# Supplementary material for: Global Gene Expression Profiling and Alternative Splicing Events during the Chondrogenic Differentiation of Human Cartilage Endplate-Derived Stem Cells
Source: Hindawi journal article supplement (doi:10.1155/2015/604972), 2015-01-01
Supplement: f1 [file 604972.f1.pdf]

| Gene symbol | Primers (5' to 3')                                 |
|-------------|----------------------------------------------------|
| ANGPTL7     | CTCCGCAAAGGTGGCTACT<br>ACCCGTTTGAGGGAGTAGGT        |
| DPT         | ATGGAATGGTACCAGACGTGC<br>CTGACTCGAAGTAGCGGCTC      |
| RANBP3L     | CCGTCACTAACCTCCCAACC<br>ACAGGACCTGTTCAGCACT        |
| COL10A1     | ACTCCCAGCACGCAGAATCC<br>GGGCATTTGGTATCGTTCAGC      |
| MMP7        | AGTGGTCACCTACAGGATCG<br>GGGATCTCTTGCCCCACAT        |
| COMP        | GCTGTGGGTTACACTGCCT<br>AAGCCCGCATAGTCGTCATC        |
| CORIN       | CAATCCCACAACAGAGCATCG<br>CATCCTTGCAGTCTCGTCA       |
| CXCL14      | TCATCACCACCAAGAGCGTG<br>TTCCAGGCGTTGTACCACTT       |
| ADAMTSL3    | CCCTCCTGTGATAGAGACTGC<br>TCAGCGACATGGGGAAAAGA      |
| STC1        | TGAAGTGGTTCGTTGCCTCA<br>GACGAATGCTTTTCCCTGAGT      |
| CP          | CCGTTCTACAAAATGAAGACACCAA<br>TTCCCCACAAATGTACAAAGT |
| APLN        | TCCGTCCAGTCCATCTTCCT<br>AGATGAGACAGGCAGGGACT       |

| Names                                                                | Genes_In_Term | DEG |
|----------------------------------------------------------------------|---------------|-----|
| Total                                                                | 16490         | 671 |
| GO:0001666//response to hypoxia                                      | 191           | 42  |
| GO:0001944//vasculature development                                  | 355           | 57  |
| GO:0007275//multicellular organismal development                     | 3339          | 239 |
| GO:0009653//anatomical structure morphogenesis                       | 1573          | 150 |
| GO:0032501//multicellular organismal process                         | 5201          | 319 |
| GO:0032502//developmental process                                    | 3759          | 262 |
| GO:0036293//response to decreased oxygen levels                      | 193           | 42  |
| GO:0044707//single-multicellular organism process                    | 4967          | 309 |
| GO:0044767//single-organism developmental process                    | 2824          | 207 |
| GO:0048731//system development                                       | 2833          | 219 |
| GO:0048856//anatomical structure development                         | 3300          | 242 |
| GO:0050793//regulation of developmental process                      | 1333          | 124 |
| GO:0051239//regulation of multicellular organismal process           | 1683          | 144 |
| GO:0070482//response to oxygen levels                                | 204           | 44  |
| GO:0072358//cardiovascular system development                        | 571           | 73  |
| GO:0072359//circulatory system development                           | 571           | 73  |
| GO:0001568//blood vessel development                                 | 326           | 51  |
| GO:0048513//organ development                                        | 2014          | 158 |
| GO:2000026//regulation of multicellular organismal development       | 1024          | 99  |
| GO:0009628//response to abiotic stimulus                             | 722           | 79  |
| GO:0042127//regulation of cell proliferation                         | 1061          | 99  |
| GO:0048514//blood vessel morphogenesis                               | 268           | 43  |
| GO:0050896//response to stimulus                                     | 6156          | 346 |
| GO:0048468//cell development                                         | 1054          | 97  |
| GO:0048646//anatomical structure formation involved in morphogenesis | 604           | 68  |
| GO:0009888//tissue development                                       | 1110          | 100 |
| GO:0009605//response to external stimulus                            | 885           | 86  |
| GO:0030154//cell differentiation                                     | 2110          | 153 |
| GO:0051094//positive regulation of developmental process             | 621           | 67  |
| GO:0007155//cell adhesion                                            | 655           | 69  |
| GO:0044699//single-organism process                                  | 10099         | 498 |
| GO:0048519//negative regulation of biological process                | 2913          | 193 |
| GO:0022610//biological adhesion                                      | 657           | 69  |
| GO:0040011//locomotion                                               | 828           | 80  |
| GO:0045595//regulation of cell differentiation                       | 943           | 86  |
| GO:0048869//cellular developmental process                           | 2220          | 156 |
| GO:0048518//positive regulation of biological process                | 3304          | 209 |
| GO:0001501//skeletal system development                              | 314           | 43  |
| GO:0048583//regulation of response to stimulus                       | 2414          | 164 |
| GO:0040012//regulation of locomotion                                 | 429           | 51  |
| GO:0048523//negative regulation of cellular process                  | 2680          | 177 |
| GO:0030334//regulation of cell migration                             | 376           | 47  |
| GO:2000145//regulation of cell motility                              | 395           | 48  |
| GO:0009719//response to endogenous stimulus                          | 868           | 79  |
| GO:0048522//positive regulation of cellular process                  | 2907          | 187 |
| GO:0030198//extracellular matrix organization                        | 244           | 36  |
| GO:0070887//cellular response to chemical stimulus                   | 1508          | 115 |
| GO:0043062//extracellular structure organization                     | 245           | 36  |
| GO:0008284//positive regulation of cell proliferation                | 602           | 61  |
| GO:0051270//regulation of cellular component movement                | 439           | 50  |
| GO:0007167//enzyme linked receptor protein signaling pathway         | 575           | 59  |
| GO:0022603//regulation of anatomical structure morphogenesis         | 531           | 56  |
| GO:0001503//ossification                                             | 139           | 26  |
| GO:0048585//negative regulation of response to stimulus              | 758           | 70  |
| GO:0030278//regulation of ossification                               | 143           | 26  |
| GO:0007399//nervous system development                               | 1444          | 109 |

|                                                                            |      |     |
|----------------------------------------------------------------------------|------|-----|
| GO:1901700//response to oxygen-containing compound                         | 836  | 74  |
| GO:0006928//cellular component movement                                    | 923  | 79  |
| GO:0065008//regulation of biological quality                               | 2348 | 155 |
| GO:0042221//response to chemical stimulus                                  | 2879 | 181 |
| GO:0001525//angiogenesis                                                   | 193  | 30  |
| GO:0071453//cellular response to oxygen levels                             | 62   | 17  |
| GO:0009725//response to hormone stimulus                                   | 552  | 56  |
| GO:0036294//cellular response to decreased oxygen levels                   | 55   | 16  |
| GO:0071456//cellular response to hypoxia                                   | 55   | 16  |
| GO:0045597//positive regulation of cell differentiation                    | 451  | 49  |
| GO:0016477//cell migration                                                 | 516  | 53  |
| GO:0008015//blood circulation                                              | 236  | 33  |
| GO:0032879//regulation of localization                                     | 1314 | 100 |
| GO:0048705//skeletal system morphogenesis                                  | 143  | 25  |
| GO:0003013//circulatory system process                                     | 238  | 33  |
| GO:0009887//organ morphogenesis                                            | 614  | 59  |
| GO:0032101//regulation of response to external stimulus                    | 403  | 45  |
| GO:0006950//response to stress                                             | 2592 | 165 |
| GO:0010033//response to organic substance                                  | 1685 | 119 |
| GO:0010906//regulation of glucose metabolic process                        | 77   | 18  |
| GO:0009790//embryo development                                             | 805  | 70  |
| GO:0023051//regulation of signaling                                        | 1945 | 131 |
| GO:0050727//regulation of inflammatory response                            | 225  | 31  |
| GO:0010646//regulation of cell communication                               | 1949 | 131 |
| GO:0022008//neurogenesis                                                   | 959  | 78  |
| GO:0007507//heart development                                              | 323  | 38  |
| GO:0048736//appendage development                                          | 123  | 22  |
| GO:0060173//limb development                                               | 123  | 22  |
| GO:0071495//cellular response to endogenous stimulus                       | 569  | 54  |
| GO:0048870//cell motility                                                  | 571  | 54  |
| GO:0051674//localization of cell                                           | 571  | 54  |
| GO:0060485//mesenchyme development                                         | 116  | 21  |
| GO:0009966//regulation of signal transduction                              | 1731 | 118 |
| GO:0061448//connective tissue development                                  | 140  | 23  |
| GO:0043067//regulation of programmed cell death                            | 1022 | 80  |
| GO:0010675//regulation of cellular carbohydrate metabolic process          | 98   | 19  |
| GO:2000027//regulation of organ morphogenesis                              | 130  | 22  |
| GO:0051174//regulation of phosphorus metabolic process                     | 1248 | 92  |
| GO:0042981//regulation of apoptotic process                                | 1011 | 79  |
| GO:0048699//generation of neurons                                          | 890  | 72  |
| GO:0033993//response to lipid                                              | 496  | 48  |
| GO:0006109//regulation of carbohydrate metabolic process                   | 102  | 19  |
| GO:0008217//regulation of blood pressure                                   | 135  | 22  |
| GO:0006935//chemotaxis                                                     | 421  | 43  |
| GO:0042330//taxis                                                          | 421  | 43  |
| GO:1901701//cellular response to oxygen-containing compound                | 485  | 47  |
| GO:0010941//regulation of cell death                                       | 1055 | 80  |
| GO:0010677//negative regulation of cellular carbohydrate metabolic process | 27   | 10  |
| GO:1901342//regulation of vasculature development                          | 154  | 23  |
| GO:0019220//regulation of phosphate metabolic process                      | 1236 | 89  |
| GO:0071310//cellular response to organic substance                         | 1181 | 86  |
| GO:0001655//urogenital system development                                  | 246  | 30  |
| GO:0000904//cell morphogenesis involved in differentiation                 | 437  | 43  |
| GO:0051246//regulation of protein metabolic process                        | 1391 | 97  |
| GO:0010243//response to organonitrogen compound                            | 486  | 46  |
| GO:0023056//positive regulation of signaling                               | 805  | 65  |
| GO:0010647//positive regulation of cell communication                      | 806  | 65  |
| GO:0009611//response to wounding                                           | 790  | 64  |

|                                                                          |      |     |
|--------------------------------------------------------------------------|------|-----|
| GO:0048660//regulation of smooth muscle cell proliferation               | 70   | 15  |
| GO:0045667//regulation of osteoblast differentiation                     | 90   | 17  |
| GO:0010627//regulation of intracellular protein kinase cascade           | 654  | 56  |
| GO:0042325//regulation of phosphorylation                                | 815  | 65  |
| GO:0048568//embryonic organ development                                  | 310  | 34  |
| GO:0045912//negative regulation of carbohydrate metabolic process        | 30   | 10  |
| GO:0032989//cellular component morphogenesis                             | 647  | 55  |
| GO:0061035//regulation of cartilage development                          | 38   | 11  |
| GO:0030155//regulation of cell adhesion                                  | 243  | 29  |
| GO:0006957//complement activation, alternative pathway                   | 18   | 8   |
| GO:0043069//negative regulation of programmed cell death                 | 550  | 49  |
| GO:0051093//negative regulation of developmental process                 | 518  | 47  |
| GO:0072001//renal system development                                     | 217  | 27  |
| GO:0003085//negative regulation of systemic arterial blood pressure      | 13   | 7   |
| GO:0061298//retina vasculature development in camera-type eye            | 13   | 7   |
| GO:0090287//regulation of cellular response to growth factor stimulus    | 129  | 20  |
| GO:0045765//regulation of angiogenesis                                   | 142  | 21  |
| GO:0007423//sensory organ development                                    | 380  | 38  |
| GO:0001890//placenta development                                         | 119  | 19  |
| GO:0043066//negative regulation of apoptotic process                     | 544  | 48  |
| GO:0051241//negative regulation of multicellular organismal process      | 323  | 34  |
| GO:1901698//response to nitrogen compound                                | 512  | 46  |
| GO:0007169//transmembrane receptor protein tyrosine kinase signaling pat | 432  | 41  |
| GO:0060548//negative regulation of cell death                            | 571  | 49  |
| GO:0044763//single-organism cellular process                             | 8996 | 427 |
| GO:0001932//regulation of protein phosphorylation                        | 763  | 60  |
| GO:0042060//wound healing                                                | 457  | 42  |
| GO:0043408//regulation of MAPK cascade                                   | 426  | 40  |
| GO:0002347//response to tumor cell                                       | 10   | 6   |
| GO:0045820//negative regulation of glycolysis                            | 10   | 6   |
| GO:0071363//cellular response to growth factor stimulus                  | 364  | 36  |
| GO:0008285//negative regulation of cell proliferation                    | 476  | 43  |
| GO:0048666//neuron development                                           | 543  | 47  |
| GO:0048634//regulation of muscle organ development                       | 82   | 15  |
| GO:0035295//tube development                                             | 382  | 37  |
| GO:0007411//axon guidance                                                | 247  | 28  |
| GO:0097485//neuron projection guidance                                   | 247  | 28  |
| GO:0043009//chordate embryonic development                               | 462  | 42  |
| GO:0035107//appendage morphogenesis                                      | 116  | 18  |
| GO:0035108//limb morphogenesis                                           | 116  | 18  |
| GO:0000902//cell morphogenesis                                           | 597  | 50  |
| GO:0051147//regulation of muscle cell differentiation                    | 84   | 15  |
| GO:0080134//regulation of response to stress                             | 723  | 57  |
| GO:0043410//positive regulation of MAPK cascade                          | 295  | 31  |
| GO:0009792//embryo development ending in birth or egg hatching           | 468  | 42  |
| GO:0050678//regulation of epithelial cell proliferation                  | 182  | 23  |
| GO:0048729//tissue morphogenesis                                         | 420  | 39  |
| GO:0060284//regulation of cell development                               | 420  | 39  |
| GO:0032102//negative regulation of response to external stimulus         | 131  | 19  |
| GO:0048812//neuron projection morphogenesis                              | 358  | 35  |
| GO:0051130//positive regulation of cellular component organization       | 454  | 41  |
| GO:0007178//transmembrane receptor protein serine/threonine kinase sign  | 132  | 19  |
| GO:0048661//positive regulation of smooth muscle cell proliferation      | 46   | 11  |
| GO:0030182//neuron differentiation                                       | 659  | 53  |
| GO:0009893//positive regulation of metabolic process                     | 1809 | 113 |
| GO:0009967//positive regulation of signal transduction                   | 768  | 59  |
| GO:0030449//regulation of complement activation                          | 38   | 10  |
| GO:2000257//regulation of protein activation cascade                     | 38   | 10  |



|                                                                         |      |     |
|-------------------------------------------------------------------------|------|-----|
| GO:0044710//single-organism metabolic process                           | 2708 | 156 |
| GO:0070848//response to growth factor stimulus                          | 378  | 36  |
| GO:0048598//embryonic morphogenesis                                     | 427  | 39  |
| GO:0023057//negative regulation of signaling                            | 629  | 51  |
| GO:0010648//negative regulation of cell communication                   | 632  | 51  |
| GO:0009968//negative regulation of signal transduction                  | 599  | 49  |
| GO:0010562//positive regulation of phosphorus metabolic process         | 600  | 49  |
| GO:0045937//positive regulation of phosphate metabolic process          | 600  | 49  |
| GO:0048667//cell morphogenesis involved in neuron differentiation       | 352  | 34  |
| GO:0010604//positive regulation of macromolecule metabolic process      | 1664 | 105 |
| GO:0002009//morphogenesis of an epithelium                              | 322  | 32  |
| GO:0060429//epithelium development                                      | 620  | 50  |
| GO:0048771//tissue remodeling                                           | 79   | 14  |
| GO:0030199//collagen fibril organization                                | 40   | 10  |
| GO:0045669//positive regulation of osteoblast differentiation           | 49   | 11  |
| GO:0010740//positive regulation of intracellular protein kinase cascade | 468  | 41  |
| GO:0048608//reproductive structure development                          | 220  | 25  |
| GO:0061458//reproductive system development                             | 220  | 25  |
| GO:0070613//regulation of protein processing                            | 59   | 12  |
| GO:0061564//axon development                                            | 340  | 33  |
| GO:0031175//neuron projection development                               | 438  | 39  |
| GO:0007409//axonogenesis                                                | 326  | 32  |
| GO:0051247//positive regulation of protein metabolic process            | 804  | 60  |
| GO:0006110//regulation of glycolysis                                    | 25   | 8   |
| GO:0032330//regulation of chondrocyte differentiation                   | 25   | 8   |
| GO:0048584//positive regulation of response to stimulus                 | 1201 | 81  |
| GO:1901652//response to peptide                                         | 266  | 28  |
| GO:0016202//regulation of striated muscle tissue development            | 81   | 14  |
| GO:1901861//regulation of muscle tissue development                     | 81   | 14  |
| GO:0040007//growth                                                      | 282  | 29  |
| GO:0001822//kidney development                                          | 169  | 21  |
| GO:0051128//regulation of cellular component organization               | 1113 | 76  |
| GO:0001562//response to protozoan                                       | 19   | 7   |
| GO:0051240//positive regulation of multicellular organismal process     | 498  | 42  |
| GO:0050728//negative regulation of inflammatory response                | 73   | 13  |
| GO:0001701//in utero embryonic development                              | 288  | 29  |
| GO:0001654//eye development                                             | 243  | 26  |
| GO:0031667//response to nutrient levels                                 | 214  | 24  |
| GO:0048762//mesenchymal cell differentiation                            | 96   | 15  |
| GO:0055123//digestive system development                                | 96   | 15  |
| GO:0045732//positive regulation of protein catabolic process            | 85   | 14  |
| GO:0060541//respiratory system development                              | 147  | 19  |
| GO:0009991//response to extracellular stimulus                          | 232  | 25  |
| GO:0051716//cellular response to stimulus                               | 4615 | 238 |
| GO:0042327//positive regulation of phosphorylation                      | 523  | 43  |
| GO:0030323//respiratory tube development                                | 136  | 18  |
| GO:0048863//stem cell differentiation                                   | 205  | 23  |
| GO:0048732//gland development                                           | 221  | 24  |
| GO:0046683//response to organophosphorus                                | 77   | 13  |
| GO:0001958//endochondral ossification                                   | 21   | 7   |
| GO:0036075//replacement ossification                                    | 21   | 7   |
| GO:0001934//positive regulation of protein phosphorylation              | 512  | 42  |
| GO:0048565//digestive tract development                                 | 89   | 14  |
| GO:0006022//aminoglycan metabolic process                               | 140  | 18  |
| GO:0030574//collagen catabolic process                                  | 57   | 11  |
| GO:2000736//regulation of stem cell differentiation                     | 57   | 11  |
| GO:0048878//chemical homeostasis                                        | 551  | 44  |
| GO:0048844//artery morphogenesis                                        | 38   | 9   |

|                                                                           |      |     |
|---------------------------------------------------------------------------|------|-----|
| GO:0060322//head development                                              | 38   | 9   |
| GO:0043434//response to peptide hormone stimulus                          | 257  | 26  |
| GO:0060324//face development                                              | 30   | 8   |
| GO:0003073//regulation of systemic arterial blood pressure                | 69   | 12  |
| GO:0044706//multi-multicellular organism process                          | 170  | 20  |
| GO:0010563//negative regulation of phosphorus metabolic process           | 258  | 26  |
| GO:0045936//negative regulation of phosphate metabolic process            | 258  | 26  |
| GO:0050679//positive regulation of epithelial cell proliferation          | 105  | 15  |
| GO:0051216//cartilage development                                         | 105  | 15  |
| GO:0042692//muscle cell differentiation                                   | 200  | 22  |
| GO:0009607//response to biotic stimulus                                   | 524  | 42  |
| GO:0031399//regulation of protein modification process                    | 927  | 64  |
| GO:0007417//central nervous system development                            | 578  | 45  |
| GO:0043470//regulation of carbohydrate catabolic process                  | 31   | 8   |
| GO:0043471//regulation of cellular carbohydrate catabolic process         | 31   | 8   |
| GO:0042592//homeostatic process                                           | 873  | 61  |
| GO:2000147//positive regulation of cell motility                          | 231  | 24  |
| GO:0044057//regulation of system process                                  | 390  | 34  |
| GO:0090101//negative regulation of transmembrane receptor protein serine  | 71   | 12  |
| GO:0050789//regulation of biological process                              | 8567 | 400 |
| GO:0030324//lung development                                              | 133  | 17  |
| GO:0009892//negative regulation of metabolic process                      | 1327 | 84  |
| GO:0051272//positive regulation of cellular component movement            | 234  | 24  |
| GO:0060350//endochondral bone morphogenesis                               | 32   | 8   |
| GO:0002376//immune system process                                         | 1675 | 101 |
| GO:0014031//mesenchymal cell development                                  | 84   | 13  |
| GO:0060349//bone morphogenesis                                            | 51   | 10  |
| GO:0060325//face morphogenesis                                            | 24   | 7   |
| GO:0045598//regulation of fat cell differentiation                        | 62   | 11  |
| GO:0090092//regulation of transmembrane receptor protein serine/threonin  | 149  | 18  |
| GO:0071560//cellular response to transforming growth factor beta stimulus | 97   | 14  |
| GO:0065007//biological regulation                                         | 9063 | 419 |
| GO:0005996//monosaccharide metabolic process                              | 192  | 21  |
| GO:0007568//aging                                                         | 136  | 17  |
| GO:0001957//intramembranous ossification                                  | 6    | 4   |
| GO:0002418//immune response to tumor cell                                 | 6    | 4   |
| GO:0036072//direct ossification                                           | 6    | 4   |
| GO:0061299//retina vasculature morphogenesis in camera-type eye           | 6    | 4   |
| GO:0044703//multi-organism reproductive process                           | 178  | 20  |
| GO:0042176//regulation of protein catabolic process                       | 150  | 18  |
| GO:0050730//regulation of peptidyl-tyrosine phosphorylation               | 150  | 18  |
| GO:0042698//ovulation cycle                                               | 74   | 12  |
| GO:0060348//bone development                                              | 74   | 12  |
| GO:0040017//positive regulation of locomotion                             | 238  | 24  |
| GO:0071559//response to transforming growth factor beta stimulus          | 98   | 14  |
| GO:0031325//positive regulation of cellular metabolic process             | 1708 | 102 |
| GO:0043549//regulation of kinase activity                                 | 593  | 45  |
| GO:0031347//regulation of defense response                                | 436  | 36  |
| GO:0044243//multicellular organismal catabolic process                    | 64   | 11  |
| GO:0048511//rhythmic process                                              | 139  | 17  |
| GO:0048545//response to steroid hormone stimulus                          | 241  | 24  |
| GO:0060711//labyrinthine layer development                                | 34   | 8   |
| GO:0002673//regulation of acute inflammatory response                     | 76   | 12  |
| GO:0030335//positive regulation of cell migration                         | 227  | 23  |
| GO:0060537//muscle tissue development                                     | 212  | 22  |
| GO:0051049//regulation of transport                                       | 974  | 65  |
| GO:0045859//regulation of protein kinase activity                         | 563  | 43  |
| GO:0031324//negative regulation of cellular metabolic process             | 1232 | 78  |

|                                                                      |      |     |
|----------------------------------------------------------------------|------|-----|
| GO:0043010//camera-type eye development                              | 213  | 22  |
| GO:0014070//response to organic cyclic compound                      | 477  | 38  |
| GO:0014706//striated muscle tissue development                       | 199  | 21  |
| GO:0007154//cell communication                                       | 4207 | 215 |
| GO:0010171//body morphogenesis                                       | 35   | 8   |
| GO:0070542//response to fatty acid                                   | 35   | 8   |
| GO:0051153//regulation of striated muscle cell differentiation       | 55   | 10  |
| GO:2000377//regulation of reactive oxygen species metabolic process  | 55   | 10  |
| GO:0002920//regulation of humoral immune response                    | 66   | 11  |
| GO:0003006//developmental process involved in reproduction           | 375  | 32  |
| GO:0071417//cellular response to organonitrogen compound             | 277  | 26  |
| GO:0032332//positive regulation of chondrocyte differentiation       | 12   | 5   |
| GO:0060840//artery development                                       | 45   | 9   |
| GO:0032963//collagen metabolic process                               | 78   | 12  |
| GO:0045766//positive regulation of angiogenesis                      | 78   | 12  |
| GO:0006007//glucose catabolic process                                | 56   | 10  |
| GO:0060323//head morphogenesis                                       | 27   | 7   |
| GO:0043583//ear development                                          | 158  | 18  |
| GO:0042326//negative regulation of phosphorylation                   | 202  | 21  |
| GO:0065009//regulation of molecular function                         | 1758 | 103 |
| GO:0030203//glycosaminoglycan metabolic process                      | 131  | 16  |
| GO:0010605//negative regulation of macromolecule metabolic process   | 1226 | 77  |
| GO:0007596//blood coagulation                                        | 380  | 32  |
| GO:0050817//coagulation                                              | 380  | 32  |
| GO:0060174//limb bud formation                                       | 7    | 4   |
| GO:0022617//extracellular matrix disassembly                         | 68   | 11  |
| GO:0051338//regulation of transferase activity                       | 613  | 45  |
| GO:0050900//leukocyte migration                                      | 190  | 20  |
| GO:0043065//positive regulation of apoptotic process                 | 366  | 31  |
| GO:0007599//hemostasis                                               | 383  | 32  |
| GO:0022602//ovulation cycle process                                  | 69   | 11  |
| GO:0009952//anterior/posterior pattern specification                 | 147  | 17  |
| GO:0070167//regulation of biomineral tissue development              | 58   | 10  |
| GO:0031348//negative regulation of defense response                  | 94   | 13  |
| GO:0003002//regionalization                                          | 238  | 23  |
| GO:0008585//female gonad development                                 | 70   | 11  |
| GO:0045995//regulation of embryonic development                      | 82   | 12  |
| GO:0055114//oxidation-reduction process                              | 767  | 53  |
| GO:0031214//biomineral tissue development                            | 48   | 9   |
| GO:0051336//regulation of hydrolase activity                         | 787  | 54  |
| GO:0043068//positive regulation of programmed cell death             | 370  | 31  |
| GO:0007584//response to nutrient                                     | 108  | 14  |
| GO:0048701//embryonic cranial skeleton morphogenesis                 | 29   | 7   |
| GO:0061061//muscle structure development                             | 321  | 28  |
| GO:0021700//developmental maturation                                 | 136  | 16  |
| GO:0014066//regulation of phosphatidylinositol 3-kinase cascade      | 49   | 9   |
| GO:0050790//regulation of catalytic activity                         | 1428 | 86  |
| GO:0030168//platelet activation                                      | 151  | 17  |
| GO:0006111//regulation of gluconeogenesis                            | 21   | 6   |
| GO:0040013//negative regulation of locomotion                        | 137  | 16  |
| GO:0044259//multicellular organismal macromolecule metabolic process | 84   | 12  |
| GO:0019318//hexose metabolic process                                 | 166  | 18  |
| GO:0048858//cell projection morphogenesis                            | 462  | 36  |
| GO:0007565//female pregnancy                                         | 138  | 16  |
| GO:0046849//bone remodeling                                          | 30   | 7   |
| GO:2000278//regulation of DNA biosynthetic process                   | 14   | 5   |
| GO:0003231//cardiac ventricle development                            | 73   | 11  |
| GO:0001913//T cell mediated cytotoxicity                             | 8    | 4   |

|                                                                                      |      |     |
|--------------------------------------------------------------------------------------|------|-----|
| GO:2000573//positive regulation of DNA biosynthetic process                          | 8    | 4   |
| GO:NM_0059                                                                           | 8    | 4   |
| GO:0009612//response to mechanical stimulus                                          | 125  | 15  |
| GO:0016043//cellular component organization                                          | 3343 | 174 |
| GO:0045860//positive regulation of protein kinase activity                           | 361  | 30  |
| GO:0048589//developmental growth                                                     | 154  | 17  |
| GO:1901699//cellular response to nitrogen compound                                   | 295  | 26  |
| GO:0051707//response to other organism                                               | 503  | 38  |
| GO:0023052//signaling                                                                | 4097 | 207 |
| GO:0044700//single organism signaling                                                | 4097 | 207 |
| GO:0048641//regulation of skeletal muscle tissue development                         | 51   | 9   |
| GO:0030282//bone mineralization                                                      | 31   | 7   |
| GO:0045776//negative regulation of blood pressure                                    | 31   | 7   |
| GO:0050819//negative regulation of coagulation                                       | 31   | 7   |
| GO:0033674//positive regulation of kinase activity                                   | 381  | 31  |
| GO:0006096//glycolysis                                                               | 41   | 8   |
| GO:0014068//positive regulation of phosphatidylinositol 3-kinase cascade             | 41   | 8   |
| GO:0045807//positive regulation of endocytosis                                       | 63   | 10  |
| GO:0010942//positive regulation of cell death                                        | 382  | 31  |
| GO:0031401//positive regulation of protein modification process                      | 635  | 45  |
| GO:0030336//negative regulation of cell migration                                    | 114  | 14  |
| GO:0006979//response to oxidative stress                                             | 233  | 22  |
| GO:0045087//innate immune response                                                   | 525  | 39  |
| GO:0032844//regulation of homeostatic process                                        | 250  | 23  |
| GO:0002076//osteoblast development                                                   | 15   | 5   |
| GO:0072012//glomerulus vasculature development                                       | 15   | 5   |
| GO:0050731//positive regulation of peptidyl-tyrosine phosphorylation                 | 115  | 14  |
| GO:0006959//humoral immune response                                                  | 129  | 15  |
| GO:0007173//epidermal growth factor receptor signaling pathway                       | 129  | 15  |
| GO:0043589//skin morphogenesis                                                       | 32   | 7   |
| GO:0048546//digestive tract morphogenesis                                            | 42   | 8   |
| GO:0032990//cell part morphogenesis                                                  | 474  | 36  |
| GO:0003205//cardiac chamber development                                              | 89   | 12  |
| GO:0009743//response to carbohydrate stimulus                                        | 89   | 12  |
| GO:0048562//embryonic organ morphogenesis                                            | 204  | 20  |
| GO:0030500//regulation of bone mineralization                                        | 53   | 9   |
| GO:0070555//response to interleukin-1                                                | 53   | 9   |
| GO:0038127//ERBB signaling pathway                                                   | 130  | 15  |
| GO:0042445//hormone metabolic process                                                | 145  | 16  |
| GO:0044236//multicellular organismal metabolic process                               | 90   | 12  |
| GO:0010817//regulation of hormone levels                                             | 190  | 19  |
| GO:2000146//negative regulation of cell motility                                     | 117  | 14  |
| GO:0044344//cellular response to fibroblast growth factor stimulus                   | 131  | 15  |
| GO:1901135//carbohydrate derivative metabolic process                                | 1072 | 67  |
| GO:0043467//regulation of generation of precursor metabolites and energy             | 54   | 9   |
| GO:0090130//tissue migration                                                         | 54   | 9   |
| GO:0061138//morphogenesis of a branching epithelium                                  | 146  | 16  |
| GO:0017015//regulation of transforming growth factor beta receptor signaling pathway | 78   | 11  |
| GO:0048566//embryonic digestive tract development                                    | 33   | 7   |
| GO:0071774//response to fibroblast growth factor stimulus                            | 132  | 15  |
| GO:0048469//cell maturation                                                          | 91   | 12  |
| GO:0060828//regulation of canonical Wnt receptor signaling pathway                   | 118  | 14  |
| GO:0048260//positive regulation of receptor-mediated endocytosis                     | 24   | 6   |
| GO:0051347//positive regulation of transferase activity                              | 391  | 31  |
| GO:0009896//positive regulation of catabolic process                                 | 147  | 16  |
| GO:0061437//renal system vasculature development                                     | 16   | 5   |
| GO:0061440//kidney vasculature development                                           | 16   | 5   |
| GO:0008406//gonad development                                                        | 162  | 17  |

|                                                                        |      |     |
|------------------------------------------------------------------------|------|-----|
| GO:0048864//stem cell development                                      | 162  | 17  |
| GO:0071900//regulation of protein serine/threonine kinase activity     | 340  | 28  |
| GO:0005975//carbohydrate metabolic process                             | 648  | 45  |
| GO:0007292//female gamete generation                                   | 79   | 11  |
| GO:0019216//regulation of lipid metabolic process                      | 193  | 19  |
| GO:0048706//embryonic skeletal system development                      | 92   | 12  |
| GO:0050878//regulation of body fluid levels                            | 464  | 35  |
| GO:0001892//embryonic placenta development                             | 67   | 10  |
| GO:0060191//regulation of lipase activity                              | 106  | 13  |
| GO:0051223//regulation of protein transport                            | 291  | 25  |
| GO:0006692//prostanoid metabolic process                               | 25   | 6   |
| GO:0006693//prostaglandin metabolic process                            | 25   | 6   |
| GO:0043666//regulation of phosphoprotein phosphatase activity          | 25   | 6   |
| GO:0048008//platelet-derived growth factor receptor signaling pathway  | 25   | 6   |
| GO:0035272//exocrine system development                                | 45   | 8   |
| GO:0010810//regulation of cell-substrate adhesion                      | 94   | 12  |
| GO:0030858//positive regulation of epithelial cell differentiation     | 35   | 7   |
| GO:0071347//cellular response to interleukin-1                         | 35   | 7   |
| GO:0032870//cellular response to hormone stimulus                      | 329  | 27  |
| GO:0043588//skin development                                           | 213  | 20  |
| GO:0019320//hexose catabolic process                                   | 69   | 10  |
| GO:0033688//regulation of osteoblast proliferation                     | 17   | 5   |
| GO:0060445//branching involved in salivary gland morphogenesis         | 17   | 5   |
| GO:0031646//positive regulation of neurological system process         | 57   | 9   |
| GO:0043255//regulation of carbohydrate biosynthetic process            | 57   | 9   |
| GO:0032880//regulation of protein localization                         | 364  | 29  |
| GO:0032270//positive regulation of cellular protein metabolic process  | 715  | 48  |
| GO:0030638//polyketide metabolic process                               | 10   | 4   |
| GO:2000505//regulation of energy homeostasis                           | 10   | 4   |
| GO:0001763//morphogenesis of a branching structure                     | 152  | 16  |
| GO:0051146//striated muscle cell differentiation                       | 152  | 16  |
| GO:0010976//positive regulation of neuron projection development       | 46   | 8   |
| GO:0051271//negative regulation of cellular component movement         | 123  | 14  |
| GO:0015711//organic anion transport                                    | 263  | 23  |
| GO:0001775//cell activation                                            | 491  | 36  |
| GO:0014902//myotube differentiation                                    | 26   | 6   |
| GO:0035567//non-canonical Wnt receptor signaling pathway               | 26   | 6   |
| GO:0003007//heart morphogenesis                                        | 153  | 16  |
| GO:0007435//salivary gland morphogenesis                               | 36   | 7   |
| GO:0048259//regulation of receptor-mediated endocytosis                | 36   | 7   |
| GO:0044723//single-organism carbohydrate metabolic process             | 457  | 34  |
| GO:0045596//negative regulation of cell differentiation                | 421  | 32  |
| GO:0022414//reproductive process                                       | 898  | 57  |
| GO:0019222//regulation of metabolic process                            | 4734 | 231 |
| GO:0045137//development of primary sexual characteristics              | 186  | 18  |
| GO:0060137//maternal process involved in parturition                   | 5    | 3   |
| GO:0072103//glomerulus vasculature morphogenesis                       | 5    | 3   |
| GO:0072104//glomerular capillary formation                             | 5    | 3   |
| GO:0002053//positive regulation of mesenchymal cell proliferation      | 27   | 6   |
| GO:0043405//regulation of MAP kinase activity                          | 235  | 21  |
| GO:0007179//transforming growth factor beta receptor signaling pathway | 72   | 10  |
| GO:0006721//terpenoid metabolic process                                | 85   | 11  |
| GO:0046545//development of primary female sexual characteristics       | 85   | 11  |
| GO:0010631//epithelial cell migration                                  | 48   | 8   |
| GO:0090132//epithelium migration                                       | 48   | 8   |
| GO:0007165//signal transduction                                        | 3681 | 185 |
| GO:0070201//regulation of establishment of protein localization        | 320  | 26  |
| GO:0030326//embryonic limb morphogenesis                               | 99   | 12  |

|                                                                             |      |     |
|-----------------------------------------------------------------------------|------|-----|
| GO:0035113//embryonic appendage morphogenesis                               | 99   | 12  |
| GO:0045785//positive regulation of cell adhesion                            | 113  | 13  |
| GO:0006024//glycosaminoglycan biosynthetic process                          | 86   | 11  |
| GO:0051896//regulation of protein kinase B signaling cascade                | 86   | 11  |
| GO:2000725//regulation of cardiac muscle cell differentiation               | 11   | 4   |
| GO:0016101//diterpenoid metabolic process                                   | 73   | 10  |
| GO:0001933//negative regulation of protein phosphorylation                  | 190  | 18  |
| GO:0030195//negative regulation of blood coagulation                        | 28   | 6   |
| GO:1900047//negative regulation of hemostasis                               | 28   | 6   |
| GO:0006023//aminoglycan biosynthetic process                                | 87   | 11  |
| GO:0060071//Wnt receptor signaling pathway, planar cell polarity pathway    | 19   | 5   |
| GO:0090175//regulation of establishment of planar polarity                  | 19   | 5   |
| GO:0046365//monosaccharide catabolic process                                | 74   | 10  |
| GO:0072006//nephron development                                             | 74   | 10  |
| GO:0032268//regulation of cellular protein metabolic process                | 1175 | 70  |
| GO:0071902//positive regulation of protein serine/threonine kinase activity | 207  | 19  |
| GO:0010720//positive regulation of cell development                         | 130  | 14  |
| GO:0002088//lens development in camera-type eye                             | 50   | 8   |
| GO:0060688//regulation of morphogenesis of a branching structure            | 50   | 8   |
| GO:0001942//hair follicle development                                       | 62   | 9   |
| GO:0030856//regulation of epithelial cell differentiation                   | 88   | 11  |
| GO:0031960//response to corticosteroid stimulus                             | 88   | 11  |
| GO:0046660//female sex differentiation                                      | 88   | 11  |
| GO:0042063//gliogenesis                                                     | 116  | 13  |
| GO:0007431//salivary gland development                                      | 39   | 7   |
| GO:0043542//endothelial cell migration                                      | 39   | 7   |
| GO:0001656//metanephros development                                         | 75   | 10  |
| GO:0006690//icosanoid metabolic process                                     | 75   | 10  |
| GO:1901568//fatty acid derivative metabolic process                         | 75   | 10  |
| GO:0045787//positive regulation of cell cycle                               | 102  | 12  |
| GO:0051222//positive regulation of protein transport                        | 177  | 17  |
| GO:0006357//regulation of transcription from RNA polymerase II promoter     | 1120 | 67  |
| GO:0044246//regulation of multicellular organismal metabolic process        | 29   | 6   |
| GO:0009895//negative regulation of catabolic process                        | 89   | 11  |
| GO:0010632//regulation of epithelial cell migration                         | 89   | 11  |
| GO:0022404//molting cycle process                                           | 63   | 9   |
| GO:0022405//hair cycle process                                              | 63   | 9   |
| GO:0006112//energy reserve metabolic process                                | 103  | 12  |
| GO:0071496//cellular response to external stimulus                          | 147  | 15  |
| GO:0016055//Wnt receptor signaling pathway                                  | 132  | 14  |
| GO:0014032//neural crest cell development                                   | 51   | 8   |
| GO:0051971//positive regulation of transmission of nerve impulse            | 51   | 8   |
| GO:0034284//response to monosaccharide stimulus                             | 76   | 10  |
| GO:0061041//regulation of wound healing                                     | 76   | 10  |
| GO:0080135//regulation of cellular response to stress                       | 277  | 23  |
| GO:0044281//small molecule metabolic process                                | 2121 | 114 |
| GO:0000122//negative regulation of transcription from RNA polymerase II p   | 455  | 33  |
| GO:0050794//regulation of cellular process                                  | 8119 | 370 |
| GO:0080090//regulation of primary metabolic process                         | 4221 | 207 |
| GO:0002228//natural killer cell mediated immunity                           | 20   | 5   |
| GO:0010660//regulation of muscle cell apoptotic process                     | 20   | 5   |
| GO:0030325//adrenal gland development                                       | 20   | 5   |
| GO:0042267//natural killer cell mediated cytotoxicity                       | 20   | 5   |
| GO:0060412//ventricular septum morphogenesis                                | 20   | 5   |
| GO:0060612//adipose tissue development                                      | 20   | 5   |
| GO:0007548//sex differentiation                                             | 211  | 19  |
| GO:0048742//regulation of skeletal muscle fiber development                 | 40   | 7   |
| GO:0010463//mesenchymal cell proliferation                                  | 12   | 4   |

|                                                                         |       |     |
|-------------------------------------------------------------------------|-------|-----|
| GO:0010656//negative regulation of muscle cell apoptotic process        | 12    | 4   |
| GO:0090257//regulation of muscle system process                         | 104   | 12  |
| GO:0045216//cell-cell junction organization                             | 119   | 13  |
| GO:0051591//response to cAMP                                            | 52    | 8   |
| GO:0071840//cellular component organization or biogenesis               | 3471  | 174 |
| GO:0003281//ventricular septum development                              | 30    | 6   |
| GO:0015701//bicarbonate transport                                       | 30    | 6   |
| GO:0007389//pattern specification process                               | 350   | 27  |
| GO:0014074//response to purine-containing compound                      | 91    | 11  |
| GO:0003151//outflow tract morphogenesis                                 | 41    | 7   |
| GO:0003206//cardiac chamber morphogenesis                               | 78    | 10  |
| GO:0006091//generation of precursor metabolites and energy              | 316   | 25  |
| GO:0060346//bone trabecula formation                                    | 6     | 3   |
| GO:0060462//lung lobe development                                       | 6     | 3   |
| GO:0060463//lung lobe morphogenesis                                     | 6     | 3   |
| GO:0061438//renal system vasculature morphogenesis                      | 6     | 3   |
| GO:0061439//kidney vasculature morphogenesis                            | 6     | 3   |
| GO:2000543//positive regulation of gastrulation                         | 6     | 3   |
| GO:0030111//regulation of Wnt receptor signaling pathway                | 166   | 16  |
| GO:0043406//positive regulation of MAP kinase activity                  | 166   | 16  |
| GO:0051046//regulation of secretion                                     | 425   | 31  |
| GO:0055082//cellular chemical homeostasis                               | 335   | 26  |
| GO:0008543//fibroblast growth factor receptor signaling pathway         | 121   | 13  |
| GO:0009987//cellular process                                            | 11733 | 512 |
| GO:0003401//axis elongation                                             | 21    | 5   |
| GO:0010718//positive regulation of epithelial to mesenchymal transition | 21    | 5   |
| GO:0032965//regulation of collagen biosynthetic process                 | 21    | 5   |
| GO:0048839//inner ear development                                       | 136   | 14  |
| GO:0032868//response to insulin stimulus                                | 167   | 16  |
| GO:0051704//multi-organism process                                      | 1053  | 63  |
| GO:0010517//regulation of phospholipase activity                        | 79    | 10  |
| GO:0042303//molting cycle                                               | 66    | 9   |
| GO:0042633//hair cycle                                                  | 66    | 9   |
| GO:0001678//cellular glucose homeostasis                                | 31    | 6   |
| GO:0002040//sprouting angiogenesis                                      | 31    | 6   |
| GO:0008544//epidermis development                                       | 184   | 17  |
| GO:0051050//positive regulation of transport                            | 446   | 32  |
| GO:0042149//cellular response to glucose starvation                     | 13    | 4   |
| GO:0051154//negative regulation of striated muscle cell differentiation | 13    | 4   |
| GO:0001667//ameboidal cell migration                                    | 108   | 12  |
| GO:0003018//vascular process in circulatory system                      | 80    | 10  |
| GO:0006937//regulation of muscle contraction                            | 94    | 11  |
| GO:0006820//anion transport                                             | 339   | 26  |
| GO:1901564//organonitrogen compound metabolic process                   | 1415  | 80  |
| GO:0071396//cellular response to lipid                                  | 219   | 19  |
| GO:0050795//regulation of behavior                                      | 139   | 14  |
| GO:0003279//cardiac septum development                                  | 43    | 7   |
| GO:0001570//vasculogenesis                                              | 55    | 8   |
| GO:0007204//elevation of cytosolic calcium ion concentration            | 124   | 13  |
| GO:0010712//regulation of collagen metabolic process                    | 22    | 5   |
| GO:0010464//regulation of mesenchymal cell proliferation                | 32    | 6   |
| GO:0045429//positive regulation of nitric oxide biosynthetic process    | 32    | 6   |
| GO:0055024//regulation of cardiac muscle tissue development             | 32    | 6   |
| GO:0060411//cardiac septum morphogenesis                                | 32    | 6   |
| GO:0051384//response to glucocorticoid stimulus                         | 82    | 10  |
| GO:0030030//cell projection organization                                | 644   | 42  |
| GO:0034330//cell junction organization                                  | 141   | 14  |
| GO:0043436//oxoacid metabolic process                                   | 865   | 53  |

|                                                                                               |      |     |
|-----------------------------------------------------------------------------------------------|------|-----|
| GO:0002062//chondrocyte differentiation                                                       | 33   | 6   |
| GO:0016486//peptide hormone processing                                                        | 33   | 6   |
| GO:0019748//secondary metabolic process                                                       | 33   | 6   |
| GO:0035914//skeletal muscle cell differentiation                                              | 33   | 6   |
| GO:0006952//defense response                                                                  | 1049 | 62  |
| GO:0044724//single-organism carbohydrate catabolic process                                    | 97   | 11  |
| GO:0031669//cellular response to nutrient levels                                              | 83   | 10  |
| GO:0032314//regulation of Rac GTPase activity                                                 | 14   | 4   |
| GO:0038084//vascular endothelial growth factor signaling pathway                              | 14   | 4   |
| GO:0046629//gamma-delta T cell activation                                                     | 14   | 4   |
| GO:0048557//embryonic digestive tract morphogenesis                                           | 14   | 4   |
| GO:0060713//labyrinthine layer morphogenesis                                                  | 14   | 4   |
| GO:0070168//negative regulation of biomineral tissue development                              | 14   | 4   |
| GO:0000003//reproduction                                                                      | 989  | 59  |
| GO:0048010//vascular endothelial growth factor receptor signaling pathway                     | 23   | 5   |
| GO:0009891//positive regulation of biosynthetic process                                       | 1155 | 67  |
| GO:0001523//retinoid metabolic process                                                        | 70   | 9   |
| GO:0010518//positive regulation of phospholipase activity                                     | 70   | 9   |
| GO:0016337//cell-cell adhesion                                                                | 293  | 23  |
| GO:0010665//regulation of cardiac muscle cell apoptotic process                               | 7    | 3   |
| GO:0019511//peptidyl-proline hydroxylation                                                    | 7    | 3   |
| GO:0032317//regulation of Rap GTPase activity                                                 | 7    | 3   |
| GO:0032516//positive regulation of phosphoprotein phosphatase activity                        | 7    | 3   |
| GO:0042730//fibrinolysis                                                                      | 7    | 3   |
| GO:0045091//regulation of retroviral genome replication                                       | 7    | 3   |
| GO:0072102//glomerulus morphogenesis                                                          | 7    | 3   |
| GO:2000737//negative regulation of stem cell differentiation                                  | 7    | 3   |
| GO:0035270//endocrine system development                                                      | 98   | 11  |
| GO:0010717//regulation of epithelial to mesenchymal transition                                | 34   | 6   |
| GO:0010863//positive regulation of phospholipase C activity                                   | 58   | 8   |
| GO:0051179//localization                                                                      | 3502 | 173 |
| GO:0033559//unsaturated fatty acid metabolic process                                          | 85   | 10  |
| GO:0051248//negative regulation of protein metabolic process                                  | 424  | 30  |
| GO:0051960//regulation of nervous system development                                          | 369  | 27  |
| GO:0045600//positive regulation of fat cell differentiation                                   | 24   | 5   |
| GO:0048599//oocyte development                                                                | 24   | 5   |
| GO:0007519//skeletal muscle tissue development                                                | 100  | 11  |
| GO:0060326//cell chemotaxis                                                                   | 100  | 11  |
| GO:0007166//cell surface receptor signaling pathway                                           | 2334 | 121 |
| GO:0006956//complement activation                                                             | 86   | 10  |
| GO:0014033//neural crest cell differentiation                                                 | 59   | 8   |
| GO:0035239//tube morphogenesis                                                                | 263  | 21  |
| GO:0002686//negative regulation of leukocyte migration                                        | 15   | 4   |
| GO:0071398//cellular response to fatty acid                                                   | 15   | 4   |
| GO:0006874//cellular calcium ion homeostasis                                                  | 195  | 17  |
| GO:0045685//regulation of glial cell differentiation                                          | 35   | 6   |
| GO:0006006//glucose metabolic process                                                         | 131  | 13  |
| GO:0006720//isoprenoid metabolic process                                                      | 101  | 11  |
| GO:0019932//second-messenger-mediated signaling                                               | 101  | 11  |
| GO:0031668//cellular response to extracellular stimulus                                       | 101  | 11  |
| GO:0050708//regulation of protein secretion                                                   | 147  | 14  |
| GO:0019369//arachidonic acid metabolic process                                                | 47   | 7   |
| GO:0030512//negative regulation of transforming growth factor beta receptor signaling pathway | 47   | 7   |
| GO:0030855//epithelial cell differentiation                                                   | 372  | 27  |
| GO:0006082//organic acid metabolic process                                                    | 880  | 53  |
| GO:0006898//receptor-mediated endocytosis                                                     | 87   | 10  |
| GO:0050818//regulation of coagulation                                                         | 60   | 8   |
| GO:0006869//lipid transport                                                                   | 164  | 15  |



|                                                                              |      |     |
|------------------------------------------------------------------------------|------|-----|
| GO:0016052//carbohydrate catabolic process                                   | 102  | 11  |
| GO:0048011//neurotrophin TRK receptor signaling pathway                      | 197  | 17  |
| GO:0051173//positive regulation of nitrogen compound metabolic process       | 1068 | 62  |
| GO:0009994//oocyte differentiation                                           | 25   | 5   |
| GO:0072028//nephron morphogenesis                                            | 25   | 5   |
| GO:0035051//cardiocyte differentiation                                       | 74   | 9   |
| GO:0051480//cytosolic calcium ion homeostasis                                | 133  | 13  |
| GO:0048286//lung alveolus development                                        | 36   | 6   |
| GO:0038179//neurotrophin signaling pathway                                   | 198  | 17  |
| GO:0050806//positive regulation of synaptic transmission                     | 48   | 7   |
| GO:0072376//protein activation cascade                                       | 103  | 11  |
| GO:0060255//regulation of macromolecule metabolic process                    | 4012 | 194 |
| GO:0060562//epithelial tube morphogenesis                                    | 250  | 20  |
| GO:0003188//heart valve formation                                            | 8    | 3   |
| GO:0003264//regulation of cardioblast proliferation                          | 8    | 3   |
| GO:0003266//regulation of secondary heart field cardioblast proliferation    | 8    | 3   |
| GO:0010662//regulation of striated muscle cell apoptotic process             | 8    | 3   |
| GO:0032487//regulation of Rap protein signal transduction                    | 8    | 3   |
| GO:0035413//positive regulation of catenin import into nucleus               | 8    | 3   |
| GO:0045721//negative regulation of gluconeogenesis                           | 8    | 3   |
| GO:0060426//lung vasculature development                                     | 8    | 3   |
| GO:0060484//lung-associated mesenchyme development                           | 8    | 3   |
| GO:0060670//branching involved in labyrinthine layer morphogenesis           | 8    | 3   |
| GO:0061430//bone trabecula morphogenesis                                     | 8    | 3   |
| GO:0045444//fat cell differentiation                                         | 75   | 9   |
| GO:0090090//negative regulation of canonical Wnt receptor signaling pathway  | 75   | 9   |
| GO:0031328//positive regulation of cellular biosynthetic process             | 1137 | 65  |
| GO:0051150//regulation of smooth muscle cell differentiation                 | 16   | 4   |
| GO:0060669//embryonic placenta morphogenesis                                 | 16   | 4   |
| GO:0072273//metanephric nephron morphogenesis                                | 16   | 4   |
| GO:0016051//carbohydrate biosynthetic process                                | 104  | 11  |
| GO:0043200//response to amino acid stimulus                                  | 62   | 8   |
| GO:0048704//embryonic skeletal system morphogenesis                          | 62   | 8   |
| GO:1900274//regulation of phospholipase C activity                           | 62   | 8   |
| GO:0003044//regulation of systemic arterial blood pressure mediated by a c   | 37   | 6   |
| GO:0050886//endocrine process                                                | 37   | 6   |
| GO:0010628//positive regulation of gene expression                           | 973  | 57  |
| GO:0022411//cellular component disassembly                                   | 184  | 16  |
| GO:0002682//regulation of immune system process                              | 994  | 58  |
| GO:0014910//regulation of smooth muscle cell migration                       | 26   | 5   |
| GO:0042517//positive regulation of tyrosine phosphorylation of Stat3 protein | 26   | 5   |
| GO:0072210//metanephric nephron development                                  | 26   | 5   |
| GO:0070372//regulation of ERK1 and ERK2 cascade                              | 120  | 12  |
| GO:0019725//cellular homeostasis                                             | 417  | 29  |
| GO:0030178//negative regulation of Wnt receptor signaling pathway            | 105  | 11  |
| GO:0072503//cellular divalent inorganic cation homeostasis                   | 202  | 17  |
| GO:0044093//positive regulation of molecular function                        | 1039 | 60  |
| GO:0033500//carbohydrate homeostasis                                         | 91   | 10  |
| GO:0034612//response to tumor necrosis factor                                | 91   | 10  |
| GO:0042593//glucose homeostasis                                              | 91   | 10  |
| GO:0060041//retina development in camera-type eye                            | 91   | 10  |
| GO:0042493//response to drug                                                 | 290  | 22  |
| GO:0030100//regulation of endocytosis                                        | 106  | 11  |
| GO:0050920//regulation of chemotaxis                                         | 106  | 11  |
| GO:0001649//osteoblast differentiation                                       | 50   | 7   |
| GO:0050654//chondroitin sulfate proteoglycan metabolic process               | 50   | 7   |
| GO:0090183//regulation of kidney development                                 | 50   | 7   |
| GO:0060193//positive regulation of lipase activity                           | 77   | 9   |

|                                                                       |      |     |
|-----------------------------------------------------------------------|------|-----|
| GO:0030029//actin filament-based process                              | 291  | 22  |
| GO:0006081//cellular aldehyde metabolic process                       | 38   | 6   |
| GO:0008206//bile acid metabolic process                               | 38   | 6   |
| GO:0045840//positive regulation of mitosis                            | 38   | 6   |
| GO:0051785//positive regulation of nuclear division                   | 38   | 6   |
| GO:0032869//cellular response to insulin stimulus                     | 138  | 13  |
| GO:0060538//skeletal muscle organ development                         | 107  | 11  |
| GO:0001909//leukocyte mediated cytotoxicity                           | 27   | 5   |
| GO:0045445//myoblast differentiation                                  | 27   | 5   |
| GO:0045604//regulation of epidermal cell differentiation              | 27   | 5   |
| GO:0071322//cellular response to carbohydrate stimulus                | 27   | 5   |
| GO:0001502//cartilage condensation                                    | 17   | 4   |
| GO:0030728//ovulation                                                 | 17   | 4   |
| GO:0034694//response to prostaglandin stimulus                        | 17   | 4   |
| GO:0035909//aorta morphogenesis                                       | 17   | 4   |
| GO:0045453//bone resorption                                           | 17   | 4   |
| GO:0048710//regulation of astrocyte differentiation                   | 17   | 4   |
| GO:0006687//glycosphingolipid metabolic process                       | 64   | 8   |
| GO:0031323//regulation of cellular metabolic process                  | 4250 | 203 |
| GO:0006029//proteoglycan metabolic process                            | 78   | 9   |
| GO:0055074//calcium ion homeostasis                                   | 205  | 17  |
| GO:0031330//negative regulation of cellular catabolic process         | 51   | 7   |
| GO:0060341//regulation of cellular localization                       | 637  | 40  |
| GO:0007050//cell cycle arrest                                         | 108  | 11  |
| GO:0010921//regulation of phosphatase activity                        | 93   | 10  |
| GO:0030036//actin cytoskeleton organization                           | 258  | 20  |
| GO:0001541//ovarian follicle development                              | 39   | 6   |
| GO:0010883//regulation of lipid storage                               | 39   | 6   |
| GO:0030509//BMP signaling pathway                                     | 39   | 6   |
| GO:0010565//regulation of cellular ketone metabolic process           | 124  | 12  |
| GO:0014812//muscle cell migration                                     | 9    | 3   |
| GO:0014829//vascular smooth muscle contraction                        | 9    | 3   |
| GO:0019852//L-ascorbic acid metabolic process                         | 9    | 3   |
| GO:0030647//aminoglycoside antibiotic metabolic process               | 9    | 3   |
| GO:0034383//low-density lipoprotein particle clearance                | 9    | 3   |
| GO:0044597//daunorubicin metabolic process                            | 9    | 3   |
| GO:0044598//doxorubicin metabolic process                             | 9    | 3   |
| GO:0045986//negative regulation of smooth muscle contraction          | 9    | 3   |
| GO:0048617//embryonic foregut morphogenesis                           | 9    | 3   |
| GO:0048711//positive regulation of astrocyte differentiation          | 9    | 3   |
| GO:0048715//negative regulation of oligodendrocyte differentiation    | 9    | 3   |
| GO:0061036//positive regulation of cartilage development              | 9    | 3   |
| GO:NR_0014                                                            | 9    | 3   |
| GO:0010035//response to inorganic substance                           | 259  | 20  |
| GO:0051897//positive regulation of protein kinase B signaling cascade | 65   | 8   |
| GO:0031346//positive regulation of cell projection organization       | 109  | 11  |
| GO:0045786//negative regulation of cell cycle                         | 191  | 16  |
| GO:0006940//regulation of smooth muscle contraction                   | 40   | 6   |
| GO:0051149//positive regulation of muscle cell differentiation        | 40   | 6   |
| GO:0001516//prostaglandin biosynthetic process                        | 18   | 4   |
| GO:0002090//regulation of receptor internalization                    | 18   | 4   |
| GO:0010714//positive regulation of collagen metabolic process         | 18   | 4   |
| GO:0032967//positive regulation of collagen biosynthetic process      | 18   | 4   |
| GO:0046457//prostanoid biosynthetic process                           | 18   | 4   |
| GO:0048713//regulation of oligodendrocyte differentiation             | 18   | 4   |
| GO:0060343//trabecula formation                                       | 18   | 4   |
| GO:0006469//negative regulation of protein kinase activity            | 142  | 13  |
| GO:0033554//cellular response to stress                               | 951  | 55  |

|                                                                              |     |    |
|------------------------------------------------------------------------------|-----|----|
| GO:0000302//response to reactive oxygen species                              | 111 | 11 |
| GO:0009890//negative regulation of biosynthetic process                      | 932 | 54 |
| GO:0022612//gland morphogenesis                                              | 96  | 10 |
| GO:0050714//positive regulation of protein secretion                         | 96  | 10 |
| GO:0001889//liver development                                                | 67  | 8  |
| GO:0002697//regulation of immune effector process                            | 264 | 20 |
| GO:0010770//positive regulation of cell morphogenesis involved in differenti | 29  | 5  |
| GO:0042516//regulation of tyrosine phosphorylation of Stat3 protein          | 29  | 5  |
| GO:2000243//positive regulation of reproductive process                      | 29  | 5  |
| GO:0002237//response to molecule of bacterial origin                         | 194 | 16 |
| GO:0035303//regulation of dephosphorylation                                  | 112 | 11 |
| GO:0007162//negative regulation of cell adhesion                             | 82  | 9  |
| GO:0032526//response to retinoic acid                                        | 97  | 10 |
| GO:0050707//regulation of cytokine secretion                                 | 97  | 10 |
| GO:0055001//muscle cell development                                          | 97  | 10 |
| GO:0046883//regulation of hormone secretion                                  | 161 | 14 |
| GO:0072507//divalent inorganic cation homeostasis                            | 213 | 17 |
| GO:0006955//immune response                                                  | 918 | 53 |
| GO:0035904//aorta development                                                | 19  | 4  |
| GO:0043618//regulation of transcription from RNA polymerase II promoter in   | 19  | 4  |
| GO:0061178//regulation of insulin secretion involved in cellular response to | 19  | 4  |
| GO:0070306//lens fiber cell differentiation                                  | 19  | 4  |
| GO:0001542//ovulation from ovarian follicle                                  | 10  | 3  |
| GO:0007440//foregut morphogenesis                                            | 10  | 3  |
| GO:0010866//regulation of triglyceride biosynthetic process                  | 10  | 3  |
| GO:0046033//AMP metabolic process                                            | 10  | 3  |
| GO:1900115//extracellular regulation of signal transduction                  | 10  | 3  |
| GO:1900116//extracellular negative regulation of signal transduction         | 10  | 3  |
| GO:0010001//glial cell differentiation                                       | 98  | 10 |
| GO:0031327//negative regulation of cellular biosynthetic process             | 919 | 53 |
| GO:0030193//regulation of blood coagulation                                  | 55  | 7  |
| GO:1900046//regulation of hemostasis                                         | 55  | 7  |
| GO:0032835//glomerulus development                                           | 42  | 6  |
| GO:0045428//regulation of nitric oxide biosynthetic process                  | 42  | 6  |
| GO:0061097//regulation of protein tyrosine kinase activity                   | 42  | 6  |
| GO:0015758//glucose transport                                                | 30  | 5  |
| GO:0010594//regulation of endothelial cell migration                         | 69  | 8  |
| GO:0061008//hepaticobiliary system development                               | 69  | 8  |
| GO:0071356//cellular response to tumor necrosis factor                       | 69  | 8  |
| GO:0016265//death                                                            | 735 | 44 |
| GO:0009617//response to bacterium                                            | 323 | 23 |
| GO:0009894//regulation of catabolic process                                  | 535 | 34 |
| GO:0008202//steroid metabolic process                                        | 215 | 17 |
| GO:0050767//regulation of neurogenesis                                       | 324 | 23 |
| GO:0034097//response to cytokine stimulus                                    | 458 | 30 |
| GO:0010469//regulation of receptor activity                                  | 56  | 7  |
| GO:0090288//negative regulation of cellular response to growth factor stimu  | 70  | 8  |
| GO:0050801//ion homeostasis                                                  | 382 | 26 |
| GO:0008610//lipid biosynthetic process                                       | 459 | 30 |
| GO:0046456//icosanoid biosynthetic process                                   | 43  | 6  |
| GO:0048477//oogenesis                                                        | 43  | 6  |
| GO:1901570//fatty acid derivative biosynthetic process                       | 43  | 6  |
| GO:0042594//response to starvation                                           | 85  | 9  |
| GO:0006790//sulfur compound metabolic process                                | 217 | 17 |
| GO:0006801//superoxide metabolic process                                     | 31  | 5  |
| GO:0051148//negative regulation of muscle cell differentiation               | 31  | 5  |
| GO:0003179//heart valve morphogenesis                                        | 20  | 4  |
| GO:0007176//regulation of epidermal growth factor-activated receptor activi  | 20  | 4  |

|                                                                                  |      |    |
|----------------------------------------------------------------------------------|------|----|
| GO:0035020//regulation of Rac protein signal transduction                        | 20   | 4  |
| GO:0035924//cellular response to vascular endothelial growth factor stimulus     | 20   | 4  |
| GO:0007420//brain development                                                    | 422  | 28 |
| GO:1901214//regulation of neuron death                                           | 149  | 13 |
| GO:0046903//secretion                                                            | 403  | 27 |
| GO:0006508//proteolysis                                                          | 826  | 48 |
| GO:0033673//negative regulation of kinase activity                               | 150  | 13 |
| GO:0032496//response to lipopolysaccharide                                       | 184  | 15 |
| GO:0030166//proteoglycan biosynthetic process                                    | 44   | 6  |
| GO:0033273//response to vitamin                                                  | 44   | 6  |
| GO:0042531//positive regulation of tyrosine phosphorylation of STAT protein      | 44   | 6  |
| GO:0097006//regulation of plasma lipoprotein particle levels                     | 44   | 6  |
| GO:2000648//positive regulation of stem cell proliferation                       | 44   | 6  |
| GO:0002685//regulation of leukocyte migration                                    | 102  | 10 |
| GO:0008016//regulation of heart contraction                                      | 102  | 10 |
| GO:0009950//dorsal/ventral axis specification                                    | 11   | 3  |
| GO:0010510//regulation of acetyl-CoA biosynthetic process from pyruvate          | 11   | 3  |
| GO:0043116//negative regulation of vascular permeability                         | 11   | 3  |
| GO:0045606//positive regulation of epidermal cell differentiation                | 11   | 3  |
| GO:0050812//regulation of acyl-CoA biosynthetic process                          | 11   | 3  |
| GO:0060841//venous blood vessel development                                      | 11   | 3  |
| GO:0022604//regulation of cell morphogenesis                                     | 256  | 19 |
| GO:0001974//blood vessel remodeling                                              | 32   | 5  |
| GO:0001990//regulation of systemic arterial blood pressure by hormone            | 32   | 5  |
| GO:0008645//hexose transport                                                     | 32   | 5  |
| GO:0030850//prostate gland development                                           | 32   | 5  |
| GO:0045599//negative regulation of fat cell differentiation                      | 32   | 5  |
| GO:0046677//response to antibiotic                                               | 32   | 5  |
| GO:0051145//smooth muscle cell differentiation                                   | 32   | 5  |
| GO:0007517//muscle organ development                                             | 203  | 16 |
| GO:0010558//negative regulation of macromolecule biosynthetic process            | 872  | 50 |
| GO:0010557//positive regulation of macromolecule biosynthetic process            | 1062 | 59 |
| GO:0010741//negative regulation of intracellular protein kinase cascade          | 119  | 11 |
| GO:0034329//cell junction assembly                                               | 119  | 11 |
| GO:0010769//regulation of cell morphogenesis involved in differentiation         | 152  | 13 |
| GO:0055065//metal ion homeostasis                                                | 313  | 22 |
| GO:0003170//heart valve development                                              | 21   | 4  |
| GO:0003338//metanephros morphogenesis                                            | 21   | 4  |
| GO:0008207//C21-steroid hormone metabolic process                                | 21   | 4  |
| GO:0023014//signal transduction by phosphorylation                               | 21   | 4  |
| GO:0035412//regulation of catenin import into nucleus                            | 21   | 4  |
| GO:0040036//regulation of fibroblast growth factor receptor signaling pathway    | 21   | 4  |
| GO:0045687//positive regulation of glial cell differentiation                    | 21   | 4  |
| GO:0060674//placenta blood vessel development                                    | 21   | 4  |
| GO:0090263//positive regulation of canonical Wnt receptor signaling pathway      | 45   | 6  |
| GO:0009746//response to hexose stimulus                                          | 73   | 8  |
| GO:0055088//lipid homeostasis                                                    | 88   | 9  |
| GO:0043086//negative regulation of catalytic activity                            | 507  | 32 |
| GO:0010876//lipid localization                                                   | 187  | 15 |
| GO:0045944//positive regulation of transcription from RNA polymerase II promoter | 628  | 38 |
| GO:1901566//organonitrogen compound biosynthetic process                         | 508  | 32 |
| GO:0042306//regulation of protein import into nucleus                            | 120  | 11 |
| GO:0048871//multicellular organismal homeostasis                                 | 120  | 11 |
| GO:0001837//epithelial to mesenchymal transition                                 | 33   | 5  |
| GO:0007566//embryo implantation                                                  | 33   | 5  |
| GO:0032147//activation of protein kinase activity                                | 206  | 16 |
| GO:0008219//cell death                                                           | 733  | 43 |
| GO:0045935//positive regulation of nucleobase-containing compound metabolism     | 1048 | 58 |

|                                                                              |     |    |
|------------------------------------------------------------------------------|-----|----|
| GO:0046364//monosaccharide biosynthetic process                              | 46  | 6  |
| GO:0048738//cardiac muscle tissue development                                | 105 | 10 |
| GO:0032787//monocarboxylic acid metabolic process                            | 374 | 25 |
| GO:0043523//regulation of neuron apoptotic process                           | 138 | 12 |
| GO:0050796//regulation of insulin secretion                                  | 122 | 11 |
| GO:2001020//regulation of response to DNA damage stimulus                    | 75  | 8  |
| GO:0010574//regulation of vascular endothelial growth factor production      | 22  | 4  |
| GO:0031952//regulation of protein autophosphorylation                        | 22  | 4  |
| GO:0042481//regulation of odontogenesis                                      | 22  | 4  |
| GO:0043620//regulation of DNA-dependent transcription in response to stre    | 22  | 4  |
| GO:0045661//regulation of myoblast differentiation                           | 22  | 4  |
| GO:0050873//brown fat cell differentiation                                   | 22  | 4  |
| GO:0071326//cellular response to monosaccharide stimulus                     | 22  | 4  |
| GO:0072088//nephron epithelium morphogenesis                                 | 22  | 4  |
| GO:0072676//lymphocyte migration                                             | 22  | 4  |
| GO:0016331//morphogenesis of embryonic epithelium                            | 106 | 10 |
| GO:0044272//sulfur compound biosynthetic process                             | 106 | 10 |
| GO:0000303//response to superoxide                                           | 12  | 3  |
| GO:0019371//cyclooxygenase pathway                                           | 12  | 3  |
| GO:0019433//triglyceride catabolic process                                   | 12  | 3  |
| GO:0030502//negative regulation of bone mineralization                       | 12  | 3  |
| GO:0031954//positive regulation of protein autophosphorylation               | 12  | 3  |
| GO:0034204//lipid translocation                                              | 12  | 3  |
| GO:0043584//nose development                                                 | 12  | 3  |
| GO:0045332//phospholipid translocation                                       | 12  | 3  |
| GO:0051193//regulation of cofactor metabolic process                         | 12  | 3  |
| GO:0051196//regulation of coenzyme metabolic process                         | 12  | 3  |
| GO:0072075//metanephric mesenchyme development                               | 12  | 3  |
| GO:2000136//regulation of cell proliferation involved in heart morphogenesis | 12  | 3  |
| GO:0010812//negative regulation of cell-substrate adhesion                   | 34  | 5  |
| GO:0015749//monosaccharide transport                                         | 34  | 5  |
| GO:0001756//somitogenesis                                                    | 47  | 6  |
| GO:0042058//regulation of epidermal growth factor receptor signaling pathw   | 47  | 6  |
| GO:0050776//regulation of immune response                                    | 656 | 39 |
| GO:0048520//positive regulation of behavior                                  | 91  | 9  |
| GO:0070374//positive regulation of ERK1 and ERK2 cascade                     | 91  | 9  |
| GO:0001101//response to acid                                                 | 76  | 8  |
| GO:1901137//carbohydrate derivative biosynthetic process                     | 476 | 30 |
| GO:0051051//negative regulation of transport                                 | 265 | 19 |
| GO:1900180//regulation of protein localization to nucleus                    | 124 | 11 |
| GO:0008203//cholesterol metabolic process                                    | 92  | 9  |
| GO:0008283//cell proliferation                                               | 438 | 28 |
| GO:0035282//segmentation                                                     | 62  | 7  |
| GO:0043085//positive regulation of catalytic activity                        | 868 | 49 |
| GO:0014013//regulation of gliogenesis                                        | 48  | 6  |
| GO:0030204//chondroitin sulfate metabolic process                            | 48  | 6  |
| GO:0042509//regulation of tyrosine phosphorylation of STAT protein           | 48  | 6  |
| GO:0045682//regulation of epidermis development                              | 48  | 6  |
| GO:1901184//regulation of ERBB signaling pathway                             | 48  | 6  |
| GO:0032269//negative regulation of cellular protein metabolic process        | 361 | 24 |
| GO:0019229//regulation of vasoconstriction                                   | 35  | 5  |
| GO:0045778//positive regulation of ossification                              | 35  | 5  |
| GO:0072009//nephron epithelium development                                   | 35  | 5  |
| GO:0031069//hair follicle morphogenesis                                      | 23  | 4  |
| GO:0061098//positive regulation of protein tyrosine kinase activity          | 23  | 4  |
| GO:0002683//negative regulation of immune system process                     | 194 | 15 |
| GO:0071375//cellular response to peptide hormone stimulus                    | 194 | 15 |
| GO:1901653//cellular response to peptide                                     | 194 | 15 |

|                                                                                  |      |    |
|----------------------------------------------------------------------------------|------|----|
| GO:0006875//cellular metal ion homeostasis                                       | 267  | 19 |
| GO:0001894//tissue homeostasis                                                   | 93   | 9  |
| GO:0045892//negative regulation of transcription, DNA-dependent                  | 745  | 43 |
| GO:0001817//regulation of cytokine production                                    | 402  | 26 |
| GO:0022857//transmembrane transporter activity                                   | 582  | 35 |
| GO:0016266//O-glycan processing                                                  | 49   | 6  |
| GO:0002092//positive regulation of receptor internalization                      | 13   | 3  |
| GO:0007567//parturition                                                          | 13   | 3  |
| GO:0010611//regulation of cardiac muscle hypertrophy                             | 13   | 3  |
| GO:0032924//activin receptor signaling pathway                                   | 13   | 3  |
| GO:0046461//neutral lipid catabolic process                                      | 13   | 3  |
| GO:0046464//acylglycerol catabolic process                                       | 13   | 3  |
| GO:0061418//regulation of transcription from RNA polymerase II promoter in       | 13   | 3  |
| GO:1901215//negative regulation of neuron death                                  | 94   | 9  |
| GO:0071345//cellular response to cytokine stimulus                               | 384  | 25 |
| GO:0051348//negative regulation of transferase activity                          | 161  | 13 |
| GO:0005215//transporter activity                                                 | 585  | 35 |
| GO:0018209//peptidyl-serine modification                                         | 64   | 7  |
| GO:0019722//calcium-mediated signaling                                           | 64   | 7  |
| GO:0010743//regulation of macrophage derived foam cell differentiation           | 24   | 4  |
| GO:0018149//peptide cross-linking                                                | 24   | 4  |
| GO:0042246//tissue regeneration                                                  | 24   | 4  |
| GO:0044060//regulation of endocrine process                                      | 24   | 4  |
| GO:0044253//positive regulation of multicellular organismal metabolic proce      | 24   | 4  |
| GO:0050650//chondroitin sulfate proteoglycan biosynthetic process                | 24   | 4  |
| GO:0050769//positive regulation of neurogenesis                                  | 95   | 9  |
| GO:0006629//lipid metabolic process                                              | 1005 | 55 |
| GO:0003008//system process                                                       | 1749 | 89 |
| GO:0003337//mesenchymal to epithelial transition involved in metanephros         | 5    | 2  |
| GO:0010667//negative regulation of cardiac muscle cell apoptotic process         | 5    | 2  |
| GO:0014824//artery smooth muscle contraction                                     | 5    | 2  |
| GO:0014909//smooth muscle cell migration                                         | 5    | 2  |
| GO:0016553//base conversion or substitution editing                              | 5    | 2  |
| GO:0018401//peptidyl-proline hydroxylation to 4-hydroxy-L-proline                | 5    | 2  |
| GO:0030859//polarized epithelial cell differentiation                            | 5    | 2  |
| GO:0030913//paranodal junction assembly                                          | 5    | 2  |
| GO:0032430//positive regulation of phospholipase A2 activity                     | 5    | 2  |
| GO:0032486//Rap protein signal transduction                                      | 5    | 2  |
| GO:0034144//negative regulation of toll-like receptor 4 signaling pathway        | 5    | 2  |
| GO:0034392//negative regulation of smooth muscle cell apoptotic process          | 5    | 2  |
| GO:0035581//sequestering of extracellular ligand from receptor                   | 5    | 2  |
| GO:0035989//tendon development                                                   | 5    | 2  |
| GO:0035990//tendon cell differentiation                                          | 5    | 2  |
| GO:0035992//tendon formation                                                     | 5    | 2  |
| GO:0043619//regulation of transcription from RNA polymerase II promoter in       | 5    | 2  |
| GO:0044252//negative regulation of multicellular organismal metabolic proc       | 5    | 2  |
| GO:0045722//positive regulation of gluconeogenesis                               | 5    | 2  |
| GO:0046880//regulation of follicle-stimulating hormone secretion                 | 5    | 2  |
| GO:0060394//negative regulation of pathway-restricted SMAD protein phos          | 5    | 2  |
| GO:0060501//positive regulation of epithelial cell proliferation involved in lur | 5    | 2  |
| GO:0060526//prostate glandular acinus morphogenesis                              | 5    | 2  |
| GO:0060527//prostate epithelial cord arborization involved in prostate gland     | 5    | 2  |
| GO:0060665//regulation of branching involved in salivary gland morphogen         | 5    | 2  |
| GO:0060856//establishment of blood-brain barrier                                 | 5    | 2  |
| GO:0061045//negative regulation of wound healing                                 | 5    | 2  |
| GO:0061307//cardiac neural crest cell differentiation involved in heart devel    | 5    | 2  |
| GO:0071318//cellular response to ATP                                             | 5    | 2  |
| GO:0071637//regulation of monocyte chemotactic protein-1 production              | 5    | 2  |

|                                                                             |       |     |
|-----------------------------------------------------------------------------|-------|-----|
| GO:0072050//S-shaped body morphogenesis                                     | 5     | 2   |
| GO:0097070//ductus arteriosus closure                                       | 5     | 2   |
| GO:0097084//vascular smooth muscle cell development                         | 5     | 2   |
| GO:2000727//positive regulation of cardiac muscle cell differentiation      | 5     | 2   |
| GO:0052547//regulation of peptidase activity                                | 271   | 19  |
| GO:0045893//positive regulation of transcription, DNA-dependent             | 899   | 50  |
| GO:0051969//regulation of transmission of nerve impulse                     | 180   | 14  |
| GO:0032940//secretion by cell                                               | 329   | 22  |
| GO:0052548//regulation of endopeptidase activity                            | 235   | 17  |
| GO:0055080//cation homeostasis                                              | 349   | 23  |
| GO:1901615//organic hydroxy compound metabolic process                      | 349   | 23  |
| GO:0030177//positive regulation of Wnt receptor signaling pathway           | 65    | 7   |
| GO:0042307//positive regulation of protein import into nucleus              | 65    | 7   |
| GO:0044255//cellular lipid metabolic process                                | 776   | 44  |
| GO:0044765//single-organism transport                                       | 2250  | 111 |
| GO:0032504//multicellular organism reproduction                             | 590   | 35  |
| GO:0008150//biological_process                                              | 14755 | 617 |
| GO:0060627//regulation of vesicle-mediated transport                        | 200   | 15  |
| GO:0006811//ion transport                                                   | 947   | 52  |
| GO:0010629//negative regulation of gene expression                          | 820   | 46  |
| GO:0016125//sterol metabolic process                                        | 97    | 9   |
| GO:0002456//T cell mediated immunity                                        | 25    | 4   |
| GO:0007157//heterophilic cell-cell adhesion                                 | 25    | 4   |
| GO:0043114//regulation of vascular permeability                             | 25    | 4   |
| GO:0045123//cellular extravasation                                          | 25    | 4   |
| GO:0045684//positive regulation of epidermis development                    | 25    | 4   |
| GO:0002576//platelet degranulation                                          | 66    | 7   |
| GO:0001935//endothelial cell proliferation                                  | 14    | 3   |
| GO:0007520//myoblast fusion                                                 | 14    | 3   |
| GO:0008347//glial cell migration                                            | 14    | 3   |
| GO:0010623//developmental programmed cell death                             | 14    | 3   |
| GO:0010955//negative regulation of protein processing                       | 14    | 3   |
| GO:0014743//regulation of muscle hypertrophy                                | 14    | 3   |
| GO:0014911//positive regulation of smooth muscle cell migration             | 14    | 3   |
| GO:0016137//glycoside metabolic process                                     | 14    | 3   |
| GO:0032148//activation of protein kinase B activity                         | 14    | 3   |
| GO:0032288//myelin assembly                                                 | 14    | 3   |
| GO:0033280//response to vitamin D                                           | 14    | 3   |
| GO:0042448//progesterone metabolic process                                  | 14    | 3   |
| GO:0042554//superoxide anion generation                                     | 14    | 3   |
| GO:0045932//negative regulation of muscle contraction                       | 14    | 3   |
| GO:0046697//decidualization                                                 | 14    | 3   |
| GO:0048857//neural nucleus development                                      | 14    | 3   |
| GO:0060037//pharyngeal system development                                   | 14    | 3   |
| GO:0060571//morphogenesis of an epithelial fold                             | 14    | 3   |
| GO:0060716//labyrinthine layer blood vessel development                     | 14    | 3   |
| GO:0072074//kidney mesenchyme development                                   | 14    | 3   |
| GO:0010676//positive regulation of cellular carbohydrate metabolic process  | 38    | 5   |
| GO:0033628//regulation of cell adhesion mediated by integrin                | 38    | 5   |
| GO:0050710//negative regulation of cytokine secretion                       | 38    | 5   |
| GO:0060993//kidney morphogenesis                                            | 38    | 5   |
| GO:0050921//positive regulation of chemotaxis                               | 82    | 8   |
| GO:0008277//regulation of G-protein coupled receptor protein signaling path | 98    | 9   |
| GO:0046427//positive regulation of JAK-STAT cascade                         | 52    | 6   |
| GO:0051090//regulation of sequence-specific DNA binding transcription fac   | 296   | 20  |
| GO:0002688//regulation of leukocyte chemotaxis                              | 67    | 7   |
| GO:0006493//protein O-linked glycosylation                                  | 67    | 7   |
| GO:0009267//cellular response to starvation                                 | 67    | 7   |

|                                                                            |     |    |
|----------------------------------------------------------------------------|-----|----|
| GO:0009953//dorsal/ventral pattern formation                               | 67  | 7  |
| GO:0009636//response to toxic substance                                    | 115 | 10 |
| GO:0051048//negative regulation of secretion                               | 132 | 11 |
| GO:0090276//regulation of peptide hormone secretion                        | 132 | 11 |
| GO:0045664//regulation of neuron differentiation                           | 259 | 18 |
| GO:0043627//response to estrogen stimulus                                  | 99  | 9  |
| GO:0046890//regulation of lipid biosynthetic process                       | 99  | 9  |
| GO:0001816//cytokine production                                            | 83  | 8  |
| GO:0009791//post-embryonic development                                     | 83  | 8  |
| GO:0002886//regulation of myeloid leukocyte mediated immunity              | 26  | 4  |
| GO:0030279//negative regulation of ossification                            | 26  | 4  |
| GO:0030514//negative regulation of BMP signaling pathway                   | 26  | 4  |
| GO:0034381//plasma lipoprotein particle clearance                          | 26  | 4  |
| GO:0042312//regulation of vasodilation                                     | 26  | 4  |
| GO:0090102//cochlea development                                            | 26  | 4  |
| GO:0061053//somite development                                             | 53  | 6  |
| GO:0072073//kidney epithelium development                                  | 53  | 6  |
| GO:0046888//negative regulation of hormone secretion                       | 39  | 5  |
| GO:0031099//regeneration                                                   | 68  | 7  |
| GO:0072330//monocarboxylic acid biosynthetic process                       | 151 | 12 |
| GO:0006664//glycolipid metabolic process                                   | 100 | 9  |
| GO:0048609//multicellular organismal reproductive process                  | 579 | 34 |
| GO:0055085//transmembrane transport                                        | 788 | 44 |
| GO:0002791//regulation of peptide secretion                                | 134 | 11 |
| GO:0090087//regulation of peptide transport                                | 134 | 11 |
| GO:0000768//syncytium formation by plasma membrane fusion                  | 15  | 3  |
| GO:0001738//morphogenesis of a polarized epithelium                        | 15  | 3  |
| GO:0006688//glycosphingolipid biosynthetic process                         | 15  | 3  |
| GO:0010884//positive regulation of lipid storage                           | 15  | 3  |
| GO:0010922//positive regulation of phosphatase activity                    | 15  | 3  |
| GO:0019933//cAMP-mediated signaling                                        | 15  | 3  |
| GO:0031670//cellular response to nutrient                                  | 15  | 3  |
| GO:0033137//negative regulation of peptidyl-serine phosphorylation         | 15  | 3  |
| GO:0050746//regulation of lipoprotein metabolic process                    | 15  | 3  |
| GO:0060291//long-term synaptic potentiation                                | 15  | 3  |
| GO:0060479//lung cell differentiation                                      | 15  | 3  |
| GO:0070741//response to interleukin-6                                      | 15  | 3  |
| GO:2000826//regulation of heart morphogenesis                              | 15  | 3  |
| GO:0002252//immune effector process                                        | 378 | 24 |
| GO:0051346//negative regulation of hydrolase activity                      | 262 | 18 |
| GO:0022891//substrate-specific transmembrane transporter activity          | 581 | 34 |
| GO:0051253//negative regulation of RNA metabolic process                   | 769 | 43 |
| GO:0007422//peripheral nervous system development                          | 69  | 7  |
| GO:0009266//response to temperature stimulus                               | 101 | 9  |
| GO:0044283//small molecule biosynthetic process                            | 379 | 24 |
| GO:0007603//phototransduction, visible light                               | 54  | 6  |
| GO:0060070//canonical Wnt receptor signaling pathway                       | 54  | 6  |
| GO:0001508//regulation of action potential                                 | 118 | 10 |
| GO:0007160//cell-matrix adhesion                                           | 85  | 8  |
| GO:0002138//retinoic acid biosynthetic process                             | 6   | 2  |
| GO:0007223//Wnt receptor signaling pathway, calcium modulating pathway     | 6   | 2  |
| GO:0010761//fibroblast migration                                           | 6   | 2  |
| GO:0010871//negative regulation of receptor biosynthetic process           | 6   | 2  |
| GO:0010886//positive regulation of cholesterol storage                     | 6   | 2  |
| GO:0014820//tonic smooth muscle contraction                                | 6   | 2  |
| GO:0016264//gap junction assembly                                          | 6   | 2  |
| GO:0019800//peptide cross-linking via chondroitin 4-sulfate glycosaminogly | 6   | 2  |
| GO:0030299//intestinal cholesterol absorption                              | 6   | 2  |



|                                                                                                |     |    |
|------------------------------------------------------------------------------------------------|-----|----|
| GO:0032682//negative regulation of chemokine production                                        | 6   | 2  |
| GO:0033004//negative regulation of mast cell activation                                        | 6   | 2  |
| GO:0033690//positive regulation of osteoblast proliferation                                    | 6   | 2  |
| GO:0043301//negative regulation of leukocyte degranulation                                     | 6   | 2  |
| GO:0060059//embryonic retina morphogenesis in camera-type eye                                  | 6   | 2  |
| GO:0060373//regulation of ventricular cardiac muscle cell membrane depolarization              | 6   | 2  |
| GO:0060666//dichotomous subdivision of terminal units involved in salivary gland morphogenesis | 6   | 2  |
| GO:0070102//interleukin-6-mediated signaling pathway                                           | 6   | 2  |
| GO:0070141//response to UV-A                                                                   | 6   | 2  |
| GO:0072109//glomerular mesangium development                                                   | 6   | 2  |
| GO:0072141//renal interstitial cell development                                                | 6   | 2  |
| GO:0072239//metanephric glomerulus vasculature development                                     | 6   | 2  |
| GO:0086014//regulation of atrial cardiac muscle cell action potential                          | 6   | 2  |
| GO:0086026//atrial cardiac muscle cell to AV node cell signaling                               | 6   | 2  |
| GO:0086066//atrial cardiac muscle cell to AV node cell communication                           | 6   | 2  |
| GO:1900407//regulation of cellular response to oxidative stress                                | 6   | 2  |
| GO:1901031//regulation of response to reactive oxygen species                                  | 6   | 2  |
| GO:2000794//regulation of epithelial cell proliferation involved in lung morphogenesis         | 6   | 2  |
| GO:0045165//cell fate commitment                                                               | 189 | 14 |
| GO:0010907//positive regulation of glucose metabolic process                                   | 27  | 4  |
| GO:0042059//negative regulation of epidermal growth factor receptor signaling pathway          | 27  | 4  |
| GO:0045933//positive regulation of muscle contraction                                          | 27  | 4  |
| GO:0048730//epidermis morphogenesis                                                            | 27  | 4  |
| GO:0061383//trabecula morphogenesis                                                            | 27  | 4  |
| GO:1901185//negative regulation of ERBB signaling pathway                                      | 27  | 4  |
| GO:0022892//substrate-specific transporter activity                                            | 583 | 34 |
| GO:0071216//cellular response to biotic stimulus                                               | 102 | 9  |
| GO:2000113//negative regulation of cellular macromolecule biosynthetic process                 | 837 | 46 |
| GO:0010466//negative regulation of peptidase activity                                          | 154 | 12 |
| GO:0016787//hydrolase activity                                                                 | 154 | 12 |
| GO:0042471//ear morphogenesis                                                                  | 86  | 8  |
| GO:0021675//nerve development                                                                  | 55  | 6  |
| GO:0031644//regulation of neurological system process                                          | 191 | 14 |
| GO:0051493//regulation of cytoskeleton organization                                            | 247 | 17 |
| GO:0019319//hexose biosynthetic process                                                        | 41  | 5  |
| GO:0044092//negative regulation of molecular function                                          | 650 | 37 |
| GO:0009749//response to glucose stimulus                                                       | 71  | 7  |
| GO:0042476//odontogenesis                                                                      | 71  | 7  |
| GO:0034754//cellular hormone metabolic process                                                 | 87  | 8  |
| GO:0001991//regulation of systemic arterial blood pressure by circulatory system               | 16  | 3  |
| GO:0010830//regulation of myotube differentiation                                              | 16  | 3  |
| GO:0010869//regulation of receptor biosynthetic process                                        | 16  | 3  |
| GO:0042474//middle ear morphogenesis                                                           | 16  | 3  |
| GO:0045686//negative regulation of glial cell differentiation                                  | 16  | 3  |
| GO:0048247//lymphocyte chemotaxis                                                              | 16  | 3  |
| GO:0050892//intestinal absorption                                                              | 16  | 3  |
| GO:0060693//regulation of branching involved in salivary gland morphogenesis                   | 16  | 3  |
| GO:0072078//nephron tubule morphogenesis                                                       | 16  | 3  |
| GO:0097035//regulation of membrane lipid distribution                                          | 16  | 3  |
| GO:0043551//regulation of phosphatidylinositol 3-kinase activity                               | 28  | 4  |
| GO:0048662//negative regulation of smooth muscle cell proliferation                            | 28  | 4  |
| GO:0050766//positive regulation of phagocytosis                                                | 28  | 4  |
| GO:0061005//cell differentiation involved in kidney development                                | 28  | 4  |
| GO:0007043//cell-cell junction assembly                                                        | 56  | 6  |
| GO:0007613//memory                                                                             | 56  | 6  |
| GO:0016525//negative regulation of angiogenesis                                                | 56  | 6  |
| GO:0018958//phenol-containing compound metabolic process                                       | 56  | 6  |
| GO:0019217//regulation of fatty acid metabolic process                                         | 56  | 6  |

|                                                                            |     |    |
|----------------------------------------------------------------------------|-----|----|
| GO:0050880//regulation of blood vessel size                                | 56  | 6  |
| GO:0034599//cellular response to oxidative stress                          | 104 | 9  |
| GO:0033043//regulation of organelle organization                           | 487 | 29 |
| GO:0046822//regulation of nucleocytoplasmic transport                      | 139 | 11 |
| GO:0043409//negative regulation of MAPK cascade                            | 88  | 8  |
| GO:0043524//negative regulation of neuron apoptotic process                | 88  | 8  |
| GO:0001676//long-chain fatty acid metabolic process                        | 72  | 7  |
| GO:0051254//positive regulation of RNA metabolic process                   | 931 | 50 |
| GO:0030003//cellular cation homeostasis                                    | 289 | 19 |
| GO:0010634//positive regulation of epithelial cell migration               | 57  | 6  |
| GO:0035150//regulation of tube size                                        | 57  | 6  |
| GO:0006805//xenobiotic metabolic process                                   | 140 | 11 |
| GO:0044711//single-organism biosynthetic process                           | 388 | 24 |
| GO:0055002//striated muscle cell development                               | 89  | 8  |
| GO:0010951//negative regulation of endopeptidase activity                  | 123 | 10 |
| GO:0001657//ureteric bud development                                       | 73  | 7  |
| GO:0046824//positive regulation of nucleocytoplasmic transport             | 73  | 7  |
| GO:0003156//regulation of organ formation                                  | 29  | 4  |
| GO:0003333//amino acid transmembrane transport                             | 29  | 4  |
| GO:0006584//catecholamine metabolic process                                | 29  | 4  |
| GO:0009712//catechol-containing compound metabolic process                 | 29  | 4  |
| GO:0009954//proximal/distal pattern formation                              | 29  | 4  |
| GO:0014015//positive regulation of gliogenesis                             | 29  | 4  |
| GO:0045168//cell-cell signaling involved in cell fate commitment           | 29  | 4  |
| GO:0051004//regulation of lipoprotein lipase activity                      | 29  | 4  |
| GO:0061326//renal tubule development                                       | 29  | 4  |
| GO:0071622//regulation of granulocyte chemotaxis                           | 29  | 4  |
| GO:0072080//nephron tubule development                                     | 29  | 4  |
| GO:1901888//regulation of cell junction assembly                           | 29  | 4  |
| GO:0008286//insulin receptor signaling pathway                             | 106 | 9  |
| GO:0048015//phosphatidylinositol-mediated signaling                        | 106 | 9  |
| GO:0048017//inositol lipid-mediated signaling                              | 106 | 9  |
| GO:0051726//regulation of cell cycle                                       | 657 | 37 |
| GO:0071466//cellular response to xenobiotic stimulus                       | 141 | 11 |
| GO:0032872//regulation of stress-activated MAPK cascade                    | 159 | 12 |
| GO:0001906//cell killing                                                   | 43  | 5  |
| GO:0006949//syncytium formation                                            | 17  | 3  |
| GO:0042573//retinoic acid metabolic process                                | 17  | 3  |
| GO:0045909//positive regulation of vasodilation                            | 17  | 3  |
| GO:0046503//glycerolipid catabolic process                                 | 17  | 3  |
| GO:0060441//epithelial tube branching involved in lung morphogenesis       | 17  | 3  |
| GO:0072215//regulation of metanephros development                          | 17  | 3  |
| GO:0090103//cochlea morphogenesis                                          | 17  | 3  |
| GO:2000209//regulation of anoikis                                          | 17  | 3  |
| GO:0046470//phosphatidylcholine metabolic process                          | 58  | 6  |
| GO:0003256//regulation of transcription from RNA polymerase II promoter ii | 7   | 2  |
| GO:0006030//chitin metabolic process                                       | 7   | 2  |
| GO:0006032//chitin catabolic process                                       | 7   | 2  |
| GO:0010042//response to manganese ion                                      | 7   | 2  |
| GO:0010269//response to selenium ion                                       | 7   | 2  |
| GO:0010613//positive regulation of cardiac muscle hypertrophy              | 7   | 2  |
| GO:0010664//negative regulation of striated muscle cell apoptotic process  | 7   | 2  |
| GO:0010832//negative regulation of myotube differentiation                 | 7   | 2  |
| GO:0014742//positive regulation of muscle hypertrophy                      | 7   | 2  |
| GO:0016102//diterpenoid biosynthetic process                               | 7   | 2  |
| GO:0032354//response to follicle-stimulating hormone stimulus              | 7   | 2  |
| GO:0032909//regulation of transforming growth factor beta2 production      | 7   | 2  |
| GO:0035089//establishment of apical/basal cell polarity                    | 7   | 2  |

|                                                                                     |     |    |
|-------------------------------------------------------------------------------------|-----|----|
| GO:0044320//cellular response to leptin stimulus                                    | 7   | 2  |
| GO:0045603//positive regulation of endothelial cell differentiation                 | 7   | 2  |
| GO:0051890//regulation of cardioblast differentiation                               | 7   | 2  |
| GO:0060307//regulation of ventricular cardiac muscle cell membrane repolarization   | 7   | 2  |
| GO:0060371//regulation of atrial cardiac muscle cell membrane depolarization        | 7   | 2  |
| GO:0060572//morphogenesis of an epithelial bud                                      | 7   | 2  |
| GO:0070208//protein heterotrimerization                                             | 7   | 2  |
| GO:0072071//renal interstitial cell differentiation                                 | 7   | 2  |
| GO:0072077//renal vesicle morphogenesis                                             | 7   | 2  |
| GO:0072283//metanephric renal vesicle morphogenesis                                 | 7   | 2  |
| GO:2001015//negative regulation of skeletal muscle cell differentiation             | 7   | 2  |
| GO:NM_0142                                                                          | 7   | 2  |
| GO:0051172//negative regulation of nitrogen compound metabolic process              | 873 | 47 |
| GO:0019752//carboxylic acid metabolic process                                       | 766 | 42 |
| GO:0070302//regulation of stress-activated protein kinase signaling cascade         | 160 | 12 |
| GO:0007229//integrin-mediated signaling pathway                                     | 74  | 7  |
| GO:0031400//negative regulation of protein modification process                     | 273 | 18 |
| GO:0051345//positive regulation of hydrolase activity                               | 473 | 28 |
| GO:0048754//branching morphogenesis of an epithelial tube                           | 125 | 10 |
| GO:0009410//response to xenobiotic stimulus                                         | 143 | 11 |
| GO:0019835//cytolysis                                                               | 30  | 4  |
| GO:0031076//embryonic camera-type eye development                                   | 30  | 4  |
| GO:0060425//lung morphogenesis                                                      | 30  | 4  |
| GO:0042490//mechanoreceptor differentiation                                         | 44  | 5  |
| GO:0048663//neuron fate commitment                                                  | 44  | 5  |
| GO:2000241//regulation of reproductive process                                      | 75  | 7  |
| GO:0010038//response to metal ion                                                   | 180 | 13 |
| GO:0009100//glycoprotein metabolic process                                          | 315 | 20 |
| GO:0007088//regulation of mitosis                                                   | 92  | 8  |
| GO:0051783//regulation of nuclear division                                          | 92  | 8  |
| GO:0071219//cellular response to molecule of bacterial origin                       | 92  | 8  |
| GO:0007267//cell-cell signaling                                                     | 729 | 40 |
| GO:0032970//regulation of actin filament-based process                              | 181 | 13 |
| GO:0035637//multicellular organismal signaling                                      | 540 | 31 |
| GO:0007010//cytoskeleton organization                                               | 561 | 32 |
| GO:0002690//positive regulation of leukocyte chemotaxis                             | 60  | 6  |
| GO:0007623//circadian rhythm                                                        | 60  | 6  |
| GO:0019935//cyclic-nucleotide-mediated signaling                                    | 18  | 3  |
| GO:0034405//response to fluid shear stress                                          | 18  | 3  |
| GO:0046058//cAMP metabolic process                                                  | 18  | 3  |
| GO:0050829//defense response to Gram-negative bacterium                             | 18  | 3  |
| GO:0050918//positive chemotaxis                                                     | 18  | 3  |
| GO:0071634//regulation of transforming growth factor beta production                | 18  | 3  |
| GO:0022407//regulation of cell-cell adhesion                                        | 76  | 7  |
| GO:0042542//response to hydrogen peroxide                                           | 76  | 7  |
| GO:0071901//negative regulation of protein serine/threonine kinase activity         | 76  | 7  |
| GO:0009880//embryonic pattern specification                                         | 45  | 5  |
| GO:0018108//peptidyl-tyrosine phosphorylation                                       | 45  | 5  |
| GO:0045913//positive regulation of carbohydrate metabolic process                   | 45  | 5  |
| GO:0071300//cellular response to retinoic acid                                      | 45  | 5  |
| GO:0009615//response to virus                                                       | 201 | 14 |
| GO:0045934//negative regulation of nucleobase-containing compound metabolic process | 861 | 46 |
| GO:0042752//regulation of circadian rhythm                                          | 31  | 4  |
| GO:2000401//regulation of lymphocyte migration                                      | 31  | 4  |
| GO:0007346//regulation of mitotic cell cycle                                        | 259 | 17 |
| GO:0002698//negative regulation of immune effector process                          | 61  | 6  |
| GO:0072091//regulation of stem cell proliferation                                   | 61  | 6  |
| GO:0006954//inflammatory response                                                   | 299 | 19 |

|                                                                                                 |     |    |
|-------------------------------------------------------------------------------------------------|-----|----|
| GO:0090316//positive regulation of intracellular protein transport                              | 94  | 8  |
| GO:0006636//unsaturated fatty acid biosynthetic process                                         | 46  | 5  |
| GO:0007569//cell aging                                                                          | 46  | 5  |
| GO:0046460//neutral lipid biosynthetic process                                                  | 46  | 5  |
| GO:0046463//acylglycerol biosynthetic process                                                   | 46  | 5  |
| GO:0016053//organic acid biosynthetic process                                                   | 261 | 17 |
| GO:0046394//carboxylic acid biosynthetic process                                                | 261 | 17 |
| GO:0015075//ion transmembrane transporter activity                                              | 567 | 32 |
| GO:0001764//neuron migration                                                                    | 78  | 7  |
| GO:0001553//luteinization                                                                       | 8   | 2  |
| GO:0002063//chondrocyte development                                                             | 8   | 2  |
| GO:0003161//cardiac conduction system development                                               | 8   | 2  |
| GO:0007175//negative regulation of epidermal growth factor-activated receptor signaling pathway | 8   | 2  |
| GO:0010755//regulation of plasminogen activation                                                | 8   | 2  |
| GO:0010996//response to auditory stimulus                                                       | 8   | 2  |
| GO:0019471//4-hydroxyproline metabolic process                                                  | 8   | 2  |
| GO:0031659//positive regulation of cyclin-dependent protein serine/threonine kinase activity    | 8   | 2  |
| GO:0032276//regulation of gonadotropin secretion                                                | 8   | 2  |
| GO:0032331//negative regulation of chondrocyte differentiation                                  | 8   | 2  |
| GO:0032429//regulation of phospholipase A2 activity                                             | 8   | 2  |
| GO:0033689//negative regulation of osteoblast proliferation                                     | 8   | 2  |
| GO:0034505//tooth mineralization                                                                | 8   | 2  |
| GO:0038092//nodal signaling pathway                                                             | 8   | 2  |
| GO:0040034//regulation of development, heterochronic                                            | 8   | 2  |
| GO:0043129//surfactant homeostasis                                                              | 8   | 2  |
| GO:0044321//response to leptin stimulus                                                         | 8   | 2  |
| GO:0045117//azole transport                                                                     | 8   | 2  |
| GO:0045628//regulation of T-helper 2 cell differentiation                                       | 8   | 2  |
| GO:0045663//positive regulation of myoblast differentiation                                     | 8   | 2  |
| GO:0045844//positive regulation of striated muscle tissue development                           | 8   | 2  |
| GO:0048505//regulation of timing of cell differentiation                                        | 8   | 2  |
| GO:0048636//positive regulation of muscle organ development                                     | 8   | 2  |
| GO:0048875//chemical homeostasis within a tissue                                                | 8   | 2  |
| GO:0060638//mesenchymal-epithelial cell signaling                                               | 8   | 2  |
| GO:0061162//establishment of monopolar cell polarity                                            | 8   | 2  |
| GO:0061339//establishment or maintenance of monopolar cell polarity                             | 8   | 2  |
| GO:0071276//cellular response to cadmium ion                                                    | 8   | 2  |
| GO:0071379//cellular response to prostaglandin stimulus                                         | 8   | 2  |
| GO:0071850//mitotic cell cycle arrest                                                           | 8   | 2  |
| GO:0072087//renal vesicle development                                                           | 8   | 2  |
| GO:0072111//cell proliferation involved in kidney development                                   | 8   | 2  |
| GO:0072203//cell proliferation involved in metanephros development                              | 8   | 2  |
| GO:1900015//regulation of cytokine production involved in inflammatory response                 | 8   | 2  |
| GO:1901072//glucosamine-containing compound catabolic process                                   | 8   | 2  |
| GO:1901863//positive regulation of muscle tissue development                                    | 8   | 2  |
| GO:0006040//amino sugar metabolic process                                                       | 32  | 4  |
| GO:0006730//one-carbon metabolic process                                                        | 32  | 4  |
| GO:0043550//regulation of lipid kinase activity                                                 | 32  | 4  |
| GO:0021782//glial cell development                                                              | 62  | 6  |
| GO:0015012//heparan sulfate proteoglycan biosynthetic process                                   | 19  | 3  |
| GO:0043304//regulation of mast cell degranulation                                               | 19  | 3  |
| GO:0043502//regulation of muscle adaptation                                                     | 19  | 3  |
| GO:0045823//positive regulation of heart contraction                                            | 19  | 3  |
| GO:0045920//negative regulation of exocytosis                                                   | 19  | 3  |
| GO:0050716//positive regulation of interleukin-1 secretion                                      | 19  | 3  |
| GO:0060740//prostate gland epithelium morphogenesis                                             | 19  | 3  |
| GO:0061333//renal tubule morphogenesis                                                          | 19  | 3  |
| GO:0090207//regulation of triglyceride metabolic process                                        | 19  | 3  |

|                                                                             |     |    |
|-----------------------------------------------------------------------------|-----|----|
| GO:2000404//regulation of T cell migration                                  | 19  | 3  |
| GO:2001014//regulation of skeletal muscle cell differentiation              | 19  | 3  |
| GO:0006873//cellular ion homeostasis                                        | 302 | 19 |
| GO:0044708//single-organism behavior                                        | 302 | 19 |
| GO:0071407//cellular response to organic cyclic compound                    | 186 | 13 |
| GO:0001708//cell fate specification                                         | 47  | 5  |
| GO:0002027//regulation of heart rate                                        | 47  | 5  |
| GO:0015748//organophosphate ester transport                                 | 47  | 5  |
| GO:0018212//peptidyl-tyrosine modification                                  | 47  | 5  |
| GO:0021954//central nervous system neuron development                       | 47  | 5  |
| GO:0035148//tube formation                                                  | 96  | 8  |
| GO:0015399//primary active transmembrane transporter activity               | 63  | 6  |
| GO:0015405//P-P-bond-hydrolysis-driven transmembrane transporter activity   | 63  | 6  |
| GO:0016462//pyrophosphatase activity                                        | 63  | 6  |
| GO:0016817//hydrolase activity, acting on acid anhydrides                   | 63  | 6  |
| GO:0016818//hydrolase activity, acting on acid anhydrides, in phosphorus-c  | 63  | 6  |
| GO:0016820//hydrolase activity, acting on acid anhydrides, catalyzing trans | 63  | 6  |
| GO:0016887//ATPase activity                                                 | 63  | 6  |
| GO:0017111//nucleoside-triphosphatase activity                              | 63  | 6  |
| GO:0031016//pancreas development                                            | 63  | 6  |
| GO:0035050//embryonic heart tube development                                | 63  | 6  |
| GO:0042623//ATPase activity, coupled                                        | 63  | 6  |
| GO:0042625//ATPase activity, coupled to transmembrane movement of ions      | 63  | 6  |
| GO:0042626//ATPase activity, coupled to transmembrane movement of sub       | 63  | 6  |
| GO:0043492//ATPase activity, coupled to movement of substances              | 63  | 6  |
| GO:0012501//programmed cell death                                           | 614 | 34 |
| GO:0010470//regulation of gastrulation                                      | 33  | 4  |
| GO:0015914//phospholipid transport                                          | 33  | 4  |
| GO:0030595//leukocyte chemotaxis                                            | 80  | 7  |
| GO:0097202//activation of cysteine-type endopeptidase activity              | 80  | 7  |
| GO:0000187//activation of MAPK activity                                     | 115 | 9  |
| GO:0006665//sphingolipid metabolic process                                  | 115 | 9  |
| GO:0031589//cell-substrate adhesion                                         | 115 | 9  |
| GO:0008643//carbohydrate transport                                          | 64  | 6  |
| GO:0042552//myelination                                                     | 64  | 6  |
| GO:0050715//positive regulation of cytokine secretion                       | 64  | 6  |
| GO:0008045//motor neuron axon guidance                                      | 20  | 3  |
| GO:0015179//L-amino acid transmembrane transporter activity                 | 20  | 3  |
| GO:0015301//anion:anion antiporter activity                                 | 20  | 3  |
| GO:0017145//stem cell division                                              | 20  | 3  |
| GO:0032925//regulation of activin receptor signaling pathway                | 20  | 3  |
| GO:0033006//regulation of mast cell activation involved in immune respons   | 20  | 3  |
| GO:0036151//phosphatidylcholine acyl-chain remodeling                       | 20  | 3  |
| GO:0045987//positive regulation of smooth muscle contraction                | 20  | 3  |
| GO:0002520//immune system development                                       | 429 | 25 |
| GO:0015980//energy derivation by oxidation of organic compounds             | 228 | 15 |
| GO:0019228//regulation of action potential in neuron                        | 81  | 7  |
| GO:0031329//regulation of cellular catabolic process                        | 471 | 27 |
| GO:0001569//patterning of blood vessels                                     | 34  | 4  |
| GO:0018210//peptidyl-threonine modification                                 | 34  | 4  |
| GO:0045668//negative regulation of osteoblast differentiation               | 34  | 4  |
| GO:0071230//cellular response to amino acid stimulus                        | 34  | 4  |
| GO:0003208//cardiac ventricle morphogenesis                                 | 49  | 5  |
| GO:0006942//regulation of striated muscle contraction                       | 49  | 5  |
| GO:0050773//regulation of dendrite development                              | 49  | 5  |
| GO:0034765//regulation of ion transmembrane transport                       | 153 | 11 |
| GO:0016049//cell growth                                                     | 65  | 6  |
| GO:0060560//developmental growth involved in morphogenesis                  | 65  | 6  |

|                                                                             |     |    |
|-----------------------------------------------------------------------------|-----|----|
| GO:0007156//homophilic cell adhesion                                        | 99  | 8  |
| GO:0043122//regulation of I-kappaB kinase/NF-kappaB cascade                 | 191 | 13 |
| GO:0003177//pulmonary valve development                                     | 9   | 2  |
| GO:0003184//pulmonary valve morphogenesis                                   | 9   | 2  |
| GO:0009404//toxin metabolic process                                         | 9   | 2  |
| GO:0010544//negative regulation of platelet activation                      | 9   | 2  |
| GO:0016114//terpenoid biosynthetic process                                  | 9   | 2  |
| GO:0019430//removal of superoxide radicals                                  | 9   | 2  |
| GO:0031657//regulation of cyclin-dependent protein serine/threonine kinase  | 9   | 2  |
| GO:0032495//response to muramyl dipeptide                                   | 9   | 2  |
| GO:0032926//negative regulation of activin receptor signaling pathway       | 9   | 2  |
| GO:0033629//negative regulation of cell adhesion mediated by integrin       | 9   | 2  |
| GO:0035112//genitalia morphogenesis                                         | 9   | 2  |
| GO:0035584//calcium-mediated signaling using intracellular calcium source   | 9   | 2  |
| GO:0043931//ossification involved in bone maturation                        | 9   | 2  |
| GO:0045741//positive regulation of epidermal growth factor-activated recep  | 9   | 2  |
| GO:0048368//lateral mesoderm development                                    | 9   | 2  |
| GO:0055003//cardiac myofibril assembly                                      | 9   | 2  |
| GO:0055089//fatty acid homeostasis                                          | 9   | 2  |
| GO:0060192//negative regulation of lipase activity                          | 9   | 2  |
| GO:0060231//mesenchymal to epithelial transition                            | 9   | 2  |
| GO:0060379//cardiac muscle cell myoblast differentiation                    | 9   | 2  |
| GO:0060736//prostate gland growth                                           | 9   | 2  |
| GO:0071451//cellular response to superoxide                                 | 9   | 2  |
| GO:0072079//nephron tubule formation                                        | 9   | 2  |
| GO:0086009//membrane repolarization                                         | 9   | 2  |
| GO:0086011//membrane repolarization involved in regulation of action pote   | 9   | 2  |
| GO:0086013//membrane repolarization involved in regulation of cardiac mu    | 9   | 2  |
| GO:0090178//regulation of establishment of planar polarity involved in neur | 9   | 2  |
| GO:0090179//planar cell polarity pathway involved in neural tube closure    | 9   | 2  |
| GO:0097150//neuronal stem cell maintenance                                  | 9   | 2  |
| GO:1900006//positive regulation of dendrite development                     | 9   | 2  |
| GO:1901213//regulation of transcription from RNA polymerase II promoter in  | 9   | 2  |
| GO:2000095//regulation of Wnt receptor signaling pathway, planar cell pola  | 9   | 2  |
| GO:0022804//active transmembrane transporter activity                       | 154 | 11 |
| GO:0001936//regulation of endothelial cell proliferation                    | 66  | 6  |
| GO:0007272//ensheathment of neurons                                         | 66  | 6  |
| GO:0008366//axon ensheathment                                               | 66  | 6  |
| GO:0009408//response to heat                                                | 66  | 6  |
| GO:0043507//positive regulation of JUN kinase activity                      | 66  | 6  |
| GO:0050673//epithelial cell proliferation                                   | 66  | 6  |
| GO:0050866//negative regulation of cell activation                          | 118 | 9  |
| GO:0006699//bile acid biosynthetic process                                  | 21  | 3  |
| GO:0014014//negative regulation of gliogenesis                              | 21  | 3  |
| GO:0030206//chondroitin sulfate biosynthetic process                        | 21  | 3  |
| GO:0030947//regulation of vascular endothelial growth factor receptor signa | 21  | 3  |
| GO:0042311//vasodilation                                                    | 21  | 3  |
| GO:0043388//positive regulation of DNA binding                              | 21  | 3  |
| GO:0045616//regulation of keratinocyte differentiation                      | 21  | 3  |
| GO:0046686//response to cadmium ion                                         | 21  | 3  |
| GO:0060512//prostate gland morphogenesis                                    | 21  | 3  |
| GO:0071331//cellular response to hexose stimulus                            | 21  | 3  |
| GO:0071333//cellular response to glucose stimulus                           | 21  | 3  |
| GO:0086001//regulation of cardiac muscle cell action potential              | 21  | 3  |
| GO:0090022//regulation of neutrophil chemotaxis                             | 21  | 3  |
| GO:0090189//regulation of branching involved in ureteric bud morphogenes    | 21  | 3  |
| GO:1901071//glucosamine-containing compound metabolic process               | 21  | 3  |
| GO:0010822//positive regulation of mitochondrion organization               | 35  | 4  |

|                                                                                                  |     |    |
|--------------------------------------------------------------------------------------------------|-----|----|
| GO:0015807//L-amino acid transport                                                               | 35  | 4  |
| GO:0022409//positive regulation of cell-cell adhesion                                            | 35  | 4  |
| GO:0048146//positive regulation of fibroblast proliferation                                      | 35  | 4  |
| GO:0009584//detection of visible light                                                           | 67  | 6  |
| GO:0040014//regulation of multicellular organism growth                                          | 67  | 6  |
| GO:0042391//regulation of membrane potential                                                     | 214 | 14 |
| GO:0048747//muscle fiber development                                                             | 51  | 5  |
| GO:0032956//regulation of actin cytoskeleton organization                                        | 157 | 11 |
| GO:0019226//transmission of nerve impulse                                                        | 523 | 29 |
| GO:0008637//apoptotic mitochondrial changes                                                      | 36  | 4  |
| GO:0021545//cranial nerve development                                                            | 36  | 4  |
| GO:0071695//anatomical structure maturation                                                      | 36  | 4  |
| GO:0048872//homeostasis of number of cells                                                       | 139 | 10 |
| GO:0001838//embryonic epithelial tube formation                                                  | 85  | 7  |
| GO:0046425//regulation of JAK-STAT cascade                                                       | 68  | 6  |
| GO:0072593//reactive oxygen species metabolic process                                            | 68  | 6  |
| GO:0015849//organic acid transport                                                               | 177 | 12 |
| GO:0046942//carboxylic acid transport                                                            | 177 | 12 |
| GO:0033157//regulation of intracellular protein transport                                        | 158 | 11 |
| GO:0003081//regulation of systemic arterial blood pressure by renin-angiotensin system           | 22  | 3  |
| GO:0015171//amino acid transmembrane transporter activity                                        | 22  | 3  |
| GO:0030212//hyaluronan metabolic process                                                         | 22  | 3  |
| GO:0030511//positive regulation of transforming growth factor beta receptor signaling pathway    | 22  | 3  |
| GO:0034122//negative regulation of toll-like receptor signaling pathway                          | 22  | 3  |
| GO:0042036//negative regulation of cytokine biosynthetic process                                 | 22  | 3  |
| GO:0042491//auditory receptor cell differentiation                                               | 22  | 3  |
| GO:0043552//positive regulation of phosphatidylinositol 3-kinase activity                        | 22  | 3  |
| GO:0048645//organ formation                                                                      | 22  | 3  |
| GO:0050704//regulation of interleukin-1 secretion                                                | 22  | 3  |
| GO:0050974//detection of mechanical stimulus involved in sensory perception of touch             | 22  | 3  |
| GO:0051893//regulation of focal adhesion assembly                                                | 22  | 3  |
| GO:0090109//regulation of cell-substrate junction assembly                                       | 22  | 3  |
| GO:0048592//eye morphogenesis                                                                    | 103 | 8  |
| GO:0001952//regulation of cell-matrix adhesion                                                   | 52  | 5  |
| GO:0007202//activation of phospholipase C activity                                               | 52  | 5  |
| GO:0042475//odontogenesis of dentin-containing tooth                                             | 52  | 5  |
| GO:0050709//negative regulation of protein secretion                                             | 52  | 5  |
| GO:0006198//cAMP catabolic process                                                               | 10  | 2  |
| GO:0006809//nitric oxide biosynthetic process                                                    | 10  | 2  |
| GO:0007096//regulation of exit from mitosis                                                      | 10  | 2  |
| GO:0010885//regulation of cholesterol storage                                                    | 10  | 2  |
| GO:0019372//lipxygenase pathway                                                                  | 10  | 2  |
| GO:0030219//megakaryocyte differentiation                                                        | 10  | 2  |
| GO:0033160//positive regulation of protein import into nucleus, translocation                    | 10  | 2  |
| GO:0034143//regulation of toll-like receptor 4 signaling pathway                                 | 10  | 2  |
| GO:0035886//vascular smooth muscle cell differentiation                                          | 10  | 2  |
| GO:0042574//retinal metabolic process                                                            | 10  | 2  |
| GO:0044241//lipid digestion                                                                      | 10  | 2  |
| GO:0045618//positive regulation of keratinocyte differentiation                                  | 10  | 2  |
| GO:0045821//positive regulation of glycolysis                                                    | 10  | 2  |
| GO:0046851//negative regulation of bone remodeling                                               | 10  | 2  |
| GO:0060438//trachea development                                                                  | 10  | 2  |
| GO:0060442//branching involved in prostate gland morphogenesis                                   | 10  | 2  |
| GO:0060525//prostate glandular acinus development                                                | 10  | 2  |
| GO:0060768//regulation of epithelial cell proliferation involved in prostate gland morphogenesis | 10  | 2  |
| GO:0070498//interleukin-1-mediated signaling pathway                                             | 10  | 2  |
| GO:0070977//bone maturation                                                                      | 10  | 2  |
| GO:0072182//regulation of nephron tubule epithelial cell differentiation                         | 10  | 2  |

|                                                                           |      |     |
|---------------------------------------------------------------------------|------|-----|
| GO:0072189//ureter development                                            | 10   | 2   |
| GO:0072224//metanephric glomerulus development                            | 10   | 2   |
| GO:0086010//membrane depolarization involved in regulation of action pote | 10   | 2   |
| GO:0086012//membrane depolarization involved in regulation of cardiac mu  | 10   | 2   |
| GO:0090136//epithelial cell-cell adhesion                                 | 10   | 2   |
| GO:0034762//regulation of transmembrane transport                         | 159  | 11  |
| GO:0071222//cellular response to lipopolysaccharide                       | 86   | 7   |
| GO:0072175//epithelial tube formation                                     | 86   | 7   |
| GO:0042102//positive regulation of T cell proliferation                   | 69   | 6   |
| GO:0009889//regulation of biosynthetic process                            | 3216 | 147 |
| GO:0051224//negative regulation of protein transport                      | 104  | 8   |
| GO:0006094//gluconeogenesis                                               | 37   | 4   |
| GO:0031623//receptor internalization                                      | 37   | 4   |
| GO:0045069//regulation of viral genome replication                        | 53   | 5   |
| GO:0051101//regulation of DNA binding                                     | 53   | 5   |
| GO:0044702//single organism reproductive process                          | 658  | 35  |
| GO:0006066//alcohol metabolic process                                     | 279  | 17  |
| GO:0016485//protein processing                                            | 105  | 8   |
| GO:0050804//regulation of synaptic transmission                           | 161  | 11  |
| GO:0060249//anatomical structure homeostasis                              | 161  | 11  |
| GO:0002828//regulation of type 2 immune response                          | 23   | 3   |
| GO:0008154//actin polymerization or depolymerization                      | 23   | 3   |
| GO:0032570//response to progesterone stimulus                             | 23   | 3   |
| GO:0042310//vasoconstriction                                              | 23   | 3   |
| GO:0046513//ceramide biosynthetic process                                 | 23   | 3   |
| GO:0051057//positive regulation of small GTPase mediated signal transduc  | 23   | 3   |
| GO:0051966//regulation of synaptic transmission, glutamatergic            | 23   | 3   |
| GO:0060428//lung epithelium development                                   | 23   | 3   |
| GO:0086036//regulation of cardiac muscle cell membrane potential          | 23   | 3   |
| GO:0090218//positive regulation of lipid kinase activity                  | 23   | 3   |
| GO:0042472//inner ear morphogenesis                                       | 70   | 6   |
| GO:0072527//pyrimidine-containing compound metabolic process              | 70   | 6   |
| GO:0002684//positive regulation of immune system process                  | 638  | 34  |
| GO:0043269//regulation of ion transport                                   | 321  | 19  |
| GO:0051607//defense response to virus                                     | 124  | 9   |
| GO:0032103//positive regulation of response to external stimulus          | 162  | 11  |
| GO:0046328//regulation of JNK cascade                                     | 143  | 10  |
| GO:0043506//regulation of JUN kinase activity                             | 88   | 7   |
| GO:0006865//amino acid transport                                          | 106  | 8   |
| GO:0031532//actin cytoskeleton reorganization                             | 38   | 4   |
| GO:0050764//regulation of phagocytosis                                    | 38   | 4   |
| GO:0071229//cellular response to acid                                     | 38   | 4   |
| GO:0035556//intracellular signal transduction                             | 1058 | 53  |
| GO:0048534//hematopoietic or lymphoid organ development                   | 405  | 23  |
| GO:0002526//acute inflammatory response                                   | 54   | 5   |
| GO:0007200//phospholipase C-activating G-protein coupled receptor signal  | 54   | 5   |
| GO:0007610//behavior                                                      | 364  | 21  |
| GO:0009581//detection of external stimulus                                | 144  | 10  |
| GO:0002544//chronic inflammatory response                                 | 11   | 2   |
| GO:0005355//glucose transmembrane transporter activity                    | 11   | 2   |
| GO:0006012//galactose metabolic process                                   | 11   | 2   |
| GO:0010002//cardioblast differentiation                                   | 11   | 2   |
| GO:0010745//negative regulation of macrophage derived foam cell different | 11   | 2   |
| GO:0021783//preganglionic parasympathetic nervous system development      | 11   | 2   |
| GO:0030878//thyroid gland development                                     | 11   | 2   |
| GO:0032793//positive regulation of CREB transcription factor activity     | 11   | 2   |
| GO:0032878//regulation of establishment or maintenance of cell polarity   | 11   | 2   |
| GO:0033363//secretory granule organization                                | 11   | 2   |



|                                                                                |      |     |
|--------------------------------------------------------------------------------|------|-----|
| GO:0034110//regulation of homotypic cell-cell adhesion                         | 11   | 2   |
| GO:0034442//regulation of lipoprotein oxidation                                | 11   | 2   |
| GO:0035810//positive regulation of urine volume                                | 11   | 2   |
| GO:0042487//regulation of odontogenesis of dentin-containing tooth             | 11   | 2   |
| GO:0043403//skeletal muscle tissue regeneration                                | 11   | 2   |
| GO:0045187//regulation of circadian sleep/wake cycle, sleep                    | 11   | 2   |
| GO:0045197//establishment or maintenance of epithelial cell apical/basal po    | 11   | 2   |
| GO:0045624//positive regulation of T-helper cell differentiation               | 11   | 2   |
| GO:0046348//amino sugar catabolic process                                      | 11   | 2   |
| GO:0048009//insulin-like growth factor receptor signaling pathway              | 11   | 2   |
| GO:0060306//regulation of membrane repolarization                              | 11   | 2   |
| GO:0060351//cartilage development involved in endochondral bone morpho         | 11   | 2   |
| GO:0060644//mammary gland epithelial cell differentiation                      | 11   | 2   |
| GO:0060742//epithelial cell differentiation involved in prostate gland develop | 11   | 2   |
| GO:0060976//coronary vasculature development                                   | 11   | 2   |
| GO:0086019//cell-cell signaling involved in cardiac conduction                 | 11   | 2   |
| GO:0090162//establishment of epithelial cell polarity                          | 11   | 2   |
| GO:2000050//regulation of non-canonical Wnt receptor signaling pathway         | 11   | 2   |
| GO:2000380//regulation of mesoderm development                                 | 11   | 2   |
| GO:0008324//cation transmembrane transporter activity                          | 471  | 26  |
| GO:0006810//transport                                                          | 2836 | 130 |
| GO:0051234//establishment of localization                                      | 2883 | 132 |
| GO:0001893//maternal placenta development                                      | 24   | 3   |
| GO:0030201//heparan sulfate proteoglycan metabolic process                     | 24   | 3   |
| GO:0043043//peptide biosynthetic process                                       | 24   | 3   |
| GO:0043300//regulation of leukocyte degranulation                              | 24   | 3   |
| GO:1901661//quinone metabolic process                                          | 24   | 3   |
| GO:0008509//anion transmembrane transporter activity                           | 145  | 10  |
| GO:0030510//regulation of BMP signaling pathway                                | 55   | 5   |
| GO:0032355//response to estradiol stimulus                                     | 55   | 5   |
| GO:0031032//actomyosin structure organization                                  | 39   | 4   |
| GO:0034637//cellular carbohydrate biosynthetic process                         | 39   | 4   |
| GO:0042177//negative regulation of protein catabolic process                   | 39   | 4   |
| GO:0060113//inner ear receptor cell differentiation                            | 39   | 4   |
| GO:0060135//maternal process involved in female pregnancy                      | 39   | 4   |
| GO:0051047//positive regulation of secretion                                   | 205  | 13  |
| GO:0005976//polysaccharide metabolic process                                   | 56   | 5   |
| GO:0010821//regulation of mitochondrion organization                           | 56   | 5   |
| GO:0006766//vitamin metabolic process                                          | 91   | 7   |
| GO:0034976//response to endoplasmic reticulum stress                           | 91   | 7   |
| GO:0051054//positive regulation of DNA metabolic process                       | 91   | 7   |
| GO:0046777//protein autophosphorylation                                        | 147  | 10  |
| GO:0009582//detection of abiotic stimulus                                      | 128  | 9   |
| GO:0006897//endocytosis                                                        | 307  | 18  |
| GO:0006939//smooth muscle contraction                                          | 40   | 4   |
| GO:0032652//regulation of interleukin-1 production                             | 40   | 4   |
| GO:0046879//hormone secretion                                                  | 40   | 4   |
| GO:0001702//gastrulation with mouth forming second                             | 25   | 3   |
| GO:0009409//response to cold                                                   | 25   | 3   |
| GO:0015893//drug transport                                                     | 25   | 3   |
| GO:0018146//keratan sulfate biosynthetic process                               | 25   | 3   |
| GO:0034367//macromolecular complex remodeling                                  | 25   | 3   |
| GO:0034368//protein-lipid complex remodeling                                   | 25   | 3   |
| GO:0034369//plasma lipoprotein particle remodeling                             | 25   | 3   |
| GO:0007602//phototransduction                                                  | 74   | 6   |
| GO:0010638//positive regulation of organelle organization                      | 207  | 13  |
| GO:0009058//biosynthetic process                                               | 2149 | 100 |
| GO:0042632//cholesterol homeostasis                                            | 57   | 5   |

|                                                                                 |      |     |
|---------------------------------------------------------------------------------|------|-----|
| GO:0010975//regulation of neuron projection development                         | 168  | 11  |
| GO:0001556//oocyte maturation                                                   | 12   | 2   |
| GO:0002003//angiotensin maturation                                              | 12   | 2   |
| GO:0002042//cell migration involved in sprouting angiogenesis                   | 12   | 2   |
| GO:0006700//C21-steroid hormone biosynthetic process                            | 12   | 2   |
| GO:0009214//cyclic nucleotide catabolic process                                 | 12   | 2   |
| GO:0015145//monosaccharide transmembrane transporter activity                   | 12   | 2   |
| GO:0015149//hexose transmembrane transporter activity                           | 12   | 2   |
| GO:0030949//positive regulation of vascular endothelial growth factor recep     | 12   | 2   |
| GO:0032309//icosanoid secretion                                                 | 12   | 2   |
| GO:0034104//negative regulation of tissue remodeling                            | 12   | 2   |
| GO:0034391//regulation of smooth muscle cell apoptotic process                  | 12   | 2   |
| GO:0034394//protein localization to cell surface                                | 12   | 2   |
| GO:0036296//response to increased oxygen levels                                 | 12   | 2   |
| GO:0042749//regulation of circadian sleep/wake cycle                            | 12   | 2   |
| GO:0045576//mast cell activation                                                | 12   | 2   |
| GO:0046718//viral entry into host cell                                          | 12   | 2   |
| GO:0048016//inositol phosphate-mediated signaling                               | 12   | 2   |
| GO:0048486//parasympathetic nervous system development                          | 12   | 2   |
| GO:0048635//negative regulation of muscle organ development                     | 12   | 2   |
| GO:0050482//arachidonic acid secretion                                          | 12   | 2   |
| GO:0050748//negative regulation of lipoprotein metabolic process                | 12   | 2   |
| GO:0051482//elevation of cytosolic calcium ion concentration involved in ph     | 12   | 2   |
| GO:0051968//positive regulation of synaptic transmission, glutamatergic         | 12   | 2   |
| GO:0055093//response to hyperoxia                                               | 12   | 2   |
| GO:0060008//Sertoli cell differentiation                                        | 12   | 2   |
| GO:0060602//branch elongation of an epithelium                                  | 12   | 2   |
| GO:0060749//mammary gland alveolus development                                  | 12   | 2   |
| GO:0061001//regulation of dendritic spine morphogenesis                         | 12   | 2   |
| GO:0061377//mammary gland lobule development                                    | 12   | 2   |
| GO:0071354//cellular response to interleukin-6                                  | 12   | 2   |
| GO:2000272//negative regulation of receptor activity                            | 12   | 2   |
| GO:2000696//regulation of epithelial cell differentiation involved in kidney de | 12   | 2   |
| GO:0010595//positive regulation of endothelial cell migration                   | 41   | 4   |
| GO:0042044//fluid transport                                                     | 41   | 4   |
| GO:0048709//oligodendrocyte differentiation                                     | 41   | 4   |
| GO:0055117//regulation of cardiac muscle contraction                            | 41   | 4   |
| GO:0042439//ethanolamine-containing compound metabolic process                  | 75   | 6   |
| GO:0051091//positive regulation of sequence-specific DNA binding transcrip      | 169  | 11  |
| GO:0051098//regulation of binding                                               | 150  | 10  |
| GO:0055092//sterol homeostasis                                                  | 58   | 5   |
| GO:0002675//positive regulation of acute inflammatory response                  | 26   | 3   |
| GO:0009167//purine ribonucleoside monophosphate metabolic process               | 26   | 3   |
| GO:0032732//positive regulation of interleukin-1 production                     | 26   | 3   |
| GO:0033003//regulation of mast cell activation                                  | 26   | 3   |
| GO:0035315//hair cell differentiation                                           | 26   | 3   |
| GO:0042304//regulation of fatty acid biosynthetic process                       | 26   | 3   |
| GO:0046850//regulation of bone remodeling                                       | 26   | 3   |
| GO:0048538//thymus development                                                  | 26   | 3   |
| GO:0050922//negative regulation of chemotaxis                                   | 26   | 3   |
| GO:0051963//regulation of synapse assembly                                      | 26   | 3   |
| GO:0019538//protein metabolic process                                           | 3191 | 144 |
| GO:0050680//negative regulation of epithelial cell proliferation                | 76   | 6   |
| GO:0016310//phosphorylation                                                     | 812  | 41  |
| GO:0030800//negative regulation of cyclic nucleotide metabolic process          | 42   | 4   |
| GO:0030815//negative regulation of cAMP metabolic process                       | 42   | 4   |
| GO:0042787//protein ubiquitination involved in ubiquitin-dependent protein d    | 42   | 4   |
| GO:0006812//cation transport                                                    | 592  | 31  |

|                                                                            |      |     |
|----------------------------------------------------------------------------|------|-----|
| GO:0001824//blastocyst development                                         | 59   | 5   |
| GO:0006026//aminoglycan catabolic process                                  | 59   | 5   |
| GO:0009101//glycoprotein biosynthetic process                              | 273  | 16  |
| GO:0097305//response to alcohol                                            | 172  | 11  |
| GO:0031344//regulation of cell projection organization                     | 212  | 13  |
| GO:0001704//formation of primary germ layer                                | 77   | 6   |
| GO:0006919//activation of cysteine-type endopeptidase activity involved in | 77   | 6   |
| GO:0007369//gastrulation                                                   | 114  | 8   |
| GO:0051604//protein maturation                                             | 114  | 8   |
| GO:0050865//regulation of cell activation                                  | 400  | 22  |
| GO:0006643//membrane lipid metabolic process                               | 153  | 10  |
| GO:0001825//blastocyst formation                                           | 27   | 3   |
| GO:0005342//organic acid transmembrane transporter activity                | 27   | 3   |
| GO:0009126//purine nucleoside monophosphate metabolic process              | 27   | 3   |
| GO:0014003//oligodendrocyte development                                    | 27   | 3   |
| GO:0030239//myofibril assembly                                             | 27   | 3   |
| GO:0046943//carboxylic acid transmembrane transporter activity             | 27   | 3   |
| GO:0090278//negative regulation of peptide hormone secretion               | 27   | 3   |
| GO:2000179//positive regulation of neural precursor cell proliferation     | 27   | 3   |
| GO:0002253//activation of immune response                                  | 337  | 19  |
| GO:0034220//ion transmembrane transport                                    | 337  | 19  |
| GO:0001573//ganglioside metabolic process                                  | 13   | 2   |
| GO:0002021//response to dietary excess                                     | 13   | 2   |
| GO:0002548//monocyte chemotaxis                                            | 13   | 2   |
| GO:0002701//negative regulation of production of molecular mediator of im  | 13   | 2   |
| GO:0002719//negative regulation of cytokine production involved in immune  | 13   | 2   |
| GO:0006098//pentose-phosphate shunt                                        | 13   | 2   |
| GO:0010744//positive regulation of macrophage derived foam cell differenti | 13   | 2   |
| GO:0030041//actin filament polymerization                                  | 13   | 2   |
| GO:0031290//retinal ganglion cell axon guidance                            | 13   | 2   |
| GO:0036148//phosphatidylglycerol acyl-chain remodeling                     | 13   | 2   |
| GO:0036150//phosphatidylserine acyl-chain remodeling                       | 13   | 2   |
| GO:0048103//somatic stem cell division                                     | 13   | 2   |
| GO:0050919//negative chemotaxis                                            | 13   | 2   |
| GO:0060026//convergent extension                                           | 13   | 2   |
| GO:0071599//otic vesicle development                                       | 13   | 2   |
| GO:0071887//leukocyte apoptotic process                                    | 13   | 2   |
| GO:2000021//regulation of ion homeostasis                                  | 134  | 9   |
| GO:0007189//adenylate cyclase-activating G-protein coupled receptor signa  | 43   | 4   |
| GO:0043604//amide biosynthetic process                                     | 43   | 4   |
| GO:0045665//negative regulation of neuron differentiation                  | 43   | 4   |
| GO:0043271//negative regulation of ion transport                           | 60   | 5   |
| GO:0045744//negative regulation of G-protein coupled receptor protein sign | 60   | 5   |
| GO:0019827//stem cell maintenance                                          | 78   | 6   |
| GO:0048593//camera-type eye morphogenesis                                  | 78   | 6   |
| GO:0070663//regulation of leukocyte proliferation                          | 154  | 10  |
| GO:1901576//organic substance biosynthetic process                         | 2080 | 96  |
| GO:0046165//alcohol biosynthetic process                                   | 97   | 7   |
| GO:0006576//cellular biogenic amine metabolic process                      | 116  | 8   |
| GO:0044106//cellular amine metabolic process                               | 116  | 8   |
| GO:0001707//mesoderm formation                                             | 61   | 5   |
| GO:0048145//regulation of fibroblast proliferation                         | 61   | 5   |
| GO:0031326//regulation of cellular biosynthetic process                    | 3188 | 143 |
| GO:0048167//regulation of synaptic plasticity                              | 79   | 6   |
| GO:0002440//production of molecular mediator of immune response            | 44   | 4   |
| GO:0019432//triglyceride biosynthetic process                              | 44   | 4   |
| GO:0072089//stem cell proliferation                                        | 44   | 4   |
| GO:2000177//regulation of neural precursor cell proliferation              | 44   | 4   |

|                                                                                         |      |     |
|-----------------------------------------------------------------------------------------|------|-----|
| GO:0002792//negative regulation of peptide secretion                                    | 28   | 3   |
| GO:0010633//negative regulation of epithelial cell migration                            | 28   | 3   |
| GO:0015662//ATPase activity, coupled to transmembrane movement of ions                  | 28   | 3   |
| GO:0030501//positive regulation of bone mineralization                                  | 28   | 3   |
| GO:0031100//organ regeneration                                                          | 28   | 3   |
| GO:0031128//developmental induction                                                     | 28   | 3   |
| GO:0032436//positive regulation of proteasomal ubiquitin-dependent proteolysis          | 28   | 3   |
| GO:0035136//forelimb morphogenesis                                                      | 28   | 3   |
| GO:0048013//ephrin receptor signaling pathway                                           | 28   | 3   |
| GO:0060416//response to growth hormone stimulus                                         | 28   | 3   |
| GO:0070098//chemokine-mediated signaling pathway                                        | 28   | 3   |
| GO:0050671//positive regulation of lymphocyte proliferation                             | 98   | 7   |
| GO:0010468//regulation of gene expression                                               | 3215 | 144 |
| GO:0006631//fatty acid metabolic process                                                | 258  | 15  |
| GO:0019221//cytokine-mediated signaling pathway                                         | 300  | 17  |
| GO:0002687//positive regulation of leukocyte migration                                  | 80   | 6   |
| GO:0045017//glycerolipid biosynthetic process                                           | 197  | 12  |
| GO:0019829//cation-transporting ATPase activity                                         | 62   | 5   |
| GO:0055007//cardiac muscle cell differentiation                                         | 62   | 5   |
| GO:0006468//protein phosphorylation                                                     | 559  | 29  |
| GO:0022412//cellular process involved in reproduction in multicellular organism         | 157  | 10  |
| GO:2000116//regulation of cysteine-type endopeptidase activity                          | 157  | 10  |
| GO:0006915//apoptotic process                                                           | 603  | 31  |
| GO:0032946//positive regulation of mononuclear cell proliferation                       | 99   | 7   |
| GO:0046546//development of primary male sexual characteristics                          | 99   | 7   |
| GO:0002002//regulation of angiotensin levels in blood                                   | 14   | 2   |
| GO:0005452//inorganic anion exchanger activity                                          | 14   | 2   |
| GO:0005978//glycogen biosynthetic process                                               | 14   | 2   |
| GO:0006740//NADPH regeneration                                                          | 14   | 2   |
| GO:0006855//drug transmembrane transport                                                | 14   | 2   |
| GO:0009250//glucan biosynthetic process                                                 | 14   | 2   |
| GO:0010460//positive regulation of heart rate                                           | 14   | 2   |
| GO:0015695//organic cation transport                                                    | 14   | 2   |
| GO:0022410//circadian sleep/wake cycle process                                          | 14   | 2   |
| GO:0030260//entry into host cell                                                        | 14   | 2   |
| GO:0033158//regulation of protein import into nucleus, translocation                    | 14   | 2   |
| GO:0035809//regulation of urine volume                                                  | 14   | 2   |
| GO:0044409//entry into host                                                             | 14   | 2   |
| GO:0050910//detection of mechanical stimulus involved in sensory perception of touch    | 14   | 2   |
| GO:0051769//regulation of nitric-oxide synthase biosynthetic process                    | 14   | 2   |
| GO:0051806//entry into cell of other organism involved in symbiotic interaction         | 14   | 2   |
| GO:0051828//entry into other organism involved in symbiotic interaction                 | 14   | 2   |
| GO:0051917//regulation of fibrinolysis                                                  | 14   | 2   |
| GO:0052126//movement in host environment                                                | 14   | 2   |
| GO:0052192//movement in environment of other organism involved in symbiotic interaction | 14   | 2   |
| GO:0060038//cardiac muscle cell proliferation                                           | 14   | 2   |
| GO:0060177//regulation of angiotensin metabolic process                                 | 14   | 2   |
| GO:0060384//innervation                                                                 | 14   | 2   |
| GO:0060487//lung epithelial cell differentiation                                        | 14   | 2   |
| GO:0060664//epithelial cell proliferation involved in salivary gland morphogenesis      | 14   | 2   |
| GO:0071715//icosanoid transport                                                         | 14   | 2   |
| GO:1901571//fatty acid derivative transport                                             | 14   | 2   |
| GO:2000351//regulation of endothelial cell apoptotic process                            | 14   | 2   |
| GO:0001776//leukocyte homeostasis                                                       | 45   | 4   |
| GO:0009914//hormone transport                                                           | 45   | 4   |
| GO:0015297//antiporter activity                                                         | 45   | 4   |
| GO:1900543//negative regulation of purine nucleotide metabolic process                  | 45   | 4   |
| GO:0050954//sensory perception of mechanical stimulus                                   | 119  | 8   |

|                                                                                                       |     |    |
|-------------------------------------------------------------------------------------------------------|-----|----|
| GO:0007585//respiratory gaseous exchange                                                              | 29  | 3  |
| GO:0008088//axon cargo transport                                                                      | 29  | 3  |
| GO:0010828//positive regulation of glucose transport                                                  | 29  | 3  |
| GO:0048814//regulation of dendrite morphogenesis                                                      | 29  | 3  |
| GO:0070169//positive regulation of biomineral tissue development                                      | 29  | 3  |
| GO:0043112//receptor metabolic process                                                                | 63  | 5  |
| GO:0051099//positive regulation of binding                                                            | 63  | 5  |
| GO:0009247//glycolipid biosynthetic process                                                           | 46  | 4  |
| GO:0016050//vesicle organization                                                                      | 82  | 6  |
| GO:0006767//water-soluble vitamin metabolic process                                                   | 64  | 5  |
| GO:0032387//negative regulation of intracellular transport                                            | 64  | 5  |
| GO:0048332//mesoderm morphogenesis                                                                    | 64  | 5  |
| GO:0032386//regulation of intracellular transport                                                     | 263 | 15 |
| GO:0003012//muscle system process                                                                     | 181 | 11 |
| GO:0022600//digestive system process                                                                  | 30  | 3  |
| GO:0033692//cellular polysaccharide biosynthetic process                                              | 30  | 3  |
| GO:0042339//keratan sulfate metabolic process                                                         | 30  | 3  |
| GO:0060393//regulation of pathway-restricted SMAD protein phosphorylation                             | 30  | 3  |
| GO:1901800//positive regulation of proteasomal protein catabolic process                              | 30  | 3  |
| GO:0009583//detection of light stimulus                                                               | 83  | 6  |
| GO:0006694//steroid biosynthetic process                                                              | 102 | 7  |
| GO:0070665//positive regulation of leukocyte proliferation                                            | 102 | 7  |
| GO:2001056//positive regulation of cysteine-type endopeptidase activity                               | 102 | 7  |
| GO:0003215//cardiac right ventricle morphogenesis                                                     | 15  | 2  |
| GO:0009110//vitamin biosynthetic process                                                              | 15  | 2  |
| GO:0014855//striated muscle cell proliferation                                                        | 15  | 2  |
| GO:0031641//regulation of myelination                                                                 | 15  | 2  |
| GO:0031650//regulation of heat generation                                                             | 15  | 2  |
| GO:0042523//positive regulation of tyrosine phosphorylation of Stat5 protein                          | 15  | 2  |
| GO:0045070//positive regulation of viral genome replication                                           | 15  | 2  |
| GO:0045601//regulation of endothelial cell differentiation                                            | 15  | 2  |
| GO:0045742//positive regulation of epidermal growth factor receptor signaling pathway                 | 15  | 2  |
| GO:0046716//muscle cell cellular homeostasis                                                          | 15  | 2  |
| GO:0048070//regulation of developmental pigmentation                                                  | 15  | 2  |
| GO:0060998//regulation of dendritic spine development                                                 | 15  | 2  |
| GO:0061099//negative regulation of protein tyrosine kinase activity                                   | 15  | 2  |
| GO:0061311//cell surface receptor signaling pathway involved in heart development                     | 15  | 2  |
| GO:0070059//intrinsic apoptotic signaling pathway in response to endoplasmic reticulum stress         | 15  | 2  |
| GO:0080111//DNA demethylation                                                                         | 15  | 2  |
| GO:0086002//regulation of cardiac muscle cell action potential involved in cardiac muscle contraction | 15  | 2  |
| GO:2000811//negative regulation of anoikis                                                            | 15  | 2  |
| GO:0001938//positive regulation of endothelial cell proliferation                                     | 47  | 4  |
| GO:0071260//cellular response to mechanical stimulus                                                  | 47  | 4  |
| GO:0002065//columnar/cuboidal epithelial cell differentiation                                         | 65  | 5  |
| GO:0006633//fatty acid biosynthetic process                                                           | 103 | 7  |
| GO:0015850//organic hydroxy compound transport                                                        | 84  | 6  |
| GO:0007224//smoothed signaling pathway                                                                | 48  | 4  |
| GO:0021761//limbic system development                                                                 | 48  | 4  |
| GO:0021987//cerebral cortex development                                                               | 48  | 4  |
| GO:0045980//negative regulation of nucleotide metabolic process                                       | 48  | 4  |
| GO:0000271//polysaccharide biosynthetic process                                                       | 31  | 3  |
| GO:0005977//glycogen metabolic process                                                                | 31  | 3  |
| GO:0015909//long-chain fatty acid transport                                                           | 31  | 3  |
| GO:0055006//cardiac cell development                                                                  | 31  | 3  |
| GO:0055081//anion homeostasis                                                                         | 31  | 3  |
| GO:0072529//pyrimidine-containing compound catabolic process                                          | 31  | 3  |
| GO:0030968//endoplasmic reticulum unfolded protein response                                           | 66  | 5  |
| GO:0071241//cellular response to inorganic substance                                                  | 66  | 5  |

|                                                                              |      |     |
|------------------------------------------------------------------------------|------|-----|
| GO:0046873//metal ion transmembrane transporter activity                     | 310  | 17  |
| GO:0008584//male gonad development                                           | 85   | 6   |
| GO:0030902//hindbrain development                                            | 85   | 6   |
| GO:0009308//amine metabolic process                                          | 124  | 8   |
| GO:0044003//modification by symbiont of host morphology or physiology        | 247  | 14  |
| GO:0018193//peptidyl-amino acid modification                                 | 441  | 23  |
| GO:0021602//cranial nerve morphogenesis                                      | 16   | 2   |
| GO:0022011//myelination in peripheral nervous system                         | 16   | 2   |
| GO:0032292//peripheral nervous system axon ensheathment                      | 16   | 2   |
| GO:0033630//positive regulation of cell adhesion mediated by integrin        | 16   | 2   |
| GO:0033632//regulation of cell-cell adhesion mediated by integrin            | 16   | 2   |
| GO:0042104//positive regulation of activated T cell proliferation            | 16   | 2   |
| GO:0043372//positive regulation of CD4-positive, alpha-beta T cell different | 16   | 2   |
| GO:0045671//negative regulation of osteoclast differentiation                | 16   | 2   |
| GO:0045736//negative regulation of cyclin-dependent protein serine/threoni   | 16   | 2   |
| GO:0045745//positive regulation of G-protein coupled receptor protein signa  | 16   | 2   |
| GO:0050901//leukocyte tethering or rolling                                   | 16   | 2   |
| GO:0051155//positive regulation of striated muscle cell differentiation      | 16   | 2   |
| GO:0055017//cardiac muscle tissue growth                                     | 16   | 2   |
| GO:0071526//semaphorin-plexin signaling pathway                              | 16   | 2   |
| GO:0090023//positive regulation of neutrophil chemotaxis                     | 16   | 2   |
| GO:1901186//positive regulation of ERBB signaling pathway                    | 16   | 2   |
| GO:0034614//cellular response to reactive oxygen species                     | 67   | 5   |
| GO:0034620//cellular response to unfolded protein                            | 67   | 5   |
| GO:1901654//response to ketone                                               | 67   | 5   |
| GO:0030099//myeloid cell differentiation                                     | 145  | 9   |
| GO:0015918//sterol transport                                                 | 49   | 4   |
| GO:0018208//peptidyl-proline modification                                    | 49   | 4   |
| GO:0030301//cholesterol transport                                            | 49   | 4   |
| GO:0034332//adherens junction organization                                   | 49   | 4   |
| GO:0046324//regulation of glucose import                                     | 49   | 4   |
| GO:0006073//cellular glucan metabolic process                                | 32   | 3   |
| GO:0044042//glucan metabolic process                                         | 32   | 3   |
| GO:0048521//negative regulation of behavior                                  | 32   | 3   |
| GO:0070206//protein trimerization                                            | 32   | 3   |
| GO:0043687//post-translational protein modification                          | 166  | 10  |
| GO:0006986//response to unfolded protein                                     | 106  | 7   |
| GO:0010950//positive regulation of endopeptidase activity                    | 106  | 7   |
| GO:0042129//regulation of T cell proliferation                               | 106  | 7   |
| GO:0043433//negative regulation of sequence-specific DNA binding transcr     | 106  | 7   |
| GO:0046661//male sex differentiation                                         | 106  | 7   |
| GO:1901617//organic hydroxy compound biosynthetic process                    | 126  | 8   |
| GO:0009314//response to radiation                                            | 314  | 17  |
| GO:0022836//gated channel activity                                           | 208  | 12  |
| GO:0022839//ion gated channel activity                                       | 208  | 12  |
| GO:0004721//phosphoprotein phosphatase activity                              | 87   | 6   |
| GO:0004725//protein tyrosine phosphatase activity                            | 87   | 6   |
| GO:0010959//regulation of metal ion transport                                | 167  | 10  |
| GO:0071704//organic substance metabolic process                              | 6497 | 278 |
| GO:0006672//ceramide metabolic process                                       | 50   | 4   |
| GO:0010811//positive regulation of cell-substrate adhesion                   | 50   | 4   |
| GO:0030148//sphingolipid biosynthetic process                                | 50   | 4   |
| GO:0044264//cellular polysaccharide metabolic process                        | 50   | 4   |
| GO:0061180//mammary gland epithelium development                             | 50   | 4   |
| GO:0007586//digestion                                                        | 88   | 6   |
| GO:0042886//amide transport                                                  | 69   | 5   |
| GO:0045862//positive regulation of proteolysis                               | 69   | 5   |
| GO:0015077//monovalent inorganic cation transmembrane transporter activ      | 231  | 13  |

|                                                                             |      |     |
|-----------------------------------------------------------------------------|------|-----|
| GO:0002790//peptide secretion                                               | 33   | 3   |
| GO:0006953//acute-phase response                                            | 33   | 3   |
| GO:0010332//response to gamma radiation                                     | 33   | 3   |
| GO:0030593//neutrophil chemotaxis                                           | 33   | 3   |
| GO:0030803//negative regulation of cyclic nucleotide biosynthetic process   | 33   | 3   |
| GO:0030818//negative regulation of cAMP biosynthetic process                | 33   | 3   |
| GO:0044273//sulfur compound catabolic process                               | 33   | 3   |
| GO:0071827//plasma lipoprotein particle organization                        | 33   | 3   |
| GO:0051171//regulation of nitrogen compound metabolic process               | 3364 | 148 |
| GO:0043281//regulation of cysteine-type endopeptidase activity involved in  | 148  | 9   |
| GO:0002089//lens morphogenesis in camera-type eye                           | 17   | 2   |
| GO:0006829//zinc ion transport                                              | 17   | 2   |
| GO:0006972//hyperosmotic response                                           | 17   | 2   |
| GO:0007250//activation of NF-kappaB-inducing kinase activity                | 17   | 2   |
| GO:0010771//negative regulation of cell morphogenesis involved in differen  | 17   | 2   |
| GO:0021795//cerebral cortex cell migration                                  | 17   | 2   |
| GO:0034698//response to gonadotropin stimulus                               | 17   | 2   |
| GO:0042107//cytokine metabolic process                                      | 17   | 2   |
| GO:0042522//regulation of tyrosine phosphorylation of Stat5 protein         | 17   | 2   |
| GO:0042745//circadian sleep/wake cycle                                      | 17   | 2   |
| GO:0045737//positive regulation of cyclin-dependent protein kinase activity | 17   | 2   |
| GO:0045747//positive regulation of Notch signaling pathway                  | 17   | 2   |
| GO:0046688//response to copper ion                                          | 17   | 2   |
| GO:0086065//cell communication involved in cardiac conduction               | 17   | 2   |
| GO:1901623//regulation of lymphocyte chemotaxis                             | 17   | 2   |
| GO:2000273//positive regulation of receptor activity                        | 17   | 2   |
| GO:0030814//regulation of cAMP metabolic process                            | 108  | 7   |
| GO:0048644//muscle organ morphogenesis                                      | 51   | 4   |
| GO:0008152//metabolic process                                               | 7070 | 301 |
| GO:0006796//phosphate-containing compound metabolic process                 | 1781 | 81  |
| GO:0002695//negative regulation of leukocyte activation                     | 109  | 7   |
| GO:0030808//regulation of nucleotide biosynthetic process                   | 109  | 7   |
| GO:1900371//regulation of purine nucleotide biosynthetic process            | 109  | 7   |
| GO:0044249//cellular biosynthetic process                                   | 1995 | 90  |
| GO:0006654//phosphatidic acid biosynthetic process                          | 34   | 3   |
| GO:0046473//phosphatidic acid metabolic process                             | 34   | 3   |
| GO:0071825//protein-lipid complex subunit organization                      | 34   | 3   |
| GO:0015103//inorganic anion transmembrane transporter activity              | 90   | 6   |
| GO:0032319//regulation of Rho GTPase activity                               | 90   | 6   |
| GO:0021537//telencephalon development                                       | 130  | 8   |
| GO:0016579//protein deubiquitination                                        | 52   | 4   |
| GO:0042180//cellular ketone metabolic process                               | 52   | 4   |
| GO:0007605//sensory perception of sound                                     | 110  | 7   |
| GO:0001759//organ induction                                                 | 18   | 2   |
| GO:0001953//negative regulation of cell-matrix adhesion                     | 18   | 2   |
| GO:0003254//regulation of membrane depolarization                           | 18   | 2   |
| GO:0010575//positive regulation vascular endothelial growth factor producti | 18   | 2   |
| GO:0014044//Schwann cell development                                        | 18   | 2   |
| GO:0030539//male genitalia development                                      | 18   | 2   |
| GO:0032410//negative regulation of transporter activity                     | 18   | 2   |
| GO:0033002//muscle cell proliferation                                       | 18   | 2   |
| GO:0035088//establishment or maintenance of apical/basal cell polarity      | 18   | 2   |
| GO:0035510//DNA dealkylation                                                | 18   | 2   |
| GO:0035813//regulation of renal sodium excretion                            | 18   | 2   |
| GO:0036152//phosphatidylethanolamine acyl-chain remodeling                  | 18   | 2   |
| GO:0042417//dopamine metabolic process                                      | 18   | 2   |
| GO:0042755//eating behavior                                                 | 18   | 2   |
| GO:0048745//smooth muscle tissue development                                | 18   | 2   |

|                                                                             |      |    |
|-----------------------------------------------------------------------------|------|----|
| GO:0050718//positive regulation of interleukin-1 beta secretion             | 18   | 2  |
| GO:0060419//heart growth                                                    | 18   | 2  |
| GO:0060600//dichotomous subdivision of an epithelial terminal unit          | 18   | 2  |
| GO:0061245//establishment or maintenance of bipolar cell polarity           | 18   | 2  |
| GO:0071624//positive regulation of granulocyte chemotaxis                   | 18   | 2  |
| GO:0086004//regulation of cardiac muscle cell contraction                   | 18   | 2  |
| GO:0090190//positive regulation of branching involved in ureteric bud morph | 18   | 2  |
| GO:0090279//regulation of calcium ion import                                | 18   | 2  |
| GO:1901222//regulation of NIK/NF-kappaB cascade                             | 18   | 2  |
| GO:0016788//hydrolase activity, acting on ester bonds                       | 91   | 6  |
| GO:0016791//phosphatase activity                                            | 91   | 6  |
| GO:0042578//phosphoric ester hydrolase activity                             | 91   | 6  |
| GO:0043279//response to alkaloid                                            | 91   | 6  |
| GO:0010952//positive regulation of peptidase activity                       | 111  | 7  |
| GO:0021915//neural tube development                                         | 111  | 7  |
| GO:0006970//response to osmotic stress                                      | 53   | 4  |
| GO:0016126//sterol biosynthetic process                                     | 35   | 3  |
| GO:0030809//negative regulation of nucleotide biosynthetic process          | 35   | 3  |
| GO:0043966//histone H3 acetylation                                          | 35   | 3  |
| GO:0050982//detection of mechanical stimulus                                | 35   | 3  |
| GO:0051492//regulation of stress fiber assembly                             | 35   | 3  |
| GO:1900372//negative regulation of purine nucleotide biosynthetic process   | 35   | 3  |
| GO:0006936//muscle contraction                                              | 153  | 9  |
| GO:0007601//visual perception                                               | 153  | 9  |
| GO:0009056//catabolic process                                               | 1631 | 74 |
| GO:0032388//positive regulation of intracellular transport                  | 133  | 8  |
| GO:0050953//sensory perception of light stimulus                            | 154  | 9  |
| GO:0009306//protein secretion                                               | 54   | 4  |
| GO:0032642//regulation of chemokine production                              | 54   | 4  |
| GO:0043407//negative regulation of MAP kinase activity                      | 54   | 4  |
| GO:0051701//interaction with host                                           | 282  | 15 |
| GO:0002064//epithelial cell development                                     | 175  | 10 |
| GO:0008360//regulation of cell shape                                        | 93   | 6  |
| GO:0030817//regulation of cAMP biosynthetic process                         | 93   | 6  |
| GO:0019058//viral infectious cycle                                          | 36   | 3  |
| GO:0032651//regulation of interleukin-1 beta production                     | 36   | 3  |
| GO:0034121//regulation of toll-like receptor signaling pathway              | 36   | 3  |
| GO:0035094//response to nicotine                                            | 36   | 3  |
| GO:0043535//regulation of blood vessel endothelial cell migration           | 36   | 3  |
| GO:0001659//temperature homeostasis                                         | 19   | 2  |
| GO:0002066//columnar/cuboidal epithelial cell development                   | 19   | 2  |
| GO:0006541//glutamine metabolic process                                     | 19   | 2  |
| GO:0009084//glutamine family amino acid biosynthetic process                | 19   | 2  |
| GO:0009268//response to pH                                                  | 19   | 2  |
| GO:0010226//response to lithium ion                                         | 19   | 2  |
| GO:0015144//carbohydrate transmembrane transporter activity                 | 19   | 2  |
| GO:0015721//bile acid and bile salt transport                               | 19   | 2  |
| GO:0032873//negative regulation of stress-activated MAPK cascade            | 19   | 2  |
| GO:0034333//adherens junction assembly                                      | 19   | 2  |
| GO:0035850//epithelial cell differentiation involved in kidney development  | 19   | 2  |
| GO:0043534//blood vessel endothelial cell migration                         | 19   | 2  |
| GO:0043536//positive regulation of blood vessel endothelial cell migration  | 19   | 2  |
| GO:0046209//nitric oxide metabolic process                                  | 19   | 2  |
| GO:0046320//regulation of fatty acid oxidation                              | 19   | 2  |
| GO:0051119//sugar transmembrane transporter activity                        | 19   | 2  |
| GO:0051602//response to electrical stimulus                                 | 19   | 2  |
| GO:0051898//negative regulation of protein kinase B signaling cascade       | 19   | 2  |
| GO:0060043//regulation of cardiac muscle cell proliferation                 | 19   | 2  |



|                                                                              |     |    |
|------------------------------------------------------------------------------|-----|----|
| GO:0060968//regulation of gene silencing                                     | 19  | 2  |
| GO:0070303//negative regulation of stress-activated protein kinase signalin  | 19  | 2  |
| GO:1901476//carbohydrate transporter activity                                | 19  | 2  |
| GO:2000516//positive regulation of CD4-positive, alpha-beta T cell activatio | 19  | 2  |
| GO:0046474//glycerophospholipid biosynthetic process                         | 176 | 10 |
| GO:0021543//pallium development                                              | 74  | 5  |
| GO:0010721//negative regulation of cell development                          | 94  | 6  |
| GO:0045834//positive regulation of lipid metabolic process                   | 94  | 6  |
| GO:0046887//positive regulation of hormone secretion                         | 55  | 4  |
| GO:0019048//modulation by virus of host morphology or physiology             | 241 | 13 |
| GO:0001547//antral ovarian follicle growth                                   | 5   | 1  |
| GO:0001554//luteolysis                                                       | 5   | 1  |
| GO:0001778//plasma membrane repair                                           | 5   | 1  |
| GO:0001911//negative regulation of leukocyte mediated cytotoxicity           | 5   | 1  |
| GO:0002467//germinal center formation                                        | 5   | 1  |
| GO:0003032//detection of oxygen                                              | 5   | 1  |
| GO:0003094//glomerular filtration                                            | 5   | 1  |
| GO:0003100//regulation of systemic arterial blood pressure by endothelin     | 5   | 1  |
| GO:0003174//mitral valve development                                         | 5   | 1  |
| GO:0003307//regulation of Wnt receptor signaling pathway involved in hear    | 5   | 1  |
| GO:0003308//negative regulation of Wnt receptor signaling pathway involve    | 5   | 1  |
| GO:0003417//growth plate cartilage development                               | 5   | 1  |
| GO:0006003//fructose 2,6-bisphosphate metabolic process                      | 5   | 1  |
| GO:0006167//AMP biosynthetic process                                         | 5   | 1  |
| GO:0006572//tyrosine catabolic process                                       | 5   | 1  |
| GO:0006678//glucosylceramide metabolic process                               | 5   | 1  |
| GO:0006787//porphyrin-containing compound catabolic process                  | 5   | 1  |
| GO:0006857//oligopeptide transport                                           | 5   | 1  |
| GO:0006925//inflammatory cell apoptotic process                              | 5   | 1  |
| GO:0007028//cytoplasm organization                                           | 5   | 1  |
| GO:0007262//STAT protein import into nucleus                                 | 5   | 1  |
| GO:0007442//hindgut morphogenesis                                            | 5   | 1  |
| GO:0007501//mesodermal cell fate specification                               | 5   | 1  |
| GO:0007598//blood coagulation, extrinsic pathway                             | 5   | 1  |
| GO:0008216//spermidine metabolic process                                     | 5   | 1  |
| GO:0009052//pentose-phosphate shunt, non-oxidative branch                    | 5   | 1  |
| GO:0009128//purine nucleoside monophosphate catabolic process                | 5   | 1  |
| GO:0009133//nucleoside diphosphate biosynthetic process                      | 5   | 1  |
| GO:0009448//gamma-aminobutyric acid metabolic process                        | 5   | 1  |
| GO:0009744//response to sucrose stimulus                                     | 5   | 1  |
| GO:0009912//auditory receptor cell fate commitment                           | 5   | 1  |
| GO:0010766//negative regulation of sodium ion transport                      | 5   | 1  |
| GO:0015106//bicarbonate transmembrane transporter activity                   | 5   | 1  |
| GO:0015180//L-alanine transmembrane transporter activity                     | 5   | 1  |
| GO:0015220//choline transmembrane transporter activity                       | 5   | 1  |
| GO:0015464//acetylcholine receptor activity                                  | 5   | 1  |
| GO:0015665//alcohol transmembrane transporter activity                       | 5   | 1  |
| GO:0015840//urea transport                                                   | 5   | 1  |
| GO:0015865//purine nucleotide transport                                      | 5   | 1  |
| GO:0015868//purine ribonucleotide transport                                  | 5   | 1  |
| GO:0016907//G-protein coupled acetylcholine receptor activity                | 5   | 1  |
| GO:0021557//oculomotor nerve development                                     | 5   | 1  |
| GO:0021561//facial nerve development                                         | 5   | 1  |
| GO:0021604//cranial nerve structural organization                            | 5   | 1  |
| GO:0021683//cerebellar granular layer morphogenesis                          | 5   | 1  |
| GO:0021869//forebrain ventricular zone progenitor cell division              | 5   | 1  |
| GO:0022601//menstrual cycle phase                                            | 5   | 1  |
| GO:0022614//membrane to membrane docking                                     | 5   | 1  |

|                                                                               |   |   |
|-------------------------------------------------------------------------------|---|---|
| GO:0022858//alanine transmembrane transporter activity                        | 5 | 1 |
| GO:0030042//actin filament depolymerization                                   | 5 | 1 |
| GO:0031017//exocrine pancreas development                                     | 5 | 1 |
| GO:0031115//negative regulation of microtubule polymerization                 | 5 | 1 |
| GO:0031223//auditory behavior                                                 | 5 | 1 |
| GO:0031342//negative regulation of cell killing                               | 5 | 1 |
| GO:0031392//regulation of prostaglandin biosynthetic process                  | 5 | 1 |
| GO:0031427//response to methotrexate                                          | 5 | 1 |
| GO:0031915//positive regulation of synaptic plasticity                        | 5 | 1 |
| GO:0031936//negative regulation of chromatin silencing                        | 5 | 1 |
| GO:0032224//positive regulation of synaptic transmission, cholinergic         | 5 | 1 |
| GO:0032277//negative regulation of gonadotropin secretion                     | 5 | 1 |
| GO:0032364//oxygen homeostasis                                                | 5 | 1 |
| GO:0032747//positive regulation of interleukin-23 production                  | 5 | 1 |
| GO:0032854//positive regulation of Rap GTPase activity                        | 5 | 1 |
| GO:0032964//collagen biosynthetic process                                     | 5 | 1 |
| GO:0033015//tetrapyrrole catabolic process                                    | 5 | 1 |
| GO:0033633//negative regulation of cell-cell adhesion mediated by integrin    | 5 | 1 |
| GO:0034285//response to disaccharide stimulus                                 | 5 | 1 |
| GO:0034372//very-low-density lipoprotein particle remodeling                  | 5 | 1 |
| GO:0035330//regulation of hippo signaling cascade                             | 5 | 1 |
| GO:0035356//cellular triglyceride homeostasis                                 | 5 | 1 |
| GO:0035624//receptor transactivation                                          | 5 | 1 |
| GO:0036155//acylglycerol acyl-chain remodeling                                | 5 | 1 |
| GO:0042167//heme catabolic process                                            | 5 | 1 |
| GO:0042723//thiamine-containing compound metabolic process                    | 5 | 1 |
| GO:0043476//pigment accumulation                                              | 5 | 1 |
| GO:0043482//cellular pigment accumulation                                     | 5 | 1 |
| GO:0043587//tongue morphogenesis                                              | 5 | 1 |
| GO:0045714//regulation of low-density lipoprotein particle receptor biosynth  | 5 | 1 |
| GO:0045743//positive regulation of fibroblast growth factor receptor signalin | 5 | 1 |
| GO:0045869//negative regulation of retroviral genome replication              | 5 | 1 |
| GO:0046031//ADP metabolic process                                             | 5 | 1 |
| GO:0046149//pigment catabolic process                                         | 5 | 1 |
| GO:0046469//platelet activating factor metabolic process                      | 5 | 1 |
| GO:0046835//carbohydrate phosphorylation                                      | 5 | 1 |
| GO:0048642//negative regulation of skeletal muscle tissue development         | 5 | 1 |
| GO:0048664//neuron fate determination                                         | 5 | 1 |
| GO:0051503//adenine nucleotide transport                                      | 5 | 1 |
| GO:0051547//regulation of keratinocyte migration                              | 5 | 1 |
| GO:0051549//positive regulation of keratinocyte migration                     | 5 | 1 |
| GO:0051597//response to methylmercury                                         | 5 | 1 |
| GO:0051608//histamine transport                                               | 5 | 1 |
| GO:0051973//positive regulation of telomerase activity                        | 5 | 1 |
| GO:0060087//relaxation of vascular smooth muscle                              | 5 | 1 |
| GO:0060120//inner ear receptor cell fate commitment                           | 5 | 1 |
| GO:0060157//urinary bladder development                                       | 5 | 1 |
| GO:0060297//regulation of sarcomere organization                              | 5 | 1 |
| GO:0060389//pathway-restricted SMAD protein phosphorylation                   | 5 | 1 |
| GO:0060452//positive regulation of cardiac muscle contraction                 | 5 | 1 |
| GO:0060605//tube lumen cavitation                                             | 5 | 1 |
| GO:0060662//salivary gland cavitation                                         | 5 | 1 |
| GO:0060687//regulation of branching involved in prostate gland morphogen      | 5 | 1 |
| GO:0060696//regulation of phospholipid catabolic process                      | 5 | 1 |
| GO:0060710//chorio-allantoic fusion                                           | 5 | 1 |
| GO:0060977//coronary vasculature morphogenesis                                | 5 | 1 |
| GO:0061037//negative regulation of cartilage development                      | 5 | 1 |
| GO:0061316//canonical Wnt receptor signaling pathway involved in heart de     | 5 | 1 |

|                                                                              |      |    |
|------------------------------------------------------------------------------|------|----|
| GO:0061525//hindgut development                                              | 5    | 1  |
| GO:0070120//ciliary neurotrophic factor-mediated signaling pathway           | 5    | 1  |
| GO:0070295//renal water absorption                                           | 5    | 1  |
| GO:0070383//DNA cytosine deamination                                         | 5    | 1  |
| GO:0070424//regulation of nucleotide-binding oligomerization domain conta    | 5    | 1  |
| GO:0071361//cellular response to ethanol                                     | 5    | 1  |
| GO:0071380//cellular response to prostaglandin E stimulus                    | 5    | 1  |
| GO:0071503//response to heparin                                              | 5    | 1  |
| GO:0071680//response to indole-3-methanol                                    | 5    | 1  |
| GO:0071681//cellular response to indole-3-methanol                           | 5    | 1  |
| GO:0071731//response to nitric oxide                                         | 5    | 1  |
| GO:0072008//glomerular mesangial cell differentiation                        | 5    | 1  |
| GO:0072124//regulation of glomerular mesangial cell proliferation            | 5    | 1  |
| GO:0072143//mesangial cell development                                       | 5    | 1  |
| GO:0072161//mesenchymal cell differentiation involved in kidney developm     | 5    | 1  |
| GO:0072171//mesonephric tubule morphogenesis                                 | 5    | 1  |
| GO:0072298//regulation of metanephric glomerulus development                 | 5    | 1  |
| GO:0072307//regulation of metanephric nephron tubule epithelial cell differe | 5    | 1  |
| GO:0072338//cellular lactam metabolic process                                | 5    | 1  |
| GO:0090232//positive regulation of spindle checkpoint                        | 5    | 1  |
| GO:0090244//Wnt receptor signaling pathway involved in somitogenesis         | 5    | 1  |
| GO:0090381//regulation of heart induction                                    | 5    | 1  |
| GO:0097205//renal filtration                                                 | 5    | 1  |
| GO:1900027//regulation of ruffle assembly                                    | 5    | 1  |
| GO:1900107//regulation of nodal signaling pathway                            | 5    | 1  |
| GO:1901385//regulation of voltage-gated calcium channel activity             | 5    | 1  |
| GO:1901618//organic hydroxy compound transmembrane transporter activi        | 5    | 1  |
| GO:1901978//positive regulation of cell cycle checkpoint                     | 5    | 1  |
| GO:2000018//regulation of male gonad development                             | 5    | 1  |
| GO:2000048//negative regulation of cell-cell adhesion mediated by cadherin   | 5    | 1  |
| GO:2000279//negative regulation of DNA biosynthetic process                  | 5    | 1  |
| GO:2000353//positive regulation of endothelial cell apoptotic process        | 5    | 1  |
| GO:2000738//positive regulation of stem cell differentiation                 | 5    | 1  |
| GO:2000973//regulation of pro-B cell differentiation                         | 5    | 1  |
| GO:2001012//mesenchymal cell differentiation involved in renal system dev    | 5    | 1  |
| GO:2001279//regulation of unsaturated fatty acid biosynthetic process        | 5    | 1  |
| GO:NM_0032                                                                   | 5    | 1  |
| GO:NM_0048                                                                   | 5    | 1  |
| GO:NM_0062                                                                   | 5    | 1  |
| GO:NM_0124                                                                   | 5    | 1  |
| GO:NM_0230                                                                   | 5    | 1  |
| GO:NR_0021                                                                   | 5    | 1  |
| GO:0006464//cellular protein modification process                            | 1902 | 85 |
| GO:0036211//protein modification process                                     | 1902 | 85 |
| GO:0007259//JAK-STAT cascade                                                 | 37   | 3  |
| GO:0009187//cyclic nucleotide metabolic process                              | 37   | 3  |
| GO:0034103//regulation of tissue remodeling                                  | 37   | 3  |
| GO:0042993//positive regulation of transcription factor import into nucleus  | 37   | 3  |
| GO:0048806//genitalia development                                            | 37   | 3  |
| GO:0001818//negative regulation of cytokine production                       | 136  | 8  |
| GO:0030162//regulation of proteolysis                                        | 157  | 9  |
| GO:0002694//regulation of leukocyte activation                               | 375  | 19 |
| GO:0051899//membrane depolarization                                          | 56   | 4  |
| GO:0002026//regulation of the force of heart contraction                     | 20   | 2  |
| GO:0005242//inward rectifier potassium channel activity                      | 20   | 2  |
| GO:0006658//phosphatidylserine metabolic process                             | 20   | 2  |
| GO:0007220//Notch receptor processing                                        | 20   | 2  |
| GO:0010453//regulation of cell fate commitment                               | 20   | 2  |

|                                                                             |     |    |
|-----------------------------------------------------------------------------|-----|----|
| GO:0010888//negative regulation of lipid storage                            | 20  | 2  |
| GO:0021952//central nervous system projection neuron axonogenesis           | 20  | 2  |
| GO:0030101//natural killer cell activation                                  | 20  | 2  |
| GO:0031102//neuron projection regeneration                                  | 20  | 2  |
| GO:0033144//negative regulation of intracellular steroid hormone receptor s | 20  | 2  |
| GO:0033198//response to ATP                                                 | 20  | 2  |
| GO:0034308//primary alcohol metabolic process                               | 20  | 2  |
| GO:0044062//regulation of excretion                                         | 20  | 2  |
| GO:0045073//regulation of chemokine biosynthetic process                    | 20  | 2  |
| GO:0046579//positive regulation of Ras protein signal transduction          | 20  | 2  |
| GO:0048512//circadian behavior                                              | 20  | 2  |
| GO:0048596//embryonic camera-type eye morphogenesis                         | 20  | 2  |
| GO:0050706//regulation of interleukin-1 beta secretion                      | 20  | 2  |
| GO:0051926//negative regulation of calcium ion transport                    | 20  | 2  |
| GO:0055021//regulation of cardiac muscle tissue growth                      | 20  | 2  |
| GO:0071320//cellular response to cAMP                                       | 20  | 2  |
| GO:1900087//positive regulation of G1/S transition of mitotic cell cycle    | 20  | 2  |
| GO:2001237//negative regulation of extrinsic apoptotic signaling pathway    | 20  | 2  |
| GO:0050792//regulation of viral process                                     | 96  | 6  |
| GO:0000079//regulation of cyclin-dependent protein serine/threonine kinase  | 76  | 5  |
| GO:0006984//ER-nucleus signaling pathway                                    | 76  | 5  |
| GO:0015718//monocarboxylic acid transport                                   | 76  | 5  |
| GO:0050870//positive regulation of T cell activation                        | 201 | 11 |
| GO:0006833//water transport                                                 | 38  | 3  |
| GO:0014823//response to activity                                            | 38  | 3  |
| GO:0015908//fatty acid transport                                            | 38  | 3  |
| GO:0042308//negative regulation of protein import into nucleus              | 38  | 3  |
| GO:0048741//skeletal muscle fiber development                               | 38  | 3  |
| GO:1901880//negative regulation of protein depolymerization                 | 38  | 3  |
| GO:0045833//negative regulation of lipid metabolic process                  | 57  | 4  |
| GO:0007188//adenylate cyclase-modulating G-protein coupled receptor sigi    | 97  | 6  |
| GO:0043280//positive regulation of cysteine-type endopeptidase activity inv | 97  | 6  |
| GO:0009913//epidermal cell differentiation                                  | 77  | 5  |
| GO:0035967//cellular response to topologically incorrect protein            | 77  | 5  |
| GO:0044087//regulation of cellular component biogenesis                     | 312 | 16 |
| GO:0051817//modification of morphology or physiology of other organism ir   | 268 | 14 |
| GO:0015079//potassium ion transmembrane transporter activity                | 118 | 7  |
| GO:0035966//response to topologically incorrect protein                     | 118 | 7  |
| GO:0005244//voltage-gated ion channel activity                              | 139 | 8  |
| GO:0022832//voltage-gated channel activity                                  | 139 | 8  |
| GO:0006638//neutral lipid metabolic process                                 | 98  | 6  |
| GO:0006639//acylglycerol metabolic process                                  | 98  | 6  |
| GO:0001823//mesonephros development                                         | 21  | 2  |
| GO:0003197//endocardial cushion development                                 | 21  | 2  |
| GO:0005247//voltage-gated chloride channel activity                         | 21  | 2  |
| GO:0007622//rhythmic behavior                                               | 21  | 2  |
| GO:0008308//voltage-gated anion channel activity                            | 21  | 2  |
| GO:0043113//receptor clustering                                             | 21  | 2  |
| GO:0043124//negative regulation of I-kappaB kinase/NF-kappaB cascade        | 21  | 2  |
| GO:0045879//negative regulation of smoothened signaling pathway             | 21  | 2  |
| GO:0046135//pyrimidine nucleoside catabolic process                         | 21  | 2  |
| GO:0046717//acid secretion                                                  | 21  | 2  |
| GO:0048048//embryonic eye morphogenesis                                     | 21  | 2  |
| GO:0001843//neural tube closure                                             | 58  | 4  |
| GO:0042110//T cell activation                                               | 161 | 9  |
| GO:0002260//lymphocyte homeostasis                                          | 39  | 3  |
| GO:0009161//ribonucleoside monophosphate metabolic process                  | 39  | 3  |
| GO:0032720//negative regulation of tumor necrosis factor production         | 39  | 3  |

|                                                                              |      |     |
|------------------------------------------------------------------------------|------|-----|
| GO:0042345//regulation of NF-kappaB import into nucleus                      | 39   | 3   |
| GO:0045861//negative regulation of proteolysis                               | 39   | 3   |
| GO:0002262//myeloid cell homeostasis                                         | 78   | 5   |
| GO:0050729//positive regulation of inflammatory response                     | 78   | 5   |
| GO:0009416//response to light stimulus                                       | 226  | 12  |
| GO:0019219//regulation of nucleobase-containing compound metabolic pro       | 3304 | 143 |
| GO:0006793//phosphorus metabolic process                                     | 1824 | 81  |
| GO:1900542//regulation of purine nucleotide metabolic process                | 405  | 20  |
| GO:0051924//regulation of calcium ion transport                              | 120  | 7   |
| GO:0003014//renal system process                                             | 59   | 4   |
| GO:0009798//axis specification                                               | 59   | 4   |
| GO:0060606//tube closure                                                     | 59   | 4   |
| GO:0030097//hemopoiesis                                                      | 361  | 18  |
| GO:0001514//selenocysteine incorporation                                     | 6    | 1   |
| GO:0002072//optic cup morphogenesis involved in camera-type eye develo       | 6    | 1   |
| GO:0002327//immature B cell differentiation                                  | 6    | 1   |
| GO:0002866//positive regulation of acute inflammatory response to antigen    | 6    | 1   |
| GO:0002885//positive regulation of hypersensitivity                          | 6    | 1   |
| GO:0003097//renal water transport                                            | 6    | 1   |
| GO:0003306//Wnt receptor signaling pathway involved in heart developmer      | 6    | 1   |
| GO:0006290//pyrimidine dimer repair                                          | 6    | 1   |
| GO:0006451//translational readthrough                                        | 6    | 1   |
| GO:0006477//protein sulfation                                                | 6    | 1   |
| GO:0006537//glutamate biosynthetic process                                   | 6    | 1   |
| GO:0006924//activation-induced cell death of T cells                         | 6    | 1   |
| GO:0008356//asymmetric cell division                                         | 6    | 1   |
| GO:0009111//vitamin catabolic process                                        | 6    | 1   |
| GO:0009186//deoxyribonucleoside diphosphate metabolic process                | 6    | 1   |
| GO:0009996//negative regulation of cell fate specification                   | 6    | 1   |
| GO:0010614//negative regulation of cardiac muscle hypertrophy                | 6    | 1   |
| GO:0010715//regulation of extracellular matrix disassembly                   | 6    | 1   |
| GO:0010867//positive regulation of triglyceride biosynthetic process         | 6    | 1   |
| GO:0010890//positive regulation of sequestering of triglyceride              | 6    | 1   |
| GO:0010944//negative regulation of transcription by competitive promoter b   | 6    | 1   |
| GO:0014012//peripheral nervous system axon regeneration                      | 6    | 1   |
| GO:0014067//negative regulation of phosphatidylinositol 3-kinase cascade     | 6    | 1   |
| GO:0014819//regulation of skeletal muscle contraction                        | 6    | 1   |
| GO:0015187//glycine transmembrane transporter activity                       | 6    | 1   |
| GO:0015808//L-alanine transport                                              | 6    | 1   |
| GO:0015809//arginine transport                                               | 6    | 1   |
| GO:0015816//glycine transport                                                | 6    | 1   |
| GO:0016115//terpenoid catabolic process                                      | 6    | 1   |
| GO:0021535//cell migration in hindbrain                                      | 6    | 1   |
| GO:0021546//rhombomere development                                           | 6    | 1   |
| GO:0021681//cerebellar granular layer development                            | 6    | 1   |
| GO:0021819//layer formation in cerebral cortex                               | 6    | 1   |
| GO:0021859//pyramidal neuron differentiation                                 | 6    | 1   |
| GO:0021860//pyramidal neuron development                                     | 6    | 1   |
| GO:0030300//regulation of intestinal cholesterol absorption                  | 6    | 1   |
| GO:0031639//plasminogen activation                                           | 6    | 1   |
| GO:0031643//positive regulation of myelination                               | 6    | 1   |
| GO:0032222//regulation of synaptic transmission, cholinergic                 | 6    | 1   |
| GO:0032287//peripheral nervous system myelin maintenance                     | 6    | 1   |
| GO:0032623//interleukin-2 production                                         | 6    | 1   |
| GO:0032667//regulation of interleukin-23 production                          | 6    | 1   |
| GO:0032811//negative regulation of epinephrine secretion                     | 6    | 1   |
| GO:0033147//negative regulation of intracellular estrogen receptor signaling | 6    | 1   |
| GO:0034350//regulation of glial cell apoptotic process                       | 6    | 1   |

|                                                                            |     |   |
|----------------------------------------------------------------------------|-----|---|
| GO:0034351//negative regulation of glial cell apoptotic process            | 6   | 1 |
| GO:0035728//response to hepatocyte growth factor stimulus                  | 6   | 1 |
| GO:0035729//cellular response to hepatocyte growth factor stimulus         | 6   | 1 |
| GO:0035965//cardiolipin acyl-chain remodeling                              | 6   | 1 |
| GO:0040016//embryonic cleavage                                             | 6   | 1 |
| GO:0042363//fat-soluble vitamin catabolic process                          | 6   | 1 |
| GO:0042482//positive regulation of odontogenesis                           | 6   | 1 |
| GO:0042661//regulation of mesodermal cell fate specification               | 6   | 1 |
| GO:0043117//positive regulation of vascular permeability                   | 6   | 1 |
| GO:0043615//astrocyte cell migration                                       | 6   | 1 |
| GO:0044557//relaxation of smooth muscle                                    | 6   | 1 |
| GO:0045188//regulation of circadian sleep/wake cycle, non-REM sleep        | 6   | 1 |
| GO:0045630//positive regulation of T-helper 2 cell differentiation         | 6   | 1 |
| GO:0045634//regulation of melanocyte differentiation                       | 6   | 1 |
| GO:0045793//positive regulation of cell size                               | 6   | 1 |
| GO:0045916//negative regulation of complement activation                   | 6   | 1 |
| GO:0046596//regulation of viral entry into host cell                       | 6   | 1 |
| GO:0046628//positive regulation of insulin receptor signaling pathway      | 6   | 1 |
| GO:0048643//positive regulation of skeletal muscle tissue development      | 6   | 1 |
| GO:0048845//venous blood vessel morphogenesis                              | 6   | 1 |
| GO:0050942//positive regulation of pigment cell differentiation            | 6   | 1 |
| GO:0051497//negative regulation of stress fiber assembly                   | 6   | 1 |
| GO:0055119//relaxation of cardiac muscle                                   | 6   | 1 |
| GO:0060259//regulation of feeding behavior                                 | 6   | 1 |
| GO:0060601//lateral sprouting from an epithelium                           | 6   | 1 |
| GO:0060969//negative regulation of gene silencing                          | 6   | 1 |
| GO:0060986//endocrine hormone secretion                                    | 6   | 1 |
| GO:0060999//positive regulation of dendritic spine development             | 6   | 1 |
| GO:0070166//enamel mineralization                                          | 6   | 1 |
| GO:0070170//regulation of tooth mineralization                             | 6   | 1 |
| GO:0071071//regulation of phospholipid biosynthetic process                | 6   | 1 |
| GO:0072007//mesangial cell differentiation                                 | 6   | 1 |
| GO:0072173//metanephric tubule morphogenesis                               | 6   | 1 |
| GO:0072282//metanephric nephron tubule morphogenesis                       | 6   | 1 |
| GO:0086069//bundle of His cell to Purkinje myocyte communication           | 6   | 1 |
| GO:0090280//positive regulation of calcium ion import                      | 6   | 1 |
| GO:0097090//presynaptic membrane organization                              | 6   | 1 |
| GO:1901016//regulation of potassium ion transmembrane transporter activiti | 6   | 1 |
| GO:1901532//regulation of hematopoietic progenitor cell differentiation    | 6   | 1 |
| GO:1901998//toxin transport                                                | 6   | 1 |
| GO:2000188//regulation of cholesterol homeostasis                          | 6   | 1 |
| GO:2000258//negative regulation of protein activation cascade              | 6   | 1 |
| GO:2001026//regulation of endothelial cell chemotaxis                      | 6   | 1 |
| GO:NM_0003                                                                 | 6   | 1 |
| GO:NM_0013                                                                 | 6   | 1 |
| GO:0031018//endocrine pancreas development                                 | 40  | 3 |
| GO:0032231//regulation of actin filament bundle assembly                   | 40  | 3 |
| GO:0035265//organ growth                                                   | 40  | 3 |
| GO:0048385//regulation of retinoic acid receptor signaling pathway         | 40  | 3 |
| GO:0050807//regulation of synapse organization                             | 40  | 3 |
| GO:0070988//demethylation                                                  | 40  | 3 |
| GO:0006813//potassium ion transport                                        | 121 | 7 |
| GO:0043903//regulation of symbiosis, encompassing mutualism through pa     | 121 | 7 |
| GO:0001937//negative regulation of endothelial cell proliferation          | 22  | 2 |
| GO:0006706//steroid catabolic process                                      | 22  | 2 |
| GO:0008299//isoprenoid biosynthetic process                                | 22  | 2 |
| GO:0030104//water homeostasis                                              | 22  | 2 |
| GO:0032845//negative regulation of homeostatic process                     | 22  | 2 |

|                                                                        |      |     |
|------------------------------------------------------------------------|------|-----|
| GO:0035115//embryonic forelimb morphogenesis                           | 22   | 2   |
| GO:0035329//hippo signaling cascade                                    | 22   | 2   |
| GO:0045622//regulation of T-helper cell differentiation                | 22   | 2   |
| GO:0046006//regulation of activated T cell proliferation               | 22   | 2   |
| GO:0048535//lymph node development                                     | 22   | 2   |
| GO:0060119//inner ear receptor cell development                        | 22   | 2   |
| GO:0061337//cardiac conduction                                         | 22   | 2   |
| GO:0070373//negative regulation of ERK1 and ERK2 cascade               | 22   | 2   |
| GO:0006140//regulation of nucleotide metabolic process                 | 408  | 20  |
| GO:0042157//lipoprotein metabolic process                              | 80   | 5   |
| GO:0015833//peptide transport                                          | 60   | 4   |
| GO:0010556//regulation of macromolecule biosynthetic process           | 3052 | 132 |
| GO:0007276//gamete generation                                          | 454  | 22  |
| GO:0046649//lymphocyte activation                                      | 252  | 13  |
| GO:0055008//cardiac muscle tissue morphogenesis                        | 41   | 3   |
| GO:0071621//granulocyte chemotaxis                                     | 41   | 3   |
| GO:0015081//sodium ion transmembrane transporter activity              | 81   | 5   |
| GO:0046467//membrane lipid biosynthetic process                        | 81   | 5   |
| GO:0007281//germ cell development                                      | 123  | 7   |
| GO:0005267//potassium channel activity                                 | 102  | 6   |
| GO:0007498//mesoderm development                                       | 102  | 6   |
| GO:0070646//protein modification by small protein removal              | 61   | 4   |
| GO:0006887//exocytosis                                                 | 188  | 10  |
| GO:0030900//forebrain development                                      | 232  | 12  |
| GO:0090068//positive regulation of cell cycle process                  | 145  | 8   |
| GO:0005979//regulation of glycogen biosynthetic process                | 23   | 2   |
| GO:0010962//regulation of glucan biosynthetic process                  | 23   | 2   |
| GO:0014037//Schwann cell differentiation                               | 23   | 2   |
| GO:0015804//neutral amino acid transport                               | 23   | 2   |
| GO:0021955//central nervous system neuron axonogenesis                 | 23   | 2   |
| GO:0030049//muscle filament sliding                                    | 23   | 2   |
| GO:0030835//negative regulation of actin filament depolymerization     | 23   | 2   |
| GO:0032731//positive regulation of interleukin-1 beta production       | 23   | 2   |
| GO:0038061//NIK/NF-kappaB cascade                                      | 23   | 2   |
| GO:0050869//negative regulation of B cell activation                   | 23   | 2   |
| GO:0051496//positive regulation of stress fiber assembly               | 23   | 2   |
| GO:0060420//regulation of heart growth                                 | 23   | 2   |
| GO:0045321//leukocyte activation                                       | 322  | 16  |
| GO:0030799//regulation of cyclic nucleotide metabolic process          | 124  | 7   |
| GO:0010827//regulation of glucose transport                            | 82   | 5   |
| GO:0051052//regulation of DNA metabolic process                        | 189  | 10  |
| GO:0040008//regulation of growth                                       | 436  | 21  |
| GO:0002028//regulation of sodium ion transport                         | 42   | 3   |
| GO:0008514//organic anion transmembrane transporter activity           | 42   | 3   |
| GO:0048483//autonomic nervous system development                       | 42   | 3   |
| GO:0015276//ligand-gated ion channel activity                          | 83   | 5   |
| GO:0022834//ligand-gated channel activity                              | 83   | 5   |
| GO:0050808//synapse organization                                       | 83   | 5   |
| GO:0006355//regulation of transcription, DNA-dependent                 | 2732 | 118 |
| GO:0035821//modification of morphology or physiology of other organism | 280  | 14  |
| GO:0000712//resolution of meiotic recombination intermediates          | 7    | 1   |
| GO:0001574//ganglioside biosynthetic process                           | 7    | 1   |
| GO:0001779//natural killer cell differentiation                        | 7    | 1   |
| GO:0001955//blood vessel maturation                                    | 7    | 1   |
| GO:0002279//mast cell activation involved in immune response           | 7    | 1   |
| GO:0002367//cytokine production involved in immune response            | 7    | 1   |
| GO:0002507//tolerance induction                                        | 7    | 1   |
| GO:0002634//regulation of germinal center formation                    | 7    | 1   |

|                                                                                              |   |   |
|----------------------------------------------------------------------------------------------|---|---|
| GO:0003159//morphogenesis of an endothelium                                                  | 7 | 1 |
| GO:0005218//intracellular ligand-gated calcium channel activity                              | 7 | 1 |
| GO:0006002//fructose 6-phosphate metabolic process                                           | 7 | 1 |
| GO:0006068//ethanol catabolic process                                                        | 7 | 1 |
| GO:0006171//cAMP biosynthetic process                                                        | 7 | 1 |
| GO:0006208//pyrimidine nucleobase catabolic process                                          | 7 | 1 |
| GO:0006265//DNA topological change                                                           | 7 | 1 |
| GO:0006701//progesterone biosynthetic process                                                | 7 | 1 |
| GO:0007183//SMAD protein complex assembly                                                    | 7 | 1 |
| GO:0007494//midgut development                                                               | 7 | 1 |
| GO:0008228//opsonization                                                                     | 7 | 1 |
| GO:0008343//adult feeding behavior                                                           | 7 | 1 |
| GO:0009125//nucleoside monophosphate catabolic process                                       | 7 | 1 |
| GO:0009265//2-deoxyribonucleotide biosynthetic process                                       | 7 | 1 |
| GO:0009415//response to water stimulus                                                       | 7 | 1 |
| GO:0010172//embryonic body morphogenesis                                                     | 7 | 1 |
| GO:0010528//regulation of transposition                                                      | 7 | 1 |
| GO:0010529//negative regulation of transposition                                             | 7 | 1 |
| GO:0010642//negative regulation of platelet-derived growth factor receptor signaling pathway | 7 | 1 |
| GO:0010700//negative regulation of norepinephrine secretion                                  | 7 | 1 |
| GO:0010759//positive regulation of macrophage chemotaxis                                     | 7 | 1 |
| GO:0014060//regulation of epinephrine secretion                                              | 7 | 1 |
| GO:0014741//negative regulation of muscle hypertrophy                                        | 7 | 1 |
| GO:0015271//outward rectifier potassium channel activity                                     | 7 | 1 |
| GO:0016322//neuron remodeling                                                                | 7 | 1 |
| GO:0021801//cerebral cortex radial glia guided migration                                     | 7 | 1 |
| GO:0030210//heparin biosynthetic process                                                     | 7 | 1 |
| GO:0030917//midbrain-hindbrain boundary development                                          | 7 | 1 |
| GO:0033483//gas homeostasis                                                                  | 7 | 1 |
| GO:0034135//regulation of toll-like receptor 2 signaling pathway                             | 7 | 1 |
| GO:0034370//triglyceride-rich lipoprotein particle remodeling                                | 7 | 1 |
| GO:0035458//cellular response to interferon-beta                                             | 7 | 1 |
| GO:0035855//megakaryocyte development                                                        | 7 | 1 |
| GO:0042364//water-soluble vitamin biosynthetic process                                       | 7 | 1 |
| GO:0042415//norepinephrine metabolic process                                                 | 7 | 1 |
| GO:0043303//mast cell degranulation                                                          | 7 | 1 |
| GO:0043353//enucleate erythrocyte differentiation                                            | 7 | 1 |
| GO:0043371//negative regulation of CD4-positive, alpha-beta T cell differentiation           | 7 | 1 |
| GO:0043517//positive regulation of DNA damage response, signal transduction                  | 7 | 1 |
| GO:0044030//regulation of DNA methylation                                                    | 7 | 1 |
| GO:0044068//modulation by symbiont of host cellular process                                  | 7 | 1 |
| GO:0045623//negative regulation of T-helper cell differentiation                             | 7 | 1 |
| GO:0045719//negative regulation of glycogen biosynthetic process                             | 7 | 1 |
| GO:0046385//deoxyribose phosphate biosynthetic process                                       | 7 | 1 |
| GO:0046500//S-adenosylmethionine metabolic process                                           | 7 | 1 |
| GO:0048537//mucosal-associated lymphoid tissue development                                   | 7 | 1 |
| GO:0048541//Peyers patch development                                                         | 7 | 1 |
| GO:0050667//homocysteine metabolic process                                                   | 7 | 1 |
| GO:0051024//positive regulation of immunoglobulin secretion                                  | 7 | 1 |
| GO:0051938//L-glutamate import                                                               | 7 | 1 |
| GO:0060147//regulation of posttranscriptional gene silencing                                 | 7 | 1 |
| GO:0060253//negative regulation of glial cell proliferation                                  | 7 | 1 |
| GO:0060363//cranial suture morphogenesis                                                     | 7 | 1 |
| GO:0060561//apoptotic process involved in morphogenesis                                      | 7 | 1 |
| GO:0060770//negative regulation of epithelial cell proliferation involved in morphogenesis   | 7 | 1 |
| GO:0060911//cardiac cell fate commitment                                                     | 7 | 1 |
| GO:0060964//regulation of gene silencing by miRNA                                            | 7 | 1 |
| GO:0060966//regulation of gene silencing by RNA                                              | 7 | 1 |



|                                                                                          |      |     |
|------------------------------------------------------------------------------------------|------|-----|
| GO:0060973//cell migration involved in heart development                                 | 7    | 1   |
| GO:0061154//endothelial tube morphogenesis                                               | 7    | 1   |
| GO:0061314//Notch signaling involved in heart development                                | 7    | 1   |
| GO:0070231//T cell apoptotic process                                                     | 7    | 1   |
| GO:0070884//regulation of calcineurin-NFAT signaling cascade                             | 7    | 1   |
| GO:0071295//cellular response to vitamin                                                 | 7    | 1   |
| GO:0071875//adrenergic receptor signaling pathway                                        | 7    | 1   |
| GO:0072070//loop of Henle development                                                    | 7    | 1   |
| GO:0090201//negative regulation of release of cytochrome c from mitochondrion            | 7    | 1   |
| GO:1900017//positive regulation of cytokine production involved in inflammatory response | 7    | 1   |
| GO:1901722//regulation of cell proliferation involved in kidney development              | 7    | 1   |
| GO:1901798//positive regulation of signal transduction by p53 class mediator             | 7    | 1   |
| GO:2000482//regulation of interleukin-8 secretion                                        | 7    | 1   |
| GO:2000810//regulation of tight junction assembly                                        | 7    | 1   |
| GO:2001212//regulation of vasculogenesis                                                 | 7    | 1   |
| GO:NR_0268                                                                               | 7    | 1   |
| GO:0014020//primary neural tube formation                                                | 63   | 4   |
| GO:0071248//cellular response to metal ion                                               | 63   | 4   |
| GO:0001709//cell fate determination                                                      | 43   | 3   |
| GO:0006835//dicarboxylic acid transport                                                  | 43   | 3   |
| GO:0008589//regulation of smoothened signaling pathway                                   | 43   | 3   |
| GO:0019233//sensory perception of pain                                                   | 43   | 3   |
| GO:0043525//positive regulation of neuron apoptotic process                              | 43   | 3   |
| GO:0045446//endothelial cell differentiation                                             | 43   | 3   |
| GO:0046823//negative regulation of nucleocytoplasmic transport                           | 43   | 3   |
| GO:0060675//ureteric bud morphogenesis                                                   | 43   | 3   |
| GO:0002244//hematopoietic progenitor cell differentiation                                | 24   | 2   |
| GO:0007266//Rho protein signal transduction                                              | 24   | 2   |
| GO:0010543//regulation of platelet activation                                            | 24   | 2   |
| GO:0010596//negative regulation of endothelial cell migration                            | 24   | 2   |
| GO:0033275//actin-myosin filament sliding                                                | 24   | 2   |
| GO:0035116//embryonic hindlimb morphogenesis                                             | 24   | 2   |
| GO:0046676//negative regulation of insulin secretion                                     | 24   | 2   |
| GO:0051043//regulation of membrane protein ectodomain proteolysis                        | 24   | 2   |
| GO:0051180//vitamin transport                                                            | 24   | 2   |
| GO:0051953//negative regulation of amine transport                                       | 24   | 2   |
| GO:0055090//acylglycerol homeostasis                                                     | 24   | 2   |
| GO:0070328//triglyceride homeostasis                                                     | 24   | 2   |
| GO:0050670//regulation of lymphocyte proliferation                                       | 148  | 8   |
| GO:0001819//positive regulation of cytokine production                                   | 214  | 11  |
| GO:0015267//channel activity                                                             | 304  | 15  |
| GO:0022803//passive transmembrane transporter activity                                   | 304  | 15  |
| GO:0032944//regulation of mononuclear cell proliferation                                 | 149  | 8   |
| GO:0032318//regulation of Ras GTPase activity                                            | 193  | 10  |
| GO:0030802//regulation of cyclic nucleotide biosynthetic process                         | 106  | 6   |
| GO:0030810//positive regulation of nucleotide biosynthetic process                       | 64   | 4   |
| GO:0042990//regulation of transcription factor import into nucleus                       | 64   | 4   |
| GO:0051494//negative regulation of cytoskeleton organization                             | 64   | 4   |
| GO:1900373//positive regulation of purine nucleotide biosynthetic process                | 64   | 4   |
| GO:0009855//determination of bilateral symmetry                                          | 85   | 5   |
| GO:0032434//regulation of proteasomal ubiquitin-dependent protein catabolic process      | 44   | 3   |
| GO:0097285//cell-type specific apoptotic process                                         | 44   | 3   |
| GO:1901216//positive regulation of neuron death                                          | 44   | 3   |
| GO:0002699//positive regulation of immune effector process                               | 128  | 7   |
| GO:2001141//regulation of RNA biosynthetic process                                       | 2744 | 118 |
| GO:0016192//vesicle-mediated transport                                                   | 768  | 35  |
| GO:0007268//synaptic transmission                                                        | 444  | 21  |
| GO:0031331//positive regulation of cellular catabolic process                            | 107  | 6   |

|                                                                            |     |    |
|----------------------------------------------------------------------------|-----|----|
| GO:0000578//embryonic axis specification                                   | 25  | 2  |
| GO:0033344//cholesterol efflux                                             | 25  | 2  |
| GO:0035019//somatic stem cell maintenance                                  | 25  | 2  |
| GO:0035065//regulation of histone acetylation                              | 25  | 2  |
| GO:0045055//regulated secretory pathway                                    | 25  | 2  |
| GO:0046326//positive regulation of glucose import                          | 25  | 2  |
| GO:0046471//phosphatidylglycerol metabolic process                         | 25  | 2  |
| GO:0072348//sulfur compound transport                                      | 25  | 2  |
| GO:0090199//regulation of release of cytochrome c from mitochondria        | 25  | 2  |
| GO:1901019//regulation of calcium ion transmembrane transporter activity   | 25  | 2  |
| GO:2001234//negative regulation of apoptotic signaling pathway             | 25  | 2  |
| GO:0033135//regulation of peptidyl-serine phosphorylation                  | 65  | 4  |
| GO:0090100//positive regulation of transmembrane receptor protein serine/  | 65  | 4  |
| GO:0009799//specification of symmetry                                      | 86  | 5  |
| GO:0048638//regulation of developmental growth                             | 86  | 5  |
| GO:0006650//glycerophospholipid metabolic process                          | 218 | 11 |
| GO:0045740//positive regulation of DNA replication                         | 45  | 3  |
| GO:0050803//regulation of synapse structure and activity                   | 45  | 3  |
| GO:0021953//central nervous system neuron differentiation                  | 108 | 6  |
| GO:0030879//mammary gland development                                      | 108 | 6  |
| GO:0009118//regulation of nucleoside metabolic process                     | 286 | 14 |
| GO:0046486//glycerolipid metabolic process                                 | 286 | 14 |
| GO:0008654//phospholipid biosynthetic process                              | 196 | 10 |
| GO:0071214//cellular response to abiotic stimulus                          | 130 | 7  |
| GO:0022890//inorganic cation transmembrane transporter activity            | 355 | 17 |
| GO:0050863//regulation of T cell activation                                | 264 | 13 |
| GO:0002573//myeloid leukocyte differentiation                              | 66  | 4  |
| GO:0032846//positive regulation of homeostatic process                     | 66  | 4  |
| GO:0000729//DNA double-strand break processing                             | 8   | 1  |
| GO:0002448//mast cell mediated immunity                                    | 8   | 1  |
| GO:0002883//regulation of hypersensitivity                                 | 8   | 1  |
| GO:0002921//negative regulation of humoral immune response                 | 8   | 1  |
| GO:0003148//outflow tract septum morphogenesis                             | 8   | 1  |
| GO:0003339//regulation of mesenchymal to epithelial transition involved in | 8   | 1  |
| GO:0005391//sodium:potassium-exchanging ATPase activity                    | 8   | 1  |
| GO:0006216//cytidine catabolic process                                     | 8   | 1  |
| GO:0006558//L-phenylalanine metabolic process                              | 8   | 1  |
| GO:0006559//L-phenylalanine catabolic process                              | 8   | 1  |
| GO:0006563//L-serine metabolic process                                     | 8   | 1  |
| GO:0006707//cholesterol catabolic process                                  | 8   | 1  |
| GO:0006817//phosphate ion transport                                        | 8   | 1  |
| GO:0006853//carnitine shuttle                                              | 8   | 1  |
| GO:0008300//isoprenoid catabolic process                                   | 8   | 1  |
| GO:0009134//nucleoside diphosphate catabolic process                       | 8   | 1  |
| GO:0009135//purine nucleoside diphosphate metabolic process                | 8   | 1  |
| GO:0009179//purine ribonucleoside diphosphate metabolic process            | 8   | 1  |
| GO:0009972//cytidine deamination                                           | 8   | 1  |
| GO:0010454//negative regulation of cell fate commitment                    | 8   | 1  |
| GO:0010661//positive regulation of muscle cell apoptotic process           | 8   | 1  |
| GO:0010819//regulation of T cell chemotaxis                                | 8   | 1  |
| GO:0010820//positive regulation of T cell chemotaxis                       | 8   | 1  |
| GO:0014850//response to muscle activity                                    | 8   | 1  |
| GO:0015810//aspartate transport                                            | 8   | 1  |
| GO:0015884//folic acid transport                                           | 8   | 1  |
| GO:0016127//sterol catabolic process                                       | 8   | 1  |
| GO:0016540//protein autoprocessing                                         | 8   | 1  |
| GO:0021873//forebrain neuroblast division                                  | 8   | 1  |
| GO:0021903//rostrocaudal neural tube patterning                            | 8   | 1  |

|                                                                            |   |   |
|----------------------------------------------------------------------------|---|---|
| GO:0030202//heparin metabolic process                                      | 8 | 1 |
| GO:0030916//otic vesicle formation                                         | 8 | 1 |
| GO:0031935//regulation of chromatin silencing                              | 8 | 1 |
| GO:0031953//negative regulation of protein autophosphorylation             | 8 | 1 |
| GO:0032048//cardiolipin metabolic process                                  | 8 | 1 |
| GO:0032232//negative regulation of actin filament bundle assembly          | 8 | 1 |
| GO:0032328//alanine transport                                              | 8 | 1 |
| GO:0032703//negative regulation of interleukin-2 production                | 8 | 1 |
| GO:0033089//positive regulation of T cell differentiation in thymus        | 8 | 1 |
| GO:0033197//response to vitamin E                                          | 8 | 1 |
| GO:0033623//regulation of integrin activation                              | 8 | 1 |
| GO:0033634//positive regulation of cell-cell adhesion mediated by integrin | 8 | 1 |
| GO:0033962//cytoplasmic mRNA processing body assembly                      | 8 | 1 |
| GO:0034331//cell junction maintenance                                      | 8 | 1 |
| GO:0034379//very-low-density lipoprotein particle assembly                 | 8 | 1 |
| GO:0042135//neurotransmitter catabolic process                             | 8 | 1 |
| GO:0042362//fat-soluble vitamin biosynthetic process                       | 8 | 1 |
| GO:0042416//dopamine biosynthetic process                                  | 8 | 1 |
| GO:0043092//L-amino acid import                                            | 8 | 1 |
| GO:0045217//cell-cell junction maintenance                                 | 8 | 1 |
| GO:0045540//regulation of cholesterol biosynthetic process                 | 8 | 1 |
| GO:0045605//negative regulation of epidermal cell differentiation          | 8 | 1 |
| GO:0045625//regulation of T-helper 1 cell differentiation                  | 8 | 1 |
| GO:0045651//positive regulation of macrophage differentiation              | 8 | 1 |
| GO:0045779//negative regulation of bone resorption                         | 8 | 1 |
| GO:0045989//positive regulation of striated muscle contraction             | 8 | 1 |
| GO:0046085//adenosine metabolic process                                    | 8 | 1 |
| GO:0046087//cytidine metabolic process                                     | 8 | 1 |
| GO:0046548//retinal rod cell development                                   | 8 | 1 |
| GO:0046599//regulation of centriole replication                            | 8 | 1 |
| GO:0048087//positive regulation of developmental pigmentation              | 8 | 1 |
| GO:0048340//paraxial mesoderm morphogenesis                                | 8 | 1 |
| GO:0048532//anatomical structure arrangement                               | 8 | 1 |
| GO:0048569//post-embryonic organ development                               | 8 | 1 |
| GO:0048714//positive regulation of oligodendrocyte differentiation         | 8 | 1 |
| GO:0050665//hydrogen peroxide biosynthetic process                         | 8 | 1 |
| GO:0050932//regulation of pigment cell differentiation                     | 8 | 1 |
| GO:0051151//negative regulation of smooth muscle cell differentiation      | 8 | 1 |
| GO:0051156//glucose 6-phosphate metabolic process                          | 8 | 1 |
| GO:0051307//meiotic chromosome separation                                  | 8 | 1 |
| GO:0051782//negative regulation of cell division                           | 8 | 1 |
| GO:0051895//negative regulation of focal adhesion assembly                 | 8 | 1 |
| GO:0052173//response to defenses of other organism involved in symbiotic   | 8 | 1 |
| GO:0052200//response to host defenses                                      | 8 | 1 |
| GO:0055091//phospholipid homeostasis                                       | 8 | 1 |
| GO:0060055//angiogenesis involved in wound healing                         | 8 | 1 |
| GO:0060439//trachea morphogenesis                                          | 8 | 1 |
| GO:0060575//intestinal epithelial cell differentiation                     | 8 | 1 |
| GO:0060592//mammary gland formation                                        | 8 | 1 |
| GO:0060900//embryonic camera-type eye formation                            | 8 | 1 |
| GO:0061028//establishment of endothelial barrier                           | 8 | 1 |
| GO:0070233//negative regulation of T cell apoptotic process                | 8 | 1 |
| GO:0070472//regulation of uterine smooth muscle contraction                | 8 | 1 |
| GO:0070986//left/right axis specification                                  | 8 | 1 |
| GO:0071236//cellular response to antibiotic                                | 8 | 1 |
| GO:0071480//cellular response to gamma radiation                           | 8 | 1 |
| GO:0071498//cellular response to fluid shear stress                        | 8 | 1 |
| GO:0071772//response to BMP stimulus                                       | 8 | 1 |

|                                                                               |      |     |
|-------------------------------------------------------------------------------|------|-----|
| GO:0071773//cellular response to BMP stimulus                                 | 8    | 1   |
| GO:0072015//glomerular visceral epithelial cell development                   | 8    | 1   |
| GO:0075136//response to host                                                  | 8    | 1   |
| GO:0090330//regulation of platelet aggregation                                | 8    | 1   |
| GO:0097186//amelogenesis                                                      | 8    | 1   |
| GO:1900024//regulation of substrate adhesion-dependent cell spreading         | 8    | 1   |
| GO:1901379//regulation of potassium ion transmembrane transport               | 8    | 1   |
| GO:1901889//negative regulation of cell junction assembly                     | 8    | 1   |
| GO:1902221//erythrose 4-phosphate/phosphoenolpyruvate family amino ac         | 8    | 1   |
| GO:1902222//erythrose 4-phosphate/phosphoenolpyruvate family amino ac         | 8    | 1   |
| GO:2000114//regulation of establishment of cell polarity                      | 8    | 1   |
| GO:2000310//regulation of N-methyl-D-aspartate selective glutamate recep      | 8    | 1   |
| GO:2000651//positive regulation of sodium ion transmembrane transporter       | 8    | 1   |
| GO:NM_0068                                                                    | 8    | 1   |
| GO:0044242//cellular lipid catabolic process                                  | 109  | 6   |
| GO:0007187//G-protein coupled receptor signaling pathway, coupled to cyc      | 131  | 7   |
| GO:0001885//endothelial cell development                                      | 26   | 2   |
| GO:0006775//fat-soluble vitamin metabolic process                             | 26   | 2   |
| GO:0009218//pyrimidine ribonucleotide metabolic process                       | 26   | 2   |
| GO:0022029//telencephalon cell migration                                      | 26   | 2   |
| GO:0030901//midbrain development                                              | 26   | 2   |
| GO:0042346//positive regulation of NF-kappaB import into nucleus              | 26   | 2   |
| GO:0045923//positive regulation of fatty acid metabolic process               | 26   | 2   |
| GO:0046626//regulation of insulin receptor signaling pathway                  | 26   | 2   |
| GO:0050805//negative regulation of synaptic transmission                      | 26   | 2   |
| GO:0052646//alditol phosphate metabolic process                               | 26   | 2   |
| GO:0070873//regulation of glycogen metabolic process                          | 26   | 2   |
| GO:2000756//regulation of peptidyl-lysine acetylation                         | 26   | 2   |
| GO:0048610//cellular process involved in reproduction                         | 334  | 16  |
| GO:0051249//regulation of lymphocyte activation                               | 334  | 16  |
| GO:0042446//hormone biosynthetic process                                      | 46   | 3   |
| GO:0060415//muscle tissue morphogenesis                                       | 46   | 3   |
| GO:1901879//regulation of protein depolymerization                            | 46   | 3   |
| GO:2000112//regulation of cellular macromolecule biosynthetic process         | 2977 | 127 |
| GO:0032412//regulation of ion transmembrane transporter activity              | 67   | 4   |
| GO:0034101//erythrocyte homeostasis                                           | 67   | 4   |
| GO:0070588//calcium ion transmembrane transport                               | 67   | 4   |
| GO:1902106//negative regulation of leukocyte differentiation                  | 67   | 4   |
| GO:0044262//cellular carbohydrate metabolic process                           | 110  | 6   |
| GO:0043412//macromolecule modification                                        | 2017 | 87  |
| GO:0015291//secondary active transmembrane transporter activity               | 89   | 5   |
| GO:0005261//cation channel activity                                           | 245  | 12  |
| GO:0097190//apoptotic signaling pathway                                       | 200  | 10  |
| GO:0006213//pyrimidine nucleoside metabolic process                           | 47   | 3   |
| GO:0006987//activation of signaling protein activity involved in unfolded pro | 47   | 3   |
| GO:0009123//nucleoside monophosphate metabolic process                        | 47   | 3   |
| GO:0030216//keratinocyte differentiation                                      | 47   | 3   |
| GO:0043154//negative regulation of cysteine-type endopeptidase activity in    | 47   | 3   |
| GO:0043242//negative regulation of protein complex disassembly                | 47   | 3   |
| GO:0050905//neuromuscular process                                             | 68   | 4   |
| GO:0051251//positive regulation of lymphocyte activation                      | 246  | 12  |
| GO:0002067//glandular epithelial cell differentiation                         | 27   | 2   |
| GO:0002444//myeloid leukocyte mediated immunity                               | 27   | 2   |
| GO:0005251//delayed rectifier potassium channel activity                      | 27   | 2   |
| GO:0009132//nucleoside diphosphate metabolic process                          | 27   | 2   |
| GO:0010977//negative regulation of neuron projection development              | 27   | 2   |
| GO:0021575//hindbrain morphogenesis                                           | 27   | 2   |
| GO:0022408//negative regulation of cell-cell adhesion                         | 27   | 2   |

|                                                                                    |      |    |
|------------------------------------------------------------------------------------|------|----|
| GO:0032233//positive regulation of actin filament bundle assembly                  | 27   | 2  |
| GO:0032885//regulation of polysaccharide biosynthetic process                      | 27   | 2  |
| GO:0043266//regulation of potassium ion transport                                  | 27   | 2  |
| GO:0043370//regulation of CD4-positive, alpha-beta T cell differentiation          | 27   | 2  |
| GO:0045931//positive regulation of mitotic cell cycle                              | 27   | 2  |
| GO:0050732//negative regulation of peptidyl-tyrosine phosphorylation               | 27   | 2  |
| GO:0042742//defense response to bacterium                                          | 156  | 8  |
| GO:0071702//organic substance transport                                            | 1376 | 60 |
| GO:0006367//transcription initiation from RNA polymerase II promoter               | 112  | 6  |
| GO:0010923//negative regulation of phosphatase activity                            | 69   | 4  |
| GO:0007611//learning or memory                                                     | 135  | 7  |
| GO:0002443//leukocyte mediated immunity                                            | 180  | 9  |
| GO:0006518//peptide metabolic process                                              | 91   | 5  |
| GO:0000160//phosphorelay signal transduction system                                | 9    | 1  |
| GO:0001504//neurotransmitter uptake                                                | 9    | 1  |
| GO:0001736//establishment of planar polarity                                       | 9    | 1  |
| GO:0001840//neural plate development                                               | 9    | 1  |
| GO:0002070//epithelial cell maturation                                             | 9    | 1  |
| GO:0002320//lymphoid progenitor cell differentiation                               | 9    | 1  |
| GO:0002864//regulation of acute inflammatory response to antigenic stimulus        | 9    | 1  |
| GO:0003416//endochondral bone growth                                               | 9    | 1  |
| GO:0005388//calcium-transporting ATPase activity                                   | 9    | 1  |
| GO:0005513//detection of calcium ion                                               | 9    | 1  |
| GO:0006266//DNA ligation                                                           | 9    | 1  |
| GO:0006516//glycoprotein catabolic process                                         | 9    | 1  |
| GO:0006570//tyrosine metabolic process                                             | 9    | 1  |
| GO:0007164//establishment of tissue polarity                                       | 9    | 1  |
| GO:0007638//mechanosensory behavior                                                | 9    | 1  |
| GO:0009649//entrainment of circadian clock                                         | 9    | 1  |
| GO:0010640//regulation of platelet-derived growth factor receptor signaling        | 9    | 1  |
| GO:0010758//regulation of macrophage chemotaxis                                    | 9    | 1  |
| GO:0010870//positive regulation of receptor biosynthetic process                   | 9    | 1  |
| GO:0015280//ligand-gated sodium channel activity                                   | 9    | 1  |
| GO:0015740//C4-dicarboxylate transport                                             | 9    | 1  |
| GO:0015824//proline transport                                                      | 9    | 1  |
| GO:0019079//viral genome replication                                               | 9    | 1  |
| GO:0019755//one-carbon compound transport                                          | 9    | 1  |
| GO:0021940//positive regulation of cerebellar granule cell precursor proliferation | 9    | 1  |
| GO:0030220//platelet formation                                                     | 9    | 1  |
| GO:0032494//response to peptidoglycan                                              | 9    | 1  |
| GO:0032691//negative regulation of interleukin-1 beta production                   | 9    | 1  |
| GO:0034764//positive regulation of transmembrane transport                         | 9    | 1  |
| GO:0034767//positive regulation of ion transmembrane transport                     | 9    | 1  |
| GO:0036344//platelet morphogenesis                                                 | 9    | 1  |
| GO:0040015//negative regulation of multicellular organism growth                   | 9    | 1  |
| GO:0042100//B cell proliferation                                                   | 9    | 1  |
| GO:0042511//positive regulation of tyrosine phosphorylation of Stat1 protein       | 9    | 1  |
| GO:0042640//anagen                                                                 | 9    | 1  |
| GO:0043217//myelin maintenance                                                     | 9    | 1  |
| GO:0043508//negative regulation of JUN kinase activity                             | 9    | 1  |
| GO:0045006//DNA deamination                                                        | 9    | 1  |
| GO:0045176//apical protein localization                                            | 9    | 1  |
| GO:0046113//nucleobase catabolic process                                           | 9    | 1  |
| GO:0046133//pyrimidine ribonucleoside catabolic process                            | 9    | 1  |
| GO:0046689//response to mercury ion                                                | 9    | 1  |
| GO:0050884//neuromuscular process controlling posture                              | 9    | 1  |
| GO:0050951//sensory perception of temperature stimulus                             | 9    | 1  |
| GO:0055057//neuroblast division                                                    | 9    | 1  |

|                                                                                   |     |    |
|-----------------------------------------------------------------------------------|-----|----|
| GO:0060272//embryonic skeletal joint morphogenesis                                | 9   | 1  |
| GO:0070874//negative regulation of glycogen metabolic process                     | 9   | 1  |
| GO:0071350//cellular response to interleukin-15                                   | 9   | 1  |
| GO:0072017//distal tubule development                                             | 9   | 1  |
| GO:0072202//cell differentiation involved in metanephros development              | 9   | 1  |
| GO:0072310//glomerular epithelial cell development                                | 9   | 1  |
| GO:0072678//T cell migration                                                      | 9   | 1  |
| GO:0086005//regulation of ventricular cardiac muscle cell action potential        | 9   | 1  |
| GO:0090049//regulation of cell migration involved in sprouting angiogenesis       | 9   | 1  |
| GO:0090231//regulation of spindle checkpoint                                      | 9   | 1  |
| GO:0097067//cellular response to thyroid hormone stimulus                         | 9   | 1  |
| GO:0097094//craniofacial suture morphogenesis                                     | 9   | 1  |
| GO:0097237//cellular response to toxic substance                                  | 9   | 1  |
| GO:0097267//omega-hydroxylase P450 pathway                                        | 9   | 1  |
| GO:1900078//positive regulation of cellular response to insulin stimulus          | 9   | 1  |
| GO:1901020//negative regulation of calcium ion transmembrane transporter activity | 9   | 1  |
| GO:2000036//regulation of stem cell maintenance                                   | 9   | 1  |
| GO:2000352//negative regulation of endothelial cell apoptotic process             | 9   | 1  |
| GO:2000515//negative regulation of CD4-positive, alpha-beta T cell activation     | 9   | 1  |
| GO:2000772//regulation of cellular senescence                                     | 9   | 1  |
| GO:0005245//voltage-gated calcium channel activity                                | 28  | 2  |
| GO:0006739//NADP metabolic process                                                | 28  | 2  |
| GO:0007528//neuromuscular junction development                                    | 28  | 2  |
| GO:0007628//adult walking behavior                                                | 28  | 2  |
| GO:0021517//ventral spinal cord development                                       | 28  | 2  |
| GO:0021885//forebrain cell migration                                              | 28  | 2  |
| GO:0030834//regulation of actin filament depolymerization                         | 28  | 2  |
| GO:0030857//negative regulation of epithelial cell differentiation                | 28  | 2  |
| GO:0048333//mesodermal cell differentiation                                       | 28  | 2  |
| GO:0050663//cytokine secretion                                                    | 28  | 2  |
| GO:1901983//regulation of protein acetylation                                     | 28  | 2  |
| GO:0045981//positive regulation of nucleotide metabolic process                   | 70  | 4  |
| GO:1900544//positive regulation of purine nucleotide metabolic process            | 70  | 4  |
| GO:0034504//protein localization to nucleus                                       | 114 | 6  |
| GO:0006641//triglyceride metabolic process                                        | 92  | 5  |
| GO:0051495//positive regulation of cytoskeleton organization                      | 92  | 5  |
| GO:0003158//endothelium development                                               | 49  | 3  |
| GO:0032075//positive regulation of nuclease activity                              | 49  | 3  |
| GO:0015108//chloride transmembrane transporter activity                           | 71  | 4  |
| GO:0022898//regulation of transmembrane transporter activity                      | 71  | 4  |
| GO:0007015//actin filament organization                                           | 93  | 5  |
| GO:0006575//cellular modified amino acid metabolic process                        | 183 | 9  |
| GO:0050867//positive regulation of cell activation                                | 275 | 13 |
| GO:0006352//DNA-dependent transcription, initiation                               | 138 | 7  |
| GO:0002762//negative regulation of myeloid leukocyte differentiation              | 29  | 2  |
| GO:0003382//epithelial cell morphogenesis                                         | 29  | 2  |
| GO:0006206//pyrimidine nucleobase metabolic process                               | 29  | 2  |
| GO:0006656//phosphatidylcholine biosynthetic process                              | 29  | 2  |
| GO:0006695//cholesterol biosynthetic process                                      | 29  | 2  |
| GO:0007044//cell-substrate junction assembly                                      | 29  | 2  |
| GO:0007052//mitotic spindle organization                                          | 29  | 2  |
| GO:0022406//membrane docking                                                      | 29  | 2  |
| GO:0034644//cellular response to UV                                               | 29  | 2  |
| GO:0046638//positive regulation of alpha-beta T cell differentiation              | 29  | 2  |
| GO:0051209//release of sequestered calcium ion into cytosol                       | 29  | 2  |
| GO:0051283//negative regulation of sequestering of calcium ion                    | 29  | 2  |
| GO:0055013//cardiac muscle cell development                                       | 29  | 2  |
| GO:1901264//carbohydrate derivative transport                                     | 29  | 2  |

|                                                                             |    |   |
|-----------------------------------------------------------------------------|----|---|
| GO:1901989//positive regulation of cell cycle phase transition              | 29 | 2 |
| GO:1901992//positive regulation of mitotic cell cycle phase transition      | 29 | 2 |
| GO:0010970//microtubule-based transport                                     | 50 | 3 |
| GO:0090317//negative regulation of intracellular protein transport          | 50 | 3 |
| GO:0097479//synaptic vesicle localization                                   | 50 | 3 |
| GO:2000117//negative regulation of cysteine-type endopeptidase activity     | 50 | 3 |
| GO:0042451//purine nucleoside biosynthetic process                          | 72 | 4 |
| GO:0046129//purine ribonucleoside biosynthetic process                      | 72 | 4 |
| GO:0050768//negative regulation of neurogenesis                             | 72 | 4 |
| GO:0000738//DNA catabolic process, exonucleolytic                           | 10 | 1 |
| GO:0002251//organ or tissue specific immune response                        | 10 | 1 |
| GO:0003214//cardiac left ventricle morphogenesis                            | 10 | 1 |
| GO:0005451//monovalent cation:hydrogen antiporter activity                  | 10 | 1 |
| GO:0006000//fructose metabolic process                                      | 10 | 1 |
| GO:0006465//signal peptide processing                                       | 10 | 1 |
| GO:0006596//polyamine biosynthetic process                                  | 10 | 1 |
| GO:0007063//regulation of sister chromatid cohesion                         | 10 | 1 |
| GO:0008631//intrinsic apoptotic signaling pathway in response to oxidative  | 10 | 1 |
| GO:0009151//purine deoxyribonucleotide metabolic process                    | 10 | 1 |
| GO:0009185//ribonucleoside diphosphate metabolic process                    | 10 | 1 |
| GO:0009263//deoxyribonucleotide biosynthetic process                        | 10 | 1 |
| GO:0010693//negative regulation of alkaline phosphatase activity            | 10 | 1 |
| GO:0010881//regulation of cardiac muscle contraction by regulation of the r | 10 | 1 |
| GO:0010935//regulation of macrophage cytokine production                    | 10 | 1 |
| GO:0015278//calcium-release channel activity                                | 10 | 1 |
| GO:0015802//basic amino acid transport                                      | 10 | 1 |
| GO:0019067//viral assembly, maturation, egress, and release                 | 10 | 1 |
| GO:0021548//pons development                                                | 10 | 1 |
| GO:0021781//glial cell fate commitment                                      | 10 | 1 |
| GO:0021799//cerebral cortex radially oriented cell migration                | 10 | 1 |
| GO:0021936//regulation of cerebellar granule cell precursor proliferation   | 10 | 1 |
| GO:0030207//chondroitin sulfate catabolic process                           | 10 | 1 |
| GO:0032096//negative regulation of response to food                         | 10 | 1 |
| GO:0032099//negative regulation of appetite                                 | 10 | 1 |
| GO:0032692//negative regulation of interleukin-1 production                 | 10 | 1 |
| GO:0033233//regulation of protein sumoylation                               | 10 | 1 |
| GO:0033327//Leydig cell differentiation                                     | 10 | 1 |
| GO:0033604//negative regulation of catecholamine secretion                  | 10 | 1 |
| GO:0034374//low-density lipoprotein particle remodeling                     | 10 | 1 |
| GO:0034443//negative regulation of lipoprotein oxidation                    | 10 | 1 |
| GO:0035024//negative regulation of Rho protein signal transduction          | 10 | 1 |
| GO:0035414//negative regulation of catenin import into nucleus              | 10 | 1 |
| GO:0042347//negative regulation of NF-kappaB import into nucleus            | 10 | 1 |
| GO:0043268//positive regulation of potassium ion transport                  | 10 | 1 |
| GO:0045683//negative regulation of epidermis development                    | 10 | 1 |
| GO:0046639//negative regulation of alpha-beta T cell differentiation        | 10 | 1 |
| GO:0048268//clathrin coat assembly                                          | 10 | 1 |
| GO:0048703//embryonic viscerocranium morphogenesis                          | 10 | 1 |
| GO:0051642//centrosome localization                                         | 10 | 1 |
| GO:0051770//positive regulation of nitric-oxide synthase biosynthetic proce | 10 | 1 |
| GO:0051918//negative regulation of fibrinolysis                             | 10 | 1 |
| GO:0055062//phosphate ion homeostasis                                       | 10 | 1 |
| GO:0060117//auditory receptor cell development                              | 10 | 1 |
| GO:0060292//long term synaptic depression                                   | 10 | 1 |
| GO:0060712//spongiontrophoblast layer development                           | 10 | 1 |
| GO:0060732//positive regulation of inositol phosphate biosynthetic process  | 10 | 1 |
| GO:0060788//ectodermal placode formation                                    | 10 | 1 |
| GO:0070227//lymphocyte apoptotic process                                    | 10 | 1 |

|                                                                              |      |     |
|------------------------------------------------------------------------------|------|-----|
| GO:0070307//lens fiber cell development                                      | 10   | 1   |
| GO:0071600//otic vesicle morphogenesis                                       | 10   | 1   |
| GO:0071696//ectodermal placode development                                   | 10   | 1   |
| GO:0071697//ectodermal placode morphogenesis                                 | 10   | 1   |
| GO:0072148//epithelial cell fate commitment                                  | 10   | 1   |
| GO:0072506//trivalent inorganic anion homeostasis                            | 10   | 1   |
| GO:0090192//regulation of glomerulus development                             | 10   | 1   |
| GO:0090399//replicative senescence                                           | 10   | 1   |
| GO:1901881//positive regulation of protein depolymerization                  | 10   | 1   |
| GO:1902001//fatty acid transmembrane transport                               | 10   | 1   |
| GO:2000047//regulation of cell-cell adhesion mediated by cadherin            | 10   | 1   |
| GO:2000501//regulation of natural killer cell chemotaxis                     | 10   | 1   |
| GO:0045666//positive regulation of neuron differentiation                    | 51   | 3   |
| GO:0051250//negative regulation of lymphocyte activation                     | 95   | 5   |
| GO:0001841//neural tube formation                                            | 73   | 4   |
| GO:0055072//iron ion homeostasis                                             | 73   | 4   |
| GO:0006383//transcription from RNA polymerase III promoter                   | 30   | 2   |
| GO:0030317//sperm motility                                                   | 30   | 2   |
| GO:0032881//regulation of polysaccharide metabolic process                   | 30   | 2   |
| GO:0043392//negative regulation of DNA binding                               | 30   | 2   |
| GO:0045620//negative regulation of lymphocyte differentiation                | 30   | 2   |
| GO:0050691//regulation of defense response to virus by host                  | 30   | 2   |
| GO:0051282//regulation of sequestering of calcium ion                        | 30   | 2   |
| GO:0051970//negative regulation of transmission of nerve impulse             | 30   | 2   |
| GO:0060603//mammary gland duct morphogenesis                                 | 30   | 2   |
| GO:0061077//chaperone-mediated protein folding                               | 30   | 2   |
| GO:0070252//actin-mediated cell contraction                                  | 30   | 2   |
| GO:2000379//positive regulation of reactive oxygen species metabolic process | 30   | 2   |
| GO:2000514//regulation of CD4-positive, alpha-beta T cell activation         | 30   | 2   |
| GO:0022843//voltage-gated cation channel activity                            | 118  | 6   |
| GO:1901575//organic substance catabolic process                              | 1470 | 63  |
| GO:0005216//ion channel activity                                             | 303  | 14  |
| GO:0022838//substrate-specific channel activity                              | 303  | 14  |
| GO:0005249//voltage-gated potassium channel activity                         | 74   | 4   |
| GO:0045471//response to ethanol                                              | 74   | 4   |
| GO:0003143//embryonic heart tube morphogenesis                               | 52   | 3   |
| GO:0006027//glycosaminoglycan catabolic process                              | 52   | 3   |
| GO:0030010//establishment of cell polarity                                   | 52   | 3   |
| GO:0030705//cytoskeleton-dependent intracellular transport                   | 52   | 3   |
| GO:0051291//protein heterooligomerization                                    | 52   | 3   |
| GO:0044764//multi-organism cellular process                                  | 398  | 18  |
| GO:0051252//regulation of RNA metabolic process                              | 2804 | 118 |
| GO:0051129//negative regulation of cellular component organization           | 281  | 13  |
| GO:0030001//metal ion transport                                              | 446  | 20  |
| GO:0003001//generation of a signal involved in cell-cell signaling           | 97   | 5   |
| GO:0023061//signal release                                                   | 97   | 5   |
| GO:0030072//peptide hormone secretion                                        | 31   | 2   |
| GO:0031663//lipopolysaccharide-mediated signaling pathway                    | 31   | 2   |
| GO:0043624//cellular protein complex disassembly                             | 31   | 2   |
| GO:0050931//pigment cell differentiation                                     | 31   | 2   |
| GO:0051055//negative regulation of lipid biosynthetic process                | 31   | 2   |
| GO:0055010//ventricular cardiac muscle tissue morphogenesis                  | 31   | 2   |
| GO:0060042//retina morphogenesis in camera-type eye                          | 31   | 2   |
| GO:0090066//regulation of anatomical structure size                          | 212  | 10  |
| GO:0051056//regulation of small GTPase mediated signal transduction          | 376  | 17  |
| GO:1901607//alpha-amino acid biosynthetic process                            | 75   | 4   |
| GO:0061136//regulation of proteasomal protein catabolic process              | 53   | 3   |
| GO:0000098//sulfur amino acid catabolic process                              | 11   | 1   |



|                                                                               |     |    |
|-------------------------------------------------------------------------------|-----|----|
| GO:0001833//inner cell mass cell proliferation                                | 11  | 1  |
| GO:0001946//lymphangiogenesis                                                 | 11  | 1  |
| GO:0002031//G-protein coupled receptor internalization                        | 11  | 1  |
| GO:0002532//production of molecular mediator involved in inflammatory res     | 11  | 1  |
| GO:0003323//type B pancreatic cell development                                | 11  | 1  |
| GO:0006590//thyroid hormone generation                                        | 11  | 1  |
| GO:0006895//Golgi to endosome transport                                       | 11  | 1  |
| GO:0007213//G-protein coupled acetylcholine receptor signaling pathway        | 11  | 1  |
| GO:0007350//blastoderm segmentation                                           | 11  | 1  |
| GO:0007351//tripartite regional subdivision                                   | 11  | 1  |
| GO:0008556//potassium-transporting ATPase activity                            | 11  | 1  |
| GO:0008595//anterior/posterior axis specification, embryo                     | 11  | 1  |
| GO:0010224//response to UV-B                                                  | 11  | 1  |
| GO:0010882//regulation of cardiac muscle contraction by calcium ion signal    | 11  | 1  |
| GO:0010889//regulation of sequestering of triglyceride                        | 11  | 1  |
| GO:0014047//glutamate secretion                                               | 11  | 1  |
| GO:0015114//phosphate ion transmembrane transporter activity                  | 11  | 1  |
| GO:0017187//peptidyl-glutamic acid carboxylation                              | 11  | 1  |
| GO:0018214//protein carboxylation                                             | 11  | 1  |
| GO:0021520//spinal cord motor neuron cell fate specification                  | 11  | 1  |
| GO:0021756//striatum development                                              | 11  | 1  |
| GO:0021884//forebrain neuron development                                      | 11  | 1  |
| GO:0022010//central nervous system myelination                                | 11  | 1  |
| GO:0030214//hyaluronan catabolic process                                      | 11  | 1  |
| GO:0031638//zymogen activation                                                | 11  | 1  |
| GO:0032291//axon ensheathment in central nervous system                       | 11  | 1  |
| GO:0032922//circadian regulation of gene expression                           | 11  | 1  |
| GO:0033598//mammary gland epithelial cell proliferation                       | 11  | 1  |
| GO:0034310//primary alcohol catabolic process                                 | 11  | 1  |
| GO:0035307//positive regulation of protein dephosphorylation                  | 11  | 1  |
| GO:0036092//phosphatidylinositol-3-phosphate biosynthetic process             | 11  | 1  |
| GO:0036303//lymph vessel morphogenesis                                        | 11  | 1  |
| GO:0042340//keratan sulfate catabolic process                                 | 11  | 1  |
| GO:0042832//defense response to protozoan                                     | 11  | 1  |
| GO:0042953//lipoprotein transport                                             | 11  | 1  |
| GO:0043090//amino acid import                                                 | 11  | 1  |
| GO:0043568//positive regulation of insulin-like growth factor receptor signal | 11  | 1  |
| GO:0045815//positive regulation of gene expression, epigenetic                | 11  | 1  |
| GO:0045843//negative regulation of striated muscle tissue development         | 11  | 1  |
| GO:0046321//positive regulation of fatty acid oxidation                       | 11  | 1  |
| GO:0048934//peripheral nervous system neuron differentiation                  | 11  | 1  |
| GO:0048935//peripheral nervous system neuron development                      | 11  | 1  |
| GO:0051304//chromosome separation                                             | 11  | 1  |
| GO:0051972//regulation of telomerase activity                                 | 11  | 1  |
| GO:0060251//regulation of glial cell proliferation                            | 11  | 1  |
| GO:0060347//heart trabecula formation                                         | 11  | 1  |
| GO:0060413//atrial septum morphogenesis                                       | 11  | 1  |
| GO:0070293//renal absorption                                                  | 11  | 1  |
| GO:0071636//positive regulation of transforming growth factor beta producti   | 11  | 1  |
| GO:0072164//mesonephric tubule development                                    | 11  | 1  |
| GO:0090075//relaxation of muscle                                              | 11  | 1  |
| GO:0097066//response to thyroid hormone stimulus                              | 11  | 1  |
| GO:1901862//negative regulation of muscle tissue development                  | 11  | 1  |
| GO:1901976//regulation of cell cycle checkpoint                               | 11  | 1  |
| GO:0033121//regulation of purine nucleotide catabolic process                 | 283 | 13 |
| GO:0046578//regulation of Ras protein signal transduction                     | 307 | 14 |
| GO:0030811//regulation of nucleotide catabolic process                        | 284 | 13 |
| GO:0016573//histone acetylation                                               | 76  | 4  |

|                                                                               |      |     |
|-------------------------------------------------------------------------------|------|-----|
| GO:0043087//regulation of GTPase activity                                     | 261  | 12  |
| GO:0035023//regulation of Rho protein signal transduction                     | 168  | 8   |
| GO:0003229//ventricular cardiac muscle tissue development                     | 32   | 2   |
| GO:0007205//protein kinase C-activating G-protein coupled receptor signaling  | 32   | 2   |
| GO:0009948//anterior/posterior axis specification                             | 32   | 2   |
| GO:0035137//hindlimb morphogenesis                                            | 32   | 2   |
| GO:0043241//protein complex disassembly                                       | 32   | 2   |
| GO:0044070//regulation of anion transport                                     | 54   | 3   |
| GO:0072524//pyridine-containing compound metabolic process                    | 54   | 3   |
| GO:1901616//organic hydroxy compound catabolic process                        | 54   | 3   |
| GO:0044238//primary metabolic process                                         | 6263 | 259 |
| GO:0010639//negative regulation of organelle organization                     | 146  | 7   |
| GO:0043123//positive regulation of I-kappaB kinase/NF-kappaB cascade          | 146  | 7   |
| GO:0019953//sexual reproduction                                               | 524  | 23  |
| GO:0045637//regulation of myeloid cell differentiation                        | 123  | 6   |
| GO:0060021//palate development                                                | 55   | 3   |
| GO:0070664//negative regulation of leukocyte proliferation                    | 55   | 3   |
| GO:0033124//regulation of GTP catabolic process                               | 264  | 12  |
| GO:1901136//carbohydrate derivative catabolic process                         | 478  | 21  |
| GO:0005272//sodium channel activity                                           | 33   | 2   |
| GO:0046131//pyrimidine ribonucleoside metabolic process                       | 33   | 2   |
| GO:0060795//cell fate commitment involved in formation of primary germ layers | 33   | 2   |
| GO:0050864//regulation of B cell activation                                   | 78   | 4   |
| GO:0071383//cellular response to steroid hormone stimulus                     | 78   | 4   |
| GO:0002710//negative regulation of T cell mediated immunity                   | 12   | 1   |
| GO:0006677//glycosylceramide metabolic process                                | 12   | 1   |
| GO:0006862//nucleotide transport                                              | 12   | 1   |
| GO:0006978//DNA damage response, signal transduction by p53 class mediator    | 12   | 1   |
| GO:0010560//positive regulation of glycoprotein biosynthetic process          | 12   | 1   |
| GO:0010837//regulation of keratinocyte proliferation                          | 12   | 1   |
| GO:0010880//regulation of release of sequestered calcium ion into cytosol     | 12   | 1   |
| GO:0010919//regulation of inositol phosphate biosynthetic process             | 12   | 1   |
| GO:0014061//regulation of norepinephrine secretion                            | 12   | 1   |
| GO:0015370//solute:sodium symporter activity                                  | 12   | 1   |
| GO:0015671//oxygen transport                                                  | 12   | 1   |
| GO:0015838//amino-acid betaine transport                                      | 12   | 1   |
| GO:0015858//nucleoside transport                                              | 12   | 1   |
| GO:0015879//carnitine transport                                               | 12   | 1   |
| GO:0019373//epoxygenase P450 pathway                                          | 12   | 1   |
| GO:0032225//regulation of synaptic transmission, dopaminergic                 | 12   | 1   |
| GO:0034695//response to prostaglandin E stimulus                              | 12   | 1   |
| GO:0035306//positive regulation of dephosphorylation                          | 12   | 1   |
| GO:0035815//positive regulation of renal sodium excretion                     | 12   | 1   |
| GO:0036342//post-anal tail morphogenesis                                      | 12   | 1   |
| GO:0042219//cellular modified amino acid catabolic process                    | 12   | 1   |
| GO:0042510//regulation of tyrosine phosphorylation of Stat1 protein           | 12   | 1   |
| GO:0042659//regulation of cell fate specification                             | 12   | 1   |
| GO:0043586//tongue development                                                | 12   | 1   |
| GO:0043650//dicarboxylic acid biosynthetic process                            | 12   | 1   |
| GO:0045662//negative regulation of myoblast differentiation                   | 12   | 1   |
| GO:0045725//positive regulation of glycogen biosynthetic process              | 12   | 1   |
| GO:0045955//negative regulation of calcium ion-dependent exocytosis           | 12   | 1   |
| GO:0046339//diacylglycerol metabolic process                                  | 12   | 1   |
| GO:0048246//macrophage chemotaxis                                             | 12   | 1   |
| GO:0050435//beta-amyloid metabolic process                                    | 12   | 1   |
| GO:0050651//dermatan sulfate proteoglycan biosynthetic process                | 12   | 1   |
| GO:0050655//dermatan sulfate proteoglycan metabolic process                   | 12   | 1   |
| GO:0050930//induction of positive chemotaxis                                  | 12   | 1   |

|                                                                        |     |    |
|------------------------------------------------------------------------|-----|----|
| GO:0051187//cofactor catabolic process                                 | 12  | 1  |
| GO:0051261//protein depolymerization                                   | 12  | 1  |
| GO:0060039//pericardium development                                    | 12  | 1  |
| GO:0060065//uterus development                                         | 12  | 1  |
| GO:0060122//inner ear receptor stereocilium organization               | 12  | 1  |
| GO:0060766//negative regulation of androgen receptor signaling pathway | 12  | 1  |
| GO:0061046//regulation of branching involved in lung morphogenesis     | 12  | 1  |
| GO:0061318//renal filtration cell differentiation                      | 12  | 1  |
| GO:0070672//response to interleukin-15                                 | 12  | 1  |
| GO:0071385//cellular response to glucocorticoid stimulus               | 12  | 1  |
| GO:0072112//glomerular visceral epithelial cell differentiation        | 12  | 1  |
| GO:0072163//mesonephric epithelium development                         | 12  | 1  |
| GO:0072498//embryonic skeletal joint development                       | 12  | 1  |
| GO:0086091//regulation of heart rate by cardiac conduction             | 12  | 1  |
| GO:0090303//positive regulation of wound healing                       | 12  | 1  |
| GO:NM_0024                                                             | 12  | 1  |
| GO:0002696//positive regulation of leukocyte activation                | 265 | 12 |
| GO:0071705//nitrogen compound transport                                | 337 | 15 |
| GO:0007626//locomotory behavior                                        | 125 | 6  |
| GO:0030819//positive regulation of cAMP biosynthetic process           | 56  | 3  |
| GO:0032069//regulation of nuclease activity                            | 56  | 3  |
| GO:0033238//regulation of cellular amine metabolic process             | 56  | 3  |
| GO:0045638//negative regulation of myeloid cell differentiation        | 56  | 3  |
| GO:0032675//regulation of interleukin-6 production                     | 79  | 4  |
| GO:0050890//cognition                                                  | 149 | 7  |
| GO:0006644//phospholipid metabolic process                             | 267 | 12 |
| GO:0032006//regulation of TOR signaling cascade                        | 34  | 2  |
| GO:0048678//response to axon injury                                    | 34  | 2  |
| GO:0050772//positive regulation of axonogenesis                        | 34  | 2  |
| GO:1900076//regulation of cellular response to insulin stimulus        | 34  | 2  |
| GO:0016042//lipid catabolic process                                    | 197 | 9  |
| GO:0009064//glutamine family amino acid metabolic process              | 57  | 3  |
| GO:0050821//protein stabilization                                      | 57  | 3  |
| GO:0071804//cellular potassium ion transport                           | 57  | 3  |
| GO:0071805//potassium ion transmembrane transport                      | 57  | 3  |
| GO:0017157//regulation of exocytosis                                   | 80  | 4  |
| GO:0032409//regulation of transporter activity                         | 80  | 4  |
| GO:0046034//ATP metabolic process                                      | 174 | 8  |
| GO:0010927//cellular component assembly involved in morphogenesis      | 127 | 6  |
| GO:0000266//mitochondrial fission                                      | 13  | 1  |
| GO:0002068//glandular epithelial cell development                      | 13  | 1  |
| GO:0003091//renal water homeostasis                                    | 13  | 1  |
| GO:0003283//atrial septum development                                  | 13  | 1  |
| GO:0003309//type B pancreatic cell differentiation                     | 13  | 1  |
| GO:0005217//intracellular ligand-gated ion channel activity            | 13  | 1  |
| GO:0005980//glycogen catabolic process                                 | 13  | 1  |
| GO:0006044//N-acetylglucosamine metabolic process                      | 13  | 1  |
| GO:0006278//RNA-dependent DNA replication                              | 13  | 1  |
| GO:0006927//transformed cell apoptotic process                         | 13  | 1  |
| GO:0007320//insemination                                               | 13  | 1  |
| GO:0007342//fusion of sperm to egg plasma membrane                     | 13  | 1  |
| GO:0007413//axonal fasciculation                                       | 13  | 1  |
| GO:0007512//adult heart development                                    | 13  | 1  |
| GO:0010092//specification of organ identity                            | 13  | 1  |
| GO:0010954//positive regulation of protein processing                  | 13  | 1  |
| GO:0015101//organic cation transmembrane transporter activity          | 13  | 1  |
| GO:0016254//preassembly of GPI anchor in ER membrane                   | 13  | 1  |
| GO:0019083//viral transcription                                        | 13  | 1  |

|                                                                               |     |    |
|-------------------------------------------------------------------------------|-----|----|
| GO:0021984//adenohypophysis development                                       | 13  | 1  |
| GO:0023019//signal transduction involved in regulation of gene expression     | 13  | 1  |
| GO:0030224//monocyte differentiation                                          | 13  | 1  |
| GO:0031620//regulation of fever generation                                    | 13  | 1  |
| GO:0031622//positive regulation of fever generation                           | 13  | 1  |
| GO:0031665//negative regulation of lipopolysaccharide-mediated signaling      | 13  | 1  |
| GO:0032413//negative regulation of ion transmembrane transporter activity     | 13  | 1  |
| GO:0032438//melanosome organization                                           | 13  | 1  |
| GO:0032469//endoplasmic reticulum calcium ion homeostasis                     | 13  | 1  |
| GO:0035456//response to interferon-beta                                       | 13  | 1  |
| GO:0036149//phosphatidylinositol acyl-chain remodeling                        | 13  | 1  |
| GO:0042772//DNA damage response, signal transduction resulting in trans       | 13  | 1  |
| GO:0043277//apoptotic cell clearance                                          | 13  | 1  |
| GO:0043954//cellular component maintenance                                    | 13  | 1  |
| GO:0045649//regulation of macrophage differentiation                          | 13  | 1  |
| GO:0045723//positive regulation of fatty acid biosynthetic process            | 13  | 1  |
| GO:0045730//respiratory burst                                                 | 13  | 1  |
| GO:0046051//UTP metabolic process                                             | 13  | 1  |
| GO:0048820//hair follicle maturation                                          | 13  | 1  |
| GO:0051402//neuron apoptotic process                                          | 13  | 1  |
| GO:0051923//sulfation                                                         | 13  | 1  |
| GO:0060045//positive regulation of cardiac muscle cell proliferation          | 13  | 1  |
| GO:0070207//protein homotrimerization                                         | 13  | 1  |
| GO:0070527//platelet aggregation                                              | 13  | 1  |
| GO:0071285//cellular response to lithium ion                                  | 13  | 1  |
| GO:0071384//cellular response to corticosteroid stimulus                      | 13  | 1  |
| GO:0072010//glomerular epithelium development                                 | 13  | 1  |
| GO:0072234//metanephric nephron tubule development                            | 13  | 1  |
| GO:0072243//metanephric nephron epithelium development                        | 13  | 1  |
| GO:0072311//glomerular epithelial cell differentiation                        | 13  | 1  |
| GO:0090004//positive regulation of establishment of protein localization to p | 13  | 1  |
| GO:0090208//positive regulation of triglyceride metabolic process             | 13  | 1  |
| GO:0090322//regulation of superoxide metabolic process                        | 13  | 1  |
| GO:1901099//negative regulation of signal transduction in absence of ligand   | 13  | 1  |
| GO:2001240//negative regulation of extrinsic apoptotic signaling pathway in   | 13  | 1  |
| GO:0006473//protein acetylation                                               | 104 | 5  |
| GO:0006144//purine nucleobase metabolic process                               | 35  | 2  |
| GO:0006691//leukotriene metabolic process                                     | 35  | 2  |
| GO:0008593//regulation of Notch signaling pathway                             | 35  | 2  |
| GO:0031645//negative regulation of neurological system process                | 35  | 2  |
| GO:0043967//histone H4 acetylation                                            | 35  | 2  |
| GO:2001236//regulation of extrinsic apoptotic signaling pathway               | 35  | 2  |
| GO:0007368//determination of left/right symmetry                              | 81  | 4  |
| GO:0050777//negative regulation of immune response                            | 58  | 3  |
| GO:0071478//cellular response to radiation                                    | 58  | 3  |
| GO:0010564//regulation of cell cycle process                                  | 391 | 17 |
| GO:0015672//monovalent inorganic cation transport                             | 272 | 12 |
| GO:0070507//regulation of microtubule cytoskeleton organization               | 82  | 4  |
| GO:0002449//lymphocyte mediated immunity                                      | 153 | 7  |
| GO:0050778//positive regulation of immune response                            | 441 | 19 |
| GO:0008344//adult locomotory behavior                                         | 59  | 3  |
| GO:0009112//nucleobase metabolic process                                      | 59  | 3  |
| GO:0030816//positive regulation of cAMP metabolic process                     | 59  | 3  |
| GO:0007041//lysosomal transport                                               | 36  | 2  |
| GO:0021766//hippocampus development                                           | 36  | 2  |
| GO:0032092//positive regulation of protein binding                            | 36  | 2  |
| GO:0033143//regulation of intracellular steroid hormone receptor signaling p  | 36  | 2  |
| GO:0060402//calcium ion transport into cytosol                                | 36  | 2  |

|                                                                                       |     |    |
|---------------------------------------------------------------------------------------|-----|----|
| GO:0097306//cellular response to alcohol                                              | 36  | 2  |
| GO:2001022//positive regulation of response to DNA damage stimulus                    | 36  | 2  |
| GO:0030522//intracellular receptor signaling pathway                                  | 130 | 6  |
| GO:0002460//adaptive immune response based on somatic recombination                   | 154 | 7  |
| GO:0002446//neutrophil mediated immunity                                              | 14  | 1  |
| GO:0006067//ethanol metabolic process                                                 | 14  | 1  |
| GO:0006662//glycerol ether metabolic process                                          | 14  | 1  |
| GO:0008272//sulfate transport                                                         | 14  | 1  |
| GO:0009070//serine family amino acid biosynthetic process                             | 14  | 1  |
| GO:0009251//glucan catabolic process                                                  | 14  | 1  |
| GO:0010692//regulation of alkaline phosphatase activity                               | 14  | 1  |
| GO:0010800//positive regulation of peptidyl-threonine phosphorylation                 | 14  | 1  |
| GO:0014912//negative regulation of smooth muscle cell migration                       | 14  | 1  |
| GO:0015175//neutral amino acid transmembrane transporter activity                     | 14  | 1  |
| GO:0015697//quaternary ammonium group transport                                       | 14  | 1  |
| GO:0016572//histone phosphorylation                                                   | 14  | 1  |
| GO:0021544//subpallium development                                                    | 14  | 1  |
| GO:0030866//cortical actin cytoskeleton organization                                  | 14  | 1  |
| GO:0031112//positive regulation of microtubule polymerization or depolymerization     | 14  | 1  |
| GO:0031652//positive regulation of heat generation                                    | 14  | 1  |
| GO:0032095//regulation of response to food                                            | 14  | 1  |
| GO:0032401//establishment of melanosome localization                                  | 14  | 1  |
| GO:0032781//positive regulation of ATPase activity                                    | 14  | 1  |
| GO:0035249//synaptic transmission, glutamatergic                                      | 14  | 1  |
| GO:0035304//regulation of protein dephosphorylation                                   | 14  | 1  |
| GO:0042089//cytokine biosynthetic process                                             | 14  | 1  |
| GO:0042136//neurotransmitter biosynthetic process                                     | 14  | 1  |
| GO:0042403//thyroid hormone metabolic process                                         | 14  | 1  |
| GO:0044247//cellular polysaccharide catabolic process                                 | 14  | 1  |
| GO:0045824//negative regulation of innate immune response                             | 14  | 1  |
| GO:0048753//pigment granule organization                                              | 14  | 1  |
| GO:0051798//positive regulation of hair follicle development                          | 14  | 1  |
| GO:0051956//negative regulation of amino acid transport                               | 14  | 1  |
| GO:0060317//cardiac epithelial to mesenchymal transition                              | 14  | 1  |
| GO:0060972//left/right pattern formation                                              | 14  | 1  |
| GO:0070076//histone lysine demethylation                                              | 14  | 1  |
| GO:0070232//regulation of T cell apoptotic process                                    | 14  | 1  |
| GO:0072170//metanephric tubule development                                            | 14  | 1  |
| GO:0090026//positive regulation of monocyte chemotaxis                                | 14  | 1  |
| GO:0090181//regulation of cholesterol metabolic process                               | 14  | 1  |
| GO:2000178//negative regulation of neural precursor cell proliferation                | 14  | 1  |
| GO:NM_0005                                                                            | 14  | 1  |
| GO:0043244//regulation of protein complex disassembly                                 | 60  | 3  |
| GO:0002377//immunoglobulin production                                                 | 37  | 2  |
| GO:0007193//adenylate cyclase-inhibiting G-protein coupled receptor signaling pathway | 37  | 2  |
| GO:0042733//embryonic digit morphogenesis                                             | 37  | 2  |
| GO:0045071//negative regulation of viral genome replication                           | 37  | 2  |
| GO:0048066//developmental pigmentation                                                | 37  | 2  |
| GO:0050885//neuromuscular process controlling balance                                 | 37  | 2  |
| GO:0060401//cytosolic calcium ion transport                                           | 37  | 2  |
| GO:0071482//cellular response to light stimulus                                       | 37  | 2  |
| GO:0072522//purine-containing compound biosynthetic process                           | 108 | 5  |
| GO:0007631//feeding behavior                                                          | 61  | 3  |
| GO:0030218//erythrocyte differentiation                                               | 61  | 3  |
| GO:0006486//protein glycosylation                                                     | 229 | 10 |
| GO:0043413//macromolecule glycosylation                                               | 229 | 10 |
| GO:0016032//viral process                                                             | 423 | 18 |
| GO:0019637//organophosphate metabolic process                                         | 934 | 39 |

|                                                                             |     |   |
|-----------------------------------------------------------------------------|-----|---|
| GO:0006816//calcium ion transport                                           | 157 | 7 |
| GO:0008652//cellular amino acid biosynthetic process                        | 109 | 5 |
| GO:0007257//activation of JUN kinase activity                               | 38  | 2 |
| GO:0030521//androgen receptor signaling pathway                             | 38  | 2 |
| GO:0038032//termination of G-protein coupled receptor signaling pathway     | 38  | 2 |
| GO:0001711//endodermal cell fate commitment                                 | 15  | 1 |
| GO:0001832//blastocyst growth                                               | 15  | 1 |
| GO:0001976//neurological system process involved in regulation of systemi   | 15  | 1 |
| GO:0002029//desensitization of G-protein coupled receptor protein signaling | 15  | 1 |
| GO:0002052//positive regulation of neuroblast proliferation                 | 15  | 1 |
| GO:0002230//positive regulation of defense response to virus by host        | 15  | 1 |
| GO:0002707//negative regulation of lymphocyte mediated immunity             | 15  | 1 |
| GO:0006825//copper ion transport                                            | 15  | 1 |
| GO:0007026//negative regulation of microtubule depolymerization             | 15  | 1 |
| GO:0007045//cell-substrate adherens junction assembly                       | 15  | 1 |
| GO:0008105//asymmetric protein localization                                 | 15  | 1 |
| GO:0009713//catechol-containing compound biosynthetic process               | 15  | 1 |
| GO:0015813//L-glutamate transport                                           | 15  | 1 |
| GO:0015949//nucleobase-containing small molecule interconversion            | 15  | 1 |
| GO:0019321//pentose metabolic process                                       | 15  | 1 |
| GO:0022401//negative adaptation of signaling pathway                        | 15  | 1 |
| GO:0030316//osteoclast differentiation                                      | 15  | 1 |
| GO:0031103//axon regeneration                                               | 15  | 1 |
| GO:0031113//regulation of microtubule polymerization                        | 15  | 1 |
| GO:0033146//regulation of intracellular estrogen receptor signaling pathway | 15  | 1 |
| GO:0033574//response to testosterone stimulus                               | 15  | 1 |
| GO:0035066//positive regulation of histone acetylation                      | 15  | 1 |
| GO:0042119//neutrophil activation                                           | 15  | 1 |
| GO:0042423//catecholamine biosynthetic process                              | 15  | 1 |
| GO:0045214//sarcomere organization                                          | 15  | 1 |
| GO:0045648//positive regulation of erythrocyte differentiation              | 15  | 1 |
| GO:0046329//negative regulation of JNK cascade                              | 15  | 1 |
| GO:0046939//nucleotide phosphorylation                                      | 15  | 1 |
| GO:0048041//focal adhesion assembly                                         | 15  | 1 |
| GO:0048251//elastic fiber assembly                                          | 15  | 1 |
| GO:0048339//paraxial mesoderm development                                   | 15  | 1 |
| GO:0048384//retinoic acid receptor signaling pathway                        | 15  | 1 |
| GO:0051647//nucleus localization                                            | 15  | 1 |
| GO:0051905//establishment of pigment granule localization                   | 15  | 1 |
| GO:0051930//regulation of sensory perception of pain                        | 15  | 1 |
| GO:0051931//regulation of sensory perception                                | 15  | 1 |
| GO:0060004//reflex                                                          | 15  | 1 |
| GO:0070875//positive regulation of glycogen metabolic process               | 15  | 1 |
| GO:0072207//metanephric epithelium development                              | 15  | 1 |
| GO:1901985//positive regulation of protein acetylation                      | 15  | 1 |
| GO:2000008//regulation of protein localization to cell surface              | 15  | 1 |
| GO:2000249//regulation of actin cytoskeleton reorganization                 | 15  | 1 |
| GO:2000758//positive regulation of peptidyl-lysine acetylation              | 15  | 1 |
| GO:0030804//positive regulation of cyclic nucleotide biosynthetic process   | 62  | 3 |
| GO:0007163//establishment or maintenance of cell polarity                   | 86  | 4 |
| GO:0042455//ribonucleoside biosynthetic process                             | 86  | 4 |
| GO:0043393//regulation of protein binding                                   | 86  | 4 |
| GO:0002521//leukocyte differentiation                                       | 208 | 9 |
| GO:0006606//protein import into nucleus                                     | 87  | 4 |
| GO:0009411//response to UV                                                  | 87  | 4 |
| GO:0015698//inorganic anion transport                                       | 87  | 4 |
| GO:0044744//protein targeting to nucleus                                    | 87  | 4 |
| GO:2001233//regulation of apoptotic signaling pathway                       | 87  | 4 |

|                                                                            |      |    |
|----------------------------------------------------------------------------|------|----|
| GO:0001755//neural crest cell migration                                    | 39   | 2  |
| GO:0051017//actin filament bundle assembly                                 | 39   | 2  |
| GO:0061572//actin filament bundle organization                             | 39   | 2  |
| GO:0070936//protein K48-linked ubiquitination                              | 39   | 2  |
| GO:0022037//metencephalon development                                      | 63   | 3  |
| GO:0051100//negative regulation of binding                                 | 63   | 3  |
| GO:0070085//glycosylation                                                  | 233  | 10 |
| GO:0003674//molecular_function                                             | 1016 | 42 |
| GO:0022900//electron transport chain                                       | 112  | 5  |
| GO:0007265//Ras protein signal transduction                                | 88   | 4  |
| GO:0000272//polysaccharide catabolic process                               | 16   | 1  |
| GO:0001836//release of cytochrome c from mitochondria                      | 16   | 1  |
| GO:0002483//antigen processing and presentation of endogenous peptide a    | 16   | 1  |
| GO:0006415//translational termination                                      | 16   | 1  |
| GO:0007620//copulation                                                     | 16   | 1  |
| GO:0009312//oligosaccharide biosynthetic process                           | 16   | 1  |
| GO:0010823//negative regulation of mitochondrion organization              | 16   | 1  |
| GO:0015669//gas transport                                                  | 16   | 1  |
| GO:0016577//histone demethylation                                          | 16   | 1  |
| GO:0019885//antigen processing and presentation of endogenous peptide a    | 16   | 1  |
| GO:0023058//adaptation of signaling pathway                                | 16   | 1  |
| GO:0030865//cortical cytoskeleton organization                             | 16   | 1  |
| GO:0032098//regulation of appetite                                         | 16   | 1  |
| GO:0034199//activation of protein kinase A activity                        | 16   | 1  |
| GO:0034375//high-density lipoprotein particle remodeling                   | 16   | 1  |
| GO:0035883//enteroendocrine cell differentiation                           | 16   | 1  |
| GO:0035987//endodermal cell differentiation                                | 16   | 1  |
| GO:0042572//retinol metabolic process                                      | 16   | 1  |
| GO:0044058//regulation of digestive system process                         | 16   | 1  |
| GO:0045026//plasma membrane fusion                                         | 16   | 1  |
| GO:0045907//positive regulation of vasoconstriction                        | 16   | 1  |
| GO:0051491//positive regulation of filopodium assembly                     | 16   | 1  |
| GO:0051881//regulation of mitochondrial membrane potential                 | 16   | 1  |
| GO:0051962//positive regulation of nervous system development              | 16   | 1  |
| GO:0051965//positive regulation of synapse assembly                        | 16   | 1  |
| GO:0060314//regulation of ryanodine-sensitive calcium-release channel act  | 16   | 1  |
| GO:0060395//SMAD protein signal transduction                               | 16   | 1  |
| GO:0070229//negative regulation of lymphocyte apoptotic process            | 16   | 1  |
| GO:0070371//ERK1 and ERK2 cascade                                          | 16   | 1  |
| GO:0072132//mesenchyme morphogenesis                                       | 16   | 1  |
| GO:0090025//regulation of monocyte chemotaxis                              | 16   | 1  |
| GO:0090342//regulation of cell aging                                       | 16   | 1  |
| GO:2001239//regulation of extrinsic apoptotic signaling pathway in absence | 16   | 1  |
| GO:0031345//negative regulation of cell projection organization            | 64   | 3  |
| GO:0045639//positive regulation of myeloid cell differentiation            | 64   | 3  |
| GO:0001558//regulation of cell growth                                      | 235  | 10 |
| GO:0046637//regulation of alpha-beta T cell differentiation                | 40   | 2  |
| GO:0006520//cellular amino acid metabolic process                          | 407  | 17 |
| GO:0051170//nuclear import                                                 | 89   | 4  |
| GO:2000045//regulation of G1/S transition of mitotic cell cycle            | 89   | 4  |
| GO:0007254//JNK cascade                                                    | 65   | 3  |
| GO:0045582//positive regulation of T cell differentiation                  | 65   | 3  |
| GO:0006200//ATP catabolic process                                          | 139  | 6  |
| GO:0018393//internal peptidyl-lysine acetylation                           | 90   | 4  |
| GO:0031647//regulation of protein stability                                | 90   | 4  |
| GO:0000186//activation of MAPKK activity                                   | 41   | 2  |
| GO:0007034//vacuolar transport                                             | 41   | 2  |
| GO:0007416//synapse assembly                                               | 41   | 2  |

|                                                                            |     |    |
|----------------------------------------------------------------------------|-----|----|
| GO:0023021//termination of signal transduction                             | 41  | 2  |
| GO:0034134//toll-like receptor 2 signaling pathway                         | 41  | 2  |
| GO:0002250//adaptive immune response                                       | 164 | 7  |
| GO:0006917//induction of apoptosis                                         | 164 | 7  |
| GO:0000718//nucleotide-excision repair, DNA damage removal                 | 17  | 1  |
| GO:0001782//B cell homeostasis                                             | 17  | 1  |
| GO:0001945//lymph vessel development                                       | 17  | 1  |
| GO:0002704//negative regulation of leukocyte mediated immunity             | 17  | 1  |
| GO:0002823//negative regulation of adaptive immune response based on s     | 17  | 1  |
| GO:0004889//acetylcholine-activated cation-selective channel activity      | 17  | 1  |
| GO:0006595//polyamine metabolic process                                    | 17  | 1  |
| GO:0007271//synaptic transmission, cholinergic                             | 17  | 1  |
| GO:0007616//long-term memory                                               | 17  | 1  |
| GO:0009208//pyrimidine ribonucleoside triphosphate metabolic process       | 17  | 1  |
| GO:0010824//regulation of centrosome duplication                           | 17  | 1  |
| GO:0014065//phosphatidylinositol 3-kinase cascade                          | 17  | 1  |
| GO:0015269//calcium-activated potassium channel activity                   | 17  | 1  |
| GO:0015299//solute:hydrogen antiporter activity                            | 17  | 1  |
| GO:0015800//acidic amino acid transport                                    | 17  | 1  |
| GO:0031000//response to caffeine                                           | 17  | 1  |
| GO:0031114//regulation of microtubule depolymerization                     | 17  | 1  |
| GO:0032105//negative regulation of response to extracellular stimulus      | 17  | 1  |
| GO:0032108//negative regulation of response to nutrient levels             | 17  | 1  |
| GO:0032365//intracellular lipid transport                                  | 17  | 1  |
| GO:0032400//melanosome localization                                        | 17  | 1  |
| GO:0043001//Golgi to plasma membrane protein transport                     | 17  | 1  |
| GO:0043206//extracellular fibril organization                              | 17  | 1  |
| GO:0043500//muscle adaptation                                              | 17  | 1  |
| GO:0043537//negative regulation of blood vessel endothelial cell migration | 17  | 1  |
| GO:0044089//positive regulation of cellular component biogenesis           | 17  | 1  |
| GO:0044349//DNA excision                                                   | 17  | 1  |
| GO:0045080//positive regulation of chemokine biosynthetic process          | 17  | 1  |
| GO:0045930//negative regulation of mitotic cell cycle                      | 17  | 1  |
| GO:0050891//multicellular organismal water homeostasis                     | 17  | 1  |
| GO:0051205//protein insertion into membrane                                | 17  | 1  |
| GO:0051797//regulation of hair follicle development                        | 17  | 1  |
| GO:0060334//regulation of interferon-gamma-mediated signaling pathway      | 17  | 1  |
| GO:0061384//heart trabecula morphogenesis                                  | 17  | 1  |
| GO:0070536//protein K63-linked deubiquitination                            | 17  | 1  |
| GO:0070997//neuron death                                                   | 17  | 1  |
| GO:0071675//regulation of mononuclear cell migration                       | 17  | 1  |
| GO:0097435//fibril organization                                            | 17  | 1  |
| GO:1900449//regulation of glutamate receptor signaling pathway             | 17  | 1  |
| GO:1901655//cellular response to ketone                                    | 17  | 1  |
| GO:2000406//positive regulation of T cell migration                        | 17  | 1  |
| GO:0012502//induction of programmed cell death                             | 165 | 7  |
| GO:0018394//peptidyl-lysine acetylation                                    | 91  | 4  |
| GO:0007264//small GTPase mediated signal transduction                      | 264 | 11 |
| GO:0051259//protein oligomerization                                        | 289 | 12 |
| GO:0000096//sulfur amino acid metabolic process                            | 42  | 2  |
| GO:0006220//pyrimidine nucleotide metabolic process                        | 42  | 2  |
| GO:0015293//symporter activity                                             | 42  | 2  |
| GO:0015294//solute:cation symporter activity                               | 42  | 2  |
| GO:0035264//multicellular organism growth                                  | 42  | 2  |
| GO:0045670//regulation of osteoclast differentiation                       | 42  | 2  |
| GO:0030801//positive regulation of cyclic nucleotide metabolic process     | 67  | 3  |
| GO:1902275//regulation of chromatin organization                           | 67  | 3  |
| GO:0010212//response to ionizing radiation                                 | 92  | 4  |



|                                                                             |     |    |
|-----------------------------------------------------------------------------|-----|----|
| GO:0045927//positive regulation of growth                                   | 117 | 5  |
| GO:0043603//cellular amide metabolic process                                | 142 | 6  |
| GO:0016044//cellular membrane organization                                  | 365 | 15 |
| GO:0003071//renal system process involved in regulation of systemic arteri  | 18  | 1  |
| GO:0006482//protein demethylation                                           | 18  | 1  |
| GO:0006611//protein export from nucleus                                     | 18  | 1  |
| GO:0008089//anterograde axon cargo transport                                | 18  | 1  |
| GO:0008214//protein dealkylation                                            | 18  | 1  |
| GO:0009074//aromatic amino acid family catabolic process                    | 18  | 1  |
| GO:0009303//rRNA transcription                                              | 18  | 1  |
| GO:0014821//phasic smooth muscle contraction                                | 18  | 1  |
| GO:0016024//CDP-diacylglycerol biosynthetic process                         | 18  | 1  |
| GO:0019883//antigen processing and presentation of endogenous antigen       | 18  | 1  |
| GO:0021696//cerebellar cortex morphogenesis                                 | 18  | 1  |
| GO:0030194//positive regulation of blood coagulation                        | 18  | 1  |
| GO:0032007//negative regulation of TOR signaling cascade                    | 18  | 1  |
| GO:0042401//cellular biogenic amine biosynthetic process                    | 18  | 1  |
| GO:0042596//fear response                                                   | 18  | 1  |
| GO:0043491//protein kinase B signaling cascade                              | 18  | 1  |
| GO:0043516//regulation of DNA damage response, signal transduction by p     | 18  | 1  |
| GO:0046325//negative regulation of glucose import                           | 18  | 1  |
| GO:0046636//negative regulation of alpha-beta T cell activation             | 18  | 1  |
| GO:0048484//enteric nervous system development                              | 18  | 1  |
| GO:0050927//positive regulation of positive chemotaxis                      | 18  | 1  |
| GO:0051085//chaperone mediated protein folding requiring cofactor           | 18  | 1  |
| GO:0051875//pigment granule localization                                    | 18  | 1  |
| GO:0052652//cyclic purine nucleotide metabolic process                      | 18  | 1  |
| GO:0055012//ventricular cardiac muscle cell differentiation                 | 18  | 1  |
| GO:0060330//regulation of response to interferon-gamma                      | 18  | 1  |
| GO:0085029//extracellular matrix assembly                                   | 18  | 1  |
| GO:0090003//regulation of establishment of protein localization to plasma m | 18  | 1  |
| GO:1900048//positive regulation of hemostasis                               | 18  | 1  |
| GO:1901796//regulation of signal transduction by p53 class mediator         | 18  | 1  |
| GO:1902305//regulation of sodium ion transmembrane transport                | 18  | 1  |
| GO:2000649//regulation of sodium ion transmembrane transporter activity     | 18  | 1  |
| GO:0006885//regulation of pH                                                | 43  | 2  |
| GO:0007159//leukocyte cell-cell adhesion                                    | 43  | 2  |
| GO:0030048//actin filament-based movement                                   | 43  | 2  |
| GO:0034162//toll-like receptor 9 signaling pathway                          | 43  | 2  |
| GO:0009163//nucleoside biosynthetic process                                 | 93  | 4  |
| GO:0006470//protein dephosphorylation                                       | 144 | 6  |
| GO:1901565//organonitrogen compound catabolic process                       | 616 | 25 |
| GO:0006475//internal protein amino acid acetylation                         | 94  | 4  |
| GO:0033044//regulation of chromosome organization                           | 94  | 4  |
| GO:0035335//peptidyl-tyrosine dephosphorylation                             | 94  | 4  |
| GO:0055076//transition metal ion homeostasis                                | 94  | 4  |
| GO:1901659//glycosyl compound biosynthetic process                          | 94  | 4  |
| GO:0003824//catalytic activity                                              | 294 | 12 |
| GO:0006941//striated muscle contraction                                     | 44  | 2  |
| GO:0032012//regulation of ARF protein signal transduction                   | 44  | 2  |
| GO:0046635//positive regulation of alpha-beta T cell activation             | 44  | 2  |
| GO:0060443//mammary gland morphogenesis                                     | 44  | 2  |
| GO:0030098//lymphocyte differentiation                                      | 145 | 6  |
| GO:0043543//protein acylation                                               | 120 | 5  |
| GO:0061024//membrane organization                                           | 370 | 15 |
| GO:0030217//T cell differentiation                                          | 95  | 4  |
| GO:0000188//inactivation of MAPK activity                                   | 19  | 1  |
| GO:0006906//vesicle fusion                                                  | 19  | 1  |

|                                                                              |     |    |
|------------------------------------------------------------------------------|-----|----|
| GO:0007405//neuroblast proliferation                                         | 19  | 1  |
| GO:0009309//amine biosynthetic process                                       | 19  | 1  |
| GO:0015491//cation:cation antiporter activity                                | 19  | 1  |
| GO:0019080//viral genome expression                                          | 19  | 1  |
| GO:0033081//regulation of T cell differentiation in thymus                   | 19  | 1  |
| GO:0035162//embryonic hemopoiesis                                            | 19  | 1  |
| GO:0036230//granulocyte activation                                           | 19  | 1  |
| GO:0043462//regulation of ATPase activity                                    | 19  | 1  |
| GO:0043567//regulation of insulin-like growth factor receptor signaling path | 19  | 1  |
| GO:0045577//regulation of B cell differentiation                             | 19  | 1  |
| GO:0046341//CDP-diacylglycerol metabolic process                             | 19  | 1  |
| GO:0046627//negative regulation of insulin receptor signaling pathway        | 19  | 1  |
| GO:0048665//neuron fate specification                                        | 19  | 1  |
| GO:0050926//regulation of positive chemotaxis                                | 19  | 1  |
| GO:0051023//regulation of immunoglobulin secretion                           | 19  | 1  |
| GO:0060397//JAK-STAT cascade involved in growth hormone signaling pat        | 19  | 1  |
| GO:0060765//regulation of androgen receptor signaling pathway                | 19  | 1  |
| GO:0072337//modified amino acid transport                                    | 19  | 1  |
| GO:0072378//blood coagulation, fibrin clot formation                         | 19  | 1  |
| GO:0090200//positive regulation of release of cytochrome c from mitochonc    | 19  | 1  |
| GO:0030307//positive regulation of cell growth                               | 70  | 3  |
| GO:0046164//alcohol catabolic process                                        | 45  | 2  |
| GO:0046889//positive regulation of lipid biosynthetic process                | 45  | 2  |
| GO:0050994//regulation of lipid catabolic process                            | 45  | 2  |
| GO:0070301//cellular response to hydrogen peroxide                           | 45  | 2  |
| GO:0044403//symbiosis, encompassing mutualism through parasitism             | 447 | 18 |
| GO:0044419//interspecies interaction between organisms                       | 447 | 18 |
| GO:0050868//negative regulation of T cell activation                         | 71  | 3  |
| GO:0030534//adult behavior                                                   | 97  | 4  |
| GO:0032886//regulation of microtubule-based process                          | 97  | 4  |
| GO:0007243//intracellular protein kinase cascade                             | 274 | 11 |
| GO:0001947//heart looping                                                    | 46  | 2  |
| GO:0032984//macromolecular complex disassembly                               | 46  | 2  |
| GO:0048524//positive regulation of viral process                             | 46  | 2  |
| GO:0051781//positive regulation of cell division                             | 46  | 2  |
| GO:0070661//leukocyte proliferation                                          | 46  | 2  |
| GO:0000726//non-recombinational repair                                       | 20  | 1  |
| GO:0002825//regulation of T-helper 1 type immune response                    | 20  | 1  |
| GO:0003209//cardiac atrium morphogenesis                                     | 20  | 1  |
| GO:0006501//C-terminal protein lipidation                                    | 20  | 1  |
| GO:0006904//vesicle docking involved in exocytosis                           | 20  | 1  |
| GO:0007098//centrosome cycle                                                 | 20  | 1  |
| GO:0007530//sex determination                                                | 20  | 1  |
| GO:0008227//G-protein coupled amine receptor activity                        | 20  | 1  |
| GO:0009067//aspartate family amino acid biosynthetic process                 | 20  | 1  |
| GO:0009127//purine nucleoside monophosphate biosynthetic process             | 20  | 1  |
| GO:0009168//purine ribonucleoside monophosphate biosynthetic process         | 20  | 1  |
| GO:0009395//phospholipid catabolic process                                   | 20  | 1  |
| GO:0015296//anion:cation symporter activity                                  | 20  | 1  |
| GO:0018200//peptidyl-glutamic acid modification                              | 20  | 1  |
| GO:0030032//lamellipodium assembly                                           | 20  | 1  |
| GO:0031111//negative regulation of microtubule polymerization or depolyme    | 20  | 1  |
| GO:0031664//regulation of lipopolysaccharide-mediated signaling pathway      | 20  | 1  |
| GO:0034446//substrate adhesion-dependent cell spreading                      | 20  | 1  |
| GO:0042634//regulation of hair cycle                                         | 20  | 1  |
| GO:0043299//leukocyte degranulation                                          | 20  | 1  |
| GO:0043691//reverse cholesterol transport                                    | 20  | 1  |
| GO:0046839//phospholipid dephosphorylation                                   | 20  | 1  |

|                                                                                |      |     |
|--------------------------------------------------------------------------------|------|-----|
| GO:0048536//spleen development                                                 | 20   | 1   |
| GO:0050820//positive regulation of coagulation                                 | 20   | 1   |
| GO:0051044//positive regulation of membrane protein ectodomain proteolysis     | 20   | 1   |
| GO:0060444//branching involved in mammary gland duct morphogenesis             | 20   | 1   |
| GO:0002700//regulation of production of molecular mediator of immune response  | 72   | 3   |
| GO:0097193//intrinsic apoptotic signaling pathway                              | 98   | 4   |
| GO:0090407//organophosphate biosynthetic process                               | 376  | 15  |
| GO:0070838//divalent metal ion transport                                       | 175  | 7   |
| GO:0000041//transition metal ion transport                                     | 73   | 3   |
| GO:0038093//Fc receptor signaling pathway                                      | 73   | 3   |
| GO:0043473//pigmentation                                                       | 73   | 3   |
| GO:0007492//endoderm development                                               | 47   | 2   |
| GO:0046620//regulation of organ growth                                         | 47   | 2   |
| GO:0050830//defense response to Gram-positive bacterium                        | 47   | 2   |
| GO:0060491//regulation of cell projection assembly                             | 47   | 2   |
| GO:0044267//cellular protein metabolic process                                 | 2591 | 104 |
| GO:1901990//regulation of mitotic cell cycle phase transition                  | 151  | 6   |
| GO:0002676//regulation of chronic inflammatory response                        | 21   | 1   |
| GO:0006071//glycerol metabolic process                                         | 21   | 1   |
| GO:0006893//Golgi to plasma membrane transport                                 | 21   | 1   |
| GO:0006998//nuclear envelope organization                                      | 21   | 1   |
| GO:0008038//neuron recognition                                                 | 21   | 1   |
| GO:0009190//cyclic nucleotide biosynthetic process                             | 21   | 1   |
| GO:0010799//regulation of peptidyl-threonine phosphorylation                   | 21   | 1   |
| GO:0010829//negative regulation of glucose transport                           | 21   | 1   |
| GO:0021846//cell proliferation in forebrain                                    | 21   | 1   |
| GO:0032757//positive regulation of interleukin-8 production                    | 21   | 1   |
| GO:0032891//negative regulation of organic acid transport                      | 21   | 1   |
| GO:0034377//plasma lipoprotein particle assembly                               | 21   | 1   |
| GO:0042551//neuron maturation                                                  | 21   | 1   |
| GO:0043243//positive regulation of protein complex disassembly                 | 21   | 1   |
| GO:0043330//response to exogenous dsRNA                                        | 21   | 1   |
| GO:0046605//regulation of centrosome cycle                                     | 21   | 1   |
| GO:0060048//cardiac muscle contraction                                         | 21   | 1   |
| GO:0090398//cellular senescence                                                | 21   | 1   |
| GO:1900077//negative regulation of cellular response to insulin stimulus       | 21   | 1   |
| GO:1901657//glycosyl compound metabolic process                                | 505  | 20  |
| GO:0051302//regulation of cell division                                        | 74   | 3   |
| GO:0072329//monocarboxylic acid catabolic process                              | 74   | 3   |
| GO:0050810//regulation of steroid biosynthetic process                         | 48   | 2   |
| GO:0061371//determination of heart left/right asymmetry                        | 48   | 2   |
| GO:0072511//divalent inorganic cation transport                                | 178  | 7   |
| GO:0043170//macromolecule metabolic process                                    | 4724 | 190 |
| GO:0006814//sodium ion transport                                               | 101  | 4   |
| GO:0031349//positive regulation of defense response                            | 204  | 8   |
| GO:0044237//cellular metabolic process                                         | 6082 | 245 |
| GO:1901361//organic cyclic compound catabolic process                          | 635  | 25  |
| GO:0002718//regulation of cytokine production involved in immune response      | 49   | 2   |
| GO:0007589//body fluid secretion                                               | 49   | 2   |
| GO:0017148//negative regulation of translation                                 | 49   | 2   |
| GO:0019362//pyridine nucleotide metabolic process                              | 49   | 2   |
| GO:0043401//steroid hormone mediated signaling pathway                         | 49   | 2   |
| GO:0046496//nicotinamide nucleotide metabolic process                          | 49   | 2   |
| GO:0048489//synaptic vesicle transport                                         | 49   | 2   |
| GO:0097480//establishment of synaptic vesicle localization                     | 49   | 2   |
| GO:0002011//morphogenesis of an epithelial sheet                               | 22   | 1   |
| GO:0002863//positive regulation of inflammatory response to antigenic stimulus | 22   | 1   |
| GO:0003230//cardiac atrium development                                         | 22   | 1   |

|                                                                             |     |    |
|-----------------------------------------------------------------------------|-----|----|
| GO:0005227//calcium activated cation channel activity                       | 22  | 1  |
| GO:0006509//membrane protein ectodomain proteolysis                         | 22  | 1  |
| GO:0007398//ectoderm development                                            | 22  | 1  |
| GO:0009225//nucleotide-sugar metabolic process                              | 22  | 1  |
| GO:0010043//response to zinc ion                                            | 22  | 1  |
| GO:0018904//ether metabolic process                                         | 22  | 1  |
| GO:0019400//alditol metabolic process                                       | 22  | 1  |
| GO:0021522//spinal cord motor neuron differentiation                        | 22  | 1  |
| GO:0021772//olfactory bulb development                                      | 22  | 1  |
| GO:0030261//chromosome condensation                                         | 22  | 1  |
| GO:0030262//apoptotic nuclear changes                                       | 22  | 1  |
| GO:0032369//negative regulation of lipid transport                          | 22  | 1  |
| GO:0040020//regulation of meiosis                                           | 22  | 1  |
| GO:0042133//neurotransmitter metabolic process                              | 22  | 1  |
| GO:0042992//negative regulation of transcription factor import into nucleus | 22  | 1  |
| GO:0043030//regulation of macrophage activation                             | 22  | 1  |
| GO:0044275//cellular carbohydrate catabolic process                         | 22  | 1  |
| GO:0045124//regulation of bone resorption                                   | 22  | 1  |
| GO:0045132//meiotic chromosome segregation                                  | 22  | 1  |
| GO:0045581//negative regulation of T cell differentiation                   | 22  | 1  |
| GO:0046173//polyol biosynthetic process                                     | 22  | 1  |
| GO:0048278//vesicle docking                                                 | 22  | 1  |
| GO:0051181//cofactor transport                                              | 22  | 1  |
| GO:0051489//regulation of filopodium assembly                               | 22  | 1  |
| GO:0060396//growth hormone receptor signaling pathway                       | 22  | 1  |
| GO:0065005//protein-lipid complex assembly                                  | 22  | 1  |
| GO:0072525//pyridine-containing compound biosynthetic process               | 22  | 1  |
| GO:0002703//regulation of leukocyte mediated immunity                       | 128 | 5  |
| GO:0002822//regulation of adaptive immune response based on somatic re      | 102 | 4  |
| GO:0015085//calcium ion transmembrane transporter activity                  | 102 | 4  |
| GO:0042035//regulation of cytokine biosynthetic process                     | 102 | 4  |
| GO:0045621//positive regulation of lymphocyte differentiation               | 76  | 3  |
| GO:0051648//vesicle localization                                            | 103 | 4  |
| GO:0019693//ribose phosphate metabolic process                              | 487 | 19 |
| GO:0032677//regulation of interleukin-8 production                          | 50  | 2  |
| GO:0033077//T cell differentiation in thymus                                | 50  | 2  |
| GO:0048525//negative regulation of viral process                            | 50  | 2  |
| GO:0002761//regulation of myeloid leukocyte differentiation                 | 77  | 3  |
| GO:0043900//regulation of multi-organism process                            | 208 | 8  |
| GO:0006536//glutamate metabolic process                                     | 23  | 1  |
| GO:0009147//pyrimidine nucleoside triphosphate metabolic process            | 23  | 1  |
| GO:0009220//pyrimidine ribonucleotide biosynthetic process                  | 23  | 1  |
| GO:0021988//olfactory lobe development                                      | 23  | 1  |
| GO:0032480//negative regulation of type I interferon production             | 23  | 1  |
| GO:0042181//ketone biosynthetic process                                     | 23  | 1  |
| GO:0045646//regulation of erythrocyte differentiation                       | 23  | 1  |
| GO:0045739//positive regulation of DNA repair                               | 23  | 1  |
| GO:0046189//phenol-containing compound biosynthetic process                 | 23  | 1  |
| GO:0050995//negative regulation of lipid catabolic process                  | 23  | 1  |
| GO:0051668//localization within membrane                                    | 23  | 1  |
| GO:0051955//regulation of amino acid transport                              | 23  | 1  |
| GO:0051983//regulation of chromosome segregation                            | 23  | 1  |
| GO:0071377//cellular response to glucagon stimulus                          | 23  | 1  |
| GO:0071378//cellular response to growth hormone stimulus                    | 23  | 1  |
| GO:0009154//purine ribonucleotide catabolic process                         | 363 | 14 |
| GO:0043902//positive regulation of multi-organism process                   | 51  | 2  |
| GO:0000165//MAPK cascade                                                    | 131 | 5  |
| GO:0018205//peptidyl-lysine modification                                    | 131 | 5  |

|                                                                           |     |    |
|---------------------------------------------------------------------------|-----|----|
| GO:0009261//ribonucleotide catabolic process                              | 364 | 14 |
| GO:1901605//alpha-amino acid metabolic process                            | 210 | 8  |
| GO:0045185//maintenance of protein location                               | 79  | 3  |
| GO:0051592//response to calcium ion                                       | 79  | 3  |
| GO:0006879//cellular iron ion homeostasis                                 | 52  | 2  |
| GO:0050871//positive regulation of B cell activation                      | 52  | 2  |
| GO:0046390//ribose phosphate biosynthetic process                         | 106 | 4  |
| GO:0016311//dephosphorylation                                             | 185 | 7  |
| GO:0001914//regulation of T cell mediated cytotoxicity                    | 24  | 1  |
| GO:0001960//negative regulation of cytokine-mediated signaling pathway    | 24  | 1  |
| GO:0007194//negative regulation of adenylate cyclase activity             | 24  | 1  |
| GO:0009394//2-deoxyribonucleotide metabolic process                       | 24  | 1  |
| GO:0010259//multicellular organismal aging                                | 24  | 1  |
| GO:0010559//regulation of glycoprotein biosynthetic process               | 24  | 1  |
| GO:0016339//calcium-dependent cell-cell adhesion                          | 24  | 1  |
| GO:0018410//C-terminal protein amino acid modification                    | 24  | 1  |
| GO:0019370//leukotriene biosynthetic process                              | 24  | 1  |
| GO:0021587//cerebellum morphogenesis                                      | 24  | 1  |
| GO:0032414//positive regulation of ion transmembrane transporter activity | 24  | 1  |
| GO:0042220//response to cocaine                                           | 24  | 1  |
| GO:0043029//T cell homeostasis                                            | 24  | 1  |
| GO:0051445//regulation of meiotic cell cycle                              | 24  | 1  |
| GO:0002274//myeloid leukocyte activation                                  | 80  | 3  |
| GO:0009150//purine ribonucleotide metabolic process                       | 470 | 18 |
| GO:0018105//peptidyl-serine phosphorylation                               | 53  | 2  |
| GO:0031333//negative regulation of protein complex assembly               | 53  | 2  |
| GO:0042158//lipoprotein biosynthetic process                              | 53  | 2  |
| GO:0044728//DNA methylation or demethylation                              | 53  | 2  |
| GO:0045454//cell redox homeostasis                                        | 53  | 2  |
| GO:0050770//regulation of axonogenesis                                    | 81  | 3  |
| GO:0051403//stress-activated MAPK cascade                                 | 81  | 3  |
| GO:0001706//endoderm formation                                            | 25  | 1  |
| GO:0001710//mesodermal cell fate commitment                               | 25  | 1  |
| GO:0001961//positive regulation of cytokine-mediated signaling pathway    | 25  | 1  |
| GO:0002820//negative regulation of adaptive immune response               | 25  | 1  |
| GO:0008210//estrogen metabolic process                                    | 25  | 1  |
| GO:0010508//positive regulation of autophagy                              | 25  | 1  |
| GO:0015298//solute:cation antiporter activity                             | 25  | 1  |
| GO:0031280//negative regulation of cyclase activity                       | 25  | 1  |
| GO:0032715//negative regulation of interleukin-6 production               | 25  | 1  |
| GO:0050853//B cell receptor signaling pathway                             | 25  | 1  |
| GO:0050879//multicellular organismal movement                             | 25  | 1  |
| GO:0050881//musculoskeletal movement                                      | 25  | 1  |
| GO:0060047//heart contraction                                             | 25  | 1  |
| GO:0060760//positive regulation of response to cytokine stimulus          | 25  | 1  |
| GO:0061515//myeloid cell development                                      | 25  | 1  |
| GO:0071479//cellular response to ionizing radiation                       | 25  | 1  |
| GO:2000403//positive regulation of lymphocyte migration                   | 25  | 1  |
| GO:1901292//nucleoside phosphate catabolic process                        | 396 | 15 |
| GO:0021549//cerebellum development                                        | 54  | 2  |
| GO:0030183//B cell differentiation                                        | 54  | 2  |
| GO:0001959//regulation of cytokine-mediated signaling pathway             | 82  | 3  |
| GO:0007612//learning                                                      | 82  | 3  |
| GO:0031098//stress-activated protein kinase signaling cascade             | 82  | 3  |
| GO:0002832//negative regulation of response to biotic stimulus            | 26  | 1  |
| GO:0002922//positive regulation of humoral immune response                | 26  | 1  |
| GO:0003015//heart process                                                 | 26  | 1  |
| GO:0008333//endosome to lysosome transport                                | 26  | 1  |

|                                                                           |      |    |
|---------------------------------------------------------------------------|------|----|
| GO:0019692//deoxyribose phosphate metabolic process                       | 26   | 1  |
| GO:0021532//neural tube patterning                                        | 26   | 1  |
| GO:0030513//positive regulation of BMP signaling pathway                  | 26   | 1  |
| GO:0032856//activation of Ras GTPase activity                             | 26   | 1  |
| GO:0040018//positive regulation of multicellular organism growth          | 26   | 1  |
| GO:0042462//eye photoreceptor cell development                            | 26   | 1  |
| GO:0051350//negative regulation of lyase activity                         | 26   | 1  |
| GO:0060761//negative regulation of response to cytokine stimulus          | 26   | 1  |
| GO:0070534//protein K63-linked ubiquitination                             | 26   | 1  |
| GO:2001257//regulation of cation channel activity                         | 26   | 1  |
| GO:0030518//intracellular steroid hormone receptor signaling pathway      | 55   | 2  |
| GO:0071158//positive regulation of cell cycle arrest                      | 55   | 2  |
| GO:0032680//regulation of tumor necrosis factor production                | 83   | 3  |
| GO:0051641//cellular localization                                         | 1390 | 54 |
| GO:0006195//purine nucleotide catabolic process                           | 374  | 14 |
| GO:0051260//protein homooligomerization                                   | 191  | 7  |
| GO:0071822//protein complex subunit organization                          | 759  | 29 |
| GO:0002224//toll-like receptor signaling pathway                          | 84   | 3  |
| GO:0022904//respiratory electron transport chain                          | 84   | 3  |
| GO:0006308//DNA catabolic process                                         | 56   | 2  |
| GO:0006414//translational elongation                                      | 56   | 2  |
| GO:0006921//cellular component disassembly involved in execution phase    | 56   | 2  |
| GO:0002714//positive regulation of B cell mediated immunity               | 27   | 1  |
| GO:0002891//positive regulation of immunoglobulin mediated immune resp    | 27   | 1  |
| GO:0006312//mitotic recombination                                         | 27   | 1  |
| GO:0006614//SRP-dependent cotranslational protein targeting to membran    | 27   | 1  |
| GO:0009072//aromatic amino acid family metabolic process                  | 27   | 1  |
| GO:0009651//response to salt stress                                       | 27   | 1  |
| GO:0030318//melanocyte differentiation                                    | 27   | 1  |
| GO:0034109//homotypic cell-cell adhesion                                  | 27   | 1  |
| GO:0035872//nucleotide-binding domain, leucine rich repeat containing rec | 27   | 1  |
| GO:0048147//negative regulation of fibroblast proliferation               | 27   | 1  |
| GO:0046434//organophosphate catabolic process                             | 429  | 16 |
| GO:0055086//nucleobase-containing small molecule metabolic process        | 661  | 25 |
| GO:0008064//regulation of actin polymerization or depolymerization        | 85   | 3  |
| GO:0030832//regulation of actin filament length                           | 85   | 3  |
| GO:0060759//regulation of response to cytokine stimulus                   | 85   | 3  |
| GO:0072523//purine-containing compound catabolic process                  | 378  | 14 |
| GO:0005254//chloride channel activity                                     | 57   | 2  |
| GO:0006892//post-Golgi vesicle-mediated transport                         | 57   | 2  |
| GO:0051952//regulation of amine transport                                 | 57   | 2  |
| GO:0009259//ribonucleotide metabolic process                              | 483  | 18 |
| GO:0005262//calcium channel activity                                      | 86   | 3  |
| GO:0007218//neuropeptide signaling pathway                                | 86   | 3  |
| GO:0043901//negative regulation of multi-organism process                 | 86   | 3  |
| GO:0030308//negative regulation of cell growth                            | 114  | 4  |
| GO:1901991//negative regulation of mitotic cell cycle phase transition    | 114  | 4  |
| GO:1902107//positive regulation of leukocyte differentiation              | 114  | 4  |
| GO:0000080//G1 phase of mitotic cell cycle                                | 28   | 1  |
| GO:0002275//myeloid cell activation involved in immune response           | 28   | 1  |
| GO:0006613//cotranslational protein targeting to membrane                 | 28   | 1  |
| GO:0009262//deoxyribonucleotide metabolic process                         | 28   | 1  |
| GO:0014075//response to amine stimulus                                    | 28   | 1  |
| GO:0033762//response to glucagon stimulus                                 | 28   | 1  |
| GO:0046928//regulation of neurotransmitter secretion                      | 28   | 1  |
| GO:0050433//regulation of catecholamine secretion                         | 28   | 1  |
| GO:0070830//tight junction assembly                                       | 28   | 1  |
| GO:0051649//establishment of localization in cell                         | 1175 | 45 |

|                                                                            |     |    |
|----------------------------------------------------------------------------|-----|----|
| GO:0051258//protein polymerization                                         | 58  | 2  |
| GO:0055067//monovalent inorganic cation homeostasis                        | 58  | 2  |
| GO:0006461//protein complex assembly                                       | 615 | 23 |
| GO:0002819//regulation of adaptive immune response                         | 115 | 4  |
| GO:0017038//protein import                                                 | 115 | 4  |
| GO:0005253//anion channel activity                                         | 59  | 2  |
| GO:0045761//regulation of adenylate cyclase activity                       | 59  | 2  |
| GO:0006163//purine nucleotide metabolic process                            | 488 | 18 |
| GO:0031295//T cell costimulation                                           | 88  | 3  |
| GO:0042113//B cell activation                                              | 88  | 3  |
| GO:0045926//negative regulation of growth                                  | 171 | 6  |
| GO:0001578//microtubule bundle formation                                   | 29  | 1  |
| GO:0006221//pyrimidine nucleotide biosynthetic process                     | 29  | 1  |
| GO:0006506//GPI anchor biosynthetic process                                | 29  | 1  |
| GO:0006901//vesicle coating                                                | 29  | 1  |
| GO:0007190//activation of adenylate cyclase activity                       | 29  | 1  |
| GO:0017144//drug metabolic process                                         | 29  | 1  |
| GO:0017158//regulation of calcium ion-dependent exocytosis                 | 29  | 1  |
| GO:0021695//cerebellar cortex development                                  | 29  | 1  |
| GO:0021879//forebrain neuron differentiation                               | 29  | 1  |
| GO:0032312//regulation of ARF GTPase activity                              | 29  | 1  |
| GO:0042168//heme metabolic process                                         | 29  | 1  |
| GO:0042743//hydrogen peroxide metabolic process                            | 29  | 1  |
| GO:0045047//protein targeting to ER                                        | 29  | 1  |
| GO:0045777//positive regulation of blood pressure                          | 29  | 1  |
| GO:0050850//positive regulation of calcium-mediated signaling              | 29  | 1  |
| GO:0051279//regulation of release of sequestered calcium ion into cytosol  | 29  | 1  |
| GO:0051318//G1 phase                                                       | 29  | 1  |
| GO:2000107//negative regulation of leukocyte apoptotic process             | 29  | 1  |
| GO:0006366//transcription from RNA polymerase II promoter                  | 252 | 9  |
| GO:0034341//response to interferon-gamma                                   | 144 | 5  |
| GO:0009057//macromolecule catabolic process                                | 645 | 24 |
| GO:0070271//protein complex biogenesis                                     | 620 | 23 |
| GO:0006733//oxidoreduction coenzyme metabolic process                      | 60  | 2  |
| GO:0015078//hydrogen ion transmembrane transporter activity                | 60  | 2  |
| GO:0021510//spinal cord development                                        | 60  | 2  |
| GO:0031056//regulation of histone modification                             | 60  | 2  |
| GO:0046634//regulation of alpha-beta T cell activation                     | 60  | 2  |
| GO:0031294//lymphocyte costimulation                                       | 89  | 3  |
| GO:0005230//extracellular ligand-gated ion channel activity                | 30  | 1  |
| GO:0005231//excitatory extracellular ligand-gated ion channel activity     | 30  | 1  |
| GO:0007270//neuron-neuron synaptic transmission                            | 30  | 1  |
| GO:0031572//G2 DNA damage checkpoint                                       | 30  | 1  |
| GO:0032411//positive regulation of transporter activity                    | 30  | 1  |
| GO:0032653//regulation of interleukin-10 production                        | 30  | 1  |
| GO:0033059//cellular pigmentation                                          | 30  | 1  |
| GO:0033619//membrane protein proteolysis                                   | 30  | 1  |
| GO:0043331//response to dsRNA                                              | 30  | 1  |
| GO:0050999//regulation of nitric-oxide synthase activity                   | 30  | 1  |
| GO:0070228//regulation of lymphocyte apoptotic process                     | 30  | 1  |
| GO:0072599//establishment of protein localization to endoplasmic reticulum | 30  | 1  |
| GO:0000086//G2/M transition of mitotic cell cycle                          | 90  | 3  |
| GO:0006821//chloride transport                                             | 61  | 2  |
| GO:0032368//regulation of lipid transport                                  | 61  | 2  |
| GO:0034142//toll-like receptor 4 signaling pathway                         | 61  | 2  |
| GO:0050851//antigen receptor-mediated signaling pathway                    | 119 | 4  |
| GO:0016570//histone modification                                           | 229 | 8  |
| GO:0009166//nucleotide catabolic process                                   | 389 | 14 |

|                                                                          |      |    |
|--------------------------------------------------------------------------|------|----|
| GO:0042454//ribonucleoside catabolic process                             | 363  | 13 |
| GO:0072521//purine-containing compound metabolic process                 | 521  | 19 |
| GO:0009152//purine ribonucleotide biosynthetic process                   | 91   | 3  |
| GO:0051650//establishment of vesicle localization                        | 91   | 3  |
| GO:0015992//proton transport                                             | 62   | 2  |
| GO:0030330//DNA damage response, signal transduction by p53 class mec    | 62   | 2  |
| GO:0002861//regulation of inflammatory response to antigenic stimulus    | 31   | 1  |
| GO:0006505//GPI anchor metabolic process                                 | 31   | 1  |
| GO:0007595//lactation                                                    | 31   | 1  |
| GO:0008209//androgen metabolic process                                   | 31   | 1  |
| GO:0018107//peptidyl-threonine phosphorylation                           | 31   | 1  |
| GO:0032091//negative regulation of protein binding                       | 31   | 1  |
| GO:0032371//regulation of sterol transport                               | 31   | 1  |
| GO:0032374//regulation of cholesterol transport                          | 31   | 1  |
| GO:0035690//cellular response to drug                                    | 31   | 1  |
| GO:0035725//sodium ion transmembrane transport                           | 31   | 1  |
| GO:0051865//protein autoubiquitination                                   | 31   | 1  |
| GO:0050877//neurological system process                                  | 1396 | 53 |
| GO:0002221//pattern recognition receptor signaling pathway               | 92   | 3  |
| GO:0009119//ribonucleoside metabolic process                             | 471  | 17 |
| GO:0016569//covalent chromatin modification                              | 232  | 8  |
| GO:0006818//hydrogen transport                                           | 63   | 2  |
| GO:0008361//regulation of cell size                                      | 63   | 2  |
| GO:0019439//aromatic compound catabolic process                          | 604  | 22 |
| GO:0001754//eye photoreceptor cell differentiation                       | 32   | 1  |
| GO:0006900//membrane budding                                             | 32   | 1  |
| GO:0007040//lysosome organization                                        | 32   | 1  |
| GO:0030890//positive regulation of B cell proliferation                  | 32   | 1  |
| GO:0031058//positive regulation of histone modification                  | 32   | 1  |
| GO:0033209//tumor necrosis factor-mediated signaling pathway             | 32   | 1  |
| GO:0042461//photoreceptor cell development                               | 32   | 1  |
| GO:0045762//positive regulation of adenylate cyclase activity            | 32   | 1  |
| GO:0045839//negative regulation of mitosis                               | 32   | 1  |
| GO:0046580//negative regulation of Ras protein signal transduction       | 32   | 1  |
| GO:0048639//positive regulation of developmental growth                  | 32   | 1  |
| GO:0051784//negative regulation of nuclear division                      | 32   | 1  |
| GO:0060338//regulation of type I interferon-mediated signaling pathway   | 32   | 1  |
| GO:0045619//regulation of lymphocyte differentiation                     | 122  | 4  |
| GO:0071346//cellular response to interferon-gamma                        | 122  | 4  |
| GO:0046128//purine ribonucleoside metabolic process                      | 448  | 16 |
| GO:0050688//regulation of defense response to virus                      | 64   | 2  |
| GO:0051341//regulation of oxidoreductase activity                        | 64   | 2  |
| GO:0097194//execution phase of apoptosis                                 | 64   | 2  |
| GO:0000082//G1/S transition of mitotic cell cycle                        | 94   | 3  |
| GO:0002758//innate immune response-activating signal transduction        | 94   | 3  |
| GO:0046488//phosphatidylinositol metabolic process                       | 123  | 4  |
| GO:0007131//reciprocal meiotic recombination                             | 33   | 1  |
| GO:0007618//mating                                                       | 33   | 1  |
| GO:0009156//ribonucleoside monophosphate biosynthetic process            | 33   | 1  |
| GO:0035825//reciprocal DNA recombination                                 | 33   | 1  |
| GO:0050771//negative regulation of axonogenesis                          | 33   | 1  |
| GO:0051058//negative regulation of small GTPase mediated signal transdu  | 33   | 1  |
| GO:0060563//neuroepithelial cell differentiation                         | 33   | 1  |
| GO:0090382//phagosome maturation                                         | 33   | 1  |
| GO:1902115//regulation of organelle assembly                             | 33   | 1  |
| GO:0002768//immune response-regulating cell surface receptor signaling p | 208  | 7  |
| GO:0031279//regulation of cyclase activity                               | 65   | 2  |
| GO:0032321//positive regulation of Rho GTPase activity                   | 65   | 2  |



|                                                                                 |      |    |
|---------------------------------------------------------------------------------|------|----|
| GO:0050852//T cell receptor signaling pathway                                   | 95   | 3  |
| GO:0042278//purine nucleoside metabolic process                                 | 451  | 16 |
| GO:0032535//regulation of cellular component size                               | 153  | 5  |
| GO:0002764//immune response-regulating signaling pathway                        | 291  | 10 |
| GO:0072509//divalent inorganic cation transmembrane transporter activity        | 125  | 4  |
| GO:0006164//purine nucleotide biosynthetic process                              | 96   | 3  |
| GO:0007005//mitochondrion organization                                          | 182  | 6  |
| GO:0019218//regulation of steroid metabolic process                             | 66   | 2  |
| GO:0032874//positive regulation of stress-activated MAPK cascade                | 66   | 2  |
| GO:0071156//regulation of cell cycle arrest                                     | 66   | 2  |
| GO:0009069//serine family amino acid metabolic process                          | 34   | 1  |
| GO:0009620//response to fungus                                                  | 34   | 1  |
| GO:0021983//pituitary gland development                                         | 34   | 1  |
| GO:0030433//ER-associated protein catabolic process                             | 34   | 1  |
| GO:0043297//apical junction assembly                                            | 34   | 1  |
| GO:0048387//negative regulation of retinoic acid receptor signaling pathway     | 34   | 1  |
| GO:2001251//negative regulation of chromosome organization                      | 34   | 1  |
| GO:0009143//nucleoside triphosphate catabolic process                           | 348  | 12 |
| GO:0009164//nucleoside catabolic process                                        | 375  | 13 |
| GO:0070304//positive regulation of stress-activated protein kinase signaling    | 67   | 2  |
| GO:0006909//phagocytosis                                                        | 127  | 4  |
| GO:0031281//positive regulation of cyclase activity                             | 35   | 1  |
| GO:0032272//negative regulation of protein polymerization                       | 35   | 1  |
| GO:0072528//pyrimidine-containing compound biosynthetic process                 | 35   | 1  |
| GO:2000242//negative regulation of reproductive process                         | 35   | 1  |
| GO:0060333//interferon-gamma-mediated signaling pathway                         | 98   | 3  |
| GO:0002433//immune response-regulating cell surface receptor signaling p        | 68   | 2  |
| GO:0008037//cell recognition                                                    | 68   | 2  |
| GO:0038094//Fc-gamma receptor signaling pathway                                 | 68   | 2  |
| GO:0038096//Fc-gamma receptor signaling pathway involved in phagocytosis        | 68   | 2  |
| GO:0051339//regulation of lyase activity                                        | 68   | 2  |
| GO:0009059//macromolecule biosynthetic process                                  | 1293 | 48 |
| GO:0045580//regulation of T cell differentiation                                | 99   | 3  |
| GO:1901658//glycosyl compound catabolic process                                 | 379  | 13 |
| GO:0000184//nuclear-transcribed mRNA catabolic process, nonsense-mediated decay | 36   | 1  |
| GO:0030838//positive regulation of actin filament polymerization                | 36   | 1  |
| GO:0032104//regulation of response to extracellular stimulus                    | 36   | 1  |
| GO:0032107//regulation of response to nutrient levels                           | 36   | 1  |
| GO:0032722//positive regulation of chemokine production                         | 36   | 1  |
| GO:0032755//positive regulation of interleukin-6 production                     | 36   | 1  |
| GO:0034146//toll-like receptor 5 signaling pathway                              | 36   | 1  |
| GO:0034166//toll-like receptor 10 signaling pathway                             | 36   | 1  |
| GO:0051353//positive regulation of oxidoreductase activity                      | 36   | 1  |
| GO:0006304//DNA modification                                                    | 69   | 2  |
| GO:0006944//cellular membrane fusion                                            | 69   | 2  |
| GO:0007009//plasma membrane organization                                        | 69   | 2  |
| GO:0044271//cellular nitrogen compound biosynthetic process                     | 752  | 27 |
| GO:0006275//regulation of DNA replication                                       | 100  | 3  |
| GO:0006839//mitochondrial transport                                             | 100  | 3  |
| GO:0009566//fertilization                                                       | 100  | 3  |
| GO:0009141//nucleoside triphosphate metabolic process                           | 408  | 14 |
| GO:0006152//purine nucleoside catabolic process                                 | 354  | 12 |
| GO:0046130//purine ribonucleoside catabolic process                             | 354  | 12 |
| GO:0006753//nucleoside phosphate metabolic process                              | 622  | 22 |
| GO:0000910//cytokinesis                                                         | 70   | 2  |
| GO:0002431//Fc receptor mediated stimulatory signaling pathway                  | 70   | 2  |
| GO:0007219//Notch signaling pathway                                             | 70   | 2  |
| GO:0042770//signal transduction in response to DNA damage                       | 70   | 2  |

|                                                                                |     |    |
|--------------------------------------------------------------------------------|-----|----|
| GO:0046916//cellular transition metal ion homeostasis                          | 70  | 2  |
| GO:0009116//nucleoside metabolic process                                       | 490 | 17 |
| GO:0002757//immune response-activating signal transduction                     | 273 | 9  |
| GO:0001658//branching involved in ureteric bud morphogenesis                   | 37  | 1  |
| GO:0009066//aspartate family amino acid metabolic process                      | 37  | 1  |
| GO:0009124//nucleoside monophosphate biosynthetic process                      | 37  | 1  |
| GO:0021515//cell differentiation in spinal cord                                | 37  | 1  |
| GO:0051084//de novo posttranslational protein folding                          | 37  | 1  |
| GO:0051297//centrosome organization                                            | 37  | 1  |
| GO:0051349//positive regulation of lyase activity                              | 37  | 1  |
| GO:0051588//regulation of neurotransmitter transport                           | 37  | 1  |
| GO:0051640//organelle localization                                             | 189 | 6  |
| GO:1901987//regulation of cell cycle phase transition                          | 246 | 8  |
| GO:0030163//protein catabolic process                                          | 411 | 14 |
| GO:0002218//activation of innate immune response                               | 102 | 3  |
| GO:0006958//complement activation, classical pathway                           | 71  | 2  |
| GO:0009451//RNA modification                                                   | 71  | 2  |
| GO:0009755//hormone-mediated signaling pathway                                 | 71  | 2  |
| GO:0031110//regulation of microtubule polymerization or depolymerization       | 38  | 1  |
| GO:0046530//photoreceptor cell differentiation                                 | 38  | 1  |
| GO:0009260//ribonucleotide biosynthetic process                                | 103 | 3  |
| GO:0043270//positive regulation of ion transport                               | 103 | 3  |
| GO:0007283//spermatogenesis                                                    | 359 | 12 |
| GO:0046700//heterocycle catabolic process                                      | 602 | 21 |
| GO:0002429//immune response-activating cell surface receptor signaling pathway | 192 | 6  |
| GO:0048232//male gamete generation                                             | 360 | 12 |
| GO:0051603//proteolysis involved in cellular protein catabolic process         | 360 | 12 |
| GO:0044270//cellular nitrogen compound catabolic process                       | 603 | 21 |
| GO:0045088//regulation of innate immune response                               | 193 | 6  |
| GO:0006778//porphyrin-containing compound metabolic process                    | 39  | 1  |
| GO:0009311//oligosaccharide metabolic process                                  | 39  | 1  |
| GO:0021872//forebrain generation of neurons                                    | 39  | 1  |
| GO:0048284//organelle fusion                                                   | 39  | 1  |
| GO:0060359//response to ammonium ion                                           | 39  | 1  |
| GO:NM_0010                                                                     | 250 | 8  |
| GO:0007051//spindle organization                                               | 73  | 2  |
| GO:0061025//membrane fusion                                                    | 73  | 2  |
| GO:0019941//modification-dependent protein catabolic process                   | 334 | 11 |
| GO:0009205//purine ribonucleoside triphosphate metabolic process               | 389 | 13 |
| GO:0000209//protein polyubiquitination                                         | 135 | 4  |
| GO:0051235//maintenance of location                                            | 105 | 3  |
| GO:1902105//regulation of leukocyte differentiation                            | 195 | 6  |
| GO:0000413//protein peptidyl-prolyl isomerization                              | 40  | 1  |
| GO:0006458//de novo protein folding                                            | 40  | 1  |
| GO:0032941//secretion by tissue                                                | 40  | 1  |
| GO:0061351//neural precursor cell proliferation                                | 40  | 1  |
| GO:0006260//DNA replication                                                    | 166 | 5  |
| GO:0006913//nucleocytoplasmic transport                                        | 166 | 5  |
| GO:0034613//cellular protein localization                                      | 688 | 24 |
| GO:1901362//organic cyclic compound biosynthetic process                       | 821 | 29 |
| GO:0009144//purine nucleoside triphosphate metabolic process                   | 392 | 13 |
| GO:0043632//modification-dependent macromolecule catabolic process             | 337 | 11 |
| GO:0072657//protein localization to membrane                                   | 75  | 2  |
| GO:0009199//ribonucleoside triphosphate metabolic process                      | 394 | 13 |
| GO:0032320//positive regulation of Ras GTPase activity                         | 138 | 4  |
| GO:0002637//regulation of immunoglobulin production                            | 41  | 1  |
| GO:0006282//regulation of DNA repair                                           | 41  | 1  |
| GO:0006521//regulation of cellular amino acid metabolic process                | 41  | 1  |

|                                                                      |      |    |
|----------------------------------------------------------------------|------|----|
| GO:0006626//protein targeting to mitochondrion                       | 41   | 1  |
| GO:0006888//ER to Golgi vesicle-mediated transport                   | 41   | 1  |
| GO:0032890//regulation of organic acid transport                     | 41   | 1  |
| GO:0050848//regulation of calcium-mediated signaling                 | 41   | 1  |
| GO:2001252//positive regulation of chromosome organization           | 41   | 1  |
| GO:0070727//cellular macromolecule localization                      | 692  | 24 |
| GO:0000018//regulation of DNA recombination                          | 42   | 1  |
| GO:0002709//regulation of T cell mediated immunity                   | 42   | 1  |
| GO:0031023//microtubule organizing center organization               | 42   | 1  |
| GO:0038123//toll-like receptor TLR1:TLR2 signaling pathway           | 42   | 1  |
| GO:0038124//toll-like receptor TLR6:TLR2 signaling pathway           | 42   | 1  |
| GO:0042130//negative regulation of T cell proliferation              | 42   | 1  |
| GO:0046651//lymphocyte proliferation                                 | 42   | 1  |
| GO:0070972//protein localization to endoplasmic reticulum            | 42   | 1  |
| GO:0051169//nuclear transport                                        | 170  | 5  |
| GO:0009203//ribonucleoside triphosphate catabolic process            | 342  | 11 |
| GO:0009207//purine ribonucleoside triphosphate catabolic process     | 342  | 11 |
| GO:0009117//nucleotide metabolic process                             | 616  | 21 |
| GO:0043623//cellular protein complex assembly                        | 200  | 6  |
| GO:0034655//nucleobase-containing compound catabolic process         | 563  | 19 |
| GO:0043547//positive regulation of GTPase activity                   | 201  | 6  |
| GO:0033036//macromolecule localization                               | 1357 | 49 |
| GO:0009146//purine nucleoside triphosphate catabolic process         | 344  | 11 |
| GO:0002763//positive regulation of myeloid leukocyte differentiation | 43   | 1  |
| GO:0032729//positive regulation of interferon-gamma production       | 43   | 1  |
| GO:0032943//mononuclear cell proliferation                           | 43   | 1  |
| GO:0072655//establishment of protein localization to mitochondrion   | 43   | 1  |
| GO:0044257//cellular protein catabolic process                       | 373  | 12 |
| GO:0033365//protein localization to organelle                        | 289  | 9  |
| GO:0002455//humoral immune response mediated by circulating immunogl | 79   | 2  |
| GO:0006749//glutathione metabolic process                            | 44   | 1  |
| GO:0010522//regulation of calcium ion transport into cytosol         | 44   | 1  |
| GO:0030594//neurotransmitter receptor activity                       | 44   | 1  |
| GO:0044704//single-organism reproductive behavior                    | 44   | 1  |
| GO:0070585//protein localization to mitochondrion                    | 44   | 1  |
| GO:0006974//response to DNA damage stimulus                          | 513  | 17 |
| GO:0044770//cell cycle phase transition                              | 174  | 5  |
| GO:0044772//mitotic cell cycle phase transition                      | 174  | 5  |
| GO:0007588//excretion                                                | 45   | 1  |
| GO:0032313//regulation of Rab GTPase activity                        | 45   | 1  |
| GO:0032483//regulation of Rab protein signal transduction            | 45   | 1  |
| GO:0032663//regulation of interleukin-2 production                   | 45   | 1  |
| GO:0032851//positive regulation of Rab GTPase activity               | 45   | 1  |
| GO:0033555//multicellular organismal response to stress              | 45   | 1  |
| GO:0051289//protein homotetramerization                              | 45   | 1  |
| GO:0006661//phosphatidylinositol biosynthetic process                | 82   | 2  |
| GO:0001910//regulation of leukocyte mediated cytotoxicity            | 46   | 1  |
| GO:0030888//regulation of B cell proliferation                       | 46   | 1  |
| GO:0032768//regulation of monooxygenase activity                     | 46   | 1  |
| GO:0016054//organic acid catabolic process                           | 178  | 5  |
| GO:0046395//carboxylic acid catabolic process                        | 178  | 5  |
| GO:0032774//RNA biosynthetic process                                 | 438  | 14 |
| GO:0032273//positive regulation of protein polymerization            | 47   | 1  |
| GO:0001505//regulation of neurotransmitter levels                    | 84   | 2  |
| GO:0006511//ubiquitin-dependent protein catabolic process            | 328  | 10 |
| GO:0002889//regulation of immunoglobulin mediated immune response    | 48   | 1  |
| GO:0031341//regulation of cell killing                               | 48   | 1  |
| GO:0033013//tetrapyrrole metabolic process                           | 48   | 1  |

|                                                                            |      |    |
|----------------------------------------------------------------------------|------|----|
| GO:1901988//negative regulation of cell cycle phase transition             | 213  | 6  |
| GO:0006351//transcription, DNA-dependent                                   | 416  | 13 |
| GO:0002712//regulation of B cell mediated immunity                         | 49   | 1  |
| GO:0006497//protein lipidation                                             | 49   | 1  |
| GO:0008630//intrinsic apoptotic signaling pathway in response to DNA dam   | 49   | 1  |
| GO:0045727//positive regulation of translation                             | 49   | 1  |
| GO:0019882//antigen processing and presentation                            | 274  | 8  |
| GO:0010948//negative regulation of cell cycle process                      | 245  | 7  |
| GO:0046039//GTP metabolic process                                          | 215  | 6  |
| GO:0033138//positive regulation of peptidyl-serine phosphorylation         | 50   | 1  |
| GO:2000106//regulation of leukocyte apoptotic process                      | 50   | 1  |
| GO:0070647//protein modification by small protein conjugation or removal   | 505  | 16 |
| GO:0021536//diencephalon development                                       | 51   | 1  |
| GO:0045333//cellular respiration                                           | 123  | 3  |
| GO:0048285//organelle fission                                              | 187  | 5  |
| GO:0022607//cellular component assembly                                    | 1291 | 45 |
| GO:0000819//sister chromatid segregation                                   | 52   | 1  |
| GO:0002755//MyD88-dependent toll-like receptor signaling pathway           | 52   | 1  |
| GO:0006997//nucleus organization                                           | 52   | 1  |
| GO:0032945//negative regulation of mononuclear cell proliferation          | 52   | 1  |
| GO:0042440//pigment metabolic process                                      | 52   | 1  |
| GO:0050672//negative regulation of lymphocyte proliferation                | 52   | 1  |
| GO:0032271//regulation of protein polymerization                           | 90   | 2  |
| GO:0072331//signal transduction by p53 class mediator                      | 90   | 2  |
| GO:0006605//protein targeting                                              | 250  | 7  |
| GO:0042398//cellular modified amino acid biosynthetic process              | 53   | 1  |
| GO:0051928//positive regulation of calcium ion transport                   | 53   | 1  |
| GO:0060337//type I interferon-mediated signaling pathway                   | 53   | 1  |
| GO:0071357//cellular response to type I interferon                         | 53   | 1  |
| GO:0044248//cellular catabolic process                                     | 1325 | 46 |
| GO:0044265//cellular macromolecule catabolic process                       | 540  | 17 |
| GO:0016567//protein ubiquitination                                         | 427  | 13 |
| GO:0002831//regulation of response to biotic stimulus                      | 92   | 2  |
| GO:0006836//neurotransmitter transport                                     | 92   | 2  |
| GO:0000724//double-strand break repair via homologous recombination        | 54   | 1  |
| GO:0006637//acyl-CoA metabolic process                                     | 54   | 1  |
| GO:0010506//regulation of autophagy                                        | 54   | 1  |
| GO:0035383//thioester metabolic process                                    | 54   | 1  |
| GO:0090305//nucleic acid phosphodiester bond hydrolysis                    | 93   | 2  |
| GO:1901068//guanosine-containing compound metabolic process                | 224  | 6  |
| GO:0000725//recombinational repair                                         | 55   | 1  |
| GO:0007033//vacuole organization                                           | 55   | 1  |
| GO:0034340//response to type I interferon                                  | 55   | 1  |
| GO:0031334//positive regulation of protein complex assembly                | 94   | 2  |
| GO:0016568//chromatin modification                                         | 346  | 10 |
| GO:0006417//regulation of translation                                      | 195  | 5  |
| GO:ENST000                                                                 | 130  | 3  |
| GO:0006418//tRNA aminoacylation for protein translation                    | 57   | 1  |
| GO:0032088//negative regulation of NF-kappaB transcription factor activity | 57   | 1  |
| GO:0032479//regulation of type I interferon production                     | 57   | 1  |
| GO:0006996//organelle organization                                         | 1764 | 62 |
| GO:0007093//mitotic cell cycle checkpoint                                  | 97   | 2  |
| GO:0007269//neurotransmitter secretion                                     | 58   | 1  |
| GO:0009062//fatty acid catabolic process                                   | 58   | 1  |
| GO:0046330//positive regulation of JNK cascade                             | 58   | 1  |
| GO:0051053//negative regulation of DNA metabolic process                   | 58   | 1  |
| GO:0016482//cytoplasmic transport                                          | 410  | 12 |
| GO:0007018//microtubule-based movement                                     | 134  | 3  |

|                                                                            |      |     |
|----------------------------------------------------------------------------|------|-----|
| GO:0006612//protein targeting to membrane                                  | 59   | 1   |
| GO:0000280//nuclear division                                               | 168  | 4   |
| GO:0007067//mitosis                                                        | 168  | 4   |
| GO:0034645//cellular macromolecule biosynthetic process                    | 1244 | 42  |
| GO:0045089//positive regulation of innate immune response                  | 135  | 3   |
| GO:0044282//small molecule catabolic process                               | 233  | 6   |
| GO:0044712//single-organism catabolic process                              | 233  | 6   |
| GO:0010608//posttranscriptional regulation of gene expression              | 325  | 9   |
| GO:0019098//reproductive behavior                                          | 60   | 1   |
| GO:0043038//amino acid activation                                          | 60   | 1   |
| GO:0043039//tRNA aminoacylation                                            | 60   | 1   |
| GO:0006184//GTP catabolic process                                          | 203  | 5   |
| GO:0032446//protein modification by small protein conjugation              | 447  | 13  |
| GO:0002706//regulation of lymphocyte mediated immunity                     | 102  | 2   |
| GO:0006914//autophagy                                                      | 62   | 1   |
| GO:2000134//negative regulation of G1/S transition of mitotic cell cycle   | 62   | 1   |
| GO:0043933//macromolecular complex subunit organization                    | 1038 | 34  |
| GO:1901069//guanosine-containing compound catabolic process                | 206  | 5   |
| GO:0009063//cellular amino acid catabolic process                          | 104  | 2   |
| GO:0051092//positive regulation of NF-kappaB transcription factor activity | 104  | 2   |
| GO:0051301//cell division                                                  | 333  | 9   |
| GO:0031397//negative regulation of protein ubiquitination                  | 64   | 1   |
| GO:NM_0012                                                                 | 64   | 1   |
| GO:0034654//nucleobase-containing compound biosynthetic process            | 627  | 19  |
| GO:0002474//antigen processing and presentation of peptide antigen via M   | 105  | 2   |
| GO:0006807//nitrogen compound metabolic process                            | 3073 | 111 |
| GO:0043254//regulation of protein complex assembly                         | 176  | 4   |
| GO:0002824//positive regulation of adaptive immune response based on sc    | 65   | 1   |
| GO:0051329//interphase of mitotic cell cycle                               | 179  | 4   |
| GO:0051656//establishment of organelle localization                        | 145  | 3   |
| GO:0006457//protein folding                                                | 180  | 4   |
| GO:0002821//positive regulation of adaptive immune response                | 67   | 1   |
| GO:0006289//nucleotide-excision repair                                     | 67   | 1   |
| GO:0007338//single fertilization                                           | 67   | 1   |
| GO:0048193//Golgi vesicle transport                                        | 146  | 3   |
| GO:0006732//coenzyme metabolic process                                     | 181  | 4   |
| GO:0051325//interphase                                                     | 181  | 4   |
| GO:0000226//microtubule cytoskeleton organization                          | 215  | 5   |
| GO:0051262//protein tetramerization                                        | 69   | 1   |
| GO:0006886//intracellular protein transport                                | 465  | 13  |
| GO:0006968//cellular defense response                                      | 70   | 1   |
| GO:0010498//proteasomal protein catabolic process                          | 150  | 3   |
| GO:0016064//immunoglobulin mediated immune response                        | 113  | 2   |
| GO:0072594//establishment of protein localization to organelle             | 113  | 2   |
| GO:0051168//nuclear export                                                 | 71   | 1   |
| GO:0018130//heterocycle biosynthetic process                               | 703  | 21  |
| GO:0007127//meiosis I                                                      | 72   | 1   |
| GO:0070925//organelle assembly                                             | 222  | 5   |
| GO:0019724//B cell mediated immunity                                       | 115  | 2   |
| GO:0002708//positive regulation of lymphocyte mediated immunity            | 73   | 1   |
| GO:0030833//regulation of actin filament polymerization                    | 73   | 1   |
| GO:0051186//cofactor metabolic process                                     | 224  | 5   |
| GO:0007286//spermatid development                                          | 74   | 1   |
| GO:0032649//regulation of interferon-gamma production                      | 74   | 1   |
| GO:0042108//positive regulation of cytokine biosynthetic process           | 74   | 1   |
| GO:0040029//regulation of gene expression, epigenetic                      | 117  | 2   |
| GO:0002263//cell activation involved in immune response                    | 75   | 1   |
| GO:0002366//leukocyte activation involved in immune response               | 75   | 1   |

|                                                                         |      |     |
|-------------------------------------------------------------------------|------|-----|
| GO:0002705//positive regulation of leukocyte mediated immunity          | 75   | 1   |
| GO:0008104//protein localization                                        | 1138 | 36  |
| GO:0043648//dicarboxylic acid metabolic process                         | 76   | 1   |
| GO:0006413//translational initiation                                    | 77   | 1   |
| GO:0000075//cell cycle checkpoint                                       | 196  | 4   |
| GO:0009165//nucleotide biosynthetic process                             | 160  | 3   |
| GO:0006261//DNA-dependent DNA replication                               | 78   | 1   |
| GO:0048515//spermatid differentiation                                   | 78   | 1   |
| GO:0065003//macromolecular complex assembly                             | 866  | 26  |
| GO:1901293//nucleoside phosphate biosynthetic process                   | 162  | 3   |
| GO:0006338//chromatin remodeling                                        | 80   | 1   |
| GO:0032259//methylation                                                 | 237  | 5   |
| GO:0019438//aromatic compound biosynthetic process                      | 702  | 20  |
| GO:0000956//nuclear-transcribed mRNA catabolic process                  | 82   | 1   |
| GO:0002479//antigen processing and presentation of exogenous peptide ar | 82   | 1   |
| GO:0019751//polyol metabolic process                                    | 82   | 1   |
| GO:0007126//meiosis                                                     | 127  | 2   |
| GO:1901606//alpha-amino acid catabolic process                          | 83   | 1   |
| GO:0006323//DNA packaging                                               | 169  | 3   |
| GO:0051321//meiotic cell cycle                                          | 131  | 2   |
| GO:0004930//G-protein coupled receptor activity                         | 86   | 1   |
| GO:0006479//protein methylation                                         | 86   | 1   |
| GO:0008213//protein alkylation                                          | 86   | 1   |
| GO:0042590//antigen processing and presentation of exogenous peptide ar | 86   | 1   |
| GO:0004888//transmembrane signaling receptor activity                   | 87   | 1   |
| GO:0044085//cellular component biogenesis                               | 1423 | 45  |
| GO:0006334//nucleosome assembly                                         | 133  | 2   |
| GO:NM_0011                                                              | 281  | 6   |
| GO:0006325//chromatin organization                                      | 475  | 12  |
| GO:0007049//cell cycle                                                  | 921  | 27  |
| GO:0004872//receptor activity                                           | 89   | 1   |
| GO:0038023//signaling receptor activity                                 | 89   | 1   |
| GO:0004871//signal transducer activity                                  | 90   | 1   |
| GO:0006402//mRNA catabolic process                                      | 90   | 1   |
| GO:0060089//molecular transducer activity                               | 90   | 1   |
| GO:0007017//microtubule-based process                                   | 353  | 8   |
| GO:0000084//S phase of mitotic cell cycle                               | 92   | 1   |
| GO:0022618//ribonucleoprotein complex assembly                          | 92   | 1   |
| GO:0051320//S phase                                                     | 92   | 1   |
| GO:0006281//DNA repair                                                  | 324  | 7   |
| GO:0022402//cell cycle process                                          | 790  | 22  |
| GO:0009108//coenzyme biosynthetic process                               | 94   | 1   |
| GO:0031396//regulation of protein ubiquitination                        | 141  | 2   |
| GO:0031497//chromatin assembly                                          | 142  | 2   |
| GO:0071826//ribonucleoprotein complex subunit organization              | 96   | 1   |
| GO:0046907//intracellular transport                                     | 855  | 24  |
| GO:0043161//proteasomal ubiquitin-dependent protein catabolic process   | 145  | 2   |
| GO:0034728//nucleosome organization                                     | 148  | 2   |
| GO:0031398//positive regulation of protein ubiquitination               | 101  | 1   |
| GO:0044260//cellular macromolecule metabolic process                    | 4106 | 144 |
| GO:0065004//protein-DNA complex assembly                                | 149  | 2   |
| GO:0060271//cilium morphogenesis                                        | 104  | 1   |
| GO:0006302//double-strand break repair                                  | 105  | 1   |
| GO:0006333//chromatin assembly or disassembly                           | 155  | 2   |
| GO:0030258//lipid modification                                          | 108  | 1   |
| GO:0015931//nucleobase-containing compound transport                    | 109  | 1   |
| GO:0000077//DNA damage checkpoint                                       | 111  | 1   |
| GO:0000090//mitotic anaphase                                            | 111  | 1   |

|                                                                          |      |    |
|--------------------------------------------------------------------------|------|----|
| GO:0006401//RNA catabolic process                                        | 111  | 1  |
| GO:0051322//anaphase                                                     | 113  | 1  |
| GO:0071103//DNA conformation change                                      | 206  | 3  |
| GO:0006310//DNA recombination                                            | 163  | 2  |
| GO:0008380//RNA splicing                                                 | 163  | 2  |
| GO:0045184//establishment of protein localization                        | 868  | 23 |
| GO:0071824//protein-DNA complex subunit organization                     | 164  | 2  |
| GO:0019886//antigen processing and presentation of exogenous peptide ar  | 117  | 1  |
| GO:0031570//DNA integrity checkpoint                                     | 117  | 1  |
| GO:0002495//antigen processing and presentation of peptide antigen via M | 119  | 1  |
| GO:0015031//protein transport                                            | 849  | 22 |
| GO:0034622//cellular macromolecular complex assembly                     | 435  | 9  |
| GO:0007059//chromosome segregation                                       | 121  | 1  |
| GO:0048002//antigen processing and presentation of peptide antigen       | 216  | 3  |
| GO:0016197//endosomal transport                                          | 122  | 1  |
| GO:0051188//cofactor biosynthetic process                                | 124  | 1  |
| GO:0002504//antigen processing and presentation of peptide or polysaccha | 130  | 1  |
| GO:0022403//cell cycle phase                                             | 316  | 5  |
| GO:0000278//mitotic cell cycle                                           | 498  | 10 |
| GO:0043414//macromolecule methylation                                    | 138  | 1  |
| GO:0000087//M phase of mitotic cell cycle                                | 139  | 1  |
| GO:0006399//tRNA metabolic process                                       | 143  | 1  |
| GO:0030031//cell projection assembly                                     | 143  | 1  |
| GO:0002478//antigen processing and presentation of exogenous peptide ar  | 200  | 2  |
| GO:0019884//antigen processing and presentation of exogenous antigen     | 202  | 2  |
| GO:0007600//sensory perception                                           | 826  | 19 |
| GO:0007186//G-protein coupled receptor signaling pathway                 | 1047 | 26 |
| GO:0051276//chromosome organization                                      | 637  | 13 |
| GO:1901360//organic cyclic compound metabolic process                    | 2697 | 81 |
| GO:0000279//M phase                                                      | 177  | 1  |
| GO:0006397//mRNA processing                                              | 235  | 2  |
| GO:0006259//DNA metabolic process                                        | 708  | 14 |
| GO:0051606//detection of stimulus                                        | 645  | 12 |
| GO:0006412//translation                                                  | 341  | 4  |
| GO:0022613//ribonucleoprotein complex biogenesis                         | 215  | 1  |
| GO:0016071//mRNA metabolic process                                       | 349  | 3  |
| GO:0034641//cellular nitrogen compound metabolic process                 | 2672 | 73 |
| GO:0034660//ncRNA metabolic process                                      | 275  | 1  |
| GO:0010467//gene expression                                              | 1324 | 26 |
| GO:0006725//cellular aromatic compound metabolic process                 | 2483 | 61 |
| GO:0016070//RNA metabolic process                                        | 1058 | 17 |
| GO:0006396//RNA processing                                               | 470  | 3  |
| GO:0046483//heterocycle metabolic process                                | 2465 | 59 |
| GO:0050906//detection of stimulus involved in sensory perception         | 503  | 3  |
| GO:0006139//nucleobase-containing compound metabolic process             | 2312 | 52 |
| GO:0009593//detection of chemical stimulus                               | 494  | 2  |
| GO:0090304//nucleic acid metabolic process                               | 1688 | 30 |
| GO:0007608//sensory perception of smell                                  | 470  | 1  |
| GO:0007606//sensory perception of chemical stimulus                      | 520  | 1  |

| Input_gene      | Gene_Symbol      | P_value   | Q_value   | Significant |
|-----------------|------------------|-----------|-----------|-------------|
| -               | -                | -         | -         | -           |
| TC01000904.hg.1 | ENSG00000162692; | 0         | 0         | TRUE        |
| TC01001805.hg.1 | ENSG00000092969; | 0         | 0         | TRUE        |
| TC01000728.hg.1 | ENSG00000162433; | 0         | 0         | TRUE        |
| TC01000904.hg.1 | ENSG00000162692; | 0         | 0         | TRUE        |
| TC01000394.hg.1 | ENSG00000159023; | 0         | 0         | TRUE        |
| TC01000728.hg.1 | ENSG00000162433; | 0         | 0         | TRUE        |
| TC01000904.hg.1 | ENSG00000162692; | 0         | 0         | TRUE        |
| TC01000394.hg.1 | ENSG00000159023; | 0         | 0         | TRUE        |
| TC01000728.hg.1 | ENSG00000162433; | 0         | 0         | TRUE        |
| TC01000728.hg.1 | ENSG00000162433; | 0         | 0         | TRUE        |
| TC01000728.hg.1 | ENSG00000162433; | 0         | 0         | TRUE        |
| TC01001188.hg.1 | ENSG00000143369; | 0         | 0         | TRUE        |
| TC01000685.hg.1 | ENSG00000162409; | 0         | 0         | TRUE        |
| TC01000904.hg.1 | ENSG00000162692; | 0         | 0         | TRUE        |
| TC01000904.hg.1 | ENSG00000162692; | 0         | 0         | TRUE        |
| TC01000904.hg.1 | ENSG00000162692; | 0         | 0         | TRUE        |
| TC01001805.hg.1 | ENSG00000092969; | 1.11E-16  | 2.716E-14 | TRUE        |
| TC01000728.hg.1 | ENSG00000162433; | 1.11E-16  | 2.716E-14 | TRUE        |
| TC01001188.hg.1 | ENSG00000143369; | 3.331E-16 | 7.505E-14 | TRUE        |
| TC01000904.hg.1 | ENSG00000162692; | 6.661E-16 | 1.426E-13 | TRUE        |
| TC01000904.hg.1 | ENSG00000162692; | 3.886E-15 | 7.921E-13 | TRUE        |
| TC01003129.hg.1 | ENSG00000143140; | 9.659E-15 | 1.88E-12  | TRUE        |
| TC01000100.hg.1 | ENSG00000049246; | 1.343E-14 | 2.5E-12   | TRUE        |
| TC01001704.hg.1 | ENSG00000163531; | 1.821E-14 | 3.248E-12 | TRUE        |
| TC01002284.hg.1 | ENSG00000117122; | 1.965E-14 | 3.365E-12 | TRUE        |
| TC01001090.hg.1 | ENSG00000117289; | 2.62E-14  | 4.314E-12 | TRUE        |
| TC01000685.hg.1 | ENSG00000162409; | 3.209E-14 | 5.087E-12 | TRUE        |
| TC01000904.hg.1 | ENSG00000162692; | 2.118E-13 | 3.239E-11 | TRUE        |
| TC01001188.hg.1 | ENSG00000143369; | 2.389E-13 | 3.527E-11 | TRUE        |
| TC01000904.hg.1 | ENSG00000162692; | 3.234E-13 | 4.435E-11 | TRUE        |
| TC01000100.hg.1 | ENSG00000049246; | 3.256E-13 | 4.435E-11 | TRUE        |
| TC01000100.hg.1 | ENSG00000049246; | 3.315E-13 | 4.435E-11 | TRUE        |
| TC01000904.hg.1 | ENSG00000162692; | 3.744E-13 | 4.782E-11 | TRUE        |
| TC01000904.hg.1 | ENSG00000162692; | 3.798E-13 | 4.782E-11 | TRUE        |
| TC01001805.hg.1 | ENSG00000092969; | 1.118E-12 | 1.368E-10 | TRUE        |
| TC01000904.hg.1 | ENSG00000162692; | 1.519E-12 | 1.807E-10 | TRUE        |
| TC01000685.hg.1 | ENSG00000162409; | 2.272E-12 | 2.628E-10 | TRUE        |
| TC01001805.hg.1 | ENSG00000092969; | 2.599E-12 | 2.928E-10 | TRUE        |
| TC01000685.hg.1 | ENSG00000162409; | 5.561E-12 | 6.069E-10 | TRUE        |
| TC01000789.hg.1 | ENSG00000162614; | 5.67E-12  | 6.069E-10 | TRUE        |
| TC01000100.hg.1 | ENSG00000049246; | 6.655E-12 | 6.896E-10 | TRUE        |
| TC01000789.hg.1 | ENSG00000162614; | 6.765E-12 | 6.896E-10 | TRUE        |
| TC01000789.hg.1 | ENSG00000162614; | 1.115E-11 | 1.11E-09  | TRUE        |
| TC01000685.hg.1 | ENSG00000162409; | 1.147E-11 | 1.116E-09 | TRUE        |
| TC01000685.hg.1 | ENSG00000162409; | 1.374E-11 | 1.307E-09 | TRUE        |
| TC01001805.hg.1 | ENSG00000092969; | 1.872E-11 | 1.736E-09 | TRUE        |
| TC01000685.hg.1 | ENSG00000162409; | 1.906E-11 | 1.736E-09 | TRUE        |
| TC01001805.hg.1 | ENSG00000092969; | 2.112E-11 | 1.883E-09 | TRUE        |
| TC01000904.hg.1 | ENSG00000162692; | 4.274E-11 | 3.734E-09 | TRUE        |
| TC01000789.hg.1 | ENSG00000162614; | 4.435E-11 | 3.797E-09 | TRUE        |
| TC01000685.hg.1 | ENSG00000162409; | 5.498E-11 | 4.615E-09 | TRUE        |
| TC01001188.hg.1 | ENSG00000143369; | 6.07E-11  | 4.916E-09 | TRUE        |
| TC01002954.hg.1 | ENSG00000134243; | 6.086E-11 | 4.916E-09 | TRUE        |
| TC01000685.hg.1 | ENSG00000162409; | 1.003E-10 | 7.955E-09 | TRUE        |
| TC01001188.hg.1 | ENSG00000143369; | 1.176E-10 | 9.151E-09 | TRUE        |
| TC01000728.hg.1 | ENSG00000162433; | 1.314E-10 | 1.005E-08 | TRUE        |



|                  |                  |           |           |      |
|------------------|------------------|-----------|-----------|------|
| TC01000685.hg.1  | ENSG00000162409; | 1.99E-10  | 1.494E-08 | TRUE |
| TC01000904.hg.1  | ENSG00000162692; | 2.296E-10 | 1.695E-08 | TRUE |
| TC01000685.hg.1  | ENSG00000162409; | 2.346E-10 | 1.697E-08 | TRUE |
| TC01000685.hg.1  | ENSG00000162409; | 2.379E-10 | 1.697E-08 | TRUE |
| TC01003129.hg.1  | ENSG00000143140; | 2.505E-10 | 1.733E-08 | TRUE |
| TC01003638.hg.1  | ENSG00000073756; | 2.51E-10  | 1.733E-08 | TRUE |
| TC01000685.hg.1  | ENSG00000162409; | 2.686E-10 | 1.825E-08 | TRUE |
| TC01003638.hg.1  | ENSG00000073756; | 3.202E-10 | 2.126E-08 | TRUE |
| TC01003638.hg.1  | ENSG00000073756; | 3.202E-10 | 2.126E-08 | TRUE |
| TC01001805.hg.1  | ENSG00000092969; | 3.642E-10 | 2.362E-08 | TRUE |
| TC01000904.hg.1  | ENSG00000162692; | 5.307E-10 | 3.391E-08 | TRUE |
| TC01000394.hg.1  | ENSG00000159023; | 5.495E-10 | 3.459E-08 | TRUE |
| TC01000734.hg.1  | ENSG00000118473; | 5.632E-10 | 3.495E-08 | TRUE |
| TC01001805.hg.1  | ENSG00000092969; | 6.362E-10 | 3.891E-08 | TRUE |
| TC01000394.hg.1  | ENSG00000159023; | 6.863E-10 | 4.138E-08 | TRUE |
| TC01001805.hg.1  | ENSG00000092969; | 7.283E-10 | 4.33E-08  | TRUE |
| TC01001736.hg.1  | ENSG00000196352; | 8.147E-10 | 4.759E-08 | TRUE |
| TC01000139.hg.1  | ENSG00000171819; | 8.226E-10 | 4.759E-08 | TRUE |
| TC01000685.hg.1  | ENSG00000162409; | 1.008E-09 | 5.753E-08 | TRUE |
| TC01000685.hg.1  | ENSG00000162409; | 1.287E-09 | 7.249E-08 | TRUE |
| TC01000904.hg.1  | ENSG00000162692; | 1.378E-09 | 7.662E-08 | TRUE |
| TC01000685.hg.1  | ENSG00000162409; | 2.529E-09 | 1.388E-07 | TRUE |
| TC01001736.hg.1  | ENSG00000196352; | 2.651E-09 | 1.436E-07 | TRUE |
| TC01000685.hg.1  | ENSG00000162409; | 2.879E-09 | 1.541E-07 | TRUE |
| TC01001704.hg.1  | ENSG00000163531; | 3.142E-09 | 1.66E-07  | TRUE |
| TC01000904.hg.1  | ENSG00000162692; | 4.118E-09 | 2.15E-07  | TRUE |
| TC01003129.hg.1  | ENSG00000143140; | 4.365E-09 | 2.238E-07 | TRUE |
| TC01003129.hg.1  | ENSG00000143140; | 4.365E-09 | 2.238E-07 | TRUE |
| TC01000685.hg.1  | ENSG00000162409; | 6.152E-09 | 3.098E-07 | TRUE |
| TC01000904.hg.1  | ENSG00000162692; | 6.951E-09 | 3.44E-07  | TRUE |
| TC01000904.hg.1  | ENSG00000162692; | 6.951E-09 | 3.44E-07  | TRUE |
| TC01001805.hg.1  | ENSG00000092969; | 7.834E-09 | 3.811E-07 | TRUE |
| TC01000685.hg.1  | ENSG00000162409; | 9.602E-09 | 4.619E-07 | TRUE |
| TC01001805.hg.1  | ENSG00000092969; | 1.063E-08 | 5.054E-07 | TRUE |
| TC01000685.hg.1  | ENSG00000162409; | 1.09E-08  | 5.13E-07  | TRUE |
| TC01000685.hg.1  | ENSG00000162409; | 1.255E-08 | 5.823E-07 | TRUE |
| TC01002706.hg.1  | ENSG00000184292; | 1.265E-08 | 5.823E-07 | TRUE |
| TC01001624.hg.1  | ENSG00000116741; | 1.47E-08  | 6.625E-07 | TRUE |
| TC01000685.hg.1  | ENSG00000162409; | 1.47E-08  | 6.625E-07 | TRUE |
| TC01001704.hg.1  | ENSG00000163531; | 1.68E-08  | 7.493E-07 | TRUE |
| TC01001090.hg.1  | ENSG00000117289; | 2.412E-08 | 1.064E-06 | TRUE |
| TC01000685.hg.1  | ENSG00000162409; | 2.491E-08 | 1.088E-06 | TRUE |
| TC01003638.hg.1  | ENSG00000073756; | 2.58E-08  | 1.116E-06 | TRUE |
| TC01001704.hg.1  | ENSG00000163531; | 2.82E-08  | 1.201E-06 | TRUE |
| TC01001704.hg.1  | ENSG00000163531; | 2.82E-08  | 1.201E-06 | TRUE |
| TC01000685.hg.1  | ENSG00000162409; | 3.25E-08  | 1.364E-06 | TRUE |
| TC01000685.hg.1  | ENSG00000162409; | 4.371E-08 | 1.817E-06 | TRUE |
| TC05003423.hg.1  | ENSG00000082196; | 5.241E-08 | 2.158E-06 | TRUE |
| TC01001188.hg.1; | ENSG00000143369; | 6.684E-08 | 2.725E-06 | TRUE |
| TC01001624.hg.1  | ENSG00000116741; | 7.704E-08 | 3.111E-06 | TRUE |
| TC01000685.hg.1  | ENSG00000162409; | 8.017E-08 | 3.202E-06 | TRUE |
| TC02000041.hg.1  | ENSG00000115738; | 8.078E-08 | 3.202E-06 | TRUE |
| TC01001704.hg.1  | ENSG00000163531; | 8.242E-08 | 3.237E-06 | TRUE |
| TC01001624.hg.1  | ENSG00000116741; | 8.713E-08 | 3.391E-06 | TRUE |
| TC01000685.hg.1  | ENSG00000162409; | 9.232E-08 | 3.561E-06 | TRUE |
| TC01001188.hg.1; | ENSG00000143369; | 9.46E-08  | 3.616E-06 | TRUE |
| TC01001188.hg.1; | ENSG00000143369; | 9.903E-08 | 3.752E-06 | TRUE |
| TC01000904.hg.1  | ENSG00000162692; | 1.06E-07  | 3.98E-06  | TRUE |

|                 |                  |           |           |      |
|-----------------|------------------|-----------|-----------|------|
| TC01003638.hg.1 | ENSG0000073756;  | 1.069E-07 | 3.98E-06  | TRUE |
| TC02000041.hg.1 | ENSG00000115738; | 1.093E-07 | 4.034E-06 | TRUE |
| TC01001188.hg.1 | ENSG00000143369; | 1.139E-07 | 4.167E-06 | TRUE |
| TC01001624.hg.1 | ENSG00000116741; | 1.488E-07 | 5.399E-06 | TRUE |
| TC01000904.hg.1 | ENSG00000162692; | 1.522E-07 | 5.475E-06 | TRUE |
| TC05003423.hg.1 | ENSG0000082196;  | 1.671E-07 | 5.961E-06 | TRUE |
| TC01001704.hg.1 | ENSG00000163531; | 1.883E-07 | 6.663E-06 | TRUE |
| TC02001867.hg.1 | ENSG00000115380; | 2.057E-07 | 7.218E-06 | TRUE |
| TC01001805.hg.1 | ENSG00000092969; | 2.119E-07 | 7.376E-06 | TRUE |
| TC06004077.hg.1 | ENSG00000243649; | 2.197E-07 | 7.584E-06 | TRUE |
| TC01000685.hg.1 | ENSG00000162409; | 2.245E-07 | 7.688E-06 | TRUE |
| TC01001188.hg.1 | ENSG00000143369; | 2.345E-07 | 7.969E-06 | TRUE |
| TC02000041.hg.1 | ENSG00000115738; | 2.387E-07 | 8.046E-06 | TRUE |
| TC06001510.hg.1 | ENSG00000137331; | 2.481E-07 | 8.264E-06 | TRUE |
| TC02001750.hg.1 | ENSG00000138061; | 2.481E-07 | 8.264E-06 | TRUE |
| TC02000219.hg.1 | ENSG00000049323; | 2.57E-07  | 8.463E-06 | TRUE |
| TC01001188.hg.1 | ENSG00000143369; | 2.939E-07 | 9.605E-06 | TRUE |
| TC01001805.hg.1 | ENSG00000092969; | 3.141E-07 | 1.019E-05 | TRUE |
| TC01000904.hg.1 | ENSG00000162692; | 3.193E-07 | 1.028E-05 | TRUE |
| TC01000685.hg.1 | ENSG00000162409; | 3.975E-07 | 1.27E-05  | TRUE |
| TC01001188.hg.1 | ENSG00000143369; | 4.035E-07 | 1.28E-05  | TRUE |
| TC01000685.hg.1 | ENSG00000162409; | 4.189E-07 | 1.319E-05 | TRUE |
| TC01000685.hg.1 | ENSG00000162409; | 4.355E-07 | 1.361E-05 | TRUE |
| TC01000685.hg.1 | ENSG00000162409; | 6.824E-07 | 2.117E-05 | TRUE |
| TC01000100.hg.1 | ENSG00000049246; | 7.124E-07 | 2.194E-05 | TRUE |
| TC01001624.hg.1 | ENSG00000116741; | 7.395E-07 | 2.256E-05 | TRUE |
| TC01001473.hg.1 | ENSG00000143153; | 7.429E-07 | 2.256E-05 | TRUE |
| TC01001624.hg.1 | ENSG00000116741; | 7.936E-07 | 2.392E-05 | TRUE |
| TC01001090.hg.1 | ENSG00000117289; | 8.106E-07 | 2.418E-05 | TRUE |
| TC06001510.hg.1 | ENSG00000137331; | 8.106E-07 | 2.418E-05 | TRUE |
| TC01001805.hg.1 | ENSG00000092969; | 8.383E-07 | 2.475E-05 | TRUE |
| TC01001805.hg.1 | ENSG00000092969; | 8.691E-07 | 2.548E-05 | TRUE |
| TC01001704.hg.1 | ENSG00000163531; | 9.098E-07 | 2.649E-05 | TRUE |
| TC03000577.hg.1 | ENSG00000144857; | 9.387E-07 | 2.715E-05 | TRUE |
| TC01002166.hg.1 | ENSG00000116285; | 9.805E-07 | 2.786E-05 | TRUE |
| TC01001704.hg.1 | ENSG00000163531; | 9.816E-07 | 2.786E-05 | TRUE |
| TC01001704.hg.1 | ENSG00000163531; | 9.816E-07 | 2.786E-05 | TRUE |
| TC01000904.hg.1 | ENSG00000162692; | 9.891E-07 | 2.786E-05 | TRUE |
| TC01003129.hg.1 | ENSG00000143140; | 1.003E-06 | 2.796E-05 | TRUE |
| TC01003129.hg.1 | ENSG00000143140; | 1.003E-06 | 2.796E-05 | TRUE |
| TC01001704.hg.1 | ENSG00000163531; | 1.073E-06 | 2.964E-05 | TRUE |
| TC03000577.hg.1 | ENSG00000144857; | 1.294E-06 | 3.55E-05  | TRUE |
| TC01001736.hg.1 | ENSG00000196352; | 1.309E-06 | 3.569E-05 | TRUE |
| TC01001805.hg.1 | ENSG00000092969; | 1.358E-06 | 3.678E-05 | TRUE |
| TC01000904.hg.1 | ENSG00000162692; | 1.385E-06 | 3.728E-05 | TRUE |
| TC01001188.hg.1 | ENSG00000143369; | 1.409E-06 | 3.771E-05 | TRUE |
| TC01001805.hg.1 | ENSG00000092969; | 1.438E-06 | 3.812E-05 | TRUE |
| TC01001805.hg.1 | ENSG00000092969; | 1.438E-06 | 3.812E-05 | TRUE |
| TC02002605.hg.1 | ENSG00000064989; | 1.452E-06 | 3.815E-05 | TRUE |
| TC01001704.hg.1 | ENSG00000163531; | 1.555E-06 | 4.059E-05 | TRUE |
| TC01000734.hg.1 | ENSG00000118473; | 1.579E-06 | 4.095E-05 | TRUE |
| TC01001805.hg.1 | ENSG00000092969; | 1.633E-06 | 4.212E-05 | TRUE |
| TC01003638.hg.1 | ENSG00000073756; | 1.695E-06 | 4.344E-05 | TRUE |
| TC01001704.hg.1 | ENSG00000163531; | 1.733E-06 | 4.416E-05 | TRUE |
| TC01000685.hg.1 | ENSG00000162409; | 1.906E-06 | 4.828E-05 | TRUE |
| TC01001188.hg.1 | ENSG00000143369; | 1.949E-06 | 4.851E-05 | TRUE |
| TC01001736.hg.1 | ENSG00000196352; | 1.957E-06 | 4.851E-05 | TRUE |
| TC01001736.hg.1 | ENSG00000196352; | 1.957E-06 | 4.851E-05 | TRUE |

|                  |                  |           |           |      |
|------------------|------------------|-----------|-----------|------|
| TC01000643.hg.1  | ENSG00000116157; | 1.96E-06  | 4.851E-05 | TRUE |
| TC01001805.hg.1  | ENSG00000092969; | 2.038E-06 | 5.015E-05 | TRUE |
| TC01000904.hg.1  | ENSG00000162692; | 2.158E-06 | 5.261E-05 | TRUE |
| TC01000685.hg.1  | ENSG00000162409; | 2.163E-06 | 5.261E-05 | TRUE |
| TC01000685.hg.1  | ENSG00000162409; | 2.482E-06 | 6.002E-05 | TRUE |
| TC01000685.hg.1  | ENSG00000162409; | 2.686E-06 | 6.461E-05 | TRUE |
| TC01001805.hg.1  | ENSG00000092969; | 2.815E-06 | 6.713E-05 | TRUE |
| TC01001805.hg.1  | ENSG00000092969; | 2.815E-06 | 6.713E-05 | TRUE |
| TC01001704.hg.1  | ENSG00000163531; | 2.868E-06 | 6.783E-05 | TRUE |
| TC01000685.hg.1  | ENSG00000162409; | 3.003E-06 | 7.065E-05 | TRUE |
| TC03000214.hg.1  | ENSG00000168036; | 3.077E-06 | 7.198E-05 | TRUE |
| TC01001090.hg.1  | ENSG00000117289; | 3.178E-06 | 7.394E-05 | TRUE |
| TC01001805.hg.1  | ENSG00000092969; | 3.199E-06 | 7.403E-05 | TRUE |
| TC01001805.hg.1  | ENSG00000092969; | 3.26E-06  | 7.503E-05 | TRUE |
| TC03000214.hg.1  | ENSG00000168036; | 3.311E-06 | 7.58E-05  | TRUE |
| TC01001188.hg.1; | ENSG00000143369; | 3.388E-06 | 7.715E-05 | TRUE |
| TC02000762.hg.1  | ENSG00000163083; | 3.555E-06 | 8.03E-05  | TRUE |
| TC02000762.hg.1  | ENSG00000163083; | 3.555E-06 | 8.03E-05  | TRUE |
| TC01001736.hg.1  | ENSG00000196352; | 3.609E-06 | 8.055E-05 | TRUE |
| TC01001704.hg.1  | ENSG00000163531; | 3.613E-06 | 8.055E-05 | TRUE |
| TC01001704.hg.1  | ENSG00000163531; | 3.992E-06 | 8.799E-05 | TRUE |
| TC01001704.hg.1  | ENSG00000163531; | 3.997E-06 | 8.799E-05 | TRUE |
| TC01001805.hg.1  | ENSG00000092969; | 4.008E-06 | 8.799E-05 | TRUE |
| TC01000685.hg.1  | ENSG00000162409; | 4.214E-06 | 9.127E-05 | TRUE |
| TC02001867.hg.1  | ENSG00000115380; | 4.214E-06 | 9.127E-05 | TRUE |
| TC01000734.hg.1  | ENSG00000118473; | 4.228E-06 | 9.127E-05 | TRUE |
| TC01000685.hg.1  | ENSG00000162409; | 4.242E-06 | 9.127E-05 | TRUE |
| TC03000577.hg.1  | ENSG00000144857; | 4.349E-06 | 9.285E-05 | TRUE |
| TC03000577.hg.1  | ENSG00000144857; | 4.349E-06 | 9.285E-05 | TRUE |
| TC01001805.hg.1  | ENSG00000092969; | 4.557E-06 | 9.657E-05 | TRUE |
| TC02000041.hg.1  | ENSG00000115738; | 5.26E-06  | 0.0001109 | TRUE |
| TC01000734.hg.1  | ENSG00000118473; | 5.53E-06  | 0.0001161 | TRUE |
| TC06001510.hg.1  | ENSG00000137331; | 5.879E-06 | 0.0001228 | TRUE |
| TC01000734.hg.1  | ENSG00000118473; | 6.671E-06 | 0.0001386 | TRUE |
| TC02002605.hg.1  | ENSG00000064989; | 6.773E-06 | 0.0001401 | TRUE |
| TC01000904.hg.1  | ENSG00000162692; | 6.883E-06 | 0.0001417 | TRUE |
| TC01001805.hg.1  | ENSG00000092969; | 6.917E-06 | 0.0001417 | TRUE |
| TC01000685.hg.1  | ENSG00000162409; | 6.966E-06 | 0.000142  | TRUE |
| TC01001805.hg.1  | ENSG00000092969; | 7.268E-06 | 0.0001471 | TRUE |
| TC01001805.hg.1  | ENSG00000092969; | 7.268E-06 | 0.0001471 | TRUE |
| TC02000082.hg.1  | ENSG00000071575; | 7.798E-06 | 0.0001567 | TRUE |
| TC01002166.hg.1  | ENSG00000116285; | 8.253E-06 | 0.0001651 | TRUE |
| TC01000685.hg.1  | ENSG00000162409; | 9.141E-06 | 0.000182  | TRUE |
| TC01000100.hg.1  | ENSG00000049246; | 9.68E-06  | 0.0001919 | TRUE |
| TC01001805.hg.1  | ENSG00000092969; | 9.78E-06  | 0.0001929 | TRUE |
| TC01002166.hg.1  | ENSG00000116285; | 1.018E-05 | 0.0002    | TRUE |
| TC01001805.hg.1  | ENSG00000092969; | 1.07E-05  | 0.0002092 | TRUE |
| TC01001805.hg.1  | ENSG00000092969; | 1.206E-05 | 0.0002347 | TRUE |
| TC01003638.hg.1  | ENSG00000073756; | 1.242E-05 | 0.0002406 | TRUE |
| TC05000943.hg.1  | ENSG00000156427; | 1.263E-05 | 0.0002431 | TRUE |
| TC05000943.hg.1  | ENSG00000156427; | 1.263E-05 | 0.0002431 | TRUE |
| TC01001805.hg.1  | ENSG00000092969; | 1.311E-05 | 0.0002505 | TRUE |
| TC01001805.hg.1  | ENSG00000092969; | 1.348E-05 | 0.0002565 | TRUE |
| TC01000972.hg.1  | ENSG00000064886; | 1.527E-05 | 0.0002893 | TRUE |
| TC01002932.hg.1  | ENSG00000060718; | 1.559E-05 | 0.0002934 | TRUE |
| TC01001805.hg.1  | ENSG00000092969; | 1.559E-05 | 0.0002934 | TRUE |
| TC01000685.hg.1  | ENSG00000162409; | 1.594E-05 | 0.000298  | TRUE |
| TC01003129.hg.1  | ENSG00000143140; | 1.636E-05 | 0.0003039 | TRUE |

|                  |                  |           |           |      |
|------------------|------------------|-----------|-----------|------|
| TC01001805.hg.1  | ENSG00000092969; | 1.636E-05 | 0.0003039 | TRUE |
| TC01000685.hg.1  | ENSG00000162409; | 1.877E-05 | 0.0003464 | TRUE |
| TC01001805.hg.1  | ENSG00000092969; | 1.904E-05 | 0.0003498 | TRUE |
| TC03000846.hg.1  | ENSG00000196549; | 1.959E-05 | 0.0003584 | TRUE |
| TC01001736.hg.1  | ENSG00000196352; | 1.988E-05 | 0.0003621 | TRUE |
| TC01001624.hg.1  | ENSG00000116741; | 2.009E-05 | 0.0003637 | TRUE |
| TC01001624.hg.1  | ENSG00000116741; | 2.009E-05 | 0.0003637 | TRUE |
| TC01001188.hg.1; | ENSG00000143369; | 2.204E-05 | 0.0003957 | TRUE |
| TC01001805.hg.1  | ENSG00000092969; | 2.204E-05 | 0.0003957 | TRUE |
| TC01002954.hg.1  | ENSG00000134243; | 2.258E-05 | 0.0004028 | TRUE |
| TC01001090.hg.1  | ENSG00000117289; | 2.276E-05 | 0.0004042 | TRUE |
| TC01001624.hg.1  | ENSG00000116741; | 2.285E-05 | 0.0004042 | TRUE |
| TC01000728.hg.1  | ENSG00000162433; | 2.398E-05 | 0.0004225 | TRUE |
| TC01000685.hg.1  | ENSG00000162409; | 2.475E-05 | 0.0004334 | TRUE |
| TC01000685.hg.1  | ENSG00000162409; | 2.475E-05 | 0.0004334 | TRUE |
| TC01000685.hg.1  | ENSG00000162409; | 2.516E-05 | 0.0004373 | TRUE |
| TC01001805.hg.1  | ENSG00000092969; | 2.523E-05 | 0.0004373 | TRUE |
| TC01001624.hg.1  | ENSG00000116741; | 2.562E-05 | 0.0004423 | TRUE |
| TC02000219.hg.1  | ENSG00000049323; | 2.641E-05 | 0.0004541 | TRUE |
| TC01000100.hg.1  | ENSG00000049246; | 2.794E-05 | 0.0004785 | TRUE |
| TC01002166.hg.1  | ENSG00000116285; | 2.827E-05 | 0.0004821 | TRUE |
| TC01000100.hg.1  | ENSG00000049246; | 2.989E-05 | 0.0005078 | TRUE |
| TC01001805.hg.1  | ENSG00000092969; | 3.118E-05 | 0.0005275 | TRUE |
| TC05000943.hg.1  | ENSG00000156427; | 3.184E-05 | 0.0005366 | TRUE |
| TC01000904.hg.1  | ENSG00000162692; | 3.198E-05 | 0.0005368 | TRUE |
| TC01001805.hg.1  | ENSG00000092969; | 3.258E-05 | 0.0005448 | TRUE |
| TC05000943.hg.1  | ENSG00000156427; | 3.28E-05  | 0.0005463 | TRUE |
| TC01001805.hg.1  | ENSG00000092969; | 3.38E-05  | 0.0005608 | TRUE |
| TC01003638.hg.1  | ENSG00000073756; | 3.571E-05 | 0.0005898 | TRUE |
| TC02000219.hg.1  | ENSG00000049323; | 3.582E-05 | 0.0005898 | TRUE |
| TC01001805.hg.1  | ENSG00000092969; | 3.661E-05 | 0.0006004 | TRUE |
| TC01000100.hg.1  | ENSG00000049246; | 3.702E-05 | 0.0006049 | TRUE |
| TC01002578.hg.1  | ENSG00000117394; | 3.752E-05 | 0.0006108 | TRUE |
| TC01000904.hg.1  | ENSG00000162692; | 3.78E-05  | 0.0006129 | TRUE |
| TC01003211.hg.1; | ENSG00000143387; | 3.818E-05 | 0.0006133 | TRUE |
| TC06004073.hg.1  | ENSG00000204520; | 3.818E-05 | 0.0006133 | TRUE |
| TC01003211.hg.1; | ENSG00000143387; | 3.818E-05 | 0.0006133 | TRUE |
| TC03001255.hg.1  | ENSG00000033867; | 3.818E-05 | 0.0006133 | TRUE |
| TC01001736.hg.1  | ENSG00000196352; | 3.885E-05 | 0.0006182 | TRUE |
| TC02000082.hg.1  | ENSG00000071575; | 3.92E-05  | 0.0006203 | TRUE |
| TC01002166.hg.1  | ENSG00000116285; | 3.92E-05  | 0.0006203 | TRUE |
| TC01001805.hg.1  | ENSG00000092969; | 4.05E-05  | 0.0006363 | TRUE |
| TC05000943.hg.1  | ENSG00000156427; | 4.05E-05  | 0.0006363 | TRUE |
| TC01001805.hg.1  | ENSG00000092969; | 4.106E-05 | 0.0006404 | TRUE |
| TC01001805.hg.1  | ENSG00000092969; | 4.114E-05 | 0.0006404 | TRUE |
| TC01000685.hg.1  | ENSG00000162409; | 4.284E-05 | 0.0006644 | TRUE |
| TC01001624.hg.1  | ENSG00000116741; | 4.463E-05 | 0.0006898 | TRUE |
| TC01001736.hg.1  | ENSG00000196352; | 4.727E-05 | 0.0007279 | TRUE |
| TC01002932.hg.1  | ENSG00000060718; | 4.852E-05 | 0.0007446 | TRUE |
| TC01000100.hg.1  | ENSG00000049246; | 5.007E-05 | 0.0007652 | TRUE |
| TC01001090.hg.1  | ENSG00000117289; | 5.022E-05 | 0.0007652 | TRUE |
| TC01000904.hg.1  | ENSG00000162692; | 5.113E-05 | 0.0007763 | TRUE |
| TC01001736.hg.1  | ENSG00000196352; | 5.316E-05 | 0.0008042 | TRUE |
| TC01001805.hg.1  | ENSG00000092969; | 5.483E-05 | 0.0008264 | TRUE |
| TC01001805.hg.1  | ENSG00000092969; | 5.527E-05 | 0.0008275 | TRUE |
| TC01000734.hg.1  | ENSG00000118473; | 5.528E-05 | 0.0008275 | TRUE |
| TC01001624.hg.1  | ENSG00000116741; | 5.676E-05 | 0.0008467 | TRUE |
| TC01000100.hg.1  | ENSG00000049246; | 5.865E-05 | 0.0008718 | TRUE |

|                  |                  |           |           |      |
|------------------|------------------|-----------|-----------|------|
| TC02001750.hg.1  | ENSG00000138061; | 5.934E-05 | 0.000879  | TRUE |
| TC01001090.hg.1  | ENSG00000117289; | 6.334E-05 | 0.0009327 | TRUE |
| TC01001805.hg.1  | ENSG00000092969; | 6.357E-05 | 0.0009327 | TRUE |
| TC01000100.hg.1  | ENSG00000049246; | 6.387E-05 | 0.0009327 | TRUE |
| TC01001805.hg.1  | ENSG00000092969; | 6.394E-05 | 0.0009327 | TRUE |
| TC01003638.hg.1  | ENSG00000073756; | 6.394E-05 | 0.0009327 | TRUE |
| TC03000577.hg.1  | ENSG00000144857; | 6.483E-05 | 0.0009384 | TRUE |
| TC05001933.hg.1  | ENSG00000113721; | 6.483E-05 | 0.0009384 | TRUE |
| TC01001736.hg.1  | ENSG00000196352; | 6.51E-05  | 0.0009384 | TRUE |
| TC01001805.hg.1  | ENSG00000092969; | 6.642E-05 | 0.0009542 | TRUE |
| TC01000685.hg.1  | ENSG00000162409; | 6.759E-05 | 0.0009677 | TRUE |
| TC05000943.hg.1  | ENSG00000156427; | 6.858E-05 | 0.000978  | TRUE |
| TC01003129.hg.1  | ENSG00000143140; | 6.894E-05 | 0.000978  | TRUE |
| TC01002932.hg.1  | ENSG00000060718; | 6.911E-05 | 0.000978  | TRUE |
| TC01001188.hg.1; | ENSG00000143369; | 6.911E-05 | 0.000978  | TRUE |
| TC02000466.hg.1  | ENSG00000159399; | 7.609E-05 | 0.0010715 | TRUE |
| TC01001805.hg.1  | ENSG00000092969; | 7.795E-05 | 0.0010917 | TRUE |
| TC03001071.hg.1  | ENSG00000114315; | 7.804E-05 | 0.0010917 | TRUE |
| TC01001624.hg.1  | ENSG00000116741; | 7.898E-05 | 0.0011013 | TRUE |
| TC01000394.hg.1  | ENSG00000159023; | 8.32E-05  | 0.0011565 | TRUE |
| TC02002292.hg.1  | ENSG00000136720; | 8.407E-05 | 0.0011647 | TRUE |
| TC01000100.hg.1  | ENSG00000049246; | 8.526E-05 | 0.0011726 | TRUE |
| TC01001473.hg.1  | ENSG00000143153; | 8.533E-05 | 0.0011726 | TRUE |
| TC01001473.hg.1  | ENSG00000143153; | 8.533E-05 | 0.0011726 | TRUE |
| TC01003778.hg.1  | ENSG00000076356; | 8.621E-05 | 0.0011769 | TRUE |
| TC01002932.hg.1  | ENSG00000060718; | 8.632E-05 | 0.0011769 | TRUE |
| TC01001624.hg.1  | ENSG00000116741; | 9.736E-05 | 0.0013231 | TRUE |
| TC01000904.hg.1  | ENSG00000162692; | 9.766E-05 | 0.0013231 | TRUE |
| TC01001090.hg.1  | ENSG00000117289; | 9.862E-05 | 0.0013282 | TRUE |
| TC01001473.hg.1  | ENSG00000143153; | 9.887E-05 | 0.0013282 | TRUE |
| TC01001805.hg.1  | ENSG00000092969; | 9.897E-05 | 0.0013282 | TRUE |
| TC01003778.hg.1  | ENSG00000076356; | 0.0001016 | 0.0013586 | TRUE |
| TC01001188.hg.1; | ENSG00000143369; | 0.0001036 | 0.001382  | TRUE |
| TC02002605.hg.1  | ENSG00000064989; | 0.000108  | 0.0014362 | TRUE |
| TC01003778.hg.1  | ENSG00000076356; | 0.0001131 | 0.0014954 | TRUE |
| TC02000762.hg.1  | ENSG00000163083; | 0.0001132 | 0.0014954 | TRUE |
| TC03000214.hg.1  | ENSG00000168036; | 0.0001137 | 0.0014972 | TRUE |
| TC01000643.hg.1  | ENSG00000116157; | 0.0001151 | 0.0015116 | TRUE |
| TC01003638.hg.1  | ENSG00000073756; | 0.000117  | 0.0015319 | TRUE |
| TC01001188.hg.1; | ENSG00000143369; | 0.0001189 | 0.0015523 | TRUE |
| TC01001090.hg.1  | ENSG00000117289; | 0.0001202 | 0.0015645 | TRUE |
| TC01000904.hg.1  | ENSG00000162692; | 0.0001212 | 0.0015726 | TRUE |
| TC01003042.hg.1  | ENSG00000092607; | 0.0001276 | 0.0016506 | TRUE |
| TC01002954.hg.1  | ENSG00000134243; | 0.000129  | 0.0016638 | TRUE |
| TC01003638.hg.1  | ENSG00000073756; | 0.0001316 | 0.0016913 | TRUE |
| TC01001805.hg.1  | ENSG00000092969; | 0.0001382 | 0.0017667 | TRUE |
| TC01001090.hg.1  | ENSG00000117289; | 0.0001382 | 0.0017667 | TRUE |
| TC01001607.hg.1  | ENSG00000116711; | 0.0001416 | 0.0018036 | TRUE |
| TC04001084.hg.1  | ENSG00000109819; | 0.0001426 | 0.0018114 | TRUE |
| TC01002706.hg.1  | ENSG00000184292; | 0.0001435 | 0.001817  | TRUE |
| TC01002932.hg.1  | ENSG00000060718; | 0.000144  | 0.0018179 | TRUE |
| TC02000245.hg.1  | ENSG00000143891; | 0.0001476 | 0.001858  | TRUE |
| TC01001704.hg.1  | ENSG00000163531; | 0.0001526 | 0.0019155 | TRUE |
| TC01003638.hg.1  | ENSG00000073756; | 0.0001563 | 0.0019564 | TRUE |
| TC01003211.hg.1; | ENSG00000143387; | 0.0001607 | 0.0020054 | TRUE |
| TC05001933.hg.1  | ENSG00000113721; | 0.000162  | 0.0020156 | TRUE |
| TC01003129.hg.1  | ENSG00000143140; | 0.0001667 | 0.0020585 | TRUE |
| TC06004073.hg.1  | ENSG00000204520; | 0.0001669 | 0.0020585 | TRUE |

|                 |                  |           |           |      |
|-----------------|------------------|-----------|-----------|------|
| TC05001933.hg.1 | ENSG00000113721; | 0.0001669 | 0.0020585 | TRUE |
| TC16000474.hg.1 | ENSG00000205358; | 0.0001669 | 0.0020585 | TRUE |
| TC01001090.hg.1 | ENSG00000117289; | 0.0001695 | 0.0020789 | TRUE |
| TC01000394.hg.1 | ENSG00000159023; | 0.0001749 | 0.0021396 | TRUE |
| TC01001805.hg.1 | ENSG00000092969; | 0.0001777 | 0.0021672 | TRUE |
| TC01003638.hg.1 | ENSG00000073756; | 0.00018   | 0.0021893 | TRUE |
| TC01000685.hg.1 | ENSG00000162409; | 0.0001884 | 0.002283  | TRUE |
| TC01002847.hg.1 | ENSG00000117228; | 0.0001898 | 0.002283  | TRUE |
| TC01000100.hg.1 | ENSG00000049246; | 0.0001901 | 0.002283  | TRUE |
| TC01000100.hg.1 | ENSG00000049246; | 0.0001901 | 0.002283  | TRUE |
| TC03000577.hg.1 | ENSG00000144857; | 0.0001904 | 0.002283  | TRUE |
| TC01003638.hg.1 | ENSG00000073756; | 0.0002003 | 0.0023887 | TRUE |
| TC06001510.hg.1 | ENSG00000137331; | 0.0002003 | 0.0023887 | TRUE |
| TC02002823.hg.1 | ENSG00000135919; | 0.0002003 | 0.0023887 | TRUE |
| TC01001805.hg.1 | ENSG00000092969; | 0.0002032 | 0.0024101 | TRUE |
| TC02000466.hg.1 | ENSG00000159399; | 0.0002093 | 0.0024713 | TRUE |
| TC01001805.hg.1 | ENSG00000092969; | 0.0002093 | 0.0024713 | TRUE |
| TC01000734.hg.1 | ENSG00000118473; | 0.0002114 | 0.0024864 | TRUE |
| TC01001090.hg.1 | ENSG00000117289; | 0.0002129 | 0.0024967 | TRUE |
| TC01001805.hg.1 | ENSG00000092969; | 0.0002163 | 0.0025287 | TRUE |
| TC01002706.hg.1 | ENSG00000184292; | 0.0002168 | 0.0025287 | TRUE |
| TC01000139.hg.1 | ENSG00000171819; | 0.0002206 | 0.0025666 | TRUE |
| TC01000904.hg.1 | ENSG00000162692; | 0.0002213 | 0.0025673 | TRUE |
| TC01000685.hg.1 | ENSG00000162409; | 0.0002345 | 0.0027061 | TRUE |
| TC03000248.hg.1 | ENSG00000144791; | 0.0002348 | 0.0027061 | TRUE |
| TC03001071.hg.1 | ENSG00000114315; | 0.0002348 | 0.0027061 | TRUE |
| TC01002669.hg.1 | ENSG00000157193; | 0.0002378 | 0.0027292 | TRUE |
| TC01001736.hg.1 | ENSG00000196352; | 0.0002407 | 0.0027519 | TRUE |
| TC02001031.hg.1 | ENSG00000152256; | 0.0002407 | 0.0027519 | TRUE |
| TC01001805.hg.1 | ENSG00000092969; | 0.0002475 | 0.0028179 | TRUE |
| TC02000041.hg.1 | ENSG00000115738; | 0.0002494 | 0.002832  | TRUE |
| TC01001704.hg.1 | ENSG00000163531; | 0.0002512 | 0.0028355 | TRUE |
| TC01003129.hg.1 | ENSG00000143140; | 0.0002514 | 0.0028355 | TRUE |
| TC01000904.hg.1 | ENSG00000162692; | 0.0002514 | 0.0028355 | TRUE |
| TC01003042.hg.1 | ENSG00000092607; | 0.0002563 | 0.0028797 | TRUE |
| TC01001188.hg.1 | ENSG00000143369; | 0.0002579 | 0.002887  | TRUE |
| TC01003718.hg.1 | ENSG00000133048; | 0.0002579 | 0.002887  | TRUE |
| TC02001031.hg.1 | ENSG00000152256; | 0.0002621 | 0.0029224 | TRUE |
| TC03000846.hg.1 | ENSG00000196549; | 0.0002775 | 0.0030858 | TRUE |
| TC01002932.hg.1 | ENSG00000060718; | 0.0002795 | 0.0030999 | TRUE |
| TC03000846.hg.1 | ENSG00000196549; | 0.0002817 | 0.0031163 | TRUE |
| TC01002706.hg.1 | ENSG00000184292; | 0.0002851 | 0.0031382 | TRUE |
| TC02001031.hg.1 | ENSG00000152256; | 0.0002852 | 0.0031382 | TRUE |
| TC01000728.hg.1 | ENSG00000162433; | 0.0002884 | 0.003166  | TRUE |
| TC01000685.hg.1 | ENSG00000162409; | 0.0002985 | 0.0032644 | TRUE |
| TC02001750.hg.1 | ENSG00000138061; | 0.0002985 | 0.0032644 | TRUE |
| TC03000214.hg.1 | ENSG00000168036; | 0.0003002 | 0.0032701 | TRUE |
| TC02000219.hg.1 | ENSG00000049323; | 0.0003031 | 0.0032862 | TRUE |
| TC01001805.hg.1 | ENSG00000092969; | 0.0003032 | 0.0032862 | TRUE |
| TC02001031.hg.1 | ENSG00000152256; | 0.0003099 | 0.0033459 | TRUE |
| TC02000041.hg.1 | ENSG00000115738; | 0.0003103 | 0.0033459 | TRUE |
| TC03000248.hg.1 | ENSG00000144791; | 0.0003117 | 0.0033523 | TRUE |
| TC01000734.hg.1 | ENSG00000118473; | 0.0003187 | 0.003419  | TRUE |
| TC01001805.hg.1 | ENSG00000092969; | 0.0003197 | 0.0034215 | TRUE |
| TC01000685.hg.1 | ENSG00000162409; | 0.0003245 | 0.0034638 | TRUE |
| TC03001071.hg.1 | ENSG00000114315; | 0.0003302 | 0.003495  | TRUE |
| TC03001071.hg.1 | ENSG00000114315; | 0.0003302 | 0.003495  | TRUE |
| TC02000762.hg.1 | ENSG00000163083; | 0.0003302 | 0.003495  | TRUE |

|                 |                  |           |           |      |
|-----------------|------------------|-----------|-----------|------|
| TC01001805.hg.1 | ENSG00000092969; | 0.0003302 | 0.003495  | TRUE |
| TC01001624.hg.1 | ENSG00000116741; | 0.0003347 | 0.0035294 | TRUE |
| TC01000783.hg.1 | ENSG00000117069; | 0.0003374 | 0.0035488 | TRUE |
| TC01003638.hg.1 | ENSG00000073756; | 0.0003395 | 0.003562  | TRUE |
| TC01000685.hg.1 | ENSG00000162409; | 0.0003438 | 0.0035906 | TRUE |
| TC01003042.hg.1 | ENSG00000092607; | 0.0003439 | 0.0035906 | TRUE |
| TC01001473.hg.1 | ENSG00000143153; | 0.0003463 | 0.0036074 | TRUE |
| TC01000904.hg.1 | ENSG00000162692; | 0.0003545 | 0.0036835 | TRUE |
| TC01001624.hg.1 | ENSG00000116741; | 0.0003654 | 0.0037875 | TRUE |
| TC01001805.hg.1 | ENSG00000092969; | 0.0003665 | 0.0037901 | TRUE |
| TC01003638.hg.1 | ENSG00000073756; | 0.000405  | 0.0041626 | TRUE |
| TC01003638.hg.1 | ENSG00000073756; | 0.000405  | 0.0041626 | TRUE |
| TC05001933.hg.1 | ENSG00000113721; | 0.000405  | 0.0041626 | TRUE |
| TC01001090.hg.1 | ENSG00000117289; | 0.000405  | 0.0041626 | TRUE |
| TC01001805.hg.1 | ENSG00000092969; | 0.0004091 | 0.0041795 | TRUE |
| TC01002706.hg.1 | ENSG00000184292; | 0.0004204 | 0.004285  | TRUE |
| TC03000214.hg.1 | ENSG00000168036; | 0.0004447 | 0.0045168 | TRUE |
| TC02000620.hg.1 | ENSG00000115594; | 0.0004447 | 0.0045168 | TRUE |
| TC01000685.hg.1 | ENSG00000162409; | 0.0004483 | 0.0045268 | TRUE |
| TC01001090.hg.1 | ENSG00000117289; | 0.0004508 | 0.0045268 | TRUE |
| TC02000466.hg.1 | ENSG00000159399; | 0.0004519 | 0.0045268 | TRUE |
| TC02001100.hg.1 | ENSG00000138448; | 0.0004522 | 0.0045268 | TRUE |
| TC07000137.hg.1 | ENSG00000136244; | 0.0004522 | 0.0045268 | TRUE |
| TC01003638.hg.1 | ENSG00000073756; | 0.0004531 | 0.0045268 | TRUE |
| TC03000262.hg.1 | ENSG00000160801; | 0.0004531 | 0.0045268 | TRUE |
| TC01001805.hg.1 | ENSG00000092969; | 0.0004557 | 0.0045373 | TRUE |
| TC01001805.hg.1 | ENSG00000092969; | 0.0004627 | 0.0045958 | TRUE |
| TC01000728.hg.1 | ENSG00000162433; | 0.0004689 | 0.004641  | TRUE |
| TC01000685.hg.1 | ENSG00000162409; | 0.0004689 | 0.004641  | TRUE |
| TC03000214.hg.1 | ENSG00000168036; | 0.0004728 | 0.0046586 | TRUE |
| TC01002954.hg.1 | ENSG00000134243; | 0.0004728 | 0.0046586 | TRUE |
| TC01002669.hg.1 | ENSG00000157193; | 0.0004778 | 0.0046872 | TRUE |
| TC01002706.hg.1 | ENSG00000184292; | 0.0004785 | 0.0046872 | TRUE |
| TC01000685.hg.1 | ENSG00000162409; | 0.0004841 | 0.0047313 | TRUE |
| TC01000904.hg.1 | ENSG00000162692; | 0.0004881 | 0.0047595 | TRUE |
| TC01002954.hg.1 | ENSG00000134243; | 0.0005085 | 0.0049262 | TRUE |
| TC06000595.hg.1 | ENSG00000112655; | 0.0005085 | 0.0049262 | TRUE |
| TC01001805.hg.1 | ENSG00000092969; | 0.0005086 | 0.0049262 | TRUE |
| TC01001805.hg.1 | ENSG00000092969; | 0.0005329 | 0.0051442 | TRUE |
| TC01000734.hg.1 | ENSG00000118473; | 0.0005329 | 0.0051442 | TRUE |
| TC01000783.hg.1 | ENSG00000117069; | 0.0005361 | 0.005157  | TRUE |
| TC01002706.hg.1 | ENSG00000184292; | 0.0005378 | 0.0051625 | TRUE |
| TC01001624.hg.1 | ENSG00000116741; | 0.0005668 | 0.0054281 | TRUE |
| TC01000100.hg.1 | ENSG00000049246; | 0.0005789 | 0.0055321 | TRUE |
| TC02000762.hg.1 | ENSG00000163083; | 0.0005983 | 0.0057043 | TRUE |
| TC01001736.hg.1 | ENSG00000196352; | 0.0006308 | 0.0059683 | TRUE |
| TC04002931.hg.1 | ENSG00000134853; | 0.0006308 | 0.0059683 | TRUE |
| TC04002931.hg.1 | ENSG00000134853; | 0.0006308 | 0.0059683 | TRUE |
| TC02002624.hg.1 | ENSG00000115415; | 0.0006315 | 0.0059683 | TRUE |
| TC01001624.hg.1 | ENSG00000116741; | 0.0006332 | 0.0059708 | TRUE |
| TC01001805.hg.1 | ENSG00000092969; | 0.0006388 | 0.0060063 | TRUE |
| TC01002669.hg.1 | ENSG00000157193; | 0.0006431 | 0.0060063 | TRUE |
| TC02000762.hg.1 | ENSG00000163083; | 0.0006431 | 0.0060063 | TRUE |
| TC02001750.hg.1 | ENSG00000138061; | 0.0006433 | 0.0060063 | TRUE |
| TC02001750.hg.1 | ENSG00000138061; | 0.0006433 | 0.0060063 | TRUE |
| TC01000100.hg.1 | ENSG00000049246; | 0.0006505 | 0.0060536 | TRUE |
| TC01001805.hg.1 | ENSG00000092969; | 0.0006594 | 0.006123  | TRUE |
| TC01003129.hg.1 | ENSG00000143140; | 0.0006767 | 0.0062638 | TRUE |

|                 |                  |           |           |      |
|-----------------|------------------|-----------|-----------|------|
| TC01003129.hg.1 | ENSG00000143140; | 0.0006767 | 0.0062638 | TRUE |
| TC01001805.hg.1 | ENSG00000092969; | 0.0006801 | 0.0062746 | TRUE |
| TC02002292.hg.1 | ENSG00000136720; | 0.0007109 | 0.0065292 | TRUE |
| TC01003718.hg.1 | ENSG00000133048; | 0.0007109 | 0.0065292 | TRUE |
| TC10000350.hg.1 | ENSG00000107984; | 0.0007131 | 0.0065292 | TRUE |
| TC01002669.hg.1 | ENSG00000157193; | 0.0007138 | 0.0065292 | TRUE |
| TC01001624.hg.1 | ENSG00000116741; | 0.0007689 | 0.0070186 | TRUE |
| TC02002823.hg.1 | ENSG00000135919; | 0.0007764 | 0.0070646 | TRUE |
| TC02002823.hg.1 | ENSG00000135919; | 0.0007764 | 0.0070646 | TRUE |
| TC02002292.hg.1 | ENSG00000136720; | 0.0007845 | 0.0071155 | TRUE |
| TC06000595.hg.1 | ENSG00000112655; | 0.0007942 | 0.0071649 | TRUE |
| TC06000595.hg.1 | ENSG00000112655; | 0.0007942 | 0.0071649 | TRUE |
| TC02000466.hg.1 | ENSG00000159399; | 0.0007958 | 0.0071649 | TRUE |
| TC03000214.hg.1 | ENSG00000168036; | 0.0007958 | 0.0071649 | TRUE |
| TC01001624.hg.1 | ENSG00000116741; | 0.0008047 | 0.0072224 | TRUE |
| TC01003718.hg.1 | ENSG00000133048; | 0.0008175 | 0.0073217 | TRUE |
| TC01001805.hg.1 | ENSG00000092969; | 0.0008355 | 0.0074672 | TRUE |
| TC03000214.hg.1 | ENSG00000168036; | 0.0008522 | 0.007576  | TRUE |
| TC01002706.hg.1 | ENSG00000184292; | 0.0008522 | 0.007576  | TRUE |
| TC01001805.hg.1 | ENSG00000092969; | 0.000853  | 0.007576  | TRUE |
| TC01002166.hg.1 | ENSG00000116285; | 0.0008644 | 0.0076453 | TRUE |
| TC01003638.hg.1 | ENSG00000073756; | 0.0008644 | 0.0076453 | TRUE |
| TC02000762.hg.1 | ENSG00000163083; | 0.0008644 | 0.0076453 | TRUE |
| TC01001805.hg.1 | ENSG00000092969; | 0.0008722 | 0.0076832 | TRUE |
| TC01001805.hg.1 | ENSG00000092969; | 0.0008834 | 0.0077054 | TRUE |
| TC02001750.hg.1 | ENSG00000138061; | 0.0008834 | 0.0077054 | TRUE |
| TC02000041.hg.1 | ENSG00000115738; | 0.0008855 | 0.0077054 | TRUE |
| TC01001607.hg.1 | ENSG00000116711; | 0.0008855 | 0.0077054 | TRUE |
| TC01001607.hg.1 | ENSG00000116711; | 0.0008855 | 0.0077054 | TRUE |
| TC01001805.hg.1 | ENSG00000092969; | 0.0008856 | 0.0077054 | TRUE |
| TC01001805.hg.1 | ENSG00000092969; | 0.0009141 | 0.0079375 | TRUE |
| TC01000100.hg.1 | ENSG00000049246; | 0.0009365 | 0.0081155 | TRUE |
| TC05001590.hg.1 | ENSG00000113369; | 0.0009457 | 0.0081787 | TRUE |
| TC02002823.hg.1 | ENSG00000135919; | 0.0009508 | 0.0081982 | TRUE |
| TC01001805.hg.1 | ENSG00000092969; | 0.0009508 | 0.0081982 | TRUE |
| TC01001805.hg.1 | ENSG00000092969; | 0.0009599 | 0.0082435 | TRUE |
| TC01001805.hg.1 | ENSG00000092969; | 0.0009599 | 0.0082435 | TRUE |
| TC01000685.hg.1 | ENSG00000162409; | 0.0009661 | 0.0082718 | TRUE |
| TC01000685.hg.1 | ENSG00000162409; | 0.0009706 | 0.0082851 | TRUE |
| TC01000685.hg.1 | ENSG00000162409; | 0.0009715 | 0.0082851 | TRUE |
| TC02001206.hg.1 | ENSG00000118257; | 0.0009753 | 0.0082923 | TRUE |
| TC01003638.hg.1 | ENSG00000073756; | 0.0009753 | 0.0082923 | TRUE |
| TC01000904.hg.1 | ENSG00000162692; | 0.0009832 | 0.0083268 | TRUE |
| TC02002823.hg.1 | ENSG00000135919; | 0.0009832 | 0.0083268 | TRUE |
| TC01001805.hg.1 | ENSG00000092969; | 0.0009874 | 0.008337  | TRUE |
| TC01000685.hg.1 | ENSG00000162409; | 0.0009897 | 0.00834   | TRUE |
| TC01000100.hg.1 | ENSG00000049246; | 0.0009932 | 0.0083532 | TRUE |
| TC01000100.hg.1 | ENSG00000049246; | 0.0010138 | 0.0084996 | TRUE |
| TC01000100.hg.1 | ENSG00000049246; | 0.0010206 | 0.0084996 | TRUE |
| TC06001089.hg.1 | ENSG00000111981; | 0.0010237 | 0.0084996 | TRUE |
| TC02001031.hg.1 | ENSG00000152256; | 0.0010237 | 0.0084996 | TRUE |
| TC04002931.hg.1 | ENSG00000134853; | 0.0010237 | 0.0084996 | TRUE |
| TC06001089.hg.1 | ENSG00000111981; | 0.0010237 | 0.0084996 | TRUE |
| TC01003129.hg.1 | ENSG00000143140; | 0.0010237 | 0.0084996 | TRUE |
| TC02000041.hg.1 | ENSG00000115738; | 0.0010237 | 0.0084996 | TRUE |
| TC02000762.hg.1 | ENSG00000163083; | 0.0010285 | 0.0084996 | TRUE |
| TC03000577.hg.1 | ENSG00000144857; | 0.0010338 | 0.0085162 | TRUE |
| TC02002624.hg.1 | ENSG00000115415; | 0.0010354 | 0.0085162 | TRUE |



|                  |                  |           |           |      |
|------------------|------------------|-----------|-----------|------|
| TC02001031.hg.1  | ENSG00000152256; | 0.0010354 | 0.0085162 | TRUE |
| TC01001624.hg.1  | ENSG00000116741; | 0.0010527 | 0.008633  | TRUE |
| TC01000703.hg.1  | ENSG00000132849; | 0.001108  | 0.0090694 | TRUE |
| TC02002624.hg.1  | ENSG00000115415; | 0.0011122 | 0.0090868 | TRUE |
| TC01000394.hg.1  | ENSG00000159023; | 0.0011362 | 0.0092652 | TRUE |
| TC01003129.hg.1  | ENSG00000143140; | 0.0011419 | 0.0092677 | TRUE |
| TC03001255.hg.1  | ENSG00000033867; | 0.0011419 | 0.0092677 | TRUE |
| TC01003778.hg.1  | ENSG00000076356; | 0.0011446 | 0.0092677 | TRUE |
| TC01003638.hg.1  | ENSG00000073756; | 0.0011452 | 0.0092677 | TRUE |
| TC01003129.hg.1  | ENSG00000143140; | 0.0012035 | 0.0097175 | TRUE |
| TC01003129.hg.1  | ENSG00000143140; | 0.0012053 | 0.0097175 | TRUE |
| TC01000685.hg.1  | ENSG00000162409; | 0.001211  | 0.0097447 | TRUE |
| TC05001752.hg.1  | ENSG00000138829; | 0.0012233 | 0.0097699 | TRUE |
| TC10001711.hg.1; | ENSG00000066468; | 0.0012233 | 0.0097699 | TRUE |
| TC10001711.hg.1; | ENSG00000066468; | 0.0012233 | 0.0097699 | TRUE |
| TC04002931.hg.1  | ENSG00000134853; | 0.0012233 | 0.0097699 | TRUE |
| TC04002931.hg.1  | ENSG00000134853; | 0.0012233 | 0.0097699 | TRUE |
| TC08000845.hg.1  | ENSG00000187786; | 0.0012233 | 0.0097699 | TRUE |
| TC03000248.hg.1  | ENSG00000144791; | 0.0012312 | 0.0097699 | TRUE |
| TC02001963.hg.1  | ENSG00000163235; | 0.0012312 | 0.0097699 | TRUE |
| TC01001805.hg.1  | ENSG00000092969; | 0.0012757 | 0.0100951 | TRUE |
| TC01000904.hg.1  | ENSG00000162692; | 0.0012857 | 0.010155  | TRUE |
| TC02001031.hg.1  | ENSG00000152256; | 0.001293  | 0.0101552 | TRUE |
| TC01000100.hg.1  | ENSG00000049246; | 0.0012936 | 0.0101552 | TRUE |
| TC06000595.hg.1  | ENSG00000112655; | 0.0012991 | 0.0101552 | TRUE |
| TC01001805.hg.1  | ENSG00000092969; | 0.0012991 | 0.0101552 | TRUE |
| TC05001933.hg.1  | ENSG00000113721; | 0.0012991 | 0.0101552 | TRUE |
| TC03001071.hg.1  | ENSG00000114315; | 0.0012999 | 0.0101552 | TRUE |
| TC01000685.hg.1  | ENSG00000162409; | 0.0013117 | 0.0102288 | TRUE |
| TC01000904.hg.1  | ENSG00000162692; | 0.0013238 | 0.0103042 | TRUE |
| TC01001624.hg.1  | ENSG00000116741; | 0.0013308 | 0.0103398 | TRUE |
| TC01001805.hg.1  | ENSG00000092969; | 0.0013475 | 0.0104409 | TRUE |
| TC01001805.hg.1  | ENSG00000092969; | 0.0013475 | 0.0104409 | TRUE |
| TC01000904.hg.1  | ENSG00000162692; | 0.0013679 | 0.0105609 | TRUE |
| TC06000608.hg.1  | ENSG00000112715; | 0.0013679 | 0.0105609 | TRUE |
| TC01001090.hg.1  | ENSG00000117289; | 0.0014025 | 0.0107798 | TRUE |
| TC01000734.hg.1  | ENSG00000118473; | 0.0014026 | 0.0107798 | TRUE |
| TC01000685.hg.1  | ENSG00000162409; | 0.0014477 | 0.0110972 | TRUE |
| TC10000350.hg.1  | ENSG00000107984; | 0.0014477 | 0.0110972 | TRUE |
| TC02001206.hg.1  | ENSG00000118257; | 0.0014659 | 0.0111927 | TRUE |
| TC01001624.hg.1  | ENSG00000116741; | 0.0014667 | 0.0111927 | TRUE |
| TC01001624.hg.1  | ENSG00000116741; | 0.0014972 | 0.0114049 | TRUE |
| TC01000685.hg.1  | ENSG00000162409; | 0.0015216 | 0.01157   | TRUE |
| TC01000728.hg.1  | ENSG00000162433; | 0.0015636 | 0.0118684 | TRUE |
| TC02001628.hg.1  | ENSG00000084674; | 0.0015925 | 0.0120667 | TRUE |
| TC01000734.hg.1  | ENSG00000118473; | 0.0016032 | 0.0121256 | TRUE |
| TC01003129.hg.1  | ENSG00000143140; | 0.001608  | 0.0121407 | TRUE |
| TC02001437.hg.1  | ENSG00000144476; | 0.0016172 | 0.0121623 | TRUE |
| TC01001736.hg.1  | ENSG00000196352; | 0.0016181 | 0.0121623 | TRUE |
| TC05001933.hg.1  | ENSG00000113721; | 0.0016255 | 0.0121623 | TRUE |
| TC02002624.hg.1  | ENSG00000115415; | 0.0016265 | 0.0121623 | TRUE |
| TC01003638.hg.1  | ENSG00000073756; | 0.0016265 | 0.0121623 | TRUE |
| TC10000350.hg.1  | ENSG00000107984; | 0.0016265 | 0.0121623 | TRUE |
| TC01003129.hg.1  | ENSG00000143140; | 0.0016265 | 0.0121623 | TRUE |
| TC01003638.hg.1  | ENSG00000073756; | 0.0017724 | 0.0131959 | TRUE |
| TC01001704.hg.1  | ENSG00000163531; | 0.0017925 | 0.0133226 | TRUE |
| TC01000703.hg.1  | ENSG00000132849; | 0.0018363 | 0.0136246 | TRUE |
| TC01001607.hg.1  | ENSG00000116711; | 0.0019133 | 0.0141602 | TRUE |

|                  |                  |           |           |      |
|------------------|------------------|-----------|-----------|------|
| TC03000262.hg.1  | ENSG00000160801; | 0.0019205 | 0.0141602 | TRUE |
| TC03000846.hg.1  | ENSG00000196549; | 0.0019205 | 0.0141602 | TRUE |
| TC01000728.hg.1  | ENSG00000162433; | 0.0019205 | 0.0141602 | TRUE |
| TC01002954.hg.1  | ENSG00000134243; | 0.0019205 | 0.0141602 | TRUE |
| TC01000904.hg.1  | ENSG00000162692; | 0.0019284 | 0.0141602 | TRUE |
| TC02000466.hg.1  | ENSG00000159399; | 0.0019332 | 0.0141716 | TRUE |
| TC01000685.hg.1  | ENSG00000162409; | 0.0019435 | 0.0142222 | TRUE |
| TC02002808.hg.1  | ENSG00000116106; | 0.0019621 | 0.0142729 | TRUE |
| TC02001206.hg.1  | ENSG00000118257; | 0.0019621 | 0.0142729 | TRUE |
| TC06004073.hg.1  | ENSG00000204520; | 0.0019621 | 0.0142729 | TRUE |
| TC02000041.hg.1  | ENSG00000115738; | 0.0019621 | 0.0142729 | TRUE |
| TC01000904.hg.1  | ENSG00000162692; | 0.0019621 | 0.0142729 | TRUE |
| TC01001188.hg.1; | ENSG00000143369; | 0.0019621 | 0.0142729 | TRUE |
| TC01001624.hg.1  | ENSG00000116741; | 0.0020021 | 0.0144777 | TRUE |
| TC02001206.hg.1  | ENSG00000118257; | 0.0020082 | 0.0144979 | TRUE |
| TC01001805.hg.1  | ENSG00000092969; | 0.0020325 | 0.0146487 | TRUE |
| TC01002669.hg.1  | ENSG00000157193; | 0.0020504 | 0.0147401 | TRUE |
| TC03000013.hg.1  | ENSG00000150995; | 0.0020504 | 0.0147401 | TRUE |
| TC01000904.hg.1  | ENSG00000162692; | 0.0020648 | 0.0147767 | TRUE |
| TC02001031.hg.1  | ENSG00000152256; | 0.0020762 | 0.0147767 | TRUE |
| TC03002106.hg.1  | ENSG00000090530; | 0.0020762 | 0.0147767 | TRUE |
| TC02002808.hg.1  | ENSG00000116106; | 0.0020762 | 0.0147767 | TRUE |
| TC05001933.hg.1  | ENSG00000113721; | 0.0020762 | 0.0147767 | TRUE |
| TC03001590.hg.1  | ENSG00000184500; | 0.0020762 | 0.0147767 | TRUE |
| TC04000408.hg.1  | ENSG00000169429; | 0.0020762 | 0.0147767 | TRUE |
| TC04002931.hg.1  | ENSG00000134853; | 0.0020762 | 0.0147767 | TRUE |
| TC03001071.hg.1  | ENSG00000114315; | 0.0020762 | 0.0147767 | TRUE |
| TC02001031.hg.1  | ENSG00000152256; | 0.0020997 | 0.0148328 | TRUE |
| TC01001805.hg.1  | ENSG00000092969; | 0.0022531 | 0.0158904 | TRUE |
| TC03000013.hg.1  | ENSG00000150995; | 0.0022884 | 0.0161127 | TRUE |
| TC01000685.hg.1  | ENSG00000162409; | 0.0022934 | 0.0161215 | TRUE |
| TC01001607.hg.1  | ENSG00000116711; | 0.0023255 | 0.0163208 | TRUE |
| TC01001624.hg.1  | ENSG00000116741; | 0.0024059 | 0.0168573 | TRUE |
| TC01002669.hg.1  | ENSG00000157193; | 0.0024433 | 0.0170908 | TRUE |
| TC01003638.hg.1  | ENSG00000073756; | 0.0024529 | 0.0171161 | TRUE |
| TC02000762.hg.1  | ENSG00000163083; | 0.0024529 | 0.0171161 | TRUE |
| TC01002954.hg.1  | ENSG00000134243; | 0.0024674 | 0.0171617 | TRUE |
| TC04000313.hg.1  | ENSG00000157404; | 0.0024674 | 0.0171617 | TRUE |
| TC01000685.hg.1  | ENSG00000162409; | 0.0025115 | 0.0174256 | TRUE |
| TC01001736.hg.1  | ENSG00000196352; | 0.002538  | 0.0175812 | TRUE |
| TC02001206.hg.1  | ENSG00000118257; | 0.002555  | 0.0176702 | TRUE |
| TC03000214.hg.1  | ENSG00000168036; | 0.0025845 | 0.0178414 | TRUE |
| TC03002146.hg.1  | ENSG00000189058; | 0.0025901 | 0.0178414 | TRUE |
| TC02001628.hg.1  | ENSG00000084674; | 0.0025901 | 0.0178414 | TRUE |
| TC01001736.hg.1  | ENSG00000196352; | 0.0026066 | 0.0179115 | TRUE |
| TC02000041.hg.1  | ENSG00000115738; | 0.0026272 | 0.0180244 | TRUE |
| TC02000466.hg.1  | ENSG00000159399; | 0.002646  | 0.0181238 | TRUE |
| TC01002669.hg.1  | ENSG00000157193; | 0.0026699 | 0.0182295 | TRUE |
| TC03000013.hg.1  | ENSG00000150995; | 0.0026699 | 0.0182295 | TRUE |
| TC01000685.hg.1  | ENSG00000162409; | 0.0026699 | 0.0182295 | TRUE |
| TC01001805.hg.1  | ENSG00000092969; | 0.0027106 | 0.0184483 | TRUE |
| TC01001607.hg.1  | ENSG00000116711; | 0.0027276 | 0.0185201 | TRUE |
| TC02000219.hg.1  | ENSG00000049323; | 0.0027276 | 0.0185201 | TRUE |
| TC01001090.hg.1  | ENSG00000117289; | 0.0027344 | 0.018522  | TRUE |
| TC01001607.hg.1  | ENSG00000116711; | 0.0027476 | 0.0185819 | TRUE |
| TC02001628.hg.1  | ENSG00000084674; | 0.0027657 | 0.0186752 | TRUE |
| TC02002823.hg.1  | ENSG00000135919; | 0.0028453 | 0.019182  | TRUE |
| TC01000685.hg.1  | ENSG00000162409; | 0.0028812 | 0.0193929 | TRUE |

|                 |                  |           |           |      |
|-----------------|------------------|-----------|-----------|------|
| TC02000466.hg.1 | ENSG00000159399; | 0.0028856 | 0.0193929 | TRUE |
| TC01002954.hg.1 | ENSG00000134243; | 0.0028988 | 0.0194508 | TRUE |
| TC01003638.hg.1 | ENSG00000073756; | 0.0029173 | 0.0195445 | TRUE |
| TC02000762.hg.1 | ENSG00000163083; | 0.0029648 | 0.0198165 | TRUE |
| TC03000214.hg.1 | ENSG00000168036; | 0.0029648 | 0.0198165 | TRUE |
| TC03001071.hg.1 | ENSG00000114315; | 0.0030188 | 0.02012   | TRUE |
| TC01001736.hg.1 | ENSG00000196352; | 0.003022  | 0.02012   | TRUE |
| TC01002166.hg.1 | ENSG00000116285; | 0.0030461 | 0.020249  | TRUE |
| TC01002954.hg.1 | ENSG00000134243; | 0.0030548 | 0.020275  | TRUE |
| TC01003638.hg.1 | ENSG00000073756; | 0.0030835 | 0.020434  | TRUE |
| TC01001736.hg.1 | ENSG00000196352; | 0.0031151 | 0.0206117 | TRUE |
| TC01000100.hg.1 | ENSG00000049246; | 0.0031247 | 0.0206431 | TRUE |
| TC03000214.hg.1 | ENSG00000168036; | 0.003161  | 0.0208508 | TRUE |
| TC01003129.hg.1 | ENSG00000143140; | 0.0032218 | 0.0210573 | TRUE |
| TC03000214.hg.1 | ENSG00000168036; | 0.0032218 | 0.0210573 | TRUE |
| TC03000214.hg.1 | ENSG00000168036; | 0.0032218 | 0.0210573 | TRUE |
| TC02001031.hg.1 | ENSG00000152256; | 0.0032218 | 0.0210573 | TRUE |
| TC02002808.hg.1 | ENSG00000116106; | 0.0032218 | 0.0210573 | TRUE |
| TC07000328.hg.1 | ENSG00000146648; | 0.0032218 | 0.0210573 | TRUE |
| TC05003423.hg.1 | ENSG00000082196; | 0.0032218 | 0.0210573 | TRUE |
| TC01002166.hg.1 | ENSG00000116285; | 0.0032218 | 0.0210573 | TRUE |
| TC03000214.hg.1 | ENSG00000168036; | 0.0032218 | 0.0210573 | TRUE |
| TC06000968.hg.1 | ENSG00000146374; | 0.0032218 | 0.0210573 | TRUE |
| TC05001752.hg.1 | ENSG00000138829; | 0.0032218 | 0.0210573 | TRUE |
| TC01001624.hg.1 | ENSG00000116741; | 0.0033097 | 0.021419  | TRUE |
| TC03000248.hg.1 | ENSG00000144791; | 0.0033097 | 0.021419  | TRUE |
| TC01003638.hg.1 | ENSG00000073756; | 0.0033287 | 0.0214936 | TRUE |
| TC10001711.hg.1 | ENSG00000066468; | 0.0033435 | 0.0215239 | TRUE |
| TC01000904.hg.1 | ENSG00000162692; | 0.0033435 | 0.0215239 | TRUE |
| TC03000214.hg.1 | ENSG00000168036; | 0.0033435 | 0.0215239 | TRUE |
| TC01000783.hg.1 | ENSG00000117069; | 0.0033591 | 0.0215594 | TRUE |
| TC04002931.hg.1 | ENSG00000134853; | 0.0035025 | 0.0223699 | TRUE |
| TC01003042.hg.1 | ENSG00000092607; | 0.0035025 | 0.0223699 | TRUE |
| TC03000013.hg.1 | ENSG00000150995; | 0.0035025 | 0.0223699 | TRUE |
| TC03000846.hg.1 | ENSG00000196549; | 0.0035129 | 0.0223699 | TRUE |
| TC03000846.hg.1 | ENSG00000196549; | 0.0035129 | 0.0223699 | TRUE |
| TC01001805.hg.1 | ENSG00000092969; | 0.0035167 | 0.0223699 | TRUE |
| TC01002932.hg.1 | ENSG00000060718; | 0.0035221 | 0.0223714 | TRUE |
| TC01000904.hg.1 | ENSG00000162692; | 0.0035396 | 0.0224463 | TRUE |
| TC05001933.hg.1 | ENSG00000113721; | 0.0035497 | 0.0224463 | TRUE |
| TC03001071.hg.1 | ENSG00000114315; | 0.0035497 | 0.0224463 | TRUE |
| TC03000214.hg.1 | ENSG00000168036; | 0.0035497 | 0.0224463 | TRUE |
| TC01003718.hg.1 | ENSG00000133048; | 0.0035691 | 0.0225024 | TRUE |
| TC01000904.hg.1 | ENSG00000162692; | 0.0036069 | 0.0227077 | TRUE |
| TC03000248.hg.1 | ENSG00000144791; | 0.0036181 | 0.0227445 | TRUE |
| TC01001736.hg.1 | ENSG00000196352; | 0.00375   | 0.0235394 | TRUE |
| TC01000394.hg.1 | ENSG00000159023; | 0.0038074 | 0.0238644 | TRUE |
| TC01000685.hg.1 | ENSG00000162409; | 0.003845  | 0.0240122 | TRUE |
| TC01003638.hg.1 | ENSG00000073756; | 0.003845  | 0.0240122 | TRUE |
| TC01000685.hg.1 | ENSG00000162409; | 0.003845  | 0.0240122 | TRUE |
| TC02001750.hg.1 | ENSG00000138061; | 0.003845  | 0.0240122 | TRUE |
| TC01000728.hg.1 | ENSG00000162433; | 0.0038609 | 0.0240242 | TRUE |
| TC01000734.hg.1 | ENSG00000118473; | 0.0038928 | 0.0241303 | TRUE |
| TC04000408.hg.1 | ENSG00000169429; | 0.0038928 | 0.0241303 | TRUE |
| TC03000248.hg.1 | ENSG00000144791; | 0.0039005 | 0.0241303 | TRUE |
| TC04001509.hg.1 | ENSG00000173376; | 0.0039005 | 0.0241303 | TRUE |
| TC01002706.hg.1 | ENSG00000184292; | 0.0039005 | 0.0241303 | TRUE |
| TC03000013.hg.1 | ENSG00000150995; | 0.0039574 | 0.0244113 | TRUE |

|                  |                  |           |           |      |
|------------------|------------------|-----------|-----------|------|
| TC01000394.hg.1  | ENSG00000159023; | 0.0040221 | 0.0247393 | TRUE |
| TC03001466.hg.1  | ENSG00000163931; | 0.0040307 | 0.0247393 | TRUE |
| TC06001772.hg.1  | ENSG00000146233; | 0.0040307 | 0.0247393 | TRUE |
| TC02001963.hg.1  | ENSG00000163235; | 0.0040307 | 0.0247393 | TRUE |
| TC02001963.hg.1  | ENSG00000163235; | 0.0040307 | 0.0247393 | TRUE |
| TC01000685.hg.1  | ENSG00000162409; | 0.0041554 | 0.0254132 | TRUE |
| TC01002954.hg.1  | ENSG00000134243; | 0.004184  | 0.0255517 | TRUE |
| TC06001089.hg.1  | ENSG00000111981; | 0.0042129 | 0.0255777 | TRUE |
| TC02000281.hg.1  | ENSG00000116016; | 0.0042129 | 0.0255777 | TRUE |
| TC01002166.hg.1  | ENSG00000116285; | 0.0042129 | 0.0255777 | TRUE |
| TC01000904.hg.1  | ENSG00000162692; | 0.0042129 | 0.0255777 | TRUE |
| TC01001805.hg.1  | ENSG00000092969; | 0.0042331 | 0.0255777 | TRUE |
| TC01003638.hg.1  | ENSG00000073756; | 0.0042331 | 0.0255777 | TRUE |
| TC02001628.hg.1  | ENSG00000084674; | 0.0042331 | 0.0255777 | TRUE |
| TC03001071.hg.1  | ENSG00000114315; | 0.0042331 | 0.0255777 | TRUE |
| TC01003211.hg.1; | ENSG00000143387; | 0.0042331 | 0.0255777 | TRUE |
| TC02000041.hg.1  | ENSG00000115738; | 0.0042331 | 0.0255777 | TRUE |
| TC01000783.hg.1  | ENSG00000117069; | 0.0042716 | 0.0256837 | TRUE |
| TC01000100.hg.1  | ENSG00000049246; | 0.0043093 | 0.0258737 | TRUE |
| TC02002292.hg.1  | ENSG00000136720; | 0.0043163 | 0.0258798 | TRUE |
| TC01001736.hg.1  | ENSG00000196352; | 0.0043531 | 0.0260635 | TRUE |
| TC06001510.hg.1  | ENSG00000137331; | 0.0043659 | 0.0261039 | TRUE |
| TC01001805.hg.1  | ENSG00000092969; | 0.0043986 | 0.0262629 | TRUE |
| TC01000685.hg.1  | ENSG00000162409; | 0.0044922 | 0.026776  | TRUE |
| TC01001805.hg.1  | ENSG00000092969; | 0.0044971 | 0.026776  | TRUE |
| TC01000394.hg.1  | ENSG00000159023; | 0.004504  | 0.0267803 | TRUE |
| TC02000762.hg.1  | ENSG00000163083; | 0.004603  | 0.0272375 | TRUE |
| TC02001100.hg.1; | ENSG00000138448; | 0.004603  | 0.0272375 | TRUE |
| TC04000503.hg.1  | ENSG00000138696; | 0.004603  | 0.0272375 | TRUE |
| TC01000685.hg.1  | ENSG00000162409; | 0.0046573 | 0.0272375 | TRUE |
| TC05001933.hg.1  | ENSG00000113721; | 0.0046874 | 0.0272375 | TRUE |
| TC04000729.hg.1  | ENSG00000151617; | 0.0046874 | 0.0272375 | TRUE |
| TC01002578.hg.1  | ENSG00000117394; | 0.0046874 | 0.0272375 | TRUE |
| TC07001883.hg.1  | ENSG00000085662; | 0.0046874 | 0.0272375 | TRUE |
| TC02001628.hg.1  | ENSG00000084674; | 0.0046874 | 0.0272375 | TRUE |
| TC07001883.hg.1  | ENSG00000085662; | 0.0046874 | 0.0272375 | TRUE |
| TC07001883.hg.1  | ENSG00000085662; | 0.0046874 | 0.0272375 | TRUE |
| TC01001624.hg.1  | ENSG00000116741; | 0.0046874 | 0.0272375 | TRUE |
| TC03000214.hg.1  | ENSG00000168036; | 0.0046874 | 0.0272375 | TRUE |
| TC02000041.hg.1  | ENSG00000115738; | 0.0046874 | 0.0272375 | TRUE |
| TC02000041.hg.1  | ENSG00000115738; | 0.0046874 | 0.0272375 | TRUE |
| TC08000845.hg.1  | ENSG00000187786; | 0.0046874 | 0.0272375 | TRUE |
| TC06004066.hg.1  | NR_001434;NR_001 | 0.0046874 | 0.0272375 | TRUE |
| TC01001090.hg.1  | ENSG00000117289; | 0.004701  | 0.0272375 | TRUE |
| TC01003718.hg.1  | ENSG00000133048; | 0.0047018 | 0.0272375 | TRUE |
| TC01002669.hg.1  | ENSG00000157193; | 0.0048182 | 0.0278742 | TRUE |
| TC01000685.hg.1  | ENSG00000162409; | 0.0050605 | 0.0292364 | TRUE |
| TC01001624.hg.1  | ENSG00000116741; | 0.0052329 | 0.0301569 | TRUE |
| TC03000577.hg.1  | ENSG00000144857; | 0.0052329 | 0.0301569 | TRUE |
| TC01003638.hg.1  | ENSG00000073756; | 0.0052696 | 0.0301569 | TRUE |
| TC07001293.hg.1  | ENSG00000106483; | 0.0052696 | 0.0301569 | TRUE |
| TC05001933.hg.1  | ENSG00000113721; | 0.0052696 | 0.0301569 | TRUE |
| TC05001933.hg.1  | ENSG00000113721; | 0.0052696 | 0.0301569 | TRUE |
| TC01003638.hg.1  | ENSG00000073756; | 0.0052696 | 0.0301569 | TRUE |
| TC02000041.hg.1  | ENSG00000115738; | 0.0052696 | 0.0301569 | TRUE |
| TC05001752.hg.1  | ENSG00000138829; | 0.0052696 | 0.0301569 | TRUE |
| TC01001624.hg.1  | ENSG00000116741; | 0.0052903 | 0.0301569 | TRUE |
| TC01000685.hg.1  | ENSG00000162409; | 0.0053389 | 0.0303935 | TRUE |

|                 |                  |           |           |      |
|-----------------|------------------|-----------|-----------|------|
| TC01001090.hg.1 | ENSG00000117289; | 0.0055264 | 0.0314189 | TRUE |
| TC01000100.hg.1 | ENSG00000049246; | 0.0055449 | 0.0314826 | TRUE |
| TC01001805.hg.1 | ENSG00000092969; | 0.005635  | 0.0319305 | TRUE |
| TC01001805.hg.1 | ENSG00000092969; | 0.005635  | 0.0319305 | TRUE |
| TC01000728.hg.1 | ENSG00000162433; | 0.0056612 | 0.0320151 | TRUE |
| TC01001736.hg.1 | ENSG00000196352; | 0.0057957 | 0.0326497 | TRUE |
| TC01001805.hg.1 | ENSG00000092969; | 0.0057962 | 0.0326497 | TRUE |
| TC03001071.hg.1 | ENSG00000114315; | 0.0057962 | 0.0326497 | TRUE |
| TC02000762.hg.1 | ENSG00000163083; | 0.0057962 | 0.0326497 | TRUE |
| TC01003638.hg.1 | ENSG00000073756; | 0.0058689 | 0.0329724 | TRUE |
| TC01001805.hg.1 | ENSG00000092969; | 0.0059099 | 0.0331591 | TRUE |
| TC01002706.hg.1 | ENSG00000184292; | 0.0060125 | 0.0336903 | TRUE |
| TC05001933.hg.1 | ENSG00000113721; | 0.0060605 | 0.0338708 | TRUE |
| TC05003423.hg.1 | ENSG00000082196; | 0.0060605 | 0.0338708 | TRUE |
| TC03001071.hg.1 | ENSG00000114315; | 0.0060605 | 0.0338708 | TRUE |
| TC01002578.hg.1 | ENSG00000117394; | 0.0061171 | 0.0340983 | TRUE |
| TC01001736.hg.1 | ENSG00000196352; | 0.0063592 | 0.0354012 | TRUE |
| TC01000904.hg.1 | ENSG00000162692; | 0.0063986 | 0.0355748 | TRUE |
| TC03001071.hg.1 | ENSG00000114315; | 0.006463  | 0.0356875 | TRUE |
| TC02000281.hg.1 | ENSG00000116016; | 0.006463  | 0.0356875 | TRUE |
| TC04001245.hg.1 | ENSG00000145242; | 0.006463  | 0.0356875 | TRUE |
| TC03000917.hg.1 | ENSG00000136603; | 0.006463  | 0.0356875 | TRUE |
| TC07000768.hg.1 | ENSG00000174697; | 0.0064953 | 0.0356875 | TRUE |
| TC03000214.hg.1 | ENSG00000168036; | 0.0064953 | 0.0356875 | TRUE |
| TC19000191.hg.1 | ENSG00000130164; | 0.0064953 | 0.0356875 | TRUE |
| TC01000728.hg.1 | ENSG00000162433; | 0.0064953 | 0.0356875 | TRUE |
| TC02000219.hg.1 | ENSG00000049323; | 0.0064953 | 0.0356875 | TRUE |
| TC02000219.hg.1 | ENSG00000049323; | 0.0064953 | 0.0356875 | TRUE |
| TC02000041.hg.1 | ENSG00000115738; | 0.0065106 | 0.0356875 | TRUE |
| TC01000100.hg.1 | ENSG00000049246; | 0.0065339 | 0.0357695 | TRUE |
| TC02002823.hg.1 | ENSG00000135919; | 0.0066565 | 0.036371  | TRUE |
| TC02002823.hg.1 | ENSG00000135919; | 0.0066565 | 0.036371  | TRUE |
| TC03001071.hg.1 | ENSG00000114315; | 0.0066785 | 0.0363748 | TRUE |
| TC01003638.hg.1 | ENSG00000073756; | 0.0066785 | 0.0363748 | TRUE |
| TC01002166.hg.1 | ENSG00000116285; | 0.0066785 | 0.0363748 | TRUE |
| TC01002578.hg.1 | ENSG00000117394; | 0.0067271 | 0.0365467 | TRUE |
| TC01003638.hg.1 | ENSG00000073756; | 0.0067627 | 0.0366066 | TRUE |
| TC01000728.hg.1 | ENSG00000162433; | 0.0067627 | 0.0366066 | TRUE |
| TC01003718.hg.1 | ENSG00000133048; | 0.0067627 | 0.0366066 | TRUE |
| TC01001805.hg.1 | ENSG00000092969; | 0.0067724 | 0.0366066 | TRUE |
| TC01003638.hg.1 | ENSG00000073756; | 0.0068054 | 0.0367391 | TRUE |
| TC01000685.hg.1 | ENSG00000162409; | 0.00694   | 0.0374185 | TRUE |
| TC01000685.hg.1 | ENSG00000162409; | 0.0069629 | 0.0374948 | TRUE |
| TC01002669.hg.1 | ENSG00000157193; | 0.0070544 | 0.0379394 | TRUE |
| TC01000904.hg.1 | ENSG00000162692; | 0.0072179 | 0.0387702 | TRUE |
| TC01002166.hg.1 | ENSG00000116285; | 0.0073474 | 0.0394161 | TRUE |
| TC02000219.hg.1 | ENSG00000049323; | 0.0073708 | 0.0394922 | TRUE |
| TC01000685.hg.1 | ENSG00000162409; | 0.0074328 | 0.039734  | TRUE |
| TC01000685.hg.1 | ENSG00000162409; | 0.0074345 | 0.039734  | TRUE |
| TC01001607.hg.1 | ENSG00000116711; | 0.0075007 | 0.0399883 | TRUE |
| TC02000762.hg.1 | ENSG00000163083; | 0.0075007 | 0.0399883 | TRUE |
| TC01001607.hg.1 | ENSG00000116711; | 0.0075007 | 0.0399883 | TRUE |
| TC01000685.hg.1 | ENSG00000162409; | 0.0075904 | 0.0403656 | TRUE |
| TC01003497.hg.1 | ENSG00000117479; | 0.0076122 | 0.0404316 | TRUE |
| TC04000173.hg.1 | ENSG00000109610; | 0.0077577 | 0.041128  | TRUE |
| TC10000350.hg.1 | ENSG00000107984; | 0.0077577 | 0.041128  | TRUE |
| TC01003129.hg.1 | ENSG00000143140; | 0.0078229 | 0.0412581 | TRUE |
| TC01002166.hg.1 | ENSG00000116285; | 0.0078229 | 0.0412581 | TRUE |

|                 |                  |           |           |       |
|-----------------|------------------|-----------|-----------|-------|
| TC02002808.hg.1 | ENSG00000116106; | 0.0078229 | 0.0412581 | TRUE  |
| TC02001206.hg.1 | ENSG00000118257; | 0.0078229 | 0.0412581 | TRUE  |
| TC01000728.hg.1 | ENSG00000162433; | 0.0078353 | 0.0412581 | TRUE  |
| TC01001805.hg.1 | ENSG00000092969; | 0.007863  | 0.0413533 | TRUE  |
| TC01001607.hg.1 | ENSG00000116711; | 0.0078947 | 0.0414688 | TRUE  |
| TC01002669.hg.1 | ENSG00000157193; | 0.0082279 | 0.0431662 | TRUE  |
| TC01001624.hg.1 | ENSG00000116741; | 0.0082996 | 0.0434893 | TRUE  |
| TC01003638.hg.1 | ENSG00000073756; | 0.0083099 | 0.0434897 | TRUE  |
| TC02002292.hg.1 | ENSG00000136720; | 0.0083935 | 0.043767  | TRUE  |
| TC01003638.hg.1 | ENSG00000073756; | 0.0083935 | 0.043767  | TRUE  |
| TC03001071.hg.1 | ENSG00000114315; | 0.0083935 | 0.043767  | TRUE  |
| TC02001628.hg.1 | ENSG00000084674; | 0.0083935 | 0.043767  | TRUE  |
| TC02002624.hg.1 | ENSG00000115415; | 0.0083935 | 0.043767  | TRUE  |
| TC01001188.hg.1 | ENSG00000143369; | 0.0085757 | 0.0445269 | TRUE  |
| TC01001624.hg.1 | ENSG00000116741; | 0.0085757 | 0.0445269 | TRUE  |
| TC02002714.hg.1 | ENSG00000163251; | 0.0086636 | 0.0447486 | TRUE  |
| TC02001031.hg.1 | ENSG00000152256; | 0.0086636 | 0.0447486 | TRUE  |
| TC11000182.hg.1 | ENSG00000148926; | 0.0086636 | 0.0447486 | TRUE  |
| TC07001293.hg.1 | ENSG00000106483; | 0.0086636 | 0.0447486 | TRUE  |
| TC02001031.hg.1 | ENSG00000152256; | 0.0086636 | 0.0447486 | TRUE  |
| TC07001559.hg.1 | ENSG00000075223; | 0.0086636 | 0.0447486 | TRUE  |
| TC01001805.hg.1 | ENSG00000092969; | 0.0086968 | 0.0447486 | TRUE  |
| TC01001805.hg.1 | ENSG00000092969; | 0.0088931 | 0.0455402 | TRUE  |
| TC03000846.hg.1 | ENSG00000196549; | 0.0088931 | 0.0455402 | TRUE  |
| TC01002578.hg.1 | ENSG00000117394; | 0.0088931 | 0.0455402 | TRUE  |
| TC03000214.hg.1 | ENSG00000168036; | 0.0088931 | 0.0455402 | TRUE  |
| TC02000082.hg.1 | ENSG00000071575; | 0.0088931 | 0.0455402 | TRUE  |
| TC01001607.hg.1 | ENSG00000116711; | 0.0088931 | 0.0455402 | TRUE  |
| TC03000214.hg.1 | ENSG00000168036; | 0.0088931 | 0.0455402 | TRUE  |
| TC01002954.hg.1 | ENSG00000134243; | 0.008939  | 0.0455571 | TRUE  |
| TC01000100.hg.1 | ENSG00000049246; | 0.0090221 | 0.0459257 | TRUE  |
| TC01001805.hg.1 | ENSG00000092969; | 0.0090896 | 0.0462147 | TRUE  |
| TC01001624.hg.1 | ENSG00000116741; | 0.0092144 | 0.0467616 | TRUE  |
| TC01000703.hg.1 | ENSG00000132849; | 0.0092144 | 0.0467616 | TRUE  |
| TC01001805.hg.1 | ENSG00000092969; | 0.00923   | 0.0467616 | TRUE  |
| TC01001736.hg.1 | ENSG00000196352; | 0.0092557 | 0.0468366 | TRUE  |
| TC01003129.hg.1 | ENSG00000143140; | 0.0093579 | 0.0468661 | TRUE  |
| TC03000214.hg.1 | ENSG00000168036; | 0.0093579 | 0.0468661 | TRUE  |
| TC07001883.hg.1 | ENSG00000085662; | 0.0093579 | 0.0468661 | TRUE  |
| TC01001805.hg.1 | ENSG00000092969; | 0.0093579 | 0.0468661 | TRUE  |
| TC07000328.hg.1 | ENSG00000146648; | 0.0093579 | 0.0468661 | TRUE  |
| TC03000214.hg.1 | ENSG00000168036; | 0.0093579 | 0.0468661 | TRUE  |
| TC02000041.hg.1 | ENSG00000115738; | 0.0093579 | 0.0468661 | TRUE  |
| TC02002292.hg.1 | ENSG00000136720; | 0.0093579 | 0.0468661 | TRUE  |
| TC07001293.hg.1 | ENSG00000106483; | 0.0093601 | 0.0468661 | TRUE  |
| TC01000904.hg.1 | ENSG00000162692; | 0.0094429 | 0.0472257 | TRUE  |
| TC01000685.hg.1 | ENSG00000162409; | 0.0094661 | 0.0472861 | TRUE  |
| TC01001090.hg.1 | ENSG00000117289; | 0.0095115 | 0.0474575 | TRUE  |
| TC01000685.hg.1 | ENSG00000162409; | 0.0095733 | 0.0477103 | TRUE  |
| TC02000281.hg.1 | ENSG00000116016; | 0.0096748 | 0.0481603 | TRUE  |
| TC01000783.hg.1 | ENSG00000117069; | 0.0097717 | 0.0485634 | TRUE  |
| TC01003638.hg.1 | ENSG00000073756; | 0.0097841 | 0.0485634 | TRUE  |
| TC01003211.hg.1 | ENSG00000143387; | 0.0097841 | 0.0485634 | TRUE  |
| TC01001805.hg.1 | ENSG00000092969; | 0.0101383 | 0.0502046 | FALSE |
| TC01003638.hg.1 | ENSG00000073756; | 0.0101383 | 0.0502046 | FALSE |
| TC01001805.hg.1 | ENSG00000092969; | 0.0102077 | 0.050461  | FALSE |
| TC01001805.hg.1 | ENSG00000092969; | 0.0103089 | 0.0509024 | FALSE |
| TC02000041.hg.1 | ENSG00000115738; | 0.0103981 | 0.0512512 | FALSE |

|                 |                  |           |           |       |
|-----------------|------------------|-----------|-----------|-------|
| TC03001466.hg.1 | ENSG00000163931; | 0.0104035 | 0.0512512 | FALSE |
| TC01001805.hg.1 | ENSG00000092969; | 0.0104289 | 0.0513174 | FALSE |
| TC01001607.hg.1 | ENSG00000116711; | 0.0106025 | 0.0521115 | FALSE |
| TC01001805.hg.1 | ENSG00000092969; | 0.0106894 | 0.0524786 | FALSE |
| TC01002578.hg.1 | ENSG00000117394; | 0.0110046 | 0.0537714 | FALSE |
| TC06001510.hg.1 | ENSG00000137331; | 0.0110469 | 0.0537714 | FALSE |
| TC01003638.hg.1 | ENSG00000073756; | 0.0110762 | 0.0537714 | FALSE |
| TC01002166.hg.1 | ENSG00000116285; | 0.0110762 | 0.0537714 | FALSE |
| TC06000087.hg.1 | ENSG00000078401; | 0.0110762 | 0.0537714 | FALSE |
| TC02000281.hg.1 | ENSG00000116016; | 0.0110762 | 0.0537714 | FALSE |
| TC03000577.hg.1 | ENSG00000144857; | 0.0110762 | 0.0537714 | FALSE |
| TC01001624.hg.1 | ENSG00000116741; | 0.0110762 | 0.0537714 | FALSE |
| TC01000904.hg.1 | ENSG00000162692; | 0.0110762 | 0.0537714 | FALSE |
| TC03000214.hg.1 | ENSG00000168036; | 0.0110762 | 0.0537714 | FALSE |
| TC04000432.hg.1 | ENSG00000156234; | 0.0110762 | 0.0537714 | FALSE |
| TC03000214.hg.1 | ENSG00000168036; | 0.0111097 | 0.0537714 | FALSE |
| TC02000511.hg.1 | ENSG00000168906; | 0.0111097 | 0.0537714 | FALSE |
| TC04000173.hg.1 | ENSG00000109610; | 0.0112063 | 0.053813  | FALSE |
| TC01003638.hg.1 | ENSG00000073756; | 0.0112063 | 0.053813  | FALSE |
| TC02001628.hg.1 | ENSG00000084674; | 0.0112063 | 0.053813  | FALSE |
| TC01001188.hg.1 | ENSG00000143369; | 0.0112063 | 0.053813  | FALSE |
| TC06000608.hg.1 | ENSG00000112715; | 0.0112063 | 0.053813  | FALSE |
| TC04000274.hg.1 | ENSG00000145246; | 0.0112063 | 0.053813  | FALSE |
| TC07001627.hg.1 | ENSG00000105880; | 0.0112063 | 0.053813  | FALSE |
| TC04000274.hg.1 | ENSG00000145246; | 0.0112063 | 0.053813  | FALSE |
| TC02001031.hg.1 | ENSG00000152256; | 0.0112063 | 0.053813  | FALSE |
| TC02001031.hg.1 | ENSG00000152256; | 0.0112063 | 0.053813  | FALSE |
| TC02002624.hg.1 | ENSG00000115415; | 0.0112063 | 0.053813  | FALSE |
| TC03000214.hg.1 | ENSG00000168036; | 0.0112063 | 0.053813  | FALSE |
| TC01002706.hg.1 | ENSG00000184292; | 0.0114978 | 0.0547824 | FALSE |
| TC01002578.hg.1 | ENSG00000117394; | 0.0114978 | 0.0547824 | FALSE |
| TC01003778.hg.1 | ENSG00000076356; | 0.0115268 | 0.0547985 | FALSE |
| TC01002166.hg.1 | ENSG00000116285; | 0.0115268 | 0.0547985 | FALSE |
| TC01000904.hg.1 | ENSG00000162692; | 0.0115809 | 0.0549641 | FALSE |
| TC01000734.hg.1 | ENSG00000118473; | 0.0116722 | 0.0553057 | FALSE |
| TC01003718.hg.1 | ENSG00000133048; | 0.0116722 | 0.0553057 | FALSE |
| TC04002931.hg.1 | ENSG00000134853; | 0.0119204 | 0.0563882 | FALSE |
| TC01000783.hg.1 | ENSG00000117069; | 0.0120196 | 0.0567946 | FALSE |
| TC01003638.hg.1 | ENSG00000073756; | 0.0122717 | 0.057922  | FALSE |
| TC01003638.hg.1 | ENSG00000073756; | 0.0123382 | 0.0581716 | FALSE |
| TC01000685.hg.1 | ENSG00000162409; | 0.0124867 | 0.0588068 | FALSE |
| TC01001603.hg.1 | ENSG00000116690; | 0.0125316 | 0.0589534 | FALSE |
| TC01003778.hg.1 | ENSG00000076356; | 0.0126525 | 0.0594571 | FALSE |
| TC01001624.hg.1 | ENSG00000116741; | 0.0126933 | 0.0595735 | FALSE |
| TC02000041.hg.1 | ENSG00000115738; | 0.012733  | 0.0595735 | FALSE |
| TC04001509.hg.1 | ENSG00000173376; | 0.012733  | 0.0595735 | FALSE |
| TC03001071.hg.1 | ENSG00000114315; | 0.012733  | 0.0595735 | FALSE |
| TC01001805.hg.1 | ENSG00000092969; | 0.012733  | 0.0595735 | FALSE |
| TC01002166.hg.1 | ENSG00000116285; | 0.012733  | 0.0595735 | FALSE |
| TC01001624.hg.1 | ENSG00000116741; | 0.0128817 | 0.0600724 | FALSE |
| TC01003638.hg.1 | ENSG00000073756; | 0.0129762 | 0.0602601 | FALSE |
| TC01001805.hg.1 | ENSG00000092969; | 0.0129762 | 0.0602601 | FALSE |
| TC03000214.hg.1 | ENSG00000168036; | 0.0129762 | 0.0602601 | FALSE |
| TC01001805.hg.1 | ENSG00000092969; | 0.0129853 | 0.0602601 | FALSE |
| TC01002669.hg.1 | ENSG00000157193; | 0.0129853 | 0.0602601 | FALSE |
| TC01001736.hg.1 | ENSG00000196352; | 0.0131129 | 0.0606879 | FALSE |
| TC01000685.hg.1 | ENSG00000162409; | 0.0131129 | 0.0606879 | FALSE |
| TC01000685.hg.1 | ENSG00000162409; | 0.0131129 | 0.0606879 | FALSE |

|                 |                  |           |           |       |
|-----------------|------------------|-----------|-----------|-------|
| TC01001736.hg.1 | ENSG00000196352; | 0.0132058 | 0.060986  | FALSE |
| TC01003211.hg.1 | ENSG00000143387; | 0.0133427 | 0.0615518 | FALSE |
| TC01000100.hg.1 | ENSG00000049246; | 0.0133587 | 0.0615594 | FALSE |
| TC01001805.hg.1 | ENSG00000092969; | 0.0137459 | 0.0632757 | FALSE |
| TC01001473.hg.1 | ENSG00000143153; | 0.0138358 | 0.0636211 | FALSE |
| TC01001907.hg.1 | ENSG00000143641; | 0.0140249 | 0.0644214 | FALSE |
| TC07001293.hg.1 | ENSG00000106483; | 0.0141339 | 0.0646445 | FALSE |
| TC01001736.hg.1 | ENSG00000196352; | 0.0141339 | 0.0646445 | FALSE |
| TC01001624.hg.1 | ENSG00000116741; | 0.0141339 | 0.0646445 | FALSE |
| TC02000762.hg.1 | ENSG00000163083; | 0.0141339 | 0.0646445 | FALSE |
| TC02001628.hg.1 | ENSG00000084674; | 0.0141339 | 0.0646445 | FALSE |
| TC02001628.hg.1 | ENSG00000084674; | 0.0141339 | 0.0646445 | FALSE |
| TC02000281.hg.1 | ENSG00000116016; | 0.0141339 | 0.0646445 | FALSE |
| TC04001084.hg.1 | ENSG00000109819; | 0.0142415 | 0.0648593 | FALSE |
| TC01000904.hg.1 | ENSG00000162692; | 0.0143728 | 0.0653879 | FALSE |
| TC01001624.hg.1 | ENSG00000116741; | 0.0144673 | 0.065748  | FALSE |
| TC01001473.hg.1 | ENSG00000143153; | 0.0148553 | 0.065977  | FALSE |
| TC01000685.hg.1 | ENSG00000162409; | 0.0149141 | 0.065977  | FALSE |
| TC04000408.hg.1 | ENSG00000169429; | 0.0149141 | 0.065977  | FALSE |
| TC02001100.hg.1 | ENSG00000138448; | 0.0150917 | 0.065977  | FALSE |
| TC04001509.hg.1 | ENSG00000173376; | 0.0150917 | 0.065977  | FALSE |
| TC03002146.hg.1 | ENSG00000189058; | 0.0150917 | 0.065977  | FALSE |
| TC01003129.hg.1 | ENSG00000143140; | 0.0150917 | 0.065977  | FALSE |
| TC05001933.hg.1 | ENSG00000113721; | 0.0150917 | 0.065977  | FALSE |
| TC05000619.hg.1 | ENSG00000198108; | 0.0150917 | 0.065977  | FALSE |
| TC02000041.hg.1 | ENSG00000115738; | 0.0151842 | 0.065977  | FALSE |
| TC01000685.hg.1 | ENSG00000162409; | 0.0152106 | 0.065977  | FALSE |
| TC01000394.hg.1 | ENSG00000159023; | 0.0152217 | 0.065977  | FALSE |
| TC03000214.hg.1 | ENSG00000168036; | 0.0152328 | 0.065977  | FALSE |
| TC02001031.hg.1 | ENSG00000152256; | 0.0152328 | 0.065977  | FALSE |
| TC04000729.hg.1 | ENSG00000151617; | 0.0152328 | 0.065977  | FALSE |
| TC05001933.hg.1 | ENSG00000113721; | 0.0152328 | 0.065977  | FALSE |
| TC21000241.hg.1 | ENSG00000197381; | 0.0152328 | 0.065977  | FALSE |
| TC10001398.hg.1 | ENSG00000122884; | 0.0152328 | 0.065977  | FALSE |
| TC06000595.hg.1 | ENSG00000112655; | 0.0152328 | 0.065977  | FALSE |
| TC12000076.hg.1 | ENSG00000010278; | 0.0152328 | 0.065977  | FALSE |
| TC07000328.hg.1 | ENSG00000146648; | 0.0152328 | 0.065977  | FALSE |
| TC05001385.hg.1 | ENSG00000145632; | 0.0152328 | 0.065977  | FALSE |
| TC06001027.hg.1 | ENSG00000118503; | 0.0152328 | 0.065977  | FALSE |
| TC06000087.hg.1 | ENSG00000078401; | 0.0152328 | 0.065977  | FALSE |
| TC02000219.hg.1 | ENSG00000049323; | 0.0152328 | 0.065977  | FALSE |
| TC08000845.hg.1 | ENSG00000187786; | 0.0152328 | 0.065977  | FALSE |
| TC08000845.hg.1 | ENSG00000187786; | 0.0152328 | 0.065977  | FALSE |
| TC08000845.hg.1 | ENSG00000187786; | 0.0152328 | 0.065977  | FALSE |
| TC02000281.hg.1 | ENSG00000116016; | 0.0152328 | 0.065977  | FALSE |
| TC05001590.hg.1 | ENSG00000113369; | 0.0152328 | 0.065977  | FALSE |
| TC04001084.hg.1 | ENSG00000109819; | 0.0152328 | 0.065977  | FALSE |
| TC02000762.hg.1 | ENSG00000163083; | 0.0152328 | 0.065977  | FALSE |
| TC10000350.hg.1 | ENSG00000107984; | 0.0152328 | 0.065977  | FALSE |
| TC10001711.hg.1 | ENSG00000066468; | 0.0152328 | 0.065977  | FALSE |
| TC10001711.hg.1 | ENSG00000066468; | 0.0152328 | 0.065977  | FALSE |
| TC10001711.hg.1 | ENSG00000066468; | 0.0152328 | 0.065977  | FALSE |
| TC07001562.hg.1 | ENSG00000019991; | 0.0152328 | 0.065977  | FALSE |
| TC03000214.hg.1 | ENSG00000168036; | 0.0152328 | 0.065977  | FALSE |
| TC07000643.hg.1 | ENSG00000106366; | 0.0152328 | 0.065977  | FALSE |
| TC03001071.hg.1 | ENSG00000114315; | 0.0152328 | 0.065977  | FALSE |
| TC01003638.hg.1 | ENSG00000073756; | 0.0152328 | 0.065977  | FALSE |
| TC03002146.hg.1 | ENSG00000189058; | 0.0152328 | 0.065977  | FALSE |



|                  |                  |           |           |       |
|------------------|------------------|-----------|-----------|-------|
| TC03001071.hg.1  | ENSG00000114315; | 0.0152328 | 0.065977  | FALSE |
| TC16000668.hg.1  | ENSG00000103241; | 0.0152328 | 0.065977  | FALSE |
| TC03001071.hg.1  | ENSG00000114315; | 0.0152328 | 0.065977  | FALSE |
| TC15000226.hg.1  | ENSG00000166923; | 0.0152328 | 0.065977  | FALSE |
| TC01001188.hg.1; | ENSG00000143369; | 0.0152421 | 0.065977  | FALSE |
| TC02000041.hg.1  | ENSG00000115738; | 0.015349  | 0.0663726 | FALSE |
| TC01002669.hg.1  | ENSG00000157193; | 0.0154553 | 0.0667652 | FALSE |
| TC01003718.hg.1  | ENSG00000133048; | 0.015784  | 0.0681164 | FALSE |
| TC02002606.hg.1  | ENSG00000003436; | 0.0159106 | 0.0685934 | FALSE |
| TC01001736.hg.1  | ENSG00000196352; | 0.016136  | 0.0693663 | FALSE |
| TC01000685.hg.1  | ENSG00000162409; | 0.016136  | 0.0693663 | FALSE |
| TC07001293.hg.1  | ENSG00000106483; | 0.0161466 | 0.0693663 | FALSE |
| TC01003638.hg.1  | ENSG00000073756; | 0.0161466 | 0.0693663 | FALSE |
| TC01000783.hg.1  | ENSG00000117069; | 0.0164486 | 0.0705574 | FALSE |
| TC01000685.hg.1  | ENSG00000162409; | 0.0165015 | 0.0707138 | FALSE |
| TC01001624.hg.1  | ENSG00000116741; | 0.0166889 | 0.071445  | FALSE |
| TC01000100.hg.1  | ENSG00000049246; | 0.0167649 | 0.0716988 | FALSE |
| TC01000734.hg.1  | ENSG00000118473; | 0.0168928 | 0.0721737 | FALSE |
| TC01000685.hg.1  | ENSG00000162409; | 0.016969  | 0.0724268 | FALSE |
| TC01000100.hg.1  | ENSG00000049246; | 0.0170824 | 0.0728386 | FALSE |
| TC01000685.hg.1  | ENSG00000162409; | 0.0172062 | 0.0731458 | FALSE |
| TC06004073.hg.1  | ENSG00000204520; | 0.0174016 | 0.0731458 | FALSE |
| TC01000904.hg.1  | ENSG00000162692; | 0.0174016 | 0.0731458 | FALSE |
| TC11000182.hg.1; | ENSG00000148926; | 0.0174016 | 0.0731458 | FALSE |
| TC01000904.hg.1  | ENSG00000162692; | 0.0174016 | 0.0731458 | FALSE |
| TC01001805.hg.1  | ENSG00000092969; | 0.0174016 | 0.0731458 | FALSE |
| TC03001590.hg.1  | ENSG00000184500; | 0.0174495 | 0.0731458 | FALSE |
| TC07000220.hg.1  | ENSG00000164619; | 0.0174535 | 0.0731458 | FALSE |
| TC10001744.hg.1  | ENSG00000148848; | 0.0174535 | 0.0731458 | FALSE |
| TC01001805.hg.1  | ENSG00000092969; | 0.0174535 | 0.0731458 | FALSE |
| TC02002714.hg.1  | ENSG00000163251; | 0.0174535 | 0.0731458 | FALSE |
| TC01001736.hg.1  | ENSG00000196352; | 0.0174535 | 0.0731458 | FALSE |
| TC01001624.hg.1  | ENSG00000116741; | 0.0174535 | 0.0731458 | FALSE |
| TC05001933.hg.1  | ENSG00000113721; | 0.0174535 | 0.0731458 | FALSE |
| TC07001883.hg.1  | ENSG00000085662; | 0.0174535 | 0.0731458 | FALSE |
| TC02001031.hg.1  | ENSG00000152256; | 0.0174535 | 0.0731458 | FALSE |
| TC11002140.hg.1; | ENSG00000149256; | 0.0174535 | 0.0731458 | FALSE |
| TC01003638.hg.1  | ENSG00000073756; | 0.0174535 | 0.0731458 | FALSE |
| TC10000986.hg.1  | ENSG00000151632; | 0.0174535 | 0.0731458 | FALSE |
| TC06000087.hg.1  | ENSG00000078401; | 0.0174535 | 0.0731458 | FALSE |
| TC01001624.hg.1  | ENSG00000116741; | 0.0174535 | 0.0731458 | FALSE |
| TC01003638.hg.1  | ENSG00000073756; | 0.0174535 | 0.0731458 | FALSE |
| TC03001255.hg.1  | ENSG00000033867; | 0.0174535 | 0.0731458 | FALSE |
| TC01003778.hg.1  | ENSG00000076356; | 0.0174535 | 0.0731458 | FALSE |
| TC07000328.hg.1  | ENSG00000146648; | 0.0174535 | 0.0731458 | FALSE |
| TC02002292.hg.1  | ENSG00000136720; | 0.0174535 | 0.0731458 | FALSE |
| TC02002624.hg.1  | ENSG00000115415; | 0.0174535 | 0.0731458 | FALSE |
| TC01000685.hg.1  | ENSG00000162409; | 0.0181667 | 0.0752508 | FALSE |
| TC01001805.hg.1  | ENSG00000092969; | 0.0181667 | 0.0752508 | FALSE |
| TC05003423.hg.1  | ENSG00000082196; | 0.0181667 | 0.0752508 | FALSE |
| TC03000214.hg.1  | ENSG00000168036; | 0.0181667 | 0.0752508 | FALSE |
| TC04000408.hg.1  | ENSG00000169429; | 0.0182598 | 0.0754537 | FALSE |
| TC01001624.hg.1  | ENSG00000116741; | 0.0182878 | 0.0754965 | FALSE |
| TC03001071.hg.1  | ENSG00000114315; | 0.0184434 | 0.0760658 | FALSE |
| TC01002669.hg.1  | ENSG00000157193; | 0.0187258 | 0.0771562 | FALSE |
| TC04000408.hg.1  | ENSG00000169429; | 0.0188248 | 0.0772724 | FALSE |
| TC01001907.hg.1  | ENSG00000143641; | 0.0188248 | 0.0772724 | FALSE |
| TC01000685.hg.1  | ENSG00000162409; | 0.0188248 | 0.0772724 | FALSE |

|                  |                  |           |           |       |
|------------------|------------------|-----------|-----------|-------|
| TC02002714.hg.1  | ENSG00000163251; | 0.0188248 | 0.0772724 | FALSE |
| TC01001607.hg.1  | ENSG00000116711; | 0.0188443 | 0.0772724 | FALSE |
| TC02000762.hg.1  | ENSG00000163083; | 0.0189308 | 0.0775157 | FALSE |
| TC01002578.hg.1  | ENSG00000117394; | 0.0189308 | 0.0775157 | FALSE |
| TC01002669.hg.1  | ENSG00000157193; | 0.0193341 | 0.0790539 | FALSE |
| TC01001090.hg.1  | ENSG00000117289; | 0.0194179 | 0.0792828 | FALSE |
| TC01000685.hg.1  | ENSG00000162409; | 0.0194179 | 0.0792828 | FALSE |
| TC01003638.hg.1  | ENSG00000073756; | 0.0195134 | 0.0795209 | FALSE |
| TC02001628.hg.1  | ENSG00000084674; | 0.0195134 | 0.0795209 | FALSE |
| TC02001031.hg.1  | ENSG00000152256; | 0.0199202 | 0.0808708 | FALSE |
| TC01001188.hg.1; | ENSG00000143369; | 0.0199202 | 0.0808708 | FALSE |
| TC07000220.hg.1  | ENSG00000164619; | 0.0199202 | 0.0808708 | FALSE |
| TC02001628.hg.1  | ENSG00000084674; | 0.0199202 | 0.0808708 | FALSE |
| TC01003129.hg.1  | ENSG00000143140; | 0.0199202 | 0.0808708 | FALSE |
| TC03001071.hg.1  | ENSG00000114315; | 0.0199202 | 0.0808708 | FALSE |
| TC01003778.hg.1  | ENSG00000076356; | 0.0201058 | 0.0813161 | FALSE |
| TC03000214.hg.1  | ENSG00000168036; | 0.0201058 | 0.0813161 | FALSE |
| TC02000762.hg.1  | ENSG00000163083; | 0.0201614 | 0.0814253 | FALSE |
| TC03002146.hg.1  | ENSG00000189058; | 0.0202744 | 0.0818044 | FALSE |
| TC01003638.hg.1  | ENSG00000073756; | 0.0205289 | 0.0827536 | FALSE |
| TC01000783.hg.1  | ENSG00000117069; | 0.0205978 | 0.082953  | FALSE |
| TC01001624.hg.1  | ENSG00000116741; | 0.0207258 | 0.0833902 | FALSE |
| TC01000685.hg.1  | ENSG00000162409; | 0.0208084 | 0.0836439 | FALSE |
| TC01002578.hg.1  | ENSG00000117394; | 0.0209245 | 0.0839925 | FALSE |
| TC01002578.hg.1  | ENSG00000117394; | 0.0209245 | 0.0839925 | FALSE |
| TC10001744.hg.1  | ENSG00000148848; | 0.0211693 | 0.0841914 | FALSE |
| TC06000595.hg.1  | ENSG00000112655; | 0.0211693 | 0.0841914 | FALSE |
| TC01000783.hg.1  | ENSG00000117069; | 0.0211693 | 0.0841914 | FALSE |
| TC02001628.hg.1  | ENSG00000084674; | 0.0211693 | 0.0841914 | FALSE |
| TC05001933.hg.1  | ENSG00000113721; | 0.0211693 | 0.0841914 | FALSE |
| TC04001245.hg.1  | ENSG00000145242; | 0.0211693 | 0.0841914 | FALSE |
| TC07000768.hg.1  | ENSG00000174697; | 0.0211693 | 0.0841914 | FALSE |
| TC0X000943.hg.1  | ENSG00000198947; | 0.0211693 | 0.0841914 | FALSE |
| TC02001100.hg.1; | ENSG00000138448; | 0.0211693 | 0.0841914 | FALSE |
| TC02002823.hg.1  | ENSG00000135919; | 0.0211693 | 0.0841914 | FALSE |
| TC03000214.hg.1  | ENSG00000168036; | 0.0211693 | 0.0841914 | FALSE |
| TC01003718.hg.1  | ENSG00000133048; | 0.0211693 | 0.0841914 | FALSE |
| TC03000214.hg.1  | ENSG00000168036; | 0.0211693 | 0.0841914 | FALSE |
| TC01001736.hg.1  | ENSG00000196352; | 0.0212593 | 0.0841914 | FALSE |
| TC01001188.hg.1; | ENSG00000143369; | 0.0214355 | 0.0848111 | FALSE |
| TC01001473.hg.1  | ENSG00000143153; | 0.0216729 | 0.0856177 | FALSE |
| TC01000100.hg.1  | ENSG00000049246; | 0.0216794 | 0.0856177 | FALSE |
| TC01001704.hg.1  | ENSG00000163531; | 0.0217999 | 0.0860022 | FALSE |
| TC06004073.hg.1  | ENSG00000204520; | 0.0218284 | 0.0860022 | FALSE |
| TC01000685.hg.1  | ENSG00000162409; | 0.0218601 | 0.0860022 | FALSE |
| TC01002669.hg.1  | ENSG00000157193; | 0.0218672 | 0.0860022 | FALSE |
| TC02002714.hg.1  | ENSG00000163251; | 0.0218672 | 0.0860022 | FALSE |
| TC01001704.hg.1  | ENSG00000163531; | 0.0221389 | 0.0861295 | FALSE |
| TC01001095.hg.1  | ENSG00000143127; | 0.0222023 | 0.0861295 | FALSE |
| TC08000482.hg.1  | ENSG00000121039; | 0.0222375 | 0.0861295 | FALSE |
| TC09001326.hg.1  | ENSG00000169071; | 0.0222375 | 0.0861295 | FALSE |
| TC02002765.hg.1  | ENSG00000079308; | 0.0222375 | 0.0861295 | FALSE |
| TC02001100.hg.1; | ENSG00000138448; | 0.0222375 | 0.0861295 | FALSE |
| TC02001628.hg.1  | ENSG00000084674; | 0.0222375 | 0.0861295 | FALSE |
| TC04000729.hg.1  | ENSG00000151617; | 0.0222375 | 0.0861295 | FALSE |
| TC01003129.hg.1  | ENSG00000143140; | 0.0222375 | 0.0861295 | FALSE |
| TC04001509.hg.1  | ENSG00000173376; | 0.0222375 | 0.0861295 | FALSE |
| TC10002924.hg.1  | ENSG00000187134; | 0.0222375 | 0.0861295 | FALSE |

|                 |                  |           |           |       |
|-----------------|------------------|-----------|-----------|-------|
| TC03002146.hg.1 | ENSG00000189058; | 0.0222375 | 0.0861295 | FALSE |
| TC16000668.hg.1 | ENSG00000103241; | 0.0222375 | 0.0861295 | FALSE |
| TC02001100.hg.1 | ENSG00000138448; | 0.0222375 | 0.0861295 | FALSE |
| TC16000668.hg.1 | ENSG00000103241; | 0.0222375 | 0.0861295 | FALSE |
| TC11000707.hg.1 | ENSG00000162337; | 0.0222375 | 0.0861295 | FALSE |
| TC01003129.hg.1 | ENSG00000143140; | 0.0222375 | 0.0861295 | FALSE |
| TC07001559.hg.1 | ENSG00000075223; | 0.0222375 | 0.0861295 | FALSE |
| TC04000699.hg.1 | ENSG00000109458; | 0.0222375 | 0.0861295 | FALSE |
| TC03000846.hg.1 | ENSG00000196549; | 0.0222375 | 0.0861295 | FALSE |
| TC05001933.hg.1 | ENSG00000113721; | 0.0222375 | 0.0861295 | FALSE |
| TC03001071.hg.1 | ENSG00000114315; | 0.0222375 | 0.0861295 | FALSE |
| TC04002931.hg.1 | ENSG00000134853; | 0.0222375 | 0.0861295 | FALSE |
| TC01003129.hg.1 | ENSG00000143140; | 0.0222375 | 0.0861295 | FALSE |
| TC01003129.hg.1 | ENSG00000143140; | 0.0222375 | 0.0861295 | FALSE |
| TC01003129.hg.1 | ENSG00000143140; | 0.0222375 | 0.0861295 | FALSE |
| TC07001562.hg.1 | ENSG00000019991; | 0.0222375 | 0.0861295 | FALSE |
| TC07001562.hg.1 | ENSG00000019991; | 0.0222375 | 0.0861295 | FALSE |
| TC10001711.hg.1 | ENSG00000066468; | 0.0222375 | 0.0861295 | FALSE |
| TC01001805.hg.1 | ENSG00000092969; | 0.0225857 | 0.0861295 | FALSE |
| TC01000685.hg.1 | ENSG00000162409; | 0.0226519 | 0.0861295 | FALSE |
| TC01002166.hg.1 | ENSG00000116285; | 0.0226519 | 0.0861295 | FALSE |
| TC01001624.hg.1 | ENSG00000116741; | 0.0226519 | 0.0861295 | FALSE |
| TC01001805.hg.1 | ENSG00000092969; | 0.0226519 | 0.0861295 | FALSE |
| TC05001752.hg.1 | ENSG00000138829; | 0.0226519 | 0.0861295 | FALSE |
| TC01002166.hg.1 | ENSG00000116285; | 0.0226519 | 0.0861295 | FALSE |
| TC01001473.hg.1 | ENSG00000143153; | 0.022654  | 0.0861295 | FALSE |
| TC01001090.hg.1 | ENSG00000117289; | 0.0231109 | 0.0877887 | FALSE |
| TC01000100.hg.1 | ENSG00000049246; | 0.0235084 | 0.0892029 | FALSE |
| TC01001188.hg.1 | ENSG00000143369; | 0.0235353 | 0.0892029 | FALSE |
| TC01001473.hg.1 | ENSG00000143153; | 0.0235353 | 0.0892029 | FALSE |
| TC06000087.hg.1 | ENSG00000078401; | 0.0236404 | 0.0894824 | FALSE |
| TC02002823.hg.1 | ENSG00000135919; | 0.0237297 | 0.089741  | FALSE |
| TC01002669.hg.1 | ENSG00000157193; | 0.0244593 | 0.0924185 | FALSE |
| TC01000789.hg.1 | ENSG00000162614; | 0.024522  | 0.092574  | FALSE |
| TC07001332.hg.1 | ENSG00000164708; | 0.0245677 | 0.0926646 | FALSE |
| TC01001090.hg.1 | ENSG00000117289; | 0.0249912 | 0.094179  | FALSE |
| TC01000904.hg.1 | ENSG00000162692; | 0.0250857 | 0.0944105 | FALSE |
| TC03000214.hg.1 | ENSG00000168036; | 0.0250857 | 0.0944105 | FALSE |
| TC04002931.hg.1 | ENSG00000134853; | 0.0251427 | 0.0945002 | FALSE |
| TC03000846.hg.1 | ENSG00000196549; | 0.025283  | 0.0945711 | FALSE |
| TC12001324.hg.1 | ENSG00000123095; | 0.025283  | 0.0945711 | FALSE |
| TC02001100.hg.1 | ENSG00000138448; | 0.025283  | 0.0945711 | FALSE |
| TC06000087.hg.1 | ENSG00000078401; | 0.025283  | 0.0945711 | FALSE |
| TC02000041.hg.1 | ENSG00000115738; | 0.025283  | 0.0945711 | FALSE |
| TC04000432.hg.1 | ENSG00000156234; | 0.025283  | 0.0945711 | FALSE |
| TC10000811.hg.1 | ENSG00000150594; | 0.025283  | 0.0945711 | FALSE |
| TC07001562.hg.1 | ENSG00000019991; | 0.025283  | 0.0945711 | FALSE |
| TC03000214.hg.1 | ENSG00000168036; | 0.025283  | 0.0945711 | FALSE |
| TC04000274.hg.1 | ENSG00000145246; | 0.025283  | 0.0945711 | FALSE |
| TC01002616.hg.1 | ENSG00000117461; | 0.0256005 | 0.095117  | FALSE |
| TC03002146.hg.1 | ENSG00000189058; | 0.0256005 | 0.095117  | FALSE |
| TC02001100.hg.1 | ENSG00000138448; | 0.0256005 | 0.095117  | FALSE |
| TC02002624.hg.1 | ENSG00000115415; | 0.0256005 | 0.095117  | FALSE |
| TC01000703.hg.1 | ENSG00000132849; | 0.0256956 | 0.095117  | FALSE |
| TC01003638.hg.1 | ENSG00000073756; | 0.0256956 | 0.095117  | FALSE |
| TC02002624.hg.1 | ENSG00000115415; | 0.0256956 | 0.095117  | FALSE |
| TC01000728.hg.1 | ENSG00000162433; | 0.0256956 | 0.095117  | FALSE |
| TC01000685.hg.1 | ENSG00000162409; | 0.0256956 | 0.095117  | FALSE |

|                  |                  |           |           |       |
|------------------|------------------|-----------|-----------|-------|
| TC01001624.hg.1  | ENSG00000116741; | 0.0256956 | 0.095117  | FALSE |
| TC02000281.hg.1  | ENSG00000116016; | 0.0258358 | 0.0953475 | FALSE |
| TC01000789.hg.1  | ENSG00000162614; | 0.0264071 | 0.0973718 | FALSE |
| TC01003638.hg.1  | ENSG00000073756; | 0.0265798 | 0.0979245 | FALSE |
| TC01001624.hg.1  | ENSG00000116741; | 0.0267103 | 0.0982784 | FALSE |
| TC04001084.hg.1  | ENSG00000109819; | 0.0267103 | 0.0982784 | FALSE |
| TC01001607.hg.1  | ENSG00000116711; | 0.0268493 | 0.0986627 | FALSE |
| TC02000041.hg.1  | ENSG00000115738; | 0.0271333 | 0.0996207 | FALSE |
| TC01001736.hg.1  | ENSG00000196352; | 0.0276075 | 0.101275  | FALSE |
| TC01001805.hg.1  | ENSG00000092969; | 0.0277668 | 0.1017286 | FALSE |
| TC01001624.hg.1  | ENSG00000116741; | 0.0277668 | 0.1017286 | FALSE |
| TC01000728.hg.1  | ENSG00000162433; | 0.0278316 | 0.1018353 | FALSE |
| TC01000685.hg.1  | ENSG00000162409; | 0.0278795 | 0.1019233 | FALSE |
| TC04000253.hg.1  | ENSG00000154277; | 0.0283446 | 0.1034553 | FALSE |
| TC02002606.hg.1  | ENSG00000003436; | 0.0285281 | 0.1034553 | FALSE |
| TC03000214.hg.1  | ENSG00000168036; | 0.0286955 | 0.1034553 | FALSE |
| TC01003638.hg.1  | ENSG00000073756; | 0.0286955 | 0.1034553 | FALSE |
| TC03000214.hg.1  | ENSG00000168036; | 0.0287692 | 0.1034553 | FALSE |
| TC01000685.hg.1  | ENSG00000162409; | 0.0287692 | 0.1034553 | FALSE |
| TC01001805.hg.1  | ENSG00000092969; | 0.0287692 | 0.1034553 | FALSE |
| TC01001805.hg.1  | ENSG00000092969; | 0.0287692 | 0.1034553 | FALSE |
| TC03000214.hg.1  | ENSG00000168036; | 0.0287692 | 0.1034553 | FALSE |
| TC02000041.hg.1  | ENSG00000115738; | 0.0287692 | 0.1034553 | FALSE |
| TC02002714.hg.1  | ENSG00000163251; | 0.0287692 | 0.1034553 | FALSE |
| TC01002954.hg.1  | ENSG00000134243; | 0.0287692 | 0.1034553 | FALSE |
| TC03000214.hg.1  | ENSG00000168036; | 0.0287692 | 0.1034553 | FALSE |
| TC04000408.hg.1  | ENSG00000169429; | 0.0287692 | 0.1034553 | FALSE |
| TC03000214.hg.1  | ENSG00000168036; | 0.0287692 | 0.1034553 | FALSE |
| TC03002146.hg.1  | ENSG00000189058; | 0.0287692 | 0.1034553 | FALSE |
| TC01000685.hg.1  | ENSG00000162409; | 0.0287805 | 0.1034553 | FALSE |
| TC02001031.hg.1  | ENSG00000152256; | 0.0287805 | 0.1034553 | FALSE |
| TC02001031.hg.1  | ENSG00000152256; | 0.0287805 | 0.1034553 | FALSE |
| TC01000685.hg.1  | ENSG00000162409; | 0.0287819 | 0.1034553 | FALSE |
| TC01000728.hg.1  | ENSG00000162433; | 0.0291253 | 0.104602  | FALSE |
| TC01001805.hg.1  | ENSG00000092969; | 0.0292476 | 0.1049531 | FALSE |
| TC06001089.hg.1  | ENSG00000111981; | 0.0295489 | 0.1058384 | FALSE |
| TC10001744.hg.1  | ENSG00000148848; | 0.0297937 | 0.1058384 | FALSE |
| TC08000482.hg.1  | ENSG00000121039; | 0.0297937 | 0.1058384 | FALSE |
| TC10000811.hg.1; | ENSG00000150594; | 0.0297937 | 0.1058384 | FALSE |
| TC02001628.hg.1  | ENSG00000084674; | 0.0297937 | 0.1058384 | FALSE |
| TC08000482.hg.1  | ENSG00000121039; | 0.0297937 | 0.1058384 | FALSE |
| TC02002624.hg.1  | ENSG00000115415; | 0.0297937 | 0.1058384 | FALSE |
| TC06000595.hg.1  | ENSG00000112655; | 0.0297937 | 0.1058384 | FALSE |
| TC07001618.hg.1  | ENSG00000004799; | 0.0297937 | 0.1058384 | FALSE |
| TC01000873.hg.1  | ENSG00000143036; | 0.0299454 | 0.1058384 | FALSE |
| TC15000226.hg.1  | ENSG00000166923; | 0.030302  | 0.1058384 | FALSE |
| TC01000972.hg.1  | ENSG00000064886; | 0.030302  | 0.1058384 | FALSE |
| TC01000972.hg.1  | ENSG00000064886; | 0.030302  | 0.1058384 | FALSE |
| TC01003638.hg.1  | ENSG00000073756; | 0.030302  | 0.1058384 | FALSE |
| TC02001628.hg.1  | ENSG00000084674; | 0.030302  | 0.1058384 | FALSE |
| TC06000087.hg.1  | ENSG00000078401; | 0.030302  | 0.1058384 | FALSE |
| TC02001031.hg.1  | ENSG00000152256; | 0.030302  | 0.1058384 | FALSE |
| TC12001324.hg.1  | ENSG00000123095; | 0.030302  | 0.1058384 | FALSE |
| TC06000087.hg.1  | ENSG00000078401; | 0.030302  | 0.1058384 | FALSE |
| TC08000482.hg.1  | ENSG00000121039; | 0.030302  | 0.1058384 | FALSE |
| TC07001630.hg.1  | ENSG00000070669; | 0.030302  | 0.1058384 | FALSE |
| TC01001805.hg.1  | ENSG00000092969; | 0.030302  | 0.1058384 | FALSE |
| TC06000595.hg.1  | ENSG00000112655; | 0.030302  | 0.1058384 | FALSE |

|                 |                  |           |           |       |
|-----------------|------------------|-----------|-----------|-------|
| TC02000762.hg.1 | ENSG00000163083; | 0.030302  | 0.1058384 | FALSE |
| TC03000214.hg.1 | ENSG00000168036; | 0.030302  | 0.1058384 | FALSE |
| TC01001805.hg.1 | ENSG00000092969; | 0.030302  | 0.1058384 | FALSE |
| TC01003129.hg.1 | ENSG00000143140; | 0.030302  | 0.1058384 | FALSE |
| TC01003129.hg.1 | ENSG00000143140; | 0.030302  | 0.1058384 | FALSE |
| TC08000482.hg.1 | ENSG00000121039; | 0.030302  | 0.1058384 | FALSE |
| TC03000917.hg.1 | ENSG00000136603; | 0.030302  | 0.1058384 | FALSE |
| TC03001071.hg.1 | ENSG00000114315; | 0.030302  | 0.1058384 | FALSE |
| TC03000214.hg.1 | ENSG00000168036; | 0.030302  | 0.1058384 | FALSE |
| TC03000214.hg.1 | ENSG00000168036; | 0.030302  | 0.1058384 | FALSE |
| TC12001324.hg.1 | ENSG00000123095; | 0.030302  | 0.1058384 | FALSE |
| TC03001888.hg.1 | ENSG00000169908; | 0.030302  | 0.1058384 | FALSE |
| TC01000100.hg.1 | ENSG00000049246; | 0.0303843 | 0.1058384 | FALSE |
| TC01001607.hg.1 | ENSG00000116711; | 0.030497  | 0.106071  | FALSE |
| TC01001805.hg.1 | ENSG00000092969; | 0.0305007 | 0.106071  | FALSE |
| TC01001095.hg.1 | ENSG00000143127; | 0.0306256 | 0.1064189 | FALSE |
| TC01001624.hg.1 | ENSG00000116741; | 0.0306605 | 0.1064537 | FALSE |
| TC01001624.hg.1 | ENSG00000116741; | 0.0307185 | 0.1065689 | FALSE |
| TC03000214.hg.1 | ENSG00000168036; | 0.0314178 | 0.1089065 | FALSE |
| TC01000728.hg.1 | ENSG00000162433; | 0.031841  | 0.1102842 | FALSE |
| TC06004073.hg.1 | ENSG00000204520; | 0.0321603 | 0.1112102 | FALSE |
| TC02002714.hg.1 | ENSG00000163251; | 0.0321603 | 0.1112102 | FALSE |
| TC08000482.hg.1 | ENSG00000121039; | 0.0321603 | 0.1112102 | FALSE |
| TC03001071.hg.1 | ENSG00000114315; | 0.0322611 | 0.111334  | FALSE |
| TC01001805.hg.1 | ENSG00000092969; | 0.0322611 | 0.111334  | FALSE |
| TC02000762.hg.1 | ENSG00000163083; | 0.032641  | 0.1124337 | FALSE |
| TC01001090.hg.1 | ENSG00000117289; | 0.0326454 | 0.1124337 | FALSE |
| TC01000783.hg.1 | ENSG00000117069; | 0.0333739 | 0.1148501 | FALSE |
| TC02001963.hg.1 | ENSG00000163235; | 0.0336588 | 0.1156448 | FALSE |
| TC02001963.hg.1 | ENSG00000163235; | 0.0336588 | 0.1156448 | FALSE |
| TC02002624.hg.1 | ENSG00000115415; | 0.0336588 | 0.1156448 | FALSE |
| TC01003129.hg.1 | ENSG00000143140; | 0.0338114 | 0.1159829 | FALSE |
| TC01002706.hg.1 | ENSG00000184292; | 0.033922  | 0.1162689 | FALSE |
| TC01001704.hg.1 | ENSG00000163531; | 0.0343412 | 0.1176117 | FALSE |
| TC01000394.hg.1 | ENSG00000159023; | 0.0344442 | 0.1178701 | FALSE |
| TC04000408.hg.1 | ENSG00000169429; | 0.0346312 | 0.1179503 | FALSE |
| TC01000100.hg.1 | ENSG00000049246; | 0.0346312 | 0.1179503 | FALSE |
| TC04001245.hg.1 | ENSG00000145242; | 0.0346985 | 0.1179503 | FALSE |
| TC05001933.hg.1 | ENSG00000113721; | 0.0346985 | 0.1179503 | FALSE |
| TC05000054.hg.1 | ENSG00000078295; | 0.0346985 | 0.1179503 | FALSE |
| TC07000137.hg.1 | ENSG00000136244; | 0.0346985 | 0.1179503 | FALSE |
| TC06000608.hg.1 | ENSG00000112715; | 0.0346985 | 0.1179503 | FALSE |
| TC01001805.hg.1 | ENSG00000092969; | 0.0346985 | 0.1179503 | FALSE |
| TC02002823.hg.1 | ENSG00000135919; | 0.0347431 | 0.1179503 | FALSE |
| TC01001090.hg.1 | ENSG00000117289; | 0.0347431 | 0.1179503 | FALSE |
| TC01001624.hg.1 | ENSG00000116741; | 0.0347431 | 0.1179503 | FALSE |
| TC02002714.hg.1 | ENSG00000163251; | 0.0351238 | 0.1189124 | FALSE |
| TC02001867.hg.1 | ENSG00000115380; | 0.0351238 | 0.1189124 | FALSE |
| TC01000685.hg.1 | ENSG00000162409; | 0.0351238 | 0.1189124 | FALSE |
| TC06000595.hg.1 | ENSG00000112655; | 0.0351238 | 0.1189124 | FALSE |
| TC01002847.hg.1 | ENSG00000117228; | 0.0355975 | 0.1202784 | FALSE |
| TC01000100.hg.1 | ENSG00000049246; | 0.0357061 | 0.1205503 | FALSE |
| TC01000685.hg.1 | ENSG00000162409; | 0.0357755 | 0.1206419 | FALSE |
| TC01001188.hg.1 | ENSG00000143369; | 0.0357755 | 0.1206419 | FALSE |
| TC02000041.hg.1 | ENSG00000115738; | 0.0362605 | 0.1221332 | FALSE |
| TC01001736.hg.1 | ENSG00000196352; | 0.0371416 | 0.1248064 | FALSE |
| TC02002624.hg.1 | ENSG00000115415; | 0.0371416 | 0.1248064 | FALSE |
| TC01000904.hg.1 | ENSG00000162692; | 0.0371416 | 0.1248064 | FALSE |

|                 |                 |           |           |       |
|-----------------|-----------------|-----------|-----------|-------|
| TC01003638.hg.1 | ENSG0000073756; | 0.0375551 | 0.1260967 | FALSE |
| TC01003638.hg.1 | ENSG0000073756; | 0.0381384 | 0.1278048 | FALSE |
| TC02000041.hg.1 | ENSG0000115738; | 0.0381384 | 0.1278048 | FALSE |
| TC05001110.hg.1 | ENSG0000153395; | 0.0381384 | 0.1278048 | FALSE |
| TC05001110.hg.1 | ENSG0000153395; | 0.0381384 | 0.1278048 | FALSE |
| TC01001607.hg.1 | ENSG0000116711; | 0.0385591 | 0.1283841 | FALSE |
| TC01001607.hg.1 | ENSG0000116711; | 0.0385591 | 0.1283841 | FALSE |
| TC01001473.hg.1 | ENSG0000143153; | 0.0389593 | 0.1283841 | FALSE |
| TC03000214.hg.1 | ENSG0000168036; | 0.039212  | 0.1283841 | FALSE |
| TC04002931.hg.1 | ENSG0000134853; | 0.0393287 | 0.1283841 | FALSE |
| TC05000943.hg.1 | ENSG0000156427; | 0.0393287 | 0.1283841 | FALSE |
| TC01003129.hg.1 | ENSG0000143140; | 0.0393287 | 0.1283841 | FALSE |
| TC01002166.hg.1 | ENSG0000116285; | 0.0393287 | 0.1283841 | FALSE |
| TC02002823.hg.1 | ENSG0000135919; | 0.0393287 | 0.1283841 | FALSE |
| TC05000165.hg.1 | ENSG0000079215; | 0.0393287 | 0.1283841 | FALSE |
| TC10001398.hg.1 | ENSG0000122884; | 0.0393287 | 0.1283841 | FALSE |
| TC07000328.hg.1 | ENSG0000146648; | 0.0393287 | 0.1283841 | FALSE |
| TC02000762.hg.1 | ENSG0000163083; | 0.0393287 | 0.1283841 | FALSE |
| TC02001867.hg.1 | ENSG0000115380; | 0.0393287 | 0.1283841 | FALSE |
| TC07000328.hg.1 | ENSG0000146648; | 0.0393287 | 0.1283841 | FALSE |
| TC15000226.hg.1 | ENSG0000166923; | 0.0393287 | 0.1283841 | FALSE |
| TC07000004.hg.1 | ENSG0000177706; | 0.0393287 | 0.1283841 | FALSE |
| TC06002168.hg.1 | ENSG0000164442; | 0.0393287 | 0.1283841 | FALSE |
| TC02002823.hg.1 | ENSG0000135919; | 0.0393287 | 0.1283841 | FALSE |
| TC02000281.hg.1 | ENSG0000116016; | 0.0393287 | 0.1283841 | FALSE |
| TC02000762.hg.1 | ENSG0000163083; | 0.0393287 | 0.1283841 | FALSE |
| TC01003497.hg.1 | ENSG0000117479; | 0.0393287 | 0.1283841 | FALSE |
| TC02000286.hg.1 | ENSG0000171150; | 0.0393287 | 0.1283841 | FALSE |
| TC03000577.hg.1 | ENSG0000144857; | 0.0393287 | 0.1283841 | FALSE |
| TC06000945.hg.1 | ENSG0000152661; | 0.0393287 | 0.1283841 | FALSE |
| TC02002823.hg.1 | ENSG0000135919; | 0.0393287 | 0.1283841 | FALSE |
| TC06000945.hg.1 | ENSG0000152661; | 0.0393287 | 0.1283841 | FALSE |
| TC02000281.hg.1 | ENSG0000116016; | 0.0393287 | 0.1283841 | FALSE |
| TC07001562.hg.1 | ENSG0000019991; | 0.0393287 | 0.1283841 | FALSE |
| TC06000595.hg.1 | ENSG0000112655; | 0.0393287 | 0.1283841 | FALSE |
| TC06000595.hg.1 | ENSG0000112655; | 0.0393287 | 0.1283841 | FALSE |
| TC16000473.hg.1 | ENSG0000198417; | 0.0393287 | 0.1283841 | FALSE |
| TC02001628.hg.1 | ENSG0000084674; | 0.0393287 | 0.1283841 | FALSE |
| TC07001552.hg.1 | ENSG0000187391; | 0.0393287 | 0.1283841 | FALSE |
| TC03000214.hg.1 | ENSG0000168036; | 0.0393287 | 0.1283841 | FALSE |
| TC02002624.hg.1 | ENSG0000115415; | 0.0393287 | 0.1283841 | FALSE |
| TC02002624.hg.1 | ENSG0000115415; | 0.0393287 | 0.1283841 | FALSE |
| TC03002146.hg.1 | ENSG0000189058; | 0.0393287 | 0.1283841 | FALSE |
| TC01000972.hg.1 | ENSG0000064886; | 0.0393287 | 0.1283841 | FALSE |
| TC06000945.hg.1 | ENSG0000152661; | 0.0393287 | 0.1283841 | FALSE |
| TC01000972.hg.1 | ENSG0000064886; | 0.0396158 | 0.1283841 | FALSE |
| TC02000511.hg.1 | ENSG0000168906; | 0.0396158 | 0.1283841 | FALSE |
| TC01002616.hg.1 | ENSG0000117461; | 0.0396158 | 0.1283841 | FALSE |
| TC02000041.hg.1 | ENSG0000115738; | 0.0397654 | 0.1286741 | FALSE |
| TC02002292.hg.1 | ENSG0000136720; | 0.0399927 | 0.1288252 | FALSE |
| TC02001031.hg.1 | ENSG0000152256; | 0.0399927 | 0.1288252 | FALSE |
| TC01001624.hg.1 | ENSG0000116741; | 0.0399927 | 0.1288252 | FALSE |
| TC01001805.hg.1 | ENSG0000092969; | 0.0399927 | 0.1288252 | FALSE |
| TC10000811.hg.1 | ENSG0000150594; | 0.0399927 | 0.1288252 | FALSE |
| TC11000238.hg.1 | ENSG0000173432; | 0.0399927 | 0.1288252 | FALSE |
| TC08001275.hg.1 | ENSG0000172817; | 0.0399927 | 0.1288252 | FALSE |
| TC03000214.hg.1 | ENSG0000168036; | 0.0399927 | 0.1288252 | FALSE |
| TC19000191.hg.1 | ENSG0000130164; | 0.0399927 | 0.1288252 | FALSE |

|                 |                 |           |           |       |
|-----------------|-----------------|-----------|-----------|-------|
| TC01001188.hg.1 | ENSG00000143369 | 0.0399927 | 0.1288252 | FALSE |
| TC12001324.hg.1 | ENSG00000123095 | 0.0399927 | 0.1288252 | FALSE |
| TC01001736.hg.1 | ENSG00000196352 | 0.0404248 | 0.1295832 | FALSE |
| TC01003638.hg.1 | ENSG00000073756 | 0.0404248 | 0.1295832 | FALSE |
| TC01003638.hg.1 | ENSG00000073756 | 0.0408458 | 0.1307859 | FALSE |
| TC03000214.hg.1 | ENSG00000168036 | 0.0413065 | 0.1319649 | FALSE |
| TC01003129.hg.1 | ENSG00000143140 | 0.0413065 | 0.1319649 | FALSE |
| TC04000274.hg.1 | ENSG00000145246 | 0.0413065 | 0.1319649 | FALSE |
| TC02001867.hg.1 | ENSG00000115380 | 0.0413065 | 0.1319649 | FALSE |
| TC02002808.hg.1 | ENSG00000116106 | 0.0413065 | 0.1319649 | FALSE |
| TC03000214.hg.1 | ENSG00000168036 | 0.0417431 | 0.1330619 | FALSE |
| TC01001473.hg.1 | ENSG00000143153 | 0.0425039 | 0.1347347 | FALSE |
| TC01001473.hg.1 | ENSG00000143153 | 0.0425039 | 0.1347347 | FALSE |
| TC01001473.hg.1 | ENSG00000143153 | 0.0425039 | 0.1347347 | FALSE |
| TC01001473.hg.1 | ENSG00000143153 | 0.0425039 | 0.1347347 | FALSE |
| TC01001473.hg.1 | ENSG00000143153 | 0.0425039 | 0.1347347 | FALSE |
| TC01001473.hg.1 | ENSG00000143153 | 0.0425039 | 0.1347347 | FALSE |
| TC01001473.hg.1 | ENSG00000143153 | 0.0425039 | 0.1347347 | FALSE |
| TC01001473.hg.1 | ENSG00000143153 | 0.0425039 | 0.1347347 | FALSE |
| TC01001473.hg.1 | ENSG00000143153 | 0.0425039 | 0.1347347 | FALSE |
| TC01001473.hg.1 | ENSG00000143153 | 0.0425039 | 0.1347347 | FALSE |
| TC01001473.hg.1 | ENSG00000143153 | 0.0425039 | 0.1347347 | FALSE |
| TC01001473.hg.1 | ENSG00000143153 | 0.0425039 | 0.1347347 | FALSE |
| TC01001473.hg.1 | ENSG00000143153 | 0.0425039 | 0.1347347 | FALSE |
| TC01001473.hg.1 | ENSG00000143153 | 0.0425039 | 0.1347347 | FALSE |
| TC01001473.hg.1 | ENSG00000143153 | 0.0425039 | 0.1347347 | FALSE |
| TC02001031.hg.1 | ENSG00000152256 | 0.0425039 | 0.1347347 | FALSE |
| TC01003129.hg.1 | ENSG00000143140 | 0.0425039 | 0.1347347 | FALSE |
| TC01001473.hg.1 | ENSG00000143153 | 0.0425039 | 0.1347347 | FALSE |
| TC01001473.hg.1 | ENSG00000143153 | 0.0425039 | 0.1347347 | FALSE |
| TC01001473.hg.1 | ENSG00000143153 | 0.0425039 | 0.1347347 | FALSE |
| TC01001473.hg.1 | ENSG00000143153 | 0.0425039 | 0.1347347 | FALSE |
| TC01001473.hg.1 | ENSG00000143153 | 0.0425039 | 0.1347347 | FALSE |
| TC01001805.hg.1 | ENSG00000092969 | 0.0427868 | 0.1348824 | FALSE |
| TC08000845.hg.1 | ENSG00000187786 | 0.0436817 | 0.1375516 | FALSE |
| TC04000274.hg.1 | ENSG00000145246 | 0.0436817 | 0.1375516 | FALSE |
| TC04000313.hg.1 | ENSG00000157404 | 0.0440409 | 0.1384789 | FALSE |
| TC02002624.hg.1 | ENSG00000115415 | 0.0440409 | 0.1384789 | FALSE |
| TC02001963.hg.1 | ENSG00000163235 | 0.0449483 | 0.141073  | FALSE |
| TC01000783.hg.1 | ENSG00000117069 | 0.0449483 | 0.141073  | FALSE |
| TC01001095.hg.1 | ENSG00000143127 | 0.0449483 | 0.141073  | FALSE |
| TC01002578.hg.1 | ENSG00000117394 | 0.045358  | 0.1420466 | FALSE |
| TC01001704.hg.1 | ENSG00000163531 | 0.045358  | 0.1420466 | FALSE |
| TC05003423.hg.1 | ENSG00000082196 | 0.045358  | 0.1420466 | FALSE |
| TC02002808.hg.1 | ENSG00000116106 | 0.0456697 | 0.1424496 | FALSE |
| TC05000165.hg.1 | ENSG00000079215 | 0.0456697 | 0.1424496 | FALSE |
| TC03001255.hg.1 | ENSG00000033867 | 0.0456697 | 0.1424496 | FALSE |
| TC01001805.hg.1 | ENSG00000092969 | 0.0456697 | 0.1424496 | FALSE |
| TC07001552.hg.1 | ENSG00000187391 | 0.0456697 | 0.1424496 | FALSE |
| TC02001031.hg.1 | ENSG00000152256 | 0.0456697 | 0.1424496 | FALSE |
| TC01001607.hg.1 | ENSG00000116711 | 0.0456697 | 0.1424496 | FALSE |
| TC01003638.hg.1 | ENSG00000073756 | 0.0456697 | 0.1424496 | FALSE |
| TC01000904.hg.1 | ENSG00000162692 | 0.0461124 | 0.1433603 | FALSE |
| TC01000685.hg.1 | ENSG00000162409 | 0.0463345 | 0.1439463 | FALSE |
| TC01001704.hg.1 | ENSG00000163531 | 0.0465927 | 0.1446212 | FALSE |
| TC01000685.hg.1 | ENSG00000162409 | 0.0466193 | 0.1446212 | FALSE |
| TC03000214.hg.1 | ENSG00000168036 | 0.0479729 | 0.1484879 | FALSE |
| TC01001907.hg.1 | ENSG00000143641 | 0.0479729 | 0.1484879 | FALSE |
| TC02000041.hg.1 | ENSG00000115738 | 0.0479729 | 0.1484879 | FALSE |
| TC04002931.hg.1 | ENSG00000134853 | 0.0479729 | 0.1484879 | FALSE |
| TC03001362.hg.1 | ENSG00000160808 | 0.0481067 | 0.1484879 | FALSE |
| TC01001624.hg.1 | ENSG00000116741 | 0.0481067 | 0.1484879 | FALSE |
| TC01002669.hg.1 | ENSG00000157193 | 0.0481067 | 0.1484879 | FALSE |
| TC01003129.hg.1 | ENSG00000143140 | 0.0481433 | 0.1484879 | FALSE |
| TC02000286.hg.1 | ENSG00000171150 | 0.0483287 | 0.1488989 | FALSE |
| TC06000595.hg.1 | ENSG00000112655 | 0.0483287 | 0.1488989 | FALSE |

|                 |                  |           |           |       |
|-----------------|------------------|-----------|-----------|-------|
| TC01006336.hg.1 | ENSG00000162706; | 0.0485867 | 0.1495324 | FALSE |
| TC01001188.hg.1 | ENSG00000143369; | 0.0487105 | 0.1496183 | FALSE |
| TC01003129.hg.1 | ENSG00000143140; | 0.0492262 | 0.1496183 | FALSE |
| TC01003129.hg.1 | ENSG00000143140; | 0.0492262 | 0.1496183 | FALSE |
| TC02001750.hg.1 | ENSG00000138061; | 0.0492262 | 0.1496183 | FALSE |
| TC02002823.hg.1 | ENSG00000135919; | 0.0492262 | 0.1496183 | FALSE |
| TC08000482.hg.1 | ENSG00000121039; | 0.0492262 | 0.1496183 | FALSE |
| TC04000173.hg.1 | ENSG00000109610; | 0.0492262 | 0.1496183 | FALSE |
| TC07000328.hg.1 | ENSG00000146648; | 0.0492262 | 0.1496183 | FALSE |
| TC06001027.hg.1 | ENSG00000118503; | 0.0492262 | 0.1496183 | FALSE |
| TC07001552.hg.1 | ENSG00000187391; | 0.0492262 | 0.1496183 | FALSE |
| TC07000643.hg.1 | ENSG00000106366; | 0.0492262 | 0.1496183 | FALSE |
| TC03000214.hg.1 | ENSG00000168036; | 0.0492262 | 0.1496183 | FALSE |
| TC05000914.hg.1 | ENSG00000145934; | 0.0492262 | 0.1496183 | FALSE |
| TC07000768.hg.1 | ENSG00000174697; | 0.0492262 | 0.1496183 | FALSE |
| TC02001963.hg.1 | ENSG00000163235; | 0.0492262 | 0.1496183 | FALSE |
| TC06002168.hg.1 | ENSG00000164442; | 0.0492262 | 0.1496183 | FALSE |
| TC04002931.hg.1 | ENSG00000134853; | 0.0492262 | 0.1496183 | FALSE |
| TC01000685.hg.1 | ENSG00000162409; | 0.0492262 | 0.1496183 | FALSE |
| TC01001624.hg.1 | ENSG00000116741; | 0.0492262 | 0.1496183 | FALSE |
| TC03000214.hg.1 | ENSG00000168036; | 0.0492262 | 0.1496183 | FALSE |
| TC15000226.hg.1 | ENSG00000166923; | 0.0492262 | 0.1496183 | FALSE |
| TC10001711.hg.1 | ENSG00000066468; | 0.0492262 | 0.1496183 | FALSE |
| TC04000173.hg.1 | ENSG00000109610; | 0.0492262 | 0.1496183 | FALSE |
| TC03000214.hg.1 | ENSG00000168036; | 0.0492262 | 0.1496183 | FALSE |
| TC01003129.hg.1 | ENSG00000143140; | 0.0492262 | 0.1496183 | FALSE |
| TC01003129.hg.1 | ENSG00000143140; | 0.0492262 | 0.1496183 | FALSE |
| TC01003129.hg.1 | ENSG00000143140; | 0.0492262 | 0.1496183 | FALSE |
| TC06000595.hg.1 | ENSG00000112655; | 0.0492262 | 0.1496183 | FALSE |
| TC06000595.hg.1 | ENSG00000112655; | 0.0492262 | 0.1496183 | FALSE |
| TC03001071.hg.1 | ENSG00000114315; | 0.0492262 | 0.1496183 | FALSE |
| TC01002669.hg.1 | ENSG00000157193; | 0.0492262 | 0.1496183 | FALSE |
| TC15000226.hg.1 | ENSG00000166923; | 0.0492262 | 0.1496183 | FALSE |
| TC10001571.hg.1 | ENSG00000120057; | 0.0492262 | 0.1496183 | FALSE |
| TC01001473.hg.1 | ENSG00000143153; | 0.0500362 | 0.1503192 | FALSE |
| TC01001188.hg.1 | ENSG00000143369; | 0.0514166 | 0.1537643 | FALSE |
| TC01001704.hg.1 | ENSG00000163531; | 0.0514166 | 0.1537643 | FALSE |
| TC01001704.hg.1 | ENSG00000163531; | 0.0514166 | 0.1537643 | FALSE |
| TC06004073.hg.1 | ENSG00000204520; | 0.0514166 | 0.1537643 | FALSE |
| TC02002714.hg.1 | ENSG00000163251; | 0.0514166 | 0.1537643 | FALSE |
| TC02000041.hg.1 | ENSG00000115738; | 0.0514166 | 0.1537643 | FALSE |
| TC02000041.hg.1 | ENSG00000115738; | 0.0514633 | 0.1537643 | FALSE |
| TC06001772.hg.1 | ENSG00000146233; | 0.0517217 | 0.1537643 | FALSE |
| TC02000041.hg.1 | ENSG00000115738; | 0.0517217 | 0.1537643 | FALSE |
| TC05000619.hg.1 | ENSG00000198108; | 0.0517217 | 0.1537643 | FALSE |
| TC05000943.hg.1 | ENSG00000156427; | 0.0517217 | 0.1537643 | FALSE |
| TC01001624.hg.1 | ENSG00000116741; | 0.0517217 | 0.1537643 | FALSE |
| TC03001071.hg.1 | ENSG00000114315; | 0.0517217 | 0.1537643 | FALSE |
| TC01002166.hg.1 | ENSG00000116285; | 0.0517217 | 0.1537643 | FALSE |
| TC06004141.hg.1 | ENSG00000112096; | 0.0517217 | 0.1537643 | FALSE |
| TC08001275.hg.1 | ENSG00000172817; | 0.0517217 | 0.1537643 | FALSE |
| TC01000904.hg.1 | ENSG00000162692; | 0.0517217 | 0.1537643 | FALSE |
| TC01000904.hg.1 | ENSG00000162692; | 0.0517217 | 0.1537643 | FALSE |
| TC01003129.hg.1 | ENSG00000143140; | 0.0517217 | 0.1537643 | FALSE |
| TC04000408.hg.1 | ENSG00000169429; | 0.0517217 | 0.1537643 | FALSE |
| TC01002706.hg.1 | ENSG00000184292; | 0.0517217 | 0.1537643 | FALSE |
| TC01000972.hg.1 | ENSG00000064886; | 0.0517217 | 0.1537643 | FALSE |
| TC03000631.hg.1 | ENSG00000114023; | 0.0524886 | 0.1550215 | FALSE |



|                 |                  |           |           |       |
|-----------------|------------------|-----------|-----------|-------|
| TC05000165.hg.1 | ENSG0000079215;  | 0.0524886 | 0.1550215 | FALSE |
| TC04000432.hg.1 | ENSG00000156234; | 0.0524886 | 0.1550215 | FALSE |
| TC04002931.hg.1 | ENSG00000134853; | 0.0524886 | 0.1550215 | FALSE |
| TC01002669.hg.1 | ENSG00000157193; | 0.0546223 | 0.1609902 | FALSE |
| TC01000734.hg.1 | ENSG00000118473; | 0.0546223 | 0.1609902 | FALSE |
| TC01001704.hg.1 | ENSG00000163531; | 0.0550008 | 0.1619383 | FALSE |
| TC04000253.hg.1 | ENSG00000154277; | 0.0555296 | 0.163383  | FALSE |
| TC01002706.hg.1 | ENSG00000184292; | 0.0560145 | 0.1646965 | FALSE |
| TC01001704.hg.1 | ENSG00000163531; | 0.0571235 | 0.167842  | FALSE |
| TC02000466.hg.1 | ENSG00000159399; | 0.0572274 | 0.1679168 | FALSE |
| TC03001071.hg.1 | ENSG00000114315; | 0.0572274 | 0.1679168 | FALSE |
| TC01003638.hg.1 | ENSG00000073756; | 0.0572274 | 0.1679168 | FALSE |
| TC01001805.hg.1 | ENSG00000092969; | 0.0575457 | 0.1686197 | FALSE |
| TC03000214.hg.1 | ENSG00000168036; | 0.0577324 | 0.1688567 | FALSE |
| TC03001071.hg.1 | ENSG00000114315; | 0.0579463 | 0.1688567 | FALSE |
| TC04000173.hg.1 | ENSG00000109610; | 0.0579463 | 0.1688567 | FALSE |
| TC01000685.hg.1 | ENSG00000162409; | 0.0580585 | 0.1688567 | FALSE |
| TC01000685.hg.1 | ENSG00000162409; | 0.0580585 | 0.1688567 | FALSE |
| TC01003638.hg.1 | ENSG00000073756; | 0.0581084 | 0.1688567 | FALSE |
| TC03000846.hg.1 | ENSG00000196549; | 0.0581394 | 0.1688567 | FALSE |
| TC05000165.hg.1 | ENSG00000079215; | 0.0581394 | 0.1688567 | FALSE |
| TC08001567.hg.1 | ENSG00000170961; | 0.0581394 | 0.1688567 | FALSE |
| TC06002168.hg.1 | ENSG00000164442; | 0.0581394 | 0.1688567 | FALSE |
| TC02001031.hg.1 | ENSG00000152256; | 0.0581394 | 0.1688567 | FALSE |
| TC02000082.hg.1 | ENSG00000071575; | 0.0581394 | 0.1688567 | FALSE |
| TC03001071.hg.1 | ENSG00000114315; | 0.0581394 | 0.1688567 | FALSE |
| TC04000313.hg.1 | ENSG00000157404; | 0.0581394 | 0.1688567 | FALSE |
| TC03000214.hg.1 | ENSG00000168036; | 0.0581394 | 0.1688567 | FALSE |
| TC11000238.hg.1 | ENSG00000173432; | 0.0581394 | 0.1688567 | FALSE |
| TC01002932.hg.1 | ENSG00000060718; | 0.0581394 | 0.1688567 | FALSE |
| TC03002146.hg.1 | ENSG00000189058; | 0.0581394 | 0.1688567 | FALSE |
| TC03002146.hg.1 | ENSG00000189058; | 0.0581394 | 0.1688567 | FALSE |
| TC03000214.hg.1 | ENSG00000168036; | 0.058788  | 0.1699333 | FALSE |
| TC03002146.hg.1 | ENSG00000189058; | 0.0594749 | 0.1705987 | FALSE |
| TC03000013.hg.1 | ENSG00000150995; | 0.0594749 | 0.1705987 | FALSE |
| TC03000214.hg.1 | ENSG00000168036; | 0.0594749 | 0.1705987 | FALSE |
| TC05003423.hg.1 | ENSG00000082196; | 0.0594749 | 0.1705987 | FALSE |
| TC06001015.hg.1 | ENSG00000171408; | 0.0599089 | 0.1705987 | FALSE |
| TC08000127.hg.1 | ENSG00000003989; | 0.0599089 | 0.1705987 | FALSE |
| TC07000235.hg.1 | ENSG00000011426; | 0.0599089 | 0.1705987 | FALSE |
| TC02001628.hg.1 | ENSG00000084674; | 0.0599089 | 0.1705987 | FALSE |
| TC01003638.hg.1 | ENSG00000073756; | 0.0599089 | 0.1705987 | FALSE |
| TC04000313.hg.1 | ENSG00000157404; | 0.0599089 | 0.1705987 | FALSE |
| TC07000137.hg.1 | ENSG00000136244; | 0.0599089 | 0.1705987 | FALSE |
| TC06001027.hg.1 | ENSG00000118503; | 0.0599089 | 0.1705987 | FALSE |
| TC03001071.hg.1 | ENSG00000114315; | 0.0599089 | 0.1705987 | FALSE |
| TC10002924.hg.1 | ENSG00000187134; | 0.0599089 | 0.1705987 | FALSE |
| TC10002924.hg.1 | ENSG00000187134; | 0.0599089 | 0.1705987 | FALSE |
| TC17000220.hg.1 | ENSG00000108448; | 0.0599089 | 0.1705987 | FALSE |
| TC01000685.hg.1 | ENSG00000162409; | 0.0599089 | 0.1705987 | FALSE |
| TC06001027.hg.1 | ENSG00000118503; | 0.0599089 | 0.1705987 | FALSE |
| TC03000214.hg.1 | ENSG00000168036; | 0.0599089 | 0.1705987 | FALSE |
| TC10001711.hg.1 | ENSG00000066468; | 0.0599089 | 0.1705987 | FALSE |
| TC10001711.hg.1 | ENSG00000066468; | 0.0599089 | 0.1705987 | FALSE |
| TC03000214.hg.1 | ENSG00000168036; | 0.0599089 | 0.1705987 | FALSE |
| TC02000620.hg.1 | ENSG00000115594; | 0.0599089 | 0.1705987 | FALSE |
| TC07000768.hg.1 | ENSG00000174697; | 0.0599089 | 0.1705987 | FALSE |
| TC02002624.hg.1 | ENSG00000115415; | 0.0599089 | 0.1705987 | FALSE |

|                  |                  |           |           |       |
|------------------|------------------|-----------|-----------|-------|
| TC14001188.hg.1; | ENSG00000126778; | 0.0599089 | 0.1705987 | FALSE |
| TC04002931.hg.1  | ENSG00000134853; | 0.0599089 | 0.1705987 | FALSE |
| TC01003129.hg.1  | ENSG00000143140; | 0.0599089 | 0.1705987 | FALSE |
| TC01003129.hg.1  | ENSG00000143140; | 0.0599089 | 0.1705987 | FALSE |
| TC02001750.hg.1  | ENSG00000138061; | 0.0599089 | 0.1705987 | FALSE |
| TC01003129.hg.1  | ENSG00000143140; | 0.0602535 | 0.1705987 | FALSE |
| TC02002624.hg.1  | ENSG00000115415; | 0.0607532 | 0.171843  | FALSE |
| TC03000214.hg.1  | ENSG00000168036; | 0.0607532 | 0.171843  | FALSE |
| TC01000904.hg.1  | ENSG00000162692; | 0.0613889 | 0.1733608 | FALSE |
| TC01000100.hg.1  | ENSG00000049246; | 0.061391  | 0.1733608 | FALSE |
| TC03002146.hg.1  | ENSG00000189058; | 0.061534  | 0.1736499 | FALSE |
| TC07001332.hg.1  | ENSG00000164708; | 0.0621875 | 0.1753209 | FALSE |
| TC02002605.hg.1  | ENSG00000064989; | 0.0621875 | 0.1753209 | FALSE |
| TC04000408.hg.1  | ENSG00000169429; | 0.0635759 | 0.1789993 | FALSE |
| TC02000041.hg.1  | ENSG00000115738; | 0.0635759 | 0.1789993 | FALSE |
| TC01001624.hg.1  | ENSG00000116741; | 0.0640945 | 0.1802815 | FALSE |
| TC01000685.hg.1  | ENSG00000162409; | 0.0641715 | 0.1803795 | FALSE |
| TC03000846.hg.1  | ENSG00000196549; | 0.064359  | 0.180788  | FALSE |
| TC01002669.hg.1  | ENSG00000157193; | 0.0646983 | 0.1808462 | FALSE |
| TC01003211.hg.1; | ENSG00000143387; | 0.0646983 | 0.1808462 | FALSE |
| TC01001188.hg.1; | ENSG00000143369; | 0.0649125 | 0.1808462 | FALSE |
| TC11000198.hg.1; | ENSG00000133816; | 0.0649125 | 0.1808462 | FALSE |
| TC01001090.hg.1  | ENSG00000117289; | 0.0649125 | 0.1808462 | FALSE |
| TC04000729.hg.1  | ENSG00000151617; | 0.0649125 | 0.1808462 | FALSE |
| TC02000996.hg.1  | ENSG00000172292; | 0.0649125 | 0.1808462 | FALSE |
| TC07001897.hg.1  | ENSG00000157680; | 0.0649125 | 0.1808462 | FALSE |
| TC01003638.hg.1  | ENSG00000073756; | 0.0649125 | 0.1808462 | FALSE |
| TC01002166.hg.1  | ENSG00000116285; | 0.0649125 | 0.1808462 | FALSE |
| TC01003129.hg.1  | ENSG00000143140; | 0.0649125 | 0.1808462 | FALSE |
| TC04000313.hg.1  | ENSG00000157404; | 0.0649125 | 0.1808462 | FALSE |
| TC06000595.hg.1  | ENSG00000112655; | 0.06495   | 0.1808462 | FALSE |
| TC01000728.hg.1  | ENSG00000162433; | 0.06495   | 0.1808462 | FALSE |
| TC01000904.hg.1  | ENSG00000162692; | 0.0658989 | 0.1833095 | FALSE |
| TC01003129.hg.1  | ENSG00000143140; | 0.0662471 | 0.1841207 | FALSE |
| TC01002847.hg.1  | ENSG00000117228; | 0.0662766 | 0.1841207 | FALSE |
| TC01003638.hg.1  | ENSG00000073756; | 0.0669985 | 0.1859916 | FALSE |
| TC02002714.hg.1  | ENSG00000163251; | 0.0670394 | 0.1859916 | FALSE |
| TC02002714.hg.1  | ENSG00000163251; | 0.0670804 | 0.1859916 | FALSE |
| TC01000685.hg.1  | ENSG00000162409; | 0.0672634 | 0.1863784 | FALSE |
| TC04000313.hg.1  | ENSG00000157404; | 0.0673664 | 0.1864213 | FALSE |
| TC02001100.hg.1; | ENSG00000138448; | 0.0673664 | 0.1864213 | FALSE |
| TC04002931.hg.1  | ENSG00000134853; | 0.0673664 | 0.1864213 | FALSE |
| TC01000115.hg.1; | ENSG00000171621; | 0.0674531 | 0.1864213 | FALSE |
| TC01000904.hg.1  | ENSG00000162692; | 0.067831  | 0.1871661 | FALSE |
| TC01000904.hg.1  | ENSG00000162692; | 0.0678319 | 0.1871661 | FALSE |
| TC03000262.hg.1  | ENSG00000160801; | 0.0678319 | 0.1871661 | FALSE |
| TC01003638.hg.1  | ENSG00000073756; | 0.0689193 | 0.1899829 | FALSE |
| TC01002669.hg.1  | ENSG00000157193; | 0.06956   | 0.1916256 | FALSE |
| TC01000904.hg.1  | ENSG00000162692; | 0.0712968 | 0.1936373 | FALSE |
| TC01002578.hg.1  | ENSG00000117394; | 0.0712968 | 0.1936373 | FALSE |
| TC11001589.hg.1; | ENSG00000175264; | 0.0712968 | 0.1936373 | FALSE |
| TC15000226.hg.1  | ENSG00000166923; | 0.0712968 | 0.1936373 | FALSE |
| TC02001100.hg.1; | ENSG00000138448; | 0.0712968 | 0.1936373 | FALSE |
| TC03001071.hg.1  | ENSG00000114315; | 0.0712968 | 0.1936373 | FALSE |
| TC14001188.hg.1; | ENSG00000126778; | 0.0712968 | 0.1936373 | FALSE |
| TC01002669.hg.1  | ENSG00000157193; | 0.0712968 | 0.1936373 | FALSE |
| TC12000601.hg.1  | ENSG00000127314; | 0.0712968 | 0.1936373 | FALSE |
| TC02002823.hg.1  | ENSG00000135919; | 0.0712968 | 0.1936373 | FALSE |

|                 |                  |           |           |       |
|-----------------|------------------|-----------|-----------|-------|
| TC02002823.hg.1 | ENSG00000135919; | 0.0712968 | 0.1936373 | FALSE |
| TC03002146.hg.1 | ENSG00000189058; | 0.0712968 | 0.1936373 | FALSE |
| TC06000087.hg.1 | ENSG00000078401; | 0.0712968 | 0.1936373 | FALSE |
| TC06000621.hg.1 | ENSG00000124813; | 0.0712968 | 0.1936373 | FALSE |
| TC06000945.hg.1 | ENSG00000152661; | 0.0712968 | 0.1936373 | FALSE |
| TC07000137.hg.1 | ENSG00000136244; | 0.0712968 | 0.1936373 | FALSE |
| TC06000595.hg.1 | ENSG00000112655; | 0.0712968 | 0.1936373 | FALSE |
| TC02000286.hg.1 | ENSG00000171150; | 0.0712968 | 0.1936373 | FALSE |
| TC01000972.hg.1 | ENSG00000064886; | 0.0712968 | 0.1936373 | FALSE |
| TC02000230.hg.1 | ENSG00000150938; | 0.0712968 | 0.1936373 | FALSE |
| TC01003129.hg.1 | ENSG00000143140; | 0.0712968 | 0.1936373 | FALSE |
| TC17001682.hg.1 | ENSG00000108821; | 0.0712968 | 0.1936373 | FALSE |
| TC02000041.hg.1 | ENSG00000115738; | 0.0712968 | 0.1936373 | FALSE |
| TC03000214.hg.1 | ENSG00000168036; | 0.0712968 | 0.1936373 | FALSE |
| TC05001933.hg.1 | ENSG00000113721; | 0.0712968 | 0.1936373 | FALSE |
| TC01003129.hg.1 | ENSG00000143140; | 0.0712968 | 0.1936373 | FALSE |
| TC06000595.hg.1 | ENSG00000112655; | 0.0712968 | 0.1936373 | FALSE |
| TC10001571.hg.1 | ENSG00000120057; | 0.0712968 | 0.1936373 | FALSE |
| TC0X001186.hg.1 | ENSG00000072133; | 0.0712968 | 0.1936373 | FALSE |
| TC01001473.hg.1 | ENSG00000143153; | 0.0716472 | 0.1936373 | FALSE |
| TC01000685.hg.1 | ENSG00000162409; | 0.0719708 | 0.193989  | FALSE |
| TC01000685.hg.1 | ENSG00000162409; | 0.0720085 | 0.193989  | FALSE |
| TC01003638.hg.1 | ENSG00000073756; | 0.0720298 | 0.193989  | FALSE |
| TC02002292.hg.1 | ENSG00000136720; | 0.0720298 | 0.193989  | FALSE |
| TC05001614.hg.1 | ENSG00000175426; | 0.0720298 | 0.193989  | FALSE |
| TC02001031.hg.1 | ENSG00000152256; | 0.0720298 | 0.193989  | FALSE |
| TC07001883.hg.1 | ENSG00000085662; | 0.0720298 | 0.193989  | FALSE |
| TC02000416.hg.1 | ENSG00000116005; | 0.0721398 | 0.193989  | FALSE |
| TC03001071.hg.1 | ENSG00000114315; | 0.0722421 | 0.1940812 | FALSE |
| TC01001090.hg.1 | ENSG00000117289; | 0.0722421 | 0.1940812 | FALSE |
| TC04002931.hg.1 | ENSG00000134853; | 0.0727613 | 0.1950477 | FALSE |
| TC03001575.hg.1 | ENSG00000114480; | 0.0727613 | 0.1950477 | FALSE |
| TC02002823.hg.1 | ENSG00000135919; | 0.0727613 | 0.1950477 | FALSE |
| TC03001071.hg.1 | ENSG00000114315; | 0.0727613 | 0.1950477 | FALSE |
| TC01003638.hg.1 | ENSG00000073756; | 0.0727613 | 0.1950477 | FALSE |
| TC01001805.hg.1 | ENSG00000092969; | 0.0761067 | 0.2036329 | FALSE |
| TC03001575.hg.1 | ENSG00000114480; | 0.0768055 | 0.2053102 | FALSE |
| TC03000631.hg.1 | ENSG00000114023; | 0.0768055 | 0.2053102 | FALSE |
| TC01002578.hg.1 | ENSG00000117394; | 0.0772869 | 0.2062751 | FALSE |
| TC03000013.hg.1 | ENSG00000150995; | 0.0772869 | 0.2062751 | FALSE |
| TC04002931.hg.1 | ENSG00000134853; | 0.0772869 | 0.2062751 | FALSE |
| TC02001031.hg.1 | ENSG00000152256; | 0.0774781 | 0.2064271 | FALSE |
| TC01002669.hg.1 | ENSG00000157193; | 0.0775037 | 0.2064271 | FALSE |
| TC01002669.hg.1 | ENSG00000157193; | 0.0775367 | 0.2064271 | FALSE |
| TC04000729.hg.1 | ENSG00000151617; | 0.0783688 | 0.2083831 | FALSE |
| TC06001027.hg.1 | ENSG00000118503; | 0.0783688 | 0.2083831 | FALSE |
| TC06000087.hg.1 | ENSG00000078401; | 0.0783688 | 0.2083831 | FALSE |
| TC03000214.hg.1 | ENSG00000168036; | 0.0794791 | 0.210681  | FALSE |
| TC07000137.hg.1 | ENSG00000136244; | 0.0794791 | 0.210681  | FALSE |
| TC01003497.hg.1 | ENSG00000117479; | 0.0794791 | 0.210681  | FALSE |
| TC09001335.hg.1 | ENSG00000127083; | 0.0794791 | 0.210681  | FALSE |
| TC02001628.hg.1 | ENSG00000084674; | 0.0794791 | 0.210681  | FALSE |
| TC02001628.hg.1 | ENSG00000084674; | 0.0794791 | 0.210681  | FALSE |
| TC02001628.hg.1 | ENSG00000084674; | 0.0794791 | 0.210681  | FALSE |
| TC01002669.hg.1 | ENSG00000157193; | 0.0803784 | 0.2125385 | FALSE |
| TC02001963.hg.1 | ENSG00000163235; | 0.0806954 | 0.2132452 | FALSE |
| TC01000685.hg.1 | ENSG00000162409; | 0.0808688 | 0.2135714 | FALSE |
| TC02001628.hg.1 | ENSG00000084674; | 0.0815207 | 0.2151604 | FALSE |

|                 |                  |           |           |       |
|-----------------|------------------|-----------|-----------|-------|
| TC01002669.hg.1 | ENSG00000157193; | 0.0819034 | 0.2160374 | FALSE |
| TC12000227.hg.1 | ENSG00000172572; | 0.0833149 | 0.2174338 | FALSE |
| TC03000846.hg.1 | ENSG00000196549; | 0.0833149 | 0.2174338 | FALSE |
| TC06000608.hg.1 | ENSG00000112715; | 0.0833149 | 0.2174338 | FALSE |
| TC07001883.hg.1 | ENSG00000085662; | 0.0833149 | 0.2174338 | FALSE |
| TC06001015.hg.1 | ENSG00000171408; | 0.0833149 | 0.2174338 | FALSE |
| TC01002578.hg.1 | ENSG00000117394; | 0.0833149 | 0.2174338 | FALSE |
| TC01002578.hg.1 | ENSG00000117394; | 0.0833149 | 0.2174338 | FALSE |
| TC05000943.hg.1 | ENSG00000156427; | 0.0833149 | 0.2174338 | FALSE |
| TC01001607.hg.1 | ENSG00000116711; | 0.0833149 | 0.2174338 | FALSE |
| TC06001027.hg.1 | ENSG00000118503; | 0.0833149 | 0.2174338 | FALSE |
| TC06000087.hg.1 | ENSG00000078401; | 0.0833149 | 0.2174338 | FALSE |
| TC14001443.hg.1 | ENSG00000140092; | 0.0833149 | 0.2174338 | FALSE |
| TC05001933.hg.1 | ENSG00000113721; | 0.0833149 | 0.2174338 | FALSE |
| TC07000137.hg.1 | ENSG00000136244; | 0.0833149 | 0.2174338 | FALSE |
| TC04000313.hg.1 | ENSG00000157404; | 0.0833149 | 0.2174338 | FALSE |
| TC02001100.hg.1 | ENSG00000138448; | 0.0833149 | 0.2174338 | FALSE |
| TC03000013.hg.1 | ENSG00000150995; | 0.0833149 | 0.2174338 | FALSE |
| TC03001071.hg.1 | ENSG00000114315; | 0.0833149 | 0.2174338 | FALSE |
| TC07000137.hg.1 | ENSG00000136244; | 0.0833149 | 0.2174338 | FALSE |
| TC01001607.hg.1 | ENSG00000116711; | 0.0833149 | 0.2174338 | FALSE |
| TC02001100.hg.1 | ENSG00000138448; | 0.0833149 | 0.2174338 | FALSE |
| TC06000087.hg.1 | ENSG00000078401; | 0.0833149 | 0.2174338 | FALSE |
| TC01003638.hg.1 | ENSG00000073756; | 0.0833149 | 0.2174338 | FALSE |
| TC05001933.hg.1 | ENSG00000113721; | 0.0833149 | 0.2174338 | FALSE |
| TC08000845.hg.1 | ENSG00000187786; | 0.0833149 | 0.2174338 | FALSE |
| TC08000482.hg.1 | ENSG00000121039; | 0.0833149 | 0.2174338 | FALSE |
| TC02000041.hg.1 | ENSG00000115738; | 0.0833149 | 0.2174338 | FALSE |
| TC01002669.hg.1 | ENSG00000157193; | 0.0833149 | 0.2174338 | FALSE |
| TC02000041.hg.1 | ENSG00000115738; | 0.0833149 | 0.2174338 | FALSE |
| TC04000699.hg.1 | ENSG00000109458; | 0.0833149 | 0.2174338 | FALSE |
| TC01002166.hg.1 | ENSG00000116285; | 0.0833149 | 0.2174338 | FALSE |
| TC02002624.hg.1 | ENSG00000115415; | 0.0833149 | 0.2174338 | FALSE |
| TC01003638.hg.1 | ENSG00000073756; | 0.0841851 | 0.2174338 | FALSE |
| TC05000054.hg.1 | ENSG00000078295; | 0.0841851 | 0.2174338 | FALSE |
| TC02000041.hg.1 | ENSG00000115738; | 0.0841851 | 0.2174338 | FALSE |
| TC01001624.hg.1 | ENSG00000116741; | 0.0841851 | 0.2174338 | FALSE |
| TC01000873.hg.1 | ENSG00000143036; | 0.0845295 | 0.2179749 | FALSE |
| TC01002669.hg.1 | ENSG00000157193; | 0.0845728 | 0.2179749 | FALSE |
| TC01000394.hg.1 | ENSG00000159023; | 0.0859337 | 0.2213491 | FALSE |
| TC02001628.hg.1 | ENSG00000084674; | 0.0863863 | 0.2223812 | FALSE |
| TC01003638.hg.1 | ENSG00000073756; | 0.0872476 | 0.223858  | FALSE |
| TC01000728.hg.1 | ENSG00000162433; | 0.0872476 | 0.223858  | FALSE |
| TC11000238.hg.1 | ENSG00000173432; | 0.0872476 | 0.223858  | FALSE |
| TC02001031.hg.1 | ENSG00000152256; | 0.0872476 | 0.223858  | FALSE |
| TC03001071.hg.1 | ENSG00000114315; | 0.0872476 | 0.223858  | FALSE |
| TC01000685.hg.1 | ENSG00000162409; | 0.0872476 | 0.223858  | FALSE |
| TC06000945.hg.1 | ENSG00000152661; | 0.0872476 | 0.223858  | FALSE |
| TC03000214.hg.1 | ENSG00000168036; | 0.0872476 | 0.223858  | FALSE |
| TC04000432.hg.1 | ENSG00000156234; | 0.0872476 | 0.223858  | FALSE |
| TC04001245.hg.1 | ENSG00000145242; | 0.0872476 | 0.223858  | FALSE |
| TC01000115.hg.1 | ENSG00000171621; | 0.0877371 | 0.2243744 | FALSE |
| TC01001805.hg.1 | ENSG00000092969; | 0.0887969 | 0.2269489 | FALSE |
| TC01000685.hg.1 | ENSG00000162409; | 0.0900537 | 0.2300238 | FALSE |
| TC04000729.hg.1 | ENSG00000151617; | 0.0902062 | 0.2301386 | FALSE |
| TC04000729.hg.1 | ENSG00000151617; | 0.0902062 | 0.2301386 | FALSE |
| TC06000120.hg.1 | ENSG00000137393; | 0.0902062 | 0.2301386 | FALSE |
| TC01000685.hg.1 | ENSG00000162409; | 0.0906208 | 0.2309211 | FALSE |

|                 |                  |           |           |       |
|-----------------|------------------|-----------|-----------|-------|
| TC03000917.hg.1 | ENSG00000136603; | 0.0914005 | 0.2327004 | FALSE |
| TC01000972.hg.1 | ENSG00000064886; | 0.0914005 | 0.2327004 | FALSE |
| TC01000783.hg.1 | ENSG00000117069; | 0.0922479 | 0.2346485 | FALSE |
| TC01001090.hg.1 | ENSG00000117289; | 0.0929    | 0.2360878 | FALSE |
| TC01002669.hg.1 | ENSG00000157193; | 0.0929241 | 0.2360878 | FALSE |
| TC03000214.hg.1 | ENSG00000168036; | 0.0931797 | 0.2365268 | FALSE |
| TC02002624.hg.1 | ENSG00000115415; | 0.0931797 | 0.2365268 | FALSE |
| TC03000214.hg.1 | ENSG00000168036; | 0.0933652 | 0.2367169 | FALSE |
| TC03000846.hg.1 | ENSG00000196549; | 0.0933652 | 0.2367169 | FALSE |
| TC01000904.hg.1 | ENSG00000162692; | 0.0943156 | 0.2389143 | FALSE |
| TC01000783.hg.1 | ENSG00000117069; | 0.0949278 | 0.2399879 | FALSE |
| TC03000917.hg.1 | ENSG00000136603; | 0.0953221 | 0.2399879 | FALSE |
| TC05000165.hg.1 | ENSG00000079215; | 0.0953221 | 0.2399879 | FALSE |
| TC01000728.hg.1 | ENSG00000162433; | 0.0953221 | 0.2399879 | FALSE |
| TC02000041.hg.1 | ENSG00000115738; | 0.0953221 | 0.2399879 | FALSE |
| TC04002931.hg.1 | ENSG00000134853; | 0.0953221 | 0.2399879 | FALSE |
| TC05000165.hg.1 | ENSG00000079215; | 0.0953221 | 0.2399879 | FALSE |
| TC02000762.hg.1 | ENSG00000163083; | 0.0953221 | 0.2399879 | FALSE |
| TC03000214.hg.1 | ENSG00000168036; | 0.0953221 | 0.2399879 | FALSE |
| TC01001736.hg.1 | ENSG00000196352; | 0.0953308 | 0.2399879 | FALSE |
| TC01000685.hg.1 | ENSG00000162409; | 0.0953308 | 0.2399879 | FALSE |
| TC02002049.hg.1 | ENSG00000115525; | 0.0958932 | 0.2399879 | FALSE |
| TC01000734.hg.1 | ENSG00000118473; | 0.0958932 | 0.2399879 | FALSE |
| TC07000137.hg.1 | ENSG00000136244; | 0.0958932 | 0.2399879 | FALSE |
| TC01001805.hg.1 | ENSG00000092969; | 0.0958932 | 0.2399879 | FALSE |
| TC01001805.hg.1 | ENSG00000092969; | 0.0958932 | 0.2399879 | FALSE |
| TC03001466.hg.1 | ENSG00000163931; | 0.0958932 | 0.2399879 | FALSE |
| TC02001628.hg.1 | ENSG00000084674; | 0.0958932 | 0.2399879 | FALSE |
| TC14000067.hg.1 | ENSG00000181784; | 0.0958932 | 0.2399879 | FALSE |
| TC04000503.hg.1 | ENSG00000138696; | 0.0958932 | 0.2399879 | FALSE |
| TC01001607.hg.1 | ENSG00000116711; | 0.0958932 | 0.2399879 | FALSE |
| TC01001607.hg.1 | ENSG00000116711; | 0.0958932 | 0.2399879 | FALSE |
| TC01001805.hg.1 | ENSG00000092969; | 0.0958932 | 0.2399879 | FALSE |
| TC02001206.hg.1 | ENSG00000118257; | 0.0958932 | 0.2399879 | FALSE |
| TC06000595.hg.1 | ENSG00000112655; | 0.0958932 | 0.2399879 | FALSE |
| TC10001711.hg.1 | ENSG00000066468; | 0.0958932 | 0.2399879 | FALSE |
| TC01001805.hg.1 | ENSG00000092969; | 0.0958932 | 0.2399879 | FALSE |
| TC01003129.hg.1 | ENSG00000143140; | 0.096394  | 0.2399879 | FALSE |
| TC02002605.hg.1 | ENSG00000064989; | 0.0964274 | 0.2399879 | FALSE |
| TC05001614.hg.1 | ENSG00000175426; | 0.0964274 | 0.2399879 | FALSE |
| TC02000041.hg.1 | ENSG00000115738; | 0.0964274 | 0.2399879 | FALSE |
| TC01003638.hg.1 | ENSG00000073756; | 0.0965614 | 0.2399879 | FALSE |
| TC01001624.hg.1 | ENSG00000116741; | 0.0965614 | 0.2399879 | FALSE |
| TC03001071.hg.1 | ENSG00000114315; | 0.097677  | 0.2424792 | FALSE |
| TC03000214.hg.1 | ENSG00000168036; | 0.097677  | 0.2424792 | FALSE |
| TC01000904.hg.1 | ENSG00000162692; | 0.0980453 | 0.2431819 | FALSE |
| TC01000685.hg.1 | ENSG00000162409; | 0.1000378 | 0.2479801 | FALSE |
| TC01000685.hg.1 | ENSG00000162409; | 0.1002618 | 0.2483915 | FALSE |
| TC01000873.hg.1 | ENSG00000143036; | 0.1006837 | 0.2492206 | FALSE |
| TC01000873.hg.1 | ENSG00000143036; | 0.1006837 | 0.2492206 | FALSE |
| TC08000845.hg.1 | ENSG00000187786; | 0.1018667 | 0.2518576 | FALSE |
| TC04002931.hg.1 | ENSG00000134853; | 0.1018667 | 0.2518576 | FALSE |
| TC01000100.hg.1 | ENSG00000049246; | 0.1020951 | 0.2522039 | FALSE |
| TC01003638.hg.1 | ENSG00000073756; | 0.1022877 | 0.2525338 | FALSE |
| TC01001907.hg.1 | ENSG00000143641; | 0.1028441 | 0.2535419 | FALSE |
| TC05001110.hg.1 | ENSG00000153395; | 0.1028441 | 0.2535419 | FALSE |
| TC02002624.hg.1 | ENSG00000115415; | 0.1028441 | 0.2535419 | FALSE |
| TC02000041.hg.1 | ENSG00000115738; | 0.1028441 | 0.2535419 | FALSE |

|                 |                  |           |           |       |
|-----------------|------------------|-----------|-----------|-------|
| TC02000762.hg.1 | ENSG00000163083; | 0.1036887 | 0.2545247 | FALSE |
| TC01002706.hg.1 | ENSG00000184292; | 0.1036887 | 0.2545247 | FALSE |
| TC01001473.hg.1 | ENSG00000143153; | 0.1036887 | 0.2545247 | FALSE |
| TC04000503.hg.1 | ENSG00000138696; | 0.1036887 | 0.2545247 | FALSE |
| TC07001562.hg.1 | ENSG00000019991; | 0.1036887 | 0.2545247 | FALSE |
| TC02002714.hg.1 | ENSG00000163251; | 0.1036887 | 0.2545247 | FALSE |
| TC02000082.hg.1 | ENSG00000071575; | 0.1036887 | 0.2545247 | FALSE |
| TC03000214.hg.1 | ENSG00000168036; | 0.1036887 | 0.2545247 | FALSE |
| TC02002808.hg.1 | ENSG00000116106; | 0.1036887 | 0.2545247 | FALSE |
| TC02002624.hg.1 | ENSG00000115415; | 0.1036887 | 0.2545247 | FALSE |
| TC02001437.hg.1 | ENSG00000144476; | 0.1036887 | 0.2545247 | FALSE |
| TC01000904.hg.1 | ENSG00000162692; | 0.1044181 | 0.2554364 | FALSE |
| TC01000100.hg.1 | ENSG00000049246; | 0.104528  | 0.2555593 | FALSE |
| TC01001607.hg.1 | ENSG00000116711; | 0.1057285 | 0.2583468 | FALSE |
| TC01000904.hg.1 | ENSG00000162692; | 0.106341  | 0.2596952 | FALSE |
| TC04000408.hg.1 | ENSG00000169429; | 0.1070104 | 0.261181  | FALSE |
| TC01000873.hg.1 | ENSG00000143036; | 0.1072746 | 0.2612542 | FALSE |
| TC01001473.hg.1 | ENSG00000143153; | 0.1073142 | 0.2612542 | FALSE |
| TC04002931.hg.1 | ENSG00000134853; | 0.1073142 | 0.2612542 | FALSE |
| TC01000685.hg.1 | ENSG00000162409; | 0.1077213 | 0.2612542 | FALSE |
| TC02000762.hg.1 | ENSG00000163083; | 0.1077542 | 0.2612542 | FALSE |
| TC02002624.hg.1 | ENSG00000115415; | 0.1077542 | 0.2612542 | FALSE |
| TC01001805.hg.1 | ENSG00000092969; | 0.1077891 | 0.2612542 | FALSE |
| TC01000904.hg.1 | ENSG00000162692; | 0.1086661 | 0.2612542 | FALSE |
| TC03000214.hg.1 | ENSG00000168036; | 0.1086661 | 0.2612542 | FALSE |
| TC03000846.hg.1 | ENSG00000196549; | 0.1089665 | 0.2612542 | FALSE |
| TC03001255.hg.1 | ENSG00000033867; | 0.1089665 | 0.2612542 | FALSE |
| TC03001575.hg.1 | ENSG00000114480; | 0.1089665 | 0.2612542 | FALSE |
| TC03001466.hg.1 | ENSG00000163931; | 0.1089665 | 0.2612542 | FALSE |
| TC01003497.hg.1 | ENSG00000117479; | 0.1089665 | 0.2612542 | FALSE |
| TC03001575.hg.1 | ENSG00000114480; | 0.1089665 | 0.2612542 | FALSE |
| TC06000087.hg.1 | ENSG00000078401; | 0.1089665 | 0.2612542 | FALSE |
| TC14000951.hg.1 | ENSG00000092068; | 0.1089665 | 0.2612542 | FALSE |
| TC07000137.hg.1 | ENSG00000136244; | 0.1089665 | 0.2612542 | FALSE |
| TC02001100.hg.1 | ENSG00000138448; | 0.1089665 | 0.2612542 | FALSE |
| TC07000137.hg.1 | ENSG00000136244; | 0.1089665 | 0.2612542 | FALSE |
| TC06000087.hg.1 | ENSG00000078401; | 0.1089665 | 0.2612542 | FALSE |
| TC02001100.hg.1 | ENSG00000138448; | 0.1089665 | 0.2612542 | FALSE |
| TC01002932.hg.1 | ENSG00000060718; | 0.1089665 | 0.2612542 | FALSE |
| TC06000087.hg.1 | ENSG00000078401; | 0.1089665 | 0.2612542 | FALSE |
| TC02001100.hg.1 | ENSG00000138448; | 0.1089665 | 0.2612542 | FALSE |
| TC02001100.hg.1 | ENSG00000138448; | 0.1089665 | 0.2612542 | FALSE |
| TC02002480.hg.1 | ENSG00000078098; | 0.1089665 | 0.2612542 | FALSE |
| TC02001100.hg.1 | ENSG00000138448; | 0.1089665 | 0.2612542 | FALSE |
| TC02001100.hg.1 | ENSG00000138448; | 0.1089665 | 0.2612542 | FALSE |
| TC01001805.hg.1 | ENSG00000092969; | 0.1089665 | 0.2612542 | FALSE |
| TC03000846.hg.1 | ENSG00000196549; | 0.1089665 | 0.2612542 | FALSE |
| TC02002823.hg.1 | ENSG00000135919; | 0.1089665 | 0.2612542 | FALSE |
| TC12001890.hg.1 | ENSG00000017427; | 0.1089665 | 0.2612542 | FALSE |
| TC07000137.hg.1 | ENSG00000136244; | 0.1089665 | 0.2612542 | FALSE |
| TC01001607.hg.1 | ENSG00000116711; | 0.1089665 | 0.2612542 | FALSE |
| TC01001607.hg.1 | ENSG00000116711; | 0.1089665 | 0.2612542 | FALSE |
| TC06001027.hg.1 | ENSG00000118503; | 0.1089665 | 0.2612542 | FALSE |
| TC01001805.hg.1 | ENSG00000092969; | 0.1094509 | 0.2612542 | FALSE |
| TC06000087.hg.1 | ENSG00000078401; | 0.1094509 | 0.2612542 | FALSE |
| TC03001255.hg.1 | ENSG00000033867; | 0.1094509 | 0.2612542 | FALSE |
| TC04000729.hg.1 | ENSG00000151617; | 0.1094509 | 0.2612542 | FALSE |
| TC01002932.hg.1 | ENSG00000060718; | 0.1122462 | 0.2673143 | FALSE |

|                 |                  |           |           |       |
|-----------------|------------------|-----------|-----------|-------|
| TC02000891.hg.1 | ENSG00000150540; | 0.1123332 | 0.2673143 | FALSE |
| TC04000253.hg.1 | ENSG00000154277; | 0.1123332 | 0.2673143 | FALSE |
| TC12001890.hg.1 | ENSG00000017427; | 0.1123332 | 0.2673143 | FALSE |
| TC01002669.hg.1 | ENSG00000157193; | 0.1123332 | 0.2673143 | FALSE |
| TC04000503.hg.1 | ENSG00000138696; | 0.1123332 | 0.2673143 | FALSE |
| TC02002605.hg.1 | ENSG00000064989; | 0.1129013 | 0.2681445 | FALSE |
| TC01000394.hg.1 | ENSG00000159023; | 0.1129013 | 0.2681445 | FALSE |
| TC01000783.hg.1 | ENSG00000117069; | 0.1162426 | 0.2758506 | FALSE |
| TC01002954.hg.1 | ENSG00000134243; | 0.1167865 | 0.2769877 | FALSE |
| TC01002578.hg.1 | ENSG00000117394; | 0.1186253 | 0.2810375 | FALSE |
| TC03002146.hg.1 | ENSG00000189058; | 0.1186253 | 0.2810375 | FALSE |
| TC08000845.hg.1 | ENSG00000187786; | 0.1186253 | 0.2810375 | FALSE |
| TC01003638.hg.1 | ENSG00000073756; | 0.1187908 | 0.2811184 | FALSE |
| TC01001624.hg.1 | ENSG00000116741; | 0.120739  | 0.2855711 | FALSE |
| TC10000811.hg.1 | ENSG00000150594; | 0.1212413 | 0.2862846 | FALSE |
| TC03001575.hg.1 | ENSG00000114480; | 0.1212413 | 0.2862846 | FALSE |
| TC09001335.hg.1 | ENSG00000127083; | 0.1212413 | 0.2862846 | FALSE |
| TC07000220.hg.1 | ENSG00000164619; | 0.1212413 | 0.2862846 | FALSE |
| TC02000082.hg.1 | ENSG00000071575; | 0.1212413 | 0.2862846 | FALSE |
| TC01002669.hg.1 | ENSG00000157193; | 0.1218367 | 0.2867433 | FALSE |
| TC01000685.hg.1 | ENSG00000162409; | 0.1219517 | 0.2867433 | FALSE |
| TC01000904.hg.1 | ENSG00000162692; | 0.1219517 | 0.2867433 | FALSE |
| TC02002624.hg.1 | ENSG00000115415; | 0.1219517 | 0.2867433 | FALSE |
| TC07001559.hg.1 | ENSG00000075223; | 0.1224738 | 0.2867433 | FALSE |
| TC09000358.hg.1 | ENSG00000135069; | 0.1224738 | 0.2867433 | FALSE |
| TC01001805.hg.1 | ENSG00000092969; | 0.1224738 | 0.2867433 | FALSE |
| TC03000214.hg.1 | ENSG00000168036; | 0.1224738 | 0.2867433 | FALSE |
| TC01003638.hg.1 | ENSG00000073756; | 0.1224738 | 0.2867433 | FALSE |
| TC04000313.hg.1 | ENSG00000157404; | 0.1224738 | 0.2867433 | FALSE |
| TC17001462.hg.1 | ENSG00000131747; | 0.1224738 | 0.2867433 | FALSE |
| TC03000214.hg.1 | ENSG00000168036; | 0.1224738 | 0.2867433 | FALSE |
| TC02001963.hg.1 | ENSG00000163235; | 0.1224738 | 0.2867433 | FALSE |
| TC07000137.hg.1 | ENSG00000136244; | 0.1224738 | 0.2867433 | FALSE |
| TC03001527.hg.1 | ENSG00000163638; | 0.1224738 | 0.2867433 | FALSE |
| TC01002669.hg.1 | ENSG00000157193; | 0.1224738 | 0.2867433 | FALSE |
| TC01002166.hg.1 | ENSG00000116285; | 0.1224738 | 0.2867433 | FALSE |
| TC03000214.hg.1 | ENSG00000168036; | 0.1224738 | 0.2867433 | FALSE |
| TC03000013.hg.1 | ENSG00000150995; | 0.1224738 | 0.2867433 | FALSE |
| TC10000406.hg.1 | ENSG00000138336; | 0.1224738 | 0.2867433 | FALSE |
| TC01003129.hg.1 | ENSG00000143140; | 0.1224738 | 0.2867433 | FALSE |
| TC07001618.hg.1 | ENSG00000004799; | 0.1224738 | 0.2867433 | FALSE |
| TC01001188.hg.1 | ENSG00000143369; | 0.1232134 | 0.2869059 | FALSE |
| TC01003638.hg.1 | ENSG00000073756; | 0.1232134 | 0.2869059 | FALSE |
| TC02001031.hg.1 | ENSG00000152256; | 0.1244833 | 0.2896267 | FALSE |
| TC01003638.hg.1 | ENSG00000073756; | 0.1265574 | 0.2942924 | FALSE |
| TC01000685.hg.1 | ENSG00000162409; | 0.1269929 | 0.2951447 | FALSE |
| TC03000577.hg.1 | ENSG00000144857; | 0.1303574 | 0.3013501 | FALSE |
| TC01002669.hg.1 | ENSG00000157193; | 0.1303574 | 0.3013501 | FALSE |
| TC01002669.hg.1 | ENSG00000157193; | 0.1303574 | 0.3013501 | FALSE |
| TC04000729.hg.1 | ENSG00000151617; | 0.1303574 | 0.3013501 | FALSE |
| TC03001575.hg.1 | ENSG00000114480; | 0.1303984 | 0.3013501 | FALSE |
| TC03001575.hg.1 | ENSG00000114480; | 0.1303984 | 0.3013501 | FALSE |
| TC01000685.hg.1 | ENSG00000162409; | 0.1303984 | 0.3013501 | FALSE |
| TC04002931.hg.1 | ENSG00000134853; | 0.1303984 | 0.3013501 | FALSE |
| TC01000685.hg.1 | ENSG00000162409; | 0.1303984 | 0.3013501 | FALSE |
| TC06000779.hg.1 | ENSG00000135318; | 0.1303984 | 0.3013501 | FALSE |
| TC04000408.hg.1 | ENSG00000169429; | 0.1304724 | 0.3013501 | FALSE |
| TC02000041.hg.1 | ENSG00000115738; | 0.1304724 | 0.3013501 | FALSE |

|                  |                  |           |           |       |
|------------------|------------------|-----------|-----------|-------|
| TC01001473.hg.1  | ENSG00000143153; | 0.1313122 | 0.3030446 | FALSE |
| TC04000313.hg.1  | ENSG00000157404; | 0.1322532 | 0.3049695 | FALSE |
| TC01003778.hg.1  | ENSG00000076356; | 0.1322532 | 0.3049695 | FALSE |
| TC01000873.hg.1  | ENSG00000143036; | 0.133038  | 0.3063719 | FALSE |
| TC01000904.hg.1  | ENSG00000162692; | 0.1330403 | 0.3063719 | FALSE |
| TC01000685.hg.1  | ENSG00000162409; | 0.1341074 | 0.3086634 | FALSE |
| TC0X000943.hg.1  | ENSG00000198947; | 0.1363581 | 0.3113626 | FALSE |
| TC07000525.hg.1  | ENSG00000008277; | 0.1363581 | 0.3113626 | FALSE |
| TC07000525.hg.1  | ENSG00000008277; | 0.1363581 | 0.3113626 | FALSE |
| TC01001805.hg.1  | ENSG00000092969; | 0.1363581 | 0.3113626 | FALSE |
| TC04000432.hg.1  | ENSG00000156234; | 0.1363581 | 0.3113626 | FALSE |
| TC10001663.hg.1  | ENSG00000119927; | 0.1363581 | 0.3113626 | FALSE |
| TC02000286.hg.1  | ENSG00000171150; | 0.1363581 | 0.3113626 | FALSE |
| TC03000214.hg.1  | ENSG00000168036; | 0.1363581 | 0.3113626 | FALSE |
| TC06001027.hg.1  | ENSG00000118503; | 0.1363581 | 0.3113626 | FALSE |
| TC05001590.hg.1  | ENSG00000113369; | 0.1363581 | 0.3113626 | FALSE |
| TC01000904.hg.1  | ENSG00000162692; | 0.1363581 | 0.3113626 | FALSE |
| TC15000226.hg.1  | ENSG00000166923; | 0.1363581 | 0.3113626 | FALSE |
| TC01001805.hg.1  | ENSG00000092969; | 0.1363581 | 0.3113626 | FALSE |
| TC01003778.hg.1  | ENSG00000076356; | 0.1363581 | 0.3113626 | FALSE |
| TC04000408.hg.1  | ENSG00000169429; | 0.1363581 | 0.3113626 | FALSE |
| TC02001963.hg.1  | ENSG00000163235; | 0.1363581 | 0.3113626 | FALSE |
| TC04000173.hg.1  | ENSG00000109610; | 0.1365894 | 0.3113626 | FALSE |
| TC04000408.hg.1  | ENSG00000169429; | 0.1365894 | 0.3113626 | FALSE |
| TC01001090.hg.1  | ENSG00000117289; | 0.1365894 | 0.3113626 | FALSE |
| TC01002284.hg.1  | ENSG00000117122; | 0.137306  | 0.3126632 | FALSE |
| TC02001628.hg.1  | ENSG00000084674; | 0.1376686 | 0.3129895 | FALSE |
| TC03002106.hg.1  | ENSG00000090530; | 0.1376686 | 0.3129895 | FALSE |
| TC02001628.hg.1  | ENSG00000084674; | 0.1376686 | 0.3129895 | FALSE |
| TC01006336.hg.1  | ENSG00000162706; | 0.1376686 | 0.3129895 | FALSE |
| TC02000466.hg.1  | ENSG00000159399; | 0.1376686 | 0.3129895 | FALSE |
| TC03001575.hg.1  | ENSG00000114480; | 0.1397897 | 0.3170541 | FALSE |
| TC03001575.hg.1  | ENSG00000114480; | 0.1397897 | 0.3170541 | FALSE |
| TC04000432.hg.1  | ENSG00000156234; | 0.1397897 | 0.3170541 | FALSE |
| TC03000917.hg.1  | ENSG00000136603; | 0.1397897 | 0.3170541 | FALSE |
| TC01001907.hg.1  | ENSG00000143641; | 0.1400262 | 0.3171705 | FALSE |
| TC04000408.hg.1  | ENSG00000169429; | 0.1408899 | 0.318621  | FALSE |
| TC02002624.hg.1  | ENSG00000115415; | 0.1408899 | 0.318621  | FALSE |
| TC01000904.hg.1  | ENSG00000162692; | 0.1408899 | 0.318621  | FALSE |
| TC02000041.hg.1  | ENSG00000115738; | 0.1408899 | 0.318621  | FALSE |
| TC03000214.hg.1  | ENSG00000168036; | 0.1408899 | 0.318621  | FALSE |
| TC01000685.hg.1  | ENSG00000162409; | 0.1418698 | 0.3203294 | FALSE |
| TC01000904.hg.1  | ENSG00000162692; | 0.1421771 | 0.320854  | FALSE |
| TC01003791.hg.1  | ENSG00000143473; | 0.1424096 | 0.3211248 | FALSE |
| TC01003791.hg.1  | ENSG00000143473; | 0.1424096 | 0.3211248 | FALSE |
| TC04000469.hg.1  | ENSG00000163629; | 0.1430784 | 0.3222934 | FALSE |
| TC04000469.hg.1  | ENSG00000163629; | 0.1430784 | 0.3222934 | FALSE |
| TC01003638.hg.1  | ENSG00000073756; | 0.143895  | 0.3238771 | FALSE |
| TC01000115.hg.1; | ENSG00000171621; | 0.1448698 | 0.3258999 | FALSE |
| TC02000996.hg.1  | ENSG00000172292; | 0.1451406 | 0.3259953 | FALSE |
| TC04001509.hg.1  | ENSG00000173376; | 0.1451406 | 0.3259953 | FALSE |
| TC01000783.hg.1  | ENSG00000117069; | 0.1451406 | 0.3259953 | FALSE |
| TC03001575.hg.1  | ENSG00000114480; | 0.1451406 | 0.3259953 | FALSE |
| TC02000041.hg.1  | ENSG00000115738; | 0.1451406 | 0.3259953 | FALSE |
| TC04001084.hg.1  | ENSG00000109819; | 0.1486392 | 0.3330774 | FALSE |
| TC06000087.hg.1  | ENSG00000078401; | 0.1491935 | 0.3330774 | FALSE |
| TC02000082.hg.1  | ENSG00000071575; | 0.1491935 | 0.3330774 | FALSE |
| TC01001473.hg.1  | ENSG00000143153; | 0.1492091 | 0.3330774 | FALSE |



|                 |                  |           |           |       |
|-----------------|------------------|-----------|-----------|-------|
| TC06000087.hg.1 | ENSG00000078401; | 0.1494005 | 0.3330774 | FALSE |
| TC07000137.hg.1 | ENSG00000136244; | 0.1494005 | 0.3330774 | FALSE |
| TC06004141.hg.1 | ENSG00000112096; | 0.1494005 | 0.3330774 | FALSE |
| TC05003439.hg.1 | ENSG00000213949; | 0.1494005 | 0.3330774 | FALSE |
| TC04000729.hg.1 | ENSG00000151617; | 0.1494005 | 0.3330774 | FALSE |
| TC04000729.hg.1 | ENSG00000151617; | 0.1494005 | 0.3330774 | FALSE |
| TC02000416.hg.1 | ENSG00000116005; | 0.1494005 | 0.3330774 | FALSE |
| TC02001628.hg.1 | ENSG00000084674; | 0.1494005 | 0.3330774 | FALSE |
| TC01000100.hg.1 | ENSG00000049246; | 0.149715  | 0.3330774 | FALSE |
| TC02002624.hg.1 | ENSG00000115415; | 0.1498143 | 0.3330774 | FALSE |
| TC03000214.hg.1 | ENSG00000168036; | 0.1505667 | 0.3330774 | FALSE |
| TC02001139.hg.1 | ENSG00000196950; | 0.1505667 | 0.3330774 | FALSE |
| TC02000891.hg.1 | ENSG00000150540; | 0.1505667 | 0.3330774 | FALSE |
| TC01003718.hg.1 | ENSG00000133048; | 0.1505667 | 0.3330774 | FALSE |
| TC01002706.hg.1 | ENSG00000184292; | 0.1505667 | 0.3330774 | FALSE |
| TC01002669.hg.1 | ENSG00000157193; | 0.1505667 | 0.3330774 | FALSE |
| TC07001630.hg.1 | ENSG00000070669; | 0.1505667 | 0.3330774 | FALSE |
| TC09000347.hg.1 | ENSG00000099139; | 0.1505667 | 0.3330774 | FALSE |
| TC04000313.hg.1 | ENSG00000157404; | 0.1505667 | 0.3330774 | FALSE |
| TC07000137.hg.1 | ENSG00000136244; | 0.1505667 | 0.3330774 | FALSE |
| TC07000328.hg.1 | ENSG00000146648; | 0.1505667 | 0.3330774 | FALSE |
| TC03001071.hg.1 | ENSG00000114315; | 0.1505667 | 0.3330774 | FALSE |
| TC04000173.hg.1 | ENSG00000109610; | 0.1505667 | 0.3330774 | FALSE |
| TC01003129.hg.1 | ENSG00000143140; | 0.1505667 | 0.3330774 | FALSE |
| TC04000432.hg.1 | ENSG00000156234; | 0.1505667 | 0.3330774 | FALSE |
| TC02001963.hg.1 | ENSG00000163235; | 0.1505667 | 0.3330774 | FALSE |
| TC02002605.hg.1 | ENSG00000064989; | 0.1508613 | 0.3330774 | FALSE |
| TC03001362.hg.1 | ENSG00000160808; | 0.1527671 | 0.3371114 | FALSE |
| TC01000115.hg.1 | ENSG00000171621; | 0.1537829 | 0.339178  | FALSE |
| TC01000685.hg.1 | ENSG00000162409; | 0.1540255 | 0.3395383 | FALSE |
| TC02000041.hg.1 | ENSG00000115738; | 0.1559676 | 0.3434657 | FALSE |
| TC02002605.hg.1 | ENSG00000064989; | 0.1559676 | 0.3434657 | FALSE |
| TC02002605.hg.1 | ENSG00000064989; | 0.1559676 | 0.3434657 | FALSE |
| TC02002605.hg.1 | ENSG00000064989; | 0.1559676 | 0.3434657 | FALSE |
| TC01000783.hg.1 | ENSG00000117069; | 0.1572475 | 0.3459282 | FALSE |
| TC01001607.hg.1 | ENSG00000116711; | 0.159216  | 0.3498993 | FALSE |
| TC01001607.hg.1 | ENSG00000116711; | 0.159216  | 0.3498993 | FALSE |
| TC02001628.hg.1 | ENSG00000084674; | 0.159216  | 0.3498993 | FALSE |
| TC02000416.hg.1 | ENSG00000116005; | 0.1600465 | 0.3512735 | FALSE |
| TC01002166.hg.1 | ENSG00000116285; | 0.1600465 | 0.3512735 | FALSE |
| TC01002669.hg.1 | ENSG00000157193; | 0.1603756 | 0.3517254 | FALSE |
| TC04000253.hg.1 | ENSG00000154277; | 0.1605415 | 0.3518188 | FALSE |
| TC07001883.hg.1 | ENSG00000085662; | 0.1605415 | 0.3518188 | FALSE |
| TC01002932.hg.1 | ENSG00000060718; | 0.1611524 | 0.3528867 | FALSE |
| TC03000214.hg.1 | ENSG00000168036; | 0.1650503 | 0.3583992 | FALSE |
| TC03002146.hg.1 | ENSG00000189058; | 0.1650503 | 0.3583992 | FALSE |
| TC01003129.hg.1 | ENSG00000143140; | 0.1650503 | 0.3583992 | FALSE |
| TC01003638.hg.1 | ENSG00000073756; | 0.1650503 | 0.3583992 | FALSE |
| TC07000525.hg.1 | ENSG00000008277; | 0.1650503 | 0.3583992 | FALSE |
| TC03000214.hg.1 | ENSG00000168036; | 0.1650503 | 0.3583992 | FALSE |
| TC10000811.hg.1 | ENSG00000150594; | 0.1650503 | 0.3583992 | FALSE |
| TC01001805.hg.1 | ENSG00000092969; | 0.1650503 | 0.3583992 | FALSE |
| TC06000595.hg.1 | ENSG00000112655; | 0.1650503 | 0.3583992 | FALSE |
| TC10000406.hg.1 | ENSG00000138336; | 0.1650503 | 0.3583992 | FALSE |
| TC04001169.hg.1 | ENSG00000145244; | 0.1650503 | 0.3583992 | FALSE |
| TC01001607.hg.1 | ENSG00000116711; | 0.1650503 | 0.3583992 | FALSE |
| TC01001805.hg.1 | ENSG00000092969; | 0.1650503 | 0.3583992 | FALSE |
| TC04000253.hg.1 | ENSG00000154277; | 0.1650503 | 0.3583992 | FALSE |
| TC05001933.hg.1 | ENSG00000113721; | 0.1650503 | 0.3583992 | FALSE |

|                  |                  |           |           |       |
|------------------|------------------|-----------|-----------|-------|
| TC17000220.hg.1  | ENSG00000108448; | 0.1650503 | 0.3583992 | FALSE |
| TC01001805.hg.1  | ENSG00000092969; | 0.1650503 | 0.3583992 | FALSE |
| TC07001559.hg.1  | ENSG00000075223; | 0.1650503 | 0.3583992 | FALSE |
| TC06000595.hg.1  | ENSG00000112655; | 0.1650503 | 0.3583992 | FALSE |
| TC04000408.hg.1  | ENSG00000169429; | 0.1650503 | 0.3583992 | FALSE |
| TC01003129.hg.1  | ENSG00000143140; | 0.1650503 | 0.3583992 | FALSE |
| TC14001188.hg.1; | ENSG00000126778; | 0.1650503 | 0.3583992 | FALSE |
| TC03000214.hg.1  | ENSG00000168036; | 0.1650503 | 0.3583992 | FALSE |
| TC01003718.hg.1  | ENSG00000133048; | 0.1650503 | 0.3583992 | FALSE |
| TC04000469.hg.1  | ENSG00000163629; | 0.1658883 | 0.3583992 | FALSE |
| TC04000469.hg.1  | ENSG00000163629; | 0.1658883 | 0.3583992 | FALSE |
| TC04000469.hg.1  | ENSG00000163629; | 0.1658883 | 0.3583992 | FALSE |
| TC02000891.hg.1  | ENSG00000150540; | 0.1658883 | 0.3583992 | FALSE |
| TC02002624.hg.1  | ENSG00000115415; | 0.166414  | 0.3589914 | FALSE |
| TC01003778.hg.1  | ENSG00000076356; | 0.166414  | 0.3589914 | FALSE |
| TC01002578.hg.1  | ENSG00000117394; | 0.168457  | 0.3631241 | FALSE |
| TC01000685.hg.1  | ENSG00000162409; | 0.1692217 | 0.3641308 | FALSE |
| TC04000729.hg.1  | ENSG00000151617; | 0.1692217 | 0.3641308 | FALSE |
| TC03000986.hg.1  | ENSG00000163872; | 0.1692217 | 0.3641308 | FALSE |
| TC01002932.hg.1  | ENSG00000060718; | 0.1692217 | 0.3641308 | FALSE |
| TC01002706.hg.1  | ENSG00000184292; | 0.1692217 | 0.3641308 | FALSE |
| TC04000729.hg.1  | ENSG00000151617; | 0.1692217 | 0.3641308 | FALSE |
| TC01003697.hg.1  | ENSG00000163431; | 0.1718617 | 0.3690694 | FALSE |
| TC01002706.hg.1  | ENSG00000184292; | 0.1718617 | 0.3690694 | FALSE |
| TC01000972.hg.1  | ENSG00000064886; | 0.1726373 | 0.3704563 | FALSE |
| TC01003638.hg.1  | ENSG00000073756; | 0.1749577 | 0.3706089 | FALSE |
| TC01002706.hg.1  | ENSG00000184292; | 0.1764434 | 0.3706089 | FALSE |
| TC01003718.hg.1  | ENSG00000133048; | 0.176507  | 0.3706089 | FALSE |
| TC03002146.hg.1  | ENSG00000189058; | 0.176507  | 0.3706089 | FALSE |
| TC01001624.hg.1  | ENSG00000116741; | 0.176507  | 0.3706089 | FALSE |
| TC01000904.hg.1  | ENSG00000162692; | 0.1765376 | 0.3706089 | FALSE |
| TC02001031.hg.1  | ENSG00000152256; | 0.1767644 | 0.3706089 | FALSE |
| TC03000248.hg.1  | ENSG00000144791; | 0.1778365 | 0.3706089 | FALSE |
| TC02002605.hg.1  | ENSG00000064989; | 0.1778365 | 0.3706089 | FALSE |
| TC09000347.hg.1  | ENSG00000099139; | 0.179403  | 0.3706089 | FALSE |
| TC06001027.hg.1  | ENSG00000118503; | 0.179403  | 0.3706089 | FALSE |
| TC02001031.hg.1  | ENSG00000152256; | 0.179403  | 0.3706089 | FALSE |
| TC06000087.hg.1  | ENSG00000078401; | 0.179403  | 0.3706089 | FALSE |
| TC01003638.hg.1  | ENSG00000073756; | 0.179403  | 0.3706089 | FALSE |
| TC04001084.hg.1  | ENSG00000109819; | 0.1797629 | 0.3706089 | FALSE |
| TC02001031.hg.1  | ENSG00000152256; | 0.1797629 | 0.3706089 | FALSE |
| TC01003605.hg.1  | ENSG00000135821; | 0.1797629 | 0.3706089 | FALSE |
| TC01003605.hg.1  | ENSG00000135821; | 0.1797629 | 0.3706089 | FALSE |
| TC05001519.hg.1  | ENSG00000113273; | 0.1797629 | 0.3706089 | FALSE |
| TC01003638.hg.1  | ENSG00000073756; | 0.1797629 | 0.3706089 | FALSE |
| TC01002578.hg.1  | ENSG00000117394; | 0.1797629 | 0.3706089 | FALSE |
| TC10002924.hg.1  | ENSG00000187134; | 0.1797629 | 0.3706089 | FALSE |
| TC13001719.hg.1  | ENSG00000150907; | 0.1797629 | 0.3706089 | FALSE |
| TC02001031.hg.1  | ENSG00000152256; | 0.1797629 | 0.3706089 | FALSE |
| TC07001552.hg.1  | ENSG00000187391; | 0.1797629 | 0.3706089 | FALSE |
| TC06000608.hg.1  | ENSG00000112715; | 0.1797629 | 0.3706089 | FALSE |
| TC01003638.hg.1  | ENSG00000073756; | 0.1797629 | 0.3706089 | FALSE |
| TC08000127.hg.1  | ENSG00000003989; | 0.1797629 | 0.3706089 | FALSE |
| TC04001084.hg.1  | ENSG00000109819; | 0.1797629 | 0.3706089 | FALSE |
| TC01002578.hg.1  | ENSG00000117394; | 0.1797629 | 0.3706089 | FALSE |
| TC06004141.hg.1  | ENSG00000112096; | 0.1797629 | 0.3706089 | FALSE |
| TC07001552.hg.1  | ENSG00000187391; | 0.1797629 | 0.3706089 | FALSE |
| TC10001711.hg.1; | ENSG00000066468; | 0.1797629 | 0.3706089 | FALSE |

|                 |                 |           |           |       |
|-----------------|-----------------|-----------|-----------|-------|
| TC03000248.hg.1 | ENSG00000144791 | 0.1797629 | 0.3706089 | FALSE |
| TC13001719.hg.1 | ENSG00000150907 | 0.1797629 | 0.3706089 | FALSE |
| TC01002578.hg.1 | ENSG00000117394 | 0.1797629 | 0.3706089 | FALSE |
| TC02000286.hg.1 | ENSG00000171150 | 0.1797629 | 0.3706089 | FALSE |
| TC01000873.hg.1 | ENSG00000143036 | 0.1811029 | 0.3706089 | FALSE |
| TC01002669.hg.1 | ENSG00000157193 | 0.1826968 | 0.3706089 | FALSE |
| TC01002706.hg.1 | ENSG00000184292 | 0.1839378 | 0.3706089 | FALSE |
| TC01003638.hg.1 | ENSG00000073756 | 0.1839378 | 0.3706089 | FALSE |
| TC02000762.hg.1 | ENSG00000163083 | 0.1846847 | 0.3706089 | FALSE |
| TC01000904.hg.1 | ENSG00000162692 | 0.1847822 | 0.3706089 | FALSE |
| TC04000503.hg.1 | ENSG00000138696 | 0.1875799 | 0.3706089 | FALSE |
| TC12001587.hg.1 | ENSG00000123342 | 0.1875799 | 0.3706089 | FALSE |
| TC02000432.hg.1 | ENSG00000135636 | 0.1875799 | 0.3706089 | FALSE |
| TC05000159.hg.1 | ENSG00000168685 | 0.1875799 | 0.3706089 | FALSE |
| TC04000432.hg.1 | ENSG00000156234 | 0.1875799 | 0.3706089 | FALSE |
| TC06004141.hg.1 | ENSG00000112096 | 0.1875799 | 0.3706089 | FALSE |
| TC11002366.hg.1 | ENSG00000076706 | 0.1875799 | 0.3706089 | FALSE |
| TC06000087.hg.1 | ENSG00000078401 | 0.1875799 | 0.3706089 | FALSE |
| TC01003129.hg.1 | ENSG00000143140 | 0.1875799 | 0.3706089 | FALSE |
| TC10000350.hg.1 | ENSG00000107984 | 0.1875799 | 0.3706089 | FALSE |
| TC10000350.hg.1 | ENSG00000107984 | 0.1875799 | 0.3706089 | FALSE |
| TC19001293.hg.1 | ENSG00000105664 | 0.1875799 | 0.3706089 | FALSE |
| TC10000053.hg.1 | ENSG00000170525 | 0.1875799 | 0.3706089 | FALSE |
| TC14000819.hg.1 | ENSG00000185100 | 0.1875799 | 0.3706089 | FALSE |
| TC12002066.hg.1 | ENSG00000158104 | 0.1875799 | 0.3706089 | FALSE |
| TC09000560.hg.1 | ENSG00000148154 | 0.1875799 | 0.3706089 | FALSE |
| TC22000259.hg.1 | ENSG00000100292 | 0.1875799 | 0.3706089 | FALSE |
| TC12002122.hg.1 | ENSG00000139370 | 0.1875799 | 0.3706089 | FALSE |
| TC07000137.hg.1 | ENSG00000136244 | 0.1875799 | 0.3706089 | FALSE |
| TC10000565.hg.1 | ENSG00000108175 | 0.1875799 | 0.3706089 | FALSE |
| TC03001071.hg.1 | ENSG00000114315 | 0.1875799 | 0.3706089 | FALSE |
| TC14000353.hg.1 | ENSG00000165617 | 0.1875799 | 0.3706089 | FALSE |
| TC20000368.hg.1 | ENSG00000064655 | 0.1875799 | 0.3706089 | FALSE |
| TC02002606.hg.1 | ENSG00000003436 | 0.1875799 | 0.3706089 | FALSE |
| TC01002195.hg.1 | ENSG00000116649 | 0.1875799 | 0.3706089 | FALSE |
| TC03001466.hg.1 | ENSG00000163931 | 0.1875799 | 0.3706089 | FALSE |
| TC06000779.hg.1 | ENSG00000135318 | 0.1875799 | 0.3706089 | FALSE |
| TC01000785.hg.1 | ENSG00000154027 | 0.1875799 | 0.3706089 | FALSE |
| TC05000165.hg.1 | ENSG00000079215 | 0.1875799 | 0.3706089 | FALSE |
| TC02002605.hg.1 | ENSG00000064989 | 0.1875799 | 0.3706089 | FALSE |
| TC03001071.hg.1 | ENSG00000114315 | 0.1875799 | 0.3706089 | FALSE |
| TC02002823.hg.1 | ENSG00000135919 | 0.1875799 | 0.3706089 | FALSE |
| TC03001255.hg.1 | ENSG00000033867 | 0.1875799 | 0.3706089 | FALSE |
| TC05000840.hg.1 | ENSG00000123643 | 0.1875799 | 0.3706089 | FALSE |
| TC09000535.hg.1 | ENSG00000070214 | 0.1875799 | 0.3706089 | FALSE |
| TC07000852.hg.1 | ENSG00000181072 | 0.1875799 | 0.3706089 | FALSE |
| TC09000535.hg.1 | ENSG00000070214 | 0.1875799 | 0.3706089 | FALSE |
| TC18000164.hg.1 | ENSG00000141469 | 0.1875799 | 0.3706089 | FALSE |
| TC06000945.hg.1 | ENSG00000152661 | 0.1875799 | 0.3706089 | FALSE |
| TC06000945.hg.1 | ENSG00000152661 | 0.1875799 | 0.3706089 | FALSE |
| TC07000852.hg.1 | ENSG00000181072 | 0.1875799 | 0.3706089 | FALSE |
| TC03001071.hg.1 | ENSG00000114315 | 0.1875799 | 0.3706089 | FALSE |
| TC14001188.hg.1 | ENSG00000126778 | 0.1875799 | 0.3706089 | FALSE |
| TC0X000943.hg.1 | ENSG00000198947 | 0.1875799 | 0.3706089 | FALSE |
| TC02002823.hg.1 | ENSG00000135919 | 0.1875799 | 0.3706089 | FALSE |
| TC10001711.hg.1 | ENSG00000066468 | 0.1875799 | 0.3706089 | FALSE |
| TC01001805.hg.1 | ENSG00000092969 | 0.1875799 | 0.3706089 | FALSE |
| TC01000904.hg.1 | ENSG00000162692 | 0.1875799 | 0.3706089 | FALSE |

|                 |                 |           |           |       |
|-----------------|-----------------|-----------|-----------|-------|
| TC05000840.hg.1 | ENSG00000123643 | 0.1875799 | 0.3706089 | FALSE |
| TC11000198.hg.1 | ENSG00000133816 | 0.1875799 | 0.3706089 | FALSE |
| TC12001890.hg.1 | ENSG00000017427 | 0.1875799 | 0.3706089 | FALSE |
| TC08000508.hg.1 | ENSG00000104435 | 0.1875799 | 0.3706089 | FALSE |
| TC05000165.hg.1 | ENSG00000079215 | 0.1875799 | 0.3706089 | FALSE |
| TC05000159.hg.1 | ENSG00000168685 | 0.1875799 | 0.3706089 | FALSE |
| TC01003638.hg.1 | ENSG00000073756 | 0.1875799 | 0.3706089 | FALSE |
| TC07001630.hg.1 | ENSG00000070669 | 0.1875799 | 0.3706089 | FALSE |
| TC01003638.hg.1 | ENSG00000073756 | 0.1875799 | 0.3706089 | FALSE |
| TC10000406.hg.1 | ENSG00000138336 | 0.1875799 | 0.3706089 | FALSE |
| TC06000976.hg.1 | ENSG00000196569 | 0.1875799 | 0.3706089 | FALSE |
| TC02000762.hg.1 | ENSG00000163083 | 0.1875799 | 0.3706089 | FALSE |
| TC06004141.hg.1 | ENSG00000112096 | 0.1875799 | 0.3706089 | FALSE |
| TC22000019.hg.1 | ENSG00000177663 | 0.1875799 | 0.3706089 | FALSE |
| TC04000432.hg.1 | ENSG00000156234 | 0.1875799 | 0.3706089 | FALSE |
| TC17001682.hg.1 | ENSG00000108821 | 0.1875799 | 0.3706089 | FALSE |
| TC22000259.hg.1 | ENSG00000100292 | 0.1875799 | 0.3706089 | FALSE |
| TC13000147.hg.1 | ENSG00000102760 | 0.1875799 | 0.3706089 | FALSE |
| TC02002605.hg.1 | ENSG00000064989 | 0.1875799 | 0.3706089 | FALSE |
| TC08000149.hg.1 | ENSG00000175445 | 0.1875799 | 0.3706089 | FALSE |
| TC03000248.hg.1 | ENSG00000144791 | 0.1875799 | 0.3706089 | FALSE |
| TC05003423.hg.1 | ENSG00000082196 | 0.1875799 | 0.3706089 | FALSE |
| TC10000811.hg.1 | ENSG00000150594 | 0.1875799 | 0.3706089 | FALSE |
| TC22001477.hg.1 | ENSG00000100344 | 0.1875799 | 0.3706089 | FALSE |
| TC22000259.hg.1 | ENSG00000100292 | 0.1875799 | 0.3706089 | FALSE |
| TC01003497.hg.1 | ENSG00000117479 | 0.1875799 | 0.3706089 | FALSE |
| TC0X000034.hg.1 | ENSG00000146950 | 0.1875799 | 0.3706089 | FALSE |
| TC0X000034.hg.1 | ENSG00000146950 | 0.1875799 | 0.3706089 | FALSE |
| TC03000214.hg.1 | ENSG00000168036 | 0.1875799 | 0.3706089 | FALSE |
| TC02001100.hg.1 | ENSG00000138448 | 0.1875799 | 0.3706089 | FALSE |
| TC03000214.hg.1 | ENSG00000168036 | 0.1875799 | 0.3706089 | FALSE |
| TC22001467.hg.1 | ENSG00000128394 | 0.1875799 | 0.3706089 | FALSE |
| TC01000785.hg.1 | ENSG00000154027 | 0.1875799 | 0.3706089 | FALSE |
| TC22000259.hg.1 | ENSG00000100292 | 0.1875799 | 0.3706089 | FALSE |
| TC01001607.hg.1 | ENSG00000116711 | 0.1875799 | 0.3706089 | FALSE |
| TC15000386.hg.1 | ENSG00000140285 | 0.1875799 | 0.3706089 | FALSE |
| TC10000350.hg.1 | ENSG00000107984 | 0.1875799 | 0.3706089 | FALSE |
| TC03001071.hg.1 | ENSG00000114315 | 0.1875799 | 0.3706089 | FALSE |
| TC06000945.hg.1 | ENSG00000152661 | 0.1875799 | 0.3706089 | FALSE |
| TC15000386.hg.1 | ENSG00000140285 | 0.1875799 | 0.3706089 | FALSE |
| TC15000386.hg.1 | ENSG00000140285 | 0.1875799 | 0.3706089 | FALSE |
| TC05001519.hg.1 | ENSG00000113273 | 0.1875799 | 0.3706089 | FALSE |
| TC06000087.hg.1 | ENSG00000078401 | 0.1875799 | 0.3706089 | FALSE |
| TC15000226.hg.1 | ENSG00000166923 | 0.1875799 | 0.3706089 | FALSE |
| TC01001624.hg.1 | ENSG00000116741 | 0.1875799 | 0.3706089 | FALSE |
| TC03001071.hg.1 | ENSG00000114315 | 0.1875799 | 0.3706089 | FALSE |
| TC17000158.hg.1 | ENSG00000141052 | 0.1875799 | 0.3706089 | FALSE |
| TC06000087.hg.1 | ENSG00000078401 | 0.1875799 | 0.3706089 | FALSE |
| TC01001805.hg.1 | ENSG00000092969 | 0.1875799 | 0.3706089 | FALSE |
| TC01001624.hg.1 | ENSG00000116741 | 0.1875799 | 0.3706089 | FALSE |
| TC20000833.hg.1 | ENSG00000198959 | 0.1875799 | 0.3706089 | FALSE |
| TC20000833.hg.1 | ENSG00000198959 | 0.1875799 | 0.3706089 | FALSE |
| TC10001711.hg.1 | ENSG00000066468 | 0.1875799 | 0.3706089 | FALSE |
| TC19000191.hg.1 | ENSG00000130164 | 0.1875799 | 0.3706089 | FALSE |
| TC01000904.hg.1 | ENSG00000162692 | 0.1875799 | 0.3706089 | FALSE |
| TC05001933.hg.1 | ENSG00000113721 | 0.1875799 | 0.3706089 | FALSE |
| TC07000768.hg.1 | ENSG00000174697 | 0.1875799 | 0.3706089 | FALSE |
| TC03000214.hg.1 | ENSG00000168036 | 0.1875799 | 0.3706089 | FALSE |

|                 |                 |           |           |       |
|-----------------|-----------------|-----------|-----------|-------|
| TC14000353.hg.1 | ENSG00000165617 | 0.1875799 | 0.3706089 | FALSE |
| TC05001289.hg.1 | ENSG00000113594 | 0.1875799 | 0.3706089 | FALSE |
| TC08001567.hg.1 | ENSG00000170961 | 0.1875799 | 0.3706089 | FALSE |
| TC22001467.hg.1 | ENSG00000128394 | 0.1875799 | 0.3706089 | FALSE |
| TC06001027.hg.1 | ENSG00000118503 | 0.1875799 | 0.3706089 | FALSE |
| TC06004141.hg.1 | ENSG00000112096 | 0.1875799 | 0.3706089 | FALSE |
| TC14000306.hg.1 | ENSG00000125384 | 0.1875799 | 0.3706089 | FALSE |
| TC05000701.hg.1 | ENSG00000120738 | 0.1875799 | 0.3706089 | FALSE |
| TC03000214.hg.1 | ENSG00000168036 | 0.1875799 | 0.3706089 | FALSE |
| TC03000214.hg.1 | ENSG00000168036 | 0.1875799 | 0.3706089 | FALSE |
| TC13001719.hg.1 | ENSG00000150907 | 0.1875799 | 0.3706089 | FALSE |
| TC10001498.hg.1 | ENSG00000107796 | 0.1875799 | 0.3706089 | FALSE |
| TC05000701.hg.1 | ENSG00000120738 | 0.1875799 | 0.3706089 | FALSE |
| TC10001498.hg.1 | ENSG00000107796 | 0.1875799 | 0.3706089 | FALSE |
| TC02002624.hg.1 | ENSG00000115415 | 0.1875799 | 0.3706089 | FALSE |
| TC14001188.hg.1 | ENSG00000126778 | 0.1875799 | 0.3706089 | FALSE |
| TC05000701.hg.1 | ENSG00000120738 | 0.1875799 | 0.3706089 | FALSE |
| TC02002624.hg.1 | ENSG00000115415 | 0.1875799 | 0.3706089 | FALSE |
| TC03000846.hg.1 | ENSG00000196549 | 0.1875799 | 0.3706089 | FALSE |
| TC08001659.hg.1 | ENSG00000104419 | 0.1875799 | 0.3706089 | FALSE |
| TC10000350.hg.1 | ENSG00000107984 | 0.1875799 | 0.3706089 | FALSE |
| TC10000350.hg.1 | ENSG00000107984 | 0.1875799 | 0.3706089 | FALSE |
| TC11002366.hg.1 | ENSG00000076706 | 0.1875799 | 0.3706089 | FALSE |
| TC01002706.hg.1 | ENSG00000184292 | 0.1875799 | 0.3706089 | FALSE |
| TC14000353.hg.1 | ENSG00000165617 | 0.1875799 | 0.3706089 | FALSE |
| TC0X000943.hg.1 | ENSG00000198947 | 0.1875799 | 0.3706089 | FALSE |
| TC09000535.hg.1 | ENSG00000070214 | 0.1875799 | 0.3706089 | FALSE |
| TC08001659.hg.1 | ENSG00000104419 | 0.1875799 | 0.3706089 | FALSE |
| TC06002168.hg.1 | ENSG00000164442 | 0.1875799 | 0.3706089 | FALSE |
| TC13000147.hg.1 | ENSG00000102760 | 0.1875799 | 0.3706089 | FALSE |
| TC10001517.hg.1 | ENSG00000148677 | 0.1875799 | 0.3706089 | FALSE |
| TC13000147.hg.1 | ENSG00000102760 | 0.1875799 | 0.3706089 | FALSE |
| TC01001805.hg.1 | ENSG00000092969 | 0.1875799 | 0.3706089 | FALSE |
| TC03001071.hg.1 | ENSG00000114315 | 0.1875799 | 0.3706089 | FALSE |
| TC02002624.hg.1 | ENSG00000115415 | 0.1875799 | 0.3706089 | FALSE |
| TC01003638.hg.1 | ENSG00000073756 | 0.1875799 | 0.3706089 | FALSE |
| TC09001058.hg.1 | ENSG00000198467 | 0.1875799 | 0.3706089 | FALSE |
| TC15001761.hg.1 | ENSG00000103942 | 0.1875799 | 0.3706089 | FALSE |
| TC01001258.hg.1 | ENSG00000160678 | 0.1875799 | 0.3706089 | FALSE |
| TC17001886.hg.1 | ENSG00000132471 | 0.1875799 | 0.3706089 | FALSE |
| TC13000109.hg.1 | ENSG00000073910 | 0.1875799 | 0.3706089 | FALSE |
| TC06001332.hg.1 | ENSG00000168405 | 0.1875799 | 0.3706089 | FALSE |
| TC01000115.hg.1 | ENSG00000171621 | 0.1893732 | 0.3706089 | FALSE |
| TC01000115.hg.1 | ENSG00000171621 | 0.1893732 | 0.3706089 | FALSE |
| TC02002624.hg.1 | ENSG00000115415 | 0.1897456 | 0.3707443 | FALSE |
| TC05000054.hg.1 | ENSG00000078295 | 0.1897456 | 0.3707443 | FALSE |
| TC06000945.hg.1 | ENSG00000152661 | 0.1897456 | 0.3707443 | FALSE |
| TC01003638.hg.1 | ENSG00000073756 | 0.1897456 | 0.3707443 | FALSE |
| TC03000214.hg.1 | ENSG00000168036 | 0.1897456 | 0.3707443 | FALSE |
| TC01001805.hg.1 | ENSG00000092969 | 0.1901057 | 0.37094   | FALSE |
| TC02000082.hg.1 | ENSG00000071575 | 0.1905157 | 0.3715707 | FALSE |
| TC01000904.hg.1 | ENSG00000162692 | 0.1926417 | 0.375546  | FALSE |
| TC01003129.hg.1 | ENSG00000143140 | 0.1929831 | 0.3760403 | FALSE |
| TC03001362.hg.1 | ENSG00000160808 | 0.1946622 | 0.3772516 | FALSE |
| TC06000728.hg.1 | ENSG00000185760 | 0.1946622 | 0.3772516 | FALSE |
| TC01001607.hg.1 | ENSG00000116711 | 0.1946622 | 0.3772516 | FALSE |
| TC19001250.hg.1 | ENSG00000074181 | 0.1946622 | 0.3772516 | FALSE |
| TC10000350.hg.1 | ENSG00000107984 | 0.1946622 | 0.3772516 | FALSE |

|                  |                  |           |           |       |
|------------------|------------------|-----------|-----------|-------|
| TC02001100.hg.1; | ENSG00000138448; | 0.1946622 | 0.3772516 | FALSE |
| TC02002808.hg.1; | ENSG00000116106; | 0.1946622 | 0.3772516 | FALSE |
| TC02000041.hg.1; | ENSG00000115738; | 0.1946622 | 0.3772516 | FALSE |
| TC03002146.hg.1; | ENSG00000189058; | 0.1946622 | 0.3772516 | FALSE |
| TC08001275.hg.1; | ENSG00000172817; | 0.1946622 | 0.3772516 | FALSE |
| TC01003638.hg.1; | ENSG00000073756; | 0.1946622 | 0.3772516 | FALSE |
| TC09000222.hg.1; | ENSG00000137124; | 0.1946622 | 0.3772516 | FALSE |
| TC04001169.hg.1; | ENSG00000145244; | 0.1946622 | 0.3772516 | FALSE |
| TC07000137.hg.1; | ENSG00000136244; | 0.1946622 | 0.3772516 | FALSE |
| TC07001897.hg.1; | ENSG00000157680; | 0.1946622 | 0.3772516 | FALSE |
| TC07000137.hg.1; | ENSG00000136244; | 0.1946622 | 0.3772516 | FALSE |
| TC11000707.hg.1; | ENSG00000162337; | 0.1946622 | 0.3772516 | FALSE |
| TC17000220.hg.1; | ENSG00000108448; | 0.1946622 | 0.3772516 | FALSE |
| TC01003638.hg.1; | ENSG00000073756; | 0.1946622 | 0.3772516 | FALSE |
| TC10001711.hg.1; | ENSG00000066468; | 0.1946622 | 0.3772516 | FALSE |
| TC08001062.hg.1; | ENSG00000159167; | 0.1946622 | 0.3772516 | FALSE |
| TC07000328.hg.1; | ENSG00000146648; | 0.1946622 | 0.3772516 | FALSE |
| TC10000438.hg.1; | ENSG00000107731; | 0.1946622 | 0.3772516 | FALSE |
| TC04000408.hg.1; | ENSG00000169429; | 0.1963821 | 0.3785285 | FALSE |
| TC06001027.hg.1; | ENSG00000118503; | 0.1968152 | 0.379022  | FALSE |
| TC04000408.hg.1; | ENSG00000169429; | 0.1968152 | 0.379022  | FALSE |
| TC01000685.hg.1; | ENSG00000162409; | 0.1968152 | 0.379022  | FALSE |
| TC01000904.hg.1; | ENSG00000162692; | 0.1971093 | 0.3792472 | FALSE |
| TC05000054.hg.1; | ENSG00000078295; | 0.2002352 | 0.3846564 | FALSE |
| TC04001084.hg.1; | ENSG00000109819; | 0.2002352 | 0.3846564 | FALSE |
| TC01000685.hg.1; | ENSG00000162409; | 0.2002352 | 0.3846564 | FALSE |
| TC03002146.hg.1; | ENSG00000189058; | 0.2002352 | 0.3846564 | FALSE |
| TC10001711.hg.1; | ENSG00000066468; | 0.2002352 | 0.3846564 | FALSE |
| TC02000270.hg.1; | ENSG00000152527; | 0.2002352 | 0.3846564 | FALSE |
| TC03002146.hg.1; | ENSG00000189058; | 0.2013953 | 0.3862784 | FALSE |
| TC02002605.hg.1; | ENSG00000064989; | 0.2027197 | 0.3885574 | FALSE |
| TC02002624.hg.1; | ENSG00000115415; | 0.2027197 | 0.3885574 | FALSE |
| TC01001090.hg.1; | ENSG00000117289; | 0.2040121 | 0.3906848 | FALSE |
| TC04000408.hg.1; | ENSG00000169429; | 0.2040121 | 0.3906848 | FALSE |
| TC01002706.hg.1; | ENSG00000184292; | 0.2041544 | 0.3906952 | FALSE |
| TC01000904.hg.1; | ENSG00000162692; | 0.2044028 | 0.3909958 | FALSE |
| TC01001473.hg.1; | ENSG00000143153; | 0.2052516 | 0.3923563 | FALSE |
| TC04000408.hg.1; | ENSG00000169429; | 0.2052516 | 0.3923563 | FALSE |
| TC01003791.hg.1; | ENSG00000143473; | 0.2057834 | 0.393022  | FALSE |
| TC01003791.hg.1; | ENSG00000143473; | 0.2057834 | 0.393022  | FALSE |
| TC02001628.hg.1; | ENSG00000084674; | 0.2091307 | 0.3983264 | FALSE |
| TC02001628.hg.1; | ENSG00000084674; | 0.2091307 | 0.3983264 | FALSE |
| TC11001026.hg.1; | ENSG00000109906; | 0.2097085 | 0.3983264 | FALSE |
| TC16000668.hg.1; | ENSG00000103241; | 0.2097085 | 0.3983264 | FALSE |
| TC0X000038.hg.1; | ENSG00000073464; | 0.2097085 | 0.3983264 | FALSE |
| TC07000137.hg.1; | ENSG00000136244; | 0.2097085 | 0.3983264 | FALSE |
| TC0X000038.hg.1; | ENSG00000073464; | 0.2097085 | 0.3983264 | FALSE |
| TC07001552.hg.1; | ENSG00000187391; | 0.2097085 | 0.3983264 | FALSE |
| TC02002624.hg.1; | ENSG00000115415; | 0.2097085 | 0.3983264 | FALSE |
| TC02002823.hg.1; | ENSG00000135919; | 0.2097085 | 0.3983264 | FALSE |
| TC06000779.hg.1; | ENSG00000135318; | 0.2097085 | 0.3983264 | FALSE |
| TC01001607.hg.1; | ENSG00000116711; | 0.2097085 | 0.3983264 | FALSE |
| TC11000707.hg.1; | ENSG00000162337; | 0.2097085 | 0.3983264 | FALSE |
| TC08000646.hg.1; | ENSG00000164932; | 0.2099145 | 0.3983264 | FALSE |
| TC02002714.hg.1; | ENSG00000163251; | 0.210003  | 0.3983264 | FALSE |
| TC01001805.hg.1; | ENSG00000092969; | 0.210858  | 0.3993703 | FALSE |
| TC01000728.hg.1; | ENSG00000162433; | 0.210858  | 0.3993703 | FALSE |
| TC06001027.hg.1; | ENSG00000118503; | 0.210858  | 0.3993703 | FALSE |

|                 |                  |           |           |       |
|-----------------|------------------|-----------|-----------|-------|
| TC01003638.hg.1 | ENSG0000073756;  | 0.210858  | 0.3993703 | FALSE |
| TC02002823.hg.1 | ENSG00000135919; | 0.210858  | 0.3993703 | FALSE |
| TC02000041.hg.1 | ENSG00000115738; | 0.2112954 | 0.3993703 | FALSE |
| TC01003638.hg.1 | ENSG0000073756;  | 0.2112954 | 0.3993703 | FALSE |
| TC01002669.hg.1 | ENSG00000157193; | 0.2112996 | 0.3993703 | FALSE |
| TC01000100.hg.1 | ENSG00000049246; | 0.2128369 | 0.4008753 | FALSE |
| TC01000685.hg.1 | ENSG00000162409; | 0.2133716 | 0.4008753 | FALSE |
| TC01001624.hg.1 | ENSG00000116741; | 0.216297  | 0.4008753 | FALSE |
| TC01003638.hg.1 | ENSG0000073756;  | 0.2169376 | 0.4008753 | FALSE |
| TC06000087.hg.1 | ENSG00000078401; | 0.2185337 | 0.4008753 | FALSE |
| TC02002714.hg.1 | ENSG00000163251; | 0.2185337 | 0.4008753 | FALSE |
| TC08000646.hg.1 | ENSG00000164932; | 0.2185337 | 0.4008753 | FALSE |
| TC01000904.hg.1 | ENSG00000162692; | 0.219337  | 0.4008753 | FALSE |
| TC14001364.hg.1 | ENSG00000211448  | 0.2206483 | 0.4008753 | FALSE |
| TC15000971.hg.1 | ENSG00000184254  | 0.2206483 | 0.4008753 | FALSE |
| TC04000313.hg.1 | ENSG00000157404  | 0.2206483 | 0.4008753 | FALSE |
| TC19001103.hg.1 | ENSG00000125730  | 0.2206483 | 0.4008753 | FALSE |
| TC19001103.hg.1 | ENSG00000125730  | 0.2206483 | 0.4008753 | FALSE |
| TC08001567.hg.1 | ENSG00000170961  | 0.2206483 | 0.4008753 | FALSE |
| TC03000214.hg.1 | ENSG00000168036  | 0.2206483 | 0.4008753 | FALSE |
| TC11000404.hg.1 | ENSG00000134574  | 0.2206483 | 0.4008753 | FALSE |
| TC14001364.hg.1 | ENSG00000211448  | 0.2206483 | 0.4008753 | FALSE |
| TC06002036.hg.1 | ENSG00000249853  | 0.2206483 | 0.4008753 | FALSE |
| TC05000165.hg.1 | ENSG00000079215  | 0.2206483 | 0.4008753 | FALSE |
| TC01001805.hg.1 | ENSG00000092969  | 0.2206483 | 0.4008753 | FALSE |
| TC11001026.hg.1 | ENSG00000109906  | 0.2206483 | 0.4008753 | FALSE |
| TC10000663.hg.1 | ENSG00000095596  | 0.2206483 | 0.4008753 | FALSE |
| TC01000785.hg.1 | ENSG00000154027  | 0.2206483 | 0.4008753 | FALSE |
| TC10000350.hg.1 | ENSG00000107984  | 0.2206483 | 0.4008753 | FALSE |
| TC01001624.hg.1 | ENSG00000116741  | 0.2206483 | 0.4008753 | FALSE |
| TC02002480.hg.1 | ENSG00000078098  | 0.2206483 | 0.4008753 | FALSE |
| TC19000191.hg.1 | ENSG00000130164  | 0.2206483 | 0.4008753 | FALSE |
| TC08000149.hg.1 | ENSG00000175445  | 0.2206483 | 0.4008753 | FALSE |
| TC12001324.hg.1 | ENSG00000123095  | 0.2206483 | 0.4008753 | FALSE |
| TC03002146.hg.1 | ENSG00000189058  | 0.2206483 | 0.4008753 | FALSE |
| TC02002823.hg.1 | ENSG00000135919  | 0.2206483 | 0.4008753 | FALSE |
| TC0X000943.hg.1 | ENSG00000198947  | 0.2206483 | 0.4008753 | FALSE |
| TC05000840.hg.1 | ENSG00000123643  | 0.2206483 | 0.4008753 | FALSE |
| TC05000840.hg.1 | ENSG00000123643  | 0.2206483 | 0.4008753 | FALSE |
| TC08000127.hg.1 | ENSG00000003989  | 0.2206483 | 0.4008753 | FALSE |
| TC05000840.hg.1 | ENSG00000123643  | 0.2206483 | 0.4008753 | FALSE |
| TC10000663.hg.1 | ENSG00000095596  | 0.2206483 | 0.4008753 | FALSE |
| TC01003778.hg.1 | ENSG00000076356  | 0.2206483 | 0.4008753 | FALSE |
| TC10001327.hg.1 | ENSG00000122877  | 0.2206483 | 0.4008753 | FALSE |
| TC02002823.hg.1 | ENSG00000135919  | 0.2206483 | 0.4008753 | FALSE |
| TC01002669.hg.1 | ENSG00000157193  | 0.2206483 | 0.4008753 | FALSE |
| TC10001711.hg.1 | ENSG00000066468  | 0.2206483 | 0.4008753 | FALSE |
| TC10001711.hg.1 | ENSG00000066468  | 0.2206483 | 0.4008753 | FALSE |
| TC07000768.hg.1 | ENSG00000174697  | 0.2206483 | 0.4008753 | FALSE |
| TC08001175.hg.1 | ENSG00000104368  | 0.2206483 | 0.4008753 | FALSE |
| TC11002140.hg.1 | ENSG00000149256  | 0.2206483 | 0.4008753 | FALSE |
| TC06000976.hg.1 | ENSG00000196569  | 0.2206483 | 0.4008753 | FALSE |
| TC08001659.hg.1 | ENSG00000104419  | 0.2206483 | 0.4008753 | FALSE |
| TC10001663.hg.1 | ENSG00000119927  | 0.2206483 | 0.4008753 | FALSE |
| TC22000019.hg.1 | ENSG00000177663  | 0.2206483 | 0.4008753 | FALSE |
| TC10000811.hg.1 | ENSG00000150594  | 0.2206483 | 0.4008753 | FALSE |
| TC08001275.hg.1 | ENSG00000172817  | 0.2206483 | 0.4008753 | FALSE |
| TC17000383.hg.1 | ENSG00000108691  | 0.2206483 | 0.4008753 | FALSE |

|                 |                  |           |           |       |
|-----------------|------------------|-----------|-----------|-------|
| TC17000383.hg.1 | ENSG00000108691  | 0.2206483 | 0.4008753 | FALSE |
| TC07001562.hg.1 | ENSG00000019991  | 0.2206483 | 0.4008753 | FALSE |
| TC07001562.hg.1 | ENSG00000019991  | 0.2206483 | 0.4008753 | FALSE |
| TC01001607.hg.1 | ENSG00000116711  | 0.2206483 | 0.4008753 | FALSE |
| TC17001462.hg.1 | ENSG00000131747  | 0.2206483 | 0.4008753 | FALSE |
| TC10000663.hg.1 | ENSG00000095596  | 0.2206483 | 0.4008753 | FALSE |
| TC06000087.hg.1 | ENSG00000078401  | 0.2206483 | 0.4008753 | FALSE |
| TC10000350.hg.1 | ENSG00000107984  | 0.2206483 | 0.4008753 | FALSE |
| TC12000227.hg.1 | ENSG00000172572  | 0.2206483 | 0.4008753 | FALSE |
| TC17000383.hg.1 | ENSG00000108691  | 0.2206483 | 0.4008753 | FALSE |
| TC01001624.hg.1 | ENSG00000116741  | 0.2206483 | 0.4008753 | FALSE |
| TC07000137.hg.1 | ENSG00000136244  | 0.2206483 | 0.4008753 | FALSE |
| TC07000137.hg.1 | ENSG00000136244  | 0.2206483 | 0.4008753 | FALSE |
| TC03001527.hg.1 | ENSG00000163638  | 0.2206483 | 0.4008753 | FALSE |
| TC06000087.hg.1 | ENSG00000078401  | 0.2206483 | 0.4008753 | FALSE |
| TC01001736.hg.1 | ENSG00000196352  | 0.2206483 | 0.4008753 | FALSE |
| TC06002036.hg.1 | ENSG00000249853  | 0.2206483 | 0.4008753 | FALSE |
| TC07000768.hg.1 | ENSG00000174697  | 0.2206483 | 0.4008753 | FALSE |
| TC11002427.hg.1 | ENSG00000064309  | 0.2206483 | 0.4008753 | FALSE |
| TC18000548.hg.1 | ENSG00000183287  | 0.2206483 | 0.4008753 | FALSE |
| TC03001527.hg.1 | ENSG00000163638  | 0.2206483 | 0.4008753 | FALSE |
| TC01002706.hg.1 | ENSG00000184292  | 0.2206483 | 0.4008753 | FALSE |
| TC01001624.hg.1 | ENSG00000116741  | 0.2206483 | 0.4008753 | FALSE |
| TC01000734.hg.1 | ENSG00000118473  | 0.2206483 | 0.4008753 | FALSE |
| TC10001711.hg.1 | ENSG00000066468  | 0.2206483 | 0.4008753 | FALSE |
| TC10000406.hg.1 | ENSG00000138336  | 0.2206483 | 0.4008753 | FALSE |
| TC11002170.hg.1 | ENSG00000174804  | 0.2206483 | 0.4008753 | FALSE |
| TC01002669.hg.1 | ENSG00000157193  | 0.2206483 | 0.4008753 | FALSE |
| TC07000004.hg.1 | ENSG00000177706  | 0.2206483 | 0.4008753 | FALSE |
| TC09001336.hg.1 | ENSG00000106819  | 0.2206483 | 0.4008753 | FALSE |
| TC05001110.hg.1 | ENSG00000153395  | 0.2206483 | 0.4008753 | FALSE |
| TC10001498.hg.1 | ENSG00000107796  | 0.2206483 | 0.4008753 | FALSE |
| TC03001071.hg.1 | ENSG00000114315  | 0.2206483 | 0.4008753 | FALSE |
| TC03001071.hg.1 | ENSG00000114315  | 0.2206483 | 0.4008753 | FALSE |
| TC01003129.hg.1 | ENSG00000143140  | 0.2206483 | 0.4008753 | FALSE |
| TC05001933.hg.1 | ENSG00000113721  | 0.2206483 | 0.4008753 | FALSE |
| TC20000162.hg.1 | ENSG00000101463  | 0.2206483 | 0.4008753 | FALSE |
| TC16000571.hg.1 | ENSG00000198373  | 0.2206483 | 0.4008753 | FALSE |
| TC03001071.hg.1 | ENSG00000114315  | 0.2206483 | 0.4008753 | FALSE |
| TC14000951.hg.1 | ENSG00000092068  | 0.2206483 | 0.4008753 | FALSE |
| TC17001459.hg.1 | ENSG00000126368  | 0.2206483 | 0.4008753 | FALSE |
| TC01001736.hg.1 | ENSG00000196352  | 0.2206483 | 0.4008753 | FALSE |
| TC04000432.hg.1 | ENSG00000156234  | 0.2206483 | 0.4008753 | FALSE |
| TC17000819.hg.1 | ENSG00000125398  | 0.2206483 | 0.4008753 | FALSE |
| TC12001755.hg.1 | ENSG00000175183  | 0.2206483 | 0.4008753 | FALSE |
| TC02001031.hg.1 | ENSG00000152256; | 0.2216004 | 0.4008753 | FALSE |
| TC01002706.hg.1 | ENSG00000184292; | 0.2216004 | 0.4008753 | FALSE |
| TC01001805.hg.1 | ENSG00000092969; | 0.2216004 | 0.4008753 | FALSE |
| TC10000663.hg.1 | ENSG00000095596; | 0.2216004 | 0.4008753 | FALSE |
| TC04001245.hg.1 | ENSG00000145242; | 0.2216004 | 0.4008753 | FALSE |
| TC0Y000185.hg.1 | ENSG00000012817; | 0.2216004 | 0.4008753 | FALSE |
| TC01001473.hg.1 | ENSG00000143153; | 0.2228692 | 0.4024902 | FALSE |
| TC02001100.hg.1 | ENSG00000138448; | 0.2228692 | 0.4024902 | FALSE |
| TC02002624.hg.1 | ENSG00000115415; | 0.2248654 | 0.4048145 | FALSE |
| TC06001772.hg.1 | ENSG00000146233; | 0.2248654 | 0.4048145 | FALSE |
| TC08000482.hg.1 | ENSG00000121039; | 0.2248654 | 0.4048145 | FALSE |
| TC08001567.hg.1 | ENSG00000170961; | 0.2248654 | 0.4048145 | FALSE |
| TC05001590.hg.1 | ENSG00000113369; | 0.2248654 | 0.4048145 | FALSE |



|                 |                  |           |           |       |
|-----------------|------------------|-----------|-----------|-------|
| TC03000214.hg.1 | ENSG00000168036; | 0.2248654 | 0.4048145 | FALSE |
| TC14001122.hg.1 | ENSG00000151748; | 0.2248654 | 0.4048145 | FALSE |
| TC02000286.hg.1 | ENSG00000171150; | 0.2248654 | 0.4048145 | FALSE |
| TC10001663.hg.1 | ENSG00000119927; | 0.2248654 | 0.4048145 | FALSE |
| TC04000432.hg.1 | ENSG00000156234; | 0.2248654 | 0.4048145 | FALSE |
| TC03001255.hg.1 | ENSG00000033867; | 0.2248654 | 0.4048145 | FALSE |
| TC01003129.hg.1 | ENSG00000143140; | 0.2248654 | 0.4048145 | FALSE |
| TC0X001186.hg.1 | ENSG00000072133; | 0.2248654 | 0.4048145 | FALSE |
| TC01001624.hg.1 | ENSG00000116741; | 0.2258162 | 0.4053329 | FALSE |
| TC02001628.hg.1 | ENSG00000084674; | 0.2261041 | 0.4056796 | FALSE |
| TC06000087.hg.1 | ENSG00000078401; | 0.227246  | 0.4075577 | FALSE |
| TC01000100.hg.1 | ENSG00000049246; | 0.2277468 | 0.4082848 | FALSE |
| TC01001624.hg.1 | ENSG00000116741; | 0.2279473 | 0.4084731 | FALSE |
| TC01000904.hg.1 | ENSG00000162692; | 0.2280942 | 0.4085654 | FALSE |
| TC03001362.hg.1 | ENSG00000160808; | 0.232449  | 0.4161046 | FALSE |
| TC05003439.hg.1 | ENSG00000213949; | 0.232449  | 0.4161046 | FALSE |
| TC01001473.hg.1 | ENSG00000143153; | 0.2336212 | 0.4178535 | FALSE |
| TC01000783.hg.1 | ENSG00000117069; | 0.2336212 | 0.4178535 | FALSE |
| TC02000762.hg.1 | ENSG00000163083; | 0.2348991 | 0.4198761 | FALSE |
| TC01001792.hg.1 | ENSG00000082482; | 0.2354526 | 0.4206019 | FALSE |
| TC06002168.hg.1 | ENSG00000164442; | 0.2354526 | 0.4206019 | FALSE |
| TC04000253.hg.1 | ENSG00000154277; | 0.2360446 | 0.4213957 | FALSE |
| TC03001590.hg.1 | ENSG00000184500; | 0.2367021 | 0.4223934 | FALSE |
| TC01002669.hg.1 | ENSG00000157193; | 0.2369971 | 0.4227436 | FALSE |
| TC02000041.hg.1 | ENSG00000115738; | 0.2385711 | 0.4253739 | FALSE |
| TC07001374.hg.1 | ENSG00000106070; | 0.2400991 | 0.4259918 | FALSE |
| TC07001374.hg.1 | ENSG00000106070; | 0.2400991 | 0.4259918 | FALSE |
| TC07000525.hg.1 | ENSG00000008277; | 0.2400991 | 0.4259918 | FALSE |
| TC05000840.hg.1 | ENSG00000123643; | 0.2400991 | 0.4259918 | FALSE |
| TC02002808.hg.1 | ENSG00000116106; | 0.2400991 | 0.4259918 | FALSE |
| TC03001362.hg.1 | ENSG00000160808; | 0.2400991 | 0.4259918 | FALSE |
| TC02000270.hg.1 | ENSG00000152527; | 0.2400991 | 0.4259918 | FALSE |
| TC17000220.hg.1 | ENSG00000108448; | 0.2400991 | 0.4259918 | FALSE |
| TC01003718.hg.1 | ENSG00000133048; | 0.2400991 | 0.4259918 | FALSE |
| TC02000041.hg.1 | ENSG00000115738; | 0.2400991 | 0.4259918 | FALSE |
| TC11002178.hg.1 | ENSG00000086991; | 0.2400991 | 0.4259918 | FALSE |
| TC10001711.hg.1 | ENSG00000066468; | 0.2400991 | 0.4259918 | FALSE |
| TC01000904.hg.1 | ENSG00000162692; | 0.2402112 | 0.4259918 | FALSE |
| TC02002605.hg.1 | ENSG00000064989; | 0.2409934 | 0.4272019 | FALSE |
| TC02000466.hg.1 | ENSG00000159399; | 0.2412079 | 0.4274052 | FALSE |
| TC04002931.hg.1 | ENSG00000134853; | 0.241602  | 0.4279264 | FALSE |
| TC01000734.hg.1 | ENSG00000118473; | 0.2428513 | 0.4299613 | FALSE |
| TC02002823.hg.1 | ENSG00000135919; | 0.2433907 | 0.4305602 | FALSE |
| TC05000165.hg.1 | ENSG00000079215; | 0.2433907 | 0.4305602 | FALSE |
| TC03001071.hg.1 | ENSG00000114315; | 0.2433907 | 0.4305602 | FALSE |
| TC03000013.hg.1 | ENSG00000150995; | 0.2488599 | 0.4323241 | FALSE |
| TC03000013.hg.1 | ENSG00000150995; | 0.2488599 | 0.4323241 | FALSE |
| TC01001704.hg.1 | ENSG00000163531; | 0.2488599 | 0.4323241 | FALSE |
| TC01000100.hg.1 | ENSG00000049246; | 0.249158  | 0.4323241 | FALSE |
| TC01000904.hg.1 | ENSG00000162692; | 0.2516292 | 0.4323241 | FALSE |
| TC17001462.hg.1 | ENSG00000131747  | 0.2523727 | 0.4323241 | FALSE |
| TC02002049.hg.1 | ENSG00000115525  | 0.2523727 | 0.4323241 | FALSE |
| TC02000041.hg.1 | ENSG00000115738  | 0.2523727 | 0.4323241 | FALSE |
| TC16000454.hg.1 | ENSG00000087245  | 0.2523727 | 0.4323241 | FALSE |
| TC04000313.hg.1 | ENSG00000157404  | 0.2523727 | 0.4323241 | FALSE |
| TC04000313.hg.1 | ENSG00000157404  | 0.2523727 | 0.4323241 | FALSE |
| TC06001027.hg.1 | ENSG00000118503  | 0.2523727 | 0.4323241 | FALSE |
| TC06001027.hg.1 | ENSG00000118503  | 0.2523727 | 0.4323241 | FALSE |

|                 |                 |           |           |       |
|-----------------|-----------------|-----------|-----------|-------|
| TC03000214.hg.1 | ENSG00000168036 | 0.2523727 | 0.4323241 | FALSE |
| TC03000013.hg.1 | ENSG00000150995 | 0.2523727 | 0.4323241 | FALSE |
| TC10000022.hg.1 | ENSG00000067057 | 0.2523727 | 0.4323241 | FALSE |
| TC09000222.hg.1 | ENSG00000137124 | 0.2523727 | 0.4323241 | FALSE |
| TC05000054.hg.1 | ENSG00000078295 | 0.2523727 | 0.4323241 | FALSE |
| TC08000203.hg.1 | ENSG00000092964 | 0.2523727 | 0.4323241 | FALSE |
| TC17001462.hg.1 | ENSG00000131747 | 0.2523727 | 0.4323241 | FALSE |
| TC11000182.hg.1 | ENSG00000148926 | 0.2523727 | 0.4323241 | FALSE |
| TC15000622.hg.1 | ENSG00000166949 | 0.2523727 | 0.4323241 | FALSE |
| TC16000668.hg.1 | ENSG00000103241 | 0.2523727 | 0.4323241 | FALSE |
| TC03000862.hg.1 | ENSG00000163661 | 0.2523727 | 0.4323241 | FALSE |
| TC07000768.hg.1 | ENSG00000174697 | 0.2523727 | 0.4323241 | FALSE |
| TC06000779.hg.1 | ENSG00000135318 | 0.2523727 | 0.4323241 | FALSE |
| TC01000785.hg.1 | ENSG00000154027 | 0.2523727 | 0.4323241 | FALSE |
| TC12000076.hg.1 | ENSG00000010278 | 0.2523727 | 0.4323241 | FALSE |
| TC11002427.hg.1 | ENSG00000064309 | 0.2523727 | 0.4323241 | FALSE |
| TC22001467.hg.1 | ENSG00000128394 | 0.2523727 | 0.4323241 | FALSE |
| TC22001467.hg.1 | ENSG00000128394 | 0.2523727 | 0.4323241 | FALSE |
| TC03002146.hg.1 | ENSG00000189058 | 0.2523727 | 0.4323241 | FALSE |
| TC10000811.hg.1 | ENSG00000150594 | 0.2523727 | 0.4323241 | FALSE |
| TC17000383.hg.1 | ENSG00000108691 | 0.2523727 | 0.4323241 | FALSE |
| TC10000811.hg.1 | ENSG00000150594 | 0.2523727 | 0.4323241 | FALSE |
| TC01001624.hg.1 | ENSG00000116741 | 0.2523727 | 0.4323241 | FALSE |
| TC20000926.hg.1 | ENSG00000158445 | 0.2523727 | 0.4323241 | FALSE |
| TC12001837.hg.1 | ENSG00000074527 | 0.2523727 | 0.4323241 | FALSE |
| TC01002669.hg.1 | ENSG00000157193 | 0.2523727 | 0.4323241 | FALSE |
| TC08001022.hg.1 | ENSG00000147408 | 0.2523727 | 0.4323241 | FALSE |
| TC03001071.hg.1 | ENSG00000114315 | 0.2523727 | 0.4323241 | FALSE |
| TC06004141.hg.1 | ENSG00000112096 | 0.2523727 | 0.4323241 | FALSE |
| TC06001027.hg.1 | ENSG00000118503 | 0.2523727 | 0.4323241 | FALSE |
| TC08000149.hg.1 | ENSG00000175445 | 0.2523727 | 0.4323241 | FALSE |
| TC02002624.hg.1 | ENSG00000115415 | 0.2523727 | 0.4323241 | FALSE |
| TC04000313.hg.1 | ENSG00000157404 | 0.2523727 | 0.4323241 | FALSE |
| TC09000358.hg.1 | ENSG00000135069 | 0.2523727 | 0.4323241 | FALSE |
| TC02000281.hg.1 | ENSG00000116016 | 0.2523727 | 0.4323241 | FALSE |
| TC04000313.hg.1 | ENSG00000157404 | 0.2523727 | 0.4323241 | FALSE |
| TC02000041.hg.1 | ENSG00000115738 | 0.2523727 | 0.4323241 | FALSE |
| TC02000286.hg.1 | ENSG00000171150 | 0.2523727 | 0.4323241 | FALSE |
| TC10001517.hg.1 | ENSG00000148677 | 0.2523727 | 0.4323241 | FALSE |
| TC10000406.hg.1 | ENSG00000138336 | 0.2523727 | 0.4323241 | FALSE |
| TC02001100.hg.1 | ENSG00000138448 | 0.2523727 | 0.4323241 | FALSE |
| TC02000286.hg.1 | ENSG00000171150 | 0.2523727 | 0.4323241 | FALSE |
| TC07001374.hg.1 | ENSG00000106070 | 0.2523727 | 0.4323241 | FALSE |
| TC01000785.hg.1 | ENSG00000154027 | 0.2523727 | 0.4323241 | FALSE |
| TC02000511.hg.1 | ENSG00000168906 | 0.2523727 | 0.4323241 | FALSE |
| TC02000041.hg.1 | ENSG00000115738 | 0.2523727 | 0.4323241 | FALSE |
| TC02000041.hg.1 | ENSG00000115738 | 0.2523727 | 0.4323241 | FALSE |
| TC11002178.hg.1 | ENSG00000086991 | 0.2523727 | 0.4323241 | FALSE |
| TC07000137.hg.1 | ENSG00000136244 | 0.2523727 | 0.4323241 | FALSE |
| TC05000165.hg.1 | ENSG00000079215 | 0.2523727 | 0.4323241 | FALSE |
| TC03000248.hg.1 | ENSG00000144791 | 0.2523727 | 0.4323241 | FALSE |
| TC03001071.hg.1 | ENSG00000114315 | 0.2523727 | 0.4323241 | FALSE |
| TC10001711.hg.1 | ENSG00000066468 | 0.2523727 | 0.4323241 | FALSE |
| TC02002714.hg.1 | ENSG00000163251 | 0.2523727 | 0.4323241 | FALSE |
| TC17000015.hg.1 | ENSG00000132386 | 0.2523727 | 0.4323241 | FALSE |
| TC11002140.hg.1 | ENSG00000149256 | 0.2523727 | 0.4323241 | FALSE |
| TC03000248.hg.1 | ENSG00000144791 | 0.2523727 | 0.4323241 | FALSE |
| TC03000248.hg.1 | ENSG00000144791 | 0.2523727 | 0.4323241 | FALSE |

|                 |                  |           |           |       |
|-----------------|------------------|-----------|-----------|-------|
| TC05001933.hg.1 | ENSG00000113721  | 0.2523727 | 0.4323241 | FALSE |
| TC03000214.hg.1 | ENSG00000168036  | 0.2523727 | 0.4323241 | FALSE |
| TC20000621.hg.1 | ENSG00000101384  | 0.2523727 | 0.4323241 | FALSE |
| TC01001805.hg.1 | ENSG00000092969  | 0.2523727 | 0.4323241 | FALSE |
| TC12001890.hg.1 | ENSG00000017427  | 0.2523727 | 0.4323241 | FALSE |
| TC07000768.hg.1 | ENSG00000174697  | 0.2523727 | 0.4323241 | FALSE |
| TC10000811.hg.1 | ENSG00000150594  | 0.2523727 | 0.4323241 | FALSE |
| TC20000621.hg.1 | ENSG00000101384  | 0.2523727 | 0.4323241 | FALSE |
| TC07001562.hg.1 | ENSG00000019991  | 0.2523727 | 0.4323241 | FALSE |
| TC22000019.hg.1 | ENSG00000177663  | 0.2523727 | 0.4323241 | FALSE |
| TC05000701.hg.1 | ENSG00000120738  | 0.2523727 | 0.4323241 | FALSE |
| TC10001517.hg.1 | ENSG00000148677  | 0.2523727 | 0.4323241 | FALSE |
| TC19000677.hg.1 | ENSG00000134830  | 0.2523727 | 0.4323241 | FALSE |
| TC06000945.hg.1 | ENSG00000152661  | 0.2523727 | 0.4323241 | FALSE |
| TC11000182.hg.1 | ENSG00000148926  | 0.2523727 | 0.4323241 | FALSE |
| TC06002302.hg.1 | ENSG00000223414  | 0.2523727 | 0.4323241 | FALSE |
| TC08000646.hg.1 | ENSG00000164932; | 0.2538731 | 0.4323241 | FALSE |
| TC02000041.hg.1 | ENSG00000115738; | 0.2538731 | 0.4323241 | FALSE |
| TC03000214.hg.1 | ENSG00000168036; | 0.254413  | 0.4323241 | FALSE |
| TC01003497.hg.1 | ENSG00000117479; | 0.254413  | 0.4323241 | FALSE |
| TC02002823.hg.1 | ENSG00000135919; | 0.254413  | 0.4323241 | FALSE |
| TC01003638.hg.1 | ENSG00000073756; | 0.254413  | 0.4323241 | FALSE |
| TC01001805.hg.1 | ENSG00000092969; | 0.254413  | 0.4323241 | FALSE |
| TC03000214.hg.1 | ENSG00000168036; | 0.254413  | 0.4323241 | FALSE |
| TC03002146.hg.1 | ENSG00000189058; | 0.254413  | 0.4323241 | FALSE |
| TC03000214.hg.1 | ENSG00000168036; | 0.254413  | 0.4323241 | FALSE |
| TC04000313.hg.1 | ENSG00000157404; | 0.2553781 | 0.4323241 | FALSE |
| TC07000559.hg.1 | ENSG00000164692; | 0.2553781 | 0.4323241 | FALSE |
| TC02002823.hg.1 | ENSG00000135919; | 0.2553781 | 0.4323241 | FALSE |
| TC04000432.hg.1 | ENSG00000156234; | 0.2553781 | 0.4323241 | FALSE |
| TC03001362.hg.1 | ENSG00000160808; | 0.2553781 | 0.4323241 | FALSE |
| TC03000214.hg.1 | ENSG00000168036; | 0.2553781 | 0.4323241 | FALSE |
| TC02000762.hg.1 | ENSG00000163083; | 0.2553781 | 0.4323241 | FALSE |
| TC10000811.hg.1 | ENSG00000150594; | 0.2553781 | 0.4323241 | FALSE |
| TC01002578.hg.1 | ENSG00000117394; | 0.2553781 | 0.4323241 | FALSE |
| TC07000768.hg.1 | ENSG00000174697; | 0.2553781 | 0.4323241 | FALSE |
| TC05003423.hg.1 | ENSG00000082196; | 0.2553781 | 0.4323241 | FALSE |
| TC05003423.hg.1 | ENSG00000082196; | 0.2553781 | 0.4323241 | FALSE |
| TC01000904.hg.1 | ENSG00000162692; | 0.2555974 | 0.4323241 | FALSE |
| TC01003638.hg.1 | ENSG00000073756; | 0.2558734 | 0.4326201 | FALSE |
| TC01001792.hg.1 | ENSG00000082482; | 0.2576541 | 0.4353728 | FALSE |
| TC01001792.hg.1 | ENSG00000082482; | 0.2576541 | 0.4353728 | FALSE |
| TC01000904.hg.1 | ENSG00000162692; | 0.2613557 | 0.4413664 | FALSE |
| TC01002166.hg.1 | ENSG00000116285; | 0.2615546 | 0.4415281 | FALSE |
| TC02002605.hg.1 | ENSG00000064989; | 0.2627223 | 0.4431702 | FALSE |
| TC02002605.hg.1 | ENSG00000064989; | 0.2628897 | 0.4431702 | FALSE |
| TC01003638.hg.1 | ENSG00000073756; | 0.2628897 | 0.4431702 | FALSE |
| TC01002706.hg.1 | ENSG00000184292; | 0.2628897 | 0.4431702 | FALSE |
| TC02002605.hg.1 | ENSG00000064989; | 0.2628897 | 0.4431702 | FALSE |
| TC06000945.hg.1 | ENSG00000152661; | 0.264343  | 0.4451819 | FALSE |
| TC02000082.hg.1 | ENSG00000071575; | 0.2655034 | 0.4467846 | FALSE |
| TC01001805.hg.1 | ENSG00000092969; | 0.2655034 | 0.4467846 | FALSE |
| TC01001805.hg.1 | ENSG00000092969; | 0.2655034 | 0.4467846 | FALSE |
| TC02000286.hg.1 | ENSG00000171150; | 0.2658496 | 0.4470158 | FALSE |
| TC01000100.hg.1 | ENSG00000049246; | 0.2659893 | 0.447075  | FALSE |
| TC01002669.hg.1 | ENSG00000157193; | 0.2662879 | 0.4474012 | FALSE |
| TC02001031.hg.1 | ENSG00000152256; | 0.2691606 | 0.4520505 | FALSE |
| TC01000685.hg.1 | ENSG00000162409; | 0.2696661 | 0.4527218 | FALSE |

|                 |                  |           |           |       |
|-----------------|------------------|-----------|-----------|-------|
| TC02002714.hg.1 | ENSG00000163251; | 0.2706736 | 0.4529859 | FALSE |
| TC02001628.hg.1 | ENSG00000084674; | 0.2706736 | 0.4529859 | FALSE |
| TC03001071.hg.1 | ENSG00000114315; | 0.2706736 | 0.4529859 | FALSE |
| TC04001084.hg.1 | ENSG00000109819; | 0.2706736 | 0.4529859 | FALSE |
| TC04000313.hg.1 | ENSG00000157404; | 0.2706736 | 0.4529859 | FALSE |
| TC12001890.hg.1 | ENSG00000017427; | 0.2706736 | 0.4529859 | FALSE |
| TC01001607.hg.1 | ENSG00000116711; | 0.2706736 | 0.4529859 | FALSE |
| TC01003497.hg.1 | ENSG00000117479; | 0.2706736 | 0.4529859 | FALSE |
| TC03000631.hg.1 | ENSG00000114023; | 0.2706736 | 0.4529859 | FALSE |
| TC0X000943.hg.1 | ENSG00000198947; | 0.2706736 | 0.4529859 | FALSE |
| TC10000438.hg.1 | ENSG00000107731; | 0.2706736 | 0.4529859 | FALSE |
| TC07000137.hg.1 | ENSG00000136244; | 0.2719655 | 0.4529859 | FALSE |
| TC03001071.hg.1 | ENSG00000114315; | 0.2719655 | 0.4529859 | FALSE |
| TC06000945.hg.1 | ENSG00000152661; | 0.2721657 | 0.4529859 | FALSE |
| TC07000768.hg.1 | ENSG00000174697; | 0.2721657 | 0.4529859 | FALSE |
| TC01000873.hg.1 | ENSG00000143036; | 0.2750844 | 0.4529859 | FALSE |
| TC04002931.hg.1 | ENSG00000134853; | 0.27665   | 0.4529859 | FALSE |
| TC04001245.hg.1 | ENSG00000145242; | 0.27665   | 0.4529859 | FALSE |
| TC02002808.hg.1 | ENSG00000116106; | 0.2766546 | 0.4529859 | FALSE |
| TC02000041.hg.1 | ENSG00000115738; | 0.2766546 | 0.4529859 | FALSE |
| TC01001624.hg.1 | ENSG00000116741; | 0.2766652 | 0.4529859 | FALSE |
| TC01000873.hg.1 | ENSG00000143036; | 0.2766652 | 0.4529859 | FALSE |
| TC01000873.hg.1 | ENSG00000143036; | 0.2768598 | 0.4529859 | FALSE |
| TC01003638.hg.1 | ENSG00000073756; | 0.2785352 | 0.4529859 | FALSE |
| TC01001473.hg.1 | ENSG00000143153; | 0.2791627 | 0.4529859 | FALSE |
| TC01000904.hg.1 | ENSG00000162692; | 0.2795189 | 0.4529859 | FALSE |
| TC04000313.hg.1 | ENSG00000157404; | 0.2810941 | 0.4529859 | FALSE |
| TC01000734.hg.1 | ENSG00000118473; | 0.2810941 | 0.4529859 | FALSE |
| TC18000097.hg.1 | ENSG00000101773  | 0.2828076 | 0.4529859 | FALSE |
| TC04000313.hg.1 | ENSG00000157404  | 0.2828076 | 0.4529859 | FALSE |
| TC19001103.hg.1 | ENSG00000125730  | 0.2828076 | 0.4529859 | FALSE |
| TC01001736.hg.1 | ENSG00000196352  | 0.2828076 | 0.4529859 | FALSE |
| TC10001711.hg.1 | ENSG00000066468  | 0.2828076 | 0.4529859 | FALSE |
| TC02002624.hg.1 | ENSG00000115415  | 0.2828076 | 0.4529859 | FALSE |
| TC01001473.hg.1 | ENSG00000143153  | 0.2828076 | 0.4529859 | FALSE |
| TC22001467.hg.1 | ENSG00000128394  | 0.2828076 | 0.4529859 | FALSE |
| TC12002066.hg.1 | ENSG00000158104  | 0.2828076 | 0.4529859 | FALSE |
| TC12002066.hg.1 | ENSG00000158104  | 0.2828076 | 0.4529859 | FALSE |
| TC09000358.hg.1 | ENSG00000135069  | 0.2828076 | 0.4529859 | FALSE |
| TC06001772.hg.1 | ENSG00000146233  | 0.2828076 | 0.4529859 | FALSE |
| TC05001172.hg.1 | ENSG00000154122  | 0.2828076 | 0.4529859 | FALSE |
| TC01000685.hg.1 | ENSG00000162409  | 0.2828076 | 0.4529859 | FALSE |
| TC10000663.hg.1 | ENSG00000095596  | 0.2828076 | 0.4529859 | FALSE |
| TC03000208.hg.1 | ENSG00000168032  | 0.2828076 | 0.4529859 | FALSE |
| TC01000785.hg.1 | ENSG00000154027  | 0.2828076 | 0.4529859 | FALSE |
| TC01000785.hg.1 | ENSG00000154027  | 0.2828076 | 0.4529859 | FALSE |
| TC22001467.hg.1 | ENSG00000128394  | 0.2828076 | 0.4529859 | FALSE |
| TC10000350.hg.1 | ENSG00000107984  | 0.2828076 | 0.4529859 | FALSE |
| TC06001142.hg.1 | ENSG00000164694  | 0.2828076 | 0.4529859 | FALSE |
| TC04000432.hg.1 | ENSG00000156234  | 0.2828076 | 0.4529859 | FALSE |
| TC04000432.hg.1 | ENSG00000156234  | 0.2828076 | 0.4529859 | FALSE |
| TC04001084.hg.1 | ENSG00000109819  | 0.2828076 | 0.4529859 | FALSE |
| TC05000165.hg.1 | ENSG00000079215  | 0.2828076 | 0.4529859 | FALSE |
| TC01003497.hg.1 | ENSG00000117479  | 0.2828076 | 0.4529859 | FALSE |
| TC06001772.hg.1 | ENSG00000146233  | 0.2828076 | 0.4529859 | FALSE |
| TC20000108.hg.1 | ENSG00000125851  | 0.2828076 | 0.4529859 | FALSE |
| TC10001711.hg.1 | ENSG00000066468  | 0.2828076 | 0.4529859 | FALSE |
| TC03001071.hg.1 | ENSG00000114315  | 0.2828076 | 0.4529859 | FALSE |

|                  |                 |           |           |       |
|------------------|-----------------|-----------|-----------|-------|
| TC08001022.hg.1  | ENSG00000147408 | 0.2828076 | 0.4529859 | FALSE |
| TC10001711.hg.1  | ENSG00000066468 | 0.2828076 | 0.4529859 | FALSE |
| TC10000406.hg.1  | ENSG00000138336 | 0.2828076 | 0.4529859 | FALSE |
| TC01002166.hg.1  | ENSG00000116285 | 0.2828076 | 0.4529859 | FALSE |
| TC01001607.hg.1  | ENSG00000116711 | 0.2828076 | 0.4529859 | FALSE |
| TC01002706.hg.1  | ENSG00000184292 | 0.2828076 | 0.4529859 | FALSE |
| TC05000840.hg.1  | ENSG00000123643 | 0.2828076 | 0.4529859 | FALSE |
| TC06001027.hg.1  | ENSG00000118503 | 0.2828076 | 0.4529859 | FALSE |
| TC05000159.hg.1  | ENSG00000168685 | 0.2828076 | 0.4529859 | FALSE |
| TC07000768.hg.1  | ENSG00000174697 | 0.2828076 | 0.4529859 | FALSE |
| TC04000432.hg.1  | ENSG00000156234 | 0.2828076 | 0.4529859 | FALSE |
| TC04000432.hg.1  | ENSG00000156234 | 0.2828076 | 0.4529859 | FALSE |
| TC03000248.hg.1  | ENSG00000144791 | 0.2828076 | 0.4529859 | FALSE |
| TC0X000034.hg.1  | ENSG00000146950 | 0.2828076 | 0.4529859 | FALSE |
| TC02001628.hg.1  | ENSG00000084674 | 0.2828076 | 0.4529859 | FALSE |
| TC0X000207.hg.1  | ENSG00000189221 | 0.2828076 | 0.4529859 | FALSE |
| TC20000893.hg.1  | ENSG00000100979 | 0.2828076 | 0.4529859 | FALSE |
| TC01001805.hg.1  | ENSG00000092969 | 0.2828076 | 0.4529859 | FALSE |
| TC05000165.hg.1  | ENSG00000079215 | 0.2828076 | 0.4529859 | FALSE |
| TC0X000034.hg.1  | ENSG00000146950 | 0.2828076 | 0.4529859 | FALSE |
| TC02001628.hg.1  | ENSG00000084674 | 0.2828076 | 0.4529859 | FALSE |
| TC03001071.hg.1  | ENSG00000114315 | 0.2828076 | 0.4529859 | FALSE |
| TC02000286.hg.1  | ENSG00000171150 | 0.2828076 | 0.4529859 | FALSE |
| TC02000041.hg.1  | ENSG00000115738 | 0.2828076 | 0.4529859 | FALSE |
| TC06001027.hg.1  | ENSG00000118503 | 0.2828076 | 0.4529859 | FALSE |
| TC01001624.hg.1  | ENSG00000116741 | 0.2828076 | 0.4529859 | FALSE |
| TC06000779.hg.1  | ENSG00000135318 | 0.2828076 | 0.4529859 | FALSE |
| TC22001467.hg.1  | ENSG00000128394 | 0.2828076 | 0.4529859 | FALSE |
| TC09000388.hg.1  | ENSG00000148053 | 0.2828076 | 0.4529859 | FALSE |
| TC05001385.hg.1  | ENSG00000145632 | 0.2828076 | 0.4529859 | FALSE |
| TC03001527.hg.1  | ENSG00000163638 | 0.2828076 | 0.4529859 | FALSE |
| TC15000622.hg.1  | ENSG00000166949 | 0.2828076 | 0.4529859 | FALSE |
| TC0X0000943.hg.1 | ENSG00000198947 | 0.2828076 | 0.4529859 | FALSE |
| TC02002714.hg.1  | ENSG00000163251 | 0.2828076 | 0.4529859 | FALSE |
| TC11002140.hg.1  | ENSG00000149256 | 0.2828076 | 0.4529859 | FALSE |
| TC06004141.hg.1  | ENSG00000112096 | 0.2828076 | 0.4529859 | FALSE |
| TC03001527.hg.1  | ENSG00000163638 | 0.2828076 | 0.4529859 | FALSE |
| TC21000420.hg.1  | ENSG00000159200 | 0.2828076 | 0.4529859 | FALSE |
| TC02000466.hg.1  | ENSG00000159399 | 0.2828076 | 0.4529859 | FALSE |
| TC17001462.hg.1  | ENSG00000131747 | 0.2828076 | 0.4529859 | FALSE |
| TC01001090.hg.1  | ENSG00000117289 | 0.2828076 | 0.4529859 | FALSE |
| TC03002146.hg.1  | ENSG00000189058 | 0.2828076 | 0.4529859 | FALSE |
| TC15000622.hg.1  | ENSG00000166949 | 0.2828076 | 0.4529859 | FALSE |
| TC15000622.hg.1  | ENSG00000166949 | 0.2828076 | 0.4529859 | FALSE |
| TC10001663.hg.1  | ENSG00000119927 | 0.2828076 | 0.4529859 | FALSE |
| TC11002366.hg.1  | ENSG00000076706 | 0.2828076 | 0.4529859 | FALSE |
| TC03000214.hg.1  | ENSG00000168036 | 0.2828076 | 0.4529859 | FALSE |
| TC14001122.hg.1  | ENSG00000151748 | 0.2828076 | 0.4529859 | FALSE |
| TC10001711.hg.1  | ENSG00000066468 | 0.2828076 | 0.4529859 | FALSE |
| TC15000971.hg.1  | ENSG00000184254 | 0.2828076 | 0.4529859 | FALSE |
| TC03000214.hg.1  | ENSG00000168036 | 0.2828076 | 0.4529859 | FALSE |
| TC10001663.hg.1  | ENSG00000119927 | 0.2828076 | 0.4529859 | FALSE |
| TC10000811.hg.1  | ENSG00000150594 | 0.2828076 | 0.4529859 | FALSE |
| TC06002168.hg.1  | ENSG00000164442 | 0.2828076 | 0.4529859 | FALSE |
| TC01001607.hg.1  | ENSG00000116711 | 0.2828076 | 0.4529859 | FALSE |
| TC11002178.hg.1  | ENSG00000086991 | 0.2828076 | 0.4529859 | FALSE |
| TC08001567.hg.1  | ENSG00000170961 | 0.2828076 | 0.4529859 | FALSE |
| TC07001627.hg.1  | ENSG00000105880 | 0.2828076 | 0.4529859 | FALSE |

|                  |                  |           |           |       |
|------------------|------------------|-----------|-----------|-------|
| TC07001627.hg.1  | ENSG00000105880  | 0.2828076 | 0.4529859 | FALSE |
| TC07001552.hg.1  | ENSG00000187391  | 0.2828076 | 0.4529859 | FALSE |
| TC15000622.hg.1  | ENSG00000166949  | 0.2828076 | 0.4529859 | FALSE |
| TC02002823.hg.1  | ENSG00000135919  | 0.2828076 | 0.4529859 | FALSE |
| TC07000004.hg.1  | ENSG00000177706  | 0.2828076 | 0.4529859 | FALSE |
| TC01002706.hg.1  | ENSG00000184292  | 0.2828076 | 0.4529859 | FALSE |
| TC16000571.hg.1  | ENSG00000198373  | 0.2828076 | 0.4529859 | FALSE |
| TC03002146.hg.1  | ENSG00000189058  | 0.2828076 | 0.4529859 | FALSE |
| TC12002066.hg.1  | ENSG00000158104  | 0.2828076 | 0.4529859 | FALSE |
| TC12002066.hg.1  | ENSG00000158104  | 0.2828076 | 0.4529859 | FALSE |
| TC12000601.hg.1  | ENSG00000127314  | 0.2828076 | 0.4529859 | FALSE |
| TC04001084.hg.1  | ENSG00000109819  | 0.2828076 | 0.4529859 | FALSE |
| TC0X000943.hg.1  | ENSG00000198947  | 0.2828076 | 0.4529859 | FALSE |
| TC10002938.hg.1  | ENSG00000148671  | 0.2828076 | 0.4529859 | FALSE |
| TC01001607.hg.1  | ENSG00000116711; | 0.2836849 | 0.4529859 | FALSE |
| TC02002605.hg.1  | ENSG00000064989; | 0.2849347 | 0.4548119 | FALSE |
| TC03000214.hg.1  | ENSG00000168036; | 0.2859591 | 0.4551149 | FALSE |
| TC10000663.hg.1  | ENSG00000095596; | 0.2859591 | 0.4551149 | FALSE |
| TC01000728.hg.1  | ENSG00000162433; | 0.2859591 | 0.4551149 | FALSE |
| TC01002669.hg.1  | ENSG00000157193; | 0.2859591 | 0.4551149 | FALSE |
| TC03001071.hg.1  | ENSG00000114315; | 0.2859591 | 0.4551149 | FALSE |
| TC01003638.hg.1  | ENSG00000073756; | 0.2859591 | 0.4551149 | FALSE |
| TC01003638.hg.1  | ENSG00000073756; | 0.2859591 | 0.4551149 | FALSE |
| TC07000768.hg.1  | ENSG00000174697; | 0.2859591 | 0.4551149 | FALSE |
| TC01003638.hg.1  | ENSG00000073756; | 0.2859591 | 0.4551149 | FALSE |
| TC01001607.hg.1  | ENSG00000116711; | 0.2859591 | 0.4551149 | FALSE |
| TC07001374.hg.1  | ENSG00000106070; | 0.2859591 | 0.4551149 | FALSE |
| TC04001084.hg.1  | ENSG00000109819; | 0.2859591 | 0.4551149 | FALSE |
| TC02000762.hg.1  | ENSG00000163083; | 0.2865597 | 0.4551149 | FALSE |
| TC01000904.hg.1  | ENSG00000162692; | 0.2865597 | 0.4551149 | FALSE |
| TC07001883.hg.1  | ENSG00000085662; | 0.2878412 | 0.4567265 | FALSE |
| TC03001362.hg.1  | ENSG00000160808; | 0.2878412 | 0.4567265 | FALSE |
| TC02000270.hg.1  | ENSG00000152527; | 0.2878412 | 0.4567265 | FALSE |
| TC01000100.hg.1  | ENSG00000049246; | 0.2889668 | 0.458173  | FALSE |
| TC04001084.hg.1  | ENSG00000109819; | 0.290269  | 0.4598118 | FALSE |
| TC02000041.hg.1  | ENSG00000115738; | 0.290269  | 0.4598118 | FALSE |
| TC01001688.hg.1  | ENSG00000058668; | 0.290269  | 0.4598118 | FALSE |
| TC02000041.hg.1  | ENSG00000115738; | 0.290269  | 0.4598118 | FALSE |
| TC03001575.hg.1  | ENSG00000114480; | 0.2907541 | 0.4601547 | FALSE |
| TC01000115.hg.1; | ENSG00000171621; | 0.2938112 | 0.4648211 | FALSE |
| TC03001255.hg.1  | ENSG00000033867; | 0.2959081 | 0.4679655 | FALSE |
| TC01001792.hg.1  | ENSG00000082482; | 0.296348  | 0.4684881 | FALSE |
| TC01002954.hg.1  | ENSG00000134243; | 0.2976644 | 0.4703955 | FALSE |
| TC01000728.hg.1  | ENSG00000162433; | 0.2990658 | 0.4720003 | FALSE |
| TC04000408.hg.1  | ENSG00000169429; | 0.2990658 | 0.4720003 | FALSE |
| TC01000728.hg.1  | ENSG00000162433; | 0.2990658 | 0.4720003 | FALSE |
| TC01001090.hg.1  | ENSG00000117289; | 0.2990658 | 0.4720003 | FALSE |
| TC06001027.hg.1  | ENSG00000118503; | 0.2990658 | 0.4720003 | FALSE |
| TC02000270.hg.1  | ENSG00000152527; | 0.2990658 | 0.4720003 | FALSE |
| TC04000253.hg.1  | ENSG00000154277; | 0.2994838 | 0.4720509 | FALSE |
| TC01000904.hg.1  | ENSG00000162692; | 0.3010857 | 0.4733776 | FALSE |
| TC02001031.hg.1  | ENSG00000152256; | 0.3012101 | 0.4733776 | FALSE |
| TC04000313.hg.1  | ENSG00000157404; | 0.3012101 | 0.4733776 | FALSE |
| TC06000728.hg.1  | ENSG00000185760; | 0.3012101 | 0.4733776 | FALSE |
| TC01000785.hg.1  | ENSG00000154027; | 0.3012101 | 0.4733776 | FALSE |
| TC02002808.hg.1  | ENSG00000116106; | 0.3012101 | 0.4733776 | FALSE |
| TC02002823.hg.1  | ENSG00000135919; | 0.3012101 | 0.4733776 | FALSE |
| TC02002823.hg.1  | ENSG00000135919; | 0.3012101 | 0.4733776 | FALSE |

|                  |                  |           |           |       |
|------------------|------------------|-----------|-----------|-------|
| TC11002178.hg.1; | ENSG00000086991; | 0.3012101 | 0.4733776 | FALSE |
| TC07001374.hg.1; | ENSG00000106070; | 0.3012101 | 0.4733776 | FALSE |
| TC10000811.hg.1; | ENSG00000150594; | 0.3012101 | 0.4733776 | FALSE |
| TC02000286.hg.1; | ENSG00000171150; | 0.3012101 | 0.4733776 | FALSE |
| TC03001071.hg.1; | ENSG00000114315; | 0.3012101 | 0.4733776 | FALSE |
| TC01002166.hg.1; | ENSG00000116285; | 0.3012101 | 0.4733776 | FALSE |
| TC04000432.hg.1; | ENSG00000156234; | 0.3026541 | 0.4744278 | FALSE |
| TC01000685.hg.1; | ENSG00000162409; | 0.3037578 | 0.4759836 | FALSE |
| TC03000917.hg.1; | ENSG00000136603; | 0.3049975 | 0.4777513 | FALSE |
| TC01001805.hg.1; | ENSG00000092969; | 0.3087325 | 0.4822002 | FALSE |
| TC01003638.hg.1; | ENSG00000073756; | 0.3108608 | 0.4822002 | FALSE |
| TC01001736.hg.1; | ENSG00000196352; | 0.3115961 | 0.4822002 | FALSE |
| TC03000846.hg.1; | ENSG00000196549; | 0.3119239 | 0.4822002 | FALSE |
| TC01003791.hg.1; | ENSG00000143473  | 0.3120053 | 0.4822002 | FALSE |
| TC05000165.hg.1; | ENSG00000079215  | 0.3120053 | 0.4822002 | FALSE |
| TC08000646.hg.1; | ENSG00000164932  | 0.3120053 | 0.4822002 | FALSE |
| TC03000214.hg.1; | ENSG00000168036  | 0.3120053 | 0.4822002 | FALSE |
| TC06000945.hg.1; | ENSG00000152661  | 0.3120053 | 0.4822002 | FALSE |
| TC04000313.hg.1; | ENSG00000157404  | 0.3120053 | 0.4822002 | FALSE |
| TC19001103.hg.1; | ENSG00000125730  | 0.3120053 | 0.4822002 | FALSE |
| TC19001293.hg.1; | ENSG00000105664  | 0.3120053 | 0.4822002 | FALSE |
| TC01001688.hg.1; | ENSG00000058668  | 0.3120053 | 0.4822002 | FALSE |
| TC12000621.hg.1; | ENSG00000135643  | 0.3120053 | 0.4822002 | FALSE |
| TC17001462.hg.1; | ENSG00000131747  | 0.3120053 | 0.4822002 | FALSE |
| TC03001527.hg.1; | ENSG00000163638  | 0.3120053 | 0.4822002 | FALSE |
| TC12002066.hg.1; | ENSG00000158104  | 0.3120053 | 0.4822002 | FALSE |
| TC08000646.hg.1; | ENSG00000164932  | 0.3120053 | 0.4822002 | FALSE |
| TC05000165.hg.1; | ENSG00000079215  | 0.3120053 | 0.4822002 | FALSE |
| TC02000041.hg.1; | ENSG00000115738  | 0.3120053 | 0.4822002 | FALSE |
| TC03002146.hg.1; | ENSG00000189058  | 0.3120053 | 0.4822002 | FALSE |
| TC17000383.hg.1; | ENSG00000108691  | 0.3120053 | 0.4822002 | FALSE |
| TC06000087.hg.1; | ENSG00000078401  | 0.3120053 | 0.4822002 | FALSE |
| TC0X000034.hg.1; | ENSG00000146950  | 0.3120053 | 0.4822002 | FALSE |
| TC05000165.hg.1; | ENSG00000079215  | 0.3120053 | 0.4822002 | FALSE |
| TC05000840.hg.1; | ENSG00000123643  | 0.3120053 | 0.4822002 | FALSE |
| TC17000383.hg.1; | ENSG00000108691  | 0.3120053 | 0.4822002 | FALSE |
| TC18000164.hg.1; | ENSG00000141469  | 0.3120053 | 0.4822002 | FALSE |
| TC12001890.hg.1; | ENSG00000017427  | 0.3120053 | 0.4822002 | FALSE |
| TC01002284.hg.1; | ENSG00000117122  | 0.3120053 | 0.4822002 | FALSE |
| TC07000137.hg.1; | ENSG00000136244  | 0.3120053 | 0.4822002 | FALSE |
| TC06001027.hg.1; | ENSG00000118503  | 0.3120053 | 0.4822002 | FALSE |
| TC05001933.hg.1; | ENSG00000113721  | 0.3120053 | 0.4822002 | FALSE |
| TC05001933.hg.1; | ENSG00000113721  | 0.3120053 | 0.4822002 | FALSE |
| TC01002284.hg.1; | ENSG00000117122  | 0.3120053 | 0.4822002 | FALSE |
| TC05002075.hg.1; | ENSG00000113739  | 0.3120053 | 0.4822002 | FALSE |
| TC05000159.hg.1; | ENSG00000168685  | 0.3120053 | 0.4822002 | FALSE |
| TC04000313.hg.1; | ENSG00000157404  | 0.3120053 | 0.4822002 | FALSE |
| TC01003638.hg.1; | ENSG00000073756  | 0.3120053 | 0.4822002 | FALSE |
| TC08001659.hg.1; | ENSG00000104419  | 0.3120053 | 0.4822002 | FALSE |
| TC10001571.hg.1; | ENSG00000120057  | 0.3120053 | 0.4822002 | FALSE |
| TC22001467.hg.1; | ENSG00000128394  | 0.3120053 | 0.4822002 | FALSE |
| TC0X000034.hg.1; | ENSG00000146950  | 0.3120053 | 0.4822002 | FALSE |
| TC08000203.hg.1; | ENSG00000092964  | 0.3120053 | 0.4822002 | FALSE |
| TC22001467.hg.1; | ENSG00000128394  | 0.3120053 | 0.4822002 | FALSE |
| TC07001332.hg.1; | ENSG00000164708  | 0.3120053 | 0.4822002 | FALSE |
| TC17000533.hg.1; | ENSG00000108797  | 0.3120053 | 0.4822002 | FALSE |
| TC10000811.hg.1; | ENSG00000150594  | 0.3120053 | 0.4822002 | FALSE |
| TC10001711.hg.1; | ENSG00000066468  | 0.3120053 | 0.4822002 | FALSE |

|                 |                  |           |           |       |
|-----------------|------------------|-----------|-----------|-------|
| TC03000214.hg.1 | ENSG00000168036  | 0.3120053 | 0.4822002 | FALSE |
| TC07001374.hg.1 | ENSG00000106070  | 0.3120053 | 0.4822002 | FALSE |
| TC05000159.hg.1 | ENSG00000168685  | 0.3120053 | 0.4822002 | FALSE |
| TC20000621.hg.1 | ENSG00000101384  | 0.3120053 | 0.4822002 | FALSE |
| TC02002624.hg.1 | ENSG00000115415  | 0.3120053 | 0.4822002 | FALSE |
| TC07001552.hg.1 | ENSG00000187391  | 0.3120053 | 0.4822002 | FALSE |
| TC17000383.hg.1 | ENSG00000108691  | 0.3120053 | 0.4822002 | FALSE |
| TC01003129.hg.1 | ENSG00000143140  | 0.3120053 | 0.4822002 | FALSE |
| TC01003638.hg.1 | ENSG00000073756  | 0.3120053 | 0.4822002 | FALSE |
| TC08001659.hg.1 | ENSG00000104419  | 0.3120053 | 0.4822002 | FALSE |
| TC04000313.hg.1 | ENSG00000157404  | 0.3120053 | 0.4822002 | FALSE |
| TC10001711.hg.1 | ENSG00000066468  | 0.3120053 | 0.4822002 | FALSE |
| TC01001607.hg.1 | ENSG00000116711  | 0.3120053 | 0.4822002 | FALSE |
| TC02001750.hg.1 | ENSG00000138061  | 0.3120053 | 0.4822002 | FALSE |
| TC07000768.hg.1 | ENSG00000174697  | 0.3120053 | 0.4822002 | FALSE |
| TC10000811.hg.1 | ENSG00000150594  | 0.3120053 | 0.4822002 | FALSE |
| TC14001122.hg.1 | ENSG00000151748  | 0.3120053 | 0.4822002 | FALSE |
| TC06001027.hg.1 | ENSG00000118503  | 0.3120053 | 0.4822002 | FALSE |
| TC02000286.hg.1 | ENSG00000171150  | 0.3120053 | 0.4822002 | FALSE |
| TC12001916.hg.1 | ENSG00000074590  | 0.3120053 | 0.4822002 | FALSE |
| TC02001100.hg.1 | ENSG00000138448; | 0.3164041 | 0.482381  | FALSE |
| TC03001466.hg.1 | ENSG00000163931; | 0.3164041 | 0.482381  | FALSE |
| TC10001711.hg.1 | ENSG00000066468; | 0.3164041 | 0.482381  | FALSE |
| TC02002808.hg.1 | ENSG00000116106; | 0.3164041 | 0.482381  | FALSE |
| TC09000015.hg.1 | ENSG00000147852; | 0.3164041 | 0.482381  | FALSE |
| TC01002669.hg.1 | ENSG00000157193; | 0.3164041 | 0.482381  | FALSE |
| TC02000270.hg.1 | ENSG00000152527; | 0.3164041 | 0.482381  | FALSE |
| TC02002624.hg.1 | ENSG00000115415; | 0.3164041 | 0.482381  | FALSE |
| TC16000668.hg.1 | ENSG00000103241; | 0.3164041 | 0.482381  | FALSE |
| TC01003718.hg.1 | ENSG00000133048; | 0.3164041 | 0.482381  | FALSE |
| TC04001084.hg.1 | ENSG00000109819; | 0.3164041 | 0.482381  | FALSE |
| TC02002605.hg.1 | ENSG00000064989; | 0.3180088 | 0.4837078 | FALSE |
| TC02002605.hg.1 | ENSG00000064989; | 0.3180088 | 0.4837078 | FALSE |
| TC01001090.hg.1 | ENSG00000117289; | 0.3193616 | 0.4855067 | FALSE |
| TC02001628.hg.1 | ENSG00000084674; | 0.3199759 | 0.4861816 | FALSE |
| TC05000243.hg.1 | ENSG00000095015; | 0.3199759 | 0.4861816 | FALSE |
| TC03000214.hg.1 | ENSG00000168036; | 0.3215725 | 0.4882609 | FALSE |
| TC04000408.hg.1 | ENSG00000169429; | 0.3215725 | 0.4882609 | FALSE |
| TC02000416.hg.1 | ENSG00000116005; | 0.3273067 | 0.4966153 | FALSE |
| TC04001084.hg.1 | ENSG00000109819; | 0.3273067 | 0.4966153 | FALSE |
| TC0X000034.hg.1 | ENSG00000146950; | 0.328052  | 0.4974816 | FALSE |
| TC01001607.hg.1 | ENSG00000116711; | 0.3286263 | 0.4981761 | FALSE |
| TC01000904.hg.1 | ENSG00000162692; | 0.3295551 | 0.4994073 | FALSE |
| TC03000917.hg.1 | ENSG00000136603; | 0.3305888 | 0.5007017 | FALSE |
| TC03000214.hg.1 | ENSG00000168036; | 0.3315204 | 0.5007017 | FALSE |
| TC03000214.hg.1 | ENSG00000168036; | 0.3315204 | 0.5007017 | FALSE |
| TC06000779.hg.1 | ENSG00000135318; | 0.3315204 | 0.5007017 | FALSE |
| TC01000873.hg.1 | ENSG00000143036; | 0.3315204 | 0.5007017 | FALSE |
| TC01000685.hg.1 | ENSG00000162409; | 0.3315204 | 0.5007017 | FALSE |
| TC02001031.hg.1 | ENSG00000152256; | 0.3315204 | 0.5007017 | FALSE |
| TC05001385.hg.1 | ENSG00000145632; | 0.3315204 | 0.5007017 | FALSE |
| TC01000904.hg.1 | ENSG00000162692; | 0.3315204 | 0.5007017 | FALSE |
| TC01003638.hg.1 | ENSG00000073756; | 0.3315204 | 0.5007017 | FALSE |
| TC02000286.hg.1 | ENSG00000171150; | 0.3315204 | 0.5007017 | FALSE |
| TC03000013.hg.1 | ENSG00000150995; | 0.3315204 | 0.5007017 | FALSE |
| TC03000013.hg.1 | ENSG00000150995; | 0.3315204 | 0.5007017 | FALSE |
| TC04002931.hg.1 | ENSG00000134853; | 0.3315204 | 0.5007017 | FALSE |
| TC06000945.hg.1 | ENSG00000152661; | 0.3315204 | 0.5007017 | FALSE |



|                 |                  |           |           |       |
|-----------------|------------------|-----------|-----------|-------|
| TC07000328.hg.1 | ENSG00000146648; | 0.3315204 | 0.5007017 | FALSE |
| TC07000328.hg.1 | ENSG00000146648; | 0.3315204 | 0.5007017 | FALSE |
| TC04000253.hg.1 | ENSG00000154277; | 0.3328341 | 0.5009185 | FALSE |
| TC03002146.hg.1 | ENSG00000189058; | 0.3328341 | 0.5009185 | FALSE |
| TC03000214.hg.1 | ENSG00000168036; | 0.3328341 | 0.5009185 | FALSE |
| TC06001027.hg.1 | ENSG00000118503; | 0.3328341 | 0.5009185 | FALSE |
| TC01000785.hg.1 | ENSG00000154027; | 0.3366205 | 0.5054196 | FALSE |
| TC01000785.hg.1 | ENSG00000154027; | 0.3366205 | 0.5054196 | FALSE |
| TC02000041.hg.1 | ENSG00000115738; | 0.3366205 | 0.5054196 | FALSE |
| TC18000097.hg.1 | ENSG00000101773  | 0.340016  | 0.5054196 | FALSE |
| TC07000137.hg.1 | ENSG00000136244  | 0.340016  | 0.5054196 | FALSE |
| TC16000668.hg.1 | ENSG00000103241  | 0.340016  | 0.5054196 | FALSE |
| TC17000241.hg.1 | ENSG00000142494  | 0.340016  | 0.5054196 | FALSE |
| TC10000053.hg.1 | ENSG00000170525  | 0.340016  | 0.5054196 | FALSE |
| TC09000347.hg.1 | ENSG00000099139  | 0.340016  | 0.5054196 | FALSE |
| TC01002195.hg.1 | ENSG00000116649  | 0.340016  | 0.5054196 | FALSE |
| TC03000214.hg.1 | ENSG00000168036  | 0.340016  | 0.5054196 | FALSE |
| TC02001031.hg.1 | ENSG00000152256  | 0.340016  | 0.5054196 | FALSE |
| TC01000785.hg.1 | ENSG00000154027  | 0.340016  | 0.5054196 | FALSE |
| TC01000785.hg.1 | ENSG00000154027  | 0.340016  | 0.5054196 | FALSE |
| TC01000785.hg.1 | ENSG00000154027  | 0.340016  | 0.5054196 | FALSE |
| TC01001805.hg.1 | ENSG00000092969  | 0.340016  | 0.5054196 | FALSE |
| TC0X000943.hg.1 | ENSG00000198947  | 0.340016  | 0.5054196 | FALSE |
| TC01001805.hg.1 | ENSG00000092969  | 0.340016  | 0.5054196 | FALSE |
| TC03000013.hg.1 | ENSG00000150995  | 0.340016  | 0.5054196 | FALSE |
| TC08000127.hg.1 | ENSG00000003989  | 0.340016  | 0.5054196 | FALSE |
| TC09000347.hg.1 | ENSG00000099139  | 0.340016  | 0.5054196 | FALSE |
| TC03001255.hg.1 | ENSG00000033867  | 0.340016  | 0.5054196 | FALSE |
| TC03000214.hg.1 | ENSG00000168036  | 0.340016  | 0.5054196 | FALSE |
| TC01002669.hg.1 | ENSG00000157193  | 0.340016  | 0.5054196 | FALSE |
| TC12001890.hg.1 | ENSG00000017427  | 0.340016  | 0.5054196 | FALSE |
| TC05001519.hg.1 | ENSG00000113273  | 0.340016  | 0.5054196 | FALSE |
| TC07000768.hg.1 | ENSG00000174697  | 0.340016  | 0.5054196 | FALSE |
| TC07000768.hg.1 | ENSG00000174697  | 0.340016  | 0.5054196 | FALSE |
| TC06001027.hg.1 | ENSG00000118503  | 0.340016  | 0.5054196 | FALSE |
| TC05000701.hg.1 | ENSG00000120738  | 0.340016  | 0.5054196 | FALSE |
| TC04002931.hg.1 | ENSG00000134853  | 0.340016  | 0.5054196 | FALSE |
| TC10000811.hg.1 | ENSG00000150594  | 0.340016  | 0.5054196 | FALSE |
| TC02001628.hg.1 | ENSG00000084674  | 0.340016  | 0.5054196 | FALSE |
| TC03002146.hg.1 | ENSG00000189058  | 0.340016  | 0.5054196 | FALSE |
| TC09001585.hg.1 | ENSG00000173611  | 0.340016  | 0.5054196 | FALSE |
| TC10001571.hg.1 | ENSG00000120057  | 0.340016  | 0.5054196 | FALSE |
| TC05003423.hg.1 | ENSG00000082196  | 0.340016  | 0.5054196 | FALSE |
| TC10000811.hg.1 | ENSG00000150594  | 0.340016  | 0.5054196 | FALSE |
| TC03001071.hg.1 | ENSG00000114315  | 0.340016  | 0.5054196 | FALSE |
| TC02000286.hg.1 | ENSG00000171150  | 0.340016  | 0.5054196 | FALSE |
| TC07001534.hg.1 | ENSG00000127946  | 0.340016  | 0.5054196 | FALSE |
| TC08000482.hg.1 | ENSG00000121039  | 0.340016  | 0.5054196 | FALSE |
| TC01003778.hg.1 | ENSG00000076356  | 0.340016  | 0.5054196 | FALSE |
| TC17000383.hg.1 | ENSG00000108691  | 0.340016  | 0.5054196 | FALSE |
| TC07000643.hg.1 | ENSG00000106366  | 0.340016  | 0.5054196 | FALSE |
| TC07001293.hg.1 | ENSG00000106483  | 0.340016  | 0.5054196 | FALSE |
| TC03001255.hg.1 | ENSG00000033867  | 0.340016  | 0.5054196 | FALSE |
| TC05001385.hg.1 | ENSG00000145632  | 0.340016  | 0.5054196 | FALSE |
| TC11000182.hg.1 | ENSG00000148926  | 0.340016  | 0.5054196 | FALSE |
| TC03000262.hg.1 | ENSG00000160801  | 0.340016  | 0.5054196 | FALSE |
| TC03000214.hg.1 | ENSG00000168036  | 0.340016  | 0.5054196 | FALSE |
| TC01001805.hg.1 | ENSG00000092969  | 0.340016  | 0.5054196 | FALSE |

|                  |                  |           |           |       |
|------------------|------------------|-----------|-----------|-------|
| TC10001711.hg.1  | ENSG00000066468  | 0.340016  | 0.5054196 | FALSE |
| TC10001711.hg.1  | ENSG00000066468  | 0.340016  | 0.5054196 | FALSE |
| TC03000214.hg.1  | ENSG00000168036  | 0.340016  | 0.5054196 | FALSE |
| TC03000214.hg.1  | ENSG00000168036  | 0.340016  | 0.5054196 | FALSE |
| TC03001071.hg.1  | ENSG00000114315  | 0.340016  | 0.5054196 | FALSE |
| TC07001293.hg.1  | ENSG00000106483  | 0.340016  | 0.5054196 | FALSE |
| TC05000701.hg.1  | ENSG00000120738  | 0.340016  | 0.5054196 | FALSE |
| TC03000846.hg.1  | ENSG00000196549  | 0.340016  | 0.5054196 | FALSE |
| TC08000508.hg.1  | ENSG00000104435  | 0.340016  | 0.5054196 | FALSE |
| TC01000685.hg.1  | ENSG00000162409  | 0.340016  | 0.5054196 | FALSE |
| TC13000147.hg.1  | ENSG00000102760  | 0.340016  | 0.5054196 | FALSE |
| TC17000383.hg.1  | ENSG00000108691  | 0.340016  | 0.5054196 | FALSE |
| TC07000137.hg.1  | ENSG00000136244; | 0.3440882 | 0.506026  | FALSE |
| TC02000041.hg.1  | ENSG00000115738; | 0.3442609 | 0.5061061 | FALSE |
| TC08000646.hg.1  | ENSG00000164932; | 0.3459444 | 0.5078875 | FALSE |
| TC03001884.hg.1  | ENSG00000047457; | 0.3459444 | 0.5078875 | FALSE |
| TC01003629.hg.1  | ENSG00000116679; | 0.3465404 | 0.5078875 | FALSE |
| TC02001628.hg.1  | ENSG00000084674; | 0.3465404 | 0.5078875 | FALSE |
| TC07001374.hg.1  | ENSG00000106070; | 0.3465404 | 0.5078875 | FALSE |
| TC02000041.hg.1  | ENSG00000115738; | 0.3465404 | 0.5078875 | FALSE |
| TC02000041.hg.1  | ENSG00000115738; | 0.3465404 | 0.5078875 | FALSE |
| TC06001027.hg.1  | ENSG00000118503; | 0.3465404 | 0.5078875 | FALSE |
| TC03000013.hg.1  | ENSG00000150995; | 0.3465404 | 0.5078875 | FALSE |
| TC01003638.hg.1  | ENSG00000073756; | 0.3465404 | 0.5078875 | FALSE |
| TC10001711.hg.1; | ENSG00000066468; | 0.3465404 | 0.5078875 | FALSE |
| TC06004150.hg.1  | ENSG00000096060; | 0.3465404 | 0.5078875 | FALSE |
| TC03001362.hg.1  | ENSG00000160808; | 0.3465404 | 0.5078875 | FALSE |
| TC05001933.hg.1  | ENSG00000113721; | 0.3465404 | 0.5078875 | FALSE |
| TC02000286.hg.1  | ENSG00000171150; | 0.3465404 | 0.5078875 | FALSE |
| TC01003791.hg.1  | ENSG00000143473; | 0.348361  | 0.5093352 | FALSE |
| TC01000972.hg.1  | ENSG00000064886; | 0.3496982 | 0.5111158 | FALSE |
| TC01001792.hg.1  | ENSG00000082482; | 0.3514038 | 0.5133457 | FALSE |
| TC01001792.hg.1  | ENSG00000082482; | 0.3514038 | 0.5133457 | FALSE |
| TC01003791.hg.1  | ENSG00000143473; | 0.3552728 | 0.5181028 | FALSE |
| TC06004141.hg.1  | ENSG00000112096; | 0.3552728 | 0.5181028 | FALSE |
| TC03001071.hg.1  | ENSG00000114315; | 0.3553258 | 0.5181028 | FALSE |
| TC05001519.hg.1  | ENSG00000113273; | 0.3553258 | 0.5181028 | FALSE |
| TC06000595.hg.1  | ENSG00000112655; | 0.3553258 | 0.5181028 | FALSE |
| TC04000253.hg.1  | ENSG00000154277; | 0.3553258 | 0.5181028 | FALSE |
| TC03000917.hg.1  | ENSG00000136603; | 0.3553258 | 0.5181028 | FALSE |
| TC01000904.hg.1  | ENSG00000162692; | 0.3563706 | 0.5190958 | FALSE |
| TC01000100.hg.1  | ENSG00000049246; | 0.3571532 | 0.5200588 | FALSE |
| TC01002706.hg.1  | ENSG00000184292; | 0.3576652 | 0.5206273 | FALSE |
| TC01001473.hg.1  | ENSG00000143153; | 0.3595512 | 0.5219753 | FALSE |
| TC06000087.hg.1  | ENSG00000078401; | 0.3605202 | 0.5219753 | FALSE |
| TC06000087.hg.1  | ENSG00000078401; | 0.3605202 | 0.5219753 | FALSE |
| TC06000087.hg.1  | ENSG00000078401; | 0.3614467 | 0.5219753 | FALSE |
| TC02002624.hg.1  | ENSG00000115415; | 0.3614467 | 0.5219753 | FALSE |
| TC0Y000351.hg.1  | ENSG00000129824; | 0.3614467 | 0.5219753 | FALSE |
| TC04000313.hg.1  | ENSG00000157404; | 0.3614467 | 0.5219753 | FALSE |
| TC05001110.hg.1; | ENSG00000153395; | 0.3614467 | 0.5219753 | FALSE |
| TC03001362.hg.1  | ENSG00000160808; | 0.3614467 | 0.5219753 | FALSE |
| TC11000707.hg.1; | ENSG00000162337; | 0.3614467 | 0.5219753 | FALSE |
| TC01001624.hg.1  | ENSG00000116741; | 0.3621145 | 0.5219753 | FALSE |
| TC01002166.hg.1  | ENSG00000116285; | 0.3626312 | 0.5219753 | FALSE |
| TC01003605.hg.1  | ENSG00000135821; | 0.3646004 | 0.5219753 | FALSE |
| TC02000082.hg.1  | ENSG00000071575; | 0.3665379 | 0.5219753 | FALSE |
| TC02000416.hg.1  | ENSG00000116005  | 0.3668879 | 0.5219753 | FALSE |

|                 |                  |           |           |       |
|-----------------|------------------|-----------|-----------|-------|
| TC20000945.hg.1 | ENSG00000101115  | 0.3668879 | 0.5219753 | FALSE |
| TC18000548.hg.1 | ENSG00000183287  | 0.3668879 | 0.5219753 | FALSE |
| TC11000182.hg.1 | ENSG00000148926  | 0.3668879 | 0.5219753 | FALSE |
| TC08000127.hg.1 | ENSG00000003989  | 0.3668879 | 0.5219753 | FALSE |
| TC02001031.hg.1 | ENSG00000152256  | 0.3668879 | 0.5219753 | FALSE |
| TC14001364.hg.1 | ENSG00000211448  | 0.3668879 | 0.5219753 | FALSE |
| TC01002954.hg.1 | ENSG00000134243  | 0.3668879 | 0.5219753 | FALSE |
| TC07000852.hg.1 | ENSG00000181072  | 0.3668879 | 0.5219753 | FALSE |
| TC02002714.hg.1 | ENSG00000163251  | 0.3668879 | 0.5219753 | FALSE |
| TC02002714.hg.1 | ENSG00000163251  | 0.3668879 | 0.5219753 | FALSE |
| TC01001473.hg.1 | ENSG00000143153  | 0.3668879 | 0.5219753 | FALSE |
| TC02002714.hg.1 | ENSG00000163251  | 0.3668879 | 0.5219753 | FALSE |
| TC03000846.hg.1 | ENSG00000196549  | 0.3668879 | 0.5219753 | FALSE |
| TC0X000943.hg.1 | ENSG00000198947  | 0.3668879 | 0.5219753 | FALSE |
| TC08000149.hg.1 | ENSG00000175445  | 0.3668879 | 0.5219753 | FALSE |
| TC09000388.hg.1 | ENSG00000148053  | 0.3668879 | 0.5219753 | FALSE |
| TC05001172.hg.1 | ENSG00000154122  | 0.3668879 | 0.5219753 | FALSE |
| TC03001590.hg.1 | ENSG00000184500  | 0.3668879 | 0.5219753 | FALSE |
| TC03001590.hg.1 | ENSG00000184500  | 0.3668879 | 0.5219753 | FALSE |
| TC12003293.hg.1 | ENSG00000180818  | 0.3668879 | 0.5219753 | FALSE |
| TC15000971.hg.1 | ENSG00000184254  | 0.3668879 | 0.5219753 | FALSE |
| TC10001711.hg.1 | ENSG00000066468  | 0.3668879 | 0.5219753 | FALSE |
| TC11002140.hg.1 | ENSG00000149256  | 0.3668879 | 0.5219753 | FALSE |
| TC11001415.hg.1 | ENSG00000133800  | 0.3668879 | 0.5219753 | FALSE |
| TC08001175.hg.1 | ENSG00000104368  | 0.3668879 | 0.5219753 | FALSE |
| TC11002140.hg.1 | ENSG00000149256  | 0.3668879 | 0.5219753 | FALSE |
| TC12001324.hg.1 | ENSG00000123095  | 0.3668879 | 0.5219753 | FALSE |
| TC02000041.hg.1 | ENSG00000115738  | 0.3668879 | 0.5219753 | FALSE |
| TC09000222.hg.1 | ENSG00000137124  | 0.3668879 | 0.5219753 | FALSE |
| TC12002155.hg.1 | ENSG00000176915  | 0.3668879 | 0.5219753 | FALSE |
| TC01002616.hg.1 | ENSG00000117461  | 0.3668879 | 0.5219753 | FALSE |
| TC18000548.hg.1 | ENSG00000183287  | 0.3668879 | 0.5219753 | FALSE |
| TC09001335.hg.1 | ENSG00000127083  | 0.3668879 | 0.5219753 | FALSE |
| TC07000137.hg.1 | ENSG00000136244  | 0.3668879 | 0.5219753 | FALSE |
| TC02001628.hg.1 | ENSG00000084674  | 0.3668879 | 0.5219753 | FALSE |
| TC05000165.hg.1 | ENSG00000079215  | 0.3668879 | 0.5219753 | FALSE |
| TC12001890.hg.1 | ENSG00000017427  | 0.3668879 | 0.5219753 | FALSE |
| TC10000406.hg.1 | ENSG00000138336  | 0.3668879 | 0.5219753 | FALSE |
| TC10000350.hg.1 | ENSG00000107984  | 0.3668879 | 0.5219753 | FALSE |
| TC04001084.hg.1 | ENSG00000109819  | 0.3668879 | 0.5219753 | FALSE |
| TC09000388.hg.1 | ENSG00000148053  | 0.3668879 | 0.5219753 | FALSE |
| TC09000388.hg.1 | ENSG00000148053  | 0.3668879 | 0.5219753 | FALSE |
| TC17001462.hg.1 | ENSG00000131747  | 0.3668879 | 0.5219753 | FALSE |
| TC15000226.hg.1 | ENSG00000166923  | 0.3668879 | 0.5219753 | FALSE |
| TC03001071.hg.1 | ENSG00000114315  | 0.3668879 | 0.5219753 | FALSE |
| TC21000345.hg.1 | ENSG00000154734  | 0.3668879 | 0.5219753 | FALSE |
| TC01003129.hg.1 | ENSG00000143140  | 0.3668879 | 0.5219753 | FALSE |
| TC08001567.hg.1 | ENSG00000170961  | 0.3668879 | 0.5219753 | FALSE |
| TC01003638.hg.1 | ENSG00000073756  | 0.3668879 | 0.5219753 | FALSE |
| TC14001188.hg.1 | ENSG00000126778  | 0.3668879 | 0.5219753 | FALSE |
| TC01001624.hg.1 | ENSG00000116741  | 0.3668879 | 0.5219753 | FALSE |
| TC04000313.hg.1 | ENSG00000157404  | 0.3668879 | 0.5219753 | FALSE |
| TC10000350.hg.1 | ENSG00000107984  | 0.3668879 | 0.5219753 | FALSE |
| TC08001659.hg.1 | ENSG00000104419  | 0.3668879 | 0.5219753 | FALSE |
| TC01001624.hg.1 | ENSG00000116741; | 0.3671263 | 0.5219753 | FALSE |
| TC01002166.hg.1 | ENSG00000116285; | 0.3695662 | 0.5252699 | FALSE |
| TC01001624.hg.1 | ENSG00000116741; | 0.3718705 | 0.5283697 | FALSE |
| TC03000986.hg.1 | ENSG00000163872; | 0.3739218 | 0.5311079 | FALSE |

|                 |                  |           |           |       |
|-----------------|------------------|-----------|-----------|-------|
| TC01001624.hg.1 | ENSG00000116741; | 0.3741503 | 0.5312562 | FALSE |
| TC01002166.hg.1 | ENSG00000116285; | 0.3761929 | 0.5334927 | FALSE |
| TC03001362.hg.1 | ENSG00000160808; | 0.3762239 | 0.5334927 | FALSE |
| TC06000087.hg.1 | ENSG00000078401; | 0.3762239 | 0.5334927 | FALSE |
| TC02002714.hg.1 | ENSG00000163251; | 0.3762239 | 0.5334927 | FALSE |
| TC03000214.hg.1 | ENSG00000168036; | 0.3762239 | 0.5334927 | FALSE |
| TC0Y000351.hg.1 | ENSG00000129824; | 0.3762239 | 0.5334927 | FALSE |
| TC06004055.hg.1 | ENSG00000047936; | 0.3777162 | 0.5349001 | FALSE |
| TC03001466.hg.1 | ENSG00000163931; | 0.3777162 | 0.5349001 | FALSE |
| TC06001772.hg.1 | ENSG00000146233; | 0.3777162 | 0.5349001 | FALSE |
| TC01000115.hg.1 | ENSG00000171621; | 0.3824195 | 0.5412026 | FALSE |
| TC01002706.hg.1 | ENSG00000184292; | 0.3839145 | 0.543049  | FALSE |
| TC01001188.hg.1 | ENSG00000143369; | 0.3839145 | 0.543049  | FALSE |
| TC01001624.hg.1 | ENSG00000116741; | 0.3841881 | 0.5431669 | FALSE |
| TC02000041.hg.1 | ENSG00000115738; | 0.3848911 | 0.5439812 | FALSE |
| TC04002931.hg.1 | ENSG00000134853; | 0.3888527 | 0.5461141 | FALSE |
| TC06001027.hg.1 | ENSG00000118503; | 0.3888527 | 0.5461141 | FALSE |
| TC01001624.hg.1 | ENSG00000116741; | 0.3890693 | 0.5461141 | FALSE |
| TC01000972.hg.1 | ENSG00000064886; | 0.3903905 | 0.5461141 | FALSE |
| TC0X000034.hg.1 | ENSG00000146950; | 0.3908576 | 0.5461141 | FALSE |
| TC01000728.hg.1 | ENSG00000162433; | 0.3908576 | 0.5461141 | FALSE |
| TC03000214.hg.1 | ENSG00000168036; | 0.3908576 | 0.5461141 | FALSE |
| TC02000041.hg.1 | ENSG00000115738; | 0.3925258 | 0.5461141 | FALSE |
| TC03000131.hg.1 | ENSG00000077092; | 0.3925258 | 0.5461141 | FALSE |
| TC05000159.hg.1 | ENSG00000168685  | 0.3926673 | 0.5461141 | FALSE |
| TC09000560.hg.1 | ENSG00000148154  | 0.3926673 | 0.5461141 | FALSE |
| TC06000945.hg.1 | ENSG00000152661  | 0.3926673 | 0.5461141 | FALSE |
| TC0X001186.hg.1 | ENSG00000072133  | 0.3926673 | 0.5461141 | FALSE |
| TC03000214.hg.1 | ENSG00000168036  | 0.3926673 | 0.5461141 | FALSE |
| TC15000386.hg.1 | ENSG00000140285  | 0.3926673 | 0.5461141 | FALSE |
| TC0X000943.hg.1 | ENSG00000198947  | 0.3926673 | 0.5461141 | FALSE |
| TC03000262.hg.1 | ENSG00000160801  | 0.3926673 | 0.5461141 | FALSE |
| TC10000811.hg.1 | ENSG00000150594  | 0.3926673 | 0.5461141 | FALSE |
| TC05000165.hg.1 | ENSG00000079215  | 0.3926673 | 0.5461141 | FALSE |
| TC17001902.hg.1 | ENSG00000161544  | 0.3926673 | 0.5461141 | FALSE |
| TC01000685.hg.1 | ENSG00000162409  | 0.3926673 | 0.5461141 | FALSE |
| TC06000945.hg.1 | ENSG00000152661  | 0.3926673 | 0.5461141 | FALSE |
| TC01000685.hg.1 | ENSG00000162409  | 0.3926673 | 0.5461141 | FALSE |
| TC02001750.hg.1 | ENSG00000138061  | 0.3926673 | 0.5461141 | FALSE |
| TC01003638.hg.1 | ENSG00000073756  | 0.3926673 | 0.5461141 | FALSE |
| TC14000306.hg.1 | ENSG00000125384  | 0.3926673 | 0.5461141 | FALSE |
| TC12002155.hg.1 | ENSG00000176915  | 0.3926673 | 0.5461141 | FALSE |
| TC06000087.hg.1 | ENSG00000078401  | 0.3926673 | 0.5461141 | FALSE |
| TC10001571.hg.1 | ENSG00000120057  | 0.3926673 | 0.5461141 | FALSE |
| TC02000416.hg.1 | ENSG00000116005  | 0.3926673 | 0.5461141 | FALSE |
| TC04000313.hg.1 | ENSG00000157404  | 0.3926673 | 0.5461141 | FALSE |
| TC10000350.hg.1 | ENSG00000107984  | 0.3926673 | 0.5461141 | FALSE |
| TC03000214.hg.1 | ENSG00000168036  | 0.3926673 | 0.5461141 | FALSE |
| TC05000165.hg.1 | ENSG00000079215  | 0.3926673 | 0.5461141 | FALSE |
| TC12001405.hg.1 | ENSG00000139174  | 0.3926673 | 0.5461141 | FALSE |
| TC12001890.hg.1 | ENSG00000017427  | 0.3926673 | 0.5461141 | FALSE |
| TC10000811.hg.1 | ENSG00000150594  | 0.3926673 | 0.5461141 | FALSE |
| TC14000067.hg.1 | ENSG00000181784  | 0.3926673 | 0.5461141 | FALSE |
| TC11000238.hg.1 | ENSG00000173432  | 0.3926673 | 0.5461141 | FALSE |
| TC03000846.hg.1 | ENSG00000196549  | 0.3926673 | 0.5461141 | FALSE |
| TC08001022.hg.1 | ENSG00000147408  | 0.3926673 | 0.5461141 | FALSE |
| TC08001022.hg.1 | ENSG00000147408  | 0.3926673 | 0.5461141 | FALSE |
| TC04000408.hg.1 | ENSG00000169429  | 0.3926673 | 0.5461141 | FALSE |

|                  |                  |           |           |       |
|------------------|------------------|-----------|-----------|-------|
| TC22000259.hg.1  | ENSG00000100292  | 0.3926673 | 0.5461141 | FALSE |
| TC11000198.hg.1  | ENSG00000133816  | 0.3926673 | 0.5461141 | FALSE |
| TC15000622.hg.1  | ENSG00000166949  | 0.3926673 | 0.5461141 | FALSE |
| TC17000158.hg.1  | ENSG00000141052  | 0.3926673 | 0.5461141 | FALSE |
| TC08000646.hg.1  | ENSG00000164932  | 0.3926673 | 0.5461141 | FALSE |
| TC12001890.hg.1  | ENSG00000017427  | 0.3926673 | 0.5461141 | FALSE |
| TC03000214.hg.1  | ENSG00000168036  | 0.3926673 | 0.5461141 | FALSE |
| TC07001552.hg.1  | ENSG00000187391  | 0.3926673 | 0.5461141 | FALSE |
| TC05000159.hg.1  | ENSG00000168685  | 0.3926673 | 0.5461141 | FALSE |
| TC08001062.hg.1  | ENSG00000159167  | 0.3926673 | 0.5461141 | FALSE |
| TC07001552.hg.1  | ENSG00000187391  | 0.3926673 | 0.5461141 | FALSE |
| TC14001188.hg.1  | ENSG00000126778  | 0.3926673 | 0.5461141 | FALSE |
| TC03000214.hg.1  | ENSG00000168036  | 0.3926673 | 0.5461141 | FALSE |
| TC01003129.hg.1  | ENSG00000143140  | 0.3926673 | 0.5461141 | FALSE |
| TC10000811.hg.1  | ENSG00000150594  | 0.3926673 | 0.5461141 | FALSE |
| TC22000620.hg.1  | ENSG00000169184  | 0.3926673 | 0.5461141 | FALSE |
| TC01000904.hg.1  | ENSG00000162692; | 0.3940543 | 0.5461141 | FALSE |
| TC01000685.hg.1  | ENSG00000162409; | 0.3981497 | 0.5516113 | FALSE |
| TC02002808.hg.1  | ENSG00000116106; | 0.3995224 | 0.5533341 | FALSE |
| TC02002605.hg.1  | ENSG00000064989; | 0.3999396 | 0.5534642 | FALSE |
| TC04000408.hg.1  | ENSG00000169429; | 0.3999396 | 0.5534642 | FALSE |
| TC05001110.hg.1; | ENSG00000153395; | 0.3999396 | 0.5534642 | FALSE |
| TC03000214.hg.1  | ENSG00000168036; | 0.3999396 | 0.5534642 | FALSE |
| TC05003423.hg.1  | ENSG00000082196; | 0.4017986 | 0.5555877 | FALSE |
| TC01003638.hg.1  | ENSG00000073756; | 0.4040217 | 0.558323  | FALSE |
| TC01000873.hg.1  | ENSG00000143036; | 0.4040375 | 0.558323  | FALSE |
| TC01000685.hg.1  | ENSG00000162409; | 0.4053352 | 0.5596646 | FALSE |
| TC03002146.hg.1  | ENSG00000189058; | 0.4053352 | 0.5596646 | FALSE |
| TC03000917.hg.1  | ENSG00000136603; | 0.4053352 | 0.5596646 | FALSE |
| TC07000768.hg.1  | ENSG00000174697; | 0.4053352 | 0.5596646 | FALSE |
| TC01001607.hg.1  | ENSG00000116711; | 0.4097176 | 0.5644098 | FALSE |
| TC01003605.hg.1  | ENSG00000135821; | 0.4109699 | 0.5644098 | FALSE |
| TC04001084.hg.1  | ENSG00000109819; | 0.4109699 | 0.5644098 | FALSE |
| TC01001792.hg.1  | ENSG00000082482; | 0.4109699 | 0.5644098 | FALSE |
| TC01001792.hg.1  | ENSG00000082482; | 0.4109699 | 0.5644098 | FALSE |
| TC02001031.hg.1  | ENSG00000152256; | 0.4110456 | 0.5644098 | FALSE |
| TC04001084.hg.1  | ENSG00000109819; | 0.4110456 | 0.5644098 | FALSE |
| TC01000728.hg.1  | ENSG00000162433; | 0.4135085 | 0.5644098 | FALSE |
| TC04002931.hg.1  | ENSG00000134853; | 0.4141344 | 0.5644098 | FALSE |
| TC10001769.hg.1  | ENSG00000176171  | 0.4173985 | 0.5644098 | FALSE |
| TC02001031.hg.1  | ENSG00000152256  | 0.4173985 | 0.5644098 | FALSE |
| TC08001567.hg.1  | ENSG00000170961  | 0.4173985 | 0.5644098 | FALSE |
| TC01003129.hg.1  | ENSG00000143140  | 0.4173985 | 0.5644098 | FALSE |
| TC02001031.hg.1  | ENSG00000152256  | 0.4173985 | 0.5644098 | FALSE |
| TC03000013.hg.1  | ENSG00000150995  | 0.4173985 | 0.5644098 | FALSE |
| TC14001124.hg.1  | ENSG00000100504  | 0.4173985 | 0.5644098 | FALSE |
| TC16001281.hg.1  | ENSG00000183196  | 0.4173985 | 0.5644098 | FALSE |
| TC11002175.hg.1  | ENSG00000109861  | 0.4173985 | 0.5644098 | FALSE |
| TC03000631.hg.1  | ENSG00000114023  | 0.4173985 | 0.5644098 | FALSE |
| TC02002823.hg.1  | ENSG00000135919  | 0.4173985 | 0.5644098 | FALSE |
| TC12000076.hg.1  | ENSG00000010278  | 0.4173985 | 0.5644098 | FALSE |
| TC02002808.hg.1  | ENSG00000116106  | 0.4173985 | 0.5644098 | FALSE |
| TC06000945.hg.1  | ENSG00000152661  | 0.4173985 | 0.5644098 | FALSE |
| TC10001711.hg.1  | ENSG00000066468  | 0.4173985 | 0.5644098 | FALSE |
| TC19001103.hg.1  | ENSG00000125730  | 0.4173985 | 0.5644098 | FALSE |
| TC14000951.hg.1  | ENSG00000092068  | 0.4173985 | 0.5644098 | FALSE |
| TC18000552.hg.1  | ENSG00000197563  | 0.4173985 | 0.5644098 | FALSE |
| TC0Y000351.hg.1  | ENSG00000129824  | 0.4173985 | 0.5644098 | FALSE |

|                 |                  |           |           |       |
|-----------------|------------------|-----------|-----------|-------|
| TC03001071.hg.1 | ENSG00000114315  | 0.4173985 | 0.5644098 | FALSE |
| TC04002931.hg.1 | ENSG00000134853  | 0.4173985 | 0.5644098 | FALSE |
| TC0X002327.hg.1 | ENSG00000087842  | 0.4173985 | 0.5644098 | FALSE |
| TC01003638.hg.1 | ENSG00000073756  | 0.4173985 | 0.5644098 | FALSE |
| TC01003638.hg.1 | ENSG00000073756  | 0.4173985 | 0.5644098 | FALSE |
| TC06001027.hg.1 | ENSG00000118503  | 0.4173985 | 0.5644098 | FALSE |
| TC10000811.hg.1 | ENSG00000150594  | 0.4173985 | 0.5644098 | FALSE |
| TC0X000034.hg.1 | ENSG00000146950  | 0.4173985 | 0.5644098 | FALSE |
| TC03000013.hg.1 | ENSG00000150995  | 0.4173985 | 0.5644098 | FALSE |
| TC02002624.hg.1 | ENSG00000115415  | 0.4173985 | 0.5644098 | FALSE |
| TC01001607.hg.1 | ENSG00000116711  | 0.4173985 | 0.5644098 | FALSE |
| TC0X001186.hg.1 | ENSG00000072133  | 0.4173985 | 0.5644098 | FALSE |
| TC20000833.hg.1 | ENSG00000198959  | 0.4173985 | 0.5644098 | FALSE |
| TC0X000034.hg.1 | ENSG00000146950  | 0.4173985 | 0.5644098 | FALSE |
| TC02000041.hg.1 | ENSG00000115738  | 0.4173985 | 0.5644098 | FALSE |
| TC01003638.hg.1 | ENSG00000073756  | 0.4173985 | 0.5644098 | FALSE |
| TC01001736.hg.1 | ENSG00000196352  | 0.4173985 | 0.5644098 | FALSE |
| TC01000728.hg.1 | ENSG00000162433  | 0.4173985 | 0.5644098 | FALSE |
| TC01003638.hg.1 | ENSG00000073756  | 0.4173985 | 0.5644098 | FALSE |
| TC03000631.hg.1 | ENSG00000114023  | 0.4173985 | 0.5644098 | FALSE |
| TC06002036.hg.1 | ENSG00000249853  | 0.4173985 | 0.5644098 | FALSE |
| TC10001711.hg.1 | ENSG00000066468  | 0.4173985 | 0.5644098 | FALSE |
| TC03000917.hg.1 | ENSG00000136603  | 0.4173985 | 0.5644098 | FALSE |
| TC04002931.hg.1 | ENSG00000134853  | 0.4173985 | 0.5644098 | FALSE |
| TC02000041.hg.1 | ENSG00000115738  | 0.4173985 | 0.5644098 | FALSE |
| TC08001062.hg.1 | ENSG00000159167  | 0.4173985 | 0.5644098 | FALSE |
| TC07001552.hg.1 | ENSG00000187391  | 0.4173985 | 0.5644098 | FALSE |
| TC03001071.hg.1 | ENSG00000114315  | 0.4173985 | 0.5644098 | FALSE |
| TC03001071.hg.1 | ENSG00000114315  | 0.4173985 | 0.5644098 | FALSE |
| TC07001552.hg.1 | ENSG00000187391  | 0.4173985 | 0.5644098 | FALSE |
| TC02001031.hg.1 | ENSG00000152256  | 0.4173985 | 0.5644098 | FALSE |
| TC19000191.hg.1 | ENSG00000130164  | 0.4173985 | 0.5644098 | FALSE |
| TC14001443.hg.1 | ENSG00000140092  | 0.4173985 | 0.5644098 | FALSE |
| TC10000438.hg.1 | ENSG00000107731  | 0.4173985 | 0.5644098 | FALSE |
| TC10000438.hg.1 | ENSG00000107731  | 0.4173985 | 0.5644098 | FALSE |
| TC03000986.hg.1 | ENSG00000163872; | 0.4174075 | 0.5644098 | FALSE |
| TC06000779.hg.1 | ENSG00000135318; | 0.4196451 | 0.5668089 | FALSE |
| TC16000193.hg.1 | ENSG00000103222; | 0.4196451 | 0.5668089 | FALSE |
| TC03001071.hg.1 | ENSG00000114315; | 0.4196451 | 0.5668089 | FALSE |
| TC01003638.hg.1 | ENSG00000073756; | 0.4196451 | 0.5668089 | FALSE |
| TC17000220.hg.1 | ENSG00000108448; | 0.4196451 | 0.5668089 | FALSE |
| TC10000438.hg.1 | ENSG00000107731; | 0.4196451 | 0.5668089 | FALSE |
| TC06000945.hg.1 | ENSG00000152661; | 0.4202625 | 0.5670166 | FALSE |
| TC01001736.hg.1 | ENSG00000196352; | 0.4219365 | 0.5690062 | FALSE |
| TC01003638.hg.1 | ENSG00000073756; | 0.4219365 | 0.5690062 | FALSE |
| TC02000041.hg.1 | ENSG00000115738; | 0.4247745 | 0.5725629 | FALSE |
| TC01001473.hg.1 | ENSG00000143153; | 0.429034  | 0.5781222 | FALSE |
| TC03000214.hg.1 | ENSG00000168036; | 0.4294448 | 0.5784937 | FALSE |
| TC01001736.hg.1 | ENSG00000196352; | 0.4307872 | 0.5801195 | FALSE |
| TC01001736.hg.1 | ENSG00000196352; | 0.4323436 | 0.5820323 | FALSE |
| TC02002808.hg.1 | ENSG00000116106; | 0.4328331 | 0.5823251 | FALSE |
| TC06000779.hg.1 | ENSG00000135318; | 0.4328331 | 0.5823251 | FALSE |
| TC02002605.hg.1 | ENSG00000064989; | 0.4328331 | 0.5823251 | FALSE |
| TC01002954.hg.1 | ENSG00000134243; | 0.433777  | 0.5826795 | FALSE |
| TC01002669.hg.1 | ENSG00000157193; | 0.433777  | 0.5826795 | FALSE |
| TC01000394.hg.1 | ENSG00000159023; | 0.433777  | 0.5826795 | FALSE |
| TC08001275.hg.1 | ENSG00000172817; | 0.433777  | 0.5826795 | FALSE |
| TC03000013.hg.1 | ENSG00000150995; | 0.433777  | 0.5826795 | FALSE |

|                 |                  |           |           |       |
|-----------------|------------------|-----------|-----------|-------|
| TC03000214.hg.1 | ENSG00000168036; | 0.433777  | 0.5826795 | FALSE |
| TC07000328.hg.1 | ENSG00000146648; | 0.433777  | 0.5826795 | FALSE |
| TC01001090.hg.1 | ENSG00000117289; | 0.4359742 | 0.5848968 | FALSE |
| TC01001736.hg.1 | ENSG00000196352; | 0.4374583 | 0.5867039 | FALSE |
| TC07000137.hg.1 | ENSG00000136244  | 0.441124  | 0.5878305 | FALSE |
| TC09000222.hg.1 | ENSG00000137124  | 0.441124  | 0.5878305 | FALSE |
| TC18000565.hg.1 | ENSG00000166479  | 0.441124  | 0.5878305 | FALSE |
| TC03003381.hg.1 | ENSG00000225697  | 0.441124  | 0.5878305 | FALSE |
| TC09000358.hg.1 | ENSG00000135069  | 0.441124  | 0.5878305 | FALSE |
| TC14001124.hg.1 | ENSG00000100504  | 0.441124  | 0.5878305 | FALSE |
| TC01001805.hg.1 | ENSG00000092969  | 0.441124  | 0.5878305 | FALSE |
| TC01003718.hg.1 | ENSG00000133048  | 0.441124  | 0.5878305 | FALSE |
| TC07000643.hg.1 | ENSG00000106366  | 0.441124  | 0.5878305 | FALSE |
| TC05000840.hg.1 | ENSG00000123643  | 0.441124  | 0.5878305 | FALSE |
| TC01000685.hg.1 | ENSG00000162409  | 0.441124  | 0.5878305 | FALSE |
| TC01000685.hg.1 | ENSG00000162409  | 0.441124  | 0.5878305 | FALSE |
| TC15000971.hg.1 | ENSG00000184254  | 0.441124  | 0.5878305 | FALSE |
| TC01000394.hg.1 | ENSG00000159023  | 0.441124  | 0.5878305 | FALSE |
| TC08000508.hg.1 | ENSG00000104435  | 0.441124  | 0.5878305 | FALSE |
| TC01003638.hg.1 | ENSG00000073756  | 0.441124  | 0.5878305 | FALSE |
| TC07000768.hg.1 | ENSG00000174697  | 0.441124  | 0.5878305 | FALSE |
| TC0X000034.hg.1 | ENSG00000146950  | 0.441124  | 0.5878305 | FALSE |
| TC03001362.hg.1 | ENSG00000160808  | 0.441124  | 0.5878305 | FALSE |
| TC08001175.hg.1 | ENSG00000104368  | 0.441124  | 0.5878305 | FALSE |
| TC12002155.hg.1 | ENSG00000176915  | 0.441124  | 0.5878305 | FALSE |
| TC09000347.hg.1 | ENSG00000099139  | 0.441124  | 0.5878305 | FALSE |
| TC0X000207.hg.1 | ENSG00000189221  | 0.441124  | 0.5878305 | FALSE |
| TC14001364.hg.1 | ENSG00000211448  | 0.441124  | 0.5878305 | FALSE |
| TC14001124.hg.1 | ENSG00000100504  | 0.441124  | 0.5878305 | FALSE |
| TC06001027.hg.1 | ENSG00000118503  | 0.441124  | 0.5878305 | FALSE |
| TC0X000034.hg.1 | ENSG00000146950  | 0.441124  | 0.5878305 | FALSE |
| TC01001805.hg.1 | ENSG00000092969  | 0.441124  | 0.5878305 | FALSE |
| TC07000768.hg.1 | ENSG00000174697  | 0.441124  | 0.5878305 | FALSE |
| TC01001805.hg.1 | ENSG00000092969  | 0.441124  | 0.5878305 | FALSE |
| TC06002168.hg.1 | ENSG00000164442  | 0.441124  | 0.5878305 | FALSE |
| TC0Y000185.hg.1 | ENSG00000012817  | 0.441124  | 0.5878305 | FALSE |
| TC10001663.hg.1 | ENSG00000119927  | 0.441124  | 0.5878305 | FALSE |
| TC03001071.hg.1 | ENSG00000114315  | 0.441124  | 0.5878305 | FALSE |
| TC07000643.hg.1 | ENSG00000106366  | 0.441124  | 0.5878305 | FALSE |
| TC02001628.hg.1 | ENSG00000084674  | 0.441124  | 0.5878305 | FALSE |
| TC02000041.hg.1 | ENSG00000115738  | 0.441124  | 0.5878305 | FALSE |
| TC07000449.hg.1 | ENSG00000049540  | 0.441124  | 0.5878305 | FALSE |
| TC02000270.hg.1 | ENSG00000152527; | 0.4436535 | 0.5878305 | FALSE |
| TC01001907.hg.1 | ENSG00000143641; | 0.4477217 | 0.5923958 | FALSE |
| TC05000054.hg.1 | ENSG00000078295; | 0.4477217 | 0.5923958 | FALSE |
| TC03000214.hg.1 | ENSG00000168036; | 0.4477217 | 0.5923958 | FALSE |
| TC20000876.hg.1 | ENSG00000124107; | 0.4477217 | 0.5923958 | FALSE |
| TC04000313.hg.1 | ENSG00000157404; | 0.4477217 | 0.5923958 | FALSE |
| TC05000165.hg.1 | ENSG00000079215; | 0.4477217 | 0.5923958 | FALSE |
| TC03000013.hg.1 | ENSG00000150995; | 0.4477217 | 0.5923958 | FALSE |
| TC01003638.hg.1 | ENSG00000073756; | 0.4477217 | 0.5923958 | FALSE |
| TC01000785.hg.1 | ENSG00000154027; | 0.4495834 | 0.5940328 | FALSE |
| TC04000253.hg.1 | ENSG00000154277; | 0.4543918 | 0.6001084 | FALSE |
| TC02000041.hg.1 | ENSG00000115738; | 0.4543918 | 0.6001084 | FALSE |
| TC01000783.hg.1 | ENSG00000117069; | 0.45557   | 0.6012935 | FALSE |
| TC01000783.hg.1 | ENSG00000117069; | 0.45557   | 0.6012935 | FALSE |
| TC01000904.hg.1 | ENSG00000162692; | 0.4570526 | 0.6029714 | FALSE |
| TC01000728.hg.1 | ENSG00000162433; | 0.4572812 | 0.6030506 | FALSE |

|                 |                  |           |           |       |
|-----------------|------------------|-----------|-----------|-------|
| TC01001688.hg.1 | ENSG0000058668;  | 0.4573944 | 0.6030506 | FALSE |
| TC01003605.hg.1 | ENSG00000135821; | 0.4575592 | 0.6030822 | FALSE |
| TC04000699.hg.1 | ENSG00000109458; | 0.4614709 | 0.6042028 | FALSE |
| TC04001084.hg.1 | ENSG00000109819; | 0.4614709 | 0.6042028 | FALSE |
| TC01001624.hg.1 | ENSG00000116741; | 0.4614709 | 0.6042028 | FALSE |
| TC03000214.hg.1 | ENSG00000168036  | 0.4638847 | 0.6042028 | FALSE |
| TC20000945.hg.1 | ENSG00000101115  | 0.4638847 | 0.6042028 | FALSE |
| TC06004141.hg.1 | ENSG00000112096  | 0.4638847 | 0.6042028 | FALSE |
| TC11000182.hg.1 | ENSG00000148926  | 0.4638847 | 0.6042028 | FALSE |
| TC03000214.hg.1 | ENSG00000168036  | 0.4638847 | 0.6042028 | FALSE |
| TC22001467.hg.1 | ENSG00000128394  | 0.4638847 | 0.6042028 | FALSE |
| TC05000159.hg.1 | ENSG00000168685  | 0.4638847 | 0.6042028 | FALSE |
| TC03001884.hg.1 | ENSG00000047457  | 0.4638847 | 0.6042028 | FALSE |
| TC08000508.hg.1 | ENSG00000104435  | 0.4638847 | 0.6042028 | FALSE |
| TC02001031.hg.1 | ENSG00000152256  | 0.4638847 | 0.6042028 | FALSE |
| TC0X000034.hg.1 | ENSG00000146950  | 0.4638847 | 0.6042028 | FALSE |
| TC01001805.hg.1 | ENSG00000092969  | 0.4638847 | 0.6042028 | FALSE |
| TC05000165.hg.1 | ENSG00000079215  | 0.4638847 | 0.6042028 | FALSE |
| TC01000785.hg.1 | ENSG00000154027  | 0.4638847 | 0.6042028 | FALSE |
| TC03001466.hg.1 | ENSG00000163931  | 0.4638847 | 0.6042028 | FALSE |
| TC11000182.hg.1 | ENSG00000148926  | 0.4638847 | 0.6042028 | FALSE |
| TC07000004.hg.1 | ENSG00000177706  | 0.4638847 | 0.6042028 | FALSE |
| TC03002146.hg.1 | ENSG00000189058  | 0.4638847 | 0.6042028 | FALSE |
| TC08000508.hg.1 | ENSG00000104435  | 0.4638847 | 0.6042028 | FALSE |
| TC08001275.hg.1 | ENSG00000172817  | 0.4638847 | 0.6042028 | FALSE |
| TC06000087.hg.1 | ENSG00000078401  | 0.4638847 | 0.6042028 | FALSE |
| TC04001084.hg.1 | ENSG00000109819  | 0.4638847 | 0.6042028 | FALSE |
| TC04000408.hg.1 | ENSG00000169429  | 0.4638847 | 0.6042028 | FALSE |
| TC01001805.hg.1 | ENSG00000092969  | 0.4638847 | 0.6042028 | FALSE |
| TC10001517.hg.1 | ENSG00000148677  | 0.4638847 | 0.6042028 | FALSE |
| TC02000041.hg.1 | ENSG00000115738  | 0.4638847 | 0.6042028 | FALSE |
| TC14000353.hg.1 | ENSG00000165617  | 0.4638847 | 0.6042028 | FALSE |
| TC01000728.hg.1 | ENSG00000162433  | 0.4638847 | 0.6042028 | FALSE |
| TC02001031.hg.1 | ENSG00000152256  | 0.4638847 | 0.6042028 | FALSE |
| TC14001443.hg.1 | ENSG00000140092  | 0.4638847 | 0.6042028 | FALSE |
| TC15000622.hg.1 | ENSG00000166949  | 0.4638847 | 0.6042028 | FALSE |
| TC03000131.hg.1 | ENSG00000077092  | 0.4638847 | 0.6042028 | FALSE |
| TC0X000943.hg.1 | ENSG00000198947  | 0.4638847 | 0.6042028 | FALSE |
| TC0X000034.hg.1 | ENSG00000146950  | 0.4638847 | 0.6042028 | FALSE |
| TC06000087.hg.1 | ENSG00000078401  | 0.4638847 | 0.6042028 | FALSE |
| TC06000087.hg.1 | ENSG00000078401  | 0.4638847 | 0.6042028 | FALSE |
| TC06000945.hg.1 | ENSG00000152661  | 0.4638847 | 0.6042028 | FALSE |
| TC12001890.hg.1 | ENSG00000017427  | 0.4638847 | 0.6042028 | FALSE |
| TC03001071.hg.1 | ENSG00000114315  | 0.4638847 | 0.6042028 | FALSE |
| TC04001084.hg.1 | ENSG00000109819  | 0.4638847 | 0.6042028 | FALSE |
| TC03000214.hg.1 | ENSG00000168036  | 0.4638847 | 0.6042028 | FALSE |
| TC04002931.hg.1 | ENSG00000134853  | 0.4638847 | 0.6042028 | FALSE |
| TC04001084.hg.1 | ENSG00000109819  | 0.4638847 | 0.6042028 | FALSE |
| TC02002605.hg.1 | ENSG00000064989; | 0.4650428 | 0.6042028 | FALSE |
| TC06000595.hg.1 | ENSG00000112655; | 0.465747  | 0.6047506 | FALSE |
| TC01000785.hg.1 | ENSG00000154027; | 0.465747  | 0.6047506 | FALSE |
| TC01000394.hg.1 | ENSG00000159023; | 0.465747  | 0.6047506 | FALSE |
| TC01000904.hg.1 | ENSG00000162692; | 0.473611  | 0.6145888 | FALSE |
| TC01001090.hg.1 | ENSG00000117289; | 0.4746969 | 0.6150159 | FALSE |
| TC01003638.hg.1 | ENSG00000073756; | 0.4746969 | 0.6150159 | FALSE |
| TC03003381.hg.1 | ENSG00000225697; | 0.4746969 | 0.6150159 | FALSE |
| TC01001090.hg.1 | ENSG00000117289; | 0.4746969 | 0.6150159 | FALSE |
| TC03000631.hg.1 | ENSG00000114023; | 0.4746969 | 0.6150159 | FALSE |



|                  |                  |           |           |       |
|------------------|------------------|-----------|-----------|-------|
| TC02001206.hg.1  | ENSG00000118257; | 0.4750176 | 0.6150159 | FALSE |
| TC0X000034.hg.1  | ENSG00000146950; | 0.4750176 | 0.6150159 | FALSE |
| TC0X000034.hg.1  | ENSG00000146950; | 0.4750176 | 0.6150159 | FALSE |
| TC06001027.hg.1  | ENSG00000118503; | 0.4750176 | 0.6150159 | FALSE |
| TC02002823.hg.1  | ENSG00000135919; | 0.4756013 | 0.6152135 | FALSE |
| TC02000041.hg.1  | ENSG00000115738; | 0.4756013 | 0.6152135 | FALSE |
| TC01000783.hg.1  | ENSG00000117069; | 0.4774247 | 0.6172924 | FALSE |
| TC01001473.hg.1  | ENSG00000143153; | 0.4809076 | 0.6214226 | FALSE |
| TC04001084.hg.1  | ENSG00000109819; | 0.4812798 | 0.6214226 | FALSE |
| TC05001385.hg.1  | ENSG00000145632; | 0.4835895 | 0.6214226 | FALSE |
| TC14001124.hg.1  | ENSG00000100504  | 0.4857198 | 0.6214226 | FALSE |
| TC06004141.hg.1  | ENSG00000112096  | 0.4857198 | 0.6214226 | FALSE |
| TC05001617.hg.1  | ENSG00000164307  | 0.4857198 | 0.6214226 | FALSE |
| TC0Y000351.hg.1  | ENSG00000129824  | 0.4857198 | 0.6214226 | FALSE |
| TC02002823.hg.1  | ENSG00000135919  | 0.4857198 | 0.6214226 | FALSE |
| TC01000783.hg.1  | ENSG00000117069  | 0.4857198 | 0.6214226 | FALSE |
| TC07001562.hg.1  | ENSG00000019991  | 0.4857198 | 0.6214226 | FALSE |
| TC17001902.hg.1  | ENSG00000161544  | 0.4857198 | 0.6214226 | FALSE |
| TC0Y000185.hg.1  | ENSG00000012817  | 0.4857198 | 0.6214226 | FALSE |
| TC05001617.hg.1  | ENSG00000164307  | 0.4857198 | 0.6214226 | FALSE |
| TC11000182.hg.1  | ENSG00000148926  | 0.4857198 | 0.6214226 | FALSE |
| TC01000394.hg.1  | ENSG00000159023  | 0.4857198 | 0.6214226 | FALSE |
| TC07000768.hg.1  | ENSG00000174697  | 0.4857198 | 0.6214226 | FALSE |
| TC05000054.hg.1  | ENSG00000078295  | 0.4857198 | 0.6214226 | FALSE |
| TC17001830.hg.1  | ENSG00000154265  | 0.4857198 | 0.6214226 | FALSE |
| TC02001031.hg.1  | ENSG00000152256  | 0.4857198 | 0.6214226 | FALSE |
| TC03000214.hg.1  | ENSG00000168036  | 0.4857198 | 0.6214226 | FALSE |
| TC15000971.hg.1  | ENSG00000184254  | 0.4857198 | 0.6214226 | FALSE |
| TC07000768.hg.1  | ENSG00000174697  | 0.4857198 | 0.6214226 | FALSE |
| TC12000076.hg.1  | ENSG00000010278  | 0.4857198 | 0.6214226 | FALSE |
| TC01003638.hg.1  | ENSG00000073756  | 0.4857198 | 0.6214226 | FALSE |
| TC05000914.hg.1  | ENSG00000145934  | 0.4857198 | 0.6214226 | FALSE |
| TC06004141.hg.1  | ENSG00000112096  | 0.4857198 | 0.6214226 | FALSE |
| TC20000162.hg.1  | ENSG00000101463  | 0.4857198 | 0.6214226 | FALSE |
| TC20000162.hg.1  | ENSG00000101463  | 0.4857198 | 0.6214226 | FALSE |
| TC0X000943.hg.1  | ENSG00000198947  | 0.4857198 | 0.6214226 | FALSE |
| TC07001552.hg.1  | ENSG00000187391  | 0.4857198 | 0.6214226 | FALSE |
| TC10001663.hg.1  | ENSG00000119927  | 0.4857198 | 0.6214226 | FALSE |
| TC02001100.hg.1  | ENSG00000138448  | 0.4857198 | 0.6214226 | FALSE |
| TC16000668.hg.1  | ENSG00000103241  | 0.4857198 | 0.6214226 | FALSE |
| TC07000643.hg.1  | ENSG00000106366  | 0.4857198 | 0.6214226 | FALSE |
| TC12001916.hg.1  | ENSG00000074590  | 0.4857198 | 0.6214226 | FALSE |
| TC10000438.hg.1  | ENSG00000107731  | 0.4857198 | 0.6214226 | FALSE |
| TC01002706.hg.1  | ENSG00000184292; | 0.4860625 | 0.6214226 | FALSE |
| TC02000041.hg.1  | ENSG00000115738; | 0.4860625 | 0.6214226 | FALSE |
| TC01001805.hg.1  | ENSG00000092969; | 0.4882867 | 0.6238881 | FALSE |
| TC02000286.hg.1  | ENSG00000171150; | 0.4883553 | 0.6238881 | FALSE |
| TC01001607.hg.1  | ENSG00000116711; | 0.4913523 | 0.6275296 | FALSE |
| TC01001090.hg.1  | ENSG00000117289; | 0.4924215 | 0.6286139 | FALSE |
| TC02000041.hg.1  | ENSG00000115738; | 0.4924215 | 0.6286139 | FALSE |
| TC04000699.hg.1  | ENSG00000109458; | 0.4964221 | 0.6333431 | FALSE |
| TC02000286.hg.1  | ENSG00000171150; | 0.4964221 | 0.6333431 | FALSE |
| TC01001112.hg.1; | ENSG00000131778; | 0.5003767 | 0.6381033 | FALSE |
| TC03000986.hg.1  | ENSG00000163872; | 0.50119   | 0.6385575 | FALSE |
| TC04001084.hg.1  | ENSG00000109819; | 0.50119   | 0.6385575 | FALSE |
| TC05000243.hg.1  | ENSG00000095015; | 0.5014787 | 0.6385575 | FALSE |
| TC01002954.hg.1  | ENSG00000134243; | 0.5014787 | 0.6385575 | FALSE |
| TC05000746.hg.1  | ENSG00000113209; | 0.5014787 | 0.6385575 | FALSE |

|                 |                  |           |           |       |
|-----------------|------------------|-----------|-----------|-------|
| TC01001624.hg.1 | ENSG00000116741; | 0.5014787 | 0.6385575 | FALSE |
| TC05000243.hg.1 | ENSG00000095015; | 0.5014787 | 0.6385575 | FALSE |
| TC01001736.hg.1 | ENSG00000196352; | 0.5032505 | 0.6401472 | FALSE |
| TC01001805.hg.1 | ENSG00000092969; | 0.5032505 | 0.6401472 | FALSE |
| TC11000404.hg.1 | ENSG00000134574  | 0.5066669 | 0.6402697 | FALSE |
| TC06001027.hg.1 | ENSG00000118503  | 0.5066669 | 0.6402697 | FALSE |
| TC18000548.hg.1 | ENSG00000183287  | 0.5066669 | 0.6402697 | FALSE |
| TC05000159.hg.1 | ENSG00000168685  | 0.5066669 | 0.6402697 | FALSE |
| TC05000159.hg.1 | ENSG00000168685  | 0.5066669 | 0.6402697 | FALSE |
| TC15001136.hg.1 | ENSG00000166664  | 0.5066669 | 0.6402697 | FALSE |
| TC01002195.hg.1 | ENSG00000116649  | 0.5066669 | 0.6402697 | FALSE |
| TC16001225.hg.1 | ENSG00000181019  | 0.5066669 | 0.6402697 | FALSE |
| TC09000388.hg.1 | ENSG00000148053  | 0.5066669 | 0.6402697 | FALSE |
| TC01000728.hg.1 | ENSG00000162433  | 0.5066669 | 0.6402697 | FALSE |
| TC05001385.hg.1 | ENSG00000145632  | 0.5066669 | 0.6402697 | FALSE |
| TC06000087.hg.1 | ENSG00000078401  | 0.5066669 | 0.6402697 | FALSE |
| TC12000621.hg.1 | ENSG00000135643  | 0.5066669 | 0.6402697 | FALSE |
| TC17000241.hg.1 | ENSG00000142494  | 0.5066669 | 0.6402697 | FALSE |
| TC05000165.hg.1 | ENSG00000079215  | 0.5066669 | 0.6402697 | FALSE |
| TC07000137.hg.1 | ENSG00000136244  | 0.5066669 | 0.6402697 | FALSE |
| TC08000508.hg.1 | ENSG00000104435  | 0.5066669 | 0.6402697 | FALSE |
| TC07000768.hg.1 | ENSG00000174697  | 0.5066669 | 0.6402697 | FALSE |
| TC07000768.hg.1 | ENSG00000174697  | 0.5066669 | 0.6402697 | FALSE |
| TC01000685.hg.1 | ENSG00000162409  | 0.5066669 | 0.6402697 | FALSE |
| TC0X000034.hg.1 | ENSG00000146950  | 0.5066669 | 0.6402697 | FALSE |
| TC18000047.hg.1 | ENSG00000168461  | 0.5066669 | 0.6402697 | FALSE |
| TC12001181.hg.1 | ENSG00000197614  | 0.5066669 | 0.6402697 | FALSE |
| TC22000259.hg.1 | ENSG00000100292  | 0.5066669 | 0.6402697 | FALSE |
| TC13000147.hg.1 | ENSG00000102760  | 0.5066669 | 0.6402697 | FALSE |
| TC20000162.hg.1 | ENSG00000101463  | 0.5066669 | 0.6402697 | FALSE |
| TC11000404.hg.1 | ENSG00000134574  | 0.5066669 | 0.6402697 | FALSE |
| TC22000259.hg.1 | ENSG00000100292  | 0.5066669 | 0.6402697 | FALSE |
| TC15000622.hg.1 | ENSG00000166949  | 0.5066669 | 0.6402697 | FALSE |
| TC08001567.hg.1 | ENSG00000170961  | 0.5066669 | 0.6402697 | FALSE |
| TC07000328.hg.1 | ENSG00000146648  | 0.5066669 | 0.6402697 | FALSE |
| TC01001805.hg.1 | ENSG00000092969  | 0.5066669 | 0.6402697 | FALSE |
| TC02002624.hg.1 | ENSG00000115415  | 0.5066669 | 0.6402697 | FALSE |
| TC21000345.hg.1 | ENSG00000154734  | 0.5066669 | 0.6402697 | FALSE |
| TC06001027.hg.1 | ENSG00000118503  | 0.5066669 | 0.6402697 | FALSE |
| TC03000631.hg.1 | ENSG00000114023  | 0.5066669 | 0.6402697 | FALSE |
| TC17000383.hg.1 | ENSG00000108691  | 0.5066669 | 0.6402697 | FALSE |
| TC12001181.hg.1 | ENSG00000197614  | 0.5066669 | 0.6402697 | FALSE |
| TC04001084.hg.1 | ENSG00000109819  | 0.5066669 | 0.6402697 | FALSE |
| TC14000306.hg.1 | ENSG00000125384  | 0.5066669 | 0.6402697 | FALSE |
| TC04000432.hg.1 | ENSG00000156234  | 0.5066669 | 0.6402697 | FALSE |
| TC01001805.hg.1 | ENSG00000092969; | 0.5097031 | 0.6402697 | FALSE |
| TC03000986.hg.1 | ENSG00000163872; | 0.5098919 | 0.6403189 | FALSE |
| TC02002419.hg.1 | ENSG00000115963; | 0.5116257 | 0.6423078 | FALSE |
| TC03000917.hg.1 | ENSG00000136603; | 0.5132705 | 0.6441839 | FALSE |
| TC02000416.hg.1 | ENSG00000116005; | 0.5143831 | 0.6449185 | FALSE |
| TC01000728.hg.1 | ENSG00000162433; | 0.5143831 | 0.6449185 | FALSE |
| TC03001255.hg.1 | ENSG00000033867; | 0.5143831 | 0.6449185 | FALSE |
| TC03001255.hg.1 | ENSG00000033867; | 0.5143831 | 0.6449185 | FALSE |
| TC0X000116.hg.1 | ENSG00000005889; | 0.5143831 | 0.6449185 | FALSE |
| TC03000214.hg.1 | ENSG00000168036; | 0.5143831 | 0.6449185 | FALSE |
| TC02002605.hg.1 | ENSG00000064989; | 0.5168199 | 0.6472154 | FALSE |
| TC04001084.hg.1 | ENSG00000109819; | 0.5168199 | 0.6472154 | FALSE |
| TC01000904.hg.1 | ENSG00000162692; | 0.5185244 | 0.6490652 | FALSE |

|                 |                  |           |           |       |
|-----------------|------------------|-----------|-----------|-------|
| TC01001805.hg.1 | ENSG00000092969; | 0.5199765 | 0.6506926 | FALSE |
| TC03000846.hg.1 | ENSG00000196549; | 0.5212938 | 0.6521504 | FALSE |
| TC01000685.hg.1 | ENSG00000162409; | 0.521943  | 0.6521534 | FALSE |
| TC09000347.hg.1 | ENSG00000099139  | 0.526762  | 0.6521534 | FALSE |
| TC0Y000185.hg.1 | ENSG00000012817  | 0.526762  | 0.6521534 | FALSE |
| TC10001327.hg.1 | ENSG00000122877  | 0.526762  | 0.6521534 | FALSE |
| TC04002948.hg.1 | ENSG00000137463  | 0.526762  | 0.6521534 | FALSE |
| TC0Y000185.hg.1 | ENSG00000012817  | 0.526762  | 0.6521534 | FALSE |
| TC12002066.hg.1 | ENSG00000158104  | 0.526762  | 0.6521534 | FALSE |
| TC14000067.hg.1 | ENSG00000181784  | 0.526762  | 0.6521534 | FALSE |
| TC06000087.hg.1 | ENSG00000078401  | 0.526762  | 0.6521534 | FALSE |
| TC10001663.hg.1 | ENSG00000119927  | 0.526762  | 0.6521534 | FALSE |
| TC05001617.hg.1 | ENSG00000164307  | 0.526762  | 0.6521534 | FALSE |
| TC02002823.hg.1 | ENSG00000135919  | 0.526762  | 0.6521534 | FALSE |
| TC07000643.hg.1 | ENSG00000106366  | 0.526762  | 0.6521534 | FALSE |
| TC01000685.hg.1 | ENSG00000162409  | 0.526762  | 0.6521534 | FALSE |
| TC01002195.hg.1 | ENSG00000116649  | 0.526762  | 0.6521534 | FALSE |
| TC10000811.hg.1 | ENSG00000150594  | 0.526762  | 0.6521534 | FALSE |
| TC17000383.hg.1 | ENSG00000108691  | 0.526762  | 0.6521534 | FALSE |
| TC10001517.hg.1 | ENSG00000148677  | 0.526762  | 0.6521534 | FALSE |
| TC07001374.hg.1 | ENSG00000106070  | 0.526762  | 0.6521534 | FALSE |
| TC02000286.hg.1 | ENSG00000171150  | 0.526762  | 0.6521534 | FALSE |
| TC04000729.hg.1 | ENSG00000151617  | 0.526762  | 0.6521534 | FALSE |
| TC04000408.hg.1 | ENSG00000169429  | 0.526762  | 0.6521534 | FALSE |
| TC14001141.hg.1 | ENSG00000197930  | 0.526762  | 0.6521534 | FALSE |
| TC0X000034.hg.1 | ENSG00000146950  | 0.526762  | 0.6521534 | FALSE |
| TC05000054.hg.1 | ENSG00000078295  | 0.526762  | 0.6521534 | FALSE |
| TC17000158.hg.1 | ENSG00000141052  | 0.526762  | 0.6521534 | FALSE |
| TC02002624.hg.1 | ENSG00000115415  | 0.526762  | 0.6521534 | FALSE |
| TC14001443.hg.1 | ENSG00000140092  | 0.526762  | 0.6521534 | FALSE |
| TC02001031.hg.1 | ENSG00000152256  | 0.526762  | 0.6521534 | FALSE |
| TC07000643.hg.1 | ENSG00000106366  | 0.526762  | 0.6521534 | FALSE |
| TC10001517.hg.1 | ENSG00000148677  | 0.526762  | 0.6521534 | FALSE |
| TC0X000943.hg.1 | ENSG00000198947  | 0.526762  | 0.6521534 | FALSE |
| TC0X000943.hg.1 | ENSG00000198947  | 0.526762  | 0.6521534 | FALSE |
| TC06000087.hg.1 | ENSG00000078401; | 0.5270646 | 0.6521534 | FALSE |
| TC01000904.hg.1 | ENSG00000162692; | 0.5270646 | 0.6521534 | FALSE |
| TC03001362.hg.1 | ENSG00000160808; | 0.5270646 | 0.6521534 | FALSE |
| TC05000243.hg.1 | ENSG00000095015; | 0.5270646 | 0.6521534 | FALSE |
| TC01000785.hg.1 | ENSG00000154027; | 0.527085  | 0.6521534 | FALSE |
| TC03002008.hg.1 | ENSG00000144959; | 0.5350448 | 0.6616969 | FALSE |
| TC01000972.hg.1 | ENSG00000064886; | 0.5351795 | 0.6616969 | FALSE |
| TC03000986.hg.1 | ENSG00000163872; | 0.5355711 | 0.6616969 | FALSE |
| TC03000214.hg.1 | ENSG00000168036; | 0.5355711 | 0.6616969 | FALSE |
| TC04000469.hg.1 | ENSG00000163629; | 0.5355711 | 0.6616969 | FALSE |
| TC03001884.hg.1 | ENSG00000047457; | 0.5355711 | 0.6616969 | FALSE |
| TC01000785.hg.1 | ENSG00000154027; | 0.5355711 | 0.6616969 | FALSE |
| TC01001473.hg.1 | ENSG00000143153; | 0.537468  | 0.6634661 | FALSE |
| TC03001362.hg.1 | ENSG00000160808; | 0.5395199 | 0.6655193 | FALSE |
| TC06001029.hg.1 | ENSG00000112379; | 0.5395199 | 0.6655193 | FALSE |
| TC02000286.hg.1 | ENSG00000171150; | 0.5395199 | 0.6655193 | FALSE |
| TC10001711.hg.1 | ENSG00000066468; | 0.5395199 | 0.6655193 | FALSE |
| TC01000904.hg.1 | ENSG00000162692; | 0.5418575 | 0.6679217 | FALSE |
| TC03000986.hg.1 | ENSG00000163872; | 0.5425956 | 0.668639  | FALSE |
| TC01000685.hg.1 | ENSG00000162409; | 0.5434981 | 0.6687124 | FALSE |
| TC02002714.hg.1 | ENSG00000163251; | 0.5439803 | 0.6687124 | FALSE |
| TC06000004.hg.1 | ENSG00000112679  | 0.5460397 | 0.6687124 | FALSE |
| TC02000432.hg.1 | ENSG00000135636  | 0.5460397 | 0.6687124 | FALSE |

|                  |                  |           |           |       |
|------------------|------------------|-----------|-----------|-------|
| TC10001711.hg.1  | ENSG00000066468  | 0.5460397 | 0.6687124 | FALSE |
| TC01002195.hg.1  | ENSG00000116649  | 0.5460397 | 0.6687124 | FALSE |
| TC17000241.hg.1  | ENSG00000142494  | 0.5460397 | 0.6687124 | FALSE |
| TC0Y000351.hg.1  | ENSG00000129824  | 0.5460397 | 0.6687124 | FALSE |
| TC05000159.hg.1  | ENSG00000168685  | 0.5460397 | 0.6687124 | FALSE |
| TC04000313.hg.1  | ENSG00000157404  | 0.5460397 | 0.6687124 | FALSE |
| TC04000408.hg.1  | ENSG00000169429  | 0.5460397 | 0.6687124 | FALSE |
| TC03001362.hg.1  | ENSG00000160808  | 0.5460397 | 0.6687124 | FALSE |
| TC12001890.hg.1  | ENSG00000017427  | 0.5460397 | 0.6687124 | FALSE |
| TC02000041.hg.1  | ENSG00000115738  | 0.5460397 | 0.6687124 | FALSE |
| TC10001663.hg.1  | ENSG00000119927  | 0.5460397 | 0.6687124 | FALSE |
| TC07001374.hg.1  | ENSG00000106070  | 0.5460397 | 0.6687124 | FALSE |
| TC12003293.hg.1  | ENSG00000180818  | 0.5460397 | 0.6687124 | FALSE |
| TC04000408.hg.1  | ENSG00000169429  | 0.5460397 | 0.6687124 | FALSE |
| TC07000137.hg.1  | ENSG00000136244  | 0.5460397 | 0.6687124 | FALSE |
| TC02002624.hg.1  | ENSG00000115415  | 0.5460397 | 0.6687124 | FALSE |
| TC12001890.hg.1  | ENSG00000017427  | 0.5460397 | 0.6687124 | FALSE |
| TC01003497.hg.1  | ENSG00000117479  | 0.5460397 | 0.6687124 | FALSE |
| TC02002606.hg.1  | ENSG00000003436  | 0.5460397 | 0.6687124 | FALSE |
| TC03000631.hg.1  | ENSG00000114023  | 0.5460397 | 0.6687124 | FALSE |
| TC01001805.hg.1  | ENSG00000092969; | 0.5465603 | 0.6687124 | FALSE |
| TC06001772.hg.1  | ENSG00000146233; | 0.5517464 | 0.6745755 | FALSE |
| TC01003638.hg.1  | ENSG00000073756; | 0.5517464 | 0.6745755 | FALSE |
| TC10000811.hg.1; | ENSG00000150594; | 0.5517464 | 0.6745755 | FALSE |
| TC06001027.hg.1  | ENSG00000118503; | 0.5517464 | 0.6745755 | FALSE |
| TC01000904.hg.1  | ENSG00000162692; | 0.5527353 | 0.6752061 | FALSE |
| TC01000904.hg.1  | ENSG00000162692; | 0.5527353 | 0.6752061 | FALSE |
| TC02000286.hg.1  | ENSG00000171150; | 0.5562332 | 0.6791884 | FALSE |
| TC02002808.hg.1  | ENSG00000116106; | 0.5605595 | 0.6840189 | FALSE |
| TC03000214.hg.1  | ENSG00000168036; | 0.5605595 | 0.6840189 | FALSE |
| TC02001100.hg.1; | ENSG00000138448; | 0.5617592 | 0.6840189 | FALSE |
| TC06000945.hg.1  | ENSG00000152661; | 0.5637421 | 0.6840189 | FALSE |
| TC0Y000351.hg.1  | ENSG00000129824; | 0.5637421 | 0.6840189 | FALSE |
| TC17001462.hg.1  | ENSG00000131747; | 0.5637421 | 0.6840189 | FALSE |
| TC10001711.hg.1; | ENSG00000066468; | 0.5637421 | 0.6840189 | FALSE |
| TC04000313.hg.1  | ENSG00000157404; | 0.5637421 | 0.6840189 | FALSE |
| TC18000097.hg.1  | ENSG00000101773  | 0.5645333 | 0.6840189 | FALSE |
| TC02000286.hg.1  | ENSG00000171150  | 0.5645333 | 0.6840189 | FALSE |
| TC01003129.hg.1  | ENSG00000143140  | 0.5645333 | 0.6840189 | FALSE |
| TC18000552.hg.1  | ENSG00000197563  | 0.5645333 | 0.6840189 | FALSE |
| TC11002162.hg.1  | ENSG00000137501  | 0.5645333 | 0.6840189 | FALSE |
| TC03000214.hg.1  | ENSG00000168036  | 0.5645333 | 0.6840189 | FALSE |
| TC06002168.hg.1  | ENSG00000164442  | 0.5645333 | 0.6840189 | FALSE |
| TC07000852.hg.1  | ENSG00000181072  | 0.5645333 | 0.6840189 | FALSE |
| TC07001630.hg.1  | ENSG00000070669  | 0.5645333 | 0.6840189 | FALSE |
| TC14000819.hg.1  | ENSG00000185100  | 0.5645333 | 0.6840189 | FALSE |
| TC14000819.hg.1  | ENSG00000185100  | 0.5645333 | 0.6840189 | FALSE |
| TC01001607.hg.1  | ENSG00000116711  | 0.5645333 | 0.6840189 | FALSE |
| TC03001255.hg.1  | ENSG00000033867  | 0.5645333 | 0.6840189 | FALSE |
| TC03001590.hg.1  | ENSG00000184500  | 0.5645333 | 0.6840189 | FALSE |
| TC04000313.hg.1  | ENSG00000157404  | 0.5645333 | 0.6840189 | FALSE |
| TC08000508.hg.1  | ENSG00000104435  | 0.5645333 | 0.6840189 | FALSE |
| TC06001027.hg.1  | ENSG00000118503  | 0.5645333 | 0.6840189 | FALSE |
| TC11002170.hg.1  | ENSG00000174804  | 0.5645333 | 0.6840189 | FALSE |
| TC01001805.hg.1  | ENSG00000092969  | 0.5645333 | 0.6840189 | FALSE |
| TC04000313.hg.1  | ENSG00000157404  | 0.5645333 | 0.6840189 | FALSE |
| TC17001830.hg.1  | ENSG00000154265  | 0.5645333 | 0.6840189 | FALSE |
| TC10000874.hg.1  | ENSG00000203805  | 0.5645333 | 0.6840189 | FALSE |

|                 |                  |           |           |       |
|-----------------|------------------|-----------|-----------|-------|
| TC06002168.hg.1 | ENSG00000164442  | 0.5645333 | 0.6840189 | FALSE |
| TC07000643.hg.1 | ENSG00000106366  | 0.5645333 | 0.6840189 | FALSE |
| TC10000811.hg.1 | ENSG00000150594  | 0.5645333 | 0.6840189 | FALSE |
| TC11000707.hg.1 | ENSG00000162337  | 0.5645333 | 0.6840189 | FALSE |
| TC01001805.hg.1 | ENSG00000092969; | 0.5657816 | 0.6840189 | FALSE |
| TC02001031.hg.1 | ENSG00000152256; | 0.5687255 | 0.6873839 | FALSE |
| TC01000785.hg.1 | ENSG00000154027; | 0.56894   | 0.6874491 | FALSE |
| TC01001688.hg.1 | ENSG00000058668; | 0.5724334 | 0.691475  | FALSE |
| TC02001139.hg.1 | ENSG00000196950; | 0.5752032 | 0.6941087 | FALSE |
| TC03000013.hg.1 | ENSG00000150995; | 0.5752032 | 0.6941087 | FALSE |
| TC04000313.hg.1 | ENSG00000157404; | 0.5752032 | 0.6941087 | FALSE |
| TC03000214.hg.1 | ENSG00000168036; | 0.5755055 | 0.6941087 | FALSE |
| TC10001711.hg.1 | ENSG00000066468; | 0.5755055 | 0.6941087 | FALSE |
| TC07000137.hg.1 | ENSG00000136244; | 0.5755055 | 0.6941087 | FALSE |
| TC01002706.hg.1 | ENSG00000184292; | 0.5755055 | 0.6941087 | FALSE |
| TC01000115.hg.1 | ENSG00000171621; | 0.5785654 | 0.6973082 | FALSE |
| TC02000041.hg.1 | ENSG00000115738; | 0.5817685 | 0.6980253 | FALSE |
| TC06001027.hg.1 | ENSG00000118503  | 0.5822745 | 0.6980253 | FALSE |
| TC07000768.hg.1 | ENSG00000174697  | 0.5822745 | 0.6980253 | FALSE |
| TC18000047.hg.1 | ENSG00000168461  | 0.5822745 | 0.6980253 | FALSE |
| TC12002155.hg.1 | ENSG00000176915  | 0.5822745 | 0.6980253 | FALSE |
| TC02002808.hg.1 | ENSG00000116106  | 0.5822745 | 0.6980253 | FALSE |
| TC05000054.hg.1 | ENSG00000078295  | 0.5822745 | 0.6980253 | FALSE |
| TC01003718.hg.1 | ENSG00000133048  | 0.5822745 | 0.6980253 | FALSE |
| TC07001374.hg.1 | ENSG00000106070  | 0.5822745 | 0.6980253 | FALSE |
| TC10001711.hg.1 | ENSG00000066468  | 0.5822745 | 0.6980253 | FALSE |
| TC07000643.hg.1 | ENSG00000106366  | 0.5822745 | 0.6980253 | FALSE |
| TC07000768.hg.1 | ENSG00000174697  | 0.5822745 | 0.6980253 | FALSE |
| TC02001628.hg.1 | ENSG00000084674  | 0.5822745 | 0.6980253 | FALSE |
| TC12001837.hg.1 | ENSG00000074527  | 0.5822745 | 0.6980253 | FALSE |
| TC08000508.hg.1 | ENSG00000104435  | 0.5822745 | 0.6980253 | FALSE |
| TC02002624.hg.1 | ENSG00000115415  | 0.5822745 | 0.6980253 | FALSE |
| TC05001385.hg.1 | ENSG00000145632  | 0.5822745 | 0.6980253 | FALSE |
| TC03001362.hg.1 | ENSG00000160808  | 0.5822745 | 0.6980253 | FALSE |
| TC02000041.hg.1 | ENSG00000115738  | 0.5822745 | 0.6980253 | FALSE |
| TC07001374.hg.1 | ENSG00000106070  | 0.5822745 | 0.6980253 | FALSE |
| TC01000728.hg.1 | ENSG00000162433; | 0.5825845 | 0.6980253 | FALSE |
| TC01001090.hg.1 | ENSG00000117289; | 0.584496  | 0.7000217 | FALSE |
| TC06001772.hg.1 | ENSG00000146233; | 0.584496  | 0.7000217 | FALSE |
| TC02001628.hg.1 | ENSG00000084674; | 0.5870356 | 0.70267   | FALSE |
| TC06000945.hg.1 | ENSG00000152661; | 0.5870356 | 0.70267   | FALSE |
| TC01001688.hg.1 | ENSG00000058668; | 0.5905109 | 0.7065336 | FALSE |
| TC01000115.hg.1 | ENSG00000171621; | 0.5918158 | 0.707897  | FALSE |
| TC01001473.hg.1 | ENSG00000143153; | 0.5927074 | 0.7087654 | FALSE |
| TC01003211.hg.1 | ENSG00000143387; | 0.5929109 | 0.7088108 | FALSE |
| TC01000115.hg.1 | ENSG00000171621; | 0.5951068 | 0.7093939 | FALSE |
| TC01001112.hg.1 | ENSG00000131778; | 0.5975873 | 0.7093939 | FALSE |
| TC01001805.hg.1 | ENSG00000092969; | 0.5983319 | 0.7093939 | FALSE |
| TC02000466.hg.1 | ENSG00000159399; | 0.5983319 | 0.7093939 | FALSE |
| TC05001481.hg.1 | ENSG00000171617; | 0.5983319 | 0.7093939 | FALSE |
| TC03001466.hg.1 | ENSG00000163931; | 0.5983319 | 0.7093939 | FALSE |
| TC03000131.hg.1 | ENSG00000077092; | 0.5983319 | 0.7093939 | FALSE |
| TC03001466.hg.1 | ENSG00000163931; | 0.5983319 | 0.7093939 | FALSE |
| TC03000214.hg.1 | ENSG00000168036; | 0.5983319 | 0.7093939 | FALSE |
| TC03000214.hg.1 | ENSG00000168036; | 0.5983319 | 0.7093939 | FALSE |
| TC20000621.hg.1 | ENSG00000101384  | 0.599294  | 0.7093939 | FALSE |
| TC19001103.hg.1 | ENSG00000125730  | 0.599294  | 0.7093939 | FALSE |
| TC01003129.hg.1 | ENSG00000143140  | 0.599294  | 0.7093939 | FALSE |

|                 |                  |           |           |       |
|-----------------|------------------|-----------|-----------|-------|
| TC12000621.hg.1 | ENSG00000135643  | 0.599294  | 0.7093939 | FALSE |
| TC05001617.hg.1 | ENSG00000164307  | 0.599294  | 0.7093939 | FALSE |
| TC03000214.hg.1 | ENSG00000168036  | 0.599294  | 0.7093939 | FALSE |
| TC08001022.hg.1 | ENSG00000147408  | 0.599294  | 0.7093939 | FALSE |
| TC06004141.hg.1 | ENSG00000112096  | 0.599294  | 0.7093939 | FALSE |
| TC18000565.hg.1 | ENSG00000166479  | 0.599294  | 0.7093939 | FALSE |
| TC07000768.hg.1 | ENSG00000174697  | 0.599294  | 0.7093939 | FALSE |
| TC12003293.hg.1 | ENSG00000180818  | 0.599294  | 0.7093939 | FALSE |
| TC02000041.hg.1 | ENSG00000115738  | 0.599294  | 0.7093939 | FALSE |
| TC17001462.hg.1 | ENSG00000131747  | 0.599294  | 0.7093939 | FALSE |
| TC17001462.hg.1 | ENSG00000131747  | 0.599294  | 0.7093939 | FALSE |
| TC02001100.hg.1 | ENSG00000138448  | 0.599294  | 0.7093939 | FALSE |
| TC12000227.hg.1 | ENSG00000172572  | 0.599294  | 0.7093939 | FALSE |
| TC0X000207.hg.1 | ENSG00000189221  | 0.599294  | 0.7093939 | FALSE |
| TC05003423.hg.1 | ENSG00000082196  | 0.599294  | 0.7093939 | FALSE |
| TC08000127.hg.1 | ENSG00000003989  | 0.599294  | 0.7093939 | FALSE |
| TC14001124.hg.1 | ENSG00000100504  | 0.599294  | 0.7093939 | FALSE |
| TC06001027.hg.1 | ENSG00000118503  | 0.599294  | 0.7093939 | FALSE |
| TC17001462.hg.1 | ENSG00000131747  | 0.599294  | 0.7093939 | FALSE |
| TC02000286.hg.1 | ENSG00000171150  | 0.599294  | 0.7093939 | FALSE |
| TC07000768.hg.1 | ENSG00000174697  | 0.599294  | 0.7093939 | FALSE |
| TC11002162.hg.1 | ENSG00000137501  | 0.599294  | 0.7093939 | FALSE |
| TC01003497.hg.1 | ENSG00000117479  | 0.599294  | 0.7093939 | FALSE |
| TC05000914.hg.1 | ENSG00000145934  | 0.599294  | 0.7093939 | FALSE |
| TC02002624.hg.1 | ENSG00000115415  | 0.599294  | 0.7093939 | FALSE |
| TC02001628.hg.1 | ENSG00000084674  | 0.599294  | 0.7093939 | FALSE |
| TC09000358.hg.1 | ENSG00000135069  | 0.599294  | 0.7093939 | FALSE |
| TC02001031.hg.1 | ENSG00000152256; | 0.6002963 | 0.7093939 | FALSE |
| TC02000286.hg.1 | ENSG00000171150; | 0.6005241 | 0.7093939 | FALSE |
| TC01001688.hg.1 | ENSG00000058668; | 0.6005241 | 0.7093939 | FALSE |
| TC02000082.hg.1 | ENSG00000071575; | 0.6005241 | 0.7093939 | FALSE |
| TC02000286.hg.1 | ENSG00000171150; | 0.6026886 | 0.7115582 | FALSE |
| TC03000214.hg.1 | ENSG00000168036; | 0.6082499 | 0.7179261 | FALSE |
| TC01000728.hg.1 | ENSG00000162433; | 0.6085642 | 0.7180991 | FALSE |
| TC07000643.hg.1 | ENSG00000106366; | 0.6093943 | 0.7186823 | FALSE |
| TC02002714.hg.1 | ENSG00000163251; | 0.6093943 | 0.7186823 | FALSE |
| TC20000876.hg.1 | ENSG00000124107; | 0.6093943 | 0.7186823 | FALSE |
| TC02000041.hg.1 | ENSG00000115738; | 0.6115855 | 0.7208694 | FALSE |
| TC02001100.hg.1 | ENSG00000138448; | 0.6148757 | 0.7238324 | FALSE |
| TC05000165.hg.1 | ENSG00000079215  | 0.615621  | 0.7238324 | FALSE |
| TC01000728.hg.1 | ENSG00000162433  | 0.615621  | 0.7238324 | FALSE |
| TC01000785.hg.1 | ENSG00000154027  | 0.615621  | 0.7238324 | FALSE |
| TC02000041.hg.1 | ENSG00000115738  | 0.615621  | 0.7238324 | FALSE |
| TC06001027.hg.1 | ENSG00000118503  | 0.615621  | 0.7238324 | FALSE |
| TC11000182.hg.1 | ENSG00000148926  | 0.615621  | 0.7238324 | FALSE |
| TC02000041.hg.1 | ENSG00000115738  | 0.615621  | 0.7238324 | FALSE |
| TC07000328.hg.1 | ENSG00000146648  | 0.615621  | 0.7238324 | FALSE |
| TC01001805.hg.1 | ENSG00000092969  | 0.615621  | 0.7238324 | FALSE |
| TC10000811.hg.1 | ENSG00000150594  | 0.615621  | 0.7238324 | FALSE |
| TC07000328.hg.1 | ENSG00000146648  | 0.615621  | 0.7238324 | FALSE |
| TC07000768.hg.1 | ENSG00000174697  | 0.615621  | 0.7238324 | FALSE |
| TC03000214.hg.1 | ENSG00000168036  | 0.615621  | 0.7238324 | FALSE |
| TC05000054.hg.1 | ENSG00000078295  | 0.615621  | 0.7238324 | FALSE |
| TC02002624.hg.1 | ENSG00000115415  | 0.615621  | 0.7238324 | FALSE |
| TC01001112.hg.1 | ENSG00000131778; | 0.6201293 | 0.7274452 | FALSE |
| TC17001462.hg.1 | ENSG00000131747; | 0.6202231 | 0.7274452 | FALSE |
| TC02001100.hg.1 | ENSG00000138448; | 0.6208442 | 0.7278745 | FALSE |
| TC03000986.hg.1 | ENSG00000163872; | 0.6208442 | 0.7278745 | FALSE |

|                  |                  |           |           |       |
|------------------|------------------|-----------|-----------|-------|
| TC01001112.hg.1; | ENSG00000131778; | 0.6242305 | 0.7315442 | FALSE |
| TC01003605.hg.1; | ENSG00000135821; | 0.6256224 | 0.7329747 | FALSE |
| TC02000219.hg.1; | ENSG00000049323; | 0.6289749 | 0.7366    | FALSE |
| TC01001090.hg.1; | ENSG00000117289; | 0.6289749 | 0.7366    | FALSE |
| TC03001884.hg.1; | ENSG00000047457; | 0.630819  | 0.736885  | FALSE |
| TC07000137.hg.1; | ENSG00000136244; | 0.630819  | 0.736885  | FALSE |
| TC01000785.hg.1; | ENSG00000154027; | 0.6308704 | 0.736885  | FALSE |
| TC03002008.hg.1; | ENSG00000144959; | 0.6311382 | 0.736885  | FALSE |
| TC05000159.hg.1; | ENSG00000168685  | 0.6312838 | 0.736885  | FALSE |
| TC01001188.hg.1; | ENSG00000143369  | 0.6312838 | 0.736885  | FALSE |
| TC10000811.hg.1; | ENSG00000150594  | 0.6312838 | 0.736885  | FALSE |
| TC01000785.hg.1; | ENSG00000154027  | 0.6312838 | 0.736885  | FALSE |
| TC06000087.hg.1; | ENSG00000078401  | 0.6312838 | 0.736885  | FALSE |
| TC03000214.hg.1; | ENSG00000168036  | 0.6312838 | 0.736885  | FALSE |
| TC05000746.hg.1; | ENSG00000113209  | 0.6312838 | 0.736885  | FALSE |
| TC18000552.hg.1; | ENSG00000197563  | 0.6312838 | 0.736885  | FALSE |
| TC17000124.hg.1; | ENSG00000179593  | 0.6312838 | 0.736885  | FALSE |
| TC02002823.hg.1; | ENSG00000135919  | 0.6312838 | 0.736885  | FALSE |
| TC0X000943.hg.1; | ENSG00000198947  | 0.6312838 | 0.736885  | FALSE |
| TC02000891.hg.1; | ENSG00000150540  | 0.6312838 | 0.736885  | FALSE |
| TC01001805.hg.1; | ENSG00000092969  | 0.6312838 | 0.736885  | FALSE |
| TC12000227.hg.1; | ENSG00000172572  | 0.6312838 | 0.736885  | FALSE |
| TC04000313.hg.1; | ENSG00000157404; | 0.6374656 | 0.7425824 | FALSE |
| TC01000728.hg.1; | ENSG00000162433; | 0.6387501 | 0.7438763 | FALSE |
| TC01000685.hg.1; | ENSG00000162409; | 0.641183  | 0.7461006 | FALSE |
| TC08000508.hg.1; | ENSG00000104435; | 0.641183  | 0.7461006 | FALSE |
| TC02001628.hg.1; | ENSG00000084674; | 0.641183  | 0.7461006 | FALSE |
| TC10000406.hg.1; | ENSG00000138336; | 0.641183  | 0.7461006 | FALSE |
| TC07000137.hg.1; | ENSG00000136244; | 0.641183  | 0.7461006 | FALSE |
| TC02002808.hg.1; | ENSG00000116106; | 0.6458196 | 0.7494176 | FALSE |
| TC04000699.hg.1; | ENSG00000109458; | 0.6458196 | 0.7494176 | FALSE |
| TC03000214.hg.1; | ENSG00000168036  | 0.6463092 | 0.7494176 | FALSE |
| TC20000368.hg.1; | ENSG00000064655  | 0.6463092 | 0.7494176 | FALSE |
| TC06000087.hg.1; | ENSG00000078401  | 0.6463092 | 0.7494176 | FALSE |
| TC05000159.hg.1; | ENSG00000168685  | 0.6463092 | 0.7494176 | FALSE |
| TC04002931.hg.1; | ENSG00000134853  | 0.6463092 | 0.7494176 | FALSE |
| TC01000685.hg.1; | ENSG00000162409  | 0.6463092 | 0.7494176 | FALSE |
| TC17000241.hg.1; | ENSG00000142494  | 0.6463092 | 0.7494176 | FALSE |
| TC10000811.hg.1; | ENSG00000150594  | 0.6463092 | 0.7494176 | FALSE |
| TC06001027.hg.1; | ENSG00000118503  | 0.6463092 | 0.7494176 | FALSE |
| TC20000942.hg.1; | ENSG00000101096  | 0.6463092 | 0.7494176 | FALSE |
| TC03000013.hg.1; | ENSG00000150995  | 0.6463092 | 0.7494176 | FALSE |
| TC03000013.hg.1; | ENSG00000150995  | 0.6463092 | 0.7494176 | FALSE |
| TC03001362.hg.1; | ENSG00000160808  | 0.6463092 | 0.7494176 | FALSE |
| TC06000087.hg.1; | ENSG00000078401  | 0.6463092 | 0.7494176 | FALSE |
| TC04000313.hg.1; | ENSG00000157404  | 0.6463092 | 0.7494176 | FALSE |
| TC11002178.hg.1; | ENSG00000086991  | 0.6463092 | 0.7494176 | FALSE |
| TC04000432.hg.1; | ENSG00000156234  | 0.6463092 | 0.7494176 | FALSE |
| TC01001112.hg.1; | ENSG00000131778; | 0.6493773 | 0.7511441 | FALSE |
| TC02002823.hg.1; | ENSG00000135919; | 0.6513163 | 0.7530817 | FALSE |
| TC01000904.hg.1; | ENSG00000162692; | 0.6513163 | 0.7530817 | FALSE |
| TC01001188.hg.1; | ENSG00000143369; | 0.6540364 | 0.7557165 | FALSE |
| TC01003638.hg.1; | ENSG00000073756; | 0.6540364 | 0.7557165 | FALSE |
| TC04000699.hg.1; | ENSG00000109458; | 0.6540364 | 0.7557165 | FALSE |
| TC06001027.hg.1; | ENSG00000118503  | 0.6607232 | 0.7606302 | FALSE |
| TC19001103.hg.1; | ENSG00000125730  | 0.6607232 | 0.7606302 | FALSE |
| TC03001362.hg.1; | ENSG00000160808  | 0.6607232 | 0.7606302 | FALSE |
| TC01002954.hg.1; | ENSG00000134243  | 0.6607232 | 0.7606302 | FALSE |

|                 |                  |           |           |       |
|-----------------|------------------|-----------|-----------|-------|
| TC01000785.hg.1 | ENSG00000154027  | 0.6607232 | 0.7606302 | FALSE |
| TC03001071.hg.1 | ENSG00000114315  | 0.6607232 | 0.7606302 | FALSE |
| TC03001071.hg.1 | ENSG00000114315  | 0.6607232 | 0.7606302 | FALSE |
| TC04000432.hg.1 | ENSG00000156234  | 0.6607232 | 0.7606302 | FALSE |
| TC10001663.hg.1 | ENSG00000119927  | 0.6607232 | 0.7606302 | FALSE |
| TC09000388.hg.1 | ENSG00000148053  | 0.6607232 | 0.7606302 | FALSE |
| TC10000811.hg.1 | ENSG00000150594  | 0.6607232 | 0.7606302 | FALSE |
| TC01001188.hg.1 | ENSG00000143369  | 0.6607232 | 0.7606302 | FALSE |
| TC16000571.hg.1 | ENSG00000198373  | 0.6607232 | 0.7606302 | FALSE |
| TC0X000943.hg.1 | ENSG00000198947  | 0.6607232 | 0.7606302 | FALSE |
| TC04001084.hg.1 | ENSG00000109819; | 0.6612206 | 0.7606302 | FALSE |
| TC02000041.hg.1 | ENSG00000115738; | 0.6612206 | 0.7606302 | FALSE |
| TC06001027.hg.1 | ENSG00000118503; | 0.6621157 | 0.761353  | FALSE |
| TC01000685.hg.1 | ENSG00000162409; | 0.6625448 | 0.7616418 | FALSE |
| TC01001112.hg.1 | ENSG00000131778; | 0.6640183 | 0.7629988 | FALSE |
| TC03000917.hg.1 | ENSG00000136603; | 0.6640816 | 0.7629988 | FALSE |
| TC01002578.hg.1 | ENSG00000117394; | 0.6654265 | 0.7643389 | FALSE |
| TC01003211.hg.1 | ENSG00000143387; | 0.6700574 | 0.7693484 | FALSE |
| TC04001084.hg.1 | ENSG00000109819; | 0.6700574 | 0.7693484 | FALSE |
| TC11000404.hg.1 | ENSG00000134574; | 0.6708977 | 0.7697971 | FALSE |
| TC0Y000351.hg.1 | ENSG00000129824; | 0.6708977 | 0.7697971 | FALSE |
| TC15001110.hg.1 | ENSG00000104067; | 0.6708977 | 0.7697971 | FALSE |
| TC19001103.hg.1 | ENSG00000125730  | 0.6745506 | 0.7726425 | FALSE |
| TC19001103.hg.1 | ENSG00000125730  | 0.6745506 | 0.7726425 | FALSE |
| TC17001462.hg.1 | ENSG00000131747  | 0.6745506 | 0.7726425 | FALSE |
| TC0Y000351.hg.1 | ENSG00000129824  | 0.6745506 | 0.7726425 | FALSE |
| TC12002066.hg.1 | ENSG00000158104  | 0.6745506 | 0.7726425 | FALSE |
| TC14002310.hg.1 | ENSG00000168398  | 0.6745506 | 0.7726425 | FALSE |
| TC04000313.hg.1 | ENSG00000157404  | 0.6745506 | 0.7726425 | FALSE |
| TC04002931.hg.1 | ENSG00000134853  | 0.6745506 | 0.7726425 | FALSE |
| TC01001090.hg.1 | ENSG00000117289  | 0.6745506 | 0.7726425 | FALSE |
| TC06004141.hg.1 | ENSG00000112096  | 0.6745506 | 0.7726425 | FALSE |
| TC01001112.hg.1 | ENSG00000131778; | 0.6759078 | 0.7730594 | FALSE |
| TC01000728.hg.1 | ENSG00000162433; | 0.6770613 | 0.7741719 | FALSE |
| TC02000270.hg.1 | ENSG00000152527; | 0.6778616 | 0.7746731 | FALSE |
| TC02000270.hg.1 | ENSG00000152527; | 0.6778616 | 0.7746731 | FALSE |
| TC01001188.hg.1 | ENSG00000143369; | 0.6778616 | 0.7746731 | FALSE |
| TC01001112.hg.1 | ENSG00000131778; | 0.6792726 | 0.7758714 | FALSE |
| TC0X000038.hg.1 | ENSG00000073464; | 0.6803496 | 0.7766871 | FALSE |
| TC01002954.hg.1 | ENSG00000134243; | 0.6803496 | 0.7766871 | FALSE |
| TC07000768.hg.1 | ENSG00000174697; | 0.6803496 | 0.7766871 | FALSE |
| TC01000728.hg.1 | ENSG00000162433; | 0.6835885 | 0.7799687 | FALSE |
| TC02001100.hg.1 | ENSG00000138448; | 0.6855283 | 0.7817653 | FALSE |
| TC01002954.hg.1 | ENSG00000134243; | 0.6855283 | 0.7817653 | FALSE |
| TC02001100.hg.1 | ENSG00000138448; | 0.6855283 | 0.7817653 | FALSE |
| TC01001805.hg.1 | ENSG00000092969; | 0.6869639 | 0.7824973 | FALSE |
| TC05001385.hg.1 | ENSG00000145632; | 0.6869639 | 0.7824973 | FALSE |
| TC02000041.hg.1 | ENSG00000115738; | 0.6869639 | 0.7824973 | FALSE |
| TC09000965.hg.1 | ENSG00000147883  | 0.6878153 | 0.7824973 | FALSE |
| TC04000313.hg.1 | ENSG00000157404  | 0.6878153 | 0.7824973 | FALSE |
| TC0Y000351.hg.1 | ENSG00000129824  | 0.6878153 | 0.7824973 | FALSE |
| TC01000785.hg.1 | ENSG00000154027  | 0.6878153 | 0.7824973 | FALSE |
| TC02000891.hg.1 | ENSG00000150540  | 0.6878153 | 0.7824973 | FALSE |
| TC05000054.hg.1 | ENSG00000078295  | 0.6878153 | 0.7824973 | FALSE |
| TC09000388.hg.1 | ENSG00000148053  | 0.6878153 | 0.7824973 | FALSE |
| TC10000811.hg.1 | ENSG00000150594  | 0.6878153 | 0.7824973 | FALSE |
| TC01000703.hg.1 | ENSG00000132849  | 0.6878153 | 0.7824973 | FALSE |
| TC01000685.hg.1 | ENSG00000162409; | 0.6887687 | 0.7825422 | FALSE |



|                 |                  |           |           |       |
|-----------------|------------------|-----------|-----------|-------|
| TC14000067.hg.1 | ENSG00000181784; | 0.6895786 | 0.7831506 | FALSE |
| TC06000087.hg.1 | ENSG00000078401; | 0.6895786 | 0.7831506 | FALSE |
| TC01002578.hg.1 | ENSG00000117394; | 0.692699  | 0.7863815 | FALSE |
| TC02000286.hg.1 | ENSG00000171150; | 0.6935343 | 0.7870166 | FALSE |
| TC01001090.hg.1 | ENSG00000117289; | 0.6935343 | 0.7870166 | FALSE |
| TC0X000038.hg.1 | ENSG00000073464; | 0.6985872 | 0.7911873 | FALSE |
| TC09000388.hg.1 | ENSG00000148053; | 0.6985872 | 0.7911873 | FALSE |
| TC01000728.hg.1 | ENSG00000162433; | 0.6999827 | 0.7911873 | FALSE |
| TC02001031.hg.1 | ENSG00000152256; | 0.7004511 | 0.7911873 | FALSE |
| TC01000904.hg.1 | ENSG00000162692; | 0.7004511 | 0.7911873 | FALSE |
| TC01001805.hg.1 | ENSG00000092969; | 0.7004978 | 0.7911873 | FALSE |
| TC0X001279.hg.1 | ENSG00000077274  | 0.7005401 | 0.7911873 | FALSE |
| TC01000785.hg.1 | ENSG00000154027  | 0.7005401 | 0.7911873 | FALSE |
| TC18000552.hg.1 | ENSG00000197563  | 0.7005401 | 0.7911873 | FALSE |
| TC07001534.hg.1 | ENSG00000127946  | 0.7005401 | 0.7911873 | FALSE |
| TC09000388.hg.1 | ENSG00000148053  | 0.7005401 | 0.7911873 | FALSE |
| TC01000728.hg.1 | ENSG00000162433  | 0.7005401 | 0.7911873 | FALSE |
| TC10000811.hg.1 | ENSG00000150594  | 0.7005401 | 0.7911873 | FALSE |
| TC02002823.hg.1 | ENSG00000135919  | 0.7005401 | 0.7911873 | FALSE |
| TC10001711.hg.1 | ENSG00000066468  | 0.7005401 | 0.7911873 | FALSE |
| TC10002939.hg.1 | ENSG00000151303  | 0.7005401 | 0.7911873 | FALSE |
| TC22000259.hg.1 | ENSG00000100292  | 0.7005401 | 0.7911873 | FALSE |
| TC06004141.hg.1 | ENSG00000112096  | 0.7005401 | 0.7911873 | FALSE |
| TC0Y000351.hg.1 | ENSG00000129824  | 0.7005401 | 0.7911873 | FALSE |
| TC02000041.hg.1 | ENSG00000115738  | 0.7005401 | 0.7911873 | FALSE |
| TC12001890.hg.1 | ENSG00000017427  | 0.7005401 | 0.7911873 | FALSE |
| TC0X000943.hg.1 | ENSG00000198947  | 0.7005401 | 0.7911873 | FALSE |
| TC09000965.hg.1 | ENSG00000147883  | 0.7005401 | 0.7911873 | FALSE |
| TC10001663.hg.1 | ENSG00000119927  | 0.7005401 | 0.7911873 | FALSE |
| TC03000917.hg.1 | ENSG00000136603; | 0.7019223 | 0.7911873 | FALSE |
| TC01000904.hg.1 | ENSG00000162692; | 0.7022539 | 0.7913527 | FALSE |
| TC01000972.hg.1 | ENSG00000064886; | 0.7047679 | 0.7939767 | FALSE |
| TC01002578.hg.1 | ENSG00000117394; | 0.7071436 | 0.7958228 | FALSE |
| TC03001466.hg.1 | ENSG00000163931; | 0.707378  | 0.7958228 | FALSE |
| TC05000840.hg.1 | ENSG00000123643; | 0.707378  | 0.7958228 | FALSE |
| TC09000015.hg.1 | ENSG00000147852; | 0.707378  | 0.7958228 | FALSE |
| TC04001084.hg.1 | ENSG00000109819; | 0.707378  | 0.7958228 | FALSE |
| TC02000286.hg.1 | ENSG00000171150; | 0.707378  | 0.7958228 | FALSE |
| TC02001031.hg.1 | ENSG00000152256; | 0.7077079 | 0.7958228 | FALSE |
| TC15001136.hg.1 | ENSG00000166664  | 0.712747  | 0.8001232 | FALSE |
| TC15001136.hg.1 | ENSG00000166664  | 0.712747  | 0.8001232 | FALSE |
| TC08001175.hg.1 | ENSG00000104368  | 0.712747  | 0.8001232 | FALSE |
| TC18000097.hg.1 | ENSG00000101773  | 0.712747  | 0.8001232 | FALSE |
| TC0X000943.hg.1 | ENSG00000198947  | 0.712747  | 0.8001232 | FALSE |
| TC02000082.hg.1 | ENSG00000071575  | 0.712747  | 0.8001232 | FALSE |
| TC0X000034.hg.1 | ENSG00000146950  | 0.712747  | 0.8001232 | FALSE |
| TC05001617.hg.1 | ENSG00000164307  | 0.712747  | 0.8001232 | FALSE |
| TC02002624.hg.1 | ENSG00000115415  | 0.712747  | 0.8001232 | FALSE |
| TC07000328.hg.1 | ENSG00000146648  | 0.712747  | 0.8001232 | FALSE |
| TC10001663.hg.1 | ENSG00000119927  | 0.712747  | 0.8001232 | FALSE |
| TC0Y000351.hg.1 | ENSG00000129824  | 0.712747  | 0.8001232 | FALSE |
| TC03001823.hg.1 | ENSG00000114107; | 0.7148292 | 0.8010952 | FALSE |
| TC0X000038.hg.1 | ENSG00000073464; | 0.7159538 | 0.8019357 | FALSE |
| TC02001100.hg.1 | ENSG00000138448; | 0.7159538 | 0.8019357 | FALSE |
| TC05000243.hg.1 | ENSG00000095015; | 0.7159538 | 0.8019357 | FALSE |
| TC02001031.hg.1 | ENSG00000152256; | 0.7188279 | 0.8046493 | FALSE |
| TC01000685.hg.1 | ENSG00000162409; | 0.719038  | 0.8046493 | FALSE |
| TC01001112.hg.1 | ENSG00000131778; | 0.7191282 | 0.8046493 | FALSE |

|                  |                  |           |           |       |
|------------------|------------------|-----------|-----------|-------|
| TC01001112.hg.1; | ENSG00000131778; | 0.7206468 | 0.8061377 | FALSE |
| TC01000728.hg.1; | ENSG00000162433; | 0.7216372 | 0.8069181 | FALSE |
| TC01000785.hg.1; | ENSG00000154027; | 0.7218157 | 0.8069181 | FALSE |
| TC03000214.hg.1; | ENSG00000168036; | 0.7218157 | 0.8069181 | FALSE |
| TC05000840.hg.1; | ENSG00000123643; | 0.7243175 | 0.8075559 | FALSE |
| TC08001659.hg.1; | ENSG00000104419; | 0.7243175 | 0.8075559 | FALSE |
| TC19001103.hg.1; | ENSG00000125730  | 0.724457  | 0.8075559 | FALSE |
| TC18000552.hg.1; | ENSG00000197563  | 0.724457  | 0.8075559 | FALSE |
| TC02000466.hg.1; | ENSG00000159399  | 0.724457  | 0.8075559 | FALSE |
| TC11000182.hg.1; | ENSG00000148926  | 0.724457  | 0.8075559 | FALSE |
| TC02001031.hg.1; | ENSG00000152256  | 0.724457  | 0.8075559 | FALSE |
| TC20000876.hg.1; | ENSG00000124107  | 0.724457  | 0.8075559 | FALSE |
| TC07000768.hg.1; | ENSG00000174697  | 0.724457  | 0.8075559 | FALSE |
| TC07000768.hg.1; | ENSG00000174697  | 0.724457  | 0.8075559 | FALSE |
| TC10001517.hg.1; | ENSG00000148677  | 0.724457  | 0.8075559 | FALSE |
| TC13000845.hg.1; | ENSG00000102452  | 0.724457  | 0.8075559 | FALSE |
| TC11000404.hg.1; | ENSG00000134574  | 0.724457  | 0.8075559 | FALSE |
| TC01001704.hg.1; | ENSG00000163531; | 0.7251215 | 0.8075559 | FALSE |
| TC01003211.hg.1; | ENSG00000143387; | 0.7286682 | 0.8112948 | FALSE |
| TC01000728.hg.1; | ENSG00000162433; | 0.7290034 | 0.811457  | FALSE |
| TC01000685.hg.1; | ENSG00000162409; | 0.7322642 | 0.8147885 | FALSE |
| TC05000840.hg.1; | ENSG00000123643; | 0.7324722 | 0.8147885 | FALSE |
| TC05000159.hg.1; | ENSG00000168685; | 0.7324722 | 0.8147885 | FALSE |
| TC01001112.hg.1; | ENSG00000131778; | 0.7350474 | 0.8161702 | FALSE |
| TC09000388.hg.1; | ENSG00000148053  | 0.7356903 | 0.8161702 | FALSE |
| TC07001534.hg.1; | ENSG00000127946  | 0.7356903 | 0.8161702 | FALSE |
| TC05001519.hg.1; | ENSG00000113273  | 0.7356903 | 0.8161702 | FALSE |
| TC20000942.hg.1; | ENSG00000101096  | 0.7356903 | 0.8161702 | FALSE |
| TC04001084.hg.1; | ENSG00000109819  | 0.7356903 | 0.8161702 | FALSE |
| TC02002624.hg.1; | ENSG00000115415  | 0.7356903 | 0.8161702 | FALSE |
| TC09000388.hg.1; | ENSG00000148053  | 0.7356903 | 0.8161702 | FALSE |
| TC09000388.hg.1; | ENSG00000148053  | 0.7356903 | 0.8161702 | FALSE |
| TC10001711.hg.1; | ENSG00000066468  | 0.7356903 | 0.8161702 | FALSE |
| TC09001585.hg.1; | ENSG00000173611  | 0.7356903 | 0.8161702 | FALSE |
| TC07000768.hg.1; | ENSG00000174697  | 0.7356903 | 0.8161702 | FALSE |
| TC10001711.hg.1; | ENSG00000066468  | 0.7356903 | 0.8161702 | FALSE |
| TC02002624.hg.1; | ENSG00000115415  | 0.7356903 | 0.8161702 | FALSE |
| TC02000041.hg.1; | ENSG00000115738; | 0.7367647 | 0.8161702 | FALSE |
| TC01000904.hg.1; | ENSG00000162692; | 0.7367647 | 0.8161702 | FALSE |
| TC01000728.hg.1; | ENSG00000162433; | 0.7394894 | 0.8188707 | FALSE |
| TC06001027.hg.1; | ENSG00000118503; | 0.7404209 | 0.8194782 | FALSE |
| TC06000087.hg.1; | ENSG00000078401; | 0.7404209 | 0.8194782 | FALSE |
| TC15001110.hg.1; | ENSG00000104067; | 0.7404209 | 0.8194782 | FALSE |
| TC05001385.hg.1; | ENSG00000145632; | 0.741975  | 0.8206679 | FALSE |
| TC01003211.hg.1; | ENSG00000143387; | 0.741975  | 0.8206679 | FALSE |
| TC01001607.hg.1; | ENSG00000116711; | 0.7425483 | 0.8209838 | FALSE |
| TC17001462.hg.1; | ENSG00000131747  | 0.7464664 | 0.8239226 | FALSE |
| TC02002823.hg.1; | ENSG00000135919  | 0.7464664 | 0.8239226 | FALSE |
| TC14000819.hg.1; | ENSG00000185100  | 0.7464664 | 0.8239226 | FALSE |
| TC17001462.hg.1; | ENSG00000131747  | 0.7464664 | 0.8239226 | FALSE |
| TC02002808.hg.1; | ENSG00000116106  | 0.7464664 | 0.8239226 | FALSE |
| TC09001585.hg.1; | ENSG00000173611  | 0.7464664 | 0.8239226 | FALSE |
| TC04000313.hg.1; | ENSG00000157404  | 0.7464664 | 0.8239226 | FALSE |
| TC18000047.hg.1; | ENSG00000168461  | 0.7464664 | 0.8239226 | FALSE |
| TC06000087.hg.1; | ENSG00000078401  | 0.7464664 | 0.8239226 | FALSE |
| TC02001031.hg.1; | ENSG00000152256; | 0.7471309 | 0.8239226 | FALSE |
| TC09000388.hg.1; | ENSG00000148053; | 0.7481669 | 0.8247194 | FALSE |
| TC01002166.hg.1; | ENSG00000116285; | 0.7481669 | 0.8247194 | FALSE |

|                  |                  |           |           |       |
|------------------|------------------|-----------|-----------|-------|
| TC02001031.hg.1  | ENSG00000152256; | 0.7484314 | 0.8247194 | FALSE |
| TC01000728.hg.1  | ENSG00000162433; | 0.7487583 | 0.8248673 | FALSE |
| TC02000270.hg.1  | ENSG00000152527; | 0.7510204 | 0.8270339 | FALSE |
| TC01003211.hg.1  | ENSG00000143387; | 0.7511114 | 0.8270339 | FALSE |
| TC01001688.hg.1  | ENSG00000058668; | 0.753825  | 0.8298083 | FALSE |
| TC01000785.hg.1  | ENSG00000154027; | 0.7547578 | 0.8306217 | FALSE |
| TC02000281.hg.1  | ENSG00000116016; | 0.7552306 | 0.8309283 | FALSE |
| TC02001628.hg.1  | ENSG00000084674; | 0.7557135 | 0.8310325 | FALSE |
| TC01001805.hg.1  | ENSG00000092969; | 0.7557135 | 0.8310325 | FALSE |
| TC02000041.hg.1  | ENSG00000115738; | 0.7557135 | 0.8310325 | FALSE |
| TC09000358.hg.1  | ENSG00000135069  | 0.7568037 | 0.8311638 | FALSE |
| TC03000862.hg.1  | ENSG00000163661  | 0.7568037 | 0.8311638 | FALSE |
| TC03001071.hg.1  | ENSG00000114315  | 0.7568037 | 0.8311638 | FALSE |
| TC12000803.hg.1  | ENSG00000166598  | 0.7568037 | 0.8311638 | FALSE |
| TC01000703.hg.1  | ENSG00000132849  | 0.7568037 | 0.8311638 | FALSE |
| TC10000663.hg.1  | ENSG00000095596  | 0.7568037 | 0.8311638 | FALSE |
| TC10000406.hg.1  | ENSG00000138336  | 0.7568037 | 0.8311638 | FALSE |
| TC01001112.hg.1; | ENSG00000131778; | 0.7613622 | 0.835313  | FALSE |
| TC01001112.hg.1; | ENSG00000131778; | 0.7615698 | 0.8353268 | FALSE |
| TC01001805.hg.1  | ENSG00000092969; | 0.763064  | 0.8367513 | FALSE |
| TC03000013.hg.1  | ENSG00000150995; | 0.7647178 | 0.83835   | FALSE |
| TC09000388.hg.1  | ENSG00000148053  | 0.7667201 | 0.8398053 | FALSE |
| TC08000508.hg.1  | ENSG00000104435  | 0.7667201 | 0.8398053 | FALSE |
| TC01000785.hg.1  | ENSG00000154027  | 0.7667201 | 0.8398053 | FALSE |
| TC17000015.hg.1  | ENSG00000132386  | 0.7667201 | 0.8398053 | FALSE |
| TC01000904.hg.1  | ENSG00000162692; | 0.7670261 | 0.8398053 | FALSE |
| TC03000013.hg.1  | ENSG00000150995; | 0.770222  | 0.8426579 | FALSE |
| TC02002808.hg.1  | ENSG00000116106; | 0.770222  | 0.8426579 | FALSE |
| TC03000013.hg.1  | ENSG00000150995; | 0.770222  | 0.8426579 | FALSE |
| TC03000013.hg.1  | ENSG00000150995; | 0.770222  | 0.8426579 | FALSE |
| TC09000388.hg.1  | ENSG00000148053; | 0.770222  | 0.8426579 | FALSE |
| TC01000783.hg.1  | ENSG00000117069; | 0.7708161 | 0.8426618 | FALSE |
| TC02000286.hg.1  | ENSG00000171150; | 0.7729705 | 0.8448013 | FALSE |
| TC01001112.hg.1; | ENSG00000131778; | 0.7742666 | 0.8460018 | FALSE |
| TC0Y000351.hg.1  | ENSG00000129824  | 0.7762328 | 0.8468196 | FALSE |
| TC05000243.hg.1  | ENSG00000095015  | 0.7762328 | 0.8468196 | FALSE |
| TC07000768.hg.1  | ENSG00000174697  | 0.7762328 | 0.8468196 | FALSE |
| TC07000768.hg.1  | ENSG00000174697  | 0.7762328 | 0.8468196 | FALSE |
| TC07000137.hg.1  | ENSG00000136244  | 0.7762328 | 0.8468196 | FALSE |
| TC07000137.hg.1  | ENSG00000136244  | 0.7762328 | 0.8468196 | FALSE |
| TC05000243.hg.1  | ENSG00000095015  | 0.7762328 | 0.8468196 | FALSE |
| TC05000243.hg.1  | ENSG00000095015  | 0.7762328 | 0.8468196 | FALSE |
| TC06000087.hg.1  | ENSG00000078401  | 0.7762328 | 0.8468196 | FALSE |
| TC10000406.hg.1  | ENSG00000138336; | 0.7771909 | 0.8468196 | FALSE |
| TC02000432.hg.1  | ENSG00000135636; | 0.7771909 | 0.8468196 | FALSE |
| TC02000432.hg.1  | ENSG00000135636; | 0.7771909 | 0.8468196 | FALSE |
| TC01000785.hg.1  | ENSG00000154027; | 0.7776165 | 0.8468523 | FALSE |
| TC04002931.hg.1  | ENSG00000134853; | 0.7787901 | 0.8476991 | FALSE |
| TC01000685.hg.1  | ENSG00000162409; | 0.7787901 | 0.8476991 | FALSE |
| TC02001628.hg.1  | ENSG00000084674; | 0.7787901 | 0.8476991 | FALSE |
| TC01000728.hg.1  | ENSG00000162433; | 0.7803238 | 0.8489368 | FALSE |
| TC01001112.hg.1; | ENSG00000131778; | 0.7808938 | 0.8492331 | FALSE |
| TC01001112.hg.1; | ENSG00000131778; | 0.7808938 | 0.8492331 | FALSE |
| TC01000728.hg.1  | ENSG00000162433; | 0.7815108 | 0.8495804 | FALSE |
| TC07000235.hg.1  | ENSG00000011426; | 0.7839741 | 0.8510556 | FALSE |
| TC03000013.hg.1  | ENSG00000150995; | 0.7839741 | 0.8510556 | FALSE |
| TC19001250.hg.1  | ENSG00000074181; | 0.7839741 | 0.8510556 | FALSE |
| TC08001659.hg.1  | ENSG00000104419; | 0.7839741 | 0.8510556 | FALSE |

|                 |                  |           |           |       |
|-----------------|------------------|-----------|-----------|-------|
| TC03001884.hg.1 | ENSG00000047457; | 0.7839741 | 0.8510556 | FALSE |
| TC01000728.hg.1 | ENSG00000162433; | 0.7841697 | 0.8510556 | FALSE |
| TC01003211.hg.1 | ENSG00000143387; | 0.7853071 | 0.8510556 | FALSE |
| TC03000214.hg.1 | ENSG00000168036  | 0.7853581 | 0.8510556 | FALSE |
| TC07001630.hg.1 | ENSG00000070669  | 0.7853581 | 0.8510556 | FALSE |
| TC14000819.hg.1 | ENSG00000185100  | 0.7853581 | 0.8510556 | FALSE |
| TC12003293.hg.1 | ENSG00000180818  | 0.7853581 | 0.8510556 | FALSE |
| TC14001141.hg.1 | ENSG00000197930  | 0.7853581 | 0.8510556 | FALSE |
| TC03000214.hg.1 | ENSG00000168036  | 0.7853581 | 0.8510556 | FALSE |
| TC09000388.hg.1 | ENSG00000148053  | 0.7853581 | 0.8510556 | FALSE |
| TC09000388.hg.1 | ENSG00000148053  | 0.7853581 | 0.8510556 | FALSE |
| TC01003778.hg.1 | ENSG00000076356; | 0.7860485 | 0.8510556 | FALSE |
| TC02000041.hg.1 | ENSG00000115738; | 0.7883088 | 0.853287  | FALSE |
| TC02000416.hg.1 | ENSG00000116005; | 0.7890783 | 0.853904  | FALSE |
| TC01003211.hg.1 | ENSG00000143387; | 0.7900612 | 0.8547515 | FALSE |
| TC01001736.hg.1 | ENSG00000196352; | 0.7905753 | 0.8548757 | FALSE |
| TC21000241.hg.1 | ENSG00000197381; | 0.7905753 | 0.8548757 | FALSE |
| TC03000131.hg.1 | ENSG00000077092; | 0.7905753 | 0.8548757 | FALSE |
| TC08000508.hg.1 | ENSG00000104435  | 0.7941118 | 0.8581579 | FALSE |
| TC09000388.hg.1 | ENSG00000148053  | 0.7941118 | 0.8581579 | FALSE |
| TC01000785.hg.1 | ENSG00000154027; | 0.7955155 | 0.859241  | FALSE |
| TC05001933.hg.1 | ENSG00000113721; | 0.7955155 | 0.859241  | FALSE |
| TC01001624.hg.1 | ENSG00000116741; | 0.7962902 | 0.8597524 | FALSE |
| TC01001112.hg.1 | ENSG00000131778; | 0.7971364 | 0.8604491 | FALSE |
| TC02001031.hg.1 | ENSG00000152256; | 0.7983199 | 0.8615093 | FALSE |
| TC01001624.hg.1 | ENSG00000116741; | 0.799274  | 0.8621049 | FALSE |
| TC02000416.hg.1 | ENSG00000116005; | 0.799274  | 0.8621049 | FALSE |
| TC01001112.hg.1 | ENSG00000131778; | 0.7994759 | 0.8621049 | FALSE |
| TC01003211.hg.1 | ENSG00000143387; | 0.8022878 | 0.8639694 | FALSE |
| TC22000259.hg.1 | ENSG00000100292  | 0.802509  | 0.8639694 | FALSE |
| TC01000783.hg.1 | ENSG00000117069  | 0.802509  | 0.8639694 | FALSE |
| TC10001711.hg.1 | ENSG00000066468  | 0.802509  | 0.8639694 | FALSE |
| TC02000432.hg.1 | ENSG00000135636  | 0.802509  | 0.8639694 | FALSE |
| TC02000891.hg.1 | ENSG00000150540  | 0.802509  | 0.8639694 | FALSE |
| TC03003365.hg.1 | ENSG00000176945; | 0.8026177 | 0.8639694 | FALSE |
| TC05001385.hg.1 | ENSG00000145632; | 0.8032457 | 0.8643195 | FALSE |
| TC02000432.hg.1 | ENSG00000135636; | 0.8032457 | 0.8643195 | FALSE |
| TC02000416.hg.1 | ENSG00000116005; | 0.8038284 | 0.8645182 | FALSE |
| TC01000728.hg.1 | ENSG00000162433; | 0.8039353 | 0.8645182 | FALSE |
| TC06001027.hg.1 | ENSG00000118503; | 0.8045559 | 0.8649683 | FALSE |
| TC02000219.hg.1 | ENSG00000049323; | 0.8060695 | 0.866378  | FALSE |
| TC02000041.hg.1 | ENSG00000115738; | 0.8100418 | 0.8696946 | FALSE |
| TC06004150.hg.1 | ENSG00000096060  | 0.8105642 | 0.8696946 | FALSE |
| TC14001141.hg.1 | ENSG00000197930  | 0.8105642 | 0.8696946 | FALSE |
| TC02000466.hg.1 | ENSG00000159399  | 0.8105642 | 0.8696946 | FALSE |
| TC10001711.hg.1 | ENSG00000066468  | 0.8105642 | 0.8696946 | FALSE |
| TC03002111.hg.1 | ENSG00000205835; | 0.8105917 | 0.8696946 | FALSE |
| TC01001090.hg.1 | ENSG00000117289; | 0.8105917 | 0.8696946 | FALSE |
| TC01001090.hg.1 | ENSG00000117289; | 0.8107804 | 0.8696946 | FALSE |
| TC01000685.hg.1 | ENSG00000162409; | 0.8117976 | 0.8705676 | FALSE |
| TC01000728.hg.1 | ENSG00000162433; | 0.8122622 | 0.8708476 | FALSE |
| TC02000416.hg.1 | ENSG00000116005; | 0.812763  | 0.8711663 | FALSE |
| TC07001552.hg.1 | ENSG00000187391; | 0.8152307 | 0.8735927 | FALSE |
| TC01000728.hg.1 | ENSG00000162433; | 0.8176681 | 0.8753288 | FALSE |
| TC01002166.hg.1 | ENSG00000116285; | 0.8180122 | 0.8753288 | FALSE |
| TC07000137.hg.1 | ENSG00000136244  | 0.8182914 | 0.8753288 | FALSE |
| TC07000328.hg.1 | ENSG00000146648  | 0.8182914 | 0.8753288 | FALSE |
| TC16001225.hg.1 | ENSG00000181019  | 0.8182914 | 0.8753288 | FALSE |

|                  |                  |           |           |       |
|------------------|------------------|-----------|-----------|-------|
| TC04002948.hg.1  | ENSG00000137463  | 0.8182914 | 0.8753288 | FALSE |
| TC07001898.hg.1  | ENSG00000182158  | 0.8182914 | 0.8753288 | FALSE |
| TC07000768.hg.1  | ENSG00000174697  | 0.8182914 | 0.8753288 | FALSE |
| TC12001890.hg.1  | ENSG00000017427  | 0.8182914 | 0.8753288 | FALSE |
| TC04001084.hg.1  | ENSG00000109819  | 0.8182914 | 0.8753288 | FALSE |
| TC01001090.hg.1  | ENSG00000117289; | 0.8191    | 0.8753288 | FALSE |
| TC05000159.hg.1  | ENSG00000168685  | 0.8257037 | 0.8812117 | FALSE |
| TC05000159.hg.1  | ENSG00000168685  | 0.8257037 | 0.8812117 | FALSE |
| TC03000214.hg.1  | ENSG00000168036  | 0.8257037 | 0.8812117 | FALSE |
| TC05000243.hg.1  | ENSG00000095015  | 0.8257037 | 0.8812117 | FALSE |
| TC05000243.hg.1  | ENSG00000095015  | 0.8257037 | 0.8812117 | FALSE |
| TC09000038.hg.1  | ENSG00000197646  | 0.8257037 | 0.8812117 | FALSE |
| TC05000159.hg.1  | ENSG00000168685  | 0.8257037 | 0.8812117 | FALSE |
| TC0Y000351.hg.1  | ENSG00000129824  | 0.8257037 | 0.8812117 | FALSE |
| TC01001090.hg.1  | ENSG00000117289; | 0.8264576 | 0.8812117 | FALSE |
| TC01001112.hg.1; | ENSG00000131778; | 0.826977  | 0.8814362 | FALSE |
| TC01001112.hg.1; | ENSG00000131778; | 0.826977  | 0.8814362 | FALSE |
| TC01000728.hg.1  | ENSG00000162433; | 0.828191  | 0.8823894 | FALSE |
| TC07000235.hg.1  | ENSG00000011426; | 0.8283866 | 0.8823894 | FALSE |
| TC01001112.hg.1; | ENSG00000131778; | 0.8303454 | 0.8842559 | FALSE |
| TC01001624.hg.1  | ENSG00000116741; | 0.8318808 | 0.8856706 | FALSE |
| TC01000685.hg.1  | ENSG00000162409; | 0.8321376 | 0.8856732 | FALSE |
| TC01001112.hg.1; | ENSG00000131778; | 0.8324288 | 0.8856732 | FALSE |
| TC02000041.hg.1  | ENSG00000115738  | 0.8328142 | 0.8856732 | FALSE |
| TC02002714.hg.1  | ENSG00000163251  | 0.8328142 | 0.8856732 | FALSE |
| TC05000159.hg.1  | ENSG00000168685  | 0.8328142 | 0.8856732 | FALSE |
| TC04002948.hg.1  | ENSG00000137463  | 0.8328142 | 0.8856732 | FALSE |
| TC02000416.hg.1  | ENSG00000116005; | 0.8352109 | 0.8876708 | FALSE |
| TC01001090.hg.1  | ENSG00000117289; | 0.8364346 | 0.8887507 | FALSE |
| TC01001736.hg.1  | ENSG00000196352; | 0.8372584 | 0.8894053 | FALSE |
| TC06004141.hg.1  | ENSG00000112096  | 0.839635  | 0.8909352 | FALSE |
| TC0X000943.hg.1  | ENSG00000198947  | 0.839635  | 0.8909352 | FALSE |
| TC07000852.hg.1  | ENSG00000181072  | 0.839635  | 0.8909352 | FALSE |
| TC02002823.hg.1  | ENSG00000135919  | 0.839635  | 0.8909352 | FALSE |
| TC04002948.hg.1  | ENSG00000137463  | 0.839635  | 0.8909352 | FALSE |
| TC01001112.hg.1; | ENSG00000131778; | 0.8399473 | 0.8909352 | FALSE |
| TC03001823.hg.1  | ENSG00000114107; | 0.8412302 | 0.8919644 | FALSE |
| TC03001823.hg.1  | ENSG00000114107; | 0.8412302 | 0.8919644 | FALSE |
| TC22000259.hg.1  | ENSG00000100292  | 0.8461779 | 0.8962117 | FALSE |
| TC02002143.hg.1  | ENSG00000204634  | 0.8461779 | 0.8962117 | FALSE |
| TC02002143.hg.1  | ENSG00000204634  | 0.8461779 | 0.8962117 | FALSE |
| TC06001027.hg.1  | ENSG00000118503  | 0.8461779 | 0.8962117 | FALSE |
| TC02002143.hg.1  | ENSG00000204634  | 0.8461779 | 0.8962117 | FALSE |
| TC10000811.hg.1  | ENSG00000150594  | 0.8461779 | 0.8962117 | FALSE |
| TC06004141.hg.1  | ENSG00000112096  | 0.8461779 | 0.8962117 | FALSE |
| TC01002616.hg.1  | ENSG00000117461; | 0.8521906 | 0.9015209 | FALSE |
| TC05000159.hg.1  | ENSG00000168685  | 0.8524543 | 0.9015209 | FALSE |
| TC20000942.hg.1  | ENSG00000101096  | 0.8524543 | 0.9015209 | FALSE |
| TC07000328.hg.1  | ENSG00000146648  | 0.8524543 | 0.9015209 | FALSE |
| TC02000416.hg.1  | ENSG00000116005; | 0.8549538 | 0.9036063 | FALSE |
| TC02000416.hg.1  | ENSG00000116005; | 0.8549538 | 0.9036063 | FALSE |
| TC01003629.hg.1  | ENSG00000116679; | 0.8569069 | 0.9053352 | FALSE |
| TC05000243.hg.1  | ENSG00000095015  | 0.8584749 | 0.9067681 | FALSE |
| TC05000165.hg.1  | ENSG00000079215; | 0.8614405 | 0.9096761 | FALSE |
| TC04000101.hg.1  | ENSG00000249811; | 0.8637447 | 0.9118844 | FALSE |
| TC19001103.hg.1  | ENSG00000125730  | 0.8642502 | 0.9119682 | FALSE |
| TC05000159.hg.1  | ENSG00000168685  | 0.8642502 | 0.9119682 | FALSE |
| TC22000259.hg.1  | ENSG00000100292  | 0.8642502 | 0.9119682 | FALSE |

|                  |                  |           |           |       |
|------------------|------------------|-----------|-----------|-------|
| TC05001385.hg.1  | ENSG00000145632; | 0.8695023 | 0.9165715 | FALSE |
| TC01003629.hg.1  | ENSG00000116679; | 0.8697067 | 0.9165715 | FALSE |
| TC19001103.hg.1  | ENSG00000125730  | 0.8697902 | 0.9165715 | FALSE |
| TC18000552.hg.1  | ENSG00000197563  | 0.8697902 | 0.9165715 | FALSE |
| TC22000259.hg.1  | ENSG00000100292  | 0.8697902 | 0.9165715 | FALSE |
| TC07000137.hg.1  | ENSG00000136244  | 0.8697902 | 0.9165715 | FALSE |
| TC02001100.hg.1; | ENSG00000138448; | 0.8735124 | 0.9199278 | FALSE |
| TC05001385.hg.1; | ENSG00000145632; | 0.8749965 | 0.9208116 | FALSE |
| TC01000728.hg.1; | ENSG00000162433; | 0.8750376 | 0.9208116 | FALSE |
| TC07000137.hg.1  | ENSG00000136244  | 0.8751044 | 0.9208116 | FALSE |
| TC10001663.hg.1  | ENSG00000119927  | 0.8751044 | 0.9208116 | FALSE |
| TC01000115.hg.1; | ENSG00000171621; | 0.8788584 | 0.9244208 | FALSE |
| TC03001071.hg.1  | ENSG00000114315  | 0.880202  | 0.9256067 | FALSE |
| TC04001084.hg.1; | ENSG00000109819; | 0.8818783 | 0.9271417 | FALSE |
| TC07001562.hg.1; | ENSG00000019991; | 0.8822433 | 0.9272489 | FALSE |
| TC01000703.hg.1; | ENSG00000132849; | 0.8824135 | 0.9272489 | FALSE |
| TC17001462.hg.1  | ENSG00000131747  | 0.8850919 | 0.9292651 | FALSE |
| TC05000243.hg.1  | ENSG00000095015  | 0.8850919 | 0.9292651 | FALSE |
| TC12002155.hg.1  | ENSG00000176915  | 0.8850919 | 0.9292651 | FALSE |
| TC09000038.hg.1  | ENSG00000197646  | 0.8850919 | 0.9292651 | FALSE |
| TC22000259.hg.1  | ENSG00000100292  | 0.8850919 | 0.9292651 | FALSE |
| TC09000038.hg.1  | ENSG00000197646  | 0.8850919 | 0.9292651 | FALSE |
| TC05000243.hg.1; | ENSG00000095015; | 0.8860977 | 0.9294093 | FALSE |
| TC08001659.hg.1; | ENSG00000104419; | 0.8860977 | 0.9294093 | FALSE |
| TC01001090.hg.1; | ENSG00000117289; | 0.887267  | 0.9302939 | FALSE |
| TC02000511.hg.1  | ENSG00000168906  | 0.8897824 | 0.9323604 | FALSE |
| TC05001933.hg.1  | ENSG00000113721  | 0.8897824 | 0.9323604 | FALSE |
| TC05000701.hg.1  | ENSG00000120738  | 0.8897824 | 0.9323604 | FALSE |
| TC05000701.hg.1  | ENSG00000120738  | 0.8897824 | 0.9323604 | FALSE |
| TC01001112.hg.1; | ENSG00000131778; | 0.8907853 | 0.9325313 | FALSE |
| TC02000416.hg.1; | ENSG00000116005; | 0.8907958 | 0.9325313 | FALSE |
| TC01000115.hg.1; | ENSG00000171621; | 0.8909257 | 0.9325313 | FALSE |
| TC06001027.hg.1; | ENSG00000118503; | 0.8933699 | 0.9347468 | FALSE |
| TC05000165.hg.1; | ENSG00000079215; | 0.8933699 | 0.9347468 | FALSE |
| TC18000097.hg.1  | ENSG00000101773  | 0.8942818 | 0.9350153 | FALSE |
| TC10001663.hg.1  | ENSG00000119927  | 0.8942818 | 0.9350153 | FALSE |
| TC01000685.hg.1  | ENSG00000162409  | 0.8942818 | 0.9350153 | FALSE |
| TC10001663.hg.1  | ENSG00000119927  | 0.8942818 | 0.9350153 | FALSE |
| TC14000067.hg.1; | ENSG00000181784; | 0.896842  | 0.93712   | FALSE |
| TC01000728.hg.1; | ENSG00000162433; | 0.8975685 | 0.9376503 | FALSE |
| TC18000097.hg.1  | ENSG00000101773  | 0.8985977 | 0.9382675 | FALSE |
| TC05001519.hg.1  | ENSG00000113273  | 0.8985977 | 0.9382675 | FALSE |
| TC05000701.hg.1  | ENSG00000120738  | 0.8985977 | 0.9382675 | FALSE |
| TC04000432.hg.1; | ENSG00000156234; | 0.9002087 | 0.9394913 | FALSE |
| TC01000685.hg.1  | ENSG00000162409; | 0.9015188 | 0.9406292 | FALSE |
| TC01001624.hg.1; | ENSG00000116741; | 0.9026982 | 0.9416303 | FALSE |
| TC08000255.hg.1; | ENSG00000157168; | 0.9033844 | 0.9421166 | FALSE |
| TC12000531.hg.1  | ENSG00000166986  | 0.9067089 | 0.9450749 | FALSE |
| TC06001027.hg.1  | ENSG00000118503  | 0.9067089 | 0.9450749 | FALSE |
| TC06001027.hg.1  | ENSG00000118503  | 0.9067089 | 0.9450749 | FALSE |
| TC01000394.hg.1; | ENSG00000159023; | 0.9071042 | 0.9450749 | FALSE |
| TC05001385.hg.1; | ENSG00000145632; | 0.9097038 | 0.9475528 | FALSE |
| TC0X000207.hg.1  | ENSG00000189221  | 0.9105183 | 0.9475659 | FALSE |
| TC07000768.hg.1  | ENSG00000174697  | 0.9105183 | 0.9475659 | FALSE |
| TC06000004.hg.1  | ENSG00000112679  | 0.9105183 | 0.9475659 | FALSE |
| TC10001517.hg.1  | ENSG00000148677  | 0.9105183 | 0.9475659 | FALSE |
| TC01001090.hg.1; | ENSG00000117289; | 0.9108231 | 0.9475659 | FALSE |
| TC04000253.hg.1; | ENSG00000154277; | 0.9140234 | 0.9505881 | FALSE |

|                  |                  |           |           |       |
|------------------|------------------|-----------|-----------|-------|
| TC0Y000351.hg.1  | ENSG00000129824  | 0.9141722 | 0.9505881 | FALSE |
| TC07001562.hg.1  | ENSG00000019991; | 0.9148664 | 0.9509635 | FALSE |
| TC07001562.hg.1  | ENSG00000019991; | 0.9148664 | 0.9509635 | FALSE |
| TC01000783.hg.1  | ENSG00000117069; | 0.9161876 | 0.9515819 | FALSE |
| TC01003211.hg.1; | ENSG00000143387; | 0.9165113 | 0.9515819 | FALSE |
| TC02000416.hg.1; | ENSG00000116005; | 0.9165328 | 0.9515819 | FALSE |
| TC02000416.hg.1; | ENSG00000116005; | 0.9165328 | 0.9515819 | FALSE |
| TC01001624.hg.1; | ENSG00000116741; | 0.9166839 | 0.9515819 | FALSE |
| TC02002823.hg.1  | ENSG00000135919  | 0.9176772 | 0.9521513 | FALSE |
| TC12000531.hg.1  | ENSG00000166986  | 0.9176772 | 0.9521513 | FALSE |
| TC12000531.hg.1  | ENSG00000166986  | 0.9176772 | 0.9521513 | FALSE |
| TC01002847.hg.1; | ENSG00000117228; | 0.9199917 | 0.9540902 | FALSE |
| TC01000115.hg.1; | ENSG00000171621; | 0.9222857 | 0.9562376 | FALSE |
| TC05000159.hg.1; | ENSG00000168685; | 0.923672  | 0.9574431 | FALSE |
| TC05001519.hg.1  | ENSG00000113273  | 0.9242642 | 0.9577091 | FALSE |
| TC14000353.hg.1  | ENSG00000165617  | 0.9242642 | 0.9577091 | FALSE |
| TC01002578.hg.1; | ENSG00000117394; | 0.9255253 | 0.9586601 | FALSE |
| TC01002847.hg.1; | ENSG00000117228; | 0.9257419 | 0.9586601 | FALSE |
| TC02000416.hg.1; | ENSG00000116005; | 0.9286678 | 0.9613413 | FALSE |
| TC07000137.hg.1; | ENSG00000136244; | 0.9286678 | 0.9613413 | FALSE |
| TC01001805.hg.1; | ENSG00000092969; | 0.9290517 | 0.96139   | FALSE |
| TC06001027.hg.1  | ENSG00000118503  | 0.9303249 | 0.9623586 | FALSE |
| TC08001590.hg.1  | ENSG00000156804  | 0.9303249 | 0.9623586 | FALSE |
| TC01000785.hg.1; | ENSG00000154027; | 0.9310407 | 0.9623654 | FALSE |
| TC02001100.hg.1; | ENSG00000138448; | 0.9310484 | 0.9623654 | FALSE |
| TC01000728.hg.1; | ENSG00000162433; | 0.9311537 | 0.9623654 | FALSE |
| TC04000432.hg.1; | ENSG00000156234; | 0.9313431 | 0.9623654 | FALSE |
| TC19001103.hg.1  | ENSG00000125730  | 0.9331711 | 0.9640216 | FALSE |
| TC05001385.hg.1; | ENSG00000145632; | 0.9367394 | 0.9674744 | FALSE |
| TC03000214.hg.1; | ENSG00000168036; | 0.9380105 | 0.9683789 | FALSE |
| TC04000643.hg.1; | ENSG00000164070; | 0.9384508 | 0.9683789 | FALSE |
| TC19001103.hg.1  | ENSG00000125730  | 0.93852   | 0.9683789 | FALSE |
| TC11000404.hg.1  | ENSG00000134574  | 0.93852   | 0.9683789 | FALSE |
| TC12000076.hg.1  | ENSG00000010278  | 0.93852   | 0.9683789 | FALSE |
| TC01002954.hg.1; | ENSG00000134243; | 0.9398527 | 0.9692123 | FALSE |
| TC02000511.hg.1; | ENSG00000168906; | 0.9401201 | 0.9692123 | FALSE |
| TC05001385.hg.1; | ENSG00000145632; | 0.9401201 | 0.9692123 | FALSE |
| TC03000214.hg.1; | ENSG00000168036; | 0.9408515 | 0.9696161 | FALSE |
| TC06004141.hg.1  | ENSG00000112096  | 0.9434413 | 0.9720457 | FALSE |
| TC01001090.hg.1; | ENSG00000117289; | 0.9436631 | 0.9720457 | FALSE |
| TC11001948.hg.1  | ENSG00000175592  | 0.9457524 | 0.9739635 | FALSE |
| TC05001481.hg.1; | ENSG00000171617; | 0.946726  | 0.9747316 | FALSE |
| TC01001736.hg.1; | ENSG00000196352; | 0.9475599 | 0.9752383 | FALSE |
| TC04002948.hg.1; | ENSG00000137463; | 0.9475599 | 0.9752383 | FALSE |
| TC10001327.hg.1  | ENSG00000122877  | 0.9479692 | 0.9753079 | FALSE |
| TC01000785.hg.1; | ENSG00000154027; | 0.9484894 | 0.9756086 | FALSE |
| TC17001462.hg.1  | ENSG00000131747  | 0.9500956 | 0.977026  | FALSE |
| TC03000248.hg.1; | ENSG00000144791; | 0.9506272 | 0.9773379 | FALSE |
| TC01001736.hg.1; | ENSG00000196352; | 0.9510568 | 0.9775448 | FALSE |
| TC19001103.hg.1  | ENSG00000125730  | 0.9521352 | 0.9783009 | FALSE |
| TC05000243.hg.1  | ENSG00000095015  | 0.9521352 | 0.9783009 | FALSE |
| TC02000511.hg.1; | ENSG00000168906; | 0.9531377 | 0.9789785 | FALSE |
| TC04000313.hg.1  | ENSG00000157404  | 0.9540915 | 0.9792639 | FALSE |
| TC02002714.hg.1  | ENSG00000163251  | 0.9540915 | 0.9792639 | FALSE |
| TC22000259.hg.1  | ENSG00000100292  | 0.9540915 | 0.9792639 | FALSE |
| TC10000406.hg.1; | ENSG00000138336; | 0.9543305 | 0.9792639 | FALSE |
| TC04000313.hg.1  | ENSG00000157404  | 0.955968  | 0.9804742 | FALSE |
| TC04000313.hg.1  | ENSG00000157404  | 0.955968  | 0.9804742 | FALSE |

|                  |                  |           |           |       |
|------------------|------------------|-----------|-----------|-------|
| TC19001103.hg.1  | ENSG00000125730  | 0.955968  | 0.9804742 | FALSE |
| TC01001090.hg.1  | ENSG00000117289; | 0.9575892 | 0.9816147 | FALSE |
| TC05000165.hg.1  | ENSG00000079215  | 0.9577679 | 0.9816147 | FALSE |
| TC0Y000351.hg.1  | ENSG00000129824  | 0.9594944 | 0.9831487 | FALSE |
| TC05001385.hg.1  | ENSG00000145632; | 0.9606689 | 0.9840212 | FALSE |
| TC01000785.hg.1  | ENSG00000154027; | 0.960843  | 0.9840212 | FALSE |
| TC17001462.hg.1  | ENSG00000131747  | 0.9611503 | 0.9840212 | FALSE |
| TC04000313.hg.1  | ENSG00000157404  | 0.9611503 | 0.9840212 | FALSE |
| TC01002578.hg.1  | ENSG00000117394; | 0.9621864 | 0.9847286 | FALSE |
| TC01000785.hg.1  | ENSG00000154027; | 0.9632082 | 0.9855388 | FALSE |
| TC01001112.hg.1  | ENSG00000131778  | 0.9642622 | 0.9863815 | FALSE |
| TC02000891.hg.1  | ENSG00000150540; | 0.9668146 | 0.9883654 | FALSE |
| TC01000785.hg.1  | ENSG00000154027; | 0.9671223 | 0.9883654 | FALSE |
| TC0Y000351.hg.1  | ENSG00000129824  | 0.9671251 | 0.9883654 | FALSE |
| TC02001100.hg.1  | ENSG00000138448  | 0.9671251 | 0.9883654 | FALSE |
| TC07000768.hg.1  | ENSG00000174697  | 0.9671251 | 0.9883654 | FALSE |
| TC17001462.hg.1  | ENSG00000131747; | 0.9677926 | 0.9885755 | FALSE |
| TC12002066.hg.1  | ENSG00000158104  | 0.9684696 | 0.989031  | FALSE |
| TC01003172.hg.1  | ENSG00000203818; | 0.9704699 | 0.9908375 | FALSE |
| TC17001462.hg.1  | ENSG00000131747; | 0.9720292 | 0.9917579 | FALSE |
| TC07000852.hg.1  | ENSG00000181072  | 0.9721822 | 0.9917579 | FALSE |
| TC12001807.hg.1  | ENSG00000133639  | 0.9721822 | 0.9917579 | FALSE |
| TC12001807.hg.1  | ENSG00000133639  | 0.9721822 | 0.9917579 | FALSE |
| TC02001100.hg.1  | ENSG00000138448  | 0.9721822 | 0.9917579 | FALSE |
| TC07000852.hg.1  | ENSG00000181072  | 0.9733201 | 0.9921434 | FALSE |
| TC01000703.hg.1  | ENSG00000132849; | 0.9733713 | 0.9921434 | FALSE |
| TC01003172.hg.1  | ENSG00000203818; | 0.9739407 | 0.9924203 | FALSE |
| TC02000448.hg.1  | ENSG00000163017; | 0.9743378 | 0.9924203 | FALSE |
| TC01000685.hg.1  | ENSG00000162409; | 0.9743384 | 0.9924203 | FALSE |
| TC01000685.hg.1  | ENSG00000162409; | 0.974668  | 0.99252   | FALSE |
| TC07000852.hg.1  | ENSG00000181072  | 0.9754583 | 0.9929704 | FALSE |
| TC07000852.hg.1  | ENSG00000181072  | 0.9754583 | 0.9929704 | FALSE |
| TC07000852.hg.1  | ENSG00000181072  | 0.9764624 | 0.993402  | FALSE |
| TC0Y000351.hg.1  | ENSG00000129824  | 0.9764624 | 0.993402  | FALSE |
| TC07000852.hg.1  | ENSG00000181072  | 0.9764624 | 0.993402  | FALSE |
| TC03000214.hg.1  | ENSG00000168036; | 0.977383  | 0.9938662 | FALSE |
| TC11000174.hg.1  | ENSG00000166483  | 0.9783491 | 0.9943762 | FALSE |
| TC03000248.hg.1  | ENSG00000144791  | 0.9783491 | 0.9943762 | FALSE |
| TC11000174.hg.1  | ENSG00000166483  | 0.9783491 | 0.9943762 | FALSE |
| TC01001112.hg.1; | ENSG00000131778; | 0.9796572 | 0.9951952 | FALSE |
| TC01000685.hg.1  | ENSG00000162409; | 0.979958  | 0.9951952 | FALSE |
| TC02000511.hg.1  | ENSG00000168906  | 0.9800848 | 0.9951952 | FALSE |
| TC06001027.hg.1  | ENSG00000118503; | 0.9803999 | 0.9952791 | FALSE |
| TC01003172.hg.1  | ENSG00000203818; | 0.981089  | 0.9957425 | FALSE |
| TC03000248.hg.1  | ENSG00000144791  | 0.9816815 | 0.9961078 | FALSE |
| TC01000685.hg.1  | ENSG00000162409; | 0.9819491 | 0.9961431 | FALSE |
| TC12000803.hg.1  | ENSG00000166598; | 0.9830181 | 0.9969913 | FALSE |
| TC01003172.hg.1  | ENSG00000203818; | 0.9847556 | 0.998355  | FALSE |
| TC12001405.hg.1  | ENSG00000139174  | 0.9851362 | 0.998355  | FALSE |
| TC01000115.hg.1; | ENSG00000171621; | 0.9852478 | 0.998355  | FALSE |
| TC01003172.hg.1  | ENSG00000203818; | 0.9852954 | 0.998355  | FALSE |
| TC09000455.hg.1  | ENSG00000158079  | 0.9868882 | 0.9997323 | FALSE |
| TC18000097.hg.1  | ENSG00000101773  | 0.9874251 | 1         | FALSE |
| TC01003172.hg.1  | ENSG00000203818; | 0.9881646 | 1         | FALSE |
| TC10000874.hg.1  | ENSG00000203805  | 0.9889077 | 1         | FALSE |
| TC06000945.hg.1  | ENSG00000152661  | 0.9893621 | 1         | FALSE |
| TC18000097.hg.1  | ENSG00000101773  | 0.9902157 | 1         | FALSE |
| TC12002155.hg.1  | ENSG00000176915  | 0.9902157 | 1         | FALSE |



|                  |                  |           |   |       |
|------------------|------------------|-----------|---|-------|
| TC0Y000351.hg.1  | ENSG00000129824  | 0.9902157 | 1 | FALSE |
| TC12002155.hg.1  | ENSG00000176915  | 0.991001  | 1 | FALSE |
| TC01003172.hg.1  | ENSG00000203818; | 0.9911297 | 1 | FALSE |
| TC17001462.hg.1  | ENSG00000131747; | 0.9911556 | 1 | FALSE |
| TC01003629.hg.1  | ENSG00000116679; | 0.9911556 | 1 | FALSE |
| TC01001090.hg.1  | ENSG00000117289; | 0.9914466 | 1 | FALSE |
| TC01003172.hg.1  | ENSG00000203818; | 0.991473  | 1 | FALSE |
| TC06000408.hg.1  | ENSG00000223865  | 0.9923878 | 1 | FALSE |
| TC18000097.hg.1  | ENSG00000101773  | 0.9923878 | 1 | FALSE |
| TC06000408.hg.1  | ENSG00000223865  | 0.9929989 | 1 | FALSE |
| TC01001090.hg.1  | ENSG00000117289; | 0.9930557 | 1 | FALSE |
| TC01003172.hg.1  | ENSG00000203818; | 0.9931003 | 1 | FALSE |
| TC17001462.hg.1  | ENSG00000131747  | 0.9935611 | 1 | FALSE |
| TC02001100.hg.1; | ENSG00000138448; | 0.9936553 | 1 | FALSE |
| TC01002954.hg.1  | ENSG00000134243  | 0.993825  | 1 | FALSE |
| TC02000511.hg.1  | ENSG00000168906  | 0.994321  | 1 | FALSE |
| TC06000408.hg.1  | ENSG00000223865  | 0.9955826 | 1 | FALSE |
| TC05001385.hg.1  | ENSG00000145632; | 0.9966005 | 1 | FALSE |
| TC03001823.hg.1  | ENSG00000114107; | 0.99665   | 1 | FALSE |
| TC12001807.hg.1  | ENSG00000133639  | 0.9968404 | 1 | FALSE |
| TC12002155.hg.1  | ENSG00000176915  | 0.99697   | 1 | FALSE |
| TC12000531.hg.1  | ENSG00000166986  | 0.9974377 | 1 | FALSE |
| TC04000313.hg.1  | ENSG00000157404  | 0.9974377 | 1 | FALSE |
| TC02001100.hg.1; | ENSG00000138448; | 0.9977554 | 1 | FALSE |
| TC02001100.hg.1; | ENSG00000138448; | 0.9979178 | 1 | FALSE |
| TC01002706.hg.1  | ENSG00000184292; | 0.9983396 | 1 | FALSE |
| TC01002954.hg.1  | ENSG00000134243; | 0.9983741 | 1 | FALSE |
| TC01000685.hg.1  | ENSG00000162409; | 0.9986429 | 1 | FALSE |
| TC01000685.hg.1  | ENSG00000162409; | 0.9993735 | 1 | FALSE |
| TC12002155.hg.1  | ENSG00000176915  | 0.9993847 | 1 | FALSE |
| TC04001084.hg.1  | ENSG00000109819; | 0.999404  | 1 | FALSE |
| TC01001112.hg.1; | ENSG00000131778; | 0.9994547 | 1 | FALSE |
| TC01002669.hg.1  | ENSG00000157193; | 0.9995416 | 1 | FALSE |
| TC0Y000351.hg.1  | ENSG00000129824; | 0.999603  | 1 | FALSE |
| TC03000248.hg.1  | ENSG00000144791  | 0.9998755 | 1 | FALSE |
| TC04001084.hg.1  | ENSG00000109819; | 0.9999439 | 1 | FALSE |
| TC01000728.hg.1  | ENSG00000162433; | 0.9999755 | 1 | FALSE |
| TC12000531.hg.1  | ENSG00000166986  | 0.9999901 | 1 | FALSE |
| TC01003629.hg.1  | ENSG00000116679; | 0.9999968 | 1 | FALSE |
| TC01000728.hg.1  | ENSG00000162433; | 0.999999  | 1 | FALSE |
| TC01003629.hg.1  | ENSG00000116679; | 0.9999992 | 1 | FALSE |
| TC01003629.hg.1  | ENSG00000116679; | 0.9999994 | 1 | FALSE |
| TC01000728.hg.1  | ENSG00000162433; | 0.9999996 | 1 | FALSE |
| TC01002932.hg.1  | ENSG00000060718; | 0.9999998 | 1 | FALSE |
| TC01000728.hg.1  | ENSG00000162433; | 0.9999999 | 1 | FALSE |
| TC06004141.hg.1  | ENSG00000112096; | 1         | 1 | FALSE |
| TC01001112.hg.1; | ENSG00000131778; | 1         | 1 | FALSE |
| TC07001256.hg.1  | ENSG00000154678  | 1         | 1 | FALSE |
| TC07001256.hg.1  | ENSG00000154678  | 1         | 1 | FALSE |

| Names                                                  | Genes_In_Term | DEG | Input_gene       |
|--------------------------------------------------------|---------------|-----|------------------|
| Total                                                  | 18153         | 702 | -                |
| GO:0005576//extracellular region                       | 2049          | 186 | TC01000139.hg.1; |
| GO:0005578//proteinaceous extracellular matrix         | 325           | 54  | TC01001188.hg.1; |
| GO:0031012//extracellular matrix                       | 395           | 70  | TC01001188.hg.1; |
| GO:0044421//extracellular region part                  | 1093          | 123 | TC01000904.hg.1; |
| GO:0005615//extracellular space                        | 820           | 84  | TC01000904.hg.1; |
| GO:0044420//extracellular matrix part                  | 152           | 23  | TC01002284.hg.1; |
| GO:0005886//plasma membrane                            | 4087          | 214 | TC01000394.hg.1; |
| GO:0016020//membrane                                   | 7384          | 349 | TC01000394.hg.1; |
| GO:0071944//cell periphery                             | 4180          | 216 | TC01000394.hg.1; |
| GO:0044425//membrane part                              | 5713          | 276 | TC01000394.hg.1; |
| GO:0031224//intrinsic to membrane                      | 5004          | 245 | TC01000723.hg.1; |
| GO:NM_0059                                             | 10            | 5   | TC02000511.hg.1; |
| GO:0016021//integral to membrane                       | 4884          | 237 | TC01000723.hg.1; |
| GO:0044459//plasma membrane part                       | 1883          | 106 | TC01000703.hg.1; |
| GO:0009986//cell surface                               | 494           | 38  | TC01000904.hg.1; |
| GO:0043025//neuronal cell body                         | 216           | 21  | TC01001805.hg.1; |
| GO:0031226//intrinsic to plasma membrane               | 1212          | 73  | TC01000723.hg.1; |
| GO:0043205//fibril                                     | 8             | 4   | TC01002284.hg.1; |
| GO:0005604//basement membrane                          | 75            | 11  | TC03002106.hg.1; |
| GO:0005887//integral to plasma membrane                | 1162          | 70  | TC01000723.hg.1; |
| GO:0005783//endoplasmic reticulum                      | 1218          | 72  | TC01001607.hg.1; |
| GO:0044297//cell body                                  | 244           | 22  | TC01001805.hg.1; |
| GO:0043005//neuron projection                          | 464           | 34  | TC01001805.hg.1; |
| GO:0097458//neuron part                                | 598           | 41  | TC01001805.hg.1; |
| GO:0016323//basolateral plasma membrane                | 146           | 15  | TC01001473.hg.1; |
| GO:0005575//cellular_component                         | 15844         | 640 | TC01000100.hg.1; |
| GO:0005737//cytoplasm                                  | 8351          | 364 | TC01000100.hg.1; |
| GO:0001527//microfibril                                | 6             | 3   | TC01002284.hg.1; |
| GO:0043235//receptor complex                           | 161           | 15  | TC01001095.hg.1; |
| GO:0031983//vesicle lumen                              | 62            | 8   | TC02001628.hg.1; |
| GO:0002116//semaphorin receptor complex                | 8             | 3   | TC01003778.hg.1; |
| GO:0005788//endoplasmic reticulum lumen                | 141           | 13  | TC01002932.hg.1; |
| GO:0031091//platelet alpha granule                     | 51            | 7   | TC02002823.hg.1; |
| GO:0045177//apical part of cell                        | 264           | 20  | TC01000703.hg.1; |
| GO:0008305//integrin complex                           | 27            | 5   | TC01001095.hg.1; |
| GO:0034358//plasma lipoprotein particle                | 39            | 6   | TC02000416.hg.1; |
| GO:0005911//cell-cell junction                         | 249           | 19  | TC01000703.hg.1; |
| GO:NR_0014                                             | 9             | 3   | TC06004066.hg.1; |
| GO:0032994//protein-lipid complex                      | 40            | 6   | TC02000416.hg.1; |
| GO:0042995//cell projection                            | 1055          | 58  | TC01000904.hg.1; |
| GO:0034774//secretory granule lumen                    | 54            | 7   | TC03001590.hg.1; |
| GO:0030424//axon                                       | 207           | 16  | TC01001805.hg.1; |
| GO:0005905//coated pit                                 | 45            | 6   | TC01000734.hg.1; |
| GO:0044432//endoplasmic reticulum part                 | 871           | 48  | TC01001607.hg.1; |
| GO:0060205//cytoplasmic membrane-bounded vesicle lumen | 61            | 7   | TC03001590.hg.1; |
| GO:0030132//clathrin coat of coated pit                | 12            | 3   | TC01000734.hg.1; |
| GO:0009897//external side of plasma membrane           | 200           | 15  | TC01000904.hg.1; |
| GO:0012505//endomembrane system                        | 1516          | 76  | TC01000734.hg.1; |
| GO:0060076//excitatory synapse                         | 13            | 3   | TC09000388.hg.1; |
| GO:0034361//very-low-density lipoprotein particle      | 24            | 4   | TC02000416.hg.1; |
| GO:0034385//triglyceride-rich lipoprotein particle     | 24            | 4   | TC02000416.hg.1; |
| GO:0042827//platelet dense granule                     | 5             | 2   | TC03000013.hg.1; |
| GO:0048471//perinuclear region of cytoplasm            | 387           | 24  | TC01000703.hg.1; |
| GO:0005741//mitochondrial outer membrane               | 101           | 9   | TC02000466.hg.1; |
| GO:0005913//cell-cell adherens junction                | 39            | 5   | TC03000214.hg.1; |
| GO:0031093//platelet alpha granule lumen               | 39            | 5   | TC03001590.hg.1; |

|                                                            |      |     |                  |
|------------------------------------------------------------|------|-----|------------------|
| GO:0005581//collagen                                       | 69   | 7   | TC01002932.hg.1; |
| GO:0030426//growth cone                                    | 69   | 7   | TC02002808.hg.1; |
| GO:0030125//clathrin vesicle coat                          | 15   | 3   | TC01000734.hg.1; |
| GO:0030425//dendrite                                       | 194  | 14  | TC01002954.hg.1; |
| GO:0005794//Golgi apparatus                                | 1093 | 56  | TC01000394.hg.1; |
| GO:0014704//intercalated disc                              | 27   | 4   | TC01003129.hg.1; |
| GO:0030864//cortical actin cytoskeleton                    | 27   | 4   | TC01000394.hg.1; |
| GO:0030122//AP-2 adaptor complex                           | 6    | 2   | TC01000734.hg.1; |
| GO:0030173//integral to Golgi membrane                     | 41   | 5   | TC01000783.hg.1; |
| GO:0016324//apical plasma membrane                         | 196  | 14  | TC01000703.hg.1; |
| GO:0000139//Golgi membrane                                 | 523  | 30  | TC01000783.hg.1; |
| GO:0031988//membrane-bounded vesicle                       | 875  | 46  | TC01000734.hg.1; |
| GO:0019867//outer membrane                                 | 124  | 10  | TC02000466.hg.1; |
| GO:0005583//fibrillar collagen                             | 16   | 3   | TC01002932.hg.1; |
| GO:0030427//site of polarized growth                       | 73   | 7   | TC02002808.hg.1; |
| GO:0031228//intrinsic to Golgi membrane                    | 43   | 5   | TC01000783.hg.1; |
| GO:0005789//endoplasmic reticulum membrane                 | 750  | 40  | TC01001607.hg.1; |
| GO:0030141//secretory granule                              | 223  | 15  | TC02002823.hg.1; |
| GO:0044291//cell-cell contact zone                         | 30   | 4   | TC01003129.hg.1; |
| GO:0005606//laminin-1 complex                              | 7    | 2   | TC06000976.hg.1; |
| GO:0030128//clathrin coat of endocytic vesicle             | 7    | 2   | TC01000734.hg.1; |
| GO:0032580//Golgi cisterna membrane                        | 62   | 6   | TC01001907.hg.1; |
| GO:0042175//nuclear outer membrane-endoplasmic reticulum r | 764  | 40  | TC01001607.hg.1; |
| GO:0031982//vesicle                                        | 949  | 48  | TC01000734.hg.1; |
| GO:0005605//basal lamina                                   | 19   | 3   | TC06000976.hg.1; |
| GO:0043204//perikaryon                                     | 33   | 4   | TC02002808.hg.1; |
| GO:0045121//membrane raft                                  | 174  | 12  | TC01001473.hg.1; |
| GO:0043292//contractile fiber                              | 136  | 10  | TC01002530.hg.1; |
| GO:0031968//organelle outer membrane                       | 118  | 9   | TC02000466.hg.1; |
| GO:0044306//neuron projection terminus                     | 49   | 5   | TC02002808.hg.1; |
| GO:0070161//anchoring junction                             | 196  | 13  | TC02001031.hg.1; |
| GO:0044449//contractile fiber part                         | 120  | 9   | TC01002530.hg.1; |
| GO:0044444//cytoplasmic part                               | 6139 | 259 | TC01000394.hg.1; |
| GO:0030877//beta-catenin destruction complex               | 9    | 2   | TC03000214.hg.1; |
| GO:0044295//axonal growth cone                             | 9    | 2   | TC02002808.hg.1; |
| GO:0005637//nuclear inner membrane                         | 35   | 4   | TC01003791.hg.1; |
| GO:0070062//extracellular vesicular exosome                | 69   | 6   | TC06000779.hg.1; |
| GO:0043230//extracellular organelle                        | 70   | 6   | TC06000779.hg.1; |
| GO:0065010//extracellular membrane-bounded organelle       | 70   | 6   | TC06000779.hg.1; |
| GO:0043256//laminin complex                                | 10   | 2   | TC06000976.hg.1; |
| GO:0030017//sarcomere                                      | 107  | 8   | TC01002530.hg.1; |
| GO:0030118//clathrin coat                                  | 38   | 4   | TC01000734.hg.1; |
| GO:0031674//I band                                         | 72   | 6   | TC01002530.hg.1; |
| GO:0031985//Golgi cisterna                                 | 72   | 6   | TC01001907.hg.1; |
| GO:0042612//MHC class I protein complex                    | 55   | 5   | TC06001089.hg.1; |
| GO:0015629//actin cytoskeleton                             | 335  | 19  | TC01000394.hg.1; |
| GO:0044431//Golgi apparatus part                           | 623  | 32  | TC01000783.hg.1; |
| GO:0005916//fascia adherens                                | 11   | 2   | TC03000214.hg.1; |
| GO:0042627//chylomicron                                    | 11   | 2   | TC02001628.hg.1; |
| GO:0031984//organelle subcompartment                       | 74   | 6   | TC01001907.hg.1; |
| GO:0031225//anchored to membrane                           | 131  | 9   | TC01001736.hg.1; |
| GO:0030054//cell junction                                  | 651  | 33  | TC01000703.hg.1; |
| GO:0031904//endosome lumen                                 | 12   | 2   | TC01003211.hg.1; |
| GO:0031090//organelle membrane                             | 2205 | 98  | TC01000734.hg.1; |
| GO:0016605//PML body                                       | 77   | 6   | TC03000917.hg.1; |
| GO:0030131//clathrin adaptor complex                       | 26   | 3   | TC01000734.hg.1; |
| GO:0043296//apical junction complex                        | 97   | 7   | TC01000703.hg.1; |
| GO:0030175//filopodium                                     | 43   | 4   | TC01000904.hg.1; |

|                                                               |     |    |                  |
|---------------------------------------------------------------|-----|----|------------------|
| GO:0045178//basal part of cell                                | 27  | 3  | TC01002706.hg.1; |
| GO:0030669//clathrin-coated endocytic vesicle membrane        | 61  | 5  | TC01000734.hg.1; |
| GO:0031528//microvillus membrane                              | 13  | 2  | TC03000214.hg.1; |
| GO:0005921//gap junction                                      | 28  | 3  | TC01003129.hg.1; |
| GO:0016328//lateral plasma membrane                           | 28  | 3  | TC01002706.hg.1; |
| GO:0005923//tight junction                                    | 82  | 6  | TC01000703.hg.1; |
| GO:0070160//occluding junction                                | 82  | 6  | TC01000703.hg.1; |
| GO:0005912//adherens junction                                 | 183 | 11 | TC02001031.hg.1; |
| GO:0045334//clathrin-coated endocytic vesicle                 | 64  | 5  | TC01000734.hg.1; |
| GO:0030863//cortical cytoskeleton                             | 47  | 4  | TC01000394.hg.1; |
| GO:0030016//myofibril                                         | 124 | 8  | TC01002530.hg.1; |
| GO:0030057//desmosome                                         | 15  | 2  | TC06002157.hg.1; |
| GO:0030027//lamellipodium                                     | 106 | 7  | TC02000270.hg.1; |
| GO:0030120//vesicle coat                                      | 32  | 3  | TC01000734.hg.1; |
| GO:0005922//connexon complex                                  | 16  | 2  | TC01003129.hg.1; |
| GO:0016023//cytoplasmic membrane-bounded vesicle              | 811 | 38 | TC01000734.hg.1; |
| GO:0030119//AP-type membrane coat adaptor complex             | 33  | 3  | TC01000734.hg.1; |
| GO:0031526//brush border membrane                             | 33  | 3  | TC03000262.hg.1; |
| GO:0046658//anchored to plasma membrane                       | 33  | 3  | TC05000478.hg.1; |
| GO:0030055//cell-substrate junction                           | 132 | 8  | TC02001031.hg.1; |
| GO:0031410//cytoplasmic vesicle                               | 867 | 40 | TC01000734.hg.1; |
| GO:0005903//brush border                                      | 53  | 4  | TC03000262.hg.1; |
| GO:0005614//interstitial matrix                               | 18  | 2  | TC06001189.hg.1; |
| GO:0030140//trans-Golgi network transport vesicle             | 18  | 2  | TC01002954.hg.1; |
| GO:0042383//sarcolemma                                        | 74  | 5  | TC01000904.hg.1; |
| GO:0016010//dystrophin-associated glycoprotein complex        | 19  | 2  | TC05000860.hg.1; |
| GO:0034362//low-density lipoprotein particle                  | 19  | 2  | TC02001628.hg.1; |
| GO:0005667//transcription factor complex                      | 249 | 13 | TC01003629.hg.1; |
| GO:0014069//postsynaptic density                              | 76  | 5  | TC02002808.hg.1; |
| GO:0005791//rough endoplasmic reticulum                       | 37  | 3  | TC04001245.hg.1; |
| GO:0005902//microvillus                                       | 57  | 4  | TC01000904.hg.1; |
| GO:0000015//phosphopyruvate hydratase complex                 | 5   | 1  | TC12000099.hg.1  |
| GO:0005593//FACIT collagen                                    | 5   | 1  | TC08000700.hg.1  |
| GO:0005826//actomyosin contractile ring                       | 5   | 1  | TC07000235.hg.1  |
| GO:0036021//endolysosome lumen                                | 5   | 1  | TC01003211.hg.1  |
| GO:0044453//nuclear membrane part                             | 5   | 1  | TC01003887.hg.1  |
| GO:0071437//invadopodium                                      | 5   | 1  | TC02002480.hg.1  |
| GO:NM_0032                                                    | 5   | 1  | TC09001058.hg.1  |
| GO:NM_0041                                                    | 5   | 1  | TC09001345.hg.1  |
| GO:NM_0149                                                    | 5   | 1  | TC12000656.hg.1  |
| GO:NM_1985                                                    | 5   | 1  | TC02000705.hg.1  |
| GO:0044433//cytoplasmic vesicle part                          | 413 | 20 | TC01000734.hg.1; |
| GO:0005795//Golgi stack                                       | 100 | 6  | TC01001907.hg.1; |
| GO:0009925//basal plasma membrane                             | 21  | 2  | TC01002706.hg.1; |
| GO:0043198//dendritic shaft                                   | 21  | 2  | TC11002435.hg.1; |
| GO:0005901//caveola                                           | 60  | 4  | TC01001473.hg.1; |
| GO:0008076//voltage-gated potassium channel complex           | 60  | 4  | TC06000728.hg.1; |
| GO:0034705//potassium channel complex                         | 60  | 4  | TC06000728.hg.1; |
| GO:0045202//synapse                                           | 400 | 19 | TC02002808.hg.1; |
| GO:0030018//Z disc                                            | 61  | 4  | TC01002530.hg.1; |
| GO:0014731//spectrin-associated cytoskeleton                  | 6   | 1  | TC01000394.hg.1  |
| GO:0016012//sarcoglycan complex                               | 6   | 1  | TC05000860.hg.1  |
| GO:0016342//catenin complex                                   | 6   | 1  | TC03000214.hg.1  |
| GO:0019907//cyclin-dependent protein kinase activating kinase | 6   | 1  | TC12003293.hg.1  |
| GO:0031092//platelet alpha granule membrane                   | 6   | 1  | TC12000076.hg.1  |
| GO:0032809//neuronal cell body membrane                       | 6   | 1  | TC20000926.hg.1  |
| GO:0033270//paranode region of axon                           | 6   | 1  | TC17000533.hg.1  |
| GO:0044298//cell body membrane                                | 6   | 1  | TC20000926.hg.1  |

|                                                            |     |    |                  |
|------------------------------------------------------------|-----|----|------------------|
| GO:0070382//exocytic vesicle                               | 6   | 1  | TC11002162.hg.1  |
| GO:NR_0021                                                 | 6   | 1  | TC06001332.hg.1  |
| GO:0030665//clathrin-coated vesicle membrane               | 126 | 7  | TC01000734.hg.1; |
| GO:0005924//cell-substrate adherens junction               | 128 | 7  | TC02001031.hg.1; |
| GO:0044448//cell cortex part                               | 86  | 5  | TC01000394.hg.1; |
| GO:0001939//female pronucleus                              | 7   | 1  | TC01002578.hg.1  |
| GO:0008091//spectrin                                       | 7   | 1  | TC01000394.hg.1  |
| GO:0016011//dystroglycan complex                           | 7   | 1  | TC05000860.hg.1  |
| GO:0016327//apicolateral plasma membrane                   | 7   | 1  | TC15001110.hg.1  |
| GO:0016442//RNA-induced silencing complex                  | 7   | 1  | TC03000248.hg.1  |
| GO:0030130//clathrin coat of trans-Golgi network vesicle   | 7   | 1  | TC22000487.hg.1  |
| GO:0031232//extrinsic to external side of plasma membrane  | 7   | 1  | TC02002823.hg.1  |
| GO:0031332//RNAi effector complex                          | 7   | 1  | TC03000248.hg.1  |
| GO:0032590//dendrite membrane                              | 7   | 1  | TC20000926.hg.1  |
| GO:0036056//filtration diaphragm                           | 7   | 1  | TC07001552.hg.1  |
| GO:0036057//slit diaphragm                                 | 7   | 1  | TC07001552.hg.1  |
| GO:0046581//intercellular canaliculus                      | 7   | 1  | TC15001110.hg.1  |
| GO:NM_0124                                                 | 7   | 1  | TC17001886.hg.1  |
| GO:0000323//lytic vacuole                                  | 364 | 17 | TC01002441.hg.1; |
| GO:0005764//lysosome                                       | 364 | 17 | TC01002441.hg.1; |
| GO:0032589//neuron projection membrane                     | 25  | 2  | TC17001353.hg.1; |
| GO:0055038//recycling endosome membrane                    | 25  | 2  | TC08001659.hg.1; |
| GO:0045211//postsynaptic membrane                          | 155 | 8  | TC02002808.hg.1; |
| GO:0030667//secretory granule membrane                     | 46  | 3  | TC03000013.hg.1; |
| GO:0012510//trans-Golgi network transport vesicle membrane | 8   | 1  | TC22000487.hg.1  |
| GO:0070938//contractile ring                               | 8   | 1  | TC07000235.hg.1  |
| GO:NM_0068                                                 | 8   | 1  | TC10002938.hg.1  |
| GO:0030136//clathrin-coated vesicle                        | 209 | 10 | TC01000734.hg.1; |
| GO:0019897//extrinsic to plasma membrane                   | 71  | 4  | TC01002166.hg.1; |
| GO:0030117//membrane coat                                  | 71  | 4  | TC01000734.hg.1; |
| GO:0043202//lysosomal lumen                                | 71  | 4  | TC01003211.hg.1; |
| GO:0048475//coated membrane                                | 71  | 4  | TC01000734.hg.1; |
| GO:0031252//cell leading edge                              | 234 | 11 | TC02000270.hg.1; |
| GO:0030673//axolemma                                       | 9   | 1  | TC17001353.hg.1  |
| GO:0030934//anchoring collagen                             | 9   | 1  | TC08000700.hg.1  |
| GO:0031095//platelet dense tubular network membrane        | 9   | 1  | TC03000013.hg.1  |
| GO:0036019//endolysosome                                   | 9   | 1  | TC01003211.hg.1  |
| GO:0042588//zymogen granule                                | 9   | 1  | TC10000415.hg.1  |
| GO:0019898//extrinsic to membrane                          | 119 | 6  | TC01000394.hg.1; |
| GO:0005769//early endosome                                 | 190 | 9  | TC01002954.hg.1; |
| GO:0033267//axon part                                      | 97  | 5  | TC02002808.hg.1; |
| GO:0005890//sodium:potassium-exchanging ATPase complex     | 10  | 1  | TC01001473.hg.1  |
| GO:0043020//NADPH oxidase complex                          | 10  | 1  | TC11002178.hg.1  |
| GO:0043034//costamere                                      | 10  | 1  | TC0X000943.hg.1  |
| GO:NM_0024                                                 | 10  | 1  | TC22000620.hg.1  |
| GO:NR_0268                                                 | 10  | 1  | TC21000425.hg.1  |
| GO:0044463//cell projection part                           | 534 | 23 | TC02002480.hg.1; |
| GO:0031965//nuclear membrane                               | 194 | 9  | TC01002954.hg.1; |
| GO:0005775//vacuolar lumen                                 | 76  | 4  | TC01003211.hg.1; |
| GO:0005925//focal adhesion                                 | 124 | 6  | TC02001031.hg.1; |
| GO:0005665//DNA-directed RNA polymerase II, core complex   | 11  | 1  | TC04001084.hg.1  |
| GO:0031094//platelet dense tubular network                 | 11  | 1  | TC03000013.hg.1  |
| GO:0031307//integral to mitochondrial outer membrane       | 11  | 1  | TC04002948.hg.1  |
| GO:0033276//transcription factor TFC complex               | 11  | 1  | TC0X001176.hg.1  |
| GO:NM_0140                                                 | 11  | 1  | TC02000286.hg.1  |
| GO:0005793//endoplasmic reticulum-Golgi intermediate compa | 55  | 3  | TC02002637.hg.1; |
| GO:0005798//Golgi-associated vesicle                       | 55  | 3  | TC01002954.hg.1; |
| GO:0017053//transcriptional repressor complex              | 55  | 3  | TC01003042.hg.1; |

|                                                            |       |     |                  |
|------------------------------------------------------------|-------|-----|------------------|
| GO:0042611//MHC protein complex                            | 126   | 6   | TC06000408.hg.1; |
| GO:0030660//Golgi-associated vesicle membrane              | 33    | 2   | TC06000945.hg.1; |
| GO:0031594//neuromuscular junction                         | 33    | 2   | TC02002808.hg.1; |
| GO:0030666//endocytic vesicle membrane                     | 127   | 6   | TC01000734.hg.1; |
| GO:0031306//intrinsic to mitochondrial outer membrane      | 12    | 1   | TC04002948.hg.1  |
| GO:0048786//presynaptic active zone                        | 12    | 1   | TC09000388.hg.1  |
| GO:0005938//cell cortex                                    | 177   | 8   | TC01000394.hg.1; |
| GO:0030133//transport vesicle                              | 177   | 8   | TC01002954.hg.1; |
| GO:0001725//stress fiber                                   | 34    | 2   | TC01002530.hg.1; |
| GO:0097060//synaptic membrane                              | 179   | 8   | TC02002808.hg.1; |
| GO:0044304//main axon                                      | 35    | 2   | TC17000533.hg.1; |
| GO:0031253//cell projection membrane                       | 181   | 8   | TC02002480.hg.1; |
| GO:0002102//podosome                                       | 13    | 1   | TC01000904.hg.1  |
| GO:0005790//smooth endoplasmic reticulum                   | 13    | 1   | TC17001353.hg.1  |
| GO:0005942//phosphatidylinositol 3-kinase complex          | 13    | 1   | TC01002616.hg.1  |
| GO:0031258//lamellipodium membrane                         | 13    | 1   | TC02002480.hg.1  |
| GO:0032432//actin filament bundle                          | 37    | 2   | TC01002530.hg.1; |
| GO:NM_0005                                                 | 14    | 1   | TC07000449.hg.1  |
| GO:0005671//Ada2/Gcn5/Ada3 transcription activator complex | 15    | 1   | TC03000986.hg.1  |
| GO:0031362//anchored to external side of plasma membrane   | 15    | 1   | TC05001657.hg.1  |
| GO:0005876//spindle microtubule                            | 39    | 2   | TC0X001279.hg.1  |
| GO:0005829//cytosol                                        | 1983  | 78  | TC01000685.hg.1; |
| GO:0009295//nucleoid                                       | 40    | 2   | TC06004141.hg.1; |
| GO:0005796//Golgi lumen                                    | 65    | 3   | TC03001590.hg.1; |
| GO:0034703//cation channel complex                         | 116   | 5   | TC06000728.hg.1; |
| GO:0000159//protein phosphatase type 2A complex            | 16    | 1   | TC04001001.hg.1  |
| GO:0005669//transcription factor TFIID complex             | 16    | 1   | TC0X001176.hg.1  |
| GO:0005859//muscle myosin complex                          | 16    | 1   | TC03001362.hg.1  |
| GO:0045120//pronucleus                                     | 16    | 1   | TC01002578.hg.1  |
| GO:0072686//mitotic spindle                                | 16    | 1   | TC03000986.hg.1  |
| GO:0008287//protein serine/threonine phosphatase complex   | 41    | 2   | TC03000013.hg.1; |
| GO:0005773//vacuole                                        | 427   | 17  | TC01002441.hg.1; |
| GO:0042641//actomyosin                                     | 42    | 2   | TC01002530.hg.1; |
| GO:0043679//axon terminus                                  | 42    | 2   | TC02002808.hg.1; |
| GO:0005892//acetylcholine-gated channel complex            | 17    | 1   | TC15001136.hg.1  |
| GO:0022627//cytosolic small ribosomal subunit              | 17    | 1   | TC0Y000351.hg.1  |
| GO:0044456//synapse part                                   | 301   | 12  | TC02002808.hg.1; |
| GO:0055037//recycling endosome                             | 69    | 3   | TC02001437.hg.1; |
| GO:0034702//ion channel complex                            | 173   | 7   | TC06000728.hg.1; |
| GO:0031941//filamentous actin                              | 18    | 1   | TC0X000034.hg.1  |
| GO:0000932//cytoplasmic mRNA processing body               | 44    | 2   | TC03000248.hg.1; |
| GO:0005811//lipid particle                                 | 44    | 2   | TC12000399.hg.1; |
| GO:0044464//cell part                                      | 13780 | 533 | TC01000100.hg.1; |
| GO:0005623//cell                                           | 13781 | 533 | TC01000100.hg.1; |
| GO:0044440//endosomal part                                 | 332   | 13  | TC01002954.hg.1; |
| GO:0031233//intrinsic to external side of plasma membrane  | 19    | 1   | TC05001657.hg.1  |
| GO:0031463//Cul3-RING ubiquitin ligase complex             | 20    | 1   | TC05001481.hg.1  |
| GO:0030662//coated vesicle membrane                        | 180   | 7   | TC01000734.hg.1; |
| GO:0022626//cytosolic ribosome                             | 48    | 2   | TC03002146.hg.1; |
| GO:0030315//T-tubule                                       | 21    | 1   | TC02000432.hg.1  |
| GO:0031672//A band                                         | 21    | 1   | TC03001362.hg.1  |
| GO:0032420//stereocilium                                   | 21    | 1   | TC03001255.hg.1  |
| GO:0042470//melanosome                                     | 76    | 3   | TC01002578.hg.1; |
| GO:0048770//pigment granule                                | 76    | 3   | TC01002578.hg.1; |
| GO:0001917//photoreceptor inner segment                    | 22    | 1   | TC12000099.hg.1  |
| GO:0016460//myosin II complex                              | 22    | 1   | TC03001362.hg.1  |
| GO:0030659//cytoplasmic vesicle membrane                   | 347   | 13  | TC01000734.hg.1; |
| GO:0015935//small ribosomal subunit                        | 51    | 2   | TC0Y000351.hg.1  |

|                                                           |      |    |                  |
|-----------------------------------------------------------|------|----|------------------|
| GO:0010008//endosome membrane                             | 322  | 12 | TC01002954.hg.1; |
| GO:0030139//endocytic vesicle                             | 189  | 7  | TC01000734.hg.1; |
| GO:0030135//coated vesicle                                | 270  | 10 | TC01000734.hg.1; |
| GO:0000790//nuclear chromatin                             | 135  | 5  | TC02002624.hg.1; |
| GO:0005884//actin filament                                | 52   | 2  | TC0X000034.hg.1  |
| GO:0070461//SAGA-type complex                             | 25   | 1  | TC0X001176.hg.1  |
| GO:0012506//vesicle membrane                              | 357  | 13 | TC01000734.hg.1; |
| GO:0005844//polysome                                      | 26   | 1  | TC0Y000351.hg.1  |
| GO:0005891//voltage-gated calcium channel complex         | 26   | 1  | TC19001220.hg.1  |
| GO:0032592//integral to mitochondrial membrane            | 26   | 1  | TC04002948.hg.1  |
| GO:0043195//terminal bouton                               | 26   | 1  | TC09000388.hg.1  |
| GO:0000795//synaptonemal complex                          | 27   | 1  | TC17001462.hg.1  |
| GO:0043209//myelin sheath                                 | 27   | 1  | TC01003017.hg.1  |
| GO:0031301//integral to organelle membrane                | 255  | 9  | TC01000783.hg.1; |
| GO:0005740//mitochondrial envelope                        | 475  | 17 | TC01001090.hg.1; |
| GO:0031966//mitochondrial membrane                        | 449  | 16 | TC01001607.hg.1; |
| GO:0034364//high-density lipoprotein particle             | 28   | 1  | TC11000238.hg.1  |
| GO:0005814//centriole                                     | 59   | 2  | TC05001385.hg.1; |
| GO:0005802//trans-Golgi network                           | 147  | 5  | TC04000173.hg.1; |
| GO:0032588//trans-Golgi network membrane                  | 60   | 2  | TC06000408.hg.1; |
| GO:0044437//vacuolar part                                 | 288  | 10 | TC01002441.hg.1; |
| GO:0032421//stereocilium bundle                           | 29   | 1  | TC03001255.hg.1  |
| GO:0044445//cytosolic part                                | 148  | 5  | TC01002616.hg.1; |
| GO:0016459//myosin complex                                | 61   | 2  | TC03001362.hg.1; |
| GO:0005771//multivesicular body                           | 30   | 1  | TC06000945.hg.1  |
| GO:0031256//leading edge membrane                         | 93   | 3  | TC02002480.hg.1; |
| GO:0031901//early endosome membrane                       | 93   | 3  | TC02002808.hg.1; |
| GO:0005765//lysosomal membrane                            | 182  | 6  | TC01002441.hg.1; |
| GO:NM_0010                                                | 324  | 11 | TC01001704.hg.1; |
| GO:0016604//nuclear body                                  | 212  | 7  | TC03000917.hg.1; |
| GO:0043197//dendritic spine                               | 32   | 1  | TC05000914.hg.1  |
| GO:0044309//neuron spine                                  | 32   | 1  | TC05000914.hg.1  |
| GO:0044451//nucleoplasm part                              | 690  | 24 | TC01003042.hg.1; |
| GO:0031300//intrinsic to organelle membrane               | 275  | 9  | TC01000783.hg.1; |
| GO:0000123//histone acetyltransferase complex             | 69   | 2  | TC03000986.hg.1; |
| GO:0032153//cell division site                            | 36   | 1  | TC07000235.hg.1  |
| GO:0032155//cell division site part                       | 36   | 1  | TC07000235.hg.1  |
| GO:0005768//endosome                                      | 564  | 19 | TC01002954.hg.1; |
| GO:0042645//mitochondrial nucleoid                        | 37   | 1  | TC06004141.hg.1  |
| GO:0035770//ribonucleoprotein granule                     | 72   | 2  | TC03000248.hg.1; |
| GO:0034704//calcium channel complex                       | 38   | 1  | TC19001220.hg.1  |
| GO:0000118//histone deacetylase complex                   | 40   | 1  | TC04000856.hg.1  |
| GO:0005758//mitochondrial intermembrane space             | 40   | 1  | TC01001090.hg.1  |
| GO:0034707//chloride channel complex                      | 40   | 1  | TC21000138.hg.1  |
| GO:0000151//ubiquitin ligase complex                      | 142  | 4  | TC05001481.hg.1; |
| GO:0031967//organelle envelope                            | 779  | 26 | TC01001090.hg.1; |
| GO:0005881//cytoplasmic microtubule                       | 42   | 1  | TC05000601.hg.1  |
| GO:0031234//extrinsic to internal side of plasma membrane | 42   | 1  | TC01002166.hg.1  |
| GO:0045335//phagocytic vesicle                            | 80   | 2  | TC02001100.hg.1; |
| GO:0042734//presynaptic membrane                          | 44   | 1  | TC13000741.hg.1  |
| GO:0030496//midbody                                       | 81   | 2  | TC01002578.hg.1; |
| GO:0016591//DNA-directed RNA polymerase II, holoenzyme    | 82   | 2  | TC04001084.hg.1; |
| GO:0031975//envelope                                      | 792  | 26 | TC01001090.hg.1; |
| GO:0005856//cytoskeleton                                  | 1539 | 53 | TC01000394.hg.1; |
| GO:0001750//photoreceptor outer segment                   | 48   | 1  | TC09000614.hg.1  |
| GO:0016607//nuclear speck                                 | 86   | 2  | TC10000565.hg.1; |
| GO:0005635//nuclear envelope                              | 310  | 9  | TC01002954.hg.1; |
| GO:0000922//spindle pole                                  | 87   | 2  | TC13000109.hg.1; |

|                                                               |       |     |                  |
|---------------------------------------------------------------|-------|-----|------------------|
| GO:0009898//internal side of plasma membrane                  | 87    | 2   | TC01001624.hg.1; |
| GO:0016529//sarcoplasmic reticulum                            | 49    | 1   | TC03000013.hg.1  |
| GO:0045095//keratin filament                                  | 49    | 1   | TC17001485.hg.1  |
| GO:0005882//intermediate filament                             | 123   | 3   | TC06000945.hg.1; |
| GO:NM_0011                                                    | 405   | 12  | TC04001459.hg.1; |
| GO:0044424//intracellular part                                | 11420 | 428 | TC01000100.hg.1; |
| GO:0005774//vacuolar membrane                                 | 225   | 6   | TC01002441.hg.1; |
| GO:0000792//heterochromatin                                   | 52    | 1   | TC20000945.hg.1  |
| GO:0019866//organelle inner membrane                          | 352   | 10  | TC01001607.hg.1; |
| GO:0000428//DNA-directed RNA polymerase complex               | 93    | 2   | TC04001084.hg.1; |
| GO:0055029//nuclear DNA-directed RNA polymerase complex       | 93    | 2   | TC04001084.hg.1; |
| GO:0016528//sarcoplasm                                        | 54    | 1   | TC03000013.hg.1  |
| GO:0031970//organelle envelope lumen                          | 54    | 1   | TC01001090.hg.1  |
| GO:0030880//RNA polymerase complex                            | 95    | 2   | TC04001084.hg.1; |
| GO:0005819//spindle                                           | 200   | 5   | TC03000986.hg.1; |
| GO:0030670//phagocytic vesicle membrane                       | 57    | 1   | TC18000047.hg.1  |
| GO:0044450//microtubule organizing center part                | 98    | 2   | TC05001385.hg.1; |
| GO:0044454//nuclear chromosome part                           | 237   | 6   | TC02002624.hg.1; |
| GO:0001669//acrosomal vesicle                                 | 59    | 1   | TC05003439.hg.1  |
| GO:0044391//ribosomal subunit                                 | 101   | 2   | TC0Y000351.hg.1  |
| GO:0044429//mitochondrial part                                | 698   | 21  | TC01000728.hg.1; |
| GO:0016363//nuclear matrix                                    | 63    | 1   | TC05001481.hg.1  |
| GO:0005770//late endosome                                     | 143   | 3   | TC06000945.hg.1; |
| GO:0000794//condensed nuclear chromosome                      | 64    | 1   | TC17001462.hg.1  |
| GO:0005739//mitochondrion                                     | 1457  | 47  | TC01000728.hg.1; |
| GO:0097223//sperm part                                        | 66    | 1   | TC05003439.hg.1  |
| GO:0005654//nucleoplasm                                       | 1186  | 37  | TC01000685.hg.1; |
| GO:0000785//chromatin                                         | 290   | 7   | TC01003172.hg.1; |
| GO:0042613//MHC class II protein complex                      | 71    | 1   | TC06000408.hg.1  |
| GO:0005777//peroxisome                                        | 118   | 2   | TC03001466.hg.1; |
| GO:0042579//microbody                                         | 118   | 2   | TC03001466.hg.1; |
| GO:0045111//intermediate filament cytoskeleton                | 158   | 3   | TC06000945.hg.1; |
| GO:0000228//nuclear chromosome                                | 267   | 6   | TC02002624.hg.1; |
| GO:0030658//transport vesicle membrane                        | 120   | 2   | TC06000408.hg.1; |
| GO:ENST000                                                    | 160   | 3   | TC08000255.hg.1; |
| GO:0043227//membrane-bounded organelle                        | 8945  | 325 | TC01000100.hg.1; |
| GO:0005622//intracellular                                     | 11692 | 432 | TC01000100.hg.1; |
| GO:0034399//nuclear periphery                                 | 77    | 1   | TC05001481.hg.1  |
| GO:0001726//ruffle                                            | 122   | 2   | TC05002110.hg.1; |
| GO:0031902//late endosome membrane                            | 79    | 1   | TC17001830.hg.1  |
| GO:0044430//cytoskeletal part                                 | 1112  | 33  | TC01000394.hg.1; |
| GO:0032993//protein-DNA complex                               | 129   | 2   | TC01003172.hg.1; |
| GO:0005813//centrosome                                        | 356   | 8   | TC01000785.hg.1; |
| GO:0008021//synaptic vesicle                                  | 87    | 1   | TC03000846.hg.1  |
| GO:0031513//nonmotile primary cilium                          | 88    | 1   | TC09000614.hg.1  |
| GO:0000786//nucleosome                                        | 89    | 1   | TC01003172.hg.1  |
| GO:0012507//ER to Golgi transport vesicle membrane            | 89    | 1   | TC06000408.hg.1  |
| GO:0071556//integral to lumenal side of endoplasmic reticulum | 89    | 1   | TC06000408.hg.1  |
| GO:0005759//mitochondrial matrix                              | 291   | 6   | TC01000728.hg.1; |
| GO:0031461//cullin-RING ubiquitin ligase complex              | 90    | 1   | TC05001481.hg.1  |
| GO:0043231//intracellular membrane-bounded organelle          | 8909  | 320 | TC01000100.hg.1; |
| GO:0043233//organelle lumen                                   | 2913  | 95  | TC01000685.hg.1; |
| GO:0030134//ER to Golgi transport vesicle                     | 92    | 1   | TC06000408.hg.1  |
| GO:0043226//organelle                                         | 9838  | 355 | TC01000100.hg.1; |
| GO:0031974//membrane-enclosed lumen                           | 2959  | 96  | TC01000685.hg.1; |
| GO:0044422//organelle part                                    | 6109  | 212 | TC01000394.hg.1; |
| GO:0072372//primary cilium                                    | 104   | 1   | TC09000614.hg.1  |
| GO:0005743//mitochondrial inner membrane                      | 317   | 6   | TC01001607.hg.1; |



|                                                          |      |     |                  |
|----------------------------------------------------------|------|-----|------------------|
| GO:0030176//integral to endoplasmic reticulum membrane   | 163  | 2   | TC06000408.hg.1; |
| GO:0005840//ribosome                                     | 208  | 3   | TC03002146.hg.1; |
| GO:0005815//microtubule organizing center                | 440  | 9   | TC01000785.hg.1; |
| GO:0005681//spliceosomal complex                         | 117  | 1   | TC01003629.hg.1; |
| GO:0044455//mitochondrial membrane part                  | 121  | 1   | TC04002948.hg.1; |
| GO:0070013//intracellular organelle lumen                | 2868 | 89  | TC01000685.hg.1; |
| GO:0044446//intracellular organelle part                 | 6023 | 204 | TC01000394.hg.1; |
| GO:0043229//intracellular organelle                      | 9803 | 348 | TC01000100.hg.1; |
| GO:0005874//microtubule                                  | 308  | 5   | TC05000601.hg.1; |
| GO:0031227//intrinsic to endoplasmic reticulum membrane  | 179  | 2   | TC06000408.hg.1; |
| GO:0005730//nucleolus                                    | 1315 | 35  | TC01001112.hg.1; |
| GO:0000793//condensed chromosome                         | 139  | 1   | TC17001462.hg.1; |
| GO:0005929//cilium                                       | 254  | 3   | TC07001256.hg.1; |
| GO:0031981//nuclear lumen                                | 2338 | 67  | TC01000685.hg.1; |
| GO:0015630//microtubule cytoskeleton                     | 803  | 17  | TC01000785.hg.1; |
| GO:0043234//protein complex                              | 3150 | 93  | TC01000394.hg.1; |
| GO:0005634//nucleus                                      | 5342 | 171 | TC01000100.hg.1; |
| GO:0044427//chromosomal part                             | 517  | 8   | TC01003172.hg.1; |
| GO:0044428//nuclear part                                 | 2702 | 75  | TC01000685.hg.1; |
| GO:0043228//non-membrane-bounded organelle               | 3387 | 96  | TC01000394.hg.1; |
| GO:0043232//intracellular non-membrane-bounded organelle | 3387 | 96  | TC01000394.hg.1; |
| GO:0005694//chromosome                                   | 611  | 9   | TC01003172.hg.1; |
| GO:0030529//ribonucleoprotein complex                    | 531  | 7   | TC01003629.hg.1; |
| GO:0032991//macromolecular complex                       | 3724 | 104 | TC01000394.hg.1; |

| Gene_Symbol      | P_value   | Q_value   | Significant |
|------------------|-----------|-----------|-------------|
| -                | -         | -         | -           |
| ENSG00000171819; | 0         | 0         | TRUE        |
| ENSG00000143369; | 0         | 0         | TRUE        |
| ENSG00000143369; | 0         | 0         | TRUE        |
| ENSG00000162692; | 0         | 0         | TRUE        |
| ENSG00000162692; | 2.22E-16  | 1.901E-14 | TRUE        |
| ENSG00000117122; | 2.096E-08 | 1.495E-06 | TRUE        |
| ENSG00000159023; | 3.818E-07 | 2.334E-05 | TRUE        |
| ENSG00000159023; | 4.94E-07  | 2.643E-05 | TRUE        |
| ENSG00000159023; | 9.046E-07 | 4.302E-05 | TRUE        |
| ENSG00000159023; | 4.396E-06 | 0.0001882 | TRUE        |
| ENSG00000185483; | 8.602E-06 | 0.0003347 | TRUE        |
| ENSG00000168906; | 1.828E-05 | 0.0006518 | TRUE        |
| ENSG00000185483; | 2.585E-05 | 0.0008512 | TRUE        |
| ENSG00000132849; | 4.434E-05 | 0.0013317 | TRUE        |
| ENSG00000162692; | 4.667E-05 | 0.0013317 | TRUE        |
| ENSG00000092969; | 0.0001022 | 0.0026242 | TRUE        |
| ENSG00000185483; | 0.0001042 | 0.0026242 | TRUE        |
| ENSG00000117122; | 0.0001371 | 0.0030949 | TRUE        |
| ENSG00000090530; | 0.0001374 | 0.0030949 | TRUE        |
| ENSG00000185483; | 0.0001447 | 0.0030966 | TRUE        |
| ENSG00000116711; | 0.0002045 | 0.0041069 | TRUE        |
| ENSG00000092969; | 0.0002111 | 0.0041069 | TRUE        |
| ENSG00000092969; | 0.0002882 | 0.0052062 | TRUE        |
| ENSG00000092969; | 0.0002919 | 0.0052062 | TRUE        |
| ENSG00000143153; | 0.0005411 | 0.0092636 | TRUE        |
| ENSG00000049246; | 0.0006227 | 0.0102498 | TRUE        |
| ENSG00000049246; | 0.0008828 | 0.0139947 | TRUE        |
| ENSG00000117122; | 0.0010551 | 0.0161281 | TRUE        |
| ENSG00000143127; | 0.0014815 | 0.0218651 | TRUE        |
| ENSG00000084674; | 0.0025696 | 0.0366599 | TRUE        |
| ENSG00000076356; | 0.0027872 | 0.0384819 | TRUE        |
| ENSG00000060718; | 0.0032679 | 0.0414688 | TRUE        |
| ENSG00000135919; | 0.003306  | 0.0414688 | TRUE        |
| ENSG00000132849; | 0.0033375 | 0.0414688 | TRUE        |
| ENSG00000143127; | 0.0033911 | 0.0414688 | TRUE        |
| ENSG00000116005; | 0.0035927 | 0.0427133 | TRUE        |
| ENSG00000132849; | 0.003854  | 0.0445814 | TRUE        |
| NR_001434;NR_001 | 0.0040613 | 0.0448978 | TRUE        |
| ENSG00000116005; | 0.0040912 | 0.0448978 | TRUE        |
| ENSG00000162692; | 0.0043435 | 0.0464749 | TRUE        |
| ENSG00000184500; | 0.004578  | 0.0477902 | TRUE        |
| ENSG00000092969; | 0.0067636 | 0.068924  | FALSE       |
| ENSG00000118473; | 0.0073789 | 0.0734455 | FALSE       |
| ENSG00000116711; | 0.0086771 | 0.0844045 | FALSE       |
| ENSG00000184500; | 0.0089478 | 0.0851035 | FALSE       |
| ENSG00000118473; | 0.0097534 | 0.0907493 | FALSE       |
| ENSG00000162692; | 0.0111207 | 0.1012695 | FALSE       |
| ENSG00000118473; | 0.0113897 | 0.1015583 | FALSE       |
| ENSG00000148053; | 0.0123198 | 0.1076096 | FALSE       |
| ENSG00000116005; | 0.0127175 | 0.1077836 | FALSE       |
| ENSG00000116005; | 0.0127175 | 0.1077836 | FALSE       |
| ENSG00000150995; | 0.0138153 | 0.1137102 | FALSE       |
| ENSG00000132849; | 0.0159801 | 0.1266208 | FALSE       |
| ENSG00000159399; | 0.0162798 | 0.1266208 | FALSE       |
| ENSG00000168036; | 0.0165465 | 0.1266208 | FALSE       |
| ENSG00000184500; | 0.0165465 | 0.1266208 | FALSE       |

|                  |           |           |       |
|------------------|-----------|-----------|-------|
| ENSG0000060718;  | 0.017011  | 0.1266208 | FALSE |
| ENSG00000116106; | 0.017011  | 0.1266208 | FALSE |
| ENSG00000118473; | 0.0185069 | 0.1313246 | FALSE |
| ENSG00000134243; | 0.0188017 | 0.1313246 | FALSE |
| ENSG00000159023; | 0.0190795 | 0.1313246 | FALSE |
| ENSG00000143140; | 0.0191771 | 0.1313246 | FALSE |
| ENSG00000159023; | 0.0191771 | 0.1313246 | FALSE |
| ENSG00000118473; | 0.0201953 | 0.1319739 | FALSE |
| ENSG00000117069; | 0.0202268 | 0.1319739 | FALSE |
| ENSG00000132849; | 0.0203511 | 0.1319739 | FALSE |
| ENSG00000117069; | 0.0208164 | 0.1329761 | FALSE |
| ENSG00000118473; | 0.0215158 | 0.1353439 | FALSE |
| ENSG00000159399; | 0.0221048 | 0.1353439 | FALSE |
| ENSG0000060718;  | 0.0221357 | 0.1353439 | FALSE |
| ENSG00000116106; | 0.0225386 | 0.1358663 | FALSE |
| ENSG00000117069; | 0.0244047 | 0.1450725 | FALSE |
| ENSG00000116711; | 0.0251192 | 0.1472743 | FALSE |
| ENSG00000135919; | 0.0270042 | 0.15417   | FALSE |
| ENSG00000143140; | 0.0273523 | 0.15417   | FALSE |
| ENSG00000196569; | 0.0275561 | 0.15417   | FALSE |
| ENSG00000118473; | 0.0275561 | 0.15417   | FALSE |
| ENSG00000143641; | 0.032223  | 0.175137  | FALSE |
| ENSG00000116711; | 0.0323267 | 0.175137  | FALSE |
| ENSG00000118473; | 0.0346507 | 0.1853813 | FALSE |
| ENSG00000196569; | 0.0351674 | 0.1858229 | FALSE |
| ENSG00000116106; | 0.0373204 | 0.1947944 | FALSE |
| ENSG00000143153; | 0.0380859 | 0.1957754 | FALSE |
| ENSG00000183386; | 0.0384232 | 0.1957754 | FALSE |
| ENSG00000159399; | 0.0394726 | 0.1987561 | FALSE |
| ENSG00000116106; | 0.0401047 | 0.1995907 | FALSE |
| ENSG00000152256; | 0.0414589 | 0.2039588 | FALSE |
| ENSG00000183386; | 0.0431947 | 0.2092526 | FALSE |
| ENSG00000159023; | 0.043702  | 0.2092526 | FALSE |
| ENSG00000168036; | 0.0448841 | 0.2092526 | FALSE |
| ENSG00000116106; | 0.0448841 | 0.2092526 | FALSE |
| ENSG00000143473; | 0.0449795 | 0.2092526 | FALSE |
| ENSG00000135318; | 0.0502947 | 0.2314636 | FALSE |
| ENSG00000135318; | 0.0532949 | 0.241378  | FALSE |
| ENSG00000135318; | 0.0532949 | 0.241378  | FALSE |
| ENSG00000196569; | 0.0546961 | 0.2438533 | FALSE |
| ENSG00000183386; | 0.0555258 | 0.2450006 | FALSE |
| ENSG00000118473; | 0.0579867 | 0.253248  | FALSE |
| ENSG00000183386; | 0.059615  | 0.2564343 | FALSE |
| ENSG00000143641; | 0.059615  | 0.2564343 | FALSE |
| ENSG00000111981; | 0.0607797 | 0.2575616 | FALSE |
| ENSG00000159023; | 0.0624124 | 0.2618872 | FALSE |
| ENSG00000117069; | 0.0631092 | 0.2622403 | FALSE |
| ENSG00000168036; | 0.0651776 | 0.2669476 | FALSE |
| ENSG00000084674; | 0.0651776 | 0.2669476 | FALSE |
| ENSG00000143641; | 0.0663625 | 0.2679541 | FALSE |
| ENSG00000196352; | 0.0678526 | 0.2714104 | FALSE |
| ENSG00000132849; | 0.068921  | 0.2731313 | FALSE |
| ENSG00000143387; | 0.0762625 | 0.2961081 | FALSE |
| ENSG00000118473; | 0.0767003 | 0.2961081 | FALSE |
| ENSG00000136603; | 0.0772842 | 0.2961081 | FALSE |
| ENSG00000118473; | 0.0774862 | 0.2961081 | FALSE |
| ENSG00000132849; | 0.081795  | 0.3098076 | FALSE |
| ENSG00000162692; | 0.0836096 | 0.3139027 | FALSE |

|                 |           |           |       |
|-----------------|-----------|-----------|-------|
| ENSG00000184292 | 0.0847749 | 0.31551   | FALSE |
| ENSG00000118473 | 0.0864764 | 0.3190682 | FALSE |
| ENSG00000168036 | 0.0878884 | 0.3215063 | FALSE |
| ENSG00000143140 | 0.0923431 | 0.333526  | FALSE |
| ENSG00000184292 | 0.0923431 | 0.333526  | FALSE |
| ENSG00000132849 | 0.0975958 | 0.3464113 | FALSE |
| ENSG00000132849 | 0.0975958 | 0.3464113 | FALSE |
| ENSG00000152256 | 0.0987434 | 0.3464113 | FALSE |
| ENSG00000118473 | 0.1011484 | 0.3519637 | FALSE |
| ENSG00000159023 | 0.1074485 | 0.3696817 | FALSE |
| ENSG00000183386 | 0.1079678 | 0.3696817 | FALSE |
| ENSG00000112378 | 0.1125341 | 0.3822587 | FALSE |
| ENSG00000152527 | 0.1165151 | 0.3926651 | FALSE |
| ENSG00000118473 | 0.125173  | 0.4162156 | FALSE |
| ENSG00000143140 | 0.1254482 | 0.4162156 | FALSE |
| ENSG00000118473 | 0.1277051 | 0.4204446 | FALSE |
| ENSG00000118473 | 0.1339583 | 0.4343497 | FALSE |
| ENSG00000160801 | 0.1339583 | 0.4343497 | FALSE |
| ENSG00000174136 | 0.1339583 | 0.4343497 | FALSE |
| ENSG00000152256 | 0.1396567 | 0.4460677 | FALSE |
| ENSG00000118473 | 0.1411494 | 0.4474959 | FALSE |
| ENSG00000160801 | 0.1481409 | 0.4662081 | FALSE |
| ENSG00000112562 | 0.1522195 | 0.4738177 | FALSE |
| ENSG00000134243 | 0.1522195 | 0.4738177 | FALSE |
| ENSG00000162692 | 0.1580296 | 0.4865949 | FALSE |
| ENSG00000170624 | 0.1659903 | 0.4913501 | FALSE |
| ENSG00000084674 | 0.1659903 | 0.4913501 | FALSE |
| ENSG00000116679 | 0.1690855 | 0.4913501 | FALSE |
| ENSG00000116106 | 0.1707184 | 0.4913501 | FALSE |
| ENSG00000145242 | 0.1710336 | 0.4913501 | FALSE |
| ENSG00000162692 | 0.1780756 | 0.4913501 | FALSE |
| ENSG00000111674 | 0.1789872 | 0.4913501 | FALSE |
| ENSG00000187955 | 0.1789872 | 0.4913501 | FALSE |
| ENSG00000011426 | 0.1789872 | 0.4913501 | FALSE |
| ENSG00000143387 | 0.1789872 | 0.4913501 | FALSE |
| ENSG00000143815 | 0.1789872 | 0.4913501 | FALSE |
| ENSG00000078098 | 0.1789872 | 0.4913501 | FALSE |
| ENSG00000198467 | 0.1789872 | 0.4913501 | FALSE |
| ENSG00000131669 | 0.1789872 | 0.4913501 | FALSE |
| ENSG00000067798 | 0.1789872 | 0.4913501 | FALSE |
| ENSG00000188177 | 0.1789872 | 0.4913501 | FALSE |
| ENSG00000118473 | 0.1790902 | 0.4913501 | FALSE |
| ENSG00000143641 | 0.190552  | 0.5194665 | FALSE |
| ENSG00000184292 | 0.1941075 | 0.5241514 | FALSE |
| ENSG00000149571 | 0.1941075 | 0.5241514 | FALSE |
| ENSG00000143153 | 0.2017417 | 0.5273861 | FALSE |
| ENSG00000185760 | 0.2017417 | 0.5273861 | FALSE |
| ENSG00000185760 | 0.2017417 | 0.5273861 | FALSE |
| ENSG00000116106 | 0.2090053 | 0.5273861 | FALSE |
| ENSG00000183386 | 0.2098305 | 0.5273861 | FALSE |
| ENSG00000159023 | 0.2107456 | 0.5273861 | FALSE |
| ENSG00000170624 | 0.2107456 | 0.5273861 | FALSE |
| ENSG00000168036 | 0.2107456 | 0.5273861 | FALSE |
| ENSG00000180818 | 0.2107456 | 0.5273861 | FALSE |
| ENSG00000010278 | 0.2107456 | 0.5273861 | FALSE |
| ENSG00000158445 | 0.2107456 | 0.5273861 | FALSE |
| ENSG00000108797 | 0.2107456 | 0.5273861 | FALSE |
| ENSG00000158445 | 0.2107456 | 0.5273861 | FALSE |

|                 |           |           |       |
|-----------------|-----------|-----------|-------|
| ENSG00000137501 | 0.2107456 | 0.5273861 | FALSE |
| ENSG00000168405 | 0.2107456 | 0.5273861 | FALSE |
| ENSG00000118473 | 0.2156369 | 0.5273861 | FALSE |
| ENSG00000152256 | 0.2269221 | 0.548914  | FALSE |
| ENSG00000159023 | 0.2393096 | 0.548914  | FALSE |
| ENSG00000117394 | 0.2412772 | 0.548914  | FALSE |
| ENSG00000159023 | 0.2412772 | 0.548914  | FALSE |
| ENSG00000170624 | 0.2412772 | 0.548914  | FALSE |
| ENSG00000104067 | 0.2412772 | 0.548914  | FALSE |
| ENSG00000144791 | 0.2412772 | 0.548914  | FALSE |
| ENSG00000070371 | 0.2412772 | 0.548914  | FALSE |
| ENSG00000135919 | 0.2412772 | 0.548914  | FALSE |
| ENSG00000144791 | 0.2412772 | 0.548914  | FALSE |
| ENSG00000158445 | 0.2412772 | 0.548914  | FALSE |
| ENSG00000187391 | 0.2412772 | 0.548914  | FALSE |
| ENSG00000187391 | 0.2412772 | 0.548914  | FALSE |
| ENSG00000104067 | 0.2412772 | 0.548914  | FALSE |
| ENSG00000132471 | 0.2412772 | 0.548914  | FALSE |
| ENSG00000162511 | 0.2456006 | 0.548914  | FALSE |
| ENSG00000162511 | 0.2456006 | 0.548914  | FALSE |
| ENSG00000176658 | 0.2517121 | 0.5526738 | FALSE |
| ENSG00000104419 | 0.2517121 | 0.5526738 | FALSE |
| ENSG00000116106 | 0.2518023 | 0.5526738 | FALSE |
| ENSG00000150995 | 0.2624249 | 0.5730503 | FALSE |
| ENSG00000070371 | 0.2706293 | 0.5849966 | FALSE |
| ENSG00000011426 | 0.2706293 | 0.5849966 | FALSE |
| ENSG00000148671 | 0.2706293 | 0.5849966 | FALSE |
| ENSG00000118473 | 0.2906239 | 0.614936  | FALSE |
| ENSG00000116285 | 0.2947157 | 0.614936  | FALSE |
| ENSG00000118473 | 0.2947157 | 0.614936  | FALSE |
| ENSG00000143387 | 0.2947157 | 0.614936  | FALSE |
| ENSG00000118473 | 0.2947157 | 0.614936  | FALSE |
| ENSG00000152527 | 0.296793  | 0.614936  | FALSE |
| ENSG00000176658 | 0.2988474 | 0.614936  | FALSE |
| ENSG00000187955 | 0.2988474 | 0.614936  | FALSE |
| ENSG00000150995 | 0.2988474 | 0.614936  | FALSE |
| ENSG00000143387 | 0.2988474 | 0.614936  | FALSE |
| ENSG00000122862 | 0.2988474 | 0.614936  | FALSE |
| ENSG00000159023 | 0.31292   | 0.6347382 | FALSE |
| ENSG00000134243 | 0.3149278 | 0.6357976 | FALSE |
| ENSG00000116106 | 0.3215284 | 0.6389967 | FALSE |
| ENSG00000143153 | 0.3259753 | 0.6389967 | FALSE |
| ENSG00000086991 | 0.3259753 | 0.6389967 | FALSE |
| ENSG00000198947 | 0.3259753 | 0.6389967 | FALSE |
| ENSG00000169184 | 0.3259753 | 0.6389967 | FALSE |
| NR_026812       | 0.3259753 | 0.6389967 | FALSE |
| ENSG00000078098 | 0.3269633 | 0.6389967 | FALSE |
| ENSG00000134243 | 0.3365536 | 0.6547497 | FALSE |
| ENSG00000143387 | 0.3387589 | 0.6560579 | FALSE |
| ENSG00000152256 | 0.3472764 | 0.669092  | FALSE |
| ENSG00000109819 | 0.3520551 | 0.669092  | FALSE |
| ENSG00000150995 | 0.3520551 | 0.669092  | FALSE |
| ENSG00000137463 | 0.3520551 | 0.669092  | FALSE |
| ENSG00000187325 | 0.3520551 | 0.669092  | FALSE |
| ENSG00000171150 | 0.3520551 | 0.669092  | FALSE |
| ENSG00000081320 | 0.358318  | 0.669092  | FALSE |
| ENSG00000134243 | 0.358318  | 0.669092  | FALSE |
| ENSG00000092607 | 0.358318  | 0.669092  | FALSE |

|                 |           |           |       |
|-----------------|-----------|-----------|-------|
| ENSG00000223865 | 0.3611221 | 0.669092  | FALSE |
| ENSG00000152661 | 0.3667042 | 0.6731995 | FALSE |
| ENSG00000116106 | 0.3667042 | 0.6731995 | FALSE |
| ENSG00000118473 | 0.3680577 | 0.6731995 | FALSE |
| ENSG00000137463 | 0.3771272 | 0.6803889 | FALSE |
| ENSG00000148053 | 0.3771272 | 0.6803889 | FALSE |
| ENSG00000159023 | 0.3775522 | 0.6803889 | FALSE |
| ENSG00000134243 | 0.3775522 | 0.6803889 | FALSE |
| ENSG00000183386 | 0.3806888 | 0.6817357 | FALSE |
| ENSG00000116106 | 0.3893503 | 0.6943413 | FALSE |
| ENSG00000108797 | 0.3945406 | 0.700678  | FALSE |
| ENSG00000078098 | 0.4011604 | 0.7023583 | FALSE |
| ENSG00000162692 | 0.4012304 | 0.7023583 | FALSE |
| ENSG00000176658 | 0.4012304 | 0.7023583 | FALSE |
| ENSG00000117461 | 0.4012304 | 0.7023583 | FALSE |
| ENSG00000078098 | 0.4012304 | 0.7023583 | FALSE |
| ENSG00000183386 | 0.4218041 | 0.7308994 | FALSE |
| ENSG00000049540 | 0.4244022 | 0.732436  | FALSE |
| ENSG00000163872 | 0.4466785 | 0.7646386 | FALSE |
| ENSG00000184349 | 0.4466785 | 0.7646386 | FALSE |
| ENSG00000077274 | 0.4484213 | 0.7646386 | FALSE |
| ENSG00000162409 | 0.4541341 | 0.7713072 | FALSE |
| ENSG00000112096 | 0.4614686 | 0.7765278 | FALSE |
| ENSG00000184500 | 0.462488  | 0.7765278 | FALSE |
| ENSG00000185760 | 0.4673064 | 0.7765278 | FALSE |
| ENSG00000074211 | 0.4680938 | 0.7765278 | FALSE |
| ENSG00000187325 | 0.4680938 | 0.7765278 | FALSE |
| ENSG00000160808 | 0.4680938 | 0.7765278 | FALSE |
| ENSG00000117394 | 0.4680938 | 0.7765278 | FALSE |
| ENSG00000163872 | 0.4680938 | 0.7765278 | FALSE |
| ENSG00000150995 | 0.4743333 | 0.777834  | FALSE |
| ENSG00000162511 | 0.4863217 | 0.7877803 | FALSE |
| ENSG00000183386 | 0.4870101 | 0.7877803 | FALSE |
| ENSG00000116106 | 0.4870101 | 0.7877803 | FALSE |
| ENSG00000166664 | 0.4886815 | 0.7877803 | FALSE |
| ENSG00000129824 | 0.4886815 | 0.7877803 | FALSE |
| ENSG00000116106 | 0.4987648 | 0.7995181 | FALSE |
| ENSG00000144476 | 0.5021405 | 0.8019259 | FALSE |
| ENSG00000185760 | 0.5057767 | 0.8047302 | FALSE |
| ENSG00000146950 | 0.5084734 | 0.8060245 | FALSE |
| ENSG00000144791 | 0.5117813 | 0.8067859 | FALSE |
| ENSG00000185432 | 0.5117813 | 0.8067859 | FALSE |
| ENSG00000049246 | 0.5168746 | 0.8095496 | FALSE |
| ENSG00000049246 | 0.5182631 | 0.8095496 | FALSE |
| ENSG00000134243 | 0.5217575 | 0.8120444 | FALSE |
| ENSG00000184349 | 0.5275002 | 0.8180076 | FALSE |
| ENSG00000171617 | 0.5457915 | 0.8433169 | FALSE |
| ENSG00000118473 | 0.5479845 | 0.8436596 | FALSE |
| ENSG00000189058 | 0.558901  | 0.8570368 | FALSE |
| ENSG00000135636 | 0.5633757 | 0.8570368 | FALSE |
| ENSG00000160808 | 0.5633757 | 0.8570368 | FALSE |
| ENSG00000033867 | 0.5633757 | 0.8570368 | FALSE |
| ENSG00000117394 | 0.5676868 | 0.8570368 | FALSE |
| ENSG00000117394 | 0.5676868 | 0.8570368 | FALSE |
| ENSG00000111674 | 0.5802801 | 0.869912  | FALSE |
| ENSG00000160808 | 0.5802801 | 0.869912  | FALSE |
| ENSG00000118473 | 0.5865385 | 0.8746985 | FALSE |
| ENSG00000129824 | 0.5920565 | 0.8790702 | FALSE |

|                  |           |           |       |
|------------------|-----------|-----------|-------|
| ENSG00000134243; | 0.5935777 | 0.8790702 | FALSE |
| ENSG00000118473; | 0.599857  | 0.8803759 | FALSE |
| ENSG00000118473; | 0.6005803 | 0.8803759 | FALSE |
| ENSG00000115415; | 0.6021167 | 0.8803759 | FALSE |
| ENSG00000146950; | 0.6026872 | 0.8803759 | FALSE |
| ENSG00000187325  | 0.6271718 | 0.9105164 | FALSE |
| ENSG00000118473; | 0.6275756 | 0.9105164 | FALSE |
| ENSG00000129824  | 0.6416094 | 0.9230549 | FALSE |
| ENSG00000141837  | 0.6416094 | 0.9230549 | FALSE |
| ENSG00000137463  | 0.6416094 | 0.9230549 | FALSE |
| ENSG00000148053  | 0.6416094 | 0.9230549 | FALSE |
| ENSG00000131747  | 0.6554887 | 0.9312685 | FALSE |
| ENSG00000134198  | 0.6554887 | 0.9312685 | FALSE |
| ENSG00000117069; | 0.65711   | 0.9312685 | FALSE |
| ENSG00000117289; | 0.6634908 | 0.9372081 | FALSE |
| ENSG00000116711; | 0.6673635 | 0.9385566 | FALSE |
| ENSG00000173432  | 0.6688313 | 0.9385566 | FALSE |
| ENSG00000145632; | 0.6712418 | 0.9388545 | FALSE |
| ENSG00000109610; | 0.6764479 | 0.9388545 | FALSE |
| ENSG00000223865; | 0.6802118 | 0.9388545 | FALSE |
| ENSG00000162511; | 0.6804801 | 0.9388545 | FALSE |
| ENSG00000033867  | 0.6816578 | 0.9388545 | FALSE |
| ENSG00000117461; | 0.682205  | 0.9388545 | FALSE |
| ENSG00000160808; | 0.6889809 | 0.9451404 | FALSE |
| ENSG00000152661  | 0.6939882 | 0.9489678 | FALSE |
| ENSG00000078098; | 0.7029179 | 0.9565942 | FALSE |
| ENSG00000116106; | 0.7029179 | 0.9565942 | FALSE |
| ENSG00000162511; | 0.7105121 | 0.9608052 | FALSE |
| ENSG00000163531; | 0.7126543 | 0.9608052 | FALSE |
| ENSG00000136603; | 0.7167686 | 0.9608052 | FALSE |
| ENSG00000145934  | 0.7172366 | 0.9608052 | FALSE |
| ENSG00000145934  | 0.7172366 | 0.9608052 | FALSE |
| ENSG00000092607; | 0.7335951 | 0.9781268 | FALSE |
| ENSG00000117069; | 0.7409858 | 0.9849128 | FALSE |
| ENSG00000163872; | 0.7521791 | 0.9966955 | FALSE |
| ENSG00000011426  | 0.7585753 | 0.9999686 | FALSE |
| ENSG00000011426  | 0.7585753 | 0.9999686 | FALSE |
| ENSG00000134243; | 0.7641625 | 0.9999686 | FALSE |
| ENSG00000112096  | 0.7679301 | 0.9999686 | FALSE |
| ENSG00000144791; | 0.7728647 | 0.9999686 | FALSE |
| ENSG00000141837  | 0.7769228 | 0.9999686 | FALSE |
| ENSG00000164105  | 0.7938779 | 0.9999686 | FALSE |
| ENSG00000117289  | 0.7938779 | 0.9999686 | FALSE |
| ENSG00000159212  | 0.7938779 | 0.9999686 | FALSE |
| ENSG00000171617; | 0.8039824 | 0.9999686 | FALSE |
| ENSG00000117289; | 0.808629  | 0.9999686 | FALSE |
| ENSG00000155324  | 0.8095459 | 0.9999686 | FALSE |
| ENSG00000116285  | 0.8095459 | 0.9999686 | FALSE |
| ENSG00000138448; | 0.8208036 | 0.9999686 | FALSE |
| ENSG00000178695  | 0.8240245 | 0.9999686 | FALSE |
| ENSG00000117394; | 0.8261121 | 0.9999686 | FALSE |
| ENSG00000109819; | 0.8312787 | 0.9999686 | FALSE |
| ENSG00000117289; | 0.8328319 | 0.9999686 | FALSE |
| ENSG00000159023; | 0.8336702 | 0.9999686 | FALSE |
| ENSG00000095303  | 0.8497674 | 0.9999686 | FALSE |
| ENSG00000108175; | 0.8505868 | 0.9999686 | FALSE |
| ENSG00000134243; | 0.8515674 | 0.9999686 | FALSE |
| ENSG00000073910; | 0.855089  | 0.9999686 | FALSE |

|                  |           |           |       |
|------------------|-----------|-----------|-------|
| ENSG00000116741; | 0.855089  | 0.9999686 | FALSE |
| ENSG00000150995  | 0.8555925 | 0.9999686 | FALSE |
| ENSG00000212724  | 0.8555925 | 0.9999686 | FALSE |
| ENSG00000152661; | 0.8594255 | 0.9999686 | FALSE |
| ENSG00000138795; | 0.8632113 | 0.9999686 | FALSE |
| ENSG00000049246; | 0.8696915 | 0.9999686 | FALSE |
| ENSG00000162511; | 0.8714885 | 0.9999686 | FALSE |
| ENSG00000101115  | 0.871749  | 0.9999686 | FALSE |
| ENSG00000116711; | 0.8782325 | 0.9999686 | FALSE |
| ENSG00000109819; | 0.879594  | 0.9999686 | FALSE |
| ENSG00000109819; | 0.879594  | 0.9999686 | FALSE |
| ENSG00000150995  | 0.8815041 | 0.9999686 | FALSE |
| ENSG00000117289  | 0.8815041 | 0.9999686 | FALSE |
| ENSG00000109819; | 0.8868729 | 0.9999686 | FALSE |
| ENSG00000163872; | 0.8901852 | 0.9999686 | FALSE |
| ENSG00000168461  | 0.8947651 | 0.9999686 | FALSE |
| ENSG00000145632; | 0.8970297 | 0.9999686 | FALSE |
| ENSG00000115415; | 0.9000617 | 0.9999686 | FALSE |
| ENSG00000213949  | 0.9027718 | 0.9999686 | FALSE |
| ENSG00000129824; | 0.9063324 | 0.9999686 | FALSE |
| ENSG00000162433; | 0.9071465 | 0.9999686 | FALSE |
| ENSG00000171617  | 0.9170061 | 0.9999686 | FALSE |
| ENSG00000152661; | 0.9184416 | 0.9999686 | FALSE |
| ENSG00000131747  | 0.9202267 | 0.9999686 | FALSE |
| ENSG00000162433; | 0.9213458 | 0.9999686 | FALSE |
| ENSG00000213949  | 0.9262984 | 0.9999686 | FALSE |
| ENSG00000162409; | 0.9312996 | 0.9999686 | FALSE |
| ENSG00000203818; | 0.9350653 | 0.9999686 | FALSE |
| ENSG00000223865  | 0.9395345 | 0.9999686 | FALSE |
| ENSG00000163931; | 0.9457935 | 0.9999686 | FALSE |
| ENSG00000163931; | 0.9457935 | 0.9999686 | FALSE |
| ENSG00000152661; | 0.9467756 | 0.9999686 | FALSE |
| ENSG00000115415; | 0.9487792 | 0.9999686 | FALSE |
| ENSG00000223865; | 0.9492247 | 0.9999686 | FALSE |
| ENSG00000157168; | 0.9497726 | 0.9999686 | FALSE |
| ENSG00000049246; | 0.9504739 | 0.9999686 | FALSE |
| ENSG00000049246; | 0.9509358 | 0.9999686 | FALSE |
| ENSG00000171617  | 0.9523225 | 0.9999686 | FALSE |
| ENSG00000196923; | 0.9524483 | 0.9999686 | FALSE |
| ENSG00000154265  | 0.9559539 | 0.9999686 | FALSE |
| ENSG00000159023; | 0.9583629 | 0.9999686 | FALSE |
| ENSG00000203818; | 0.9622589 | 0.9999686 | FALSE |
| ENSG00000154027; | 0.967861  | 0.9999686 | FALSE |
| ENSG00000196549  | 0.9679193 | 0.9999686 | FALSE |
| ENSG00000095303  | 0.9691658 | 0.9999686 | FALSE |
| ENSG00000203818  | 0.9703641 | 0.9999686 | FALSE |
| ENSG00000223865  | 0.9703641 | 0.9999686 | FALSE |
| ENSG00000223865  | 0.9703641 | 0.9999686 | FALSE |
| ENSG00000162433; | 0.9710537 | 0.9999686 | FALSE |
| ENSG00000171617  | 0.9715158 | 0.9999686 | FALSE |
| ENSG00000049246; | 0.973069  | 0.9999686 | FALSE |
| ENSG00000162409; | 0.9734987 | 0.9999686 | FALSE |
| ENSG00000223865  | 0.9736868 | 0.9999686 | FALSE |
| ENSG00000049246; | 0.9773815 | 0.9999686 | FALSE |
| ENSG00000162409; | 0.9776181 | 0.9999686 | FALSE |
| ENSG00000159023; | 0.9787857 | 0.9999686 | FALSE |
| ENSG00000095303  | 0.9836505 | 0.9999686 | FALSE |
| ENSG00000116711; | 0.9848794 | 0.9999686 | FALSE |



|                 |           |           |       |
|-----------------|-----------|-----------|-------|
| ENSG00000223865 | 0.9880546 | 0.9999686 | FALSE |
| ENSG00000189058 | 0.9882352 | 0.9999686 | FALSE |
| ENSG00000154027 | 0.9894429 | 0.9999686 | FALSE |
| ENSG00000116679 | 0.9902399 | 0.9999686 | FALSE |
| ENSG00000137463 | 0.9916731 | 0.9999686 | FALSE |
| ENSG00000162409 | 0.9922804 | 0.9999686 | FALSE |
| ENSG00000159023 | 0.9923917 | 0.9999686 | FALSE |
| ENSG00000049246 | 0.9925928 | 0.9999686 | FALSE |
| ENSG00000155324 | 0.9930982 | 0.9999686 | FALSE |
| ENSG00000223865 | 0.9931389 | 0.9999686 | FALSE |
| ENSG00000131778 | 0.9944889 | 0.9999686 | FALSE |
| ENSG00000131747 | 0.995927  | 0.9999686 | FALSE |
| ENSG00000154678 | 0.9973086 | 0.9999686 | FALSE |
| ENSG00000162409 | 0.997792  | 0.9999686 | FALSE |
| ENSG00000154027 | 0.9983761 | 0.9999686 | FALSE |
| ENSG00000159023 | 0.9989339 | 0.9999686 | FALSE |
| ENSG00000049246 | 0.9990239 | 0.9999686 | FALSE |
| ENSG00000203818 | 0.9994238 | 0.9999686 | FALSE |
| ENSG00000162409 | 0.9996278 | 0.9999686 | FALSE |
| ENSG00000159023 | 0.9998584 | 0.9999686 | FALSE |
| ENSG00000159023 | 0.9998584 | 0.9999686 | FALSE |
| ENSG00000203818 | 0.9998702 | 0.9999686 | FALSE |
| ENSG00000116679 | 0.9998806 | 0.9999686 | FALSE |
| ENSG00000159023 | 0.9999686 | 0.9999686 | FALSE |

|                                                                                                                   |
|-------------------------------------------------------------------------------------------------------------------|
| Names                                                                                                             |
| Total                                                                                                             |
| GO:0005102//receptor binding                                                                                      |
| GO:0097367//carbohydrate derivative binding                                                                       |
| GO:0019838//growth factor binding                                                                                 |
| GO:0005539//glycosaminoglycan binding                                                                             |
| GO:0019199//transmembrane receptor protein kinase activity                                                        |
| GO:0004714//transmembrane receptor protein tyrosine kinase activity                                               |
| GO:0005515//protein binding                                                                                       |
| GO:0008201//heparin binding                                                                                       |
| GO:0001848//complement binding                                                                                    |
| GO:0005488//binding                                                                                               |
| GO:1901681//sulfur compound binding                                                                               |
| GO:0017147//Wnt-protein binding                                                                                   |
| GO:0001664//G-protein coupled receptor binding                                                                    |
| GO:0046332//SMAD binding                                                                                          |
| GO:0005201//extracellular matrix structural constituent                                                           |
| GO:0038024//cargo receptor activity                                                                               |
| GO:0008237//metallopeptidase activity                                                                             |
| GO:0030881//beta-2-microglobulin binding                                                                          |
| GO:NM_0059                                                                                                        |
| GO:0005509//calcium ion binding                                                                                   |
| GO:0004175//endopeptidase activity                                                                                |
| GO:0004713//protein tyrosine kinase activity                                                                      |
| GO:0048407//platelet-derived growth factor binding                                                                |
| GO:0008376//acetylgalactosaminyltransferase activity                                                              |
| GO:0070011//peptidase activity, acting on L-amino acid peptides                                                   |
| GO:0004033//aldo-keto reductase (NADP) activity                                                                   |
| GO:0004222//metalloendopeptidase activity                                                                         |
| GO:0008106//alcohol dehydrogenase (NADP+) activity                                                                |
| GO:0008233//peptidase activity                                                                                    |
| GO:0016705//oxidoreductase activity, acting on paired donors, with incorporation or reduction of molecular oxygen |
| GO:0070851//growth factor receptor binding                                                                        |
| GO:0070412//R-SMAD binding                                                                                        |
| GO:0004029//aldehyde dehydrogenase (NAD) activity                                                                 |
| GO:0004653//polypeptide N-acetylgalactosaminyltransferase activity                                                |
| GO:0004784//superoxide dismutase activity                                                                         |
| GO:0016721//oxidoreductase activity, acting on superoxide radicals as acceptor                                    |
| GO:0004252//serine-type endopeptidase activity                                                                    |
| GO:0031690//adrenergic receptor binding                                                                           |
| GO:0046703//natural killer cell lectin-like receptor binding                                                      |
| GO:0005044//scavenger receptor activity                                                                           |
| GO:0008083//growth factor activity                                                                                |
| GO:0017171//serine hydrolase activity                                                                             |
| GO:0016773//phosphotransferase activity, alcohol group as acceptor                                                |
| GO:0003824//catalytic activity                                                                                    |
| GO:0032052//bile acid binding                                                                                     |
| GO:0019955//cytokine binding                                                                                      |
| GO:0051213//dioxygenase activity                                                                                  |
| GO:0030228//lipoprotein particle receptor activity                                                                |
| GO:0016491//oxidoreductase activity                                                                               |
| GO:0019899//enzyme binding                                                                                        |
| GO:0016641//oxidoreductase activity, acting on the CH-NH2 group of donors, oxygen as acceptor                     |
| GO:0004030//aldehyde dehydrogenase [NAD(P)+] activity                                                             |
| GO:0004032//alditol:NADP+ 1-oxidoreductase activity                                                               |
| GO:0016301//kinase activity                                                                                       |
| GO:0016740//transferase activity                                                                                  |
| GO:0008236//serine-type peptidase activity                                                                        |

|                                                                                                                 |
|-----------------------------------------------------------------------------------------------------------------|
| GO:0004672//protein kinase activity                                                                             |
| GO:0035035//histone acetyltransferase binding                                                                   |
| GO:0016702//oxidoreductase activity, acting on single donors with incorporation of molecular oxygen, incorp     |
| GO:0005507//copper ion binding                                                                                  |
| GO:0016701//oxidoreductase activity, acting on single donors with incorporation of molecular oxygen             |
| GO:0016638//oxidoreductase activity, acting on the CH-NH2 group of donors                                       |
| GO:0005021//vascular endothelial growth factor-activated receptor activity                                      |
| GO:0031543//peptidyl-proline dioxygenase activity                                                               |
| GO:NR_0014                                                                                                      |
| GO:0008484//sulfuric ester hydrolase activity                                                                   |
| GO:0043169//cation binding                                                                                      |
| GO:0046872//metal ion binding                                                                                   |
| GO:0042802//identical protein binding                                                                           |
| GO:0005126//cytokine receptor binding                                                                           |
| GO:0042813//Wnt-activated receptor activity                                                                     |
| GO:0017154//semaphorin receptor activity                                                                        |
| GO:0005518//collagen binding                                                                                    |
| GO:0019200//carbohydrate kinase activity                                                                        |
| GO:0043167//ion binding                                                                                         |
| GO:0042803//protein homodimerization activity                                                                   |
| GO:0005041//low-density lipoprotein receptor activity                                                           |
| GO:0008194//UDP-glycosyltransferase activity                                                                    |
| GO:0043425//bHLH transcription factor binding                                                                   |
| GO:0019902//phosphatase binding                                                                                 |
| GO:0001085//RNA polymerase II transcription factor binding                                                      |
| GO:0019825//oxygen binding                                                                                      |
| GO:0004866//endopeptidase inhibitor activity                                                                    |
| GO:0005161//platelet-derived growth factor receptor binding                                                     |
| GO:0050750//low-density lipoprotein particle receptor binding                                                   |
| GO:0046983//protein dimerization activity                                                                       |
| GO:0005520//insulin-like growth factor binding                                                                  |
| GO:0061135//endopeptidase regulator activity                                                                    |
| GO:0044212//transcription regulatory region DNA binding                                                         |
| GO:0003674//molecular_function                                                                                  |
| GO:0002020//protease binding                                                                                    |
| GO:0001191//RNA polymerase II transcription factor binding transcription factor activity involved in negative r |
| GO:0030414//peptidase inhibitor activity                                                                        |
| GO:0004958//prostaglandin F receptor activity                                                                   |
| GO:0005004//GPI-linked ephrin receptor activity                                                                 |
| GO:0005127//ciliary neurotrophic factor receptor binding                                                        |
| GO:0005536//glucose binding                                                                                     |
| GO:0008061//chitin binding                                                                                      |
| GO:0019966//interleukin-1 binding                                                                               |
| GO:0045118//azole transporter activity                                                                          |
| GO:1901474//azole transmembrane transporter activity                                                            |
| GO:0005540//hyaluronic acid binding                                                                             |
| GO:0019903//protein phosphatase binding                                                                         |
| GO:0001106//RNA polymerase II transcription corepressor activity                                                |
| GO:0004089//carbonate dehydratase activity                                                                      |
| GO:0000975//regulatory region DNA binding                                                                       |
| GO:0001067//regulatory region nucleic acid binding                                                              |
| GO:0003779//actin binding                                                                                       |
| GO:0016709//oxidoreductase activity, acting on paired donors, with incorporation or reduction of molecular ox   |
| GO:0004012//phospholipid-translocating ATPase activity                                                          |
| GO:0005160//transforming growth factor beta receptor binding                                                    |
| GO:0016209//antioxidant activity                                                                                |
| GO:0016772//transferase activity, transferring phosphorus-containing groups                                     |
| GO:0001102//RNA polymerase II activating transcription factor binding                                           |

|                                                                                                                   |
|-------------------------------------------------------------------------------------------------------------------|
| GO:0005544//calcium-dependent phospholipid binding                                                                |
| GO:0042826//histone deacetylase binding                                                                           |
| GO:0005138//interleukin-6 receptor binding                                                                        |
| GO:0030215//semaphorin receptor binding                                                                           |
| GO:0031545//peptidyl-proline 4-dioxygenase activity                                                               |
| GO:0043121//neurotrophin binding                                                                                  |
| GO:0045236//CXCR chemokine receptor binding                                                                       |
| GO:0050656//3-phosphoadenosine 5-phosphosulfate binding                                                           |
| GO:0016903//oxidoreductase activity, acting on the aldehyde or oxo group of donors                                |
| GO:0004867//serine-type endopeptidase inhibitor activity                                                          |
| GO:0000287//magnesium ion binding                                                                                 |
| GO:0008395//steroid hydroxylase activity                                                                          |
| GO:0070325//lipoprotein particle receptor binding                                                                 |
| GO:0004497//monooxygenase activity                                                                                |
| GO:0004857//enzyme inhibitor activity                                                                             |
| GO:0034185//apolipoprotein binding                                                                                |
| GO:0048029//monosaccharide binding                                                                                |
| GO:0004017//adenylate kinase activity                                                                             |
| GO:0004115//3,5-cyclic-AMP phosphodiesterase activity                                                             |
| GO:0004568//chitinase activity                                                                                    |
| GO:0008443//phosphofructokinase activity                                                                          |
| GO:0019798//procollagen-proline dioxygenase activity                                                              |
| GO:0035251//UDP-glucosyltransferase activity                                                                      |
| GO:0016706//oxidoreductase activity, acting on paired donors, with incorporation or reduction of molecular oxygen |
| GO:0016620//oxidoreductase activity, acting on the aldehyde or oxo group of donors, NAD or NADP as acceptor       |
| GO:0043168//anion binding                                                                                         |
| GO:0008009//chemokine activity                                                                                    |
| GO:0005154//epidermal growth factor receptor binding                                                              |
| GO:0090484//drug transporter activity                                                                             |
| GO:0005109//frizzled binding                                                                                      |
| GO:0004872//receptor activity                                                                                     |
| GO:0031406//carboxylic acid binding                                                                               |
| GO:0020037//heme binding                                                                                          |
| GO:0016757//transferase activity, transferring glycosyl groups                                                    |
| GO:0046982//protein heterodimerization activity                                                                   |
| GO:0001076//RNA polymerase II transcription factor binding transcription factor activity                          |
| GO:0004716//receptor signaling protein tyrosine kinase activity                                                   |
| GO:0005172//vascular endothelial growth factor receptor binding                                                   |
| GO:0003714//transcription corepressor activity                                                                    |
| GO:0061134//peptidase regulator activity                                                                          |
| GO:0030674//protein binding, bridging                                                                             |
| GO:0031418//L-ascorbic acid binding                                                                               |
| GO:0033293//monocarboxylic acid binding                                                                           |
| GO:0008146//sulfotransferase activity                                                                             |
| GO:0003810//protein-glutamine gamma-glutamyltransferase activity                                                  |
| GO:0005005//transmembrane-ephrin receptor activity                                                                |
| GO:0019534//toxin transporter activity                                                                            |
| GO:0046527//glucosyltransferase activity                                                                          |
| GO:0016758//transferase activity, transferring hexosyl groups                                                     |
| GO:0030145//manganese ion binding                                                                                 |
| GO:0008373//sialyltransferase activity                                                                            |
| GO:0046906//tetrapyrrole binding                                                                                  |
| GO:0008092//cytoskeletal protein binding                                                                          |
| GO:0042379//chemokine receptor binding                                                                            |
| GO:0008307//structural constituent of muscle                                                                      |
| GO:0004708//MAP kinase kinase activity                                                                            |
| GO:0004955//prostaglandin receptor activity                                                                       |
| GO:0005243//gap junction channel activity                                                                         |

|                                                                                                         |
|---------------------------------------------------------------------------------------------------------|
| GO:0070410//co-SMAD binding                                                                             |
| GO:0000976//transcription regulatory region sequence-specific DNA binding                               |
| GO:0005506//iron ion binding                                                                            |
| GO:0004114//3,5-cyclic-nucleotide phosphodiesterase activity                                            |
| GO:0019843//rRNA binding                                                                                |
| GO:0005057//receptor signaling protein activity                                                         |
| GO:0001540//beta-amyloid binding                                                                        |
| GO:0004112//cyclic-nucleotide phosphodiesterase activity                                                |
| GO:0004623//phospholipase A2 activity                                                                   |
| GO:0016628//oxidoreductase activity, acting on the CH-CH group of donors, NAD or NADP as acceptor       |
| GO:0004954//prostanoid receptor activity                                                                |
| GO:0042301//phosphate ion binding                                                                       |
| GO:0005178//integrin binding                                                                            |
| GO:0000987//core promoter proximal region sequence-specific DNA binding                                 |
| GO:0060090//binding, bridging                                                                           |
| GO:0005158//insulin receptor binding                                                                    |
| GO:0046875//ephrin receptor binding                                                                     |
| GO:0004221//ubiquitin thiolesterase activity                                                            |
| GO:0008528//G-protein coupled peptide receptor activity                                                 |
| GO:0001159//core promoter proximal region DNA binding                                                   |
| GO:0004601//peroxidase activity                                                                         |
| GO:0016684//oxidoreductase activity, acting on peroxide as acceptor                                     |
| GO:0033613//activating transcription factor binding                                                     |
| GO:0004065//arylsulfatase activity                                                                      |
| GO:0008191//metalloendopeptidase inhibitor activity                                                     |
| GO:0010576//metalloenzyme regulator activity                                                            |
| GO:0048018//receptor agonist activity                                                                   |
| GO:0048551//metalloenzyme inhibitor activity                                                            |
| GO:0019904//protein domain specific binding                                                             |
| GO:0070888//E-box binding                                                                               |
| GO:0001104//RNA polymerase II transcription cofactor activity                                           |
| GO:0004702//receptor signaling protein serine/threonine kinase activity                                 |
| GO:0005070//SH3/SH2 adaptor activity                                                                    |
| GO:0000982//RNA polymerase II core promoter proximal region sequence-specific DNA binding transcription |
| GO:0001653//peptide receptor activity                                                                   |
| GO:0016836//hydro-lyase activity                                                                        |
| GO:0000978//RNA polymerase II core promoter proximal region sequence-specific DNA binding               |
| GO:0043621//protein self-association                                                                    |
| GO:0005516//calmodulin binding                                                                          |
| GO:0004622//lysophospholipase activity                                                                  |
| GO:0022829//wide pore channel activity                                                                  |
| GO:0051721//protein phosphatase 2A binding                                                              |
| GO:0005548//phospholipid transporter activity                                                           |
| GO:0016782//transferase activity, transferring sulfur-containing groups                                 |
| GO:0004896//cytokine receptor activity                                                                  |
| GO:0050839//cell adhesion molecule binding                                                              |
| GO:0003682//chromatin binding                                                                           |
| GO:0004953//icosanoid receptor activity                                                                 |
| GO:0008601//protein phosphatase type 2A regulator activity                                              |
| GO:0048020//CCR chemokine receptor binding                                                              |
| GO:0004871//signal transducer activity                                                                  |
| GO:0060089//molecular transducer activity                                                               |
| GO:0005179//hormone activity                                                                            |
| GO:0001078//RNA polymerase II core promoter proximal region sequence-specific DNA binding transcription |
| GO:0005080//protein kinase C binding                                                                    |
| GO:0004620//phospholipase activity                                                                      |
| GO:0030246//carbohydrate binding                                                                        |
| GO:0001871//pattern binding                                                                             |

|                                                                                                           |
|-----------------------------------------------------------------------------------------------------------|
| GO:0003756//protein disulfide isomerase activity                                                          |
| GO:0016864//intramolecular oxidoreductase activity, transposing S-S bonds                                 |
| GO:0030247//polysaccharide binding                                                                        |
| GO:0043492//ATPase activity, coupled to movement of substances                                            |
| GO:0016860//intramolecular oxidoreductase activity                                                        |
| GO:0030165//PDZ domain binding                                                                            |
| GO:0004675//transmembrane receptor protein serine/threonine kinase activity                               |
| GO:0004709//MAP kinase kinase kinase activity                                                             |
| GO:0005024//transforming growth factor beta-activated receptor activity                                   |
| GO:0016862//intramolecular oxidoreductase activity, interconverting keto- and enol-groups                 |
| GO:0043548//phosphatidylinositol 3-kinase binding                                                         |
| GO:0001227//RNA polymerase II transcription regulatory region sequence-specific DNA binding transcription |
| GO:0030545//receptor regulator activity                                                                   |
| GO:0050840//extracellular matrix binding                                                                  |
| GO:0004806//triglyceride lipase activity                                                                  |
| GO:0005003//ephrin receptor activity                                                                      |
| GO:0017134//fibroblast growth factor binding                                                              |
| GO:0000988//protein binding transcription factor activity                                                 |
| GO:0001948//glycoprotein binding                                                                          |
| GO:0019900//kinase binding                                                                                |
| GO:0019842//vitamin binding                                                                               |
| GO:0042056//chemoattractant activity                                                                      |
| GO:0051183//vitamin transporter activity                                                                  |
| GO:0032403//protein complex binding                                                                       |
| GO:0000989//transcription factor binding transcription factor activity                                    |
| GO:0070491//repressing transcription factor binding                                                       |
| GO:0015291//secondary active transmembrane transporter activity                                           |
| GO:0035591//signaling adaptor activity                                                                    |
| GO:0043130//ubiquitin binding                                                                             |
| GO:0019201//nucleotide kinase activity                                                                    |
| GO:0031490//chromatin DNA binding                                                                         |
| GO:0042277//peptide binding                                                                               |
| GO:0003712//transcription cofactor activity                                                               |
| GO:0016835//carbon-oxygen lyase activity                                                                  |
| GO:0000014//single-stranded DNA specific endodeoxyribonuclease activity                                   |
| GO:0001517//N-acetylglucosamine 6-O-sulfotransferase activity                                             |
| GO:0001846//opsonin binding                                                                               |
| GO:0004028//3-chloroallyl aldehyde dehydrogenase activity                                                 |
| GO:0004340//glucokinase activity                                                                          |
| GO:0004366//glycerol-3-phosphate O-acyltransferase activity                                               |
| GO:0004396//hexokinase activity                                                                           |
| GO:0004630//phospholipase D activity                                                                      |
| GO:0004634//phosphopyruvate hydratase activity                                                            |
| GO:0004679//AMP-activated protein kinase activity                                                         |
| GO:0004936//alpha-adrenergic receptor activity                                                            |
| GO:0005007//fibroblast growth factor-activated receptor activity                                          |
| GO:0008131//primary amine oxidase activity                                                                |
| GO:0008467//[heparan sulfate]-glucosamine 3-sulfotransferase 1 activity                                   |
| GO:0008517//folic acid transporter activity                                                               |
| GO:0008865//fructokinase activity                                                                         |
| GO:0015174//basic amino acid transmembrane transporter activity                                           |
| GO:0016413//O-acetyltransferase activity                                                                  |
| GO:0019158//mannokinase activity                                                                          |
| GO:0031694//alpha-2A adrenergic receptor binding                                                          |
| GO:0032036//myosin heavy chain binding                                                                    |
| GO:0032453//histone demethylase activity (H3-K4 specific)                                                 |
| GO:0035252//UDP-xylosyltransferase activity                                                               |
| GO:0035259//glucocorticoid receptor binding                                                               |

|                                                                                             |
|---------------------------------------------------------------------------------------------|
| GO:0042285//xylosyltransferase activity                                                     |
| GO:0045499//chemorepellent activity                                                         |
| GO:0048406//nerve growth factor binding                                                     |
| GO:0050998//nitric-oxide synthase binding                                                   |
| GO:0055103//ligase regulator activity                                                       |
| GO:NM_0145                                                                                  |
| GO:NM_0211                                                                                  |
| GO:NR_0021                                                                                  |
| GO:0008238//exopeptidase activity                                                           |
| GO:0001968//fibronectin binding                                                             |
| GO:0019956//chemokine binding                                                               |
| GO:0045296//cadherin binding                                                                |
| GO:0003690//double-stranded DNA binding                                                     |
| GO:0033218//amide binding                                                                   |
| GO:0046943//carboxylic acid transmembrane transporter activity                              |
| GO:0004843//ubiquitin-specific protease activity                                            |
| GO:0005125//cytokine activity                                                               |
| GO:0071813//lipoprotein particle binding                                                    |
| GO:0071814//protein-lipid complex binding                                                   |
| GO:1901682//sulfur compound transmembrane transporter activity                              |
| GO:0005319//lipid transporter activity                                                      |
| GO:0008301//DNA binding, bending                                                            |
| GO:0016298//lipase activity                                                                 |
| GO:0017124//SH3 domain binding                                                              |
| GO:0005342//organic acid transmembrane transporter activity                                 |
| GO:0015179//L-amino acid transmembrane transporter activity                                 |
| GO:0016755//transferase activity, transferring amino-acyl groups                            |
| GO:0003916//DNA topoisomerase activity                                                      |
| GO:0004035//alkaline phosphatase activity                                                   |
| GO:0004128//cytochrome-b5 reductase activity, acting on NAD(P)H                             |
| GO:0004322//ferroxidase activity                                                            |
| GO:0004331//fructose-2,6-bisphosphate 2-phosphatase activity                                |
| GO:0004645//phosphorylase activity                                                          |
| GO:0005072//transforming growth factor beta receptor, cytoplasmic mediator activity         |
| GO:0005114//type II transforming growth factor beta receptor binding                        |
| GO:0008035//high-density lipoprotein particle binding                                       |
| GO:0008140//cAMP response element binding protein binding                                   |
| GO:0008179//adenylate cyclase binding                                                       |
| GO:0016165//linoleate 13S-lipoxygenase activity                                             |
| GO:0016174//NAD(P)H oxidase activity                                                        |
| GO:0016595//glutamate binding                                                               |
| GO:0016670//oxidoreductase activity, acting on a sulfur group of donors, oxygen as acceptor |
| GO:0016724//oxidoreductase activity, oxidizing metal ions, oxygen as acceptor               |
| GO:0017081//chloride channel regulator activity                                             |
| GO:0030955//potassium ion binding                                                           |
| GO:0031702//type 1 angiotensin receptor binding                                             |
| GO:0031994//insulin-like growth factor I binding                                            |
| GO:0035014//phosphatidylinositol 3-kinase regulator activity                                |
| GO:0043237//laminin-1 binding                                                               |
| GO:0043426//MRF binding                                                                     |
| GO:0050291//sphingosine N-acyltransferase activity                                          |
| GO:0050780//dopamine receptor binding                                                       |
| GO:0070087//chromo shadow domain binding                                                    |
| GO:0070097//delta-catenin binding                                                           |
| GO:0070492//oligosaccharide binding                                                         |
| GO:NM_0018                                                                                  |
| GO:NM_0048                                                                                  |
| GO:NM_0066                                                                                  |

|                                                                                                         |
|---------------------------------------------------------------------------------------------------------|
| GO:NM_0203                                                                                              |
| GO:0008234//cysteine-type peptidase activity                                                            |
| GO:0008514//organic anion transmembrane transporter activity                                            |
| GO:0015026//coreceptor activity                                                                         |
| GO:0032559//adenyl ribonucleotide binding                                                               |
| GO:0072341//modified amino acid binding                                                                 |
| GO:0016790//thiolester hydrolase activity                                                               |
| GO:0030554//adenyl nucleotide binding                                                                   |
| GO:0001637//G-protein coupled chemoattractant receptor activity                                         |
| GO:0004950//chemokine receptor activity                                                                 |
| GO:0030546//receptor activator activity                                                                 |
| GO:0000155//phosphorelay sensor kinase activity                                                         |
| GO:0004908//interleukin-1 receptor activity                                                             |
| GO:0008046//axon guidance receptor activity                                                             |
| GO:0016208//AMP binding                                                                                 |
| GO:0016494//C-X-C chemokine receptor activity                                                           |
| GO:0016671//oxidoreductase activity, acting on a sulfur group of donors, disulfide as acceptor          |
| GO:0030898//actin-dependent ATPase activity                                                             |
| GO:0031701//angiotensin receptor binding                                                                |
| GO:0031996//thioesterase binding                                                                        |
| GO:0045294//alpha-catenin binding                                                                       |
| GO:0047498//calcium-dependent phospholipase A2 activity                                                 |
| GO:NM_0003                                                                                              |
| GO:0004674//protein serine/threonine kinase activity                                                    |
| GO:0019783//small conjugating protein-specific protease activity                                        |
| GO:0019901//protein kinase binding                                                                      |
| GO:0022804//active transmembrane transporter activity                                                   |
| GO:0030295//protein kinase activator activity                                                           |
| GO:0043236//laminin binding                                                                             |
| GO:0008374//O-acyltransferase activity                                                                  |
| GO:0032182//small conjugating protein binding                                                           |
| GO:0008081//phosphoric diester hydrolase activity                                                       |
| GO:0008134//transcription factor binding                                                                |
| GO:0009055//electron carrier activity                                                                   |
| GO:0016614//oxidoreductase activity, acting on CH-OH group of donors                                    |
| GO:0051015//actin filament binding                                                                      |
| GO:0016655//oxidoreductase activity, acting on NAD(P)H, quinone or similar compound as acceptor         |
| GO:0015020//glucuronosyltransferase activity                                                            |
| GO:0017022//myosin binding                                                                              |
| GO:0038023//signaling receptor activity                                                                 |
| GO:0000983//RNA polymerase II core promoter sequence-specific DNA binding transcription factor activity |
| GO:0003964//RNA-directed DNA polymerase activity                                                        |
| GO:0004126//cytidine deaminase activity                                                                 |
| GO:0004673//protein histidine kinase activity                                                           |
| GO:0005095//GTPase inhibitor activity                                                                   |
| GO:0008253//5-nucleotidase activity                                                                     |
| GO:0008271//secondary active sulfate transmembrane transporter activity                                 |
| GO:0016175//superoxide-generating NADPH oxidase activity                                                |
| GO:0016832//aldehyde-lyase activity                                                                     |
| GO:0019206//nucleoside kinase activity                                                                  |
| GO:0030296//protein tyrosine kinase activator activity                                                  |
| GO:0030547//receptor inhibitor activity                                                                 |
| GO:0048019//receptor antagonist activity                                                                |
| GO:0050786//RAGE receptor binding                                                                       |
| GO:0070411//I-SMAD binding                                                                              |
| GO:0071949//FAD binding                                                                                 |
| GO:NM_0032                                                                                              |
| GO:NM_0142                                                                                              |



|                                                                                                          |
|----------------------------------------------------------------------------------------------------------|
| GO:0005215//transporter activity                                                                         |
| GO:0015171//amino acid transmembrane transporter activity                                                |
| GO:0016853//isomerase activity                                                                           |
| GO:0004888//transmembrane signaling receptor activity                                                    |
| GO:0004712//protein serine/threonine/tyrosine kinase activity                                            |
| GO:0019239//deaminase activity                                                                           |
| GO:0043566//structure-specific DNA binding                                                               |
| GO:0004197//cysteine-type endopeptidase activity                                                         |
| GO:0005496//steroid binding                                                                              |
| GO:0004000//adenosine deaminase activity                                                                 |
| GO:0004551//nucleotide diphosphatase activity                                                            |
| GO:0004935//adrenergic receptor activity                                                                 |
| GO:0005123//death receptor binding                                                                       |
| GO:0005521//lamin binding                                                                                |
| GO:0008195//phosphatidate phosphatase activity                                                           |
| GO:0008430//selenium binding                                                                             |
| GO:0015643//toxic substance binding                                                                      |
| GO:0016857//racemase and epimerase activity, acting on carbohydrates and derivatives                     |
| GO:0030507//spectrin binding                                                                             |
| GO:0070696//transmembrane receptor protein serine/threonine kinase binding                               |
| GO:0071837//HMG box domain binding                                                                       |
| GO:NM_0007                                                                                               |
| GO:NM_0022                                                                                               |
| GO:NM_0024                                                                                               |
| GO:0001077//RNA polymerase II core promoter proximal region sequence-specific DNA binding transcription  |
| GO:0001046//core promoter sequence-specific DNA binding                                                  |
| GO:0004177//aminopeptidase activity                                                                      |
| GO:0005501//retinoid binding                                                                             |
| GO:0019840//isoprenoid binding                                                                           |
| GO:0033764//steroid dehydrogenase activity, acting on the CH-OH group of donors, NAD or NADP as acceptor |
| GO:0031625//ubiquitin protein ligase binding                                                             |
| GO:0044389//small conjugating protein ligase binding                                                     |
| GO:0005524//ATP binding                                                                                  |
| GO:0022892//substrate-specific transporter activity                                                      |
| GO:0008013//beta-catenin binding                                                                         |
| GO:0016667//oxidoreductase activity, acting on a sulfur group of donors                                  |
| GO:0035258//steroid hormone receptor binding                                                             |
| GO:0016616//oxidoreductase activity, acting on the CH-OH group of donors, NAD or NADP as acceptor        |
| GO:0004982//N-formyl peptide receptor activity                                                           |
| GO:0008239//dipeptidyl-peptidase activity                                                                |
| GO:0008252//nucleotidase activity                                                                        |
| GO:0015175//neutral amino acid transmembrane transporter activity                                        |
| GO:0015238//drug transmembrane transporter activity                                                      |
| GO:0015296//anion:cation symporter activity                                                              |
| GO:0016303//1-phosphatidylinositol-3-kinase activity                                                     |
| GO:0016812//hydrolase activity, acting on carbon-nitrogen (but not peptide) bonds, in cyclic amides      |
| GO:0017153//sodium:dicarboxylate symporter activity                                                      |
| GO:0019203//carbohydrate phosphatase activity                                                            |
| GO:0031420//alkali metal ion binding                                                                     |
| GO:0033612//receptor serine/threonine kinase binding                                                     |
| GO:0050308//sugar-phosphatase activity                                                                   |
| GO:0051428//peptide hormone receptor binding                                                             |
| GO:NM_0047                                                                                               |
| GO:0022857//transmembrane transporter activity                                                           |
| GO:0019209//kinase activator activity                                                                    |
| GO:0030971//receptor tyrosine kinase binding                                                             |
| GO:0048306//calcium-dependent protein binding                                                            |
| GO:0019207//kinase regulator activity                                                                    |

|                                                                                                           |
|-----------------------------------------------------------------------------------------------------------|
| GO:0004016//adenylate cyclase activity                                                                    |
| GO:0004522//pancreatic ribonuclease activity                                                              |
| GO:0005112//Notch binding                                                                                 |
| GO:0005159//insulin-like growth factor receptor binding                                                   |
| GO:0005344//oxygen transporter activity                                                                   |
| GO:0005372//water transmembrane transporter activity                                                      |
| GO:0015116//sulfate transmembrane transporter activity                                                    |
| GO:0016722//oxidoreductase activity, oxidizing metal ions                                                 |
| GO:0016775//phosphotransferase activity, nitrogenous group as acceptor                                    |
| GO:0016868//intramolecular transferase activity, phosphotransferases                                      |
| GO:0016884//carbon-nitrogen ligase activity, with glutamine as amido-N-donor                              |
| GO:0017025//TBP-class protein binding                                                                     |
| GO:0017166//vinculin binding                                                                              |
| GO:0031432//titin binding                                                                                 |
| GO:0035004//phosphatidylinositol 3-kinase activity                                                        |
| GO:0042166//acetylcholine binding                                                                         |
| GO:0045295//gamma-catenin binding                                                                         |
| GO:0050431//transforming growth factor beta binding                                                       |
| GO:0070008//serine-type exopeptidase activity                                                             |
| GO:0070403//NAD+ binding                                                                                  |
| GO:0071855//neuropeptide receptor binding                                                                 |
| GO:NM_0037                                                                                                |
| GO:0000977//RNA polymerase II regulatory region sequence-specific DNA binding                             |
| GO:0016229//steroid dehydrogenase activity                                                                |
| GO:0016814//hydrolase activity, acting on carbon-nitrogen (but not peptide) bonds, in cyclic amidines     |
| GO:0043565//sequence-specific DNA binding                                                                 |
| GO:0016787//hydrolase activity                                                                            |
| GO:0001228//RNA polymerase II transcription regulatory region sequence-specific DNA binding transcription |
| GO:0016627//oxidoreductase activity, acting on the CH-CH group of donors                                  |
| GO:0005198//structural molecule activity                                                                  |
| GO:0016776//phosphotransferase activity, phosphate group as acceptor                                      |
| GO:0019003//GDP binding                                                                                   |
| GO:0001012//RNA polymerase II regulatory region DNA binding                                               |
| GO:0003708//retinoic acid receptor activity                                                               |
| GO:0004861//cyclin-dependent protein serine/threonine kinase inhibitor activity                           |
| GO:0005542//folic acid binding                                                                            |
| GO:0016653//oxidoreductase activity, acting on NAD(P)H, heme protein as acceptor                          |
| GO:0030159//receptor signaling complex scaffold activity                                                  |
| GO:0034483//heparan sulfate sulfotransferase activity                                                     |
| GO:0035173//histone kinase activity                                                                       |
| GO:0048185//activin binding                                                                               |
| GO:0071889//14-3-3 protein binding                                                                        |
| GO:NM_0068                                                                                                |
| GO:0005100//Rho GTPase activator activity                                                                 |
| GO:0016788//hydrolase activity, acting on ester bonds                                                     |
| GO:0008289//lipid binding                                                                                 |
| GO:0008509//anion transmembrane transporter activity                                                      |
| GO:0019887//protein kinase regulator activity                                                             |
| GO:0003785//actin monomer binding                                                                         |
| GO:0008093//cytoskeletal adaptor activity                                                                 |
| GO:0008170//N-methyltransferase activity                                                                  |
| GO:0016861//intramolecular oxidoreductase activity, interconverting aldoses and ketoses                   |
| GO:0017110//nucleoside-diphosphatase activity                                                             |
| GO:0017127//cholesterol transporter activity                                                              |
| GO:0042043//neurexin family protein binding                                                               |
| GO:0050664//oxidoreductase activity, acting on NAD(P)H, oxygen as acceptor                                |
| GO:0051184//cofactor transporter activity                                                                 |
| GO:0052742//phosphatidylinositol kinase activity                                                          |

|                                                                                           |
|-------------------------------------------------------------------------------------------|
| GO:0005200//structural constituent of cytoskeleton                                        |
| GO:0005149//interleukin-1 receptor binding                                                |
| GO:0005545//1-phosphatidylinositol binding                                                |
| GO:0015248//sterol transporter activity                                                   |
| GO:0015464//acetylcholine receptor activity                                               |
| GO:0016854//racemase and epimerase activity                                               |
| GO:0016892//endoribonuclease activity, producing 3-phosphomonoesters                      |
| GO:0050253//retinyl-palmitate esterase activity                                           |
| GO:1901338//catecholamine binding                                                         |
| GO:1901677//phosphate transmembrane transporter activity                                  |
| GO:0008757//S-adenosylmethionine-dependent methyltransferase activity                     |
| GO:0015293//symporter activity                                                            |
| GO:0008022//protein C-terminus binding                                                    |
| GO:0016651//oxidoreductase activity, acting on NAD(P)H                                    |
| GO:0000981//sequence-specific DNA binding RNA polymerase II transcription factor activity |
| GO:0004143//diacylglycerol kinase activity                                                |
| GO:0032452//histone demethylase activity                                                  |
| GO:0043395//heparan sulfate proteoglycan binding                                          |
| GO:0004860//protein kinase inhibitor activity                                             |
| GO:0008235//metalloexopeptidase activity                                                  |
| GO:0030234//enzyme regulator activity                                                     |
| GO:0016597//amino acid binding                                                            |
| GO:0001786//phosphatidylserine binding                                                    |
| GO:0001972//retinoic acid binding                                                         |
| GO:0004198//calcium-dependent cysteine-type endopeptidase activity                        |
| GO:0005104//fibroblast growth factor receptor binding                                     |
| GO:0016922//ligand-dependent nuclear receptor binding                                     |
| GO:0030552//cAMP binding                                                                  |
| GO:0050699//WW domain binding                                                             |
| GO:0017137//Rab GTPase binding                                                            |
| GO:0019205//nucleobase-containing compound kinase activity                                |
| GO:0032555//purine ribonucleotide binding                                                 |
| GO:0003713//transcription coactivator activity                                            |
| GO:0032550//purine ribonucleoside binding                                                 |
| GO:0052689//carboxylic ester hydrolase activity                                           |
| GO:0008324//cation transmembrane transporter activity                                     |
| GO:0050660//flavin adenine dinucleotide binding                                           |
| GO:0001103//RNA polymerase II repressing transcription factor binding                     |
| GO:0005527//macrolide binding                                                             |
| GO:0005528//FK506 binding                                                                 |
| GO:0008242//omega peptidase activity                                                      |
| GO:0008603//cAMP-dependent protein kinase regulator activity                              |
| GO:0030276//clathrin binding                                                              |
| GO:0042165//neurotransmitter binding                                                      |
| GO:0043027//cysteine-type endopeptidase inhibitor activity involved in apoptotic process  |
| GO:0097110//scaffold protein binding                                                      |
| GO:0001883//purine nucleoside binding                                                     |
| GO:0019210//kinase inhibitor activity                                                     |
| GO:0044325//ion channel binding                                                           |
| GO:0032549//ribonucleoside binding                                                        |
| GO:0017076//purine nucleotide binding                                                     |
| GO:0005543//phospholipid binding                                                          |
| GO:0022891//substrate-specific transmembrane transporter activity                         |
| GO:0042578//phosphoric ester hydrolase activity                                           |
| GO:0004602//glutathione peroxidase activity                                               |
| GO:0005086//ARF guanyl-nucleotide exchange factor activity                                |
| GO:0005537//mannose binding                                                               |
| GO:0030331//estrogen receptor binding                                                     |

|                                                                                                            |
|------------------------------------------------------------------------------------------------------------|
| GO:0043015//gamma-tubulin binding                                                                          |
| GO:0043394//proteoglycan binding                                                                           |
| GO:0032553//ribonucleotide binding                                                                         |
| GO:0001882//nucleoside binding                                                                             |
| GO:0001047//core promoter binding                                                                          |
| GO:0005164//tumor necrosis factor receptor binding                                                         |
| GO:0008138//protein tyrosine/serine/threonine phosphatase activity                                         |
| GO:0019888//protein phosphatase regulator activity                                                         |
| GO:0001105//RNA polymerase II transcription coactivator activity                                           |
| GO:0048487//beta-tubulin binding                                                                           |
| GO:0003705//RNA polymerase II distal enhancer sequence-specific DNA binding transcription factor activity  |
| GO:0003684//damaged DNA binding                                                                            |
| GO:0000146//microfilament motor activity                                                                   |
| GO:0015103//inorganic anion transmembrane transporter activity                                             |
| GO:0051018//protein kinase A binding                                                                       |
| GO:1901505//carbohydrate derivative transporter activity                                                   |
| GO:0008144//drug binding                                                                                   |
| GO:0004879//ligand-activated sequence-specific DNA binding RNA polymerase II transcription factor activity |
| GO:0046873//metal ion transmembrane transporter activity                                                   |
| GO:0042562//hormone binding                                                                                |
| GO:0000979//RNA polymerase II core promoter sequence-specific DNA binding                                  |
| GO:0005310//dicarboxylic acid transmembrane transporter activity                                           |
| GO:0008227//G-protein coupled amine receptor activity                                                      |
| GO:0008483//transaminase activity                                                                          |
| GO:0016538//cyclin-dependent protein serine/threonine kinase regulator activity                            |
| GO:0016799//hydrolase activity, hydrolyzing N-glycosyl compounds                                           |
| GO:0016849//phosphorus-oxygen lyase activity                                                               |
| GO:0030291//protein serine/threonine kinase inhibitor activity                                             |
| GO:NM_0252                                                                                                 |
| GO:0008168//methyltransferase activity                                                                     |
| GO:0035639//purine ribonucleoside triphosphate binding                                                     |
| GO:0016829//lyase activity                                                                                 |
| GO:0016746//transferase activity, transferring acyl groups                                                 |
| GO:0002039//p53 binding                                                                                    |
| GO:0003707//steroid hormone receptor activity                                                              |
| GO:0008017//microtubule binding                                                                            |
| GO:0009975//cyclase activity                                                                               |
| GO:0016411//acylglycerol O-acyltransferase activity                                                        |
| GO:0031683//G-protein beta/gamma-subunit complex binding                                                   |
| GO:0032451//demethylase activity                                                                           |
| GO:0035254//glutamate receptor binding                                                                     |
| GO:0042887//amide transmembrane transporter activity                                                       |
| GO:0070330//aromatase activity                                                                             |
| GO:0015075//ion transmembrane transporter activity                                                         |
| GO:0016763//transferase activity, transferring pentosyl groups                                             |
| GO:0042626//ATPase activity, coupled to transmembrane movement of substances                               |
| GO:0005343//organic acid:sodium symporter activity                                                         |
| GO:0016769//transferase activity, transferring nitrogenous groups                                          |
| GO:0022890//inorganic cation transmembrane transporter activity                                            |
| GO:0016741//transferase activity, transferring one-carbon groups                                           |
| GO:0004842//ubiquitin-protein ligase activity                                                              |
| GO:0032813//tumor necrosis factor receptor superfamily binding                                             |
| GO:0004129//cytochrome-c oxidase activity                                                                  |
| GO:0004181//metallocarboxypeptidase activity                                                               |
| GO:0005504//fatty acid binding                                                                             |
| GO:0015002//heme-copper terminal oxidase activity                                                          |
| GO:0016675//oxidoreductase activity, acting on a heme group of donors                                      |
| GO:0016676//oxidoreductase activity, acting on a heme group of donors, oxygen as acceptor                  |

|                                                                                                                  |
|------------------------------------------------------------------------------------------------------------------|
| GO:0016894//endonuclease activity, active with either ribo- or deoxyribonucleic acids and producing 3-phosp      |
| GO:0016765//transferase activity, transferring alkyl or aryl (other than methyl) groups                          |
| GO:0019208//phosphatase regulator activity                                                                       |
| GO:0016747//transferase activity, transferring acyl groups other than amino-acyl groups                          |
| GO:0001190//RNA polymerase II transcription factor binding transcription factor activity involved in positive re |
| GO:0003950//NAD+ ADP-ribosyltransferase activity                                                                 |
| GO:0005244//voltage-gated ion channel activity                                                                   |
| GO:0008028//monocarboxylic acid transmembrane transporter activity                                               |
| GO:0022832//voltage-gated channel activity                                                                       |
| GO:0050997//quaternary ammonium group binding                                                                    |
| GO:0017016//Ras GTPase binding                                                                                   |
| GO:0030170//pyridoxal phosphate binding                                                                          |
| GO:0048037//cofactor binding                                                                                     |
| GO:0016879//ligase activity, forming carbon-nitrogen bonds                                                       |
| GO:0004693//cyclin-dependent protein serine/threonine kinase activity                                            |
| GO:0016712//oxidoreductase activity, acting on paired donors, with incorporation or reduction of molecular ox    |
| GO:0030594//neurotransmitter receptor activity                                                                   |
| GO:0097472//cyclin-dependent protein kinase activity                                                             |
| GO:0015399//primary active transmembrane transporter activity                                                    |
| GO:0015405//P-P-bond-hydrolysis-driven transmembrane transporter activity                                        |
| GO:0035091//phosphatidylinositol binding                                                                         |
| GO:0005546//phosphatidylinositol-4,5-bisphosphate binding                                                        |
| GO:0015035//protein disulfide oxidoreductase activity                                                            |
| GO:0030551//cyclic nucleotide binding                                                                            |
| GO:0042605//peptide antigen binding                                                                              |
| GO:NM_0010                                                                                                       |
| GO:0004435//phosphatidylinositol phospholipase C activity                                                        |
| GO:0019787//small conjugating protein ligase activity                                                            |
| GO:0016866//intramolecular transferase activity                                                                  |
| GO:0016820//hydrolase activity, acting on acid anhydrides, catalyzing transmembrane movement of substanc         |
| GO:0004629//phospholipase C activity                                                                             |
| GO:0008060//ARF GTPase activator activity                                                                        |
| GO:0017046//peptide hormone binding                                                                              |
| GO:0019905//syntaxin binding                                                                                     |
| GO:0015267//channel activity                                                                                     |
| GO:0022803//passive transmembrane transporter activity                                                           |
| GO:0042623//ATPase activity, coupled                                                                             |
| GO:0000049//tRNA binding                                                                                         |
| GO:0042169//SH2 domain binding                                                                                   |
| GO:0031267//small GTPase binding                                                                                 |
| GO:0015631//tubulin binding                                                                                      |
| GO:0016791//phosphatase activity                                                                                 |
| GO:0004520//endodeoxyribonuclease activity                                                                       |
| GO:0015036//disulfide oxidoreductase activity                                                                    |
| GO:0015078//hydrogen ion transmembrane transporter activity                                                      |
| GO:0015485//cholesterol binding                                                                                  |
| GO:0046914//transition metal ion binding                                                                         |
| GO:0016798//hydrolase activity, acting on glycosyl bonds                                                         |
| GO:0051427//hormone receptor binding                                                                             |
| GO:0050681//androgen receptor binding                                                                            |
| GO:0004091//carboxylesterase activity                                                                            |
| GO:0043028//cysteine-type endopeptidase regulator activity involved in apoptotic process                         |
| GO:0004553//hydrolase activity, hydrolyzing O-glycosyl compounds                                                 |
| GO:0016887//ATPase activity                                                                                      |
| GO:0030374//ligand-dependent nuclear receptor transcription coactivator activity                                 |
| GO:0051020//GTPase binding                                                                                       |
| GO:0004003//ATP-dependent DNA helicase activity                                                                  |
| GO:0035064//methylated histone residue binding                                                                   |

|                                                                                   |
|-----------------------------------------------------------------------------------|
| GO:0004180//carboxypeptidase activity                                             |
| GO:0032947//protein complex scaffold                                              |
| GO:0034061//DNA polymerase activity                                               |
| GO:0005089//Rho guanyl-nucleotide exchange factor activity                        |
| GO:0032934//sterol binding                                                        |
| GO:0004519//endonuclease activity                                                 |
| GO:0008565//protein transporter activity                                          |
| GO:0005096//GTPase activator activity                                             |
| GO:0003725//double-stranded RNA binding                                           |
| GO:0051087//chaperone binding                                                     |
| GO:0008094//DNA-dependent ATPase activity                                         |
| GO:0005099//Ras GTPase activator activity                                         |
| GO:0000149//SNARE binding                                                         |
| GO:0036094//small molecule binding                                                |
| GO:0015077//monovalent inorganic cation transmembrane transporter activity        |
| GO:0003755//peptidyl-prolyl cis-trans isomerase activity                          |
| GO:0016881//acid-amino acid ligase activity                                       |
| GO:0000166//nucleotide binding                                                    |
| GO:1901265//nucleoside phosphate binding                                          |
| GO:0035257//nuclear hormone receptor binding                                      |
| GO:0004715//non-membrane spanning protein tyrosine kinase activity                |
| GO:0016859//cis-trans isomerase activity                                          |
| GO:0051287//NAD binding                                                           |
| GO:0003823//antigen binding                                                       |
| GO:0004536//deoxyribonuclease activity                                            |
| GO:0004869//cysteine-type endopeptidase inhibitor activity                        |
| GO:0015081//sodium ion transmembrane transporter activity                         |
| GO:0015294//solute:cation symporter activity                                      |
| GO:0015370//solute:sodium symporter activity                                      |
| GO:0016830//carbon-carbon lyase activity                                          |
| GO:0003700//sequence-specific DNA binding transcription factor activity           |
| GO:0004521//endoribonuclease activity                                             |
| GO:0022836//gated channel activity                                                |
| GO:0022839//ion gated channel activity                                            |
| GO:0001071//nucleic acid binding transcription factor activity                    |
| GO:0015276//ligand-gated ion channel activity                                     |
| GO:0022834//ligand-gated channel activity                                         |
| GO:0031072//heat shock protein binding                                            |
| GO:NM_0011                                                                        |
| GO:0016407//acetyltransferase activity                                            |
| GO:0016410//N-acyltransferase activity                                            |
| GO:0016810//hydrolase activity, acting on carbon-nitrogen (but not peptide) bonds |
| GO:0003678//DNA helicase activity                                                 |
| GO:0017048//Rho GTPase binding                                                    |
| GO:0051082//unfolded protein binding                                              |
| GO:0005097//Rab GTPase activator activity                                         |
| GO:NM_0012                                                                        |
| GO:0005083//small GTPase regulator activity                                       |
| GO:0004812//aminoacyl-tRNA ligase activity                                        |
| GO:0016875//ligase activity, forming carbon-oxygen bonds                          |
| GO:0016876//ligase activity, forming aminoacyl-tRNA and related compounds         |
| GO:0005216//ion channel activity                                                  |
| GO:0030695//GTPase regulator activity                                             |
| GO:1901981//phosphatidylinositol phosphate binding                                |
| GO:0060589//nucleoside-triphosphatase regulator activity                          |
| GO:ENST000                                                                        |
| GO:0016247//channel regulator activity                                            |
| GO:0003924//GTPase activity                                                       |

|                                                                                                |
|------------------------------------------------------------------------------------------------|
| GO:0042393//histone binding                                                                    |
| GO:0050662//coenzyme binding                                                                   |
| GO:0022838//substrate-specific channel activity                                                |
| GO:0016874//ligase activity                                                                    |
| GO:0043178//alcohol binding                                                                    |
| GO:0005088//Ras guanyl-nucleotide exchange factor activity                                     |
| GO:0005525//GTP binding                                                                        |
| GO:0008047//enzyme activator activity                                                          |
| GO:0003774//motor activity                                                                     |
| GO:0019001//guanyl nucleotide binding                                                          |
| GO:0032561//guanyl ribonucleotide binding                                                      |
| GO:0004721//phosphoprotein phosphatase activity                                                |
| GO:0004540//ribonuclease activity                                                              |
| GO:0047485//protein N-terminus binding                                                         |
| GO:0003729//mRNA binding                                                                       |
| GO:0008026//ATP-dependent helicase activity                                                    |
| GO:0070035//purine NTP-dependent helicase activity                                             |
| GO:0017111//nucleoside-triphosphatase activity                                                 |
| GO:0005085//guanyl-nucleotide exchange factor activity                                         |
| GO:0016462//pyrophosphatase activity                                                           |
| GO:0016818//hydrolase activity, acting on acid anhydrides, in phosphorus-containing anhydrides |
| GO:0004518//nuclease activity                                                                  |
| GO:0008270//zinc ion binding                                                                   |
| GO:0003735//structural constituent of ribosome                                                 |
| GO:0016817//hydrolase activity, acting on acid anhydrides                                      |
| GO:0004386//helicase activity                                                                  |
| GO:0004930//G-protein coupled receptor activity                                                |
| GO:0016779//nucleotidyltransferase activity                                                    |
| GO:0003677//DNA binding                                                                        |
| GO:0003723//RNA binding                                                                        |
| GO:0097159//organic cyclic compound binding                                                    |
| GO:1901363//heterocyclic compound binding                                                      |
| GO:0003676//nucleic acid binding                                                               |

| Genes_In_Term | DEG | Input_gene      | Gene_Symbol      | P_value   | Q_value   | Significant |
|---------------|-----|-----------------|------------------|-----------|-----------|-------------|
| 16391         | 645 | -               | -                | -         | -         | -           |
| 1140          | 87  | TC01000904.hg.1 | ENSG00000162692; | 1.484E-09 | 8.419E-07 | TRUE        |
| 180           | 27  | TC01000972.hg.1 | ENSG00000064886; | 2.145E-09 | 8.419E-07 | TRUE        |
| 94            | 19  | TC01002954.hg.1 | ENSG00000134243; | 3.515E-09 | 9.198E-07 | TRUE        |
| 163           | 25  | TC02000704.hg.1 | ENSG00000144152; | 5.315E-09 | 1.043E-06 | TRUE        |
| 81            | 17  | TC01000723.hg.1 | ENSG00000185483; | 1.291E-08 | 2.027E-06 | TRUE        |
| 65            | 15  | TC01000723.hg.1 | ENSG00000185483; | 2.382E-08 | 3.117E-06 | TRUE        |
| 6571          | 324 | TC01000394.hg.1 | ENSG00000159023; | 6.73E-08  | 7.548E-06 | TRUE        |
| 121           | 19  | TC02000704.hg.1 | ENSG00000144152; | 2.498E-07 | 2.451E-05 | TRUE        |
| 14            | 7   | TC06004077.hg.1 | ENSG00000243649; | 3.814E-07 | 3.327E-05 | TRUE        |
| 11232         | 496 | TC01000394.hg.1 | ENSG00000159023; | 1.019E-06 | 8.001E-05 | TRUE        |
| 160           | 21  | TC02000704.hg.1 | ENSG00000144152; | 1.278E-06 | 9.122E-05 | TRUE        |
| 27            | 8   | TC01000723.hg.1 | ENSG00000185483; | 6.29E-06  | 0.0004115 | TRUE        |
| 157           | 19  | TC04000253.hg.1 | ENSG00000154277; | 1.341E-05 | 0.0008099 | TRUE        |
| 51            | 10  | TC02002166.hg.1 | ENSG00000135966; | 2.463E-05 | 0.001381  | TRUE        |
| 54            | 10  | TC01003718.hg.1 | ENSG00000133048; | 4.147E-05 | 0.0021705 | TRUE        |
| 56            | 10  | TC01001603.hg.1 | ENSG00000116690; | 5.749E-05 | 0.0028207 | TRUE        |
| 175           | 19  | TC02002480.hg.1 | ENSG00000078098; | 6.157E-05 | 0.0028432 | TRUE        |
| 7             | 4   | TC06004073.hg.1 | ENSG00000204520; | 7.562E-05 | 0.0032087 | TRUE        |
| 7             | 4   | TC16000474.hg.1 | ENSG00000205358; | 7.562E-05 | 0.0032087 | TRUE        |
| 614           | 44  | TC01001607.hg.1 | ENSG00000116711; | 9.38E-05  | 0.0036818 | TRUE        |
| 398           | 32  | TC01003211.hg.1 | ENSG00000143387; | 0.0001088 | 0.0040674 | TRUE        |
| 139           | 16  | TC01000723.hg.1 | ENSG00000185483; | 0.0001158 | 0.004133  | TRUE        |
| 8             | 4   | TC04002931.hg.1 | ENSG00000134853; | 0.0001465 | 0.0050009 | TRUE        |
| 31            | 7   | TC01001907.hg.1 | ENSG00000143641; | 0.0001629 | 0.0053273 | TRUE        |
| 576           | 41  | TC01003211.hg.1 | ENSG00000143387; | 0.0001867 | 0.0058625 | TRUE        |
| 15            | 5   | TC07001883.hg.1 | ENSG00000085662; | 0.0002008 | 0.0060624 | TRUE        |
| 104           | 13  | TC02002480.hg.1 | ENSG00000078098; | 0.0002187 | 0.0063582 | TRUE        |
| 9             | 4   | TC07001883.hg.1 | ENSG00000085662; | 0.0002555 | 0.0067764 | TRUE        |
| 604           | 42  | TC01003211.hg.1 | ENSG00000143387; | 0.0002572 | 0.0067764 | TRUE        |
| 164           | 17  | TC01003638.hg.1 | ENSG00000073756; | 0.000259  | 0.0067764 | TRUE        |
| 93            | 12  | TC01001188.hg.1 | ENSG00000143369; | 0.0002808 | 0.0071118 | TRUE        |
| 17            | 5   | TC03000214.hg.1 | ENSG00000168036; | 0.0003875 | 0.0095062 | TRUE        |
| 10            | 4   | TC09000222.hg.1 | ENSG00000137124; | 0.0004126 | 0.009816  | TRUE        |
| 18            | 5   | TC01001907.hg.1 | ENSG00000143641; | 0.0005193 | 0.0119896 | TRUE        |
| 5             | 3   | TC04000173.hg.1 | ENSG00000109610; | 0.0005715 | 0.0126382 | TRUE        |
| 5             | 3   | TC04000173.hg.1 | ENSG00000109610; | 0.0005715 | 0.0126382 | TRUE        |
| 161           | 16  | TC02002480.hg.1 | ENSG00000078098; | 0.0006218 | 0.0129796 | TRUE        |
| 11            | 4   | TC04000253.hg.1 | ENSG00000154277; | 0.0006283 | 0.0129796 | TRUE        |
| 19            | 5   | TC06001089.hg.1 | ENSG00000111981; | 0.0006821 | 0.0137295 | TRUE        |
| 39            | 7   | TC01001603.hg.1 | ENSG00000116690; | 0.0007251 | 0.0142294 | TRUE        |
| 134           | 14  | TC01001805.hg.1 | ENSG00000092969; | 0.000816  | 0.0156229 | TRUE        |
| 185           | 17  | TC02002480.hg.1 | ENSG00000078098; | 0.0010366 | 0.0193567 | TRUE        |
| 708           | 45  | TC01000685.hg.1 | ENSG00000162409; | 0.0010653 | 0.0193567 | TRUE        |
| 5273          | 244 | TC01000643.hg.1 | ENSG00000116157; | 0.0011056 | 0.0193567 | TRUE        |
| 6             | 3   | TC10000986.hg.1 | ENSG00000151632; | 0.0011096 | 0.0193567 | TRUE        |
| 67            | 9   | TC02001100.hg.1 | ENSG00000138448; | 0.0011899 | 0.0203054 | TRUE        |
| 81            | 10  | TC01003638.hg.1 | ENSG00000073756; | 0.0012568 | 0.0208922 | TRUE        |
| 13            | 4   | TC01002669.hg.1 | ENSG00000157193; | 0.0012783 | 0.0208922 | TRUE        |
| 695           | 44  | TC01000643.hg.1 | ENSG00000116157; | 0.0013041 | 0.0208922 | TRUE        |
| 973           | 57  | TC01001090.hg.1 | ENSG00000117289; | 0.0016809 | 0.0263901 | TRUE        |
| 14            | 4   | TC02002002.hg.1 | ENSG00000115318; | 0.0017343 | 0.0266944 | TRUE        |
| 7             | 3   | TC15000971.hg.1 | ENSG00000184254; | 0.0018851 | 0.0278388 | TRUE        |
| 7             | 3   | TC07001883.hg.1 | ENSG00000085662; | 0.0018851 | 0.0278388 | TRUE        |
| 853           | 51  | TC01000685.hg.1 | ENSG00000162409; | 0.001915  | 0.0278388 | TRUE        |
| 1747          | 92  | TC01000685.hg.1 | ENSG00000162409; | 0.0021454 | 0.0306209 | TRUE        |
| 182           | 16  | TC02002480.hg.1 | ENSG00000078098; | 0.0022708 | 0.03102   | TRUE        |



|       |     |                 |                  |           |           |       |
|-------|-----|-----------------|------------------|-----------|-----------|-------|
| 594   | 38  | TC01000685.hg.1 | ENSG00000162409; | 0.0022784 | 0.03102   | TRUE  |
| 15    | 4   | TC02000281.hg.1 | ENSG00000116016; | 0.0022919 | 0.03102   | TRUE  |
| 74    | 9   | TC01003638.hg.1 | ENSG00000073756; | 0.002412  | 0.0320917 | TRUE  |
| 48    | 7   | TC02002002.hg.1 | ENSG00000115318; | 0.0025573 | 0.0334581 | TRUE  |
| 75    | 9   | TC01003638.hg.1 | ENSG00000073756; | 0.0026475 | 0.0340707 | TRUE  |
| 17    | 4   | TC02002002.hg.1 | ENSG00000115318; | 0.0037537 | 0.0475271 | TRUE  |
| 9     | 3   | TC02001206.hg.1 | ENSG00000118257; | 0.0042646 | 0.0523086 | FALSE |
| 9     | 3   | TC03002106.hg.1 | ENSG00000090530; | 0.0042646 | 0.0523086 | FALSE |
| 9     | 3   | TC06004066.hg.1 | NR_001434;NR_001 | 0.0042646 | 0.0523086 | FALSE |
| 18    | 4   | TC04001487.hg.1 | ENSG00000180801; | 0.0046779 | 0.0556381 | FALSE |
| 3759  | 176 | TC01000685.hg.1 | ENSG00000162409; | 0.0047628 | 0.0558031 | FALSE |
| 3693  | 173 | TC01000685.hg.1 | ENSG00000162409; | 0.0050803 | 0.0586478 | FALSE |
| 791   | 46  | TC01001258.hg.1 | ENSG00000160678; | 0.0052427 | 0.0596447 | FALSE |
| 217   | 17  | TC01001188.hg.1 | ENSG00000143369; | 0.0055164 | 0.0618627 | FALSE |
| 19    | 4   | TC02002714.hg.1 | ENSG00000163251; | 0.0057434 | 0.0635009 | FALSE |
| 10    | 3   | TC01003778.hg.1 | ENSG00000076356; | 0.0059155 | 0.0644954 | FALSE |
| 56    | 7   | TC01001095.hg.1 | ENSG00000143127; | 0.0061495 | 0.0661282 | FALSE |
| 20    | 4   | TC02000466.hg.1 | ENSG00000159399; | 0.0069592 | 0.0738236 | FALSE |
| 5776  | 257 | TC01000394.hg.1 | ENSG00000159023; | 0.0073625 | 0.0770612 | FALSE |
| 516   | 32  | TC01001805.hg.1 | ENSG00000092969; | 0.0076324 | 0.0788347 | FALSE |
| 11    | 3   | TC09000015.hg.1 | ENSG00000147852; | 0.0078982 | 0.0805206 | FALSE |
| 121   | 11  | TC01001907.hg.1 | ENSG00000143641; | 0.0081961 | 0.0819863 | FALSE |
| 21    | 4   | TC06000621.hg.1 | ENSG00000124813; | 0.0083335 | 0.0819863 | FALSE |
| 105   | 10  | TC03000214.hg.1 | ENSG00000168036; | 0.0083553 | 0.0819863 | FALSE |
| 61    | 7   | TC03000214.hg.1 | ENSG00000168036; | 0.0097801 | 0.0947823 | FALSE |
| 34    | 5   | TC02001750.hg.1 | ENSG00000138061; | 0.0100403 | 0.0950037 | FALSE |
| 159   | 13  | TC02000230.hg.1 | ENSG00000150938; | 0.0101538 | 0.0950037 | FALSE |
| 12    | 3   | TC02000620.hg.1 | ENSG00000115594; | 0.0102265 | 0.0950037 | FALSE |
| 12    | 3   | TC02001628.hg.1 | ENSG00000084674; | 0.0102265 | 0.0950037 | FALSE |
| 867   | 48  | TC01001805.hg.1 | ENSG00000092969; | 0.0106527 | 0.0972371 | FALSE |
| 23    | 4   | TC02000230.hg.1 | ENSG00000150938; | 0.0115881 | 0.1045592 | FALSE |
| 162   | 13  | TC02000230.hg.1 | ENSG00000150938; | 0.0117582 | 0.1048884 | FALSE |
| 312   | 21  | TC01003042.hg.1 | ENSG00000092607; | 0.0120373 | 0.105138  | FALSE |
| 14259 | 580 | TC01000100.hg.1 | ENSG00000049246; | 0.012054  | 0.105138  | FALSE |
| 64    | 7   | TC01001188.hg.1 | ENSG00000143369; | 0.0125953 | 0.1086521 | FALSE |
| 24    | 4   | TC01003042.hg.1 | ENSG00000092607; | 0.013482  | 0.114392  | FALSE |
| 165   | 13  | TC02000230.hg.1 | ENSG00000150938; | 0.0135522 | 0.114392  | FALSE |
| 5     | 2   | TC10000986.hg.1 | ENSG00000151632; | 0.0142839 | 0.1150034 | FALSE |
| 5     | 2   | TC02002808.hg.1 | ENSG00000116106; | 0.0142839 | 0.1150034 | FALSE |
| 5     | 2   | TC05001289.hg.1 | ENSG00000113594; | 0.0142839 | 0.1150034 | FALSE |
| 5     | 2   | TC02000466.hg.1 | ENSG00000159399; | 0.0142839 | 0.1150034 | FALSE |
| 5     | 2   | TC01000972.hg.1 | ENSG00000064886; | 0.0142839 | 0.1150034 | FALSE |
| 5     | 2   | TC17000220.hg.1 | ENSG00000108448; | 0.0142839 | 0.1150034 | FALSE |
| 5     | 2   | TC01003497.hg.1 | ENSG00000117479; | 0.0142839 | 0.1150034 | FALSE |
| 5     | 2   | TC01003497.hg.1 | ENSG00000117479; | 0.0142839 | 0.1150034 | FALSE |
| 25    | 4   | TC02000937.hg.1 | ENSG00000123610; | 0.0155617 | 0.1187553 | FALSE |
| 67    | 7   | TC03000214.hg.1 | ENSG00000168036; | 0.0159512 | 0.1187553 | FALSE |
| 14    | 3   | TC01003042.hg.1 | ENSG00000092607; | 0.0159592 | 0.1187553 | FALSE |
| 14    | 3   | TC09000191.hg.1 | ENSG00000107159; | 0.0159592 | 0.1187553 | FALSE |
| 321   | 21  | TC01003042.hg.1 | ENSG00000092607; | 0.0161114 | 0.1187553 | FALSE |
| 321   | 21  | TC01003042.hg.1 | ENSG00000092607; | 0.0161114 | 0.1187553 | FALSE |
| 303   | 20  | TC01000394.hg.1 | ENSG00000159023; | 0.0170092 | 0.1236319 | FALSE |
| 39    | 5   | TC06001772.hg.1 | ENSG00000146233; | 0.0177004 | 0.1274756 | FALSE |
| 15    | 3   | TC04000274.hg.1 | ENSG00000145246; | 0.019376  | 0.1371023 | FALSE |
| 15    | 3   | TC01001805.hg.1 | ENSG00000092969; | 0.019376  | 0.1371023 | FALSE |
| 70    | 7   | TC01000643.hg.1 | ENSG00000116157; | 0.0198964 | 0.1371023 | FALSE |
| 989   | 52  | TC01000685.hg.1 | ENSG00000162409; | 0.0200008 | 0.1371023 | FALSE |
| 27    | 4   | TC03000214.hg.1 | ENSG00000168036; | 0.0202988 | 0.1371023 | FALSE |

|      |     |                 |                  |           |           |       |
|------|-----|-----------------|------------------|-----------|-----------|-------|
| 27   | 4   | TC01001607.hg.1 | ENSG00000116711; | 0.0202988 | 0.1371023 | FALSE |
| 55   | 6   | TC03001071.hg.1 | ENSG00000114315; | 0.0205079 | 0.1371023 | FALSE |
| 6    | 2   | TC05001617.hg.1 | ENSG00000164307; | 0.020871  | 0.1371023 | FALSE |
| 6    | 2   | TC07001559.hg.1 | ENSG00000075223; | 0.020871  | 0.1371023 | FALSE |
| 6    | 2   | TC10001398.hg.1 | ENSG00000122884; | 0.020871  | 0.1371023 | FALSE |
| 6    | 2   | TC01002954.hg.1 | ENSG00000134243; | 0.020871  | 0.1371023 | FALSE |
| 6    | 2   | TC04000408.hg.1 | ENSG00000169429; | 0.020871  | 0.1371023 | FALSE |
| 6    | 2   | TC06002036.hg.1 | ENSG00000249853; | 0.020871  | 0.1371023 | FALSE |
| 41   | 5   | TC07001883.hg.1 | ENSG00000085662; | 0.0216148 | 0.1379482 | FALSE |
| 88   | 8   | TC02000230.hg.1 | ENSG00000150938; | 0.0224193 | 0.1419284 | FALSE |
| 177  | 13  | TC01003745.hg.1 | ENSG00000163545; | 0.0228966 | 0.1437444 | FALSE |
| 16   | 3   | TC06001772.hg.1 | ENSG00000146233; | 0.0231639 | 0.1437444 | FALSE |
| 16   | 3   | TC02001628.hg.1 | ENSG00000084674; | 0.0231639 | 0.1437444 | FALSE |
| 106  | 9   | TC02001750.hg.1 | ENSG00000138061; | 0.0238561 | 0.1463053 | FALSE |
| 276  | 18  | TC01001090.hg.1 | ENSG00000117289; | 0.0252912 | 0.1539041 | FALSE |
| 17   | 3   | TC01002669.hg.1 | ENSG00000157193; | 0.0273232 | 0.1619689 | FALSE |
| 59   | 6   | TC02000466.hg.1 | ENSG00000159399; | 0.0279771 | 0.1619689 | FALSE |
| 7    | 2   | TC01000728.hg.1 | ENSG00000162433; | 0.0284653 | 0.1619689 | FALSE |
| 7    | 2   | TC06001015.hg.1 | ENSG00000171408; | 0.0284653 | 0.1619689 | FALSE |
| 7    | 2   | TC01000972.hg.1 | ENSG00000064886; | 0.0284653 | 0.1619689 | FALSE |
| 7    | 2   | TC10000022.hg.1 | ENSG00000067057; | 0.0284653 | 0.1619689 | FALSE |
| 7    | 2   | TC03002106.hg.1 | ENSG00000090530; | 0.0284653 | 0.1619689 | FALSE |
| 7    | 2   | TC09000560.hg.1 | ENSG00000148154; | 0.0284653 | 0.1619689 | FALSE |
| 44   | 5   | TC03002106.hg.1 | ENSG00000090530; | 0.0284735 | 0.1619689 | FALSE |
| 30   | 4   | TC09000222.hg.1 | ENSG00000137124; | 0.0289083 | 0.1632589 | FALSE |
| 2670 | 123 | TC01000394.hg.1 | ENSG00000159023; | 0.0307618 | 0.1724858 | FALSE |
| 45   | 5   | TC04000408.hg.1 | ENSG00000169429; | 0.0310326 | 0.17277   | FALSE |
| 18   | 3   | TC02000286.hg.1 | ENSG00000171150; | 0.0318523 | 0.1754671 | FALSE |
| 18   | 3   | TC01003497.hg.1 | ENSG00000117479; | 0.0318523 | 0.1754671 | FALSE |
| 31   | 4   | TC06000968.hg.1 | ENSG00000146374; | 0.0321906 | 0.1754836 | FALSE |
| 1477 | 72  | TC01000723.hg.1 | ENSG00000185483; | 0.0330889 | 0.1791362 | FALSE |
| 168  | 12  | TC01003497.hg.1 | ENSG00000117479; | 0.0338294 | 0.1818911 | FALSE |
| 131  | 10  | TC01003638.hg.1 | ENSG00000073756; | 0.0340891 | 0.1820405 | FALSE |
| 266  | 17  | TC01000783.hg.1 | ENSG00000117069; | 0.0343756 | 0.1823302 | FALSE |
| 328  | 20  | TC01003042.hg.1 | ENSG00000092607; | 0.0355465 | 0.1868235 | FALSE |
| 79   | 7   | TC01003042.hg.1 | ENSG00000092607; | 0.0356988 | 0.1868235 | FALSE |
| 8    | 2   | TC04000313.hg.1 | ENSG00000157404; | 0.0369777 | 0.1916006 | FALSE |
| 8    | 2   | TC06000608.hg.1 | ENSG00000112715; | 0.0369777 | 0.1916006 | FALSE |
| 153  | 11  | TC01003042.hg.1 | ENSG00000092607; | 0.0394259 | 0.2022834 | FALSE |
| 192  | 13  | TC02000230.hg.1 | ENSG00000150938; | 0.040444  | 0.2061593 | FALSE |
| 99   | 8   | TC04000699.hg.1 | ENSG00000109458; | 0.0412761 | 0.2090433 | FALSE |
| 20   | 3   | TC03002106.hg.1 | ENSG00000090530; | 0.0420045 | 0.2113689 | FALSE |
| 49   | 5   | TC09002910.hg.1 | ENSG00000107317; | 0.0426805 | 0.2134023 | FALSE |
| 50   | 5   | TC02002292.hg.1 | ENSG00000136720; | 0.0459514 | 0.2265385 | FALSE |
| 9    | 2   | TC06001246.hg.1 | ENSG00000124491; | 0.0463243 | 0.2265385 | FALSE |
| 9    | 2   | TC02002808.hg.1 | ENSG00000116106; | 0.0463243 | 0.2265385 | FALSE |
| 9    | 2   | TC11000707.hg.1 | ENSG00000162337; | 0.0463243 | 0.2265385 | FALSE |
| 9    | 2   | TC09000560.hg.1 | ENSG00000148154; | 0.0463243 | 0.2265385 | FALSE |
| 177  | 12  | TC01001907.hg.1 | ENSG00000143641; | 0.0472984 | 0.2265385 | FALSE |
| 35   | 4   | TC01001907.hg.1 | ENSG00000143641; | 0.0474197 | 0.2265385 | FALSE |
| 21   | 3   | TC01000783.hg.1 | ENSG00000117069; | 0.0476164 | 0.2265385 | FALSE |
| 140  | 10  | TC01003638.hg.1 | ENSG00000073756; | 0.0498647 | 0.2358061 | FALSE |
| 557  | 30  | TC01000394.hg.1 | ENSG00000159023; | 0.0512914 | 0.2411002 | FALSE |
| 52   | 5   | TC04000408.hg.1 | ENSG00000169429; | 0.0529293 | 0.2473187 | FALSE |
| 37   | 4   | TC01000789.hg.1 | ENSG00000162614; | 0.0562939 | 0.2582786 | FALSE |
| 10   | 2   | TC02001963.hg.1 | ENSG00000163235; | 0.0564265 | 0.2582786 | FALSE |
| 10   | 2   | TC10000986.hg.1 | ENSG00000151632; | 0.0564265 | 0.2582786 | FALSE |
| 10   | 2   | TC01003129.hg.1 | ENSG00000143140; | 0.0564265 | 0.2582786 | FALSE |

|      |    |                 |                  |           |           |       |
|------|----|-----------------|------------------|-----------|-----------|-------|
| 10   | 2  | TC0Y000052.hg.1 | ENSG00000114374; | 0.0564265 | 0.2582786 | FALSE |
| 125  | 9  | TC01003042.hg.1 | ENSG00000092607; | 0.0583826 | 0.2633928 | FALSE |
| 164  | 11 | TC02001750.hg.1 | ENSG00000138061; | 0.0594795 | 0.2662943 | FALSE |
| 23   | 3  | TC06001015.hg.1 | ENSG00000171408; | 0.0598738 | 0.2662943 | FALSE |
| 23   | 3  | TC0Y000351.hg.1 | ENSG00000129824; | 0.0598738 | 0.2662943 | FALSE |
| 90   | 7  | TC01001805.hg.1 | ENSG00000092969; | 0.0640957 | 0.2826694 | FALSE |
| 24   | 3  | TC01001805.hg.1 | ENSG00000092969; | 0.0665012 | 0.2875219 | FALSE |
| 24   | 3  | TC06001015.hg.1 | ENSG00000171408; | 0.0665012 | 0.2875219 | FALSE |
| 24   | 3  | TC01001607.hg.1 | ENSG00000116711; | 0.0665012 | 0.2875219 | FALSE |
| 24   | 3  | TC01003887.hg.1 | ENSG00000143815; | 0.0665012 | 0.2875219 | FALSE |
| 11   | 2  | TC10000986.hg.1 | ENSG00000151632; | 0.0672105 | 0.2875219 | FALSE |
| 11   | 2  | TC03002008.hg.1 | ENSG00000144959; | 0.0672105 | 0.2875219 | FALSE |
| 74   | 6  | TC01000904.hg.1 | ENSG00000162692; | 0.0708724 | 0.2997439 | FALSE |
| 40   | 4  | TC02002624.hg.1 | ENSG00000115415; | 0.0711515 | 0.2997439 | FALSE |
| 111  | 8  | TC04000699.hg.1 | ENSG00000109458; | 0.071404  | 0.2997439 | FALSE |
| 25   | 3  | TC02001031.hg.1 | ENSG00000152256; | 0.0734475 | 0.3058689 | FALSE |
| 25   | 3  | TC02002808.hg.1 | ENSG00000116106; | 0.0734475 | 0.3058689 | FALSE |
| 75   | 6  | TC04000101.hg.1 | ENSG00000249811; | 0.074609  | 0.3074438 | FALSE |
| 75   | 6  | TC02001437.hg.1 | ENSG00000144476; | 0.074609  | 0.3074438 | FALSE |
| 41   | 4  | TC02002624.hg.1 | ENSG00000115415; | 0.0765068 | 0.3103766 | FALSE |
| 41   | 4  | TC01000643.hg.1 | ENSG00000116157; | 0.0765068 | 0.3103766 | FALSE |
| 41   | 4  | TC01000643.hg.1 | ENSG00000116157; | 0.0765068 | 0.3103766 | FALSE |
| 41   | 4  | TC03000214.hg.1 | ENSG00000168036; | 0.0765068 | 0.3103766 | FALSE |
| 12   | 2  | TC04001487.hg.1 | ENSG00000180801; | 0.0786073 | 0.3116503 | FALSE |
| 12   | 2  | TC03001169.hg.1 | ENSG00000157150; | 0.0786073 | 0.3116503 | FALSE |
| 12   | 2  | TC03001169.hg.1 | ENSG00000157150; | 0.0786073 | 0.3116503 | FALSE |
| 12   | 2  | TC04000432.hg.1 | ENSG00000156234; | 0.0786073 | 0.3116503 | FALSE |
| 12   | 2  | TC03001169.hg.1 | ENSG00000157150; | 0.0786073 | 0.3116503 | FALSE |
| 449  | 24 | TC01000734.hg.1 | ENSG00000118473; | 0.0801141 | 0.3128834 | FALSE |
| 26   | 3  | TC08000845.hg.1 | ENSG00000187786; | 0.0807016 | 0.3136178 | FALSE |
| 59   | 5  | TC01003042.hg.1 | ENSG00000092607; | 0.0819183 | 0.314992  | FALSE |
| 42   | 4  | TC01001805.hg.1 | ENSG00000092969; | 0.0820584 | 0.314992  | FALSE |
| 42   | 4  | TC04000699.hg.1 | ENSG00000109458; | 0.0820584 | 0.314992  | FALSE |
| 78   | 6  | TC02000281.hg.1 | ENSG00000116016; | 0.0864771 | 0.3287387 | FALSE |
| 78   | 6  | TC02001437.hg.1 | ENSG00000144476; | 0.0864771 | 0.3287387 | FALSE |
| 43   | 4  | TC09000191.hg.1 | ENSG00000107159; | 0.0878026 | 0.3288826 | FALSE |
| 27   | 3  | TC02002624.hg.1 | ENSG00000115415; | 0.088252  | 0.3288826 | FALSE |
| 27   | 3  | TC01002578.hg.1 | ENSG00000117394; | 0.088252  | 0.3288826 | FALSE |
| 136  | 9  | TC01000394.hg.1 | ENSG00000159023; | 0.0884003 | 0.3288826 | FALSE |
| 13   | 2  | TC01001607.hg.1 | ENSG00000116711; | 0.0905521 | 0.333725  | FALSE |
| 13   | 2  | TC01003129.hg.1 | ENSG00000143140; | 0.0905521 | 0.333725  | FALSE |
| 13   | 2  | TC12002155.hg.1 | ENSG00000176915; | 0.0905521 | 0.333725  | FALSE |
| 28   | 3  | TC04000274.hg.1 | ENSG00000145246; | 0.0960865 | 0.3505876 | FALSE |
| 62   | 5  | TC02002292.hg.1 | ENSG00000136720; | 0.0964674 | 0.3505876 | FALSE |
| 81   | 6  | TC02000620.hg.1 | ENSG00000115594; | 0.0993193 | 0.3592885 | FALSE |
| 45   | 4  | TC01000904.hg.1 | ENSG00000162692; | 0.0998529 | 0.3595621 | FALSE |
| 287  | 16 | TC01000685.hg.1 | ENSG00000162409; | 0.1027814 | 0.3658039 | FALSE |
| 14   | 2  | TC10000986.hg.1 | ENSG00000151632; | 0.1029843 | 0.3658039 | FALSE |
| 14   | 2  | TC04001001.hg.1 | ENSG00000074211; | 0.1029843 | 0.3658039 | FALSE |
| 14   | 2  | TC04000432.hg.1 | ENSG00000156234; | 0.1029843 | 0.3658039 | FALSE |
| 1559 | 71 | TC01000100.hg.1 | ENSG00000049246; | 0.1066324 | 0.3745255 | FALSE |
| 1559 | 71 | TC01000100.hg.1 | ENSG00000049246; | 0.1066324 | 0.3745255 | FALSE |
| 103  | 7  | TC02000762.hg.1 | ENSG00000163083; | 0.1114107 | 0.3886994 | FALSE |
| 30   | 3  | TC03001071.hg.1 | ENSG00000114315; | 0.1125575 | 0.3894349 | FALSE |
| 30   | 3  | TC02001100.hg.1 | ENSG00000138448; | 0.1125575 | 0.3894349 | FALSE |
| 84   | 6  | TC01001607.hg.1 | ENSG00000116711; | 0.1131098 | 0.3894349 | FALSE |
| 206  | 12 | TC01001603.hg.1 | ENSG00000116690; | 0.113991  | 0.3907552 | FALSE |
| 15   | 2  | TC01001603.hg.1 | ENSG00000116690; | 0.1158471 | 0.3928293 | FALSE |

|     |    |                 |                  |           |           |       |
|-----|----|-----------------|------------------|-----------|-----------|-------|
| 15  | 2  | TC14001141.hg.1 | ENSG00000197930; | 0.1158471 | 0.3928293 | FALSE |
| 15  | 2  | TC14001141.hg.1 | ENSG00000197930; | 0.1158471 | 0.3928293 | FALSE |
| 15  | 2  | TC01001603.hg.1 | ENSG00000116690; | 0.1158471 | 0.3928293 | FALSE |
| 66  | 5  | TC04000274.hg.1 | ENSG00000145246; | 0.1177444 | 0.3949972 | FALSE |
| 48  | 4  | TC09002910.hg.1 | ENSG00000107317; | 0.1192653 | 0.3983967 | FALSE |
| 67  | 5  | TC02002714.hg.1 | ENSG00000163251; | 0.1233839 | 0.4104085 | FALSE |
| 16  | 2  | TC02000219.hg.1 | ENSG00000049323; | 0.1290876 | 0.4217318 | FALSE |
| 16  | 2  | TC05000243.hg.1 | ENSG00000095015; | 0.1290876 | 0.4217318 | FALSE |
| 16  | 2  | TC02000219.hg.1 | ENSG00000049323; | 0.1290876 | 0.4217318 | FALSE |
| 16  | 2  | TC14001141.hg.1 | ENSG00000197930; | 0.1290876 | 0.4217318 | FALSE |
| 16  | 2  | TC05001933.hg.1 | ENSG00000113721; | 0.1290876 | 0.4217318 | FALSE |
| 32  | 3  | TC03001071.hg.1 | ENSG00000114315; | 0.1300116 | 0.4217318 | FALSE |
| 33  | 3  | TC04000432.hg.1 | ENSG00000156234; | 0.1390743 | 0.4483505 | FALSE |
| 33  | 3  | TC01001188.hg.1 | ENSG00000143369; | 0.1390743 | 0.4483505 | FALSE |
| 17  | 2  | TC08000149.hg.1 | ENSG00000175445; | 0.1426561 | 0.4549289 | FALSE |
| 17  | 2  | TC02002808.hg.1 | ENSG00000116106; | 0.1426561 | 0.4549289 | FALSE |
| 17  | 2  | TC04000432.hg.1 | ENSG00000156234; | 0.1426561 | 0.4549289 | FALSE |
| 415 | 21 | TC01003042.hg.1 | ENSG00000092607; | 0.1437228 | 0.4549289 | FALSE |
| 52  | 4  | TC09000015.hg.1 | ENSG00000147852; | 0.1474302 | 0.46479   | FALSE |
| 350 | 18 | TC01002166.hg.1 | ENSG00000116285; | 0.1501968 | 0.4716178 | FALSE |
| 72  | 5  | TC01003497.hg.1 | ENSG00000117479; | 0.1533672 | 0.4796545 | FALSE |
| 18  | 2  | TC07001562.hg.1 | ENSG00000019991; | 0.1565066 | 0.4832773 | FALSE |
| 18  | 2  | TC01002578.hg.1 | ENSG00000117394; | 0.1565066 | 0.4832773 | FALSE |
| 286 | 15 | TC01000904.hg.1 | ENSG00000162692; | 0.1588692 | 0.4832773 | FALSE |
| 401 | 20 | TC01003042.hg.1 | ENSG00000092607; | 0.1656003 | 0.4832773 | FALSE |
| 36  | 3  | TC03000214.hg.1 | ENSG00000168036; | 0.1674458 | 0.4832773 | FALSE |
| 115 | 7  | TC01003497.hg.1 | ENSG00000117479; | 0.1676473 | 0.4832773 | FALSE |
| 55  | 4  | TC04000699.hg.1 | ENSG00000109458; | 0.1700687 | 0.4832773 | FALSE |
| 55  | 4  | TC04000253.hg.1 | ENSG00000154277; | 0.1700687 | 0.4832773 | FALSE |
| 19  | 2  | TC01000728.hg.1 | ENSG00000162433; | 0.1705959 | 0.4832773 | FALSE |
| 19  | 2  | TC04001084.hg.1 | ENSG00000109819; | 0.1705959 | 0.4832773 | FALSE |
| 137 | 8  | TC01001805.hg.1 | ENSG00000092969; | 0.1725285 | 0.4832773 | FALSE |
| 382 | 19 | TC01003042.hg.1 | ENSG00000092607; | 0.1759922 | 0.4832773 | FALSE |
| 56  | 4  | TC09000191.hg.1 | ENSG00000107159; | 0.1778716 | 0.4832773 | FALSE |
| 5   | 1  | TC18000097.hg.1 | ENSG00000101773  | 0.1818873 | 0.4832773 | FALSE |
| 5   | 1  | TC16001281.hg.1 | ENSG00000183196  | 0.1818873 | 0.4832773 | FALSE |
| 5   | 1  | TC02001100.hg.1 | ENSG00000138448  | 0.1818873 | 0.4832773 | FALSE |
| 5   | 1  | TC17001250.hg.1 | ENSG00000108602  | 0.1818873 | 0.4832773 | FALSE |
| 5   | 1  | TC02000466.hg.1 | ENSG00000159399  | 0.1818873 | 0.4832773 | FALSE |
| 5   | 1  | TC10001663.hg.1 | ENSG00000119927  | 0.1818873 | 0.4832773 | FALSE |
| 5   | 1  | TC02000466.hg.1 | ENSG00000159399  | 0.1818873 | 0.4832773 | FALSE |
| 5   | 1  | TC22000259.hg.1 | ENSG00000100292  | 0.1818873 | 0.4832773 | FALSE |
| 5   | 1  | TC12000099.hg.1 | ENSG00000111674  | 0.1818873 | 0.4832773 | FALSE |
| 5   | 1  | TC01000685.hg.1 | ENSG00000162409  | 0.1818873 | 0.4832773 | FALSE |
| 5   | 1  | TC10000811.hg.1 | ENSG00000150594  | 0.1818873 | 0.4832773 | FALSE |
| 5   | 1  | TC10001711.hg.1 | ENSG00000066468  | 0.1818873 | 0.4832773 | FALSE |
| 5   | 1  | TC0X000207.hg.1 | ENSG00000189221  | 0.1818873 | 0.4832773 | FALSE |
| 5   | 1  | TC06002036.hg.1 | ENSG00000249853  | 0.1818873 | 0.4832773 | FALSE |
| 5   | 1  | TC01003497.hg.1 | ENSG00000117479  | 0.1818873 | 0.4832773 | FALSE |
| 5   | 1  | TC02000466.hg.1 | ENSG00000159399  | 0.1818873 | 0.4832773 | FALSE |
| 5   | 1  | TC12002122.hg.1 | ENSG00000139370  | 0.1818873 | 0.4832773 | FALSE |
| 5   | 1  | TC05001110.hg.1 | ENSG00000153395  | 0.1818873 | 0.4832773 | FALSE |
| 5   | 1  | TC02000466.hg.1 | ENSG00000159399  | 0.1818873 | 0.4832773 | FALSE |
| 5   | 1  | TC04000253.hg.1 | ENSG00000154277  | 0.1818873 | 0.4832773 | FALSE |
| 5   | 1  | TC03001362.hg.1 | ENSG00000160808  | 0.1818873 | 0.4832773 | FALSE |
| 5   | 1  | TC0Y000185.hg.1 | ENSG00000012817  | 0.1818873 | 0.4832773 | FALSE |
| 5   | 1  | TC03003359.hg.1 | ENSG00000172986  | 0.1818873 | 0.4832773 | FALSE |
| 5   | 1  | TC21000169.hg.1 | ENSG00000157557  | 0.1818873 | 0.4832773 | FALSE |

|     |    |                 |                  |           |           |       |
|-----|----|-----------------|------------------|-----------|-----------|-------|
| 5   | 1  | TC03003359.hg.1 | ENSG00000172986  | 0.1818873 | 0.4832773 | FALSE |
| 5   | 1  | TC05001657.hg.1 | ENSG00000184349  | 0.1818873 | 0.4832773 | FALSE |
| 5   | 1  | TC01002954.hg.1 | ENSG00000134243  | 0.1818873 | 0.4832773 | FALSE |
| 5   | 1  | TC0X000943.hg.1 | ENSG00000198947  | 0.1818873 | 0.4832773 | FALSE |
| 5   | 1  | TC02000082.hg.1 | ENSG00000071575  | 0.1818873 | 0.4832773 | FALSE |
| 5   | 1  | TC12000621.hg.1 | ENSG00000135643  | 0.1818873 | 0.4832773 | FALSE |
| 5   | 1  | TC01000139.hg.1 | ENSG00000171819  | 0.1818873 | 0.4832773 | FALSE |
| 5   | 1  | TC06001332.hg.1 | ENSG00000168405  | 0.1818873 | 0.4832773 | FALSE |
| 97  | 6  | TC02002480.hg.1 | ENSG00000078098; | 0.182845  | 0.4832773 | FALSE |
| 20  | 2  | TC01002284.hg.1 | ENSG00000117122; | 0.1848838 | 0.4853974 | FALSE |
| 20  | 2  | TC02001437.hg.1 | ENSG00000144476; | 0.1848838 | 0.4853974 | FALSE |
| 20  | 2  | TC08001659.hg.1 | ENSG00000104419; | 0.1848838 | 0.4853974 | FALSE |
| 98  | 6  | TC02002624.hg.1 | ENSG00000115415; | 0.1888052 | 0.492399  | FALSE |
| 141 | 8  | TC01001805.hg.1 | ENSG00000092969; | 0.1920339 | 0.499161  | FALSE |
| 78  | 5  | TC03003381.hg.1 | ENSG00000225697; | 0.1928574 | 0.4996471 | FALSE |
| 39  | 3  | TC06001027.hg.1 | ENSG00000118503; | 0.1973158 | 0.5028079 | FALSE |
| 208 | 11 | TC02000762.hg.1 | ENSG00000163083; | 0.1978293 | 0.5028079 | FALSE |
| 21  | 2  | TC09000015.hg.1 | ENSG00000147852; | 0.199333  | 0.5028079 | FALSE |
| 21  | 2  | TC09000015.hg.1 | ENSG00000147852; | 0.199333  | 0.5028079 | FALSE |
| 21  | 2  | TC01003497.hg.1 | ENSG00000117479; | 0.199333  | 0.5028079 | FALSE |
| 80  | 5  | TC02001628.hg.1 | ENSG00000084674; | 0.206752  | 0.5028079 | FALSE |
| 40  | 3  | TC13001719.hg.1 | ENSG00000150907; | 0.2075454 | 0.5028079 | FALSE |
| 102 | 6  | TC01001607.hg.1 | ENSG00000116711; | 0.2133629 | 0.5028079 | FALSE |
| 102 | 6  | TC01000734.hg.1 | ENSG00000118473; | 0.2133629 | 0.5028079 | FALSE |
| 81  | 5  | TC03003381.hg.1 | ENSG00000225697; | 0.21382   | 0.5028079 | FALSE |
| 22  | 2  | TC12002122.hg.1 | ENSG00000139370; | 0.2139088 | 0.5028079 | FALSE |
| 22  | 2  | TC06001246.hg.1 | ENSG00000124491; | 0.2139088 | 0.5028079 | FALSE |
| 6   | 1  | TC17001462.hg.1 | ENSG00000131747  | 0.2140906 | 0.5028079 | FALSE |
| 6   | 1  | TC19000377.hg.1 | ENSG00000160161  | 0.2140906 | 0.5028079 | FALSE |
| 6   | 1  | TC16001225.hg.1 | ENSG00000181019  | 0.2140906 | 0.5028079 | FALSE |
| 6   | 1  | TC03001884.hg.1 | ENSG00000047457  | 0.2140906 | 0.5028079 | FALSE |
| 6   | 1  | TC10000053.hg.1 | ENSG00000170525  | 0.2140906 | 0.5028079 | FALSE |
| 6   | 1  | TC14001124.hg.1 | ENSG00000100504  | 0.2140906 | 0.5028079 | FALSE |
| 6   | 1  | TC15000622.hg.1 | ENSG00000166949  | 0.2140906 | 0.5028079 | FALSE |
| 6   | 1  | TC01001805.hg.1 | ENSG00000092969  | 0.2140906 | 0.5028079 | FALSE |
| 6   | 1  | TC22000702.hg.1 | ENSG00000128335  | 0.2140906 | 0.5028079 | FALSE |
| 6   | 1  | TC21000506.hg.1 | ENSG00000142178  | 0.2140906 | 0.5028079 | FALSE |
| 6   | 1  | TC05000054.hg.1 | ENSG00000078295  | 0.2140906 | 0.5028079 | FALSE |
| 6   | 1  | TC17000124.hg.1 | ENSG00000179593  | 0.2140906 | 0.5028079 | FALSE |
| 6   | 1  | TC11002178.hg.1 | ENSG00000086991  | 0.2140906 | 0.5028079 | FALSE |
| 6   | 1  | TC05000165.hg.1 | ENSG00000079215  | 0.2140906 | 0.5028079 | FALSE |
| 6   | 1  | TC02000416.hg.1 | ENSG00000116005  | 0.2140906 | 0.5028079 | FALSE |
| 6   | 1  | TC03001884.hg.1 | ENSG00000047457  | 0.2140906 | 0.5028079 | FALSE |
| 6   | 1  | TC15001136.hg.1 | ENSG00000166664  | 0.2140906 | 0.5028079 | FALSE |
| 6   | 1  | TC15002776.hg.1 | ENSG00000067225  | 0.2140906 | 0.5028079 | FALSE |
| 6   | 1  | TC14002310.hg.1 | ENSG00000168398  | 0.2140906 | 0.5028079 | FALSE |
| 6   | 1  | TC02001100.hg.1 | ENSG00000138448  | 0.2140906 | 0.5028079 | FALSE |
| 6   | 1  | TC01002616.hg.1 | ENSG00000117461  | 0.2140906 | 0.5028079 | FALSE |
| 6   | 1  | TC12001837.hg.1 | ENSG00000074527  | 0.2140906 | 0.5028079 | FALSE |
| 6   | 1  | TC12001324.hg.1 | ENSG00000123095  | 0.2140906 | 0.5028079 | FALSE |
| 6   | 1  | TC02000996.hg.1 | ENSG00000172292  | 0.2140906 | 0.5028079 | FALSE |
| 6   | 1  | TC21000138.hg.1 | ENSG00000159212  | 0.2140906 | 0.5028079 | FALSE |
| 6   | 1  | TC01003887.hg.1 | ENSG00000143815  | 0.2140906 | 0.5028079 | FALSE |
| 6   | 1  | TC14000353.hg.1 | ENSG00000165617  | 0.2140906 | 0.5028079 | FALSE |
| 6   | 1  | TC08002613.hg.1 | ENSG00000134013  | 0.2140906 | 0.5028079 | FALSE |
| 6   | 1  | TC0X000038.hg.1 | ENSG00000073464  | 0.2140906 | 0.5028079 | FALSE |
| 6   | 1  | TC15001761.hg.1 | ENSG00000103942  | 0.2140906 | 0.5028079 | FALSE |
| 6   | 1  | TC17001590.hg.1 | ENSG00000131094  | 0.2140906 | 0.5028079 | FALSE |

|      |    |                 |                 |           |           |       |
|------|----|-----------------|-----------------|-----------|-----------|-------|
| 6    | 1  | TC02001139.hg.1 | ENSG00000196950 | 0.2140906 | 0.5028079 | FALSE |
| 147  | 8  | TC01003211.hg.1 | ENSG00000143387 | 0.2229008 | 0.5028079 | FALSE |
| 83   | 5  | TC03003381.hg.1 | ENSG00000225697 | 0.2281783 | 0.5126696 | FALSE |
| 23   | 2  | TC02001437.hg.1 | ENSG00000144476 | 0.2285788 | 0.5126696 | FALSE |
| 1483 | 64 | TC01000685.hg.1 | ENSG00000162409 | 0.2330876 | 0.5212928 | FALSE |
| 43   | 3  | TC01003497.hg.1 | ENSG00000117479 | 0.2388794 | 0.5268378 | FALSE |
| 106  | 6  | TC04000101.hg.1 | ENSG00000249811 | 0.2389483 | 0.5268378 | FALSE |
| 1487 | 64 | TC01000685.hg.1 | ENSG00000162409 | 0.2399816 | 0.5268378 | FALSE |
| 24   | 2  | TC02001437.hg.1 | ENSG00000144476 | 0.2433131 | 0.5268378 | FALSE |
| 24   | 2  | TC02001437.hg.1 | ENSG00000144476 | 0.2433131 | 0.5268378 | FALSE |
| 24   | 2  | TC04000432.hg.1 | ENSG00000156234 | 0.2433131 | 0.5268378 | FALSE |
| 7    | 1  | TC01003791.hg.1 | ENSG00000143473 | 0.2450281 | 0.5268378 | FALSE |
| 7    | 1  | TC02000620.hg.1 | ENSG00000115594 | 0.2450281 | 0.5268378 | FALSE |
| 7    | 1  | TC05001151.hg.1 | ENSG00000112902 | 0.2450281 | 0.5268378 | FALSE |
| 7    | 1  | TC14001124.hg.1 | ENSG00000100504 | 0.2450281 | 0.5268378 | FALSE |
| 7    | 1  | TC02001437.hg.1 | ENSG00000144476 | 0.2450281 | 0.5268378 | FALSE |
| 7    | 1  | TC14001141.hg.1 | ENSG00000197930 | 0.2450281 | 0.5268378 | FALSE |
| 7    | 1  | TC17001353.hg.1 | ENSG00000176658 | 0.2450281 | 0.5268378 | FALSE |
| 7    | 1  | TC14002310.hg.1 | ENSG00000168398 | 0.2450281 | 0.5268378 | FALSE |
| 7    | 1  | TC10000811.hg.1 | ENSG00000150594 | 0.2450281 | 0.5268378 | FALSE |
| 7    | 1  | TC03000214.hg.1 | ENSG00000168036 | 0.2450281 | 0.5268378 | FALSE |
| 7    | 1  | TC01001607.hg.1 | ENSG00000116711 | 0.2450281 | 0.5268378 | FALSE |
| 7    | 1  | TC17000819.hg.1 | ENSG00000125398 | 0.2450281 | 0.5268378 | FALSE |
| 429  | 20 | TC01000685.hg.1 | ENSG00000162409 | 0.2483185 | 0.5268378 | FALSE |
| 44   | 3  | TC06001027.hg.1 | ENSG00000118503 | 0.2494996 | 0.527917  | FALSE |
| 314  | 15 | TC01002166.hg.1 | ENSG00000116285 | 0.2563396 | 0.5340341 | FALSE |
| 176  | 9  | TC01003497.hg.1 | ENSG00000117479 | 0.2576671 | 0.5340341 | FALSE |
| 25   | 2  | TC13000147.hg.1 | ENSG00000102760 | 0.258084  | 0.5340341 | FALSE |
| 25   | 2  | TC01001188.hg.1 | ENSG00000143369 | 0.258084  | 0.5340341 | FALSE |
| 45   | 3  | TC05001110.hg.1 | ENSG00000153395 | 0.2601887 | 0.5340341 | FALSE |
| 66   | 4  | TC04000253.hg.1 | ENSG00000154277 | 0.2613724 | 0.5340341 | FALSE |
| 88   | 5  | TC06001015.hg.1 | ENSG00000171408 | 0.2651945 | 0.5340341 | FALSE |
| 387  | 18 | TC02000082.hg.1 | ENSG00000071575 | 0.2657491 | 0.5340341 | FALSE |
| 155  | 8  | TC02001750.hg.1 | ENSG00000138061 | 0.2666037 | 0.5340341 | FALSE |
| 133  | 7  | TC07001883.hg.1 | ENSG00000085662 | 0.2698227 | 0.5340341 | FALSE |
| 67   | 4  | TC01000789.hg.1 | ENSG00000162614 | 0.2701336 | 0.5340341 | FALSE |
| 46   | 3  | TC10000986.hg.1 | ENSG00000151632 | 0.2709356 | 0.5340341 | FALSE |
| 26   | 2  | TC05000619.hg.1 | ENSG00000198108 | 0.2728659 | 0.5340341 | FALSE |
| 26   | 2  | TC03001362.hg.1 | ENSG00000160808 | 0.2728659 | 0.5340341 | FALSE |
| 1285 | 55 | TC01000723.hg.1 | ENSG00000185483 | 0.2740541 | 0.5340341 | FALSE |
| 8    | 1  | TC02002624.hg.1 | ENSG00000115415 | 0.2747496 | 0.5340341 | FALSE |
| 8    | 1  | TC11002175.hg.1 | ENSG00000109861 | 0.2747496 | 0.5340341 | FALSE |
| 8    | 1  | TC22001467.hg.1 | ENSG00000128394 | 0.2747496 | 0.5340341 | FALSE |
| 8    | 1  | TC01003791.hg.1 | ENSG00000143473 | 0.2747496 | 0.5340341 | FALSE |
| 8    | 1  | TC07001897.hg.1 | ENSG00000157680 | 0.2747496 | 0.5340341 | FALSE |
| 8    | 1  | TC06000779.hg.1 | ENSG00000135318 | 0.2747496 | 0.5340341 | FALSE |
| 8    | 1  | TC03003381.hg.1 | ENSG00000225697 | 0.2747496 | 0.5340341 | FALSE |
| 8    | 1  | TC11002178.hg.1 | ENSG00000086991 | 0.2747496 | 0.5340341 | FALSE |
| 8    | 1  | TC17001301.hg.1 | ENSG00000109107 | 0.2747496 | 0.5340341 | FALSE |
| 8    | 1  | TC01000785.hg.1 | ENSG00000154027 | 0.2747496 | 0.5340341 | FALSE |
| 8    | 1  | TC15000226.hg.1 | ENSG00000166923 | 0.2747496 | 0.5340341 | FALSE |
| 8    | 1  | TC10000350.hg.1 | ENSG00000107984 | 0.2747496 | 0.5340341 | FALSE |
| 8    | 1  | TC10000350.hg.1 | ENSG00000107984 | 0.2747496 | 0.5340341 | FALSE |
| 8    | 1  | TC01003266.hg.1 | ENSG00000196154 | 0.2747496 | 0.5340341 | FALSE |
| 8    | 1  | TC03000214.hg.1 | ENSG00000168036 | 0.2747496 | 0.5340341 | FALSE |
| 8    | 1  | TC11000198.hg.1 | ENSG00000133816 | 0.2747496 | 0.5340341 | FALSE |
| 8    | 1  | TC09001058.hg.1 | ENSG00000198467 | 0.2747496 | 0.5340341 | FALSE |
| 8    | 1  | TC03001888.hg.1 | ENSG00000169908 | 0.2747496 | 0.5340341 | FALSE |

|      |    |                 |                  |           |           |       |
|------|----|-----------------|------------------|-----------|-----------|-------|
| 677  | 30 | TC01002578.hg.1 | ENSG00000117394; | 0.2755208 | 0.5340341 | FALSE |
| 47   | 3  | TC12001429.hg.1 | ENSG00000139209; | 0.2817296 | 0.5447235 | FALSE |
| 158  | 8  | TC02000245.hg.1 | ENSG00000143891; | 0.2836068 | 0.5470058 | FALSE |
| 1192 | 51 | TC01000723.hg.1 | ENSG00000185483; | 0.2843646 | 0.547123  | FALSE |
| 27   | 2  | TC02001963.hg.1 | ENSG00000163235; | 0.287635  | 0.5513882 | FALSE |
| 27   | 2  | TC21000241.hg.1 | ENSG00000197381; | 0.287635  | 0.5513882 | FALSE |
| 160  | 8  | TC02002624.hg.1 | ENSG00000115415; | 0.2950958 | 0.5552063 | FALSE |
| 70   | 4  | TC01003211.hg.1 | ENSG00000143387; | 0.296697  | 0.5552063 | FALSE |
| 70   | 4  | TC03002146.hg.1 | ENSG00000189058; | 0.296697  | 0.5552063 | FALSE |
| 9    | 1  | TC21000241.hg.1 | ENSG00000197381  | 0.3033028 | 0.5552063 | FALSE |
| 9    | 1  | TC19000377.hg.1 | ENSG00000160161  | 0.3033028 | 0.5552063 | FALSE |
| 9    | 1  | TC10000811.hg.1 | ENSG00000150594  | 0.3033028 | 0.5552063 | FALSE |
| 9    | 1  | TC09001515.hg.1 | ENSG00000181634  | 0.3033028 | 0.5552063 | FALSE |
| 9    | 1  | TC01003887.hg.1 | ENSG00000143815  | 0.3033028 | 0.5552063 | FALSE |
| 9    | 1  | TC10000874.hg.1 | ENSG00000203805  | 0.3033028 | 0.5552063 | FALSE |
| 9    | 1  | TC14001364.hg.1 | ENSG00000211448  | 0.3033028 | 0.5552063 | FALSE |
| 9    | 1  | TC15001136.hg.1 | ENSG00000166664  | 0.3033028 | 0.5552063 | FALSE |
| 9    | 1  | TC02000245.hg.1 | ENSG00000143891  | 0.3033028 | 0.5552063 | FALSE |
| 9    | 1  | TC01000394.hg.1 | ENSG00000159023  | 0.3033028 | 0.5552063 | FALSE |
| 9    | 1  | TC07001552.hg.1 | ENSG00000187391  | 0.3033028 | 0.5552063 | FALSE |
| 9    | 1  | TC07001627.hg.1 | ENSG00000105880  | 0.3033028 | 0.5552063 | FALSE |
| 9    | 1  | TC07000852.hg.1 | ENSG00000181072  | 0.3033028 | 0.5552063 | FALSE |
| 9    | 1  | TC21000443.hg.1 | ENSG00000157542  | 0.3033028 | 0.5552063 | FALSE |
| 9    | 1  | TC22000620.hg.1 | ENSG00000169184  | 0.3033028 | 0.5552063 | FALSE |
| 49   | 3  | TC02000281.hg.1 | ENSG00000116016; | 0.3034185 | 0.5552063 | FALSE |
| 29   | 2  | TC02002624.hg.1 | ENSG00000115415; | 0.3170493 | 0.5754815 | FALSE |
| 29   | 2  | TC05001617.hg.1 | ENSG00000164307; | 0.3170493 | 0.5754815 | FALSE |
| 29   | 2  | TC09002910.hg.1 | ENSG00000107317; | 0.3170493 | 0.5754815 | FALSE |
| 29   | 2  | TC09002910.hg.1 | ENSG00000107317; | 0.3170493 | 0.5754815 | FALSE |
| 29   | 2  | TC10000986.hg.1 | ENSG00000151632; | 0.3170493 | 0.5754815 | FALSE |
| 141  | 7  | TC01001090.hg.1 | ENSG00000117289; | 0.3197865 | 0.5754815 | FALSE |
| 141  | 7  | TC01001090.hg.1 | ENSG00000117289; | 0.3197865 | 0.5754815 | FALSE |
| 1456 | 61 | TC01000685.hg.1 | ENSG00000162409; | 0.3203636 | 0.5754815 | FALSE |
| 451  | 20 | TC01003497.hg.1 | ENSG00000117479; | 0.3229983 | 0.5769462 | FALSE |
| 51   | 3  | TC0X000034.hg.1 | ENSG00000146950; | 0.325177  | 0.5769462 | FALSE |
| 51   | 3  | TC02000416.hg.1 | ENSG00000116005; | 0.325177  | 0.5769462 | FALSE |
| 51   | 3  | TC03000214.hg.1 | ENSG00000168036; | 0.325177  | 0.5769462 | FALSE |
| 119  | 6  | TC07001883.hg.1 | ENSG00000085662; | 0.3271924 | 0.5769462 | FALSE |
| 10   | 1  | TC19000677.hg.1 | ENSG00000134830  | 0.3307335 | 0.5769462 | FALSE |
| 10   | 1  | TC02002480.hg.1 | ENSG00000078098  | 0.3307335 | 0.5769462 | FALSE |
| 10   | 1  | TC06000779.hg.1 | ENSG00000135318  | 0.3307335 | 0.5769462 | FALSE |
| 10   | 1  | TC14000951.hg.1 | ENSG00000092068  | 0.3307335 | 0.5769462 | FALSE |
| 10   | 1  | TC17000241.hg.1 | ENSG00000142494  | 0.3307335 | 0.5769462 | FALSE |
| 10   | 1  | TC05000165.hg.1 | ENSG00000079215  | 0.3307335 | 0.5769462 | FALSE |
| 10   | 1  | TC01002616.hg.1 | ENSG00000117461  | 0.3307335 | 0.5769462 | FALSE |
| 10   | 1  | TC08000203.hg.1 | ENSG00000092964  | 0.3307335 | 0.5769462 | FALSE |
| 10   | 1  | TC05000165.hg.1 | ENSG00000079215  | 0.3307335 | 0.5769462 | FALSE |
| 10   | 1  | TC10000053.hg.1 | ENSG00000170525  | 0.3307335 | 0.5769462 | FALSE |
| 10   | 1  | TC15002776.hg.1 | ENSG00000067225  | 0.3307335 | 0.5769462 | FALSE |
| 10   | 1  | TC07001552.hg.1 | ENSG00000187391  | 0.3307335 | 0.5769462 | FALSE |
| 10   | 1  | TC10000053.hg.1 | ENSG00000170525  | 0.3307335 | 0.5769462 | FALSE |
| 10   | 1  | TC07000768.hg.1 | ENSG00000174697  | 0.3307335 | 0.5769462 | FALSE |
| 10   | 1  | TC13000364.hg.1 | ENSG00000198542  | 0.3307335 | 0.5769462 | FALSE |
| 407  | 18 | TC01003129.hg.1 | ENSG00000143140; | 0.3390184 | 0.5810687 | FALSE |
| 31   | 2  | TC13000147.hg.1 | ENSG00000102760; | 0.3461722 | 0.5818245 | FALSE |
| 31   | 2  | TC02000286.hg.1 | ENSG00000171150; | 0.3461722 | 0.5818245 | FALSE |
| 31   | 2  | TC09000015.hg.1 | ENSG00000147852; | 0.3461722 | 0.5818245 | FALSE |
| 122  | 6  | TC01000785.hg.1 | ENSG00000154027; | 0.3482442 | 0.5818245 | FALSE |

|      |    |                 |                  |           |           |       |
|------|----|-----------------|------------------|-----------|-----------|-------|
| 11   | 1  | TC05000054.hg.1 | ENSG00000078295  | 0.3570858 | 0.5818245 | FALSE |
| 11   | 1  | TC14000067.hg.1 | ENSG00000181784  | 0.3570858 | 0.5818245 | FALSE |
| 11   | 1  | TC20000621.hg.1 | ENSG00000101384  | 0.3570858 | 0.5818245 | FALSE |
| 11   | 1  | TC12001890.hg.1 | ENSG00000017427  | 0.3570858 | 0.5818245 | FALSE |
| 11   | 1  | TC17001902.hg.1 | ENSG00000161544  | 0.3570858 | 0.5818245 | FALSE |
| 11   | 1  | TC18000164.hg.1 | ENSG00000141469  | 0.3570858 | 0.5818245 | FALSE |
| 11   | 1  | TC03003381.hg.1 | ENSG00000225697  | 0.3570858 | 0.5818245 | FALSE |
| 11   | 1  | TC03001884.hg.1 | ENSG00000047457  | 0.3570858 | 0.5818245 | FALSE |
| 11   | 1  | TC01003791.hg.1 | ENSG00000143473  | 0.3570858 | 0.5818245 | FALSE |
| 11   | 1  | TC07001332.hg.1 | ENSG00000164708  | 0.3570858 | 0.5818245 | FALSE |
| 11   | 1  | TC07001630.hg.1 | ENSG00000070669  | 0.3570858 | 0.5818245 | FALSE |
| 11   | 1  | TC03000986.hg.1 | ENSG00000163872  | 0.3570858 | 0.5818245 | FALSE |
| 11   | 1  | TC0X000943.hg.1 | ENSG00000198947  | 0.3570858 | 0.5818245 | FALSE |
| 11   | 1  | TC10001517.hg.1 | ENSG00000148677  | 0.3570858 | 0.5818245 | FALSE |
| 11   | 1  | TC01002616.hg.1 | ENSG00000117461  | 0.3570858 | 0.5818245 | FALSE |
| 11   | 1  | TC15001136.hg.1 | ENSG00000166664  | 0.3570858 | 0.5818245 | FALSE |
| 11   | 1  | TC18000435.hg.1 | ENSG00000134762  | 0.3570858 | 0.5818245 | FALSE |
| 11   | 1  | TC02001100.hg.1 | ENSG00000138448  | 0.3570858 | 0.5818245 | FALSE |
| 11   | 1  | TC04001169.hg.1 | ENSG00000145244  | 0.3570858 | 0.5818245 | FALSE |
| 11   | 1  | TC15000971.hg.1 | ENSG00000184254  | 0.3570858 | 0.5818245 | FALSE |
| 11   | 1  | TC06000087.hg.1 | ENSG00000078401  | 0.3570858 | 0.5818245 | FALSE |
| 11   | 1  | TC04000396.hg.1 | ENSG00000080493  | 0.3570858 | 0.5818245 | FALSE |
| 77   | 4  | TC02002624.hg.1 | ENSG00000115415; | 0.3595939 | 0.5818245 | FALSE |
| 32   | 2  | TC10000986.hg.1 | ENSG00000151632; | 0.3605829 | 0.5818245 | FALSE |
| 32   | 2  | TC21000241.hg.1 | ENSG00000197381; | 0.3605829 | 0.5818245 | FALSE |
| 560  | 24 | TC01003042.hg.1 | ENSG00000092607; | 0.3624767 | 0.5830824 | FALSE |
| 2304 | 94 | TC01000972.hg.1 | ENSG00000064886; | 0.3672768 | 0.5895957 | FALSE |
| 55   | 3  | TC02000281.hg.1 | ENSG00000116016; | 0.3686179 | 0.589939  | FALSE |
| 55   | 3  | TC01003887.hg.1 | ENSG00000143815; | 0.3686179 | 0.589939  | FALSE |
| 539  | 23 | TC01000394.hg.1 | ENSG00000159023; | 0.3744703 | 0.5963038 | FALSE |
| 33   | 2  | TC01000728.hg.1 | ENSG00000162433; | 0.3748738 | 0.5963038 | FALSE |
| 33   | 2  | TC12000601.hg.1 | ENSG00000127314; | 0.3748738 | 0.5963038 | FALSE |
| 79   | 4  | TC02002624.hg.1 | ENSG00000115415; | 0.3776116 | 0.5988386 | FALSE |
| 12   | 1  | TC03000131.hg.1 | ENSG00000077092  | 0.382402  | 0.5997713 | FALSE |
| 12   | 1  | TC09000965.hg.1 | ENSG00000147883  | 0.382402  | 0.5997713 | FALSE |
| 12   | 1  | TC01003497.hg.1 | ENSG00000117479  | 0.382402  | 0.5997713 | FALSE |
| 12   | 1  | TC16001225.hg.1 | ENSG00000181019  | 0.382402  | 0.5997713 | FALSE |
| 12   | 1  | TC07001552.hg.1 | ENSG00000187391  | 0.382402  | 0.5997713 | FALSE |
| 12   | 1  | TC06002036.hg.1 | ENSG00000249853  | 0.382402  | 0.5997713 | FALSE |
| 12   | 1  | TC01000685.hg.1 | ENSG00000162409  | 0.382402  | 0.5997713 | FALSE |
| 12   | 1  | TC19000012.hg.1 | ENSG00000070404  | 0.382402  | 0.5997713 | FALSE |
| 12   | 1  | TC21000506.hg.1 | ENSG00000142178  | 0.382402  | 0.5997713 | FALSE |
| 12   | 1  | TC10002938.hg.1 | ENSG00000148671  | 0.382402  | 0.5997713 | FALSE |
| 34   | 2  | TC01002166.hg.1 | ENSG00000116285; | 0.389032  | 0.6035377 | FALSE |
| 718  | 30 | TC01001607.hg.1 | ENSG00000116711; | 0.3934404 | 0.6091729 | FALSE |
| 695  | 29 | TC01000394.hg.1 | ENSG00000159023; | 0.3989891 | 0.6165481 | FALSE |
| 106  | 5  | TC03003381.hg.1 | ENSG00000225697; | 0.4053033 | 0.6193548 | FALSE |
| 106  | 5  | TC01000785.hg.1 | ENSG00000154027; | 0.4053033 | 0.6193548 | FALSE |
| 13   | 1  | TC03001362.hg.1 | ENSG00000160808  | 0.4067228 | 0.6193548 | FALSE |
| 13   | 1  | TC04001820.hg.1 | ENSG00000154556  | 0.4067228 | 0.6193548 | FALSE |
| 13   | 1  | TC02000891.hg.1 | ENSG00000150540  | 0.4067228 | 0.6193548 | FALSE |
| 13   | 1  | TC12000096.hg.1 | ENSG00000111669  | 0.4067228 | 0.6193548 | FALSE |
| 13   | 1  | TC03000208.hg.1 | ENSG00000168032  | 0.4067228 | 0.6193548 | FALSE |
| 13   | 1  | TC02001628.hg.1 | ENSG00000084674  | 0.4067228 | 0.6193548 | FALSE |
| 13   | 1  | TC11002162.hg.1 | ENSG00000137501  | 0.4067228 | 0.6193548 | FALSE |
| 13   | 1  | TC11002178.hg.1 | ENSG00000086991  | 0.4067228 | 0.6193548 | FALSE |
| 13   | 1  | TC01003497.hg.1 | ENSG00000117479  | 0.4067228 | 0.6193548 | FALSE |
| 13   | 1  | TC01002616.hg.1 | ENSG00000117461  | 0.4067228 | 0.6193548 | FALSE |



|      |    |                 |                  |           |           |       |
|------|----|-----------------|------------------|-----------|-----------|-------|
| 84   | 4  | TC01000394.hg.1 | ENSG00000159023; | 0.4223643 | 0.6363093 | FALSE |
| 14   | 1  | TC05001617.hg.1 | ENSG00000164307  | 0.4300873 | 0.6363093 | FALSE |
| 14   | 1  | TC01000394.hg.1 | ENSG00000159023  | 0.4300873 | 0.6363093 | FALSE |
| 14   | 1  | TC02001628.hg.1 | ENSG00000084674  | 0.4300873 | 0.6363093 | FALSE |
| 14   | 1  | TC15001136.hg.1 | ENSG00000166664  | 0.4300873 | 0.6363093 | FALSE |
| 14   | 1  | TC02000245.hg.1 | ENSG00000143891  | 0.4300873 | 0.6363093 | FALSE |
| 14   | 1  | TC14000067.hg.1 | ENSG00000181784  | 0.4300873 | 0.6363093 | FALSE |
| 14   | 1  | TC22001477.hg.1 | ENSG00000100344  | 0.4300873 | 0.6363093 | FALSE |
| 14   | 1  | TC10000811.hg.1 | ENSG00000150594  | 0.4300873 | 0.6363093 | FALSE |
| 14   | 1  | TC05001172.hg.1 | ENSG00000154122  | 0.4300873 | 0.6363093 | FALSE |
| 37   | 2  | TC02000891.hg.1 | ENSG00000150540; | 0.4305989 | 0.6363093 | FALSE |
| 85   | 4  | TC05000165.hg.1 | ENSG00000079215; | 0.4312313 | 0.6363093 | FALSE |
| 134  | 6  | TC01001188.hg.1 | ENSG00000143369; | 0.432941  | 0.6376336 | FALSE |
| 86   | 4  | TC10000986.hg.1 | ENSG00000151632; | 0.4400614 | 0.6469067 | FALSE |
| 236  | 10 | TC02000281.hg.1 | ENSG00000116016; | 0.4513077 | 0.6615241 | FALSE |
| 15   | 1  | TC07001897.hg.1 | ENSG00000157680  | 0.452533  | 0.6615241 | FALSE |
| 15   | 1  | TC0Y000185.hg.1 | ENSG00000012817  | 0.452533  | 0.6615241 | FALSE |
| 15   | 1  | TC19001293.hg.1 | ENSG00000105664  | 0.452533  | 0.6615241 | FALSE |
| 39   | 2  | TC02000082.hg.1 | ENSG00000071575; | 0.4574611 | 0.6656292 | FALSE |
| 39   | 2  | TC05001617.hg.1 | ENSG00000164307; | 0.4574611 | 0.6656292 | FALSE |
| 891  | 36 | TC01000785.hg.1 | ENSG00000154027; | 0.4594551 | 0.6666771 | FALSE |
| 89   | 4  | TC01003497.hg.1 | ENSG00000117479; | 0.4662947 | 0.675353  | FALSE |
| 16   | 1  | TC11002162.hg.1 | ENSG00000137501  | 0.4740961 | 0.6816216 | FALSE |
| 16   | 1  | TC10000663.hg.1 | ENSG00000095596  | 0.4740961 | 0.6816216 | FALSE |
| 16   | 1  | TC0X001279.hg.1 | ENSG00000077274  | 0.4740961 | 0.6816216 | FALSE |
| 16   | 1  | TC05000943.hg.1 | ENSG00000156427  | 0.4740961 | 0.6816216 | FALSE |
| 16   | 1  | TC04001084.hg.1 | ENSG00000109819  | 0.4740961 | 0.6816216 | FALSE |
| 16   | 1  | TC12000227.hg.1 | ENSG00000172572  | 0.4740961 | 0.6816216 | FALSE |
| 16   | 1  | TC20000980.hg.1 | ENSG00000124225  | 0.4740961 | 0.6816216 | FALSE |
| 41   | 2  | TC08001659.hg.1 | ENSG00000104419; | 0.4835747 | 0.6853547 | FALSE |
| 41   | 2  | TC01000728.hg.1 | ENSG00000162433; | 0.4835747 | 0.6853547 | FALSE |
| 1839 | 73 | TC01000685.hg.1 | ENSG00000162409; | 0.487155  | 0.6853547 | FALSE |
| 218  | 9  | TC03000214.hg.1 | ENSG00000168036; | 0.4897523 | 0.6853547 | FALSE |
| 1815 | 72 | TC01000685.hg.1 | ENSG00000162409; | 0.4898931 | 0.6853547 | FALSE |
| 117  | 5  | TC01001607.hg.1 | ENSG00000116711; | 0.4901835 | 0.6853547 | FALSE |
| 92   | 4  | TC03000013.hg.1 | ENSG00000150995; | 0.4920741 | 0.6853547 | FALSE |
| 67   | 3  | TC11000198.hg.1 | ENSG00000133816; | 0.4941868 | 0.6853547 | FALSE |
| 17   | 1  | TC18000097.hg.1 | ENSG00000101773  | 0.4948111 | 0.6853547 | FALSE |
| 17   | 1  | TC06004150.hg.1 | ENSG00000096060  | 0.4948111 | 0.6853547 | FALSE |
| 17   | 1  | TC06004150.hg.1 | ENSG00000096060  | 0.4948111 | 0.6853547 | FALSE |
| 17   | 1  | TC04000253.hg.1 | ENSG00000154277  | 0.4948111 | 0.6853547 | FALSE |
| 17   | 1  | TC01000785.hg.1 | ENSG00000154027  | 0.4948111 | 0.6853547 | FALSE |
| 17   | 1  | TC07001534.hg.1 | ENSG00000127946  | 0.4948111 | 0.6853547 | FALSE |
| 17   | 1  | TC15001136.hg.1 | ENSG00000166664  | 0.4948111 | 0.6853547 | FALSE |
| 17   | 1  | TC06001027.hg.1 | ENSG00000118503  | 0.4948111 | 0.6853547 | FALSE |
| 17   | 1  | TC06000945.hg.1 | ENSG00000152661  | 0.4948111 | 0.6853547 | FALSE |
| 1818 | 72 | TC01000685.hg.1 | ENSG00000162409; | 0.4959245 | 0.6853547 | FALSE |
| 42   | 2  | TC02000082.hg.1 | ENSG00000071575; | 0.4963365 | 0.6853547 | FALSE |
| 42   | 2  | TC02000041.hg.1 | ENSG00000115738; | 0.4963365 | 0.6853547 | FALSE |
| 1819 | 72 | TC01000685.hg.1 | ENSG00000162409; | 0.497934  | 0.6857511 | FALSE |
| 1845 | 73 | TC01000685.hg.1 | ENSG00000162409; | 0.4991441 | 0.6862139 | FALSE |
| 477  | 19 | TC01000394.hg.1 | ENSG00000159023; | 0.5119147 | 0.6986398 | FALSE |
| 299  | 12 | TC01003497.hg.1 | ENSG00000117479; | 0.5139725 | 0.6986398 | FALSE |
| 299  | 12 | TC06000004.hg.1 | ENSG00000112679; | 0.5139725 | 0.6986398 | FALSE |
| 18   | 1  | TC01000643.hg.1 | ENSG00000116157  | 0.5147113 | 0.6986398 | FALSE |
| 18   | 1  | TC06001029.hg.1 | ENSG00000112379  | 0.5147113 | 0.6986398 | FALSE |
| 18   | 1  | TC08000694.hg.1 | ENSG00000184374  | 0.5147113 | 0.6986398 | FALSE |
| 18   | 1  | TC03000214.hg.1 | ENSG00000168036  | 0.5147113 | 0.6986398 | FALSE |

|      |    |                 |                 |           |           |       |
|------|----|-----------------|-----------------|-----------|-----------|-------|
| 18   | 1  | TC08001659.hg.1 | ENSG00000104419 | 0.5147113 | 0.6986398 | FALSE |
| 18   | 1  | TC19001293.hg.1 | ENSG00000105664 | 0.5147113 | 0.6986398 | FALSE |
| 1854 | 73 | TC01000685.hg.1 | ENSG00000162409 | 0.5170825 | 0.6986398 | FALSE |
| 1829 | 72 | TC01000685.hg.1 | ENSG00000162409 | 0.5179866 | 0.6986589 | FALSE |
| 44   | 2  | TC02002624.hg.1 | ENSG00000115415 | 0.5212476 | 0.7000502 | FALSE |
| 44   | 2  | TC02002624.hg.1 | ENSG00000115415 | 0.5212476 | 0.7000502 | FALSE |
| 44   | 2  | TC06000004.hg.1 | ENSG00000112679 | 0.5212476 | 0.7000502 | FALSE |
| 44   | 2  | TC04001001.hg.1 | ENSG00000074211 | 0.5212476 | 0.7000502 | FALSE |
| 19   | 1  | TC10001517.hg.1 | ENSG00000148677 | 0.5338288 | 0.7132862 | FALSE |
| 19   | 1  | TC06000945.hg.1 | ENSG00000152661 | 0.5338288 | 0.7132862 | FALSE |
| 72   | 3  | TC12001324.hg.1 | ENSG00000123095 | 0.5428113 | 0.7234412 | FALSE |
| 46   | 2  | TC11000404.hg.1 | ENSG00000134574 | 0.5453196 | 0.7255524 | FALSE |
| 20   | 1  | TC17001353.hg.1 | ENSG00000176658 | 0.5521944 | 0.728543  | FALSE |
| 20   | 1  | TC03003381.hg.1 | ENSG00000225697 | 0.5521944 | 0.728543  | FALSE |
| 20   | 1  | TC14000353.hg.1 | ENSG00000165617 | 0.5521944 | 0.728543  | FALSE |
| 20   | 1  | TC09000015.hg.1 | ENSG00000147852 | 0.5521944 | 0.728543  | FALSE |
| 73   | 3  | TC06004150.hg.1 | ENSG00000096060 | 0.5522078 | 0.728543  | FALSE |
| 47   | 2  | TC03000131.hg.1 | ENSG00000077092 | 0.5570347 | 0.7330633 | FALSE |
| 47   | 2  | TC03000013.hg.1 | ENSG00000150995 | 0.5570347 | 0.7330633 | FALSE |
| 48   | 2  | TC03000262.hg.1 | ENSG00000160801 | 0.5685336 | 0.7363078 | FALSE |
| 21   | 1  | TC02002624.hg.1 | ENSG00000115415 | 0.5698374 | 0.7363078 | FALSE |
| 21   | 1  | TC05000165.hg.1 | ENSG00000079215 | 0.5698374 | 0.7363078 | FALSE |
| 21   | 1  | TC10000811.hg.1 | ENSG00000150594 | 0.5698374 | 0.7363078 | FALSE |
| 21   | 1  | TC09000358.hg.1 | ENSG00000135069 | 0.5698374 | 0.7363078 | FALSE |
| 21   | 1  | TC09000965.hg.1 | ENSG00000147883 | 0.5698374 | 0.7363078 | FALSE |
| 21   | 1  | TC04002929.hg.1 | ENSG00000109743 | 0.5698374 | 0.7363078 | FALSE |
| 21   | 1  | TC05000054.hg.1 | ENSG00000078295 | 0.5698374 | 0.7363078 | FALSE |
| 21   | 1  | TC09000965.hg.1 | ENSG00000147883 | 0.5698374 | 0.7363078 | FALSE |
| 21   | 1  | TC09000038.hg.1 | ENSG00000197646 | 0.5698374 | 0.7363078 | FALSE |
| 128  | 5  | TC02000891.hg.1 | ENSG00000150540 | 0.5702868 | 0.7363078 | FALSE |
| 1806 | 70 | TC01000685.hg.1 | ENSG00000162409 | 0.5738923 | 0.7392547 | FALSE |
| 155  | 6  | TC05000054.hg.1 | ENSG00000078295 | 0.5744527 | 0.7392547 | FALSE |
| 182  | 7  | TC02000996.hg.1 | ENSG00000172292 | 0.5784464 | 0.7431099 | FALSE |
| 49   | 2  | TC10001517.hg.1 | ENSG00000148677 | 0.5798151 | 0.7431099 | FALSE |
| 49   | 2  | TC03000131.hg.1 | ENSG00000077092 | 0.5798151 | 0.7431099 | FALSE |
| 103  | 4  | TC01000734.hg.1 | ENSG00000118473 | 0.5815518 | 0.7435149 | FALSE |
| 22   | 1  | TC05000054.hg.1 | ENSG00000078295 | 0.5867864 | 0.7453517 | FALSE |
| 22   | 1  | TC22001477.hg.1 | ENSG00000100344 | 0.5867864 | 0.7453517 | FALSE |
| 22   | 1  | TC05000054.hg.1 | ENSG00000078295 | 0.5867864 | 0.7453517 | FALSE |
| 22   | 1  | TC0Y000185.hg.1 | ENSG00000012817 | 0.5867864 | 0.7453517 | FALSE |
| 22   | 1  | TC20000162.hg.1 | ENSG00000101463 | 0.5867864 | 0.7453517 | FALSE |
| 22   | 1  | TC18000164.hg.1 | ENSG00000141469 | 0.5867864 | 0.7453517 | FALSE |
| 22   | 1  | TC02001750.hg.1 | ENSG00000138061 | 0.5867864 | 0.7453517 | FALSE |
| 239  | 9  | TC03000013.hg.1 | ENSG00000150995 | 0.6011868 | 0.7568487 | FALSE |
| 51   | 2  | TC03000634.hg.1 | ENSG00000173193 | 0.6017234 | 0.7568487 | FALSE |
| 51   | 2  | TC13000799.hg.1 | ENSG00000125257 | 0.6017234 | 0.7568487 | FALSE |
| 23   | 1  | TC05000165.hg.1 | ENSG00000079215 | 0.6030686 | 0.7568487 | FALSE |
| 23   | 1  | TC09000358.hg.1 | ENSG00000135069 | 0.6030686 | 0.7568487 | FALSE |
| 79   | 3  | TC03000013.hg.1 | ENSG00000150995 | 0.6060967 | 0.7588293 | FALSE |
| 134  | 5  | TC02000891.hg.1 | ENSG00000150540 | 0.6111218 | 0.7627676 | FALSE |
| 241  | 9  | TC06000120.hg.1 | ENSG00000137393 | 0.6111857 | 0.7627676 | FALSE |
| 52   | 2  | TC02002624.hg.1 | ENSG00000115415 | 0.61235   | 0.7630075 | FALSE |
| 24   | 1  | TC18000574.hg.1 | ENSG00000166347 | 0.6187101 | 0.7656467 | FALSE |
| 24   | 1  | TC07000810.hg.1 | ENSG00000128510 | 0.6187101 | 0.7656467 | FALSE |
| 24   | 1  | TC09002910.hg.1 | ENSG00000107317 | 0.6187101 | 0.7656467 | FALSE |
| 24   | 1  | TC18000574.hg.1 | ENSG00000166347 | 0.6187101 | 0.7656467 | FALSE |
| 24   | 1  | TC18000574.hg.1 | ENSG00000166347 | 0.6187101 | 0.7656467 | FALSE |
| 24   | 1  | TC18000574.hg.1 | ENSG00000166347 | 0.6187101 | 0.7656467 | FALSE |

|      |    |                  |                  |           |           |       |
|------|----|------------------|------------------|-----------|-----------|-------|
| 24   | 1  | TC14000067.hg.1  | ENSG00000181784  | 0.6187101 | 0.7656467 | FALSE |
| 53   | 2  | TC01002195.hg.1  | ENSG00000116649; | 0.6227585 | 0.7656467 | FALSE |
| 53   | 2  | TC04001001.hg.1  | ENSG00000074211; | 0.6227585 | 0.7656467 | FALSE |
| 137  | 5  | TC02000996.hg.1  | ENSG00000172292; | 0.6306727 | 0.7730892 | FALSE |
| 25   | 1  | TC10001517.hg.1  | ENSG00000148677  | 0.6337362 | 0.7730892 | FALSE |
| 25   | 1  | TC03000634.hg.1  | ENSG00000173193  | 0.6337362 | 0.7730892 | FALSE |
| 25   | 1  | TC13000845.hg.1  | ENSG00000102452  | 0.6337362 | 0.7730892 | FALSE |
| 25   | 1  | TC03003381.hg.1  | ENSG00000225697  | 0.6337362 | 0.7730892 | FALSE |
| 25   | 1  | TC13000845.hg.1  | ENSG00000102452  | 0.6337362 | 0.7730892 | FALSE |
| 25   | 1  | TC15001136.hg.1  | ENSG00000166664  | 0.6337362 | 0.7730892 | FALSE |
| 111  | 4  | TC02002827.hg.1  | ENSG00000135905; | 0.6405871 | 0.7772192 | FALSE |
| 55   | 2  | TC09000358.hg.1  | ENSG00000135069; | 0.6429245 | 0.7788514 | FALSE |
| 248  | 9  | TC03001466.hg.1  | ENSG00000163931; | 0.6451525 | 0.779792  | FALSE |
| 329  | 12 | TC01003605.hg.1  | ENSG00000135821; | 0.6474052 | 0.779792  | FALSE |
| 26   | 1  | TC01001710.hg.1  | ENSG00000117266  | 0.648171  | 0.779792  | FALSE |
| 26   | 1  | TC02001750.hg.1  | ENSG00000138061  | 0.648171  | 0.779792  | FALSE |
| 26   | 1  | TC15001136.hg.1  | ENSG00000166664  | 0.648171  | 0.779792  | FALSE |
| 26   | 1  | TC01001710.hg.1  | ENSG00000117266  | 0.648171  | 0.779792  | FALSE |
| 56   | 2  | TC13000799.hg.1  | ENSG00000125257; | 0.6526841 | 0.7816278 | FALSE |
| 56   | 2  | TC13000799.hg.1  | ENSG00000125257; | 0.6526841 | 0.7816278 | FALSE |
| 142  | 5  | TC01000394.hg.1  | ENSG00000159023; | 0.6618972 | 0.7880207 | FALSE |
| 27   | 1  | TC11002162.hg.1  | ENSG00000137501  | 0.6620378 | 0.7880207 | FALSE |
| 27   | 1  | TC18000565.hg.1  | ENSG00000166479  | 0.6620378 | 0.7880207 | FALSE |
| 27   | 1  | TC12000227.hg.1  | ENSG00000172572  | 0.6620378 | 0.7880207 | FALSE |
| 27   | 1  | TC14000951.hg.1  | ENSG00000092068  | 0.6620378 | 0.7880207 | FALSE |
| 281  | 10 | TC01001792.hg.1  | ENSG00000082482; | 0.6720614 | 0.7969308 | FALSE |
| 28   | 1  | TC14002310.hg.1  | ENSG00000168398  | 0.6753588 | 0.799633  | FALSE |
| 256  | 9  | TC06000120.hg.1  | ENSG00000137393; | 0.6818658 | 0.8061214 | FALSE |
| 29   | 1  | TC07001332.hg.1  | ENSG00000164708  | 0.6881556 | 0.8123341 | FALSE |
| 60   | 2  | TC13000799.hg.1  | ENSG00000125257; | 0.6896032 | 0.8128206 | FALSE |
| 30   | 1  | TC14002310.hg.1  | ENSG00000168398  | 0.7004487 | 0.8225164 | FALSE |
| 30   | 1  | TC10002939.hg.1  | ENSG00000151303  | 0.7004487 | 0.8225164 | FALSE |
| 30   | 1  | TC03000262.hg.1  | ENSG00000160801  | 0.7004487 | 0.8225164 | FALSE |
| 30   | 1  | TC19001220.hg.1  | ENSG00000141837  | 0.7004487 | 0.8225164 | FALSE |
| 121  | 4  | TC01003129.hg.1  | ENSG00000143140; | 0.7063168 | 0.8256279 | FALSE |
| 121  | 4  | TC01003129.hg.1  | ENSG00000143140; | 0.7063168 | 0.8256279 | FALSE |
| 262  | 9  | TC01001112.hg.1; | ENSG00000131778; | 0.7078313 | 0.8256279 | FALSE |
| 31   | 1  | TC12000531.hg.1  | ENSG00000166986  | 0.7122579 | 0.8289436 | FALSE |
| 31   | 1  | TC08001361.hg.1  | ENSG00000076641  | 0.7122579 | 0.8289436 | FALSE |
| 123  | 4  | TC02002827.hg.1  | ENSG00000135905; | 0.7183583 | 0.8311831 | FALSE |
| 152  | 5  | TC01000734.hg.1  | ENSG00000118473; | 0.7190286 | 0.8311831 | FALSE |
| 209  | 7  | TC06000004.hg.1  | ENSG00000112679; | 0.7200363 | 0.8311831 | FALSE |
| 32   | 1  | TC18000097.hg.1  | ENSG00000101773  | 0.7236023 | 0.8311831 | FALSE |
| 32   | 1  | TC18000565.hg.1  | ENSG00000166479  | 0.7236023 | 0.8311831 | FALSE |
| 32   | 1  | TC18000574.hg.1  | ENSG00000166347  | 0.7236023 | 0.8311831 | FALSE |
| 32   | 1  | TC03002146.hg.1  | ENSG00000189058  | 0.7236023 | 0.8311831 | FALSE |
| 2097 | 78 | TC01001907.hg.1  | ENSG00000143641; | 0.7240093 | 0.8311831 | FALSE |
| 124  | 4  | TC01000972.hg.1  | ENSG00000064886; | 0.724241  | 0.8311831 | FALSE |
| 125  | 4  | TC03000214.hg.1  | ENSG00000168036; | 0.7300321 | 0.8366061 | FALSE |
| 33   | 1  | TC04001084.hg.1  | ENSG00000109819  | 0.7345    | 0.8404993 | FALSE |
| 34   | 1  | TC03002008.hg.1  | ENSG00000144959  | 0.7449688 | 0.8506189 | FALSE |
| 34   | 1  | TC06001027.hg.1  | ENSG00000118503  | 0.7449688 | 0.8506189 | FALSE |
| 98   | 3  | TC01000972.hg.1  | ENSG00000064886; | 0.7467998 | 0.8508532 | FALSE |
| 328  | 11 | TC01001112.hg.1; | ENSG00000131778; | 0.7479485 | 0.850927  | FALSE |
| 35   | 1  | TC04001084.hg.1  | ENSG00000109819  | 0.7550253 | 0.857735  | FALSE |
| 131  | 4  | TC02002827.hg.1  | ENSG00000135905; | 0.762872  | 0.8653967 | FALSE |
| 36   | 1  | TC01001112.hg.1  | ENSG00000131778  | 0.7646859 | 0.8655782 | FALSE |
| 36   | 1  | TC08002613.hg.1  | ENSG00000134013  | 0.7646859 | 0.8655782 | FALSE |

|      |    |                 |                 |           |           |       |
|------|----|-----------------|-----------------|-----------|-----------|-------|
| 37   | 1  | TC07000810.hg.1 | ENSG00000128510 | 0.7739661 | 0.8729359 | FALSE |
| 37   | 1  | TC07001552.hg.1 | ENSG00000187391 | 0.7739661 | 0.8729359 | FALSE |
| 37   | 1  | TC11002175.hg.1 | ENSG00000109861 | 0.7739661 | 0.8729359 | FALSE |
| 72   | 2  | TC02002827.hg.1 | ENSG00000135905 | 0.7812884 | 0.8786696 | FALSE |
| 38   | 1  | TC03002146.hg.1 | ENSG00000189058 | 0.7828809 | 0.879201  | FALSE |
| 105  | 3  | TC11002175.hg.1 | ENSG00000109861 | 0.787352  | 0.8821354 | FALSE |
| 73   | 2  | TC02002605.hg.1 | ENSG00000064989 | 0.7877413 | 0.8821354 | FALSE |
| 226  | 7  | TC01001624.hg.1 | ENSG00000116741 | 0.7906755 | 0.8831329 | FALSE |
| 39   | 1  | TC21000241.hg.1 | ENSG00000197381 | 0.7914445 | 0.8831329 | FALSE |
| 39   | 1  | TC03001884.hg.1 | ENSG00000047457 | 0.7914445 | 0.8831329 | FALSE |
| 74   | 2  | TC01001112.hg.1 | ENSG00000131778 | 0.7940261 | 0.8841284 | FALSE |
| 107  | 3  | TC01002166.hg.1 | ENSG00000116285 | 0.7979015 | 0.8871851 | FALSE |
| 40   | 1  | TC19001220.hg.1 | ENSG00000141837 | 0.799671  | 0.8878949 | FALSE |
| 2389 | 87 | TC01000685.hg.1 | ENSG00000162409 | 0.8028006 | 0.8901109 | FALSE |
| 76   | 2  | TC05000165.hg.1 | ENSG00000079215 | 0.806104  | 0.8925129 | FALSE |
| 41   | 1  | TC06004150.hg.1 | ENSG00000096060 | 0.8075734 | 0.8928804 | FALSE |
| 293  | 9  | TC06000120.hg.1 | ENSG00000137393 | 0.8194728 | 0.9017157 | FALSE |
| 2246 | 81 | TC01000685.hg.1 | ENSG00000162409 | 0.8209483 | 0.9017157 | FALSE |
| 2246 | 81 | TC01000685.hg.1 | ENSG00000162409 | 0.8209483 | 0.9017157 | FALSE |
| 112  | 3  | TC03000214.hg.1 | ENSG00000168036 | 0.822371  | 0.9017157 | FALSE |
| 43   | 1  | TC11000174.hg.1 | ENSG00000166483 | 0.8224566 | 0.9017157 | FALSE |
| 43   | 1  | TC06004150.hg.1 | ENSG00000096060 | 0.8224566 | 0.9017157 | FALSE |
| 43   | 1  | TC15000971.hg.1 | ENSG00000184254 | 0.8224566 | 0.9017157 | FALSE |
| 80   | 2  | TC05000159.hg.1 | ENSG00000168685 | 0.8283836 | 0.9024633 | FALSE |
| 44   | 1  | TC18000097.hg.1 | ENSG00000101773 | 0.8294615 | 0.9024633 | FALSE |
| 44   | 1  | TC06001027.hg.1 | ENSG00000118503 | 0.8294615 | 0.9024633 | FALSE |
| 44   | 1  | TC05000165.hg.1 | ENSG00000079215 | 0.8294615 | 0.9024633 | FALSE |
| 44   | 1  | TC05000165.hg.1 | ENSG00000079215 | 0.8294615 | 0.9024633 | FALSE |
| 44   | 1  | TC05000165.hg.1 | ENSG00000079215 | 0.8294615 | 0.9024633 | FALSE |
| 44   | 1  | TC05000165.hg.1 | ENSG00000079215 | 0.8294615 | 0.9024633 | FALSE |
| 44   | 1  | TC17001301.hg.1 | ENSG00000109107 | 0.8294615 | 0.9024633 | FALSE |
| 861  | 29 | TC01003042.hg.1 | ENSG00000092607 | 0.8335435 | 0.9025264 | FALSE |
| 45   | 1  | TC14000067.hg.1 | ENSG00000181784 | 0.8361904 | 0.9041453 | FALSE |
| 82   | 2  | TC03000013.hg.1 | ENSG00000150995 | 0.8386365 | 0.9048829 | FALSE |
| 82   | 2  | TC03000013.hg.1 | ENSG00000150995 | 0.8386365 | 0.9048829 | FALSE |
| 865  | 29 | TC01003042.hg.1 | ENSG00000092607 | 0.8403308 | 0.9048829 | FALSE |
| 46   | 1  | TC03000013.hg.1 | ENSG00000150995 | 0.8426542 | 0.9049022 | FALSE |
| 46   | 1  | TC03000013.hg.1 | ENSG00000150995 | 0.8426542 | 0.9049022 | FALSE |
| 46   | 1  | TC06004150.hg.1 | ENSG00000096060 | 0.8426542 | 0.9049022 | FALSE |
| 335  | 10 | TC01006414.hg.1 | ENSG00000143248 | 0.8537786 | 0.9132602 | FALSE |
| 48   | 1  | TC05001110.hg.1 | ENSG00000153395 | 0.8548278 | 0.9132602 | FALSE |
| 48   | 1  | TC02000996.hg.1 | ENSG00000172292 | 0.8548278 | 0.9132602 | FALSE |
| 120  | 3  | TC08000203.hg.1 | ENSG00000092964 | 0.8562541 | 0.9132602 | FALSE |
| 49   | 1  | TC01001112.hg.1 | ENSG00000131778 | 0.8605572 | 0.9155331 | FALSE |
| 49   | 1  | TC02002827.hg.1 | ENSG00000135905 | 0.8605572 | 0.9155331 | FALSE |
| 87   | 2  | TC12000803.hg.1 | ENSG00000166598 | 0.861884  | 0.9155331 | FALSE |
| 50   | 1  | TC02002143.hg.1 | ENSG00000204634 | 0.8660608 | 0.9187267 | FALSE |
| 91   | 2  | TC16001088.hg.1 | ENSG00000171208 | 0.8782297 | 0.9303783 | FALSE |
| 288  | 8  | TC01002166.hg.1 | ENSG00000116285 | 0.8841088 | 0.9348149 | FALSE |
| 54   | 1  | TC12000531.hg.1 | ENSG00000166986 | 0.8859901 | 0.9348149 | FALSE |
| 54   | 1  | TC12000531.hg.1 | ENSG00000166986 | 0.8859901 | 0.9348149 | FALSE |
| 54   | 1  | TC12000531.hg.1 | ENSG00000166986 | 0.8859901 | 0.9348149 | FALSE |
| 94   | 2  | TC03000013.hg.1 | ENSG00000150995 | 0.8892972 | 0.9357886 | FALSE |
| 414  | 12 | TC01001624.hg.1 | ENSG00000116741 | 0.8945557 | 0.9400619 | FALSE |
| 59   | 1  | TC11002162.hg.1 | ENSG00000137501 | 0.9067902 | 0.9513874 | FALSE |
| 422  | 12 | TC01001624.hg.1 | ENSG00000116741 | 0.9077569 | 0.9513874 | FALSE |
| 137  | 3  | TC08000255.hg.1 | ENSG00000157168 | 0.9100148 | 0.9516911 | FALSE |
| 60   | 1  | TC15001136.hg.1 | ENSG00000166664 | 0.9104714 | 0.9516911 | FALSE |
| 207  | 5  | TC01002847.hg.1 | ENSG00000117228 | 0.914138  | 0.9532678 | FALSE |

|      |     |                 |                  |           |           |       |
|------|-----|-----------------|------------------|-----------|-----------|-------|
| 102  | 2   | TC08002613.hg.1 | ENSG00000134013; | 0.9144085 | 0.9532678 | FALSE |
| 175  | 4   | TC11000198.hg.1 | ENSG00000133816; | 0.9175198 | 0.9552428 | FALSE |
| 104  | 2   | TC03000013.hg.1 | ENSG00000150995; | 0.919794  | 0.9563421 | FALSE |
| 496  | 14  | TC01003605.hg.1 | ENSG00000135821; | 0.9268748 | 0.9624296 | FALSE |
| 66   | 1   | TC03002146.hg.1 | ENSG00000189058  | 0.9297021 | 0.9640901 | FALSE |
| 109  | 2   | TC02002827.hg.1 | ENSG00000135905; | 0.9318956 | 0.9641218 | FALSE |
| 378  | 10  | TC01000728.hg.1 | ENSG00000162433; | 0.9321891 | 0.9641218 | FALSE |
| 357  | 9   | TC01001624.hg.1 | ENSG00000116741; | 0.9448571 | 0.9737847 | FALSE |
| 116  | 2   | TC03001362.hg.1 | ENSG00000160808; | 0.9459658 | 0.9737847 | FALSE |
| 390  | 10  | TC01000728.hg.1 | ENSG00000162433; | 0.9462138 | 0.9737847 | FALSE |
| 390  | 10  | TC01000728.hg.1 | ENSG00000162433; | 0.9462138 | 0.9737847 | FALSE |
| 117  | 2   | TC06000004.hg.1 | ENSG00000112679; | 0.9477344 | 0.9737847 | FALSE |
| 74   | 1   | TC14000067.hg.1 | ENSG00000181784  | 0.949084  | 0.9738966 | FALSE |
| 80   | 1   | TC20000926.hg.1 | ENSG00000158445  | 0.9600292 | 0.9838419 | FALSE |
| 81   | 1   | TC21000241.hg.1 | ENSG00000197381  | 0.9616098 | 0.9841769 | FALSE |
| 129  | 2   | TC01001112.hg.1 | ENSG00000131778; | 0.9650793 | 0.9858    | FALSE |
| 129  | 2   | TC01001112.hg.1 | ENSG00000131778; | 0.9650793 | 0.9858    | FALSE |
| 698  | 19  | TC01001112.hg.1 | ENSG00000131778; | 0.9684109 | 0.9872761 | FALSE |
| 178  | 3   | TC02002827.hg.1 | ENSG00000135905; | 0.9732134 | 0.9905258 | FALSE |
| 744  | 20  | TC01001112.hg.1 | ENSG00000131778; | 0.9756081 | 0.9905258 | FALSE |
| 746  | 20  | TC01001112.hg.1 | ENSG00000131778; | 0.9764131 | 0.9905258 | FALSE |
| 184  | 3   | TC11002175.hg.1 | ENSG00000109861; | 0.9777408 | 0.9905258 | FALSE |
| 1861 | 58  | TC01002530.hg.1 | ENSG00000183386; | 0.9794401 | 0.9905258 | FALSE |
| 145  | 2   | TC0Y000351.hg.1 | ENSG00000129824; | 0.9798048 | 0.9905258 | FALSE |
| 757  | 20  | TC01001112.hg.1 | ENSG00000131778; | 0.9804313 | 0.9905258 | FALSE |
| 167  | 2   | TC01001112.hg.1 | ENSG00000131778; | 0.9906341 | 0.9986897 | FALSE |
| 801  | 20  | TC02001437.hg.1 | ENSG00000144476; | 0.9910564 | 0.9986897 | FALSE |
| 124  | 1   | TC11002175.hg.1 | ENSG00000109861  | 0.9932436 | 0.9996105 | FALSE |
| 2075 | 58  | TC01001112.hg.1 | ENSG00000131778; | 0.9988159 | 0.9999999 | FALSE |
| 612  | 11  | TC04001084.hg.1 | ENSG00000109819; | 0.9992695 | 0.9999999 | FALSE |
| 5012 | 157 | TC01000685.hg.1 | ENSG00000162409; | 0.9998529 | 0.9999999 | FALSE |
| 4941 | 153 | TC01000685.hg.1 | ENSG00000162409; | 0.9999108 | 0.9999999 | FALSE |
| 2991 | 70  | TC01001112.hg.1 | ENSG00000131778; | 0.9999999 | 0.9999999 | FALSE |

| Names                                                          | Genes_In_Term | DEG |
|----------------------------------------------------------------|---------------|-----|
| Total                                                          | 9927          | 415 |
| ko04610 Complement and coagulation cascades                    | 157           | 24  |
| ko05200 Pathways in cancer                                     | 439           | 44  |
| ko04510 Focal adhesion                                         | 377           | 34  |
| ko05410 Hypertrophic cardiomyopathy (HCM)                      | 127           | 16  |
| ko04350 TGF-beta signaling pathway                             | 116           | 15  |
| ko05211 Renal cell carcinoma                                   | 95            | 13  |
| ko00010 Glycolysis / Gluconeogenesis                           | 96            | 13  |
| ko04512 ECM-receptor interaction                               | 166           | 18  |
| ko05412 Arrhythmogenic right ventricular cardiomyopathy (ARVC) | 114           | 14  |
| ko05215 Prostate cancer                                        | 118           | 14  |
| ko00340 Histidine metabolism                                   | 26            | 6   |
| ko00910 Nitrogen metabolism                                    | 33            | 6   |
| ko04060 Cytokine-cytokine receptor interaction                 | 309           | 24  |
| ko00561 Glycerolipid metabolism                                | 86            | 10  |
| ko00051 Fructose and mannose metabolism                        | 47            | 7   |
| ko05222 Small cell lung cancer                                 | 119           | 12  |
| ko04930 Type II diabetes mellitus                              | 77            | 9   |
| ko05218 Melanoma                                               | 92            | 10  |
| ko04360 Axon guidance                                          | 244           | 19  |
| ko00512 Mucin type O-Glycan biosynthesis                       | 30            | 5   |
| ko04640 Hematopoietic cell lineage                             | 161           | 14  |
| ko04976 Bile secretion                                         | 100           | 10  |
| ko00410 beta-Alanine metabolism                                | 46            | 6   |
| ko04810 Regulation of actin cytoskeleton                       | 332           | 23  |
| ko00710 Carbon fixation in photosynthetic organisms            | 35            | 5   |
| ko05414 Dilated cardiomyopathy                                 | 178           | 14  |
| ko00360 Phenylalanine metabolism                               | 26            | 4   |
| ko04270 Vascular smooth muscle contraction                     | 198           | 14  |
| ko04710 Circadian rhythm - mammal                              | 31            | 4   |
| ko00903 Limonene and pinene degradation                        | 8             | 2   |
| ko00350 Tyrosine metabolism                                    | 47            | 5   |
| ko04974 Protein digestion and absorption                       | 167           | 12  |
| ko04115 p53 signaling pathway                                  | 97            | 8   |
| ko04150 mTOR signaling pathway                                 | 99            | 8   |
| ko05212 Pancreatic cancer                                      | 101           | 8   |
| ko00120 Primary bile acid biosynthesis                         | 23            | 3   |
| ko00625 Chloroalkane and chloroalkene degradation              | 11            | 2   |
| ko00330 Arginine and proline metabolism                        | 88            | 7   |
| ko04310 Wnt signaling pathway                                  | 240           | 15  |
| ko05144 Malaria                                                | 126           | 9   |
| ko00532 Glycosaminoglycan biosynthesis - chondroitin sulfate   | 25            | 3   |
| ko04614 Renin-angiotensin system                               | 25            | 3   |
| ko04973 Carbohydrate digestion and absorption                  | 91            | 7   |
| ko04013 MAPK signaling pathway - fly                           | 26            | 3   |
| ko05219 Bladder cancer                                         | 58            | 5   |
| ko00620 Pyruvate metabolism                                    | 59            | 5   |
| ko05210 Colorectal cancer                                      | 97            | 7   |
| ko04972 Pancreatic secretion                                   | 154           | 10  |
| ko05100 Bacterial invasion of epithelial cells                 | 155           | 10  |
| ko00564 Glycerophospholipid metabolism                         | 120           | 8   |
| ko04670 Leukocyte transendothelial migration                   | 220           | 13  |
| ko05146 Amoebiasis                                             | 241           | 14  |
| ko05213 Endometrial cancer                                     | 84            | 6   |
| ko04920 Adipocytokine signaling pathway                        | 103           | 7   |
| ko04520 Adherens junction                                      | 142           | 9   |
| ko00533 Glycosaminoglycan biosynthesis - keratan sulfate       | 16            | 2   |

|         |                                                            |     |    |
|---------|------------------------------------------------------------|-----|----|
| ko04711 | Circadian rhythm - fly                                     | 16  | 2  |
| ko03320 | PPAR signaling pathway                                     | 123 | 8  |
| ko05214 | Glioma                                                     | 126 | 8  |
| ko00053 | Ascorbate and aldarate metabolism                          | 33  | 3  |
| ko00590 | Arachidonic acid metabolism                                | 89  | 6  |
| ko04960 | Aldosterone-regulated sodium reabsorption                  | 89  | 6  |
| ko00680 | Methane metabolism                                         | 52  | 4  |
| ko04010 | MAPK signaling pathway                                     | 384 | 20 |
| ko00040 | Pentose and glucuronate interconversions                   | 36  | 3  |
| ko00524 | Butirosin and neomycin biosynthesis                        | 5   | 1  |
| ko00140 | Steroid hormone biosynthesis                               | 74  | 5  |
| ko04961 | Endocrine and other factor-regulated calcium reabsorption  | 94  | 6  |
| ko00030 | Pentose phosphate pathway                                  | 37  | 3  |
| ko05160 | Hepatitis C                                                | 197 | 11 |
| ko05142 | Chagas disease (American trypanosomiasis)                  | 198 | 11 |
| ko00604 | Glycosphingolipid biosynthesis - ganglio series            | 21  | 2  |
| ko04380 | Osteoclast differentiation                                 | 180 | 10 |
| ko00052 | Galactose metabolism                                       | 39  | 3  |
| ko04964 | Proximal tubule bicarbonate reclamation                    | 58  | 4  |
| ko04260 | Cardiac muscle contraction                                 | 100 | 6  |
| ko02010 | ABC transporters                                           | 60  | 4  |
| ko00730 | Thiamine metabolism                                        | 7   | 1  |
| ko04112 | Cell cycle - Caulobacter                                   | 7   | 1  |
| ko00380 | Tryptophan metabolism                                      | 62  | 4  |
| ko04540 | Gap junction                                               | 124 | 7  |
| ko04978 | Mineral absorption                                         | 63  | 4  |
| ko05217 | Basal cell carcinoma                                       | 63  | 4  |
| ko04630 | Jak-STAT signaling pathway                                 | 190 | 10 |
| ko04370 | VEGF signaling pathway                                     | 126 | 7  |
| ko00250 | Alanine, aspartate and glutamate metabolism                | 44  | 3  |
| ko00500 | Starch and sucrose metabolism                              | 85  | 5  |
| ko04062 | Chemokine signaling pathway                                | 263 | 13 |
| ko05120 | Epithelial cell signaling in Helicobacter pylori infection | 88  | 5  |
| ko04910 | Insulin signaling pathway                                  | 243 | 12 |
| ko00750 | Vitamin B6 metabolism                                      | 9   | 1  |
| ko05145 | Toxoplasmosis                                              | 266 | 13 |
| ko05221 | Acute myeloid leukemia                                     | 90  | 5  |
| ko05223 | Non-small cell lung cancer                                 | 90  | 5  |
| ko04724 | Glutamatergic synapse                                      | 158 | 8  |
| ko00534 | Glycosaminoglycan biosynthesis - heparan sulfate           | 29  | 2  |
| ko00520 | Amino sugar and nucleotide sugar metabolism                | 93  | 5  |
| ko04012 | ErbB signaling pathway                                     | 139 | 7  |
| ko04142 | Lysosome                                                   | 163 | 8  |
| ko00565 | Ether lipid metabolism                                     | 53  | 3  |
| ko00230 | Purine metabolism                                          | 257 | 12 |
| ko04971 | Gastric acid secretion                                     | 143 | 7  |
| ko04916 | Melanogenesis                                              | 145 | 7  |
| ko00760 | Nicotinate and nicotinamide metabolism                     | 33  | 2  |
| ko05143 | African trypanosomiasis                                    | 101 | 5  |
| ko00130 | Ubiquinone and other terpenoid-quinone biosynthesis        | 13  | 1  |
| ko00950 | Isoquinoline alkaloid biosynthesis                         | 13  | 1  |
| ko04977 | Vitamin digestion and absorption                           | 13  | 1  |
| ko04530 | Tight junction                                             | 288 | 13 |
| ko05020 | Prion diseases                                             | 58  | 3  |
| ko02020 | Two-component system                                       | 14  | 1  |
| ko00480 | Glutathione metabolism                                     | 83  | 4  |
| ko04912 | GnRH signaling pathway                                     | 154 | 7  |
| ko04914 | Progesterone-mediated oocyte maturation                    | 131 | 6  |

|         |                                                       |     |    |
|---------|-------------------------------------------------------|-----|----|
| ko04621 | NOD-like receptor signaling pathway                   | 108 | 5  |
| ko00514 | Other types of O-glycan biosynthesis                  | 62  | 3  |
| ko04722 | Neurotrophin signaling pathway                        | 228 | 10 |
| ko00521 | Streptomycin biosynthesis                             | 16  | 1  |
| ko04330 | Notch signaling pathway                               | 89  | 4  |
| ko00100 | Steroid biosynthesis                                  | 41  | 2  |
| ko05216 | Thyroid cancer                                        | 41  | 2  |
| ko04144 | Endocytosis                                           | 380 | 16 |
| ko00640 | Propanoate metabolism                                 | 43  | 2  |
| ko05131 | Shigellosis                                           | 117 | 5  |
| ko05220 | Chronic myeloid leukemia                              | 118 | 5  |
| ko04320 | Dorso-ventral axis formation                          | 69  | 3  |
| ko04020 | Calcium signaling pathway                             | 364 | 15 |
| ko04514 | Cell adhesion molecules (CAMs)                        | 340 | 14 |
| ko05150 | Staphylococcus aureus infection                       | 268 | 11 |
| ko00270 | Cysteine and methionine metabolism                    | 71  | 3  |
| ko00860 | Porphyryn and chlorophyll metabolism                  | 46  | 2  |
| ko00600 | Sphingolipid metabolism                               | 72  | 3  |
| ko05140 | Leishmaniasis                                         | 223 | 9  |
| ko04730 | Long-term depression                                  | 100 | 4  |
| ko00450 | Selenocompound metabolism                             | 22  | 1  |
| ko00531 | Glycosaminoglycan degradation                         | 22  | 1  |
| ko04620 | Toll-like receptor signaling pathway                  | 152 | 6  |
| ko00920 | Sulfur metabolism                                     | 23  | 1  |
| ko00980 | Metabolism of xenobiotics by cytochrome P450          | 77  | 3  |
| ko04742 | Taste transduction                                    | 51  | 2  |
| ko04080 | Neuroactive ligand-receptor interaction               | 357 | 14 |
| ko00260 | Glycine, serine and threonine metabolism              | 52  | 2  |
| ko04970 | Salivary secretion                                    | 183 | 7  |
| ko00982 | Drug metabolism - cytochrome P450                     | 81  | 3  |
| ko05016 | Huntingtons disease                                   | 239 | 9  |
| ko04110 | Cell cycle                                            | 162 | 6  |
| ko00563 | Glycosylphosphatidylinositol(GPI)-anchor biosynthesis | 27  | 1  |
| ko00071 | Fatty acid metabolism                                 | 56  | 2  |
| ko04070 | Phosphatidylinositol signaling system                 | 164 | 6  |
| ko04975 | Fat digestion and absorption                          | 58  | 2  |
| ko04950 | Maturity onset diabetes of the young                  | 29  | 1  |
| ko04622 | RIG-I-like receptor signaling pathway                 | 90  | 3  |
| ko00280 | Valine, leucine and isoleucine degradation            | 63  | 2  |
| ko00592 | alpha-Linolenic acid metabolism                       | 33  | 1  |
| ko04720 | Long-term potentiation                                | 129 | 4  |
| ko00591 | Linoleic acid metabolism                              | 38  | 1  |
| ko00830 | Retinol metabolism                                    | 72  | 2  |
| ko05340 | Primary immunodeficiency                              | 106 | 3  |
| ko04662 | B cell receptor signaling pathway                     | 166 | 5  |
| ko04650 | Natural killer cell mediated cytotoxicity             | 307 | 10 |
| ko04664 | Fc epsilon RI signaling pathway                       | 169 | 5  |
| ko03410 | Base excision repair                                  | 43  | 1  |
| ko04140 | Regulation of autophagy                               | 43  | 1  |
| ko00310 | Lysine degradation                                    | 80  | 2  |
| ko04120 | Ubiquitin mediated proteolysis                        | 205 | 6  |
| ko04666 | Fc gamma R-mediated phagocytosis                      | 206 | 6  |
| ko05110 | Vibrio cholerae infection                             | 120 | 3  |
| ko04114 | Oocyte meiosis                                        | 187 | 5  |
| ko05323 | Rheumatoid arthritis                                  | 281 | 8  |
| ko04962 | Vasopressin-regulated water reabsorption              | 58  | 1  |
| ko04113 | Meiosis - yeast                                       | 97  | 2  |
| ko04210 | Apoptosis                                             | 133 | 3  |



|         |                                              |     |    |
|---------|----------------------------------------------|-----|----|
| ko04626 | Plant-pathogen interaction                   | 99  | 2  |
| ko03022 | Basal transcription factors                  | 61  | 1  |
| ko05010 | Alzheimers disease                           | 233 | 6  |
| ko00562 | Inositol phosphate metabolism                | 106 | 2  |
| ko05130 | Pathogenic Escherichia coli infection        | 108 | 2  |
| ko00970 | Aminoacyl-tRNA biosynthesis                  | 69  | 1  |
| ko04111 | Cell cycle - yeast                           | 113 | 2  |
| ko03420 | Nucleotide excision repair                   | 74  | 1  |
| ko04623 | Cytosolic DNA-sensing pathway                | 74  | 1  |
| ko03015 | mRNA surveillance pathway                    | 85  | 1  |
| ko00240 | Pyrimidine metabolism                        | 135 | 2  |
| ko04660 | T cell receptor signaling pathway            | 221 | 4  |
| ko04672 | Intestinal immune network for IgA production | 221 | 4  |
| ko05012 | Parkinsons disease                           | 159 | 2  |
| ko04146 | Peroxisome                                   | 116 | 1  |
| ko05162 | Measles                                      | 291 | 5  |
| ko03018 | RNA degradation                              | 126 | 1  |
| ko03050 | Proteasome                                   | 646 | 15 |
| ko04145 | Phagosome                                    | 423 | 8  |
| ko00190 | Oxidative phosphorylation                    | 144 | 1  |
| ko05152 | Tuberculosis                                 | 405 | 7  |
| ko05416 | Viral myocarditis                            | 369 | 6  |
| ko03013 | RNA transport                                | 252 | 3  |
| ko05332 | Graft-versus-host disease                    | 211 | 2  |
| ko03010 | Ribosome                                     | 158 | 1  |
| ko04141 | Protein processing in endoplasmic reticulum  | 262 | 3  |
| ko05322 | Systemic lupus erythematosus                 | 380 | 5  |
| ko05310 | Asthma                                       | 206 | 1  |
| ko04940 | Type I diabetes mellitus                     | 227 | 1  |
| ko05330 | Allograft rejection                          | 261 | 1  |
| ko05320 | Autoimmune thyroid disease                   | 272 | 1  |
| ko04612 | Antigen processing and presentation          | 295 | 1  |

| Input_gene       | Gene_Symbol      | P_value   | Q_value   | Significant |
|------------------|------------------|-----------|-----------|-------------|
| -                | -                | -         | -         | -           |
| TC01001736.hg.1; | ENSG00000196352; | 3.132E-08 | 5.258E-06 | TRUE        |
| TC01001805.hg.1; | ENSG00000092969; | 5.155E-08 | 5.258E-06 | TRUE        |
| TC01000789.hg.1; | ENSG00000162614; | 1.849E-05 | 0.0012576 | TRUE        |
| TC01000685.hg.1; | ENSG00000162409; | 7.495E-05 | 0.0037846 | TRUE        |
| TC01001805.hg.1; | ENSG00000092969; | 9.276E-05 | 0.0037846 | TRUE        |
| TC01001805.hg.1; | ENSG00000092969; | 0.0001516 | 0.0049199 | TRUE        |
| TC02000245.hg.1; | ENSG00000143891; | 0.0001688 | 0.0049199 | TRUE        |
| TC01001095.hg.1; | ENSG00000143127; | 0.0001937 | 0.0049396 | TRUE        |
| TC01001095.hg.1; | ENSG00000143127; | 0.0002741 | 0.006214  | TRUE        |
| TC01002616.hg.1; | ENSG00000117461; | 0.0003931 | 0.0080186 | TRUE        |
| TC02000891.hg.1; | ENSG00000150540; | 0.0005809 | 0.0107729 | TRUE        |
| TC01003605.hg.1; | ENSG00000135821; | 0.0021819 | 0.0370916 | TRUE        |
| TC01001805.hg.1; | ENSG00000092969; | 0.0025558 | 0.0401056 | TRUE        |
| TC06001313.hg.1; | ENSG00000172197; | 0.0030242 | 0.0426504 | TRUE        |
| TC02000466.hg.1; | ENSG00000159399; | 0.0031361 | 0.0426504 | TRUE        |
| TC01002616.hg.1; | ENSG00000117461; | 0.0040387 | 0.0514934 | FALSE       |
| TC01002503.hg.1; | ENSG00000171812; | 0.0046473 | 0.0557681 | FALSE       |
| TC01002616.hg.1; | ENSG00000117461; | 0.0049361 | 0.0559419 | FALSE       |
| TC01001624.hg.1; | ENSG00000116741; | 0.0067209 | 0.0721607 | FALSE       |
| TC01001907.hg.1; | ENSG00000143641; | 0.0074829 | 0.0727476 | FALSE       |
| TC01001736.hg.1; | ENSG00000196352; | 0.0074887 | 0.0727476 | FALSE       |
| TC01001473.hg.1; | ENSG00000143153; | 0.0088304 | 0.0818819 | FALSE       |
| TC01002195.hg.1; | ENSG00000116649; | 0.0117002 | 0.1022221 | FALSE       |
| TC01000789.hg.1; | ENSG00000162614; | 0.0120261 | 0.1022221 | FALSE       |
| TC03001466.hg.1; | ENSG00000163931; | 0.0143782 | 0.117326  | FALSE       |
| TC01001095.hg.1; | ENSG00000143127; | 0.0170988 | 0.1341596 | FALSE       |
| TC0X000207.hg.1  | ENSG00000189221; | 0.0216996 | 0.1639527 | FALSE       |
| TC01000789.hg.1; | ENSG00000162614; | 0.0380705 | 0.273107  | FALSE       |
| TC01000100.hg.1; | ENSG00000049246; | 0.038824  | 0.273107  | FALSE       |
| TC09000222.hg.1; | ENSG00000137124; | 0.0413009 | 0.2808458 | FALSE       |
| TC06002113.hg.1; | ENSG00000079931; | 0.0453512 | 0.2984403 | FALSE       |
| TC01001473.hg.1; | ENSG00000143153; | 0.0472497 | 0.3012169 | FALSE       |
| TC02002765.hg.1; | ENSG00000079308; | 0.0497355 | 0.307456  | FALSE       |
| TC01000685.hg.1; | ENSG00000162409; | 0.0549016 | 0.3294098 | FALSE       |
| TC01001805.hg.1; | ENSG00000092969; | 0.0603985 | 0.3520372 | FALSE       |
| TC06001772.hg.1; | ENSG00000146233; | 0.0691616 | 0.3919157 | FALSE       |
| TC09000222.hg.1; | ENSG00000137124; | 0.0747195 | 0.4012834 | FALSE       |
| TC01002195.hg.1; | ENSG00000116649; | 0.0747489 | 0.4012834 | FALSE       |
| TC02002714.hg.1; | ENSG00000163251; | 0.0782154 | 0.4076661 | FALSE       |
| TC01000904.hg.1; | ENSG00000162692; | 0.0812165 | 0.4076661 | FALSE       |
| TC05000619.hg.1; | ENSG00000198108; | 0.0845605 | 0.4076661 | FALSE       |
| TC03000846.hg.1; | ENSG00000196549; | 0.0845605 | 0.4076661 | FALSE       |
| TC01001473.hg.1; | ENSG00000143153; | 0.0859296 | 0.4076661 | FALSE       |
| TC06004055.hg.1; | ENSG00000047936; | 0.0927597 | 0.4264469 | FALSE       |
| TC04000408.hg.1; | ENSG00000169429; | 0.0940692 | 0.4264469 | FALSE       |
| TC07001883.hg.1; | ENSG00000085662; | 0.0994561 | 0.4410661 | FALSE       |
| TC01001805.hg.1; | ENSG00000092969; | 0.1109792 | 0.4720244 | FALSE       |
| TC01001473.hg.1; | ENSG00000143153; | 0.1110646 | 0.4720244 | FALSE       |
| TC01002530.hg.1; | ENSG00000183386; | 0.1145794 | 0.4770243 | FALSE       |
| TC01001607.hg.1; | ENSG00000116711; | 0.1293312 | 0.5026062 | FALSE       |
| TC01000904.hg.1; | ENSG00000162692; | 0.1319086 | 0.5026062 | FALSE       |
| TC01001805.hg.1; | ENSG00000092969; | 0.1336722 | 0.5026062 | FALSE       |
| TC01002616.hg.1; | ENSG00000117461; | 0.1387917 | 0.5026062 | FALSE       |
| TC01000685.hg.1; | ENSG00000162409; | 0.139471  | 0.5026062 | FALSE       |
| TC03000214.hg.1; | ENSG00000168036; | 0.1402341 | 0.5026062 | FALSE       |
| TC11001589.hg.1; | ENSG00000175264; | 0.1424328 | 0.5026062 | FALSE       |

|                  |                  |           |           |       |
|------------------|------------------|-----------|-----------|-------|
| TC01000100.hg.1; | ENSG00000049246; | 0.1424328 | 0.5026062 | FALSE |
| TC01002503.hg.1; | ENSG00000171812; | 0.1428978 | 0.5026062 | FALSE |
| TC01002616.hg.1; | ENSG00000117461; | 0.1571398 | 0.5374235 | FALSE |
| TC04002948.hg.1; | ENSG00000137463; | 0.1580657 | 0.5374235 | FALSE |
| TC01000643.hg.1; | ENSG00000116157; | 0.1680238 | 0.555594  | FALSE |
| TC01001473.hg.1; | ENSG00000143153; | 0.1680238 | 0.555594  | FALSE |
| TC07001332.hg.1; | ENSG00000164708; | 0.1715805 | 0.555594  | FALSE |
| TC01001607.hg.1; | ENSG00000116711; | 0.1827953 | 0.5826601 | FALSE |
| TC07001883.hg.1; | ENSG00000085662; | 0.189422  | 0.5894088 | FALSE |
| TC02000466.hg.1  | ENSG00000159399  | 0.1923001 | 0.5894088 | FALSE |
| TC02001750.hg.1; | ENSG00000138061; | 0.1966654 | 0.5894088 | FALSE |
| TC01001473.hg.1; | ENSG00000143153; | 0.1995905 | 0.5894088 | FALSE |
| TC03001466.hg.1; | ENSG00000163931; | 0.2002076 | 0.5894088 | FALSE |
| TC01002616.hg.1; | ENSG00000117461; | 0.2022481 | 0.5894088 | FALSE |
| TC01001805.hg.1; | ENSG00000092969; | 0.2067261 | 0.5939736 | FALSE |
| TC01000783.hg.1; | ENSG00000117069; | 0.2183551 | 0.6077033 | FALSE |
| TC01001805.hg.1; | ENSG00000092969; | 0.2211572 | 0.6077033 | FALSE |
| TC02000466.hg.1; | ENSG00000159399; | 0.2221879 | 0.6077033 | FALSE |
| TC01001473.hg.1; | ENSG00000143153; | 0.2234203 | 0.6077033 | FALSE |
| TC01001473.hg.1; | ENSG00000143153; | 0.240055  | 0.6399211 | FALSE |
| TC13000799.hg.1; | ENSG00000125257; | 0.2415388 | 0.6399211 | FALSE |
| TC12000656.hg.1  | ENSG00000067798  | 0.2584565 | 0.6589568 | FALSE |
| TC19000377.hg.1  | ENSG00000160161  | 0.2584565 | 0.6589568 | FALSE |
| TC02001750.hg.1; | ENSG00000138061; | 0.2599773 | 0.6589568 | FALSE |
| TC03000013.hg.1; | ENSG00000150995; | 0.2616446 | 0.6589568 | FALSE |
| TC01001473.hg.1; | ENSG00000143153; | 0.2692983 | 0.6591813 | FALSE |
| TC02002714.hg.1; | ENSG00000163251; | 0.2692983 | 0.6591813 | FALSE |
| TC01002616.hg.1; | ENSG00000117461; | 0.2721614 | 0.6591813 | FALSE |
| TC01001607.hg.1; | ENSG00000116711; | 0.2746589 | 0.6591813 | FALSE |
| TC01003605.hg.1; | ENSG00000135821; | 0.2788585 | 0.6614784 | FALSE |
| TC02000466.hg.1; | ENSG00000159399; | 0.2824088 | 0.6621999 | FALSE |
| TC01002530.hg.1; | ENSG00000183386; | 0.30676   | 0.7037198 | FALSE |
| TC03000743.hg.1; | ENSG00000114098; | 0.307015  | 0.7037198 | FALSE |
| TC01000685.hg.1; | ENSG00000162409; | 0.3179919 | 0.7060143 | FALSE |
| TC09000358.hg.1  | ENSG00000135069  | 0.3192062 | 0.7060143 | FALSE |
| TC01001607.hg.1; | ENSG00000116711; | 0.3209821 | 0.7060143 | FALSE |
| TC01002616.hg.1; | ENSG00000117461; | 0.3235899 | 0.7060143 | FALSE |
| TC01002616.hg.1; | ENSG00000117461; | 0.3235899 | 0.7060143 | FALSE |
| TC01001607.hg.1; | ENSG00000116711; | 0.3408766 | 0.7300014 | FALSE |
| TC02002292.hg.1; | ENSG00000136720; | 0.34353   | 0.7300014 | FALSE |
| TC01000972.hg.1; | ENSG00000064886; | 0.348622  | 0.7331844 | FALSE |
| TC01002616.hg.1; | ENSG00000117461; | 0.362409  | 0.7544023 | FALSE |
| TC01002441.hg.1; | ENSG00000162511; | 0.3727217 | 0.7680326 | FALSE |
| TC01001607.hg.1; | ENSG00000116711; | 0.3828222 | 0.7800143 | FALSE |
| TC01000728.hg.1; | ENSG00000162433; | 0.3890343 | 0.7800143 | FALSE |
| TC01000789.hg.1; | ENSG00000162614; | 0.3900071 | 0.7800143 | FALSE |
| TC02002714.hg.1; | ENSG00000163251; | 0.4038261 | 0.7926469 | FALSE |
| TC04002929.hg.1; | ENSG00000109743; | 0.4040945 | 0.7926469 | FALSE |
| TC01000904.hg.1; | ENSG00000162692; | 0.4155965 | 0.8022759 | FALSE |
| TC12002066.hg.1  | ENSG00000158104  | 0.4262131 | 0.8022759 | FALSE |
| TC0X000207.hg.1  | ENSG00000189221  | 0.4262131 | 0.8022759 | FALSE |
| TC16000193.hg.1  | ENSG00000103222  | 0.4262131 | 0.8022759 | FALSE |
| TC01000394.hg.1; | ENSG00000159023; | 0.428667  | 0.8022759 | FALSE |
| TC05000701.hg.1; | ENSG00000120738; | 0.4393785 | 0.8148474 | FALSE |
| TC01003605.hg.1  | ENSG00000135821  | 0.4502318 | 0.827453  | FALSE |
| TC01000643.hg.1; | ENSG00000116157; | 0.4594076 | 0.8367781 | FALSE |
| TC01001607.hg.1; | ENSG00000116711; | 0.4656617 | 0.8396159 | FALSE |
| TC01002616.hg.1; | ENSG00000117461; | 0.469293  | 0.8396159 | FALSE |

|                  |                  |           |           |       |
|------------------|------------------|-----------|-----------|-------|
| TC03000248.hg.1; | ENSG00000144791; | 0.4733129 | 0.8396159 | FALSE |
| TC03003359.hg.1; | ENSG00000172986; | 0.4831603 | 0.8447682 | FALSE |
| TC01002616.hg.1; | ENSG00000117461; | 0.4844994 | 0.8447682 | FALSE |
| TC02000466.hg.1  | ENSG00000159399  | 0.4953017 | 0.8562843 | FALSE |
| TC03000743.hg.1; | ENSG00000114098; | 0.5140016 | 0.8739698 | FALSE |
| TC01003887.hg.1; | ENSG00000143815; | 0.516242  | 0.8739698 | FALSE |
| TC03000214.hg.1; | ENSG00000168036; | 0.516242  | 0.8739698 | FALSE |
| TC01001805.hg.1; | ENSG00000092969; | 0.5254819 | 0.8786746 | FALSE |
| TC09000222.hg.1; | ENSG00000137124; | 0.5420302 | 0.8958753 | FALSE |
| TC02002827.hg.1; | ENSG00000135905; | 0.5445517 | 0.8958753 | FALSE |
| TC01001805.hg.1; | ENSG00000092969; | 0.5521917 | 0.897151  | FALSE |
| TC07000328.hg.1; | ENSG00000146648; | 0.5555498 | 0.897151  | FALSE |
| TC01000789.hg.1; | ENSG00000162614; | 0.5613118 | 0.897151  | FALSE |
| TC01000904.hg.1; | ENSG00000162692; | 0.5629183 | 0.897151  | FALSE |
| TC02000937.hg.1; | ENSG00000123610; | 0.5691238 | 0.9000097 | FALSE |
| TC01002195.hg.1; | ENSG00000116649; | 0.5750958 | 0.9014796 | FALSE |
| TC03001884.hg.1; | ENSG00000047457; | 0.5788913 | 0.9014796 | FALSE |
| TC02000996.hg.1; | ENSG00000172292; | 0.5846656 | 0.9035742 | FALSE |
| TC01001805.hg.1; | ENSG00000092969; | 0.5914901 | 0.907248  | FALSE |
| TC01001607.hg.1; | ENSG00000116711; | 0.6067767 | 0.9162838 | FALSE |
| TC12000531.hg.1  | ENSG00000166986  | 0.6095706 | 0.9162838 | FALSE |
| TC05001519.hg.1  | ENSG00000113273  | 0.6095706 | 0.9162838 | FALSE |
| TC01002616.hg.1; | ENSG00000117461; | 0.6153474 | 0.9162838 | FALSE |
| TC01002847.hg.1  | ENSG00000117228  | 0.6259289 | 0.9214912 | FALSE |
| TC02001750.hg.1; | ENSG00000138061; | 0.6304133 | 0.9214912 | FALSE |
| TC19001220.hg.1; | ENSG00000141837; | 0.6353936 | 0.9214912 | FALSE |
| TC02002605.hg.1; | ENSG00000064989; | 0.636913  | 0.9214912 | FALSE |
| TC09000358.hg.1; | ENSG00000135069; | 0.6459559 | 0.9255479 | FALSE |
| TC01001473.hg.1; | ENSG00000143153; | 0.6487909 | 0.9255479 | FALSE |
| TC0X000207.hg.1  | ENSG00000189221; | 0.6644246 | 0.9412681 | FALSE |
| TC03000013.hg.1; | ENSG00000150995; | 0.6737554 | 0.9417541 | FALSE |
| TC01001805.hg.1; | ENSG00000092969; | 0.6764135 | 0.9417541 | FALSE |
| TC18000552.hg.1  | ENSG00000197563  | 0.6848031 | 0.9417541 | FALSE |
| TC09000222.hg.1; | ENSG00000137124; | 0.6857916 | 0.9417541 | FALSE |
| TC01002616.hg.1; | ENSG00000117461; | 0.6878498 | 0.9417541 | FALSE |
| TC01001607.hg.1; | ENSG00000116711; | 0.7042933 | 0.9578389 | FALSE |
| TC03001071.hg.1  | ENSG00000114315  | 0.7106761 | 0.9601187 | FALSE |
| TC04000408.hg.1; | ENSG00000169429; | 0.7324664 | 0.983047  | FALSE |
| TC09000222.hg.1; | ENSG00000137124; | 0.7466015 | 0.9954687 | FALSE |
| TC01001607.hg.1  | ENSG00000116711  | 0.756238  | 0.9999972 | FALSE |
| TC02000184.hg.1; | ENSG00000163803; | 0.7937541 | 0.9999972 | FALSE |
| TC01001607.hg.1  | ENSG00000116711  | 0.8032567 | 0.9999972 | FALSE |
| TC08000482.hg.1; | ENSG00000121039; | 0.8097263 | 0.9999972 | FALSE |
| TC01002284.hg.1; | ENSG00000117122; | 0.8260767 | 0.9999972 | FALSE |
| TC01002616.hg.1; | ENSG00000117461; | 0.8295643 | 0.9999972 | FALSE |
| TC01002616.hg.1; | ENSG00000117461; | 0.8327549 | 0.9999972 | FALSE |
| TC01001607.hg.1; | ENSG00000116711; | 0.8409307 | 0.9999972 | FALSE |
| TC11001132.hg.1  | ENSG00000110002  | 0.8412237 | 0.9999972 | FALSE |
| TC01000685.hg.1  | ENSG00000162409  | 0.8412237 | 0.9999972 | FALSE |
| TC09000222.hg.1; | ENSG00000137124; | 0.8536688 | 0.9999972 | FALSE |
| TC02000432.hg.1; | ENSG00000135636; | 0.8637991 | 0.9999972 | FALSE |
| TC01002616.hg.1; | ENSG00000117461; | 0.8667901 | 0.9999972 | FALSE |
| TC07000220.hg.1; | ENSG00000164619; | 0.8835443 | 0.9999972 | FALSE |
| TC02000184.hg.1; | ENSG00000163803; | 0.8966996 | 0.9999972 | FALSE |
| TC01001805.hg.1; | ENSG00000092969; | 0.9069193 | 0.9999972 | FALSE |
| TC07001898.hg.1  | ENSG00000182158  | 0.9166023 | 0.9999972 | FALSE |
| TC02000184.hg.1; | ENSG00000163803; | 0.9179061 | 0.9999972 | FALSE |
| TC01002616.hg.1; | ENSG00000117461; | 0.9210981 | 0.9999972 | FALSE |

|                  |                  |           |           |       |
|------------------|------------------|-----------|-----------|-------|
| TC09000202.hg.1; | ENSG00000122694; | 0.9234202 | 0.9999972 | FALSE |
| TC0X001176.hg.1  | ENSG00000187325  | 0.9266879 | 0.9999972 | FALSE |
| TC03000013.hg.1; | ENSG00000150995; | 0.9290561 | 0.9999972 | FALSE |
| TC02002765.hg.1; | ENSG00000079308; | 0.9400939 | 0.9999972 | FALSE |
| TC03000214.hg.1; | ENSG00000168036; | 0.9441861 | 0.9999972 | FALSE |
| TC12000531.hg.1  | ENSG00000166986  | 0.9480226 | 0.9999972 | FALSE |
| TC04001001.hg.1; | ENSG00000074211; | 0.9532856 | 0.9999972 | FALSE |
| TC11000404.hg.1  | ENSG00000134574  | 0.958082  | 0.9999972 | FALSE |
| TC07000137.hg.1  | ENSG00000136244  | 0.958082  | 0.9999972 | FALSE |
| TC04001001.hg.1  | ENSG00000074211  | 0.9738952 | 0.9999972 | FALSE |
| TC03000208.hg.1; | ENSG00000168032; | 0.9789948 | 0.9999972 | FALSE |
| TC01002616.hg.1; | ENSG00000117461; | 0.9845502 | 0.9999972 | FALSE |
| TC01002284.hg.1; | ENSG00000117122; | 0.9845502 | 0.9999972 | FALSE |
| TC04000253.hg.1; | ENSG00000154277; | 0.9914308 | 0.9999972 | FALSE |
| TC06004141.hg.1  | ENSG00000112096  | 0.9931481 | 0.9999972 | FALSE |
| TC01002616.hg.1; | ENSG00000117461; | 0.9945281 | 0.9999972 | FALSE |
| TC12000099.hg.1  | ENSG00000111674  | 0.9955535 | 0.9999972 | FALSE |
| TC01002725.hg.1; | ENSG00000132854; | 0.9968736 | 0.9999972 | FALSE |
| TC02001100.hg.1; | ENSG00000138448; | 0.9973809 | 0.9999972 | FALSE |
| TC12001622.hg.1  | ENSG00000185633  | 0.9979606 | 0.9999972 | FALSE |
| TC01001805.hg.1; | ENSG00000092969; | 0.9984299 | 0.9999972 | FALSE |
| TC01001736.hg.1; | ENSG00000196352; | 0.9984673 | 0.9999972 | FALSE |
| TC05001271.hg.1; | ENSG00000164188; | 0.9986078 | 0.9999972 | FALSE |
| TC06000408.hg.1; | ENSG00000223865; | 0.998848  | 0.9999972 | FALSE |
| TC0Y000351.hg.1  | ENSG00000129824  | 0.9988889 | 0.9999972 | FALSE |
| TC04000643.hg.1; | ENSG00000164070; | 0.999034  | 0.9999972 | FALSE |
| TC01003172.hg.1; | ENSG00000203818; | 0.9997019 | 0.9999972 | FALSE |
| TC06000408.hg.1  | ENSG00000223865  | 0.9998624 | 0.9999972 | FALSE |
| TC06000408.hg.1  | ENSG00000223865  | 0.999945  | 0.9999972 | FALSE |
| TC06000408.hg.1  | ENSG00000223865  | 0.9999876 | 0.9999972 | FALSE |
| TC06000408.hg.1  | ENSG00000223865  | 0.9999923 | 0.9999972 | FALSE |
| TC06000408.hg.1  | ENSG00000223865  | 0.9999972 | 0.9999972 | FALSE |

| Transcript Cluster | Splicing Index | PSR/Junction ID  | Gene Symbol |
|--------------------|----------------|------------------|-------------|
| TC02001616.hg.1    | 352.89         | PSR02025915.hg.1 | LAPTM4A     |
| TC02001616.hg.1    | -3.84          | JUC02013480.hg.1 | LAPTM4A     |
| TC01002980.hg.1    | 159.1          | JUC01024887.hg.1 | DRAM2       |
| TC01002980.hg.1    | 12.18          | JUC01024882.hg.1 | DRAM2       |
| TC01002980.hg.1    | 5.02           | JUC01024886.hg.1 | DRAM2       |
| TC01002980.hg.1    | 4.16           | PSR01046254.hg.1 | DRAM2       |
| TC01002980.hg.1    | -4.21          | JUC01024866.hg.1 | DRAM2       |
| TC01002980.hg.1    | -4.66          | JUC01024864.hg.1 | DRAM2       |
| TC01002980.hg.1    | -7.17          | JUC01024868.hg.1 | DRAM2       |
| TC17000371.hg.1    | 94.15          | PSR17004672.hg.1 | LRRC37B     |
| TC17000371.hg.1    | 2.41           | JUC17002672.hg.1 | LRRC37B     |
| TC17000371.hg.1    | -2.16          | JUC17002669.hg.1 | LRRC37B     |
| TC18000239.hg.1    | 75.39          | JUC18001901.hg.1 | CCDC102B    |
| TC18000239.hg.1    | 27.58          | PSR18002816.hg.1 | CCDC102B    |
| TC18000239.hg.1    | 16.81          | JUC18001900.hg.1 | CCDC102B    |
| TC18000239.hg.1    | 15.44          | PSR18002819.hg.1 | CCDC102B    |
| TC18000239.hg.1    | 14.68          | PSR18002814.hg.1 | CCDC102B    |
| TC18000239.hg.1    | 14.3           | PSR18002834.hg.1 | CCDC102B    |
| TC18000239.hg.1    | 12.26          | PSR18002813.hg.1 | CCDC102B    |
| TC18000239.hg.1    | 10.74          | PSR18002817.hg.1 | CCDC102B    |
| TC18000239.hg.1    | 8.73           | JUC18001903.hg.1 | CCDC102B    |
| TC18000239.hg.1    | 7.41           | JUC18001899.hg.1 | CCDC102B    |
| TC18000239.hg.1    | 5.33           | PSR18002830.hg.1 | CCDC102B    |
| TC18000239.hg.1    | 4.44           | PSR18002818.hg.1 | CCDC102B    |
| TC18000239.hg.1    | 4.1            | JUC18001907.hg.1 | CCDC102B    |
| TC18000239.hg.1    | 3.61           | PSR18002820.hg.1 | CCDC102B    |
| TC18000239.hg.1    | 3.45           | JUC18001913.hg.1 | CCDC102B    |
| TC18000239.hg.1    | 2.32           | PSR18002821.hg.1 | CCDC102B    |
| TC18000239.hg.1    | -2.35          | JUC18001906.hg.1 | CCDC102B    |
| TC18000239.hg.1    | -2.36          | JUC18001908.hg.1 | CCDC102B    |
| TC03000214.hg.1    | 60.47          | JUC03002262.hg.1 | CTNNB1      |
| TC03000214.hg.1    | 4.21           | PSR03004264.hg.1 | CTNNB1      |
| TC03000214.hg.1    | 3.71           | PSR03004296.hg.1 | CTNNB1      |
| TC03000214.hg.1    | 3.27           | PSR03004299.hg.1 | CTNNB1      |
| TC03000214.hg.1    | 3.27           | JUC03002273.hg.1 | CTNNB1      |
| TC03000214.hg.1    | 3.23           | PSR03004311.hg.1 | CTNNB1      |
| TC03000214.hg.1    | 2.76           | PSR03004298.hg.1 | CTNNB1      |
| TC03000214.hg.1    | 2.49           | JUC03002263.hg.1 | CTNNB1      |
| TC03000214.hg.1    | 2.19           | JUC03002271.hg.1 | CTNNB1      |
| TC03000214.hg.1    | 2.16           | JUC03002282.hg.1 | CTNNB1      |
| TC03000214.hg.1    | 2.14           | JUC03002275.hg.1 | CTNNB1      |
| TC03000214.hg.1    | 2.06           | PSR03004265.hg.1 | CTNNB1      |
| TC03000214.hg.1    | -2.9           | JUC03002269.hg.1 | CTNNB1      |
| TC03000214.hg.1    | -3.1           | PSR03004261.hg.1 | CTNNB1      |
| TC03000214.hg.1    | -3.23          | PSR03004254.hg.1 | CTNNB1      |
| TC03000214.hg.1    | -3.5           | JUC03002264.hg.1 | CTNNB1      |
| TC03000214.hg.1    | -3.69          | PSR03004316.hg.1 | CTNNB1      |
| TC14001022.hg.1    | 58.92          | JUC14005823.hg.1 | EGLN3       |
| TC14001022.hg.1    | 36.08          | PSR14011679.hg.1 | EGLN3       |
| TC14001022.hg.1    | 31.52          | JUC14005824.hg.1 | EGLN3       |
| TC14001022.hg.1    | 28.29          | PSR14011681.hg.1 | EGLN3       |
| TC14001022.hg.1    | 21.36          | PSR14011673.hg.1 | EGLN3       |
| TC14001022.hg.1    | 13.34          | PSR14011672.hg.1 | EGLN3       |
| TC14001022.hg.1    | 9.86           | PSR14011658.hg.1 | EGLN3       |
| TC14001022.hg.1    | 4.98           | JUC14005825.hg.1 | EGLN3       |
| TC14001022.hg.1    | 4.17           | PSR14011668.hg.1 | EGLN3       |
| TC14001022.hg.1    | 4.04           | PSR14011669.hg.1 | EGLN3       |

|                 |        |                  |        |
|-----------------|--------|------------------|--------|
| TC14001022.hg.1 | 2.48   | PSR14011670.hg.1 | EGLN3  |
| TC14001022.hg.1 | 2.19   | PSR14011660.hg.1 | EGLN3  |
| TC14001022.hg.1 | 2.06   | PSR14011659.hg.1 | EGLN3  |
| TC14001022.hg.1 | -2.06  | PSR14011662.hg.1 | EGLN3  |
| TC14001022.hg.1 | -2.3   | JUC14005834.hg.1 | EGLN3  |
| TC14001022.hg.1 | -2.66  | PSR14011664.hg.1 | EGLN3  |
| TC14001022.hg.1 | -2.79  | PSR14011663.hg.1 | EGLN3  |
| TC14001022.hg.1 | -3.38  | PSR14011666.hg.1 | EGLN3  |
| TC14001022.hg.1 | -4.28  | JUC14005831.hg.1 | EGLN3  |
| TC14001022.hg.1 | -9.09  | JUC14005828.hg.1 | EGLN3  |
| TC11002084.hg.1 | 54.03  | JUC11013212.hg.1 | CHRDL2 |
| TC11002084.hg.1 | 22.76  | JUC11013201.hg.1 | CHRDL2 |
| TC11002084.hg.1 | 14.72  | PSR11024992.hg.1 | CHRDL2 |
| TC11002084.hg.1 | 13.75  | JUC11013199.hg.1 | CHRDL2 |
| TC11002084.hg.1 | 11.08  | PSR11024998.hg.1 | CHRDL2 |
| TC11002084.hg.1 | 9.71   | PSR11025005.hg.1 | CHRDL2 |
| TC11002084.hg.1 | 8.37   | PSR11025000.hg.1 | CHRDL2 |
| TC11002084.hg.1 | 3.14   | PSR11025011.hg.1 | CHRDL2 |
| TC11002084.hg.1 | 2.44   | PSR11025006.hg.1 | CHRDL2 |
| TC11002084.hg.1 | 2.1    | PSR11025007.hg.1 | CHRDL2 |
| TC11002084.hg.1 | 2.07   | PSR11024993.hg.1 | CHRDL2 |
| TC11002084.hg.1 | -2.2   | PSR11024995.hg.1 | CHRDL2 |
| TC11002084.hg.1 | -3.03  | PSR11024991.hg.1 | CHRDL2 |
| TC11002084.hg.1 | -4.04  | PSR11024999.hg.1 | CHRDL2 |
| TC11002084.hg.1 | -4.45  | JUC11013202.hg.1 | CHRDL2 |
| TC11002084.hg.1 | -4.49  | JUC11013204.hg.1 | CHRDL2 |
| TC11002084.hg.1 | -4.57  | JUC11013200.hg.1 | CHRDL2 |
| TC11002084.hg.1 | -4.61  | JUC11013197.hg.1 | CHRDL2 |
| TC11002084.hg.1 | -5.57  | JUC11013210.hg.1 | CHRDL2 |
| TC11002084.hg.1 | -7.27  | JUC11013203.hg.1 | CHRDL2 |
| TC11002084.hg.1 | -11.26 | JUC11013205.hg.1 | CHRDL2 |
| TC09000388.hg.1 | 50.28  | JUC09002263.hg.1 | NTRK2  |
| TC09000388.hg.1 | 46.64  | PSR09004159.hg.1 | NTRK2  |
| TC09000388.hg.1 | 39.67  | PSR09004128.hg.1 | NTRK2  |
| TC09000388.hg.1 | 35.42  | JUC09002271.hg.1 | NTRK2  |
| TC09000388.hg.1 | 35.21  | PSR09004158.hg.1 | NTRK2  |
| TC09000388.hg.1 | 33.98  | PSR09004137.hg.1 | NTRK2  |
| TC09000388.hg.1 | 32.8   | PSR09004130.hg.1 | NTRK2  |
| TC09000388.hg.1 | 29.95  | PSR09004163.hg.1 | NTRK2  |
| TC09000388.hg.1 | 29     | JUC09002274.hg.1 | NTRK2  |
| TC09000388.hg.1 | 28.05  | PSR09004132.hg.1 | NTRK2  |
| TC09000388.hg.1 | 25.84  | PSR09004131.hg.1 | NTRK2  |
| TC09000388.hg.1 | 25.25  | PSR09004155.hg.1 | NTRK2  |
| TC09000388.hg.1 | 25.01  | PSR09004161.hg.1 | NTRK2  |
| TC09000388.hg.1 | 23.49  | PSR09004162.hg.1 | NTRK2  |
| TC09000388.hg.1 | 21.93  | PSR09004156.hg.1 | NTRK2  |
| TC09000388.hg.1 | 21.31  | JUC09002277.hg.1 | NTRK2  |
| TC09000388.hg.1 | 19.19  | PSR09004154.hg.1 | NTRK2  |
| TC09000388.hg.1 | 17.47  | JUC09002272.hg.1 | NTRK2  |
| TC09000388.hg.1 | 16.24  | JUC09002266.hg.1 | NTRK2  |
| TC09000388.hg.1 | 12.79  | PSR09004151.hg.1 | NTRK2  |
| TC09000388.hg.1 | 12.31  | PSR09004146.hg.1 | NTRK2  |
| TC09000388.hg.1 | 9.63   | JUC09002256.hg.1 | NTRK2  |
| TC09000388.hg.1 | 7.31   | JUC09002257.hg.1 | NTRK2  |
| TC09000388.hg.1 | 7.07   | PSR09004129.hg.1 | NTRK2  |
| TC09000388.hg.1 | 4.74   | PSR09004135.hg.1 | NTRK2  |
| TC09000388.hg.1 | 3.99   | JUC09002270.hg.1 | NTRK2  |
| TC09000388.hg.1 | 3.13   | PSR09004147.hg.1 | NTRK2  |

|                 |       |                  |          |
|-----------------|-------|------------------|----------|
| TC09000388.hg.1 | 2.39  | PSR09004150.hg.1 | NTRK2    |
| TC09000388.hg.1 | -2.07 | PSR09004143.hg.1 | NTRK2    |
| TC09000388.hg.1 | -2.1  | JUC09002275.hg.1 | NTRK2    |
| TC09000388.hg.1 | -2.18 | PSR09004142.hg.1 | NTRK2    |
| TC09000388.hg.1 | -4.4  | JUC09002254.hg.1 | NTRK2    |
| TC09000388.hg.1 | -4.41 | JUC09002265.hg.1 | NTRK2    |
| TC09000388.hg.1 | -5.22 | PSR09004139.hg.1 | NTRK2    |
| TC09000388.hg.1 | -7.79 | JUC09002255.hg.1 | NTRK2    |
| TC09000388.hg.1 | -9.32 | JUC09002253.hg.1 | NTRK2    |
| TC05000394.hg.1 | 43.13 | JUC05003038.hg.1 | THBS4    |
| TC05000394.hg.1 | 33.3  | JUC05003027.hg.1 | THBS4    |
| TC05000394.hg.1 | 6.97  | JUC05003021.hg.1 | THBS4    |
| TC05000394.hg.1 | 6.8   | JUC05003012.hg.1 | THBS4    |
| TC05000394.hg.1 | 6.42  | JUC05003011.hg.1 | THBS4    |
| TC05000394.hg.1 | 2.34  | PSR05005595.hg.1 | THBS4    |
| TC05000394.hg.1 | -2.08 | JUC05003041.hg.1 | THBS4    |
| TC11002235.hg.1 | 41.07 | PSR11026723.hg.1 | MMP3     |
| TC11002235.hg.1 | 32.66 | JUC11014228.hg.1 | MMP3     |
| TC11002235.hg.1 | 31.17 | PSR11026709.hg.1 | MMP3     |
| TC11002235.hg.1 | 25.63 | JUC11014227.hg.1 | MMP3     |
| TC11002235.hg.1 | 21.17 | JUC11014222.hg.1 | MMP3     |
| TC11002235.hg.1 | 16.21 | PSR11026704.hg.1 | MMP3     |
| TC11002235.hg.1 | 13.49 | PSR11026702.hg.1 | MMP3     |
| TC11002235.hg.1 | 4.53  | JUC11014230.hg.1 | MMP3     |
| TC11002235.hg.1 | 2.42  | PSR11026713.hg.1 | MMP3     |
| TC11002235.hg.1 | -2.09 | JUC11014225.hg.1 | MMP3     |
| TC11002235.hg.1 | -2.24 | JUC11014220.hg.1 | MMP3     |
| TC04001084.hg.1 | 41.02 | JUC04007928.hg.1 | PPARGC1A |
| TC04001084.hg.1 | 36.61 | JUC04007926.hg.1 | PPARGC1A |
| TC04001084.hg.1 | 22.3  | JUC04007929.hg.1 | PPARGC1A |
| TC04001084.hg.1 | 21.93 | PSR04014895.hg.1 | PPARGC1A |
| TC04001084.hg.1 | 21.34 | JUC04007930.hg.1 | PPARGC1A |
| TC04001084.hg.1 | 21.15 | PSR04014913.hg.1 | PPARGC1A |
| TC04001084.hg.1 | 18.79 | JUC04007945.hg.1 | PPARGC1A |
| TC04001084.hg.1 | 18.64 | PSR04014887.hg.1 | PPARGC1A |
| TC04001084.hg.1 | 18    | PSR04014881.hg.1 | PPARGC1A |
| TC04001084.hg.1 | 15.87 | JUC04007939.hg.1 | PPARGC1A |
| TC04001084.hg.1 | 15.3  | JUC04007942.hg.1 | PPARGC1A |
| TC04001084.hg.1 | 15.12 | PSR04014896.hg.1 | PPARGC1A |
| TC04001084.hg.1 | 14.09 | PSR04014892.hg.1 | PPARGC1A |
| TC04001084.hg.1 | 13.99 | JUC04007943.hg.1 | PPARGC1A |
| TC04001084.hg.1 | 12.95 | PSR04014897.hg.1 | PPARGC1A |
| TC04001084.hg.1 | 12.53 | JUC04007937.hg.1 | PPARGC1A |
| TC04001084.hg.1 | 12.44 | PSR04014898.hg.1 | PPARGC1A |
| TC04001084.hg.1 | 11.72 | JUC04007927.hg.1 | PPARGC1A |
| TC04001084.hg.1 | 11.61 | PSR04014865.hg.1 | PPARGC1A |
| TC04001084.hg.1 | 10.27 | PSR04014875.hg.1 | PPARGC1A |
| TC04001084.hg.1 | 8.54  | PSR04014899.hg.1 | PPARGC1A |
| TC04001084.hg.1 | 7.69  | PSR04014879.hg.1 | PPARGC1A |
| TC04001084.hg.1 | 5.72  | PSR04014905.hg.1 | PPARGC1A |
| TC04001084.hg.1 | 5.15  | JUC04007924.hg.1 | PPARGC1A |
| TC04001084.hg.1 | 4.99  | PSR04014886.hg.1 | PPARGC1A |
| TC04001084.hg.1 | 4.44  | PSR04014873.hg.1 | PPARGC1A |
| TC04001084.hg.1 | 3.4   | PSR04014880.hg.1 | PPARGC1A |
| TC04001084.hg.1 | 3.32  | PSR04014904.hg.1 | PPARGC1A |
| TC04001084.hg.1 | 3.07  | JUC04007933.hg.1 | PPARGC1A |
| TC04001084.hg.1 | 2.44  | PSR04014911.hg.1 | PPARGC1A |
| TC04001084.hg.1 | 2.34  | PSR04014877.hg.1 | PPARGC1A |



|                 |       |                  |          |
|-----------------|-------|------------------|----------|
| TC04001084.hg.1 | 2     | PSR04014882.hg.1 | PPARGC1A |
| TC04001084.hg.1 | -2.2  | JUC04007922.hg.1 | PPARGC1A |
| TC07000852.hg.1 | 40.31 | PSR07013412.hg.1 | CHRM2    |
| TC07000852.hg.1 | 34.13 | JUC07006418.hg.1 | CHRM2    |
| TC07000852.hg.1 | 32.62 | PSR07013408.hg.1 | CHRM2    |
| TC07000852.hg.1 | 29.54 | JUC07006416.hg.1 | CHRM2    |
| TC07000852.hg.1 | 26.19 | PSR07013413.hg.1 | CHRM2    |
| TC07000852.hg.1 | 22.33 | PSR07013415.hg.1 | CHRM2    |
| TC07000852.hg.1 | 15.28 | PSR07013411.hg.1 | CHRM2    |
| TC07000852.hg.1 | 14.46 | PSR07013414.hg.1 | CHRM2    |
| TC07000852.hg.1 | 10.42 | JUC07006421.hg.1 | CHRM2    |
| TC07000852.hg.1 | 5.65  | JUC07006423.hg.1 | CHRM2    |
| TC07000852.hg.1 | 5.54  | JUC07006424.hg.1 | CHRM2    |
| TC07000852.hg.1 | 3.66  | PSR07013405.hg.1 | CHRM2    |
| TC07000852.hg.1 | 3.31  | PSR07013404.hg.1 | CHRM2    |
| TC07000852.hg.1 | 2.33  | JUC07006422.hg.1 | CHRM2    |
| TC07000852.hg.1 | -2.89 | PSR07013417.hg.1 | CHRM2    |
| TC03001884.hg.1 | 34.24 | JUC03016874.hg.1 | CP       |
| TC03001884.hg.1 | 33.66 | JUC03016880.hg.1 | CP       |
| TC03001884.hg.1 | 29.99 | JUC03016868.hg.1 | CP       |
| TC03001884.hg.1 | 20.8  | PSR03033932.hg.1 | CP       |
| TC03001884.hg.1 | 20.49 | PSR03033946.hg.1 | CP       |
| TC03001884.hg.1 | 12.84 | JUC03016888.hg.1 | CP       |
| TC03001884.hg.1 | 9.86  | JUC03016870.hg.1 | CP       |
| TC03001884.hg.1 | 8.84  | PSR03033980.hg.1 | CP       |
| TC03001884.hg.1 | 8.78  | PSR03033934.hg.1 | CP       |
| TC03001884.hg.1 | 8.56  | PSR03033933.hg.1 | CP       |
| TC03001884.hg.1 | 8.02  | JUC03016866.hg.1 | CP       |
| TC03001884.hg.1 | 7.11  | PSR03033984.hg.1 | CP       |
| TC03001884.hg.1 | 5.6   | PSR03033962.hg.1 | CP       |
| TC03001884.hg.1 | 5.56  | PSR03033953.hg.1 | CP       |
| TC03001884.hg.1 | 5.46  | PSR03033970.hg.1 | CP       |
| TC03001884.hg.1 | 5.1   | JUC03016890.hg.1 | CP       |
| TC03001884.hg.1 | 4.98  | PSR03033952.hg.1 | CP       |
| TC03001884.hg.1 | 2.83  | JUC03016882.hg.1 | CP       |
| TC03001884.hg.1 | 2.49  | JUC03016876.hg.1 | CP       |
| TC03001884.hg.1 | 2.2   | JUC03016867.hg.1 | CP       |
| TC03001884.hg.1 | 2.16  | PSR03033956.hg.1 | CP       |
| TC03001884.hg.1 | 2.14  | PSR03033960.hg.1 | CP       |
| TC03001884.hg.1 | 2     | JUC03016881.hg.1 | CP       |
| TC03001884.hg.1 | -2.15 | PSR03033964.hg.1 | CP       |
| TC03001884.hg.1 | -2.35 | PSR03033950.hg.1 | CP       |
| TC03001884.hg.1 | -2.42 | PSR03033966.hg.1 | CP       |
| TC03001884.hg.1 | -2.45 | PSR03033944.hg.1 | CP       |
| TC03001884.hg.1 | -3.22 | JUC03016884.hg.1 | CP       |
| TC07000261.hg.1 | 33.91 | JUC07001943.hg.1 | HECW1    |
| TC07000261.hg.1 | 16.27 | JUC07001934.hg.1 | HECW1    |
| TC07000261.hg.1 | 11.08 | PSR07003973.hg.1 | HECW1    |
| TC07000261.hg.1 | 10.64 | JUC07001924.hg.1 | HECW1    |
| TC07000261.hg.1 | 7.67  | JUC07001923.hg.1 | HECW1    |
| TC07000261.hg.1 | 6.73  | PSR07003974.hg.1 | HECW1    |
| TC07000261.hg.1 | 5.04  | JUC07001929.hg.1 | HECW1    |
| TC07000261.hg.1 | 3.75  | JUC07001937.hg.1 | HECW1    |
| TC07000261.hg.1 | 3.46  | JUC07001914.hg.1 | HECW1    |
| TC07000261.hg.1 | 3.4   | JUC07001935.hg.1 | HECW1    |
| TC07000261.hg.1 | 3.39  | PSR07004013.hg.1 | HECW1    |
| TC07000261.hg.1 | 3.38  | JUC07001911.hg.1 | HECW1    |
| TC07000261.hg.1 | 3.34  | PSR07004022.hg.1 | HECW1    |

|                 |       |                  |          |
|-----------------|-------|------------------|----------|
| TC07000261.hg.1 | 3.25  | PSR07004025.hg.1 | HECW1    |
| TC07000261.hg.1 | 2.84  | JUC07001947.hg.1 | HECW1    |
| TC07000261.hg.1 | 2.76  | JUC07001927.hg.1 | HECW1    |
| TC07000261.hg.1 | 2.72  | PSR07004008.hg.1 | HECW1    |
| TC07000261.hg.1 | 2.64  | PSR07004010.hg.1 | HECW1    |
| TC07000261.hg.1 | 2.51  | PSR07003972.hg.1 | HECW1    |
| TC07000261.hg.1 | 2.51  | PSR07004017.hg.1 | HECW1    |
| TC07000261.hg.1 | 2.46  | JUC07001932.hg.1 | HECW1    |
| TC07000261.hg.1 | 2.24  | PSR07003987.hg.1 | HECW1    |
| TC07000261.hg.1 | 2.22  | PSR07003969.hg.1 | HECW1    |
| TC07000261.hg.1 | 2.21  | PSR07004005.hg.1 | HECW1    |
| TC07000261.hg.1 | 2.18  | JUC07001930.hg.1 | HECW1    |
| TC07000261.hg.1 | 2.13  | PSR07004003.hg.1 | HECW1    |
| TC07000261.hg.1 | 2.11  | PSR07004001.hg.1 | HECW1    |
| TC07000261.hg.1 | 2.09  | PSR07003999.hg.1 | HECW1    |
| TC07000261.hg.1 | 2.01  | PSR07004014.hg.1 | HECW1    |
| TC07000261.hg.1 | -2.11 | JUC07001915.hg.1 | HECW1    |
| TC07000261.hg.1 | -2.13 | JUC07001913.hg.1 | HECW1    |
| TC07000261.hg.1 | -2.25 | PSR07003989.hg.1 | HECW1    |
| TC07000261.hg.1 | -2.34 | PSR07003979.hg.1 | HECW1    |
| TC07000261.hg.1 | -2.43 | PSR07004015.hg.1 | HECW1    |
| TC07000261.hg.1 | -2.48 | JUC07001928.hg.1 | HECW1    |
| TC07000261.hg.1 | -2.52 | JUC07001950.hg.1 | HECW1    |
| TC12001622.hg.1 | 32.88 | PSR12021838.hg.1 | NDUFA4L2 |
| TC12001622.hg.1 | 29.74 | JUC12012057.hg.1 | NDUFA4L2 |
| TC12001622.hg.1 | 21.87 | PSR12021841.hg.1 | NDUFA4L2 |
| TC12001622.hg.1 | 18.72 | PSR12021836.hg.1 | NDUFA4L2 |
| TC12001622.hg.1 | 5.75  | JUC12012055.hg.1 | NDUFA4L2 |
| TC12001622.hg.1 | 5.64  | PSR12021828.hg.1 | NDUFA4L2 |
| TC12001622.hg.1 | 3.55  | PSR12021835.hg.1 | NDUFA4L2 |
| TC12001622.hg.1 | 2.66  | PSR12021832.hg.1 | NDUFA4L2 |
| TC12001622.hg.1 | 2.37  | PSR12021830.hg.1 | NDUFA4L2 |
| TC12001622.hg.1 | -3.05 | JUC12012058.hg.1 | NDUFA4L2 |
| TC07000815.hg.1 | 31.18 | PSR07012856.hg.1 | MEST     |
| TC07000815.hg.1 | 25.53 | PSR07012861.hg.1 | MEST     |
| TC07000815.hg.1 | 21.81 | JUC07006103.hg.1 | MEST     |
| TC07000815.hg.1 | 21.6  | PSR07012889.hg.1 | MEST     |
| TC07000815.hg.1 | 21.48 | PSR07012862.hg.1 | MEST     |
| TC07000815.hg.1 | 20.82 | PSR07012846.hg.1 | MEST     |
| TC07000815.hg.1 | 20.8  | PSR07012857.hg.1 | MEST     |
| TC07000815.hg.1 | 20.28 | PSR07012860.hg.1 | MEST     |
| TC07000815.hg.1 | 17.82 | JUC07006105.hg.1 | MEST     |
| TC07000815.hg.1 | 17.31 | JUC07006092.hg.1 | MEST     |
| TC07000815.hg.1 | 16.8  | JUC07006110.hg.1 | MEST     |
| TC07000815.hg.1 | 16.45 | JUC07006094.hg.1 | MEST     |
| TC07000815.hg.1 | 16    | PSR07012863.hg.1 | MEST     |
| TC07000815.hg.1 | 15.73 | JUC07006107.hg.1 | MEST     |
| TC07000815.hg.1 | 15.69 | PSR07012883.hg.1 | MEST     |
| TC07000815.hg.1 | 15.62 | PSR07012852.hg.1 | MEST     |
| TC07000815.hg.1 | 14.48 | PSR07012892.hg.1 | MEST     |
| TC07000815.hg.1 | 14.44 | PSR07012879.hg.1 | MEST     |
| TC07000815.hg.1 | 13.21 | PSR07012847.hg.1 | MEST     |
| TC07000815.hg.1 | 11.23 | JUC07006091.hg.1 | MEST     |
| TC07000815.hg.1 | 6.69  | PSR07012875.hg.1 | MEST     |
| TC07000815.hg.1 | 5.36  | JUC07006095.hg.1 | MEST     |
| TC07000815.hg.1 | 5.1   | JUC07006101.hg.1 | MEST     |
| TC07000815.hg.1 | 4.48  | PSR07012866.hg.1 | MEST     |
| TC07000815.hg.1 | 2.17  | JUC07006102.hg.1 | MEST     |

|                 |       |                  |         |
|-----------------|-------|------------------|---------|
| TC07000815.hg.1 | 2.02  | PSR07012884.hg.1 | MEST    |
| TC07000815.hg.1 | -2.01 | PSR07012897.hg.1 | MEST    |
| TC07000815.hg.1 | -2.03 | PSR07012870.hg.1 | MEST    |
| TC07000815.hg.1 | -2.43 | JUC07006108.hg.1 | MEST    |
| TC07000815.hg.1 | -2.52 | JUC07006086.hg.1 | MEST    |
| TC07000815.hg.1 | -3.94 | JUC07006096.hg.1 | MEST    |
| TC18000164.hg.1 | 30.46 | JUC18001343.hg.1 | SLC14A1 |
| TC18000164.hg.1 | 10.3  | JUC18001344.hg.1 | SLC14A1 |
| TC18000164.hg.1 | 4.83  | PSR18001904.hg.1 | SLC14A1 |
| TC18000164.hg.1 | 2.71  | PSR18001908.hg.1 | SLC14A1 |
| TC18000164.hg.1 | 2.53  | PSR18001909.hg.1 | SLC14A1 |
| TC09001533.hg.1 | 27.39 | JUC09010372.hg.1 | DBC1    |
| TC09001533.hg.1 | 8.01  | PSR09019143.hg.1 | DBC1    |
| TC09001533.hg.1 | 7.81  | PSR09019127.hg.1 | DBC1    |
| TC09001533.hg.1 | 4.03  | PSR09019129.hg.1 | DBC1    |
| TC09001533.hg.1 | 3.84  | JUC09010375.hg.1 | DBC1    |
| TC09001533.hg.1 | 2.41  | PSR09019142.hg.1 | DBC1    |
| TC09001533.hg.1 | 2.06  | JUC09010373.hg.1 | DBC1    |
| TC09001533.hg.1 | -3.29 | JUC09010371.hg.1 | DBC1    |
| TC09001533.hg.1 | -3.37 | JUC09010377.hg.1 | DBC1    |
| TC13000576.hg.1 | 26.18 | JUC13003856.hg.1 | POSTN   |
| TC13000576.hg.1 | 4.65  | PSR13006602.hg.1 | POSTN   |
| TC13000576.hg.1 | 3.95  | PSR13006607.hg.1 | POSTN   |
| TC13000576.hg.1 | 3.17  | JUC13003844.hg.1 | POSTN   |
| TC13000576.hg.1 | 2.72  | PSR13006629.hg.1 | POSTN   |
| TC13000576.hg.1 | 2.63  | PSR13006600.hg.1 | POSTN   |
| TC13000576.hg.1 | 2.48  | JUC13003855.hg.1 | POSTN   |
| TC13000576.hg.1 | 2.45  | JUC13003846.hg.1 | POSTN   |
| TC13000576.hg.1 | 2.34  | PSR13006595.hg.1 | POSTN   |
| TC13000576.hg.1 | 2.29  | PSR13006594.hg.1 | POSTN   |
| TC13000576.hg.1 | 2.24  | JUC13003850.hg.1 | POSTN   |
| TC13000576.hg.1 | 2.12  | JUC13003862.hg.1 | POSTN   |
| TC13000576.hg.1 | -2.02 | PSR13006604.hg.1 | POSTN   |
| TC13000576.hg.1 | -2.28 | JUC13003842.hg.1 | POSTN   |
| TC13000576.hg.1 | -2.53 | PSR13006606.hg.1 | POSTN   |
| TC13000576.hg.1 | -2.59 | PSR13006598.hg.1 | POSTN   |
| TC13000576.hg.1 | -7.66 | PSR13006635.hg.1 | POSTN   |
| TC13000576.hg.1 | -7.79 | JUC13003859.hg.1 | POSTN   |
| TC13000576.hg.1 | -8.44 | PSR13006593.hg.1 | POSTN   |
| TC05001614.hg.1 | 25.85 | JUC05011357.hg.1 | PCSK1   |
| TC05001614.hg.1 | 14.22 | JUC05011367.hg.1 | PCSK1   |
| TC05001614.hg.1 | 12.63 | PSR05022045.hg.1 | PCSK1   |
| TC05001614.hg.1 | 11.73 | PSR05022020.hg.1 | PCSK1   |
| TC05001614.hg.1 | 11.38 | PSR05022043.hg.1 | PCSK1   |
| TC05001614.hg.1 | 10.18 | PSR05022042.hg.1 | PCSK1   |
| TC05001614.hg.1 | 9.62  | PSR05022039.hg.1 | PCSK1   |
| TC05001614.hg.1 | 9.09  | PSR05022032.hg.1 | PCSK1   |
| TC05001614.hg.1 | 8.16  | PSR05022041.hg.1 | PCSK1   |
| TC05001614.hg.1 | 7.43  | JUC05011365.hg.1 | PCSK1   |
| TC05001614.hg.1 | 6.91  | PSR05022038.hg.1 | PCSK1   |
| TC05001614.hg.1 | 6.59  | JUC05011355.hg.1 | PCSK1   |
| TC05001614.hg.1 | 6.19  | PSR05022029.hg.1 | PCSK1   |
| TC05001614.hg.1 | 3.5   | JUC05011361.hg.1 | PCSK1   |
| TC05001614.hg.1 | 2.92  | JUC05011363.hg.1 | PCSK1   |
| TC05001614.hg.1 | 2.53  | PSR05022036.hg.1 | PCSK1   |
| TC05001614.hg.1 | 2.48  | PSR05022034.hg.1 | PCSK1   |
| TC05001614.hg.1 | 2.35  | PSR05022030.hg.1 | PCSK1   |
| TC05001614.hg.1 | 2.35  | JUC05011369.hg.1 | PCSK1   |

|                 |       |                  |       |
|-----------------|-------|------------------|-------|
| TC05001614.hg.1 | 2.24  | JUC05011358.hg.1 | PCSK1 |
| TC05001614.hg.1 | -2.12 | JUC05011354.hg.1 | PCSK1 |
| TC05001614.hg.1 | -2.15 | PSR05022027.hg.1 | PCSK1 |
| TC05001614.hg.1 | -2.4  | PSR05022026.hg.1 | PCSK1 |
| TC05001614.hg.1 | -4.48 | JUC05011353.hg.1 | PCSK1 |
| TC08001062.hg.1 | 24.46 | JUC08006956.hg.1 | STC1  |
| TC08001062.hg.1 | 10.67 | PSR08013517.hg.1 | STC1  |
| TC08001062.hg.1 | 8.09  | JUC08006955.hg.1 | STC1  |
| TC08001062.hg.1 | 2.37  | PSR08013512.hg.1 | STC1  |
| TC08001062.hg.1 | -2.34 | PSR08013516.hg.1 | STC1  |
| TC08001062.hg.1 | -3    | JUC08006958.hg.1 | STC1  |
| TC08001062.hg.1 | -3    | JUC08006959.hg.1 | STC1  |
| TC09000560.hg.1 | 23.99 | JUC09003458.hg.1 | UGCG  |
| TC09000560.hg.1 | 13.37 | PSR09006240.hg.1 | UGCG  |
| TC09000560.hg.1 | 11.64 | PSR09006242.hg.1 | UGCG  |
| TC09000560.hg.1 | 10.72 | PSR09006239.hg.1 | UGCG  |
| TC09000560.hg.1 | 9.14  | PSR09006253.hg.1 | UGCG  |
| TC09000560.hg.1 | 3.16  | JUC09003451.hg.1 | UGCG  |
| TC09000560.hg.1 | 2.27  | PSR09006246.hg.1 | UGCG  |
| TC09000560.hg.1 | 2.22  | PSR09006247.hg.1 | UGCG  |
| TC09000560.hg.1 | -2.32 | JUC09003455.hg.1 | UGCG  |
| TC02002747.hg.1 | 22.83 | PSR02044128.hg.1 | FN1   |
| TC02002747.hg.1 | 21.37 | PSR02044122.hg.1 | FN1   |
| TC02002747.hg.1 | 20.45 | PSR02044190.hg.1 | FN1   |
| TC02002747.hg.1 | 20.3  | PSR02044115.hg.1 | FN1   |
| TC02002747.hg.1 | 19.89 | PSR02044168.hg.1 | FN1   |
| TC02002747.hg.1 | 19.24 | PSR02044182.hg.1 | FN1   |
| TC02002747.hg.1 | 18.9  | PSR02044123.hg.1 | FN1   |
| TC02002747.hg.1 | 18.38 | PSR02044185.hg.1 | FN1   |
| TC02002747.hg.1 | 17.73 | PSR02044151.hg.1 | FN1   |
| TC02002747.hg.1 | 17.56 | PSR02044152.hg.1 | FN1   |
| TC02002747.hg.1 | 15.93 | PSR02044165.hg.1 | FN1   |
| TC02002747.hg.1 | 15.79 | PSR02044157.hg.1 | FN1   |
| TC02002747.hg.1 | 14.91 | PSR02044164.hg.1 | FN1   |
| TC02002747.hg.1 | 14.18 | PSR02044146.hg.1 | FN1   |
| TC02002747.hg.1 | 13.29 | PSR02044148.hg.1 | FN1   |
| TC02002747.hg.1 | 12.86 | PSR02044150.hg.1 | FN1   |
| TC02002747.hg.1 | 12.81 | PSR02044117.hg.1 | FN1   |
| TC02002747.hg.1 | 12.24 | PSR02044149.hg.1 | FN1   |
| TC02002747.hg.1 | 11.27 | PSR02044134.hg.1 | FN1   |
| TC02002747.hg.1 | 11.01 | PSR02044129.hg.1 | FN1   |
| TC02002747.hg.1 | 10.01 | PSR02044116.hg.1 | FN1   |
| TC02002747.hg.1 | 8.91  | PSR02044135.hg.1 | FN1   |
| TC02002747.hg.1 | 5.59  | PSR02044121.hg.1 | FN1   |
| TC02002747.hg.1 | 4.32  | JUC02023158.hg.1 | FN1   |
| TC02002747.hg.1 | 4.31  | PSR02044108.hg.1 | FN1   |
| TC02002747.hg.1 | 3.16  | PSR02044126.hg.1 | FN1   |
| TC02002747.hg.1 | 2.69  | JUC02023167.hg.1 | FN1   |
| TC02002747.hg.1 | 2.64  | JUC02023178.hg.1 | FN1   |
| TC02002747.hg.1 | 2.31  | JUC02023171.hg.1 | FN1   |
| TC02002747.hg.1 | 2.22  | JUC02023201.hg.1 | FN1   |
| TC02002747.hg.1 | 2.21  | PSR02044127.hg.1 | FN1   |
| TC02002747.hg.1 | 2.2   | PSR02044200.hg.1 | FN1   |
| TC02002747.hg.1 | 2.04  | PSR02044131.hg.1 | FN1   |
| TC6_mcf_hap5000 | 22.29 | PSR6_mcf_hap5000 | HLA-A |
| TC6_mcf_hap5000 | 5.09  | PSR6_mcf_hap5000 | HLA-A |
| TC6_mcf_hap5000 | 3.33  | PSR6_mcf_hap5000 | HLA-A |
| TC6_mcf_hap5000 | 2.72  | PSR6_mcf_hap5000 | HLA-A |

|                 |       |                   |        |
|-----------------|-------|-------------------|--------|
| TC6_mcf_hap5000 | 2.71  | JUC6_mcf_hap50017 | HLA-A  |
| TC6_mcf_hap5000 | 2.21  | PSR6_mcf_hap5000  | HLA-A  |
| TC6_mcf_hap5000 | 2.14  | JUC6_mcf_hap50017 | HLA-A  |
| TC6_mcf_hap5000 | -4.21 | JUC6_mcf_hap50017 | HLA-A  |
| TC01000733.hg.1 | 21.68 | PSR01011722.hg.1  | PDE4B  |
| TC01000733.hg.1 | 16.45 | JUC01006093.hg.1  | PDE4B  |
| TC01000733.hg.1 | 16.34 | PSR01011733.hg.1  | PDE4B  |
| TC01000733.hg.1 | 16.1  | PSR01011723.hg.1  | PDE4B  |
| TC01000733.hg.1 | 15.77 | JUC01006078.hg.1  | PDE4B  |
| TC01000733.hg.1 | 13.55 | PSR01011734.hg.1  | PDE4B  |
| TC01000733.hg.1 | 12.27 | PSR01011727.hg.1  | PDE4B  |
| TC01000733.hg.1 | 10.51 | PSR01011735.hg.1  | PDE4B  |
| TC01000733.hg.1 | 10.28 | PSR01011726.hg.1  | PDE4B  |
| TC01000733.hg.1 | 10.11 | JUC01006077.hg.1  | PDE4B  |
| TC01000733.hg.1 | 9.64  | JUC01006080.hg.1  | PDE4B  |
| TC01000733.hg.1 | 9.37  | JUC01006088.hg.1  | PDE4B  |
| TC01000733.hg.1 | 9.26  | JUC01006075.hg.1  | PDE4B  |
| TC01000733.hg.1 | 9.21  | PSR01011724.hg.1  | PDE4B  |
| TC01000733.hg.1 | 8.83  | JUC01006079.hg.1  | PDE4B  |
| TC01000733.hg.1 | 8.81  | PSR01011725.hg.1  | PDE4B  |
| TC01000733.hg.1 | 8.38  | PSR01011736.hg.1  | PDE4B  |
| TC01000733.hg.1 | 7.84  | PSR01011721.hg.1  | PDE4B  |
| TC01000733.hg.1 | 7.04  | PSR01011737.hg.1  | PDE4B  |
| TC01000733.hg.1 | 5.58  | PSR01011743.hg.1  | PDE4B  |
| TC01000733.hg.1 | 4.75  | PSR01011757.hg.1  | PDE4B  |
| TC01000733.hg.1 | 4.15  | PSR01011744.hg.1  | PDE4B  |
| TC01000733.hg.1 | 3.8   | PSR01011761.hg.1  | PDE4B  |
| TC01000733.hg.1 | -2.13 | PSR01011746.hg.1  | PDE4B  |
| TC01000733.hg.1 | -2.27 | PSR01011741.hg.1  | PDE4B  |
| TC01000733.hg.1 | -2.39 | PSR01011739.hg.1  | PDE4B  |
| TC01000733.hg.1 | -2.41 | JUC01006092.hg.1  | PDE4B  |
| TC01000733.hg.1 | -2.56 | JUC01006082.hg.1  | PDE4B  |
| TC01000733.hg.1 | -2.74 | JUC01006083.hg.1  | PDE4B  |
| TC01000733.hg.1 | -2.75 | JUC01006097.hg.1  | PDE4B  |
| TC01000733.hg.1 | -3.19 | JUC01006091.hg.1  | PDE4B  |
| TC03001459.hg.1 | 21.46 | JUC03012921.hg.1  | GLT8D1 |
| TC03001459.hg.1 | 2.05  | PSR03026478.hg.1  | GLT8D1 |
| TC6_dbb_hap3000 | 21.22 | PSR6_dbb_hap3000  | HLA-A  |
| TC6_dbb_hap3000 | 4.84  | PSR6_dbb_hap3000  | HLA-A  |
| TC6_dbb_hap3000 | 3.17  | PSR6_dbb_hap3000  | HLA-A  |
| TC6_dbb_hap3000 | 2.59  | PSR6_dbb_hap3000  | HLA-A  |
| TC6_dbb_hap3000 | 2.58  | JUC6_dbb_hap30016 | HLA-A  |
| TC6_dbb_hap3000 | 2.33  | PSR6_dbb_hap3000  | HLA-A  |
| TC6_dbb_hap3000 | 2.1   | PSR6_dbb_hap3000  | HLA-A  |
| TC6_dbb_hap3000 | 2.06  | PSR6_dbb_hap3000  | HLA-A  |
| TC6_dbb_hap3000 | 2.04  | JUC6_dbb_hap30016 | HLA-A  |
| TC6_dbb_hap3000 | -4.42 | JUC6_dbb_hap30016 | HLA-A  |
| TC13000563.hg.1 | 20.81 | JUC13003717.hg.1  | DCLK1  |
| TC13000563.hg.1 | 11.33 | PSR13006338.hg.1  | DCLK1  |
| TC13000563.hg.1 | 6.29  | PSR13006349.hg.1  | DCLK1  |
| TC13000563.hg.1 | 4.07  | JUC13003732.hg.1  | DCLK1  |
| TC13000563.hg.1 | 3.78  | PSR13006350.hg.1  | DCLK1  |
| TC13000563.hg.1 | 3.38  | JUC13003735.hg.1  | DCLK1  |
| TC13000563.hg.1 | 2.25  | JUC13003741.hg.1  | DCLK1  |
| TC13000563.hg.1 | 2.14  | JUC13003738.hg.1  | DCLK1  |
| TC13000563.hg.1 | 2.11  | PSR13006341.hg.1  | DCLK1  |
| TC13000563.hg.1 | 2.08  | PSR13006342.hg.1  | DCLK1  |
| TC13000563.hg.1 | 2.02  | PSR13006348.hg.1  | DCLK1  |

|                 |       |                  |     |
|-----------------|-------|------------------|-----|
| TC0Y000163.hg.1 | 20.73 | JUC0Y001069.hg.1 | UTY |
| TC0Y000163.hg.1 | 11.86 | JUC0Y000994.hg.1 | UTY |
| TC0Y000163.hg.1 | 6.08  | PSR0Y001638.hg.1 | UTY |
| TC0Y000163.hg.1 | 5.71  | PSR0Y001641.hg.1 | UTY |
| TC0Y000163.hg.1 | 5.62  | PSR0Y001637.hg.1 | UTY |
| TC0Y000163.hg.1 | 4.14  | JUC0Y001001.hg.1 | UTY |
| TC0Y000163.hg.1 | 3.95  | PSR0Y001645.hg.1 | UTY |
| TC0Y000163.hg.1 | 3.55  | PSR0Y001647.hg.1 | UTY |
| TC0Y000163.hg.1 | 3.53  | JUC0Y001064.hg.1 | UTY |
| TC0Y000163.hg.1 | 2.6   | PSR0Y001635.hg.1 | UTY |
| TC0Y000163.hg.1 | 2.21  | JUC0Y001041.hg.1 | UTY |
| TC0Y000163.hg.1 | -2.01 | JUC0Y001059.hg.1 | UTY |
| TC0Y000163.hg.1 | -2.04 | PSR0Y001636.hg.1 | UTY |
| TC0Y000163.hg.1 | -2.16 | PSR0Y001634.hg.1 | UTY |
| TC0Y000163.hg.1 | -2.19 | JUC0Y001013.hg.1 | UTY |
| TC0Y000163.hg.1 | -2.25 | JUC0Y001009.hg.1 | UTY |
| TC0Y000163.hg.1 | -2.26 | PSR0Y001624.hg.1 | UTY |
| TC0Y000163.hg.1 | -2.29 | JUC0Y000999.hg.1 | UTY |
| TC0Y000163.hg.1 | -2.31 | PSR0Y001621.hg.1 | UTY |
| TC0Y000163.hg.1 | -2.34 | PSR0Y001632.hg.1 | UTY |
| TC0Y000163.hg.1 | -2.4  | PSR0Y001648.hg.1 | UTY |
| TC0Y000163.hg.1 | -2.46 | PSR0Y001674.hg.1 | UTY |
| TC0Y000163.hg.1 | -2.46 | JUC0Y001050.hg.1 | UTY |
| TC0Y000163.hg.1 | -2.47 | PSR0Y001626.hg.1 | UTY |
| TC0Y000163.hg.1 | -2.48 | PSR0Y001666.hg.1 | UTY |
| TC0Y000163.hg.1 | -2.51 | PSR0Y001669.hg.1 | UTY |
| TC0Y000163.hg.1 | -2.68 | PSR0Y001616.hg.1 | UTY |
| TC0Y000163.hg.1 | -2.78 | PSR0Y001682.hg.1 | UTY |
| TC0Y000163.hg.1 | -2.86 | PSR0Y001670.hg.1 | UTY |
| TC0Y000163.hg.1 | -2.9  | PSR0Y001617.hg.1 | UTY |
| TC0Y000163.hg.1 | -2.96 | JUC0Y001088.hg.1 | UTY |
| TC0Y000163.hg.1 | -2.97 | PSR0Y001619.hg.1 | UTY |
| TC0Y000163.hg.1 | -2.99 | JUC0Y001023.hg.1 | UTY |
| TC0Y000163.hg.1 | -3.04 | JUC0Y001063.hg.1 | UTY |
| TC0Y000163.hg.1 | -3.15 | JUC0Y001081.hg.1 | UTY |
| TC0Y000163.hg.1 | -3.38 | PSR0Y001650.hg.1 | UTY |
| TC0Y000163.hg.1 | -3.39 | PSR0Y001685.hg.1 | UTY |
| TC0Y000163.hg.1 | -3.41 | PSR0Y001679.hg.1 | UTY |
| TC0Y000163.hg.1 | -3.45 | JUC0Y001040.hg.1 | UTY |
| TC0Y000163.hg.1 | -3.47 | PSR0Y001676.hg.1 | UTY |
| TC0Y000163.hg.1 | -3.59 | PSR0Y001663.hg.1 | UTY |
| TC0Y000163.hg.1 | -3.71 | PSR0Y001654.hg.1 | UTY |
| TC0Y000163.hg.1 | -3.71 | PSR0Y001665.hg.1 | UTY |
| TC0Y000163.hg.1 | -3.74 | PSR0Y001620.hg.1 | UTY |
| TC0Y000163.hg.1 | -3.78 | JUC0Y001042.hg.1 | UTY |
| TC0Y000163.hg.1 | -3.87 | PSR0Y001656.hg.1 | UTY |
| TC0Y000163.hg.1 | -3.88 | JUC0Y001077.hg.1 | UTY |
| TC0Y000163.hg.1 | -3.93 | PSR0Y001678.hg.1 | UTY |
| TC0Y000163.hg.1 | -3.93 | PSR0Y001681.hg.1 | UTY |
| TC0Y000163.hg.1 | -4    | JUC0Y001016.hg.1 | UTY |
| TC0Y000163.hg.1 | -4.03 | PSR0Y001671.hg.1 | UTY |
| TC0Y000163.hg.1 | -4.26 | JUC0Y001047.hg.1 | UTY |
| TC0Y000163.hg.1 | -4.36 | PSR0Y001668.hg.1 | UTY |
| TC0Y000163.hg.1 | -4.43 | JUC0Y000990.hg.1 | UTY |
| TC0Y000163.hg.1 | -4.59 | JUC0Y001027.hg.1 | UTY |
| TC0Y000163.hg.1 | -5.03 | JUC0Y001038.hg.1 | UTY |
| TC0Y000163.hg.1 | -5.19 | JUC0Y001039.hg.1 | UTY |
| TC0Y000163.hg.1 | -5.21 | JUC0Y001035.hg.1 | UTY |

|                 |        |                  |         |
|-----------------|--------|------------------|---------|
| TC0Y000163.hg.1 | -5.41  | JUC0Y001074.hg.1 | UTY     |
| TC0Y000163.hg.1 | -5.55  | PSR0Y001653.hg.1 | UTY     |
| TC0Y000163.hg.1 | -5.56  | PSR0Y001680.hg.1 | UTY     |
| TC0Y000163.hg.1 | -6.22  | PSR0Y001630.hg.1 | UTY     |
| TC0Y000163.hg.1 | -6.22  | JUC0Y001036.hg.1 | UTY     |
| TC0Y000163.hg.1 | -6.32  | PSR0Y001675.hg.1 | UTY     |
| TC0Y000163.hg.1 | -6.34  | JUC0Y000998.hg.1 | UTY     |
| TC0Y000163.hg.1 | -6.42  | PSR0Y001657.hg.1 | UTY     |
| TC0Y000163.hg.1 | -6.43  | JUC0Y001054.hg.1 | UTY     |
| TC0Y000163.hg.1 | -6.5   | PSR0Y001659.hg.1 | UTY     |
| TC0Y000163.hg.1 | -6.9   | PSR0Y001633.hg.1 | UTY     |
| TC0Y000163.hg.1 | -7.05  | PSR0Y001677.hg.1 | UTY     |
| TC0Y000163.hg.1 | -7.3   | JUC0Y001072.hg.1 | UTY     |
| TC0Y000163.hg.1 | -7.33  | JUC0Y001003.hg.1 | UTY     |
| TC0Y000163.hg.1 | -7.79  | JUC0Y001037.hg.1 | UTY     |
| TC0Y000163.hg.1 | -8.4   | JUC0Y001026.hg.1 | UTY     |
| TC0Y000163.hg.1 | -8.56  | JUC0Y001031.hg.1 | UTY     |
| TC0Y000163.hg.1 | -8.85  | JUC0Y001057.hg.1 | UTY     |
| TC0Y000163.hg.1 | -9.01  | JUC0Y001052.hg.1 | UTY     |
| TC0Y000163.hg.1 | -9.15  | JUC0Y001067.hg.1 | UTY     |
| TC0Y000163.hg.1 | -9.53  | JUC0Y001049.hg.1 | UTY     |
| TC0Y000163.hg.1 | -10.76 | JUC0Y001062.hg.1 | UTY     |
| TC0Y000163.hg.1 | -11.68 | JUC0Y000996.hg.1 | UTY     |
| TC0Y000163.hg.1 | -13.93 | JUC0Y000995.hg.1 | UTY     |
| TC08000531.hg.1 | 20.49  | PSR08007210.hg.1 | CA2     |
| TC08000531.hg.1 | 19.71  | PSR08007200.hg.1 | CA2     |
| TC08000531.hg.1 | 16.18  | PSR08007208.hg.1 | CA2     |
| TC08000531.hg.1 | 13.45  | JUC08003565.hg.1 | CA2     |
| TC08000531.hg.1 | 9.6    | JUC08003560.hg.1 | CA2     |
| TC08000531.hg.1 | 7.8    | PSR08007204.hg.1 | CA2     |
| TC08000531.hg.1 | 7.52   | PSR08007218.hg.1 | CA2     |
| TC08000531.hg.1 | 5.98   | JUC08003562.hg.1 | CA2     |
| TC08000531.hg.1 | 2.43   | PSR08007205.hg.1 | CA2     |
| TC08000531.hg.1 | 2.04   | JUC08003561.hg.1 | CA2     |
| TC08000531.hg.1 | -3.14  | JUC08003564.hg.1 | CA2     |
| TC08000531.hg.1 | -4.25  | PSR08007212.hg.1 | CA2     |
| TC03002106.hg.1 | 20.26  | PSR03037284.hg.1 | LEPREL1 |
| TC03002106.hg.1 | 15.77  | PSR03037252.hg.1 | LEPREL1 |
| TC03002106.hg.1 | 14.36  | PSR03037273.hg.1 | LEPREL1 |
| TC03002106.hg.1 | 13.92  | PSR03037285.hg.1 | LEPREL1 |
| TC03002106.hg.1 | 12.88  | PSR03037266.hg.1 | LEPREL1 |
| TC03002106.hg.1 | 9.33   | PSR03037282.hg.1 | LEPREL1 |
| TC03002106.hg.1 | 5.52   | PSR03037283.hg.1 | LEPREL1 |
| TC03002106.hg.1 | 5.47   | PSR03037277.hg.1 | LEPREL1 |
| TC03002106.hg.1 | 4.61   | JUC03018433.hg.1 | LEPREL1 |
| TC03002106.hg.1 | 4.56   | PSR03037268.hg.1 | LEPREL1 |
| TC03002106.hg.1 | 3.97   | PSR03037262.hg.1 | LEPREL1 |
| TC03002106.hg.1 | 3.84   | JUC03018423.hg.1 | LEPREL1 |
| TC03002106.hg.1 | -2.12  | JUC03018420.hg.1 | LEPREL1 |
| TC03002106.hg.1 | -2.53  | JUC03018434.hg.1 | LEPREL1 |
| TC10000053.hg.1 | 20.02  | JUC10000311.hg.1 | PFKFB3  |
| TC10000053.hg.1 | 8.92   | JUC10000316.hg.1 | PFKFB3  |
| TC10000053.hg.1 | 7.95   | PSR10000608.hg.1 | PFKFB3  |
| TC10000053.hg.1 | 7.94   | PSR10000620.hg.1 | PFKFB3  |
| TC10000053.hg.1 | 6.68   | PSR10000634.hg.1 | PFKFB3  |
| TC10000053.hg.1 | 6.29   | PSR10000601.hg.1 | PFKFB3  |
| TC10000053.hg.1 | 5.77   | PSR10000631.hg.1 | PFKFB3  |
| TC10000053.hg.1 | 5.63   | PSR10000626.hg.1 | PFKFB3  |

|                 |       |                  |        |
|-----------------|-------|------------------|--------|
| TC1000053.hg.1  | 5.45  | JUC10000335.hg.1 | PFKFB3 |
| TC1000053.hg.1  | 5.31  | JUC10000324.hg.1 | PFKFB3 |
| TC1000053.hg.1  | 4.97  | PSR10000611.hg.1 | PFKFB3 |
| TC1000053.hg.1  | 4.11  | JUC10000309.hg.1 | PFKFB3 |
| TC1000053.hg.1  | 3.9   | JUC10000307.hg.1 | PFKFB3 |
| TC1000053.hg.1  | 2.97  | JUC10000323.hg.1 | PFKFB3 |
| TC1000053.hg.1  | 2.77  | JUC10000325.hg.1 | PFKFB3 |
| TC1000053.hg.1  | 2.44  | PSR10000639.hg.1 | PFKFB3 |
| TC1000053.hg.1  | 2.03  | PSR10000638.hg.1 | PFKFB3 |
| TC1000053.hg.1  | 2.02  | JUC10000320.hg.1 | PFKFB3 |
| TC1000053.hg.1  | -2.03 | JUC10000330.hg.1 | PFKFB3 |
| TC1000053.hg.1  | -3.6  | JUC10000304.hg.1 | PFKFB3 |
| TC1000053.hg.1  | -4.09 | JUC10000319.hg.1 | PFKFB3 |
| TC10002924.hg.1 | 19.88 | JUC10016959.hg.1 | AKR1C1 |
| TC10002924.hg.1 | 13.55 | PSR10000320.hg.1 | AKR1C1 |
| TC10002924.hg.1 | 13.09 | PSR10000319.hg.1 | AKR1C1 |
| TC10002924.hg.1 | 12.34 | PSR10000321.hg.1 | AKR1C1 |
| TC10002924.hg.1 | 11.92 | PSR10000318.hg.1 | AKR1C1 |
| TC10002924.hg.1 | 9.98  | JUC10016964.hg.1 | AKR1C1 |
| TC10002924.hg.1 | 6.25  | JUC10016957.hg.1 | AKR1C1 |
| TC10002924.hg.1 | 5.46  | JUC10016970.hg.1 | AKR1C1 |
| TC10002924.hg.1 | 4.64  | PSR10000324.hg.1 | AKR1C1 |
| TC10002924.hg.1 | 4.47  | PSR10000329.hg.1 | AKR1C1 |
| TC10002924.hg.1 | 3.72  | PSR10000334.hg.1 | AKR1C1 |
| TC10002924.hg.1 | 3.5   | PSR10000335.hg.1 | AKR1C1 |
| TC10002924.hg.1 | 3.38  | PSR10000346.hg.1 | AKR1C1 |
| TC10002924.hg.1 | 3.36  | PSR10000338.hg.1 | AKR1C1 |
| TC10002924.hg.1 | 2.75  | JUC10016969.hg.1 | AKR1C1 |
| TC10002924.hg.1 | 2.55  | PSR10000328.hg.1 | AKR1C1 |
| TC10002924.hg.1 | 2.11  | PSR10000322.hg.1 | AKR1C1 |
| TC10002924.hg.1 | -2.28 | PSR10000332.hg.1 | AKR1C1 |
| TC08002613.hg.1 | 19.78 | JUC08015206.hg.1 | LOXL2  |
| TC08002613.hg.1 | 10.35 | JUC08015204.hg.1 | LOXL2  |
| TC08002613.hg.1 | 6.8   | JUC08015186.hg.1 | LOXL2  |
| TC08002613.hg.1 | 5.5   | JUC08015200.hg.1 | LOXL2  |
| TC08002613.hg.1 | 4.85  | JUC08015208.hg.1 | LOXL2  |
| TC08002613.hg.1 | 4.73  | PSR08013437.hg.1 | LOXL2  |
| TC08002613.hg.1 | 4.71  | JUC08015202.hg.1 | LOXL2  |
| TC08002613.hg.1 | 4.2   | PSR08013449.hg.1 | LOXL2  |
| TC08002613.hg.1 | 3.35  | PSR08013420.hg.1 | LOXL2  |
| TC08002613.hg.1 | 3.23  | PSR08013422.hg.1 | LOXL2  |
| TC08002613.hg.1 | 2.83  | PSR08013401.hg.1 | LOXL2  |
| TC08002613.hg.1 | 2.54  | JUC08015201.hg.1 | LOXL2  |
| TC08002613.hg.1 | -2.02 | PSR08013435.hg.1 | LOXL2  |
| TC08002613.hg.1 | -2.08 | JUC08015191.hg.1 | LOXL2  |
| TC08002613.hg.1 | -4.33 | PSR08013421.hg.1 | LOXL2  |
| TC01001427.hg.1 | 19.49 | JUC01011775.hg.1 | RGS4   |
| TC01001427.hg.1 | 9.83  | JUC01011772.hg.1 | RGS4   |
| TC01001427.hg.1 | 4.27  | PSR01022322.hg.1 | RGS4   |
| TC01001427.hg.1 | 3.65  | PSR01022315.hg.1 | RGS4   |
| TC01001427.hg.1 | 3.51  | JUC01011765.hg.1 | RGS4   |
| TC01001427.hg.1 | 2.82  | PSR01022320.hg.1 | RGS4   |
| TC01001427.hg.1 | 2.62  | PSR01022325.hg.1 | RGS4   |
| TC01001427.hg.1 | 2.59  | PSR01022323.hg.1 | RGS4   |
| TC01001427.hg.1 | 2.39  | PSR01022321.hg.1 | RGS4   |
| TC01001427.hg.1 | 2.1   | PSR01022328.hg.1 | RGS4   |
| TC01001427.hg.1 | -2.14 | PSR01022339.hg.1 | RGS4   |
| TC01001427.hg.1 | -2.34 | JUC01011764.hg.1 | RGS4   |



|                 |       |                  |             |
|-----------------|-------|------------------|-------------|
| TC03001370.hg.1 | 19.17 | PSR03023647.hg.1 | SMARCC1     |
| TC03001370.hg.1 | -3.68 | JUC03011797.hg.1 | SMARCC1     |
| TC20000833.hg.1 | 18.83 | JUC20005932.hg.1 | TGM2        |
| TC20000833.hg.1 | 15.75 | JUC20005940.hg.1 | TGM2        |
| TC20000833.hg.1 | 14.11 | PSR20011484.hg.1 | TGM2        |
| TC20000833.hg.1 | 13.14 | PSR20011483.hg.1 | TGM2        |
| TC20000833.hg.1 | 10.59 | PSR20011481.hg.1 | TGM2        |
| TC20000833.hg.1 | 9.41  | PSR20011476.hg.1 | TGM2        |
| TC20000833.hg.1 | 7.4   | PSR20011465.hg.1 | TGM2        |
| TC20000833.hg.1 | 7.31  | JUC20005942.hg.1 | TGM2        |
| TC20000833.hg.1 | 6.88  | JUC20005935.hg.1 | TGM2        |
| TC20000833.hg.1 | 5.29  | PSR20011459.hg.1 | TGM2        |
| TC20000833.hg.1 | 2.85  | JUC20005931.hg.1 | TGM2        |
| TC20000833.hg.1 | 2.22  | JUC20005924.hg.1 | TGM2        |
| TC20000833.hg.1 | 2     | JUC20005941.hg.1 | TGM2        |
| TC20000833.hg.1 | -2.25 | JUC20005927.hg.1 | TGM2        |
| TC20000833.hg.1 | -2.49 | JUC20005930.hg.1 | TGM2        |
| TC20000833.hg.1 | -4.16 | JUC20005925.hg.1 | TGM2        |
| TC06000608.hg.1 | 18.71 | JUC06003213.hg.1 | VEGFA       |
| TC06000608.hg.1 | 13.95 | PSR06007279.hg.1 | VEGFA       |
| TC06000608.hg.1 | 11.74 | PSR06007282.hg.1 | VEGFA       |
| TC06000608.hg.1 | 8.82  | PSR06007285.hg.1 | VEGFA       |
| TC06000608.hg.1 | 8.1   | PSR06007295.hg.1 | VEGFA       |
| TC06000608.hg.1 | 7.79  | PSR06007309.hg.1 | VEGFA       |
| TC06000608.hg.1 | 7.21  | PSR06007290.hg.1 | VEGFA       |
| TC06000608.hg.1 | 7.1   | PSR06007286.hg.1 | VEGFA       |
| TC06000608.hg.1 | 6.18  | JUC06003202.hg.1 | VEGFA       |
| TC06000608.hg.1 | 4.24  | JUC06003203.hg.1 | VEGFA       |
| TC06000608.hg.1 | 4.21  | PSR06007297.hg.1 | VEGFA       |
| TC06000608.hg.1 | 2.87  | PSR06007293.hg.1 | VEGFA       |
| TC06000608.hg.1 | 2.25  | JUC06003210.hg.1 | VEGFA       |
| TC06000608.hg.1 | -2.05 | PSR06007307.hg.1 | VEGFA       |
| TC06000608.hg.1 | -2.23 | JUC06003201.hg.1 | VEGFA       |
| TC06000608.hg.1 | -2.29 | PSR06007313.hg.1 | VEGFA       |
| TC06000608.hg.1 | -2.42 | JUC06003198.hg.1 | VEGFA       |
| TC06000608.hg.1 | -4.32 | PSR06007303.hg.1 | VEGFA       |
| TC06000608.hg.1 | -5.09 | JUC06003199.hg.1 | VEGFA       |
| TC19002613.hg.1 | 18.26 | PSR19021613.hg.1 | PSG4        |
| TC19002613.hg.1 | 16.16 | JUC19017113.hg.1 | PSG4        |
| TC19002613.hg.1 | 15.07 | PSR19021609.hg.1 | PSG4        |
| TC19002613.hg.1 | 14.53 | PSR19021618.hg.1 | PSG4        |
| TC19002613.hg.1 | 12.41 | JUC19017116.hg.1 | PSG4        |
| TC19002613.hg.1 | 11.13 | PSR19021607.hg.1 | PSG4        |
| TC19002613.hg.1 | 10.38 | PSR19021614.hg.1 | PSG4        |
| TC19002613.hg.1 | 6.86  | PSR19021615.hg.1 | PSG4        |
| TC19002613.hg.1 | 5.66  | JUC19017120.hg.1 | PSG4        |
| TC19002613.hg.1 | 4.76  | JUC19017119.hg.1 | PSG4        |
| TC19002613.hg.1 | 2.82  | JUC19017115.hg.1 | PSG4        |
| TC19002613.hg.1 | 2.42  | PSR19021610.hg.1 | PSG4        |
| TC09000253.hg.1 | 18.12 | JUC09001493.hg.1 | CNTNAP3B, C |
| TC09000253.hg.1 | 4.33  | JUC09001475.hg.1 | CNTNAP3B, C |
| TC09000253.hg.1 | 3.9   | PSR09002824.hg.1 | CNTNAP3B, C |
| TC09000253.hg.1 | 3.81  | JUC09001471.hg.1 | CNTNAP3B, C |
| TC09000253.hg.1 | 3.73  | PSR09002825.hg.1 | CNTNAP3B, C |
| TC09000253.hg.1 | 3.6   | PSR09002867.hg.1 | CNTNAP3B, C |
| TC09000253.hg.1 | 3.56  | PSR09002842.hg.1 | CNTNAP3B, C |
| TC09000253.hg.1 | 3.24  | PSR09002837.hg.1 | CNTNAP3B, C |
| TC09000253.hg.1 | 3.17  | JUC09001498.hg.1 | CNTNAP3B, C |

|                  |       |                   |             |
|------------------|-------|-------------------|-------------|
| TC09000253.hg.1  | 2.99  | JUC09001500.hg.1  | CNTNAP3B, C |
| TC09000253.hg.1  | 2.5   | PSR09002853.hg.1  | CNTNAP3B, C |
| TC09000253.hg.1  | 2.4   | PSR09002852.hg.1  | CNTNAP3B, C |
| TC09000253.hg.1  | 2.36  | PSR09002855.hg.1  | CNTNAP3B, C |
| TC09000253.hg.1  | 2.31  | PSR09002828.hg.1  | CNTNAP3B, C |
| TC09000253.hg.1  | 2.27  | JUC09001476.hg.1  | CNTNAP3B, C |
| TC09000253.hg.1  | 2.24  | JUC09001483.hg.1  | CNTNAP3B, C |
| TC09000253.hg.1  | 2.18  | PSR09002850.hg.1  | CNTNAP3B, C |
| TC09000253.hg.1  | 2.17  | PSR09002862.hg.1  | CNTNAP3B, C |
| TC09000253.hg.1  | 2.14  | PSR09002868.hg.1  | CNTNAP3B, C |
| TC09000253.hg.1  | 2.1   | PSR09002840.hg.1  | CNTNAP3B, C |
| TC09000253.hg.1  | 2.01  | PSR09002826.hg.1  | CNTNAP3B, C |
| TC09000253.hg.1  | 2     | PSR09002857.hg.1  | CNTNAP3B, C |
| TC09000253.hg.1  | -2.21 | PSR09002831.hg.1  | CNTNAP3B, C |
| TC09000253.hg.1  | -2.31 | JUC09001482.hg.1  | CNTNAP3B, C |
| TC09000253.hg.1  | -2.68 | PSR09002833.hg.1  | CNTNAP3B, C |
| TC09000253.hg.1  | -3.65 | JUC09001499.hg.1  | CNTNAP3B, C |
| TC09000253.hg.1  | -3.95 | JUC09001484.hg.1  | CNTNAP3B, C |
| TC6_qbl_hap60002 | 17.91 | PSR6_qbl_hap60002 | HLA-A       |
| TC6_qbl_hap60002 | 3.76  | PSR6_qbl_hap60002 | HLA-A       |
| TC6_qbl_hap60002 | 2.72  | PSR6_qbl_hap60002 | HLA-A       |
| TC6_qbl_hap60002 | 2.23  | JUC6_qbl_hap60018 | HLA-A       |
| TC6_qbl_hap60002 | -2.05 | PSR6_qbl_hap60002 | HLA-A       |
| TC6_qbl_hap60002 | -2.61 | JUC6_qbl_hap60018 | HLA-A       |
| TC6_qbl_hap60002 | -5.13 | JUC6_qbl_hap60018 | HLA-A       |
| TC05001900.hg.1  | 17.6  | JUC05013360.hg.1  | LARS        |
| TC05001900.hg.1  | -2    | JUC05013374.hg.1  | LARS        |
| TC05001900.hg.1  | -2.04 | PSR05026207.hg.1  | LARS        |
| TC05001900.hg.1  | -2.29 | JUC05013399.hg.1  | LARS        |
| TC05001900.hg.1  | -2.46 | JUC05013366.hg.1  | LARS        |
| TC05001900.hg.1  | -3.9  | PSR05026192.hg.1  | LARS        |
| TC01006319.hg.1  | 17.48 | PSR01007334.hg.1  | SH3D21      |
| TC01006319.hg.1  | 3.98  | PSR01007333.hg.1  | SH3D21      |
| TC01006319.hg.1  | 3.77  | PSR01007304.hg.1  | SH3D21      |
| TC01006319.hg.1  | 3.49  | JUC01043939.hg.1  | SH3D21      |
| TC01006319.hg.1  | 2.88  | PSR01007303.hg.1  | SH3D21      |
| TC01006319.hg.1  | 2.78  | JUC01043945.hg.1  | SH3D21      |
| TC01006319.hg.1  | 2.54  | JUC01043934.hg.1  | SH3D21      |
| TC01006319.hg.1  | 2.44  | PSR01007328.hg.1  | SH3D21      |
| TC01006319.hg.1  | 2.24  | PSR01007326.hg.1  | SH3D21      |
| TC01006319.hg.1  | 2.21  | PSR01007330.hg.1  | SH3D21      |
| TC01006319.hg.1  | 2.09  | PSR01007329.hg.1  | SH3D21      |
| TC01006319.hg.1  | -2.8  | JUC01043937.hg.1  | SH3D21      |
| TC01006319.hg.1  | -2.9  | PSR01007315.hg.1  | SH3D21      |
| TC01006319.hg.1  | -3.06 | JUC01043930.hg.1  | SH3D21      |
| TC10001030.hg.1  | 17.3  | PSR10012789.hg.1  | SFTA1P      |
| TC10001030.hg.1  | 4.47  | PSR10012796.hg.1  | SFTA1P      |
| TC10001030.hg.1  | 3.17  | PSR10012792.hg.1  | SFTA1P      |
| TC10001030.hg.1  | 2.22  | JUC10007406.hg.1  | SFTA1P      |
| TC10001030.hg.1  | -3.17 | JUC10007402.hg.1  | SFTA1P      |
| TC10001030.hg.1  | -3.95 | PSR10012794.hg.1  | SFTA1P      |
| TC12000406.hg.1  | 17.2  | JUC12002822.hg.1  | SLC4A8      |
| TC12000406.hg.1  | 5.5   | JUC12002820.hg.1  | SLC4A8      |
| TC12000406.hg.1  | 4.45  | JUC12002829.hg.1  | SLC4A8      |
| TC12000406.hg.1  | 3.5   | PSR12005113.hg.1  | SLC4A8      |
| TC12000406.hg.1  | 3.3   | PSR12005107.hg.1  | SLC4A8      |
| TC12000406.hg.1  | 2.47  | PSR12005105.hg.1  | SLC4A8      |
| TC12000406.hg.1  | 2.42  | PSR12005109.hg.1  | SLC4A8      |

|                 |       |                  |        |
|-----------------|-------|------------------|--------|
| TC12000406.hg.1 | 2.37  | PSR12005104.hg.1 | SLC4A8 |
| TC12000406.hg.1 | 2.36  | PSR12005108.hg.1 | SLC4A8 |
| TC12000406.hg.1 | 2.34  | JUC12002837.hg.1 | SLC4A8 |
| TC12000406.hg.1 | 2.31  | PSR12005117.hg.1 | SLC4A8 |
| TC12000406.hg.1 | 2.3   | PSR12005138.hg.1 | SLC4A8 |
| TC12000406.hg.1 | 2.26  | PSR12005114.hg.1 | SLC4A8 |
| TC12000406.hg.1 | 2.23  | PSR12005100.hg.1 | SLC4A8 |
| TC12000406.hg.1 | 2.13  | PSR12005101.hg.1 | SLC4A8 |
| TC12000406.hg.1 | 2.13  | PSR12005110.hg.1 | SLC4A8 |
| TC12000406.hg.1 | 2.09  | PSR12005102.hg.1 | SLC4A8 |
| TC12000406.hg.1 | -2.06 | JUC12002835.hg.1 | SLC4A8 |
| TC12000406.hg.1 | -2.45 | JUC12002826.hg.1 | SLC4A8 |
| TC12000406.hg.1 | -4.24 | JUC12002811.hg.1 | SLC4A8 |
| TC01001710.hg.1 | 16.41 | JUC01014286.hg.1 | CDK18  |
| TC01001710.hg.1 | 15.53 | JUC01014300.hg.1 | CDK18  |
| TC01001710.hg.1 | 13.94 | JUC01014291.hg.1 | CDK18  |
| TC01001710.hg.1 | 12.2  | JUC01014289.hg.1 | CDK18  |
| TC01001710.hg.1 | 12.17 | JUC01014310.hg.1 | CDK18  |
| TC01001710.hg.1 | 11.93 | PSR01026626.hg.1 | CDK18  |
| TC01001710.hg.1 | 9.7   | PSR01026639.hg.1 | CDK18  |
| TC01001710.hg.1 | 9.58  | JUC01014307.hg.1 | CDK18  |
| TC01001710.hg.1 | 9.08  | PSR01026631.hg.1 | CDK18  |
| TC01001710.hg.1 | 8.55  | PSR01026666.hg.1 | CDK18  |
| TC01001710.hg.1 | 8.18  | PSR01026655.hg.1 | CDK18  |
| TC01001710.hg.1 | 7.91  | PSR01026632.hg.1 | CDK18  |
| TC01001710.hg.1 | 7.83  | PSR01026680.hg.1 | CDK18  |
| TC01001710.hg.1 | 7.46  | PSR01026685.hg.1 | CDK18  |
| TC01001710.hg.1 | 6.81  | PSR01026677.hg.1 | CDK18  |
| TC01001710.hg.1 | 6.61  | PSR01026654.hg.1 | CDK18  |
| TC01001710.hg.1 | 6.52  | PSR01026694.hg.1 | CDK18  |
| TC01001710.hg.1 | 6.21  | PSR01026690.hg.1 | CDK18  |
| TC01001710.hg.1 | 6.01  | PSR01026670.hg.1 | CDK18  |
| TC01001710.hg.1 | 5.72  | PSR01026645.hg.1 | CDK18  |
| TC01001710.hg.1 | 5.69  | PSR01026683.hg.1 | CDK18  |
| TC01001710.hg.1 | 5.44  | JUC01014311.hg.1 | CDK18  |
| TC01001710.hg.1 | 5.39  | JUC01014295.hg.1 | CDK18  |
| TC01001710.hg.1 | 5.17  | PSR01026678.hg.1 | CDK18  |
| TC01001710.hg.1 | 5     | JUC01014287.hg.1 | CDK18  |
| TC01001710.hg.1 | 4.82  | PSR01026658.hg.1 | CDK18  |
| TC01001710.hg.1 | 4.24  | PSR01026636.hg.1 | CDK18  |
| TC01001710.hg.1 | 4.14  | JUC01014305.hg.1 | CDK18  |
| TC01001710.hg.1 | 3.6   | PSR01026641.hg.1 | CDK18  |
| TC01001710.hg.1 | 3.35  | PSR01026696.hg.1 | CDK18  |
| TC01001710.hg.1 | 3.08  | PSR01026671.hg.1 | CDK18  |
| TC01001710.hg.1 | 3.02  | PSR01026644.hg.1 | CDK18  |
| TC01001710.hg.1 | 2.83  | PSR01026643.hg.1 | CDK18  |
| TC01001710.hg.1 | 2.32  | JUC01014283.hg.1 | CDK18  |
| TC01001710.hg.1 | 2.28  | JUC01014285.hg.1 | CDK18  |
| TC01001710.hg.1 | 2.25  | JUC01014297.hg.1 | CDK18  |
| TC01001710.hg.1 | 2.01  | PSR01026651.hg.1 | CDK18  |
| TC01001710.hg.1 | -2.19 | PSR01026665.hg.1 | CDK18  |
| TC01001710.hg.1 | -2.33 | JUC01014298.hg.1 | CDK18  |
| TC01001710.hg.1 | -2.62 | PSR01026667.hg.1 | CDK18  |
| TC01001710.hg.1 | -2.71 | PSR01026646.hg.1 | CDK18  |
| TC01001710.hg.1 | -2.75 | JUC01014308.hg.1 | CDK18  |
| TC01001710.hg.1 | -3.04 | PSR01026692.hg.1 | CDK18  |
| TC01001710.hg.1 | -3.05 | PSR01026702.hg.1 | CDK18  |
| TC01001710.hg.1 | -3.12 | JUC01014296.hg.1 | CDK18  |

|                 |       |                   |            |
|-----------------|-------|-------------------|------------|
| TC01001710.hg.1 | -3.74 | PSR01026647.hg.1  | CDK18      |
| TC01001710.hg.1 | -4.06 | JUC01014294.hg.1  | CDK18      |
| TC01001710.hg.1 | -7.64 | PSR01026662.hg.1  | CDK18      |
| TC01001710.hg.1 | -8.51 | JUC01014302.hg.1  | CDK18      |
| TC06001029.hg.1 | 16.4  | JUC06005887.hg.1  | KIAA1244   |
| TC06001029.hg.1 | 7.54  | PSR06012058.hg.1  | KIAA1244   |
| TC06001029.hg.1 | 6.31  | JUC06005875.hg.1  | KIAA1244   |
| TC06001029.hg.1 | 5.15  | JUC06005888.hg.1  | KIAA1244   |
| TC06001029.hg.1 | 4.75  | JUC06005896.hg.1  | KIAA1244   |
| TC06001029.hg.1 | 4.21  | JUC06005866.hg.1  | KIAA1244   |
| TC06001029.hg.1 | 3.45  | PSR06012056.hg.1  | KIAA1244   |
| TC06001029.hg.1 | 3.35  | PSR06012055.hg.1  | KIAA1244   |
| TC06001029.hg.1 | 2.33  | PSR06012057.hg.1  | KIAA1244   |
| TC06001029.hg.1 | 2     | PSR06012060.hg.1  | KIAA1244   |
| TC06001029.hg.1 | -2.01 | JUC06005869.hg.1  | KIAA1244   |
| TC06001029.hg.1 | -2.07 | JUC06005899.hg.1  | KIAA1244   |
| TC06001029.hg.1 | -2.12 | PSR06012076.hg.1  | KIAA1244   |
| TC06001029.hg.1 | -2.18 | PSR06012043.hg.1  | KIAA1244   |
| TC06001029.hg.1 | -2.41 | PSR06012066.hg.1  | KIAA1244   |
| TC06001029.hg.1 | -2.54 | JUC06005895.hg.1  | KIAA1244   |
| TC06001029.hg.1 | -2.58 | JUC06005878.hg.1  | KIAA1244   |
| TC06001029.hg.1 | -2.65 | JUC06005871.hg.1  | KIAA1244   |
| TC06001029.hg.1 | -2.74 | PSR06012063.hg.1  | KIAA1244   |
| TC06001029.hg.1 | -2.85 | JUC06005873.hg.1  | KIAA1244   |
| TC06001029.hg.1 | -2.88 | JUC06005876.hg.1  | KIAA1244   |
| TC06001029.hg.1 | -3.01 | PSR06012061.hg.1  | KIAA1244   |
| TC06001029.hg.1 | -3.05 | JUC06005868.hg.1  | KIAA1244   |
| TC06001029.hg.1 | -3.55 | PSR06012077.hg.1  | KIAA1244   |
| TC06001029.hg.1 | -3.58 | JUC06005894.hg.1  | KIAA1244   |
| TC06001029.hg.1 | -3.76 | JUC06005885.hg.1  | KIAA1244   |
| TC06001029.hg.1 | -3.87 | JUC06005892.hg.1  | KIAA1244   |
| TC06001029.hg.1 | -4.36 | JUC06005877.hg.1  | KIAA1244   |
| TC09002932.hg.1 | 16.2  | JUC09016215.hg.1  | ANKRD20A1, |
| TC09002932.hg.1 | 2.37  | PSR09003017.hg.1  | ANKRD20A1, |
| TC09002932.hg.1 | 2.3   | JUC09016214.hg.1  | ANKRD20A1, |
| TC09002932.hg.1 | 2.19  | JUC09016225.hg.1  | ANKRD20A1, |
| TC09002932.hg.1 | -2.37 | JUC09016222.hg.1  | ANKRD20A1, |
| TC6_cox_hap2000 | 16.15 | JUC6_cox_hap20020 | CFB        |
| TC6_cox_hap2000 | 14.43 | PSR6_cox_hap2001  | CFB        |
| TC6_cox_hap2000 | 13.4  | PSR6_cox_hap2001  | CFB        |
| TC6_cox_hap2000 | 12.99 | PSR6_cox_hap2001  | CFB        |
| TC6_cox_hap2000 | 12.23 | PSR6_cox_hap2001  | CFB        |
| TC6_cox_hap2000 | 11.75 | PSR6_cox_hap2001  | CFB        |
| TC6_cox_hap2000 | 10.73 | PSR6_cox_hap2001  | CFB        |
| TC6_cox_hap2000 | 7.56  | PSR6_cox_hap2001  | CFB        |
| TC6_cox_hap2000 | 6.81  | PSR6_cox_hap2001  | CFB        |
| TC6_cox_hap2000 | 5.66  | PSR6_cox_hap2001  | CFB        |
| TC6_cox_hap2000 | 5.64  | PSR6_cox_hap2001  | CFB        |
| TC6_cox_hap2000 | 5.35  | PSR6_cox_hap2001  | CFB        |
| TC6_cox_hap2000 | 4.07  | PSR6_cox_hap2001  | CFB        |
| TC6_cox_hap2000 | 3.93  | PSR6_cox_hap2001  | CFB        |
| TC6_cox_hap2000 | 3.38  | PSR6_cox_hap2001  | CFB        |
| TC6_cox_hap2000 | 3.31  | PSR6_cox_hap2001  | CFB        |
| TC6_cox_hap2000 | 2.99  | PSR6_cox_hap2001  | CFB        |
| TC6_cox_hap2000 | 2.87  | JUC6_cox_hap20020 | CFB        |
| TC6_cox_hap2000 | 2.8   | PSR6_cox_hap2001  | CFB        |
| TC6_cox_hap2000 | 2.65  | PSR6_cox_hap2001  | CFB        |
| TC6_cox_hap2000 | 2.52  | PSR6_cox_hap2001  | CFB        |

|                  |       |                   |     |
|------------------|-------|-------------------|-----|
| TC6_cox_hap2000  | 2.32  | JUC6_cox_hap20020 | CFB |
| TC6_cox_hap2000  | 2.01  | JUC6_cox_hap20020 | CFB |
| TC6_cox_hap2000  | -2.46 | JUC6_cox_hap20019 | CFB |
| TC6_dbb_hap3000  | 16.15 | JUC6_dbb_hap30017 | CFB |
| TC6_dbb_hap3000  | 14.43 | PSR6_dbb_hap30017 | CFB |
| TC6_dbb_hap3000  | 13.4  | PSR6_dbb_hap30017 | CFB |
| TC6_dbb_hap3000  | 12.99 | PSR6_dbb_hap30017 | CFB |
| TC6_dbb_hap3000  | 12.23 | PSR6_dbb_hap30017 | CFB |
| TC6_dbb_hap3000  | 11.14 | PSR6_dbb_hap30017 | CFB |
| TC6_dbb_hap3000  | 10.73 | PSR6_dbb_hap30017 | CFB |
| TC6_dbb_hap3000  | 7.56  | PSR6_dbb_hap30017 | CFB |
| TC6_dbb_hap3000  | 6.81  | PSR6_dbb_hap30017 | CFB |
| TC6_dbb_hap3000  | 5.66  | PSR6_dbb_hap30017 | CFB |
| TC6_dbb_hap3000  | 5.64  | PSR6_dbb_hap30017 | CFB |
| TC6_dbb_hap3000  | 5.35  | PSR6_dbb_hap30017 | CFB |
| TC6_dbb_hap3000  | 4.07  | PSR6_dbb_hap30017 | CFB |
| TC6_dbb_hap3000  | 3.93  | PSR6_dbb_hap30017 | CFB |
| TC6_dbb_hap3000  | 3.38  | PSR6_dbb_hap30017 | CFB |
| TC6_dbb_hap3000  | 3.31  | PSR6_dbb_hap30017 | CFB |
| TC6_dbb_hap3000  | 2.99  | PSR6_dbb_hap30017 | CFB |
| TC6_dbb_hap3000  | 2.87  | JUC6_dbb_hap30018 | CFB |
| TC6_dbb_hap3000  | 2.8   | PSR6_dbb_hap30017 | CFB |
| TC6_dbb_hap3000  | 2.65  | PSR6_dbb_hap30017 | CFB |
| TC6_dbb_hap3000  | 2.52  | PSR6_dbb_hap30017 | CFB |
| TC6_dbb_hap3000  | 2.32  | JUC6_dbb_hap30017 | CFB |
| TC6_dbb_hap3000  | 2.01  | JUC6_dbb_hap30017 | CFB |
| TC6_dbb_hap3000  | -2.46 | JUC6_dbb_hap30017 | CFB |
| TC6_mcf_hap5000  | 16.15 | JUC6_mcf_hap50018 | CFB |
| TC6_mcf_hap5000  | 14.43 | PSR6_mcf_hap50017 | CFB |
| TC6_mcf_hap5000  | 13.4  | PSR6_mcf_hap50017 | CFB |
| TC6_mcf_hap5000  | 12.99 | PSR6_mcf_hap50017 | CFB |
| TC6_mcf_hap5000  | 12.23 | PSR6_mcf_hap50017 | CFB |
| TC6_mcf_hap5000  | 11.14 | PSR6_mcf_hap50017 | CFB |
| TC6_mcf_hap5000  | 10.73 | PSR6_mcf_hap50017 | CFB |
| TC6_mcf_hap5000  | 8.04  | PSR6_mcf_hap50017 | CFB |
| TC6_mcf_hap5000  | 7.56  | PSR6_mcf_hap50017 | CFB |
| TC6_mcf_hap5000  | 6.81  | PSR6_mcf_hap50017 | CFB |
| TC6_mcf_hap5000  | 5.66  | PSR6_mcf_hap50017 | CFB |
| TC6_mcf_hap5000  | 5.64  | PSR6_mcf_hap50017 | CFB |
| TC6_mcf_hap5000  | 5.35  | PSR6_mcf_hap50017 | CFB |
| TC6_mcf_hap5000  | 4.07  | PSR6_mcf_hap50017 | CFB |
| TC6_mcf_hap5000  | 3.93  | PSR6_mcf_hap50017 | CFB |
| TC6_mcf_hap5000  | 3.38  | PSR6_mcf_hap50017 | CFB |
| TC6_mcf_hap5000  | 3.31  | PSR6_mcf_hap50017 | CFB |
| TC6_mcf_hap5000  | 2.99  | PSR6_mcf_hap50017 | CFB |
| TC6_mcf_hap5000  | 2.87  | JUC6_mcf_hap50018 | CFB |
| TC6_mcf_hap5000  | 2.8   | PSR6_mcf_hap50017 | CFB |
| TC6_mcf_hap5000  | 2.65  | PSR6_mcf_hap50017 | CFB |
| TC6_mcf_hap5000  | 2.52  | PSR6_mcf_hap50017 | CFB |
| TC6_mcf_hap5000  | 2.32  | JUC6_mcf_hap50018 | CFB |
| TC6_mcf_hap5000  | 2.01  | JUC6_mcf_hap50018 | CFB |
| TC6_mcf_hap5000  | -2.46 | JUC6_mcf_hap50018 | CFB |
| TC6_qbl_hap6000z | 16.15 | JUC6_qbl_hap60019 | CFB |
| TC6_qbl_hap6000z | 14.43 | PSR6_qbl_hap60013 | CFB |
| TC6_qbl_hap6000z | 13.4  | PSR6_qbl_hap60013 | CFB |
| TC6_qbl_hap6000z | 12.99 | PSR6_qbl_hap60013 | CFB |
| TC6_qbl_hap6000z | 12.23 | PSR6_qbl_hap60013 | CFB |
| TC6_qbl_hap6000z | 11.14 | PSR6_qbl_hap60014 | CFB |

|                  |       |                   |       |
|------------------|-------|-------------------|-------|
| TC6_qbl_hap60002 | 10.73 | PSR6_qbl_hap60013 | CFB   |
| TC6_qbl_hap60002 | 7.56  | PSR6_qbl_hap60013 | CFB   |
| TC6_qbl_hap60002 | 6.81  | PSR6_qbl_hap60013 | CFB   |
| TC6_qbl_hap60002 | 5.66  | PSR6_qbl_hap60013 | CFB   |
| TC6_qbl_hap60002 | 5.64  | PSR6_qbl_hap60013 | CFB   |
| TC6_qbl_hap60002 | 5.35  | PSR6_qbl_hap60013 | CFB   |
| TC6_qbl_hap60002 | 4.07  | PSR6_qbl_hap60013 | CFB   |
| TC6_qbl_hap60002 | 3.93  | PSR6_qbl_hap60013 | CFB   |
| TC6_qbl_hap60002 | 3.38  | PSR6_qbl_hap60013 | CFB   |
| TC6_qbl_hap60002 | 3.31  | PSR6_qbl_hap60013 | CFB   |
| TC6_qbl_hap60002 | 2.99  | PSR6_qbl_hap60013 | CFB   |
| TC6_qbl_hap60002 | 2.87  | JUC6_qbl_hap60019 | CFB   |
| TC6_qbl_hap60002 | 2.8   | PSR6_qbl_hap60013 | CFB   |
| TC6_qbl_hap60002 | 2.65  | PSR6_qbl_hap60013 | CFB   |
| TC6_qbl_hap60002 | 2.52  | PSR6_qbl_hap60013 | CFB   |
| TC6_qbl_hap60002 | 2.32  | JUC6_qbl_hap60019 | CFB   |
| TC6_qbl_hap60002 | 2.01  | JUC6_qbl_hap60019 | CFB   |
| TC6_qbl_hap60002 | -2.46 | JUC6_qbl_hap60019 | CFB   |
| TC6_ssto_hap7000 | 16.15 | JUC6_ssto_hap7001 | CFB   |
| TC6_ssto_hap7000 | 14.43 | PSR6_ssto_hap7001 | CFB   |
| TC6_ssto_hap7000 | 13.4  | PSR6_ssto_hap7001 | CFB   |
| TC6_ssto_hap7000 | 12.99 | PSR6_ssto_hap7001 | CFB   |
| TC6_ssto_hap7000 | 12.23 | PSR6_ssto_hap7001 | CFB   |
| TC6_ssto_hap7000 | 11.14 | PSR6_ssto_hap7001 | CFB   |
| TC6_ssto_hap7000 | 10.73 | PSR6_ssto_hap7001 | CFB   |
| TC6_ssto_hap7000 | 8.04  | PSR6_ssto_hap7001 | CFB   |
| TC6_ssto_hap7000 | 7.56  | PSR6_ssto_hap7001 | CFB   |
| TC6_ssto_hap7000 | 6.81  | PSR6_ssto_hap7001 | CFB   |
| TC6_ssto_hap7000 | 5.66  | PSR6_ssto_hap7001 | CFB   |
| TC6_ssto_hap7000 | 5.64  | PSR6_ssto_hap7001 | CFB   |
| TC6_ssto_hap7000 | 5.35  | PSR6_ssto_hap7001 | CFB   |
| TC6_ssto_hap7000 | 4.07  | PSR6_ssto_hap7001 | CFB   |
| TC6_ssto_hap7000 | 3.93  | PSR6_ssto_hap7001 | CFB   |
| TC6_ssto_hap7000 | 3.38  | PSR6_ssto_hap7001 | CFB   |
| TC6_ssto_hap7000 | 3.31  | PSR6_ssto_hap7001 | CFB   |
| TC6_ssto_hap7000 | 2.99  | PSR6_ssto_hap7001 | CFB   |
| TC6_ssto_hap7000 | 2.87  | JUC6_ssto_hap7001 | CFB   |
| TC6_ssto_hap7000 | 2.8   | PSR6_ssto_hap7001 | CFB   |
| TC6_ssto_hap7000 | 2.65  | PSR6_ssto_hap7001 | CFB   |
| TC6_ssto_hap7000 | 2.52  | PSR6_ssto_hap7001 | CFB   |
| TC6_ssto_hap7000 | 2.32  | JUC6_ssto_hap7001 | CFB   |
| TC6_ssto_hap7000 | 2.01  | JUC6_ssto_hap7001 | CFB   |
| TC6_ssto_hap7000 | -2.46 | JUC6_ssto_hap7001 | CFB   |
| TC15000930.hg.1  | 15.75 | JUC15004593.hg.1  | MCTP2 |
| TC15000930.hg.1  | 2.19  | PSR15008655.hg.1  | MCTP2 |
| TC15001541.hg.1  | 15.73 | JUC15007849.hg.1  | CA12  |
| TC15001541.hg.1  | 10.99 | PSR15014514.hg.1  | CA12  |
| TC15001541.hg.1  | 10.68 | PSR15014515.hg.1  | CA12  |
| TC15001541.hg.1  | 9.57  | PSR15014492.hg.1  | CA12  |
| TC15001541.hg.1  | 4.54  | PSR15014511.hg.1  | CA12  |
| TC15001541.hg.1  | 4.36  | JUC15007842.hg.1  | CA12  |
| TC15001541.hg.1  | 3.67  | PSR15014503.hg.1  | CA12  |
| TC15001541.hg.1  | 3.65  | PSR15014502.hg.1  | CA12  |
| TC15001541.hg.1  | 3.07  | JUC15007843.hg.1  | CA12  |
| TC15001541.hg.1  | 2.32  | JUC15007840.hg.1  | CA12  |
| TC15001541.hg.1  | -3.17 | JUC15007846.hg.1  | CA12  |
| TC15001541.hg.1  | -3.65 | JUC15007839.hg.1  | CA12  |
| TC11001589.hg.1  | 15.57 | JUC11010566.hg.1  | CHST1 |

|                 |       |                  |        |
|-----------------|-------|------------------|--------|
| TC11001589.hg.1 | 3.67  | PSR11019775.hg.1 | CHST1  |
| TC11001589.hg.1 | 3.35  | PSR11019785.hg.1 | CHST1  |
| TC11001589.hg.1 | 3.35  | PSR11019787.hg.1 | CHST1  |
| TC11001589.hg.1 | 3.07  | JUC11010567.hg.1 | CHST1  |
| TC11001589.hg.1 | 3.04  | JUC11010564.hg.1 | CHST1  |
| TC11001589.hg.1 | 2.59  | PSR11019786.hg.1 | CHST1  |
| TC11001589.hg.1 | 2.5   | JUC11010563.hg.1 | CHST1  |
| TC11001589.hg.1 | 2.46  | PSR11019773.hg.1 | CHST1  |
| TC11001589.hg.1 | -2.06 | PSR11019784.hg.1 | CHST1  |
| TC03000716.hg.1 | 15.38 | JUC03006529.hg.1 | CCRL1  |
| TC03000716.hg.1 | 14.11 | PSR03012884.hg.1 | CCRL1  |
| TC03000716.hg.1 | 7.45  | PSR03012883.hg.1 | CCRL1  |
| TC03000716.hg.1 | 2.59  | JUC03006527.hg.1 | CCRL1  |
| TC03000716.hg.1 | -2.17 | PSR03012890.hg.1 | CCRL1  |
| TC03000716.hg.1 | -2.26 | PSR03012886.hg.1 | CCRL1  |
| TC02002143.hg.1 | 15.28 | JUC02018085.hg.1 | TBC1D8 |
| TC02002143.hg.1 | 8.64  | PSR02035035.hg.1 | TBC1D8 |
| TC02002143.hg.1 | 8.55  | JUC02018071.hg.1 | TBC1D8 |
| TC02002143.hg.1 | 8.11  | PSR02035037.hg.1 | TBC1D8 |
| TC02002143.hg.1 | 7.76  | JUC02018062.hg.1 | TBC1D8 |
| TC02002143.hg.1 | 6.19  | PSR02035040.hg.1 | TBC1D8 |
| TC02002143.hg.1 | 5.93  | PSR02035042.hg.1 | TBC1D8 |
| TC02002143.hg.1 | 5.68  | PSR02035027.hg.1 | TBC1D8 |
| TC02002143.hg.1 | 5.6   | JUC02018077.hg.1 | TBC1D8 |
| TC02002143.hg.1 | 5.58  | PSR02035039.hg.1 | TBC1D8 |
| TC02002143.hg.1 | 5.48  | PSR02035036.hg.1 | TBC1D8 |
| TC02002143.hg.1 | 5.33  | PSR02035015.hg.1 | TBC1D8 |
| TC02002143.hg.1 | 5.22  | PSR02035041.hg.1 | TBC1D8 |
| TC02002143.hg.1 | 4.71  | PSR02035033.hg.1 | TBC1D8 |
| TC02002143.hg.1 | 4.49  | JUC02018078.hg.1 | TBC1D8 |
| TC02002143.hg.1 | 4.23  | JUC02018068.hg.1 | TBC1D8 |
| TC02002143.hg.1 | 3.88  | PSR02035013.hg.1 | TBC1D8 |
| TC02002143.hg.1 | 3.84  | PSR02035002.hg.1 | TBC1D8 |
| TC02002143.hg.1 | 3.53  | PSR02035026.hg.1 | TBC1D8 |
| TC02002143.hg.1 | 3.35  | PSR02035019.hg.1 | TBC1D8 |
| TC02002143.hg.1 | 3.33  | PSR02035004.hg.1 | TBC1D8 |
| TC02002143.hg.1 | 3.04  | PSR02035025.hg.1 | TBC1D8 |
| TC02002143.hg.1 | 2.91  | PSR02035012.hg.1 | TBC1D8 |
| TC02002143.hg.1 | 2.74  | JUC02018079.hg.1 | TBC1D8 |
| TC02002143.hg.1 | 2.67  | JUC02018076.hg.1 | TBC1D8 |
| TC02002143.hg.1 | 2.25  | PSR02035007.hg.1 | TBC1D8 |
| TC02002143.hg.1 | 2.25  | PSR02035017.hg.1 | TBC1D8 |
| TC02002143.hg.1 | 2.2   | JUC02018083.hg.1 | TBC1D8 |
| TC02002143.hg.1 | 2.05  | PSR02035016.hg.1 | TBC1D8 |
| TC02002143.hg.1 | -2.01 | JUC02018070.hg.1 | TBC1D8 |
| TC02002143.hg.1 | -2.05 | JUC02018074.hg.1 | TBC1D8 |
| TC02002143.hg.1 | -2.51 | JUC02018088.hg.1 | TBC1D8 |
| TC07000220.hg.1 | 15.03 | JUC07001632.hg.1 | BMPER  |
| TC07000220.hg.1 | 7.58  | PSR07003442.hg.1 | BMPER  |
| TC07000220.hg.1 | 6.33  | JUC07001633.hg.1 | BMPER  |
| TC07000220.hg.1 | 6.32  | PSR07003465.hg.1 | BMPER  |
| TC07000220.hg.1 | 5.17  | JUC07001637.hg.1 | BMPER  |
| TC07000220.hg.1 | 4.93  | PSR07003471.hg.1 | BMPER  |
| TC07000220.hg.1 | 3.36  | PSR07003452.hg.1 | BMPER  |
| TC07000220.hg.1 | 2.8   | JUC07001641.hg.1 | BMPER  |
| TC07000220.hg.1 | 2.78  | PSR07003459.hg.1 | BMPER  |
| TC07000220.hg.1 | 2.76  | JUC07001640.hg.1 | BMPER  |
| TC07000220.hg.1 | 2.46  | PSR07003448.hg.1 | BMPER  |

|                 |       |                  |        |
|-----------------|-------|------------------|--------|
| TC07000220.hg.1 | -2.09 | PSR07003460.hg.1 | BMPER  |
| TC07000220.hg.1 | -2.5  | JUC07001630.hg.1 | BMPER  |
| TC07000220.hg.1 | -2.72 | PSR07003464.hg.1 | BMPER  |
| TC07000220.hg.1 | -2.76 | JUC07001627.hg.1 | BMPER  |
| TC07000220.hg.1 | -3.54 | JUC07001634.hg.1 | BMPER  |
| TC01001030.hg.1 | 14.85 | JUC01008564.hg.1 | FAM46C |
| TC01001030.hg.1 | 14.85 | JUC01008566.hg.1 | FAM46C |
| TC01001030.hg.1 | 3.2   | PSR01016356.hg.1 | FAM46C |
| TC01001030.hg.1 | 2.9   | PSR01016353.hg.1 | FAM46C |
| TC01001030.hg.1 | 2.29  | PSR01016355.hg.1 | FAM46C |
| TC01001030.hg.1 | 2.17  | JUC01008565.hg.1 | FAM46C |
| TC07001751.hg.1 | 14.77 | JUC07013421.hg.1 | NRCAM  |
| TC07001751.hg.1 | 3.64  | JUC07013464.hg.1 | NRCAM  |
| TC07001751.hg.1 | 2.89  | JUC07013434.hg.1 | NRCAM  |
| TC07001751.hg.1 | 2.82  | JUC07013432.hg.1 | NRCAM  |
| TC07001751.hg.1 | 2.45  | JUC07013451.hg.1 | NRCAM  |
| TC07001751.hg.1 | 2.41  | JUC07013462.hg.1 | NRCAM  |
| TC07001751.hg.1 | 2.31  | JUC07013424.hg.1 | NRCAM  |
| TC07001751.hg.1 | 2.28  | PSR07027358.hg.1 | NRCAM  |
| TC07001751.hg.1 | 2.14  | PSR07027362.hg.1 | NRCAM  |
| TC07001751.hg.1 | 2.06  | PSR07027301.hg.1 | NRCAM  |
| TC07001751.hg.1 | 2.05  | JUC07013445.hg.1 | NRCAM  |
| TC07001751.hg.1 | -2.06 | JUC07013420.hg.1 | NRCAM  |
| TC07001751.hg.1 | -2.17 | JUC07013422.hg.1 | NRCAM  |
| TC07001751.hg.1 | -2.22 | PSR07027367.hg.1 | NRCAM  |
| TC07001751.hg.1 | -2.24 | PSR07027336.hg.1 | NRCAM  |
| TC07001751.hg.1 | -2.28 | PSR07027330.hg.1 | NRCAM  |
| TC07001751.hg.1 | -2.3  | PSR07027295.hg.1 | NRCAM  |
| TC07001751.hg.1 | -2.33 | PSR07027331.hg.1 | NRCAM  |
| TC07001751.hg.1 | -2.42 | JUC07013469.hg.1 | NRCAM  |
| TC07001751.hg.1 | -2.46 | PSR07027335.hg.1 | NRCAM  |
| TC07001751.hg.1 | -2.52 | PSR07027329.hg.1 | NRCAM  |
| TC07001751.hg.1 | -2.67 | PSR07027312.hg.1 | NRCAM  |
| TC07001751.hg.1 | -2.73 | PSR07027372.hg.1 | NRCAM  |
| TC07001751.hg.1 | -2.82 | PSR07027296.hg.1 | NRCAM  |
| TC07001751.hg.1 | -2.82 | JUC07013435.hg.1 | NRCAM  |
| TC07001751.hg.1 | -2.94 | PSR07027365.hg.1 | NRCAM  |
| TC07001751.hg.1 | -3.1  | JUC07013449.hg.1 | NRCAM  |
| TC07001751.hg.1 | -3.15 | PSR07027317.hg.1 | NRCAM  |
| TC07001751.hg.1 | -3.15 | PSR07027369.hg.1 | NRCAM  |
| TC07001751.hg.1 | -3.16 | PSR07027332.hg.1 | NRCAM  |
| TC07001751.hg.1 | -3.35 | JUC07013417.hg.1 | NRCAM  |
| TC07001751.hg.1 | -3.64 | JUC07013456.hg.1 | NRCAM  |
| TC07001751.hg.1 | -3.88 | PSR07027303.hg.1 | NRCAM  |
| TC07001751.hg.1 | -4.15 | PSR07027363.hg.1 | NRCAM  |
| TC07001751.hg.1 | -4.2  | PSR07027360.hg.1 | NRCAM  |
| TC07001751.hg.1 | -5.1  | JUC07013465.hg.1 | NRCAM  |
| TC07001751.hg.1 | -5.68 | PSR07027322.hg.1 | NRCAM  |
| TC07001751.hg.1 | -6.62 | JUC07013467.hg.1 | NRCAM  |
| TC07001751.hg.1 | -7.39 | JUC07013459.hg.1 | NRCAM  |
| TC07001751.hg.1 | -8.58 | JUC07013452.hg.1 | NRCAM  |
| TC11001027.hg.1 | 14.75 | PSR11012850.hg.1 | NNMT   |
| TC11001027.hg.1 | 4.46  | PSR11012851.hg.1 | NNMT   |
| TC11001027.hg.1 | 3.31  | JUC11006915.hg.1 | NNMT   |
| TC11001027.hg.1 | 2.36  | PSR11012848.hg.1 | NNMT   |
| TC11001027.hg.1 | 2.04  | PSR11012863.hg.1 | NNMT   |
| TC11001027.hg.1 | -4.04 | PSR11012853.hg.1 | NNMT   |
| TC01006400.hg.1 | 14.74 | JUC01046627.hg.1 | GSTM1  |



|                 |        |                  |            |
|-----------------|--------|------------------|------------|
| TC01006400.hg.1 | 12.81  | JUC01046631.hg.1 | GSTM1      |
| TC01006400.hg.1 | 10.9   | PSR01015155.hg.1 | GSTM1      |
| TC18000077.hg.1 | 14.71  | JUC18000529.hg.1 | ANKRD20A5I |
| TC18000077.hg.1 | 2.4    | JUC18000533.hg.1 | ANKRD20A5I |
| TC18000077.hg.1 | 2.18   | JUC18000530.hg.1 | ANKRD20A5I |
| TC18000077.hg.1 | 2.14   | JUC18000538.hg.1 | ANKRD20A5I |
| TC18000077.hg.1 | -2.28  | PSR18000886.hg.1 | ANKRD20A5I |
| TC09001097.hg.1 | 14.66  | JUC09007862.hg.1 |            |
| TC09001097.hg.1 | 2.69   | PSR09014647.hg.1 |            |
| TC09001097.hg.1 | 2.16   | PSR09014646.hg.1 |            |
| TC09001097.hg.1 | -2.66  | PSR09014643.hg.1 |            |
| TC09001097.hg.1 | -2.86  | JUC09007858.hg.1 |            |
| TC09001097.hg.1 | -4.51  | JUC09007859.hg.1 |            |
| TC09001097.hg.1 | -4.88  | JUC09007861.hg.1 |            |
| TC09000086.hg.1 | 14.56  | JUC09000563.hg.1 | ADAMTSL1   |
| TC09000086.hg.1 | 6.07   | JUC09000567.hg.1 | ADAMTSL1   |
| TC09000086.hg.1 | 4.63   | PSR09001021.hg.1 | ADAMTSL1   |
| TC09000086.hg.1 | 3.79   | JUC09000560.hg.1 | ADAMTSL1   |
| TC09000086.hg.1 | 3.73   | PSR09001028.hg.1 | ADAMTSL1   |
| TC09000086.hg.1 | 3.63   | PSR09001034.hg.1 | ADAMTSL1   |
| TC09000086.hg.1 | 3.55   | JUC09000568.hg.1 | ADAMTSL1   |
| TC09000086.hg.1 | 3.44   | JUC09000576.hg.1 | ADAMTSL1   |
| TC09000086.hg.1 | 3.23   | PSR09001059.hg.1 | ADAMTSL1   |
| TC09000086.hg.1 | 3.18   | PSR09001069.hg.1 | ADAMTSL1   |
| TC09000086.hg.1 | 3.12   | PSR09001048.hg.1 | ADAMTSL1   |
| TC09000086.hg.1 | 2.93   | PSR09001023.hg.1 | ADAMTSL1   |
| TC09000086.hg.1 | 2.74   | PSR09001075.hg.1 | ADAMTSL1   |
| TC09000086.hg.1 | 2.71   | PSR09001080.hg.1 | ADAMTSL1   |
| TC09000086.hg.1 | 2.71   | JUC09000558.hg.1 | ADAMTSL1   |
| TC09000086.hg.1 | 2.53   | JUC09000573.hg.1 | ADAMTSL1   |
| TC09000086.hg.1 | 2.34   | PSR09001070.hg.1 | ADAMTSL1   |
| TC09000086.hg.1 | 2.25   | PSR09001057.hg.1 | ADAMTSL1   |
| TC09000086.hg.1 | 2.21   | JUC09000566.hg.1 | ADAMTSL1   |
| TC09000086.hg.1 | 2.11   | JUC09000577.hg.1 | ADAMTSL1   |
| TC09000086.hg.1 | 2.1    | JUC09000557.hg.1 | ADAMTSL1   |
| TC09000086.hg.1 | 2.07   | PSR09001073.hg.1 | ADAMTSL1   |
| TC09000086.hg.1 | 2.01   | PSR09001078.hg.1 | ADAMTSL1   |
| TC09000086.hg.1 | -2.01  | PSR09001077.hg.1 | ADAMTSL1   |
| TC09000086.hg.1 | -2.19  | JUC09000571.hg.1 | ADAMTSL1   |
| TC09000086.hg.1 | -2.24  | JUC09000561.hg.1 | ADAMTSL1   |
| TC09000086.hg.1 | -2.35  | PSR09001058.hg.1 | ADAMTSL1   |
| TC09000086.hg.1 | -2.88  | JUC09000559.hg.1 | ADAMTSL1   |
| TC09000086.hg.1 | -2.92  | JUC09000574.hg.1 | ADAMTSL1   |
| TC09000086.hg.1 | -3.22  | PSR09001039.hg.1 | ADAMTSL1   |
| TC09000086.hg.1 | -3.38  | JUC09000556.hg.1 | ADAMTSL1   |
| TC09000086.hg.1 | -3.59  | PSR09001041.hg.1 | ADAMTSL1   |
| TC09000086.hg.1 | -3.65  | PSR09001038.hg.1 | ADAMTSL1   |
| TC09000086.hg.1 | -3.82  | PSR09001033.hg.1 | ADAMTSL1   |
| TC09000086.hg.1 | -4.38  | JUC09000565.hg.1 | ADAMTSL1   |
| TC09000086.hg.1 | -4.83  | PSR09001040.hg.1 | ADAMTSL1   |
| TC09000086.hg.1 | -4.97  | PSR09001030.hg.1 | ADAMTSL1   |
| TC09000086.hg.1 | -5.17  | JUC09000582.hg.1 | ADAMTSL1   |
| TC09000086.hg.1 | -5.27  | PSR09001037.hg.1 | ADAMTSL1   |
| TC09000086.hg.1 | -5.94  | PSR09001031.hg.1 | ADAMTSL1   |
| TC09000086.hg.1 | -7.72  | JUC09000585.hg.1 | ADAMTSL1   |
| TC09000086.hg.1 | -8.45  | JUC09000583.hg.1 | ADAMTSL1   |
| TC09000086.hg.1 | -9.37  | JUC09000570.hg.1 | ADAMTSL1   |
| TC09000086.hg.1 | -10.12 | PSR09001036.hg.1 | ADAMTSL1   |

|                 |       |                  |         |
|-----------------|-------|------------------|---------|
| TC08001013.hg.1 | 14.4  | JUC08006601.hg.1 | MTUS1   |
| TC08001013.hg.1 | 3.8   | JUC08006614.hg.1 | MTUS1   |
| TC08001013.hg.1 | 3.66  | JUC08006626.hg.1 | MTUS1   |
| TC08001013.hg.1 | 3.04  | PSR08012784.hg.1 | MTUS1   |
| TC08001013.hg.1 | 2.94  | PSR08012772.hg.1 | MTUS1   |
| TC08001013.hg.1 | 2.88  | JUC08006609.hg.1 | MTUS1   |
| TC08001013.hg.1 | 2.67  | JUC08006606.hg.1 | MTUS1   |
| TC08001013.hg.1 | 2.5   | PSR08012762.hg.1 | MTUS1   |
| TC08001013.hg.1 | 2.45  | PSR08012746.hg.1 | MTUS1   |
| TC08001013.hg.1 | 2.33  | JUC08006627.hg.1 | MTUS1   |
| TC08001013.hg.1 | 2.24  | PSR08012756.hg.1 | MTUS1   |
| TC08001013.hg.1 | 2.23  | PSR08012742.hg.1 | MTUS1   |
| TC08001013.hg.1 | 2.21  | PSR08012731.hg.1 | MTUS1   |
| TC08001013.hg.1 | 2.21  | PSR08012764.hg.1 | MTUS1   |
| TC08001013.hg.1 | 2.21  | JUC08006600.hg.1 | MTUS1   |
| TC08001013.hg.1 | 2.18  | PSR08012768.hg.1 | MTUS1   |
| TC08001013.hg.1 | 2.11  | PSR08012788.hg.1 | MTUS1   |
| TC08001013.hg.1 | 2.03  | PSR08012736.hg.1 | MTUS1   |
| TC08001013.hg.1 | -2.02 | JUC08006619.hg.1 | MTUS1   |
| TC01001607.hg.1 | 14.34 | PSR01024936.hg.1 | PLA2G4A |
| TC01001607.hg.1 | 9.21  | JUC01013350.hg.1 | PLA2G4A |
| TC01001607.hg.1 | 6.75  | PSR01024943.hg.1 | PLA2G4A |
| TC01001607.hg.1 | 6.01  | JUC01013348.hg.1 | PLA2G4A |
| TC01001607.hg.1 | 5.2   | JUC01013363.hg.1 | PLA2G4A |
| TC01001607.hg.1 | 4.88  | JUC01013354.hg.1 | PLA2G4A |
| TC01001607.hg.1 | 3.52  | JUC01013347.hg.1 | PLA2G4A |
| TC01001607.hg.1 | 3.33  | JUC01013366.hg.1 | PLA2G4A |
| TC01001607.hg.1 | 2.43  | PSR01024940.hg.1 | PLA2G4A |
| TC01001607.hg.1 | 2.2   | JUC01013357.hg.1 | PLA2G4A |
| TC01001607.hg.1 | 2.16  | JUC01013361.hg.1 | PLA2G4A |
| TC01001607.hg.1 | 2.1   | JUC01013360.hg.1 | PLA2G4A |
| TC01001607.hg.1 | -2.06 | PSR01024959.hg.1 | PLA2G4A |
| TC01001607.hg.1 | -2.42 | PSR01024946.hg.1 | PLA2G4A |
| TC01001607.hg.1 | -2.54 | JUC01013351.hg.1 | PLA2G4A |
| TC06002113.hg.1 | 14.22 | JUC06013133.hg.1 | MOXD1   |
| TC06002113.hg.1 | 9.35  | PSR06026518.hg.1 | MOXD1   |
| TC06002113.hg.1 | 8.53  | PSR06026525.hg.1 | MOXD1   |
| TC06002113.hg.1 | 8.47  | PSR06026528.hg.1 | MOXD1   |
| TC06002113.hg.1 | 4.22  | PSR06026526.hg.1 | MOXD1   |
| TC06002113.hg.1 | 2.93  | JUC06013131.hg.1 | MOXD1   |
| TC06002113.hg.1 | 2.55  | PSR06026524.hg.1 | MOXD1   |
| TC06002113.hg.1 | 2.41  | JUC06013142.hg.1 | MOXD1   |
| TC06002113.hg.1 | 2.06  | JUC06013135.hg.1 | MOXD1   |
| TC06002113.hg.1 | 2.02  | PSR06026517.hg.1 | MOXD1   |
| TC06002113.hg.1 | -2.04 | JUC06013138.hg.1 | MOXD1   |
| TC01006269.hg.1 | 14    | JUC01038991.hg.1 |         |
| TC01006269.hg.1 | 8.34  | PSR01009162.hg.1 |         |
| TC01006269.hg.1 | 7.24  | PSR01009171.hg.1 |         |
| TC01006269.hg.1 | 6.28  | JUC01038993.hg.1 |         |
| TC01006269.hg.1 | 6.18  | JUC01038995.hg.1 |         |
| TC01006269.hg.1 | 6.06  | JUC01038996.hg.1 |         |
| TC01006269.hg.1 | 5.64  | JUC01038992.hg.1 |         |
| TC01006269.hg.1 | 4.69  | PSR01009175.hg.1 |         |
| TC01006269.hg.1 | 4.4   | JUC01038998.hg.1 |         |
| TC01006269.hg.1 | 4.29  | PSR01009177.hg.1 |         |
| TC01006269.hg.1 | 3.82  | JUC01039001.hg.1 |         |
| TC01006269.hg.1 | 3.76  | PSR01009176.hg.1 |         |
| TC01006269.hg.1 | 3.74  | PSR01009178.hg.1 |         |

|                 |       |                  |           |
|-----------------|-------|------------------|-----------|
| TC01006269.hg.1 | 2.69  | PSR01009172.hg.1 |           |
| TC01006269.hg.1 | -2.23 | JUC01038999.hg.1 |           |
| TC11000173.hg.1 | 14    | JUC11001057.hg.1 | ZNF143    |
| TC11000173.hg.1 | 2.28  | JUC11001055.hg.1 | ZNF143    |
| TC11000173.hg.1 | 2.02  | PSR11002346.hg.1 | ZNF143    |
| TC11000173.hg.1 | -3.53 | JUC11001062.hg.1 | ZNF143    |
| TC01001258.hg.1 | 13.94 | JUC01010429.hg.1 | S100A1    |
| TC01001258.hg.1 | 8.51  | PSR01019177.hg.1 | S100A1    |
| TC01001258.hg.1 | 8.48  | PSR01019176.hg.1 | S100A1    |
| TC01001258.hg.1 | 8.42  | JUC01010428.hg.1 | S100A1    |
| TC01001258.hg.1 | 7.66  | JUC01010425.hg.1 | S100A1    |
| TC01001258.hg.1 | 7.17  | PSR01019170.hg.1 | S100A1    |
| TC01001258.hg.1 | 6.61  | PSR01019179.hg.1 | S100A1    |
| TC05001590.hg.1 | 13.9  | PSR05021639.hg.1 | ARRDC3    |
| TC05001590.hg.1 | 10.16 | PSR05021635.hg.1 | ARRDC3    |
| TC05001590.hg.1 | 7.85  | PSR05021634.hg.1 | ARRDC3    |
| TC05001590.hg.1 | 6.73  | JUC05011125.hg.1 | ARRDC3    |
| TC05001590.hg.1 | 6.12  | JUC05011116.hg.1 | ARRDC3    |
| TC05001590.hg.1 | 5.18  | PSR05021632.hg.1 | ARRDC3    |
| TC05001590.hg.1 | 3.84  | JUC05011118.hg.1 | ARRDC3    |
| TC05001590.hg.1 | 2.49  | PSR05021631.hg.1 | ARRDC3    |
| TC05001590.hg.1 | 2.08  | PSR05021629.hg.1 | ARRDC3    |
| TC05001590.hg.1 | -2.07 | PSR05021605.hg.1 | ARRDC3    |
| TC11000182.hg.1 | 13.79 | PSR11002447.hg.1 | ADM       |
| TC11000182.hg.1 | 8.16  | PSR11002452.hg.1 | ADM       |
| TC11000182.hg.1 | 7.72  | JUC11001098.hg.1 | ADM       |
| TC11000182.hg.1 | 6.86  | PSR11002449.hg.1 | ADM       |
| TC11000182.hg.1 | 5.1   | PSR11002446.hg.1 | ADM       |
| TC11000182.hg.1 | 5.06  | JUC11001100.hg.1 | ADM       |
| TC11000182.hg.1 | 4.6   | JUC11001101.hg.1 | ADM       |
| TC11000182.hg.1 | 3.82  | PSR11002453.hg.1 | ADM       |
| TC11000182.hg.1 | -2.55 | PSR11002461.hg.1 | ADM       |
| TC11000182.hg.1 | -2.74 | JUC11001103.hg.1 | ADM       |
| TC08001022.hg.1 | 13.67 | JUC08006752.hg.1 | CSGALNACT |
| TC08001022.hg.1 | 11.67 | JUC08006748.hg.1 | CSGALNACT |
| TC08001022.hg.1 | 11.64 | JUC08006744.hg.1 | CSGALNACT |
| TC08001022.hg.1 | 10.39 | JUC08006725.hg.1 | CSGALNACT |
| TC08001022.hg.1 | 9.47  | JUC08006726.hg.1 | CSGALNACT |
| TC08001022.hg.1 | 8.89  | PSR08013006.hg.1 | CSGALNACT |
| TC08001022.hg.1 | 8.77  | JUC08006751.hg.1 | CSGALNACT |
| TC08001022.hg.1 | 8.66  | PSR08012998.hg.1 | CSGALNACT |
| TC08001022.hg.1 | 8.45  | JUC08006733.hg.1 | CSGALNACT |
| TC08001022.hg.1 | 8.37  | PSR08012996.hg.1 | CSGALNACT |
| TC08001022.hg.1 | 8.32  | PSR08012995.hg.1 | CSGALNACT |
| TC08001022.hg.1 | 8.29  | JUC08006735.hg.1 | CSGALNACT |
| TC08001022.hg.1 | 8.29  | JUC08006736.hg.1 | CSGALNACT |
| TC08001022.hg.1 | 8.1   | PSR08012973.hg.1 | CSGALNACT |
| TC08001022.hg.1 | 7.93  | PSR08013003.hg.1 | CSGALNACT |
| TC08001022.hg.1 | 7.93  | JUC08006747.hg.1 | CSGALNACT |
| TC08001022.hg.1 | 7.71  | JUC08006750.hg.1 | CSGALNACT |
| TC08001022.hg.1 | 7.48  | JUC08006727.hg.1 | CSGALNACT |
| TC08001022.hg.1 | 7.35  | JUC08006730.hg.1 | CSGALNACT |
| TC08001022.hg.1 | 6.91  | PSR08012993.hg.1 | CSGALNACT |
| TC08001022.hg.1 | 6.88  | PSR08012997.hg.1 | CSGALNACT |
| TC08001022.hg.1 | 6.65  | PSR08012994.hg.1 | CSGALNACT |
| TC08001022.hg.1 | 6.46  | PSR08012988.hg.1 | CSGALNACT |
| TC08001022.hg.1 | 6.16  | JUC08006740.hg.1 | CSGALNACT |
| TC08001022.hg.1 | 5.76  | PSR08012989.hg.1 | CSGALNACT |

|                 |       |                  |           |
|-----------------|-------|------------------|-----------|
| TC08001022.hg.1 | 5.23  | PSR08012987.hg.1 | CSGALNACT |
| TC08001022.hg.1 | 5.14  | PSR08012971.hg.1 | CSGALNACT |
| TC08001022.hg.1 | 5.11  | PSR08012992.hg.1 | CSGALNACT |
| TC08001022.hg.1 | 4.75  | JUC08006742.hg.1 | CSGALNACT |
| TC08001022.hg.1 | 4.68  | JUC08006728.hg.1 | CSGALNACT |
| TC08001022.hg.1 | 4.17  | JUC08006741.hg.1 | CSGALNACT |
| TC08001022.hg.1 | 3.96  | PSR08013000.hg.1 | CSGALNACT |
| TC08001022.hg.1 | 3.55  | JUC08006753.hg.1 | CSGALNACT |
| TC08001022.hg.1 | 3.43  | PSR08012985.hg.1 | CSGALNACT |
| TC08001022.hg.1 | 3.41  | JUC08006737.hg.1 | CSGALNACT |
| TC08001022.hg.1 | 3.36  | PSR08012983.hg.1 | CSGALNACT |
| TC08001022.hg.1 | 3.31  | PSR08013001.hg.1 | CSGALNACT |
| TC08001022.hg.1 | 2.88  | JUC08006749.hg.1 | CSGALNACT |
| TC08001022.hg.1 | 2.67  | PSR08012984.hg.1 | CSGALNACT |
| TC08001022.hg.1 | 2.51  | PSR08012991.hg.1 | CSGALNACT |
| TC08001022.hg.1 | -3.13 | JUC08006731.hg.1 | CSGALNACT |
| TC04002929.hg.1 | 13.55 | JUC04017042.hg.1 | BST1      |
| TC04002929.hg.1 | 5.05  | JUC04017031.hg.1 | BST1      |
| TC04002929.hg.1 | 5.02  | PSR04002285.hg.1 | BST1      |
| TC04002929.hg.1 | 4.91  | PSR04002301.hg.1 | BST1      |
| TC04002929.hg.1 | 4.73  | JUC04017038.hg.1 | BST1      |
| TC04002929.hg.1 | 4.61  | PSR04002302.hg.1 | BST1      |
| TC04002929.hg.1 | 4.19  | PSR04002303.hg.1 | BST1      |
| TC04002929.hg.1 | 3.83  | PSR04002282.hg.1 | BST1      |
| TC04002929.hg.1 | 3.79  | PSR04002297.hg.1 | BST1      |
| TC04002929.hg.1 | 2.54  | JUC04017034.hg.1 | BST1      |
| TC04002929.hg.1 | 2.25  | PSR04002284.hg.1 | BST1      |
| TC02002819.hg.1 | 13.41 | JUC02023745.hg.1 | AP1S3     |
| TC02002819.hg.1 | 12.69 | JUC02023750.hg.1 | AP1S3     |
| TC02002819.hg.1 | 11.85 | JUC02023753.hg.1 | AP1S3     |
| TC02002819.hg.1 | 11.23 | JUC02023748.hg.1 | AP1S3     |
| TC02002819.hg.1 | 10.96 | JUC02023741.hg.1 | AP1S3     |
| TC02002819.hg.1 | 4.96  | PSR02045505.hg.1 | AP1S3     |
| TC02002819.hg.1 | 3.96  | PSR02045504.hg.1 | AP1S3     |
| TC02002819.hg.1 | 3.88  | PSR02045495.hg.1 | AP1S3     |
| TC02002819.hg.1 | 3.86  | PSR02045498.hg.1 | AP1S3     |
| TC02002819.hg.1 | 3.78  | JUC02023752.hg.1 | AP1S3     |
| TC02002819.hg.1 | 3.72  | PSR02045490.hg.1 | AP1S3     |
| TC02002819.hg.1 | 3.41  | PSR02045479.hg.1 | AP1S3     |
| TC02002819.hg.1 | 3.19  | PSR02045499.hg.1 | AP1S3     |
| TC02002819.hg.1 | 2.98  | PSR02045480.hg.1 | AP1S3     |
| TC02002819.hg.1 | 2.42  | JUC02023743.hg.1 | AP1S3     |
| TC02002819.hg.1 | 2.02  | PSR02045484.hg.1 | AP1S3     |
| TC02002819.hg.1 | -2.18 | JUC02023749.hg.1 | AP1S3     |
| TC01001625.hg.1 | 13.35 | PSR01025117.hg.1 | TROVE2    |
| TC01001625.hg.1 | 2.24  | PSR01025086.hg.1 | TROVE2    |
| TC01001625.hg.1 | -5.11 | JUC01013440.hg.1 | TROVE2    |
| TC08000500.hg.1 | 13.1  | PSR08006842.hg.1 |           |
| TC08000500.hg.1 | 7.61  | JUC08003377.hg.1 |           |
| TC08000500.hg.1 | 3.6   | JUC08003381.hg.1 |           |
| TC08000500.hg.1 | -2.18 | PSR08006844.hg.1 |           |
| TC08000500.hg.1 | -3.18 | JUC08003378.hg.1 |           |
| TC17001937.hg.1 | 13.08 | JUC17014859.hg.1 | NPTX1     |
| TC17001937.hg.1 | 4.38  | PSR17026383.hg.1 | NPTX1     |
| TC17001937.hg.1 | 2.79  | PSR17026384.hg.1 | NPTX1     |
| TC17001937.hg.1 | 2.77  | JUC17014862.hg.1 | NPTX1     |
| TC17001937.hg.1 | -2.51 | PSR17026387.hg.1 | NPTX1     |
| TC06000408.hg.1 | 13    | JUC06001845.hg.1 | HLA-DPB1  |

|                 |       |                  |          |
|-----------------|-------|------------------|----------|
| TC06000408.hg.1 | 6.28  | PSR06004790.hg.1 | HLA-DPB1 |
| TC06000408.hg.1 | 6.17  | JUC06001841.hg.1 | HLA-DPB1 |
| TC06000408.hg.1 | 5.82  | PSR06004789.hg.1 | HLA-DPB1 |
| TC06000408.hg.1 | 5.81  | JUC06001846.hg.1 | HLA-DPB1 |
| TC06000408.hg.1 | 5.5   | JUC06001855.hg.1 | HLA-DPB1 |
| TC06000408.hg.1 | 5.02  | PSR06004787.hg.1 | HLA-DPB1 |
| TC06000408.hg.1 | 4.65  | PSR06004808.hg.1 | HLA-DPB1 |
| TC06000408.hg.1 | 4.28  | JUC06001842.hg.1 | HLA-DPB1 |
| TC06000408.hg.1 | 3.7   | JUC06001848.hg.1 | HLA-DPB1 |
| TC06000408.hg.1 | 3.45  | PSR06004779.hg.1 | HLA-DPB1 |
| TC06000408.hg.1 | 3.4   | PSR06004783.hg.1 | HLA-DPB1 |
| TC06000408.hg.1 | 3.33  | PSR06004794.hg.1 | HLA-DPB1 |
| TC06000408.hg.1 | 3.29  | PSR06004793.hg.1 | HLA-DPB1 |
| TC06000408.hg.1 | 3.02  | JUC06001850.hg.1 | HLA-DPB1 |
| TC06000408.hg.1 | 2.38  | PSR06004785.hg.1 | HLA-DPB1 |
| TC06000408.hg.1 | 2.29  | PSR06004806.hg.1 | HLA-DPB1 |
| TC06000408.hg.1 | 2.05  | PSR06004782.hg.1 | HLA-DPB1 |
| TC06000408.hg.1 | -2.11 | JUC06001849.hg.1 | HLA-DPB1 |
| TC06004077.hg.1 | 12.82 | JUC06021027.hg.1 | CFB      |
| TC06004077.hg.1 | 11.45 | PSR06004095.hg.1 | CFB      |
| TC06004077.hg.1 | 11.17 | PSR06004107.hg.1 | CFB      |
| TC06004077.hg.1 | 10.91 | JUC06021031.hg.1 | CFB      |
| TC06004077.hg.1 | 10.42 | PSR06004082.hg.1 | CFB      |
| TC06004077.hg.1 | 9.7   | PSR06004117.hg.1 | CFB      |
| TC06004077.hg.1 | 9.32  | PSR06004127.hg.1 | CFB      |
| TC06004077.hg.1 | 8.51  | PSR06004113.hg.1 | CFB      |
| TC06004077.hg.1 | 6.99  | PSR06004084.hg.1 | CFB      |
| TC06004077.hg.1 | 6.45  | PSR06004091.hg.1 | CFB      |
| TC06004077.hg.1 | 6     | PSR06004097.hg.1 | CFB      |
| TC06004077.hg.1 | 5.4   | PSR06004108.hg.1 | CFB      |
| TC06004077.hg.1 | 4.24  | PSR06004118.hg.1 | CFB      |
| TC06004077.hg.1 | 3.45  | PSR06004085.hg.1 | CFB      |
| TC06004077.hg.1 | 3.23  | PSR06004101.hg.1 | CFB      |
| TC06004077.hg.1 | 3.12  | PSR06004087.hg.1 | CFB      |
| TC06004077.hg.1 | 2.68  | PSR06004096.hg.1 | CFB      |
| TC06004077.hg.1 | 2.63  | PSR06004094.hg.1 | CFB      |
| TC06004077.hg.1 | 2.28  | JUC06021022.hg.1 | CFB      |
| TC06004077.hg.1 | 2.23  | PSR06004105.hg.1 | CFB      |
| TC06004077.hg.1 | 2.22  | PSR06004089.hg.1 | CFB      |
| TC06004077.hg.1 | 2.1   | PSR06004098.hg.1 | CFB      |
| TC06004077.hg.1 | 2     | PSR06004088.hg.1 | CFB      |
| TC06004077.hg.1 | -2.02 | JUC06021021.hg.1 | CFB      |
| TC06004077.hg.1 | -2.03 | JUC06021024.hg.1 | CFB      |
| TC06004077.hg.1 | -2.07 | PSR06004126.hg.1 | CFB      |
| TC06004077.hg.1 | -2.23 | JUC06021032.hg.1 | CFB      |
| TC06004077.hg.1 | -3.1  | JUC06021026.hg.1 | CFB      |
| TC01000545.hg.1 | 12.78 | JUC01004478.hg.1 | CDC20    |
| TC01000545.hg.1 | 2.37  | PSR01008666.hg.1 | CDC20    |
| TC01000545.hg.1 | 2.33  | PSR01008667.hg.1 | CDC20    |
| TC01000545.hg.1 | 2.26  | PSR01008681.hg.1 | CDC20    |
| TC01000545.hg.1 | 2.16  | PSR01008662.hg.1 | CDC20    |
| TC01000545.hg.1 | 2.07  | PSR01008672.hg.1 | CDC20    |
| TC01000545.hg.1 | 2.05  | PSR01008663.hg.1 | CDC20    |
| TC01000545.hg.1 | 2.04  | PSR01008671.hg.1 | CDC20    |
| TC01000545.hg.1 | -2.2  | JUC01004472.hg.1 | CDC20    |
| TC17000124.hg.1 | 12.71 | PSR17001843.hg.1 | ALOX15B  |
| TC17000124.hg.1 | 7.91  | JUC17001078.hg.1 | ALOX15B  |
| TC17000124.hg.1 | 4.67  | JUC17001084.hg.1 | ALOX15B  |

|                 |       |                  |         |
|-----------------|-------|------------------|---------|
| TC17000124.hg.1 | 4.07  | PSR17001844.hg.1 | ALOX15B |
| TC17000124.hg.1 | 2.05  | PSR17001841.hg.1 | ALOX15B |
| TC17000124.hg.1 | -2.3  | PSR17001832.hg.1 | ALOX15B |
| TC17000124.hg.1 | -2.61 | PSR17001833.hg.1 | ALOX15B |
| TC17000124.hg.1 | -3.04 | JUC17001074.hg.1 | ALOX15B |
| TC17000124.hg.1 | -3.09 | JUC17001080.hg.1 | ALOX15B |
| TC17000124.hg.1 | -3.28 | PSR17001840.hg.1 | ALOX15B |
| TC17000124.hg.1 | -5.39 | JUC17001081.hg.1 | ALOX15B |
| TC17000124.hg.1 | -6.27 | PSR17001829.hg.1 | ALOX15B |
| TC08002617.hg.1 | 12.7  | JUC08015262.hg.1 | TPD52   |
| TC08002617.hg.1 | 8.85  | JUC08015265.hg.1 | TPD52   |
| TC08002617.hg.1 | 5.33  | JUC08015282.hg.1 | TPD52   |
| TC08002617.hg.1 | 4.61  | JUC08015270.hg.1 | TPD52   |
| TC08002617.hg.1 | 4.3   | JUC08015264.hg.1 | TPD52   |
| TC08002617.hg.1 | 4.2   | PSR08017513.hg.1 | TPD52   |
| TC08002617.hg.1 | 3.87  | PSR08017500.hg.1 | TPD52   |
| TC08002617.hg.1 | 3.81  | JUC08015275.hg.1 | TPD52   |
| TC08002617.hg.1 | 3.69  | JUC08015285.hg.1 | TPD52   |
| TC08002617.hg.1 | 3.47  | JUC08015272.hg.1 | TPD52   |
| TC08002617.hg.1 | 3.4   | PSR08017517.hg.1 | TPD52   |
| TC08002617.hg.1 | 3.16  | PSR08017503.hg.1 | TPD52   |
| TC08002617.hg.1 | 3.04  | JUC08015288.hg.1 | TPD52   |
| TC08002617.hg.1 | 2.99  | PSR08017522.hg.1 | TPD52   |
| TC08002617.hg.1 | 2.94  | PSR08017523.hg.1 | TPD52   |
| TC08002617.hg.1 | 2.92  | PSR08017456.hg.1 | TPD52   |
| TC08002617.hg.1 | 2.87  | PSR08017475.hg.1 | TPD52   |
| TC08002617.hg.1 | 2.8   | PSR08017511.hg.1 | TPD52   |
| TC08002617.hg.1 | 2.76  | PSR08017501.hg.1 | TPD52   |
| TC08002617.hg.1 | 2.72  | PSR08017507.hg.1 | TPD52   |
| TC08002617.hg.1 | 2.72  | PSR08017521.hg.1 | TPD52   |
| TC08002617.hg.1 | 2.72  | JUC08015290.hg.1 | TPD52   |
| TC08002617.hg.1 | 2.68  | PSR08017508.hg.1 | TPD52   |
| TC08002617.hg.1 | 2.57  | PSR08017478.hg.1 | TPD52   |
| TC08002617.hg.1 | 2.55  | PSR08017457.hg.1 | TPD52   |
| TC08002617.hg.1 | 2.55  | PSR08017516.hg.1 | TPD52   |
| TC08002617.hg.1 | 2.41  | PSR08017520.hg.1 | TPD52   |
| TC08002617.hg.1 | 2.35  | PSR08017458.hg.1 | TPD52   |
| TC08002617.hg.1 | 2.35  | PSR08017488.hg.1 | TPD52   |
| TC08002617.hg.1 | 2.31  | PSR08017506.hg.1 | TPD52   |
| TC08002617.hg.1 | 2.25  | PSR08017505.hg.1 | TPD52   |
| TC08002617.hg.1 | 2.24  | JUC08015261.hg.1 | TPD52   |
| TC08002617.hg.1 | 2.22  | PSR08017499.hg.1 | TPD52   |
| TC08002617.hg.1 | 2.09  | PSR08017474.hg.1 | TPD52   |
| TC08002617.hg.1 | 2.07  | PSR08017487.hg.1 | TPD52   |
| TC08002617.hg.1 | 2.04  | PSR08017510.hg.1 | TPD52   |
| TC15000585.hg.1 | 12.49 | JUC15002316.hg.1 | FBXL22  |
| TC15000585.hg.1 | 2.93  | PSR15004731.hg.1 | FBXL22  |
| TC01003718.hg.1 | 12.2  | PSR01057083.hg.1 | CHI3L1  |
| TC01003718.hg.1 | 7.71  | PSR01057064.hg.1 | CHI3L1  |
| TC01003718.hg.1 | 2.71  | PSR01057073.hg.1 | CHI3L1  |
| TC01003718.hg.1 | 2.57  | PSR01057081.hg.1 | CHI3L1  |
| TC01003718.hg.1 | 2.42  | PSR01057068.hg.1 | CHI3L1  |
| TC01003718.hg.1 | -2.56 | PSR01057067.hg.1 | CHI3L1  |
| TC01003718.hg.1 | -2.67 | JUC01029778.hg.1 | CHI3L1  |
| TC01003718.hg.1 | -2.76 | JUC01029775.hg.1 | CHI3L1  |
| TC01003718.hg.1 | -3.06 | PSR01057058.hg.1 | CHI3L1  |
| TC01003718.hg.1 | -4    | JUC01029780.hg.1 | CHI3L1  |
| TC06000087.hg.1 | 12.17 | PSR06000920.hg.1 | EDN1    |

|                 |       |                  |          |
|-----------------|-------|------------------|----------|
| TC06000087.hg.1 | 9.91  | PSR06000919.hg.1 | EDN1     |
| TC06000087.hg.1 | 9.23  | PSR06000926.hg.1 | EDN1     |
| TC06000087.hg.1 | 9.08  | PSR06000929.hg.1 | EDN1     |
| TC06000087.hg.1 | 7.46  | PSR06000921.hg.1 | EDN1     |
| TC06000087.hg.1 | 4.46  | PSR06000925.hg.1 | EDN1     |
| TC06000087.hg.1 | 3.25  | PSR06000932.hg.1 | EDN1     |
| TC06000087.hg.1 | -2.95 | JUC06000412.hg.1 | EDN1     |
| TC11002162.hg.1 | 12.06 | PSR11025898.hg.1 | SYTL2    |
| TC11002162.hg.1 | 8.19  | PSR11025902.hg.1 | SYTL2    |
| TC11002162.hg.1 | 7.55  | PSR11025913.hg.1 | SYTL2    |
| TC11002162.hg.1 | 7.43  | PSR11025895.hg.1 | SYTL2    |
| TC11002162.hg.1 | 7.2   | PSR11025897.hg.1 | SYTL2    |
| TC11002162.hg.1 | 7.06  | JUC11013740.hg.1 | SYTL2    |
| TC11002162.hg.1 | 6.87  | PSR11025879.hg.1 | SYTL2    |
| TC11002162.hg.1 | 6.6   | JUC11013751.hg.1 | SYTL2    |
| TC11002162.hg.1 | 6.05  | JUC11013732.hg.1 | SYTL2    |
| TC11002162.hg.1 | 6.03  | JUC11013730.hg.1 | SYTL2    |
| TC11002162.hg.1 | 5.96  | PSR11025865.hg.1 | SYTL2    |
| TC11002162.hg.1 | 5.87  | PSR11025896.hg.1 | SYTL2    |
| TC11002162.hg.1 | 5.53  | JUC11013729.hg.1 | SYTL2    |
| TC11002162.hg.1 | 5.43  | PSR11025912.hg.1 | SYTL2    |
| TC11002162.hg.1 | 5.22  | JUC11013746.hg.1 | SYTL2    |
| TC11002162.hg.1 | 5.09  | PSR11025910.hg.1 | SYTL2    |
| TC11002162.hg.1 | 5.04  | JUC11013743.hg.1 | SYTL2    |
| TC11002162.hg.1 | 5.02  | JUC11013750.hg.1 | SYTL2    |
| TC11002162.hg.1 | 4.82  | PSR11025892.hg.1 | SYTL2    |
| TC11002162.hg.1 | 4.44  | JUC11013747.hg.1 | SYTL2    |
| TC11002162.hg.1 | 4.29  | PSR11025900.hg.1 | SYTL2    |
| TC11002162.hg.1 | 4.16  | JUC11013753.hg.1 | SYTL2    |
| TC11002162.hg.1 | 4.11  | PSR11025887.hg.1 | SYTL2    |
| TC11002162.hg.1 | 4.03  | PSR11025907.hg.1 | SYTL2    |
| TC11002162.hg.1 | 3.72  | PSR11025908.hg.1 | SYTL2    |
| TC11002162.hg.1 | 3.7   | PSR11025903.hg.1 | SYTL2    |
| TC11002162.hg.1 | 3.69  | PSR11025909.hg.1 | SYTL2    |
| TC11002162.hg.1 | 3.67  | JUC11013756.hg.1 | SYTL2    |
| TC11002162.hg.1 | 3.64  | PSR11025867.hg.1 | SYTL2    |
| TC11002162.hg.1 | 3.62  | JUC11013734.hg.1 | SYTL2    |
| TC11002162.hg.1 | 3.52  | PSR11025888.hg.1 | SYTL2    |
| TC11002162.hg.1 | 3.47  | JUC11013749.hg.1 | SYTL2    |
| TC11002162.hg.1 | 3.27  | JUC11013754.hg.1 | SYTL2    |
| TC11002162.hg.1 | 3.26  | PSR11025906.hg.1 | SYTL2    |
| TC11002162.hg.1 | 3.07  | PSR11025881.hg.1 | SYTL2    |
| TC11002162.hg.1 | 2.84  | PSR11025904.hg.1 | SYTL2    |
| TC11002162.hg.1 | 2.73  | JUC11013742.hg.1 | SYTL2    |
| TC11002162.hg.1 | 2.69  | JUC11013733.hg.1 | SYTL2    |
| TC11002162.hg.1 | 2.59  | JUC11013736.hg.1 | SYTL2    |
| TC11002162.hg.1 | 2.1   | JUC11013738.hg.1 | SYTL2    |
| TC11002162.hg.1 | -2.08 | JUC11013744.hg.1 | SYTL2    |
| TC10002952.hg.1 | 12.02 | JUC10017425.hg.1 | ARHGAP19 |
| TC10002952.hg.1 | 6.14  | JUC10017418.hg.1 | ARHGAP19 |
| TC10002952.hg.1 | -2.09 | PSR10019899.hg.1 | ARHGAP19 |
| TC07001611.hg.1 | 11.96 | JUC07012180.hg.1 | TFPI2    |
| TC07001611.hg.1 | 3.98  | JUC07012179.hg.1 | TFPI2    |
| TC07001611.hg.1 | 3.69  | PSR07024439.hg.1 | TFPI2    |
| TC07001611.hg.1 | 3.01  | PSR07024432.hg.1 | TFPI2    |
| TC07001611.hg.1 | 2.79  | PSR07024431.hg.1 | TFPI2    |
| TC07001611.hg.1 | -2.25 | PSR07024441.hg.1 | TFPI2    |
| TC07001611.hg.1 | -2.72 | PSR07024443.hg.1 | TFPI2    |

|                  |       |                   |          |
|------------------|-------|-------------------|----------|
| TC15001219.hg.1  | 11.95 | JUC15005791.hg.1  |          |
| TC15001219.hg.1  | 6.23  | PSR15010956.hg.1  |          |
| TC15001219.hg.1  | 5.86  | JUC15005790.hg.1  |          |
| TC15001219.hg.1  | 3.29  | PSR15010954.hg.1  |          |
| TC15001219.hg.1  | 2.81  | PSR15010957.hg.1  |          |
| TC15001219.hg.1  | 2.67  | PSR15010955.hg.1  |          |
| TC15001219.hg.1  | -2.22 | PSR15010951.hg.1  |          |
| TC15001219.hg.1  | -2.54 | PSR15010952.hg.1  |          |
| TC15001219.hg.1  | -2.98 | PSR15010953.hg.1  |          |
| TC15001219.hg.1  | -4.65 | PSR15010958.hg.1  |          |
| TC15001219.hg.1  | -13.7 | JUC15005792.hg.1  |          |
| TC03001038.hg.1  | 11.92 | JUC03009289.hg.1  | LPP      |
| TC03001038.hg.1  | 6.04  | JUC03009315.hg.1  | LPP      |
| TC03001038.hg.1  | 4.18  | JUC03009293.hg.1  | LPP      |
| TC03001038.hg.1  | 2.93  | PSR03018388.hg.1  | LPP      |
| TC03001038.hg.1  | 2.9   | PSR03018355.hg.1  | LPP      |
| TC03001038.hg.1  | 2.14  | PSR03018394.hg.1  | LPP      |
| TC03001038.hg.1  | -2.66 | JUC03009297.hg.1  | LPP      |
| TC17000861.hg.1  | 11.9  | JUC17006242.hg.1  | ITGB4    |
| TC17000861.hg.1  | 5.4   | JUC17006231.hg.1  | ITGB4    |
| TC17000861.hg.1  | 4.28  | JUC17006239.hg.1  | ITGB4    |
| TC17000861.hg.1  | 3.82  | JUC17006237.hg.1  | ITGB4    |
| TC17000861.hg.1  | 3.23  | PSR17011214.hg.1  | ITGB4    |
| TC17000861.hg.1  | 3.16  | JUC17006233.hg.1  | ITGB4    |
| TC17000861.hg.1  | 2.99  | JUC17006257.hg.1  | ITGB4    |
| TC17000861.hg.1  | 2.46  | JUC17006240.hg.1  | ITGB4    |
| TC17000861.hg.1  | 2.13  | JUC17006267.hg.1  | ITGB4    |
| TC17000861.hg.1  | -2.09 | JUC17006236.hg.1  | ITGB4    |
| TC01002075.hg.1  | 11.77 | JUC01017039.hg.1  | FAM41C   |
| TC01002075.hg.1  | 2.45  | PSR01031378.hg.1  | FAM41C   |
| TC6_cox_hap2000  | 11.75 | JUC6_cox_hap20017 | HLA-DPB1 |
| TC6_cox_hap2000  | 5.68  | PSR6_cox_hap20018 | HLA-DPB1 |
| TC6_cox_hap2000  | 5.57  | JUC6_cox_hap20017 | HLA-DPB1 |
| TC6_cox_hap2000  | 5.26  | PSR6_cox_hap20018 | HLA-DPB1 |
| TC6_cox_hap2000  | 4.97  | JUC6_cox_hap20017 | HLA-DPB1 |
| TC6_cox_hap2000  | 4.53  | PSR6_cox_hap20018 | HLA-DPB1 |
| TC6_cox_hap2000  | 4.34  | PSR6_cox_hap20018 | HLA-DPB1 |
| TC6_cox_hap2000  | 3.76  | PSR6_cox_hap20018 | HLA-DPB1 |
| TC6_cox_hap2000  | 3.11  | PSR6_cox_hap20018 | HLA-DPB1 |
| TC6_cox_hap2000  | 2.72  | JUC6_cox_hap20017 | HLA-DPB1 |
| TC6_qbl_hap60002 | 11.7  | JUC6_qbl_hap60017 | HLA-DPB1 |
| TC6_qbl_hap60002 | 5.65  | PSR6_qbl_hap60018 | HLA-DPB1 |
| TC6_qbl_hap60002 | 5.55  | JUC6_qbl_hap60017 | HLA-DPB1 |
| TC6_qbl_hap60002 | 5.24  | PSR6_qbl_hap60018 | HLA-DPB1 |
| TC6_qbl_hap60002 | 5.23  | JUC6_qbl_hap60017 | HLA-DPB1 |
| TC6_qbl_hap60002 | 4.95  | JUC6_qbl_hap60017 | HLA-DPB1 |
| TC6_qbl_hap60002 | 4.52  | PSR6_qbl_hap60018 | HLA-DPB1 |
| TC6_qbl_hap60002 | 4.3   | PSR6_qbl_hap60018 | HLA-DPB1 |
| TC6_qbl_hap60002 | 3.33  | JUC6_qbl_hap60017 | HLA-DPB1 |
| TC6_qbl_hap60002 | 3.1   | PSR6_qbl_hap60018 | HLA-DPB1 |
| TC6_qbl_hap60002 | 3.06  | PSR6_qbl_hap60018 | HLA-DPB1 |
| TC6_qbl_hap60002 | 3     | PSR6_qbl_hap60018 | HLA-DPB1 |
| TC6_qbl_hap60002 | 2.96  | PSR6_qbl_hap60018 | HLA-DPB1 |
| TC6_qbl_hap60002 | 2.71  | JUC6_qbl_hap60017 | HLA-DPB1 |
| TC6_qbl_hap60002 | 2.06  | PSR6_qbl_hap60018 | HLA-DPB1 |
| TC6_qbl_hap60002 | 2.04  | PSR6_qbl_hap60018 | HLA-DPB1 |
| TC6_qbl_hap60002 | -2.35 | JUC6_qbl_hap60017 | HLA-DPB1 |
| TC1000022.hg.1   | 11.67 | JUC10000125.hg.1  | PFKP     |



|                 |       |                  |       |
|-----------------|-------|------------------|-------|
| TC1000022.hg.1  | 7.77  | JUC10000130.hg.1 | PFKP  |
| TC1000022.hg.1  | 6.94  | PSR10000188.hg.1 | PFKP  |
| TC1000022.hg.1  | 5.62  | PSR10000197.hg.1 | PFKP  |
| TC1000022.hg.1  | 5.25  | PSR10000189.hg.1 | PFKP  |
| TC1000022.hg.1  | 5.05  | PSR10000212.hg.1 | PFKP  |
| TC1000022.hg.1  | 4.99  | PSR10000185.hg.1 | PFKP  |
| TC1000022.hg.1  | 4.47  | JUC10000124.hg.1 | PFKP  |
| TC1000022.hg.1  | 4.38  | PSR10000237.hg.1 | PFKP  |
| TC1000022.hg.1  | 4.34  | PSR10000203.hg.1 | PFKP  |
| TC1000022.hg.1  | 4.03  | JUC10000133.hg.1 | PFKP  |
| TC1000022.hg.1  | 3.88  | PSR10000204.hg.1 | PFKP  |
| TC1000022.hg.1  | 3.83  | JUC10000117.hg.1 | PFKP  |
| TC1000022.hg.1  | 3.81  | PSR10000187.hg.1 | PFKP  |
| TC1000022.hg.1  | 3.61  | JUC10000134.hg.1 | PFKP  |
| TC1000022.hg.1  | 3.6   | PSR10000192.hg.1 | PFKP  |
| TC1000022.hg.1  | 3.55  | PSR10000205.hg.1 | PFKP  |
| TC1000022.hg.1  | 2.86  | PSR10000222.hg.1 | PFKP  |
| TC1000022.hg.1  | 2.78  | PSR10000225.hg.1 | PFKP  |
| TC1000022.hg.1  | 2.61  | PSR10000207.hg.1 | PFKP  |
| TC1000022.hg.1  | 2.41  | PSR10000226.hg.1 | PFKP  |
| TC1000022.hg.1  | 2.07  | PSR10000194.hg.1 | PFKP  |
| TC0Y000185.hg.1 | 11.65 | JUC0Y001153.hg.1 | KDM5D |
| TC0Y000185.hg.1 | 11.12 | PSR0Y001862.hg.1 | KDM5D |
| TC0Y000185.hg.1 | 9.66  | JUC0Y001180.hg.1 | KDM5D |
| TC0Y000185.hg.1 | 9.48  | PSR0Y001860.hg.1 | KDM5D |
| TC0Y000185.hg.1 | 6.88  | JUC0Y001164.hg.1 | KDM5D |
| TC0Y000185.hg.1 | 5.93  | PSR0Y001818.hg.1 | KDM5D |
| TC0Y000185.hg.1 | 5.34  | PSR0Y001859.hg.1 | KDM5D |
| TC0Y000185.hg.1 | 3.56  | JUC0Y001158.hg.1 | KDM5D |
| TC0Y000185.hg.1 | 3.44  | PSR0Y001817.hg.1 | KDM5D |
| TC0Y000185.hg.1 | 3.18  | PSR0Y001816.hg.1 | KDM5D |
| TC0Y000185.hg.1 | 2.07  | PSR0Y001856.hg.1 | KDM5D |
| TC0Y000185.hg.1 | 2.03  | JUC0Y001186.hg.1 | KDM5D |
| TC0Y000185.hg.1 | 2.01  | PSR0Y001857.hg.1 | KDM5D |
| TC0Y000185.hg.1 | -2.06 | PSR0Y001835.hg.1 | KDM5D |
| TC0Y000185.hg.1 | -2.12 | PSR0Y001825.hg.1 | KDM5D |
| TC0Y000185.hg.1 | -2.34 | PSR0Y001854.hg.1 | KDM5D |
| TC0Y000185.hg.1 | -2.34 | JUC0Y001178.hg.1 | KDM5D |
| TC0Y000185.hg.1 | -2.41 | JUC0Y001166.hg.1 | KDM5D |
| TC0Y000185.hg.1 | -2.58 | PSR0Y001840.hg.1 | KDM5D |
| TC0Y000185.hg.1 | -2.71 | PSR0Y001838.hg.1 | KDM5D |
| TC0Y000185.hg.1 | -2.94 | PSR0Y001830.hg.1 | KDM5D |
| TC0Y000185.hg.1 | -2.98 | JUC0Y001183.hg.1 | KDM5D |
| TC0Y000185.hg.1 | -3.01 | PSR0Y001837.hg.1 | KDM5D |
| TC0Y000185.hg.1 | -3.15 | JUC0Y001173.hg.1 | KDM5D |
| TC0Y000185.hg.1 | -3.4  | JUC0Y001184.hg.1 | KDM5D |
| TC0Y000185.hg.1 | -3.43 | PSR0Y001841.hg.1 | KDM5D |
| TC0Y000185.hg.1 | -3.49 | PSR0Y001820.hg.1 | KDM5D |
| TC0Y000185.hg.1 | -3.56 | JUC0Y001155.hg.1 | KDM5D |
| TC0Y000185.hg.1 | -3.57 | PSR0Y001849.hg.1 | KDM5D |
| TC0Y000185.hg.1 | -3.68 | JUC0Y001181.hg.1 | KDM5D |
| TC0Y000185.hg.1 | -3.85 | PSR0Y001842.hg.1 | KDM5D |
| TC0Y000185.hg.1 | -3.97 | PSR0Y001836.hg.1 | KDM5D |
| TC0Y000185.hg.1 | -4    | PSR0Y001851.hg.1 | KDM5D |
| TC0Y000185.hg.1 | -4.14 | JUC0Y001182.hg.1 | KDM5D |
| TC0Y000185.hg.1 | -4.47 | PSR0Y001824.hg.1 | KDM5D |
| TC0Y000185.hg.1 | -4.59 | JUC0Y001154.hg.1 | KDM5D |
| TC0Y000185.hg.1 | -4.78 | PSR0Y001826.hg.1 | KDM5D |

|                  |       |                   |          |
|------------------|-------|-------------------|----------|
| TC0Y000185.hg.1  | -5.01 | JUC0Y001188.hg.1  | KDM5D    |
| TC0Y000185.hg.1  | -6.18 | JUC0Y001159.hg.1  | KDM5D    |
| TC0Y000185.hg.1  | -6.88 | JUC0Y001176.hg.1  | KDM5D    |
| TC0Y000185.hg.1  | -7.57 | JUC0Y001157.hg.1  | KDM5D    |
| TC0Y000185.hg.1  | -7.69 | JUC0Y001185.hg.1  | KDM5D    |
| TC6_dbb_hap3000  | 11.64 | JUC6_dbb_hap3000  | HLA-DPB1 |
| TC6_dbb_hap3000  | 5.63  | PSR6_dbb_hap3001  | HLA-DPB1 |
| TC6_dbb_hap3000  | 5.53  | JUC6_dbb_hap3000  | HLA-DPB1 |
| TC6_dbb_hap3000  | 5.21  | PSR6_dbb_hap3001  | HLA-DPB1 |
| TC6_dbb_hap3000  | 5.2   | JUC6_dbb_hap3000  | HLA-DPB1 |
| TC6_dbb_hap3000  | 4.92  | JUC6_dbb_hap3000  | HLA-DPB1 |
| TC6_dbb_hap3000  | 4.49  | PSR6_dbb_hap3001  | HLA-DPB1 |
| TC6_dbb_hap3000  | 4.17  | PSR6_dbb_hap3001  | HLA-DPB1 |
| TC6_dbb_hap3000  | 3.32  | JUC6_dbb_hap3000  | HLA-DPB1 |
| TC6_dbb_hap3000  | 3.09  | PSR6_dbb_hap3001  | HLA-DPB1 |
| TC6_dbb_hap3000  | 3.05  | PSR6_dbb_hap3001  | HLA-DPB1 |
| TC6_dbb_hap3000  | 2.98  | PSR6_dbb_hap3001  | HLA-DPB1 |
| TC6_dbb_hap3000  | 2.94  | PSR6_dbb_hap3001  | HLA-DPB1 |
| TC6_dbb_hap3000  | 2.7   | JUC6_dbb_hap3000  | HLA-DPB1 |
| TC6_dbb_hap3000  | 2.13  | PSR6_dbb_hap3001  | HLA-DPB1 |
| TC6_dbb_hap3000  | 2.05  | PSR6_dbb_hap3001  | HLA-DPB1 |
| TC6_dbb_hap3000  | -2.36 | JUC6_dbb_hap3000  | HLA-DPB1 |
| TC6_ssto_hap7000 | 11.64 | JUC6_ssto_hap7000 | HLA-DPB1 |
| TC6_ssto_hap7000 | 5.63  | PSR6_ssto_hap7001 | HLA-DPB1 |
| TC6_ssto_hap7000 | 5.53  | JUC6_ssto_hap7000 | HLA-DPB1 |
| TC6_ssto_hap7000 | 5.21  | PSR6_ssto_hap7001 | HLA-DPB1 |
| TC6_ssto_hap7000 | 5.2   | JUC6_ssto_hap7000 | HLA-DPB1 |
| TC6_ssto_hap7000 | 4.92  | JUC6_ssto_hap7000 | HLA-DPB1 |
| TC6_ssto_hap7000 | 4.49  | PSR6_ssto_hap7001 | HLA-DPB1 |
| TC6_ssto_hap7000 | 4.17  | PSR6_ssto_hap7001 | HLA-DPB1 |
| TC6_ssto_hap7000 | 3.32  | JUC6_ssto_hap7000 | HLA-DPB1 |
| TC6_ssto_hap7000 | 3.09  | PSR6_ssto_hap7001 | HLA-DPB1 |
| TC6_ssto_hap7000 | 3.05  | PSR6_ssto_hap7001 | HLA-DPB1 |
| TC6_ssto_hap7000 | 2.98  | PSR6_ssto_hap7001 | HLA-DPB1 |
| TC6_ssto_hap7000 | 2.94  | PSR6_ssto_hap7001 | HLA-DPB1 |
| TC6_ssto_hap7000 | 2.7   | JUC6_ssto_hap7000 | HLA-DPB1 |
| TC6_ssto_hap7000 | 2.13  | PSR6_ssto_hap7001 | HLA-DPB1 |
| TC6_ssto_hap7000 | 2.05  | PSR6_ssto_hap7001 | HLA-DPB1 |
| TC6_ssto_hap7000 | -2.36 | JUC6_ssto_hap7000 | HLA-DPB1 |
| TC04000584.hg.1  | 11.59 | JUC04004492.hg.1  | ANK2     |
| TC04000584.hg.1  | 9.78  | JUC04004498.hg.1  | ANK2     |
| TC04000584.hg.1  | 7.48  | JUC04004543.hg.1  | ANK2     |
| TC04000584.hg.1  | 7.22  | JUC04004513.hg.1  | ANK2     |
| TC04000584.hg.1  | 6.36  | PSR04008544.hg.1  | ANK2     |
| TC04000584.hg.1  | 6.16  | JUC04004558.hg.1  | ANK2     |
| TC04000584.hg.1  | 5.83  | JUC04004509.hg.1  | ANK2     |
| TC04000584.hg.1  | 5.38  | JUC04004552.hg.1  | ANK2     |
| TC04000584.hg.1  | 5.25  | JUC04004544.hg.1  | ANK2     |
| TC04000584.hg.1  | 5.19  | JUC04004522.hg.1  | ANK2     |
| TC04000584.hg.1  | 5.13  | PSR04008543.hg.1  | ANK2     |
| TC04000584.hg.1  | 5.06  | PSR04008553.hg.1  | ANK2     |
| TC04000584.hg.1  | 4.95  | PSR04008549.hg.1  | ANK2     |
| TC04000584.hg.1  | 4.88  | JUC04004551.hg.1  | ANK2     |
| TC04000584.hg.1  | 4.77  | PSR04008561.hg.1  | ANK2     |
| TC04000584.hg.1  | 4.76  | PSR04008559.hg.1  | ANK2     |
| TC04000584.hg.1  | 4.64  | JUC04004508.hg.1  | ANK2     |
| TC04000584.hg.1  | 4.39  | PSR04008532.hg.1  | ANK2     |
| TC04000584.hg.1  | 4.17  | PSR04008541.hg.1  | ANK2     |

|                 |       |                  |          |
|-----------------|-------|------------------|----------|
| TC04000584.hg.1 | 4.05  | PSR04008546.hg.1 | ANK2     |
| TC04000584.hg.1 | 3.88  | JUC04004531.hg.1 | ANK2     |
| TC04000584.hg.1 | 3.87  | JUC04004521.hg.1 | ANK2     |
| TC04000584.hg.1 | 3.82  | JUC04004512.hg.1 | ANK2     |
| TC04000584.hg.1 | 3.76  | PSR04008555.hg.1 | ANK2     |
| TC04000584.hg.1 | 3.69  | PSR04008547.hg.1 | ANK2     |
| TC04000584.hg.1 | 3.64  | PSR04008552.hg.1 | ANK2     |
| TC04000584.hg.1 | 3.62  | PSR04008557.hg.1 | ANK2     |
| TC04000584.hg.1 | 3.54  | PSR04008560.hg.1 | ANK2     |
| TC04000584.hg.1 | 3.43  | PSR04008551.hg.1 | ANK2     |
| TC04000584.hg.1 | 3.38  | JUC04004519.hg.1 | ANK2     |
| TC04000584.hg.1 | 3.33  | PSR04008554.hg.1 | ANK2     |
| TC04000584.hg.1 | 3.09  | PSR04008550.hg.1 | ANK2     |
| TC04000584.hg.1 | 3.05  | PSR04008526.hg.1 | ANK2     |
| TC04000584.hg.1 | 3     | PSR04008542.hg.1 | ANK2     |
| TC04000584.hg.1 | 2.88  | JUC04004538.hg.1 | ANK2     |
| TC04000584.hg.1 | 2.78  | PSR04008558.hg.1 | ANK2     |
| TC04000584.hg.1 | 2.76  | JUC04004523.hg.1 | ANK2     |
| TC04000584.hg.1 | 2.65  | PSR04008556.hg.1 | ANK2     |
| TC04000584.hg.1 | 2.45  | JUC04004532.hg.1 | ANK2     |
| TC04000584.hg.1 | 2.4   | JUC04004524.hg.1 | ANK2     |
| TC04000584.hg.1 | -2.07 | PSR04008595.hg.1 | ANK2     |
| TC04000584.hg.1 | -2.18 | PSR04008618.hg.1 | ANK2     |
| TC04000584.hg.1 | -2.87 | JUC04004496.hg.1 | ANK2     |
| TC6_mann_hap400 | 11.56 | JUC6_mann_hap400 | HLA-DPB1 |
| TC6_mann_hap400 | 5.59  | PSR6_mann_hap400 | HLA-DPB1 |
| TC6_mann_hap400 | 5.48  | JUC6_mann_hap400 | HLA-DPB1 |
| TC6_mann_hap400 | 5.17  | PSR6_mann_hap400 | HLA-DPB1 |
| TC6_mann_hap400 | 5.17  | JUC6_mann_hap400 | HLA-DPB1 |
| TC6_mann_hap400 | 4.89  | JUC6_mann_hap400 | HLA-DPB1 |
| TC6_mann_hap400 | 4.46  | PSR6_mann_hap400 | HLA-DPB1 |
| TC6_mann_hap400 | 4.24  | PSR6_mann_hap400 | HLA-DPB1 |
| TC6_mann_hap400 | 3.29  | JUC6_mann_hap400 | HLA-DPB1 |
| TC6_mann_hap400 | 3.06  | PSR6_mann_hap400 | HLA-DPB1 |
| TC6_mann_hap400 | 3.02  | PSR6_mann_hap400 | HLA-DPB1 |
| TC6_mann_hap400 | 2.96  | PSR6_mann_hap400 | HLA-DPB1 |
| TC6_mann_hap400 | 2.92  | PSR6_mann_hap400 | HLA-DPB1 |
| TC6_mann_hap400 | 2.68  | JUC6_mann_hap400 | HLA-DPB1 |
| TC6_mann_hap400 | 2.39  | PSR6_mann_hap400 | HLA-DPB1 |
| TC6_mann_hap400 | 2.04  | PSR6_mann_hap400 | HLA-DPB1 |
| TC6_mann_hap400 | -2.38 | JUC6_mann_hap400 | HLA-DPB1 |
| TC6_apd_hap1000 | 11.51 | JUC6_apd_hap1000 | HLA-DPB1 |
| TC6_apd_hap1000 | 5.56  | PSR6_apd_hap1000 | HLA-DPB1 |
| TC6_apd_hap1000 | 5.46  | JUC6_apd_hap1000 | HLA-DPB1 |
| TC6_apd_hap1000 | 5.15  | PSR6_apd_hap1000 | HLA-DPB1 |
| TC6_apd_hap1000 | 5.15  | JUC6_apd_hap1000 | HLA-DPB1 |
| TC6_apd_hap1000 | 4.87  | JUC6_apd_hap1000 | HLA-DPB1 |
| TC6_apd_hap1000 | 4.44  | PSR6_apd_hap1000 | HLA-DPB1 |
| TC6_apd_hap1000 | 4.23  | PSR6_apd_hap1000 | HLA-DPB1 |
| TC6_apd_hap1000 | 3.28  | JUC6_apd_hap1000 | HLA-DPB1 |
| TC6_apd_hap1000 | 3.05  | PSR6_apd_hap1000 | HLA-DPB1 |
| TC6_apd_hap1000 | 3.01  | PSR6_apd_hap1000 | HLA-DPB1 |
| TC6_apd_hap1000 | 2.95  | PSR6_apd_hap1000 | HLA-DPB1 |
| TC6_apd_hap1000 | 2.91  | PSR6_apd_hap1000 | HLA-DPB1 |
| TC6_apd_hap1000 | 2.67  | JUC6_apd_hap1000 | HLA-DPB1 |
| TC6_apd_hap1000 | 2.56  | PSR6_apd_hap1000 | HLA-DPB1 |
| TC6_apd_hap1000 | 2.03  | PSR6_apd_hap1000 | HLA-DPB1 |
| TC6_apd_hap1000 | -2.39 | JUC6_apd_hap1000 | HLA-DPB1 |

|                 |       |                  |          |
|-----------------|-------|------------------|----------|
| TC6_mcf_hap5000 | 11.51 | JUC6_mcf_hap5001 | HLA-DPB1 |
| TC6_mcf_hap5000 | 5.56  | PSR6_mcf_hap5001 | HLA-DPB1 |
| TC6_mcf_hap5000 | 5.46  | JUC6_mcf_hap5001 | HLA-DPB1 |
| TC6_mcf_hap5000 | 5.15  | PSR6_mcf_hap5001 | HLA-DPB1 |
| TC6_mcf_hap5000 | 5.15  | JUC6_mcf_hap5001 | HLA-DPB1 |
| TC6_mcf_hap5000 | 4.87  | JUC6_mcf_hap5001 | HLA-DPB1 |
| TC6_mcf_hap5000 | 4.44  | PSR6_mcf_hap5001 | HLA-DPB1 |
| TC6_mcf_hap5000 | 4.23  | PSR6_mcf_hap5001 | HLA-DPB1 |
| TC6_mcf_hap5000 | 3.28  | JUC6_mcf_hap5001 | HLA-DPB1 |
| TC6_mcf_hap5000 | 3.05  | PSR6_mcf_hap5001 | HLA-DPB1 |
| TC6_mcf_hap5000 | 3.01  | PSR6_mcf_hap5001 | HLA-DPB1 |
| TC6_mcf_hap5000 | 2.95  | PSR6_mcf_hap5001 | HLA-DPB1 |
| TC6_mcf_hap5000 | 2.91  | PSR6_mcf_hap5001 | HLA-DPB1 |
| TC6_mcf_hap5000 | 2.67  | JUC6_mcf_hap5001 | HLA-DPB1 |
| TC6_mcf_hap5000 | 2.56  | PSR6_mcf_hap5001 | HLA-DPB1 |
| TC6_mcf_hap5000 | 2.03  | PSR6_mcf_hap5001 | HLA-DPB1 |
| TC6_mcf_hap5000 | -2.39 | JUC6_mcf_hap5001 | HLA-DPB1 |
| TC14000371.hg.1 | 11.39 | JUC14002036.hg.1 | PRKCH    |
| TC14000371.hg.1 | 2.45  | PSR14004091.hg.1 | PRKCH    |
| TC01006414.hg.1 | 11.35 | PSR01053860.hg.1 | RGS5     |
| TC01006414.hg.1 | 10.95 | JUC01046795.hg.1 | RGS5     |
| TC01006414.hg.1 | 5.7   | PSR01053864.hg.1 | RGS5     |
| TC01006414.hg.1 | 5.32  | JUC01046803.hg.1 | RGS5     |
| TC01006414.hg.1 | 3.84  | PSR01053854.hg.1 | RGS5     |
| TC01006414.hg.1 | 3.01  | PSR01053857.hg.1 | RGS5     |
| TC01006414.hg.1 | 2.96  | JUC01046799.hg.1 | RGS5     |
| TC01006414.hg.1 | 2.28  | PSR01053861.hg.1 | RGS5     |
| TC01006414.hg.1 | -2.19 | PSR01053852.hg.1 | RGS5     |
| TC16000099.hg.1 | 11.33 | JUC16000854.hg.1 | IL32     |
| TC16000099.hg.1 | 7.86  | PSR16001819.hg.1 | IL32     |
| TC16000099.hg.1 | 6.01  | PSR16001753.hg.1 | IL32     |
| TC16000099.hg.1 | 5.71  | PSR16001820.hg.1 | IL32     |
| TC16000099.hg.1 | 5.02  | PSR16001806.hg.1 | IL32     |
| TC16000099.hg.1 | 4.8   | PSR16001804.hg.1 | IL32     |
| TC16000099.hg.1 | 4.74  | PSR16001834.hg.1 | IL32     |
| TC16000099.hg.1 | 4.67  | PSR16001801.hg.1 | IL32     |
| TC16000099.hg.1 | 4.55  | PSR16001759.hg.1 | IL32     |
| TC16000099.hg.1 | 4.38  | PSR16001810.hg.1 | IL32     |
| TC16000099.hg.1 | 4.33  | JUC16000855.hg.1 | IL32     |
| TC16000099.hg.1 | 4.07  | PSR16001780.hg.1 | IL32     |
| TC16000099.hg.1 | 3.94  | PSR16001835.hg.1 | IL32     |
| TC16000099.hg.1 | 3.25  | JUC16000858.hg.1 | IL32     |
| TC16000099.hg.1 | 3.18  | PSR16001831.hg.1 | IL32     |
| TC16000099.hg.1 | 3.11  | JUC16000850.hg.1 | IL32     |
| TC16000099.hg.1 | 3.1   | PSR16001798.hg.1 | IL32     |
| TC16000099.hg.1 | 3.05  | PSR16001800.hg.1 | IL32     |
| TC16000099.hg.1 | 2.56  | PSR16001760.hg.1 | IL32     |
| TC16000099.hg.1 | 2.34  | JUC16000867.hg.1 | IL32     |
| TC16000099.hg.1 | 2.16  | JUC16000849.hg.1 | IL32     |
| TC08000700.hg.1 | 11.22 | PSR08009448.hg.1 | COL14A1  |
| TC08000700.hg.1 | 10.86 | JUC08004851.hg.1 | COL14A1  |
| TC08000700.hg.1 | 8.88  | PSR08009444.hg.1 | COL14A1  |
| TC08000700.hg.1 | 8.26  | PSR08009445.hg.1 | COL14A1  |
| TC08000700.hg.1 | 6.33  | PSR08009467.hg.1 | COL14A1  |
| TC08000700.hg.1 | 5.14  | JUC08004872.hg.1 | COL14A1  |
| TC08000700.hg.1 | 4.09  | JUC08004864.hg.1 | COL14A1  |
| TC08000700.hg.1 | 3.7   | JUC08004871.hg.1 | COL14A1  |
| TC08000700.hg.1 | 3.1   | JUC08004823.hg.1 | COL14A1  |

|                 |       |                  |             |
|-----------------|-------|------------------|-------------|
| TC08000700.hg.1 | 2.22  | JUC08004833.hg.1 | COL14A1     |
| TC08000700.hg.1 | -2.39 | PSR08009513.hg.1 | COL14A1     |
| TC08000700.hg.1 | -2.62 | JUC08004845.hg.1 | COL14A1     |
| TC08000700.hg.1 | -2.78 | JUC08004856.hg.1 | COL14A1     |
| TC08000700.hg.1 | -3.27 | PSR08009485.hg.1 | COL14A1     |
| TC08000700.hg.1 | -8.26 | JUC08004854.hg.1 | COL14A1     |
| TC10001699.hg.1 | 11.21 | PSR10022383.hg.1 | EIF3A, SNOR |
| TC10001699.hg.1 | 2.23  | JUC10012980.hg.1 | EIF3A, SNOR |
| TC09001092.hg.1 | 11.16 | JUC09007810.hg.1 | CNTNAP3     |
| TC09001092.hg.1 | 3.24  | JUC09007819.hg.1 | CNTNAP3     |
| TC09001092.hg.1 | 2.89  | JUC09007841.hg.1 | CNTNAP3     |
| TC09001092.hg.1 | 2.73  | JUC09007812.hg.1 | CNTNAP3     |
| TC09001092.hg.1 | 2.72  | JUC09007820.hg.1 | CNTNAP3     |
| TC09001092.hg.1 | 2.71  | PSR09014558.hg.1 | CNTNAP3     |
| TC09001092.hg.1 | 2.67  | JUC09007827.hg.1 | CNTNAP3     |
| TC09001092.hg.1 | 2.6   | PSR09014553.hg.1 | CNTNAP3     |
| TC09001092.hg.1 | 2.31  | JUC09007831.hg.1 | CNTNAP3     |
| TC09001092.hg.1 | 2.12  | PSR09014592.hg.1 | CNTNAP3     |
| TC09001092.hg.1 | 2.09  | PSR09014609.hg.1 | CNTNAP3     |
| TC09001092.hg.1 | 2.03  | PSR09014557.hg.1 | CNTNAP3     |
| TC09001092.hg.1 | 2.02  | JUC09007813.hg.1 | CNTNAP3     |
| TC09001092.hg.1 | 2     | PSR09014585.hg.1 | CNTNAP3     |
| TC09001092.hg.1 | -2.44 | JUC09007815.hg.1 | CNTNAP3     |
| TC09001092.hg.1 | -2.6  | PSR09014584.hg.1 | CNTNAP3     |
| TC09001092.hg.1 | -2.63 | JUC09007826.hg.1 | CNTNAP3     |
| TC09001092.hg.1 | -2.98 | JUC09007834.hg.1 | CNTNAP3     |
| TC09001092.hg.1 | -3.3  | PSR09014598.hg.1 | CNTNAP3     |
| TC09001092.hg.1 | -3.76 | JUC09007836.hg.1 | CNTNAP3     |
| TC09001092.hg.1 | -5.93 | JUC09007817.hg.1 | CNTNAP3     |
| TC09001092.hg.1 | -6.41 | JUC09007840.hg.1 | CNTNAP3     |
| TC01006284.hg.1 | 11.11 | JUC01039220.hg.1 | LOC1002890  |
| TC01006284.hg.1 | 10.04 | JUC01039205.hg.1 | LOC1002890  |
| TC01006284.hg.1 | 8.31  | JUC01039217.hg.1 | LOC1002890  |
| TC01006284.hg.1 | 5.85  | JUC01039218.hg.1 | LOC1002890  |
| TC01006284.hg.1 | 5.02  | JUC01039213.hg.1 | LOC1002890  |
| TC01006284.hg.1 | 4.49  | PSR01016703.hg.1 | LOC1002890  |
| TC01006284.hg.1 | 3.91  | PSR01016696.hg.1 | LOC1002890  |
| TC01006284.hg.1 | 3.24  | PSR01016698.hg.1 | LOC1002890  |
| TC01006284.hg.1 | 3.21  | PSR01016697.hg.1 | LOC1002890  |
| TC01006284.hg.1 | 3.14  | PSR01016701.hg.1 | LOC1002890  |
| TC01006284.hg.1 | 3.07  | PSR01016694.hg.1 | LOC1002890  |
| TC01006284.hg.1 | 2.99  | PSR01016693.hg.1 | LOC1002890  |
| TC01006284.hg.1 | 2.73  | JUC01039216.hg.1 | LOC1002890  |
| TC01006284.hg.1 | 2.54  | PSR01016685.hg.1 | LOC1002890  |
| TC01006284.hg.1 | 2.21  | PSR01016687.hg.1 | LOC1002890  |
| TC01006284.hg.1 | 2.21  | PSR01016695.hg.1 | LOC1002890  |
| TC01006284.hg.1 | 2.07  | PSR01016690.hg.1 | LOC1002890  |
| TC03000013.hg.1 | 11.09 | PSR03000336.hg.1 | ITPR1       |
| TC03000013.hg.1 | 8.48  | PSR03000269.hg.1 | ITPR1       |
| TC03000013.hg.1 | 7.03  | JUC03000164.hg.1 | ITPR1       |
| TC03000013.hg.1 | 6.93  | JUC03000200.hg.1 | ITPR1       |
| TC03000013.hg.1 | 6.26  | JUC03000191.hg.1 | ITPR1       |
| TC03000013.hg.1 | 6.06  | PSR03000355.hg.1 | ITPR1       |
| TC03000013.hg.1 | 5.88  | PSR03000259.hg.1 | ITPR1       |
| TC03000013.hg.1 | 5.72  | JUC03000182.hg.1 | ITPR1       |
| TC03000013.hg.1 | 5.6   | JUC03000174.hg.1 | ITPR1       |
| TC03000013.hg.1 | 5.19  | JUC03000179.hg.1 | ITPR1       |
| TC03000013.hg.1 | 5.1   | PSR03000285.hg.1 | ITPR1       |

|                 |       |                  |       |
|-----------------|-------|------------------|-------|
| TC03000013.hg.1 | 5.08  | PSR03000332.hg.1 | ITPR1 |
| TC03000013.hg.1 | 5.02  | PSR03000335.hg.1 | ITPR1 |
| TC03000013.hg.1 | 4.91  | PSR03000327.hg.1 | ITPR1 |
| TC03000013.hg.1 | 4.69  | PSR03000356.hg.1 | ITPR1 |
| TC03000013.hg.1 | 4.55  | PSR03000345.hg.1 | ITPR1 |
| TC03000013.hg.1 | 4.36  | JUC03000210.hg.1 | ITPR1 |
| TC03000013.hg.1 | 4.29  | JUC03000152.hg.1 | ITPR1 |
| TC03000013.hg.1 | 4.13  | PSR03000314.hg.1 | ITPR1 |
| TC03000013.hg.1 | 3.43  | JUC03000180.hg.1 | ITPR1 |
| TC03000013.hg.1 | 3.32  | PSR03000342.hg.1 | ITPR1 |
| TC03000013.hg.1 | 3.23  | JUC03000216.hg.1 | ITPR1 |
| TC03000013.hg.1 | 3.01  | JUC03000186.hg.1 | ITPR1 |
| TC03000013.hg.1 | 2.78  | PSR03000312.hg.1 | ITPR1 |
| TC03000013.hg.1 | 2.77  | JUC03000176.hg.1 | ITPR1 |
| TC03000013.hg.1 | 2.75  | JUC03000148.hg.1 | ITPR1 |
| TC03000013.hg.1 | 2.74  | JUC03000166.hg.1 | ITPR1 |
| TC03000013.hg.1 | 2.7   | PSR03000274.hg.1 | ITPR1 |
| TC03000013.hg.1 | 2.53  | PSR03000307.hg.1 | ITPR1 |
| TC03000013.hg.1 | 2.53  | JUC03000212.hg.1 | ITPR1 |
| TC03000013.hg.1 | 2.43  | PSR03000295.hg.1 | ITPR1 |
| TC03000013.hg.1 | 2.35  | PSR03000354.hg.1 | ITPR1 |
| TC03000013.hg.1 | 2.29  | JUC03000190.hg.1 | ITPR1 |
| TC03000013.hg.1 | 2.25  | JUC03000208.hg.1 | ITPR1 |
| TC03000013.hg.1 | 2.22  | JUC03000155.hg.1 | ITPR1 |
| TC03000013.hg.1 | 2.15  | PSR03000311.hg.1 | ITPR1 |
| TC03000013.hg.1 | 2.14  | PSR03000258.hg.1 | ITPR1 |
| TC03000013.hg.1 | 2.13  | PSR03000337.hg.1 | ITPR1 |
| TC03000013.hg.1 | -2.05 | JUC03000196.hg.1 | ITPR1 |
| TC03000013.hg.1 | -2.18 | PSR03000346.hg.1 | ITPR1 |
| TC03000013.hg.1 | -2.4  | JUC03000163.hg.1 | ITPR1 |
| TC03000013.hg.1 | -2.83 | JUC03000202.hg.1 | ITPR1 |
| TC03000013.hg.1 | -2.99 | JUC03000170.hg.1 | ITPR1 |
| TC01000054.hg.1 | 10.77 | JUC01000374.hg.1 | PRKCZ |
| TC01000054.hg.1 | 3.66  | PSR01000795.hg.1 | PRKCZ |
| TC01000054.hg.1 | 3.55  | PSR01000759.hg.1 | PRKCZ |
| TC01000054.hg.1 | 3.51  | JUC01000404.hg.1 | PRKCZ |
| TC01000054.hg.1 | 3.5   | PSR01000768.hg.1 | PRKCZ |
| TC01000054.hg.1 | 3.49  | PSR01000798.hg.1 | PRKCZ |
| TC01000054.hg.1 | 3.47  | JUC01000378.hg.1 | PRKCZ |
| TC01000054.hg.1 | 3.41  | PSR01000758.hg.1 | PRKCZ |
| TC01000054.hg.1 | 3.39  | PSR01000769.hg.1 | PRKCZ |
| TC01000054.hg.1 | 3.33  | PSR01000748.hg.1 | PRKCZ |
| TC01000054.hg.1 | 3.24  | JUC01000390.hg.1 | PRKCZ |
| TC01000054.hg.1 | 3.21  | PSR01000752.hg.1 | PRKCZ |
| TC01000054.hg.1 | 3.12  | PSR01000760.hg.1 | PRKCZ |
| TC01000054.hg.1 | 3.04  | PSR01000779.hg.1 | PRKCZ |
| TC01000054.hg.1 | 3.01  | PSR01000767.hg.1 | PRKCZ |
| TC01000054.hg.1 | 2.9   | PSR01000753.hg.1 | PRKCZ |
| TC01000054.hg.1 | 2.85  | PSR01000757.hg.1 | PRKCZ |
| TC01000054.hg.1 | 2.79  | PSR01000751.hg.1 | PRKCZ |
| TC01000054.hg.1 | 2.6   | PSR01000806.hg.1 | PRKCZ |
| TC01000054.hg.1 | 2.59  | PSR01000754.hg.1 | PRKCZ |
| TC01000054.hg.1 | 2.52  | JUC01000405.hg.1 | PRKCZ |
| TC01000054.hg.1 | 2.5   | PSR01000796.hg.1 | PRKCZ |
| TC01000054.hg.1 | 2.44  | PSR01000749.hg.1 | PRKCZ |
| TC01000054.hg.1 | 2.42  | PSR01000761.hg.1 | PRKCZ |
| TC01000054.hg.1 | 2.36  | PSR01000756.hg.1 | PRKCZ |
| TC01000054.hg.1 | 2.35  | PSR01000811.hg.1 | PRKCZ |

|                 |       |                  |       |
|-----------------|-------|------------------|-------|
| TC01000054.hg.1 | 2.29  | PSR01000772.hg.1 | PRKCZ |
| TC01000054.hg.1 | 2.24  | PSR01000809.hg.1 | PRKCZ |
| TC01000054.hg.1 | 2.2   | PSR01000799.hg.1 | PRKCZ |
| TC01000054.hg.1 | 2.2   | PSR01000800.hg.1 | PRKCZ |
| TC01000054.hg.1 | 2.15  | PSR01000805.hg.1 | PRKCZ |
| TC01000054.hg.1 | 2.15  | JUC01000409.hg.1 | PRKCZ |
| TC01000054.hg.1 | 2.13  | PSR01000810.hg.1 | PRKCZ |
| TC01000054.hg.1 | 2.12  | PSR01000808.hg.1 | PRKCZ |
| TC01000054.hg.1 | 2.09  | PSR01000755.hg.1 | PRKCZ |
| TC01000054.hg.1 | 2.08  | PSR01000807.hg.1 | PRKCZ |
| TC01000054.hg.1 | 2.03  | PSR01000765.hg.1 | PRKCZ |
| TC01000054.hg.1 | 2     | PSR01000771.hg.1 | PRKCZ |
| TC6_mann_hap400 | 10.75 | JUC6_mann_hap400 | CFB   |
| TC6_mann_hap400 | 9.61  | PSR6_mann_hap400 | CFB   |
| TC6_mann_hap400 | 8.92  | PSR6_mann_hap400 | CFB   |
| TC6_mann_hap400 | 8.65  | PSR6_mann_hap400 | CFB   |
| TC6_mann_hap400 | 8.14  | PSR6_mann_hap400 | CFB   |
| TC6_mann_hap400 | 7.14  | PSR6_mann_hap400 | CFB   |
| TC6_mann_hap400 | 5.03  | PSR6_mann_hap400 | CFB   |
| TC6_mann_hap400 | 4.47  | PSR6_mann_hap400 | CFB   |
| TC6_mann_hap400 | 3.77  | PSR6_mann_hap400 | CFB   |
| TC6_mann_hap400 | 3.76  | PSR6_mann_hap400 | CFB   |
| TC6_mann_hap400 | 3.56  | PSR6_mann_hap400 | CFB   |
| TC6_mann_hap400 | 2.62  | PSR6_mann_hap400 | CFB   |
| TC6_mann_hap400 | 2.55  | PSR6_mann_hap400 | CFB   |
| TC6_mann_hap400 | 2.25  | PSR6_mann_hap400 | CFB   |
| TC6_mann_hap400 | 2.2   | PSR6_mann_hap400 | CFB   |
| TC6_mann_hap400 | -2.4  | JUC6_mann_hap400 | CFB   |
| TC6_mann_hap400 | -2.42 | JUC6_mann_hap400 | CFB   |
| TC6_mann_hap400 | -2.66 | JUC6_mann_hap400 | CFB   |
| TC08000250.hg.1 | 10.74 | JUC08001743.hg.1 | NRG1  |
| TC08000250.hg.1 | 5.63  | JUC08001769.hg.1 | NRG1  |
| TC08000250.hg.1 | 5.11  | PSR08003572.hg.1 | NRG1  |
| TC08000250.hg.1 | 3.44  | JUC08001752.hg.1 | NRG1  |
| TC08000250.hg.1 | 3.33  | PSR08003601.hg.1 | NRG1  |
| TC08000250.hg.1 | 2.87  | PSR08003602.hg.1 | NRG1  |
| TC08000250.hg.1 | 2.61  | PSR08003577.hg.1 | NRG1  |
| TC08000250.hg.1 | 2.4   | JUC08001760.hg.1 | NRG1  |
| TC08000250.hg.1 | 2.37  | JUC08001754.hg.1 | NRG1  |
| TC08000250.hg.1 | 2.22  | PSR08003576.hg.1 | NRG1  |
| TC08000250.hg.1 | 2.06  | JUC08001758.hg.1 | NRG1  |
| TC08000250.hg.1 | -2.82 | JUC08001742.hg.1 | NRG1  |
| TC08000250.hg.1 | -2.83 | PSR08003562.hg.1 | NRG1  |
| TC08000250.hg.1 | -2.99 | PSR08003597.hg.1 | NRG1  |
| TC08000250.hg.1 | -3.8  | PSR08003569.hg.1 | NRG1  |
| TC08000250.hg.1 | -3.9  | PSR08003567.hg.1 | NRG1  |
| TC08000250.hg.1 | -4.13 | PSR08003551.hg.1 | NRG1  |
| TC08000250.hg.1 | -4.15 | PSR08003565.hg.1 | NRG1  |
| TC08000250.hg.1 | -4.28 | PSR08003553.hg.1 | NRG1  |
| TC08000250.hg.1 | -4.56 | PSR08003549.hg.1 | NRG1  |
| TC08000250.hg.1 | -4.76 | JUC08001759.hg.1 | NRG1  |
| TC08000250.hg.1 | -4.78 | PSR08003563.hg.1 | NRG1  |
| TC08000250.hg.1 | -5.04 | PSR08003561.hg.1 | NRG1  |
| TC08000250.hg.1 | -5.11 | PSR08003568.hg.1 | NRG1  |
| TC08000250.hg.1 | -5.18 | PSR08003566.hg.1 | NRG1  |
| TC08000250.hg.1 | -5.41 | PSR08003598.hg.1 | NRG1  |
| TC08000250.hg.1 | -5.7  | PSR08003547.hg.1 | NRG1  |
| TC08000250.hg.1 | -6.14 | PSR08003550.hg.1 | NRG1  |

|                 |       |                  |      |
|-----------------|-------|------------------|------|
| TC08000250.hg.1 | -6.57 | JUC08001756.hg.1 | NRG1 |
| TC08000250.hg.1 | -6.9  | PSR08003559.hg.1 | NRG1 |
| TC08000250.hg.1 | -7.1  | PSR08003552.hg.1 | NRG1 |
| TC08000250.hg.1 | -7.17 | JUC08001767.hg.1 | NRG1 |
| TC08000250.hg.1 | -7.22 | PSR08003564.hg.1 | NRG1 |
| TC08000250.hg.1 | -7.32 | PSR08003560.hg.1 | NRG1 |
| TC08000250.hg.1 | -7.36 | PSR08003557.hg.1 | NRG1 |
| TC08000250.hg.1 | -7.85 | PSR08003556.hg.1 | NRG1 |
| TC08000250.hg.1 | -8.52 | JUC08001746.hg.1 | NRG1 |
| TC08000250.hg.1 | -14.8 | JUC08001762.hg.1 | NRG1 |
| TC02000466.hg.1 | 10.7  | JUC02003726.hg.1 | HK2  |
| TC02000466.hg.1 | 5.79  | PSR02007337.hg.1 | HK2  |
| TC02000466.hg.1 | 5.08  | PSR02007342.hg.1 | HK2  |
| TC02000466.hg.1 | 4.86  | PSR02007346.hg.1 | HK2  |
| TC02000466.hg.1 | 4.19  | PSR02007353.hg.1 | HK2  |
| TC02000466.hg.1 | 4.05  | JUC02003722.hg.1 | HK2  |
| TC02000466.hg.1 | 3.15  | PSR02007354.hg.1 | HK2  |
| TC02000466.hg.1 | 3.02  | JUC02003716.hg.1 | HK2  |
| TC02000466.hg.1 | 2.77  | JUC02003719.hg.1 | HK2  |
| TC02000466.hg.1 | 2.26  | PSR02007367.hg.1 | HK2  |
| TC02000466.hg.1 | 2.17  | PSR02007366.hg.1 | HK2  |
| TC02000466.hg.1 | 2.06  | JUC02003723.hg.1 | HK2  |
| TC02000466.hg.1 | 2     | JUC02003727.hg.1 | HK2  |
| TC02000466.hg.1 | -2    | PSR02007349.hg.1 | HK2  |
| TC02000466.hg.1 | -2.09 | JUC02003731.hg.1 | HK2  |
| TC02000466.hg.1 | -2.16 | PSR02007359.hg.1 | HK2  |
| TC02000466.hg.1 | -2.63 | PSR02007357.hg.1 | HK2  |
| TC02000466.hg.1 | -3.97 | JUC02003734.hg.1 | HK2  |
| TC02000466.hg.1 | -4.54 | JUC02003720.hg.1 | HK2  |
| TC19001103.hg.1 | 10.7  | PSR19015185.hg.1 | C3   |
| TC19001103.hg.1 | 9.07  | PSR19015175.hg.1 | C3   |
| TC19001103.hg.1 | 8.9   | PSR19015164.hg.1 | C3   |
| TC19001103.hg.1 | 8.29  | PSR19015139.hg.1 | C3   |
| TC19001103.hg.1 | 7.97  | PSR19015126.hg.1 | C3   |
| TC19001103.hg.1 | 7.61  | PSR19015184.hg.1 | C3   |
| TC19001103.hg.1 | 6.65  | PSR19015130.hg.1 | C3   |
| TC19001103.hg.1 | 6.53  | PSR19015157.hg.1 | C3   |
| TC19001103.hg.1 | 6.32  | PSR19015177.hg.1 | C3   |
| TC19001103.hg.1 | 6.12  | PSR19015151.hg.1 | C3   |
| TC19001103.hg.1 | 6.03  | PSR19015186.hg.1 | C3   |
| TC19001103.hg.1 | 5.08  | JUC19008614.hg.1 | C3   |
| TC19001103.hg.1 | 4.71  | PSR19015159.hg.1 | C3   |
| TC19001103.hg.1 | 4.14  | JUC19008609.hg.1 | C3   |
| TC19001103.hg.1 | 4.08  | JUC19008607.hg.1 | C3   |
| TC19001103.hg.1 | 3.01  | JUC19008618.hg.1 | C3   |
| TC19001103.hg.1 | 2.51  | JUC19008621.hg.1 | C3   |
| TC19001103.hg.1 | 2.46  | PSR19015160.hg.1 | C3   |
| TC19001103.hg.1 | 2.33  | PSR19015166.hg.1 | C3   |
| TC19001103.hg.1 | 2.27  | PSR19015145.hg.1 | C3   |
| TC19001103.hg.1 | 2.26  | PSR19015181.hg.1 | C3   |
| TC19001103.hg.1 | 2.18  | PSR19015163.hg.1 | C3   |
| TC19001103.hg.1 | 2.1   | JUC19008590.hg.1 | C3   |
| TC19001103.hg.1 | 2.01  | JUC19008581.hg.1 | C3   |
| TC19001103.hg.1 | -2.01 | PSR19015174.hg.1 | C3   |
| TC19001103.hg.1 | -2.02 | JUC19008583.hg.1 | C3   |
| TC19001103.hg.1 | -2.06 | PSR19015135.hg.1 | C3   |
| TC19001103.hg.1 | -2.08 | JUC19008591.hg.1 | C3   |
| TC19001103.hg.1 | -2.12 | JUC19008617.hg.1 | C3   |



|                 |       |                  |          |
|-----------------|-------|------------------|----------|
| TC19001103.hg.1 | -2.16 | PSR19015127.hg.1 | C3       |
| TC19001103.hg.1 | -2.26 | PSR19015176.hg.1 | C3       |
| TC19001103.hg.1 | -2.45 | PSR19015153.hg.1 | C3       |
| TC19001103.hg.1 | -2.48 | JUC19008595.hg.1 | C3       |
| TC19001103.hg.1 | -2.61 | PSR19015128.hg.1 | C3       |
| TC19001103.hg.1 | -2.91 | JUC19008615.hg.1 | C3       |
| TC19001103.hg.1 | -3.03 | JUC19008603.hg.1 | C3       |
| TC19001103.hg.1 | -3.41 | JUC19008620.hg.1 | C3       |
| TC19001103.hg.1 | -5.99 | JUC19008588.hg.1 | C3       |
| TC22000583.hg.1 | 10.68 | JUC22004128.hg.1 | GSTT1    |
| TC22000583.hg.1 | 9.18  | JUC22004121.hg.1 | GSTT1    |
| TC22000583.hg.1 | 8.63  | JUC22004129.hg.1 | GSTT1    |
| TC22000583.hg.1 | 8.51  | PSR22010293.hg.1 | GSTT1    |
| TC22000583.hg.1 | 8.2   | PSR22010306.hg.1 | GSTT1    |
| TC22000583.hg.1 | 8.13  | JUC22004120.hg.1 | GSTT1    |
| TC22000583.hg.1 | 6.68  | PSR22010294.hg.1 | GSTT1    |
| TC22000583.hg.1 | 6.33  | PSR22010295.hg.1 | GSTT1    |
| TC22000583.hg.1 | 6.3   | PSR22010289.hg.1 | GSTT1    |
| TC22000583.hg.1 | 5.31  | JUC22004127.hg.1 | GSTT1    |
| TC22000583.hg.1 | 5.26  | PSR22010296.hg.1 | GSTT1    |
| TC22000583.hg.1 | 5.03  | PSR22010288.hg.1 | GSTT1    |
| TC22000583.hg.1 | 4.73  | PSR22010292.hg.1 | GSTT1    |
| TC22000583.hg.1 | 4.05  | PSR22010280.hg.1 | GSTT1    |
| TC22000583.hg.1 | 3.09  | JUC22004126.hg.1 | GSTT1    |
| TC22000583.hg.1 | -2.85 | JUC22004133.hg.1 | GSTT1    |
| TC12000516.hg.1 | 10.64 | JUC12003519.hg.1 | HSD17B6  |
| TC12000516.hg.1 | 4.75  | PSR12006776.hg.1 | HSD17B6  |
| TC12000516.hg.1 | 3.45  | PSR12006777.hg.1 | HSD17B6  |
| TC12000516.hg.1 | -2.45 | JUC12003516.hg.1 | HSD17B6  |
| TC12000516.hg.1 | -2.47 | PSR12006763.hg.1 | HSD17B6  |
| TC12000516.hg.1 | -2.94 | PSR12006771.hg.1 | HSD17B6  |
| TC01001792.hg.1 | 10.6  | PSR01028033.hg.1 | KCNK2    |
| TC01001792.hg.1 | 9.39  | JUC01015113.hg.1 | KCNK2    |
| TC01001792.hg.1 | 9.24  | PSR01028031.hg.1 | KCNK2    |
| TC01001792.hg.1 | 8.36  | JUC01015106.hg.1 | KCNK2    |
| TC01001792.hg.1 | 6.65  | PSR01028038.hg.1 | KCNK2    |
| TC01001792.hg.1 | 6.56  | JUC01015105.hg.1 | KCNK2    |
| TC01001792.hg.1 | 6.25  | PSR01028030.hg.1 | KCNK2    |
| TC01001792.hg.1 | 5.7   | JUC01015110.hg.1 | KCNK2    |
| TC01001792.hg.1 | 5.42  | PSR01028041.hg.1 | KCNK2    |
| TC01001792.hg.1 | 3.14  | JUC01015102.hg.1 | KCNK2    |
| TC01001792.hg.1 | 2.9   | PSR01028061.hg.1 | KCNK2    |
| TC01001792.hg.1 | 2.87  | JUC01015114.hg.1 | KCNK2    |
| TC01001792.hg.1 | 2.61  | PSR01028040.hg.1 | KCNK2    |
| TC01001792.hg.1 | 2.45  | PSR01028044.hg.1 | KCNK2    |
| TC01001792.hg.1 | -2.04 | PSR01028057.hg.1 | KCNK2    |
| TC01001792.hg.1 | -2.55 | PSR01028059.hg.1 | KCNK2    |
| TC01001792.hg.1 | -3.22 | JUC01015112.hg.1 | KCNK2    |
| TC06002020.hg.1 | 10.53 | PSR06025200.hg.1 | TRAF3IP2 |
| TC06002020.hg.1 | 3.2   | PSR06025203.hg.1 | TRAF3IP2 |
| TC06002020.hg.1 | 2.97  | PSR06025199.hg.1 | TRAF3IP2 |
| TC06002020.hg.1 | 2.53  | PSR06025204.hg.1 | TRAF3IP2 |
| TC06002020.hg.1 | 2.41  | PSR06025207.hg.1 | TRAF3IP2 |
| TC06002020.hg.1 | 2.36  | PSR06025197.hg.1 | TRAF3IP2 |
| TC06002020.hg.1 | 2.16  | PSR06025205.hg.1 | TRAF3IP2 |
| TC06002020.hg.1 | 2.07  | JUC06012426.hg.1 | TRAF3IP2 |
| TC06002020.hg.1 | 2.06  | PSR06025209.hg.1 | TRAF3IP2 |
| TC05003409.hg.1 | 10.42 | JUC05019376.hg.1 | SH3TC2   |

|                 |       |                  |        |
|-----------------|-------|------------------|--------|
| TC05003409.hg.1 | 6.38  | PSR05026503.hg.1 | SH3TC2 |
| TC05003409.hg.1 | 3.69  | JUC05019388.hg.1 | SH3TC2 |
| TC05003409.hg.1 | 2.31  | JUC05019385.hg.1 | SH3TC2 |
| TC05003409.hg.1 | 2.25  | JUC05019405.hg.1 | SH3TC2 |
| TC05003409.hg.1 | 2.04  | PSR05026501.hg.1 | SH3TC2 |
| TC05003409.hg.1 | -2.08 | PSR05026534.hg.1 | SH3TC2 |
| TC05003409.hg.1 | -2.26 | JUC05019401.hg.1 | SH3TC2 |
| TC05003409.hg.1 | -5.29 | JUC05019386.hg.1 | SH3TC2 |
| TC04001030.hg.1 | 10.4  | JUC04007534.hg.1 | SLC2A9 |
| TC04001030.hg.1 | 8.66  | JUC04007514.hg.1 | SLC2A9 |
| TC04001030.hg.1 | 2.78  | JUC04007520.hg.1 | SLC2A9 |
| TC04001030.hg.1 | 2.36  | JUC04007522.hg.1 | SLC2A9 |
| TC04001030.hg.1 | 2.19  | PSR04014095.hg.1 | SLC2A9 |
| TC04001030.hg.1 | 2.19  | PSR04014119.hg.1 | SLC2A9 |
| TC04001030.hg.1 | 2.19  | JUC04007516.hg.1 | SLC2A9 |
| TC04001030.hg.1 | 2.18  | PSR04014127.hg.1 | SLC2A9 |
| TC04001030.hg.1 | 2.03  | PSR04014121.hg.1 | SLC2A9 |
| TC04001030.hg.1 | -2.13 | JUC04007528.hg.1 | SLC2A9 |
| TC04001030.hg.1 | -2.42 | JUC04007513.hg.1 | SLC2A9 |
| TC04001030.hg.1 | -2.46 | JUC04007535.hg.1 | SLC2A9 |
| TC03002093.hg.1 | 10.26 | JUC03018366.hg.1 | MASP1  |
| TC03002093.hg.1 | 8.64  | JUC03018375.hg.1 | MASP1  |
| TC03002093.hg.1 | 8.2   | PSR03037133.hg.1 | MASP1  |
| TC03002093.hg.1 | 7.03  | PSR03037136.hg.1 | MASP1  |
| TC03002093.hg.1 | 6.78  | PSR03037131.hg.1 | MASP1  |
| TC03002093.hg.1 | 6.22  | JUC03018384.hg.1 | MASP1  |
| TC03002093.hg.1 | 5.93  | PSR03037157.hg.1 | MASP1  |
| TC03002093.hg.1 | 5.79  | JUC03018392.hg.1 | MASP1  |
| TC03002093.hg.1 | 5.29  | PSR03037149.hg.1 | MASP1  |
| TC03002093.hg.1 | 5.07  | PSR03037171.hg.1 | MASP1  |
| TC03002093.hg.1 | 4.93  | PSR03037152.hg.1 | MASP1  |
| TC03002093.hg.1 | 4.87  | PSR03037188.hg.1 | MASP1  |
| TC03002093.hg.1 | 4.86  | PSR03037138.hg.1 | MASP1  |
| TC03002093.hg.1 | 4.81  | JUC03018382.hg.1 | MASP1  |
| TC03002093.hg.1 | 4.58  | JUC03018371.hg.1 | MASP1  |
| TC03002093.hg.1 | 4.28  | PSR03037154.hg.1 | MASP1  |
| TC03002093.hg.1 | 4.19  | JUC03018367.hg.1 | MASP1  |
| TC03002093.hg.1 | 4.01  | PSR03037177.hg.1 | MASP1  |
| TC03002093.hg.1 | 3.78  | PSR03037134.hg.1 | MASP1  |
| TC03002093.hg.1 | 3.62  | PSR03037155.hg.1 | MASP1  |
| TC03002093.hg.1 | 3.6   | PSR03037170.hg.1 | MASP1  |
| TC03002093.hg.1 | 3.2   | PSR03037135.hg.1 | MASP1  |
| TC03002093.hg.1 | 3.2   | PSR03037180.hg.1 | MASP1  |
| TC03002093.hg.1 | 3.09  | JUC03018378.hg.1 | MASP1  |
| TC03002093.hg.1 | 2.81  | PSR03037175.hg.1 | MASP1  |
| TC03002093.hg.1 | 2.79  | PSR03037184.hg.1 | MASP1  |
| TC03002093.hg.1 | 2.7   | JUC03018389.hg.1 | MASP1  |
| TC03002093.hg.1 | 2.66  | PSR03037132.hg.1 | MASP1  |
| TC03002093.hg.1 | 2.42  | PSR03037137.hg.1 | MASP1  |
| TC03002093.hg.1 | 2.29  | PSR03037182.hg.1 | MASP1  |
| TC03002093.hg.1 | 2.22  | PSR03037168.hg.1 | MASP1  |
| TC03002093.hg.1 | 2.15  | PSR03037159.hg.1 | MASP1  |
| TC03002093.hg.1 | -2.01 | PSR03037150.hg.1 | MASP1  |
| TC03002093.hg.1 | -2.29 | PSR03037164.hg.1 | MASP1  |
| TC03002093.hg.1 | -3.4  | JUC03018380.hg.1 | MASP1  |
| TC03002093.hg.1 | -3.5  | JUC03018383.hg.1 | MASP1  |
| TC03002093.hg.1 | -4.63 | JUC03018388.hg.1 | MASP1  |
| TC03002093.hg.1 | -4.81 | JUC03018379.hg.1 | MASP1  |

|                 |       |                  |         |
|-----------------|-------|------------------|---------|
| TC0X000230.hg.1 | 10.12 | JUC0X001461.hg.1 | CDK16   |
| TC0X000230.hg.1 | 4.47  | JUC0X001462.hg.1 | CDK16   |
| TC0X000230.hg.1 | 3.38  | PSR0X002664.hg.1 | CDK16   |
| TC0X000230.hg.1 | 2.64  | PSR0X002673.hg.1 | CDK16   |
| TC0X000230.hg.1 | 2.55  | JUC0X001459.hg.1 | CDK16   |
| TC0X000230.hg.1 | 2.52  | PSR0X002641.hg.1 | CDK16   |
| TC0X000230.hg.1 | 2.45  | PSR0X002681.hg.1 | CDK16   |
| TC0X000230.hg.1 | 2.44  | PSR0X002667.hg.1 | CDK16   |
| TC0X000230.hg.1 | 2.4   | PSR0X002642.hg.1 | CDK16   |
| TC0X000230.hg.1 | 2.29  | PSR0X002617.hg.1 | CDK16   |
| TC0X000230.hg.1 | 2.18  | PSR0X002666.hg.1 | CDK16   |
| TC0X000230.hg.1 | 2.13  | PSR0X002630.hg.1 | CDK16   |
| TC0X000230.hg.1 | 2.04  | PSR0X002616.hg.1 | CDK16   |
| TC01002725.hg.1 | 10.11 | PSR01042730.hg.1 | KANK4   |
| TC01002725.hg.1 | 3.77  | PSR01042731.hg.1 | KANK4   |
| TC01002725.hg.1 | 3.01  | PSR01042733.hg.1 | KANK4   |
| TC01002725.hg.1 | 2.7   | JUC01022827.hg.1 | KANK4   |
| TC01002725.hg.1 | 2.64  | PSR01042732.hg.1 | KANK4   |
| TC01002725.hg.1 | 2.26  | PSR01042740.hg.1 | KANK4   |
| TC01002725.hg.1 | 2.08  | JUC01022823.hg.1 | KANK4   |
| TC01002725.hg.1 | -2.32 | JUC01022829.hg.1 | KANK4   |
| TC01002725.hg.1 | -2.34 | PSR01042739.hg.1 | KANK4   |
| TC01002725.hg.1 | -2.36 | PSR01042742.hg.1 | KANK4   |
| TC01002725.hg.1 | -2.54 | JUC01022828.hg.1 | KANK4   |
| TC01002725.hg.1 | -2.63 | PSR01042744.hg.1 | KANK4   |
| TC01002725.hg.1 | -3.04 | PSR01042736.hg.1 | KANK4   |
| TC01002725.hg.1 | -3.74 | PSR01042738.hg.1 | KANK4   |
| TC01002725.hg.1 | -4.41 | PSR01042745.hg.1 | KANK4   |
| TC01002725.hg.1 | -4.48 | JUC01022821.hg.1 | KANK4   |
| TC07000425.hg.1 | 10.1  | JUC07002734.hg.1 | WBSCR17 |
| TC07000425.hg.1 | 6.83  | JUC07002727.hg.1 | WBSCR17 |
| TC07000425.hg.1 | 3.12  | PSR07005728.hg.1 | WBSCR17 |
| TC07000425.hg.1 | 3.01  | PSR07005716.hg.1 | WBSCR17 |
| TC07000425.hg.1 | 2.64  | JUC07002726.hg.1 | WBSCR17 |
| TC07000425.hg.1 | 2.26  | PSR07005714.hg.1 | WBSCR17 |
| TC07000425.hg.1 | -2.06 | JUC07002728.hg.1 | WBSCR17 |
| TC07000425.hg.1 | -2.08 | JUC07002724.hg.1 | WBSCR17 |
| TC07000425.hg.1 | -2.2  | PSR07005711.hg.1 | WBSCR17 |
| TC07000425.hg.1 | -2.35 | PSR07005712.hg.1 | WBSCR17 |
| TC07000425.hg.1 | -2.77 | JUC07002736.hg.1 | WBSCR17 |
| TC07000425.hg.1 | -3    | PSR07005713.hg.1 | WBSCR17 |
| TC03001382.hg.1 | 10.07 | JUC03012047.hg.1 | COL7A1  |
| TC03001382.hg.1 | 10    | JUC03012054.hg.1 | COL7A1  |
| TC03001382.hg.1 | 9.39  | JUC03012000.hg.1 | COL7A1  |
| TC03001382.hg.1 | 7.5   | PSR03024171.hg.1 | COL7A1  |
| TC03001382.hg.1 | 6.18  | PSR03024170.hg.1 | COL7A1  |
| TC03001382.hg.1 | 6.15  | JUC03012063.hg.1 | COL7A1  |
| TC03001382.hg.1 | 5.22  | PSR03024044.hg.1 | COL7A1  |
| TC03001382.hg.1 | 5.13  | PSR03024168.hg.1 | COL7A1  |
| TC03001382.hg.1 | 5.1   | JUC03012030.hg.1 | COL7A1  |
| TC03001382.hg.1 | 5.01  | JUC03012001.hg.1 | COL7A1  |
| TC03001382.hg.1 | 4.56  | PSR03024172.hg.1 | COL7A1  |
| TC03001382.hg.1 | 4.44  | PSR03024158.hg.1 | COL7A1  |
| TC03001382.hg.1 | 4.43  | PSR03024157.hg.1 | COL7A1  |
| TC03001382.hg.1 | 4.31  | PSR03024173.hg.1 | COL7A1  |
| TC03001382.hg.1 | 3.91  | JUC03012040.hg.1 | COL7A1  |
| TC03001382.hg.1 | 3.65  | PSR03024057.hg.1 | COL7A1  |
| TC03001382.hg.1 | 3.61  | PSR03024169.hg.1 | COL7A1  |

|                 |        |                  |         |
|-----------------|--------|------------------|---------|
| TC03001382.hg.1 | 3.46   | PSR03024161.hg.1 | COL7A1  |
| TC03001382.hg.1 | 3.19   | PSR03024164.hg.1 | COL7A1  |
| TC03001382.hg.1 | 3.16   | JUC03012013.hg.1 | COL7A1  |
| TC03001382.hg.1 | 3.06   | PSR03024153.hg.1 | COL7A1  |
| TC03001382.hg.1 | 3.04   | PSR03024166.hg.1 | COL7A1  |
| TC03001382.hg.1 | 2.95   | PSR03024122.hg.1 | COL7A1  |
| TC03001382.hg.1 | 2.73   | PSR03024162.hg.1 | COL7A1  |
| TC03001382.hg.1 | 2.53   | PSR03024165.hg.1 | COL7A1  |
| TC03001382.hg.1 | 2.49   | PSR03024043.hg.1 | COL7A1  |
| TC03001382.hg.1 | 2.39   | PSR03024150.hg.1 | COL7A1  |
| TC03001382.hg.1 | 2.34   | JUC03011993.hg.1 | COL7A1  |
| TC03001382.hg.1 | 2.23   | JUC03011980.hg.1 | COL7A1  |
| TC03001382.hg.1 | 2.04   | JUC03012037.hg.1 | COL7A1  |
| TC03001382.hg.1 | 2.03   | JUC03011990.hg.1 | COL7A1  |
| TC03001382.hg.1 | -2     | JUC03011971.hg.1 | COL7A1  |
| TC03001382.hg.1 | -2.06  | PSR03024104.hg.1 | COL7A1  |
| TC03001382.hg.1 | -2.07  | PSR03024098.hg.1 | COL7A1  |
| TC03001382.hg.1 | -2.1   | PSR03024092.hg.1 | COL7A1  |
| TC03001382.hg.1 | -2.32  | JUC03011979.hg.1 | COL7A1  |
| TC03001382.hg.1 | -2.59  | PSR03024146.hg.1 | COL7A1  |
| TC17001250.hg.1 | 10     | PSR17016769.hg.1 | ALDH3A1 |
| TC17001250.hg.1 | 9.72   | PSR17016802.hg.1 | ALDH3A1 |
| TC17001250.hg.1 | 9.59   | PSR17016786.hg.1 | ALDH3A1 |
| TC17001250.hg.1 | 8.27   | JUC17009527.hg.1 | ALDH3A1 |
| TC17001250.hg.1 | 8.13   | PSR17016794.hg.1 | ALDH3A1 |
| TC17001250.hg.1 | 8.12   | PSR17016782.hg.1 | ALDH3A1 |
| TC17001250.hg.1 | 8.11   | PSR17016790.hg.1 | ALDH3A1 |
| TC17001250.hg.1 | 8.07   | JUC17009523.hg.1 | ALDH3A1 |
| TC17001250.hg.1 | 7.69   | PSR17016781.hg.1 | ALDH3A1 |
| TC17001250.hg.1 | 7.69   | PSR17016784.hg.1 | ALDH3A1 |
| TC17001250.hg.1 | 7.4    | PSR17016789.hg.1 | ALDH3A1 |
| TC17001250.hg.1 | 7.26   | JUC17009526.hg.1 | ALDH3A1 |
| TC17001250.hg.1 | 6.92   | PSR17016780.hg.1 | ALDH3A1 |
| TC17001250.hg.1 | 6.53   | PSR17016795.hg.1 | ALDH3A1 |
| TC17001250.hg.1 | 6.33   | PSR17016785.hg.1 | ALDH3A1 |
| TC17001250.hg.1 | 6.24   | PSR17016776.hg.1 | ALDH3A1 |
| TC17001250.hg.1 | 5.48   | PSR17016800.hg.1 | ALDH3A1 |
| TC17001250.hg.1 | 5.02   | JUC17009532.hg.1 | ALDH3A1 |
| TC17001250.hg.1 | 4.61   | PSR17016765.hg.1 | ALDH3A1 |
| TC17001250.hg.1 | 4.38   | PSR17016771.hg.1 | ALDH3A1 |
| TC17001250.hg.1 | 4.35   | JUC17009525.hg.1 | ALDH3A1 |
| TC17001250.hg.1 | 4.08   | JUC17009524.hg.1 | ALDH3A1 |
| TC17001250.hg.1 | 3.56   | JUC17009522.hg.1 | ALDH3A1 |
| TC17001250.hg.1 | 3.08   | JUC17009521.hg.1 | ALDH3A1 |
| TC17001250.hg.1 | 2.99   | PSR17016763.hg.1 | ALDH3A1 |
| TC17001250.hg.1 | 2.72   | PSR17016787.hg.1 | ALDH3A1 |
| TC17001250.hg.1 | 2.7    | PSR17016761.hg.1 | ALDH3A1 |
| TC17001250.hg.1 | 2.53   | PSR17016804.hg.1 | ALDH3A1 |
| TC17001250.hg.1 | -2.07  | PSR17016767.hg.1 | ALDH3A1 |
| TC17001250.hg.1 | -2.9   | JUC17009533.hg.1 | ALDH3A1 |
| TC17001250.hg.1 | -4.09  | PSR17016783.hg.1 | ALDH3A1 |
| TC17001250.hg.1 | -4.72  | JUC17009535.hg.1 | ALDH3A1 |
| TC17001250.hg.1 | -7.44  | PSR17016774.hg.1 | ALDH3A1 |
| TC17001250.hg.1 | -9.14  | JUC17009519.hg.1 | ALDH3A1 |
| TC17001250.hg.1 | -19.92 | JUC17009518.hg.1 | ALDH3A1 |
| TC17001250.hg.1 | -23.73 | JUC17009530.hg.1 | ALDH3A1 |
| TC01001704.hg.1 | 9.98   | JUC01014213.hg.1 | NFASC   |
| TC01001704.hg.1 | 6.52   | PSR01026480.hg.1 | NFASC   |

|                 |       |                  |           |
|-----------------|-------|------------------|-----------|
| TC01001704.hg.1 | 5.61  | JUC01014185.hg.1 | NFASC     |
| TC01001704.hg.1 | 5.35  | JUC01014238.hg.1 | NFASC     |
| TC01001704.hg.1 | 4.92  | JUC01014186.hg.1 | NFASC     |
| TC01001704.hg.1 | 4.8   | JUC01014205.hg.1 | NFASC     |
| TC01001704.hg.1 | 4.47  | JUC01014191.hg.1 | NFASC     |
| TC01001704.hg.1 | 4.29  | JUC01014222.hg.1 | NFASC     |
| TC01001704.hg.1 | 4.14  | JUC01014183.hg.1 | NFASC     |
| TC01001704.hg.1 | 4.01  | PSR01026475.hg.1 | NFASC     |
| TC01001704.hg.1 | 3.62  | JUC01014240.hg.1 | NFASC     |
| TC01001704.hg.1 | 3.61  | JUC01014189.hg.1 | NFASC     |
| TC01001704.hg.1 | 3.45  | JUC01014230.hg.1 | NFASC     |
| TC01001704.hg.1 | 3.38  | JUC01014193.hg.1 | NFASC     |
| TC01001704.hg.1 | 3.35  | PSR01026476.hg.1 | NFASC     |
| TC01001704.hg.1 | 3.32  | PSR01026474.hg.1 | NFASC     |
| TC01001704.hg.1 | 3.31  | PSR01026499.hg.1 | NFASC     |
| TC01001704.hg.1 | 3.16  | PSR01026507.hg.1 | NFASC     |
| TC01001704.hg.1 | 3.16  | JUC01014201.hg.1 | NFASC     |
| TC01001704.hg.1 | 3.13  | PSR01026532.hg.1 | NFASC     |
| TC01001704.hg.1 | 3.06  | PSR01026506.hg.1 | NFASC     |
| TC01001704.hg.1 | 3.06  | JUC01014209.hg.1 | NFASC     |
| TC01001704.hg.1 | 3.02  | PSR01026547.hg.1 | NFASC     |
| TC01001704.hg.1 | 2.98  | JUC01014211.hg.1 | NFASC     |
| TC01001704.hg.1 | 2.89  | JUC01014225.hg.1 | NFASC     |
| TC01001704.hg.1 | 2.83  | PSR01026497.hg.1 | NFASC     |
| TC01001704.hg.1 | 2.7   | PSR01026496.hg.1 | NFASC     |
| TC01001704.hg.1 | 2.66  | JUC01014231.hg.1 | NFASC     |
| TC01001704.hg.1 | 2.47  | JUC01014218.hg.1 | NFASC     |
| TC01001704.hg.1 | 2.38  | JUC01014199.hg.1 | NFASC     |
| TC01001704.hg.1 | 2.26  | PSR01026524.hg.1 | NFASC     |
| TC01001704.hg.1 | 2.24  | PSR01026515.hg.1 | NFASC     |
| TC01001704.hg.1 | 2.13  | JUC01014180.hg.1 | NFASC     |
| TC01001704.hg.1 | 2.09  | PSR01026548.hg.1 | NFASC     |
| TC01001704.hg.1 | 2     | PSR01026510.hg.1 | NFASC     |
| TC01001704.hg.1 | -2.1  | JUC01014219.hg.1 | NFASC     |
| TC01001704.hg.1 | -2.34 | JUC01014202.hg.1 | NFASC     |
| TC01001704.hg.1 | -2.36 | JUC01014217.hg.1 | NFASC     |
| TC01001704.hg.1 | -2.58 | JUC01014241.hg.1 | NFASC     |
| TC01001704.hg.1 | -2.77 | PSR01026541.hg.1 | NFASC     |
| TC08001552.hg.1 | 9.97  | PSR08020447.hg.1 | TNFRSF11B |
| TC08001552.hg.1 | 9.36  | PSR08020448.hg.1 | TNFRSF11B |
| TC08001552.hg.1 | 7.09  | JUC08010437.hg.1 | TNFRSF11B |
| TC08001552.hg.1 | 5.06  | PSR08020443.hg.1 | TNFRSF11B |
| TC08001552.hg.1 | 2.39  | JUC08010439.hg.1 | TNFRSF11B |
| TC14001466.hg.1 | 9.96  | JUC14008515.hg.1 | SERPINA1  |
| TC14001466.hg.1 | 6.98  | PSR14016504.hg.1 | SERPINA1  |
| TC14001466.hg.1 | 6.67  | JUC14008529.hg.1 | SERPINA1  |
| TC14001466.hg.1 | 6.23  | PSR14016508.hg.1 | SERPINA1  |
| TC14001466.hg.1 | 6.22  | JUC14008517.hg.1 | SERPINA1  |
| TC14001466.hg.1 | 6.11  | JUC14008516.hg.1 | SERPINA1  |
| TC14001466.hg.1 | 5.56  | PSR14016499.hg.1 | SERPINA1  |
| TC14001466.hg.1 | 5.3   | PSR14016525.hg.1 | SERPINA1  |
| TC14001466.hg.1 | 5.28  | JUC14008514.hg.1 | SERPINA1  |
| TC14001466.hg.1 | 5.06  | JUC14008521.hg.1 | SERPINA1  |
| TC14001466.hg.1 | 4.73  | JUC14008525.hg.1 | SERPINA1  |
| TC14001466.hg.1 | 4.62  | JUC14008518.hg.1 | SERPINA1  |
| TC14001466.hg.1 | 4.35  | JUC14008523.hg.1 | SERPINA1  |
| TC14001466.hg.1 | 4.19  | PSR14016526.hg.1 | SERPINA1  |
| TC14001466.hg.1 | 3.49  | JUC14008522.hg.1 | SERPINA1  |

|                 |       |                  |            |
|-----------------|-------|------------------|------------|
| TC14001466.hg.1 | 3.31  | JUC14008519.hg.1 | SERPINA1   |
| TC14001466.hg.1 | -2.27 | JUC14008526.hg.1 | SERPINA1   |
| TC14001466.hg.1 | -2.48 | JUC14008513.hg.1 | SERPINA1   |
| TC17000654.hg.1 | 9.95  | JUC17004532.hg.1 | ITGA3      |
| TC17000654.hg.1 | 7.77  | JUC17004527.hg.1 | ITGA3      |
| TC17000654.hg.1 | 5.09  | PSR17008176.hg.1 | ITGA3      |
| TC17000654.hg.1 | 4.96  | JUC17004502.hg.1 | ITGA3      |
| TC17000654.hg.1 | 4.86  | PSR17008158.hg.1 | ITGA3      |
| TC17000654.hg.1 | 4.77  | PSR17008182.hg.1 | ITGA3      |
| TC17000654.hg.1 | 4.27  | PSR17008169.hg.1 | ITGA3      |
| TC17000654.hg.1 | 4.11  | PSR17008143.hg.1 | ITGA3      |
| TC17000654.hg.1 | 4.03  | PSR17008186.hg.1 | ITGA3      |
| TC17000654.hg.1 | 3.55  | PSR17008153.hg.1 | ITGA3      |
| TC17000654.hg.1 | 3.19  | PSR17008147.hg.1 | ITGA3      |
| TC17000654.hg.1 | 3.06  | PSR17008188.hg.1 | ITGA3      |
| TC17000654.hg.1 | 2.93  | PSR17008178.hg.1 | ITGA3      |
| TC17000654.hg.1 | 2.79  | JUC17004514.hg.1 | ITGA3      |
| TC17000654.hg.1 | 2.74  | JUC17004509.hg.1 | ITGA3      |
| TC17000654.hg.1 | 2.66  | PSR17008179.hg.1 | ITGA3      |
| TC17000654.hg.1 | -2.19 | JUC17004519.hg.1 | ITGA3      |
| TC17000654.hg.1 | -2.45 | JUC17004511.hg.1 | ITGA3      |
| TC17000654.hg.1 | -2.83 | JUC17004517.hg.1 | ITGA3      |
| TC03000791.hg.1 | 9.94  | PSR03014276.hg.1 | ZIC1       |
| TC03000791.hg.1 | 8.51  | JUC03007207.hg.1 | ZIC1       |
| TC03000791.hg.1 | 4.98  | PSR03014275.hg.1 | ZIC1       |
| TC03000791.hg.1 | 2.68  | PSR03014278.hg.1 | ZIC1       |
| TC03000791.hg.1 | 2.24  | JUC03007205.hg.1 | ZIC1       |
| TC14002338.hg.1 | 9.89  | JUC14012318.hg.1 | PPP1R3E    |
| TC14002338.hg.1 | 6.26  | JUC14012324.hg.1 | PPP1R3E    |
| TC14002338.hg.1 | 3.65  | PSR14010571.hg.1 | PPP1R3E    |
| TC14002338.hg.1 | 3.45  | PSR14010574.hg.1 | PPP1R3E    |
| TC14002338.hg.1 | 3.34  | JUC14012322.hg.1 | PPP1R3E    |
| TC14002338.hg.1 | 3.17  | PSR14010573.hg.1 | PPP1R3E    |
| TC14002338.hg.1 | 3.04  | JUC14012321.hg.1 | PPP1R3E    |
| TC14002338.hg.1 | 2.31  | PSR14010568.hg.1 | PPP1R3E    |
| TC03001255.hg.1 | 9.87  | JUC03010703.hg.1 | SLC4A7     |
| TC03001255.hg.1 | 4.64  | JUC03010715.hg.1 | SLC4A7     |
| TC03001255.hg.1 | 3.49  | PSR03021509.hg.1 | SLC4A7     |
| TC03001255.hg.1 | 3.16  | PSR03021530.hg.1 | SLC4A7     |
| TC03001255.hg.1 | 3.16  | PSR03021534.hg.1 | SLC4A7     |
| TC03001255.hg.1 | 3.14  | PSR03021502.hg.1 | SLC4A7     |
| TC03001255.hg.1 | 3.11  | JUC03010709.hg.1 | SLC4A7     |
| TC03001255.hg.1 | 3.1   | PSR03021523.hg.1 | SLC4A7     |
| TC03001255.hg.1 | 2.61  | JUC03010717.hg.1 | SLC4A7     |
| TC03001255.hg.1 | 2.58  | PSR03021522.hg.1 | SLC4A7     |
| TC03001255.hg.1 | 2.53  | PSR03021518.hg.1 | SLC4A7     |
| TC03001255.hg.1 | -2.21 | PSR03021496.hg.1 | SLC4A7     |
| TC03001255.hg.1 | -2.29 | JUC03010705.hg.1 | SLC4A7     |
| TC03001255.hg.1 | -2.31 | JUC03010692.hg.1 | SLC4A7     |
| TC03001255.hg.1 | -3.06 | JUC03010694.hg.1 | SLC4A7     |
| TC07001327.hg.1 | 9.81  | JUC07010013.hg.1 | COA1       |
| TC07001327.hg.1 | 5.17  | PSR07020475.hg.1 | COA1       |
| TC07001327.hg.1 | 4.66  | JUC07010025.hg.1 | COA1       |
| TC07001327.hg.1 | 2.94  | JUC07010015.hg.1 | COA1       |
| TC07001327.hg.1 | -2.62 | PSR07020459.hg.1 | COA1       |
| TC02000281.hg.1 | 9.8   | PSR02004258.hg.1 | EPAS1, LOC |
| TC02000281.hg.1 | 6.5   | PSR02004249.hg.1 | EPAS1, LOC |
| TC02000281.hg.1 | 4.35  | PSR02004254.hg.1 | EPAS1, LOC |

|                 |       |                  |            |
|-----------------|-------|------------------|------------|
| TC02000281.hg.1 | 4.03  | JUC02002226.hg.1 | EPAS1, LOC |
| TC02000281.hg.1 | 3.05  | PSR02004248.hg.1 | EPAS1, LOC |
| TC02000281.hg.1 | 2.86  | PSR02004274.hg.1 | EPAS1, LOC |
| TC02000281.hg.1 | -2.29 | JUC02002237.hg.1 | EPAS1, LOC |
| TC02000281.hg.1 | -2.39 | JUC02002239.hg.1 | EPAS1, LOC |
| TC02000281.hg.1 | -2.62 | PSR02004276.hg.1 | EPAS1, LOC |
| TC02000281.hg.1 | -3.02 | JUC02002222.hg.1 | EPAS1, LOC |
| TC02000281.hg.1 | -3.08 | PSR02004264.hg.1 | EPAS1, LOC |
| TC02000281.hg.1 | -3.78 | JUC02002238.hg.1 | EPAS1, LOC |
| TC02000281.hg.1 | -5.14 | JUC02002231.hg.1 | EPAS1, LOC |
| TC12000099.hg.1 | 9.75  | PSR12001255.hg.1 | ENO2       |
| TC12000099.hg.1 | 7.68  | PSR12001256.hg.1 | ENO2       |
| TC12000099.hg.1 | 7.45  | PSR12001267.hg.1 | ENO2       |
| TC12000099.hg.1 | 5.68  | PSR12001272.hg.1 | ENO2       |
| TC12000099.hg.1 | 5.36  | PSR12001259.hg.1 | ENO2       |
| TC12000099.hg.1 | 4.29  | JUC12000653.hg.1 | ENO2       |
| TC12000099.hg.1 | 4.27  | JUC12000645.hg.1 | ENO2       |
| TC12000099.hg.1 | 3.68  | JUC12000648.hg.1 | ENO2       |
| TC12000099.hg.1 | 3.5   | JUC12000646.hg.1 | ENO2       |
| TC12000099.hg.1 | 3.44  | PSR12001265.hg.1 | ENO2       |
| TC12000099.hg.1 | 2.83  | JUC12000655.hg.1 | ENO2       |
| TC12000099.hg.1 | 2.82  | PSR12001260.hg.1 | ENO2       |
| TC12000099.hg.1 | 2.62  | JUC12000656.hg.1 | ENO2       |
| TC12000099.hg.1 | 2.59  | JUC12000647.hg.1 | ENO2       |
| TC12000099.hg.1 | 2.05  | PSR12001268.hg.1 | ENO2       |
| TC10002927.hg.1 | 9.69  | JUC10017022.hg.1 | LDB3       |
| TC10002927.hg.1 | 3.11  | JUC10017010.hg.1 | LDB3       |
| TC10002927.hg.1 | 2.53  | JUC10017009.hg.1 | LDB3       |
| TC10002927.hg.1 | 2.04  | PSR10006610.hg.1 | LDB3       |
| TC10002927.hg.1 | -2.02 | PSR10006634.hg.1 | LDB3       |
| TC01001313.hg.1 | 9.59  | JUC01010885.hg.1 | LMNA       |
| TC01001313.hg.1 | 3.63  | JUC01010877.hg.1 | LMNA       |
| TC01001313.hg.1 | 3.63  | JUC01010886.hg.1 | LMNA       |
| TC01001313.hg.1 | 2.1   | PSR01020426.hg.1 | LMNA       |
| TC01001313.hg.1 | 2.03  | JUC01010896.hg.1 | LMNA       |
| TC01001313.hg.1 | -2.83 | PSR01020388.hg.1 | LMNA       |
| TC06000532.hg.1 | 9.58  | JUC06002389.hg.1 | CDKN1A     |
| TC06000532.hg.1 | 2.21  | PSR06005802.hg.1 | CDKN1A     |
| TC05001389.hg.1 | 9.55  | JUC05009966.hg.1 | PDE4D      |
| TC05001389.hg.1 | 9.07  | PSR05019394.hg.1 | PDE4D      |
| TC05001389.hg.1 | 3.61  | PSR05019387.hg.1 | PDE4D      |
| TC05001389.hg.1 | 3.43  | PSR05019385.hg.1 | PDE4D      |
| TC05001389.hg.1 | 3.11  | PSR05019388.hg.1 | PDE4D      |
| TC05001389.hg.1 | 3     | PSR05019386.hg.1 | PDE4D      |
| TC05001389.hg.1 | 2.47  | PSR05019374.hg.1 | PDE4D      |
| TC05001389.hg.1 | 2.45  | JUC05010011.hg.1 | PDE4D      |
| TC05001389.hg.1 | 2.37  | PSR05019382.hg.1 | PDE4D      |
| TC05001389.hg.1 | 2.36  | PSR05019373.hg.1 | PDE4D      |
| TC05001389.hg.1 | 2.31  | PSR05019368.hg.1 | PDE4D      |
| TC05001389.hg.1 | 2.23  | JUC05010000.hg.1 | PDE4D      |
| TC05001389.hg.1 | 2.12  | PSR05019367.hg.1 | PDE4D      |
| TC05001389.hg.1 | -2.02 | PSR05019362.hg.1 | PDE4D      |
| TC05001389.hg.1 | -2.07 | PSR05019355.hg.1 | PDE4D      |
| TC05001389.hg.1 | -2.07 | PSR05019410.hg.1 | PDE4D      |
| TC05001389.hg.1 | -2.08 | PSR05019401.hg.1 | PDE4D      |
| TC05001389.hg.1 | -2.15 | PSR05019421.hg.1 | PDE4D      |
| TC05001389.hg.1 | -2.21 | JUC05009969.hg.1 | PDE4D      |
| TC05001389.hg.1 | -2.33 | PSR05019429.hg.1 | PDE4D      |

|                 |        |                  |         |
|-----------------|--------|------------------|---------|
| TC05001389.hg.1 | -2.38  | PSR05019414.hg.1 | PDE4D   |
| TC05001389.hg.1 | -2.52  | JUC05009962.hg.1 | PDE4D   |
| TC05001389.hg.1 | -2.62  | PSR05019404.hg.1 | PDE4D   |
| TC05001389.hg.1 | -2.66  | PSR05019425.hg.1 | PDE4D   |
| TC05001389.hg.1 | -2.7   | PSR05019363.hg.1 | PDE4D   |
| TC05001389.hg.1 | -2.74  | PSR05019417.hg.1 | PDE4D   |
| TC05001389.hg.1 | -3.02  | JUC05009956.hg.1 | PDE4D   |
| TC05001389.hg.1 | -3.72  | JUC05009982.hg.1 | PDE4D   |
| TC05001389.hg.1 | -4.23  | PSR05019413.hg.1 | PDE4D   |
| TC05001389.hg.1 | -4.27  | JUC05010007.hg.1 | PDE4D   |
| TC05001389.hg.1 | -4.6   | JUC05009996.hg.1 | PDE4D   |
| TC05001389.hg.1 | -4.75  | PSR05019407.hg.1 | PDE4D   |
| TC05001389.hg.1 | -4.95  | PSR05019411.hg.1 | PDE4D   |
| TC05001389.hg.1 | -5.79  | PSR05019418.hg.1 | PDE4D   |
| TC05001389.hg.1 | -6.28  | JUC05010005.hg.1 | PDE4D   |
| TC05001389.hg.1 | -6.97  | PSR05019409.hg.1 | PDE4D   |
| TC17001040.hg.1 | 9.55   | JUC17007991.hg.1 | INCA1   |
| TC17001040.hg.1 | -2.03  | PSR17014000.hg.1 | INCA1   |
| TC05000401.hg.1 | 9.49   | JUC05003141.hg.1 | RASGRF2 |
| TC05000401.hg.1 | 7.11   | JUC05003146.hg.1 | RASGRF2 |
| TC05000401.hg.1 | 7.01   | JUC05003120.hg.1 | RASGRF2 |
| TC05000401.hg.1 | 5.21   | JUC05003118.hg.1 | RASGRF2 |
| TC05000401.hg.1 | 4.26   | JUC05003143.hg.1 | RASGRF2 |
| TC05000401.hg.1 | 3.99   | PSR05005724.hg.1 | RASGRF2 |
| TC05000401.hg.1 | 3.9    | PSR05005739.hg.1 | RASGRF2 |
| TC05000401.hg.1 | 2.97   | JUC05003145.hg.1 | RASGRF2 |
| TC05000401.hg.1 | 2.77   | JUC05003131.hg.1 | RASGRF2 |
| TC05000401.hg.1 | 2.68   | PSR05005740.hg.1 | RASGRF2 |
| TC05000401.hg.1 | 2.46   | JUC05003135.hg.1 | RASGRF2 |
| TC05000401.hg.1 | 2.12   | PSR05005736.hg.1 | RASGRF2 |
| TC05000401.hg.1 | -2     | PSR05005728.hg.1 | RASGRF2 |
| TC05000401.hg.1 | -2.1   | PSR05005731.hg.1 | RASGRF2 |
| TC05000401.hg.1 | -2.37  | PSR05005733.hg.1 | RASGRF2 |
| TC05000401.hg.1 | -2.38  | JUC05003136.hg.1 | RASGRF2 |
| TC05000401.hg.1 | -2.52  | JUC05003139.hg.1 | RASGRF2 |
| TC05000401.hg.1 | -2.55  | PSR05005729.hg.1 | RASGRF2 |
| TC05000401.hg.1 | -2.61  | PSR05005752.hg.1 | RASGRF2 |
| TC05000401.hg.1 | -2.66  | PSR05005743.hg.1 | RASGRF2 |
| TC05000401.hg.1 | -2.81  | PSR05005748.hg.1 | RASGRF2 |
| TC05000401.hg.1 | -2.86  | JUC05003138.hg.1 | RASGRF2 |
| TC05000401.hg.1 | -2.96  | PSR05005749.hg.1 | RASGRF2 |
| TC05000401.hg.1 | -2.99  | PSR05005745.hg.1 | RASGRF2 |
| TC05000401.hg.1 | -3     | PSR05005747.hg.1 | RASGRF2 |
| TC05000401.hg.1 | -4.36  | JUC05003124.hg.1 | RASGRF2 |
| TC05000401.hg.1 | -5.05  | PSR05005751.hg.1 | RASGRF2 |
| TC05000401.hg.1 | -5.32  | PSR05005721.hg.1 | RASGRF2 |
| TC05000401.hg.1 | -6     | PSR05005753.hg.1 | RASGRF2 |
| TC05000401.hg.1 | -6.21  | PSR05005742.hg.1 | RASGRF2 |
| TC05000401.hg.1 | -6.71  | JUC05003128.hg.1 | RASGRF2 |
| TC05000401.hg.1 | -6.81  | JUC05003123.hg.1 | RASGRF2 |
| TC05000401.hg.1 | -9.23  | JUC05003144.hg.1 | RASGRF2 |
| TC05000401.hg.1 | -9.93  | JUC05003129.hg.1 | RASGRF2 |
| TC05000401.hg.1 | -11.08 | PSR05005725.hg.1 | RASGRF2 |
| TC05000401.hg.1 | -12.99 | JUC05003116.hg.1 | RASGRF2 |
| TC01003638.hg.1 | 9.47   | PSR01055959.hg.1 | PTGS2   |
| TC01003638.hg.1 | 7.14   | JUC01029200.hg.1 | PTGS2   |
| TC01003638.hg.1 | 5.79   | PSR01055969.hg.1 | PTGS2   |
| TC01003638.hg.1 | 5.48   | JUC01029201.hg.1 | PTGS2   |



|                 |       |                  |          |
|-----------------|-------|------------------|----------|
| TC01003638.hg.1 | 4.96  | PSR01055954.hg.1 | PTGS2    |
| TC01003638.hg.1 | 3.14  | PSR01055964.hg.1 | PTGS2    |
| TC01003638.hg.1 | 2.87  | JUC01029207.hg.1 | PTGS2    |
| TC01001954.hg.1 | 9.37  | PSR01030172.hg.1 | LGALS8   |
| TC01001954.hg.1 | 3.24  | JUC01016317.hg.1 | LGALS8   |
| TC01001954.hg.1 | 2.92  | JUC01016322.hg.1 | LGALS8   |
| TC01001954.hg.1 | 2.82  | PSR01030169.hg.1 | LGALS8   |
| TC01001954.hg.1 | 2.82  | JUC01016309.hg.1 | LGALS8   |
| TC01001954.hg.1 | 2.35  | PSR01030163.hg.1 | LGALS8   |
| TC01001954.hg.1 | 2.23  | JUC01016319.hg.1 | LGALS8   |
| TC01001954.hg.1 | 2.06  | JUC01016325.hg.1 | LGALS8   |
| TC01001954.hg.1 | 2.06  | JUC01016326.hg.1 | LGALS8   |
| TC01001954.hg.1 | -3.1  | PSR01030181.hg.1 | LGALS8   |
| TC02002624.hg.1 | 9.37  | JUC02021911.hg.1 | STAT1    |
| TC02002624.hg.1 | 4.41  | JUC02021918.hg.1 | STAT1    |
| TC02002624.hg.1 | 3.7   | JUC02021937.hg.1 | STAT1    |
| TC02002624.hg.1 | 2.69  | PSR02042058.hg.1 | STAT1    |
| TC02002624.hg.1 | 2.6   | PSR02042023.hg.1 | STAT1    |
| TC02002624.hg.1 | 2.41  | PSR02042052.hg.1 | STAT1    |
| TC02002624.hg.1 | 2.36  | PSR02042006.hg.1 | STAT1    |
| TC02002624.hg.1 | -2.16 | PSR02042033.hg.1 | STAT1    |
| TC02002624.hg.1 | -4.74 | JUC02021932.hg.1 | STAT1    |
| TC06001717.hg.1 | 9.28  | JUC06009702.hg.1 | TREM1    |
| TC06001717.hg.1 | 7.03  | PSR06020463.hg.1 | TREM1    |
| TC06001717.hg.1 | 5.24  | PSR06020461.hg.1 | TREM1    |
| TC06001717.hg.1 | 4.44  | PSR06020460.hg.1 | TREM1    |
| TC06001717.hg.1 | 3.88  | PSR06020466.hg.1 | TREM1    |
| TC15000800.hg.1 | 9.26  | JUC15003821.hg.1 | ADAMTSL3 |
| TC15000800.hg.1 | 4.01  | JUC15003803.hg.1 | ADAMTSL3 |
| TC15000800.hg.1 | 3.58  | JUC15003812.hg.1 | ADAMTSL3 |
| TC15000800.hg.1 | 3.44  | JUC15003816.hg.1 | ADAMTSL3 |
| TC15000800.hg.1 | 3.22  | JUC15003794.hg.1 | ADAMTSL3 |
| TC15000800.hg.1 | 2.75  | JUC15003813.hg.1 | ADAMTSL3 |
| TC15000800.hg.1 | 2.66  | PSR15007321.hg.1 | ADAMTSL3 |
| TC15000800.hg.1 | 2.65  | JUC15003804.hg.1 | ADAMTSL3 |
| TC15000800.hg.1 | 2.64  | PSR15007320.hg.1 | ADAMTSL3 |
| TC15000800.hg.1 | 2.42  | PSR15007322.hg.1 | ADAMTSL3 |
| TC15000800.hg.1 | 2.32  | PSR15007302.hg.1 | ADAMTSL3 |
| TC15000800.hg.1 | 2.31  | JUC15003805.hg.1 | ADAMTSL3 |
| TC15000800.hg.1 | -2.25 | JUC15003811.hg.1 | ADAMTSL3 |
| TC15000800.hg.1 | -2.32 | JUC15003795.hg.1 | ADAMTSL3 |
| TC15000800.hg.1 | -2.45 | PSR15007315.hg.1 | ADAMTSL3 |
| TC15000800.hg.1 | -2.58 | JUC15003817.hg.1 | ADAMTSL3 |
| TC15000800.hg.1 | -2.74 | JUC15003820.hg.1 | ADAMTSL3 |
| TC15000800.hg.1 | -2.77 | PSR15007316.hg.1 | ADAMTSL3 |
| TC15000800.hg.1 | -2.78 | JUC15003808.hg.1 | ADAMTSL3 |
| TC15000800.hg.1 | -2.88 | PSR15007299.hg.1 | ADAMTSL3 |
| TC15000800.hg.1 | -2.91 | PSR15007324.hg.1 | ADAMTSL3 |
| TC15000800.hg.1 | -2.98 | PSR15007314.hg.1 | ADAMTSL3 |
| TC15000800.hg.1 | -3.11 | JUC15003810.hg.1 | ADAMTSL3 |
| TC15000800.hg.1 | -3.43 | PSR15007298.hg.1 | ADAMTSL3 |
| TC15000800.hg.1 | -3.88 | JUC15003807.hg.1 | ADAMTSL3 |
| TC15000800.hg.1 | -4.22 | PSR15007331.hg.1 | ADAMTSL3 |
| TC15000800.hg.1 | -4.93 | JUC15003823.hg.1 | ADAMTSL3 |
| TC15000800.hg.1 | -6.39 | PSR15007327.hg.1 | ADAMTSL3 |
| TC15000800.hg.1 | -6.87 | PSR15007330.hg.1 | ADAMTSL3 |
| TC15000800.hg.1 | -8.65 | JUC15003799.hg.1 | ADAMTSL3 |
| TC15000800.hg.1 | -9.37 | PSR15007328.hg.1 | ADAMTSL3 |

|                 |        |                  |           |
|-----------------|--------|------------------|-----------|
| TC15000800.hg.1 | -10.99 | PSR15007332.hg.1 | ADAMTSL3  |
| TC15000800.hg.1 | -19.84 | PSR15007306.hg.1 | ADAMTSL3  |
| TC15000800.hg.1 | -23.54 | JUC15003822.hg.1 | ADAMTSL3  |
| TC21000559.hg.1 | 9.26   | PSR21006827.hg.1 | S100B     |
| TC21000559.hg.1 | 8      | PSR21006829.hg.1 | S100B     |
| TC21000559.hg.1 | 7.11   | PSR21006830.hg.1 | S100B     |
| TC21000559.hg.1 | 6.38   | PSR21006828.hg.1 | S100B     |
| TC21000559.hg.1 | 6.15   | PSR21006822.hg.1 | S100B     |
| TC21000559.hg.1 | 5.74   | PSR21006825.hg.1 | S100B     |
| TC21000559.hg.1 | 4.22   | JUC21003510.hg.1 | S100B     |
| TC03000944.hg.1 | 9.2    | JUC03008302.hg.1 | LINC00578 |
| TC03000944.hg.1 | -2.02  | PSR03016306.hg.1 | LINC00578 |
| TC03000944.hg.1 | -5.38  | PSR03016301.hg.1 | LINC00578 |
| TC21000420.hg.1 | 9.2    | PSR21004944.hg.1 | RCAN1     |
| TC21000420.hg.1 | 8.72   | PSR21004941.hg.1 | RCAN1     |
| TC21000420.hg.1 | 8.35   | JUC21002514.hg.1 | RCAN1     |
| TC21000420.hg.1 | 8.1    | JUC21002516.hg.1 | RCAN1     |
| TC21000420.hg.1 | 8.07   | PSR21004939.hg.1 | RCAN1     |
| TC21000420.hg.1 | 6.5    | PSR21004942.hg.1 | RCAN1     |
| TC21000420.hg.1 | 5.86   | PSR21004940.hg.1 | RCAN1     |
| TC21000420.hg.1 | 5.36   | PSR21004921.hg.1 | RCAN1     |
| TC21000420.hg.1 | 4.63   | PSR21004938.hg.1 | RCAN1     |
| TC21000420.hg.1 | 3.48   | PSR21004927.hg.1 | RCAN1     |
| TC21000420.hg.1 | 3.24   | JUC21002525.hg.1 | RCAN1     |
| TC21000420.hg.1 | 2.59   | PSR21004936.hg.1 | RCAN1     |
| TC21000420.hg.1 | 2.45   | JUC21002522.hg.1 | RCAN1     |
| TC07000328.hg.1 | 9.17   | JUC07002401.hg.1 | EGFR      |
| TC07000328.hg.1 | 4.01   | JUC07002372.hg.1 | EGFR      |
| TC07000328.hg.1 | 2.58   | PSR07004855.hg.1 | EGFR      |
| TC07000328.hg.1 | 2.58   | PSR07004858.hg.1 | EGFR      |
| TC07000328.hg.1 | 2.41   | PSR07004880.hg.1 | EGFR      |
| TC07000328.hg.1 | 2.29   | PSR07004851.hg.1 | EGFR      |
| TC07000328.hg.1 | 2.17   | JUC07002375.hg.1 | EGFR      |
| TC07000328.hg.1 | 2      | PSR07004874.hg.1 | EGFR      |
| TC09001070.hg.1 | 9.09   | JUC09007729.hg.1 | RNF38     |
| TC09001070.hg.1 | 7.83   | JUC09007723.hg.1 | RNF38     |
| TC09001070.hg.1 | 4.02   | PSR09014342.hg.1 | RNF38     |
| TC10000773.hg.1 | 9.08   | JUC10005116.hg.1 | PDCD11    |
| TC10000773.hg.1 | 2.6    | JUC10005118.hg.1 | PDCD11    |
| TC10000773.hg.1 | 2.22   | PSR10009205.hg.1 | PDCD11    |
| TC10000773.hg.1 | 2.1    | JUC10005138.hg.1 | PDCD11    |
| TC10000773.hg.1 | 2.01   | JUC10005125.hg.1 | PDCD11    |
| TC10000773.hg.1 | -2.05  | JUC10005144.hg.1 | PDCD11    |
| TC10000773.hg.1 | -2.21  | PSR10009224.hg.1 | PDCD11    |
| TC17001240.hg.1 | 9.08   | JUC17009475.hg.1 | B9D1      |
| TC17001240.hg.1 | 4.88   | JUC17009459.hg.1 | B9D1      |
| TC17001240.hg.1 | 3.91   | JUC17009463.hg.1 | B9D1      |
| TC17001240.hg.1 | 2.61   | PSR17016660.hg.1 | B9D1      |
| TC17001240.hg.1 | 2.45   | PSR17016683.hg.1 | B9D1      |
| TC17001240.hg.1 | 2.39   | PSR17016691.hg.1 | B9D1      |
| TC17001240.hg.1 | 2.33   | PSR17016689.hg.1 | B9D1      |
| TC17001240.hg.1 | 2.32   | PSR17016687.hg.1 | B9D1      |
| TC17001240.hg.1 | 2.29   | PSR17016662.hg.1 | B9D1      |
| TC17001240.hg.1 | 2.21   | PSR17016686.hg.1 | B9D1      |
| TC17001240.hg.1 | 2.18   | PSR17016664.hg.1 | B9D1      |
| TC17001240.hg.1 | 2.12   | JUC17009467.hg.1 | B9D1      |
| TC17001240.hg.1 | 2.11   | PSR17016667.hg.1 | B9D1      |
| TC17001240.hg.1 | 2.06   | PSR17016669.hg.1 | B9D1      |

|                  |        |                   |         |
|------------------|--------|-------------------|---------|
| TC17001240.hg.1  | -2.18  | JUC17009469.hg.1  | B9D1    |
| TC17001240.hg.1  | -2.21  | JUC17009472.hg.1  | B9D1    |
| TC19001210.hg.1  | 9.04   | JUC19009834.hg.1  | PRDX2   |
| TC19001210.hg.1  | 2.65   | PSR19017006.hg.1  | PRDX2   |
| TC19001210.hg.1  | 2.57   | PSR19017002.hg.1  | PRDX2   |
| TC19001210.hg.1  | 2.16   | PSR19017009.hg.1  | PRDX2   |
| TC02002174.hg.1  | 8.99   | JUC02018260.hg.1  | ST6GAL2 |
| TC02002174.hg.1  | 7.47   | JUC02018263.hg.1  | ST6GAL2 |
| TC02002174.hg.1  | 6.76   | JUC02018267.hg.1  | ST6GAL2 |
| TC02002174.hg.1  | 4.3    | PSR02035394.hg.1  | ST6GAL2 |
| TC02002174.hg.1  | 3.36   | PSR02035392.hg.1  | ST6GAL2 |
| TC02002174.hg.1  | 2.46   | PSR02035393.hg.1  | ST6GAL2 |
| TC02002174.hg.1  | -2.92  | PSR02035396.hg.1  | ST6GAL2 |
| TC02002174.hg.1  | -4.01  | JUC02018266.hg.1  | ST6GAL2 |
| TC02002174.hg.1  | -4.42  | PSR02035395.hg.1  | ST6GAL2 |
| TC02002174.hg.1  | -7.09  | PSR02035388.hg.1  | ST6GAL2 |
| TC02002174.hg.1  | -9.02  | JUC02018264.hg.1  | ST6GAL2 |
| TC02002174.hg.1  | -10.79 | JUC02018268.hg.1  | ST6GAL2 |
| TC02002174.hg.1  | -11.48 | PSR02035397.hg.1  | ST6GAL2 |
| TC02002174.hg.1  | -12.91 | PSR02035399.hg.1  | ST6GAL2 |
| TC02002174.hg.1  | -14.75 | PSR02035398.hg.1  | ST6GAL2 |
| TC02002174.hg.1  | -17.04 | PSR02035402.hg.1  | ST6GAL2 |
| TC02002174.hg.1  | -17.45 | PSR02035390.hg.1  | ST6GAL2 |
| TC02002174.hg.1  | -20.33 | PSR02035400.hg.1  | ST6GAL2 |
| TC6_ssto_hap7000 | 8.97   | JUC6_ssto_hap7001 | HLA-B   |
| TC6_ssto_hap7000 | 3.89   | JUC6_ssto_hap7001 | HLA-B   |
| TC6_ssto_hap7000 | 3.58   | PSR6_ssto_hap7002 | HLA-B   |
| TC6_ssto_hap7000 | 3      | JUC6_ssto_hap7001 | HLA-B   |
| TC6_ssto_hap7000 | 2.92   | JUC6_ssto_hap7001 | HLA-B   |
| TC6_ssto_hap7000 | 2.91   | PSR6_ssto_hap7002 | HLA-B   |
| TC6_ssto_hap7000 | 2.68   | PSR6_ssto_hap7002 | HLA-B   |
| TC6_ssto_hap7000 | 2.56   | PSR6_ssto_hap7002 | HLA-B   |
| TC6_ssto_hap7000 | 2.5    | PSR6_ssto_hap7002 | HLA-B   |
| TC6_ssto_hap7000 | 2.34   | PSR6_ssto_hap7002 | HLA-B   |
| TC6_ssto_hap7000 | 2.34   | PSR6_ssto_hap7002 | HLA-B   |
| TC6_ssto_hap7000 | 2.31   | PSR6_ssto_hap7002 | HLA-B   |
| TC6_ssto_hap7000 | 2.01   | PSR6_ssto_hap7002 | HLA-B   |
| TC03000495.hg.1  | 8.84   | JUC03004682.hg.1  | ST3GAL6 |
| TC03000495.hg.1  | 4.52   | PSR03009403.hg.1  | ST3GAL6 |
| TC03000495.hg.1  | 4.42   | PSR03009401.hg.1  | ST3GAL6 |
| TC03000495.hg.1  | 3.95   | PSR03009402.hg.1  | ST3GAL6 |
| TC03000495.hg.1  | 3.34   | PSR03009345.hg.1  | ST3GAL6 |
| TC03000495.hg.1  | 3.33   | JUC03004664.hg.1  | ST3GAL6 |
| TC03000495.hg.1  | 3.16   | PSR03009358.hg.1  | ST3GAL6 |
| TC03000495.hg.1  | 3.15   | PSR03009339.hg.1  | ST3GAL6 |
| TC03000495.hg.1  | 3.11   | PSR03009344.hg.1  | ST3GAL6 |
| TC03000495.hg.1  | 3.05   | PSR03009363.hg.1  | ST3GAL6 |
| TC03000495.hg.1  | 2.99   | PSR03009354.hg.1  | ST3GAL6 |
| TC03000495.hg.1  | 2.96   | PSR03009346.hg.1  | ST3GAL6 |
| TC03000495.hg.1  | 2.9    | PSR03009392.hg.1  | ST3GAL6 |
| TC03000495.hg.1  | 2.76   | PSR03009380.hg.1  | ST3GAL6 |
| TC03000495.hg.1  | 2.69   | PSR03009334.hg.1  | ST3GAL6 |
| TC03000495.hg.1  | 2.67   | PSR03009398.hg.1  | ST3GAL6 |
| TC03000495.hg.1  | 2.55   | PSR03009371.hg.1  | ST3GAL6 |
| TC03000495.hg.1  | 2.54   | PSR03009367.hg.1  | ST3GAL6 |
| TC03000495.hg.1  | 2.53   | PSR03009337.hg.1  | ST3GAL6 |
| TC03000495.hg.1  | 2.37   | JUC03004681.hg.1  | ST3GAL6 |
| TC03000495.hg.1  | 2.35   | PSR03009396.hg.1  | ST3GAL6 |

|                 |       |                  |           |
|-----------------|-------|------------------|-----------|
| TC03000495.hg.1 | 2.3   | PSR03009378.hg.1 | ST3GAL6   |
| TC03000495.hg.1 | 2.28  | JUC03004691.hg.1 | ST3GAL6   |
| TC03000495.hg.1 | 2.25  | JUC03004678.hg.1 | ST3GAL6   |
| TC03000495.hg.1 | 2.22  | PSR03009400.hg.1 | ST3GAL6   |
| TC03000495.hg.1 | 2.2   | PSR03009347.hg.1 | ST3GAL6   |
| TC03000495.hg.1 | 2.1   | JUC03004663.hg.1 | ST3GAL6   |
| TC03000495.hg.1 | 2.03  | JUC03004694.hg.1 | ST3GAL6   |
| TC03000561.hg.1 | 8.78  | JUC03005064.hg.1 | PVRL3     |
| TC03000561.hg.1 | 3.06  | JUC03005062.hg.1 | PVRL3     |
| TC03000561.hg.1 | 2.49  | PSR03010133.hg.1 | PVRL3     |
| TC03000561.hg.1 | 2.44  | PSR03010138.hg.1 | PVRL3     |
| TC03000561.hg.1 | 2.31  | PSR03010140.hg.1 | PVRL3     |
| TC03000561.hg.1 | 2.19  | PSR03010135.hg.1 | PVRL3     |
| TC03000561.hg.1 | 2.16  | PSR03010144.hg.1 | PVRL3     |
| TC15000368.hg.1 | 8.78  | JUC15001592.hg.1 | SEMA6D    |
| TC15000368.hg.1 | 5.72  | PSR15003354.hg.1 | SEMA6D    |
| TC15000368.hg.1 | 4.13  | PSR15003350.hg.1 | SEMA6D    |
| TC15000368.hg.1 | 4.04  | PSR15003353.hg.1 | SEMA6D    |
| TC15000368.hg.1 | 3.49  | PSR15003349.hg.1 | SEMA6D    |
| TC15000368.hg.1 | 3.28  | PSR15003356.hg.1 | SEMA6D    |
| TC15000368.hg.1 | 3.1   | PSR15003378.hg.1 | SEMA6D    |
| TC15000368.hg.1 | 3     | PSR15003362.hg.1 | SEMA6D    |
| TC15000368.hg.1 | 2.92  | PSR15003360.hg.1 | SEMA6D    |
| TC15000368.hg.1 | 2.78  | PSR15003381.hg.1 | SEMA6D    |
| TC15000368.hg.1 | 2.59  | PSR15003357.hg.1 | SEMA6D    |
| TC15000368.hg.1 | 2.58  | JUC15001609.hg.1 | SEMA6D    |
| TC15000368.hg.1 | 2.57  | PSR15003364.hg.1 | SEMA6D    |
| TC15000368.hg.1 | -2.01 | PSR15003371.hg.1 | SEMA6D    |
| TC15000368.hg.1 | -2.03 | PSR15003377.hg.1 | SEMA6D    |
| TC15000368.hg.1 | -2.68 | JUC15001590.hg.1 | SEMA6D    |
| TC04000706.hg.1 | 8.72  | JUC04005392.hg.1 | HHIP      |
| TC04000706.hg.1 | 5.52  | PSR04010020.hg.1 | HHIP      |
| TC04000706.hg.1 | 5.32  | PSR04010021.hg.1 | HHIP      |
| TC04000706.hg.1 | 5.19  | PSR04010034.hg.1 | HHIP      |
| TC04000706.hg.1 | 5.04  | PSR04010037.hg.1 | HHIP      |
| TC04000706.hg.1 | 4.81  | PSR04010019.hg.1 | HHIP      |
| TC04000706.hg.1 | 4.81  | PSR04010022.hg.1 | HHIP      |
| TC04000706.hg.1 | 4.47  | PSR04010045.hg.1 | HHIP      |
| TC04000706.hg.1 | 4.34  | PSR04010032.hg.1 | HHIP      |
| TC04000706.hg.1 | 4.04  | JUC04005393.hg.1 | HHIP      |
| TC04000706.hg.1 | 4.02  | PSR04010040.hg.1 | HHIP      |
| TC04000706.hg.1 | 3.94  | PSR04010043.hg.1 | HHIP      |
| TC04000706.hg.1 | 3.81  | PSR04010052.hg.1 | HHIP      |
| TC04000706.hg.1 | 3.49  | JUC04005372.hg.1 | HHIP      |
| TC04000706.hg.1 | 3.3   | PSR04010033.hg.1 | HHIP      |
| TC04000706.hg.1 | 3.27  | PSR04010044.hg.1 | HHIP      |
| TC04000706.hg.1 | 3.18  | PSR04010051.hg.1 | HHIP      |
| TC04000706.hg.1 | 3.13  | PSR04010049.hg.1 | HHIP      |
| TC04000706.hg.1 | 2.97  | JUC04005383.hg.1 | HHIP      |
| TC04000706.hg.1 | 2.88  | JUC04005384.hg.1 | HHIP      |
| TC04000706.hg.1 | 2.52  | PSR04010029.hg.1 | HHIP      |
| TC04000706.hg.1 | 2.36  | JUC04005375.hg.1 | HHIP      |
| TC04000706.hg.1 | 2.04  | PSR04010048.hg.1 | HHIP      |
| TC10002938.hg.1 | 8.7   | PSR10006674.hg.1 | C10orf116 |
| TC10002938.hg.1 | 5.49  | PSR10006676.hg.1 | C10orf116 |
| TC10002938.hg.1 | 4.76  | JUC10017204.hg.1 | C10orf116 |
| TC10002938.hg.1 | 4.16  | PSR10006680.hg.1 | C10orf116 |
| TC10002938.hg.1 | 3.37  | PSR10006683.hg.1 | C10orf116 |

|                 |       |                  |           |
|-----------------|-------|------------------|-----------|
| TC10002938.hg.1 | -2.4  | PSR10006679.hg.1 | C10orf116 |
| TC11002427.hg.1 | 8.7   | JUC11015481.hg.1 | CDON      |
| TC11002427.hg.1 | 8.29  | JUC11015494.hg.1 | CDON      |
| TC11002427.hg.1 | 7.59  | PSR11029100.hg.1 | CDON      |
| TC11002427.hg.1 | 7.21  | PSR11029091.hg.1 | CDON      |
| TC11002427.hg.1 | 7.15  | PSR11029101.hg.1 | CDON      |
| TC11002427.hg.1 | 6.43  | PSR11029087.hg.1 | CDON      |
| TC11002427.hg.1 | 6.33  | JUC11015495.hg.1 | CDON      |
| TC11002427.hg.1 | 6.08  | PSR11029095.hg.1 | CDON      |
| TC11002427.hg.1 | 5.24  | PSR11029086.hg.1 | CDON      |
| TC11002427.hg.1 | 5.11  | JUC11015488.hg.1 | CDON      |
| TC11002427.hg.1 | 3.78  | JUC11015489.hg.1 | CDON      |
| TC11002427.hg.1 | 2.92  | PSR11029099.hg.1 | CDON      |
| TC11002427.hg.1 | 2.41  | JUC11015491.hg.1 | CDON      |
| TC11002427.hg.1 | 2.26  | JUC11015480.hg.1 | CDON      |
| TC11002427.hg.1 | 2.1   | JUC11015477.hg.1 | CDON      |
| TC11002427.hg.1 | -2.1  | PSR11029073.hg.1 | CDON      |
| TC11002427.hg.1 | -2.14 | JUC11015482.hg.1 | CDON      |
| TC11002427.hg.1 | -2.69 | JUC11015493.hg.1 | CDON      |
| TC11002427.hg.1 | -6.42 | JUC11015499.hg.1 | CDON      |
| TC10001676.hg.1 | 8.69  | JUC10012801.hg.1 | ABLIM1    |
| TC10001676.hg.1 | 6.19  | JUC10012833.hg.1 | ABLIM1    |
| TC10001676.hg.1 | 5.13  | JUC10012831.hg.1 | ABLIM1    |
| TC10001676.hg.1 | 3.75  | PSR10022098.hg.1 | ABLIM1    |
| TC10001676.hg.1 | 3.64  | PSR10022061.hg.1 | ABLIM1    |
| TC10001676.hg.1 | 3.55  | PSR10022092.hg.1 | ABLIM1    |
| TC10001676.hg.1 | 3.55  | JUC10012822.hg.1 | ABLIM1    |
| TC10001676.hg.1 | 3.41  | JUC10012802.hg.1 | ABLIM1    |
| TC10001676.hg.1 | 2.98  | PSR10022063.hg.1 | ABLIM1    |
| TC10001676.hg.1 | 2.95  | JUC10012804.hg.1 | ABLIM1    |
| TC10001676.hg.1 | 2.93  | JUC10012798.hg.1 | ABLIM1    |
| TC10001676.hg.1 | 2.91  | JUC10012830.hg.1 | ABLIM1    |
| TC10001676.hg.1 | 2.88  | PSR10022094.hg.1 | ABLIM1    |
| TC10001676.hg.1 | 2.85  | PSR10022075.hg.1 | ABLIM1    |
| TC10001676.hg.1 | 2.85  | JUC10012824.hg.1 | ABLIM1    |
| TC10001676.hg.1 | 2.83  | JUC10012826.hg.1 | ABLIM1    |
| TC10001676.hg.1 | 2.82  | JUC10012796.hg.1 | ABLIM1    |
| TC10001676.hg.1 | 2.78  | PSR10022095.hg.1 | ABLIM1    |
| TC10001676.hg.1 | 2.73  | PSR10022096.hg.1 | ABLIM1    |
| TC10001676.hg.1 | 2.64  | PSR10022091.hg.1 | ABLIM1    |
| TC10001676.hg.1 | 2.56  | PSR10022077.hg.1 | ABLIM1    |
| TC10001676.hg.1 | 2.52  | PSR10022062.hg.1 | ABLIM1    |
| TC10001676.hg.1 | 2.42  | PSR10022101.hg.1 | ABLIM1    |
| TC10001676.hg.1 | 2.41  | PSR10022039.hg.1 | ABLIM1    |
| TC10001676.hg.1 | 2.4   | PSR10022081.hg.1 | ABLIM1    |
| TC10001676.hg.1 | 2.34  | PSR10022100.hg.1 | ABLIM1    |
| TC10001676.hg.1 | 2.27  | PSR10022088.hg.1 | ABLIM1    |
| TC10001676.hg.1 | 2.21  | JUC10012803.hg.1 | ABLIM1    |
| TC10001676.hg.1 | 2.21  | JUC10012815.hg.1 | ABLIM1    |
| TC10001676.hg.1 | 2.05  | PSR10022069.hg.1 | ABLIM1    |
| TC10001676.hg.1 | 2.02  | PSR10022046.hg.1 | ABLIM1    |
| TC10001676.hg.1 | -2.7  | PSR10022060.hg.1 | ABLIM1    |
| TC10001676.hg.1 | -3.43 | JUC10012837.hg.1 | ABLIM1    |
| TC06001046.hg.1 | 8.67  | PSR06012235.hg.1 | GPR126    |
| TC06001046.hg.1 | 7.4   | PSR06012251.hg.1 | GPR126    |
| TC06001046.hg.1 | 6.54  | JUC06006011.hg.1 | GPR126    |
| TC06001046.hg.1 | 6.38  | PSR06012240.hg.1 | GPR126    |
| TC06001046.hg.1 | 6.13  | JUC06005992.hg.1 | GPR126    |

|                 |       |                  |        |
|-----------------|-------|------------------|--------|
| TC06001046.hg.1 | 5.83  | PSR06012237.hg.1 | GPR126 |
| TC06001046.hg.1 | 5.82  | PSR06012275.hg.1 | GPR126 |
| TC06001046.hg.1 | 5.6   | PSR06012258.hg.1 | GPR126 |
| TC06001046.hg.1 | 5.49  | PSR06012271.hg.1 | GPR126 |
| TC06001046.hg.1 | 5.44  | PSR06012249.hg.1 | GPR126 |
| TC06001046.hg.1 | 5.43  | JUC06005988.hg.1 | GPR126 |
| TC06001046.hg.1 | 5.29  | JUC06005999.hg.1 | GPR126 |
| TC06001046.hg.1 | 4.45  | JUC06006005.hg.1 | GPR126 |
| TC06001046.hg.1 | 3.99  | PSR06012267.hg.1 | GPR126 |
| TC06001046.hg.1 | 2.69  | JUC06005993.hg.1 | GPR126 |
| TC06001046.hg.1 | 2.18  | JUC06006003.hg.1 | GPR126 |
| TC06001046.hg.1 | 2.07  | PSR06012265.hg.1 | GPR126 |
| TC06001046.hg.1 | 2.03  | JUC06006010.hg.1 | GPR126 |
| TC06001046.hg.1 | -2.45 | JUC06006013.hg.1 | GPR126 |
| TC06001046.hg.1 | -2.66 | JUC06006000.hg.1 | GPR126 |
| TC06001046.hg.1 | -3.33 | JUC06005995.hg.1 | GPR126 |
| TC07003293.hg.1 | 8.66  | JUC07020378.hg.1 | HILPDA |
| TC07003293.hg.1 | 7.23  | JUC07020373.hg.1 | HILPDA |
| TC07003293.hg.1 | 4.41  | PSR07012185.hg.1 | HILPDA |
| TC07003293.hg.1 | 3.36  | PSR07012201.hg.1 | HILPDA |
| TC07003293.hg.1 | 3.12  | JUC07020374.hg.1 | HILPDA |
| TC07003293.hg.1 | 2.39  | JUC07020376.hg.1 | HILPDA |
| TC07003293.hg.1 | -2.7  | PSR07012203.hg.1 | HILPDA |
| TC07003293.hg.1 | -3.21 | PSR07012198.hg.1 | HILPDA |
| TC02002002.hg.1 | 8.65  | PSR02032182.hg.1 | LOXL3  |
| TC02002002.hg.1 | 8.1   | JUC02016631.hg.1 | LOXL3  |
| TC02002002.hg.1 | 7.79  | JUC02016626.hg.1 | LOXL3  |
| TC02002002.hg.1 | 4.58  | PSR02032162.hg.1 | LOXL3  |
| TC02002002.hg.1 | 4.16  | PSR02032187.hg.1 | LOXL3  |
| TC02002002.hg.1 | 4.16  | JUC02016623.hg.1 | LOXL3  |
| TC02002002.hg.1 | 3.78  | PSR02032178.hg.1 | LOXL3  |
| TC02002002.hg.1 | 3.55  | PSR02032190.hg.1 | LOXL3  |
| TC02002002.hg.1 | 3.09  | PSR02032158.hg.1 | LOXL3  |
| TC02002002.hg.1 | 3.04  | JUC02016628.hg.1 | LOXL3  |
| TC02002002.hg.1 | 2.67  | PSR02032159.hg.1 | LOXL3  |
| TC02002002.hg.1 | 2.59  | JUC02016636.hg.1 | LOXL3  |
| TC02002002.hg.1 | 2.53  | PSR02032160.hg.1 | LOXL3  |
| TC02002002.hg.1 | 2.11  | JUC02016622.hg.1 | LOXL3  |
| TC05001851.hg.1 | 8.6   | PSR05025367.hg.1 | NRG2   |
| TC05001851.hg.1 | 3     | JUC05012988.hg.1 | NRG2   |
| TC05001851.hg.1 | 2.92  | JUC05012983.hg.1 | NRG2   |
| TC05001851.hg.1 | 2.6   | JUC05013004.hg.1 | NRG2   |
| TC05001851.hg.1 | -3.28 | JUC05012989.hg.1 | NRG2   |
| TC10002925.hg.1 | 8.6   | PSR10000348.hg.1 | AKR1C3 |
| TC10002925.hg.1 | 8.43  | PSR10000356.hg.1 | AKR1C3 |
| TC10002925.hg.1 | 7.48  | PSR10000354.hg.1 | AKR1C3 |
| TC10002925.hg.1 | 7.39  | PSR10000353.hg.1 | AKR1C3 |
| TC10002925.hg.1 | 6.71  | PSR10000351.hg.1 | AKR1C3 |
| TC10002925.hg.1 | 6.53  | PSR10000352.hg.1 | AKR1C3 |
| TC10002925.hg.1 | 6.23  | JUC10016973.hg.1 | AKR1C3 |
| TC10002925.hg.1 | 6.11  | PSR10000349.hg.1 | AKR1C3 |
| TC10002925.hg.1 | 4.89  | PSR10000370.hg.1 | AKR1C3 |
| TC10002925.hg.1 | 4.53  | PSR10000364.hg.1 | AKR1C3 |
| TC10002925.hg.1 | 3.83  | JUC10016983.hg.1 | AKR1C3 |
| TC10002925.hg.1 | 2.58  | PSR10000357.hg.1 | AKR1C3 |
| TC10002925.hg.1 | 2.4   | JUC10016972.hg.1 | AKR1C3 |
| TC10002925.hg.1 | 2.34  | JUC10016977.hg.1 | AKR1C3 |
| TC10002925.hg.1 | 2.29  | JUC10016981.hg.1 | AKR1C3 |

|                 |       |                  |             |
|-----------------|-------|------------------|-------------|
| TC10002925.hg.1 | -2.21 | JUC10016984.hg.1 | AKR1C3      |
| TC10002925.hg.1 | -2.21 | JUC10016985.hg.1 | AKR1C3      |
| TC10002925.hg.1 | -2.23 | PSR10000369.hg.1 | AKR1C3      |
| TC01001106.hg.1 | 8.58  | JUC01008923.hg.1 | LOC1005060  |
| TC01001106.hg.1 | 2.59  | JUC01008898.hg.1 | LOC1005060  |
| TC01001106.hg.1 | 2.21  | PSR01017522.hg.1 | LOC1005060  |
| TC01001106.hg.1 | 2.14  | JUC01008910.hg.1 | LOC1005060  |
| TC01001106.hg.1 | -2.18 | JUC01008901.hg.1 | LOC1005060  |
| TC01001106.hg.1 | -2.5  | JUC01008914.hg.1 | LOC1005060  |
| TC02001557.hg.1 | 8.48  | PSR02025178.hg.1 | ITGB1BP1    |
| TC02001557.hg.1 | 6.51  | PSR02025177.hg.1 | ITGB1BP1    |
| TC02001557.hg.1 | 3.03  | JUC02013066.hg.1 | ITGB1BP1    |
| TC02001557.hg.1 | 2.09  | JUC02013053.hg.1 | ITGB1BP1    |
| TC07001276.hg.1 | 8.48  | JUC07009693.hg.1 | TBX20       |
| TC07001276.hg.1 | 2.06  | PSR07019866.hg.1 | TBX20       |
| TC07001276.hg.1 | -2.32 | PSR07019862.hg.1 | TBX20       |
| TC07001276.hg.1 | -2.7  | PSR07019861.hg.1 | TBX20       |
| TC07001276.hg.1 | -4.19 | JUC07009695.hg.1 | TBX20       |
| TC07001276.hg.1 | -4.59 | JUC07009696.hg.1 | TBX20       |
| TC13000561.hg.1 | 8.45  | PSR13006310.hg.1 | MAB21L1, MI |
| TC13000561.hg.1 | 5.83  | PSR13006309.hg.1 | MAB21L1, MI |
| TC13000561.hg.1 | 3.98  | JUC13003711.hg.1 | MAB21L1, MI |
| TC13000561.hg.1 | 3.49  | PSR13006303.hg.1 | MAB21L1, MI |
| TC6_mann_hap400 | 8.45  | JUC6_mann_hap400 | HLA-B       |
| TC6_mann_hap400 | 4.95  | PSR6_mann_hap400 | HLA-B       |
| TC6_mann_hap400 | 3.66  | JUC6_mann_hap400 | HLA-B       |
| TC6_mann_hap400 | 3.37  | PSR6_mann_hap400 | HLA-B       |
| TC6_mann_hap400 | 2.82  | JUC6_mann_hap400 | HLA-B       |
| TC6_mann_hap400 | 2.75  | JUC6_mann_hap400 | HLA-B       |
| TC6_mann_hap400 | 2.74  | PSR6_mann_hap400 | HLA-B       |
| TC6_mann_hap400 | 2.53  | PSR6_mann_hap400 | HLA-B       |
| TC6_mann_hap400 | 2.52  | PSR6_mann_hap400 | HLA-B       |
| TC6_mann_hap400 | 2.42  | PSR6_mann_hap400 | HLA-B       |
| TC6_mann_hap400 | 2.35  | PSR6_mann_hap400 | HLA-B       |
| TC6_mann_hap400 | 2.21  | PSR6_mann_hap400 | HLA-B       |
| TC6_mann_hap400 | 2.21  | PSR6_mann_hap400 | HLA-B       |
| TC6_cox_hap2000 | 8.44  | JUC6_cox_hap2001 | HLA-B       |
| TC6_cox_hap2000 | 5.57  | PSR6_cox_hap2002 | HLA-B       |
| TC6_cox_hap2000 | 3.66  | JUC6_cox_hap2001 | HLA-B       |
| TC6_cox_hap2000 | 3.18  | PSR6_cox_hap2002 | HLA-B       |
| TC6_cox_hap2000 | 2.75  | JUC6_cox_hap2001 | HLA-B       |
| TC6_cox_hap2000 | 2.3   | PSR6_cox_hap2002 | HLA-B       |
| TC6_cox_hap2000 | 2.07  | PSR6_cox_hap2002 | HLA-B       |
| TC6_cox_hap2000 | 2     | PSR6_cox_hap2002 | HLA-B       |
| TC07001163.hg.1 | 8.41  | JUC07008885.hg.1 | AGR2        |
| TC07001163.hg.1 | 3.46  | PSR07018203.hg.1 | AGR2        |
| TC07001163.hg.1 | 2.36  | PSR07018194.hg.1 | AGR2        |
| TC07001163.hg.1 | 2.23  | PSR07018198.hg.1 | AGR2        |
| TC07001163.hg.1 | 2.22  | PSR07018196.hg.1 | AGR2        |
| TC07001163.hg.1 | 2.21  | PSR07018189.hg.1 | AGR2        |
| TC07001163.hg.1 | 2.03  | PSR07018213.hg.1 | AGR2        |
| TC10001216.hg.1 | 8.41  | JUC10008791.hg.1 | C10orf10    |
| TC10001216.hg.1 | 4.89  | PSR10015195.hg.1 | C10orf10    |
| TC10001216.hg.1 | 4.45  | PSR10015181.hg.1 | C10orf10    |
| TC01000785.hg.1 | 8.4   | JUC01006579.hg.1 | AK5         |
| TC01000785.hg.1 | 6.85  | JUC01006573.hg.1 | AK5         |
| TC01000785.hg.1 | 4.26  | PSR01012502.hg.1 | AK5         |
| TC01000785.hg.1 | 3.83  | PSR01012501.hg.1 | AK5         |

|                 |       |                  |          |
|-----------------|-------|------------------|----------|
| TC01000785.hg.1 | 3.34  | PSR01012526.hg.1 | AK5      |
| TC01000785.hg.1 | 3.33  | JUC01006574.hg.1 | AK5      |
| TC01000785.hg.1 | 3.09  | PSR01012500.hg.1 | AK5      |
| TC01000785.hg.1 | 2.99  | PSR01012515.hg.1 | AK5      |
| TC01000785.hg.1 | 2.97  | PSR01012506.hg.1 | AK5      |
| TC01000785.hg.1 | 2.48  | JUC01006575.hg.1 | AK5      |
| TC01000785.hg.1 | 2.31  | PSR01012510.hg.1 | AK5      |
| TC01000785.hg.1 | -2.03 | PSR01012522.hg.1 | AK5      |
| TC01000785.hg.1 | -2.07 | JUC01006567.hg.1 | AK5      |
| TC01000785.hg.1 | -2.19 | JUC01006565.hg.1 | AK5      |
| TC01000785.hg.1 | -2.24 | JUC01006571.hg.1 | AK5      |
| TC01000785.hg.1 | -2.35 | PSR01012518.hg.1 | AK5      |
| TC01000785.hg.1 | -2.36 | PSR01012521.hg.1 | AK5      |
| TC01000785.hg.1 | -2.77 | PSR01012517.hg.1 | AK5      |
| TC01000785.hg.1 | -3.84 | PSR01012520.hg.1 | AK5      |
| TC01000785.hg.1 | -3.96 | JUC01006566.hg.1 | AK5      |
| TC01000785.hg.1 | -4.5  | JUC01006564.hg.1 | AK5      |
| TC12001960.hg.1 | 8.4   | PSR12025515.hg.1 | C12orf76 |
| TC12001960.hg.1 | 5.03  | JUC12014254.hg.1 | C12orf76 |
| TC12001960.hg.1 | 4.05  | PSR12025514.hg.1 | C12orf76 |
| TC12001960.hg.1 | 3.81  | PSR12025504.hg.1 | C12orf76 |
| TC12001960.hg.1 | 3.35  | JUC12014240.hg.1 | C12orf76 |
| TC12001960.hg.1 | 3.29  | PSR12025507.hg.1 | C12orf76 |
| TC12001960.hg.1 | 3.26  | PSR12025492.hg.1 | C12orf76 |
| TC12001960.hg.1 | 3.25  | PSR12025511.hg.1 | C12orf76 |
| TC12001960.hg.1 | 3.13  | PSR12025501.hg.1 | C12orf76 |
| TC12001960.hg.1 | 3.02  | JUC12014248.hg.1 | C12orf76 |
| TC12001960.hg.1 | 2.73  | JUC12014249.hg.1 | C12orf76 |
| TC12001960.hg.1 | 2.72  | PSR12025506.hg.1 | C12orf76 |
| TC12001960.hg.1 | 2.64  | PSR12025510.hg.1 | C12orf76 |
| TC12001960.hg.1 | 2.54  | JUC12014255.hg.1 | C12orf76 |
| TC12001960.hg.1 | 2.52  | PSR12025502.hg.1 | C12orf76 |
| TC12001960.hg.1 | 2.5   | PSR12025491.hg.1 | C12orf76 |
| TC12001960.hg.1 | 2.46  | PSR12025508.hg.1 | C12orf76 |
| TC12001960.hg.1 | 2.25  | PSR12025493.hg.1 | C12orf76 |
| TC12001960.hg.1 | 2.25  | PSR12025498.hg.1 | C12orf76 |
| TC10000593.hg.1 | 8.36  | JUC10003740.hg.1 | CDHR1    |
| TC10000593.hg.1 | 2.17  | JUC10003739.hg.1 | CDHR1    |
| TC10000593.hg.1 | -2.3  | JUC10003733.hg.1 | CDHR1    |
| TC10000593.hg.1 | -4.36 | PSR10006459.hg.1 | CDHR1    |
| TC21000400.hg.1 | 8.32  | JUC21002358.hg.1 | SYNJ1    |
| TC21000400.hg.1 | 4.38  | JUC21002366.hg.1 | SYNJ1    |
| TC21000400.hg.1 | 3.46  | JUC21002374.hg.1 | SYNJ1    |
| TC21000400.hg.1 | 2.88  | JUC21002357.hg.1 | SYNJ1    |
| TC21000400.hg.1 | 2.77  | PSR21004525.hg.1 | SYNJ1    |
| TC21000400.hg.1 | 2.47  | PSR21004489.hg.1 | SYNJ1    |
| TC21000400.hg.1 | 2.43  | JUC21002376.hg.1 | SYNJ1    |
| TC21000400.hg.1 | 2.41  | PSR21004487.hg.1 | SYNJ1    |
| TC21000400.hg.1 | 2.37  | PSR21004488.hg.1 | SYNJ1    |
| TC21000400.hg.1 | 2.26  | PSR21004491.hg.1 | SYNJ1    |
| TC21000400.hg.1 | 2.19  | JUC21002391.hg.1 | SYNJ1    |
| TC21000400.hg.1 | 2.14  | PSR21004524.hg.1 | SYNJ1    |
| TC21000400.hg.1 | -2.81 | JUC21002399.hg.1 | SYNJ1    |
| TC21000400.hg.1 | -2.99 | JUC21002377.hg.1 | SYNJ1    |
| TC21000400.hg.1 | -4.31 | JUC21002386.hg.1 | SYNJ1    |
| TC02004994.hg.1 | 8.31  | JUC02031859.hg.1 | IL1RL1   |
| TC02004994.hg.1 | 6.37  | PSR02009898.hg.1 | IL1RL1   |
| TC02004994.hg.1 | 4.52  | PSR02009907.hg.1 | IL1RL1   |



|                 |       |                  |          |
|-----------------|-------|------------------|----------|
| TC02004994.hg.1 | 4.45  | PSR02009906.hg.1 | IL1RL1   |
| TC02004994.hg.1 | 3.84  | PSR02009905.hg.1 | IL1RL1   |
| TC02004994.hg.1 | 3.79  | PSR02009877.hg.1 | IL1RL1   |
| TC02004994.hg.1 | 3.76  | PSR02009904.hg.1 | IL1RL1   |
| TC02004994.hg.1 | 3.49  | PSR02009908.hg.1 | IL1RL1   |
| TC02004994.hg.1 | 3.4   | PSR02009885.hg.1 | IL1RL1   |
| TC02004994.hg.1 | 2.79  | PSR02009879.hg.1 | IL1RL1   |
| TC02004994.hg.1 | 2.43  | PSR02009874.hg.1 | IL1RL1   |
| TC02004994.hg.1 | 2.02  | PSR02009897.hg.1 | IL1RL1   |
| TC02004994.hg.1 | -2.71 | JUC02031874.hg.1 | IL1RL1   |
| TC17000636.hg.1 | 8.27  | JUC17004403.hg.1 | IGF2BP1  |
| TC17000636.hg.1 | 3.13  | JUC17004414.hg.1 | IGF2BP1  |
| TC17000636.hg.1 | 2.4   | JUC17004408.hg.1 | IGF2BP1  |
| TC17000636.hg.1 | -2.06 | PSR17007948.hg.1 | IGF2BP1  |
| TC17000636.hg.1 | -2.24 | PSR17007961.hg.1 | IGF2BP1  |
| TC17000636.hg.1 | -2.28 | PSR17007952.hg.1 | IGF2BP1  |
| TC01002884.hg.1 | 8.26  | JUC01024205.hg.1 | ARHGAP29 |
| TC01002884.hg.1 | 6.62  | PSR01045040.hg.1 | ARHGAP29 |
| TC01002884.hg.1 | 6.2   | PSR01045074.hg.1 | ARHGAP29 |
| TC01002884.hg.1 | 5.4   | PSR01045039.hg.1 | ARHGAP29 |
| TC01002884.hg.1 | 4.98  | PSR01045073.hg.1 | ARHGAP29 |
| TC01002884.hg.1 | 4.21  | PSR01045046.hg.1 | ARHGAP29 |
| TC01002884.hg.1 | 4.06  | PSR01045038.hg.1 | ARHGAP29 |
| TC01002884.hg.1 | 3.57  | JUC01024220.hg.1 | ARHGAP29 |
| TC01002884.hg.1 | 2.4   | JUC01024209.hg.1 | ARHGAP29 |
| TC01002884.hg.1 | 2.26  | JUC01024213.hg.1 | ARHGAP29 |
| TC01002884.hg.1 | -2.25 | JUC01024221.hg.1 | ARHGAP29 |
| TC01000972.hg.1 | 8.25  | JUC01008101.hg.1 | CHI3L2   |
| TC01000972.hg.1 | 5.99  | PSR01015486.hg.1 | CHI3L2   |
| TC01000972.hg.1 | 5.29  | PSR01015483.hg.1 | CHI3L2   |
| TC01000972.hg.1 | 5.11  | JUC01008091.hg.1 | CHI3L2   |
| TC01000972.hg.1 | 5.05  | PSR01015473.hg.1 | CHI3L2   |
| TC01000972.hg.1 | 5.01  | PSR01015500.hg.1 | CHI3L2   |
| TC01000972.hg.1 | 4.27  | JUC01008095.hg.1 | CHI3L2   |
| TC01000972.hg.1 | 4.14  | PSR01015504.hg.1 | CHI3L2   |
| TC01000972.hg.1 | 3.98  | JUC01008105.hg.1 | CHI3L2   |
| TC01000972.hg.1 | 3.71  | PSR01015481.hg.1 | CHI3L2   |
| TC01000972.hg.1 | 2.66  | PSR01015484.hg.1 | CHI3L2   |
| TC01000972.hg.1 | -2.74 | JUC01008096.hg.1 | CHI3L2   |
| TC03001427.hg.1 | 8.24  | PSR03025664.hg.1 | HYAL1    |
| TC03001427.hg.1 | 3.75  | JUC03012572.hg.1 | HYAL1    |
| TC03001427.hg.1 | 3.29  | JUC03012577.hg.1 | HYAL1    |
| TC03001427.hg.1 | 2.57  | PSR03025665.hg.1 | HYAL1    |
| TC03001427.hg.1 | 2.53  | PSR03025666.hg.1 | HYAL1    |
| TC03001427.hg.1 | 2.39  | PSR03025658.hg.1 | HYAL1    |
| TC03001427.hg.1 | 2.34  | PSR03025651.hg.1 | HYAL1    |
| TC03001427.hg.1 | 2.29  | PSR03025659.hg.1 | HYAL1    |
| TC03001427.hg.1 | 2.14  | PSR03025667.hg.1 | HYAL1    |
| TC03001427.hg.1 | 2.08  | PSR03025668.hg.1 | HYAL1    |
| TC03001427.hg.1 | 2.01  | PSR03025652.hg.1 | HYAL1    |
| TC03001427.hg.1 | -3.09 | PSR03025649.hg.1 | HYAL1    |
| TC03001427.hg.1 | -6.97 | JUC03012573.hg.1 | HYAL1    |
| TC02000230.hg.1 | 8.23  | JUC02001778.hg.1 | CRIM1    |
| TC02000230.hg.1 | 3.35  | JUC02001789.hg.1 | CRIM1    |
| TC02000230.hg.1 | 3.33  | JUC02001791.hg.1 | CRIM1    |
| TC02000230.hg.1 | 3.21  | JUC02001787.hg.1 | CRIM1    |
| TC02000230.hg.1 | 2.23  | PSR02003383.hg.1 | CRIM1    |
| TC02000230.hg.1 | -2.06 | JUC02001784.hg.1 | CRIM1    |

|                 |       |                  |             |
|-----------------|-------|------------------|-------------|
| TC02000230.hg.1 | -2.71 | PSR02003414.hg.1 | CRIM1       |
| TC02000230.hg.1 | -2.96 | JUC02001771.hg.1 | CRIM1       |
| TC06001313.hg.1 | 8.2   | PSR06015735.hg.1 | MBOAT1      |
| TC06001313.hg.1 | 6.64  | PSR06015716.hg.1 | MBOAT1      |
| TC06001313.hg.1 | 5.84  | PSR06015734.hg.1 | MBOAT1      |
| TC06001313.hg.1 | 5.79  | JUC06007851.hg.1 | MBOAT1      |
| TC06001313.hg.1 | 5.4   | JUC06007857.hg.1 | MBOAT1      |
| TC06001313.hg.1 | 5.37  | JUC06007860.hg.1 | MBOAT1      |
| TC06001313.hg.1 | 5.37  | JUC06007861.hg.1 | MBOAT1      |
| TC06001313.hg.1 | 5.34  | JUC06007849.hg.1 | MBOAT1      |
| TC06001313.hg.1 | 3.22  | JUC06007845.hg.1 | MBOAT1      |
| TC06001313.hg.1 | 3.2   | JUC06007846.hg.1 | MBOAT1      |
| TC06001313.hg.1 | 2.33  | JUC06007859.hg.1 | MBOAT1      |
| TC06001313.hg.1 | 2.25  | JUC06007850.hg.1 | MBOAT1      |
| TC06001313.hg.1 | 2.16  | PSR06015721.hg.1 | MBOAT1      |
| TC06001313.hg.1 | 2.12  | PSR06015715.hg.1 | MBOAT1      |
| TC01003266.hg.1 | 8.19  | PSR01050262.hg.1 | S100A4      |
| TC01003266.hg.1 | 7.09  | PSR01050254.hg.1 | S100A4      |
| TC01003266.hg.1 | 6.08  | JUC01026573.hg.1 | S100A4      |
| TC01003266.hg.1 | 5.85  | PSR01050261.hg.1 | S100A4      |
| TC01003266.hg.1 | 5.69  | PSR01050255.hg.1 | S100A4      |
| TC01003266.hg.1 | 3.43  | PSR01050256.hg.1 | S100A4      |
| TC01000323.hg.1 | 8.14  | JUC01002639.hg.1 | LDLRAP1     |
| TC01000323.hg.1 | 2.79  | PSR01004937.hg.1 | LDLRAP1     |
| TC01000323.hg.1 | 2.76  | PSR01004938.hg.1 | LDLRAP1     |
| TC01000323.hg.1 | 2.49  | JUC01002638.hg.1 | LDLRAP1     |
| TC01000323.hg.1 | 2.19  | PSR01004944.hg.1 | LDLRAP1     |
| TC01000323.hg.1 | 2.05  | PSR01004942.hg.1 | LDLRAP1     |
| TC06001355.hg.1 | 8.1   | JUC06008083.hg.1 | HIST1H4H, H |
| TC06001355.hg.1 | 2.82  | PSR06016180.hg.1 | HIST1H4H, H |
| TC06001355.hg.1 | 2.18  | PSR06016179.hg.1 | HIST1H4H, H |
| TC08001659.hg.1 | 8.03  | JUC08011053.hg.1 | NDRG1       |
| TC08001659.hg.1 | 5.17  | PSR08021681.hg.1 | NDRG1       |
| TC08001659.hg.1 | 5.08  | PSR08021677.hg.1 | NDRG1       |
| TC08001659.hg.1 | 5.05  | PSR08021688.hg.1 | NDRG1       |
| TC08001659.hg.1 | 4     | PSR08021689.hg.1 | NDRG1       |
| TC08001659.hg.1 | 3.94  | JUC08011041.hg.1 | NDRG1       |
| TC08001659.hg.1 | 3.76  | PSR08021680.hg.1 | NDRG1       |
| TC08001659.hg.1 | 3.74  | PSR08021691.hg.1 | NDRG1       |
| TC08001659.hg.1 | 3.63  | JUC08011051.hg.1 | NDRG1       |
| TC08001659.hg.1 | 3.45  | PSR08021675.hg.1 | NDRG1       |
| TC08001659.hg.1 | 3.38  | JUC08011042.hg.1 | NDRG1       |
| TC08001659.hg.1 | 3.35  | JUC08011052.hg.1 | NDRG1       |
| TC08001659.hg.1 | 3.34  | JUC08011054.hg.1 | NDRG1       |
| TC08001659.hg.1 | 3.3   | JUC08011074.hg.1 | NDRG1       |
| TC08001659.hg.1 | 3.28  | PSR08021690.hg.1 | NDRG1       |
| TC08001659.hg.1 | 3.02  | JUC08011047.hg.1 | NDRG1       |
| TC08001659.hg.1 | 2.86  | PSR08021679.hg.1 | NDRG1       |
| TC08001659.hg.1 | 2.47  | JUC08011067.hg.1 | NDRG1       |
| TC08001659.hg.1 | 2.43  | JUC08011048.hg.1 | NDRG1       |
| TC08001659.hg.1 | 2.42  | JUC08011043.hg.1 | NDRG1       |
| TC08001659.hg.1 | 2.29  | JUC08011070.hg.1 | NDRG1       |
| TC08001659.hg.1 | 2.09  | PSR08021674.hg.1 | NDRG1       |
| TC08001659.hg.1 | 2.03  | JUC08011049.hg.1 | NDRG1       |
| TC08001659.hg.1 | -2    | PSR08021612.hg.1 | NDRG1       |
| TC08001659.hg.1 | -2.02 | PSR08021630.hg.1 | NDRG1       |
| TC08001659.hg.1 | -2.38 | PSR08021664.hg.1 | NDRG1       |
| TC08001659.hg.1 | -2.75 | PSR08021633.hg.1 | NDRG1       |

|                 |       |                  |        |
|-----------------|-------|------------------|--------|
| TC03001673.hg.1 | 7.96  | JUC03015000.hg.1 | LSAMP  |
| TC03001673.hg.1 | 5.56  | JUC03015005.hg.1 | LSAMP  |
| TC03001673.hg.1 | 4.92  | PSR03030207.hg.1 | LSAMP  |
| TC03001673.hg.1 | 4.88  | JUC03015006.hg.1 | LSAMP  |
| TC03001673.hg.1 | 4.63  | PSR03030206.hg.1 | LSAMP  |
| TC03001673.hg.1 | 4.07  | PSR03030212.hg.1 | LSAMP  |
| TC03001673.hg.1 | 3.83  | PSR03030208.hg.1 | LSAMP  |
| TC03001673.hg.1 | 3.48  | PSR03030202.hg.1 | LSAMP  |
| TC03001673.hg.1 | 3.32  | PSR03030210.hg.1 | LSAMP  |
| TC03001673.hg.1 | 3.2   | PSR03030191.hg.1 | LSAMP  |
| TC03001673.hg.1 | 2.99  | PSR03030204.hg.1 | LSAMP  |
| TC03001673.hg.1 | 2.77  | JUC03015010.hg.1 | LSAMP  |
| TC03001673.hg.1 | 2.65  | PSR03030213.hg.1 | LSAMP  |
| TC03001673.hg.1 | 2.51  | PSR03030211.hg.1 | LSAMP  |
| TC03001673.hg.1 | 2.39  | JUC03015003.hg.1 | LSAMP  |
| TC03001673.hg.1 | 2.17  | PSR03030214.hg.1 | LSAMP  |
| TC03001673.hg.1 | -2.54 | JUC03015007.hg.1 | LSAMP  |
| TC16001225.hg.1 | 7.95  | PSR16016942.hg.1 | NQO1   |
| TC16001225.hg.1 | 5.97  | PSR16016943.hg.1 | NQO1   |
| TC16001225.hg.1 | 2.85  | JUC16009538.hg.1 | NQO1   |
| TC16001225.hg.1 | 2.32  | PSR16016940.hg.1 | NQO1   |
| TC16001225.hg.1 | 2.29  | JUC16009545.hg.1 | NQO1   |
| TC16001225.hg.1 | -2.04 | JUC16009540.hg.1 | NQO1   |
| TC16001225.hg.1 | -2.16 | JUC16009544.hg.1 | NQO1   |
| TC16001225.hg.1 | -3.37 | JUC16009543.hg.1 | NQO1   |
| TC17002889.hg.1 | 7.94  | JUC17018847.hg.1 | TRIM16 |
| TC17002889.hg.1 | 6.89  | PSR17015793.hg.1 | TRIM16 |
| TC17002889.hg.1 | 5.35  | PSR17015791.hg.1 | TRIM16 |
| TC17002889.hg.1 | 4.94  | JUC17018853.hg.1 | TRIM16 |
| TC17002889.hg.1 | 4.41  | PSR17015804.hg.1 | TRIM16 |
| TC17002889.hg.1 | 4.27  | JUC17018857.hg.1 | TRIM16 |
| TC17002889.hg.1 | 4.25  | PSR17015798.hg.1 | TRIM16 |
| TC17002889.hg.1 | 4.18  | PSR17015799.hg.1 | TRIM16 |
| TC17002889.hg.1 | 3.74  | PSR17015800.hg.1 | TRIM16 |
| TC17002889.hg.1 | 3.42  | PSR17015801.hg.1 | TRIM16 |
| TC17002889.hg.1 | 3.32  | JUC17018848.hg.1 | TRIM16 |
| TC17002889.hg.1 | 2.93  | PSR17015795.hg.1 | TRIM16 |
| TC17002889.hg.1 | 2.66  | PSR17015802.hg.1 | TRIM16 |
| TC17002889.hg.1 | 2.63  | PSR17015803.hg.1 | TRIM16 |
| TC17002889.hg.1 | 2.36  | PSR17015796.hg.1 | TRIM16 |
| TC17002889.hg.1 | 2.19  | PSR17015797.hg.1 | TRIM16 |
| TC17002889.hg.1 | 2.19  | JUC17018844.hg.1 | TRIM16 |
| TC17002889.hg.1 | 2.15  | PSR17015790.hg.1 | TRIM16 |
| TC17002889.hg.1 | -2.24 | PSR17015784.hg.1 | TRIM16 |
| TC10000381.hg.1 | 7.92  | JUC10002504.hg.1 | ZNF365 |
| TC10000381.hg.1 | 5.08  | JUC10002496.hg.1 | ZNF365 |
| TC10000381.hg.1 | 4.17  | PSR10004319.hg.1 | ZNF365 |
| TC10000381.hg.1 | 3.29  | JUC10002495.hg.1 | ZNF365 |
| TC10000381.hg.1 | 2.77  | PSR10004316.hg.1 | ZNF365 |
| TC10000381.hg.1 | -3.45 | PSR10004310.hg.1 | ZNF365 |
| TC01006305.hg.1 | 7.91  | JUC01039746.hg.1 | YY1AP1 |
| TC01006305.hg.1 | 2.88  | JUC01039752.hg.1 | YY1AP1 |
| TC01006305.hg.1 | 2.84  | PSR01051582.hg.1 | YY1AP1 |
| TC01006305.hg.1 | 2.66  | PSR01051516.hg.1 | YY1AP1 |
| TC01006305.hg.1 | 2.41  | JUC01039759.hg.1 | YY1AP1 |
| TC01006305.hg.1 | 2.27  | JUC01039731.hg.1 | YY1AP1 |
| TC01006305.hg.1 | -2.37 | JUC01039738.hg.1 | YY1AP1 |
| TC01006305.hg.1 | -2.96 | PSR01051544.hg.1 | YY1AP1 |

|                 |       |                  |         |
|-----------------|-------|------------------|---------|
| TC17000241.hg.1 | 7.91  | JUC17001949.hg.1 | SLC47A1 |
| TC17000241.hg.1 | 6.24  | PSR17003384.hg.1 | SLC47A1 |
| TC17000241.hg.1 | 5.9   | PSR17003370.hg.1 | SLC47A1 |
| TC17000241.hg.1 | 4.87  | PSR17003386.hg.1 | SLC47A1 |
| TC17000241.hg.1 | 4.62  | JUC17001927.hg.1 | SLC47A1 |
| TC17000241.hg.1 | 4.16  | PSR17003381.hg.1 | SLC47A1 |
| TC17000241.hg.1 | 4.08  | JUC17001940.hg.1 | SLC47A1 |
| TC17000241.hg.1 | 3.55  | PSR17003385.hg.1 | SLC47A1 |
| TC17000241.hg.1 | 3.46  | JUC17001928.hg.1 | SLC47A1 |
| TC17000241.hg.1 | 3.43  | PSR17003401.hg.1 | SLC47A1 |
| TC17000241.hg.1 | 3.43  | JUC17001953.hg.1 | SLC47A1 |
| TC17000241.hg.1 | 3.17  | JUC17001933.hg.1 | SLC47A1 |
| TC17000241.hg.1 | 3.02  | PSR17003374.hg.1 | SLC47A1 |
| TC17000241.hg.1 | 2.91  | PSR17003389.hg.1 | SLC47A1 |
| TC17000241.hg.1 | 2.79  | JUC17001929.hg.1 | SLC47A1 |
| TC17000241.hg.1 | 2.74  | PSR17003405.hg.1 | SLC47A1 |
| TC17000241.hg.1 | 2.26  | PSR17003379.hg.1 | SLC47A1 |
| TC17000241.hg.1 | -2.11 | JUC17001936.hg.1 | SLC47A1 |
| TC17000241.hg.1 | -2.12 | PSR17003375.hg.1 | SLC47A1 |
| TC17000241.hg.1 | -2.52 | PSR17003398.hg.1 | SLC47A1 |
| TC17000241.hg.1 | -2.57 | PSR17003397.hg.1 | SLC47A1 |
| TC17000241.hg.1 | -2.59 | PSR17003399.hg.1 | SLC47A1 |
| TC17000241.hg.1 | -2.87 | JUC17001931.hg.1 | SLC47A1 |
| TC17000241.hg.1 | -3.12 | PSR17003378.hg.1 | SLC47A1 |
| TC17000241.hg.1 | -3.45 | JUC17001938.hg.1 | SLC47A1 |
| TC17000241.hg.1 | -4.79 | JUC17001946.hg.1 | SLC47A1 |
| TC19001582.hg.1 | 7.88  | JUC19012346.hg.1 | PSG5    |
| TC19001582.hg.1 | 6.14  | JUC19012349.hg.1 | PSG5    |
| TC19001582.hg.1 | 5.91  | PSR19021660.hg.1 | PSG5    |
| TC19001582.hg.1 | 5.54  | PSR19021659.hg.1 | PSG5    |
| TC19001582.hg.1 | 5.53  | JUC19012352.hg.1 | PSG5    |
| TC19001582.hg.1 | 5.34  | PSR19021668.hg.1 | PSG5    |
| TC19001582.hg.1 | 5.1   | PSR19021669.hg.1 | PSG5    |
| TC19001582.hg.1 | 5.03  | PSR19021675.hg.1 | PSG5    |
| TC19001582.hg.1 | 4.44  | JUC19012350.hg.1 | PSG5    |
| TC19001582.hg.1 | 4.37  | PSR19021667.hg.1 | PSG5    |
| TC19001582.hg.1 | 4.25  | PSR19021670.hg.1 | PSG5    |
| TC19001582.hg.1 | 3.13  | PSR19021663.hg.1 | PSG5    |
| TC19001582.hg.1 | 2.78  | JUC19012359.hg.1 | PSG5    |
| TC19001582.hg.1 | -2.03 | JUC19012357.hg.1 | PSG5    |
| TC16000186.hg.1 | 7.81  | JUC16001430.hg.1 | PDXDC1  |
| TC16000186.hg.1 | 4.65  | JUC16001414.hg.1 | PDXDC1  |
| TC16000186.hg.1 | 2.02  | PSR16002809.hg.1 | PDXDC1  |
| TC16000186.hg.1 | -2.17 | JUC16001412.hg.1 | PDXDC1  |
| TC16000186.hg.1 | -2.48 | JUC16001418.hg.1 | PDXDC1  |
| TC03000297.hg.1 | 7.78  | JUC03003040.hg.1 | APEH    |
| TC03000297.hg.1 | -2.11 | PSR03006060.hg.1 | APEH    |
| TC03000297.hg.1 | -2.52 | JUC03003035.hg.1 | APEH    |
| TC06004059.hg.1 | 7.78  | JUC06020787.hg.1 | HLA-C   |
| TC06004059.hg.1 | 2.69  | PSR06017338.hg.1 | HLA-C   |
| TC06004059.hg.1 | 2.68  | PSR06017314.hg.1 | HLA-C   |
| TC06004059.hg.1 | 2.55  | JUC06020796.hg.1 | HLA-C   |
| TC06004059.hg.1 | 2.37  | JUC06020793.hg.1 | HLA-C   |
| TC06004059.hg.1 | 2.02  | PSR06017311.hg.1 | HLA-C   |
| TC06004059.hg.1 | -3.2  | JUC06020786.hg.1 | HLA-C   |
| TC04002924.hg.1 | 7.77  | PSR04019961.hg.1 | SLC39A8 |
| TC04002924.hg.1 | 4.15  | PSR04019957.hg.1 | SLC39A8 |
| TC04002924.hg.1 | 3.66  | PSR04019939.hg.1 | SLC39A8 |

|                 |       |                  |         |
|-----------------|-------|------------------|---------|
| TC04002924.hg.1 | 3.57  | PSR04019955.hg.1 | SLC39A8 |
| TC04002924.hg.1 | 3.54  | PSR04019945.hg.1 | SLC39A8 |
| TC04002924.hg.1 | 2.95  | PSR04019938.hg.1 | SLC39A8 |
| TC04002924.hg.1 | 2.58  | JUC04016969.hg.1 | SLC39A8 |
| TC04002924.hg.1 | 2.21  | PSR04019956.hg.1 | SLC39A8 |
| TC04002924.hg.1 | 2.05  | PSR04019959.hg.1 | SLC39A8 |
| TC08002614.hg.1 | 7.76  | JUC08015219.hg.1 | ZNF395  |
| TC08002614.hg.1 | 4.93  | PSR08014006.hg.1 | ZNF395  |
| TC08002614.hg.1 | 4.91  | JUC08015216.hg.1 | ZNF395  |
| TC08002614.hg.1 | 4.83  | JUC08015211.hg.1 | ZNF395  |
| TC08002614.hg.1 | 4.72  | JUC08015224.hg.1 | ZNF395  |
| TC08002614.hg.1 | 4.35  | JUC08015222.hg.1 | ZNF395  |
| TC08002614.hg.1 | 4.33  | PSR08013999.hg.1 | ZNF395  |
| TC08002614.hg.1 | 3.84  | JUC08015212.hg.1 | ZNF395  |
| TC08002614.hg.1 | 3.79  | PSR08014002.hg.1 | ZNF395  |
| TC08002614.hg.1 | 3.71  | JUC08015215.hg.1 | ZNF395  |
| TC08002614.hg.1 | 3.6   | JUC08015223.hg.1 | ZNF395  |
| TC08002614.hg.1 | 3.52  | JUC08015229.hg.1 | ZNF395  |
| TC08002614.hg.1 | 3.42  | PSR08014005.hg.1 | ZNF395  |
| TC08002614.hg.1 | 3.39  | JUC08015230.hg.1 | ZNF395  |
| TC08002614.hg.1 | 3.36  | PSR08013994.hg.1 | ZNF395  |
| TC08002614.hg.1 | 3.03  | PSR08013985.hg.1 | ZNF395  |
| TC08002614.hg.1 | 3.01  | JUC08015218.hg.1 | ZNF395  |
| TC08002614.hg.1 | 2.62  | JUC08015214.hg.1 | ZNF395  |
| TC08002614.hg.1 | 2.35  | PSR08013997.hg.1 | ZNF395  |
| TC08002614.hg.1 | 2.24  | JUC08015231.hg.1 | ZNF395  |
| TC08002614.hg.1 | -2.11 | JUC08015225.hg.1 | ZNF395  |
| TC08002614.hg.1 | -2.16 | PSR08013978.hg.1 | ZNF395  |
| TC08002614.hg.1 | -2.35 | JUC08015226.hg.1 | ZNF395  |
| TC08002614.hg.1 | -2.94 | PSR08013981.hg.1 | ZNF395  |
| TC08002614.hg.1 | -3.44 | JUC08015228.hg.1 | ZNF395  |
| TC08002614.hg.1 | -4.12 | JUC08015232.hg.1 | ZNF395  |
| TC01002179.hg.1 | 7.75  | JUC01017995.hg.1 | SLC2A5  |
| TC01002179.hg.1 | 4.21  | JUC01018000.hg.1 | SLC2A5  |
| TC01002179.hg.1 | 3.84  | JUC01018016.hg.1 | SLC2A5  |
| TC01002179.hg.1 | 2.7   | JUC01018010.hg.1 | SLC2A5  |
| TC01002179.hg.1 | 2.18  | PSR01033568.hg.1 | SLC2A5  |
| TC01002179.hg.1 | 2.1   | PSR01033545.hg.1 | SLC2A5  |
| TC01002179.hg.1 | 2.07  | PSR01033588.hg.1 | SLC2A5  |
| TC01002179.hg.1 | 2.02  | JUC01017997.hg.1 | SLC2A5  |
| TC01002179.hg.1 | 2.01  | JUC01017998.hg.1 | SLC2A5  |
| TC02000184.hg.1 | 7.74  | JUC02001312.hg.1 | PLB1    |
| TC02000184.hg.1 | 6.68  | PSR02002638.hg.1 | PLB1    |
| TC02000184.hg.1 | 4.12  | PSR02002644.hg.1 | PLB1    |
| TC02000184.hg.1 | 4.06  | PSR02002633.hg.1 | PLB1    |
| TC02000184.hg.1 | 3.71  | JUC02001293.hg.1 | PLB1    |
| TC02000184.hg.1 | 3.5   | JUC02001316.hg.1 | PLB1    |
| TC02000184.hg.1 | 3.08  | JUC02001315.hg.1 | PLB1    |
| TC02000184.hg.1 | 2.94  | PSR02002642.hg.1 | PLB1    |
| TC02000184.hg.1 | 2.79  | JUC02001327.hg.1 | PLB1    |
| TC02000184.hg.1 | 2.41  | JUC02001289.hg.1 | PLB1    |
| TC02000184.hg.1 | 2.31  | PSR02002643.hg.1 | PLB1    |
| TC02000184.hg.1 | 2.24  | JUC02001307.hg.1 | PLB1    |
| TC02000184.hg.1 | 2.17  | JUC02001313.hg.1 | PLB1    |
| TC02000184.hg.1 | 2.04  | PSR02002607.hg.1 | PLB1    |
| TC02000184.hg.1 | -2.05 | PSR02002651.hg.1 | PLB1    |
| TC02000184.hg.1 | -2.36 | PSR02002630.hg.1 | PLB1    |
| TC02000184.hg.1 | -2.38 | JUC02001296.hg.1 | PLB1    |

|                 |       |                  |       |
|-----------------|-------|------------------|-------|
| TC02000184.hg.1 | -2.43 | PSR02002623.hg.1 | PLB1  |
| TC02000184.hg.1 | -2.44 | PSR02002617.hg.1 | PLB1  |
| TC02000184.hg.1 | -2.44 | PSR02002652.hg.1 | PLB1  |
| TC02000184.hg.1 | -2.61 | PSR02002625.hg.1 | PLB1  |
| TC02000184.hg.1 | -2.68 | PSR02002597.hg.1 | PLB1  |
| TC02000184.hg.1 | -2.71 | PSR02002596.hg.1 | PLB1  |
| TC02000184.hg.1 | -2.71 | JUC02001328.hg.1 | PLB1  |
| TC02000184.hg.1 | -2.77 | PSR02002606.hg.1 | PLB1  |
| TC02000184.hg.1 | -2.77 | PSR02002628.hg.1 | PLB1  |
| TC02000184.hg.1 | -2.82 | JUC02001317.hg.1 | PLB1  |
| TC02000184.hg.1 | -2.86 | JUC02001283.hg.1 | PLB1  |
| TC02000184.hg.1 | -2.88 | PSR02002593.hg.1 | PLB1  |
| TC02000184.hg.1 | -2.95 | PSR02002586.hg.1 | PLB1  |
| TC02000184.hg.1 | -3    | PSR02002624.hg.1 | PLB1  |
| TC02000184.hg.1 | -3    | JUC02001290.hg.1 | PLB1  |
| TC02000184.hg.1 | -3.01 | PSR02002611.hg.1 | PLB1  |
| TC02000184.hg.1 | -3.11 | JUC02001311.hg.1 | PLB1  |
| TC02000184.hg.1 | -3.16 | JUC02001303.hg.1 | PLB1  |
| TC02000184.hg.1 | -3.23 | PSR02002582.hg.1 | PLB1  |
| TC02000184.hg.1 | -3.59 | PSR02002631.hg.1 | PLB1  |
| TC02000184.hg.1 | -3.75 | PSR02002635.hg.1 | PLB1  |
| TC02000184.hg.1 | -3.81 | PSR02002626.hg.1 | PLB1  |
| TC02000184.hg.1 | -3.81 | JUC02001338.hg.1 | PLB1  |
| TC02000184.hg.1 | -3.85 | JUC02001319.hg.1 | PLB1  |
| TC02000184.hg.1 | -3.87 | PSR02002573.hg.1 | PLB1  |
| TC02000184.hg.1 | -3.92 | PSR02002584.hg.1 | PLB1  |
| TC02000184.hg.1 | -4.01 | PSR02002629.hg.1 | PLB1  |
| TC02000184.hg.1 | -4.08 | JUC02001331.hg.1 | PLB1  |
| TC02000184.hg.1 | -4.18 | PSR02002616.hg.1 | PLB1  |
| TC02000184.hg.1 | -4.23 | JUC02001286.hg.1 | PLB1  |
| TC02000184.hg.1 | -4.23 | JUC02001298.hg.1 | PLB1  |
| TC02000184.hg.1 | -4.27 | JUC02001282.hg.1 | PLB1  |
| TC02000184.hg.1 | -4.28 | JUC02001285.hg.1 | PLB1  |
| TC02000184.hg.1 | -4.33 | PSR02002571.hg.1 | PLB1  |
| TC02000184.hg.1 | -4.36 | PSR02002581.hg.1 | PLB1  |
| TC02000184.hg.1 | -4.39 | PSR02002632.hg.1 | PLB1  |
| TC02000184.hg.1 | -4.48 | PSR02002609.hg.1 | PLB1  |
| TC02000184.hg.1 | -4.49 | PSR02002570.hg.1 | PLB1  |
| TC02000184.hg.1 | -4.63 | PSR02002591.hg.1 | PLB1  |
| TC02000184.hg.1 | -4.77 | PSR02002575.hg.1 | PLB1  |
| TC02000184.hg.1 | -5.02 | PSR02002602.hg.1 | PLB1  |
| TC02000184.hg.1 | -5.3  | JUC02001278.hg.1 | PLB1  |
| TC02000184.hg.1 | -5.37 | PSR02002569.hg.1 | PLB1  |
| TC02000184.hg.1 | -5.52 | PSR02002587.hg.1 | PLB1  |
| TC02000184.hg.1 | -5.67 | JUC02001329.hg.1 | PLB1  |
| TC02000184.hg.1 | -6.02 | JUC02001310.hg.1 | PLB1  |
| TC02000184.hg.1 | -6.4  | PSR02002590.hg.1 | PLB1  |
| TC02000184.hg.1 | -6.55 | PSR02002576.hg.1 | PLB1  |
| TC02000184.hg.1 | -6.89 | PSR02002579.hg.1 | PLB1  |
| TC02000184.hg.1 | -6.95 | PSR02002577.hg.1 | PLB1  |
| TC02000184.hg.1 | -6.97 | PSR02002585.hg.1 | PLB1  |
| TC02000184.hg.1 | -7.67 | PSR02002574.hg.1 | PLB1  |
| TC02000184.hg.1 | -8.11 | PSR02002589.hg.1 | PLB1  |
| TC0Y000052.hg.1 | 7.73  | PSR0Y000610.hg.1 | USP9Y |
| TC0Y000052.hg.1 | 4.84  | PSR0Y000611.hg.1 | USP9Y |
| TC0Y000052.hg.1 | 3.55  | JUC0Y000264.hg.1 | USP9Y |
| TC0Y000052.hg.1 | 2.81  | JUC0Y000252.hg.1 | USP9Y |
| TC0Y000052.hg.1 | 2.63  | JUC0Y000254.hg.1 | USP9Y |

|                 |       |                  |          |
|-----------------|-------|------------------|----------|
| TC0Y000052.hg.1 | 2.39  | JUC0Y000263.hg.1 | USP9Y    |
| TC0Y000052.hg.1 | 2.28  | PSR0Y000596.hg.1 | USP9Y    |
| TC0Y000052.hg.1 | 2.08  | JUC0Y000235.hg.1 | USP9Y    |
| TC0Y000052.hg.1 | 2     | JUC0Y000273.hg.1 | USP9Y    |
| TC0Y000052.hg.1 | -2.14 | PSR0Y000606.hg.1 | USP9Y    |
| TC0Y000052.hg.1 | -2.16 | JUC0Y000246.hg.1 | USP9Y    |
| TC0Y000052.hg.1 | -2.18 | PSR0Y000583.hg.1 | USP9Y    |
| TC0Y000052.hg.1 | -2.2  | PSR0Y000585.hg.1 | USP9Y    |
| TC0Y000052.hg.1 | -2.34 | JUC0Y000245.hg.1 | USP9Y    |
| TC0Y000052.hg.1 | -2.4  | PSR0Y000576.hg.1 | USP9Y    |
| TC0Y000052.hg.1 | -2.5  | PSR0Y000584.hg.1 | USP9Y    |
| TC0Y000052.hg.1 | -2.63 | JUC0Y000269.hg.1 | USP9Y    |
| TC0Y000052.hg.1 | -2.72 | PSR0Y000575.hg.1 | USP9Y    |
| TC0Y000052.hg.1 | -2.98 | JUC0Y000281.hg.1 | USP9Y    |
| TC0Y000052.hg.1 | -3.16 | JUC0Y000259.hg.1 | USP9Y    |
| TC0Y000052.hg.1 | -3.17 | PSR0Y000605.hg.1 | USP9Y    |
| TC0Y000052.hg.1 | -3.44 | JUC0Y000241.hg.1 | USP9Y    |
| TC0Y000052.hg.1 | -3.53 | JUC0Y000238.hg.1 | USP9Y    |
| TC0Y000052.hg.1 | -3.63 | PSR0Y000582.hg.1 | USP9Y    |
| TC0Y000052.hg.1 | -3.75 | JUC0Y000247.hg.1 | USP9Y    |
| TC0Y000052.hg.1 | -3.79 | JUC0Y000278.hg.1 | USP9Y    |
| TC0Y000052.hg.1 | -3.8  | PSR0Y000580.hg.1 | USP9Y    |
| TC0Y000052.hg.1 | -4.03 | JUC0Y000262.hg.1 | USP9Y    |
| TC0Y000052.hg.1 | -4.07 | JUC0Y000240.hg.1 | USP9Y    |
| TC0Y000052.hg.1 | -4.07 | JUC0Y000268.hg.1 | USP9Y    |
| TC0Y000052.hg.1 | -4.09 | JUC0Y000266.hg.1 | USP9Y    |
| TC0Y000052.hg.1 | -4.32 | JUC0Y000242.hg.1 | USP9Y    |
| TC0Y000052.hg.1 | -4.56 | JUC0Y000275.hg.1 | USP9Y    |
| TC0Y000052.hg.1 | -4.69 | PSR0Y000598.hg.1 | USP9Y    |
| TC0Y000052.hg.1 | -4.73 | JUC0Y000279.hg.1 | USP9Y    |
| TC0Y000052.hg.1 | -4.91 | PSR0Y000617.hg.1 | USP9Y    |
| TC0Y000052.hg.1 | -5.21 | PSR0Y000568.hg.1 | USP9Y    |
| TC17002858.hg.1 | 7.73  | PSR17007738.hg.1 | HOXB-AS3 |
| TC17002858.hg.1 | 5.01  | JUC17018423.hg.1 | HOXB-AS3 |
| TC17002858.hg.1 | 2.59  | JUC17018421.hg.1 | HOXB-AS3 |
| TC17002858.hg.1 | 2.13  | PSR17007739.hg.1 | HOXB-AS3 |
| TC17002858.hg.1 | -2.01 | PSR17007734.hg.1 | HOXB-AS3 |
| TC17002858.hg.1 | -2.31 | PSR17007735.hg.1 | HOXB-AS3 |
| TC17002858.hg.1 | -2.76 | JUC17018413.hg.1 | HOXB-AS3 |
| TC17002858.hg.1 | -2.81 | JUC17018411.hg.1 | HOXB-AS3 |
| TC17002858.hg.1 | -4.43 | PSR17007736.hg.1 | HOXB-AS3 |
| TC10000826.hg.1 | 7.67  | JUC10005569.hg.1 | PLEKHS1  |
| TC10000826.hg.1 | 5.95  | JUC10005556.hg.1 | PLEKHS1  |
| TC10000826.hg.1 | 4.28  | PSR10009968.hg.1 | PLEKHS1  |
| TC10000826.hg.1 | 2.77  | JUC10005566.hg.1 | PLEKHS1  |
| TC10000826.hg.1 | 2.67  | PSR10009984.hg.1 | PLEKHS1  |
| TC10000826.hg.1 | 2.33  | JUC10005563.hg.1 | PLEKHS1  |
| TC10000826.hg.1 | 2.12  | PSR10009958.hg.1 | PLEKHS1  |
| TC10000826.hg.1 | -2.06 | PSR10009974.hg.1 | PLEKHS1  |
| TC10000826.hg.1 | -2.19 | JUC10005560.hg.1 | PLEKHS1  |
| TC10000826.hg.1 | -2.3  | JUC10005562.hg.1 | PLEKHS1  |
| TC10000826.hg.1 | -2.37 | JUC10005567.hg.1 | PLEKHS1  |
| TC10000826.hg.1 | -3.46 | JUC10005557.hg.1 | PLEKHS1  |
| TC19001250.hg.1 | 7.64  | JUC19010219.hg.1 | NOTCH3   |
| TC19001250.hg.1 | 6.59  | JUC19010198.hg.1 | NOTCH3   |
| TC19001250.hg.1 | 5.02  | JUC19010217.hg.1 | NOTCH3   |
| TC19001250.hg.1 | 4.54  | JUC19010201.hg.1 | NOTCH3   |
| TC19001250.hg.1 | 4.25  | PSR19017572.hg.1 | NOTCH3   |

|                 |       |                  |        |
|-----------------|-------|------------------|--------|
| TC19001250.hg.1 | 3.84  | JUC19010206.hg.1 | NOTCH3 |
| TC19001250.hg.1 | 3.59  | PSR19017555.hg.1 | NOTCH3 |
| TC19001250.hg.1 | 3.57  | PSR19017554.hg.1 | NOTCH3 |
| TC19001250.hg.1 | 3.2   | PSR19017553.hg.1 | NOTCH3 |
| TC19001250.hg.1 | 3.07  | JUC19010199.hg.1 | NOTCH3 |
| TC19001250.hg.1 | 3.03  | JUC19010200.hg.1 | NOTCH3 |
| TC19001250.hg.1 | 2.76  | JUC19010203.hg.1 | NOTCH3 |
| TC19001250.hg.1 | 2.59  | PSR19017548.hg.1 | NOTCH3 |
| TC19001250.hg.1 | 2.54  | PSR19017549.hg.1 | NOTCH3 |
| TC19001250.hg.1 | 2.46  | JUC19010212.hg.1 | NOTCH3 |
| TC19001250.hg.1 | 2.42  | PSR19017550.hg.1 | NOTCH3 |
| TC19001250.hg.1 | 2.41  | PSR19017558.hg.1 | NOTCH3 |
| TC19001250.hg.1 | 2.36  | JUC19010192.hg.1 | NOTCH3 |
| TC19001250.hg.1 | 2.34  | PSR19017556.hg.1 | NOTCH3 |
| TC19001250.hg.1 | 2.23  | PSR19017551.hg.1 | NOTCH3 |
| TC19001250.hg.1 | 2.01  | PSR19017546.hg.1 | NOTCH3 |
| TC19001250.hg.1 | -2    | JUC19010215.hg.1 | NOTCH3 |
| TC15000270.hg.1 | 7.63  | PSR15001691.hg.1 | THBS1  |
| TC15000270.hg.1 | 6.82  | PSR15001722.hg.1 | THBS1  |
| TC15000270.hg.1 | 5.39  | PSR15001698.hg.1 | THBS1  |
| TC15000270.hg.1 | 5.35  | PSR15001712.hg.1 | THBS1  |
| TC15000270.hg.1 | 4.11  | PSR15001697.hg.1 | THBS1  |
| TC15000270.hg.1 | 3.4   | PSR15001696.hg.1 | THBS1  |
| TC15000270.hg.1 | 3.32  | PSR15001721.hg.1 | THBS1  |
| TC15000270.hg.1 | 3.27  | PSR15001685.hg.1 | THBS1  |
| TC15000270.hg.1 | 2.56  | PSR15001677.hg.1 | THBS1  |
| TC15000270.hg.1 | 2.43  | JUC15000740.hg.1 | THBS1  |
| TC15000270.hg.1 | 2.12  | JUC15000735.hg.1 | THBS1  |
| TC12001984.hg.1 | 7.62  | JUC12014552.hg.1 | DDX54  |
| TC12001984.hg.1 | 2.1   | PSR12026080.hg.1 | DDX54  |
| TC12001984.hg.1 | -2.12 | JUC12014562.hg.1 | DDX54  |
| TC11000316.hg.1 | 7.61  | JUC11002135.hg.1 | HIPK3  |
| TC11000316.hg.1 | -2.01 | PSR11004039.hg.1 | HIPK3  |
| TC12001277.hg.1 | 7.6   | JUC12009119.hg.1 | ERP27  |
| TC12001277.hg.1 | 5.01  | PSR12016635.hg.1 | ERP27  |
| TC12001277.hg.1 | 4.21  | PSR12016640.hg.1 | ERP27  |
| TC12001277.hg.1 | 3.55  | PSR12016637.hg.1 | ERP27  |
| TC12001277.hg.1 | 3.5   | PSR12016638.hg.1 | ERP27  |
| TC12001277.hg.1 | -2.12 | JUC12009116.hg.1 | ERP27  |
| TC12001277.hg.1 | -2.16 | PSR12016628.hg.1 | ERP27  |
| TC12001277.hg.1 | -2.49 | PSR12016630.hg.1 | ERP27  |
| TC12001277.hg.1 | -4.42 | JUC12009115.hg.1 | ERP27  |
| TC15000622.hg.1 | 7.59  | JUC15002502.hg.1 | SMAD3  |
| TC15000622.hg.1 | 4.72  | JUC15002500.hg.1 | SMAD3  |
| TC15000622.hg.1 | 3.72  | PSR15005089.hg.1 | SMAD3  |
| TC15000622.hg.1 | 3.17  | JUC15002501.hg.1 | SMAD3  |
| TC15000622.hg.1 | 3.11  | PSR15005085.hg.1 | SMAD3  |
| TC15000622.hg.1 | 2.77  | PSR15005093.hg.1 | SMAD3  |
| TC15000622.hg.1 | 2.04  | PSR15005097.hg.1 | SMAD3  |
| TC17000536.hg.1 | 7.57  | JUC17003668.hg.1 | WNK4   |
| TC17000536.hg.1 | 5.7   | JUC17003676.hg.1 | WNK4   |
| TC17000536.hg.1 | 4.95  | PSR17006514.hg.1 | WNK4   |
| TC17000536.hg.1 | 3.75  | JUC17003670.hg.1 | WNK4   |
| TC17000536.hg.1 | 3.44  | PSR17006532.hg.1 | WNK4   |
| TC17000536.hg.1 | 3.38  | JUC17003662.hg.1 | WNK4   |
| TC17000536.hg.1 | 3.1   | PSR17006508.hg.1 | WNK4   |
| TC17000536.hg.1 | 3.06  | PSR17006510.hg.1 | WNK4   |
| TC17000536.hg.1 | 2.95  | PSR17006523.hg.1 | WNK4   |



|                 |        |                   |              |
|-----------------|--------|-------------------|--------------|
| TC17000536.hg.1 | 2.87   | JUC17003656.hg.1  | WNK4         |
| TC17000536.hg.1 | 2.66   | PSR17006534.hg.1  | WNK4         |
| TC17000536.hg.1 | 2.49   | PSR17006507.hg.1  | WNK4         |
| TC17000536.hg.1 | 2.36   | PSR17006533.hg.1  | WNK4         |
| TC17000536.hg.1 | 2.34   | JUC17003661.hg.1  | WNK4         |
| TC17000536.hg.1 | 2.33   | PSR17006511.hg.1  | WNK4         |
| TC17000536.hg.1 | 2.21   | JUC17003671.hg.1  | WNK4         |
| TC17000536.hg.1 | -2.12  | JUC17003664.hg.1  | WNK4         |
| TC17000536.hg.1 | -2.23  | PSR17006524.hg.1  | WNK4         |
| TC17000536.hg.1 | -3.29  | PSR17006525.hg.1  | WNK4         |
| TC17000536.hg.1 | -3.57  | PSR17006536.hg.1  | WNK4         |
| TC17000536.hg.1 | -4.46  | JUC17003677.hg.1  | WNK4         |
| TC17000536.hg.1 | -4.47  | JUC17003665.hg.1  | WNK4         |
| TC17000536.hg.1 | -5.01  | JUC17003674.hg.1  | WNK4         |
| TC17000536.hg.1 | -5.58  | PSR17006518.hg.1  | WNK4         |
| TC17000536.hg.1 | -5.89  | PSR17006520.hg.1  | WNK4         |
| TC17000536.hg.1 | -6.22  | PSR17006521.hg.1  | WNK4         |
| TC17000536.hg.1 | -6.64  | PSR17006535.hg.1  | WNK4         |
| TC17000536.hg.1 | -6.73  | JUC17003658.hg.1  | WNK4         |
| TC17000536.hg.1 | -9.43  | JUC17003659.hg.1  | WNK4         |
| TC17000536.hg.1 | -23.96 | JUC17003675.hg.1  | WNK4         |
| TC08000208.hg.1 | 7.53   | JUC08001473.hg.1  | EPHX2        |
| TC08000208.hg.1 | 3.26   | JUC08001479.hg.1  | EPHX2        |
| TC08000208.hg.1 | 3.06   | JUC08001494.hg.1  | EPHX2        |
| TC08000208.hg.1 | 2.4    | JUC08001483.hg.1  | EPHX2        |
| TC08000208.hg.1 | 2.01   | JUC08001489.hg.1  | EPHX2        |
| TC08000208.hg.1 | -2.17  | PSR08003028.hg.1  | EPHX2        |
| TC08000208.hg.1 | -2.62  | PSR08003009.hg.1  | EPHX2        |
| TC08000208.hg.1 | -2.81  | JUC08001469.hg.1  | EPHX2        |
| TC01003745.hg.1 | 7.52   | JUC01030000.hg.1  | NUAK2        |
| TC01003745.hg.1 | 4.75   | JUC01030002.hg.1  | NUAK2        |
| TC01003745.hg.1 | 2.91   | JUC01029999.hg.1  | NUAK2        |
| TC01003745.hg.1 | 2.77   | PSR01057454.hg.1  | NUAK2        |
| TC01003745.hg.1 | -2.86  | JUC01030001.hg.1  | NUAK2        |
| TC01003745.hg.1 | -2.91  | PSR01057457.hg.1  | NUAK2        |
| TC01003745.hg.1 | -5.35  | JUC01029997.hg.1  | NUAK2        |
| TC6_cox_hap2000 | 7.52   | JUC6_cox_hap2001E | HLA-C        |
| TC6_cox_hap2000 | 2.59   | PSR6_cox_hap2002E | HLA-C        |
| TC6_cox_hap2000 | 2.56   | PSR6_cox_hap20027 | HLA-C        |
| TC6_cox_hap2000 | 2.46   | JUC6_cox_hap2001E | HLA-C        |
| TC6_cox_hap2000 | 2.29   | JUC6_cox_hap2001E | HLA-C        |
| TC6_cox_hap2000 | 2.03   | JUC6_cox_hap2001E | HLA-C        |
| TC6_cox_hap2000 | -2.02  | JUC6_cox_hap2001E | HLA-C        |
| TC6_cox_hap2000 | -3.31  | JUC6_cox_hap2001E | HLA-C        |
| TC02002201.hg.1 | 7.5    | PSR02035635.hg.1  | LIMS3L, LIMS |
| TC02002201.hg.1 | 6.48   | JUC02018392.hg.1  | LIMS3L, LIMS |
| TC02002201.hg.1 | 5.52   | PSR02035631.hg.1  | LIMS3L, LIMS |
| TC02002201.hg.1 | 4.87   | PSR02035634.hg.1  | LIMS3L, LIMS |
| TC02002201.hg.1 | 4.6    | PSR02035629.hg.1  | LIMS3L, LIMS |
| TC02002201.hg.1 | 4.57   | PSR02035630.hg.1  | LIMS3L, LIMS |
| TC02002201.hg.1 | 4.2    | JUC02018410.hg.1  | LIMS3L, LIMS |
| TC02002201.hg.1 | 4.18   | PSR02035633.hg.1  | LIMS3L, LIMS |
| TC02002201.hg.1 | 3.46   | PSR02035632.hg.1  | LIMS3L, LIMS |
| TC02002201.hg.1 | 3.31   | JUC02018409.hg.1  | LIMS3L, LIMS |
| TC02002201.hg.1 | 2.95   | JUC02018407.hg.1  | LIMS3L, LIMS |
| TC02002201.hg.1 | 2.67   | PSR02035636.hg.1  | LIMS3L, LIMS |
| TC02002201.hg.1 | -2.17  | JUC02018400.hg.1  | LIMS3L, LIMS |
| TC02002645.hg.1 | 7.47   | JUC02022204.hg.1  | ANKRD44      |

|                 |       |                  |         |
|-----------------|-------|------------------|---------|
| TC02002645.hg.1 | 5.02  | JUC02022190.hg.1 | ANKRD44 |
| TC02002645.hg.1 | 2.24  | JUC02022203.hg.1 | ANKRD44 |
| TC02002645.hg.1 | 2.12  | JUC02022212.hg.1 | ANKRD44 |
| TC02002645.hg.1 | 2.09  | PSR02042446.hg.1 | ANKRD44 |
| TC02002645.hg.1 | 2.09  | JUC02022219.hg.1 | ANKRD44 |
| TC02002645.hg.1 | 2.07  | PSR02042419.hg.1 | ANKRD44 |
| TC02002645.hg.1 | -2.14 | PSR02042417.hg.1 | ANKRD44 |
| TC02002645.hg.1 | -2.18 | JUC02022199.hg.1 | ANKRD44 |
| TC02002645.hg.1 | -2.26 | JUC02022225.hg.1 | ANKRD44 |
| TC02002645.hg.1 | -2.68 | PSR02042425.hg.1 | ANKRD44 |
| TC02002645.hg.1 | -2.71 | PSR02042443.hg.1 | ANKRD44 |
| TC02002645.hg.1 | -2.79 | JUC02022218.hg.1 | ANKRD44 |
| TC02002645.hg.1 | -2.85 | JUC02022221.hg.1 | ANKRD44 |
| TC02002645.hg.1 | -2.88 | PSR02042440.hg.1 | ANKRD44 |
| TC02002645.hg.1 | -3.07 | JUC02022201.hg.1 | ANKRD44 |
| TC02002645.hg.1 | -3.46 | JUC02022211.hg.1 | ANKRD44 |
| TC02002645.hg.1 | -3.8  | PSR02042453.hg.1 | ANKRD44 |
| TC12002066.hg.1 | 7.46  | PSR12027178.hg.1 | HPD     |
| TC12002066.hg.1 | 6.86  | JUC12015248.hg.1 | HPD     |
| TC12002066.hg.1 | 6.06  | PSR12027180.hg.1 | HPD     |
| TC12002066.hg.1 | 4.4   | PSR12027156.hg.1 | HPD     |
| TC12002066.hg.1 | 3.52  | JUC12015240.hg.1 | HPD     |
| TC12002066.hg.1 | 3.42  | JUC12015250.hg.1 | HPD     |
| TC12002066.hg.1 | 3.03  | PSR12027177.hg.1 | HPD     |
| TC12002066.hg.1 | 2.69  | PSR12027171.hg.1 | HPD     |
| TC12002066.hg.1 | 2.41  | PSR12027176.hg.1 | HPD     |
| TC12002066.hg.1 | -2    | PSR12027158.hg.1 | HPD     |
| TC12002066.hg.1 | -2.11 | JUC12015243.hg.1 | HPD     |
| TC12002066.hg.1 | -2.22 | JUC12015242.hg.1 | HPD     |
| TC14001451.hg.1 | 7.45  | PSR14016287.hg.1 | LG MN   |
| TC14001451.hg.1 | -2.04 | JUC14008413.hg.1 | LG MN   |
| TC01001985.hg.1 | 7.44  | JUC01016734.hg.1 | ZNF238  |
| TC01001985.hg.1 | 3.06  | PSR01030750.hg.1 | ZNF238  |
| TC01001985.hg.1 | 2.7   | JUC01016730.hg.1 | ZNF238  |
| TC01001985.hg.1 | 2.52  | JUC01016733.hg.1 | ZNF238  |
| TC01001985.hg.1 | 2.43  | PSR01030745.hg.1 | ZNF238  |
| TC01001985.hg.1 | 2.38  | PSR01030744.hg.1 | ZNF238  |
| TC01003334.hg.1 | 7.42  | JUC01027218.hg.1 | SMG5    |
| TC01003334.hg.1 | 2.32  | JUC01027206.hg.1 | SMG5    |
| TC01003334.hg.1 | -2.28 | JUC01027201.hg.1 | SMG5    |
| TC01003334.hg.1 | -2.37 | JUC01027198.hg.1 | SMG5    |
| TC01003334.hg.1 | -2.67 | PSR01051948.hg.1 | SMG5    |
| TC07003315.hg.1 | 7.42  | JUC07020730.hg.1 | SUN1    |
| TC07003315.hg.1 | 4.34  | PSR07000120.hg.1 | SUN1    |
| TC07003315.hg.1 | 3.65  | PSR07000093.hg.1 | SUN1    |
| TC07003315.hg.1 | 3.2   | PSR07000101.hg.1 | SUN1    |
| TC07003315.hg.1 | 3.19  | PSR07000100.hg.1 | SUN1    |
| TC07003315.hg.1 | 3.12  | PSR07000102.hg.1 | SUN1    |
| TC07003315.hg.1 | 3.05  | JUC07020749.hg.1 | SUN1    |
| TC07003315.hg.1 | 3.02  | PSR07000115.hg.1 | SUN1    |
| TC07003315.hg.1 | 2.79  | PSR07000151.hg.1 | SUN1    |
| TC07003315.hg.1 | 2.75  | JUC07020735.hg.1 | SUN1    |
| TC07003315.hg.1 | 2.65  | PSR07000103.hg.1 | SUN1    |
| TC07003315.hg.1 | 2.61  | PSR07000110.hg.1 | SUN1    |
| TC07003315.hg.1 | 2.56  | PSR07000109.hg.1 | SUN1    |
| TC07003315.hg.1 | 2.51  | JUC07020726.hg.1 | SUN1    |
| TC07003315.hg.1 | 2.42  | PSR07000119.hg.1 | SUN1    |
| TC07003315.hg.1 | 2.33  | PSR07000160.hg.1 | SUN1    |

|                 |       |                  |            |
|-----------------|-------|------------------|------------|
| TC07003315.hg.1 | 2.31  | JUC07020757.hg.1 | SUN1       |
| TC07003315.hg.1 | 2.24  | PSR07000108.hg.1 | SUN1       |
| TC07003315.hg.1 | 2.21  | JUC07020746.hg.1 | SUN1       |
| TC07003315.hg.1 | 2.1   | PSR07000107.hg.1 | SUN1       |
| TC07003315.hg.1 | 2.08  | PSR07000177.hg.1 | SUN1       |
| TC07003315.hg.1 | 2.07  | PSR07000150.hg.1 | SUN1       |
| TC07003315.hg.1 | 2.05  | PSR07000148.hg.1 | SUN1       |
| TC07003315.hg.1 | 2.01  | PSR07000127.hg.1 | SUN1       |
| TC03001800.hg.1 | 7.4   | JUC03016184.hg.1 | SLCO2A1    |
| TC03001800.hg.1 | 3.06  | PSR03032636.hg.1 | SLCO2A1    |
| TC03001800.hg.1 | 2.26  | JUC03016198.hg.1 | SLCO2A1    |
| TC03001800.hg.1 | 2     | JUC03016186.hg.1 | SLCO2A1    |
| TC03001800.hg.1 | -2.54 | PSR03032642.hg.1 | SLCO2A1    |
| TC03001800.hg.1 | -2.72 | PSR03032653.hg.1 | SLCO2A1    |
| TC03001800.hg.1 | -2.74 | JUC03016189.hg.1 | SLCO2A1    |
| TC03001800.hg.1 | -2.75 | JUC03016185.hg.1 | SLCO2A1    |
| TC03001800.hg.1 | -2.79 | PSR03032652.hg.1 | SLCO2A1    |
| TC03001800.hg.1 | -2.88 | PSR03032654.hg.1 | SLCO2A1    |
| TC03001800.hg.1 | -2.98 | PSR03032627.hg.1 | SLCO2A1    |
| TC03001800.hg.1 | -3.02 | PSR03032631.hg.1 | SLCO2A1    |
| TC03001800.hg.1 | -3.2  | PSR03032638.hg.1 | SLCO2A1    |
| TC03001800.hg.1 | -3.49 | JUC03016195.hg.1 | SLCO2A1    |
| TC03001800.hg.1 | -5.21 | JUC03016182.hg.1 | SLCO2A1    |
| TC03001800.hg.1 | -7.26 | JUC03016191.hg.1 | SLCO2A1    |
| TC11000903.hg.1 | 7.39  | JUC11005972.hg.1 | FAT3       |
| TC11000903.hg.1 | 6.18  | JUC11005965.hg.1 | FAT3       |
| TC11000903.hg.1 | 4.69  | JUC11005970.hg.1 | FAT3       |
| TC11000903.hg.1 | 3.67  | PSR11011316.hg.1 | FAT3       |
| TC11000903.hg.1 | 2.28  | PSR11011319.hg.1 | FAT3       |
| TC11000903.hg.1 | 2.09  | JUC11005955.hg.1 | FAT3       |
| TC11000903.hg.1 | -2.03 | PSR11011321.hg.1 | FAT3       |
| TC02001769.hg.1 | 7.37  | JUC02014965.hg.1 | SLC8A1     |
| TC02001769.hg.1 | 3.77  | PSR02028578.hg.1 | SLC8A1     |
| TC02001769.hg.1 | 2.9   | PSR02028579.hg.1 | SLC8A1     |
| TC02001769.hg.1 | 2.7   | PSR02028577.hg.1 | SLC8A1     |
| TC02001769.hg.1 | 2.66  | PSR02028574.hg.1 | SLC8A1     |
| TC02001769.hg.1 | 2.32  | PSR02028560.hg.1 | SLC8A1     |
| TC02001769.hg.1 | 2.21  | PSR02028576.hg.1 | SLC8A1     |
| TC02001769.hg.1 | 2.17  | PSR02028583.hg.1 | SLC8A1     |
| TC02001769.hg.1 | 2.12  | JUC02014963.hg.1 | SLC8A1     |
| TC03000816.hg.1 | 7.37  | JUC03007408.hg.1 | SELT       |
| TC03000816.hg.1 | -2.59 | PSR03014668.hg.1 | SELT       |
| TC03000816.hg.1 | -4.31 | JUC03007410.hg.1 | SELT       |
| TC17000119.hg.1 | 7.35  | JUC17000979.hg.1 | CYB5D1     |
| TC17000119.hg.1 | 2.12  | PSR17001706.hg.1 | CYB5D1     |
| TC02000041.hg.1 | 7.33  | JUC02000259.hg.1 | ID2        |
| TC02000041.hg.1 | 7.07  | PSR02000477.hg.1 | ID2        |
| TC02000041.hg.1 | 6.37  | PSR02000478.hg.1 | ID2        |
| TC02000041.hg.1 | 6.32  | PSR02000476.hg.1 | ID2        |
| TC02000041.hg.1 | -2.57 | PSR02000480.hg.1 | ID2        |
| TC02004964.hg.1 | 7.31  | JUC02031711.hg.1 | LOC1001342 |
| TC02004964.hg.1 | 5.88  | PSR02004376.hg.1 | LOC1001342 |
| TC02004964.hg.1 | 4.3   | JUC02031710.hg.1 | LOC1001342 |
| TC02004964.hg.1 | 4.26  | PSR02004375.hg.1 | LOC1001342 |
| TC02004964.hg.1 | 2.97  | PSR02004378.hg.1 | LOC1001342 |
| TC11001450.hg.1 | 7.3   | JUC11009728.hg.1 | PLEKHA7    |
| TC11001450.hg.1 | 4.99  | PSR11018211.hg.1 | PLEKHA7    |
| TC11001450.hg.1 | 4.28  | JUC11009717.hg.1 | PLEKHA7    |

|                 |       |                  |         |
|-----------------|-------|------------------|---------|
| TC11001450.hg.1 | 3.38  | JUC11009723.hg.1 | PLEKHA7 |
| TC11001450.hg.1 | 2.9   | JUC11009722.hg.1 | PLEKHA7 |
| TC11001450.hg.1 | 2.71  | JUC11009740.hg.1 | PLEKHA7 |
| TC11001450.hg.1 | 2.71  | JUC11009745.hg.1 | PLEKHA7 |
| TC11001450.hg.1 | 2.57  | PSR11018200.hg.1 | PLEKHA7 |
| TC11001450.hg.1 | 2.37  | JUC11009741.hg.1 | PLEKHA7 |
| TC11001450.hg.1 | 2.35  | PSR11018212.hg.1 | PLEKHA7 |
| TC11001450.hg.1 | 2.04  | JUC11009729.hg.1 | PLEKHA7 |
| TC11001450.hg.1 | -2.33 | PSR11018195.hg.1 | PLEKHA7 |
| TC11001450.hg.1 | -2.35 | PSR11018218.hg.1 | PLEKHA7 |
| TC11001450.hg.1 | -2.43 | PSR11018205.hg.1 | PLEKHA7 |
| TC11001450.hg.1 | -2.5  | PSR11018206.hg.1 | PLEKHA7 |
| TC11001450.hg.1 | -2.5  | PSR11018209.hg.1 | PLEKHA7 |
| TC11001450.hg.1 | -2.54 | PSR11018219.hg.1 | PLEKHA7 |
| TC11001450.hg.1 | -2.93 | PSR11018197.hg.1 | PLEKHA7 |
| TC11001450.hg.1 | -3.04 | JUC11009724.hg.1 | PLEKHA7 |
| TC11001450.hg.1 | -3.13 | JUC11009720.hg.1 | PLEKHA7 |
| TC11001450.hg.1 | -3.27 | PSR11018228.hg.1 | PLEKHA7 |
| TC11001450.hg.1 | -3.45 | JUC11009739.hg.1 | PLEKHA7 |
| TC11001450.hg.1 | -3.65 | JUC11009731.hg.1 | PLEKHA7 |
| TC11001450.hg.1 | -4.23 | JUC11009736.hg.1 | PLEKHA7 |
| TC01001423.hg.1 | 7.27  | PSR01022235.hg.1 | DDR2    |
| TC01001423.hg.1 | 4.12  | JUC01011721.hg.1 | DDR2    |
| TC01001423.hg.1 | -2.01 | PSR01022258.hg.1 | DDR2    |
| TC03000146.hg.1 | 7.26  | PSR03002686.hg.1 | RBMS3   |
| TC03000146.hg.1 | 2     | JUC03001422.hg.1 | RBMS3   |
| TC01002669.hg.1 | 7.23  | PSR01041948.hg.1 | LRP8    |
| TC01002669.hg.1 | 7.12  | JUC01022419.hg.1 | LRP8    |
| TC01002669.hg.1 | 7.05  | JUC01022429.hg.1 | LRP8    |
| TC01002669.hg.1 | 6.53  | JUC01022411.hg.1 | LRP8    |
| TC01002669.hg.1 | 5.66  | JUC01022420.hg.1 | LRP8    |
| TC01002669.hg.1 | 5.4   | PSR01041953.hg.1 | LRP8    |
| TC01002669.hg.1 | 5.24  | PSR01041939.hg.1 | LRP8    |
| TC01002669.hg.1 | 5.02  | PSR01041949.hg.1 | LRP8    |
| TC01002669.hg.1 | 4.94  | PSR01041950.hg.1 | LRP8    |
| TC01002669.hg.1 | 4.75  | PSR01041942.hg.1 | LRP8    |
| TC01002669.hg.1 | 4.74  | PSR01041951.hg.1 | LRP8    |
| TC01002669.hg.1 | 4.44  | JUC01022423.hg.1 | LRP8    |
| TC01002669.hg.1 | 4.43  | JUC01022424.hg.1 | LRP8    |
| TC01002669.hg.1 | 4.38  | JUC01022414.hg.1 | LRP8    |
| TC01002669.hg.1 | 4.29  | PSR01041944.hg.1 | LRP8    |
| TC01002669.hg.1 | 4.28  | JUC01022412.hg.1 | LRP8    |
| TC01002669.hg.1 | 3.72  | JUC01022422.hg.1 | LRP8    |
| TC01002669.hg.1 | 3.71  | PSR01041935.hg.1 | LRP8    |
| TC01002669.hg.1 | 3.61  | PSR01041943.hg.1 | LRP8    |
| TC01002669.hg.1 | 3.39  | JUC01022435.hg.1 | LRP8    |
| TC01002669.hg.1 | 3.31  | PSR01041918.hg.1 | LRP8    |
| TC01002669.hg.1 | 3.03  | JUC01022425.hg.1 | LRP8    |
| TC01002669.hg.1 | 2.91  | JUC01022408.hg.1 | LRP8    |
| TC01002669.hg.1 | 2.75  | JUC01022413.hg.1 | LRP8    |
| TC01002669.hg.1 | 2.7   | PSR01041934.hg.1 | LRP8    |
| TC01002669.hg.1 | 2.69  | JUC01022421.hg.1 | LRP8    |
| TC01002669.hg.1 | 2.37  | JUC01022415.hg.1 | LRP8    |
| TC01002669.hg.1 | 2.23  | PSR01041945.hg.1 | LRP8    |
| TC01002669.hg.1 | 2     | PSR01041920.hg.1 | LRP8    |
| TC01002669.hg.1 | 2     | PSR01041940.hg.1 | LRP8    |
| TC01002669.hg.1 | -2.24 | JUC01022434.hg.1 | LRP8    |
| TC04001286.hg.1 | 7.23  | PSR04017583.hg.1 | CXCL2   |

|                 |       |                  |            |
|-----------------|-------|------------------|------------|
| TC04001286.hg.1 | 6.67  | PSR04017580.hg.1 | CXCL2      |
| TC04001286.hg.1 | 6.31  | PSR04017579.hg.1 | CXCL2      |
| TC04001286.hg.1 | 5.69  | PSR04017577.hg.1 | CXCL2      |
| TC04001286.hg.1 | 5.42  | PSR04017571.hg.1 | CXCL2      |
| TC04001286.hg.1 | 4.68  | PSR04017570.hg.1 | CXCL2      |
| TC04001286.hg.1 | 4.12  | JUC04009393.hg.1 | CXCL2      |
| TC04001286.hg.1 | 3.87  | PSR04017575.hg.1 | CXCL2      |
| TC04001286.hg.1 | 2.48  | PSR04017574.hg.1 | CXCL2      |
| TC04001286.hg.1 | -2.2  | JUC04009392.hg.1 | CXCL2      |
| TC04000514.hg.1 | 7.14  | JUC04003940.hg.1 | LOC1005070 |
| TC04000514.hg.1 | 2.6   | JUC04003941.hg.1 | LOC1005070 |
| TC04000514.hg.1 | 2.51  | PSR04007563.hg.1 | LOC1005070 |
| TC04000514.hg.1 | 2.36  | JUC04003925.hg.1 | LOC1005070 |
| TC04000514.hg.1 | 2.25  | PSR04007558.hg.1 | LOC1005070 |
| TC04000514.hg.1 | 2.23  | PSR04007555.hg.1 | LOC1005070 |
| TC04000514.hg.1 | -2.68 | PSR04007556.hg.1 | LOC1005070 |
| TC10002941.hg.1 | 7.14  | JUC10017226.hg.1 | STAMBPL1   |
| TC10002941.hg.1 | 3.7   | JUC10017233.hg.1 | STAMBPL1   |
| TC10002941.hg.1 | 3.29  | JUC10017232.hg.1 | STAMBPL1   |
| TC10002941.hg.1 | 2.96  | PSR10006942.hg.1 | STAMBPL1   |
| TC10002941.hg.1 | 2.91  | PSR10006933.hg.1 | STAMBPL1   |
| TC10002941.hg.1 | 2.74  | PSR10006934.hg.1 | STAMBPL1   |
| TC10002941.hg.1 | 2.59  | PSR10006930.hg.1 | STAMBPL1   |
| TC10002941.hg.1 | 2.44  | PSR10006939.hg.1 | STAMBPL1   |
| TC10002941.hg.1 | 2.13  | JUC10017229.hg.1 | STAMBPL1   |
| TC10002941.hg.1 | 2.06  | PSR10006932.hg.1 | STAMBPL1   |
| TC10002941.hg.1 | 2.01  | JUC10017227.hg.1 | STAMBPL1   |
| TC10002941.hg.1 | -3.51 | JUC10017223.hg.1 | STAMBPL1   |
| TC18000567.hg.1 | 7.1   | JUC18003951.hg.1 | RTTN       |
| TC18000567.hg.1 | 4.33  | JUC18004000.hg.1 | RTTN       |
| TC18000567.hg.1 | 3.01  | JUC18003990.hg.1 | RTTN       |
| TC18000567.hg.1 | 2.49  | JUC18003974.hg.1 | RTTN       |
| TC18000567.hg.1 | 2.43  | JUC18003985.hg.1 | RTTN       |
| TC18000567.hg.1 | 2.03  | JUC18003999.hg.1 | RTTN       |
| TC18000567.hg.1 | 2     | PSR18005929.hg.1 | RTTN       |
| TC18000567.hg.1 | -2.02 | PSR18005928.hg.1 | RTTN       |
| TC18000567.hg.1 | -2.31 | JUC18003978.hg.1 | RTTN       |
| TC18000567.hg.1 | -2.8  | JUC18003983.hg.1 | RTTN       |
| TC05001752.hg.1 | 7.06  | JUC05012198.hg.1 | FBN2       |
| TC05001752.hg.1 | 6.96  | JUC05012163.hg.1 | FBN2       |
| TC05001752.hg.1 | 6.38  | JUC05012157.hg.1 | FBN2       |
| TC05001752.hg.1 | 5.34  | JUC05012214.hg.1 | FBN2       |
| TC05001752.hg.1 | 4.87  | JUC05012181.hg.1 | FBN2       |
| TC05001752.hg.1 | 4.48  | JUC05012170.hg.1 | FBN2       |
| TC05001752.hg.1 | 3.81  | JUC05012171.hg.1 | FBN2       |
| TC05001752.hg.1 | 3.52  | PSR05023556.hg.1 | FBN2       |
| TC05001752.hg.1 | 3.44  | PSR05023548.hg.1 | FBN2       |
| TC05001752.hg.1 | 3.43  | JUC05012164.hg.1 | FBN2       |
| TC05001752.hg.1 | 3.19  | PSR05023526.hg.1 | FBN2       |
| TC05001752.hg.1 | 2.9   | PSR05023539.hg.1 | FBN2       |
| TC05001752.hg.1 | 2.9   | JUC05012165.hg.1 | FBN2       |
| TC05001752.hg.1 | 2.81  | PSR05023549.hg.1 | FBN2       |
| TC05001752.hg.1 | 2.69  | JUC05012158.hg.1 | FBN2       |
| TC05001752.hg.1 | 2.67  | PSR05023551.hg.1 | FBN2       |
| TC05001752.hg.1 | 2.64  | PSR05023518.hg.1 | FBN2       |
| TC05001752.hg.1 | 2.61  | PSR05023547.hg.1 | FBN2       |
| TC05001752.hg.1 | 2.57  | JUC05012189.hg.1 | FBN2       |
| TC05001752.hg.1 | 2.5   | PSR05023501.hg.1 | FBN2       |

|                 |       |                  |             |
|-----------------|-------|------------------|-------------|
| TC05001752.hg.1 | 2.5   | PSR05023550.hg.1 | FBN2        |
| TC05001752.hg.1 | 2.4   | JUC05012229.hg.1 | FBN2        |
| TC05001752.hg.1 | 2.36  | PSR05023529.hg.1 | FBN2        |
| TC05001752.hg.1 | 2.21  | JUC05012207.hg.1 | FBN2        |
| TC05001752.hg.1 | 2.2   | JUC05012166.hg.1 | FBN2        |
| TC05001752.hg.1 | 2.18  | PSR05023546.hg.1 | FBN2        |
| TC05001752.hg.1 | 2.17  | JUC05012196.hg.1 | FBN2        |
| TC05001752.hg.1 | 2.14  | JUC05012179.hg.1 | FBN2        |
| TC05001752.hg.1 | 2.1   | JUC05012227.hg.1 | FBN2        |
| TC05001752.hg.1 | 2.09  | PSR05023522.hg.1 | FBN2        |
| TC05001752.hg.1 | 2.07  | JUC05012183.hg.1 | FBN2        |
| TC05001752.hg.1 | 2.06  | PSR05023542.hg.1 | FBN2        |
| TC05001752.hg.1 | -2.02 | PSR05023475.hg.1 | FBN2        |
| TC05001752.hg.1 | -2.19 | PSR05023493.hg.1 | FBN2        |
| TC05001752.hg.1 | -2.27 | JUC05012175.hg.1 | FBN2        |
| TC05001752.hg.1 | -2.28 | JUC05012212.hg.1 | FBN2        |
| TC05001752.hg.1 | -2.29 | JUC05012204.hg.1 | FBN2        |
| TC05001752.hg.1 | -2.3  | JUC05012225.hg.1 | FBN2        |
| TC05001752.hg.1 | -2.32 | PSR05023510.hg.1 | FBN2        |
| TC05001752.hg.1 | -2.38 | JUC05012186.hg.1 | FBN2        |
| TC05001752.hg.1 | -2.8  | JUC05012221.hg.1 | FBN2        |
| TC05001752.hg.1 | -2.84 | JUC05012184.hg.1 | FBN2        |
| TC05001752.hg.1 | -2.91 | PSR05023545.hg.1 | FBN2        |
| TC05001752.hg.1 | -2.94 | PSR05023525.hg.1 | FBN2        |
| TC05001752.hg.1 | -3.3  | JUC05012202.hg.1 | FBN2        |
| TC05001752.hg.1 | -3.65 | PSR05023534.hg.1 | FBN2        |
| TC05001752.hg.1 | -3.71 | JUC05012203.hg.1 | FBN2        |
| TC05001752.hg.1 | -4.22 | JUC05012156.hg.1 | FBN2        |
| TC09001282.hg.1 | 7.06  | JUC09008605.hg.1 | KIF27       |
| TC09001282.hg.1 | 3.1   | JUC09008602.hg.1 | KIF27       |
| TC09001282.hg.1 | 2.77  | PSR09015980.hg.1 | KIF27       |
| TC09001282.hg.1 | 2.31  | PSR09016001.hg.1 | KIF27       |
| TC09001282.hg.1 | 2.12  | JUC09008598.hg.1 | KIF27       |
| TC09001282.hg.1 | 2     | JUC09008594.hg.1 | KIF27       |
| TC09001282.hg.1 | -2.79 | JUC09008592.hg.1 | KIF27       |
| TC10000486.hg.1 | 7.04  | PSR10005813.hg.1 | ZNF503-AS1  |
| TC10000486.hg.1 | 6.79  | JUC10003414.hg.1 | ZNF503-AS1  |
| TC10000486.hg.1 | 6.54  | JUC10003419.hg.1 | ZNF503-AS1  |
| TC10000486.hg.1 | 5.58  | PSR10005811.hg.1 | ZNF503-AS1  |
| TC10000486.hg.1 | 4.48  | PSR10005823.hg.1 | ZNF503-AS1  |
| TC10000486.hg.1 | 3.81  | PSR10005810.hg.1 | ZNF503-AS1  |
| TC10000486.hg.1 | 3.72  | PSR10005819.hg.1 | ZNF503-AS1  |
| TC10000486.hg.1 | 3.71  | PSR10005826.hg.1 | ZNF503-AS1  |
| TC10000486.hg.1 | 3.04  | PSR10005816.hg.1 | ZNF503-AS1  |
| TC10000486.hg.1 | 2.86  | PSR10005822.hg.1 | ZNF503-AS1  |
| TC10000486.hg.1 | 2.83  | PSR10005832.hg.1 | ZNF503-AS1  |
| TC10000486.hg.1 | 2.78  | JUC10003409.hg.1 | ZNF503-AS1  |
| TC10000486.hg.1 | 2.68  | PSR10005821.hg.1 | ZNF503-AS1  |
| TC10000486.hg.1 | 2.18  | JUC10003417.hg.1 | ZNF503-AS1  |
| TC10000486.hg.1 | -2.99 | JUC10003423.hg.1 | ZNF503-AS1  |
| TC01002153.hg.1 | 7.03  | JUC01017818.hg.1 | PLEKHG5, TF |
| TC01002153.hg.1 | 5.57  | JUC01017827.hg.1 | PLEKHG5, TF |
| TC01002153.hg.1 | 4.97  | JUC01017791.hg.1 | PLEKHG5, TF |
| TC01002153.hg.1 | 4.79  | JUC01017792.hg.1 | PLEKHG5, TF |
| TC01002153.hg.1 | 4.68  | PSR01033181.hg.1 | PLEKHG5, TF |
| TC01002153.hg.1 | 4.5   | JUC01017820.hg.1 | PLEKHG5, TF |
| TC01002153.hg.1 | 4.23  | JUC01017811.hg.1 | PLEKHG5, TF |
| TC01002153.hg.1 | 4.05  | PSR01033184.hg.1 | PLEKHG5, TF |

|                 |       |                  |             |
|-----------------|-------|------------------|-------------|
| TC01002153.hg.1 | 4     | PSR01033183.hg.1 | PLEKHG5, TI |
| TC01002153.hg.1 | 3.89  | PSR01033187.hg.1 | PLEKHG5, TI |
| TC01002153.hg.1 | 3.79  | PSR01033217.hg.1 | PLEKHG5, TI |
| TC01002153.hg.1 | 3.53  | JUC01017816.hg.1 | PLEKHG5, TI |
| TC01002153.hg.1 | 3.42  | JUC01017823.hg.1 | PLEKHG5, TI |
| TC01002153.hg.1 | 3.32  | JUC01017793.hg.1 | PLEKHG5, TI |
| TC01002153.hg.1 | 3.13  | PSR01033218.hg.1 | PLEKHG5, TI |
| TC01002153.hg.1 | 3.02  | PSR01033233.hg.1 | PLEKHG5, TI |
| TC01002153.hg.1 | 2.99  | PSR01033207.hg.1 | PLEKHG5, TI |
| TC01002153.hg.1 | 2.85  | JUC01017803.hg.1 | PLEKHG5, TI |
| TC01002153.hg.1 | 2.81  | PSR01033189.hg.1 | PLEKHG5, TI |
| TC01002153.hg.1 | 2.81  | PSR01033225.hg.1 | PLEKHG5, TI |
| TC01002153.hg.1 | 2.68  | PSR01033238.hg.1 | PLEKHG5, TI |
| TC01002153.hg.1 | 2.66  | JUC01017821.hg.1 | PLEKHG5, TI |
| TC01002153.hg.1 | 2.62  | PSR01033179.hg.1 | PLEKHG5, TI |
| TC01002153.hg.1 | 2.62  | PSR01033226.hg.1 | PLEKHG5, TI |
| TC01002153.hg.1 | 2.56  | PSR01033177.hg.1 | PLEKHG5, TI |
| TC01002153.hg.1 | 2.55  | PSR01033212.hg.1 | PLEKHG5, TI |
| TC01002153.hg.1 | 2.54  | PSR01033175.hg.1 | PLEKHG5, TI |
| TC01002153.hg.1 | 2.53  | PSR01033234.hg.1 | PLEKHG5, TI |
| TC01002153.hg.1 | 2.51  | JUC01017813.hg.1 | PLEKHG5, TI |
| TC01002153.hg.1 | 2.5   | PSR01033231.hg.1 | PLEKHG5, TI |
| TC01002153.hg.1 | 2.44  | PSR01033195.hg.1 | PLEKHG5, TI |
| TC01002153.hg.1 | 2.42  | PSR01033222.hg.1 | PLEKHG5, TI |
| TC01002153.hg.1 | 2.41  | JUC01017831.hg.1 | PLEKHG5, TI |
| TC01002153.hg.1 | 2.35  | PSR01033220.hg.1 | PLEKHG5, TI |
| TC01002153.hg.1 | 2.27  | PSR01033208.hg.1 | PLEKHG5, TI |
| TC01002153.hg.1 | 2.27  | PSR01033228.hg.1 | PLEKHG5, TI |
| TC01002153.hg.1 | 2.26  | PSR01033192.hg.1 | PLEKHG5, TI |
| TC01002153.hg.1 | 2.23  | PSR01033230.hg.1 | PLEKHG5, TI |
| TC01002153.hg.1 | 2.18  | PSR01033172.hg.1 | PLEKHG5, TI |
| TC01002153.hg.1 | 2.16  | JUC01017810.hg.1 | PLEKHG5, TI |
| TC01002153.hg.1 | 2.12  | PSR01033251.hg.1 | PLEKHG5, TI |
| TC01002153.hg.1 | 2.05  | PSR01033215.hg.1 | PLEKHG5, TI |
| TC01002153.hg.1 | -2.18 | JUC01017790.hg.1 | PLEKHG5, TI |
| TC01000904.hg.1 | 7.02  | JUC01007530.hg.1 | VCAM1       |
| TC01000904.hg.1 | 5.39  | PSR01014244.hg.1 | VCAM1       |
| TC01000904.hg.1 | 5.2   | JUC01007529.hg.1 | VCAM1       |
| TC01000904.hg.1 | 5.07  | JUC01007534.hg.1 | VCAM1       |
| TC01000904.hg.1 | 2.84  | PSR01014256.hg.1 | VCAM1       |
| TC01000904.hg.1 | 2.84  | JUC01007533.hg.1 | VCAM1       |
| TC01000904.hg.1 | 2.41  | JUC01007531.hg.1 | VCAM1       |
| TC01001557.hg.1 | 7.02  | JUC01012726.hg.1 | TOR1AIP1    |
| TC01001557.hg.1 | 2.3   | PSR01024024.hg.1 | TOR1AIP1    |
| TC01001557.hg.1 | -2.46 | PSR01024030.hg.1 | TOR1AIP1    |
| TC01001557.hg.1 | -2.5  | PSR01024037.hg.1 | TOR1AIP1    |
| TC01001557.hg.1 | -4.62 | JUC01012727.hg.1 | TOR1AIP1    |
| TC0X001278.hg.1 | 7.02  | PSR0X017319.hg.1 | CHRDL1      |
| TC0X001278.hg.1 | 5.99  | PSR0X017318.hg.1 | CHRDL1      |
| TC0X001278.hg.1 | 5.15  | JUC0X008797.hg.1 | CHRDL1      |
| TC0X001278.hg.1 | 3.45  | PSR0X017314.hg.1 | CHRDL1      |
| TC0X001278.hg.1 | 2.06  | JUC0X008802.hg.1 | CHRDL1      |
| TC0X001278.hg.1 | -2.03 | JUC0X008803.hg.1 | CHRDL1      |
| TC0X001278.hg.1 | -2.06 | JUC0X008799.hg.1 | CHRDL1      |
| TC0X001278.hg.1 | -2.23 | JUC0X008800.hg.1 | CHRDL1      |
| TC11000245.hg.1 | 7.01  | JUC11001617.hg.1 | SPTY2D1-AS  |
| TC11000245.hg.1 | 3.18  | PSR11003257.hg.1 | SPTY2D1-AS  |
| TC11000245.hg.1 | 2.35  | PSR11003252.hg.1 | SPTY2D1-AS  |

|                 |       |                  |             |
|-----------------|-------|------------------|-------------|
| TC11000245.hg.1 | 2.28  | PSR11003258.hg.1 | SPTY2D1-AS  |
| TC17000311.hg.1 | 7.01  | JUC17002134.hg.1 | KSR1        |
| TC17000311.hg.1 | 6.77  | JUC17002130.hg.1 | KSR1        |
| TC17000311.hg.1 | 3.82  | JUC17002109.hg.1 | KSR1        |
| TC17000311.hg.1 | 3.36  | JUC17002115.hg.1 | KSR1        |
| TC17000311.hg.1 | 2.42  | PSR17003731.hg.1 | KSR1        |
| TC17000311.hg.1 | 2.36  | JUC17002123.hg.1 | KSR1        |
| TC17000311.hg.1 | 2.14  | PSR17003725.hg.1 | KSR1        |
| TC17000311.hg.1 | -2.04 | JUC17002128.hg.1 | KSR1        |
| TC17000311.hg.1 | -2.79 | JUC17002131.hg.1 | KSR1        |
| TC08000453.hg.1 | 7     | JUC08003156.hg.1 | C8orf34     |
| TC08000453.hg.1 | 3.84  | JUC08003151.hg.1 | C8orf34     |
| TC08000453.hg.1 | 3.58  | PSR08006438.hg.1 | C8orf34     |
| TC08000453.hg.1 | 3.38  | JUC08003158.hg.1 | C8orf34     |
| TC08000453.hg.1 | 3.37  | JUC08003152.hg.1 | C8orf34     |
| TC08000453.hg.1 | 3.2   | PSR08006449.hg.1 | C8orf34     |
| TC08000453.hg.1 | 2.85  | PSR08006441.hg.1 | C8orf34     |
| TC08000453.hg.1 | 2.32  | PSR08006445.hg.1 | C8orf34     |
| TC08000453.hg.1 | 2.3   | JUC08003162.hg.1 | C8orf34     |
| TC08000453.hg.1 | 2.06  | PSR08006444.hg.1 | C8orf34     |
| TC08000453.hg.1 | -2.91 | JUC08003153.hg.1 | C8orf34     |
| TC22000129.hg.1 | 7     | JUC22000666.hg.1 | BCR         |
| TC22000129.hg.1 | 2.4   | JUC22000686.hg.1 | BCR         |
| TC22000129.hg.1 | 2.09  | JUC22000694.hg.1 | BCR         |
| TC22000129.hg.1 | 2.04  | PSR22002285.hg.1 | BCR         |
| TC11001174.hg.1 | 6.98  | JUC11008040.hg.1 | ST3GAL4     |
| TC11001174.hg.1 | -2    | PSR11014846.hg.1 | ST3GAL4     |
| TC11001174.hg.1 | -2.24 | PSR11014847.hg.1 | ST3GAL4     |
| TC20000481.hg.1 | 6.98  | JUC20003543.hg.1 | CDH4        |
| TC20000481.hg.1 | 2.12  | PSR20006696.hg.1 | CDH4        |
| TC20000481.hg.1 | -2.85 | JUC20003539.hg.1 | CDH4        |
| TC02000235.hg.1 | 6.97  | JUC02001842.hg.1 | C2orf56     |
| TC02000235.hg.1 | 3.52  | JUC02001830.hg.1 | C2orf56     |
| TC02000235.hg.1 | 2.18  | JUC02001834.hg.1 | C2orf56     |
| TC02000235.hg.1 | 2.15  | PSR02003524.hg.1 | C2orf56     |
| TC02000235.hg.1 | 2.07  | PSR02003497.hg.1 | C2orf56     |
| TC02000235.hg.1 | -2.02 | PSR02003508.hg.1 | C2orf56     |
| TC02000235.hg.1 | -2.64 | JUC02001848.hg.1 | C2orf56     |
| TC02000235.hg.1 | -3.13 | JUC02001832.hg.1 | C2orf56     |
| TC13000790.hg.1 | 6.97  | PSR13008880.hg.1 | DCT         |
| TC13000790.hg.1 | 2.76  | JUC13005209.hg.1 | DCT         |
| TC13000790.hg.1 | 2.57  | PSR13008881.hg.1 | DCT         |
| TC13000790.hg.1 | 2.33  | PSR13008894.hg.1 | DCT         |
| TC13000790.hg.1 | 2.28  | JUC13005210.hg.1 | DCT         |
| TC19001471.hg.1 | 6.97  | JUC19011510.hg.1 | ZNF529      |
| TC19001471.hg.1 | 2.82  | JUC19011506.hg.1 | ZNF529      |
| TC19001471.hg.1 | 2.55  | JUC19011508.hg.1 | ZNF529      |
| TC19001471.hg.1 | 2.22  | PSR19019996.hg.1 | ZNF529      |
| TC19001471.hg.1 | 2.15  | PSR19020006.hg.1 | ZNF529      |
| TC12000076.hg.1 | 6.95  | PSR12000741.hg.1 | CD9, LOC100 |
| TC12000076.hg.1 | 5.67  | JUC12000421.hg.1 | CD9, LOC100 |
| TC12000076.hg.1 | 4.11  | PSR12000750.hg.1 | CD9, LOC100 |
| TC12000076.hg.1 | 3.9   | JUC12000427.hg.1 | CD9, LOC100 |
| TC12000076.hg.1 | 3.73  | PSR12000751.hg.1 | CD9, LOC100 |
| TC12000076.hg.1 | 3.34  | PSR12000763.hg.1 | CD9, LOC100 |
| TC12000076.hg.1 | 3.14  | PSR12000749.hg.1 | CD9, LOC100 |
| TC12000076.hg.1 | 2.97  | PSR12000755.hg.1 | CD9, LOC100 |
| TC12000076.hg.1 | 2.77  | JUC12000419.hg.1 | CD9, LOC100 |



|                 |       |                  |             |
|-----------------|-------|------------------|-------------|
| TC12000076.hg.1 | 2.39  | JUC12000429.hg.1 | CD9, LOC100 |
| TC12000076.hg.1 | 2.11  | PSR12000748.hg.1 | CD9, LOC100 |
| TC17000220.hg.1 | 6.94  | PSR17003122.hg.1 | TRIM16L     |
| TC17000220.hg.1 | 6.58  | JUC17001777.hg.1 | TRIM16L     |
| TC17000220.hg.1 | 6.55  | JUC17001784.hg.1 | TRIM16L     |
| TC17000220.hg.1 | 5.89  | PSR17003117.hg.1 | TRIM16L     |
| TC17000220.hg.1 | 5.56  | JUC17001770.hg.1 | TRIM16L     |
| TC17000220.hg.1 | 5.31  | JUC17001781.hg.1 | TRIM16L     |
| TC17000220.hg.1 | 5.22  | JUC17001771.hg.1 | TRIM16L     |
| TC17000220.hg.1 | 4.96  | JUC17001775.hg.1 | TRIM16L     |
| TC17000220.hg.1 | 4.78  | PSR17003120.hg.1 | TRIM16L     |
| TC17000220.hg.1 | 4.54  | PSR17003119.hg.1 | TRIM16L     |
| TC17000220.hg.1 | 4.51  | PSR17003121.hg.1 | TRIM16L     |
| TC17000220.hg.1 | 4.45  | PSR17003147.hg.1 | TRIM16L     |
| TC17000220.hg.1 | 4.42  | PSR17003126.hg.1 | TRIM16L     |
| TC17000220.hg.1 | 4.39  | PSR17003123.hg.1 | TRIM16L     |
| TC17000220.hg.1 | 4.33  | JUC17001780.hg.1 | TRIM16L     |
| TC17000220.hg.1 | 4.25  | JUC17001787.hg.1 | TRIM16L     |
| TC17000220.hg.1 | 2.81  | PSR17003124.hg.1 | TRIM16L     |
| TC17000220.hg.1 | 2.54  | PSR17003150.hg.1 | TRIM16L     |
| TC17000220.hg.1 | 2.54  | PSR17003151.hg.1 | TRIM16L     |
| TC17000220.hg.1 | 2.36  | PSR17003132.hg.1 | TRIM16L     |
| TC17000220.hg.1 | 2.26  | JUC17001776.hg.1 | TRIM16L     |
| TC17000220.hg.1 | -2.28 | PSR17003133.hg.1 | TRIM16L     |
| TC17000220.hg.1 | -2.28 | PSR17003140.hg.1 | TRIM16L     |
| TC06002124.hg.1 | 6.93  | JUC06013213.hg.1 | SLC2A12     |
| TC06002124.hg.1 | 3.32  | PSR06026678.hg.1 | SLC2A12     |
| TC06002124.hg.1 | 2.15  | PSR06026679.hg.1 | SLC2A12     |
| TC11000148.hg.1 | 6.91  | JUC11000910.hg.1 | SYT9        |
| TC11000148.hg.1 | 2.66  | PSR11002086.hg.1 | SYT9        |
| TC11000148.hg.1 | 2.54  | JUC11000913.hg.1 | SYT9        |
| TC11000148.hg.1 | 2.21  | PSR11002081.hg.1 | SYT9        |
| TC11000148.hg.1 | -3.19 | JUC11000912.hg.1 | SYT9        |
| TC05000004.hg.1 | 6.9   | JUC05000027.hg.1 | SDHA        |
| TC05000004.hg.1 | 3.39  | JUC05000036.hg.1 | SDHA        |
| TC05000004.hg.1 | 2.76  | JUC05000035.hg.1 | SDHA        |
| TC05000004.hg.1 | 2.5   | PSR05000087.hg.1 | SDHA        |
| TC05000004.hg.1 | 2.42  | PSR05000086.hg.1 | SDHA        |
| TC05000004.hg.1 | 2.32  | JUC05000051.hg.1 | SDHA        |
| TC05000004.hg.1 | 2.13  | PSR05000053.hg.1 | SDHA        |
| TC05000004.hg.1 | 2.12  | JUC05000034.hg.1 | SDHA        |
| TC05000004.hg.1 | 2.09  | JUC05000023.hg.1 | SDHA        |
| TC08000778.hg.1 | 6.9   | JUC08005388.hg.1 | KHDRBS3     |
| TC08000778.hg.1 | 6.84  | JUC08005375.hg.1 | KHDRBS3     |
| TC08000778.hg.1 | 6.36  | JUC08005377.hg.1 | KHDRBS3     |
| TC08000778.hg.1 | 4.14  | PSR08010416.hg.1 | KHDRBS3     |
| TC08000778.hg.1 | 4.05  | PSR08010420.hg.1 | KHDRBS3     |
| TC08000778.hg.1 | 3.33  | PSR08010445.hg.1 | KHDRBS3     |
| TC08000778.hg.1 | 3.3   | PSR08010415.hg.1 | KHDRBS3     |
| TC08000778.hg.1 | 3.21  | PSR08010440.hg.1 | KHDRBS3     |
| TC08000778.hg.1 | 3.04  | PSR08010450.hg.1 | KHDRBS3     |
| TC08000778.hg.1 | 2.78  | PSR08010417.hg.1 | KHDRBS3     |
| TC08000778.hg.1 | 2.74  | JUC08005383.hg.1 | KHDRBS3     |
| TC08000778.hg.1 | 2.73  | PSR08010454.hg.1 | KHDRBS3     |
| TC08000778.hg.1 | 2.69  | PSR08010439.hg.1 | KHDRBS3     |
| TC08000778.hg.1 | 2.68  | PSR08010424.hg.1 | KHDRBS3     |
| TC08000778.hg.1 | 2.52  | PSR08010429.hg.1 | KHDRBS3     |
| TC08000778.hg.1 | 2.48  | PSR08010458.hg.1 | KHDRBS3     |

|                 |       |                  |         |
|-----------------|-------|------------------|---------|
| TC08000778.hg.1 | 2.41  | JUC08005390.hg.1 | KHDRBS3 |
| TC08000778.hg.1 | 2.39  | PSR08010418.hg.1 | KHDRBS3 |
| TC08000778.hg.1 | 2.37  | JUC08005378.hg.1 | KHDRBS3 |
| TC12000357.hg.1 | 6.88  | JUC12002424.hg.1 | CACNB3  |
| TC12000357.hg.1 | 2.74  | PSR12004431.hg.1 | CACNB3  |
| TC12000357.hg.1 | -2.06 | JUC12002422.hg.1 | CACNB3  |
| TC09002907.hg.1 | 6.86  | PSR09006630.hg.1 | ORM1    |
| TC09002907.hg.1 | 3.21  | PSR09006631.hg.1 | ORM1    |
| TC09002907.hg.1 | 2.76  | PSR09006628.hg.1 | ORM1    |
| TC09002907.hg.1 | 2.32  | JUC09015877.hg.1 | ORM1    |
| TC09002907.hg.1 | -2    | PSR09006624.hg.1 | ORM1    |
| TC09002907.hg.1 | -2.52 | PSR09006633.hg.1 | ORM1    |
| TC09002907.hg.1 | -2.65 | PSR09006637.hg.1 | ORM1    |
| TC01000755.hg.1 | 6.84  | JUC01006326.hg.1 | SRSF11  |
| TC01000755.hg.1 | 3.28  | JUC01006313.hg.1 | SRSF11  |
| TC01000755.hg.1 | 3.08  | JUC01006315.hg.1 | SRSF11  |
| TC01000755.hg.1 | 2.46  | PSR01012085.hg.1 | SRSF11  |
| TC01000755.hg.1 | 2.27  | JUC01006335.hg.1 | SRSF11  |
| TC01000755.hg.1 | -2.24 | JUC01006314.hg.1 | SRSF11  |
| TC01000755.hg.1 | -2.28 | JUC01006328.hg.1 | SRSF11  |
| TC01003476.hg.1 | 6.84  | JUC01028176.hg.1 | ILDR2   |
| TC01003476.hg.1 | 3.27  | PSR01054065.hg.1 | ILDR2   |
| TC01003476.hg.1 | -2.07 | JUC01028167.hg.1 | ILDR2   |
| TC09001515.hg.1 | 6.84  | PSR09018975.hg.1 | TNFSF15 |
| TC09001515.hg.1 | 4.63  | PSR09018967.hg.1 | TNFSF15 |
| TC09001515.hg.1 | 3.59  | PSR09018973.hg.1 | TNFSF15 |
| TC09001515.hg.1 | 2.34  | PSR09018971.hg.1 | TNFSF15 |
| TC09001515.hg.1 | 2.28  | PSR09018969.hg.1 | TNFSF15 |
| TC09001515.hg.1 | 2.17  | PSR09018974.hg.1 | TNFSF15 |
| TC09001515.hg.1 | -2.53 | PSR09018970.hg.1 | TNFSF15 |
| TC09001515.hg.1 | -2.64 | JUC09010268.hg.1 | TNFSF15 |
| TC09001515.hg.1 | -3.43 | PSR09018972.hg.1 | TNFSF15 |
| TC09001515.hg.1 | -5.01 | JUC09010266.hg.1 | TNFSF15 |
| TC09001515.hg.1 | -5.49 | JUC09010267.hg.1 | TNFSF15 |
| TC20000245.hg.1 | 6.83  | JUC20001792.hg.1 | ACSS2   |
| TC20000245.hg.1 | 3.3   | JUC20001760.hg.1 | ACSS2   |
| TC20000245.hg.1 | 3.11  | JUC20001775.hg.1 | ACSS2   |
| TC20000245.hg.1 | 2.94  | JUC20001798.hg.1 | ACSS2   |
| TC20000245.hg.1 | 2.93  | JUC20001797.hg.1 | ACSS2   |
| TC20000245.hg.1 | 2.89  | JUC20001774.hg.1 | ACSS2   |
| TC20000245.hg.1 | 2.47  | JUC20001767.hg.1 | ACSS2   |
| TC20000245.hg.1 | 2.44  | JUC20001768.hg.1 | ACSS2   |
| TC20000245.hg.1 | 2.31  | PSR20003183.hg.1 | ACSS2   |
| TC20000245.hg.1 | 2.2   | PSR20003180.hg.1 | ACSS2   |
| TC20000245.hg.1 | 2.15  | PSR20003148.hg.1 | ACSS2   |
| TC20000245.hg.1 | 2.11  | PSR20003150.hg.1 | ACSS2   |
| TC20000245.hg.1 | 2.07  | PSR20003199.hg.1 | ACSS2   |
| TC20000245.hg.1 | 2.06  | PSR20003169.hg.1 | ACSS2   |
| TC20000245.hg.1 | -2.17 | JUC20001793.hg.1 | ACSS2   |
| TC20000245.hg.1 | -2.91 | JUC20001773.hg.1 | ACSS2   |
| TC01000217.hg.1 | 6.8   | JUC01001941.hg.1 | CROCC   |
| TC01000217.hg.1 | 2.67  | PSR01003527.hg.1 | CROCC   |
| TC01000217.hg.1 | 2.11  | JUC01001933.hg.1 | CROCC   |
| TC01000217.hg.1 | 2.08  | PSR01003582.hg.1 | CROCC   |
| TC01000217.hg.1 | -2.07 | JUC01001932.hg.1 | CROCC   |
| TC01000217.hg.1 | -2.15 | JUC01001920.hg.1 | CROCC   |
| TC01000217.hg.1 | -2.43 | PSR01003541.hg.1 | CROCC   |
| TC01000217.hg.1 | -2.74 | JUC01001921.hg.1 | CROCC   |

|                 |       |                  |             |
|-----------------|-------|------------------|-------------|
| TC04000291.hg.1 | 6.79  | JUC04002095.hg.1 | DCUN1D4     |
| TC04000291.hg.1 | 3.73  | PSR04004186.hg.1 | DCUN1D4     |
| TC04000291.hg.1 | 3.14  | JUC04002089.hg.1 | DCUN1D4     |
| TC04000291.hg.1 | -2.45 | JUC04002075.hg.1 | DCUN1D4     |
| TC04000291.hg.1 | -2.52 | PSR04004194.hg.1 | DCUN1D4     |
| TC04000291.hg.1 | -2.55 | PSR04004211.hg.1 | DCUN1D4     |
| TC04000291.hg.1 | -3.14 | PSR04004212.hg.1 | DCUN1D4     |
| TC06000350.hg.1 | 6.79  | PSR06003120.hg.1 | DDR1, MIR46 |
| TC06000350.hg.1 | 4.97  | PSR06003238.hg.1 | DDR1, MIR46 |
| TC06000350.hg.1 | 3.79  | JUC06001373.hg.1 | DDR1, MIR46 |
| TC06000350.hg.1 | 3.39  | JUC06001411.hg.1 | DDR1, MIR46 |
| TC06000350.hg.1 | 3.32  | PSR06003178.hg.1 | DDR1, MIR46 |
| TC06000350.hg.1 | 3.25  | PSR06003151.hg.1 | DDR1, MIR46 |
| TC06000350.hg.1 | 3.22  | PSR06003128.hg.1 | DDR1, MIR46 |
| TC06000350.hg.1 | 3.14  | JUC06001398.hg.1 | DDR1, MIR46 |
| TC06000350.hg.1 | 3.11  | JUC06001386.hg.1 | DDR1, MIR46 |
| TC06000350.hg.1 | 3.08  | JUC06001363.hg.1 | DDR1, MIR46 |
| TC06000350.hg.1 | 3.05  | PSR06003191.hg.1 | DDR1, MIR46 |
| TC06000350.hg.1 | 3.03  | PSR06003207.hg.1 | DDR1, MIR46 |
| TC06000350.hg.1 | 3.02  | PSR06003112.hg.1 | DDR1, MIR46 |
| TC06000350.hg.1 | 3     | JUC06001382.hg.1 | DDR1, MIR46 |
| TC06000350.hg.1 | 2.94  | JUC06001393.hg.1 | DDR1, MIR46 |
| TC06000350.hg.1 | 2.89  | PSR06003099.hg.1 | DDR1, MIR46 |
| TC06000350.hg.1 | 2.84  | JUC06001415.hg.1 | DDR1, MIR46 |
| TC06000350.hg.1 | 2.8   | JUC06001405.hg.1 | DDR1, MIR46 |
| TC06000350.hg.1 | 2.77  | JUC06001379.hg.1 | DDR1, MIR46 |
| TC06000350.hg.1 | 2.75  | PSR06003226.hg.1 | DDR1, MIR46 |
| TC06000350.hg.1 | 2.75  | JUC06001377.hg.1 | DDR1, MIR46 |
| TC06000350.hg.1 | 2.73  | PSR06003125.hg.1 | DDR1, MIR46 |
| TC06000350.hg.1 | 2.71  | PSR06003102.hg.1 | DDR1, MIR46 |
| TC06000350.hg.1 | 2.67  | PSR06003097.hg.1 | DDR1, MIR46 |
| TC06000350.hg.1 | 2.67  | PSR06003164.hg.1 | DDR1, MIR46 |
| TC06000350.hg.1 | 2.67  | JUC06001412.hg.1 | DDR1, MIR46 |
| TC06000350.hg.1 | 2.66  | JUC06001390.hg.1 | DDR1, MIR46 |
| TC06000350.hg.1 | 2.65  | PSR06003158.hg.1 | DDR1, MIR46 |
| TC06000350.hg.1 | 2.64  | PSR06003122.hg.1 | DDR1, MIR46 |
| TC06000350.hg.1 | 2.64  | PSR06003126.hg.1 | DDR1, MIR46 |
| TC06000350.hg.1 | 2.57  | JUC06001385.hg.1 | DDR1, MIR46 |
| TC06000350.hg.1 | 2.55  | JUC06001366.hg.1 | DDR1, MIR46 |
| TC06000350.hg.1 | 2.53  | JUC06001387.hg.1 | DDR1, MIR46 |
| TC06000350.hg.1 | 2.49  | PSR06003193.hg.1 | DDR1, MIR46 |
| TC06000350.hg.1 | 2.48  | PSR06003150.hg.1 | DDR1, MIR46 |
| TC06000350.hg.1 | 2.48  | JUC06001374.hg.1 | DDR1, MIR46 |
| TC06000350.hg.1 | 2.44  | PSR06003149.hg.1 | DDR1, MIR46 |
| TC06000350.hg.1 | 2.43  | PSR06003105.hg.1 | DDR1, MIR46 |
| TC06000350.hg.1 | 2.43  | PSR06003142.hg.1 | DDR1, MIR46 |
| TC06000350.hg.1 | 2.43  | PSR06003144.hg.1 | DDR1, MIR46 |
| TC06000350.hg.1 | 2.42  | JUC06001372.hg.1 | DDR1, MIR46 |
| TC06000350.hg.1 | 2.41  | PSR06003248.hg.1 | DDR1, MIR46 |
| TC06000350.hg.1 | 2.39  | PSR06003134.hg.1 | DDR1, MIR46 |
| TC06000350.hg.1 | 2.39  | PSR06003140.hg.1 | DDR1, MIR46 |
| TC06000350.hg.1 | 2.39  | JUC06001408.hg.1 | DDR1, MIR46 |
| TC06000350.hg.1 | 2.36  | JUC06001370.hg.1 | DDR1, MIR46 |
| TC06000350.hg.1 | 2.34  | PSR06003179.hg.1 | DDR1, MIR46 |
| TC06000350.hg.1 | 2.31  | PSR06003172.hg.1 | DDR1, MIR46 |
| TC06000350.hg.1 | 2.3   | JUC06001410.hg.1 | DDR1, MIR46 |
| TC06000350.hg.1 | 2.29  | PSR06003113.hg.1 | DDR1, MIR46 |
| TC06000350.hg.1 | 2.13  | JUC06001375.hg.1 | DDR1, MIR46 |

|                 |       |                  |             |
|-----------------|-------|------------------|-------------|
| TC06000350.hg.1 | 2.1   | PSR06003098.hg.1 | DDR1, MIR46 |
| TC06000350.hg.1 | 2.07  | PSR06003135.hg.1 | DDR1, MIR46 |
| TC06000350.hg.1 | 2.06  | PSR06003115.hg.1 | DDR1, MIR46 |
| TC06000350.hg.1 | 2.06  | PSR06003124.hg.1 | DDR1, MIR46 |
| TC06000350.hg.1 | 2.06  | PSR06003194.hg.1 | DDR1, MIR46 |
| TC06000350.hg.1 | 2.04  | JUC06001414.hg.1 | DDR1, MIR46 |
| TC06000350.hg.1 | 2.03  | PSR06003127.hg.1 | DDR1, MIR46 |
| TC06000350.hg.1 | 2.03  | PSR06003146.hg.1 | DDR1, MIR46 |
| TC06000350.hg.1 | 2     | PSR06003243.hg.1 | DDR1, MIR46 |
| TC06000350.hg.1 | -2.41 | PSR06003212.hg.1 | DDR1, MIR46 |
| TC09000663.hg.1 | 6.74  | JUC09004301.hg.1 | GARNL3      |
| TC09000663.hg.1 | 6.72  | PSR09007701.hg.1 | GARNL3      |
| TC09000663.hg.1 | 6.5   | PSR09007780.hg.1 | GARNL3      |
| TC09000663.hg.1 | 6.05  | PSR09007710.hg.1 | GARNL3      |
| TC09000663.hg.1 | 6.05  | JUC09004298.hg.1 | GARNL3      |
| TC09000663.hg.1 | 6.04  | JUC09004321.hg.1 | GARNL3      |
| TC09000663.hg.1 | 6.03  | JUC09004322.hg.1 | GARNL3      |
| TC09000663.hg.1 | 5.6   | JUC09004297.hg.1 | GARNL3      |
| TC09000663.hg.1 | 5.56  | PSR09007722.hg.1 | GARNL3      |
| TC09000663.hg.1 | 5.51  | PSR09007720.hg.1 | GARNL3      |
| TC09000663.hg.1 | 5.28  | JUC09004326.hg.1 | GARNL3      |
| TC09000663.hg.1 | 5.11  | PSR09007774.hg.1 | GARNL3      |
| TC09000663.hg.1 | 4.9   | JUC09004315.hg.1 | GARNL3      |
| TC09000663.hg.1 | 4.56  | PSR09007778.hg.1 | GARNL3      |
| TC09000663.hg.1 | 4.5   | PSR09007703.hg.1 | GARNL3      |
| TC09000663.hg.1 | 4.5   | PSR09007782.hg.1 | GARNL3      |
| TC09000663.hg.1 | 4.23  | PSR09007755.hg.1 | GARNL3      |
| TC09000663.hg.1 | 4.2   | PSR09007714.hg.1 | GARNL3      |
| TC09000663.hg.1 | 4.16  | PSR09007779.hg.1 | GARNL3      |
| TC09000663.hg.1 | 4.08  | PSR09007730.hg.1 | GARNL3      |
| TC09000663.hg.1 | 4.06  | PSR09007773.hg.1 | GARNL3      |
| TC09000663.hg.1 | 3.91  | PSR09007702.hg.1 | GARNL3      |
| TC09000663.hg.1 | 3.91  | PSR09007776.hg.1 | GARNL3      |
| TC09000663.hg.1 | 3.85  | PSR09007747.hg.1 | GARNL3      |
| TC09000663.hg.1 | 3.82  | PSR09007769.hg.1 | GARNL3      |
| TC09000663.hg.1 | 3.82  | JUC09004306.hg.1 | GARNL3      |
| TC09000663.hg.1 | 3.72  | PSR09007751.hg.1 | GARNL3      |
| TC09000663.hg.1 | 3.66  | PSR09007767.hg.1 | GARNL3      |
| TC09000663.hg.1 | 3.58  | PSR09007752.hg.1 | GARNL3      |
| TC09000663.hg.1 | 3.55  | PSR09007761.hg.1 | GARNL3      |
| TC09000663.hg.1 | 3.48  | JUC09004314.hg.1 | GARNL3      |
| TC09000663.hg.1 | 3.44  | PSR09007765.hg.1 | GARNL3      |
| TC09000663.hg.1 | 3.41  | JUC09004329.hg.1 | GARNL3      |
| TC09000663.hg.1 | 3.37  | PSR09007781.hg.1 | GARNL3      |
| TC09000663.hg.1 | 3.35  | JUC09004325.hg.1 | GARNL3      |
| TC09000663.hg.1 | 3.28  | PSR09007715.hg.1 | GARNL3      |
| TC09000663.hg.1 | 3.23  | PSR09007708.hg.1 | GARNL3      |
| TC09000663.hg.1 | 3.17  | PSR09007743.hg.1 | GARNL3      |
| TC09000663.hg.1 | 3.16  | PSR09007740.hg.1 | GARNL3      |
| TC09000663.hg.1 | 3.1   | PSR09007742.hg.1 | GARNL3      |
| TC09000663.hg.1 | 3.01  | PSR09007766.hg.1 | GARNL3      |
| TC09000663.hg.1 | 3     | PSR09007754.hg.1 | GARNL3      |
| TC09000663.hg.1 | 2.95  | PSR09007711.hg.1 | GARNL3      |
| TC09000663.hg.1 | 2.95  | PSR09007768.hg.1 | GARNL3      |
| TC09000663.hg.1 | 2.81  | PSR09007771.hg.1 | GARNL3      |
| TC09000663.hg.1 | 2.81  | JUC09004290.hg.1 | GARNL3      |
| TC09000663.hg.1 | 2.68  | PSR09007729.hg.1 | GARNL3      |
| TC09000663.hg.1 | 2.65  | PSR09007739.hg.1 | GARNL3      |

|                 |       |                  |        |
|-----------------|-------|------------------|--------|
| TC09000663.hg.1 | 2.65  | PSR09007775.hg.1 | GARNL3 |
| TC09000663.hg.1 | 2.62  | JUC09004313.hg.1 | GARNL3 |
| TC09000663.hg.1 | 2.52  | PSR09007744.hg.1 | GARNL3 |
| TC09000663.hg.1 | 2.49  | PSR09007759.hg.1 | GARNL3 |
| TC09000663.hg.1 | 2.49  | JUC09004323.hg.1 | GARNL3 |
| TC09000663.hg.1 | 2.48  | JUC09004319.hg.1 | GARNL3 |
| TC09000663.hg.1 | 2.39  | PSR09007712.hg.1 | GARNL3 |
| TC09000663.hg.1 | 2.36  | JUC09004337.hg.1 | GARNL3 |
| TC09000663.hg.1 | 2.35  | JUC09004305.hg.1 | GARNL3 |
| TC09000663.hg.1 | 2.3   | JUC09004304.hg.1 | GARNL3 |
| TC09000663.hg.1 | 2.28  | PSR09007777.hg.1 | GARNL3 |
| TC09000663.hg.1 | 2.26  | PSR09007764.hg.1 | GARNL3 |
| TC09000663.hg.1 | 2.07  | PSR09007749.hg.1 | GARNL3 |
| TC09000663.hg.1 | 2.02  | PSR09007724.hg.1 | GARNL3 |
| TC09000663.hg.1 | 2     | JUC09004317.hg.1 | GARNL3 |
| TC01001851.hg.1 | 6.73  | JUC01015595.hg.1 | DNAH14 |
| TC01001851.hg.1 | 3.96  | JUC01015507.hg.1 | DNAH14 |
| TC01001851.hg.1 | 3.94  | JUC01015557.hg.1 | DNAH14 |
| TC01001851.hg.1 | 3.11  | JUC01015499.hg.1 | DNAH14 |
| TC01001851.hg.1 | 2.9   | JUC01015496.hg.1 | DNAH14 |
| TC01001851.hg.1 | 2.64  | PSR01028846.hg.1 | DNAH14 |
| TC01001851.hg.1 | 2.5   | PSR01028803.hg.1 | DNAH14 |
| TC01001851.hg.1 | 2.44  | PSR01028850.hg.1 | DNAH14 |
| TC01001851.hg.1 | 2.39  | JUC01015484.hg.1 | DNAH14 |
| TC01001851.hg.1 | 2.33  | PSR01028776.hg.1 | DNAH14 |
| TC01001851.hg.1 | 2.3   | JUC01015488.hg.1 | DNAH14 |
| TC01001851.hg.1 | 2.28  | JUC01015585.hg.1 | DNAH14 |
| TC01001851.hg.1 | 2.25  | JUC01015494.hg.1 | DNAH14 |
| TC01001851.hg.1 | 2.17  | JUC01015570.hg.1 | DNAH14 |
| TC01001851.hg.1 | 2.05  | PSR01028820.hg.1 | DNAH14 |
| TC01001851.hg.1 | 2.02  | JUC01015538.hg.1 | DNAH14 |
| TC08001175.hg.1 | 6.73  | JUC08007764.hg.1 | PLAT   |
| TC08001175.hg.1 | 5.03  | JUC08007770.hg.1 | PLAT   |
| TC08001175.hg.1 | 4.37  | PSR08015132.hg.1 | PLAT   |
| TC08001175.hg.1 | 2.39  | JUC08007758.hg.1 | PLAT   |
| TC08001175.hg.1 | 2.02  | PSR08015125.hg.1 | PLAT   |
| TC08001175.hg.1 | 2.02  | PSR08015126.hg.1 | PLAT   |
| TC08001175.hg.1 | -2.48 | PSR08015136.hg.1 | PLAT   |
| TC08001175.hg.1 | -2.6  | PSR08015134.hg.1 | PLAT   |
| TC08001175.hg.1 | -2.65 | PSR08015147.hg.1 | PLAT   |
| TC08001175.hg.1 | -2.88 | JUC08007765.hg.1 | PLAT   |
| TC08001175.hg.1 | -2.91 | JUC08007771.hg.1 | PLAT   |
| TC08001175.hg.1 | -3.04 | JUC08007768.hg.1 | PLAT   |
| TC08001175.hg.1 | -3.21 | PSR08015151.hg.1 | PLAT   |
| TC08001175.hg.1 | -3.63 | PSR08015144.hg.1 | PLAT   |
| TC08001175.hg.1 | -3.82 | PSR08015146.hg.1 | PLAT   |
| TC08001175.hg.1 | -4.05 | JUC08007749.hg.1 | PLAT   |
| TC08001175.hg.1 | -4.36 | PSR08015161.hg.1 | PLAT   |
| TC08001175.hg.1 | -4.49 | PSR08015160.hg.1 | PLAT   |
| TC08001175.hg.1 | -4.99 | PSR08015141.hg.1 | PLAT   |
| TC08001175.hg.1 | -5.03 | PSR08015140.hg.1 | PLAT   |
| TC08001175.hg.1 | -5.13 | PSR08015135.hg.1 | PLAT   |
| TC08001175.hg.1 | -5.48 | JUC08007763.hg.1 | PLAT   |
| TC08001175.hg.1 | -5.67 | JUC08007754.hg.1 | PLAT   |
| TC08001175.hg.1 | -6.78 | JUC08007761.hg.1 | PLAT   |
| TC08001175.hg.1 | -6.89 | PSR08015150.hg.1 | PLAT   |
| TC08001175.hg.1 | -6.92 | PSR08015131.hg.1 | PLAT   |
| TC08001175.hg.1 | -6.93 | PSR08015155.hg.1 | PLAT   |

|                  |       |                   |          |
|------------------|-------|-------------------|----------|
| TC08001175.hg.1  | -7.84 | PSR08015156.hg.1  | PLAT     |
| TC08001175.hg.1  | -9.95 | JUC08007759.hg.1  | PLAT     |
| TC17000246.hg.1  | 6.72  | PSR17003422.hg.1  | ALDH3A2  |
| TC17000246.hg.1  | 6.33  | PSR17003424.hg.1  | ALDH3A2  |
| TC17000246.hg.1  | 6.33  | PSR17003426.hg.1  | ALDH3A2  |
| TC17000246.hg.1  | 5.95  | PSR17003421.hg.1  | ALDH3A2  |
| TC17000246.hg.1  | 2.87  | PSR17003434.hg.1  | ALDH3A2  |
| TC17000246.hg.1  | 2.75  | PSR17003428.hg.1  | ALDH3A2  |
| TC17000246.hg.1  | -2.57 | PSR17003441.hg.1  | ALDH3A2  |
| TC17000246.hg.1  | -2.88 | JUC17001972.hg.1  | ALDH3A2  |
| TC17000246.hg.1  | -3.18 | JUC17001965.hg.1  | ALDH3A2  |
| TC6_qbl_hap6000  | 6.71  | JUC6_qbl_hap60009 | HLA-C    |
| TC6_qbl_hap6000  | 3.45  | PSR6_qbl_hap60026 | HLA-C    |
| TC6_qbl_hap6000  | 2.91  | JUC6_qbl_hap60010 | HLA-C    |
| TC6_qbl_hap6000  | 2.89  | JUC6_qbl_hap60009 | HLA-C    |
| TC6_qbl_hap6000  | 2.17  | PSR6_qbl_hap60026 | HLA-C    |
| TC6_qbl_hap6000  | 2.16  | PSR6_qbl_hap60026 | HLA-C    |
| TC6_qbl_hap6000  | -2.39 | JUC6_qbl_hap60009 | HLA-C    |
| TC6_ssto_hap7000 | 6.71  | JUC6_ssto_hap7001 | HLA-C    |
| TC6_ssto_hap7000 | 3.45  | PSR6_ssto_hap7002 | HLA-C    |
| TC6_ssto_hap7000 | 2.89  | JUC6_ssto_hap7001 | HLA-C    |
| TC6_ssto_hap7000 | 2.17  | PSR6_ssto_hap7002 | HLA-C    |
| TC6_ssto_hap7000 | 2.16  | PSR6_ssto_hap7002 | HLA-C    |
| TC6_ssto_hap7000 | -2.39 | JUC6_ssto_hap7001 | HLA-C    |
| TC10002948.hg.1  | 6.68  | JUC10017333.hg.1  | AS3MT    |
| TC10002948.hg.1  | 2.15  | PSR10009125.hg.1  | AS3MT    |
| TC10002948.hg.1  | 2.04  | PSR10009138.hg.1  | AS3MT    |
| TC16001244.hg.1  | 6.68  | JUC16009717.hg.1  | HYDIN    |
| TC16001244.hg.1  | 6.06  | JUC16009796.hg.1  | HYDIN    |
| TC16001244.hg.1  | 3.6   | JUC16009748.hg.1  | HYDIN    |
| TC16001244.hg.1  | 3.21  | JUC16009736.hg.1  | HYDIN    |
| TC16001244.hg.1  | 2.93  | JUC16009747.hg.1  | HYDIN    |
| TC16001244.hg.1  | 2.55  | JUC16009740.hg.1  | HYDIN    |
| TC16001244.hg.1  | 2.42  | JUC16009789.hg.1  | HYDIN    |
| TC16001244.hg.1  | 2.22  | PSR16017189.hg.1  | HYDIN    |
| TC16001244.hg.1  | 2.22  | JUC16009725.hg.1  | HYDIN    |
| TC16001244.hg.1  | 2.21  | JUC16009750.hg.1  | HYDIN    |
| TC16001244.hg.1  | 2.09  | JUC16009726.hg.1  | HYDIN    |
| TC16001244.hg.1  | -2.26 | JUC16009795.hg.1  | HYDIN    |
| TC16001244.hg.1  | -2.93 | JUC16009710.hg.1  | HYDIN    |
| TC16001244.hg.1  | -3.07 | JUC16009768.hg.1  | HYDIN    |
| TC17001479.hg.1  | 6.68  | JUC17011095.hg.1  | KRTAP1-5 |
| TC17001479.hg.1  | 4.81  | PSR17019665.hg.1  | KRTAP1-5 |
| TC17001479.hg.1  | 3.82  | PSR17019666.hg.1  | KRTAP1-5 |
| TC17001479.hg.1  | 3.62  | PSR17019661.hg.1  | KRTAP1-5 |
| TC17001479.hg.1  | 2.31  | PSR17019668.hg.1  | KRTAP1-5 |
| TC17001479.hg.1  | -2.31 | PSR17019664.hg.1  | KRTAP1-5 |
| TC17001479.hg.1  | -3.57 | PSR17019662.hg.1  | KRTAP1-5 |
| TC13000049.hg.1  | 6.67  | JUC13000185.hg.1  | TNFRSF19 |
| TC13000049.hg.1  | -2.07 | PSR13000342.hg.1  | TNFRSF19 |
| TC13000049.hg.1  | -2.17 | PSR13000349.hg.1  | TNFRSF19 |
| TC13000049.hg.1  | -2.2  | JUC13000189.hg.1  | TNFRSF19 |
| TC13000049.hg.1  | -2.44 | PSR13000350.hg.1  | TNFRSF19 |
| TC03000966.hg.1  | 6.65  | PSR03016756.hg.1  | SOX2-OT  |
| TC03000966.hg.1  | 2.16  | JUC03008507.hg.1  | SOX2-OT  |
| TC03000966.hg.1  | 2.09  | JUC03008519.hg.1  | SOX2-OT  |
| TC03000966.hg.1  | 2.05  | PSR03016757.hg.1  | SOX2-OT  |
| TC02005003.hg.1  | 6.64  | JUC02032002.hg.1  | PHOSPHO2 |

|                 |       |                  |            |
|-----------------|-------|------------------|------------|
| TC02005003.hg.1 | 3.19  | JUC02031999.hg.1 | PHOSPHO2   |
| TC02005003.hg.1 | 2.83  | PSR02014741.hg.1 | PHOSPHO2   |
| TC02005003.hg.1 | 2.06  | PSR02014753.hg.1 | PHOSPHO2   |
| TC22001468.hg.1 | 6.64  | PSR22005835.hg.1 | APOBEC3G   |
| TC22001468.hg.1 | 6.53  | PSR22005843.hg.1 | APOBEC3G   |
| TC22001468.hg.1 | 6.29  | PSR22005842.hg.1 | APOBEC3G   |
| TC22001468.hg.1 | 6.26  | PSR22005827.hg.1 | APOBEC3G   |
| TC22001468.hg.1 | 5.81  | PSR22005838.hg.1 | APOBEC3G   |
| TC22001468.hg.1 | 5.04  | PSR22005844.hg.1 | APOBEC3G   |
| TC22001468.hg.1 | 4.76  | PSR22005833.hg.1 | APOBEC3G   |
| TC22001468.hg.1 | 4.46  | PSR22005830.hg.1 | APOBEC3G   |
| TC22001468.hg.1 | 3.95  | PSR22005848.hg.1 | APOBEC3G   |
| TC22001468.hg.1 | 3.57  | JUC22009310.hg.1 | APOBEC3G   |
| TC22001468.hg.1 | 3.25  | PSR22005837.hg.1 | APOBEC3G   |
| TC22001468.hg.1 | 2.96  | PSR22005847.hg.1 | APOBEC3G   |
| TC22001468.hg.1 | 2.56  | PSR22005839.hg.1 | APOBEC3G   |
| TC22001468.hg.1 | 2.22  | JUC22009309.hg.1 | APOBEC3G   |
| TC22001468.hg.1 | 2.04  | PSR22005831.hg.1 | APOBEC3G   |
| TC22001468.hg.1 | -2.05 | PSR22005840.hg.1 | APOBEC3G   |
| TC22001468.hg.1 | -2.42 | JUC22009313.hg.1 | APOBEC3G   |
| TC15001730.hg.1 | 6.63  | PSR15016911.hg.1 | STARD5     |
| TC15001730.hg.1 | 4.22  | PSR15016909.hg.1 | STARD5     |
| TC15001730.hg.1 | 4.06  | PSR15016908.hg.1 | STARD5     |
| TC15001730.hg.1 | 3.48  | PSR15016910.hg.1 | STARD5     |
| TC15001730.hg.1 | 2.65  | PSR15016925.hg.1 | STARD5     |
| TC15001730.hg.1 | 2.59  | PSR15016923.hg.1 | STARD5     |
| TC15001730.hg.1 | 2.54  | PSR15016912.hg.1 | STARD5     |
| TC15001730.hg.1 | 2.21  | PSR15016922.hg.1 | STARD5     |
| TC15001730.hg.1 | -2.23 | JUC15009223.hg.1 | STARD5     |
| TC21000423.hg.1 | 6.63  | PSR21004982.hg.1 | RUNX1, LOC |
| TC21000423.hg.1 | 6.02  | PSR21004981.hg.1 | RUNX1, LOC |
| TC21000423.hg.1 | 3.89  | JUC21002535.hg.1 | RUNX1, LOC |
| TC21000423.hg.1 | 3.68  | JUC21002548.hg.1 | RUNX1, LOC |
| TC21000423.hg.1 | 2.67  | JUC21002533.hg.1 | RUNX1, LOC |
| TC21000423.hg.1 | 2.53  | PSR21004983.hg.1 | RUNX1, LOC |
| TC21000423.hg.1 | 2.23  | PSR21004990.hg.1 | RUNX1, LOC |
| TC21000423.hg.1 | 2.2   | JUC21002547.hg.1 | RUNX1, LOC |
| TC21000423.hg.1 | 2.18  | JUC21002554.hg.1 | RUNX1, LOC |
| TC21000423.hg.1 | -2.69 | JUC21002552.hg.1 | RUNX1, LOC |
| TC02000082.hg.1 | 6.62  | PSR02001045.hg.1 | TRIB2      |
| TC02000082.hg.1 | 4.27  | JUC02000586.hg.1 | TRIB2      |
| TC02000082.hg.1 | 3.86  | JUC02000590.hg.1 | TRIB2      |
| TC02000082.hg.1 | 2.35  | PSR02001048.hg.1 | TRIB2      |
| TC02000082.hg.1 | 2.25  | PSR02001046.hg.1 | TRIB2      |
| TC02004931.hg.1 | 6.62  | JUC02031433.hg.1 | ZNF514     |
| TC02004931.hg.1 | 2.3   | PSR02033774.hg.1 | ZNF514     |
| TC02004931.hg.1 | 2.16  | PSR02033778.hg.1 | ZNF514     |
| TC18000103.hg.1 | 6.61  | JUC18000847.hg.1 | LAMA3      |
| TC18000103.hg.1 | 3.59  | JUC18000786.hg.1 | LAMA3      |
| TC18000103.hg.1 | 3.29  | JUC18000818.hg.1 | LAMA3      |
| TC18000103.hg.1 | 2.98  | JUC18000803.hg.1 | LAMA3      |
| TC18000103.hg.1 | 2.57  | JUC18000864.hg.1 | LAMA3      |
| TC18000103.hg.1 | 2.03  | JUC18000789.hg.1 | LAMA3      |
| TC18000103.hg.1 | 2.03  | JUC18000815.hg.1 | LAMA3      |
| TC18000103.hg.1 | 2.03  | JUC18000835.hg.1 | LAMA3      |
| TC18000103.hg.1 | 2.02  | JUC18000834.hg.1 | LAMA3      |
| TC18000103.hg.1 | -2.02 | JUC18000799.hg.1 | LAMA3      |
| TC18000103.hg.1 | -2.05 | JUC18000819.hg.1 | LAMA3      |

|                 |        |                  |             |
|-----------------|--------|------------------|-------------|
| TC18000103.hg.1 | -2.19  | PSR18001178.hg.1 | LAMA3       |
| TC18000103.hg.1 | -2.28  | PSR18001162.hg.1 | LAMA3       |
| TC18000103.hg.1 | -3.08  | JUC18000839.hg.1 | LAMA3       |
| TC05000408.hg.1 | 6.58   | PSR05005897.hg.1 | ATP6AP1L, F |
| TC05000408.hg.1 | 4.06   | PSR05005896.hg.1 | ATP6AP1L, F |
| TC05000408.hg.1 | 3.5    | JUC05003201.hg.1 | ATP6AP1L, F |
| TC05000408.hg.1 | 3.19   | PSR05005893.hg.1 | ATP6AP1L, F |
| TC05000408.hg.1 | 2.74   | JUC05003202.hg.1 | ATP6AP1L, F |
| TC05000408.hg.1 | 2.62   | JUC05003198.hg.1 | ATP6AP1L, F |
| TC05000408.hg.1 | 2.42   | PSR05005895.hg.1 | ATP6AP1L, F |
| TC05000408.hg.1 | 2.37   | JUC05003213.hg.1 | ATP6AP1L, F |
| TC05000408.hg.1 | 2.12   | PSR05005891.hg.1 | ATP6AP1L, F |
| TC05000408.hg.1 | 2.1    | PSR05005892.hg.1 | ATP6AP1L, F |
| TC05000408.hg.1 | 2.05   | PSR05005879.hg.1 | ATP6AP1L, F |
| TC05000408.hg.1 | -3.16  | JUC05003212.hg.1 | ATP6AP1L, F |
| TC02001119.hg.1 | 6.57   | JUC02009081.hg.1 | MFSD6       |
| TC02001119.hg.1 | 2.63   | PSR02016942.hg.1 | MFSD6       |
| TC02001119.hg.1 | 2.55   | PSR02016917.hg.1 | MFSD6       |
| TC02001119.hg.1 | 2.48   | PSR02016915.hg.1 | MFSD6       |
| TC02001119.hg.1 | 2.04   | PSR02016946.hg.1 | MFSD6       |
| TC02001119.hg.1 | 2.02   | PSR02016916.hg.1 | MFSD6       |
| TC02001119.hg.1 | 2.02   | PSR02016944.hg.1 | MFSD6       |
| TC02001119.hg.1 | -2.05  | JUC02009078.hg.1 | MFSD6       |
| TC02001119.hg.1 | -2.96  | JUC02009074.hg.1 | MFSD6       |
| TC06002044.hg.1 | 6.56   | JUC06012603.hg.1 | COL10A1     |
| TC06002044.hg.1 | -6.36  | JUC06012602.hg.1 | COL10A1     |
| TC06002044.hg.1 | -7.12  | PSR06025544.hg.1 | COL10A1     |
| TC06002044.hg.1 | -10.31 | PSR06025553.hg.1 | COL10A1     |
| TC06002044.hg.1 | -11.35 | JUC06012600.hg.1 | COL10A1     |
| TC06002044.hg.1 | -16.54 | PSR06025549.hg.1 | COL10A1     |
| TC06002044.hg.1 | -28.24 | PSR06025551.hg.1 | COL10A1     |
| TC03001750.hg.1 | 6.55   | JUC03015833.hg.1 | MGLL        |
| TC03001750.hg.1 | 3.75   | JUC03015832.hg.1 | MGLL        |
| TC03001750.hg.1 | 3.62   | PSR03031775.hg.1 | MGLL        |
| TC03001750.hg.1 | 3.21   | PSR03031784.hg.1 | MGLL        |
| TC03001750.hg.1 | 3.07   | JUC03015831.hg.1 | MGLL        |
| TC03001750.hg.1 | 2.53   | PSR03031765.hg.1 | MGLL        |
| TC03001750.hg.1 | 2.5    | PSR03031785.hg.1 | MGLL        |
| TC03001750.hg.1 | 2.44   | PSR03031779.hg.1 | MGLL        |
| TC03001750.hg.1 | 2.4    | PSR03031782.hg.1 | MGLL        |
| TC03001750.hg.1 | -2.46  | JUC03015825.hg.1 | MGLL        |
| TC0X001303.hg.1 | 6.53   | PSR0X017526.hg.1 | KLHL13      |
| TC0X001303.hg.1 | 4.21   | PSR0X017536.hg.1 | KLHL13      |
| TC0X001303.hg.1 | 3.92   | PSR0X017528.hg.1 | KLHL13      |
| TC0X001303.hg.1 | 3.61   | PSR0X017527.hg.1 | KLHL13      |
| TC0X001303.hg.1 | 3.5    | JUC0X008931.hg.1 | KLHL13      |
| TC0X001303.hg.1 | 3.16   | JUC0X008925.hg.1 | KLHL13      |
| TC0X001303.hg.1 | 2.83   | PSR0X017523.hg.1 | KLHL13      |
| TC0X001303.hg.1 | 2.74   | PSR0X017512.hg.1 | KLHL13      |
| TC0X001303.hg.1 | 2.61   | PSR0X017530.hg.1 | KLHL13      |
| TC0X001303.hg.1 | 2.45   | JUC0X008921.hg.1 | KLHL13      |
| TC0X001303.hg.1 | -2.07  | PSR0X017517.hg.1 | KLHL13      |
| TC0X001303.hg.1 | -3.02  | JUC0X008924.hg.1 | KLHL13      |
| TC02002217.hg.1 | 6.52   | JUC02018636.hg.1 | CKAP2L      |
| TC02002217.hg.1 | 3.43   | JUC02018633.hg.1 | CKAP2L      |
| TC02002217.hg.1 | 2.55   | PSR02036026.hg.1 | CKAP2L      |
| TC02002217.hg.1 | -2.23  | JUC02018640.hg.1 | CKAP2L      |
| TC11000721.hg.1 | 6.52   | JUC11004882.hg.1 | ANO1        |



|                 |       |                  |       |
|-----------------|-------|------------------|-------|
| TC11000721.hg.1 | 5.16  | JUC11004885.hg.1 | ANO1  |
| TC11000721.hg.1 | 3.85  | JUC11004880.hg.1 | ANO1  |
| TC11000721.hg.1 | 3.64  | JUC11004860.hg.1 | ANO1  |
| TC11000721.hg.1 | 2.71  | JUC11004873.hg.1 | ANO1  |
| TC11000721.hg.1 | 2.24  | PSR11009420.hg.1 | ANO1  |
| TC11000721.hg.1 | 2.21  | PSR11009443.hg.1 | ANO1  |
| TC11000721.hg.1 | 2.02  | JUC11004878.hg.1 | ANO1  |
| TC11000721.hg.1 | -2.23 | PSR11009419.hg.1 | ANO1  |
| TC11000721.hg.1 | -2.83 | PSR11009413.hg.1 | ANO1  |
| TC11000721.hg.1 | -4.55 | JUC11004871.hg.1 | ANO1  |
| TC11000721.hg.1 | -5.58 | JUC11004874.hg.1 | ANO1  |
| TC11000211.hg.1 | 6.51  | JUC11001366.hg.1 | SPON1 |
| TC11000211.hg.1 | 5.31  | PSR11002835.hg.1 | SPON1 |
| TC11000211.hg.1 | 5.12  | PSR11002843.hg.1 | SPON1 |
| TC11000211.hg.1 | 4.79  | JUC11001354.hg.1 | SPON1 |
| TC11000211.hg.1 | 4.06  | PSR11002840.hg.1 | SPON1 |
| TC11000211.hg.1 | 3.58  | JUC11001363.hg.1 | SPON1 |
| TC11000211.hg.1 | 3.54  | JUC11001364.hg.1 | SPON1 |
| TC11000211.hg.1 | 2.75  | PSR11002841.hg.1 | SPON1 |
| TC11000211.hg.1 | 2.57  | PSR11002845.hg.1 | SPON1 |
| TC11000211.hg.1 | 2.44  | PSR11002836.hg.1 | SPON1 |
| TC11000211.hg.1 | -2.22 | JUC11001355.hg.1 | SPON1 |
| TC11000211.hg.1 | -2.35 | JUC11001360.hg.1 | SPON1 |
| TC11000211.hg.1 | -2.57 | JUC11001353.hg.1 | SPON1 |
| TC11000211.hg.1 | -3.57 | PSR11002851.hg.1 | SPON1 |
| TC11000211.hg.1 | -3.67 | PSR11002847.hg.1 | SPON1 |
| TC11000211.hg.1 | -3.7  | JUC11001352.hg.1 | SPON1 |
| TC11000211.hg.1 | -3.91 | PSR11002849.hg.1 | SPON1 |
| TC11000211.hg.1 | -3.92 | PSR11002850.hg.1 | SPON1 |
| TC11000211.hg.1 | -5.05 | PSR11002832.hg.1 | SPON1 |
| TC11000211.hg.1 | -5.76 | PSR11002846.hg.1 | SPON1 |
| TC11000211.hg.1 | -5.92 | JUC11001359.hg.1 | SPON1 |
| TC11000211.hg.1 | -6.43 | PSR11002848.hg.1 | SPON1 |
| TC11000211.hg.1 | -6.84 | PSR11002853.hg.1 | SPON1 |
| TC11000211.hg.1 | -6.84 | JUC11001356.hg.1 | SPON1 |
| TC11000211.hg.1 | -7.14 | PSR11002831.hg.1 | SPON1 |
| TC11000211.hg.1 | -8.08 | JUC11001357.hg.1 | SPON1 |
| TC6_dbb_hap3000 | 6.51  | JUC6_dbb_hap3000 | HLA-C |
| TC6_dbb_hap3000 | 3.35  | PSR6_dbb_hap3002 | HLA-C |
| TC6_dbb_hap3000 | 2.82  | JUC6_dbb_hap3000 | HLA-C |
| TC6_dbb_hap3000 | 2.8   | JUC6_dbb_hap3000 | HLA-C |
| TC6_dbb_hap3000 | 2.21  | PSR6_dbb_hap3002 | HLA-C |
| TC6_dbb_hap3000 | 2.17  | JUC6_dbb_hap3000 | HLA-C |
| TC6_dbb_hap3000 | 2.14  | PSR6_dbb_hap3002 | HLA-C |
| TC6_dbb_hap3000 | -2.17 | JUC6_dbb_hap3001 | HLA-C |
| TC6_dbb_hap3000 | -2.47 | JUC6_dbb_hap3000 | HLA-C |
| TC03001227.hg.1 | 6.48  | JUC03010478.hg.1 | SGOL1 |
| TC03001227.hg.1 | 4.69  | JUC03010481.hg.1 | SGOL1 |
| TC03001227.hg.1 | 2.48  | PSR03021130.hg.1 | SGOL1 |
| TC03001227.hg.1 | 2.42  | JUC03010477.hg.1 | SGOL1 |
| TC03001227.hg.1 | 2.4   | JUC03010480.hg.1 | SGOL1 |
| TC03001227.hg.1 | 2.28  | JUC03010487.hg.1 | SGOL1 |
| TC03001227.hg.1 | 2.04  | PSR03021136.hg.1 | SGOL1 |
| TC01000999.hg.1 | 6.47  | JUC01008315.hg.1 | MAGI3 |
| TC01000999.hg.1 | 3.97  | JUC01008312.hg.1 | MAGI3 |
| TC01000999.hg.1 | 2.63  | PSR01015920.hg.1 | MAGI3 |
| TC01000999.hg.1 | 2.12  | JUC01008323.hg.1 | MAGI3 |
| TC01000999.hg.1 | -2.53 | JUC01008303.hg.1 | MAGI3 |

|                 |       |                  |             |
|-----------------|-------|------------------|-------------|
| TC01000999.hg.1 | -3.44 | JUC01008307.hg.1 | MAGI3       |
| TC02005026.hg.1 | 6.46  | JUC02032391.hg.1 | ASB3, GPR79 |
| TC02005026.hg.1 | 2.73  | PSR02029421.hg.1 | ASB3, GPR79 |
| TC02005026.hg.1 | 2.7   | PSR02029425.hg.1 | ASB3, GPR79 |
| TC02005026.hg.1 | -2.01 | JUC02032392.hg.1 | ASB3, GPR79 |
| TC03001562.hg.1 | 6.46  | JUC03013999.hg.1 | CNTN3       |
| TC03001562.hg.1 | 2.97  | JUC03013994.hg.1 | CNTN3       |
| TC03001562.hg.1 | 2.26  | PSR03028408.hg.1 | CNTN3       |
| TC03001562.hg.1 | -2    | PSR03028405.hg.1 | CNTN3       |
| TC03001562.hg.1 | -2.04 | PSR03028401.hg.1 | CNTN3       |
| TC03001562.hg.1 | -2.1  | JUC03013988.hg.1 | CNTN3       |
| TC03001562.hg.1 | -2.57 | JUC03013989.hg.1 | CNTN3       |
| TC03001562.hg.1 | -2.66 | JUC03013995.hg.1 | CNTN3       |
| TC03001562.hg.1 | -2.71 | PSR03028400.hg.1 | CNTN3       |
| TC03001562.hg.1 | -3.27 | JUC03013985.hg.1 | CNTN3       |
| TC03001562.hg.1 | -7.82 | JUC03013996.hg.1 | CNTN3       |
| TC08001016.hg.1 | 6.46  | JUC08006694.hg.1 | PSD3        |
| TC08001016.hg.1 | 2.42  | PSR08012927.hg.1 | PSD3        |
| TC08001016.hg.1 | 2.4   | PSR08012926.hg.1 | PSD3        |
| TC08001016.hg.1 | -2    | PSR08012929.hg.1 | PSD3        |
| TC08001016.hg.1 | -2.07 | PSR08012940.hg.1 | PSD3        |
| TC08001016.hg.1 | -2.08 | JUC08006711.hg.1 | PSD3        |
| TC08001016.hg.1 | -2.13 | JUC08006706.hg.1 | PSD3        |
| TC08001584.hg.1 | 6.44  | JUC08010627.hg.1 | ATAD2       |
| TC08001584.hg.1 | 3.38  | JUC08010603.hg.1 | ATAD2       |
| TC08001584.hg.1 | 2.98  | JUC08010594.hg.1 | ATAD2       |
| TC08001584.hg.1 | 2.89  | JUC08010613.hg.1 | ATAD2       |
| TC08001584.hg.1 | 2.52  | JUC08010606.hg.1 | ATAD2       |
| TC08001584.hg.1 | 2.26  | PSR08020799.hg.1 | ATAD2       |
| TC08001584.hg.1 | 2.24  | JUC08010607.hg.1 | ATAD2       |
| TC08001584.hg.1 | 2.21  | PSR08020790.hg.1 | ATAD2       |
| TC08001584.hg.1 | 2.04  | PSR08020803.hg.1 | ATAD2       |
| TC08001584.hg.1 | -2.13 | JUC08010614.hg.1 | ATAD2       |
| TC17000830.hg.1 | 6.43  | JUC17005912.hg.1 | GPRC5C      |
| TC17000830.hg.1 | 3.31  | PSR17010711.hg.1 | GPRC5C      |
| TC05001793.hg.1 | 6.42  | JUC05012544.hg.1 | SAR1B       |
| TC05001793.hg.1 | -2.05 | PSR05024435.hg.1 | SAR1B       |
| TC05001793.hg.1 | -2.36 | PSR05024420.hg.1 | SAR1B       |
| TC05001793.hg.1 | -2.37 | PSR05024419.hg.1 | SAR1B       |
| TC05001793.hg.1 | -2.41 | PSR05024418.hg.1 | SAR1B       |
| TC05001793.hg.1 | -2.54 | PSR05024415.hg.1 | SAR1B       |
| TC19001061.hg.1 | 6.42  | JUC19008187.hg.1 | STAP2       |
| TC19001061.hg.1 | 2.4   | PSR19014501.hg.1 | STAP2       |
| TC19001061.hg.1 | -2    | PSR19014494.hg.1 | STAP2       |
| TC19001061.hg.1 | -2.24 | JUC19008177.hg.1 | STAP2       |
| TC14000554.hg.1 | 6.41  | JUC14003432.hg.1 | CALM1, CALI |
| TC14000554.hg.1 | -3.02 | PSR14006760.hg.1 | CALM1, CALI |
| TC21000134.hg.1 | 6.4   | JUC21000604.hg.1 | MRPS6, SLC  |
| TC21000134.hg.1 | 5.3   | PSR21001123.hg.1 | MRPS6, SLC  |
| TC21000134.hg.1 | 2.97  | JUC21000618.hg.1 | MRPS6, SLC  |
| TC21000134.hg.1 | 2.95  | JUC21000617.hg.1 | MRPS6, SLC  |
| TC21000134.hg.1 | 2.64  | PSR21001147.hg.1 | MRPS6, SLC  |
| TC21000134.hg.1 | 2.15  | JUC21000609.hg.1 | MRPS6, SLC  |
| TC21000134.hg.1 | 2     | PSR21001149.hg.1 | MRPS6, SLC  |
| TC09001585.hg.1 | 6.36  | JUC09010789.hg.1 | SCAI        |
| TC09001585.hg.1 | 3.31  | JUC09010783.hg.1 | SCAI        |
| TC09001585.hg.1 | 3.21  | PSR09019933.hg.1 | SCAI        |
| TC09001585.hg.1 | 2.56  | PSR09019911.hg.1 | SCAI        |

|                 |       |                  |             |
|-----------------|-------|------------------|-------------|
| TC09001585.hg.1 | 2.53  | PSR09019928.hg.1 | SCAI        |
| TC09001585.hg.1 | 2.5   | JUC09010782.hg.1 | SCAI        |
| TC09001585.hg.1 | 2.27  | PSR09019910.hg.1 | SCAI        |
| TC09001585.hg.1 | 2.08  | JUC09010781.hg.1 | SCAI        |
| TC09001585.hg.1 | -2.09 | JUC09010798.hg.1 | SCAI        |
| TC09001585.hg.1 | -2.31 | JUC09010784.hg.1 | SCAI        |
| TC09001585.hg.1 | -4.19 | JUC09010787.hg.1 | SCAI        |
| TC12001129.hg.1 | 6.36  | JUC12008133.hg.1 | ANO2        |
| TC12001129.hg.1 | 4.52  | JUC12008121.hg.1 | ANO2        |
| TC12001129.hg.1 | 4.13  | JUC12008124.hg.1 | ANO2        |
| TC12001129.hg.1 | 3.86  | PSR12014757.hg.1 | ANO2        |
| TC12001129.hg.1 | 3.23  | PSR12014754.hg.1 | ANO2        |
| TC12001129.hg.1 | 2.41  | PSR12014755.hg.1 | ANO2        |
| TC12001129.hg.1 | 2.26  | PSR12014753.hg.1 | ANO2        |
| TC12001129.hg.1 | -2.2  | JUC12008135.hg.1 | ANO2        |
| TC12001129.hg.1 | -2.24 | PSR12014747.hg.1 | ANO2        |
| TC12001129.hg.1 | -2.27 | PSR12014780.hg.1 | ANO2        |
| TC12001129.hg.1 | -2.32 | PSR12014766.hg.1 | ANO2        |
| TC12001129.hg.1 | -2.4  | PSR12014779.hg.1 | ANO2        |
| TC12001129.hg.1 | -2.41 | PSR12014762.hg.1 | ANO2        |
| TC12001129.hg.1 | -2.59 | JUC12008123.hg.1 | ANO2        |
| TC12001129.hg.1 | -2.74 | PSR12014765.hg.1 | ANO2        |
| TC12001129.hg.1 | -2.93 | PSR12014772.hg.1 | ANO2        |
| TC12001129.hg.1 | -3.93 | JUC12008107.hg.1 | ANO2        |
| TC22000318.hg.1 | 6.36  | JUC22002199.hg.1 | CACNA1I     |
| TC22000318.hg.1 | 5.64  | JUC22002184.hg.1 | CACNA1I     |
| TC22000318.hg.1 | 4.76  | JUC22002180.hg.1 | CACNA1I     |
| TC22000318.hg.1 | 3.37  | JUC22002191.hg.1 | CACNA1I     |
| TC22000318.hg.1 | 3.24  | JUC22002202.hg.1 | CACNA1I     |
| TC22000318.hg.1 | 2.79  | JUC22002206.hg.1 | CACNA1I     |
| TC22000318.hg.1 | 2.35  | PSR22006053.hg.1 | CACNA1I     |
| TC22000318.hg.1 | 2.34  | JUC22002181.hg.1 | CACNA1I     |
| TC22000318.hg.1 | 2.2   | JUC22002176.hg.1 | CACNA1I     |
| TC22000318.hg.1 | 2.09  | JUC22002186.hg.1 | CACNA1I     |
| TC22000318.hg.1 | 2.08  | PSR22006054.hg.1 | CACNA1I     |
| TC22000318.hg.1 | -2.76 | JUC22002178.hg.1 | CACNA1I     |
| TC14000277.hg.1 | 6.35  | PSR14002948.hg.1 | KLHDC1      |
| TC14000277.hg.1 | 2     | JUC14001366.hg.1 | KLHDC1      |
| TC02004920.hg.1 | 6.33  | JUC02031214.hg.1 | LRRFIP1     |
| TC02004920.hg.1 | 3.63  | JUC02031203.hg.1 | LRRFIP1     |
| TC02004920.hg.1 | 3.37  | JUC02031184.hg.1 | LRRFIP1     |
| TC02004920.hg.1 | 3.08  | JUC02031192.hg.1 | LRRFIP1     |
| TC02004920.hg.1 | 2.78  | JUC02031178.hg.1 | LRRFIP1     |
| TC02004920.hg.1 | 2.5   | JUC02031198.hg.1 | LRRFIP1     |
| TC02004920.hg.1 | 2.09  | PSR02023125.hg.1 | LRRFIP1     |
| TC02004920.hg.1 | 2.02  | JUC02031210.hg.1 | LRRFIP1     |
| TC02004920.hg.1 | 2     | JUC02031206.hg.1 | LRRFIP1     |
| TC02004920.hg.1 | -2.07 | PSR02023155.hg.1 | LRRFIP1     |
| TC02004920.hg.1 | -2.44 | PSR02023150.hg.1 | LRRFIP1     |
| TC02004920.hg.1 | -3.74 | JUC02031218.hg.1 | LRRFIP1     |
| TC05000988.hg.1 | 6.33  | JUC05007364.hg.1 | FAM153B, LC |
| TC05000988.hg.1 | 2.79  | JUC05007387.hg.1 | FAM153B, LC |
| TC05000988.hg.1 | 2     | JUC05007405.hg.1 | FAM153B, LC |
| TC05000988.hg.1 | 2     | JUC05007407.hg.1 | FAM153B, LC |
| TC05000988.hg.1 | -2.25 | PSR05014238.hg.1 | FAM153B, LC |
| TC05000988.hg.1 | -2.68 | PSR05014221.hg.1 | FAM153B, LC |
| TC08001282.hg.1 | 6.33  | JUC08008502.hg.1 | PDE7A       |
| TC08001282.hg.1 | 2.69  | JUC08008494.hg.1 | PDE7A       |

|                 |       |                  |             |
|-----------------|-------|------------------|-------------|
| TC08001282.hg.1 | 2.19  | JUC08008490.hg.1 | PDE7A       |
| TC08001282.hg.1 | 2.13  | PSR08016509.hg.1 | PDE7A       |
| TC08001282.hg.1 | -2.11 | JUC08008497.hg.1 | PDE7A       |
| TC08001282.hg.1 | -2.57 | JUC08008492.hg.1 | PDE7A       |
| TC08001282.hg.1 | -2.85 | PSR08016494.hg.1 | PDE7A       |
| TC08001282.hg.1 | -3.06 | PSR08016489.hg.1 | PDE7A       |
| TC12001837.hg.1 | 6.33  | PSR12024172.hg.1 | NTN4        |
| TC12001837.hg.1 | 5.81  | PSR12024177.hg.1 | NTN4        |
| TC12001837.hg.1 | 5.28  | JUC12013425.hg.1 | NTN4        |
| TC12001837.hg.1 | 3.8   | JUC12013421.hg.1 | NTN4        |
| TC12001837.hg.1 | 3.3   | JUC12013426.hg.1 | NTN4        |
| TC12001837.hg.1 | 3.21  | JUC12013418.hg.1 | NTN4        |
| TC12001837.hg.1 | 3.01  | PSR12024173.hg.1 | NTN4        |
| TC12001837.hg.1 | 2.83  | JUC12013416.hg.1 | NTN4        |
| TC12001837.hg.1 | -4.19 | JUC12013417.hg.1 | NTN4        |
| TC01000734.hg.1 | 6.32  | JUC01006111.hg.1 | SGIP1       |
| TC01000734.hg.1 | 5.43  | PSR01011767.hg.1 | SGIP1       |
| TC01000734.hg.1 | 4.91  | PSR01011825.hg.1 | SGIP1       |
| TC01000734.hg.1 | 4.89  | JUC01006115.hg.1 | SGIP1       |
| TC01000734.hg.1 | 4.89  | JUC01006139.hg.1 | SGIP1       |
| TC01000734.hg.1 | 4.86  | PSR01011823.hg.1 | SGIP1       |
| TC01000734.hg.1 | 4.31  | PSR01011773.hg.1 | SGIP1       |
| TC01000734.hg.1 | 4.12  | JUC01006106.hg.1 | SGIP1       |
| TC01000734.hg.1 | 3.84  | JUC01006099.hg.1 | SGIP1       |
| TC01000734.hg.1 | 3.74  | PSR01011801.hg.1 | SGIP1       |
| TC01000734.hg.1 | 3.66  | PSR01011783.hg.1 | SGIP1       |
| TC01000734.hg.1 | 3.66  | PSR01011818.hg.1 | SGIP1       |
| TC01000734.hg.1 | 3.39  | PSR01011775.hg.1 | SGIP1       |
| TC01000734.hg.1 | 3.06  | JUC01006134.hg.1 | SGIP1       |
| TC01000734.hg.1 | 3.03  | PSR01011776.hg.1 | SGIP1       |
| TC01000734.hg.1 | 2.97  | PSR01011812.hg.1 | SGIP1       |
| TC01000734.hg.1 | 2.76  | JUC01006098.hg.1 | SGIP1       |
| TC01000734.hg.1 | 2.65  | JUC01006141.hg.1 | SGIP1       |
| TC01000734.hg.1 | 2.46  | JUC01006127.hg.1 | SGIP1       |
| TC01000734.hg.1 | 2.37  | PSR01011779.hg.1 | SGIP1       |
| TC01000734.hg.1 | 2.05  | PSR01011814.hg.1 | SGIP1       |
| TC01000734.hg.1 | 2.04  | JUC01006116.hg.1 | SGIP1       |
| TC01000734.hg.1 | 2.02  | PSR01011799.hg.1 | SGIP1       |
| TC01000734.hg.1 | -2.13 | PSR01011806.hg.1 | SGIP1       |
| TC01000734.hg.1 | -2.21 | PSR01011778.hg.1 | SGIP1       |
| TC01000734.hg.1 | -2.37 | PSR01011774.hg.1 | SGIP1       |
| TC01000734.hg.1 | -2.44 | JUC01006136.hg.1 | SGIP1       |
| TC01000734.hg.1 | -2.7  | JUC01006120.hg.1 | SGIP1       |
| TC01000734.hg.1 | -2.74 | PSR01011795.hg.1 | SGIP1       |
| TC01000734.hg.1 | -2.86 | JUC01006125.hg.1 | SGIP1       |
| TC01000734.hg.1 | -2.88 | JUC01006105.hg.1 | SGIP1       |
| TC01000734.hg.1 | -2.94 | JUC01006130.hg.1 | SGIP1       |
| TC01000734.hg.1 | -3.19 | JUC01006123.hg.1 | SGIP1       |
| TC01000734.hg.1 | -3.86 | JUC01006102.hg.1 | SGIP1       |
| TC07003392.hg.1 | 6.32  | JUC07021812.hg.1 | FAM188B, AC |
| TC07003392.hg.1 | 5.27  | PSR07003132.hg.1 | FAM188B, AC |
| TC07003392.hg.1 | 4.32  | PSR07003135.hg.1 | FAM188B, AC |
| TC07003392.hg.1 | 4.06  | PSR07003122.hg.1 | FAM188B, AC |
| TC07003392.hg.1 | 3.88  | JUC07021796.hg.1 | FAM188B, AC |
| TC07003392.hg.1 | 3.2   | JUC07021795.hg.1 | FAM188B, AC |
| TC07003392.hg.1 | 2.49  | PSR07003131.hg.1 | FAM188B, AC |
| TC07003392.hg.1 | 2.06  | PSR07003120.hg.1 | FAM188B, AC |
| TC07003392.hg.1 | -2.06 | PSR07003108.hg.1 | FAM188B, AC |

|                 |       |                  |             |
|-----------------|-------|------------------|-------------|
| TC07003392.hg.1 | -2.06 | PSR07003110.hg.1 | FAM188B, AC |
| TC07003392.hg.1 | -2.08 | PSR07003109.hg.1 | FAM188B, AC |
| TC07003392.hg.1 | -2.09 | PSR07003128.hg.1 | FAM188B, AC |
| TC07003392.hg.1 | -2.09 | JUC07021794.hg.1 | FAM188B, AC |
| TC07003392.hg.1 | -2.11 | PSR07003090.hg.1 | FAM188B, AC |
| TC07003392.hg.1 | -2.13 | PSR07003129.hg.1 | FAM188B, AC |
| TC07003392.hg.1 | -2.13 | JUC07021798.hg.1 | FAM188B, AC |
| TC07003392.hg.1 | -2.21 | JUC07021800.hg.1 | FAM188B, AC |
| TC07003392.hg.1 | -2.24 | PSR07003098.hg.1 | FAM188B, AC |
| TC07003392.hg.1 | -2.27 | JUC07021793.hg.1 | FAM188B, AC |
| TC07003392.hg.1 | -2.3  | JUC07021818.hg.1 | FAM188B, AC |
| TC07003392.hg.1 | -2.32 | JUC07021813.hg.1 | FAM188B, AC |
| TC07003392.hg.1 | -2.38 | PSR07003114.hg.1 | FAM188B, AC |
| TC07003392.hg.1 | -2.42 | PSR07003103.hg.1 | FAM188B, AC |
| TC07003392.hg.1 | -2.49 | PSR07003111.hg.1 | FAM188B, AC |
| TC07003392.hg.1 | -2.53 | PSR07003124.hg.1 | FAM188B, AC |
| TC07003392.hg.1 | -2.54 | JUC07021805.hg.1 | FAM188B, AC |
| TC07003392.hg.1 | -2.56 | JUC07021814.hg.1 | FAM188B, AC |
| TC07003392.hg.1 | -2.63 | JUC07021803.hg.1 | FAM188B, AC |
| TC07003392.hg.1 | -2.71 | PSR07003099.hg.1 | FAM188B, AC |
| TC07003392.hg.1 | -2.76 | JUC07021810.hg.1 | FAM188B, AC |
| TC07003392.hg.1 | -2.82 | PSR07003093.hg.1 | FAM188B, AC |
| TC07003392.hg.1 | -2.83 | PSR07003100.hg.1 | FAM188B, AC |
| TC07003392.hg.1 | -2.93 | PSR07003095.hg.1 | FAM188B, AC |
| TC07003392.hg.1 | -3.02 | JUC07021806.hg.1 | FAM188B, AC |
| TC07003392.hg.1 | -3.33 | PSR07003094.hg.1 | FAM188B, AC |
| TC07003392.hg.1 | -3.34 | JUC07021802.hg.1 | FAM188B, AC |
| TC07003392.hg.1 | -3.38 | JUC07021815.hg.1 | FAM188B, AC |
| TC07003392.hg.1 | -3.4  | PSR07003092.hg.1 | FAM188B, AC |
| TC07003392.hg.1 | -3.43 | JUC07021819.hg.1 | FAM188B, AC |
| TC07003392.hg.1 | -3.48 | PSR07003091.hg.1 | FAM188B, AC |
| TC07003392.hg.1 | -3.51 | JUC07021807.hg.1 | FAM188B, AC |
| TC07003392.hg.1 | -3.63 | PSR07003113.hg.1 | FAM188B, AC |
| TC07003392.hg.1 | -3.86 | JUC07021820.hg.1 | FAM188B, AC |
| TC07003392.hg.1 | -3.88 | PSR07003104.hg.1 | FAM188B, AC |
| TC07003392.hg.1 | -4.21 | PSR07003101.hg.1 | FAM188B, AC |
| TC07003392.hg.1 | -4.26 | JUC07021799.hg.1 | FAM188B, AC |
| TC07003392.hg.1 | -4.62 | PSR07003102.hg.1 | FAM188B, AC |
| TC07003392.hg.1 | -4.72 | PSR07003107.hg.1 | FAM188B, AC |
| TC07003392.hg.1 | -5.06 | JUC07021788.hg.1 | FAM188B, AC |
| TC07003392.hg.1 | -5.28 | JUC07021789.hg.1 | FAM188B, AC |
| TC0Y000073.hg.1 | 6.32  | PSR0Y000841.hg.1 | RPS4Y2      |
| TC0Y000073.hg.1 | 3.09  | JUC0Y000372.hg.1 | RPS4Y2      |
| TC0Y000073.hg.1 | 2.67  | PSR0Y000840.hg.1 | RPS4Y2      |
| TC1100332.hg.1  | 6.31  | JUC11002277.hg.1 | CD44        |
| TC1100332.hg.1  | 4.67  | JUC11002270.hg.1 | CD44        |
| TC1100332.hg.1  | 3.31  | JUC11002276.hg.1 | CD44        |
| TC1100332.hg.1  | 3.18  | JUC11002269.hg.1 | CD44        |
| TC1100332.hg.1  | 2.97  | JUC11002280.hg.1 | CD44        |
| TC1100332.hg.1  | 2.83  | JUC11002283.hg.1 | CD44        |
| TC1100332.hg.1  | 2.15  | JUC11002281.hg.1 | CD44        |
| TC1100332.hg.1  | -2.37 | PSR11004275.hg.1 | CD44        |
| TC1100332.hg.1  | -2.53 | JUC11002273.hg.1 | CD44        |
| TC1100332.hg.1  | -2.68 | PSR11004279.hg.1 | CD44        |
| TC1100332.hg.1  | -2.68 | JUC11002295.hg.1 | CD44        |
| TC1100332.hg.1  | -3.24 | JUC11002296.hg.1 | CD44        |
| TC1100332.hg.1  | -3.56 | PSR11004280.hg.1 | CD44        |
| TC1100332.hg.1  | -7.87 | JUC11002292.hg.1 | CD44        |

|                 |       |                  |          |
|-----------------|-------|------------------|----------|
| TC08001248.hg.1 | 6.3   | PSR08016170.hg.1 | TOX      |
| TC08001248.hg.1 | 4.38  | JUC08008328.hg.1 | TOX      |
| TC08001248.hg.1 | 3.44  | PSR08016174.hg.1 | TOX      |
| TC08001248.hg.1 | 2.09  | JUC08008331.hg.1 | TOX      |
| TC05001030.hg.1 | 6.29  | JUC05007779.hg.1 | FAM153C  |
| TC05001030.hg.1 | 2.78  | JUC05007778.hg.1 | FAM153C  |
| TC05001030.hg.1 | -2.7  | PSR05014979.hg.1 | FAM153C  |
| TC05001030.hg.1 | -2.88 | JUC05007775.hg.1 | FAM153C  |
| TC04000766.hg.1 | 6.28  | JUC04005640.hg.1 | ARFIP1   |
| TC04000766.hg.1 | 3.96  | JUC04005637.hg.1 | ARFIP1   |
| TC04000766.hg.1 | 3.41  | JUC04005654.hg.1 | ARFIP1   |
| TC04000766.hg.1 | 2.61  | PSR04010524.hg.1 | ARFIP1   |
| TC04000766.hg.1 | 2.49  | JUC04005639.hg.1 | ARFIP1   |
| TC04000766.hg.1 | 2.17  | PSR04010522.hg.1 | ARFIP1   |
| TC04000766.hg.1 | 2.02  | PSR04010531.hg.1 | ARFIP1   |
| TC17000015.hg.1 | 6.28  | JUC17000060.hg.1 | SERPINF1 |
| TC17000015.hg.1 | 2.24  | PSR17000142.hg.1 | SERPINF1 |
| TC17000015.hg.1 | 2.06  | JUC17000065.hg.1 | SERPINF1 |
| TC17000015.hg.1 | -2.71 | JUC17000062.hg.1 | SERPINF1 |
| TC17000015.hg.1 | -3.08 | PSR17000138.hg.1 | SERPINF1 |
| TC17000015.hg.1 | -4.18 | JUC17000061.hg.1 | SERPINF1 |
| TC17000015.hg.1 | -7.34 | PSR17000137.hg.1 | SERPINF1 |
| TC17000015.hg.1 | -7.38 | PSR17000135.hg.1 | SERPINF1 |
| TC18000150.hg.1 | 6.27  | JUC18001214.hg.1 | FHOD3    |
| TC18000150.hg.1 | 4.07  | JUC18001207.hg.1 | FHOD3    |
| TC18000150.hg.1 | 3.64  | PSR18001741.hg.1 | FHOD3    |
| TC18000150.hg.1 | 3.47  | PSR18001739.hg.1 | FHOD3    |
| TC18000150.hg.1 | 3.03  | JUC18001229.hg.1 | FHOD3    |
| TC18000150.hg.1 | 2.9   | JUC18001197.hg.1 | FHOD3    |
| TC18000150.hg.1 | 2.74  | PSR18001737.hg.1 | FHOD3    |
| TC18000150.hg.1 | 2.56  | PSR18001740.hg.1 | FHOD3    |
| TC18000150.hg.1 | 2.51  | JUC18001228.hg.1 | FHOD3    |
| TC18000150.hg.1 | 2.15  | PSR18001747.hg.1 | FHOD3    |
| TC18000150.hg.1 | -2.09 | PSR18001735.hg.1 | FHOD3    |
| TC18000150.hg.1 | -2.14 | PSR18001756.hg.1 | FHOD3    |
| TC18000150.hg.1 | -2.17 | PSR18001733.hg.1 | FHOD3    |
| TC18000150.hg.1 | -2.17 | PSR18001765.hg.1 | FHOD3    |
| TC18000150.hg.1 | -2.21 | JUC18001221.hg.1 | FHOD3    |
| TC18000150.hg.1 | -2.22 | PSR18001762.hg.1 | FHOD3    |
| TC18000150.hg.1 | -2.26 | PSR18001743.hg.1 | FHOD3    |
| TC18000150.hg.1 | -2.27 | JUC18001200.hg.1 | FHOD3    |
| TC18000150.hg.1 | -2.33 | PSR18001738.hg.1 | FHOD3    |
| TC18000150.hg.1 | -2.44 | PSR18001745.hg.1 | FHOD3    |
| TC18000150.hg.1 | -2.44 | PSR18001758.hg.1 | FHOD3    |
| TC18000150.hg.1 | -2.45 | PSR18001744.hg.1 | FHOD3    |
| TC18000150.hg.1 | -2.74 | PSR18001755.hg.1 | FHOD3    |
| TC18000150.hg.1 | -3.03 | PSR18001752.hg.1 | FHOD3    |
| TC18000150.hg.1 | -3.03 | JUC18001213.hg.1 | FHOD3    |
| TC18000150.hg.1 | -3.61 | JUC18001202.hg.1 | FHOD3    |
| TC18000150.hg.1 | -3.77 | PSR18001753.hg.1 | FHOD3    |
| TC18000150.hg.1 | -4.09 | JUC18001223.hg.1 | FHOD3    |
| TC18000150.hg.1 | -4.65 | PSR18001750.hg.1 | FHOD3    |
| TC18000150.hg.1 | -4.96 | JUC18001203.hg.1 | FHOD3    |
| TC18000150.hg.1 | -6.59 | JUC18001224.hg.1 | FHOD3    |
| TC18000150.hg.1 | -7.02 | JUC18001210.hg.1 | FHOD3    |
| TC12001307.hg.1 | 6.25  | JUC12009447.hg.1 | SOX5     |
| TC12001307.hg.1 | 4.31  | JUC12009427.hg.1 | SOX5     |
| TC12001307.hg.1 | 3.49  | JUC12009448.hg.1 | SOX5     |

|                 |       |                  |            |
|-----------------|-------|------------------|------------|
| TC12001307.hg.1 | 2.89  | JUC12009431.hg.1 | SOX5       |
| TC12001307.hg.1 | 2.85  | JUC12009444.hg.1 | SOX5       |
| TC12001307.hg.1 | 2.67  | JUC12009453.hg.1 | SOX5       |
| TC12001307.hg.1 | 2.4   | PSR12017165.hg.1 | SOX5       |
| TC12001307.hg.1 | 2.33  | JUC12009443.hg.1 | SOX5       |
| TC12001307.hg.1 | 2.29  | PSR12017171.hg.1 | SOX5       |
| TC12001307.hg.1 | 2.02  | PSR12017158.hg.1 | SOX5       |
| TC12001307.hg.1 | -2.15 | PSR12017146.hg.1 | SOX5       |
| TC01001586.hg.1 | 6.23  | JUC01013116.hg.1 | SMG7       |
| TC01001586.hg.1 | 3.37  | JUC01013091.hg.1 | SMG7       |
| TC01001586.hg.1 | 2.6   | JUC01013115.hg.1 | SMG7       |
| TC01001586.hg.1 | -2.4  | PSR01024601.hg.1 | SMG7       |
| TC13001724.hg.1 | 6.22  | JUC13008471.hg.1 | SOHLH2, CC |
| TC13001724.hg.1 | 2.41  | PSR13006364.hg.1 | SOHLH2, CC |
| TC05001617.hg.1 | 6.2   | JUC05011398.hg.1 | ERAP1      |
| TC05001617.hg.1 | 3.53  | PSR05022094.hg.1 | ERAP1      |
| TC05001617.hg.1 | 3.18  | PSR05022078.hg.1 | ERAP1      |
| TC05001617.hg.1 | 2.99  | PSR05022067.hg.1 | ERAP1      |
| TC05001617.hg.1 | 2.92  | PSR05022095.hg.1 | ERAP1      |
| TC05001617.hg.1 | 2.85  | PSR05022051.hg.1 | ERAP1      |
| TC05001617.hg.1 | 2.66  | PSR05022089.hg.1 | ERAP1      |
| TC05001617.hg.1 | 2.61  | PSR05022070.hg.1 | ERAP1      |
| TC05001617.hg.1 | 2.13  | PSR05022093.hg.1 | ERAP1      |
| TC05001617.hg.1 | 2.12  | PSR05022090.hg.1 | ERAP1      |
| TC05001617.hg.1 | -2.03 | JUC05011378.hg.1 | ERAP1      |
| TC05001617.hg.1 | -2.39 | JUC05011397.hg.1 | ERAP1      |
| TC05001617.hg.1 | -2.49 | JUC05011390.hg.1 | ERAP1      |
| TC05001617.hg.1 | -2.8  | JUC05011399.hg.1 | ERAP1      |
| TC05001617.hg.1 | -3.56 | JUC05011392.hg.1 | ERAP1      |
| TC14000819.hg.1 | 6.2   | JUC14004565.hg.1 | ADSSL1     |
| TC14000819.hg.1 | 5.33  | PSR14008952.hg.1 | ADSSL1     |
| TC14000819.hg.1 | 5.25  | PSR14008953.hg.1 | ADSSL1     |
| TC14000819.hg.1 | 5.15  | PSR14008967.hg.1 | ADSSL1     |
| TC14000819.hg.1 | 5.14  | PSR14008970.hg.1 | ADSSL1     |
| TC14000819.hg.1 | 4.07  | JUC14004561.hg.1 | ADSSL1     |
| TC14000819.hg.1 | 4     | PSR14008968.hg.1 | ADSSL1     |
| TC14000819.hg.1 | 3.57  | PSR14008951.hg.1 | ADSSL1     |
| TC14000819.hg.1 | 2.61  | PSR14008966.hg.1 | ADSSL1     |
| TC14000819.hg.1 | 2.45  | PSR14008954.hg.1 | ADSSL1     |
| TC14000819.hg.1 | -2.03 | JUC14004564.hg.1 | ADSSL1     |
| TC14000819.hg.1 | -2.31 | PSR14008965.hg.1 | ADSSL1     |
| TC14000819.hg.1 | -3.13 | JUC14004555.hg.1 | ADSSL1     |
| TC14000819.hg.1 | -4.02 | JUC14004563.hg.1 | ADSSL1     |
| TC18000161.hg.1 | 6.2   | JUC18001326.hg.1 | SLC14A2    |
| TC18000161.hg.1 | 2.43  | JUC18001313.hg.1 | SLC14A2    |
| TC18000161.hg.1 | 2.2   | PSR18001880.hg.1 | SLC14A2    |
| TC18000161.hg.1 | 2.19  | PSR18001881.hg.1 | SLC14A2    |
| TC18000161.hg.1 | 2.05  | PSR18001878.hg.1 | SLC14A2    |
| TC18000161.hg.1 | -2.11 | PSR18001871.hg.1 | SLC14A2    |
| TC18000161.hg.1 | -2.14 | JUC18001325.hg.1 | SLC14A2    |
| TC18000161.hg.1 | -2.25 | JUC18001321.hg.1 | SLC14A2    |
| TC18000161.hg.1 | -2.43 | PSR18001889.hg.1 | SLC14A2    |
| TC18000161.hg.1 | -3.31 | PSR18001873.hg.1 | SLC14A2    |
| TC19000530.hg.1 | 6.2   | JUC19004295.hg.1 | RYR1       |
| TC19000530.hg.1 | 2.47  | JUC19004290.hg.1 | RYR1       |
| TC19000530.hg.1 | 2.24  | JUC19004195.hg.1 | RYR1       |
| TC19000530.hg.1 | 2.18  | PSR19007127.hg.1 | RYR1       |
| TC19000530.hg.1 | 2.08  | JUC19004240.hg.1 | RYR1       |

|                 |        |                  |         |
|-----------------|--------|------------------|---------|
| TC20000176.hg.1 | 6.2    | JUC20001177.hg.1 | FAM182A |
| TC20000176.hg.1 | 3.19   | JUC20001178.hg.1 | FAM182A |
| TC20000176.hg.1 | 2.88   | JUC20001184.hg.1 | FAM182A |
| TC20000176.hg.1 | 2.45   | JUC20001175.hg.1 | FAM182A |
| TC20000176.hg.1 | 2.12   | PSR20002201.hg.1 | FAM182A |
| TC20000176.hg.1 | 2.03   | JUC20001185.hg.1 | FAM182A |
| TC20000176.hg.1 | 2.03   | JUC20001186.hg.1 | FAM182A |
| TC20000176.hg.1 | -2.23  | PSR20002187.hg.1 | FAM182A |
| TC20000176.hg.1 | -3.37  | PSR20002184.hg.1 | FAM182A |
| TC08000769.hg.1 | 6.19   | JUC08005285.hg.1 | TG      |
| TC08000769.hg.1 | 5.27   | JUC08005334.hg.1 | TG      |
| TC08000769.hg.1 | 4.44   | JUC08005304.hg.1 | TG      |
| TC08000769.hg.1 | 4.37   | JUC08005284.hg.1 | TG      |
| TC08000769.hg.1 | 4.28   | JUC08005295.hg.1 | TG      |
| TC08000769.hg.1 | 3.92   | JUC08005305.hg.1 | TG      |
| TC08000769.hg.1 | 3.76   | JUC08005337.hg.1 | TG      |
| TC08000769.hg.1 | 3.66   | JUC08005298.hg.1 | TG      |
| TC08000769.hg.1 | 3.06   | JUC08005327.hg.1 | TG      |
| TC08000769.hg.1 | 2.79   | PSR08010284.hg.1 | TG      |
| TC08000769.hg.1 | 2.68   | PSR08010308.hg.1 | TG      |
| TC08000769.hg.1 | 2.65   | JUC08005300.hg.1 | TG      |
| TC08000769.hg.1 | 2.65   | JUC08005326.hg.1 | TG      |
| TC08000769.hg.1 | 2.43   | JUC08005277.hg.1 | TG      |
| TC08000769.hg.1 | 2.39   | PSR08010310.hg.1 | TG      |
| TC08000769.hg.1 | 2.26   | PSR08010295.hg.1 | TG      |
| TC19001156.hg.1 | 6.19   | JUC19009319.hg.1 | COL5A3  |
| TC19001156.hg.1 | 2.31   | JUC19009333.hg.1 | COL5A3  |
| TC19001156.hg.1 | 2.02   | JUC19009321.hg.1 | COL5A3  |
| TC19001156.hg.1 | -2.02  | PSR19016017.hg.1 | COL5A3  |
| TC19001156.hg.1 | -2.03  | PSR19016015.hg.1 | COL5A3  |
| TC19001156.hg.1 | -2.08  | PSR19015953.hg.1 | COL5A3  |
| TC19001156.hg.1 | -2.15  | PSR19016013.hg.1 | COL5A3  |
| TC19001156.hg.1 | -2.17  | PSR19016014.hg.1 | COL5A3  |
| TC19001156.hg.1 | -2.17  | JUC19009322.hg.1 | COL5A3  |
| TC19001156.hg.1 | -2.27  | JUC19009303.hg.1 | COL5A3  |
| TC19001156.hg.1 | -2.35  | JUC19009329.hg.1 | COL5A3  |
| TC19001156.hg.1 | -3.16  | PSR19015957.hg.1 | COL5A3  |
| TC19001156.hg.1 | -3.49  | JUC19009305.hg.1 | COL5A3  |
| TC19001156.hg.1 | -3.56  | JUC19009332.hg.1 | COL5A3  |
| TC19001156.hg.1 | -3.7   | PSR19016018.hg.1 | COL5A3  |
| TC19001156.hg.1 | -3.78  | PSR19015952.hg.1 | COL5A3  |
| TC19001156.hg.1 | -4.38  | JUC19009336.hg.1 | COL5A3  |
| TC19001156.hg.1 | -4.92  | JUC19009280.hg.1 | COL5A3  |
| TC19001156.hg.1 | -5.82  | JUC19009285.hg.1 | COL5A3  |
| TC19001156.hg.1 | -6.68  | PSR19016016.hg.1 | COL5A3  |
| TC19001156.hg.1 | -6.79  | JUC19009315.hg.1 | COL5A3  |
| TC19001156.hg.1 | -9.79  | JUC19009277.hg.1 | COL5A3  |
| TC19001156.hg.1 | -15.02 | JUC19009314.hg.1 | COL5A3  |
| TC17000924.hg.1 | 6.18   | JUC17006882.hg.1 | BAIAP2  |
| TC17000924.hg.1 | 2.51   | PSR17012168.hg.1 | BAIAP2  |
| TC17000924.hg.1 | 2.31   | PSR17012173.hg.1 | BAIAP2  |
| TC17000924.hg.1 | -2.3   | JUC17006867.hg.1 | BAIAP2  |
| TC17000924.hg.1 | -2.35  | JUC17006875.hg.1 | BAIAP2  |
| TC01001204.hg.1 | 6.17   | JUC01010211.hg.1 | PIP5K1A |
| TC01001204.hg.1 | 4.5    | JUC01010194.hg.1 | PIP5K1A |
| TC01001204.hg.1 | 2.72   | JUC01010193.hg.1 | PIP5K1A |
| TC01001204.hg.1 | 2.53   | JUC01010199.hg.1 | PIP5K1A |
| TC01001204.hg.1 | -2.12  | JUC01010200.hg.1 | PIP5K1A |



|                 |       |                  |         |
|-----------------|-------|------------------|---------|
| TC01001204.hg.1 | -3.71 | PSR01018613.hg.1 | PIP5K1A |
| TC04001487.hg.1 | 6.17  | JUC04011077.hg.1 | ARSJ    |
| TC04001487.hg.1 | 3.87  | PSR04021107.hg.1 | ARSJ    |
| TC04001487.hg.1 | 2.54  | JUC04011086.hg.1 | ARSJ    |
| TC04001487.hg.1 | 2.44  | PSR04021106.hg.1 | ARSJ    |
| TC04001487.hg.1 | 2.36  | PSR04021082.hg.1 | ARSJ    |
| TC04001487.hg.1 | -2.06 | JUC04011084.hg.1 | ARSJ    |
| TC01003311.hg.1 | 6.16  | PSR01051374.hg.1 | CLK2    |
| TC01003311.hg.1 | 4.71  | PSR01051372.hg.1 | CLK2    |
| TC01003311.hg.1 | 2.49  | PSR01051400.hg.1 | CLK2    |
| TC01003311.hg.1 | 2.11  | JUC01027006.hg.1 | CLK2    |
| TC01003311.hg.1 | 2.09  | PSR01051387.hg.1 | CLK2    |
| TC01003311.hg.1 | 2.05  | PSR01051401.hg.1 | CLK2    |
| TC01003311.hg.1 | 2.03  | PSR01051402.hg.1 | CLK2    |
| TC01003311.hg.1 | -3.98 | JUC01027012.hg.1 | CLK2    |
| TC0X000821.hg.1 | 6.16  | JUC0X005468.hg.1 | NLGN4X  |
| TC0X000821.hg.1 | 3.72  | JUC0X005472.hg.1 | NLGN4X  |
| TC0X000821.hg.1 | 3.38  | PSR0X011188.hg.1 | NLGN4X  |
| TC0X000821.hg.1 | 3.11  | PSR0X011197.hg.1 | NLGN4X  |
| TC0X000821.hg.1 | 3.07  | PSR0X011193.hg.1 | NLGN4X  |
| TC0X000821.hg.1 | 2.65  | PSR0X011194.hg.1 | NLGN4X  |
| TC0X000821.hg.1 | 2.61  | JUC0X005470.hg.1 | NLGN4X  |
| TC0X000821.hg.1 | 2.61  | JUC0X005483.hg.1 | NLGN4X  |
| TC0X000821.hg.1 | 2.39  | JUC0X005471.hg.1 | NLGN4X  |
| TC0X000821.hg.1 | 2.08  | PSR0X011195.hg.1 | NLGN4X  |
| TC0X000821.hg.1 | -2.06 | PSR0X011181.hg.1 | NLGN4X  |
| TC0X000821.hg.1 | -2.59 | PSR0X011191.hg.1 | NLGN4X  |
| TC08001497.hg.1 | 6.15  | JUC08009991.hg.1 | UBR5    |
| TC08001497.hg.1 | 4.5   | JUC08009971.hg.1 | UBR5    |
| TC08001497.hg.1 | 2.91  | PSR08019644.hg.1 | UBR5    |
| TC08001497.hg.1 | 2.9   | PSR08019697.hg.1 | UBR5    |
| TC08001497.hg.1 | 2.29  | PSR08019705.hg.1 | UBR5    |
| TC08001497.hg.1 | 2.15  | JUC08009988.hg.1 | UBR5    |
| TC08001497.hg.1 | 2.13  | PSR08019706.hg.1 | UBR5    |
| TC08001497.hg.1 | 2.11  | JUC08009961.hg.1 | UBR5    |
| TC08001497.hg.1 | 2.04  | JUC08009985.hg.1 | UBR5    |
| TC08001497.hg.1 | 2.03  | JUC08009993.hg.1 | UBR5    |
| TC08001497.hg.1 | -3    | JUC08009957.hg.1 | UBR5    |
| TC20000368.hg.1 | 6.15  | JUC20002922.hg.1 | EYA2    |
| TC20000368.hg.1 | 5     | JUC20002909.hg.1 | EYA2    |
| TC20000368.hg.1 | 3.78  | PSR20005361.hg.1 | EYA2    |
| TC20000368.hg.1 | 3.75  | JUC20002920.hg.1 | EYA2    |
| TC20000368.hg.1 | 3.49  | JUC20002914.hg.1 | EYA2    |
| TC20000368.hg.1 | 2.88  | JUC20002910.hg.1 | EYA2    |
| TC20000368.hg.1 | 2.82  | JUC20002931.hg.1 | EYA2    |
| TC20000368.hg.1 | 2.6   | JUC20002924.hg.1 | EYA2    |
| TC20000368.hg.1 | 2.3   | JUC20002908.hg.1 | EYA2    |
| TC20000368.hg.1 | 2.29  | PSR20005374.hg.1 | EYA2    |
| TC20000368.hg.1 | 2.22  | PSR20005375.hg.1 | EYA2    |
| TC20000368.hg.1 | 2.17  | JUC20002926.hg.1 | EYA2    |
| TC20000368.hg.1 | -2.12 | PSR20005363.hg.1 | EYA2    |
| TC20000368.hg.1 | -2.14 | PSR20005372.hg.1 | EYA2    |
| TC20000368.hg.1 | -2.24 | PSR20005382.hg.1 | EYA2    |
| TC20000368.hg.1 | -2.39 | PSR20005379.hg.1 | EYA2    |
| TC20000368.hg.1 | -2.41 | JUC20002927.hg.1 | EYA2    |
| TC20000368.hg.1 | -2.81 | JUC20002912.hg.1 | EYA2    |
| TC20000368.hg.1 | -3.07 | JUC20002930.hg.1 | EYA2    |
| TC20000368.hg.1 | -3.09 | PSR20005384.hg.1 | EYA2    |

|                 |       |                  |            |
|-----------------|-------|------------------|------------|
| TC20000368.hg.1 | -3.35 | PSR20005358.hg.1 | EYA2       |
| TC20000368.hg.1 | -4.45 | PSR20005356.hg.1 | EYA2       |
| TC20000368.hg.1 | -4.46 | PSR20005357.hg.1 | EYA2       |
| TC20000368.hg.1 | -4.58 | PSR20005355.hg.1 | EYA2       |
| TC20000368.hg.1 | -6.17 | JUC20002907.hg.1 | EYA2       |
| TC04002931.hg.1 | 6.14  | JUC04017072.hg.1 | PDGFRA     |
| TC04002931.hg.1 | 5.16  | JUC04017075.hg.1 | PDGFRA     |
| TC04002931.hg.1 | 3.98  | JUC04017073.hg.1 | PDGFRA     |
| TC04002931.hg.1 | 3.64  | JUC04017092.hg.1 | PDGFRA     |
| TC04002931.hg.1 | 3.41  | PSR04004383.hg.1 | PDGFRA     |
| TC04002931.hg.1 | 3.26  | JUC04017077.hg.1 | PDGFRA     |
| TC04002931.hg.1 | 3.01  | PSR04004360.hg.1 | PDGFRA     |
| TC04002931.hg.1 | 3.01  | PSR04004362.hg.1 | PDGFRA     |
| TC04002931.hg.1 | 2.3   | PSR04004363.hg.1 | PDGFRA     |
| TC04002931.hg.1 | -2.44 | JUC04017102.hg.1 | PDGFRA     |
| TC15000846.hg.1 | 6.14  | JUC15004137.hg.1 | FANCI      |
| TC15000846.hg.1 | 2.49  | JUC15004147.hg.1 | FANCI      |
| TC15000846.hg.1 | 2.35  | PSR15007805.hg.1 | FANCI      |
| TC15000846.hg.1 | -2.41 | JUC15004131.hg.1 | FANCI      |
| TC01003532.hg.1 | 6.11  | JUC01028596.hg.1 | SNORD47, S |
| TC01003532.hg.1 | 2.5   | JUC01028600.hg.1 | SNORD47, S |
| TC01003532.hg.1 | 2.38  | PSR01054836.hg.1 | SNORD47, S |
| TC01003532.hg.1 | 2.06  | PSR01054799.hg.1 | SNORD47, S |
| TC01003532.hg.1 | -4.38 | JUC01028606.hg.1 | SNORD47, S |
| TC01003532.hg.1 | -4.9  | JUC01028597.hg.1 | SNORD47, S |
| TC07000178.hg.1 | 6.1   | PSR07002787.hg.1 | CREB5, LOC |
| TC07000178.hg.1 | 5.67  | PSR07002771.hg.1 | CREB5, LOC |
| TC07000178.hg.1 | 4.8   | PSR07002779.hg.1 | CREB5, LOC |
| TC07000178.hg.1 | 4.24  | PSR07002793.hg.1 | CREB5, LOC |
| TC07000178.hg.1 | 4.15  | PSR07002770.hg.1 | CREB5, LOC |
| TC07000178.hg.1 | 3.6   | PSR07002789.hg.1 | CREB5, LOC |
| TC07000178.hg.1 | 3.26  | PSR07002772.hg.1 | CREB5, LOC |
| TC07000178.hg.1 | 3.23  | JUC07001341.hg.1 | CREB5, LOC |
| TC07000178.hg.1 | 2.91  | PSR07002773.hg.1 | CREB5, LOC |
| TC07000178.hg.1 | 2.77  | PSR07002798.hg.1 | CREB5, LOC |
| TC07000178.hg.1 | 2.67  | PSR07002799.hg.1 | CREB5, LOC |
| TC07000178.hg.1 | 2.57  | PSR07002769.hg.1 | CREB5, LOC |
| TC07000178.hg.1 | 2.43  | PSR07002797.hg.1 | CREB5, LOC |
| TC07000178.hg.1 | 2.38  | PSR07002785.hg.1 | CREB5, LOC |
| TC07000178.hg.1 | 2.25  | PSR07002803.hg.1 | CREB5, LOC |
| TC07000178.hg.1 | 2.17  | PSR07002781.hg.1 | CREB5, LOC |
| TC07000178.hg.1 | 2.17  | PSR07002783.hg.1 | CREB5, LOC |
| TC07000178.hg.1 | -2.71 | JUC07001349.hg.1 | CREB5, LOC |
| TC10001398.hg.1 | 6.1   | JUC10010247.hg.1 | P4HA1      |
| TC10001398.hg.1 | 5.35  | PSR10017612.hg.1 | P4HA1      |
| TC10001398.hg.1 | 4.75  | PSR10017588.hg.1 | P4HA1      |
| TC10001398.hg.1 | 3.95  | JUC10010265.hg.1 | P4HA1      |
| TC10001398.hg.1 | 3.77  | JUC10010262.hg.1 | P4HA1      |
| TC10001398.hg.1 | 3.45  | JUC10010252.hg.1 | P4HA1      |
| TC10001398.hg.1 | 2.95  | JUC10010266.hg.1 | P4HA1      |
| TC10001398.hg.1 | 2.57  | PSR10017613.hg.1 | P4HA1      |
| TC10001398.hg.1 | 2.27  | JUC10010264.hg.1 | P4HA1      |
| TC10001398.hg.1 | -3.17 | PSR10017611.hg.1 | P4HA1      |
| TC20000391.hg.1 | 6.1   | JUC20003114.hg.1 | SLC9A8     |
| TC20000391.hg.1 | 2.11  | PSR20005637.hg.1 | SLC9A8     |
| TC22000700.hg.1 | 6.09  | PSR22012322.hg.1 | APOL3      |
| TC22000700.hg.1 | 6.08  | JUC22005104.hg.1 | APOL3      |
| TC22000700.hg.1 | 3.83  | PSR22012313.hg.1 | APOL3      |

|                 |       |                  |             |
|-----------------|-------|------------------|-------------|
| TC22000700.hg.1 | 3.21  | PSR22012309.hg.1 | APOL3       |
| TC22000700.hg.1 | 3.17  | JUC22005094.hg.1 | APOL3       |
| TC22000700.hg.1 | 2.98  | PSR22012321.hg.1 | APOL3       |
| TC22000700.hg.1 | 2.93  | PSR22012311.hg.1 | APOL3       |
| TC22000700.hg.1 | 2.83  | JUC22005111.hg.1 | APOL3       |
| TC22000700.hg.1 | 2.59  | PSR22012306.hg.1 | APOL3       |
| TC22000700.hg.1 | 2.58  | PSR22012308.hg.1 | APOL3       |
| TC22000700.hg.1 | 2.46  | PSR22012307.hg.1 | APOL3       |
| TC22000700.hg.1 | 2.26  | PSR22012324.hg.1 | APOL3       |
| TC22000700.hg.1 | 2.12  | PSR22012299.hg.1 | APOL3       |
| TC22000700.hg.1 | -2.21 | PSR22012302.hg.1 | APOL3       |
| TC0X001024.hg.1 | 6.08  | JUC0X006839.hg.1 | GRIPAP1     |
| TC0X001024.hg.1 | 2.01  | JUC0X006841.hg.1 | GRIPAP1     |
| TC0X001024.hg.1 | 2     | PSR0X013634.hg.1 | GRIPAP1     |
| TC0X001024.hg.1 | -2.09 | PSR0X013632.hg.1 | GRIPAP1     |
| TC0X001024.hg.1 | -2.28 | JUC0X006821.hg.1 | GRIPAP1     |
| TC13000051.hg.1 | 6.08  | PSR13000426.hg.1 | C1QTNF9, SF |
| TC13000051.hg.1 | 5.17  | PSR13000377.hg.1 | C1QTNF9, SF |
| TC13000051.hg.1 | 4.26  | JUC13000224.hg.1 | C1QTNF9, SF |
| TC13000051.hg.1 | 4.14  | JUC13000222.hg.1 | C1QTNF9, SF |
| TC13000051.hg.1 | 3.76  | PSR13000379.hg.1 | C1QTNF9, SF |
| TC13000051.hg.1 | 3.52  | PSR13000378.hg.1 | C1QTNF9, SF |
| TC13000051.hg.1 | 3.35  | PSR13000372.hg.1 | C1QTNF9, SF |
| TC13000051.hg.1 | 3.31  | PSR13000427.hg.1 | C1QTNF9, SF |
| TC13000051.hg.1 | 3.26  | PSR13000392.hg.1 | C1QTNF9, SF |
| TC13000051.hg.1 | 3.23  | PSR13000394.hg.1 | C1QTNF9, SF |
| TC13000051.hg.1 | 3.2   | PSR13000423.hg.1 | C1QTNF9, SF |
| TC13000051.hg.1 | 3.15  | PSR13000371.hg.1 | C1QTNF9, SF |
| TC13000051.hg.1 | 3.12  | PSR13000419.hg.1 | C1QTNF9, SF |
| TC13000051.hg.1 | 2.94  | PSR13000424.hg.1 | C1QTNF9, SF |
| TC13000051.hg.1 | 2.71  | PSR13000376.hg.1 | C1QTNF9, SF |
| TC13000051.hg.1 | 2.58  | PSR13000373.hg.1 | C1QTNF9, SF |
| TC13000051.hg.1 | 2.58  | PSR13000420.hg.1 | C1QTNF9, SF |
| TC13000051.hg.1 | 2.57  | JUC13000216.hg.1 | C1QTNF9, SF |
| TC13000051.hg.1 | 2.53  | JUC13000202.hg.1 | C1QTNF9, SF |
| TC13000051.hg.1 | 2.48  | PSR13000380.hg.1 | C1QTNF9, SF |
| TC13000051.hg.1 | 2.43  | JUC13000205.hg.1 | C1QTNF9, SF |
| TC13000051.hg.1 | 2.32  | PSR13000390.hg.1 | C1QTNF9, SF |
| TC13000051.hg.1 | 2.27  | JUC13000229.hg.1 | C1QTNF9, SF |
| TC13000051.hg.1 | 2.01  | PSR13000425.hg.1 | C1QTNF9, SF |
| TC13000051.hg.1 | 2     | PSR13000375.hg.1 | C1QTNF9, SF |
| TC13000051.hg.1 | -2.43 | JUC13000214.hg.1 | C1QTNF9, SF |
| TC13000051.hg.1 | -2.65 | JUC13000221.hg.1 | C1QTNF9, SF |
| TC13000051.hg.1 | -4.48 | JUC13000227.hg.1 | C1QTNF9, SF |
| TC03000577.hg.1 | 6.06  | JUC03005245.hg.1 | BOC         |
| TC03000577.hg.1 | 4.98  | JUC03005224.hg.1 | BOC         |
| TC03000577.hg.1 | 4.03  | JUC03005233.hg.1 | BOC         |
| TC03000577.hg.1 | 3.95  | JUC03005229.hg.1 | BOC         |
| TC03000577.hg.1 | 3.86  | JUC03005235.hg.1 | BOC         |
| TC03000577.hg.1 | 3.76  | PSR03010503.hg.1 | BOC         |
| TC03000577.hg.1 | 3.63  | PSR03010518.hg.1 | BOC         |
| TC03000577.hg.1 | 3.54  | PSR03010506.hg.1 | BOC         |
| TC03000577.hg.1 | 3.42  | JUC03005246.hg.1 | BOC         |
| TC03000577.hg.1 | 3.21  | JUC03005238.hg.1 | BOC         |
| TC03000577.hg.1 | 3.17  | PSR03010530.hg.1 | BOC         |
| TC03000577.hg.1 | 2.82  | JUC03005239.hg.1 | BOC         |
| TC03000577.hg.1 | 2.76  | PSR03010521.hg.1 | BOC         |
| TC03000577.hg.1 | 2.63  | PSR03010487.hg.1 | BOC         |

|                 |        |                  |        |
|-----------------|--------|------------------|--------|
| TC03000577.hg.1 | 2.58   | PSR03010537.hg.1 | BOC    |
| TC03000577.hg.1 | 2.36   | PSR03010484.hg.1 | BOC    |
| TC03000577.hg.1 | 2.31   | PSR03010488.hg.1 | BOC    |
| TC03000577.hg.1 | 2.31   | PSR03010509.hg.1 | BOC    |
| TC03000577.hg.1 | 2.08   | PSR03010489.hg.1 | BOC    |
| TC03000577.hg.1 | 2.07   | PSR03010508.hg.1 | BOC    |
| TC04001425.hg.1 | 6.04   | JUC04010455.hg.1 | PPP3CA |
| TC04001425.hg.1 | 2.06   | PSR04019922.hg.1 | PPP3CA |
| TC04001425.hg.1 | -2.09  | JUC04010458.hg.1 | PPP3CA |
| TC04001425.hg.1 | -2.28  | JUC04010448.hg.1 | PPP3CA |
| TC08000149.hg.1 | 6.04   | PSR08001499.hg.1 | LPL    |
| TC08000149.hg.1 | 2.87   | JUC08000818.hg.1 | LPL    |
| TC08000149.hg.1 | 2.77   | JUC08000813.hg.1 | LPL    |
| TC08000149.hg.1 | 2.67   | JUC08000810.hg.1 | LPL    |
| TC08000149.hg.1 | 2.63   | PSR08001507.hg.1 | LPL    |
| TC08000149.hg.1 | 2.33   | PSR08001496.hg.1 | LPL    |
| TC08000149.hg.1 | 2.29   | PSR08001503.hg.1 | LPL    |
| TC08000149.hg.1 | 2.2    | PSR08001508.hg.1 | LPL    |
| TC08000149.hg.1 | 2.15   | PSR08001513.hg.1 | LPL    |
| TC08000149.hg.1 | -2.02  | JUC08000816.hg.1 | LPL    |
| TC08000149.hg.1 | -2.08  | PSR08001525.hg.1 | LPL    |
| TC08000149.hg.1 | -2.33  | JUC08000814.hg.1 | LPL    |
| TC08000149.hg.1 | -2.93  | PSR08001521.hg.1 | LPL    |
| TC08000149.hg.1 | -3.06  | PSR08001515.hg.1 | LPL    |
| TC08000149.hg.1 | -3.11  | PSR08001522.hg.1 | LPL    |
| TC08000149.hg.1 | -3.11  | PSR08001526.hg.1 | LPL    |
| TC08000149.hg.1 | -3.15  | PSR08001520.hg.1 | LPL    |
| TC08000149.hg.1 | -3.88  | PSR08001527.hg.1 | LPL    |
| TC08000149.hg.1 | -4.03  | JUC08000804.hg.1 | LPL    |
| TC08000149.hg.1 | -4.98  | PSR08001524.hg.1 | LPL    |
| TC08000149.hg.1 | -7.22  | PSR08001528.hg.1 | LPL    |
| TC08000149.hg.1 | -8.52  | JUC08000807.hg.1 | LPL    |
| TC08000149.hg.1 | -11.02 | JUC08000817.hg.1 | LPL    |
| TC02001069.hg.1 | 6.03   | PSR02015873.hg.1 | RBM45  |
| TC02001069.hg.1 | 4.04   | JUC02008426.hg.1 | RBM45  |
| TC02001069.hg.1 | 2.74   | JUC02008432.hg.1 | RBM45  |
| TC02001069.hg.1 | 2.44   | JUC02008438.hg.1 | RBM45  |
| TC02001069.hg.1 | 2.35   | JUC02008428.hg.1 | RBM45  |
| TC02001069.hg.1 | 2.26   | JUC02008435.hg.1 | RBM45  |
| TC02001069.hg.1 | 2.03   | JUC02008427.hg.1 | RBM45  |
| TC02001069.hg.1 | -2.2   | JUC02008433.hg.1 | RBM45  |
| TC02001069.hg.1 | -2.22  | PSR02015881.hg.1 | RBM45  |
| TC05001166.hg.1 | 6.03   | JUC05008458.hg.1 | CTNND2 |
| TC05001166.hg.1 | 4.67   | JUC05008474.hg.1 | CTNND2 |
| TC05001166.hg.1 | 4.35   | PSR05016680.hg.1 | CTNND2 |
| TC05001166.hg.1 | 3.95   | PSR05016692.hg.1 | CTNND2 |
| TC05001166.hg.1 | 3.16   | JUC05008466.hg.1 | CTNND2 |
| TC05001166.hg.1 | 3.1    | JUC05008463.hg.1 | CTNND2 |
| TC05001166.hg.1 | 3.02   | JUC05008490.hg.1 | CTNND2 |
| TC05001166.hg.1 | 2.73   | PSR05016688.hg.1 | CTNND2 |
| TC05001166.hg.1 | 2.61   | PSR05016676.hg.1 | CTNND2 |
| TC05001166.hg.1 | 2.6    | JUC05008478.hg.1 | CTNND2 |
| TC05001166.hg.1 | 2.53   | PSR05016655.hg.1 | CTNND2 |
| TC05001166.hg.1 | 2.44   | PSR05016637.hg.1 | CTNND2 |
| TC05001166.hg.1 | 2.43   | JUC05008468.hg.1 | CTNND2 |
| TC05001166.hg.1 | 2.4    | JUC05008457.hg.1 | CTNND2 |
| TC05001166.hg.1 | 2.34   | PSR05016671.hg.1 | CTNND2 |
| TC05001166.hg.1 | 2.33   | PSR05016670.hg.1 | CTNND2 |

|                 |       |                  |        |
|-----------------|-------|------------------|--------|
| TC05001166.hg.1 | 2.29  | JUC05008485.hg.1 | CTNND2 |
| TC05001166.hg.1 | 2.27  | PSR05016689.hg.1 | CTNND2 |
| TC05001166.hg.1 | 2.27  | PSR05016697.hg.1 | CTNND2 |
| TC05001166.hg.1 | 2.22  | PSR05016684.hg.1 | CTNND2 |
| TC05001166.hg.1 | 2.21  | JUC05008489.hg.1 | CTNND2 |
| TC05001166.hg.1 | 2.15  | PSR05016677.hg.1 | CTNND2 |
| TC05001166.hg.1 | 2.09  | JUC05008484.hg.1 | CTNND2 |
| TC05001166.hg.1 | 2.06  | PSR05016643.hg.1 | CTNND2 |
| TC05001166.hg.1 | 2.05  | PSR05016687.hg.1 | CTNND2 |
| TC05001166.hg.1 | 2.04  | PSR05016683.hg.1 | CTNND2 |
| TC05001166.hg.1 | 2.03  | PSR05016672.hg.1 | CTNND2 |
| TC05001166.hg.1 | -2.33 | JUC05008472.hg.1 | CTNND2 |
| TC05001166.hg.1 | -3.88 | JUC05008480.hg.1 | CTNND2 |
| TC05001166.hg.1 | -4.68 | PSR05016649.hg.1 | CTNND2 |
| TC05003407.hg.1 | 6.03  | JUC05019343.hg.1 | CDKL3  |
| TC05003407.hg.1 | 2.46  | JUC05019349.hg.1 | CDKL3  |
| TC05003407.hg.1 | 2.44  | PSR05024365.hg.1 | CDKL3  |
| TC05003407.hg.1 | 2.44  | JUC05019322.hg.1 | CDKL3  |
| TC05003407.hg.1 | 2.26  | JUC05019344.hg.1 | CDKL3  |
| TC05003407.hg.1 | -2.44 | JUC05019341.hg.1 | CDKL3  |
| TC05003407.hg.1 | -2.45 | JUC05019336.hg.1 | CDKL3  |
| TC04000038.hg.1 | 6.01  | JUC04000373.hg.1 | SH3BP2 |
| TC04000038.hg.1 | 5.04  | PSR04000918.hg.1 | SH3BP2 |
| TC04000038.hg.1 | 4.47  | PSR04000928.hg.1 | SH3BP2 |
| TC04000038.hg.1 | 4.44  | JUC04000384.hg.1 | SH3BP2 |
| TC04000038.hg.1 | 4.12  | PSR04000954.hg.1 | SH3BP2 |
| TC04000038.hg.1 | 3.72  | JUC04000366.hg.1 | SH3BP2 |
| TC04000038.hg.1 | 3.65  | PSR04000924.hg.1 | SH3BP2 |
| TC04000038.hg.1 | 3.63  | PSR04000929.hg.1 | SH3BP2 |
| TC04000038.hg.1 | 3.55  | PSR04000931.hg.1 | SH3BP2 |
| TC04000038.hg.1 | 3.48  | JUC04000383.hg.1 | SH3BP2 |
| TC04000038.hg.1 | 3.47  | JUC04000371.hg.1 | SH3BP2 |
| TC04000038.hg.1 | 3.41  | PSR04000955.hg.1 | SH3BP2 |
| TC04000038.hg.1 | 3.39  | JUC04000362.hg.1 | SH3BP2 |
| TC04000038.hg.1 | 3.36  | JUC04000360.hg.1 | SH3BP2 |
| TC04000038.hg.1 | 3.26  | PSR04000969.hg.1 | SH3BP2 |
| TC04000038.hg.1 | 3.23  | PSR04000908.hg.1 | SH3BP2 |
| TC04000038.hg.1 | 2.97  | JUC04000372.hg.1 | SH3BP2 |
| TC04000038.hg.1 | 2.89  | PSR04000934.hg.1 | SH3BP2 |
| TC04000038.hg.1 | 2.86  | PSR04000921.hg.1 | SH3BP2 |
| TC04000038.hg.1 | 2.86  | PSR04000932.hg.1 | SH3BP2 |
| TC04000038.hg.1 | 2.84  | PSR04000910.hg.1 | SH3BP2 |
| TC04000038.hg.1 | 2.8   | PSR04000914.hg.1 | SH3BP2 |
| TC04000038.hg.1 | 2.74  | PSR04000947.hg.1 | SH3BP2 |
| TC04000038.hg.1 | 2.69  | JUC04000374.hg.1 | SH3BP2 |
| TC04000038.hg.1 | 2.65  | PSR04000973.hg.1 | SH3BP2 |
| TC04000038.hg.1 | 2.56  | PSR04000926.hg.1 | SH3BP2 |
| TC04000038.hg.1 | 2.52  | PSR04000917.hg.1 | SH3BP2 |
| TC04000038.hg.1 | 2.48  | PSR04000919.hg.1 | SH3BP2 |
| TC04000038.hg.1 | 2.44  | PSR04000949.hg.1 | SH3BP2 |
| TC04000038.hg.1 | 2.44  | JUC04000353.hg.1 | SH3BP2 |
| TC04000038.hg.1 | 2.43  | JUC04000379.hg.1 | SH3BP2 |
| TC04000038.hg.1 | 2.42  | PSR04000963.hg.1 | SH3BP2 |
| TC04000038.hg.1 | 2.4   | PSR04000939.hg.1 | SH3BP2 |
| TC04000038.hg.1 | 2.35  | PSR04000956.hg.1 | SH3BP2 |
| TC04000038.hg.1 | 2.3   | PSR04000920.hg.1 | SH3BP2 |
| TC04000038.hg.1 | 2.24  | PSR04000964.hg.1 | SH3BP2 |
| TC04000038.hg.1 | 2.15  | JUC04000376.hg.1 | SH3BP2 |

|                 |       |                  |        |
|-----------------|-------|------------------|--------|
| TC0400038.hg.1  | 2.09  | PSR04000967.hg.1 | SH3BP2 |
| TC0400038.hg.1  | 2.04  | PSR04000966.hg.1 | SH3BP2 |
| TC0400038.hg.1  | 2.01  | JUC04000357.hg.1 | SH3BP2 |
| TC0400038.hg.1  | -2.31 | JUC04000356.hg.1 | SH3BP2 |
| TC10000865.hg.1 | 6.01  | JUC10005880.hg.1 | GRK5   |
| TC10000865.hg.1 | 4.75  | PSR10010451.hg.1 | GRK5   |
| TC10000865.hg.1 | 4.03  | PSR10010443.hg.1 | GRK5   |
| TC10000865.hg.1 | 3.53  | JUC10005867.hg.1 | GRK5   |
| TC10000865.hg.1 | 3.49  | PSR10010448.hg.1 | GRK5   |
| TC10000865.hg.1 | 3.08  | JUC10005875.hg.1 | GRK5   |
| TC10000865.hg.1 | 3.02  | JUC10005869.hg.1 | GRK5   |
| TC10000865.hg.1 | 2.75  | PSR10010467.hg.1 | GRK5   |
| TC10000865.hg.1 | 2.66  | JUC10005872.hg.1 | GRK5   |
| TC10000865.hg.1 | 2.6   | PSR10010473.hg.1 | GRK5   |
| TC10000865.hg.1 | 2.51  | JUC10005864.hg.1 | GRK5   |
| TC10000865.hg.1 | 2.34  | PSR10010449.hg.1 | GRK5   |
| TC10000865.hg.1 | 2.16  | PSR10010463.hg.1 | GRK5   |
| TC10000865.hg.1 | 2.16  | JUC10005863.hg.1 | GRK5   |
| TC10000865.hg.1 | -2.01 | PSR10010459.hg.1 | GRK5   |
| TC10000865.hg.1 | -2.17 | PSR10010457.hg.1 | GRK5   |
| TC02001362.hg.1 | 6     | JUC02011363.hg.1 | MFF    |
| TC02001362.hg.1 | -2.15 | PSR02021299.hg.1 | MFF    |
| TC02001362.hg.1 | -2.19 | PSR02021271.hg.1 | MFF    |
| TC04001057.hg.1 | 6     | PSR04014446.hg.1 | FBXL5  |
| TC04001057.hg.1 | 3.3   | JUC04007728.hg.1 | FBXL5  |
| TC04001057.hg.1 | 3     | JUC04007711.hg.1 | FBXL5  |
| TC04001057.hg.1 | 2.72  | JUC04007714.hg.1 | FBXL5  |
| TC04001057.hg.1 | 2.06  | JUC04007729.hg.1 | FBXL5  |
| TC04001057.hg.1 | 2.04  | JUC04007724.hg.1 | FBXL5  |
| TC08000291.hg.1 | 6     | JUC08002001.hg.1 | LETM2  |
| TC08000291.hg.1 | 3.62  | PSR08004051.hg.1 | LETM2  |
| TC08000291.hg.1 | 3.36  | PSR08004066.hg.1 | LETM2  |
| TC08000291.hg.1 | 3.32  | PSR08004042.hg.1 | LETM2  |
| TC08000291.hg.1 | 3.23  | PSR08004033.hg.1 | LETM2  |
| TC08000291.hg.1 | 2.99  | PSR08004064.hg.1 | LETM2  |
| TC08000291.hg.1 | 2.94  | PSR08004053.hg.1 | LETM2  |
| TC08000291.hg.1 | 2.7   | PSR08004039.hg.1 | LETM2  |
| TC08000291.hg.1 | 2.66  | PSR08004034.hg.1 | LETM2  |
| TC08000291.hg.1 | 2.66  | PSR08004049.hg.1 | LETM2  |
| TC08000291.hg.1 | 2.37  | JUC08002002.hg.1 | LETM2  |
| TC08000291.hg.1 | 2.34  | PSR08004046.hg.1 | LETM2  |
| TC08000291.hg.1 | 2.27  | JUC08001997.hg.1 | LETM2  |
| TC08000291.hg.1 | 2.26  | PSR08004052.hg.1 | LETM2  |
| TC08000291.hg.1 | 2.25  | PSR08004060.hg.1 | LETM2  |
| TC08000291.hg.1 | -2.06 | PSR08004058.hg.1 | LETM2  |
| TC08000291.hg.1 | -4.68 | JUC08001999.hg.1 | LETM2  |
| TC18000040.hg.1 | 6     | JUC18000252.hg.1 | SOGA2  |
| TC18000040.hg.1 | -2.28 | PSR18000378.hg.1 | SOGA2  |
| TC18000040.hg.1 | -2.37 | PSR18000396.hg.1 | SOGA2  |
| TC18000040.hg.1 | -2.69 | PSR18000391.hg.1 | SOGA2  |
| TC01001188.hg.1 | 5.99  | PSR01018298.hg.1 | ECM1   |
| TC01001188.hg.1 | 5.64  | PSR01018304.hg.1 | ECM1   |
| TC01001188.hg.1 | 5.36  | PSR01018303.hg.1 | ECM1   |
| TC01001188.hg.1 | 5.34  | PSR01018308.hg.1 | ECM1   |
| TC01001188.hg.1 | 4.47  | JUC01010046.hg.1 | ECM1   |
| TC01001188.hg.1 | 4.06  | PSR01018291.hg.1 | ECM1   |
| TC01001188.hg.1 | 3.51  | JUC01010051.hg.1 | ECM1   |
| TC01001188.hg.1 | 3.33  | PSR01018312.hg.1 | ECM1   |

|                 |       |                  |         |
|-----------------|-------|------------------|---------|
| TC01001188.hg.1 | 2.97  | JUC01010050.hg.1 | ECM1    |
| TC01001188.hg.1 | 2.78  | PSR01018315.hg.1 | ECM1    |
| TC17000885.hg.1 | 5.99  | JUC17006451.hg.1 | 9-Sep   |
| TC17000885.hg.1 | 5.22  | JUC17006454.hg.1 | 9-Sep   |
| TC17000885.hg.1 | 3.5   | PSR17011529.hg.1 | 9-Sep   |
| TC17000885.hg.1 | 2.87  | PSR17011525.hg.1 | 9-Sep   |
| TC17000885.hg.1 | 2.73  | PSR17011512.hg.1 | 9-Sep   |
| TC17000885.hg.1 | 2.71  | PSR17011511.hg.1 | 9-Sep   |
| TC17000885.hg.1 | 2.49  | PSR17011518.hg.1 | 9-Sep   |
| TC17000885.hg.1 | 2.36  | PSR17011515.hg.1 | 9-Sep   |
| TC17000885.hg.1 | 2.31  | PSR17011526.hg.1 | 9-Sep   |
| TC17000885.hg.1 | 2.3   | PSR17011527.hg.1 | 9-Sep   |
| TC17000885.hg.1 | 2.27  | PSR17011513.hg.1 | 9-Sep   |
| TC17000885.hg.1 | 2.26  | JUC17006452.hg.1 | 9-Sep   |
| TC17000885.hg.1 | 2.22  | PSR17011523.hg.1 | 9-Sep   |
| TC17000885.hg.1 | 2.09  | PSR17011524.hg.1 | 9-Sep   |
| TC17000885.hg.1 | 2.02  | JUC17006444.hg.1 | 9-Sep   |
| TC17000885.hg.1 | 2.01  | PSR17011516.hg.1 | 9-Sep   |
| TC17000885.hg.1 | -3.57 | JUC17006455.hg.1 | 9-Sep   |
| TC02002928.hg.1 | 5.98  | JUC02024562.hg.1 | NDUFA10 |
| TC02002928.hg.1 | 2.48  | PSR02046941.hg.1 | NDUFA10 |
| TC02002928.hg.1 | 2.26  | JUC02024582.hg.1 | NDUFA10 |
| TC02002928.hg.1 | -2.24 | JUC02024578.hg.1 | NDUFA10 |
| TC11000184.hg.1 | 5.98  | JUC11001116.hg.1 | AMPD3   |
| TC11000184.hg.1 | 5.52  | JUC11001109.hg.1 | AMPD3   |
| TC11000184.hg.1 | 3.27  | PSR11002474.hg.1 | AMPD3   |
| TC11000184.hg.1 | 3.18  | PSR11002481.hg.1 | AMPD3   |
| TC11000184.hg.1 | 3.14  | JUC11001110.hg.1 | AMPD3   |
| TC11000184.hg.1 | 3.05  | PSR11002473.hg.1 | AMPD3   |
| TC11000184.hg.1 | 3.04  | PSR11002501.hg.1 | AMPD3   |
| TC11000184.hg.1 | 2.81  | PSR11002476.hg.1 | AMPD3   |
| TC11000184.hg.1 | 2.74  | JUC11001127.hg.1 | AMPD3   |
| TC11000184.hg.1 | 2.73  | PSR11002479.hg.1 | AMPD3   |
| TC11000184.hg.1 | 2.65  | JUC11001113.hg.1 | AMPD3   |
| TC11000184.hg.1 | 2.52  | PSR11002496.hg.1 | AMPD3   |
| TC11000184.hg.1 | 2.31  | JUC11001115.hg.1 | AMPD3   |
| TC11000184.hg.1 | 2.21  | PSR11002493.hg.1 | AMPD3   |
| TC11000184.hg.1 | 2.2   | PSR11002495.hg.1 | AMPD3   |
| TC11000184.hg.1 | 2.14  | PSR11002498.hg.1 | AMPD3   |
| TC11000184.hg.1 | 2.04  | PSR11002492.hg.1 | AMPD3   |
| TC11000184.hg.1 | -2.13 | PSR11002505.hg.1 | AMPD3   |
| TC11000184.hg.1 | -2.39 | PSR11002491.hg.1 | AMPD3   |
| TC11000184.hg.1 | -3.16 | PSR11002489.hg.1 | AMPD3   |
| TC11000184.hg.1 | -3.96 | JUC11001131.hg.1 | AMPD3   |
| TC11000184.hg.1 | -5.56 | JUC11001126.hg.1 | AMPD3   |
| TC11000184.hg.1 | -8.04 | JUC11001123.hg.1 | AMPD3   |
| TC0X000413.hg.1 | 5.96  | PSR0X005524.hg.1 | UPRT    |
| TC0X000413.hg.1 | -2.04 | JUC0X002732.hg.1 | UPRT    |
| TC0X000987.hg.1 | 5.94  | JUC0X006596.hg.1 |         |
| TC0X000987.hg.1 | 2.62  | PSR0X013117.hg.1 |         |
| TC01001996.hg.1 | 5.93  | JUC01016826.hg.1 | KIF26B  |
| TC01001996.hg.1 | 4.25  | JUC01016830.hg.1 | KIF26B  |
| TC01001996.hg.1 | 2.95  | JUC01016822.hg.1 | KIF26B  |
| TC01001996.hg.1 | 2.76  | JUC01016827.hg.1 | KIF26B  |
| TC01001996.hg.1 | -2.46 | PSR01030904.hg.1 | KIF26B  |
| TC01001996.hg.1 | -2.53 | JUC01016816.hg.1 | KIF26B  |
| TC01001996.hg.1 | -2.54 | PSR01030923.hg.1 | KIF26B  |
| TC01001996.hg.1 | -2.68 | JUC01016820.hg.1 | KIF26B  |

|                 |       |                  |             |
|-----------------|-------|------------------|-------------|
| TC01001996.hg.1 | -2.76 | PSR01030907.hg.1 | KIF26B      |
| TC01001996.hg.1 | -3.15 | PSR01030908.hg.1 | KIF26B      |
| TC01001996.hg.1 | -3.75 | PSR01030920.hg.1 | KIF26B      |
| TC01001996.hg.1 | -3.84 | JUC01016821.hg.1 | KIF26B      |
| TC01001996.hg.1 | -3.9  | JUC01016814.hg.1 | KIF26B      |
| TC01001996.hg.1 | -3.97 | PSR01030918.hg.1 | KIF26B      |
| TC01001996.hg.1 | -4.56 | JUC01016818.hg.1 | KIF26B      |
| TC05000158.hg.1 | 5.93  | JUC05000976.hg.1 | SPEF2       |
| TC05000158.hg.1 | 5.26  | JUC05000992.hg.1 | SPEF2       |
| TC05000158.hg.1 | 4.27  | JUC05000950.hg.1 | SPEF2       |
| TC05000158.hg.1 | 4.21  | PSR05001774.hg.1 | SPEF2       |
| TC05000158.hg.1 | 3.75  | JUC05000995.hg.1 | SPEF2       |
| TC05000158.hg.1 | 3.61  | JUC05000990.hg.1 | SPEF2       |
| TC05000158.hg.1 | 3.53  | PSR05001754.hg.1 | SPEF2       |
| TC05000158.hg.1 | 3.41  | JUC05000964.hg.1 | SPEF2       |
| TC05000158.hg.1 | 3.36  | JUC05000979.hg.1 | SPEF2       |
| TC05000158.hg.1 | 3.23  | PSR05001769.hg.1 | SPEF2       |
| TC05000158.hg.1 | 3.21  | JUC05000969.hg.1 | SPEF2       |
| TC05000158.hg.1 | 3.13  | PSR05001767.hg.1 | SPEF2       |
| TC05000158.hg.1 | 3.07  | JUC05000963.hg.1 | SPEF2       |
| TC05000158.hg.1 | 3.05  | PSR05001763.hg.1 | SPEF2       |
| TC05000158.hg.1 | 2.97  | PSR05001770.hg.1 | SPEF2       |
| TC05000158.hg.1 | 2.96  | PSR05001777.hg.1 | SPEF2       |
| TC05000158.hg.1 | 2.91  | PSR05001778.hg.1 | SPEF2       |
| TC05000158.hg.1 | 2.89  | PSR05001748.hg.1 | SPEF2       |
| TC05000158.hg.1 | 2.82  | PSR05001762.hg.1 | SPEF2       |
| TC05000158.hg.1 | 2.78  | PSR05001772.hg.1 | SPEF2       |
| TC05000158.hg.1 | 2.74  | JUC05000949.hg.1 | SPEF2       |
| TC05000158.hg.1 | 2.74  | JUC05000965.hg.1 | SPEF2       |
| TC05000158.hg.1 | 2.63  | PSR05001764.hg.1 | SPEF2       |
| TC05000158.hg.1 | 2.58  | JUC05000994.hg.1 | SPEF2       |
| TC05000158.hg.1 | 2.47  | PSR05001776.hg.1 | SPEF2       |
| TC05000158.hg.1 | 2.41  | PSR05001714.hg.1 | SPEF2       |
| TC05000158.hg.1 | 2.38  | JUC05000975.hg.1 | SPEF2       |
| TC05000158.hg.1 | 2.36  | PSR05001765.hg.1 | SPEF2       |
| TC05000158.hg.1 | 2.32  | PSR05001773.hg.1 | SPEF2       |
| TC05000158.hg.1 | 2.26  | PSR05001757.hg.1 | SPEF2       |
| TC05000158.hg.1 | 2.21  | PSR05001775.hg.1 | SPEF2       |
| TC05000158.hg.1 | 2.2   | PSR05001755.hg.1 | SPEF2       |
| TC05000158.hg.1 | 2.18  | PSR05001752.hg.1 | SPEF2       |
| TC05000158.hg.1 | 2.16  | JUC05000947.hg.1 | SPEF2       |
| TC05000158.hg.1 | 2.13  | JUC05000982.hg.1 | SPEF2       |
| TC05000158.hg.1 | 2.03  | PSR05001760.hg.1 | SPEF2       |
| TC05000158.hg.1 | 2     | JUC05000967.hg.1 | SPEF2       |
| TC05000158.hg.1 | -2.12 | PSR05001722.hg.1 | SPEF2       |
| TC04001431.hg.1 | 5.91  | JUC04010514.hg.1 | UBE2D3      |
| TC04001431.hg.1 | 2     | JUC04010522.hg.1 | UBE2D3      |
| TC04001431.hg.1 | -3.02 | PSR04020054.hg.1 | UBE2D3      |
| TC07003376.hg.1 | 5.9   | JUC07021649.hg.1 | POLR2J3, UF |
| TC07003376.hg.1 | 3.8   | JUC07021640.hg.1 | POLR2J3, UF |
| TC07003376.hg.1 | -2.19 | PSR07026340.hg.1 | POLR2J3, UF |
| TC07003376.hg.1 | -2.47 | JUC07021655.hg.1 | POLR2J3, UF |
| TC07003376.hg.1 | -2.78 | PSR07026373.hg.1 | POLR2J3, UF |
| TC02000271.hg.1 | 5.89  | JUC02002101.hg.1 | DYNC2LI1    |
| TC02000271.hg.1 | 2.01  | PSR02004043.hg.1 | DYNC2LI1    |
| TC02001687.hg.1 | 5.89  | JUC02014267.hg.1 | IFT172      |
| TC02001687.hg.1 | 2.53  | JUC02014223.hg.1 | IFT172      |
| TC02001687.hg.1 | 2.17  | JUC02014251.hg.1 | IFT172      |



|                 |       |                  |         |
|-----------------|-------|------------------|---------|
| TC02001687.hg.1 | 2.04  | PSR02027297.hg.1 | IFT172  |
| TC02001687.hg.1 | 2.04  | JUC02014269.hg.1 | IFT172  |
| TC02001687.hg.1 | -2.01 | PSR02027305.hg.1 | IFT172  |
| TC02001687.hg.1 | -2.3  | JUC02014268.hg.1 | IFT172  |
| TC02001687.hg.1 | -2.33 | JUC02014244.hg.1 | IFT172  |
| TC02001687.hg.1 | -2.63 | JUC02014264.hg.1 | IFT172  |
| TC02001687.hg.1 | -2.66 | JUC02014225.hg.1 | IFT172  |
| TC02001687.hg.1 | -2.68 | JUC02014273.hg.1 | IFT172  |
| TC02001687.hg.1 | -4.36 | JUC02014263.hg.1 | IFT172  |
| TC17000819.hg.1 | 5.89  | JUC17005808.hg.1 | SOX9    |
| TC17000819.hg.1 | -2.24 | PSR17010551.hg.1 | SOX9    |
| TC19001076.hg.1 | 5.89  | JUC19008307.hg.1 | PTPRS   |
| TC19001076.hg.1 | 2.71  | JUC19008316.hg.1 | PTPRS   |
| TC19001076.hg.1 | 2.46  | JUC19008306.hg.1 | PTPRS   |
| TC19001076.hg.1 | 2.4   | JUC19008289.hg.1 | PTPRS   |
| TC19001076.hg.1 | 2.39  | JUC19008303.hg.1 | PTPRS   |
| TC19001076.hg.1 | 2.27  | PSR19014711.hg.1 | PTPRS   |
| TC19001076.hg.1 | 2.17  | JUC19008297.hg.1 | PTPRS   |
| TC19001076.hg.1 | 2.14  | JUC19008310.hg.1 | PTPRS   |
| TC19001076.hg.1 | 2.04  | PSR19014724.hg.1 | PTPRS   |
| TC19001076.hg.1 | -2.3  | JUC19008291.hg.1 | PTPRS   |
| TC07000784.hg.1 | 5.88  | JUC07005794.hg.1 | CCDC136 |
| TC07000784.hg.1 | 3.46  | JUC07005813.hg.1 | CCDC136 |
| TC07000784.hg.1 | -2.3  | PSR07012381.hg.1 | CCDC136 |
| TC07000784.hg.1 | -6.61 | JUC07005791.hg.1 | CCDC136 |
| TC11000773.hg.1 | 5.87  | JUC11005159.hg.1 | P2RY6   |
| TC11000773.hg.1 | 2.67  | JUC11005160.hg.1 | P2RY6   |
| TC11000773.hg.1 | 2.51  | PSR11009934.hg.1 | P2RY6   |
| TC11000773.hg.1 | 2.43  | PSR11009935.hg.1 | P2RY6   |
| TC11000773.hg.1 | 2.42  | PSR11009949.hg.1 | P2RY6   |
| TC11000773.hg.1 | 2.19  | PSR11009938.hg.1 | P2RY6   |
| TC11000773.hg.1 | 2.06  | PSR11009944.hg.1 | P2RY6   |
| TC11000773.hg.1 | -3.23 | JUC11005164.hg.1 | P2RY6   |
| TC06000726.hg.1 | 5.86  | JUC06003900.hg.1 | RIMS1   |
| TC06000726.hg.1 | 4.3   | JUC06003956.hg.1 | RIMS1   |
| TC06000726.hg.1 | 3.71  | JUC06003952.hg.1 | RIMS1   |
| TC06000726.hg.1 | 3.5   | JUC06003932.hg.1 | RIMS1   |
| TC06000726.hg.1 | 3.13  | JUC06003919.hg.1 | RIMS1   |
| TC06000726.hg.1 | 3.05  | JUC06003905.hg.1 | RIMS1   |
| TC06000726.hg.1 | 2.93  | PSR06008665.hg.1 | RIMS1   |
| TC06000726.hg.1 | 2.92  | JUC06003948.hg.1 | RIMS1   |
| TC06000726.hg.1 | 2.8   | JUC06003904.hg.1 | RIMS1   |
| TC06000726.hg.1 | 2.65  | JUC06003950.hg.1 | RIMS1   |
| TC06000726.hg.1 | 2.46  | JUC06003933.hg.1 | RIMS1   |
| TC06000726.hg.1 | 2.31  | JUC06003942.hg.1 | RIMS1   |
| TC06000726.hg.1 | 2.3   | PSR06008653.hg.1 | RIMS1   |
| TC06000726.hg.1 | 2.25  | PSR06008631.hg.1 | RIMS1   |
| TC06000726.hg.1 | 2.15  | PSR06008688.hg.1 | RIMS1   |
| TC06000726.hg.1 | 2.12  | PSR06008635.hg.1 | RIMS1   |
| TC06000726.hg.1 | 2.07  | PSR06008684.hg.1 | RIMS1   |
| TC06000726.hg.1 | 2.05  | PSR06008614.hg.1 | RIMS1   |
| TC06000726.hg.1 | 2.01  | PSR06008671.hg.1 | RIMS1   |
| TC06000726.hg.1 | 2     | JUC06003939.hg.1 | RIMS1   |
| TC01000347.hg.1 | 5.85  | JUC01002825.hg.1 | RPS6KA1 |
| TC01000347.hg.1 | 2.24  | PSR01005382.hg.1 | RPS6KA1 |
| TC01000347.hg.1 | 2.07  | JUC01002824.hg.1 | RPS6KA1 |
| TC01000347.hg.1 | 2.01  | PSR01005353.hg.1 | RPS6KA1 |
| TC01000347.hg.1 | -2.08 | PSR01005371.hg.1 | RPS6KA1 |

|                 |       |                  |          |
|-----------------|-------|------------------|----------|
| TC01000347.hg.1 | -2.52 | PSR01005361.hg.1 | RPS6KA1  |
| TC01000347.hg.1 | -3    | PSR01005384.hg.1 | RPS6KA1  |
| TC01000347.hg.1 | -3.67 | JUC01002794.hg.1 | RPS6KA1  |
| TC01000347.hg.1 | -3.73 | JUC01002809.hg.1 | RPS6KA1  |
| TC01000347.hg.1 | -3.84 | JUC01002816.hg.1 | RPS6KA1  |
| TC01000347.hg.1 | -3.9  | JUC01002800.hg.1 | RPS6KA1  |
| TC01000347.hg.1 | -5.49 | JUC01002813.hg.1 | RPS6KA1  |
| TC12000606.hg.1 | 5.84  | JUC12004259.hg.1 | MDM2     |
| TC12000606.hg.1 | -2.04 | PSR12008030.hg.1 | MDM2     |
| TC12000606.hg.1 | -2.13 | JUC12004252.hg.1 | MDM2     |
| TC12000606.hg.1 | -2.43 | PSR12008016.hg.1 | MDM2     |
| TC02002074.hg.1 | 5.83  | JUC02017114.hg.1 | EIF2AK3  |
| TC02002074.hg.1 | 2.79  | PSR02033226.hg.1 | EIF2AK3  |
| TC02002074.hg.1 | 2.5   | PSR02033231.hg.1 | EIF2AK3  |
| TC02002074.hg.1 | 2.32  | PSR02033229.hg.1 | EIF2AK3  |
| TC02002074.hg.1 | 2.01  | PSR02033233.hg.1 | EIF2AK3  |
| TC12001168.hg.1 | 5.83  | PSR12015538.hg.1 | SLC2A14  |
| TC12001168.hg.1 | 5.31  | PSR12015537.hg.1 | SLC2A14  |
| TC12001168.hg.1 | 5.3   | JUC12008558.hg.1 | SLC2A14  |
| TC12001168.hg.1 | 5.23  | JUC12008559.hg.1 | SLC2A14  |
| TC12001168.hg.1 | 5.18  | PSR12015551.hg.1 | SLC2A14  |
| TC12001168.hg.1 | 4.47  | JUC12008564.hg.1 | SLC2A14  |
| TC12001168.hg.1 | 4.35  | PSR12015539.hg.1 | SLC2A14  |
| TC12001168.hg.1 | 4.04  | PSR12015552.hg.1 | SLC2A14  |
| TC12001168.hg.1 | 3.91  | JUC12008563.hg.1 | SLC2A14  |
| TC12001168.hg.1 | 3.8   | JUC12008560.hg.1 | SLC2A14  |
| TC12001168.hg.1 | 3.72  | PSR12015540.hg.1 | SLC2A14  |
| TC12001168.hg.1 | 3.61  | JUC12008568.hg.1 | SLC2A14  |
| TC12001168.hg.1 | 3.23  | PSR12015534.hg.1 | SLC2A14  |
| TC12001168.hg.1 | 3.18  | PSR12015529.hg.1 | SLC2A14  |
| TC12001168.hg.1 | 2.46  | PSR12015521.hg.1 | SLC2A14  |
| TC12001168.hg.1 | 2.02  | JUC12008571.hg.1 | SLC2A14  |
| TC04001783.hg.1 | 5.82  | JUC04012944.hg.1 | MGC45800 |
| TC04001783.hg.1 | 3.78  | PSR04024409.hg.1 | MGC45800 |
| TC04001783.hg.1 | 3.48  | JUC04012945.hg.1 | MGC45800 |
| TC04001783.hg.1 | 2.54  | PSR04024410.hg.1 | MGC45800 |
| TC04001783.hg.1 | -2    | PSR04024423.hg.1 | MGC45800 |
| TC04001783.hg.1 | -2.08 | PSR04024414.hg.1 | MGC45800 |
| TC04001783.hg.1 | -2.19 | JUC04012953.hg.1 | MGC45800 |
| TC04001783.hg.1 | -2.37 | PSR04024412.hg.1 | MGC45800 |
| TC08000695.hg.1 | 5.82  | JUC08004786.hg.1 | MAL2     |
| TC08000695.hg.1 | 4.06  | PSR08009382.hg.1 | MAL2     |
| TC08000695.hg.1 | 3.67  | JUC08004793.hg.1 | MAL2     |
| TC08000695.hg.1 | 3.4   | PSR08009397.hg.1 | MAL2     |
| TC08000695.hg.1 | 3.09  | JUC08004791.hg.1 | MAL2     |
| TC08000695.hg.1 | 3.06  | PSR08009390.hg.1 | MAL2     |
| TC08000695.hg.1 | 2.99  | PSR08009383.hg.1 | MAL2     |
| TC08000695.hg.1 | 2.56  | PSR08009384.hg.1 | MAL2     |
| TC08000695.hg.1 | 2.13  | PSR08009380.hg.1 | MAL2     |
| TC08000695.hg.1 | 2.04  | PSR08009388.hg.1 | MAL2     |
| TC08000695.hg.1 | 2.04  | PSR08009396.hg.1 | MAL2     |
| TC08000695.hg.1 | -2.14 | JUC08004790.hg.1 | MAL2     |
| TC10002961.hg.1 | 5.82  | JUC10017501.hg.1 | NSUN6    |
| TC10002961.hg.1 | -2.67 | PSR10013654.hg.1 | NSUN6    |
| TC10002961.hg.1 | -2.67 | JUC10017500.hg.1 | NSUN6    |
| TC02001126.hg.1 | 5.81  | JUC02009174.hg.1 | MYO1B    |
| TC02001126.hg.1 | 4.01  | JUC02009165.hg.1 | MYO1B    |
| TC02001126.hg.1 | 2.35  | PSR02017114.hg.1 | MYO1B    |

|                 |       |                  |            |
|-----------------|-------|------------------|------------|
| TC02001126.hg.1 | 2.32  | PSR02017102.hg.1 | MYO1B      |
| TC02001126.hg.1 | 2.04  | PSR02017060.hg.1 | MYO1B      |
| TC02001628.hg.1 | 5.81  | JUC02013582.hg.1 | APOB       |
| TC02001628.hg.1 | 5.79  | JUC02013572.hg.1 | APOB       |
| TC02001628.hg.1 | 3.75  | PSR02026065.hg.1 | APOB       |
| TC02001628.hg.1 | 3.28  | JUC02013561.hg.1 | APOB       |
| TC02001628.hg.1 | 3     | JUC02013563.hg.1 | APOB       |
| TC02001628.hg.1 | 2.89  | JUC02013581.hg.1 | APOB       |
| TC02001628.hg.1 | 2.85  | PSR02026060.hg.1 | APOB       |
| TC02001628.hg.1 | 2.79  | JUC02013580.hg.1 | APOB       |
| TC02001628.hg.1 | 2.74  | JUC02013564.hg.1 | APOB       |
| TC02001628.hg.1 | 2.3   | PSR02026068.hg.1 | APOB       |
| TC02001628.hg.1 | 2.22  | JUC02013570.hg.1 | APOB       |
| TC02001628.hg.1 | 2.18  | PSR02026090.hg.1 | APOB       |
| TC02001628.hg.1 | 2.16  | JUC02013568.hg.1 | APOB       |
| TC02001628.hg.1 | 2.15  | PSR02026087.hg.1 | APOB       |
| TC02001628.hg.1 | -2.05 | JUC02013573.hg.1 | APOB       |
| TC02001628.hg.1 | -2.06 | JUC02013578.hg.1 | APOB       |
| TC02001628.hg.1 | -2.13 | JUC02013566.hg.1 | APOB       |
| TC02001628.hg.1 | -2.33 | JUC02013585.hg.1 | APOB       |
| TC02001628.hg.1 | -2.43 | PSR02026083.hg.1 | APOB       |
| TC02001628.hg.1 | -2.46 | JUC02013558.hg.1 | APOB       |
| TC02001628.hg.1 | -2.57 | PSR02026079.hg.1 | APOB       |
| TC02001628.hg.1 | -2.67 | PSR02026077.hg.1 | APOB       |
| TC02001628.hg.1 | -2.79 | PSR02026094.hg.1 | APOB       |
| TC02001628.hg.1 | -3.01 | PSR02026063.hg.1 | APOB       |
| TC02001628.hg.1 | -3.33 | JUC02013586.hg.1 | APOB       |
| TC02001628.hg.1 | -3.53 | PSR02026059.hg.1 | APOB       |
| TC02001628.hg.1 | -3.86 | PSR02026092.hg.1 | APOB       |
| TC02001628.hg.1 | -4.22 | PSR02026075.hg.1 | APOB       |
| TC15001107.hg.1 | 5.81  | PSR15010083.hg.1 | FAM189A1   |
| TC15001107.hg.1 | 2.9   | PSR15010085.hg.1 | FAM189A1   |
| TC15001107.hg.1 | -2.48 | JUC15005335.hg.1 | FAM189A1   |
| TC01002832.hg.1 | 5.8   | JUC01023653.hg.1 | COL24A1    |
| TC01002832.hg.1 | 4.84  | PSR01044149.hg.1 | COL24A1    |
| TC01002832.hg.1 | 2.76  | JUC01023668.hg.1 | COL24A1    |
| TC01002832.hg.1 | 2.16  | JUC01023649.hg.1 | COL24A1    |
| TC01002832.hg.1 | 2.1   | PSR01044144.hg.1 | COL24A1    |
| TC01002832.hg.1 | 2.1   | PSR01044145.hg.1 | COL24A1    |
| TC01002832.hg.1 | 2.01  | JUC01023699.hg.1 | COL24A1    |
| TC01002832.hg.1 | -2.05 | PSR01044135.hg.1 | COL24A1    |
| TC01002832.hg.1 | -2.43 | JUC01023691.hg.1 | COL24A1    |
| TC01002832.hg.1 | -2.44 | JUC01023697.hg.1 | COL24A1    |
| TC01002832.hg.1 | -2.48 | PSR01044090.hg.1 | COL24A1    |
| TC01002832.hg.1 | -4.61 | JUC01023713.hg.1 | COL24A1    |
| TC0X000298.hg.1 | 5.79  | JUC0X001944.hg.1 | MAGED4, MA |
| TC0X000298.hg.1 | 3.55  | JUC0X001951.hg.1 | MAGED4, MA |
| TC0X000298.hg.1 | 3.47  | PSR0X003995.hg.1 | MAGED4, MA |
| TC0X000298.hg.1 | 2.87  | JUC0X001943.hg.1 | MAGED4, MA |
| TC0X000298.hg.1 | 2.75  | PSR0X003963.hg.1 | MAGED4, MA |
| TC0X000298.hg.1 | 2.4   | JUC0X001941.hg.1 | MAGED4, MA |
| TC0X000298.hg.1 | 2.26  | JUC0X001932.hg.1 | MAGED4, MA |
| TC0X000298.hg.1 | 2.07  | PSR0X003990.hg.1 | MAGED4, MA |
| TC03001500.hg.1 | 5.78  | PSR03027397.hg.1 | ACOX2      |
| TC03001500.hg.1 | 3.67  | PSR03027355.hg.1 | ACOX2      |
| TC03001500.hg.1 | 3.3   | JUC03013379.hg.1 | ACOX2      |
| TC03001500.hg.1 | 3.06  | PSR03027384.hg.1 | ACOX2      |
| TC03001500.hg.1 | 2.52  | PSR03027374.hg.1 | ACOX2      |

|                 |       |                  |         |
|-----------------|-------|------------------|---------|
| TC03001500.hg.1 | 2.46  | PSR03027381.hg.1 | ACOX2   |
| TC03001500.hg.1 | 2.06  | JUC03013389.hg.1 | ACOX2   |
| TC03001500.hg.1 | 2.03  | PSR03027363.hg.1 | ACOX2   |
| TC03001500.hg.1 | 2.02  | JUC03013381.hg.1 | ACOX2   |
| TC03001500.hg.1 | -2.2  | JUC03013382.hg.1 | ACOX2   |
| TC03001500.hg.1 | -2.23 | PSR03027378.hg.1 | ACOX2   |
| TC03001500.hg.1 | -2.25 | PSR03027383.hg.1 | ACOX2   |
| TC03001500.hg.1 | -2.33 | PSR03027386.hg.1 | ACOX2   |
| TC03001500.hg.1 | -2.4  | PSR03027354.hg.1 | ACOX2   |
| TC03001500.hg.1 | -3.36 | JUC03013374.hg.1 | ACOX2   |
| TC10000289.hg.1 | 5.78  | JUC10001861.hg.1 | RASSF4  |
| TC10000289.hg.1 | 5.17  | JUC10001845.hg.1 | RASSF4  |
| TC10000289.hg.1 | 2.66  | PSR10003233.hg.1 | RASSF4  |
| TC10000289.hg.1 | 2.51  | PSR10003246.hg.1 | RASSF4  |
| TC10000289.hg.1 | 2.51  | PSR10003257.hg.1 | RASSF4  |
| TC10000289.hg.1 | 2.24  | PSR10003219.hg.1 | RASSF4  |
| TC10000289.hg.1 | 2.15  | JUC10001848.hg.1 | RASSF4  |
| TC10000289.hg.1 | 2.08  | PSR10003241.hg.1 | RASSF4  |
| TC10000289.hg.1 | 2.04  | JUC10001864.hg.1 | RASSF4  |
| TC10000289.hg.1 | 2     | PSR10003254.hg.1 | RASSF4  |
| TC10000289.hg.1 | -2    | JUC10001851.hg.1 | RASSF4  |
| TC10000289.hg.1 | -2.26 | JUC10001850.hg.1 | RASSF4  |
| TC10000289.hg.1 | -2.36 | PSR10003253.hg.1 | RASSF4  |
| TC10000289.hg.1 | -2.43 | JUC10001855.hg.1 | RASSF4  |
| TC10000289.hg.1 | -2.57 | PSR10003238.hg.1 | RASSF4  |
| TC10000289.hg.1 | -2.59 | PSR10003249.hg.1 | RASSF4  |
| TC10000289.hg.1 | -2.8  | JUC10001853.hg.1 | RASSF4  |
| TC10000289.hg.1 | -2.9  | PSR10003225.hg.1 | RASSF4  |
| TC10000289.hg.1 | -2.92 | PSR10003255.hg.1 | RASSF4  |
| TC10000289.hg.1 | -4.06 | JUC10001866.hg.1 | RASSF4  |
| TC21001058.hg.1 | 5.78  | JUC21005084.hg.1 | DONSON  |
| TC21001058.hg.1 | 3.5   | JUC21005089.hg.1 | DONSON  |
| TC21001058.hg.1 | -2.67 | PSR21004740.hg.1 | DONSON  |
| TC0Y000353.hg.1 | 5.77  | PSR0Y000796.hg.1 | TXLNG2P |
| TC0Y000353.hg.1 | 4.45  | PSR0Y000795.hg.1 | TXLNG2P |
| TC0Y000353.hg.1 | 3.57  | PSR0Y000791.hg.1 | TXLNG2P |
| TC0Y000353.hg.1 | -2.29 | PSR0Y000797.hg.1 | TXLNG2P |
| TC0Y000353.hg.1 | -2.69 | JUC0Y001894.hg.1 | TXLNG2P |
| TC0Y000353.hg.1 | -2.78 | PSR0Y000788.hg.1 | TXLNG2P |
| TC0Y000353.hg.1 | -2.78 | PSR0Y000804.hg.1 | TXLNG2P |
| TC0Y000353.hg.1 | -3.62 | PSR0Y000789.hg.1 | TXLNG2P |
| TC0Y000353.hg.1 | -4.69 | PSR0Y000790.hg.1 | TXLNG2P |
| TC0Y000353.hg.1 | -4.79 | JUC0Y001898.hg.1 | TXLNG2P |
| TC0Y000353.hg.1 | -5.3  | PSR0Y000800.hg.1 | TXLNG2P |
| TC0Y000353.hg.1 | -6.21 | PSR0Y000799.hg.1 | TXLNG2P |
| TC11000043.hg.1 | 5.77  | JUC11000425.hg.1 | BRSK2   |
| TC11000043.hg.1 | 5.62  | JUC11000436.hg.1 | BRSK2   |
| TC11000043.hg.1 | 4.08  | JUC11000440.hg.1 | BRSK2   |
| TC11000043.hg.1 | 2.54  | JUC11000437.hg.1 | BRSK2   |
| TC11000043.hg.1 | 2     | PSR11000878.hg.1 | BRSK2   |
| TC11000043.hg.1 | -2.1  | JUC11000421.hg.1 | BRSK2   |
| TC11000043.hg.1 | -3.3  | JUC11000439.hg.1 | BRSK2   |
| TC02001658.hg.1 | 5.76  | JUC02013820.hg.1 | DNMT3A  |
| TC02001658.hg.1 | 2.5   | JUC02013807.hg.1 | DNMT3A  |
| TC02001658.hg.1 | 2.09  | PSR02026486.hg.1 | DNMT3A  |
| TC02001658.hg.1 | 2.07  | JUC02013806.hg.1 | DNMT3A  |
| TC02001658.hg.1 | -2.01 | JUC02013832.hg.1 | DNMT3A  |
| TC02001658.hg.1 | -2.21 | PSR02026457.hg.1 | DNMT3A  |

|                 |       |                  |        |
|-----------------|-------|------------------|--------|
| TC02001963.hg.1 | 5.74  | JUC02016322.hg.1 | TGFA   |
| TC02001963.hg.1 | 4.85  | PSR02031288.hg.1 | TGFA   |
| TC02001963.hg.1 | 4.2   | JUC02016328.hg.1 | TGFA   |
| TC02001963.hg.1 | 4.17  | PSR02031287.hg.1 | TGFA   |
| TC02001963.hg.1 | 4.14  | PSR02031284.hg.1 | TGFA   |
| TC02001963.hg.1 | 3.79  | PSR02031290.hg.1 | TGFA   |
| TC02001963.hg.1 | 3.6   | JUC02016319.hg.1 | TGFA   |
| TC02001963.hg.1 | 3.39  | PSR02031278.hg.1 | TGFA   |
| TC02001963.hg.1 | 2.78  | PSR02031280.hg.1 | TGFA   |
| TC02001963.hg.1 | 2.4   | PSR02031283.hg.1 | TGFA   |
| TC02001963.hg.1 | 2.22  | PSR02031285.hg.1 | TGFA   |
| TC02001963.hg.1 | -2.04 | JUC02016323.hg.1 | TGFA   |
| TC02001963.hg.1 | -2.09 | JUC02016320.hg.1 | TGFA   |
| TC02001963.hg.1 | -2.5  | PSR02031273.hg.1 | TGFA   |
| TC02001963.hg.1 | -2.76 | PSR02031270.hg.1 | TGFA   |
| TC02001963.hg.1 | -3.63 | PSR02031281.hg.1 | TGFA   |
| TC02001963.hg.1 | -3.74 | PSR02031271.hg.1 | TGFA   |
| TC02001963.hg.1 | -3.88 | PSR02031272.hg.1 | TGFA   |
| TC02001963.hg.1 | -4.17 | PSR02031274.hg.1 | TGFA   |
| TC02001963.hg.1 | -5.9  | JUC02016326.hg.1 | TGFA   |
| TC05000776.hg.1 | 5.74  | JUC05005730.hg.1 | RNF14  |
| TC05000776.hg.1 | 3.52  | JUC05005727.hg.1 | RNF14  |
| TC05000776.hg.1 | 3.05  | JUC05005716.hg.1 | RNF14  |
| TC05000776.hg.1 | 2.12  | PSR05011056.hg.1 | RNF14  |
| TC06000866.hg.1 | 5.73  | JUC06004739.hg.1 | LACE1  |
| TC06000866.hg.1 | 2.93  | JUC06004748.hg.1 | LACE1  |
| TC06000866.hg.1 | -2.17 | PSR06010111.hg.1 | LACE1  |
| TC12001300.hg.1 | 5.73  | JUC12009376.hg.1 | ABCC9  |
| TC12001300.hg.1 | 2.52  | PSR12016996.hg.1 | ABCC9  |
| TC12001300.hg.1 | 2.27  | JUC12009368.hg.1 | ABCC9  |
| TC12001300.hg.1 | 2.25  | JUC12009351.hg.1 | ABCC9  |
| TC12001300.hg.1 | 2.2   | JUC12009336.hg.1 | ABCC9  |
| TC12001300.hg.1 | 2.13  | PSR12016993.hg.1 | ABCC9  |
| TC12001300.hg.1 | -2.32 | JUC12009340.hg.1 | ABCC9  |
| TC12001300.hg.1 | -2.86 | JUC12009369.hg.1 | ABCC9  |
| TC12001300.hg.1 | -2.92 | JUC12009374.hg.1 | ABCC9  |
| TC12001300.hg.1 | -2.95 | JUC12009343.hg.1 | ABCC9  |
| TC12001300.hg.1 | -2.96 | JUC12009354.hg.1 | ABCC9  |
| TC12001300.hg.1 | -3.3  | JUC12009370.hg.1 | ABCC9  |
| TC16001012.hg.1 | 5.72  | JUC16008127.hg.1 | SEZ6L2 |
| TC16001012.hg.1 | 2.86  | JUC16008116.hg.1 | SEZ6L2 |
| TC16001012.hg.1 | 2.63  | JUC16008129.hg.1 | SEZ6L2 |
| TC16001012.hg.1 | 2.59  | JUC16008126.hg.1 | SEZ6L2 |
| TC16001012.hg.1 | 2.45  | PSR16014481.hg.1 | SEZ6L2 |
| TC16001012.hg.1 | 2.35  | JUC16008125.hg.1 | SEZ6L2 |
| TC16001012.hg.1 | 2.31  | PSR16014478.hg.1 | SEZ6L2 |
| TC16001012.hg.1 | 2.31  | JUC16008128.hg.1 | SEZ6L2 |
| TC16001012.hg.1 | 2.2   | PSR16014480.hg.1 | SEZ6L2 |
| TC16001012.hg.1 | 2.07  | JUC16008123.hg.1 | SEZ6L2 |
| TC16001012.hg.1 | -2.1  | PSR16014497.hg.1 | SEZ6L2 |
| TC16001012.hg.1 | -3.09 | JUC16008122.hg.1 | SEZ6L2 |
| TC02001031.hg.1 | 5.71  | PSR02015345.hg.1 | PDK1   |
| TC02001031.hg.1 | 5.58  | PSR02015344.hg.1 | PDK1   |
| TC02001031.hg.1 | 4.12  | PSR02015358.hg.1 | PDK1   |
| TC02001031.hg.1 | 3.86  | JUC02008197.hg.1 | PDK1   |
| TC02001031.hg.1 | 3.73  | PSR02015353.hg.1 | PDK1   |
| TC02001031.hg.1 | 3.63  | PSR02015342.hg.1 | PDK1   |
| TC02001031.hg.1 | 3.49  | JUC02008190.hg.1 | PDK1   |

|                 |       |                  |       |
|-----------------|-------|------------------|-------|
| TC02001031.hg.1 | 3.34  | JUC02008194.hg.1 | PDK1  |
| TC02001031.hg.1 | 3.17  | PSR02015372.hg.1 | PDK1  |
| TC02001031.hg.1 | 2.34  | JUC02008199.hg.1 | PDK1  |
| TC02001031.hg.1 | 2.08  | PSR02015347.hg.1 | PDK1  |
| TC02001031.hg.1 | -2.24 | PSR02015369.hg.1 | PDK1  |
| TC02001031.hg.1 | -3.32 | JUC02008185.hg.1 | PDK1  |
| TC02001031.hg.1 | -3.81 | JUC02008189.hg.1 | PDK1  |
| TC02001031.hg.1 | -4.52 | JUC02008180.hg.1 | PDK1  |
| TC06002238.hg.1 | 5.71  | JUC06013931.hg.1 | SYNE1 |
| TC06002238.hg.1 | 3.65  | PSR06027938.hg.1 | SYNE1 |
| TC06002238.hg.1 | 2.55  | JUC06014103.hg.1 | SYNE1 |
| TC06002238.hg.1 | 2.54  | JUC06014008.hg.1 | SYNE1 |
| TC06002238.hg.1 | 2.34  | JUC06014070.hg.1 | SYNE1 |
| TC06002238.hg.1 | 2.33  | PSR06028108.hg.1 | SYNE1 |
| TC06002238.hg.1 | 2.31  | PSR06027918.hg.1 | SYNE1 |
| TC06002238.hg.1 | 2.3   | PSR06028154.hg.1 | SYNE1 |
| TC06002238.hg.1 | 2.2   | PSR06027936.hg.1 | SYNE1 |
| TC06002238.hg.1 | 2.1   | PSR06027924.hg.1 | SYNE1 |
| TC06002238.hg.1 | 2.03  | PSR06027985.hg.1 | SYNE1 |
| TC06002238.hg.1 | 2     | PSR06028044.hg.1 | SYNE1 |
| TC06002238.hg.1 | -2    | JUC06013988.hg.1 | SYNE1 |
| TC06002238.hg.1 | -2.02 | JUC06014090.hg.1 | SYNE1 |
| TC06002238.hg.1 | -2.09 | PSR06028083.hg.1 | SYNE1 |
| TC06002238.hg.1 | -2.16 | PSR06028145.hg.1 | SYNE1 |
| TC06002238.hg.1 | -2.17 | PSR06028137.hg.1 | SYNE1 |
| TC06002238.hg.1 | -2.23 | JUC06013970.hg.1 | SYNE1 |
| TC06002238.hg.1 | -2.27 | JUC06014050.hg.1 | SYNE1 |
| TC06002238.hg.1 | -2.33 | JUC06014021.hg.1 | SYNE1 |
| TC06002238.hg.1 | -2.39 | PSR06028149.hg.1 | SYNE1 |
| TC06002238.hg.1 | -2.4  | JUC06013964.hg.1 | SYNE1 |
| TC06002238.hg.1 | -2.4  | JUC06014056.hg.1 | SYNE1 |
| TC06002238.hg.1 | -2.46 | PSR06028139.hg.1 | SYNE1 |
| TC06002238.hg.1 | -2.46 | PSR06028148.hg.1 | SYNE1 |
| TC06002238.hg.1 | -2.62 | JUC06014032.hg.1 | SYNE1 |
| TC06002238.hg.1 | -2.65 | JUC06014098.hg.1 | SYNE1 |
| TC06002238.hg.1 | -2.84 | JUC06013973.hg.1 | SYNE1 |
| TC06002238.hg.1 | -2.89 | PSR06028142.hg.1 | SYNE1 |
| TC06002238.hg.1 | -2.9  | JUC06013976.hg.1 | SYNE1 |
| TC06002238.hg.1 | -2.98 | PSR06028084.hg.1 | SYNE1 |
| TC06002238.hg.1 | -3.67 | JUC06014033.hg.1 | SYNE1 |
| TC06002238.hg.1 | -3.83 | JUC06014002.hg.1 | SYNE1 |
| TC06002238.hg.1 | -4.03 | JUC06013934.hg.1 | SYNE1 |
| TC06002238.hg.1 | -4.06 | PSR06028140.hg.1 | SYNE1 |
| TC06002238.hg.1 | -4.69 | PSR06028146.hg.1 | SYNE1 |
| TC06002238.hg.1 | -4.73 | JUC06013987.hg.1 | SYNE1 |
| TC07000735.hg.1 | 5.69  | JUC07005509.hg.1 | CPED1 |
| TC07000735.hg.1 | 5.11  | JUC07005518.hg.1 | CPED1 |
| TC07000735.hg.1 | 3.97  | JUC07005500.hg.1 | CPED1 |
| TC07000735.hg.1 | 3.63  | PSR07011743.hg.1 | CPED1 |
| TC07000735.hg.1 | 3.34  | PSR07011742.hg.1 | CPED1 |
| TC07000735.hg.1 | 3.04  | PSR07011764.hg.1 | CPED1 |
| TC07000735.hg.1 | 2.99  | PSR07011741.hg.1 | CPED1 |
| TC07000735.hg.1 | 2.96  | JUC07005510.hg.1 | CPED1 |
| TC07000735.hg.1 | 2.54  | PSR07011735.hg.1 | CPED1 |
| TC07000735.hg.1 | -2.52 | JUC07005508.hg.1 | CPED1 |
| TC07000735.hg.1 | -3    | JUC07005513.hg.1 | CPED1 |
| TC02002666.hg.1 | 5.68  | JUC02022400.hg.1 | CLK1  |
| TC02002666.hg.1 | 4.53  | JUC02022398.hg.1 | CLK1  |

|                 |       |                  |            |
|-----------------|-------|------------------|------------|
| TC02002666.hg.1 | 4.03  | JUC02022392.hg.1 | CLK1       |
| TC02002666.hg.1 | 2.36  | JUC02022390.hg.1 | CLK1       |
| TC02002666.hg.1 | -2.06 | PSR02042811.hg.1 | CLK1       |
| TC02002666.hg.1 | -2.15 | PSR02042813.hg.1 | CLK1       |
| TC02002666.hg.1 | -2.35 | PSR02042814.hg.1 | CLK1       |
| TC02002666.hg.1 | -2.52 | PSR02042810.hg.1 | CLK1       |
| TC02002666.hg.1 | -3.63 | PSR02042807.hg.1 | CLK1       |
| TC07001883.hg.1 | 5.68  | JUC07014436.hg.1 | AKR1B1     |
| TC07001883.hg.1 | 3.99  | PSR07029203.hg.1 | AKR1B1     |
| TC07001883.hg.1 | 2.55  | PSR07029200.hg.1 | AKR1B1     |
| TC07001883.hg.1 | 2.45  | PSR07029214.hg.1 | AKR1B1     |
| TC07001883.hg.1 | 2.43  | PSR07029199.hg.1 | AKR1B1     |
| TC07001883.hg.1 | 2.39  | PSR07029192.hg.1 | AKR1B1     |
| TC07001883.hg.1 | 2.03  | PSR07029201.hg.1 | AKR1B1     |
| TC0Y000181.hg.1 | 5.68  | PSR0Y001782.hg.1 | NCRNA00185 |
| TC0Y000181.hg.1 | 4.99  | JUC0Y001135.hg.1 | NCRNA00185 |
| TC0Y000181.hg.1 | 4.29  | JUC0Y001125.hg.1 | NCRNA00185 |
| TC0Y000181.hg.1 | 2.52  | PSR0Y001781.hg.1 | NCRNA00185 |
| TC0Y000181.hg.1 | 2.09  | PSR0Y001775.hg.1 | NCRNA00185 |
| TC0Y000181.hg.1 | 2.02  | JUC0Y001127.hg.1 | NCRNA00185 |
| TC10000869.hg.1 | 5.68  | PSR10010519.hg.1 | INPP5F     |
| TC10000869.hg.1 | 5.68  | JUC10005913.hg.1 | INPP5F     |
| TC10000869.hg.1 | 4.91  | PSR10010518.hg.1 | INPP5F     |
| TC10000869.hg.1 | 3.8   | PSR10010521.hg.1 | INPP5F     |
| TC10000869.hg.1 | 3.5   | JUC10005912.hg.1 | INPP5F     |
| TC10000869.hg.1 | 3.36  | PSR10010526.hg.1 | INPP5F     |
| TC10000869.hg.1 | 3.34  | JUC10005916.hg.1 | INPP5F     |
| TC10000869.hg.1 | 2.95  | JUC10005903.hg.1 | INPP5F     |
| TC10000869.hg.1 | 2.93  | PSR10010520.hg.1 | INPP5F     |
| TC10000869.hg.1 | 2.37  | PSR10010523.hg.1 | INPP5F     |
| TC10000869.hg.1 | 2.24  | PSR10010524.hg.1 | INPP5F     |
| TC10000869.hg.1 | 2.1   | JUC10005905.hg.1 | INPP5F     |
| TC10000869.hg.1 | -2.25 | JUC10005899.hg.1 | INPP5F     |
| TC10000869.hg.1 | -2.58 | JUC10005901.hg.1 | INPP5F     |
| TC03001466.hg.1 | 5.67  | JUC03013014.hg.1 | TKT        |
| TC03001466.hg.1 | 4.2   | PSR03026747.hg.1 | TKT        |
| TC03001466.hg.1 | 4.08  | PSR03026725.hg.1 | TKT        |
| TC03001466.hg.1 | 3.96  | PSR03026720.hg.1 | TKT        |
| TC03001466.hg.1 | 3.86  | PSR03026722.hg.1 | TKT        |
| TC03001466.hg.1 | 3.43  | PSR03026750.hg.1 | TKT        |
| TC03001466.hg.1 | 2.86  | PSR03026710.hg.1 | TKT        |
| TC03001466.hg.1 | 2.85  | PSR03026737.hg.1 | TKT        |
| TC03001466.hg.1 | 2.84  | JUC03013026.hg.1 | TKT        |
| TC03001466.hg.1 | 2.74  | PSR03026735.hg.1 | TKT        |
| TC03001466.hg.1 | 2.68  | PSR03026757.hg.1 | TKT        |
| TC03001466.hg.1 | 2.63  | PSR03026763.hg.1 | TKT        |
| TC03001466.hg.1 | 2.46  | JUC03013021.hg.1 | TKT        |
| TC03001466.hg.1 | 2.4   | JUC03013027.hg.1 | TKT        |
| TC03001466.hg.1 | 2.29  | PSR03026740.hg.1 | TKT        |
| TC03001466.hg.1 | 2.28  | JUC03013009.hg.1 | TKT        |
| TC03001466.hg.1 | 2.25  | PSR03026736.hg.1 | TKT        |
| TC03001466.hg.1 | 2.17  | JUC03013030.hg.1 | TKT        |
| TC03001466.hg.1 | 2.01  | JUC03013010.hg.1 | TKT        |
| TC0X001048.hg.1 | 5.67  | JUC0X007050.hg.1 | MAGED4, MA |
| TC0X001048.hg.1 | 3.47  | JUC0X007058.hg.1 | MAGED4, MA |
| TC0X001048.hg.1 | 3.22  | PSR0X014088.hg.1 | MAGED4, MA |
| TC0X001048.hg.1 | 2.88  | PSR0X014056.hg.1 | MAGED4, MA |
| TC0X001048.hg.1 | 2.81  | JUC0X007049.hg.1 | MAGED4, MA |

|                 |       |                  |             |
|-----------------|-------|------------------|-------------|
| TC0X001048.hg.1 | 2.42  | PSR0X014061.hg.1 | MAGED4, MA  |
| TC0X001048.hg.1 | 2.35  | JUC0X007047.hg.1 | MAGED4, MA  |
| TC0X001048.hg.1 | 2.23  | JUC0X007057.hg.1 | MAGED4, MA  |
| TC0X001048.hg.1 | 2.2   | PSR0X014051.hg.1 | MAGED4, MA  |
| TC0X001482.hg.1 | 5.66  | JUC0X009765.hg.1 | TMEM185A    |
| TC0X001482.hg.1 | 2.33  | JUC0X009769.hg.1 | TMEM185A    |
| TC0X001482.hg.1 | 2.26  | JUC0X009768.hg.1 | TMEM185A    |
| TC0X001482.hg.1 | -2.32 | PSR0X019270.hg.1 | TMEM185A    |
| TC01006309.hg.1 | 5.64  | JUC01040506.hg.1 | NBPF10, LOC |
| TC01006309.hg.1 | 2.26  | PSR01017103.hg.1 | NBPF10, LOC |
| TC01006309.hg.1 | 2.17  | JUC01039833.hg.1 | NBPF10, LOC |
| TC10000169.hg.1 | 5.64  | JUC10001084.hg.1 | KIAA1217    |
| TC10000169.hg.1 | 2.51  | PSR10002017.hg.1 | KIAA1217    |
| TC10000169.hg.1 | 2.33  | JUC10001066.hg.1 | KIAA1217    |
| TC10000169.hg.1 | 2.02  | JUC10001080.hg.1 | KIAA1217    |
| TC10000169.hg.1 | -2.12 | PSR10001984.hg.1 | KIAA1217    |
| TC10000169.hg.1 | -2.17 | JUC10001069.hg.1 | KIAA1217    |
| TC10000169.hg.1 | -2.31 | JUC10001067.hg.1 | KIAA1217    |
| TC10000169.hg.1 | -2.31 | JUC10001077.hg.1 | KIAA1217    |
| TC10000169.hg.1 | -2.42 | JUC10001073.hg.1 | KIAA1217    |
| TC10000169.hg.1 | -2.6  | JUC10001072.hg.1 | KIAA1217    |
| TC10000169.hg.1 | -2.74 | JUC10001074.hg.1 | KIAA1217    |
| TC10000169.hg.1 | -3.01 | PSR10002026.hg.1 | KIAA1217    |
| TC10000169.hg.1 | -3.09 | JUC10001088.hg.1 | KIAA1217    |
| TC10000169.hg.1 | -3.23 | JUC10001081.hg.1 | KIAA1217    |
| TC10000169.hg.1 | -3.29 | JUC10001087.hg.1 | KIAA1217    |
| TC10000169.hg.1 | -3.31 | JUC10001082.hg.1 | KIAA1217    |
| TC10000169.hg.1 | -3.38 | PSR10001979.hg.1 | KIAA1217    |
| TC10000169.hg.1 | -3.38 | PSR10001981.hg.1 | KIAA1217    |
| TC10000169.hg.1 | -3.39 | PSR10001982.hg.1 | KIAA1217    |
| TC10000169.hg.1 | -4.26 | PSR10002027.hg.1 | KIAA1217    |
| TC10000169.hg.1 | -4.28 | PSR10001987.hg.1 | KIAA1217    |
| TC10000169.hg.1 | -5.97 | JUC10001089.hg.1 | KIAA1217    |
| TC10000169.hg.1 | -6.16 | PSR10001986.hg.1 | KIAA1217    |
| TC01002327.hg.1 | 5.62  | JUC01019262.hg.1 | USP48       |
| TC01002327.hg.1 | 3.26  | JUC01019266.hg.1 | USP48       |
| TC01002327.hg.1 | 2.36  | PSR01035799.hg.1 | USP48       |
| TC01002327.hg.1 | 2.29  | JUC01019265.hg.1 | USP48       |
| TC01002327.hg.1 | -2.06 | PSR01035821.hg.1 | USP48       |
| TC01002327.hg.1 | -2.22 | JUC01019258.hg.1 | USP48       |
| TC01002327.hg.1 | -2.32 | JUC01019278.hg.1 | USP48       |
| TC01002327.hg.1 | -2.64 | JUC01019277.hg.1 | USP48       |
| TC04001585.hg.1 | 5.62  | JUC04011637.hg.1 | MAML3       |
| TC04001585.hg.1 | -2.12 | PSR04022103.hg.1 | MAML3       |
| TC04001585.hg.1 | -2.32 | JUC04011648.hg.1 | MAML3       |
| TC04001585.hg.1 | -2.32 | JUC04011649.hg.1 | MAML3       |
| TC04001585.hg.1 | -3.12 | JUC04011645.hg.1 | MAML3       |
| TC17001249.hg.1 | 5.61  | JUC17009494.hg.1 | SLC47A2     |
| TC17001249.hg.1 | 4.6   | JUC17009499.hg.1 | SLC47A2     |
| TC17001249.hg.1 | 3.54  | PSR17016757.hg.1 | SLC47A2     |
| TC17001249.hg.1 | 3.52  | PSR17016739.hg.1 | SLC47A2     |
| TC17001249.hg.1 | 3.39  | PSR17016746.hg.1 | SLC47A2     |
| TC17001249.hg.1 | 3.31  | PSR17016731.hg.1 | SLC47A2     |
| TC17001249.hg.1 | 3.1   | PSR17016747.hg.1 | SLC47A2     |
| TC17001249.hg.1 | 3.08  | JUC17009512.hg.1 | SLC47A2     |
| TC17001249.hg.1 | 2.94  | JUC17009510.hg.1 | SLC47A2     |
| TC17001249.hg.1 | 2.93  | JUC17009511.hg.1 | SLC47A2     |
| TC17001249.hg.1 | 2.92  | PSR17016732.hg.1 | SLC47A2     |



|                 |        |                  |         |
|-----------------|--------|------------------|---------|
| TC17001249.hg.1 | 2.88   | JUC17009503.hg.1 | SLC47A2 |
| TC17001249.hg.1 | 2.72   | PSR17016750.hg.1 | SLC47A2 |
| TC17001249.hg.1 | 2.69   | PSR17016730.hg.1 | SLC47A2 |
| TC17001249.hg.1 | 2.57   | PSR17016756.hg.1 | SLC47A2 |
| TC17001249.hg.1 | 2.56   | JUC17009497.hg.1 | SLC47A2 |
| TC17001249.hg.1 | 2.47   | PSR17016740.hg.1 | SLC47A2 |
| TC17001249.hg.1 | 2.45   | PSR17016755.hg.1 | SLC47A2 |
| TC17001249.hg.1 | 2.39   | PSR17016738.hg.1 | SLC47A2 |
| TC17001249.hg.1 | 2.29   | JUC17009496.hg.1 | SLC47A2 |
| TC17001249.hg.1 | 2.21   | PSR17016744.hg.1 | SLC47A2 |
| TC17001249.hg.1 | 2.15   | JUC17009504.hg.1 | SLC47A2 |
| TC17001249.hg.1 | 2.01   | PSR17016722.hg.1 | SLC47A2 |
| TC17001249.hg.1 | -2.63  | JUC17009506.hg.1 | SLC47A2 |
| TC17001249.hg.1 | -2.99  | JUC17009515.hg.1 | SLC47A2 |
| TC17001249.hg.1 | -3.13  | PSR17016741.hg.1 | SLC47A2 |
| TC17001249.hg.1 | -3.37  | PSR17016729.hg.1 | SLC47A2 |
| TC17001249.hg.1 | -3.43  | JUC17009509.hg.1 | SLC47A2 |
| TC17001249.hg.1 | -6.49  | JUC17009502.hg.1 | SLC47A2 |
| TC17001249.hg.1 | -6.88  | PSR17016745.hg.1 | SLC47A2 |
| TC17001249.hg.1 | -6.95  | JUC17009492.hg.1 | SLC47A2 |
| TC17001249.hg.1 | -14.24 | JUC17009501.hg.1 | SLC47A2 |
| TC6_mann_hap400 | 5.61   | JUC6_mann_hap400 | HLA-C   |
| TC6_mann_hap400 | 2.94   | PSR6_mann_hap400 | HLA-C   |
| TC6_mann_hap400 | 2.43   | JUC6_mann_hap400 | HLA-C   |
| TC6_mann_hap400 | 2.42   | JUC6_mann_hap400 | HLA-C   |
| TC6_mann_hap400 | -2.86  | JUC6_mann_hap400 | HLA-C   |
| TC6_mann_hap400 | -3.05  | JUC6_mann_hap400 | HLA-C   |
| TC01001264.hg.1 | 5.6    | JUC01010511.hg.1 | SLC27A3 |
| TC01001264.hg.1 | 2.1    | PSR01019328.hg.1 | SLC27A3 |
| TC06004055.hg.1 | 5.6    | JUC06020692.hg.1 | ROS1    |
| TC06004055.hg.1 | 4.19   | JUC06020681.hg.1 | ROS1    |
| TC06004055.hg.1 | 4.19   | JUC06020683.hg.1 | ROS1    |
| TC06004055.hg.1 | 3.73   | JUC06020665.hg.1 | ROS1    |
| TC06004055.hg.1 | 3.53   | JUC06020667.hg.1 | ROS1    |
| TC06004055.hg.1 | 3.21   | JUC06020661.hg.1 | ROS1    |
| TC06004055.hg.1 | 3.19   | JUC06020666.hg.1 | ROS1    |
| TC06004055.hg.1 | 3.17   | PSR06025669.hg.1 | ROS1    |
| TC06004055.hg.1 | 3.16   | PSR06025666.hg.1 | ROS1    |
| TC06004055.hg.1 | 2.98   | JUC06020671.hg.1 | ROS1    |
| TC06004055.hg.1 | 2.96   | JUC06020685.hg.1 | ROS1    |
| TC06004055.hg.1 | 2.94   | PSR06025645.hg.1 | ROS1    |
| TC06004055.hg.1 | 2.58   | JUC06020684.hg.1 | ROS1    |
| TC06004055.hg.1 | 2.37   | PSR06025671.hg.1 | ROS1    |
| TC06004055.hg.1 | 2.33   | PSR06025646.hg.1 | ROS1    |
| TC06004055.hg.1 | 2.32   | JUC06020698.hg.1 | ROS1    |
| TC06004055.hg.1 | 2.23   | JUC06020668.hg.1 | ROS1    |
| TC06004055.hg.1 | -2.01  | JUC06020688.hg.1 | ROS1    |
| TC06004055.hg.1 | -2.05  | JUC06020674.hg.1 | ROS1    |
| TC06004055.hg.1 | -2.11  | PSR06025650.hg.1 | ROS1    |
| TC06004055.hg.1 | -2.19  | PSR06025629.hg.1 | ROS1    |
| TC06004055.hg.1 | -2.22  | JUC06020659.hg.1 | ROS1    |
| TC06004055.hg.1 | -2.23  | JUC06020675.hg.1 | ROS1    |
| TC06004055.hg.1 | -2.24  | PSR06025665.hg.1 | ROS1    |
| TC06004055.hg.1 | -2.36  | PSR06025636.hg.1 | ROS1    |
| TC06004055.hg.1 | -2.49  | JUC06020697.hg.1 | ROS1    |
| TC06004055.hg.1 | -2.51  | JUC06020696.hg.1 | ROS1    |
| TC06004055.hg.1 | -2.58  | PSR06025622.hg.1 | ROS1    |
| TC06004055.hg.1 | -2.91  | JUC06020673.hg.1 | ROS1    |

|                 |       |                  |          |
|-----------------|-------|------------------|----------|
| TC06004055.hg.1 | -2.95 | PSR06025620.hg.1 | ROS1     |
| TC06004055.hg.1 | -3.18 | PSR06025624.hg.1 | ROS1     |
| TC06004055.hg.1 | -3.21 | JUC06020654.hg.1 | ROS1     |
| TC06004055.hg.1 | -3.36 | JUC06020662.hg.1 | ROS1     |
| TC06004055.hg.1 | -3.43 | PSR06025625.hg.1 | ROS1     |
| TC06004055.hg.1 | -3.49 | JUC06020676.hg.1 | ROS1     |
| TC06004055.hg.1 | -3.8  | PSR06025633.hg.1 | ROS1     |
| TC06004055.hg.1 | -3.81 | JUC06020690.hg.1 | ROS1     |
| TC06004055.hg.1 | -3.88 | PSR06025630.hg.1 | ROS1     |
| TC06004055.hg.1 | -3.98 | JUC06020699.hg.1 | ROS1     |
| TC06004055.hg.1 | -4.28 | PSR06025627.hg.1 | ROS1     |
| TC06004055.hg.1 | -4.87 | PSR06025632.hg.1 | ROS1     |
| TC06004055.hg.1 | -5    | PSR06025635.hg.1 | ROS1     |
| TC06004055.hg.1 | -5.34 | PSR06025621.hg.1 | ROS1     |
| TC06004055.hg.1 | -5.42 | PSR06025623.hg.1 | ROS1     |
| TC06004055.hg.1 | -6.09 | JUC06020656.hg.1 | ROS1     |
| TC07000782.hg.1 | 5.6   | PSR07012309.hg.1 | CALU     |
| TC07000782.hg.1 | -2.13 | JUC07005775.hg.1 | CALU     |
| TC22000223.hg.1 | 5.6   | JUC22001505.hg.1 | RNF185   |
| TC22000223.hg.1 | 2.76  | PSR22004215.hg.1 | RNF185   |
| TC22000223.hg.1 | 2.4   | JUC22001501.hg.1 | RNF185   |
| TC06000185.hg.1 | 5.58  | JUC06000897.hg.1 | BTN2A2   |
| TC06000185.hg.1 | -2.38 | PSR06001836.hg.1 | BTN2A2   |
| TC02002194.hg.1 | 5.57  | PSR02035538.hg.1 | MALL     |
| TC02002194.hg.1 | 4.85  | JUC02018342.hg.1 | MALL     |
| TC02002194.hg.1 | 3.32  | PSR02035540.hg.1 | MALL     |
| TC02002194.hg.1 | 3.11  | PSR02035541.hg.1 | MALL     |
| TC02002194.hg.1 | 3     | PSR02035542.hg.1 | MALL     |
| TC02002194.hg.1 | -2.12 | PSR02035539.hg.1 | MALL     |
| TC02002194.hg.1 | -5.65 | JUC02018338.hg.1 | MALL     |
| TC05000384.hg.1 | 5.57  | JUC05002928.hg.1 | SCAMP1   |
| TC05000384.hg.1 | 3.05  | JUC05002917.hg.1 | SCAMP1   |
| TC05000384.hg.1 | 2.59  | PSR05005405.hg.1 | SCAMP1   |
| TC05000384.hg.1 | 2.38  | PSR05005377.hg.1 | SCAMP1   |
| TC05000384.hg.1 | 2.27  | JUC05002918.hg.1 | SCAMP1   |
| TC05000384.hg.1 | 2.26  | PSR05005410.hg.1 | SCAMP1   |
| TC05000384.hg.1 | 2.17  | PSR05005404.hg.1 | SCAMP1   |
| TC05000384.hg.1 | 2.11  | PSR05005384.hg.1 | SCAMP1   |
| TC05000384.hg.1 | 2.02  | PSR05005409.hg.1 | SCAMP1   |
| TC6_apd_hap1000 | 5.56  | JUC6_apd_hap1000 | HLA-DPA1 |
| TC6_apd_hap1000 | 4.03  | JUC6_apd_hap1000 | HLA-DPA1 |
| TC6_apd_hap1000 | 2.67  | PSR6_apd_hap1001 | HLA-DPA1 |
| TC6_apd_hap1000 | 2.49  | PSR6_apd_hap1001 | HLA-DPA1 |
| TC6_apd_hap1000 | 2.32  | PSR6_apd_hap1001 | HLA-DPA1 |
| TC6_apd_hap1000 | 2.31  | PSR6_apd_hap1001 | HLA-DPA1 |
| TC6_apd_hap1000 | 2.25  | PSR6_apd_hap1001 | HLA-DPA1 |
| TC6_apd_hap1000 | 2.08  | PSR6_apd_hap1001 | HLA-DPA1 |
| TC6_apd_hap1000 | 2.06  | PSR6_apd_hap1001 | HLA-DPA1 |
| TC6_apd_hap1000 | -2.23 | PSR6_apd_hap1001 | HLA-DPA1 |
| TC6_apd_hap1000 | -4.18 | JUC6_apd_hap1000 | HLA-DPA1 |
| TC6_dbb_hap3000 | 5.56  | JUC6_dbb_hap3001 | HLA-DPA1 |
| TC6_dbb_hap3000 | 4.03  | JUC6_dbb_hap3001 | HLA-DPA1 |
| TC6_dbb_hap3000 | 3.09  | PSR6_dbb_hap3003 | HLA-DPA1 |
| TC6_dbb_hap3000 | 2.67  | PSR6_dbb_hap3003 | HLA-DPA1 |
| TC6_dbb_hap3000 | 2.32  | PSR6_dbb_hap3003 | HLA-DPA1 |
| TC6_dbb_hap3000 | 2.31  | PSR6_dbb_hap3003 | HLA-DPA1 |
| TC6_dbb_hap3000 | 2.25  | PSR6_dbb_hap3003 | HLA-DPA1 |
| TC6_dbb_hap3000 | 2.08  | PSR6_dbb_hap3003 | HLA-DPA1 |

|                  |       |                   |          |
|------------------|-------|-------------------|----------|
| TC6_dbb_hap3000  | 2.06  | PSR6_dbb_hap3003  | HLA-DPA1 |
| TC6_dbb_hap3000  | -2.23 | PSR6_dbb_hap3003  | HLA-DPA1 |
| TC6_dbb_hap3000  | -4.18 | JUC6_dbb_hap3001  | HLA-DPA1 |
| TC6_mann_hap400  | 5.56  | JUC6_mann_hap400  | HLA-DPA1 |
| TC6_mann_hap400  | 4.03  | JUC6_mann_hap400  | HLA-DPA1 |
| TC6_mann_hap400  | 3.33  | PSR6_mann_hap400  | HLA-DPA1 |
| TC6_mann_hap400  | 3.09  | PSR6_mann_hap400  | HLA-DPA1 |
| TC6_mann_hap400  | 2.67  | PSR6_mann_hap400  | HLA-DPA1 |
| TC6_mann_hap400  | 2.32  | PSR6_mann_hap400  | HLA-DPA1 |
| TC6_mann_hap400  | 2.31  | PSR6_mann_hap400  | HLA-DPA1 |
| TC6_mann_hap400  | 2.08  | PSR6_mann_hap400  | HLA-DPA1 |
| TC6_mann_hap400  | 2.06  | PSR6_mann_hap400  | HLA-DPA1 |
| TC6_mann_hap400  | -2.23 | PSR6_mann_hap400  | HLA-DPA1 |
| TC6_mann_hap400  | -4.18 | JUC6_mann_hap400  | HLA-DPA1 |
| TC6_mcf_hap5000  | 5.56  | JUC6_mcf_hap5001  | HLA-DPA1 |
| TC6_mcf_hap5000  | 4.03  | JUC6_mcf_hap5001  | HLA-DPA1 |
| TC6_mcf_hap5000  | 2.67  | PSR6_mcf_hap5003  | HLA-DPA1 |
| TC6_mcf_hap5000  | 2.49  | PSR6_mcf_hap5003  | HLA-DPA1 |
| TC6_mcf_hap5000  | 2.32  | PSR6_mcf_hap5003  | HLA-DPA1 |
| TC6_mcf_hap5000  | 2.31  | PSR6_mcf_hap5003  | HLA-DPA1 |
| TC6_mcf_hap5000  | 2.25  | PSR6_mcf_hap5003  | HLA-DPA1 |
| TC6_mcf_hap5000  | 2.08  | PSR6_mcf_hap5003  | HLA-DPA1 |
| TC6_mcf_hap5000  | 2.06  | PSR6_mcf_hap5003  | HLA-DPA1 |
| TC6_mcf_hap5000  | -2.23 | PSR6_mcf_hap5003  | HLA-DPA1 |
| TC6_mcf_hap5000  | -4.18 | JUC6_mcf_hap5001  | HLA-DPA1 |
| TC6_mcf_hap5000  | 5.56  | JUC6_mcf_hap5001  | HLA-C    |
| TC6_mcf_hap5000  | 2.41  | JUC6_mcf_hap5001  | HLA-C    |
| TC6_mcf_hap5000  | 2.39  | JUC6_mcf_hap5001  | HLA-C    |
| TC6_mcf_hap5000  | 2.16  | PSR6_mcf_hap5002  | HLA-C    |
| TC6_mcf_hap5000  | -2.89 | JUC6_mcf_hap5001  | HLA-C    |
| TC6_qbl_hap6000  | 5.56  | JUC6_qbl_hap6001  | HLA-DPA1 |
| TC6_qbl_hap6000  | 4.03  | JUC6_qbl_hap6001  | HLA-DPA1 |
| TC6_qbl_hap6000  | 3.33  | PSR6_qbl_hap6003  | HLA-DPA1 |
| TC6_qbl_hap6000  | 3.09  | PSR6_qbl_hap6003  | HLA-DPA1 |
| TC6_qbl_hap6000  | 2.67  | PSR6_qbl_hap6003  | HLA-DPA1 |
| TC6_qbl_hap6000  | 2.32  | PSR6_qbl_hap6003  | HLA-DPA1 |
| TC6_qbl_hap6000  | 2.31  | PSR6_qbl_hap6003  | HLA-DPA1 |
| TC6_qbl_hap6000  | 2.08  | PSR6_qbl_hap6003  | HLA-DPA1 |
| TC6_qbl_hap6000  | 2.06  | PSR6_qbl_hap6003  | HLA-DPA1 |
| TC6_qbl_hap6000  | -2.23 | PSR6_qbl_hap6003  | HLA-DPA1 |
| TC6_qbl_hap6000  | -4.18 | JUC6_qbl_hap6001  | HLA-DPA1 |
| TC6_ssto_hap7000 | 5.56  | JUC6_ssto_hap7001 | HLA-DPA1 |
| TC6_ssto_hap7000 | 4.03  | JUC6_ssto_hap7001 | HLA-DPA1 |
| TC6_ssto_hap7000 | 3.09  | PSR6_ssto_hap7003 | HLA-DPA1 |
| TC6_ssto_hap7000 | 2.67  | PSR6_ssto_hap7003 | HLA-DPA1 |
| TC6_ssto_hap7000 | 2.32  | PSR6_ssto_hap7003 | HLA-DPA1 |
| TC6_ssto_hap7000 | 2.31  | PSR6_ssto_hap7003 | HLA-DPA1 |
| TC6_ssto_hap7000 | 2.25  | PSR6_ssto_hap7003 | HLA-DPA1 |
| TC6_ssto_hap7000 | 2.08  | PSR6_ssto_hap7003 | HLA-DPA1 |
| TC6_ssto_hap7000 | 2.06  | PSR6_ssto_hap7003 | HLA-DPA1 |
| TC6_ssto_hap7000 | -2.23 | PSR6_ssto_hap7003 | HLA-DPA1 |
| TC6_ssto_hap7000 | -4.18 | JUC6_ssto_hap7001 | HLA-DPA1 |
| TC07001047.hg.1  | 5.55  | JUC07007831.hg.1  | RNF32    |
| TC07001047.hg.1  | 2.46  | PSR07016158.hg.1  | RNF32    |
| TC07001047.hg.1  | 2.22  | PSR07016120.hg.1  | RNF32    |
| TC07001047.hg.1  | 2.04  | PSR07016145.hg.1  | RNF32    |
| TC0X001291.hg.1  | 5.55  | JUC0X008899.hg.1  | LRCH2    |
| TC0X001291.hg.1  | 2.66  | JUC0X008891.hg.1  | LRCH2    |

|                 |       |                  |          |
|-----------------|-------|------------------|----------|
| TC0X001291.hg.1 | 2.32  | PSR0X017483.hg.1 | LRCH2    |
| TC0X001291.hg.1 | -2.16 | JUC0X008896.hg.1 | LRCH2    |
| TC0X001291.hg.1 | -2.2  | JUC0X008902.hg.1 | LRCH2    |
| TC0X001291.hg.1 | -2.99 | JUC0X008887.hg.1 | LRCH2    |
| TC07000116.hg.1 | 5.54  | JUC07000847.hg.1 | HDAC9    |
| TC07000116.hg.1 | 5.49  | PSR07001771.hg.1 | HDAC9    |
| TC07000116.hg.1 | 2.63  | PSR07001793.hg.1 | HDAC9    |
| TC07000116.hg.1 | 2.56  | JUC07000846.hg.1 | HDAC9    |
| TC07000116.hg.1 | 2.41  | JUC07000801.hg.1 | HDAC9    |
| TC07000116.hg.1 | 2.32  | PSR07001767.hg.1 | HDAC9    |
| TC07000116.hg.1 | 2.08  | PSR07001777.hg.1 | HDAC9    |
| TC07000116.hg.1 | 2.07  | PSR07001785.hg.1 | HDAC9    |
| TC07000116.hg.1 | -2.08 | JUC07000797.hg.1 | HDAC9    |
| TC07000116.hg.1 | -2.1  | PSR07001856.hg.1 | HDAC9    |
| TC07000116.hg.1 | -2.21 | PSR07001847.hg.1 | HDAC9    |
| TC07000116.hg.1 | -2.31 | PSR07001858.hg.1 | HDAC9    |
| TC07000116.hg.1 | -2.59 | PSR07001852.hg.1 | HDAC9    |
| TC07000116.hg.1 | -2.65 | JUC07000802.hg.1 | HDAC9    |
| TC07000116.hg.1 | -2.72 | JUC07000823.hg.1 | HDAC9    |
| TC07000116.hg.1 | -2.79 | PSR07001851.hg.1 | HDAC9    |
| TC07000116.hg.1 | -2.86 | PSR07001859.hg.1 | HDAC9    |
| TC07000116.hg.1 | -4    | JUC07000810.hg.1 | HDAC9    |
| TC07000116.hg.1 | -4.06 | PSR07001821.hg.1 | HDAC9    |
| TC07000116.hg.1 | -4.16 | PSR07001860.hg.1 | HDAC9    |
| TC07000116.hg.1 | -6.51 | JUC07000793.hg.1 | HDAC9    |
| TC03001666.hg.1 | 5.53  | JUC03014914.hg.1 | KIAA1407 |
| TC03001666.hg.1 | 3.32  | JUC03014926.hg.1 | KIAA1407 |
| TC03001666.hg.1 | 3.03  | PSR03030084.hg.1 | KIAA1407 |
| TC03001666.hg.1 | 2.98  | PSR03030071.hg.1 | KIAA1407 |
| TC03001666.hg.1 | 2.11  | JUC03014908.hg.1 | KIAA1407 |
| TC10001576.hg.1 | 5.52  | JUC10011746.hg.1 | LOXL4    |
| TC10001576.hg.1 | 3.66  | JUC10011749.hg.1 | LOXL4    |
| TC10001576.hg.1 | 3.16  | JUC10011742.hg.1 | LOXL4    |
| TC10001576.hg.1 | 3.13  | JUC10011751.hg.1 | LOXL4    |
| TC10001576.hg.1 | 2.78  | JUC10011753.hg.1 | LOXL4    |
| TC10001576.hg.1 | 2.64  | JUC10011755.hg.1 | LOXL4    |
| TC10001576.hg.1 | 2.58  | JUC10011750.hg.1 | LOXL4    |
| TC10001576.hg.1 | 2.54  | JUC10011743.hg.1 | LOXL4    |
| TC10001576.hg.1 | 2.49  | PSR10020182.hg.1 | LOXL4    |
| TC10001576.hg.1 | 2.37  | PSR10020192.hg.1 | LOXL4    |
| TC10001576.hg.1 | -2.27 | JUC10011745.hg.1 | LOXL4    |
| TC10001576.hg.1 | -2.93 | PSR10020196.hg.1 | LOXL4    |
| TC11001132.hg.1 | 5.52  | JUC11007750.hg.1 | VWA5A    |
| TC11001132.hg.1 | 3.38  | JUC11007747.hg.1 | VWA5A    |
| TC11001132.hg.1 | 3.23  | JUC11007759.hg.1 | VWA5A    |
| TC11001132.hg.1 | 3.13  | PSR11014315.hg.1 | VWA5A    |
| TC11001132.hg.1 | 2.63  | PSR11014338.hg.1 | VWA5A    |
| TC11001132.hg.1 | 2.45  | JUC11007753.hg.1 | VWA5A    |
| TC11001132.hg.1 | 2.38  | PSR11014342.hg.1 | VWA5A    |
| TC11001132.hg.1 | 2.24  | JUC11007757.hg.1 | VWA5A    |
| TC11001132.hg.1 | 2.13  | PSR11014339.hg.1 | VWA5A    |
| TC11001132.hg.1 | -2.31 | JUC11007763.hg.1 | VWA5A    |
| TC11001132.hg.1 | -2.59 | JUC11007755.hg.1 | VWA5A    |
| TC02001347.hg.1 | 5.51  | JUC02011201.hg.1 | SGPP2    |
| TC02001347.hg.1 | 2.14  | JUC02011198.hg.1 | SGPP2    |
| TC02001347.hg.1 | -2.25 | PSR02021024.hg.1 | SGPP2    |
| TC0X001186.hg.1 | 5.51  | JUC0X008128.hg.1 | RPS6KA6  |
| TC0X001186.hg.1 | 4.17  | JUC0X008123.hg.1 | RPS6KA6  |

|                 |       |                  |         |
|-----------------|-------|------------------|---------|
| TC0X001186.hg.1 | 4.13  | JUC0X008109.hg.1 | RPS6KA6 |
| TC0X001186.hg.1 | 3.34  | PSR0X016023.hg.1 | RPS6KA6 |
| TC0X001186.hg.1 | 3.3   | PSR0X016025.hg.1 | RPS6KA6 |
| TC0X001186.hg.1 | 3.22  | PSR0X016020.hg.1 | RPS6KA6 |
| TC0X001186.hg.1 | 2.87  | PSR0X016022.hg.1 | RPS6KA6 |
| TC0X001186.hg.1 | 2.66  | JUC0X008124.hg.1 | RPS6KA6 |
| TC0X001186.hg.1 | 2.41  | PSR0X016024.hg.1 | RPS6KA6 |
| TC0X001186.hg.1 | 2.4   | JUC0X008111.hg.1 | RPS6KA6 |
| TC0X001186.hg.1 | 2.22  | PSR0X016015.hg.1 | RPS6KA6 |
| TC0X001186.hg.1 | -2.26 | PSR0X016011.hg.1 | RPS6KA6 |
| TC0X001186.hg.1 | -3.05 | JUC0X008131.hg.1 | RPS6KA6 |
| TC0X001186.hg.1 | -3.73 | PSR0X016006.hg.1 | RPS6KA6 |
| TC02000231.hg.1 | 5.5   | JUC02001805.hg.1 | VIT     |
| TC02000231.hg.1 | 2.16  | PSR02003442.hg.1 | VIT     |
| TC02000231.hg.1 | 2.09  | PSR02003420.hg.1 | VIT     |
| TC02000231.hg.1 | 2.07  | PSR02003440.hg.1 | VIT     |
| TC02000231.hg.1 | -2.18 | PSR02003424.hg.1 | VIT     |
| TC02000231.hg.1 | -2.54 | JUC02001798.hg.1 | VIT     |
| TC02000231.hg.1 | -2.62 | PSR02003435.hg.1 | VIT     |
| TC02000231.hg.1 | -2.77 | PSR02003426.hg.1 | VIT     |
| TC22000863.hg.1 | 5.5   | JUC22006061.hg.1 | EFCAB6  |
| TC22000863.hg.1 | 3.87  | JUC22006072.hg.1 | EFCAB6  |
| TC22000863.hg.1 | 3.44  | JUC22006074.hg.1 | EFCAB6  |
| TC22000863.hg.1 | 3.09  | PSR22014593.hg.1 | EFCAB6  |
| TC22000863.hg.1 | 2.93  | PSR22014594.hg.1 | EFCAB6  |
| TC22000863.hg.1 | 2.77  | JUC22006041.hg.1 | EFCAB6  |
| TC22000863.hg.1 | 2.71  | PSR22014617.hg.1 | EFCAB6  |
| TC22000863.hg.1 | 2.67  | JUC22006044.hg.1 | EFCAB6  |
| TC22000863.hg.1 | 2.42  | JUC22006085.hg.1 | EFCAB6  |
| TC22000863.hg.1 | 2.2   | PSR22014599.hg.1 | EFCAB6  |
| TC22000863.hg.1 | 2.11  | PSR22014622.hg.1 | EFCAB6  |
| TC22000863.hg.1 | 2.1   | PSR22014597.hg.1 | EFCAB6  |
| TC10000738.hg.1 | 5.49  | JUC10004847.hg.1 | BTRC    |
| TC10000738.hg.1 | 2.98  | PSR10008705.hg.1 | BTRC    |
| TC10000738.hg.1 | 2.48  | PSR10008697.hg.1 | BTRC    |
| TC10000738.hg.1 | 2.28  | JUC10004835.hg.1 | BTRC    |
| TC10000738.hg.1 | -2.96 | JUC10004838.hg.1 | BTRC    |
| TC01000702.hg.1 | 5.48  | JUC01005776.hg.1 | NFIA    |
| TC01000702.hg.1 | 2.73  | JUC01005781.hg.1 | NFIA    |
| TC01000702.hg.1 | 2.43  | JUC01005779.hg.1 | NFIA    |
| TC01000702.hg.1 | 2.36  | JUC01005764.hg.1 | NFIA    |
| TC01000702.hg.1 | -2.62 | PSR01011201.hg.1 | NFIA    |
| TC01000702.hg.1 | -2.64 | PSR01011193.hg.1 | NFIA    |
| TC06001579.hg.1 | 5.47  | JUC06008998.hg.1 | COL11A2 |
| TC06001579.hg.1 | 2.7   | JUC06009011.hg.1 | COL11A2 |
| TC06001579.hg.1 | 2.54  | JUC06008991.hg.1 | COL11A2 |
| TC06001579.hg.1 | 2.49  | JUC06009017.hg.1 | COL11A2 |
| TC06001579.hg.1 | 2.22  | JUC06009039.hg.1 | COL11A2 |
| TC06001579.hg.1 | 2.1   | JUC06009031.hg.1 | COL11A2 |
| TC06001579.hg.1 | -2.14 | PSR06018959.hg.1 | COL11A2 |
| TC06001579.hg.1 | -2.18 | JUC06009022.hg.1 | COL11A2 |
| TC06001579.hg.1 | -2.21 | PSR06018978.hg.1 | COL11A2 |
| TC06001579.hg.1 | -2.46 | JUC06008992.hg.1 | COL11A2 |
| TC06001579.hg.1 | -2.77 | JUC06009063.hg.1 | COL11A2 |
| TC06001579.hg.1 | -2.85 | JUC06009047.hg.1 | COL11A2 |
| TC06001579.hg.1 | -5.6  | JUC06009032.hg.1 | COL11A2 |
| TC18000548.hg.1 | 5.47  | PSR18005703.hg.1 | CCBE1   |
| TC18000548.hg.1 | 5.07  | PSR18005702.hg.1 | CCBE1   |

|                 |       |                  |         |
|-----------------|-------|------------------|---------|
| TC18000548.hg.1 | 3.9   | PSR18005696.hg.1 | CCBE1   |
| TC18000548.hg.1 | 3.38  | JUC18003841.hg.1 | CCBE1   |
| TC18000548.hg.1 | 2.91  | PSR18005693.hg.1 | CCBE1   |
| TC18000548.hg.1 | 2.13  | PSR18005689.hg.1 | CCBE1   |
| TC18000548.hg.1 | -2.41 | PSR18005699.hg.1 | CCBE1   |
| TC18000548.hg.1 | -2.93 | JUC18003840.hg.1 | CCBE1   |
| TC08000383.hg.1 | 5.46  | JUC08002692.hg.1 | LYN     |
| TC08000383.hg.1 | 2.9   | PSR08005437.hg.1 | LYN     |
| TC08000383.hg.1 | 2.75  | PSR08005436.hg.1 | LYN     |
| TC08000383.hg.1 | 2.64  | JUC08002695.hg.1 | LYN     |
| TC08000383.hg.1 | 2.55  | PSR08005438.hg.1 | LYN     |
| TC08000383.hg.1 | 2.27  | PSR08005439.hg.1 | LYN     |
| TC08000383.hg.1 | 2.14  | PSR08005454.hg.1 | LYN     |
| TC08000383.hg.1 | -2.76 | JUC08002705.hg.1 | LYN     |
| TC0X000606.hg.1 | 5.46  | JUC0X003998.hg.1 | STAG2   |
| TC0X000606.hg.1 | 2.75  | PSR0X007952.hg.1 | STAG2   |
| TC0X000606.hg.1 | 2.67  | JUC0X003994.hg.1 | STAG2   |
| TC0X000606.hg.1 | 2.05  | PSR0X007974.hg.1 | STAG2   |
| TC0X000606.hg.1 | -2    | JUC0X004020.hg.1 | STAG2   |
| TC0X000606.hg.1 | -2.22 | JUC0X003996.hg.1 | STAG2   |
| TC0X000606.hg.1 | -2.23 | JUC0X003995.hg.1 | STAG2   |
| TC10001340.hg.1 | 5.46  | JUC10009865.hg.1 | DNAJC12 |
| TC10001340.hg.1 | 4     | JUC10009872.hg.1 | DNAJC12 |
| TC10001340.hg.1 | 3.69  | JUC10009869.hg.1 | DNAJC12 |
| TC10001340.hg.1 | 2.03  | PSR10016887.hg.1 | DNAJC12 |
| TC10001340.hg.1 | -2.09 | JUC10009871.hg.1 | DNAJC12 |
| TC10001340.hg.1 | -2.66 | PSR10016885.hg.1 | DNAJC12 |
| TC10001340.hg.1 | -3.5  | PSR10016902.hg.1 | DNAJC12 |
| TC10001340.hg.1 | -3.85 | PSR10016897.hg.1 | DNAJC12 |
| TC10001340.hg.1 | -3.97 | PSR10016891.hg.1 | DNAJC12 |
| TC21000249.hg.1 | 5.45  | JUC21001614.hg.1 | COL6A1  |
| TC21000249.hg.1 | 2.43  | PSR21003049.hg.1 | COL6A1  |
| TC21000249.hg.1 | 2.3   | PSR21003011.hg.1 | COL6A1  |
| TC21000249.hg.1 | 2.18  | PSR21003041.hg.1 | COL6A1  |
| TC21000249.hg.1 | 2.16  | PSR21003013.hg.1 | COL6A1  |
| TC21000476.hg.1 | 5.44  | JUC21002950.hg.1 | RIPK4   |
| TC21000476.hg.1 | 3.47  | PSR21005724.hg.1 | RIPK4   |
| TC21000476.hg.1 | 2.33  | PSR21005721.hg.1 | RIPK4   |
| TC21000476.hg.1 | 2.13  | JUC21002943.hg.1 | RIPK4   |
| TC21000476.hg.1 | -2.13 | JUC21002948.hg.1 | RIPK4   |
| TC21000476.hg.1 | -2.42 | PSR21005730.hg.1 | RIPK4   |
| TC21000476.hg.1 | -3.08 | PSR21005729.hg.1 | RIPK4   |
| TC21000476.hg.1 | -3.25 | JUC21002952.hg.1 | RIPK4   |
| TC21000476.hg.1 | -6.2  | PSR21005723.hg.1 | RIPK4   |
| TC21000476.hg.1 | -12.8 | JUC21002955.hg.1 | RIPK4   |
| TC0X000362.hg.1 | 5.42  | JUC0X002276.hg.1 | EFNB1   |
| TC0X000362.hg.1 | 5     | PSR0X004705.hg.1 | EFNB1   |
| TC0X000362.hg.1 | 3.16  | JUC0X002274.hg.1 | EFNB1   |
| TC0X000362.hg.1 | 3.11  | JUC0X002279.hg.1 | EFNB1   |
| TC0X000362.hg.1 | 3.1   | PSR0X004708.hg.1 | EFNB1   |
| TC0X000362.hg.1 | -3.25 | JUC0X002273.hg.1 | EFNB1   |
| TC0X000362.hg.1 | -6.3  | JUC0X002275.hg.1 | EFNB1   |
| TC16001088.hg.1 | 5.41  | PSR16015289.hg.1 | NETO2   |
| TC16001088.hg.1 | 5.15  | PSR16015288.hg.1 | NETO2   |
| TC16001088.hg.1 | 2.54  | JUC16008539.hg.1 | NETO2   |
| TC16001088.hg.1 | 2.08  | JUC16008532.hg.1 | NETO2   |
| TC19001584.hg.1 | 5.41  | JUC19012371.hg.1 | PSG9    |
| TC19001584.hg.1 | 3.09  | PSR19021695.hg.1 | PSG9    |

|                 |       |                  |          |
|-----------------|-------|------------------|----------|
| TC19001584.hg.1 | 3.04  | JUC19012370.hg.1 | PSG9     |
| TC19001584.hg.1 | 2.94  | JUC19012369.hg.1 | PSG9     |
| TC19001584.hg.1 | 2.79  | JUC19012372.hg.1 | PSG9     |
| TC19001584.hg.1 | 2.52  | PSR19021693.hg.1 | PSG9     |
| TC19001584.hg.1 | 2.14  | PSR19021706.hg.1 | PSG9     |
| TC19001584.hg.1 | 2.05  | PSR19021699.hg.1 | PSG9     |
| TC19001584.hg.1 | -2.72 | PSR19021698.hg.1 | PSG9     |
| TC19001584.hg.1 | -3.19 | PSR19021701.hg.1 | PSG9     |
| TC19001584.hg.1 | -4.73 | JUC19012376.hg.1 | PSG9     |
| TC19001584.hg.1 | -5.41 | JUC19012377.hg.1 | PSG9     |
| TC6_mann_hap400 | 5.41  | PSR6_mann_hap400 | MICA     |
| TC6_mann_hap400 | 3.21  | PSR6_mann_hap400 | MICA     |
| TC6_mann_hap400 | 3.01  | JUC6_mann_hap400 | MICA     |
| TC6_mann_hap400 | 2.82  | PSR6_mann_hap400 | MICA     |
| TC6_mann_hap400 | 2.74  | JUC6_mann_hap400 | MICA     |
| TC6_mann_hap400 | 2.47  | JUC6_mann_hap400 | MICA     |
| TC6_mann_hap400 | 2.46  | JUC6_mann_hap400 | MICA     |
| TC6_mann_hap400 | 2.44  | PSR6_mann_hap400 | MICA     |
| TC6_mann_hap400 | 2.11  | JUC6_mann_hap400 | MICA     |
| TC6_mann_hap400 | 2.1   | JUC6_mann_hap400 | MICA     |
| TC11002275.hg.1 | 5.4   | JUC11014533.hg.1 | ARHGAP20 |
| TC11002275.hg.1 | 2.82  | PSR11027288.hg.1 | ARHGAP20 |
| TC11002275.hg.1 | 2.19  | PSR11027291.hg.1 | ARHGAP20 |
| TC11002275.hg.1 | 2.08  | PSR11027289.hg.1 | ARHGAP20 |
| TC01000794.hg.1 | 5.39  | JUC01006636.hg.1 | IFI44L   |
| TC01000794.hg.1 | 3.11  | JUC01006645.hg.1 | IFI44L   |
| TC01000794.hg.1 | -2.03 | PSR01012681.hg.1 | IFI44L   |
| TC06004058.hg.1 | 5.39  | PSR06028998.hg.1 | RNASET2  |
| TC06004058.hg.1 | 4.18  | JUC06020771.hg.1 | RNASET2  |
| TC06004058.hg.1 | 3.27  | PSR06029026.hg.1 | RNASET2  |
| TC06004058.hg.1 | 3.19  | PSR06029015.hg.1 | RNASET2  |
| TC06004058.hg.1 | 3.01  | PSR06029016.hg.1 | RNASET2  |
| TC06004058.hg.1 | 2.75  | PSR06029029.hg.1 | RNASET2  |
| TC06004058.hg.1 | 2.74  | JUC06020749.hg.1 | RNASET2  |
| TC06004058.hg.1 | 2.67  | PSR06029006.hg.1 | RNASET2  |
| TC06004058.hg.1 | 2.66  | PSR06028982.hg.1 | RNASET2  |
| TC06004058.hg.1 | 2.54  | PSR06029027.hg.1 | RNASET2  |
| TC06004058.hg.1 | 2.44  | PSR06029018.hg.1 | RNASET2  |
| TC06004058.hg.1 | 2.42  | JUC06020773.hg.1 | RNASET2  |
| TC06004058.hg.1 | 2.36  | PSR06028977.hg.1 | RNASET2  |
| TC06004058.hg.1 | 2.35  | PSR06028983.hg.1 | RNASET2  |
| TC06004058.hg.1 | 2.35  | JUC06020776.hg.1 | RNASET2  |
| TC06004058.hg.1 | 2.26  | PSR06029004.hg.1 | RNASET2  |
| TC06004058.hg.1 | 2.21  | PSR06028985.hg.1 | RNASET2  |
| TC06004058.hg.1 | 2.19  | JUC06020750.hg.1 | RNASET2  |
| TC06004058.hg.1 | 2.19  | JUC06020770.hg.1 | RNASET2  |
| TC06004058.hg.1 | 2.12  | JUC06020761.hg.1 | RNASET2  |
| TC06004058.hg.1 | 2.03  | JUC06020751.hg.1 | RNASET2  |
| TC01002815.hg.1 | 5.38  | JUC01023457.hg.1 | TTLL7    |
| TC01002815.hg.1 | 2.84  | PSR01043773.hg.1 | TTLL7    |
| TC01002815.hg.1 | 2.61  | JUC01023465.hg.1 | TTLL7    |
| TC01002815.hg.1 | 2.53  | PSR01043780.hg.1 | TTLL7    |
| TC01002815.hg.1 | 2.46  | PSR01043821.hg.1 | TTLL7    |
| TC01002815.hg.1 | 2.39  | PSR01043786.hg.1 | TTLL7    |
| TC01002815.hg.1 | 2.39  | PSR01043795.hg.1 | TTLL7    |
| TC01002815.hg.1 | 2.25  | PSR01043789.hg.1 | TTLL7    |
| TC01002815.hg.1 | 2.12  | PSR01043820.hg.1 | TTLL7    |
| TC01002815.hg.1 | 2.11  | PSR01043802.hg.1 | TTLL7    |

|                 |       |                  |           |
|-----------------|-------|------------------|-----------|
| TC01002815.hg.1 | 2.03  | PSR01043797.hg.1 | TTLL7     |
| TC01002815.hg.1 | 2.01  | PSR01043809.hg.1 | TTLL7     |
| TC01002815.hg.1 | -2.12 | JUC01023455.hg.1 | TTLL7     |
| TC01002815.hg.1 | -2.18 | JUC01023464.hg.1 | TTLL7     |
| TC02000723.hg.1 | 5.38  | JUC02005935.hg.1 | LOC654433 |
| TC02000723.hg.1 | -2.01 | PSR02011238.hg.1 | LOC654433 |
| TC02000723.hg.1 | -2.02 | JUC02005937.hg.1 | LOC654433 |
| TC02000723.hg.1 | -2.06 | PSR02011250.hg.1 | LOC654433 |
| TC02000723.hg.1 | -2.28 | JUC02005946.hg.1 | LOC654433 |
| TC02000723.hg.1 | -2.37 | PSR02011239.hg.1 | LOC654433 |
| TC02000723.hg.1 | -2.52 | PSR02011221.hg.1 | LOC654433 |
| TC02000723.hg.1 | -2.72 | PSR02011235.hg.1 | LOC654433 |
| TC02000723.hg.1 | -2.98 | JUC02005943.hg.1 | LOC654433 |
| TC02000723.hg.1 | -3.24 | JUC02005934.hg.1 | LOC654433 |
| TC02000723.hg.1 | -3.88 | JUC02005944.hg.1 | LOC654433 |
| TC06000544.hg.1 | 5.38  | PSR06005959.hg.1 | RNF8      |
| TC06000544.hg.1 | 2.3   | JUC06002482.hg.1 | RNF8      |
| TC06000544.hg.1 | 2.25  | JUC06002478.hg.1 | RNF8      |
| TC19000796.hg.1 | 5.36  | JUC19006555.hg.1 | ZNF610    |
| TC19000796.hg.1 | -2.27 | PSR19011194.hg.1 | ZNF610    |
| TC06000999.hg.1 | 5.35  | PSR06011772.hg.1 | EYA4      |
| TC06000999.hg.1 | 5.29  | JUC06005697.hg.1 | EYA4      |
| TC06000999.hg.1 | 4.95  | JUC06005713.hg.1 | EYA4      |
| TC06000999.hg.1 | 3.91  | JUC06005716.hg.1 | EYA4      |
| TC06000999.hg.1 | 3.33  | PSR06011773.hg.1 | EYA4      |
| TC06000999.hg.1 | 3.25  | JUC06005703.hg.1 | EYA4      |
| TC06000999.hg.1 | 2.46  | PSR06011803.hg.1 | EYA4      |
| TC06000999.hg.1 | 2.3   | JUC06005706.hg.1 | EYA4      |
| TC06000999.hg.1 | 2.23  | PSR06011769.hg.1 | EYA4      |
| TC06000999.hg.1 | 2.15  | PSR06011806.hg.1 | EYA4      |
| TC06000999.hg.1 | 2.02  | JUC06005698.hg.1 | EYA4      |
| TC06000999.hg.1 | -2.22 | PSR06011779.hg.1 | EYA4      |
| TC06000999.hg.1 | -2.46 | PSR06011788.hg.1 | EYA4      |
| TC06000999.hg.1 | -2.5  | PSR06011774.hg.1 | EYA4      |
| TC06000999.hg.1 | -2.69 | JUC06005714.hg.1 | EYA4      |
| TC06000999.hg.1 | -2.75 | PSR06011787.hg.1 | EYA4      |
| TC06000999.hg.1 | -3.09 | JUC06005721.hg.1 | EYA4      |
| TC06000999.hg.1 | -3.39 | PSR06011794.hg.1 | EYA4      |
| TC06000999.hg.1 | -3.71 | PSR06011771.hg.1 | EYA4      |
| TC06000999.hg.1 | -3.84 | PSR06011799.hg.1 | EYA4      |
| TC06000999.hg.1 | -3.92 | PSR06011763.hg.1 | EYA4      |
| TC06000999.hg.1 | -4.07 | PSR06011798.hg.1 | EYA4      |
| TC06000999.hg.1 | -4.27 | PSR06011792.hg.1 | EYA4      |
| TC06000999.hg.1 | -4.31 | JUC06005694.hg.1 | EYA4      |
| TC06000999.hg.1 | -4.33 | PSR06011795.hg.1 | EYA4      |
| TC06000999.hg.1 | -4.52 | PSR06011764.hg.1 | EYA4      |
| TC06000999.hg.1 | -5    | PSR06011793.hg.1 | EYA4      |
| TC06000999.hg.1 | -6.62 | PSR06011768.hg.1 | EYA4      |
| TC06000999.hg.1 | -6.93 | JUC06005708.hg.1 | EYA4      |
| TC06000999.hg.1 | -7.6  | JUC06005723.hg.1 | EYA4      |
| TC6_mann_hap400 | 5.35  | JUC6_mann_hap400 | COL11A2   |
| TC6_mann_hap400 | 2.64  | JUC6_mann_hap400 | COL11A2   |
| TC6_mann_hap400 | 2.49  | JUC6_mann_hap400 | COL11A2   |
| TC6_mann_hap400 | 2.43  | JUC6_mann_hap400 | COL11A2   |
| TC6_mann_hap400 | 2.17  | JUC6_mann_hap400 | COL11A2   |
| TC6_mann_hap400 | 2.06  | JUC6_mann_hap400 | COL11A2   |
| TC6_mann_hap400 | -2.02 | JUC6_mann_hap400 | COL11A2   |
| TC6_mann_hap400 | -2.09 | PSR6_mann_hap400 | COL11A2   |



|                  |       |                   |         |
|------------------|-------|-------------------|---------|
| TC6_mann_hap400  | -2.19 | PSR6_mann_hap400  | COL11A2 |
| TC6_mann_hap400  | -2.23 | JUC6_mann_hap400  | COL11A2 |
| TC6_mann_hap400  | -2.26 | PSR6_mann_hap400  | COL11A2 |
| TC6_mann_hap400  | -2.52 | JUC6_mann_hap400  | COL11A2 |
| TC6_mann_hap400  | -2.83 | JUC6_mann_hap400  | COL11A2 |
| TC6_mann_hap400  | -2.91 | JUC6_mann_hap400  | COL11A2 |
| TC6_mann_hap400  | -5.73 | JUC6_mann_hap400  | COL11A2 |
| TC02000952.hg.1  | 5.34  | JUC02007459.hg.1  | GPD2    |
| TC02000952.hg.1  | 3.55  | JUC02007473.hg.1  | GPD2    |
| TC02000952.hg.1  | 3.06  | PSR02013883.hg.1  | GPD2    |
| TC02000952.hg.1  | 2.67  | PSR02013922.hg.1  | GPD2    |
| TC02000952.hg.1  | 2.52  | PSR02013878.hg.1  | GPD2    |
| TC02000952.hg.1  | 2.3   | PSR02013893.hg.1  | GPD2    |
| TC02000952.hg.1  | 2.18  | PSR02013885.hg.1  | GPD2    |
| TC02000952.hg.1  | -2.59 | JUC02007451.hg.1  | GPD2    |
| TC02000952.hg.1  | -2.74 | JUC02007462.hg.1  | GPD2    |
| TC02000952.hg.1  | -3.75 | JUC02007455.hg.1  | GPD2    |
| TC07001617.hg.1  | 5.34  | PSR07024581.hg.1  | PON2    |
| TC07001617.hg.1  | 4.89  | JUC07012234.hg.1  | PON2    |
| TC07001617.hg.1  | 2.49  | PSR07024589.hg.1  | PON2    |
| TC07001617.hg.1  | 2.22  | JUC07012228.hg.1  | PON2    |
| TC07001617.hg.1  | 2.02  | PSR07024573.hg.1  | PON2    |
| TC07001617.hg.1  | -2.16 | PSR07024583.hg.1  | PON2    |
| TC07001617.hg.1  | -2.17 | JUC07012236.hg.1  | PON2    |
| TC6_ssto_hap7000 | 5.34  | JUC6_ssto_hap7001 | COL11A2 |
| TC6_ssto_hap7000 | 2.63  | JUC6_ssto_hap7001 | COL11A2 |
| TC6_ssto_hap7000 | 2.48  | JUC6_ssto_hap7001 | COL11A2 |
| TC6_ssto_hap7000 | 2.42  | JUC6_ssto_hap7001 | COL11A2 |
| TC6_ssto_hap7000 | 2.17  | JUC6_ssto_hap7001 | COL11A2 |
| TC6_ssto_hap7000 | 2.05  | JUC6_ssto_hap7001 | COL11A2 |
| TC6_ssto_hap7000 | -2.02 | JUC6_ssto_hap7001 | COL11A2 |
| TC6_ssto_hap7000 | -2.19 | PSR6_ssto_hap7003 | COL11A2 |
| TC6_ssto_hap7000 | -2.23 | JUC6_ssto_hap7001 | COL11A2 |
| TC6_ssto_hap7000 | -2.26 | PSR6_ssto_hap7003 | COL11A2 |
| TC6_ssto_hap7000 | -2.52 | JUC6_ssto_hap7001 | COL11A2 |
| TC6_ssto_hap7000 | -2.84 | JUC6_ssto_hap7001 | COL11A2 |
| TC6_ssto_hap7000 | -2.92 | JUC6_ssto_hap7001 | COL11A2 |
| TC6_ssto_hap7000 | -5.74 | JUC6_ssto_hap7001 | COL11A2 |
| TC07000525.hg.1  | 5.32  | PSR07007506.hg.1  | ADAM22  |
| TC07000525.hg.1  | 5.24  | JUC07003618.hg.1  | ADAM22  |
| TC07000525.hg.1  | 4.96  | JUC07003612.hg.1  | ADAM22  |
| TC07000525.hg.1  | 4.65  | PSR07007501.hg.1  | ADAM22  |
| TC07000525.hg.1  | 3.23  | JUC07003631.hg.1  | ADAM22  |
| TC07000525.hg.1  | 3.15  | PSR07007551.hg.1  | ADAM22  |
| TC07000525.hg.1  | 2.98  | PSR07007505.hg.1  | ADAM22  |
| TC07000525.hg.1  | 2.47  | JUC07003607.hg.1  | ADAM22  |
| TC07000525.hg.1  | 2.11  | PSR07007538.hg.1  | ADAM22  |
| TC07000525.hg.1  | 2.09  | JUC07003594.hg.1  | ADAM22  |
| TC07000525.hg.1  | 2.06  | JUC07003611.hg.1  | ADAM22  |
| TC07000525.hg.1  | 2.05  | JUC07003627.hg.1  | ADAM22  |
| TC07000525.hg.1  | 2.01  | PSR07007502.hg.1  | ADAM22  |
| TC07000525.hg.1  | 2     | PSR07007548.hg.1  | ADAM22  |
| TC07000525.hg.1  | -2.12 | JUC07003630.hg.1  | ADAM22  |
| TC07000525.hg.1  | -2.32 | JUC07003623.hg.1  | ADAM22  |
| TC07000525.hg.1  | -2.35 | JUC07003621.hg.1  | ADAM22  |
| TC07000525.hg.1  | -2.38 | PSR07007529.hg.1  | ADAM22  |
| TC07000525.hg.1  | -2.7  | PSR07007542.hg.1  | ADAM22  |
| TC07000525.hg.1  | -3.05 | PSR07007519.hg.1  | ADAM22  |

|                 |        |                   |             |
|-----------------|--------|-------------------|-------------|
| TC07000525.hg.1 | -3.06  | JUC07003605.hg.1  | ADAM22      |
| TC07000525.hg.1 | -3.16  | JUC07003593.hg.1  | ADAM22      |
| TC07000525.hg.1 | -3.3   | PSR07007518.hg.1  | ADAM22      |
| TC07000525.hg.1 | -3.41  | JUC07003616.hg.1  | ADAM22      |
| TC07000525.hg.1 | -3.85  | PSR07007522.hg.1  | ADAM22      |
| TC07000525.hg.1 | -3.98  | JUC07003628.hg.1  | ADAM22      |
| TC07000525.hg.1 | -4     | PSR07007513.hg.1  | ADAM22      |
| TC07000525.hg.1 | -4.12  | JUC07003615.hg.1  | ADAM22      |
| TC07000525.hg.1 | -4.38  | PSR07007499.hg.1  | ADAM22      |
| TC07000525.hg.1 | -5.11  | JUC07003619.hg.1  | ADAM22      |
| TC07000525.hg.1 | -5.53  | JUC07003590.hg.1  | ADAM22      |
| TC07000525.hg.1 | -5.55  | JUC07003614.hg.1  | ADAM22      |
| TC07000525.hg.1 | -5.93  | PSR07007536.hg.1  | ADAM22      |
| TC07000525.hg.1 | -6.87  | JUC07003591.hg.1  | ADAM22      |
| TC07000525.hg.1 | -6.93  | JUC07003602.hg.1  | ADAM22      |
| TC07000525.hg.1 | -7.09  | PSR07007544.hg.1  | ADAM22      |
| TC07000525.hg.1 | -7.13  | PSR07007545.hg.1  | ADAM22      |
| TC07000525.hg.1 | -7.25  | PSR07007496.hg.1  | ADAM22      |
| TC07000525.hg.1 | -7.85  | PSR07007504.hg.1  | ADAM22      |
| TC07000525.hg.1 | -7.93  | PSR07007495.hg.1  | ADAM22      |
| TC07000525.hg.1 | -8.6   | PSR07007497.hg.1  | ADAM22      |
| TC07000525.hg.1 | -9.2   | PSR07007535.hg.1  | ADAM22      |
| TC07000525.hg.1 | -11.27 | JUC07003617.hg.1  | ADAM22      |
| TC07000525.hg.1 | -11.34 | JUC07003596.hg.1  | ADAM22      |
| TC07000525.hg.1 | -11.57 | PSR07007490.hg.1  | ADAM22      |
| TC07000525.hg.1 | -11.96 | PSR07007493.hg.1  | ADAM22      |
| TC07000525.hg.1 | -12.86 | PSR07007503.hg.1  | ADAM22      |
| TC07000525.hg.1 | -13.57 | JUC07003625.hg.1  | ADAM22      |
| TC07000525.hg.1 | -14.87 | JUC07003599.hg.1  | ADAM22      |
| TC22000195.hg.1 | 5.32   | JUC22001254.hg.1  | EWSR1       |
| TC22000195.hg.1 | -2.23  | PSR22003585.hg.1  | EWSR1       |
| TC10000986.hg.1 | 5.31   | PSR10012373.hg.1  | AKR1C2, LOC |
| TC10000986.hg.1 | 3.45   | PSR10012376.hg.1  | AKR1C2, LOC |
| TC10000986.hg.1 | 3.18   | PSR10012355.hg.1  | AKR1C2, LOC |
| TC10000986.hg.1 | 3.04   | PSR10012356.hg.1  | AKR1C2, LOC |
| TC10000986.hg.1 | 2.65   | JUC10007165.hg.1  | AKR1C2, LOC |
| TC10000986.hg.1 | 2.47   | PSR10012375.hg.1  | AKR1C2, LOC |
| TC05000943.hg.1 | 5.29   | PSR05013796.hg.1  | FGF18       |
| TC05000943.hg.1 | 4.88   | PSR05013794.hg.1  | FGF18       |
| TC05000943.hg.1 | 2.9    | PSR05013795.hg.1  | FGF18       |
| TC05000943.hg.1 | -2.07  | JUC05007157.hg.1  | FGF18       |
| TC05000943.hg.1 | -2.55  | PSR05013790.hg.1  | FGF18       |
| TC05000943.hg.1 | -2.55  | PSR05013791.hg.1  | FGF18       |
| TC12000452.hg.1 | 5.29   | JUC12003184.hg.1  | HOXC8       |
| TC12000452.hg.1 | 3.66   | PSR12005914.hg.1  | HOXC8       |
| TC12000452.hg.1 | 2.84   | PSR12005921.hg.1  | HOXC8       |
| TC6_cox_hap2000 | 5.29   | JUC6_cox_hap20014 | COL11A2     |
| TC6_cox_hap2000 | 2.61   | JUC6_cox_hap20015 | COL11A2     |
| TC6_cox_hap2000 | 2.46   | JUC6_cox_hap20014 | COL11A2     |
| TC6_cox_hap2000 | 2.4    | JUC6_cox_hap20015 | COL11A2     |
| TC6_cox_hap2000 | 2.15   | JUC6_cox_hap20015 | COL11A2     |
| TC6_cox_hap2000 | 2.03   | JUC6_cox_hap20015 | COL11A2     |
| TC6_cox_hap2000 | -2.04  | JUC6_cox_hap20015 | COL11A2     |
| TC6_cox_hap2000 | -2.21  | PSR6_cox_hap20040 | COL11A2     |
| TC6_cox_hap2000 | -2.25  | JUC6_cox_hap20015 | COL11A2     |
| TC6_cox_hap2000 | -2.28  | PSR6_cox_hap20040 | COL11A2     |
| TC6_cox_hap2000 | -2.55  | JUC6_cox_hap20014 | COL11A2     |
| TC6_cox_hap2000 | -2.86  | JUC6_cox_hap20015 | COL11A2     |

|                 |       |                   |         |
|-----------------|-------|-------------------|---------|
| TC6_cox_hap2000 | -2.94 | JUC6_cox_hap20015 | COL11A2 |
| TC6_cox_hap2000 | -5.79 | JUC6_cox_hap20015 | COL11A2 |
| TC6_dbb_hap3000 | 5.29  | JUC6_dbb_hap30014 | COL11A2 |
| TC6_dbb_hap3000 | 2.61  | JUC6_dbb_hap30014 | COL11A2 |
| TC6_dbb_hap3000 | 2.46  | JUC6_dbb_hap30014 | COL11A2 |
| TC6_dbb_hap3000 | 2.4   | JUC6_dbb_hap30014 | COL11A2 |
| TC6_dbb_hap3000 | 2.15  | JUC6_dbb_hap30014 | COL11A2 |
| TC6_dbb_hap3000 | 2.03  | JUC6_dbb_hap30014 | COL11A2 |
| TC6_dbb_hap3000 | -2.04 | JUC6_dbb_hap30014 | COL11A2 |
| TC6_dbb_hap3000 | -2.21 | PSR6_dbb_hap30031 | COL11A2 |
| TC6_dbb_hap3000 | -2.25 | JUC6_dbb_hap30014 | COL11A2 |
| TC6_dbb_hap3000 | -2.28 | PSR6_dbb_hap30031 | COL11A2 |
| TC6_dbb_hap3000 | -2.55 | JUC6_dbb_hap30014 | COL11A2 |
| TC6_dbb_hap3000 | -2.86 | JUC6_dbb_hap30014 | COL11A2 |
| TC6_dbb_hap3000 | -2.94 | JUC6_dbb_hap30014 | COL11A2 |
| TC6_dbb_hap3000 | -5.79 | JUC6_dbb_hap30014 | COL11A2 |
| TC6_mcf_hap5000 | 5.29  | JUC6_mcf_hap50012 | COL11A2 |
| TC6_mcf_hap5000 | 2.61  | JUC6_mcf_hap50013 | COL11A2 |
| TC6_mcf_hap5000 | 2.46  | JUC6_mcf_hap50012 | COL11A2 |
| TC6_mcf_hap5000 | 2.4   | JUC6_mcf_hap50013 | COL11A2 |
| TC6_mcf_hap5000 | 2.15  | JUC6_mcf_hap50013 | COL11A2 |
| TC6_mcf_hap5000 | 2.03  | JUC6_mcf_hap50013 | COL11A2 |
| TC6_mcf_hap5000 | -2.04 | JUC6_mcf_hap50013 | COL11A2 |
| TC6_mcf_hap5000 | -2.21 | PSR6_mcf_hap50031 | COL11A2 |
| TC6_mcf_hap5000 | -2.25 | JUC6_mcf_hap50013 | COL11A2 |
| TC6_mcf_hap5000 | -2.28 | PSR6_mcf_hap50031 | COL11A2 |
| TC6_mcf_hap5000 | -2.55 | JUC6_mcf_hap50012 | COL11A2 |
| TC6_mcf_hap5000 | -2.86 | JUC6_mcf_hap50013 | COL11A2 |
| TC6_mcf_hap5000 | -2.94 | JUC6_mcf_hap50013 | COL11A2 |
| TC6_mcf_hap5000 | -5.79 | JUC6_mcf_hap50013 | COL11A2 |
| TC6_qbl_hap6000 | 5.29  | JUC6_qbl_hap60015 | COL11A2 |
| TC6_qbl_hap6000 | 2.61  | JUC6_qbl_hap60015 | COL11A2 |
| TC6_qbl_hap6000 | 2.46  | JUC6_qbl_hap60015 | COL11A2 |
| TC6_qbl_hap6000 | 2.4   | JUC6_qbl_hap60015 | COL11A2 |
| TC6_qbl_hap6000 | 2.15  | JUC6_qbl_hap60015 | COL11A2 |
| TC6_qbl_hap6000 | 2.03  | JUC6_qbl_hap60015 | COL11A2 |
| TC6_qbl_hap6000 | -2.04 | JUC6_qbl_hap60015 | COL11A2 |
| TC6_qbl_hap6000 | -2.21 | PSR6_qbl_hap60039 | COL11A2 |
| TC6_qbl_hap6000 | -2.25 | JUC6_qbl_hap60015 | COL11A2 |
| TC6_qbl_hap6000 | -2.28 | PSR6_qbl_hap60039 | COL11A2 |
| TC6_qbl_hap6000 | -2.55 | JUC6_qbl_hap60015 | COL11A2 |
| TC6_qbl_hap6000 | -2.86 | JUC6_qbl_hap60015 | COL11A2 |
| TC6_qbl_hap6000 | -2.94 | JUC6_qbl_hap60015 | COL11A2 |
| TC6_qbl_hap6000 | -5.79 | JUC6_qbl_hap60015 | COL11A2 |
| TC03000076.hg.1 | 5.27  | JUC03000873.hg.1  | HDAC11  |
| TC03000076.hg.1 | 4.69  | JUC03000892.hg.1  | HDAC11  |
| TC03000076.hg.1 | 3.63  | JUC03000890.hg.1  | HDAC11  |
| TC03000076.hg.1 | 3.03  | JUC03000880.hg.1  | HDAC11  |
| TC03000076.hg.1 | 2.83  | PSR03001655.hg.1  | HDAC11  |
| TC03000076.hg.1 | 2.79  | PSR03001675.hg.1  | HDAC11  |
| TC03000076.hg.1 | 2.5   | PSR03001656.hg.1  | HDAC11  |
| TC03000076.hg.1 | 2.47  | PSR03001707.hg.1  | HDAC11  |
| TC03000076.hg.1 | 2.39  | PSR03001665.hg.1  | HDAC11  |
| TC03000076.hg.1 | 2.39  | PSR03001667.hg.1  | HDAC11  |
| TC03000076.hg.1 | 2.36  | PSR03001705.hg.1  | HDAC11  |
| TC03000076.hg.1 | 2.28  | JUC03000895.hg.1  | HDAC11  |
| TC03000076.hg.1 | 2.1   | PSR03001706.hg.1  | HDAC11  |
| TC03000076.hg.1 | 2.09  | PSR03001708.hg.1  | HDAC11  |

|                 |       |                  |            |
|-----------------|-------|------------------|------------|
| TC03000076.hg.1 | 2.06  | PSR03001682.hg.1 | HDAC11     |
| TC03000076.hg.1 | 2.06  | JUC03000889.hg.1 | HDAC11     |
| TC03000076.hg.1 | -2.78 | JUC03000886.hg.1 | HDAC11     |
| TC03000076.hg.1 | -3.24 | PSR03001694.hg.1 | HDAC11     |
| TC05001385.hg.1 | 5.27  | PSR05019320.hg.1 | PLK2       |
| TC05001385.hg.1 | 5.13  | PSR05019301.hg.1 | PLK2       |
| TC05001385.hg.1 | 5.12  | PSR05019305.hg.1 | PLK2       |
| TC05001385.hg.1 | 3.95  | PSR05019306.hg.1 | PLK2       |
| TC05001385.hg.1 | 3.89  | JUC05009929.hg.1 | PLK2       |
| TC05001385.hg.1 | 3.68  | PSR05019290.hg.1 | PLK2       |
| TC05001385.hg.1 | 3.48  | PSR05019267.hg.1 | PLK2       |
| TC05001385.hg.1 | 3.41  | PSR05019308.hg.1 | PLK2       |
| TC05001385.hg.1 | 2.97  | PSR05019313.hg.1 | PLK2       |
| TC05001385.hg.1 | 2.92  | JUC05009933.hg.1 | PLK2       |
| TC05001385.hg.1 | 2.91  | PSR05019302.hg.1 | PLK2       |
| TC05001385.hg.1 | 2.82  | PSR05019295.hg.1 | PLK2       |
| TC05001385.hg.1 | 2.82  | JUC05009946.hg.1 | PLK2       |
| TC05001385.hg.1 | 2.69  | PSR05019298.hg.1 | PLK2       |
| TC05001385.hg.1 | 2.61  | PSR05019277.hg.1 | PLK2       |
| TC05001385.hg.1 | 2.42  | PSR05019315.hg.1 | PLK2       |
| TC05001385.hg.1 | 2.22  | PSR05019263.hg.1 | PLK2       |
| TC05001385.hg.1 | 2.19  | PSR05019276.hg.1 | PLK2       |
| TC05001385.hg.1 | 2.12  | PSR05019316.hg.1 | PLK2       |
| TC07001501.hg.1 | 5.27  | JUC07011080.hg.1 | TBL2       |
| TC07001501.hg.1 | 2.39  | PSR07022522.hg.1 | TBL2       |
| TC07001501.hg.1 | 2.34  | JUC07011069.hg.1 | TBL2       |
| TC07001501.hg.1 | 2.31  | PSR07022555.hg.1 | TBL2       |
| TC07001501.hg.1 | 2.17  | PSR07022509.hg.1 | TBL2       |
| TC07001501.hg.1 | 2.16  | PSR07022534.hg.1 | TBL2       |
| TC07001501.hg.1 | 2.11  | JUC07011074.hg.1 | TBL2       |
| TC07001501.hg.1 | 2.06  | PSR07022504.hg.1 | TBL2       |
| TC07001501.hg.1 | -2.22 | JUC07011063.hg.1 | TBL2       |
| TC14000948.hg.1 | 5.27  | PSR14010481.hg.1 | ACIN1      |
| TC14000948.hg.1 | 2.54  | JUC14005313.hg.1 | ACIN1      |
| TC14000948.hg.1 | -2.05 | JUC14005302.hg.1 | ACIN1      |
| TC14000948.hg.1 | -2.97 | JUC14005325.hg.1 | ACIN1      |
| TC16000381.hg.1 | 5.27  | JUC16003130.hg.1 | KIAA0664L3 |
| TC16000381.hg.1 | 4.83  | JUC16003132.hg.1 | KIAA0664L3 |
| TC16000381.hg.1 | 2.74  | JUC16003138.hg.1 | KIAA0664L3 |
| TC16000381.hg.1 | 2.55  | PSR16005676.hg.1 | KIAA0664L3 |
| TC16000381.hg.1 | 2.27  | PSR16005672.hg.1 | KIAA0664L3 |
| TC16000381.hg.1 | -2.08 | PSR16005678.hg.1 | KIAA0664L3 |
| TC6_dbb_hap3000 | 5.27  | PSR6_dbb_hap3000 | HLA-H      |
| TC6_dbb_hap3000 | 3.53  | PSR6_dbb_hap3000 | HLA-H      |
| TC6_dbb_hap3000 | 2.6   | JUC6_dbb_hap3001 | HLA-H      |
| TC6_dbb_hap3000 | 2.3   | JUC6_dbb_hap3001 | HLA-H      |
| TC6_dbb_hap3000 | 2.1   | PSR6_dbb_hap3000 | HLA-H      |
| TC6_dbb_hap3000 | 2.06  | PSR6_dbb_hap3000 | HLA-H      |
| TC01002163.hg.1 | 5.26  | JUC01017910.hg.1 | TNFRSF9    |
| TC01002163.hg.1 | 5.14  | PSR01033393.hg.1 | TNFRSF9    |
| TC01002163.hg.1 | 4.86  | JUC01017913.hg.1 | TNFRSF9    |
| TC01002163.hg.1 | 4.17  | PSR01033391.hg.1 | TNFRSF9    |
| TC01002163.hg.1 | 3.52  | PSR01033383.hg.1 | TNFRSF9    |
| TC01002163.hg.1 | 2.53  | PSR01033390.hg.1 | TNFRSF9    |
| TC01002163.hg.1 | -2.05 | JUC01017908.hg.1 | TNFRSF9    |
| TC01002163.hg.1 | -3.14 | PSR01033386.hg.1 | TNFRSF9    |
| TC02001495.hg.1 | 5.26  | JUC02012693.hg.1 | SH3YL1     |
| TC02001495.hg.1 | 3.67  | JUC02012660.hg.1 | SH3YL1     |

|                 |       |                  |        |
|-----------------|-------|------------------|--------|
| TC02001495.hg.1 | 3.53  | PSR02024531.hg.1 | SH3YL1 |
| TC02001495.hg.1 | 3.1   | PSR02024528.hg.1 | SH3YL1 |
| TC02001495.hg.1 | 2.81  | PSR02024524.hg.1 | SH3YL1 |
| TC02001495.hg.1 | 2.81  | PSR02024529.hg.1 | SH3YL1 |
| TC02001495.hg.1 | 2.67  | JUC02012694.hg.1 | SH3YL1 |
| TC02001495.hg.1 | 2.64  | PSR02024469.hg.1 | SH3YL1 |
| TC02001495.hg.1 | 2.56  | PSR02024468.hg.1 | SH3YL1 |
| TC02001495.hg.1 | 2.49  | PSR02024472.hg.1 | SH3YL1 |
| TC02001495.hg.1 | 2.43  | PSR02024527.hg.1 | SH3YL1 |
| TC02001495.hg.1 | 2.39  | PSR02024534.hg.1 | SH3YL1 |
| TC02001495.hg.1 | 2.35  | JUC02012683.hg.1 | SH3YL1 |
| TC02001495.hg.1 | 2.27  | JUC02012689.hg.1 | SH3YL1 |
| TC02001495.hg.1 | 2.17  | PSR02024518.hg.1 | SH3YL1 |
| TC02001495.hg.1 | 2.17  | PSR02024530.hg.1 | SH3YL1 |
| TC02001495.hg.1 | 2.09  | PSR02024455.hg.1 | SH3YL1 |
| TC02001495.hg.1 | 2.04  | JUC02012681.hg.1 | SH3YL1 |
| TC02001495.hg.1 | 2.01  | PSR02024476.hg.1 | SH3YL1 |
| TC02001495.hg.1 | -2.19 | PSR02024509.hg.1 | SH3YL1 |
| TC02001495.hg.1 | -2.2  | PSR02024499.hg.1 | SH3YL1 |
| TC02001495.hg.1 | -5.35 | JUC02012669.hg.1 | SH3YL1 |
| TC02001495.hg.1 | -8.96 | JUC02012658.hg.1 | SH3YL1 |
| TC14000440.hg.1 | 5.26  | JUC14002843.hg.1 | PAPLN  |
| TC14000440.hg.1 | 3.7   | PSR14005411.hg.1 | PAPLN  |
| TC14000440.hg.1 | 3.51  | PSR14005444.hg.1 | PAPLN  |
| TC14000440.hg.1 | 2.77  | JUC14002842.hg.1 | PAPLN  |
| TC14000440.hg.1 | 2.11  | PSR14005442.hg.1 | PAPLN  |
| TC01006404.hg.1 | 5.25  | PSR01016601.hg.1 |        |
| TC01006404.hg.1 | 5.09  | JUC01046653.hg.1 |        |
| TC01006404.hg.1 | 4.14  | JUC01046654.hg.1 |        |
| TC01006404.hg.1 | 3.42  | JUC01046658.hg.1 |        |
| TC01006404.hg.1 | 3.01  | PSR01016603.hg.1 |        |
| TC01006404.hg.1 | 2.68  | JUC01046657.hg.1 |        |
| TC01006404.hg.1 | 2.21  | PSR01016609.hg.1 |        |
| TC01006404.hg.1 | 2.14  | PSR01016610.hg.1 |        |
| TC02002529.hg.1 | 5.25  | JUC02021160.hg.1 |        |
| TC02002529.hg.1 | 4.22  | PSR02040131.hg.1 |        |
| TC02002529.hg.1 | 2.95  | PSR02040135.hg.1 |        |
| TC02002529.hg.1 | 2.73  | PSR02040139.hg.1 |        |
| TC02002529.hg.1 | 2.64  | PSR02040130.hg.1 |        |
| TC02002529.hg.1 | 2.42  | PSR02040138.hg.1 |        |
| TC02002529.hg.1 | 2.09  | PSR02040136.hg.1 |        |
| TC02002529.hg.1 | 2.07  | PSR02040129.hg.1 |        |
| TC02002529.hg.1 | -2.09 | PSR02040132.hg.1 |        |
| TC02002529.hg.1 | -2.58 | JUC02021156.hg.1 |        |
| TC10000081.hg.1 | 5.25  | JUC10000441.hg.1 | CELF2  |
| TC10000081.hg.1 | 3.59  | JUC10000449.hg.1 | CELF2  |
| TC10000081.hg.1 | 3.46  | JUC10000453.hg.1 | CELF2  |
| TC10000081.hg.1 | 2.61  | PSR10000864.hg.1 | CELF2  |
| TC10000081.hg.1 | 2.56  | PSR10000854.hg.1 | CELF2  |
| TC10000081.hg.1 | 2.5   | JUC10000456.hg.1 | CELF2  |
| TC10000081.hg.1 | 2.27  | PSR10000853.hg.1 | CELF2  |
| TC10000081.hg.1 | 2.23  | JUC10000450.hg.1 | CELF2  |
| TC10000081.hg.1 | 2.17  | PSR10000842.hg.1 | CELF2  |
| TC10000081.hg.1 | 2.15  | PSR10000839.hg.1 | CELF2  |
| TC10000081.hg.1 | 2.06  | JUC10000454.hg.1 | CELF2  |
| TC10000081.hg.1 | 2.03  | PSR10000871.hg.1 | CELF2  |
| TC10000081.hg.1 | -2.22 | PSR10000866.hg.1 | CELF2  |
| TC10000081.hg.1 | -2.29 | JUC10000452.hg.1 | CELF2  |

|                 |        |                  |           |
|-----------------|--------|------------------|-----------|
| TC10000081.hg.1 | -2.33  | PSR10000843.hg.1 | CELF2     |
| TC10000081.hg.1 | -3.78  | JUC10000457.hg.1 | CELF2     |
| TC15001136.hg.1 | 5.24   | JUC15005382.hg.1 | CHRFAM7A  |
| TC15001136.hg.1 | 3.19   | PSR15010181.hg.1 | CHRFAM7A  |
| TC15001136.hg.1 | 2.61   | PSR15010183.hg.1 | CHRFAM7A  |
| TC15001136.hg.1 | 2.52   | JUC15005388.hg.1 | CHRFAM7A  |
| TC15001136.hg.1 | 2.37   | PSR15010184.hg.1 | CHRFAM7A  |
| TC15001136.hg.1 | 2      | PSR15010182.hg.1 | CHRFAM7A  |
| TC10001448.hg.1 | 5.23   | JUC10010737.hg.1 | LOC283050 |
| TC10001448.hg.1 | 4.27   | JUC10010739.hg.1 | LOC283050 |
| TC10001448.hg.1 | 3.94   | JUC10010742.hg.1 | LOC283050 |
| TC10001448.hg.1 | 2.41   | JUC10010744.hg.1 | LOC283050 |
| TC10001448.hg.1 | 2.35   | JUC10010740.hg.1 | LOC283050 |
| TC10001448.hg.1 | 2.21   | PSR10018392.hg.1 | LOC283050 |
| TC10001448.hg.1 | 2.06   | JUC10010738.hg.1 | LOC283050 |
| TC10001448.hg.1 | 2.02   | PSR10018408.hg.1 | LOC283050 |
| TC01003226.hg.1 | 5.22   | JUC01026389.hg.1 | SELENBP1  |
| TC01003226.hg.1 | 2.43   | PSR01049721.hg.1 | SELENBP1  |
| TC01003226.hg.1 | 2.23   | PSR01049710.hg.1 | SELENBP1  |
| TC01003226.hg.1 | 2.16   | PSR01049730.hg.1 | SELENBP1  |
| TC01003226.hg.1 | 2.1    | PSR01049723.hg.1 | SELENBP1  |
| TC01003226.hg.1 | 2      | JUC01026386.hg.1 | SELENBP1  |
| TC03000208.hg.1 | 5.22   | JUC03002206.hg.1 | ENTPD3    |
| TC03000208.hg.1 | 3.65   | JUC03002200.hg.1 | ENTPD3    |
| TC03000208.hg.1 | -2.15  | PSR03004121.hg.1 | ENTPD3    |
| TC03000208.hg.1 | -2.54  | JUC03002199.hg.1 | ENTPD3    |
| TC03000208.hg.1 | -3.37  | PSR03004126.hg.1 | ENTPD3    |
| TC03000208.hg.1 | -4.83  | PSR03004119.hg.1 | ENTPD3    |
| TC03000208.hg.1 | -5.58  | PSR03004123.hg.1 | ENTPD3    |
| TC03000208.hg.1 | -6.42  | JUC03002201.hg.1 | ENTPD3    |
| TC03000208.hg.1 | -7.28  | PSR03004120.hg.1 | ENTPD3    |
| TC04001169.hg.1 | 5.22   | PSR04016020.hg.1 | CORIN     |
| TC04001169.hg.1 | 2.81   | PSR04016032.hg.1 | CORIN     |
| TC04001169.hg.1 | 2.78   | PSR04016054.hg.1 | CORIN     |
| TC04001169.hg.1 | 2.41   | PSR04016030.hg.1 | CORIN     |
| TC04001169.hg.1 | 2.41   | JUC04008509.hg.1 | CORIN     |
| TC04001169.hg.1 | 2.13   | JUC04008491.hg.1 | CORIN     |
| TC04001169.hg.1 | -2.45  | JUC04008496.hg.1 | CORIN     |
| TC04001169.hg.1 | -2.48  | PSR04016026.hg.1 | CORIN     |
| TC04001169.hg.1 | -2.78  | PSR04016023.hg.1 | CORIN     |
| TC04001169.hg.1 | -2.85  | PSR04016039.hg.1 | CORIN     |
| TC04001169.hg.1 | -2.86  | JUC04008506.hg.1 | CORIN     |
| TC04001169.hg.1 | -3.75  | JUC04008505.hg.1 | CORIN     |
| TC04001169.hg.1 | -3.81  | JUC04008517.hg.1 | CORIN     |
| TC04001169.hg.1 | -3.82  | PSR04016028.hg.1 | CORIN     |
| TC04001169.hg.1 | -3.83  | PSR04016043.hg.1 | CORIN     |
| TC04001169.hg.1 | -5     | JUC04008499.hg.1 | CORIN     |
| TC04001169.hg.1 | -5.75  | JUC04008514.hg.1 | CORIN     |
| TC04001169.hg.1 | -6.37  | PSR04016041.hg.1 | CORIN     |
| TC04001169.hg.1 | -6.45  | JUC04008490.hg.1 | CORIN     |
| TC04001169.hg.1 | -6.69  | JUC04008498.hg.1 | CORIN     |
| TC04001169.hg.1 | -7.47  | JUC04008503.hg.1 | CORIN     |
| TC04001169.hg.1 | -13.29 | JUC04008495.hg.1 | CORIN     |
| TC04001169.hg.1 | -16.48 | JUC04008516.hg.1 | CORIN     |
| TC04001169.hg.1 | -20.18 | PSR04016053.hg.1 | CORIN     |
| TC04001169.hg.1 | -22.4  | PSR04016050.hg.1 | CORIN     |
| TC04001169.hg.1 | -24.14 | PSR04016057.hg.1 | CORIN     |
| TC04001169.hg.1 | -27.5  | PSR04016027.hg.1 | CORIN     |

|                 |        |                  |        |
|-----------------|--------|------------------|--------|
| TC01001399.hg.1 | 5.21   | JUC01011642.hg.1 | FCGR2A |
| TC01001399.hg.1 | 3.49   | PSR01021959.hg.1 | FCGR2A |
| TC01001399.hg.1 | 3.15   | PSR01021960.hg.1 | FCGR2A |
| TC01001399.hg.1 | 2.65   | PSR01021958.hg.1 | FCGR2A |
| TC01001399.hg.1 | 2.65   | PSR01021987.hg.1 | FCGR2A |
| TC01001399.hg.1 | 2.59   | PSR01021965.hg.1 | FCGR2A |
| TC01001399.hg.1 | 2.54   | JUC01011634.hg.1 | FCGR2A |
| TC01001399.hg.1 | 2.43   | PSR01021982.hg.1 | FCGR2A |
| TC01001399.hg.1 | 2.41   | JUC01011639.hg.1 | FCGR2A |
| TC01001399.hg.1 | 2.26   | PSR01021967.hg.1 | FCGR2A |
| TC01001399.hg.1 | 2.14   | JUC01011636.hg.1 | FCGR2A |
| TC01001399.hg.1 | -2.54  | PSR01021970.hg.1 | FCGR2A |
| TC01001399.hg.1 | -4.66  | PSR01021972.hg.1 | FCGR2A |
| TC01001399.hg.1 | -5.28  | JUC01011643.hg.1 | FCGR2A |
| TC01001399.hg.1 | -10.33 | PSR01021973.hg.1 | FCGR2A |
| TC01001399.hg.1 | -10.69 | PSR01021977.hg.1 | FCGR2A |
| TC02001904.hg.1 | 5.21   | JUC02016053.hg.1 | WDPCP  |
| TC02001904.hg.1 | 2.72   | JUC02016047.hg.1 | WDPCP  |
| TC02001904.hg.1 | 2.34   | JUC02016040.hg.1 | WDPCP  |
| TC02001904.hg.1 | 2.03   | PSR02030494.hg.1 | WDPCP  |
| TC02001904.hg.1 | 2.03   | PSR02030511.hg.1 | WDPCP  |
| TC07000559.hg.1 | 5.21   | PSR07008216.hg.1 | COL1A2 |
| TC07000559.hg.1 | 3.43   | PSR07008241.hg.1 | COL1A2 |
| TC07000559.hg.1 | 3.1    | PSR07008234.hg.1 | COL1A2 |
| TC07000559.hg.1 | 2.86   | PSR07008221.hg.1 | COL1A2 |
| TC07000559.hg.1 | 2.81   | PSR07008247.hg.1 | COL1A2 |
| TC07000559.hg.1 | 2.68   | PSR07008232.hg.1 | COL1A2 |
| TC07000559.hg.1 | 2.66   | PSR07008242.hg.1 | COL1A2 |
| TC07000559.hg.1 | 2.59   | PSR07008249.hg.1 | COL1A2 |
| TC07000559.hg.1 | 2.14   | PSR07008230.hg.1 | COL1A2 |
| TC07000559.hg.1 | 2.07   | PSR07008227.hg.1 | COL1A2 |
| TC07000559.hg.1 | 2.06   | PSR07008243.hg.1 | COL1A2 |
| TC07000559.hg.1 | 2.03   | PSR07008254.hg.1 | COL1A2 |
| TC07000559.hg.1 | -2     | JUC07003932.hg.1 | COL1A2 |
| TC07000559.hg.1 | -2.01  | JUC07003952.hg.1 | COL1A2 |
| TC07000559.hg.1 | -2.03  | PSR07008244.hg.1 | COL1A2 |
| TC07000559.hg.1 | -2.1   | PSR07008253.hg.1 | COL1A2 |
| TC07000559.hg.1 | -2.16  | JUC07003924.hg.1 | COL1A2 |
| TC07000559.hg.1 | -2.21  | PSR07008256.hg.1 | COL1A2 |
| TC07000559.hg.1 | -2.26  | PSR07008250.hg.1 | COL1A2 |
| TC07000559.hg.1 | -2.29  | JUC07003915.hg.1 | COL1A2 |
| TC07000559.hg.1 | -2.37  | PSR07008255.hg.1 | COL1A2 |
| TC07000559.hg.1 | -2.39  | PSR07008251.hg.1 | COL1A2 |
| TC07000559.hg.1 | -2.41  | PSR07008252.hg.1 | COL1A2 |
| TC07000559.hg.1 | -2.71  | JUC07003935.hg.1 | COL1A2 |
| TC07000559.hg.1 | -2.75  | PSR07008173.hg.1 | COL1A2 |
| TC02001610.hg.1 | 5.2    | JUC02013413.hg.1 |        |
| TC02001610.hg.1 | 3.67   | JUC02013414.hg.1 |        |
| TC02001610.hg.1 | 3.09   | PSR02025810.hg.1 |        |
| TC02001610.hg.1 | 2.65   | JUC02013415.hg.1 |        |
| TC02001610.hg.1 | 2.48   | PSR02025809.hg.1 |        |
| TC02001610.hg.1 | 2.44   | PSR02025805.hg.1 |        |
| TC02001610.hg.1 | 2.09   | JUC02013412.hg.1 |        |
| TC01000184.hg.1 | 5.19   | JUC01001610.hg.1 | KAZN   |
| TC01000184.hg.1 | 2.71   | JUC01001611.hg.1 | KAZN   |
| TC01000184.hg.1 | 2.6    | PSR01002917.hg.1 | KAZN   |
| TC01000184.hg.1 | 2.56   | PSR01002938.hg.1 | KAZN   |
| TC01000184.hg.1 | 2.33   | PSR01002912.hg.1 | KAZN   |

|                 |       |                  |             |
|-----------------|-------|------------------|-------------|
| TC01000184.hg.1 | 2.15  | JUC01001612.hg.1 | KAZN        |
| TC01000184.hg.1 | 2.06  | PSR01002916.hg.1 | KAZN        |
| TC01000184.hg.1 | 2.04  | JUC01001621.hg.1 | KAZN        |
| TC01000184.hg.1 | 2.04  | JUC01001624.hg.1 | KAZN        |
| TC01000184.hg.1 | 2     | PSR01002935.hg.1 | KAZN        |
| TC01006369.hg.1 | 5.19  | JUC01045125.hg.1 | NBPF10, LOC |
| TC01006369.hg.1 | 2.47  | PSR01048679.hg.1 | NBPF10, LOC |
| TC01006369.hg.1 | 2.15  | PSR01048654.hg.1 | NBPF10, LOC |
| TC01006369.hg.1 | 2.15  | PSR01048706.hg.1 | NBPF10, LOC |
| TC01006369.hg.1 | 2.15  | PSR01048715.hg.1 | NBPF10, LOC |
| TC01006369.hg.1 | 2.09  | PSR01048708.hg.1 | NBPF10, LOC |
| TC01006369.hg.1 | 2.09  | PSR01048717.hg.1 | NBPF10, LOC |
| TC01006369.hg.1 | 2.06  | PSR01048690.hg.1 | NBPF10, LOC |
| TC04001820.hg.1 | 5.18  | PSR04024888.hg.1 | SORBS2      |
| TC04001820.hg.1 | 4.26  | PSR04024903.hg.1 | SORBS2      |
| TC04001820.hg.1 | 4.09  | JUC04013189.hg.1 | SORBS2      |
| TC04001820.hg.1 | 3.89  | JUC04013236.hg.1 | SORBS2      |
| TC04001820.hg.1 | 3.87  | PSR04025012.hg.1 | SORBS2      |
| TC04001820.hg.1 | 3.64  | PSR04025026.hg.1 | SORBS2      |
| TC04001820.hg.1 | 3.58  | PSR04025034.hg.1 | SORBS2      |
| TC04001820.hg.1 | 3.56  | JUC04013212.hg.1 | SORBS2      |
| TC04001820.hg.1 | 3.41  | JUC04013248.hg.1 | SORBS2      |
| TC04001820.hg.1 | 3.34  | JUC04013204.hg.1 | SORBS2      |
| TC04001820.hg.1 | 3.02  | JUC04013247.hg.1 | SORBS2      |
| TC04001820.hg.1 | 2.99  | JUC04013221.hg.1 | SORBS2      |
| TC04001820.hg.1 | 2.9   | JUC04013217.hg.1 | SORBS2      |
| TC04001820.hg.1 | 2.87  | JUC04013195.hg.1 | SORBS2      |
| TC04001820.hg.1 | 2.81  | PSR04025040.hg.1 | SORBS2      |
| TC04001820.hg.1 | 2.67  | PSR04025027.hg.1 | SORBS2      |
| TC04001820.hg.1 | 2.48  | PSR04024935.hg.1 | SORBS2      |
| TC04001820.hg.1 | 2.47  | PSR04025035.hg.1 | SORBS2      |
| TC04001820.hg.1 | 2.44  | JUC04013229.hg.1 | SORBS2      |
| TC04001820.hg.1 | 2.35  | PSR04025015.hg.1 | SORBS2      |
| TC04001820.hg.1 | 2.28  | PSR04025038.hg.1 | SORBS2      |
| TC04001820.hg.1 | 2.25  | PSR04025019.hg.1 | SORBS2      |
| TC04001820.hg.1 | 2.23  | PSR04024894.hg.1 | SORBS2      |
| TC04001820.hg.1 | 2.2   | PSR04025010.hg.1 | SORBS2      |
| TC04001820.hg.1 | 2.17  | PSR04024913.hg.1 | SORBS2      |
| TC04001820.hg.1 | 2.14  | PSR04024994.hg.1 | SORBS2      |
| TC04001820.hg.1 | 2.1   | PSR04024904.hg.1 | SORBS2      |
| TC04001820.hg.1 | 2.1   | PSR04025017.hg.1 | SORBS2      |
| TC04001820.hg.1 | 2.07  | PSR04024997.hg.1 | SORBS2      |
| TC04001820.hg.1 | 2.03  | JUC04013200.hg.1 | SORBS2      |
| TC04001820.hg.1 | 2     | JUC04013214.hg.1 | SORBS2      |
| TC04001820.hg.1 | -4.02 | JUC04013224.hg.1 | SORBS2      |
| TC06001332.hg.1 | 5.18  | JUC06008028.hg.1 | CMAHP       |
| TC06001332.hg.1 | -2.03 | PSR06015966.hg.1 | CMAHP       |
| TC06001332.hg.1 | -2.2  | PSR06015985.hg.1 | CMAHP       |
| TC06001332.hg.1 | -2.2  | PSR06016004.hg.1 | CMAHP       |
| TC06001332.hg.1 | -2.46 | PSR06016001.hg.1 | CMAHP       |
| TC06001332.hg.1 | -2.51 | PSR06016003.hg.1 | CMAHP       |
| TC06001332.hg.1 | -3.33 | PSR06015972.hg.1 | CMAHP       |
| TC06001332.hg.1 | -3.63 | PSR06015981.hg.1 | CMAHP       |
| TC06001332.hg.1 | -4.02 | PSR06015975.hg.1 | CMAHP       |
| TC06001332.hg.1 | -4.06 | PSR06015999.hg.1 | CMAHP       |
| TC06001332.hg.1 | -4.15 | PSR06016000.hg.1 | CMAHP       |
| TC06001332.hg.1 | -4.37 | PSR06015973.hg.1 | CMAHP       |
| TC06001332.hg.1 | -4.76 | PSR06015995.hg.1 | CMAHP       |



|                 |       |                   |           |
|-----------------|-------|-------------------|-----------|
| TC06001332.hg.1 | -5.25 | PSR06015965.hg.1  | CMAHP     |
| TC06001332.hg.1 | -5.65 | PSR06015974.hg.1  | CMAHP     |
| TC06001332.hg.1 | -6.74 | PSR06015984.hg.1  | CMAHP     |
| TC06001332.hg.1 | -7.33 | JUC06008018.hg.1  | CMAHP     |
| TC08000452.hg.1 | 5.18  | JUC08003116.hg.1  | PREX2     |
| TC08000452.hg.1 | 5.06  | JUC08003104.hg.1  | PREX2     |
| TC08000452.hg.1 | 4.32  | JUC08003110.hg.1  | PREX2     |
| TC08000452.hg.1 | 3.8   | JUC08003140.hg.1  | PREX2     |
| TC08000452.hg.1 | 3.69  | JUC08003127.hg.1  | PREX2     |
| TC08000452.hg.1 | 3.45  | JUC08003128.hg.1  | PREX2     |
| TC08000452.hg.1 | 3.42  | PSR08006423.hg.1  | PREX2     |
| TC08000452.hg.1 | 3.08  | PSR08006404.hg.1  | PREX2     |
| TC08000452.hg.1 | 2.99  | PSR08006424.hg.1  | PREX2     |
| TC08000452.hg.1 | 2.65  | PSR08006433.hg.1  | PREX2     |
| TC08000452.hg.1 | 2.46  | PSR08006422.hg.1  | PREX2     |
| TC08000452.hg.1 | 2.37  | JUC08003119.hg.1  | PREX2     |
| TC08000452.hg.1 | 2.28  | PSR08006421.hg.1  | PREX2     |
| TC08000452.hg.1 | 2.08  | PSR08006425.hg.1  | PREX2     |
| TC08000452.hg.1 | 2.07  | JUC08003099.hg.1  | PREX2     |
| TC08000452.hg.1 | 2.06  | PSR08006426.hg.1  | PREX2     |
| TC08000452.hg.1 | -2.4  | JUC08003142.hg.1  | PREX2     |
| TC08000452.hg.1 | -4.1  | JUC08003134.hg.1  | PREX2     |
| TC15001636.hg.1 | 5.17  | JUC15008577.hg.1  | LOXL1-AS1 |
| TC15001636.hg.1 | 2.53  | PSR15015878.hg.1  | LOXL1-AS1 |
| TC15001636.hg.1 | 2.21  | PSR15015877.hg.1  | LOXL1-AS1 |
| TC15001636.hg.1 | 2.08  | PSR15015875.hg.1  | LOXL1-AS1 |
| TC15001636.hg.1 | 2.06  | JUC15008578.hg.1  | LOXL1-AS1 |
| TC21000039.hg.1 | 5.17  | JUC21000081.hg.1  | USP25     |
| TC21000039.hg.1 | -2.06 | PSR21000147.hg.1  | USP25     |
| TC17000914.hg.1 | 5.16  | JUC17006637.hg.1  | CCDC40    |
| TC17000914.hg.1 | 3.55  | PSR17011848.hg.1  | CCDC40    |
| TC17000914.hg.1 | 3.32  | JUC17006646.hg.1  | CCDC40    |
| TC6_qbl_hap6000 | 5.16  | PSR6_qbl_hap60022 | ZNRD1-AS1 |
| TC6_qbl_hap6000 | 4.45  | PSR6_qbl_hap60021 | ZNRD1-AS1 |
| TC6_qbl_hap6000 | 3.58  | PSR6_qbl_hap60021 | ZNRD1-AS1 |
| TC6_qbl_hap6000 | 3.4   | PSR6_qbl_hap60021 | ZNRD1-AS1 |
| TC6_qbl_hap6000 | 3.29  | PSR6_qbl_hap60021 | ZNRD1-AS1 |
| TC6_qbl_hap6000 | 3.11  | PSR6_qbl_hap60021 | ZNRD1-AS1 |
| TC6_qbl_hap6000 | 3.06  | PSR6_qbl_hap60021 | ZNRD1-AS1 |
| TC6_qbl_hap6000 | 2.92  | PSR6_qbl_hap60021 | ZNRD1-AS1 |
| TC6_qbl_hap6000 | 2.83  | PSR6_qbl_hap60021 | ZNRD1-AS1 |
| TC6_qbl_hap6000 | 2.65  | JUC6_qbl_hap60007 | ZNRD1-AS1 |
| TC6_qbl_hap6000 | 2.58  | PSR6_qbl_hap60021 | ZNRD1-AS1 |
| TC6_qbl_hap6000 | 2.58  | JUC6_qbl_hap60007 | ZNRD1-AS1 |
| TC6_qbl_hap6000 | 2.36  | PSR6_qbl_hap60021 | ZNRD1-AS1 |
| TC6_qbl_hap6000 | -2.55 | JUC6_qbl_hap60007 | ZNRD1-AS1 |
| TC0X000724.hg.1 | 5.15  | JUC0X004713.hg.1  | MTMR1     |
| TC0X000724.hg.1 | 2.47  | PSR0X009344.hg.1  | MTMR1     |
| TC0X000724.hg.1 | 2.46  | PSR0X009314.hg.1  | MTMR1     |
| TC0X000724.hg.1 | 2.33  | PSR0X009319.hg.1  | MTMR1     |
| TC0X000724.hg.1 | 2.33  | PSR0X009338.hg.1  | MTMR1     |
| TC0X000724.hg.1 | 2.22  | PSR0X009337.hg.1  | MTMR1     |
| TC0X000724.hg.1 | 2.22  | JUC0X004738.hg.1  | MTMR1     |
| TC0X000724.hg.1 | 2.11  | PSR0X009349.hg.1  | MTMR1     |
| TC07000424.hg.1 | 5.14  | JUC07002697.hg.1  | AUTS2     |
| TC07000424.hg.1 | 2.45  | PSR07005666.hg.1  | AUTS2     |
| TC07000424.hg.1 | 2     | JUC07002703.hg.1  | AUTS2     |
| TC22000019.hg.1 | 5.14  | JUC22000038.hg.1  | IL17RA    |

|                 |       |                  |        |
|-----------------|-------|------------------|--------|
| TC22000019.hg.1 | 4.45  | PSR22000087.hg.1 | IL17RA |
| TC22000019.hg.1 | 3.1   | JUC22000039.hg.1 | IL17RA |
| TC22000019.hg.1 | 2.81  | PSR22000070.hg.1 | IL17RA |
| TC22000019.hg.1 | 2.56  | PSR22000072.hg.1 | IL17RA |
| TC05000258.hg.1 | 5.13  | JUC05001746.hg.1 | PART1  |
| TC05000258.hg.1 | 4.64  | JUC05001745.hg.1 | PART1  |
| TC05000258.hg.1 | 4.04  | PSR05003151.hg.1 | PART1  |
| TC05000258.hg.1 | 3.38  | PSR05003152.hg.1 | PART1  |
| TC05000258.hg.1 | 3.12  | PSR05003153.hg.1 | PART1  |
| TC07003396.hg.1 | 5.13  | JUC07021873.hg.1 | TRRAP  |
| TC07003396.hg.1 | 2.19  | PSR07008540.hg.1 | TRRAP  |
| TC07003396.hg.1 | 2.13  | PSR07008577.hg.1 | TRRAP  |
| TC07003396.hg.1 | 2.09  | JUC07021897.hg.1 | TRRAP  |
| TC07003396.hg.1 | -2.01 | JUC07021910.hg.1 | TRRAP  |
| TC07003396.hg.1 | -2.15 | JUC07021902.hg.1 | TRRAP  |
| TC11002170.hg.1 | 5.13  | JUC11013816.hg.1 | FZD4   |
| TC11002170.hg.1 | 3.52  | PSR11026010.hg.1 | FZD4   |
| TC05000849.hg.1 | 5.12  | JUC05006395.hg.1 | GRIA1  |
| TC05000849.hg.1 | 3.36  | JUC05006399.hg.1 | GRIA1  |
| TC05000849.hg.1 | 2.79  | PSR05012232.hg.1 | GRIA1  |
| TC05000849.hg.1 | 2.64  | PSR05012238.hg.1 | GRIA1  |
| TC05000849.hg.1 | 2.43  | PSR05012225.hg.1 | GRIA1  |
| TC05000849.hg.1 | 2.4   | JUC05006389.hg.1 | GRIA1  |
| TC05000849.hg.1 | 2.32  | JUC05006392.hg.1 | GRIA1  |
| TC05000849.hg.1 | 2.16  | JUC05006384.hg.1 | GRIA1  |
| TC05000849.hg.1 | 2.15  | PSR05012243.hg.1 | GRIA1  |
| TC05000849.hg.1 | 2.04  | PSR05012235.hg.1 | GRIA1  |
| TC05000849.hg.1 | 2.03  | PSR05012261.hg.1 | GRIA1  |
| TC05000849.hg.1 | -2.08 | PSR05012270.hg.1 | GRIA1  |
| TC05000849.hg.1 | -2.45 | JUC05006404.hg.1 | GRIA1  |
| TC05000849.hg.1 | -2.57 | PSR05012272.hg.1 | GRIA1  |
| TC05000849.hg.1 | -2.68 | JUC05006397.hg.1 | GRIA1  |
| TC07000296.hg.1 | 5.11  | PSR07004546.hg.1 |        |
| TC07000296.hg.1 | 3.75  | JUC07002181.hg.1 |        |
| TC02000704.hg.1 | 5.1   | JUC02005753.hg.1 | FBLN7  |
| TC02000704.hg.1 | 4.62  | PSR02010875.hg.1 | FBLN7  |
| TC02000704.hg.1 | 4     | PSR02010887.hg.1 | FBLN7  |
| TC02000704.hg.1 | 3.69  | JUC02005764.hg.1 | FBLN7  |
| TC02000704.hg.1 | 3.34  | PSR02010886.hg.1 | FBLN7  |
| TC02000704.hg.1 | 2.94  | PSR02010868.hg.1 | FBLN7  |
| TC02000704.hg.1 | 2.64  | JUC02005766.hg.1 | FBLN7  |
| TC02000704.hg.1 | 2.4   | PSR02010874.hg.1 | FBLN7  |
| TC02000704.hg.1 | 2.18  | PSR02010873.hg.1 | FBLN7  |
| TC02000704.hg.1 | 2     | JUC02005761.hg.1 | FBLN7  |
| TC02000704.hg.1 | -2    | JUC02005765.hg.1 | FBLN7  |
| TC02000704.hg.1 | -2.04 | JUC02005760.hg.1 | FBLN7  |
| TC02000704.hg.1 | -2.08 | PSR02010880.hg.1 | FBLN7  |
| TC02000704.hg.1 | -2.64 | PSR02010883.hg.1 | FBLN7  |
| TC03001849.hg.1 | 5.1   | JUC03016541.hg.1 | TFDP2  |
| TC03001849.hg.1 | -2.08 | JUC03016524.hg.1 | TFDP2  |
| TC03001849.hg.1 | -2.14 | JUC03016539.hg.1 | TFDP2  |
| TC03001849.hg.1 | -2.47 | PSR03033311.hg.1 | TFDP2  |
| TC20000802.hg.1 | 5.1   | JUC20005685.hg.1 | FER1L4 |
| TC20000802.hg.1 | 2.58  | JUC20005675.hg.1 | FER1L4 |
| TC20000802.hg.1 | 2.34  | PSR20010821.hg.1 | FER1L4 |
| TC20000802.hg.1 | 2.22  | PSR20010829.hg.1 | FER1L4 |
| TC20000802.hg.1 | 2.18  | JUC20005647.hg.1 | FER1L4 |
| TC20000802.hg.1 | 2.17  | PSR20010818.hg.1 | FER1L4 |

|                 |       |                  |        |
|-----------------|-------|------------------|--------|
| TC20000802.hg.1 | 2.09  | PSR20010845.hg.1 | FER1L4 |
| TC20000802.hg.1 | 2.04  | JUC20005645.hg.1 | FER1L4 |
| TC20000802.hg.1 | -2.19 | JUC20005662.hg.1 | FER1L4 |
| TC20000802.hg.1 | -2.25 | PSR20010824.hg.1 | FER1L4 |
| TC20000802.hg.1 | -2.37 | JUC20005654.hg.1 | FER1L4 |
| TC20000802.hg.1 | -2.38 | PSR20010838.hg.1 | FER1L4 |
| TC20000802.hg.1 | -2.44 | PSR20010814.hg.1 | FER1L4 |
| TC20000802.hg.1 | -2.51 | PSR20010849.hg.1 | FER1L4 |
| TC20000802.hg.1 | -2.51 | JUC20005669.hg.1 | FER1L4 |
| TC20000802.hg.1 | -2.77 | JUC20005664.hg.1 | FER1L4 |
| TC20000802.hg.1 | -2.84 | JUC20005678.hg.1 | FER1L4 |
| TC20000802.hg.1 | -3.08 | JUC20005663.hg.1 | FER1L4 |
| TC20000802.hg.1 | -3.1  | JUC20005671.hg.1 | FER1L4 |
| TC20000802.hg.1 | -3.21 | JUC20005677.hg.1 | FER1L4 |
| TC20000802.hg.1 | -3.33 | JUC20005642.hg.1 | FER1L4 |
| TC20000802.hg.1 | -4.36 | PSR20010839.hg.1 | FER1L4 |
| TC20000802.hg.1 | -5.35 | PSR20010812.hg.1 | FER1L4 |
| TC20000802.hg.1 | -6.08 | JUC20005659.hg.1 | FER1L4 |
| TC19002651.hg.1 | 5.1   | JUC19017503.hg.1 | ZNF765 |
| TC19002651.hg.1 | -2    | PSR19011361.hg.1 | ZNF765 |
| TC19002651.hg.1 | -3.56 | JUC19017499.hg.1 | ZNF765 |
| TC01006324.hg.1 | 5.09  | PSR01013873.hg.1 | TMEM56 |
| TC01006324.hg.1 | 4.51  | PSR01013874.hg.1 | TMEM56 |
| TC01006324.hg.1 | 3.68  | JUC01044057.hg.1 | TMEM56 |
| TC01006324.hg.1 | 3.27  | PSR01013872.hg.1 | TMEM56 |
| TC01006324.hg.1 | 2.64  | PSR01013869.hg.1 | TMEM56 |
| TC01006324.hg.1 | -2.06 | JUC01044056.hg.1 | TMEM56 |
| TC01006324.hg.1 | -2.16 | JUC01044054.hg.1 | TMEM56 |
| TC01006324.hg.1 | -2.27 | PSR01013886.hg.1 | TMEM56 |
| TC07001065.hg.1 | 5.09  | JUC07007952.hg.1 | WDR60  |
| TC07001065.hg.1 | 2.22  | JUC07007944.hg.1 | WDR60  |
| TC07001065.hg.1 | 2.15  | PSR07016344.hg.1 | WDR60  |
| TC07001552.hg.1 | 5.09  | JUC07011580.hg.1 | MAGI2  |
| TC07001552.hg.1 | 3.45  | JUC07011566.hg.1 | MAGI2  |
| TC07001552.hg.1 | 2.64  | PSR07023362.hg.1 | MAGI2  |
| TC07001552.hg.1 | 2.55  | PSR07023355.hg.1 | MAGI2  |
| TC07001552.hg.1 | 2.45  | JUC07011572.hg.1 | MAGI2  |
| TC07001552.hg.1 | 2     | PSR07023347.hg.1 | MAGI2  |
| TC07001552.hg.1 | -2.11 | PSR07023380.hg.1 | MAGI2  |
| TC07001552.hg.1 | -2.12 | JUC07011591.hg.1 | MAGI2  |
| TC07001552.hg.1 | -2.18 | JUC07011561.hg.1 | MAGI2  |
| TC07001552.hg.1 | -2.24 | PSR07023342.hg.1 | MAGI2  |
| TC07001552.hg.1 | -2.25 | PSR07023345.hg.1 | MAGI2  |
| TC07001552.hg.1 | -2.45 | JUC07011583.hg.1 | MAGI2  |
| TC07001552.hg.1 | -2.57 | PSR07023370.hg.1 | MAGI2  |
| TC07001552.hg.1 | -2.87 | JUC07011567.hg.1 | MAGI2  |
| TC07001552.hg.1 | -3.14 | JUC07011571.hg.1 | MAGI2  |
| TC07001552.hg.1 | -3.24 | JUC07011562.hg.1 | MAGI2  |
| TC07001552.hg.1 | -3.48 | PSR07023372.hg.1 | MAGI2  |
| TC07001552.hg.1 | -3.62 | JUC07011559.hg.1 | MAGI2  |
| TC07001552.hg.1 | -3.83 | PSR07023382.hg.1 | MAGI2  |
| TC07001552.hg.1 | -3.84 | PSR07023357.hg.1 | MAGI2  |
| TC07001552.hg.1 | -3.93 | PSR07023341.hg.1 | MAGI2  |
| TC07001552.hg.1 | -4.18 | PSR07023338.hg.1 | MAGI2  |
| TC07001552.hg.1 | -4.22 | PSR07023374.hg.1 | MAGI2  |
| TC07001552.hg.1 | -4.61 | PSR07023383.hg.1 | MAGI2  |
| TC07001552.hg.1 | -4.7  | JUC07011576.hg.1 | MAGI2  |
| TC07001552.hg.1 | -5.61 | PSR07023373.hg.1 | MAGI2  |

|                 |        |                  |             |
|-----------------|--------|------------------|-------------|
| TC07001552.hg.1 | -5.62  | PSR07023364.hg.1 | MAGI2       |
| TC07001552.hg.1 | -6.28  | PSR07023376.hg.1 | MAGI2       |
| TC07001552.hg.1 | -6.82  | PSR07023339.hg.1 | MAGI2       |
| TC07001552.hg.1 | -8.03  | JUC07011590.hg.1 | MAGI2       |
| TC07001552.hg.1 | -8.32  | JUC07011558.hg.1 | MAGI2       |
| TC04000486.hg.1 | 5.08   | JUC04003631.hg.1 | HERC3       |
| TC04000486.hg.1 | 2.46   | JUC04003652.hg.1 | HERC3       |
| TC04000486.hg.1 | 2.02   | PSR04007069.hg.1 | HERC3       |
| TC01000061.hg.1 | 5.06   | JUC01000474.hg.1 | TNFRSF14    |
| TC01000061.hg.1 | 4.26   | JUC01000475.hg.1 | TNFRSF14    |
| TC01000061.hg.1 | 2.12   | PSR01000938.hg.1 | TNFRSF14    |
| TC01000061.hg.1 | -2.53  | PSR01000967.hg.1 | TNFRSF14    |
| TC01000061.hg.1 | -2.9   | PSR01000954.hg.1 | TNFRSF14    |
| TC01000061.hg.1 | -2.9   | JUC01000485.hg.1 | TNFRSF14    |
| TC01000061.hg.1 | -2.98  | JUC01000487.hg.1 | TNFRSF14    |
| TC01000061.hg.1 | -3.12  | JUC01000470.hg.1 | TNFRSF14    |
| TC01003129.hg.1 | 5.04   | JUC01025970.hg.1 | GJA5        |
| TC01003129.hg.1 | 2.46   | PSR01048502.hg.1 | GJA5        |
| TC01003129.hg.1 | -2.4   | PSR01048498.hg.1 | GJA5        |
| TC01003129.hg.1 | -3.36  | PSR01048500.hg.1 | GJA5        |
| TC01003129.hg.1 | -3.56  | PSR01048506.hg.1 | GJA5        |
| TC01003129.hg.1 | -4.43  | PSR01048507.hg.1 | GJA5        |
| TC01003129.hg.1 | -12.59 | PSR01048509.hg.1 | GJA5        |
| TC02000286.hg.1 | 5.04   | PSR02004351.hg.1 | SOCS5       |
| TC02000286.hg.1 | 4.42   | JUC02002263.hg.1 | SOCS5       |
| TC02000286.hg.1 | 3.13   | JUC02002262.hg.1 | SOCS5       |
| TC02000286.hg.1 | 2.85   | JUC02002264.hg.1 | SOCS5       |
| TC02000286.hg.1 | -2.46  | PSR02004361.hg.1 | SOCS5       |
| TC17000205.hg.1 | 5.04   | JUC17001647.hg.1 | MYO15A      |
| TC17000205.hg.1 | 3.81   | JUC17001664.hg.1 | MYO15A      |
| TC17000205.hg.1 | 2.58   | PSR17002905.hg.1 | MYO15A      |
| TC17000205.hg.1 | 2      | JUC17001658.hg.1 | MYO15A      |
| TC17000205.hg.1 | -3.47  | JUC17001632.hg.1 | MYO15A      |
| TC21000506.hg.1 | 5.04   | JUC21003154.hg.1 | SIK1        |
| TC21000506.hg.1 | 4.19   | JUC21003155.hg.1 | SIK1        |
| TC21000506.hg.1 | 2.95   | PSR21006117.hg.1 | SIK1        |
| TC21000506.hg.1 | 2.87   | PSR21006103.hg.1 | SIK1        |
| TC21000506.hg.1 | 2.46   | JUC21003161.hg.1 | SIK1        |
| TC21000506.hg.1 | 2.34   | JUC21003149.hg.1 | SIK1        |
| TC21000506.hg.1 | 2.05   | JUC21003160.hg.1 | SIK1        |
| TC21000506.hg.1 | 2.01   | JUC21003151.hg.1 | SIK1        |
| TC21000506.hg.1 | -2.12  | JUC21003157.hg.1 | SIK1        |
| TC21000506.hg.1 | -2.64  | PSR21006121.hg.1 | SIK1        |
| TC21000506.hg.1 | -4.08  | JUC21003159.hg.1 | SIK1        |
| TC19000202.hg.1 | 5.03   | JUC19001811.hg.1 | CNN1        |
| TC19000202.hg.1 | 2.5    | JUC19001812.hg.1 | CNN1        |
| TC19000202.hg.1 | 2.29   | JUC19001810.hg.1 | CNN1        |
| TC19000202.hg.1 | 2.13   | PSR19003084.hg.1 | CNN1        |
| TC19000202.hg.1 | -2.37  | PSR19003092.hg.1 | CNN1        |
| TC19000202.hg.1 | -3.38  | PSR19003078.hg.1 | CNN1        |
| TC19000202.hg.1 | -3.53  | JUC19001813.hg.1 | CNN1        |
| TC19000202.hg.1 | -4.46  | PSR19003082.hg.1 | CNN1        |
| TC06004141.hg.1 | 5.02   | PSR06028534.hg.1 | SOD2, LOC10 |
| TC06004141.hg.1 | 4.95   | PSR06028535.hg.1 | SOD2, LOC10 |
| TC06004141.hg.1 | 3.43   | PSR06028520.hg.1 | SOD2, LOC10 |
| TC06004141.hg.1 | 3.31   | JUC06021913.hg.1 | SOD2, LOC10 |
| TC06004141.hg.1 | 2.15   | PSR06028524.hg.1 | SOD2, LOC10 |
| TC06004141.hg.1 | -2.22  | PSR06028521.hg.1 | SOD2, LOC10 |

|                 |       |                  |             |
|-----------------|-------|------------------|-------------|
| TC06004141.hg.1 | -2.59 | JUC06021917.hg.1 | SOD2, LOC10 |
| TC06004141.hg.1 | -3.4  | PSR06028507.hg.1 | SOD2, LOC10 |
| TC06004141.hg.1 | -3.68 | PSR06028522.hg.1 | SOD2, LOC10 |
| TC08000173.hg.1 | 5.02  | JUC08001139.hg.1 | SORBS3      |
| TC08000173.hg.1 | 2.43  | JUC08001124.hg.1 | SORBS3      |
| TC08000173.hg.1 | 2.34  | PSR08002097.hg.1 | SORBS3      |
| TC08000173.hg.1 | 2.24  | PSR08002084.hg.1 | SORBS3      |
| TC08000173.hg.1 | 2.09  | PSR08002088.hg.1 | SORBS3      |
| TC08000173.hg.1 | 2.08  | PSR08002074.hg.1 | SORBS3      |
| TC08000173.hg.1 | 2.06  | PSR08002068.hg.1 | SORBS3      |
| TC08000173.hg.1 | -3.17 | PSR08002091.hg.1 | SORBS3      |
| TC14000386.hg.1 | 5.02  | JUC14002216.hg.1 | SYNE2       |
| TC14000386.hg.1 | 4.12  | JUC14002207.hg.1 | SYNE2       |
| TC14000386.hg.1 | 4.11  | JUC14002176.hg.1 | SYNE2       |
| TC14000386.hg.1 | 3.45  | JUC14002204.hg.1 | SYNE2       |
| TC14000386.hg.1 | 3.34  | PSR14004252.hg.1 | SYNE2       |
| TC14000386.hg.1 | 3.13  | PSR14004346.hg.1 | SYNE2       |
| TC14000386.hg.1 | 3.13  | JUC14002133.hg.1 | SYNE2       |
| TC14000386.hg.1 | 2.9   | JUC14002106.hg.1 | SYNE2       |
| TC14000386.hg.1 | 2.85  | PSR14004267.hg.1 | SYNE2       |
| TC14000386.hg.1 | 2.78  | JUC14002197.hg.1 | SYNE2       |
| TC14000386.hg.1 | 2.77  | PSR14004264.hg.1 | SYNE2       |
| TC14000386.hg.1 | 2.66  | JUC14002102.hg.1 | SYNE2       |
| TC14000386.hg.1 | 2.6   | JUC14002123.hg.1 | SYNE2       |
| TC14000386.hg.1 | 2.59  | PSR14004244.hg.1 | SYNE2       |
| TC14000386.hg.1 | 2.57  | PSR14004249.hg.1 | SYNE2       |
| TC14000386.hg.1 | 2.47  | PSR14004303.hg.1 | SYNE2       |
| TC14000386.hg.1 | 2.34  | PSR14004277.hg.1 | SYNE2       |
| TC14000386.hg.1 | 2.3   | JUC14002136.hg.1 | SYNE2       |
| TC14000386.hg.1 | 2.29  | PSR14004300.hg.1 | SYNE2       |
| TC14000386.hg.1 | 2.28  | PSR14004263.hg.1 | SYNE2       |
| TC14000386.hg.1 | 2.23  | JUC14002157.hg.1 | SYNE2       |
| TC14000386.hg.1 | 2.23  | JUC14002166.hg.1 | SYNE2       |
| TC14000386.hg.1 | 2.19  | JUC14002215.hg.1 | SYNE2       |
| TC14000386.hg.1 | 2.16  | JUC14002221.hg.1 | SYNE2       |
| TC14000386.hg.1 | 2.11  | JUC14002131.hg.1 | SYNE2       |
| TC14000386.hg.1 | 2.1   | PSR14004261.hg.1 | SYNE2       |
| TC14000386.hg.1 | 2.08  | PSR14004284.hg.1 | SYNE2       |
| TC14000386.hg.1 | 2.07  | PSR14004253.hg.1 | SYNE2       |
| TC14000386.hg.1 | 2.07  | PSR14004254.hg.1 | SYNE2       |
| TC14000386.hg.1 | 2.07  | PSR14004366.hg.1 | SYNE2       |
| TC14000386.hg.1 | 2.07  | JUC14002206.hg.1 | SYNE2       |
| TC14000386.hg.1 | 2.06  | PSR14004257.hg.1 | SYNE2       |
| TC14000386.hg.1 | 2.06  | PSR14004360.hg.1 | SYNE2       |
| TC14000386.hg.1 | 2.06  | JUC14002139.hg.1 | SYNE2       |
| TC14000386.hg.1 | 2.04  | PSR14004358.hg.1 | SYNE2       |
| TC14000386.hg.1 | 2.03  | PSR14004308.hg.1 | SYNE2       |
| TC14000386.hg.1 | 2.02  | PSR14004281.hg.1 | SYNE2       |
| TC14000386.hg.1 | 2.02  | PSR14004285.hg.1 | SYNE2       |
| TC14000386.hg.1 | 2.02  | PSR14004374.hg.1 | SYNE2       |
| TC14000386.hg.1 | 2.02  | JUC14002146.hg.1 | SYNE2       |
| TC14000386.hg.1 | 2.01  | PSR14004238.hg.1 | SYNE2       |
| TC14000386.hg.1 | 2     | PSR14004234.hg.1 | SYNE2       |
| TC14000386.hg.1 | 2     | PSR14004302.hg.1 | SYNE2       |
| TC14000386.hg.1 | -2    | PSR14004376.hg.1 | SYNE2       |
| TC14000386.hg.1 | -2.01 | PSR14004370.hg.1 | SYNE2       |
| TC14000386.hg.1 | -2.02 | JUC14002103.hg.1 | SYNE2       |
| TC14000386.hg.1 | -2.04 | PSR14004314.hg.1 | SYNE2       |

|                 |       |                   |             |
|-----------------|-------|-------------------|-------------|
| TC14000386.hg.1 | -2.05 | JUC14002100.hg.1  | SYNE2       |
| TC14000386.hg.1 | -2.07 | JUC14002116.hg.1  | SYNE2       |
| TC14000386.hg.1 | -2.1  | JUC14002198.hg.1  | SYNE2       |
| TC14000386.hg.1 | -2.17 | PSR14004342.hg.1  | SYNE2       |
| TC14000386.hg.1 | -2.17 | JUC14002111.hg.1  | SYNE2       |
| TC14000386.hg.1 | -2.17 | JUC14002203.hg.1  | SYNE2       |
| TC14000386.hg.1 | -2.27 | PSR14004316.hg.1  | SYNE2       |
| TC14000386.hg.1 | -2.29 | PSR14004325.hg.1  | SYNE2       |
| TC14000386.hg.1 | -2.31 | JUC14002138.hg.1  | SYNE2       |
| TC14000386.hg.1 | -2.34 | JUC14002147.hg.1  | SYNE2       |
| TC14000386.hg.1 | -2.52 | JUC14002155.hg.1  | SYNE2       |
| TC14000386.hg.1 | -2.57 | JUC14002088.hg.1  | SYNE2       |
| TC14000386.hg.1 | -3.01 | JUC14002097.hg.1  | SYNE2       |
| TC14000386.hg.1 | -3.02 | PSR14004313.hg.1  | SYNE2       |
| TC14000386.hg.1 | -3.04 | PSR14004330.hg.1  | SYNE2       |
| TC14000386.hg.1 | -3.33 | JUC14002137.hg.1  | SYNE2       |
| TC14000386.hg.1 | -4.36 | JUC14002119.hg.1  | SYNE2       |
| TC01003353.hg.1 | 4.98  | JUC01027412.hg.1  | HDGF        |
| TC01003353.hg.1 | 2.38  | PSR01052377.hg.1  | HDGF        |
| TC01003353.hg.1 | 2.28  | JUC01027417.hg.1  | HDGF        |
| TC06001578.hg.1 | 4.98  | JUC06008987.hg.1  | HLA-DPA1    |
| TC06001578.hg.1 | 3.61  | JUC06008978.hg.1  | HLA-DPA1    |
| TC06001578.hg.1 | 2.77  | PSR06018909.hg.1  | HLA-DPA1    |
| TC06001578.hg.1 | 2.39  | PSR06018922.hg.1  | HLA-DPA1    |
| TC06001578.hg.1 | 2.08  | PSR06018907.hg.1  | HLA-DPA1    |
| TC06001578.hg.1 | 2.07  | PSR06018921.hg.1  | HLA-DPA1    |
| TC06001578.hg.1 | 2.02  | PSR06018905.hg.1  | HLA-DPA1    |
| TC06001578.hg.1 | -2.07 | JUC06008979.hg.1  | HLA-DPA1    |
| TC06001578.hg.1 | -2.08 | JUC06008984.hg.1  | HLA-DPA1    |
| TC06001578.hg.1 | -2.18 | PSR06018929.hg.1  | HLA-DPA1    |
| TC06001578.hg.1 | -2.49 | PSR06018934.hg.1  | HLA-DPA1    |
| TC06001578.hg.1 | -4.66 | JUC06008989.hg.1  | HLA-DPA1    |
| TC10001187.hg.1 | 4.98  | JUC10008625.hg.1  | ZNF248      |
| TC10001187.hg.1 | 2.98  | PSR10014900.hg.1  | ZNF248      |
| TC10001187.hg.1 | 2.48  | PSR10014875.hg.1  | ZNF248      |
| TC6_cox_hap2000 | 4.98  | JUC6_cox_hap20014 | HLA-DPA1    |
| TC6_cox_hap2000 | 3.61  | JUC6_cox_hap20014 | HLA-DPA1    |
| TC6_cox_hap2000 | 2.77  | PSR6_cox_hap20040 | HLA-DPA1    |
| TC6_cox_hap2000 | 2.39  | PSR6_cox_hap20040 | HLA-DPA1    |
| TC6_cox_hap2000 | 2.08  | PSR6_cox_hap20040 | HLA-DPA1    |
| TC6_cox_hap2000 | 2.07  | PSR6_cox_hap20040 | HLA-DPA1    |
| TC6_cox_hap2000 | 2.02  | PSR6_cox_hap20040 | HLA-DPA1    |
| TC6_cox_hap2000 | -2.08 | JUC6_cox_hap20014 | HLA-DPA1    |
| TC6_cox_hap2000 | -2.18 | PSR6_cox_hap20040 | HLA-DPA1    |
| TC6_cox_hap2000 | -2.62 | PSR6_cox_hap20040 | HLA-DPA1    |
| TC6_cox_hap2000 | -4.66 | JUC6_cox_hap20014 | HLA-DPA1    |
| TC0X001549.hg.1 | 4.98  | JUC0X010381.hg.1  | MTCP1NB, M  |
| TC0X001549.hg.1 | 2.96  | JUC0X010377.hg.1  | MTCP1NB, M  |
| TC0X001549.hg.1 | 2.19  | JUC0X010378.hg.1  | MTCP1NB, M  |
| TC0X001549.hg.1 | 2     | PSR0X020786.hg.1  | MTCP1NB, M  |
| TC06001002.hg.1 | 4.97  | JUC06005742.hg.1  | TBPL1       |
| TC06001002.hg.1 | 2.83  | JUC06005738.hg.1  | TBPL1       |
| TC06001002.hg.1 | 2.61  | PSR06011841.hg.1  | TBPL1       |
| TC10000228.hg.1 | 4.97  | JUC10001434.hg.1  | CCDC7, C10c |
| TC10000228.hg.1 | 4.2   | JUC10001393.hg.1  | CCDC7, C10c |
| TC10000228.hg.1 | 3.98  | JUC10001402.hg.1  | CCDC7, C10c |
| TC10000228.hg.1 | 3.95  | JUC10001396.hg.1  | CCDC7, C10c |
| TC10000228.hg.1 | 3.6   | PSR10002639.hg.1  | CCDC7, C10c |

|                 |       |                  |             |
|-----------------|-------|------------------|-------------|
| TC10000228.hg.1 | 3.4   | JUC10001412.hg.1 | CCDC7, C100 |
| TC10000228.hg.1 | 3.21  | PSR10002635.hg.1 | CCDC7, C100 |
| TC10000228.hg.1 | 3.16  | PSR10002634.hg.1 | CCDC7, C100 |
| TC10000228.hg.1 | 3.16  | JUC10001450.hg.1 | CCDC7, C100 |
| TC10000228.hg.1 | 3.05  | PSR10002637.hg.1 | CCDC7, C100 |
| TC10000228.hg.1 | 3.01  | PSR10002640.hg.1 | CCDC7, C100 |
| TC10000228.hg.1 | 2.96  | PSR10002570.hg.1 | CCDC7, C100 |
| TC10000228.hg.1 | 2.94  | PSR10002617.hg.1 | CCDC7, C100 |
| TC10000228.hg.1 | 2.93  | PSR10002643.hg.1 | CCDC7, C100 |
| TC10000228.hg.1 | 2.88  | PSR10002632.hg.1 | CCDC7, C100 |
| TC10000228.hg.1 | 2.87  | JUC10001409.hg.1 | CCDC7, C100 |
| TC10000228.hg.1 | 2.86  | PSR10002633.hg.1 | CCDC7, C100 |
| TC10000228.hg.1 | 2.83  | PSR10002590.hg.1 | CCDC7, C100 |
| TC10000228.hg.1 | 2.83  | PSR10002592.hg.1 | CCDC7, C100 |
| TC10000228.hg.1 | 2.7   | JUC10001448.hg.1 | CCDC7, C100 |
| TC10000228.hg.1 | 2.65  | PSR10002628.hg.1 | CCDC7, C100 |
| TC10000228.hg.1 | 2.63  | PSR10002644.hg.1 | CCDC7, C100 |
| TC10000228.hg.1 | 2.61  | PSR10002579.hg.1 | CCDC7, C100 |
| TC10000228.hg.1 | 2.56  | JUC10001392.hg.1 | CCDC7, C100 |
| TC10000228.hg.1 | 2.5   | PSR10002631.hg.1 | CCDC7, C100 |
| TC10000228.hg.1 | 2.45  | PSR10002621.hg.1 | CCDC7, C100 |
| TC10000228.hg.1 | 2.44  | JUC10001446.hg.1 | CCDC7, C100 |
| TC10000228.hg.1 | 2.41  | PSR10002641.hg.1 | CCDC7, C100 |
| TC10000228.hg.1 | 2.38  | PSR10002646.hg.1 | CCDC7, C100 |
| TC10000228.hg.1 | 2.35  | JUC10001437.hg.1 | CCDC7, C100 |
| TC10000228.hg.1 | 2.33  | PSR10002624.hg.1 | CCDC7, C100 |
| TC10000228.hg.1 | 2.32  | PSR10002645.hg.1 | CCDC7, C100 |
| TC10000228.hg.1 | 2.31  | JUC10001452.hg.1 | CCDC7, C100 |
| TC10000228.hg.1 | 2.3   | PSR10002618.hg.1 | CCDC7, C100 |
| TC10000228.hg.1 | 2.29  | PSR10002642.hg.1 | CCDC7, C100 |
| TC10000228.hg.1 | 2.25  | PSR10002601.hg.1 | CCDC7, C100 |
| TC10000228.hg.1 | 2.24  | PSR10002576.hg.1 | CCDC7, C100 |
| TC10000228.hg.1 | 2.21  | PSR10002574.hg.1 | CCDC7, C100 |
| TC10000228.hg.1 | 2.13  | PSR10002630.hg.1 | CCDC7, C100 |
| TC10000228.hg.1 | 2.11  | JUC10001403.hg.1 | CCDC7, C100 |
| TC10000228.hg.1 | 2.09  | PSR10002607.hg.1 | CCDC7, C100 |
| TC10000228.hg.1 | 2.08  | PSR10002604.hg.1 | CCDC7, C100 |
| TC10000228.hg.1 | 2.08  | JUC10001416.hg.1 | CCDC7, C100 |
| TC10000228.hg.1 | 2.07  | PSR10002578.hg.1 | CCDC7, C100 |
| TC10000228.hg.1 | 2.06  | PSR10002599.hg.1 | CCDC7, C100 |
| TC10000228.hg.1 | 2.02  | PSR10002638.hg.1 | CCDC7, C100 |
| TC10000228.hg.1 | 2     | JUC10001406.hg.1 | CCDC7, C100 |
| TC17000648.hg.1 | 4.97  | JUC17004477.hg.1 | KAT7        |
| TC17000648.hg.1 | 4.68  | JUC17004469.hg.1 | KAT7        |
| TC17000648.hg.1 | 2.26  | PSR17008056.hg.1 | KAT7        |
| TC17000648.hg.1 | 2.21  | JUC17004481.hg.1 | KAT7        |
| TC17000648.hg.1 | 2.2   | JUC17004472.hg.1 | KAT7        |
| TC17000648.hg.1 | 2.12  | JUC17004475.hg.1 | KAT7        |
| TC17000648.hg.1 | -2.32 | JUC17004480.hg.1 | KAT7        |
| TC20000621.hg.1 | 4.97  | JUC20004621.hg.1 | JAG1        |
| TC20000621.hg.1 | 4.94  | PSR20008940.hg.1 | JAG1        |
| TC20000621.hg.1 | 4.3   | PSR20008935.hg.1 | JAG1        |
| TC20000621.hg.1 | 3.41  | PSR20008919.hg.1 | JAG1        |
| TC20000621.hg.1 | 2.2   | JUC20004606.hg.1 | JAG1        |
| TC20000621.hg.1 | -2.05 | PSR20008899.hg.1 | JAG1        |
| TC20000621.hg.1 | -2.42 | PSR20008900.hg.1 | JAG1        |
| TC20000621.hg.1 | -2.9  | JUC20004618.hg.1 | JAG1        |
| TC20000621.hg.1 | -3.59 | JUC20004619.hg.1 | JAG1        |

|                 |       |                  |          |
|-----------------|-------|------------------|----------|
| TC20000621.hg.1 | -5.57 | JUC20004615.hg.1 | JAG1     |
| TC05002138.hg.1 | 4.96  | JUC05015254.hg.1 | MGAT4B   |
| TC05002138.hg.1 | 3.74  | JUC05015246.hg.1 | MGAT4B   |
| TC05002138.hg.1 | 3.61  | PSR05029902.hg.1 | MGAT4B   |
| TC05002138.hg.1 | 3.07  | PSR05029925.hg.1 | MGAT4B   |
| TC05002138.hg.1 | 2.97  | PSR05029928.hg.1 | MGAT4B   |
| TC05002138.hg.1 | 2.89  | PSR05029881.hg.1 | MGAT4B   |
| TC05002138.hg.1 | 2.82  | PSR05029893.hg.1 | MGAT4B   |
| TC05002138.hg.1 | 2.69  | PSR05029935.hg.1 | MGAT4B   |
| TC05002138.hg.1 | 2.68  | JUC05015256.hg.1 | MGAT4B   |
| TC05002138.hg.1 | 2.62  | PSR05029913.hg.1 | MGAT4B   |
| TC05002138.hg.1 | 2.51  | PSR05029932.hg.1 | MGAT4B   |
| TC05002138.hg.1 | 2.49  | PSR05029918.hg.1 | MGAT4B   |
| TC05002138.hg.1 | 2.26  | PSR05029883.hg.1 | MGAT4B   |
| TC05002138.hg.1 | 2.23  | PSR05029931.hg.1 | MGAT4B   |
| TC05002138.hg.1 | 2.16  | PSR05029941.hg.1 | MGAT4B   |
| TC05002138.hg.1 | 2.04  | PSR05029927.hg.1 | MGAT4B   |
| TC07000125.hg.1 | 4.96  | JUC07000885.hg.1 | ITGB8    |
| TC07000125.hg.1 | 4.58  | JUC07000877.hg.1 | ITGB8    |
| TC07000125.hg.1 | 4.39  | PSR07001904.hg.1 | ITGB8    |
| TC07000125.hg.1 | 4.23  | PSR07001906.hg.1 | ITGB8    |
| TC07000125.hg.1 | 4.16  | PSR07001902.hg.1 | ITGB8    |
| TC07000125.hg.1 | 3.66  | PSR07001907.hg.1 | ITGB8    |
| TC07000125.hg.1 | 3.43  | JUC07000886.hg.1 | ITGB8    |
| TC07000125.hg.1 | 3.27  | PSR07001914.hg.1 | ITGB8    |
| TC07000125.hg.1 | 3.19  | JUC07000879.hg.1 | ITGB8    |
| TC07000125.hg.1 | 3.13  | PSR07001912.hg.1 | ITGB8    |
| TC07000125.hg.1 | 2.74  | PSR07001905.hg.1 | ITGB8    |
| TC07000125.hg.1 | 2.42  | PSR07001909.hg.1 | ITGB8    |
| TC07000125.hg.1 | 2.28  | PSR07001923.hg.1 | ITGB8    |
| TC07000125.hg.1 | 2.11  | JUC07000881.hg.1 | ITGB8    |
| TC07000125.hg.1 | -2.05 | JUC07000890.hg.1 | ITGB8    |
| TC07000125.hg.1 | -2.08 | PSR07001927.hg.1 | ITGB8    |
| TC07000125.hg.1 | -2.32 | PSR07001910.hg.1 | ITGB8    |
| TC07000125.hg.1 | -2.32 | JUC07000883.hg.1 | ITGB8    |
| TC07000125.hg.1 | -2.5  | JUC07000884.hg.1 | ITGB8    |
| TC07000125.hg.1 | -2.75 | JUC07000882.hg.1 | ITGB8    |
| TC07000125.hg.1 | -3.74 | JUC07000889.hg.1 | ITGB8    |
| TC12001978.hg.1 | 4.96  | JUC12014468.hg.1 | C12orf51 |
| TC12001978.hg.1 | 2.47  | JUC12014459.hg.1 | C12orf51 |
| TC12001978.hg.1 | 2.2   | JUC12014471.hg.1 | C12orf51 |
| TC12001978.hg.1 | 2.16  | JUC12014480.hg.1 | C12orf51 |
| TC12001978.hg.1 | 2.01  | PSR12025898.hg.1 | C12orf51 |
| TC12001978.hg.1 | -3.78 | JUC12014485.hg.1 | C12orf51 |
| TC20000264.hg.1 | 4.95  | JUC20002075.hg.1 | EPB41L1  |
| TC20000264.hg.1 | 4.4   | JUC20002037.hg.1 | EPB41L1  |
| TC20000264.hg.1 | 3.71  | JUC20002076.hg.1 | EPB41L1  |
| TC20000264.hg.1 | 3.41  | JUC20002059.hg.1 | EPB41L1  |
| TC20000264.hg.1 | 2.55  | PSR20003585.hg.1 | EPB41L1  |
| TC20000264.hg.1 | 2.5   | PSR20003595.hg.1 | EPB41L1  |
| TC20000264.hg.1 | 2.36  | JUC20002038.hg.1 | EPB41L1  |
| TC20000264.hg.1 | 2.35  | JUC20002032.hg.1 | EPB41L1  |
| TC20000264.hg.1 | 2.25  | JUC20002074.hg.1 | EPB41L1  |
| TC20000264.hg.1 | 2.22  | JUC20002054.hg.1 | EPB41L1  |
| TC20000264.hg.1 | 2.12  | PSR20003592.hg.1 | EPB41L1  |
| TC20000264.hg.1 | 2.1   | PSR20003597.hg.1 | EPB41L1  |
| TC20000264.hg.1 | 2.08  | JUC20002021.hg.1 | EPB41L1  |
| TC20000264.hg.1 | 2.07  | JUC20002069.hg.1 | EPB41L1  |



|                 |       |                  |          |
|-----------------|-------|------------------|----------|
| TC20000264.hg.1 | 2.01  | PSR20003591.hg.1 | EPB41L1  |
| TC20000264.hg.1 | 2.01  | JUC20002072.hg.1 | EPB41L1  |
| TC20000264.hg.1 | 2     | PSR20003598.hg.1 | EPB41L1  |
| TC09000417.hg.1 | 4.92  | JUC09002436.hg.1 | SECISBP2 |
| TC09000417.hg.1 | 2.77  | JUC09002432.hg.1 | SECISBP2 |
| TC09000417.hg.1 | 2.37  | PSR09004444.hg.1 | SECISBP2 |
| TC09000417.hg.1 | 2.12  | PSR09004446.hg.1 | SECISBP2 |
| TC09000417.hg.1 | 2.09  | JUC09002424.hg.1 | SECISBP2 |
| TC09000417.hg.1 | 2     | JUC09002443.hg.1 | SECISBP2 |
| TC06000979.hg.1 | 4.91  | JUC06005564.hg.1 | TMEM200A |
| TC06000979.hg.1 | 3.71  | JUC06005565.hg.1 | TMEM200A |
| TC06000979.hg.1 | 3.58  | PSR06011526.hg.1 | TMEM200A |
| TC06000979.hg.1 | -2.11 | PSR06011521.hg.1 | TMEM200A |
| TC06000979.hg.1 | -3.09 | PSR06011518.hg.1 | TMEM200A |
| TC06000979.hg.1 | -3.26 | PSR06011519.hg.1 | TMEM200A |
| TC06001027.hg.1 | 4.91  | PSR06012002.hg.1 | TNFAIP3  |
| TC06001027.hg.1 | 3.73  | PSR06012003.hg.1 | TNFAIP3  |
| TC06001027.hg.1 | 3.72  | JUC06005857.hg.1 | TNFAIP3  |
| TC06001027.hg.1 | 3.15  | JUC06005858.hg.1 | TNFAIP3  |
| TC06001027.hg.1 | 2.88  | PSR06012008.hg.1 | TNFAIP3  |
| TC06001027.hg.1 | 2.87  | JUC06005848.hg.1 | TNFAIP3  |
| TC06001027.hg.1 | 2.55  | JUC06005856.hg.1 | TNFAIP3  |
| TC06001027.hg.1 | 2.01  | PSR06012020.hg.1 | TNFAIP3  |
| TC07000018.hg.1 | 4.91  | PSR07000251.hg.1 | GPER     |
| TC07000018.hg.1 | 3.31  | PSR07000252.hg.1 | GPER     |
| TC07000018.hg.1 | 3.23  | PSR07000270.hg.1 | GPER     |
| TC07000018.hg.1 | 2.76  | PSR07000264.hg.1 | GPER     |
| TC07000018.hg.1 | 2.69  | PSR07000254.hg.1 | GPER     |
| TC07000018.hg.1 | 2.42  | PSR07000268.hg.1 | GPER     |
| TC07000018.hg.1 | 2.3   | JUC07000071.hg.1 | GPER     |
| TC07000018.hg.1 | 2.22  | JUC07000070.hg.1 | GPER     |
| TC07000018.hg.1 | 2.19  | JUC07000074.hg.1 | GPER     |
| TC07000018.hg.1 | 2.12  | PSR07000253.hg.1 | GPER     |
| TC07000018.hg.1 | 2.02  | PSR07000269.hg.1 | GPER     |
| TC07000018.hg.1 | -3.05 | JUC07000072.hg.1 | GPER     |
| TC0X000261.hg.1 | 4.91  | PSR0X003327.hg.1 | HDAC6    |
| TC0X000261.hg.1 | 3.67  | JUC0X001727.hg.1 | HDAC6    |
| TC0X000261.hg.1 | 3.3   | PSR0X003311.hg.1 | HDAC6    |
| TC0X000261.hg.1 | 2.34  | PSR0X003350.hg.1 | HDAC6    |
| TC0X000261.hg.1 | 2.23  | PSR0X003335.hg.1 | HDAC6    |
| TC0X000261.hg.1 | 2.22  | PSR0X003346.hg.1 | HDAC6    |
| TC0X000261.hg.1 | 2.2   | PSR0X003250.hg.1 | HDAC6    |
| TC0X000261.hg.1 | 2.11  | PSR0X003299.hg.1 | HDAC6    |
| TC0X000261.hg.1 | 2.04  | PSR0X003249.hg.1 | HDAC6    |
| TC0X000261.hg.1 | 2.01  | PSR0X003300.hg.1 | HDAC6    |
| TC0X000261.hg.1 | -2.12 | JUC0X001737.hg.1 | HDAC6    |
| TC0X000261.hg.1 | -2.14 | PSR0X003279.hg.1 | HDAC6    |
| TC01000580.hg.1 | 4.9   | JUC01005062.hg.1 | TSPAN1   |
| TC01000580.hg.1 | 3.19  | JUC01005054.hg.1 | TSPAN1   |
| TC01000580.hg.1 | 3.14  | JUC01005057.hg.1 | TSPAN1   |
| TC01000580.hg.1 | 2.2   | PSR01009873.hg.1 | TSPAN1   |
| TC01000580.hg.1 | 2.16  | JUC01005056.hg.1 | TSPAN1   |
| TC01000580.hg.1 | 2.09  | PSR01009872.hg.1 | TSPAN1   |
| TC01000580.hg.1 | -2.12 | PSR01009868.hg.1 | TSPAN1   |
| TC01001966.hg.1 | 4.9   | JUC01016573.hg.1 | FMN2     |
| TC01001966.hg.1 | 3.76  | JUC01016559.hg.1 | FMN2     |
| TC01001966.hg.1 | 3.42  | PSR01030490.hg.1 | FMN2     |
| TC01001966.hg.1 | 3.11  | PSR01030479.hg.1 | FMN2     |

|                 |       |                  |        |
|-----------------|-------|------------------|--------|
| TC01001966.hg.1 | 3.08  | JUC01016586.hg.1 | FMN2   |
| TC01001966.hg.1 | 3.03  | PSR01030512.hg.1 | FMN2   |
| TC01001966.hg.1 | 3     | PSR01030482.hg.1 | FMN2   |
| TC01001966.hg.1 | 2.83  | PSR01030492.hg.1 | FMN2   |
| TC01001966.hg.1 | 2.73  | JUC01016571.hg.1 | FMN2   |
| TC01001966.hg.1 | 2.7   | JUC01016560.hg.1 | FMN2   |
| TC01001966.hg.1 | 2.63  | JUC01016580.hg.1 | FMN2   |
| TC01001966.hg.1 | 2.52  | PSR01030503.hg.1 | FMN2   |
| TC01001966.hg.1 | 2.49  | JUC01016579.hg.1 | FMN2   |
| TC01001966.hg.1 | 2.42  | JUC01016577.hg.1 | FMN2   |
| TC01001966.hg.1 | 2.27  | PSR01030496.hg.1 | FMN2   |
| TC01001966.hg.1 | 2.22  | PSR01030493.hg.1 | FMN2   |
| TC01001966.hg.1 | -2.28 | JUC01016587.hg.1 | FMN2   |
| TC01001966.hg.1 | -4.54 | JUC01016568.hg.1 | FMN2   |
| TC03001071.hg.1 | 4.9   | PSR03018702.hg.1 | HES1   |
| TC03001071.hg.1 | 4.68  | PSR03018708.hg.1 | HES1   |
| TC03001071.hg.1 | 4.55  | PSR03018710.hg.1 | HES1   |
| TC03001071.hg.1 | 4.23  | JUC03009497.hg.1 | HES1   |
| TC03001071.hg.1 | -2.35 | PSR03018706.hg.1 | HES1   |
| TC03001071.hg.1 | -3.28 | JUC03009494.hg.1 | HES1   |
| TC03001071.hg.1 | -3.88 | JUC03009495.hg.1 | HES1   |
| TC02001279.hg.1 | 4.89  | JUC02010542.hg.1 | RPL37A |
| TC02001279.hg.1 | 2.14  | PSR02019567.hg.1 | RPL37A |
| TC02001279.hg.1 | -2.17 | JUC02010540.hg.1 | RPL37A |
| TC02001279.hg.1 | -2.77 | PSR02019590.hg.1 | RPL37A |
| TC02001279.hg.1 | -3.97 | JUC02010545.hg.1 | RPL37A |
| TC02002637.hg.1 | 4.89  | JUC02022087.hg.1 | STK17B |
| TC02002637.hg.1 | 4.12  | PSR02042265.hg.1 | STK17B |
| TC02002637.hg.1 | 3.26  | PSR02042267.hg.1 | STK17B |
| TC02002637.hg.1 | 2.46  | PSR02042266.hg.1 | STK17B |
| TC02002637.hg.1 | 2.38  | PSR02042260.hg.1 | STK17B |
| TC02002637.hg.1 | -2.54 | PSR02042249.hg.1 | STK17B |
| TC16000193.hg.1 | 4.89  | JUC16001502.hg.1 | ABCC1  |
| TC16000193.hg.1 | 3.35  | PSR16002869.hg.1 | ABCC1  |
| TC16000193.hg.1 | 3.11  | JUC16001504.hg.1 | ABCC1  |
| TC16000193.hg.1 | 2.72  | JUC16001495.hg.1 | ABCC1  |
| TC16000193.hg.1 | 2.47  | JUC16001498.hg.1 | ABCC1  |
| TC16000193.hg.1 | 2.43  | PSR16002884.hg.1 | ABCC1  |
| TC16000193.hg.1 | 2.22  | JUC16001483.hg.1 | ABCC1  |
| TC16000193.hg.1 | 2.22  | JUC16001506.hg.1 | ABCC1  |
| TC16000193.hg.1 | 2.05  | PSR16002860.hg.1 | ABCC1  |
| TC16000193.hg.1 | -2.68 | JUC16001480.hg.1 | ABCC1  |
| TC16000193.hg.1 | -3.29 | JUC16001505.hg.1 | ABCC1  |
| TC09000201.hg.1 | 4.88  | JUC09001222.hg.1 | RECK   |
| TC09000201.hg.1 | -2.87 | PSR09002290.hg.1 | RECK   |
| TC09000201.hg.1 | -2.99 | JUC09001216.hg.1 | RECK   |
| TC09000201.hg.1 | -3.67 | JUC09001232.hg.1 | RECK   |
| TC09000005.hg.1 | 4.87  | JUC09000079.hg.1 | KANK1  |
| TC09000005.hg.1 | 2.08  | JUC09000081.hg.1 | KANK1  |
| TC09000005.hg.1 | 2.06  | JUC09000076.hg.1 | KANK1  |
| TC09000005.hg.1 | -2.04 | PSR09000140.hg.1 | KANK1  |
| TC09000005.hg.1 | -2.21 | JUC09000084.hg.1 | KANK1  |
| TC09000005.hg.1 | -2.23 | JUC09000090.hg.1 | KANK1  |
| TC09000005.hg.1 | -2.42 | PSR09000131.hg.1 | KANK1  |
| TC09000005.hg.1 | -2.43 | JUC09000098.hg.1 | KANK1  |
| TC09000005.hg.1 | -2.63 | PSR09000123.hg.1 | KANK1  |
| TC09000005.hg.1 | -3.42 | JUC09000077.hg.1 | KANK1  |
| TC09000005.hg.1 | -6.44 | JUC09000089.hg.1 | KANK1  |

|                 |       |                  |             |
|-----------------|-------|------------------|-------------|
| TC20000108.hg.1 | 4.87  | PSR20001425.hg.1 | PCSK2       |
| TC20000108.hg.1 | 3.72  | PSR20001427.hg.1 | PCSK2       |
| TC20000108.hg.1 | 3.32  | PSR20001431.hg.1 | PCSK2       |
| TC20000108.hg.1 | 3.01  | JUC20000749.hg.1 | PCSK2       |
| TC20000108.hg.1 | -2.13 | JUC20000742.hg.1 | PCSK2       |
| TC20000108.hg.1 | -2.27 | JUC20000745.hg.1 | PCSK2       |
| TC01001112.hg.1 | 4.86  | JUC01009670.hg.1 | CHD1L       |
| TC01001112.hg.1 | 4.67  | JUC01009657.hg.1 | CHD1L       |
| TC01001112.hg.1 | 2.61  | JUC01009667.hg.1 | CHD1L       |
| TC01001112.hg.1 | 2.59  | PSR01017585.hg.1 | CHD1L       |
| TC01001112.hg.1 | 2.26  | PSR01017558.hg.1 | CHD1L       |
| TC01001112.hg.1 | 2.24  | JUC01009655.hg.1 | CHD1L       |
| TC01001112.hg.1 | 2.12  | JUC01009672.hg.1 | CHD1L       |
| TC01001112.hg.1 | -2.46 | JUC01009689.hg.1 | CHD1L       |
| TC01001112.hg.1 | -2.58 | JUC01009665.hg.1 | CHD1L       |
| TC02001874.hg.1 | 4.85  | PSR02029944.hg.1 | LOC1001294  |
| TC02001874.hg.1 | 3.11  | PSR02029943.hg.1 | LOC1001294  |
| TC02001874.hg.1 | 2.44  | JUC02015733.hg.1 | LOC1001294  |
| TC02001874.hg.1 | 2.23  | PSR02029940.hg.1 | LOC1001294  |
| TC02002541.hg.1 | 4.85  | JUC02021260.hg.1 | WIPF1       |
| TC02002541.hg.1 | 4.67  | JUC02021276.hg.1 | WIPF1       |
| TC02002541.hg.1 | 3.64  | JUC02021256.hg.1 | WIPF1       |
| TC02002541.hg.1 | 2.16  | JUC02021282.hg.1 | WIPF1       |
| TC02002541.hg.1 | 2.1   | JUC02021264.hg.1 | WIPF1       |
| TC02002541.hg.1 | 2.05  | PSR02040354.hg.1 | WIPF1       |
| TC02002541.hg.1 | -3.66 | PSR02040364.hg.1 | WIPF1       |
| TC02002823.hg.1 | 4.85  | PSR02045569.hg.1 | SERPINE2    |
| TC02002823.hg.1 | 4.73  | PSR02045571.hg.1 | SERPINE2    |
| TC02002823.hg.1 | 4.58  | JUC02023773.hg.1 | SERPINE2    |
| TC02002823.hg.1 | 4.23  | PSR02045565.hg.1 | SERPINE2    |
| TC02002823.hg.1 | 4.05  | JUC02023781.hg.1 | SERPINE2    |
| TC02002823.hg.1 | 3.57  | PSR02045559.hg.1 | SERPINE2    |
| TC02002823.hg.1 | 3.29  | PSR02045566.hg.1 | SERPINE2    |
| TC02002823.hg.1 | 3.22  | PSR02045575.hg.1 | SERPINE2    |
| TC02002823.hg.1 | 3.04  | PSR02045535.hg.1 | SERPINE2    |
| TC02002823.hg.1 | 2.89  | PSR02045563.hg.1 | SERPINE2    |
| TC02002823.hg.1 | 2.53  | PSR02045567.hg.1 | SERPINE2    |
| TC02002823.hg.1 | 2.22  | JUC02023780.hg.1 | SERPINE2    |
| TC02002823.hg.1 | 2.2   | JUC02023784.hg.1 | SERPINE2    |
| TC02002823.hg.1 | 2.06  | PSR02045570.hg.1 | SERPINE2    |
| TC02002823.hg.1 | 2     | JUC02023769.hg.1 | SERPINE2    |
| TC02002823.hg.1 | -2.83 | JUC02023788.hg.1 | SERPINE2    |
| TC07001895.hg.1 | 4.85  | PSR07029420.hg.1 | PTN, LOC100 |
| TC07001895.hg.1 | 2.99  | PSR07029413.hg.1 | PTN, LOC100 |
| TC07001895.hg.1 | 2.12  | PSR07029417.hg.1 | PTN, LOC100 |
| TC07001895.hg.1 | -2.5  | PSR07029414.hg.1 | PTN, LOC100 |
| TC07001895.hg.1 | -2.63 | PSR07029416.hg.1 | PTN, LOC100 |
| TC07001895.hg.1 | -3.28 | JUC07014519.hg.1 | PTN, LOC100 |
| TC07001895.hg.1 | -3.41 | JUC07014518.hg.1 | PTN, LOC100 |
| TC04001014.hg.1 | 4.84  | JUC04007430.hg.1 | AFAP1       |
| TC04001014.hg.1 | 2.68  | JUC04007434.hg.1 | AFAP1       |
| TC04001014.hg.1 | 2.46  | JUC04007422.hg.1 | AFAP1       |
| TC04001014.hg.1 | 2.34  | PSR04013943.hg.1 | AFAP1       |
| TC04001014.hg.1 | -2.03 | PSR04013969.hg.1 | AFAP1       |
| TC04001014.hg.1 | -2.34 | JUC04007418.hg.1 | AFAP1       |
| TC11000063.hg.1 | 4.84  | JUC11000604.hg.1 | CD81        |
| TC11000063.hg.1 | 2.3   | PSR11001200.hg.1 | CD81        |
| TC02002428.hg.1 | 4.82  | JUC02019898.hg.1 | NEB         |

|                 |       |                  |          |
|-----------------|-------|------------------|----------|
| TC02002428.hg.1 | 3.09  | JUC02019999.hg.1 | NEB      |
| TC02002428.hg.1 | 3.09  | JUC02020002.hg.1 | NEB      |
| TC02002428.hg.1 | 3.09  | JUC02020036.hg.1 | NEB      |
| TC02002428.hg.1 | 2.99  | JUC02019963.hg.1 | NEB      |
| TC02002428.hg.1 | 2.99  | JUC02019966.hg.1 | NEB      |
| TC02002428.hg.1 | 2.99  | JUC02019968.hg.1 | NEB      |
| TC02002428.hg.1 | 2.69  | PSR02038241.hg.1 | NEB      |
| TC02002428.hg.1 | 2.45  | JUC02020029.hg.1 | NEB      |
| TC02002428.hg.1 | 2.14  | PSR02038097.hg.1 | NEB      |
| TC02002428.hg.1 | 2.09  | PSR02038202.hg.1 | NEB      |
| TC02002428.hg.1 | 2.05  | PSR02038245.hg.1 | NEB      |
| TC02002428.hg.1 | 2.03  | JUC02019943.hg.1 | NEB      |
| TC02002428.hg.1 | 2.03  | JUC02019946.hg.1 | NEB      |
| TC02002428.hg.1 | 2.03  | JUC02019948.hg.1 | NEB      |
| TC02002428.hg.1 | -2.04 | JUC02019902.hg.1 | NEB      |
| TC02002428.hg.1 | -2.47 | PSR02038296.hg.1 | NEB      |
| TC13000678.hg.1 | 4.82  | JUC13004567.hg.1 | INTS6    |
| TC13000678.hg.1 | 2.33  | PSR13007854.hg.1 | INTS6    |
| TC13000678.hg.1 | -2.16 | JUC13004562.hg.1 | INTS6    |
| TC06001915.hg.1 | 4.8   | JUC06011405.hg.1 | KIAA1009 |
| TC06001915.hg.1 | 2.14  | JUC06011431.hg.1 | KIAA1009 |
| TC06001915.hg.1 | 2.13  | JUC06011426.hg.1 | KIAA1009 |
| TC06001915.hg.1 | 2.09  | JUC06011423.hg.1 | KIAA1009 |
| TC06001915.hg.1 | 2.05  | JUC06011416.hg.1 | KIAA1009 |
| TC06001915.hg.1 | 2.03  | JUC06011435.hg.1 | KIAA1009 |
| TC06001915.hg.1 | -2.14 | PSR06023409.hg.1 | KIAA1009 |
| TC06001915.hg.1 | -2.16 | JUC06011434.hg.1 | KIAA1009 |
| TC13001722.hg.1 | 4.8   | JUC13008429.hg.1 | N4BP2L1  |
| TC13001722.hg.1 | 4.61  | PSR13006172.hg.1 | N4BP2L1  |
| TC13001722.hg.1 | 4.16  | JUC13008432.hg.1 | N4BP2L1  |
| TC13001722.hg.1 | 3.75  | JUC13008437.hg.1 | N4BP2L1  |
| TC13001722.hg.1 | 3.16  | PSR13006168.hg.1 | N4BP2L1  |
| TC13001722.hg.1 | 2.95  | PSR13006165.hg.1 | N4BP2L1  |
| TC13001722.hg.1 | 2.94  | PSR13006159.hg.1 | N4BP2L1  |
| TC13001722.hg.1 | 2.26  | PSR13006167.hg.1 | N4BP2L1  |
| TC13001722.hg.1 | 2.15  | PSR13006166.hg.1 | N4BP2L1  |
| TC13001722.hg.1 | 2.09  | PSR13006171.hg.1 | N4BP2L1  |
| TC13001722.hg.1 | 2.06  | PSR13006155.hg.1 | N4BP2L1  |
| TC13001722.hg.1 | 2.05  | PSR13006161.hg.1 | N4BP2L1  |
| TC13001722.hg.1 | -2.06 | JUC13008431.hg.1 | N4BP2L1  |
| TC13001722.hg.1 | -2.31 | PSR13006162.hg.1 | N4BP2L1  |
| TC13001722.hg.1 | -2.67 | PSR13006154.hg.1 | N4BP2L1  |
| TC13001722.hg.1 | -3.15 | JUC13008428.hg.1 | N4BP2L1  |
| TC13001722.hg.1 | -3.81 | JUC13008427.hg.1 | N4BP2L1  |
| TC13001722.hg.1 | -3.94 | JUC13008435.hg.1 | N4BP2L1  |
| TC14002310.hg.1 | 4.8   | PSR14007438.hg.1 | BDKRB2   |
| TC14002310.hg.1 | 4.61  | PSR14007440.hg.1 | BDKRB2   |
| TC14002310.hg.1 | 3.22  | PSR14007448.hg.1 | BDKRB2   |
| TC14002310.hg.1 | 3.15  | PSR14007447.hg.1 | BDKRB2   |
| TC14002310.hg.1 | 2.99  | PSR14007442.hg.1 | BDKRB2   |
| TC14002310.hg.1 | 2.67  | PSR14007451.hg.1 | BDKRB2   |
| TC14002310.hg.1 | 2.56  | JUC14011897.hg.1 | BDKRB2   |
| TC20000357.hg.1 | 4.8   | JUC20002778.hg.1 | UBE2C    |
| TC20000357.hg.1 | 4.32  | PSR20005117.hg.1 | UBE2C    |
| TC20000357.hg.1 | 4.06  | PSR20005096.hg.1 | UBE2C    |
| TC20000357.hg.1 | 3.07  | PSR20005105.hg.1 | UBE2C    |
| TC20000357.hg.1 | 2.69  | PSR20005116.hg.1 | UBE2C    |
| TC20000357.hg.1 | 2.45  | PSR20005104.hg.1 | UBE2C    |

|                 |       |                  |            |
|-----------------|-------|------------------|------------|
| TC20000357.hg.1 | 2.31  | PSR20005103.hg.1 | UBE2C      |
| TC20000357.hg.1 | 2.31  | JUC20002775.hg.1 | UBE2C      |
| TC20000357.hg.1 | 2.06  | PSR20005115.hg.1 | UBE2C      |
| TC17000532.hg.1 | 4.79  | JUC17003619.hg.1 | TUBG2      |
| TC17000532.hg.1 | 3.45  | PSR17006447.hg.1 | TUBG2      |
| TC17000532.hg.1 | 3.21  | PSR17006450.hg.1 | TUBG2      |
| TC17000532.hg.1 | 2.13  | JUC17003621.hg.1 | TUBG2      |
| TC17000532.hg.1 | -2.25 | JUC17003611.hg.1 | TUBG2      |
| TC03001670.hg.1 | 4.78  | JUC03014949.hg.1 | ZBTB20     |
| TC03001670.hg.1 | 4.36  | JUC03014951.hg.1 | ZBTB20     |
| TC03001670.hg.1 | 4.05  | JUC03014966.hg.1 | ZBTB20     |
| TC03001670.hg.1 | 3.86  | JUC03014963.hg.1 | ZBTB20     |
| TC03001670.hg.1 | 3.22  | JUC03014983.hg.1 | ZBTB20     |
| TC03001670.hg.1 | 3.19  | PSR03030160.hg.1 | ZBTB20     |
| TC03001670.hg.1 | 2.65  | JUC03014962.hg.1 | ZBTB20     |
| TC03001670.hg.1 | 2.49  | JUC03014981.hg.1 | ZBTB20     |
| TC03001670.hg.1 | 2.4   | JUC03014982.hg.1 | ZBTB20     |
| TC03001670.hg.1 | 2.24  | JUC03014970.hg.1 | ZBTB20     |
| TC03001670.hg.1 | 2.1   | PSR03030162.hg.1 | ZBTB20     |
| TC03001670.hg.1 | 2.07  | PSR03030156.hg.1 | ZBTB20     |
| TC03001670.hg.1 | 2.04  | PSR03030144.hg.1 | ZBTB20     |
| TC03001670.hg.1 | 2.04  | PSR03030164.hg.1 | ZBTB20     |
| TC03001670.hg.1 | -2.8  | JUC03014964.hg.1 | ZBTB20     |
| TC02001483.hg.1 | 4.77  | PSR02024188.hg.1 | ATG4B      |
| TC02001483.hg.1 | -2.35 | PSR02024150.hg.1 | ATG4B      |
| TC02001483.hg.1 | -2.62 | JUC02012566.hg.1 | ATG4B      |
| TC03003317.hg.1 | 4.77  | JUC03023019.hg.1 | P4HTM      |
| TC03003317.hg.1 | 3.56  | JUC03023023.hg.1 | P4HTM      |
| TC03003317.hg.1 | 2.53  | JUC03023016.hg.1 | P4HTM      |
| TC03003317.hg.1 | 2.15  | PSR03005808.hg.1 | P4HTM      |
| TC03003317.hg.1 | 2.14  | PSR03005793.hg.1 | P4HTM      |
| TC03003317.hg.1 | 2.08  | PSR03005794.hg.1 | P4HTM      |
| TC03003317.hg.1 | 2.07  | PSR03005797.hg.1 | P4HTM      |
| TC06000991.hg.1 | 4.77  | PSR06011703.hg.1 | LOC1005072 |
| TC06000991.hg.1 | 3.56  | JUC06005670.hg.1 | LOC1005072 |
| TC06000991.hg.1 | 3.09  | JUC06005669.hg.1 | LOC1005072 |
| TC06000991.hg.1 | 2.51  | PSR06011704.hg.1 | LOC1005072 |
| TC06000991.hg.1 | -2.18 | PSR06011705.hg.1 | LOC1005072 |
| TC13000025.hg.1 | 4.77  | JUC13000116.hg.1 | IFT88      |
| TC13000025.hg.1 | 3.38  | JUC13000094.hg.1 | IFT88      |
| TC13000025.hg.1 | 2.91  | JUC13000093.hg.1 | IFT88      |
| TC13000025.hg.1 | 2.74  | JUC13000120.hg.1 | IFT88      |
| TC13000025.hg.1 | 2.6   | PSR13000189.hg.1 | IFT88      |
| TC13000025.hg.1 | 2.54  | JUC13000096.hg.1 | IFT88      |
| TC13000025.hg.1 | 2.45  | JUC13000103.hg.1 | IFT88      |
| TC13000025.hg.1 | 2.4   | JUC13000102.hg.1 | IFT88      |
| TC13000025.hg.1 | 2.23  | PSR13000162.hg.1 | IFT88      |
| TC13000025.hg.1 | 2.2   | PSR13000158.hg.1 | IFT88      |
| TC13000025.hg.1 | 2.17  | JUC13000100.hg.1 | IFT88      |
| TC13000025.hg.1 | 2.16  | JUC13000099.hg.1 | IFT88      |
| TC13000025.hg.1 | 2.15  | JUC13000108.hg.1 | IFT88      |
| TC13000025.hg.1 | 2.09  | JUC13000117.hg.1 | IFT88      |
| TC13000025.hg.1 | 2.08  | PSR13000177.hg.1 | IFT88      |
| TC13000025.hg.1 | -2.09 | JUC13000123.hg.1 | IFT88      |
| TC13000025.hg.1 | -2.16 | JUC13000112.hg.1 | IFT88      |
| TC13000025.hg.1 | -2.81 | JUC13000121.hg.1 | IFT88      |
| TC15002784.hg.1 | 4.77  | PSR15000322.hg.1 | SNRPN, SNU |
| TC15002784.hg.1 | 3.95  | JUC15013593.hg.1 | SNRPN, SNU |

|                 |       |                  |             |
|-----------------|-------|------------------|-------------|
| TC15002784.hg.1 | 2.3   | JUC15013589.hg.1 | SNRPN, SNU  |
| TC15002784.hg.1 | -2.53 | JUC15013578.hg.1 | SNRPN, SNU  |
| TC04001380.hg.1 | 4.76  | PSR04019319.hg.1 | FAM13A      |
| TC04001380.hg.1 | 4.61  | JUC04010131.hg.1 | FAM13A      |
| TC04001380.hg.1 | 4.61  | JUC04010144.hg.1 | FAM13A      |
| TC04001380.hg.1 | 4.22  | JUC04010151.hg.1 | FAM13A      |
| TC04001380.hg.1 | 4.2   | JUC04010135.hg.1 | FAM13A      |
| TC04001380.hg.1 | 4.1   | JUC04010125.hg.1 | FAM13A      |
| TC04001380.hg.1 | 4     | JUC04010122.hg.1 | FAM13A      |
| TC04001380.hg.1 | 3.91  | PSR04019316.hg.1 | FAM13A      |
| TC04001380.hg.1 | 3.87  | PSR04019312.hg.1 | FAM13A      |
| TC04001380.hg.1 | 3.62  | PSR04019315.hg.1 | FAM13A      |
| TC04001380.hg.1 | 3.57  | JUC04010146.hg.1 | FAM13A      |
| TC04001380.hg.1 | 3.41  | JUC04010127.hg.1 | FAM13A      |
| TC04001380.hg.1 | 3.4   | PSR04019302.hg.1 | FAM13A      |
| TC04001380.hg.1 | 3.35  | PSR04019304.hg.1 | FAM13A      |
| TC04001380.hg.1 | 3.34  | PSR04019310.hg.1 | FAM13A      |
| TC04001380.hg.1 | 3.31  | PSR04019314.hg.1 | FAM13A      |
| TC04001380.hg.1 | 3.25  | PSR04019318.hg.1 | FAM13A      |
| TC04001380.hg.1 | 3.19  | PSR04019306.hg.1 | FAM13A      |
| TC04001380.hg.1 | 3.19  | JUC04010117.hg.1 | FAM13A      |
| TC04001380.hg.1 | 3.18  | PSR04019325.hg.1 | FAM13A      |
| TC04001380.hg.1 | 2.83  | JUC04010154.hg.1 | FAM13A      |
| TC04001380.hg.1 | 2.58  | PSR04019320.hg.1 | FAM13A      |
| TC04001380.hg.1 | 2.54  | JUC04010143.hg.1 | FAM13A      |
| TC04001380.hg.1 | 2.52  | PSR04019311.hg.1 | FAM13A      |
| TC04001380.hg.1 | 2.5   | JUC04010156.hg.1 | FAM13A      |
| TC04001380.hg.1 | 2.32  | PSR04019308.hg.1 | FAM13A      |
| TC04001380.hg.1 | 2.19  | PSR04019313.hg.1 | FAM13A      |
| TC04001380.hg.1 | 2.13  | PSR04019301.hg.1 | FAM13A      |
| TC04001380.hg.1 | 2.1   | PSR04019307.hg.1 | FAM13A      |
| TC04001380.hg.1 | -2.7  | PSR04019260.hg.1 | FAM13A      |
| TC04001380.hg.1 | -2.71 | JUC04010145.hg.1 | FAM13A      |
| TC04001380.hg.1 | -4.05 | PSR04019294.hg.1 | FAM13A      |
| TC04001380.hg.1 | -7.19 | JUC04010124.hg.1 | FAM13A      |
| TC17001895.hg.1 | 4.76  | JUC17014420.hg.1 | RNF157      |
| TC17001895.hg.1 | 2.43  | JUC17014425.hg.1 | RNF157      |
| TC17001895.hg.1 | 2.39  | PSR17025677.hg.1 | RNF157      |
| TC17001895.hg.1 | 2.08  | JUC17014421.hg.1 | RNF157      |
| TC17001895.hg.1 | -2.05 | JUC17014423.hg.1 | RNF157      |
| TC17001895.hg.1 | -2.59 | JUC17014418.hg.1 | RNF157      |
| TC01000440.hg.1 | 4.74  | JUC01003544.hg.1 | ZNF362      |
| TC01000440.hg.1 | -2.12 | JUC01003551.hg.1 | ZNF362      |
| TC01000440.hg.1 | -2.4  | PSR01006832.hg.1 | ZNF362      |
| TC01000769.hg.1 | 4.74  | JUC01006425.hg.1 | FPGT-TNNI3I |
| TC01000769.hg.1 | 4.21  | JUC01006417.hg.1 | FPGT-TNNI3I |
| TC01000769.hg.1 | 4.18  | JUC01006437.hg.1 | FPGT-TNNI3I |
| TC01000769.hg.1 | 3.81  | JUC01006409.hg.1 | FPGT-TNNI3I |
| TC01000769.hg.1 | 3.39  | JUC01006402.hg.1 | FPGT-TNNI3I |
| TC01000769.hg.1 | 3.09  | JUC01006406.hg.1 | FPGT-TNNI3I |
| TC01000769.hg.1 | 2.78  | PSR01012244.hg.1 | FPGT-TNNI3I |
| TC01000769.hg.1 | 2.57  | PSR01012252.hg.1 | FPGT-TNNI3I |
| TC01000769.hg.1 | 2.45  | PSR01012254.hg.1 | FPGT-TNNI3I |
| TC01000769.hg.1 | 2.35  | PSR01012231.hg.1 | FPGT-TNNI3I |
| TC01000769.hg.1 | 2.33  | PSR01012251.hg.1 | FPGT-TNNI3I |
| TC01000769.hg.1 | 2.33  | PSR01012271.hg.1 | FPGT-TNNI3I |
| TC01000769.hg.1 | 2.27  | JUC01006408.hg.1 | FPGT-TNNI3I |
| TC01000769.hg.1 | 2.21  | PSR01012225.hg.1 | FPGT-TNNI3I |

|                 |       |                  |                        |
|-----------------|-------|------------------|------------------------|
| TC01000769.hg.1 | 2.12  | JUC01006438.hg.1 | FPGT-TNNI3I            |
| TC01000769.hg.1 | 2     | PSR01012266.hg.1 | FPGT-TNNI3I            |
| TC01002300.hg.1 | 4.74  | JUC01018939.hg.1 | CAPZB                  |
| TC01002300.hg.1 | 2.86  | PSR01035269.hg.1 | CAPZB                  |
| TC01002300.hg.1 | 2.08  | PSR01035271.hg.1 | CAPZB                  |
| TC01002300.hg.1 | -2.05 | JUC01018945.hg.1 | CAPZB                  |
| TC01002300.hg.1 | -2.24 | JUC01018958.hg.1 | CAPZB                  |
| TC01002300.hg.1 | -2.33 | JUC01018955.hg.1 | CAPZB                  |
| TC01002300.hg.1 | -2.67 | JUC01018949.hg.1 | CAPZB                  |
| TC6_apd_hap1000 | 4.74  | PSR6_apd_hap1000 | HLA-H                  |
| TC6_apd_hap1000 | 2.94  | JUC6_apd_hap1000 | HLA-H                  |
| TC6_apd_hap1000 | 2.63  | PSR6_apd_hap1000 | HLA-H                  |
| TC6_apd_hap1000 | 2.17  | JUC6_apd_hap1000 | HLA-H                  |
| TC6_apd_hap1000 | 2.08  | PSR6_apd_hap1000 | HLA-H                  |
| TC03001298.hg.1 | 4.74  | JUC03011151.hg.1 | SCN10A                 |
| TC03001298.hg.1 | 2     | PSR03022308.hg.1 | SCN10A                 |
| TC01000649.hg.1 | 4.73  | PSR01010613.hg.1 | PODN                   |
| TC01000649.hg.1 | 4.67  | JUC01005490.hg.1 | PODN                   |
| TC01000649.hg.1 | 3.82  | PSR01010614.hg.1 | PODN                   |
| TC01000649.hg.1 | 2.77  | JUC01005488.hg.1 | PODN                   |
| TC01000649.hg.1 | 2.7   | JUC01005475.hg.1 | PODN                   |
| TC01000649.hg.1 | -2.2  | JUC01005491.hg.1 | PODN                   |
| TC01000649.hg.1 | -2.21 | JUC01005492.hg.1 | PODN                   |
| TC02002793.hg.1 | 4.72  | PSR02045103.hg.1 | TUBA4A                 |
| TC02002793.hg.1 | 4.63  | PSR02045090.hg.1 | TUBA4A                 |
| TC02002793.hg.1 | 4.28  | PSR02045112.hg.1 | TUBA4A                 |
| TC02002793.hg.1 | 4.16  | PSR02045109.hg.1 | TUBA4A                 |
| TC02002793.hg.1 | 4.11  | PSR02045111.hg.1 | TUBA4A                 |
| TC02002793.hg.1 | 3.98  | PSR02045105.hg.1 | TUBA4A                 |
| TC02002793.hg.1 | 3.85  | PSR02045110.hg.1 | TUBA4A                 |
| TC02002793.hg.1 | 3.84  | JUC02023549.hg.1 | TUBA4A                 |
| TC02002793.hg.1 | 3.25  | PSR02045089.hg.1 | TUBA4A                 |
| TC02002793.hg.1 | 2.61  | JUC02023557.hg.1 | TUBA4A                 |
| TC02002793.hg.1 | 2.5   | PSR02045106.hg.1 | TUBA4A                 |
| TC02002793.hg.1 | 2.12  | PSR02045101.hg.1 | TUBA4A                 |
| TC02002793.hg.1 | -2    | JUC02023553.hg.1 | TUBA4A                 |
| TC02002793.hg.1 | -2.53 | JUC02023556.hg.1 | TUBA4A                 |
| TC02002793.hg.1 | -3.23 | PSR02045096.hg.1 | TUBA4A                 |
| TC03003407.hg.1 | 4.72  | JUC03024561.hg.1 | PRSS46, PRSS46, PRSS46 |
| TC03003407.hg.1 | 2.44  | PSR03023287.hg.1 | PRSS46, PRSS46, PRSS46 |
| TC03003407.hg.1 | -2.04 | JUC03024558.hg.1 | PRSS46, PRSS46, PRSS46 |
| TC03003407.hg.1 | -2.1  | PSR03023284.hg.1 | PRSS46, PRSS46, PRSS46 |
| TC03003407.hg.1 | -2.18 | PSR03023292.hg.1 | PRSS46, PRSS46, PRSS46 |
| TC01003070.hg.1 | 4.71  | JUC01025590.hg.1 |                        |
| TC01003070.hg.1 | 3.96  | JUC01025618.hg.1 |                        |
| TC01003070.hg.1 | 3.72  | JUC01025612.hg.1 |                        |
| TC01003070.hg.1 | 3.69  | JUC01025603.hg.1 |                        |
| TC01003070.hg.1 | 3.38  | PSR01047722.hg.1 |                        |
| TC01003070.hg.1 | 3.31  | JUC01025595.hg.1 |                        |
| TC01003070.hg.1 | 3.28  | PSR01047732.hg.1 |                        |
| TC01003070.hg.1 | 2.58  | JUC01025608.hg.1 |                        |
| TC01003070.hg.1 | 2.56  | PSR01047727.hg.1 |                        |
| TC01003070.hg.1 | 2.54  | PSR01047724.hg.1 |                        |
| TC01003070.hg.1 | 2.41  | PSR01047714.hg.1 |                        |
| TC01003070.hg.1 | 2.34  | PSR01047703.hg.1 |                        |
| TC01003070.hg.1 | 2.31  | JUC01025614.hg.1 |                        |
| TC01003070.hg.1 | 2.29  | PSR01047707.hg.1 |                        |
| TC01003070.hg.1 | 2.27  | PSR01047702.hg.1 |                        |

|                  |       |                   |         |
|------------------|-------|-------------------|---------|
| TC01003070.hg.1  | 2.21  | PSR01047701.hg.1  |         |
| TC01003070.hg.1  | 2.19  | PSR01047713.hg.1  |         |
| TC01003070.hg.1  | 2.18  | PSR01047728.hg.1  |         |
| TC01003070.hg.1  | 2.01  | JUC01025599.hg.1  |         |
| TC06002197.hg.1  | 4.71  | JUC06013709.hg.1  | SHPRH   |
| TC06002197.hg.1  | 3.66  | PSR06027584.hg.1  | SHPRH   |
| TC06002197.hg.1  | 3.17  | JUC06013721.hg.1  | SHPRH   |
| TC06002197.hg.1  | 2.35  | JUC06013723.hg.1  | SHPRH   |
| TC06002197.hg.1  | 2.29  | PSR06027561.hg.1  | SHPRH   |
| TC06002197.hg.1  | 2.27  | PSR06027582.hg.1  | SHPRH   |
| TC06002197.hg.1  | 2.27  | JUC06013720.hg.1  | SHPRH   |
| TC14001188.hg.1  | 4.71  | JUC14006876.hg.1  | SIX1    |
| TC14001188.hg.1  | 4.45  | PSR14013641.hg.1  | SIX1    |
| TC14001188.hg.1  | 4.19  | PSR14013639.hg.1  | SIX1    |
| TC14001188.hg.1  | 2.17  | PSR14013637.hg.1  | SIX1    |
| TC17000724.hg.1  | 4.71  | JUC17005127.hg.1  | DHX40   |
| TC17000724.hg.1  | 2.05  | JUC17005129.hg.1  | DHX40   |
| TC17000724.hg.1  | -2.01 | PSR17009430.hg.1  | DHX40   |
| TC05002052.hg.1  | 4.7   | JUC05014438.hg.1  | KCNMB1  |
| TC05002052.hg.1  | 3.91  | JUC05014437.hg.1  | KCNMB1  |
| TC05002052.hg.1  | 2.24  | PSR05028265.hg.1  | KCNMB1  |
| TC10000726.hg.1  | 4.7   | JUC10004729.hg.1  | FAM178A |
| TC10000726.hg.1  | 2.59  | PSR10008487.hg.1  | FAM178A |
| TC10000726.hg.1  | 2.54  | JUC10004743.hg.1  | FAM178A |
| TC10000726.hg.1  | 2.27  | PSR10008469.hg.1  | FAM178A |
| TC10000726.hg.1  | 2.24  | JUC10004740.hg.1  | FAM178A |
| TC10000726.hg.1  | -2.02 | JUC10004736.hg.1  | FAM178A |
| TC10000726.hg.1  | -2.12 | JUC10004732.hg.1  | FAM178A |
| TC10000726.hg.1  | -2.38 | JUC10004733.hg.1  | FAM178A |
| TC6_mann_hap400  | 4.7   | PSR6_mann_hap400  | DDR1    |
| TC6_mann_hap400  | 3.21  | JUC6_mann_hap400  | DDR1    |
| TC6_mann_hap400  | 2.99  | PSR6_mann_hap400  | DDR1    |
| TC6_mann_hap400  | 2.91  | JUC6_mann_hap400  | DDR1    |
| TC6_mann_hap400  | 2.87  | PSR6_mann_hap400  | DDR1    |
| TC6_mann_hap400  | 2.79  | PSR6_mann_hap400  | DDR1    |
| TC6_mann_hap400  | 2.78  | JUC6_mann_hap400  | DDR1    |
| TC6_mann_hap400  | 2.74  | PSR6_mann_hap400  | DDR1    |
| TC6_mann_hap400  | 2.65  | JUC6_mann_hap400  | DDR1    |
| TC6_mann_hap400  | 2.6   | JUC6_mann_hap400  | DDR1    |
| TC6_mann_hap400  | 2.43  | JUC6_mann_hap400  | DDR1    |
| TC6_mann_hap400  | 2.42  | PSR6_mann_hap400  | DDR1    |
| TC6_mann_hap400  | 2.34  | JUC6_mann_hap400  | DDR1    |
| TC6_mann_hap400  | 2.28  | PSR6_mann_hap400  | DDR1    |
| TC6_mann_hap400  | 2.27  | PSR6_mann_hap400  | DDR1    |
| TC6_mann_hap400  | 2.26  | JUC6_mann_hap400  | DDR1    |
| TC6_mann_hap400  | 2.2   | PSR6_mann_hap400  | DDR1    |
| TC6_mann_hap400  | 2.19  | PSR6_mann_hap400  | DDR1    |
| TC6_mann_hap400  | 2.17  | JUC6_mann_hap400  | DDR1    |
| TC6_mann_hap400  | 2.04  | PSR6_mann_hap400  | DDR1    |
| TC6_mann_hap400  | 2     | PSR6_mann_hap400  | DDR1    |
| TC6_mann_hap400  | -2.03 | JUC6_mann_hap400  | DDR1    |
| TC6_mann_hap400  | -2.55 | PSR6_mann_hap400  | DDR1    |
| TC6_qbl_hap60000 | 4.7   | PSR6_qbl_hap60000 | DDR1    |
| TC6_qbl_hap60000 | 3.21  | JUC6_qbl_hap60002 | DDR1    |
| TC6_qbl_hap60000 | 2.99  | PSR6_qbl_hap60000 | DDR1    |
| TC6_qbl_hap60000 | 2.91  | JUC6_qbl_hap60002 | DDR1    |
| TC6_qbl_hap60000 | 2.87  | PSR6_qbl_hap60000 | DDR1    |
| TC6_qbl_hap60000 | 2.79  | PSR6_qbl_hap60000 | DDR1    |



|                  |       |                   |            |
|------------------|-------|-------------------|------------|
| TC6_qbl_hap60000 | 2.78  | JUC6_qbl_hap60002 | DDR1       |
| TC6_qbl_hap60000 | 2.74  | PSR6_qbl_hap60006 | DDR1       |
| TC6_qbl_hap60000 | 2.65  | JUC6_qbl_hap60002 | DDR1       |
| TC6_qbl_hap60000 | 2.6   | JUC6_qbl_hap60002 | DDR1       |
| TC6_qbl_hap60000 | 2.43  | JUC6_qbl_hap60002 | DDR1       |
| TC6_qbl_hap60000 | 2.42  | PSR6_qbl_hap60006 | DDR1       |
| TC6_qbl_hap60000 | 2.34  | JUC6_qbl_hap60002 | DDR1       |
| TC6_qbl_hap60000 | 2.28  | PSR6_qbl_hap60006 | DDR1       |
| TC6_qbl_hap60000 | 2.27  | PSR6_qbl_hap60006 | DDR1       |
| TC6_qbl_hap60000 | 2.26  | JUC6_qbl_hap60002 | DDR1       |
| TC6_qbl_hap60000 | 2.2   | PSR6_qbl_hap60006 | DDR1       |
| TC6_qbl_hap60000 | 2.19  | PSR6_qbl_hap60006 | DDR1       |
| TC6_qbl_hap60000 | 2.17  | JUC6_qbl_hap60002 | DDR1       |
| TC6_qbl_hap60000 | 2.04  | PSR6_qbl_hap60006 | DDR1       |
| TC6_qbl_hap60000 | 2     | PSR6_qbl_hap60005 | DDR1       |
| TC6_qbl_hap60000 | -2.03 | JUC6_qbl_hap60002 | DDR1       |
| TC6_qbl_hap60000 | -2.55 | PSR6_qbl_hap60006 | DDR1       |
| TC01002610.hg.1  | 4.69  | JUC01021817.hg.1  | CCDC163P   |
| TC01002610.hg.1  | 3.32  | JUC01021821.hg.1  | CCDC163P   |
| TC01002610.hg.1  | 2.32  | JUC01021822.hg.1  | CCDC163P   |
| TC01002610.hg.1  | 2.28  | PSR01040642.hg.1  | CCDC163P   |
| TC01002610.hg.1  | 2.21  | JUC01021819.hg.1  | CCDC163P   |
| TC01002610.hg.1  | 2.18  | PSR01040639.hg.1  | CCDC163P   |
| TC01000917.hg.1  | 4.67  | JUC01007586.hg.1  | RNPC3, AMY |
| TC01000917.hg.1  | 3.31  | JUC01007597.hg.1  | RNPC3, AMY |
| TC01000917.hg.1  | 3.13  | JUC01007592.hg.1  | RNPC3, AMY |
| TC01000917.hg.1  | 3.09  | PSR01014346.hg.1  | RNPC3, AMY |
| TC01000917.hg.1  | 2.86  | JUC01007595.hg.1  | RNPC3, AMY |
| TC01000917.hg.1  | 2.72  | PSR01014368.hg.1  | RNPC3, AMY |
| TC01000917.hg.1  | 2.64  | PSR01014349.hg.1  | RNPC3, AMY |
| TC01000917.hg.1  | 2.59  | PSR01014381.hg.1  | RNPC3, AMY |
| TC01000917.hg.1  | 2.16  | PSR01014350.hg.1  | RNPC3, AMY |
| TC01000917.hg.1  | 2.16  | PSR01014351.hg.1  | RNPC3, AMY |
| TC01000917.hg.1  | 2.13  | PSR01014353.hg.1  | RNPC3, AMY |
| TC01000917.hg.1  | 2.11  | JUC01007587.hg.1  | RNPC3, AMY |
| TC01000917.hg.1  | 2.11  | JUC01007604.hg.1  | RNPC3, AMY |
| TC01000917.hg.1  | 2.11  | JUC01007615.hg.1  | RNPC3, AMY |
| TC01000917.hg.1  | 2.06  | PSR01014354.hg.1  | RNPC3, AMY |
| TC01000917.hg.1  | 2.06  | PSR01014395.hg.1  | RNPC3, AMY |
| TC01000917.hg.1  | 2.05  | JUC01007612.hg.1  | RNPC3, AMY |
| TC01000917.hg.1  | 2.04  | JUC01007600.hg.1  | RNPC3, AMY |
| TC01000917.hg.1  | 2     | PSR01014388.hg.1  | RNPC3, AMY |
| TC05000270.hg.1  | 4.67  | PSR05003344.hg.1  | RNF180     |
| TC05000270.hg.1  | 4.13  | PSR05003334.hg.1  | RNF180     |
| TC05000270.hg.1  | 3.33  | PSR05003335.hg.1  | RNF180     |
| TC05000270.hg.1  | 3.27  | PSR05003340.hg.1  | RNF180     |
| TC05000270.hg.1  | 3.1   | PSR05003331.hg.1  | RNF180     |
| TC05000270.hg.1  | 3.09  | PSR05003346.hg.1  | RNF180     |
| TC05000270.hg.1  | 2.87  | PSR05003341.hg.1  | RNF180     |
| TC05000270.hg.1  | 2.78  | PSR05003347.hg.1  | RNF180     |
| TC05000270.hg.1  | 2.29  | JUC05001791.hg.1  | RNF180     |
| TC05000270.hg.1  | 2.2   | PSR05003345.hg.1  | RNF180     |
| TC05000270.hg.1  | 2.17  | PSR05003338.hg.1  | RNF180     |
| TC11000753.hg.1  | 4.67  | JUC11005069.hg.1  |            |
| TC11000753.hg.1  | 2.22  | PSR11009788.hg.1  |            |
| TC11000753.hg.1  | 2.08  | PSR11009786.hg.1  |            |
| TC11001884.hg.1  | 4.67  | PSR11022098.hg.1  | SNORD27, S |
| TC11001884.hg.1  | 3.06  | JUC11011681.hg.1  | SNORD27, S |

|                  |       |                   |            |
|------------------|-------|-------------------|------------|
| TC11001884.hg.1  | 2.3   | PSR11022178.hg.1  | SNORD27, S |
| TC11001884.hg.1  | 2.27  | JUC11011691.hg.1  | SNORD27, S |
| TC11001884.hg.1  | 2.24  | PSR11022156.hg.1  | SNORD27, S |
| TC11001884.hg.1  | 2.22  | PSR11022124.hg.1  | SNORD27, S |
| TC11001884.hg.1  | 2.12  | PSR11022164.hg.1  | SNORD27, S |
| TC11001884.hg.1  | -2.93 | PSR11022146.hg.1  | SNORD27, S |
| TC02002638.hg.1  | 4.66  | JUC02022101.hg.1  | HECW2      |
| TC02002638.hg.1  | 2.29  | JUC02022113.hg.1  | HECW2      |
| TC02002638.hg.1  | -2.34 | PSR02042298.hg.1  | HECW2      |
| TC02002638.hg.1  | -2.48 | JUC02022114.hg.1  | HECW2      |
| TC02002638.hg.1  | -2.72 | JUC02022097.hg.1  | HECW2      |
| TC02002638.hg.1  | -2.79 | JUC02022102.hg.1  | HECW2      |
| TC02002638.hg.1  | -4.33 | JUC02022122.hg.1  | HECW2      |
| TC04001719.hg.1  | 4.66  | JUC04012592.hg.1  | DDX60L     |
| TC04001719.hg.1  | 2.98  | JUC04012591.hg.1  | DDX60L     |
| TC04001719.hg.1  | 2.81  | JUC04012564.hg.1  | DDX60L     |
| TC04001719.hg.1  | 2.45  | PSR04023761.hg.1  | DDX60L     |
| TC04001719.hg.1  | 2.32  | JUC04012578.hg.1  | DDX60L     |
| TC04001719.hg.1  | 2.06  | PSR04023751.hg.1  | DDX60L     |
| TC04001719.hg.1  | 2.06  | JUC04012589.hg.1  | DDX60L     |
| TC04001719.hg.1  | 2.06  | JUC04012590.hg.1  | DDX60L     |
| TC04001719.hg.1  | 2.01  | PSR04023780.hg.1  | DDX60L     |
| TC04001719.hg.1  | 2.01  | PSR04023786.hg.1  | DDX60L     |
| TC10001051.hg.1  | 4.66  | JUC10007562.hg.1  | BEND7      |
| TC10001051.hg.1  | 4.05  | JUC10007555.hg.1  | BEND7      |
| TC10001051.hg.1  | 3.21  | PSR10013072.hg.1  | BEND7      |
| TC10001051.hg.1  | 2.72  | JUC10007569.hg.1  | BEND7      |
| TC10001051.hg.1  | 2.69  | PSR10013077.hg.1  | BEND7      |
| TC10001051.hg.1  | 2.48  | JUC10007567.hg.1  | BEND7      |
| TC10001051.hg.1  | 2.34  | PSR10013073.hg.1  | BEND7      |
| TC10001051.hg.1  | 2.16  | PSR10013057.hg.1  | BEND7      |
| TC10001051.hg.1  | 2.16  | JUC10007559.hg.1  | BEND7      |
| TC10001051.hg.1  | 2.06  | JUC10007563.hg.1  | BEND7      |
| TC10001051.hg.1  | 2.05  | PSR10013040.hg.1  | BEND7      |
| TC6_qbl_hap60002 | 4.66  | PSR6_qbl_hap60008 | MICA       |
| TC6_qbl_hap60002 | 4.28  | JUC6_qbl_hap60021 | MICA       |
| TC6_qbl_hap60002 | 3.59  | PSR6_qbl_hap60008 | MICA       |
| TC6_qbl_hap60002 | 3.55  | PSR6_qbl_hap60008 | MICA       |
| TC6_qbl_hap60002 | 3.15  | PSR6_qbl_hap60008 | MICA       |
| TC6_qbl_hap60002 | 2.76  | JUC6_qbl_hap60021 | MICA       |
| TC6_qbl_hap60002 | 2.75  | JUC6_qbl_hap60021 | MICA       |
| TC6_qbl_hap60002 | 2.72  | PSR6_qbl_hap60008 | MICA       |
| TC6_qbl_hap60002 | 2.36  | JUC6_qbl_hap60021 | MICA       |
| TC6_qbl_hap60002 | 2.36  | JUC6_qbl_hap60021 | MICA       |
| TC6_qbl_hap60002 | 2.34  | JUC6_qbl_hap60021 | MICA       |
| TC6_qbl_hap60002 | 2.14  | PSR6_qbl_hap60008 | MICA       |
| TC6_qbl_hap60002 | 2.07  | JUC6_qbl_hap60021 | MICA       |
| TC01002821.hg.1  | 4.65  | PSR01043910.hg.1  | SSX2IP     |
| TC01002821.hg.1  | 3.39  | JUC01023538.hg.1  | SSX2IP     |
| TC01002821.hg.1  | 3.1   | PSR01043904.hg.1  | SSX2IP     |
| TC01002821.hg.1  | 3.04  | JUC01023526.hg.1  | SSX2IP     |
| TC01002821.hg.1  | 2.71  | PSR01043903.hg.1  | SSX2IP     |
| TC01002821.hg.1  | 2.61  | PSR01043896.hg.1  | SSX2IP     |
| TC01002821.hg.1  | 2.56  | JUC01023530.hg.1  | SSX2IP     |
| TC01002821.hg.1  | 2.46  | PSR01043906.hg.1  | SSX2IP     |
| TC01002821.hg.1  | 2.44  | JUC01023543.hg.1  | SSX2IP     |
| TC01002821.hg.1  | 2.41  | PSR01043902.hg.1  | SSX2IP     |
| TC01002821.hg.1  | 2.37  | PSR01043873.hg.1  | SSX2IP     |

|                 |       |                  |          |
|-----------------|-------|------------------|----------|
| TC01002821.hg.1 | 2.34  | PSR01043907.hg.1 | SSX2IP   |
| TC01002821.hg.1 | 2.02  | JUC01023532.hg.1 | SSX2IP   |
| TC01002821.hg.1 | -2.51 | PSR01043888.hg.1 | SSX2IP   |
| TC01002821.hg.1 | -2.65 | JUC01023536.hg.1 | SSX2IP   |
| TC03001286.hg.1 | 4.65  | JUC03011021.hg.1 | LRRFIP2  |
| TC03001286.hg.1 | 4.49  | JUC03011022.hg.1 | LRRFIP2  |
| TC03001286.hg.1 | 4.41  | PSR03022079.hg.1 | LRRFIP2  |
| TC03001286.hg.1 | 3.41  | JUC03011030.hg.1 | LRRFIP2  |
| TC03001286.hg.1 | 2.53  | JUC03011017.hg.1 | LRRFIP2  |
| TC03001286.hg.1 | 2.39  | PSR03022087.hg.1 | LRRFIP2  |
| TC03001286.hg.1 | 2.26  | PSR03022058.hg.1 | LRRFIP2  |
| TC03001286.hg.1 | 2.22  | PSR03022074.hg.1 | LRRFIP2  |
| TC03001286.hg.1 | 2.05  | PSR03022080.hg.1 | LRRFIP2  |
| TC03001286.hg.1 | -2.26 | JUC03011011.hg.1 | LRRFIP2  |
| TC03001286.hg.1 | -2.26 | JUC03011041.hg.1 | LRRFIP2  |
| TC04001805.hg.1 | 4.65  | PSR04024589.hg.1 | IRF2     |
| TC04001805.hg.1 | 4.11  | JUC04013016.hg.1 | IRF2     |
| TC04001805.hg.1 | 2.82  | PSR04024592.hg.1 | IRF2     |
| TC04001805.hg.1 | 2.65  | JUC04013029.hg.1 | IRF2     |
| TC04001805.hg.1 | 2.4   | PSR04024586.hg.1 | IRF2     |
| TC04001805.hg.1 | 2.33  | JUC04013015.hg.1 | IRF2     |
| TC04001805.hg.1 | 2.14  | PSR04024572.hg.1 | IRF2     |
| TC04001805.hg.1 | 2.13  | JUC04013020.hg.1 | IRF2     |
| TC04001805.hg.1 | 2.06  | PSR04024583.hg.1 | IRF2     |
| TC04001805.hg.1 | -2.04 | PSR04024577.hg.1 | IRF2     |
| TC10001201.hg.1 | 4.65  | PSR10015067.hg.1 | HNRNPF   |
| TC10001201.hg.1 | 2.24  | JUC10008744.hg.1 | HNRNPF   |
| TC01002971.hg.1 | 4.65  | JUC01024831.hg.1 | SLC16A4  |
| TC01002971.hg.1 | 4.31  | JUC01024830.hg.1 | SLC16A4  |
| TC01002971.hg.1 | 2     | PSR01046150.hg.1 | SLC16A4  |
| TC10000769.hg.1 | 4.64  | JUC10005077.hg.1 | CNNM2    |
| TC10000769.hg.1 | 2.2   | PSR10009152.hg.1 | CNNM2    |
| TC13000660.hg.1 | 4.64  | JUC13004397.hg.1 | CAB39L   |
| TC13000660.hg.1 | 4.48  | PSR13007600.hg.1 | CAB39L   |
| TC13000660.hg.1 | 3.85  | PSR13007602.hg.1 | CAB39L   |
| TC13000660.hg.1 | 3.53  | PSR13007606.hg.1 | CAB39L   |
| TC13000660.hg.1 | 2.89  | PSR13007597.hg.1 | CAB39L   |
| TC13000660.hg.1 | 2.86  | JUC13004401.hg.1 | CAB39L   |
| TC13000660.hg.1 | 2.84  | PSR13007592.hg.1 | CAB39L   |
| TC13000660.hg.1 | 2.77  | JUC13004394.hg.1 | CAB39L   |
| TC13000660.hg.1 | 2.75  | JUC13004414.hg.1 | CAB39L   |
| TC13000660.hg.1 | 2.7   | PSR13007601.hg.1 | CAB39L   |
| TC13000660.hg.1 | 2.57  | JUC13004392.hg.1 | CAB39L   |
| TC13000660.hg.1 | 2.52  | PSR13007598.hg.1 | CAB39L   |
| TC13000660.hg.1 | 2.45  | PSR13007599.hg.1 | CAB39L   |
| TC13000660.hg.1 | 2.43  | PSR13007594.hg.1 | CAB39L   |
| TC13000660.hg.1 | 2.01  | PSR13007587.hg.1 | CAB39L   |
| TC0X000470.hg.1 | 4.63  | JUC0X003004.hg.1 | CSTF2    |
| TC0X000470.hg.1 | 2.02  | PSR0X006069.hg.1 | CSTF2    |
| TC0X000470.hg.1 | -2.14 | JUC0X003017.hg.1 | CSTF2    |
| TC0X000470.hg.1 | -2.16 | JUC0X003013.hg.1 | CSTF2    |
| TC04000754.hg.1 | 4.62  | PSR04010459.hg.1 | FAM160A1 |
| TC04000754.hg.1 | 3.35  | PSR04010454.hg.1 | FAM160A1 |
| TC04000754.hg.1 | 3.28  | JUC04005610.hg.1 | FAM160A1 |
| TC04000754.hg.1 | 3.03  | PSR04010452.hg.1 | FAM160A1 |
| TC04000754.hg.1 | 2.89  | JUC04005616.hg.1 | FAM160A1 |
| TC04000754.hg.1 | 2.57  | JUC04005602.hg.1 | FAM160A1 |
| TC04000754.hg.1 | 2.51  | JUC04005608.hg.1 | FAM160A1 |

|                 |       |                  |          |
|-----------------|-------|------------------|----------|
| TC04000754.hg.1 | 2.28  | JUC04005603.hg.1 | FAM160A1 |
| TC04000754.hg.1 | 2.21  | PSR04010453.hg.1 | FAM160A1 |
| TC04000754.hg.1 | 2.14  | JUC04005614.hg.1 | FAM160A1 |
| TC08000508.hg.1 | 4.62  | PSR08006955.hg.1 | STMN2    |
| TC08000508.hg.1 | -2.15 | JUC08003447.hg.1 | STMN2    |
| TC08000508.hg.1 | -2.17 | PSR08006948.hg.1 | STMN2    |
| TC08000508.hg.1 | -2.24 | PSR08006947.hg.1 | STMN2    |
| TC08000508.hg.1 | -4.4  | JUC08003449.hg.1 | STMN2    |
| TC08000508.hg.1 | -7.11 | JUC08003443.hg.1 | STMN2    |
| TC12000641.hg.1 | 4.62  | PSR12008513.hg.1 | GLIPR1L2 |
| TC12000641.hg.1 | 2.27  | JUC12004496.hg.1 | GLIPR1L2 |
| TC14001124.hg.1 | 4.62  | PSR14012816.hg.1 | PYGL     |
| TC14001124.hg.1 | 4.24  | PSR14012783.hg.1 | PYGL     |
| TC14001124.hg.1 | 2.36  | PSR14012815.hg.1 | PYGL     |
| TC14001124.hg.1 | 2.12  | JUC14006452.hg.1 | PYGL     |
| TC14001124.hg.1 | -2.48 | JUC14006467.hg.1 | PYGL     |
| TC14001124.hg.1 | -2.93 | JUC14006472.hg.1 | PYGL     |
| TC19001688.hg.1 | 4.62  | PSR19023044.hg.1 | DBP      |
| TC19001688.hg.1 | 2.62  | PSR19023039.hg.1 | DBP      |
| TC19001688.hg.1 | 2.25  | PSR19023042.hg.1 | DBP      |
| TC19001688.hg.1 | -2.26 | PSR19023035.hg.1 | DBP      |
| TC19001688.hg.1 | -5.06 | JUC19013149.hg.1 | DBP      |
| TC01002608.hg.1 | 4.61  | PSR01040608.hg.1 | TESK2    |
| TC01002608.hg.1 | 4.18  | PSR01040626.hg.1 | TESK2    |
| TC01002608.hg.1 | 4.14  | PSR01040619.hg.1 | TESK2    |
| TC01002608.hg.1 | 3.55  | JUC01021807.hg.1 | TESK2    |
| TC01002608.hg.1 | 3.41  | JUC01021811.hg.1 | TESK2    |
| TC01002608.hg.1 | 2.9   | PSR01040625.hg.1 | TESK2    |
| TC01002608.hg.1 | 2.51  | PSR01040612.hg.1 | TESK2    |
| TC01006430.hg.1 | 4.61  | JUC01043856.hg.1 | NBPF9    |
| TC01006430.hg.1 | 2.78  | JUC01041183.hg.1 | NBPF9    |
| TC01006430.hg.1 | 2.4   | PSR01016961.hg.1 | NBPF9    |
| TC02002398.hg.1 | 4.61  | JUC02019640.hg.1 | GTDC1    |
| TC02002398.hg.1 | 2.12  | JUC02019635.hg.1 | GTDC1    |
| TC02002398.hg.1 | -2.03 | PSR02037742.hg.1 | GTDC1    |
| TC02002398.hg.1 | -2.17 | JUC02019636.hg.1 | GTDC1    |
| TC09000883.hg.1 | 4.61  | JUC09006379.hg.1 | SPATA6L  |
| TC09000883.hg.1 | -2.13 | JUC09006355.hg.1 | SPATA6L  |
| TC09000883.hg.1 | -2.3  | JUC09006363.hg.1 | SPATA6L  |
| TC09000883.hg.1 | -2.62 | PSR09011763.hg.1 | SPATA6L  |
| TC09001583.hg.1 | 4.6   | JUC09010773.hg.1 | GOLGA1   |
| TC09001583.hg.1 | 3.96  | JUC09010754.hg.1 | GOLGA1   |
| TC09001583.hg.1 | 2.52  | JUC09010762.hg.1 | GOLGA1   |
| TC09001583.hg.1 | 2.31  | JUC09010770.hg.1 | GOLGA1   |
| TC09001583.hg.1 | -3.66 | PSR09019900.hg.1 | GOLGA1   |
| TC0X000141.hg.1 | 4.6   | JUC0X000959.hg.1 | GK       |
| TC0X000141.hg.1 | 2.68  | JUC0X000974.hg.1 | GK       |
| TC0X000141.hg.1 | 2.66  | PSR0X001781.hg.1 | GK       |
| TC0X000141.hg.1 | 2.41  | JUC0X000967.hg.1 | GK       |
| TC0X000141.hg.1 | 2.09  | JUC0X000986.hg.1 | GK       |
| TC0X000141.hg.1 | 2.07  | JUC0X000953.hg.1 | GK       |
| TC0X000141.hg.1 | 2     | PSR0X001760.hg.1 | GK       |
| TC19001760.hg.1 | 4.59  | PSR19023929.hg.1 | KLKP1    |
| TC19001760.hg.1 | -2.51 | PSR19023933.hg.1 | KLKP1    |
| TC19001760.hg.1 | -2.65 | PSR19023934.hg.1 | KLKP1    |
| TC19001760.hg.1 | -2.77 | PSR19023932.hg.1 | KLKP1    |
| TC19001760.hg.1 | -3.71 | JUC19013599.hg.1 | KLKP1    |
| TC22000816.hg.1 | 4.59  | PSR22013870.hg.1 | ST13     |

|                 |       |                  |            |
|-----------------|-------|------------------|------------|
| TC22000816.hg.1 | 3     | JUC22005707.hg.1 | ST13       |
| TC06001961.hg.1 | 4.58  | JUC06011831.hg.1 | FBXL4      |
| TC06001961.hg.1 | 2.53  | JUC06011823.hg.1 | FBXL4      |
| TC06001961.hg.1 | 2.44  | PSR06024158.hg.1 | FBXL4      |
| TC06001961.hg.1 | -2.6  | JUC06011827.hg.1 | FBXL4      |
| TC07001635.hg.1 | 4.58  | JUC07012382.hg.1 | BAIAP2L1   |
| TC07001635.hg.1 | 2.75  | PSR07024941.hg.1 | BAIAP2L1   |
| TC07001635.hg.1 | 2.72  | JUC07012383.hg.1 | BAIAP2L1   |
| TC07001635.hg.1 | 2.69  | PSR07024937.hg.1 | BAIAP2L1   |
| TC07001635.hg.1 | 2.67  | JUC07012372.hg.1 | BAIAP2L1   |
| TC07001635.hg.1 | 2.11  | PSR07024922.hg.1 | BAIAP2L1   |
| TC07001635.hg.1 | 2.1   | PSR07024939.hg.1 | BAIAP2L1   |
| TC14000067.hg.1 | 4.58  | JUC14000131.hg.1 | ANG, RNASE |
| TC14000067.hg.1 | 4.25  | JUC14000132.hg.1 | ANG, RNASE |
| TC14000067.hg.1 | 3.25  | PSR14000287.hg.1 | ANG, RNASE |
| TC14000067.hg.1 | 3.22  | PSR14000290.hg.1 | ANG, RNASE |
| TC14000067.hg.1 | 2.93  | JUC14000133.hg.1 | ANG, RNASE |
| TC14000067.hg.1 | 2.45  | PSR14000289.hg.1 | ANG, RNASE |
| TC14000067.hg.1 | 2.41  | PSR14000288.hg.1 | ANG, RNASE |
| TC01000685.hg.1 | 4.57  | PSR01010994.hg.1 | PRKAA2     |
| TC01000685.hg.1 | 4.1   | JUC01005640.hg.1 | PRKAA2     |
| TC01000685.hg.1 | 2.03  | JUC01005642.hg.1 | PRKAA2     |
| TC01002441.hg.1 | 4.57  | JUC01020192.hg.1 | LAPTM5     |
| TC01002441.hg.1 | 4.18  | PSR01037577.hg.1 | LAPTM5     |
| TC01002441.hg.1 | 2.9   | JUC01020188.hg.1 | LAPTM5     |
| TC01002441.hg.1 | 2.81  | PSR01037572.hg.1 | LAPTM5     |
| TC01002441.hg.1 | 2.8   | PSR01037578.hg.1 | LAPTM5     |
| TC01002441.hg.1 | 2.27  | PSR01037575.hg.1 | LAPTM5     |
| TC01002441.hg.1 | -2.81 | JUC01020184.hg.1 | LAPTM5     |
| TC01002441.hg.1 | -3.72 | PSR01037564.hg.1 | LAPTM5     |
| TC07000168.hg.1 | 4.57  | JUC07001288.hg.1 | MIR196B    |
| TC07000168.hg.1 | 4.33  | PSR07002653.hg.1 | MIR196B    |
| TC07000168.hg.1 | 4.26  | PSR07002644.hg.1 | MIR196B    |
| TC07000168.hg.1 | 4.24  | PSR07002646.hg.1 | MIR196B    |
| TC07000168.hg.1 | 2.71  | JUC07001289.hg.1 | MIR196B    |
| TC07000168.hg.1 | 2.42  | PSR07002647.hg.1 | MIR196B    |
| TC07000168.hg.1 | -2.04 | JUC07001287.hg.1 | MIR196B    |
| TC07000235.hg.1 | 4.57  | JUC07001744.hg.1 | ANLN       |
| TC07000235.hg.1 | 4.43  | PSR07003661.hg.1 | ANLN       |
| TC07000235.hg.1 | 4.4   | JUC07001753.hg.1 | ANLN       |
| TC07000235.hg.1 | 4.39  | PSR07003609.hg.1 | ANLN       |
| TC07000235.hg.1 | 4.36  | JUC07001765.hg.1 | ANLN       |
| TC07000235.hg.1 | 4.15  | PSR07003611.hg.1 | ANLN       |
| TC07000235.hg.1 | 4.14  | PSR07003653.hg.1 | ANLN       |
| TC07000235.hg.1 | 4.07  | PSR07003615.hg.1 | ANLN       |
| TC07000235.hg.1 | 3.71  | PSR07003656.hg.1 | ANLN       |
| TC07000235.hg.1 | 3.45  | JUC07001766.hg.1 | ANLN       |
| TC07000235.hg.1 | 3.15  | JUC07001741.hg.1 | ANLN       |
| TC07000235.hg.1 | 2.73  | PSR07003652.hg.1 | ANLN       |
| TC07000235.hg.1 | 2.49  | PSR07003607.hg.1 | ANLN       |
| TC07000235.hg.1 | 2.45  | PSR07003647.hg.1 | ANLN       |
| TC07000235.hg.1 | 2.33  | JUC07001738.hg.1 | ANLN       |
| TC07000235.hg.1 | 2.14  | PSR07003632.hg.1 | ANLN       |
| TC07000235.hg.1 | 2.13  | JUC07001760.hg.1 | ANLN       |
| TC07000235.hg.1 | 2.12  | JUC07001743.hg.1 | ANLN       |
| TC07000235.hg.1 | 2.09  | PSR07003640.hg.1 | ANLN       |
| TC08001269.hg.1 | 4.57  | JUC08008422.hg.1 | GGH        |
| TC08001269.hg.1 | 3.36  | PSR08016357.hg.1 | GGH        |

|                  |        |                   |         |
|------------------|--------|-------------------|---------|
| TC08001269.hg.1  | 3.06   | PSR08016366.hg.1  | GGH     |
| TC08001269.hg.1  | 2.8    | PSR08016370.hg.1  | GGH     |
| TC08001269.hg.1  | 2.8    | JUC08008412.hg.1  | GGH     |
| TC08001269.hg.1  | 2.71   | PSR08016368.hg.1  | GGH     |
| TC08001269.hg.1  | 2.37   | PSR08016360.hg.1  | GGH     |
| TC08001269.hg.1  | -2.37  | JUC08008411.hg.1  | GGH     |
| TC10001711.hg.1  | 4.57   | JUC10013107.hg.1  | FGFR2   |
| TC10001711.hg.1  | 4.53   | JUC10013115.hg.1  | FGFR2   |
| TC10001711.hg.1  | 4.4    | PSR10022638.hg.1  | FGFR2   |
| TC10001711.hg.1  | 4.36   | PSR10022618.hg.1  | FGFR2   |
| TC10001711.hg.1  | 4.28   | JUC10013109.hg.1  | FGFR2   |
| TC10001711.hg.1  | 3.94   | JUC10013111.hg.1  | FGFR2   |
| TC10001711.hg.1  | 3.7    | JUC10013089.hg.1  | FGFR2   |
| TC10001711.hg.1  | 3.6    | PSR10022641.hg.1  | FGFR2   |
| TC10001711.hg.1  | 3.17   | PSR10022620.hg.1  | FGFR2   |
| TC10001711.hg.1  | 3.15   | PSR10022617.hg.1  | FGFR2   |
| TC10001711.hg.1  | 3.08   | JUC10013105.hg.1  | FGFR2   |
| TC10001711.hg.1  | 3.07   | PSR10022639.hg.1  | FGFR2   |
| TC10001711.hg.1  | 3.03   | PSR10022592.hg.1  | FGFR2   |
| TC10001711.hg.1  | 2.83   | PSR10022615.hg.1  | FGFR2   |
| TC10001711.hg.1  | 2.48   | PSR10022626.hg.1  | FGFR2   |
| TC10001711.hg.1  | 2.48   | PSR10022631.hg.1  | FGFR2   |
| TC10001711.hg.1  | 2.42   | JUC10013096.hg.1  | FGFR2   |
| TC10001711.hg.1  | 2.41   | PSR10022587.hg.1  | FGFR2   |
| TC10001711.hg.1  | 2.41   | PSR10022637.hg.1  | FGFR2   |
| TC10001711.hg.1  | -2.06  | JUC10013124.hg.1  | FGFR2   |
| TC10001711.hg.1  | -2.06  | JUC10013125.hg.1  | FGFR2   |
| TC10001711.hg.1  | -2.48  | PSR10022579.hg.1  | FGFR2   |
| TC6_ssto_hap7000 | 4.57   | JUC6_ssto_hap7000 | BRD2    |
| TC6_ssto_hap7000 | 2.58   | JUC6_ssto_hap7000 | BRD2    |
| TC6_ssto_hap7000 | 2      | PSR6_ssto_hap7001 | BRD2    |
| TC02000386.hg.1  | 4.56   | JUC02003021.hg.1  | MEIS1   |
| TC02000386.hg.1  | 4.08   | JUC02003035.hg.1  | MEIS1   |
| TC02000386.hg.1  | 3.52   | PSR02005830.hg.1  | MEIS1   |
| TC02000386.hg.1  | 2.83   | JUC02003038.hg.1  | MEIS1   |
| TC02000386.hg.1  | 2.65   | PSR02005798.hg.1  | MEIS1   |
| TC02000386.hg.1  | 2.61   | JUC02003023.hg.1  | MEIS1   |
| TC02000386.hg.1  | 2.38   | PSR02005824.hg.1  | MEIS1   |
| TC02000386.hg.1  | 2.3    | JUC02003026.hg.1  | MEIS1   |
| TC02000386.hg.1  | 2.19   | JUC02003016.hg.1  | MEIS1   |
| TC02000386.hg.1  | 2.13   | JUC02003020.hg.1  | MEIS1   |
| TC02000386.hg.1  | 2.11   | JUC02003033.hg.1  | MEIS1   |
| TC02000386.hg.1  | 2.07   | JUC02003013.hg.1  | MEIS1   |
| TC02000386.hg.1  | 2.05   | PSR02005839.hg.1  | MEIS1   |
| TC02000386.hg.1  | 2.02   | PSR02005800.hg.1  | MEIS1   |
| TC02000386.hg.1  | 2.01   | JUC02003036.hg.1  | MEIS1   |
| TC02000386.hg.1  | 2      | PSR02005810.hg.1  | MEIS1   |
| TC02000386.hg.1  | -2.37  | JUC02003025.hg.1  | MEIS1   |
| TC02000386.hg.1  | -3.36  | PSR02005819.hg.1  | MEIS1   |
| TC04000303.hg.1  | 4.56   | JUC04002132.hg.1  | RASL11B |
| TC04000303.hg.1  | -2.38  | PSR04004286.hg.1  | RASL11B |
| TC04000303.hg.1  | -3.23  | PSR04004291.hg.1  | RASL11B |
| TC04000303.hg.1  | -3.37  | JUC04002130.hg.1  | RASL11B |
| TC04000303.hg.1  | -11.38 | PSR04004288.hg.1  | RASL11B |
| TC01000703.hg.1  | 4.55   | JUC01005813.hg.1  | INADL   |
| TC01000703.hg.1  | 3.66   | PSR01011279.hg.1  | INADL   |
| TC01000703.hg.1  | 3.62   | JUC01005828.hg.1  | INADL   |
| TC01000703.hg.1  | 3.46   | PSR01011213.hg.1  | INADL   |

|                 |       |                  |         |
|-----------------|-------|------------------|---------|
| TC01000703.hg.1 | 3.18  | JUC01005805.hg.1 | INADL   |
| TC01000703.hg.1 | 3.15  | PSR01011236.hg.1 | INADL   |
| TC01000703.hg.1 | 3.14  | PSR01011282.hg.1 | INADL   |
| TC01000703.hg.1 | 3     | JUC01005786.hg.1 | INADL   |
| TC01000703.hg.1 | 2.87  | JUC01005825.hg.1 | INADL   |
| TC01000703.hg.1 | 2.84  | PSR01011272.hg.1 | INADL   |
| TC01000703.hg.1 | 2.81  | JUC01005836.hg.1 | INADL   |
| TC01000703.hg.1 | 2.58  | PSR01011264.hg.1 | INADL   |
| TC01000703.hg.1 | 2.52  | PSR01011274.hg.1 | INADL   |
| TC01000703.hg.1 | 2.45  | PSR01011253.hg.1 | INADL   |
| TC01000703.hg.1 | 2.4   | JUC01005820.hg.1 | INADL   |
| TC01000703.hg.1 | 2.36  | PSR01011265.hg.1 | INADL   |
| TC01000703.hg.1 | 2.36  | JUC01005811.hg.1 | INADL   |
| TC01000703.hg.1 | 2.35  | PSR01011290.hg.1 | INADL   |
| TC01000703.hg.1 | 2.27  | JUC01005821.hg.1 | INADL   |
| TC01000703.hg.1 | 2.18  | PSR01011263.hg.1 | INADL   |
| TC01000703.hg.1 | 2.18  | PSR01011285.hg.1 | INADL   |
| TC01000703.hg.1 | 2.08  | PSR01011254.hg.1 | INADL   |
| TC01000703.hg.1 | 2.04  | PSR01011262.hg.1 | INADL   |
| TC01000703.hg.1 | 2     | PSR01011276.hg.1 | INADL   |
| TC01000703.hg.1 | 2     | JUC01005815.hg.1 | INADL   |
| TC01000703.hg.1 | -2.01 | JUC01005809.hg.1 | INADL   |
| TC01000703.hg.1 | -2.09 | PSR01011245.hg.1 | INADL   |
| TC01000703.hg.1 | -2.54 | JUC01005837.hg.1 | INADL   |
| TC01000703.hg.1 | -2.59 | JUC01005818.hg.1 | INADL   |
| TC11000150.hg.1 | 4.55  | PSR11002155.hg.1 | PPFIBP2 |
| TC11000150.hg.1 | 3.03  | PSR11002113.hg.1 | PPFIBP2 |
| TC11000150.hg.1 | 2.96  | PSR11002139.hg.1 | PPFIBP2 |
| TC11000150.hg.1 | 2.85  | JUC11000943.hg.1 | PPFIBP2 |
| TC11000150.hg.1 | 2.72  | PSR11002119.hg.1 | PPFIBP2 |
| TC11000150.hg.1 | 2.51  | PSR11002138.hg.1 | PPFIBP2 |
| TC11000150.hg.1 | 2.44  | PSR11002121.hg.1 | PPFIBP2 |
| TC11000150.hg.1 | 2.44  | PSR11002152.hg.1 | PPFIBP2 |
| TC11000150.hg.1 | 2.27  | PSR11002124.hg.1 | PPFIBP2 |
| TC11000150.hg.1 | 2.27  | PSR11002156.hg.1 | PPFIBP2 |
| TC11000150.hg.1 | 2.26  | PSR11002118.hg.1 | PPFIBP2 |
| TC11000150.hg.1 | 2.17  | JUC11000956.hg.1 | PPFIBP2 |
| TC11000150.hg.1 | 2.05  | JUC11000931.hg.1 | PPFIBP2 |
| TC11000150.hg.1 | -2.03 | JUC11000937.hg.1 | PPFIBP2 |
| TC11000150.hg.1 | -2.08 | JUC11000950.hg.1 | PPFIBP2 |
| TC11000150.hg.1 | -2.54 | JUC11000954.hg.1 | PPFIBP2 |
| TC11000150.hg.1 | -3.11 | JUC11000949.hg.1 | PPFIBP2 |
| TC14000585.hg.1 | 4.55  | JUC14003722.hg.1 | PPP4R4  |
| TC14000585.hg.1 | 3.78  | JUC14003747.hg.1 | PPP4R4  |
| TC14000585.hg.1 | 2.9   | JUC14003730.hg.1 | PPP4R4  |
| TC14000585.hg.1 | 2.9   | JUC14003744.hg.1 | PPP4R4  |
| TC14000585.hg.1 | 2.55  | JUC14003735.hg.1 | PPP4R4  |
| TC14000585.hg.1 | 2.33  | JUC14003727.hg.1 | PPP4R4  |
| TC14000585.hg.1 | 2.12  | PSR14007236.hg.1 | PPP4R4  |
| TC14000585.hg.1 | -2.14 | JUC14003740.hg.1 | PPP4R4  |
| TC01000394.hg.1 | 4.54  | PSR01006088.hg.1 | EPB41   |
| TC01000394.hg.1 | 3.94  | PSR01006052.hg.1 | EPB41   |
| TC01000394.hg.1 | 3.88  | PSR01006053.hg.1 | EPB41   |
| TC01000394.hg.1 | 3.68  | PSR01006050.hg.1 | EPB41   |
| TC01000394.hg.1 | 3.63  | PSR01006054.hg.1 | EPB41   |
| TC01000394.hg.1 | 3.31  | PSR01006056.hg.1 | EPB41   |
| TC01000394.hg.1 | 3.14  | JUC01003148.hg.1 | EPB41   |
| TC01000394.hg.1 | 3.08  | JUC01003147.hg.1 | EPB41   |

|                 |       |                  |         |
|-----------------|-------|------------------|---------|
| TC01000394.hg.1 | 3.04  | JUC01003150.hg.1 | EPB41   |
| TC01000394.hg.1 | 2.63  | JUC01003156.hg.1 | EPB41   |
| TC01000394.hg.1 | 2.57  | JUC01003162.hg.1 | EPB41   |
| TC01000394.hg.1 | 2.52  | PSR01006082.hg.1 | EPB41   |
| TC01000394.hg.1 | 2.45  | JUC01003136.hg.1 | EPB41   |
| TC01000394.hg.1 | 2.44  | PSR01006081.hg.1 | EPB41   |
| TC01000394.hg.1 | 2.27  | PSR01006076.hg.1 | EPB41   |
| TC01000394.hg.1 | 2.22  | PSR01006077.hg.1 | EPB41   |
| TC01000394.hg.1 | 2.21  | JUC01003166.hg.1 | EPB41   |
| TC01000394.hg.1 | 2.02  | JUC01003142.hg.1 | EPB41   |
| TC01000394.hg.1 | -2.04 | JUC01003163.hg.1 | EPB41   |
| TC01000394.hg.1 | -2.05 | JUC01003160.hg.1 | EPB41   |
| TC01000394.hg.1 | -2.29 | JUC01003154.hg.1 | EPB41   |
| TC01000394.hg.1 | -2.65 | JUC01003153.hg.1 | EPB41   |
| TC01001736.hg.1 | 4.54  | PSR01027147.hg.1 | CD55    |
| TC01001736.hg.1 | 3     | PSR01027129.hg.1 | CD55    |
| TC01001736.hg.1 | 3     | PSR01027138.hg.1 | CD55    |
| TC01001736.hg.1 | 2.71  | PSR01027141.hg.1 | CD55    |
| TC01001736.hg.1 | 2.4   | PSR01027145.hg.1 | CD55    |
| TC01001736.hg.1 | 2.38  | PSR01027144.hg.1 | CD55    |
| TC01001736.hg.1 | 2.36  | PSR01027140.hg.1 | CD55    |
| TC01001736.hg.1 | 2.32  | PSR01027132.hg.1 | CD55    |
| TC01001736.hg.1 | 2.25  | JUC01014542.hg.1 | CD55    |
| TC01001736.hg.1 | 2.23  | PSR01027142.hg.1 | CD55    |
| TC01001736.hg.1 | 2.09  | PSR01027143.hg.1 | CD55    |
| TC01001736.hg.1 | 2.02  | JUC01014529.hg.1 | CD55    |
| TC01001736.hg.1 | -2.32 | JUC01014537.hg.1 | CD55    |
| TC01001736.hg.1 | -2.54 | PSR01027136.hg.1 | CD55    |
| TC07000838.hg.1 | 4.54  | PSR07013178.hg.1 | CALD1   |
| TC07000838.hg.1 | 3.82  | JUC07006281.hg.1 | CALD1   |
| TC07000838.hg.1 | 3.32  | PSR07013170.hg.1 | CALD1   |
| TC07000838.hg.1 | 2.94  | PSR07013162.hg.1 | CALD1   |
| TC07000838.hg.1 | 2.79  | PSR07013169.hg.1 | CALD1   |
| TC07000838.hg.1 | 2.6   | PSR07013177.hg.1 | CALD1   |
| TC07000838.hg.1 | 2.57  | JUC07006271.hg.1 | CALD1   |
| TC07000838.hg.1 | 2.56  | PSR07013163.hg.1 | CALD1   |
| TC07000838.hg.1 | -2.1  | PSR07013154.hg.1 | CALD1   |
| TC07000838.hg.1 | -2.1  | JUC07006276.hg.1 | CALD1   |
| TC07000838.hg.1 | -2.44 | PSR07013192.hg.1 | CALD1   |
| TC07000838.hg.1 | -3.1  | PSR07013173.hg.1 | CALD1   |
| TC07000838.hg.1 | -6.4  | JUC07006280.hg.1 | CALD1   |
| TC01003719.hg.1 | 4.53  | JUC01029802.hg.1 | CHIT1   |
| TC01003719.hg.1 | 3.16  | JUC01029783.hg.1 | CHIT1   |
| TC01003719.hg.1 | 2.29  | JUC01029789.hg.1 | CHIT1   |
| TC01003719.hg.1 | 2.05  | PSR01057092.hg.1 | CHIT1   |
| TC01003719.hg.1 | 2.04  | PSR01057104.hg.1 | CHIT1   |
| TC01003719.hg.1 | -2.43 | PSR01057086.hg.1 | CHIT1   |
| TC04001001.hg.1 | 4.53  | JUC04007398.hg.1 | PPP2R2C |
| TC04001001.hg.1 | 4.37  | JUC04007382.hg.1 | PPP2R2C |
| TC04001001.hg.1 | 2.07  | PSR04013860.hg.1 | PPP2R2C |
| TC04001001.hg.1 | -2.24 | JUC04007389.hg.1 | PPP2R2C |
| TC04001001.hg.1 | -2.28 | PSR04013864.hg.1 | PPP2R2C |
| TC04001001.hg.1 | -2.64 | JUC04007381.hg.1 | PPP2R2C |
| TC04001001.hg.1 | -2.8  | JUC04007390.hg.1 | PPP2R2C |
| TC04001001.hg.1 | -2.97 | JUC04007386.hg.1 | PPP2R2C |
| TC04001001.hg.1 | -3.16 | PSR04013875.hg.1 | PPP2R2C |
| TC04001001.hg.1 | -3.56 | JUC04007383.hg.1 | PPP2R2C |
| TC04001001.hg.1 | -3.59 | PSR04013876.hg.1 | PPP2R2C |



|                 |       |                  |             |
|-----------------|-------|------------------|-------------|
| TC04001001.hg.1 | -4.24 | PSR04013874.hg.1 | PPP2R2C     |
| TC04001001.hg.1 | -4.68 | PSR04013858.hg.1 | PPP2R2C     |
| TC04001001.hg.1 | -4.91 | JUC04007387.hg.1 | PPP2R2C     |
| TC04001001.hg.1 | -5.6  | PSR04013856.hg.1 | PPP2R2C     |
| TC04001001.hg.1 | -5.93 | PSR04013877.hg.1 | PPP2R2C     |
| TC04001001.hg.1 | -6.75 | PSR04013862.hg.1 | PPP2R2C     |
| TC04001001.hg.1 | -6.83 | PSR04013873.hg.1 | PPP2R2C     |
| TC04001001.hg.1 | -7.51 | PSR04013871.hg.1 | PPP2R2C     |
| TC04001001.hg.1 | -7.96 | PSR04013865.hg.1 | PPP2R2C     |
| TC04001001.hg.1 | -7.98 | PSR04013869.hg.1 | PPP2R2C     |
| TC04001001.hg.1 | -8.03 | PSR04013866.hg.1 | PPP2R2C     |
| TC04001001.hg.1 | -9.08 | PSR04013872.hg.1 | PPP2R2C     |
| TC04001001.hg.1 | -16.8 | JUC04007385.hg.1 | PPP2R2C     |
| TC01000139.hg.1 | 4.52  | JUC01001178.hg.1 | ANGPTL7     |
| TC01000139.hg.1 | -2.04 | PSR01002181.hg.1 | ANGPTL7     |
| TC01000139.hg.1 | -3.17 | JUC01001182.hg.1 | ANGPTL7     |
| TC01000139.hg.1 | -3.63 | PSR01002188.hg.1 | ANGPTL7     |
| TC01000139.hg.1 | -4.02 | PSR01002183.hg.1 | ANGPTL7     |
| TC01000139.hg.1 | -8.75 | JUC01001181.hg.1 | ANGPTL7     |
| TC03002152.hg.1 | 4.52  | JUC03018846.hg.1 | TNK2        |
| TC03002152.hg.1 | 3.54  | JUC03018868.hg.1 | TNK2        |
| TC03002152.hg.1 | 2.78  | PSR03038009.hg.1 | TNK2        |
| TC03002152.hg.1 | 2.71  | JUC03018840.hg.1 | TNK2        |
| TC03002152.hg.1 | 2.67  | JUC03018853.hg.1 | TNK2        |
| TC03002152.hg.1 | 2.48  | JUC03018865.hg.1 | TNK2        |
| TC03002152.hg.1 | 2.47  | JUC03018859.hg.1 | TNK2        |
| TC03002152.hg.1 | 2.43  | PSR03038002.hg.1 | TNK2        |
| TC03002152.hg.1 | 2.36  | PSR03038018.hg.1 | TNK2        |
| TC03002152.hg.1 | 2.3   | PSR03037990.hg.1 | TNK2        |
| TC03002152.hg.1 | 2.19  | JUC03018856.hg.1 | TNK2        |
| TC03002152.hg.1 | 2.16  | JUC03018832.hg.1 | TNK2        |
| TC03002152.hg.1 | 2.06  | PSR03038027.hg.1 | TNK2        |
| TC03002152.hg.1 | -2.08 | JUC03018849.hg.1 | TNK2        |
| TC03002152.hg.1 | -2.99 | JUC03018864.hg.1 | TNK2        |
| TC03002152.hg.1 | -3.71 | JUC03018843.hg.1 | TNK2        |
| TC06004061.hg.1 | 4.51  | PSR06000123.hg.1 | DKFZP686119 |
| TC06004061.hg.1 | 2.67  | JUC06020809.hg.1 | DKFZP686119 |
| TC06004061.hg.1 | 2.33  | PSR06000124.hg.1 | DKFZP686119 |
| TC06004061.hg.1 | 2.07  | PSR06000125.hg.1 | DKFZP686119 |
| TC08001033.hg.1 | 4.5   | PSR08013164.hg.1 | HR          |
| TC08001033.hg.1 | 4.3   | PSR08013149.hg.1 | HR          |
| TC08001033.hg.1 | 4.07  | PSR08013173.hg.1 | HR          |
| TC08001033.hg.1 | 3.76  | JUC08006840.hg.1 | HR          |
| TC08001033.hg.1 | 3.57  | PSR08013180.hg.1 | HR          |
| TC08001033.hg.1 | 3.47  | JUC08006841.hg.1 | HR          |
| TC08001033.hg.1 | 3.42  | PSR08013176.hg.1 | HR          |
| TC08001033.hg.1 | 3.25  | PSR08013151.hg.1 | HR          |
| TC08001033.hg.1 | 2.71  | PSR08013159.hg.1 | HR          |
| TC08001033.hg.1 | 2.57  | PSR08013150.hg.1 | HR          |
| TC08001033.hg.1 | 2.5   | PSR08013174.hg.1 | HR          |
| TC08001033.hg.1 | 2.34  | JUC08006833.hg.1 | HR          |
| TC08001033.hg.1 | 2.12  | JUC08006832.hg.1 | HR          |
| TC08001033.hg.1 | -2.16 | PSR08013166.hg.1 | HR          |
| TC08001033.hg.1 | -2.27 | PSR08013147.hg.1 | HR          |
| TC08001033.hg.1 | -2.64 | PSR08013169.hg.1 | HR          |
| TC08001033.hg.1 | -3.06 | JUC08006842.hg.1 | HR          |
| TC08001033.hg.1 | -4.72 | JUC08006837.hg.1 | HR          |
| TC08001033.hg.1 | -6.12 | PSR08013163.hg.1 | HR          |

|                 |        |                  |            |
|-----------------|--------|------------------|------------|
| TC08001033.hg.1 | -6.97  | JUC08006827.hg.1 | HR         |
| TC08001033.hg.1 | -7.77  | JUC08006826.hg.1 | HR         |
| TC08001033.hg.1 | -11.52 | JUC08006825.hg.1 | HR         |
| TC12001181.hg.1 | 4.5    | PSR12015690.hg.1 | MFAP5      |
| TC12001181.hg.1 | 4.28   | JUC12008633.hg.1 | MFAP5      |
| TC12001181.hg.1 | 3.4    | JUC12008647.hg.1 | MFAP5      |
| TC12001181.hg.1 | 2.76   | JUC12008638.hg.1 | MFAP5      |
| TC12001181.hg.1 | 2.43   | PSR12015664.hg.1 | MFAP5      |
| TC12001181.hg.1 | 2.37   | PSR12015663.hg.1 | MFAP5      |
| TC12001181.hg.1 | 2.1    | PSR12015666.hg.1 | MFAP5      |
| TC12001181.hg.1 | -2     | PSR12015675.hg.1 | MFAP5      |
| TC12001181.hg.1 | -3.22  | JUC12008646.hg.1 | MFAP5      |
| TC12001181.hg.1 | -8.14  | JUC12008634.hg.1 | MFAP5      |
| TC12001181.hg.1 | -8.34  | JUC12008643.hg.1 | MFAP5      |
| TC15000678.hg.1 | 4.5    | PSR15005878.hg.1 | ISLR       |
| TC15000678.hg.1 | 4.44   | JUC15003000.hg.1 | ISLR       |
| TC15000678.hg.1 | -4.01  | PSR15005873.hg.1 | ISLR       |
| TC01000134.hg.1 | 4.47   | JUC01001165.hg.1 | TARDBP     |
| TC01000134.hg.1 | 2.26   | JUC01001167.hg.1 | TARDBP     |
| TC01000134.hg.1 | 2.24   | PSR01002166.hg.1 | TARDBP     |
| TC01000134.hg.1 | -2.43  | JUC01001158.hg.1 | TARDBP     |
| TC01003871.hg.1 | 4.47   | PSR01058872.hg.1 | TLR5       |
| TC01003871.hg.1 | 3.13   | PSR01058874.hg.1 | TLR5       |
| TC01003871.hg.1 | 2.42   | PSR01058873.hg.1 | TLR5       |
| TC01003871.hg.1 | 2.23   | PSR01058877.hg.1 | TLR5       |
| TC01003871.hg.1 | 2.04   | PSR01058867.hg.1 | TLR5       |
| TC01003871.hg.1 | -2.71  | JUC01030851.hg.1 | TLR5       |
| TC01003871.hg.1 | -3.49  | JUC01030848.hg.1 | TLR5       |
| TC03002150.hg.1 | 4.47   | JUC03018801.hg.1 | MUC4       |
| TC03002150.hg.1 | 2.86   | JUC03018800.hg.1 | MUC4       |
| TC03002150.hg.1 | 2.75   | PSR03037925.hg.1 | MUC4       |
| TC03002150.hg.1 | 2.26   | JUC03018821.hg.1 | MUC4       |
| TC03002150.hg.1 | -2.15  | PSR03037935.hg.1 | MUC4       |
| TC04000396.hg.1 | 4.47   | JUC04002704.hg.1 | SLC4A4     |
| TC04000396.hg.1 | 2.98   | PSR04005441.hg.1 | SLC4A4     |
| TC04000396.hg.1 | 2.7    | PSR04005442.hg.1 | SLC4A4     |
| TC04000396.hg.1 | 2.54   | JUC04002728.hg.1 | SLC4A4     |
| TC04000396.hg.1 | 2.02   | PSR04005460.hg.1 | SLC4A4     |
| TC04000396.hg.1 | -2.22  | JUC04002712.hg.1 | SLC4A4     |
| TC11000855.hg.1 | 4.47   | JUC11005660.hg.1 | LOC1005062 |
| TC11000855.hg.1 | 3      | JUC11005661.hg.1 | LOC1005062 |
| TC11000855.hg.1 | 2.7    | JUC11005664.hg.1 | LOC1005062 |
| TC11000855.hg.1 | 2.18   | JUC11005663.hg.1 | LOC1005062 |
| TC11000855.hg.1 | 2.17   | PSR11010824.hg.1 | LOC1005062 |
| TC21000154.hg.1 | 4.47   | JUC21000676.hg.1 | CHAF1B     |
| TC21000154.hg.1 | 2.17   | PSR21001340.hg.1 | CHAF1B     |
| TC21000154.hg.1 | -2.05  | JUC21000668.hg.1 | CHAF1B     |
| TC21000154.hg.1 | -2.11  | PSR21001349.hg.1 | CHAF1B     |
| TC21000154.hg.1 | -2.87  | JUC21000674.hg.1 | CHAF1B     |
| TC12001700.hg.1 | 4.46   | PSR12022692.hg.1 | LOC1005071 |
| TC12001700.hg.1 | 4.23   | PSR12022707.hg.1 | LOC1005071 |
| TC12001700.hg.1 | 4.22   | PSR12022702.hg.1 | LOC1005071 |
| TC12001700.hg.1 | 3.91   | JUC12012509.hg.1 | LOC1005071 |
| TC12001700.hg.1 | 2.57   | PSR12022700.hg.1 | LOC1005071 |
| TC12001700.hg.1 | 2.5    | PSR12022696.hg.1 | LOC1005071 |
| TC12001700.hg.1 | 2.41   | PSR12022708.hg.1 | LOC1005071 |
| TC12001700.hg.1 | 2.12   | JUC12012511.hg.1 | LOC1005071 |
| TC6_mann_hap400 | 4.46   | JUC6_mann_hap400 | HLA-DRB3   |

|                 |       |                  |             |
|-----------------|-------|------------------|-------------|
| TC6_mann_hap400 | 2.29  | PSR6_mann_hap400 | HLA-DRB3    |
| TC6_mann_hap400 | 2.16  | JUC6_mann_hap400 | HLA-DRB3    |
| TC01000728.hg.1 | 4.45  | JUC01006009.hg.1 | AK4, LOC100 |
| TC01000728.hg.1 | 4.43  | JUC01006005.hg.1 | AK4, LOC100 |
| TC01000728.hg.1 | 3.98  | JUC01006011.hg.1 | AK4, LOC100 |
| TC01000728.hg.1 | 3.87  | PSR01011580.hg.1 | AK4, LOC100 |
| TC01000728.hg.1 | 3.5   | PSR01011584.hg.1 | AK4, LOC100 |
| TC01000728.hg.1 | 3.32  | PSR01011583.hg.1 | AK4, LOC100 |
| TC01000728.hg.1 | 2.89  | PSR01011591.hg.1 | AK4, LOC100 |
| TC01000728.hg.1 | 2.85  | PSR01011588.hg.1 | AK4, LOC100 |
| TC01000728.hg.1 | 2.62  | PSR01011585.hg.1 | AK4, LOC100 |
| TC01000728.hg.1 | 2.56  | PSR01011590.hg.1 | AK4, LOC100 |
| TC01000728.hg.1 | 2.12  | PSR01011582.hg.1 | AK4, LOC100 |
| TC01000728.hg.1 | -2.65 | JUC01006015.hg.1 | AK4, LOC100 |
| TC07000617.hg.1 | 4.45  | JUC07004322.hg.1 | SPDYE3      |
| TC07000617.hg.1 | 2.61  | PSR07009343.hg.1 | SPDYE3      |
| TC07000617.hg.1 | 2.12  | PSR07009355.hg.1 | SPDYE3      |
| TC08001675.hg.1 | 4.45  | JUC08011220.hg.1 | COL22A1     |
| TC08001675.hg.1 | 2.34  | JUC08011237.hg.1 | COL22A1     |
| TC08001675.hg.1 | 2.25  | JUC08011189.hg.1 | COL22A1     |
| TC08001675.hg.1 | 2.1   | PSR08021883.hg.1 | COL22A1     |
| TC08001675.hg.1 | 2     | PSR08021918.hg.1 | COL22A1     |
| TC08001675.hg.1 | -2.13 | JUC08011184.hg.1 | COL22A1     |
| TC15000157.hg.1 | 4.45  | JUC15000397.hg.1 | GOLGA8J     |
| TC15000157.hg.1 | 3.45  | PSR15001003.hg.1 | GOLGA8J     |
| TC15000157.hg.1 | -2.41 | JUC15000383.hg.1 | GOLGA8J     |
| TC01003192.hg.1 | 4.44  | JUC01026022.hg.1 | HIST2H4B, H |
| TC01003192.hg.1 | 2.77  | PSR01048907.hg.1 | HIST2H4B, H |
| TC01003192.hg.1 | 2.51  | PSR01048911.hg.1 | HIST2H4B, H |
| TC01003192.hg.1 | 2.38  | PSR01048910.hg.1 | HIST2H4B, H |
| TC01003192.hg.1 | 2.09  | PSR01048916.hg.1 | HIST2H4B, H |
| TC01003733.hg.1 | 4.44  | JUC01029913.hg.1 | PIK3C2B     |
| TC01003733.hg.1 | 2.95  | JUC01029923.hg.1 | PIK3C2B     |
| TC01003733.hg.1 | 2.32  | JUC01029931.hg.1 | PIK3C2B     |
| TC01003733.hg.1 | -2.15 | PSR01057339.hg.1 | PIK3C2B     |
| TC01003733.hg.1 | -2.5  | JUC01029915.hg.1 | PIK3C2B     |
| TC04000839.hg.1 | 4.44  | JUC04006207.hg.1 | PALLD       |
| TC04000839.hg.1 | 2.59  | PSR04011592.hg.1 | PALLD       |
| TC04000839.hg.1 | 2.16  | PSR04011596.hg.1 | PALLD       |
| TC04000839.hg.1 | 2.1   | PSR04011591.hg.1 | PALLD       |
| TC04000839.hg.1 | -2.04 | JUC04006186.hg.1 | PALLD       |
| TC04000839.hg.1 | -2.54 | PSR04011566.hg.1 | PALLD       |
| TC04000839.hg.1 | -4.55 | JUC04006184.hg.1 | PALLD       |
| TC05001924.hg.1 | 4.44  | JUC05013527.hg.1 | CSNK1A1     |
| TC05001924.hg.1 | 4.29  | JUC05013525.hg.1 | CSNK1A1     |
| TC05001924.hg.1 | 3.37  | JUC05013517.hg.1 | CSNK1A1     |
| TC05001924.hg.1 | 2.18  | JUC05013528.hg.1 | CSNK1A1     |
| TC05001924.hg.1 | -2.02 | PSR05026589.hg.1 | CSNK1A1     |
| TC05001924.hg.1 | -2.11 | PSR05026588.hg.1 | CSNK1A1     |
| TC06000165.hg.1 | 4.44  | PSR06001683.hg.1 | HFE         |
| TC06000165.hg.1 | 2.96  | JUC06000855.hg.1 | HFE         |
| TC06000165.hg.1 | 2.64  | JUC06000842.hg.1 | HFE         |
| TC06000165.hg.1 | 2.19  | PSR06001685.hg.1 | HFE         |
| TC0X000116.hg.1 | 4.44  | JUC0X000848.hg.1 | ZFX         |
| TC0X000116.hg.1 | 3.2   | PSR0X001544.hg.1 | ZFX         |
| TC0X000116.hg.1 | 3.16  | PSR0X001550.hg.1 | ZFX         |
| TC0X000116.hg.1 | 3.08  | PSR0X001554.hg.1 | ZFX         |
| TC0X000116.hg.1 | 3.05  | PSR0X001545.hg.1 | ZFX         |

|                 |       |                  |        |
|-----------------|-------|------------------|--------|
| TC0X000116.hg.1 | 2.96  | JUC0X000833.hg.1 | ZFX    |
| TC0X000116.hg.1 | 2.9   | PSR0X001535.hg.1 | ZFX    |
| TC0X000116.hg.1 | 2.85  | PSR0X001546.hg.1 | ZFX    |
| TC0X000116.hg.1 | 2.85  | PSR0X001547.hg.1 | ZFX    |
| TC0X000116.hg.1 | 2.85  | PSR0X001571.hg.1 | ZFX    |
| TC0X000116.hg.1 | 2.82  | PSR0X001542.hg.1 | ZFX    |
| TC0X000116.hg.1 | 2.66  | JUC0X000839.hg.1 | ZFX    |
| TC0X000116.hg.1 | 2.37  | JUC0X000840.hg.1 | ZFX    |
| TC0X000116.hg.1 | 2.17  | JUC0X000837.hg.1 | ZFX    |
| TC0X000116.hg.1 | 2.11  | JUC0X000860.hg.1 | ZFX    |
| TC0X000116.hg.1 | -2.27 | JUC0X000846.hg.1 | ZFX    |
| TC0X000116.hg.1 | -2.3  | JUC0X000832.hg.1 | ZFX    |
| TC0X000978.hg.1 | 4.44  | JUC0X006556.hg.1 | MAOB   |
| TC0X000978.hg.1 | 3.86  | JUC0X006546.hg.1 | MAOB   |
| TC0X000978.hg.1 | 3.49  | PSR0X013041.hg.1 | MAOB   |
| TC0X000978.hg.1 | 2.82  | JUC0X006545.hg.1 | MAOB   |
| TC0X000978.hg.1 | 2.77  | JUC0X006553.hg.1 | MAOB   |
| TC0X000978.hg.1 | 2.61  | JUC0X006539.hg.1 | MAOB   |
| TC0X000978.hg.1 | 2.48  | PSR0X013037.hg.1 | MAOB   |
| TC0X000978.hg.1 | 2.32  | JUC0X006543.hg.1 | MAOB   |
| TC0X000978.hg.1 | 2.15  | PSR0X013038.hg.1 | MAOB   |
| TC0X000978.hg.1 | 2.09  | PSR0X013036.hg.1 | MAOB   |
| TC0X000978.hg.1 | 2.02  | PSR0X013010.hg.1 | MAOB   |
| TC0X000978.hg.1 | -2.03 | JUC0X006540.hg.1 | MAOB   |
| TC0X000978.hg.1 | -2.1  | JUC0X006552.hg.1 | MAOB   |
| TC6_cox_hap2000 | 4.44  | PSR6_cox_hap2000 | HLA-H  |
| TC6_cox_hap2000 | 3.11  | JUC6_cox_hap2000 | HLA-H  |
| TC6_cox_hap2000 | 2.75  | JUC6_cox_hap2000 | HLA-H  |
| TC6_cox_hap2000 | 2.66  | PSR6_cox_hap2000 | HLA-H  |
| TC6_cox_hap2000 | 2.46  | PSR6_cox_hap2000 | HLA-H  |
| TC6_cox_hap2000 | 2.03  | JUC6_cox_hap2000 | HLA-H  |
| TC03001998.hg.1 | 4.43  | PSR03035733.hg.1 | TNIK   |
| TC03001998.hg.1 | 4.23  | JUC03017647.hg.1 | TNIK   |
| TC03001998.hg.1 | 3.11  | PSR03035709.hg.1 | TNIK   |
| TC03001998.hg.1 | 2.98  | PSR03035753.hg.1 | TNIK   |
| TC03001998.hg.1 | 2.91  | PSR03035704.hg.1 | TNIK   |
| TC03001998.hg.1 | 2.82  | PSR03035738.hg.1 | TNIK   |
| TC03001998.hg.1 | 2.78  | JUC03017630.hg.1 | TNIK   |
| TC03001998.hg.1 | 2.46  | PSR03035716.hg.1 | TNIK   |
| TC03001998.hg.1 | 2.42  | PSR03035734.hg.1 | TNIK   |
| TC03001998.hg.1 | 2.35  | PSR03035752.hg.1 | TNIK   |
| TC03001998.hg.1 | 2.22  | JUC03017619.hg.1 | TNIK   |
| TC03001998.hg.1 | 2.14  | JUC03017634.hg.1 | TNIK   |
| TC03001998.hg.1 | 2.07  | PSR03035735.hg.1 | TNIK   |
| TC03001998.hg.1 | 2.06  | PSR03035724.hg.1 | TNIK   |
| TC03001998.hg.1 | -2.29 | PSR03035750.hg.1 | TNIK   |
| TC03001998.hg.1 | -3.2  | PSR03035705.hg.1 | TNIK   |
| TC03001998.hg.1 | -3.49 | JUC03017641.hg.1 | TNIK   |
| TC03001998.hg.1 | -4.32 | JUC03017640.hg.1 | TNIK   |
| TC05000837.hg.1 | 4.43  | JUC05006292.hg.1 | GPX3   |
| TC05000837.hg.1 | 2.74  | JUC05006284.hg.1 | GPX3   |
| TC05000837.hg.1 | 2.57  | JUC05006287.hg.1 | GPX3   |
| TC05000837.hg.1 | 2.51  | PSR05012082.hg.1 | GPX3   |
| TC05000837.hg.1 | 2.04  | PSR05012081.hg.1 | GPX3   |
| TC09000709.hg.1 | 4.43  | JUC09004899.hg.1 | PPP2R4 |
| TC09000709.hg.1 | 2.07  | JUC09004876.hg.1 | PPP2R4 |
| TC09000709.hg.1 | -2.03 | JUC09004880.hg.1 | PPP2R4 |
| TC09000709.hg.1 | -2.2  | PSR09008946.hg.1 | PPP2R4 |

|                 |       |                  |                |
|-----------------|-------|------------------|----------------|
| TC09000709.hg.1 | -2.58 | JUC09004875.hg.1 | PPP2R4         |
| TC09000709.hg.1 | -2.67 | JUC09004903.hg.1 | PPP2R4         |
| TC09000709.hg.1 | -3.48 | PSR09008947.hg.1 | PPP2R4         |
| TC22000224.hg.1 | 4.43  | JUC22001517.hg.1 | LIMK2          |
| TC22000224.hg.1 | 3.83  | PSR22004259.hg.1 | LIMK2          |
| TC22000224.hg.1 | 3.43  | JUC22001519.hg.1 | LIMK2          |
| TC22000224.hg.1 | 3     | PSR22004256.hg.1 | LIMK2          |
| TC22000224.hg.1 | 2.48  | JUC22001521.hg.1 | LIMK2          |
| TC22000224.hg.1 | 2.45  | JUC22001511.hg.1 | LIMK2          |
| TC22000224.hg.1 | 2.18  | JUC22001509.hg.1 | LIMK2          |
| TC22000224.hg.1 | -2.31 | PSR22004251.hg.1 | LIMK2          |
| TC22000224.hg.1 | -2.46 | PSR22004288.hg.1 | LIMK2          |
| TC22000224.hg.1 | -3.04 | PSR22004252.hg.1 | LIMK2          |
| TC22000224.hg.1 | -3.21 | JUC22001531.hg.1 | LIMK2          |
| TC03003365.hg.1 | 4.42  | JUC03023893.hg.1 | MUC20          |
| TC03003365.hg.1 | 3.52  | JUC03023905.hg.1 | MUC20          |
| TC03003365.hg.1 | 3.52  | JUC03023907.hg.1 | MUC20          |
| TC03003365.hg.1 | 3.4   | PSR03018821.hg.1 | MUC20          |
| TC03003365.hg.1 | 3.07  | JUC03023889.hg.1 | MUC20          |
| TC03003365.hg.1 | 3.06  | JUC03023897.hg.1 | MUC20          |
| TC03003365.hg.1 | 2.96  | PSR03018785.hg.1 | MUC20          |
| TC03003365.hg.1 | 2.8   | PSR03018862.hg.1 | MUC20          |
| TC03003365.hg.1 | 2.6   | JUC03023898.hg.1 | MUC20          |
| TC03003365.hg.1 | 2.58  | JUC03023892.hg.1 | MUC20          |
| TC03003365.hg.1 | 2.56  | JUC03023891.hg.1 | MUC20          |
| TC03003365.hg.1 | 2.33  | PSR03018858.hg.1 | MUC20          |
| TC03003365.hg.1 | 2.13  | PSR03018825.hg.1 | MUC20          |
| TC03003365.hg.1 | 2.13  | PSR03018853.hg.1 | MUC20          |
| TC03003365.hg.1 | 2.1   | JUC03023901.hg.1 | MUC20          |
| TC03003365.hg.1 | 2.1   | JUC03023902.hg.1 | MUC20          |
| TC03000548.hg.1 | 4.41  | JUC03005025.hg.1 | DZIP3          |
| TC03000548.hg.1 | 2.93  | PSR03010057.hg.1 | DZIP3          |
| TC03000548.hg.1 | 2.27  | JUC03004997.hg.1 | DZIP3          |
| TC03000548.hg.1 | 2.03  | JUC03005013.hg.1 | DZIP3          |
| TC03000548.hg.1 | -2.26 | JUC03005021.hg.1 | DZIP3          |
| TC03000548.hg.1 | -3.08 | JUC03005005.hg.1 | DZIP3          |
| TC07000679.hg.1 | 4.41  | JUC07004920.hg.1 | MLL5           |
| TC07000679.hg.1 | 2.42  | JUC07004924.hg.1 | MLL5           |
| TC07000679.hg.1 | 2.06  | JUC07004901.hg.1 | MLL5           |
| TC07000679.hg.1 | -2.32 | PSR07010519.hg.1 | MLL5           |
| TC07003401.hg.1 | 4.41  | JUC07021995.hg.1 | HOXA9, MIR3938 |
| TC07003401.hg.1 | 3.71  | PSR07019190.hg.1 | HOXA9, MIR3938 |
| TC07003401.hg.1 | 3.48  | PSR07019143.hg.1 | HOXA9, MIR3938 |
| TC07003401.hg.1 | 3.35  | JUC07021990.hg.1 | HOXA9, MIR3938 |
| TC07003401.hg.1 | 3.31  | PSR07019167.hg.1 | HOXA9, MIR3938 |
| TC07003401.hg.1 | 3.11  | JUC07021991.hg.1 | HOXA9, MIR3938 |
| TC07003401.hg.1 | 2.91  | PSR07019166.hg.1 | HOXA9, MIR3938 |
| TC07003401.hg.1 | 2.85  | JUC07021996.hg.1 | HOXA9, MIR3938 |
| TC07003401.hg.1 | 2.83  | JUC07021997.hg.1 | HOXA9, MIR3938 |
| TC07003401.hg.1 | 2.7   | JUC07021994.hg.1 | HOXA9, MIR3938 |
| TC07003401.hg.1 | 2.61  | PSR07019134.hg.1 | HOXA9, MIR3938 |
| TC07003401.hg.1 | 2.4   | JUC07021988.hg.1 | HOXA9, MIR3938 |
| TC07003401.hg.1 | 2.26  | PSR07019154.hg.1 | HOXA9, MIR3938 |
| TC07003401.hg.1 | -3.02 | PSR07019162.hg.1 | HOXA9, MIR3938 |
| TC08000132.hg.1 | 4.41  | JUC08000665.hg.1 |                |
| TC08000132.hg.1 | 2.94  | PSR08001246.hg.1 |                |
| TC08000132.hg.1 | 2.44  | PSR08001244.hg.1 |                |
| TC08000132.hg.1 | 2.11  | PSR08001245.hg.1 |                |

|                 |       |                  |          |
|-----------------|-------|------------------|----------|
| TC14000419.hg.1 | 4.41  | PSR14005084.hg.1 | SMOC1    |
| TC14000419.hg.1 | 3.6   | JUC14002604.hg.1 | SMOC1    |
| TC14000419.hg.1 | 3.5   | PSR14005085.hg.1 | SMOC1    |
| TC14000419.hg.1 | 3.29  | PSR14005086.hg.1 | SMOC1    |
| TC01003073.hg.1 | 4.4   | JUC01025633.hg.1 |          |
| TC01003073.hg.1 | 3.36  | JUC01025628.hg.1 |          |
| TC01003073.hg.1 | 2.42  | PSR01047756.hg.1 |          |
| TC01003073.hg.1 | 2.33  | JUC01025632.hg.1 |          |
| TC01003073.hg.1 | 2.26  | PSR01047745.hg.1 |          |
| TC01003073.hg.1 | 2.11  | JUC01025622.hg.1 |          |
| TC01003073.hg.1 | 2.04  | PSR01047757.hg.1 |          |
| TC01003073.hg.1 | -2.44 | PSR01047749.hg.1 |          |
| TC01003073.hg.1 | -2.53 | PSR01047743.hg.1 |          |
| TC03001105.hg.1 | 4.4   | JUC03009623.hg.1 | MF12-AS1 |
| TC03001105.hg.1 | 2.62  | PSR03019064.hg.1 | MF12-AS1 |
| TC07001738.hg.1 | 4.4   | JUC07013261.hg.1 | NAMPT    |
| TC07001738.hg.1 | 3.38  | PSR07027039.hg.1 | NAMPT    |
| TC07001738.hg.1 | 2.73  | PSR07027038.hg.1 | NAMPT    |
| TC07001738.hg.1 | 2.73  | PSR07027047.hg.1 | NAMPT    |
| TC07001738.hg.1 | 2.72  | PSR07027028.hg.1 | NAMPT    |
| TC07001738.hg.1 | 2.67  | PSR07027058.hg.1 | NAMPT    |
| TC07001738.hg.1 | 2.22  | PSR07027030.hg.1 | NAMPT    |
| TC07001738.hg.1 | 2.14  | PSR07027056.hg.1 | NAMPT    |
| TC07001738.hg.1 | -2.07 | JUC07013253.hg.1 | NAMPT    |
| TC10001681.hg.1 | 4.4   | JUC10012876.hg.1 | HSPA12A  |
| TC10001681.hg.1 | 3.1   | JUC10012859.hg.1 | HSPA12A  |
| TC10001681.hg.1 | 2.75  | JUC10012874.hg.1 | HSPA12A  |
| TC10001681.hg.1 | -2.09 | PSR10022164.hg.1 | HSPA12A  |
| TC10001681.hg.1 | -2.3  | PSR10022165.hg.1 | HSPA12A  |
| TC01000644.hg.1 | 4.39  | JUC01005409.hg.1 | FAM159A  |
| TC01000644.hg.1 | 3.41  | PSR01010508.hg.1 | FAM159A  |
| TC01000644.hg.1 | -2.6  | PSR01010510.hg.1 | FAM159A  |
| TC01000644.hg.1 | -2.66 | PSR01010507.hg.1 | FAM159A  |
| TC01000644.hg.1 | -2.88 | PSR01010515.hg.1 | FAM159A  |
| TC01000644.hg.1 | -6    | JUC01005413.hg.1 | FAM159A  |
| TC01003778.hg.1 | 4.39  | JUC01030251.hg.1 | PLXNA2   |
| TC01003778.hg.1 | 3.54  | JUC01030274.hg.1 | PLXNA2   |
| TC01003778.hg.1 | 3.13  | JUC01030263.hg.1 | PLXNA2   |
| TC01003778.hg.1 | 3.04  | JUC01030266.hg.1 | PLXNA2   |
| TC01003778.hg.1 | 2.84  | JUC01030255.hg.1 | PLXNA2   |
| TC01003778.hg.1 | 2.47  | JUC01030254.hg.1 | PLXNA2   |
| TC01003778.hg.1 | 2.4   | PSR01057911.hg.1 | PLXNA2   |
| TC01003778.hg.1 | 2.34  | PSR01057890.hg.1 | PLXNA2   |
| TC01003778.hg.1 | 2.34  | JUC01030265.hg.1 | PLXNA2   |
| TC01003778.hg.1 | 2.26  | JUC01030259.hg.1 | PLXNA2   |
| TC01003778.hg.1 | 2.2   | PSR01057903.hg.1 | PLXNA2   |
| TC01003778.hg.1 | 2.15  | PSR01057921.hg.1 | PLXNA2   |
| TC01003778.hg.1 | 2.13  | PSR01057915.hg.1 | PLXNA2   |
| TC01003778.hg.1 | 2.12  | PSR01057914.hg.1 | PLXNA2   |
| TC01003778.hg.1 | 2.12  | PSR01057918.hg.1 | PLXNA2   |
| TC01003778.hg.1 | 2.06  | PSR01057930.hg.1 | PLXNA2   |
| TC01003778.hg.1 | 2.04  | PSR01057912.hg.1 | PLXNA2   |
| TC01003778.hg.1 | -2    | PSR01057927.hg.1 | PLXNA2   |
| TC01003778.hg.1 | -2.08 | PSR01057906.hg.1 | PLXNA2   |
| TC01003778.hg.1 | -2.51 | JUC01030267.hg.1 | PLXNA2   |
| TC01003778.hg.1 | -5.69 | JUC01030270.hg.1 | PLXNA2   |
| TC03002141.hg.1 | 4.39  | JUC03018723.hg.1 | ACAP2    |
| TC03002141.hg.1 | 2.65  | JUC03018750.hg.1 | ACAP2    |

|                 |        |                  |                          |
|-----------------|--------|------------------|--------------------------|
| TC03002141.hg.1 | 2.46   | JUC03018759.hg.1 | ACAP2                    |
| TC03002141.hg.1 | 2.45   | JUC03018736.hg.1 | ACAP2                    |
| TC03002141.hg.1 | 2.12   | JUC03018755.hg.1 | ACAP2                    |
| TC03002141.hg.1 | 2.01   | PSR03037798.hg.1 | ACAP2                    |
| TC0X000943.hg.1 | 4.39   | JUC0X006353.hg.1 | DMD                      |
| TC0X000943.hg.1 | 4.2    | PSR0X012609.hg.1 | DMD                      |
| TC0X000943.hg.1 | 2.88   | JUC0X006249.hg.1 | DMD                      |
| TC0X000943.hg.1 | 2.67   | JUC0X006248.hg.1 | DMD                      |
| TC0X000943.hg.1 | 2.36   | JUC0X006301.hg.1 | DMD                      |
| TC0X000943.hg.1 | 2.36   | JUC0X006317.hg.1 | DMD                      |
| TC0X000943.hg.1 | 2.34   | JUC0X006321.hg.1 | DMD                      |
| TC0X000943.hg.1 | 2.25   | JUC0X006329.hg.1 | DMD                      |
| TC0X000943.hg.1 | 2.24   | JUC0X006342.hg.1 | DMD                      |
| TC0X000943.hg.1 | 2.21   | JUC0X006276.hg.1 | DMD                      |
| TC0X000943.hg.1 | 2.11   | PSR0X012611.hg.1 | DMD                      |
| TC0X000943.hg.1 | 2.07   | JUC0X006298.hg.1 | DMD                      |
| TC0X000943.hg.1 | 2.03   | JUC0X006311.hg.1 | DMD                      |
| TC0X000943.hg.1 | -2.02  | JUC0X006305.hg.1 | DMD                      |
| TC0X000943.hg.1 | -2.04  | PSR0X012579.hg.1 | DMD                      |
| TC0X000943.hg.1 | -2.07  | JUC0X006309.hg.1 | DMD                      |
| TC0X000943.hg.1 | -2.2   | JUC0X006275.hg.1 | DMD                      |
| TC0X000943.hg.1 | -2.26  | JUC0X006264.hg.1 | DMD                      |
| TC0X000943.hg.1 | -2.27  | JUC0X006307.hg.1 | DMD                      |
| TC0X000943.hg.1 | -2.28  | JUC0X006289.hg.1 | DMD                      |
| TC0X000943.hg.1 | -2.31  | PSR0X012591.hg.1 | DMD                      |
| TC0X000943.hg.1 | -2.33  | JUC0X006345.hg.1 | DMD                      |
| TC0X000943.hg.1 | -2.44  | JUC0X006304.hg.1 | DMD                      |
| TC0X000943.hg.1 | -2.5   | PSR0X012593.hg.1 | DMD                      |
| TC0X000943.hg.1 | -2.56  | JUC0X006322.hg.1 | DMD                      |
| TC0X000943.hg.1 | -2.67  | PSR0X012631.hg.1 | DMD                      |
| TC0X000943.hg.1 | -2.68  | JUC0X006262.hg.1 | DMD                      |
| TC0X000943.hg.1 | -2.69  | PSR0X012648.hg.1 | DMD                      |
| TC0X000943.hg.1 | -2.72  | JUC0X006355.hg.1 | DMD                      |
| TC0X000943.hg.1 | -2.76  | PSR0X012625.hg.1 | DMD                      |
| TC0X000943.hg.1 | -2.88  | PSR0X012698.hg.1 | DMD                      |
| TC0X000943.hg.1 | -2.9   | PSR0X012604.hg.1 | DMD                      |
| TC0X000943.hg.1 | -2.93  | PSR0X012605.hg.1 | DMD                      |
| TC0X000943.hg.1 | -3.15  | PSR0X012699.hg.1 | DMD                      |
| TC0X000943.hg.1 | -3.55  | PSR0X012692.hg.1 | DMD                      |
| TC0X000943.hg.1 | -3.79  | JUC0X006346.hg.1 | DMD                      |
| TC0X000943.hg.1 | -4.12  | JUC0X006250.hg.1 | DMD                      |
| TC0X000943.hg.1 | -5.03  | PSR0X012569.hg.1 | DMD                      |
| TC0X000943.hg.1 | -10.91 | JUC0X006277.hg.1 | DMD                      |
| TC22000394.hg.1 | 4.39   | JUC22002903.hg.1 | GTSE1                    |
| TC22000394.hg.1 | 2.36   | PSR22007633.hg.1 | GTSE1                    |
| TC22000394.hg.1 | 2.35   | PSR22007631.hg.1 | GTSE1                    |
| TC22000394.hg.1 | 2.15   | JUC22002900.hg.1 | GTSE1                    |
| TC01002649.hg.1 | 4.38   | PSR01041454.hg.1 | EPS15                    |
| TC01002649.hg.1 | 2.26   | JUC01022169.hg.1 | EPS15                    |
| TC01002649.hg.1 | -2.06  | JUC01022159.hg.1 | EPS15                    |
| TC02002399.hg.1 | 4.38   | JUC02019655.hg.1 | ZEB2, ZEB2- <del>1</del> |
| TC02002399.hg.1 | 2.3    | PSR02037863.hg.1 | ZEB2, ZEB2- <del>1</del> |
| TC02002399.hg.1 | 2.17   | JUC02019669.hg.1 | ZEB2, ZEB2- <del>1</del> |
| TC02002399.hg.1 | 2.1    | JUC02019677.hg.1 | ZEB2, ZEB2- <del>1</del> |
| TC10000565.hg.1 | 4.38   | JUC10003523.hg.1 | ZMIZ1                    |
| TC10000565.hg.1 | 3.37   | JUC10003504.hg.1 | ZMIZ1                    |
| TC10000565.hg.1 | 3.03   | JUC10003507.hg.1 | ZMIZ1                    |
| TC10000565.hg.1 | 2.89   | JUC10003529.hg.1 | ZMIZ1                    |

|                 |       |                  |        |
|-----------------|-------|------------------|--------|
| TC10000565.hg.1 | 2.84  | JUC10003506.hg.1 | ZMIZ1  |
| TC10000565.hg.1 | 2.71  | PSR10006066.hg.1 | ZMIZ1  |
| TC10000565.hg.1 | 2.53  | JUC10003533.hg.1 | ZMIZ1  |
| TC10000565.hg.1 | 2.24  | PSR10006060.hg.1 | ZMIZ1  |
| TC10000565.hg.1 | 2.13  | PSR10006042.hg.1 | ZMIZ1  |
| TC10000565.hg.1 | 2.08  | JUC10003535.hg.1 | ZMIZ1  |
| TC12000974.hg.1 | 4.38  | JUC12006982.hg.1 | KNTC1  |
| TC12000974.hg.1 | 2.66  | JUC12007025.hg.1 | KNTC1  |
| TC12000974.hg.1 | 2.08  | PSR12012791.hg.1 | KNTC1  |
| TC12000974.hg.1 | 2.05  | JUC12007024.hg.1 | KNTC1  |
| TC12000974.hg.1 | 2.03  | JUC12006976.hg.1 | KNTC1  |
| TC12000974.hg.1 | -2.17 | JUC12007023.hg.1 | KNTC1  |
| TC12000974.hg.1 | -2.48 | JUC12006993.hg.1 | KNTC1  |
| TC12000974.hg.1 | -2.51 | JUC12006968.hg.1 | KNTC1  |
| TC12000974.hg.1 | -2.63 | JUC12006994.hg.1 | KNTC1  |
| TC12000974.hg.1 | -2.74 | JUC12007020.hg.1 | KNTC1  |
| TC12000974.hg.1 | -2.81 | JUC12006998.hg.1 | KNTC1  |
| TC12000974.hg.1 | -2.85 | JUC12006997.hg.1 | KNTC1  |
| TC03001888.hg.1 | 4.37  | PSR03034034.hg.1 | TM4SF1 |
| TC03001888.hg.1 | -6.27 | JUC03016905.hg.1 | TM4SF1 |
| TC05000914.hg.1 | 4.37  | PSR05013205.hg.1 | ODZ2   |
| TC05000914.hg.1 | 3.87  | JUC05006819.hg.1 | ODZ2   |
| TC05000914.hg.1 | 3.71  | PSR05013204.hg.1 | ODZ2   |
| TC05000914.hg.1 | 3.27  | PSR05013235.hg.1 | ODZ2   |
| TC05000914.hg.1 | 3.21  | JUC05006848.hg.1 | ODZ2   |
| TC05000914.hg.1 | 3     | JUC05006816.hg.1 | ODZ2   |
| TC05000914.hg.1 | 2.56  | PSR05013206.hg.1 | ODZ2   |
| TC05000914.hg.1 | 2.54  | JUC05006855.hg.1 | ODZ2   |
| TC05000914.hg.1 | 2.47  | JUC05006825.hg.1 | ODZ2   |
| TC05000914.hg.1 | 2.42  | JUC05006844.hg.1 | ODZ2   |
| TC05000914.hg.1 | 2.4   | JUC05006820.hg.1 | ODZ2   |
| TC05000914.hg.1 | 2.33  | PSR05013219.hg.1 | ODZ2   |
| TC05000914.hg.1 | 2.29  | PSR05013214.hg.1 | ODZ2   |
| TC05000914.hg.1 | 2.02  | JUC05006834.hg.1 | ODZ2   |
| TC05000914.hg.1 | -2.39 | JUC05006857.hg.1 | ODZ2   |
| TC05003446.hg.1 | 4.37  | JUC05019878.hg.1 | SMA5   |
| TC05003446.hg.1 | -2.76 | PSR05019978.hg.1 | SMA5   |
| TC06000762.hg.1 | 4.37  | JUC06004242.hg.1 | BCKDHB |
| TC06000762.hg.1 | -2.01 | PSR06009137.hg.1 | BCKDHB |
| TC22000688.hg.1 | 4.37  | JUC22005004.hg.1 | LARGE  |
| TC22000688.hg.1 | 2.94  | PSR22012185.hg.1 | LARGE  |
| TC22000688.hg.1 | 2.64  | JUC22005007.hg.1 | LARGE  |
| TC22000688.hg.1 | 2.5   | PSR22012178.hg.1 | LARGE  |
| TC22000688.hg.1 | 2.14  | PSR22012172.hg.1 | LARGE  |
| TC22000688.hg.1 | 2.11  | PSR22012176.hg.1 | LARGE  |
| TC22000688.hg.1 | 2.01  | PSR22012170.hg.1 | LARGE  |
| TC22000688.hg.1 | -2.14 | JUC22005020.hg.1 | LARGE  |
| TC01003996.hg.1 | 4.36  | JUC01031624.hg.1 | LYST   |
| TC01003996.hg.1 | 3.42  | JUC01031668.hg.1 | LYST   |
| TC01003996.hg.1 | 3.17  | JUC01031623.hg.1 | LYST   |
| TC01003996.hg.1 | 2.9   | JUC01031630.hg.1 | LYST   |
| TC01003996.hg.1 | 2.6   | JUC01031658.hg.1 | LYST   |
| TC01003996.hg.1 | 2.6   | JUC01031667.hg.1 | LYST   |
| TC01003996.hg.1 | 2.17  | JUC01031617.hg.1 | LYST   |
| TC01003996.hg.1 | 2.14  | PSR01060519.hg.1 | LYST   |
| TC01003996.hg.1 | 2.05  | PSR01060503.hg.1 | LYST   |
| TC01003996.hg.1 | -2.29 | JUC01031643.hg.1 | LYST   |
| TC01003996.hg.1 | -3.25 | JUC01031650.hg.1 | LYST   |



|                 |       |                  |          |
|-----------------|-------|------------------|----------|
| TC01003996.hg.1 | -4.61 | JUC01031663.hg.1 | LYST     |
| TC02001326.hg.1 | 4.36  | JUC02010997.hg.1 | DES      |
| TC02001326.hg.1 | 2.69  | PSR02020642.hg.1 | DES      |
| TC02001326.hg.1 | 2.25  | JUC02011001.hg.1 | DES      |
| TC02001326.hg.1 | -2.17 | PSR02020641.hg.1 | DES      |
| TC02002900.hg.1 | 4.36  | JUC02024351.hg.1 | IQCA1    |
| TC02002900.hg.1 | -2.37 | PSR02046547.hg.1 | IQCA1    |
| TC02002900.hg.1 | -3.63 | JUC02024346.hg.1 | IQCA1    |
| TC02002900.hg.1 | -3.88 | JUC02024358.hg.1 | IQCA1    |
| TC05000697.hg.1 | 4.36  | PSR05009662.hg.1 | KIF20A   |
| TC05000697.hg.1 | 3.35  | JUC05005151.hg.1 | KIF20A   |
| TC05000697.hg.1 | 3.12  | PSR05009671.hg.1 | KIF20A   |
| TC05000697.hg.1 | 2.63  | PSR05009664.hg.1 | KIF20A   |
| TC05000697.hg.1 | 2.23  | PSR05009673.hg.1 | KIF20A   |
| TC05000697.hg.1 | 2.19  | PSR05009672.hg.1 | KIF20A   |
| TC05000697.hg.1 | 2.15  | PSR05009674.hg.1 | KIF20A   |
| TC05000697.hg.1 | -2.3  | JUC05005156.hg.1 | KIF20A   |
| TC05000697.hg.1 | -2.39 | JUC05005154.hg.1 | KIF20A   |
| TC13000173.hg.1 | 4.36  | JUC13001212.hg.1 | TPT1-AS1 |
| TC13000173.hg.1 | 3.1   | JUC13001219.hg.1 | TPT1-AS1 |
| TC13000173.hg.1 | 2.42  | JUC13001222.hg.1 | TPT1-AS1 |
| TC13000173.hg.1 | 2.04  | PSR13001959.hg.1 | TPT1-AS1 |
| TC13000173.hg.1 | 2.04  | JUC13001214.hg.1 | TPT1-AS1 |
| TC01001476.hg.1 | 4.35  | JUC01012082.hg.1 | C1orf112 |
| TC01001476.hg.1 | 2.65  | JUC01012059.hg.1 | C1orf112 |
| TC01001476.hg.1 | 2.27  | PSR01022921.hg.1 | C1orf112 |
| TC01001476.hg.1 | -2    | PSR01022896.hg.1 | C1orf112 |
| TC01001476.hg.1 | -2.06 | JUC01012062.hg.1 | C1orf112 |
| TC01001476.hg.1 | -2.09 | PSR01022898.hg.1 | C1orf112 |
| TC01001476.hg.1 | -2.14 | JUC01012072.hg.1 | C1orf112 |
| TC01001476.hg.1 | -2.15 | JUC01012058.hg.1 | C1orf112 |
| TC01001476.hg.1 | -2.39 | JUC01012077.hg.1 | C1orf112 |
| TC01001476.hg.1 | -2.56 | PSR01022908.hg.1 | C1orf112 |
| TC01001476.hg.1 | -3.14 | PSR01022913.hg.1 | C1orf112 |
| TC01001476.hg.1 | -3.46 | PSR01022885.hg.1 | C1orf112 |
| TC01001476.hg.1 | -3.49 | JUC01012083.hg.1 | C1orf112 |
| TC08001660.hg.1 | 4.35  | JUC08011101.hg.1 | ST3GAL1  |
| TC08001660.hg.1 | -2.27 | PSR08021724.hg.1 | ST3GAL1  |
| TC08001660.hg.1 | -3.04 | JUC08011086.hg.1 | ST3GAL1  |
| TC01002981.hg.1 | 4.34  | JUC01024897.hg.1 | DENND2D  |
| TC01002981.hg.1 | 2.93  | JUC01024900.hg.1 | DENND2D  |
| TC01002981.hg.1 | 2.14  | PSR01046282.hg.1 | DENND2D  |
| TC08001164.hg.1 | 4.34  | JUC08007637.hg.1 | ZMAT4    |
| TC08001164.hg.1 | 4.15  | JUC08007640.hg.1 | ZMAT4    |
| TC08001164.hg.1 | 3.57  | PSR08014969.hg.1 | ZMAT4    |
| TC08001164.hg.1 | 3.41  | PSR08014958.hg.1 | ZMAT4    |
| TC08001164.hg.1 | 2.25  | PSR08014971.hg.1 | ZMAT4    |
| TC08001164.hg.1 | 2.16  | PSR08014965.hg.1 | ZMAT4    |
| TC08001164.hg.1 | 2.15  | JUC08007648.hg.1 | ZMAT4    |
| TC08001164.hg.1 | -2.11 | PSR08014954.hg.1 | ZMAT4    |
| TC08001164.hg.1 | -2.15 | JUC08007641.hg.1 | ZMAT4    |
| TC08001164.hg.1 | -2.2  | PSR08014962.hg.1 | ZMAT4    |
| TC08001164.hg.1 | -2.45 | JUC08007646.hg.1 | ZMAT4    |
| TC08001164.hg.1 | -4.28 | JUC08007638.hg.1 | ZMAT4    |
| TC11000228.hg.1 | 4.34  | JUC11001435.hg.1 | NUCB2    |
| TC11000228.hg.1 | 3.25  | PSR11002965.hg.1 | NUCB2    |
| TC11000228.hg.1 | 2.98  | PSR11002972.hg.1 | NUCB2    |
| TC11000228.hg.1 | 2.87  | PSR11002971.hg.1 | NUCB2    |

|                 |        |                  |        |
|-----------------|--------|------------------|--------|
| TC11000228.hg.1 | 2.87   | PSR11002995.hg.1 | NUCB2  |
| TC11000228.hg.1 | 2.56   | PSR11002966.hg.1 | NUCB2  |
| TC11000228.hg.1 | 2.45   | JUC11001448.hg.1 | NUCB2  |
| TC11000228.hg.1 | 2.35   | PSR11002980.hg.1 | NUCB2  |
| TC11000228.hg.1 | 2.33   | PSR11002967.hg.1 | NUCB2  |
| TC11000228.hg.1 | 2.22   | PSR11002997.hg.1 | NUCB2  |
| TC11000228.hg.1 | 2.13   | PSR11002975.hg.1 | NUCB2  |
| TC11000228.hg.1 | 2.12   | JUC11001451.hg.1 | NUCB2  |
| TC11000228.hg.1 | 2.07   | JUC11001442.hg.1 | NUCB2  |
| TC11000228.hg.1 | 2      | PSR11002994.hg.1 | NUCB2  |
| TC02002765.hg.1 | 4.33   | PSR02044435.hg.1 | TNS1   |
| TC02002765.hg.1 | -2.06  | PSR02044387.hg.1 | TNS1   |
| TC02002765.hg.1 | -2.06  | JUC02023285.hg.1 | TNS1   |
| TC02002765.hg.1 | -2.07  | PSR02044405.hg.1 | TNS1   |
| TC02002765.hg.1 | -2.1   | PSR02044390.hg.1 | TNS1   |
| TC02002765.hg.1 | -2.23  | JUC02023306.hg.1 | TNS1   |
| TC02002765.hg.1 | -2.24  | PSR02044439.hg.1 | TNS1   |
| TC02002765.hg.1 | -2.36  | JUC02023297.hg.1 | TNS1   |
| TC02002765.hg.1 | -2.39  | PSR02044412.hg.1 | TNS1   |
| TC02002765.hg.1 | -2.42  | PSR02044443.hg.1 | TNS1   |
| TC02002765.hg.1 | -2.43  | PSR02044445.hg.1 | TNS1   |
| TC02002765.hg.1 | -2.46  | JUC02023313.hg.1 | TNS1   |
| TC02002765.hg.1 | -2.48  | JUC02023291.hg.1 | TNS1   |
| TC02002765.hg.1 | -2.54  | PSR02044395.hg.1 | TNS1   |
| TC02002765.hg.1 | -2.97  | JUC02023319.hg.1 | TNS1   |
| TC02002765.hg.1 | -3.06  | PSR02044415.hg.1 | TNS1   |
| TC02002765.hg.1 | -3.14  | PSR02044444.hg.1 | TNS1   |
| TC02002765.hg.1 | -3.32  | JUC02023286.hg.1 | TNS1   |
| TC02002765.hg.1 | -3.56  | PSR02044442.hg.1 | TNS1   |
| TC02002765.hg.1 | -3.57  | JUC02023321.hg.1 | TNS1   |
| TC02002765.hg.1 | -4.25  | JUC02023310.hg.1 | TNS1   |
| TC05001804.hg.1 | 4.33   | PSR05024563.hg.1 | CXCL14 |
| TC05001804.hg.1 | 4.02   | JUC05012596.hg.1 | CXCL14 |
| TC05001804.hg.1 | 2.39   | PSR05024559.hg.1 | CXCL14 |
| TC05001804.hg.1 | 2.27   | PSR05024565.hg.1 | CXCL14 |
| TC05001804.hg.1 | 2.26   | JUC05012598.hg.1 | CXCL14 |
| TC05001804.hg.1 | -3.92  | JUC05012597.hg.1 | CXCL14 |
| TC05001804.hg.1 | -12.21 | PSR05024567.hg.1 | CXCL14 |
| TC05001804.hg.1 | -26.65 | PSR05024568.hg.1 | CXCL14 |
| TC05001804.hg.1 | -33.11 | PSR05024569.hg.1 | CXCL14 |
| TC09000576.hg.1 | 4.33   | JUC09003558.hg.1 | RGS3   |
| TC09000576.hg.1 | 4.3    | PSR09006457.hg.1 | RGS3   |
| TC09000576.hg.1 | 3.98   | JUC09003578.hg.1 | RGS3   |
| TC09000576.hg.1 | 3.73   | JUC09003559.hg.1 | RGS3   |
| TC09000576.hg.1 | 3.64   | PSR09006430.hg.1 | RGS3   |
| TC09000576.hg.1 | 3.63   | PSR09006444.hg.1 | RGS3   |
| TC09000576.hg.1 | 3.47   | PSR09006441.hg.1 | RGS3   |
| TC09000576.hg.1 | 3.36   | PSR09006465.hg.1 | RGS3   |
| TC09000576.hg.1 | 3.35   | JUC09003590.hg.1 | RGS3   |
| TC09000576.hg.1 | 3.27   | JUC09003597.hg.1 | RGS3   |
| TC09000576.hg.1 | 3.11   | JUC09003581.hg.1 | RGS3   |
| TC09000576.hg.1 | 2.86   | PSR09006420.hg.1 | RGS3   |
| TC09000576.hg.1 | 2.72   | PSR09006418.hg.1 | RGS3   |
| TC09000576.hg.1 | 2.61   | JUC09003574.hg.1 | RGS3   |
| TC09000576.hg.1 | 2.39   | PSR09006416.hg.1 | RGS3   |
| TC09000576.hg.1 | 2.39   | PSR09006423.hg.1 | RGS3   |
| TC09000576.hg.1 | 2.33   | PSR09006454.hg.1 | RGS3   |
| TC09000576.hg.1 | 2.33   | PSR09006458.hg.1 | RGS3   |

|                 |       |                  |          |
|-----------------|-------|------------------|----------|
| TC09000576.hg.1 | 2.3   | PSR09006448.hg.1 | RGS3     |
| TC09000576.hg.1 | 2.25  | PSR09006428.hg.1 | RGS3     |
| TC09000576.hg.1 | 2.24  | PSR09006434.hg.1 | RGS3     |
| TC09000576.hg.1 | 2.24  | PSR09006437.hg.1 | RGS3     |
| TC09000576.hg.1 | 2.2   | PSR09006432.hg.1 | RGS3     |
| TC09000576.hg.1 | 2.2   | PSR09006463.hg.1 | RGS3     |
| TC09000576.hg.1 | 2.19  | PSR09006443.hg.1 | RGS3     |
| TC09000576.hg.1 | 2.15  | PSR09006478.hg.1 | RGS3     |
| TC09000576.hg.1 | 2.14  | PSR09006445.hg.1 | RGS3     |
| TC09000576.hg.1 | 2.14  | PSR09006490.hg.1 | RGS3     |
| TC09000576.hg.1 | 2.11  | JUC09003595.hg.1 | RGS3     |
| TC09000576.hg.1 | 2.1   | JUC09003569.hg.1 | RGS3     |
| TC09000576.hg.1 | 2.08  | PSR09006422.hg.1 | RGS3     |
| TC09000576.hg.1 | 2.08  | PSR09006455.hg.1 | RGS3     |
| TC09000576.hg.1 | 2.03  | PSR09006451.hg.1 | RGS3     |
| TC09000576.hg.1 | 2.02  | PSR09006447.hg.1 | RGS3     |
| TC09000576.hg.1 | 2.02  | PSR09006450.hg.1 | RGS3     |
| TC09000576.hg.1 | -2.51 | JUC09003557.hg.1 | RGS3     |
| TC09000576.hg.1 | -3.69 | PSR09006470.hg.1 | RGS3     |
| TC12001170.hg.1 | 4.33  | PSR12015582.hg.1 | SLC2A3   |
| TC12001170.hg.1 | 3.89  | PSR12015558.hg.1 | SLC2A3   |
| TC12001170.hg.1 | 3.69  | PSR12015571.hg.1 | SLC2A3   |
| TC12001170.hg.1 | 3.22  | PSR12015567.hg.1 | SLC2A3   |
| TC12001170.hg.1 | 3.03  | PSR12015569.hg.1 | SLC2A3   |
| TC12001170.hg.1 | 2.76  | JUC12008575.hg.1 | SLC2A3   |
| TC12001170.hg.1 | 2.33  | PSR12015565.hg.1 | SLC2A3   |
| TC12001170.hg.1 | 2.16  | PSR12015559.hg.1 | SLC2A3   |
| TC12001170.hg.1 | -2.41 | PSR12015561.hg.1 | SLC2A3   |
| TC12001170.hg.1 | -3.21 | JUC12008574.hg.1 | SLC2A3   |
| TC06000323.hg.1 | 4.32  | JUC06001161.hg.1 | HLA-F    |
| TC06000323.hg.1 | 3.32  | PSR06002535.hg.1 | HLA-F    |
| TC06000323.hg.1 | 3.16  | PSR06002559.hg.1 | HLA-F    |
| TC06000323.hg.1 | 2.92  | JUC06001169.hg.1 | HLA-F    |
| TC06000323.hg.1 | 2.8   | JUC06001152.hg.1 | HLA-F    |
| TC06000323.hg.1 | 2.68  | JUC06001174.hg.1 | HLA-F    |
| TC06000323.hg.1 | 2.63  | PSR06002549.hg.1 | HLA-F    |
| TC06000323.hg.1 | 2.38  | PSR06002587.hg.1 | HLA-F    |
| TC06000323.hg.1 | 2.27  | JUC06001156.hg.1 | HLA-F    |
| TC06000323.hg.1 | 2.26  | JUC06001162.hg.1 | HLA-F    |
| TC06000323.hg.1 | 2.15  | PSR06002589.hg.1 | HLA-F    |
| TC06000323.hg.1 | 2.1   | JUC06001153.hg.1 | HLA-F    |
| TC06000323.hg.1 | 2.07  | PSR06002591.hg.1 | HLA-F    |
| TC06000323.hg.1 | 2.02  | PSR06002582.hg.1 | HLA-F    |
| TC06000323.hg.1 | 2     | PSR06002585.hg.1 | HLA-F    |
| TC06000323.hg.1 | -2    | PSR06002552.hg.1 | HLA-F    |
| TC07000643.hg.1 | 4.32  | PSR07010040.hg.1 | SERPINE1 |
| TC07000643.hg.1 | 4.12  | PSR07010036.hg.1 | SERPINE1 |
| TC07000643.hg.1 | 3.69  | PSR07010023.hg.1 | SERPINE1 |
| TC07000643.hg.1 | 2.16  | PSR07010038.hg.1 | SERPINE1 |
| TC07000643.hg.1 | -4.69 | JUC07004647.hg.1 | SERPINE1 |
| TC08000298.hg.1 | 4.32  | JUC08002114.hg.1 | ADAM9    |
| TC08000298.hg.1 | -2.13 | PSR08004236.hg.1 | ADAM9    |
| TC09000857.hg.1 | 4.32  | PSR09011428.hg.1 | FAM157B  |
| TC09000857.hg.1 | 3.39  | JUC09006159.hg.1 | FAM157B  |
| TC09000857.hg.1 | 2.82  | JUC09006162.hg.1 | FAM157B  |
| TC09000857.hg.1 | 2.27  | PSR09011430.hg.1 | FAM157B  |
| TC09000857.hg.1 | 2.08  | PSR09011433.hg.1 | FAM157B  |
| TC11000252.hg.1 | 4.32  | JUC11001689.hg.1 | NAV2     |

|                 |       |                  |             |
|-----------------|-------|------------------|-------------|
| TC11000252.hg.1 | 3.46  | PSR11003309.hg.1 | NAV2        |
| TC11000252.hg.1 | 2.79  | JUC11001652.hg.1 | NAV2        |
| TC11000252.hg.1 | 2.27  | PSR11003331.hg.1 | NAV2        |
| TC11000252.hg.1 | 2.27  | PSR11003335.hg.1 | NAV2        |
| TC11000252.hg.1 | 2.25  | JUC11001674.hg.1 | NAV2        |
| TC11000252.hg.1 | 2.24  | JUC11001690.hg.1 | NAV2        |
| TC11000252.hg.1 | 2.08  | PSR11003334.hg.1 | NAV2        |
| TC11000252.hg.1 | -2.16 | JUC11001677.hg.1 | NAV2        |
| TC19000256.hg.1 | 4.32  | JUC19002149.hg.1 | CD97        |
| TC19000256.hg.1 | 3.31  | JUC19002165.hg.1 | CD97        |
| TC19000256.hg.1 | 2.8   | JUC19002158.hg.1 | CD97        |
| TC19000256.hg.1 | 2.3   | JUC19002159.hg.1 | CD97        |
| TC19000256.hg.1 | 2.26  | PSR19003674.hg.1 | CD97        |
| TC19000256.hg.1 | -2.11 | JUC19002162.hg.1 | CD97        |
| TC01006336.hg.1 | 4.31  | JUC01044211.hg.1 | CADM3       |
| TC01006336.hg.1 | 2.79  | JUC01044209.hg.1 | CADM3       |
| TC01006336.hg.1 | 2.65  | PSR01021163.hg.1 | CADM3       |
| TC01006336.hg.1 | 2.51  | JUC01044204.hg.1 | CADM3       |
| TC01006336.hg.1 | 2.04  | PSR01021168.hg.1 | CADM3       |
| TC01006336.hg.1 | -2.28 | PSR01021161.hg.1 | CADM3       |
| TC01006336.hg.1 | -2.4  | JUC01044210.hg.1 | CADM3       |
| TC01006336.hg.1 | -2.5  | JUC01044208.hg.1 | CADM3       |
| TC01006336.hg.1 | -3.21 | PSR01021160.hg.1 | CADM3       |
| TC01006336.hg.1 | -3.47 | JUC01044214.hg.1 | CADM3       |
| TC01006336.hg.1 | -3.49 | JUC01044213.hg.1 | CADM3       |
| TC01006336.hg.1 | -3.59 | PSR01021162.hg.1 | CADM3       |
| TC01006336.hg.1 | -4.68 | PSR01021175.hg.1 | CADM3       |
| TC01006336.hg.1 | -4.91 | PSR01021166.hg.1 | CADM3       |
| TC05000565.hg.1 | 4.31  | PSR05007844.hg.1 | TNFAIP8     |
| TC05000565.hg.1 | 2.45  | JUC05004284.hg.1 | TNFAIP8     |
| TC05000565.hg.1 | 2.17  | JUC05004282.hg.1 | TNFAIP8     |
| TC05000565.hg.1 | -2.36 | JUC05004283.hg.1 | TNFAIP8     |
| TC01001817.hg.1 | 4.3   | JUC01015252.hg.1 | MARK1       |
| TC01001817.hg.1 | 2.67  | PSR01028278.hg.1 | MARK1       |
| TC01001817.hg.1 | -2.64 | PSR01028292.hg.1 | MARK1       |
| TC02001103.hg.1 | 4.3   | JUC02008855.hg.1 | GULP1       |
| TC02001103.hg.1 | 2.9   | JUC02008852.hg.1 | GULP1       |
| TC02001103.hg.1 | 2.84  | PSR02016560.hg.1 | GULP1       |
| TC02001103.hg.1 | 2.6   | JUC02008863.hg.1 | GULP1       |
| TC02001103.hg.1 | 2.51  | PSR02016563.hg.1 | GULP1       |
| TC02001103.hg.1 | 2.5   | PSR02016558.hg.1 | GULP1       |
| TC02001103.hg.1 | 2.49  | PSR02016585.hg.1 | GULP1       |
| TC02001103.hg.1 | 2.42  | JUC02008865.hg.1 | GULP1       |
| TC02001103.hg.1 | 2.11  | PSR02016552.hg.1 | GULP1       |
| TC02001103.hg.1 | 2     | PSR02016562.hg.1 | GULP1       |
| TC08001686.hg.1 | 4.3   | JUC08011353.hg.1 | PTK2, LOC10 |
| TC08001686.hg.1 | 4.25  | JUC08011418.hg.1 | PTK2, LOC10 |
| TC08001686.hg.1 | 4.06  | JUC08011362.hg.1 | PTK2, LOC10 |
| TC08001686.hg.1 | 4.02  | JUC08011347.hg.1 | PTK2, LOC10 |
| TC08001686.hg.1 | 3.85  | JUC08011407.hg.1 | PTK2, LOC10 |
| TC08001686.hg.1 | 3.43  | JUC08011368.hg.1 | PTK2, LOC10 |
| TC08001686.hg.1 | 3.15  | JUC08011338.hg.1 | PTK2, LOC10 |
| TC08001686.hg.1 | 3.12  | JUC08011405.hg.1 | PTK2, LOC10 |
| TC08001686.hg.1 | 3.07  | PSR08022200.hg.1 | PTK2, LOC10 |
| TC08001686.hg.1 | 3.01  | JUC08011413.hg.1 | PTK2, LOC10 |
| TC08001686.hg.1 | 2.99  | JUC08011344.hg.1 | PTK2, LOC10 |
| TC08001686.hg.1 | 2.91  | PSR08022203.hg.1 | PTK2, LOC10 |
| TC08001686.hg.1 | 2.82  | PSR08022105.hg.1 | PTK2, LOC10 |

|                 |        |                  |             |
|-----------------|--------|------------------|-------------|
| TC08001686.hg.1 | 2.82   | PSR08022227.hg.1 | PTK2, LOC10 |
| TC08001686.hg.1 | 2.81   | JUC08011348.hg.1 | PTK2, LOC10 |
| TC08001686.hg.1 | 2.73   | PSR08022233.hg.1 | PTK2, LOC10 |
| TC08001686.hg.1 | 2.59   | PSR08022234.hg.1 | PTK2, LOC10 |
| TC08001686.hg.1 | 2.58   | JUC08011375.hg.1 | PTK2, LOC10 |
| TC08001686.hg.1 | 2.57   | PSR08022155.hg.1 | PTK2, LOC10 |
| TC08001686.hg.1 | 2.56   | PSR08022211.hg.1 | PTK2, LOC10 |
| TC08001686.hg.1 | 2.54   | PSR08022206.hg.1 | PTK2, LOC10 |
| TC08001686.hg.1 | 2.53   | PSR08022207.hg.1 | PTK2, LOC10 |
| TC08001686.hg.1 | 2.51   | PSR08022235.hg.1 | PTK2, LOC10 |
| TC08001686.hg.1 | 2.5    | PSR08022162.hg.1 | PTK2, LOC10 |
| TC08001686.hg.1 | 2.5    | JUC08011391.hg.1 | PTK2, LOC10 |
| TC08001686.hg.1 | 2.48   | JUC08011377.hg.1 | PTK2, LOC10 |
| TC08001686.hg.1 | 2.47   | JUC08011341.hg.1 | PTK2, LOC10 |
| TC08001686.hg.1 | 2.43   | PSR08022119.hg.1 | PTK2, LOC10 |
| TC08001686.hg.1 | 2.41   | JUC08011423.hg.1 | PTK2, LOC10 |
| TC08001686.hg.1 | 2.39   | JUC08011357.hg.1 | PTK2, LOC10 |
| TC08001686.hg.1 | 2.39   | JUC08011421.hg.1 | PTK2, LOC10 |
| TC08001686.hg.1 | 2.38   | PSR08022111.hg.1 | PTK2, LOC10 |
| TC08001686.hg.1 | 2.36   | PSR08022089.hg.1 | PTK2, LOC10 |
| TC08001686.hg.1 | 2.35   | JUC08011419.hg.1 | PTK2, LOC10 |
| TC08001686.hg.1 | 2.34   | JUC08011359.hg.1 | PTK2, LOC10 |
| TC08001686.hg.1 | 2.31   | PSR08022120.hg.1 | PTK2, LOC10 |
| TC08001686.hg.1 | 2.3    | PSR08022221.hg.1 | PTK2, LOC10 |
| TC08001686.hg.1 | 2.29   | PSR08022070.hg.1 | PTK2, LOC10 |
| TC08001686.hg.1 | 2.29   | JUC08011320.hg.1 | PTK2, LOC10 |
| TC08001686.hg.1 | 2.27   | PSR08022178.hg.1 | PTK2, LOC10 |
| TC08001686.hg.1 | 2.27   | PSR08022222.hg.1 | PTK2, LOC10 |
| TC08001686.hg.1 | 2.25   | PSR08022209.hg.1 | PTK2, LOC10 |
| TC08001686.hg.1 | 2.24   | PSR08022212.hg.1 | PTK2, LOC10 |
| TC08001686.hg.1 | 2.17   | PSR08022091.hg.1 | PTK2, LOC10 |
| TC08001686.hg.1 | 2.17   | JUC08011382.hg.1 | PTK2, LOC10 |
| TC08001686.hg.1 | 2.16   | PSR08022166.hg.1 | PTK2, LOC10 |
| TC08001686.hg.1 | 2.15   | JUC08011372.hg.1 | PTK2, LOC10 |
| TC08001686.hg.1 | 2.12   | PSR08022214.hg.1 | PTK2, LOC10 |
| TC08001686.hg.1 | 2.11   | PSR08022116.hg.1 | PTK2, LOC10 |
| TC08001686.hg.1 | 2.11   | PSR08022175.hg.1 | PTK2, LOC10 |
| TC08001686.hg.1 | 2.08   | JUC08011330.hg.1 | PTK2, LOC10 |
| TC08001686.hg.1 | 2.07   | PSR08022077.hg.1 | PTK2, LOC10 |
| TC08001686.hg.1 | 2.05   | PSR08022195.hg.1 | PTK2, LOC10 |
| TC08001686.hg.1 | 2.04   | PSR08022143.hg.1 | PTK2, LOC10 |
| TC08001686.hg.1 | 2.01   | PSR08022191.hg.1 | PTK2, LOC10 |
| TC08001686.hg.1 | 2.01   | PSR08022218.hg.1 | PTK2, LOC10 |
| TC08001686.hg.1 | -2.01  | JUC08011385.hg.1 | PTK2, LOC10 |
| TC08001686.hg.1 | -3.66  | PSR08022108.hg.1 | PTK2, LOC10 |
| TC08001686.hg.1 | -16.69 | JUC08011387.hg.1 | PTK2, LOC10 |
| TC10000488.hg.1 | 4.3    | JUC10003430.hg.1 | C10orf11    |
| TC10000488.hg.1 | 4.26   | PSR10005851.hg.1 | C10orf11    |
| TC10000488.hg.1 | 4.16   | PSR10005853.hg.1 | C10orf11    |
| TC10000488.hg.1 | 4.02   | JUC10003444.hg.1 | C10orf11    |
| TC10000488.hg.1 | 3.85   | PSR10005854.hg.1 | C10orf11    |
| TC10000488.hg.1 | 3.38   | PSR10005857.hg.1 | C10orf11    |
| TC10000488.hg.1 | 3.32   | PSR10005859.hg.1 | C10orf11    |
| TC10000488.hg.1 | 3.3    | JUC10003439.hg.1 | C10orf11    |
| TC10000488.hg.1 | 3.09   | JUC10003436.hg.1 | C10orf11    |
| TC10000488.hg.1 | 3.01   | PSR10005856.hg.1 | C10orf11    |
| TC10000488.hg.1 | 2.84   | PSR10005850.hg.1 | C10orf11    |
| TC10000488.hg.1 | 2.82   | JUC10003431.hg.1 | C10orf11    |

|                 |       |                  |             |
|-----------------|-------|------------------|-------------|
| TC10000488.hg.1 | 2.75  | JUC10003437.hg.1 | C10orf11    |
| TC10000488.hg.1 | 2.58  | PSR10005852.hg.1 | C10orf11    |
| TC10000488.hg.1 | 2.36  | PSR10005865.hg.1 | C10orf11    |
| TC10000488.hg.1 | 2.34  | JUC10003446.hg.1 | C10orf11    |
| TC10000488.hg.1 | 2.29  | JUC10003441.hg.1 | C10orf11    |
| TC17000704.hg.1 | 4.3   | JUC17004999.hg.1 | AKAP1       |
| TC17000704.hg.1 | 3.2   | PSR17009189.hg.1 | AKAP1       |
| TC17000704.hg.1 | 3.09  | PSR17009198.hg.1 | AKAP1       |
| TC17000704.hg.1 | 2.9   | PSR17009188.hg.1 | AKAP1       |
| TC17000704.hg.1 | 2.9   | PSR17009199.hg.1 | AKAP1       |
| TC17000704.hg.1 | 2.84  | JUC17004990.hg.1 | AKAP1       |
| TC17000704.hg.1 | 2.68  | PSR17009191.hg.1 | AKAP1       |
| TC17000704.hg.1 | 2.61  | JUC17004996.hg.1 | AKAP1       |
| TC17000704.hg.1 | 2.55  | PSR17009194.hg.1 | AKAP1       |
| TC17000704.hg.1 | 2.29  | JUC17004985.hg.1 | AKAP1       |
| TC17000704.hg.1 | 2.23  | PSR17009186.hg.1 | AKAP1       |
| TC17000704.hg.1 | 2.1   | PSR17009187.hg.1 | AKAP1       |
| TC17000704.hg.1 | -2.65 | JUC17004998.hg.1 | AKAP1       |
| TC17000704.hg.1 | -3.16 | JUC17004995.hg.1 | AKAP1       |
| TC17001781.hg.1 | 4.3   | JUC17013277.hg.1 | CYB561      |
| TC17001781.hg.1 | 2.14  | PSR17023721.hg.1 | CYB561      |
| TC17001781.hg.1 | 2.06  | JUC17013278.hg.1 | CYB561      |
| TC22000126.hg.1 | 4.3   | JUC22000646.hg.1 | GNAZ        |
| TC22000126.hg.1 | 2.37  | PSR22002233.hg.1 | GNAZ        |
| TC22000126.hg.1 | 2.14  | PSR22002214.hg.1 | GNAZ        |
| TC22000126.hg.1 | 2.12  | JUC22000644.hg.1 | GNAZ        |
| TC22000126.hg.1 | 2.08  | PSR22002218.hg.1 | GNAZ        |
| TC22000126.hg.1 | -3.2  | JUC22000649.hg.1 | GNAZ        |
| TC22000126.hg.1 | -4.01 | PSR22002226.hg.1 | GNAZ        |
| TC01000892.hg.1 | 4.29  | JUC01007402.hg.1 | PALMD, MIR5 |
| TC01000892.hg.1 | 3.72  | PSR01014042.hg.1 | PALMD, MIR5 |
| TC01000892.hg.1 | 2.17  | PSR01014043.hg.1 | PALMD, MIR5 |
| TC01000892.hg.1 | -2.67 | JUC01007410.hg.1 | PALMD, MIR5 |
| TC01001907.hg.1 | 4.29  | JUC01016003.hg.1 | GALNT2      |
| TC01001907.hg.1 | 4.28  | PSR01029600.hg.1 | GALNT2      |
| TC01001907.hg.1 | 2.92  | JUC01015999.hg.1 | GALNT2      |
| TC01001907.hg.1 | 2.53  | JUC01016006.hg.1 | GALNT2      |
| TC01001907.hg.1 | 2.48  | PSR01029618.hg.1 | GALNT2      |
| TC01001907.hg.1 | 2.3   | PSR01029620.hg.1 | GALNT2      |
| TC01001907.hg.1 | -5.01 | JUC01015987.hg.1 | GALNT2      |
| TC01003271.hg.1 | 4.29  | JUC01026612.hg.1 | S100A13     |
| TC01003271.hg.1 | 3.68  | PSR01050359.hg.1 | S100A13     |
| TC01003271.hg.1 | 3.25  | JUC01026619.hg.1 | S100A13     |
| TC01003271.hg.1 | 3.05  | JUC01026614.hg.1 | S100A13     |
| TC01003271.hg.1 | 2.95  | PSR01050360.hg.1 | S100A13     |
| TC01003271.hg.1 | 2.89  | PSR01050365.hg.1 | S100A13     |
| TC01003271.hg.1 | 2.77  | PSR01050353.hg.1 | S100A13     |
| TC01003271.hg.1 | 2.69  | PSR01050352.hg.1 | S100A13     |
| TC01003271.hg.1 | 2.68  | PSR01050357.hg.1 | S100A13     |
| TC01003271.hg.1 | 2.55  | PSR01050363.hg.1 | S100A13     |
| TC01003271.hg.1 | 2.34  | JUC01026608.hg.1 | S100A13     |
| TC01003271.hg.1 | 2.33  | PSR01050341.hg.1 | S100A13     |
| TC01003271.hg.1 | 2.33  | PSR01050364.hg.1 | S100A13     |
| TC01003271.hg.1 | 2.3   | JUC01026615.hg.1 | S100A13     |
| TC01003271.hg.1 | 2.08  | JUC01026609.hg.1 | S100A13     |
| TC01003271.hg.1 | 2.04  | PSR01050356.hg.1 | S100A13     |
| TC06000733.hg.1 | 4.29  | JUC06004012.hg.1 | DDX43       |
| TC06000733.hg.1 | 2.5   | PSR06008759.hg.1 | DDX43       |

|                 |       |                  |          |
|-----------------|-------|------------------|----------|
| TC06000733.hg.1 | 2.09  | JUC06004013.hg.1 | DDX43    |
| TC06000733.hg.1 | -2.52 | PSR06008775.hg.1 | DDX43    |
| TC06000733.hg.1 | -2.71 | PSR06008769.hg.1 | DDX43    |
| TC06000733.hg.1 | -2.83 | PSR06008753.hg.1 | DDX43    |
| TC06000733.hg.1 | -2.9  | JUC06004001.hg.1 | DDX43    |
| TC06000733.hg.1 | -3.06 | JUC06004015.hg.1 | DDX43    |
| TC06000733.hg.1 | -3.37 | PSR06008771.hg.1 | DDX43    |
| TC06000733.hg.1 | -3.42 | PSR06008757.hg.1 | DDX43    |
| TC06000733.hg.1 | -3.57 | PSR06008764.hg.1 | DDX43    |
| TC06000733.hg.1 | -3.64 | PSR06008752.hg.1 | DDX43    |
| TC06000733.hg.1 | -4.94 | JUC06004016.hg.1 | DDX43    |
| TC07000011.hg.1 | 4.29  | JUC07000038.hg.1 | HEATR2   |
| TC07000011.hg.1 | 3.29  | JUC07000046.hg.1 | HEATR2   |
| TC07000011.hg.1 | 2.85  | JUC07000048.hg.1 | HEATR2   |
| TC07000011.hg.1 | 2.32  | JUC07000036.hg.1 | HEATR2   |
| TC07000011.hg.1 | 2.28  | PSR07000075.hg.1 | HEATR2   |
| TC07000011.hg.1 | 2.24  | PSR07000058.hg.1 | HEATR2   |
| TC07000011.hg.1 | 2.14  | PSR07000083.hg.1 | HEATR2   |
| TC07001256.hg.1 | 4.29  | JUC07009513.hg.1 | PDE1C    |
| TC07001256.hg.1 | 3.27  | JUC07009509.hg.1 | PDE1C    |
| TC07001256.hg.1 | 3.03  | PSR07019605.hg.1 | PDE1C    |
| TC07001256.hg.1 | 2.83  | PSR07019604.hg.1 | PDE1C    |
| TC07001256.hg.1 | 2.82  | PSR07019602.hg.1 | PDE1C    |
| TC07001256.hg.1 | 2.59  | PSR07019597.hg.1 | PDE1C    |
| TC07001256.hg.1 | 2.52  | PSR07019577.hg.1 | PDE1C    |
| TC07001256.hg.1 | 2.37  | PSR07019596.hg.1 | PDE1C    |
| TC07001256.hg.1 | 2.3   | PSR07019606.hg.1 | PDE1C    |
| TC07001256.hg.1 | 2.22  | JUC07009516.hg.1 | PDE1C    |
| TC07001256.hg.1 | 2.15  | PSR07019599.hg.1 | PDE1C    |
| TC07001256.hg.1 | -2.19 | JUC07009532.hg.1 | PDE1C    |
| TC07001563.hg.1 | 4.29  | JUC07011692.hg.1 | CACNA2D1 |
| TC07001563.hg.1 | 3.04  | JUC07011714.hg.1 | CACNA2D1 |
| TC07001563.hg.1 | 2.41  | JUC07011696.hg.1 | CACNA2D1 |
| TC07001563.hg.1 | 2.07  | JUC07011679.hg.1 | CACNA2D1 |
| TC07001563.hg.1 | 2.07  | JUC07011694.hg.1 | CACNA2D1 |
| TC07001563.hg.1 | 2.02  | PSR07023520.hg.1 | CACNA2D1 |
| TC07001563.hg.1 | -2.13 | JUC07011706.hg.1 | CACNA2D1 |
| TC10001721.hg.1 | 4.29  | JUC10013201.hg.1 | CPXM2    |
| TC10001721.hg.1 | 3.62  | JUC10013200.hg.1 | CPXM2    |
| TC10001721.hg.1 | 3.1   | JUC10013207.hg.1 | CPXM2    |
| TC10001721.hg.1 | 2.73  | PSR10022809.hg.1 | CPXM2    |
| TC10001721.hg.1 | 2.49  | JUC10013203.hg.1 | CPXM2    |
| TC10001721.hg.1 | 2.45  | JUC10013202.hg.1 | CPXM2    |
| TC10001721.hg.1 | 2.41  | PSR10022810.hg.1 | CPXM2    |
| TC10001721.hg.1 | 2.33  | PSR10022807.hg.1 | CPXM2    |
| TC10001721.hg.1 | 2.29  | PSR10022836.hg.1 | CPXM2    |
| TC10001721.hg.1 | 2.22  | JUC10013192.hg.1 | CPXM2    |
| TC10001721.hg.1 | 2.19  | PSR10022822.hg.1 | CPXM2    |
| TC10001721.hg.1 | 2.15  | PSR10022838.hg.1 | CPXM2    |
| TC10001721.hg.1 | 2.08  | JUC10013194.hg.1 | CPXM2    |
| TC10001721.hg.1 | 2.06  | PSR10022815.hg.1 | CPXM2    |
| TC10001721.hg.1 | 2.05  | JUC10013193.hg.1 | CPXM2    |
| TC10001721.hg.1 | -2.14 | PSR10022828.hg.1 | CPXM2    |
| TC10001721.hg.1 | -2.77 | PSR10022816.hg.1 | CPXM2    |
| TC10001721.hg.1 | -3.4  | JUC10013197.hg.1 | CPXM2    |
| TC01001498.hg.1 | 4.28  | PSR01023294.hg.1 | DNM3     |
| TC01001498.hg.1 | 3.86  | JUC01012286.hg.1 | DNM3     |
| TC01001498.hg.1 | 3.7   | PSR01023295.hg.1 | DNM3     |

|                 |       |                  |         |
|-----------------|-------|------------------|---------|
| TC01001498.hg.1 | 3.49  | PSR01023288.hg.1 | DNM3    |
| TC01001498.hg.1 | -2.06 | JUC01012288.hg.1 | DNM3    |
| TC01001498.hg.1 | -2.18 | JUC01012302.hg.1 | DNM3    |
| TC01001498.hg.1 | -2.69 | JUC01012278.hg.1 | DNM3    |
| TC09000608.hg.1 | 4.28  | JUC09003881.hg.1 | GSN     |
| TC09000608.hg.1 | 4.03  | JUC09003878.hg.1 | GSN     |
| TC09000608.hg.1 | 3.84  | PSR09006919.hg.1 | GSN     |
| TC09000608.hg.1 | 3.69  | PSR09006917.hg.1 | GSN     |
| TC09000608.hg.1 | 3.25  | PSR09006918.hg.1 | GSN     |
| TC09000608.hg.1 | 3.09  | PSR09006977.hg.1 | GSN     |
| TC09000608.hg.1 | 3     | JUC09003898.hg.1 | GSN     |
| TC09000608.hg.1 | 2.87  | PSR09006976.hg.1 | GSN     |
| TC09000608.hg.1 | 2.85  | JUC09003899.hg.1 | GSN     |
| TC09000608.hg.1 | 2.52  | PSR09006912.hg.1 | GSN     |
| TC09000608.hg.1 | 2.35  | PSR09006981.hg.1 | GSN     |
| TC09000608.hg.1 | 2.29  | JUC09003874.hg.1 | GSN     |
| TC09000608.hg.1 | 2.25  | PSR09006940.hg.1 | GSN     |
| TC09000608.hg.1 | 2.18  | PSR09006923.hg.1 | GSN     |
| TC09000608.hg.1 | 2.14  | PSR09006941.hg.1 | GSN     |
| TC09000608.hg.1 | 2.12  | PSR09006991.hg.1 | GSN     |
| TC09000608.hg.1 | 2.1   | PSR09006929.hg.1 | GSN     |
| TC09000608.hg.1 | 2.09  | PSR09006921.hg.1 | GSN     |
| TC09000608.hg.1 | 2     | JUC09003883.hg.1 | GSN     |
| TC09000608.hg.1 | -2.06 | PSR09006956.hg.1 | GSN     |
| TC09000608.hg.1 | -2.56 | JUC09003897.hg.1 | GSN     |
| TC09002903.hg.1 | 4.28  | PSR09005625.hg.1 | TMEFF1  |
| TC09002903.hg.1 | 3.92  | JUC09015843.hg.1 | TMEFF1  |
| TC09002903.hg.1 | 3.63  | PSR09005621.hg.1 | TMEFF1  |
| TC09002903.hg.1 | 3.31  | JUC09015846.hg.1 | TMEFF1  |
| TC09002903.hg.1 | 2.94  | PSR09005622.hg.1 | TMEFF1  |
| TC09002903.hg.1 | 2.74  | PSR09005633.hg.1 | TMEFF1  |
| TC09002903.hg.1 | 2.14  | JUC09015853.hg.1 | TMEFF1  |
| TC09002903.hg.1 | 2.09  | JUC09015850.hg.1 | TMEFF1  |
| TC09002903.hg.1 | 2     | JUC09015848.hg.1 | TMEFF1  |
| TC17001830.hg.1 | 4.28  | JUC17013830.hg.1 | ABCA5   |
| TC17001830.hg.1 | 3.77  | JUC17013858.hg.1 | ABCA5   |
| TC17001830.hg.1 | 3.38  | JUC17013860.hg.1 | ABCA5   |
| TC17001830.hg.1 | 2.2   | PSR17024654.hg.1 | ABCA5   |
| TC17001830.hg.1 | 2.02  | PSR17024639.hg.1 | ABCA5   |
| TC17001830.hg.1 | -2.5  | JUC17013826.hg.1 | ABCA5   |
| TC17001830.hg.1 | -2.56 | PSR17024645.hg.1 | ABCA5   |
| TC17001830.hg.1 | -3.04 | PSR17024664.hg.1 | ABCA5   |
| TC20000818.hg.1 | 4.28  | JUC20005785.hg.1 | DSN1    |
| TC20000818.hg.1 | 2.44  | PSR20011228.hg.1 | DSN1    |
| TC20000818.hg.1 | 2.29  | PSR20011226.hg.1 | DSN1    |
| TC20000818.hg.1 | 2     | PSR20011219.hg.1 | DSN1    |
| TC20000818.hg.1 | -2    | JUC20005783.hg.1 | DSN1    |
| TC20000818.hg.1 | -2.41 | JUC20005782.hg.1 | DSN1    |
| TC09001104.hg.1 | 4.27  | JUC09007883.hg.1 | ZNF658B |
| TC09001104.hg.1 | 2.59  | PSR09014684.hg.1 | ZNF658B |
| TC09001104.hg.1 | 2.54  | PSR09014685.hg.1 | ZNF658B |
| TC09001104.hg.1 | 2.21  | PSR09014686.hg.1 | ZNF658B |
| TC09001104.hg.1 | 2.19  | PSR09014678.hg.1 | ZNF658B |
| TC0X001368.hg.1 | 4.26  | JUC0X009404.hg.1 | FRMD7   |
| TC0X001368.hg.1 | 2.44  | PSR0X018371.hg.1 | FRMD7   |
| TC0X001368.hg.1 | 2.26  | PSR0X018366.hg.1 | FRMD7   |
| TC0X001368.hg.1 | -2.31 | PSR0X018361.hg.1 | FRMD7   |
| TC0X001368.hg.1 | -2.59 | JUC0X009397.hg.1 | FRMD7   |



|                 |       |                  |             |
|-----------------|-------|------------------|-------------|
| TC0X001368.hg.1 | -2.93 | JUC0X009402.hg.1 | FRMD7       |
| TC0X001368.hg.1 | -3.07 | JUC0X009405.hg.1 | FRMD7       |
| TC14001255.hg.1 | 4.26  | JUC14007199.hg.1 | ACTN1       |
| TC14001255.hg.1 | 2.23  | PSR14014277.hg.1 | ACTN1       |
| TC14001255.hg.1 | 2.19  | JUC14007207.hg.1 | ACTN1       |
| TC14001255.hg.1 | 2.06  | JUC14007210.hg.1 | ACTN1       |
| TC02002922.hg.1 | 4.25  | JUC02024536.hg.1 | HDAC4       |
| TC02002922.hg.1 | 2.92  | JUC02024545.hg.1 | HDAC4       |
| TC02002922.hg.1 | 2.02  | JUC02024538.hg.1 | HDAC4       |
| TC02002922.hg.1 | -2.08 | JUC02024546.hg.1 | HDAC4       |
| TC02002922.hg.1 | -2.12 | JUC02024527.hg.1 | HDAC4       |
| TC02002922.hg.1 | -2.16 | PSR02046879.hg.1 | HDAC4       |
| TC02002922.hg.1 | -2.21 | PSR02046850.hg.1 | HDAC4       |
| TC02002922.hg.1 | -2.72 | JUC02024520.hg.1 | HDAC4       |
| TC02002922.hg.1 | -3.49 | PSR02046874.hg.1 | HDAC4       |
| TC08002591.hg.1 | 4.25  | JUC08014901.hg.1 | PPP2R2A     |
| TC08002591.hg.1 | 2.77  | JUC08014900.hg.1 | PPP2R2A     |
| TC08002591.hg.1 | 2.04  | JUC08014885.hg.1 | PPP2R2A     |
| TC08002591.hg.1 | -2.1  | PSR08002735.hg.1 | PPP2R2A     |
| TC09000550.hg.1 | 4.25  | JUC09003392.hg.1 | AKAP2, PALM |
| TC09000550.hg.1 | 3.43  | JUC09003381.hg.1 | AKAP2, PALM |
| TC09000550.hg.1 | 2.27  | PSR09006105.hg.1 | AKAP2, PALM |
| TC09000550.hg.1 | 2.26  | JUC09003382.hg.1 | AKAP2, PALM |
| TC09000550.hg.1 | 2.23  | PSR09006117.hg.1 | AKAP2, PALM |
| TC09000550.hg.1 | 2.05  | JUC09003385.hg.1 | AKAP2, PALM |
| TC09000550.hg.1 | -3.98 | PSR09006144.hg.1 | AKAP2, PALM |
| TC05000471.hg.1 | 4.23  | PSR05006726.hg.1 | ERAP2       |
| TC05000471.hg.1 | 4.18  | PSR05006736.hg.1 | ERAP2       |
| TC05000471.hg.1 | 3.81  | JUC05003690.hg.1 | ERAP2       |
| TC05000471.hg.1 | 2.88  | JUC05003693.hg.1 | ERAP2       |
| TC05000471.hg.1 | 2.62  | PSR05006748.hg.1 | ERAP2       |
| TC05000471.hg.1 | 2.37  | PSR05006728.hg.1 | ERAP2       |
| TC05000471.hg.1 | 2.24  | JUC05003699.hg.1 | ERAP2       |
| TC05000471.hg.1 | -2.16 | PSR05006733.hg.1 | ERAP2       |
| TC05000471.hg.1 | -2.16 | PSR05006755.hg.1 | ERAP2       |
| TC05000471.hg.1 | -2.29 | PSR05006739.hg.1 | ERAP2       |
| TC05000471.hg.1 | -2.5  | PSR05006725.hg.1 | ERAP2       |
| TC05000471.hg.1 | -2.77 | PSR05006738.hg.1 | ERAP2       |
| TC05000471.hg.1 | -2.82 | PSR05006754.hg.1 | ERAP2       |
| TC05000471.hg.1 | -3.22 | PSR05006720.hg.1 | ERAP2       |
| TC05000471.hg.1 | -3.62 | PSR05006753.hg.1 | ERAP2       |
| TC05000471.hg.1 | -3.92 | PSR05006747.hg.1 | ERAP2       |
| TC06001772.hg.1 | 4.23  | JUC06010173.hg.1 | CYP39A1     |
| TC06001772.hg.1 | 3.08  | JUC06010159.hg.1 | CYP39A1     |
| TC06001772.hg.1 | 2.72  | JUC06010158.hg.1 | CYP39A1     |
| TC06001772.hg.1 | 2.51  | PSR06021343.hg.1 | CYP39A1     |
| TC06001772.hg.1 | 2.33  | PSR06021328.hg.1 | CYP39A1     |
| TC06001772.hg.1 | -2.04 | JUC06010168.hg.1 | CYP39A1     |
| TC07003320.hg.1 | 4.23  | PSR07001383.hg.1 | GLCC1       |
| TC07003320.hg.1 | 4.08  | JUC07020823.hg.1 | GLCC1       |
| TC07003320.hg.1 | 3.42  | PSR07001369.hg.1 | GLCC1       |
| TC07003320.hg.1 | 3.19  | PSR07001344.hg.1 | GLCC1       |
| TC07003320.hg.1 | 3.14  | JUC07020827.hg.1 | GLCC1       |
| TC07003320.hg.1 | 3.01  | PSR07001347.hg.1 | GLCC1       |
| TC07003320.hg.1 | 2.81  | PSR07001360.hg.1 | GLCC1       |
| TC07003320.hg.1 | 2.6   | JUC07020821.hg.1 | GLCC1       |
| TC07003320.hg.1 | 2.6   | JUC07020836.hg.1 | GLCC1       |
| TC07003320.hg.1 | 2.54  | PSR07001364.hg.1 | GLCC1       |

|                 |       |                  |          |
|-----------------|-------|------------------|----------|
| TC07003320.hg.1 | 2.42  | PSR07001356.hg.1 | GLCC11   |
| TC07003320.hg.1 | 2.41  | JUC07020820.hg.1 | GLCC11   |
| TC07003320.hg.1 | 2.4   | PSR07001375.hg.1 | GLCC11   |
| TC07003320.hg.1 | 2.36  | PSR07001382.hg.1 | GLCC11   |
| TC07003320.hg.1 | 2.08  | JUC07020839.hg.1 | GLCC11   |
| TC07003320.hg.1 | 2.01  | PSR07001378.hg.1 | GLCC11   |
| TC11002175.hg.1 | 4.23  | JUC11013825.hg.1 | CTSC     |
| TC11002175.hg.1 | 2.29  | JUC11013829.hg.1 | CTSC     |
| TC11002175.hg.1 | -2.07 | JUC11013823.hg.1 | CTSC     |
| TC11002175.hg.1 | -2.26 | PSR11026033.hg.1 | CTSC     |
| TC11002175.hg.1 | -2.59 | PSR11026032.hg.1 | CTSC     |
| TC11002175.hg.1 | -2.73 | JUC11013822.hg.1 | CTSC     |
| TC11002175.hg.1 | -4.82 | JUC11013824.hg.1 | CTSC     |
| TC11002175.hg.1 | -5.17 | PSR11026034.hg.1 | CTSC     |
| TC11002175.hg.1 | -5.96 | JUC11013833.hg.1 | CTSC     |
| TC11002433.hg.1 | 4.23  | JUC11015529.hg.1 |          |
| TC11002433.hg.1 | 3.04  | PSR11029153.hg.1 |          |
| TC11002433.hg.1 | 2.03  | PSR11029151.hg.1 |          |
| TC17002910.hg.1 | 4.23  | JUC17019118.hg.1 | HOXB6    |
| TC17002910.hg.1 | 3.53  | PSR17022019.hg.1 | HOXB6    |
| TC17002910.hg.1 | 3.38  | PSR17022018.hg.1 | HOXB6    |
| TC17002910.hg.1 | 3.36  | JUC17019124.hg.1 | HOXB6    |
| TC17002910.hg.1 | 2.93  | PSR17022027.hg.1 | HOXB6    |
| TC17002910.hg.1 | 2.87  | JUC17019120.hg.1 | HOXB6    |
| TC17002910.hg.1 | 2.76  | JUC17019117.hg.1 | HOXB6    |
| TC17002910.hg.1 | 2.64  | PSR17022015.hg.1 | HOXB6    |
| TC17002910.hg.1 | 2.45  | PSR17022013.hg.1 | HOXB6    |
| TC17002910.hg.1 | 2.28  | PSR17022012.hg.1 | HOXB6    |
| TC17002910.hg.1 | 2.1   | PSR17022026.hg.1 | HOXB6    |
| TC17002910.hg.1 | 2.07  | PSR17022016.hg.1 | HOXB6    |
| TC17002910.hg.1 | -2.01 | JUC17019122.hg.1 | HOXB6    |
| TC17002910.hg.1 | -2.66 | PSR17022021.hg.1 | HOXB6    |
| TC21000175.hg.1 | 4.23  | JUC21000861.hg.1 | WRB      |
| TC21000175.hg.1 | 2.5   | JUC21000850.hg.1 | WRB      |
| TC21000175.hg.1 | 2.47  | JUC21000847.hg.1 | WRB      |
| TC21000175.hg.1 | 2.05  | JUC21000859.hg.1 | WRB      |
| TC21000175.hg.1 | 2     | JUC21000849.hg.1 | WRB      |
| TC21000175.hg.1 | -2.06 | PSR21001660.hg.1 | WRB      |
| TC21000175.hg.1 | -2.29 | PSR21001661.hg.1 | WRB      |
| TC22001467.hg.1 | 4.23  | JUC22009301.hg.1 | APOBEC3F |
| TC22001467.hg.1 | 3.62  | PSR22005804.hg.1 | APOBEC3F |
| TC22001467.hg.1 | 2.92  | PSR22005823.hg.1 | APOBEC3F |
| TC22001467.hg.1 | 2.83  | PSR22005811.hg.1 | APOBEC3F |
| TC22001467.hg.1 | 2.76  | PSR22005805.hg.1 | APOBEC3F |
| TC22001467.hg.1 | 2.69  | PSR22005815.hg.1 | APOBEC3F |
| TC22001467.hg.1 | 2.38  | PSR22005812.hg.1 | APOBEC3F |
| TC22001467.hg.1 | 2.11  | PSR22005817.hg.1 | APOBEC3F |
| TC22001467.hg.1 | -2.02 | JUC22009298.hg.1 | APOBEC3F |
| TC22001467.hg.1 | -2.07 | JUC22009305.hg.1 | APOBEC3F |
| TC01002541.hg.1 | 4.22  | JUC01021212.hg.1 | PABPC4   |
| TC01002541.hg.1 | 2.58  | PSR01039532.hg.1 | PABPC4   |
| TC01002541.hg.1 | 2.56  | PSR01039570.hg.1 | PABPC4   |
| TC01002541.hg.1 | 2.46  | PSR01039528.hg.1 | PABPC4   |
| TC01002541.hg.1 | 2.14  | PSR01039530.hg.1 | PABPC4   |
| TC01002541.hg.1 | -3.17 | PSR01039560.hg.1 | PABPC4   |
| TC01003018.hg.1 | 4.22  | PSR01047110.hg.1 | NGF      |
| TC01003018.hg.1 | 3.58  | PSR01047115.hg.1 | NGF      |
| TC01003018.hg.1 | -2.76 | PSR01047113.hg.1 | NGF      |

|                 |        |                  |         |
|-----------------|--------|------------------|---------|
| TC01003018.hg.1 | -2.93  | JUC01025253.hg.1 | NGF     |
| TC03001677.hg.1 | 4.22   | PSR03030222.hg.1 |         |
| TC03001677.hg.1 | 2.92   | PSR03030219.hg.1 |         |
| TC03001677.hg.1 | 2.31   | PSR03030223.hg.1 |         |
| TC03001677.hg.1 | 2.26   | PSR03030221.hg.1 |         |
| TC03001677.hg.1 | 2.24   | PSR03030224.hg.1 |         |
| TC03001677.hg.1 | 2.2    | PSR03030218.hg.1 |         |
| TC03001677.hg.1 | 2.16   | JUC03015015.hg.1 |         |
| TC04000432.hg.1 | 4.22   | PSR04006124.hg.1 | CXCL13  |
| TC04000432.hg.1 | -2.06  | JUC04003081.hg.1 | CXCL13  |
| TC04000432.hg.1 | -5.2   | PSR04006122.hg.1 | CXCL13  |
| TC04000432.hg.1 | -11.27 | JUC04003082.hg.1 | CXCL13  |
| TC04000432.hg.1 | -35.7  | PSR04006119.hg.1 | CXCL13  |
| TC04001171.hg.1 | 4.22   | JUC04008522.hg.1 | NFXL1   |
| TC04001171.hg.1 | 3.9    | PSR04016064.hg.1 | NFXL1   |
| TC04001171.hg.1 | 3.35   | PSR04016070.hg.1 | NFXL1   |
| TC04001171.hg.1 | 3.3    | JUC04008530.hg.1 | NFXL1   |
| TC04001171.hg.1 | 3.23   | PSR04016068.hg.1 | NFXL1   |
| TC04001171.hg.1 | 3.22   | JUC04008518.hg.1 | NFXL1   |
| TC04001171.hg.1 | 2.75   | PSR04016063.hg.1 | NFXL1   |
| TC04001171.hg.1 | 2.5    | PSR04016067.hg.1 | NFXL1   |
| TC04001171.hg.1 | 2.18   | PSR04016061.hg.1 | NFXL1   |
| TC04001171.hg.1 | 2.18   | JUC04008537.hg.1 | NFXL1   |
| TC04001171.hg.1 | -2     | JUC04008523.hg.1 | NFXL1   |
| TC04001171.hg.1 | -2.03  | PSR04016097.hg.1 | NFXL1   |
| TC04001171.hg.1 | -2.3   | JUC04008540.hg.1 | NFXL1   |
| TC05001763.hg.1 | 4.22   | JUC05012321.hg.1 | P4HA2   |
| TC05001763.hg.1 | 2.21   | JUC05012311.hg.1 | P4HA2   |
| TC05001763.hg.1 | -2.1   | JUC05012329.hg.1 | P4HA2   |
| TC05001763.hg.1 | -3.04  | PSR05023797.hg.1 | P4HA2   |
| TC06001854.hg.1 | 4.22   | JUC06010865.hg.1 | LMBRD1  |
| TC06001854.hg.1 | 2.72   | PSR06022501.hg.1 | LMBRD1  |
| TC06001854.hg.1 | 2.71   | JUC06010869.hg.1 | LMBRD1  |
| TC06001854.hg.1 | 2.03   | PSR06022481.hg.1 | LMBRD1  |
| TC07001920.hg.1 | 4.22   | JUC07014753.hg.1 | SLC37A3 |
| TC07001920.hg.1 | 2.1    | PSR07029754.hg.1 | SLC37A3 |
| TC07001920.hg.1 | 2.04   | PSR07029793.hg.1 | SLC37A3 |
| TC07001920.hg.1 | -2.18  | PSR07029790.hg.1 | SLC37A3 |
| TC07001920.hg.1 | -2.41  | PSR07029785.hg.1 | SLC37A3 |
| TC07001920.hg.1 | -2.75  | JUC07014744.hg.1 | SLC37A3 |
| TC01002322.hg.1 | 4.21   | PSR01035672.hg.1 | ECE1    |
| TC01002322.hg.1 | 4.03   | PSR01035684.hg.1 | ECE1    |
| TC01002322.hg.1 | 3.67   | JUC01019208.hg.1 | ECE1    |
| TC01002322.hg.1 | 2.87   | PSR01035694.hg.1 | ECE1    |
| TC01002322.hg.1 | 2.7    | PSR01035695.hg.1 | ECE1    |
| TC01002322.hg.1 | 2.6    | PSR01035703.hg.1 | ECE1    |
| TC01002322.hg.1 | 2.55   | PSR01035663.hg.1 | ECE1    |
| TC01002322.hg.1 | 2.38   | PSR01035698.hg.1 | ECE1    |
| TC01002322.hg.1 | 2.35   | PSR01035664.hg.1 | ECE1    |
| TC01002322.hg.1 | 2.33   | PSR01035701.hg.1 | ECE1    |
| TC01002322.hg.1 | 2.28   | JUC01019196.hg.1 | ECE1    |
| TC01002322.hg.1 | 2.23   | PSR01035660.hg.1 | ECE1    |
| TC01002322.hg.1 | 2.18   | PSR01035661.hg.1 | ECE1    |
| TC01002322.hg.1 | 2.06   | PSR01035700.hg.1 | ECE1    |
| TC02005009.hg.1 | 4.21   | PSR02021445.hg.1 | SP140   |
| TC02005009.hg.1 | 2.21   | PSR02021498.hg.1 | SP140   |
| TC02005009.hg.1 | 2.13   | JUC02032051.hg.1 | SP140   |
| TC02005009.hg.1 | 2.05   | JUC02032063.hg.1 | SP140   |

|                 |       |                  |          |
|-----------------|-------|------------------|----------|
| TC02005009.hg.1 | -2.23 | JUC02032086.hg.1 | SP140    |
| TC03003372.hg.1 | 4.21  | JUC03024006.hg.1 | SRGAP3   |
| TC03003372.hg.1 | 3.13  | JUC03023994.hg.1 | SRGAP3   |
| TC03003372.hg.1 | 2.74  | JUC03023995.hg.1 | SRGAP3   |
| TC03003372.hg.1 | 2.68  | PSR03019707.hg.1 | SRGAP3   |
| TC03003372.hg.1 | 2.61  | PSR03019684.hg.1 | SRGAP3   |
| TC03003372.hg.1 | 2.55  | JUC03023993.hg.1 | SRGAP3   |
| TC03003372.hg.1 | 2.33  | JUC03024008.hg.1 | SRGAP3   |
| TC03003372.hg.1 | 2.13  | JUC03024001.hg.1 | SRGAP3   |
| TC03003372.hg.1 | 2.02  | JUC03024023.hg.1 | SRGAP3   |
| TC03003372.hg.1 | 2     | JUC03024020.hg.1 | SRGAP3   |
| TC06001771.hg.1 | 4.21  | PSR06021319.hg.1 | RCAN2    |
| TC06001771.hg.1 | 4.09  | PSR06021322.hg.1 | RCAN2    |
| TC06001771.hg.1 | 3.27  | PSR06021316.hg.1 | RCAN2    |
| TC06001771.hg.1 | 3.05  | PSR06021314.hg.1 | RCAN2    |
| TC06001771.hg.1 | 2.43  | PSR06021321.hg.1 | RCAN2    |
| TC06001771.hg.1 | 2.02  | PSR06021309.hg.1 | RCAN2    |
| TC06001771.hg.1 | -3.29 | JUC06010155.hg.1 | RCAN2    |
| TC20000538.hg.1 | 4.21  | JUC20004053.hg.1 | C20orf96 |
| TC20000538.hg.1 | -2.23 | PSR20007766.hg.1 | C20orf96 |
| TC20000538.hg.1 | -2.35 | JUC20004046.hg.1 | C20orf96 |
| TC20000538.hg.1 | -4.45 | JUC20004049.hg.1 | C20orf96 |
| TC02001267.hg.1 | 4.2   | JUC02010472.hg.1 |          |
| TC02001267.hg.1 | 2.14  | PSR02019422.hg.1 |          |
| TC02001267.hg.1 | -2.14 | PSR02019421.hg.1 |          |
| TC04000429.hg.1 | 4.2   | PSR04006026.hg.1 |          |
| TC04000429.hg.1 | 3.97  | JUC04003034.hg.1 |          |
| TC04000429.hg.1 | 3.2   | PSR04006029.hg.1 |          |
| TC04000429.hg.1 | -2.65 | PSR04006028.hg.1 |          |
| TC08000022.hg.1 | 4.2   | PSR08000343.hg.1 | AGPAT5   |
| TC08000022.hg.1 | 3.08  | PSR08000359.hg.1 | AGPAT5   |
| TC08000022.hg.1 | 2.41  | PSR08000342.hg.1 | AGPAT5   |
| TC08000022.hg.1 | 2.24  | JUC08000201.hg.1 | AGPAT5   |
| TC08000022.hg.1 | 2.18  | JUC08000198.hg.1 | AGPAT5   |
| TC0X001354.hg.1 | 4.2   | PSR0X018132.hg.1 | APLN     |
| TC0X001354.hg.1 | -3.21 | JUC0X009244.hg.1 | APLN     |
| TC0X001354.hg.1 | -5.64 | PSR0X018129.hg.1 | APLN     |
| TC0X001354.hg.1 | -7.22 | PSR0X018127.hg.1 | APLN     |
| TC14001474.hg.1 | 4.2   | PSR14016658.hg.1 | CLMN     |
| TC14001474.hg.1 | 3.92  | JUC14008596.hg.1 | CLMN     |
| TC14001474.hg.1 | 3.59  | PSR14016644.hg.1 | CLMN     |
| TC14001474.hg.1 | 2.99  | JUC14008611.hg.1 | CLMN     |
| TC14001474.hg.1 | 2.93  | PSR14016645.hg.1 | CLMN     |
| TC14001474.hg.1 | 2.57  | PSR14016632.hg.1 | CLMN     |
| TC14001474.hg.1 | 2.26  | PSR14016633.hg.1 | CLMN     |
| TC14001474.hg.1 | 2.26  | PSR14016642.hg.1 | CLMN     |
| TC14001474.hg.1 | 2.12  | PSR14016652.hg.1 | CLMN     |
| TC14001474.hg.1 | 2.07  | JUC14008599.hg.1 | CLMN     |
| TC14001474.hg.1 | -2.08 | PSR14016648.hg.1 | CLMN     |
| TC14001474.hg.1 | -2.45 | PSR14016643.hg.1 | CLMN     |
| TC02001139.hg.1 | 4.19  | PSR02017197.hg.1 | SLC39A10 |
| TC02001139.hg.1 | 3.59  | JUC02009214.hg.1 | SLC39A10 |
| TC02001139.hg.1 | 3.07  | JUC02009217.hg.1 | SLC39A10 |
| TC02001139.hg.1 | 2.86  | PSR02017204.hg.1 | SLC39A10 |
| TC02001139.hg.1 | 2.68  | JUC02009213.hg.1 | SLC39A10 |
| TC02001139.hg.1 | 2.55  | JUC02009224.hg.1 | SLC39A10 |
| TC02001139.hg.1 | 2.42  | PSR02017205.hg.1 | SLC39A10 |
| TC02001139.hg.1 | 2.17  | PSR02017220.hg.1 | SLC39A10 |

|                 |       |                   |        |
|-----------------|-------|-------------------|--------|
| TC07001152.hg.1 | 4.19  | JUC07008786.hg.1  | ETV1   |
| TC07001152.hg.1 | 4.11  | JUC07008770.hg.1  | ETV1   |
| TC07001152.hg.1 | 2.65  | JUC07008783.hg.1  | ETV1   |
| TC07001152.hg.1 | 2.47  | JUC07008762.hg.1  | ETV1   |
| TC07001152.hg.1 | 2.45  | PSR07018029.hg.1  | ETV1   |
| TC07001152.hg.1 | 2.38  | PSR07018046.hg.1  | ETV1   |
| TC07001152.hg.1 | 2.27  | JUC07008790.hg.1  | ETV1   |
| TC07001152.hg.1 | 2.26  | PSR07018052.hg.1  | ETV1   |
| TC07001152.hg.1 | 2.14  | PSR07018053.hg.1  | ETV1   |
| TC07001152.hg.1 | 2.06  | PSR07018007.hg.1  | ETV1   |
| TC07001152.hg.1 | -2.38 | PSR07018034.hg.1  | ETV1   |
| TC07001152.hg.1 | -2.5  | PSR07018037.hg.1  | ETV1   |
| TC07001152.hg.1 | -2.74 | PSR07018017.hg.1  | ETV1   |
| TC06004073.hg.1 | 4.18  | JUC06020958.hg.1  | MICA   |
| TC06004073.hg.1 | 3.88  | PSR06003469.hg.1  | MICA   |
| TC06004073.hg.1 | 3.5   | PSR06003455.hg.1  | MICA   |
| TC06004073.hg.1 | 3.16  | JUC06020963.hg.1  | MICA   |
| TC06004073.hg.1 | 2.99  | JUC06020965.hg.1  | MICA   |
| TC06004073.hg.1 | 2.88  | PSR06003443.hg.1  | MICA   |
| TC06004073.hg.1 | 2.69  | JUC06020961.hg.1  | MICA   |
| TC06004073.hg.1 | 2.68  | JUC06020964.hg.1  | MICA   |
| TC06004073.hg.1 | 2.63  | PSR06003454.hg.1  | MICA   |
| TC06004073.hg.1 | 2.31  | JUC06020955.hg.1  | MICA   |
| TC06004073.hg.1 | 2.3   | JUC06020960.hg.1  | MICA   |
| TC06004073.hg.1 | 2.29  | JUC06020952.hg.1  | MICA   |
| TC06004073.hg.1 | 2.09  | PSR06003451.hg.1  | MICA   |
| TC06004073.hg.1 | 2.02  | JUC06020957.hg.1  | MICA   |
| TC10001053.hg.1 | 4.18  | JUC10007578.hg.1  | FRMD4A |
| TC10001053.hg.1 | 3.93  | PSR10013129.hg.1  | FRMD4A |
| TC10001053.hg.1 | 3.4   | JUC10007585.hg.1  | FRMD4A |
| TC10001053.hg.1 | 3.17  | PSR10013083.hg.1  | FRMD4A |
| TC10001053.hg.1 | 2.85  | JUC10007586.hg.1  | FRMD4A |
| TC10001053.hg.1 | 2.71  | JUC10007577.hg.1  | FRMD4A |
| TC10001053.hg.1 | 2.67  | PSR10013111.hg.1  | FRMD4A |
| TC10001053.hg.1 | 2.61  | PSR10013137.hg.1  | FRMD4A |
| TC10001053.hg.1 | 2.51  | JUC10007576.hg.1  | FRMD4A |
| TC10001053.hg.1 | 2.46  | PSR10013131.hg.1  | FRMD4A |
| TC10001053.hg.1 | 2.36  | PSR10013090.hg.1  | FRMD4A |
| TC10001053.hg.1 | 2.33  | PSR10013118.hg.1  | FRMD4A |
| TC10001053.hg.1 | 2.31  | PSR10013110.hg.1  | FRMD4A |
| TC10001053.hg.1 | 2.23  | JUC10007589.hg.1  | FRMD4A |
| TC10001053.hg.1 | 2.14  | PSR10013128.hg.1  | FRMD4A |
| TC10001053.hg.1 | 2.12  | PSR10013109.hg.1  | FRMD4A |
| TC10001053.hg.1 | 2.06  | JUC10007580.hg.1  | FRMD4A |
| TC10001053.hg.1 | 2.06  | JUC10007605.hg.1  | FRMD4A |
| TC10001053.hg.1 | 2.03  | PSR10013125.hg.1  | FRMD4A |
| TC10001053.hg.1 | 2.02  | PSR10013104.hg.1  | FRMD4A |
| TC10001053.hg.1 | -2.62 | JUC10007592.hg.1  | FRMD4A |
| TC10001053.hg.1 | -4.8  | JUC10007588.hg.1  | FRMD4A |
| TC6_cox_hap2000 | 4.18  | JUC6_cox_hap20018 | MICA   |
| TC6_cox_hap2000 | 3.88  | PSR6_cox_hap20008 | MICA   |
| TC6_cox_hap2000 | 3.5   | PSR6_cox_hap20008 | MICA   |
| TC6_cox_hap2000 | 3.16  | JUC6_cox_hap20018 | MICA   |
| TC6_cox_hap2000 | 3.03  | PSR6_cox_hap20008 | MICA   |
| TC6_cox_hap2000 | 2.99  | JUC6_cox_hap20018 | MICA   |
| TC6_cox_hap2000 | 2.69  | JUC6_cox_hap20018 | MICA   |
| TC6_cox_hap2000 | 2.68  | JUC6_cox_hap20018 | MICA   |
| TC6_cox_hap2000 | 2.66  | PSR6_cox_hap20008 | MICA   |

|                  |       |                   |         |
|------------------|-------|-------------------|---------|
| TC6_cox_hap2000  | 2.31  | JUC6_cox_hap20018 | MICA    |
| TC6_cox_hap2000  | 2.3   | JUC6_cox_hap20018 | MICA    |
| TC6_cox_hap2000  | 2.29  | JUC6_cox_hap20018 | MICA    |
| TC6_cox_hap2000  | 2.09  | PSR6_cox_hap20008 | MICA    |
| TC6_cox_hap2000  | 2.02  | JUC6_cox_hap20018 | MICA    |
| TC6_qbl_hap60002 | 4.18  | PSR6_qbl_hap60001 | HLA-H   |
| TC6_qbl_hap60002 | 2.51  | JUC6_qbl_hap60018 | HLA-H   |
| TC6_qbl_hap60002 | 2.23  | JUC6_qbl_hap60018 | HLA-H   |
| TC6_qbl_hap60002 | 2.03  | PSR6_qbl_hap60001 | HLA-H   |
| TC6_ssto_hap7000 | 4.18  | JUC6_ssto_hap7001 | MICA    |
| TC6_ssto_hap7000 | 3.88  | PSR6_ssto_hap7000 | MICA    |
| TC6_ssto_hap7000 | 3.5   | PSR6_ssto_hap7000 | MICA    |
| TC6_ssto_hap7000 | 3.16  | JUC6_ssto_hap7001 | MICA    |
| TC6_ssto_hap7000 | 3.03  | PSR6_ssto_hap7000 | MICA    |
| TC6_ssto_hap7000 | 2.99  | JUC6_ssto_hap7001 | MICA    |
| TC6_ssto_hap7000 | 2.69  | JUC6_ssto_hap7001 | MICA    |
| TC6_ssto_hap7000 | 2.68  | JUC6_ssto_hap7001 | MICA    |
| TC6_ssto_hap7000 | 2.66  | PSR6_ssto_hap7000 | MICA    |
| TC6_ssto_hap7000 | 2.31  | JUC6_ssto_hap7001 | MICA    |
| TC6_ssto_hap7000 | 2.3   | JUC6_ssto_hap7001 | MICA    |
| TC6_ssto_hap7000 | 2.29  | JUC6_ssto_hap7001 | MICA    |
| TC6_ssto_hap7000 | 2.09  | PSR6_ssto_hap7000 | MICA    |
| TC6_ssto_hap7000 | 2.02  | JUC6_ssto_hap7001 | MICA    |
| TC05003425.hg.1  | 4.17  | JUC05019586.hg.1  | DAB2    |
| TC05003425.hg.1  | 3.39  | JUC05019595.hg.1  | DAB2    |
| TC05003425.hg.1  | 2.63  | JUC05019604.hg.1  | DAB2    |
| TC05003425.hg.1  | 2.34  | JUC05019610.hg.1  | DAB2    |
| TC05003425.hg.1  | 2.14  | JUC05019612.hg.1  | DAB2    |
| TC05003425.hg.1  | -2.64 | PSR05018231.hg.1  | DAB2    |
| TC08001464.hg.1  | 4.17  | JUC08009663.hg.1  | STK3    |
| TC08001464.hg.1  | 3.44  | JUC08009664.hg.1  | STK3    |
| TC08001464.hg.1  | 2.26  | JUC08009649.hg.1  | STK3    |
| TC08001464.hg.1  | 2.14  | PSR08018987.hg.1  | STK3    |
| TC08001464.hg.1  | -2.54 | JUC08009648.hg.1  | STK3    |
| TC09000498.hg.1  | 4.17  | JUC09002987.hg.1  | GALNT12 |
| TC09000498.hg.1  | 2.21  | PSR09005401.hg.1  | GALNT12 |
| TC09000498.hg.1  | 2.06  | JUC09002991.hg.1  | GALNT12 |
| TC09000498.hg.1  | -2.2  | JUC09002985.hg.1  | GALNT12 |
| TC14000319.hg.1  | 4.17  | JUC14001642.hg.1  | SAMD4A  |
| TC14000319.hg.1  | 2.57  | PSR14003381.hg.1  | SAMD4A  |
| TC14000319.hg.1  | 2.1   | PSR14003389.hg.1  | SAMD4A  |
| TC14000319.hg.1  | 2.01  | JUC14001633.hg.1  | SAMD4A  |
| TC14000319.hg.1  | -2.06 | JUC14001639.hg.1  | SAMD4A  |
| TC14000319.hg.1  | -2.09 | PSR14003390.hg.1  | SAMD4A  |
| TC14000319.hg.1  | -3.46 | JUC14001637.hg.1  | SAMD4A  |
| TC02002606.hg.1  | 4.16  | JUC02021745.hg.1  | TFPI    |
| TC02002606.hg.1  | 3.36  | JUC02021728.hg.1  | TFPI    |
| TC02002606.hg.1  | 3.23  | JUC02021730.hg.1  | TFPI    |
| TC02002606.hg.1  | 2.41  | JUC02021731.hg.1  | TFPI    |
| TC02002606.hg.1  | 2.38  | PSR02041713.hg.1  | TFPI    |
| TC02002606.hg.1  | 2.35  | PSR02041727.hg.1  | TFPI    |
| TC02002606.hg.1  | 2.07  | JUC02021736.hg.1  | TFPI    |
| TC02002606.hg.1  | 2.05  | PSR02041739.hg.1  | TFPI    |
| TC05001481.hg.1  | 4.16  | PSR05020318.hg.1  | ENC1    |
| TC05001481.hg.1  | 2.47  | PSR05020319.hg.1  | ENC1    |
| TC05001481.hg.1  | -2.79 | JUC05010456.hg.1  | ENC1    |
| TC06001074.hg.1  | 4.16  | JUC06006268.hg.1  | SASH1   |
| TC06001074.hg.1  | 3.45  | PSR06012705.hg.1  | SASH1   |

|                 |       |                  |         |
|-----------------|-------|------------------|---------|
| TC06001074.hg.1 | 3.45  | PSR06012708.hg.1 | SASH1   |
| TC06001074.hg.1 | 3.15  | PSR06012697.hg.1 | SASH1   |
| TC06001074.hg.1 | 2.56  | PSR06012713.hg.1 | SASH1   |
| TC06001074.hg.1 | 2.44  | PSR06012698.hg.1 | SASH1   |
| TC0X000034.hg.1 | 4.16  | PSR0X000449.hg.1 | SHROOM2 |
| TC0X000034.hg.1 | 4.09  | JUC0X000261.hg.1 | SHROOM2 |
| TC0X000034.hg.1 | 4.03  | PSR0X000447.hg.1 | SHROOM2 |
| TC0X000034.hg.1 | 3.6   | PSR0X000453.hg.1 | SHROOM2 |
| TC0X000034.hg.1 | 3.51  | PSR0X000457.hg.1 | SHROOM2 |
| TC0X000034.hg.1 | 2.69  | JUC0X000258.hg.1 | SHROOM2 |
| TC0X000034.hg.1 | 2.63  | PSR0X000454.hg.1 | SHROOM2 |
| TC0X000034.hg.1 | 2.53  | JUC0X000254.hg.1 | SHROOM2 |
| TC0X000034.hg.1 | 2.22  | JUC0X000260.hg.1 | SHROOM2 |
| TC0X000034.hg.1 | 2.09  | PSR0X000448.hg.1 | SHROOM2 |
| TC0X000034.hg.1 | -2.22 | JUC0X000257.hg.1 | SHROOM2 |
| TC0X000034.hg.1 | -2.45 | JUC0X000253.hg.1 | SHROOM2 |
| TC0X000034.hg.1 | -2.79 | PSR0X000464.hg.1 | SHROOM2 |
| TC0X000034.hg.1 | -3.79 | PSR0X000451.hg.1 | SHROOM2 |
| TC11002435.hg.1 | 4.16  | JUC11015539.hg.1 | KIRREL3 |
| TC11002435.hg.1 | 3.96  | JUC11015550.hg.1 | KIRREL3 |
| TC11002435.hg.1 | 3.14  | JUC11015542.hg.1 | KIRREL3 |
| TC11002435.hg.1 | 3.02  | PSR11029172.hg.1 | KIRREL3 |
| TC11002435.hg.1 | 2.84  | PSR11029160.hg.1 | KIRREL3 |
| TC11002435.hg.1 | 2.71  | PSR11029170.hg.1 | KIRREL3 |
| TC11002435.hg.1 | 2.7   | JUC11015544.hg.1 | KIRREL3 |
| TC11002435.hg.1 | 2.61  | PSR11029187.hg.1 | KIRREL3 |
| TC11002435.hg.1 | 2.3   | PSR11029182.hg.1 | KIRREL3 |
| TC11002435.hg.1 | 2.05  | JUC11015545.hg.1 | KIRREL3 |
| TC11002435.hg.1 | 2     | PSR11029188.hg.1 | KIRREL3 |
| TC11002435.hg.1 | -2.13 | PSR11029167.hg.1 | KIRREL3 |
| TC11002435.hg.1 | -2.33 | JUC11015540.hg.1 | KIRREL3 |
| TC11002435.hg.1 | -2.43 | PSR11029183.hg.1 | KIRREL3 |
| TC11002435.hg.1 | -3.19 | JUC11015543.hg.1 | KIRREL3 |
| TC11002435.hg.1 | -4.96 | JUC11015551.hg.1 | KIRREL3 |
| TC11002435.hg.1 | -5.54 | PSR11029166.hg.1 | KIRREL3 |
| TC11002435.hg.1 | -7.91 | JUC11015546.hg.1 | KIRREL3 |
| TC11002435.hg.1 | -8.54 | JUC11015536.hg.1 | KIRREL3 |
| TC15001211.hg.1 | 4.16  | JUC15005753.hg.1 | MEIS2   |
| TC15001211.hg.1 | 4.01  | PSR15010899.hg.1 | MEIS2   |
| TC15001211.hg.1 | 3.82  | PSR15010874.hg.1 | MEIS2   |
| TC15001211.hg.1 | 3.6   | PSR15010886.hg.1 | MEIS2   |
| TC15001211.hg.1 | 3.57  | PSR15010897.hg.1 | MEIS2   |
| TC15001211.hg.1 | 3.5   | PSR15010884.hg.1 | MEIS2   |
| TC15001211.hg.1 | 3.33  | PSR15010857.hg.1 | MEIS2   |
| TC15001211.hg.1 | 2.99  | PSR15010893.hg.1 | MEIS2   |
| TC15001211.hg.1 | 2.72  | JUC15005751.hg.1 | MEIS2   |
| TC15001211.hg.1 | 2.67  | PSR15010853.hg.1 | MEIS2   |
| TC15001211.hg.1 | 2.63  | PSR15010894.hg.1 | MEIS2   |
| TC15001211.hg.1 | 2.59  | PSR15010892.hg.1 | MEIS2   |
| TC15001211.hg.1 | 2.44  | PSR15010860.hg.1 | MEIS2   |
| TC15001211.hg.1 | 2.36  | JUC15005750.hg.1 | MEIS2   |
| TC15001211.hg.1 | 2.22  | PSR15010873.hg.1 | MEIS2   |
| TC15001211.hg.1 | 2.19  | PSR15010887.hg.1 | MEIS2   |
| TC15001211.hg.1 | 2.18  | PSR15010881.hg.1 | MEIS2   |
| TC17001462.hg.1 | 4.16  | JUC17010973.hg.1 | TOP2A   |
| TC17001462.hg.1 | 3.55  | JUC17010988.hg.1 | TOP2A   |
| TC17001462.hg.1 | 3.54  | JUC17011011.hg.1 | TOP2A   |
| TC17001462.hg.1 | 3.14  | PSR17019384.hg.1 | TOP2A   |

|                 |       |                  |             |
|-----------------|-------|------------------|-------------|
| TC17001462.hg.1 | 3.13  | PSR17019405.hg.1 | TOP2A       |
| TC17001462.hg.1 | 3.01  | JUC17010971.hg.1 | TOP2A       |
| TC17001462.hg.1 | 2.62  | PSR17019387.hg.1 | TOP2A       |
| TC17001462.hg.1 | 2.59  | JUC17011013.hg.1 | TOP2A       |
| TC17001462.hg.1 | 2.52  | PSR17019404.hg.1 | TOP2A       |
| TC17001462.hg.1 | 2.51  | PSR17019386.hg.1 | TOP2A       |
| TC17001462.hg.1 | 2.47  | PSR17019374.hg.1 | TOP2A       |
| TC17001462.hg.1 | 2.28  | JUC17010974.hg.1 | TOP2A       |
| TC17001462.hg.1 | 2.22  | PSR17019378.hg.1 | TOP2A       |
| TC17001462.hg.1 | 2.22  | PSR17019382.hg.1 | TOP2A       |
| TC17001462.hg.1 | 2.16  | PSR17019348.hg.1 | TOP2A       |
| TC17001462.hg.1 | 2.13  | JUC17010979.hg.1 | TOP2A       |
| TC17001462.hg.1 | -2.05 | JUC17010985.hg.1 | TOP2A       |
| TC17001462.hg.1 | -2.15 | PSR17019364.hg.1 | TOP2A       |
| TC17001462.hg.1 | -3.81 | JUC17011008.hg.1 | TOP2A       |
| TC02000423.hg.1 | 4.15  | JUC02003228.hg.1 | ATP6V1B1    |
| TC02000423.hg.1 | 3.88  | JUC02003236.hg.1 | ATP6V1B1    |
| TC02000423.hg.1 | 2.85  | JUC02003224.hg.1 | ATP6V1B1    |
| TC02000423.hg.1 | 2.15  | PSR02006310.hg.1 | ATP6V1B1    |
| TC02000423.hg.1 | -6.26 | JUC02003237.hg.1 | ATP6V1B1    |
| TC11000267.hg.1 | 4.15  | JUC11001836.hg.1 |             |
| TC11000267.hg.1 | 2.15  | PSR11003577.hg.1 |             |
| TC02000874.hg.1 | 4.14  | JUC02006847.hg.1 | MGAT5       |
| TC02000874.hg.1 | 2.91  | PSR02012904.hg.1 | MGAT5       |
| TC02000874.hg.1 | 2.51  | PSR02012928.hg.1 | MGAT5       |
| TC02000874.hg.1 | -2.13 | JUC02006843.hg.1 | MGAT5       |
| TC02000874.hg.1 | -2.61 | JUC02006846.hg.1 | MGAT5       |
| TC16001281.hg.1 | 4.14  | PSR16017829.hg.1 | CHST6       |
| TC16001281.hg.1 | 3.07  | JUC16010157.hg.1 | CHST6       |
| TC16001281.hg.1 | 2.82  | PSR16017832.hg.1 | CHST6       |
| TC16001281.hg.1 | -2.08 | PSR16017828.hg.1 | CHST6       |
| TC16001281.hg.1 | -2.36 | PSR16017823.hg.1 | CHST6       |
| TC19001802.hg.1 | 4.14  | JUC19013900.hg.1 | ZNF83       |
| TC19001802.hg.1 | 3.47  | JUC19013911.hg.1 | ZNF83       |
| TC19001802.hg.1 | 2.24  | JUC19013913.hg.1 | ZNF83       |
| TC19001802.hg.1 | 2.18  | JUC19013904.hg.1 | ZNF83       |
| TC19001802.hg.1 | 2.13  | JUC19013906.hg.1 | ZNF83       |
| TC19001802.hg.1 | 2.06  | PSR19024462.hg.1 | ZNF83       |
| TC20000788.hg.1 | 4.14  | JUC20005528.hg.1 | GGT7        |
| TC20000788.hg.1 | 2.67  | PSR20010518.hg.1 | GGT7        |
| TC20000788.hg.1 | 2.18  | JUC20005516.hg.1 | GGT7        |
| TC20000788.hg.1 | 2.06  | JUC20005531.hg.1 | GGT7        |
| TC01003096.hg.1 | 4.13  | JUC01025749.hg.1 | PDE4DIP, LO |
| TC01003096.hg.1 | 3.65  | PSR01047962.hg.1 | PDE4DIP, LO |
| TC01003096.hg.1 | 3.56  | PSR01047965.hg.1 | PDE4DIP, LO |
| TC01003096.hg.1 | 3.31  | PSR01047967.hg.1 | PDE4DIP, LO |
| TC01003096.hg.1 | 3.27  | PSR01047963.hg.1 | PDE4DIP, LO |
| TC01003096.hg.1 | 2.77  | PSR01047968.hg.1 | PDE4DIP, LO |
| TC01003096.hg.1 | 2.73  | PSR01047961.hg.1 | PDE4DIP, LO |
| TC01003096.hg.1 | 2.66  | PSR01047969.hg.1 | PDE4DIP, LO |
| TC01003096.hg.1 | 2.52  | PSR01047966.hg.1 | PDE4DIP, LO |
| TC01003096.hg.1 | 2.37  | JUC01025801.hg.1 | PDE4DIP, LO |
| TC14001347.hg.1 | 4.13  | PSR14015326.hg.1 | ISM2        |
| TC14001347.hg.1 | -3.28 | JUC14007785.hg.1 | ISM2        |
| TC08001075.hg.1 | 4.12  | JUC08007033.hg.1 | PNMA2       |
| TC08001075.hg.1 | 2.43  | JUC08007041.hg.1 | PNMA2       |
| TC08001075.hg.1 | 2.03  | PSR08013692.hg.1 | PNMA2       |
| TC08001075.hg.1 | 2.02  | PSR08013690.hg.1 | PNMA2       |



|                 |       |                  |          |
|-----------------|-------|------------------|----------|
| TC08001075.hg.1 | 2.02  | PSR08013697.hg.1 | PNMA2    |
| TC08001075.hg.1 | -2.04 | PSR08013672.hg.1 | PNMA2    |
| TC08001075.hg.1 | -2.28 | PSR08013666.hg.1 | PNMA2    |
| TC08001075.hg.1 | -2.39 | PSR08013663.hg.1 | PNMA2    |
| TC08001075.hg.1 | -2.41 | PSR08013664.hg.1 | PNMA2    |
| TC08001075.hg.1 | -2.58 | PSR08013667.hg.1 | PNMA2    |
| TC08001075.hg.1 | -3.05 | PSR08013661.hg.1 | PNMA2    |
| TC12001303.hg.1 | 4.12  | JUC12009420.hg.1 | KIAA0528 |
| TC12001303.hg.1 | 2.21  | JUC12009422.hg.1 | KIAA0528 |
| TC12001303.hg.1 | -2.27 | JUC12009402.hg.1 | KIAA0528 |
| TC12001303.hg.1 | -2.3  | PSR12017069.hg.1 | KIAA0528 |
| TC12001303.hg.1 | -3.46 | JUC12009411.hg.1 | KIAA0528 |
| TC19000377.hg.1 | 4.12  | JUC19003011.hg.1 | CILP2    |
| TC19000377.hg.1 | 3.18  | JUC19003010.hg.1 | CILP2    |
| TC19000377.hg.1 | 2.91  | PSR19005105.hg.1 | CILP2    |
| TC19000377.hg.1 | -2.02 | PSR19005098.hg.1 | CILP2    |
| TC19000377.hg.1 | -2.16 | JUC19003008.hg.1 | CILP2    |
| TC19000377.hg.1 | -2.27 | PSR19005097.hg.1 | CILP2    |
| TC19000377.hg.1 | -2.47 | PSR19005101.hg.1 | CILP2    |
| TC19000377.hg.1 | -3.47 | JUC19003007.hg.1 | CILP2    |
| TC19000377.hg.1 | -6.95 | JUC19003012.hg.1 | CILP2    |
| TC14002298.hg.1 | 4.11  | JUC14011690.hg.1 | SLC38A6  |
| TC14002298.hg.1 | 2.49  | JUC14011709.hg.1 | SLC38A6  |
| TC14002298.hg.1 | 2.4   | PSR14004049.hg.1 | SLC38A6  |
| TC14002298.hg.1 | 2.19  | PSR14004074.hg.1 | SLC38A6  |
| TC14002298.hg.1 | 2.11  | JUC14011712.hg.1 | SLC38A6  |
| TC14002298.hg.1 | 2.02  | JUC14011704.hg.1 | SLC38A6  |
| TC14002298.hg.1 | -2.12 | JUC14011714.hg.1 | SLC38A6  |
| TC14002298.hg.1 | -2.74 | JUC14011692.hg.1 | SLC38A6  |
| TC05001943.hg.1 | 4.1   | JUC05013706.hg.1 | DCTN4    |
| TC05001943.hg.1 | 3.72  | JUC05013705.hg.1 | DCTN4    |
| TC05001943.hg.1 | 2.55  | JUC05013715.hg.1 | DCTN4    |
| TC05001943.hg.1 | 2.13  | PSR05026956.hg.1 | DCTN4    |
| TC05001943.hg.1 | -2.58 | PSR05026949.hg.1 | DCTN4    |
| TC06000718.hg.1 | 4.1   | JUC06003873.hg.1 | SMAP1    |
| TC06000718.hg.1 | 2.95  | PSR06008567.hg.1 | SMAP1    |
| TC01006321.hg.1 | 4.09  | JUC01043959.hg.1 | CCDC30   |
| TC01006321.hg.1 | 2.89  | PSR01008283.hg.1 | CCDC30   |
| TC01006321.hg.1 | 2.66  | PSR01008317.hg.1 | CCDC30   |
| TC01006321.hg.1 | 2.14  | PSR01008270.hg.1 | CCDC30   |
| TC01006321.hg.1 | 2.03  | PSR01008295.hg.1 | CCDC30   |
| TC01006321.hg.1 | 2     | PSR01008258.hg.1 | CCDC30   |
| TC01006321.hg.1 | 2     | JUC01043961.hg.1 | CCDC30   |
| TC03000173.hg.1 | 4.09  | JUC03001699.hg.1 | STAC     |
| TC03000173.hg.1 | -2.34 | JUC03001697.hg.1 | STAC     |
| TC03000173.hg.1 | -3.19 | PSR03003243.hg.1 | STAC     |
| TC0X001425.hg.1 | 4.09  | JUC0X009642.hg.1 | FGF13    |
| TC0X001425.hg.1 | 3.63  | JUC0X009644.hg.1 | FGF13    |
| TC0X001425.hg.1 | 2.4   | PSR0X018892.hg.1 | FGF13    |
| TC0X001425.hg.1 | 2.38  | JUC0X009653.hg.1 | FGF13    |
| TC0X001425.hg.1 | 2.3   | JUC0X009646.hg.1 | FGF13    |
| TC0X001425.hg.1 | 2.2   | PSR0X018888.hg.1 | FGF13    |
| TC0X001425.hg.1 | 2.2   | PSR0X018906.hg.1 | FGF13    |
| TC0X001425.hg.1 | 2.13  | PSR0X018915.hg.1 | FGF13    |
| TC0X001425.hg.1 | 2.05  | PSR0X018903.hg.1 | FGF13    |
| TC0X001425.hg.1 | 2.04  | JUC0X009638.hg.1 | FGF13    |
| TC0X001425.hg.1 | 2.03  | PSR0X018911.hg.1 | FGF13    |
| TC0X001425.hg.1 | 2.03  | JUC0X009651.hg.1 | FGF13    |

|                 |       |                  |            |
|-----------------|-------|------------------|------------|
| TC0X001425.hg.1 | -2.37 | JUC0X009654.hg.1 | FGF13      |
| TC11003504.hg.1 | 4.09  | JUC11019767.hg.1 | LOC1005062 |
| TC11003504.hg.1 | 3.42  | PSR11017247.hg.1 | LOC1005062 |
| TC11003504.hg.1 | 2.99  | JUC11019777.hg.1 | LOC1005062 |
| TC11003504.hg.1 | 2.45  | PSR11017227.hg.1 | LOC1005062 |
| TC11003504.hg.1 | 2.24  | PSR11017234.hg.1 | LOC1005062 |
| TC11003504.hg.1 | 2.07  | JUC11019772.hg.1 | LOC1005062 |
| TC12000621.hg.1 | 4.09  | JUC12004347.hg.1 | KCNMB4     |
| TC12000621.hg.1 | -2.33 | PSR12008256.hg.1 | KCNMB4     |
| TC12000621.hg.1 | -2.69 | PSR12008257.hg.1 | KCNMB4     |
| TC15002013.hg.1 | 4.09  | JUC15010201.hg.1 | TARSL2     |
| TC15002013.hg.1 | 3.82  | JUC15010192.hg.1 | TARSL2     |
| TC15002013.hg.1 | 2.4   | PSR15018695.hg.1 | TARSL2     |
| TC15002013.hg.1 | 2.06  | PSR15018706.hg.1 | TARSL2     |
| TC07000262.hg.1 | 4.08  | PSR07004027.hg.1 | HECW1-IT1  |
| TC07000262.hg.1 | -2.35 | PSR07004030.hg.1 | HECW1-IT1  |
| TC07000262.hg.1 | -2.66 | PSR07004029.hg.1 | HECW1-IT1  |
| TC07000262.hg.1 | -3.37 | JUC07001951.hg.1 | HECW1-IT1  |
| TC17001457.hg.1 | 4.08  | PSR17019277.hg.1 | MED24      |
| TC17001457.hg.1 | 2.69  | JUC17010938.hg.1 | MED24      |
| TC17001457.hg.1 | 2.36  | JUC17010951.hg.1 | MED24      |
| TC17001457.hg.1 | 2.14  | JUC17010943.hg.1 | MED24      |
| TC17001457.hg.1 | -2.38 | JUC17010913.hg.1 | MED24      |
| TC17001457.hg.1 | -2.38 | JUC17010940.hg.1 | MED24      |
| TC17001457.hg.1 | -2.39 | PSR17019247.hg.1 | MED24      |
| TC17001457.hg.1 | -2.78 | JUC17010936.hg.1 | MED24      |
| TC02000507.hg.1 | 4.07  | JUC02003985.hg.1 | ELMOD3     |
| TC02000507.hg.1 | -2.22 | JUC02003968.hg.1 | ELMOD3     |
| TC02000507.hg.1 | -2.27 | PSR02007781.hg.1 | ELMOD3     |
| TC02000507.hg.1 | -2.31 | JUC02003960.hg.1 | ELMOD3     |
| TC03000248.hg.1 | 4.07  | JUC03002576.hg.1 | LIMD1      |
| TC03000248.hg.1 | 3.92  | PSR03005047.hg.1 | LIMD1      |
| TC03000248.hg.1 | 3.61  | PSR03005062.hg.1 | LIMD1      |
| TC03000248.hg.1 | 3.1   | PSR03005049.hg.1 | LIMD1      |
| TC03000248.hg.1 | 3.07  | JUC03002573.hg.1 | LIMD1      |
| TC03000248.hg.1 | 2.88  | JUC03002575.hg.1 | LIMD1      |
| TC03000248.hg.1 | 2.72  | PSR03005052.hg.1 | LIMD1      |
| TC03000248.hg.1 | 2.65  | JUC03002567.hg.1 | LIMD1      |
| TC03000248.hg.1 | 2.49  | PSR03005051.hg.1 | LIMD1      |
| TC03000248.hg.1 | 2.32  | JUC03002570.hg.1 | LIMD1      |
| TC03000248.hg.1 | 2.24  | PSR03005058.hg.1 | LIMD1      |
| TC10001322.hg.1 | 4.07  | PSR10016707.hg.1 | TMEM26     |
| TC10001322.hg.1 | 3.28  | JUC10009752.hg.1 | TMEM26     |
| TC10001322.hg.1 | 3.2   | JUC10009754.hg.1 | TMEM26     |
| TC10001322.hg.1 | 2.85  | PSR10016712.hg.1 | TMEM26     |
| TC10001322.hg.1 | 2.66  | JUC10009755.hg.1 | TMEM26     |
| TC10001322.hg.1 | 2.18  | PSR10016711.hg.1 | TMEM26     |
| TC10001322.hg.1 | -2.38 | JUC10009750.hg.1 | TMEM26     |
| TC10001322.hg.1 | -3.35 | PSR10016705.hg.1 | TMEM26     |
| TC11002439.hg.1 | 4.07  | JUC11015566.hg.1 | ETS1       |
| TC11002439.hg.1 | 3.37  | JUC11015562.hg.1 | ETS1       |
| TC11002439.hg.1 | 3.08  | JUC11015568.hg.1 | ETS1       |
| TC11002439.hg.1 | 3.06  | PSR11029216.hg.1 | ETS1       |
| TC11002439.hg.1 | 2.51  | PSR11029212.hg.1 | ETS1       |
| TC11002439.hg.1 | 2.37  | PSR11029211.hg.1 | ETS1       |
| TC11002439.hg.1 | 2.15  | JUC11015561.hg.1 | ETS1       |
| TC15001711.hg.1 | 4.07  | JUC15009111.hg.1 | ADAMTS7, L |
| TC15001711.hg.1 | 2.47  | PSR15016723.hg.1 | ADAMTS7, L |

|                 |       |                  |             |
|-----------------|-------|------------------|-------------|
| TC15001711.hg.1 | 2.32  | JUC15009116.hg.1 | ADAMTS7, L0 |
| TC15001711.hg.1 | 2.25  | PSR15016716.hg.1 | ADAMTS7, L0 |
| TC15001711.hg.1 | 2.24  | PSR15016728.hg.1 | ADAMTS7, L0 |
| TC15001711.hg.1 | 2.14  | PSR15016725.hg.1 | ADAMTS7, L0 |
| TC15001711.hg.1 | -2.11 | JUC15009110.hg.1 | ADAMTS7, L0 |
| TC17002883.hg.1 | 4.07  | PSR17012340.hg.1 | SLC25A10    |
| TC17002883.hg.1 | 2.32  | PSR17012343.hg.1 | SLC25A10    |
| TC17002883.hg.1 | -2.3  | PSR17012337.hg.1 | SLC25A10    |
| TC17002883.hg.1 | -2.33 | JUC17018790.hg.1 | SLC25A10    |
| TC21000459.hg.1 | 4.07  | PSR21005370.hg.1 | BRWD1       |
| TC21000459.hg.1 | 3.22  | PSR21005362.hg.1 | BRWD1       |
| TC21000459.hg.1 | 2.98  | JUC21002773.hg.1 | BRWD1       |
| TC21000459.hg.1 | 2.15  | JUC21002768.hg.1 | BRWD1       |
| TC21000459.hg.1 | 2     | JUC21002797.hg.1 | BRWD1       |
| TC21000459.hg.1 | -2.21 | JUC21002753.hg.1 | BRWD1       |
| TC01003005.hg.1 | 4.06  | PSR01046740.hg.1 | RSBN1       |
| TC01003005.hg.1 | 2.36  | JUC01025083.hg.1 | RSBN1       |
| TC03003352.hg.1 | 4.06  | JUC03023683.hg.1 | RBM5        |
| TC03003352.hg.1 | 3.45  | PSR03006335.hg.1 | RBM5        |
| TC03003352.hg.1 | 3     | JUC03023676.hg.1 | RBM5        |
| TC03003352.hg.1 | 2.49  | PSR03006346.hg.1 | RBM5        |
| TC03003352.hg.1 | 2.27  | PSR03006332.hg.1 | RBM5        |
| TC03003352.hg.1 | -2.2  | PSR03006307.hg.1 | RBM5        |
| TC03003352.hg.1 | -2.25 | JUC03023685.hg.1 | RBM5        |
| TC11001273.hg.1 | 4.06  | PSR11016094.hg.1 | MIR675, H19 |
| TC11001273.hg.1 | 3.73  | PSR11016075.hg.1 | MIR675, H19 |
| TC11001273.hg.1 | 3.54  | JUC11008656.hg.1 | MIR675, H19 |
| TC11001273.hg.1 | 2.99  | PSR11016071.hg.1 | MIR675, H19 |
| TC11001273.hg.1 | 2.6   | JUC11008657.hg.1 | MIR675, H19 |
| TC11001273.hg.1 | 2.48  | PSR11016089.hg.1 | MIR675, H19 |
| TC11001273.hg.1 | 2.35  | JUC11008655.hg.1 | MIR675, H19 |
| TC11001273.hg.1 | 2.11  | PSR11016070.hg.1 | MIR675, H19 |
| TC11001273.hg.1 | 2.05  | PSR11016088.hg.1 | MIR675, H19 |
| TC11001273.hg.1 | -2.18 | JUC11008660.hg.1 | MIR675, H19 |
| TC12000284.hg.1 | 4.06  | JUC12001714.hg.1 | TSPAN11     |
| TC12000284.hg.1 | 3.4   | JUC12001722.hg.1 | TSPAN11     |
| TC12000284.hg.1 | 2.64  | JUC12001715.hg.1 | TSPAN11     |
| TC12000284.hg.1 | 2.15  | JUC12001719.hg.1 | TSPAN11     |
| TC12000284.hg.1 | 2.05  | PSR12003403.hg.1 | TSPAN11     |
| TC12000284.hg.1 | -2.64 | JUC12001713.hg.1 | TSPAN11     |
| TC20000727.hg.1 | 4.06  | PSR20009824.hg.1 | ACSS1       |
| TC20000727.hg.1 | -2.15 | PSR20009839.hg.1 | ACSS1       |
| TC20000727.hg.1 | -2.15 | JUC20005122.hg.1 | ACSS1       |
| TC20000727.hg.1 | -2.21 | PSR20009840.hg.1 | ACSS1       |
| TC20000727.hg.1 | -2.34 | PSR20009848.hg.1 | ACSS1       |
| TC20000727.hg.1 | -2.57 | JUC20005127.hg.1 | ACSS1       |
| TC20000727.hg.1 | -2.59 | JUC20005141.hg.1 | ACSS1       |
| TC20000727.hg.1 | -2.75 | JUC20005135.hg.1 | ACSS1       |
| TC20000727.hg.1 | -3.06 | JUC20005125.hg.1 | ACSS1       |
| TC20000727.hg.1 | -3.73 | JUC20005124.hg.1 | ACSS1       |
| TC05000822.hg.1 | 4.05  | JUC05006125.hg.1 | ARHGEF37    |
| TC05000822.hg.1 | 3.99  | PSR05011756.hg.1 | ARHGEF37    |
| TC05000822.hg.1 | 3.77  | PSR05011757.hg.1 | ARHGEF37    |
| TC05000822.hg.1 | 3.18  | PSR05011770.hg.1 | ARHGEF37    |
| TC05000822.hg.1 | 3.1   | JUC05006127.hg.1 | ARHGEF37    |
| TC05000822.hg.1 | 2.6   | JUC05006130.hg.1 | ARHGEF37    |
| TC05000822.hg.1 | 2.56  | JUC05006129.hg.1 | ARHGEF37    |
| TC05000822.hg.1 | -2.49 | PSR05011761.hg.1 | ARHGEF37    |

|                 |        |                  |            |
|-----------------|--------|------------------|------------|
| TC05000822.hg.1 | -3.08  | JUC05006133.hg.1 | ARHGEF37   |
| TC05000822.hg.1 | -3.46  | JUC05006123.hg.1 | ARHGEF37   |
| TC05000822.hg.1 | -3.5   | PSR05011760.hg.1 | ARHGEF37   |
| TC05000822.hg.1 | -4.45  | PSR05011762.hg.1 | ARHGEF37   |
| TC05000822.hg.1 | -15.12 | JUC05006128.hg.1 | ARHGEF37   |
| TC05001327.hg.1 | 4.05   | JUC05009633.hg.1 | LOC1005066 |
| TC05001327.hg.1 | 3.56   | JUC05009632.hg.1 | LOC1005066 |
| TC05001327.hg.1 | 2.61   | JUC05009639.hg.1 | LOC1005066 |
| TC05001327.hg.1 | 2.44   | PSR05018740.hg.1 | LOC1005066 |
| TC05001327.hg.1 | 2.34   | PSR05018736.hg.1 | LOC1005066 |
| TC05001327.hg.1 | 2.3    | PSR05018735.hg.1 | LOC1005066 |
| TC05001327.hg.1 | 2.13   | PSR05018751.hg.1 | LOC1005066 |
| TC06001732.hg.1 | 4.05   | PSR06020721.hg.1 | TRERF1     |
| TC06001732.hg.1 | 2.82   | JUC06009835.hg.1 | TRERF1     |
| TC06001732.hg.1 | 2.78   | JUC06009820.hg.1 | TRERF1     |
| TC06001732.hg.1 | 2.24   | PSR06020697.hg.1 | TRERF1     |
| TC06001732.hg.1 | -2     | PSR06020715.hg.1 | TRERF1     |
| TC09001656.hg.1 | 4.05   | JUC09011327.hg.1 | FNBP1      |
| TC09001656.hg.1 | 2.58   | PSR09021088.hg.1 | FNBP1      |
| TC09001656.hg.1 | 2.49   | JUC09011329.hg.1 | FNBP1      |
| TC09001656.hg.1 | 2.44   | PSR09021116.hg.1 | FNBP1      |
| TC09001656.hg.1 | 2.39   | JUC09011324.hg.1 | FNBP1      |
| TC09001656.hg.1 | 2.22   | JUC09011319.hg.1 | FNBP1      |
| TC09001656.hg.1 | -2.4   | JUC09011321.hg.1 | FNBP1      |
| TC09001656.hg.1 | -2.42  | JUC09011328.hg.1 | FNBP1      |
| TC09001656.hg.1 | -2.62  | JUC09011317.hg.1 | FNBP1      |
| TC10001571.hg.1 | 4.05   | JUC10011722.hg.1 | SFRP5      |
| TC10001571.hg.1 | -3.2   | PSR10020146.hg.1 | SFRP5      |
| TC12000726.hg.1 | 4.05   | PSR12009221.hg.1 | SOCS2      |
| TC12000726.hg.1 | 3.42   | PSR12009219.hg.1 | SOCS2      |
| TC12000726.hg.1 | 3.42   | PSR12009230.hg.1 | SOCS2      |
| TC12000726.hg.1 | 3.15   | JUC12004969.hg.1 | SOCS2      |
| TC12000726.hg.1 | 3.02   | PSR12009231.hg.1 | SOCS2      |
| TC12000726.hg.1 | 2.96   | PSR12009224.hg.1 | SOCS2      |
| TC12000726.hg.1 | 2.96   | PSR12009228.hg.1 | SOCS2      |
| TC12000726.hg.1 | 2.88   | PSR12009218.hg.1 | SOCS2      |
| TC12000726.hg.1 | 2.79   | PSR12009222.hg.1 | SOCS2      |
| TC12000726.hg.1 | 2.55   | PSR12009229.hg.1 | SOCS2      |
| TC12000726.hg.1 | 2.46   | JUC12004973.hg.1 | SOCS2      |
| TC12000726.hg.1 | 2.42   | PSR12009226.hg.1 | SOCS2      |
| TC12000726.hg.1 | 2.21   | PSR12009220.hg.1 | SOCS2      |
| TC12000726.hg.1 | 2.02   | PSR12009244.hg.1 | SOCS2      |
| TC12000726.hg.1 | -2.02  | PSR12009232.hg.1 | SOCS2      |
| TC19000623.hg.1 | 4.05   | PSR19008634.hg.1 | IGSF23     |
| TC19000623.hg.1 | 3.18   | PSR19008635.hg.1 | IGSF23     |
| TC19000623.hg.1 | 2.8    | JUC19005156.hg.1 | IGSF23     |
| TC19000623.hg.1 | 2.77   | PSR19008636.hg.1 | IGSF23     |
| TC19000623.hg.1 | 2.16   | PSR19008639.hg.1 | IGSF23     |
| TC19000623.hg.1 | -2.16  | JUC19005152.hg.1 | IGSF23     |
| TC19000623.hg.1 | -2.18  | PSR19008644.hg.1 | IGSF23     |
| TC19000623.hg.1 | -4.07  | JUC19005157.hg.1 | IGSF23     |
| TC02001714.hg.1 | 4.04   | JUC02014479.hg.1 | XDH        |
| TC02001714.hg.1 | 2.16   | PSR02027630.hg.1 | XDH        |
| TC02001714.hg.1 | 2.1    | JUC02014455.hg.1 | XDH        |
| TC02001714.hg.1 | -2.03  | JUC02014475.hg.1 | XDH        |
| TC02002172.hg.1 | 4.04   | JUC02018252.hg.1 | RGPD3      |
| TC02002172.hg.1 | 2.14   | PSR02035341.hg.1 | RGPD3      |
| TC03000142.hg.1 | 4.04   | JUC03001391.hg.1 | ZCWPW2     |

|                 |       |                  |          |
|-----------------|-------|------------------|----------|
| TC03000142.hg.1 | 2.8   | JUC03001388.hg.1 | ZCWPW2   |
| TC03000142.hg.1 | -5.32 | PSR03002616.hg.1 | ZCWPW2   |
| TC05000336.hg.1 | 4.04  | JUC05002465.hg.1 | MAP1B    |
| TC05000336.hg.1 | -6.28 | PSR05004589.hg.1 | MAP1B    |
| TC05000336.hg.1 | -6.65 | JUC05002459.hg.1 | MAP1B    |
| TC05001837.hg.1 | 4.04  | JUC05012904.hg.1 | SIL1     |
| TC05001837.hg.1 | 2.66  | JUC05012901.hg.1 | SIL1     |
| TC05001837.hg.1 | 2.36  | JUC05012902.hg.1 | SIL1     |
| TC05001837.hg.1 | 2.07  | PSR05025132.hg.1 | SIL1     |
| TC07001283.hg.1 | 4.04  | JUC07009727.hg.1 | KIAA0895 |
| TC07001283.hg.1 | 2.44  | PSR07019958.hg.1 | KIAA0895 |
| TC07001283.hg.1 | 2.38  | PSR07019956.hg.1 | KIAA0895 |
| TC07001283.hg.1 | 2.33  | PSR07019954.hg.1 | KIAA0895 |
| TC07001283.hg.1 | 2.25  | PSR07019915.hg.1 | KIAA0895 |
| TC07001283.hg.1 | 2.14  | PSR07019919.hg.1 | KIAA0895 |
| TC07001283.hg.1 | 2.06  | PSR07019918.hg.1 | KIAA0895 |
| TC01003847.hg.1 | 4.02  | JUC01030775.hg.1 | DUSP10   |
| TC01003847.hg.1 | 3.23  | PSR01058741.hg.1 | DUSP10   |
| TC01003847.hg.1 | 3.12  | PSR01058740.hg.1 | DUSP10   |
| TC01003847.hg.1 | 2.72  | JUC01030777.hg.1 | DUSP10   |
| TC01003847.hg.1 | 2.21  | JUC01030782.hg.1 | DUSP10   |
| TC05000243.hg.1 | 4.02  | PSR05002987.hg.1 | MAP3K1   |
| TC05000243.hg.1 | 3.37  | PSR05002994.hg.1 | MAP3K1   |
| TC05000243.hg.1 | 2.89  | JUC05001672.hg.1 | MAP3K1   |
| TC05000243.hg.1 | 2.52  | JUC05001663.hg.1 | MAP3K1   |
| TC05000243.hg.1 | 2.35  | PSR05003002.hg.1 | MAP3K1   |
| TC05000243.hg.1 | 2.22  | PSR05002995.hg.1 | MAP3K1   |
| TC05000243.hg.1 | 2.18  | PSR05003006.hg.1 | MAP3K1   |
| TC05000243.hg.1 | 2.13  | PSR05002989.hg.1 | MAP3K1   |
| TC05000243.hg.1 | -2    | JUC05001669.hg.1 | MAP3K1   |
| TC05000243.hg.1 | -2.12 | JUC05001670.hg.1 | MAP3K1   |
| TC05000243.hg.1 | -2.38 | JUC05001676.hg.1 | MAP3K1   |
| TC05000243.hg.1 | -2.52 | JUC05001665.hg.1 | MAP3K1   |
| TC11003492.hg.1 | 4.02  | PSR11024707.hg.1 | STARD10  |
| TC11003492.hg.1 | 3.88  | PSR11024711.hg.1 | STARD10  |
| TC11003492.hg.1 | 3.73  | JUC11019669.hg.1 | STARD10  |
| TC11003492.hg.1 | 3.6   | PSR11024706.hg.1 | STARD10  |
| TC11003492.hg.1 | 2.61  | PSR11024708.hg.1 | STARD10  |
| TC11003492.hg.1 | 2.52  | PSR11024710.hg.1 | STARD10  |
| TC11003492.hg.1 | 2.34  | PSR11024709.hg.1 | STARD10  |
| TC12003293.hg.1 | 4.02  | JUC12020612.hg.1 | HOXC10   |
| TC12003293.hg.1 | 3.92  | JUC12020616.hg.1 | HOXC10   |
| TC12003293.hg.1 | 3.45  | JUC12020615.hg.1 | HOXC10   |
| TC12003293.hg.1 | 3.28  | PSR12005852.hg.1 | HOXC10   |
| TC12003293.hg.1 | 3.23  | PSR12005853.hg.1 | HOXC10   |
| TC12003293.hg.1 | 2.55  | PSR12005850.hg.1 | HOXC10   |
| TC12003293.hg.1 | 2.43  | PSR12005854.hg.1 | HOXC10   |
| TC12003293.hg.1 | 2.11  | PSR12005862.hg.1 | HOXC10   |
| TC12003293.hg.1 | -4.16 | JUC12020618.hg.1 | HOXC10   |
| TC20000271.hg.1 | 4.02  | JUC20002127.hg.1 | RPN2     |
| TC20000271.hg.1 | 2.5   | PSR20003818.hg.1 | RPN2     |
| TC20000271.hg.1 | -3.55 | JUC20002138.hg.1 | RPN2     |
| TC07000095.hg.1 | 4.01  | JUC07000693.hg.1 | SCIN     |
| TC07000095.hg.1 | 3.56  | JUC07000700.hg.1 | SCIN     |
| TC07000095.hg.1 | 2.95  | JUC07000686.hg.1 | SCIN     |
| TC07000095.hg.1 | 2.86  | JUC07000704.hg.1 | SCIN     |
| TC07000095.hg.1 | 2.76  | PSR07001546.hg.1 | SCIN     |
| TC07000095.hg.1 | 2.48  | JUC07000703.hg.1 | SCIN     |

|                 |       |                  |           |
|-----------------|-------|------------------|-----------|
| TC07000095.hg.1 | 2.41  | PSR07001545.hg.1 | SCIN      |
| TC07000095.hg.1 | 2.41  | PSR07001549.hg.1 | SCIN      |
| TC07000095.hg.1 | 2.37  | JUC07000683.hg.1 | SCIN      |
| TC07000095.hg.1 | 2.21  | PSR07001551.hg.1 | SCIN      |
| TC07000095.hg.1 | 2.08  | PSR07001562.hg.1 | SCIN      |
| TC07000095.hg.1 | 2.07  | PSR07001553.hg.1 | SCIN      |
| TC07000095.hg.1 | 2.02  | PSR07001580.hg.1 | SCIN      |
| TC07000095.hg.1 | 2.01  | PSR07001550.hg.1 | SCIN      |
| TC07000095.hg.1 | -2.23 | PSR07001582.hg.1 | SCIN      |
| TC07000095.hg.1 | -2.27 | JUC07000699.hg.1 | SCIN      |
| TC07000095.hg.1 | -2.51 | PSR07001583.hg.1 | SCIN      |
| TC07000095.hg.1 | -3.34 | JUC07000702.hg.1 | SCIN      |
| TC0X001401.hg.1 | 4.01  | JUC0X009533.hg.1 | LINC00087 |
| TC0X001401.hg.1 | -2.26 | PSR0X018659.hg.1 | LINC00087 |
| TC0X001401.hg.1 | -2.71 | PSR0X018654.hg.1 | LINC00087 |
| TC0X001401.hg.1 | -4.15 | PSR0X018655.hg.1 | LINC00087 |
| TC13000364.hg.1 | 4.01  | PSR13003896.hg.1 | ITGBL1    |
| TC13000364.hg.1 | 3.69  | PSR13003886.hg.1 | ITGBL1    |
| TC13000364.hg.1 | -2.17 | JUC13002402.hg.1 | ITGBL1    |
| TC13000364.hg.1 | -2.2  | JUC13002403.hg.1 | ITGBL1    |
| TC20000095.hg.1 | 4.01  | JUC20000683.hg.1 | NDUFAF5   |
| TC20000095.hg.1 | 3.07  | JUC20000667.hg.1 | NDUFAF5   |
| TC20000095.hg.1 | -2.03 | PSR20001298.hg.1 | NDUFAF5   |
| TC20000095.hg.1 | -2.9  | JUC20000679.hg.1 | NDUFAF5   |
| TC03001941.hg.1 | 4     | JUC03017192.hg.1 | VEPH1     |
| TC03001941.hg.1 | -2.01 | PSR03034731.hg.1 | VEPH1     |
| TC03001941.hg.1 | -2.03 | JUC03017188.hg.1 | VEPH1     |
| TC03001941.hg.1 | -2.13 | PSR03034749.hg.1 | VEPH1     |
| TC03001941.hg.1 | -2.23 | PSR03034732.hg.1 | VEPH1     |
| TC03001941.hg.1 | -2.29 | PSR03034733.hg.1 | VEPH1     |
| TC03001941.hg.1 | -2.85 | PSR03034755.hg.1 | VEPH1     |
| TC03001941.hg.1 | -3.69 | JUC03017183.hg.1 | VEPH1     |
| TC06000779.hg.1 | 4     | PSR06009312.hg.1 | NT5E      |
| TC06000779.hg.1 | 3.05  | PSR06009326.hg.1 | NT5E      |
| TC06000779.hg.1 | 2.72  | JUC06004360.hg.1 | NT5E      |
| TC06000779.hg.1 | 2.33  | PSR06009327.hg.1 | NT5E      |
| TC06000779.hg.1 | -2.03 | PSR06009319.hg.1 | NT5E      |
| TC08000401.hg.1 | 4     | JUC08002773.hg.1 | FAM110B   |
| TC08000401.hg.1 | 2.58  | PSR08005614.hg.1 | FAM110B   |
| TC08000401.hg.1 | 2.54  | PSR08005600.hg.1 | FAM110B   |
| TC08000401.hg.1 | 2.43  | PSR08005595.hg.1 | FAM110B   |
| TC08000401.hg.1 | 2.36  | PSR08005616.hg.1 | FAM110B   |
| TC08000401.hg.1 | 2.34  | PSR08005590.hg.1 | FAM110B   |
| TC08000401.hg.1 | 2.27  | PSR08005612.hg.1 | FAM110B   |
| TC08000401.hg.1 | 2.08  | PSR08005593.hg.1 | FAM110B   |
| TC08000412.hg.1 | 4     | JUC08002857.hg.1 | CHD7      |
| TC08000412.hg.1 | 2.21  | PSR08005744.hg.1 | CHD7      |
| TC08000412.hg.1 | 2.19  | JUC08002869.hg.1 | CHD7      |
| TC08001191.hg.1 | 4     | PSR08015377.hg.1 | PRKDC     |
| TC08001191.hg.1 | 2.49  | JUC08007912.hg.1 | PRKDC     |
| TC08001191.hg.1 | -2    | JUC08007905.hg.1 | PRKDC     |
| TC08001191.hg.1 | -2.02 | JUC08007862.hg.1 | PRKDC     |
| TC08001191.hg.1 | -2.05 | JUC08007901.hg.1 | PRKDC     |
| TC08001191.hg.1 | -2.5  | JUC08007843.hg.1 | PRKDC     |
| TC08001191.hg.1 | -2.51 | JUC08007854.hg.1 | PRKDC     |
| TC08001191.hg.1 | -2.59 | JUC08007876.hg.1 | PRKDC     |
| TC08001191.hg.1 | -3.06 | JUC08007888.hg.1 | PRKDC     |
| TC12000647.hg.1 | 4     | JUC12004516.hg.1 |           |

|                 |       |                  |            |
|-----------------|-------|------------------|------------|
| TC12000647.hg.1 | 2.08  | PSR12008542.hg.1 |            |
| TC12000647.hg.1 | -2.03 | PSR12008541.hg.1 |            |
| TC16002036.hg.1 | 4     | JUC16013200.hg.1 | CLEC18A    |
| TC16002036.hg.1 | 2.96  | JUC16013194.hg.1 | CLEC18A    |
| TC16002036.hg.1 | 2.25  | PSR16008318.hg.1 | CLEC18A    |
| TC16002036.hg.1 | -2.12 | PSR16008298.hg.1 | CLEC18A    |
| TC19001282.hg.1 | 4     | PSR19018215.hg.1 | RAB3A      |
| TC19001282.hg.1 | 3.7   | JUC19010633.hg.1 | RAB3A      |
| TC19001282.hg.1 | 3.23  | PSR19018213.hg.1 | RAB3A      |
| TC19001282.hg.1 | 3.13  | JUC19010636.hg.1 | RAB3A      |
| TC19001282.hg.1 | 3.07  | JUC19010631.hg.1 | RAB3A      |
| TC19001282.hg.1 | 3.01  | PSR19018216.hg.1 | RAB3A      |
| TC19001282.hg.1 | 2.88  | PSR19018208.hg.1 | RAB3A      |
| TC19001282.hg.1 | 2.26  | PSR19018206.hg.1 | RAB3A      |
| TC19001282.hg.1 | -2.06 | JUC19010632.hg.1 | RAB3A      |
| TC02002003.hg.1 | 3.99  | JUC02016660.hg.1 | C2orf65    |
| TC02002003.hg.1 | 2.43  | PSR02032209.hg.1 | C2orf65    |
| TC02002003.hg.1 | -2.49 | JUC02016654.hg.1 | C2orf65    |
| TC02002003.hg.1 | -2.95 | JUC02016657.hg.1 | C2orf65    |
| TC02002003.hg.1 | -4.05 | PSR02032200.hg.1 | C2orf65    |
| TC02002003.hg.1 | -4.15 | PSR02032202.hg.1 | C2orf65    |
| TC02002003.hg.1 | -5.09 | JUC02016643.hg.1 | C2orf65    |
| TC03001025.hg.1 | 3.99  | JUC03009217.hg.1 | SNORA81, E |
| TC03001025.hg.1 | 3.6   | PSR03018221.hg.1 | SNORA81, E |
| TC03001025.hg.1 | 3.16  | PSR03018168.hg.1 | SNORA81, E |
| TC03001025.hg.1 | 2.44  | PSR03018182.hg.1 | SNORA81, E |
| TC03001025.hg.1 | 2.05  | PSR03018154.hg.1 | SNORA81, E |
| TC03001025.hg.1 | 2.03  | PSR03018174.hg.1 | SNORA81, E |
| TC03001025.hg.1 | 2.03  | PSR03018226.hg.1 | SNORA81, E |
| TC04001120.hg.1 | 3.99  | JUC04008108.hg.1 | FLJ13197   |
| TC04001120.hg.1 | 2.04  | JUC04008115.hg.1 | FLJ13197   |
| TC04001120.hg.1 | -2.27 | PSR04015254.hg.1 | FLJ13197   |
| TC04001120.hg.1 | -2.8  | PSR04015258.hg.1 | FLJ13197   |
| TC15001191.hg.1 | 3.99  | JUC15005588.hg.1 | C15orf29   |
| TC15001191.hg.1 | 2.21  | JUC15005593.hg.1 | C15orf29   |
| TC15001191.hg.1 | -2.05 | PSR15010542.hg.1 | C15orf29   |
| TC18000127.hg.1 | 3.99  | JUC18000988.hg.1 | DSG3       |
| TC18000127.hg.1 | 2.08  | PSR18001432.hg.1 | DSG3       |
| TC20000824.hg.1 | 3.99  | JUC20005891.hg.1 | C20orf132  |
| TC20000824.hg.1 | 3.92  | JUC20005859.hg.1 | C20orf132  |
| TC20000824.hg.1 | 3.03  | JUC20005876.hg.1 | C20orf132  |
| TC20000824.hg.1 | 2.83  | JUC20005889.hg.1 | C20orf132  |
| TC20000824.hg.1 | 2.65  | JUC20005858.hg.1 | C20orf132  |
| TC20000824.hg.1 | 2.48  | PSR20011372.hg.1 | C20orf132  |
| TC20000824.hg.1 | 2.4   | PSR20011357.hg.1 | C20orf132  |
| TC20000824.hg.1 | 2.16  | JUC20005870.hg.1 | C20orf132  |
| TC20000824.hg.1 | -2.23 | JUC20005862.hg.1 | C20orf132  |
| TC20000824.hg.1 | -3.46 | JUC20005857.hg.1 | C20orf132  |
| TC02002148.hg.1 | 3.98  | JUC02018111.hg.1 | MFSD9      |
| TC02002148.hg.1 | 3.39  | JUC02018101.hg.1 | MFSD9      |
| TC02002148.hg.1 | 2.24  | PSR02035124.hg.1 | MFSD9      |
| TC02002148.hg.1 | 2.24  | JUC02018110.hg.1 | MFSD9      |
| TC02002148.hg.1 | -2.62 | JUC02018102.hg.1 | MFSD9      |
| TC10001020.hg.1 | 3.98  | JUC10007346.hg.1 | ITIH5      |
| TC10001020.hg.1 | 3.47  | PSR10012689.hg.1 | ITIH5      |
| TC10001020.hg.1 | 3.45  | JUC10007350.hg.1 | ITIH5      |
| TC10001020.hg.1 | 3.43  | PSR10012713.hg.1 | ITIH5      |
| TC10001020.hg.1 | 2.96  | JUC10007343.hg.1 | ITIH5      |

|                 |       |                  |             |
|-----------------|-------|------------------|-------------|
| TC10001020.hg.1 | 2.72  | PSR10012695.hg.1 | ITIH5       |
| TC10001020.hg.1 | -2.05 | PSR10012690.hg.1 | ITIH5       |
| TC10001020.hg.1 | -2.27 | PSR10012708.hg.1 | ITIH5       |
| TC10001020.hg.1 | -5.63 | JUC10007354.hg.1 | ITIH5       |
| TC15000858.hg.1 | 3.98  | PSR15007991.hg.1 | SEMA4B      |
| TC15000858.hg.1 | 3.89  | PSR15007987.hg.1 | SEMA4B      |
| TC15000858.hg.1 | 3.2   | JUC15004250.hg.1 | SEMA4B      |
| TC15000858.hg.1 | 3.03  | JUC15004251.hg.1 | SEMA4B      |
| TC15000858.hg.1 | 2.69  | PSR15007990.hg.1 | SEMA4B      |
| TC15000858.hg.1 | 2.55  | JUC15004255.hg.1 | SEMA4B      |
| TC15000858.hg.1 | 2.51  | JUC15004258.hg.1 | SEMA4B      |
| TC15000858.hg.1 | 2.32  | PSR15007992.hg.1 | SEMA4B      |
| TC15000858.hg.1 | -2.07 | JUC15004264.hg.1 | SEMA4B      |
| TC15000858.hg.1 | -2.08 | PSR15008014.hg.1 | SEMA4B      |
| TC15000858.hg.1 | -2.12 | PSR15007996.hg.1 | SEMA4B      |
| TC15000858.hg.1 | -2.12 | PSR15008013.hg.1 | SEMA4B      |
| TC15000858.hg.1 | -2.21 | JUC15004253.hg.1 | SEMA4B      |
| TC15000858.hg.1 | -2.22 | JUC15004257.hg.1 | SEMA4B      |
| TC15000858.hg.1 | -2.35 | JUC15004261.hg.1 | SEMA4B      |
| TC15000858.hg.1 | -2.49 | JUC15004259.hg.1 | SEMA4B      |
| TC15000858.hg.1 | -2.54 | JUC15004252.hg.1 | SEMA4B      |
| TC15000858.hg.1 | -2.68 | PSR15007995.hg.1 | SEMA4B      |
| TC15000858.hg.1 | -3.6  | JUC15004247.hg.1 | SEMA4B      |
| TC15000858.hg.1 | -7.37 | PSR15007994.hg.1 | SEMA4B      |
| TC02001333.hg.1 | 3.97  | JUC02011138.hg.1 | STK11IP     |
| TC02001333.hg.1 | -2.06 | PSR02020899.hg.1 | STK11IP     |
| TC02001333.hg.1 | -2.08 | JUC02011135.hg.1 | STK11IP     |
| TC02001333.hg.1 | -3.04 | JUC02011111.hg.1 | STK11IP     |
| TC03002088.hg.1 | 3.97  | JUC03018345.hg.1 | RFC4        |
| TC03002088.hg.1 | 3.37  | PSR03037099.hg.1 | RFC4        |
| TC11001948.hg.1 | 3.97  | PSR11023396.hg.1 | FOSL1       |
| TC11001948.hg.1 | 3.13  | PSR11023393.hg.1 | FOSL1       |
| TC11001948.hg.1 | 3.07  | PSR11023395.hg.1 | FOSL1       |
| TC11001948.hg.1 | 2.8   | JUC11012345.hg.1 | FOSL1       |
| TC11001948.hg.1 | -2.2  | PSR11023382.hg.1 | FOSL1       |
| TC14000393.hg.1 | 3.97  | JUC14002280.hg.1 | PLEKHG3     |
| TC14000393.hg.1 | 3.73  | JUC14002287.hg.1 | PLEKHG3     |
| TC14000393.hg.1 | 2.59  | JUC14002298.hg.1 | PLEKHG3     |
| TC14000393.hg.1 | 2.53  | PSR14004516.hg.1 | PLEKHG3     |
| TC14000393.hg.1 | 2.41  | PSR14004492.hg.1 | PLEKHG3     |
| TC14000393.hg.1 | 2.33  | PSR14004508.hg.1 | PLEKHG3     |
| TC14000393.hg.1 | 2.27  | PSR14004515.hg.1 | PLEKHG3     |
| TC14000393.hg.1 | 2.14  | PSR14004510.hg.1 | PLEKHG3     |
| TC14000393.hg.1 | 2.04  | PSR14004511.hg.1 | PLEKHG3     |
| TC14000393.hg.1 | 2.03  | JUC14002297.hg.1 | PLEKHG3     |
| TC14000393.hg.1 | -2.18 | PSR14004501.hg.1 | PLEKHG3     |
| TC14000393.hg.1 | -2.31 | JUC14002283.hg.1 | PLEKHG3     |
| TC14000393.hg.1 | -2.54 | PSR14004497.hg.1 | PLEKHG3     |
| TC14000393.hg.1 | -2.59 | JUC14002289.hg.1 | PLEKHG3     |
| TC14000393.hg.1 | -2.63 | JUC14002281.hg.1 | PLEKHG3     |
| TC02002495.hg.1 | 3.96  | PSR02039454.hg.1 | TTC21B, LOC |
| TC02002495.hg.1 | 3.88  | JUC02020714.hg.1 | TTC21B, LOC |
| TC02002495.hg.1 | 2.34  | JUC02020718.hg.1 | TTC21B, LOC |
| TC02002495.hg.1 | -2.22 | JUC02020726.hg.1 | TTC21B, LOC |
| TC15000142.hg.1 | 3.96  | PSR15000881.hg.1 |             |
| TC15000142.hg.1 | -2.27 | JUC15000299.hg.1 |             |
| TC01002658.hg.1 | 3.95  | JUC01022286.hg.1 | ORC1        |
| TC01002658.hg.1 | -2.21 | PSR01041689.hg.1 | ORC1        |



|                  |       |                   |             |
|------------------|-------|-------------------|-------------|
| TC03003399.hg.1  | 3.95  | JUC03024494.hg.1  | TRIM59      |
| TC03003399.hg.1  | -2.13 | PSR03034979.hg.1  | TRIM59      |
| TC03003399.hg.1  | -3.19 | PSR03034976.hg.1  | TRIM59      |
| TC03003399.hg.1  | -3.93 | JUC03024496.hg.1  | TRIM59      |
| TC05000218.hg.1  | 3.95  | JUC05001492.hg.1  | ITGA2       |
| TC05000218.hg.1  | 2.85  | PSR05002682.hg.1  | ITGA2       |
| TC05000218.hg.1  | 2.29  | JUC05001513.hg.1  | ITGA2       |
| TC05000218.hg.1  | 2.03  | PSR05002673.hg.1  | ITGA2       |
| TC05000218.hg.1  | -2.02 | JUC05001495.hg.1  | ITGA2       |
| TC06000621.hg.1  | 3.95  | JUC06003346.hg.1  | RUNX2       |
| TC06000621.hg.1  | 2.72  | PSR06007558.hg.1  | RUNX2       |
| TC06000621.hg.1  | 2.38  | PSR06007553.hg.1  | RUNX2       |
| TC06000621.hg.1  | 2.16  | PSR06007554.hg.1  | RUNX2       |
| TC06000621.hg.1  | 2.09  | PSR06007557.hg.1  | RUNX2       |
| TC06000621.hg.1  | -2.07 | JUC06003345.hg.1  | RUNX2       |
| TC0X002319.hg.1  | 3.95  | JUC0X013000.hg.1  | ARMCX5      |
| TC0X002319.hg.1  | -2.01 | PSR0X006450.hg.1  | ARMCX5      |
| TC12000386.hg.1  | 3.95  | JUC12002632.hg.1  | ASIC1       |
| TC12000386.hg.1  | 3.75  | JUC12002639.hg.1  | ASIC1       |
| TC12000386.hg.1  | 3.08  | PSR12004795.hg.1  | ASIC1       |
| TC12000386.hg.1  | 2.65  | PSR12004803.hg.1  | ASIC1       |
| TC12000386.hg.1  | 2.3   | JUC12002629.hg.1  | ASIC1       |
| TC12000386.hg.1  | 2.02  | PSR12004789.hg.1  | ASIC1       |
| TC12001566.hg.1  | 3.95  | JUC12011514.hg.1  | CBX5, MIR31 |
| TC12001566.hg.1  | 3.25  | PSR12020755.hg.1  | CBX5, MIR31 |
| TC12001566.hg.1  | 2.85  | JUC12011515.hg.1  | CBX5, MIR31 |
| TC12001566.hg.1  | 2.59  | JUC12011511.hg.1  | CBX5, MIR31 |
| TC12001566.hg.1  | -3.48 | JUC12011512.hg.1  | CBX5, MIR31 |
| TC21001057.hg.1  | 3.95  | JUC21005047.hg.1  | CRYZL1      |
| TC21001057.hg.1  | 2.45  | PSR21004837.hg.1  | CRYZL1      |
| TC21001057.hg.1  | 2.23  | JUC21005057.hg.1  | CRYZL1      |
| TC21001057.hg.1  | 2     | PSR21004782.hg.1  | CRYZL1      |
| TC6_qbl_hap60000 | 3.95  | JUC6_qbl_hap60003 | PSORS1C1    |
| TC6_qbl_hap60000 | 2.58  | JUC6_qbl_hap60003 | PSORS1C1    |
| TC6_qbl_hap60000 | 2.48  | JUC6_qbl_hap60003 | PSORS1C1    |
| TC6_qbl_hap60000 | 2.23  | PSR6_qbl_hap60008 | PSORS1C1    |
| TC6_qbl_hap60000 | -2.23 | PSR6_qbl_hap60008 | PSORS1C1    |
| TC01002171.hg.1  | 3.94  | JUC01017932.hg.1  | RERE        |
| TC01002171.hg.1  | 2.83  | PSR01033455.hg.1  | RERE        |
| TC01002171.hg.1  | 2.29  | JUC01017948.hg.1  | RERE        |
| TC01002171.hg.1  | 2.08  | JUC01017940.hg.1  | RERE        |
| TC01002171.hg.1  | 2     | JUC01017933.hg.1  | RERE        |
| TC01002171.hg.1  | -2.32 | JUC01017959.hg.1  | RERE        |
| TC01002171.hg.1  | -2.42 | JUC01017958.hg.1  | RERE        |
| TC01002171.hg.1  | -2.48 | JUC01017943.hg.1  | RERE        |
| TC01002171.hg.1  | -3.35 | JUC01017924.hg.1  | RERE        |
| TC01002377.hg.1  | 3.94  | PSR01036653.hg.1  | RHCE        |
| TC01002377.hg.1  | 3.65  | JUC01019731.hg.1  | RHCE        |
| TC01002377.hg.1  | 3.18  | JUC01019746.hg.1  | RHCE        |
| TC01002377.hg.1  | 3.14  | JUC01019738.hg.1  | RHCE        |
| TC01002377.hg.1  | 3.03  | JUC01019742.hg.1  | RHCE        |
| TC01002377.hg.1  | 2.52  | JUC01019743.hg.1  | RHCE        |
| TC01002377.hg.1  | 2.3   | PSR01036638.hg.1  | RHCE        |
| TC01002377.hg.1  | 2.26  | JUC01019729.hg.1  | RHCE        |
| TC01002377.hg.1  | 2.18  | JUC01019747.hg.1  | RHCE        |
| TC01002377.hg.1  | -2.16 | PSR01036632.hg.1  | RHCE        |
| TC01002377.hg.1  | -2.36 | PSR01036635.hg.1  | RHCE        |
| TC01002377.hg.1  | -3.19 | JUC01019730.hg.1  | RHCE        |

|                 |       |                  |        |
|-----------------|-------|------------------|--------|
| TC01002377.hg.1 | -3.76 | PSR01036633.hg.1 | RHCE   |
| TC02001645.hg.1 | 3.94  | JUC02013681.hg.1 | TP53I3 |
| TC02001645.hg.1 | 2.31  | PSR02026226.hg.1 | TP53I3 |
| TC02001645.hg.1 | -2.02 | PSR02026238.hg.1 | TP53I3 |
| TC02001645.hg.1 | -2.06 | PSR02026241.hg.1 | TP53I3 |
| TC02001645.hg.1 | -2.08 | PSR02026239.hg.1 | TP53I3 |
| TC02001645.hg.1 | -2.2  | PSR02026240.hg.1 | TP53I3 |
| TC02001645.hg.1 | -2.61 | PSR02026235.hg.1 | TP53I3 |
| TC03003380.hg.1 | 3.94  | JUC03024127.hg.1 | PFKFB4 |
| TC03003380.hg.1 | 2.39  | JUC03024135.hg.1 | PFKFB4 |
| TC03003380.hg.1 | 2.27  | PSR03024021.hg.1 | PFKFB4 |
| TC03003380.hg.1 | 2.21  | JUC03024136.hg.1 | PFKFB4 |
| TC03003380.hg.1 | 2.19  | JUC03024132.hg.1 | PFKFB4 |
| TC03003380.hg.1 | 2.02  | JUC03024131.hg.1 | PFKFB4 |
| TC03003380.hg.1 | -2.02 | JUC03024124.hg.1 | PFKFB4 |
| TC03003380.hg.1 | -2.75 | PSR03024007.hg.1 | PFKFB4 |
| TC05001797.hg.1 | 3.94  | PSR05024439.hg.1 | PITX1  |
| TC05001797.hg.1 | 3.01  | JUC05012561.hg.1 | PITX1  |
| TC05001797.hg.1 | 2.92  | JUC05012563.hg.1 | PITX1  |
| TC05001797.hg.1 | 2.44  | PSR05024452.hg.1 | PITX1  |
| TC05001797.hg.1 | 2.26  | PSR05024453.hg.1 | PITX1  |
| TC05001797.hg.1 | 2.25  | PSR05024456.hg.1 | PITX1  |
| TC05001797.hg.1 | 2.2   | PSR05024460.hg.1 | PITX1  |
| TC05001797.hg.1 | 2.07  | JUC05012558.hg.1 | PITX1  |
| TC05001797.hg.1 | 2.04  | PSR05024454.hg.1 | PITX1  |
| TC05001797.hg.1 | 2.04  | JUC05012562.hg.1 | PITX1  |
| TC05001996.hg.1 | 3.94  | JUC05014162.hg.1 | RNF145 |
| TC05001996.hg.1 | 2.56  | PSR05027794.hg.1 | RNF145 |
| TC05001996.hg.1 | 2.52  | JUC05014161.hg.1 | RNF145 |
| TC05001996.hg.1 | 2.15  | JUC05014174.hg.1 | RNF145 |
| TC14000908.hg.1 | 3.94  | JUC14004978.hg.1 | NDRG2  |
| TC14000908.hg.1 | 3.9   | JUC14004988.hg.1 | NDRG2  |
| TC14000908.hg.1 | 3.85  | JUC14004989.hg.1 | NDRG2  |
| TC14000908.hg.1 | 3.84  | PSR14009854.hg.1 | NDRG2  |
| TC14000908.hg.1 | 3.8   | PSR14009844.hg.1 | NDRG2  |
| TC14000908.hg.1 | 3.8   | PSR14009845.hg.1 | NDRG2  |
| TC14000908.hg.1 | 3.78  | PSR14009846.hg.1 | NDRG2  |
| TC14000908.hg.1 | 3.54  | JUC14004994.hg.1 | NDRG2  |
| TC14000908.hg.1 | 3.51  | PSR14009812.hg.1 | NDRG2  |
| TC14000908.hg.1 | 3.12  | JUC14004997.hg.1 | NDRG2  |
| TC14000908.hg.1 | 3.09  | PSR14009807.hg.1 | NDRG2  |
| TC14000908.hg.1 | 3.06  | JUC14004969.hg.1 | NDRG2  |
| TC14000908.hg.1 | 3     | JUC14004993.hg.1 | NDRG2  |
| TC14000908.hg.1 | 2.94  | PSR14009833.hg.1 | NDRG2  |
| TC14000908.hg.1 | 2.93  | PSR14009835.hg.1 | NDRG2  |
| TC14000908.hg.1 | 2.92  | JUC14004982.hg.1 | NDRG2  |
| TC14000908.hg.1 | 2.83  | JUC14004979.hg.1 | NDRG2  |
| TC14000908.hg.1 | 2.76  | PSR14009803.hg.1 | NDRG2  |
| TC14000908.hg.1 | 2.72  | PSR14009802.hg.1 | NDRG2  |
| TC14000908.hg.1 | 2.65  | PSR14009828.hg.1 | NDRG2  |
| TC14000908.hg.1 | 2.63  | PSR14009849.hg.1 | NDRG2  |
| TC14000908.hg.1 | 2.53  | PSR14009857.hg.1 | NDRG2  |
| TC14000908.hg.1 | 2.5   | PSR14009827.hg.1 | NDRG2  |
| TC14000908.hg.1 | 2.21  | JUC14004966.hg.1 | NDRG2  |
| TC14000908.hg.1 | 2.13  | JUC14004985.hg.1 | NDRG2  |
| TC14000908.hg.1 | 2.02  | PSR14009832.hg.1 | NDRG2  |
| TC14000908.hg.1 | 2.01  | JUC14004992.hg.1 | NDRG2  |
| TC14000908.hg.1 | -2.06 | JUC14004995.hg.1 | NDRG2  |

|                 |       |                  |             |
|-----------------|-------|------------------|-------------|
| TC14000908.hg.1 | -2.1  | JUC14004971.hg.1 | NDRG2       |
| TC14000908.hg.1 | -2.22 | JUC14004986.hg.1 | NDRG2       |
| TC14000908.hg.1 | -2.52 | JUC14004991.hg.1 | NDRG2       |
| TC14000908.hg.1 | -2.68 | PSR14009821.hg.1 | NDRG2       |
| TC14000908.hg.1 | -2.97 | PSR14009817.hg.1 | NDRG2       |
| TC14000908.hg.1 | -3.6  | JUC14004967.hg.1 | NDRG2       |
| TC14000908.hg.1 | -3.91 | PSR14009815.hg.1 | NDRG2       |
| TC14000908.hg.1 | -3.92 | JUC14004983.hg.1 | NDRG2       |
| TC14000908.hg.1 | -4.44 | PSR14009814.hg.1 | NDRG2       |
| TC14000908.hg.1 | -5.05 | JUC14004974.hg.1 | NDRG2       |
| TC14000908.hg.1 | -6.53 | JUC14004968.hg.1 | NDRG2       |
| TC15000162.hg.1 | 3.94  | JUC15000416.hg.1 | LOC653075,  |
| TC15000162.hg.1 | -2.06 | PSR15001052.hg.1 | LOC653075,  |
| TC17000103.hg.1 | 3.94  | PSR17001449.hg.1 | CD68        |
| TC17000103.hg.1 | 2.69  | JUC17000801.hg.1 | CD68        |
| TC22000801.hg.1 | 3.94  | JUC22005603.hg.1 | CBX7        |
| TC22000801.hg.1 | 2.97  | JUC22005606.hg.1 | CBX7        |
| TC22000801.hg.1 | 2.7   | PSR22013597.hg.1 | CBX7        |
| TC22000801.hg.1 | 2.27  | JUC22005601.hg.1 | CBX7        |
| TC22000801.hg.1 | 2.26  | PSR22013603.hg.1 | CBX7        |
| TC22000801.hg.1 | 2.21  | PSR22013594.hg.1 | CBX7        |
| TC22000801.hg.1 | 2.09  | PSR22013598.hg.1 | CBX7        |
| TC22000801.hg.1 | 2.02  | PSR22013607.hg.1 | CBX7        |
| TC02000074.hg.1 | 3.93  | PSR02000919.hg.1 | GREB1       |
| TC02000074.hg.1 | 2.05  | JUC02000517.hg.1 | GREB1       |
| TC02000074.hg.1 | -2.11 | JUC02000491.hg.1 | GREB1       |
| TC02000074.hg.1 | -2.52 | JUC02000485.hg.1 | GREB1       |
| TC06002090.hg.1 | 3.93  | PSR06026160.hg.1 | SOGA3, KIAA |
| TC06002090.hg.1 | 2.78  | JUC06012908.hg.1 | SOGA3, KIAA |
| TC06002090.hg.1 | 2.34  | PSR06026165.hg.1 | SOGA3, KIAA |
| TC06002090.hg.1 | 2.28  | PSR06026164.hg.1 | SOGA3, KIAA |
| TC06002090.hg.1 | 2.16  | PSR06026154.hg.1 | SOGA3, KIAA |
| TC12000096.hg.1 | 3.93  | PSR12001169.hg.1 | TPI1        |
| TC12000096.hg.1 | 3.43  | PSR12001184.hg.1 | TPI1        |
| TC12000096.hg.1 | 3.35  | JUC12000613.hg.1 | TPI1        |
| TC12000096.hg.1 | 3.1   | PSR12001189.hg.1 | TPI1        |
| TC03000444.hg.1 | 3.92  | JUC03004405.hg.1 | ROBO2       |
| TC03000444.hg.1 | 3.3   | PSR03008868.hg.1 | ROBO2       |
| TC03000444.hg.1 | 2.93  | JUC03004420.hg.1 | ROBO2       |
| TC03000444.hg.1 | 2.76  | PSR03008871.hg.1 | ROBO2       |
| TC03000444.hg.1 | 2.69  | PSR03008929.hg.1 | ROBO2       |
| TC03000444.hg.1 | 2.64  | JUC03004428.hg.1 | ROBO2       |
| TC03000444.hg.1 | 2.64  | JUC03004432.hg.1 | ROBO2       |
| TC03000444.hg.1 | 2.63  | JUC03004393.hg.1 | ROBO2       |
| TC03000444.hg.1 | 2.46  | JUC03004403.hg.1 | ROBO2       |
| TC03000444.hg.1 | 2.35  | PSR03008892.hg.1 | ROBO2       |
| TC03000444.hg.1 | 2.33  | JUC03004404.hg.1 | ROBO2       |
| TC03000444.hg.1 | 2.22  | PSR03008866.hg.1 | ROBO2       |
| TC03000444.hg.1 | 2.08  | PSR03008900.hg.1 | ROBO2       |
| TC03000444.hg.1 | 2.05  | PSR03008889.hg.1 | ROBO2       |
| TC03000444.hg.1 | 2.04  | JUC03004391.hg.1 | ROBO2       |
| TC03000444.hg.1 | 2.01  | PSR03008920.hg.1 | ROBO2       |
| TC03000444.hg.1 | -2.05 | JUC03004421.hg.1 | ROBO2       |
| TC03000444.hg.1 | -2.13 | PSR03008878.hg.1 | ROBO2       |
| TC03000444.hg.1 | -2.21 | PSR03008885.hg.1 | ROBO2       |
| TC03000444.hg.1 | -3.36 | JUC03004402.hg.1 | ROBO2       |
| TC03000444.hg.1 | -3.38 | PSR03008899.hg.1 | ROBO2       |
| TC03000444.hg.1 | -3.41 | JUC03004401.hg.1 | ROBO2       |

|                 |        |                  |        |
|-----------------|--------|------------------|--------|
| TC03000444.hg.1 | -3.45  | PSR03008880.hg.1 | ROBO2  |
| TC03000444.hg.1 | -4.13  | JUC03004419.hg.1 | ROBO2  |
| TC09000119.hg.1 | 3.92   | JUC09000723.hg.1 | IFT74  |
| TC09000119.hg.1 | 3.25   | JUC09000719.hg.1 | IFT74  |
| TC09000119.hg.1 | 2.55   | JUC09000729.hg.1 | IFT74  |
| TC09000119.hg.1 | 2.38   | JUC09000731.hg.1 | IFT74  |
| TC09000119.hg.1 | 2.28   | JUC09000740.hg.1 | IFT74  |
| TC09000119.hg.1 | 2.04   | PSR09001366.hg.1 | IFT74  |
| TC09000119.hg.1 | -3.5   | JUC09000743.hg.1 | IFT74  |
| TC09000119.hg.1 | -3.72  | PSR09001369.hg.1 | IFT74  |
| TC09002910.hg.1 | 3.92   | JUC09015952.hg.1 | PTGDS  |
| TC09002910.hg.1 | 2.16   | JUC09015962.hg.1 | PTGDS  |
| TC09002910.hg.1 | -2.6   | PSR09010918.hg.1 | PTGDS  |
| TC09002910.hg.1 | -4.57  | PSR09010934.hg.1 | PTGDS  |
| TC09002910.hg.1 | -4.6   | PSR09010931.hg.1 | PTGDS  |
| TC09002910.hg.1 | -6.65  | PSR09010937.hg.1 | PTGDS  |
| TC09002910.hg.1 | -7.67  | PSR09010926.hg.1 | PTGDS  |
| TC09002910.hg.1 | -8.24  | PSR09010914.hg.1 | PTGDS  |
| TC09002910.hg.1 | -10.11 | PSR09010921.hg.1 | PTGDS  |
| TC09002910.hg.1 | -10.92 | PSR09010930.hg.1 | PTGDS  |
| TC09002910.hg.1 | -11.92 | JUC09015957.hg.1 | PTGDS  |
| TC09002910.hg.1 | -13.87 | PSR09010920.hg.1 | PTGDS  |
| TC09002910.hg.1 | -14.98 | PSR09010912.hg.1 | PTGDS  |
| TC09002910.hg.1 | -16.39 | PSR09010927.hg.1 | PTGDS  |
| TC09002910.hg.1 | -18.59 | JUC09015961.hg.1 | PTGDS  |
| TC19000191.hg.1 | 3.92   | JUC19001725.hg.1 | LDLR   |
| TC19000191.hg.1 | 2.63   | JUC19001723.hg.1 | LDLR   |
| TC19000191.hg.1 | 2.41   | JUC19001741.hg.1 | LDLR   |
| TC19000191.hg.1 | 2.31   | JUC19001718.hg.1 | LDLR   |
| TC19000191.hg.1 | 2.01   | PSR19002943.hg.1 | LDLR   |
| TC19000191.hg.1 | -2.68  | PSR19002974.hg.1 | LDLR   |
| TC22000265.hg.1 | 3.92   | JUC22001809.hg.1 | APOL1  |
| TC22000265.hg.1 | -2.04  | PSR22004921.hg.1 | APOL1  |
| TC22000265.hg.1 | -2.08  | PSR22004934.hg.1 | APOL1  |
| TC22000265.hg.1 | -2.6   | JUC22001794.hg.1 | APOL1  |
| TC22000265.hg.1 | -2.7   | PSR22004908.hg.1 | APOL1  |
| TC22000265.hg.1 | -2.8   | PSR22004924.hg.1 | APOL1  |
| TC22000265.hg.1 | -3.1   | JUC22001807.hg.1 | APOL1  |
| TC22000265.hg.1 | -3.19  | PSR22004919.hg.1 | APOL1  |
| TC22000265.hg.1 | -3.21  | PSR22004920.hg.1 | APOL1  |
| TC22000265.hg.1 | -3.28  | JUC22001804.hg.1 | APOL1  |
| TC22000265.hg.1 | -3.3   | JUC22001812.hg.1 | APOL1  |
| TC22000265.hg.1 | -3.35  | JUC22001800.hg.1 | APOL1  |
| TC22000265.hg.1 | -3.74  | PSR22004943.hg.1 | APOL1  |
| TC22000265.hg.1 | -3.79  | PSR22004925.hg.1 | APOL1  |
| TC22000265.hg.1 | -3.82  | PSR22004926.hg.1 | APOL1  |
| TC22000265.hg.1 | -3.98  | PSR22004940.hg.1 | APOL1  |
| TC22000265.hg.1 | -4     | PSR22004937.hg.1 | APOL1  |
| TC22000265.hg.1 | -4.38  | JUC22001798.hg.1 | APOL1  |
| TC22000265.hg.1 | -4.43  | JUC22001803.hg.1 | APOL1  |
| TC22000265.hg.1 | -4.53  | JUC22001801.hg.1 | APOL1  |
| TC22000265.hg.1 | -5.42  | JUC22001796.hg.1 | APOL1  |
| TC22001423.hg.1 | 3.92   | JUC22008575.hg.1 | SFI1   |
| TC22001423.hg.1 | 2.91   | JUC22008522.hg.1 | SFI1   |
| TC22001423.hg.1 | 2.57   | JUC22008532.hg.1 | SFI1   |
| TC22001423.hg.1 | 2.23   | JUC22008524.hg.1 | SFI1   |
| TC22001423.hg.1 | 2.14   | PSR22004392.hg.1 | SFI1   |
| TC04000086.hg.1 | 3.91   | JUC04000830.hg.1 | SH3TC1 |

|                 |       |                  |         |
|-----------------|-------|------------------|---------|
| TC04000086.hg.1 | 2.42  | JUC04000866.hg.1 | SH3TC1  |
| TC04000086.hg.1 | 2.36  | PSR04001828.hg.1 | SH3TC1  |
| TC04000086.hg.1 | -2.23 | PSR04001848.hg.1 | SH3TC1  |
| TC04000086.hg.1 | -2.76 | JUC04000859.hg.1 | SH3TC1  |
| TC04000086.hg.1 | -2.9  | PSR04001799.hg.1 | SH3TC1  |
| TC04000086.hg.1 | -3.08 | JUC04000858.hg.1 | SH3TC1  |
| TC04000086.hg.1 | -4    | JUC04000838.hg.1 | SH3TC1  |
| TC04001700.hg.1 | 3.91  | JUC04012449.hg.1 | 1-Mar   |
| TC04001700.hg.1 | 3.05  | JUC04012436.hg.1 | 1-Mar   |
| TC04001700.hg.1 | 2.71  | PSR04023550.hg.1 | 1-Mar   |
| TC04001700.hg.1 | 2.65  | JUC04012434.hg.1 | 1-Mar   |
| TC04001700.hg.1 | 2.6   | PSR04023543.hg.1 | 1-Mar   |
| TC04001700.hg.1 | 2.45  | PSR04023551.hg.1 | 1-Mar   |
| TC04001700.hg.1 | 2.39  | JUC04012435.hg.1 | 1-Mar   |
| TC04001700.hg.1 | 2.36  | JUC04012438.hg.1 | 1-Mar   |
| TC04001700.hg.1 | 2.35  | PSR04023517.hg.1 | 1-Mar   |
| TC04001700.hg.1 | 2.31  | PSR04023519.hg.1 | 1-Mar   |
| TC04001700.hg.1 | 2.29  | PSR04023553.hg.1 | 1-Mar   |
| TC04001700.hg.1 | 2.29  | JUC04012446.hg.1 | 1-Mar   |
| TC04001700.hg.1 | 2.16  | JUC04012451.hg.1 | 1-Mar   |
| TC04001700.hg.1 | 2.1   | PSR04023546.hg.1 | 1-Mar   |
| TC04001700.hg.1 | 2.09  | JUC04012443.hg.1 | 1-Mar   |
| TC04001700.hg.1 | 2.02  | PSR04023520.hg.1 | 1-Mar   |
| TC04001700.hg.1 | -2.12 | JUC04012452.hg.1 | 1-Mar   |
| TC04001700.hg.1 | -2.14 | PSR04023511.hg.1 | 1-Mar   |
| TC04001700.hg.1 | -2.58 | PSR04023542.hg.1 | 1-Mar   |
| TC04001700.hg.1 | -3.83 | JUC04012431.hg.1 | 1-Mar   |
| TC04001700.hg.1 | -5.6  | PSR04023536.hg.1 | 1-Mar   |
| TC02002668.hg.1 | 3.9   | JUC02022407.hg.1 | PPIL3   |
| TC02002668.hg.1 | -2.69 | PSR02042844.hg.1 | PPIL3   |
| TC03001312.hg.1 | 3.9   | JUC03011300.hg.1 | ULK4    |
| TC03001312.hg.1 | 3.64  | PSR03022546.hg.1 | ULK4    |
| TC03001312.hg.1 | 3.37  | PSR03022543.hg.1 | ULK4    |
| TC03001312.hg.1 | 2.79  | JUC03011286.hg.1 | ULK4    |
| TC03001312.hg.1 | 2.61  | JUC03011273.hg.1 | ULK4    |
| TC03001312.hg.1 | -2.18 | PSR03022563.hg.1 | ULK4    |
| TC03001312.hg.1 | -2.48 | JUC03011288.hg.1 | ULK4    |
| TC03001312.hg.1 | -2.53 | JUC03011294.hg.1 | ULK4    |
| TC03001312.hg.1 | -2.62 | PSR03022566.hg.1 | ULK4    |
| TC03001312.hg.1 | -2.87 | JUC03011274.hg.1 | ULK4    |
| TC03001312.hg.1 | -3.03 | JUC03011267.hg.1 | ULK4    |
| TC0X000393.hg.1 | 3.9   | PSR0X005382.hg.1 | NHSL2   |
| TC0X000393.hg.1 | 3.18  | JUC0X002668.hg.1 | NHSL2   |
| TC0X000393.hg.1 | 3.12  | PSR0X005385.hg.1 | NHSL2   |
| TC0X000393.hg.1 | -2.05 | JUC0X002663.hg.1 | NHSL2   |
| TC10000757.hg.1 | 3.9   | JUC10005006.hg.1 | TMEM180 |
| TC10000757.hg.1 | 3.36  | PSR10008985.hg.1 | TMEM180 |
| TC10000757.hg.1 | 3.14  | JUC10005015.hg.1 | TMEM180 |
| TC10000757.hg.1 | 2.91  | JUC10005008.hg.1 | TMEM180 |
| TC10000757.hg.1 | 2.73  | JUC10005011.hg.1 | TMEM180 |
| TC10000757.hg.1 | 2.49  | JUC10005013.hg.1 | TMEM180 |
| TC10000757.hg.1 | 2.48  | PSR10009011.hg.1 | TMEM180 |
| TC10000757.hg.1 | 2.17  | PSR10009001.hg.1 | TMEM180 |
| TC10000757.hg.1 | 2.15  | PSR10009009.hg.1 | TMEM180 |
| TC10000757.hg.1 | 2.11  | PSR10008982.hg.1 | TMEM180 |
| TC10000757.hg.1 | 2.07  | PSR10009005.hg.1 | TMEM180 |
| TC13000157.hg.1 | 3.9   | JUC13001136.hg.1 | DNAJC15 |
| TC13000157.hg.1 | 2.43  | PSR13001832.hg.1 | DNAJC15 |

|                 |       |                  |             |
|-----------------|-------|------------------|-------------|
| TC15001641.hg.1 | 3.9   | JUC15008640.hg.1 | STRA6       |
| TC15001641.hg.1 | 2.94  | JUC15008628.hg.1 | STRA6       |
| TC15001641.hg.1 | 2.52  | JUC15008642.hg.1 | STRA6       |
| TC15001641.hg.1 | 2.04  | PSR15015937.hg.1 | STRA6       |
| TC16001266.hg.1 | 3.9   | JUC16010005.hg.1 | CLEC18B     |
| TC16001266.hg.1 | 2.88  | JUC16010010.hg.1 | CLEC18B     |
| TC16001266.hg.1 | -2.43 | PSR16017601.hg.1 | CLEC18B     |
| TC16001266.hg.1 | -2.93 | PSR16017606.hg.1 | CLEC18B     |
| TC20000732.hg.1 | 3.9   | JUC20005171.hg.1 | ABHD12      |
| TC20000732.hg.1 | 3.49  | JUC20005179.hg.1 | ABHD12      |
| TC20000732.hg.1 | 3.3   | JUC20005178.hg.1 | ABHD12      |
| TC20000732.hg.1 | 3.2   | PSR20009911.hg.1 | ABHD12      |
| TC20000732.hg.1 | 2.5   | PSR20009898.hg.1 | ABHD12      |
| TC20000732.hg.1 | 2.43  | PSR20009923.hg.1 | ABHD12      |
| TC20000732.hg.1 | 2.39  | PSR20009914.hg.1 | ABHD12      |
| TC20000732.hg.1 | 2.28  | JUC20005167.hg.1 | ABHD12      |
| TC20000732.hg.1 | 2.04  | PSR20009909.hg.1 | ABHD12      |
| TC20000732.hg.1 | 2     | PSR20009920.hg.1 | ABHD12      |
| TC20000732.hg.1 | 2     | JUC20005177.hg.1 | ABHD12      |
| TC20000732.hg.1 | -3.68 | JUC20005181.hg.1 | ABHD12      |
| TC01002657.hg.1 | 3.89  | JUC01022241.hg.1 | CC2D1B      |
| TC01002657.hg.1 | 2.44  | PSR01041634.hg.1 | CC2D1B      |
| TC01002657.hg.1 | 2.36  | PSR01041625.hg.1 | CC2D1B      |
| TC01002657.hg.1 | 2.19  | JUC01022255.hg.1 | CC2D1B      |
| TC01002657.hg.1 | 2.09  | PSR01041619.hg.1 | CC2D1B      |
| TC01002657.hg.1 | 2.06  | JUC01022274.hg.1 | CC2D1B      |
| TC01002657.hg.1 | -2.68 | JUC01022264.hg.1 | CC2D1B      |
| TC07000477.hg.1 | 3.89  | JUC07003234.hg.1 | POR, MIR465 |
| TC07000477.hg.1 | 2.93  | JUC07003237.hg.1 | POR, MIR465 |
| TC07000477.hg.1 | 2.8   | PSR07006635.hg.1 | POR, MIR465 |
| TC07000477.hg.1 | 2.06  | PSR07006646.hg.1 | POR, MIR465 |
| TC19001689.hg.1 | 3.89  | JUC19013153.hg.1 | CA11        |
| TC19001689.hg.1 | -2.01 | PSR19023048.hg.1 | CA11        |
| TC19001689.hg.1 | -2.21 | JUC19013155.hg.1 | CA11        |
| TC02001653.hg.1 | 3.88  | PSR02026387.hg.1 | ADCY3       |
| TC02001653.hg.1 | 3.66  | PSR02026405.hg.1 | ADCY3       |
| TC02001653.hg.1 | 3.28  | PSR02026406.hg.1 | ADCY3       |
| TC02001653.hg.1 | 2.83  | PSR02026356.hg.1 | ADCY3       |
| TC02001653.hg.1 | 2.58  | JUC02013770.hg.1 | ADCY3       |
| TC02001653.hg.1 | 2.48  | PSR02026376.hg.1 | ADCY3       |
| TC02001653.hg.1 | 2.44  | JUC02013762.hg.1 | ADCY3       |
| TC02001653.hg.1 | 2.42  | PSR02026357.hg.1 | ADCY3       |
| TC02001653.hg.1 | 2.28  | PSR02026397.hg.1 | ADCY3       |
| TC02001653.hg.1 | 2.21  | PSR02026384.hg.1 | ADCY3       |
| TC02001653.hg.1 | 2.16  | JUC02013771.hg.1 | ADCY3       |
| TC02001653.hg.1 | 2.15  | PSR02026394.hg.1 | ADCY3       |
| TC02001653.hg.1 | 2.12  | JUC02013774.hg.1 | ADCY3       |
| TC02001653.hg.1 | 2.11  | PSR02026393.hg.1 | ADCY3       |
| TC02001653.hg.1 | 2.09  | PSR02026360.hg.1 | ADCY3       |
| TC02001653.hg.1 | 2.08  | PSR02026400.hg.1 | ADCY3       |
| TC02001653.hg.1 | 2.04  | JUC02013784.hg.1 | ADCY3       |
| TC02001653.hg.1 | 2.04  | JUC02013785.hg.1 | ADCY3       |
| TC02001653.hg.1 | 2.02  | JUC02013753.hg.1 | ADCY3       |
| TC02001653.hg.1 | -2.05 | JUC02013780.hg.1 | ADCY3       |
| TC02001653.hg.1 | -2.39 | JUC02013786.hg.1 | ADCY3       |
| TC06000389.hg.1 | 3.88  | JUC06001675.hg.1 | SKIV2L      |
| TC06000389.hg.1 | 2.06  | PSR06004160.hg.1 | SKIV2L      |
| TC06000389.hg.1 | -2.59 | JUC06001678.hg.1 | SKIV2L      |

|                 |       |                  |             |
|-----------------|-------|------------------|-------------|
| TC07000443.hg.1 | 3.88  | JUC07002831.hg.1 | WBSCR22     |
| TC07000443.hg.1 | 2.47  | PSR07005918.hg.1 | WBSCR22     |
| TC07000443.hg.1 | 2.08  | JUC07002842.hg.1 | WBSCR22     |
| TC07000443.hg.1 | -2    | JUC07002847.hg.1 | WBSCR22     |
| TC09001508.hg.1 | 3.88  | PSR09018920.hg.1 | AKNA        |
| TC09001508.hg.1 | 3.33  | JUC09010213.hg.1 | AKNA        |
| TC09001508.hg.1 | 2.16  | PSR09018890.hg.1 | AKNA        |
| TC09001508.hg.1 | -2.16 | JUC09010231.hg.1 | AKNA        |
| TC16002056.hg.1 | 3.88  | JUC16013475.hg.1 | NFATC3      |
| TC16002056.hg.1 | 2.54  | PSR16007940.hg.1 | NFATC3      |
| TC16002056.hg.1 | 2.41  | PSR16007946.hg.1 | NFATC3      |
| TC16002056.hg.1 | 2.06  | PSR16007939.hg.1 | NFATC3      |
| TC17001700.hg.1 | 3.88  | JUC17012691.hg.1 | SPAG9       |
| TC17001700.hg.1 | 3.86  | PSR17022875.hg.1 | SPAG9       |
| TC17001700.hg.1 | 2.81  | PSR17022874.hg.1 | SPAG9       |
| TC17001700.hg.1 | 2.69  | JUC17012709.hg.1 | SPAG9       |
| TC17001700.hg.1 | -2.02 | JUC17012674.hg.1 | SPAG9       |
| TC19001501.hg.1 | 3.88  | JUC19011732.hg.1 | MAP4K1      |
| TC19001501.hg.1 | 2.03  | PSR19020399.hg.1 | MAP4K1      |
| TC01000271.hg.1 | 3.87  | JUC01002233.hg.1 | NBPF3, LOC  |
| TC01000271.hg.1 | 2.5   | PSR01004180.hg.1 | NBPF3, LOC  |
| TC01000271.hg.1 | 2.15  | JUC01002241.hg.1 | NBPF3, LOC  |
| TC01000271.hg.1 | -3.16 | JUC01002236.hg.1 | NBPF3, LOC  |
| TC02001447.hg.1 | 3.87  | JUC02012183.hg.1 | RAMP1       |
| TC02001447.hg.1 | 2.1   | PSR02023202.hg.1 | RAMP1       |
| TC02001447.hg.1 | 2.07  | PSR02023205.hg.1 | RAMP1       |
| TC02001447.hg.1 | -2.02 | JUC02012181.hg.1 | RAMP1       |
| TC02001447.hg.1 | -2.42 | PSR02023198.hg.1 | RAMP1       |
| TC02001447.hg.1 | -2.61 | PSR02023204.hg.1 | RAMP1       |
| TC02001447.hg.1 | -2.63 | JUC02012180.hg.1 | RAMP1       |
| TC02001891.hg.1 | 3.87  | JUC02015921.hg.1 | USP34       |
| TC02001891.hg.1 | 3.01  | PSR02030123.hg.1 | USP34       |
| TC02001891.hg.1 | -2.18 | JUC02015854.hg.1 | USP34       |
| TC03001625.hg.1 | 3.87  | JUC03014490.hg.1 | LOC1003026  |
| TC03001625.hg.1 | 3.38  | PSR03029335.hg.1 | LOC1003026  |
| TC03001625.hg.1 | 2.79  | JUC03014492.hg.1 | LOC1003026  |
| TC03001625.hg.1 | 2.75  | JUC03014485.hg.1 | LOC1003026  |
| TC03001625.hg.1 | 2.59  | JUC03014493.hg.1 | LOC1003026  |
| TC03003344.hg.1 | 3.87  | JUC03023552.hg.1 | TTLL3       |
| TC03003344.hg.1 | 2.26  | JUC03023558.hg.1 | TTLL3       |
| TC03003344.hg.1 | 2.16  | JUC03023548.hg.1 | TTLL3       |
| TC03003344.hg.1 | 2.05  | JUC03023568.hg.1 | TTLL3       |
| TC03003344.hg.1 | -2.02 | PSR03000946.hg.1 | TTLL3       |
| TC05001151.hg.1 | 3.87  | JUC05008405.hg.1 | SEMA5A      |
| TC05001151.hg.1 | 2.83  | JUC05008408.hg.1 | SEMA5A      |
| TC05001151.hg.1 | 2.29  | JUC05008396.hg.1 | SEMA5A      |
| TC05001151.hg.1 | 2.24  | PSR05016506.hg.1 | SEMA5A      |
| TC05001151.hg.1 | 2.08  | PSR05016503.hg.1 | SEMA5A      |
| TC05001151.hg.1 | -2.57 | PSR05016509.hg.1 | SEMA5A      |
| TC05001151.hg.1 | -2.61 | JUC05008393.hg.1 | SEMA5A      |
| TC05001151.hg.1 | -2.74 | JUC05008394.hg.1 | SEMA5A      |
| TC05001151.hg.1 | -2.96 | PSR05016513.hg.1 | SEMA5A      |
| TC08000844.hg.1 | 3.87  | JUC08005787.hg.1 | HEATR7A, LC |
| TC08000844.hg.1 | 2.06  | JUC08005804.hg.1 | HEATR7A, LC |
| TC08000844.hg.1 | 2.05  | PSR08011179.hg.1 | HEATR7A, LC |
| TC08000844.hg.1 | -2.38 | JUC08005760.hg.1 | HEATR7A, LC |
| TC08000844.hg.1 | -2.74 | JUC08005801.hg.1 | HEATR7A, LC |
| TC10001128.hg.1 | 3.87  | JUC10008181.hg.1 | ACBD5       |

|                 |       |                  |          |
|-----------------|-------|------------------|----------|
| TC10001128.hg.1 | 2.45  | PSR10014167.hg.1 | ACBD5    |
| TC10001128.hg.1 | 2.1   | PSR10014161.hg.1 | ACBD5    |
| TC10001128.hg.1 | 2.05  | PSR10014164.hg.1 | ACBD5    |
| TC10001128.hg.1 | -2.06 | JUC10008180.hg.1 | ACBD5    |
| TC10001128.hg.1 | -2.71 | JUC10008179.hg.1 | ACBD5    |
| TC22000259.hg.1 | 3.87  | PSR22004814.hg.1 | HMOX1    |
| TC22000259.hg.1 | 3.35  | PSR22004815.hg.1 | HMOX1    |
| TC22000259.hg.1 | 3.24  | PSR22004819.hg.1 | HMOX1    |
| TC22000259.hg.1 | 3.17  | PSR22004813.hg.1 | HMOX1    |
| TC22000259.hg.1 | 3.02  | JUC22001748.hg.1 | HMOX1    |
| TC22000259.hg.1 | 2.32  | JUC22001751.hg.1 | HMOX1    |
| TC03002155.hg.1 | 3.86  | JUC03018904.hg.1 | TFRC     |
| TC03002155.hg.1 | 3.22  | PSR03038060.hg.1 | TFRC     |
| TC03002155.hg.1 | 3.18  | JUC03018894.hg.1 | TFRC     |
| TC03002155.hg.1 | 2.65  | JUC03018903.hg.1 | TFRC     |
| TC03002155.hg.1 | 2.44  | PSR03038082.hg.1 | TFRC     |
| TC03002155.hg.1 | 2.33  | PSR03038104.hg.1 | TFRC     |
| TC03002155.hg.1 | 2.01  | PSR03038105.hg.1 | TFRC     |
| TC03002155.hg.1 | -2.34 | JUC03018910.hg.1 | TFRC     |
| TC03002155.hg.1 | -2.43 | JUC03018913.hg.1 | TFRC     |
| TC05000311.hg.1 | 3.86  | JUC05002275.hg.1 |          |
| TC05000311.hg.1 | 2.62  | PSR05004194.hg.1 |          |
| TC09000790.hg.1 | 3.86  | JUC09005678.hg.1 | OLFM1    |
| TC09000790.hg.1 | 3.8   | PSR09010273.hg.1 | OLFM1    |
| TC09000790.hg.1 | 3.8   | PSR09010274.hg.1 | OLFM1    |
| TC09000790.hg.1 | 3.43  | PSR09010278.hg.1 | OLFM1    |
| TC09000790.hg.1 | 3.37  | PSR09010269.hg.1 | OLFM1    |
| TC09000790.hg.1 | 3.23  | PSR09010276.hg.1 | OLFM1    |
| TC09000790.hg.1 | 3.16  | PSR09010271.hg.1 | OLFM1    |
| TC09000790.hg.1 | 3.02  | PSR09010268.hg.1 | OLFM1    |
| TC09000790.hg.1 | 2.78  | PSR09010290.hg.1 | OLFM1    |
| TC09000790.hg.1 | 2.72  | PSR09010277.hg.1 | OLFM1    |
| TC09000790.hg.1 | 2.38  | PSR09010279.hg.1 | OLFM1    |
| TC09000790.hg.1 | 2.3   | PSR09010272.hg.1 | OLFM1    |
| TC09000790.hg.1 | 2.28  | JUC09005673.hg.1 | OLFM1    |
| TC09000790.hg.1 | 2.24  | JUC09005679.hg.1 | OLFM1    |
| TC09000790.hg.1 | 2.15  | JUC09005675.hg.1 | OLFM1    |
| TC09000790.hg.1 | -2.23 | JUC09005676.hg.1 | OLFM1    |
| TC09000790.hg.1 | -2.43 | PSR09010281.hg.1 | OLFM1    |
| TC09000790.hg.1 | -4.6  | JUC09005672.hg.1 | OLFM1    |
| TC6_cox_hap2000 | 3.86  | JUC6_cox_hap2000 | PSORS1C1 |
| TC6_cox_hap2000 | 2.52  | JUC6_cox_hap2000 | PSORS1C1 |
| TC6_cox_hap2000 | 2.42  | JUC6_cox_hap2000 | PSORS1C1 |
| TC6_cox_hap2000 | 2.17  | PSR6_cox_hap2000 | PSORS1C1 |
| TC03002027.hg.1 | 3.85  | JUC03017795.hg.1 |          |
| TC03002027.hg.1 | -6.21 | PSR03035991.hg.1 |          |
| TC09000964.hg.1 | 3.85  | PSR09012770.hg.1 | CDKN2A   |
| TC09000964.hg.1 | 3.63  | JUC09006947.hg.1 | CDKN2A   |
| TC01000515.hg.1 | 3.84  | JUC01004193.hg.1 | NFYC     |
| TC01000515.hg.1 | 2.58  | JUC01004215.hg.1 | NFYC     |
| TC01000515.hg.1 | -2.13 | PSR01008063.hg.1 | NFYC     |
| TC01000515.hg.1 | -2.66 | JUC01004201.hg.1 | NFYC     |
| TC01000515.hg.1 | -2.7  | JUC01004200.hg.1 | NFYC     |
| TC01000515.hg.1 | -3.13 | JUC01004212.hg.1 | NFYC     |
| TC01006331.hg.1 | 3.84  | JUC01044116.hg.1 | ADAM15   |
| TC01006331.hg.1 | 3.2   | JUC01044128.hg.1 | ADAM15   |
| TC01006331.hg.1 | 2.9   | PSR01019847.hg.1 | ADAM15   |
| TC01006331.hg.1 | 2.63  | JUC01044138.hg.1 | ADAM15   |



|                 |       |                  |         |
|-----------------|-------|------------------|---------|
| TC01006331.hg.1 | 2.46  | PSR01019857.hg.1 | ADAM15  |
| TC01006331.hg.1 | 2.34  | PSR01019837.hg.1 | ADAM15  |
| TC01006331.hg.1 | 2.31  | PSR01019810.hg.1 | ADAM15  |
| TC01006331.hg.1 | 2.16  | PSR01019856.hg.1 | ADAM15  |
| TC01006331.hg.1 | 2.08  | PSR01019852.hg.1 | ADAM15  |
| TC01006331.hg.1 | 2.04  | PSR01019851.hg.1 | ADAM15  |
| TC01006331.hg.1 | 2.04  | PSR01019853.hg.1 | ADAM15  |
| TC01006331.hg.1 | 2.03  | PSR01019808.hg.1 | ADAM15  |
| TC02000213.hg.1 | 3.84  | JUC02001567.hg.1 | BIRC6   |
| TC02000213.hg.1 | 2.13  | PSR02003127.hg.1 | BIRC6   |
| TC02000213.hg.1 | -2.44 | JUC02001606.hg.1 | BIRC6   |
| TC02000213.hg.1 | -2.58 | JUC02001573.hg.1 | BIRC6   |
| TC0Y000354.hg.1 | 3.84  | PSR0Y000815.hg.1 | TXLNG2P |
| TC0Y000354.hg.1 | 2.89  | PSR0Y000816.hg.1 | TXLNG2P |
| TC0Y000354.hg.1 | 2.78  | PSR0Y000812.hg.1 | TXLNG2P |
| TC0Y000354.hg.1 | -2.49 | PSR0Y000808.hg.1 | TXLNG2P |
| TC0Y000354.hg.1 | -2.54 | JUC0Y001909.hg.1 | TXLNG2P |
| TC0Y000354.hg.1 | -2.62 | PSR0Y000818.hg.1 | TXLNG2P |
| TC0Y000354.hg.1 | -2.74 | PSR0Y000817.hg.1 | TXLNG2P |
| TC0Y000354.hg.1 | -2.76 | PSR0Y000810.hg.1 | TXLNG2P |
| TC0Y000354.hg.1 | -3.5  | PSR0Y000819.hg.1 | TXLNG2P |
| TC10000406.hg.1 | 3.84  | JUC10002609.hg.1 | TET1    |
| TC10000406.hg.1 | 2.1   | PSR10004528.hg.1 | TET1    |
| TC10000406.hg.1 | 2.02  | JUC10002615.hg.1 | TET1    |
| TC10000406.hg.1 | -2.64 | JUC10002614.hg.1 | TET1    |
| TC10000406.hg.1 | -2.71 | JUC10002607.hg.1 | TET1    |
| TC10002960.hg.1 | 3.84  | JUC10017491.hg.1 |         |
| TC10002960.hg.1 | -2.2  | PSR10013673.hg.1 |         |
| TC11000023.hg.1 | 3.84  | JUC11000191.hg.1 | DRD4    |
| TC11000023.hg.1 | 2.06  | PSR11000333.hg.1 | DRD4    |
| TC11000023.hg.1 | -2.18 | JUC11000189.hg.1 | DRD4    |
| TC11000023.hg.1 | -2.2  | JUC11000188.hg.1 | DRD4    |
| TC11000023.hg.1 | -2.69 | PSR11000332.hg.1 | DRD4    |
| TC12001361.hg.1 | 3.84  | JUC12009892.hg.1 | FAM60A  |
| TC12001361.hg.1 | 2.23  | JUC12009888.hg.1 | FAM60A  |
| TC12001361.hg.1 | -2.06 | PSR12017806.hg.1 | FAM60A  |
| TC12001361.hg.1 | -3.13 | PSR12017793.hg.1 | FAM60A  |
| TC18000006.hg.1 | 3.84  | JUC18000042.hg.1 | TYMS    |
| TC18000006.hg.1 | 3.69  | PSR18000068.hg.1 | TYMS    |
| TC18000006.hg.1 | 3.06  | PSR18000052.hg.1 | TYMS    |
| TC18000006.hg.1 | 2.29  | JUC18000036.hg.1 | TYMS    |
| TC18000006.hg.1 | 2.24  | PSR18000056.hg.1 | TYMS    |
| TC18000006.hg.1 | 2.17  | PSR18000055.hg.1 | TYMS    |
| TC18000006.hg.1 | 2.08  | JUC18000044.hg.1 | TYMS    |
| TC18000006.hg.1 | -2.14 | JUC18000038.hg.1 | TYMS    |
| TC18000006.hg.1 | -2.15 | JUC18000035.hg.1 | TYMS    |
| TC19000462.hg.1 | 3.84  | JUC19003600.hg.1 | LSR     |
| TC19000462.hg.1 | -2.14 | PSR19006074.hg.1 | LSR     |
| TC20000657.hg.1 | 3.84  | JUC20004823.hg.1 | RRBP1   |
| TC20000657.hg.1 | 2.21  | PSR20009201.hg.1 | RRBP1   |
| TC20000657.hg.1 | -2.39 | JUC20004806.hg.1 | RRBP1   |
| TC01001741.hg.1 | 3.83  | JUC01014699.hg.1 | CD46    |
| TC01001741.hg.1 | 2.29  | JUC01014704.hg.1 | CD46    |
| TC01001741.hg.1 | -2.31 | JUC01014685.hg.1 | CD46    |
| TC01001741.hg.1 | -2.33 | PSR01027294.hg.1 | CD46    |
| TC01001741.hg.1 | -2.82 | PSR01027301.hg.1 | CD46    |
| TC01002520.hg.1 | 3.83  | JUC01021044.hg.1 | RSPO1   |
| TC01002520.hg.1 | -2.54 | PSR01039171.hg.1 | RSPO1   |

|                 |       |                  |            |
|-----------------|-------|------------------|------------|
| TC12000392.hg.1 | 3.83  | JUC12002694.hg.1 | LARP4      |
| TC12000392.hg.1 | 2.57  | PSR12004897.hg.1 | LARP4      |
| TC12000392.hg.1 | 2.33  | PSR12004896.hg.1 | LARP4      |
| TC12000392.hg.1 | 2.13  | JUC12002702.hg.1 | LARP4      |
| TC12000392.hg.1 | 2.11  | JUC12002708.hg.1 | LARP4      |
| TC19000493.hg.1 | 3.83  | JUC19003885.hg.1 | WDR62      |
| TC19000493.hg.1 | -2.06 | PSR19006553.hg.1 | WDR62      |
| TC19000493.hg.1 | -2.82 | JUC19003854.hg.1 | WDR62      |
| TC01001328.hg.1 | 3.82  | JUC01011089.hg.1 | NTRK1      |
| TC01001328.hg.1 | 3.48  | JUC01011097.hg.1 | NTRK1      |
| TC01001328.hg.1 | 2.13  | PSR01020860.hg.1 | NTRK1      |
| TC02000758.hg.1 | 3.82  | JUC02006324.hg.1 | EPB41L5    |
| TC02000758.hg.1 | 3.21  | JUC02006310.hg.1 | EPB41L5    |
| TC02000758.hg.1 | 3     | PSR02011884.hg.1 | EPB41L5    |
| TC02000758.hg.1 | 2.76  | JUC02006307.hg.1 | EPB41L5    |
| TC02000758.hg.1 | 2.28  | JUC02006300.hg.1 | EPB41L5    |
| TC02000758.hg.1 | 2.18  | PSR02011881.hg.1 | EPB41L5    |
| TC02000758.hg.1 | 2.12  | PSR02011913.hg.1 | EPB41L5    |
| TC02000758.hg.1 | 2.11  | PSR02011906.hg.1 | EPB41L5    |
| TC02000758.hg.1 | 2.1   | PSR02011910.hg.1 | EPB41L5    |
| TC02000758.hg.1 | 2.01  | PSR02011892.hg.1 | EPB41L5    |
| TC02000758.hg.1 | -2.2  | JUC02006303.hg.1 | EPB41L5    |
| TC02000758.hg.1 | -2.73 | JUC02006302.hg.1 | EPB41L5    |
| TC02002229.hg.1 | 3.82  | JUC02018722.hg.1 | SLC35F5    |
| TC02002229.hg.1 | -2.42 | PSR02036191.hg.1 | SLC35F5    |
| TC04001486.hg.1 | 3.82  | PSR04021054.hg.1 | CAMK2D     |
| TC04001486.hg.1 | -2.18 | PSR04021040.hg.1 | CAMK2D     |
| TC04001486.hg.1 | -2.3  | JUC04011063.hg.1 | CAMK2D     |
| TC04001486.hg.1 | -3.27 | JUC04011054.hg.1 | CAMK2D     |
| TC05002151.hg.1 | 3.82  | JUC05015396.hg.1 | MGAT1      |
| TC05002151.hg.1 | 3.07  | JUC05015402.hg.1 | MGAT1      |
| TC05002151.hg.1 | 2.31  | PSR05030325.hg.1 | MGAT1      |
| TC06000357.hg.1 | 3.82  | JUC06001442.hg.1 | PSORS1C1   |
| TC06000357.hg.1 | 2.49  | JUC06001451.hg.1 | PSORS1C1   |
| TC06000357.hg.1 | 2.39  | JUC06001444.hg.1 | PSORS1C1   |
| TC06000357.hg.1 | 2.15  | PSR06003414.hg.1 | PSORS1C1   |
| TC19001505.hg.1 | 3.82  | JUC19011791.hg.1 | LGALS4     |
| TC19001505.hg.1 | -4.16 | PSR19020448.hg.1 | LGALS4     |
| TC22000437.hg.1 | 3.82  | JUC22003262.hg.1 | RPL23AP82, |
| TC22000437.hg.1 | 2.86  | JUC22003257.hg.1 | RPL23AP82, |
| TC22000437.hg.1 | 2.02  | JUC22003258.hg.1 | RPL23AP82, |
| TC22000437.hg.1 | -2.2  | PSR22008262.hg.1 | RPL23AP82, |
| TC22000437.hg.1 | -2.32 | PSR22008266.hg.1 | RPL23AP82, |
| TC6_dbb_hap3000 | 3.82  | JUC6_dbb_hap3000 | PSORS1C1   |
| TC6_dbb_hap3000 | 2.49  | JUC6_dbb_hap3000 | PSORS1C1   |
| TC6_dbb_hap3000 | 2.39  | JUC6_dbb_hap3000 | PSORS1C1   |
| TC6_dbb_hap3000 | 2.15  | PSR6_dbb_hap3000 | PSORS1C1   |
| TC04000881.hg.1 | 3.81  | JUC04006475.hg.1 | ODZ3       |
| TC04000881.hg.1 | 3.27  | JUC04006470.hg.1 | ODZ3       |
| TC04000881.hg.1 | 2.31  | PSR04012031.hg.1 | ODZ3       |
| TC04000881.hg.1 | 2.14  | PSR04012033.hg.1 | ODZ3       |
| TC05000782.hg.1 | 3.81  | JUC05005797.hg.1 | ARHGAP26   |
| TC05000782.hg.1 | 2.46  | PSR05011154.hg.1 | ARHGAP26   |
| TC05000782.hg.1 | 2.46  | JUC05005763.hg.1 | ARHGAP26   |
| TC05000782.hg.1 | 2.09  | JUC05005766.hg.1 | ARHGAP26   |
| TC05000782.hg.1 | -2.38 | JUC05005764.hg.1 | ARHGAP26   |
| TC11001377.hg.1 | 3.81  | PSR11017328.hg.1 | LOC283299  |
| TC11001377.hg.1 | -2.13 | PSR11017327.hg.1 | LOC283299  |

|                 |        |                  |             |
|-----------------|--------|------------------|-------------|
| TC11001377.hg.1 | -2.95  | JUC11009228.hg.1 | LOC283299   |
| TC05000682.hg.1 | 3.8    | PSR05009481.hg.1 | TGFBI, LOC1 |
| TC05000682.hg.1 | 3.44   | JUC05005063.hg.1 | TGFBI, LOC1 |
| TC05000682.hg.1 | 2.11   | PSR05009482.hg.1 | TGFBI, LOC1 |
| TC05000682.hg.1 | 2.11   | JUC05005064.hg.1 | TGFBI, LOC1 |
| TC05000682.hg.1 | 2.07   | JUC05005055.hg.1 | TGFBI, LOC1 |
| TC05000682.hg.1 | -2.42  | JUC05005044.hg.1 | TGFBI, LOC1 |
| TC05003423.hg.1 | 3.8    | JUC05019564.hg.1 | C1QTNF3     |
| TC05003423.hg.1 | 3.11   | JUC05019563.hg.1 | C1QTNF3     |
| TC05003423.hg.1 | 2.55   | PSR05017533.hg.1 | C1QTNF3     |
| TC05003423.hg.1 | 2.47   | JUC05019568.hg.1 | C1QTNF3     |
| TC05003423.hg.1 | -2.48  | PSR05017544.hg.1 | C1QTNF3     |
| TC05003423.hg.1 | -3.7   | PSR05017540.hg.1 | C1QTNF3     |
| TC05003423.hg.1 | -6.5   | PSR05017536.hg.1 | C1QTNF3     |
| TC05003423.hg.1 | -6.54  | PSR05017532.hg.1 | C1QTNF3     |
| TC05003423.hg.1 | -7.12  | PSR05017523.hg.1 | C1QTNF3     |
| TC05003423.hg.1 | -7.8   | PSR05017537.hg.1 | C1QTNF3     |
| TC05003423.hg.1 | -7.92  | PSR05017547.hg.1 | C1QTNF3     |
| TC05003423.hg.1 | -10.11 | PSR05017521.hg.1 | C1QTNF3     |
| TC05003423.hg.1 | -12.39 | PSR05017535.hg.1 | C1QTNF3     |
| TC05003423.hg.1 | -13.01 | PSR05017551.hg.1 | C1QTNF3     |
| TC05003423.hg.1 | -13.38 | PSR05017550.hg.1 | C1QTNF3     |
| TC18000413.hg.1 | 3.8    | PSR18004218.hg.1 | NPC1        |
| TC18000413.hg.1 | -2     | JUC18002819.hg.1 | NPC1        |
| TC18000552.hg.1 | 3.8    | JUC18003872.hg.1 | PIGN        |
| TC18000552.hg.1 | 2.64   | PSR18005756.hg.1 | PIGN        |
| TC18000552.hg.1 | 2.44   | JUC18003858.hg.1 | PIGN        |
| TC18000552.hg.1 | -2.48  | PSR18005731.hg.1 | PIGN        |
| TC18000552.hg.1 | -2.55  | JUC18003869.hg.1 | PIGN        |
| TC21000543.hg.1 | 3.8    | PSR21006542.hg.1 | POFUT2      |
| TC21000543.hg.1 | 3.28   | PSR21006526.hg.1 | POFUT2      |
| TC21000543.hg.1 | 2.28   | PSR21006532.hg.1 | POFUT2      |
| TC21000543.hg.1 | 2.26   | PSR21006538.hg.1 | POFUT2      |
| TC21000543.hg.1 | 2.26   | JUC21003353.hg.1 | POFUT2      |
| TC21000543.hg.1 | 2.25   | PSR21006529.hg.1 | POFUT2      |
| TC21000543.hg.1 | 2.21   | PSR21006544.hg.1 | POFUT2      |
| TC21000543.hg.1 | 2.1    | PSR21006541.hg.1 | POFUT2      |
| TC21000543.hg.1 | 2.04   | PSR21006531.hg.1 | POFUT2      |
| TC04000524.hg.1 | 3.79   | PSR04007728.hg.1 | BANK1       |
| TC04000524.hg.1 | 2.73   | PSR04007731.hg.1 | BANK1       |
| TC04000524.hg.1 | 2.68   | JUC04004022.hg.1 | BANK1       |
| TC04000524.hg.1 | -2.59  | JUC04004018.hg.1 | BANK1       |
| TC06001184.hg.1 | 3.79   | JUC06006974.hg.1 | MLLT4       |
| TC06001184.hg.1 | 3.49   | JUC06006990.hg.1 | MLLT4       |
| TC06001184.hg.1 | 2.48   | PSR06014165.hg.1 | MLLT4       |
| TC06001184.hg.1 | 2.39   | JUC06006978.hg.1 | MLLT4       |
| TC06001184.hg.1 | 2.29   | JUC06007015.hg.1 | MLLT4       |
| TC06001184.hg.1 | 2.28   | JUC06007008.hg.1 | MLLT4       |
| TC07001811.hg.1 | 3.79   | JUC07013802.hg.1 | AASS        |
| TC07001811.hg.1 | 2.97   | JUC07013776.hg.1 | AASS        |
| TC07001811.hg.1 | 2.44   | JUC07013783.hg.1 | AASS        |
| TC07001811.hg.1 | 2.33   | PSR07028026.hg.1 | AASS        |
| TC11002380.hg.1 | 3.79   | JUC11015299.hg.1 | MIR100HG    |
| TC11002380.hg.1 | 2.76   | JUC11015311.hg.1 | MIR100HG    |
| TC11002380.hg.1 | 2.54   | PSR11028663.hg.1 | MIR100HG    |
| TC11002380.hg.1 | 2.08   | PSR11028662.hg.1 | MIR100HG    |
| TC11002380.hg.1 | 2.06   | PSR11028665.hg.1 | MIR100HG    |
| TC11002380.hg.1 | -2.11  | PSR11028678.hg.1 | MIR100HG    |

|                 |       |                  |            |
|-----------------|-------|------------------|------------|
| TC11002380.hg.1 | -2.57 | PSR11028677.hg.1 | MIR100HG   |
| TC11002380.hg.1 | -2.87 | JUC11015301.hg.1 | MIR100HG   |
| TC11002380.hg.1 | -2.95 | JUC11015308.hg.1 | MIR100HG   |
| TC11002380.hg.1 | -3.15 | JUC11015309.hg.1 | MIR100HG   |
| TC11002380.hg.1 | -3.4  | JUC11015304.hg.1 | MIR100HG   |
| TC11002380.hg.1 | -4.3  | PSR11028676.hg.1 | MIR100HG   |
| TC11002380.hg.1 | -5.02 | PSR11028674.hg.1 | MIR100HG   |
| TC13000566.hg.1 | 3.79  | JUC13003762.hg.1 | SPG20      |
| TC13000566.hg.1 | -2.1  | PSR13006420.hg.1 | SPG20      |
| TC13000566.hg.1 | -2.29 | PSR13006436.hg.1 | SPG20      |
| TC13000895.hg.1 | 3.79  | JUC13005898.hg.1 | DCUN1D2    |
| TC13000895.hg.1 | 2.95  | JUC13005897.hg.1 | DCUN1D2    |
| TC13000895.hg.1 | 2.64  | JUC13005904.hg.1 | DCUN1D2    |
| TC13000895.hg.1 | 2.59  | PSR13010039.hg.1 | DCUN1D2    |
| TC14000668.hg.1 | 3.79  | PSR14008055.hg.1 | SNORD113-4 |
| TC14000668.hg.1 | 2.68  | PSR14008052.hg.1 | SNORD113-4 |
| TC14000668.hg.1 | 2.56  | PSR14008057.hg.1 | SNORD113-4 |
| TC14000668.hg.1 | 2.47  | JUC14004113.hg.1 | SNORD113-4 |
| TC14000668.hg.1 | 2.3   | JUC14004098.hg.1 | SNORD113-4 |
| TC14000668.hg.1 | -2.11 | JUC14004108.hg.1 | SNORD113-4 |
| TC14000668.hg.1 | -2.39 | JUC14004109.hg.1 | SNORD113-4 |
| TC14000668.hg.1 | -3.39 | JUC14004097.hg.1 | SNORD113-4 |
| TC14000668.hg.1 | -3.76 | JUC14004118.hg.1 | SNORD113-4 |
| TC15000350.hg.1 | 3.79  | PSR15003144.hg.1 | SORD       |
| TC15000350.hg.1 | 2.13  | JUC15001473.hg.1 | SORD       |
| TC15000350.hg.1 | -2.12 | JUC15001465.hg.1 | SORD       |
| TC15000350.hg.1 | -2.67 | JUC15001474.hg.1 | SORD       |
| TC01000561.hg.1 | 3.78  | PSR01009260.hg.1 | RNF220     |
| TC01000561.hg.1 | 3.17  | PSR01009264.hg.1 | RNF220     |
| TC01000561.hg.1 | 3.15  | JUC01004795.hg.1 | RNF220     |
| TC01000561.hg.1 | 3.1   | PSR01009266.hg.1 | RNF220     |
| TC01000561.hg.1 | 2.3   | PSR01009258.hg.1 | RNF220     |
| TC01000561.hg.1 | -2.97 | JUC01004808.hg.1 | RNF220     |
| TC05000010.hg.1 | 3.78  | JUC05000144.hg.1 | TRIP13     |
| TC05000010.hg.1 | 2.83  | PSR05000277.hg.1 | TRIP13     |
| TC05000010.hg.1 | 2.7   | PSR05000251.hg.1 | TRIP13     |
| TC05000010.hg.1 | 2.47  | JUC05000145.hg.1 | TRIP13     |
| TC05000010.hg.1 | 2.37  | PSR05000259.hg.1 | TRIP13     |
| TC05000010.hg.1 | 2.28  | JUC05000141.hg.1 | TRIP13     |
| TC05000010.hg.1 | 2.13  | JUC05000134.hg.1 | TRIP13     |
| TC05000010.hg.1 | 2.08  | PSR05000275.hg.1 | TRIP13     |
| TC05000010.hg.1 | 2.01  | PSR05000252.hg.1 | TRIP13     |
| TC05000010.hg.1 | -2.07 | JUC05000146.hg.1 | TRIP13     |
| TC05000391.hg.1 | 3.78  | JUC05002984.hg.1 | PAPD4      |
| TC05000391.hg.1 | 3.42  | PSR05005489.hg.1 | PAPD4      |
| TC05000391.hg.1 | 2.63  | JUC05002993.hg.1 | PAPD4      |
| TC05000391.hg.1 | 2.36  | JUC05002983.hg.1 | PAPD4      |
| TC05000391.hg.1 | -4.02 | JUC05002973.hg.1 | PAPD4      |
| TC08000293.hg.1 | 3.78  | PSR08004085.hg.1 | TACC1      |
| TC08000293.hg.1 | 2.65  | JUC08002023.hg.1 | TACC1      |
| TC08000293.hg.1 | -2.09 | PSR08004135.hg.1 | TACC1      |
| TC08000293.hg.1 | -3.09 | JUC08002025.hg.1 | TACC1      |
| TC10001411.hg.1 | 3.78  | JUC10010416.hg.1 | USP54      |
| TC10001411.hg.1 | 3.63  | JUC10010413.hg.1 | USP54      |
| TC10001411.hg.1 | 2.63  | PSR10017839.hg.1 | USP54      |
| TC10001411.hg.1 | 2.31  | PSR10017828.hg.1 | USP54      |
| TC10001411.hg.1 | 2.29  | JUC10010411.hg.1 | USP54      |
| TC10001411.hg.1 | 2.22  | JUC10010388.hg.1 | USP54      |

|                 |       |                  |           |
|-----------------|-------|------------------|-----------|
| TC10001411.hg.1 | 2.08  | PSR10017857.hg.1 | USP54     |
| TC10001411.hg.1 | 2.08  | PSR10017881.hg.1 | USP54     |
| TC10001411.hg.1 | 2.01  | PSR10017880.hg.1 | USP54     |
| TC10001411.hg.1 | -2.01 | JUC10010403.hg.1 | USP54     |
| TC10001411.hg.1 | -2.06 | JUC10010414.hg.1 | USP54     |
| TC10001411.hg.1 | -2.13 | PSR10017871.hg.1 | USP54     |
| TC10001411.hg.1 | -2.33 | PSR10017849.hg.1 | USP54     |
| TC10001411.hg.1 | -3.93 | JUC10010417.hg.1 | USP54     |
| TC14000524.hg.1 | 3.78  | PSR14006522.hg.1 | LOC283587 |
| TC14000524.hg.1 | 2.72  | JUC14003286.hg.1 | LOC283587 |
| TC14000524.hg.1 | 2.49  | PSR14006512.hg.1 | LOC283587 |
| TC14000524.hg.1 | 2.06  | PSR14006515.hg.1 | LOC283587 |
| TC15000881.hg.1 | 3.78  | JUC15004528.hg.1 | SLCO3A1   |
| TC15000881.hg.1 | 2.51  | PSR15008488.hg.1 | SLCO3A1   |
| TC15000881.hg.1 | 2.12  | PSR15008477.hg.1 | SLCO3A1   |
| TC02001977.hg.1 | 3.77  | JUC02016429.hg.1 | EXOC6B    |
| TC02001977.hg.1 | 2.27  | PSR02031500.hg.1 | EXOC6B    |
| TC02001977.hg.1 | 2.05  | PSR02031479.hg.1 | EXOC6B    |
| TC03001772.hg.1 | 3.77  | JUC03015982.hg.1 | PLXND1    |
| TC03001772.hg.1 | 3.35  | PSR03032127.hg.1 | PLXND1    |
| TC03001772.hg.1 | 3.35  | JUC03015963.hg.1 | PLXND1    |
| TC03001772.hg.1 | 3.24  | JUC03015970.hg.1 | PLXND1    |
| TC03001772.hg.1 | 2.98  | JUC03015978.hg.1 | PLXND1    |
| TC03001772.hg.1 | 2.96  | PSR03032151.hg.1 | PLXND1    |
| TC03001772.hg.1 | 2.9   | JUC03015959.hg.1 | PLXND1    |
| TC03001772.hg.1 | 2.62  | PSR03032148.hg.1 | PLXND1    |
| TC03001772.hg.1 | 2.57  | PSR03032159.hg.1 | PLXND1    |
| TC03001772.hg.1 | 2.5   | JUC03015985.hg.1 | PLXND1    |
| TC03001772.hg.1 | 2.44  | JUC03015975.hg.1 | PLXND1    |
| TC03001772.hg.1 | 2.36  | PSR03032129.hg.1 | PLXND1    |
| TC03001772.hg.1 | 2.34  | PSR03032140.hg.1 | PLXND1    |
| TC03001772.hg.1 | 2.32  | PSR03032166.hg.1 | PLXND1    |
| TC03001772.hg.1 | 2.31  | PSR03032167.hg.1 | PLXND1    |
| TC03001772.hg.1 | 2.26  | PSR03032158.hg.1 | PLXND1    |
| TC03001772.hg.1 | 2.23  | PSR03032142.hg.1 | PLXND1    |
| TC03001772.hg.1 | 2.19  | PSR03032156.hg.1 | PLXND1    |
| TC03001772.hg.1 | 2.18  | PSR03032131.hg.1 | PLXND1    |
| TC03001772.hg.1 | 2.18  | JUC03015960.hg.1 | PLXND1    |
| TC03001772.hg.1 | 2.17  | JUC03015972.hg.1 | PLXND1    |
| TC03001772.hg.1 | 2.13  | PSR03032147.hg.1 | PLXND1    |
| TC03001772.hg.1 | 2.12  | PSR03032154.hg.1 | PLXND1    |
| TC03001772.hg.1 | 2.1   | PSR03032145.hg.1 | PLXND1    |
| TC03001772.hg.1 | 2.08  | PSR03032128.hg.1 | PLXND1    |
| TC03001772.hg.1 | 2.08  | JUC03015966.hg.1 | PLXND1    |
| TC03001772.hg.1 | 2.07  | JUC03015990.hg.1 | PLXND1    |
| TC03001772.hg.1 | 2.06  | JUC03015973.hg.1 | PLXND1    |
| TC03001772.hg.1 | 2.05  | PSR03032134.hg.1 | PLXND1    |
| TC03001772.hg.1 | 2.05  | PSR03032165.hg.1 | PLXND1    |
| TC03001772.hg.1 | 2.04  | JUC03015981.hg.1 | PLXND1    |
| TC03001772.hg.1 | 2.04  | JUC03015996.hg.1 | PLXND1    |
| TC03001772.hg.1 | 2.03  | PSR03032155.hg.1 | PLXND1    |
| TC03001772.hg.1 | 2.03  | PSR03032171.hg.1 | PLXND1    |
| TC03001772.hg.1 | 2.01  | JUC03015964.hg.1 | PLXND1    |
| TC05000135.hg.1 | 3.77  | JUC05000777.hg.1 | PDZD2     |
| TC05000135.hg.1 | 2.8   | JUC05000773.hg.1 | PDZD2     |
| TC05000135.hg.1 | 2.65  | JUC05000766.hg.1 | PDZD2     |
| TC05000135.hg.1 | 2.13  | PSR05001368.hg.1 | PDZD2     |
| TC05000135.hg.1 | 2.11  | PSR05001371.hg.1 | PDZD2     |

|                 |       |                  |             |
|-----------------|-------|------------------|-------------|
| TC05000135.hg.1 | -2.07 | JUC05000745.hg.1 | PDZD2       |
| TC05000135.hg.1 | -2.34 | JUC05000764.hg.1 | PDZD2       |
| TC05000135.hg.1 | -2.51 | PSR05001325.hg.1 | PDZD2       |
| TC05000135.hg.1 | -2.7  | JUC05000770.hg.1 | PDZD2       |
| TC05000135.hg.1 | -2.72 | JUC05000758.hg.1 | PDZD2       |
| TC05000135.hg.1 | -7.59 | JUC05000782.hg.1 | PDZD2       |
| TC06002122.hg.1 | 3.77  | JUC06013209.hg.1 | SLC18B1     |
| TC06002122.hg.1 | -2.1  | PSR06026633.hg.1 | SLC18B1     |
| TC11001387.hg.1 | 3.77  | JUC11009289.hg.1 | TRIM66      |
| TC11001387.hg.1 | 2.99  | JUC11009311.hg.1 | TRIM66      |
| TC11001387.hg.1 | 2.08  | PSR11017465.hg.1 | TRIM66      |
| TC11001387.hg.1 | -2.97 | JUC11009297.hg.1 | TRIM66      |
| TC11001444.hg.1 | 3.77  | PSR11018099.hg.1 | CYP2R1      |
| TC11001444.hg.1 | 2.41  | PSR11018116.hg.1 | CYP2R1      |
| TC11001444.hg.1 | 2.05  | JUC11009661.hg.1 | CYP2R1      |
| TC11001444.hg.1 | -3.05 | JUC11009664.hg.1 | CYP2R1      |
| TC16000338.hg.1 | 3.77  | PSR16004840.hg.1 | ALDOA       |
| TC16000338.hg.1 | 3.7   | JUC16002686.hg.1 | ALDOA       |
| TC16000338.hg.1 | 3.25  | PSR16004848.hg.1 | ALDOA       |
| TC16000338.hg.1 | 3.14  | JUC16002685.hg.1 | ALDOA       |
| TC16000338.hg.1 | 2.6   | PSR16004844.hg.1 | ALDOA       |
| TC16000338.hg.1 | 2.37  | JUC16002699.hg.1 | ALDOA       |
| TC16000338.hg.1 | 2.29  | PSR16004856.hg.1 | ALDOA       |
| TC16000338.hg.1 | 2.23  | JUC16002680.hg.1 | ALDOA       |
| TC16000338.hg.1 | 2.21  | JUC16002696.hg.1 | ALDOA       |
| TC16000338.hg.1 | 2.08  | PSR16004852.hg.1 | ALDOA       |
| TC16000338.hg.1 | 2.02  | PSR16004858.hg.1 | ALDOA       |
| TC16000461.hg.1 | 3.77  | JUC16003605.hg.1 | GNAO1       |
| TC16000461.hg.1 | 3.32  | JUC16003612.hg.1 | GNAO1       |
| TC16000461.hg.1 | 2.74  | PSR16006423.hg.1 | GNAO1       |
| TC16000461.hg.1 | 2     | PSR16006408.hg.1 | GNAO1       |
| TC16000461.hg.1 | -2.12 | JUC16003615.hg.1 | GNAO1       |
| TC16000461.hg.1 | -2.17 | JUC16003609.hg.1 | GNAO1       |
| TC01002697.hg.1 | 3.76  | PSR01042290.hg.1 | USP24       |
| TC01002697.hg.1 | 2.89  | JUC01022634.hg.1 | USP24       |
| TC01002697.hg.1 | -2.13 | JUC01022630.hg.1 | USP24       |
| TC01002697.hg.1 | -2.4  | JUC01022612.hg.1 | USP24       |
| TC01002697.hg.1 | -3.07 | JUC01022624.hg.1 | USP24       |
| TC07001007.hg.1 | 3.76  | JUC07007429.hg.1 | TMEM176A    |
| TC07001007.hg.1 | 2.79  | JUC07007427.hg.1 | TMEM176A    |
| TC07001007.hg.1 | 2.02  | PSR07015346.hg.1 | TMEM176A    |
| TC08001701.hg.1 | 3.76  | PSR08022402.hg.1 | LOC1002881  |
| TC08001701.hg.1 | -3.14 | JUC08011517.hg.1 | LOC1002881  |
| TC09001100.hg.1 | 3.76  | JUC09007871.hg.1 | ZNF658, LOC |
| TC09001100.hg.1 | 2.01  | PSR09014663.hg.1 | ZNF658, LOC |
| TC09001100.hg.1 | -2.57 | PSR09014661.hg.1 | ZNF658, LOC |
| TC11000256.hg.1 | 3.76  | JUC11001714.hg.1 | HTATIP2     |
| TC11000256.hg.1 | -2.15 | PSR11003405.hg.1 | HTATIP2     |
| TC11000256.hg.1 | -2.57 | PSR11003403.hg.1 | HTATIP2     |
| TC17000480.hg.1 | 3.76  | JUC17003229.hg.1 | ERBB2, MIR4 |
| TC17000480.hg.1 | -2.16 | PSR17005664.hg.1 | ERBB2, MIR4 |
| TC17000480.hg.1 | -3.21 | JUC17003212.hg.1 | ERBB2, MIR4 |
| TC17001376.hg.1 | 3.76  | JUC17010288.hg.1 | MMP28       |
| TC17001376.hg.1 | 2.58  | PSR17018248.hg.1 | MMP28       |
| TC17001376.hg.1 | 2.16  | JUC17010289.hg.1 | MMP28       |
| TC17001376.hg.1 | -2.06 | JUC17010294.hg.1 | MMP28       |
| TC17001376.hg.1 | -2.07 | PSR17018231.hg.1 | MMP28       |
| TC19000787.hg.1 | 3.76  | JUC19006490.hg.1 | LINC00085   |

|                 |       |                  |            |
|-----------------|-------|------------------|------------|
| TC19000787.hg.1 | -2.15 | PSR19011044.hg.1 | LINC00085  |
| TC6_mann_hap400 | 3.76  | JUC6_mann_hap400 | PSORS1C1   |
| TC6_mann_hap400 | 2.45  | JUC6_mann_hap400 | PSORS1C1   |
| TC6_mann_hap400 | 2.36  | JUC6_mann_hap400 | PSORS1C1   |
| TC6_mann_hap400 | 2.11  | PSR6_mann_hap400 | PSORS1C1   |
| TC6_mcf_hap5000 | 3.76  | JUC6_mcf_hap5000 | PSORS1C1   |
| TC6_mcf_hap5000 | 2.45  | JUC6_mcf_hap5000 | PSORS1C1   |
| TC6_mcf_hap5000 | 2.36  | JUC6_mcf_hap5000 | PSORS1C1   |
| TC6_mcf_hap5000 | 2.11  | PSR6_mcf_hap5000 | PSORS1C1   |
| TC01000454.hg.1 | 3.75  | JUC01003614.hg.1 | ZMYM1      |
| TC01000454.hg.1 | 3.55  | PSR01006977.hg.1 | ZMYM1      |
| TC01000454.hg.1 | 2.18  | JUC01003620.hg.1 | ZMYM1      |
| TC01000454.hg.1 | 2.11  | PSR01006991.hg.1 | ZMYM1      |
| TC01000454.hg.1 | 2     | JUC01003624.hg.1 | ZMYM1      |
| TC06000325.hg.1 | 3.75  | PSR06002601.hg.1 | LOC554223, |
| TC06000325.hg.1 | 3.05  | PSR06002600.hg.1 | LOC554223, |
| TC06000325.hg.1 | 2.57  | JUC06001178.hg.1 | LOC554223, |
| TC06000325.hg.1 | 2.27  | JUC06001177.hg.1 | LOC554223, |
| TC06000325.hg.1 | 2.23  | PSR06002596.hg.1 | LOC554223, |
| TC06001492.hg.1 | 3.75  | PSR06016764.hg.1 | ZNRD1-AS1  |
| TC06001492.hg.1 | 3.2   | PSR06016740.hg.1 | ZNRD1-AS1  |
| TC06001492.hg.1 | 3.11  | PSR06016748.hg.1 | ZNRD1-AS1  |
| TC06001492.hg.1 | 2.99  | PSR06016753.hg.1 | ZNRD1-AS1  |
| TC06001492.hg.1 | 2.84  | PSR06016733.hg.1 | ZNRD1-AS1  |
| TC06001492.hg.1 | 2.75  | PSR06016754.hg.1 | ZNRD1-AS1  |
| TC06001492.hg.1 | 2.71  | PSR06016745.hg.1 | ZNRD1-AS1  |
| TC06001492.hg.1 | 2.57  | JUC06008251.hg.1 | ZNRD1-AS1  |
| TC06001492.hg.1 | 2.56  | PSR06016732.hg.1 | ZNRD1-AS1  |
| TC06001492.hg.1 | 2.51  | JUC06008266.hg.1 | ZNRD1-AS1  |
| TC06001492.hg.1 | 2.5   | PSR06016758.hg.1 | ZNRD1-AS1  |
| TC06001492.hg.1 | 2.49  | PSR06016749.hg.1 | ZNRD1-AS1  |
| TC06001492.hg.1 | 2.36  | PSR06016750.hg.1 | ZNRD1-AS1  |
| TC06001492.hg.1 | 2.29  | PSR06016755.hg.1 | ZNRD1-AS1  |
| TC06001492.hg.1 | 2.08  | PSR06016739.hg.1 | ZNRD1-AS1  |
| TC06001492.hg.1 | -2.62 | JUC06008264.hg.1 | ZNRD1-AS1  |
| TC09000691.hg.1 | 3.75  | PSR09008371.hg.1 | ODF2       |
| TC09000691.hg.1 | 3.41  | JUC09004634.hg.1 | ODF2       |
| TC09000691.hg.1 | 3.28  | JUC09004664.hg.1 | ODF2       |
| TC09000691.hg.1 | 2.58  | JUC09004655.hg.1 | ODF2       |
| TC09000691.hg.1 | 2.33  | JUC09004669.hg.1 | ODF2       |
| TC09000691.hg.1 | 2.18  | PSR09008402.hg.1 | ODF2       |
| TC09000691.hg.1 | 2.02  | PSR09008373.hg.1 | ODF2       |
| TC09000691.hg.1 | 2.02  | JUC09004657.hg.1 | ODF2       |
| TC09000691.hg.1 | -3.04 | JUC09004647.hg.1 | ODF2       |
| TC11000790.hg.1 | 3.75  | JUC11005301.hg.1 | POLD3      |
| TC11000790.hg.1 | 3.42  | JUC11005306.hg.1 | POLD3      |
| TC11000790.hg.1 | 2.65  | PSR11010163.hg.1 | POLD3      |
| TC12000549.hg.1 | 3.75  | JUC12003827.hg.1 | LOC1005068 |
| TC12000549.hg.1 | 2.12  | PSR12007382.hg.1 | LOC1005068 |
| TC12001817.hg.1 | 3.75  | PSR12023994.hg.1 | SOCS2-AS1  |
| TC12001817.hg.1 | 3.48  | PSR12023995.hg.1 | SOCS2-AS1  |
| TC12001817.hg.1 | 3.03  | JUC12013311.hg.1 | SOCS2-AS1  |
| TC12001817.hg.1 | 2.67  | JUC12013309.hg.1 | SOCS2-AS1  |
| TC12001817.hg.1 | 2.34  | PSR12023992.hg.1 | SOCS2-AS1  |
| TC20001039.hg.1 | 3.75  | JUC20007460.hg.1 | ZBTB46     |
| TC20001039.hg.1 | -3.01 | PSR20014248.hg.1 | ZBTB46     |
| TC01003456.hg.1 | 3.74  | JUC01028061.hg.1 | C1orf110   |
| TC01003456.hg.1 | 2.53  | PSR01053844.hg.1 | C1orf110   |

|                 |       |                  |             |
|-----------------|-------|------------------|-------------|
| TC01003456.hg.1 | 2.34  | PSR01053843.hg.1 | C1orf110    |
| TC04000962.hg.1 | 3.74  | PSR04013051.hg.1 | SPON2, LOC  |
| TC04000962.hg.1 | 2.96  | JUC04006970.hg.1 | SPON2, LOC  |
| TC04000962.hg.1 | 2.95  | PSR04013046.hg.1 | SPON2, LOC  |
| TC04000962.hg.1 | 2.83  | JUC04006974.hg.1 | SPON2, LOC  |
| TC04000962.hg.1 | 2.25  | JUC04006989.hg.1 | SPON2, LOC  |
| TC04000962.hg.1 | -2.1  | PSR04013096.hg.1 | SPON2, LOC  |
| TC04000962.hg.1 | -2.59 | JUC04006968.hg.1 | SPON2, LOC  |
| TC04000962.hg.1 | -2.68 | JUC04006980.hg.1 | SPON2, LOC  |
| TC04000962.hg.1 | -3.07 | JUC04006987.hg.1 | SPON2, LOC  |
| TC04000962.hg.1 | -4.59 | JUC04006979.hg.1 | SPON2, LOC  |
| TC08000002.hg.1 | 3.74  | JUC08000005.hg.1 | ZNF596      |
| TC08000002.hg.1 | 3.18  | JUC08000010.hg.1 | ZNF596      |
| TC08000002.hg.1 | 2.69  | PSR08000009.hg.1 | ZNF596      |
| TC08000002.hg.1 | 2.4   | PSR08000007.hg.1 | ZNF596      |
| TC08000002.hg.1 | 2.38  | PSR08000010.hg.1 | ZNF596      |
| TC08000002.hg.1 | -2.01 | PSR08000037.hg.1 | ZNF596      |
| TC14000208.hg.1 | 3.74  | JUC14001021.hg.1 | AKAP6       |
| TC14000208.hg.1 | -2.57 | PSR14002277.hg.1 | AKAP6       |
| TC14000208.hg.1 | -3.28 | JUC14001020.hg.1 | AKAP6       |
| TC16000750.hg.1 | 3.74  | JUC16006113.hg.1 | UNKL        |
| TC16000750.hg.1 | 2.86  | JUC16006114.hg.1 | UNKL        |
| TC16000750.hg.1 | 2.28  | PSR16010927.hg.1 | UNKL        |
| TC16000750.hg.1 | 2.07  | JUC16006106.hg.1 | UNKL        |
| TC16000750.hg.1 | -2.06 | JUC16006102.hg.1 | UNKL        |
| TC16000750.hg.1 | -2.15 | JUC16006111.hg.1 | UNKL        |
| TC16000750.hg.1 | -4.35 | JUC16006099.hg.1 | UNKL        |
| TC17000207.hg.1 | 3.74  | JUC17001688.hg.1 | ALKBH5, LOC |
| TC17000207.hg.1 | 3.33  | PSR17002976.hg.1 | ALKBH5, LOC |
| TC17000207.hg.1 | 2.85  | JUC17001691.hg.1 | ALKBH5, LOC |
| TC17000207.hg.1 | 2.58  | PSR17002973.hg.1 | ALKBH5, LOC |
| TC17000207.hg.1 | 2.22  | PSR17002975.hg.1 | ALKBH5, LOC |
| TC17000207.hg.1 | 2.07  | PSR17002974.hg.1 | ALKBH5, LOC |
| TC20000566.hg.1 | 3.74  | PSR20008229.hg.1 | PCED1A      |
| TC20000566.hg.1 | -2.73 | JUC20004203.hg.1 | PCED1A      |
| TC05000761.hg.1 | 3.73  | JUC05005680.hg.1 | PCDHGC4, P  |
| TC05000761.hg.1 | 3.17  | JUC05005666.hg.1 | PCDHGC4, P  |
| TC05000761.hg.1 | 2.97  | JUC05005676.hg.1 | PCDHGC4, P  |
| TC05000761.hg.1 | 2.86  | JUC05005672.hg.1 | PCDHGC4, P  |
| TC05000761.hg.1 | 2.58  | JUC05005668.hg.1 | PCDHGC4, P  |
| TC05000761.hg.1 | 2.55  | JUC05005667.hg.1 | PCDHGC4, P  |
| TC05000761.hg.1 | 2.5   | JUC05005681.hg.1 | PCDHGC4, P  |
| TC05000761.hg.1 | 2.45  | JUC05005656.hg.1 | PCDHGC4, P  |
| TC05000761.hg.1 | 2.35  | JUC05005655.hg.1 | PCDHGC4, P  |
| TC05000761.hg.1 | 2.32  | JUC05005674.hg.1 | PCDHGC4, P  |
| TC05000761.hg.1 | 2.31  | JUC05005678.hg.1 | PCDHGC4, P  |
| TC05000761.hg.1 | 2.29  | PSR05010868.hg.1 | PCDHGC4, P  |
| TC05000761.hg.1 | 2.2   | JUC05005677.hg.1 | PCDHGC4, P  |
| TC05000761.hg.1 | 2.18  | PSR05010862.hg.1 | PCDHGC4, P  |
| TC05000761.hg.1 | 2.12  | JUC05005657.hg.1 | PCDHGC4, P  |
| TC05000761.hg.1 | 2.12  | JUC05005662.hg.1 | PCDHGC4, P  |
| TC05000761.hg.1 | 2.08  | JUC05005675.hg.1 | PCDHGC4, P  |
| TC08000645.hg.1 | 3.73  | JUC08004463.hg.1 | FZD6        |
| TC08000645.hg.1 | 2.32  | PSR08008772.hg.1 | FZD6        |
| TC08001332.hg.1 | 3.73  | JUC08008843.hg.1 | TCEB1       |
| TC08001332.hg.1 | 2.67  | PSR08017216.hg.1 | TCEB1       |
| TC16000503.hg.1 | 3.73  | JUC16004031.hg.1 | NDRG4       |
| TC16000503.hg.1 | 3.33  | JUC16004027.hg.1 | NDRG4       |



|                 |       |                  |         |
|-----------------|-------|------------------|---------|
| TC16000503.hg.1 | 2.84  | JUC16004022.hg.1 | NDRG4   |
| TC16000503.hg.1 | 2.74  | PSR16007050.hg.1 | NDRG4   |
| TC16000503.hg.1 | 2.69  | PSR16007055.hg.1 | NDRG4   |
| TC16000503.hg.1 | 2.68  | JUC16004032.hg.1 | NDRG4   |
| TC16000503.hg.1 | 2.4   | JUC16004042.hg.1 | NDRG4   |
| TC16000503.hg.1 | 2.34  | PSR16007061.hg.1 | NDRG4   |
| TC16000503.hg.1 | 2.29  | JUC16004024.hg.1 | NDRG4   |
| TC16000503.hg.1 | 2.18  | PSR16007077.hg.1 | NDRG4   |
| TC16000503.hg.1 | 2.13  | PSR16007062.hg.1 | NDRG4   |
| TC16000503.hg.1 | 2.1   | PSR16007058.hg.1 | NDRG4   |
| TC16000503.hg.1 | 2.1   | PSR16007066.hg.1 | NDRG4   |
| TC16000503.hg.1 | 2.1   | JUC16004035.hg.1 | NDRG4   |
| TC16000503.hg.1 | -2.04 | JUC16004036.hg.1 | NDRG4   |
| TC16000503.hg.1 | -2.27 | JUC16004018.hg.1 | NDRG4   |
| TC19001438.hg.1 | 3.73  | JUC19011239.hg.1 | ZNF792  |
| TC19001438.hg.1 | 2.51  | PSR19019345.hg.1 | ZNF792  |
| TC19001700.hg.1 | 3.73  | JUC19013246.hg.1 | PLEKHA4 |
| TC19001700.hg.1 | 2.06  | PSR19023165.hg.1 | PLEKHA4 |
| TC19001700.hg.1 | -2.04 | JUC19013231.hg.1 | PLEKHA4 |
| TC19001700.hg.1 | -3.32 | JUC19013244.hg.1 | PLEKHA4 |
| TC01002733.hg.1 | 3.72  | JUC01022935.hg.1 | ITGB3BP |
| TC01002733.hg.1 | 2.21  | PSR01042902.hg.1 | ITGB3BP |
| TC01002733.hg.1 | 2.16  | JUC01022920.hg.1 | ITGB3BP |
| TC01002733.hg.1 | -3.86 | JUC01022917.hg.1 | ITGB3BP |
| TC01002733.hg.1 | -4.22 | JUC01022936.hg.1 | ITGB3BP |
| TC01002733.hg.1 | -5.29 | JUC01022915.hg.1 | ITGB3BP |
| TC08000160.hg.1 | 3.72  | JUC08000893.hg.1 | XPO7    |
| TC08000160.hg.1 | 2.79  | PSR08001629.hg.1 | XPO7    |
| TC08000160.hg.1 | 2.09  | PSR08001651.hg.1 | XPO7    |
| TC11000963.hg.1 | 3.72  | JUC11006427.hg.1 | DYNC2H1 |
| TC11000963.hg.1 | 3.2   | JUC11006367.hg.1 | DYNC2H1 |
| TC11000963.hg.1 | 2.49  | JUC11006420.hg.1 | DYNC2H1 |
| TC11000963.hg.1 | 2.38  | JUC11006398.hg.1 | DYNC2H1 |
| TC11000963.hg.1 | 2.27  | JUC11006416.hg.1 | DYNC2H1 |
| TC11000963.hg.1 | 2.08  | JUC11006371.hg.1 | DYNC2H1 |
| TC11000963.hg.1 | -2.03 | JUC11006359.hg.1 | DYNC2H1 |
| TC11000963.hg.1 | -2.06 | JUC11006418.hg.1 | DYNC2H1 |
| TC11000963.hg.1 | -2.21 | PSR11012007.hg.1 | DYNC2H1 |
| TC11000963.hg.1 | -2.86 | JUC11006421.hg.1 | DYNC2H1 |
| TC11000963.hg.1 | -2.94 | JUC11006426.hg.1 | DYNC2H1 |
| TC15000448.hg.1 | 3.72  | PSR15004259.hg.1 | RNF111  |
| TC15000448.hg.1 | 2.41  | PSR15004270.hg.1 | RNF111  |
| TC15000448.hg.1 | 2.14  | JUC15002098.hg.1 | RNF111  |
| TC15000448.hg.1 | -2.11 | JUC15002103.hg.1 | RNF111  |
| TC15000465.hg.1 | 3.72  | JUC15002153.hg.1 |         |
| TC15000465.hg.1 | -2.64 | PSR15004356.hg.1 |         |
| TC15000465.hg.1 | -2.99 | PSR15004360.hg.1 |         |
| TC17001341.hg.1 | 3.72  | JUC17010104.hg.1 | EVI2B   |
| TC17001341.hg.1 | 2.59  | JUC17010105.hg.1 | EVI2B   |
| TC17001341.hg.1 | 2.51  | PSR17017838.hg.1 | EVI2B   |
| TC11001523.hg.1 | 3.71  | JUC11010156.hg.1 | MPPED2  |
| TC11001523.hg.1 | 2.41  | JUC11010157.hg.1 | MPPED2  |
| TC11001523.hg.1 | 2.24  | JUC11010151.hg.1 | MPPED2  |
| TC11001523.hg.1 | 2.22  | PSR11019027.hg.1 | MPPED2  |
| TC12001412.hg.1 | 3.71  | PSR12018284.hg.1 | PUS7L   |
| TC12001412.hg.1 | -2.44 | JUC12010201.hg.1 | PUS7L   |
| TC15000433.hg.1 | 3.71  | JUC15001930.hg.1 | TEX9    |
| TC15000433.hg.1 | 2.12  | PSR15003992.hg.1 | TEX9    |

|                 |       |                  |             |
|-----------------|-------|------------------|-------------|
| TC15001612.hg.1 | 3.71  | PSR15015540.hg.1 | UACA        |
| TC15001612.hg.1 | 2.32  | JUC15008438.hg.1 | UACA        |
| TC15001612.hg.1 | 2.14  | PSR15015516.hg.1 | UACA        |
| TC15001612.hg.1 | -2.07 | JUC15008436.hg.1 | UACA        |
| TC15001612.hg.1 | -2.23 | JUC15008448.hg.1 | UACA        |
| TC01000313.hg.1 | 3.7   | PSR01004752.hg.1 | SRRM1       |
| TC01000313.hg.1 | 2.21  | JUC01002558.hg.1 | SRRM1       |
| TC01000313.hg.1 | -2    | PSR01004768.hg.1 | SRRM1       |
| TC01000313.hg.1 | -2.01 | JUC01002562.hg.1 | SRRM1       |
| TC01000313.hg.1 | -2.12 | JUC01002557.hg.1 | SRRM1       |
| TC01000313.hg.1 | -2.31 | PSR01004771.hg.1 | SRRM1       |
| TC04000072.hg.1 | 3.7   | JUC04000757.hg.1 | S100P       |
| TC04000072.hg.1 | 2.21  | PSR04001641.hg.1 | S100P       |
| TC04000072.hg.1 | 2.01  | JUC04000758.hg.1 | S100P       |
| TC04000072.hg.1 | -2.08 | PSR04001636.hg.1 | S100P       |
| TC04000181.hg.1 | 3.7   | PSR04002853.hg.1 | RBPJ        |
| TC04000181.hg.1 | 2.43  | JUC04001353.hg.1 | RBPJ        |
| TC04000181.hg.1 | 2.05  | JUC04001365.hg.1 | RBPJ        |
| TC08000646.hg.1 | 3.7   | JUC08004469.hg.1 | CTHRC1      |
| TC08000646.hg.1 | 3.18  | PSR08008801.hg.1 | CTHRC1      |
| TC08000646.hg.1 | 2.13  | JUC08004465.hg.1 | CTHRC1      |
| TC08000646.hg.1 | -2.95 | PSR08008790.hg.1 | CTHRC1      |
| TC08000646.hg.1 | -6.65 | PSR08008793.hg.1 | CTHRC1      |
| TC08000646.hg.1 | -9.34 | PSR08008788.hg.1 | CTHRC1      |
| TC10001195.hg.1 | 3.7   | JUC10008706.hg.1 | ZNF33B      |
| TC10001195.hg.1 | 2.54  | PSR10015007.hg.1 | ZNF33B      |
| TC13001718.hg.1 | 3.7   | JUC13008373.hg.1 | LINC00598   |
| TC13001718.hg.1 | 2.23  | PSR13006760.hg.1 | LINC00598   |
| TC15001507.hg.1 | 3.7   | JUC15007696.hg.1 | RORA        |
| TC15001507.hg.1 | 2.98  | PSR15014280.hg.1 | RORA        |
| TC15001507.hg.1 | 2.8   | JUC15007691.hg.1 | RORA        |
| TC15001507.hg.1 | 2.26  | PSR15014285.hg.1 | RORA        |
| TC15001507.hg.1 | 2.01  | PSR15014274.hg.1 | RORA        |
| TC15001507.hg.1 | 2.01  | PSR15014282.hg.1 | RORA        |
| TC15001507.hg.1 | -2.32 | PSR15014275.hg.1 | RORA        |
| TC16000464.hg.1 | 3.7   | JUC16003631.hg.1 | MT4         |
| TC16000464.hg.1 | 2.88  | PSR16006451.hg.1 | MT4         |
| TC19000058.hg.1 | 3.7   | PSR19000898.hg.1 | ZNF554      |
| TC19000058.hg.1 | 2.3   | JUC19000493.hg.1 | ZNF554      |
| TC19000058.hg.1 | 2.01  | JUC19000494.hg.1 | ZNF554      |
| TC01002519.hg.1 | 3.69  | PSR01039158.hg.1 | GNL2        |
| TC01002519.hg.1 | 3.68  | JUC01021022.hg.1 | GNL2        |
| TC01002519.hg.1 | -2.02 | JUC01021017.hg.1 | GNL2        |
| TC01002519.hg.1 | -2.08 | JUC01021027.hg.1 | GNL2        |
| TC01003801.hg.1 | 3.68  | JUC01030384.hg.1 | INTS7       |
| TC01003801.hg.1 | 2.87  | JUC01030389.hg.1 | INTS7       |
| TC01003801.hg.1 | -2.09 | PSR01058132.hg.1 | INTS7       |
| TC01003801.hg.1 | -3.32 | JUC01030387.hg.1 | INTS7       |
| TC08000579.hg.1 | 3.68  | JUC08004032.hg.1 | NDUFAF6, LC |
| TC08000579.hg.1 | 3.01  | JUC08004050.hg.1 | NDUFAF6, LC |
| TC08000579.hg.1 | 2.92  | PSR08008029.hg.1 | NDUFAF6, LC |
| TC08000579.hg.1 | 2.52  | JUC08004063.hg.1 | NDUFAF6, LC |
| TC08000579.hg.1 | 2.3   | JUC08004054.hg.1 | NDUFAF6, LC |
| TC08000579.hg.1 | 2.25  | JUC08004036.hg.1 | NDUFAF6, LC |
| TC08000579.hg.1 | 2.17  | PSR08008073.hg.1 | NDUFAF6, LC |
| TC08000579.hg.1 | 2.16  | JUC08004030.hg.1 | NDUFAF6, LC |
| TC08000579.hg.1 | 2.11  | JUC08004041.hg.1 | NDUFAF6, LC |
| TC08000579.hg.1 | -4.46 | PSR08008033.hg.1 | NDUFAF6, LC |

|                 |        |                  |         |
|-----------------|--------|------------------|---------|
| TC10000663.hg.1 | 3.68   | JUC10004242.hg.1 | CYP26A1 |
| TC10000663.hg.1 | 2.09   | PSR10007472.hg.1 | CYP26A1 |
| TC10000663.hg.1 | -2.03  | PSR10007469.hg.1 | CYP26A1 |
| TC10000663.hg.1 | -2.64  | JUC10004246.hg.1 | CYP26A1 |
| TC10000663.hg.1 | -3.06  | JUC10004248.hg.1 | CYP26A1 |
| TC10000663.hg.1 | -4.43  | PSR10007467.hg.1 | CYP26A1 |
| TC10000663.hg.1 | -8.56  | PSR10007465.hg.1 | CYP26A1 |
| TC10000663.hg.1 | -10.01 | PSR10007466.hg.1 | CYP26A1 |
| TC10000663.hg.1 | -13.3  | JUC10004247.hg.1 | CYP26A1 |
| TC12001862.hg.1 | 3.68   | JUC12013549.hg.1 | ANKS1B  |
| TC12001862.hg.1 | 2.77   | JUC12013574.hg.1 | ANKS1B  |
| TC12001862.hg.1 | 2.71   | JUC12013578.hg.1 | ANKS1B  |
| TC12001862.hg.1 | 2.61   | PSR12024377.hg.1 | ANKS1B  |
| TC12001862.hg.1 | 2.04   | JUC12013554.hg.1 | ANKS1B  |
| TC12001862.hg.1 | -2.03  | PSR12024405.hg.1 | ANKS1B  |
| TC12001862.hg.1 | -2.03  | PSR12024411.hg.1 | ANKS1B  |
| TC12001862.hg.1 | -2.03  | JUC12013560.hg.1 | ANKS1B  |
| TC12001862.hg.1 | -2.17  | PSR12024400.hg.1 | ANKS1B  |
| TC12001862.hg.1 | -2.18  | PSR12024408.hg.1 | ANKS1B  |
| TC12001862.hg.1 | -2.38  | PSR12024393.hg.1 | ANKS1B  |
| TC12001862.hg.1 | -2.47  | PSR12024401.hg.1 | ANKS1B  |
| TC12001862.hg.1 | -2.55  | JUC12013571.hg.1 | ANKS1B  |
| TC12001862.hg.1 | -2.76  | PSR12024403.hg.1 | ANKS1B  |
| TC12001862.hg.1 | -2.9   | JUC12013584.hg.1 | ANKS1B  |
| TC12001862.hg.1 | -3.58  | JUC12013566.hg.1 | ANKS1B  |
| TC02000270.hg.1 | 3.67   | PSR02003998.hg.1 | PLEKHH2 |
| TC02000270.hg.1 | 3.09   | PSR02003966.hg.1 | PLEKHH2 |
| TC02000270.hg.1 | 2.78   | PSR02003968.hg.1 | PLEKHH2 |
| TC02000270.hg.1 | 2.56   | PSR02003974.hg.1 | PLEKHH2 |
| TC02000270.hg.1 | 2.55   | JUC02002068.hg.1 | PLEKHH2 |
| TC02000270.hg.1 | 2.34   | PSR02003973.hg.1 | PLEKHH2 |
| TC02000270.hg.1 | 2.09   | JUC02002064.hg.1 | PLEKHH2 |
| TC02000270.hg.1 | 2.08   | PSR02003969.hg.1 | PLEKHH2 |
| TC02000270.hg.1 | 2.02   | PSR02004001.hg.1 | PLEKHH2 |
| TC02000270.hg.1 | -2.13  | JUC02002082.hg.1 | PLEKHH2 |
| TC02000270.hg.1 | -2.22  | JUC02002071.hg.1 | PLEKHH2 |
| TC02000270.hg.1 | -2.37  | JUC02002062.hg.1 | PLEKHH2 |
| TC02000270.hg.1 | -2.54  | JUC02002076.hg.1 | PLEKHH2 |
| TC02001361.hg.1 | 3.67   | JUC02011276.hg.1 | COL4A3  |
| TC02001361.hg.1 | 2.58   | PSR02021194.hg.1 | COL4A3  |
| TC02001361.hg.1 | 2.56   | JUC02011325.hg.1 | COL4A3  |
| TC02001361.hg.1 | -2.04  | JUC02011342.hg.1 | COL4A3  |
| TC02001361.hg.1 | -2.05  | PSR02021199.hg.1 | COL4A3  |
| TC02001361.hg.1 | -2.14  | PSR02021173.hg.1 | COL4A3  |
| TC02001361.hg.1 | -2.14  | JUC02011306.hg.1 | COL4A3  |
| TC02001361.hg.1 | -2.21  | JUC02011282.hg.1 | COL4A3  |
| TC02001361.hg.1 | -2.24  | PSR02021192.hg.1 | COL4A3  |
| TC02001361.hg.1 | -2.26  | PSR02021214.hg.1 | COL4A3  |
| TC02001361.hg.1 | -2.29  | PSR02021174.hg.1 | COL4A3  |
| TC02001361.hg.1 | -2.46  | PSR02021215.hg.1 | COL4A3  |
| TC02002434.hg.1 | 3.67   | PSR02038449.hg.1 | PRPF40A |
| TC02002434.hg.1 | 2.24   | JUC02020111.hg.1 | PRPF40A |
| TC02002434.hg.1 | 2.01   | JUC02020118.hg.1 | PRPF40A |
| TC03000375.hg.1 | 3.67   | PSR03008088.hg.1 | FLNB    |
| TC03000375.hg.1 | 2.86   | PSR03008086.hg.1 | FLNB    |
| TC03000375.hg.1 | 2.49   | JUC03003992.hg.1 | FLNB    |
| TC03000375.hg.1 | 2.13   | PSR03008087.hg.1 | FLNB    |
| TC03000375.hg.1 | 2      | PSR03008145.hg.1 | FLNB    |

|                 |        |                  |            |
|-----------------|--------|------------------|------------|
| TC05000433.hg.1 | 3.67   | JUC05003335.hg.1 | TMEM161B-A |
| TC05000433.hg.1 | 3.63   | JUC05003333.hg.1 | TMEM161B-A |
| TC05000433.hg.1 | 2.68   | JUC05003347.hg.1 | TMEM161B-A |
| TC05000433.hg.1 | 2.24   | PSR05006114.hg.1 | TMEM161B-A |
| TC05000433.hg.1 | 2.08   | JUC05003337.hg.1 | TMEM161B-A |
| TC05000433.hg.1 | -2.41  | JUC05003345.hg.1 | TMEM161B-A |
| TC06000938.hg.1 | 3.67   | JUC06005231.hg.1 |            |
| TC06000938.hg.1 | 2.15   | PSR06010971.hg.1 |            |
| TC07000652.hg.1 | 3.67   | JUC07004731.hg.1 | SH2B2      |
| TC07000652.hg.1 | -2.58  | JUC07004744.hg.1 | SH2B2      |
| TC07000652.hg.1 | -2.96  | PSR07010179.hg.1 | SH2B2      |
| TC15001230.hg.1 | 3.67   | JUC15005838.hg.1 | BMF        |
| TC15001230.hg.1 | -2.14  | PSR15011035.hg.1 | BMF        |
| TC15001230.hg.1 | -2.61  | PSR15011036.hg.1 | BMF        |
| TC02002673.hg.1 | 3.67   | JUC02022487.hg.1 | ALS2CR12   |
| TC02002673.hg.1 | -2     | PSR02042976.hg.1 | ALS2CR12   |
| TC05000398.hg.1 | 3.66   | JUC05003062.hg.1 | ZFYVE16    |
| TC05000398.hg.1 | 3.33   | JUC05003068.hg.1 | ZFYVE16    |
| TC05000398.hg.1 | 2.51   | PSR05005619.hg.1 | ZFYVE16    |
| TC05000398.hg.1 | 2.31   | JUC05003070.hg.1 | ZFYVE16    |
| TC05000398.hg.1 | 2.23   | PSR05005622.hg.1 | ZFYVE16    |
| TC05000398.hg.1 | -2.73  | JUC05003063.hg.1 | ZFYVE16    |
| TC10000204.hg.1 | 3.66   | JUC10001311.hg.1 | LOC387647  |
| TC10000204.hg.1 | -2.05  | PSR10002437.hg.1 | LOC387647  |
| TC10000204.hg.1 | -2.26  | PSR10002435.hg.1 | LOC387647  |
| TC10000204.hg.1 | -2.77  | PSR10002436.hg.1 | LOC387647  |
| TC10000204.hg.1 | -3.51  | JUC10001319.hg.1 | LOC387647  |
| TC15002009.hg.1 | 3.66   | PSR15018660.hg.1 | PCSK6, LOC |
| TC15002009.hg.1 | 3.6    | JUC15010174.hg.1 | PCSK6, LOC |
| TC15002009.hg.1 | 3.15   | JUC15010170.hg.1 | PCSK6, LOC |
| TC15002009.hg.1 | 3.02   | PSR15018654.hg.1 | PCSK6, LOC |
| TC15002009.hg.1 | 2.76   | PSR15018628.hg.1 | PCSK6, LOC |
| TC15002009.hg.1 | 2.55   | JUC15010166.hg.1 | PCSK6, LOC |
| TC15002009.hg.1 | 2.51   | JUC15010152.hg.1 | PCSK6, LOC |
| TC15002009.hg.1 | 2.47   | PSR15018637.hg.1 | PCSK6, LOC |
| TC15002009.hg.1 | 2.46   | PSR15018627.hg.1 | PCSK6, LOC |
| TC15002009.hg.1 | 2.33   | JUC15010161.hg.1 | PCSK6, LOC |
| TC15002009.hg.1 | 2.28   | JUC15010169.hg.1 | PCSK6, LOC |
| TC15002009.hg.1 | 2.26   | PSR15018659.hg.1 | PCSK6, LOC |
| TC15002009.hg.1 | 2.07   | PSR15018645.hg.1 | PCSK6, LOC |
| TC15002009.hg.1 | 2.07   | PSR15018650.hg.1 | PCSK6, LOC |
| TC15002009.hg.1 | 2.02   | JUC15010163.hg.1 | PCSK6, LOC |
| TC15002009.hg.1 | -2.01  | PSR15018648.hg.1 | PCSK6, LOC |
| TC15002009.hg.1 | -2.25  | PSR15018642.hg.1 | PCSK6, LOC |
| TC15002009.hg.1 | -2.68  | PSR15018629.hg.1 | PCSK6, LOC |
| TC15002009.hg.1 | -2.93  | JUC15010167.hg.1 | PCSK6, LOC |
| TC15002009.hg.1 | -3.11  | JUC15010151.hg.1 | PCSK6, LOC |
| TC15002009.hg.1 | -3.12  | JUC15010173.hg.1 | PCSK6, LOC |
| TC15002009.hg.1 | -3.28  | JUC15010164.hg.1 | PCSK6, LOC |
| TC15002009.hg.1 | -3.38  | JUC15010149.hg.1 | PCSK6, LOC |
| TC15002009.hg.1 | -4.15  | JUC15010154.hg.1 | PCSK6, LOC |
| TC15002009.hg.1 | -4.25  | PSR15018626.hg.1 | PCSK6, LOC |
| TC15002009.hg.1 | -5.33  | JUC15010175.hg.1 | PCSK6, LOC |
| TC15002009.hg.1 | -10.64 | JUC15010172.hg.1 | PCSK6, LOC |
| TC15002009.hg.1 | -11.81 | JUC15010157.hg.1 | PCSK6, LOC |
| TC22000326.hg.1 | 3.66   | JUC22002265.hg.1 | MCHR1      |
| TC22000326.hg.1 | 2.27   | JUC22002267.hg.1 | MCHR1      |
| TC22000326.hg.1 | 2.12   | PSR22006285.hg.1 | MCHR1      |

|                 |       |                  |       |
|-----------------|-------|------------------|-------|
| TC22000326.hg.1 | 2.12  | PSR22006286.hg.1 | MCHR1 |
| TC22000326.hg.1 | -2.43 | JUC22002266.hg.1 | MCHR1 |
| TC22000326.hg.1 | -2.49 | PSR22006289.hg.1 | MCHR1 |
| TC22000326.hg.1 | -4.62 | PSR22006288.hg.1 | MCHR1 |
| TC01000024.hg.1 | 3.65  | JUC01000127.hg.1 | AGRN  |
| TC01000024.hg.1 | 2.52  | PSR01000260.hg.1 | AGRN  |
| TC01000024.hg.1 | 2.48  | PSR01000278.hg.1 | AGRN  |
| TC01000024.hg.1 | 2.12  | JUC01000124.hg.1 | AGRN  |
| TC01000024.hg.1 | 2.12  | JUC01000137.hg.1 | AGRN  |
| TC01000024.hg.1 | -2.02 | PSR01000248.hg.1 | AGRN  |
| TC01000024.hg.1 | -2.02 | JUC01000126.hg.1 | AGRN  |
| TC01000024.hg.1 | -2.05 | JUC01000149.hg.1 | AGRN  |
| TC01000024.hg.1 | -2.37 | JUC01000125.hg.1 | AGRN  |
| TC01000024.hg.1 | -2.43 | JUC01000136.hg.1 | AGRN  |
| TC01000151.hg.1 | 3.65  | JUC01001329.hg.1 | PLOD1 |
| TC01000151.hg.1 | 2.03  | PSR01002441.hg.1 | PLOD1 |
| TC02000939.hg.1 | 3.65  | JUC02007348.hg.1 | RIF1  |
| TC02000939.hg.1 | 2.42  | JUC02007366.hg.1 | RIF1  |
| TC02000939.hg.1 | 2.16  | PSR02013734.hg.1 | RIF1  |
| TC02000939.hg.1 | 2.15  | PSR02013678.hg.1 | RIF1  |
| TC02000939.hg.1 | -2.03 | JUC02007341.hg.1 | RIF1  |
| TC02000939.hg.1 | -3.28 | JUC02007347.hg.1 | RIF1  |
| TC03000419.hg.1 | 3.65  | JUC03004347.hg.1 | MITF  |
| TC03000419.hg.1 | 3.35  | JUC03004357.hg.1 | MITF  |
| TC03000419.hg.1 | 2.52  | PSR03008700.hg.1 | MITF  |
| TC03000419.hg.1 | 2.47  | JUC03004345.hg.1 | MITF  |
| TC03000419.hg.1 | 2.44  | PSR03008712.hg.1 | MITF  |
| TC03000419.hg.1 | 2.36  | JUC03004355.hg.1 | MITF  |
| TC03000419.hg.1 | 2.3   | PSR03008715.hg.1 | MITF  |
| TC03000419.hg.1 | 2.08  | JUC03004342.hg.1 | MITF  |
| TC03000419.hg.1 | 2.04  | PSR03008748.hg.1 | MITF  |
| TC03001004.hg.1 | 3.65  | JUC03008973.hg.1 | CHRD  |
| TC03001004.hg.1 | -2.24 | PSR03017705.hg.1 | CHRD  |
| TC03001004.hg.1 | -4.36 | JUC03008979.hg.1 | CHRD  |
| TC04002910.hg.1 | 3.65  | JUC04016768.hg.1 | RNF4  |
| TC04002910.hg.1 | -2.03 | PSR04000829.hg.1 | RNF4  |
| TC04002910.hg.1 | -2.36 | JUC04016749.hg.1 | RNF4  |
| TC04002910.hg.1 | -2.97 | JUC04016751.hg.1 | RNF4  |
| TC06000976.hg.1 | 3.65  | JUC06005517.hg.1 | LAMA2 |
| TC06000976.hg.1 | 3.56  | JUC06005503.hg.1 | LAMA2 |
| TC06000976.hg.1 | 3.43  | JUC06005480.hg.1 | LAMA2 |
| TC06000976.hg.1 | 3.19  | JUC06005525.hg.1 | LAMA2 |
| TC06000976.hg.1 | 3.18  | JUC06005458.hg.1 | LAMA2 |
| TC06000976.hg.1 | 3.08  | PSR06011415.hg.1 | LAMA2 |
| TC06000976.hg.1 | 2.95  | PSR06011470.hg.1 | LAMA2 |
| TC06000976.hg.1 | 2.87  | PSR06011435.hg.1 | LAMA2 |
| TC06000976.hg.1 | 2.81  | JUC06005486.hg.1 | LAMA2 |
| TC06000976.hg.1 | 2.74  | JUC06005499.hg.1 | LAMA2 |
| TC06000976.hg.1 | 2.7   | JUC06005473.hg.1 | LAMA2 |
| TC06000976.hg.1 | 2.67  | JUC06005489.hg.1 | LAMA2 |
| TC06000976.hg.1 | 2.52  | JUC06005483.hg.1 | LAMA2 |
| TC06000976.hg.1 | 2.48  | JUC06005521.hg.1 | LAMA2 |
| TC06000976.hg.1 | 2.45  | JUC06005476.hg.1 | LAMA2 |
| TC06000976.hg.1 | 2.45  | JUC06005495.hg.1 | LAMA2 |
| TC06000976.hg.1 | 2.43  | JUC06005482.hg.1 | LAMA2 |
| TC06000976.hg.1 | 2.4   | JUC06005513.hg.1 | LAMA2 |
| TC06000976.hg.1 | 2.24  | PSR06011400.hg.1 | LAMA2 |
| TC06000976.hg.1 | 2.23  | JUC06005456.hg.1 | LAMA2 |

|                 |        |                  |       |
|-----------------|--------|------------------|-------|
| TC06000976.hg.1 | 2.2    | PSR06011462.hg.1 | LAMA2 |
| TC06000976.hg.1 | 2.15   | PSR06011414.hg.1 | LAMA2 |
| TC06000976.hg.1 | 2.1    | PSR06011398.hg.1 | LAMA2 |
| TC06000976.hg.1 | 2.09   | JUC06005506.hg.1 | LAMA2 |
| TC06000976.hg.1 | 2.06   | PSR06011408.hg.1 | LAMA2 |
| TC06000976.hg.1 | -2     | JUC06005500.hg.1 | LAMA2 |
| TC06000976.hg.1 | -2.02  | PSR06011428.hg.1 | LAMA2 |
| TC06000976.hg.1 | -2.02  | JUC06005504.hg.1 | LAMA2 |
| TC06000976.hg.1 | -2.07  | JUC06005462.hg.1 | LAMA2 |
| TC06000976.hg.1 | -2.1   | PSR06011404.hg.1 | LAMA2 |
| TC06000976.hg.1 | -2.15  | PSR06011424.hg.1 | LAMA2 |
| TC06000976.hg.1 | -2.17  | JUC06005465.hg.1 | LAMA2 |
| TC06000976.hg.1 | -2.28  | JUC06005494.hg.1 | LAMA2 |
| TC06000976.hg.1 | -2.43  | PSR06011427.hg.1 | LAMA2 |
| TC06000976.hg.1 | -2.55  | JUC06005511.hg.1 | LAMA2 |
| TC06000976.hg.1 | -2.58  | PSR06011396.hg.1 | LAMA2 |
| TC06000976.hg.1 | -2.64  | PSR06011421.hg.1 | LAMA2 |
| TC06000976.hg.1 | -2.69  | PSR06011403.hg.1 | LAMA2 |
| TC06000976.hg.1 | -2.7   | PSR06011438.hg.1 | LAMA2 |
| TC06000976.hg.1 | -2.9   | JUC06005531.hg.1 | LAMA2 |
| TC06000976.hg.1 | -3.08  | PSR06011449.hg.1 | LAMA2 |
| TC06000976.hg.1 | -3.14  | JUC06005522.hg.1 | LAMA2 |
| TC06000976.hg.1 | -3.2   | PSR06011409.hg.1 | LAMA2 |
| TC06000976.hg.1 | -3.3   | PSR06011430.hg.1 | LAMA2 |
| TC06000976.hg.1 | -3.31  | JUC06005463.hg.1 | LAMA2 |
| TC06000976.hg.1 | -3.35  | JUC06005487.hg.1 | LAMA2 |
| TC06000976.hg.1 | -3.54  | JUC06005475.hg.1 | LAMA2 |
| TC06000976.hg.1 | -3.82  | JUC06005527.hg.1 | LAMA2 |
| TC06000976.hg.1 | -3.84  | JUC06005523.hg.1 | LAMA2 |
| TC06000976.hg.1 | -3.91  | PSR06011419.hg.1 | LAMA2 |
| TC06000976.hg.1 | -3.92  | JUC06005464.hg.1 | LAMA2 |
| TC06000976.hg.1 | -4.12  | PSR06011459.hg.1 | LAMA2 |
| TC06000976.hg.1 | -4.36  | PSR06011475.hg.1 | LAMA2 |
| TC06000976.hg.1 | -4.39  | PSR06011422.hg.1 | LAMA2 |
| TC06000976.hg.1 | -4.41  | PSR06011432.hg.1 | LAMA2 |
| TC06000976.hg.1 | -4.62  | PSR06011464.hg.1 | LAMA2 |
| TC06000976.hg.1 | -4.89  | PSR06011397.hg.1 | LAMA2 |
| TC06000976.hg.1 | -5.72  | PSR06011395.hg.1 | LAMA2 |
| TC06000976.hg.1 | -5.82  | PSR06011407.hg.1 | LAMA2 |
| TC06000976.hg.1 | -6     | JUC06005474.hg.1 | LAMA2 |
| TC06000976.hg.1 | -6.41  | PSR06011460.hg.1 | LAMA2 |
| TC06000976.hg.1 | -6.52  | JUC06005488.hg.1 | LAMA2 |
| TC06000976.hg.1 | -8.12  | JUC06005472.hg.1 | LAMA2 |
| TC06000976.hg.1 | -8.49  | JUC06005459.hg.1 | LAMA2 |
| TC06000976.hg.1 | -8.59  | PSR06011429.hg.1 | LAMA2 |
| TC06000976.hg.1 | -10.18 | PSR06011426.hg.1 | LAMA2 |
| TC06000976.hg.1 | -10.64 | JUC06005470.hg.1 | LAMA2 |
| TC06000976.hg.1 | -10.89 | PSR06011476.hg.1 | LAMA2 |
| TC06000976.hg.1 | -13.42 | JUC06005508.hg.1 | LAMA2 |
| TC06000976.hg.1 | -16.1  | JUC06005505.hg.1 | LAMA2 |
| TC06000976.hg.1 | -16.84 | PSR06011393.hg.1 | LAMA2 |
| TC06000976.hg.1 | -17.87 | JUC06005491.hg.1 | LAMA2 |
| TC06000976.hg.1 | -41.24 | JUC06005461.hg.1 | LAMA2 |
| TC10001327.hg.1 | 3.65   | PSR10016755.hg.1 | EGR2  |
| TC10001327.hg.1 | 3.21   | JUC10009791.hg.1 | EGR2  |
| TC10001327.hg.1 | -2.26  | PSR10016756.hg.1 | EGR2  |
| TC10001327.hg.1 | -2.74  | PSR10016761.hg.1 | EGR2  |
| TC10001327.hg.1 | -3.37  | JUC10009789.hg.1 | EGR2  |

|                 |        |                  |           |
|-----------------|--------|------------------|-----------|
| TC10001327.hg.1 | -4.15  | PSR10016747.hg.1 | EGR2      |
| TC10001327.hg.1 | -6.19  | PSR10016751.hg.1 | EGR2      |
| TC10001327.hg.1 | -6.89  | PSR10016769.hg.1 | EGR2      |
| TC10001327.hg.1 | -7.52  | PSR10016749.hg.1 | EGR2      |
| TC10001327.hg.1 | -7.59  | JUC10009783.hg.1 | EGR2      |
| TC10001327.hg.1 | -9.54  | PSR10016767.hg.1 | EGR2      |
| TC10001327.hg.1 | -11.23 | PSR10016770.hg.1 | EGR2      |
| TC10001327.hg.1 | -13.54 | JUC10009784.hg.1 | EGR2      |
| TC13000687.hg.1 | 3.65   | JUC13004679.hg.1 | MRPS31P3, |
| TC13000687.hg.1 | 2.4    | PSR13008054.hg.1 | MRPS31P3, |
| TC13000687.hg.1 | 2.4    | JUC13004702.hg.1 | MRPS31P3, |
| TC13000687.hg.1 | 2.39   | JUC13004698.hg.1 | MRPS31P3, |
| TC13000687.hg.1 | 2.28   | JUC13004693.hg.1 | MRPS31P3, |
| TC13000687.hg.1 | 2.27   | PSR13008065.hg.1 | MRPS31P3, |
| TC13000687.hg.1 | 2.21   | JUC13004714.hg.1 | MRPS31P3, |
| TC13000687.hg.1 | 2.01   | PSR13008050.hg.1 | MRPS31P3, |
| TC17000655.hg.1 | 3.65   | JUC17004544.hg.1 | PDK2      |
| TC17000655.hg.1 | 3.13   | PSR17008211.hg.1 | PDK2      |
| TC17000655.hg.1 | 2.27   | PSR17008226.hg.1 | PDK2      |
| TC17000655.hg.1 | 2.16   | PSR17008228.hg.1 | PDK2      |
| TC17000655.hg.1 | 2.12   | PSR17008208.hg.1 | PDK2      |
| TC17000655.hg.1 | 2.07   | PSR17008245.hg.1 | PDK2      |
| TC17000655.hg.1 | 2.05   | PSR17008240.hg.1 | PDK2      |
| TC17000655.hg.1 | 2.04   | PSR17008232.hg.1 | PDK2      |
| TC17000953.hg.1 | 3.65   | JUC17007103.hg.1 | NARF      |
| TC17000953.hg.1 | 2.35   | PSR17012534.hg.1 | NARF      |
| TC17000953.hg.1 | 2.23   | JUC17007117.hg.1 | NARF      |
| TC17000953.hg.1 | 2.21   | PSR17012539.hg.1 | NARF      |
| TC17002913.hg.1 | 3.65   | PSR17003578.hg.1 |           |
| TC17002913.hg.1 | 3.06   | PSR17003576.hg.1 |           |
| TC17002913.hg.1 | 2.1    | JUC17019182.hg.1 |           |
| TC17002913.hg.1 | -2.18  | JUC17019178.hg.1 |           |
| TC17002913.hg.1 | -2.55  | PSR17003573.hg.1 |           |
| TC17002913.hg.1 | -2.63  | JUC17019181.hg.1 |           |
| TC17002913.hg.1 | -3.17  | JUC17019179.hg.1 |           |
| TC19001155.hg.1 | 3.65   | JUC19009270.hg.1 | OLFM2     |
| TC19001155.hg.1 | 3.26   | PSR19015949.hg.1 | OLFM2     |
| TC19001155.hg.1 | -2.31  | JUC19009268.hg.1 | OLFM2     |
| TC20000198.hg.1 | 3.65   | JUC20001274.hg.1 | TPX2      |
| TC20000198.hg.1 | 3.25   | JUC20001276.hg.1 | TPX2      |
| TC20000198.hg.1 | 3.02   | PSR20002360.hg.1 | TPX2      |
| TC20000198.hg.1 | 3      | PSR20002361.hg.1 | TPX2      |
| TC20000198.hg.1 | 2.2    | PSR20002363.hg.1 | TPX2      |
| TC20000198.hg.1 | 2.12   | JUC20001275.hg.1 | TPX2      |
| TC20000198.hg.1 | -2     | JUC20001264.hg.1 | TPX2      |
| TC20000198.hg.1 | -2.37  | JUC20001266.hg.1 | TPX2      |
| TC01002405.hg.1 | 3.64   | JUC01019958.hg.1 | MAP3K6    |
| TC01002405.hg.1 | 2.2    | PSR01037073.hg.1 | MAP3K6    |
| TC02002478.hg.1 | 3.64   | JUC02020440.hg.1 | DPP4      |
| TC02002478.hg.1 | 2.6    | JUC02020445.hg.1 | DPP4      |
| TC02002478.hg.1 | 2.53   | PSR02039034.hg.1 | DPP4      |
| TC02002478.hg.1 | 2.38   | PSR02039024.hg.1 | DPP4      |
| TC02002478.hg.1 | 2.26   | PSR02039017.hg.1 | DPP4      |
| TC02002478.hg.1 | 2.26   | JUC02020450.hg.1 | DPP4      |
| TC02002478.hg.1 | 2.24   | JUC02020429.hg.1 | DPP4      |
| TC02002478.hg.1 | 2.04   | JUC02020454.hg.1 | DPP4      |
| TC02002478.hg.1 | -2.04  | PSR02039063.hg.1 | DPP4      |
| TC02002478.hg.1 | -2.06  | PSR02039058.hg.1 | DPP4      |

|                 |       |                  |         |
|-----------------|-------|------------------|---------|
| TC02002478.hg.1 | -2.21 | PSR02039054.hg.1 | DPP4    |
| TC02002478.hg.1 | -2.39 | PSR02039062.hg.1 | DPP4    |
| TC02002478.hg.1 | -2.72 | JUC02020441.hg.1 | DPP4    |
| TC02002478.hg.1 | -2.84 | PSR02039031.hg.1 | DPP4    |
| TC02002478.hg.1 | -3.59 | PSR02039019.hg.1 | DPP4    |
| TC08002626.hg.1 | 3.64  | JUC08015390.hg.1 | ZFPM2   |
| TC08002626.hg.1 | 3.19  | JUC08015379.hg.1 | ZFPM2   |
| TC08002626.hg.1 | 2.88  | JUC08015383.hg.1 | ZFPM2   |
| TC08002626.hg.1 | 2.68  | PSR08008961.hg.1 | ZFPM2   |
| TC08002626.hg.1 | 2.63  | JUC08015382.hg.1 | ZFPM2   |
| TC08002626.hg.1 | 2.36  | PSR08008939.hg.1 | ZFPM2   |
| TC08002626.hg.1 | 2.34  | PSR08008936.hg.1 | ZFPM2   |
| TC08002626.hg.1 | 2.2   | PSR08008944.hg.1 | ZFPM2   |
| TC08002626.hg.1 | 2.04  | PSR08008948.hg.1 | ZFPM2   |
| TC08002626.hg.1 | 2.03  | PSR08008934.hg.1 | ZFPM2   |
| TC09000508.hg.1 | 3.64  | PSR09005517.hg.1 | NR4A3   |
| TC09000508.hg.1 | 2.98  | PSR09005519.hg.1 | NR4A3   |
| TC09000508.hg.1 | 2.42  | PSR09005521.hg.1 | NR4A3   |
| TC09000508.hg.1 | 2.17  | JUC09003064.hg.1 | NR4A3   |
| TC09000508.hg.1 | 2.15  | JUC09003071.hg.1 | NR4A3   |
| TC09000508.hg.1 | -2.29 | JUC09003066.hg.1 | NR4A3   |
| TC12001328.hg.1 | 3.64  | JUC12009591.hg.1 | ITPR2   |
| TC12001328.hg.1 | 2.82  | JUC12009606.hg.1 | ITPR2   |
| TC12001328.hg.1 | 2.58  | JUC12009632.hg.1 | ITPR2   |
| TC12001328.hg.1 | 2.21  | JUC12009598.hg.1 | ITPR2   |
| TC12001328.hg.1 | 2.11  | JUC12009618.hg.1 | ITPR2   |
| TC12001328.hg.1 | -2.41 | JUC12009626.hg.1 | ITPR2   |
| TC12001328.hg.1 | -2.74 | PSR12017380.hg.1 | ITPR2   |
| TC18000418.hg.1 | 3.64  | JUC18002877.hg.1 | OSBPL1A |
| TC18000418.hg.1 | 2.56  | PSR18004277.hg.1 | OSBPL1A |
| TC18000418.hg.1 | 2.38  | JUC18002862.hg.1 | OSBPL1A |
| TC18000418.hg.1 | 2.26  | PSR18004259.hg.1 | OSBPL1A |
| TC18000418.hg.1 | 2.12  | PSR18004278.hg.1 | OSBPL1A |
| TC18000418.hg.1 | 2.07  | JUC18002876.hg.1 | OSBPL1A |
| TC18000418.hg.1 | 2.06  | PSR18004264.hg.1 | OSBPL1A |
| TC18000418.hg.1 | -2.15 | PSR18004244.hg.1 | OSBPL1A |
| TC18000418.hg.1 | -2.2  | JUC18002880.hg.1 | OSBPL1A |
| TC19001792.hg.1 | 3.64  | JUC19013843.hg.1 | ZNF615  |
| TC19001792.hg.1 | 2.27  | PSR19024351.hg.1 | ZNF615  |
| TC01001799.hg.1 | 3.63  | JUC01015170.hg.1 | SPATA17 |
| TC01001799.hg.1 | 3.2   | PSR01028129.hg.1 | SPATA17 |
| TC01001799.hg.1 | 3.1   | JUC01015157.hg.1 | SPATA17 |
| TC01001799.hg.1 | -2.02 | PSR01028121.hg.1 | SPATA17 |
| TC01001799.hg.1 | -2.08 | PSR01028134.hg.1 | SPATA17 |
| TC01001799.hg.1 | -2.09 | JUC01015165.hg.1 | SPATA17 |
| TC01001799.hg.1 | -2.15 | JUC01015172.hg.1 | SPATA17 |
| TC01001799.hg.1 | -2.18 | PSR01028120.hg.1 | SPATA17 |
| TC01001799.hg.1 | -2.41 | JUC01015167.hg.1 | SPATA17 |
| TC01001799.hg.1 | -2.76 | JUC01015155.hg.1 | SPATA17 |
| TC04001129.hg.1 | 3.63  | PSR04015453.hg.1 | RPL9    |
| TC04001129.hg.1 | 3.23  | JUC04008191.hg.1 | RPL9    |
| TC04001129.hg.1 | 2.23  | JUC04008184.hg.1 | RPL9    |
| TC04001129.hg.1 | 2.13  | JUC04008187.hg.1 | RPL9    |
| TC04001129.hg.1 | 2.04  | PSR04015448.hg.1 | RPL9    |
| TC05001545.hg.1 | 3.63  | JUC05010884.hg.1 | SSBP2   |
| TC05001545.hg.1 | -2.4  | PSR05021103.hg.1 | SSBP2   |
| TC06000597.hg.1 | 3.63  | JUC06003038.hg.1 | CUL9    |
| TC06000597.hg.1 | 3.07  | JUC06003048.hg.1 | CUL9    |



|                 |       |                  |          |
|-----------------|-------|------------------|----------|
| TC06000597.hg.1 | 2.95  | JUC06003035.hg.1 | CUL9     |
| TC06000597.hg.1 | 2.77  | PSR06007024.hg.1 | CUL9     |
| TC06000597.hg.1 | 2.71  | JUC06003053.hg.1 | CUL9     |
| TC06000597.hg.1 | 2.56  | PSR06007040.hg.1 | CUL9     |
| TC06000597.hg.1 | 2.43  | JUC06003040.hg.1 | CUL9     |
| TC06000597.hg.1 | 2.42  | JUC06003057.hg.1 | CUL9     |
| TC06000597.hg.1 | 2.38  | JUC06003023.hg.1 | CUL9     |
| TC06000597.hg.1 | 2.24  | PSR06006969.hg.1 | CUL9     |
| TC06000597.hg.1 | 2.21  | PSR06007007.hg.1 | CUL9     |
| TC06000597.hg.1 | 2.14  | JUC06003066.hg.1 | CUL9     |
| TC06000597.hg.1 | 2.11  | PSR06007019.hg.1 | CUL9     |
| TC06000597.hg.1 | 2.08  | PSR06007039.hg.1 | CUL9     |
| TC06000597.hg.1 | 2.08  | PSR06007041.hg.1 | CUL9     |
| TC06000597.hg.1 | 2.06  | PSR06006965.hg.1 | CUL9     |
| TC06000597.hg.1 | 2.06  | PSR06006996.hg.1 | CUL9     |
| TC06000597.hg.1 | 2.02  | PSR06007027.hg.1 | CUL9     |
| TC06000597.hg.1 | 2.01  | JUC06003046.hg.1 | CUL9     |
| TC06000597.hg.1 | 2     | PSR06006994.hg.1 | CUL9     |
| TC08000021.hg.1 | 3.63  | JUC08000193.hg.1 | MCPH1    |
| TC08000021.hg.1 | 3.62  | JUC08000184.hg.1 | MCPH1    |
| TC08000021.hg.1 | 2.3   | PSR08000333.hg.1 | MCPH1    |
| TC08000021.hg.1 | 2.01  | JUC08000179.hg.1 | MCPH1    |
| TC08000021.hg.1 | -2.2  | PSR08000327.hg.1 | MCPH1    |
| TC08000021.hg.1 | -2.35 | PSR08000326.hg.1 | MCPH1    |
| TC08000343.hg.1 | 3.63  | JUC08002495.hg.1 | KIAA0146 |
| TC08000343.hg.1 | 3.3   | JUC08002519.hg.1 | KIAA0146 |
| TC08000343.hg.1 | 2.84  | JUC08002515.hg.1 | KIAA0146 |
| TC08000343.hg.1 | 2.51  | JUC08002501.hg.1 | KIAA0146 |
| TC08000343.hg.1 | 2.01  | JUC08002513.hg.1 | KIAA0146 |
| TC08000343.hg.1 | -2.05 | PSR08005075.hg.1 | KIAA0146 |
| TC08000343.hg.1 | -2.19 | PSR08005074.hg.1 | KIAA0146 |
| TC08000343.hg.1 | -3.33 | JUC08002504.hg.1 | KIAA0146 |
| TC08000343.hg.1 | -3.76 | PSR08005071.hg.1 | KIAA0146 |
| TC08000343.hg.1 | -4.58 | PSR08005069.hg.1 | KIAA0146 |
| TC08001737.hg.1 | 3.63  | JUC08011832.hg.1 | PLEC     |
| TC08001737.hg.1 | 2.45  | JUC08011820.hg.1 | PLEC     |
| TC08001737.hg.1 | 2.33  | JUC08011816.hg.1 | PLEC     |
| TC08001737.hg.1 | 2.1   | PSR08022960.hg.1 | PLEC     |
| TC15001264.hg.1 | 3.63  | PSR15011658.hg.1 | ZFP106   |
| TC15001264.hg.1 | 2.99  | JUC15006257.hg.1 | ZFP106   |
| TC16002037.hg.1 | 3.63  | JUC16013222.hg.1 | CLEC18C  |
| TC16002037.hg.1 | 2.68  | JUC16013218.hg.1 | CLEC18C  |
| TC16002037.hg.1 | -2.15 | PSR16008327.hg.1 | CLEC18C  |
| TC16002037.hg.1 | -2.67 | PSR16008351.hg.1 | CLEC18C  |
| TC19000037.hg.1 | 3.63  | JUC19000290.hg.1 | NDUFS7   |
| TC19000037.hg.1 | 2.66  | JUC19000286.hg.1 | NDUFS7   |
| TC19000037.hg.1 | 2.02  | PSR19000501.hg.1 | NDUFS7   |
| TC6_mcf_hap5000 | 3.63  | PSR6_mcf_hap5000 | HLA-H    |
| TC6_mcf_hap5000 | 2.85  | PSR6_mcf_hap5000 | HLA-H    |
| TC6_mcf_hap5000 | 2.14  | PSR6_mcf_hap5000 | HLA-H    |
| TC6_mcf_hap5000 | -2.51 | JUC6_mcf_hap5001 | HLA-H    |
| TC01000129.hg.1 | 3.62  | JUC01001110.hg.1 | PGD      |
| TC01000129.hg.1 | 2.46  | PSR01002045.hg.1 | PGD      |
| TC01000129.hg.1 | 2.2   | PSR01002066.hg.1 | PGD      |
| TC01003627.hg.1 | 3.62  | JUC01029099.hg.1 | TRMT1L   |
| TC01003627.hg.1 | 2.34  | PSR01055795.hg.1 | TRMT1L   |
| TC01003627.hg.1 | 2.18  | JUC01029093.hg.1 | TRMT1L   |
| TC01006288.hg.1 | 3.62  | PSR01003380.hg.1 | CLCNKB   |

|                 |        |                  |             |
|-----------------|--------|------------------|-------------|
| TC01006288.hg.1 | 2.64   | JUC01039312.hg.1 | CLCNKB      |
| TC01006288.hg.1 | -2.64  | JUC01039296.hg.1 | CLCNKB      |
| TC02000078.hg.1 | 3.62   | JUC02000555.hg.1 | LPIN1       |
| TC02000078.hg.1 | 3.53   | PSR02000954.hg.1 | LPIN1       |
| TC02000078.hg.1 | 2.98   | PSR02000950.hg.1 | LPIN1       |
| TC02000078.hg.1 | 2.78   | PSR02001001.hg.1 | LPIN1       |
| TC02000078.hg.1 | 2.68   | PSR02000969.hg.1 | LPIN1       |
| TC02000078.hg.1 | 2.64   | PSR02000976.hg.1 | LPIN1       |
| TC02000078.hg.1 | 2.64   | PSR02000987.hg.1 | LPIN1       |
| TC02000078.hg.1 | 2.63   | PSR02000951.hg.1 | LPIN1       |
| TC02000078.hg.1 | 2.62   | PSR02000952.hg.1 | LPIN1       |
| TC02000078.hg.1 | 2.6    | PSR02000955.hg.1 | LPIN1       |
| TC02000078.hg.1 | 2.54   | JUC02000533.hg.1 | LPIN1       |
| TC02000078.hg.1 | 2.46   | JUC02000530.hg.1 | LPIN1       |
| TC02000078.hg.1 | 2.41   | PSR02000960.hg.1 | LPIN1       |
| TC02000078.hg.1 | 2.39   | PSR02000985.hg.1 | LPIN1       |
| TC02000078.hg.1 | 2.37   | PSR02000961.hg.1 | LPIN1       |
| TC02000078.hg.1 | 2.34   | PSR02000963.hg.1 | LPIN1       |
| TC02000078.hg.1 | 2.15   | PSR02000990.hg.1 | LPIN1       |
| TC02000078.hg.1 | 2.09   | PSR02000996.hg.1 | LPIN1       |
| TC02000078.hg.1 | 2.07   | PSR02000944.hg.1 | LPIN1       |
| TC02000078.hg.1 | 2.02   | PSR02000973.hg.1 | LPIN1       |
| TC02000078.hg.1 | 2.02   | JUC02000561.hg.1 | LPIN1       |
| TC02000078.hg.1 | -2.07  | JUC02000545.hg.1 | LPIN1       |
| TC02000078.hg.1 | -2.38  | JUC02000536.hg.1 | LPIN1       |
| TC02000078.hg.1 | -2.52  | JUC02000528.hg.1 | LPIN1       |
| TC02000078.hg.1 | -11.68 | JUC02000563.hg.1 | LPIN1       |
| TC04000041.hg.1 | 3.62   | JUC04000431.hg.1 | GRK4        |
| TC04000041.hg.1 | -2.1   | PSR04001077.hg.1 | GRK4        |
| TC15001761.hg.1 | 3.62   | JUC15009439.hg.1 | HOMER2      |
| TC15001761.hg.1 | 2.72   | JUC15009430.hg.1 | HOMER2      |
| TC15001761.hg.1 | 2.38   | JUC15009435.hg.1 | HOMER2      |
| TC15001761.hg.1 | -2.48  | JUC15009433.hg.1 | HOMER2      |
| TC15001761.hg.1 | -2.57  | PSR15017264.hg.1 | HOMER2      |
| TC15001761.hg.1 | -2.58  | JUC15009437.hg.1 | HOMER2      |
| TC15001761.hg.1 | -3.22  | JUC15009438.hg.1 | HOMER2      |
| TC15001761.hg.1 | -3.73  | PSR15017266.hg.1 | HOMER2      |
| TC15001761.hg.1 | -4.16  | PSR15017269.hg.1 | HOMER2      |
| TC15001761.hg.1 | -5.07  | PSR15017273.hg.1 | HOMER2      |
| TC01001173.hg.1 | 3.61   | JUC01009904.hg.1 | HIST2H4B, H |
| TC01001173.hg.1 | 3.42   | PSR01017984.hg.1 | HIST2H4B, H |
| TC01001173.hg.1 | 2.25   | PSR01017987.hg.1 | HIST2H4B, H |
| TC01002293.hg.1 | 3.61   | PSR01035071.hg.1 | UBR4        |
| TC01002293.hg.1 | 2.87   | PSR01034993.hg.1 | UBR4        |
| TC01002293.hg.1 | 2.62   | JUC01018814.hg.1 | UBR4        |
| TC01002293.hg.1 | 2.54   | PSR01035048.hg.1 | UBR4        |
| TC01002293.hg.1 | 2.54   | JUC01018846.hg.1 | UBR4        |
| TC01002293.hg.1 | 2.52   | PSR01035039.hg.1 | UBR4        |
| TC01002293.hg.1 | 2.43   | PSR01034981.hg.1 | UBR4        |
| TC01002293.hg.1 | 2.41   | PSR01035050.hg.1 | UBR4        |
| TC01002293.hg.1 | 2.39   | PSR01034972.hg.1 | UBR4        |
| TC01002293.hg.1 | 2.38   | JUC01018776.hg.1 | UBR4        |
| TC01002293.hg.1 | 2.29   | PSR01035082.hg.1 | UBR4        |
| TC01002293.hg.1 | 2.23   | PSR01035025.hg.1 | UBR4        |
| TC01002293.hg.1 | 2.16   | JUC01018838.hg.1 | UBR4        |
| TC01002293.hg.1 | 2.15   | PSR01035073.hg.1 | UBR4        |
| TC01002293.hg.1 | 2.13   | PSR01035002.hg.1 | UBR4        |
| TC01002293.hg.1 | 2.13   | PSR01035027.hg.1 | UBR4        |

|                 |       |                  |             |
|-----------------|-------|------------------|-------------|
| TC01002293.hg.1 | 2.12  | PSR01035015.hg.1 | UBR4        |
| TC01002293.hg.1 | 2.1   | JUC01018788.hg.1 | UBR4        |
| TC01002293.hg.1 | 2.06  | PSR01034986.hg.1 | UBR4        |
| TC03001815.hg.1 | 3.61  | JUC03016310.hg.1 | LOC1005072  |
| TC03001815.hg.1 | 2.65  | PSR03032883.hg.1 | LOC1005072  |
| TC05001109.hg.1 | 3.61  | JUC05008208.hg.1 | SLC6A3      |
| TC05001109.hg.1 | 2.04  | PSR05016152.hg.1 | SLC6A3      |
| TC05001109.hg.1 | -2.05 | JUC05008216.hg.1 | SLC6A3      |
| TC07000696.hg.1 | 3.61  | JUC07005156.hg.1 | CBLL1, LOC1 |
| TC07000696.hg.1 | 2.62  | PSR07010934.hg.1 | CBLL1, LOC1 |
| TC07000696.hg.1 | 2.07  | JUC07005142.hg.1 | CBLL1, LOC1 |
| TC0X000112.hg.1 | 3.61  | JUC0X000797.hg.1 | SAT1        |
| TC0X000112.hg.1 | 2.83  | JUC0X000796.hg.1 | SAT1        |
| TC0X000112.hg.1 | -2.04 | PSR0X001474.hg.1 | SAT1        |
| TC0X000112.hg.1 | -2.22 | PSR0X001476.hg.1 | SAT1        |
| TC0X000641.hg.1 | 3.61  | JUC0X004247.hg.1 | FAM122C     |
| TC0X000641.hg.1 | 2.56  | JUC0X004256.hg.1 | FAM122C     |
| TC0X000641.hg.1 | 2.33  | PSR0X008429.hg.1 | FAM122C     |
| TC0X000641.hg.1 | 2.16  | PSR0X008428.hg.1 | FAM122C     |
| TC0X000641.hg.1 | 2.06  | JUC0X004248.hg.1 | FAM122C     |
| TC13000109.hg.1 | 3.61  | JUC13000687.hg.1 | FRY         |
| TC13000109.hg.1 | 2.73  | PSR13001137.hg.1 | FRY         |
| TC13000109.hg.1 | -2.22 | PSR13001074.hg.1 | FRY         |
| TC13000109.hg.1 | -2.26 | PSR13001131.hg.1 | FRY         |
| TC13000109.hg.1 | -2.44 | JUC13000705.hg.1 | FRY         |
| TC13000109.hg.1 | -2.49 | JUC13000701.hg.1 | FRY         |
| TC13000109.hg.1 | -2.53 | PSR13001065.hg.1 | FRY         |
| TC13000109.hg.1 | -2.55 | JUC13000686.hg.1 | FRY         |
| TC13000109.hg.1 | -3.24 | JUC13000690.hg.1 | FRY         |
| TC13000109.hg.1 | -3.44 | JUC13000679.hg.1 | FRY         |
| TC13000109.hg.1 | -3.51 | JUC13000667.hg.1 | FRY         |
| TC16000056.hg.1 | 3.61  | JUC16000499.hg.1 | SYNGR3      |
| TC16000056.hg.1 | -4.54 | PSR16001180.hg.1 | SYNGR3      |
| TC02001246.hg.1 | 3.6   | JUC02010370.hg.1 | CPS1        |
| TC02001246.hg.1 | 3.04  | PSR02019231.hg.1 | CPS1        |
| TC02001246.hg.1 | 2.54  | JUC02010347.hg.1 | CPS1        |
| TC02001246.hg.1 | 2.14  | JUC02010330.hg.1 | CPS1        |
| TC02001246.hg.1 | 2.11  | PSR02019194.hg.1 | CPS1        |
| TC02001246.hg.1 | -2.27 | JUC02010369.hg.1 | CPS1        |
| TC02001246.hg.1 | -2.36 | JUC02010327.hg.1 | CPS1        |
| TC04000948.hg.1 | 3.6   | PSR04012752.hg.1 | ZNF721, ABC |
| TC04000948.hg.1 | 2.36  | JUC04006811.hg.1 | ZNF721, ABC |
| TC04000948.hg.1 | 2.23  | PSR04012748.hg.1 | ZNF721, ABC |
| TC04000948.hg.1 | 2.15  | PSR04012754.hg.1 | ZNF721, ABC |
| TC08001286.hg.1 | 3.6   | PSR08016562.hg.1 | MYBL1       |
| TC08001286.hg.1 | 2.93  | PSR08016535.hg.1 | MYBL1       |
| TC08001286.hg.1 | 2.82  | PSR08016558.hg.1 | MYBL1       |
| TC08001286.hg.1 | 2.81  | PSR08016554.hg.1 | MYBL1       |
| TC08001286.hg.1 | 2.72  | PSR08016560.hg.1 | MYBL1       |
| TC08001286.hg.1 | 2.58  | JUC08008530.hg.1 | MYBL1       |
| TC08001286.hg.1 | -2.34 | JUC08008535.hg.1 | MYBL1       |
| TC16000445.hg.1 | 3.6   | JUC16003456.hg.1 | CHD9        |
| TC16000445.hg.1 | 2.08  | JUC16003431.hg.1 | CHD9        |
| TC16000445.hg.1 | -2.49 | PSR16006170.hg.1 | CHD9        |
| TC16000445.hg.1 | -2.51 | JUC16003451.hg.1 | CHD9        |
| TC16000445.hg.1 | -2.9  | JUC16003447.hg.1 | CHD9        |
| TC16000445.hg.1 | -3.66 | JUC16003442.hg.1 | CHD9        |
| TC16000445.hg.1 | -4.84 | JUC16003458.hg.1 | CHD9        |

|                 |        |                  |        |
|-----------------|--------|------------------|--------|
| TC01002639.hg.1 | 3.59   | JUC01022070.hg.1 | BEND5  |
| TC01002639.hg.1 | 2.7    | PSR01041291.hg.1 | BEND5  |
| TC01002639.hg.1 | 2.19   | PSR01041295.hg.1 | BEND5  |
| TC01002639.hg.1 | 2.12   | PSR01041303.hg.1 | BEND5  |
| TC01002639.hg.1 | -2.54  | JUC01022065.hg.1 | BEND5  |
| TC01002639.hg.1 | -3.02  | PSR01041293.hg.1 | BEND5  |
| TC01002883.hg.1 | 3.59   | JUC01024177.hg.1 | ABCA4  |
| TC01002883.hg.1 | 3.33   | JUC01024141.hg.1 | ABCA4  |
| TC01002883.hg.1 | 3.29   | JUC01024187.hg.1 | ABCA4  |
| TC01002883.hg.1 | 3.25   | PSR01045022.hg.1 | ABCA4  |
| TC01002883.hg.1 | 2.96   | JUC01024174.hg.1 | ABCA4  |
| TC01002883.hg.1 | 2.79   | PSR01045035.hg.1 | ABCA4  |
| TC01002883.hg.1 | 2.69   | PSR01044989.hg.1 | ABCA4  |
| TC01002883.hg.1 | 2.62   | PSR01045029.hg.1 | ABCA4  |
| TC01002883.hg.1 | 2.58   | PSR01045017.hg.1 | ABCA4  |
| TC01002883.hg.1 | 2.58   | JUC01024142.hg.1 | ABCA4  |
| TC01002883.hg.1 | 2.58   | JUC01024191.hg.1 | ABCA4  |
| TC01002883.hg.1 | 2.55   | PSR01044990.hg.1 | ABCA4  |
| TC01002883.hg.1 | 2.46   | JUC01024175.hg.1 | ABCA4  |
| TC01002883.hg.1 | 2.45   | PSR01045024.hg.1 | ABCA4  |
| TC01002883.hg.1 | 2.43   | PSR01044985.hg.1 | ABCA4  |
| TC01002883.hg.1 | 2.42   | JUC01024144.hg.1 | ABCA4  |
| TC01002883.hg.1 | 2.31   | PSR01044973.hg.1 | ABCA4  |
| TC01002883.hg.1 | 2.16   | PSR01045033.hg.1 | ABCA4  |
| TC01002883.hg.1 | 2.14   | JUC01024152.hg.1 | ABCA4  |
| TC01002883.hg.1 | 2.12   | PSR01045020.hg.1 | ABCA4  |
| TC01002883.hg.1 | 2.12   | JUC01024150.hg.1 | ABCA4  |
| TC01002883.hg.1 | 2.09   | PSR01044998.hg.1 | ABCA4  |
| TC01002883.hg.1 | 2.09   | JUC01024192.hg.1 | ABCA4  |
| TC01002883.hg.1 | -2.05  | PSR01045003.hg.1 | ABCA4  |
| TC01002883.hg.1 | -2.08  | PSR01044996.hg.1 | ABCA4  |
| TC01002883.hg.1 | -2.08  | JUC01024146.hg.1 | ABCA4  |
| TC01002883.hg.1 | -2.24  | JUC01024185.hg.1 | ABCA4  |
| TC01002883.hg.1 | -2.36  | JUC01024181.hg.1 | ABCA4  |
| TC01002883.hg.1 | -2.53  | PSR01045014.hg.1 | ABCA4  |
| TC01002883.hg.1 | -2.72  | JUC01024164.hg.1 | ABCA4  |
| TC01002883.hg.1 | -2.97  | PSR01044981.hg.1 | ABCA4  |
| TC01002883.hg.1 | -3.2   | JUC01024193.hg.1 | ABCA4  |
| TC01002883.hg.1 | -3.53  | JUC01024145.hg.1 | ABCA4  |
| TC01002883.hg.1 | -3.83  | PSR01045005.hg.1 | ABCA4  |
| TC01002883.hg.1 | -4.06  | PSR01045015.hg.1 | ABCA4  |
| TC01002883.hg.1 | -5.89  | JUC01024178.hg.1 | ABCA4  |
| TC01002883.hg.1 | -6.41  | PSR01045000.hg.1 | ABCA4  |
| TC01002883.hg.1 | -6.91  | JUC01024197.hg.1 | ABCA4  |
| TC01002883.hg.1 | -7.41  | PSR01045018.hg.1 | ABCA4  |
| TC01002883.hg.1 | -11.98 | JUC01024182.hg.1 | ABCA4  |
| TC07001363.hg.1 | 3.59   | JUC07010388.hg.1 | TNS3   |
| TC07001363.hg.1 | 3.4    | JUC07010417.hg.1 | TNS3   |
| TC07001363.hg.1 | 2.51   | PSR07021314.hg.1 | TNS3   |
| TC07001363.hg.1 | 2.46   | JUC07010401.hg.1 | TNS3   |
| TC07001363.hg.1 | -2.6   | JUC07010383.hg.1 | TNS3   |
| TC11001217.hg.1 | 3.59   | JUC11008285.hg.1 | GLB1L2 |
| TC11001217.hg.1 | 2.5    | JUC11008267.hg.1 | GLB1L2 |
| TC11001217.hg.1 | 2.37   | JUC11008274.hg.1 | GLB1L2 |
| TC11001217.hg.1 | 2.17   | PSR11015286.hg.1 | GLB1L2 |
| TC11001217.hg.1 | -2.82  | JUC11008288.hg.1 | GLB1L2 |
| TC14002301.hg.1 | 3.59   | JUC14011754.hg.1 | PTGR2  |
| TC14002301.hg.1 | 2.24   | PSR14005548.hg.1 | PTGR2  |

|                 |       |                  |             |
|-----------------|-------|------------------|-------------|
| TC14002301.hg.1 | 2.16  | PSR14005567.hg.1 | PTGR2       |
| TC15001668.hg.1 | 3.59  | PSR15016276.hg.1 | SNUPN       |
| TC15001668.hg.1 | 3.19  | PSR15016280.hg.1 | SNUPN       |
| TC15001668.hg.1 | 3.13  | PSR15016277.hg.1 | SNUPN       |
| TC15001668.hg.1 | 2.82  | JUC15008844.hg.1 | SNUPN       |
| TC15001668.hg.1 | 2.45  | PSR15016273.hg.1 | SNUPN       |
| TC15001668.hg.1 | 2.15  | JUC15008843.hg.1 | SNUPN       |
| TC19001104.hg.1 | 3.59  | JUC19008640.hg.1 | GPR108      |
| TC19001104.hg.1 | -2.01 | PSR19015212.hg.1 | GPR108      |
| TC20000169.hg.1 | 3.59  | JUC20001144.hg.1 | GINS1       |
| TC20000169.hg.1 | 2.05  | PSR20002126.hg.1 | GINS1       |
| TC20000169.hg.1 | 2.02  | PSR20002131.hg.1 | GINS1       |
| TC04000320.hg.1 | 3.58  | JUC04002207.hg.1 | TMEM165     |
| TC04000320.hg.1 | -2.04 | JUC04002196.hg.1 | TMEM165     |
| TC04000320.hg.1 | -2.09 | JUC04002195.hg.1 | TMEM165     |
| TC04000320.hg.1 | -2.15 | PSR04004509.hg.1 | TMEM165     |
| TC04000320.hg.1 | -2.25 | PSR04004513.hg.1 | TMEM165     |
| TC04000320.hg.1 | -2.38 | PSR04004511.hg.1 | TMEM165     |
| TC07000764.hg.1 | 3.58  | JUC07005694.hg.1 | SND1, SND1- |
| TC07000764.hg.1 | 2.44  | PSR07012103.hg.1 | SND1, SND1- |
| TC07000764.hg.1 | 2.34  | JUC07005710.hg.1 | SND1, SND1- |
| TC07000764.hg.1 | 2.06  | JUC07005701.hg.1 | SND1, SND1- |
| TC15001278.hg.1 | 3.58  | JUC15006477.hg.1 | TP53BP1     |
| TC15001278.hg.1 | 2.6   | PSR15011884.hg.1 | TP53BP1     |
| TC15001278.hg.1 | -2    | JUC15006471.hg.1 | TP53BP1     |
| TC15001278.hg.1 | -2.03 | JUC15006468.hg.1 | TP53BP1     |
| TC15001278.hg.1 | -2.34 | JUC15006462.hg.1 | TP53BP1     |
| TC15001278.hg.1 | -2.44 | JUC15006454.hg.1 | TP53BP1     |
| TC15001278.hg.1 | -2.51 | PSR15011903.hg.1 | TP53BP1     |
| TC15001278.hg.1 | -2.98 | PSR15011893.hg.1 | TP53BP1     |
| TC19001625.hg.1 | 3.58  | JUC19012672.hg.1 | EML2        |
| TC19001625.hg.1 | 2.23  | JUC19012658.hg.1 | EML2        |
| TC19001625.hg.1 | -2.1  | PSR19022221.hg.1 | EML2        |
| TC19001625.hg.1 | -2.17 | JUC19012679.hg.1 | EML2        |
| TC21000239.hg.1 | 3.58  | JUC21001448.hg.1 | LOC1005057. |
| TC21000239.hg.1 | 3.13  | PSR21002801.hg.1 | LOC1005057. |
| TC01000950.hg.1 | 3.57  | PSR01015009.hg.1 | AMPD2       |
| TC01000950.hg.1 | 2.97  | JUC01007929.hg.1 | AMPD2       |
| TC01000950.hg.1 | 2.93  | JUC01007931.hg.1 | AMPD2       |
| TC01000950.hg.1 | 2.9   | JUC01007943.hg.1 | AMPD2       |
| TC01000950.hg.1 | 2.83  | PSR01015016.hg.1 | AMPD2       |
| TC01000950.hg.1 | 2.83  | JUC01007924.hg.1 | AMPD2       |
| TC01000950.hg.1 | 2.75  | PSR01014998.hg.1 | AMPD2       |
| TC01000950.hg.1 | 2.6   | JUC01007921.hg.1 | AMPD2       |
| TC01000950.hg.1 | 2.32  | PSR01015029.hg.1 | AMPD2       |
| TC01000950.hg.1 | 2.21  | PSR01015011.hg.1 | AMPD2       |
| TC01000950.hg.1 | 2.14  | PSR01015006.hg.1 | AMPD2       |
| TC01000950.hg.1 | 2.13  | PSR01015039.hg.1 | AMPD2       |
| TC01000950.hg.1 | 2.12  | PSR01015014.hg.1 | AMPD2       |
| TC01000950.hg.1 | 2.07  | PSR01015007.hg.1 | AMPD2       |
| TC01000950.hg.1 | -2.18 | JUC01007939.hg.1 | AMPD2       |
| TC06002025.hg.1 | 3.57  | JUC06012499.hg.1 | LAMA4       |
| TC06002025.hg.1 | 2.87  | PSR06025430.hg.1 | LAMA4       |
| TC06002025.hg.1 | 2.85  | PSR06025418.hg.1 | LAMA4       |
| TC06002025.hg.1 | 2.77  | PSR06025379.hg.1 | LAMA4       |
| TC06002025.hg.1 | 2.42  | PSR06025402.hg.1 | LAMA4       |
| TC06002025.hg.1 | 2.28  | PSR06025427.hg.1 | LAMA4       |
| TC06002025.hg.1 | 2.16  | PSR06025425.hg.1 | LAMA4       |

|                 |       |                  |            |
|-----------------|-------|------------------|------------|
| TC06002025.hg.1 | -2.01 | PSR06025374.hg.1 | LAMA4      |
| TC06002025.hg.1 | -2.02 | PSR06025351.hg.1 | LAMA4      |
| TC06002025.hg.1 | -2.06 | PSR06025397.hg.1 | LAMA4      |
| TC06002025.hg.1 | -2.1  | PSR06025354.hg.1 | LAMA4      |
| TC06002025.hg.1 | -2.1  | PSR06025393.hg.1 | LAMA4      |
| TC06002025.hg.1 | -2.1  | JUC06012508.hg.1 | LAMA4      |
| TC06002025.hg.1 | -2.13 | PSR06025408.hg.1 | LAMA4      |
| TC06002025.hg.1 | -2.14 | PSR06025355.hg.1 | LAMA4      |
| TC06002025.hg.1 | -2.19 | JUC06012507.hg.1 | LAMA4      |
| TC06002025.hg.1 | -2.2  | JUC06012535.hg.1 | LAMA4      |
| TC06002025.hg.1 | -2.25 | JUC06012520.hg.1 | LAMA4      |
| TC06002025.hg.1 | -2.26 | JUC06012543.hg.1 | LAMA4      |
| TC06002025.hg.1 | -2.3  | PSR06025347.hg.1 | LAMA4      |
| TC06002025.hg.1 | -2.33 | JUC06012512.hg.1 | LAMA4      |
| TC06002025.hg.1 | -2.41 | JUC06012542.hg.1 | LAMA4      |
| TC06002025.hg.1 | -2.48 | PSR06025383.hg.1 | LAMA4      |
| TC06002025.hg.1 | -2.64 | JUC06012522.hg.1 | LAMA4      |
| TC06002025.hg.1 | -2.99 | PSR06025384.hg.1 | LAMA4      |
| TC06002025.hg.1 | -3.13 | PSR06025382.hg.1 | LAMA4      |
| TC06002025.hg.1 | -3.38 | PSR06025380.hg.1 | LAMA4      |
| TC06002025.hg.1 | -3.74 | JUC06012504.hg.1 | LAMA4      |
| TC06002025.hg.1 | -3.89 | JUC06012502.hg.1 | LAMA4      |
| TC07000190.hg.1 | 3.57  | JUC07001400.hg.1 |            |
| TC07000190.hg.1 | 3.47  | JUC07001401.hg.1 |            |
| TC07000190.hg.1 | 2.45  | PSR07002950.hg.1 |            |
| TC0X000387.hg.1 | 3.57  | JUC0X002609.hg.1 | TAF1       |
| TC0X000387.hg.1 | 3.36  | JUC0X002602.hg.1 | TAF1       |
| TC0X000387.hg.1 | 2.31  | PSR0X005201.hg.1 | TAF1       |
| TC0X000387.hg.1 | 2.22  | JUC0X002566.hg.1 | TAF1       |
| TC0X000387.hg.1 | 2.21  | JUC0X002557.hg.1 | TAF1       |
| TC0X000387.hg.1 | 2.14  | PSR0X005199.hg.1 | TAF1       |
| TC0X000387.hg.1 | 2.1   | JUC0X002575.hg.1 | TAF1       |
| TC0X000387.hg.1 | 2.04  | PSR0X005205.hg.1 | TAF1       |
| TC0X000387.hg.1 | 2     | JUC0X002589.hg.1 | TAF1       |
| TC11001911.hg.1 | 3.57  | JUC11011946.hg.1 | SF1        |
| TC11001911.hg.1 | 2.18  | PSR11022684.hg.1 | SF1        |
| TC11001911.hg.1 | -4.37 | JUC11011948.hg.1 | SF1        |
| TC15001092.hg.1 | 3.57  | JUC15005281.hg.1 | HERC2, LOC |
| TC15001092.hg.1 | 2.21  | JUC15005256.hg.1 | HERC2, LOC |
| TC15001092.hg.1 | -2.01 | JUC15005221.hg.1 | HERC2, LOC |
| TC15001092.hg.1 | -2.14 | PSR15009918.hg.1 | HERC2, LOC |
| TC15001092.hg.1 | -2.19 | JUC15005234.hg.1 | HERC2, LOC |
| TC15001092.hg.1 | -2.34 | JUC15005248.hg.1 | HERC2, LOC |
| TC15001092.hg.1 | -2.75 | JUC15005232.hg.1 | HERC2, LOC |
| TC19000755.hg.1 | 3.57  | JUC19006271.hg.1 | MYH14      |
| TC19000755.hg.1 | 3.17  | JUC19006259.hg.1 | MYH14      |
| TC19000755.hg.1 | -2.16 | JUC19006268.hg.1 | MYH14      |
| TC19000755.hg.1 | -2.2  | JUC19006234.hg.1 | MYH14      |
| TC19000755.hg.1 | -2.43 | JUC19006282.hg.1 | MYH14      |
| TC19000755.hg.1 | -2.51 | JUC19006244.hg.1 | MYH14      |
| TC19000755.hg.1 | -2.99 | JUC19006235.hg.1 | MYH14      |
| TC19000755.hg.1 | -3.5  | JUC19006243.hg.1 | MYH14      |
| TC19000755.hg.1 | -4.02 | JUC19006264.hg.1 | MYH14      |
| TC19000755.hg.1 | -4.24 | PSR19010685.hg.1 | MYH14      |
| TC19000755.hg.1 | -4.75 | JUC19006251.hg.1 | MYH14      |
| TC19000755.hg.1 | -7.66 | JUC19006278.hg.1 | MYH14      |
| TC03000611.hg.1 | 3.56  | JUC03005490.hg.1 | PLA1A      |
| TC03000611.hg.1 | 2.64  | JUC03005496.hg.1 | PLA1A      |

|                 |       |                  |          |
|-----------------|-------|------------------|----------|
| TC03000611.hg.1 | -2.03 | PSR03011039.hg.1 | PLA1A    |
| TC09001466.hg.1 | 3.56  | JUC09009788.hg.1 | EPB41L4B |
| TC09001466.hg.1 | 3.55  | PSR09018117.hg.1 | EPB41L4B |
| TC09001466.hg.1 | 3.52  | PSR09018131.hg.1 | EPB41L4B |
| TC09001466.hg.1 | 3.5   | PSR09018112.hg.1 | EPB41L4B |
| TC09001466.hg.1 | 3.41  | JUC09009784.hg.1 | EPB41L4B |
| TC09001466.hg.1 | 3.37  | PSR09018100.hg.1 | EPB41L4B |
| TC09001466.hg.1 | 3.2   | PSR09018115.hg.1 | EPB41L4B |
| TC09001466.hg.1 | 3.15  | PSR09018130.hg.1 | EPB41L4B |
| TC09001466.hg.1 | 2.92  | PSR09018106.hg.1 | EPB41L4B |
| TC09001466.hg.1 | 2.79  | JUC09009768.hg.1 | EPB41L4B |
| TC09001466.hg.1 | 2.73  | PSR09018113.hg.1 | EPB41L4B |
| TC09001466.hg.1 | 2.67  | PSR09018102.hg.1 | EPB41L4B |
| TC09001466.hg.1 | 2.62  | PSR09018108.hg.1 | EPB41L4B |
| TC09001466.hg.1 | 2.52  | JUC09009782.hg.1 | EPB41L4B |
| TC09001466.hg.1 | 2.47  | PSR09018103.hg.1 | EPB41L4B |
| TC09001466.hg.1 | 2.3   | PSR09018111.hg.1 | EPB41L4B |
| TC09001466.hg.1 | 2.29  | JUC09009764.hg.1 | EPB41L4B |
| TC09001466.hg.1 | 2.24  | PSR09018110.hg.1 | EPB41L4B |
| TC09001466.hg.1 | 2.05  | PSR09018099.hg.1 | EPB41L4B |
| TC09001466.hg.1 | 2     | JUC09009785.hg.1 | EPB41L4B |
| TC09001466.hg.1 | -2.3  | PSR09018127.hg.1 | EPB41L4B |
| TC09001466.hg.1 | -3.31 | PSR09018116.hg.1 | EPB41L4B |
| TC09001466.hg.1 | -3.38 | PSR09018122.hg.1 | EPB41L4B |
| TC09001466.hg.1 | -4.5  | PSR09018118.hg.1 | EPB41L4B |
| TC10000112.hg.1 | 3.56  | JUC10000639.hg.1 | HSPA14   |
| TC10000112.hg.1 | 2.74  | JUC10000654.hg.1 | HSPA14   |
| TC10000112.hg.1 | 2.63  | JUC10000650.hg.1 | HSPA14   |
| TC10000112.hg.1 | 2.49  | PSR10001192.hg.1 | HSPA14   |
| TC10000112.hg.1 | -2.03 | PSR10001209.hg.1 | HSPA14   |
| TC12001106.hg.1 | 3.56  | JUC12008016.hg.1 | FOXMI    |
| TC12001106.hg.1 | 2.74  | JUC12008022.hg.1 | FOXMI    |
| TC12001106.hg.1 | 2.33  | JUC12008009.hg.1 | FOXMI    |
| TC12001106.hg.1 | 2.27  | JUC12008017.hg.1 | FOXMI    |
| TC12001106.hg.1 | 2.21  | JUC12008015.hg.1 | FOXMI    |
| TC12001106.hg.1 | 2.19  | JUC12008020.hg.1 | FOXMI    |
| TC12001106.hg.1 | -3.05 | PSR12014592.hg.1 | FOXMI    |
| TC02001121.hg.1 | 3.54  | PSR02016956.hg.1 | NAB1     |
| TC02001121.hg.1 | 3.05  | JUC02009088.hg.1 | NAB1     |
| TC0X001405.hg.1 | 3.54  | JUC0X009554.hg.1 | ZNF75D   |
| TC0X001405.hg.1 | 2.64  | PSR0X018699.hg.1 | ZNF75D   |
| TC0X001405.hg.1 | 2.53  | JUC0X009556.hg.1 | ZNF75D   |
| TC0X001405.hg.1 | 2.01  | PSR0X018690.hg.1 | ZNF75D   |
| TC0X001405.hg.1 | -2.07 | PSR0X018696.hg.1 | ZNF75D   |
| TC0X001405.hg.1 | -2.15 | JUC0X009555.hg.1 | ZNF75D   |
| TC0X001405.hg.1 | -2.7  | JUC0X009551.hg.1 | ZNF75D   |
| TC0X001405.hg.1 | -3.02 | JUC0X009550.hg.1 | ZNF75D   |
| TC0X002313.hg.1 | 3.54  | JUC0X012948.hg.1 | CA5B     |
| TC0X002313.hg.1 | 3.29  | JUC0X012949.hg.1 | CA5B     |
| TC0X002313.hg.1 | 2.89  | JUC0X012960.hg.1 | CA5B     |
| TC0X002313.hg.1 | 2.54  | PSR0X000991.hg.1 | CA5B     |
| TC0X002313.hg.1 | 2.13  | PSR0X000975.hg.1 | CA5B     |
| TC0X002313.hg.1 | 2.11  | JUC0X012950.hg.1 | CA5B     |
| TC0X002313.hg.1 | 2.07  | PSR0X000974.hg.1 | CA5B     |
| TC0X002313.hg.1 | -2.07 | PSR0X000986.hg.1 | CA5B     |
| TC0X002313.hg.1 | -2.3  | JUC0X012955.hg.1 | CA5B     |
| TC0X002313.hg.1 | -2.38 | JUC0X012951.hg.1 | CA5B     |
| TC0X002313.hg.1 | -2.41 | JUC0X012958.hg.1 | CA5B     |

|                 |       |                  |           |
|-----------------|-------|------------------|-----------|
| TC0X002313.hg.1 | -3.83 | JUC0X012956.hg.1 | CA5B      |
| TC0X002313.hg.1 | -4.46 | PSR0X000967.hg.1 | CA5B      |
| TC11000979.hg.1 | 3.54  | JUC11006519.hg.1 | ACAT1     |
| TC11000979.hg.1 | 2.01  | PSR11012158.hg.1 | ACAT1     |
| TC13000135.hg.1 | 3.54  | JUC13000973.hg.1 | NHLRC3    |
| TC13000135.hg.1 | -2.51 | JUC13000964.hg.1 | NHLRC3    |
| TC13000135.hg.1 | -2.71 | PSR13001565.hg.1 | NHLRC3    |
| TC15000638.hg.1 | 3.54  | JUC15002703.hg.1 | KIF23     |
| TC15000638.hg.1 | 2.79  | PSR15005401.hg.1 | KIF23     |
| TC15000638.hg.1 | 2.59  | JUC15002717.hg.1 | KIF23     |
| TC15000638.hg.1 | 2.39  | JUC15002711.hg.1 | KIF23     |
| TC15000638.hg.1 | 2.21  | PSR15005406.hg.1 | KIF23     |
| TC15000638.hg.1 | 2.19  | PSR15005408.hg.1 | KIF23     |
| TC15000638.hg.1 | 2     | PSR15005430.hg.1 | KIF23     |
| TC03000631.hg.1 | 3.53  | PSR03011364.hg.1 | FAM162A   |
| TC03000631.hg.1 | 3.5   | PSR03011362.hg.1 | FAM162A   |
| TC03000631.hg.1 | 3     | JUC03005673.hg.1 | FAM162A   |
| TC03000631.hg.1 | 2.61  | JUC03005672.hg.1 | FAM162A   |
| TC03000631.hg.1 | 2.51  | JUC03005669.hg.1 | FAM162A   |
| TC03000631.hg.1 | 2.01  | PSR03011378.hg.1 | FAM162A   |
| TC03000316.hg.1 | 3.52  | PSR03006657.hg.1 | MAPKAPK3  |
| TC03000316.hg.1 | 3.21  | PSR03006660.hg.1 | MAPKAPK3  |
| TC03000316.hg.1 | 3.19  | PSR03006662.hg.1 | MAPKAPK3  |
| TC03000316.hg.1 | 3.06  | PSR03006658.hg.1 | MAPKAPK3  |
| TC03000316.hg.1 | 2.86  | PSR03006654.hg.1 | MAPKAPK3  |
| TC03000316.hg.1 | 2.85  | PSR03006659.hg.1 | MAPKAPK3  |
| TC03000316.hg.1 | 2.72  | PSR03006668.hg.1 | MAPKAPK3  |
| TC03000316.hg.1 | 2.71  | PSR03006666.hg.1 | MAPKAPK3  |
| TC03000316.hg.1 | 2.16  | JUC03003247.hg.1 | MAPKAPK3  |
| TC08000053.hg.1 | 3.52  | JUC08000281.hg.1 | FAM66E    |
| TC08000053.hg.1 | 2.09  | PSR08000488.hg.1 | FAM66E    |
| TC08000053.hg.1 | -2.15 | PSR08000491.hg.1 | FAM66E    |
| TC08000053.hg.1 | -2.25 | JUC08000277.hg.1 | FAM66E    |
| TC08000053.hg.1 | -2.73 | PSR08000497.hg.1 | FAM66E    |
| TC0X000811.hg.1 | 3.52  | JUC0X005440.hg.1 | LOC389906 |
| TC0X000811.hg.1 | 3.18  | PSR0X011113.hg.1 | LOC389906 |
| TC0X000811.hg.1 | 3     | PSR0X011119.hg.1 | LOC389906 |
| TC0X000811.hg.1 | 2.89  | PSR0X011126.hg.1 | LOC389906 |
| TC0X000811.hg.1 | 2.34  | PSR0X011127.hg.1 | LOC389906 |
| TC0X000811.hg.1 | 2.31  | PSR0X011110.hg.1 | LOC389906 |
| TC0X000811.hg.1 | 2.27  | JUC0X005447.hg.1 | LOC389906 |
| TC0X000811.hg.1 | 2.23  | JUC0X005438.hg.1 | LOC389906 |
| TC0X000811.hg.1 | 2.21  | PSR0X011125.hg.1 | LOC389906 |
| TC0X000811.hg.1 | 2.01  | PSR0X011120.hg.1 | LOC389906 |
| TC0X000811.hg.1 | 2     | JUC0X005434.hg.1 | LOC389906 |
| TC11002138.hg.1 | 3.52  | PSR11025584.hg.1 | NARS2     |
| TC11002138.hg.1 | 2.34  | JUC11013559.hg.1 | NARS2     |
| TC11002138.hg.1 | 2.06  | PSR11025581.hg.1 | NARS2     |
| TC11002138.hg.1 | 2.05  | JUC11013554.hg.1 | NARS2     |
| TC01000548.hg.1 | 3.51  | JUC01004591.hg.1 | PTPRF     |
| TC01000548.hg.1 | 2.81  | JUC01004576.hg.1 | PTPRF     |
| TC01000548.hg.1 | 2.49  | PSR01008812.hg.1 | PTPRF     |
| TC01000548.hg.1 | 2.42  | JUC01004584.hg.1 | PTPRF     |
| TC01000548.hg.1 | 2.25  | JUC01004580.hg.1 | PTPRF     |
| TC01000548.hg.1 | 2.24  | PSR01008842.hg.1 | PTPRF     |
| TC01000548.hg.1 | 2.08  | PSR01008826.hg.1 | PTPRF     |
| TC01000548.hg.1 | 2.08  | PSR01008841.hg.1 | PTPRF     |
| TC01000548.hg.1 | 2.02  | PSR01008821.hg.1 | PTPRF     |



|                 |       |                  |             |
|-----------------|-------|------------------|-------------|
| TC01000548.hg.1 | -2.13 | JUC01004593.hg.1 | PTPRF       |
| TC01003325.hg.1 | 3.51  | JUC01027093.hg.1 | KIAA0907    |
| TC01003325.hg.1 | 2.18  | PSR01051719.hg.1 | KIAA0907    |
| TC01003325.hg.1 | 2.12  | PSR01051709.hg.1 | KIAA0907    |
| TC03003371.hg.1 | 3.51  | PSR03019262.hg.1 | FAM157A, LC |
| TC03003371.hg.1 | 2.83  | PSR03019263.hg.1 | FAM157A, LC |
| TC03003371.hg.1 | 2.57  | PSR03019264.hg.1 | FAM157A, LC |
| TC03003371.hg.1 | 2.39  | JUC03023974.hg.1 | FAM157A, LC |
| TC03003371.hg.1 | 2.38  | PSR03019265.hg.1 | FAM157A, LC |
| TC03003371.hg.1 | -2.17 | JUC03023965.hg.1 | FAM157A, LC |
| TC03003371.hg.1 | -2.4  | PSR03019267.hg.1 | FAM157A, LC |
| TC06002181.hg.1 | 3.51  | JUC06013617.hg.1 | HIVEP2      |
| TC06002181.hg.1 | 2.05  | PSR06027366.hg.1 | HIVEP2      |
| TC07003289.hg.1 | 3.51  | JUC07020312.hg.1 | ZNF655      |
| TC07003289.hg.1 | 2.07  | JUC07020324.hg.1 | ZNF655      |
| TC07003289.hg.1 | -2.69 | PSR07008928.hg.1 | ZNF655      |
| TC08000148.hg.1 | 3.51  | JUC08000778.hg.1 | INTS10      |
| TC08000148.hg.1 | 2.65  | JUC08000789.hg.1 | INTS10      |
| TC08000148.hg.1 | 2.6   | JUC08000795.hg.1 | INTS10      |
| TC08000148.hg.1 | 2.13  | PSR08001480.hg.1 | INTS10      |
| TC08000148.hg.1 | 2.03  | PSR08001439.hg.1 | INTS10      |
| TC10001498.hg.1 | 3.51  | PSR10018941.hg.1 | ACTA2       |
| TC10001498.hg.1 | 2.76  | JUC10011034.hg.1 | ACTA2       |
| TC10001498.hg.1 | 2.4   | JUC10011040.hg.1 | ACTA2       |
| TC10001498.hg.1 | 2.35  | PSR10018933.hg.1 | ACTA2       |
| TC10001498.hg.1 | -2.82 | JUC10011035.hg.1 | ACTA2       |
| TC10001498.hg.1 | -2.85 | JUC10011038.hg.1 | ACTA2       |
| TC10001498.hg.1 | -2.88 | PSR10018953.hg.1 | ACTA2       |
| TC10001498.hg.1 | -4.34 | PSR10018952.hg.1 | ACTA2       |
| TC10001498.hg.1 | -4.39 | JUC10011041.hg.1 | ACTA2       |
| TC10001498.hg.1 | -5    | PSR10018951.hg.1 | ACTA2       |
| TC11000069.hg.1 | 3.51  | PSR11001307.hg.1 | SLC22A18    |
| TC11000069.hg.1 | 3.07  | PSR11001299.hg.1 | SLC22A18    |
| TC11000069.hg.1 | 2.86  | JUC11000652.hg.1 | SLC22A18    |
| TC11000069.hg.1 | 2.67  | PSR11001304.hg.1 | SLC22A18    |
| TC11000069.hg.1 | 2.47  | PSR11001308.hg.1 | SLC22A18    |
| TC11000069.hg.1 | 2.44  | PSR11001320.hg.1 | SLC22A18    |
| TC11000069.hg.1 | 2.36  | PSR11001305.hg.1 | SLC22A18    |
| TC11000069.hg.1 | 2.35  | JUC11000643.hg.1 | SLC22A18    |
| TC11000069.hg.1 | 2.3   | JUC11000647.hg.1 | SLC22A18    |
| TC11000069.hg.1 | 2.16  | PSR11001330.hg.1 | SLC22A18    |
| TC11000069.hg.1 | 2.15  | PSR11001301.hg.1 | SLC22A18    |
| TC11000069.hg.1 | 2.12  | PSR11001328.hg.1 | SLC22A18    |
| TC11000069.hg.1 | 2.09  | PSR11001316.hg.1 | SLC22A18    |
| TC11000069.hg.1 | 2.03  | JUC11000657.hg.1 | SLC22A18    |
| TC12000232.hg.1 | 3.51  | JUC12001383.hg.1 | PYROXD1     |
| TC12000232.hg.1 | -2.22 | PSR12002876.hg.1 | PYROXD1     |
| TC16002044.hg.1 | 3.51  | PSR16005776.hg.1 | TP53TG3B, T |
| TC16002044.hg.1 | 2.99  | JUC16013322.hg.1 | TP53TG3B, T |
| TC16002044.hg.1 | 2.91  | JUC16013324.hg.1 | TP53TG3B, T |
| TC16002044.hg.1 | 2.73  | PSR16005780.hg.1 | TP53TG3B, T |
| TC16002044.hg.1 | 2.56  | PSR16005779.hg.1 | TP53TG3B, T |
| TC16002044.hg.1 | 2.2   | PSR16005781.hg.1 | TP53TG3B, T |
| TC20000338.hg.1 | 3.51  | JUC20002672.hg.1 | PABPC1L     |
| TC20000338.hg.1 | -2.64 | PSR20004848.hg.1 | PABPC1L     |
| TC22000068.hg.1 | 3.51  | JUC22000434.hg.1 | MED15       |
| TC22000068.hg.1 | 2.19  | PSR22000887.hg.1 | MED15       |
| TC22000068.hg.1 | 2     | PSR22000947.hg.1 | MED15       |

|                 |       |                  |              |
|-----------------|-------|------------------|--------------|
| TC22000068.hg.1 | 2     | JUC22000399.hg.1 | MED15        |
| TC22000068.hg.1 | -2.22 | JUC22000395.hg.1 | MED15        |
| TC01003219.hg.1 | 3.5   | JUC01026303.hg.1 | SEMA6C       |
| TC01003219.hg.1 | 2.5   | JUC01026301.hg.1 | SEMA6C       |
| TC01003219.hg.1 | 2.27  | JUC01026306.hg.1 | SEMA6C       |
| TC01003219.hg.1 | -2    | JUC01026292.hg.1 | SEMA6C       |
| TC01003219.hg.1 | -2.05 | PSR01049493.hg.1 | SEMA6C       |
| TC01003219.hg.1 | -2.39 | PSR01049500.hg.1 | SEMA6C       |
| TC01003219.hg.1 | -2.4  | JUC01026310.hg.1 | SEMA6C       |
| TC01003219.hg.1 | -2.94 | JUC01026295.hg.1 | SEMA6C       |
| TC01003219.hg.1 | -3    | JUC01026293.hg.1 | SEMA6C       |
| TC01006303.hg.1 | 3.5   | JUC01039692.hg.1 | GBAP1        |
| TC01006303.hg.1 | 3.14  | JUC01039685.hg.1 | GBAP1        |
| TC01006303.hg.1 | 2.78  | JUC01039688.hg.1 | GBAP1        |
| TC01006303.hg.1 | 2.11  | PSR01051231.hg.1 | GBAP1        |
| TC01006303.hg.1 | -2.04 | JUC01039681.hg.1 | GBAP1        |
| TC01006303.hg.1 | -4.25 | JUC01039697.hg.1 | GBAP1        |
| TC10001559.hg.1 | 3.5   | JUC10011592.hg.1 | PIK3AP1      |
| TC10001559.hg.1 | 2.99  | JUC10011581.hg.1 | PIK3AP1      |
| TC10001559.hg.1 | 2.6   | PSR10019791.hg.1 | PIK3AP1      |
| TC10001559.hg.1 | 2.51  | JUC10011591.hg.1 | PIK3AP1      |
| TC10001559.hg.1 | 2.36  | PSR10019811.hg.1 | PIK3AP1      |
| TC10001559.hg.1 | 2.35  | PSR10019810.hg.1 | PIK3AP1      |
| TC10001559.hg.1 | 2.17  | JUC10011596.hg.1 | PIK3AP1      |
| TC10001559.hg.1 | 2.16  | JUC10011582.hg.1 | PIK3AP1      |
| TC10001559.hg.1 | 2.11  | PSR10019808.hg.1 | PIK3AP1      |
| TC10001559.hg.1 | 2.06  | PSR10019812.hg.1 | PIK3AP1      |
| TC10001559.hg.1 | -2.68 | JUC10011584.hg.1 | PIK3AP1      |
| TC10001559.hg.1 | -3.2  | PSR10019795.hg.1 | PIK3AP1      |
| TC10001559.hg.1 | -3.38 | PSR10019817.hg.1 | PIK3AP1      |
| TC10001559.hg.1 | -3.53 | JUC10011577.hg.1 | PIK3AP1      |
| TC10001559.hg.1 | -3.65 | PSR10019802.hg.1 | PIK3AP1      |
| TC10001559.hg.1 | -3.72 | PSR10019815.hg.1 | PIK3AP1      |
| TC10001559.hg.1 | -4.98 | PSR10019814.hg.1 | PIK3AP1      |
| TC10001559.hg.1 | -5.86 | PSR10019794.hg.1 | PIK3AP1      |
| TC02001965.hg.1 | 3.49  | PSR02031339.hg.1 | ADD2         |
| TC02001965.hg.1 | 2.37  | JUC02016369.hg.1 | ADD2         |
| TC02001965.hg.1 | -2.02 | JUC02016348.hg.1 | ADD2         |
| TC02001965.hg.1 | -2.15 | PSR02031303.hg.1 | ADD2         |
| TC06004080.hg.1 | 3.49  | JUC06021119.hg.1 | C4B, C4A, LC |
| TC06004080.hg.1 | 2.7   | PSR06004435.hg.1 | C4B, C4A, LC |
| TC06004080.hg.1 | 2.59  | JUC06021098.hg.1 | C4B, C4A, LC |
| TC06004080.hg.1 | 2.57  | JUC06021111.hg.1 | C4B, C4A, LC |
| TC06004080.hg.1 | 2.52  | JUC06021128.hg.1 | C4B, C4A, LC |
| TC06004080.hg.1 | 2.46  | PSR06004417.hg.1 | C4B, C4A, LC |
| TC06004080.hg.1 | 2.41  | PSR06004446.hg.1 | C4B, C4A, LC |
| TC06004080.hg.1 | 2.3   | JUC06021120.hg.1 | C4B, C4A, LC |
| TC06004080.hg.1 | 2.21  | PSR06004413.hg.1 | C4B, C4A, LC |
| TC06004080.hg.1 | 2.14  | JUC06021122.hg.1 | C4B, C4A, LC |
| TC06004080.hg.1 | 2.12  | PSR06004397.hg.1 | C4B, C4A, LC |
| TC06004080.hg.1 | 2.08  | PSR06004449.hg.1 | C4B, C4A, LC |
| TC06004080.hg.1 | 2.02  | PSR06004428.hg.1 | C4B, C4A, LC |
| TC06004080.hg.1 | 2     | PSR06004452.hg.1 | C4B, C4A, LC |
| TC06004080.hg.1 | -2.17 | JUC06021102.hg.1 | C4B, C4A, LC |
| TC06004080.hg.1 | -2.72 | JUC06021108.hg.1 | C4B, C4A, LC |
| TC06004080.hg.1 | -2.72 | JUC06021112.hg.1 | C4B, C4A, LC |
| TC06004080.hg.1 | -2.91 | JUC06021134.hg.1 | C4B, C4A, LC |
| TC06004080.hg.1 | -3.47 | JUC06021113.hg.1 | C4B, C4A, LC |

|                 |       |                  |          |
|-----------------|-------|------------------|----------|
| TC08000781.hg.1 | 3.49  | PSR08010473.hg.1 |          |
| TC08000781.hg.1 | 2.08  | PSR08010485.hg.1 |          |
| TC08000781.hg.1 | -4.34 | JUC08005402.hg.1 |          |
| TC17000362.hg.1 | 3.49  | PSR17004523.hg.1 | NF1      |
| TC17000362.hg.1 | 2.81  | JUC17002621.hg.1 | NF1      |
| TC17000362.hg.1 | 2.56  | JUC17002589.hg.1 | NF1      |
| TC17000362.hg.1 | 2.55  | PSR17004543.hg.1 | NF1      |
| TC17000362.hg.1 | 2.43  | PSR17004574.hg.1 | NF1      |
| TC17000362.hg.1 | 2.28  | PSR17004606.hg.1 | NF1      |
| TC17000362.hg.1 | 2.26  | JUC17002599.hg.1 | NF1      |
| TC17000362.hg.1 | -2.02 | JUC17002586.hg.1 | NF1      |
| TC17000362.hg.1 | -2.15 | JUC17002559.hg.1 | NF1      |
| TC17000362.hg.1 | -2.36 | PSR17004544.hg.1 | NF1      |
| TC17000966.hg.1 | 3.49  | JUC17007257.hg.1 | VPS53    |
| TC17000966.hg.1 | -2.4  | PSR17012757.hg.1 | VPS53    |
| TC17000966.hg.1 | -2.54 | JUC17007264.hg.1 | VPS53    |
| TC17000966.hg.1 | -2.68 | PSR17012751.hg.1 | VPS53    |
| TC17000966.hg.1 | -3.33 | JUC17007258.hg.1 | VPS53    |
| TC03000866.hg.1 | 3.48  | PSR03015324.hg.1 | GFM1     |
| TC03000866.hg.1 | 3.35  | JUC03007764.hg.1 | GFM1     |
| TC03000866.hg.1 | -2.15 | JUC03007767.hg.1 | GFM1     |
| TC03000866.hg.1 | -3.57 | JUC03007766.hg.1 | GFM1     |
| TC04000012.hg.1 | 3.48  | PSR04000250.hg.1 | MYL5     |
| TC04000012.hg.1 | 3     | PSR04000229.hg.1 | MYL5     |
| TC04000012.hg.1 | 2.56  | PSR04000234.hg.1 | MYL5     |
| TC04000012.hg.1 | 2.36  | PSR04000236.hg.1 | MYL5     |
| TC04000012.hg.1 | 2.16  | PSR04000232.hg.1 | MYL5     |
| TC04000012.hg.1 | 2.14  | PSR04000242.hg.1 | MYL5     |
| TC04000012.hg.1 | 2.14  | JUC04000085.hg.1 | MYL5     |
| TC04000012.hg.1 | -2.43 | PSR04000244.hg.1 | MYL5     |
| TC05000075.hg.1 | 3.48  | JUC05000470.hg.1 | ROPN1L   |
| TC05000075.hg.1 | -2.52 | PSR05000881.hg.1 | ROPN1L   |
| TC05000075.hg.1 | -4.11 | JUC05000471.hg.1 | ROPN1L   |
| TC05000364.hg.1 | 3.48  | PSR05005053.hg.1 | POLK     |
| TC05000364.hg.1 | 2.96  | JUC05002720.hg.1 | POLK     |
| TC05000364.hg.1 | 2.23  | JUC05002727.hg.1 | POLK     |
| TC05000364.hg.1 | 2.19  | PSR05005074.hg.1 | POLK     |
| TC05000364.hg.1 | -2.57 | JUC05002732.hg.1 | POLK     |
| TC06001879.hg.1 | 3.48  | JUC06011104.hg.1 | COL12A1  |
| TC06001879.hg.1 | 3.04  | PSR06022862.hg.1 | COL12A1  |
| TC06001879.hg.1 | 2.82  | PSR06022821.hg.1 | COL12A1  |
| TC06001879.hg.1 | 2.72  | JUC06011038.hg.1 | COL12A1  |
| TC06001879.hg.1 | 2.71  | PSR06022809.hg.1 | COL12A1  |
| TC10000715.hg.1 | 3.48  | JUC10004662.hg.1 | ABCC2    |
| TC10000715.hg.1 | 3.24  | JUC10004652.hg.1 | ABCC2    |
| TC10000715.hg.1 | -2.28 | JUC10004642.hg.1 | ABCC2    |
| TC10000715.hg.1 | -2.4  | PSR10008357.hg.1 | ABCC2    |
| TC10000715.hg.1 | -2.76 | JUC10004656.hg.1 | ABCC2    |
| TC10001683.hg.1 | 3.48  | JUC10012877.hg.1 | KIAA1598 |
| TC10001683.hg.1 | 2.61  | JUC10012888.hg.1 | KIAA1598 |
| TC10001683.hg.1 | 2.29  | PSR10022195.hg.1 | KIAA1598 |
| TC10001683.hg.1 | -2.13 | JUC10012901.hg.1 | KIAA1598 |
| TC10001683.hg.1 | -2.31 | PSR10022190.hg.1 | KIAA1598 |
| TC10001683.hg.1 | -2.75 | JUC10012880.hg.1 | KIAA1598 |
| TC11000272.hg.1 | 3.48  | JUC11001862.hg.1 | LUZP2    |
| TC11000272.hg.1 | 3.05  | JUC11001851.hg.1 | LUZP2    |
| TC11000272.hg.1 | 3.03  | JUC11001857.hg.1 | LUZP2    |
| TC11000272.hg.1 | 2.78  | JUC11001853.hg.1 | LUZP2    |

|                 |       |                  |          |
|-----------------|-------|------------------|----------|
| TC11000272.hg.1 | 2.12  | PSR11003605.hg.1 | LUZP2    |
| TC11000272.hg.1 | -2.02 | JUC11001859.hg.1 | LUZP2    |
| TC11000272.hg.1 | -2.05 | PSR11003594.hg.1 | LUZP2    |
| TC11000272.hg.1 | -2.15 | PSR11003596.hg.1 | LUZP2    |
| TC11000272.hg.1 | -2.37 | PSR11003611.hg.1 | LUZP2    |
| TC14000261.hg.1 | 3.48  | JUC14001263.hg.1 | C14orf28 |
| TC14000261.hg.1 | -2.21 | PSR14002782.hg.1 | C14orf28 |
| TC19001220.hg.1 | 3.48  | JUC19009926.hg.1 | CACNA1A  |
| TC19001220.hg.1 | 2.77  | PSR19017147.hg.1 | CACNA1A  |
| TC19001220.hg.1 | 2.67  | JUC19009940.hg.1 | CACNA1A  |
| TC19001220.hg.1 | 2.66  | JUC19009951.hg.1 | CACNA1A  |
| TC19001220.hg.1 | 2.61  | PSR19017185.hg.1 | CACNA1A  |
| TC19001220.hg.1 | 2.56  | JUC19009910.hg.1 | CACNA1A  |
| TC19001220.hg.1 | 2.33  | PSR19017140.hg.1 | CACNA1A  |
| TC19001220.hg.1 | 2.33  | PSR19017146.hg.1 | CACNA1A  |
| TC19001220.hg.1 | 2.08  | JUC19009917.hg.1 | CACNA1A  |
| TC19001220.hg.1 | 2.05  | JUC19009918.hg.1 | CACNA1A  |
| TC19001220.hg.1 | 2.04  | PSR19017173.hg.1 | CACNA1A  |
| TC19001220.hg.1 | -2.01 | PSR19017169.hg.1 | CACNA1A  |
| TC19001220.hg.1 | -2.01 | JUC19009934.hg.1 | CACNA1A  |
| TC19001220.hg.1 | -2.06 | JUC19009929.hg.1 | CACNA1A  |
| TC19001220.hg.1 | -2.06 | JUC19009938.hg.1 | CACNA1A  |
| TC19001220.hg.1 | -2.17 | PSR19017177.hg.1 | CACNA1A  |
| TC19001220.hg.1 | -2.32 | JUC19009914.hg.1 | CACNA1A  |
| TC19001220.hg.1 | -2.48 | JUC19009959.hg.1 | CACNA1A  |
| TC19001220.hg.1 | -2.65 | JUC19009930.hg.1 | CACNA1A  |
| TC19001220.hg.1 | -2.66 | JUC19009945.hg.1 | CACNA1A  |
| TC19001220.hg.1 | -3.28 | JUC19009942.hg.1 | CACNA1A  |
| TC19001220.hg.1 | -3.56 | JUC19009958.hg.1 | CACNA1A  |
| TC19001220.hg.1 | -3.82 | JUC19009931.hg.1 | CACNA1A  |
| TC19001220.hg.1 | -3.95 | JUC19009915.hg.1 | CACNA1A  |
| TC21000169.hg.1 | 3.48  | PSR21001603.hg.1 | ETS2     |
| TC21000169.hg.1 | 2.97  | JUC21000834.hg.1 | ETS2     |
| TC21000169.hg.1 | 2.96  | JUC21000837.hg.1 | ETS2     |
| TC21000169.hg.1 | 2.68  | JUC21000828.hg.1 | ETS2     |
| TC21000169.hg.1 | 2.23  | PSR21001611.hg.1 | ETS2     |
| TC05000799.hg.1 | 3.47  | PSR05011313.hg.1 | TCERG1   |
| TC05000799.hg.1 | 2.43  | JUC05005869.hg.1 | TCERG1   |
| TC05001297.hg.1 | 3.47  | JUC05009390.hg.1 | TTC33    |
| TC05001297.hg.1 | 2.6   | PSR05018268.hg.1 | TTC33    |
| TC05001297.hg.1 | 2     | JUC05009391.hg.1 | TTC33    |
| TC07000305.hg.1 | 3.47  | PSR07004588.hg.1 | C7orf69  |
| TC07000305.hg.1 | 2.43  | PSR07004579.hg.1 | C7orf69  |
| TC07000305.hg.1 | 2.17  | JUC07002202.hg.1 | C7orf69  |
| TC08000299.hg.1 | 3.47  | JUC08002121.hg.1 | ADAM32   |
| TC08000299.hg.1 | 3.31  | PSR08004292.hg.1 | ADAM32   |
| TC08000299.hg.1 | 2.84  | JUC08002139.hg.1 | ADAM32   |
| TC08000299.hg.1 | 2.83  | JUC08002130.hg.1 | ADAM32   |
| TC08000299.hg.1 | 2.18  | JUC08002134.hg.1 | ADAM32   |
| TC08000299.hg.1 | 2.13  | PSR08004270.hg.1 | ADAM32   |
| TC08000299.hg.1 | -2.07 | JUC08002118.hg.1 | ADAM32   |
| TC08000299.hg.1 | -2.14 | JUC08002131.hg.1 | ADAM32   |
| TC08000299.hg.1 | -2.61 | JUC08002155.hg.1 | ADAM32   |
| TC08000299.hg.1 | -2.86 | JUC08002137.hg.1 | ADAM32   |
| TC10002939.hg.1 | 3.47  | PSR10006695.hg.1 | AGAP11   |
| TC10002939.hg.1 | 3.15  | PSR10006704.hg.1 | AGAP11   |
| TC10002939.hg.1 | 3.13  | PSR10006697.hg.1 | AGAP11   |
| TC10002939.hg.1 | 2.88  | JUC10017208.hg.1 | AGAP11   |

|                 |       |                  |              |
|-----------------|-------|------------------|--------------|
| TC10002939.hg.1 | 2.7   | PSR10006698.hg.1 | AGAP11       |
| TC10002939.hg.1 | 2.7   | JUC10017206.hg.1 | AGAP11       |
| TC10002939.hg.1 | 2.57  | JUC10017212.hg.1 | AGAP11       |
| TC10002939.hg.1 | 2.32  | JUC10017209.hg.1 | AGAP11       |
| TC10002939.hg.1 | 2.1   | PSR10006690.hg.1 | AGAP11       |
| TC10002939.hg.1 | 2     | PSR10006702.hg.1 | AGAP11       |
| TC10002939.hg.1 | -2.01 | PSR10006701.hg.1 | AGAP11       |
| TC10002939.hg.1 | -2.72 | JUC10017205.hg.1 | AGAP11       |
| TC10002939.hg.1 | -4.76 | JUC10017213.hg.1 | AGAP11       |
| TC10002939.hg.1 | -6.07 | PSR10006700.hg.1 | AGAP11       |
| TC12000810.hg.1 | 3.47  | JUC12005643.hg.1 | TXNRD1       |
| TC12000810.hg.1 | 2.97  | JUC12005661.hg.1 | TXNRD1       |
| TC12000810.hg.1 | 2.59  | PSR12010291.hg.1 | TXNRD1       |
| TC12000810.hg.1 | 2.49  | PSR12010286.hg.1 | TXNRD1       |
| TC12000810.hg.1 | 2.33  | PSR12010289.hg.1 | TXNRD1       |
| TC12000810.hg.1 | 2.14  | JUC12005658.hg.1 | TXNRD1       |
| TC12000810.hg.1 | 2.1   | JUC12005648.hg.1 | TXNRD1       |
| TC12000810.hg.1 | -2    | JUC12005641.hg.1 | TXNRD1       |
| TC12000810.hg.1 | -2.17 | JUC12005632.hg.1 | TXNRD1       |
| TC15001112.hg.1 | 3.47  | PSR15010146.hg.1 |              |
| TC15001112.hg.1 | -3.47 | PSR15010147.hg.1 |              |
| TC15001112.hg.1 | -5.67 | JUC15005377.hg.1 |              |
| TC22001504.hg.1 | 3.47  | JUC22009899.hg.1 | LOC150381    |
| TC22001504.hg.1 | 2.84  | PSR22007522.hg.1 | LOC150381    |
| TC22001504.hg.1 | 2.6   | PSR22007518.hg.1 | LOC150381    |
| TC22001504.hg.1 | 2.15  | PSR22007533.hg.1 | LOC150381    |
| TC22001504.hg.1 | 2     | PSR22007520.hg.1 | LOC150381    |
| TC03001708.hg.1 | 3.47  | JUC03015385.hg.1 | SEMA5B       |
| TC03001708.hg.1 | -2    | PSR03030923.hg.1 | SEMA5B       |
| TC03001708.hg.1 | -3.05 | JUC03015393.hg.1 | SEMA5B       |
| TC01006304.hg.1 | 3.46  | JUC01039708.hg.1 | GBA          |
| TC01006304.hg.1 | 2.98  | JUC01039707.hg.1 | GBA          |
| TC01006304.hg.1 | 2.59  | JUC01039700.hg.1 | GBA          |
| TC01006304.hg.1 | 2.52  | PSR01051248.hg.1 | GBA          |
| TC01006304.hg.1 | 2.19  | PSR01051235.hg.1 | GBA          |
| TC01006304.hg.1 | -3.86 | JUC01039727.hg.1 | GBA          |
| TC02004967.hg.1 | 3.46  | JUC02031741.hg.1 | APLF         |
| TC02004967.hg.1 | 3.01  | JUC02031738.hg.1 | APLF         |
| TC02004967.hg.1 | 2.2   | JUC02031744.hg.1 | APLF         |
| TC02004967.hg.1 | 2.01  | PSR02005965.hg.1 | APLF         |
| TC03001125.hg.1 | 3.46  | JUC03009761.hg.1 | SUMF1        |
| TC03001125.hg.1 | 2.73  | PSR03019414.hg.1 | SUMF1        |
| TC03001125.hg.1 | 2.4   | PSR03019426.hg.1 | SUMF1        |
| TC03001125.hg.1 | 2.38  | PSR03019433.hg.1 | SUMF1        |
| TC03001125.hg.1 | 2.29  | JUC03009767.hg.1 | SUMF1        |
| TC03001125.hg.1 | 2.01  | PSR03019447.hg.1 | SUMF1        |
| TC03001125.hg.1 | 2     | PSR03019416.hg.1 | SUMF1        |
| TC03001125.hg.1 | -2.02 | JUC03009782.hg.1 | SUMF1        |
| TC06000717.hg.1 | 3.46  | PSR06008552.hg.1 | C6orf57      |
| TC06000717.hg.1 | 2.01  | JUC06003866.hg.1 | C6orf57      |
| TC06004079.hg.1 | 3.46  | JUC06021083.hg.1 | C4B, C4A, LC |
| TC06004079.hg.1 | 2.68  | PSR06004314.hg.1 | C4B, C4A, LC |
| TC06004079.hg.1 | 2.57  | JUC06021053.hg.1 | C4B, C4A, LC |
| TC06004079.hg.1 | 2.55  | JUC06021080.hg.1 | C4B, C4A, LC |
| TC06004079.hg.1 | 2.5   | JUC06021070.hg.1 | C4B, C4A, LC |
| TC06004079.hg.1 | 2.44  | PSR06004294.hg.1 | C4B, C4A, LC |
| TC06004079.hg.1 | 2.38  | PSR06004325.hg.1 | C4B, C4A, LC |
| TC06004079.hg.1 | 2.28  | JUC06021066.hg.1 | C4B, C4A, LC |

|                 |       |                  |              |
|-----------------|-------|------------------|--------------|
| TC06004079.hg.1 | 2.19  | PSR06004290.hg.1 | C4B, C4A, LC |
| TC06004079.hg.1 | 2.13  | PSR06004309.hg.1 | C4B, C4A, LC |
| TC06004079.hg.1 | 2.12  | JUC06021084.hg.1 | C4B, C4A, LC |
| TC06004079.hg.1 | 2.1   | PSR06004274.hg.1 | C4B, C4A, LC |
| TC06004079.hg.1 | 2.06  | PSR06004328.hg.1 | C4B, C4A, LC |
| TC06004079.hg.1 | 2.05  | PSR06004283.hg.1 | C4B, C4A, LC |
| TC06004079.hg.1 | 2     | PSR06004305.hg.1 | C4B, C4A, LC |
| TC06004079.hg.1 | -2.19 | JUC06021057.hg.1 | C4B, C4A, LC |
| TC06004079.hg.1 | -2.74 | JUC06021060.hg.1 | C4B, C4A, LC |
| TC06004079.hg.1 | -2.74 | JUC06021081.hg.1 | C4B, C4A, LC |
| TC06004079.hg.1 | -2.94 | JUC06021091.hg.1 | C4B, C4A, LC |
| TC06004079.hg.1 | -3.5  | JUC06021061.hg.1 | C4B, C4A, LC |
| TC07003313.hg.1 | 3.46  | PSR07009399.hg.1 | PILRB        |
| TC07003313.hg.1 | 2.33  | JUC07020682.hg.1 | PILRB        |
| TC07003313.hg.1 | -2.45 | JUC07020690.hg.1 | PILRB        |
| TC10001726.hg.1 | 3.46  | JUC10013230.hg.1 | OAT          |
| TC10001726.hg.1 | -2.5  | PSR10022897.hg.1 | OAT          |
| TC03001402.hg.1 | 3.45  | PSR03024883.hg.1 | LAMB2        |
| TC03001402.hg.1 | 2.77  | PSR03024854.hg.1 | LAMB2        |
| TC03001402.hg.1 | 2.66  | PSR03024856.hg.1 | LAMB2        |
| TC03001402.hg.1 | 2.61  | PSR03024894.hg.1 | LAMB2        |
| TC03001402.hg.1 | 2.59  | PSR03024855.hg.1 | LAMB2        |
| TC03001402.hg.1 | 2.34  | PSR03024858.hg.1 | LAMB2        |
| TC03001402.hg.1 | 2.26  | PSR03024884.hg.1 | LAMB2        |
| TC03001402.hg.1 | 2.12  | PSR03024881.hg.1 | LAMB2        |
| TC03001402.hg.1 | 2.09  | JUC03012342.hg.1 | LAMB2        |
| TC06001104.hg.1 | 3.45  | JUC06006463.hg.1 | ESR1         |
| TC06001104.hg.1 | 2.57  | JUC06006447.hg.1 | ESR1         |
| TC06001104.hg.1 | 2.55  | JUC06006462.hg.1 | ESR1         |
| TC06001104.hg.1 | 2.18  | PSR06013062.hg.1 | ESR1         |
| TC06001104.hg.1 | -2.1  | PSR06013076.hg.1 | ESR1         |
| TC06001104.hg.1 | -2.11 | JUC06006471.hg.1 | ESR1         |
| TC06001104.hg.1 | -2.35 | JUC06006449.hg.1 | ESR1         |
| TC06001104.hg.1 | -2.58 | JUC06006444.hg.1 | ESR1         |
| TC06001573.hg.1 | 3.45  | PSR06018782.hg.1 | PSMB8        |
| TC06001573.hg.1 | 2.72  | JUC06008951.hg.1 | PSMB8        |
| TC06001573.hg.1 | -2.75 | PSR06018775.hg.1 | PSMB8        |
| TC11002360.hg.1 | 3.45  | JUC11015111.hg.1 | SLC37A4      |
| TC11002360.hg.1 | 2.7   | PSR11028331.hg.1 | SLC37A4      |
| TC11002360.hg.1 | 2.18  | PSR11028354.hg.1 | SLC37A4      |
| TC11002360.hg.1 | 2.09  | JUC11015110.hg.1 | SLC37A4      |
| TC11002360.hg.1 | -2.15 | JUC11015118.hg.1 | SLC37A4      |
| TC15000625.hg.1 | 3.45  | JUC15002563.hg.1 | MAP2K5       |
| TC15000625.hg.1 | 2.57  | PSR15005191.hg.1 | MAP2K5       |
| TC15000625.hg.1 | -2    | PSR15005183.hg.1 | MAP2K5       |
| TC15000625.hg.1 | -2.17 | PSR15005190.hg.1 | MAP2K5       |
| TC21000222.hg.1 | 3.45  | PSR21002638.hg.1 | PFKL         |
| TC21000222.hg.1 | 2.93  | PSR21002642.hg.1 | PFKL         |
| TC21000222.hg.1 | 2.41  | PSR21002622.hg.1 | PFKL         |
| TC21000222.hg.1 | 2.4   | PSR21002630.hg.1 | PFKL         |
| TC21000222.hg.1 | 2.32  | PSR21002628.hg.1 | PFKL         |
| TC21000222.hg.1 | 2.25  | PSR21002646.hg.1 | PFKL         |
| TC21000222.hg.1 | 2.23  | PSR21002621.hg.1 | PFKL         |
| TC21000222.hg.1 | 2.13  | PSR21002606.hg.1 | PFKL         |
| TC21000222.hg.1 | 2.1   | PSR21002633.hg.1 | PFKL         |
| TC21000222.hg.1 | 2.1   | PSR21002644.hg.1 | PFKL         |
| TC21000222.hg.1 | 2.03  | PSR21002632.hg.1 | PFKL         |
| TC21000222.hg.1 | 2.03  | JUC21001363.hg.1 | PFKL         |

|                  |        |                   |             |
|------------------|--------|-------------------|-------------|
| TC6_apd_hap1000  | 3.45   | PSR6_apd_hap1001  | PSMB8       |
| TC6_apd_hap1000  | 2.72   | JUC6_apd_hap1000  | PSMB8       |
| TC6_apd_hap1000  | -2.75  | PSR6_apd_hap1001  | PSMB8       |
| TC6_cox_hap2000  | 3.45   | PSR6_cox_hap2003  | PSMB8       |
| TC6_cox_hap2000  | 2.72   | JUC6_cox_hap2001  | PSMB8       |
| TC6_cox_hap2000  | -2.75  | PSR6_cox_hap2003  | PSMB8       |
| TC6_dbb_hap3000  | 3.45   | PSR6_dbb_hap3003  | PSMB8       |
| TC6_dbb_hap3000  | 2.95   | JUC6_dbb_hap3001  | PSMB8       |
| TC6_dbb_hap3000  | -2.75  | PSR6_dbb_hap3003  | PSMB8       |
| TC6_mann_hap4000 | 3.45   | PSR6_mann_hap4000 | PSMB8       |
| TC6_mann_hap4000 | 2.72   | JUC6_mann_hap4000 | PSMB8       |
| TC6_mann_hap4000 | -2.75  | PSR6_mann_hap4000 | PSMB8       |
| TC6_mcf_hap5000  | 3.45   | PSR6_mcf_hap5003  | PSMB8       |
| TC6_mcf_hap5000  | 2.72   | JUC6_mcf_hap5001  | PSMB8       |
| TC6_mcf_hap5000  | -2.75  | PSR6_mcf_hap5003  | PSMB8       |
| TC6_qbl_hap6000  | 3.45   | PSR6_qbl_hap6003  | PSMB8       |
| TC6_qbl_hap6000  | 2.72   | JUC6_qbl_hap6001  | PSMB8       |
| TC6_qbl_hap6000  | -2.75  | PSR6_qbl_hap6003  | PSMB8       |
| TC03000204.hg.1  | 3.44   | JUC03002193.hg.1  | MYRIP       |
| TC03000204.hg.1  | 3.01   | JUC03002191.hg.1  | MYRIP       |
| TC03000204.hg.1  | 2.72   | PSR03004082.hg.1  | MYRIP       |
| TC03000204.hg.1  | 2.67   | JUC03002177.hg.1  | MYRIP       |
| TC03000204.hg.1  | 2.63   | PSR03004074.hg.1  | MYRIP       |
| TC03000204.hg.1  | 2.51   | PSR03004065.hg.1  | MYRIP       |
| TC03000204.hg.1  | 2.34   | PSR03004064.hg.1  | MYRIP       |
| TC03000204.hg.1  | 2.22   | PSR03004069.hg.1  | MYRIP       |
| TC03000204.hg.1  | 2.21   | PSR03004067.hg.1  | MYRIP       |
| TC03000204.hg.1  | 2.13   | PSR03004081.hg.1  | MYRIP       |
| TC03000204.hg.1  | -2.19  | JUC03002178.hg.1  | MYRIP       |
| TC03000204.hg.1  | -2.23  | PSR03004090.hg.1  | MYRIP       |
| TC03000204.hg.1  | -2.68  | JUC03002179.hg.1  | MYRIP       |
| TC03000204.hg.1  | -2.73  | JUC03002182.hg.1  | MYRIP       |
| TC03000204.hg.1  | -2.91  | JUC03002192.hg.1  | MYRIP       |
| TC10000874.hg.1  | 3.44   | JUC10005946.hg.1  | PPAPDC1A    |
| TC10000874.hg.1  | 2.81   | JUC10005953.hg.1  | PPAPDC1A    |
| TC10000874.hg.1  | 2.09   | PSR10010586.hg.1  | PPAPDC1A    |
| TC10000874.hg.1  | -2.05  | PSR10010596.hg.1  | PPAPDC1A    |
| TC10000874.hg.1  | -2.2   | PSR10010583.hg.1  | PPAPDC1A    |
| TC10000874.hg.1  | -3.96  | PSR10010598.hg.1  | PPAPDC1A    |
| TC10000874.hg.1  | -4.33  | JUC10005951.hg.1  | PPAPDC1A    |
| TC10000874.hg.1  | -4.68  | JUC10005958.hg.1  | PPAPDC1A    |
| TC10000874.hg.1  | -5.45  | PSR10010592.hg.1  | PPAPDC1A    |
| TC10000874.hg.1  | -5.51  | PSR10010584.hg.1  | PPAPDC1A    |
| TC10000874.hg.1  | -7.39  | JUC10005948.hg.1  | PPAPDC1A    |
| TC10000874.hg.1  | -7.88  | PSR10010593.hg.1  | PPAPDC1A    |
| TC10000874.hg.1  | -9.32  | JUC10005945.hg.1  | PPAPDC1A    |
| TC10000874.hg.1  | -9.64  | PSR10010577.hg.1  | PPAPDC1A    |
| TC10000874.hg.1  | -10.34 | JUC10005955.hg.1  | PPAPDC1A    |
| TC10000874.hg.1  | -11.2  | JUC10005947.hg.1  | PPAPDC1A    |
| TC10000874.hg.1  | -11.21 | JUC10005954.hg.1  | PPAPDC1A    |
| TC10000874.hg.1  | -14.73 | PSR10010582.hg.1  | PPAPDC1A    |
| TC10000874.hg.1  | -16.1  | PSR10010594.hg.1  | PPAPDC1A    |
| TC20000685.hg.1  | 3.44   | JUC20004956.hg.1  | RALGAPA2    |
| TC20000685.hg.1  | 2.34   | JUC20004960.hg.1  | RALGAPA2    |
| TC20000685.hg.1  | 2.25   | PSR20009517.hg.1  | RALGAPA2    |
| TC20000685.hg.1  | 2.02   | JUC20004964.hg.1  | RALGAPA2    |
| TC20000685.hg.1  | -2.85  | JUC20004953.hg.1  | RALGAPA2    |
| TC22000856.hg.1  | 3.44   | JUC22005968.hg.1  | ARFGAP3, P/ |

|                 |       |                  |             |
|-----------------|-------|------------------|-------------|
| TC22000856.hg.1 | 3.26  | JUC22005961.hg.1 | ARFGAP3, P/ |
| TC22000856.hg.1 | 3.17  | PSR22014463.hg.1 | ARFGAP3, P/ |
| TC22000856.hg.1 | 2.96  | JUC22005970.hg.1 | ARFGAP3, P/ |
| TC22000856.hg.1 | 2.77  | PSR22014461.hg.1 | ARFGAP3, P/ |
| TC22000856.hg.1 | 2.72  | JUC22005932.hg.1 | ARFGAP3, P/ |
| TC22000856.hg.1 | 2.68  | PSR22014452.hg.1 | ARFGAP3, P/ |
| TC22000856.hg.1 | 2.45  | JUC22005936.hg.1 | ARFGAP3, P/ |
| TC22000856.hg.1 | 2.44  | JUC22005971.hg.1 | ARFGAP3, P/ |
| TC22000856.hg.1 | 2.38  | PSR22014458.hg.1 | ARFGAP3, P/ |
| TC22000856.hg.1 | 2.35  | PSR22014444.hg.1 | ARFGAP3, P/ |
| TC22000856.hg.1 | 2.34  | PSR22014454.hg.1 | ARFGAP3, P/ |
| TC22000856.hg.1 | 2.3   | PSR22014455.hg.1 | ARFGAP3, P/ |
| TC22000856.hg.1 | 2.29  | JUC22005942.hg.1 | ARFGAP3, P/ |
| TC22000856.hg.1 | 2.27  | PSR22014443.hg.1 | ARFGAP3, P/ |
| TC22000856.hg.1 | 2.24  | PSR22014447.hg.1 | ARFGAP3, P/ |
| TC22000856.hg.1 | 2.23  | PSR22014459.hg.1 | ARFGAP3, P/ |
| TC22000856.hg.1 | 2.19  | PSR22014448.hg.1 | ARFGAP3, P/ |
| TC22000856.hg.1 | 2.15  | PSR22014471.hg.1 | ARFGAP3, P/ |
| TC22000856.hg.1 | 2.15  | JUC22005965.hg.1 | ARFGAP3, P/ |
| TC22000856.hg.1 | 2.03  | PSR22014450.hg.1 | ARFGAP3, P/ |
| TC22000856.hg.1 | 2.03  | PSR22014453.hg.1 | ARFGAP3, P/ |
| TC22000856.hg.1 | 2.02  | JUC22005933.hg.1 | ARFGAP3, P/ |
| TC22000856.hg.1 | -2.32 | JUC22005948.hg.1 | ARFGAP3, P/ |
| TC6_dbb_hap3000 | 3.44  | JUC6_dbb_hap3000 | DDR1        |
| TC6_dbb_hap3000 | 3.21  | PSR6_dbb_hap3000 | DDR1        |
| TC6_dbb_hap3000 | 3.12  | JUC6_dbb_hap3000 | DDR1        |
| TC6_dbb_hap3000 | 3.1   | PSR6_dbb_hap3000 | DDR1        |
| TC6_dbb_hap3000 | 3.07  | PSR6_dbb_hap3000 | DDR1        |
| TC6_dbb_hap3000 | 2.99  | PSR6_dbb_hap3000 | DDR1        |
| TC6_dbb_hap3000 | 2.98  | JUC6_dbb_hap3000 | DDR1        |
| TC6_dbb_hap3000 | 2.84  | JUC6_dbb_hap3000 | DDR1        |
| TC6_dbb_hap3000 | 2.79  | JUC6_dbb_hap3000 | DDR1        |
| TC6_dbb_hap3000 | 2.59  | PSR6_dbb_hap3000 | DDR1        |
| TC6_dbb_hap3000 | 2.51  | JUC6_dbb_hap3000 | DDR1        |
| TC6_dbb_hap3000 | 2.44  | PSR6_dbb_hap3000 | DDR1        |
| TC6_dbb_hap3000 | 2.43  | PSR6_dbb_hap3000 | DDR1        |
| TC6_dbb_hap3000 | 2.42  | JUC6_dbb_hap3000 | DDR1        |
| TC6_dbb_hap3000 | 2.36  | PSR6_dbb_hap3000 | DDR1        |
| TC6_dbb_hap3000 | 2.35  | PSR6_dbb_hap3000 | DDR1        |
| TC6_dbb_hap3000 | 2.33  | JUC6_dbb_hap3000 | DDR1        |
| TC6_dbb_hap3000 | 2.19  | PSR6_dbb_hap3000 | DDR1        |
| TC6_dbb_hap3000 | 2.15  | PSR6_dbb_hap3000 | DDR1        |
| TC6_dbb_hap3000 | 2.11  | PSR6_dbb_hap3000 | DDR1        |
| TC6_dbb_hap3000 | 2.1   | PSR6_dbb_hap3000 | DDR1        |
| TC6_dbb_hap3000 | 2.07  | PSR6_dbb_hap3000 | DDR1        |
| TC6_dbb_hap3000 | -2.38 | PSR6_dbb_hap3000 | DDR1        |
| TC01002984.hg.1 | 3.43  | PSR01046330.hg.1 | OVGP1       |
| TC01002984.hg.1 | 3.21  | JUC01024911.hg.1 | OVGP1       |
| TC01002984.hg.1 | 2.08  | JUC01024914.hg.1 | OVGP1       |
| TC02000894.hg.1 | 3.43  | JUC02007047.hg.1 | SPOPL       |
| TC02000894.hg.1 | 2.5   | PSR02013269.hg.1 | SPOPL       |
| TC02002573.hg.1 | 3.43  | JUC02021491.hg.1 | PRKRA       |
| TC02002573.hg.1 | 2.06  | PSR02040837.hg.1 | PRKRA       |
| TC03001362.hg.1 | 3.43  | JUC03011615.hg.1 | MYL3        |
| TC03001362.hg.1 | 2.49  | PSR03023330.hg.1 | MYL3        |
| TC03001362.hg.1 | -2.1  | JUC03011616.hg.1 | MYL3        |
| TC03001362.hg.1 | -2.22 | PSR03023338.hg.1 | MYL3        |
| TC03001362.hg.1 | -2.32 | JUC03011617.hg.1 | MYL3        |



|                 |        |                  |             |
|-----------------|--------|------------------|-------------|
| TC03001362.hg.1 | -2.4   | PSR03023340.hg.1 | MYL3        |
| TC03001362.hg.1 | -2.75  | JUC03011610.hg.1 | MYL3        |
| TC10001006.hg.1 | 3.43   | JUC10007260.hg.1 | IL15RA      |
| TC10001006.hg.1 | 2.52   | JUC10007258.hg.1 | IL15RA      |
| TC10001006.hg.1 | 2.1    | JUC10007272.hg.1 | IL15RA      |
| TC10001006.hg.1 | 2.01   | PSR10012560.hg.1 | IL15RA      |
| TC10001006.hg.1 | -2.45  | PSR10012545.hg.1 | IL15RA      |
| TC16000022.hg.1 | 3.43   | JUC16000124.hg.1 | MSLN        |
| TC16000022.hg.1 | 3.06   | JUC16000125.hg.1 | MSLN        |
| TC16000022.hg.1 | 2.93   | JUC16000123.hg.1 | MSLN        |
| TC16000022.hg.1 | 2.73   | PSR16000516.hg.1 | MSLN        |
| TC16000022.hg.1 | 2.7    | JUC16000121.hg.1 | MSLN        |
| TC16000022.hg.1 | 2.67   | JUC16000112.hg.1 | MSLN        |
| TC16000022.hg.1 | 2.59   | PSR16000500.hg.1 | MSLN        |
| TC16000022.hg.1 | 2.44   | PSR16000497.hg.1 | MSLN        |
| TC16000022.hg.1 | 2.17   | JUC16000116.hg.1 | MSLN        |
| TC16000022.hg.1 | 2.09   | PSR16000503.hg.1 | MSLN        |
| TC16000022.hg.1 | -4.22  | JUC16000109.hg.1 | MSLN        |
| TC16000022.hg.1 | -7.94  | JUC16000110.hg.1 | MSLN        |
| TC16000022.hg.1 | -8.57  | PSR16000510.hg.1 | MSLN        |
| TC16000022.hg.1 | -15.82 | JUC16000115.hg.1 | MSLN        |
| TC20000277.hg.1 | 3.43   | JUC20002215.hg.1 | VSTM2L      |
| TC20000277.hg.1 | 3.17   | PSR20003944.hg.1 | VSTM2L      |
| TC20001008.hg.1 | 3.43   | JUC20007190.hg.1 | LAMA5, MIR4 |
| TC20001008.hg.1 | 2.47   | JUC20007213.hg.1 | LAMA5, MIR4 |
| TC20001008.hg.1 | 2.04   | JUC20007149.hg.1 | LAMA5, MIR4 |
| TC20001008.hg.1 | 2.04   | JUC20007217.hg.1 | LAMA5, MIR4 |
| TC20001008.hg.1 | 2.02   | JUC20007142.hg.1 | LAMA5, MIR4 |
| TC20001008.hg.1 | -2     | PSR20013767.hg.1 | LAMA5, MIR4 |
| TC20001008.hg.1 | -2.08  | PSR20013839.hg.1 | LAMA5, MIR4 |
| TC20001008.hg.1 | -2.13  | JUC20007169.hg.1 | LAMA5, MIR4 |
| TC20001008.hg.1 | -2.14  | PSR20013820.hg.1 | LAMA5, MIR4 |
| TC20001008.hg.1 | -2.14  | PSR20013840.hg.1 | LAMA5, MIR4 |
| TC20001008.hg.1 | -2.14  | JUC20007177.hg.1 | LAMA5, MIR4 |
| TC20001008.hg.1 | -2.19  | PSR20013837.hg.1 | LAMA5, MIR4 |
| TC20001008.hg.1 | -2.27  | JUC20007185.hg.1 | LAMA5, MIR4 |
| TC20001008.hg.1 | -2.46  | PSR20013823.hg.1 | LAMA5, MIR4 |
| TC20001008.hg.1 | -2.5   | JUC20007158.hg.1 | LAMA5, MIR4 |
| TC20001008.hg.1 | -2.71  | PSR20013766.hg.1 | LAMA5, MIR4 |
| TC20001008.hg.1 | -2.73  | PSR20013752.hg.1 | LAMA5, MIR4 |
| TC20001008.hg.1 | -2.87  | JUC20007196.hg.1 | LAMA5, MIR4 |
| TC20001008.hg.1 | -2.91  | JUC20007137.hg.1 | LAMA5, MIR4 |
| TC20001008.hg.1 | -3.03  | PSR20013843.hg.1 | LAMA5, MIR4 |
| TC20001008.hg.1 | -3.45  | JUC20007155.hg.1 | LAMA5, MIR4 |
| TC20001008.hg.1 | -3.47  | PSR20013806.hg.1 | LAMA5, MIR4 |
| TC20001008.hg.1 | -3.64  | JUC20007167.hg.1 | LAMA5, MIR4 |
| TC20001008.hg.1 | -3.76  | PSR20013817.hg.1 | LAMA5, MIR4 |
| TC20001008.hg.1 | -4.08  | PSR20013739.hg.1 | LAMA5, MIR4 |
| TC20001008.hg.1 | -4.36  | JUC20007197.hg.1 | LAMA5, MIR4 |
| TC20001008.hg.1 | -4.91  | JUC20007174.hg.1 | LAMA5, MIR4 |
| TC20001008.hg.1 | -4.97  | JUC20007201.hg.1 | LAMA5, MIR4 |
| TC20001008.hg.1 | -6.52  | JUC20007179.hg.1 | LAMA5, MIR4 |
| TC22000911.hg.1 | 3.43   | PSR22015472.hg.1 | PLXNB2      |
| TC22000911.hg.1 | 2.84   | PSR22015474.hg.1 | PLXNB2      |
| TC22000911.hg.1 | 2.39   | PSR22015427.hg.1 | PLXNB2      |
| TC22000911.hg.1 | 2.35   | JUC22006513.hg.1 | PLXNB2      |
| TC22000911.hg.1 | 2.26   | JUC22006506.hg.1 | PLXNB2      |
| TC22000911.hg.1 | 2.16   | JUC22006507.hg.1 | PLXNB2      |

|                 |       |                  |           |
|-----------------|-------|------------------|-----------|
| TC07000688.hg.1 | 3.42  | JUC07005048.hg.1 | PRKAR2B   |
| TC07000688.hg.1 | 2.99  | PSR07010720.hg.1 | PRKAR2B   |
| TC07000688.hg.1 | 2.86  | PSR07010726.hg.1 | PRKAR2B   |
| TC07000688.hg.1 | 2.54  | JUC07005040.hg.1 | PRKAR2B   |
| TC07000688.hg.1 | -2.08 | PSR07010730.hg.1 | PRKAR2B   |
| TC09000593.hg.1 | 3.42  | JUC09003732.hg.1 | PAPPA     |
| TC09000593.hg.1 | 2.16  | PSR09006732.hg.1 | PAPPA     |
| TC09001342.hg.1 | 3.42  | PSR09016829.hg.1 | ZNF484    |
| TC09001342.hg.1 | -2.04 | JUC09009044.hg.1 | ZNF484    |
| TC12003211.hg.1 | 3.42  | JUC12019449.hg.1 | ACAD10    |
| TC12003211.hg.1 | 2.73  | PSR12011442.hg.1 | ACAD10    |
| TC12003211.hg.1 | -2.25 | PSR12011414.hg.1 | ACAD10    |
| TC12003211.hg.1 | -2.86 | PSR12011409.hg.1 | ACAD10    |
| TC13000644.hg.1 | 3.42  | JUC13004249.hg.1 | KIAA0226L |
| TC13000644.hg.1 | 2.39  | JUC13004274.hg.1 | KIAA0226L |
| TC13000644.hg.1 | 2.2   | JUC13004279.hg.1 | KIAA0226L |
| TC13000644.hg.1 | -2.12 | PSR13007336.hg.1 | KIAA0226L |
| TC13000644.hg.1 | -2.65 | PSR13007353.hg.1 | KIAA0226L |
| TC13000644.hg.1 | -2.77 | PSR13007356.hg.1 | KIAA0226L |
| TC13000644.hg.1 | -2.91 | PSR13007366.hg.1 | KIAA0226L |
| TC13000644.hg.1 | -3.01 | JUC13004250.hg.1 | KIAA0226L |
| TC13000644.hg.1 | -3.21 | JUC13004280.hg.1 | KIAA0226L |
| TC13000644.hg.1 | -3.41 | JUC13004281.hg.1 | KIAA0226L |
| TC13000644.hg.1 | -3.46 | PSR13007368.hg.1 | KIAA0226L |
| TC13000644.hg.1 | -3.66 | JUC13004276.hg.1 | KIAA0226L |
| TC13000644.hg.1 | -4.12 | PSR13007365.hg.1 | KIAA0226L |
| TC13000644.hg.1 | -4.57 | JUC13004277.hg.1 | KIAA0226L |
| TC13000644.hg.1 | -4.66 | JUC13004251.hg.1 | KIAA0226L |
| TC19002697.hg.1 | 3.42  | JUC19017960.hg.1 | ALKBH6    |
| TC19002697.hg.1 | 3.22  | JUC19017957.hg.1 | ALKBH6    |
| TC19002697.hg.1 | 2.33  | JUC19017956.hg.1 | ALKBH6    |
| TC19002697.hg.1 | 2.29  | JUC19017953.hg.1 | ALKBH6    |
| TC19002697.hg.1 | 2.15  | PSR19019772.hg.1 | ALKBH6    |
| TC01001866.hg.1 | 3.41  | JUC01015701.hg.1 | ADCK3     |
| TC01001866.hg.1 | 2.71  | PSR01029088.hg.1 | ADCK3     |
| TC01001866.hg.1 | 2.63  | PSR01029069.hg.1 | ADCK3     |
| TC01001866.hg.1 | 2.46  | PSR01029036.hg.1 | ADCK3     |
| TC01001866.hg.1 | 2.36  | JUC01015670.hg.1 | ADCK3     |
| TC01001866.hg.1 | 2.17  | PSR01029042.hg.1 | ADCK3     |
| TC01001866.hg.1 | 2.12  | JUC01015676.hg.1 | ADCK3     |
| TC01001866.hg.1 | 2.11  | PSR01029073.hg.1 | ADCK3     |
| TC01001866.hg.1 | 2.08  | JUC01015692.hg.1 | ADCK3     |
| TC01001866.hg.1 | 2.03  | PSR01029043.hg.1 | ADCK3     |
| TC01001866.hg.1 | 2.03  | JUC01015679.hg.1 | ADCK3     |
| TC01001866.hg.1 | -2.4  | JUC01015693.hg.1 | ADCK3     |
| TC01001866.hg.1 | -2.42 | JUC01015703.hg.1 | ADCK3     |
| TC01001866.hg.1 | -2.67 | JUC01015698.hg.1 | ADCK3     |
| TC01001866.hg.1 | -2.72 | JUC01015702.hg.1 | ADCK3     |
| TC03000351.hg.1 | 3.41  | JUC03003735.hg.1 | CACNA1D   |
| TC03000351.hg.1 | 3.04  | JUC03003774.hg.1 | CACNA1D   |
| TC03000351.hg.1 | 2.86  | JUC03003784.hg.1 | CACNA1D   |
| TC03000351.hg.1 | 2.64  | JUC03003744.hg.1 | CACNA1D   |
| TC03000351.hg.1 | 2.34  | JUC03003741.hg.1 | CACNA1D   |
| TC03000351.hg.1 | 2.33  | JUC03003787.hg.1 | CACNA1D   |
| TC03000351.hg.1 | 2.16  | PSR03007717.hg.1 | CACNA1D   |
| TC03000351.hg.1 | 2.08  | PSR03007715.hg.1 | CACNA1D   |
| TC03000351.hg.1 | -2.06 | JUC03003750.hg.1 | CACNA1D   |
| TC03000351.hg.1 | -2.28 | JUC03003749.hg.1 | CACNA1D   |

|                 |        |                  |              |
|-----------------|--------|------------------|--------------|
| TC03000351.hg.1 | -3.12  | JUC03003761.hg.1 | CACNA1D      |
| TC03001773.hg.1 | 3.41   | JUC03016017.hg.1 | TMCC1        |
| TC03001773.hg.1 | 2.51   | PSR03032191.hg.1 | TMCC1        |
| TC03001773.hg.1 | 2.36   | JUC03016014.hg.1 | TMCC1        |
| TC03001773.hg.1 | 2.15   | PSR03032195.hg.1 | TMCC1        |
| TC03001773.hg.1 | -2.25  | JUC03016001.hg.1 | TMCC1        |
| TC03001773.hg.1 | -2.68  | JUC03016005.hg.1 | TMCC1        |
| TC05001110.hg.1 | 3.41   | JUC05008235.hg.1 | LPCAT1       |
| TC05001110.hg.1 | 2.61   | PSR05016179.hg.1 | LPCAT1       |
| TC05001110.hg.1 | 2.49   | JUC05008236.hg.1 | LPCAT1       |
| TC05001110.hg.1 | 2.29   | JUC05008225.hg.1 | LPCAT1       |
| TC05001110.hg.1 | 2.28   | PSR05016182.hg.1 | LPCAT1       |
| TC05001110.hg.1 | 2.26   | PSR05016200.hg.1 | LPCAT1       |
| TC05001110.hg.1 | 2.24   | PSR05016175.hg.1 | LPCAT1       |
| TC05001110.hg.1 | 2.22   | PSR05016174.hg.1 | LPCAT1       |
| TC05001110.hg.1 | -2.18  | JUC05008227.hg.1 | LPCAT1       |
| TC05001110.hg.1 | -2.24  | PSR05016184.hg.1 | LPCAT1       |
| TC05001110.hg.1 | -2.43  | PSR05016187.hg.1 | LPCAT1       |
| TC05001110.hg.1 | -3.12  | JUC05008232.hg.1 | LPCAT1       |
| TC07001717.hg.1 | 3.41   | JUC07012958.hg.1 | DPY19L2P2    |
| TC07001717.hg.1 | 2.62   | JUC07012969.hg.1 | DPY19L2P2    |
| TC07001717.hg.1 | 2.46   | JUC07012948.hg.1 | DPY19L2P2    |
| TC07001717.hg.1 | 2.43   | JUC07012954.hg.1 | DPY19L2P2    |
| TC07001717.hg.1 | 2.04   | PSR07026600.hg.1 | DPY19L2P2    |
| TC07001717.hg.1 | -2.22  | JUC07012967.hg.1 | DPY19L2P2    |
| TC07001717.hg.1 | -2.27  | PSR07026591.hg.1 | DPY19L2P2    |
| TC07001717.hg.1 | -3.42  | JUC07012953.hg.1 | DPY19L2P2    |
| TC09000489.hg.1 | 3.41   | JUC09002864.hg.1 | C9orf174, LO |
| TC09000489.hg.1 | 2.97   | PSR09005251.hg.1 | C9orf174, LO |
| TC09000489.hg.1 | 2.55   | JUC09002853.hg.1 | C9orf174, LO |
| TC09000489.hg.1 | -2.02  | PSR09005223.hg.1 | C9orf174, LO |
| TC09000489.hg.1 | -2.1   | JUC09002874.hg.1 | C9orf174, LO |
| TC09000489.hg.1 | -2.14  | JUC09002909.hg.1 | C9orf174, LO |
| TC09000489.hg.1 | -2.25  | JUC09002884.hg.1 | C9orf174, LO |
| TC09000489.hg.1 | -2.35  | JUC09002900.hg.1 | C9orf174, LO |
| TC09001403.hg.1 | 3.41   | JUC09009362.hg.1 | TRIM14       |
| TC09001403.hg.1 | 2.48   | JUC09009372.hg.1 | TRIM14       |
| TC09001403.hg.1 | 2.1    | PSR09017458.hg.1 | TRIM14       |
| TC09001403.hg.1 | -2.02  | PSR09017448.hg.1 | TRIM14       |
| TC09001403.hg.1 | -2.26  | PSR09017464.hg.1 | TRIM14       |
| TC09001403.hg.1 | -2.72  | JUC09009368.hg.1 | TRIM14       |
| TC09001403.hg.1 | -4.24  | JUC09009374.hg.1 | TRIM14       |
| TC0Y000017.hg.1 | 3.41   | JUC0Y000103.hg.1 | ZFY          |
| TC0Y000017.hg.1 | -2.09  | JUC0Y000105.hg.1 | ZFY          |
| TC0Y000017.hg.1 | -2.17  | PSR0Y000215.hg.1 | ZFY          |
| TC0Y000017.hg.1 | -2.21  | PSR0Y000216.hg.1 | ZFY          |
| TC0Y000017.hg.1 | -2.72  | JUC0Y000106.hg.1 | ZFY          |
| TC0Y000017.hg.1 | -5.61  | PSR0Y000229.hg.1 | ZFY          |
| TC0Y000017.hg.1 | -5.85  | PSR0Y000230.hg.1 | ZFY          |
| TC0Y000017.hg.1 | -6.41  | JUC0Y000102.hg.1 | ZFY          |
| TC0Y000017.hg.1 | -6.54  | JUC0Y000109.hg.1 | ZFY          |
| TC0Y000017.hg.1 | -8.2   | JUC0Y000100.hg.1 | ZFY          |
| TC0Y000017.hg.1 | -18.58 | JUC0Y000101.hg.1 | ZFY          |
| TC12001393.hg.1 | 3.41   | JUC12010083.hg.1 | SLC2A13      |
| TC12001393.hg.1 | 2.33   | PSR12018088.hg.1 | SLC2A13      |
| TC12001393.hg.1 | 2.12   | JUC12010085.hg.1 | SLC2A13      |
| TC14001387.hg.1 | 3.41   | JUC14007992.hg.1 | GALC         |
| TC14001387.hg.1 | 2.2    | JUC14007990.hg.1 | GALC         |

|                 |       |                  |           |
|-----------------|-------|------------------|-----------|
| TC14001387.hg.1 | 2.18  | JUC14008002.hg.1 | GALC      |
| TC14001387.hg.1 | -2.08 | PSR14015658.hg.1 | GALC      |
| TC14001387.hg.1 | -2.1  | JUC14008000.hg.1 | GALC      |
| TC17001029.hg.1 | 3.41  | PSR17013881.hg.1 | CXCL16    |
| TC17001029.hg.1 | 2.46  | JUC17007916.hg.1 | CXCL16    |
| TC17001029.hg.1 | 2.31  | PSR17013886.hg.1 | CXCL16    |
| TC17001029.hg.1 | 2.19  | PSR17013887.hg.1 | CXCL16    |
| TC17001029.hg.1 | -2.23 | JUC17007914.hg.1 | CXCL16    |
| TC17001029.hg.1 | -2.64 | PSR17013885.hg.1 | CXCL16    |
| TC01002662.hg.1 | 3.4   | JUC01022341.hg.1 | ECHDC2    |
| TC01002662.hg.1 | 2.4   | JUC01022357.hg.1 | ECHDC2    |
| TC01002662.hg.1 | 2.33  | JUC01022351.hg.1 | ECHDC2    |
| TC01002662.hg.1 | -2.19 | PSR01041797.hg.1 | ECHDC2    |
| TC02002853.hg.1 | 3.4   | PSR02046049.hg.1 | SP110     |
| TC02002853.hg.1 | -2.85 | JUC02024119.hg.1 | SP110     |
| TC04001723.hg.1 | 3.4   | JUC04012611.hg.1 | CBR4      |
| TC04001723.hg.1 | 2.63  | PSR04023812.hg.1 | CBR4      |
| TC04001723.hg.1 | 2.42  | JUC04012612.hg.1 | CBR4      |
| TC04001723.hg.1 | -2.17 | PSR04023815.hg.1 | CBR4      |
| TC07001654.hg.1 | 3.4   | PSR07025380.hg.1 | MCM7      |
| TC07001654.hg.1 | 2.81  | PSR07025376.hg.1 | MCM7      |
| TC07001654.hg.1 | 2.25  | JUC07012499.hg.1 | MCM7      |
| TC07001654.hg.1 | -2.33 | JUC07012511.hg.1 | MCM7      |
| TC07001654.hg.1 | -2.68 | JUC07012514.hg.1 | MCM7      |
| TC14001253.hg.1 | 3.4   | PSR14014237.hg.1 | ZFP36L1   |
| TC14001253.hg.1 | 2.66  | JUC14007190.hg.1 | ZFP36L1   |
| TC14001253.hg.1 | 2.6   | PSR14014238.hg.1 | ZFP36L1   |
| TC14001253.hg.1 | 2.58  | JUC14007193.hg.1 | ZFP36L1   |
| TC14001253.hg.1 | 2.54  | PSR14014236.hg.1 | ZFP36L1   |
| TC14001253.hg.1 | 2.5   | JUC14007189.hg.1 | ZFP36L1   |
| TC14001253.hg.1 | 2.12  | PSR14014235.hg.1 | ZFP36L1   |
| TC14001253.hg.1 | -2.02 | JUC14007194.hg.1 | ZFP36L1   |
| TC17000146.hg.1 | 3.4   | JUC17001184.hg.1 | USP43     |
| TC17000146.hg.1 | 3.05  | JUC17001194.hg.1 | USP43     |
| TC17000146.hg.1 | 2.3   | PSR17002013.hg.1 | USP43     |
| TC01000367.hg.1 | 3.39  | JUC01002944.hg.1 | FAM76A    |
| TC01000367.hg.1 | 2.37  | PSR01005664.hg.1 | FAM76A    |
| TC0X001165.hg.1 | 3.39  | JUC0X007942.hg.1 | ZDHHC15   |
| TC0X001165.hg.1 | 2.47  | JUC0X007937.hg.1 | ZDHHC15   |
| TC0X001165.hg.1 | -2.32 | PSR0X015736.hg.1 | ZDHHC15   |
| TC15001338.hg.1 | 3.39  | PSR15012850.hg.1 | SHC4      |
| TC15001338.hg.1 | 2.56  | PSR15012835.hg.1 | SHC4      |
| TC15001338.hg.1 | 2.02  | JUC15006846.hg.1 | SHC4      |
| TC02001935.hg.1 | 3.38  | JUC02016184.hg.1 | LOC644838 |
| TC02001935.hg.1 | 2.86  | PSR02030722.hg.1 | LOC644838 |
| TC03000336.hg.1 | 3.38  | JUC03003559.hg.1 | STAB1     |
| TC03000336.hg.1 | 2.78  | JUC03003563.hg.1 | STAB1     |
| TC03000336.hg.1 | 2.74  | JUC03003567.hg.1 | STAB1     |
| TC03000336.hg.1 | 2.16  | PSR03007401.hg.1 | STAB1     |
| TC03000336.hg.1 | 2.01  | PSR03007393.hg.1 | STAB1     |
| TC03001145.hg.1 | 3.38  | PSR03019627.hg.1 | OXTR      |
| TC03001145.hg.1 | 3.19  | PSR03019628.hg.1 | OXTR      |
| TC03001145.hg.1 | -2.25 | PSR03019632.hg.1 | OXTR      |
| TC03001145.hg.1 | -2.31 | JUC03009898.hg.1 | OXTR      |
| TC05001883.hg.1 | 3.38  | JUC05013261.hg.1 | FGF1      |
| TC05001883.hg.1 | 3.12  | JUC05013267.hg.1 | FGF1      |
| TC05001883.hg.1 | 2.92  | PSR05026024.hg.1 | FGF1      |
| TC05001883.hg.1 | 2.39  | PSR05026021.hg.1 | FGF1      |

|                 |       |                  |            |
|-----------------|-------|------------------|------------|
| TC05001883.hg.1 | 2.37  | PSR05026020.hg.1 | FGF1       |
| TC05001883.hg.1 | 2.37  | PSR05026028.hg.1 | FGF1       |
| TC05001883.hg.1 | 2.17  | PSR05026029.hg.1 | FGF1       |
| TC05001883.hg.1 | -3.75 | JUC05013259.hg.1 | FGF1       |
| TC06001895.hg.1 | 3.38  | JUC06011187.hg.1 | PHIP       |
| TC06001895.hg.1 | 3.17  | JUC06011184.hg.1 | PHIP       |
| TC06001895.hg.1 | 2.86  | PSR06023011.hg.1 | PHIP       |
| TC06001895.hg.1 | 2.53  | JUC06011188.hg.1 | PHIP       |
| TC06001895.hg.1 | 2.39  | JUC06011163.hg.1 | PHIP       |
| TC06001895.hg.1 | 2.37  | JUC06011168.hg.1 | PHIP       |
| TC06001895.hg.1 | 2.2   | PSR06023051.hg.1 | PHIP       |
| TC06001895.hg.1 | 2.09  | PSR06022999.hg.1 | PHIP       |
| TC06001895.hg.1 | 2.09  | PSR06023047.hg.1 | PHIP       |
| TC06001895.hg.1 | -2.31 | JUC06011162.hg.1 | PHIP       |
| TC06001895.hg.1 | -3.27 | JUC06011201.hg.1 | PHIP       |
| TC12003224.hg.1 | 3.38  | JUC12019702.hg.1 | C1S        |
| TC12003224.hg.1 | 2.09  | JUC12019681.hg.1 | C1S        |
| TC12003224.hg.1 | -2.12 | PSR12001403.hg.1 | C1S        |
| TC12001425.hg.1 | 3.38  | JUC12010273.hg.1 | SCAF11     |
| TC12001425.hg.1 | 3.12  | JUC12010271.hg.1 | SCAF11     |
| TC12001425.hg.1 | 2.81  | JUC12010272.hg.1 | SCAF11     |
| TC12001425.hg.1 | 2.29  | JUC12010267.hg.1 | SCAF11     |
| TC12001425.hg.1 | 2.12  | JUC12010263.hg.1 | SCAF11     |
| TC12001425.hg.1 | 2     | PSR12018412.hg.1 | SCAF11     |
| TC12001425.hg.1 | -2.2  | JUC12010269.hg.1 | SCAF11     |
| TC02000057.hg.1 | 3.37  | PSR02000759.hg.1 | RRM2       |
| TC02000057.hg.1 | 2.85  | PSR02000732.hg.1 | RRM2       |
| TC02000057.hg.1 | 2.69  | JUC02000407.hg.1 | RRM2       |
| TC02000057.hg.1 | 2.28  | PSR02000746.hg.1 | RRM2       |
| TC02000057.hg.1 | -2.19 | JUC02000408.hg.1 | RRM2       |
| TC02000057.hg.1 | -3.46 | JUC02000412.hg.1 | RRM2       |
| TC02001022.hg.1 | 3.37  | JUC02008090.hg.1 | DYNC112    |
| TC02001022.hg.1 | 2.25  | PSR02015123.hg.1 | DYNC112    |
| TC02002377.hg.1 | 3.37  | PSR02037540.hg.1 | DARS       |
| TC02002377.hg.1 | 2.74  | PSR02037533.hg.1 | DARS       |
| TC02002377.hg.1 | 2.63  | JUC02019460.hg.1 | DARS       |
| TC02002377.hg.1 | 2.28  | PSR02037539.hg.1 | DARS       |
| TC02002377.hg.1 | 2.17  | PSR02037526.hg.1 | DARS       |
| TC06001128.hg.1 | 3.37  | PSR06013405.hg.1 | SYNJ2      |
| TC06001128.hg.1 | 3.27  | JUC06006593.hg.1 | SYNJ2      |
| TC06001128.hg.1 | 2.96  | JUC06006602.hg.1 | SYNJ2      |
| TC06001128.hg.1 | 2.58  | PSR06013408.hg.1 | SYNJ2      |
| TC06001128.hg.1 | 2.44  | PSR06013445.hg.1 | SYNJ2      |
| TC06001128.hg.1 | 2.17  | PSR06013424.hg.1 | SYNJ2      |
| TC06001128.hg.1 | 2.1   | PSR06013447.hg.1 | SYNJ2      |
| TC06001128.hg.1 | -2.05 | JUC06006612.hg.1 | SYNJ2      |
| TC06001128.hg.1 | -2.32 | JUC06006610.hg.1 | SYNJ2      |
| TC06001128.hg.1 | -2.35 | JUC06006591.hg.1 | SYNJ2      |
| TC06001128.hg.1 | -2.67 | JUC06006598.hg.1 | SYNJ2      |
| TC06001128.hg.1 | -3.06 | JUC06006585.hg.1 | SYNJ2      |
| TC07000877.hg.1 | 3.37  | JUC07006588.hg.1 | TBXAS1     |
| TC07000877.hg.1 | 2.33  | JUC07006597.hg.1 | TBXAS1     |
| TC07000877.hg.1 | 2.28  | JUC07006567.hg.1 | TBXAS1     |
| TC07000877.hg.1 | 2.04  | PSR07013672.hg.1 | TBXAS1     |
| TC07000877.hg.1 | -2.41 | JUC07006596.hg.1 | TBXAS1     |
| TC07000877.hg.1 | -2.63 | PSR07013703.hg.1 | TBXAS1     |
| TC07000877.hg.1 | -3.97 | JUC07006584.hg.1 | TBXAS1     |
| TC10000876.hg.1 | 3.37  | JUC10005977.hg.1 | WDR11, LOC |

|                 |       |                  |            |
|-----------------|-------|------------------|------------|
| TC10000876.hg.1 | 2.02  | PSR10010609.hg.1 | WDR11, LOC |
| TC11001812.hg.1 | 3.37  | JUC11011169.hg.1 | LPXN       |
| TC11001812.hg.1 | 2.88  | PSR11020949.hg.1 | LPXN       |
| TC11001812.hg.1 | 2.77  | PSR11020950.hg.1 | LPXN       |
| TC11001812.hg.1 | 2.26  | PSR11020942.hg.1 | LPXN       |
| TC11001812.hg.1 | 2.08  | JUC11011176.hg.1 | LPXN       |
| TC13000411.hg.1 | 3.37  | PSR13004492.hg.1 | ATP11A     |
| TC13000411.hg.1 | 3.16  | JUC13002718.hg.1 | ATP11A     |
| TC13000411.hg.1 | 3.01  | PSR13004453.hg.1 | ATP11A     |
| TC13000411.hg.1 | 2.75  | JUC13002730.hg.1 | ATP11A     |
| TC13000411.hg.1 | 2.44  | JUC13002719.hg.1 | ATP11A     |
| TC13000411.hg.1 | 2.43  | PSR13004477.hg.1 | ATP11A     |
| TC13000411.hg.1 | 2.35  | PSR13004455.hg.1 | ATP11A     |
| TC13000411.hg.1 | 2.34  | PSR13004482.hg.1 | ATP11A     |
| TC13000411.hg.1 | 2.32  | PSR13004451.hg.1 | ATP11A     |
| TC13000411.hg.1 | 2.27  | JUC13002701.hg.1 | ATP11A     |
| TC13000411.hg.1 | 2.26  | PSR13004508.hg.1 | ATP11A     |
| TC13000411.hg.1 | 2.2   | PSR13004487.hg.1 | ATP11A     |
| TC13000411.hg.1 | 2.17  | JUC13002708.hg.1 | ATP11A     |
| TC13000411.hg.1 | 2.12  | JUC13002715.hg.1 | ATP11A     |
| TC13000411.hg.1 | 2.11  | PSR13004502.hg.1 | ATP11A     |
| TC14000794.hg.1 | 3.37  | PSR14008566.hg.1 | TNFAIP2    |
| TC14000794.hg.1 | 2.59  | PSR14008561.hg.1 | TNFAIP2    |
| TC14000794.hg.1 | 2.47  | PSR14008560.hg.1 | TNFAIP2    |
| TC14000794.hg.1 | 2.35  | PSR14008587.hg.1 | TNFAIP2    |
| TC14000794.hg.1 | 2.23  | PSR14008563.hg.1 | TNFAIP2    |
| TC14000794.hg.1 | 2.15  | JUC14004372.hg.1 | TNFAIP2    |
| TC14000794.hg.1 | 2.14  | JUC14004373.hg.1 | TNFAIP2    |
| TC14000794.hg.1 | 2.07  | PSR14008567.hg.1 | TNFAIP2    |
| TC14000794.hg.1 | 2.07  | JUC14004371.hg.1 | TNFAIP2    |
| TC14000794.hg.1 | -2.16 | JUC14004360.hg.1 | TNFAIP2    |
| TC14000794.hg.1 | -2.3  | JUC14004374.hg.1 | TNFAIP2    |
| TC01001755.hg.1 | 3.36  | JUC01014837.hg.1 | HHAT       |
| TC01001755.hg.1 | 2.01  | PSR01027556.hg.1 | HHAT       |
| TC01001755.hg.1 | -2.14 | JUC01014818.hg.1 | HHAT       |
| TC01001755.hg.1 | -2.3  | PSR01027539.hg.1 | HHAT       |
| TC02000432.hg.1 | 3.36  | JUC02003410.hg.1 | DYSF       |
| TC02000432.hg.1 | 2.73  | JUC02003416.hg.1 | DYSF       |
| TC02000432.hg.1 | 2.55  | JUC02003426.hg.1 | DYSF       |
| TC02000432.hg.1 | 2.39  | JUC02003372.hg.1 | DYSF       |
| TC02000432.hg.1 | 2.29  | JUC02003393.hg.1 | DYSF       |
| TC02000432.hg.1 | 2.28  | JUC02003361.hg.1 | DYSF       |
| TC02000432.hg.1 | 2.19  | JUC02003391.hg.1 | DYSF       |
| TC02000432.hg.1 | 2.17  | JUC02003385.hg.1 | DYSF       |
| TC02000432.hg.1 | 2.13  | JUC02003392.hg.1 | DYSF       |
| TC02000432.hg.1 | 2.1   | PSR02006601.hg.1 | DYSF       |
| TC02000432.hg.1 | 2.02  | PSR02006570.hg.1 | DYSF       |
| TC02000432.hg.1 | 2     | JUC02003364.hg.1 | DYSF       |
| TC02000432.hg.1 | -2.15 | PSR02006597.hg.1 | DYSF       |
| TC02000432.hg.1 | -2.16 | JUC02003419.hg.1 | DYSF       |
| TC02000432.hg.1 | -2.22 | JUC02003386.hg.1 | DYSF       |
| TC02000432.hg.1 | -2.26 | PSR02006562.hg.1 | DYSF       |
| TC02000432.hg.1 | -2.29 | JUC02003428.hg.1 | DYSF       |
| TC02000432.hg.1 | -2.3  | PSR02006565.hg.1 | DYSF       |
| TC02000432.hg.1 | -2.4  | PSR02006618.hg.1 | DYSF       |
| TC02000432.hg.1 | -2.44 | PSR02006620.hg.1 | DYSF       |
| TC02000432.hg.1 | -2.44 | JUC02003368.hg.1 | DYSF       |
| TC02000432.hg.1 | -2.48 | PSR02006631.hg.1 | DYSF       |

|                 |       |                  |            |
|-----------------|-------|------------------|------------|
| TC02000432.hg.1 | -2.49 | PSR02006599.hg.1 | DYSF       |
| TC02000432.hg.1 | -2.56 | PSR02006561.hg.1 | DYSF       |
| TC02000432.hg.1 | -2.56 | PSR02006585.hg.1 | DYSF       |
| TC02000432.hg.1 | -2.67 | PSR02006612.hg.1 | DYSF       |
| TC02000432.hg.1 | -2.68 | JUC02003369.hg.1 | DYSF       |
| TC02000432.hg.1 | -2.69 | PSR02006593.hg.1 | DYSF       |
| TC02000432.hg.1 | -2.7  | PSR02006611.hg.1 | DYSF       |
| TC02000432.hg.1 | -2.73 | JUC02003403.hg.1 | DYSF       |
| TC02000432.hg.1 | -2.74 | JUC02003394.hg.1 | DYSF       |
| TC02000432.hg.1 | -2.75 | JUC02003415.hg.1 | DYSF       |
| TC02000432.hg.1 | -2.78 | JUC02003380.hg.1 | DYSF       |
| TC02000432.hg.1 | -2.88 | PSR02006616.hg.1 | DYSF       |
| TC02000432.hg.1 | -3.07 | JUC02003360.hg.1 | DYSF       |
| TC02000432.hg.1 | -3.44 | JUC02003379.hg.1 | DYSF       |
| TC02000432.hg.1 | -3.57 | JUC02003397.hg.1 | DYSF       |
| TC02000432.hg.1 | -3.73 | PSR02006600.hg.1 | DYSF       |
| TC02000432.hg.1 | -4.62 | JUC02003383.hg.1 | DYSF       |
| TC02000432.hg.1 | -4.98 | PSR02006607.hg.1 | DYSF       |
| TC02000432.hg.1 | -5.2  | PSR02006609.hg.1 | DYSF       |
| TC02000432.hg.1 | -7.04 | JUC02003376.hg.1 | DYSF       |
| TC08000119.hg.1 | 3.36  | JUC08000553.hg.1 | TUSC3      |
| TC08000119.hg.1 | 2.93  | PSR08001057.hg.1 | TUSC3      |
| TC08000119.hg.1 | 2.58  | JUC08000567.hg.1 | TUSC3      |
| TC08000119.hg.1 | 2.3   | PSR08001050.hg.1 | TUSC3      |
| TC08000119.hg.1 | 2.04  | PSR08001048.hg.1 | TUSC3      |
| TC08000119.hg.1 | -2.1  | PSR08001079.hg.1 | TUSC3      |
| TC08000119.hg.1 | -2.6  | JUC08000570.hg.1 | TUSC3      |
| TC09001345.hg.1 | 3.36  | PSR09016848.hg.1 | NINJ1      |
| TC09001345.hg.1 | 3.36  | PSR09016857.hg.1 | NINJ1      |
| TC09001345.hg.1 | 3.2   | PSR09016851.hg.1 | NINJ1      |
| TC09001345.hg.1 | 2.63  | JUC09009051.hg.1 | NINJ1      |
| TC09001345.hg.1 | 2.35  | JUC09009054.hg.1 | NINJ1      |
| TC09001345.hg.1 | 2.28  | JUC09009056.hg.1 | NINJ1      |
| TC09001345.hg.1 | 2.09  | JUC09009052.hg.1 | NINJ1      |
| TC19001913.hg.1 | 3.36  | JUC19014668.hg.1 |            |
| TC19001913.hg.1 | 2.84  | PSR19025917.hg.1 |            |
| TC19001913.hg.1 | 2     | JUC19014667.hg.1 |            |
| TC01002627.hg.1 | 3.35  | JUC01021996.hg.1 | PDZK1IP1   |
| TC01002627.hg.1 | 2.69  | JUC01021995.hg.1 | PDZK1IP1   |
| TC01002627.hg.1 | 2.05  | PSR01041120.hg.1 | PDZK1IP1   |
| TC01003887.hg.1 | 3.35  | JUC01031048.hg.1 | LBR        |
| TC01003887.hg.1 | 2.7   | JUC01031036.hg.1 | LBR        |
| TC01003887.hg.1 | 2.09  | JUC01031038.hg.1 | LBR        |
| TC01003887.hg.1 | -2    | JUC01031047.hg.1 | LBR        |
| TC01003887.hg.1 | -2.13 | PSR01059228.hg.1 | LBR        |
| TC01003887.hg.1 | -2.38 | PSR01059225.hg.1 | LBR        |
| TC01003887.hg.1 | -2.4  | PSR01059226.hg.1 | LBR        |
| TC01003887.hg.1 | -2.58 | PSR01059224.hg.1 | LBR        |
| TC01003887.hg.1 | -2.97 | PSR01059221.hg.1 | LBR        |
| TC01003887.hg.1 | -3.82 | JUC01031044.hg.1 | LBR        |
| TC01006385.hg.1 | 3.35  | JUC01046486.hg.1 | ACBD6      |
| TC01006385.hg.1 | 2.15  | PSR01055365.hg.1 | ACBD6      |
| TC01006385.hg.1 | 2     | PSR01055363.hg.1 | ACBD6      |
| TC01006385.hg.1 | -2.14 | PSR01055356.hg.1 | ACBD6      |
| TC02001013.hg.1 | 3.35  | PSR02014955.hg.1 | LOC1005056 |
| TC02001013.hg.1 | 2.75  | JUC02007986.hg.1 | LOC1005056 |
| TC02001013.hg.1 | 2.11  | PSR02014952.hg.1 | LOC1005056 |
| TC02001013.hg.1 | 2.04  | PSR02014957.hg.1 | LOC1005056 |

|                 |       |                  |          |
|-----------------|-------|------------------|----------|
| TC03001422.hg.1 | 3.35  | JUC03012554.hg.1 | MON1A    |
| TC03001422.hg.1 | -2.67 | PSR03025530.hg.1 | MON1A    |
| TC03001796.hg.1 | 3.35  | JUC03016141.hg.1 | TOPBP1   |
| TC03001796.hg.1 | 2.1   | PSR03032568.hg.1 | TOPBP1   |
| TC05001731.hg.1 | 3.35  | JUC05012055.hg.1 | ZNF608   |
| TC05001731.hg.1 | -2.31 | PSR05023316.hg.1 | ZNF608   |
| TC11001938.hg.1 | 3.35  | JUC11012268.hg.1 | MAP3K11  |
| TC11001938.hg.1 | 2.45  | PSR11023237.hg.1 | MAP3K11  |
| TC12000187.hg.1 | 3.35  | PSR12002355.hg.1 | KIAA1467 |
| TC12000187.hg.1 | 2.08  | PSR12002348.hg.1 | KIAA1467 |
| TC12000187.hg.1 | -3.11 | JUC12001092.hg.1 | KIAA1467 |
| TC12000187.hg.1 | -3.14 | JUC12001085.hg.1 | KIAA1467 |
| TC01000902.hg.1 | 3.34  | JUC01007509.hg.1 | CDC14A   |
| TC01000902.hg.1 | -2.08 | PSR01014234.hg.1 | CDC14A   |
| TC01000902.hg.1 | -2.21 | PSR01014198.hg.1 | CDC14A   |
| TC01000902.hg.1 | -2.32 | PSR01014213.hg.1 | CDC14A   |
| TC02000611.hg.1 | 3.34  | JUC02005079.hg.1 | NPAS2    |
| TC02000611.hg.1 | 2.43  | JUC02005097.hg.1 | NPAS2    |
| TC02000611.hg.1 | 2.08  | PSR02009641.hg.1 | NPAS2    |
| TC02002292.hg.1 | 3.34  | PSR02036866.hg.1 | HS6ST1   |
| TC02002292.hg.1 | 3     | PSR02036875.hg.1 | HS6ST1   |
| TC02002292.hg.1 | 2.85  | JUC02019120.hg.1 | HS6ST1   |
| TC02002292.hg.1 | 2.5   | PSR02036872.hg.1 | HS6ST1   |
| TC02002292.hg.1 | 2.37  | PSR02036865.hg.1 | HS6ST1   |
| TC03000241.hg.1 | 3.34  | JUC03002472.hg.1 | ZNF501   |
| TC03000241.hg.1 | 2.07  | PSR03004856.hg.1 | ZNF501   |
| TC03000241.hg.1 | 2.07  | PSR03004868.hg.1 | ZNF501   |
| TC07000453.hg.1 | 3.34  | JUC07002963.hg.1 | LAT2     |
| TC07000453.hg.1 | 2.09  | PSR07006138.hg.1 | LAT2     |
| TC07000453.hg.1 | -2.23 | PSR07006142.hg.1 | LAT2     |
| TC07000453.hg.1 | -3.28 | JUC07002975.hg.1 | LAT2     |
| TC07000668.hg.1 | 3.34  | JUC07004829.hg.1 | LRRC17   |
| TC07000668.hg.1 | 2.41  | JUC07004827.hg.1 | LRRC17   |
| TC07000668.hg.1 | -2.13 | PSR07010375.hg.1 | LRRC17   |
| TC07000668.hg.1 | -2.33 | PSR07010376.hg.1 | LRRC17   |
| TC0X000264.hg.1 | 3.34  | JUC0X001794.hg.1 | CCDC120  |
| TC0X000264.hg.1 | 2.48  | PSR0X003427.hg.1 | CCDC120  |
| TC10001363.hg.1 | 3.34  | PSR10017254.hg.1 | NPFFR1   |
| TC10001363.hg.1 | 3.06  | JUC10010062.hg.1 | NPFFR1   |
| TC12000309.hg.1 | 3.34  | JUC12001943.hg.1 | LRRK2    |
| TC12000309.hg.1 | 2.6   | JUC12001904.hg.1 | LRRK2    |
| TC12000309.hg.1 | 2.41  | JUC12001919.hg.1 | LRRK2    |
| TC12000309.hg.1 | 2.34  | JUC12001935.hg.1 | LRRK2    |
| TC12000309.hg.1 | -2.13 | PSR12003726.hg.1 | LRRK2    |
| TC12000309.hg.1 | -2.3  | JUC12001913.hg.1 | LRRK2    |
| TC12000309.hg.1 | -2.41 | JUC12001953.hg.1 | LRRK2    |
| TC17000161.hg.1 | 3.34  | JUC17001377.hg.1 | CDRT15P1 |
| TC17000161.hg.1 | -2.01 | JUC17001378.hg.1 | CDRT15P1 |
| TC17000161.hg.1 | -2.14 | PSR17002274.hg.1 | CDRT15P1 |
| TC20000048.hg.1 | 3.34  | PSR20000781.hg.1 | SMOX     |
| TC20000048.hg.1 | 3.02  | PSR20000796.hg.1 | SMOX     |
| TC20000048.hg.1 | 2.89  | JUC20000368.hg.1 | SMOX     |
| TC20000048.hg.1 | 2.75  | JUC20000369.hg.1 | SMOX     |
| TC20000048.hg.1 | 2.74  | PSR20000798.hg.1 | SMOX     |
| TC20000048.hg.1 | 2.63  | PSR20000782.hg.1 | SMOX     |
| TC20000048.hg.1 | 2.56  | JUC20000386.hg.1 | SMOX     |
| TC20000048.hg.1 | 2.55  | PSR20000794.hg.1 | SMOX     |
| TC20000048.hg.1 | 2.32  | PSR20000779.hg.1 | SMOX     |



|                 |       |                  |             |
|-----------------|-------|------------------|-------------|
| TC20000048.hg.1 | 2.28  | PSR20000778.hg.1 | SMOX        |
| TC20000048.hg.1 | 2.27  | PSR20000785.hg.1 | SMOX        |
| TC20000048.hg.1 | 2.23  | PSR20000780.hg.1 | SMOX        |
| TC20000048.hg.1 | -2.39 | JUC20000377.hg.1 | SMOX        |
| TC22000342.hg.1 | 3.34  | JUC22002481.hg.1 | MEI1        |
| TC22000342.hg.1 | 2.88  | JUC22002456.hg.1 | MEI1        |
| TC22000342.hg.1 | 2.02  | PSR22006600.hg.1 | MEI1        |
| TC22000342.hg.1 | -2.28 | PSR22006649.hg.1 | MEI1        |
| TC22000342.hg.1 | -2.28 | JUC22002483.hg.1 | MEI1        |
| TC22000798.hg.1 | 3.34  | PSR22013562.hg.1 | NPTXR       |
| TC22000798.hg.1 | 2.51  | JUC22005588.hg.1 | NPTXR       |
| TC22000798.hg.1 | 2.18  | PSR22013561.hg.1 | NPTXR       |
| TC02001309.hg.1 | 3.33  | JUC02010833.hg.1 | STK36       |
| TC02001309.hg.1 | 2.97  | JUC02010816.hg.1 | STK36       |
| TC02001309.hg.1 | 2.28  | JUC02010834.hg.1 | STK36       |
| TC02001309.hg.1 | -2.37 | PSR02020179.hg.1 | STK36       |
| TC02001309.hg.1 | -2.39 | JUC02010836.hg.1 | STK36       |
| TC02001758.hg.1 | 3.33  | JUC02014838.hg.1 | DHX57       |
| TC02001758.hg.1 | 2.93  | JUC02014833.hg.1 | DHX57       |
| TC02001758.hg.1 | 2.6   | JUC02014841.hg.1 | DHX57       |
| TC02001758.hg.1 | 2.41  | JUC02014828.hg.1 | DHX57       |
| TC02001758.hg.1 | 2.09  | JUC02014830.hg.1 | DHX57       |
| TC02001758.hg.1 | -2.15 | PSR02028355.hg.1 | DHX57       |
| TC02001758.hg.1 | -3.76 | JUC02014839.hg.1 | DHX57       |
| TC02002848.hg.1 | 3.33  | JUC02024034.hg.1 | TRIP12      |
| TC02002848.hg.1 | 2.1   | PSR02045946.hg.1 | TRIP12      |
| TC02002848.hg.1 | 2.05  | PSR02046020.hg.1 | TRIP12      |
| TC02002848.hg.1 | -2.67 | JUC02024036.hg.1 | TRIP12      |
| TC03000282.hg.1 | 3.33  | PSR03005678.hg.1 | TREX1, ATRI |
| TC03000282.hg.1 | 3.12  | JUC03002869.hg.1 | TREX1, ATRI |
| TC03000282.hg.1 | 2.6   | PSR03005664.hg.1 | TREX1, ATRI |
| TC03000282.hg.1 | 2.37  | JUC03002879.hg.1 | TREX1, ATRI |
| TC03000282.hg.1 | 2.36  | JUC03002862.hg.1 | TREX1, ATRI |
| TC03000282.hg.1 | 2.33  | JUC03002882.hg.1 | TREX1, ATRI |
| TC03000282.hg.1 | 2.31  | PSR03005674.hg.1 | TREX1, ATRI |
| TC03000282.hg.1 | 2.11  | JUC03002877.hg.1 | TREX1, ATRI |
| TC03000282.hg.1 | 2     | PSR03005675.hg.1 | TREX1, ATRI |
| TC04000447.hg.1 | 3.33  | PSR04006416.hg.1 | PRDM8       |
| TC04000447.hg.1 | 3.25  | JUC04003263.hg.1 | PRDM8       |
| TC04000447.hg.1 | 3.11  | JUC04003270.hg.1 | PRDM8       |
| TC04000447.hg.1 | 2.64  | JUC04003268.hg.1 | PRDM8       |
| TC04000447.hg.1 | 2.59  | PSR04006407.hg.1 | PRDM8       |
| TC04000447.hg.1 | 2.45  | PSR04006411.hg.1 | PRDM8       |
| TC04000447.hg.1 | 2.2   | PSR04006428.hg.1 | PRDM8       |
| TC08002616.hg.1 | 3.33  | PSR08017432.hg.1 | MRPS28      |
| TC08002616.hg.1 | 2.57  | JUC08015255.hg.1 | MRPS28      |
| TC09001012.hg.1 | 3.33  | JUC09007229.hg.1 | AQP3        |
| TC09001012.hg.1 | 3.12  | JUC09007233.hg.1 | AQP3        |
| TC09001012.hg.1 | -2.99 | PSR09013299.hg.1 | AQP3        |
| TC10000039.hg.1 | 3.33  | JUC10000177.hg.1 | AKR1E2      |
| TC10000039.hg.1 | -2.02 | PSR10000315.hg.1 | AKR1E2      |
| TC10000039.hg.1 | -2.27 | PSR10000304.hg.1 | AKR1E2      |
| TC10000039.hg.1 | -2.61 | JUC10000181.hg.1 | AKR1E2      |
| TC10000039.hg.1 | -2.75 | JUC10000171.hg.1 | AKR1E2      |
| TC10000039.hg.1 | -4.21 | JUC10000168.hg.1 | AKR1E2      |
| TC10000181.hg.1 | 3.33  | JUC10001176.hg.1 | APBB1IP     |
| TC10000181.hg.1 | 3.18  | JUC10001175.hg.1 | APBB1IP     |
| TC10000181.hg.1 | 2.14  | PSR10002163.hg.1 | APBB1IP     |

|                 |       |                  |             |
|-----------------|-------|------------------|-------------|
| TC10000181.hg.1 | -2.05 | PSR10002177.hg.1 | APBB1IP     |
| TC10000181.hg.1 | -2.11 | JUC10001179.hg.1 | APBB1IP     |
| TC10000181.hg.1 | -2.15 | PSR10002173.hg.1 | APBB1IP     |
| TC10000181.hg.1 | -2.18 | JUC10001182.hg.1 | APBB1IP     |
| TC11003444.hg.1 | 3.33  | JUC11018963.hg.1 | DNHD1       |
| TC11003444.hg.1 | 3.14  | JUC11018991.hg.1 | DNHD1       |
| TC11003444.hg.1 | 2.47  | JUC11018996.hg.1 | DNHD1       |
| TC11003444.hg.1 | 2.46  | JUC11018969.hg.1 | DNHD1       |
| TC11003444.hg.1 | 2.42  | PSR11001936.hg.1 | DNHD1       |
| TC11003444.hg.1 | 2.31  | PSR11001955.hg.1 | DNHD1       |
| TC11003444.hg.1 | 2.3   | JUC11018992.hg.1 | DNHD1       |
| TC11003444.hg.1 | 2.19  | JUC11018972.hg.1 | DNHD1       |
| TC11003444.hg.1 | 2.12  | PSR11001967.hg.1 | DNHD1       |
| TC11003444.hg.1 | 2.04  | JUC11019010.hg.1 | DNHD1       |
| TC11003444.hg.1 | -2.17 | PSR11001895.hg.1 | DNHD1       |
| TC11003444.hg.1 | -2.33 | JUC11018967.hg.1 | DNHD1       |
| TC11003444.hg.1 | -2.34 | PSR11001928.hg.1 | DNHD1       |
| TC14001446.hg.1 | 3.33  | JUC14008334.hg.1 | ATXN3       |
| TC14001446.hg.1 | 3.11  | JUC14008339.hg.1 | ATXN3       |
| TC14001446.hg.1 | 3.02  | JUC14008350.hg.1 | ATXN3       |
| TC14001446.hg.1 | 2.89  | JUC14008383.hg.1 | ATXN3       |
| TC14001446.hg.1 | 2.86  | JUC14008372.hg.1 | ATXN3       |
| TC14001446.hg.1 | 2.21  | JUC14008345.hg.1 | ATXN3       |
| TC14001446.hg.1 | 2.2   | JUC14008342.hg.1 | ATXN3       |
| TC14001446.hg.1 | -2.02 | PSR14016185.hg.1 | ATXN3       |
| TC14001446.hg.1 | -2.02 | PSR14016214.hg.1 | ATXN3       |
| TC14001446.hg.1 | -2.08 | JUC14008327.hg.1 | ATXN3       |
| TC14001446.hg.1 | -2.09 | PSR14016232.hg.1 | ATXN3       |
| TC14001446.hg.1 | -2.15 | JUC14008356.hg.1 | ATXN3       |
| TC14001446.hg.1 | -2.21 | PSR14016213.hg.1 | ATXN3       |
| TC14001446.hg.1 | -2.41 | JUC14008373.hg.1 | ATXN3       |
| TC14001446.hg.1 | -2.72 | JUC14008377.hg.1 | ATXN3       |
| TC19000662.hg.1 | 3.33  | PSR19009274.hg.1 | HIF3A       |
| TC19000662.hg.1 | 2.78  | PSR19009241.hg.1 | HIF3A       |
| TC19000662.hg.1 | 2.15  | JUC19005494.hg.1 | HIF3A       |
| TC19000662.hg.1 | -2.3  | JUC19005507.hg.1 | HIF3A       |
| TC19000662.hg.1 | -2.41 | JUC19005498.hg.1 | HIF3A       |
| TC19000662.hg.1 | -2.81 | PSR19009236.hg.1 | HIF3A       |
| TC6_apd_hap1000 | 3.33  | JUC6_apd_hap1000 | HLA-DRB1, F |
| TC6_apd_hap1000 | -3.53 | PSR6_apd_hap1001 | HLA-DRB1, F |
| TC03001732.hg.1 | 3.32  | JUC03015677.hg.1 | SLC41A3     |
| TC03001732.hg.1 | 2.66  | PSR03031516.hg.1 | SLC41A3     |
| TC03001732.hg.1 | 2.51  | PSR03031494.hg.1 | SLC41A3     |
| TC03001732.hg.1 | 2.48  | PSR03031520.hg.1 | SLC41A3     |
| TC03001732.hg.1 | 2.47  | PSR03031495.hg.1 | SLC41A3     |
| TC03001732.hg.1 | 2.36  | PSR03031492.hg.1 | SLC41A3     |
| TC03001732.hg.1 | 2.32  | JUC03015678.hg.1 | SLC41A3     |
| TC03001732.hg.1 | 2.14  | PSR03031482.hg.1 | SLC41A3     |
| TC03001732.hg.1 | 2.06  | PSR03031508.hg.1 | SLC41A3     |
| TC03001732.hg.1 | 2.03  | PSR03031515.hg.1 | SLC41A3     |
| TC04001504.hg.1 | 3.32  | JUC04011205.hg.1 | PDE5A       |
| TC04001504.hg.1 | 2.95  | JUC04011207.hg.1 | PDE5A       |
| TC04001504.hg.1 | 2.1   | PSR04021330.hg.1 | PDE5A       |
| TC04001504.hg.1 | 2.06  | PSR04021302.hg.1 | PDE5A       |
| TC04001504.hg.1 | 2.04  | JUC04011203.hg.1 | PDE5A       |
| TC04001504.hg.1 | -2.14 | JUC04011217.hg.1 | PDE5A       |
| TC06004066.hg.1 | 3.32  | PSR06002626.hg.1 | HLA-H       |
| TC06004066.hg.1 | 2.89  | PSR06002632.hg.1 | HLA-H       |

|                 |       |                  |              |
|-----------------|-------|------------------|--------------|
| TC06004066.hg.1 | 2.24  | PSR06002623.hg.1 | HLA-H        |
| TC06004066.hg.1 | 2.21  | JUC06020844.hg.1 | HLA-H        |
| TC08001400.hg.1 | 3.32  | PSR08018143.hg.1 | NBN          |
| TC08001400.hg.1 | -2.38 | JUC08009238.hg.1 | NBN          |
| TC08001400.hg.1 | -2.49 | JUC08009252.hg.1 | NBN          |
| TC08001400.hg.1 | -2.97 | JUC08009230.hg.1 | NBN          |
| TC09001434.hg.1 | 3.32  | JUC09009638.hg.1 | ABCA1        |
| TC09001434.hg.1 | 2.92  | JUC09009616.hg.1 | ABCA1        |
| TC09001434.hg.1 | 2.27  | PSR09017895.hg.1 | ABCA1        |
| TC09001434.hg.1 | 2.05  | PSR09017851.hg.1 | ABCA1        |
| TC09001434.hg.1 | 2.05  | JUC09009607.hg.1 | ABCA1        |
| TC09001434.hg.1 | -2.13 | PSR09017842.hg.1 | ABCA1        |
| TC09001434.hg.1 | -2.19 | JUC09009640.hg.1 | ABCA1        |
| TC0X000425.hg.1 | 3.32  | PSR0X005622.hg.1 | PGK1, LOC10  |
| TC0X000425.hg.1 | 2.87  | PSR0X005619.hg.1 | PGK1, LOC10  |
| TC0X000425.hg.1 | 2.68  | JUC0X002787.hg.1 | PGK1, LOC10  |
| TC0X000425.hg.1 | 2.2   | PSR0X005623.hg.1 | PGK1, LOC10  |
| TC0X000425.hg.1 | -2.02 | PSR0X005656.hg.1 | PGK1, LOC10  |
| TC0X000425.hg.1 | -2.12 | PSR0X005655.hg.1 | PGK1, LOC10  |
| TC0X000425.hg.1 | -2.94 | PSR0X005646.hg.1 | PGK1, LOC10  |
| TC0X000744.hg.1 | 3.32  | JUC0X004879.hg.1 | ZNF185       |
| TC0X000744.hg.1 | -2.08 | PSR0X009656.hg.1 | ZNF185       |
| TC0X000744.hg.1 | -2.11 | JUC0X004865.hg.1 | ZNF185       |
| TC0X000744.hg.1 | -2.12 | PSR0X009643.hg.1 | ZNF185       |
| TC0X000744.hg.1 | -2.2  | JUC0X004869.hg.1 | ZNF185       |
| TC0X000744.hg.1 | -2.4  | PSR0X009655.hg.1 | ZNF185       |
| TC0X000744.hg.1 | -3.3  | JUC0X004899.hg.1 | ZNF185       |
| TC10000896.hg.1 | 3.32  | JUC10006405.hg.1 | ACADSB       |
| TC10000896.hg.1 | 2.44  | JUC10006408.hg.1 | ACADSB       |
| TC10000896.hg.1 | 2.21  | PSR10010979.hg.1 | ACADSB       |
| TC10000896.hg.1 | 2.18  | PSR10010984.hg.1 | ACADSB       |
| TC10000896.hg.1 | 2     | JUC10006402.hg.1 | ACADSB       |
| TC12000264.hg.1 | 3.32  | JUC12001593.hg.1 | ARNTL2       |
| TC12000264.hg.1 | 2.29  | PSR12003196.hg.1 | ARNTL2       |
| TC12000264.hg.1 | 2.07  | JUC12001588.hg.1 | ARNTL2       |
| TC12000264.hg.1 | -2.08 | JUC12001594.hg.1 | ARNTL2       |
| TC12000264.hg.1 | -2.11 | PSR12003198.hg.1 | ARNTL2       |
| TC12000264.hg.1 | -2.43 | JUC12001584.hg.1 | ARNTL2       |
| TC12001272.hg.1 | 3.32  | PSR12016566.hg.1 | HIST4H4, HIS |
| TC12001272.hg.1 | 2.88  | PSR12016568.hg.1 | HIST4H4, HIS |
| TC12001272.hg.1 | 2.36  | JUC12009088.hg.1 | HIST4H4, HIS |
| TC12001272.hg.1 | 2.07  | PSR12016565.hg.1 | HIST4H4, HIS |
| TC12001804.hg.1 | 3.32  | JUC12013227.hg.1 | DCN          |
| TC12001804.hg.1 | 2.02  | PSR12023858.hg.1 | DCN          |
| TC12001804.hg.1 | -2.35 | PSR12023867.hg.1 | DCN          |
| TC12001804.hg.1 | -2.81 | PSR12023871.hg.1 | DCN          |
| TC12001804.hg.1 | -3.91 | JUC12013229.hg.1 | DCN          |
| TC16001270.hg.1 | 3.32  | PSR16017682.hg.1 | MLKL         |
| TC16001270.hg.1 | -2.14 | JUC16010066.hg.1 | MLKL         |
| TC16001270.hg.1 | -2.49 | PSR16017684.hg.1 | MLKL         |
| TC01002924.hg.1 | 3.31  | JUC01024428.hg.1 | DPH5         |
| TC01002924.hg.1 | -2.33 | PSR01045426.hg.1 | DPH5         |
| TC01002924.hg.1 | -2.35 | JUC01024444.hg.1 | DPH5         |
| TC01002924.hg.1 | -3.8  | JUC01024433.hg.1 | DPH5         |
| TC05001041.hg.1 | 3.31  | JUC05007867.hg.1 | ZNF354C      |
| TC05001041.hg.1 | 2.79  | PSR05015195.hg.1 | ZNF354C      |
| TC05001041.hg.1 | 2.13  | JUC05007868.hg.1 | ZNF354C      |
| TC05001041.hg.1 | 2.06  | JUC05007863.hg.1 | ZNF354C      |

|                 |       |                  |             |
|-----------------|-------|------------------|-------------|
| TC05001880.hg.1 | 3.31  | PSR05025988.hg.1 | SPRY4       |
| TC05001880.hg.1 | 3.28  | PSR05026004.hg.1 | SPRY4       |
| TC05001880.hg.1 | 2.51  | JUC05013249.hg.1 | SPRY4       |
| TC05001880.hg.1 | 2.51  | JUC05013256.hg.1 | SPRY4       |
| TC05001880.hg.1 | 2.45  | JUC05013250.hg.1 | SPRY4       |
| TC05001880.hg.1 | 2.03  | PSR05025987.hg.1 | SPRY4       |
| TC05001880.hg.1 | -2.32 | JUC05013251.hg.1 | SPRY4       |
| TC05001880.hg.1 | -2.75 | PSR05025993.hg.1 | SPRY4       |
| TC05001880.hg.1 | -2.88 | PSR05025986.hg.1 | SPRY4       |
| TC05001880.hg.1 | -3.15 | PSR05025982.hg.1 | SPRY4       |
| TC11002017.hg.1 | 3.31  | JUC11012772.hg.1 | ORAOV1      |
| TC11002017.hg.1 | -3.32 | PSR11024187.hg.1 | ORAOV1      |
| TC11002017.hg.1 | -4.2  | JUC11012773.hg.1 | ORAOV1      |
| TC13000453.hg.1 | 3.31  | JUC13003104.hg.1 | PSPC1, PSPC |
| TC13000453.hg.1 | -2.05 | PSR13005142.hg.1 | PSPC1, PSPC |
| TC13000453.hg.1 | -4.03 | PSR13005165.hg.1 | PSPC1, PSPC |
| TC14000414.hg.1 | 3.31  | JUC14002532.hg.1 | GALNTL1     |
| TC14000414.hg.1 | 2.1   | PSR14004967.hg.1 | GALNTL1     |
| TC16000218.hg.1 | 3.31  | JUC16001762.hg.1 | ACSM5       |
| TC16000218.hg.1 | 2.88  | JUC16001767.hg.1 | ACSM5       |
| TC16000218.hg.1 | 2.05  | PSR16003262.hg.1 | ACSM5       |
| TC6_cox_hap2000 | 3.31  | PSR6_cox_hap2000 | HLA-F       |
| TC6_cox_hap2000 | 3.15  | PSR6_cox_hap2000 | HLA-F       |
| TC6_cox_hap2000 | 2.91  | JUC6_cox_hap2000 | HLA-F       |
| TC6_cox_hap2000 | 2.79  | JUC6_cox_hap2000 | HLA-F       |
| TC6_cox_hap2000 | 2.68  | JUC6_cox_hap2000 | HLA-F       |
| TC6_cox_hap2000 | 2.34  | PSR6_cox_hap2000 | HLA-F       |
| TC6_cox_hap2000 | 2.26  | JUC6_cox_hap2000 | HLA-F       |
| TC6_cox_hap2000 | 2.25  | JUC6_cox_hap2000 | HLA-F       |
| TC6_cox_hap2000 | 2.14  | PSR6_cox_hap2000 | HLA-F       |
| TC6_cox_hap2000 | 2.09  | JUC6_cox_hap2000 | HLA-F       |
| TC6_cox_hap2000 | 2.02  | PSR6_cox_hap2000 | HLA-F       |
| TC02001625.hg.1 | 3.3   | JUC02013529.hg.1 | HS1BP3      |
| TC02001625.hg.1 | -2.16 | JUC02013537.hg.1 | HS1BP3      |
| TC02001625.hg.1 | -2.48 | PSR02026013.hg.1 | HS1BP3      |
| TC02002745.hg.1 | 3.3   | JUC02023081.hg.1 | BARD1       |
| TC02002745.hg.1 | 2.01  | PSR02044020.hg.1 | BARD1       |
| TC03001532.hg.1 | 3.3   | PSR03027921.hg.1 | LRIG1       |
| TC03001532.hg.1 | 3.21  | JUC03013717.hg.1 | LRIG1       |
| TC03001532.hg.1 | 2.71  | PSR03027920.hg.1 | LRIG1       |
| TC03001532.hg.1 | 2.59  | JUC03013699.hg.1 | LRIG1       |
| TC03001532.hg.1 | 2.34  | PSR03027898.hg.1 | LRIG1       |
| TC03001532.hg.1 | 2.22  | PSR03027911.hg.1 | LRIG1       |
| TC03001532.hg.1 | 2.07  | PSR03027902.hg.1 | LRIG1       |
| TC03001532.hg.1 | 2.05  | PSR03027900.hg.1 | LRIG1       |
| TC06002126.hg.1 | 3.3   | PSR06026704.hg.1 | SGK1        |
| TC06002126.hg.1 | 2.75  | PSR06026706.hg.1 | SGK1        |
| TC06002126.hg.1 | 2.69  | PSR06026697.hg.1 | SGK1        |
| TC06002126.hg.1 | 2.02  | PSR06026698.hg.1 | SGK1        |
| TC06002126.hg.1 | -2.03 | JUC06013218.hg.1 | SGK1        |
| TC06002126.hg.1 | -2.07 | PSR06026727.hg.1 | SGK1        |
| TC06002126.hg.1 | -2.08 | PSR06026734.hg.1 | SGK1        |
| TC06002126.hg.1 | -2.09 | PSR06026732.hg.1 | SGK1        |
| TC06002126.hg.1 | -2.15 | JUC06013219.hg.1 | SGK1        |
| TC06002126.hg.1 | -2.16 | JUC06013232.hg.1 | SGK1        |
| TC06002126.hg.1 | -2.27 | PSR06026742.hg.1 | SGK1        |
| TC12000424.hg.1 | 3.3   | PSR12005416.hg.1 | KRT18       |
| TC12000424.hg.1 | 2.31  | JUC12002982.hg.1 | KRT18       |

|                 |       |                  |        |
|-----------------|-------|------------------|--------|
| TC12000424.hg.1 | 2.19  | PSR12005400.hg.1 | KRT18  |
| TC12000424.hg.1 | 2.07  | PSR12005401.hg.1 | KRT18  |
| TC12000890.hg.1 | 3.3   | JUC12006487.hg.1 | TPCN1  |
| TC12000890.hg.1 | 2.52  | JUC12006501.hg.1 | TPCN1  |
| TC12000890.hg.1 | 2.35  | PSR12011801.hg.1 | TPCN1  |
| TC12000890.hg.1 | 2.23  | PSR12011770.hg.1 | TPCN1  |
| TC12000890.hg.1 | -2.21 | JUC12006474.hg.1 | TPCN1  |
| TC13000845.hg.1 | 3.3   | JUC13005606.hg.1 | NALCN  |
| TC13000845.hg.1 | 2.9   | JUC13005609.hg.1 | NALCN  |
| TC13000845.hg.1 | 2.14  | PSR13009460.hg.1 | NALCN  |
| TC13000845.hg.1 | -2.11 | JUC13005581.hg.1 | NALCN  |
| TC13000845.hg.1 | -2.19 | JUC13005587.hg.1 | NALCN  |
| TC13000845.hg.1 | -2.22 | PSR13009489.hg.1 | NALCN  |
| TC13000845.hg.1 | -2.25 | JUC13005595.hg.1 | NALCN  |
| TC13000845.hg.1 | -2.3  | PSR13009485.hg.1 | NALCN  |
| TC13000845.hg.1 | -2.34 | PSR13009483.hg.1 | NALCN  |
| TC13000845.hg.1 | -2.54 | PSR13009461.hg.1 | NALCN  |
| TC13000845.hg.1 | -2.59 | PSR13009514.hg.1 | NALCN  |
| TC13000845.hg.1 | -2.96 | JUC13005571.hg.1 | NALCN  |
| TC13000845.hg.1 | -3    | JUC13005599.hg.1 | NALCN  |
| TC14001117.hg.1 | 3.3   | JUC14006324.hg.1 | L2HGDH |
| TC14001117.hg.1 | 2.52  | PSR14012591.hg.1 | L2HGDH |
| TC14001117.hg.1 | 2.14  | JUC14006328.hg.1 | L2HGDH |
| TC14001117.hg.1 | 2.04  | JUC14006331.hg.1 | L2HGDH |
| TC14001117.hg.1 | -2.37 | JUC14006336.hg.1 | L2HGDH |
| TC02000237.hg.1 | 3.29  | JUC02001856.hg.1 | QPCT   |
| TC02000237.hg.1 | 2.09  | JUC02001851.hg.1 | QPCT   |
| TC02000237.hg.1 | -2.48 | PSR02003548.hg.1 | QPCT   |
| TC02000237.hg.1 | -3.73 | JUC02001850.hg.1 | QPCT   |
| TC02000237.hg.1 | -4.18 | PSR02003536.hg.1 | QPCT   |
| TC02000237.hg.1 | -5.44 | PSR02003549.hg.1 | QPCT   |
| TC02000237.hg.1 | -5.66 | PSR02003532.hg.1 | QPCT   |
| TC02000237.hg.1 | -6.52 | PSR02003544.hg.1 | QPCT   |
| TC04001741.hg.1 | 3.29  | PSR04024051.hg.1 | HMGB2  |
| TC04001741.hg.1 | 3.01  | JUC04012753.hg.1 | HMGB2  |
| TC04001741.hg.1 | 2.94  | PSR04024061.hg.1 | HMGB2  |
| TC04001741.hg.1 | 2.81  | PSR04024052.hg.1 | HMGB2  |
| TC04001741.hg.1 | 2.8   | PSR04024057.hg.1 | HMGB2  |
| TC04001741.hg.1 | 2.63  | JUC04012758.hg.1 | HMGB2  |
| TC04001741.hg.1 | 2.47  | JUC04012755.hg.1 | HMGB2  |
| TC04001741.hg.1 | 2.24  | PSR04024038.hg.1 | HMGB2  |
| TC04001741.hg.1 | 2.09  | JUC04012754.hg.1 | HMGB2  |
| TC04001741.hg.1 | 2.08  | PSR04024059.hg.1 | HMGB2  |
| TC05000287.hg.1 | 3.29  | JUC05002024.hg.1 |        |
| TC05000287.hg.1 | 3.04  | JUC05002022.hg.1 |        |
| TC05000287.hg.1 | 2.1   | JUC05002023.hg.1 |        |
| TC05000287.hg.1 | -4.39 | PSR05003760.hg.1 |        |
| TC05000458.hg.1 | 3.29  | JUC05003577.hg.1 | ARSK   |
| TC05000458.hg.1 | 2.82  | PSR05006472.hg.1 | ARSK   |
| TC05000458.hg.1 | 2.76  | JUC05003579.hg.1 | ARSK   |
| TC05000700.hg.1 | 3.29  | PSR05009800.hg.1 | REEP2  |
| TC05000700.hg.1 | 3.17  | JUC05005215.hg.1 | REEP2  |
| TC05000700.hg.1 | 3.05  | JUC05005219.hg.1 | REEP2  |
| TC05000700.hg.1 | 3.04  | PSR05009809.hg.1 | REEP2  |
| TC05000700.hg.1 | 2.75  | JUC05005220.hg.1 | REEP2  |
| TC05000700.hg.1 | 2.64  | PSR05009784.hg.1 | REEP2  |
| TC05000700.hg.1 | 2.62  | PSR05009801.hg.1 | REEP2  |
| TC05000700.hg.1 | 2.3   | PSR05009795.hg.1 | REEP2  |

|                 |       |                  |               |
|-----------------|-------|------------------|---------------|
| TC05000700.hg.1 | 2.15  | PSR05009791.hg.1 | REEP2         |
| TC07001798.hg.1 | 3.29  | JUC07013718.hg.1 | CTTNBP2       |
| TC07001798.hg.1 | 2.38  | JUC07013727.hg.1 | CTTNBP2       |
| TC07001798.hg.1 | 2.23  | JUC07013714.hg.1 | CTTNBP2       |
| TC07001798.hg.1 | 2.08  | PSR07027896.hg.1 | CTTNBP2       |
| TC11000311.hg.1 | 3.29  | PSR11003974.hg.1 | QSER1         |
| TC11000311.hg.1 | 2.46  | JUC11002081.hg.1 | QSER1         |
| TC11000311.hg.1 | -2.08 | JUC11002076.hg.1 | QSER1         |
| TC13000433.hg.1 | 3.29  | PSR13004901.hg.1 | FLJ44054, LII |
| TC13000433.hg.1 | 2.01  | JUC13002951.hg.1 | FLJ44054, LII |
| TC20000166.hg.1 | 3.29  | JUC20001107.hg.1 | ENTPD6        |
| TC20000166.hg.1 | 2.39  | JUC20001093.hg.1 | ENTPD6        |
| TC20000166.hg.1 | 2.34  | JUC20001096.hg.1 | ENTPD6        |
| TC20000166.hg.1 | -4.19 | PSR20002049.hg.1 | ENTPD6        |
| TC01003810.hg.1 | 3.28  | JUC01030434.hg.1 | NSL1          |
| TC01003810.hg.1 | -2.37 | PSR01058218.hg.1 | NSL1          |
| TC06000747.hg.1 | 3.28  | JUC06004146.hg.1 | MYO6          |
| TC06000747.hg.1 | 2.9   | PSR06009021.hg.1 | MYO6          |
| TC06000747.hg.1 | 2.69  | JUC06004179.hg.1 | MYO6          |
| TC06000747.hg.1 | 2.28  | JUC06004177.hg.1 | MYO6          |
| TC06000747.hg.1 | -2.04 | JUC06004180.hg.1 | MYO6          |
| TC08001396.hg.1 | 3.28  | PSR08018079.hg.1 | MMP16         |
| TC08001396.hg.1 | 2.52  | JUC08009207.hg.1 | MMP16         |
| TC08001396.hg.1 | 2.43  | JUC08009210.hg.1 | MMP16         |
| TC08001396.hg.1 | 2.31  | JUC08009212.hg.1 | MMP16         |
| TC08001396.hg.1 | 2.04  | PSR08018077.hg.1 | MMP16         |
| TC15002793.hg.1 | 3.28  | JUC15013951.hg.1 | CAPN3         |
| TC15002793.hg.1 | -2.01 | PSR15002538.hg.1 | CAPN3         |
| TC15002793.hg.1 | -2.03 | PSR15002549.hg.1 | CAPN3         |
| TC15002793.hg.1 | -2.2  | PSR15002541.hg.1 | CAPN3         |
| TC15002793.hg.1 | -2.43 | PSR15002539.hg.1 | CAPN3         |
| TC15002793.hg.1 | -2.48 | JUC15013933.hg.1 | CAPN3         |
| TC15002793.hg.1 | -2.56 | JUC15013950.hg.1 | CAPN3         |
| TC15002793.hg.1 | -2.59 | JUC15013937.hg.1 | CAPN3         |
| TC15002793.hg.1 | -2.73 | JUC15013956.hg.1 | CAPN3         |
| TC15002793.hg.1 | -2.83 | PSR15002540.hg.1 | CAPN3         |
| TC15002793.hg.1 | -3.05 | JUC15013945.hg.1 | CAPN3         |
| TC15002793.hg.1 | -3.81 | JUC15013963.hg.1 | CAPN3         |
| TC19000509.hg.1 | 3.28  | JUC19003979.hg.1 | ZNF568        |
| TC19000509.hg.1 | 2.48  | JUC19003976.hg.1 | ZNF568        |
| TC19000509.hg.1 | 2.24  | PSR19006760.hg.1 | ZNF568        |
| TC19000509.hg.1 | 2.13  | JUC19003981.hg.1 | ZNF568        |
| TC19000509.hg.1 | -2.01 | PSR19006768.hg.1 | ZNF568        |
| TC19000509.hg.1 | -3.33 | JUC19003974.hg.1 | ZNF568        |
| TC04001436.hg.1 | 3.27  | JUC04010586.hg.1 | CENPE         |
| TC04001436.hg.1 | 3.03  | JUC04010599.hg.1 | CENPE         |
| TC04001436.hg.1 | 2.82  | JUC04010555.hg.1 | CENPE         |
| TC04001436.hg.1 | 2.66  | JUC04010590.hg.1 | CENPE         |
| TC04001436.hg.1 | 2.22  | JUC04010576.hg.1 | CENPE         |
| TC04001436.hg.1 | 2.16  | PSR04020227.hg.1 | CENPE         |
| TC04001436.hg.1 | 2.14  | JUC04010559.hg.1 | CENPE         |
| TC04001436.hg.1 | 2.13  | JUC04010575.hg.1 | CENPE         |
| TC04001436.hg.1 | 2.04  | PSR04020232.hg.1 | CENPE         |
| TC04001436.hg.1 | -2.77 | JUC04010583.hg.1 | CENPE         |
| TC05001605.hg.1 | 3.27  | PSR05021886.hg.1 | TTC37         |
| TC05001605.hg.1 | -2.02 | JUC05011262.hg.1 | TTC37         |
| TC05001605.hg.1 | -2.38 | PSR05021877.hg.1 | TTC37         |
| TC05001605.hg.1 | -2.65 | JUC05011292.hg.1 | TTC37         |

|                  |       |                   |             |
|------------------|-------|-------------------|-------------|
| TC05001605.hg.1  | -3.72 | PSR05021873.hg.1  | TTC37       |
| TC06000322.hg.1  | 3.27  | JUC06001150.hg.1  | MOG         |
| TC06000322.hg.1  | 2.27  | PSR06002521.hg.1  | MOG         |
| TC07000599.hg.1  | 3.27  | JUC07004187.hg.1  | ZNF498      |
| TC07000599.hg.1  | 2.09  | PSR07008964.hg.1  | ZNF498      |
| TC07003296.hg.1  | 3.27  | PSR07015219.hg.1  | ZNF775, LOC |
| TC07003296.hg.1  | 2.7   | PSR07015217.hg.1  | ZNF775, LOC |
| TC07003296.hg.1  | 2.65  | JUC07020419.hg.1  | ZNF775, LOC |
| TC07003296.hg.1  | 2.6   | PSR07015213.hg.1  | ZNF775, LOC |
| TC07003296.hg.1  | 2.05  | PSR07015216.hg.1  | ZNF775, LOC |
| TC07003296.hg.1  | 2.02  | PSR07015229.hg.1  | ZNF775, LOC |
| TC10000322.hg.1  | 3.27  | JUC10002141.hg.1  | MAPK8       |
| TC10000322.hg.1  | 2.16  | JUC10002138.hg.1  | MAPK8       |
| TC10000322.hg.1  | -2.1  | PSR10003685.hg.1  | MAPK8       |
| TC10000322.hg.1  | -2.21 | JUC10002134.hg.1  | MAPK8       |
| TC10000322.hg.1  | -2.38 | JUC10002121.hg.1  | MAPK8       |
| TC10000322.hg.1  | -4.03 | JUC10002135.hg.1  | MAPK8       |
| TC11000155.hg.1  | 3.27  | PSR11002193.hg.1  | TUB         |
| TC11000155.hg.1  | 3.2   | JUC11000980.hg.1  | TUB         |
| TC11000155.hg.1  | 2.99  | PSR11002207.hg.1  | TUB         |
| TC11000155.hg.1  | 2.03  | JUC11000975.hg.1  | TUB         |
| TC11000155.hg.1  | 2     | PSR11002206.hg.1  | TUB         |
| TC11001358.hg.1  | 3.27  | JUC11009132.hg.1  | ARFIP2      |
| TC11001358.hg.1  | 2.15  | PSR11017086.hg.1  | ARFIP2      |
| TC11002151.hg.1  | 3.27  | JUC11013625.hg.1  | PRCP        |
| TC11002151.hg.1  | 2.25  | JUC11013633.hg.1  | PRCP        |
| TC11002151.hg.1  | 2.14  | PSR11025680.hg.1  | PRCP        |
| TC17_ctg5_hap100 | 3.27  | JUC17_ctg5_hap100 | KANSL1      |
| TC17_ctg5_hap100 | -2.13 | PSR17_ctg5_hap100 | KANSL1      |
| TC17_ctg5_hap100 | -2.97 | JUC17_ctg5_hap100 | KANSL1      |
| TC01000500.hg.1  | 3.26  | JUC01004059.hg.1  | PPIE        |
| TC01000500.hg.1  | 2.54  | JUC01004042.hg.1  | PPIE        |
| TC01000500.hg.1  | 2.34  | PSR01007772.hg.1  | PPIE        |
| TC01000500.hg.1  | 2.12  | JUC01004047.hg.1  | PPIE        |
| TC01000500.hg.1  | 2.07  | PSR01007755.hg.1  | PPIE        |
| TC01000500.hg.1  | -2.57 | JUC01004045.hg.1  | PPIE        |
| TC02001075.hg.1  | 3.26  | JUC02008540.hg.1  | TTN-AS1     |
| TC02001075.hg.1  | 2.98  | PSR02016031.hg.1  | TTN-AS1     |
| TC02001075.hg.1  | 2.73  | PSR02016039.hg.1  | TTN-AS1     |
| TC02001075.hg.1  | 2.61  | PSR02016038.hg.1  | TTN-AS1     |
| TC02001075.hg.1  | 2.54  | JUC02008518.hg.1  | TTN-AS1     |
| TC02001075.hg.1  | 2.18  | PSR02016032.hg.1  | TTN-AS1     |
| TC05000054.hg.1  | 3.26  | PSR05000590.hg.1  | ADCY2       |
| TC05000054.hg.1  | 3.13  | JUC05000334.hg.1  | ADCY2       |
| TC05000054.hg.1  | 2.7   | PSR05000593.hg.1  | ADCY2       |
| TC05000054.hg.1  | 2.62  | PSR05000629.hg.1  | ADCY2       |
| TC05000054.hg.1  | 2.4   | JUC05000341.hg.1  | ADCY2       |
| TC05000054.hg.1  | 2.25  | PSR05000619.hg.1  | ADCY2       |
| TC05000054.hg.1  | 2.05  | PSR05000627.hg.1  | ADCY2       |
| TC05000054.hg.1  | -2.21 | JUC05000335.hg.1  | ADCY2       |
| TC05000054.hg.1  | -2.3  | JUC05000331.hg.1  | ADCY2       |
| TC05000054.hg.1  | -2.39 | JUC05000346.hg.1  | ADCY2       |
| TC05000054.hg.1  | -2.64 | JUC05000338.hg.1  | ADCY2       |
| TC05003410.hg.1  | 3.26  | JUC05019420.hg.1  | C5orf45     |
| TC05003410.hg.1  | 2.54  | JUC05019423.hg.1  | C5orf45     |
| TC05003410.hg.1  | -2.09 | PSR05029953.hg.1  | C5orf45     |
| TC05003410.hg.1  | -2.33 | PSR05029951.hg.1  | C5orf45     |
| TC05003410.hg.1  | -2.61 | PSR05029954.hg.1  | C5orf45     |

|                 |       |                  |             |
|-----------------|-------|------------------|-------------|
| TC09000772.hg.1 | 3.26  | PSR09009903.hg.1 | SNORD24, R  |
| TC09000772.hg.1 | 2.65  | PSR09009905.hg.1 | SNORD24, R  |
| TC09000772.hg.1 | 2.53  | JUC09005425.hg.1 | SNORD24, R  |
| TC09000772.hg.1 | 2.34  | PSR09009912.hg.1 | SNORD24, R  |
| TC09000772.hg.1 | 2.03  | PSR09009886.hg.1 | SNORD24, R  |
| TC0X000716.hg.1 | 3.26  | JUC0X004638.hg.1 | HSFX2, HSF) |
| TC0X000716.hg.1 | 2.28  | PSR0X009177.hg.1 | HSFX2, HSF) |
| TC10001761.hg.1 | 3.26  | JUC10013434.hg.1 | EBF3        |
| TC10001761.hg.1 | 2.83  | PSR10023286.hg.1 | EBF3        |
| TC10001761.hg.1 | 2.59  | JUC10013438.hg.1 | EBF3        |
| TC10001761.hg.1 | 2.21  | PSR10023268.hg.1 | EBF3        |
| TC10001761.hg.1 | 2.14  | PSR10023288.hg.1 | EBF3        |
| TC10001761.hg.1 | 2.1   | PSR10023293.hg.1 | EBF3        |
| TC10001761.hg.1 | 2.03  | PSR10023278.hg.1 | EBF3        |
| TC10001761.hg.1 | -2.15 | JUC10013426.hg.1 | EBF3        |
| TC10001761.hg.1 | -2.49 | PSR10023279.hg.1 | EBF3        |
| TC10001761.hg.1 | -2.54 | PSR10023280.hg.1 | EBF3        |
| TC10001761.hg.1 | -4.56 | JUC10013424.hg.1 | EBF3        |
| TC10001761.hg.1 | -5.74 | PSR10023274.hg.1 | EBF3        |
| TC11000032.hg.1 | 3.26  | JUC11000250.hg.1 | PNPLA2      |
| TC11000032.hg.1 | 2.14  | PSR11000460.hg.1 | PNPLA2      |
| TC12001930.hg.1 | 3.26  | JUC12014020.hg.1 |             |
| TC12001930.hg.1 | 2.33  | PSR12025130.hg.1 |             |
| TC12001930.hg.1 | 2.33  | PSR12025131.hg.1 |             |
| TC12001930.hg.1 | 2.07  | JUC12014018.hg.1 |             |
| TC15001441.hg.1 | 3.26  | JUC15007080.hg.1 | DMXL2       |
| TC15001441.hg.1 | 2.86  | JUC15007123.hg.1 | DMXL2       |
| TC15001441.hg.1 | -2.02 | JUC15007087.hg.1 | DMXL2       |
| TC15001441.hg.1 | -2.12 | PSR15013316.hg.1 | DMXL2       |
| TC15001441.hg.1 | -2.16 | JUC15007113.hg.1 | DMXL2       |
| TC15001441.hg.1 | -2.38 | JUC15007125.hg.1 | DMXL2       |
| TC15001441.hg.1 | -2.79 | JUC15007081.hg.1 | DMXL2       |
| TC20000482.hg.1 | 3.26  | JUC20003559.hg.1 | LSM14B      |
| TC20000482.hg.1 | 2.36  | JUC20003550.hg.1 | LSM14B      |
| TC20000482.hg.1 | 2.32  | PSR20006717.hg.1 | LSM14B      |
| TC20001723.hg.1 | 3.26  | JUC20009638.hg.1 | L3MBTL1     |
| TC20001723.hg.1 | 2.19  | PSR20004480.hg.1 | L3MBTL1     |
| TC20001723.hg.1 | 2.15  | JUC20009637.hg.1 | L3MBTL1     |
| TC20001723.hg.1 | -2.37 | PSR20004493.hg.1 | L3MBTL1     |
| TC01001848.hg.1 | 3.25  | JUC01015456.hg.1 | CNIH3, LOC1 |
| TC01001848.hg.1 | 2.03  | JUC01015442.hg.1 | CNIH3, LOC1 |
| TC01001848.hg.1 | -2.75 | PSR01028722.hg.1 | CNIH3, LOC1 |
| TC04000905.hg.1 | 3.25  | PSR04012364.hg.1 | ANKRD37     |
| TC04000905.hg.1 | 3.15  | PSR04012357.hg.1 | ANKRD37     |
| TC04000905.hg.1 | 3.13  | PSR04012358.hg.1 | ANKRD37     |
| TC04000905.hg.1 | 2.94  | PSR04012356.hg.1 | ANKRD37     |
| TC04000905.hg.1 | 2.67  | PSR04012359.hg.1 | ANKRD37     |
| TC04000905.hg.1 | 2.42  | JUC04006656.hg.1 | ANKRD37     |
| TC04000905.hg.1 | -2.4  | JUC04006658.hg.1 | ANKRD37     |
| TC04002955.hg.1 | 3.25  | JUC04017441.hg.1 | ARAP2       |
| TC04002955.hg.1 | 3.14  | PSR04015210.hg.1 | ARAP2       |
| TC04002955.hg.1 | 2.49  | JUC04017456.hg.1 | ARAP2       |
| TC04002955.hg.1 | 2.36  | JUC04017459.hg.1 | ARAP2       |
| TC04002955.hg.1 | 2.07  | PSR04015208.hg.1 | ARAP2       |
| TC04002955.hg.1 | -2.06 | PSR04015214.hg.1 | ARAP2       |
| TC05001157.hg.1 | 3.25  | JUC05008426.hg.1 | FAM173B     |
| TC05001157.hg.1 | -2.22 | PSR05016559.hg.1 | FAM173B     |
| TC07000995.hg.1 | 3.25  | JUC07007375.hg.1 | ATP6V0E2    |



|                 |       |                   |              |
|-----------------|-------|-------------------|--------------|
| TC07000995.hg.1 | 2.48  | PSR07015115.hg.1  | ATP6V0E2     |
| TC07000995.hg.1 | 2.26  | PSR07015104.hg.1  | ATP6V0E2     |
| TC07000995.hg.1 | 2.22  | JUC07007380.hg.1  | ATP6V0E2     |
| TC07003292.hg.1 | 3.25  | JUC07020372.hg.1  | C7orf53      |
| TC07003292.hg.1 | -2.08 | PSR07011164.hg.1  | C7orf53      |
| TC07003292.hg.1 | -2.26 | PSR07011165.hg.1  | C7orf53      |
| TC12001811.hg.1 | 3.25  | PSR12023941.hg.1  | EEA1         |
| TC12001811.hg.1 | -2.18 | JUC12013263.hg.1  | EEA1         |
| TC15000152.hg.1 | 3.25  | JUC15000344.hg.1  | LOC646278    |
| TC15000152.hg.1 | 2.21  | JUC15000347.hg.1  | LOC646278    |
| TC15000152.hg.1 | 2.04  | PSR15000956.hg.1  | LOC646278    |
| TC15000152.hg.1 | -2.73 | JUC15000340.hg.1  | LOC646278    |
| TC17001301.hg.1 | 3.25  | JUC17009773.hg.1  | ALDOC        |
| TC17001301.hg.1 | 3.25  | JUC17009776.hg.1  | ALDOC        |
| TC17001301.hg.1 | 3.02  | JUC17009775.hg.1  | ALDOC        |
| TC17001301.hg.1 | 3     | PSR17017294.hg.1  | ALDOC        |
| TC17001301.hg.1 | 2.68  | PSR17017292.hg.1  | ALDOC        |
| TC17001301.hg.1 | 2.5   | PSR17017280.hg.1  | ALDOC        |
| TC17001301.hg.1 | 2.3   | JUC17009768.hg.1  | ALDOC        |
| TC17001301.hg.1 | 2     | JUC17009772.hg.1  | ALDOC        |
| TC20000092.hg.1 | 3.25  | JUC20000650.hg.1  | SPTLC3       |
| TC20000092.hg.1 | 2.06  | JUC20000648.hg.1  | SPTLC3       |
| TC20000092.hg.1 | -2.49 | JUC20000645.hg.1  | SPTLC3       |
| TC20000092.hg.1 | -2.89 | PSR20001262.hg.1  | SPTLC3       |
| TC02002110.hg.1 | 3.24  | JUC02017603.hg.1  | KANSL3, KIA  |
| TC02002110.hg.1 | 2.46  | JUC02017581.hg.1  | KANSL3, KIA  |
| TC02002110.hg.1 | 2.08  | PSR02034200.hg.1  | KANSL3, KIA  |
| TC02002110.hg.1 | -3.44 | JUC02017594.hg.1  | KANSL3, KIA  |
| TC02002110.hg.1 | -3.98 | JUC02017620.hg.1  | KANSL3, KIA  |
| TC02002110.hg.1 | -4.02 | PSR02034175.hg.1  | KANSL3, KIA  |
| TC02002110.hg.1 | -4.11 | JUC02017584.hg.1  | KANSL3, KIA  |
| TC04000547.hg.1 | 3.24  | JUC04004185.hg.1  | GSTCD        |
| TC04000547.hg.1 | 2.67  | PSR04007948.hg.1  | GSTCD        |
| TC04000547.hg.1 | 2.4   | PSR04007961.hg.1  | GSTCD        |
| TC04000547.hg.1 | 2.26  | JUC04004187.hg.1  | GSTCD        |
| TC04000547.hg.1 | 2.2   | PSR04007972.hg.1  | GSTCD        |
| TC04001724.hg.1 | 3.24  | PSR04023858.hg.1  | SH3RF1       |
| TC04001724.hg.1 | 3.13  | PSR04023831.hg.1  | SH3RF1       |
| TC04001724.hg.1 | 2.82  | PSR04023830.hg.1  | SH3RF1       |
| TC04001724.hg.1 | 2.52  | PSR04023856.hg.1  | SH3RF1       |
| TC04001724.hg.1 | 2.42  | JUC04012636.hg.1  | SH3RF1       |
| TC04001724.hg.1 | 2.24  | PSR04023857.hg.1  | SH3RF1       |
| TC04001724.hg.1 | -2.36 | JUC04012637.hg.1  | SH3RF1       |
| TC04001724.hg.1 | -2.84 | JUC04012626.hg.1  | SH3RF1       |
| TC08001371.hg.1 | 3.24  | PSR08017781.hg.1  | SNX16        |
| TC08001371.hg.1 | -2.4  | JUC08009016.hg.1  | SNX16        |
| TC18000016.hg.1 | 3.24  | JUC18000128.hg.1  | MYL12A       |
| TC18000016.hg.1 | 2.24  | PSR18000174.hg.1  | MYL12A       |
| TC6_dbb_hap3000 | 3.24  | JUC6_dbb_hap30018 | C4B, C4A, LC |
| TC6_dbb_hap3000 | 2.61  | PSR6_dbb_hap30018 | C4B, C4A, LC |
| TC6_dbb_hap3000 | 2.4   | JUC6_dbb_hap30018 | C4B, C4A, LC |
| TC6_dbb_hap3000 | 2.39  | JUC6_dbb_hap30018 | C4B, C4A, LC |
| TC6_dbb_hap3000 | 2.29  | PSR6_dbb_hap30018 | C4B, C4A, LC |
| TC6_dbb_hap3000 | 2.23  | PSR6_dbb_hap30018 | C4B, C4A, LC |
| TC6_dbb_hap3000 | 2.22  | PSR6_dbb_hap30018 | C4B, C4A, LC |
| TC6_dbb_hap3000 | 2.14  | JUC6_dbb_hap30018 | C4B, C4A, LC |
| TC6_dbb_hap3000 | 2.05  | PSR6_dbb_hap30018 | C4B, C4A, LC |
| TC6_dbb_hap3000 | -2.08 | JUC6_dbb_hap30018 | C4B, C4A, LC |

|                 |        |                   |              |
|-----------------|--------|-------------------|--------------|
| TC6_dbb_hap3000 | -2.34  | JUC6_dbb_hap30018 | C4B, C4A, LC |
| TC6_dbb_hap3000 | -2.93  | JUC6_dbb_hap30018 | C4B, C4A, LC |
| TC6_dbb_hap3000 | -2.93  | JUC6_dbb_hap30018 | C4B, C4A, LC |
| TC6_dbb_hap3000 | -3.13  | JUC6_dbb_hap30018 | C4B, C4A, LC |
| TC6_dbb_hap3000 | -3.74  | JUC6_dbb_hap30018 | C4B, C4A, LC |
| TC6_mcf_hap5000 | 3.24   | PSR6_mcf_hap5000  | HLA-F        |
| TC6_mcf_hap5000 | 2.91   | PSR6_mcf_hap5000  | HLA-F        |
| TC6_mcf_hap5000 | 2.75   | JUC6_mcf_hap50016 | HLA-F        |
| TC6_mcf_hap5000 | 2.4    | PSR6_mcf_hap5000  | HLA-F        |
| TC6_mcf_hap5000 | 2.32   | JUC6_mcf_hap50016 | HLA-F        |
| TC01003006.hg.1 | 3.23   | PSR01046773.hg.1  | PTPN22       |
| TC01003006.hg.1 | -2.43  | JUC01025089.hg.1  | PTPN22       |
| TC01003006.hg.1 | -2.44  | JUC01025095.hg.1  | PTPN22       |
| TC02000465.hg.1 | 3.23   | JUC02003702.hg.1  | SEMA4F       |
| TC02000465.hg.1 | 3.23   | JUC02003710.hg.1  | SEMA4F       |
| TC02000465.hg.1 | 3.01   | PSR02007310.hg.1  | SEMA4F       |
| TC02000465.hg.1 | 2.53   | PSR02007308.hg.1  | SEMA4F       |
| TC02000465.hg.1 | 2.45   | JUC02003701.hg.1  | SEMA4F       |
| TC02000465.hg.1 | 2.36   | JUC02003714.hg.1  | SEMA4F       |
| TC02000465.hg.1 | 2.18   | JUC02003706.hg.1  | SEMA4F       |
| TC02002211.hg.1 | 3.23   | JUC02018529.hg.1  | ANAPC1, LO   |
| TC02002211.hg.1 | 2.4    | JUC02018558.hg.1  | ANAPC1, LO   |
| TC02002211.hg.1 | -2     | JUC02018539.hg.1  | ANAPC1, LO   |
| TC02002211.hg.1 | -2.12  | JUC02018570.hg.1  | ANAPC1, LO   |
| TC02002211.hg.1 | -2.28  | PSR02035909.hg.1  | ANAPC1, LO   |
| TC02002211.hg.1 | -2.31  | JUC02018563.hg.1  | ANAPC1, LO   |
| TC02002211.hg.1 | -2.32  | JUC02018575.hg.1  | ANAPC1, LO   |
| TC02002211.hg.1 | -3.08  | JUC02018559.hg.1  | ANAPC1, LO   |
| TC02002211.hg.1 | -3.89  | JUC02018556.hg.1  | ANAPC1, LO   |
| TC03001632.hg.1 | 3.23   | JUC03014610.hg.1  | KIAA1524     |
| TC03001632.hg.1 | -2.18  | JUC03014593.hg.1  | KIAA1524     |
| TC03001632.hg.1 | -2.2   | PSR03029482.hg.1  | KIAA1524     |
| TC03001632.hg.1 | -2.32  | JUC03014599.hg.1  | KIAA1524     |
| TC06001201.hg.1 | 3.23   | JUC06007125.hg.1  | TBP          |
| TC06001201.hg.1 | -2.45  | PSR06014353.hg.1  | TBP          |
| TC09000906.hg.1 | 3.23   | JUC09006558.hg.1  | PTPRD        |
| TC09000906.hg.1 | 2.24   | JUC09006500.hg.1  | PTPRD        |
| TC09000906.hg.1 | 2.23   | JUC09006492.hg.1  | PTPRD        |
| TC09000906.hg.1 | -2.01  | PSR09012024.hg.1  | PTPRD        |
| TC09000906.hg.1 | -2.31  | PSR09012020.hg.1  | PTPRD        |
| TC09000906.hg.1 | -2.44  | JUC09006562.hg.1  | PTPRD        |
| TC09000906.hg.1 | -2.59  | PSR09011993.hg.1  | PTPRD        |
| TC09000906.hg.1 | -2.61  | PSR09012050.hg.1  | PTPRD        |
| TC09000906.hg.1 | -2.89  | PSR09012053.hg.1  | PTPRD        |
| TC09000906.hg.1 | -2.99  | PSR09012005.hg.1  | PTPRD        |
| TC09000906.hg.1 | -3.41  | JUC09006536.hg.1  | PTPRD        |
| TC09000906.hg.1 | -4     | JUC09006509.hg.1  | PTPRD        |
| TC09000906.hg.1 | -4.1   | JUC09006521.hg.1  | PTPRD        |
| TC09000906.hg.1 | -4.19  | JUC09006553.hg.1  | PTPRD        |
| TC09000906.hg.1 | -4.9   | JUC09006505.hg.1  | PTPRD        |
| TC09000906.hg.1 | -5.06  | PSR09012055.hg.1  | PTPRD        |
| TC09000906.hg.1 | -5.4   | JUC09006504.hg.1  | PTPRD        |
| TC09000906.hg.1 | -6.34  | PSR09012061.hg.1  | PTPRD        |
| TC09000906.hg.1 | -6.35  | PSR09012062.hg.1  | PTPRD        |
| TC09000906.hg.1 | -6.45  | PSR09012067.hg.1  | PTPRD        |
| TC09000906.hg.1 | -6.65  | PSR09012056.hg.1  | PTPRD        |
| TC09000906.hg.1 | -7.5   | PSR09012060.hg.1  | PTPRD        |
| TC09000906.hg.1 | -11.12 | PSR09012064.hg.1  | PTPRD        |

|                  |        |                   |            |
|------------------|--------|-------------------|------------|
| TC09000906.hg.1  | -14.04 | JUC09006524.hg.1  | PTPRD      |
| TC15001992.hg.1  | 3.23   | PSR15018495.hg.1  | ADAMTS17   |
| TC15001992.hg.1  | -2     | JUC15010063.hg.1  | ADAMTS17   |
| TC15001992.hg.1  | -2.26  | JUC15010076.hg.1  | ADAMTS17   |
| TC16000240.hg.1  | 3.23   | JUC16001922.hg.1  | C16orf52   |
| TC16000240.hg.1  | 2.15   | JUC16001926.hg.1  | C16orf52   |
| TC16000240.hg.1  | -2.01  | PSR16003501.hg.1  | C16orf52   |
| TC16000240.hg.1  | -2.01  | JUC16001923.hg.1  | C16orf52   |
| TC16000240.hg.1  | -2.03  | PSR16003494.hg.1  | C16orf52   |
| TC16000240.hg.1  | -2.42  | PSR16003500.hg.1  | C16orf52   |
| TC16000240.hg.1  | -2.54  | JUC16001929.hg.1  | C16orf52   |
| TC17_ctg5_hap100 | 3.23   | JUC17_ctg5_hap100 | LRRC37A4P  |
| TC17_ctg5_hap100 | 2.58   | PSR17_ctg5_hap100 | LRRC37A4P  |
| TC17_ctg5_hap100 | 2.23   | JUC17_ctg5_hap100 | LRRC37A4P  |
| TC17_ctg5_hap100 | 2.19   | JUC17_ctg5_hap100 | LRRC37A4P  |
| TC17_ctg5_hap100 | -2.69  | JUC17_ctg5_hap100 | LRRC37A4P  |
| TC21000409.hg.1  | 3.23   | JUC21002460.hg.1  | TMEM50B    |
| TC21000409.hg.1  | 2.49   | PSR21004645.hg.1  | TMEM50B    |
| TC21000409.hg.1  | 2.25   | PSR21004640.hg.1  | TMEM50B    |
| TC21000409.hg.1  | 2.23   | PSR21004623.hg.1  | TMEM50B    |
| TC21000409.hg.1  | 2.12   | PSR21004639.hg.1  | TMEM50B    |
| TC01002258.hg.1  | 3.22   | JUC01018442.hg.1  | EPHA2      |
| TC01002258.hg.1  | 2.09   | PSR01034440.hg.1  | EPHA2      |
| TC01004024.hg.1  | 3.22   | JUC01031823.hg.1  | RGS7       |
| TC01004024.hg.1  | 3.18   | JUC01031806.hg.1  | RGS7       |
| TC01004024.hg.1  | 2.29   | JUC01031826.hg.1  | RGS7       |
| TC01004024.hg.1  | 2.25   | PSR01060765.hg.1  | RGS7       |
| TC01004024.hg.1  | 2.12   | JUC01031824.hg.1  | RGS7       |
| TC01004024.hg.1  | 2.01   | PSR01060781.hg.1  | RGS7       |
| TC01004024.hg.1  | -2.36  | PSR01060762.hg.1  | RGS7       |
| TC01004024.hg.1  | -2.52  | PSR01060780.hg.1  | RGS7       |
| TC02000360.hg.1  | 3.22   | JUC02002819.hg.1  | EHBP1      |
| TC02000360.hg.1  | -2.07  | PSR02005406.hg.1  | EHBP1      |
| TC02000360.hg.1  | -3     | JUC02002804.hg.1  | EHBP1      |
| TC02000360.hg.1  | -3.25  | PSR02005384.hg.1  | EHBP1      |
| TC02000360.hg.1  | -5.83  | JUC02002788.hg.1  | EHBP1      |
| TC02001600.hg.1  | 3.22   | PSR02025688.hg.1  | FAM49A     |
| TC02001600.hg.1  | 2.13   | PSR02025689.hg.1  | FAM49A     |
| TC02001600.hg.1  | 2.11   | PSR02025684.hg.1  | FAM49A     |
| TC02001600.hg.1  | -3.3   | JUC02013349.hg.1  | FAM49A     |
| TC02005058.hg.1  | 3.22   | PSR02001475.hg.1  | FAM228B    |
| TC02005058.hg.1  | 2.71   | JUC02033252.hg.1  | FAM228B    |
| TC02005058.hg.1  | 2      | JUC02033250.hg.1  | FAM228B    |
| TC02005058.hg.1  | -2.25  | PSR02001467.hg.1  | FAM228B    |
| TC02005058.hg.1  | -2.68  | JUC02033249.hg.1  | FAM228B    |
| TC02005058.hg.1  | -2.76  | JUC02033241.hg.1  | FAM228B    |
| TC02005058.hg.1  | -3.21  | JUC02033247.hg.1  | FAM228B    |
| TC02005058.hg.1  | -3.3   | JUC02033258.hg.1  | FAM228B    |
| TC06001327.hg.1  | 3.22   | JUC06007963.hg.1  | TDP2       |
| TC06001327.hg.1  | -2.21  | PSR06015888.hg.1  | TDP2       |
| TC06001327.hg.1  | -2.73  | PSR06015887.hg.1  | TDP2       |
| TC07000658.hg.1  | 3.22   | JUC07004760.hg.1  | LOC1002895 |
| TC07000658.hg.1  | -2.24  | PSR07010217.hg.1  | LOC1002895 |
| TC07001897.hg.1  | 3.22   | JUC07014524.hg.1  | DGKI       |
| TC07001897.hg.1  | 2.69   | PSR07029471.hg.1  | DGKI       |
| TC07001897.hg.1  | 2.29   | PSR07029448.hg.1  | DGKI       |
| TC07001897.hg.1  | 2.21   | JUC07014546.hg.1  | DGKI       |
| TC07001897.hg.1  | 2.09   | PSR07029427.hg.1  | DGKI       |

|                 |       |                  |             |
|-----------------|-------|------------------|-------------|
| TC07001897.hg.1 | 2.03  | PSR07029443.hg.1 | DGKI        |
| TC07001897.hg.1 | -2.08 | PSR07029444.hg.1 | DGKI        |
| TC07001897.hg.1 | -2.14 | JUC07014536.hg.1 | DGKI        |
| TC07001897.hg.1 | -2.14 | JUC07014537.hg.1 | DGKI        |
| TC07001897.hg.1 | -2.17 | PSR07029449.hg.1 | DGKI        |
| TC07001897.hg.1 | -2.31 | JUC07014554.hg.1 | DGKI        |
| TC07001897.hg.1 | -2.4  | PSR07029475.hg.1 | DGKI        |
| TC07001897.hg.1 | -2.49 | JUC07014545.hg.1 | DGKI        |
| TC07001897.hg.1 | -2.5  | PSR07029476.hg.1 | DGKI        |
| TC07001897.hg.1 | -2.57 | JUC07014544.hg.1 | DGKI        |
| TC07001897.hg.1 | -2.86 | JUC07014560.hg.1 | DGKI        |
| TC07001897.hg.1 | -3.75 | PSR07029447.hg.1 | DGKI        |
| TC08000565.hg.1 | 3.22  | JUC08003854.hg.1 | FAM92A1     |
| TC08000565.hg.1 | 2.06  | PSR08007708.hg.1 | FAM92A1     |
| TC08000565.hg.1 | -2.13 | PSR08007678.hg.1 | FAM92A1     |
| TC08000565.hg.1 | -2.63 | PSR08007721.hg.1 | FAM92A1     |
| TC09001361.hg.1 | 3.22  | PSR09016977.hg.1 | FANCC       |
| TC09001361.hg.1 | 2.9   | PSR09016971.hg.1 | FANCC       |
| TC09001361.hg.1 | 2.64  | PSR09016970.hg.1 | FANCC       |
| TC09001361.hg.1 | 2.41  | JUC09009132.hg.1 | FANCC       |
| TC09001361.hg.1 | 2.36  | PSR09016968.hg.1 | FANCC       |
| TC09001361.hg.1 | 2.34  | PSR09017002.hg.1 | FANCC       |
| TC09001361.hg.1 | 2.17  | PSR09016967.hg.1 | FANCC       |
| TC09001361.hg.1 | 2.06  | PSR09016993.hg.1 | FANCC       |
| TC09001361.hg.1 | 2.04  | PSR09016991.hg.1 | FANCC       |
| TC09001361.hg.1 | 2.01  | PSR09016984.hg.1 | FANCC       |
| TC10001577.hg.1 | 3.22  | JUC10011758.hg.1 | MIR1287, PY |
| TC10001577.hg.1 | 2.24  | JUC10011762.hg.1 | MIR1287, PY |
| TC10001577.hg.1 | -2.06 | JUC10011757.hg.1 | MIR1287, PY |
| TC10001577.hg.1 | -2.14 | PSR10020201.hg.1 | MIR1287, PY |
| TC10001577.hg.1 | -2.56 | JUC10011768.hg.1 | MIR1287, PY |
| TC10001577.hg.1 | -2.69 | JUC10011775.hg.1 | MIR1287, PY |
| TC10001577.hg.1 | -2.79 | JUC10011770.hg.1 | MIR1287, PY |
| TC10001577.hg.1 | -2.87 | JUC10011769.hg.1 | MIR1287, PY |
| TC10001577.hg.1 | -2.93 | JUC10011761.hg.1 | MIR1287, PY |
| TC10001577.hg.1 | -3.32 | PSR10020218.hg.1 | MIR1287, PY |
| TC10001577.hg.1 | -3.36 | PSR10020223.hg.1 | MIR1287, PY |
| TC10001577.hg.1 | -3.75 | PSR10020221.hg.1 | MIR1287, PY |
| TC10001577.hg.1 | -7.56 | PSR10020222.hg.1 | MIR1287, PY |
| TC11003463.hg.1 | 3.22  | JUC11019233.hg.1 | C11orf80    |
| TC11003463.hg.1 | 3.11  | JUC11019229.hg.1 | C11orf80    |
| TC11003463.hg.1 | 2.91  | PSR11008650.hg.1 | C11orf80    |
| TC11003463.hg.1 | 2.37  | JUC11019228.hg.1 | C11orf80    |
| TC11003463.hg.1 | 2.23  | PSR11008653.hg.1 | C11orf80    |
| TC11003463.hg.1 | -2.22 | PSR11008634.hg.1 | C11orf80    |
| TC13000622.hg.1 | 3.22  | JUC13004121.hg.1 | TSC22D1     |
| TC13000622.hg.1 | 2.48  | PSR13007085.hg.1 | TSC22D1     |
| TC13000622.hg.1 | 2.11  | PSR13007084.hg.1 | TSC22D1     |
| TC13000622.hg.1 | -2.14 | JUC13004114.hg.1 | TSC22D1     |
| TC13000622.hg.1 | -2.17 | PSR13007073.hg.1 | TSC22D1     |
| TC13000622.hg.1 | -2.41 | PSR13007072.hg.1 | TSC22D1     |
| TC15001468.hg.1 | 3.22  | JUC15007371.hg.1 | PYGO1       |
| TC15001468.hg.1 | 2.78  | PSR15013754.hg.1 | PYGO1       |
| TC15001468.hg.1 | 2.51  | PSR15013753.hg.1 | PYGO1       |
| TC15001468.hg.1 | 2.25  | PSR15013758.hg.1 | PYGO1       |
| TC17001954.hg.1 | 3.22  | JUC17014989.hg.1 | NPLOC4      |
| TC17001954.hg.1 | 2.33  | PSR17026590.hg.1 | NPLOC4      |
| TC17001954.hg.1 | 2.06  | JUC17014987.hg.1 | NPLOC4      |

|                 |       |                  |            |
|-----------------|-------|------------------|------------|
| TC20000900.hg.1 | 3.22  | PSR20012376.hg.1 | ELMO2      |
| TC20000900.hg.1 | 2.7   | JUC20006403.hg.1 | ELMO2      |
| TC20000900.hg.1 | 2.36  | JUC20006412.hg.1 | ELMO2      |
| TC20000900.hg.1 | 2.07  | JUC20006410.hg.1 | ELMO2      |
| TC20000900.hg.1 | -2.05 | JUC20006407.hg.1 | ELMO2      |
| TC20000900.hg.1 | -2.38 | JUC20006399.hg.1 | ELMO2      |
| TC20000900.hg.1 | -2.41 | JUC20006423.hg.1 | ELMO2      |
| TC01003791.hg.1 | 3.21  | JUC01030336.hg.1 | KCNH1      |
| TC01003791.hg.1 | 2.05  | PSR01058048.hg.1 | KCNH1      |
| TC01003791.hg.1 | -2.02 | PSR01058043.hg.1 | KCNH1      |
| TC01003791.hg.1 | -2.37 | PSR01058050.hg.1 | KCNH1      |
| TC01003791.hg.1 | -2.65 | JUC01030343.hg.1 | KCNH1      |
| TC01003791.hg.1 | -2.7  | JUC01030338.hg.1 | KCNH1      |
| TC01003791.hg.1 | -3.25 | PSR01058052.hg.1 | KCNH1      |
| TC06001584.hg.1 | 3.21  | JUC06009155.hg.1 | TAPBP      |
| TC06001584.hg.1 | 2.06  | PSR06019230.hg.1 | TAPBP      |
| TC07000387.hg.1 | 3.21  | JUC07002544.hg.1 | ZNF273     |
| TC07000387.hg.1 | 2.04  | JUC07002549.hg.1 | ZNF273     |
| TC07000387.hg.1 | -2.02 | PSR07005273.hg.1 | ZNF273     |
| TC07000387.hg.1 | -2.29 | PSR07005274.hg.1 | ZNF273     |
| TC09002922.hg.1 | 3.21  | PSR09021476.hg.1 | RALGDS     |
| TC09002922.hg.1 | 3.18  | JUC09016084.hg.1 | RALGDS     |
| TC09002922.hg.1 | 3.13  | PSR09021480.hg.1 | RALGDS     |
| TC09002922.hg.1 | 2.47  | PSR09021515.hg.1 | RALGDS     |
| TC09002922.hg.1 | 2.05  | PSR09021508.hg.1 | RALGDS     |
| TC09002922.hg.1 | 2.02  | PSR09021492.hg.1 | RALGDS     |
| TC09002922.hg.1 | 2     | PSR09021513.hg.1 | RALGDS     |
| TC12000084.hg.1 | 3.21  | JUC12000524.hg.1 | GAPDH      |
| TC12000084.hg.1 | 2.29  | JUC12000530.hg.1 | GAPDH      |
| TC12000084.hg.1 | 2.1   | PSR12000904.hg.1 | GAPDH      |
| TC12000084.hg.1 | -3.28 | PSR12000953.hg.1 | GAPDH      |
| TC12000084.hg.1 | -5.09 | PSR12000937.hg.1 | GAPDH      |
| TC16000615.hg.1 | 3.21  | PSR16008761.hg.1 | ZNRF1      |
| TC16000615.hg.1 | 2.86  | JUC16004863.hg.1 | ZNRF1      |
| TC16000615.hg.1 | 2.34  | PSR16008767.hg.1 | ZNRF1      |
| TC16000615.hg.1 | 2.2   | PSR16008765.hg.1 | ZNRF1      |
| TC18000480.hg.1 | 3.21  | PSR18004967.hg.1 | ATP5A1     |
| TC18000480.hg.1 | 2.05  | JUC18003332.hg.1 | ATP5A1     |
| TC04001086.hg.1 | 3.2   | JUC04007956.hg.1 | DHX15      |
| TC04001086.hg.1 | 3     | PSR04014936.hg.1 | DHX15      |
| TC04001086.hg.1 | 2.1   | PSR04014949.hg.1 | DHX15      |
| TC04001086.hg.1 | 2.08  | JUC04007951.hg.1 | DHX15      |
| TC04001462.hg.1 | 3.2   | JUC04010902.hg.1 | COL25A1    |
| TC04001462.hg.1 | 2.32  | PSR04020744.hg.1 | COL25A1    |
| TC04001462.hg.1 | 2.32  | JUC04010856.hg.1 | COL25A1    |
| TC04001462.hg.1 | 2.01  | JUC04010905.hg.1 | COL25A1    |
| TC04001462.hg.1 | -2.54 | PSR04020746.hg.1 | COL25A1    |
| TC07000722.hg.1 | 3.2   | JUC07005313.hg.1 | MET        |
| TC07000722.hg.1 | 2.79  | JUC07005321.hg.1 | MET        |
| TC07000722.hg.1 | 2.38  | PSR07011433.hg.1 | MET        |
| TC09000820.hg.1 | 3.2   | JUC09005859.hg.1 | FAM69B     |
| TC09000820.hg.1 | 2.44  | PSR09010604.hg.1 | FAM69B     |
| TC14000944.hg.1 | 3.2   | PSR14010406.hg.1 | C14orf93   |
| TC14000944.hg.1 | 2.56  | PSR14010402.hg.1 | C14orf93   |
| TC14000944.hg.1 | 2.51  | JUC14005269.hg.1 | C14orf93   |
| TC19001892.hg.1 | 3.2   | JUC19014550.hg.1 | PEG3, ZIM2 |
| TC19001892.hg.1 | 2.94  | PSR19025676.hg.1 | PEG3, ZIM2 |
| TC19001892.hg.1 | 2.86  | JUC19014534.hg.1 | PEG3, ZIM2 |

|                  |       |                   |              |
|------------------|-------|-------------------|--------------|
| TC19001892.hg.1  | -2.09 | PSR19025682.hg.1  | PEG3, ZIM2   |
| TC19001892.hg.1  | -2.35 | JUC19014546.hg.1  | PEG3, ZIM2   |
| TC19001892.hg.1  | -3.1  | PSR19025678.hg.1  | PEG3, ZIM2   |
| TC6_cox_hap2000  | 3.2   | JUC6_cox_hap20017 | C4B, C4A, LC |
| TC6_cox_hap2000  | 2.57  | PSR6_cox_hap20015 | C4B, C4A, LC |
| TC6_cox_hap2000  | 2.37  | JUC6_cox_hap20017 | C4B, C4A, LC |
| TC6_cox_hap2000  | 2.36  | JUC6_cox_hap20017 | C4B, C4A, LC |
| TC6_cox_hap2000  | 2.31  | JUC6_cox_hap20017 | C4B, C4A, LC |
| TC6_cox_hap2000  | 2.26  | PSR6_cox_hap20015 | C4B, C4A, LC |
| TC6_cox_hap2000  | 2.21  | PSR6_cox_hap20015 | C4B, C4A, LC |
| TC6_cox_hap2000  | 2.11  | JUC6_cox_hap20017 | C4B, C4A, LC |
| TC6_cox_hap2000  | 2.02  | PSR6_cox_hap20015 | C4B, C4A, LC |
| TC6_cox_hap2000  | -2.1  | JUC6_cox_hap20017 | C4B, C4A, LC |
| TC6_cox_hap2000  | -2.37 | JUC6_cox_hap20017 | C4B, C4A, LC |
| TC6_cox_hap2000  | -2.96 | JUC6_cox_hap20017 | C4B, C4A, LC |
| TC6_cox_hap2000  | -2.97 | JUC6_cox_hap20017 | C4B, C4A, LC |
| TC6_cox_hap2000  | -3.17 | JUC6_cox_hap20017 | C4B, C4A, LC |
| TC6_cox_hap2000  | -3.79 | JUC6_cox_hap20017 | C4B, C4A, LC |
| TC6_dbb_hap3000  | 3.2   | JUC6_dbb_hap30005 | C4B, C4A, LC |
| TC6_dbb_hap3000  | 2.57  | PSR6_dbb_hap30011 | C4B, C4A, LC |
| TC6_dbb_hap3000  | 2.37  | JUC6_dbb_hap30005 | C4B, C4A, LC |
| TC6_dbb_hap3000  | 2.36  | JUC6_dbb_hap30005 | C4B, C4A, LC |
| TC6_dbb_hap3000  | 2.31  | JUC6_dbb_hap30005 | C4B, C4A, LC |
| TC6_dbb_hap3000  | 2.26  | PSR6_dbb_hap30011 | C4B, C4A, LC |
| TC6_dbb_hap3000  | 2.21  | PSR6_dbb_hap30011 | C4B, C4A, LC |
| TC6_dbb_hap3000  | 2.11  | JUC6_dbb_hap30005 | C4B, C4A, LC |
| TC6_dbb_hap3000  | 2.02  | PSR6_dbb_hap30011 | C4B, C4A, LC |
| TC6_dbb_hap3000  | -2.1  | JUC6_dbb_hap30005 | C4B, C4A, LC |
| TC6_dbb_hap3000  | -2.37 | JUC6_dbb_hap30005 | C4B, C4A, LC |
| TC6_dbb_hap3000  | -2.96 | JUC6_dbb_hap30005 | C4B, C4A, LC |
| TC6_dbb_hap3000  | -2.97 | JUC6_dbb_hap30005 | C4B, C4A, LC |
| TC6_dbb_hap3000  | -3.17 | JUC6_dbb_hap30005 | C4B, C4A, LC |
| TC6_dbb_hap3000  | -3.79 | JUC6_dbb_hap30005 | C4B, C4A, LC |
| TC6_qbl_hap60002 | 3.2   | JUC6_qbl_hap60017 | C4B, C4A, LC |
| TC6_qbl_hap60002 | 2.57  | PSR6_qbl_hap60015 | C4B, C4A, LC |
| TC6_qbl_hap60002 | 2.37  | JUC6_qbl_hap60017 | C4B, C4A, LC |
| TC6_qbl_hap60002 | 2.36  | JUC6_qbl_hap60017 | C4B, C4A, LC |
| TC6_qbl_hap60002 | 2.31  | JUC6_qbl_hap60017 | C4B, C4A, LC |
| TC6_qbl_hap60002 | 2.26  | PSR6_qbl_hap60015 | C4B, C4A, LC |
| TC6_qbl_hap60002 | 2.21  | PSR6_qbl_hap60015 | C4B, C4A, LC |
| TC6_qbl_hap60002 | 2.11  | JUC6_qbl_hap60017 | C4B, C4A, LC |
| TC6_qbl_hap60002 | 2.02  | PSR6_qbl_hap60015 | C4B, C4A, LC |
| TC6_qbl_hap60002 | -2.1  | JUC6_qbl_hap60017 | C4B, C4A, LC |
| TC6_qbl_hap60002 | -2.37 | JUC6_qbl_hap60017 | C4B, C4A, LC |
| TC6_qbl_hap60002 | -2.96 | JUC6_qbl_hap60017 | C4B, C4A, LC |
| TC6_qbl_hap60002 | -2.97 | JUC6_qbl_hap60017 | C4B, C4A, LC |
| TC6_qbl_hap60002 | -3.17 | JUC6_qbl_hap60017 | C4B, C4A, LC |
| TC6_qbl_hap60002 | -3.79 | JUC6_qbl_hap60017 | C4B, C4A, LC |
| TC03000584.hg.1  | 3.19  | PSR03010654.hg.1  | GRAMD1C      |
| TC03000584.hg.1  | 3.13  | PSR03010644.hg.1  | GRAMD1C      |
| TC03000584.hg.1  | 2.99  | JUC03005322.hg.1  | GRAMD1C      |
| TC03000584.hg.1  | 2.28  | JUC03005326.hg.1  | GRAMD1C      |
| TC03000584.hg.1  | 2.01  | PSR03010667.hg.1  | GRAMD1C      |
| TC03000584.hg.1  | -2.2  | PSR03010679.hg.1  | GRAMD1C      |
| TC03000584.hg.1  | -2.25 | PSR03010691.hg.1  | GRAMD1C      |
| TC04000683.hg.1  | 3.19  | JUC04005197.hg.1  | NAA15        |
| TC04000683.hg.1  | 2.04  | PSR04009676.hg.1  | NAA15        |
| TC04000683.hg.1  | -2.39 | JUC04005206.hg.1  | NAA15        |

|                 |       |                  |            |
|-----------------|-------|------------------|------------|
| TC05000317.hg.1 | 3.19  | JUC05002305.hg.1 | SMN1, SMN2 |
| TC05000317.hg.1 | 2.89  | JUC05002299.hg.1 | SMN1, SMN2 |
| TC05000317.hg.1 | 2.37  | PSR05004261.hg.1 | SMN1, SMN2 |
| TC05000317.hg.1 | 2.12  | JUC05002307.hg.1 | SMN1, SMN2 |
| TC05001102.hg.1 | 3.19  | JUC05008144.hg.1 | SLC12A7    |
| TC05001102.hg.1 | 2.7   | PSR05016017.hg.1 | SLC12A7    |
| TC05001102.hg.1 | 2.68  | JUC05008129.hg.1 | SLC12A7    |
| TC05001102.hg.1 | 2.5   | PSR05016010.hg.1 | SLC12A7    |
| TC05001102.hg.1 | 2.19  | JUC05008136.hg.1 | SLC12A7    |
| TC05001102.hg.1 | -2.52 | PSR05016030.hg.1 | SLC12A7    |
| TC05001102.hg.1 | -2.81 | JUC05008141.hg.1 | SLC12A7    |
| TC05001102.hg.1 | -3.09 | JUC05008134.hg.1 | SLC12A7    |
| TC05001102.hg.1 | -3.24 | JUC05008128.hg.1 | SLC12A7    |
| TC05001184.hg.1 | 3.19  | JUC05008660.hg.1 | MYO10      |
| TC05001184.hg.1 | 2.89  | PSR05016947.hg.1 | MYO10      |
| TC05001184.hg.1 | 2.57  | JUC05008671.hg.1 | MYO10      |
| TC05001184.hg.1 | 2.2   | PSR05016942.hg.1 | MYO10      |
| TC05001184.hg.1 | 2.16  | PSR05016927.hg.1 | MYO10      |
| TC05001184.hg.1 | 2.14  | PSR05016972.hg.1 | MYO10      |
| TC05001184.hg.1 | 2.06  | PSR05016930.hg.1 | MYO10      |
| TC07001043.hg.1 | 3.19  | PSR07016073.hg.1 | RBM33      |
| TC07001043.hg.1 | 3.05  | PSR07016072.hg.1 | RBM33      |
| TC07001043.hg.1 | 2.47  | PSR07016087.hg.1 | RBM33      |
| TC07001043.hg.1 | 2.46  | PSR07016090.hg.1 | RBM33      |
| TC07001043.hg.1 | 2.3   | JUC07007795.hg.1 | RBM33      |
| TC07001043.hg.1 | 2.22  | JUC07007802.hg.1 | RBM33      |
| TC07001043.hg.1 | 2.19  | PSR07016085.hg.1 | RBM33      |
| TC07001043.hg.1 | 2.09  | JUC07007799.hg.1 | RBM33      |
| TC07001043.hg.1 | 2.07  | PSR07016099.hg.1 | RBM33      |
| TC07001043.hg.1 | 2.06  | PSR07016103.hg.1 | RBM33      |
| TC07001043.hg.1 | -3.35 | JUC07007798.hg.1 | RBM33      |
| TC08002586.hg.1 | 3.19  | JUC08014763.hg.1 | STAU2      |
| TC08002586.hg.1 | 2.13  | PSR08017178.hg.1 | STAU2      |
| TC09001170.hg.1 | 3.19  | JUC09008092.hg.1 | CBWD6      |
| TC09001170.hg.1 | 2.16  | JUC09008100.hg.1 | CBWD6      |
| TC09001170.hg.1 | -2.02 | PSR09015039.hg.1 | CBWD6      |
| TC09001170.hg.1 | -2.04 | PSR09015023.hg.1 | CBWD6      |
| TC09001170.hg.1 | -2.04 | PSR09015043.hg.1 | CBWD6      |
| TC09001170.hg.1 | -2.27 | PSR09015062.hg.1 | CBWD6      |
| TC09001170.hg.1 | -2.27 | JUC09008091.hg.1 | CBWD6      |
| TC09001170.hg.1 | -3.96 | PSR09015056.hg.1 | CBWD6      |
| TC09001170.hg.1 | -3.99 | JUC09008093.hg.1 | CBWD6      |
| TC0X001518.hg.1 | 3.19  | JUC0X010020.hg.1 | IDH3G      |
| TC0X001518.hg.1 | 2.1   | PSR0X019909.hg.1 | IDH3G      |
| TC14000413.hg.1 | 3.19  | JUC14002519.hg.1 | EXD2       |
| TC14000413.hg.1 | 2.09  | PSR14004950.hg.1 | EXD2       |
| TC14001141.hg.1 | 3.19  | PSR14012960.hg.1 | ERO1L      |
| TC14001141.hg.1 | 2.09  | PSR14012944.hg.1 | ERO1L      |
| TC14001141.hg.1 | -2.81 | PSR14012951.hg.1 | ERO1L      |
| TC14001141.hg.1 | -3.96 | JUC14006574.hg.1 | ERO1L      |
| TC15000224.hg.1 | 3.19  | JUC15000515.hg.1 | SCG5       |
| TC15000224.hg.1 | 2.34  | PSR15001311.hg.1 | SCG5       |
| TC15000224.hg.1 | -2.42 | PSR15001324.hg.1 | SCG5       |
| TC15000224.hg.1 | -2.8  | PSR15001316.hg.1 | SCG5       |
| TC17000957.hg.1 | 3.19  | PSR17012630.hg.1 | FN3K       |
| TC17000957.hg.1 | 2.66  | JUC17007159.hg.1 | FN3K       |
| TC17000957.hg.1 | 2.54  | PSR17012627.hg.1 | FN3K       |
| TC17000957.hg.1 | 2.51  | PSR17012620.hg.1 | FN3K       |

|                 |       |                  |            |
|-----------------|-------|------------------|------------|
| TC17000957.hg.1 | 2.5   | JUC17007157.hg.1 | FN3K       |
| TC17000957.hg.1 | 2.25  | PSR17012625.hg.1 | FN3K       |
| TC17001017.hg.1 | 3.19  | PSR17013689.hg.1 | ZZEF1      |
| TC17001017.hg.1 | 2.16  | JUC17007794.hg.1 | ZZEF1      |
| TC17001017.hg.1 | -2.05 | JUC17007763.hg.1 | ZZEF1      |
| TC17001017.hg.1 | -2.07 | JUC17007784.hg.1 | ZZEF1      |
| TC17001017.hg.1 | -2.4  | JUC17007782.hg.1 | ZZEF1      |
| TC19001273.hg.1 | 3.19  | JUC19010491.hg.1 | ANO8       |
| TC19001273.hg.1 | 3.06  | JUC19010506.hg.1 | ANO8       |
| TC19001273.hg.1 | 2.28  | JUC19010497.hg.1 | ANO8       |
| TC19001273.hg.1 | 2.18  | JUC19010503.hg.1 | ANO8       |
| TC19001273.hg.1 | -2.07 | PSR19018036.hg.1 | ANO8       |
| TC19001273.hg.1 | -2.6  | JUC19010502.hg.1 | ANO8       |
| TC03000069.hg.1 | 3.18  | JUC03000808.hg.1 | PPARG      |
| TC03000069.hg.1 | 2.33  | JUC03000812.hg.1 | PPARG      |
| TC03000069.hg.1 | 2.07  | PSR03001551.hg.1 | PPARG      |
| TC03000069.hg.1 | -2.16 | PSR03001529.hg.1 | PPARG      |
| TC03000069.hg.1 | -2.34 | PSR03001556.hg.1 | PPARG      |
| TC03000069.hg.1 | -2.48 | PSR03001538.hg.1 | PPARG      |
| TC03000069.hg.1 | -2.6  | JUC03000814.hg.1 | PPARG      |
| TC03000069.hg.1 | -2.86 | PSR03001532.hg.1 | PPARG      |
| TC03000069.hg.1 | -2.95 | PSR03001534.hg.1 | PPARG      |
| TC03000069.hg.1 | -3    | PSR03001539.hg.1 | PPARG      |
| TC03000069.hg.1 | -4.29 | PSR03001533.hg.1 | PPARG      |
| TC03000069.hg.1 | -6.24 | JUC03000810.hg.1 | PPARG      |
| TC03000632.hg.1 | 3.18  | JUC03005680.hg.1 | DTX3L      |
| TC03000632.hg.1 | -2.48 | PSR03011391.hg.1 | DTX3L      |
| TC03000667.hg.1 | 3.18  | JUC03006010.hg.1 | ABTB1      |
| TC03000667.hg.1 | 2.85  | PSR03012002.hg.1 | ABTB1      |
| TC03000667.hg.1 | 2.66  | JUC03006011.hg.1 | ABTB1      |
| TC03000667.hg.1 | 2.29  | JUC03006012.hg.1 | ABTB1      |
| TC03000667.hg.1 | 2.14  | JUC03005993.hg.1 | ABTB1      |
| TC03000667.hg.1 | 2.14  | JUC03006002.hg.1 | ABTB1      |
| TC03000667.hg.1 | 2.1   | PSR03012015.hg.1 | ABTB1      |
| TC03000667.hg.1 | 2     | PSR03011981.hg.1 | ABTB1      |
| TC05001316.hg.1 | 3.18  | JUC05009557.hg.1 | HMGCS1     |
| TC05001316.hg.1 | -2.19 | PSR05018555.hg.1 | HMGCS1     |
| TC06002302.hg.1 | 3.18  | JUC06014527.hg.1 | LINC00473  |
| TC06002302.hg.1 | -2.86 | PSR06028842.hg.1 | LINC00473  |
| TC08000471.hg.1 | 3.18  | JUC08003248.hg.1 | LOC1001328 |
| TC08000471.hg.1 | 2.27  | PSR08006602.hg.1 | LOC1001328 |
| TC08000471.hg.1 | 2.11  | JUC08003242.hg.1 | LOC1001328 |
| TC08000471.hg.1 | -2    | PSR08006583.hg.1 | LOC1001328 |
| TC08000471.hg.1 | -6.16 | JUC08003256.hg.1 | LOC1001328 |
| TC08001120.hg.1 | 3.18  | PSR08014486.hg.1 | RNF122     |
| TC08001120.hg.1 | 2.77  | JUC08007376.hg.1 | RNF122     |
| TC08001120.hg.1 | 2.21  | PSR08014481.hg.1 | RNF122     |
| TC09000077.hg.1 | 3.18  | PSR09000899.hg.1 | CCDC171    |
| TC09000077.hg.1 | 2.69  | JUC09000483.hg.1 | CCDC171    |
| TC09000077.hg.1 | 2.65  | JUC09000476.hg.1 | CCDC171    |
| TC09000077.hg.1 | 2.17  | JUC09000459.hg.1 | CCDC171    |
| TC09000077.hg.1 | -8.78 | JUC09000451.hg.1 | CCDC171    |
| TC17000297.hg.1 | 3.18  | PSR17003629.hg.1 | MAP2K3     |
| TC17000297.hg.1 | 3.09  | JUC17002067.hg.1 | MAP2K3     |
| TC17000297.hg.1 | 2.95  | JUC17002053.hg.1 | MAP2K3     |
| TC17000297.hg.1 | 2.57  | JUC17002062.hg.1 | MAP2K3     |
| TC17000297.hg.1 | 2.18  | JUC17002063.hg.1 | MAP2K3     |
| TC17000297.hg.1 | 2.11  | JUC17002055.hg.1 | MAP2K3     |



|                 |       |                  |          |
|-----------------|-------|------------------|----------|
| TC17000297.hg.1 | 2.05  | JUC17002052.hg.1 | MAP2K3   |
| TC17001064.hg.1 | 3.18  | JUC17008151.hg.1 | KIAA0753 |
| TC17001064.hg.1 | 2.51  | JUC17008157.hg.1 | KIAA0753 |
| TC17001064.hg.1 | 2.21  | PSR17014253.hg.1 | KIAA0753 |
| TC17001064.hg.1 | -2.23 | JUC17008152.hg.1 | KIAA0753 |
| TC19000442.hg.1 | 3.18  | PSR19005775.hg.1 | GPI      |
| TC19000442.hg.1 | 2.93  | PSR19005765.hg.1 | GPI      |
| TC19000442.hg.1 | 2.55  | JUC19003436.hg.1 | GPI      |
| TC19000442.hg.1 | 2.42  | PSR19005754.hg.1 | GPI      |
| TC19000442.hg.1 | 2.1   | PSR19005755.hg.1 | GPI      |
| TC19000442.hg.1 | 2.02  | PSR19005759.hg.1 | GPI      |
| TC19000442.hg.1 | 2.01  | JUC19003431.hg.1 | GPI      |
| TC22000565.hg.1 | 3.18  | JUC22004079.hg.1 | GUSBP11  |
| TC22000565.hg.1 | 2.88  | JUC22004074.hg.1 | GUSBP11  |
| TC22000565.hg.1 | 2.81  | JUC22004078.hg.1 | GUSBP11  |
| TC22000565.hg.1 | 2.6   | PSR22010149.hg.1 | GUSBP11  |
| TC22000565.hg.1 | 2.12  | JUC22004071.hg.1 | GUSBP11  |
| TC22000565.hg.1 | 2.02  | JUC22004068.hg.1 | GUSBP11  |
| TC01003968.hg.1 | 3.17  | PSR01060100.hg.1 | EGLN1    |
| TC01003968.hg.1 | 2.32  | JUC01031440.hg.1 | EGLN1    |
| TC04002963.hg.1 | 3.17  | PSR04000023.hg.1 | ZNF595   |
| TC04002963.hg.1 | 2.09  | JUC04017534.hg.1 | ZNF595   |
| TC04002963.hg.1 | -2.06 | PSR04000025.hg.1 | ZNF595   |
| TC04002963.hg.1 | -2.09 | PSR04000024.hg.1 | ZNF595   |
| TC04002963.hg.1 | -2.28 | JUC04017524.hg.1 | ZNF595   |
| TC05001771.hg.1 | 3.17  | JUC05012402.hg.1 | KIF3A    |
| TC05001771.hg.1 | 2.15  | PSR05024012.hg.1 | KIF3A    |
| TC05001771.hg.1 | -2.27 | JUC05012381.hg.1 | KIF3A    |
| TC05001771.hg.1 | -2.37 | JUC05012387.hg.1 | KIF3A    |
| TC06001059.hg.1 | 3.17  | JUC06006090.hg.1 | UTRN     |
| TC06001059.hg.1 | 2.57  | PSR06012454.hg.1 | UTRN     |
| TC06001059.hg.1 | 2.28  | PSR06012430.hg.1 | UTRN     |
| TC06001059.hg.1 | 2.12  | JUC06006121.hg.1 | UTRN     |
| TC06001059.hg.1 | 2.09  | PSR06012518.hg.1 | UTRN     |
| TC06001059.hg.1 | 2.06  | JUC06006126.hg.1 | UTRN     |
| TC06001059.hg.1 | 2     | JUC06006125.hg.1 | UTRN     |
| TC06001059.hg.1 | -2.24 | PSR06012486.hg.1 | UTRN     |
| TC06001059.hg.1 | -2.27 | JUC06006108.hg.1 | UTRN     |
| TC09001639.hg.1 | 3.17  | PSR09020828.hg.1 | C9orf114 |
| TC09001639.hg.1 | 2.19  | JUC09011177.hg.1 | C9orf114 |
| TC09001639.hg.1 | -2.28 | JUC09011188.hg.1 | C9orf114 |
| TC11001449.hg.1 | 3.17  | JUC11009687.hg.1 | SOX6     |
| TC11001449.hg.1 | 3.15  | JUC11009703.hg.1 | SOX6     |
| TC11001449.hg.1 | 2.68  | PSR11018181.hg.1 | SOX6     |
| TC11001449.hg.1 | 2.52  | JUC11009706.hg.1 | SOX6     |
| TC11001449.hg.1 | 2.11  | PSR11018168.hg.1 | SOX6     |
| TC11001449.hg.1 | 2.05  | JUC11009686.hg.1 | SOX6     |
| TC11001449.hg.1 | 2.01  | PSR11018177.hg.1 | SOX6     |
| TC14001476.hg.1 | 3.17  | JUC14008618.hg.1 | SYNE3    |
| TC14001476.hg.1 | 2.78  | JUC14008619.hg.1 | SYNE3    |
| TC14001476.hg.1 | 2.58  | JUC14008624.hg.1 | SYNE3    |
| TC14001476.hg.1 | 2.43  | JUC14008616.hg.1 | SYNE3    |
| TC14001476.hg.1 | 2.36  | PSR14016684.hg.1 | SYNE3    |
| TC16000126.hg.1 | 3.17  | JUC16000953.hg.1 | DNASE1   |
| TC16000126.hg.1 | 2.08  | JUC16000951.hg.1 | DNASE1   |
| TC16000126.hg.1 | -2.12 | JUC16000947.hg.1 | DNASE1   |
| TC16000126.hg.1 | -2.19 | PSR16002005.hg.1 | DNASE1   |
| TC16000126.hg.1 | -2.42 | JUC16000949.hg.1 | DNASE1   |

|                  |       |                   |             |
|------------------|-------|-------------------|-------------|
| TC16000126.hg.1  | -2.61 | JUC16000958.hg.1  | DNASE1      |
| TC19001079.hg.1  | 3.17  | JUC19008360.hg.1  | SAFB2       |
| TC19001079.hg.1  | -2.04 | JUC19008334.hg.1  | SAFB2       |
| TC19001079.hg.1  | -2.52 | PSR19014759.hg.1  | SAFB2       |
| TC19001079.hg.1  | -2.6  | JUC19008344.hg.1  | SAFB2       |
| TC6_ssto_hap7000 | 3.17  | PSR6_ssto_hap7000 | HLA-F       |
| TC6_ssto_hap7000 | 3     | PSR6_ssto_hap7000 | HLA-F       |
| TC6_ssto_hap7000 | 2.93  | JUC6_ssto_hap7000 | HLA-F       |
| TC6_ssto_hap7000 | 2.92  | PSR6_ssto_hap7000 | HLA-F       |
| TC6_ssto_hap7000 | 2.8   | JUC6_ssto_hap7000 | HLA-F       |
| TC6_ssto_hap7000 | 2.69  | JUC6_ssto_hap7000 | HLA-F       |
| TC6_ssto_hap7000 | 2.5   | PSR6_ssto_hap7000 | HLA-F       |
| TC6_ssto_hap7000 | 2.27  | JUC6_ssto_hap7000 | HLA-F       |
| TC6_ssto_hap7000 | 2.26  | JUC6_ssto_hap7000 | HLA-F       |
| TC6_ssto_hap7000 | 2.19  | PSR6_ssto_hap7000 | HLA-F       |
| TC6_ssto_hap7000 | 2.15  | PSR6_ssto_hap7000 | HLA-F       |
| TC6_ssto_hap7000 | 2.13  | PSR6_ssto_hap7000 | HLA-F       |
| TC6_ssto_hap7000 | 2.1   | JUC6_ssto_hap7000 | HLA-F       |
| TC01001252.hg.1  | 3.16  | PSR01019137.hg.1  | LOR         |
| TC01001252.hg.1  | 2.25  | JUC01010415.hg.1  | LOR         |
| TC01001252.hg.1  | 2.19  | PSR01019140.hg.1  | LOR         |
| TC01001544.hg.1  | 3.16  | JUC01012584.hg.1  | RALGPS2     |
| TC01001544.hg.1  | 2.54  | PSR01023837.hg.1  | RALGPS2     |
| TC01003784.hg.1  | 3.16  | PSR01057988.hg.1  | LAMB3, MIR4 |
| TC01003784.hg.1  | 2.63  | JUC01030294.hg.1  | LAMB3, MIR4 |
| TC01003784.hg.1  | 2.63  | JUC01030313.hg.1  | LAMB3, MIR4 |
| TC01003784.hg.1  | 2.22  | JUC01030310.hg.1  | LAMB3, MIR4 |
| TC01003784.hg.1  | 2.18  | PSR01057967.hg.1  | LAMB3, MIR4 |
| TC01003784.hg.1  | -2.08 | PSR01057983.hg.1  | LAMB3, MIR4 |
| TC01003784.hg.1  | -2.44 | JUC01030309.hg.1  | LAMB3, MIR4 |
| TC01003784.hg.1  | -2.45 | PSR01057981.hg.1  | LAMB3, MIR4 |
| TC01003784.hg.1  | -2.76 | PSR01057985.hg.1  | LAMB3, MIR4 |
| TC01003784.hg.1  | -2.99 | JUC01030307.hg.1  | LAMB3, MIR4 |
| TC01003784.hg.1  | -3.42 | JUC01030314.hg.1  | LAMB3, MIR4 |
| TC01003784.hg.1  | -3.69 | PSR01057982.hg.1  | LAMB3, MIR4 |
| TC01003784.hg.1  | -3.75 | JUC01030304.hg.1  | LAMB3, MIR4 |
| TC01003784.hg.1  | -3.81 | PSR01057979.hg.1  | LAMB3, MIR4 |
| TC01003784.hg.1  | -4.2  | JUC01030295.hg.1  | LAMB3, MIR4 |
| TC01003784.hg.1  | -4.34 | PSR01057986.hg.1  | LAMB3, MIR4 |
| TC01003784.hg.1  | -8.07 | JUC01030305.hg.1  | LAMB3, MIR4 |
| TC02002204.hg.1  | 3.16  | JUC02018484.hg.1  | BUB1        |
| TC02002204.hg.1  | 2.64  | JUC02018455.hg.1  | BUB1        |
| TC02002204.hg.1  | 2.22  | PSR02035777.hg.1  | BUB1        |
| TC02002204.hg.1  | 2.04  | JUC02018480.hg.1  | BUB1        |
| TC02002204.hg.1  | -2.26 | PSR02035775.hg.1  | BUB1        |
| TC02002204.hg.1  | -2.44 | JUC02018457.hg.1  | BUB1        |
| TC02002204.hg.1  | -2.58 | PSR02035765.hg.1  | BUB1        |
| TC02002204.hg.1  | -3.16 | JUC02018466.hg.1  | BUB1        |
| TC03000011.hg.1  | 3.16  | PSR03000233.hg.1  | LRRN1       |
| TC03000011.hg.1  | -2.18 | JUC03000133.hg.1  | LRRN1       |
| TC03000011.hg.1  | -2.63 | JUC03000135.hg.1  | LRRN1       |
| TC07001457.hg.1  | 3.16  | JUC07010831.hg.1  | GUSB        |
| TC07001457.hg.1  | 2.28  | JUC07010820.hg.1  | GUSB        |
| TC07001457.hg.1  | 2.22  | PSR07022103.hg.1  | GUSB        |
| TC07001457.hg.1  | 2.18  | PSR07022078.hg.1  | GUSB        |
| TC07001457.hg.1  | 2.11  | JUC07010837.hg.1  | GUSB        |
| TC07001457.hg.1  | 2.04  | JUC07010833.hg.1  | GUSB        |
| TC0X001182.hg.1  | 3.16  | PSR0X015960.hg.1  | BRWD3       |

|                 |       |                  |         |
|-----------------|-------|------------------|---------|
| TC0X001182.hg.1 | 2.81  | PSR0X015939.hg.1 | BRWD3   |
| TC0X001182.hg.1 | 2.27  | PSR0X015914.hg.1 | BRWD3   |
| TC0X001182.hg.1 | 2.26  | JUC0X008075.hg.1 | BRWD3   |
| TC0X001182.hg.1 | 2.22  | JUC0X008093.hg.1 | BRWD3   |
| TC0X001182.hg.1 | -2.36 | JUC0X008069.hg.1 | BRWD3   |
| TC0X002327.hg.1 | 3.16  | JUC0X013137.hg.1 | PIR     |
| TC0X002327.hg.1 | 3.11  | PSR0X011728.hg.1 | PIR     |
| TC0X002327.hg.1 | 2.63  | PSR0X011726.hg.1 | PIR     |
| TC0X002327.hg.1 | 2.55  | PSR0X011736.hg.1 | PIR     |
| TC0X002327.hg.1 | 2.51  | PSR0X011738.hg.1 | PIR     |
| TC0X002327.hg.1 | 2.51  | JUC0X013135.hg.1 | PIR     |
| TC0X002327.hg.1 | 2.29  | JUC0X013138.hg.1 | PIR     |
| TC0X002327.hg.1 | -2.11 | JUC0X013132.hg.1 | PIR     |
| TC0X002327.hg.1 | -2.31 | JUC0X013131.hg.1 | PIR     |
| TC0X002327.hg.1 | -2.63 | JUC0X013134.hg.1 | PIR     |
| TC0X002327.hg.1 | -2.7  | PSR0X011732.hg.1 | PIR     |
| TC0X002327.hg.1 | -3.21 | JUC0X013130.hg.1 | PIR     |
| TC10001613.hg.1 | 3.16  | JUC10012112.hg.1 | MGEA5   |
| TC10001613.hg.1 | 2.95  | JUC10012096.hg.1 | MGEA5   |
| TC10001613.hg.1 | 2.06  | JUC10012118.hg.1 | MGEA5   |
| TC10001613.hg.1 | 2.03  | JUC10012108.hg.1 | MGEA5   |
| TC10001613.hg.1 | -2.79 | PSR10020914.hg.1 | MGEA5   |
| TC11000707.hg.1 | 3.16  | PSR11009212.hg.1 | LRP5    |
| TC11000707.hg.1 | 3.04  | JUC11004711.hg.1 | LRP5    |
| TC11000707.hg.1 | 2.94  | JUC11004724.hg.1 | LRP5    |
| TC11000707.hg.1 | 2.64  | JUC11004708.hg.1 | LRP5    |
| TC11000707.hg.1 | 2.35  | PSR11009187.hg.1 | LRP5    |
| TC11000707.hg.1 | 2.31  | JUC11004718.hg.1 | LRP5    |
| TC11000707.hg.1 | 2.17  | JUC11004702.hg.1 | LRP5    |
| TC11000707.hg.1 | 2.15  | PSR11009188.hg.1 | LRP5    |
| TC11000707.hg.1 | 2.1   | PSR11009197.hg.1 | LRP5    |
| TC11000707.hg.1 | 2.02  | PSR11009189.hg.1 | LRP5    |
| TC11000707.hg.1 | -2.29 | JUC11004709.hg.1 | LRP5    |
| TC11000707.hg.1 | -2.32 | JUC11004721.hg.1 | LRP5    |
| TC15000971.hg.1 | 3.16  | JUC15004759.hg.1 | ALDH1A3 |
| TC15000971.hg.1 | 2.48  | PSR15009022.hg.1 | ALDH1A3 |
| TC15000971.hg.1 | 2.09  | JUC15004751.hg.1 | ALDH1A3 |
| TC15000971.hg.1 | 2     | JUC15004755.hg.1 | ALDH1A3 |
| TC15000971.hg.1 | -2.37 | PSR15009019.hg.1 | ALDH1A3 |
| TC15000971.hg.1 | -3.56 | JUC15004758.hg.1 | ALDH1A3 |
| TC15000971.hg.1 | -3.68 | PSR15009009.hg.1 | ALDH1A3 |
| TC15000971.hg.1 | -3.71 | PSR15009025.hg.1 | ALDH1A3 |
| TC15000971.hg.1 | -3.73 | PSR15009017.hg.1 | ALDH1A3 |
| TC15000971.hg.1 | -3.85 | PSR15009013.hg.1 | ALDH1A3 |
| TC15000971.hg.1 | -4.15 | PSR15009012.hg.1 | ALDH1A3 |
| TC15000971.hg.1 | -4.41 | PSR15009003.hg.1 | ALDH1A3 |
| TC15000971.hg.1 | -4.89 | JUC15004757.hg.1 | ALDH1A3 |
| TC15000971.hg.1 | -5.26 | PSR15009010.hg.1 | ALDH1A3 |
| TC15000971.hg.1 | -5.79 | JUC15004747.hg.1 | ALDH1A3 |
| TC15000971.hg.1 | -6.53 | JUC15004761.hg.1 | ALDH1A3 |
| TC16000294.hg.1 | 3.16  | PSR16004123.hg.1 | IL21R   |
| TC16000294.hg.1 | -2.01 | JUC16002269.hg.1 | IL21R   |
| TC16000294.hg.1 | -2.19 | JUC16002264.hg.1 | IL21R   |
| TC16000482.hg.1 | 3.16  | JUC16003745.hg.1 | NLRC5   |
| TC16000482.hg.1 | 2.83  | JUC16003779.hg.1 | NLRC5   |
| TC16000482.hg.1 | 2.75  | JUC16003771.hg.1 | NLRC5   |
| TC16000482.hg.1 | 2.49  | PSR16006703.hg.1 | NLRC5   |
| TC16000482.hg.1 | 2.41  | JUC16003772.hg.1 | NLRC5   |

|                 |       |                  |         |
|-----------------|-------|------------------|---------|
| TC16000482.hg.1 | 2.35  | PSR16006658.hg.1 | NLRC5   |
| TC16000482.hg.1 | 2.23  | JUC16003797.hg.1 | NLRC5   |
| TC16000482.hg.1 | -2.01 | PSR16006675.hg.1 | NLRC5   |
| TC16000482.hg.1 | -2.64 | JUC16003756.hg.1 | NLRC5   |
| TC16000482.hg.1 | -2.9  | JUC16003739.hg.1 | NLRC5   |
| TC16000482.hg.1 | -2.93 | JUC16003795.hg.1 | NLRC5   |
| TC16000482.hg.1 | -3.32 | PSR16006653.hg.1 | NLRC5   |
| TC20000250.hg.1 | 3.16  | JUC20001860.hg.1 | MMP24   |
| TC20000250.hg.1 | 2.41  | JUC20001857.hg.1 | MMP24   |
| TC20000250.hg.1 | 2.23  | PSR20003287.hg.1 | MMP24   |
| TC20000250.hg.1 | -2.06 | JUC20001856.hg.1 | MMP24   |
| TC20000250.hg.1 | -2.3  | PSR20003285.hg.1 | MMP24   |
| TC20000250.hg.1 | -2.53 | PSR20003282.hg.1 | MMP24   |
| TC20000378.hg.1 | 3.16  | JUC20002974.hg.1 |         |
| TC20000378.hg.1 | -2.21 | PSR20005459.hg.1 |         |
| TC01001750.hg.1 | 3.15  | PSR01027393.hg.1 | HSD11B1 |
| TC01001750.hg.1 | -2.08 | PSR01027397.hg.1 | HSD11B1 |
| TC01001750.hg.1 | -3.44 | JUC01014746.hg.1 | HSD11B1 |
| TC01001750.hg.1 | -3.86 | JUC01014744.hg.1 | HSD11B1 |
| TC01002352.hg.1 | 3.15  | JUC01019557.hg.1 | FUCA1   |
| TC01002352.hg.1 | 3     | PSR01036296.hg.1 | FUCA1   |
| TC01002352.hg.1 | 2.9   | PSR01036298.hg.1 | FUCA1   |
| TC01002352.hg.1 | 2.35  | JUC01019563.hg.1 | FUCA1   |
| TC01002352.hg.1 | 2.23  | PSR01036292.hg.1 | FUCA1   |
| TC01002352.hg.1 | 2.19  | PSR01036299.hg.1 | FUCA1   |
| TC01002352.hg.1 | 2.17  | PSR01036297.hg.1 | FUCA1   |
| TC01002932.hg.1 | 3.15  | PSR01045510.hg.1 | COL11A1 |
| TC01002932.hg.1 | 3.09  | PSR01045535.hg.1 | COL11A1 |
| TC01002932.hg.1 | -2.01 | PSR01045587.hg.1 | COL11A1 |
| TC01002932.hg.1 | -2.01 | PSR01045588.hg.1 | COL11A1 |
| TC01002932.hg.1 | -2.04 | PSR01045582.hg.1 | COL11A1 |
| TC01002932.hg.1 | -2.06 | PSR01045580.hg.1 | COL11A1 |
| TC01002932.hg.1 | -2.13 | PSR01045511.hg.1 | COL11A1 |
| TC01002932.hg.1 | -2.13 | PSR01045590.hg.1 | COL11A1 |
| TC01002932.hg.1 | -2.16 | JUC01024485.hg.1 | COL11A1 |
| TC01002932.hg.1 | -2.2  | JUC01024501.hg.1 | COL11A1 |
| TC01002932.hg.1 | -2.21 | PSR01045585.hg.1 | COL11A1 |
| TC01002932.hg.1 | -2.23 | JUC01024498.hg.1 | COL11A1 |
| TC01002932.hg.1 | -2.23 | JUC01024552.hg.1 | COL11A1 |
| TC01002932.hg.1 | -2.36 | JUC01024542.hg.1 | COL11A1 |
| TC01002932.hg.1 | -2.44 | PSR01045589.hg.1 | COL11A1 |
| TC01002932.hg.1 | -2.44 | JUC01024489.hg.1 | COL11A1 |
| TC01002932.hg.1 | -2.47 | JUC01024507.hg.1 | COL11A1 |
| TC01002932.hg.1 | -2.52 | PSR01045506.hg.1 | COL11A1 |
| TC01002932.hg.1 | -2.72 | JUC01024543.hg.1 | COL11A1 |
| TC01002932.hg.1 | -2.81 | JUC01024525.hg.1 | COL11A1 |
| TC01002932.hg.1 | -3.61 | JUC01024499.hg.1 | COL11A1 |
| TC01002932.hg.1 | -4.28 | JUC01024551.hg.1 | COL11A1 |
| TC01002932.hg.1 | -8.98 | JUC01024490.hg.1 | COL11A1 |
| TC02001218.hg.1 | 3.15  | JUC02010002.hg.1 | ADAM23  |
| TC02001218.hg.1 | 2.41  | PSR02018713.hg.1 | ADAM23  |
| TC02001218.hg.1 | 2.14  | JUC02010000.hg.1 | ADAM23  |
| TC02001218.hg.1 | -2.23 | JUC02010017.hg.1 | ADAM23  |
| TC02001218.hg.1 | -2.7  | JUC02010007.hg.1 | ADAM23  |
| TC06001908.hg.1 | 3.15  | JUC06011267.hg.1 | IBTK    |
| TC06001908.hg.1 | 2.87  | JUC06011258.hg.1 | IBTK    |
| TC06001908.hg.1 | -2.27 | PSR06023176.hg.1 | IBTK    |
| TC06001908.hg.1 | -2.56 | JUC06011257.hg.1 | IBTK    |

|                 |       |                   |            |
|-----------------|-------|-------------------|------------|
| TC06001944.hg.1 | 3.15  | JUC06011679.hg.1  | MDN1       |
| TC06001944.hg.1 | 2.71  | JUC06011628.hg.1  | MDN1       |
| TC06001944.hg.1 | 2.2   | JUC06011615.hg.1  | MDN1       |
| TC06001944.hg.1 | 2.11  | JUC06011672.hg.1  | MDN1       |
| TC06001944.hg.1 | -2.19 | JUC06011600.hg.1  | MDN1       |
| TC06001944.hg.1 | -2.34 | JUC06011635.hg.1  | MDN1       |
| TC06001944.hg.1 | -2.36 | JUC06011690.hg.1  | MDN1       |
| TC06001944.hg.1 | -2.7  | JUC06011614.hg.1  | MDN1       |
| TC06001944.hg.1 | -2.72 | PSR06023868.hg.1  | MDN1       |
| TC06001944.hg.1 | -2.81 | JUC06011652.hg.1  | MDN1       |
| TC06001944.hg.1 | -3.14 | JUC06011622.hg.1  | MDN1       |
| TC08000123.hg.1 | 3.15  | PSR08001107.hg.1  | EFHA2      |
| TC08000123.hg.1 | 2.45  | PSR08001108.hg.1  | EFHA2      |
| TC08000123.hg.1 | -2    | JUC08000586.hg.1  | EFHA2      |
| TC08000123.hg.1 | -3.6  | JUC08000588.hg.1  | EFHA2      |
| TC12000668.hg.1 | 3.15  | JUC12004727.hg.1  | PTPRQ      |
| TC12000668.hg.1 | 3.02  | JUC12004707.hg.1  | PTPRQ      |
| TC12000668.hg.1 | 2.29  | PSR12008810.hg.1  | PTPRQ      |
| TC12000668.hg.1 | 2.24  | JUC12004719.hg.1  | PTPRQ      |
| TC12000668.hg.1 | 2.1   | JUC12004729.hg.1  | PTPRQ      |
| TC12000668.hg.1 | -2    | JUC12004734.hg.1  | PTPRQ      |
| TC12000668.hg.1 | -2.04 | JUC12004721.hg.1  | PTPRQ      |
| TC12000668.hg.1 | -2.64 | JUC12004743.hg.1  | PTPRQ      |
| TC12000668.hg.1 | -3.49 | JUC12004698.hg.1  | PTPRQ      |
| TC16000267.hg.1 | 3.15  | JUC16002198.hg.1  |            |
| TC16000267.hg.1 | 2.47  | PSR16003991.hg.1  |            |
| TC17001601.hg.1 | 3.15  | PSR17021588.hg.1  | PLEKHM1, M |
| TC17001601.hg.1 | 2.48  | PSR17021577.hg.1  | PLEKHM1, M |
| TC17001601.hg.1 | 2.37  | JUC17012126.hg.1  | PLEKHM1, M |
| TC17001601.hg.1 | 2.36  | JUC17012139.hg.1  | PLEKHM1, M |
| TC17001601.hg.1 | 2.26  | PSR17021590.hg.1  | PLEKHM1, M |
| TC6_cox_hap2000 | 3.15  | JUC6_cox_hap20002 | DDR1       |
| TC6_cox_hap2000 | 2.94  | PSR6_cox_hap20006 | DDR1       |
| TC6_cox_hap2000 | 2.86  | JUC6_cox_hap20002 | DDR1       |
| TC6_cox_hap2000 | 2.84  | PSR6_cox_hap20006 | DDR1       |
| TC6_cox_hap2000 | 2.82  | PSR6_cox_hap20006 | DDR1       |
| TC6_cox_hap2000 | 2.75  | PSR6_cox_hap20006 | DDR1       |
| TC6_cox_hap2000 | 2.73  | JUC6_cox_hap20003 | DDR1       |
| TC6_cox_hap2000 | 2.69  | PSR6_cox_hap20006 | DDR1       |
| TC6_cox_hap2000 | 2.61  | JUC6_cox_hap20003 | DDR1       |
| TC6_cox_hap2000 | 2.56  | JUC6_cox_hap20002 | DDR1       |
| TC6_cox_hap2000 | 2.39  | JUC6_cox_hap20003 | DDR1       |
| TC6_cox_hap2000 | 2.38  | PSR6_cox_hap20006 | DDR1       |
| TC6_cox_hap2000 | 2.31  | JUC6_cox_hap20003 | DDR1       |
| TC6_cox_hap2000 | 2.24  | PSR6_cox_hap20006 | DDR1       |
| TC6_cox_hap2000 | 2.23  | PSR6_cox_hap20006 | DDR1       |
| TC6_cox_hap2000 | 2.22  | JUC6_cox_hap20003 | DDR1       |
| TC6_cox_hap2000 | 2.16  | PSR6_cox_hap20006 | DDR1       |
| TC6_cox_hap2000 | 2.16  | PSR6_cox_hap20006 | DDR1       |
| TC6_cox_hap2000 | 2.14  | JUC6_cox_hap20002 | DDR1       |
| TC6_cox_hap2000 | 2.01  | PSR6_cox_hap20006 | DDR1       |
| TC6_cox_hap2000 | -2.07 | JUC6_cox_hap20003 | DDR1       |
| TC6_cox_hap2000 | -2.6  | PSR6_cox_hap20006 | DDR1       |
| TC6_dbb_hap3000 | 3.15  | PSR6_dbb_hap30000 | HLA-F      |
| TC6_dbb_hap3000 | 2.91  | JUC6_dbb_hap30000 | HLA-F      |
| TC6_dbb_hap3000 | 2.79  | JUC6_dbb_hap30000 | HLA-F      |
| TC6_dbb_hap3000 | 2.68  | JUC6_dbb_hap30000 | HLA-F      |
| TC6_dbb_hap3000 | 2.65  | PSR6_dbb_hap30000 | HLA-F      |

|                  |       |                   |            |
|------------------|-------|-------------------|------------|
| TC6_dbb_hap3000  | 2.34  | PSR6_dbb_hap3000  | HLA-F      |
| TC6_dbb_hap3000  | 2.26  | JUC6_dbb_hap3000  | HLA-F      |
| TC6_dbb_hap3000  | 2.25  | JUC6_dbb_hap3000  | HLA-F      |
| TC6_dbb_hap3000  | 2.13  | PSR6_dbb_hap3000  | HLA-F      |
| TC6_dbb_hap3000  | 2.09  | JUC6_dbb_hap3000  | HLA-F      |
| TC6_dbb_hap3000  | 2.02  | PSR6_dbb_hap3000  | HLA-F      |
| TC6_dbb_hap3000  | 2.02  | PSR6_dbb_hap3000  | HLA-F      |
| TC6_mann_hap4000 | 3.15  | PSR6_mann_hap4000 | HLA-F      |
| TC6_mann_hap4000 | 2.91  | JUC6_mann_hap4000 | HLA-F      |
| TC6_mann_hap4000 | 2.79  | JUC6_mann_hap4000 | HLA-F      |
| TC6_mann_hap4000 | 2.68  | JUC6_mann_hap4000 | HLA-F      |
| TC6_mann_hap4000 | 2.65  | PSR6_mann_hap4000 | HLA-F      |
| TC6_mann_hap4000 | 2.34  | PSR6_mann_hap4000 | HLA-F      |
| TC6_mann_hap4000 | 2.26  | JUC6_mann_hap4000 | HLA-F      |
| TC6_mann_hap4000 | 2.25  | JUC6_mann_hap4000 | HLA-F      |
| TC6_mann_hap4000 | 2.13  | PSR6_mann_hap4000 | HLA-F      |
| TC6_mann_hap4000 | 2.09  | JUC6_mann_hap4000 | HLA-F      |
| TC6_mann_hap4000 | 2.02  | PSR6_mann_hap4000 | HLA-F      |
| TC6_mann_hap4000 | 2.02  | PSR6_mann_hap4000 | HLA-F      |
| TC6_qbl_hap60000 | 3.15  | PSR6_qbl_hap60001 | HLA-F      |
| TC6_qbl_hap60000 | 2.91  | JUC6_qbl_hap60000 | HLA-F      |
| TC6_qbl_hap60000 | 2.79  | JUC6_qbl_hap60000 | HLA-F      |
| TC6_qbl_hap60000 | 2.68  | JUC6_qbl_hap60000 | HLA-F      |
| TC6_qbl_hap60000 | 2.65  | PSR6_qbl_hap60001 | HLA-F      |
| TC6_qbl_hap60000 | 2.34  | PSR6_qbl_hap60001 | HLA-F      |
| TC6_qbl_hap60000 | 2.26  | JUC6_qbl_hap60000 | HLA-F      |
| TC6_qbl_hap60000 | 2.25  | JUC6_qbl_hap60000 | HLA-F      |
| TC6_qbl_hap60000 | 2.13  | PSR6_qbl_hap60001 | HLA-F      |
| TC6_qbl_hap60000 | 2.09  | JUC6_qbl_hap60000 | HLA-F      |
| TC6_qbl_hap60000 | 2.02  | PSR6_qbl_hap60001 | HLA-F      |
| TC6_qbl_hap60000 | 2.02  | PSR6_qbl_hap60001 | HLA-F      |
| TC01002115.hg.1  | 3.14  | JUC01017411.hg.1  | MORN1      |
| TC01002115.hg.1  | 2.2   | PSR01032513.hg.1  | MORN1      |
| TC01002115.hg.1  | 2.03  | PSR01032503.hg.1  | MORN1      |
| TC01003650.hg.1  | 3.14  | PSR01056057.hg.1  | UHL5       |
| TC01003650.hg.1  | -2.2  | PSR01056041.hg.1  | UHL5       |
| TC01003650.hg.1  | -2.21 | JUC01029243.hg.1  | UHL5       |
| TC01003650.hg.1  | -2.55 | JUC01029251.hg.1  | UHL5       |
| TC01003650.hg.1  | -4.83 | JUC01029232.hg.1  | UHL5       |
| TC03002131.hg.1  | 3.14  | JUC03018609.hg.1  | LRRC15     |
| TC03002131.hg.1  | 2.43  | PSR03037579.hg.1  | LRRC15     |
| TC03002131.hg.1  | 2     | PSR03037578.hg.1  | LRRC15     |
| TC03002131.hg.1  | -2.51 | PSR03037584.hg.1  | LRRC15     |
| TC04002964.hg.1  | 3.14  | JUC04017543.hg.1  | ZNF718     |
| TC04002964.hg.1  | -2.04 | PSR04000056.hg.1  | ZNF718     |
| TC04002964.hg.1  | -2.18 | JUC04017540.hg.1  | ZNF718     |
| TC04002964.hg.1  | -2.75 | JUC04017539.hg.1  | ZNF718     |
| TC05000326.hg.1  | 3.14  | JUC05002356.hg.1  | SMN1, SMN2 |
| TC05000326.hg.1  | 2.84  | JUC05002361.hg.1  | SMN1, SMN2 |
| TC05000326.hg.1  | 2.33  | PSR05004401.hg.1  | SMN1, SMN2 |
| TC05000326.hg.1  | 2.08  | JUC05002359.hg.1  | SMN1, SMN2 |
| TC06000558.hg.1  | 3.14  | JUC06002664.hg.1  | DAAM2      |
| TC06000558.hg.1  | 2.82  | PSR06006230.hg.1  | DAAM2      |
| TC07000075.hg.1  | 3.14  | PSR07001261.hg.1  | C1GALT1    |
| TC07000075.hg.1  | 2.99  | JUC07000562.hg.1  | C1GALT1    |
| TC07000075.hg.1  | 2.61  | PSR07001263.hg.1  | C1GALT1    |
| TC07000075.hg.1  | 2.58  | PSR07001262.hg.1  | C1GALT1    |
| TC07000075.hg.1  | -4.23 | JUC07000568.hg.1  | C1GALT1    |

|                 |        |                           |              |
|-----------------|--------|---------------------------|--------------|
| TC07000942.hg.1 | 3.14   | PSR07014536.hg.1          | FAM115C      |
| TC07000942.hg.1 | 2.54   | JUC07007025.hg.1          | FAM115C      |
| TC07000942.hg.1 | 2.54   | JUC07007026.hg.1          | FAM115C      |
| TC07000942.hg.1 | 2.54   | JUC07007027.hg.1          | FAM115C      |
| TC07000942.hg.1 | 2.44   | PSR07014530.hg.1          | FAM115C      |
| TC07000942.hg.1 | 2.27   | PSR07014543.hg.1          | FAM115C      |
| TC07000942.hg.1 | -2.05  | PSR07014526.hg.1          | FAM115C      |
| TC07000942.hg.1 | -2.31  | JUC07006997.hg.1          | FAM115C      |
| TC07000942.hg.1 | -2.37  | JUC07007000.hg.1          | FAM115C      |
| TC07000942.hg.1 | -2.37  | JUC07007002.hg.1          | FAM115C      |
| TC07000942.hg.1 | -2.6   | JUC07007003.hg.1          | FAM115C      |
| TC07000942.hg.1 | -2.6   | JUC07007004.hg.1          | FAM115C      |
| TC07000942.hg.1 | -2.85  | PSR07014540.hg.1          | FAM115C      |
| TC07000942.hg.1 | -3.53  | PSR07014539.hg.1          | FAM115C      |
| TC07000942.hg.1 | -3.53  | PSR07014549.hg.1          | FAM115C      |
| TC07000942.hg.1 | -4.83  | JUC07007012.hg.1          | FAM115C      |
| TC07000942.hg.1 | -4.83  | JUC07007014.hg.1          | FAM115C      |
| TC07000942.hg.1 | -10.47 | JUC07006999.hg.1          | FAM115C      |
| TC07002073.hg.1 | 3.14   | JUC07015726.hg.1          | LMBR1        |
| TC07002073.hg.1 | 2.2    | PSR07031664.hg.1          | LMBR1        |
| TC07002073.hg.1 | 2.07   | JUC07015728.hg.1          | LMBR1        |
| TC07002073.hg.1 | -2.28  | JUC07015709.hg.1          | LMBR1        |
| TC07002073.hg.1 | -2.85  | JUC07015727.hg.1          | LMBR1        |
| TC07003361.hg.1 | 3.14   | JUC07021438.hg.1          | CYP51A1      |
| TC07003361.hg.1 | -2.01  | PSR07024093.hg.1          | CYP51A1      |
| TC09001591.hg.1 | 3.14   | PSR09020013.hg.1          | MAPKAP1      |
| TC09001591.hg.1 | -2.07  | PSR09019999.hg.1          | MAPKAP1      |
| TC09001591.hg.1 | -2.08  | PSR09020014.hg.1          | MAPKAP1      |
| TC09001591.hg.1 | -2.36  | PSR09019988.hg.1          | MAPKAP1      |
| TC09001591.hg.1 | -3.5   | JUC09010824.hg.1          | MAPKAP1      |
| TC09001591.hg.1 | -9.56  | JUC09010823.hg.1          | MAPKAP1      |
| TC0X000965.hg.1 | 3.14   | PSR0X012874.hg.1          | CXorf38      |
| TC0X000965.hg.1 | 2.57   | PSR0X012878.hg.1          | CXorf38      |
| TC0X000965.hg.1 | 2.41   | PSR0X012869.hg.1          | CXorf38      |
| TC0X000965.hg.1 | 2.33   | PSR0X012879.hg.1          | CXorf38      |
| TC0X000965.hg.1 | 2.24   | PSR0X012866.hg.1          | CXorf38      |
| TC0X000965.hg.1 | 2.16   | JUC0X006458.hg.1          | CXorf38      |
| TC11000708.hg.1 | 3.14   | JUC11004752.hg.1          | PPP6R3       |
| TC11000708.hg.1 | 2.81   | JUC11004767.hg.1          | PPP6R3       |
| TC11000708.hg.1 | 2.24   | JUC11004751.hg.1          | PPP6R3       |
| TC11000708.hg.1 | -2.11  | PSR11009246.hg.1          | PPP6R3       |
| TC11000708.hg.1 | -2.93  | JUC11004771.hg.1          | PPP6R3       |
| TC11003442.hg.1 | 3.14   | PSR11001716.hg.1          | TRIM34, TRIM |
| TC11003442.hg.1 | -2.56  | JUC11018941.hg.1          | TRIM34, TRIM |
| TC14000974.hg.1 | 3.14   | PSR14011112.hg.1          | CIDEB        |
| TC14000974.hg.1 | 3.13   | JUC14005569.hg.1          | CIDEB        |
| TC14000974.hg.1 | 2.26   | PSR14011121.hg.1          | CIDEB        |
| TC14000974.hg.1 | 2.14   | PSR14011126.hg.1          | CIDEB        |
| TC14000974.hg.1 | 2.03   | PSR14011122.hg.1          | CIDEB        |
| TC15000253.hg.1 | 3.14   | JUC15000669.hg.1          | C15orf41     |
| TC15000253.hg.1 | 2.58   | PSR15001559.hg.1          | C15orf41     |
| TC15000253.hg.1 | 2.01   | JUC15000668.hg.1          | C15orf41     |
| TC15000253.hg.1 | -2.74  | JUC15000667.hg.1          | C15orf41     |
| TC19000641.hg.1 | 3.14   | PSR19008955.hg.1          | GEMIN7       |
| TC19000641.hg.1 | 2.49   | JUC19005319.hg.1          | GEMIN7       |
| TC6_mann_hap400 | 3.14   | JUC6_mann_hap4001106.hg.1 |              |
| TC6_mann_hap400 | 2.1    | PSR6_mann_hap4002957.hg.1 |              |
| TC6_mann_hap400 | -2.38  | PSR6_mann_hap4002982.hg.1 |              |

|                  |       |                   |              |
|------------------|-------|-------------------|--------------|
| TC6_mcf_hap5000  | 3.14  | JUC6_mcf_hap5001  | C4B, C4A, LC |
| TC6_mcf_hap5000  | 2.52  | PSR6_mcf_hap5001  | C4B, C4A, LC |
| TC6_mcf_hap5000  | 2.32  | JUC6_mcf_hap5001  | C4B, C4A, LC |
| TC6_mcf_hap5000  | 2.31  | JUC6_mcf_hap5001  | C4B, C4A, LC |
| TC6_mcf_hap5000  | 2.21  | PSR6_mcf_hap5001  | C4B, C4A, LC |
| TC6_mcf_hap5000  | 2.16  | PSR6_mcf_hap5001  | C4B, C4A, LC |
| TC6_mcf_hap5000  | 2.07  | JUC6_mcf_hap5001  | C4B, C4A, LC |
| TC6_mcf_hap5000  | -2.01 | PSR6_mcf_hap5001  | C4B, C4A, LC |
| TC6_mcf_hap5000  | -2.15 | JUC6_mcf_hap5001  | C4B, C4A, LC |
| TC6_mcf_hap5000  | -2.42 | JUC6_mcf_hap5001  | C4B, C4A, LC |
| TC6_mcf_hap5000  | -3.03 | JUC6_mcf_hap5001  | C4B, C4A, LC |
| TC6_mcf_hap5000  | -3.03 | JUC6_mcf_hap5001  | C4B, C4A, LC |
| TC6_mcf_hap5000  | -3.24 | JUC6_mcf_hap5001  | C4B, C4A, LC |
| TC6_mcf_hap5000  | -3.87 | JUC6_mcf_hap5001  | C4B, C4A, LC |
| TC6_ssto_hap7000 | 3.14  | JUC6_ssto_hap7000 | C4B, C4A, LC |
| TC6_ssto_hap7000 | 2.52  | PSR6_ssto_hap7001 | C4B, C4A, LC |
| TC6_ssto_hap7000 | 2.32  | JUC6_ssto_hap7000 | C4B, C4A, LC |
| TC6_ssto_hap7000 | 2.31  | JUC6_ssto_hap7000 | C4B, C4A, LC |
| TC6_ssto_hap7000 | 2.21  | PSR6_ssto_hap7001 | C4B, C4A, LC |
| TC6_ssto_hap7000 | 2.16  | PSR6_ssto_hap7001 | C4B, C4A, LC |
| TC6_ssto_hap7000 | 2.07  | JUC6_ssto_hap7000 | C4B, C4A, LC |
| TC6_ssto_hap7000 | -2.01 | PSR6_ssto_hap7001 | C4B, C4A, LC |
| TC6_ssto_hap7000 | -2.15 | JUC6_ssto_hap7000 | C4B, C4A, LC |
| TC6_ssto_hap7000 | -2.42 | JUC6_ssto_hap7000 | C4B, C4A, LC |
| TC6_ssto_hap7000 | -3.03 | JUC6_ssto_hap7000 | C4B, C4A, LC |
| TC6_ssto_hap7000 | -3.03 | JUC6_ssto_hap7000 | C4B, C4A, LC |
| TC6_ssto_hap7000 | -3.24 | JUC6_ssto_hap7000 | C4B, C4A, LC |
| TC6_ssto_hap7000 | -3.87 | JUC6_ssto_hap7000 | C4B, C4A, LC |
| TC6_ssto_hap7000 | 3.14  | JUC6_ssto_hap7001 | C4B, C4A, LC |
| TC6_ssto_hap7000 | 2.52  | PSR6_ssto_hap7001 | C4B, C4A, LC |
| TC6_ssto_hap7000 | 2.32  | JUC6_ssto_hap7001 | C4B, C4A, LC |
| TC6_ssto_hap7000 | 2.31  | JUC6_ssto_hap7001 | C4B, C4A, LC |
| TC6_ssto_hap7000 | 2.21  | PSR6_ssto_hap7001 | C4B, C4A, LC |
| TC6_ssto_hap7000 | 2.16  | PSR6_ssto_hap7001 | C4B, C4A, LC |
| TC6_ssto_hap7000 | 2.07  | JUC6_ssto_hap7001 | C4B, C4A, LC |
| TC6_ssto_hap7000 | -2.01 | PSR6_ssto_hap7001 | C4B, C4A, LC |
| TC6_ssto_hap7000 | -2.15 | JUC6_ssto_hap7001 | C4B, C4A, LC |
| TC6_ssto_hap7000 | -2.42 | JUC6_ssto_hap7001 | C4B, C4A, LC |
| TC6_ssto_hap7000 | -3.03 | JUC6_ssto_hap7001 | C4B, C4A, LC |
| TC6_ssto_hap7000 | -3.03 | JUC6_ssto_hap7001 | C4B, C4A, LC |
| TC6_ssto_hap7000 | -3.24 | JUC6_ssto_hap7001 | C4B, C4A, LC |
| TC6_ssto_hap7000 | -3.87 | JUC6_ssto_hap7001 | C4B, C4A, LC |
| TC04000614.hg.1  | 3.14  | JUC04004690.hg.1  | LOC645513,   |
| TC04000614.hg.1  | 2.96  | JUC04004696.hg.1  | LOC645513,   |
| TC04000614.hg.1  | 2.94  | JUC04004689.hg.1  | LOC645513,   |
| TC04000614.hg.1  | 2     | PSR04008854.hg.1  | LOC645513,   |
| TC01000941.hg.1  | 3.13  | JUC01007846.hg.1  | CELSR2       |
| TC01000941.hg.1  | 2.31  | PSR01014863.hg.1  | CELSR2       |
| TC01000941.hg.1  | 2.27  | PSR01014872.hg.1  | CELSR2       |
| TC01000941.hg.1  | 2.17  | PSR01014860.hg.1  | CELSR2       |
| TC01000941.hg.1  | 2.06  | PSR01014840.hg.1  | CELSR2       |
| TC01000941.hg.1  | 2.03  | JUC01007855.hg.1  | CELSR2       |
| TC01000941.hg.1  | -2.06 | PSR01014851.hg.1  | CELSR2       |
| TC01000941.hg.1  | -2.12 | JUC01007847.hg.1  | CELSR2       |
| TC01000941.hg.1  | -2.35 | PSR01014858.hg.1  | CELSR2       |
| TC01000941.hg.1  | -2.36 | JUC01007841.hg.1  | CELSR2       |
| TC01000941.hg.1  | -2.51 | JUC01007863.hg.1  | CELSR2       |
| TC01000941.hg.1  | -2.65 | PSR01014859.hg.1  | CELSR2       |



|                 |        |                  |            |
|-----------------|--------|------------------|------------|
| TC01000941.hg.1 | -2.74  | PSR01014832.hg.1 | CELSR2     |
| TC01000941.hg.1 | -2.91  | PSR01014854.hg.1 | CELSR2     |
| TC01000941.hg.1 | -3.62  | JUC01007858.hg.1 | CELSR2     |
| TC01000941.hg.1 | -4.38  | JUC01007833.hg.1 | CELSR2     |
| TC01000941.hg.1 | -5.24  | JUC01007861.hg.1 | CELSR2     |
| TC01000941.hg.1 | -10.48 | JUC01007848.hg.1 | CELSR2     |
| TC01003225.hg.1 | 3.13   | PSR01049686.hg.1 | RFX5       |
| TC01003225.hg.1 | 2.12   | JUC01026360.hg.1 | RFX5       |
| TC01003467.hg.1 | 3.13   | JUC01028124.hg.1 | TMCO1      |
| TC01003467.hg.1 | 2.17   | JUC01028126.hg.1 | TMCO1      |
| TC01003467.hg.1 | -2.14  | PSR01053989.hg.1 | TMCO1      |
| TC01003467.hg.1 | -2.29  | JUC01028133.hg.1 | TMCO1      |
| TC01003467.hg.1 | -2.48  | JUC01028132.hg.1 | TMCO1      |
| TC02002419.hg.1 | 3.13   | PSR02038019.hg.1 | RND3       |
| TC02002419.hg.1 | 2.78   | PSR02038021.hg.1 | RND3       |
| TC02002419.hg.1 | 2.25   | PSR02038001.hg.1 | RND3       |
| TC02002419.hg.1 | 2.1    | PSR02038008.hg.1 | RND3       |
| TC02002419.hg.1 | -3.66  | PSR02038017.hg.1 | RND3       |
| TC02002419.hg.1 | -3.75  | JUC02019743.hg.1 | RND3       |
| TC03000572.hg.1 | 3.13   | JUC03005165.hg.1 | CD200      |
| TC03000572.hg.1 | -2.04  | JUC03005168.hg.1 | CD200      |
| TC03000572.hg.1 | -2.12  | PSR03010391.hg.1 | CD200      |
| TC03000572.hg.1 | -2.42  | JUC03005169.hg.1 | CD200      |
| TC03000572.hg.1 | -2.84  | PSR03010385.hg.1 | CD200      |
| TC03000572.hg.1 | -3.44  | PSR03010384.hg.1 | CD200      |
| TC03000572.hg.1 | -3.47  | PSR03010382.hg.1 | CD200      |
| TC03000572.hg.1 | -3.92  | JUC03005172.hg.1 | CD200      |
| TC04001194.hg.1 | 3.13   | PSR04016361.hg.1 | SGCB       |
| TC04001194.hg.1 | 2.9    | JUC04008703.hg.1 | SGCB       |
| TC04001194.hg.1 | 2.83   | JUC04008708.hg.1 | SGCB       |
| TC04001194.hg.1 | 2.61   | PSR04016360.hg.1 | SGCB       |
| TC04001194.hg.1 | 2.43   | PSR04016362.hg.1 | SGCB       |
| TC04001194.hg.1 | 2.28   | PSR04016363.hg.1 | SGCB       |
| TC04001194.hg.1 | 2.06   | JUC04008705.hg.1 | SGCB       |
| TC05000359.hg.1 | 3.13   | PSR05004929.hg.1 | HEXB       |
| TC05000359.hg.1 | 2.44   | PSR05004942.hg.1 | HEXB       |
| TC05000359.hg.1 | 2.01   | PSR05004932.hg.1 | HEXB       |
| TC05000359.hg.1 | -2.25  | JUC05002663.hg.1 | HEXB       |
| TC06000501.hg.1 | 3.13   | PSR06005245.hg.1 | HMGA1, HMC |
| TC06000501.hg.1 | 2.37   | JUC06002056.hg.1 | HMGA1, HMC |
| TC06000501.hg.1 | 2.08   | PSR06005236.hg.1 | HMGA1, HMC |
| TC06000501.hg.1 | 2.07   | JUC06002063.hg.1 | HMGA1, HMC |
| TC06000501.hg.1 | -2     | PSR06005254.hg.1 | HMGA1, HMC |
| TC06000501.hg.1 | -2.05  | PSR06005253.hg.1 | HMGA1, HMC |
| TC06000501.hg.1 | -2.18  | PSR06005261.hg.1 | HMGA1, HMC |
| TC06000501.hg.1 | -2.41  | PSR06005258.hg.1 | HMGA1, HMC |
| TC07001266.hg.1 | 3.13   | JUC07009601.hg.1 | RP9        |
| TC07001266.hg.1 | 2.93   | PSR07019744.hg.1 | RP9        |
| TC07001266.hg.1 | 2.77   | PSR07019745.hg.1 | RP9        |
| TC07001266.hg.1 | 2.12   | PSR07019752.hg.1 | RP9        |
| TC07001266.hg.1 | 2.08   | JUC07009603.hg.1 | RP9        |
| TC07001266.hg.1 | 2.03   | PSR07019751.hg.1 | RP9        |
| TC07002017.hg.1 | 3.13   | PSR07030815.hg.1 |            |
| TC07002017.hg.1 | 2.13   | JUC07015280.hg.1 |            |
| TC09002927.hg.1 | 3.13   | JUC09016142.hg.1 | LCN6       |
| TC09002927.hg.1 | 2.11   | PSR09022391.hg.1 | LCN6       |
| TC0X000601.hg.1 | 3.13   | PSR0X007903.hg.1 | GRIA3      |
| TC0X000601.hg.1 | -2     | JUC0X003934.hg.1 | GRIA3      |

|                 |       |                  |             |
|-----------------|-------|------------------|-------------|
| TC0X000601.hg.1 | -2.03 | JUC0X003952.hg.1 | GRIA3       |
| TC0X000601.hg.1 | -2.04 | PSR0X007867.hg.1 | GRIA3       |
| TC0X000601.hg.1 | -2.1  | JUC0X003947.hg.1 | GRIA3       |
| TC0X000601.hg.1 | -2.27 | PSR0X007895.hg.1 | GRIA3       |
| TC0X000601.hg.1 | -2.29 | PSR0X007881.hg.1 | GRIA3       |
| TC0X000955.hg.1 | 3.13  | JUC0X006409.hg.1 | RPGR        |
| TC0X000955.hg.1 | 2.46  | JUC0X006404.hg.1 | RPGR        |
| TC0X000955.hg.1 | 2.01  | JUC0X006397.hg.1 | RPGR        |
| TC0X000955.hg.1 | -2.27 | JUC0X006407.hg.1 | RPGR        |
| TC0X000955.hg.1 | -2.28 | PSR0X012773.hg.1 | RPGR        |
| TC0X002330.hg.1 | 3.13  | JUC0X013161.hg.1 | PRAF2       |
| TC0X002330.hg.1 | 2.03  | PSR0X013673.hg.1 | PRAF2       |
| TC11000406.hg.1 | 3.13  | JUC11002831.hg.1 | MADD        |
| TC11000406.hg.1 | 2.04  | PSR11005221.hg.1 | MADD        |
| TC11000406.hg.1 | -2.3  | JUC11002823.hg.1 | MADD        |
| TC12000523.hg.1 | 3.13  | PSR12006915.hg.1 | NXPH4       |
| TC12000523.hg.1 | 2.89  | PSR12006914.hg.1 | NXPH4       |
| TC12000523.hg.1 | 2.32  | JUC12003634.hg.1 | NXPH4       |
| TC12000523.hg.1 | 2.12  | PSR12006910.hg.1 | NXPH4       |
| TC12001807.hg.1 | 3.13  | PSR12023897.hg.1 | BTG1        |
| TC12001807.hg.1 | 2.65  | PSR12023895.hg.1 | BTG1        |
| TC12001807.hg.1 | 2.45  | JUC12013248.hg.1 | BTG1        |
| TC14002191.hg.1 | 3.13  | PSR14000975.hg.1 | TRDJ1, TRDJ |
| TC14002191.hg.1 | 2.53  | PSR14000980.hg.1 | TRDJ1, TRDJ |
| TC14002191.hg.1 | 2.4   | PSR14000982.hg.1 | TRDJ1, TRDJ |
| TC14002191.hg.1 | 2.35  | JUC14011269.hg.1 | TRDJ1, TRDJ |
| TC14002191.hg.1 | 2.11  | JUC14011265.hg.1 | TRDJ1, TRDJ |
| TC14002191.hg.1 | 2.01  | PSR14000977.hg.1 | TRDJ1, TRDJ |
| TC15000778.hg.1 | 3.13  | JUC15003701.hg.1 | AGSK1, LOC  |
| TC15000778.hg.1 | 2.5   | JUC15003708.hg.1 | AGSK1, LOC  |
| TC15000778.hg.1 | 2.2   | PSR15007140.hg.1 | AGSK1, LOC  |
| TC15000778.hg.1 | -2.55 | JUC15003704.hg.1 | AGSK1, LOC  |
| TC15000778.hg.1 | -2.83 | JUC15003702.hg.1 | AGSK1, LOC  |
| TC17000047.hg.1 | 3.13  | JUC17000259.hg.1 | ARRB2       |
| TC17000047.hg.1 | 2.6   | PSR17000464.hg.1 | ARRB2       |
| TC17000047.hg.1 | 2.3   | PSR17000471.hg.1 | ARRB2       |
| TC17000047.hg.1 | -2.07 | PSR17000475.hg.1 | ARRB2       |
| TC17000047.hg.1 | -2.09 | JUC17000273.hg.1 | ARRB2       |
| TC17000047.hg.1 | -2.2  | JUC17000272.hg.1 | ARRB2       |
| TC17000047.hg.1 | -3.09 | JUC17000264.hg.1 | ARRB2       |
| TC17000047.hg.1 | -3.1  | JUC17000268.hg.1 | ARRB2       |
| TC17000047.hg.1 | -3.22 | PSR17000473.hg.1 | ARRB2       |
| TC17000047.hg.1 | -3.29 | JUC17000266.hg.1 | ARRB2       |
| TC17000047.hg.1 | -3.53 | JUC17000269.hg.1 | ARRB2       |
| TC17000047.hg.1 | -4.51 | JUC17000265.hg.1 | ARRB2       |
| TC19000741.hg.1 | 3.13  | PSR19010358.hg.1 | PRR12       |
| TC19000741.hg.1 | -4.7  | JUC19006056.hg.1 | PRR12       |
| TC19002636.hg.1 | 3.13  | JUC19017404.hg.1 | BCKDHA      |
| TC19002636.hg.1 | 2.93  | JUC19017411.hg.1 | BCKDHA      |
| TC19002636.hg.1 | 2.6   | JUC19017403.hg.1 | BCKDHA      |
| TC19002636.hg.1 | 2.36  | PSR19008035.hg.1 | BCKDHA      |
| TC20000256.hg.1 | 3.13  | PSR20003475.hg.1 | SPAG4       |
| TC20000256.hg.1 | 2.47  | PSR20003456.hg.1 | SPAG4       |
| TC20000256.hg.1 | 2.26  | JUC20001957.hg.1 | SPAG4       |
| TC20000256.hg.1 | -2.05 | PSR20003469.hg.1 | SPAG4       |
| TC20000256.hg.1 | -2.43 | PSR20003463.hg.1 | SPAG4       |
| TC01002962.hg.1 | 3.12  | JUC01024786.hg.1 | GSTM3       |
| TC01002962.hg.1 | 2.88  | JUC01024789.hg.1 | GSTM3       |

|                 |        |                  |          |
|-----------------|--------|------------------|----------|
| TC01002962.hg.1 | 2.22   | PSR01046053.hg.1 | GSTM3    |
| TC03000732.hg.1 | 3.12   | JUC03006711.hg.1 | PPP2R3A  |
| TC03000732.hg.1 | 2.1    | PSR03013247.hg.1 | PPP2R3A  |
| TC03000732.hg.1 | 2.07   | JUC03006727.hg.1 | PPP2R3A  |
| TC04000960.hg.1 | 3.12   | JUC04006940.hg.1 | RNF212   |
| TC04000960.hg.1 | -2.01  | PSR04013002.hg.1 | RNF212   |
| TC04000960.hg.1 | -2.39  | PSR04012996.hg.1 | RNF212   |
| TC04000960.hg.1 | -2.72  | PSR04013006.hg.1 | RNF212   |
| TC07000704.hg.1 | 3.12   | PSR07011051.hg.1 | LRRN3    |
| TC07000704.hg.1 | 2.04   | PSR07011052.hg.1 | LRRN3    |
| TC07000704.hg.1 | -2.04  | PSR07011048.hg.1 | LRRN3    |
| TC07000704.hg.1 | -2.05  | JUC07005196.hg.1 | LRRN3    |
| TC07000704.hg.1 | -2.35  | JUC07005199.hg.1 | LRRN3    |
| TC07000704.hg.1 | -2.8   | PSR07011055.hg.1 | LRRN3    |
| TC07000704.hg.1 | -2.95  | PSR07011050.hg.1 | LRRN3    |
| TC07000704.hg.1 | -4.88  | PSR07011043.hg.1 | LRRN3    |
| TC07000704.hg.1 | -9.25  | PSR07011045.hg.1 | LRRN3    |
| TC07000704.hg.1 | -11.19 | PSR07011046.hg.1 | LRRN3    |
| TC09000876.hg.1 | 3.12   | JUC09006315.hg.1 | RFX3     |
| TC09000876.hg.1 | 2.46   | PSR09011647.hg.1 | RFX3     |
| TC09000876.hg.1 | 2.04   | JUC09006305.hg.1 | RFX3     |
| TC09000876.hg.1 | -2.26  | PSR09011668.hg.1 | RFX3     |
| TC09000876.hg.1 | -2.29  | JUC09006311.hg.1 | RFX3     |
| TC09000876.hg.1 | -3.08  | JUC09006304.hg.1 | RFX3     |
| TC0X000212.hg.1 | 3.12   | JUC0X001284.hg.1 | KDM6A    |
| TC0X000212.hg.1 | 2.43   | JUC0X001274.hg.1 | KDM6A    |
| TC0X000212.hg.1 | 2.3    | PSR0X002375.hg.1 | KDM6A    |
| TC0X000212.hg.1 | 2.23   | PSR0X002378.hg.1 | KDM6A    |
| TC0X000212.hg.1 | 2.16   | PSR0X002383.hg.1 | KDM6A    |
| TC0X000212.hg.1 | 2.05   | PSR0X002340.hg.1 | KDM6A    |
| TC0X000212.hg.1 | -2.04  | PSR0X002382.hg.1 | KDM6A    |
| TC0X000212.hg.1 | -2.66  | JUC0X001301.hg.1 | KDM6A    |
| TC0X000212.hg.1 | -2.92  | JUC0X001311.hg.1 | KDM6A    |
| TC16000169.hg.1 | 3.12   | JUC16001320.hg.1 | SHISA9   |
| TC16000169.hg.1 | 2.69   | PSR16002559.hg.1 | SHISA9   |
| TC17001689.hg.1 | 3.12   | JUC17012631.hg.1 | CHAD     |
| TC17001689.hg.1 | -2.17  | JUC17012632.hg.1 | CHAD     |
| TC17001689.hg.1 | -2.42  | PSR17022729.hg.1 | CHAD     |
| TC17001689.hg.1 | -2.48  | PSR17022730.hg.1 | CHAD     |
| TC17001689.hg.1 | -3.4   | JUC17012635.hg.1 | CHAD     |
| TC17001689.hg.1 | -4.3   | JUC17012633.hg.1 | CHAD     |
| TC17001914.hg.1 | 3.12   | PSR17025960.hg.1 | TK1      |
| TC17001914.hg.1 | 2.76   | JUC17014587.hg.1 | TK1      |
| TC17001914.hg.1 | 2.49   | PSR17025959.hg.1 | TK1      |
| TC17001914.hg.1 | 2.34   | PSR17025951.hg.1 | TK1      |
| TC17001914.hg.1 | 2.24   | JUC17014585.hg.1 | TK1      |
| TC17001914.hg.1 | 2.21   | PSR17025953.hg.1 | TK1      |
| TC17001914.hg.1 | -2.01  | PSR17025955.hg.1 | TK1      |
| TC01001675.hg.1 | 3.11   | JUC01013925.hg.1 | PPP1R12B |
| TC01001675.hg.1 | 2.67   | JUC01013933.hg.1 | PPP1R12B |
| TC01001675.hg.1 | -2     | PSR01026011.hg.1 | PPP1R12B |
| TC01001675.hg.1 | -2     | JUC01013938.hg.1 | PPP1R12B |
| TC01001675.hg.1 | -2.08  | PSR01026031.hg.1 | PPP1R12B |
| TC01001675.hg.1 | -2.11  | PSR01026025.hg.1 | PPP1R12B |
| TC01001675.hg.1 | -2.11  | JUC01013907.hg.1 | PPP1R12B |
| TC01001675.hg.1 | -2.14  | JUC01013923.hg.1 | PPP1R12B |
| TC01001675.hg.1 | -2.15  | PSR01026036.hg.1 | PPP1R12B |
| TC01001675.hg.1 | -2.15  | PSR01026039.hg.1 | PPP1R12B |

|                  |        |                   |              |
|------------------|--------|-------------------|--------------|
| TC01001675.hg.1  | -2.2   | PSR01026026.hg.1  | PPP1R12B     |
| TC01001675.hg.1  | -2.2   | PSR01026038.hg.1  | PPP1R12B     |
| TC01001675.hg.1  | -2.39  | JUC01013904.hg.1  | PPP1R12B     |
| TC01001675.hg.1  | -2.67  | PSR01026027.hg.1  | PPP1R12B     |
| TC01001675.hg.1  | -2.92  | JUC01013934.hg.1  | PPP1R12B     |
| TC01001675.hg.1  | -2.97  | PSR01026020.hg.1  | PPP1R12B     |
| TC01001675.hg.1  | -3.57  | JUC01013911.hg.1  | PPP1R12B     |
| TC01006268.hg.1  | 3.11   | PSR01003949.hg.1  | NBL1, C1orf1 |
| TC01006268.hg.1  | 2.79   | PSR01003939.hg.1  | NBL1, C1orf1 |
| TC01006268.hg.1  | 2.42   | PSR01003951.hg.1  | NBL1, C1orf1 |
| TC01006268.hg.1  | 2.31   | JUC01038979.hg.1  | NBL1, C1orf1 |
| TC01006268.hg.1  | -2.04  | PSR01003944.hg.1  | NBL1, C1orf1 |
| TC01006268.hg.1  | -4.42  | JUC01038987.hg.1  | NBL1, C1orf1 |
| TC01006268.hg.1  | -4.65  | PSR01003937.hg.1  | NBL1, C1orf1 |
| TC01006268.hg.1  | -4.7   | PSR01003945.hg.1  | NBL1, C1orf1 |
| TC01006268.hg.1  | -5.15  | JUC01038988.hg.1  | NBL1, C1orf1 |
| TC01006268.hg.1  | -5.31  | PSR01003936.hg.1  | NBL1, C1orf1 |
| TC01006268.hg.1  | -5.34  | JUC01038982.hg.1  | NBL1, C1orf1 |
| TC01006268.hg.1  | -5.35  | PSR01003938.hg.1  | NBL1, C1orf1 |
| TC01006268.hg.1  | -5.77  | PSR01003934.hg.1  | NBL1, C1orf1 |
| TC01006268.hg.1  | -6.05  | PSR01003931.hg.1  | NBL1, C1orf1 |
| TC01006268.hg.1  | -6.16  | JUC01038985.hg.1  | NBL1, C1orf1 |
| TC01006268.hg.1  | -6.34  | JUC01038980.hg.1  | NBL1, C1orf1 |
| TC01006268.hg.1  | -6.39  | PSR01003927.hg.1  | NBL1, C1orf1 |
| TC01006268.hg.1  | -10.11 | JUC01038986.hg.1  | NBL1, C1orf1 |
| TC03000038.hg.1  | 3.11   | JUC03000378.hg.1  | SETD5        |
| TC03000038.hg.1  | 2.16   | PSR03000678.hg.1  | SETD5        |
| TC03000038.hg.1  | 2.06   | JUC03000395.hg.1  | SETD5        |
| TC03000038.hg.1  | -2.03  | JUC03000398.hg.1  | SETD5        |
| TC03000038.hg.1  | -2.59  | PSR03000670.hg.1  | SETD5        |
| TC03000038.hg.1  | -3.08  | PSR03000635.hg.1  | SETD5        |
| TC05000451.hg.1  | 3.11   | JUC05003514.hg.1  | NR2F1        |
| TC05000451.hg.1  | -2.44  | PSR05006375.hg.1  | NR2F1        |
| TC05001366.hg.1  | 3.11   | JUC05009848.hg.1  | IL6ST        |
| TC05001366.hg.1  | 2.06   | PSR05019130.hg.1  | IL6ST        |
| TC05001366.hg.1  | -3.84  | JUC05009854.hg.1  | IL6ST        |
| TC05001543.hg.1  | 3.11   | PSR05021049.hg.1  | LOC1001310   |
| TC05001543.hg.1  | 2.38   | JUC05010854.hg.1  | LOC1001310   |
| TC05001543.hg.1  | 2      | PSR05021037.hg.1  | LOC1001310   |
| TC05001543.hg.1  | -2.07  | JUC05010853.hg.1  | LOC1001310   |
| TC14000562.hg.1  | 3.11   | JUC14003506.hg.1  | C14orf159    |
| TC14000562.hg.1  | 2.75   | JUC14003471.hg.1  | C14orf159    |
| TC14000562.hg.1  | 2.48   | JUC14003478.hg.1  | C14orf159    |
| TC14000562.hg.1  | 2.43   | JUC14003490.hg.1  | C14orf159    |
| TC14000562.hg.1  | 2.41   | JUC14003488.hg.1  | C14orf159    |
| TC14000562.hg.1  | 2.29   | PSR14006829.hg.1  | C14orf159    |
| TC14000562.hg.1  | 2.29   | JUC14003469.hg.1  | C14orf159    |
| TC14000562.hg.1  | 2.29   | JUC14003472.hg.1  | C14orf159    |
| TC14000562.hg.1  | 2.2    | PSR14006790.hg.1  | C14orf159    |
| TC14000562.hg.1  | 2.14   | JUC14003486.hg.1  | C14orf159    |
| TC14000562.hg.1  | 2.11   | PSR14006791.hg.1  | C14orf159    |
| TC14000562.hg.1  | 2.1    | PSR14006820.hg.1  | C14orf159    |
| TC14000562.hg.1  | 2.08   | PSR14006841.hg.1  | C14orf159    |
| TC14000562.hg.1  | 2.01   | JUC14003493.hg.1  | C14orf159    |
| TC14000562.hg.1  | 2      | PSR14006801.hg.1  | C14orf159    |
| TC14000562.hg.1  | -2.28  | PSR14006822.hg.1  | C14orf159    |
| TC14000562.hg.1  | -2.38  | JUC14003497.hg.1  | C14orf159    |
| TC6_ssto_hap7000 | 3.11   | JUC6_ssto_hap7000 | APOM         |

|                  |       |                   |             |
|------------------|-------|-------------------|-------------|
| TC6_ssto_hap7000 | 2.37  | PSR6_ssto_hap7000 | APOM        |
| TC02000589.hg.1  | 3.1   | JUC02004643.hg.1  | ANKRD36, AF |
| TC02000589.hg.1  | -2.02 | PSR02009089.hg.1  | ANKRD36, AF |
| TC02000589.hg.1  | -2.02 | PSR02009101.hg.1  | ANKRD36, AF |
| TC02000589.hg.1  | -2.07 | JUC02004664.hg.1  | ANKRD36, AF |
| TC02000589.hg.1  | -2.09 | JUC02004669.hg.1  | ANKRD36, AF |
| TC02000589.hg.1  | -2.1  | JUC02004633.hg.1  | ANKRD36, AF |
| TC02000589.hg.1  | -2.39 | PSR02009158.hg.1  | ANKRD36, AF |
| TC02000589.hg.1  | -2.78 | JUC02004671.hg.1  | ANKRD36, AF |
| TC02000589.hg.1  | -2.95 | JUC02004667.hg.1  | ANKRD36, AF |
| TC02001573.hg.1  | 3.1   | JUC02013167.hg.1  | PDIA6       |
| TC02001573.hg.1  | 2.41  | JUC02013176.hg.1  | PDIA6       |
| TC02001573.hg.1  | 2.37  | PSR02025394.hg.1  | PDIA6       |
| TC02001573.hg.1  | 2.37  | JUC02013169.hg.1  | PDIA6       |
| TC02001573.hg.1  | 2.15  | PSR02025393.hg.1  | PDIA6       |
| TC02001573.hg.1  | 2.08  | PSR02025399.hg.1  | PDIA6       |
| TC02001573.hg.1  | 2.02  | PSR02025395.hg.1  | PDIA6       |
| TC02001573.hg.1  | 2.01  | PSR02025397.hg.1  | PDIA6       |
| TC03001939.hg.1  | 3.1   | JUC03017163.hg.1  | CCNL1       |
| TC03001939.hg.1  | -2.55 | PSR03034660.hg.1  | CCNL1       |
| TC04000897.hg.1  | 3.1   | JUC04006595.hg.1  | CCDC111     |
| TC04000897.hg.1  | 2.04  | PSR04012266.hg.1  | CCDC111     |
| TC04000897.hg.1  | -2.11 | JUC04006587.hg.1  | CCDC111     |
| TC06001506.hg.1  | 3.1   | JUC06008386.hg.1  | NRM         |
| TC06001506.hg.1  | 2.28  | PSR06017027.hg.1  | NRM         |
| TC06001506.hg.1  | -2.94 | JUC06008384.hg.1  | NRM         |
| TC06001506.hg.1  | -2.94 | JUC06008385.hg.1  | NRM         |
| TC11000174.hg.1  | 3.1   | PSR11002379.hg.1  | WEE1        |
| TC11000174.hg.1  | 2.79  | PSR11002378.hg.1  | WEE1        |
| TC11000174.hg.1  | 2.16  | JUC11001066.hg.1  | WEE1        |
| TC11000174.hg.1  | 2.03  | PSR11002380.hg.1  | WEE1        |
| TC11000174.hg.1  | -2.24 | PSR11002386.hg.1  | WEE1        |
| TC11000174.hg.1  | -2.26 | JUC11001076.hg.1  | WEE1        |
| TC11000174.hg.1  | -2.31 | JUC11001075.hg.1  | WEE1        |
| TC12001440.hg.1  | 3.1   | PSR12018821.hg.1  | COL2A1      |
| TC12001440.hg.1  | 2.86  | JUC12010515.hg.1  | COL2A1      |
| TC12001440.hg.1  | 2.69  | PSR12018848.hg.1  | COL2A1      |
| TC12001440.hg.1  | 2.54  | JUC12010536.hg.1  | COL2A1      |
| TC12001440.hg.1  | 2.49  | JUC12010541.hg.1  | COL2A1      |
| TC12001440.hg.1  | 2.32  | JUC12010509.hg.1  | COL2A1      |
| TC12001440.hg.1  | 2.27  | JUC12010510.hg.1  | COL2A1      |
| TC12001440.hg.1  | 2.23  | PSR12018833.hg.1  | COL2A1      |
| TC12001440.hg.1  | 2.19  | PSR12018827.hg.1  | COL2A1      |
| TC12001440.hg.1  | 2.19  | PSR12018859.hg.1  | COL2A1      |
| TC12001440.hg.1  | 2.18  | JUC12010544.hg.1  | COL2A1      |
| TC12001440.hg.1  | 2.05  | PSR12018850.hg.1  | COL2A1      |
| TC12001440.hg.1  | 2.04  | JUC12010540.hg.1  | COL2A1      |
| TC12001440.hg.1  | -2.03 | JUC12010547.hg.1  | COL2A1      |
| TC12001440.hg.1  | -2.18 | PSR12018810.hg.1  | COL2A1      |
| TC12001440.hg.1  | -2.18 | JUC12010535.hg.1  | COL2A1      |
| TC12001440.hg.1  | -2.36 | PSR12018853.hg.1  | COL2A1      |
| TC12001440.hg.1  | -2.42 | JUC12010546.hg.1  | COL2A1      |
| TC12001440.hg.1  | -2.44 | PSR12018840.hg.1  | COL2A1      |
| TC12001440.hg.1  | -2.51 | JUC12010516.hg.1  | COL2A1      |
| TC12001440.hg.1  | -2.94 | JUC12010554.hg.1  | COL2A1      |
| TC12001440.hg.1  | -3.2  | PSR12018863.hg.1  | COL2A1      |
| TC12001440.hg.1  | -3.33 | JUC12010533.hg.1  | COL2A1      |
| TC12001440.hg.1  | -4.32 | PSR12018801.hg.1  | COL2A1      |

|                  |         |                   |           |
|------------------|---------|-------------------|-----------|
| TC12001440.hg.1  | -4.64   | PSR12018806.hg.1  | COL2A1    |
| TC12001440.hg.1  | -6.35   | JUC12010503.hg.1  | COL2A1    |
| TC12001440.hg.1  | -7.37   | PSR12018808.hg.1  | COL2A1    |
| TC12001440.hg.1  | -22.62  | PSR12018804.hg.1  | COL2A1    |
| TC12001440.hg.1  | -24.51  | PSR12018805.hg.1  | COL2A1    |
| TC12001440.hg.1  | -36.62  | PSR12018802.hg.1  | COL2A1    |
| TC12001440.hg.1  | -80.9   | PSR12018803.hg.1  | COL2A1    |
| TC12001440.hg.1  | -269.44 | JUC12010517.hg.1  | COL2A1    |
| TC16001350.hg.1  | 3.1     | PSR16018731.hg.1  | ANKRD11   |
| TC16001350.hg.1  | -2.05   | JUC16010676.hg.1  | ANKRD11   |
| TC16001350.hg.1  | -3.06   | PSR16018718.hg.1  | ANKRD11   |
| TC18000058.hg.1  | 3.1     | PSR18000591.hg.1  | GNAL      |
| TC18000058.hg.1  | 2.3     | PSR18000594.hg.1  | GNAL      |
| TC18000058.hg.1  | -2.73   | JUC18000379.hg.1  | GNAL      |
| TC6_apd_hap1000  | 3.1     | JUC6_apd_hap1000  | NRM       |
| TC6_apd_hap1000  | 2.28    | PSR6_apd_hap1001  | NRM       |
| TC6_apd_hap1000  | -2.94   | JUC6_apd_hap1000  | NRM       |
| TC6_apd_hap1000  | -2.94   | JUC6_apd_hap1000  | NRM       |
| TC6_cox_hap2000  | 3.1     | JUC6_cox_hap2000  | NRM       |
| TC6_cox_hap2000  | 2.28    | PSR6_cox_hap2002  | NRM       |
| TC6_cox_hap2000  | -2.94   | JUC6_cox_hap2000  | NRM       |
| TC6_cox_hap2000  | -2.94   | JUC6_cox_hap2000  | NRM       |
| TC6_dbb_hap3000  | 3.1     | JUC6_dbb_hap3000  | NRM       |
| TC6_dbb_hap3000  | 2.28    | PSR6_dbb_hap3002  | NRM       |
| TC6_dbb_hap3000  | -2.94   | JUC6_dbb_hap3000  | NRM       |
| TC6_dbb_hap3000  | -2.94   | JUC6_dbb_hap3000  | NRM       |
| TC6_mann_hap4000 | 3.1     | JUC6_mann_hap4000 | NRM       |
| TC6_mann_hap4000 | 2.28    | PSR6_mann_hap4000 | NRM       |
| TC6_mann_hap4000 | -2.94   | JUC6_mann_hap4000 | NRM       |
| TC6_mann_hap4000 | -2.94   | JUC6_mann_hap4000 | NRM       |
| TC6_mcf_hap5000  | 3.1     | JUC6_mcf_hap5000  | NRM       |
| TC6_mcf_hap5000  | 2.28    | PSR6_mcf_hap5002  | NRM       |
| TC6_mcf_hap5000  | -2.94   | JUC6_mcf_hap5000  | NRM       |
| TC6_mcf_hap5000  | -2.94   | JUC6_mcf_hap5000  | NRM       |
| TC6_qbl_hap6000  | 3.1     | JUC6_qbl_hap6000  | NRM       |
| TC6_qbl_hap6000  | 2.28    | PSR6_qbl_hap6002  | NRM       |
| TC6_qbl_hap6000  | -2.94   | JUC6_qbl_hap6000  | NRM       |
| TC6_qbl_hap6000  | -2.94   | JUC6_qbl_hap6000  | NRM       |
| TC6_ssto_hap7000 | 3.1     | JUC6_ssto_hap7000 | HLA-F-AS1 |
| TC6_ssto_hap7000 | 2.56    | PSR6_ssto_hap7001 | HLA-F-AS1 |
| TC6_ssto_hap7000 | 2.54    | PSR6_ssto_hap7001 | HLA-F-AS1 |
| TC6_ssto_hap7000 | 2.38    | JUC6_ssto_hap7000 | HLA-F-AS1 |
| TC6_ssto_hap7000 | 2.07    | JUC6_ssto_hap7000 | HLA-F-AS1 |
| TC6_ssto_hap7000 | 2.01    | JUC6_ssto_hap7000 | HLA-F-AS1 |
| TC6_ssto_hap7000 | -2.43   | JUC6_ssto_hap7000 | HLA-F-AS1 |
| TC01001658.hg.1  | 3.09    | JUC01013696.hg.1  | PKP1      |
| TC01001658.hg.1  | -2.21   | PSR01025658.hg.1  | PKP1      |
| TC01002388.hg.1  | 3.09    | JUC01019818.hg.1  | UBXN11    |
| TC01002388.hg.1  | 2.14    | JUC01019821.hg.1  | UBXN11    |
| TC01002388.hg.1  | 2.08    | PSR01036818.hg.1  | UBXN11    |
| TC01002388.hg.1  | 2.07    | JUC01019837.hg.1  | UBXN11    |
| TC02002769.hg.1  | 3.09    | PSR02044466.hg.1  | AAMP      |
| TC02002769.hg.1  | 2.56    | JUC02023329.hg.1  | AAMP      |
| TC06001532.hg.1  | 3.09    | JUC06008526.hg.1  | BAG6      |
| TC06001532.hg.1  | 2.6     | PSR06017544.hg.1  | BAG6      |
| TC06001532.hg.1  | 2.4     | PSR06017617.hg.1  | BAG6      |
| TC06001532.hg.1  | 2.4     | JUC06008523.hg.1  | BAG6      |
| TC06001532.hg.1  | 2.39    | JUC06008546.hg.1  | BAG6      |

|                 |       |                   |             |
|-----------------|-------|-------------------|-------------|
| TC06001532.hg.1 | 2.34  | PSR06017611.hg.1  | BAG6        |
| TC06001532.hg.1 | 2.3   | JUC06008563.hg.1  | BAG6        |
| TC06001532.hg.1 | 2.17  | PSR06017552.hg.1  | BAG6        |
| TC06001532.hg.1 | 2.12  | PSR06017556.hg.1  | BAG6        |
| TC06001532.hg.1 | 2.09  | JUC06008532.hg.1  | BAG6        |
| TC06001532.hg.1 | 2.08  | PSR06017609.hg.1  | BAG6        |
| TC07003331.hg.1 | 3.09  | JUC07020964.hg.1  | STAG3L1, ST |
| TC07003331.hg.1 | 2.12  | JUC07020963.hg.1  | STAG3L1, ST |
| TC07003331.hg.1 | 2.11  | PSR07006523.hg.1  | STAG3L1, ST |
| TC07003331.hg.1 | 2.08  | JUC07020975.hg.1  | STAG3L1, ST |
| TC07003331.hg.1 | 2.03  | JUC07020959.hg.1  | STAG3L1, ST |
| TC09001141.hg.1 | 3.09  | JUC09007980.hg.1  |             |
| TC09001141.hg.1 | 2.57  | PSR09014876.hg.1  |             |
| TC09001141.hg.1 | 2.54  | JUC09007977.hg.1  |             |
| TC09001141.hg.1 | 2.06  | PSR09014875.hg.1  |             |
| TC09001141.hg.1 | -3.13 | JUC09007985.hg.1  |             |
| TC12000628.hg.1 | 3.09  | JUC12004415.hg.1  | TBC1D15     |
| TC12000628.hg.1 | 2.81  | PSR12008367.hg.1  | TBC1D15     |
| TC12000628.hg.1 | 2.41  | PSR12008383.hg.1  | TBC1D15     |
| TC15000735.hg.1 | 3.09  | JUC15003371.hg.1  | MORF4L1     |
| TC15000735.hg.1 | 2.18  | PSR15006629.hg.1  | MORF4L1     |
| TC16000722.hg.1 | 3.09  | JUC16005799.hg.1  | NPRL3       |
| TC16000722.hg.1 | 2.42  | PSR16010380.hg.1  | NPRL3       |
| TC16000722.hg.1 | 2.41  | PSR16010416.hg.1  | NPRL3       |
| TC16000722.hg.1 | 2.13  | JUC16005818.hg.1  | NPRL3       |
| TC16000722.hg.1 | 2.05  | PSR16010382.hg.1  | NPRL3       |
| TC16000722.hg.1 | -2.1  | JUC16005806.hg.1  | NPRL3       |
| TC16000722.hg.1 | -2.15 | JUC16005798.hg.1  | NPRL3       |
| TC20000253.hg.1 | 3.09  | JUC20001897.hg.1  | CEP250      |
| TC20000253.hg.1 | 2.47  | JUC20001905.hg.1  | CEP250      |
| TC20000253.hg.1 | 2.28  | PSR20003330.hg.1  | CEP250      |
| TC20000253.hg.1 | 2.25  | JUC20001909.hg.1  | CEP250      |
| TC20000253.hg.1 | 2.21  | JUC20001888.hg.1  | CEP250      |
| TC20000253.hg.1 | 2.09  | JUC20001910.hg.1  | CEP250      |
| TC20000253.hg.1 | 2.04  | PSR20003332.hg.1  | CEP250      |
| TC20000253.hg.1 | -2.21 | JUC20001871.hg.1  | CEP250      |
| TC20000253.hg.1 | -2.37 | JUC20001887.hg.1  | CEP250      |
| TC20000253.hg.1 | -2.54 | PSR20003315.hg.1  | CEP250      |
| TC20000253.hg.1 | -2.88 | PSR20003363.hg.1  | CEP250      |
| TC20000253.hg.1 | -4.58 | JUC20001868.hg.1  | CEP250      |
| TC6_cox_hap2000 | 3.09  | JUC6_cox_hap20007 | HLA-F-AS1   |
| TC6_cox_hap2000 | 2.56  | PSR6_cox_hap20027 | HLA-F-AS1   |
| TC6_cox_hap2000 | 2.38  | PSR6_cox_hap20027 | HLA-F-AS1   |
| TC6_cox_hap2000 | 2.37  | JUC6_cox_hap20007 | HLA-F-AS1   |
| TC6_cox_hap2000 | 2.06  | JUC6_cox_hap20007 | HLA-F-AS1   |
| TC6_cox_hap2000 | 2.01  | JUC6_cox_hap20007 | HLA-F-AS1   |
| TC6_cox_hap2000 | -2.43 | JUC6_cox_hap20007 | HLA-F-AS1   |
| TC6_mcf_hap5000 | 3.09  | JUC6_mcf_hap50008 | BAG6        |
| TC6_mcf_hap5000 | 2.6   | PSR6_mcf_hap50028 | BAG6        |
| TC6_mcf_hap5000 | 2.4   | PSR6_mcf_hap50028 | BAG6        |
| TC6_mcf_hap5000 | 2.4   | JUC6_mcf_hap50008 | BAG6        |
| TC6_mcf_hap5000 | 2.39  | JUC6_mcf_hap50008 | BAG6        |
| TC6_mcf_hap5000 | 2.34  | PSR6_mcf_hap50028 | BAG6        |
| TC6_mcf_hap5000 | 2.3   | JUC6_mcf_hap50008 | BAG6        |
| TC6_mcf_hap5000 | 2.17  | PSR6_mcf_hap50028 | BAG6        |
| TC6_mcf_hap5000 | 2.09  | JUC6_mcf_hap50008 | BAG6        |
| TC6_mcf_hap5000 | 2.08  | PSR6_mcf_hap50028 | BAG6        |
| TC6_qbl_hap6000 | 3.09  | JUC6_qbl_hap60010 | BAG6        |

|                 |       |                   |             |
|-----------------|-------|-------------------|-------------|
| TC6_qbl_hap6000 | 2.6   | PSR6_qbl_hap60028 | BAG6        |
| TC6_qbl_hap6000 | 2.4   | PSR6_qbl_hap60029 | BAG6        |
| TC6_qbl_hap6000 | 2.4   | JUC6_qbl_hap60010 | BAG6        |
| TC6_qbl_hap6000 | 2.39  | JUC6_qbl_hap60010 | BAG6        |
| TC6_qbl_hap6000 | 2.34  | PSR6_qbl_hap60029 | BAG6        |
| TC6_qbl_hap6000 | 2.3   | JUC6_qbl_hap60010 | BAG6        |
| TC6_qbl_hap6000 | 2.19  | PSR6_qbl_hap60028 | BAG6        |
| TC6_qbl_hap6000 | 2.17  | PSR6_qbl_hap60028 | BAG6        |
| TC6_qbl_hap6000 | 2.09  | JUC6_qbl_hap60010 | BAG6        |
| TC6_qbl_hap6000 | 2.08  | PSR6_qbl_hap60029 | BAG6        |
| TC03000326.hg.1 | 3.08  | JUC03003345.hg.1  | PARP3       |
| TC03000326.hg.1 | 2.5   | JUC03003339.hg.1  | PARP3       |
| TC03000326.hg.1 | 2.35  | PSR03006937.hg.1  | PARP3       |
| TC03000326.hg.1 | 2.17  | PSR03006949.hg.1  | PARP3       |
| TC03000326.hg.1 | 2.12  | PSR03006928.hg.1  | PARP3       |
| TC03000326.hg.1 | 2.07  | PSR03006926.hg.1  | PARP3       |
| TC03000326.hg.1 | 2.05  | PSR03006936.hg.1  | PARP3       |
| TC03000326.hg.1 | -2    | PSR03006935.hg.1  | PARP3       |
| TC03000326.hg.1 | -2.23 | JUC03003347.hg.1  | PARP3       |
| TC04000222.hg.1 | 3.08  | JUC04001577.hg.1  | FAM114A1    |
| TC04000222.hg.1 | 2.29  | PSR04003255.hg.1  | FAM114A1    |
| TC04000222.hg.1 | 2.19  | JUC04001574.hg.1  | FAM114A1    |
| TC04000222.hg.1 | -2.27 | JUC04001585.hg.1  | FAM114A1    |
| TC04001355.hg.1 | 3.08  | JUC04009945.hg.1  | WDFY3       |
| TC04001355.hg.1 | 3     | JUC04009933.hg.1  | WDFY3       |
| TC04001355.hg.1 | 2.04  | PSR04018864.hg.1  | WDFY3       |
| TC04001355.hg.1 | -2.16 | JUC04009971.hg.1  | WDFY3       |
| TC05002009.hg.1 | 3.08  | PSR05027907.hg.1  | C5orf54     |
| TC05002009.hg.1 | 2.7   | JUC05014226.hg.1  | C5orf54     |
| TC05002009.hg.1 | 2.21  | PSR05027899.hg.1  | C5orf54     |
| TC06001510.hg.1 | 3.08  | JUC06008438.hg.1  | IER3        |
| TC06001510.hg.1 | 2.03  | PSR06017128.hg.1  | IER3        |
| TC07001489.hg.1 | 3.08  | JUC07010970.hg.1  | STAG3L3, ST |
| TC07001489.hg.1 | 2.1   | PSR07022322.hg.1  | STAG3L3, ST |
| TC07001489.hg.1 | 2.07  | JUC07010967.hg.1  | STAG3L3, ST |
| TC07001489.hg.1 | 2.02  | JUC07010974.hg.1  | STAG3L3, ST |
| TC10001200.hg.1 | 3.08  | PSR10015043.hg.1  | RASGEF1A    |
| TC10001200.hg.1 | -2.03 | PSR10015062.hg.1  | RASGEF1A    |
| TC10001200.hg.1 | -2.37 | JUC10008740.hg.1  | RASGEF1A    |
| TC15001277.hg.1 | 3.08  | JUC15006438.hg.1  | ZSCAN29     |
| TC15001277.hg.1 | 2.24  | JUC15006434.hg.1  | ZSCAN29     |
| TC15001277.hg.1 | 2.1   | PSR15011871.hg.1  | ZSCAN29     |
| TC16001112.hg.1 | 3.08  | JUC16008705.hg.1  | LOC388276   |
| TC16001112.hg.1 | -2.02 | PSR16015542.hg.1  | LOC388276   |
| TC19001787.hg.1 | 3.08  | PSR19024281.hg.1  | FPR1        |
| TC19001787.hg.1 | -2.86 | JUC19013815.hg.1  | FPR1        |
| TC19001787.hg.1 | -3.05 | JUC19013813.hg.1  | FPR1        |
| TC21000477.hg.1 | 3.08  | JUC21002989.hg.1  | PRDM15      |
| TC21000477.hg.1 | 2.56  | JUC21002959.hg.1  | PRDM15      |
| TC21000477.hg.1 | 2.48  | JUC21002996.hg.1  | PRDM15      |
| TC21000477.hg.1 | 2.13  | PSR21005795.hg.1  | PRDM15      |
| TC21000477.hg.1 | 2.12  | JUC21002957.hg.1  | PRDM15      |
| TC21000477.hg.1 | -2.62 | JUC21002987.hg.1  | PRDM15      |
| TC01001585.hg.1 | 3.07  | JUC01013062.hg.1  | LAMC2       |
| TC01001585.hg.1 | 2.91  | JUC01013064.hg.1  | LAMC2       |
| TC01001585.hg.1 | 2.33  | JUC01013057.hg.1  | LAMC2       |
| TC01001585.hg.1 | -2.19 | JUC01013076.hg.1  | LAMC2       |
| TC01001585.hg.1 | -2.48 | JUC01013079.hg.1  | LAMC2       |



|                  |       |                   |            |
|------------------|-------|-------------------|------------|
| TC01001585.hg.1  | -2.57 | JUC01013074.hg.1  | LAMC2      |
| TC01001585.hg.1  | -2.61 | PSR01024555.hg.1  | LAMC2      |
| TC01001585.hg.1  | -3.38 | JUC01013072.hg.1  | LAMC2      |
| TC01003197.hg.1  | 3.07  | PSR01049013.hg.1  | MTMR11     |
| TC01003197.hg.1  | 2.99  | JUC01026061.hg.1  | MTMR11     |
| TC01003197.hg.1  | 2.05  | JUC01026055.hg.1  | MTMR11     |
| TC01003197.hg.1  | -2.91 | PSR01048995.hg.1  | MTMR11     |
| TC06000377.hg.1  | 3.07  | JUC06001566.hg.1  | APOM       |
| TC06000377.hg.1  | 2.34  | PSR06003729.hg.1  | APOM       |
| TC08000324.hg.1  | 3.07  | PSR08004573.hg.1  | AP3M2      |
| TC08000324.hg.1  | 2.04  | JUC08002307.hg.1  | AP3M2      |
| TC08000324.hg.1  | 2.01  | PSR08004586.hg.1  | AP3M2      |
| TC08000324.hg.1  | -2.11 | PSR08004572.hg.1  | AP3M2      |
| TC08001427.hg.1  | 3.07  | JUC08009429.hg.1  | RBM12B     |
| TC08001427.hg.1  | 2.11  | PSR08018531.hg.1  | RBM12B     |
| TC08001427.hg.1  | -2.12 | PSR08018514.hg.1  | RBM12B     |
| TC09000269.hg.1  | 3.07  | JUC09001526.hg.1  | LOC1005096 |
| TC09000269.hg.1  | 2.51  | PSR09002933.hg.1  | LOC1005096 |
| TC11000770.hg.1  | 3.07  | JUC11005135.hg.1  | ATG16L2    |
| TC11000770.hg.1  | 2.66  | JUC11005137.hg.1  | ATG16L2    |
| TC11000770.hg.1  | 2.02  | PSR11009914.hg.1  | ATG16L2    |
| TC11000770.hg.1  | -2.01 | PSR11009891.hg.1  | ATG16L2    |
| TC11000770.hg.1  | -2.16 | PSR11009894.hg.1  | ATG16L2    |
| TC11000770.hg.1  | -2.3  | JUC11005146.hg.1  | ATG16L2    |
| TC13000686.hg.1  | 3.07  | JUC13004671.hg.1  | NEK3       |
| TC13000686.hg.1  | 2.15  | JUC13004665.hg.1  | NEK3       |
| TC13000686.hg.1  | -2.11 | PSR13007994.hg.1  | NEK3       |
| TC13000686.hg.1  | -2.45 | PSR13007996.hg.1  | NEK3       |
| TC17000324.hg.1  | 3.07  | JUC17002217.hg.1  | SPAG5-AS1  |
| TC17000324.hg.1  | 2.01  | PSR17003948.hg.1  | SPAG5-AS1  |
| TC17001897.hg.1  | 3.07  | PSR17025736.hg.1  | PRPSAP1    |
| TC17001897.hg.1  | 2.68  | PSR17025719.hg.1  | PRPSAP1    |
| TC17001897.hg.1  | 2.61  | PSR17025742.hg.1  | PRPSAP1    |
| TC17001897.hg.1  | 2.22  | PSR17025729.hg.1  | PRPSAP1    |
| TC17001897.hg.1  | 2.1   | JUC17014463.hg.1  | PRPSAP1    |
| TC17001897.hg.1  | 2.05  | PSR17025722.hg.1  | PRPSAP1    |
| TC17001897.hg.1  | -2.06 | JUC17014455.hg.1  | PRPSAP1    |
| TC17001897.hg.1  | -2.6  | JUC17014460.hg.1  | PRPSAP1    |
| TC21000138.hg.1  | 3.07  | JUC21000639.hg.1  | CLIC6      |
| TC21000138.hg.1  | 2.14  | PSR21001194.hg.1  | CLIC6      |
| TC21000138.hg.1  | -2.2  | JUC21000634.hg.1  | CLIC6      |
| TC21000138.hg.1  | -4.81 | PSR21001193.hg.1  | CLIC6      |
| TC21000138.hg.1  | -5.88 | PSR21001192.hg.1  | CLIC6      |
| TC6_cox_hap2000  | 3.07  | JUC6_cox_hap20004 | APOM       |
| TC6_cox_hap2000  | 2.34  | PSR6_cox_hap20010 | APOM       |
| TC6_dbb_hap3000  | 3.07  | JUC6_dbb_hap30000 | APOM       |
| TC6_dbb_hap3000  | 2.34  | PSR6_dbb_hap30010 | APOM       |
| TC6_mann_hap400  | 3.07  | JUC6_mann_hap400  | APOM       |
| TC6_mann_hap400  | 2.34  | PSR6_mann_hap400  | APOM       |
| TC6_mcf_hap5000  | 3.07  | JUC6_mcf_hap50000 | APOM       |
| TC6_mcf_hap5000  | 2.34  | PSR6_mcf_hap50000 | APOM       |
| TC6_qbl_hap60000 | 3.07  | JUC6_qbl_hap60004 | APOM       |
| TC6_qbl_hap60000 | 2.34  | PSR6_qbl_hap60010 | APOM       |
| TC02000725.hg.1  | 3.06  | JUC02005961.hg.1  | CBWD2, CBV |
| TC02000725.hg.1  | 2.42  | JUC02005972.hg.1  | CBWD2, CBV |
| TC02000725.hg.1  | 2.21  | JUC02005980.hg.1  | CBWD2, CBV |
| TC02000725.hg.1  | 2.12  | JUC02005966.hg.1  | CBWD2, CBV |
| TC02000725.hg.1  | -2.08 | PSR02011277.hg.1  | CBWD2, CBV |

|                 |       |                  |            |
|-----------------|-------|------------------|------------|
| TC02000725.hg.1 | -2.08 | PSR02011285.hg.1 | CBWD2, CBV |
| TC02000725.hg.1 | -2.21 | JUC02005965.hg.1 | CBWD2, CBV |
| TC02000725.hg.1 | -2.27 | PSR02011291.hg.1 | CBWD2, CBV |
| TC02000725.hg.1 | -2.33 | PSR02011294.hg.1 | CBWD2, CBV |
| TC02002657.hg.1 | 3.06  | PSR02042716.hg.1 | FONG       |
| TC02002657.hg.1 | 2.68  | PSR02042717.hg.1 | FONG       |
| TC02002657.hg.1 | 2.49  | JUC02022351.hg.1 | FONG       |
| TC02002657.hg.1 | -2.14 | JUC02022350.hg.1 | FONG       |
| TC02002657.hg.1 | -2.42 | PSR02042711.hg.1 | FONG       |
| TC03001680.hg.1 | 3.06  | JUC03015068.hg.1 | B4GALT4    |
| TC03001680.hg.1 | 2.69  | JUC03015059.hg.1 | B4GALT4    |
| TC03001680.hg.1 | 2.45  | JUC03015056.hg.1 | B4GALT4    |
| TC03001680.hg.1 | 2.38  | JUC03015048.hg.1 | B4GALT4    |
| TC03001680.hg.1 | 2.35  | PSR03030326.hg.1 | B4GALT4    |
| TC03001680.hg.1 | -2.07 | PSR03030293.hg.1 | B4GALT4    |
| TC03003334.hg.1 | 3.06  | JUC03023258.hg.1 | DGKG       |
| TC03003334.hg.1 | -2.01 | PSR03036963.hg.1 | DGKG       |
| TC03003334.hg.1 | -2.31 | JUC03023273.hg.1 | DGKG       |
| TC03003334.hg.1 | -2.43 | JUC03023250.hg.1 | DGKG       |
| TC05000833.hg.1 | 3.06  | JUC05006267.hg.1 | SYNPO      |
| TC05000833.hg.1 | 2.58  | PSR05011993.hg.1 | SYNPO      |
| TC05000833.hg.1 | 2.02  | PSR05011992.hg.1 | SYNPO      |
| TC07000795.hg.1 | 3.06  | JUC07005917.hg.1 | SMO        |
| TC07000795.hg.1 | 2.36  | JUC07005916.hg.1 | SMO        |
| TC07000795.hg.1 | 2.15  | PSR07012542.hg.1 | SMO        |
| TC07000795.hg.1 | 2.01  | JUC07005904.hg.1 | SMO        |
| TC0X000061.hg.1 | 3.06  | JUC0X000451.hg.1 | OFD1       |
| TC0X000061.hg.1 | 2.54  | JUC0X000480.hg.1 | OFD1       |
| TC0X000061.hg.1 | 2.1   | PSR0X000859.hg.1 | OFD1       |
| TC0X000061.hg.1 | 2.05  | JUC0X000475.hg.1 | OFD1       |
| TC0X000061.hg.1 | -3.27 | JUC0X000450.hg.1 | OFD1       |
| TC0X000963.hg.1 | 3.06  | PSR0X012851.hg.1 | BCOR       |
| TC0X000963.hg.1 | 2.94  | PSR0X012832.hg.1 | BCOR       |
| TC0X000963.hg.1 | 2.93  | PSR0X012855.hg.1 | BCOR       |
| TC0X000963.hg.1 | 2.71  | PSR0X012860.hg.1 | BCOR       |
| TC0X000963.hg.1 | 2.49  | JUC0X006448.hg.1 | BCOR       |
| TC0X000963.hg.1 | 2.19  | JUC0X006432.hg.1 | BCOR       |
| TC0X000963.hg.1 | 2.13  | PSR0X012861.hg.1 | BCOR       |
| TC0X000963.hg.1 | 2     | JUC0X006439.hg.1 | BCOR       |
| TC0X001184.hg.1 | 3.06  | PSR0X015990.hg.1 | HMG5       |
| TC0X001184.hg.1 | 2.96  | JUC0X008107.hg.1 | HMG5       |
| TC0X001184.hg.1 | 2.68  | JUC0X008108.hg.1 | HMG5       |
| TC0X001184.hg.1 | -2.05 | PSR0X015974.hg.1 | HMG5       |
| TC0X001184.hg.1 | -2.5  | JUC0X008101.hg.1 | HMG5       |
| TC0X001184.hg.1 | -2.57 | JUC0X008098.hg.1 | HMG5       |
| TC0X001184.hg.1 | -2.9  | JUC0X008104.hg.1 | HMG5       |
| TC0X001326.hg.1 | 3.06  | PSR0X017830.hg.1 | CUL4B      |
| TC0X001326.hg.1 | 3     | PSR0X017832.hg.1 | CUL4B      |
| TC0X001326.hg.1 | 2.68  | PSR0X017826.hg.1 | CUL4B      |
| TC0X001326.hg.1 | 2.43  | PSR0X017827.hg.1 | CUL4B      |
| TC0X001326.hg.1 | 2.34  | PSR0X017825.hg.1 | CUL4B      |
| TC0X001326.hg.1 | 2.13  | PSR0X017817.hg.1 | CUL4B      |
| TC0X001326.hg.1 | -2.39 | JUC0X009070.hg.1 | CUL4B      |
| TC12001526.hg.1 | 3.06  | PSR12020042.hg.1 | KRT5       |
| TC12001526.hg.1 | 2     | PSR12020047.hg.1 | KRT5       |
| TC12001526.hg.1 | -2.01 | PSR12020050.hg.1 | KRT5       |
| TC12001526.hg.1 | -2.2  | JUC12011129.hg.1 | KRT5       |
| TC12001526.hg.1 | -2.57 | JUC12011128.hg.1 | KRT5       |

|                  |       |                   |             |
|------------------|-------|-------------------|-------------|
| TC12001526.hg.1  | -4.61 | JUC12011125.hg.1  | KRT5        |
| TC12001526.hg.1  | -4.79 | JUC12011127.hg.1  | KRT5        |
| TC17000375.hg.1  | 3.06  | PSR17004749.hg.1  | MIR632, ZNF |
| TC17000375.hg.1  | 2.63  | JUC17002730.hg.1  | MIR632, ZNF |
| TC17000375.hg.1  | 2.18  | JUC17002725.hg.1  | MIR632, ZNF |
| TC6_cox_hap2000  | 3.06  | JUC6_cox_hap20020 | DDX39B, SNO |
| TC6_cox_hap2000  | 2.83  | PSR6_cox_hap20028 | DDX39B, SNO |
| TC6_cox_hap2000  | 2.54  | JUC6_cox_hap20020 | DDX39B, SNO |
| TC6_cox_hap2000  | 2.16  | PSR6_cox_hap20027 | DDX39B, SNO |
| TC6_cox_hap2000  | -2.72 | PSR6_cox_hap20027 | DDX39B, SNO |
| TC6_dbb_hap3000  | 3.06  | JUC6_dbb_hap30019 | DDX39B, SNO |
| TC6_dbb_hap3000  | 2.83  | PSR6_dbb_hap30027 | DDX39B, SNO |
| TC6_dbb_hap3000  | 2.54  | JUC6_dbb_hap30019 | DDX39B, SNO |
| TC6_dbb_hap3000  | 2.16  | PSR6_dbb_hap30027 | DDX39B, SNO |
| TC6_dbb_hap3000  | -2.72 | PSR6_dbb_hap30027 | DDX39B, SNO |
| TC6_mann_hap4000 | 3.06  | JUC6_mann_hap4000 | DDX39B, SNO |
| TC6_mann_hap4000 | 2.83  | PSR6_mann_hap4000 | DDX39B, SNO |
| TC6_mann_hap4000 | 2.54  | JUC6_mann_hap4000 | DDX39B, SNO |
| TC6_mann_hap4000 | 2.16  | PSR6_mann_hap4000 | DDX39B, SNO |
| TC6_mann_hap4000 | -2.72 | PSR6_mann_hap4000 | DDX39B, SNO |
| TC6_mcf_hap5000  | 3.06  | JUC6_mcf_hap50018 | DDX39B, SNO |
| TC6_mcf_hap5000  | 2.83  | PSR6_mcf_hap50024 | DDX39B, SNO |
| TC6_mcf_hap5000  | 2.54  | JUC6_mcf_hap50018 | DDX39B, SNO |
| TC6_mcf_hap5000  | 2.16  | PSR6_mcf_hap50024 | DDX39B, SNO |
| TC6_mcf_hap5000  | -2.72 | PSR6_mcf_hap50024 | DDX39B, SNO |
| TC6_qbl_hap60002 | 3.06  | JUC6_qbl_hap60020 | DDX39B, SNO |
| TC6_qbl_hap60002 | 2.83  | PSR6_qbl_hap60027 | DDX39B, SNO |
| TC6_qbl_hap60002 | 2.54  | JUC6_qbl_hap60020 | DDX39B, SNO |
| TC6_qbl_hap60002 | 2.16  | PSR6_qbl_hap60027 | DDX39B, SNO |
| TC6_qbl_hap60002 | -2.72 | PSR6_qbl_hap60027 | DDX39B, SNO |
| TC01002825.hg.1  | 3.05  | PSR01043966.hg.1  | MCOLN3      |
| TC01002825.hg.1  | 2.66  | PSR01043950.hg.1  | MCOLN3      |
| TC01002825.hg.1  | 2.01  | JUC01023579.hg.1  | MCOLN3      |
| TC01002825.hg.1  | 2     | PSR01043975.hg.1  | MCOLN3      |
| TC02000944.hg.1  | 3.05  | JUC02007425.hg.1  | GALNT13     |
| TC02000944.hg.1  | 2.82  | JUC02007435.hg.1  | GALNT13     |
| TC02000944.hg.1  | 2.35  | PSR02013820.hg.1  | GALNT13     |
| TC02000944.hg.1  | 2.04  | JUC02007434.hg.1  | GALNT13     |
| TC02000944.hg.1  | -2.02 | PSR02013836.hg.1  | GALNT13     |
| TC02000944.hg.1  | -2.04 | JUC02007440.hg.1  | GALNT13     |
| TC02000944.hg.1  | -2.09 | JUC02007424.hg.1  | GALNT13     |
| TC02000944.hg.1  | -2.29 | PSR02013853.hg.1  | GALNT13     |
| TC02000944.hg.1  | -2.42 | JUC02007419.hg.1  | GALNT13     |
| TC02000944.hg.1  | -2.52 | JUC02007430.hg.1  | GALNT13     |
| TC02000944.hg.1  | -2.76 | JUC02007433.hg.1  | GALNT13     |
| TC02000944.hg.1  | -2.99 | PSR02013842.hg.1  | GALNT13     |
| TC02000944.hg.1  | -3.19 | PSR02013849.hg.1  | GALNT13     |
| TC02000944.hg.1  | -3.37 | PSR02013821.hg.1  | GALNT13     |
| TC02000944.hg.1  | -3.47 | JUC02007431.hg.1  | GALNT13     |
| TC02000944.hg.1  | -3.69 | PSR02013818.hg.1  | GALNT13     |
| TC02000944.hg.1  | -4.16 | PSR02013817.hg.1  | GALNT13     |
| TC02000944.hg.1  | -4.25 | PSR02013843.hg.1  | GALNT13     |
| TC02000944.hg.1  | -5.66 | PSR02013844.hg.1  | GALNT13     |
| TC02002136.hg.1  | 3.05  | JUC02018004.hg.1  | AFF3        |
| TC02002136.hg.1  | 2.86  | JUC02017989.hg.1  | AFF3        |
| TC02002136.hg.1  | 2.43  | PSR02034862.hg.1  | AFF3        |
| TC02002136.hg.1  | 2.38  | JUC02017977.hg.1  | AFF3        |
| TC02002136.hg.1  | 2.32  | PSR02034927.hg.1  | AFF3        |

|                 |       |                  |        |
|-----------------|-------|------------------|--------|
| TC02002136.hg.1 | 2.26  | PSR02034899.hg.1 | AFF3   |
| TC02002136.hg.1 | 2.24  | PSR02034913.hg.1 | AFF3   |
| TC02002136.hg.1 | 2.18  | PSR02034907.hg.1 | AFF3   |
| TC02002136.hg.1 | 2.17  | PSR02034905.hg.1 | AFF3   |
| TC02002136.hg.1 | 2.12  | PSR02034902.hg.1 | AFF3   |
| TC02002136.hg.1 | 2.05  | JUC02017997.hg.1 | AFF3   |
| TC02002136.hg.1 | -2.02 | JUC02018005.hg.1 | AFF3   |
| TC02002136.hg.1 | -2.16 | PSR02034869.hg.1 | AFF3   |
| TC02002136.hg.1 | -2.19 | PSR02034857.hg.1 | AFF3   |
| TC02002136.hg.1 | -2.48 | JUC02017991.hg.1 | AFF3   |
| TC02002136.hg.1 | -2.75 | JUC02017993.hg.1 | AFF3   |
| TC02002136.hg.1 | -2.98 | JUC02017988.hg.1 | AFF3   |
| TC02002136.hg.1 | -2.99 | PSR02034883.hg.1 | AFF3   |
| TC02002136.hg.1 | -3.58 | JUC02018018.hg.1 | AFF3   |
| TC02002136.hg.1 | -5.35 | JUC02017990.hg.1 | AFF3   |
| TC03000087.hg.1 | 3.05  | JUC03000968.hg.1 | SLC6A6 |
| TC03000087.hg.1 | 2.17  | JUC03000958.hg.1 | SLC6A6 |
| TC03000087.hg.1 | 2.15  | JUC03000976.hg.1 | SLC6A6 |
| TC03000087.hg.1 | 2.04  | PSR03001834.hg.1 | SLC6A6 |
| TC03000634.hg.1 | 3.05  | PSR03011428.hg.1 | PARP14 |
| TC03000634.hg.1 | 2.67  | JUC03005707.hg.1 | PARP14 |
| TC03000634.hg.1 | 2.34  | PSR03011459.hg.1 | PARP14 |
| TC03000634.hg.1 | 2.02  | PSR03011462.hg.1 | PARP14 |
| TC03000634.hg.1 | -2.14 | JUC03005702.hg.1 | PARP14 |
| TC03000634.hg.1 | -2.16 | PSR03011460.hg.1 | PARP14 |
| TC03000634.hg.1 | -2.56 | PSR03011447.hg.1 | PARP14 |
| TC03001431.hg.1 | 3.05  | JUC03012618.hg.1 | NPRL2  |
| TC03001431.hg.1 | 2.28  | PSR03025803.hg.1 | NPRL2  |
| TC03001431.hg.1 | 2.13  | PSR03025794.hg.1 | NPRL2  |
| TC08000216.hg.1 | 3.05  | PSR08003107.hg.1 | ELP3   |
| TC08000216.hg.1 | 2.91  | JUC08001542.hg.1 | ELP3   |
| TC08000216.hg.1 | -2.52 | JUC08001538.hg.1 | ELP3   |
| TC09001220.hg.1 | 3.05  | PSR09015653.hg.1 | NMRK1  |
| TC09001220.hg.1 | 3.02  | JUC09008417.hg.1 | NMRK1  |
| TC09001220.hg.1 | 2.63  | PSR09015646.hg.1 | NMRK1  |
| TC09001220.hg.1 | 2.57  | PSR09015655.hg.1 | NMRK1  |
| TC09001220.hg.1 | 2.54  | JUC09008413.hg.1 | NMRK1  |
| TC09001220.hg.1 | 2.17  | PSR09015658.hg.1 | NMRK1  |
| TC09001220.hg.1 | 2.1   | PSR09015636.hg.1 | NMRK1  |
| TC11000216.hg.1 | 3.05  | PSR11002915.hg.1 | INSC   |
| TC11000216.hg.1 | 2.65  | JUC11001411.hg.1 | INSC   |
| TC11000216.hg.1 | -2.2  | PSR11002904.hg.1 | INSC   |
| TC11000216.hg.1 | -2.37 | PSR11002896.hg.1 | INSC   |
| TC12001367.hg.1 | 3.05  | PSR12017879.hg.1 | AMN1   |
| TC12001367.hg.1 | 2.86  | PSR12017881.hg.1 | AMN1   |
| TC12001367.hg.1 | 2.23  | PSR12017883.hg.1 | AMN1   |
| TC12001367.hg.1 | 2.18  | JUC12009934.hg.1 | AMN1   |
| TC12001367.hg.1 | 2.06  | PSR12017878.hg.1 | AMN1   |
| TC12001367.hg.1 | 2.05  | PSR12017861.hg.1 | AMN1   |
| TC12001367.hg.1 | -2.44 | JUC12009935.hg.1 | AMN1   |
| TC12001377.hg.1 | 3.05  | JUC12009969.hg.1 | PKP2   |
| TC12001377.hg.1 | 2.39  | JUC12009965.hg.1 | PKP2   |
| TC12001377.hg.1 | 2.15  | JUC12009960.hg.1 | PKP2   |
| TC12001377.hg.1 | -2.03 | PSR12017914.hg.1 | PKP2   |
| TC12001377.hg.1 | -2.17 | PSR12017925.hg.1 | PKP2   |
| TC12001377.hg.1 | -2.36 | PSR12017929.hg.1 | PKP2   |
| TC12001377.hg.1 | -2.4  | PSR12017932.hg.1 | PKP2   |
| TC12001377.hg.1 | -2.42 | PSR12017937.hg.1 | PKP2   |

|                 |        |                  |             |
|-----------------|--------|------------------|-------------|
| TC12001377.hg.1 | -3.1   | JUC12009958.hg.1 | PKP2        |
| TC12001377.hg.1 | -3.11  | PSR12017931.hg.1 | PKP2        |
| TC12001377.hg.1 | -3.12  | PSR12017926.hg.1 | PKP2        |
| TC12001377.hg.1 | -3.75  | JUC12009971.hg.1 | PKP2        |
| TC17002870.hg.1 | 3.05   | PSR17002644.hg.1 | CCDC144A    |
| TC17002870.hg.1 | 2.32   | PSR17002637.hg.1 | CCDC144A    |
| TC17002870.hg.1 | 2.08   | JUC17018585.hg.1 | CCDC144A    |
| TC22000165.hg.1 | 3.05   | JUC22000977.hg.1 | ADRBK2      |
| TC22000165.hg.1 | 2.62   | PSR22003107.hg.1 | ADRBK2      |
| TC22000165.hg.1 | 2.5    | JUC22000987.hg.1 | ADRBK2      |
| TC22000165.hg.1 | 2.33   | JUC22000965.hg.1 | ADRBK2      |
| TC22000165.hg.1 | 2.06   | JUC22000968.hg.1 | ADRBK2      |
| TC22000165.hg.1 | -2.55  | PSR22003113.hg.1 | ADRBK2      |
| TC22000165.hg.1 | -2.81  | JUC22000980.hg.1 | ADRBK2      |
| TC6_apd_hap1000 | 3.05   | JUC6_apd_hap1000 | DDX39B, ATF |
| TC6_apd_hap1000 | -2.73  | PSR6_apd_hap1001 | DDX39B, ATF |
| TC6_apd_hap1000 | -3.61  | PSR6_apd_hap1001 | DDX39B, ATF |
| TC01002903.hg.1 | 3.04   | JUC01024300.hg.1 | DPYD        |
| TC01002903.hg.1 | -2.41  | PSR01045227.hg.1 | DPYD        |
| TC04000040.hg.1 | 3.04   | JUC04000421.hg.1 | NOP14-AS1   |
| TC04000040.hg.1 | 2.28   | PSR04001049.hg.1 | NOP14-AS1   |
| TC05000730.hg.1 | 3.04   | JUC05005558.hg.1 | IK, MIR3655 |
| TC05000730.hg.1 | 2.12   | JUC05005551.hg.1 | IK, MIR3655 |
| TC05000730.hg.1 | 2.02   | PSR05010527.hg.1 | IK, MIR3655 |
| TC05002110.hg.1 | 3.04   | JUC05014829.hg.1 | PDLIM7      |
| TC05002110.hg.1 | -2.35  | PSR05029126.hg.1 | PDLIM7      |
| TC05002110.hg.1 | -2.38  | JUC05014816.hg.1 | PDLIM7      |
| TC05002110.hg.1 | -3.06  | PSR05029142.hg.1 | PDLIM7      |
| TC05002110.hg.1 | -3.35  | PSR05029143.hg.1 | PDLIM7      |
| TC07001143.hg.1 | 3.04   | PSR07017828.hg.1 | ICA1        |
| TC07001143.hg.1 | 2.69   | JUC07008646.hg.1 | ICA1        |
| TC07001143.hg.1 | 2.28   | JUC07008661.hg.1 | ICA1        |
| TC07001143.hg.1 | 2.17   | PSR07017835.hg.1 | ICA1        |
| TC07001143.hg.1 | 2.07   | PSR07017829.hg.1 | ICA1        |
| TC07001143.hg.1 | 2.04   | JUC07008663.hg.1 | ICA1        |
| TC07001143.hg.1 | -2.02  | PSR07017816.hg.1 | ICA1        |
| TC07001143.hg.1 | -2.04  | PSR07017838.hg.1 | ICA1        |
| TC07001143.hg.1 | -2.08  | JUC07008674.hg.1 | ICA1        |
| TC07001143.hg.1 | -2.09  | PSR07017852.hg.1 | ICA1        |
| TC07001143.hg.1 | -2.12  | PSR07017819.hg.1 | ICA1        |
| TC07001143.hg.1 | -2.16  | PSR07017820.hg.1 | ICA1        |
| TC07001143.hg.1 | -2.22  | PSR07017809.hg.1 | ICA1        |
| TC07001143.hg.1 | -2.39  | PSR07017822.hg.1 | ICA1        |
| TC07001143.hg.1 | -2.39  | PSR07017823.hg.1 | ICA1        |
| TC07001143.hg.1 | -2.4   | PSR07017858.hg.1 | ICA1        |
| TC07001143.hg.1 | -2.5   | PSR07017837.hg.1 | ICA1        |
| TC07001143.hg.1 | -2.5   | JUC07008647.hg.1 | ICA1        |
| TC07001143.hg.1 | -2.6   | PSR07017834.hg.1 | ICA1        |
| TC07001143.hg.1 | -2.81  | PSR07017849.hg.1 | ICA1        |
| TC07001143.hg.1 | -2.89  | PSR07017847.hg.1 | ICA1        |
| TC07001143.hg.1 | -4.88  | JUC07008650.hg.1 | ICA1        |
| TC07001143.hg.1 | -10.31 | JUC07008666.hg.1 | ICA1        |
| TC08001370.hg.1 | 3.04   | JUC08009012.hg.1 | ZFAND1      |
| TC08001370.hg.1 | 2.12   | JUC08008996.hg.1 | ZFAND1      |
| TC08001370.hg.1 | -2.22  | PSR08017704.hg.1 | ZFAND1      |
| TC08001370.hg.1 | -2.76  | JUC08009000.hg.1 | ZFAND1      |
| TC0X000658.hg.1 | 3.04   | JUC0X004381.hg.1 | FHL1        |
| TC0X000658.hg.1 | 3.02   | JUC0X004383.hg.1 | FHL1        |

|                 |        |                  |          |
|-----------------|--------|------------------|----------|
| TC0X000658.hg.1 | 2.71   | PSR0X008658.hg.1 | FHL1     |
| TC0X000658.hg.1 | 2.68   | PSR0X008660.hg.1 | FHL1     |
| TC0X000658.hg.1 | 2.03   | PSR0X008633.hg.1 | FHL1     |
| TC0X000658.hg.1 | -2.1   | JUC0X004382.hg.1 | FHL1     |
| TC0X000658.hg.1 | -4.11  | PSR0X008661.hg.1 | FHL1     |
| TC0X000658.hg.1 | -19.57 | PSR0X008662.hg.1 | FHL1     |
| TC10000848.hg.1 | 3.04   | JUC10005774.hg.1 | ENO4     |
| TC10000848.hg.1 | 2.87   | JUC10005773.hg.1 | ENO4     |
| TC10000848.hg.1 | 2.49   | PSR10010293.hg.1 | ENO4     |
| TC10000848.hg.1 | 2.42   | JUC10005783.hg.1 | ENO4     |
| TC10000848.hg.1 | 2.41   | JUC10005779.hg.1 | ENO4     |
| TC10000848.hg.1 | 2.04   | PSR10010284.hg.1 | ENO4     |
| TC13000468.hg.1 | 3.04   | PSR13005310.hg.1 | SKA3     |
| TC13000468.hg.1 | 2.89   | PSR13005323.hg.1 | SKA3     |
| TC13000468.hg.1 | 2.87   | JUC13003205.hg.1 | SKA3     |
| TC13000468.hg.1 | 2.17   | PSR13005321.hg.1 | SKA3     |
| TC13000468.hg.1 | 2.08   | PSR13005311.hg.1 | SKA3     |
| TC13000468.hg.1 | 2.04   | PSR13005322.hg.1 | SKA3     |
| TC15000449.hg.1 | 3.04   | PSR15004285.hg.1 | CCNB2    |
| TC15000449.hg.1 | 2.74   | PSR15004276.hg.1 | CCNB2    |
| TC15000449.hg.1 | 2.17   | PSR15004284.hg.1 | CCNB2    |
| TC15000449.hg.1 | -2.2   | PSR15004279.hg.1 | CCNB2    |
| TC15000449.hg.1 | -2.27  | JUC15002113.hg.1 | CCNB2    |
| TC15000449.hg.1 | -2.71  | JUC15002118.hg.1 | CCNB2    |
| TC17001644.hg.1 | 3.04   | JUC17012325.hg.1 | HOXB5    |
| TC17001644.hg.1 | -2.13  | PSR17022033.hg.1 | HOXB5    |
| TC22000370.hg.1 | 3.04   | PSR22007080.hg.1 | PARVB    |
| TC22000370.hg.1 | 2.11   | JUC22002629.hg.1 | PARVB    |
| TC22000370.hg.1 | 2.04   | PSR22007061.hg.1 | PARVB    |
| TC01002294.hg.1 | 3.03   | PSR01035157.hg.1 | EMC1     |
| TC01002294.hg.1 | 2.83   | PSR01035181.hg.1 | EMC1     |
| TC01002294.hg.1 | 2.61   | JUC01018899.hg.1 | EMC1     |
| TC01002294.hg.1 | 2.35   | PSR01035169.hg.1 | EMC1     |
| TC01002294.hg.1 | 2.28   | PSR01035153.hg.1 | EMC1     |
| TC01002294.hg.1 | 2.18   | PSR01035175.hg.1 | EMC1     |
| TC01002294.hg.1 | -3.35  | JUC01018912.hg.1 | EMC1     |
| TC01002294.hg.1 | -9.29  | JUC01018889.hg.1 | EMC1     |
| TC01004007.hg.1 | 3.03   | JUC01031730.hg.1 | HEATR1   |
| TC01004007.hg.1 | 2.27   | JUC01031739.hg.1 | HEATR1   |
| TC01004007.hg.1 | 2.05   | PSR01060648.hg.1 | HEATR1   |
| TC01004007.hg.1 | -2.05  | JUC01031735.hg.1 | HEATR1   |
| TC01004007.hg.1 | -2.28  | JUC01031746.hg.1 | HEATR1   |
| TC02000464.hg.1 | 3.03   | PSR02007263.hg.1 | DOK1     |
| TC02000464.hg.1 | 2.92   | PSR02007262.hg.1 | DOK1     |
| TC02000464.hg.1 | 2.65   | PSR02007260.hg.1 | DOK1     |
| TC02000464.hg.1 | 2.64   | JUC02003679.hg.1 | DOK1     |
| TC02000464.hg.1 | 2.33   | JUC02003689.hg.1 | DOK1     |
| TC02000464.hg.1 | 2.24   | JUC02003684.hg.1 | DOK1     |
| TC02000464.hg.1 | -9.71  | JUC02003690.hg.1 | DOK1     |
| TC02002445.hg.1 | 3.03   | PSR02038535.hg.1 | NR4A2    |
| TC02002445.hg.1 | 2.57   | JUC02020162.hg.1 | NR4A2    |
| TC02002445.hg.1 | 2.43   | JUC02020163.hg.1 | NR4A2    |
| TC02002445.hg.1 | 2.29   | PSR02038536.hg.1 | NR4A2    |
| TC02002445.hg.1 | 2.19   | PSR02038518.hg.1 | NR4A2    |
| TC02002445.hg.1 | 2.18   | PSR02038517.hg.1 | NR4A2    |
| TC02002445.hg.1 | -2.04  | PSR02038507.hg.1 | NR4A2    |
| TC02002445.hg.1 | -2.3   | PSR02038523.hg.1 | NR4A2    |
| TC04001335.hg.1 | 3.03   | JUC04009759.hg.1 | TMEM150C |

|                 |       |                  |            |
|-----------------|-------|------------------|------------|
| TC04001335.hg.1 | 2.6   | JUC04009751.hg.1 | TMEM150C   |
| TC04001335.hg.1 | 2.43  | JUC04009765.hg.1 | TMEM150C   |
| TC04001335.hg.1 | 2.37  | JUC04009749.hg.1 | TMEM150C   |
| TC04001335.hg.1 | 2.07  | PSR04018378.hg.1 | TMEM150C   |
| TC04001335.hg.1 | -2.44 | JUC04009750.hg.1 | TMEM150C   |
| TC04001335.hg.1 | -2.75 | JUC04009764.hg.1 | TMEM150C   |
| TC04001335.hg.1 | -3.03 | JUC04009756.hg.1 | TMEM150C   |
| TC04001335.hg.1 | -3.11 | JUC04009752.hg.1 | TMEM150C   |
| TC04001335.hg.1 | -4.1  | PSR04018381.hg.1 | TMEM150C   |
| TC04001335.hg.1 | -4.5  | PSR04018410.hg.1 | TMEM150C   |
| TC04001335.hg.1 | -4.56 | JUC04009766.hg.1 | TMEM150C   |
| TC04001335.hg.1 | -7.46 | PSR04018405.hg.1 | TMEM150C   |
| TC04001335.hg.1 | -8.17 | PSR04018411.hg.1 | TMEM150C   |
| TC04001335.hg.1 | -9.97 | PSR04018409.hg.1 | TMEM150C   |
| TC04001335.hg.1 | -11.1 | PSR04018404.hg.1 | TMEM150C   |
| TC05001053.hg.1 | 3.03  | JUC05007963.hg.1 | SQSTM1     |
| TC05001053.hg.1 | 2.65  | PSR05015411.hg.1 | SQSTM1     |
| TC05001053.hg.1 | 2.35  | PSR05015415.hg.1 | SQSTM1     |
| TC05001053.hg.1 | 2.32  | PSR05015423.hg.1 | SQSTM1     |
| TC05001053.hg.1 | 2.3   | PSR05015416.hg.1 | SQSTM1     |
| TC05001053.hg.1 | 2.19  | JUC05007968.hg.1 | SQSTM1     |
| TC05001053.hg.1 | 2.15  | PSR05015413.hg.1 | SQSTM1     |
| TC05001053.hg.1 | 2.12  | PSR05015418.hg.1 | SQSTM1     |
| TC05001053.hg.1 | -3.57 | PSR05015452.hg.1 | SQSTM1     |
| TC05001053.hg.1 | -4.37 | JUC05007969.hg.1 | SQSTM1     |
| TC05001053.hg.1 | -4.56 | PSR05015449.hg.1 | SQSTM1     |
| TC06004060.hg.1 | 3.03  | JUC06020807.hg.1 | HLA-B      |
| TC06004060.hg.1 | 2.54  | PSR06017383.hg.1 | HLA-B      |
| TC06004060.hg.1 | 2.28  | JUC06020797.hg.1 | HLA-B      |
| TC06004060.hg.1 | 2.07  | PSR06017361.hg.1 | HLA-B      |
| TC06004060.hg.1 | -2.37 | PSR06017365.hg.1 | HLA-B      |
| TC06004060.hg.1 | -2.63 | JUC06020804.hg.1 | HLA-B      |
| TC06004060.hg.1 | -2.93 | PSR06017382.hg.1 | HLA-B      |
| TC09000536.hg.1 | 3.03  | JUC09003264.hg.1 | FSD1L      |
| TC09000536.hg.1 | 2.23  | PSR09005883.hg.1 | FSD1L      |
| TC09000536.hg.1 | -2.09 | JUC09003258.hg.1 | FSD1L      |
| TC09000536.hg.1 | -2.18 | JUC09003270.hg.1 | FSD1L      |
| TC09000536.hg.1 | -2.36 | JUC09003267.hg.1 | FSD1L      |
| TC09000536.hg.1 | -2.54 | JUC09003251.hg.1 | FSD1L      |
| TC09001025.hg.1 | 3.03  | JUC09007318.hg.1 | UBAP2, SNO |
| TC09001025.hg.1 | -2.03 | PSR09013435.hg.1 | UBAP2, SNO |
| TC09001025.hg.1 | -2.13 | JUC09007314.hg.1 | UBAP2, SNO |
| TC09001025.hg.1 | -2.54 | PSR09013430.hg.1 | UBAP2, SNO |
| TC10000752.hg.1 | 3.03  | PSR10008864.hg.1 | GBF1       |
| TC10000752.hg.1 | 2.19  | JUC10004942.hg.1 | GBF1       |
| TC10000764.hg.1 | 3.03  | JUC10005072.hg.1 | WBP1L      |
| TC10000764.hg.1 | -2.32 | PSR10009106.hg.1 | WBP1L      |
| TC10000764.hg.1 | -2.36 | PSR10009092.hg.1 | WBP1L      |
| TC10000764.hg.1 | -2.47 | PSR10009105.hg.1 | WBP1L      |
| TC10000764.hg.1 | -2.78 | JUC10005065.hg.1 | WBP1L      |
| TC10000764.hg.1 | -3.01 | PSR10009108.hg.1 | WBP1L      |
| TC10000764.hg.1 | -4.54 | JUC10005066.hg.1 | WBP1L      |
| TC10001022.hg.1 | 3.03  | JUC10007378.hg.1 | KIN        |
| TC10001022.hg.1 | -2.28 | PSR10012733.hg.1 | KIN        |
| TC10001022.hg.1 | -2.93 | JUC10007367.hg.1 | KIN        |
| TC10001022.hg.1 | -3.21 | JUC10007381.hg.1 | KIN        |
| TC11001750.hg.1 | 3.03  | JUC11010992.hg.1 | NUP160     |
| TC11001750.hg.1 | -2.25 | JUC11010998.hg.1 | NUP160     |

|                 |        |                  |             |
|-----------------|--------|------------------|-------------|
| TC11001750.hg.1 | -2.33  | JUC11010977.hg.1 | NUP160      |
| TC11001750.hg.1 | -2.6   | JUC11011011.hg.1 | NUP160      |
| TC11001750.hg.1 | -2.83  | PSR11020546.hg.1 | NUP160      |
| TC11001750.hg.1 | -3.63  | JUC11010979.hg.1 | NUP160      |
| TC11003478.hg.1 | 3.03   | PSR11018494.hg.1 | SAA2, RN5S3 |
| TC11003478.hg.1 | 2.54   | PSR11018493.hg.1 | SAA2, RN5S3 |
| TC11003478.hg.1 | -2.73  | PSR11018500.hg.1 | SAA2, RN5S3 |
| TC11003478.hg.1 | -3.03  | PSR11018492.hg.1 | SAA2, RN5S3 |
| TC11003478.hg.1 | -3.24  | PSR11018497.hg.1 | SAA2, RN5S3 |
| TC11003478.hg.1 | -3.98  | PSR11018496.hg.1 | SAA2, RN5S3 |
| TC11003478.hg.1 | -4.76  | PSR11018488.hg.1 | SAA2, RN5S3 |
| TC11003478.hg.1 | -6.41  | PSR11018503.hg.1 | SAA2, RN5S3 |
| TC11003478.hg.1 | -7.4   | PSR11018486.hg.1 | SAA2, RN5S3 |
| TC11003478.hg.1 | -7.56  | PSR11018485.hg.1 | SAA2, RN5S3 |
| TC11003478.hg.1 | -9.13  | JUC11019453.hg.1 | SAA2, RN5S3 |
| TC11003478.hg.1 | -10.98 | JUC11019454.hg.1 | SAA2, RN5S3 |
| TC20000096.hg.1 | 3.03   | JUC20000717.hg.1 | MACROD2     |
| TC20000096.hg.1 | 2.62   | PSR20001336.hg.1 | MACROD2     |
| TC20000096.hg.1 | 2.49   | JUC20000689.hg.1 | MACROD2     |
| TC20000096.hg.1 | 2.08   | PSR20001349.hg.1 | MACROD2     |
| TC03001166.hg.1 | 3.02   | JUC03010082.hg.1 | VGLL4       |
| TC03001166.hg.1 | 2.57   | JUC03010075.hg.1 | VGLL4       |
| TC03001166.hg.1 | 2.22   | JUC03010063.hg.1 | VGLL4       |
| TC03001166.hg.1 | -2.11  | PSR03020164.hg.1 | VGLL4       |
| TC03001166.hg.1 | -2.77  | PSR03020172.hg.1 | VGLL4       |
| TC03001489.hg.1 | 3.02   | JUC03013206.hg.1 | IL17RD      |
| TC03001489.hg.1 | 2.81   | PSR03027091.hg.1 | IL17RD      |
| TC03001489.hg.1 | 2.76   | PSR03027086.hg.1 | IL17RD      |
| TC03001489.hg.1 | 2.56   | PSR03027092.hg.1 | IL17RD      |
| TC03001489.hg.1 | 2.53   | PSR03027087.hg.1 | IL17RD      |
| TC03001489.hg.1 | 2.52   | JUC03013211.hg.1 | IL17RD      |
| TC03001489.hg.1 | 2.44   | JUC03013208.hg.1 | IL17RD      |
| TC03001489.hg.1 | 2.43   | PSR03027070.hg.1 | IL17RD      |
| TC03001489.hg.1 | 2.28   | PSR03027081.hg.1 | IL17RD      |
| TC03001489.hg.1 | 2.14   | JUC03013216.hg.1 | IL17RD      |
| TC03001489.hg.1 | 2.13   | JUC03013218.hg.1 | IL17RD      |
| TC03001489.hg.1 | 2.11   | PSR03027088.hg.1 | IL17RD      |
| TC03001489.hg.1 | 2.1    | PSR03027084.hg.1 | IL17RD      |
| TC03001489.hg.1 | 2.04   | JUC03013203.hg.1 | IL17RD      |
| TC03001489.hg.1 | 2.03   | JUC03013209.hg.1 | IL17RD      |
| TC03001489.hg.1 | -2.26  | PSR03027074.hg.1 | IL17RD      |
| TC03001489.hg.1 | -3.49  | PSR03027078.hg.1 | IL17RD      |
| TC03001976.hg.1 | 3.02   | JUC03017448.hg.1 | PDCD10      |
| TC03001976.hg.1 | 2.23   | JUC03017452.hg.1 | PDCD10      |
| TC03001976.hg.1 | -2.36  | PSR03035350.hg.1 | PDCD10      |
| TC03001976.hg.1 | -2.62  | JUC03017455.hg.1 | PDCD10      |
| TC04001824.hg.1 | 3.02   | JUC04013268.hg.1 | FAT1        |
| TC04001824.hg.1 | 2.52   | JUC04013295.hg.1 | FAT1        |
| TC04001824.hg.1 | 2.23   | PSR04025123.hg.1 | FAT1        |
| TC04001824.hg.1 | 2.13   | PSR04025084.hg.1 | FAT1        |
| TC06000698.hg.1 | 3.02   | JUC06003726.hg.1 | PHF3        |
| TC06000698.hg.1 | 2.83   | PSR06008352.hg.1 | PHF3        |
| TC06000698.hg.1 | 2.04   | PSR06008328.hg.1 | PHF3        |
| TC13000502.hg.1 | 3.02   | PSR13005694.hg.1 | RNF6        |
| TC13000502.hg.1 | -2.19  | JUC13003410.hg.1 | RNF6        |
| TC19001703.hg.1 | 3.02   | PSR19023237.hg.1 | GYS1        |
| TC19001703.hg.1 | 2.79   | PSR19023246.hg.1 | GYS1        |
| TC19001703.hg.1 | 2.27   | PSR19023227.hg.1 | GYS1        |



|                 |       |                  |             |
|-----------------|-------|------------------|-------------|
| TC19001703.hg.1 | 2.26  | JUC19013270.hg.1 | GYS1        |
| TC19001703.hg.1 | 2.19  | JUC19013284.hg.1 | GYS1        |
| TC19001703.hg.1 | 2.13  | JUC19013277.hg.1 | GYS1        |
| TC21000135.hg.1 | 3.02  | JUC21000622.hg.1 | LINC00310   |
| TC21000135.hg.1 | 2.79  | JUC21000620.hg.1 | LINC00310   |
| TC21000135.hg.1 | 2.7   | JUC21000621.hg.1 | LINC00310   |
| TC21000135.hg.1 | 2.09  | PSR21001160.hg.1 | LINC00310   |
| TC21000135.hg.1 | -2.71 | JUC21000619.hg.1 | LINC00310   |
| TC01001144.hg.1 | 3.01  | JUC01009778.hg.1 | NBPF16, NBF |
| TC01001144.hg.1 | 2.06  | PSR01017777.hg.1 | NBPF16, NBF |
| TC01001144.hg.1 | -2.09 | JUC01009773.hg.1 | NBPF16, NBF |
| TC04001459.hg.1 | 3.01  | JUC04010797.hg.1 | LEF1        |
| TC04001459.hg.1 | -2.19 | PSR04020637.hg.1 | LEF1        |
| TC04001459.hg.1 | -2.27 | PSR04020643.hg.1 | LEF1        |
| TC04001459.hg.1 | -2.36 | PSR04020619.hg.1 | LEF1        |
| TC04001459.hg.1 | -2.58 | PSR04020600.hg.1 | LEF1        |
| TC04001459.hg.1 | -2.65 | PSR04020638.hg.1 | LEF1        |
| TC04001459.hg.1 | -2.82 | JUC04010814.hg.1 | LEF1        |
| TC04001459.hg.1 | -2.86 | PSR04020616.hg.1 | LEF1        |
| TC04001459.hg.1 | -3.01 | PSR04020614.hg.1 | LEF1        |
| TC04001459.hg.1 | -3.1  | JUC04010790.hg.1 | LEF1        |
| TC04001459.hg.1 | -3.24 | PSR04020642.hg.1 | LEF1        |
| TC04001459.hg.1 | -3.39 | PSR04020653.hg.1 | LEF1        |
| TC04001459.hg.1 | -3.46 | PSR04020625.hg.1 | LEF1        |
| TC04001459.hg.1 | -3.7  | JUC04010801.hg.1 | LEF1        |
| TC04001459.hg.1 | -3.92 | PSR04020615.hg.1 | LEF1        |
| TC04001459.hg.1 | -3.97 | PSR04020630.hg.1 | LEF1        |
| TC04001459.hg.1 | -4.06 | PSR04020644.hg.1 | LEF1        |
| TC04001459.hg.1 | -4.51 | JUC04010798.hg.1 | LEF1        |
| TC04001459.hg.1 | -5.57 | PSR04020617.hg.1 | LEF1        |
| TC04001459.hg.1 | -6.64 | PSR04020610.hg.1 | LEF1        |
| TC04001459.hg.1 | -6.67 | JUC04010809.hg.1 | LEF1        |
| TC06000328.hg.1 | 3.01  | PSR06002682.hg.1 | HLA-A       |
| TC06000328.hg.1 | 2.88  | PSR06002653.hg.1 | HLA-A       |
| TC06000328.hg.1 | 2.62  | PSR06002663.hg.1 | HLA-A       |
| TC06000328.hg.1 | 2.5   | PSR06002651.hg.1 | HLA-A       |
| TC06000328.hg.1 | 2.33  | PSR06002680.hg.1 | HLA-A       |
| TC06000328.hg.1 | 2.32  | PSR06002655.hg.1 | HLA-A       |
| TC06000328.hg.1 | 2.2   | PSR06002668.hg.1 | HLA-A       |
| TC06000328.hg.1 | 2.19  | PSR06002677.hg.1 | HLA-A       |
| TC06000328.hg.1 | 2.12  | JUC06001194.hg.1 | HLA-A       |
| TC06000328.hg.1 | 2.04  | PSR06002654.hg.1 | HLA-A       |
| TC06000328.hg.1 | -2.29 | JUC06001191.hg.1 | HLA-A       |
| TC06000328.hg.1 | -3.82 | JUC06001187.hg.1 | HLA-A       |
| TC06000328.hg.1 | -4.35 | PSR06002679.hg.1 | HLA-A       |
| TC06001965.hg.1 | 3.01  | JUC06011876.hg.1 | USP45       |
| TC06001965.hg.1 | 2.06  | PSR06024260.hg.1 | USP45       |
| TC06001965.hg.1 | -2.84 | JUC06011899.hg.1 | USP45       |
| TC07001931.hg.1 | 3.01  | PSR07030029.hg.1 | FLJ40852    |
| TC07001931.hg.1 | 2.83  | PSR07030028.hg.1 | FLJ40852    |
| TC07001931.hg.1 | -2.27 | JUC07014890.hg.1 | FLJ40852    |
| TC07001931.hg.1 | -3.39 | PSR07030019.hg.1 | FLJ40852    |
| TC08000203.hg.1 | 3.01  | JUC08001409.hg.1 | DPYSL2      |
| TC08000203.hg.1 | 2.99  | PSR08002869.hg.1 | DPYSL2      |
| TC08000203.hg.1 | 2.98  | PSR08002865.hg.1 | DPYSL2      |
| TC08000203.hg.1 | 2.92  | PSR08002878.hg.1 | DPYSL2      |
| TC08000203.hg.1 | 2.8   | PSR08002888.hg.1 | DPYSL2      |
| TC08000203.hg.1 | 2.71  | PSR08002874.hg.1 | DPYSL2      |

|                  |       |                   |             |
|------------------|-------|-------------------|-------------|
| TC08000203.hg.1  | 2.56  | JUC08001407.hg.1  | DPYSL2      |
| TC08000203.hg.1  | 2.26  | PSR08002862.hg.1  | DPYSL2      |
| TC08000203.hg.1  | 2.21  | PSR08002861.hg.1  | DPYSL2      |
| TC08000203.hg.1  | 2.2   | JUC08001418.hg.1  | DPYSL2      |
| TC08000203.hg.1  | 2.16  | PSR08002879.hg.1  | DPYSL2      |
| TC08000203.hg.1  | -2.05 | JUC08001410.hg.1  | DPYSL2      |
| TC08000203.hg.1  | -2.3  | JUC08001413.hg.1  | DPYSL2      |
| TC08001705.hg.1  | 3.01  | JUC08011525.hg.1  | LYNX1       |
| TC08001705.hg.1  | 2.94  | PSR08022420.hg.1  | LYNX1       |
| TC08001705.hg.1  | 2.91  | PSR08022421.hg.1  | LYNX1       |
| TC08001705.hg.1  | 2.76  | PSR08022439.hg.1  | LYNX1       |
| TC08001705.hg.1  | 2.34  | JUC08011533.hg.1  | LYNX1       |
| TC08001705.hg.1  | 2.12  | JUC08011529.hg.1  | LYNX1       |
| TC08001705.hg.1  | 2.09  | PSR08022424.hg.1  | LYNX1       |
| TC08001705.hg.1  | 2.09  | PSR08022435.hg.1  | LYNX1       |
| TC0X000809.hg.1  | 3.01  | PSR0X011080.hg.1  | PRKX        |
| TC0X000809.hg.1  | 2.42  | JUC0X005424.hg.1  | PRKX        |
| TC0X000809.hg.1  | 2.36  | PSR0X011101.hg.1  | PRKX        |
| TC0X000809.hg.1  | 2.36  | PSR0X011102.hg.1  | PRKX        |
| TC0X000809.hg.1  | 2.22  | PSR0X011086.hg.1  | PRKX        |
| TC0X000809.hg.1  | -2.04 | JUC0X005428.hg.1  | PRKX        |
| TC12001791.hg.1  | 3.01  | JUC12013087.hg.1  | CEP290      |
| TC12001791.hg.1  | 2.61  | JUC12013097.hg.1  | CEP290      |
| TC12001791.hg.1  | 2.12  | JUC12013130.hg.1  | CEP290      |
| TC12001791.hg.1  | -2.01 | PSR12023682.hg.1  | CEP290      |
| TC12001791.hg.1  | -2.75 | JUC12013122.hg.1  | CEP290      |
| TC12001791.hg.1  | -2.79 | JUC12013116.hg.1  | CEP290      |
| TC12001791.hg.1  | -3.98 | JUC12013086.hg.1  | CEP290      |
| TC15001469.hg.1  | 3.01  | PSR15013760.hg.1  | PRTG        |
| TC15001469.hg.1  | 2.39  | JUC15007381.hg.1  | PRTG        |
| TC15001469.hg.1  | -2.14 | JUC15007383.hg.1  | PRTG        |
| TC21000267.hg.1  | 3.01  | JUC21001805.hg.1  | TEKT4P2, LC |
| TC21000267.hg.1  | 2.52  | JUC21001808.hg.1  | TEKT4P2, LC |
| TC21000267.hg.1  | 2.04  | JUC21001804.hg.1  | TEKT4P2, LC |
| TC21000267.hg.1  | -2.48 | PSR21003353.hg.1  | TEKT4P2, LC |
| TC6_mcf_hap5000  | 3.01  | JUC6_mcf_hap50015 | HLA-B       |
| TC6_mcf_hap5000  | 2.32  | JUC6_mcf_hap50015 | HLA-B       |
| TC6_mcf_hap5000  | 2.27  | PSR6_mcf_hap50024 | HLA-B       |
| TC6_mcf_hap5000  | 2.26  | JUC6_mcf_hap50014 | HLA-B       |
| TC6_mcf_hap5000  | 2.16  | PSR6_mcf_hap50024 | HLA-B       |
| TC6_mcf_hap5000  | 2.07  | PSR6_mcf_hap50024 | HLA-B       |
| TC6_ssto_hap7000 | 3.01  | PSR6_ssto_hap7003 | PSMB8       |
| TC6_ssto_hap7000 | 2.38  | JUC6_ssto_hap7001 | PSMB8       |
| TC6_ssto_hap7000 | -3.15 | PSR6_ssto_hap7003 | PSMB8       |
| TC6_ssto_hap7000 | 3.01  | JUC6_ssto_hap7001 | DDX39B, SNO |
| TC6_ssto_hap7000 | 2.78  | PSR6_ssto_hap7002 | DDX39B, SNO |
| TC6_ssto_hap7000 | 2.12  | PSR6_ssto_hap7002 | DDX39B, SNO |
| TC6_ssto_hap7000 | -2.77 | PSR6_ssto_hap7002 | DDX39B, SNO |
| TC6_ssto_hap7000 | -3.66 | PSR6_ssto_hap7002 | DDX39B, SNO |
| TC01003883.hg.1  | 3     | JUC01031010.hg.1  | WDR26       |
| TC01003883.hg.1  | 2.56  | PSR01059192.hg.1  | WDR26       |
| TC01006323.hg.1  | 3     | JUC01044045.hg.1  | HEATR8      |
| TC01006323.hg.1  | -2.07 | PSR01010821.hg.1  | HEATR8      |
| TC01006323.hg.1  | -2.23 | PSR01010818.hg.1  | HEATR8      |
| TC02001893.hg.1  | 3     | JUC02015964.hg.1  | XPO1        |
| TC02001893.hg.1  | 2.96  | PSR02030318.hg.1  | XPO1        |
| TC02001893.hg.1  | 2.63  | PSR02030345.hg.1  | XPO1        |
| TC02001893.hg.1  | 2.48  | PSR02030316.hg.1  | XPO1        |

|                 |       |                  |          |
|-----------------|-------|------------------|----------|
| TC02001893.hg.1 | 2.39  | PSR02030348.hg.1 | XPO1     |
| TC02001893.hg.1 | 2.16  | PSR02030351.hg.1 | XPO1     |
| TC02001893.hg.1 | 2.06  | PSR02030288.hg.1 | XPO1     |
| TC02001893.hg.1 | 2.01  | PSR02030343.hg.1 | XPO1     |
| TC06001195.hg.1 | 3     | JUC06007077.hg.1 | C6orf70  |
| TC06001195.hg.1 | -2.03 | PSR06014278.hg.1 | C6orf70  |
| TC06001195.hg.1 | -2.89 | JUC06007089.hg.1 | C6orf70  |
| TC06001195.hg.1 | -2.99 | PSR06014270.hg.1 | C6orf70  |
| TC07000520.hg.1 | 3     | JUC07003503.hg.1 | DMTF1    |
| TC07000520.hg.1 | -2.54 | PSR07007337.hg.1 | DMTF1    |
| TC07000520.hg.1 | -2.94 | PSR07007338.hg.1 | DMTF1    |
| TC07000520.hg.1 | -3.74 | PSR07007343.hg.1 | DMTF1    |
| TC07001955.hg.1 | 3     | JUC07014953.hg.1 | TRBV10-1 |
| TC07001955.hg.1 | 2.23  | PSR07030190.hg.1 | TRBV10-1 |
| TC08000019.hg.1 | 3     | JUC08000170.hg.1 |          |
| TC08000019.hg.1 | 2.12  | PSR08000305.hg.1 |          |
| TC0X000038.hg.1 | 3     | JUC0X000309.hg.1 | CLCN4    |
| TC0X000038.hg.1 | 2.27  | JUC0X000301.hg.1 | CLCN4    |
| TC0X000038.hg.1 | 2.02  | PSR0X000540.hg.1 | CLCN4    |
| TC0X000038.hg.1 | -2.13 | JUC0X000302.hg.1 | CLCN4    |
| TC0X000038.hg.1 | -3.87 | JUC0X000296.hg.1 | CLCN4    |
| TC0X001544.hg.1 | 3     | PSR0X020691.hg.1 | MPP1     |
| TC0X001544.hg.1 | 2.78  | JUC0X010326.hg.1 | MPP1     |
| TC0X001544.hg.1 | 2.39  | JUC0X010322.hg.1 | MPP1     |
| TC0X001544.hg.1 | 2.2   | PSR0X020686.hg.1 | MPP1     |
| TC0X001544.hg.1 | -2.79 | JUC0X010337.hg.1 | MPP1     |
| TC12003260.hg.1 | 3     | JUC12020197.hg.1 | WDR66    |
| TC12003260.hg.1 | 2.85  | PSR12012606.hg.1 | WDR66    |
| TC12003260.hg.1 | 2.6   | JUC12020179.hg.1 | WDR66    |
| TC12003260.hg.1 | 2.12  | JUC12020188.hg.1 | WDR66    |
| TC13000484.hg.1 | 3     | JUC13003295.hg.1 | MIPEP    |
| TC13000484.hg.1 | 2.44  | JUC13003277.hg.1 | MIPEP    |
| TC13000484.hg.1 | -2.1  | JUC13003286.hg.1 | MIPEP    |
| TC13000484.hg.1 | -2.36 | JUC13003296.hg.1 | MIPEP    |
| TC13000484.hg.1 | -3.28 | PSR13005460.hg.1 | MIPEP    |
| TC18000051.hg.1 | 3     | JUC18000348.hg.1 | APCDD1   |
| TC18000051.hg.1 | 2.56  | PSR18000560.hg.1 | APCDD1   |
| TC18000051.hg.1 | 2.08  | PSR18000557.hg.1 | APCDD1   |
| TC18000051.hg.1 | -2.68 | PSR18000552.hg.1 | APCDD1   |
| TC18000051.hg.1 | -3.5  | PSR18000553.hg.1 | APCDD1   |
| TC01002493.hg.1 | 2.99  | JUC01020793.hg.1 | SFPQ     |
| TC01002493.hg.1 | 2.9   | JUC01020783.hg.1 | SFPQ     |
| TC01002493.hg.1 | 2.89  | PSR01038690.hg.1 | SFPQ     |
| TC01002493.hg.1 | 2.81  | PSR01038686.hg.1 | SFPQ     |
| TC01002493.hg.1 | 2.77  | JUC01020789.hg.1 | SFPQ     |
| TC01002493.hg.1 | 2.71  | JUC01020787.hg.1 | SFPQ     |
| TC01002493.hg.1 | 2.67  | JUC01020781.hg.1 | SFPQ     |
| TC01002493.hg.1 | 2.56  | PSR01038689.hg.1 | SFPQ     |
| TC01002493.hg.1 | 2.54  | PSR01038682.hg.1 | SFPQ     |
| TC01002493.hg.1 | 2.49  | PSR01038692.hg.1 | SFPQ     |
| TC01002493.hg.1 | 2.49  | PSR01038694.hg.1 | SFPQ     |
| TC01002493.hg.1 | 2.46  | PSR01038685.hg.1 | SFPQ     |
| TC01002493.hg.1 | 2.45  | PSR01038684.hg.1 | SFPQ     |
| TC01002493.hg.1 | 2.34  | PSR01038680.hg.1 | SFPQ     |
| TC01002493.hg.1 | 2.3   | PSR01038683.hg.1 | SFPQ     |
| TC01002493.hg.1 | 2.22  | JUC01020786.hg.1 | SFPQ     |
| TC01002493.hg.1 | 2.17  | PSR01038687.hg.1 | SFPQ     |
| TC01002493.hg.1 | 2.16  | PSR01038688.hg.1 | SFPQ     |

|                 |       |                  |             |
|-----------------|-------|------------------|-------------|
| TC01002493.hg.1 | -2.01 | JUC01020790.hg.1 | SFPQ        |
| TC01002493.hg.1 | -2.64 | JUC01020779.hg.1 | SFPQ        |
| TC02001320.hg.1 | 2.99  | PSR02020512.hg.1 | ANKZF1      |
| TC02001320.hg.1 | 2.71  | JUC02010955.hg.1 | ANKZF1      |
| TC02001320.hg.1 | 2.16  | JUC02010941.hg.1 | ANKZF1      |
| TC02001320.hg.1 | -2.15 | PSR02020466.hg.1 | ANKZF1      |
| TC02001320.hg.1 | -2.63 | PSR02020465.hg.1 | ANKZF1      |
| TC02001320.hg.1 | -2.68 | PSR02020464.hg.1 | ANKZF1      |
| TC02001753.hg.1 | 2.99  | JUC02014748.hg.1 | ATL2        |
| TC02001753.hg.1 | 2.51  | JUC02014761.hg.1 | ATL2        |
| TC02001753.hg.1 | 2.37  | JUC02014769.hg.1 | ATL2        |
| TC02001753.hg.1 | 2.28  | JUC02014750.hg.1 | ATL2        |
| TC02001753.hg.1 | 2.19  | PSR02028197.hg.1 | ATL2        |
| TC02001753.hg.1 | 2.01  | JUC02014755.hg.1 | ATL2        |
| TC02002195.hg.1 | 2.99  | JUC02018360.hg.1 | NPHP1       |
| TC02002195.hg.1 | 2.55  | JUC02018355.hg.1 | NPHP1       |
| TC02002195.hg.1 | 2.05  | JUC02018368.hg.1 | NPHP1       |
| TC02002195.hg.1 | -2.37 | JUC02018362.hg.1 | NPHP1       |
| TC02002195.hg.1 | -2.76 | JUC02018345.hg.1 | NPHP1       |
| TC02002195.hg.1 | -2.96 | PSR02035552.hg.1 | NPHP1       |
| TC02002195.hg.1 | -3.62 | JUC02018348.hg.1 | NPHP1       |
| TC03001010.hg.1 | 2.99  | JUC03009101.hg.1 | MAP3K13     |
| TC03001010.hg.1 | 2.63  | JUC03009091.hg.1 | MAP3K13     |
| TC03001010.hg.1 | 2.24  | JUC03009106.hg.1 | MAP3K13     |
| TC03001010.hg.1 | 2.08  | PSR03017916.hg.1 | MAP3K13     |
| TC03001010.hg.1 | 2.04  | PSR03017913.hg.1 | MAP3K13     |
| TC03001010.hg.1 | 2.01  | JUC03009108.hg.1 | MAP3K13     |
| TC05001558.hg.1 | 2.99  | PSR05021273.hg.1 | EDIL3       |
| TC05001558.hg.1 | -4.77 | JUC05010963.hg.1 | EDIL3       |
| TC06001094.hg.1 | 2.99  | PSR06012912.hg.1 | PLEKHG1     |
| TC06001094.hg.1 | 2.13  | JUC06006349.hg.1 | PLEKHG1     |
| TC06001094.hg.1 | 2.02  | JUC06006365.hg.1 | PLEKHG1     |
| TC06001094.hg.1 | -2.03 | JUC06006345.hg.1 | PLEKHG1     |
| TC06001094.hg.1 | -2.26 | PSR06012928.hg.1 | PLEKHG1     |
| TC06001094.hg.1 | -2.69 | JUC06006356.hg.1 | PLEKHG1     |
| TC06001094.hg.1 | -3.3  | PSR06012924.hg.1 | PLEKHG1     |
| TC07000539.hg.1 | 2.99  | JUC07003695.hg.1 | C7orf63     |
| TC07000539.hg.1 | 2.65  | JUC07003696.hg.1 | C7orf63     |
| TC07000539.hg.1 | 2.21  | PSR07007687.hg.1 | C7orf63     |
| TC07000539.hg.1 | 2.15  | JUC07003689.hg.1 | C7orf63     |
| TC07000539.hg.1 | 2.13  | JUC07003685.hg.1 | C7orf63     |
| TC07000539.hg.1 | -2.08 | JUC07003679.hg.1 | C7orf63     |
| TC07000539.hg.1 | -2.18 | PSR07007673.hg.1 | C7orf63     |
| TC09001488.hg.1 | 2.99  | JUC09010047.hg.1 | PTBP3, MIR3 |
| TC09001488.hg.1 | 2.73  | PSR09018496.hg.1 | PTBP3, MIR3 |
| TC15001620.hg.1 | 2.99  | JUC15008484.hg.1 | MYO9A       |
| TC15001620.hg.1 | 2.61  | JUC15008518.hg.1 | MYO9A       |
| TC15001620.hg.1 | 2.37  | JUC15008512.hg.1 | MYO9A       |
| TC15001620.hg.1 | 2.25  | JUC15008516.hg.1 | MYO9A       |
| TC15001620.hg.1 | -2.03 | PSR15015634.hg.1 | MYO9A       |
| TC15001620.hg.1 | -2.05 | JUC15008489.hg.1 | MYO9A       |
| TC17000531.hg.1 | 2.99  | JUC17003609.hg.1 | TUBG1       |
| TC17000531.hg.1 | 2.23  | PSR17006433.hg.1 | TUBG1       |
| TC17002892.hg.1 | 2.99  | JUC17018891.hg.1 | CCDC144B, C |
| TC17002892.hg.1 | 2.72  | PSR17016545.hg.1 | CCDC144B, C |
| TC17002892.hg.1 | 2.7   | PSR17016547.hg.1 | CCDC144B, C |
| TC17002892.hg.1 | 2.42  | JUC17018896.hg.1 | CCDC144B, C |
| TC17002892.hg.1 | 2.25  | JUC17018897.hg.1 | CCDC144B, C |

|                  |       |                   |             |
|------------------|-------|-------------------|-------------|
| TC17002892.hg.1  | 2.15  | PSR17016546.hg.1  | CCDC144B, C |
| TC17002892.hg.1  | 2.02  | JUC17018885.hg.1  | CCDC144B, C |
| TC17002892.hg.1  | -2.57 | JUC17018880.hg.1  | CCDC144B, C |
| TC22000598.hg.1  | 2.99  | PSR22010521.hg.1  | LRP5L       |
| TC22000598.hg.1  | 2.75  | PSR22010527.hg.1  | LRP5L       |
| TC22000598.hg.1  | 2.66  | PSR22010529.hg.1  | LRP5L       |
| TC22000598.hg.1  | 2.63  | PSR22010526.hg.1  | LRP5L       |
| TC22000598.hg.1  | 2.41  | JUC22004262.hg.1  | LRP5L       |
| TC22000598.hg.1  | 2.38  | PSR22010540.hg.1  | LRP5L       |
| TC22000598.hg.1  | 2.2   | JUC22004257.hg.1  | LRP5L       |
| TC22000598.hg.1  | 2.08  | PSR22010542.hg.1  | LRP5L       |
| TC22000598.hg.1  | -2.25 | JUC22004258.hg.1  | LRP5L       |
| TC6_cox_hap2000  | 2.99  | JUC6_cox_hap20010 | BAG6        |
| TC6_cox_hap2000  | 2.51  | PSR6_cox_hap20028 | BAG6        |
| TC6_cox_hap2000  | 2.32  | PSR6_cox_hap20029 | BAG6        |
| TC6_cox_hap2000  | 2.32  | JUC6_cox_hap20010 | BAG6        |
| TC6_cox_hap2000  | 2.31  | JUC6_cox_hap20010 | BAG6        |
| TC6_cox_hap2000  | 2.26  | PSR6_cox_hap20029 | BAG6        |
| TC6_cox_hap2000  | 2.23  | JUC6_cox_hap20010 | BAG6        |
| TC6_cox_hap2000  | 2.11  | PSR6_cox_hap20028 | BAG6        |
| TC6_cox_hap2000  | 2.1   | PSR6_cox_hap20028 | BAG6        |
| TC6_cox_hap2000  | 2.02  | JUC6_cox_hap20010 | BAG6        |
| TC6_cox_hap2000  | 2.01  | PSR6_cox_hap20029 | BAG6        |
| TC6_dbb_hap3000  | 2.99  | JUC6_dbb_hap30010 | BAG6        |
| TC6_dbb_hap3000  | 2.51  | PSR6_dbb_hap30021 | BAG6        |
| TC6_dbb_hap3000  | 2.32  | PSR6_dbb_hap30021 | BAG6        |
| TC6_dbb_hap3000  | 2.32  | JUC6_dbb_hap30010 | BAG6        |
| TC6_dbb_hap3000  | 2.31  | JUC6_dbb_hap30010 | BAG6        |
| TC6_dbb_hap3000  | 2.26  | PSR6_dbb_hap30021 | BAG6        |
| TC6_dbb_hap3000  | 2.23  | JUC6_dbb_hap30010 | BAG6        |
| TC6_dbb_hap3000  | 2.1   | PSR6_dbb_hap30021 | BAG6        |
| TC6_dbb_hap3000  | 2.02  | JUC6_dbb_hap30010 | BAG6        |
| TC6_dbb_hap3000  | 2.01  | PSR6_dbb_hap30021 | BAG6        |
| TC6_mann_hap4000 | 2.99  | JUC6_mann_hap4000 | BAG6        |
| TC6_mann_hap4000 | 2.51  | PSR6_mann_hap4000 | BAG6        |
| TC6_mann_hap4000 | 2.32  | PSR6_mann_hap4000 | BAG6        |
| TC6_mann_hap4000 | 2.32  | JUC6_mann_hap4000 | BAG6        |
| TC6_mann_hap4000 | 2.31  | JUC6_mann_hap4000 | BAG6        |
| TC6_mann_hap4000 | 2.26  | PSR6_mann_hap4000 | BAG6        |
| TC6_mann_hap4000 | 2.23  | JUC6_mann_hap4000 | BAG6        |
| TC6_mann_hap4000 | 2.1   | PSR6_mann_hap4000 | BAG6        |
| TC6_mann_hap4000 | 2.02  | JUC6_mann_hap4000 | BAG6        |
| TC6_mann_hap4000 | 2.01  | PSR6_mann_hap4000 | BAG6        |
| TC6_ssto_hap7000 | 2.99  | JUC6_ssto_hap7000 | BAG6        |
| TC6_ssto_hap7000 | 2.51  | PSR6_ssto_hap7002 | BAG6        |
| TC6_ssto_hap7000 | 2.32  | PSR6_ssto_hap7002 | BAG6        |
| TC6_ssto_hap7000 | 2.32  | JUC6_ssto_hap7000 | BAG6        |
| TC6_ssto_hap7000 | 2.31  | JUC6_ssto_hap7000 | BAG6        |
| TC6_ssto_hap7000 | 2.26  | PSR6_ssto_hap7002 | BAG6        |
| TC6_ssto_hap7000 | 2.23  | JUC6_ssto_hap7000 | BAG6        |
| TC6_ssto_hap7000 | 2.11  | PSR6_ssto_hap7002 | BAG6        |
| TC6_ssto_hap7000 | 2.1   | PSR6_ssto_hap7002 | BAG6        |
| TC6_ssto_hap7000 | 2.02  | JUC6_ssto_hap7000 | BAG6        |
| TC6_ssto_hap7000 | 2.01  | PSR6_ssto_hap7002 | BAG6        |
| TC01001522.hg.1  | 2.98  | JUC01012434.hg.1  | RABGAP1L    |
| TC01001522.hg.1  | 2.86  | PSR01023551.hg.1  | RABGAP1L    |
| TC01001522.hg.1  | 2.33  | JUC01012417.hg.1  | RABGAP1L    |
| TC01001522.hg.1  | 2.31  | PSR01023522.hg.1  | RABGAP1L    |

|                 |       |                  |             |
|-----------------|-------|------------------|-------------|
| TC01001522.hg.1 | -2.17 | JUC01012453.hg.1 | RABGAP1L    |
| TC01001522.hg.1 | -2.3  | PSR01023540.hg.1 | RABGAP1L    |
| TC01006356.hg.1 | 2.98  | PSR01041030.hg.1 | KIAA0494    |
| TC01006356.hg.1 | 2.18  | JUC01044437.hg.1 | KIAA0494    |
| TC02005029.hg.1 | 2.98  | JUC02032467.hg.1 | PCBP1-AS1   |
| TC02005029.hg.1 | 2.26  | JUC02032455.hg.1 | PCBP1-AS1   |
| TC02005029.hg.1 | 2.17  | JUC02032432.hg.1 | PCBP1-AS1   |
| TC02005029.hg.1 | 2.13  | PSR02031058.hg.1 | PCBP1-AS1   |
| TC02005029.hg.1 | 2.04  | JUC02032435.hg.1 | PCBP1-AS1   |
| TC02005029.hg.1 | -2.01 | JUC02032447.hg.1 | PCBP1-AS1   |
| TC02005029.hg.1 | -2.04 | JUC02032452.hg.1 | PCBP1-AS1   |
| TC02005029.hg.1 | -2.17 | PSR02031027.hg.1 | PCBP1-AS1   |
| TC02005029.hg.1 | -2.58 | JUC02032425.hg.1 | PCBP1-AS1   |
| TC02005029.hg.1 | -3.44 | JUC02032461.hg.1 | PCBP1-AS1   |
| TC03000162.hg.1 | 2.98  | JUC03001538.hg.1 | CNOT10      |
| TC03000162.hg.1 | 2.67  | JUC03001525.hg.1 | CNOT10      |
| TC03000162.hg.1 | -2.18 | PSR03002869.hg.1 | CNOT10      |
| TC03000162.hg.1 | -2.37 | PSR03002897.hg.1 | CNOT10      |
| TC05000707.hg.1 | 2.98  | JUC05005305.hg.1 | MATR3, SNH  |
| TC05000707.hg.1 | 2.93  | JUC05005336.hg.1 | MATR3, SNH  |
| TC05000707.hg.1 | 2.92  | JUC05005334.hg.1 | MATR3, SNH  |
| TC05000707.hg.1 | 2.74  | JUC05005349.hg.1 | MATR3, SNH  |
| TC05000707.hg.1 | 2.5   | PSR05009994.hg.1 | MATR3, SNH  |
| TC05000707.hg.1 | 2.25  | JUC05005331.hg.1 | MATR3, SNH  |
| TC05000707.hg.1 | -2.01 | PSR05010044.hg.1 | MATR3, SNH  |
| TC06001217.hg.1 | 2.98  | PSR06014495.hg.1 | SERPINB1    |
| TC06001217.hg.1 | 2.11  | PSR06014489.hg.1 | SERPINB1    |
| TC06001217.hg.1 | -3.22 | JUC06007206.hg.1 | SERPINB1    |
| TC06004114.hg.1 | 2.98  | JUC06021555.hg.1 | DDX39B, SNH |
| TC06004114.hg.1 | 2.76  | PSR06017458.hg.1 | DDX39B, SNH |
| TC06004114.hg.1 | 2.45  | JUC06021570.hg.1 | DDX39B, SNH |
| TC06004114.hg.1 | 2.11  | PSR06017449.hg.1 | DDX39B, SNH |
| TC06004114.hg.1 | 2.06  | PSR06017473.hg.1 | DDX39B, SNH |
| TC06004114.hg.1 | -2.03 | PSR06017471.hg.1 | DDX39B, SNH |
| TC06004114.hg.1 | -3.69 | PSR06017436.hg.1 | DDX39B, SNH |
| TC06004114.hg.1 | -4.07 | PSR06017437.hg.1 | DDX39B, SNH |
| TC07001877.hg.1 | 2.98  | JUC07014370.hg.1 | PLXNA4      |
| TC07001877.hg.1 | 2.34  | JUC07014364.hg.1 | PLXNA4      |
| TC07001877.hg.1 | 2.3   | PSR07029068.hg.1 | PLXNA4      |
| TC07001877.hg.1 | -2.39 | JUC07014359.hg.1 | PLXNA4      |
| TC09001258.hg.1 | 2.98  | JUC09008502.hg.1 | TLE1        |
| TC09001258.hg.1 | 2.1   | PSR09015824.hg.1 | TLE1        |
| TC09001258.hg.1 | 2.02  | JUC09008491.hg.1 | TLE1        |
| TC09001258.hg.1 | -2.97 | JUC09008503.hg.1 | TLE1        |
| TC0X000826.hg.1 | 2.98  | JUC0X005503.hg.1 | HDHD1       |
| TC0X000826.hg.1 | 2.9   | PSR0X011236.hg.1 | HDHD1       |
| TC0X000826.hg.1 | 2.49  | JUC0X005500.hg.1 | HDHD1       |
| TC0X000826.hg.1 | 2.38  | PSR0X011245.hg.1 | HDHD1       |
| TC0X000826.hg.1 | 2.11  | JUC0X005502.hg.1 | HDHD1       |
| TC0X000826.hg.1 | -2.27 | JUC0X005507.hg.1 | HDHD1       |
| TC0X000826.hg.1 | -5.07 | PSR0X011227.hg.1 | HDHD1       |
| TC0X001067.hg.1 | 2.98  | JUC0X007327.hg.1 | HUWE1       |
| TC0X001067.hg.1 | 2.45  | JUC0X007322.hg.1 | HUWE1       |
| TC0X001067.hg.1 | 2.03  | JUC0X007257.hg.1 | HUWE1       |
| TC0X001067.hg.1 | 2.01  | PSR0X014423.hg.1 | HUWE1       |
| TC0X001067.hg.1 | -2.01 | JUC0X007326.hg.1 | HUWE1       |
| TC0X001067.hg.1 | -2.11 | PSR0X014469.hg.1 | HUWE1       |
| TC12001829.hg.1 | 2.98  | JUC12013384.hg.1 | FGD6        |

|                 |       |                  |             |
|-----------------|-------|------------------|-------------|
| TC12001829.hg.1 | 2.76  | JUC12013389.hg.1 | FGD6        |
| TC12001829.hg.1 | 2.68  | PSR12024106.hg.1 | FGD6        |
| TC12001829.hg.1 | 2.23  | JUC12013379.hg.1 | FGD6        |
| TC15002776.hg.1 | 2.98  | JUC15013452.hg.1 | PKM         |
| TC15002776.hg.1 | 2.78  | PSR15015695.hg.1 | PKM         |
| TC15002776.hg.1 | 2.65  | PSR15015694.hg.1 | PKM         |
| TC15002776.hg.1 | 2.42  | JUC15013464.hg.1 | PKM         |
| TC15002776.hg.1 | 2.31  | JUC15013449.hg.1 | PKM         |
| TC15002776.hg.1 | 2.21  | JUC15013461.hg.1 | PKM         |
| TC15002776.hg.1 | 2.16  | JUC15013457.hg.1 | PKM         |
| TC15002776.hg.1 | 2.07  | JUC15013441.hg.1 | PKM         |
| TC15002776.hg.1 | 2.04  | PSR15015688.hg.1 | PKM         |
| TC15002776.hg.1 | 2.02  | PSR15015693.hg.1 | PKM         |
| TC17000872.hg.1 | 2.98  | JUC17006321.hg.1 | SPHK1       |
| TC17000872.hg.1 | -2.07 | PSR17011324.hg.1 | SPHK1       |
| TC01001385.hg.1 | 2.97  | JUC01011621.hg.1 | SDHC        |
| TC01001385.hg.1 | 2.26  | PSR01021915.hg.1 | SDHC        |
| TC01001385.hg.1 | 2.11  | JUC01011618.hg.1 | SDHC        |
| TC01001385.hg.1 | -2.35 | JUC01011614.hg.1 | SDHC        |
| TC01001385.hg.1 | -2.52 | JUC01011612.hg.1 | SDHC        |
| TC01001559.hg.1 | 2.97  | PSR01024116.hg.1 | QSOX1, FLJ2 |
| TC01001559.hg.1 | 2.96  | JUC01012791.hg.1 | QSOX1, FLJ2 |
| TC01001559.hg.1 | -3.77 | JUC01012795.hg.1 | QSOX1, FLJ2 |
| TC02005001.hg.1 | 2.97  | JUC02031987.hg.1 | BBS5        |
| TC02005001.hg.1 | 2.3   | JUC02031976.hg.1 | BBS5        |
| TC02005001.hg.1 | 2.25  | PSR02014653.hg.1 | BBS5        |
| TC02005001.hg.1 | 2.25  | JUC02031985.hg.1 | BBS5        |
| TC02005001.hg.1 | 2.01  | PSR02014677.hg.1 | BBS5        |
| TC02005001.hg.1 | -2.59 | JUC02031986.hg.1 | BBS5        |
| TC02005010.hg.1 | 2.97  | PSR02021537.hg.1 | SP140L      |
| TC02005010.hg.1 | 2.67  | JUC02032106.hg.1 | SP140L      |
| TC02005010.hg.1 | 2.05  | PSR02021539.hg.1 | SP140L      |
| TC02005010.hg.1 | -2.33 | JUC02032097.hg.1 | SP140L      |
| TC03000046.hg.1 | 2.97  | PSR03001038.hg.1 | IL17RE      |
| TC03000046.hg.1 | 2.03  | PSR03001045.hg.1 | IL17RE      |
| TC03000046.hg.1 | -2    | JUC03000513.hg.1 | IL17RE      |
| TC03000046.hg.1 | -2.77 | JUC03000512.hg.1 | IL17RE      |
| TC03000046.hg.1 | -2.81 | PSR03001031.hg.1 | IL17RE      |
| TC03000046.hg.1 | -2.96 | PSR03001029.hg.1 | IL17RE      |
| TC03001527.hg.1 | 2.97  | JUC03013618.hg.1 | ADAMTS9     |
| TC03001527.hg.1 | 2.8   | JUC03013616.hg.1 | ADAMTS9     |
| TC03001527.hg.1 | 2.25  | JUC03013622.hg.1 | ADAMTS9     |
| TC03001527.hg.1 | -2    | JUC03013609.hg.1 | ADAMTS9     |
| TC03001527.hg.1 | -2.09 | JUC03013628.hg.1 | ADAMTS9     |
| TC03001527.hg.1 | -2.13 | PSR03027806.hg.1 | ADAMTS9     |
| TC03001527.hg.1 | -2.16 | PSR03027759.hg.1 | ADAMTS9     |
| TC03001527.hg.1 | -2.23 | PSR03027788.hg.1 | ADAMTS9     |
| TC03001527.hg.1 | -2.28 | JUC03013603.hg.1 | ADAMTS9     |
| TC03001527.hg.1 | -2.31 | JUC03013624.hg.1 | ADAMTS9     |
| TC03001527.hg.1 | -2.53 | JUC03013606.hg.1 | ADAMTS9     |
| TC03001527.hg.1 | -2.74 | JUC03013620.hg.1 | ADAMTS9     |
| TC03001527.hg.1 | -2.79 | PSR03027767.hg.1 | ADAMTS9     |
| TC03001527.hg.1 | -2.86 | JUC03013636.hg.1 | ADAMTS9     |
| TC03001527.hg.1 | -2.87 | JUC03013615.hg.1 | ADAMTS9     |
| TC03001527.hg.1 | -2.99 | PSR03027777.hg.1 | ADAMTS9     |
| TC03001527.hg.1 | -3.06 | JUC03013638.hg.1 | ADAMTS9     |
| TC03001527.hg.1 | -3.1  | PSR03027809.hg.1 | ADAMTS9     |
| TC03001527.hg.1 | -3.52 | PSR03027800.hg.1 | ADAMTS9     |

|                 |       |                  |             |
|-----------------|-------|------------------|-------------|
| TC03001527.hg.1 | -3.56 | PSR03027801.hg.1 | ADAMTS9     |
| TC03001527.hg.1 | -5.6  | PSR03027765.hg.1 | ADAMTS9     |
| TC03001527.hg.1 | -6.77 | PSR03027754.hg.1 | ADAMTS9     |
| TC04000548.hg.1 | 2.97  | JUC04004206.hg.1 | NPNT        |
| TC04000548.hg.1 | 2.11  | PSR04008005.hg.1 | NPNT        |
| TC04000548.hg.1 | -2.16 | JUC04004217.hg.1 | NPNT        |
| TC04000548.hg.1 | -2.29 | PSR04008015.hg.1 | NPNT        |
| TC04000548.hg.1 | -2.54 | PSR04008023.hg.1 | NPNT        |
| TC04000548.hg.1 | -3.26 | JUC04004216.hg.1 | NPNT        |
| TC05001573.hg.1 | 2.97  | PSR05021340.hg.1 | TMEM161B    |
| TC05001573.hg.1 | 2.94  | JUC05011001.hg.1 | TMEM161B    |
| TC05001573.hg.1 | 2.83  | JUC05011003.hg.1 | TMEM161B    |
| TC05001573.hg.1 | 2.15  | JUC05010998.hg.1 | TMEM161B    |
| TC05001573.hg.1 | -2.22 | JUC05011000.hg.1 | TMEM161B    |
| TC05001936.hg.1 | 2.97  | PSR05026835.hg.1 | CD74        |
| TC05001936.hg.1 | 2.7   | PSR05026841.hg.1 | CD74        |
| TC05001936.hg.1 | 2.62  | PSR05026828.hg.1 | CD74        |
| TC05001936.hg.1 | 2.43  | PSR05026831.hg.1 | CD74        |
| TC05001936.hg.1 | 2.41  | PSR05026840.hg.1 | CD74        |
| TC05001936.hg.1 | 2.34  | JUC05013666.hg.1 | CD74        |
| TC05001936.hg.1 | 2.19  | PSR05026849.hg.1 | CD74        |
| TC05001936.hg.1 | 2.08  | JUC05013658.hg.1 | CD74        |
| TC05001936.hg.1 | -2.73 | PSR05026834.hg.1 | CD74        |
| TC05001936.hg.1 | -3.69 | PSR05026838.hg.1 | CD74        |
| TC05001936.hg.1 | -4.08 | JUC05013669.hg.1 | CD74        |
| TC06001941.hg.1 | 2.97  | JUC06011575.hg.1 | RRAGD       |
| TC06001941.hg.1 | 2.42  | PSR06023802.hg.1 | RRAGD       |
| TC06001941.hg.1 | 2.24  | PSR06023799.hg.1 | RRAGD       |
| TC06001941.hg.1 | -2.2  | JUC06011583.hg.1 | RRAGD       |
| TC07001898.hg.1 | 2.97  | JUC07014583.hg.1 | CREB3L2     |
| TC07001898.hg.1 | 2.07  | JUC07014588.hg.1 | CREB3L2     |
| TC07001898.hg.1 | -2.08 | JUC07014579.hg.1 | CREB3L2     |
| TC07001898.hg.1 | -2.16 | PSR07029499.hg.1 | CREB3L2     |
| TC07001898.hg.1 | -2.27 | JUC07014590.hg.1 | CREB3L2     |
| TC07001898.hg.1 | -4.23 | PSR07029504.hg.1 | CREB3L2     |
| TC08001225.hg.1 | 2.97  | PSR08015885.hg.1 | TMEM68      |
| TC08001225.hg.1 | 2.52  | PSR08015894.hg.1 | TMEM68      |
| TC08001225.hg.1 | 2.15  | PSR08015888.hg.1 | TMEM68      |
| TC08001225.hg.1 | 2.1   | PSR08015893.hg.1 | TMEM68      |
| TC08001225.hg.1 | -2.03 | JUC08008195.hg.1 | TMEM68      |
| TC08001225.hg.1 | -2.15 | JUC08008182.hg.1 | TMEM68      |
| TC09000746.hg.1 | 2.97  | JUC09005244.hg.1 | NUP214      |
| TC09000746.hg.1 | 2.26  | JUC09005206.hg.1 | NUP214      |
| TC09000746.hg.1 | 2.22  | JUC09005210.hg.1 | NUP214      |
| TC09000746.hg.1 | 2.17  | PSR09009555.hg.1 | NUP214      |
| TC09000746.hg.1 | 2.1   | JUC09005220.hg.1 | NUP214      |
| TC09000746.hg.1 | 2.04  | JUC09005202.hg.1 | NUP214      |
| TC09000746.hg.1 | -2.25 | JUC09005251.hg.1 | NUP214      |
| TC12000803.hg.1 | 2.97  | PSR12010192.hg.1 | HSP90B1, MI |
| TC12000803.hg.1 | 2.1   | JUC12005577.hg.1 | HSP90B1, MI |
| TC12000803.hg.1 | 2.06  | JUC12005586.hg.1 | HSP90B1, MI |
| TC12000803.hg.1 | -2.9  | JUC12005588.hg.1 | HSP90B1, MI |
| TC14000316.hg.1 | 2.97  | JUC14001605.hg.1 | CDKN3       |
| TC14000316.hg.1 | 2.59  | JUC14001614.hg.1 | CDKN3       |
| TC14000316.hg.1 | -2.12 | PSR14003345.hg.1 | CDKN3       |
| TC14000316.hg.1 | -2.61 | JUC14001619.hg.1 | CDKN3       |
| TC17001610.hg.1 | 2.97  | JUC17012159.hg.1 | KANSL1      |
| TC17001610.hg.1 | -2.04 | JUC17012153.hg.1 | KANSL1      |



|                 |       |                  |           |
|-----------------|-------|------------------|-----------|
| TC17001610.hg.1 | -2.34 | PSR17021638.hg.1 | KANSL1    |
| TC17001610.hg.1 | -3.26 | JUC17012157.hg.1 | KANSL1    |
| TC21000441.hg.1 | 2.97  | JUC21002656.hg.1 | DSCR3     |
| TC21000441.hg.1 | 2.67  | JUC21002653.hg.1 | DSCR3     |
| TC21000441.hg.1 | -2.01 | PSR21005194.hg.1 | DSCR3     |
| TC21000441.hg.1 | -2.9  | PSR21005193.hg.1 | DSCR3     |
| TC02002938.hg.1 | 2.96  | JUC02024610.hg.1 | ANKMY1    |
| TC02002938.hg.1 | 2.49  | JUC02024626.hg.1 | ANKMY1    |
| TC02002938.hg.1 | 2.18  | JUC02024618.hg.1 | ANKMY1    |
| TC02002938.hg.1 | 2.12  | PSR02047064.hg.1 | ANKMY1    |
| TC02002938.hg.1 | 2.09  | JUC02024617.hg.1 | ANKMY1    |
| TC02002938.hg.1 | 2.02  | PSR02047055.hg.1 | ANKMY1    |
| TC02002938.hg.1 | 2     | PSR02047054.hg.1 | ANKMY1    |
| TC02002938.hg.1 | -2.3  | JUC02024609.hg.1 | ANKMY1    |
| TC02002938.hg.1 | -2.88 | JUC02024627.hg.1 | ANKMY1    |
| TC04001319.hg.1 | 2.96  | JUC04009603.hg.1 | CCNI      |
| TC04001319.hg.1 | 2.46  | PSR04018055.hg.1 | CCNI      |
| TC04001319.hg.1 | 2.18  | PSR04018051.hg.1 | CCNI      |
| TC08000135.hg.1 | 2.96  | PSR08001312.hg.1 | PCM1      |
| TC08000135.hg.1 | 2.44  | PSR08001306.hg.1 | PCM1      |
| TC08000135.hg.1 | 2.15  | PSR08001346.hg.1 | PCM1      |
| TC08000135.hg.1 | 2.07  | PSR08001347.hg.1 | PCM1      |
| TC08000135.hg.1 | -3.44 | JUC08000690.hg.1 | PCM1      |
| TC09000668.hg.1 | 2.96  | PSR09007938.hg.1 | STXBP1    |
| TC09000668.hg.1 | 2.82  | JUC09004421.hg.1 | STXBP1    |
| TC09000668.hg.1 | 2.37  | JUC09004401.hg.1 | STXBP1    |
| TC09000668.hg.1 | 2.23  | JUC09004418.hg.1 | STXBP1    |
| TC09000668.hg.1 | 2.06  | PSR09007903.hg.1 | STXBP1    |
| TC16001325.hg.1 | 2.96  | PSR16018308.hg.1 | FOXF1-AS1 |
| TC16001325.hg.1 | 2.37  | PSR16018317.hg.1 | FOXF1-AS1 |
| TC16001325.hg.1 | 2.33  | PSR16018312.hg.1 | FOXF1-AS1 |
| TC16001325.hg.1 | 2.13  | JUC16010440.hg.1 | FOXF1-AS1 |
| TC16001325.hg.1 | -2.45 | JUC16010442.hg.1 | FOXF1-AS1 |
| TC16001325.hg.1 | -2.53 | PSR16018316.hg.1 | FOXF1-AS1 |
| TC16001325.hg.1 | -2.64 | PSR16018309.hg.1 | FOXF1-AS1 |
| TC16001325.hg.1 | -2.72 | JUC16010439.hg.1 | FOXF1-AS1 |
| TC17001201.hg.1 | 2.96  | JUC17009404.hg.1 | SHMT1     |
| TC17001201.hg.1 | 2.69  | JUC17009411.hg.1 | SHMT1     |
| TC17001201.hg.1 | 2.3   | JUC17009412.hg.1 | SHMT1     |
| TC17001201.hg.1 | 2.01  | PSR17016472.hg.1 | SHMT1     |
| TC17001201.hg.1 | -2.89 | PSR17016463.hg.1 | SHMT1     |
| TC19001469.hg.1 | 2.96  | PSR19019969.hg.1 | ZNF566    |
| TC19001469.hg.1 | 2.28  | JUC19011494.hg.1 | ZNF566    |
| TC19001469.hg.1 | 2.23  | PSR19019949.hg.1 | ZNF566    |
| TC19001469.hg.1 | -2.13 | PSR19019954.hg.1 | ZNF566    |
| TC19001469.hg.1 | -2.19 | PSR19019944.hg.1 | ZNF566    |
| TC20001745.hg.1 | 2.96  | PSR20008127.hg.1 | ZNF343    |
| TC20001745.hg.1 | 2.59  | JUC20009954.hg.1 | ZNF343    |
| TC22000138.hg.1 | 2.96  | PSR22002427.hg.1 | MMP11     |
| TC22000138.hg.1 | 2.29  | PSR22002441.hg.1 | MMP11     |
| TC22000138.hg.1 | 2.07  | JUC22000762.hg.1 | MMP11     |
| TC01000559.hg.1 | 2.95  | JUC01004769.hg.1 | DMAP1     |
| TC01000559.hg.1 | -2.13 | PSR01009221.hg.1 | DMAP1     |
| TC01003565.hg.1 | 2.95  | JUC01028847.hg.1 | ANGPTL1   |
| TC01003565.hg.1 | -2.22 | JUC01028843.hg.1 | ANGPTL1   |
| TC01003565.hg.1 | -3.45 | PSR01055243.hg.1 | ANGPTL1   |
| TC01003565.hg.1 | -3.85 | PSR01055242.hg.1 | ANGPTL1   |
| TC01003565.hg.1 | -4.53 | PSR01055240.hg.1 | ANGPTL1   |

|                 |       |                  |          |
|-----------------|-------|------------------|----------|
| TC01003565.hg.1 | -5.86 | JUC01028840.hg.1 | ANGPTL1  |
| TC01003565.hg.1 | -6.14 | PSR01055227.hg.1 | ANGPTL1  |
| TC01003565.hg.1 | -8.2  | PSR01055241.hg.1 | ANGPTL1  |
| TC02005053.hg.1 | 2.95  | JUC02033146.hg.1 | NHEJ1    |
| TC02005053.hg.1 | -2.28 | PSR02044843.hg.1 | NHEJ1    |
| TC07003291.hg.1 | 2.95  | PSR07011127.hg.1 | IFRD1    |
| TC07003291.hg.1 | 2.71  | JUC07020359.hg.1 | IFRD1    |
| TC07003291.hg.1 | 2.7   | PSR07011094.hg.1 | IFRD1    |
| TC07003291.hg.1 | 2.65  | PSR07011114.hg.1 | IFRD1    |
| TC07003291.hg.1 | 2.16  | JUC07020341.hg.1 | IFRD1    |
| TC07003291.hg.1 | 2.13  | PSR07011101.hg.1 | IFRD1    |
| TC07003291.hg.1 | 2.03  | PSR07011095.hg.1 | IFRD1    |
| TC07003291.hg.1 | 2     | PSR07011103.hg.1 | IFRD1    |
| TC07003291.hg.1 | -2.03 | JUC07020363.hg.1 | IFRD1    |
| TC13000534.hg.1 | 2.95  | JUC13003603.hg.1 | HMGB1    |
| TC13000534.hg.1 | 2.82  | PSR13006048.hg.1 | HMGB1    |
| TC13000534.hg.1 | 2.8   | JUC13003611.hg.1 | HMGB1    |
| TC13000534.hg.1 | -2.06 | JUC13003616.hg.1 | HMGB1    |
| TC14001544.hg.1 | 2.95  | JUC14008969.hg.1 | PPP1R13B |
| TC14001544.hg.1 | 2.77  | JUC14008970.hg.1 | PPP1R13B |
| TC14001544.hg.1 | 2.19  | PSR14017340.hg.1 | PPP1R13B |
| TC14001544.hg.1 | 2.17  | PSR14017352.hg.1 | PPP1R13B |
| TC14001544.hg.1 | -2.18 | JUC14008967.hg.1 | PPP1R13B |
| TC14001544.hg.1 | -2.85 | JUC14008979.hg.1 | PPP1R13B |
| TC14001544.hg.1 | -2.88 | JUC14008972.hg.1 | PPP1R13B |
| TC15001011.hg.1 | 2.95  | JUC15004864.hg.1 | HERC2P3  |
| TC15001011.hg.1 | -2.17 | JUC15004865.hg.1 | HERC2P3  |
| TC15001011.hg.1 | -2.18 | PSR15009377.hg.1 | HERC2P3  |
| TC15001011.hg.1 | -2.38 | JUC15004852.hg.1 | HERC2P3  |
| TC15001011.hg.1 | -2.5  | JUC15004873.hg.1 | HERC2P3  |
| TC15001011.hg.1 | -4.02 | PSR15009379.hg.1 | HERC2P3  |
| TC15001544.hg.1 | 2.95  | PSR15014631.hg.1 | HERC1    |
| TC15001544.hg.1 | -2.02 | JUC15007891.hg.1 | HERC1    |
| TC15001544.hg.1 | -2.05 | JUC15007882.hg.1 | HERC1    |
| TC15001544.hg.1 | -2.07 | JUC15007878.hg.1 | HERC1    |
| TC15001544.hg.1 | -2.2  | JUC15007862.hg.1 | HERC1    |
| TC15001544.hg.1 | -2.24 | PSR15014593.hg.1 | HERC1    |
| TC15001544.hg.1 | -2.3  | JUC15007859.hg.1 | HERC1    |
| TC15001544.hg.1 | -2.58 | JUC15007927.hg.1 | HERC1    |
| TC15001544.hg.1 | -2.82 | JUC15007918.hg.1 | HERC1    |
| TC15001544.hg.1 | -3.17 | JUC15007860.hg.1 | HERC1    |
| TC15001544.hg.1 | -4.48 | JUC15007903.hg.1 | HERC1    |
| TC16001052.hg.1 | 2.95  | PSR16015029.hg.1 | PYCARD   |
| TC16001052.hg.1 | 2.59  | PSR16015031.hg.1 | PYCARD   |
| TC16001052.hg.1 | 2.58  | JUC16008383.hg.1 | PYCARD   |
| TC16001052.hg.1 | 2.21  | PSR16015025.hg.1 | PYCARD   |
| TC16001052.hg.1 | 2.17  | JUC16008384.hg.1 | PYCARD   |
| TC17001682.hg.1 | 2.95  | PSR17022620.hg.1 | COL1A1   |
| TC17001682.hg.1 | 2.81  | PSR17022662.hg.1 | COL1A1   |
| TC17001682.hg.1 | 2.3   | PSR17022602.hg.1 | COL1A1   |
| TC17001682.hg.1 | 2.23  | PSR17022605.hg.1 | COL1A1   |
| TC17001682.hg.1 | 2.16  | PSR17022628.hg.1 | COL1A1   |
| TC17001682.hg.1 | -2.02 | PSR17022670.hg.1 | COL1A1   |
| TC17001682.hg.1 | -2.04 | PSR17022600.hg.1 | COL1A1   |
| TC17001682.hg.1 | -2.05 | PSR17022597.hg.1 | COL1A1   |
| TC17001682.hg.1 | -2.06 | PSR17022595.hg.1 | COL1A1   |
| TC17001682.hg.1 | -2.1  | PSR17022598.hg.1 | COL1A1   |
| TC17001682.hg.1 | -2.11 | PSR17022594.hg.1 | COL1A1   |

|                 |       |                   |           |
|-----------------|-------|-------------------|-----------|
| TC17001682.hg.1 | -2.11 | JUC17012578.hg.1  | COL1A1    |
| TC17001682.hg.1 | -2.18 | JUC17012572.hg.1  | COL1A1    |
| TC17001682.hg.1 | -2.19 | PSR17022593.hg.1  | COL1A1    |
| TC17001682.hg.1 | -2.45 | JUC17012566.hg.1  | COL1A1    |
| TC17001682.hg.1 | -2.57 | PSR17022633.hg.1  | COL1A1    |
| TC19000368.hg.1 | 2.95  | PSR19004919.hg.1  | SLC25A42  |
| TC19000368.hg.1 | 2.88  | JUC19002897.hg.1  | SLC25A42  |
| TC19000368.hg.1 | 2.12  | PSR19004912.hg.1  | SLC25A42  |
| TC19000368.hg.1 | -2.29 | JUC19002894.hg.1  | SLC25A42  |
| TC20000466.hg.1 | 2.95  | JUC20003394.hg.1  | GNAS      |
| TC20000466.hg.1 | 2.1   | JUC20003418.hg.1  | GNAS      |
| TC20000466.hg.1 | -2.16 | PSR20006354.hg.1  | GNAS      |
| TC6_dbb_hap3000 | 2.95  | JUC6_dbb_hap3000  | HLA-F-AS1 |
| TC6_dbb_hap3000 | 2.41  | PSR6_dbb_hap3002  | HLA-F-AS1 |
| TC6_dbb_hap3000 | 2.27  | PSR6_dbb_hap3002  | HLA-F-AS1 |
| TC6_dbb_hap3000 | 2.26  | JUC6_dbb_hap3000  | HLA-F-AS1 |
| TC6_dbb_hap3000 | -2.55 | JUC6_dbb_hap3000  | HLA-F-AS1 |
| TC6_mann_hap400 | 2.95  | JUC6_mann_hap400  | HLA-F-AS1 |
| TC6_mann_hap400 | 2.41  | PSR6_mann_hap400  | HLA-F-AS1 |
| TC6_mann_hap400 | 2.27  | PSR6_mann_hap400  | HLA-F-AS1 |
| TC6_mann_hap400 | 2.26  | JUC6_mann_hap400  | HLA-F-AS1 |
| TC6_mann_hap400 | -2.55 | JUC6_mann_hap400  | HLA-F-AS1 |
| TC6_mann_hap400 | 2.95  | PSR6_mann_hap400  | AGPAT1    |
| TC6_mann_hap400 | 2.74  | JUC6_mann_hap400  | AGPAT1    |
| TC6_mann_hap400 | 2.55  | PSR6_mann_hap400  | AGPAT1    |
| TC6_mann_hap400 | -3.15 | JUC6_mann_hap400  | AGPAT1    |
| TC6_qbl_hap6000 | 2.95  | JUC6_qbl_hap60007 | HLA-F-AS1 |
| TC6_qbl_hap6000 | 2.41  | PSR6_qbl_hap60021 | HLA-F-AS1 |
| TC6_qbl_hap6000 | 2.27  | PSR6_qbl_hap60021 | HLA-F-AS1 |
| TC6_qbl_hap6000 | 2.26  | JUC6_qbl_hap60007 | HLA-F-AS1 |
| TC6_qbl_hap6000 | -2.55 | JUC6_qbl_hap60007 | HLA-F-AS1 |
| TC01001490.hg.1 | 2.94  | JUC01012205.hg.1  | FMO4      |
| TC01001490.hg.1 | -2.09 | JUC01012206.hg.1  | FMO4      |
| TC01001490.hg.1 | -2.69 | JUC01012208.hg.1  | FMO4      |
| TC01001490.hg.1 | -2.92 | PSR01023140.hg.1  | FMO4      |
| TC02000263.hg.1 | 2.94  | PSR02003952.hg.1  | MTA3      |
| TC02000263.hg.1 | 2.67  | JUC02002028.hg.1  | MTA3      |
| TC02000263.hg.1 | 2.58  | JUC02002039.hg.1  | MTA3      |
| TC02000263.hg.1 | 2.46  | PSR02003944.hg.1  | MTA3      |
| TC02000263.hg.1 | 2.05  | JUC02002018.hg.1  | MTA3      |
| TC02000263.hg.1 | 2.04  | PSR02003946.hg.1  | MTA3      |
| TC06001687.hg.1 | 2.94  | JUC06009569.hg.1  | MDGA1     |
| TC06001687.hg.1 | 2.31  | PSR06020091.hg.1  | MDGA1     |
| TC06001687.hg.1 | 2.22  | JUC06009573.hg.1  | MDGA1     |
| TC06001687.hg.1 | 2.12  | PSR06020135.hg.1  | MDGA1     |
| TC06001687.hg.1 | 2.09  | PSR06020118.hg.1  | MDGA1     |
| TC07001208.hg.1 | 2.94  | JUC07009270.hg.1  | C7orf31   |
| TC07001208.hg.1 | 2.34  | PSR07018929.hg.1  | C7orf31   |
| TC07001208.hg.1 | 2.02  | PSR07018931.hg.1  | C7orf31   |
| TC08000178.hg.1 | 2.94  | PSR08002317.hg.1  | RHOBTB2   |
| TC08000178.hg.1 | 2.94  | JUC08001188.hg.1  | RHOBTB2   |
| TC08000178.hg.1 | -2.07 | JUC08001183.hg.1  | RHOBTB2   |
| TC12001723.hg.1 | 2.94  | JUC12012639.hg.1  | TSPAN8    |
| TC12001723.hg.1 | 2.52  | PSR12022908.hg.1  | TSPAN8    |
| TC12001723.hg.1 | 2.47  | PSR12022906.hg.1  | TSPAN8    |
| TC12001723.hg.1 | 2.38  | PSR12022918.hg.1  | TSPAN8    |
| TC12001723.hg.1 | 2.18  | PSR12022913.hg.1  | TSPAN8    |
| TC12001723.hg.1 | 2.14  | PSR12022907.hg.1  | TSPAN8    |

|                 |       |                  |              |
|-----------------|-------|------------------|--------------|
| TC16000226.hg.1 | 2.94  | JUC16001830.hg.1 | LYRM1        |
| TC16000226.hg.1 | 2.82  | PSR16003355.hg.1 | LYRM1        |
| TC16000226.hg.1 | 2.66  | JUC16001824.hg.1 | LYRM1        |
| TC16000226.hg.1 | 2.2   | PSR16003354.hg.1 | LYRM1        |
| TC16000226.hg.1 | 2.2   | JUC16001831.hg.1 | LYRM1        |
| TC16000226.hg.1 | 2.09  | PSR16003356.hg.1 | LYRM1        |
| TC19000630.hg.1 | 2.94  | JUC19005221.hg.1 | BCAM         |
| TC19000630.hg.1 | 2.73  | PSR19008741.hg.1 | BCAM         |
| TC19000630.hg.1 | 2.48  | PSR19008740.hg.1 | BCAM         |
| TC19000630.hg.1 | 2.44  | JUC19005218.hg.1 | BCAM         |
| TC19000630.hg.1 | 2.02  | JUC19005215.hg.1 | BCAM         |
| TC19000630.hg.1 | -2.29 | PSR19008742.hg.1 | BCAM         |
| TC19000630.hg.1 | -3.63 | JUC19005216.hg.1 | BCAM         |
| TC19000630.hg.1 | -6.05 | JUC19005220.hg.1 | BCAM         |
| TC20000942.hg.1 | 2.94  | PSR20013004.hg.1 | NFATC2       |
| TC20000942.hg.1 | 2     | JUC20006743.hg.1 | NFATC2       |
| TC20000942.hg.1 | -2.13 | JUC20006745.hg.1 | NFATC2       |
| TC20000942.hg.1 | -2.23 | PSR20013006.hg.1 | NFATC2       |
| TC20000942.hg.1 | -2.28 | PSR20013008.hg.1 | NFATC2       |
| TC20000942.hg.1 | -2.45 | JUC20006739.hg.1 | NFATC2       |
| TC20000942.hg.1 | -2.51 | JUC20006740.hg.1 | NFATC2       |
| TC20000942.hg.1 | -3.05 | PSR20013007.hg.1 | NFATC2       |
| TC20000942.hg.1 | -3.15 | JUC20006741.hg.1 | NFATC2       |
| TC20000942.hg.1 | -5.69 | PSR20013010.hg.1 | NFATC2       |
| TC17000402.hg.1 | 2.94  | JUC17002896.hg.1 | TAF15        |
| TC17000402.hg.1 | 2.17  | JUC17002910.hg.1 | TAF15        |
| TC17000402.hg.1 | 2     | PSR17005047.hg.1 | TAF15        |
| TC01001724.hg.1 | 2.93  | JUC01014409.hg.1 | RASSF5       |
| TC01001724.hg.1 | -2.44 | PSR01026908.hg.1 | RASSF5       |
| TC01003759.hg.1 | 2.93  | JUC01030123.hg.1 | C1orf186, LO |
| TC01003759.hg.1 | 2.56  | JUC01030138.hg.1 | C1orf186, LO |
| TC01003759.hg.1 | 2.42  | JUC01030126.hg.1 | C1orf186, LO |
| TC01003759.hg.1 | 2.38  | PSR01057672.hg.1 | C1orf186, LO |
| TC01003759.hg.1 | 2.31  | PSR01057663.hg.1 | C1orf186, LO |
| TC01003759.hg.1 | 2.15  | PSR01057679.hg.1 | C1orf186, LO |
| TC01003759.hg.1 | 2.07  | PSR01057664.hg.1 | C1orf186, LO |
| TC02001475.hg.1 | 2.93  | JUC02012410.hg.1 | PPP1R7       |
| TC02001475.hg.1 | 2.07  | PSR02023828.hg.1 | PPP1R7       |
| TC02001475.hg.1 | -2.13 | PSR02023819.hg.1 | PPP1R7       |
| TC02002669.hg.1 | 2.93  | JUC02022435.hg.1 | ORC2         |
| TC02002669.hg.1 | 2.14  | PSR02042901.hg.1 | ORC2         |
| TC02002669.hg.1 | 2.13  | JUC02022429.hg.1 | ORC2         |
| TC02002669.hg.1 | 2.02  | PSR02042907.hg.1 | ORC2         |
| TC02002669.hg.1 | -2.57 | JUC02022439.hg.1 | ORC2         |
| TC02002669.hg.1 | -2.73 | JUC02022424.hg.1 | ORC2         |
| TC02002669.hg.1 | -2.74 | JUC02022428.hg.1 | ORC2         |
| TC02004917.hg.1 | 2.93  | PSR02001856.hg.1 | CENPA        |
| TC02004917.hg.1 | 2.32  | JUC02031168.hg.1 | CENPA        |
| TC02004917.hg.1 | -2.35 | PSR02001862.hg.1 | CENPA        |
| TC03001496.hg.1 | 2.93  | JUC03013329.hg.1 | FAM116A      |
| TC03001496.hg.1 | -2.11 | PSR03027269.hg.1 | FAM116A      |
| TC03001575.hg.1 | 2.93  | PSR03028581.hg.1 | GBE1         |
| TC03001575.hg.1 | 2.85  | PSR03028585.hg.1 | GBE1         |
| TC03001575.hg.1 | 2.34  | PSR03028583.hg.1 | GBE1         |
| TC03001575.hg.1 | -2.31 | PSR03028545.hg.1 | GBE1         |
| TC03001575.hg.1 | -2.76 | JUC03014094.hg.1 | GBE1         |
| TC05001271.hg.1 | 2.93  | PSR05017813.hg.1 | RANBP3L      |
| TC05001271.hg.1 | 2.04  | JUC05009125.hg.1 | RANBP3L      |

|                 |         |                  |            |
|-----------------|---------|------------------|------------|
| TC05001271.hg.1 | -2.2    | JUC05009128.hg.1 | RANBP3L    |
| TC05001271.hg.1 | -2.64   | PSR05017805.hg.1 | RANBP3L    |
| TC05001271.hg.1 | -2.67   | PSR05017800.hg.1 | RANBP3L    |
| TC05001271.hg.1 | -3.38   | JUC05009127.hg.1 | RANBP3L    |
| TC05001271.hg.1 | -3.68   | PSR05017802.hg.1 | RANBP3L    |
| TC05001271.hg.1 | -3.95   | JUC05009121.hg.1 | RANBP3L    |
| TC05001271.hg.1 | -4.64   | JUC05009122.hg.1 | RANBP3L    |
| TC05001271.hg.1 | -13.12  | PSR05017806.hg.1 | RANBP3L    |
| TC05001271.hg.1 | -138.65 | JUC05009135.hg.1 | RANBP3L    |
| TC07001972.hg.1 | 2.93    | PSR07030414.hg.1 | LOC154761, |
| TC07001972.hg.1 | 2.92    | JUC07015067.hg.1 | LOC154761, |
| TC07001972.hg.1 | 2.62    | PSR07030411.hg.1 | LOC154761, |
| TC07001972.hg.1 | 2.29    | PSR07030420.hg.1 | LOC154761, |
| TC07001972.hg.1 | 2.14    | PSR07030406.hg.1 | LOC154761, |
| TC07001972.hg.1 | -2.01   | JUC07015075.hg.1 | LOC154761, |
| TC07001972.hg.1 | -2.06   | JUC07015072.hg.1 | LOC154761, |
| TC07001972.hg.1 | -2.26   | JUC07015073.hg.1 | LOC154761, |
| TC07001972.hg.1 | -3.07   | PSR07030404.hg.1 | LOC154761, |
| TC07001972.hg.1 | -4.21   | JUC07015061.hg.1 | LOC154761, |
| TC09001054.hg.1 | 2.93    | PSR09013968.hg.1 | CD72       |
| TC09001054.hg.1 | 2.67    | PSR09013969.hg.1 | CD72       |
| TC09001054.hg.1 | 2.45    | JUC09007529.hg.1 | CD72       |
| TC09001054.hg.1 | 2.26    | JUC09007543.hg.1 | CD72       |
| TC09001054.hg.1 | 2.25    | PSR09013972.hg.1 | CD72       |
| TC09001054.hg.1 | 2.22    | PSR09013958.hg.1 | CD72       |
| TC09001054.hg.1 | 2.09    | PSR09013974.hg.1 | CD72       |
| TC09001054.hg.1 | -4.04   | JUC09007537.hg.1 | CD72       |
| TC09001490.hg.1 | 2.93    | JUC09010058.hg.1 | SUSD1      |
| TC09001490.hg.1 | 2.18    | JUC09010059.hg.1 | SUSD1      |
| TC09001490.hg.1 | -2.04   | PSR09018521.hg.1 | SUSD1      |
| TC09001490.hg.1 | -2.32   | PSR09018520.hg.1 | SUSD1      |
| TC09001490.hg.1 | -2.34   | PSR09018513.hg.1 | SUSD1      |
| TC09001490.hg.1 | -2.54   | JUC09010066.hg.1 | SUSD1      |
| TC09001490.hg.1 | -2.8    | PSR09018515.hg.1 | SUSD1      |
| TC09001490.hg.1 | -3.69   | JUC09010070.hg.1 | SUSD1      |
| TC10000219.hg.1 | 2.93    | PSR10002515.hg.1 | ZEB1       |
| TC10000219.hg.1 | 2.71    | PSR10002523.hg.1 | ZEB1       |
| TC10000219.hg.1 | -2.07   | JUC10001356.hg.1 | ZEB1       |
| TC10000219.hg.1 | -2.93   | JUC10001367.hg.1 | ZEB1       |
| TC10000733.hg.1 | 2.93    | JUC10004817.hg.1 | TLX1       |
| TC10000733.hg.1 | -2.02   | PSR10008664.hg.1 | TLX1       |
| TC10001446.hg.1 | 2.93    | JUC10010695.hg.1 | POLR3A     |
| TC10001446.hg.1 | 2.54    | JUC10010688.hg.1 | POLR3A     |
| TC10001446.hg.1 | 2.39    | JUC10010722.hg.1 | POLR3A     |
| TC10001446.hg.1 | 2.07    | JUC10010707.hg.1 | POLR3A     |
| TC10001446.hg.1 | -2.05   | PSR10018356.hg.1 | POLR3A     |
| TC10001446.hg.1 | -2.06   | JUC10010708.hg.1 | POLR3A     |
| TC10001446.hg.1 | -2.12   | JUC10010694.hg.1 | POLR3A     |
| TC10001446.hg.1 | -2.28   | JUC10010699.hg.1 | POLR3A     |
| TC10002969.hg.1 | 2.93    | JUC10017585.hg.1 | FAM53B     |
| TC10002969.hg.1 | 2.12    | JUC10017579.hg.1 | FAM53B     |
| TC10002969.hg.1 | -2.03   | PSR10022950.hg.1 | FAM53B     |
| TC15001575.hg.1 | 2.93    | JUC15008225.hg.1 | MEGF11     |
| TC15001575.hg.1 | 2.42    | JUC15008234.hg.1 | MEGF11     |
| TC15001575.hg.1 | -2.29   | PSR15015153.hg.1 | MEGF11     |
| TC15001575.hg.1 | -2.79   | JUC15008237.hg.1 | MEGF11     |
| TC01000586.hg.1 | 2.92    | PSR01010021.hg.1 | LOC729041  |
| TC01000586.hg.1 | 2.36    | JUC01005144.hg.1 | LOC729041  |

|                 |       |                   |           |
|-----------------|-------|-------------------|-----------|
| TC01000586.hg.1 | -4.52 | JUC01005139.hg.1  | LOC729041 |
| TC02000430.hg.1 | 2.92  | JUC02003337.hg.1  | ZNF638    |
| TC02000430.hg.1 | 2.49  | JUC02003334.hg.1  | ZNF638    |
| TC02000430.hg.1 | 2.42  | JUC02003333.hg.1  | ZNF638    |
| TC02000430.hg.1 | 2.36  | JUC02003317.hg.1  | ZNF638    |
| TC02000430.hg.1 | -2    | PSR02006515.hg.1  | ZNF638    |
| TC02000430.hg.1 | -2.01 | JUC02003311.hg.1  | ZNF638    |
| TC02000430.hg.1 | -2.13 | JUC02003341.hg.1  | ZNF638    |
| TC02000430.hg.1 | -2.2  | JUC02003346.hg.1  | ZNF638    |
| TC02000430.hg.1 | -3.37 | PSR02006477.hg.1  | ZNF638    |
| TC02002127.hg.1 | 2.92  | PSR02034602.hg.1  | MGAT4A    |
| TC02002127.hg.1 | 2.61  | JUC02017846.hg.1  | MGAT4A    |
| TC02002127.hg.1 | 2.5   | PSR02034567.hg.1  | MGAT4A    |
| TC02002127.hg.1 | 2.19  | PSR02034592.hg.1  | MGAT4A    |
| TC02002127.hg.1 | 2.13  | JUC02017854.hg.1  | MGAT4A    |
| TC02002127.hg.1 | 2.04  | PSR02034603.hg.1  | MGAT4A    |
| TC04000011.hg.1 | 2.92  | JUC04000073.hg.1  | PDE6B     |
| TC04000011.hg.1 | -2.76 | PSR04000197.hg.1  | PDE6B     |
| TC05000938.hg.1 | 2.92  | PSR05013724.hg.1  | RANBP17   |
| TC05000938.hg.1 | 2.9   | JUC05007089.hg.1  | RANBP17   |
| TC05000938.hg.1 | 2.43  | JUC05007091.hg.1  | RANBP17   |
| TC05000938.hg.1 | 2.08  | PSR05013718.hg.1  | RANBP17   |
| TC05000938.hg.1 | -2.05 | JUC05007111.hg.1  | RANBP17   |
| TC05000938.hg.1 | -2.11 | PSR05013695.hg.1  | RANBP17   |
| TC05000938.hg.1 | -2.19 | PSR05013727.hg.1  | RANBP17   |
| TC05000938.hg.1 | -2.32 | PSR05013671.hg.1  | RANBP17   |
| TC05000938.hg.1 | -2.41 | JUC05007134.hg.1  | RANBP17   |
| TC05000938.hg.1 | -2.93 | JUC05007087.hg.1  | RANBP17   |
| TC07000552.hg.1 | 2.92  | PSR07008062.hg.1  | CCDC132   |
| TC07000552.hg.1 | 2.29  | JUC07003855.hg.1  | CCDC132   |
| TC07000552.hg.1 | 2.05  | PSR07008123.hg.1  | CCDC132   |
| TC07000552.hg.1 | 2.02  | JUC07003850.hg.1  | CCDC132   |
| TC07000552.hg.1 | -2.13 | JUC07003840.hg.1  | CCDC132   |
| TC07002029.hg.1 | 2.92  | PSR07030994.hg.1  | FASTK     |
| TC07002029.hg.1 | -2.11 | JUC07015380.hg.1  | FASTK     |
| TC11001247.hg.1 | 2.92  | JUC11008509.hg.1  | SLC25A22  |
| TC11001247.hg.1 | 2.32  | PSR11015767.hg.1  | SLC25A22  |
| TC11001247.hg.1 | 2     | JUC11008516.hg.1  | SLC25A22  |
| TC13000867.hg.1 | 2.92  | JUC13005687.hg.1  | LIG4      |
| TC13000867.hg.1 | 2.68  | JUC13005691.hg.1  | LIG4      |
| TC13000867.hg.1 | -2.05 | PSR13009687.hg.1  | LIG4      |
| TC6_qbl_hap6000 | 2.92  | JUC6_qbl_hap60010 | HLA-B     |
| TC6_qbl_hap6000 | 2.61  | PSR6_qbl_hap60027 | HLA-B     |
| TC6_qbl_hap6000 | 2.25  | PSR6_qbl_hap60027 | HLA-B     |
| TC6_qbl_hap6000 | 2.25  | JUC6_qbl_hap60010 | HLA-B     |
| TC6_qbl_hap6000 | 2.09  | PSR6_qbl_hap60027 | HLA-B     |
| TC6_qbl_hap6000 | -2.34 | PSR6_qbl_hap60027 | HLA-B     |
| TC02000348.hg.1 | 2.91  | JUC02002738.hg.1  | REL       |
| TC02000348.hg.1 | 2.61  | PSR02005179.hg.1  | REL       |
| TC02000348.hg.1 | 2.17  | JUC02002728.hg.1  | REL       |
| TC02001377.hg.1 | 2.91  | JUC02011460.hg.1  | SP100     |
| TC02001377.hg.1 | 2.37  | PSR02021601.hg.1  | SP100     |
| TC02001377.hg.1 | 2.32  | PSR02021559.hg.1  | SP100     |
| TC02001377.hg.1 | 2.12  | PSR02021620.hg.1  | SP100     |
| TC02001377.hg.1 | 2.01  | PSR02021615.hg.1  | SP100     |
| TC02001421.hg.1 | 2.91  | JUC02011969.hg.1  | HEATR7B1  |
| TC02001421.hg.1 | 2.47  | JUC02011997.hg.1  | HEATR7B1  |
| TC02001421.hg.1 | 2.19  | PSR02022756.hg.1  | HEATR7B1  |

|                 |       |                  |          |
|-----------------|-------|------------------|----------|
| TC03000212.hg.1 | 2.91  | PSR03004248.hg.1 | ZNF621   |
| TC03000212.hg.1 | 2.37  | JUC03002248.hg.1 | ZNF621   |
| TC03000212.hg.1 | -2.24 | PSR03004239.hg.1 | ZNF621   |
| TC03000263.hg.1 | 2.91  | JUC03002697.hg.1 | NBEAL2   |
| TC03000263.hg.1 | 2.36  | PSR03005338.hg.1 | NBEAL2   |
| TC03000263.hg.1 | 2.34  | JUC03002679.hg.1 | NBEAL2   |
| TC03000263.hg.1 | 2.2   | PSR03005392.hg.1 | NBEAL2   |
| TC03000263.hg.1 | -2.41 | JUC03002702.hg.1 | NBEAL2   |
| TC04001718.hg.1 | 2.91  | JUC04012546.hg.1 | DDX60    |
| TC04001718.hg.1 | 2.32  | JUC04012519.hg.1 | DDX60    |
| TC04001718.hg.1 | 2.13  | JUC04012537.hg.1 | DDX60    |
| TC04001718.hg.1 | -2.02 | PSR04023712.hg.1 | DDX60    |
| TC04001718.hg.1 | -2.02 | JUC04012526.hg.1 | DDX60    |
| TC04001718.hg.1 | -2.02 | JUC04012533.hg.1 | DDX60    |
| TC04001718.hg.1 | -2.09 | PSR04023671.hg.1 | DDX60    |
| TC04001718.hg.1 | -2.21 | PSR04023705.hg.1 | DDX60    |
| TC04001718.hg.1 | -2.22 | JUC04012524.hg.1 | DDX60    |
| TC04001718.hg.1 | -2.46 | JUC04012538.hg.1 | DDX60    |
| TC04001718.hg.1 | -3.22 | JUC04012532.hg.1 | DDX60    |
| TC05000039.hg.1 | 2.91  | JUC05000255.hg.1 | ADAMTS16 |
| TC05000039.hg.1 | 2.31  | PSR05000461.hg.1 | ADAMTS16 |
| TC05000039.hg.1 | 2.2   | JUC05000233.hg.1 | ADAMTS16 |
| TC05000039.hg.1 | 2.19  | JUC05000246.hg.1 | ADAMTS16 |
| TC05000039.hg.1 | 2.08  | JUC05000250.hg.1 | ADAMTS16 |
| TC05000039.hg.1 | -2    | PSR05000465.hg.1 | ADAMTS16 |
| TC05000039.hg.1 | -2.16 | PSR05000471.hg.1 | ADAMTS16 |
| TC05000039.hg.1 | -2.34 | JUC05000236.hg.1 | ADAMTS16 |
| TC05000866.hg.1 | 2.91  | JUC05006547.hg.1 | CYFIP2   |
| TC05000866.hg.1 | 2.88  | PSR05012690.hg.1 | CYFIP2   |
| TC05000866.hg.1 | 2.61  | PSR05012679.hg.1 | CYFIP2   |
| TC05000866.hg.1 | 2.52  | JUC05006570.hg.1 | CYFIP2   |
| TC05000866.hg.1 | 2.46  | JUC05006545.hg.1 | CYFIP2   |
| TC05000866.hg.1 | 2.43  | JUC05006568.hg.1 | CYFIP2   |
| TC05000866.hg.1 | 2.34  | PSR05012688.hg.1 | CYFIP2   |
| TC05000866.hg.1 | 2.26  | PSR05012650.hg.1 | CYFIP2   |
| TC05000866.hg.1 | 2.11  | PSR05012656.hg.1 | CYFIP2   |
| TC05000866.hg.1 | -2.24 | PSR05012664.hg.1 | CYFIP2   |
| TC05000866.hg.1 | -2.26 | JUC05006555.hg.1 | CYFIP2   |
| TC05000866.hg.1 | -2.39 | JUC05006535.hg.1 | CYFIP2   |
| TC05000866.hg.1 | -2.7  | PSR05012668.hg.1 | CYFIP2   |
| TC05000866.hg.1 | -4    | PSR05012662.hg.1 | CYFIP2   |
| TC06000819.hg.1 | 2.91  | JUC06004542.hg.1 | UFL1     |
| TC06000819.hg.1 | 2.15  | PSR06009739.hg.1 | UFL1     |
| TC06000851.hg.1 | 2.91  | JUC06004704.hg.1 | QRSL1    |
| TC06000851.hg.1 | 2.74  | JUC06004695.hg.1 | QRSL1    |
| TC06000851.hg.1 | -2.63 | PSR06010032.hg.1 | QRSL1    |
| TC10000403.hg.1 | 2.91  | PSR10004481.hg.1 | HNRNPH3  |
| TC10000403.hg.1 | 2.6   | PSR10004502.hg.1 | HNRNPH3  |
| TC10000403.hg.1 | -2.77 | JUC10002597.hg.1 | HNRNPH3  |
| TC14000202.hg.1 | 2.91  | PSR14002217.hg.1 | NUBPL    |
| TC14000202.hg.1 | 2.51  | JUC14000995.hg.1 | NUBPL    |
| TC14000202.hg.1 | 2.18  | PSR14002220.hg.1 | NUBPL    |
| TC16001291.hg.1 | 2.91  | JUC16010221.hg.1 | MAF      |
| TC16001291.hg.1 | 2.01  | JUC16010220.hg.1 | MAF      |
| TC16001291.hg.1 | -2.48 | PSR16017944.hg.1 | MAF      |
| TC6_mann_hap400 | 2.91  | JUC6_mann_hap400 | HCG18    |
| TC6_mann_hap400 | 2.03  | PSR6_mann_hap400 | HCG18    |
| TC02001323.hg.1 | 2.9   | JUC02010976.hg.1 | DNAJB2   |

|                  |       |                               |          |
|------------------|-------|-------------------------------|----------|
| TC02001323.hg.1  | 2.02  | JUC02010982.hg.1              | DNAJB2   |
| TC02001323.hg.1  | 2     | PSR02020607.hg.1              | DNAJB2   |
| TC02001323.hg.1  | -2.01 | JUC02010979.hg.1              | DNAJB2   |
| TC02001323.hg.1  | -2.1  | PSR02020601.hg.1              | DNAJB2   |
| TC03000315.hg.1  | 2.9   | JUC03003230.hg.1              | HEMK1    |
| TC03000315.hg.1  | 2.17  | JUC03003235.hg.1              | HEMK1    |
| TC03000315.hg.1  | 2.11  | JUC03003232.hg.1              | HEMK1    |
| TC03000315.hg.1  | 2.01  | PSR03006647.hg.1              | HEMK1    |
| TC03000315.hg.1  | -2.8  | PSR03006652.hg.1              | HEMK1    |
| TC03000315.hg.1  | -3.22 | JUC03003227.hg.1              | HEMK1    |
| TC03000353.hg.1  | 2.9   | JUC03003822.hg.1              | CACNA2D3 |
| TC03000353.hg.1  | 2.89  | JUC03003832.hg.1              | CACNA2D3 |
| TC03000353.hg.1  | 2.56  | PSR03007782.hg.1              | CACNA2D3 |
| TC03000353.hg.1  | 2.46  | JUC03003817.hg.1              | CACNA2D3 |
| TC03000353.hg.1  | 2.44  | PSR03007773.hg.1              | CACNA2D3 |
| TC03000353.hg.1  | 2.35  | JUC03003839.hg.1              | CACNA2D3 |
| TC03000353.hg.1  | 2.27  | PSR03007814.hg.1              | CACNA2D3 |
| TC03000353.hg.1  | 2.21  | JUC03003854.hg.1              | CACNA2D3 |
| TC03000353.hg.1  | 2.2   | PSR03007779.hg.1              | CACNA2D3 |
| TC03000353.hg.1  | 2.16  | JUC03003811.hg.1              | CACNA2D3 |
| TC03000353.hg.1  | 2.14  | PSR03007819.hg.1              | CACNA2D3 |
| TC03000353.hg.1  | 2.11  | PSR03007775.hg.1              | CACNA2D3 |
| TC03000353.hg.1  | 2.11  | PSR03007808.hg.1              | CACNA2D3 |
| TC03000353.hg.1  | 2.05  | PSR03007777.hg.1              | CACNA2D3 |
| TC03000353.hg.1  | -2.3  | JUC03003834.hg.1              | CACNA2D3 |
| TC03000353.hg.1  | -2.35 | JUC03003828.hg.1              | CACNA2D3 |
| TC03000353.hg.1  | -2.68 | JUC03003842.hg.1              | CACNA2D3 |
| TC03000353.hg.1  | -3.04 | JUC03003826.hg.1              | CACNA2D3 |
| TC03000353.hg.1  | -3.04 | JUC03003836.hg.1              | CACNA2D3 |
| TC03000353.hg.1  | -5.3  | JUC03003830.hg.1              | CACNA2D3 |
| TC03001241.hg.1  | 2.9   | PSR03021275.hg.1              | THRБ     |
| TC03001241.hg.1  | 2.49  | JUC03010537.hg.1              | THRБ     |
| TC03001241.hg.1  | 2.09  | PSR03021256.hg.1              | THRБ     |
| TC03001241.hg.1  | 2.09  | PSR03021290.hg.1              | THRБ     |
| TC03001241.hg.1  | 2.08  | PSR03021277.hg.1              | THRБ     |
| TC03001241.hg.1  | 2.07  | JUC03010551.hg.1              | THRБ     |
| TC03001241.hg.1  | 2.06  | JUC03010553.hg.1              | THRБ     |
| TC03001241.hg.1  | 2.04  | PSR03021288.hg.1              | THRБ     |
| TC03001241.hg.1  | 2.02  | PSR03021262.hg.1              | THRБ     |
| TC05003440.hg.1  | 2.9   | JUC05019828.hg.1              | RFESD    |
| TC05003440.hg.1  | -2.02 | PSR05006497.hg.1              | RFESD    |
| TC1_gl000192_ran | 2.9   | JUC1_gl000192_random000038.hg |          |
| TC1_gl000192_ran | 2.58  | JUC1_gl000192_random000031.hg |          |
| TC1_gl000192_ran | 2.05  | JUC1_gl000192_random000039.hg |          |
| TC1_gl000192_ran | -3.27 | PSR1_gl000192_random000028.hg |          |
| TC1_gl000192_ran | -3.81 | JUC1_gl000192_random000032.hg |          |
| TC14001189.hg.1  | 2.9   | PSR14013655.hg.1              | SIX4     |
| TC14001189.hg.1  | 2.66  | JUC14006884.hg.1              | SIX4     |
| TC14001189.hg.1  | 2.41  | PSR14013647.hg.1              | SIX4     |
| TC14001189.hg.1  | 2.13  | PSR14013646.hg.1              | SIX4     |
| TC16000189.hg.1  | 2.9   | JUC16001449.hg.1              | MPV17L   |
| TC16000189.hg.1  | -2.09 | PSR16002823.hg.1              | MPV17L   |
| TC20001751.hg.1  | 2.9   | JUC20010009.hg.1              | UBE2V1   |
| TC20001751.hg.1  | 2.14  | PSR20012862.hg.1              | UBE2V1   |
| TC20001751.hg.1  | -2.06 | PSR20012825.hg.1              | UBE2V1   |
| TC20001751.hg.1  | -2.22 | PSR20012826.hg.1              | UBE2V1   |
| TC20001751.hg.1  | -2.81 | JUC20010025.hg.1              | UBE2V1   |
| TC02001087.hg.1  | 2.9   | JUC02008661.hg.1              | PPP1R1C  |



|                 |        |                  |            |
|-----------------|--------|------------------|------------|
| TC02001087.hg.1 | 2      | PSR02016268.hg.1 | PPP1R1C    |
| TC01000439.hg.1 | 2.89   | JUC01003525.hg.1 | ADC        |
| TC01000439.hg.1 | 2.07   | PSR01006797.hg.1 | ADC        |
| TC01000439.hg.1 | -2.08  | PSR01006806.hg.1 | ADC        |
| TC02002792.hg.1 | 2.89   | JUC02023525.hg.1 | GLB1L      |
| TC02002792.hg.1 | 2.3    | PSR02045059.hg.1 | GLB1L      |
| TC02002792.hg.1 | 2.3    | JUC02023538.hg.1 | GLB1L      |
| TC02002792.hg.1 | 2.26   | PSR02045078.hg.1 | GLB1L      |
| TC02002792.hg.1 | 2.17   | PSR02045040.hg.1 | GLB1L      |
| TC02002792.hg.1 | 2.12   | JUC02023545.hg.1 | GLB1L      |
| TC02002792.hg.1 | 2.11   | PSR02045074.hg.1 | GLB1L      |
| TC02002792.hg.1 | 2.06   | JUC02023535.hg.1 | GLB1L      |
| TC02002792.hg.1 | 2.02   | PSR02045083.hg.1 | GLB1L      |
| TC02002792.hg.1 | 2.01   | PSR02045066.hg.1 | GLB1L      |
| TC02002792.hg.1 | -2.03  | JUC02023528.hg.1 | GLB1L      |
| TC02002859.hg.1 | 2.89   | JUC02024157.hg.1 | NCL        |
| TC02002859.hg.1 | 2.24   | PSR02046162.hg.1 | NCL        |
| TC02002859.hg.1 | 2.23   | JUC02024171.hg.1 | NCL        |
| TC04000155.hg.1 | 2.89   | PSR04002416.hg.1 | NCAPG      |
| TC04000155.hg.1 | 2.87   | JUC04001095.hg.1 | NCAPG      |
| TC04000155.hg.1 | -2.04  | JUC04001086.hg.1 | NCAPG      |
| TC04000155.hg.1 | -2.14  | JUC04001101.hg.1 | NCAPG      |
| TC04000155.hg.1 | -2.28  | PSR04002429.hg.1 | NCAPG      |
| TC06004150.hg.1 | 2.89   | JUC06021967.hg.1 | FKBP5      |
| TC06004150.hg.1 | 2.45   | PSR06019753.hg.1 | FKBP5      |
| TC06004150.hg.1 | 2.19   | PSR06019755.hg.1 | FKBP5      |
| TC06004150.hg.1 | 2.14   | JUC06021963.hg.1 | FKBP5      |
| TC06004150.hg.1 | -2.14  | PSR06019763.hg.1 | FKBP5      |
| TC06004150.hg.1 | -3.94  | PSR06019751.hg.1 | FKBP5      |
| TC06004150.hg.1 | -6.86  | JUC06021970.hg.1 | FKBP5      |
| TC06004150.hg.1 | -9.93  | JUC06021966.hg.1 | FKBP5      |
| TC06004150.hg.1 | -11.03 | PSR06019768.hg.1 | FKBP5      |
| TC06004150.hg.1 | -13.4  | JUC06021962.hg.1 | FKBP5      |
| TC06004150.hg.1 | -15.12 | JUC06021957.hg.1 | FKBP5      |
| TC06004150.hg.1 | -22.11 | PSR06019745.hg.1 | FKBP5      |
| TC06004150.hg.1 | -27.78 | PSR06019770.hg.1 | FKBP5      |
| TC06004150.hg.1 | -32.14 | PSR06019772.hg.1 | FKBP5      |
| TC06004150.hg.1 | -36.8  | PSR06019777.hg.1 | FKBP5      |
| TC06004150.hg.1 | -37.59 | PSR06019775.hg.1 | FKBP5      |
| TC06004150.hg.1 | -40.29 | JUC06021958.hg.1 | FKBP5      |
| TC07003326.hg.1 | 2.89   | PSR07004985.hg.1 | GBAS       |
| TC07003326.hg.1 | -2.57  | JUC07020896.hg.1 | GBAS       |
| TC10000199.hg.1 | 2.89   | PSR10002381.hg.1 | BAMBI      |
| TC10000199.hg.1 | 2.05   | JUC10001295.hg.1 | BAMBI      |
| TC10000424.hg.1 | 2.89   | JUC10002884.hg.1 | COL13A1    |
| TC10000424.hg.1 | 2.27   | JUC10002852.hg.1 | COL13A1    |
| TC10000424.hg.1 | 2.16   | PSR10004935.hg.1 | COL13A1    |
| TC10000424.hg.1 | -2.44  | JUC10002849.hg.1 | COL13A1    |
| TC10000424.hg.1 | -4.71  | JUC10002896.hg.1 | COL13A1    |
| TC10001410.hg.1 | 2.89   | JUC10010371.hg.1 | PPP3CB     |
| TC10001410.hg.1 | -2.56  | PSR10017808.hg.1 | PPP3CB     |
| TC10001410.hg.1 | -2.64  | JUC10010365.hg.1 | PPP3CB     |
| TC10001410.hg.1 | -2.68  | PSR10017805.hg.1 | PPP3CB     |
| TC10001410.hg.1 | -3.51  | PSR10017802.hg.1 | PPP3CB     |
| TC10001410.hg.1 | -4.02  | JUC10010383.hg.1 | PPP3CB     |
| TC12000183.hg.1 | 2.89   | JUC12001069.hg.1 | LOC1005063 |
| TC12000183.hg.1 | 2.23   | JUC12001077.hg.1 | LOC1005063 |
| TC12000183.hg.1 | 2.19   | JUC12001071.hg.1 | LOC1005063 |

|                 |       |                  |            |
|-----------------|-------|------------------|------------|
| TC12000183.hg.1 | -2.1  | PSR12002317.hg.1 | LOC1005063 |
| TC12000418.hg.1 | 2.89  | JUC12002948.hg.1 | KRT7       |
| TC12000418.hg.1 | 2.46  | PSR12005361.hg.1 | KRT7       |
| TC12000418.hg.1 | 2.23  | PSR12005339.hg.1 | KRT7       |
| TC12000418.hg.1 | 2.09  | PSR12005352.hg.1 | KRT7       |
| TC12000418.hg.1 | -2.41 | JUC12002957.hg.1 | KRT7       |
| TC12000418.hg.1 | -2.42 | JUC12002951.hg.1 | KRT7       |
| TC17000460.hg.1 | 2.89  | JUC17003067.hg.1 | SOCS7      |
| TC17000460.hg.1 | 2.63  | PSR17005398.hg.1 | SOCS7      |
| TC17000460.hg.1 | 2.3   | PSR17005386.hg.1 | SOCS7      |
| TC17000460.hg.1 | 2.06  | PSR17005399.hg.1 | SOCS7      |
| TC19002668.hg.1 | 2.89  | JUC19017698.hg.1 | ZNF776     |
| TC19002668.hg.1 | 2.74  | JUC19017699.hg.1 | ZNF776     |
| TC19002668.hg.1 | 2.17  | PSR19013047.hg.1 | ZNF776     |
| TC19002668.hg.1 | 2.16  | JUC19017700.hg.1 | ZNF776     |
| TC19002668.hg.1 | 2.11  | PSR19013051.hg.1 | ZNF776     |
| TC19002668.hg.1 | 2.09  | PSR19013046.hg.1 | ZNF776     |
| TC19002668.hg.1 | 2.03  | PSR19013050.hg.1 | ZNF776     |
| TC01003677.hg.1 | 2.88  | PSR01056295.hg.1 | C1orf98    |
| TC01003677.hg.1 | 2.18  | PSR01056297.hg.1 | C1orf98    |
| TC01003677.hg.1 | 2.13  | JUC01029416.hg.1 | C1orf98    |
| TC01003677.hg.1 | -2.4  | PSR01056296.hg.1 | C1orf98    |
| TC01004096.hg.1 | 2.88  | JUC01032180.hg.1 | ZNF692     |
| TC01004096.hg.1 | -2.18 | PSR01061583.hg.1 | ZNF692     |
| TC05000689.hg.1 | 2.88  | PSR05009590.hg.1 | MYOT       |
| TC05000689.hg.1 | 2.82  | JUC05005093.hg.1 | MYOT       |
| TC05000689.hg.1 | 2.03  | PSR05009589.hg.1 | MYOT       |
| TC05000689.hg.1 | -2.36 | PSR05009575.hg.1 | MYOT       |
| TC05000689.hg.1 | -2.37 | PSR05009572.hg.1 | MYOT       |
| TC05000689.hg.1 | -2.44 | PSR05009588.hg.1 | MYOT       |
| TC05000689.hg.1 | -2.57 | PSR05009574.hg.1 | MYOT       |
| TC05000689.hg.1 | -2.63 | PSR05009576.hg.1 | MYOT       |
| TC05000689.hg.1 | -5.52 | PSR05009578.hg.1 | MYOT       |
| TC05001872.hg.1 | 2.88  | PSR05025779.hg.1 | ARAP3      |
| TC05001872.hg.1 | 2.83  | PSR05025830.hg.1 | ARAP3      |
| TC05001872.hg.1 | 2.32  | JUC05013168.hg.1 | ARAP3      |
| TC05001872.hg.1 | 2.26  | PSR05025799.hg.1 | ARAP3      |
| TC05001872.hg.1 | 2.17  | JUC05013141.hg.1 | ARAP3      |
| TC05001872.hg.1 | 2.14  | JUC05013155.hg.1 | ARAP3      |
| TC05001872.hg.1 | 2.13  | PSR05025781.hg.1 | ARAP3      |
| TC05001872.hg.1 | 2.13  | PSR05025800.hg.1 | ARAP3      |
| TC05001872.hg.1 | 2.12  | JUC05013150.hg.1 | ARAP3      |
| TC05001872.hg.1 | 2.08  | JUC05013143.hg.1 | ARAP3      |
| TC05001872.hg.1 | 2.07  | JUC05013166.hg.1 | ARAP3      |
| TC05001872.hg.1 | -2    | PSR05025783.hg.1 | ARAP3      |
| TC05001872.hg.1 | -2.06 | PSR05025790.hg.1 | ARAP3      |
| TC05001872.hg.1 | -2.25 | JUC05013160.hg.1 | ARAP3      |
| TC05001872.hg.1 | -2.3  | PSR05025785.hg.1 | ARAP3      |
| TC05001872.hg.1 | -3.27 | PSR05025792.hg.1 | ARAP3      |
| TC05001872.hg.1 | -3.76 | PSR05025819.hg.1 | ARAP3      |
| TC05001872.hg.1 | -3.8  | JUC05013153.hg.1 | ARAP3      |
| TC05001872.hg.1 | -5.09 | JUC05013177.hg.1 | ARAP3      |
| TC05001872.hg.1 | -6.45 | PSR05025786.hg.1 | ARAP3      |
| TC05003436.hg.1 | 2.88  | PSR05028923.hg.1 | RAB24      |
| TC05003436.hg.1 | -2.16 | JUC05019767.hg.1 | RAB24      |
| TC06001142.hg.1 | 2.88  | PSR06013575.hg.1 | FNDC1      |
| TC06001142.hg.1 | 2.25  | PSR06013573.hg.1 | FNDC1      |
| TC06001142.hg.1 | -2.58 | JUC06006699.hg.1 | FNDC1      |

|                 |       |                  |           |
|-----------------|-------|------------------|-----------|
| TC07001087.hg.1 | 2.88  | PSR07016753.hg.1 | TMEM184A  |
| TC07001087.hg.1 | 2.12  | PSR07016751.hg.1 | TMEM184A  |
| TC07001087.hg.1 | 2.11  | JUC07008114.hg.1 | TMEM184A  |
| TC07001087.hg.1 | 2.09  | PSR07016747.hg.1 | TMEM184A  |
| TC07001087.hg.1 | 2.07  | JUC07008128.hg.1 | TMEM184A  |
| TC07001124.hg.1 | 2.88  | JUC07008492.hg.1 | PMS2      |
| TC07001124.hg.1 | -3.36 | PSR07017415.hg.1 | PMS2      |
| TC0X001324.hg.1 | 2.88  | PSR0X017758.hg.1 | FAM70A    |
| TC0X001324.hg.1 | 2.33  | JUC0X009044.hg.1 | FAM70A    |
| TC0X001324.hg.1 | 2.25  | JUC0X009047.hg.1 | FAM70A    |
| TC0X001324.hg.1 | 2     | JUC0X009037.hg.1 | FAM70A    |
| TC0X001324.hg.1 | -2.29 | JUC0X009045.hg.1 | FAM70A    |
| TC0X001324.hg.1 | -2.36 | PSR0X017760.hg.1 | FAM70A    |
| TC13000717.hg.1 | 2.88  | PSR13008298.hg.1 | PCDH9     |
| TC13000717.hg.1 | 2.16  | PSR13008301.hg.1 | PCDH9     |
| TC13000717.hg.1 | 2.08  | JUC13004850.hg.1 | PCDH9     |
| TC13000717.hg.1 | -2    | PSR13008296.hg.1 | PCDH9     |
| TC13000717.hg.1 | -2.19 | PSR13008291.hg.1 | PCDH9     |
| TC13000717.hg.1 | -2.39 | JUC13004847.hg.1 | PCDH9     |
| TC13000717.hg.1 | -2.51 | JUC13004854.hg.1 | PCDH9     |
| TC13000717.hg.1 | -2.51 | JUC13004855.hg.1 | PCDH9     |
| TC13000717.hg.1 | -3.2  | PSR13008287.hg.1 | PCDH9     |
| TC13000717.hg.1 | -3.44 | PSR13008290.hg.1 | PCDH9     |
| TC13000717.hg.1 | -3.44 | JUC13004846.hg.1 | PCDH9     |
| TC13000717.hg.1 | -3.95 | JUC13004849.hg.1 | PCDH9     |
| TC13000717.hg.1 | -4.35 | PSR13008294.hg.1 | PCDH9     |
| TC13000717.hg.1 | -4.61 | JUC13004853.hg.1 | PCDH9     |
| TC13000717.hg.1 | -4.64 | PSR13008285.hg.1 | PCDH9     |
| TC13000717.hg.1 | -6.55 | PSR13008286.hg.1 | PCDH9     |
| TC13000717.hg.1 | -8.26 | JUC13004852.hg.1 | PCDH9     |
| TC13000892.hg.1 | 2.88  | JUC13005856.hg.1 | PCID2     |
| TC13000892.hg.1 | 2.14  | PSR13009947.hg.1 | PCID2     |
| TC13000892.hg.1 | 2.05  | PSR13009962.hg.1 | PCID2     |
| TC13000892.hg.1 | -4.22 | PSR13009956.hg.1 | PCID2     |
| TC14001217.hg.1 | 2.88  | JUC14006996.hg.1 | ZBTB25    |
| TC14001217.hg.1 | -2.14 | JUC14006995.hg.1 | ZBTB25    |
| TC14001217.hg.1 | -2.39 | PSR14013857.hg.1 | ZBTB25    |
| TC14001217.hg.1 | -7.52 | JUC14006993.hg.1 | ZBTB25    |
| TC16000660.hg.1 | 2.88  | JUC16005223.hg.1 | CRISPLD2  |
| TC16000660.hg.1 | 2.09  | JUC16005226.hg.1 | CRISPLD2  |
| TC16000660.hg.1 | 2.05  | JUC16005222.hg.1 | CRISPLD2  |
| TC16000660.hg.1 | -2.65 | PSR16009326.hg.1 | CRISPLD2  |
| TC16000660.hg.1 | -2.87 | PSR16009331.hg.1 | CRISPLD2  |
| TC16000660.hg.1 | -6.55 | PSR16009328.hg.1 | CRISPLD2  |
| TC16000660.hg.1 | -9.79 | PSR16009339.hg.1 | CRISPLD2  |
| TC17001118.hg.1 | 2.88  | JUC17008543.hg.1 | MYH10     |
| TC17001118.hg.1 | 2.54  | JUC17008578.hg.1 | MYH10     |
| TC17001118.hg.1 | 2.42  | JUC17008575.hg.1 | MYH10     |
| TC17001118.hg.1 | 2.3   | PSR17015038.hg.1 | MYH10     |
| TC17001118.hg.1 | 2.06  | PSR17015086.hg.1 | MYH10     |
| TC17001118.hg.1 | -2.5  | JUC17008570.hg.1 | MYH10     |
| TC17001903.hg.1 | 2.88  | JUC17014510.hg.1 | ST6GALNAC |
| TC17001903.hg.1 | 2.16  | JUC17014513.hg.1 | ST6GALNAC |
| TC17001903.hg.1 | -2.03 | PSR17025820.hg.1 | ST6GALNAC |
| TC17001903.hg.1 | -2.05 | PSR17025818.hg.1 | ST6GALNAC |
| TC17001903.hg.1 | -2.24 | PSR17025825.hg.1 | ST6GALNAC |
| TC17001903.hg.1 | -3.29 | JUC17014514.hg.1 | ST6GALNAC |
| TC17001903.hg.1 | -5.36 | JUC17014515.hg.1 | ST6GALNAC |

|                 |       |                  |        |
|-----------------|-------|------------------|--------|
| TC19000144.hg.1 | 2.88  | JUC19001375.hg.1 | CERS4  |
| TC19000144.hg.1 | 2.68  | PSR19002283.hg.1 | CERS4  |
| TC19000144.hg.1 | 2.66  | PSR19002297.hg.1 | CERS4  |
| TC19000144.hg.1 | 2.32  | JUC19001377.hg.1 | CERS4  |
| TC19000144.hg.1 | 2.23  | PSR19002294.hg.1 | CERS4  |
| TC19000144.hg.1 | 2.22  | PSR19002284.hg.1 | CERS4  |
| TC19000144.hg.1 | -2.02 | PSR19002293.hg.1 | CERS4  |
| TC19000144.hg.1 | -2.32 | PSR19002291.hg.1 | CERS4  |
| TC19000144.hg.1 | -2.48 | JUC19001368.hg.1 | CERS4  |
| TC19000144.hg.1 | -2.82 | PSR19002285.hg.1 | CERS4  |
| TC01001993.hg.1 | 2.87  | JUC01016796.hg.1 | EFCAB2 |
| TC01001993.hg.1 | 2.27  | JUC01016805.hg.1 | EFCAB2 |
| TC01001993.hg.1 | -2.06 | JUC01016807.hg.1 | EFCAB2 |
| TC01001993.hg.1 | -2.12 | PSR01030863.hg.1 | EFCAB2 |
| TC01001993.hg.1 | -2.15 | JUC01016811.hg.1 | EFCAB2 |
| TC01001993.hg.1 | -2.19 | PSR01030900.hg.1 | EFCAB2 |
| TC01001993.hg.1 | -2.22 | PSR01030873.hg.1 | EFCAB2 |
| TC01001993.hg.1 | -2.23 | PSR01030860.hg.1 | EFCAB2 |
| TC01001993.hg.1 | -2.28 | PSR01030865.hg.1 | EFCAB2 |
| TC01001993.hg.1 | -2.3  | PSR01030896.hg.1 | EFCAB2 |
| TC01001993.hg.1 | -2.32 | PSR01030888.hg.1 | EFCAB2 |
| TC01001993.hg.1 | -2.39 | JUC01016798.hg.1 | EFCAB2 |
| TC01001993.hg.1 | -2.45 | PSR01030898.hg.1 | EFCAB2 |
| TC01001993.hg.1 | -2.49 | JUC01016808.hg.1 | EFCAB2 |
| TC01001993.hg.1 | -2.6  | PSR01030889.hg.1 | EFCAB2 |
| TC01001993.hg.1 | -3.02 | JUC01016797.hg.1 | EFCAB2 |
| TC01001993.hg.1 | -3.72 | PSR01030884.hg.1 | EFCAB2 |
| TC01001993.hg.1 | -4.04 | JUC01016801.hg.1 | EFCAB2 |
| TC02000524.hg.1 | 2.87  | PSR02008183.hg.1 | KDM3A  |
| TC02000524.hg.1 | 2.8   | JUC02004174.hg.1 | KDM3A  |
| TC02000524.hg.1 | 2.71  | PSR02008187.hg.1 | KDM3A  |
| TC02000524.hg.1 | 2.55  | PSR02008181.hg.1 | KDM3A  |
| TC02000524.hg.1 | 2.5   | JUC02004168.hg.1 | KDM3A  |
| TC02000524.hg.1 | 2.27  | JUC02004154.hg.1 | KDM3A  |
| TC02000524.hg.1 | 2.2   | PSR02008142.hg.1 | KDM3A  |
| TC02000524.hg.1 | -2.09 | PSR02008168.hg.1 | KDM3A  |
| TC02000524.hg.1 | -2.43 | JUC02004184.hg.1 | KDM3A  |
| TC02000524.hg.1 | -2.86 | JUC02004189.hg.1 | KDM3A  |
| TC04000859.hg.1 | 2.87  | JUC04006355.hg.1 | CEP44  |
| TC04000859.hg.1 | 2.79  | PSR04011856.hg.1 | CEP44  |
| TC04000859.hg.1 | -2.28 | JUC04006353.hg.1 | CEP44  |
| TC06000894.hg.1 | 2.87  | JUC06005014.hg.1 | WISP3  |
| TC06000894.hg.1 | 2.79  | PSR06010559.hg.1 | WISP3  |
| TC06000894.hg.1 | 2.63  | JUC06005003.hg.1 | WISP3  |
| TC06000894.hg.1 | 2.62  | PSR06010544.hg.1 | WISP3  |
| TC06000894.hg.1 | -2.8  | JUC06005007.hg.1 | WISP3  |
| TC07000276.hg.1 | 2.87  | JUC07002044.hg.1 | OGDH   |
| TC07000276.hg.1 | 2.26  | JUC07002039.hg.1 | OGDH   |
| TC07000276.hg.1 | -2.62 | PSR07004280.hg.1 | OGDH   |
| TC07000449.hg.1 | 2.87  | JUC07002913.hg.1 | ELN    |
| TC07000449.hg.1 | 2.83  | JUC07002925.hg.1 | ELN    |
| TC07000449.hg.1 | 2.61  | JUC07002932.hg.1 | ELN    |
| TC07000449.hg.1 | 2.53  | PSR07006046.hg.1 | ELN    |
| TC07000449.hg.1 | 2.44  | JUC07002917.hg.1 | ELN    |
| TC07000449.hg.1 | 2.29  | JUC07002924.hg.1 | ELN    |
| TC07000449.hg.1 | 2.23  | PSR07005982.hg.1 | ELN    |
| TC07000449.hg.1 | 2.2   | JUC07002890.hg.1 | ELN    |
| TC07000449.hg.1 | 2.15  | PSR07006007.hg.1 | ELN    |

|                 |       |                  |        |
|-----------------|-------|------------------|--------|
| TC07000449.hg.1 | 2.15  | PSR07006055.hg.1 | ELN    |
| TC07000449.hg.1 | 2.09  | PSR07005992.hg.1 | ELN    |
| TC07000449.hg.1 | 2.05  | PSR07005983.hg.1 | ELN    |
| TC07000449.hg.1 | 2.01  | JUC07002877.hg.1 | ELN    |
| TC07000449.hg.1 | -2    | PSR07006025.hg.1 | ELN    |
| TC07000449.hg.1 | -2.09 | JUC07002907.hg.1 | ELN    |
| TC07000449.hg.1 | -2.11 | JUC07002903.hg.1 | ELN    |
| TC07000449.hg.1 | -2.13 | JUC07002914.hg.1 | ELN    |
| TC07000449.hg.1 | -2.29 | PSR07005989.hg.1 | ELN    |
| TC07000449.hg.1 | -2.3  | PSR07006030.hg.1 | ELN    |
| TC07000449.hg.1 | -2.4  | JUC07002918.hg.1 | ELN    |
| TC07000449.hg.1 | -2.44 | PSR07006000.hg.1 | ELN    |
| TC07000449.hg.1 | -2.55 | PSR07005986.hg.1 | ELN    |
| TC07000449.hg.1 | -2.56 | JUC07002928.hg.1 | ELN    |
| TC07000449.hg.1 | -2.79 | JUC07002911.hg.1 | ELN    |
| TC07000449.hg.1 | -2.8  | JUC07002874.hg.1 | ELN    |
| TC07000449.hg.1 | -2.81 | PSR07006032.hg.1 | ELN    |
| TC07000449.hg.1 | -2.83 | PSR07005991.hg.1 | ELN    |
| TC07000449.hg.1 | -2.86 | JUC07002886.hg.1 | ELN    |
| TC07000449.hg.1 | -2.87 | PSR07006019.hg.1 | ELN    |
| TC07000449.hg.1 | -2.87 | JUC07002930.hg.1 | ELN    |
| TC07000449.hg.1 | -2.9  | JUC07002878.hg.1 | ELN    |
| TC07000449.hg.1 | -2.93 | PSR07005993.hg.1 | ELN    |
| TC07000449.hg.1 | -3.03 | JUC07002873.hg.1 | ELN    |
| TC07000449.hg.1 | -3.15 | PSR07005981.hg.1 | ELN    |
| TC07000449.hg.1 | -3.19 | PSR07006008.hg.1 | ELN    |
| TC07000449.hg.1 | -3.35 | PSR07005999.hg.1 | ELN    |
| TC07000449.hg.1 | -3.4  | JUC07002919.hg.1 | ELN    |
| TC07000449.hg.1 | -3.52 | PSR07006012.hg.1 | ELN    |
| TC07000449.hg.1 | -3.74 | JUC07002882.hg.1 | ELN    |
| TC07000449.hg.1 | -3.9  | JUC07002883.hg.1 | ELN    |
| TC07000449.hg.1 | -3.91 | JUC07002929.hg.1 | ELN    |
| TC07000449.hg.1 | -3.99 | PSR07006022.hg.1 | ELN    |
| TC07000449.hg.1 | -4.12 | PSR07006023.hg.1 | ELN    |
| TC07000449.hg.1 | -4.21 | PSR07006006.hg.1 | ELN    |
| TC07000449.hg.1 | -4.39 | JUC07002920.hg.1 | ELN    |
| TC07000449.hg.1 | -4.42 | PSR07006015.hg.1 | ELN    |
| TC07000449.hg.1 | -4.66 | JUC07002916.hg.1 | ELN    |
| TC07000449.hg.1 | -4.71 | JUC07002904.hg.1 | ELN    |
| TC07000449.hg.1 | -4.87 | JUC07002888.hg.1 | ELN    |
| TC07000449.hg.1 | -5.09 | PSR07005987.hg.1 | ELN    |
| TC07000449.hg.1 | -5.18 | PSR07005963.hg.1 | ELN    |
| TC07000449.hg.1 | -5.19 | JUC07002900.hg.1 | ELN    |
| TC07000449.hg.1 | -5.66 | JUC07002891.hg.1 | ELN    |
| TC07000449.hg.1 | -5.67 | PSR07006021.hg.1 | ELN    |
| TC07000449.hg.1 | -5.75 | PSR07006014.hg.1 | ELN    |
| TC07000449.hg.1 | -6.04 | JUC07002912.hg.1 | ELN    |
| TC07000449.hg.1 | -6.14 | PSR07006031.hg.1 | ELN    |
| TC07000449.hg.1 | -6.33 | PSR07005997.hg.1 | ELN    |
| TC07000449.hg.1 | -6.36 | PSR07006017.hg.1 | ELN    |
| TC07000449.hg.1 | -8.04 | JUC07002906.hg.1 | ELN    |
| TC07001568.hg.1 | 2.87  | JUC07011800.hg.1 | SEMA3A |
| TC07001568.hg.1 | 2.08  | PSR07023692.hg.1 | SEMA3A |
| TC07001568.hg.1 | 2.03  | JUC07011795.hg.1 | SEMA3A |
| TC07001568.hg.1 | -2    | PSR07023703.hg.1 | SEMA3A |
| TC07001568.hg.1 | -2.05 | PSR07023701.hg.1 | SEMA3A |
| TC07001568.hg.1 | -2.29 | PSR07023702.hg.1 | SEMA3A |
| TC07001568.hg.1 | -4.24 | JUC07011806.hg.1 | SEMA3A |

|                 |        |                  |             |
|-----------------|--------|------------------|-------------|
| TC09001468.hg.1 | 2.87   | PSR09018162.hg.1 | PTPN3       |
| TC09001468.hg.1 | 2.24   | PSR09018157.hg.1 | PTPN3       |
| TC09001468.hg.1 | 2.11   | JUC09009806.hg.1 | PTPN3       |
| TC09001468.hg.1 | 2.09   | JUC09009800.hg.1 | PTPN3       |
| TC09001643.hg.1 | 2.87   | JUC09011259.hg.1 | CRAT        |
| TC09001643.hg.1 | 2.76   | JUC09011256.hg.1 | CRAT        |
| TC09001643.hg.1 | 2.4    | JUC09011253.hg.1 | CRAT        |
| TC09001643.hg.1 | 2.3    | PSR09020977.hg.1 | CRAT        |
| TC09001643.hg.1 | 2.07   | JUC09011241.hg.1 | CRAT        |
| TC09001643.hg.1 | 2.04   | PSR09020964.hg.1 | CRAT        |
| TC09001643.hg.1 | 2      | PSR09020960.hg.1 | CRAT        |
| TC11000684.hg.1 | 2.87   | JUC11004527.hg.1 | SSH3        |
| TC11000684.hg.1 | 2.64   | JUC11004534.hg.1 | SSH3        |
| TC11000684.hg.1 | -2     | JUC11004529.hg.1 | SSH3        |
| TC11000684.hg.1 | -2.83  | PSR11008875.hg.1 | SSH3        |
| TC15001501.hg.1 | 2.87   | JUC15007619.hg.1 | GTF2A2      |
| TC15001501.hg.1 | -2.12  | PSR15014142.hg.1 | GTF2A2      |
| TC16000137.hg.1 | 2.87   | JUC16001060.hg.1 | UBN1        |
| TC16000137.hg.1 | 2.17   | PSR16002155.hg.1 | UBN1        |
| TC19001826.hg.1 | 2.87   | PSR19024692.hg.1 | NLRP12      |
| TC19001826.hg.1 | -2.4   | JUC19014033.hg.1 | NLRP12      |
| TC19001826.hg.1 | -2.75  | JUC19014037.hg.1 | NLRP12      |
| TC20000544.hg.1 | 2.87   | PSR20007852.hg.1 | SCRT2, SRXI |
| TC20000544.hg.1 | 2.72   | JUC20004093.hg.1 | SCRT2, SRXI |
| TC20000544.hg.1 | 2.13   | PSR20007851.hg.1 | SCRT2, SRXI |
| TC22001460.hg.1 | 2.87   | PSR22002936.hg.1 | GGT1, GGT2  |
| TC22001460.hg.1 | 2.19   | JUC22009158.hg.1 | GGT1, GGT2  |
| TC22001460.hg.1 | 2.17   | JUC22009178.hg.1 | GGT1, GGT2  |
| TC22001460.hg.1 | -2.48  | PSR22002918.hg.1 | GGT1, GGT2  |
| TC22001460.hg.1 | -2.54  | PSR22002927.hg.1 | GGT1, GGT2  |
| TC22001460.hg.1 | -2.74  | JUC22009170.hg.1 | GGT1, GGT2  |
| TC22001460.hg.1 | -3.24  | JUC22009190.hg.1 | GGT1, GGT2  |
| TC22001460.hg.1 | -3.46  | JUC22009176.hg.1 | GGT1, GGT2  |
| TC22001460.hg.1 | -4.65  | PSR22002879.hg.1 | GGT1, GGT2  |
| TC22001460.hg.1 | -18.14 | JUC22009191.hg.1 | GGT1, GGT2  |
| TC6_mcf_hap5000 | 2.87   | JUC6_mcf_hap5000 | DDR1        |
| TC6_mcf_hap5000 | 2.6    | JUC6_mcf_hap5000 | DDR1        |
| TC6_mcf_hap5000 | 2.56   | PSR6_mcf_hap5000 | DDR1        |
| TC6_mcf_hap5000 | 2.5    | PSR6_mcf_hap5000 | DDR1        |
| TC6_mcf_hap5000 | 2.48   | JUC6_mcf_hap5000 | DDR1        |
| TC6_mcf_hap5000 | 2.45   | PSR6_mcf_hap5000 | DDR1        |
| TC6_mcf_hap5000 | 2.37   | JUC6_mcf_hap5000 | DDR1        |
| TC6_mcf_hap5000 | 2.32   | JUC6_mcf_hap5000 | DDR1        |
| TC6_mcf_hap5000 | 2.29   | PSR6_mcf_hap5000 | DDR1        |
| TC6_mcf_hap5000 | 2.17   | JUC6_mcf_hap5000 | DDR1        |
| TC6_mcf_hap5000 | 2.16   | PSR6_mcf_hap5000 | DDR1        |
| TC6_mcf_hap5000 | 2.09   | JUC6_mcf_hap5000 | DDR1        |
| TC6_mcf_hap5000 | 2.02   | PSR6_mcf_hap5000 | DDR1        |
| TC6_mcf_hap5000 | 2.02   | JUC6_mcf_hap5000 | DDR1        |
| TC6_mcf_hap5000 | -2.86  | PSR6_mcf_hap5000 | DDR1        |
| TC02002035.hg.1 | 2.86   | PSR02032537.hg.1 | TGOLN2      |
| TC02002035.hg.1 | 2.64   | JUC02016803.hg.1 | TGOLN2      |
| TC02002035.hg.1 | 2.16   | JUC02016806.hg.1 | TGOLN2      |
| TC02002035.hg.1 | 2.08   | PSR02032535.hg.1 | TGOLN2      |
| TC02002035.hg.1 | 2.01   | PSR02032536.hg.1 | TGOLN2      |
| TC03000502.hg.1 | 2.86   | JUC03004713.hg.1 | COL8A1      |
| TC03000502.hg.1 | 2.19   | PSR03009426.hg.1 | COL8A1      |
| TC03000502.hg.1 | 2.15   | PSR03009425.hg.1 | COL8A1      |

|                 |       |                  |        |
|-----------------|-------|------------------|--------|
| TC04000503.hg.1 | 2.86  | JUC04003831.hg.1 | BMPR1B |
| TC04000503.hg.1 | 2.82  | PSR04007403.hg.1 | BMPR1B |
| TC04000503.hg.1 | 2.33  | PSR04007402.hg.1 | BMPR1B |
| TC04000503.hg.1 | 2.25  | PSR04007396.hg.1 | BMPR1B |
| TC04000503.hg.1 | -2.08 | PSR04007420.hg.1 | BMPR1B |
| TC04000503.hg.1 | -2.54 | JUC04003844.hg.1 | BMPR1B |
| TC04000503.hg.1 | -2.76 | PSR04007397.hg.1 | BMPR1B |
| TC04000503.hg.1 | -3.64 | PSR04007399.hg.1 | BMPR1B |
| TC04000503.hg.1 | -3.78 | PSR04007416.hg.1 | BMPR1B |
| TC04000503.hg.1 | -4.15 | PSR04007398.hg.1 | BMPR1B |
| TC04000503.hg.1 | -4.91 | PSR04007395.hg.1 | BMPR1B |
| TC04000503.hg.1 | -5.9  | PSR04007392.hg.1 | BMPR1B |
| TC04000503.hg.1 | -7.43 | PSR04007400.hg.1 | BMPR1B |
| TC08000207.hg.1 | 2.86  | JUC08001431.hg.1 | PTK2B  |
| TC08000207.hg.1 | 2.63  | JUC08001455.hg.1 | PTK2B  |
| TC08000207.hg.1 | 2.15  | PSR08002962.hg.1 | PTK2B  |
| TC08000207.hg.1 | 2.1   | JUC08001430.hg.1 | PTK2B  |
| TC08000207.hg.1 | -2.11 | PSR08002960.hg.1 | PTK2B  |
| TC08000207.hg.1 | -2.2  | PSR08002948.hg.1 | PTK2B  |
| TC08000207.hg.1 | -2.22 | JUC08001447.hg.1 | PTK2B  |
| TC08000207.hg.1 | -2.48 | PSR08002951.hg.1 | PTK2B  |
| TC08000207.hg.1 | -2.51 | PSR08002974.hg.1 | PTK2B  |
| TC08000207.hg.1 | -2.52 | PSR08002929.hg.1 | PTK2B  |
| TC08000207.hg.1 | -2.55 | PSR08002950.hg.1 | PTK2B  |
| TC08000207.hg.1 | -2.66 | PSR08002955.hg.1 | PTK2B  |
| TC08000207.hg.1 | -2.8  | PSR08002954.hg.1 | PTK2B  |
| TC08000207.hg.1 | -2.83 | PSR08002982.hg.1 | PTK2B  |
| TC08000207.hg.1 | -2.89 | PSR08002957.hg.1 | PTK2B  |
| TC08000207.hg.1 | -3.1  | PSR08002941.hg.1 | PTK2B  |
| TC08000207.hg.1 | -3.1  | JUC08001424.hg.1 | PTK2B  |
| TC08000207.hg.1 | -3.17 | PSR08002956.hg.1 | PTK2B  |
| TC08000207.hg.1 | -3.23 | PSR08002977.hg.1 | PTK2B  |
| TC08000207.hg.1 | -3.25 | PSR08002933.hg.1 | PTK2B  |
| TC08000207.hg.1 | -3.36 | PSR08002980.hg.1 | PTK2B  |
| TC08000207.hg.1 | -3.37 | JUC08001437.hg.1 | PTK2B  |
| TC08000207.hg.1 | -3.49 | PSR08002924.hg.1 | PTK2B  |
| TC08000207.hg.1 | -3.5  | JUC08001443.hg.1 | PTK2B  |
| TC08000207.hg.1 | -3.51 | PSR08002934.hg.1 | PTK2B  |
| TC08000207.hg.1 | -3.63 | JUC08001458.hg.1 | PTK2B  |
| TC08000207.hg.1 | -3.91 | PSR08002979.hg.1 | PTK2B  |
| TC08000207.hg.1 | -3.99 | PSR08002967.hg.1 | PTK2B  |
| TC08000207.hg.1 | -4.03 | PSR08002927.hg.1 | PTK2B  |
| TC08000207.hg.1 | -4.07 | PSR08002926.hg.1 | PTK2B  |
| TC08000207.hg.1 | -4.07 | JUC08001445.hg.1 | PTK2B  |
| TC08000207.hg.1 | -4.19 | JUC08001466.hg.1 | PTK2B  |
| TC08000207.hg.1 | -4.35 | PSR08002922.hg.1 | PTK2B  |
| TC08000207.hg.1 | -4.39 | JUC08001436.hg.1 | PTK2B  |
| TC08000207.hg.1 | -4.51 | PSR08002940.hg.1 | PTK2B  |
| TC08000207.hg.1 | -4.68 | JUC08001450.hg.1 | PTK2B  |
| TC08000207.hg.1 | -4.7  | JUC08001439.hg.1 | PTK2B  |
| TC08000207.hg.1 | -4.81 | PSR08002930.hg.1 | PTK2B  |
| TC08000207.hg.1 | -4.88 | JUC08001467.hg.1 | PTK2B  |
| TC08000207.hg.1 | -4.92 | PSR08002932.hg.1 | PTK2B  |
| TC08000207.hg.1 | -5.27 | PSR08002919.hg.1 | PTK2B  |
| TC08000207.hg.1 | -5.29 | PSR08002925.hg.1 | PTK2B  |
| TC08000207.hg.1 | -5.39 | PSR08002920.hg.1 | PTK2B  |
| TC08000207.hg.1 | -6.3  | JUC08001426.hg.1 | PTK2B  |
| TC08000207.hg.1 | -6.75 | JUC08001454.hg.1 | PTK2B  |

|                 |        |                  |             |
|-----------------|--------|------------------|-------------|
| TC08000207.hg.1 | -7.25  | JUC08001461.hg.1 | PTK2B       |
| TC08000207.hg.1 | -9.42  | PSR08002923.hg.1 | PTK2B       |
| TC08000207.hg.1 | -11.85 | PSR08002921.hg.1 | PTK2B       |
| TC08000207.hg.1 | -12.09 | JUC08001423.hg.1 | PTK2B       |
| TC08001481.hg.1 | 2.86   | JUC08009825.hg.1 | PABPC1      |
| TC08001481.hg.1 | -2.15  | PSR08019327.hg.1 | PABPC1      |
| TC10000941.hg.1 | 2.86   | JUC10006735.hg.1 | DPYSL4      |
| TC10000941.hg.1 | -2     | JUC10006739.hg.1 | DPYSL4      |
| TC10000941.hg.1 | -2.74  | JUC10006752.hg.1 | DPYSL4      |
| TC10000941.hg.1 | -2.93  | JUC10006738.hg.1 | DPYSL4      |
| TC10000941.hg.1 | -3.02  | PSR10011561.hg.1 | DPYSL4      |
| TC10000941.hg.1 | -3.35  | PSR10011553.hg.1 | DPYSL4      |
| TC10000941.hg.1 | -5.37  | JUC10006753.hg.1 | DPYSL4      |
| TC10000941.hg.1 | -5.74  | PSR10011552.hg.1 | DPYSL4      |
| TC10000941.hg.1 | -24.11 | JUC10006750.hg.1 | DPYSL4      |
| TC10001486.hg.1 | 2.86   | JUC10010950.hg.1 | GLUD1       |
| TC10001486.hg.1 | 2.21   | PSR10018812.hg.1 | GLUD1       |
| TC10001486.hg.1 | 2.13   | JUC10010958.hg.1 | GLUD1       |
| TC11000702.hg.1 | 2.86   | JUC11004648.hg.1 | ALDH3B1     |
| TC11000702.hg.1 | 2.05   | PSR11009096.hg.1 | ALDH3B1     |
| TC12001543.hg.1 | 2.86   | JUC12011278.hg.1 | CSAD        |
| TC12001543.hg.1 | -2.04  | PSR12020356.hg.1 | CSAD        |
| TC12001543.hg.1 | -2.2   | JUC12011281.hg.1 | CSAD        |
| TC13000111.hg.1 | 2.86   | JUC13000727.hg.1 | BRCA2       |
| TC13000111.hg.1 | -2.34  | PSR13001192.hg.1 | BRCA2       |
| TC14002258.hg.1 | 2.86   | PSR14017645.hg.1 | IGHA2, IGHE |
| TC14002258.hg.1 | 2.43   | JUC14011563.hg.1 | IGHA2, IGHE |
| TC14002258.hg.1 | 2.4    | JUC14011502.hg.1 | IGHA2, IGHE |
| TC14002258.hg.1 | 2.4    | JUC14011505.hg.1 | IGHA2, IGHE |
| TC14002258.hg.1 | 2.4    | JUC14011507.hg.1 | IGHA2, IGHE |
| TC14002258.hg.1 | 2.18   | PSR14017759.hg.1 | IGHA2, IGHE |
| TC14002258.hg.1 | -2.31  | PSR14017756.hg.1 | IGHA2, IGHE |
| TC14002258.hg.1 | -2.59  | JUC14011487.hg.1 | IGHA2, IGHE |
| TC17001459.hg.1 | 2.86   | PSR17019334.hg.1 | NR1D1       |
| TC17001459.hg.1 | 2.8    | JUC17010958.hg.1 | NR1D1       |
| TC17001459.hg.1 | -3.72  | JUC17010959.hg.1 | NR1D1       |
| TC18000565.hg.1 | 2.86   | PSR18005886.hg.1 | TMX3        |
| TC18000565.hg.1 | 2.53   | JUC18003929.hg.1 | TMX3        |
| TC18000565.hg.1 | 2.43   | JUC18003939.hg.1 | TMX3        |
| TC18000565.hg.1 | -2.04  | PSR18005904.hg.1 | TMX3        |
| TC22000861.hg.1 | 2.86   | JUC22006030.hg.1 | SCUBE1      |
| TC22000861.hg.1 | -2.12  | PSR22014579.hg.1 | SCUBE1      |
| TC22000861.hg.1 | -2.15  | JUC22006013.hg.1 | SCUBE1      |
| TC6_mann_hap400 | 2.86   | PSR6_mann_hap400 | HLA-A       |
| TC6_mann_hap400 | 2.81   | PSR6_mann_hap400 | HLA-A       |
| TC6_mann_hap400 | 2.3    | JUC6_mann_hap400 | HLA-A       |
| TC6_mann_hap400 | 2.02   | PSR6_mann_hap400 | HLA-A       |
| TC6_mann_hap400 | -4.96  | JUC6_mann_hap400 | HLA-A       |
| TC02001354.hg.1 | 2.85   | PSR02021099.hg.1 | MRPL44      |
| TC02001354.hg.1 | -2.11  | JUC02011237.hg.1 | MRPL44      |
| TC02001354.hg.1 | -3.31  | JUC02011239.hg.1 | MRPL44      |
| TC02001768.hg.1 | 2.85   | PSR02028514.hg.1 | THUMPD2     |
| TC02001768.hg.1 | -2.44  | PSR02028524.hg.1 | THUMPD2     |
| TC02001768.hg.1 | -2.59  | JUC02014949.hg.1 | THUMPD2     |
| TC02002620.hg.1 | 2.85   | JUC02021895.hg.1 | TMEM194B    |
| TC02002620.hg.1 | 2.69   | JUC02021887.hg.1 | TMEM194B    |
| TC02002620.hg.1 | 2.26   | PSR02041984.hg.1 | TMEM194B    |
| TC02002620.hg.1 | 2.06   | PSR02041992.hg.1 | TMEM194B    |



|                 |        |                  |            |
|-----------------|--------|------------------|------------|
| TC02002620.hg.1 | 2.03   | JUC02021896.hg.1 | TMEM194B   |
| TC04000699.hg.1 | 2.85   | JUC04005307.hg.1 | GAB1       |
| TC04000699.hg.1 | 2.41   | PSR04009909.hg.1 | GAB1       |
| TC04000699.hg.1 | 2.38   | JUC04005308.hg.1 | GAB1       |
| TC04000699.hg.1 | 2.36   | PSR04009899.hg.1 | GAB1       |
| TC04000699.hg.1 | 2.36   | PSR04009906.hg.1 | GAB1       |
| TC04000699.hg.1 | 2.3    | PSR04009911.hg.1 | GAB1       |
| TC04000699.hg.1 | 2.25   | PSR04009916.hg.1 | GAB1       |
| TC04000699.hg.1 | 2.19   | PSR04009913.hg.1 | GAB1       |
| TC04000699.hg.1 | 2.15   | PSR04009902.hg.1 | GAB1       |
| TC04000699.hg.1 | 2.13   | PSR04009920.hg.1 | GAB1       |
| TC04000699.hg.1 | 2.1    | PSR04009905.hg.1 | GAB1       |
| TC04000699.hg.1 | -2.79  | JUC04005304.hg.1 | GAB1       |
| TC04002920.hg.1 | 2.85   | JUC04016905.hg.1 | NAAA       |
| TC04002920.hg.1 | -2.02  | PSR04017821.hg.1 | NAAA       |
| TC04002920.hg.1 | -2.08  | PSR04017818.hg.1 | NAAA       |
| TC04002920.hg.1 | -2.2   | PSR04017801.hg.1 | NAAA       |
| TC04002920.hg.1 | -2.35  | PSR04017815.hg.1 | NAAA       |
| TC04002920.hg.1 | -2.75  | JUC04016891.hg.1 | NAAA       |
| TC05001627.hg.1 | 2.85   | JUC05011433.hg.1 | FLJ35946   |
| TC05001627.hg.1 | -2.64  | PSR05022164.hg.1 | FLJ35946   |
| TC05001627.hg.1 | -10.73 | PSR05022166.hg.1 | FLJ35946   |
| TC09000217.hg.1 | 2.85   | JUC09001374.hg.1 | TRMT10B    |
| TC09000217.hg.1 | -3.15  | PSR09002571.hg.1 | TRMT10B    |
| TC11001912.hg.1 | 2.85   | JUC11011988.hg.1 | MAP4K2     |
| TC11001912.hg.1 | 2.23   | JUC11012003.hg.1 | MAP4K2     |
| TC11001912.hg.1 | 2.15   | JUC11011995.hg.1 | MAP4K2     |
| TC11001912.hg.1 | -2.7   | PSR11022740.hg.1 | MAP4K2     |
| TC11002369.hg.1 | 2.85   | PSR11028527.hg.1 | C1QTNF5, M |
| TC11002369.hg.1 | 2.19   | JUC11015219.hg.1 | C1QTNF5, M |
| TC11002369.hg.1 | 2.05   | PSR11028528.hg.1 | C1QTNF5, M |
| TC15000664.hg.1 | 2.85   | JUC15002901.hg.1 | NEO1       |
| TC15000664.hg.1 | 2.65   | JUC15002921.hg.1 | NEO1       |
| TC15000664.hg.1 | 2.45   | PSR15005712.hg.1 | NEO1       |
| TC15000664.hg.1 | 2.39   | JUC15002922.hg.1 | NEO1       |
| TC15000664.hg.1 | 2.14   | PSR15005701.hg.1 | NEO1       |
| TC15000664.hg.1 | 2      | PSR15005703.hg.1 | NEO1       |
| TC22000025.hg.1 | 2.85   | JUC22000109.hg.1 | BCL2L13    |
| TC22000025.hg.1 | 2.47   | JUC22000097.hg.1 | BCL2L13    |
| TC22000025.hg.1 | 2.06   | PSR22000194.hg.1 | BCL2L13    |
| TC22000025.hg.1 | 2.05   | PSR22000167.hg.1 | BCL2L13    |
| TC01000100.hg.1 | 2.84   | PSR01001600.hg.1 | PER3       |
| TC01000100.hg.1 | 2.35   | PSR01001599.hg.1 | PER3       |
| TC01000100.hg.1 | 2.12   | JUC01000847.hg.1 | PER3       |
| TC01000100.hg.1 | 2.07   | PSR01001613.hg.1 | PER3       |
| TC01000100.hg.1 | -2.25  | PSR01001618.hg.1 | PER3       |
| TC01000100.hg.1 | -2.37  | JUC01000858.hg.1 | PER3       |
| TC01000100.hg.1 | -3.21  | JUC01000840.hg.1 | PER3       |
| TC01000391.hg.1 | 2.84   | JUC01003125.hg.1 | YTHDF2     |
| TC01000391.hg.1 | 2.59   | JUC01003128.hg.1 | YTHDF2     |
| TC01000391.hg.1 | -2.17  | PSR01006027.hg.1 | YTHDF2     |
| TC01003238.hg.1 | 2.84   | JUC01026491.hg.1 | THEM4      |
| TC01003238.hg.1 | -2.03  | JUC01026493.hg.1 | THEM4      |
| TC01003238.hg.1 | -2.16  | PSR01050000.hg.1 | THEM4      |
| TC01003238.hg.1 | -2.27  | JUC01026490.hg.1 | THEM4      |
| TC01003238.hg.1 | -4.53  | PSR01050001.hg.1 | THEM4      |
| TC02001654.hg.1 | 2.84   | PSR02026423.hg.1 | DNAJC27    |
| TC02001654.hg.1 | 2.33   | JUC02013793.hg.1 | DNAJC27    |

|                 |       |                  |            |
|-----------------|-------|------------------|------------|
| TC02001654.hg.1 | 2.09  | PSR02026428.hg.1 | DNAJC27    |
| TC02001654.hg.1 | 2.07  | PSR02026424.hg.1 | DNAJC27    |
| TC02001736.hg.1 | 2.84  | JUC02014589.hg.1 | STRN       |
| TC02001736.hg.1 | 2.03  | JUC02014582.hg.1 | STRN       |
| TC02001736.hg.1 | -2.13 | PSR02027904.hg.1 | STRN       |
| TC02001736.hg.1 | -2.41 | JUC02014594.hg.1 | STRN       |
| TC03001277.hg.1 | 2.84  | PSR03021958.hg.1 | CLASP2     |
| TC03001277.hg.1 | -2.24 | JUC03010950.hg.1 | CLASP2     |
| TC03001277.hg.1 | -2.83 | JUC03010916.hg.1 | CLASP2     |
| TC05000005.hg.1 | 2.84  | JUC05000069.hg.1 | PDCD6, AHR |
| TC05000005.hg.1 | 2.3   | JUC05000061.hg.1 | PDCD6, AHR |
| TC05000005.hg.1 | 2.21  | PSR05000139.hg.1 | PDCD6, AHR |
| TC05000005.hg.1 | 2.12  | PSR05000109.hg.1 | PDCD6, AHR |
| TC05000005.hg.1 | 2.12  | PSR05000131.hg.1 | PDCD6, AHR |
| TC05000005.hg.1 | 2.11  | JUC05000068.hg.1 | PDCD6, AHR |
| TC05000005.hg.1 | 2.08  | PSR05000129.hg.1 | PDCD6, AHR |
| TC05000005.hg.1 | 2.02  | JUC05000060.hg.1 | PDCD6, AHR |
| TC05000005.hg.1 | -2.2  | PSR05000138.hg.1 | PDCD6, AHR |
| TC05000005.hg.1 | -2.28 | PSR05000141.hg.1 | PDCD6, AHR |
| TC05000005.hg.1 | -2.36 | JUC05000055.hg.1 | PDCD6, AHR |
| TC05000005.hg.1 | -2.44 | PSR05000154.hg.1 | PDCD6, AHR |
| TC05000005.hg.1 | -3.88 | JUC05000082.hg.1 | PDCD6, AHR |
| TC06001229.hg.1 | 2.84  | JUC06007274.hg.1 | SLC22A23   |
| TC06001229.hg.1 | 2.05  | JUC06007262.hg.1 | SLC22A23   |
| TC06001229.hg.1 | 2.05  | JUC06007283.hg.1 | SLC22A23   |
| TC06001229.hg.1 | -2.14 | JUC06007281.hg.1 | SLC22A23   |
| TC06001229.hg.1 | -2.2  | PSR06014615.hg.1 | SLC22A23   |
| TC06001229.hg.1 | -2.61 | JUC06007273.hg.1 | SLC22A23   |
| TC06001229.hg.1 | -2.75 | JUC06007276.hg.1 | SLC22A23   |
| TC06001229.hg.1 | -2.98 | PSR06014616.hg.1 | SLC22A23   |
| TC0X000120.hg.1 | 2.84  | JUC0X000885.hg.1 | POLA1      |
| TC0X000120.hg.1 | 2.71  | JUC0X000881.hg.1 | POLA1      |
| TC0X000120.hg.1 | 2.45  | JUC0X000910.hg.1 | POLA1      |
| TC0X000120.hg.1 | 2.28  | JUC0X000897.hg.1 | POLA1      |
| TC0X000120.hg.1 | -2.07 | JUC0X000875.hg.1 | POLA1      |
| TC0X000120.hg.1 | -2.55 | JUC0X000906.hg.1 | POLA1      |
| TC0X000120.hg.1 | -2.57 | JUC0X000911.hg.1 | POLA1      |
| TC0X000120.hg.1 | -3    | PSR0X001641.hg.1 | POLA1      |
| TC10001550.hg.1 | 2.84  | JUC10011427.hg.1 | SORBS1     |
| TC10001550.hg.1 | 2.73  | JUC10011407.hg.1 | SORBS1     |
| TC10001550.hg.1 | 2.29  | JUC10011400.hg.1 | SORBS1     |
| TC10001550.hg.1 | 2.13  | JUC10011389.hg.1 | SORBS1     |
| TC10001550.hg.1 | 2.05  | JUC10011390.hg.1 | SORBS1     |
| TC10001550.hg.1 | -2.01 | PSR10019561.hg.1 | SORBS1     |
| TC10001550.hg.1 | -2.02 | PSR10019528.hg.1 | SORBS1     |
| TC10001550.hg.1 | -2.11 | PSR10019509.hg.1 | SORBS1     |
| TC10001550.hg.1 | -2.11 | JUC10011415.hg.1 | SORBS1     |
| TC10001550.hg.1 | -2.26 | JUC10011423.hg.1 | SORBS1     |
| TC10001550.hg.1 | -2.3  | PSR10019542.hg.1 | SORBS1     |
| TC10001550.hg.1 | -2.52 | JUC10011401.hg.1 | SORBS1     |
| TC10001550.hg.1 | -2.55 | JUC10011367.hg.1 | SORBS1     |
| TC10001550.hg.1 | -2.98 | PSR10019504.hg.1 | SORBS1     |
| TC10001550.hg.1 | -3.02 | JUC10011379.hg.1 | SORBS1     |
| TC12000237.hg.1 | 2.84  | PSR12002922.hg.1 | CMAS       |
| TC12000237.hg.1 | 2.36  | JUC12001419.hg.1 | CMAS       |
| TC12003294.hg.1 | 2.84  | JUC12020620.hg.1 | HOXC9      |
| TC12003294.hg.1 | 2.76  | JUC12020619.hg.1 | HOXC9      |
| TC12003294.hg.1 | 2.2   | PSR12005866.hg.1 | HOXC9      |

|                 |       |                  |             |
|-----------------|-------|------------------|-------------|
| TC17001192.hg.1 | 2.84  | JUC17009272.hg.1 | SREBF1      |
| TC17001192.hg.1 | 2.01  | JUC17009274.hg.1 | SREBF1      |
| TC17001192.hg.1 | -2.08 | PSR17016237.hg.1 | SREBF1      |
| TC17001192.hg.1 | -2.43 | JUC17009280.hg.1 | SREBF1      |
| TC17001192.hg.1 | -2.5  | PSR17016232.hg.1 | SREBF1      |
| TC17001192.hg.1 | -2.5  | PSR17016246.hg.1 | SREBF1      |
| TC17001192.hg.1 | -2.61 | JUC17009282.hg.1 | SREBF1      |
| TC17001192.hg.1 | -2.72 | JUC17009270.hg.1 | SREBF1      |
| TC17001192.hg.1 | -2.82 | JUC17009287.hg.1 | SREBF1      |
| TC17001192.hg.1 | -5.41 | PSR17016234.hg.1 | SREBF1      |
| TC20000592.hg.1 | 2.84  | JUC20004460.hg.1 | PCNA        |
| TC20000592.hg.1 | 2.38  | PSR20008655.hg.1 | PCNA        |
| TC01003750.hg.1 | 2.83  | JUC01030027.hg.1 | ELK4, SLC45 |
| TC01003750.hg.1 | 2.31  | JUC01030030.hg.1 | ELK4, SLC45 |
| TC01003750.hg.1 | 2.25  | PSR01057516.hg.1 | ELK4, SLC45 |
| TC01003750.hg.1 | 2.09  | PSR01057521.hg.1 | ELK4, SLC45 |
| TC01003750.hg.1 | 2.09  | JUC01030039.hg.1 | ELK4, SLC45 |
| TC02001451.hg.1 | 2.83  | JUC02012209.hg.1 | FAM132B     |
| TC02001451.hg.1 | 2.13  | PSR02023367.hg.1 | FAM132B     |
| TC02001451.hg.1 | 2.11  | PSR02023377.hg.1 | FAM132B     |
| TC02001451.hg.1 | 2.09  | JUC02012203.hg.1 | FAM132B     |
| TC02001451.hg.1 | 2.01  | PSR02023376.hg.1 | FAM132B     |
| TC03001380.hg.1 | 2.83  | JUC03011940.hg.1 | SHISA5      |
| TC03001380.hg.1 | 2.13  | PSR03023927.hg.1 | SHISA5      |
| TC03001380.hg.1 | 2.08  | JUC03011936.hg.1 | SHISA5      |
| TC05001406.hg.1 | 2.83  | JUC05010143.hg.1 | ADAMTS6     |
| TC05001406.hg.1 | 2.28  | JUC05010138.hg.1 | ADAMTS6     |
| TC05001406.hg.1 | -2.3  | JUC05010148.hg.1 | ADAMTS6     |
| TC05001406.hg.1 | -2.31 | JUC05010141.hg.1 | ADAMTS6     |
| TC05001406.hg.1 | -2.67 | PSR05019631.hg.1 | ADAMTS6     |
| TC05001406.hg.1 | -3.46 | JUC05010142.hg.1 | ADAMTS6     |
| TC05001406.hg.1 | -4.11 | JUC05010136.hg.1 | ADAMTS6     |
| TC06002035.hg.1 | 2.83  | JUC06012567.hg.1 | HDAC2       |
| TC06002035.hg.1 | 2.4   | PSR06025491.hg.1 | HDAC2       |
| TC06002035.hg.1 | 2.32  | JUC06012582.hg.1 | HDAC2       |
| TC06002035.hg.1 | 2     | PSR06025505.hg.1 | HDAC2       |
| TC08001030.hg.1 | 2.83  | JUC08006799.hg.1 | GFRA2       |
| TC08001030.hg.1 | 2.06  | JUC08006793.hg.1 | GFRA2       |
| TC08001030.hg.1 | -2.19 | PSR08013068.hg.1 | GFRA2       |
| TC08001030.hg.1 | -2.25 | JUC08006794.hg.1 | GFRA2       |
| TC08001030.hg.1 | -2.28 | JUC08006800.hg.1 | GFRA2       |
| TC08001030.hg.1 | -2.32 | JUC08006801.hg.1 | GFRA2       |
| TC08001030.hg.1 | -2.36 | PSR08013085.hg.1 | GFRA2       |
| TC08001030.hg.1 | -2.59 | JUC08006788.hg.1 | GFRA2       |
| TC08001030.hg.1 | -2.6  | JUC08006798.hg.1 | GFRA2       |
| TC08001030.hg.1 | -2.78 | PSR08013066.hg.1 | GFRA2       |
| TC08001030.hg.1 | -2.99 | PSR08013070.hg.1 | GFRA2       |
| TC08001030.hg.1 | -3    | JUC08006796.hg.1 | GFRA2       |
| TC08001030.hg.1 | -3.05 | PSR08013094.hg.1 | GFRA2       |
| TC08001030.hg.1 | -3.09 | PSR08013069.hg.1 | GFRA2       |
| TC08001030.hg.1 | -3.16 | PSR08013087.hg.1 | GFRA2       |
| TC08001030.hg.1 | -3.41 | PSR08013091.hg.1 | GFRA2       |
| TC08001030.hg.1 | -3.51 | JUC08006804.hg.1 | GFRA2       |
| TC08001030.hg.1 | -3.6  | JUC08006803.hg.1 | GFRA2       |
| TC08001030.hg.1 | -3.8  | JUC08006792.hg.1 | GFRA2       |
| TC08001030.hg.1 | -3.93 | PSR08013099.hg.1 | GFRA2       |
| TC08001030.hg.1 | -4.03 | JUC08006805.hg.1 | GFRA2       |
| TC08001030.hg.1 | -4.14 | PSR08013097.hg.1 | GFRA2       |

|                 |       |                   |        |
|-----------------|-------|-------------------|--------|
| TC08001030.hg.1 | -4.2  | PSR08013086.hg.1  | GFRA2  |
| TC08001030.hg.1 | -4.99 | PSR08013084.hg.1  | GFRA2  |
| TC09000207.hg.1 | 2.83  | JUC09001297.hg.1  | MELK   |
| TC09000207.hg.1 | 2.71  | PSR09002374.hg.1  | MELK   |
| TC09000207.hg.1 | 2.48  | JUC09001301.hg.1  | MELK   |
| TC09000207.hg.1 | 2.43  | JUC09001300.hg.1  | MELK   |
| TC09000207.hg.1 | 2.29  | PSR09002403.hg.1  | MELK   |
| TC09000207.hg.1 | 2.01  | JUC09001298.hg.1  | MELK   |
| TC09000207.hg.1 | -2.04 | JUC09001275.hg.1  | MELK   |
| TC6_cox_hap2000 | 2.83  | PSR6_cox_hap20036 | AGPAT1 |
| TC6_cox_hap2000 | 2.63  | JUC6_cox_hap20012 | AGPAT1 |
| TC6_cox_hap2000 | 2.45  | PSR6_cox_hap20036 | AGPAT1 |
| TC6_cox_hap2000 | -3.28 | JUC6_cox_hap20012 | AGPAT1 |
| TC6_mcf_hap5000 | 2.83  | PSR6_mcf_hap50033 | AGPAT1 |
| TC6_mcf_hap5000 | 2.63  | JUC6_mcf_hap50010 | AGPAT1 |
| TC6_mcf_hap5000 | 2.45  | PSR6_mcf_hap50033 | AGPAT1 |
| TC6_mcf_hap5000 | -3.28 | JUC6_mcf_hap50010 | AGPAT1 |
| TC6_qbl_hap6000 | 2.83  | PSR6_qbl_hap60034 | AGPAT1 |
| TC6_qbl_hap6000 | 2.63  | JUC6_qbl_hap60012 | AGPAT1 |
| TC6_qbl_hap6000 | 2.45  | PSR6_qbl_hap60034 | AGPAT1 |
| TC6_qbl_hap6000 | -3.28 | JUC6_qbl_hap60012 | AGPAT1 |
| TC01002284.hg.1 | 2.82  | JUC01018675.hg.1  | MFAP2  |
| TC01002284.hg.1 | -2.46 | JUC01018674.hg.1  | MFAP2  |
| TC01002284.hg.1 | -2.72 | PSR01034768.hg.1  | MFAP2  |
| TC01002284.hg.1 | -3.29 | PSR01034753.hg.1  | MFAP2  |
| TC01002284.hg.1 | -4.62 | PSR01034772.hg.1  | MFAP2  |
| TC01002284.hg.1 | -5.9  | PSR01034763.hg.1  | MFAP2  |
| TC01002284.hg.1 | -6.52 | PSR01034766.hg.1  | MFAP2  |
| TC01002284.hg.1 | -7.63 | PSR01034761.hg.1  | MFAP2  |
| TC01002284.hg.1 | -8.18 | PSR01034769.hg.1  | MFAP2  |
| TC01002284.hg.1 | -8.49 | PSR01034771.hg.1  | MFAP2  |
| TC01002284.hg.1 | -9.24 | PSR01034757.hg.1  | MFAP2  |
| TC02001649.hg.1 | 2.82  | PSR02026332.hg.1  | ITSN2  |
| TC02001649.hg.1 | 2.66  | JUC02013713.hg.1  | ITSN2  |
| TC02001649.hg.1 | 2.13  | PSR02026322.hg.1  | ITSN2  |
| TC02001649.hg.1 | 2.13  | JUC02013702.hg.1  | ITSN2  |
| TC02001649.hg.1 | 2.07  | JUC02013720.hg.1  | ITSN2  |
| TC02001649.hg.1 | 2.06  | JUC02013705.hg.1  | ITSN2  |
| TC02001649.hg.1 | 2.01  | PSR02026327.hg.1  | ITSN2  |
| TC02001649.hg.1 | 2     | JUC02013715.hg.1  | ITSN2  |
| TC02001649.hg.1 | -2.22 | JUC02013738.hg.1  | ITSN2  |
| TC03000309.hg.1 | 2.82  | JUC03003212.hg.1  | SEMA3B |
| TC03000309.hg.1 | 2.49  | JUC03003195.hg.1  | SEMA3B |
| TC03000309.hg.1 | 2.48  | JUC03003208.hg.1  | SEMA3B |
| TC03000309.hg.1 | 2.33  | PSR03006595.hg.1  | SEMA3B |
| TC03000309.hg.1 | 2.3   | PSR03006589.hg.1  | SEMA3B |
| TC03000309.hg.1 | 2.04  | JUC03003198.hg.1  | SEMA3B |
| TC03000309.hg.1 | -2.03 | PSR03006550.hg.1  | SEMA3B |
| TC03000309.hg.1 | -2.04 | PSR03006545.hg.1  | SEMA3B |
| TC03000309.hg.1 | -2.13 | JUC03003213.hg.1  | SEMA3B |
| TC03000309.hg.1 | -2.76 | PSR03006573.hg.1  | SEMA3B |
| TC03000309.hg.1 | -5.44 | JUC03003190.hg.1  | SEMA3B |
| TC03000334.hg.1 | 2.82  | PSR03007281.hg.1  | PHF7   |
| TC03000334.hg.1 | 2.79  | PSR03007238.hg.1  | PHF7   |
| TC03000334.hg.1 | 2.52  | JUC03003499.hg.1  | PHF7   |
| TC03000334.hg.1 | 2.17  | PSR03007237.hg.1  | PHF7   |
| TC03000334.hg.1 | 2.14  | PSR03007282.hg.1  | PHF7   |
| TC03001149.hg.1 | 2.82  | JUC03009932.hg.1  | CAMK1  |

|                 |       |                  |              |
|-----------------|-------|------------------|--------------|
| TC03001149.hg.1 | 2.23  | PSR03019813.hg.1 | CAMK1        |
| TC03001149.hg.1 | 2.09  | PSR03019827.hg.1 | CAMK1        |
| TC03001149.hg.1 | 2.03  | PSR03019812.hg.1 | CAMK1        |
| TC03001149.hg.1 | -2.18 | JUC03009934.hg.1 | CAMK1        |
| TC03001514.hg.1 | 2.82  | JUC03013500.hg.1 | LOC1005069   |
| TC03001514.hg.1 | 2.27  | PSR03027559.hg.1 | LOC1005069   |
| TC03001514.hg.1 | 2.24  | JUC03013489.hg.1 | LOC1005069   |
| TC03001514.hg.1 | 2.15  | PSR03027558.hg.1 | LOC1005069   |
| TC03001514.hg.1 | 2.08  | JUC03013497.hg.1 | LOC1005069   |
| TC04000014.hg.1 | 2.82  | JUC04000138.hg.1 | TMEM175      |
| TC04000014.hg.1 | 2.65  | PSR04000331.hg.1 | TMEM175      |
| TC06004104.hg.1 | 2.82  | JUC06021389.hg.1 | TIAM2, LOC1  |
| TC06004104.hg.1 | -2.14 | PSR06013240.hg.1 | TIAM2, LOC1  |
| TC06004104.hg.1 | -2.16 | JUC06021395.hg.1 | TIAM2, LOC1  |
| TC06004104.hg.1 | -2.33 | JUC06021406.hg.1 | TIAM2, LOC1  |
| TC06004104.hg.1 | -2.5  | JUC06021421.hg.1 | TIAM2, LOC1  |
| TC07003393.hg.1 | 2.82  | JUC07021846.hg.1 | DBNL         |
| TC07003393.hg.1 | -2.92 | PSR07004186.hg.1 | DBNL         |
| TC07003393.hg.1 | -3.3  | JUC07021849.hg.1 | DBNL         |
| TC0X000490.hg.1 | 2.82  | JUC0X003225.hg.1 | BHLHB9       |
| TC0X000490.hg.1 | 2.43  | JUC0X003227.hg.1 | BHLHB9       |
| TC0X000490.hg.1 | 2.23  | PSR0X006501.hg.1 | BHLHB9       |
| TC0X000754.hg.1 | 2.82  | JUC0X004984.hg.1 | SLC6A8       |
| TC0X000754.hg.1 | 2.62  | PSR0X009843.hg.1 | SLC6A8       |
| TC0X000754.hg.1 | 2.59  | PSR0X009831.hg.1 | SLC6A8       |
| TC0X000754.hg.1 | 2.31  | JUC0X004973.hg.1 | SLC6A8       |
| TC0X000754.hg.1 | 2.11  | PSR0X009839.hg.1 | SLC6A8       |
| TC0X000754.hg.1 | 2.06  | PSR0X009832.hg.1 | SLC6A8       |
| TC0X000754.hg.1 | 2     | PSR0X009842.hg.1 | SLC6A8       |
| TC10001061.hg.1 | 2.82  | PSR10013317.hg.1 | NMT2         |
| TC10001061.hg.1 | 2.17  | JUC10007664.hg.1 | NMT2         |
| TC10001061.hg.1 | 2.07  | PSR10013327.hg.1 | NMT2         |
| TC10001061.hg.1 | 2.05  | PSR10013298.hg.1 | NMT2         |
| TC12002032.hg.1 | 2.82  | PSR12026661.hg.1 | CIT, MIR1178 |
| TC12002032.hg.1 | 2.65  | JUC12014924.hg.1 | CIT, MIR1178 |
| TC12002032.hg.1 | 2.53  | JUC12014908.hg.1 | CIT, MIR1178 |
| TC12002032.hg.1 | 2.39  | JUC12014926.hg.1 | CIT, MIR1178 |
| TC12002032.hg.1 | 2.29  | JUC12014904.hg.1 | CIT, MIR1178 |
| TC12002032.hg.1 | 2.24  | PSR12026671.hg.1 | CIT, MIR1178 |
| TC12002032.hg.1 | 2.2   | PSR12026652.hg.1 | CIT, MIR1178 |
| TC12002032.hg.1 | 2.17  | JUC12014941.hg.1 | CIT, MIR1178 |
| TC12002032.hg.1 | 2.16  | PSR12026610.hg.1 | CIT, MIR1178 |
| TC12002032.hg.1 | 2.04  | PSR12026627.hg.1 | CIT, MIR1178 |
| TC12002032.hg.1 | -2.03 | JUC12014919.hg.1 | CIT, MIR1178 |
| TC12002032.hg.1 | -2.11 | JUC12014927.hg.1 | CIT, MIR1178 |
| TC12002032.hg.1 | -2.3  | PSR12026619.hg.1 | CIT, MIR1178 |
| TC12002032.hg.1 | -2.41 | JUC12014940.hg.1 | CIT, MIR1178 |
| TC12002032.hg.1 | -2.48 | JUC12014949.hg.1 | CIT, MIR1178 |
| TC12002032.hg.1 | -2.49 | PSR12026636.hg.1 | CIT, MIR1178 |
| TC12002032.hg.1 | -2.52 | PSR12026614.hg.1 | CIT, MIR1178 |
| TC12002032.hg.1 | -2.56 | JUC12014917.hg.1 | CIT, MIR1178 |
| TC12002032.hg.1 | -2.81 | JUC12014932.hg.1 | CIT, MIR1178 |
| TC12002032.hg.1 | -2.96 | JUC12014938.hg.1 | CIT, MIR1178 |
| TC12002032.hg.1 | -3.03 | PSR12026618.hg.1 | CIT, MIR1178 |
| TC12002032.hg.1 | -3.03 | JUC12014923.hg.1 | CIT, MIR1178 |
| TC12002032.hg.1 | -3.52 | JUC12014930.hg.1 | CIT, MIR1178 |
| TC12002032.hg.1 | -3.59 | JUC12014947.hg.1 | CIT, MIR1178 |
| TC13000120.hg.1 | 2.82  | PSR13001294.hg.1 | NBEA         |

|                 |       |                  |        |
|-----------------|-------|------------------|--------|
| TC13000120.hg.1 | 2.61  | JUC13000839.hg.1 | NBEA   |
| TC13000120.hg.1 | 2.56  | JUC13000814.hg.1 | NBEA   |
| TC13000120.hg.1 | 2.49  | JUC13000860.hg.1 | NBEA   |
| TC13000120.hg.1 | 2.46  | JUC13000827.hg.1 | NBEA   |
| TC13000120.hg.1 | 2.33  | JUC13000852.hg.1 | NBEA   |
| TC13000120.hg.1 | 2.19  | PSR13001297.hg.1 | NBEA   |
| TC13000120.hg.1 | 2.12  | JUC13000828.hg.1 | NBEA   |
| TC13000120.hg.1 | 2.11  | PSR13001293.hg.1 | NBEA   |
| TC13000120.hg.1 | 2.06  | PSR13001308.hg.1 | NBEA   |
| TC13000120.hg.1 | 2.04  | JUC13000857.hg.1 | NBEA   |
| TC13000120.hg.1 | 2.03  | JUC13000864.hg.1 | NBEA   |
| TC13000120.hg.1 | -2.05 | JUC13000812.hg.1 | NBEA   |
| TC13000120.hg.1 | -2.07 | JUC13000867.hg.1 | NBEA   |
| TC13000120.hg.1 | -2.17 | JUC13000861.hg.1 | NBEA   |
| TC13000120.hg.1 | -3.47 | JUC13000843.hg.1 | NBEA   |
| TC17000657.hg.1 | 2.82  | JUC17004565.hg.1 | SGCA   |
| TC17000657.hg.1 | 2.28  | PSR17008260.hg.1 | SGCA   |
| TC17000657.hg.1 | -2.77 | JUC17004567.hg.1 | SGCA   |
| TC17000657.hg.1 | -3.31 | JUC17004557.hg.1 | SGCA   |
| TC17000657.hg.1 | -3.87 | JUC17004571.hg.1 | SGCA   |
| TC01001682.hg.1 | 2.81  | PSR01026093.hg.1 | PPFIA4 |
| TC01001682.hg.1 | 2.63  | JUC01013989.hg.1 | PPFIA4 |
| TC01001682.hg.1 | 2.6   | PSR01026092.hg.1 | PPFIA4 |
| TC01001682.hg.1 | 2.55  | PSR01026088.hg.1 | PPFIA4 |
| TC01001682.hg.1 | 2.44  | PSR01026132.hg.1 | PPFIA4 |
| TC01001682.hg.1 | 2.42  | JUC01013972.hg.1 | PPFIA4 |
| TC01001682.hg.1 | 2.32  | PSR01026091.hg.1 | PPFIA4 |
| TC01001682.hg.1 | 2.2   | JUC01013980.hg.1 | PPFIA4 |
| TC01001682.hg.1 | 2.18  | PSR01026099.hg.1 | PPFIA4 |
| TC01001682.hg.1 | 2.17  | JUC01013982.hg.1 | PPFIA4 |
| TC01001682.hg.1 | 2.16  | JUC01013971.hg.1 | PPFIA4 |
| TC01001682.hg.1 | 2.12  | JUC01013985.hg.1 | PPFIA4 |
| TC01001682.hg.1 | 2.06  | PSR01026126.hg.1 | PPFIA4 |
| TC01001682.hg.1 | 2.06  | JUC01013983.hg.1 | PPFIA4 |
| TC01001682.hg.1 | -2.07 | PSR01026115.hg.1 | PPFIA4 |
| TC01001682.hg.1 | -2.18 | PSR01026130.hg.1 | PPFIA4 |
| TC01001682.hg.1 | -2.45 | PSR01026119.hg.1 | PPFIA4 |
| TC01001682.hg.1 | -2.85 | JUC01013979.hg.1 | PPFIA4 |
| TC01001682.hg.1 | -2.87 | JUC01013965.hg.1 | PPFIA4 |
| TC01001682.hg.1 | -3.68 | JUC01013986.hg.1 | PPFIA4 |
| TC01001682.hg.1 | -4.03 | JUC01013967.hg.1 | PPFIA4 |
| TC01001682.hg.1 | -4.37 | PSR01026129.hg.1 | PPFIA4 |
| TC01001682.hg.1 | -4.93 | JUC01013988.hg.1 | PPFIA4 |
| TC01001682.hg.1 | -6.57 | JUC01014001.hg.1 | PPFIA4 |
| TC01001682.hg.1 | -6.61 | PSR01026111.hg.1 | PPFIA4 |
| TC02000192.hg.1 | 2.81  | PSR02002785.hg.1 | CLIP4  |
| TC02000192.hg.1 | -2.01 | JUC02001411.hg.1 | CLIP4  |
| TC04000324.hg.1 | 2.81  | PSR04004564.hg.1 | EXOC1  |
| TC04000324.hg.1 | 2.47  | JUC04002216.hg.1 | EXOC1  |
| TC04000324.hg.1 | -2.38 | JUC04002217.hg.1 | EXOC1  |
| TC04000324.hg.1 | -3.61 | JUC04002215.hg.1 | EXOC1  |
| TC05001621.hg.1 | 2.81  | PSR05022126.hg.1 | RIOK2  |
| TC05001621.hg.1 | 2.18  | JUC05011418.hg.1 | RIOK2  |
| TC05001700.hg.1 | 2.81  | JUC05011925.hg.1 | SEMA6A |
| TC05001700.hg.1 | 2.67  | JUC05011914.hg.1 | SEMA6A |
| TC05001700.hg.1 | 2.15  | JUC05011911.hg.1 | SEMA6A |
| TC05001700.hg.1 | 2.1   | JUC05011901.hg.1 | SEMA6A |
| TC05001700.hg.1 | -2.07 | JUC05011908.hg.1 | SEMA6A |

|                 |       |                  |         |
|-----------------|-------|------------------|---------|
| TC05001700.hg.1 | -2.13 | PSR05023060.hg.1 | SEMA6A  |
| TC05001995.hg.1 | 2.81  | PSR05027744.hg.1 | EBF1    |
| TC05001995.hg.1 | -2.26 | PSR05027724.hg.1 | EBF1    |
| TC05001995.hg.1 | -3.11 | JUC05014124.hg.1 | EBF1    |
| TC05001995.hg.1 | -3.28 | JUC05014152.hg.1 | EBF1    |
| TC06001855.hg.1 | 2.81  | JUC06010909.hg.1 | COL9A1  |
| TC06001855.hg.1 | 2.78  | JUC06010882.hg.1 | COL9A1  |
| TC06001855.hg.1 | 2.71  | JUC06010915.hg.1 | COL9A1  |
| TC06001855.hg.1 | 2.48  | JUC06010890.hg.1 | COL9A1  |
| TC06001855.hg.1 | 2.23  | PSR06022520.hg.1 | COL9A1  |
| TC08000918.hg.1 | 2.81  | PSR08011982.hg.1 | ZNF705G |
| TC08000918.hg.1 | -2.13 | PSR08011976.hg.1 | ZNF705G |
| TC08000918.hg.1 | -4.05 | JUC08006233.hg.1 | ZNF705G |
| TC09001036.hg.1 | 2.81  | JUC09007378.hg.1 | FAM219A |
| TC09001036.hg.1 | 2.52  | JUC09007374.hg.1 | FAM219A |
| TC09001036.hg.1 | 2.29  | JUC09007377.hg.1 | FAM219A |
| TC09001036.hg.1 | 2.03  | PSR09013580.hg.1 | FAM219A |
| TC0X000379.hg.1 | 2.81  | PSR0X004929.hg.1 | DLG3    |
| TC0X000379.hg.1 | 2.62  | JUC0X002429.hg.1 | DLG3    |
| TC0X000379.hg.1 | 2.55  | JUC0X002425.hg.1 | DLG3    |
| TC0X000379.hg.1 | 2.25  | JUC0X002413.hg.1 | DLG3    |
| TC0X000379.hg.1 | 2.16  | PSR0X004933.hg.1 | DLG3    |
| TC0X000379.hg.1 | 2.1   | PSR0X004923.hg.1 | DLG3    |
| TC0X000379.hg.1 | 2.05  | PSR0X004930.hg.1 | DLG3    |
| TC0X000379.hg.1 | -2.12 | JUC0X002432.hg.1 | DLG3    |
| TC0X000379.hg.1 | -3.38 | JUC0X002436.hg.1 | DLG3    |
| TC11003468.hg.1 | 2.81  | JUC11019285.hg.1 | TMEM25  |
| TC11003468.hg.1 | 2.47  | PSR11013427.hg.1 | TMEM25  |
| TC11003468.hg.1 | 2.38  | PSR11013423.hg.1 | TMEM25  |
| TC11003468.hg.1 | 2.23  | PSR11013415.hg.1 | TMEM25  |
| TC11003468.hg.1 | 2.15  | PSR11013433.hg.1 | TMEM25  |
| TC11003468.hg.1 | 2.13  | PSR11013424.hg.1 | TMEM25  |
| TC11003468.hg.1 | 2.03  | PSR11013425.hg.1 | TMEM25  |
| TC11003468.hg.1 | -2.28 | PSR11013449.hg.1 | TMEM25  |
| TC11003468.hg.1 | -3.19 | JUC11019295.hg.1 | TMEM25  |
| TC12001536.hg.1 | 2.81  | PSR12020179.hg.1 | KRT4    |
| TC12001536.hg.1 | 2.19  | JUC12011217.hg.1 | KRT4    |
| TC13000825.hg.1 | 2.81  | JUC13005445.hg.1 | DOCK9   |
| TC13000825.hg.1 | -2.16 | PSR13009236.hg.1 | DOCK9   |
| TC13000825.hg.1 | -2.27 | JUC13005433.hg.1 | DOCK9   |
| TC13000825.hg.1 | -2.52 | JUC13005424.hg.1 | DOCK9   |
| TC13000825.hg.1 | -2.73 | JUC13005461.hg.1 | DOCK9   |
| TC13000825.hg.1 | -2.78 | JUC13005409.hg.1 | DOCK9   |
| TC13000854.hg.1 | 2.81  | JUC13005643.hg.1 | TEX30   |
| TC13000854.hg.1 | 2.72  | PSR13009578.hg.1 | TEX30   |
| TC13000854.hg.1 | 2.51  | JUC13005638.hg.1 | TEX30   |
| TC13000854.hg.1 | 2.03  | JUC13005644.hg.1 | TEX30   |
| TC15001583.hg.1 | 2.81  | JUC15008267.hg.1 | LCTL    |
| TC15001583.hg.1 | 2.27  | JUC15008270.hg.1 | LCTL    |
| TC15001583.hg.1 | 2.26  | JUC15008271.hg.1 | LCTL    |
| TC15001583.hg.1 | 2.03  | PSR15015234.hg.1 | LCTL    |
| TC15001583.hg.1 | -2.04 | JUC15008275.hg.1 | LCTL    |
| TC15001583.hg.1 | -2.99 | JUC15008268.hg.1 | LCTL    |
| TC16002046.hg.1 | 2.81  | JUC16013340.hg.1 | ITFG3   |
| TC16002046.hg.1 | 2.41  | JUC16013334.hg.1 | ITFG3   |
| TC16002046.hg.1 | 2.3   | PSR16000166.hg.1 | ITFG3   |
| TC16002046.hg.1 | 2.1   | JUC16013344.hg.1 | ITFG3   |
| TC16002046.hg.1 | 2.09  | JUC16013351.hg.1 | ITFG3   |

|                 |       |                  |         |
|-----------------|-------|------------------|---------|
| TC16002046.hg.1 | 2.04  | JUC16013346.hg.1 | ITFG3   |
| TC16002046.hg.1 | 2.03  | PSR16000128.hg.1 | ITFG3   |
| TC16002046.hg.1 | -2.17 | JUC16013361.hg.1 | ITFG3   |
| TC01001791.hg.1 | 2.8   | PSR01027997.hg.1 | CENPF   |
| TC01001791.hg.1 | 2.35  | JUC01015096.hg.1 | CENPF   |
| TC01001791.hg.1 | 2.16  | PSR01028008.hg.1 | CENPF   |
| TC01001791.hg.1 | 2.09  | PSR01028016.hg.1 | CENPF   |
| TC01001791.hg.1 | -2.08 | JUC01015081.hg.1 | CENPF   |
| TC01001791.hg.1 | -2.15 | PSR01028021.hg.1 | CENPF   |
| TC02000986.hg.1 | 2.8   | PSR02014452.hg.1 | CSRNP3  |
| TC02000986.hg.1 | 2.07  | JUC02007727.hg.1 | CSRNP3  |
| TC02000986.hg.1 | -2    | JUC02007733.hg.1 | CSRNP3  |
| TC02002408.hg.1 | 2.8   | PSR02037939.hg.1 | ORC4    |
| TC02002408.hg.1 | 2.62  | JUC02019710.hg.1 | ORC4    |
| TC02002408.hg.1 | 2.1   | PSR02037912.hg.1 | ORC4    |
| TC02002408.hg.1 | -2    | JUC02019700.hg.1 | ORC4    |
| TC02002408.hg.1 | -2.1  | JUC02019695.hg.1 | ORC4    |
| TC02002408.hg.1 | -2.21 | PSR02037903.hg.1 | ORC4    |
| TC02002408.hg.1 | -2.49 | JUC02019717.hg.1 | ORC4    |
| TC03003385.hg.1 | 2.8   | PSR03025121.hg.1 | NICN1   |
| TC03003385.hg.1 | -2.05 | JUC03024253.hg.1 | NICN1   |
| TC03003385.hg.1 | -2.09 | PSR03025114.hg.1 | NICN1   |
| TC03003385.hg.1 | -2.09 | JUC03024254.hg.1 | NICN1   |
| TC03003385.hg.1 | -2.12 | PSR03025110.hg.1 | NICN1   |
| TC03003385.hg.1 | -2.19 | PSR03025111.hg.1 | NICN1   |
| TC03003385.hg.1 | -2.24 | PSR03025113.hg.1 | NICN1   |
| TC05001365.hg.1 | 2.8   | JUC05009801.hg.1 | SLC38A9 |
| TC05001365.hg.1 | -2.08 | PSR05019070.hg.1 | SLC38A9 |
| TC05001365.hg.1 | -2.22 | JUC05009794.hg.1 | SLC38A9 |
| TC05001365.hg.1 | -2.76 | PSR05019050.hg.1 | SLC38A9 |
| TC05001365.hg.1 | -2.99 | JUC05009827.hg.1 | SLC38A9 |
| TC07000131.hg.1 | 2.8   | PSR07001994.hg.1 | SP4     |
| TC07000131.hg.1 | 2.72  | JUC07000939.hg.1 | SP4     |
| TC07000131.hg.1 | 2.46  | PSR07001991.hg.1 | SP4     |
| TC07000131.hg.1 | 2.41  | JUC07000932.hg.1 | SP4     |
| TC07000131.hg.1 | 2.41  | JUC07000938.hg.1 | SP4     |
| TC07000131.hg.1 | 2.01  | PSR07002006.hg.1 | SP4     |
| TC07000255.hg.1 | 2.8   | JUC07001882.hg.1 | C7orf10 |
| TC07000255.hg.1 | 2.23  | JUC07001884.hg.1 | C7orf10 |
| TC07000255.hg.1 | 2.02  | PSR07003924.hg.1 | C7orf10 |
| TC07000255.hg.1 | -2.3  | PSR07003925.hg.1 | C7orf10 |
| TC07000255.hg.1 | -2.44 | JUC07001885.hg.1 | C7orf10 |
| TC07000255.hg.1 | -2.45 | PSR07003923.hg.1 | C7orf10 |
| TC07000255.hg.1 | -2.5  | PSR07003918.hg.1 | C7orf10 |
| TC07000255.hg.1 | -2.63 | PSR07003922.hg.1 | C7orf10 |
| TC07000255.hg.1 | -2.89 | JUC07001887.hg.1 | C7orf10 |
| TC07000255.hg.1 | -2.95 | JUC07001868.hg.1 | C7orf10 |
| TC07000255.hg.1 | -3.27 | JUC07001880.hg.1 | C7orf10 |
| TC07000255.hg.1 | -3.37 | PSR07003913.hg.1 | C7orf10 |
| TC07000255.hg.1 | -3.39 | PSR07003905.hg.1 | C7orf10 |
| TC07000255.hg.1 | -3.86 | PSR07003904.hg.1 | C7orf10 |
| TC07000255.hg.1 | -4.05 | JUC07001867.hg.1 | C7orf10 |
| TC07000255.hg.1 | -5.4  | JUC07001874.hg.1 | C7orf10 |
| TC07000255.hg.1 | -5.42 | JUC07001871.hg.1 | C7orf10 |
| TC07000255.hg.1 | -8.86 | JUC07001866.hg.1 | C7orf10 |
| TC07000715.hg.1 | 2.8   | JUC07005280.hg.1 | MDFIC   |
| TC07000715.hg.1 | -2.35 | PSR07011271.hg.1 | MDFIC   |
| TC07000715.hg.1 | -3.67 | PSR07011273.hg.1 | MDFIC   |



|                 |       |                  |            |
|-----------------|-------|------------------|------------|
| TC07001761.hg.1 | 2.8   | JUC07013543.hg.1 | DOCK4      |
| TC07001761.hg.1 | 2.1   | JUC07013559.hg.1 | DOCK4      |
| TC07001761.hg.1 | 2     | JUC07013544.hg.1 | DOCK4      |
| TC07001761.hg.1 | -2    | PSR07027550.hg.1 | DOCK4      |
| TC07001761.hg.1 | -2.05 | PSR07027583.hg.1 | DOCK4      |
| TC07001761.hg.1 | -2.46 | JUC07013561.hg.1 | DOCK4      |
| TC07001761.hg.1 | -2.47 | JUC07013525.hg.1 | DOCK4      |
| TC09001193.hg.1 | 2.8   | JUC09008188.hg.1 | APBA1, LOC |
| TC09001193.hg.1 | -2.28 | PSR09015260.hg.1 | APBA1, LOC |
| TC09001193.hg.1 | -4.51 | JUC09008191.hg.1 | APBA1, LOC |
| TC0Y000187.hg.1 | 2.8   | JUC0Y001194.hg.1 |            |
| TC0Y000187.hg.1 | 2.4   | PSR0Y001876.hg.1 |            |
| TC10001329.hg.1 | 2.8   | JUC10009816.hg.1 | JMJD1C     |
| TC10001329.hg.1 | 2.07  | JUC10009823.hg.1 | JMJD1C     |
| TC10001329.hg.1 | -2.04 | PSR10016828.hg.1 | JMJD1C     |
| TC10001329.hg.1 | -2.04 | JUC10009804.hg.1 | JMJD1C     |
| TC10001329.hg.1 | -2.11 | JUC10009827.hg.1 | JMJD1C     |
| TC10001329.hg.1 | -3.02 | JUC10009813.hg.1 | JMJD1C     |
| TC10001416.hg.1 | 2.8   | PSR10017940.hg.1 | AGAP5, BMS |
| TC10001416.hg.1 | 2.27  | JUC10010448.hg.1 | AGAP5, BMS |
| TC10001416.hg.1 | -2.03 | JUC10010459.hg.1 | AGAP5, BMS |
| TC13000681.hg.1 | 2.8   | JUC13004572.hg.1 | DHRS12     |
| TC13000681.hg.1 | 2.04  | PSR13007885.hg.1 | DHRS12     |
| TC16000484.hg.1 | 2.8   | JUC16003820.hg.1 | RSPRY1     |
| TC16000484.hg.1 | 2.21  | PSR16006748.hg.1 | RSPRY1     |
| TC16002098.hg.1 | 2.8   | JUC16014080.hg.1 | NPIPL3     |
| TC16002098.hg.1 | -2.81 | JUC16014073.hg.1 | NPIPL3     |
| TC16002098.hg.1 | -3.2  | PSR16013577.hg.1 | NPIPL3     |
| TC17000026.hg.1 | 2.8   | JUC17000163.hg.1 | RAP1GAP2   |
| TC17000026.hg.1 | 2.32  | PSR17000320.hg.1 | RAP1GAP2   |
| TC17000026.hg.1 | -2.04 | JUC17000166.hg.1 | RAP1GAP2   |
| TC17000026.hg.1 | -2.09 | JUC17000157.hg.1 | RAP1GAP2   |
| TC17000026.hg.1 | -2.41 | JUC17000159.hg.1 | RAP1GAP2   |
| TC17000026.hg.1 | -2.76 | JUC17000164.hg.1 | RAP1GAP2   |
| TC17000026.hg.1 | -3.13 | JUC17000158.hg.1 | RAP1GAP2   |
| TC17000026.hg.1 | -3.16 | JUC17000170.hg.1 | RAP1GAP2   |
| TC17000026.hg.1 | -3.33 | PSR17000287.hg.1 | RAP1GAP2   |
| TC17000026.hg.1 | -4.95 | JUC17000173.hg.1 | RAP1GAP2   |
| TC17000085.hg.1 | 2.8   | PSR17001080.hg.1 | ACADVL     |
| TC17000085.hg.1 | 2.36  | JUC17000669.hg.1 | ACADVL     |
| TC17000667.hg.1 | 2.8   | PSR17008418.hg.1 | ACSF2      |
| TC17000667.hg.1 | 2.39  | JUC17004642.hg.1 | ACSF2      |
| TC17000667.hg.1 | 2.37  | PSR17008413.hg.1 | ACSF2      |
| TC17000667.hg.1 | 2.31  | PSR17008449.hg.1 | ACSF2      |
| TC17000667.hg.1 | 2.21  | PSR17008425.hg.1 | ACSF2      |
| TC17000667.hg.1 | 2.07  | PSR17008429.hg.1 | ACSF2      |
| TC17000667.hg.1 | 2.06  | PSR17008428.hg.1 | ACSF2      |
| TC19000627.hg.1 | 2.8   | PSR19008695.hg.1 | BCL3       |
| TC19000627.hg.1 | 2.79  | PSR19008697.hg.1 | BCL3       |
| TC19000627.hg.1 | 2.73  | PSR19008700.hg.1 | BCL3       |
| TC19000627.hg.1 | 2.64  | PSR19008716.hg.1 | BCL3       |
| TC19000627.hg.1 | 2.54  | PSR19008717.hg.1 | BCL3       |
| TC19000627.hg.1 | 2.27  | PSR19008719.hg.1 | BCL3       |
| TC19000627.hg.1 | 2.16  | JUC19005200.hg.1 | BCL3       |
| TC06004098.hg.1 | 2.8   | JUC06021307.hg.1 | PHACTR2    |
| TC06004098.hg.1 | 2     | PSR06012348.hg.1 | PHACTR2    |
| TC01002497.hg.1 | 2.79  | JUC01020816.hg.1 | KIAA0319L  |
| TC01002497.hg.1 | 2.63  | JUC01020810.hg.1 | KIAA0319L  |

|                 |       |                  |            |
|-----------------|-------|------------------|------------|
| TC01002497.hg.1 | 2.45  | PSR01038771.hg.1 | KIAA0319L  |
| TC01002497.hg.1 | 2.43  | PSR01038758.hg.1 | KIAA0319L  |
| TC01002497.hg.1 | 2.38  | JUC01020804.hg.1 | KIAA0319L  |
| TC01002497.hg.1 | 2.35  | PSR01038768.hg.1 | KIAA0319L  |
| TC01002497.hg.1 | 2.34  | PSR01038711.hg.1 | KIAA0319L  |
| TC01002497.hg.1 | 2.22  | PSR01038756.hg.1 | KIAA0319L  |
| TC01002497.hg.1 | 2.14  | PSR01038757.hg.1 | KIAA0319L  |
| TC01002497.hg.1 | 2.08  | PSR01038754.hg.1 | KIAA0319L  |
| TC01002497.hg.1 | -2.04 | JUC01020812.hg.1 | KIAA0319L  |
| TC01002497.hg.1 | -2.48 | JUC01020813.hg.1 | KIAA0319L  |
| TC01002497.hg.1 | -2.87 | JUC01020800.hg.1 | KIAA0319L  |
| TC01006302.hg.1 | 2.79  | PSR01048354.hg.1 | LOC1005060 |
| TC01006302.hg.1 | 2     | JUC01039575.hg.1 | LOC1005060 |
| TC03002091.hg.1 | 2.79  | PSR03037117.hg.1 | RPL39L     |
| TC03002091.hg.1 | 2.04  | JUC03018357.hg.1 | RPL39L     |
| TC04001219.hg.1 | 2.79  | JUC04008889.hg.1 | AASDH      |
| TC04001219.hg.1 | 2.31  | PSR04016656.hg.1 | AASDH      |
| TC04001219.hg.1 | 2     | JUC04008875.hg.1 | AASDH      |
| TC05002010.hg.1 | 2.79  | PSR05027941.hg.1 | SLU7       |
| TC05002010.hg.1 | -3.5  | JUC05014248.hg.1 | SLU7       |
| TC08000200.hg.1 | 2.79  | PSR08002832.hg.1 | BNIP3L     |
| TC08000200.hg.1 | 2.63  | PSR08002833.hg.1 | BNIP3L     |
| TC08000200.hg.1 | 2.07  | JUC08001386.hg.1 | BNIP3L     |
| TC08000200.hg.1 | 2.05  | JUC08001379.hg.1 | BNIP3L     |
| TC08000200.hg.1 | -2    | PSR08002852.hg.1 | BNIP3L     |
| TC08000200.hg.1 | -2.29 | PSR08002848.hg.1 | BNIP3L     |
| TC08000277.hg.1 | 2.79  | JUC08001889.hg.1 | ERLIN2     |
| TC08000277.hg.1 | 2.43  | JUC08001891.hg.1 | ERLIN2     |
| TC08000277.hg.1 | 2.35  | JUC08001896.hg.1 | ERLIN2     |
| TC08000277.hg.1 | 2.14  | JUC08001898.hg.1 | ERLIN2     |
| TC08000277.hg.1 | 2.06  | PSR08003833.hg.1 | ERLIN2     |
| TC08000277.hg.1 | 2     | PSR08003809.hg.1 | ERLIN2     |
| TC08000602.hg.1 | 2.79  | JUC08004217.hg.1 | POP1       |
| TC08000602.hg.1 | 2.07  | PSR08008351.hg.1 | POP1       |
| TC12001389.hg.1 | 2.79  | JUC12010014.hg.1 | CPNE8      |
| TC12001389.hg.1 | 2.7   | JUC12010015.hg.1 | CPNE8      |
| TC12001389.hg.1 | 2.15  | JUC12010011.hg.1 | CPNE8      |
| TC12001389.hg.1 | -2.08 | PSR12017988.hg.1 | CPNE8      |
| TC12001389.hg.1 | -2.36 | JUC12010013.hg.1 | CPNE8      |
| TC12001941.hg.1 | 2.79  | PSR12025277.hg.1 | SSH1       |
| TC12001941.hg.1 | -2.32 | JUC12014108.hg.1 | SSH1       |
| TC12001941.hg.1 | -2.77 | PSR12025264.hg.1 | SSH1       |
| TC17001753.hg.1 | 2.79  | JUC17013037.hg.1 | TUBD1      |
| TC17001753.hg.1 | 2.45  | PSR17023404.hg.1 | TUBD1      |
| TC17001753.hg.1 | 2.07  | JUC17013051.hg.1 | TUBD1      |
| TC17001753.hg.1 | -4.32 | PSR17023409.hg.1 | TUBD1      |
| TC17002844.hg.1 | 2.79  | JUC17018185.hg.1 | SPATA20    |
| TC17002844.hg.1 | 2.53  | JUC17018193.hg.1 | SPATA20    |
| TC17002844.hg.1 | 2.5   | PSR17008640.hg.1 | SPATA20    |
| TC17002844.hg.1 | 2.43  | PSR17008606.hg.1 | SPATA20    |
| TC17002844.hg.1 | 2.35  | JUC17018191.hg.1 | SPATA20    |
| TC17002844.hg.1 | 2.34  | PSR17008615.hg.1 | SPATA20    |
| TC17002844.hg.1 | 2.24  | PSR17008652.hg.1 | SPATA20    |
| TC17002844.hg.1 | 2.22  | PSR17008619.hg.1 | SPATA20    |
| TC17002844.hg.1 | 2.17  | PSR17008648.hg.1 | SPATA20    |
| TC17002844.hg.1 | 2.16  | JUC17018186.hg.1 | SPATA20    |
| TC17002844.hg.1 | -2.36 | PSR17008643.hg.1 | SPATA20    |
| TC17002844.hg.1 | -3.04 | JUC17018213.hg.1 | SPATA20    |

|                  |       |                   |              |
|------------------|-------|-------------------|--------------|
| TC6_apd_hap1000  | 2.79  | PSR6_apd_hap1001  | AGPAT1       |
| TC6_apd_hap1000  | 2.59  | JUC6_apd_hap1000  | AGPAT1       |
| TC6_apd_hap1000  | 2.41  | PSR6_apd_hap1001  | AGPAT1       |
| TC6_apd_hap1000  | -3.33 | JUC6_apd_hap1000  | AGPAT1       |
| TC6_cox_hap2000  | 2.79  | JUC6_cox_hap2002  | TNXB, TNXA   |
| TC6_cox_hap2000  | -2.07 | JUC6_cox_hap2002  | TNXB, TNXA   |
| TC6_cox_hap2000  | -2.37 | PSR6_cox_hap2003  | TNXB, TNXA   |
| TC6_dbb_hap3000  | 2.79  | JUC6_dbb_hap3002  | TNXB         |
| TC6_dbb_hap3000  | -2.07 | JUC6_dbb_hap3002  | TNXB         |
| TC6_dbb_hap3000  | -2.25 | PSR6_dbb_hap3003  | TNXB         |
| TC6_dbb_hap3000  | -2.37 | PSR6_dbb_hap3003  | TNXB         |
| TC6_ssto_hap7000 | 2.79  | PSR6_ssto_hap7003 | AGPAT1       |
| TC6_ssto_hap7000 | 2.59  | JUC6_ssto_hap7001 | AGPAT1       |
| TC6_ssto_hap7000 | 2.41  | PSR6_ssto_hap7003 | AGPAT1       |
| TC6_ssto_hap7000 | -3.33 | JUC6_ssto_hap7001 | AGPAT1       |
| TC01000743.hg.1  | 2.78  | JUC01006242.hg.1  |              |
| TC01000743.hg.1  | 2.14  | PSR01011950.hg.1  |              |
| TC02002539.hg.1  | 2.78  | PSR02040273.hg.1  | GPR155       |
| TC02002539.hg.1  | -2.05 | JUC02021249.hg.1  | GPR155       |
| TC02002539.hg.1  | -2.13 | PSR02040294.hg.1  | GPR155       |
| TC02002539.hg.1  | -2.54 | JUC02021231.hg.1  | GPR155       |
| TC03000534.hg.1  | 2.78  | PSR03009870.hg.1  | ALCAM        |
| TC03000534.hg.1  | 2.02  | JUC03004902.hg.1  | ALCAM        |
| TC03000751.hg.1  | 2.78  | PSR03013677.hg.1  | LOC1005072   |
| TC03000751.hg.1  | -2.73 | JUC03006907.hg.1  | LOC1005072   |
| TC03001202.hg.1  | 2.78  | JUC03010308.hg.1  | MRPS25       |
| TC03001202.hg.1  | 2.56  | JUC03010301.hg.1  | MRPS25       |
| TC03001202.hg.1  | 2.02  | PSR03020594.hg.1  | MRPS25       |
| TC03001202.hg.1  | -2.2  | PSR03020586.hg.1  | MRPS25       |
| TC03001375.hg.1  | 2.78  | JUC03011873.hg.1  | NME6         |
| TC03001375.hg.1  | 2.4   | JUC03011866.hg.1  | NME6         |
| TC03001375.hg.1  | 2.16  | PSR03023767.hg.1  | NME6         |
| TC03001375.hg.1  | 2.13  | JUC03011871.hg.1  | NME6         |
| TC03001457.hg.1  | 2.78  | JUC03012866.hg.1  | PBRM1        |
| TC03001457.hg.1  | 2.75  | JUC03012903.hg.1  | PBRM1        |
| TC03001457.hg.1  | 2.51  | JUC03012872.hg.1  | PBRM1        |
| TC03001457.hg.1  | 2.45  | JUC03012906.hg.1  | PBRM1        |
| TC03001457.hg.1  | 2.1   | PSR03026372.hg.1  | PBRM1        |
| TC03001457.hg.1  | -2.14 | JUC03012889.hg.1  | PBRM1        |
| TC06000870.hg.1  | 2.78  | JUC06004788.hg.1  | ARMC2        |
| TC06000870.hg.1  | 2.13  | JUC06004783.hg.1  | ARMC2        |
| TC06000870.hg.1  | -2.09 | JUC06004789.hg.1  | ARMC2        |
| TC06000870.hg.1  | -2.15 | PSR06010180.hg.1  | ARMC2        |
| TC10001505.hg.1  | 2.78  | JUC10011047.hg.1  | LIPA, LOC100 |
| TC10001505.hg.1  | 2.78  | JUC10011053.hg.1  | LIPA, LOC100 |
| TC10001505.hg.1  | -2.03 | JUC10011049.hg.1  | LIPA, LOC100 |
| TC10001505.hg.1  | -2.05 | PSR10019010.hg.1  | LIPA, LOC100 |
| TC10001505.hg.1  | -2.13 | PSR10018970.hg.1  | LIPA, LOC100 |
| TC10001505.hg.1  | -2.35 | JUC10011046.hg.1  | LIPA, LOC100 |
| TC10001505.hg.1  | -3.05 | JUC10011071.hg.1  | LIPA, LOC100 |
| TC11003505.hg.1  | 2.78  | PSR11026921.hg.1  | CASP1        |
| TC11003505.hg.1  | 2.44  | JUC11019791.hg.1  | CASP1        |
| TC11003505.hg.1  | 2.22  | PSR11026920.hg.1  | CASP1        |
| TC11003505.hg.1  | -2.66 | JUC11019792.hg.1  | CASP1        |
| TC12001152.hg.1  | 2.78  | PSR12015286.hg.1  | SPSB2        |
| TC12001152.hg.1  | -2    | JUC12008416.hg.1  | SPSB2        |
| TC15000150.hg.1  | 2.78  | JUC15000330.hg.1  | WHAMMP2      |
| TC15000150.hg.1  | -2.09 | PSR15000927.hg.1  | WHAMMP2      |

|                 |       |                  |          |
|-----------------|-------|------------------|----------|
| TC16000493.hg.1 | 2.78  | PSR16006866.hg.1 | GPR56    |
| TC16000493.hg.1 | 2.77  | PSR16006860.hg.1 | GPR56    |
| TC16000493.hg.1 | 2.73  | PSR16006862.hg.1 | GPR56    |
| TC16000493.hg.1 | 2.53  | JUC16003900.hg.1 | GPR56    |
| TC16000493.hg.1 | 2.5   | JUC16003897.hg.1 | GPR56    |
| TC16000493.hg.1 | 2.36  | JUC16003905.hg.1 | GPR56    |
| TC16000493.hg.1 | 2.35  | PSR16006861.hg.1 | GPR56    |
| TC16000493.hg.1 | 2.22  | JUC16003893.hg.1 | GPR56    |
| TC16000493.hg.1 | 2.06  | PSR16006865.hg.1 | GPR56    |
| TC16000493.hg.1 | 2.02  | PSR16006872.hg.1 | GPR56    |
| TC16000493.hg.1 | -2.09 | PSR16006875.hg.1 | GPR56    |
| TC16000493.hg.1 | -3.34 | JUC16003896.hg.1 | GPR56    |
| TC17001068.hg.1 | 2.78  | JUC17008168.hg.1 | SLC13A5  |
| TC17001068.hg.1 | 2.41  | PSR17014284.hg.1 | SLC13A5  |
| TC17001068.hg.1 | -2.07 | PSR17014293.hg.1 | SLC13A5  |
| TC17001068.hg.1 | -2.12 | PSR17014294.hg.1 | SLC13A5  |
| TC17001068.hg.1 | -2.15 | PSR17014289.hg.1 | SLC13A5  |
| TC17001068.hg.1 | -2.38 | JUC17008167.hg.1 | SLC13A5  |
| TC19000488.hg.1 | 2.78  | JUC19003825.hg.1 | APLP1    |
| TC19000488.hg.1 | 2.52  | PSR19006490.hg.1 | APLP1    |
| TC19000488.hg.1 | 2.35  | PSR19006492.hg.1 | APLP1    |
| TC19000488.hg.1 | 2.31  | PSR19006491.hg.1 | APLP1    |
| TC19000488.hg.1 | 2.18  | JUC19003840.hg.1 | APLP1    |
| TC19000488.hg.1 | 2.03  | JUC19003834.hg.1 | APLP1    |
| TC19000488.hg.1 | -2.1  | PSR19006508.hg.1 | APLP1    |
| TC19000488.hg.1 | -2.52 | PSR19006512.hg.1 | APLP1    |
| TC22001425.hg.1 | 2.78  | PSR22005780.hg.1 | APOBEC3B |
| TC22001425.hg.1 | 2.37  | JUC22008590.hg.1 | APOBEC3B |
| TC22001425.hg.1 | 2.22  | JUC22008588.hg.1 | APOBEC3B |
| TC22001425.hg.1 | 2.04  | PSR22005773.hg.1 | APOBEC3B |
| TC22001425.hg.1 | -2.5  | JUC22008592.hg.1 | APOBEC3B |
| TC22001425.hg.1 | -4.14 | JUC22008595.hg.1 | APOBEC3B |
| TC22001425.hg.1 | -4.35 | JUC22008591.hg.1 | APOBEC3B |
| TC22001425.hg.1 | -6.13 | JUC22008584.hg.1 | APOBEC3B |
| TC01001426.hg.1 | 2.77  | PSR01022306.hg.1 | HSD17B7  |
| TC01001426.hg.1 | 2.2   | PSR01022299.hg.1 | HSD17B7  |
| TC01001426.hg.1 | 2.11  | JUC01011756.hg.1 | HSD17B7  |
| TC01001426.hg.1 | 2.09  | PSR01022282.hg.1 | HSD17B7  |
| TC01002528.hg.1 | 2.77  | PSR01039354.hg.1 | INPP5B   |
| TC01002528.hg.1 | -2.81 | JUC01021143.hg.1 | INPP5B   |
| TC01002574.hg.1 | 2.77  | JUC01021494.hg.1 | LEPRE1   |
| TC01002574.hg.1 | 2.25  | PSR01039984.hg.1 | LEPRE1   |
| TC01002574.hg.1 | 2.16  | JUC01021479.hg.1 | LEPRE1   |
| TC01002574.hg.1 | 2.09  | PSR01040015.hg.1 | LEPRE1   |
| TC01002604.hg.1 | 2.77  | PSR01040483.hg.1 | HECTD3   |
| TC01002604.hg.1 | 2.34  | JUC01021738.hg.1 | HECTD3   |
| TC01002604.hg.1 | 2.29  | PSR01040480.hg.1 | HECTD3   |
| TC01002604.hg.1 | 2.25  | PSR01040487.hg.1 | HECTD3   |
| TC01002604.hg.1 | 2.24  | PSR01040478.hg.1 | HECTD3   |
| TC01002604.hg.1 | 2.09  | JUC01021739.hg.1 | HECTD3   |
| TC01002604.hg.1 | 2.03  | PSR01040477.hg.1 | HECTD3   |
| TC01002604.hg.1 | 2.02  | PSR01040492.hg.1 | HECTD3   |
| TC02000157.hg.1 | 2.77  | JUC02000982.hg.1 | MAPRE3   |
| TC02000157.hg.1 | 2.15  | PSR02001911.hg.1 | MAPRE3   |
| TC02000157.hg.1 | 2     | JUC02000990.hg.1 | MAPRE3   |
| TC02002886.hg.1 | 2.77  | JUC02024309.hg.1 | HJURP    |
| TC02002886.hg.1 | 2.69  | JUC02024307.hg.1 | HJURP    |
| TC02002886.hg.1 | 2.63  | PSR02046445.hg.1 | HJURP    |

|                 |       |                  |            |
|-----------------|-------|------------------|------------|
| TC02002886.hg.1 | 2.5   | PSR02046459.hg.1 | HJURP      |
| TC02002886.hg.1 | 2.03  | JUC02024297.hg.1 | HJURP      |
| TC02002886.hg.1 | -2.09 | PSR02046448.hg.1 | HJURP      |
| TC02002886.hg.1 | -2.18 | JUC02024310.hg.1 | HJURP      |
| TC02002886.hg.1 | -2.21 | PSR02046458.hg.1 | HJURP      |
| TC05003439.hg.1 | 2.77  | PSR05002644.hg.1 | ITGA1      |
| TC05003439.hg.1 | 2.64  | PSR05002671.hg.1 | ITGA1      |
| TC05003439.hg.1 | -2.45 | JUC05019800.hg.1 | ITGA1      |
| TC05003439.hg.1 | -4.53 | JUC05019809.hg.1 | ITGA1      |
| TC17000189.hg.1 | 2.77  | JUC17001478.hg.1 | SNORD49A,  |
| TC17000189.hg.1 | 2.64  | JUC17001494.hg.1 | SNORD49A,  |
| TC17000189.hg.1 | -2.06 | PSR17002584.hg.1 | SNORD49A,  |
| TC17000189.hg.1 | -2.1  | JUC17001484.hg.1 | SNORD49A,  |
| TC17000189.hg.1 | -2.24 | JUC17001464.hg.1 | SNORD49A,  |
| TC17000189.hg.1 | -2.93 | PSR17002547.hg.1 | SNORD49A,  |
| TC17000583.hg.1 | 2.77  | JUC17004068.hg.1 | LOC1001339 |
| TC17000583.hg.1 | 2.16  | PSR17007173.hg.1 | LOC1001339 |
| TC17001523.hg.1 | 2.77  | JUC17011344.hg.1 | DHX58      |
| TC17001523.hg.1 | 2.37  | PSR17020288.hg.1 | DHX58      |
| TC17001523.hg.1 | 2.12  | JUC17011339.hg.1 | DHX58      |
| TC17001523.hg.1 | 2.09  | PSR17020307.hg.1 | DHX58      |
| TC01000001.hg.1 | 2.76  | JUC01000001.hg.1 | DDX11L1    |
| TC01000001.hg.1 | 2.34  | PSR01000002.hg.1 | DDX11L1    |
| TC01000001.hg.1 | 2.24  | PSR01000004.hg.1 | DDX11L1    |
| TC01003343.hg.1 | 2.76  | JUC01027356.hg.1 | IQGAP3     |
| TC01003343.hg.1 | 2.35  | PSR01052240.hg.1 | IQGAP3     |
| TC01003343.hg.1 | -2.05 | PSR01052235.hg.1 | IQGAP3     |
| TC01003343.hg.1 | -2.08 | JUC01027330.hg.1 | IQGAP3     |
| TC01003343.hg.1 | -2.56 | PSR01052195.hg.1 | IQGAP3     |
| TC01003343.hg.1 | -2.64 | JUC01027331.hg.1 | IQGAP3     |
| TC01003343.hg.1 | -2.91 | JUC01027324.hg.1 | IQGAP3     |
| TC01003343.hg.1 | -3.24 | JUC01027354.hg.1 | IQGAP3     |
| TC01003343.hg.1 | -8.45 | JUC01027337.hg.1 | IQGAP3     |
| TC02000967.hg.1 | 2.76  | PSR02014127.hg.1 | 7-Mar      |
| TC02000967.hg.1 | -2.32 | JUC02007596.hg.1 | 7-Mar      |
| TC02001755.hg.1 | 2.76  | JUC02014798.hg.1 | HNRPLL     |
| TC02001755.hg.1 | 2.21  | JUC02014784.hg.1 | HNRPLL     |
| TC02001755.hg.1 | 2.18  | PSR02028264.hg.1 | HNRPLL     |
| TC03001819.hg.1 | 2.76  | PSR03032911.hg.1 | DZIP1L     |
| TC03001819.hg.1 | 2.47  | PSR03032926.hg.1 | DZIP1L     |
| TC03001819.hg.1 | 2.45  | PSR03032924.hg.1 | DZIP1L     |
| TC03001819.hg.1 | 2.2   | PSR03032902.hg.1 | DZIP1L     |
| TC03001819.hg.1 | 2.17  | PSR03032925.hg.1 | DZIP1L     |
| TC03001819.hg.1 | 2.11  | JUC03016330.hg.1 | DZIP1L     |
| TC03001819.hg.1 | 2.08  | PSR03032921.hg.1 | DZIP1L     |
| TC03001819.hg.1 | 2.04  | JUC03016320.hg.1 | DZIP1L     |
| TC04000643.hg.1 | 2.76  | PSR04009278.hg.1 | HSPA4L     |
| TC04000643.hg.1 | 2.68  | PSR04009275.hg.1 | HSPA4L     |
| TC04000643.hg.1 | 2.64  | PSR04009303.hg.1 | HSPA4L     |
| TC04000643.hg.1 | 2.24  | PSR04009274.hg.1 | HSPA4L     |
| TC04000643.hg.1 | 2.19  | PSR04009277.hg.1 | HSPA4L     |
| TC04000643.hg.1 | -2.08 | JUC04004959.hg.1 | HSPA4L     |
| TC04000643.hg.1 | -2.15 | JUC04004969.hg.1 | HSPA4L     |
| TC04000643.hg.1 | -2.22 | JUC04004963.hg.1 | HSPA4L     |
| TC04001742.hg.1 | 2.76  | JUC04012761.hg.1 | SCRG1      |
| TC04001742.hg.1 | 2.54  | PSR04024069.hg.1 | SCRG1      |
| TC04002948.hg.1 | 2.76  | PSR04022051.hg.1 | MGARP      |
| TC04002948.hg.1 | 2.08  | PSR04022050.hg.1 | MGARP      |

|                 |       |                  |             |
|-----------------|-------|------------------|-------------|
| TC04002948.hg.1 | -2.6  | JUC04017373.hg.1 | MGARP       |
| TC04002948.hg.1 | -4.93 | JUC04017374.hg.1 | MGARP       |
| TC05000752.hg.1 | 2.76  | JUC05005640.hg.1 | PCDHB9      |
| TC05000752.hg.1 | 2.42  | PSR05010798.hg.1 | PCDHB9      |
| TC05000752.hg.1 | 2.2   | PSR05010801.hg.1 | PCDHB9      |
| TC05001259.hg.1 | 2.76  | JUC05009002.hg.1 | RAD1        |
| TC05001259.hg.1 | 2.12  | PSR05017602.hg.1 | RAD1        |
| TC05001693.hg.1 | 2.76  | JUC05011881.hg.1 | CDO1        |
| TC05001693.hg.1 | 2.55  | JUC05011883.hg.1 | CDO1        |
| TC05001693.hg.1 | 2.09  | PSR05022965.hg.1 | CDO1        |
| TC05001693.hg.1 | -2.08 | PSR05022966.hg.1 | CDO1        |
| TC09000467.hg.1 | 2.76  | JUC09002764.hg.1 | MIR23B, MIR |
| TC09000467.hg.1 | 2.14  | JUC09002739.hg.1 | MIR23B, MIR |
| TC09000467.hg.1 | -2    | PSR09005000.hg.1 | MIR23B, MIR |
| TC09000467.hg.1 | -2.02 | PSR09005043.hg.1 | MIR23B, MIR |
| TC09000467.hg.1 | -2.04 | JUC09002740.hg.1 | MIR23B, MIR |
| TC09000467.hg.1 | -2.09 | JUC09002763.hg.1 | MIR23B, MIR |
| TC09000467.hg.1 | -2.12 | PSR09005001.hg.1 | MIR23B, MIR |
| TC09000467.hg.1 | -2.21 | JUC09002757.hg.1 | MIR23B, MIR |
| TC09000467.hg.1 | -2.23 | JUC09002749.hg.1 | MIR23B, MIR |
| TC09000467.hg.1 | -2.29 | PSR09005027.hg.1 | MIR23B, MIR |
| TC09000467.hg.1 | -2.4  | JUC09002752.hg.1 | MIR23B, MIR |
| TC09000467.hg.1 | -2.46 | PSR09005013.hg.1 | MIR23B, MIR |
| TC09000467.hg.1 | -2.65 | JUC09002759.hg.1 | MIR23B, MIR |
| TC09000467.hg.1 | -2.93 | JUC09002732.hg.1 | MIR23B, MIR |
| TC09000467.hg.1 | -3.04 | PSR09005005.hg.1 | MIR23B, MIR |
| TC09000467.hg.1 | -3.45 | JUC09002756.hg.1 | MIR23B, MIR |
| TC09000467.hg.1 | -3.71 | PSR09005006.hg.1 | MIR23B, MIR |
| TC09000855.hg.1 | 2.76  | JUC09006124.hg.1 | CACNA1B     |
| TC09000855.hg.1 | -2.05 | PSR09011372.hg.1 | CACNA1B     |
| TC09000855.hg.1 | -2.15 | JUC09006117.hg.1 | CACNA1B     |
| TC09000855.hg.1 | -2.31 | JUC09006122.hg.1 | CACNA1B     |
| TC09000855.hg.1 | -2.8  | JUC09006114.hg.1 | CACNA1B     |
| TC0Y000144.hg.1 | 2.76  | JUC0Y000922.hg.1 |             |
| TC0Y000144.hg.1 | -2.26 | JUC0Y000924.hg.1 |             |
| TC0Y000144.hg.1 | -2.42 | PSR0Y001522.hg.1 |             |
| TC0Y000144.hg.1 | -2.42 | PSR0Y001525.hg.1 |             |
| TC0Y000144.hg.1 | -2.45 | JUC0Y000919.hg.1 |             |
| TC0Y000144.hg.1 | -2.54 | JUC0Y000915.hg.1 |             |
| TC0Y000144.hg.1 | -2.95 | PSR0Y001517.hg.1 |             |
| TC11001026.hg.1 | 2.76  | PSR11012839.hg.1 | ZBTB16      |
| TC11001026.hg.1 | 2.36  | PSR11012836.hg.1 | ZBTB16      |
| TC11001026.hg.1 | -2.54 | JUC11006904.hg.1 | ZBTB16      |
| TC11001026.hg.1 | -2.88 | JUC11006906.hg.1 | ZBTB16      |
| TC11001026.hg.1 | -3.56 | PSR11012827.hg.1 | ZBTB16      |
| TC11001026.hg.1 | -3.65 | JUC11006907.hg.1 | ZBTB16      |
| TC11001026.hg.1 | -3.91 | PSR11012830.hg.1 | ZBTB16      |
| TC11001419.hg.1 | 2.76  | JUC11009586.hg.1 | ZBED5       |
| TC11001419.hg.1 | -2.1  | JUC11009578.hg.1 | ZBED5       |
| TC11001419.hg.1 | -2.32 | JUC11009583.hg.1 | ZBED5       |
| TC11001419.hg.1 | -2.37 | PSR11017881.hg.1 | ZBED5       |
| TC11001419.hg.1 | -3.24 | PSR11017880.hg.1 | ZBED5       |
| TC12002013.hg.1 | 2.76  | JUC12014752.hg.1 | FBXO21      |
| TC12002013.hg.1 | 2.24  | PSR12026387.hg.1 | FBXO21      |
| TC12002013.hg.1 | -2.58 | JUC12014749.hg.1 | FBXO21      |
| TC21000176.hg.1 | 2.76  | PSR21001691.hg.1 | SH3BGR      |
| TC21000176.hg.1 | -2.33 | PSR21001695.hg.1 | SH3BGR      |
| TC21000176.hg.1 | -2.81 | JUC21000869.hg.1 | SH3BGR      |

|                 |        |                  |                |
|-----------------|--------|------------------|----------------|
| TC22000256.hg.1 | 2.76   | JUC22001705.hg.1 | HMGXB4         |
| TC22000256.hg.1 | 2.48   | PSR22004718.hg.1 | HMGXB4         |
| TC22000256.hg.1 | 2.36   | JUC22001699.hg.1 | HMGXB4         |
| TC22000256.hg.1 | 2.01   | JUC22001698.hg.1 | HMGXB4         |
| TC22000256.hg.1 | -2.14  | PSR22004730.hg.1 | HMGXB4         |
| TC22000256.hg.1 | -2.25  | JUC22001709.hg.1 | HMGXB4         |
| TC01006297.hg.1 | 2.75   | JUC01039455.hg.1 | CDK11A, CDK11B |
| TC01006297.hg.1 | 2.3    | PSR01032151.hg.1 | CDK11A, CDK11B |
| TC01006297.hg.1 | 2.22   | JUC01039439.hg.1 | CDK11A, CDK11B |
| TC01006297.hg.1 | 2.11   | PSR01032147.hg.1 | CDK11A, CDK11B |
| TC01006297.hg.1 | 2.05   | PSR01032121.hg.1 | CDK11A, CDK11B |
| TC01006297.hg.1 | 2.01   | JUC01039464.hg.1 | CDK11A, CDK11B |
| TC01006297.hg.1 | -2.37  | JUC01039458.hg.1 | CDK11A, CDK11B |
| TC03000051.hg.1 | 2.75   | JUC03000592.hg.1 | FANCD2         |
| TC03000051.hg.1 | 2.09   | PSR03001177.hg.1 | FANCD2         |
| TC03000051.hg.1 | 2.02   | PSR03001210.hg.1 | FANCD2         |
| TC03000051.hg.1 | -2.01  | JUC03000632.hg.1 | FANCD2         |
| TC03000051.hg.1 | -2.02  | PSR03001199.hg.1 | FANCD2         |
| TC03000051.hg.1 | -2.28  | JUC03000602.hg.1 | FANCD2         |
| TC03000289.hg.1 | 2.75   | PSR03005938.hg.1 | CCDC36         |
| TC03000289.hg.1 | 2.37   | PSR03005941.hg.1 | CCDC36         |
| TC03000289.hg.1 | 2.33   | JUC03002967.hg.1 | CCDC36         |
| TC03000289.hg.1 | 2.28   | PSR03005934.hg.1 | CCDC36         |
| TC03000289.hg.1 | 2.24   | PSR03005933.hg.1 | CCDC36         |
| TC03000289.hg.1 | 2.07   | PSR03005942.hg.1 | CCDC36         |
| TC03000289.hg.1 | 2.06   | PSR03005936.hg.1 | CCDC36         |
| TC03000289.hg.1 | -2.15  | PSR03005947.hg.1 | CCDC36         |
| TC03000289.hg.1 | -3.12  | JUC03002972.hg.1 | CCDC36         |
| TC03000746.hg.1 | 2.75   | JUC03006861.hg.1 | FAIM           |
| TC03000746.hg.1 | -5.11  | PSR03013582.hg.1 | FAIM           |
| TC03000746.hg.1 | -5.35  | PSR03013601.hg.1 | FAIM           |
| TC03000746.hg.1 | -5.5   | PSR03013590.hg.1 | FAIM           |
| TC03000746.hg.1 | -5.6   | PSR03013583.hg.1 | FAIM           |
| TC03000746.hg.1 | -6.1   | PSR03013581.hg.1 | FAIM           |
| TC03000746.hg.1 | -6.25  | JUC03006865.hg.1 | FAIM           |
| TC03000746.hg.1 | -7.87  | PSR03013586.hg.1 | FAIM           |
| TC03000746.hg.1 | -8.37  | JUC03006869.hg.1 | FAIM           |
| TC03000746.hg.1 | -10.1  | PSR03013584.hg.1 | FAIM           |
| TC03000746.hg.1 | -10.44 | JUC03006864.hg.1 | FAIM           |
| TC03000746.hg.1 | -11.45 | JUC03006859.hg.1 | FAIM           |
| TC03000746.hg.1 | -13.47 | JUC03006863.hg.1 | FAIM           |
| TC03000746.hg.1 | -14.01 | JUC03006862.hg.1 | FAIM           |
| TC03003351.hg.1 | 2.75   | JUC03023652.hg.1 | RBM6           |
| TC03003351.hg.1 | 2.14   | JUC03023656.hg.1 | RBM6           |
| TC03003351.hg.1 | 2.08   | PSR03006247.hg.1 | RBM6           |
| TC03003351.hg.1 | 2.03   | JUC03023659.hg.1 | RBM6           |
| TC03003351.hg.1 | 2.02   | JUC03023647.hg.1 | RBM6           |
| TC03003351.hg.1 | -2.14  | PSR03006261.hg.1 | RBM6           |
| TC03003351.hg.1 | -2.28  | JUC03023644.hg.1 | RBM6           |
| TC03003351.hg.1 | -3.32  | JUC03023662.hg.1 | RBM6           |
| TC03003351.hg.1 | -3.96  | JUC03023632.hg.1 | RBM6           |
| TC04000788.hg.1 | 2.75   | PSR04010869.hg.1 | GUCY1B3        |
| TC04000788.hg.1 | 2.61   | PSR04010850.hg.1 | GUCY1B3        |
| TC04000788.hg.1 | 2.19   | PSR04010857.hg.1 | GUCY1B3        |
| TC04000788.hg.1 | 2.08   | JUC04005825.hg.1 | GUCY1B3        |
| TC04000788.hg.1 | 2.06   | PSR04010856.hg.1 | GUCY1B3        |
| TC04000788.hg.1 | -2.06  | JUC04005827.hg.1 | GUCY1B3        |
| TC04000788.hg.1 | -2.6   | JUC04005831.hg.1 | GUCY1B3        |

|                 |       |                  |            |
|-----------------|-------|------------------|------------|
| TC04000788.hg.1 | -4.44 | JUC04005839.hg.1 | GUCY1B3    |
| TC04000972.hg.1 | 2.75  | PSR04013361.hg.1 | POLN, HAUS |
| TC04000972.hg.1 | 2.08  | JUC04007111.hg.1 | POLN, HAUS |
| TC04000972.hg.1 | -2.1  | PSR04013372.hg.1 | POLN, HAUS |
| TC04001540.hg.1 | 2.75  | JUC04011476.hg.1 | SCLT1      |
| TC04001540.hg.1 | 2.7   | JUC04011465.hg.1 | SCLT1      |
| TC04001540.hg.1 | 2.5   | PSR04021762.hg.1 | SCLT1      |
| TC04001540.hg.1 | 2.41  | JUC04011484.hg.1 | SCLT1      |
| TC04001540.hg.1 | 2.19  | PSR04021764.hg.1 | SCLT1      |
| TC04001540.hg.1 | 2.08  | PSR04021769.hg.1 | SCLT1      |
| TC04001540.hg.1 | 2.07  | JUC04011478.hg.1 | SCLT1      |
| TC04001540.hg.1 | 2.06  | JUC04011474.hg.1 | SCLT1      |
| TC04001540.hg.1 | 2.01  | PSR04021796.hg.1 | SCLT1      |
| TC05000334.hg.1 | 2.75  | PSR05004533.hg.1 | MCCC2      |
| TC05000334.hg.1 | 2.47  | JUC05002441.hg.1 | MCCC2      |
| TC05000334.hg.1 | 2.15  | PSR05004539.hg.1 | MCCC2      |
| TC07001486.hg.1 | 2.75  | JUC07010960.hg.1 | TYW1B      |
| TC07001486.hg.1 | 2.05  | JUC07010949.hg.1 | TYW1B      |
| TC07001486.hg.1 | -2.06 | JUC07010943.hg.1 | TYW1B      |
| TC07001486.hg.1 | -2.22 | PSR07022259.hg.1 | TYW1B      |
| TC08001496.hg.1 | 2.75  | JUC08009949.hg.1 | RRM2B      |
| TC08001496.hg.1 | 2.74  | JUC08009945.hg.1 | RRM2B      |
| TC08001496.hg.1 | 2.44  | PSR08019603.hg.1 | RRM2B      |
| TC08001496.hg.1 | 2.02  | PSR08019607.hg.1 | RRM2B      |
| TC09000182.hg.1 | 2.75  | JUC09001049.hg.1 | UNC13B     |
| TC09000182.hg.1 | 2.7   | PSR09001967.hg.1 | UNC13B     |
| TC09000182.hg.1 | 2.63  | JUC09001050.hg.1 | UNC13B     |
| TC09000182.hg.1 | 2.55  | JUC09001051.hg.1 | UNC13B     |
| TC09000182.hg.1 | 2.26  | JUC09001046.hg.1 | UNC13B     |
| TC09000182.hg.1 | 2.23  | PSR09002013.hg.1 | UNC13B     |
| TC09000182.hg.1 | 2.23  | JUC09001053.hg.1 | UNC13B     |
| TC09000182.hg.1 | 2.19  | JUC09001040.hg.1 | UNC13B     |
| TC09000182.hg.1 | 2.1   | PSR09001964.hg.1 | UNC13B     |
| TC09000182.hg.1 | 2.06  | PSR09001968.hg.1 | UNC13B     |
| TC09000182.hg.1 | 2.03  | PSR09001970.hg.1 | UNC13B     |
| TC09000182.hg.1 | -2.09 | JUC09001059.hg.1 | UNC13B     |
| TC10000739.hg.1 | 2.75  | JUC10004858.hg.1 | DPCD       |
| TC10000739.hg.1 | 2.45  | JUC10004866.hg.1 | DPCD       |
| TC10000739.hg.1 | 2.08  | JUC10004864.hg.1 | DPCD       |
| TC10000739.hg.1 | 2.01  | PSR10008732.hg.1 | DPCD       |
| TC11000980.hg.1 | 2.75  | JUC11006534.hg.1 | ATM        |
| TC11000980.hg.1 | -2.02 | JUC11006577.hg.1 | ATM        |
| TC11000980.hg.1 | -2.15 | JUC11006553.hg.1 | ATM        |
| TC11000980.hg.1 | -2.19 | JUC11006570.hg.1 | ATM        |
| TC11000980.hg.1 | -2.2  | JUC11006579.hg.1 | ATM        |
| TC11000980.hg.1 | -2.21 | JUC11006599.hg.1 | ATM        |
| TC11000980.hg.1 | -2.42 | PSR11012216.hg.1 | ATM        |
| TC11000980.hg.1 | -2.53 | JUC11006592.hg.1 | ATM        |
| TC11000980.hg.1 | -2.67 | JUC11006595.hg.1 | ATM        |
| TC11000980.hg.1 | -2.93 | JUC11006537.hg.1 | ATM        |
| TC11000980.hg.1 | -3.01 | JUC11006571.hg.1 | ATM        |
| TC11000980.hg.1 | -3.23 | PSR11012218.hg.1 | ATM        |
| TC11000980.hg.1 | -4.49 | JUC11006561.hg.1 | ATM        |
| TC12000825.hg.1 | 2.75  | JUC12005800.hg.1 | RIC8B      |
| TC12000825.hg.1 | 2.58  | JUC12005808.hg.1 | RIC8B      |
| TC12000825.hg.1 | 2.06  | PSR12010554.hg.1 | RIC8B      |
| TC12000825.hg.1 | -2.72 | JUC12005798.hg.1 | RIC8B      |
| TC12000825.hg.1 | -2.84 | JUC12005797.hg.1 | RIC8B      |



|                 |       |                   |         |
|-----------------|-------|-------------------|---------|
| TC12003296.hg.1 | 2.75  | PSR12005887.hg.1  | HOXC6   |
| TC12003296.hg.1 | 2.02  | JUC12020626.hg.1  | HOXC6   |
| TC14000132.hg.1 | 2.75  | PSR14001122.hg.1  | MRPL52  |
| TC14000132.hg.1 | -2.23 | PSR14001135.hg.1  | MRPL52  |
| TC14000132.hg.1 | -2.4  | PSR14001127.hg.1  | MRPL52  |
| TC14000132.hg.1 | -3.6  | JUC14000486.hg.1  | MRPL52  |
| TC20000555.hg.1 | 2.75  | JUC20004141.hg.1  | SIRPG   |
| TC20000555.hg.1 | 2.58  | JUC20004144.hg.1  | SIRPG   |
| TC20000555.hg.1 | 2.51  | JUC20004150.hg.1  | SIRPG   |
| TC20000555.hg.1 | 2.12  | PSR20008054.hg.1  | SIRPG   |
| TC20000555.hg.1 | 2.04  | JUC20004147.hg.1  | SIRPG   |
| TC20000555.hg.1 | -2.47 | PSR20008062.hg.1  | SIRPG   |
| TC21000131.hg.1 | 2.75  | JUC21000547.hg.1  | ITSN1   |
| TC21000131.hg.1 | 2.72  | PSR21001102.hg.1  | ITSN1   |
| TC21000131.hg.1 | 2.43  | JUC21000585.hg.1  | ITSN1   |
| TC21000131.hg.1 | 2.17  | PSR21001103.hg.1  | ITSN1   |
| TC21000131.hg.1 | 2.03  | PSR21001112.hg.1  | ITSN1   |
| TC22001477.hg.1 | 2.75  | JUC22009458.hg.1  | PNPLA3  |
| TC22001477.hg.1 | -2.02 | PSR22007011.hg.1  | PNPLA3  |
| TC22001477.hg.1 | -2.3  | PSR22006996.hg.1  | PNPLA3  |
| TC22001477.hg.1 | -2.85 | PSR22006998.hg.1  | PNPLA3  |
| TC22001477.hg.1 | -3.07 | PSR22006993.hg.1  | PNPLA3  |
| TC22001477.hg.1 | -4.53 | JUC22009456.hg.1  | PNPLA3  |
| TC6_qbl_hap6000 | 2.75  | PSR6_qbl_hap60040 | VPS52   |
| TC6_qbl_hap6000 | 2.3   | JUC6_qbl_hap60016 | VPS52   |
| TC6_qbl_hap6000 | -2.1  | JUC6_qbl_hap60016 | VPS52   |
| TC6_qbl_hap6000 | -2.18 | JUC6_qbl_hap60016 | VPS52   |
| TC6_qbl_hap6000 | -2.28 | JUC6_qbl_hap60015 | VPS52   |
| TC02002946.hg.1 | 2.74  | PSR02047255.hg.1  | MTERFD2 |
| TC02002946.hg.1 | 2.55  | PSR02047250.hg.1  | MTERFD2 |
| TC02002946.hg.1 | 2.12  | JUC02024743.hg.1  | MTERFD2 |
| TC02002946.hg.1 | -2.28 | PSR02047273.hg.1  | MTERFD2 |
| TC03002170.hg.1 | 2.74  | PSR03038332.hg.1  | NCBP2   |
| TC03002170.hg.1 | 2.41  | JUC03018976.hg.1  | NCBP2   |
| TC03002170.hg.1 | 2.24  | PSR03038330.hg.1  | NCBP2   |
| TC03002170.hg.1 | -2.31 | JUC03018977.hg.1  | NCBP2   |
| TC03003318.hg.1 | 2.74  | JUC03023033.hg.1  | WDR6    |
| TC03003318.hg.1 | 2.38  | JUC03023045.hg.1  | WDR6    |
| TC03003318.hg.1 | 2.27  | JUC03023044.hg.1  | WDR6    |
| TC03003318.hg.1 | 2.1   | PSR03005847.hg.1  | WDR6    |
| TC09000753.hg.1 | 2.74  | PSR09009706.hg.1  |         |
| TC09000753.hg.1 | 2.12  | JUC09005325.hg.1  |         |
| TC12000092.hg.1 | 2.74  | PSR12001045.hg.1  | CD4     |
| TC12000092.hg.1 | 2.48  | JUC12000568.hg.1  | CD4     |
| TC12000092.hg.1 | 2.17  | PSR12001051.hg.1  | CD4     |
| TC12000092.hg.1 | 2.11  | JUC12000563.hg.1  | CD4     |
| TC12000092.hg.1 | 2.08  | PSR12001042.hg.1  | CD4     |
| TC12000092.hg.1 | -2.49 | PSR12001054.hg.1  | CD4     |
| TC12000092.hg.1 | -2.55 | JUC12000579.hg.1  | CD4     |
| TC12001843.hg.1 | 2.74  | PSR12024272.hg.1  | LTA4H   |
| TC12001843.hg.1 | 2.23  | JUC12013477.hg.1  | LTA4H   |
| TC12001843.hg.1 | 2.09  | PSR12024257.hg.1  | LTA4H   |
| TC12001843.hg.1 | -2.76 | JUC12013496.hg.1  | LTA4H   |
| TC12001843.hg.1 | -2.91 | PSR12024253.hg.1  | LTA4H   |
| TC15001886.hg.1 | 2.74  | PSR15018089.hg.1  | FAM174B |
| TC15001886.hg.1 | 2.13  | JUC15009862.hg.1  | FAM174B |
| TC15001886.hg.1 | -2.61 | JUC15009868.hg.1  | FAM174B |
| TC15001886.hg.1 | -3.66 | PSR15018079.hg.1  | FAM174B |

|                  |       |                   |            |
|------------------|-------|-------------------|------------|
| TC16000571.hg.1  | 2.74  | PSR16008252.hg.1  | WWP2       |
| TC16000571.hg.1  | 2.46  | PSR16008260.hg.1  | WWP2       |
| TC16000571.hg.1  | 2.36  | PSR16008262.hg.1  | WWP2       |
| TC16000571.hg.1  | 2.21  | JUC16004626.hg.1  | WWP2       |
| TC16000571.hg.1  | 2.05  | JUC16004644.hg.1  | WWP2       |
| TC16000571.hg.1  | -2.02 | JUC16004631.hg.1  | WWP2       |
| TC16000571.hg.1  | -2.13 | PSR16008279.hg.1  | WWP2       |
| TC17001565.hg.1  | 2.74  | JUC17011767.hg.1  | MPP2       |
| TC17001565.hg.1  | 2.38  | PSR17021029.hg.1  | MPP2       |
| TC17001565.hg.1  | 2.17  | PSR17021021.hg.1  | MPP2       |
| TC17001565.hg.1  | 2.12  | PSR17021030.hg.1  | MPP2       |
| TC17001565.hg.1  | -2.19 | PSR17021017.hg.1  | MPP2       |
| TC17001565.hg.1  | -2.7  | JUC17011768.hg.1  | MPP2       |
| TC18000009.hg.1  | 2.74  | JUC18000057.hg.1  | NDC80      |
| TC18000009.hg.1  | 2.17  | PSR18000097.hg.1  | NDC80      |
| TC18000009.hg.1  | -2.09 | PSR18000089.hg.1  | NDC80      |
| TC18000009.hg.1  | -2.39 | PSR18000088.hg.1  | NDC80      |
| TC18000009.hg.1  | -4.02 | JUC18000053.hg.1  | NDC80      |
| TC22000667.hg.1  | 2.74  | JUC22004846.hg.1  | PIK3IP1    |
| TC22000667.hg.1  | 2.24  | PSR22011782.hg.1  | PIK3IP1    |
| TC22000667.hg.1  | 2.12  | JUC22004839.hg.1  | PIK3IP1    |
| TC6_ssto_hap7000 | 2.74  | PSR6_ssto_hap7001 | SAPCD1, MS |
| TC6_ssto_hap7000 | 2.68  | JUC6_ssto_hap7000 | SAPCD1, MS |
| TC6_ssto_hap7000 | 2.63  | JUC6_ssto_hap7000 | SAPCD1, MS |
| TC6_ssto_hap7000 | 2.41  | JUC6_ssto_hap7000 | SAPCD1, MS |
| TC6_ssto_hap7000 | 2.26  | JUC6_ssto_hap7000 | SAPCD1, MS |
| TC6_ssto_hap7000 | -2.17 | JUC6_ssto_hap7000 | SAPCD1, MS |
| TC6_ssto_hap7000 | -2.64 | JUC6_ssto_hap7000 | SAPCD1, MS |
| TC6_ssto_hap7000 | 2.74  | JUC6_ssto_hap7001 | HLA-H      |
| TC6_ssto_hap7000 | 2.46  | PSR6_ssto_hap7000 | HLA-H      |
| TC6_ssto_hap7000 | 2.43  | JUC6_ssto_hap7001 | HLA-H      |
| TC6_ssto_hap7000 | 2.22  | PSR6_ssto_hap7000 | HLA-H      |
| TC6_ssto_hap7000 | 2.18  | PSR6_ssto_hap7000 | HLA-H      |
| TC6_ssto_hap7000 | 2.74  | PSR6_ssto_hap7000 | HLA-G      |
| TC6_ssto_hap7000 | -2    | JUC6_ssto_hap7001 | HLA-G      |
| TC6_ssto_hap7000 | -2.53 | PSR6_ssto_hap7000 | HLA-G      |
| TC02001742.hg.1  | 2.73  | JUC02014703.hg.1  | PRKD3      |
| TC02001742.hg.1  | 2.15  | PSR02028073.hg.1  | PRKD3      |
| TC02001742.hg.1  | -2.66 | JUC02014704.hg.1  | PRKD3      |
| TC03001361.hg.1  | 2.73  | JUC03011609.hg.1  | PRSS42     |
| TC03001361.hg.1  | 2.34  | PSR03023325.hg.1  | PRSS42     |
| TC03001361.hg.1  | 2.22  | PSR03023318.hg.1  | PRSS42     |
| TC08000598.hg.1  | 2.73  | JUC08004187.hg.1  | MATN2, LOC |
| TC08000598.hg.1  | 2.17  | PSR08008297.hg.1  | MATN2, LOC |
| TC08000598.hg.1  | -2    | PSR08008309.hg.1  | MATN2, LOC |
| TC08000598.hg.1  | -2.03 | JUC08004170.hg.1  | MATN2, LOC |
| TC08000598.hg.1  | -2.35 | PSR08008317.hg.1  | MATN2, LOC |
| TC08000598.hg.1  | -2.43 | PSR08008313.hg.1  | MATN2, LOC |
| TC08000598.hg.1  | -2.92 | JUC08004186.hg.1  | MATN2, LOC |
| TC08000598.hg.1  | -3.08 | PSR08008310.hg.1  | MATN2, LOC |
| TC08000598.hg.1  | -3.09 | JUC08004173.hg.1  | MATN2, LOC |
| TC08000598.hg.1  | -3.15 | JUC08004174.hg.1  | MATN2, LOC |
| TC08000598.hg.1  | -3.55 | JUC08004181.hg.1  | MATN2, LOC |
| TC08000598.hg.1  | -4.2  | JUC08004179.hg.1  | MATN2, LOC |
| TC09000400.hg.1  | 2.73  | PSR09004331.hg.1  | CTSL1      |
| TC09000400.hg.1  | 2.43  | PSR09004300.hg.1  | CTSL1      |
| TC09000400.hg.1  | 2.29  | JUC09002372.hg.1  | CTSL1      |
| TC09000400.hg.1  | 2.01  | PSR09004327.hg.1  | CTSL1      |

|                 |       |                  |              |
|-----------------|-------|------------------|--------------|
| TC09000400.hg.1 | -2.14 | JUC09002367.hg.1 | CTSL1        |
| TC09000400.hg.1 | -2.4  | JUC09002371.hg.1 | CTSL1        |
| TC0X000868.hg.1 | 2.73  | JUC0X005686.hg.1 | GPM6B        |
| TC0X000868.hg.1 | -2.01 | PSR0X011581.hg.1 | GPM6B        |
| TC0X000868.hg.1 | -2.42 | PSR0X011580.hg.1 | GPM6B        |
| TC0X000868.hg.1 | -2.62 | PSR0X011571.hg.1 | GPM6B        |
| TC0X000868.hg.1 | -3.17 | PSR0X011592.hg.1 | GPM6B        |
| TC0X000868.hg.1 | -3.28 | PSR0X011594.hg.1 | GPM6B        |
| TC0X000868.hg.1 | -3.34 | JUC0X005691.hg.1 | GPM6B        |
| TC0X000868.hg.1 | -3.44 | PSR0X011560.hg.1 | GPM6B        |
| TC0X000868.hg.1 | -3.49 | PSR0X011587.hg.1 | GPM6B        |
| TC0X000868.hg.1 | -3.6  | PSR0X011595.hg.1 | GPM6B        |
| TC0X000868.hg.1 | -3.64 | PSR0X011593.hg.1 | GPM6B        |
| TC0X000868.hg.1 | -3.67 | JUC0X005701.hg.1 | GPM6B        |
| TC0X000868.hg.1 | -4.05 | PSR0X011584.hg.1 | GPM6B        |
| TC0X000868.hg.1 | -4.08 | PSR0X011591.hg.1 | GPM6B        |
| TC0X000868.hg.1 | -4.54 | JUC0X005696.hg.1 | GPM6B        |
| TC0X000868.hg.1 | -5.58 | PSR0X011588.hg.1 | GPM6B        |
| TC0X000868.hg.1 | -5.64 | JUC0X005685.hg.1 | GPM6B        |
| TC15001763.hg.1 | 2.73  | PSR15017300.hg.1 | C15orf40     |
| TC15001763.hg.1 | 2.08  | PSR15017286.hg.1 | C15orf40     |
| TC15001763.hg.1 | -2.02 | PSR15017293.hg.1 | C15orf40     |
| TC15001763.hg.1 | -4.05 | JUC15009442.hg.1 | C15orf40     |
| TC17000363.hg.1 | 2.73  | JUC17002628.hg.1 | RAB11FIP4, M |
| TC17000363.hg.1 | 2.48  | PSR17004613.hg.1 | RAB11FIP4, M |
| TC17000363.hg.1 | -3.43 | PSR17004616.hg.1 | RAB11FIP4, M |
| TC20000574.hg.1 | 2.73  | PSR20008408.hg.1 | ADAM33       |
| TC20000574.hg.1 | 2.55  | JUC20004331.hg.1 | ADAM33       |
| TC20000574.hg.1 | -2.2  | PSR20008401.hg.1 | ADAM33       |
| TC22000324.hg.1 | 2.73  | PSR22006266.hg.1 | SGSM3        |
| TC22000324.hg.1 | 2.26  | JUC22002253.hg.1 | SGSM3        |
| TC01002196.hg.1 | 2.72  | PSR01033889.hg.1 | EXOSC10      |
| TC01002196.hg.1 | -2.08 | PSR01033895.hg.1 | EXOSC10      |
| TC01002196.hg.1 | -2.43 | JUC01018175.hg.1 | EXOSC10      |
| TC01002196.hg.1 | -2.61 | JUC01018156.hg.1 | EXOSC10      |
| TC01002307.hg.1 | 2.72  | JUC01018991.hg.1 | PLA2G2A      |
| TC01002307.hg.1 | 2.25  | JUC01018994.hg.1 | PLA2G2A      |
| TC01002307.hg.1 | -2.13 | PSR01035344.hg.1 | PLA2G2A      |
| TC01006325.hg.1 | 2.72  | JUC01044069.hg.1 | RWDD3        |
| TC01006325.hg.1 | 2.03  | PSR01013901.hg.1 | RWDD3        |
| TC02000816.hg.1 | 2.72  | JUC02006650.hg.1 | POTEJ        |
| TC02000816.hg.1 | -2.05 | JUC02006652.hg.1 | POTEJ        |
| TC02000816.hg.1 | -2.36 | PSR02012566.hg.1 | POTEJ        |
| TC03001714.hg.1 | 2.72  | JUC03015503.hg.1 | CCDC14       |
| TC03001714.hg.1 | 2.1   | JUC03015513.hg.1 | CCDC14       |
| TC03001714.hg.1 | -2.15 | PSR03031144.hg.1 | CCDC14       |
| TC03001714.hg.1 | -2.24 | PSR03031126.hg.1 | CCDC14       |
| TC03001714.hg.1 | -2.26 | PSR03031146.hg.1 | CCDC14       |
| TC03001714.hg.1 | -2.32 | PSR03031149.hg.1 | CCDC14       |
| TC04000363.hg.1 | 2.72  | PSR04004986.hg.1 | LOC50112, I  |
| TC04000363.hg.1 | 2.33  | PSR04004961.hg.1 | LOC50112, I  |
| TC04000363.hg.1 | 2.31  | PSR04004962.hg.1 | LOC50112, I  |
| TC04000363.hg.1 | 2.24  | JUC04002472.hg.1 | LOC50112, I  |
| TC04000363.hg.1 | 2.18  | JUC04002480.hg.1 | LOC50112, I  |
| TC05000009.hg.1 | 2.72  | JUC05000123.hg.1 | CEP72        |
| TC05000009.hg.1 | 2.24  | JUC05000114.hg.1 | CEP72        |
| TC05000009.hg.1 | -2.2  | JUC05000126.hg.1 | CEP72        |
| TC05000009.hg.1 | -2.28 | PSR05000223.hg.1 | CEP72        |

|                 |       |                  |             |
|-----------------|-------|------------------|-------------|
| TC06001869.hg.1 | 2.72  | JUC06010965.hg.1 | KHDC1L, KHI |
| TC06001869.hg.1 | 2.39  | JUC06010973.hg.1 | KHDC1L, KHI |
| TC06001869.hg.1 | 2.2   | JUC06010976.hg.1 | KHDC1L, KHI |
| TC06001869.hg.1 | 2.01  | JUC06010975.hg.1 | KHDC1L, KHI |
| TC06001869.hg.1 | -2.07 | JUC06010978.hg.1 | KHDC1L, KHI |
| TC06001869.hg.1 | -2.15 | PSR06022666.hg.1 | KHDC1L, KHI |
| TC07003351.hg.1 | 2.72  | JUC07021327.hg.1 | HOXA3       |
| TC07003351.hg.1 | -2.29 | JUC07021331.hg.1 | HOXA3       |
| TC07003351.hg.1 | -2.42 | PSR07019079.hg.1 | HOXA3       |
| TC07003351.hg.1 | -3.08 | PSR07019081.hg.1 | HOXA3       |
| TC07003351.hg.1 | -3.63 | PSR07019098.hg.1 | HOXA3       |
| TC11000539.hg.1 | 2.72  | JUC11003380.hg.1 | C11orf9     |
| TC11000539.hg.1 | 2.09  | JUC11003369.hg.1 | C11orf9     |
| TC11000539.hg.1 | -2.05 | PSR11006549.hg.1 | C11orf9     |
| TC11000539.hg.1 | -2.15 | JUC11003382.hg.1 | C11orf9     |
| TC11000539.hg.1 | -2.37 | JUC11003376.hg.1 | C11orf9     |
| TC12000884.hg.1 | 2.72  | JUC12006416.hg.1 | OAS1        |
| TC12000884.hg.1 | 2.16  | JUC12006417.hg.1 | OAS1        |
| TC12000884.hg.1 | -2.19 | PSR12011665.hg.1 | OAS1        |
| TC14001313.hg.1 | 2.72  | JUC14007602.hg.1 | PGF         |
| TC14001313.hg.1 | 2.02  | JUC14007606.hg.1 | PGF         |
| TC14001313.hg.1 | -2.11 | PSR14014998.hg.1 | PGF         |
| TC14001313.hg.1 | -2.12 | PSR14015003.hg.1 | PGF         |
| TC14001313.hg.1 | -4.81 | JUC14007605.hg.1 | PGF         |
| TC14001313.hg.1 | -8.6  | JUC14007604.hg.1 | PGF         |
| TC01001669.hg.1 | 2.71  | JUC01013808.hg.1 | RNPEP       |
| TC01001669.hg.1 | 2.66  | PSR01025836.hg.1 | RNPEP       |
| TC01001669.hg.1 | 2.51  | PSR01025845.hg.1 | RNPEP       |
| TC01001669.hg.1 | 2.32  | PSR01025849.hg.1 | RNPEP       |
| TC02000285.hg.1 | 2.71  | PSR02004337.hg.1 | CRIPT       |
| TC02000285.hg.1 | 2.62  | PSR02004342.hg.1 | CRIPT       |
| TC02000285.hg.1 | 2.15  | PSR02004336.hg.1 | CRIPT       |
| TC02000285.hg.1 | 2.1   | PSR02004340.hg.1 | CRIPT       |
| TC02000285.hg.1 | 2     | JUC02002261.hg.1 | CRIPT       |
| TC02001034.hg.1 | 2.71  | JUC02008254.hg.1 | ZAK         |
| TC02001034.hg.1 | 2.08  | PSR02015483.hg.1 | ZAK         |
| TC02001034.hg.1 | -2.17 | JUC02008257.hg.1 | ZAK         |
| TC02001911.hg.1 | 2.71  | JUC02016108.hg.1 | PELI1       |
| TC02001911.hg.1 | -2.23 | PSR02030571.hg.1 | PELI1       |
| TC04000009.hg.1 | 2.71  | JUC04000045.hg.1 | PIGG        |
| TC04000009.hg.1 | 2.51  | PSR04000118.hg.1 | PIGG        |
| TC04000009.hg.1 | 2.42  | JUC04000038.hg.1 | PIGG        |
| TC04000009.hg.1 | 2.35  | JUC04000010.hg.1 | PIGG        |
| TC04000009.hg.1 | 2.24  | JUC04000014.hg.1 | PIGG        |
| TC04000009.hg.1 | 2.19  | PSR04000114.hg.1 | PIGG        |
| TC04000009.hg.1 | 2.06  | PSR04000115.hg.1 | PIGG        |
| TC04000009.hg.1 | -4.38 | PSR04000126.hg.1 | PIGG        |
| TC04000427.hg.1 | 2.71  | JUC04003012.hg.1 | SHROOM3     |
| TC04000427.hg.1 | 2.36  | PSR04005982.hg.1 | SHROOM3     |
| TC04000427.hg.1 | 2.3   | PSR04006001.hg.1 | SHROOM3     |
| TC04000427.hg.1 | 2.11  | PSR04005986.hg.1 | SHROOM3     |
| TC04000427.hg.1 | 2     | PSR04005988.hg.1 | SHROOM3     |
| TC04000427.hg.1 | -2.22 | JUC04003009.hg.1 | SHROOM3     |
| TC05000363.hg.1 | 2.71  | JUC05002687.hg.1 | HMGCR       |
| TC05000363.hg.1 | -2.42 | JUC05002688.hg.1 | HMGCR       |
| TC05000363.hg.1 | -3.31 | PSR05005021.hg.1 | HMGCR       |
| TC05000942.hg.1 | 2.71  | JUC05007150.hg.1 | NPM1        |
| TC05000942.hg.1 | 2.13  | PSR05013776.hg.1 | NPM1        |

|                 |       |                  |            |
|-----------------|-------|------------------|------------|
| TC06000120.hg.1 | 2.71  | PSR06001259.hg.1 | RNF144B    |
| TC06000120.hg.1 | 2.59  | PSR06001258.hg.1 | RNF144B    |
| TC06000120.hg.1 | -2.14 | JUC06000604.hg.1 | RNF144B    |
| TC08000406.hg.1 | 2.71  | PSR08005683.hg.1 | LOC1005055 |
| TC08000406.hg.1 | 2.17  | PSR08005682.hg.1 | LOC1005055 |
| TC08000406.hg.1 | 2.05  | JUC08002813.hg.1 | LOC1005055 |
| TC0X000082.hg.1 | 2.71  | JUC0X000583.hg.1 | REPS2      |
| TC0X000082.hg.1 | -2.01 | PSR0X001092.hg.1 | REPS2      |
| TC0X000082.hg.1 | -2.05 | JUC0X000597.hg.1 | REPS2      |
| TC0X000082.hg.1 | -2.07 | PSR0X001077.hg.1 | REPS2      |
| TC0X000082.hg.1 | -2.23 | PSR0X001102.hg.1 | REPS2      |
| TC0X000082.hg.1 | -2.44 | PSR0X001094.hg.1 | REPS2      |
| TC0X000082.hg.1 | -2.47 | PSR0X001097.hg.1 | REPS2      |
| TC0X000082.hg.1 | -2.54 | PSR0X001104.hg.1 | REPS2      |
| TC0X000082.hg.1 | -2.55 | JUC0X000593.hg.1 | REPS2      |
| TC0X000082.hg.1 | -2.87 | PSR0X001083.hg.1 | REPS2      |
| TC0X000082.hg.1 | -3.22 | PSR0X001075.hg.1 | REPS2      |
| TC0X000082.hg.1 | -3.43 | PSR0X001093.hg.1 | REPS2      |
| TC0X000082.hg.1 | -3.46 | PSR0X001076.hg.1 | REPS2      |
| TC0X000082.hg.1 | -3.59 | PSR0X001074.hg.1 | REPS2      |
| TC10001573.hg.1 | 2.71  | JUC10011732.hg.1 | CRTAC1     |
| TC10001573.hg.1 | 2.04  | PSR10020168.hg.1 | CRTAC1     |
| TC10001573.hg.1 | -2.03 | PSR10020166.hg.1 | CRTAC1     |
| TC10001573.hg.1 | -2.19 | JUC10011734.hg.1 | CRTAC1     |
| TC10001573.hg.1 | -2.21 | JUC10011729.hg.1 | CRTAC1     |
| TC10001573.hg.1 | -2.26 | JUC10011739.hg.1 | CRTAC1     |
| TC10001573.hg.1 | -2.41 | JUC10011738.hg.1 | CRTAC1     |
| TC10001573.hg.1 | -2.71 | PSR10020177.hg.1 | CRTAC1     |
| TC10001573.hg.1 | -2.76 | PSR10020167.hg.1 | CRTAC1     |
| TC10001573.hg.1 | -3.17 | JUC10011727.hg.1 | CRTAC1     |
| TC11000273.hg.1 | 2.71  | PSR11003621.hg.1 |            |
| TC11000273.hg.1 | 2.57  | JUC11001867.hg.1 |            |
| TC11000273.hg.1 | 2.27  | PSR11003620.hg.1 |            |
| TC14000836.hg.1 | 2.71  | JUC14004695.hg.1 | MTA1       |
| TC14000836.hg.1 | 2.5   | PSR14009202.hg.1 | MTA1       |
| TC14000836.hg.1 | 2.07  | PSR14009206.hg.1 | MTA1       |
| TC14000836.hg.1 | 2.03  | JUC14004692.hg.1 | MTA1       |
| TC14000836.hg.1 | -2.29 | JUC14004673.hg.1 | MTA1       |
| TC17001077.hg.1 | 2.71  | PSR17014437.hg.1 | DLG4       |
| TC17001077.hg.1 | 2.61  | PSR17014424.hg.1 | DLG4       |
| TC17001077.hg.1 | 2.44  | PSR17014435.hg.1 | DLG4       |
| TC17001077.hg.1 | 2.1   | PSR17014397.hg.1 | DLG4       |
| TC17001077.hg.1 | 2.06  | JUC17008237.hg.1 | DLG4       |
| TC17001077.hg.1 | 2     | PSR17014391.hg.1 | DLG4       |
| TC17001077.hg.1 | -2.08 | JUC17008247.hg.1 | DLG4       |
| TC17001129.hg.1 | 2.71  | JUC17008671.hg.1 | GAS7       |
| TC17001129.hg.1 | 2.19  | PSR17015199.hg.1 | GAS7       |
| TC17001129.hg.1 | -2.09 | JUC17008672.hg.1 | GAS7       |
| TC17001129.hg.1 | -2.29 | PSR17015209.hg.1 | GAS7       |
| TC17001129.hg.1 | -2.32 | PSR17015222.hg.1 | GAS7       |
| TC17001129.hg.1 | -2.36 | PSR17015216.hg.1 | GAS7       |
| TC17001129.hg.1 | -2.53 | PSR17015224.hg.1 | GAS7       |
| TC17001129.hg.1 | -2.57 | JUC17008679.hg.1 | GAS7       |
| TC17001129.hg.1 | -2.57 | JUC17008681.hg.1 | GAS7       |
| TC17001129.hg.1 | -2.59 | JUC17008684.hg.1 | GAS7       |
| TC17001129.hg.1 | -2.98 | PSR17015231.hg.1 | GAS7       |
| TC17001129.hg.1 | -3.09 | PSR17015226.hg.1 | GAS7       |
| TC17001129.hg.1 | -4.02 | PSR17015225.hg.1 | GAS7       |

|                 |       |                  |             |
|-----------------|-------|------------------|-------------|
| TC17001129.hg.1 | -4.39 | PSR17015227.hg.1 | GAS7        |
| TC17001129.hg.1 | -4.52 | JUC17008680.hg.1 | GAS7        |
| TC17001129.hg.1 | -5.06 | PSR17015218.hg.1 | GAS7        |
| TC17001129.hg.1 | -5.18 | PSR17015229.hg.1 | GAS7        |
| TC17001129.hg.1 | -7.64 | JUC17008685.hg.1 | GAS7        |
| TC18000272.hg.1 | 2.71  | PSR18003195.hg.1 | THOC1       |
| TC18000272.hg.1 | -2.02 | JUC18002159.hg.1 | THOC1       |
| TC18000272.hg.1 | -2.19 | JUC18002157.hg.1 | THOC1       |
| TC18000272.hg.1 | -2.81 | JUC18002154.hg.1 | THOC1       |
| TC19000943.hg.1 | 2.71  | JUC19007288.hg.1 | ZNF419      |
| TC19000943.hg.1 | -5.28 | PSR19012932.hg.1 | ZNF419      |
| TC19001525.hg.1 | 2.71  | JUC19011896.hg.1 | DYRK1B      |
| TC19001525.hg.1 | 2.52  | JUC19011897.hg.1 | DYRK1B      |
| TC19001525.hg.1 | 2.51  | JUC19011895.hg.1 | DYRK1B      |
| TC19001525.hg.1 | 2.39  | PSR19020751.hg.1 | DYRK1B      |
| TC19001525.hg.1 | -2.22 | JUC19011900.hg.1 | DYRK1B      |
| TC06000384.hg.1 | 2.7   | JUC06001646.hg.1 | HSPA1A, HSP |
| TC06000384.hg.1 | 2.39  | PSR06003938.hg.1 | HSPA1A, HSP |
| TC07000140.hg.1 | 2.7   | PSR07002147.hg.1 | KLHL7       |
| TC07000140.hg.1 | 2.17  | PSR07002166.hg.1 | KLHL7       |
| TC07000140.hg.1 | -2.01 | JUC07001065.hg.1 | KLHL7       |
| TC07000140.hg.1 | -2.78 | JUC07001045.hg.1 | KLHL7       |
| TC07000140.hg.1 | -3.53 | PSR07002178.hg.1 | KLHL7       |
| TC09000032.hg.1 | 2.7   | PSR09000407.hg.1 | RCL1        |
| TC09000032.hg.1 | 2.25  | JUC09000247.hg.1 | RCL1        |
| TC09000032.hg.1 | -3.55 | JUC09000250.hg.1 | RCL1        |
| TC0X000101.hg.1 | 2.7   | JUC0X000744.hg.1 | SMS         |
| TC0X000101.hg.1 | 2.47  | PSR0X001341.hg.1 | SMS         |
| TC0X000101.hg.1 | 2.26  | PSR0X001347.hg.1 | SMS         |
| TC0X000101.hg.1 | 2.07  | JUC0X000739.hg.1 | SMS         |
| TC10001054.hg.1 | 2.7   | JUC10007627.hg.1 | FAM107B     |
| TC10001054.hg.1 | -2.15 | PSR10013152.hg.1 | FAM107B     |
| TC10001054.hg.1 | -2.29 | JUC10007611.hg.1 | FAM107B     |
| TC10001567.hg.1 | 2.7   | JUC10011697.hg.1 | MMS19       |
| TC10001567.hg.1 | 2.39  | JUC10011684.hg.1 | MMS19       |
| TC10001567.hg.1 | -2.08 | PSR10020074.hg.1 | MMS19       |
| TC10001567.hg.1 | -2.36 | JUC10011678.hg.1 | MMS19       |
| TC11001913.hg.1 | 2.7   | PSR11022802.hg.1 | MEN1        |
| TC11001913.hg.1 | -2.01 | JUC11012013.hg.1 | MEN1        |
| TC17000671.hg.1 | 2.7   | JUC17004726.hg.1 | CACNA1G     |
| TC17000671.hg.1 | 2.3   | JUC17004731.hg.1 | CACNA1G     |
| TC17000671.hg.1 | 2.21  | JUC17004719.hg.1 | CACNA1G     |
| TC17000671.hg.1 | 2.04  | PSR17008678.hg.1 | CACNA1G     |
| TC17000671.hg.1 | 2.02  | PSR17008697.hg.1 | CACNA1G     |
| TC17000671.hg.1 | -2.73 | JUC17004720.hg.1 | CACNA1G     |
| TC17000671.hg.1 | -2.96 | JUC17004743.hg.1 | CACNA1G     |
| TC17000671.hg.1 | -3.57 | JUC17004704.hg.1 | CACNA1G     |
| TC18000142.hg.1 | 2.7   | JUC18001116.hg.1 | MAPRE2      |
| TC18000142.hg.1 | 2.65  | PSR18001600.hg.1 | MAPRE2      |
| TC18000142.hg.1 | 2.45  | PSR18001596.hg.1 | MAPRE2      |
| TC18000142.hg.1 | 2.15  | JUC18001120.hg.1 | MAPRE2      |
| TC18000142.hg.1 | 2.06  | PSR18001604.hg.1 | MAPRE2      |
| TC20000118.hg.1 | 2.7   | JUC20000797.hg.1 | ZNF133      |
| TC20000118.hg.1 | 2.13  | JUC20000807.hg.1 | ZNF133      |
| TC20000118.hg.1 | -2.12 | JUC20000796.hg.1 | ZNF133      |
| TC20000118.hg.1 | -2.51 | PSR20001549.hg.1 | ZNF133      |
| TC22000301.hg.1 | 2.7   | JUC22002071.hg.1 | KDELR3      |
| TC22000301.hg.1 | -2.85 | PSR22005637.hg.1 | KDELR3      |

|                 |       |                  |             |
|-----------------|-------|------------------|-------------|
| TC01002135.hg.1 | 2.69  | PSR01032834.hg.1 | TP73-AS1    |
| TC01002135.hg.1 | -3.11 | PSR01032819.hg.1 | TP73-AS1    |
| TC01002135.hg.1 | -3.12 | JUC01017587.hg.1 | TP73-AS1    |
| TC01002135.hg.1 | -3.12 | JUC01017589.hg.1 | TP73-AS1    |
| TC01002135.hg.1 | -3.17 | PSR01032818.hg.1 | TP73-AS1    |
| TC01006349.hg.1 | 2.69  | PSR01038663.hg.1 | ZMYM6NB, Z  |
| TC01006349.hg.1 | 2.28  | PSR01038662.hg.1 | ZMYM6NB, Z  |
| TC01006349.hg.1 | 2.05  | PSR01038664.hg.1 | ZMYM6NB, Z  |
| TC01006349.hg.1 | -2.14 | JUC01044355.hg.1 | ZMYM6NB, Z  |
| TC01006349.hg.1 | -2.17 | JUC01044352.hg.1 | ZMYM6NB, Z  |
| TC01006349.hg.1 | -7.41 | JUC01044353.hg.1 | ZMYM6NB, Z  |
| TC02001328.hg.1 | 2.69  | PSR02020674.hg.1 | SPEG        |
| TC02001328.hg.1 | 2.24  | JUC02011052.hg.1 | SPEG        |
| TC02001328.hg.1 | 2.15  | JUC02011034.hg.1 | SPEG        |
| TC02001328.hg.1 | 2.15  | JUC02011038.hg.1 | SPEG        |
| TC02001328.hg.1 | -3.63 | JUC02011028.hg.1 | SPEG        |
| TC02004922.hg.1 | 2.69  | JUC02031238.hg.1 | LOC1005060  |
| TC02004922.hg.1 | 2.21  | PSR02024828.hg.1 | LOC1005060  |
| TC02004922.hg.1 | 2.09  | PSR02024830.hg.1 | LOC1005060  |
| TC02004922.hg.1 | 2.02  | PSR02024829.hg.1 | LOC1005060  |
| TC03000056.hg.1 | 2.69  | JUC03000649.hg.1 | IRAK2       |
| TC03000056.hg.1 | 2.48  | JUC03000652.hg.1 | IRAK2       |
| TC03000056.hg.1 | -3.56 | JUC03000656.hg.1 | IRAK2       |
| TC03000056.hg.1 | -3.6  | PSR03001283.hg.1 | IRAK2       |
| TC03001008.hg.1 | 2.69  | PSR03017847.hg.1 | VPS8, LOC10 |
| TC03001008.hg.1 | 2.68  | JUC03009075.hg.1 | VPS8, LOC10 |
| TC03001008.hg.1 | 2.49  | JUC03009057.hg.1 | VPS8, LOC10 |
| TC03001008.hg.1 | 2.13  | JUC03009023.hg.1 | VPS8, LOC10 |
| TC03001008.hg.1 | 2.03  | PSR03017837.hg.1 | VPS8, LOC10 |
| TC03001008.hg.1 | 2.02  | JUC03009070.hg.1 | VPS8, LOC10 |
| TC03002108.hg.1 | 2.69  | PSR03037298.hg.1 | CLDN1       |
| TC03002108.hg.1 | 2.56  | JUC03018438.hg.1 | CLDN1       |
| TC03002108.hg.1 | 2.39  | PSR03037289.hg.1 | CLDN1       |
| TC03002108.hg.1 | 2.18  | PSR03037297.hg.1 | CLDN1       |
| TC03002108.hg.1 | 2.07  | PSR03037300.hg.1 | CLDN1       |
| TC08000175.hg.1 | 2.69  | PSR08002227.hg.1 | KIAA1967    |
| TC08000175.hg.1 | -2.02 | JUC08001151.hg.1 | KIAA1967    |
| TC08001166.hg.1 | 2.69  | PSR08014987.hg.1 | SFRP1       |
| TC08001166.hg.1 | 2.63  | PSR08014989.hg.1 | SFRP1       |
| TC08001166.hg.1 | 2.42  | PSR08014984.hg.1 | SFRP1       |
| TC08001166.hg.1 | 2.35  | PSR08014983.hg.1 | SFRP1       |
| TC08001166.hg.1 | 2.18  | PSR08014990.hg.1 | SFRP1       |
| TC08001166.hg.1 | -2.76 | PSR08014986.hg.1 | SFRP1       |
| TC08001166.hg.1 | -2.79 | JUC08007656.hg.1 | SFRP1       |
| TC08001166.hg.1 | -3.44 | PSR08014980.hg.1 | SFRP1       |
| TC08001166.hg.1 | -3.54 | PSR08014981.hg.1 | SFRP1       |
| TC08001166.hg.1 | -5.7  | JUC08007657.hg.1 | SFRP1       |
| TC09001181.hg.1 | 2.69  | JUC09008163.hg.1 | CBWD5, CBV  |
| TC09001181.hg.1 | 2.28  | JUC09008159.hg.1 | CBWD5, CBV  |
| TC09001181.hg.1 | -2.01 | PSR09015224.hg.1 | CBWD5, CBV  |
| TC09001181.hg.1 | -2.03 | PSR09015178.hg.1 | CBWD5, CBV  |
| TC09001181.hg.1 | -2.04 | PSR09015175.hg.1 | CBWD5, CBV  |
| TC09001181.hg.1 | -2.11 | PSR09015200.hg.1 | CBWD5, CBV  |
| TC09001181.hg.1 | -2.16 | PSR09015162.hg.1 | CBWD5, CBV  |
| TC09001181.hg.1 | -2.16 | JUC09008141.hg.1 | CBWD5, CBV  |
| TC09001181.hg.1 | -2.24 | JUC09008169.hg.1 | CBWD5, CBV  |
| TC09001181.hg.1 | -2.69 | JUC09008162.hg.1 | CBWD5, CBV  |
| TC09001181.hg.1 | -2.71 | PSR09015165.hg.1 | CBWD5, CBV  |

|                 |       |                  |            |
|-----------------|-------|------------------|------------|
| TC09001181.hg.1 | -2.82 | PSR09015183.hg.1 | CBWD5, CBV |
| TC09001181.hg.1 | -4.72 | JUC09008164.hg.1 | CBWD5, CBV |
| TC0X000382.hg.1 | 2.69  | JUC0X002463.hg.1 | MED12      |
| TC0X000382.hg.1 | 2.64  | JUC0X002448.hg.1 | MED12      |
| TC0X000382.hg.1 | 2.4   | PSR0X005018.hg.1 | MED12      |
| TC0Y000057.hg.1 | 2.69  | PSR0Y000709.hg.1 | NLGN4Y     |
| TC0Y000057.hg.1 | -2.06 | PSR0Y000712.hg.1 | NLGN4Y     |
| TC0Y000057.hg.1 | -2.25 | PSR0Y000702.hg.1 | NLGN4Y     |
| TC0Y000057.hg.1 | -2.26 | PSR0Y000705.hg.1 | NLGN4Y     |
| TC0Y000057.hg.1 | -2.29 | PSR0Y000698.hg.1 | NLGN4Y     |
| TC0Y000057.hg.1 | -2.4  | PSR0Y000692.hg.1 | NLGN4Y     |
| TC0Y000057.hg.1 | -2.4  | JUC0Y000314.hg.1 | NLGN4Y     |
| TC0Y000057.hg.1 | -2.53 | PSR0Y000689.hg.1 | NLGN4Y     |
| TC0Y000057.hg.1 | -2.65 | PSR0Y000691.hg.1 | NLGN4Y     |
| TC0Y000057.hg.1 | -2.8  | PSR0Y000710.hg.1 | NLGN4Y     |
| TC0Y000057.hg.1 | -3.05 | PSR0Y000687.hg.1 | NLGN4Y     |
| TC0Y000057.hg.1 | -3.23 | PSR0Y000690.hg.1 | NLGN4Y     |
| TC0Y000057.hg.1 | -3.41 | PSR0Y000686.hg.1 | NLGN4Y     |
| TC0Y000057.hg.1 | -3.49 | PSR0Y000685.hg.1 | NLGN4Y     |
| TC0Y000057.hg.1 | -3.68 | PSR0Y000703.hg.1 | NLGN4Y     |
| TC0Y000057.hg.1 | -4.36 | JUC0Y000323.hg.1 | NLGN4Y     |
| TC0Y000057.hg.1 | -4.85 | JUC0Y000327.hg.1 | NLGN4Y     |
| TC0Y000057.hg.1 | -5.21 | PSR0Y000688.hg.1 | NLGN4Y     |
| TC0Y000057.hg.1 | -7    | JUC0Y000313.hg.1 | NLGN4Y     |
| TC10000412.hg.1 | 2.69  | PSR10004617.hg.1 | DDX50      |
| TC10000412.hg.1 | 2.03  | PSR10004616.hg.1 | DDX50      |
| TC10000412.hg.1 | -2.12 | JUC10002672.hg.1 | DDX50      |
| TC10000412.hg.1 | -3.45 | PSR10004626.hg.1 | DDX50      |
| TC10000813.hg.1 | 2.69  | PSR10009754.hg.1 | ACSL5      |
| TC10000813.hg.1 | 2.35  | JUC10005447.hg.1 | ACSL5      |
| TC10000813.hg.1 | 2.22  | PSR10009753.hg.1 | ACSL5      |
| TC10000813.hg.1 | 2.13  | PSR10009779.hg.1 | ACSL5      |
| TC10000813.hg.1 | -2.07 | PSR10009785.hg.1 | ACSL5      |
| TC10000813.hg.1 | -2.26 | JUC10005451.hg.1 | ACSL5      |
| TC10000820.hg.1 | 2.69  | JUC10005505.hg.1 | TCF7L2     |
| TC10000820.hg.1 | 2.21  | PSR10009847.hg.1 | TCF7L2     |
| TC10000820.hg.1 | 2.05  | PSR10009838.hg.1 | TCF7L2     |
| TC10000820.hg.1 | -2.09 | JUC10005486.hg.1 | TCF7L2     |
| TC10000820.hg.1 | -2.38 | JUC10005491.hg.1 | TCF7L2     |
| TC11002342.hg.1 | 2.69  | PSR11028106.hg.1 | SCN4B      |
| TC11002342.hg.1 | 2.33  | JUC11014979.hg.1 | SCN4B      |
| TC11002342.hg.1 | 2.12  | PSR11028104.hg.1 | SCN4B      |
| TC11002342.hg.1 | -3.05 | JUC11014982.hg.1 | SCN4B      |
| TC12000530.hg.1 | 2.69  | PSR12006984.hg.1 | GLI1       |
| TC12000530.hg.1 | -2.32 | JUC12003671.hg.1 | GLI1       |
| TC12000530.hg.1 | -4.99 | JUC12003666.hg.1 | GLI1       |
| TC12002153.hg.1 | 2.69  | JUC12015896.hg.1 | POLE       |
| TC12002153.hg.1 | 2.13  | PSR12028211.hg.1 | POLE       |
| TC12002153.hg.1 | 2.04  | JUC12015891.hg.1 | POLE       |
| TC12002153.hg.1 | -2.15 | JUC12015845.hg.1 | POLE       |
| TC12002153.hg.1 | -2.44 | JUC12015873.hg.1 | POLE       |
| TC12002153.hg.1 | -2.81 | JUC12015869.hg.1 | POLE       |
| TC12002153.hg.1 | -3.11 | JUC12015866.hg.1 | POLE       |
| TC13000351.hg.1 | 2.69  | JUC13002275.hg.1 | UBAC2      |
| TC13000351.hg.1 | -2.02 | PSR13003730.hg.1 | UBAC2      |
| TC15001044.hg.1 | 2.69  | JUC15004977.hg.1 | GOLGA8DP   |
| TC15001044.hg.1 | 2.63  | JUC15004972.hg.1 | GOLGA8DP   |
| TC15001044.hg.1 | 2.33  | PSR15009561.hg.1 | GOLGA8DP   |



|                 |       |                  |          |
|-----------------|-------|------------------|----------|
| TC15001044.hg.1 | -2.01 | PSR15009557.hg.1 | GOLGA8DP |
| TC17000533.hg.1 | 2.69  | JUC17003629.hg.1 | CNTNAP1  |
| TC17000533.hg.1 | 2.64  | JUC17003643.hg.1 | CNTNAP1  |
| TC17000533.hg.1 | 2.41  | PSR17006465.hg.1 | CNTNAP1  |
| TC17000533.hg.1 | 2.27  | PSR17006471.hg.1 | CNTNAP1  |
| TC17000533.hg.1 | 2.13  | PSR17006466.hg.1 | CNTNAP1  |
| TC17000533.hg.1 | 2.09  | JUC17003633.hg.1 | CNTNAP1  |
| TC17000533.hg.1 | -2.08 | PSR17006486.hg.1 | CNTNAP1  |
| TC17000533.hg.1 | -2.19 | JUC17003630.hg.1 | CNTNAP1  |
| TC17000533.hg.1 | -2.26 | JUC17003641.hg.1 | CNTNAP1  |
| TC17000533.hg.1 | -2.48 | JUC17003644.hg.1 | CNTNAP1  |
| TC17000533.hg.1 | -2.6  | PSR17006489.hg.1 | CNTNAP1  |
| TC17000533.hg.1 | -2.62 | JUC17003637.hg.1 | CNTNAP1  |
| TC17000533.hg.1 | -2.99 | JUC17003634.hg.1 | CNTNAP1  |
| TC17000533.hg.1 | -3.92 | JUC17003628.hg.1 | CNTNAP1  |
| TC17001170.hg.1 | 2.69  | JUC17009075.hg.1 | ZSWIM7   |
| TC17001170.hg.1 | 2.11  | PSR17015823.hg.1 | ZSWIM7   |
| TC17001170.hg.1 | -2.27 | PSR17015833.hg.1 | ZSWIM7   |
| TC18000277.hg.1 | 2.69  | JUC18002197.hg.1 | ENOSF1   |
| TC18000277.hg.1 | 2.33  | JUC18002188.hg.1 | ENOSF1   |
| TC18000277.hg.1 | 2.3   | PSR18003261.hg.1 | ENOSF1   |
| TC18000277.hg.1 | -4.17 | JUC18002192.hg.1 | ENOSF1   |
| TC19000124.hg.1 | 2.69  | JUC19001113.hg.1 | ZNF557   |
| TC19000124.hg.1 | -2.31 | PSR19001887.hg.1 | ZNF557   |
| TC19001013.hg.1 | 2.69  | JUC19007765.hg.1 | ATP8B3   |
| TC19001013.hg.1 | 2.33  | PSR19013830.hg.1 | ATP8B3   |
| TC19001013.hg.1 | 2.23  | JUC19007770.hg.1 | ATP8B3   |
| TC19001013.hg.1 | 2.07  | JUC19007780.hg.1 | ATP8B3   |
| TC19001013.hg.1 | -2.01 | PSR19013823.hg.1 | ATP8B3   |
| TC19001013.hg.1 | -2.5  | JUC19007776.hg.1 | ATP8B3   |
| TC19001013.hg.1 | -2.53 | JUC19007769.hg.1 | ATP8B3   |
| TC19001013.hg.1 | -2.58 | PSR19013844.hg.1 | ATP8B3   |
| TC19001013.hg.1 | -2.59 | PSR19013827.hg.1 | ATP8B3   |
| TC19001013.hg.1 | -2.59 | JUC19007775.hg.1 | ATP8B3   |
| TC19001013.hg.1 | -2.88 | JUC19007753.hg.1 | ATP8B3   |
| TC19001013.hg.1 | -3.04 | PSR19013828.hg.1 | ATP8B3   |
| TC19001013.hg.1 | -3.3  | JUC19007766.hg.1 | ATP8B3   |
| TC19001013.hg.1 | -3.55 | JUC19007777.hg.1 | ATP8B3   |
| TC19001013.hg.1 | -3.71 | PSR19013825.hg.1 | ATP8B3   |
| TC19001013.hg.1 | -5.91 | JUC19007756.hg.1 | ATP8B3   |
| TC20000334.hg.1 | 2.69  | PSR20004727.hg.1 | PKIG     |
| TC20000334.hg.1 | 2.69  | PSR20004731.hg.1 | PKIG     |
| TC20000334.hg.1 | 2.6   | PSR20004743.hg.1 | PKIG     |
| TC20000334.hg.1 | 2.49  | PSR20004736.hg.1 | PKIG     |
| TC20000334.hg.1 | 2.42  | JUC20002621.hg.1 | PKIG     |
| TC20000334.hg.1 | 2.34  | PSR20004742.hg.1 | PKIG     |
| TC20000334.hg.1 | 2.31  | JUC20002618.hg.1 | PKIG     |
| TC20000334.hg.1 | 2.29  | PSR20004730.hg.1 | PKIG     |
| TC20000334.hg.1 | 2.06  | JUC20002619.hg.1 | PKIG     |
| TC21000111.hg.1 | 2.69  | JUC21000409.hg.1 | SOD1     |
| TC21000111.hg.1 | 2.15  | PSR21000699.hg.1 | SOD1     |
| TC21000111.hg.1 | 2.1   | PSR21000689.hg.1 | SOD1     |
| TC01002357.hg.1 | 2.68  | PSR01036387.hg.1 | MYOM3    |
| TC01002357.hg.1 | -2.26 | JUC01019598.hg.1 | MYOM3    |
| TC01002357.hg.1 | -2.74 | JUC01019629.hg.1 | MYOM3    |
| TC01002357.hg.1 | -3.28 | JUC01019631.hg.1 | MYOM3    |
| TC01002357.hg.1 | -3.74 | JUC01019590.hg.1 | MYOM3    |
| TC03001285.hg.1 | 2.68  | JUC03011001.hg.1 | EPM2AIP1 |

|                 |       |                  |             |
|-----------------|-------|------------------|-------------|
| TC03001285.hg.1 | -2.16 | PSR03022034.hg.1 | EPM2AIP1    |
| TC05000412.hg.1 | 2.68  | JUC05003231.hg.1 | VCAN        |
| TC05000412.hg.1 | 2.57  | JUC05003230.hg.1 | VCAN        |
| TC05000412.hg.1 | -2.58 | PSR05005944.hg.1 | VCAN        |
| TC05000412.hg.1 | -3.16 | JUC05003240.hg.1 | VCAN        |
| TC05000412.hg.1 | -4.54 | JUC05003233.hg.1 | VCAN        |
| TC05002123.hg.1 | 2.68  | JUC05015027.hg.1 | COL23A1     |
| TC05002123.hg.1 | 2.39  | JUC05015041.hg.1 | COL23A1     |
| TC05002123.hg.1 | 2.07  | JUC05015066.hg.1 | COL23A1     |
| TC05002123.hg.1 | -2.35 | JUC05015046.hg.1 | COL23A1     |
| TC05002123.hg.1 | -2.38 | PSR05029513.hg.1 | COL23A1     |
| TC07001186.hg.1 | 2.68  | JUC07009110.hg.1 | STEAP1B     |
| TC07001186.hg.1 | -2.09 | PSR07018597.hg.1 | STEAP1B     |
| TC07001186.hg.1 | -2.46 | JUC07009103.hg.1 | STEAP1B     |
| TC09001199.hg.1 | 2.68  | JUC09008222.hg.1 | LOC10050729 |
| TC09001199.hg.1 | 2.51  | JUC09008225.hg.1 | LOC10050729 |
| TC09001199.hg.1 | 2.18  | PSR09015335.hg.1 | LOC10050729 |
| TC11000622.hg.1 | 2.68  | JUC11003999.hg.1 | POLA2       |
| TC11000622.hg.1 | 2.2   | JUC11003993.hg.1 | POLA2       |
| TC11000622.hg.1 | -2.04 | PSR11007733.hg.1 | POLA2       |
| TC11001396.hg.1 | 2.68  | JUC11009406.hg.1 | SCUBE2      |
| TC11001396.hg.1 | 2.36  | JUC11009393.hg.1 | SCUBE2      |
| TC11001396.hg.1 | 2.27  | PSR11017592.hg.1 | SCUBE2      |
| TC11001396.hg.1 | 2.2   | PSR11017598.hg.1 | SCUBE2      |
| TC11001396.hg.1 | -2.05 | PSR11017616.hg.1 | SCUBE2      |
| TC11001396.hg.1 | -2.56 | JUC11009408.hg.1 | SCUBE2      |
| TC11001396.hg.1 | -3.1  | JUC11009411.hg.1 | SCUBE2      |
| TC14002300.hg.1 | 2.68  | JUC14011731.hg.1 | FNTB, CHUR  |
| TC14002300.hg.1 | 2.05  | PSR14004554.hg.1 | FNTB, CHUR  |
| TC14002300.hg.1 | -2.04 | JUC14011740.hg.1 | FNTB, CHUR  |
| TC14002300.hg.1 | -2.51 | JUC14011739.hg.1 | FNTB, CHUR  |
| TC01001329.hg.1 | 2.67  | JUC01011120.hg.1 | PEAR1       |
| TC01001329.hg.1 | -2.17 | JUC01011131.hg.1 | PEAR1       |
| TC01001329.hg.1 | -2.73 | PSR01020923.hg.1 | PEAR1       |
| TC01001329.hg.1 | -3.09 | JUC01011123.hg.1 | PEAR1       |
| TC01006322.hg.1 | 2.67  | JUC01043999.hg.1 | TTC4        |
| TC01006322.hg.1 | 2.17  | JUC01044003.hg.1 | TTC4        |
| TC01006322.hg.1 | 2.05  | PSR01010889.hg.1 | TTC4        |
| TC01006322.hg.1 | -2.75 | JUC01044002.hg.1 | TTC4        |
| TC02005056.hg.1 | 2.67  | JUC02033211.hg.1 | ABCB6       |
| TC02005056.hg.1 | 2.51  | JUC02033208.hg.1 | ABCB6       |
| TC02005056.hg.1 | 2.5   | PSR02044964.hg.1 | ABCB6       |
| TC02005056.hg.1 | 2.33  | PSR02044961.hg.1 | ABCB6       |
| TC02005056.hg.1 | 2.32  | PSR02044976.hg.1 | ABCB6       |
| TC02005056.hg.1 | 2.29  | PSR02044978.hg.1 | ABCB6       |
| TC02005056.hg.1 | 2.25  | PSR02044940.hg.1 | ABCB6       |
| TC02005056.hg.1 | 2.11  | PSR02044949.hg.1 | ABCB6       |
| TC02005056.hg.1 | -2.12 | JUC02033207.hg.1 | ABCB6       |
| TC02005056.hg.1 | -2.56 | JUC02033222.hg.1 | ABCB6       |
| TC05000202.hg.1 | 2.67  | JUC05001365.hg.1 | NNT         |
| TC05000202.hg.1 | 2.42  | PSR05002409.hg.1 | NNT         |
| TC05000202.hg.1 | 2.28  | JUC05001386.hg.1 | NNT         |
| TC06004120.hg.1 | 2.67  | JUC06021682.hg.1 | TNXB        |
| TC06004120.hg.1 | 2.48  | PSR06018250.hg.1 | TNXB        |
| TC06004120.hg.1 | -2.16 | JUC06021652.hg.1 | TNXB        |
| TC06004120.hg.1 | -2.48 | PSR06018245.hg.1 | TNXB        |
| TC07000498.hg.1 | 2.67  | JUC07003366.hg.1 | PHTF2       |
| TC07000498.hg.1 | -2.11 | PSR07007079.hg.1 | PHTF2       |

|                 |       |                  |             |
|-----------------|-------|------------------|-------------|
| TC07000498.hg.1 | -3.2  | JUC07003357.hg.1 | PHTF2       |
| TC0X001323.hg.1 | 2.67  | JUC0X009033.hg.1 | NKAPP1      |
| TC0X001323.hg.1 | 2.05  | PSR0X017749.hg.1 | NKAPP1      |
| TC11000389.hg.1 | 2.67  | JUC11002583.hg.1 | MAPK8IP1, L |
| TC11000389.hg.1 | 2.61  | JUC11002584.hg.1 | MAPK8IP1, L |
| TC11000389.hg.1 | 2.53  | PSR11004832.hg.1 | MAPK8IP1, L |
| TC11000389.hg.1 | 2.07  | PSR11004841.hg.1 | MAPK8IP1, L |
| TC11000389.hg.1 | 2     | PSR11004831.hg.1 | MAPK8IP1, L |
| TC11000389.hg.1 | -2.61 | JUC11002587.hg.1 | MAPK8IP1, L |
| TC11000389.hg.1 | -2.71 | JUC11002581.hg.1 | MAPK8IP1, L |
| TC11000389.hg.1 | -4.11 | PSR11004845.hg.1 | MAPK8IP1, L |
| TC11001389.hg.1 | 2.67  | PSR11017522.hg.1 | ST5         |
| TC11001389.hg.1 | 2.6   | JUC11009348.hg.1 | ST5         |
| TC11001389.hg.1 | -2.33 | JUC11009340.hg.1 | ST5         |
| TC11002030.hg.1 | 2.67  | JUC11012798.hg.1 | SHANK2      |
| TC11002030.hg.1 | 2.15  | JUC11012820.hg.1 | SHANK2      |
| TC11002030.hg.1 | 2.12  | JUC11012819.hg.1 | SHANK2      |
| TC11002030.hg.1 | 2.03  | JUC11012812.hg.1 | SHANK2      |
| TC11002030.hg.1 | 2     | PSR11024309.hg.1 | SHANK2      |
| TC11002030.hg.1 | -2.16 | PSR11024347.hg.1 | SHANK2      |
| TC11002030.hg.1 | -2.26 | PSR11024342.hg.1 | SHANK2      |
| TC13000362.hg.1 | 2.67  | JUC13002376.hg.1 | PCCA        |
| TC13000362.hg.1 | -2.08 | PSR13003854.hg.1 | PCCA        |
| TC14000627.hg.1 | 2.67  | JUC14003958.hg.1 | CYP46A1     |
| TC14000627.hg.1 | -2.05 | JUC14003957.hg.1 | CYP46A1     |
| TC14000627.hg.1 | -2.42 | PSR14007705.hg.1 | CYP46A1     |
| TC14001310.hg.1 | 2.67  | JUC14007565.hg.1 | KIAA0317    |
| TC14001310.hg.1 | -2.17 | JUC14007569.hg.1 | KIAA0317    |
| TC14001310.hg.1 | -2.28 | JUC14007552.hg.1 | KIAA0317    |
| TC14001310.hg.1 | -2.33 | PSR14014923.hg.1 | KIAA0317    |
| TC14001310.hg.1 | -2.84 | JUC14007545.hg.1 | KIAA0317    |
| TC15000290.hg.1 | 2.67  | JUC15000941.hg.1 | CASC5       |
| TC15000290.hg.1 | 2.05  | PSR15002005.hg.1 | CASC5       |
| TC15000290.hg.1 | -2.12 | JUC15000933.hg.1 | CASC5       |
| TC15000290.hg.1 | -2.26 | JUC15000923.hg.1 | CASC5       |
| TC15000290.hg.1 | -2.31 | PSR15001996.hg.1 | CASC5       |
| TC15000290.hg.1 | -2.35 | PSR15001987.hg.1 | CASC5       |
| TC15000290.hg.1 | -2.46 | JUC15000929.hg.1 | CASC5       |
| TC17000252.hg.1 | 2.67  | JUC17002016.hg.1 | CCDC144C    |
| TC17000252.hg.1 | 2.56  | JUC17002015.hg.1 | CCDC144C    |
| TC17000252.hg.1 | 2.48  | JUC17002002.hg.1 | CCDC144C    |
| TC17000252.hg.1 | 2.4   | PSR17003510.hg.1 | CCDC144C    |
| TC17000252.hg.1 | 2.27  | PSR17003514.hg.1 | CCDC144C    |
| TC17000252.hg.1 | 2.18  | PSR17003515.hg.1 | CCDC144C    |
| TC17000252.hg.1 | 2.17  | PSR17003513.hg.1 | CCDC144C    |
| TC17000252.hg.1 | 2.11  | JUC17002004.hg.1 | CCDC144C    |
| TC17000252.hg.1 | -2.33 | JUC17002020.hg.1 | CCDC144C    |
| TC19000009.hg.1 | 2.67  | JUC19000037.hg.1 | BSG         |
| TC19000009.hg.1 | 2.5   | JUC19000040.hg.1 | BSG         |
| TC19000009.hg.1 | 2.1   | PSR19000064.hg.1 | BSG         |
| TC19000177.hg.1 | 2.67  | JUC19001574.hg.1 | PDE4A       |
| TC19000177.hg.1 | 2.07  | PSR19002671.hg.1 | PDE4A       |
| TC01000398.hg.1 | 2.66  | JUC01003181.hg.1 | PTPRU       |
| TC01000398.hg.1 | 2.14  | JUC01003209.hg.1 | PTPRU       |
| TC01000398.hg.1 | 2.11  | PSR01006105.hg.1 | PTPRU       |
| TC01000398.hg.1 | 2     | JUC01003185.hg.1 | PTPRU       |
| TC01000777.hg.1 | 2.66  | JUC01006508.hg.1 | RABGGTB, S  |
| TC01000777.hg.1 | -2.05 | PSR01012423.hg.1 | RABGGTB, S  |

|                 |       |                  |             |
|-----------------|-------|------------------|-------------|
| TC01000777.hg.1 | -2.37 | PSR01012392.hg.1 | RABGGTB, S  |
| TC01000777.hg.1 | -3.59 | PSR01012394.hg.1 | RABGGTB, S  |
| TC02001576.hg.1 | 2.66  | JUC02013221.hg.1 | ROCK2       |
| TC02001576.hg.1 | 2.51  | PSR02025428.hg.1 | ROCK2       |
| TC02001576.hg.1 | 2.33  | PSR02025460.hg.1 | ROCK2       |
| TC02002424.hg.1 | 2.66  | PSR02038045.hg.1 | RBM43       |
| TC02002424.hg.1 | 2.48  | PSR02038048.hg.1 | RBM43       |
| TC02002424.hg.1 | 2.09  | JUC02019764.hg.1 | RBM43       |
| TC02002424.hg.1 | -2.05 | JUC02019766.hg.1 | RBM43       |
| TC03000519.hg.1 | 2.66  | PSR03009671.hg.1 | PCNP        |
| TC03000519.hg.1 | -2.88 | JUC03004832.hg.1 | PCNP        |
| TC05001873.hg.1 | 2.66  | JUC05013195.hg.1 | FCHSD1      |
| TC05001873.hg.1 | -2.37 | PSR05025848.hg.1 | FCHSD1      |
| TC06001962.hg.1 | 2.66  | PSR06024176.hg.1 | FAXC        |
| TC06001962.hg.1 | 2.63  | JUC06011838.hg.1 | FAXC        |
| TC06001962.hg.1 | 2.27  | PSR06024161.hg.1 | FAXC        |
| TC06001962.hg.1 | 2.25  | PSR06024167.hg.1 | FAXC        |
| TC06001962.hg.1 | 2.18  | PSR06024175.hg.1 | FAXC        |
| TC06001962.hg.1 | 2.1   | JUC06011836.hg.1 | FAXC        |
| TC07001344.hg.1 | 2.66  | JUC07010257.hg.1 | TMED4       |
| TC07001344.hg.1 | 2.11  | PSR07020961.hg.1 | TMED4       |
| TC08000326.hg.1 | 2.66  | JUC08002378.hg.1 | POLB        |
| TC08000326.hg.1 | 2.63  | JUC08002383.hg.1 | POLB        |
| TC08000326.hg.1 | 2.21  | JUC08002389.hg.1 | POLB        |
| TC08000326.hg.1 | 2.14  | PSR08004737.hg.1 | POLB        |
| TC08000326.hg.1 | -3.52 | PSR08004719.hg.1 | POLB        |
| TC11001017.hg.1 | 2.66  | JUC11006839.hg.1 | TTC12       |
| TC11001017.hg.1 | 2.26  | JUC11006858.hg.1 | TTC12       |
| TC11001017.hg.1 | 2.17  | PSR11012764.hg.1 | TTC12       |
| TC11001017.hg.1 | 2.15  | JUC11006841.hg.1 | TTC12       |
| TC11001017.hg.1 | 2.13  | PSR11012715.hg.1 | TTC12       |
| TC11001017.hg.1 | 2.13  | PSR11012723.hg.1 | TTC12       |
| TC11001017.hg.1 | 2.12  | JUC11006835.hg.1 | TTC12       |
| TC11001017.hg.1 | 2.03  | PSR11012757.hg.1 | TTC12       |
| TC11001017.hg.1 | 2     | PSR11012722.hg.1 | TTC12       |
| TC11001017.hg.1 | -2.28 | JUC11006838.hg.1 | TTC12       |
| TC11001017.hg.1 | -5.34 | PSR11012720.hg.1 | TTC12       |
| TC11002334.hg.1 | 2.66  | PSR11027894.hg.1 | PCSK7       |
| TC11002334.hg.1 | -2.12 | PSR11027910.hg.1 | PCSK7       |
| TC11002334.hg.1 | -3.03 | JUC11014885.hg.1 | PCSK7       |
| TC15000766.hg.1 | 2.66  | JUC15003603.hg.1 | UBE2Q2P2, U |
| TC15000766.hg.1 | 2.32  | PSR15007033.hg.1 | UBE2Q2P2, U |
| TC15000766.hg.1 | -2.76 | JUC15003602.hg.1 | UBE2Q2P2, U |
| TC15000766.hg.1 | -2.8  | PSR15007029.hg.1 | UBE2Q2P2, U |
| TC16000442.hg.1 | 2.66  | JUC16003384.hg.1 | NOD2        |
| TC16000442.hg.1 | 2.32  | JUC16003394.hg.1 | NOD2        |
| TC16000442.hg.1 | 2.13  | JUC16003386.hg.1 | NOD2        |
| TC16000442.hg.1 | 2     | PSR16006117.hg.1 | NOD2        |
| TC02001115.hg.1 | 2.65  | PSR02016864.hg.1 | C2orf88     |
| TC02001115.hg.1 | 2.03  | PSR02016868.hg.1 | C2orf88     |
| TC02001115.hg.1 | -2.7  | PSR02016862.hg.1 | C2orf88     |
| TC02001115.hg.1 | -3.14 | PSR02016845.hg.1 | C2orf88     |
| TC02001115.hg.1 | -3.77 | PSR02016844.hg.1 | C2orf88     |
| TC02001115.hg.1 | -3.94 | PSR02016855.hg.1 | C2orf88     |
| TC02001115.hg.1 | -4.26 | PSR02016848.hg.1 | C2orf88     |
| TC02001115.hg.1 | -4.42 | PSR02016843.hg.1 | C2orf88     |
| TC02001115.hg.1 | -4.43 | PSR02016851.hg.1 | C2orf88     |
| TC02001115.hg.1 | -4.74 | PSR02016858.hg.1 | C2orf88     |

|                 |       |                  |         |
|-----------------|-------|------------------|---------|
| TC02001115.hg.1 | -5.09 | JUC02009032.hg.1 | C2orf88 |
| TC02001115.hg.1 | -5.16 | PSR02016849.hg.1 | C2orf88 |
| TC02001419.hg.1 | 2.65  | PSR02022671.hg.1 | DGKD    |
| TC02001419.hg.1 | 2.49  | JUC02011903.hg.1 | DGKD    |
| TC02001419.hg.1 | 2.42  | PSR02022630.hg.1 | DGKD    |
| TC02001419.hg.1 | 2.17  | PSR02022626.hg.1 | DGKD    |
| TC02001419.hg.1 | 2.13  | PSR02022663.hg.1 | DGKD    |
| TC02001419.hg.1 | 2.07  | PSR02022624.hg.1 | DGKD    |
| TC02001419.hg.1 | -2.01 | JUC02011911.hg.1 | DGKD    |
| TC02001419.hg.1 | -2.22 | PSR02022640.hg.1 | DGKD    |
| TC02001419.hg.1 | -2.71 | JUC02011915.hg.1 | DGKD    |
| TC02001419.hg.1 | -2.83 | JUC02011909.hg.1 | DGKD    |
| TC02002808.hg.1 | 2.65  | JUC02023679.hg.1 | EPHA4   |
| TC02002808.hg.1 | 2.31  | JUC02023687.hg.1 | EPHA4   |
| TC02002808.hg.1 | 2.07  | JUC02023674.hg.1 | EPHA4   |
| TC02002808.hg.1 | -2.08 | JUC02023697.hg.1 | EPHA4   |
| TC02002808.hg.1 | -2.13 | PSR02045378.hg.1 | EPHA4   |
| TC02002808.hg.1 | -2.28 | PSR02045373.hg.1 | EPHA4   |
| TC02002808.hg.1 | -2.97 | PSR02045385.hg.1 | EPHA4   |
| TC02002808.hg.1 | -3.03 | JUC02023691.hg.1 | EPHA4   |
| TC02002808.hg.1 | -3.06 | JUC02023689.hg.1 | EPHA4   |
| TC02002808.hg.1 | -3.36 | PSR02045366.hg.1 | EPHA4   |
| TC02002808.hg.1 | -3.43 | PSR02045344.hg.1 | EPHA4   |
| TC03000543.hg.1 | 2.65  | JUC03004969.hg.1 | BBX     |
| TC03000543.hg.1 | 2.63  | PSR03009934.hg.1 | BBX     |
| TC03000543.hg.1 | 2.17  | JUC03004940.hg.1 | BBX     |
| TC03000543.hg.1 | 2.15  | PSR03009933.hg.1 | BBX     |
| TC03000543.hg.1 | 2.04  | PSR03009932.hg.1 | BBX     |
| TC03001928.hg.1 | 2.65  | JUC03017108.hg.1 | C3orf33 |
| TC03001928.hg.1 | 2.23  | JUC03017110.hg.1 | C3orf33 |
| TC03001928.hg.1 | -2.85 | PSR03034559.hg.1 | C3orf33 |
| TC07000789.hg.1 | 2.65  | PSR07012473.hg.1 | IRF5    |
| TC07000789.hg.1 | 2.14  | JUC07005886.hg.1 | IRF5    |
| TC07000789.hg.1 | 2.07  | PSR07012477.hg.1 | IRF5    |
| TC07001405.hg.1 | 2.65  | JUC07010711.hg.1 | 14-Sep  |
| TC07001405.hg.1 | -2.05 | PSR07021792.hg.1 | 14-Sep  |
| TC08000125.hg.1 | 2.65  | JUC08000601.hg.1 | ZDHHC2  |
| TC08000125.hg.1 | 2.2   | PSR08001128.hg.1 | ZDHHC2  |
| TC08000125.hg.1 | -3.12 | JUC08000610.hg.1 | ZDHHC2  |
| TC09001686.hg.1 | 2.65  | JUC09011597.hg.1 | MED22   |
| TC09001686.hg.1 | 2.15  | PSR09021605.hg.1 | MED22   |
| TC0X000628.hg.1 | 2.65  | JUC0X004197.hg.1 | MST4    |
| TC0X000628.hg.1 | 2.43  | PSR0X008291.hg.1 | MST4    |
| TC0X000628.hg.1 | 2.38  | PSR0X008292.hg.1 | MST4    |
| TC0X000628.hg.1 | 2.38  | JUC0X004191.hg.1 | MST4    |
| TC0X000628.hg.1 | 2.31  | PSR0X008299.hg.1 | MST4    |
| TC0X000628.hg.1 | -2    | JUC0X004186.hg.1 | MST4    |
| TC12003234.hg.1 | 2.65  | JUC12019815.hg.1 | FAM66C  |
| TC12003234.hg.1 | 2.6   | PSR12001673.hg.1 | FAM66C  |
| TC12003234.hg.1 | 2.37  | JUC12019807.hg.1 | FAM66C  |
| TC12003234.hg.1 | 2.33  | PSR12001670.hg.1 | FAM66C  |
| TC12003234.hg.1 | 2.28  | PSR12001676.hg.1 | FAM66C  |
| TC12003234.hg.1 | 2.26  | PSR12001672.hg.1 | FAM66C  |
| TC12003234.hg.1 | 2.12  | PSR12001671.hg.1 | FAM66C  |
| TC12003234.hg.1 | 2.07  | PSR12001647.hg.1 | FAM66C  |
| TC12003234.hg.1 | -2.01 | PSR12001659.hg.1 | FAM66C  |
| TC15000306.hg.1 | 2.65  | JUC15001044.hg.1 | NUSAP1  |
| TC15000306.hg.1 | 2.47  | PSR15002208.hg.1 | NUSAP1  |

|                  |       |                   |           |
|------------------|-------|-------------------|-----------|
| TC15000306.hg.1  | 2.21  | PSR15002222.hg.1  | NUSAP1    |
| TC15000306.hg.1  | 2.13  | JUC15001043.hg.1  | NUSAP1    |
| TC15000306.hg.1  | -2.54 | JUC15001054.hg.1  | NUSAP1    |
| TC15001274.hg.1  | 2.65  | JUC15006412.hg.1  | TGM5      |
| TC15001274.hg.1  | 2.14  | JUC15006418.hg.1  | TGM5      |
| TC15001274.hg.1  | -2.71 | PSR15011830.hg.1  | TGM5      |
| TC6_apd_hap1000  | 2.65  | PSR6_apd_hap1000  | HLA-A     |
| TC6_apd_hap1000  | 2.58  | PSR6_apd_hap1000  | HLA-A     |
| TC6_apd_hap1000  | 2.25  | PSR6_apd_hap1000  | HLA-A     |
| TC6_apd_hap1000  | 2.1   | PSR6_apd_hap1000  | HLA-A     |
| TC6_apd_hap1000  | 2.05  | PSR6_apd_hap1000  | HLA-A     |
| TC6_apd_hap1000  | 2.02  | PSR6_apd_hap1000  | HLA-A     |
| TC6_apd_hap1000  | -2.25 | JUC6_apd_hap1000  | HLA-A     |
| TC6_apd_hap1000  | -2.64 | JUC6_apd_hap1000  | HLA-A     |
| TC6_apd_hap1000  | -4.42 | JUC6_apd_hap1000  | HLA-A     |
| TC6_apd_hap1000  | -5.03 | PSR6_apd_hap1000  | HLA-A     |
| TC6_apd_hap1000  | 2.65  | PSR6_apd_hap1000  | ZNRD1-AS1 |
| TC6_apd_hap1000  | 2.34  | PSR6_apd_hap1000  | ZNRD1-AS1 |
| TC6_apd_hap1000  | 2.26  | PSR6_apd_hap1000  | ZNRD1-AS1 |
| TC6_apd_hap1000  | 2.23  | PSR6_apd_hap1000  | ZNRD1-AS1 |
| TC6_apd_hap1000  | 2.01  | PSR6_apd_hap1000  | ZNRD1-AS1 |
| TC6_apd_hap1000  | -2.11 | JUC6_apd_hap1000  | ZNRD1-AS1 |
| TC6_apd_hap1000  | -2.24 | JUC6_apd_hap1000  | ZNRD1-AS1 |
| TC6_apd_hap1000  | -2.33 | PSR6_apd_hap1000  | ZNRD1-AS1 |
| TC6_apd_hap1000  | -3.71 | JUC6_apd_hap1000  | ZNRD1-AS1 |
| TC6_cox_hap2000  | 2.65  | PSR6_cox_hap2000  | HLA-A     |
| TC6_cox_hap2000  | 2.58  | PSR6_cox_hap2000  | HLA-A     |
| TC6_cox_hap2000  | 2.25  | PSR6_cox_hap2000  | HLA-A     |
| TC6_cox_hap2000  | 2.1   | PSR6_cox_hap2000  | HLA-A     |
| TC6_cox_hap2000  | 2.05  | PSR6_cox_hap2000  | HLA-A     |
| TC6_cox_hap2000  | 2.02  | PSR6_cox_hap2000  | HLA-A     |
| TC6_cox_hap2000  | -2.25 | JUC6_cox_hap2000  | HLA-A     |
| TC6_cox_hap2000  | -2.64 | JUC6_cox_hap2000  | HLA-A     |
| TC6_cox_hap2000  | -4.42 | JUC6_cox_hap2000  | HLA-A     |
| TC6_cox_hap2000  | -5.03 | PSR6_cox_hap2000  | HLA-A     |
| TC6_cox_hap2000  | 2.65  | PSR6_cox_hap2000  | ZNRD1-AS1 |
| TC6_cox_hap2000  | 2.34  | PSR6_cox_hap2000  | ZNRD1-AS1 |
| TC6_cox_hap2000  | 2.26  | PSR6_cox_hap2000  | ZNRD1-AS1 |
| TC6_cox_hap2000  | 2.23  | PSR6_cox_hap2000  | ZNRD1-AS1 |
| TC6_cox_hap2000  | 2.01  | PSR6_cox_hap2000  | ZNRD1-AS1 |
| TC6_cox_hap2000  | -2.11 | JUC6_cox_hap2000  | ZNRD1-AS1 |
| TC6_cox_hap2000  | -2.24 | JUC6_cox_hap2000  | ZNRD1-AS1 |
| TC6_cox_hap2000  | -2.33 | PSR6_cox_hap2000  | ZNRD1-AS1 |
| TC6_cox_hap2000  | -3.71 | JUC6_cox_hap2000  | ZNRD1-AS1 |
| TC6_dbb_hap3000  | 2.65  | PSR6_dbb_hap3000  | ZNRD1-AS1 |
| TC6_dbb_hap3000  | 2.34  | PSR6_dbb_hap3000  | ZNRD1-AS1 |
| TC6_dbb_hap3000  | 2.26  | PSR6_dbb_hap3000  | ZNRD1-AS1 |
| TC6_dbb_hap3000  | 2.23  | PSR6_dbb_hap3000  | ZNRD1-AS1 |
| TC6_dbb_hap3000  | 2.01  | PSR6_dbb_hap3000  | ZNRD1-AS1 |
| TC6_dbb_hap3000  | -2.11 | JUC6_dbb_hap3000  | ZNRD1-AS1 |
| TC6_dbb_hap3000  | -2.24 | JUC6_dbb_hap3000  | ZNRD1-AS1 |
| TC6_dbb_hap3000  | -2.33 | PSR6_dbb_hap3000  | ZNRD1-AS1 |
| TC6_dbb_hap3000  | -3.71 | JUC6_dbb_hap3000  | ZNRD1-AS1 |
| TC6_mann_hap4000 | 2.65  | PSR6_mann_hap4000 | ZNRD1-AS1 |
| TC6_mann_hap4000 | 2.47  | PSR6_mann_hap4000 | ZNRD1-AS1 |
| TC6_mann_hap4000 | 2.26  | PSR6_mann_hap4000 | ZNRD1-AS1 |
| TC6_mann_hap4000 | 2.26  | PSR6_mann_hap4000 | ZNRD1-AS1 |
| TC6_mann_hap4000 | 2.01  | PSR6_mann_hap4000 | ZNRD1-AS1 |

|                 |       |                  |            |
|-----------------|-------|------------------|------------|
| TC6_mann_hap400 | -2.11 | JUC6_mann_hap400 | ZNRD1-AS1  |
| TC6_mann_hap400 | -2.33 | PSR6_mann_hap400 | ZNRD1-AS1  |
| TC6_mann_hap400 | -3.71 | JUC6_mann_hap400 | ZNRD1-AS1  |
| TC6_mcf_hap5000 | 2.65  | PSR6_mcf_hap5001 | ZNRD1-AS1  |
| TC6_mcf_hap5000 | 2.26  | PSR6_mcf_hap5001 | ZNRD1-AS1  |
| TC6_mcf_hap5000 | 2.23  | PSR6_mcf_hap5001 | ZNRD1-AS1  |
| TC6_mcf_hap5000 | 2.11  | PSR6_mcf_hap5001 | ZNRD1-AS1  |
| TC6_mcf_hap5000 | 2.1   | PSR6_mcf_hap5001 | ZNRD1-AS1  |
| TC6_mcf_hap5000 | 2.01  | PSR6_mcf_hap5001 | ZNRD1-AS1  |
| TC6_mcf_hap5000 | -2.11 | JUC6_mcf_hap5000 | ZNRD1-AS1  |
| TC6_mcf_hap5000 | -2.33 | PSR6_mcf_hap5001 | ZNRD1-AS1  |
| TC6_mcf_hap5000 | -3.71 | JUC6_mcf_hap5000 | ZNRD1-AS1  |
| TC05000830.hg.1 | 2.65  | JUC05006235.hg.1 | TCOF1      |
| TC05000830.hg.1 | 2.12  | JUC05006216.hg.1 | TCOF1      |
| TC05000830.hg.1 | 2     | PSR05011912.hg.1 | TCOF1      |
| TC05000830.hg.1 | -2.21 | JUC05006217.hg.1 | TCOF1      |
| TC05000830.hg.1 | -2.25 | JUC05006199.hg.1 | TCOF1      |
| TC05000830.hg.1 | -2.71 | JUC05006226.hg.1 | TCOF1      |
| TC01001688.hg.1 | 2.64  | JUC01014045.hg.1 | ATP2B4     |
| TC01001688.hg.1 | 2.1   | PSR01026233.hg.1 | ATP2B4     |
| TC01001688.hg.1 | 2.01  | PSR01026239.hg.1 | ATP2B4     |
| TC01001688.hg.1 | -2.05 | JUC01014035.hg.1 | ATP2B4     |
| TC01002577.hg.1 | 2.64  | PSR01040052.hg.1 |            |
| TC01002577.hg.1 | 2.27  | JUC01021505.hg.1 |            |
| TC01002577.hg.1 | 2.19  | PSR01040046.hg.1 |            |
| TC01002577.hg.1 | 2.15  | JUC01021504.hg.1 |            |
| TC01002577.hg.1 | 2.08  | PSR01040048.hg.1 |            |
| TC01002710.hg.1 | 2.64  | JUC01022735.hg.1 |            |
| TC01002710.hg.1 | -2.2  | PSR01042593.hg.1 |            |
| TC02001004.hg.1 | 2.64  | JUC02007848.hg.1 | PPIG       |
| TC02001004.hg.1 | 2.4   | JUC02007856.hg.1 | PPIG       |
| TC02001004.hg.1 | 2.08  | PSR02014714.hg.1 | PPIG       |
| TC02001004.hg.1 | 2.06  | JUC02007858.hg.1 | PPIG       |
| TC02001004.hg.1 | -3.17 | JUC02007845.hg.1 | PPIG       |
| TC04000649.hg.1 | 2.64  | JUC04005055.hg.1 | LOC1005074 |
| TC04000649.hg.1 | -2.07 | PSR04009455.hg.1 | LOC1005074 |
| TC04000649.hg.1 | -2.15 | PSR04009439.hg.1 | LOC1005074 |
| TC04000649.hg.1 | -2.31 | JUC04005066.hg.1 | LOC1005074 |
| TC04000649.hg.1 | -2.49 | PSR04009441.hg.1 | LOC1005074 |
| TC04000649.hg.1 | -2.65 | PSR04009438.hg.1 | LOC1005074 |
| TC04000649.hg.1 | -2.77 | PSR04009450.hg.1 | LOC1005074 |
| TC04000649.hg.1 | -2.8  | PSR04009437.hg.1 | LOC1005074 |
| TC04000649.hg.1 | -3.79 | PSR04009436.hg.1 | LOC1005074 |
| TC04000649.hg.1 | -4.13 | JUC04005059.hg.1 | LOC1005074 |
| TC0X000118.hg.1 | 2.64  | PSR0X001593.hg.1 | PDK3       |
| TC0X000118.hg.1 | -4.4  | JUC0X000867.hg.1 | PDK3       |
| TC0X000494.hg.1 | 2.64  | PSR0X006563.hg.1 | TCEAL7     |
| TC0X000494.hg.1 | -2.89 | JUC0X003237.hg.1 | TCEAL7     |
| TC11002345.hg.1 | 2.64  | JUC11015010.hg.1 | MPZL3      |
| TC11002345.hg.1 | 2.04  | PSR11028152.hg.1 | MPZL3      |
| TC12001040.hg.1 | 2.64  | JUC12007493.hg.1 | GPR133     |
| TC12001040.hg.1 | -2.31 | JUC12007484.hg.1 | GPR133     |
| TC12001040.hg.1 | -2.37 | PSR12013660.hg.1 | GPR133     |
| TC12001040.hg.1 | -2.37 | JUC12007500.hg.1 | GPR133     |
| TC12001040.hg.1 | -2.47 | JUC12007503.hg.1 | GPR133     |
| TC12001040.hg.1 | -2.78 | PSR12013662.hg.1 | GPR133     |
| TC12001040.hg.1 | -3.15 | PSR12013664.hg.1 | GPR133     |
| TC14000219.hg.1 | 2.64  | PSR14002347.hg.1 | SRP54      |

|                  |       |                   |              |
|------------------|-------|-------------------|--------------|
| TC14000219.hg.1  | 2.44  | PSR14002325.hg.1  | SRP54        |
| TC14000219.hg.1  | 2.18  | JUC14001059.hg.1  | SRP54        |
| TC14000219.hg.1  | 2.03  | PSR14002324.hg.1  | SRP54        |
| TC14000219.hg.1  | -2.15 | JUC14001065.hg.1  | SRP54        |
| TC14000358.hg.1  | 2.64  | JUC14001966.hg.1  | JKAMP        |
| TC14000358.hg.1  | 2.44  | PSR14003902.hg.1  | JKAMP        |
| TC14000358.hg.1  | 2.06  | JUC14001958.hg.1  | JKAMP        |
| TC14000358.hg.1  | -2.15 | PSR14003921.hg.1  | JKAMP        |
| TC17000601.hg.1  | 2.64  | JUC17004166.hg.1  | WNT9B        |
| TC17000601.hg.1  | 2.33  | PSR17007371.hg.1  | WNT9B        |
| TC17000601.hg.1  | 2.22  | PSR17007369.hg.1  | WNT9B        |
| TC17000601.hg.1  | 2.08  | PSR17007367.hg.1  | WNT9B        |
| TC18000223.hg.1  | 2.64  | JUC18001762.hg.1  | ZCCHC2       |
| TC18000223.hg.1  | 2.16  | PSR18002555.hg.1  | ZCCHC2       |
| TC19000087.hg.1  | 2.64  | JUC19000793.hg.1  | MPND         |
| TC19000087.hg.1  | -2.01 | PSR19001395.hg.1  | MPND         |
| TC19000087.hg.1  | -2.38 | JUC19000798.hg.1  | MPND         |
| TC21000097.hg.1  | 2.64  | PSR21000592.hg.1  | GRIK1-AS2, E |
| TC21000097.hg.1  | 2.64  | PSR21000619.hg.1  | GRIK1-AS2, E |
| TC21000097.hg.1  | 2.42  | JUC21000380.hg.1  | GRIK1-AS2, E |
| TC21000097.hg.1  | 2.38  | PSR21000622.hg.1  | GRIK1-AS2, E |
| TC21000097.hg.1  | 2.17  | JUC21000375.hg.1  | GRIK1-AS2, E |
| TC21000097.hg.1  | 2.07  | PSR21000596.hg.1  | GRIK1-AS2, E |
| TC21000097.hg.1  | 2.06  | JUC21000389.hg.1  | GRIK1-AS2, E |
| TC21000097.hg.1  | 2     | PSR21000594.hg.1  | GRIK1-AS2, E |
| TC21000097.hg.1  | -3.03 | JUC21000377.hg.1  | GRIK1-AS2, E |
| TC22001476.hg.1  | 2.64  | PSR22006894.hg.1  | SERHL2       |
| TC22001476.hg.1  | 2.48  | JUC22009452.hg.1  | SERHL2       |
| TC22001476.hg.1  | 2.43  | PSR22006892.hg.1  | SERHL2       |
| TC22001476.hg.1  | 2.41  | JUC22009441.hg.1  | SERHL2       |
| TC22001476.hg.1  | 2.04  | PSR22006899.hg.1  | SERHL2       |
| TC22001476.hg.1  | 2.02  | PSR22006918.hg.1  | SERHL2       |
| TC22001476.hg.1  | 2.02  | PSR22006920.hg.1  | SERHL2       |
| TC22001476.hg.1  | 2     | PSR22006919.hg.1  | SERHL2       |
| TC22001476.hg.1  | -2.19 | JUC22009448.hg.1  | SERHL2       |
| TC22001476.hg.1  | -2.45 | JUC22009443.hg.1  | SERHL2       |
| TC22001476.hg.1  | -2.71 | PSR22006907.hg.1  | SERHL2       |
| TC6_ssto_hap7000 | 2.64  | PSR6_ssto_hap7002 | ZNRD1-AS1    |
| TC6_ssto_hap7000 | 2.33  | PSR6_ssto_hap7001 | ZNRD1-AS1    |
| TC6_ssto_hap7000 | 2.25  | PSR6_ssto_hap7001 | ZNRD1-AS1    |
| TC6_ssto_hap7000 | 2.23  | PSR6_ssto_hap7001 | ZNRD1-AS1    |
| TC6_ssto_hap7000 | 2     | PSR6_ssto_hap7001 | ZNRD1-AS1    |
| TC6_ssto_hap7000 | -2.12 | JUC6_ssto_hap7000 | ZNRD1-AS1    |
| TC6_ssto_hap7000 | -2.25 | JUC6_ssto_hap7000 | ZNRD1-AS1    |
| TC6_ssto_hap7000 | -2.34 | PSR6_ssto_hap7001 | ZNRD1-AS1    |
| TC6_ssto_hap7000 | -3.72 | JUC6_ssto_hap7000 | ZNRD1-AS1    |
| TC01003341.hg.1  | 2.64  | JUC01027308.hg.1  | MEF2D        |
| TC01003341.hg.1  | 2.53  | JUC01027305.hg.1  | MEF2D        |
| TC01003341.hg.1  | 2     | PSR01052183.hg.1  | MEF2D        |
| TC01001095.hg.1  | 2.63  | JUC01008793.hg.1  | ITGA10       |
| TC01001095.hg.1  | 2.07  | JUC01008791.hg.1  | ITGA10       |
| TC01001095.hg.1  | -2.02 | JUC01008797.hg.1  | ITGA10       |
| TC01001095.hg.1  | -2.2  | JUC01008799.hg.1  | ITGA10       |
| TC01001095.hg.1  | -2.4  | JUC01008790.hg.1  | ITGA10       |
| TC01001095.hg.1  | -2.68 | JUC01008798.hg.1  | ITGA10       |
| TC01001095.hg.1  | -2.7  | JUC01008819.hg.1  | ITGA10       |
| TC01001095.hg.1  | -3.25 | JUC01008818.hg.1  | ITGA10       |
| TC01001095.hg.1  | -3.66 | PSR01017234.hg.1  | ITGA10       |



|                 |       |                  |            |
|-----------------|-------|------------------|------------|
| TC01001095.hg.1 | -4.71 | JUC01008789.hg.1 | ITGA10     |
| TC01001095.hg.1 | -6.3  | PSR01017274.hg.1 | ITGA10     |
| TC01001095.hg.1 | -6.39 | JUC01008817.hg.1 | ITGA10     |
| TC02000662.hg.1 | 2.63  | PSR02010269.hg.1 | SULT1C3    |
| TC02000662.hg.1 | 2.44  | JUC02005425.hg.1 | SULT1C3    |
| TC03000134.hg.1 | 2.63  | JUC03001352.hg.1 | OXSM       |
| TC03000134.hg.1 | -2.04 | PSR03002536.hg.1 | OXSM       |
| TC03000134.hg.1 | -3.09 | PSR03002535.hg.1 | OXSM       |
| TC03000134.hg.1 | -3.96 | PSR03002527.hg.1 | OXSM       |
| TC03000594.hg.1 | 2.63  | JUC03005406.hg.1 |            |
| TC03000594.hg.1 | 2.21  | PSR03010837.hg.1 |            |
| TC03000594.hg.1 | 2.11  | JUC03005405.hg.1 |            |
| TC03000594.hg.1 | 2.02  | PSR03010835.hg.1 |            |
| TC03000594.hg.1 | -2.03 | JUC03005407.hg.1 |            |
| TC03001047.hg.1 | 2.63  | JUC03009395.hg.1 | IL1RAP     |
| TC03001047.hg.1 | -2.1  | JUC03009396.hg.1 | IL1RAP     |
| TC03001047.hg.1 | -2.38 | PSR03018532.hg.1 | IL1RAP     |
| TC04001272.hg.1 | 2.63  | JUC04009261.hg.1 | GRSF1      |
| TC04001272.hg.1 | 2.15  | PSR04017353.hg.1 | GRSF1      |
| TC04002916.hg.1 | 2.63  | JUC04016870.hg.1 | TLR1       |
| TC04002916.hg.1 | 2.31  | PSR04015312.hg.1 | TLR1       |
| TC05001261.hg.1 | 2.63  | JUC05009029.hg.1 | PRLR       |
| TC05001261.hg.1 | 2.45  | JUC05009033.hg.1 | PRLR       |
| TC05001261.hg.1 | 2.06  | PSR05017652.hg.1 | PRLR       |
| TC05001261.hg.1 | 2.05  | JUC05009042.hg.1 | PRLR       |
| TC05001261.hg.1 | -2.11 | PSR05017642.hg.1 | PRLR       |
| TC05001261.hg.1 | -2.13 | PSR05017634.hg.1 | PRLR       |
| TC05001261.hg.1 | -2.14 | PSR05017668.hg.1 | PRLR       |
| TC05001261.hg.1 | -2.28 | PSR05017663.hg.1 | PRLR       |
| TC05001261.hg.1 | -2.42 | PSR05017671.hg.1 | PRLR       |
| TC05001261.hg.1 | -3.37 | JUC05009041.hg.1 | PRLR       |
| TC05001824.hg.1 | 2.63  | JUC05012729.hg.1 | NME5       |
| TC05001824.hg.1 | 2.23  | PSR05024808.hg.1 | NME5       |
| TC05001824.hg.1 | 2.23  | JUC05012732.hg.1 | NME5       |
| TC05001824.hg.1 | 2.1   | JUC05012733.hg.1 | NME5       |
| TC05001824.hg.1 | 2.03  | JUC05012734.hg.1 | NME5       |
| TC05001824.hg.1 | -2    | PSR05024805.hg.1 | NME5       |
| TC05001824.hg.1 | -2.01 | PSR05024814.hg.1 | NME5       |
| TC05001824.hg.1 | -2.81 | PSR05024811.hg.1 | NME5       |
| TC08001264.hg.1 | 2.63  | JUC08008403.hg.1 | ASPH       |
| TC08001264.hg.1 | 2.54  | JUC08008389.hg.1 | ASPH       |
| TC08001264.hg.1 | 2.43  | PSR08016314.hg.1 | ASPH       |
| TC08001264.hg.1 | 2.3   | PSR08016260.hg.1 | ASPH       |
| TC08001264.hg.1 | 2.23  | JUC08008367.hg.1 | ASPH       |
| TC08001264.hg.1 | 2.09  | PSR08016272.hg.1 | ASPH       |
| TC08001264.hg.1 | 2.03  | JUC08008364.hg.1 | ASPH       |
| TC08001264.hg.1 | -2.28 | JUC08008394.hg.1 | ASPH       |
| TC08002596.hg.1 | 2.63  | PSR08000977.hg.1 | LOC1005069 |
| TC08002596.hg.1 | 2.29  | PSR08000974.hg.1 | LOC1005069 |
| TC08002596.hg.1 | 2.29  | PSR08000986.hg.1 | LOC1005069 |
| TC08002596.hg.1 | -2.01 | JUC08014944.hg.1 | LOC1005069 |
| TC09001517.hg.1 | 2.63  | PSR09019044.hg.1 | TNC        |
| TC09001517.hg.1 | -2.21 | PSR09019026.hg.1 | TNC        |
| TC09001517.hg.1 | -2.45 | JUC09010277.hg.1 | TNC        |
| TC09001517.hg.1 | -2.52 | PSR09019022.hg.1 | TNC        |
| TC09001517.hg.1 | -2.64 | JUC09010282.hg.1 | TNC        |
| TC09001517.hg.1 | -2.64 | JUC09010289.hg.1 | TNC        |
| TC09001517.hg.1 | -3.04 | PSR09019016.hg.1 | TNC        |

|                 |        |                  |          |
|-----------------|--------|------------------|----------|
| TC09001517.hg.1 | -3.16  | JUC09010302.hg.1 | TNC      |
| TC09001517.hg.1 | -3.18  | JUC09010298.hg.1 | TNC      |
| TC09001517.hg.1 | -3.21  | PSR09019046.hg.1 | TNC      |
| TC09001517.hg.1 | -3.24  | PSR09019023.hg.1 | TNC      |
| TC09001517.hg.1 | -3.27  | JUC09010316.hg.1 | TNC      |
| TC09001517.hg.1 | -3.28  | PSR09019017.hg.1 | TNC      |
| TC09001517.hg.1 | -3.64  | JUC09010283.hg.1 | TNC      |
| TC09001517.hg.1 | -3.86  | JUC09010276.hg.1 | TNC      |
| TC09001517.hg.1 | -4.89  | JUC09010278.hg.1 | TNC      |
| TC09001517.hg.1 | -5.24  | JUC09010292.hg.1 | TNC      |
| TC09001676.hg.1 | 2.63   | JUC09011509.hg.1 | AK8      |
| TC09001676.hg.1 | 2.45   | JUC09011518.hg.1 | AK8      |
| TC09001676.hg.1 | -2.18  | PSR09021398.hg.1 | AK8      |
| TC10000621.hg.1 | 2.63   | JUC10003870.hg.1 | PAPSS2   |
| TC10000621.hg.1 | 2.15   | PSR10006802.hg.1 | PAPSS2   |
| TC10000732.hg.1 | 2.63   | JUC10004813.hg.1 | KAZALD1  |
| TC10000732.hg.1 | -2.02  | PSR10008641.hg.1 | KAZALD1  |
| TC15002812.hg.1 | 2.63   | PSR15012026.hg.1 | STRC     |
| TC15002812.hg.1 | 2.54   | JUC15014291.hg.1 | STRC     |
| TC15002812.hg.1 | -2.67  | JUC15014280.hg.1 | STRC     |
| TC16000991.hg.1 | 2.63   | PSR16014293.hg.1 | SULT1A1  |
| TC16000991.hg.1 | 2.42   | PSR16014294.hg.1 | SULT1A1  |
| TC16000991.hg.1 | 2.24   | PSR16014289.hg.1 | SULT1A1  |
| TC16000991.hg.1 | -2.2   | PSR16014282.hg.1 | SULT1A1  |
| TC16000991.hg.1 | -2.97  | JUC16008049.hg.1 | SULT1A1  |
| TC16000991.hg.1 | -3.64  | JUC16008040.hg.1 | SULT1A1  |
| TC16000991.hg.1 | -3.97  | PSR16014284.hg.1 | SULT1A1  |
| TC16000991.hg.1 | -4.51  | JUC16008050.hg.1 | SULT1A1  |
| TC16000991.hg.1 | -13.49 | JUC16008048.hg.1 | SULT1A1  |
| TC20000083.hg.1 | 2.63   | JUC20000614.hg.1 | C20orf94 |
| TC20000083.hg.1 | 2.3    | JUC20000620.hg.1 | C20orf94 |
| TC20000083.hg.1 | 2.11   | PSR20001189.hg.1 | C20orf94 |
| TC21000508.hg.1 | 2.63   | JUC21003184.hg.1 | HSF2BP   |
| TC21000508.hg.1 | 2.07   | PSR21006141.hg.1 | HSF2BP   |
| TC21000508.hg.1 | -2.15  | PSR21006144.hg.1 | HSF2BP   |
| TC21000508.hg.1 | -3.3   | JUC21003181.hg.1 | HSF2BP   |
| TC22000221.hg.1 | 2.63   | PSR22004151.hg.1 | SMTN     |
| TC22000221.hg.1 | 2.61   | JUC22001474.hg.1 | SMTN     |
| TC22000221.hg.1 | 2.49   | PSR22004129.hg.1 | SMTN     |
| TC22000221.hg.1 | 2.23   | JUC22001465.hg.1 | SMTN     |
| TC22000221.hg.1 | 2.2    | JUC22001454.hg.1 | SMTN     |
| TC22000221.hg.1 | 2.16   | JUC22001444.hg.1 | SMTN     |
| TC22000221.hg.1 | 2.11   | PSR22004188.hg.1 | SMTN     |
| TC22000221.hg.1 | 2.11   | JUC22001462.hg.1 | SMTN     |
| TC22000221.hg.1 | 2.09   | JUC22001463.hg.1 | SMTN     |
| TC22000221.hg.1 | 2.07   | PSR22004149.hg.1 | SMTN     |
| TC22000221.hg.1 | 2.03   | PSR22004150.hg.1 | SMTN     |
| TC12001324.hg.1 | 2.63   | JUC12009562.hg.1 | BHLHE41  |
| TC12001324.hg.1 | 2      | PSR12017331.hg.1 | BHLHE41  |
| TC12001324.hg.1 | -3.49  | JUC12009563.hg.1 | BHLHE41  |
| TC01002304.hg.1 | 2.62   | JUC01018974.hg.1 | TMCO4    |
| TC01002304.hg.1 | -2.18  | JUC01018972.hg.1 | TMCO4    |
| TC01002304.hg.1 | -2.2   | JUC01018960.hg.1 | TMCO4    |
| TC01002304.hg.1 | -2.49  | JUC01018970.hg.1 | TMCO4    |
| TC01002304.hg.1 | -3.07  | PSR01035308.hg.1 | TMCO4    |
| TC01002304.hg.1 | -4.32  | JUC01018983.hg.1 | TMCO4    |
| TC02001239.hg.1 | 2.62   | JUC02010252.hg.1 | UNC80    |
| TC02001239.hg.1 | 2.37   | JUC02010219.hg.1 | UNC80    |

|                 |       |                  |             |
|-----------------|-------|------------------|-------------|
| TC02001239.hg.1 | 2.07  | JUC02010256.hg.1 | UNC80       |
| TC02001239.hg.1 | -2.33 | PSR02019086.hg.1 | UNC80       |
| TC02001239.hg.1 | -2.33 | JUC02010243.hg.1 | UNC80       |
| TC02001239.hg.1 | -3.47 | JUC02010222.hg.1 | UNC80       |
| TC02001239.hg.1 | -4.49 | JUC02010237.hg.1 | UNC80       |
| TC03003412.hg.1 | 2.62  | JUC03024602.hg.1 | NAT6        |
| TC03003412.hg.1 | 2.31  | PSR03025635.hg.1 | NAT6        |
| TC03003412.hg.1 | 2.12  | PSR03025644.hg.1 | NAT6        |
| TC03003412.hg.1 | 2.03  | PSR03025628.hg.1 | NAT6        |
| TC05000392.hg.1 | 2.62  | JUC05002999.hg.1 | CMYA5       |
| TC05000392.hg.1 | 2.4   | PSR05005548.hg.1 | CMYA5       |
| TC05000392.hg.1 | 2.28  | PSR05005539.hg.1 | CMYA5       |
| TC05000392.hg.1 | 2     | PSR05005550.hg.1 | CMYA5       |
| TC06000524.hg.1 | 2.62  | PSR06005647.hg.1 | MAPK13      |
| TC06000524.hg.1 | -2.01 | JUC06002301.hg.1 | MAPK13      |
| TC07001305.hg.1 | 2.62  | PSR07020284.hg.1 | VPS41       |
| TC07001305.hg.1 | 2.46  | PSR07020295.hg.1 | VPS41       |
| TC07001305.hg.1 | 2.44  | PSR07020292.hg.1 | VPS41       |
| TC07001305.hg.1 | 2.21  | PSR07020294.hg.1 | VPS41       |
| TC07001305.hg.1 | 2.06  | PSR07020232.hg.1 | VPS41       |
| TC07001305.hg.1 | 2.06  | JUC07009940.hg.1 | VPS41       |
| TC07001305.hg.1 | -2.28 | JUC07009946.hg.1 | VPS41       |
| TC08000225.hg.1 | 2.62  | JUC08001613.hg.1 | HMBOX1      |
| TC08000225.hg.1 | 2.13  | JUC08001597.hg.1 | HMBOX1      |
| TC08000225.hg.1 | -2.19 | PSR08003285.hg.1 | HMBOX1      |
| TC08000225.hg.1 | -2.38 | JUC08001603.hg.1 | HMBOX1      |
| TC08000750.hg.1 | 2.62  | JUC08005184.hg.1 | MIR1204, PV |
| TC08000750.hg.1 | 2.16  | JUC08005186.hg.1 | MIR1204, PV |
| TC08000750.hg.1 | 2.03  | PSR08010112.hg.1 | MIR1204, PV |
| TC08000750.hg.1 | 2     | JUC08005196.hg.1 | MIR1204, PV |
| TC08001423.hg.1 | 2.62  | PSR08018463.hg.1 | TRIQQ       |
| TC08001423.hg.1 | 2.16  | JUC08009396.hg.1 | TRIQQ       |
| TC08001423.hg.1 | 2.07  | PSR08018464.hg.1 | TRIQQ       |
| TC08001423.hg.1 | -2.02 | JUC08009399.hg.1 | TRIQQ       |
| TC08001423.hg.1 | -2.36 | JUC08009381.hg.1 | TRIQQ       |
| TC11001185.hg.1 | 2.62  | JUC11008073.hg.1 | FLI1        |
| TC11001185.hg.1 | 2.61  | JUC11008071.hg.1 | FLI1        |
| TC11001185.hg.1 | 2.26  | JUC11008070.hg.1 | FLI1        |
| TC11001185.hg.1 | 2.23  | PSR11014932.hg.1 | FLI1        |
| TC15000780.hg.1 | 2.62  | JUC15003715.hg.1 | UBE2Q2P2    |
| TC15000780.hg.1 | 2.28  | PSR15007168.hg.1 | UBE2Q2P2    |
| TC15000780.hg.1 | -2.8  | JUC15003714.hg.1 | UBE2Q2P2    |
| TC15000780.hg.1 | -2.84 | PSR15007164.hg.1 | UBE2Q2P2    |
| TC15001308.hg.1 | 2.62  | PSR15012568.hg.1 | SHF         |
| TC15001308.hg.1 | 2.48  | JUC15006662.hg.1 | SHF         |
| TC15001308.hg.1 | 2.22  | PSR15012566.hg.1 | SHF         |
| TC18000263.hg.1 | 2.62  | JUC18002084.hg.1 | NFATC1      |
| TC18000263.hg.1 | 2.34  | PSR18003093.hg.1 | NFATC1      |
| TC18000263.hg.1 | -2.31 | PSR18003096.hg.1 | NFATC1      |
| TC19001761.hg.1 | 2.62  | JUC19013611.hg.1 | KLK4        |
| TC19001761.hg.1 | -2.13 | PSR19023943.hg.1 | KLK4        |
| TC19001761.hg.1 | -2.47 | PSR19023935.hg.1 | KLK4        |
| TC19001761.hg.1 | -3.29 | PSR19023948.hg.1 | KLK4        |
| TC19001761.hg.1 | -3.51 | JUC19013603.hg.1 | KLK4        |
| TC21000345.hg.1 | 2.62  | JUC21002097.hg.1 | ADAMTS1     |
| TC21000345.hg.1 | -2.23 | PSR21003915.hg.1 | ADAMTS1     |
| TC01000895.hg.1 | 2.61  | JUC01007416.hg.1 | AGL         |
| TC01000895.hg.1 | 2.13  | JUC01007427.hg.1 | AGL         |

|                 |       |                  |            |
|-----------------|-------|------------------|------------|
| TC01000895.hg.1 | 2.05  | PSR01014081.hg.1 | AGL        |
| TC01002509.hg.1 | 2.61  | JUC01020921.hg.1 | OSCP1      |
| TC01002509.hg.1 | 2.38  | JUC01020930.hg.1 | OSCP1      |
| TC01002509.hg.1 | 2.28  | JUC01020920.hg.1 | OSCP1      |
| TC01002509.hg.1 | -2.18 | PSR01038950.hg.1 | OSCP1      |
| TC01002509.hg.1 | -3.09 | JUC01020926.hg.1 | OSCP1      |
| TC03000339.hg.1 | 2.61  | JUC03003631.hg.1 | GNL3, SNOR |
| TC03000339.hg.1 | 2.04  | PSR03007506.hg.1 | GNL3, SNOR |
| TC03000339.hg.1 | -2    | JUC03003635.hg.1 | GNL3, SNOR |
| TC04002928.hg.1 | 2.61  | PSR04002235.hg.1 | FAM200B    |
| TC04002928.hg.1 | 2.61  | JUC04017018.hg.1 | FAM200B    |
| TC04002928.hg.1 | 2.26  | PSR04002250.hg.1 | FAM200B    |
| TC05000281.hg.1 | 2.61  | JUC05001945.hg.1 | SREK1      |
| TC05000281.hg.1 | 2.56  | JUC05001943.hg.1 | SREK1      |
| TC05000281.hg.1 | 2.38  | JUC05001939.hg.1 | SREK1      |
| TC05000281.hg.1 | 2.31  | PSR05003617.hg.1 | SREK1      |
| TC05000281.hg.1 | 2.21  | PSR05003614.hg.1 | SREK1      |
| TC05000281.hg.1 | -3.04 | JUC05001938.hg.1 | SREK1      |
| TC06001487.hg.1 | 2.61  | JUC06008232.hg.1 | HLA-F-AS1  |
| TC06001487.hg.1 | 2.14  | PSR06016718.hg.1 | HLA-F-AS1  |
| TC06001487.hg.1 | 2.01  | JUC06008239.hg.1 | HLA-F-AS1  |
| TC06001487.hg.1 | -2.88 | JUC06008236.hg.1 | HLA-F-AS1  |
| TC06001881.hg.1 | 2.61  | PSR06022939.hg.1 | TMEM30A    |
| TC06001881.hg.1 | 2.03  | PSR06022934.hg.1 | TMEM30A    |
| TC06001881.hg.1 | -2.65 | JUC06011124.hg.1 | TMEM30A    |
| TC09001058.hg.1 | 2.61  | PSR09014048.hg.1 | TPM2       |
| TC09001058.hg.1 | 2.24  | PSR09014060.hg.1 | TPM2       |
| TC09001058.hg.1 | 2.17  | JUC09007569.hg.1 | TPM2       |
| TC09001058.hg.1 | -2.33 | PSR09014072.hg.1 | TPM2       |
| TC09001536.hg.1 | 2.61  | JUC09010392.hg.1 | CDK5RAP2   |
| TC09001536.hg.1 | 2.33  | JUC09010391.hg.1 | CDK5RAP2   |
| TC09001536.hg.1 | 2.16  | JUC09010395.hg.1 | CDK5RAP2   |
| TC09001536.hg.1 | -2.05 | JUC09010399.hg.1 | CDK5RAP2   |
| TC09001536.hg.1 | -2.08 | JUC09010408.hg.1 | CDK5RAP2   |
| TC09001536.hg.1 | -2.13 | PSR09019157.hg.1 | CDK5RAP2   |
| TC09001536.hg.1 | -2.14 | PSR09019164.hg.1 | CDK5RAP2   |
| TC09001536.hg.1 | -2.16 | JUC09010388.hg.1 | CDK5RAP2   |
| TC09001536.hg.1 | -2.16 | JUC09010421.hg.1 | CDK5RAP2   |
| TC09001536.hg.1 | -2.17 | PSR09019166.hg.1 | CDK5RAP2   |
| TC09001536.hg.1 | -2.18 | JUC09010416.hg.1 | CDK5RAP2   |
| TC09001536.hg.1 | -2.2  | JUC09010394.hg.1 | CDK5RAP2   |
| TC09001536.hg.1 | -2.25 | PSR09019168.hg.1 | CDK5RAP2   |
| TC09001536.hg.1 | -2.65 | JUC09010402.hg.1 | CDK5RAP2   |
| TC09001536.hg.1 | -2.72 | PSR09019163.hg.1 | CDK5RAP2   |
| TC09001536.hg.1 | -2.96 | PSR09019158.hg.1 | CDK5RAP2   |
| TC09001536.hg.1 | -3.01 | PSR09019216.hg.1 | CDK5RAP2   |
| TC09001536.hg.1 | -3.12 | JUC09010422.hg.1 | CDK5RAP2   |
| TC09001536.hg.1 | -3.23 | PSR09019162.hg.1 | CDK5RAP2   |
| TC09001536.hg.1 | -4.72 | PSR09019167.hg.1 | CDK5RAP2   |
| TC0X000619.hg.1 | 2.61  | JUC0X004116.hg.1 | UTP14A     |
| TC0X000619.hg.1 | -2.11 | PSR0X008166.hg.1 | UTP14A     |
| TC10000373.hg.1 | 2.61  | JUC10002461.hg.1 | CDK1       |
| TC10000373.hg.1 | 2.54  | PSR10004246.hg.1 | CDK1       |
| TC10000373.hg.1 | 2.28  | PSR10004254.hg.1 | CDK1       |
| TC10000373.hg.1 | 2.1   | PSR10004259.hg.1 | CDK1       |
| TC11000878.hg.1 | 2.61  | PSR11011121.hg.1 | TMEM135    |
| TC11000878.hg.1 | 2.18  | PSR11011112.hg.1 | TMEM135    |
| TC11000878.hg.1 | 2.11  | PSR11011109.hg.1 | TMEM135    |

|                 |        |                  |             |
|-----------------|--------|------------------|-------------|
| TC11000878.hg.1 | 2.11   | JUC11005821.hg.1 | TMEM135     |
| TC11000878.hg.1 | 2.03   | JUC11005834.hg.1 | TMEM135     |
| TC11000878.hg.1 | -2.22  | JUC11005828.hg.1 | TMEM135     |
| TC11002178.hg.1 | 2.61   | JUC11013881.hg.1 | NOX4        |
| TC11002178.hg.1 | 2.55   | JUC11013878.hg.1 | NOX4        |
| TC11002178.hg.1 | 2.49   | PSR11026102.hg.1 | NOX4        |
| TC11002178.hg.1 | 2.13   | JUC11013864.hg.1 | NOX4        |
| TC11002178.hg.1 | 2.02   | PSR11026091.hg.1 | NOX4        |
| TC11002178.hg.1 | -2.01  | JUC11013877.hg.1 | NOX4        |
| TC11002178.hg.1 | -2.41  | PSR11026086.hg.1 | NOX4        |
| TC11002178.hg.1 | -2.59  | JUC11013871.hg.1 | NOX4        |
| TC11002178.hg.1 | -2.75  | PSR11026076.hg.1 | NOX4        |
| TC11002178.hg.1 | -3.22  | PSR11026094.hg.1 | NOX4        |
| TC11002178.hg.1 | -3.48  | JUC11013875.hg.1 | NOX4        |
| TC11002178.hg.1 | -3.6   | PSR11026083.hg.1 | NOX4        |
| TC11002178.hg.1 | -3.6   | JUC11013868.hg.1 | NOX4        |
| TC11002178.hg.1 | -3.65  | JUC11013870.hg.1 | NOX4        |
| TC11002178.hg.1 | -4.03  | JUC11013880.hg.1 | NOX4        |
| TC11002178.hg.1 | -4.31  | PSR11026085.hg.1 | NOX4        |
| TC11002178.hg.1 | -4.44  | PSR11026072.hg.1 | NOX4        |
| TC11002178.hg.1 | -4.58  | PSR11026078.hg.1 | NOX4        |
| TC11002178.hg.1 | -6.56  | JUC11013852.hg.1 | NOX4        |
| TC11002178.hg.1 | -6.93  | PSR11026073.hg.1 | NOX4        |
| TC11002178.hg.1 | -7.84  | PSR11026105.hg.1 | NOX4        |
| TC11002178.hg.1 | -11.06 | PSR11026111.hg.1 | NOX4        |
| TC11002178.hg.1 | -12.13 | JUC11013861.hg.1 | NOX4        |
| TC11002178.hg.1 | -15.31 | PSR11026101.hg.1 | NOX4        |
| TC11002178.hg.1 | -19.83 | PSR11026106.hg.1 | NOX4        |
| TC11002178.hg.1 | -21.73 | JUC11013862.hg.1 | NOX4        |
| TC11002178.hg.1 | -21.83 | JUC11013853.hg.1 | NOX4        |
| TC11002178.hg.1 | -21.99 | JUC11013863.hg.1 | NOX4        |
| TC11002178.hg.1 | -25.61 | PSR11026103.hg.1 | NOX4        |
| TC11002178.hg.1 | -34.73 | JUC11013882.hg.1 | NOX4        |
| TC11002178.hg.1 | -35.71 | PSR11026108.hg.1 | NOX4        |
| TC11002178.hg.1 | -37.28 | PSR11026112.hg.1 | NOX4        |
| TC11002178.hg.1 | -51.07 | PSR11026116.hg.1 | NOX4        |
| TC11002178.hg.1 | -57.55 | PSR11026117.hg.1 | NOX4        |
| TC14000499.hg.1 | 2.61   | PSR14006377.hg.1 | TSHR        |
| TC14000499.hg.1 | 2.57   | JUC14003220.hg.1 | TSHR        |
| TC14000499.hg.1 | 2.28   | PSR14006398.hg.1 | TSHR        |
| TC14000499.hg.1 | 2.23   | PSR14006401.hg.1 | TSHR        |
| TC14000499.hg.1 | 2.03   | PSR14006402.hg.1 | TSHR        |
| TC14000499.hg.1 | -2.54  | JUC14003227.hg.1 | TSHR        |
| TC14000499.hg.1 | -3.7   | JUC14003230.hg.1 | TSHR        |
| TC21000157.hg.1 | 2.61   | PSR21001383.hg.1 | SIM2        |
| TC21000157.hg.1 | 2.1    | PSR21001388.hg.1 | SIM2        |
| TC21000157.hg.1 | -2.9   | PSR21001373.hg.1 | SIM2        |
| TC21000157.hg.1 | -2.95  | JUC21000689.hg.1 | SIM2        |
| TC21000157.hg.1 | -5.57  | JUC21000682.hg.1 | SIM2        |
| TC0X000904.hg.1 | 2.61   | JUC0X006070.hg.1 | CXorf23     |
| TC0X000904.hg.1 | 2.07   | JUC0X006066.hg.1 | CXorf23     |
| TC0X000904.hg.1 | 2      | PSR0X012227.hg.1 | CXorf23     |
| TC0X000904.hg.1 | -2.6   | JUC0X006051.hg.1 | CXorf23     |
| TC01001917.hg.1 | 2.6    | JUC01016148.hg.1 | DISC1, TSNA |
| TC01001917.hg.1 | -2.12  | JUC01016129.hg.1 | DISC1, TSNA |
| TC01001917.hg.1 | -2.15  | PSR01029852.hg.1 | DISC1, TSNA |
| TC01001917.hg.1 | -2.47  | JUC01016136.hg.1 | DISC1, TSNA |
| TC01001917.hg.1 | -3.09  | JUC01016158.hg.1 | DISC1, TSNA |

|                 |       |                  |         |
|-----------------|-------|------------------|---------|
| TC01006281.hg.1 | 2.6   | PSR01059951.hg.1 | AGT     |
| TC01006281.hg.1 | 2.41  | JUC01039177.hg.1 | AGT     |
| TC01006281.hg.1 | 2.32  | PSR01059952.hg.1 | AGT     |
| TC02000427.hg.1 | 2.6   | PSR02006420.hg.1 | NAGK    |
| TC02000427.hg.1 | 2.45  | JUC02003264.hg.1 | NAGK    |
| TC02000427.hg.1 | 2.4   | JUC02003268.hg.1 | NAGK    |
| TC02000427.hg.1 | 2.22  | PSR02006385.hg.1 | NAGK    |
| TC02001305.hg.1 | 2.6   | JUC02010757.hg.1 | PLCD4   |
| TC02001305.hg.1 | 2.5   | JUC02010754.hg.1 | PLCD4   |
| TC02001305.hg.1 | 2.46  | JUC02010776.hg.1 | PLCD4   |
| TC02001305.hg.1 | 2.28  | JUC02010769.hg.1 | PLCD4   |
| TC02001305.hg.1 | 2.1   | JUC02010773.hg.1 | PLCD4   |
| TC02001305.hg.1 | -2.02 | PSR02020070.hg.1 | PLCD4   |
| TC02001305.hg.1 | -2.02 | JUC02010770.hg.1 | PLCD4   |
| TC02001305.hg.1 | -2.12 | PSR02020036.hg.1 | PLCD4   |
| TC02001305.hg.1 | -4.06 | PSR02020035.hg.1 | PLCD4   |
| TC02001305.hg.1 | -4.07 | PSR02020071.hg.1 | PLCD4   |
| TC02001867.hg.1 | 2.6   | PSR02029926.hg.1 | EFEMP1  |
| TC02001867.hg.1 | -2.07 | JUC02015721.hg.1 | EFEMP1  |
| TC02001867.hg.1 | -2.15 | PSR02029913.hg.1 | EFEMP1  |
| TC02001867.hg.1 | -2.22 | JUC02015706.hg.1 | EFEMP1  |
| TC02001867.hg.1 | -2.57 | PSR02029907.hg.1 | EFEMP1  |
| TC02001867.hg.1 | -2.57 | JUC02015722.hg.1 | EFEMP1  |
| TC02001867.hg.1 | -2.72 | PSR02029887.hg.1 | EFEMP1  |
| TC02001867.hg.1 | -2.87 | PSR02029912.hg.1 | EFEMP1  |
| TC03001042.hg.1 | 2.6   | JUC03009356.hg.1 | TP63    |
| TC03001042.hg.1 | -2.01 | JUC03009369.hg.1 | TP63    |
| TC03001042.hg.1 | -2.06 | PSR03018475.hg.1 | TP63    |
| TC03001042.hg.1 | -2.13 | PSR03018473.hg.1 | TP63    |
| TC03001042.hg.1 | -2.25 | JUC03009367.hg.1 | TP63    |
| TC04000912.hg.1 | 2.6   | JUC04006684.hg.1 | TLR3    |
| TC04000912.hg.1 | -2.02 | PSR04012413.hg.1 | TLR3    |
| TC04000912.hg.1 | -2.93 | JUC04006686.hg.1 | TLR3    |
| TC04001818.hg.1 | 2.6   | PSR04024813.hg.1 | CCDC110 |
| TC04001818.hg.1 | 2.29  | PSR04024828.hg.1 | CCDC110 |
| TC04001818.hg.1 | 2.05  | JUC04013166.hg.1 | CCDC110 |
| TC05000300.hg.1 | 2.6   | JUC05002103.hg.1 | MRPS36  |
| TC05000300.hg.1 | -3.26 | PSR05003947.hg.1 | MRPS36  |
| TC06001561.hg.1 | 2.6   | PSR06018368.hg.1 | AGPAT1  |
| TC06001561.hg.1 | 2.42  | JUC06008794.hg.1 | AGPAT1  |
| TC06001561.hg.1 | 2.25  | PSR06018374.hg.1 | AGPAT1  |
| TC06001561.hg.1 | -2.06 | PSR06018370.hg.1 | AGPAT1  |
| TC06001561.hg.1 | -3.57 | JUC06008784.hg.1 | AGPAT1  |
| TC06002010.hg.1 | 2.6   | PSR06025101.hg.1 | CDK19   |
| TC06002010.hg.1 | 2.59  | PSR06025106.hg.1 | CDK19   |
| TC06002010.hg.1 | 2.28  | PSR06025105.hg.1 | CDK19   |
| TC06002010.hg.1 | 2.27  | JUC06012352.hg.1 | CDK19   |
| TC06002010.hg.1 | 2.2   | PSR06025102.hg.1 | CDK19   |
| TC07000090.hg.1 | 2.6   | PSR07001458.hg.1 | PHF14   |
| TC07000090.hg.1 | 2.14  | PSR07001471.hg.1 | PHF14   |
| TC07000090.hg.1 | 2.03  | JUC07000626.hg.1 | PHF14   |
| TC08000539.hg.1 | 2.6   | JUC08003642.hg.1 | CPNE3   |
| TC08000539.hg.1 | 2.11  | JUC08003650.hg.1 | CPNE3   |
| TC08000539.hg.1 | 2.08  | PSR08007326.hg.1 | CPNE3   |
| TC08000539.hg.1 | -2.81 | JUC08003640.hg.1 | CPNE3   |
| TC08001485.hg.1 | 2.6   | JUC08009842.hg.1 | YWHAZ   |
| TC08001485.hg.1 | 2.08  | PSR08019389.hg.1 | YWHAZ   |
| TC08001485.hg.1 | -3.89 | JUC08009864.hg.1 | YWHAZ   |

|                 |       |                  |             |
|-----------------|-------|------------------|-------------|
| TC0X000030.hg.1 | 2.6   | PSR0X000368.hg.1 | VCX3B, VCX  |
| TC0X000030.hg.1 | 2.07  | JUC0X000197.hg.1 | VCX3B, VCX  |
| TC11002132.hg.1 | 2.6   | JUC11013510.hg.1 | NDUFC2-KC   |
| TC11002132.hg.1 | -2.19 | PSR11025476.hg.1 | NDUFC2-KC   |
| TC11002132.hg.1 | -2.43 | PSR11025477.hg.1 | NDUFC2-KC   |
| TC11002132.hg.1 | -2.59 | PSR11025478.hg.1 | NDUFC2-KC   |
| TC12001336.hg.1 | 2.6   | JUC12009682.hg.1 |             |
| TC12001336.hg.1 | -2.42 | PSR12017493.hg.1 |             |
| TC12001336.hg.1 | -3.12 | PSR12017501.hg.1 |             |
| TC12001336.hg.1 | -3.46 | PSR12017498.hg.1 |             |
| TC12001336.hg.1 | -3.6  | JUC12009684.hg.1 |             |
| TC13001720.hg.1 | 2.6   | PSR13003971.hg.1 | BIVM        |
| TC13001720.hg.1 | 2.17  | JUC13008393.hg.1 | BIVM        |
| TC13001720.hg.1 | -2.24 | JUC13008391.hg.1 | BIVM        |
| TC13001720.hg.1 | -2.39 | PSR13003975.hg.1 | BIVM        |
| TC13001720.hg.1 | -2.79 | JUC13008388.hg.1 | BIVM        |
| TC14002205.hg.1 | 2.6   | JUC14011395.hg.1 | AP1G2       |
| TC14002205.hg.1 | 2.13  | JUC14011397.hg.1 | AP1G2       |
| TC14002205.hg.1 | -2.02 | PSR14010750.hg.1 | AP1G2       |
| TC14002205.hg.1 | -2.14 | PSR14010760.hg.1 | AP1G2       |
| TC14002205.hg.1 | -2.48 | PSR14010766.hg.1 | AP1G2       |
| TC14002205.hg.1 | -5.92 | JUC14011411.hg.1 | AP1G2       |
| TC15001183.hg.1 | 2.6   | JUC15005557.hg.1 | FMN1, LOC10 |
| TC15001183.hg.1 | 2.39  | PSR15010481.hg.1 | FMN1, LOC10 |
| TC15001183.hg.1 | 2.31  | PSR15010486.hg.1 | FMN1, LOC10 |
| TC15001183.hg.1 | 2.25  | JUC15005547.hg.1 | FMN1, LOC10 |
| TC15001183.hg.1 | 2.23  | PSR15010479.hg.1 | FMN1, LOC10 |
| TC15001183.hg.1 | 2.15  | JUC15005540.hg.1 | FMN1, LOC10 |
| TC17002876.hg.1 | 2.6   | PSR17007217.hg.1 | CRHR1       |
| TC17002876.hg.1 | -2.05 | JUC17018691.hg.1 | CRHR1       |
| TC17002876.hg.1 | -2.64 | PSR17007204.hg.1 | CRHR1       |
| TC01001024.hg.1 | 2.59  | PSR01016225.hg.1 | PTGFRN      |
| TC01001024.hg.1 | 2.3   | PSR01016222.hg.1 | PTGFRN      |
| TC01001024.hg.1 | 2.15  | JUC01008502.hg.1 | PTGFRN      |
| TC01001661.hg.1 | 2.59  | PSR01025680.hg.1 | NAV1        |
| TC01001661.hg.1 | 2.2   | PSR01025681.hg.1 | NAV1        |
| TC01001661.hg.1 | 2.17  | PSR01025677.hg.1 | NAV1        |
| TC01001661.hg.1 | 2.12  | JUC01013716.hg.1 | NAV1        |
| TC01001661.hg.1 | 2.1   | PSR01025676.hg.1 | NAV1        |
| TC01001661.hg.1 | 2.08  | PSR01025679.hg.1 | NAV1        |
| TC01001661.hg.1 | -2.21 | JUC01013723.hg.1 | NAV1        |
| TC01001661.hg.1 | -2.82 | JUC01013749.hg.1 | NAV1        |
| TC01001829.hg.1 | 2.59  | JUC01015331.hg.1 | MIA3        |
| TC01001829.hg.1 | 2.43  | JUC01015307.hg.1 | MIA3        |
| TC01001829.hg.1 | -2.03 | PSR01028391.hg.1 | MIA3        |
| TC01002472.hg.1 | 2.59  | JUC01020526.hg.1 | ZBTB8OS     |
| TC01002472.hg.1 | -2.17 | PSR01038175.hg.1 | ZBTB8OS     |
| TC01003305.hg.1 | 2.59  | PSR01051193.hg.1 | THBS3       |
| TC01003305.hg.1 | 2.33  | JUC01026934.hg.1 | THBS3       |
| TC01003305.hg.1 | 2.25  | PSR01051154.hg.1 | THBS3       |
| TC01003305.hg.1 | 2.22  | JUC01026928.hg.1 | THBS3       |
| TC01003305.hg.1 | 2.1   | JUC01026955.hg.1 | THBS3       |
| TC01003305.hg.1 | 2.08  | PSR01051156.hg.1 | THBS3       |
| TC01003305.hg.1 | 2.06  | JUC01026958.hg.1 | THBS3       |
| TC01003305.hg.1 | 2.01  | PSR01051194.hg.1 | THBS3       |
| TC01003305.hg.1 | -2.18 | JUC01026927.hg.1 | THBS3       |
| TC01003305.hg.1 | -3.51 | JUC01026938.hg.1 | THBS3       |
| TC02000891.hg.1 | 2.59  | JUC02007029.hg.1 | HNMT        |

|                 |       |                  |             |
|-----------------|-------|------------------|-------------|
| TC02000891.hg.1 | 2.25  | JUC02007031.hg.1 | HNMT        |
| TC02000891.hg.1 | 2.15  | PSR02013227.hg.1 | HNMT        |
| TC02000891.hg.1 | -2.05 | JUC02007042.hg.1 | HNMT        |
| TC02000891.hg.1 | -2.1  | PSR02013226.hg.1 | HNMT        |
| TC02000891.hg.1 | -2.9  | JUC02007038.hg.1 | HNMT        |
| TC02000891.hg.1 | -3.06 | PSR02013223.hg.1 | HNMT        |
| TC02000891.hg.1 | -3.28 | JUC02007037.hg.1 | HNMT        |
| TC02000891.hg.1 | -3.34 | PSR02013217.hg.1 | HNMT        |
| TC02000891.hg.1 | -3.55 | PSR02013209.hg.1 | HNMT        |
| TC02000891.hg.1 | -3.88 | JUC02007036.hg.1 | HNMT        |
| TC02000891.hg.1 | -3.92 | JUC02007033.hg.1 | HNMT        |
| TC02000891.hg.1 | -4.53 | JUC02007035.hg.1 | HNMT        |
| TC02000891.hg.1 | -4.6  | JUC02007039.hg.1 | HNMT        |
| TC02000891.hg.1 | -4.62 | PSR02013222.hg.1 | HNMT        |
| TC02000891.hg.1 | -4.69 | PSR02013219.hg.1 | HNMT        |
| TC02000891.hg.1 | -6.39 | PSR02013210.hg.1 | HNMT        |
| TC02001857.hg.1 | 2.59  | JUC02015563.hg.1 | C2orf63     |
| TC02001857.hg.1 | 2.35  | JUC02015567.hg.1 | C2orf63     |
| TC02001857.hg.1 | 2.27  | PSR02029647.hg.1 | C2orf63     |
| TC02001857.hg.1 | 2.09  | JUC02015549.hg.1 | C2orf63     |
| TC02001857.hg.1 | 2.02  | PSR02029638.hg.1 | C2orf63     |
| TC02001857.hg.1 | -2.27 | PSR02029662.hg.1 | C2orf63     |
| TC02002797.hg.1 | 2.59  | JUC02023611.hg.1 | DNPEP       |
| TC02002797.hg.1 | 2.52  | JUC02023620.hg.1 | DNPEP       |
| TC02002797.hg.1 | 2.5   | JUC02023630.hg.1 | DNPEP       |
| TC02002797.hg.1 | 2.03  | PSR02045243.hg.1 | DNPEP       |
| TC05000601.hg.1 | 2.59  | JUC05004513.hg.1 | GRAMD3      |
| TC05000601.hg.1 | -2.01 | JUC05004496.hg.1 | GRAMD3      |
| TC05000601.hg.1 | -2.22 | PSR05008288.hg.1 | GRAMD3      |
| TC05000601.hg.1 | -2.45 | PSR05008287.hg.1 | GRAMD3      |
| TC05000601.hg.1 | -2.63 | PSR05008273.hg.1 | GRAMD3      |
| TC05000601.hg.1 | -2.97 | JUC05004483.hg.1 | GRAMD3      |
| TC05000601.hg.1 | -3.08 | JUC05004494.hg.1 | GRAMD3      |
| TC05000601.hg.1 | -3.61 | JUC05004484.hg.1 | GRAMD3      |
| TC05000601.hg.1 | -3.76 | PSR05008260.hg.1 | GRAMD3      |
| TC05000601.hg.1 | -3.97 | PSR05008257.hg.1 | GRAMD3      |
| TC05000601.hg.1 | -4.04 | PSR05008286.hg.1 | GRAMD3      |
| TC05000601.hg.1 | -4.43 | PSR05008270.hg.1 | GRAMD3      |
| TC05000601.hg.1 | -4.59 | PSR05008293.hg.1 | GRAMD3      |
| TC05000601.hg.1 | -4.62 | JUC05004514.hg.1 | GRAMD3      |
| TC05000601.hg.1 | -5.1  | JUC05004489.hg.1 | GRAMD3      |
| TC05000821.hg.1 | 2.59  | PSR05011752.hg.1 | MIR145, MIR |
| TC05000821.hg.1 | 2.58  | PSR05011729.hg.1 | MIR145, MIR |
| TC05000821.hg.1 | 2     | PSR05011751.hg.1 | MIR145, MIR |
| TC05000821.hg.1 | -2    | PSR05011735.hg.1 | MIR145, MIR |
| TC05000821.hg.1 | -2    | JUC05006108.hg.1 | MIR145, MIR |
| TC05000821.hg.1 | -2.08 | PSR05011730.hg.1 | MIR145, MIR |
| TC05000821.hg.1 | -2.53 | PSR05011737.hg.1 | MIR145, MIR |
| TC05000821.hg.1 | -2.79 | PSR05011726.hg.1 | MIR145, MIR |
| TC05000821.hg.1 | -2.84 | PSR05011724.hg.1 | MIR145, MIR |
| TC05000821.hg.1 | -3.09 | JUC05006113.hg.1 | MIR145, MIR |
| TC05000821.hg.1 | -3.72 | JUC05006115.hg.1 | MIR145, MIR |
| TC05000821.hg.1 | -3.94 | JUC05006112.hg.1 | MIR145, MIR |
| TC05000821.hg.1 | -4.25 | PSR05011748.hg.1 | MIR145, MIR |
| TC05000821.hg.1 | -4.4  | JUC05006114.hg.1 | MIR145, MIR |
| TC05000821.hg.1 | -4.76 | JUC05006116.hg.1 | MIR145, MIR |
| TC05000821.hg.1 | -5.13 | PSR05011743.hg.1 | MIR145, MIR |
| TC05000821.hg.1 | -7.36 | JUC05006111.hg.1 | MIR145, MIR |



|                 |       |                  |             |
|-----------------|-------|------------------|-------------|
| TC05000821.hg.1 | -7.4  | JUC05006117.hg.1 | MIR145, MIR |
| TC06001828.hg.1 | 2.59  | PSR06022289.hg.1 | DST, LOC100 |
| TC06001828.hg.1 | -2.01 | PSR06022288.hg.1 | DST, LOC100 |
| TC06001828.hg.1 | -2.39 | JUC06010741.hg.1 | DST, LOC100 |
| TC06001828.hg.1 | -2.52 | JUC06010712.hg.1 | DST, LOC100 |
| TC06001828.hg.1 | -2.96 | JUC06010643.hg.1 | DST, LOC100 |
| TC06001828.hg.1 | -5.43 | PSR06022190.hg.1 | DST, LOC100 |
| TC06001828.hg.1 | -6.09 | JUC06010675.hg.1 | DST, LOC100 |
| TC09001366.hg.1 | 2.59  | JUC09009161.hg.1 | PTCH1       |
| TC09001366.hg.1 | 2.25  | PSR09017019.hg.1 | PTCH1       |
| TC09001366.hg.1 | 2.19  | PSR09017059.hg.1 | PTCH1       |
| TC09001366.hg.1 | 2.12  | PSR09017036.hg.1 | PTCH1       |
| TC09001366.hg.1 | 2.12  | JUC09009142.hg.1 | PTCH1       |
| TC09001366.hg.1 | 2.09  | PSR09017046.hg.1 | PTCH1       |
| TC09001366.hg.1 | -3.27 | JUC09009173.hg.1 | PTCH1       |
| TC0X001262.hg.1 | 2.59  | JUC0X008683.hg.1 | TSC22D3     |
| TC0X001262.hg.1 | -2.26 | PSR0X017068.hg.1 | TSC22D3     |
| TC0X001262.hg.1 | -2.29 | PSR0X017079.hg.1 | TSC22D3     |
| TC0X001262.hg.1 | -2.38 | PSR0X017047.hg.1 | TSC22D3     |
| TC0X001262.hg.1 | -2.45 | JUC0X008678.hg.1 | TSC22D3     |
| TC0X001262.hg.1 | -2.52 | PSR0X017061.hg.1 | TSC22D3     |
| TC0X001262.hg.1 | -2.52 | PSR0X017083.hg.1 | TSC22D3     |
| TC0X001262.hg.1 | -2.63 | PSR0X017054.hg.1 | TSC22D3     |
| TC0X001262.hg.1 | -2.65 | PSR0X017078.hg.1 | TSC22D3     |
| TC0X001262.hg.1 | -2.94 | PSR0X017071.hg.1 | TSC22D3     |
| TC0X001262.hg.1 | -2.98 | PSR0X017060.hg.1 | TSC22D3     |
| TC0X001262.hg.1 | -3.28 | JUC0X008677.hg.1 | TSC22D3     |
| TC0X001262.hg.1 | -3.39 | PSR0X017056.hg.1 | TSC22D3     |
| TC0X001262.hg.1 | -3.46 | JUC0X008671.hg.1 | TSC22D3     |
| TC0X001262.hg.1 | -3.68 | PSR0X017076.hg.1 | TSC22D3     |
| TC0X001262.hg.1 | -3.8  | PSR0X017055.hg.1 | TSC22D3     |
| TC0X001262.hg.1 | -3.97 | PSR0X017085.hg.1 | TSC22D3     |
| TC0X001262.hg.1 | -4.14 | PSR0X017073.hg.1 | TSC22D3     |
| TC0X001262.hg.1 | -4.58 | PSR0X017064.hg.1 | TSC22D3     |
| TC0X001262.hg.1 | -5.32 | JUC0X008669.hg.1 | TSC22D3     |
| TC0X001491.hg.1 | 2.59  | JUC0X009841.hg.1 | GABRE, MIR  |
| TC0X001491.hg.1 | 2.43  | JUC0X009845.hg.1 | GABRE, MIR  |
| TC0X001491.hg.1 | -2.29 | PSR0X019422.hg.1 | GABRE, MIR  |
| TC0X001491.hg.1 | -2.36 | PSR0X019387.hg.1 | GABRE, MIR  |
| TC0X002309.hg.1 | 2.59  | JUC0X012915.hg.1 | NAA10       |
| TC0X002309.hg.1 | 2.33  | JUC0X012917.hg.1 | NAA10       |
| TC0X002309.hg.1 | 2.15  | PSR0X020138.hg.1 | NAA10       |
| TC11001924.hg.1 | 2.59  | JUC11012178.hg.1 | CDCA5       |
| TC11001924.hg.1 | 2.4   | PSR11023065.hg.1 | CDCA5       |
| TC12001448.hg.1 | 2.59  | PSR12018960.hg.1 | ZNF641      |
| TC12001448.hg.1 | -2.18 | JUC12010609.hg.1 | ZNF641      |
| TC12001797.hg.1 | 2.59  | PSR12023766.hg.1 | POC1B, POC  |
| TC12001797.hg.1 | 2.06  | JUC12013173.hg.1 | POC1B, POC  |
| TC12001797.hg.1 | 2.03  | PSR12023775.hg.1 | POC1B, POC  |
| TC14000571.hg.1 | 2.59  | JUC14003569.hg.1 | RIN3        |
| TC14000571.hg.1 | -2.27 | JUC14003563.hg.1 | RIN3        |
| TC14000571.hg.1 | -2.38 | PSR14006962.hg.1 | RIN3        |
| TC14000571.hg.1 | -2.43 | JUC14003561.hg.1 | RIN3        |
| TC14000571.hg.1 | -2.48 | JUC14003559.hg.1 | RIN3        |
| TC14000571.hg.1 | -3.91 | JUC14003557.hg.1 | RIN3        |
| TC14000571.hg.1 | -4.11 | JUC14003568.hg.1 | RIN3        |
| TC17000234.hg.1 | 2.59  | PSR17003304.hg.1 | EPN2        |
| TC17000234.hg.1 | 2.14  | PSR17003298.hg.1 | EPN2        |

|                 |       |                  |               |
|-----------------|-------|------------------|---------------|
| TC17000234.hg.1 | 2.13  | JUC17001877.hg.1 | EPN2          |
| TC17000352.hg.1 | 2.59  | JUC17002487.hg.1 | LRRC37BP1     |
| TC17000352.hg.1 | 2.32  | PSR17004398.hg.1 | LRRC37BP1     |
| TC17000352.hg.1 | -2.42 | JUC17002483.hg.1 | LRRC37BP1     |
| TC19000459.hg.1 | 2.59  | PSR19006018.hg.1 | FXYD1         |
| TC19000459.hg.1 | 2.53  | PSR19006010.hg.1 | FXYD1         |
| TC19000459.hg.1 | 2.53  | JUC19003575.hg.1 | FXYD1         |
| TC19000459.hg.1 | 2.28  | PSR19006017.hg.1 | FXYD1         |
| TC19000459.hg.1 | 2.12  | PSR19006009.hg.1 | FXYD1         |
| TC19000459.hg.1 | -2.88 | JUC19003578.hg.1 | FXYD1         |
| TC20000385.hg.1 | 2.59  | PSR20005617.hg.1 | DDX27         |
| TC20000385.hg.1 | 2.12  | JUC20003065.hg.1 | DDX27         |
| TC20000600.hg.1 | 2.59  | JUC20004508.hg.1 | TRMT6         |
| TC20000600.hg.1 | -2.32 | PSR20008732.hg.1 | TRMT6         |
| TC17002869.hg.1 | 2.59  | JUC17018578.hg.1 | TBC1D26       |
| TC17002869.hg.1 | 2.36  | JUC17018569.hg.1 | TBC1D26       |
| TC17002869.hg.1 | 2     | PSR17002380.hg.1 | TBC1D26       |
| TC01001988.hg.1 | 2.58  | JUC01016745.hg.1 | C1orf101      |
| TC01001988.hg.1 | -2.01 | PSR01030783.hg.1 | C1orf101      |
| TC01001988.hg.1 | -2.89 | JUC01016772.hg.1 | C1orf101      |
| TC01002166.hg.1 | 2.58  | JUC01017921.hg.1 | ERRFI1        |
| TC01002166.hg.1 | 2.49  | PSR01033410.hg.1 | ERRFI1        |
| TC01002166.hg.1 | 2.3   | PSR01033397.hg.1 | ERRFI1        |
| TC01002166.hg.1 | -3.88 | PSR01033405.hg.1 | ERRFI1        |
| TC03000074.hg.1 | 2.58  | JUC03000853.hg.1 | CAND2         |
| TC03000074.hg.1 | 2.17  | JUC03000856.hg.1 | CAND2         |
| TC03000074.hg.1 | -2.03 | PSR03001652.hg.1 | CAND2         |
| TC03000074.hg.1 | -2.2  | JUC03000865.hg.1 | CAND2         |
| TC03000077.hg.1 | 2.58  | JUC03000897.hg.1 | FBLN2         |
| TC03000077.hg.1 | 2.48  | PSR03001741.hg.1 | FBLN2         |
| TC03000077.hg.1 | 2.29  | JUC03000902.hg.1 | FBLN2         |
| TC03000077.hg.1 | 2.23  | JUC03000913.hg.1 | FBLN2         |
| TC03000077.hg.1 | -2.1  | JUC03000919.hg.1 | FBLN2         |
| TC03000077.hg.1 | -2.23 | JUC03000916.hg.1 | FBLN2         |
| TC03000077.hg.1 | -2.31 | JUC03000899.hg.1 | FBLN2         |
| TC03000077.hg.1 | -2.46 | JUC03000907.hg.1 | FBLN2         |
| TC03000985.hg.1 | 2.58  | PSR03016940.hg.1 | KLHL24        |
| TC03000985.hg.1 | 2.08  | JUC03008612.hg.1 | KLHL24        |
| TC03000985.hg.1 | -2.2  | JUC03008623.hg.1 | KLHL24        |
| TC05001317.hg.1 | 2.58  | JUC05009561.hg.1 | CCL28         |
| TC05001317.hg.1 | 2.11  | PSR05018600.hg.1 | CCL28         |
| TC05001822.hg.1 | 2.58  | JUC05012713.hg.1 | FAM13B        |
| TC05001822.hg.1 | 2.29  | JUC05012699.hg.1 | FAM13B        |
| TC05001822.hg.1 | -2.17 | PSR05024755.hg.1 | FAM13B        |
| TC05001822.hg.1 | -2.24 | JUC05012701.hg.1 | FAM13B        |
| TC05001822.hg.1 | -2.79 | JUC05012697.hg.1 | FAM13B        |
| TC05001822.hg.1 | -2.8  | JUC05012696.hg.1 | FAM13B        |
| TC05001845.hg.1 | 2.58  | JUC05012972.hg.1 | TMEM173       |
| TC05001845.hg.1 | 2.17  | PSR05025334.hg.1 | TMEM173       |
| TC07000155.hg.1 | 2.58  | JUC07001202.hg.1 | MPP6          |
| TC07000155.hg.1 | 2.43  | JUC07001193.hg.1 | MPP6          |
| TC07000155.hg.1 | 2.17  | PSR07002455.hg.1 | MPP6          |
| TC07000155.hg.1 | -4.06 | PSR07002458.hg.1 | MPP6          |
| TC08001575.hg.1 | 2.58  | JUC08010579.hg.1 | DERL1         |
| TC08001575.hg.1 | -2.02 | PSR08020685.hg.1 | DERL1         |
| TC08001575.hg.1 | -3.58 | JUC08010587.hg.1 | DERL1         |
| TC09000378.hg.1 | 2.58  | PSR09004054.hg.1 | IDNK, C9orf10 |
| TC09000378.hg.1 | 2.56  | JUC09002210.hg.1 | IDNK, C9orf10 |

|                 |       |                  |            |
|-----------------|-------|------------------|------------|
| TC12003298.hg.1 | 2.58  | JUC12020631.hg.1 | HOXC4, HOX |
| TC12003298.hg.1 | 2.35  | PSR12005876.hg.1 | HOXC4, HOX |
| TC12003298.hg.1 | 2.19  | JUC12020628.hg.1 | HOXC4, HOX |
| TC12003298.hg.1 | -5.07 | JUC12020632.hg.1 | HOXC4, HOX |
| TC14001527.hg.1 | 2.58  | JUC14008855.hg.1 | MOK        |
| TC14001527.hg.1 | -2    | JUC14008878.hg.1 | MOK        |
| TC14001527.hg.1 | -2.02 | PSR14017110.hg.1 | MOK        |
| TC14001527.hg.1 | -2.05 | JUC14008862.hg.1 | MOK        |
| TC14001527.hg.1 | -2.08 | JUC14008857.hg.1 | MOK        |
| TC14001527.hg.1 | -2.1  | PSR14017132.hg.1 | MOK        |
| TC14001527.hg.1 | -2.11 | JUC14008877.hg.1 | MOK        |
| TC14001527.hg.1 | -2.13 | JUC14008860.hg.1 | MOK        |
| TC14001527.hg.1 | -2.18 | PSR14017131.hg.1 | MOK        |
| TC14001527.hg.1 | -2.37 | JUC14008853.hg.1 | MOK        |
| TC14001527.hg.1 | -2.67 | JUC14008865.hg.1 | MOK        |
| TC14001527.hg.1 | -2.79 | JUC14008846.hg.1 | MOK        |
| TC14001527.hg.1 | -3.02 | JUC14008850.hg.1 | MOK        |
| TC15000827.hg.1 | 2.58  | JUC15004006.hg.1 | AKAP13     |
| TC15000827.hg.1 | 2.42  | JUC15004001.hg.1 | AKAP13     |
| TC15000827.hg.1 | 2.32  | JUC15003991.hg.1 | AKAP13     |
| TC15000827.hg.1 | 2.07  | PSR15007625.hg.1 | AKAP13     |
| TC15000827.hg.1 | -2.02 | JUC15003998.hg.1 | AKAP13     |
| TC15000827.hg.1 | -2.12 | PSR15007581.hg.1 | AKAP13     |
| TC15000827.hg.1 | -2.25 | PSR15007578.hg.1 | AKAP13     |
| TC15000827.hg.1 | -2.3  | PSR15007577.hg.1 | AKAP13     |
| TC15000827.hg.1 | -2.38 | PSR15007604.hg.1 | AKAP13     |
| TC15000827.hg.1 | -4.86 | PSR15007584.hg.1 | AKAP13     |
| TC17000120.hg.1 | 2.58  | PSR17001754.hg.1 | CHD3       |
| TC17000120.hg.1 | 2.2   | JUC17001012.hg.1 | CHD3       |
| TC22000791.hg.1 | 2.58  | JUC22005522.hg.1 | DDX17      |
| TC22000791.hg.1 | 2.5   | JUC22005523.hg.1 | DDX17      |
| TC22000791.hg.1 | 2.03  | PSR22013350.hg.1 | DDX17      |
| TC02002507.hg.1 | 2.58  | JUC02020863.hg.1 | SPC25      |
| TC02002507.hg.1 | 2.45  | JUC02020868.hg.1 | SPC25      |
| TC02002507.hg.1 | 2     | PSR02039683.hg.1 | SPC25      |
| TC01000310.hg.1 | 2.57  | JUC01002513.hg.1 | NIPAL3     |
| TC01000310.hg.1 | -2.02 | JUC01002511.hg.1 | NIPAL3     |
| TC01000310.hg.1 | -2.08 | PSR01004689.hg.1 | NIPAL3     |
| TC01000476.hg.1 | 2.57  | PSR01007403.hg.1 | CDCA8      |
| TC01000476.hg.1 | -2.13 | JUC01003847.hg.1 | CDCA8      |
| TC01001700.hg.1 | 2.57  | JUC01014144.hg.1 | MDM4       |
| TC01001700.hg.1 | 2.48  | JUC01014140.hg.1 | MDM4       |
| TC01001700.hg.1 | 2.29  | JUC01014145.hg.1 | MDM4       |
| TC01001700.hg.1 | 2.17  | PSR01026450.hg.1 | MDM4       |
| TC01001700.hg.1 | -2.46 | JUC01014171.hg.1 | MDM4       |
| TC02000203.hg.1 | 2.57  | JUC02001478.hg.1 | LCLAT1     |
| TC02000203.hg.1 | 2.41  | JUC02001467.hg.1 | LCLAT1     |
| TC02000203.hg.1 | 2.09  | PSR02002949.hg.1 | LCLAT1     |
| TC02000540.hg.1 | 2.57  | JUC02004316.hg.1 | THNSL2     |
| TC02000540.hg.1 | 2.19  | JUC02004317.hg.1 | THNSL2     |
| TC02000540.hg.1 | 2.06  | JUC02004308.hg.1 | THNSL2     |
| TC02000540.hg.1 | -2.1  | JUC02004310.hg.1 | THNSL2     |
| TC02000540.hg.1 | -2.18 | PSR02008417.hg.1 | THNSL2     |
| TC02000540.hg.1 | -2.39 | JUC02004314.hg.1 | THNSL2     |
| TC02002683.hg.1 | 2.57  | JUC02022690.hg.1 | ICA1L      |
| TC02002683.hg.1 | 2.48  | JUC02022689.hg.1 | ICA1L      |
| TC02002683.hg.1 | 2.23  | PSR02043348.hg.1 | ICA1L      |
| TC02002683.hg.1 | 2.2   | PSR02043347.hg.1 | ICA1L      |

|                 |       |                  |          |
|-----------------|-------|------------------|----------|
| TC02002683.hg.1 | 2.19  | PSR02043346.hg.1 | ICA1L    |
| TC02002683.hg.1 | 2.09  | JUC02022694.hg.1 | ICA1L    |
| TC02002683.hg.1 | -2.22 | JUC02022703.hg.1 | ICA1L    |
| TC04000466.hg.1 | 2.57  | PSR04006672.hg.1 | ARHGAP24 |
| TC04000466.hg.1 | -2.55 | JUC04003379.hg.1 | ARHGAP24 |
| TC04000466.hg.1 | -2.69 | JUC04003374.hg.1 | ARHGAP24 |
| TC04000853.hg.1 | 2.57  | PSR04011712.hg.1 | GALNT7   |
| TC04000853.hg.1 | 2     | PSR04011723.hg.1 | GALNT7   |
| TC04000853.hg.1 | -2.31 | JUC04006292.hg.1 | GALNT7   |
| TC05000612.hg.1 | 2.57  | PSR05008500.hg.1 | SLC12A2  |
| TC05000612.hg.1 | 2.22  | JUC05004604.hg.1 | SLC12A2  |
| TC05000612.hg.1 | 2.19  | PSR05008521.hg.1 | SLC12A2  |
| TC05000612.hg.1 | 2.13  | JUC05004621.hg.1 | SLC12A2  |
| TC05000612.hg.1 | 2.12  | PSR05008534.hg.1 | SLC12A2  |
| TC05000612.hg.1 | 2.05  | PSR05008516.hg.1 | SLC12A2  |
| TC05000612.hg.1 | -2.19 | JUC05004631.hg.1 | SLC12A2  |
| TC05000612.hg.1 | -3.38 | JUC05004632.hg.1 | SLC12A2  |
| TC07000571.hg.1 | 2.57  | PSR07008414.hg.1 | DYNC111  |
| TC07000571.hg.1 | -2.16 | JUC07004038.hg.1 | DYNC111  |
| TC07000571.hg.1 | -2.2  | JUC07004042.hg.1 | DYNC111  |
| TC07000571.hg.1 | -2.23 | JUC07004040.hg.1 | DYNC111  |
| TC07000571.hg.1 | -2.26 | JUC07004035.hg.1 | DYNC111  |
| TC07000571.hg.1 | -2.33 | JUC07004030.hg.1 | DYNC111  |
| TC07000571.hg.1 | -2.65 | PSR07008402.hg.1 | DYNC111  |
| TC07000571.hg.1 | -2.77 | PSR07008390.hg.1 | DYNC111  |
| TC07000571.hg.1 | -2.89 | JUC07004026.hg.1 | DYNC111  |
| TC07001185.hg.1 | 2.57  | PSR07018538.hg.1 | RAPGEF5  |
| TC07001185.hg.1 | 2.12  | PSR07018544.hg.1 | RAPGEF5  |
| TC07001185.hg.1 | 2.09  | JUC07009082.hg.1 | RAPGEF5  |
| TC07001185.hg.1 | -2.05 | JUC07009068.hg.1 | RAPGEF5  |
| TC07001185.hg.1 | -2.11 | PSR07018584.hg.1 | RAPGEF5  |
| TC07001185.hg.1 | -2.15 | PSR07018588.hg.1 | RAPGEF5  |
| TC07001185.hg.1 | -2.18 | PSR07018586.hg.1 | RAPGEF5  |
| TC07001185.hg.1 | -2.35 | JUC07009076.hg.1 | RAPGEF5  |
| TC07001185.hg.1 | -3.51 | PSR07018583.hg.1 | RAPGEF5  |
| TC07001185.hg.1 | -4.15 | PSR07018585.hg.1 | RAPGEF5  |
| TC07001185.hg.1 | -4.95 | PSR07018587.hg.1 | RAPGEF5  |
| TC07001185.hg.1 | -6.15 | JUC07009091.hg.1 | RAPGEF5  |
| TC07001185.hg.1 | -6.26 | JUC07009101.hg.1 | RAPGEF5  |
| TC08001434.hg.1 | 2.57  | PSR08018640.hg.1 | KIAA1429 |
| TC08001434.hg.1 | -2.32 | JUC08009514.hg.1 | KIAA1429 |
| TC09000526.hg.1 | 2.57  | PSR09005759.hg.1 | SMC2     |
| TC09000526.hg.1 | 2.38  | JUC09003220.hg.1 | SMC2     |
| TC09000526.hg.1 | 2.1   | JUC09003200.hg.1 | SMC2     |
| TC09000526.hg.1 | 2.08  | PSR09005772.hg.1 | SMC2     |
| TC09000526.hg.1 | -2.03 | PSR09005797.hg.1 | SMC2     |
| TC09000526.hg.1 | -2.27 | JUC09003190.hg.1 | SMC2     |
| TC09000526.hg.1 | -2.77 | JUC09003194.hg.1 | SMC2     |
| TC0X001214.hg.1 | 2.57  | JUC0X008317.hg.1 | TRMT2B   |
| TC0X001214.hg.1 | 2.13  | JUC0X008316.hg.1 | TRMT2B   |
| TC0X001214.hg.1 | -2.43 | PSR0X016325.hg.1 | TRMT2B   |
| TC10000308.hg.1 | 2.57  | JUC10001983.hg.1 | ANTXR1   |
| TC10000308.hg.1 | -2.42 | PSR10003461.hg.1 | ANTXR1   |
| TC10000814.hg.1 | 2.57  | JUC10005470.hg.1 | VTI1A    |
| TC10000814.hg.1 | 2.1   | PSR10009799.hg.1 | VTI1A    |
| TC10000814.hg.1 | -2.31 | JUC10005471.hg.1 | VTI1A    |
| TC10001557.hg.1 | 2.57  | PSR10019752.hg.1 | TLL2     |
| TC10001557.hg.1 | 2.53  | PSR10019747.hg.1 | TLL2     |

|                 |       |                  |          |
|-----------------|-------|------------------|----------|
| TC10001557.hg.1 | 2.48  | JUC10011538.hg.1 | TLL2     |
| TC10001557.hg.1 | -2.42 | JUC10011554.hg.1 | TLL2     |
| TC12000202.hg.1 | 2.57  | PSR12002492.hg.1 | RERG-AS1 |
| TC12000202.hg.1 | 2.09  | JUC12001159.hg.1 | RERG-AS1 |
| TC12001279.hg.1 | 2.57  | PSR12016671.hg.1 | RERG     |
| TC12001279.hg.1 | -2.51 | JUC12009138.hg.1 | RERG     |
| TC12001391.hg.1 | 2.57  | JUC12010022.hg.1 | KIF21A   |
| TC12001391.hg.1 | 2.53  | JUC12010028.hg.1 | KIF21A   |
| TC12001391.hg.1 | 2.51  | JUC12010066.hg.1 | KIF21A   |
| TC12001391.hg.1 | -2.04 | PSR12018014.hg.1 | KIF21A   |
| TC12001391.hg.1 | -2.66 | JUC12010020.hg.1 | KIF21A   |
| TC12001391.hg.1 | -4.25 | JUC12010047.hg.1 | KIF21A   |
| TC16000526.hg.1 | 2.57  | JUC16004143.hg.1 | CES4A    |
| TC16000526.hg.1 | -2.15 | JUC16004162.hg.1 | CES4A    |
| TC16000526.hg.1 | -2.85 | PSR16007341.hg.1 | CES4A    |
| TC16002082.hg.1 | 2.57  | JUC16013844.hg.1 | PRSS53   |
| TC16002082.hg.1 | -2.26 | PSR16014952.hg.1 | PRSS53   |
| TC16002082.hg.1 | -3.42 | PSR16014949.hg.1 | PRSS53   |
| TC17001529.hg.1 | 2.57  | PSR17020399.hg.1 | STAT5B   |
| TC17001529.hg.1 | 2.37  | JUC17011419.hg.1 | STAT5B   |
| TC17001529.hg.1 | 2.1   | PSR17020429.hg.1 | STAT5B   |
| TC17001529.hg.1 | 2.05  | PSR17020418.hg.1 | STAT5B   |
| TC17001529.hg.1 | 2.01  | JUC17011428.hg.1 | STAT5B   |
| TC17001678.hg.1 | 2.57  | JUC17012541.hg.1 | SAMD14   |
| TC17001678.hg.1 | 2.42  | JUC17012529.hg.1 | SAMD14   |
| TC17001678.hg.1 | 2.21  | JUC17012543.hg.1 | SAMD14   |
| TC17001678.hg.1 | 2.11  | PSR17022533.hg.1 | SAMD14   |
| TC17001678.hg.1 | -2.09 | JUC17012530.hg.1 | SAMD14   |
| TC17001678.hg.1 | -2.61 | PSR17022551.hg.1 | SAMD14   |
| TC17001968.hg.1 | 2.57  | PSR17026836.hg.1 | NOTUM    |
| TC17001968.hg.1 | 2.13  | JUC17015092.hg.1 | NOTUM    |
| TC20001728.hg.1 | 2.57  | PSR20000508.hg.1 | PTPRA    |
| TC20001728.hg.1 | 2.4   | JUC20009748.hg.1 | PTPRA    |
| TC20001728.hg.1 | 2.24  | JUC20009730.hg.1 | PTPRA    |
| TC20001728.hg.1 | -3.29 | JUC20009736.hg.1 | PTPRA    |
| TC02000299.hg.1 | 2.56  | JUC02002364.hg.1 | MSH6     |
| TC02000299.hg.1 | 2.44  | PSR02004544.hg.1 | MSH6     |
| TC03001778.hg.1 | 2.56  | JUC03016039.hg.1 | PIK3R4   |
| TC03001778.hg.1 | -2.03 | JUC03016030.hg.1 | PIK3R4   |
| TC03001778.hg.1 | -2.37 | PSR03032244.hg.1 | PIK3R4   |
| TC03001778.hg.1 | -3.09 | JUC03016040.hg.1 | PIK3R4   |
| TC04000030.hg.1 | 2.56  | PSR04000729.hg.1 | WHSC1    |
| TC04000030.hg.1 | 2.44  | JUC04000327.hg.1 | WHSC1    |
| TC04000030.hg.1 | 2.24  | JUC04000336.hg.1 | WHSC1    |
| TC04000030.hg.1 | 2.03  | PSR04000705.hg.1 | WHSC1    |
| TC04000030.hg.1 | -2    | JUC04000338.hg.1 | WHSC1    |
| TC04000030.hg.1 | -2.01 | JUC04000340.hg.1 | WHSC1    |
| TC04000030.hg.1 | -2.08 | JUC04000310.hg.1 | WHSC1    |
| TC04000030.hg.1 | -2.13 | JUC04000312.hg.1 | WHSC1    |
| TC04000030.hg.1 | -2.72 | JUC04000307.hg.1 | WHSC1    |
| TC04000030.hg.1 | -3    | JUC04000333.hg.1 | WHSC1    |
| TC04000030.hg.1 | -5.43 | JUC04000301.hg.1 | WHSC1    |
| TC05000659.hg.1 | 2.56  | JUC05004908.hg.1 | UBE2B    |
| TC05000659.hg.1 | 2.3   | PSR05009133.hg.1 | UBE2B    |
| TC05001491.hg.1 | 2.56  | JUC05010560.hg.1 | COL4A3BP |
| TC05001491.hg.1 | 2.46  | JUC05010561.hg.1 | COL4A3BP |
| TC05001491.hg.1 | 2.05  | PSR05020470.hg.1 | COL4A3BP |
| TC07001073.hg.1 | 2.56  | JUC07007986.hg.1 | PDGFA    |

|                 |        |                  |           |
|-----------------|--------|------------------|-----------|
| TC07001073.hg.1 | -2.15  | PSR07016436.hg.1 | PDGFA     |
| TC07001073.hg.1 | -2.32  | PSR07016433.hg.1 | PDGFA     |
| TC07001073.hg.1 | -2.49  | PSR07016437.hg.1 | PDGFA     |
| TC07001073.hg.1 | -2.5   | PSR07016435.hg.1 | PDGFA     |
| TC07001073.hg.1 | -2.58  | PSR07016422.hg.1 | PDGFA     |
| TC07001073.hg.1 | -2.78  | PSR07016432.hg.1 | PDGFA     |
| TC10000090.hg.1 | 2.56   | JUC10000522.hg.1 | SEC61A2   |
| TC10000090.hg.1 | 2.1    | JUC10000504.hg.1 | SEC61A2   |
| TC10000090.hg.1 | -2.57  | JUC10000501.hg.1 | SEC61A2   |
| TC10000090.hg.1 | -2.65  | PSR10000957.hg.1 | SEC61A2   |
| TC10001136.hg.1 | 2.56   | JUC10008254.hg.1 | MPP7      |
| TC10001136.hg.1 | -2     | JUC10008257.hg.1 | MPP7      |
| TC10001136.hg.1 | -2.8   | PSR10014271.hg.1 | MPP7      |
| TC10001526.hg.1 | 2.56   | JUC10011156.hg.1 | CPEB3     |
| TC10001526.hg.1 | 2.55   | PSR10019172.hg.1 | CPEB3     |
| TC10001526.hg.1 | 2.14   | JUC10011150.hg.1 | CPEB3     |
| TC10001526.hg.1 | -2.08  | JUC10011145.hg.1 | CPEB3     |
| TC10001526.hg.1 | -2.18  | JUC10011154.hg.1 | CPEB3     |
| TC10001546.hg.1 | 2.56   | JUC10011343.hg.1 | CYP2C8    |
| TC10001546.hg.1 | 2.21   | PSR10019450.hg.1 | CYP2C8    |
| TC10001546.hg.1 | -2.06  | PSR10019456.hg.1 | CYP2C8    |
| TC10001546.hg.1 | -2.35  | JUC10011342.hg.1 | CYP2C8    |
| TC11000399.hg.1 | 2.56   | JUC11002695.hg.1 | ATG13     |
| TC11000399.hg.1 | 2.3    | PSR11005010.hg.1 | ATG13     |
| TC11000399.hg.1 | 2.03   | JUC11002711.hg.1 | ATG13     |
| TC11002228.hg.1 | 2.56   | JUC11014158.hg.1 | MMP7      |
| TC11002228.hg.1 | 2.05   | JUC11014162.hg.1 | MMP7      |
| TC11002228.hg.1 | -2.69  | PSR11026620.hg.1 | MMP7      |
| TC11002228.hg.1 | -3.26  | PSR11026617.hg.1 | MMP7      |
| TC11002228.hg.1 | -15.42 | PSR11026615.hg.1 | MMP7      |
| TC13000754.hg.1 | 2.56   | JUC13005110.hg.1 | RNF219    |
| TC13000754.hg.1 | 2.04   | PSR13008699.hg.1 | RNF219    |
| TC13000754.hg.1 | -2.04  | JUC13005107.hg.1 | RNF219    |
| TC15000410.hg.1 | 2.56   | JUC15001823.hg.1 | TMOD2     |
| TC15000410.hg.1 | -2.07  | PSR15003831.hg.1 | TMOD2     |
| TC15001772.hg.1 | 2.56   | PSR15017377.hg.1 | LOC388152 |
| TC15001772.hg.1 | 2.09   | PSR15017355.hg.1 | LOC388152 |
| TC15001772.hg.1 | -2.13  | PSR15017354.hg.1 | LOC388152 |
| TC15001772.hg.1 | -2.4   | JUC15009477.hg.1 | LOC388152 |
| TC15001772.hg.1 | -2.66  | JUC15009490.hg.1 | LOC388152 |
| TC16000488.hg.1 | 2.56   | PSR16006788.hg.1 | CX3CL1    |
| TC16000488.hg.1 | -2.07  | JUC16003848.hg.1 | CX3CL1    |
| TC16001252.hg.1 | 2.56   | JUC16009862.hg.1 | AP1G1     |
| TC16001252.hg.1 | 2.08   | PSR16017434.hg.1 | AP1G1     |
| TC17000906.hg.1 | 2.56   | PSR17011763.hg.1 | C1QTNF1   |
| TC17000906.hg.1 | 2.41   | PSR17011761.hg.1 | C1QTNF1   |
| TC17000906.hg.1 | 2.02   | JUC17006589.hg.1 | C1QTNF1   |
| TC17000906.hg.1 | -3.04  | JUC17006595.hg.1 | C1QTNF1   |
| TC18000507.hg.1 | 2.56   | JUC18003556.hg.1 | MYO5B     |
| TC18000507.hg.1 | -2.2   | PSR18005304.hg.1 | MYO5B     |
| TC18000507.hg.1 | -2.32  | JUC18003545.hg.1 | MYO5B     |
| TC18000507.hg.1 | -2.37  | PSR18005306.hg.1 | MYO5B     |
| TC18000507.hg.1 | -2.43  | JUC18003565.hg.1 | MYO5B     |
| TC18000507.hg.1 | -2.45  | JUC18003555.hg.1 | MYO5B     |
| TC18000507.hg.1 | -2.79  | JUC18003552.hg.1 | MYO5B     |
| TC18000507.hg.1 | -2.83  | JUC18003532.hg.1 | MYO5B     |
| TC01000992.hg.1 | 2.55   | PSR01015797.hg.1 | MOV10     |
| TC01000992.hg.1 | 2.45   | PSR01015807.hg.1 | MOV10     |

|                 |       |                  |             |
|-----------------|-------|------------------|-------------|
| TC01000992.hg.1 | 2.34  | PSR01015759.hg.1 | MOV10       |
| TC01000992.hg.1 | 2.3   | JUC01008255.hg.1 | MOV10       |
| TC01000992.hg.1 | 2.11  | PSR01015821.hg.1 | MOV10       |
| TC01000992.hg.1 | 2.06  | JUC01008236.hg.1 | MOV10       |
| TC01000992.hg.1 | 2.06  | JUC01008246.hg.1 | MOV10       |
| TC01000992.hg.1 | -2.21 | PSR01015787.hg.1 | MOV10       |
| TC01000992.hg.1 | -3.25 | JUC01008243.hg.1 | MOV10       |
| TC01002425.hg.1 | 2.55  | JUC01020090.hg.1 | SNORA61, SI |
| TC01002425.hg.1 | 2.24  | PSR01037391.hg.1 | SNORA61, SI |
| TC01002425.hg.1 | -2.3  | PSR01037361.hg.1 | SNORA61, SI |
| TC01002425.hg.1 | -2.86 | JUC01020093.hg.1 | SNORA61, SI |
| TC01002425.hg.1 | -4.64 | JUC01020092.hg.1 | SNORA61, SI |
| TC01006353.hg.1 | 2.55  | JUC01044398.hg.1 | MKNK1       |
| TC01006353.hg.1 | 2.09  | PSR01040954.hg.1 | MKNK1       |
| TC01006353.hg.1 | 2.08  | JUC01044391.hg.1 | MKNK1       |
| TC01006353.hg.1 | -2.3  | PSR01040945.hg.1 | MKNK1       |
| TC01006353.hg.1 | -2.67 | JUC01044400.hg.1 | MKNK1       |
| TC02001683.hg.1 | 2.55  | PSR02027164.hg.1 | EIF2B4      |
| TC02001683.hg.1 | 2.32  | PSR02027168.hg.1 | EIF2B4      |
| TC02001683.hg.1 | 2.29  | JUC02014183.hg.1 | EIF2B4      |
| TC02001683.hg.1 | 2.08  | PSR02027198.hg.1 | EIF2B4      |
| TC04000029.hg.1 | 2.55  | JUC04000277.hg.1 | FGFR3       |
| TC04000029.hg.1 | 2.47  | PSR04000641.hg.1 | FGFR3       |
| TC06001727.hg.1 | 2.55  | JUC06009788.hg.1 | CCND3       |
| TC06001727.hg.1 | 2.03  | PSR06020649.hg.1 | CCND3       |
| TC06001727.hg.1 | -2.11 | PSR06020638.hg.1 | CCND3       |
| TC06001727.hg.1 | -2.19 | PSR06020656.hg.1 | CCND3       |
| TC06001727.hg.1 | -2.44 | JUC06009785.hg.1 | CCND3       |
| TC06001727.hg.1 | -2.58 | PSR06020659.hg.1 | CCND3       |
| TC07000324.hg.1 | 2.55  | JUC07002355.hg.1 | LOC285878,  |
| TC07000324.hg.1 | -2.45 | JUC07002363.hg.1 | LOC285878,  |
| TC07000324.hg.1 | -2.84 | PSR07004813.hg.1 | LOC285878,  |
| TC07000324.hg.1 | -3.02 | JUC07002357.hg.1 | LOC285878,  |
| TC08001035.hg.1 | 2.55  | JUC08006860.hg.1 | LGI3        |
| TC08001035.hg.1 | 2.32  | JUC08006861.hg.1 | LGI3        |
| TC08001035.hg.1 | 2.14  | PSR08013208.hg.1 | LGI3        |
| TC08001361.hg.1 | 2.55  | JUC08008950.hg.1 | PAG1        |
| TC08001361.hg.1 | 2.04  | PSR08017576.hg.1 | PAG1        |
| TC09000607.hg.1 | 2.55  | PSR09006884.hg.1 | CNTRL       |
| TC09000607.hg.1 | 2.39  | JUC09003797.hg.1 | CNTRL       |
| TC09000607.hg.1 | 2.32  | JUC09003826.hg.1 | CNTRL       |
| TC09000607.hg.1 | 2.07  | JUC09003824.hg.1 | CNTRL       |
| TC09000607.hg.1 | 2.03  | JUC09003811.hg.1 | CNTRL       |
| TC09001541.hg.1 | 2.55  | JUC09010498.hg.1 | TRAF1       |
| TC09001541.hg.1 | 2.3   | PSR09019379.hg.1 | TRAF1       |
| TC0X001513.hg.1 | 2.55  | JUC0X009938.hg.1 | TREX2, HAU: |
| TC0X001513.hg.1 | -2.03 | PSR0X019661.hg.1 | TREX2, HAU: |
| TC0X001513.hg.1 | -2.38 | PSR0X019660.hg.1 | TREX2, HAU: |
| TC0X001513.hg.1 | -2.7  | PSR0X019663.hg.1 | TREX2, HAU: |
| TC0X001513.hg.1 | -3.52 | JUC0X009941.hg.1 | TREX2, HAU: |
| TC0X001513.hg.1 | -4.3  | PSR0X019662.hg.1 | TREX2, HAU: |
| TC10000623.hg.1 | 2.55  | JUC10003897.hg.1 | PTEN        |
| TC10000623.hg.1 | -2.03 | PSR10006855.hg.1 | PTEN        |
| TC11000870.hg.1 | 2.55  | JUC11005763.hg.1 | EED         |
| TC11000870.hg.1 | 2.02  | JUC11005761.hg.1 | EED         |
| TC11000870.hg.1 | -2.82 | PSR11010996.hg.1 | EED         |
| TC12002096.hg.1 | 2.55  | PSR12027754.hg.1 | NCOR2       |
| TC12002096.hg.1 | 2.26  | JUC12015589.hg.1 | NCOR2       |

|                 |       |                  |             |
|-----------------|-------|------------------|-------------|
| TC12002096.hg.1 | -2.2  | JUC12015580.hg.1 | NCOR2       |
| TC13000105.hg.1 | 2.55  | JUC13000583.hg.1 | B3GALTL     |
| TC13000105.hg.1 | 2.14  | PSR13001011.hg.1 | B3GALTL     |
| TC13000105.hg.1 | -2.01 | PSR13001017.hg.1 | B3GALTL     |
| TC14000323.hg.1 | 2.55  | JUC14001670.hg.1 | LGALS3      |
| TC14000323.hg.1 | -2.19 | PSR14003452.hg.1 | LGALS3      |
| TC14000323.hg.1 | -2.46 | JUC14001665.hg.1 | LGALS3      |
| TC14001122.hg.1 | 2.55  | PSR14012710.hg.1 | SAV1        |
| TC14001122.hg.1 | 2.4   | JUC14006403.hg.1 | SAV1        |
| TC14001122.hg.1 | 2.2   | JUC14006404.hg.1 | SAV1        |
| TC14001122.hg.1 | 2.01  | PSR14012708.hg.1 | SAV1        |
| TC14001122.hg.1 | -2.98 | JUC14006405.hg.1 | SAV1        |
| TC14001122.hg.1 | -3.14 | PSR14012703.hg.1 | SAV1        |
| TC15000756.hg.1 | 2.55  | JUC15003516.hg.1 | IL16        |
| TC15000756.hg.1 | 2.13  | JUC15003541.hg.1 | IL16        |
| TC15000756.hg.1 | -2.08 | JUC15003531.hg.1 | IL16        |
| TC15000756.hg.1 | -2.11 | JUC15003545.hg.1 | IL16        |
| TC15000756.hg.1 | -2.19 | PSR15006901.hg.1 | IL16        |
| TC15000756.hg.1 | -2.37 | PSR15006895.hg.1 | IL16        |
| TC15000756.hg.1 | -2.38 | JUC15003542.hg.1 | IL16        |
| TC15000756.hg.1 | -2.41 | JUC15003538.hg.1 | IL16        |
| TC15000756.hg.1 | -4.52 | JUC15003532.hg.1 | IL16        |
| TC16000192.hg.1 | 2.55  | JUC16001468.hg.1 | MIR484, NDE |
| TC16000192.hg.1 | 2.15  | PSR16002836.hg.1 | MIR484, NDE |
| TC16000192.hg.1 | 2.02  | PSR16002852.hg.1 | MIR484, NDE |
| TC03001862.hg.1 | 2.55  | JUC03016708.hg.1 | SLC9A9      |
| TC03001862.hg.1 | 2     | PSR03033601.hg.1 | SLC9A9      |
| TC08000126.hg.1 | 2.55  | JUC08000635.hg.1 | VPS37A      |
| TC08000126.hg.1 | 2     | PSR08001174.hg.1 | VPS37A      |
| TC08000126.hg.1 | 2     | JUC08000623.hg.1 | VPS37A      |
| TC01001552.hg.1 | 2.54  | JUC01012670.hg.1 | AXDND1      |
| TC01001552.hg.1 | 2.31  | JUC01012650.hg.1 | AXDND1      |
| TC01001552.hg.1 | 2.29  | PSR01023941.hg.1 | AXDND1      |
| TC01001552.hg.1 | -2.31 | JUC01012648.hg.1 | AXDND1      |
| TC01002199.hg.1 | 2.54  | PSR01034015.hg.1 | FBXO2       |
| TC01002199.hg.1 | 2.28  | PSR01034011.hg.1 | FBXO2       |
| TC01002199.hg.1 | 2.13  | PSR01034019.hg.1 | FBXO2       |
| TC01002199.hg.1 | 2.09  | PSR01034014.hg.1 | FBXO2       |
| TC01002199.hg.1 | 2.07  | JUC01018254.hg.1 | FBXO2       |
| TC01002199.hg.1 | -2.02 | PSR01034007.hg.1 | FBXO2       |
| TC01002199.hg.1 | -2.05 | JUC01018255.hg.1 | FBXO2       |
| TC01002199.hg.1 | -2.07 | PSR01033995.hg.1 | FBXO2       |
| TC01002199.hg.1 | -2.09 | PSR01033994.hg.1 | FBXO2       |
| TC01002199.hg.1 | -2.2  | JUC01018253.hg.1 | FBXO2       |
| TC01002199.hg.1 | -2.28 | JUC01018246.hg.1 | FBXO2       |
| TC01002199.hg.1 | -2.74 | JUC01018245.hg.1 | FBXO2       |
| TC01003659.hg.1 | 2.54  | JUC01029296.hg.1 | KCNT2       |
| TC01003659.hg.1 | 2.41  | JUC01029293.hg.1 | KCNT2       |
| TC01003659.hg.1 | 2.4   | JUC01029277.hg.1 | KCNT2       |
| TC01003659.hg.1 | 2.31  | PSR01056117.hg.1 | KCNT2       |
| TC01003659.hg.1 | 2.27  | JUC01029291.hg.1 | KCNT2       |
| TC01003659.hg.1 | 2.2   | JUC01029266.hg.1 | KCNT2       |
| TC01003659.hg.1 | -2.12 | JUC01029273.hg.1 | KCNT2       |
| TC01003659.hg.1 | -2.2  | PSR01056107.hg.1 | KCNT2       |
| TC01003659.hg.1 | -2.3  | JUC01029302.hg.1 | KCNT2       |
| TC01003659.hg.1 | -2.46 | JUC01029298.hg.1 | KCNT2       |
| TC01003659.hg.1 | -2.54 | JUC01029271.hg.1 | KCNT2       |
| TC01006283.hg.1 | 2.54  | PSR01016656.hg.1 |             |



|                 |       |                  |               |
|-----------------|-------|------------------|---------------|
| TC01006283.hg.1 | 2.22  | JUC01039186.hg.1 |               |
| TC01006283.hg.1 | 2.21  | JUC01039189.hg.1 |               |
| TC01006283.hg.1 | -2.25 | JUC01039199.hg.1 |               |
| TC02000617.hg.1 | 2.54  | JUC02005166.hg.1 | MAP4K4        |
| TC02000617.hg.1 | 2.34  | JUC02005161.hg.1 | MAP4K4        |
| TC02000617.hg.1 | 2.08  | PSR02009711.hg.1 | MAP4K4        |
| TC06000385.hg.1 | 2.54  | JUC06001653.hg.1 | HSPA1B, HSF1  |
| TC06000385.hg.1 | -2.43 | PSR06003980.hg.1 | HSPA1B, HSF1  |
| TC06000385.hg.1 | -2.55 | JUC06001654.hg.1 | HSPA1B, HSF1  |
| TC07001978.hg.1 | 2.54  | JUC07015110.hg.1 | OR2A9P, OR2A9 |
| TC07001978.hg.1 | -2.04 | PSR07030509.hg.1 | OR2A9P, OR2A9 |
| TC07001978.hg.1 | -2.05 | PSR07030524.hg.1 | OR2A9P, OR2A9 |
| TC07001978.hg.1 | -2.06 | PSR07030495.hg.1 | OR2A9P, OR2A9 |
| TC07001978.hg.1 | -2.07 | PSR07030485.hg.1 | OR2A9P, OR2A9 |
| TC07001978.hg.1 | -2.07 | PSR07030496.hg.1 | OR2A9P, OR2A9 |
| TC07001978.hg.1 | -2.15 | PSR07030484.hg.1 | OR2A9P, OR2A9 |
| TC07001978.hg.1 | -2.16 | PSR07030498.hg.1 | OR2A9P, OR2A9 |
| TC07001978.hg.1 | -2.16 | PSR07030521.hg.1 | OR2A9P, OR2A9 |
| TC07001978.hg.1 | -2.21 | PSR07030522.hg.1 | OR2A9P, OR2A9 |
| TC07001978.hg.1 | -2.22 | PSR07030513.hg.1 | OR2A9P, OR2A9 |
| TC07001978.hg.1 | -2.23 | JUC07015094.hg.1 | OR2A9P, OR2A9 |
| TC07001978.hg.1 | -2.34 | JUC07015095.hg.1 | OR2A9P, OR2A9 |
| TC07001978.hg.1 | -2.36 | PSR07030506.hg.1 | OR2A9P, OR2A9 |
| TC07001978.hg.1 | -2.37 | JUC07015113.hg.1 | OR2A9P, OR2A9 |
| TC07001978.hg.1 | -2.38 | PSR07030499.hg.1 | OR2A9P, OR2A9 |
| TC07001978.hg.1 | -2.5  | PSR07030504.hg.1 | OR2A9P, OR2A9 |
| TC07001978.hg.1 | -2.63 | PSR07030505.hg.1 | OR2A9P, OR2A9 |
| TC07001978.hg.1 | -2.65 | JUC07015123.hg.1 | OR2A9P, OR2A9 |
| TC07001978.hg.1 | -2.75 | JUC07015126.hg.1 | OR2A9P, OR2A9 |
| TC07001978.hg.1 | -2.98 | PSR07030514.hg.1 | OR2A9P, OR2A9 |
| TC07001978.hg.1 | -3.08 | PSR07030502.hg.1 | OR2A9P, OR2A9 |
| TC07001978.hg.1 | -3.11 | PSR07030501.hg.1 | OR2A9P, OR2A9 |
| TC07001978.hg.1 | -3.17 | PSR07030503.hg.1 | OR2A9P, OR2A9 |
| TC07001978.hg.1 | -3.28 | JUC07015112.hg.1 | OR2A9P, OR2A9 |
| TC07001978.hg.1 | -3.79 | PSR07030515.hg.1 | OR2A9P, OR2A9 |
| TC07001978.hg.1 | -4.71 | JUC07015106.hg.1 | OR2A9P, OR2A9 |
| TC07001978.hg.1 | -4.89 | JUC07015115.hg.1 | OR2A9P, OR2A9 |
| TC08001489.hg.1 | 2.54  | JUC08009876.hg.1 | ZNF706        |
| TC08001489.hg.1 | -2.03 | PSR08019434.hg.1 | ZNF706        |
| TC08001489.hg.1 | -2.12 | PSR08019454.hg.1 | ZNF706        |
| TC08001489.hg.1 | -2.38 | PSR08019452.hg.1 | ZNF706        |
| TC08001489.hg.1 | -3.57 | JUC08009873.hg.1 | ZNF706        |
| TC0X000858.hg.1 | 2.54  | JUC0X005643.hg.1 | ARHGAP6       |
| TC0X000858.hg.1 | 2.38  | PSR0X011452.hg.1 | ARHGAP6       |
| TC0X000858.hg.1 | 2.01  | PSR0X011473.hg.1 | ARHGAP6       |
| TC0X000858.hg.1 | -2.15 | JUC0X005630.hg.1 | ARHGAP6       |
| TC10000086.hg.1 | 2.54  | PSR10000883.hg.1 | ECHDC3        |
| TC10000086.hg.1 | 2.22  | JUC10000465.hg.1 | ECHDC3        |
| TC10000086.hg.1 | 2.12  | PSR10000889.hg.1 | ECHDC3        |
| TC10000086.hg.1 | 2     | PSR10000882.hg.1 | ECHDC3        |
| TC10000086.hg.1 | -2.21 | PSR10000887.hg.1 | ECHDC3        |
| TC10000086.hg.1 | -2.95 | JUC10000464.hg.1 | ECHDC3        |
| TC10001144.hg.1 | 2.54  | JUC10008319.hg.1 | SVIL          |
| TC10001144.hg.1 | 2.15  | JUC10008287.hg.1 | SVIL          |
| TC10001144.hg.1 | 2.03  | PSR10014375.hg.1 | SVIL          |
| TC10001144.hg.1 | -2.16 | JUC10008315.hg.1 | SVIL          |
| TC10001144.hg.1 | -2.25 | JUC10008294.hg.1 | SVIL          |
| TC10001144.hg.1 | -3.69 | JUC10008312.hg.1 | SVIL          |

|                 |        |                  |        |
|-----------------|--------|------------------|--------|
| TC10001144.hg.1 | -4.17  | JUC10008305.hg.1 | SVIL   |
| TC19000795.hg.1 | 2.54   | JUC19006552.hg.1 | ZNF480 |
| TC19000795.hg.1 | 2.09   | JUC19006550.hg.1 | ZNF480 |
| TC19000795.hg.1 | -3.64  | PSR19011176.hg.1 | ZNF480 |
| TC19001242.hg.1 | 2.54   | JUC19010129.hg.1 | EMR2   |
| TC19001242.hg.1 | 2.11   | JUC19010150.hg.1 | EMR2   |
| TC19001242.hg.1 | 2.04   | JUC19010143.hg.1 | EMR2   |
| TC19001242.hg.1 | -2.03  | PSR19017464.hg.1 | EMR2   |
| TC19001242.hg.1 | -2.93  | JUC19010128.hg.1 | EMR2   |
| TC19001242.hg.1 | -3.62  | PSR19017442.hg.1 | EMR2   |
| TC20000358.hg.1 | 2.54   | PSR20005133.hg.1 | SNX21  |
| TC20000358.hg.1 | 2.29   | JUC20002791.hg.1 | SNX21  |
| TC20000358.hg.1 | 2.08   | PSR20005123.hg.1 | SNX21  |
| TC20000358.hg.1 | 2.08   | JUC20002798.hg.1 | SNX21  |
| TC20000358.hg.1 | 2.01   | JUC20002792.hg.1 | SNX21  |
| TC01000427.hg.1 | 2.53   | PSR01006577.hg.1 | HDAC1  |
| TC01000427.hg.1 | -2.1   | JUC01003437.hg.1 | HDAC1  |
| TC01000427.hg.1 | -2.53  | PSR01006585.hg.1 | HDAC1  |
| TC02001795.hg.1 | 2.53   | PSR02028825.hg.1 | LRPPRC |
| TC02001795.hg.1 | 2.36   | JUC02015137.hg.1 | LRPPRC |
| TC02001795.hg.1 | 2.22   | PSR02028881.hg.1 | LRPPRC |
| TC02001795.hg.1 | 2.1    | JUC02015154.hg.1 | LRPPRC |
| TC02001795.hg.1 | 2.07   | JUC02015145.hg.1 | LRPPRC |
| TC04001816.hg.1 | 2.53   | JUC04013152.hg.1 | UFSP2  |
| TC04001816.hg.1 | 2.28   | JUC04013148.hg.1 | UFSP2  |
| TC04001816.hg.1 | 2.26   | PSR04024778.hg.1 | UFSP2  |
| TC04001816.hg.1 | -2.28  | JUC04013141.hg.1 | UFSP2  |
| TC05000291.hg.1 | 2.53   | PSR05003787.hg.1 | PIK3R1 |
| TC05000291.hg.1 | 2.45   | PSR05003788.hg.1 | PIK3R1 |
| TC05000291.hg.1 | 2.31   | JUC05002032.hg.1 | PIK3R1 |
| TC05000291.hg.1 | 2.27   | PSR05003785.hg.1 | PIK3R1 |
| TC05000291.hg.1 | 2.17   | JUC05002048.hg.1 | PIK3R1 |
| TC05000291.hg.1 | -2.24  | JUC05002053.hg.1 | PIK3R1 |
| TC05000291.hg.1 | -2.53  | PSR05003806.hg.1 | PIK3R1 |
| TC05000291.hg.1 | -2.61  | PSR05003807.hg.1 | PIK3R1 |
| TC05000291.hg.1 | -3.72  | JUC05002036.hg.1 | PIK3R1 |
| TC05000291.hg.1 | -3.81  | JUC05002046.hg.1 | PIK3R1 |
| TC05000291.hg.1 | -4.93  | JUC05002049.hg.1 | PIK3R1 |
| TC05000291.hg.1 | -10.77 | PSR05003801.hg.1 | PIK3R1 |
| TC09000128.hg.1 | 2.53   | JUC09000792.hg.1 | ACO1   |
| TC09000128.hg.1 | 2.24   | JUC09000784.hg.1 | ACO1   |
| TC09000128.hg.1 | 2.22   | PSR09001459.hg.1 | ACO1   |
| TC09000128.hg.1 | 2.08   | JUC09000779.hg.1 | ACO1   |
| TC09000128.hg.1 | 2.07   | PSR09001460.hg.1 | ACO1   |
| TC10001309.hg.1 | 2.53   | PSR10016371.hg.1 | ZWINT  |
| TC10001309.hg.1 | 2.51   | JUC10009571.hg.1 | ZWINT  |
| TC13000021.hg.1 | 2.53   | PSR13000098.hg.1 | ZMYM2  |
| TC13000021.hg.1 | -2.01  | PSR13000138.hg.1 | ZMYM2  |
| TC13000021.hg.1 | -2.05  | JUC13000071.hg.1 | ZMYM2  |
| TC13000021.hg.1 | -2.08  | JUC13000052.hg.1 | ZMYM2  |
| TC15000647.hg.1 | 2.53   | JUC15002776.hg.1 | LRRC49 |
| TC15000647.hg.1 | 2.2    | PSR15005505.hg.1 | LRRC49 |
| TC15000647.hg.1 | 2.09   | JUC15002788.hg.1 | LRRC49 |
| TC15000647.hg.1 | -2.21  | JUC15002774.hg.1 | LRRC49 |
| TC15000647.hg.1 | -2.37  | JUC15002772.hg.1 | LRRC49 |
| TC15000647.hg.1 | -2.37  | JUC15002785.hg.1 | LRRC49 |
| TC16001169.hg.1 | 2.53   | JUC16009135.hg.1 | TK2    |
| TC16001169.hg.1 | -2.26  | JUC16009148.hg.1 | TK2    |

|                 |       |                  |             |
|-----------------|-------|------------------|-------------|
| TC16001169.hg.1 | -2.47 | PSR16016223.hg.1 | TK2         |
| TC19000674.hg.1 | 2.53  | JUC19005602.hg.1 | CCDC9       |
| TC19000674.hg.1 | -2.16 | PSR19009429.hg.1 | CCDC9       |
| TC20000372.hg.1 | 2.53  | JUC20002951.hg.1 | NCOA3       |
| TC20000372.hg.1 | -2.04 | JUC20002939.hg.1 | NCOA3       |
| TC20000372.hg.1 | -2.77 | JUC20002934.hg.1 | NCOA3       |
| TC20000372.hg.1 | -2.91 | JUC20002935.hg.1 | NCOA3       |
| TC20000372.hg.1 | -3.32 | PSR20005402.hg.1 | NCOA3       |
| TC22000652.hg.1 | 2.53  | JUC22004673.hg.1 | RNF215, KIA |
| TC22000652.hg.1 | 2.16  | PSR22011466.hg.1 | RNF215, KIA |
| TC22000652.hg.1 | 2.06  | JUC22004674.hg.1 | RNF215, KIA |
| TC22000652.hg.1 | 2.04  | JUC22004675.hg.1 | RNF215, KIA |
| TC18000070.hg.1 | 2.53  | JUC18000483.hg.1 | CEP192      |
| TC18000070.hg.1 | 2     | PSR18000805.hg.1 | CEP192      |
| TC18000070.hg.1 | -2.95 | JUC18000447.hg.1 | CEP192      |
| TC01006366.hg.1 | 2.52  | PSR01046950.hg.1 | DENND2C     |
| TC01006366.hg.1 | -2.05 | JUC01044598.hg.1 | DENND2C     |
| TC01006366.hg.1 | -2.34 | PSR01046977.hg.1 | DENND2C     |
| TC02000721.hg.1 | 2.52  | PSR02011174.hg.1 | PSD4        |
| TC02000721.hg.1 | 2.37  | PSR02011186.hg.1 | PSD4        |
| TC02000721.hg.1 | 2.27  | JUC02005924.hg.1 | PSD4        |
| TC03000024.hg.1 | 2.52  | JUC03000279.hg.1 | GRM7        |
| TC03000024.hg.1 | 2.12  | JUC03000296.hg.1 | GRM7        |
| TC03000024.hg.1 | -2.26 | PSR03000486.hg.1 | GRM7        |
| TC04000641.hg.1 | 2.52  | JUC04004937.hg.1 | INTU        |
| TC04000641.hg.1 | 2.17  | JUC04004945.hg.1 | INTU        |
| TC04000641.hg.1 | 2.12  | JUC04004925.hg.1 | INTU        |
| TC04000641.hg.1 | -2    | PSR04009249.hg.1 | INTU        |
| TC04000641.hg.1 | -2.33 | PSR04009257.hg.1 | INTU        |
| TC05000575.hg.1 | 2.52  | JUC05004381.hg.1 | SNCAIP      |
| TC05000575.hg.1 | 2.03  | PSR05008049.hg.1 | SNCAIP      |
| TC05000575.hg.1 | 2     | PSR05008043.hg.1 | SNCAIP      |
| TC05000575.hg.1 | -2.3  | JUC05004371.hg.1 | SNCAIP      |
| TC05001342.hg.1 | 2.52  | PSR05018856.hg.1 | MOCS2       |
| TC05001342.hg.1 | -2.12 | JUC05009687.hg.1 | MOCS2       |
| TC05001820.hg.1 | 2.52  | JUC05012694.hg.1 |             |
| TC05001820.hg.1 | -2.04 | PSR05024738.hg.1 |             |
| TC06000628.hg.1 | 2.52  | JUC06003371.hg.1 | SLC25A27    |
| TC06000628.hg.1 | 2.09  | PSR06007597.hg.1 | SLC25A27    |
| TC06000628.hg.1 | 2     | PSR06007595.hg.1 | SLC25A27    |
| TC06000628.hg.1 | 2     | JUC06003366.hg.1 | SLC25A27    |
| TC07001997.hg.1 | 2.52  | JUC07015220.hg.1 | ZNF425      |
| TC07001997.hg.1 | 2.48  | PSR07030700.hg.1 | ZNF425      |
| TC07001997.hg.1 | 2.45  | PSR07030693.hg.1 | ZNF425      |
| TC07001997.hg.1 | 2.26  | PSR07030697.hg.1 | ZNF425      |
| TC07001997.hg.1 | 2.08  | PSR07030698.hg.1 | ZNF425      |
| TC10000982.hg.1 | 2.52  | JUC10007139.hg.1 | LOC1002160  |
| TC10000982.hg.1 | -2.04 | PSR10012331.hg.1 | LOC1002160  |
| TC10000982.hg.1 | -2.09 | PSR10012325.hg.1 | LOC1002160  |
| TC10000982.hg.1 | -2.36 | JUC10007140.hg.1 | LOC1002160  |
| TC10000982.hg.1 | -2.54 | PSR10012334.hg.1 | LOC1002160  |
| TC10000982.hg.1 | -3.38 | JUC10007146.hg.1 | LOC1002160  |
| TC10000982.hg.1 | -3.42 | JUC10007148.hg.1 | LOC1002160  |
| TC10000982.hg.1 | -3.66 | PSR10012333.hg.1 | LOC1002160  |
| TC11001302.hg.1 | 2.52  | JUC11008919.hg.1 | NUP98       |
| TC11001302.hg.1 | 2.29  | PSR11016593.hg.1 | NUP98       |
| TC11001302.hg.1 | -2.03 | JUC11008905.hg.1 | NUP98       |
| TC11001302.hg.1 | -2.39 | JUC11008906.hg.1 | NUP98       |

|                 |       |                  |              |
|-----------------|-------|------------------|--------------|
| TC12001426.hg.1 | 2.52  | JUC12010285.hg.1 | SLC38A1      |
| TC12001426.hg.1 | -2.11 | PSR12018425.hg.1 | SLC38A1      |
| TC14002325.hg.1 | 2.52  | JUC14012126.hg.1 | C14orf149    |
| TC14002325.hg.1 | 2.03  | PSR14013488.hg.1 | C14orf149    |
| TC14002325.hg.1 | -3.53 | JUC14012124.hg.1 | C14orf149    |
| TC15000035.hg.1 | 2.52  | JUC15000177.hg.1 | GOLGA8E, G   |
| TC15000035.hg.1 | 2.37  | PSR15000245.hg.1 | GOLGA8E, G   |
| TC15000035.hg.1 | -2.03 | PSR15000249.hg.1 | GOLGA8E, G   |
| TC16000372.hg.1 | 2.52  | PSR16005461.hg.1 | FUS          |
| TC16000372.hg.1 | 2.28  | JUC16002978.hg.1 | FUS          |
| TC21000388.hg.1 | 2.52  | JUC21002254.hg.1 | TIAM1        |
| TC21000388.hg.1 | 2.47  | JUC21002273.hg.1 | TIAM1        |
| TC21000388.hg.1 | 2.09  | PSR21004286.hg.1 | TIAM1        |
| TC21000388.hg.1 | 2.01  | JUC21002257.hg.1 | TIAM1        |
| TC21000388.hg.1 | -2    | PSR21004270.hg.1 | TIAM1        |
| TC21000388.hg.1 | -2    | JUC21002260.hg.1 | TIAM1        |
| TC21000388.hg.1 | -2.25 | JUC21002278.hg.1 | TIAM1        |
| TC21000388.hg.1 | -2.38 | JUC21002243.hg.1 | TIAM1        |
| TC21000388.hg.1 | -2.69 | PSR21004253.hg.1 | TIAM1        |
| TC21000388.hg.1 | -2.74 | PSR21004283.hg.1 | TIAM1        |
| TC21000388.hg.1 | -2.76 | JUC21002277.hg.1 | TIAM1        |
| TC01001807.hg.1 | 2.51  | PSR01028204.hg.1 | LYPLAL1      |
| TC01001807.hg.1 | 2.38  | JUC01015213.hg.1 | LYPLAL1      |
| TC01001807.hg.1 | -2.08 | JUC01015201.hg.1 | LYPLAL1      |
| TC01001807.hg.1 | -4.02 | JUC01015207.hg.1 | LYPLAL1      |
| TC03000815.hg.1 | 2.51  | JUC03007378.hg.1 | EIF2A        |
| TC03000815.hg.1 | -2.16 | PSR03014649.hg.1 | EIF2A        |
| TC03000815.hg.1 | -2.69 | PSR03014654.hg.1 | EIF2A        |
| TC03000815.hg.1 | -3.79 | PSR03014651.hg.1 | EIF2A        |
| TC03000815.hg.1 | -5.46 | JUC03007385.hg.1 | EIF2A        |
| TC03000932.hg.1 | 2.51  | PSR03016204.hg.1 | NLGN1        |
| TC03000932.hg.1 | -3.29 | JUC03008258.hg.1 | NLGN1        |
| TC04001554.hg.1 | 2.51  | PSR04021865.hg.1 | PABPC4L      |
| TC04001554.hg.1 | 2.19  | JUC04011525.hg.1 | PABPC4L      |
| TC05000245.hg.1 | 2.51  | JUC05001689.hg.1 | SETD9        |
| TC05000245.hg.1 | -2.03 | PSR05003039.hg.1 | SETD9        |
| TC05000245.hg.1 | -2.11 | JUC05001682.hg.1 | SETD9        |
| TC05000245.hg.1 | -2.15 | JUC05001691.hg.1 | SETD9        |
| TC05000245.hg.1 | -2.92 | PSR05003023.hg.1 | SETD9        |
| TC05000245.hg.1 | -3.19 | JUC05001683.hg.1 | SETD9        |
| TC05000726.hg.1 | 2.51  | PSR05010336.hg.1 | EIF4EBP3, AI |
| TC05000726.hg.1 | -2.22 | JUC05005503.hg.1 | EIF4EBP3, AI |
| TC05000726.hg.1 | -2.52 | JUC05005473.hg.1 | EIF4EBP3, AI |
| TC05001482.hg.1 | 2.51  | JUC05010491.hg.1 | GFM2         |
| TC05001482.hg.1 | 2.07  | PSR05020352.hg.1 | GFM2         |
| TC05001482.hg.1 | -2.41 | PSR05020335.hg.1 | GFM2         |
| TC05003422.hg.1 | 2.51  | JUC05019554.hg.1 | AMACR        |
| TC05003422.hg.1 | -2.02 | PSR05017509.hg.1 | AMACR        |
| TC05003422.hg.1 | -2.15 | PSR05017508.hg.1 | AMACR        |
| TC05003422.hg.1 | -4.27 | JUC05019551.hg.1 | AMACR        |
| TC06000768.hg.1 | 2.51  | JUC06004304.hg.1 | DOPEY1       |
| TC06000768.hg.1 | 2.44  | PSR06009196.hg.1 | DOPEY1       |
| TC06000768.hg.1 | 2     | PSR06009220.hg.1 | DOPEY1       |
| TC06000768.hg.1 | -2.08 | JUC06004275.hg.1 | DOPEY1       |
| TC06000768.hg.1 | -2.21 | JUC06004278.hg.1 | DOPEY1       |
| TC06000768.hg.1 | -2.32 | JUC06004301.hg.1 | DOPEY1       |
| TC06000768.hg.1 | -2.39 | JUC06004266.hg.1 | DOPEY1       |
| TC06000768.hg.1 | -2.47 | JUC06004312.hg.1 | DOPEY1       |

|                 |       |                  |             |
|-----------------|-------|------------------|-------------|
| TC06000768.hg.1 | -2.5  | PSR06009189.hg.1 | DOPEY1      |
| TC07001808.hg.1 | 2.51  | JUC07013767.hg.1 | FAM3C       |
| TC07001808.hg.1 | 2.07  | JUC07013760.hg.1 | FAM3C       |
| TC07001808.hg.1 | 2.02  | PSR07027983.hg.1 | FAM3C       |
| TC09000891.hg.1 | 2.51  | JUC09006417.hg.1 | PLGRKT      |
| TC09000891.hg.1 | -2.12 | JUC09006416.hg.1 | PLGRKT      |
| TC09000891.hg.1 | -2.26 | PSR09011841.hg.1 | PLGRKT      |
| TC09000891.hg.1 | -2.46 | JUC09006414.hg.1 | PLGRKT      |
| TC09000891.hg.1 | -4.6  | JUC09006412.hg.1 | PLGRKT      |
| TC09001379.hg.1 | 2.51  | PSR09017257.hg.1 | ZNF782      |
| TC09001379.hg.1 | 2.08  | JUC09009281.hg.1 | ZNF782      |
| TC09001379.hg.1 | -2.9  | JUC09009272.hg.1 | ZNF782      |
| TC11001716.hg.1 | 2.51  | JUC11010594.hg.1 | PHF21A      |
| TC11001716.hg.1 | 2.09  | PSR11019976.hg.1 | PHF21A      |
| TC11001716.hg.1 | -2.06 | JUC11010598.hg.1 | PHF21A      |
| TC11001716.hg.1 | -3.3  | JUC11010588.hg.1 | PHF21A      |
| TC11002004.hg.1 | 2.51  | PSR11024035.hg.1 | SUV420H1    |
| TC11002004.hg.1 | 2.19  | JUC11012694.hg.1 | SUV420H1    |
| TC11002004.hg.1 | -2.07 | JUC11012698.hg.1 | SUV420H1    |
| TC11002004.hg.1 | -2.08 | JUC11012682.hg.1 | SUV420H1    |
| TC11002004.hg.1 | -2.21 | JUC11012686.hg.1 | SUV420H1    |
| TC11002322.hg.1 | 2.51  | JUC11014787.hg.1 | BUD13       |
| TC11002322.hg.1 | -2.17 | PSR11027736.hg.1 | BUD13       |
| TC12001625.hg.1 | 2.51  | JUC12012090.hg.1 | DDIT3       |
| TC12001625.hg.1 | -2.02 | JUC12012092.hg.1 | DDIT3       |
| TC12001625.hg.1 | -2.05 | PSR12021963.hg.1 | DDIT3       |
| TC12001636.hg.1 | 2.51  | PSR12022141.hg.1 | AVIL        |
| TC12001636.hg.1 | 2.34  | PSR12022135.hg.1 | AVIL        |
| TC12001636.hg.1 | 2.12  | JUC12012204.hg.1 | AVIL        |
| TC12001636.hg.1 | -2.14 | PSR12022163.hg.1 | AVIL        |
| TC12001636.hg.1 | -2.23 | JUC12012206.hg.1 | AVIL        |
| TC12001636.hg.1 | -2.32 | PSR12022155.hg.1 | AVIL        |
| TC12001636.hg.1 | -2.46 | PSR12022154.hg.1 | AVIL        |
| TC12001636.hg.1 | -2.51 | PSR12022165.hg.1 | AVIL        |
| TC12001636.hg.1 | -2.68 | JUC12012190.hg.1 | AVIL        |
| TC12001636.hg.1 | -2.79 | PSR12022160.hg.1 | AVIL        |
| TC12001636.hg.1 | -3.17 | PSR12022161.hg.1 | AVIL        |
| TC12001636.hg.1 | -3.66 | PSR12022162.hg.1 | AVIL        |
| TC12001636.hg.1 | -3.92 | PSR12022144.hg.1 | AVIL        |
| TC12001636.hg.1 | -8.52 | JUC12012203.hg.1 | AVIL        |
| TC14000514.hg.1 | 2.51  | JUC14003254.hg.1 | FLRT2, LOC1 |
| TC14000514.hg.1 | 2.34  | PSR14006445.hg.1 | FLRT2, LOC1 |
| TC14000514.hg.1 | -2.07 | PSR14006446.hg.1 | FLRT2, LOC1 |
| TC15000164.hg.1 | 2.51  | JUC15000421.hg.1 | DKFZP434L1  |
| TC15000164.hg.1 | 2.41  | JUC15000429.hg.1 | DKFZP434L1  |
| TC15000164.hg.1 | 2.25  | PSR15001067.hg.1 | DKFZP434L1  |
| TC15000164.hg.1 | 2.2   | PSR15001063.hg.1 | DKFZP434L1  |
| TC15000164.hg.1 | 2.14  | PSR15001069.hg.1 | DKFZP434L1  |
| TC18000477.hg.1 | 2.51  | PSR18004909.hg.1 | PSTPIP2     |
| TC18000477.hg.1 | 2.18  | PSR18004926.hg.1 | PSTPIP2     |
| TC18000477.hg.1 | 2.05  | JUC18003322.hg.1 | PSTPIP2     |
| TC20000019.hg.1 | 2.51  | PSR20000225.hg.1 | SIRPA       |
| TC20000019.hg.1 | 2.2   | PSR20000219.hg.1 | SIRPA       |
| TC20000019.hg.1 | -2.53 | JUC20000114.hg.1 | SIRPA       |
| TC20000019.hg.1 | -3.02 | JUC20000109.hg.1 | SIRPA       |
| TC20000499.hg.1 | 2.51  | PSR20007010.hg.1 | COL9A3      |
| TC20000499.hg.1 | 2.44  | JUC20003722.hg.1 | COL9A3      |
| TC20000499.hg.1 | 2.41  | PSR20007037.hg.1 | COL9A3      |

|                 |       |                  |         |
|-----------------|-------|------------------|---------|
| TC20000499.hg.1 | 2.41  | JUC20003724.hg.1 | COL9A3  |
| TC20000499.hg.1 | 2.02  | JUC20003734.hg.1 | COL9A3  |
| TC20000499.hg.1 | -2.1  | PSR20007061.hg.1 | COL9A3  |
| TC20000499.hg.1 | -3.2  | JUC20003708.hg.1 | COL9A3  |
| TC20000499.hg.1 | -27.1 | JUC20003723.hg.1 | COL9A3  |
| TC21001063.hg.1 | 2.51  | PSR21002180.hg.1 | NDUFV3  |
| TC21001063.hg.1 | -2.02 | JUC21005181.hg.1 | NDUFV3  |
| TC02002644.hg.1 | 2.5   | PSR02042411.hg.1 | PGAP1   |
| TC02002644.hg.1 | 2.33  | PSR02042402.hg.1 | PGAP1   |
| TC02002644.hg.1 | 2.11  | PSR02042370.hg.1 | PGAP1   |
| TC02002644.hg.1 | 2.04  | PSR02042386.hg.1 | PGAP1   |
| TC02002644.hg.1 | -2.63 | JUC02022166.hg.1 | PGAP1   |
| TC03001343.hg.1 | 2.5   | PSR03022943.hg.1 | ZDHHC3  |
| TC03001343.hg.1 | -2.97 | JUC03011438.hg.1 | ZDHHC3  |
| TC05001871.hg.1 | 2.5   | JUC05013134.hg.1 | HDAC3   |
| TC05001871.hg.1 | 2.28  | PSR05025762.hg.1 | HDAC3   |
| TC05001871.hg.1 | 2.23  | JUC05013132.hg.1 | HDAC3   |
| TC07000993.hg.1 | 2.5   | PSR07015079.hg.1 | ZNF862  |
| TC07000993.hg.1 | 2.09  | JUC07007367.hg.1 | ZNF862  |
| TC07000993.hg.1 | -2.01 | JUC07007364.hg.1 | ZNF862  |
| TC08001652.hg.1 | 2.5   | JUC08010944.hg.1 | KCNQ3   |
| TC08001652.hg.1 | 2.29  | PSR08021452.hg.1 | KCNQ3   |
| TC08001652.hg.1 | 2.24  | JUC08010946.hg.1 | KCNQ3   |
| TC08001652.hg.1 | 2.03  | PSR08021461.hg.1 | KCNQ3   |
| TC08001652.hg.1 | 2     | PSR08021463.hg.1 | KCNQ3   |
| TC08001652.hg.1 | -2.11 | JUC08010948.hg.1 | KCNQ3   |
| TC08001652.hg.1 | -2.19 | PSR08021438.hg.1 | KCNQ3   |
| TC08001652.hg.1 | -2.3  | PSR08021439.hg.1 | KCNQ3   |
| TC08001652.hg.1 | -2.46 | PSR08021444.hg.1 | KCNQ3   |
| TC08001652.hg.1 | -2.65 | JUC08010954.hg.1 | KCNQ3   |
| TC08001652.hg.1 | -3.83 | PSR08021447.hg.1 | KCNQ3   |
| TC08001652.hg.1 | -5.66 | JUC08010945.hg.1 | KCNQ3   |
| TC08001652.hg.1 | -5.99 | PSR08021440.hg.1 | KCNQ3   |
| TC11002140.hg.1 | 2.5   | JUC11013587.hg.1 | ODZ4    |
| TC11002140.hg.1 | 2.22  | JUC11013570.hg.1 | ODZ4    |
| TC11002140.hg.1 | -2.05 | PSR11025617.hg.1 | ODZ4    |
| TC11002140.hg.1 | -2.31 | JUC11013573.hg.1 | ODZ4    |
| TC11002140.hg.1 | -2.43 | PSR11025607.hg.1 | ODZ4    |
| TC11002140.hg.1 | -2.7  | JUC11013576.hg.1 | ODZ4    |
| TC11002140.hg.1 | -2.73 | PSR11025618.hg.1 | ODZ4    |
| TC11002140.hg.1 | -2.91 | PSR11025586.hg.1 | ODZ4    |
| TC11002140.hg.1 | -3.05 | PSR11025612.hg.1 | ODZ4    |
| TC11002140.hg.1 | -3.21 | PSR11025620.hg.1 | ODZ4    |
| TC11002140.hg.1 | -3.41 | PSR11025611.hg.1 | ODZ4    |
| TC11002140.hg.1 | -4.47 | PSR11025627.hg.1 | ODZ4    |
| TC11002140.hg.1 | -5.68 | JUC11013592.hg.1 | ODZ4    |
| TC11002140.hg.1 | -5.7  | JUC11013572.hg.1 | ODZ4    |
| TC11002140.hg.1 | -6.56 | PSR11025625.hg.1 | ODZ4    |
| TC11002140.hg.1 | -8.6  | JUC11013601.hg.1 | ODZ4    |
| TC11002140.hg.1 | -8.63 | JUC11013571.hg.1 | ODZ4    |
| TC12001598.hg.1 | 2.5   | JUC12011779.hg.1 | RNF41   |
| TC12001598.hg.1 | 2.03  | PSR12021248.hg.1 | RNF41   |
| TC12001598.hg.1 | -2.97 | JUC12011784.hg.1 | RNF41   |
| TC18000018.hg.1 | 2.5   | JUC18000146.hg.1 | TGIF1   |
| TC18000018.hg.1 | 2.16  | PSR18000201.hg.1 | TGIF1   |
| TC18000018.hg.1 | 2.01  | PSR18000193.hg.1 | TGIF1   |
| TC18000018.hg.1 | -2.23 | PSR18000217.hg.1 | TGIF1   |
| TC19000589.hg.1 | 2.5   | JUC19004907.hg.1 | ARHGEF1 |

|                 |        |                  |         |
|-----------------|--------|------------------|---------|
| TC19000589.hg.1 | -2.06  | JUC19004886.hg.1 | ARHGEF1 |
| TC19000589.hg.1 | -2.39  | PSR19008192.hg.1 | ARHGEF1 |
| TC01000723.hg.1 | 2.49   | JUC01005941.hg.1 | ROR1    |
| TC01000723.hg.1 | 2.15   | JUC01005937.hg.1 | ROR1    |
| TC01000723.hg.1 | -2.23  | PSR01011484.hg.1 | ROR1    |
| TC01000723.hg.1 | -2.52  | JUC01005940.hg.1 | ROR1    |
| TC01000723.hg.1 | -2.54  | PSR01011489.hg.1 | ROR1    |
| TC01000723.hg.1 | -2.71  | PSR01011494.hg.1 | ROR1    |
| TC01000723.hg.1 | -2.75  | JUC01005938.hg.1 | ROR1    |
| TC01000723.hg.1 | -3.19  | JUC01005936.hg.1 | ROR1    |
| TC01000723.hg.1 | -4.44  | PSR01011482.hg.1 | ROR1    |
| TC01002485.hg.1 | 2.49   | JUC01020696.hg.1 | CSMD2   |
| TC01002485.hg.1 | 2.16   | JUC01020690.hg.1 | CSMD2   |
| TC01002485.hg.1 | -2.01  | PSR01038485.hg.1 | CSMD2   |
| TC01003892.hg.1 | 2.49   | JUC01031098.hg.1 | TMEM63A |
| TC01003892.hg.1 | -2.4   | PSR01059309.hg.1 | TMEM63A |
| TC02000295.hg.1 | 2.49   | JUC02002350.hg.1 | MSH2    |
| TC02000295.hg.1 | 2.33   | PSR02004483.hg.1 | MSH2    |
| TC02000295.hg.1 | -2.19  | JUC02002322.hg.1 | MSH2    |
| TC02004934.hg.1 | 2.49   | JUC02031447.hg.1 | ZNF512  |
| TC02004934.hg.1 | 2.13   | PSR02002420.hg.1 | ZNF512  |
| TC03000348.hg.1 | 2.49   | PSR03007646.hg.1 | PRKCD   |
| TC03000348.hg.1 | 2.02   | JUC03003712.hg.1 | PRKCD   |
| TC03000348.hg.1 | 2.01   | PSR03007651.hg.1 | PRKCD   |
| TC03000348.hg.1 | -2.21  | JUC03003705.hg.1 | PRKCD   |
| TC03000846.hg.1 | 2.49   | PSR03014959.hg.1 | MME     |
| TC03000846.hg.1 | 2.42   | JUC03007599.hg.1 | MME     |
| TC03000846.hg.1 | 2.01   | JUC03007602.hg.1 | MME     |
| TC03000846.hg.1 | -2.45  | PSR03014963.hg.1 | MME     |
| TC03000846.hg.1 | -2.67  | PSR03014960.hg.1 | MME     |
| TC03000846.hg.1 | -2.85  | PSR03014953.hg.1 | MME     |
| TC03000846.hg.1 | -3.58  | PSR03014955.hg.1 | MME     |
| TC03000846.hg.1 | -3.64  | PSR03014969.hg.1 | MME     |
| TC03000846.hg.1 | -3.79  | PSR03014948.hg.1 | MME     |
| TC03000846.hg.1 | -4.44  | PSR03014949.hg.1 | MME     |
| TC03000846.hg.1 | -4.5   | PSR03014954.hg.1 | MME     |
| TC03000846.hg.1 | -5.83  | JUC03007582.hg.1 | MME     |
| TC03000846.hg.1 | -7.08  | JUC03007581.hg.1 | MME     |
| TC03000846.hg.1 | -8.5   | PSR03014967.hg.1 | MME     |
| TC03000846.hg.1 | -8.82  | JUC03007573.hg.1 | MME     |
| TC03000846.hg.1 | -12.1  | PSR03014947.hg.1 | MME     |
| TC03000846.hg.1 | -16.57 | JUC03007579.hg.1 | MME     |
| TC03002033.hg.1 | 2.49   | PSR03036025.hg.1 |         |
| TC03002033.hg.1 | -2.03  | PSR03036016.hg.1 |         |
| TC03002033.hg.1 | -2.32  | JUC03017819.hg.1 |         |
| TC03002033.hg.1 | -2.93  | JUC03017815.hg.1 |         |
| TC04001641.hg.1 | 2.49   | JUC04012129.hg.1 | PET112  |
| TC04001641.hg.1 | 2.4    | JUC04012116.hg.1 | PET112  |
| TC04001641.hg.1 | -3.28  | PSR04022925.hg.1 | PET112  |
| TC05000580.hg.1 | 2.49   | JUC05004440.hg.1 | PRDM6   |
| TC05000580.hg.1 | 2.24   | PSR05008180.hg.1 | PRDM6   |
| TC05001657.hg.1 | 2.49   | PSR05022451.hg.1 | EFNA5   |
| TC05001657.hg.1 | -3.3   | PSR05022454.hg.1 | EFNA5   |
| TC05001657.hg.1 | -3.59  | PSR05022458.hg.1 | EFNA5   |
| TC05001657.hg.1 | -9.24  | JUC05011603.hg.1 | EFNA5   |
| TC06001678.hg.1 | 2.49   | JUC06009497.hg.1 | CPNE5   |
| TC06001678.hg.1 | 2.05   | PSR06019977.hg.1 | CPNE5   |
| TC06001678.hg.1 | -2.28  | JUC06009489.hg.1 | CPNE5   |

|                 |       |                  |             |
|-----------------|-------|------------------|-------------|
| TC06002210.hg.1 | 2.49  | PSR06027683.hg.1 | PPIL4       |
| TC06002210.hg.1 | -3.97 | JUC06013801.hg.1 | PPIL4       |
| TC06004134.hg.1 | 2.49  | JUC06021832.hg.1 | C6orf130    |
| TC06004134.hg.1 | -2.14 | PSR06020393.hg.1 | C6orf130    |
| TC06004134.hg.1 | -2.27 | PSR06020379.hg.1 | C6orf130    |
| TC06004134.hg.1 | -2.45 | PSR06020378.hg.1 | C6orf130    |
| TC06004134.hg.1 | -2.77 | JUC06021835.hg.1 | C6orf130    |
| TC06004134.hg.1 | -2.98 | PSR06020391.hg.1 | C6orf130    |
| TC07001012.hg.1 | 2.49  | JUC07007551.hg.1 | SLC4A2      |
| TC07001012.hg.1 | 2.28  | JUC07007555.hg.1 | SLC4A2      |
| TC07001012.hg.1 | -2.33 | PSR07015567.hg.1 | SLC4A2      |
| TC10000653.hg.1 | 2.49  | JUC10004095.hg.1 | HECTD2      |
| TC10000653.hg.1 | -2.02 | JUC10004083.hg.1 | HECTD2      |
| TC10000653.hg.1 | -2.09 | PSR10007237.hg.1 | HECTD2      |
| TC10000653.hg.1 | -2.26 | PSR10007213.hg.1 | HECTD2      |
| TC10000653.hg.1 | -2.29 | PSR10007231.hg.1 | HECTD2      |
| TC10000653.hg.1 | -2.35 | PSR10007235.hg.1 | HECTD2      |
| TC10000653.hg.1 | -2.38 | PSR10007247.hg.1 | HECTD2      |
| TC11001914.hg.1 | 2.49  | JUC11012053.hg.1 | CDC42BPG    |
| TC11001914.hg.1 | 2.22  | PSR11022832.hg.1 | CDC42BPG    |
| TC11001914.hg.1 | -2.02 | JUC11012028.hg.1 | CDC42BPG    |
| TC20000797.hg.1 | 2.49  | JUC20005616.hg.1 | GDF5        |
| TC20000797.hg.1 | -2.23 | PSR20010758.hg.1 | GDF5        |
| TC02001071.hg.1 | 2.48  | JUC02008455.hg.1 | OSBPL6, MIF |
| TC02001071.hg.1 | 2.23  | JUC02008474.hg.1 | OSBPL6, MIF |
| TC02001071.hg.1 | 2.22  | JUC02008441.hg.1 | OSBPL6, MIF |
| TC02001071.hg.1 | -2.09 | PSR02015893.hg.1 | OSBPL6, MIF |
| TC02001071.hg.1 | -2.17 | PSR02015894.hg.1 | OSBPL6, MIF |
| TC02001071.hg.1 | -2.28 | PSR02015903.hg.1 | OSBPL6, MIF |
| TC02001071.hg.1 | -2.4  | PSR02015933.hg.1 | OSBPL6, MIF |
| TC02001071.hg.1 | -2.61 | PSR02015890.hg.1 | OSBPL6, MIF |
| TC04001199.hg.1 | 2.48  | PSR04016432.hg.1 | LNX1        |
| TC04001199.hg.1 | 2.3   | JUC04008753.hg.1 | LNX1        |
| TC04001199.hg.1 | 2.03  | JUC04008749.hg.1 | LNX1        |
| TC04001199.hg.1 | -2    | PSR04016460.hg.1 | LNX1        |
| TC04001199.hg.1 | -2.3  | JUC04008761.hg.1 | LNX1        |
| TC05001725.hg.1 | 2.48  | PSR05023246.hg.1 | CEP120      |
| TC05001725.hg.1 | 2.4   | JUC05012018.hg.1 | CEP120      |
| TC05001725.hg.1 | 2.14  | PSR05023250.hg.1 | CEP120      |
| TC05001725.hg.1 | 2.09  | JUC05012041.hg.1 | CEP120      |
| TC05001725.hg.1 | 2.07  | JUC05012027.hg.1 | CEP120      |
| TC05001725.hg.1 | 2.02  | JUC05012023.hg.1 | CEP120      |
| TC05001725.hg.1 | -2.05 | JUC05012040.hg.1 | CEP120      |
| TC06004132.hg.1 | 2.48  | JUC06021814.hg.1 | MOCS1       |
| TC06004132.hg.1 | 2.38  | PSR06020333.hg.1 | MOCS1       |
| TC06004132.hg.1 | 2.29  | PSR06020329.hg.1 | MOCS1       |
| TC07001116.hg.1 | 2.48  | JUC07008355.hg.1 | TNRC18      |
| TC07001116.hg.1 | 2.28  | JUC07008350.hg.1 | TNRC18      |
| TC07001116.hg.1 | 2.19  | PSR07017189.hg.1 | TNRC18      |
| TC07001116.hg.1 | 2.03  | PSR07017153.hg.1 | TNRC18      |
| TC07001687.hg.1 | 2.48  | JUC07012820.hg.1 | PLOD3       |
| TC07001687.hg.1 | -2.03 | PSR07026096.hg.1 | PLOD3       |
| TC08000176.hg.1 | 2.48  | JUC08001173.hg.1 | LOC1005071  |
| TC08000176.hg.1 | 2.04  | PSR08002281.hg.1 | LOC1005071  |
| TC09001412.hg.1 | 2.48  | JUC09009465.hg.1 |             |
| TC09001412.hg.1 | -2.05 | PSR09017617.hg.1 |             |
| TC09001412.hg.1 | -2.09 | JUC09009470.hg.1 |             |
| TC10000922.hg.1 | 2.48  | JUC10006641.hg.1 | PTPRE       |



|                 |       |                  |             |
|-----------------|-------|------------------|-------------|
| TC10000922.hg.1 | 2.11  | PSR10011342.hg.1 | PTPRE       |
| TC10000922.hg.1 | 2.05  | PSR10011359.hg.1 | PTPRE       |
| TC10000922.hg.1 | 2.01  | JUC10006620.hg.1 | PTPRE       |
| TC10000922.hg.1 | 2.01  | JUC10006625.hg.1 | PTPRE       |
| TC10000922.hg.1 | -2.24 | JUC10006621.hg.1 | PTPRE       |
| TC10000922.hg.1 | -2.44 | JUC10006647.hg.1 | PTPRE       |
| TC10000922.hg.1 | -2.59 | JUC10006640.hg.1 | PTPRE       |
| TC11001416.hg.1 | 2.48  | JUC11009515.hg.1 | MRV11       |
| TC11001416.hg.1 | -2.02 | PSR11017819.hg.1 | MRV11       |
| TC11001416.hg.1 | -2.02 | JUC11009519.hg.1 | MRV11       |
| TC11001416.hg.1 | -2.07 | JUC11009520.hg.1 | MRV11       |
| TC11001416.hg.1 | -2.26 | JUC11009529.hg.1 | MRV11       |
| TC11001416.hg.1 | -2.42 | PSR11017818.hg.1 | MRV11       |
| TC11001416.hg.1 | -2.62 | PSR11017809.hg.1 | MRV11       |
| TC11001416.hg.1 | -2.67 | PSR11017811.hg.1 | MRV11       |
| TC11001416.hg.1 | -2.69 | PSR11017816.hg.1 | MRV11       |
| TC11001416.hg.1 | -2.79 | PSR11017821.hg.1 | MRV11       |
| TC11001416.hg.1 | -2.92 | JUC11009514.hg.1 | MRV11       |
| TC11001416.hg.1 | -2.94 | PSR11017817.hg.1 | MRV11       |
| TC11001416.hg.1 | -3.16 | JUC11009540.hg.1 | MRV11       |
| TC11001416.hg.1 | -3.18 | JUC11009545.hg.1 | MRV11       |
| TC11001416.hg.1 | -3.3  | JUC11009513.hg.1 | MRV11       |
| TC11001416.hg.1 | -3.65 | JUC11009511.hg.1 | MRV11       |
| TC11001416.hg.1 | -4.1  | JUC11009539.hg.1 | MRV11       |
| TC12000419.hg.1 | 2.48  | JUC12002964.hg.1 | KRT86       |
| TC12000419.hg.1 | -2.19 | PSR12005372.hg.1 | KRT86       |
| TC12000419.hg.1 | -3.84 | JUC12002968.hg.1 | KRT86       |
| TC12001413.hg.1 | 2.48  | JUC12010219.hg.1 | TWF1        |
| TC12001413.hg.1 | -2.14 | PSR12018308.hg.1 | TWF1        |
| TC13000209.hg.1 | 2.48  | JUC13001603.hg.1 | RNASEH2B    |
| TC13000209.hg.1 | -2.17 | PSR13002534.hg.1 | RNASEH2B    |
| TC13000209.hg.1 | -2.26 | PSR13002526.hg.1 | RNASEH2B    |
| TC13000209.hg.1 | -2.26 | JUC13001591.hg.1 | RNASEH2B    |
| TC13000510.hg.1 | 2.48  | JUC13003436.hg.1 | MTIF3       |
| TC13000510.hg.1 | 2.39  | PSR13005732.hg.1 | MTIF3       |
| TC13000510.hg.1 | -2.07 | PSR13005743.hg.1 | MTIF3       |
| TC13000510.hg.1 | -2.22 | PSR13005746.hg.1 | MTIF3       |
| TC13000510.hg.1 | -3.37 | JUC13003442.hg.1 | MTIF3       |
| TC16000295.hg.1 | 2.48  | JUC16002276.hg.1 | KIAA0556    |
| TC16000295.hg.1 | -2.69 | PSR16004128.hg.1 | KIAA0556    |
| TC17000884.hg.1 | 2.48  | PSR17011456.hg.1 | SCARNA16, S |
| TC17000884.hg.1 | 2.04  | PSR17011496.hg.1 | SCARNA16, S |
| TC17000884.hg.1 | -2.07 | JUC17006406.hg.1 | SCARNA16, S |
| TC17000884.hg.1 | -2.2  | JUC17006423.hg.1 | SCARNA16, S |
| TC17001300.hg.1 | 2.48  | PSR17017253.hg.1 | PIGS        |
| TC17001300.hg.1 | 2.22  | JUC17009754.hg.1 | PIGS        |
| TC17001300.hg.1 | 2.21  | PSR17017275.hg.1 | PIGS        |
| TC17001300.hg.1 | 2.02  | PSR17017249.hg.1 | PIGS        |
| TC17001300.hg.1 | 2     | PSR17017262.hg.1 | PIGS        |
| TC01003876.hg.1 | 2.47  | PSR01059069.hg.1 | PARP1       |
| TC01003876.hg.1 | 2.25  | JUC01030941.hg.1 | PARP1       |
| TC01003876.hg.1 | 2.23  | JUC01030935.hg.1 | PARP1       |
| TC01003876.hg.1 | 2.21  | PSR01059071.hg.1 | PARP1       |
| TC01003876.hg.1 | 2.17  | PSR01059040.hg.1 | PARP1       |
| TC01003876.hg.1 | 2.14  | PSR01059063.hg.1 | PARP1       |
| TC01003876.hg.1 | 2.12  | PSR01059033.hg.1 | PARP1       |
| TC01003876.hg.1 | 2.11  | JUC01030945.hg.1 | PARP1       |
| TC01003876.hg.1 | 2.09  | PSR01059061.hg.1 | PARP1       |

|                 |       |                  |            |
|-----------------|-------|------------------|------------|
| TC01003876.hg.1 | 2.07  | PSR01059070.hg.1 | PARP1      |
| TC02000059.hg.1 | 2.47  | JUC02000423.hg.1 | HPCAL1     |
| TC02000059.hg.1 | 2.29  | JUC02000430.hg.1 | HPCAL1     |
| TC02000059.hg.1 | 2.21  | PSR02000772.hg.1 | HPCAL1     |
| TC02001485.hg.1 | 2.47  | JUC02012577.hg.1 | ING5       |
| TC02001485.hg.1 | 2.09  | PSR02024233.hg.1 | ING5       |
| TC03000221.hg.1 | 2.47  | JUC03002356.hg.1 | NKTR       |
| TC03000221.hg.1 | 2.32  | JUC03002348.hg.1 | NKTR       |
| TC03000221.hg.1 | 2.14  | JUC03002365.hg.1 | NKTR       |
| TC03000221.hg.1 | 2.05  | PSR03004450.hg.1 | NKTR       |
| TC03000221.hg.1 | -2.04 | JUC03002341.hg.1 | NKTR       |
| TC03001549.hg.1 | 2.47  | PSR03028268.hg.1 | EIF4E3     |
| TC03001549.hg.1 | 2.27  | PSR03028263.hg.1 | EIF4E3     |
| TC03001549.hg.1 | 2.18  | PSR03028265.hg.1 | EIF4E3     |
| TC03001549.hg.1 | 2.17  | JUC03013909.hg.1 | EIF4E3     |
| TC03001979.hg.1 | 2.47  | JUC03017481.hg.1 | MECOM      |
| TC03001979.hg.1 | 2.15  | JUC03017488.hg.1 | MECOM      |
| TC03001979.hg.1 | 2.13  | PSR03035447.hg.1 | MECOM      |
| TC03001979.hg.1 | 2.07  | PSR03035445.hg.1 | MECOM      |
| TC03001979.hg.1 | -2.04 | PSR03035462.hg.1 | MECOM      |
| TC03001979.hg.1 | -2.06 | PSR03035463.hg.1 | MECOM      |
| TC03001979.hg.1 | -2.18 | PSR03035430.hg.1 | MECOM      |
| TC03001979.hg.1 | -2.38 | JUC03017495.hg.1 | MECOM      |
| TC03001979.hg.1 | -2.41 | PSR03035474.hg.1 | MECOM      |
| TC03001979.hg.1 | -2.62 | JUC03017505.hg.1 | MECOM      |
| TC03001979.hg.1 | -2.67 | PSR03035478.hg.1 | MECOM      |
| TC03001979.hg.1 | -2.69 | PSR03035461.hg.1 | MECOM      |
| TC03001979.hg.1 | -2.71 | PSR03035482.hg.1 | MECOM      |
| TC03001979.hg.1 | -2.72 | JUC03017506.hg.1 | MECOM      |
| TC03001979.hg.1 | -2.81 | PSR03035475.hg.1 | MECOM      |
| TC03001979.hg.1 | -2.85 | PSR03035477.hg.1 | MECOM      |
| TC03001979.hg.1 | -3.65 | JUC03017487.hg.1 | MECOM      |
| TC03001979.hg.1 | -5.08 | JUC03017490.hg.1 | MECOM      |
| TC05000305.hg.1 | 2.47  | PSR05004155.hg.1 | GTF2H2D, G |
| TC05000305.hg.1 | 2.13  | JUC05002203.hg.1 | GTF2H2D, G |
| TC05000305.hg.1 | -2.02 | PSR05004153.hg.1 | GTF2H2D, G |
| TC05000305.hg.1 | -2.74 | PSR05004120.hg.1 | GTF2H2D, G |
| TC05000305.hg.1 | -3.38 | JUC05002195.hg.1 | GTF2H2D, G |
| TC05001310.hg.1 | 2.47  | PSR05018528.hg.1 | SEPP1      |
| TC05001310.hg.1 | 2.37  | JUC05009531.hg.1 | SEPP1      |
| TC05001310.hg.1 | 2.24  | PSR05018525.hg.1 | SEPP1      |
| TC05001310.hg.1 | 2.15  | JUC05009523.hg.1 | SEPP1      |
| TC05001310.hg.1 | -2.04 | PSR05018516.hg.1 | SEPP1      |
| TC05001310.hg.1 | -2.07 | PSR05018509.hg.1 | SEPP1      |
| TC05001310.hg.1 | -2.16 | PSR05018512.hg.1 | SEPP1      |
| TC05001310.hg.1 | -2.21 | JUC05009529.hg.1 | SEPP1      |
| TC06001235.hg.1 | 2.47  | JUC06007317.hg.1 | ECI2       |
| TC06001235.hg.1 | 2.04  | PSR06014704.hg.1 | ECI2       |
| TC07000019.hg.1 | 2.47  | PSR07000280.hg.1 |            |
| TC07000019.hg.1 | -2.21 | JUC07000080.hg.1 |            |
| TC07000019.hg.1 | -2.53 | JUC07000076.hg.1 |            |
| TC09001463.hg.1 | 2.47  | PSR09018095.hg.1 | FRRS1L     |
| TC09001463.hg.1 | -2.98 | JUC09009760.hg.1 | FRRS1L     |
| TC09001501.hg.1 | 2.47  | PSR09018737.hg.1 | HDHD3      |
| TC09001501.hg.1 | 2.13  | JUC09010136.hg.1 | HDHD3      |
| TC14001123.hg.1 | 2.47  | JUC14006422.hg.1 | NIN        |
| TC14001123.hg.1 | 2.45  | PSR14012760.hg.1 | NIN        |
| TC14001123.hg.1 | 2.24  | JUC14006450.hg.1 | NIN        |

|                  |       |                   |             |
|------------------|-------|-------------------|-------------|
| TC15001713.hg.1  | 2.47  | PSR15016752.hg.1  | CTSH        |
| TC15001713.hg.1  | 2.14  | JUC15009131.hg.1  | CTSH        |
| TC15001713.hg.1  | 2.05  | JUC15009128.hg.1  | CTSH        |
| TC15001713.hg.1  | -2.44 | JUC15009140.hg.1  | CTSH        |
| TC15001713.hg.1  | -2.85 | JUC15009130.hg.1  | CTSH        |
| TC15001713.hg.1  | -3.42 | PSR15016755.hg.1  | CTSH        |
| TC17_ctg5_hap100 | 2.47  | PSR17_ctg5_hap100 | ARL17B, ARL |
| TC17_ctg5_hap100 | 2.36  | JUC17_ctg5_hap100 | ARL17B, ARL |
| TC17_ctg5_hap100 | 2.28  | JUC17_ctg5_hap100 | ARL17B, ARL |
| TC17_ctg5_hap100 | -2.18 | PSR17_ctg5_hap100 | ARL17B, ARL |
| TC20000826.hg.1  | 2.47  | JUC20005902.hg.1  | BLCAP       |
| TC20000826.hg.1  | 2.38  | JUC20005905.hg.1  | BLCAP       |
| TC20000826.hg.1  | 2.33  | PSR20011406.hg.1  | BLCAP       |
| TC6_dbb_hap3000  | 2.47  | PSR6_dbb_hap3001  | SAPCD1, MS  |
| TC6_dbb_hap3000  | 2.41  | JUC6_dbb_hap3000  | SAPCD1, MS  |
| TC6_dbb_hap3000  | 2.37  | JUC6_dbb_hap3000  | SAPCD1, MS  |
| TC6_dbb_hap3000  | 2.16  | JUC6_dbb_hap3000  | SAPCD1, MS  |
| TC6_dbb_hap3000  | 2.03  | JUC6_dbb_hap3000  | SAPCD1, MS  |
| TC6_dbb_hap3000  | -2.01 | JUC6_dbb_hap3000  | SAPCD1, MS  |
| TC6_dbb_hap3000  | -2.09 | JUC6_dbb_hap3000  | SAPCD1, MS  |
| TC6_dbb_hap3000  | -2.41 | JUC6_dbb_hap3000  | SAPCD1, MS  |
| TC6_dbb_hap3000  | -2.94 | JUC6_dbb_hap3000  | SAPCD1, MS  |
| TC6_mann_hap400  | 2.47  | PSR6_mann_hap400  | PRRC2A      |
| TC6_mann_hap400  | 2.36  | PSR6_mann_hap400  | PRRC2A      |
| TC6_mann_hap400  | 2.26  | JUC6_mann_hap400  | PRRC2A      |
| TC6_mann_hap400  | 2.04  | PSR6_mann_hap400  | PRRC2A      |
| TC6_mcf_hap5000  | 2.47  | PSR6_mcf_hap5001  | SAPCD1, MS  |
| TC6_mcf_hap5000  | 2.41  | JUC6_mcf_hap5000  | SAPCD1, MS  |
| TC6_mcf_hap5000  | 2.37  | JUC6_mcf_hap5000  | SAPCD1, MS  |
| TC6_mcf_hap5000  | 2.16  | JUC6_mcf_hap5000  | SAPCD1, MS  |
| TC6_mcf_hap5000  | 2.03  | JUC6_mcf_hap5000  | SAPCD1, MS  |
| TC6_mcf_hap5000  | -2.01 | JUC6_mcf_hap5000  | SAPCD1, MS  |
| TC6_mcf_hap5000  | -2.09 | JUC6_mcf_hap5000  | SAPCD1, MS  |
| TC6_mcf_hap5000  | -2.41 | JUC6_mcf_hap5000  | SAPCD1, MS  |
| TC6_mcf_hap5000  | -2.94 | JUC6_mcf_hap5000  | SAPCD1, MS  |
| TC6_ssto_hap7000 | 2.47  | JUC6_ssto_hap7000 | SYNGAP1     |
| TC6_ssto_hap7000 | 2.43  | PSR6_ssto_hap7001 | SYNGAP1     |
| TC6_ssto_hap7000 | 2.25  | JUC6_ssto_hap7000 | SYNGAP1     |
| TC02001177.hg.1  | 2.46  | JUC02009566.hg.1  | CASP8       |
| TC02001177.hg.1  | 2.32  | PSR02017903.hg.1  | CASP8       |
| TC02001177.hg.1  | -2.15 | PSR02017926.hg.1  | CASP8       |
| TC02004926.hg.1  | 2.46  | JUC02031304.hg.1  | SLC4A5      |
| TC02004926.hg.1  | 2.21  | PSR02031762.hg.1  | SLC4A5      |
| TC11000747.hg.1  | 2.46  | PSR11009722.hg.1  | IL18BP      |
| TC11000747.hg.1  | 2.31  | PSR11009721.hg.1  | IL18BP      |
| TC11000747.hg.1  | -4.4  | JUC11005029.hg.1  | IL18BP      |
| TC11000797.hg.1  | 2.46  | JUC11005334.hg.1  | NEU3        |
| TC11000797.hg.1  | 2.43  | PSR11010238.hg.1  | NEU3        |
| TC11000797.hg.1  | 2.33  | PSR11010230.hg.1  | NEU3        |
| TC11000797.hg.1  | 2.12  | JUC11005332.hg.1  | NEU3        |
| TC12001548.hg.1  | 2.46  | JUC12011374.hg.1  | SP7         |
| TC12001548.hg.1  | -2.35 | PSR12020458.hg.1  | SP7         |
| TC12001548.hg.1  | -2.49 | PSR12020464.hg.1  | SP7         |
| TC12001548.hg.1  | -2.85 | PSR12020460.hg.1  | SP7         |
| TC12001548.hg.1  | -3.31 | JUC12011372.hg.1  | SP7         |
| TC12003287.hg.1  | 2.46  | PSR12027240.hg.1  | VPS33A      |
| TC12003287.hg.1  | 2.27  | PSR12027246.hg.1  | VPS33A      |
| TC12003287.hg.1  | -2.29 | JUC12020562.hg.1  | VPS33A      |

|                 |       |                  |            |
|-----------------|-------|------------------|------------|
| TC12003287.hg.1 | -2.36 | JUC12020552.hg.1 | VPS33A     |
| TC12003287.hg.1 | -2.74 | JUC12020555.hg.1 | VPS33A     |
| TC13000068.hg.1 | 2.46  | PSR13000694.hg.1 | CDK8       |
| TC13000068.hg.1 | -2.02 | JUC13000425.hg.1 | CDK8       |
| TC14000164.hg.1 | 2.46  | JUC14000757.hg.1 | TSSK4      |
| TC14000164.hg.1 | 2.15  | PSR14001756.hg.1 | TSSK4      |
| TC14000164.hg.1 | 2.04  | PSR14001753.hg.1 | TSSK4      |
| TC15000810.hg.1 | 2.46  | JUC15003856.hg.1 |            |
| TC15000810.hg.1 | -2.79 | PSR15007395.hg.1 |            |
| TC19001281.hg.1 | 2.46  | PSR19018200.hg.1 | IL12RB1    |
| TC19001281.hg.1 | -3.02 | JUC19010618.hg.1 | IL12RB1    |
| TC02002300.hg.1 | 2.46  | JUC02019135.hg.1 | LOC1001313 |
| TC02002300.hg.1 | 2     | PSR02036903.hg.1 | LOC1001313 |
| TC03000127.hg.1 | 2.45  | JUC03001315.hg.1 | NR1D2      |
| TC03000127.hg.1 | 2.24  | JUC03001321.hg.1 | NR1D2      |
| TC03000127.hg.1 | 2.09  | PSR03002454.hg.1 | NR1D2      |
| TC03000986.hg.1 | 2.45  | PSR03016951.hg.1 | YEATS2     |
| TC03000986.hg.1 | 2.34  | PSR03016981.hg.1 | YEATS2     |
| TC03000986.hg.1 | 2.27  | JUC03008631.hg.1 | YEATS2     |
| TC03000986.hg.1 | 2.07  | JUC03008639.hg.1 | YEATS2     |
| TC03000986.hg.1 | -2.12 | JUC03008657.hg.1 | YEATS2     |
| TC05001519.hg.1 | 2.45  | PSR05020816.hg.1 | ARSB       |
| TC05001519.hg.1 | 2.32  | JUC05010726.hg.1 | ARSB       |
| TC05001519.hg.1 | 2.06  | PSR05020813.hg.1 | ARSB       |
| TC05001519.hg.1 | -2.37 | JUC05010723.hg.1 | ARSB       |
| TC05001519.hg.1 | -5.11 | PSR05020812.hg.1 | ARSB       |
| TC05001519.hg.1 | -7.36 | PSR05020811.hg.1 | ARSB       |
| TC06000761.hg.1 | 2.45  | JUC06004222.hg.1 | TTK        |
| TC06000761.hg.1 | -2.74 | JUC06004217.hg.1 | TTK        |
| TC06000761.hg.1 | -4.09 | PSR06009100.hg.1 | TTK        |
| TC07001033.hg.1 | 2.45  | JUC07007763.hg.1 | LOC1001327 |
| TC07001033.hg.1 | 2.2   | PSR07016025.hg.1 | LOC1001327 |
| TC07001033.hg.1 | 2.05  | PSR07016023.hg.1 | LOC1001327 |
| TC08000638.hg.1 | 2.45  | PSR08008663.hg.1 |            |
| TC08000638.hg.1 | 2.28  | JUC08004407.hg.1 |            |
| TC08000638.hg.1 | 2.06  | JUC08004398.hg.1 |            |
| TC08000638.hg.1 | 2.05  | PSR08008679.hg.1 |            |
| TC08000638.hg.1 | -2.03 | PSR08008688.hg.1 |            |
| TC08000638.hg.1 | -2.29 | PSR08008695.hg.1 |            |
| TC08000638.hg.1 | -4.23 | PSR08008674.hg.1 |            |
| TC09001059.hg.1 | 2.45  | PSR09014073.hg.1 | TLN1       |
| TC09001059.hg.1 | 2.41  | PSR09014082.hg.1 | TLN1       |
| TC09001059.hg.1 | 2.37  | JUC09007579.hg.1 | TLN1       |
| TC0X000748.hg.1 | 2.45  | PSR0X009724.hg.1 | ZFP92      |
| TC0X000748.hg.1 | -2.13 | JUC0X004913.hg.1 | ZFP92      |
| TC0X000748.hg.1 | -2.25 | JUC0X004915.hg.1 | ZFP92      |
| TC0X000748.hg.1 | -2.78 | PSR0X009726.hg.1 | ZFP92      |
| TC10000661.hg.1 | 2.45  | PSR10007420.hg.1 | EXOC6      |
| TC10000661.hg.1 | 2.39  | JUC10004233.hg.1 | EXOC6      |
| TC10000661.hg.1 | 2.19  | PSR10007449.hg.1 | EXOC6      |
| TC10000661.hg.1 | -3.77 | JUC10004216.hg.1 | EXOC6      |
| TC11002048.hg.1 | 2.45  | JUC11012898.hg.1 | LOC1001333 |
| TC11002048.hg.1 | -2.3  | PSR11024424.hg.1 | LOC1001333 |
| TC13000383.hg.1 | 2.45  | JUC13002486.hg.1 | TNFSF13B   |
| TC13000383.hg.1 | -2.04 | PSR13004120.hg.1 | TNFSF13B   |
| TC13000383.hg.1 | -3.07 | JUC13002479.hg.1 | TNFSF13B   |
| TC13001725.hg.1 | 2.45  | JUC13008493.hg.1 | CCDC169    |
| TC13001725.hg.1 | -2.03 | JUC13008490.hg.1 | CCDC169    |

|                 |       |                  |          |
|-----------------|-------|------------------|----------|
| TC13001725.hg.1 | -2.05 | PSR13006377.hg.1 | CCDC169  |
| TC13001725.hg.1 | -2.2  | PSR13006372.hg.1 | CCDC169  |
| TC13001725.hg.1 | -2.49 | JUC13008485.hg.1 | CCDC169  |
| TC13001725.hg.1 | -2.78 | JUC13008484.hg.1 | CCDC169  |
| TC15000796.hg.1 | 2.45  | JUC15003767.hg.1 | TM6SF1   |
| TC15000796.hg.1 | -2.09 | PSR15007249.hg.1 | TM6SF1   |
| TC15000796.hg.1 | -3.5  | PSR15007247.hg.1 | TM6SF1   |
| TC17000549.hg.1 | 2.45  | PSR17006720.hg.1 | TMEM106A |
| TC17000549.hg.1 | 2.36  | JUC17003784.hg.1 | TMEM106A |
| TC17000549.hg.1 | -2.13 | JUC17003801.hg.1 | TMEM106A |
| TC17000549.hg.1 | -2.35 | JUC17003795.hg.1 | TMEM106A |
| TC17000549.hg.1 | -3.37 | JUC17003793.hg.1 | TMEM106A |
| TC17000549.hg.1 | -4.25 | JUC17003794.hg.1 | TMEM106A |
| TC17000549.hg.1 | -7    | JUC17003785.hg.1 | TMEM106A |
| TC19000062.hg.1 | 2.45  | PSR19000955.hg.1 | TLE6     |
| TC19000062.hg.1 | 2.37  | PSR19000989.hg.1 | TLE6     |
| TC19000062.hg.1 | 2.23  | JUC19000532.hg.1 | TLE6     |
| TC20000231.hg.1 | 2.45  | JUC20001642.hg.1 | CBFA2T2  |
| TC20000231.hg.1 | -2.56 | PSR20002905.hg.1 | CBFA2T2  |
| TC6_mann_hap400 | 2.45  | PSR6_mann_hap400 | ABCF1    |
| TC6_mann_hap400 | 2.45  | JUC6_mann_hap400 | ABCF1    |
| TC6_mann_hap400 | 2.07  | PSR6_mann_hap400 | ABCF1    |
| TC6_mcf_hap5000 | 2.45  | PSR6_mcf_hap5000 | ABCF1    |
| TC6_mcf_hap5000 | 2.45  | JUC6_mcf_hap5000 | ABCF1    |
| TC6_mcf_hap5000 | 2.07  | PSR6_mcf_hap5000 | ABCF1    |
| TC02000748.hg.1 | 2.44  | PSR02011610.hg.1 | INSIG2   |
| TC02000748.hg.1 | 2.23  | PSR02011609.hg.1 | INSIG2   |
| TC02000748.hg.1 | 2.23  | JUC02006145.hg.1 | INSIG2   |
| TC02000748.hg.1 | 2.16  | JUC02006137.hg.1 | INSIG2   |
| TC02000748.hg.1 | 2.11  | JUC02006139.hg.1 | INSIG2   |
| TC03000770.hg.1 | 2.44  | JUC03007115.hg.1 | TRPC1    |
| TC03000770.hg.1 | 2.23  | PSR03014089.hg.1 | TRPC1    |
| TC05000635.hg.1 | 2.44  | JUC05004767.hg.1 | SLC22A5  |
| TC05000635.hg.1 | 2.13  | PSR05008766.hg.1 | SLC22A5  |
| TC05000635.hg.1 | 2.05  | JUC05004755.hg.1 | SLC22A5  |
| TC05000635.hg.1 | -2.09 | JUC05004756.hg.1 | SLC22A5  |
| TC05000635.hg.1 | -2.12 | PSR05008791.hg.1 | SLC22A5  |
| TC05000635.hg.1 | -2.21 | JUC05004753.hg.1 | SLC22A5  |
| TC05001032.hg.1 | 2.44  | JUC05007811.hg.1 | RMND5B   |
| TC05001032.hg.1 | 2.42  | PSR05015049.hg.1 | RMND5B   |
| TC06004112.hg.1 | 2.44  | JUC06021535.hg.1 | GABBR1   |
| TC06004112.hg.1 | 2.09  | PSR06016676.hg.1 | GABBR1   |
| TC06004112.hg.1 | -2.36 | JUC06021544.hg.1 | GABBR1   |
| TC07001016.hg.1 | 2.44  | JUC07007630.hg.1 | NUB1     |
| TC07001016.hg.1 | -2.87 | PSR07015759.hg.1 | NUB1     |
| TC11000054.hg.1 | 2.44  | JUC11000524.hg.1 | TNNT3    |
| TC11000054.hg.1 | 2.03  | PSR11001080.hg.1 | TNNT3    |
| TC11000054.hg.1 | -2.42 | JUC11000509.hg.1 | TNNT3    |
| TC11000054.hg.1 | -2.42 | JUC11000530.hg.1 | TNNT3    |
| TC11000054.hg.1 | -4.61 | JUC11000543.hg.1 | TNNT3    |
| TC11000577.hg.1 | 2.44  | JUC11003634.hg.1 | MARK2    |
| TC11000577.hg.1 | 2.25  | JUC11003629.hg.1 | MARK2    |
| TC11000577.hg.1 | -2.15 | PSR11007002.hg.1 | MARK2    |
| TC11000577.hg.1 | -2.61 | JUC11003644.hg.1 | MARK2    |
| TC12001083.hg.1 | 2.44  | JUC12007875.hg.1 | NINJ2    |
| TC12001083.hg.1 | 2.22  | PSR12014332.hg.1 | NINJ2    |
| TC12001083.hg.1 | -2.36 | PSR12014336.hg.1 | NINJ2    |
| TC12001083.hg.1 | -2.77 | JUC12007877.hg.1 | NINJ2    |

|                 |       |                  |             |
|-----------------|-------|------------------|-------------|
| TC12001083.hg.1 | -2.79 | PSR12014337.hg.1 | NINJ2       |
| TC12001083.hg.1 | -3.34 | PSR12014341.hg.1 | NINJ2       |
| TC12001083.hg.1 | -4.61 | PSR12014334.hg.1 | NINJ2       |
| TC12001083.hg.1 | -4.66 | PSR12014333.hg.1 | NINJ2       |
| TC12001083.hg.1 | -5.44 | PSR12014327.hg.1 | NINJ2       |
| TC12001148.hg.1 | 2.44  | JUC12008387.hg.1 | C12orf53    |
| TC12001148.hg.1 | -2.03 | PSR12015214.hg.1 | C12orf53    |
| TC12001148.hg.1 | -2.59 | PSR12015212.hg.1 | C12orf53    |
| TC12001148.hg.1 | -2.65 | PSR12015211.hg.1 | C12orf53    |
| TC12001148.hg.1 | -4.25 | JUC12008391.hg.1 | C12orf53    |
| TC12001148.hg.1 | -6.77 | JUC12008385.hg.1 | C12orf53    |
| TC13000419.hg.1 | 2.44  | PSR13004702.hg.1 | CUL4A       |
| TC13000419.hg.1 | 2.11  | JUC13002850.hg.1 | CUL4A       |
| TC13000419.hg.1 | -2.77 | JUC13002836.hg.1 | CUL4A       |
| TC14000356.hg.1 | 2.44  | PSR14003881.hg.1 | DAAM1       |
| TC14000356.hg.1 | -2.04 | JUC14001933.hg.1 | DAAM1       |
| TC14000356.hg.1 | -2.13 | JUC14001930.hg.1 | DAAM1       |
| TC15002754.hg.1 | 2.44  | JUC15013110.hg.1 | ULK4P1, ULK |
| TC15002754.hg.1 | -2.2  | JUC15013106.hg.1 | ULK4P1, ULK |
| TC15002754.hg.1 | -2.24 | PSR15001112.hg.1 | ULK4P1, ULK |
| TC15002754.hg.1 | -2.37 | PSR15001111.hg.1 | ULK4P1, ULK |
| TC15002801.hg.1 | 2.44  | PSR15005984.hg.1 | CLK3        |
| TC15002801.hg.1 | 2.17  | PSR15005991.hg.1 | CLK3        |
| TC15002801.hg.1 | 2.13  | PSR15005985.hg.1 | CLK3        |
| TC15002801.hg.1 | 2     | PSR15005979.hg.1 | CLK3        |
| TC15002801.hg.1 | -2.97 | JUC15014070.hg.1 | CLK3        |
| TC19002708.hg.1 | 2.44  | JUC19018095.hg.1 | PSG1        |
| TC19002708.hg.1 | -2.87 | PSR19021578.hg.1 | PSG1        |
| TC19002708.hg.1 | -4.48 | JUC19018094.hg.1 | PSG1        |
| TC19002708.hg.1 | -5.76 | JUC19018091.hg.1 | PSG1        |
| TC19002708.hg.1 | -9.54 | JUC19018089.hg.1 | PSG1        |
| TC20000088.hg.1 | 2.44  | PSR20001212.hg.1 | BTBD3       |
| TC20000088.hg.1 | -3.21 | JUC20000633.hg.1 | BTBD3       |
| TC01000727.hg.1 | 2.43  | PSR01011556.hg.1 | RAVER2      |
| TC01000727.hg.1 | -2.61 | JUC01006000.hg.1 | RAVER2      |
| TC01003505.hg.1 | 2.43  | JUC01028451.hg.1 | KIFAP3      |
| TC01003505.hg.1 | 2.12  | PSR01054541.hg.1 | KIFAP3      |
| TC02002750.hg.1 | 2.43  | JUC02023214.hg.1 | LINC00607   |
| TC02002750.hg.1 | -2.12 | PSR02044212.hg.1 | LINC00607   |
| TC02002750.hg.1 | -2.5  | PSR02044214.hg.1 | LINC00607   |
| TC02002750.hg.1 | -2.53 | PSR02044216.hg.1 | LINC00607   |
| TC02002750.hg.1 | -2.94 | PSR02044223.hg.1 | LINC00607   |
| TC02002750.hg.1 | -3.13 | JUC02023215.hg.1 | LINC00607   |
| TC02002750.hg.1 | -3.26 | PSR02044217.hg.1 | LINC00607   |
| TC02002750.hg.1 | -3.48 | JUC02023217.hg.1 | LINC00607   |
| TC02002750.hg.1 | -3.53 | JUC02023224.hg.1 | LINC00607   |
| TC02002750.hg.1 | -3.68 | PSR02044222.hg.1 | LINC00607   |
| TC02002750.hg.1 | -3.91 | PSR02044213.hg.1 | LINC00607   |
| TC02002750.hg.1 | -3.96 | PSR02044230.hg.1 | LINC00607   |
| TC02002750.hg.1 | -4.1  | PSR02044215.hg.1 | LINC00607   |
| TC02002750.hg.1 | -4.35 | JUC02023213.hg.1 | LINC00607   |
| TC02002750.hg.1 | -4.44 | PSR02044235.hg.1 | LINC00607   |
| TC02002750.hg.1 | -4.47 | PSR02044231.hg.1 | LINC00607   |
| TC02002750.hg.1 | -5.15 | PSR02044233.hg.1 | LINC00607   |
| TC02002750.hg.1 | -5.41 | PSR02044224.hg.1 | LINC00607   |
| TC02002750.hg.1 | -6.34 | JUC02023220.hg.1 | LINC00607   |
| TC02002750.hg.1 | -7.14 | JUC02023218.hg.1 | LINC00607   |
| TC02002750.hg.1 | -7.21 | PSR02044229.hg.1 | LINC00607   |

|                 |       |                  |           |
|-----------------|-------|------------------|-----------|
| TC02002750.hg.1 | -7.58 | JUC02023219.hg.1 | LINC00607 |
| TC02002750.hg.1 | -7.78 | PSR02044219.hg.1 | LINC00607 |
| TC02002750.hg.1 | -8.19 | JUC02023211.hg.1 | LINC00607 |
| TC03000064.hg.1 | 2.43  | JUC03000734.hg.1 | HRH1      |
| TC03000064.hg.1 | -2.07 | PSR03001400.hg.1 | HRH1      |
| TC03000064.hg.1 | -2.18 | JUC03000729.hg.1 | HRH1      |
| TC03000131.hg.1 | 2.43  | JUC03001345.hg.1 | RARB      |
| TC03000131.hg.1 | 2.3   | PSR03002507.hg.1 | RARB      |
| TC03000131.hg.1 | 2.27  | JUC03001338.hg.1 | RARB      |
| TC03000131.hg.1 | -2    | PSR03002513.hg.1 | RARB      |
| TC03000131.hg.1 | -2.11 | PSR03002492.hg.1 | RARB      |
| TC03000131.hg.1 | -2.28 | PSR03002518.hg.1 | RARB      |
| TC03000131.hg.1 | -2.43 | PSR03002487.hg.1 | RARB      |
| TC03000131.hg.1 | -2.55 | JUC03001339.hg.1 | RARB      |
| TC03000131.hg.1 | -2.63 | PSR03002491.hg.1 | RARB      |
| TC03000131.hg.1 | -2.67 | JUC03001330.hg.1 | RARB      |
| TC03000131.hg.1 | -3.1  | JUC03001329.hg.1 | RARB      |
| TC03000131.hg.1 | -3.2  | JUC03001340.hg.1 | RARB      |
| TC03000131.hg.1 | -3.55 | PSR03002490.hg.1 | RARB      |
| TC03000131.hg.1 | -3.78 | PSR03002488.hg.1 | RARB      |
| TC03000131.hg.1 | -4.34 | PSR03002502.hg.1 | RARB      |
| TC03000131.hg.1 | -5.06 | PSR03002489.hg.1 | RARB      |
| TC03000131.hg.1 | -6.17 | JUC03001341.hg.1 | RARB      |
| TC03000995.hg.1 | 2.43  | PSR03017266.hg.1 | ABCF3     |
| TC03000995.hg.1 | 2.06  | PSR03017267.hg.1 | ABCF3     |
| TC03000995.hg.1 | -2.23 | JUC03008790.hg.1 | ABCF3     |
| TC03003413.hg.1 | 2.43  | JUC03024613.hg.1 | ITIH4     |
| TC03003413.hg.1 | 2.18  | JUC03024619.hg.1 | ITIH4     |
| TC03003413.hg.1 | 2.04  | PSR03026542.hg.1 | ITIH4     |
| TC03003413.hg.1 | -2.36 | JUC03024638.hg.1 | ITIH4     |
| TC03003413.hg.1 | -2.95 | JUC03024629.hg.1 | ITIH4     |
| TC04000833.hg.1 | 2.43  | JUC04006159.hg.1 | TLL1      |
| TC04000833.hg.1 | 2.28  | PSR04011495.hg.1 | TLL1      |
| TC04000833.hg.1 | 2.17  | JUC04006148.hg.1 | TLL1      |
| TC04000833.hg.1 | -2.15 | PSR04011502.hg.1 | TLL1      |
| TC05000622.hg.1 | 2.43  | JUC05004692.hg.1 | LYRM7     |
| TC05000622.hg.1 | 2.4   | PSR05008647.hg.1 | LYRM7     |
| TC05000622.hg.1 | 2     | PSR05008634.hg.1 | LYRM7     |
| TC06001725.hg.1 | 2.43  | JUC06009765.hg.1 | USP49     |
| TC06001725.hg.1 | 2.35  | JUC06009757.hg.1 | USP49     |
| TC06001725.hg.1 | 2.26  | PSR06020574.hg.1 | USP49     |
| TC07000191.hg.1 | 2.43  | JUC07001416.hg.1 | PLEKHA8   |
| TC07000191.hg.1 | 2.26  | PSR07002974.hg.1 | PLEKHA8   |
| TC07000191.hg.1 | -2.08 | PSR07002973.hg.1 | PLEKHA8   |
| TC07000191.hg.1 | -3.53 | PSR07002970.hg.1 | PLEKHA8   |
| TC07001055.hg.1 | 2.43  | PSR07016265.hg.1 | DNAJB6    |
| TC07001055.hg.1 | 2.12  | JUC07007892.hg.1 | DNAJB6    |
| TC07001055.hg.1 | -2.32 | PSR07016276.hg.1 | DNAJB6    |
| TC07001055.hg.1 | -2.36 | JUC07007880.hg.1 | DNAJB6    |
| TC07001055.hg.1 | -2.83 | PSR07016285.hg.1 | DNAJB6    |
| TC08001359.hg.1 | 2.43  | PSR08017530.hg.1 | ZNF704    |
| TC08001359.hg.1 | 2.22  | PSR08017532.hg.1 | ZNF704    |
| TC08001359.hg.1 | 2.14  | PSR08017533.hg.1 | ZNF704    |
| TC08001359.hg.1 | 2.08  | JUC08008934.hg.1 | ZNF704    |
| TC08001359.hg.1 | 2.07  | PSR08017547.hg.1 | ZNF704    |
| TC09000864.hg.1 | 2.43  | JUC09006210.hg.1 | CBWD1     |
| TC09000864.hg.1 | 2.12  | JUC09006223.hg.1 | CBWD1     |
| TC09000864.hg.1 | 2.01  | JUC09006225.hg.1 | CBWD1     |

|                 |       |                  |             |
|-----------------|-------|------------------|-------------|
| TC09000864.hg.1 | -2.02 | JUC09006228.hg.1 | CBWD1       |
| TC09000864.hg.1 | -2.05 | PSR09011506.hg.1 | CBWD1       |
| TC09000864.hg.1 | -2.05 | PSR09011522.hg.1 | CBWD1       |
| TC09000864.hg.1 | -2.31 | PSR09011519.hg.1 | CBWD1       |
| TC09000864.hg.1 | -2.52 | PSR09011514.hg.1 | CBWD1       |
| TC09000864.hg.1 | -2.52 | PSR09011533.hg.1 | CBWD1       |
| TC09000864.hg.1 | -2.58 | PSR09011525.hg.1 | CBWD1       |
| TC09000916.hg.1 | 2.43  | PSR09012191.hg.1 | NFIB        |
| TC09000916.hg.1 | -4.29 | JUC09006646.hg.1 | NFIB        |
| TC0X000014.hg.1 | 2.43  | PSR0X000215.hg.1 | CD99        |
| TC0X000014.hg.1 | 2.11  | JUC0X000107.hg.1 | CD99        |
| TC0X000014.hg.1 | -3.41 | JUC0X000096.hg.1 | CD99        |
| TC12000986.hg.1 | 2.43  | JUC12007131.hg.1 | SNRNP35     |
| TC12000986.hg.1 | 2.12  | PSR12013041.hg.1 | SNRNP35     |
| TC12000986.hg.1 | 2.02  | JUC12007136.hg.1 | SNRNP35     |
| TC12000986.hg.1 | -2.25 | JUC12007130.hg.1 | SNRNP35     |
| TC12000986.hg.1 | -2.48 | PSR12013046.hg.1 | SNRNP35     |
| TC12001276.hg.1 | 2.43  | JUC12009110.hg.1 | MGP         |
| TC12001276.hg.1 | -2.26 | JUC12009113.hg.1 | MGP         |
| TC12001276.hg.1 | -2.28 | PSR12016616.hg.1 | MGP         |
| TC13000612.hg.1 | 2.43  | PSR13006973.hg.1 | EPSTI1      |
| TC13000612.hg.1 | 2.09  | JUC13004067.hg.1 | EPSTI1      |
| TC15000039.hg.1 | 2.43  | JUC15000190.hg.1 | LOC653061   |
| TC15000039.hg.1 | -2.17 | PSR15000275.hg.1 | LOC653061   |
| TC15000039.hg.1 | -2.64 | JUC15000191.hg.1 | LOC653061   |
| TC16000370.hg.1 | 2.43  | JUC16002943.hg.1 | BCKDK       |
| TC16000370.hg.1 | 2.29  | PSR16005391.hg.1 | BCKDK       |
| TC16000370.hg.1 | 2.08  | PSR16005388.hg.1 | BCKDK       |
| TC16000370.hg.1 | 2.01  | PSR16005396.hg.1 | BCKDK       |
| TC19001532.hg.1 | 2.43  | JUC19012002.hg.1 | AKT2        |
| TC19001532.hg.1 | -2.14 | PSR19020939.hg.1 | AKT2        |
| TC19001532.hg.1 | -2.97 | PSR19020936.hg.1 | AKT2        |
| TC20000801.hg.1 | 2.43  | PSR20010776.hg.1 | C20orf173   |
| TC20000801.hg.1 | 2.24  | JUC20005626.hg.1 | C20orf173   |
| TC21000162.hg.1 | 2.43  | JUC21000714.hg.1 | TTC3, TTC3F |
| TC21000162.hg.1 | 2.12  | PSR21001424.hg.1 | TTC3, TTC3F |
| TC21000162.hg.1 | -2.1  | JUC21000705.hg.1 | TTC3, TTC3F |
| TC21000162.hg.1 | -2.65 | JUC21000724.hg.1 | TTC3, TTC3F |
| TC21000162.hg.1 | -2.71 | JUC21000701.hg.1 | TTC3, TTC3F |
| TC6_apd_hap1000 | 2.43  | PSR6_apd_hap1000 | SAPCD1, MS  |
| TC6_apd_hap1000 | 2.13  | JUC6_apd_hap1000 | SAPCD1, MS  |
| TC6_apd_hap1000 | 2     | JUC6_apd_hap1000 | SAPCD1, MS  |
| TC6_apd_hap1000 | -2.04 | JUC6_apd_hap1000 | SAPCD1, MS  |
| TC6_apd_hap1000 | -2.13 | JUC6_apd_hap1000 | SAPCD1, MS  |
| TC6_apd_hap1000 | -2.45 | JUC6_apd_hap1000 | SAPCD1, MS  |
| TC6_apd_hap1000 | -2.99 | JUC6_apd_hap1000 | SAPCD1, MS  |
| TC6_cox_hap2000 | 2.43  | PSR6_cox_hap2000 | SAPCD1, MS  |
| TC6_cox_hap2000 | 2.37  | JUC6_cox_hap2000 | SAPCD1, MS  |
| TC6_cox_hap2000 | 2.33  | JUC6_cox_hap2000 | SAPCD1, MS  |
| TC6_cox_hap2000 | 2.13  | JUC6_cox_hap2000 | SAPCD1, MS  |
| TC6_cox_hap2000 | 2     | JUC6_cox_hap2000 | SAPCD1, MS  |
| TC6_cox_hap2000 | -2.04 | JUC6_cox_hap2000 | SAPCD1, MS  |
| TC6_cox_hap2000 | -2.13 | JUC6_cox_hap2000 | SAPCD1, MS  |
| TC6_cox_hap2000 | -2.45 | JUC6_cox_hap2000 | SAPCD1, MS  |
| TC6_cox_hap2000 | -2.99 | JUC6_cox_hap2000 | SAPCD1, MS  |
| TC6_dbb_hap3000 | 2.43  | PSR6_dbb_hap3000 | PRRC2A      |
| TC6_dbb_hap3000 | 2.33  | PSR6_dbb_hap3000 | PRRC2A      |
| TC6_dbb_hap3000 | 2.22  | JUC6_dbb_hap3000 | PRRC2A      |



|                 |       |                  |             |
|-----------------|-------|------------------|-------------|
| TC6_dbb_hap3000 | 2.01  | PSR6_dbb_hap3000 | PRRC2A      |
| TC01001090.hg.1 | 2.42  | JUC01008757.hg.1 | TXNIP       |
| TC01001090.hg.1 | 2.31  | PSR01017160.hg.1 | TXNIP       |
| TC01001090.hg.1 | -2.15 | PSR01017177.hg.1 | TXNIP       |
| TC01001090.hg.1 | -2.26 | PSR01017165.hg.1 | TXNIP       |
| TC01001090.hg.1 | -2.31 | PSR01017174.hg.1 | TXNIP       |
| TC01001435.hg.1 | 2.42  | PSR01022404.hg.1 | PBX1        |
| TC01001435.hg.1 | 2.35  | PSR01022400.hg.1 | PBX1        |
| TC01001435.hg.1 | -2.03 | PSR01022395.hg.1 | PBX1        |
| TC01001435.hg.1 | -2.06 | JUC01011832.hg.1 | PBX1        |
| TC01001435.hg.1 | -2.29 | JUC01011807.hg.1 | PBX1        |
| TC01002197.hg.1 | 2.42  | PSR01033955.hg.1 | MTOR        |
| TC01002197.hg.1 | -2.07 | PSR01033949.hg.1 | MTOR        |
| TC01002197.hg.1 | -2.08 | PSR01033914.hg.1 | MTOR        |
| TC01002197.hg.1 | -2.2  | PSR01033925.hg.1 | MTOR        |
| TC01002197.hg.1 | -2.27 | JUC01018188.hg.1 | MTOR        |
| TC01002197.hg.1 | -2.4  | PSR01033932.hg.1 | MTOR        |
| TC01002197.hg.1 | -3.05 | PSR01033954.hg.1 | MTOR        |
| TC01002876.hg.1 | 2.42  | JUC01024086.hg.1 | LOC1001315  |
| TC01002876.hg.1 | 2.05  | JUC01024070.hg.1 | LOC1001315  |
| TC01002876.hg.1 | -2.26 | PSR01044831.hg.1 | LOC1001315  |
| TC01002876.hg.1 | -2.29 | PSR01044846.hg.1 | LOC1001315  |
| TC01002876.hg.1 | -3.03 | JUC01024097.hg.1 | LOC1001315  |
| TC01003268.hg.1 | 2.42  | JUC01026582.hg.1 | S100A2      |
| TC01003268.hg.1 | 2.33  | JUC01026579.hg.1 | S100A2      |
| TC01003268.hg.1 | 2.19  | JUC01026580.hg.1 | S100A2      |
| TC01003268.hg.1 | 2.06  | PSR01050289.hg.1 | S100A2      |
| TC02001105.hg.1 | 2.42  | JUC02008890.hg.1 | COL3A1, MIF |
| TC02001105.hg.1 | 2.3   | JUC02008896.hg.1 | COL3A1, MIF |
| TC02001105.hg.1 | 2.26  | PSR02016655.hg.1 | COL3A1, MIF |
| TC02001105.hg.1 | 2.26  | PSR02016659.hg.1 | COL3A1, MIF |
| TC02001105.hg.1 | 2.2   | JUC02008902.hg.1 | COL3A1, MIF |
| TC02001105.hg.1 | 2.14  | PSR02016620.hg.1 | COL3A1, MIF |
| TC02001105.hg.1 | 2.1   | PSR02016622.hg.1 | COL3A1, MIF |
| TC02001105.hg.1 | 2.04  | PSR02016675.hg.1 | COL3A1, MIF |
| TC02001105.hg.1 | 2.03  | JUC02008870.hg.1 | COL3A1, MIF |
| TC02001105.hg.1 | 2.01  | PSR02016651.hg.1 | COL3A1, MIF |
| TC02001105.hg.1 | 2     | JUC02008886.hg.1 | COL3A1, MIF |
| TC02001105.hg.1 | -2.1  | PSR02016610.hg.1 | COL3A1, MIF |
| TC02001238.hg.1 | 2.42  | PSR02018982.hg.1 | MAP2        |
| TC02001238.hg.1 | 2.42  | JUC02010201.hg.1 | MAP2        |
| TC02001238.hg.1 | 2.31  | JUC02010190.hg.1 | MAP2        |
| TC02001238.hg.1 | 2.14  | PSR02018986.hg.1 | MAP2        |
| TC02001238.hg.1 | 2.13  | JUC02010194.hg.1 | MAP2        |
| TC02001238.hg.1 | 2.1   | JUC02010182.hg.1 | MAP2        |
| TC02001238.hg.1 | 2.04  | JUC02010208.hg.1 | MAP2        |
| TC02001238.hg.1 | -2.39 | JUC02010197.hg.1 | MAP2        |
| TC02001238.hg.1 | -2.8  | JUC02010198.hg.1 | MAP2        |
| TC03001074.hg.1 | 2.42  | JUC03009503.hg.1 | FLJ34208    |
| TC03001074.hg.1 | 2.06  | PSR03018722.hg.1 | FLJ34208    |
| TC03001074.hg.1 | 2.06  | PSR03018728.hg.1 | FLJ34208    |
| TC03001292.hg.1 | 2.42  | PSR03022165.hg.1 | PLCD1       |
| TC03001292.hg.1 | 2.38  | PSR03022163.hg.1 | PLCD1       |
| TC03001292.hg.1 | 2.38  | PSR03022175.hg.1 | PLCD1       |
| TC03001292.hg.1 | 2.34  | PSR03022179.hg.1 | PLCD1       |
| TC03001292.hg.1 | 2.05  | PSR03022184.hg.1 | PLCD1       |
| TC03001292.hg.1 | 2     | PSR03022152.hg.1 | PLCD1       |
| TC03001292.hg.1 | -2.39 | JUC03011079.hg.1 | PLCD1       |

|                 |       |                  |              |
|-----------------|-------|------------------|--------------|
| TC03001292.hg.1 | -2.77 | JUC03011071.hg.1 | PLCD1        |
| TC03003366.hg.1 | 2.42  | JUC03023915.hg.1 | LOC440993    |
| TC03003366.hg.1 | 2.11  | JUC03023918.hg.1 | LOC440993    |
| TC03003366.hg.1 | -2.3  | PSR03018806.hg.1 | LOC440993    |
| TC04000074.hg.1 | 2.42  | JUC04000762.hg.1 | KIAA0232     |
| TC04000074.hg.1 | 2.07  | PSR04001651.hg.1 | KIAA0232     |
| TC04000074.hg.1 | -2.03 | JUC04000767.hg.1 | KIAA0232     |
| TC04000074.hg.1 | -3.46 | JUC04000759.hg.1 | KIAA0232     |
| TC04000770.hg.1 | 2.42  | JUC04005674.hg.1 | TRIM2        |
| TC04000770.hg.1 | 2.25  | PSR04010575.hg.1 | TRIM2        |
| TC04000770.hg.1 | 2.04  | PSR04010574.hg.1 | TRIM2        |
| TC04000770.hg.1 | -2    | PSR04010590.hg.1 | TRIM2        |
| TC04000770.hg.1 | -2.12 | JUC04005688.hg.1 | TRIM2        |
| TC04000770.hg.1 | -2.14 | PSR04010593.hg.1 | TRIM2        |
| TC04000770.hg.1 | -2.24 | JUC04005679.hg.1 | TRIM2        |
| TC04000770.hg.1 | -4.09 | JUC04005691.hg.1 | TRIM2        |
| TC05001887.hg.1 | 2.42  | PSR05026086.hg.1 | NR3C1        |
| TC05001887.hg.1 | 2.3   | JUC05013299.hg.1 | NR3C1        |
| TC05001887.hg.1 | 2     | PSR05026092.hg.1 | NR3C1        |
| TC06000383.hg.1 | 2.42  | PSR06003906.hg.1 | SAPCD1, MS   |
| TC06000383.hg.1 | 2.36  | JUC06001623.hg.1 | SAPCD1, MS   |
| TC06000383.hg.1 | 2.32  | JUC06001611.hg.1 | SAPCD1, MS   |
| TC06000383.hg.1 | 2.12  | JUC06001597.hg.1 | SAPCD1, MS   |
| TC06000383.hg.1 | 2     | JUC06001605.hg.1 | SAPCD1, MS   |
| TC06000383.hg.1 | -2.04 | JUC06001600.hg.1 | SAPCD1, MS   |
| TC06000383.hg.1 | -2.13 | JUC06001628.hg.1 | SAPCD1, MS   |
| TC06000383.hg.1 | -2.46 | JUC06001632.hg.1 | SAPCD1, MS   |
| TC06000383.hg.1 | -3    | JUC06001626.hg.1 | SAPCD1, MS   |
| TC10000047.hg.1 | 2.42  | PSR10000414.hg.1 | NET1         |
| TC10000047.hg.1 | -2.33 | JUC10000208.hg.1 | NET1         |
| TC10000047.hg.1 | -2.67 | PSR10000409.hg.1 | NET1         |
| TC10000323.hg.1 | 2.42  | JUC10002166.hg.1 | WDFY4        |
| TC10000323.hg.1 | -2.63 | PSR10003720.hg.1 | WDFY4        |
| TC10000323.hg.1 | -2.64 | JUC10002143.hg.1 | WDFY4        |
| TC10000979.hg.1 | 2.42  | JUC10007128.hg.1 | KLF6         |
| TC10000979.hg.1 | -2.54 | PSR10012314.hg.1 | KLF6         |
| TC14000411.hg.1 | 2.42  | JUC14002482.hg.1 | RAD51B       |
| TC14000411.hg.1 | -2.05 | PSR14004861.hg.1 | RAD51B       |
| TC15002779.hg.1 | 2.42  | PSR15015769.hg.1 | HEXA         |
| TC15002779.hg.1 | 2.34  | JUC15013527.hg.1 | HEXA         |
| TC16000154.hg.1 | 2.42  | PSR16002349.hg.1 | ATF7IP2, LOC |
| TC16000154.hg.1 | -2.46 | JUC16001185.hg.1 | ATF7IP2, LOC |
| TC22001461.hg.1 | 2.42  | PSR22003972.hg.1 | SEC14L2      |
| TC22001461.hg.1 | 2.36  | JUC22009208.hg.1 | SEC14L2      |
| TC22001461.hg.1 | -5.13 | JUC22009204.hg.1 | SEC14L2      |
| TC01000346.hg.1 | 2.41  | JUC01002790.hg.1 | HMG2         |
| TC01000346.hg.1 | 2.22  | JUC01002783.hg.1 | HMG2         |
| TC01000346.hg.1 | 2.05  | PSR01005311.hg.1 | HMG2         |
| TC01002374.hg.1 | 2.41  | JUC01019722.hg.1 | C1orf63      |
| TC01002374.hg.1 | -2.07 | PSR01036618.hg.1 | C1orf63      |
| TC01002374.hg.1 | -3.97 | JUC01019711.hg.1 | C1orf63      |
| TC01002845.hg.1 | 2.41  | PSR01044339.hg.1 | GBP3         |
| TC01002845.hg.1 | 2.4   | JUC01023816.hg.1 | GBP3         |
| TC01002845.hg.1 | 2.16  | PSR01044343.hg.1 | GBP3         |
| TC01002845.hg.1 | 2.07  | JUC01023821.hg.1 | GBP3         |
| TC01002845.hg.1 | -2.09 | JUC01023822.hg.1 | GBP3         |
| TC01002845.hg.1 | -2.26 | PSR01044345.hg.1 | GBP3         |
| TC01002845.hg.1 | -2.29 | PSR01044330.hg.1 | GBP3         |

|                 |       |                  |               |
|-----------------|-------|------------------|---------------|
| TC01003560.hg.1 | 2.41  | JUC01028778.hg.1 | SEC16B, LOC   |
| TC01003560.hg.1 | 2.38  | JUC01028775.hg.1 | SEC16B, LOC   |
| TC01003560.hg.1 | 2.3   | JUC01028792.hg.1 | SEC16B, LOC   |
| TC01003560.hg.1 | 2.17  | PSR01055185.hg.1 | SEC16B, LOC   |
| TC01003560.hg.1 | -2.16 | JUC01028826.hg.1 | SEC16B, LOC   |
| TC01003560.hg.1 | -3.09 | JUC01028820.hg.1 | SEC16B, LOC   |
| TC01003560.hg.1 | -3.73 | JUC01028770.hg.1 | SEC16B, LOC   |
| TC03001487.hg.1 | 2.41  | JUC03013144.hg.1 | FAM208A       |
| TC03001487.hg.1 | 2.3   | PSR03027005.hg.1 | FAM208A       |
| TC03001487.hg.1 | -2.75 | JUC03013167.hg.1 | FAM208A       |
| TC05002011.hg.1 | 2.41  | PSR05027963.hg.1 | ATP10B        |
| TC05002011.hg.1 | 2.3   | JUC05014268.hg.1 | ATP10B        |
| TC05002011.hg.1 | 2.22  | PSR05027982.hg.1 | ATP10B        |
| TC05002011.hg.1 | -2.29 | JUC05014250.hg.1 | ATP10B        |
| TC05002011.hg.1 | -2.82 | JUC05014281.hg.1 | ATP10B        |
| TC08001528.hg.1 | 2.41  | PSR08020090.hg.1 | NUDCD1        |
| TC08001528.hg.1 | 2.36  | JUC08010221.hg.1 | NUDCD1        |
| TC09000354.hg.1 | 2.41  | PSR09003823.hg.1 | VPS13A        |
| TC09000354.hg.1 | 2.06  | JUC09002059.hg.1 | VPS13A        |
| TC09000354.hg.1 | -2.03 | JUC09002057.hg.1 | VPS13A        |
| TC09000354.hg.1 | -2.07 | JUC09002080.hg.1 | VPS13A        |
| TC09000354.hg.1 | -2.14 | JUC09002045.hg.1 | VPS13A        |
| TC09000354.hg.1 | -2.15 | JUC09002087.hg.1 | VPS13A        |
| TC09000354.hg.1 | -2.97 | JUC09002079.hg.1 | VPS13A        |
| TC10000475.hg.1 | 2.41  | PSR10005606.hg.1 | PLAU          |
| TC10000475.hg.1 | 2.02  | JUC10003293.hg.1 | PLAU          |
| TC10000475.hg.1 | -2.12 | PSR10005605.hg.1 | PLAU          |
| TC10000475.hg.1 | -4.25 | JUC10003307.hg.1 | PLAU          |
| TC10000475.hg.1 | -4.28 | PSR10005623.hg.1 | PLAU          |
| TC10000475.hg.1 | -5.16 | JUC10003302.hg.1 | PLAU          |
| TC10000475.hg.1 | -5.91 | PSR10005594.hg.1 | PLAU          |
| TC10000475.hg.1 | -7.11 | PSR10005600.hg.1 | PLAU          |
| TC10000475.hg.1 | -7.36 | JUC10003304.hg.1 | PLAU          |
| TC10000475.hg.1 | -7.43 | JUC10003308.hg.1 | PLAU          |
| TC11000669.hg.1 | 2.41  | JUC11004371.hg.1 | PELI3         |
| TC11000669.hg.1 | 2.1   | PSR11008402.hg.1 | PELI3         |
| TC11000669.hg.1 | 2.03  | PSR11008407.hg.1 | PELI3         |
| TC11001274.hg.1 | 2.41  | PSR11016099.hg.1 | INS, IGF2, IN |
| TC11001274.hg.1 | 2.2   | JUC11008678.hg.1 | INS, IGF2, IN |
| TC11001274.hg.1 | -2.71 | PSR11016103.hg.1 | INS, IGF2, IN |
| TC11001274.hg.1 | -3.77 | PSR11016122.hg.1 | INS, IGF2, IN |
| TC11001274.hg.1 | -4.71 | PSR11016138.hg.1 | INS, IGF2, IN |
| TC11001274.hg.1 | -4.71 | PSR11016146.hg.1 | INS, IGF2, IN |
| TC11001274.hg.1 | -4.95 | PSR11016135.hg.1 | INS, IGF2, IN |
| TC11001274.hg.1 | -5.24 | PSR11016151.hg.1 | INS, IGF2, IN |
| TC11001274.hg.1 | -5.31 | PSR11016129.hg.1 | INS, IGF2, IN |
| TC11001274.hg.1 | -5.39 | PSR11016157.hg.1 | INS, IGF2, IN |
| TC11001274.hg.1 | -5.52 | PSR11016140.hg.1 | INS, IGF2, IN |
| TC11001274.hg.1 | -5.57 | PSR11016141.hg.1 | INS, IGF2, IN |
| TC11001274.hg.1 | -5.9  | PSR11016144.hg.1 | INS, IGF2, IN |
| TC11001274.hg.1 | -6.43 | JUC11008682.hg.1 | INS, IGF2, IN |
| TC11001274.hg.1 | -6.44 | PSR11016148.hg.1 | INS, IGF2, IN |
| TC11001274.hg.1 | -6.52 | PSR11016130.hg.1 | INS, IGF2, IN |
| TC11001274.hg.1 | -6.59 | JUC11008676.hg.1 | INS, IGF2, IN |
| TC11001274.hg.1 | -6.65 | JUC11008677.hg.1 | INS, IGF2, IN |
| TC11001274.hg.1 | -6.67 | PSR11016147.hg.1 | INS, IGF2, IN |
| TC11001274.hg.1 | -6.78 | PSR11016134.hg.1 | INS, IGF2, IN |
| TC11001274.hg.1 | -7.62 | JUC11008680.hg.1 | INS, IGF2, IN |

|                  |       |                   |               |
|------------------|-------|-------------------|---------------|
| TC11001274.hg.1  | -7.69 | JUC11008668.hg.1  | INS, IGF2, IN |
| TC11001274.hg.1  | -8.48 | PSR11016133.hg.1  | INS, IGF2, IN |
| TC11001274.hg.1  | -8.93 | JUC11008662.hg.1  | INS, IGF2, IN |
| TC12001094.hg.1  | 2.41  | PSR12014503.hg.1  | DCP1B         |
| TC12001094.hg.1  | 2.26  | PSR12014493.hg.1  | DCP1B         |
| TC12001094.hg.1  | -2.73 | JUC12007972.hg.1  | DCP1B         |
| TC12001094.hg.1  | -2.85 | PSR12014505.hg.1  | DCP1B         |
| TC12002081.hg.1  | 2.41  | PSR12027430.hg.1  | ABCB9         |
| TC12002081.hg.1  | -2.5  | JUC12015358.hg.1  | ABCB9         |
| TC15000315.hg.1  | 2.41  | JUC15001205.hg.1  | JMJD7, PLA2   |
| TC15000315.hg.1  | -2.06 | PSR15002473.hg.1  | JMJD7, PLA2   |
| TC15000315.hg.1  | -2.09 | PSR15002453.hg.1  | JMJD7, PLA2   |
| TC15000315.hg.1  | -2.18 | JUC15001194.hg.1  | JMJD7, PLA2   |
| TC15000315.hg.1  | -2.4  | JUC15001220.hg.1  | JMJD7, PLA2   |
| TC15000315.hg.1  | -2.65 | JUC15001183.hg.1  | JMJD7, PLA2   |
| TC16000859.hg.1  | 2.41  | JUC16006987.hg.1  | FAM18A        |
| TC16000859.hg.1  | 2.04  | PSR16012402.hg.1  | FAM18A        |
| TC16000965.hg.1  | 2.41  | JUC16007809.hg.1  | EARS2         |
| TC16000965.hg.1  | -2.22 | PSR16013885.hg.1  | EARS2         |
| TC6_cox_hap2000  | 2.41  | PSR6_cox_hap2000  | ABCF1         |
| TC6_cox_hap2000  | 2.41  | JUC6_cox_hap2000  | ABCF1         |
| TC6_cox_hap2000  | 2.04  | PSR6_cox_hap2000  | ABCF1         |
| TC6_dbb_hap3000  | 2.41  | PSR6_dbb_hap3000  | ABCF1         |
| TC6_dbb_hap3000  | 2.41  | JUC6_dbb_hap3000  | ABCF1         |
| TC6_dbb_hap3000  | 2.04  | PSR6_dbb_hap3000  | ABCF1         |
| TC6_qbl_hap6000  | 2.41  | PSR6_qbl_hap6000  | ABCF1         |
| TC6_qbl_hap6000  | 2.41  | JUC6_qbl_hap6000  | ABCF1         |
| TC6_qbl_hap6000  | 2.04  | PSR6_qbl_hap6000  | ABCF1         |
| TC6_ssto_hap7000 | 2.41  | PSR6_ssto_hap7000 | ABCF1         |
| TC6_ssto_hap7000 | 2.41  | JUC6_ssto_hap7000 | ABCF1         |
| TC6_ssto_hap7000 | 2.04  | PSR6_ssto_hap7000 | ABCF1         |
| TC12000859.hg.1  | 2.41  | JUC12006225.hg.1  | TCTN1         |
| TC12000859.hg.1  | 2.29  | JUC12006226.hg.1  | TCTN1         |
| TC12000859.hg.1  | 2     | PSR12011257.hg.1  | TCTN1         |
| TC01001596.hg.1  | 2.4   | JUC01013185.hg.1  | SWT1          |
| TC01001596.hg.1  | 2.36  | PSR01024732.hg.1  | SWT1          |
| TC01001596.hg.1  | -2.01 | JUC01013197.hg.1  | SWT1          |
| TC01001596.hg.1  | -2.36 | JUC01013183.hg.1  | SWT1          |
| TC01001596.hg.1  | -2.51 | JUC01013196.hg.1  | SWT1          |
| TC02001414.hg.1  | 2.4   | PSR02022452.hg.1  | INPP5D        |
| TC02001414.hg.1  | -2.55 | PSR02022491.hg.1  | INPP5D        |
| TC02001414.hg.1  | -2.9  | JUC02011801.hg.1  | INPP5D        |
| TC02001414.hg.1  | -3.13 | JUC02011810.hg.1  | INPP5D        |
| TC02001414.hg.1  | -4.81 | JUC02011830.hg.1  | INPP5D        |
| TC03002083.hg.1  | 2.4   | JUC03018313.hg.1  | CRYGS         |
| TC03002083.hg.1  | 2.27  | PSR03037019.hg.1  | CRYGS         |
| TC05001289.hg.1  | 2.4   | JUC05009277.hg.1  | LIFR          |
| TC05001289.hg.1  | 2.11  | PSR05018061.hg.1  | LIFR          |
| TC05001289.hg.1  | -2    | PSR05018058.hg.1  | LIFR          |
| TC05001289.hg.1  | -2.61 | JUC05009274.hg.1  | LIFR          |
| TC05001289.hg.1  | -2.64 | PSR05018056.hg.1  | LIFR          |
| TC05001289.hg.1  | -2.92 | PSR05018065.hg.1  | LIFR          |
| TC05001289.hg.1  | -3.01 | PSR05018057.hg.1  | LIFR          |
| TC05001289.hg.1  | -3.36 | PSR05018036.hg.1  | LIFR          |
| TC05001289.hg.1  | -3.41 | PSR05018066.hg.1  | LIFR          |
| TC05001289.hg.1  | -4.53 | JUC05009280.hg.1  | LIFR          |
| TC06001062.hg.1  | 2.4   | JUC06006134.hg.1  | LOC1005075    |
| TC06001062.hg.1  | -2.35 | PSR06012535.hg.1  | LOC1005075    |

|                 |       |                  |             |
|-----------------|-------|------------------|-------------|
| TC09000679.hg.1 | 2.4   | JUC09004548.hg.1 | DNM1        |
| TC09000679.hg.1 | 2.18  | PSR09008210.hg.1 | DNM1        |
| TC09000679.hg.1 | 2.18  | JUC09004563.hg.1 | DNM1        |
| TC09000679.hg.1 | 2.16  | JUC09004568.hg.1 | DNM1        |
| TC09000679.hg.1 | 2.03  | JUC09004555.hg.1 | DNM1        |
| TC09000679.hg.1 | -2    | PSR09008206.hg.1 | DNM1        |
| TC09000679.hg.1 | -2.15 | JUC09004571.hg.1 | DNM1        |
| TC09000679.hg.1 | -2.16 | PSR09008216.hg.1 | DNM1        |
| TC09000679.hg.1 | -2.21 | PSR09008204.hg.1 | DNM1        |
| TC09000679.hg.1 | -2.21 | PSR09008239.hg.1 | DNM1        |
| TC09000679.hg.1 | -2.3  | PSR09008186.hg.1 | DNM1        |
| TC09000679.hg.1 | -2.3  | PSR09008223.hg.1 | DNM1        |
| TC09000679.hg.1 | -2.33 | PSR09008221.hg.1 | DNM1        |
| TC09000679.hg.1 | -2.45 | PSR09008227.hg.1 | DNM1        |
| TC09000679.hg.1 | -2.47 | JUC09004558.hg.1 | DNM1        |
| TC09000679.hg.1 | -2.57 | JUC09004542.hg.1 | DNM1        |
| TC09000679.hg.1 | -2.61 | PSR09008232.hg.1 | DNM1        |
| TC09000679.hg.1 | -2.66 | JUC09004554.hg.1 | DNM1        |
| TC09000679.hg.1 | -2.68 | PSR09008233.hg.1 | DNM1        |
| TC09000679.hg.1 | -2.7  | JUC09004543.hg.1 | DNM1        |
| TC09000679.hg.1 | -2.89 | PSR09008215.hg.1 | DNM1        |
| TC09000679.hg.1 | -3.11 | JUC09004553.hg.1 | DNM1        |
| TC09000679.hg.1 | -3.21 | PSR09008228.hg.1 | DNM1        |
| TC10001585.hg.1 | 2.4   | JUC10011881.hg.1 | DNMBP       |
| TC10001585.hg.1 | 2.29  | PSR10020408.hg.1 | DNMBP       |
| TC10001585.hg.1 | 2.2   | JUC10011878.hg.1 | DNMBP       |
| TC10001585.hg.1 | 2.12  | PSR10020415.hg.1 | DNMBP       |
| TC10001585.hg.1 | -2.13 | JUC10011880.hg.1 | DNMBP       |
| TC11002319.hg.1 | 2.4   | JUC11014777.hg.1 | LOC283143   |
| TC11002319.hg.1 | -2.25 | PSR11027721.hg.1 | LOC283143   |
| TC11002319.hg.1 | -2.37 | PSR11027714.hg.1 | LOC283143   |
| TC14001140.hg.1 | 2.4   | JUC14006547.hg.1 | TXNDC16     |
| TC14001140.hg.1 | 2.18  | PSR14012921.hg.1 | TXNDC16     |
| TC14001140.hg.1 | 2.07  | JUC14006536.hg.1 | TXNDC16     |
| TC15000010.hg.1 | 2.4   | JUC15000028.hg.1 | GOLGA8C     |
| TC15000010.hg.1 | 2.3   | JUC15000022.hg.1 | GOLGA8C     |
| TC15000010.hg.1 | -2.13 | PSR15000025.hg.1 | GOLGA8C     |
| TC15000134.hg.1 | 2.4   | PSR15000825.hg.1 | GOLGA8F, G  |
| TC15000134.hg.1 | -2.01 | PSR15000830.hg.1 | GOLGA8F, G  |
| TC15000134.hg.1 | -2.44 | JUC15000273.hg.1 | GOLGA8F, G  |
| TC22000873.hg.1 | 2.4   | JUC22006173.hg.1 | KIAA0930    |
| TC22000873.hg.1 | 2.24  | JUC22006171.hg.1 | KIAA0930    |
| TC22000873.hg.1 | 2.1   | PSR22014805.hg.1 | KIAA0930    |
| TC01000827.hg.1 | 2.39  | JUC01006938.hg.1 | HS2ST1, LOC |
| TC01000827.hg.1 | 2.19  | JUC01006941.hg.1 | HS2ST1, LOC |
| TC01000827.hg.1 | 2.07  | PSR01013184.hg.1 | HS2ST1, LOC |
| TC02001297.hg.1 | 2.39  | JUC02010640.hg.1 | PNKD        |
| TC02001297.hg.1 | 2.37  | PSR02019796.hg.1 | PNKD        |
| TC02001297.hg.1 | 2.29  | PSR02019787.hg.1 | PNKD        |
| TC02001297.hg.1 | 2.27  | PSR02019788.hg.1 | PNKD        |
| TC02001297.hg.1 | 2.15  | PSR02019805.hg.1 | PNKD        |
| TC02001297.hg.1 | 2.03  | JUC02010636.hg.1 | PNKD        |
| TC02001297.hg.1 | 2.01  | PSR02019808.hg.1 | PNKD        |
| TC02002467.hg.1 | 2.39  | JUC02020302.hg.1 | LY75-CD302, |
| TC02002467.hg.1 | 2.16  | JUC02020314.hg.1 | LY75-CD302, |
| TC02002467.hg.1 | 2.02  | JUC02020323.hg.1 | LY75-CD302, |
| TC02002467.hg.1 | -2.03 | PSR02038844.hg.1 | LY75-CD302, |
| TC02002467.hg.1 | -2.04 | JUC02020285.hg.1 | LY75-CD302, |

|                 |       |                  |             |
|-----------------|-------|------------------|-------------|
| TC02002467.hg.1 | -3.13 | JUC02020305.hg.1 | LY75-CD302, |
| TC02004935.hg.1 | 2.39  | PSR02002453.hg.1 | GPN1        |
| TC02004935.hg.1 | 2.07  | JUC02031479.hg.1 | GPN1        |
| TC02004935.hg.1 | -2.32 | JUC02031477.hg.1 | GPN1        |
| TC03001247.hg.1 | 2.39  | JUC03010588.hg.1 | TOP2B, MIR4 |
| TC03001247.hg.1 | 2.27  | PSR03021351.hg.1 | TOP2B, MIR4 |
| TC03001247.hg.1 | 2.17  | JUC03010598.hg.1 | TOP2B, MIR4 |
| TC03001247.hg.1 | 2.07  | JUC03010576.hg.1 | TOP2B, MIR4 |
| TC03001247.hg.1 | -2.79 | JUC03010572.hg.1 | TOP2B, MIR4 |
| TC04001411.hg.1 | 2.39  | PSR04019710.hg.1 | ADH1C       |
| TC04001411.hg.1 | -2.07 | JUC04010343.hg.1 | ADH1C       |
| TC04001411.hg.1 | -2.44 | PSR04019701.hg.1 | ADH1C       |
| TC04001411.hg.1 | -3.72 | JUC04010344.hg.1 | ADH1C       |
| TC06000683.hg.1 | 2.39  | JUC06003625.hg.1 | ZNF451      |
| TC06000683.hg.1 | 2.09  | PSR06008165.hg.1 | ZNF451      |
| TC06000683.hg.1 | -2.03 | JUC06003631.hg.1 | ZNF451      |
| TC06000683.hg.1 | -2.06 | PSR06008210.hg.1 | ZNF451      |
| TC06000683.hg.1 | -2.1  | JUC06003636.hg.1 | ZNF451      |
| TC06000683.hg.1 | -2.14 | PSR06008204.hg.1 | ZNF451      |
| TC06000683.hg.1 | -2.16 | PSR06008202.hg.1 | ZNF451      |
| TC06000683.hg.1 | -2.33 | PSR06008217.hg.1 | ZNF451      |
| TC06000683.hg.1 | -2.44 | PSR06008201.hg.1 | ZNF451      |
| TC06000683.hg.1 | -2.58 | JUC06003640.hg.1 | ZNF451      |
| TC06000683.hg.1 | -2.72 | PSR06008216.hg.1 | ZNF451      |
| TC06000683.hg.1 | -2.73 | JUC06003644.hg.1 | ZNF451      |
| TC06000683.hg.1 | -2.99 | JUC06003645.hg.1 | ZNF451      |
| TC07002016.hg.1 | 2.39  | JUC07015278.hg.1 | RARRES2     |
| TC07002016.hg.1 | -3.1  | PSR07030811.hg.1 | RARRES2     |
| TC09000384.hg.1 | 2.39  | JUC09002233.hg.1 | RMI1        |
| TC09000384.hg.1 | 2.3   | PSR09004093.hg.1 | RMI1        |
| TC09000384.hg.1 | 2.14  | PSR09004106.hg.1 | RMI1        |
| TC09000384.hg.1 | 2.02  | JUC09002240.hg.1 | RMI1        |
| TC09000852.hg.1 | 2.39  | PSR09011306.hg.1 | EHMT1       |
| TC09000852.hg.1 | -2    | JUC09006073.hg.1 | EHMT1       |
| TC09000852.hg.1 | -2.2  | JUC09006038.hg.1 | EHMT1       |
| TC09001333.hg.1 | 2.39  | JUC09008951.hg.1 | NOL8        |
| TC09001333.hg.1 | -2.08 | JUC09008954.hg.1 | NOL8        |
| TC09001333.hg.1 | -2.18 | PSR09016706.hg.1 | NOL8        |
| TC09001333.hg.1 | -2.56 | PSR09016691.hg.1 | NOL8        |
| TC09001333.hg.1 | -2.67 | PSR09016663.hg.1 | NOL8        |
| TC09001333.hg.1 | -2.87 | JUC09008967.hg.1 | NOL8        |
| TC0X001059.hg.1 | 2.39  | JUC0X007118.hg.1 | FAM156B, FA |
| TC0X001059.hg.1 | -2.13 | PSR0X014244.hg.1 | FAM156B, FA |
| TC0X001429.hg.1 | 2.39  | JUC0X009699.hg.1 | ATP11C      |
| TC0X001429.hg.1 | 2.31  | PSR0X019015.hg.1 | ATP11C      |
| TC0X001429.hg.1 | 2.24  | JUC0X009698.hg.1 | ATP11C      |
| TC10000802.hg.1 | 2.39  | JUC10005353.hg.1 | SMC3        |
| TC10000802.hg.1 | 2.19  | PSR10009594.hg.1 | SMC3        |
| TC10000802.hg.1 | 2.14  | JUC10005342.hg.1 | SMC3        |
| TC10000802.hg.1 | -2.07 | JUC10005367.hg.1 | SMC3        |
| TC11001341.hg.1 | 2.39  | PSR11016899.hg.1 | TRIM5       |
| TC11001341.hg.1 | 2.19  | JUC11009022.hg.1 | TRIM5       |
| TC11001341.hg.1 | 2.17  | JUC11009039.hg.1 | TRIM5       |
| TC11001341.hg.1 | 2.11  | JUC11009042.hg.1 | TRIM5       |
| TC11001341.hg.1 | -2.05 | JUC11009034.hg.1 | TRIM5       |
| TC11001341.hg.1 | -2.17 | PSR11016877.hg.1 | TRIM5       |
| TC11001341.hg.1 | -2.23 | JUC11009027.hg.1 | TRIM5       |
| TC15000873.hg.1 | 2.39  | JUC15004444.hg.1 | UNC45A      |

|                 |       |                  |           |
|-----------------|-------|------------------|-----------|
| TC15000873.hg.1 | 2.26  | JUC15004465.hg.1 | UNC45A    |
| TC15000873.hg.1 | 2.2   | PSR15008345.hg.1 | UNC45A    |
| TC15000873.hg.1 | 2.2   | PSR15008356.hg.1 | UNC45A    |
| TC17000975.hg.1 | 2.39  | PSR17013006.hg.1 | INPP5K    |
| TC17000975.hg.1 | 2.15  | JUC17007407.hg.1 | INPP5K    |
| TC19002635.hg.1 | 2.39  | JUC19017399.hg.1 | TMEM91    |
| TC19002635.hg.1 | -2.3  | PSR19008018.hg.1 | TMEM91    |
| TC20000598.hg.1 | 2.39  | JUC20004475.hg.1 |           |
| TC20000598.hg.1 | 2.32  | PSR20008687.hg.1 |           |
| TC20000598.hg.1 | 2.27  | PSR20008689.hg.1 |           |
| TC21000077.hg.1 | 2.39  | JUC21000256.hg.1 | JAM2      |
| TC21000077.hg.1 | 2.34  | PSR21000406.hg.1 | JAM2      |
| TC21000077.hg.1 | -2.1  | PSR21000402.hg.1 | JAM2      |
| TC21000077.hg.1 | -2.45 | JUC21000258.hg.1 | JAM2      |
| TC21000077.hg.1 | -2.53 | PSR21000404.hg.1 | JAM2      |
| TC21000077.hg.1 | -3.17 | JUC21000247.hg.1 | JAM2      |
| TC21000077.hg.1 | -3.63 | PSR21000400.hg.1 | JAM2      |
| TC22000080.hg.1 | 2.39  | PSR22001241.hg.1 | LOC400891 |
| TC22000080.hg.1 | 2.03  | JUC22000494.hg.1 | LOC400891 |
| TC01000186.hg.1 | 2.38  | JUC01001688.hg.1 | FHAD1     |
| TC01000186.hg.1 | 2.05  | PSR01002998.hg.1 | FHAD1     |
| TC01000800.hg.1 | 2.38  | PSR01012799.hg.1 | LPHN2     |
| TC01000800.hg.1 | 2.2   | JUC01006689.hg.1 | LPHN2     |
| TC01000800.hg.1 | 2.2   | JUC01006712.hg.1 | LPHN2     |
| TC01000800.hg.1 | -2.02 | JUC01006694.hg.1 | LPHN2     |
| TC01000800.hg.1 | -2.02 | JUC01006709.hg.1 | LPHN2     |
| TC01000800.hg.1 | -2.23 | PSR01012777.hg.1 | LPHN2     |
| TC01000800.hg.1 | -2.55 | JUC01006714.hg.1 | LPHN2     |
| TC01001581.hg.1 | 2.38  | JUC01012969.hg.1 | NPL       |
| TC01001581.hg.1 | -2.76 | JUC01012979.hg.1 | NPL       |
| TC01001581.hg.1 | -2.84 | JUC01012962.hg.1 | NPL       |
| TC01001581.hg.1 | -2.98 | JUC01012965.hg.1 | NPL       |
| TC01001581.hg.1 | -3.26 | PSR01024398.hg.1 | NPL       |
| TC01001581.hg.1 | -3.76 | JUC01012976.hg.1 | NPL       |
| TC02001281.hg.1 | 2.38  | JUC02010556.hg.1 | IGFBP2    |
| TC02001281.hg.1 | -2.12 | PSR02019596.hg.1 | IGFBP2    |
| TC03000533.hg.1 | 2.38  | PSR03009835.hg.1 |           |
| TC03000533.hg.1 | -2.52 | JUC03004886.hg.1 |           |
| TC03001194.hg.1 | 2.38  | PSR03020513.hg.1 | XPC       |
| TC03001194.hg.1 | 2.1   | PSR03020474.hg.1 | XPC       |
| TC03001194.hg.1 | 2.06  | JUC03010254.hg.1 | XPC       |
| TC04001466.hg.1 | 2.38  | PSR04020845.hg.1 | CFI       |
| TC04001466.hg.1 | 2.21  | JUC04010952.hg.1 | CFI       |
| TC04001466.hg.1 | 2.13  | JUC04010944.hg.1 | CFI       |
| TC04002933.hg.1 | 2.38  | JUC04017114.hg.1 | CPZ       |
| TC04002933.hg.1 | -3.41 | PSR04001942.hg.1 | CPZ       |
| TC05001750.hg.1 | 2.38  | JUC05012148.hg.1 | FLJ33630  |
| TC05001750.hg.1 | -2.34 | JUC05012146.hg.1 | FLJ33630  |
| TC05001750.hg.1 | -2.38 | PSR05023450.hg.1 | FLJ33630  |
| TC06000341.hg.1 | 2.38  | PSR06002940.hg.1 | ABCF1     |
| TC06000341.hg.1 | 2.38  | JUC06001278.hg.1 | ABCF1     |
| TC06000341.hg.1 | 2.01  | PSR06002906.hg.1 | ABCF1     |
| TC06000511.hg.1 | 2.38  | PSR06005395.hg.1 | SCUBE3    |
| TC06000511.hg.1 | 2.37  | JUC06002157.hg.1 | SCUBE3    |
| TC06000511.hg.1 | 2.36  | PSR06005393.hg.1 | SCUBE3    |
| TC06000511.hg.1 | -2.23 | JUC06002174.hg.1 | SCUBE3    |
| TC06000511.hg.1 | -2.35 | JUC06002161.hg.1 | SCUBE3    |
| TC06000511.hg.1 | -2.7  | JUC06002165.hg.1 | SCUBE3    |

|                 |       |                  |          |
|-----------------|-------|------------------|----------|
| TC06000511.hg.1 | -2.86 | JUC06002170.hg.1 | SCUBE3   |
| TC10000895.hg.1 | 2.38  | JUC10006391.hg.1 | PSTK     |
| TC10000895.hg.1 | -2.06 | PSR10010978.hg.1 | PSTK     |
| TC10001420.hg.1 | 2.38  | JUC10010489.hg.1 | CAMK2G   |
| TC10001420.hg.1 | -3.22 | PSR10018012.hg.1 | CAMK2G   |
| TC11000820.hg.1 | 2.38  | JUC11005427.hg.1 | C11orf30 |
| TC11000820.hg.1 | -2.13 | JUC11005429.hg.1 | C11orf30 |
| TC11000820.hg.1 | -2.19 | PSR11010465.hg.1 | C11orf30 |
| TC11000820.hg.1 | -2.51 | JUC11005450.hg.1 | C11orf30 |
| TC11000820.hg.1 | -2.57 | JUC11005443.hg.1 | C11orf30 |
| TC13000343.hg.1 | 2.38  | JUC13002203.hg.1 | IPO5     |
| TC13000343.hg.1 | 2.12  | PSR13003637.hg.1 | IPO5     |
| TC13000343.hg.1 | 2.08  | JUC13002217.hg.1 | IPO5     |
| TC13000343.hg.1 | -2.51 | PSR13003621.hg.1 | IPO5     |
| TC13000343.hg.1 | -2.79 | JUC13002231.hg.1 | IPO5     |
| TC15000364.hg.1 | 2.38  | PSR15003322.hg.1 | SQRDL    |
| TC15000364.hg.1 | -2.25 | JUC15001567.hg.1 | SQRDL    |
| TC16000158.hg.1 | 2.38  | JUC16001239.hg.1 | CIITA    |
| TC16000158.hg.1 | 2.26  | JUC16001215.hg.1 | CIITA    |
| TC16000158.hg.1 | -2.23 | PSR16002403.hg.1 | CIITA    |
| TC17000822.hg.1 | 2.38  | PSR17010572.hg.1 | COG1     |
| TC17000822.hg.1 | -2.44 | JUC17005815.hg.1 | COG1     |
| TC19002605.hg.1 | 2.38  | JUC19017006.hg.1 | FLT3LG   |
| TC19002605.hg.1 | 2.14  | PSR19010221.hg.1 | FLT3LG   |
| TC20000139.hg.1 | 2.38  | JUC20000972.hg.1 | PLK1S1   |
| TC20000139.hg.1 | -2.07 | PSR20001851.hg.1 | PLK1S1   |
| TC6_mcf_hap5000 | 2.38  | PSR6_mcf_hap5000 | PRRC2A   |
| TC6_mcf_hap5000 | 2.29  | PSR6_mcf_hap5000 | PRRC2A   |
| TC6_mcf_hap5000 | 2.18  | JUC6_mcf_hap5000 | PRRC2A   |
| TC01001568.hg.1 | 2.37  | PSR01024213.hg.1 | MR1      |
| TC01001568.hg.1 | 2.01  | JUC01012853.hg.1 | MR1      |
| TC01001568.hg.1 | -2.22 | PSR01024220.hg.1 | MR1      |
| TC01001568.hg.1 | -2.71 | JUC01012850.hg.1 | MR1      |
| TC01002342.hg.1 | 2.37  | PSR01036098.hg.1 | TCEA3    |
| TC01002342.hg.1 | 2     | PSR01036088.hg.1 | TCEA3    |
| TC01002342.hg.1 | -2.65 | JUC01019453.hg.1 | TCEA3    |
| TC01002342.hg.1 | -2.75 | JUC01019460.hg.1 | TCEA3    |
| TC01003452.hg.1 | 2.37  | PSR01053808.hg.1 | OLFML2B  |
| TC01003452.hg.1 | -2.01 | JUC01028042.hg.1 | OLFML2B  |
| TC01003452.hg.1 | -2.89 | PSR01053810.hg.1 | OLFML2B  |
| TC01003548.hg.1 | 2.37  | JUC01028698.hg.1 | TNR      |
| TC01003548.hg.1 | -2.23 | PSR01055005.hg.1 | TNR      |
| TC01003548.hg.1 | -2.48 | JUC01028680.hg.1 | TNR      |
| TC02001579.hg.1 | 2.37  | JUC02013240.hg.1 | E2F6     |
| TC02001579.hg.1 | -2.08 | JUC02013243.hg.1 | E2F6     |
| TC02001579.hg.1 | -2.19 | PSR02025503.hg.1 | E2F6     |
| TC03000759.hg.1 | 2.37  | JUC03006978.hg.1 | ACPL2    |
| TC03000759.hg.1 | 2.21  | JUC03006955.hg.1 | ACPL2    |
| TC03000759.hg.1 | -2.15 | PSR03013799.hg.1 | ACPL2    |
| TC03000759.hg.1 | -2.18 | JUC03006969.hg.1 | ACPL2    |
| TC05001126.hg.1 | 2.37  | PSR05016312.hg.1 |          |
| TC05001126.hg.1 | 2.37  | JUC05008301.hg.1 |          |
| TC06001256.hg.1 | 2.37  | JUC06007401.hg.1 | SLC35B3  |
| TC06001256.hg.1 | -2.15 | PSR06015002.hg.1 | SLC35B3  |
| TC06001256.hg.1 | -3.24 | PSR06014999.hg.1 | SLC35B3  |
| TC06001807.hg.1 | 2.37  | JUC06010483.hg.1 | GSTA4    |
| TC06001807.hg.1 | -2.95 | PSR06021828.hg.1 | GSTA4    |
| TC07001923.hg.1 | 2.37  | PSR07029880.hg.1 | MKRN1    |



|                 |       |                  |            |
|-----------------|-------|------------------|------------|
| TC07001923.hg.1 | 2.32  | JUC07014811.hg.1 | MKRN1      |
| TC07001923.hg.1 | -2.2  | JUC07014796.hg.1 | MKRN1      |
| TC07001923.hg.1 | -2.46 | JUC07014797.hg.1 | MKRN1      |
| TC07001923.hg.1 | -3.31 | JUC07014799.hg.1 | MKRN1      |
| TC07001930.hg.1 | 2.37  | JUC07014876.hg.1 | KIAA1147   |
| TC07001930.hg.1 | 2.14  | PSR07030003.hg.1 | KIAA1147   |
| TC07001930.hg.1 | 2.04  | PSR07029990.hg.1 | KIAA1147   |
| TC08000220.hg.1 | 2.37  | JUC08001568.hg.1 | FZD3       |
| TC08000220.hg.1 | 2.35  | JUC08001561.hg.1 | FZD3       |
| TC08000220.hg.1 | 2.32  | JUC08001569.hg.1 | FZD3       |
| TC08000220.hg.1 | 2.23  | PSR08003192.hg.1 | FZD3       |
| TC08000220.hg.1 | 2.06  | PSR08003195.hg.1 | FZD3       |
| TC08000391.hg.1 | 2.37  | JUC08002735.hg.1 | LOC1005076 |
| TC08000391.hg.1 | 2.34  | PSR08005540.hg.1 | LOC1005076 |
| TC09000666.hg.1 | 2.37  | JUC09004398.hg.1 | LRSAM1     |
| TC09000666.hg.1 | 2.25  | JUC09004365.hg.1 | LRSAM1     |
| TC09000666.hg.1 | 2.06  | PSR09007849.hg.1 | LRSAM1     |
| TC09000666.hg.1 | -2.37 | JUC09004372.hg.1 | LRSAM1     |
| TC09000666.hg.1 | -4.56 | JUC09004397.hg.1 | LRSAM1     |
| TC09002889.hg.1 | 2.37  | JUC09015700.hg.1 | FBXO10     |
| TC09002889.hg.1 | -2.15 | PSR09014421.hg.1 | FBXO10     |
| TC09002889.hg.1 | -2.44 | PSR09014422.hg.1 | FBXO10     |
| TC09002889.hg.1 | -4.6  | JUC09015698.hg.1 | FBXO10     |
| TC0X000636.hg.1 | 2.37  | JUC0X004227.hg.1 | HPRT1      |
| TC0X000636.hg.1 | 2.19  | PSR0X008361.hg.1 | HPRT1      |
| TC0X001070.hg.1 | 2.37  | JUC0X007342.hg.1 | PHF8       |
| TC0X001070.hg.1 | 2.03  | PSR0X014545.hg.1 | PHF8       |
| TC0X001070.hg.1 | -2.03 | JUC0X007341.hg.1 | PHF8       |
| TC0X001070.hg.1 | -2.26 | JUC0X007339.hg.1 | PHF8       |
| TC0X001070.hg.1 | -2.75 | JUC0X007333.hg.1 | PHF8       |
| TC11002159.hg.1 | 2.37  | PSR11025805.hg.1 | DLG2       |
| TC11002159.hg.1 | -2.06 | JUC11013680.hg.1 | DLG2       |
| TC11002159.hg.1 | -2.15 | JUC11013689.hg.1 | DLG2       |
| TC11002159.hg.1 | -3.37 | JUC11013686.hg.1 | DLG2       |
| TC12000010.hg.1 | 2.37  | JUC12000109.hg.1 | WNK1       |
| TC12000010.hg.1 | 2.28  | JUC12000128.hg.1 | WNK1       |
| TC12000010.hg.1 | 2.1   | JUC12000116.hg.1 | WNK1       |
| TC12000010.hg.1 | -2.1  | JUC12000120.hg.1 | WNK1       |
| TC12000010.hg.1 | -2.2  | JUC12000110.hg.1 | WNK1       |
| TC12000010.hg.1 | -2.45 | PSR12000142.hg.1 | WNK1       |
| TC12000118.hg.1 | 2.37  | PSR12001600.hg.1 | FOXJ2      |
| TC12000118.hg.1 | 2.33  | PSR12001599.hg.1 | FOXJ2      |
| TC12000118.hg.1 | 2.07  | PSR12001601.hg.1 | FOXJ2      |
| TC12000118.hg.1 | 2.04  | PSR12001615.hg.1 | FOXJ2      |
| TC12000118.hg.1 | 2     | PSR12001613.hg.1 | FOXJ2      |
| TC12000118.hg.1 | 2     | PSR12001614.hg.1 | FOXJ2      |
| TC12000118.hg.1 | -2.06 | JUC12000789.hg.1 | FOXJ2      |
| TC12000858.hg.1 | 2.37  | PSR12011224.hg.1 | RAD9B      |
| TC12000858.hg.1 | 2.03  | JUC12006210.hg.1 | RAD9B      |
| TC12000858.hg.1 | -2.12 | PSR12011197.hg.1 | RAD9B      |
| TC12000858.hg.1 | -2.46 | PSR12011227.hg.1 | RAD9B      |
| TC12001087.hg.1 | 2.37  | PSR12014400.hg.1 | RAD52, LOC |
| TC12001087.hg.1 | -2.06 | JUC12007905.hg.1 | RAD52, LOC |
| TC12001087.hg.1 | -2.15 | PSR12014356.hg.1 | RAD52, LOC |
| TC12001087.hg.1 | -2.55 | PSR12014377.hg.1 | RAD52, LOC |
| TC14001127.hg.1 | 2.37  | PSR14012830.hg.1 | TRIM9      |
| TC14001127.hg.1 | 2.16  | PSR14012822.hg.1 | TRIM9      |
| TC14001127.hg.1 | 2.11  | JUC14006481.hg.1 | TRIM9      |

|                  |       |                   |             |
|------------------|-------|-------------------|-------------|
| TC14001127.hg.1  | 2.02  | PSR14012844.hg.1  | TRIM9       |
| TC14001127.hg.1  | -4.8  | JUC14006479.hg.1  | TRIM9       |
| TC16000321.hg.1  | 2.37  | JUC16002559.hg.1  | SLX1A, SULT |
| TC16000321.hg.1  | 2.19  | PSR16004567.hg.1  | SLX1A, SULT |
| TC16000321.hg.1  | -2.64 | JUC16002566.hg.1  | SLX1A, SULT |
| TC16000343.hg.1  | 2.37  | JUC16002732.hg.1  | SLX1A, SULT |
| TC16000343.hg.1  | 2.18  | PSR16004951.hg.1  | SLX1A, SULT |
| TC16000343.hg.1  | -2.64 | JUC16002738.hg.1  | SLX1A, SULT |
| TC17000437.hg.1  | 2.37  | PSR17005182.hg.1  | PIGW        |
| TC17000437.hg.1  | -2.33 | JUC17002954.hg.1  | PIGW        |
| TC22000049.hg.1  | 2.37  | JUC22000234.hg.1  | TBX1        |
| TC22000049.hg.1  | 2.15  | PSR22000501.hg.1  | TBX1        |
| TC22000049.hg.1  | 2.02  | JUC22000238.hg.1  | TBX1        |
| TC22000049.hg.1  | -2.01 | PSR22000494.hg.1  | TBX1        |
| TC22000049.hg.1  | -3.34 | JUC22000231.hg.1  | TBX1        |
| TC22000049.hg.1  | -3.42 | PSR22000497.hg.1  | TBX1        |
| TC6_cox_hap2000  | 2.37  | PSR6_cox_hap20010 | PRRC2A      |
| TC6_cox_hap2000  | 2.28  | PSR6_cox_hap20010 | PRRC2A      |
| TC6_cox_hap2000  | 2.17  | JUC6_cox_hap20004 | PRRC2A      |
| TC6_qbl_hap60000 | 2.37  | PSR6_qbl_hap60010 | PRRC2A      |
| TC6_qbl_hap60000 | 2.28  | PSR6_qbl_hap60010 | PRRC2A      |
| TC6_qbl_hap60000 | 2.17  | JUC6_qbl_hap60004 | PRRC2A      |
| TC6_ssto_hap7000 | 2.37  | PSR6_ssto_hap7000 | PRRC2A      |
| TC6_ssto_hap7000 | 2.28  | PSR6_ssto_hap7000 | PRRC2A      |
| TC6_ssto_hap7000 | 2.17  | JUC6_ssto_hap7000 | PRRC2A      |
| TC21000202.hg.1  | 2.37  | JUC21001126.hg.1  | SLC37A1     |
| TC21000202.hg.1  | 2     | PSR21002085.hg.1  | SLC37A1     |
| TC03000684.hg.1  | 2.36  | JUC03006090.hg.1  | ACAD9       |
| TC03000684.hg.1  | 2.26  | JUC03006086.hg.1  | ACAD9       |
| TC03000684.hg.1  | -2.01 | PSR03012177.hg.1  | ACAD9       |
| TC03000690.hg.1  | 2.36  | JUC03006153.hg.1  | C3orf37     |
| TC03000690.hg.1  | 2.28  | JUC03006145.hg.1  | C3orf37     |
| TC03000690.hg.1  | 2.18  | PSR03012298.hg.1  | C3orf37     |
| TC03000690.hg.1  | 2     | JUC03006146.hg.1  | C3orf37     |
| TC04000809.hg.1  | 2.36  | PSR04011232.hg.1  | RAPGEF2     |
| TC04000809.hg.1  | 2.14  | JUC04006037.hg.1  | RAPGEF2     |
| TC04000809.hg.1  | 2.09  | PSR04011218.hg.1  | RAPGEF2     |
| TC04000809.hg.1  | -2.07 | JUC04006016.hg.1  | RAPGEF2     |
| TC04000809.hg.1  | -3.26 | JUC04006030.hg.1  | RAPGEF2     |
| TC05002094.hg.1  | 2.36  | JUC05014674.hg.1  | RNF44       |
| TC05002094.hg.1  | -2.05 | PSR05028774.hg.1  | RNF44       |
| TC07001871.hg.1  | 2.36  | PSR07028993.hg.1  | FLJ43663    |
| TC07001871.hg.1  | 2.1   | PSR07028994.hg.1  | FLJ43663    |
| TC07001871.hg.1  | 2.05  | PSR07029000.hg.1  | FLJ43663    |
| TC07001871.hg.1  | -2.99 | JUC07014315.hg.1  | FLJ43663    |
| TC08001215.hg.1  | 2.36  | PSR08015693.hg.1  | ATP6V1H     |
| TC08001215.hg.1  | 2.16  | JUC08008127.hg.1  | ATP6V1H     |
| TC08001215.hg.1  | -2.31 | JUC08008100.hg.1  | ATP6V1H     |
| TC09002929.hg.1  | 2.36  | PSR09000702.hg.1  | KDM4C       |
| TC09002929.hg.1  | 2.09  | JUC09016175.hg.1  | KDM4C       |
| TC09002929.hg.1  | -2.15 | JUC09016179.hg.1  | KDM4C       |
| TC09002929.hg.1  | -2.48 | PSR09000732.hg.1  | KDM4C       |
| TC09002929.hg.1  | -2.65 | PSR09000733.hg.1  | KDM4C       |
| TC09002929.hg.1  | -3.14 | JUC09016161.hg.1  | KDM4C       |
| TC09002929.hg.1  | -3.38 | PSR09000738.hg.1  | KDM4C       |
| TC09002929.hg.1  | -5.82 | PSR09000739.hg.1  | KDM4C       |
| TC0X001530.hg.1  | 2.36  | JUC0X010195.hg.1  | FLNA        |
| TC0X001530.hg.1  | 2.27  | PSR0X020369.hg.1  | FLNA        |

|                 |       |                  |            |
|-----------------|-------|------------------|------------|
| TC0X001530.hg.1 | 2.22  | PSR0X020366.hg.1 | FLNA       |
| TC0X001530.hg.1 | 2.03  | PSR0X020438.hg.1 | FLNA       |
| TC0X001530.hg.1 | 2.02  | JUC0X010173.hg.1 | FLNA       |
| TC12000329.hg.1 | 2.36  | JUC12002264.hg.1 | ANO6       |
| TC12000329.hg.1 | 2.2   | PSR12004119.hg.1 | ANO6       |
| TC12000329.hg.1 | 2.05  | JUC12002254.hg.1 | ANO6       |
| TC12000329.hg.1 | -2.35 | JUC12002249.hg.1 | ANO6       |
| TC13000150.hg.1 | 2.36  | JUC13001077.hg.1 | DGKH       |
| TC13000150.hg.1 | 2.29  | PSR13001737.hg.1 | DGKH       |
| TC13000150.hg.1 | -2.1  | JUC13001098.hg.1 | DGKH       |
| TC14000799.hg.1 | 2.36  | JUC14004396.hg.1 | MARK3      |
| TC14000799.hg.1 | -2.19 | PSR14008628.hg.1 | MARK3      |
| TC14000799.hg.1 | -2.31 | PSR14008643.hg.1 | MARK3      |
| TC14000799.hg.1 | -2.51 | JUC14004415.hg.1 | MARK3      |
| TC14000799.hg.1 | -2.93 | PSR14008641.hg.1 | MARK3      |
| TC15000274.hg.1 | 2.36  | JUC15000800.hg.1 | LOC1001310 |
| TC15000274.hg.1 | -2.92 | PSR15001778.hg.1 | LOC1001310 |
| TC17001128.hg.1 | 2.36  | JUC17008670.hg.1 | RCVRN      |
| TC17001128.hg.1 | 2.02  | PSR17015194.hg.1 | RCVRN      |
| TC17001128.hg.1 | -2.57 | PSR17015196.hg.1 | RCVRN      |
| TC17001128.hg.1 | -3.07 | PSR17015192.hg.1 | RCVRN      |
| TC17001128.hg.1 | -4.58 | PSR17015198.hg.1 | RCVRN      |
| TC21000257.hg.1 | 2.36  | PSR21003129.hg.1 | MCM3AP-AS  |
| TC21000257.hg.1 | 2.11  | JUC21001668.hg.1 | MCM3AP-AS  |
| TC21000391.hg.1 | 2.36  | PSR21004304.hg.1 | SCAF4      |
| TC21000391.hg.1 | -2.13 | JUC21002300.hg.1 | SCAF4      |
| TC22000660.hg.1 | 2.36  | PSR22011674.hg.1 | MORC2      |
| TC22000660.hg.1 | 2.35  | JUC22004816.hg.1 | MORC2      |
| TC01000514.hg.1 | 2.35  | JUC01004188.hg.1 | ZNF684     |
| TC01000514.hg.1 | -2.3  | PSR01008037.hg.1 | ZNF684     |
| TC01002050.hg.1 | 2.35  | PSR01031213.hg.1 | WASH7P     |
| TC01002050.hg.1 | 2.1   | JUC01016961.hg.1 | WASH7P     |
| TC01002050.hg.1 | 2.08  | JUC01016946.hg.1 | WASH7P     |
| TC01002050.hg.1 | -2.06 | JUC01016959.hg.1 | WASH7P     |
| TC02002506.hg.1 | 2.35  | PSR02039664.hg.1 | LOC1008614 |
| TC02002506.hg.1 | -2.3  | JUC02020852.hg.1 | LOC1008614 |
| TC02002688.hg.1 | 2.35  | JUC02022746.hg.1 | RAPH1      |
| TC02002688.hg.1 | 2.01  | PSR02043409.hg.1 | RAPH1      |
| TC02002688.hg.1 | -2.26 | JUC02022747.hg.1 | RAPH1      |
| TC03003340.hg.1 | 2.35  | PSR03028903.hg.1 | CPOX       |
| TC03003340.hg.1 | -2.12 | JUC03023442.hg.1 | CPOX       |
| TC04000281.hg.1 | 2.35  | JUC04002032.hg.1 | OCIAD1     |
| TC04000281.hg.1 | 2.3   | PSR04004086.hg.1 | OCIAD1     |
| TC04000281.hg.1 | -2.05 | JUC04002033.hg.1 | OCIAD1     |
| TC04000281.hg.1 | -2.66 | JUC04002047.hg.1 | OCIAD1     |
| TC04000648.hg.1 | 2.35  | JUC04005032.hg.1 | LARP1B     |
| TC04000648.hg.1 | 2.3   | PSR04009428.hg.1 | LARP1B     |
| TC04000648.hg.1 | 2.3   | JUC04005029.hg.1 | LARP1B     |
| TC04000648.hg.1 | -2    | JUC04005026.hg.1 | LARP1B     |
| TC04000648.hg.1 | -2    | JUC04005043.hg.1 | LARP1B     |
| TC04000648.hg.1 | -2.48 | JUC04005036.hg.1 | LARP1B     |
| TC05000464.hg.1 | 2.35  | JUC05003621.hg.1 |            |
| TC05000464.hg.1 | -2.37 | JUC05003623.hg.1 |            |
| TC05000464.hg.1 | -2.39 | PSR05006593.hg.1 |            |
| TC05000464.hg.1 | -2.59 | PSR05006594.hg.1 |            |
| TC05000464.hg.1 | -2.69 | JUC05003622.hg.1 |            |
| TC05000464.hg.1 | -3.22 | PSR05006595.hg.1 |            |
| TC05000961.hg.1 | 2.35  | PSR05013975.hg.1 |            |

|                 |       |                  |             |
|-----------------|-------|------------------|-------------|
| TC05000961.hg.1 | -2.06 | PSR05013973.hg.1 |             |
| TC05000961.hg.1 | -2.14 | PSR05013974.hg.1 |             |
| TC05000961.hg.1 | -2.24 | PSR05013971.hg.1 |             |
| TC05000961.hg.1 | -2.85 | PSR05013972.hg.1 |             |
| TC05000961.hg.1 | -3.78 | JUC05007244.hg.1 |             |
| TC05000961.hg.1 | -3.95 | PSR05013976.hg.1 |             |
| TC07000245.hg.1 | 2.35  | JUC07001788.hg.1 | STARD3NL    |
| TC07000245.hg.1 | -2.39 | PSR07003764.hg.1 | STARD3NL    |
| TC07001852.hg.1 | 2.35  | PSR07028731.hg.1 | TNPO3       |
| TC07001852.hg.1 | -2.35 | JUC07014205.hg.1 | TNPO3       |
| TC08001524.hg.1 | 2.35  | JUC08010196.hg.1 | EIF3E       |
| TC08001524.hg.1 | -2.09 | PSR08020006.hg.1 | EIF3E       |
| TC08001524.hg.1 | -2.11 | JUC08010170.hg.1 | EIF3E       |
| TC08001524.hg.1 | -2.26 | JUC08010197.hg.1 | EIF3E       |
| TC08001524.hg.1 | -2.27 | PSR08020011.hg.1 | EIF3E       |
| TC08001524.hg.1 | -3.61 | JUC08010195.hg.1 | EIF3E       |
| TC0X000824.hg.1 | 2.35  | PSR0X011220.hg.1 | VCX3A, VCX3 |
| TC0X000824.hg.1 | 2.35  | JUC0X005490.hg.1 | VCX3A, VCX3 |
| TC10000659.hg.1 | 2.35  | PSR10007368.hg.1 | KIF11       |
| TC10000659.hg.1 | 2.14  | PSR10007376.hg.1 | KIF11       |
| TC10000659.hg.1 | -2.05 | JUC10004200.hg.1 | KIF11       |
| TC10000659.hg.1 | -2.11 | PSR10007378.hg.1 | KIF11       |
| TC10000659.hg.1 | -2.25 | JUC10004188.hg.1 | KIF11       |
| TC10001225.hg.1 | 2.35  | JUC10008834.hg.1 | ZFAND4      |
| TC10001225.hg.1 | 2.17  | PSR10015272.hg.1 | ZFAND4      |
| TC10001225.hg.1 | 2.08  | JUC10008830.hg.1 | ZFAND4      |
| TC10001225.hg.1 | 2.07  | PSR10015299.hg.1 | ZFAND4      |
| TC10001225.hg.1 | 2.05  | JUC10008849.hg.1 | ZFAND4      |
| TC12001080.hg.1 | 2.35  | JUC12007834.hg.1 | SLC6A13     |
| TC12001080.hg.1 | 2.19  | PSR12014282.hg.1 | SLC6A13     |
| TC12003242.hg.1 | 2.35  | PSR12005755.hg.1 | PCBP2       |
| TC12003242.hg.1 | -2.19 | JUC12019932.hg.1 | PCBP2       |
| TC19001095.hg.1 | 2.35  | JUC19008495.hg.1 | KHSRP, MIR3 |
| TC19001095.hg.1 | 2.02  | PSR19015015.hg.1 | KHSRP, MIR3 |
| TC19001480.hg.1 | 2.35  | JUC19011564.hg.1 | ZNF585B     |
| TC19001480.hg.1 | 2.26  | PSR19020105.hg.1 | ZNF585B     |
| TC22000492.hg.1 | 2.35  | JUC22003568.hg.1 | DGCR14, TS  |
| TC22000492.hg.1 | 2.14  | PSR22008825.hg.1 | DGCR14, TS  |
| TC22000912.hg.1 | 2.35  | PSR22015494.hg.1 | FAM116B     |
| TC22000912.hg.1 | 2.04  | JUC22006521.hg.1 | FAM116B     |
| TC22000912.hg.1 | -2.24 | JUC22006527.hg.1 | FAM116B     |
| TC08002578.hg.1 | 2.35  | JUC08014646.hg.1 | LEPROTL1    |
| TC08002578.hg.1 | -2    | PSR08003366.hg.1 | LEPROTL1    |
| TC01000113.hg.1 | 2.34  | JUC01000913.hg.1 | H6PD        |
| TC01000113.hg.1 | 2.11  | PSR01001733.hg.1 | H6PD        |
| TC01000831.hg.1 | 2.34  | JUC01006958.hg.1 | PKN2        |
| TC01000831.hg.1 | 2.05  | PSR01013255.hg.1 | PKN2        |
| TC02001178.hg.1 | 2.34  | JUC02009581.hg.1 | STRADB      |
| TC02001178.hg.1 | 2.33  | PSR02017992.hg.1 | STRADB      |
| TC02001178.hg.1 | 2.26  | PSR02017955.hg.1 | STRADB      |
| TC02001178.hg.1 | 2.14  | PSR02017958.hg.1 | STRADB      |
| TC03000664.hg.1 | 2.34  | JUC03005959.hg.1 | MCM2        |
| TC03000664.hg.1 | 2.17  | JUC03005968.hg.1 | MCM2        |
| TC03000664.hg.1 | -2.07 | PSR03011917.hg.1 | MCM2        |
| TC03000664.hg.1 | -2.13 | JUC03005972.hg.1 | MCM2        |
| TC03000664.hg.1 | -2.8  | JUC03005973.hg.1 | MCM2        |
| TC03000664.hg.1 | -3.41 | JUC03005967.hg.1 | MCM2        |
| TC03000664.hg.1 | -4.58 | JUC03005960.hg.1 | MCM2        |

|                 |        |                  |           |
|-----------------|--------|------------------|-----------|
| TC03001528.hg.1 | 2.34   | JUC03013661.hg.1 | MAG1, MAG |
| TC03001528.hg.1 | 2.25   | JUC03013654.hg.1 | MAG1, MAG |
| TC03001528.hg.1 | 2.24   | PSR03027871.hg.1 | MAG1, MAG |
| TC03001528.hg.1 | 2      | PSR03027815.hg.1 | MAG1, MAG |
| TC03001528.hg.1 | 2      | PSR03027818.hg.1 | MAG1, MAG |
| TC04001279.hg.1 | 2.34   | JUC04009362.hg.1 | ANKRD17   |
| TC04001279.hg.1 | 2.13   | JUC04009340.hg.1 | ANKRD17   |
| TC04001279.hg.1 | 2.09   | PSR04017496.hg.1 | ANKRD17   |
| TC04001279.hg.1 | -2.43  | JUC04009359.hg.1 | ANKRD17   |
| TC04001450.hg.1 | 2.34   | JUC04010708.hg.1 | TBCK      |
| TC04001450.hg.1 | 2.1    | JUC04010737.hg.1 | TBCK      |
| TC04001450.hg.1 | -2.06  | PSR04020485.hg.1 | TBCK      |
| TC04001450.hg.1 | -2.29  | JUC04010705.hg.1 | TBCK      |
| TC04001450.hg.1 | -2.36  | PSR04020478.hg.1 | TBCK      |
| TC04001450.hg.1 | -2.5   | JUC04010745.hg.1 | TBCK      |
| TC04001450.hg.1 | -2.62  | JUC04010734.hg.1 | TBCK      |
| TC04001450.hg.1 | -3.6   | PSR04020504.hg.1 | TBCK      |
| TC06001966.hg.1 | 2.34   | PSR06024308.hg.1 | CCNC      |
| TC06001966.hg.1 | -2     | JUC06011913.hg.1 | CCNC      |
| TC07001139.hg.1 | 2.34   | JUC07008636.hg.1 | RPA3      |
| TC07001139.hg.1 | 2.32   | JUC07008633.hg.1 | RPA3      |
| TC07001139.hg.1 | 2.13   | PSR07017795.hg.1 | RPA3      |
| TC07001139.hg.1 | -2.08  | PSR07017786.hg.1 | RPA3      |
| TC07001139.hg.1 | -2.44  | JUC07008638.hg.1 | RPA3      |
| TC07001562.hg.1 | 2.34   | JUC07011661.hg.1 | HGF       |
| TC07001562.hg.1 | -2.16  | PSR07023472.hg.1 | HGF       |
| TC07001562.hg.1 | -2.22  | PSR07023474.hg.1 | HGF       |
| TC07001562.hg.1 | -2.27  | PSR07023470.hg.1 | HGF       |
| TC07001562.hg.1 | -2.28  | PSR07023475.hg.1 | HGF       |
| TC07001562.hg.1 | -2.53  | PSR07023501.hg.1 | HGF       |
| TC07001562.hg.1 | -2.66  | PSR07023487.hg.1 | HGF       |
| TC07001562.hg.1 | -2.97  | PSR07023495.hg.1 | HGF       |
| TC07001562.hg.1 | -3.04  | PSR07023479.hg.1 | HGF       |
| TC07001562.hg.1 | -3.15  | JUC07011672.hg.1 | HGF       |
| TC07001562.hg.1 | -3.19  | JUC07011662.hg.1 | HGF       |
| TC07001562.hg.1 | -3.54  | PSR07023480.hg.1 | HGF       |
| TC07001562.hg.1 | -4.31  | PSR07023468.hg.1 | HGF       |
| TC07001562.hg.1 | -4.52  | JUC07011673.hg.1 | HGF       |
| TC07001562.hg.1 | -4.97  | JUC07011675.hg.1 | HGF       |
| TC07001562.hg.1 | -5.07  | JUC07011658.hg.1 | HGF       |
| TC07001562.hg.1 | -5.71  | JUC07011663.hg.1 | HGF       |
| TC07001562.hg.1 | -6.07  | PSR07023478.hg.1 | HGF       |
| TC07001562.hg.1 | -6.63  | PSR07023490.hg.1 | HGF       |
| TC07001562.hg.1 | -6.74  | PSR07023496.hg.1 | HGF       |
| TC07001562.hg.1 | -6.93  | JUC07011671.hg.1 | HGF       |
| TC07001562.hg.1 | -8     | PSR07023483.hg.1 | HGF       |
| TC07001562.hg.1 | -8.5   | PSR07023511.hg.1 | HGF       |
| TC07001562.hg.1 | -9.08  | PSR07023503.hg.1 | HGF       |
| TC07001562.hg.1 | -9.45  | PSR07023494.hg.1 | HGF       |
| TC07001562.hg.1 | -10.27 | PSR07023491.hg.1 | HGF       |
| TC07001562.hg.1 | -11.24 | PSR07023477.hg.1 | HGF       |
| TC07001562.hg.1 | -11.92 | JUC07011667.hg.1 | HGF       |
| TC07001562.hg.1 | -13.13 | PSR07023516.hg.1 | HGF       |
| TC07001562.hg.1 | -13.52 | PSR07023504.hg.1 | HGF       |
| TC07001562.hg.1 | -14.45 | PSR07023515.hg.1 | HGF       |
| TC07001562.hg.1 | -16.29 | JUC07011670.hg.1 | HGF       |
| TC07001562.hg.1 | -18.24 | PSR07023514.hg.1 | HGF       |
| TC08000881.hg.1 | 2.34   | JUC08006025.hg.1 | ERICH1    |

|                  |       |                   |             |
|------------------|-------|-------------------|-------------|
| TC08000881.hg.1  | -2.16 | PSR08011630.hg.1  | ERICH1      |
| TC08000881.hg.1  | -2.29 | JUC08006030.hg.1  | ERICH1      |
| TC08000881.hg.1  | -2.31 | JUC08006026.hg.1  | ERICH1      |
| TC08000881.hg.1  | -3.2  | JUC08006027.hg.1  | ERICH1      |
| TC08001713.hg.1  | 2.34  | JUC08011587.hg.1  | TOP1MT      |
| TC08001713.hg.1  | 2.04  | PSR08022590.hg.1  | TOP1MT      |
| TC08001713.hg.1  | 2.04  | JUC08011616.hg.1  | TOP1MT      |
| TC08001713.hg.1  | 2.01  | JUC08011600.hg.1  | TOP1MT      |
| TC11001172.hg.1  | 2.34  | PSR11014823.hg.1  | TIRAP       |
| TC11001172.hg.1  | -2.05 | JUC11008017.hg.1  | TIRAP       |
| TC11001172.hg.1  | -2.35 | JUC11008012.hg.1  | TIRAP       |
| TC12000266.hg.1  | 2.34  | PSR12003230.hg.1  | PPFIBP1     |
| TC12000266.hg.1  | 2.11  | PSR12003284.hg.1  | PPFIBP1     |
| TC12000266.hg.1  | -2.03 | JUC12001622.hg.1  | PPFIBP1     |
| TC12000266.hg.1  | -2.05 | JUC12001629.hg.1  | PPFIBP1     |
| TC12000266.hg.1  | -2.07 | PSR12003265.hg.1  | PPFIBP1     |
| TC12000266.hg.1  | -2.21 | JUC12001614.hg.1  | PPFIBP1     |
| TC12000266.hg.1  | -2.8  | JUC12001608.hg.1  | PPFIBP1     |
| TC14000135.hg.1  | 2.34  | JUC14000502.hg.1  | LRP10       |
| TC14000135.hg.1  | 2.05  | PSR14001158.hg.1  | LRP10       |
| TC15000635.hg.1  | 2.34  | JUC15002683.hg.1  | PAQR5       |
| TC15000635.hg.1  | 2.11  | JUC15002682.hg.1  | PAQR5       |
| TC15000635.hg.1  | 2.1   | JUC15002693.hg.1  | PAQR5       |
| TC15000635.hg.1  | 2.02  | PSR15005375.hg.1  | PAQR5       |
| TC15000635.hg.1  | 2.01  | JUC15002690.hg.1  | PAQR5       |
| TC15000635.hg.1  | -4.45 | JUC15002689.hg.1  | PAQR5       |
| TC15000712.hg.1  | 2.34  | JUC15003250.hg.1  | HMG20A      |
| TC15000712.hg.1  | -2.18 | PSR15006389.hg.1  | HMG20A      |
| TC15001606.hg.1  | 2.34  | JUC15008416.hg.1  | TLE3        |
| TC15001606.hg.1  | 2.17  | JUC15008405.hg.1  | TLE3        |
| TC15001606.hg.1  | 2.13  | PSR15015494.hg.1  | TLE3        |
| TC15001606.hg.1  | -2.25 | JUC15008410.hg.1  | TLE3        |
| TC17000354.hg.1  | 2.34  | JUC17002495.hg.1  | SUZ12P1     |
| TC17000354.hg.1  | -2.02 | PSR17004424.hg.1  | SUZ12P1     |
| TC17000354.hg.1  | -2.24 | JUC17002501.hg.1  | SUZ12P1     |
| TC17000354.hg.1  | -2.31 | PSR17004425.hg.1  | SUZ12P1     |
| TC17002914.hg.1  | 2.34  | JUC17019184.hg.1  | LOC10050720 |
| TC17002914.hg.1  | 2.22  | PSR17003585.hg.1  | LOC10050720 |
| TC17002914.hg.1  | 2.2   | PSR17003587.hg.1  | LOC10050720 |
| TC17002914.hg.1  | 2.19  | PSR17003588.hg.1  | LOC10050720 |
| TC18000011.hg.1  | 2.34  | JUC18000076.hg.1  | SMCHD1      |
| TC18000011.hg.1  | -2.57 | JUC18000099.hg.1  | SMCHD1      |
| TC18000011.hg.1  | -2.58 | PSR18000113.hg.1  | SMCHD1      |
| TC19000657.hg.1  | 2.34  | JUC19005457.hg.1  | CCDC61      |
| TC19000657.hg.1  | -2.19 | PSR19009183.hg.1  | CCDC61      |
| TC19000657.hg.1  | -2.32 | JUC19005454.hg.1  | CCDC61      |
| TC20000816.hg.1  | 2.34  | PSR20011204.hg.1  | NDRG3       |
| TC20000816.hg.1  | 2.11  | JUC20005762.hg.1  | NDRG3       |
| TC6_ssto_hap7000 | 2.34  | PSR6_ssto_hap7000 | HLA-A       |
| TC6_ssto_hap7000 | -2.37 | JUC6_ssto_hap7000 | HLA-A       |
| TC6_ssto_hap7000 | -5.94 | JUC6_ssto_hap7000 | HLA-A       |
| TC01002363.hg.1  | 2.33  | JUC01019678.hg.1  | C1orf201    |
| TC01002363.hg.1  | 2.16  | PSR01036525.hg.1  | C1orf201    |
| TC01002363.hg.1  | 2.14  | PSR01036517.hg.1  | C1orf201    |
| TC01002363.hg.1  | 2.03  | PSR01036483.hg.1  | C1orf201    |
| TC01002363.hg.1  | -2.11 | JUC01019667.hg.1  | C1orf201    |
| TC03001378.hg.1  | 2.33  | PSR03023884.hg.1  | PLXNB1      |
| TC03001378.hg.1  | 2.22  | JUC03011896.hg.1  | PLXNB1      |

|                 |       |                  |             |
|-----------------|-------|------------------|-------------|
| TC04000971.hg.1 | 2.33  | JUC04007067.hg.1 | MIR943, WHS |
| TC04000971.hg.1 | 2.13  | PSR04013312.hg.1 | MIR943, WHS |
| TC04001139.hg.1 | 2.33  | JUC04008315.hg.1 | APBB2       |
| TC04001139.hg.1 | 2.18  | JUC04008327.hg.1 | APBB2       |
| TC04001139.hg.1 | -2    | PSR04015665.hg.1 | APBB2       |
| TC04001139.hg.1 | -2.08 | PSR04015681.hg.1 | APBB2       |
| TC04001139.hg.1 | -2.09 | PSR04015723.hg.1 | APBB2       |
| TC04001139.hg.1 | -2.15 | PSR04015731.hg.1 | APBB2       |
| TC04001139.hg.1 | -2.34 | PSR04015679.hg.1 | APBB2       |
| TC04001139.hg.1 | -2.45 | PSR04015687.hg.1 | APBB2       |
| TC04001139.hg.1 | -2.48 | PSR04015717.hg.1 | APBB2       |
| TC04001139.hg.1 | -2.86 | PSR04015718.hg.1 | APBB2       |
| TC04001139.hg.1 | -2.9  | PSR04015688.hg.1 | APBB2       |
| TC04001139.hg.1 | -3.28 | JUC04008317.hg.1 | APBB2       |
| TC05000168.hg.1 | 2.33  | JUC05001116.hg.1 | WDR70       |
| TC05000168.hg.1 | 2.2   | PSR05001970.hg.1 | WDR70       |
| TC05003430.hg.1 | 2.33  | PSR05025287.hg.1 | DNAJC18     |
| TC05003430.hg.1 | 2.14  | JUC05019687.hg.1 | DNAJC18     |
| TC05003430.hg.1 | 2.07  | JUC05019693.hg.1 | DNAJC18     |
| TC08000768.hg.1 | 2.33  | JUC08005252.hg.1 | PHF20L1     |
| TC08000768.hg.1 | -2    | PSR08010228.hg.1 | PHF20L1     |
| TC08000768.hg.1 | -2.08 | PSR08010227.hg.1 | PHF20L1     |
| TC08000768.hg.1 | -2.1  | PSR08010216.hg.1 | PHF20L1     |
| TC08000768.hg.1 | -2.21 | PSR08010239.hg.1 | PHF20L1     |
| TC08000768.hg.1 | -2.31 | PSR08010231.hg.1 | PHF20L1     |
| TC08000768.hg.1 | -2.33 | PSR08010248.hg.1 | PHF20L1     |
| TC08000768.hg.1 | -2.46 | JUC08005246.hg.1 | PHF20L1     |
| TC08000768.hg.1 | -2.64 | JUC08005244.hg.1 | PHF20L1     |
| TC08000768.hg.1 | -2.78 | PSR08010208.hg.1 | PHF20L1     |
| TC08000768.hg.1 | -2.84 | PSR08010257.hg.1 | PHF20L1     |
| TC08000768.hg.1 | -3.01 | PSR08010220.hg.1 | PHF20L1     |
| TC08000768.hg.1 | -3.56 | JUC08005262.hg.1 | PHF20L1     |
| TC08001147.hg.1 | 2.33  | JUC08007509.hg.1 | FGFR1       |
| TC08001147.hg.1 | 2.23  | JUC08007541.hg.1 | FGFR1       |
| TC08001147.hg.1 | 2.1   | PSR08014802.hg.1 | FGFR1       |
| TC08001147.hg.1 | -2.18 | JUC08007534.hg.1 | FGFR1       |
| TC08001147.hg.1 | -3.42 | JUC08007515.hg.1 | FGFR1       |
| TC09001773.hg.1 | 2.33  | JUC09012317.hg.1 | PNPLA7      |
| TC09001773.hg.1 | -2.02 | PSR09023032.hg.1 | PNPLA7      |
| TC09001773.hg.1 | -2.02 | JUC09012304.hg.1 | PNPLA7      |
| TC09001773.hg.1 | -2.1  | PSR09023030.hg.1 | PNPLA7      |
| TC09001773.hg.1 | -2.14 | PSR09023027.hg.1 | PNPLA7      |
| TC09001773.hg.1 | -2.28 | PSR09023013.hg.1 | PNPLA7      |
| TC09001773.hg.1 | -2.32 | PSR09023008.hg.1 | PNPLA7      |
| TC09001773.hg.1 | -2.74 | JUC09012312.hg.1 | PNPLA7      |
| TC09001773.hg.1 | -3.45 | PSR09023028.hg.1 | PNPLA7      |
| TC0X000901.hg.1 | 2.33  | PSR0X012072.hg.1 | GPR64       |
| TC0X000901.hg.1 | 2.15  | PSR0X012060.hg.1 | GPR64       |
| TC0X000901.hg.1 | -2.01 | JUC0X005983.hg.1 | GPR64       |
| TC0X000901.hg.1 | -2.26 | JUC0X005952.hg.1 | GPR64       |
| TC0X000901.hg.1 | -2.5  | JUC0X005950.hg.1 | GPR64       |
| TC0X000901.hg.1 | -2.59 | PSR0X012077.hg.1 | GPR64       |
| TC0X000901.hg.1 | -2.62 | PSR0X012093.hg.1 | GPR64       |
| TC0X000901.hg.1 | -2.79 | PSR0X012084.hg.1 | GPR64       |
| TC0X000901.hg.1 | -3.73 | JUC0X005946.hg.1 | GPR64       |
| TC0X000901.hg.1 | -4.42 | JUC0X005949.hg.1 | GPR64       |
| TC12000656.hg.1 | 2.33  | JUC12004567.hg.1 | NAV3        |
| TC12000656.hg.1 | 2.01  | JUC12004589.hg.1 | NAV3        |

|                 |       |                  |         |
|-----------------|-------|------------------|---------|
| TC12000656.hg.1 | -2.01 | JUC12004591.hg.1 | NAV3    |
| TC12000656.hg.1 | -2.13 | JUC12004592.hg.1 | NAV3    |
| TC12000656.hg.1 | -2.21 | PSR12008598.hg.1 | NAV3    |
| TC12000656.hg.1 | -2.26 | PSR12008622.hg.1 | NAV3    |
| TC12000656.hg.1 | -2.3  | JUC12004594.hg.1 | NAV3    |
| TC12000656.hg.1 | -2.31 | PSR12008608.hg.1 | NAV3    |
| TC12000656.hg.1 | -2.46 | JUC12004550.hg.1 | NAV3    |
| TC12000656.hg.1 | -2.47 | PSR12008590.hg.1 | NAV3    |
| TC12000656.hg.1 | -2.69 | JUC12004569.hg.1 | NAV3    |
| TC12000656.hg.1 | -3.02 | PSR12008589.hg.1 | NAV3    |
| TC12000656.hg.1 | -6.01 | JUC12004575.hg.1 | NAV3    |
| TC12000989.hg.1 | 2.33  | PSR12013101.hg.1 | DDX55   |
| TC12000989.hg.1 | -3.26 | JUC12007146.hg.1 | DDX55   |
| TC13000799.hg.1 | 2.33  | JUC13005256.hg.1 | ABCC4   |
| TC13000799.hg.1 | 2.11  | JUC13005231.hg.1 | ABCC4   |
| TC13000799.hg.1 | -2.4  | PSR13008938.hg.1 | ABCC4   |
| TC13000799.hg.1 | -2.4  | JUC13005262.hg.1 | ABCC4   |
| TC13000799.hg.1 | -2.4  | JUC13005269.hg.1 | ABCC4   |
| TC13000799.hg.1 | -2.47 | PSR13008936.hg.1 | ABCC4   |
| TC13000799.hg.1 | -2.73 | PSR13008973.hg.1 | ABCC4   |
| TC14002332.hg.1 | 2.33  | PSR14015849.hg.1 | EFCAB11 |
| TC14002332.hg.1 | -2.04 | JUC14012197.hg.1 | EFCAB11 |
| TC14002332.hg.1 | -2.2  | PSR14015840.hg.1 | EFCAB11 |
| TC14002332.hg.1 | -2.43 | JUC14012207.hg.1 | EFCAB11 |
| TC14002332.hg.1 | -2.68 | JUC14012206.hg.1 | EFCAB11 |
| TC14002332.hg.1 | -4.82 | PSR14015836.hg.1 | EFCAB11 |
| TC16001125.hg.1 | 2.33  | JUC16008782.hg.1 | CRNDE   |
| TC16001125.hg.1 | -2.28 | PSR16015655.hg.1 | CRNDE   |
| TC16001267.hg.1 | 2.33  | PSR16017657.hg.1 | GLG1    |
| TC16001267.hg.1 | 2.31  | JUC16010033.hg.1 | GLG1    |
| TC16001267.hg.1 | -2.58 | JUC16010043.hg.1 | GLG1    |
| TC16001267.hg.1 | -3.6  | JUC16010017.hg.1 | GLG1    |
| TC17001093.hg.1 | 2.33  | PSR17014691.hg.1 | SAT2    |
| TC17001093.hg.1 | 2.12  | JUC17008383.hg.1 | SAT2    |
| TC19000029.hg.1 | 2.33  | PSR19000319.hg.1 | HMHA1   |
| TC19000029.hg.1 | -2.09 | JUC19000213.hg.1 | HMHA1   |
| TC19000029.hg.1 | -2.64 | JUC19000214.hg.1 | HMHA1   |
| TC01000358.hg.1 | 2.32  | JUC01002897.hg.1 | WDTC1   |
| TC01000358.hg.1 | 2.13  | PSR01005558.hg.1 | WDTC1   |
| TC02002504.hg.1 | 2.32  | PSR02039661.hg.1 | STK39   |
| TC02002504.hg.1 | -2.54 | JUC02020843.hg.1 | STK39   |
| TC03001536.hg.1 | 2.32  | PSR03028030.hg.1 | TMF1    |
| TC03001536.hg.1 | 2.24  | JUC03013767.hg.1 | TMF1    |
| TC03001536.hg.1 | 2.02  | JUC03013769.hg.1 | TMF1    |
| TC03001536.hg.1 | -2.09 | JUC03013773.hg.1 | TMF1    |
| TC08000190.hg.1 | 2.32  | JUC08001281.hg.1 | ADAM28  |
| TC08000190.hg.1 | -2.04 | JUC08001284.hg.1 | ADAM28  |
| TC08000190.hg.1 | -2.12 | PSR08002512.hg.1 | ADAM28  |
| TC08000190.hg.1 | -2.31 | JUC08001273.hg.1 | ADAM28  |
| TC09001326.hg.1 | 2.32  | JUC09008880.hg.1 | ROR2    |
| TC09001326.hg.1 | 2.07  | PSR09016511.hg.1 | ROR2    |
| TC09001326.hg.1 | -2.05 | PSR09016521.hg.1 | ROR2    |
| TC09001326.hg.1 | -2.31 | PSR09016526.hg.1 | ROR2    |
| TC09001326.hg.1 | -2.35 | JUC09008875.hg.1 | ROR2    |
| TC09001326.hg.1 | -2.36 | PSR09016509.hg.1 | ROR2    |
| TC09001326.hg.1 | -2.39 | PSR09016525.hg.1 | ROR2    |
| TC09001326.hg.1 | -2.72 | PSR09016497.hg.1 | ROR2    |
| TC09001326.hg.1 | -2.88 | JUC09008878.hg.1 | ROR2    |



|                 |       |                  |             |
|-----------------|-------|------------------|-------------|
| TC09001326.hg.1 | -2.9  | JUC09008871.hg.1 | ROR2        |
| TC09001326.hg.1 | -3.51 | PSR09016495.hg.1 | ROR2        |
| TC09001326.hg.1 | -3.66 | PSR09016504.hg.1 | ROR2        |
| TC09001326.hg.1 | -3.75 | JUC09008867.hg.1 | ROR2        |
| TC09001326.hg.1 | -3.94 | JUC09008877.hg.1 | ROR2        |
| TC09001326.hg.1 | -4.01 | PSR09016522.hg.1 | ROR2        |
| TC09001326.hg.1 | -4.11 | PSR09016498.hg.1 | ROR2        |
| TC09001326.hg.1 | -4.25 | PSR09016523.hg.1 | ROR2        |
| TC09001326.hg.1 | -4.52 | PSR09016496.hg.1 | ROR2        |
| TC0X001244.hg.1 | 2.32  | JUC0X008586.hg.1 | RAB9B       |
| TC0X001244.hg.1 | 2.11  | PSR0X016864.hg.1 | RAB9B       |
| TC0Y000072.hg.1 | 2.32  | PSR0Y000828.hg.1 | EIF1AY      |
| TC0Y000072.hg.1 | -2.01 | PSR0Y000825.hg.1 | EIF1AY      |
| TC0Y000072.hg.1 | -2.81 | PSR0Y000832.hg.1 | EIF1AY      |
| TC0Y000072.hg.1 | -3.1  | PSR0Y000830.hg.1 | EIF1AY      |
| TC0Y000072.hg.1 | -3.18 | PSR0Y000826.hg.1 | EIF1AY      |
| TC0Y000072.hg.1 | -3.86 | PSR0Y000834.hg.1 | EIF1AY      |
| TC0Y000072.hg.1 | -5.26 | JUC0Y000364.hg.1 | EIF1AY      |
| TC0Y000072.hg.1 | -5.64 | PSR0Y000831.hg.1 | EIF1AY      |
| TC0Y000072.hg.1 | -9.15 | JUC0Y000362.hg.1 | EIF1AY      |
| TC10000309.hg.1 | 2.32  | JUC10002016.hg.1 | ANXA8L2, LC |
| TC10000309.hg.1 | 2.13  | JUC10002018.hg.1 | ANXA8L2, LC |
| TC10000309.hg.1 | -2.03 | JUC10002011.hg.1 | ANXA8L2, LC |
| TC10000309.hg.1 | -2.1  | JUC10002002.hg.1 | ANXA8L2, LC |
| TC10000309.hg.1 | -2.18 | JUC10002015.hg.1 | ANXA8L2, LC |
| TC10000309.hg.1 | -2.81 | JUC10002010.hg.1 | ANXA8L2, LC |
| TC10000309.hg.1 | -2.92 | PSR10003481.hg.1 | ANXA8L2, LC |
| TC10000309.hg.1 | -4.1  | PSR10003472.hg.1 | ANXA8L2, LC |
| TC10000309.hg.1 | -4.17 | PSR10003502.hg.1 | ANXA8L2, LC |
| TC10000309.hg.1 | -6.16 | JUC10002020.hg.1 | ANXA8L2, LC |
| TC10002963.hg.1 | 2.32  | JUC10017529.hg.1 | ANXA8L1, AN |
| TC10002963.hg.1 | 2.13  | JUC10017518.hg.1 | ANXA8L1, AN |
| TC10002963.hg.1 | -2.04 | JUC10017524.hg.1 | ANXA8L1, AN |
| TC10002963.hg.1 | -2.1  | JUC10017519.hg.1 | ANXA8L1, AN |
| TC10002963.hg.1 | -2.14 | PSR10015467.hg.1 | ANXA8L1, AN |
| TC10002963.hg.1 | -2.18 | JUC10017528.hg.1 | ANXA8L1, AN |
| TC10002963.hg.1 | -2.69 | PSR10015469.hg.1 | ANXA8L1, AN |
| TC10002963.hg.1 | -5.85 | JUC10017517.hg.1 | ANXA8L1, AN |
| TC11000052.hg.1 | 2.32  | JUC11000483.hg.1 | LSP1        |
| TC11000052.hg.1 | 2.3   | PSR11000991.hg.1 | LSP1        |
| TC11000052.hg.1 | 2.15  | JUC11000493.hg.1 | LSP1        |
| TC11000876.hg.1 | 2.32  | PSR11011093.hg.1 | PRSS23      |
| TC11000876.hg.1 | -2    | JUC11005813.hg.1 | PRSS23      |
| TC11000876.hg.1 | -8.35 | JUC11005816.hg.1 | PRSS23      |
| TC12001605.hg.1 | 2.32  | JUC12011863.hg.1 | TIMELESS    |
| TC12001605.hg.1 | -2.04 | JUC12011869.hg.1 | TIMELESS    |
| TC12001605.hg.1 | -2.2  | PSR12021422.hg.1 | TIMELESS    |
| TC12001605.hg.1 | -2.25 | JUC12011858.hg.1 | TIMELESS    |
| TC12001605.hg.1 | -2.8  | JUC12011872.hg.1 | TIMELESS    |
| TC12001605.hg.1 | -3.32 | JUC12011859.hg.1 | TIMELESS    |
| TC15001594.hg.1 | 2.32  | JUC15008386.hg.1 | ANP32A      |
| TC15001594.hg.1 | -2.75 | JUC15008383.hg.1 | ANP32A      |
| TC15001594.hg.1 | -2.85 | PSR15015417.hg.1 | ANP32A      |
| TC17001613.hg.1 | 2.32  | JUC17012181.hg.1 | ARL17A, ARL |
| TC17001613.hg.1 | 2.25  | JUC17012182.hg.1 | ARL17A, ARL |
| TC17001613.hg.1 | -2.03 | PSR17021668.hg.1 | ARL17A, ARL |
| TC19001801.hg.1 | 2.32  | PSR19024434.hg.1 |             |
| TC19001801.hg.1 | 2.01  | JUC19013892.hg.1 |             |

|                 |       |                  |             |
|-----------------|-------|------------------|-------------|
| TC2100040.hg.1  | 2.32  | JUC21000120.hg.1 | LINC00478   |
| TC2100040.hg.1  | -2.28 | JUC21000122.hg.1 | LINC00478   |
| TC2100040.hg.1  | -2.43 | PSR21000175.hg.1 | LINC00478   |
| TC2100040.hg.1  | -2.82 | JUC21000112.hg.1 | LINC00478   |
| TC2100040.hg.1  | -4.72 | JUC21000116.hg.1 | LINC00478   |
| TC01000566.hg.1 | 2.32  | JUC01004892.hg.1 | PLK3        |
| TC01000566.hg.1 | -2    | PSR01009492.hg.1 | PLK3        |
| TC0X001369.hg.1 | 2.32  | JUC0X009420.hg.1 | RAP2C       |
| TC0X001369.hg.1 | 2.2   | JUC0X009412.hg.1 | RAP2C       |
| TC0X001369.hg.1 | 2     | PSR0X018395.hg.1 | RAP2C       |
| TC02002612.hg.1 | 2.31  | JUC02021768.hg.1 | COL5A2      |
| TC02002612.hg.1 | 2.23  | JUC02021796.hg.1 | COL5A2      |
| TC02002612.hg.1 | 2.02  | JUC02021812.hg.1 | COL5A2      |
| TC02002612.hg.1 | -2.01 | PSR02041826.hg.1 | COL5A2      |
| TC02002612.hg.1 | -3.02 | JUC02021776.hg.1 | COL5A2      |
| TC02002625.hg.1 | 2.31  | JUC02021966.hg.1 | STAT4       |
| TC02002625.hg.1 | 2.16  | JUC02021945.hg.1 | STAT4       |
| TC02002625.hg.1 | -2.13 | PSR02042111.hg.1 | STAT4       |
| TC02002625.hg.1 | -2.17 | JUC02021963.hg.1 | STAT4       |
| TC02002625.hg.1 | -2.9  | JUC02021957.hg.1 | STAT4       |
| TC02002625.hg.1 | -5.67 | JUC02021964.hg.1 | STAT4       |
| TC03001418.hg.1 | 2.31  | PSR03025321.hg.1 | UBA7        |
| TC03001418.hg.1 | 2.23  | JUC03012480.hg.1 | UBA7        |
| TC03001418.hg.1 | 2.2   | JUC03012462.hg.1 | UBA7        |
| TC03001418.hg.1 | 2.11  | PSR03025342.hg.1 | UBA7        |
| TC03001418.hg.1 | 2.06  | PSR03025320.hg.1 | UBA7        |
| TC03001418.hg.1 | 2     | PSR03025331.hg.1 | UBA7        |
| TC04000808.hg.1 | 2.31  | JUC04005998.hg.1 | FNIP2       |
| TC04000808.hg.1 | -2    | PSR04011186.hg.1 | FNIP2       |
| TC04000808.hg.1 | -2.02 | PSR04011184.hg.1 | FNIP2       |
| TC04000808.hg.1 | -2.07 | PSR04011196.hg.1 | FNIP2       |
| TC04000808.hg.1 | -2.66 | PSR04011185.hg.1 | FNIP2       |
| TC04000808.hg.1 | -3.66 | JUC04005987.hg.1 | FNIP2       |
| TC04001090.hg.1 | 2.31  | JUC04008005.hg.1 | SEPSECS     |
| TC04001090.hg.1 | 2.05  | PSR04015017.hg.1 | SEPSECS     |
| TC04001090.hg.1 | -2.01 | PSR04015022.hg.1 | SEPSECS     |
| TC04001090.hg.1 | -2.85 | JUC04007999.hg.1 | SEPSECS     |
| TC06000136.hg.1 | 2.31  | JUC06000678.hg.1 | LINC00340   |
| TC06000136.hg.1 | -2.17 | PSR06001377.hg.1 | LINC00340   |
| TC06000136.hg.1 | -2.3  | JUC06000662.hg.1 | LINC00340   |
| TC06000136.hg.1 | -2.52 | PSR06001381.hg.1 | LINC00340   |
| TC06000136.hg.1 | -3.05 | JUC06000675.hg.1 | LINC00340   |
| TC06000136.hg.1 | -4.17 | JUC06000679.hg.1 | LINC00340   |
| TC06000136.hg.1 | -4.38 | JUC06000658.hg.1 | LINC00340   |
| TC06000149.hg.1 | 2.31  | JUC06000738.hg.1 | GMNN        |
| TC06000149.hg.1 | 2.19  | PSR06001503.hg.1 | GMNN        |
| TC06000149.hg.1 | -2.37 | PSR06001510.hg.1 | GMNN        |
| TC06001124.hg.1 | 2.31  | PSR06013346.hg.1 | ZDHHC14     |
| TC06001124.hg.1 | 2.3   | JUC06006553.hg.1 | ZDHHC14     |
| TC06001124.hg.1 | -2.11 | PSR06013364.hg.1 | ZDHHC14     |
| TC06001124.hg.1 | -2.21 | PSR06013359.hg.1 | ZDHHC14     |
| TC06001124.hg.1 | -2.25 | JUC06006549.hg.1 | ZDHHC14     |
| TC06001124.hg.1 | -2.68 | PSR06013356.hg.1 | ZDHHC14     |
| TC06001124.hg.1 | -2.82 | JUC06006555.hg.1 | ZDHHC14     |
| TC06004123.hg.1 | 2.31  | JUC06021721.hg.1 | HLA-DRB1, L |
| TC06004123.hg.1 | -2.05 | JUC06021726.hg.1 | HLA-DRB1, L |
| TC06004123.hg.1 | -2.24 | JUC06021723.hg.1 | HLA-DRB1, L |
| TC06004123.hg.1 | -2.4  | JUC06021722.hg.1 | HLA-DRB1, L |

|                 |       |                  |             |
|-----------------|-------|------------------|-------------|
| TC06004123.hg.1 | -2.57 | JUC06021716.hg.1 | HLA-DRB1, L |
| TC06004123.hg.1 | -3.67 | JUC06021725.hg.1 | HLA-DRB1, L |
| TC06004123.hg.1 | -4.03 | PSR06018671.hg.1 | HLA-DRB1, L |
| TC07003323.hg.1 | 2.31  | JUC07020873.hg.1 | EPDR1       |
| TC07003323.hg.1 | -2.71 | PSR07003738.hg.1 | EPDR1       |
| TC07003323.hg.1 | -3.04 | JUC07020872.hg.1 | EPDR1       |
| TC08001638.hg.1 | 2.31  | PSR08021288.hg.1 | FAM49B      |
| TC08001638.hg.1 | -2.01 | JUC08010829.hg.1 | FAM49B      |
| TC08001638.hg.1 | -2.02 | PSR08021255.hg.1 | FAM49B      |
| TC0X001155.hg.1 | 2.31  | PSR0X015614.hg.1 | XIST        |
| TC0X001155.hg.1 | 2.15  | JUC0X007890.hg.1 | XIST        |
| TC10001230.hg.1 | 2.31  | PSR10015359.hg.1 | PTPN20B, PT |
| TC10001230.hg.1 | 2.11  | JUC10008903.hg.1 | PTPN20B, PT |
| TC10001230.hg.1 | -2.31 | JUC10008885.hg.1 | PTPN20B, PT |
| TC13000103.hg.1 | 2.31  | PSR13000974.hg.1 | C13orf33    |
| TC13000103.hg.1 | 2.23  | PSR13000982.hg.1 | C13orf33    |
| TC13000103.hg.1 | 2.21  | PSR13000975.hg.1 | C13orf33    |
| TC13000103.hg.1 | -2.16 | JUC13000568.hg.1 | C13orf33    |
| TC13000103.hg.1 | -2.36 | PSR13000978.hg.1 | C13orf33    |
| TC13000103.hg.1 | -3.75 | JUC13000567.hg.1 | C13orf33    |
| TC14001443.hg.1 | 2.31  | PSR14016140.hg.1 | FBLN5       |
| TC14001443.hg.1 | -2.19 | PSR14016129.hg.1 | FBLN5       |
| TC14001443.hg.1 | -2.35 | JUC14008285.hg.1 | FBLN5       |
| TC14001443.hg.1 | -4.47 | PSR14016137.hg.1 | FBLN5       |
| TC14001443.hg.1 | -5.76 | JUC14008288.hg.1 | FBLN5       |
| TC15000405.hg.1 | 2.31  | PSR15003781.hg.1 | GLDN        |
| TC15000405.hg.1 | -2.23 | JUC15001783.hg.1 | GLDN        |
| TC15000405.hg.1 | -2.24 | JUC15001781.hg.1 | GLDN        |
| TC15000405.hg.1 | -2.4  | PSR15003768.hg.1 | GLDN        |
| TC15000405.hg.1 | -2.52 | PSR15003763.hg.1 | GLDN        |
| TC15000405.hg.1 | -2.76 | PSR15003761.hg.1 | GLDN        |
| TC15000405.hg.1 | -2.77 | PSR15003762.hg.1 | GLDN        |
| TC15000405.hg.1 | -4.37 | PSR15003773.hg.1 | GLDN        |
| TC15000872.hg.1 | 2.31  | PSR15008300.hg.1 | MAN2A2      |
| TC15000872.hg.1 | 2.11  | JUC15004423.hg.1 | MAN2A2      |
| TC16000647.hg.1 | 2.31  | PSR16009131.hg.1 | CDH13       |
| TC16000647.hg.1 | 2.25  | JUC16005086.hg.1 | CDH13       |
| TC16000647.hg.1 | -2.07 | JUC16005089.hg.1 | CDH13       |
| TC16000647.hg.1 | -2.19 | JUC16005076.hg.1 | CDH13       |
| TC16000647.hg.1 | -3.89 | PSR16009134.hg.1 | CDH13       |
| TC17000369.hg.1 | 2.31  | JUC17002653.hg.1 | SUZ12       |
| TC17000369.hg.1 | -2.04 | PSR17004644.hg.1 | SUZ12       |
| TC17000369.hg.1 | -2.11 | JUC17002650.hg.1 | SUZ12       |
| TC17000369.hg.1 | -3.47 | JUC17002655.hg.1 | SUZ12       |
| TC18000097.hg.1 | 2.31  | JUC18000721.hg.1 | RBBP8, MIR4 |
| TC18000097.hg.1 | -2.21 | PSR18001051.hg.1 | RBBP8, MIR4 |
| TC18000097.hg.1 | -2.71 | PSR18001056.hg.1 | RBBP8, MIR4 |
| TC18000097.hg.1 | -3.18 | PSR18001053.hg.1 | RBBP8, MIR4 |
| TC18000097.hg.1 | -9.11 | PSR18001059.hg.1 | RBBP8, MIR4 |
| TC18000309.hg.1 | 2.31  | JUC18002447.hg.1 | LAMA1       |
| TC18000309.hg.1 | 2.06  | JUC18002489.hg.1 | LAMA1       |
| TC18000309.hg.1 | -2.02 | JUC18002473.hg.1 | LAMA1       |
| TC18000309.hg.1 | -2.07 | JUC18002458.hg.1 | LAMA1       |
| TC18000309.hg.1 | -2.13 | JUC18002461.hg.1 | LAMA1       |
| TC18000309.hg.1 | -2.22 | PSR18003647.hg.1 | LAMA1       |
| TC18000309.hg.1 | -2.95 | JUC18002494.hg.1 | LAMA1       |
| TC19001751.hg.1 | 2.31  | JUC19013541.hg.1 | SYT3        |
| TC19001751.hg.1 | 2.28  | PSR19023824.hg.1 | SYT3        |

|                 |       |                  |             |
|-----------------|-------|------------------|-------------|
| TC19001751.hg.1 | 2.28  | JUC19013537.hg.1 | SYT3        |
| TC19001751.hg.1 | -2.51 | JUC19013543.hg.1 | SYT3        |
| TC20000171.hg.1 | 2.31  | JUC20001152.hg.1 |             |
| TC20000171.hg.1 | 2.23  | PSR20002144.hg.1 |             |
| TC20000171.hg.1 | 2.21  | JUC20001148.hg.1 |             |
| TC22001426.hg.1 | 2.31  | PSR22005783.hg.1 | APOBEC3C    |
| TC22001426.hg.1 | -2.85 | JUC22008599.hg.1 | APOBEC3C    |
| TC10001507.hg.1 | 2.31  | JUC10011090.hg.1 | PANK1       |
| TC10001507.hg.1 | 2     | PSR10019042.hg.1 | PANK1       |
| TC10001507.hg.1 | -3.13 | JUC10011086.hg.1 | PANK1       |
| TC01004004.hg.1 | 2.3   | PSR01060632.hg.1 | ERO1LB      |
| TC01004004.hg.1 | 2.24  | PSR01060622.hg.1 | ERO1LB      |
| TC01004004.hg.1 | 2.01  | PSR01060633.hg.1 | ERO1LB      |
| TC01004004.hg.1 | -2.86 | JUC01031720.hg.1 | ERO1LB      |
| TC02001017.hg.1 | 2.3   | PSR02015023.hg.1 | GORASP2     |
| TC02001017.hg.1 | -2.08 | JUC02008024.hg.1 | GORASP2     |
| TC02002481.hg.1 | 2.3   | JUC02020512.hg.1 | IFIH1       |
| TC02002481.hg.1 | -2.19 | PSR02039149.hg.1 | IFIH1       |
| TC02002481.hg.1 | -2.76 | JUC02020505.hg.1 | IFIH1       |
| TC03000068.hg.1 | 2.3   | PSR03001515.hg.1 | SYN2        |
| TC03000068.hg.1 | -2.17 | JUC03000796.hg.1 | SYN2        |
| TC03002173.hg.1 | 2.3   | JUC03018991.hg.1 | MF12        |
| TC03002173.hg.1 | 2.07  | PSR03038387.hg.1 | MF12        |
| TC05001223.hg.1 | 2.3   | JUC05008848.hg.1 | DROSHA      |
| TC05001223.hg.1 | 2.12  | JUC05008859.hg.1 | DROSHA      |
| TC05001223.hg.1 | -2.01 | JUC05008834.hg.1 | DROSHA      |
| TC05001223.hg.1 | -2.02 | PSR05017266.hg.1 | DROSHA      |
| TC05001223.hg.1 | -2.03 | PSR05017249.hg.1 | DROSHA      |
| TC05001223.hg.1 | -2.07 | PSR05017251.hg.1 | DROSHA      |
| TC05001223.hg.1 | -2.07 | JUC05008850.hg.1 | DROSHA      |
| TC05001223.hg.1 | -2.09 | JUC05008837.hg.1 | DROSHA      |
| TC05001223.hg.1 | -2.36 | JUC05008839.hg.1 | DROSHA      |
| TC05001817.hg.1 | 2.3   | JUC05012664.hg.1 | KLHL3       |
| TC05001817.hg.1 | 2.08  | JUC05012667.hg.1 | KLHL3       |
| TC05001817.hg.1 | -2.05 | JUC05012656.hg.1 | KLHL3       |
| TC05001817.hg.1 | -2.13 | JUC05012666.hg.1 | KLHL3       |
| TC05001817.hg.1 | -2.14 | PSR05024689.hg.1 | KLHL3       |
| TC05001817.hg.1 | -2.43 | JUC05012658.hg.1 | KLHL3       |
| TC05001817.hg.1 | -4    | JUC05012663.hg.1 | KLHL3       |
| TC06000233.hg.1 | 2.3   | JUC06000987.hg.1 | PRSS16      |
| TC06000233.hg.1 | 2.01  | PSR06002112.hg.1 | PRSS16      |
| TC06000233.hg.1 | -2.56 | JUC06000999.hg.1 | PRSS16      |
| TC06001232.hg.1 | 2.3   | JUC06007286.hg.1 | PXDC1       |
| TC06001232.hg.1 | 2.2   | PSR06014642.hg.1 | PXDC1       |
| TC06001232.hg.1 | -3.87 | JUC06007291.hg.1 | PXDC1       |
| TC06001743.hg.1 | 2.3   | PSR06020831.hg.1 | MRPL2       |
| TC06001743.hg.1 | 2.27  | PSR06020847.hg.1 | MRPL2       |
| TC06001743.hg.1 | 2.25  | JUC06009901.hg.1 | MRPL2       |
| TC07000454.hg.1 | 2.3   | PSR07006164.hg.1 | CLIP2       |
| TC07000454.hg.1 | 2.28  | PSR07006178.hg.1 | CLIP2       |
| TC07000454.hg.1 | 2.24  | JUC07002988.hg.1 | CLIP2       |
| TC07000454.hg.1 | 2.14  | PSR07006185.hg.1 | CLIP2       |
| TC0X000013.hg.1 | 2.3   | JUC0X000093.hg.1 | CD99P1      |
| TC0X000013.hg.1 | -2.59 | PSR0X000193.hg.1 | CD99P1      |
| TC0X000795.hg.1 | 2.3   | JUC0X005328.hg.1 | PPP2R3B     |
| TC0X000795.hg.1 | 2.27  | PSR0X010861.hg.1 | PPP2R3B     |
| TC0X000795.hg.1 | -2.14 | JUC0X005330.hg.1 | PPP2R3B     |
| TC10001253.hg.1 | 2.3   | PSR10015611.hg.1 | PTPN20B, PT |

|                 |       |                  |             |
|-----------------|-------|------------------|-------------|
| TC10001253.hg.1 | 2.11  | JUC10009049.hg.1 | PTPN20B, P1 |
| TC10001253.hg.1 | -2.31 | JUC10009031.hg.1 | PTPN20B, P1 |
| TC10001319.hg.1 | 2.3   | JUC10009721.hg.1 | ANK3        |
| TC10001319.hg.1 | 2.01  | PSR10016655.hg.1 | ANK3        |
| TC10001319.hg.1 | -2.04 | PSR10016558.hg.1 | ANK3        |
| TC10001319.hg.1 | -2.12 | JUC10009703.hg.1 | ANK3        |
| TC10001319.hg.1 | -2.14 | PSR10016619.hg.1 | ANK3        |
| TC10001319.hg.1 | -2.15 | PSR10016553.hg.1 | ANK3        |
| TC10001319.hg.1 | -2.28 | PSR10016650.hg.1 | ANK3        |
| TC10001319.hg.1 | -2.29 | JUC10009722.hg.1 | ANK3        |
| TC10001319.hg.1 | -2.3  | PSR10016541.hg.1 | ANK3        |
| TC10001319.hg.1 | -2.3  | PSR10016652.hg.1 | ANK3        |
| TC10001319.hg.1 | -2.33 | PSR10016616.hg.1 | ANK3        |
| TC10001319.hg.1 | -2.42 | PSR10016659.hg.1 | ANK3        |
| TC10001319.hg.1 | -2.46 | PSR10016547.hg.1 | ANK3        |
| TC10001319.hg.1 | -2.51 | JUC10009715.hg.1 | ANK3        |
| TC10001319.hg.1 | -2.52 | PSR10016566.hg.1 | ANK3        |
| TC10001319.hg.1 | -2.58 | PSR10016581.hg.1 | ANK3        |
| TC10001319.hg.1 | -2.7  | JUC10009691.hg.1 | ANK3        |
| TC10001319.hg.1 | -2.76 | PSR10016586.hg.1 | ANK3        |
| TC10001319.hg.1 | -2.77 | JUC10009672.hg.1 | ANK3        |
| TC10001319.hg.1 | -2.8  | PSR10016613.hg.1 | ANK3        |
| TC10001319.hg.1 | -2.86 | JUC10009681.hg.1 | ANK3        |
| TC10001319.hg.1 | -3.01 | JUC10009718.hg.1 | ANK3        |
| TC10001319.hg.1 | -3.1  | JUC10009645.hg.1 | ANK3        |
| TC10001319.hg.1 | -3.13 | JUC10009720.hg.1 | ANK3        |
| TC10001319.hg.1 | -3.31 | PSR10016660.hg.1 | ANK3        |
| TC10001319.hg.1 | -3.36 | JUC10009697.hg.1 | ANK3        |
| TC10001319.hg.1 | -3.62 | PSR10016612.hg.1 | ANK3        |
| TC10001319.hg.1 | -3.87 | JUC10009686.hg.1 | ANK3        |
| TC10001319.hg.1 | -3.89 | PSR10016617.hg.1 | ANK3        |
| TC10001319.hg.1 | -3.91 | JUC10009673.hg.1 | ANK3        |
| TC10001319.hg.1 | -3.94 | JUC10009659.hg.1 | ANK3        |
| TC10001319.hg.1 | -4.37 | JUC10009706.hg.1 | ANK3        |
| TC10001319.hg.1 | -4.65 | JUC10009682.hg.1 | ANK3        |
| TC10001319.hg.1 | -4.88 | JUC10009683.hg.1 | ANK3        |
| TC11001399.hg.1 | 2.3   | PSR11017681.hg.1 | TMEM41B     |
| TC11001399.hg.1 | -3.42 | JUC11009446.hg.1 | TMEM41B     |
| TC14001003.hg.1 | 2.3   | JUC14005721.hg.1 |             |
| TC14001003.hg.1 | 2.13  | PSR14011449.hg.1 |             |
| TC14001211.hg.1 | 2.3   | JUC14006958.hg.1 | ESR2        |
| TC14001211.hg.1 | 2.18  | JUC14006961.hg.1 | ESR2        |
| TC14001211.hg.1 | -2    | PSR14013824.hg.1 | ESR2        |
| TC14001211.hg.1 | -2.98 | PSR14013834.hg.1 | ESR2        |
| TC15001818.hg.1 | 2.3   | JUC15009610.hg.1 | DET1        |
| TC15001818.hg.1 | 2.28  | PSR15017593.hg.1 | DET1        |
| TC15001818.hg.1 | 2.09  | PSR15017609.hg.1 | DET1        |
| TC17001612.hg.1 | 2.3   | JUC17012173.hg.1 | ARL17B, ARL |
| TC17001612.hg.1 | 2.23  | JUC17012175.hg.1 | ARL17B, ARL |
| TC17001612.hg.1 | 2.02  | PSR17021647.hg.1 | ARL17B, ARL |
| TC17002873.hg.1 | 2.3   | JUC17018650.hg.1 | TMEM199, M  |
| TC17002873.hg.1 | 2.02  | PSR17003866.hg.1 | TMEM199, M  |
| TC17002873.hg.1 | -2.44 | JUC17018647.hg.1 | TMEM199, M  |
| TC19000350.hg.1 | 2.3   | JUC19002729.hg.1 | ARRDC2      |
| TC19000350.hg.1 | 2.09  | JUC19002726.hg.1 | ARRDC2      |
| TC19000350.hg.1 | -2.13 | PSR19004616.hg.1 | ARRDC2      |
| TC19001284.hg.1 | 2.3   | PSR19018263.hg.1 | KIAA1683    |
| TC19001284.hg.1 | 2.25  | PSR19018279.hg.1 | KIAA1683    |

|                  |       |                   |          |
|------------------|-------|-------------------|----------|
| TC19001284.hg.1  | 2.18  | JUC19010674.hg.1  | KIAA1683 |
| TC19001284.hg.1  | 2.17  | PSR19018283.hg.1  | KIAA1683 |
| TC19001284.hg.1  | 2.15  | JUC19010668.hg.1  | KIAA1683 |
| TC19001284.hg.1  | 2.15  | JUC19010672.hg.1  | KIAA1683 |
| TC19001284.hg.1  | -2.1  | PSR19018268.hg.1  | KIAA1683 |
| TC19001284.hg.1  | -2.6  | PSR19018280.hg.1  | KIAA1683 |
| TC20000533.hg.1  | 2.3   | JUC20003989.hg.1  | TCEA2    |
| TC20000533.hg.1  | 2.02  | PSR20007622.hg.1  | TCEA2    |
| TC6_cox_hap2000  | 2.3   | JUC6_cox_hap20012 | EHMT2    |
| TC6_cox_hap2000  | -2.07 | PSR6_cox_hap2003  | EHMT2    |
| TC6_dbb_hap3000  | 2.3   | JUC6_dbb_hap3001  | EHMT2    |
| TC6_dbb_hap3000  | -2.07 | PSR6_dbb_hap3003  | EHMT2    |
| TC6_qbl_hap6000  | 2.3   | JUC6_qbl_hap60010 | GPANK1   |
| TC6_qbl_hap6000  | 2.03  | PSR6_qbl_hap60029 | GPANK1   |
| TC6_qbl_hap6000  | 2.02  | PSR6_qbl_hap60029 | GPANK1   |
| TC6_ssto_hap7000 | 2.3   | JUC6_ssto_hap7001 | GPANK1   |
| TC6_ssto_hap7000 | 2.03  | PSR6_ssto_hap7002 | GPANK1   |
| TC6_ssto_hap7000 | 2.02  | PSR6_ssto_hap7002 | GPANK1   |
| TC01000426.hg.1  | 2.29  | PSR01006544.hg.1  | LCK      |
| TC01000426.hg.1  | 2.05  | JUC01003412.hg.1  | LCK      |
| TC01001624.hg.1  | 2.29  | JUC01013424.hg.1  | RGS2     |
| TC01001624.hg.1  | -2.44 | PSR01025081.hg.1  | RGS2     |
| TC01001657.hg.1  | 2.29  | JUC01013689.hg.1  | IGFN1    |
| TC01001657.hg.1  | 2.27  | JUC01013686.hg.1  | IGFN1    |
| TC01001657.hg.1  | 2.01  | PSR01025638.hg.1  | IGFN1    |
| TC01001657.hg.1  | -3    | PSR01025615.hg.1  | IGFN1    |
| TC01001657.hg.1  | -3.01 | JUC01013680.hg.1  | IGFN1    |
| TC01002578.hg.1  | 2.29  | PSR01040081.hg.1  | SLC2A1   |
| TC01002578.hg.1  | 2.28  | JUC01021513.hg.1  | SLC2A1   |
| TC01002578.hg.1  | 2.19  | PSR01040069.hg.1  | SLC2A1   |
| TC01002578.hg.1  | 2.09  | PSR01040091.hg.1  | SLC2A1   |
| TC01002578.hg.1  | 2.06  | PSR01040089.hg.1  | SLC2A1   |
| TC01004071.hg.1  | 2.29  | JUC01032127.hg.1  | ZNF496   |
| TC01004071.hg.1  | -2.16 | PSR01061417.hg.1  | ZNF496   |
| TC01004071.hg.1  | -2.37 | PSR01061406.hg.1  | ZNF496   |
| TC03000692.hg.1  | 2.29  | JUC03006220.hg.1  | IFT122   |
| TC03000692.hg.1  | 2.1   | PSR03012379.hg.1  | IFT122   |
| TC03000692.hg.1  | -2.16 | JUC03006207.hg.1  | IFT122   |
| TC03000692.hg.1  | -2.17 | JUC03006169.hg.1  | IFT122   |
| TC03000692.hg.1  | -2.21 | JUC03006172.hg.1  | IFT122   |
| TC03000692.hg.1  | -2.96 | JUC03006191.hg.1  | IFT122   |
| TC03000873.hg.1  | 2.29  | PSR03015564.hg.1  | SMC4     |
| TC03000873.hg.1  | 2.13  | JUC03007879.hg.1  | SMC4     |
| TC03000873.hg.1  | -2.51 | JUC03007892.hg.1  | SMC4     |
| TC03000873.hg.1  | -2.85 | JUC03007872.hg.1  | SMC4     |
| TC03000930.hg.1  | 2.29  | JUC03008219.hg.1  | ECT2     |
| TC03000930.hg.1  | 2.1   | JUC03008203.hg.1  | ECT2     |
| TC03000930.hg.1  | 2.09  | JUC03008229.hg.1  | ECT2     |
| TC03000930.hg.1  | 2     | PSR03016158.hg.1  | ECT2     |
| TC03000930.hg.1  | -2.19 | JUC03008206.hg.1  | ECT2     |
| TC03000930.hg.1  | -2.79 | PSR03016192.hg.1  | ECT2     |
| TC03000930.hg.1  | -3.37 | JUC03008232.hg.1  | ECT2     |
| TC04001600.hg.1  | 2.29  | JUC04011751.hg.1  | INPP4B   |
| TC04001600.hg.1  | 2.16  | PSR04022292.hg.1  | INPP4B   |
| TC04001600.hg.1  | 2.14  | JUC04011760.hg.1  | INPP4B   |
| TC04001600.hg.1  | 2.07  | PSR04022301.hg.1  | INPP4B   |
| TC04001600.hg.1  | -2.07 | PSR04022319.hg.1  | INPP4B   |
| TC04001600.hg.1  | -2.11 | JUC04011759.hg.1  | INPP4B   |

|                 |        |                  |         |
|-----------------|--------|------------------|---------|
| TC04001600.hg.1 | -2.38  | JUC04011737.hg.1 | INPP4B  |
| TC04001600.hg.1 | -2.5   | JUC04011779.hg.1 | INPP4B  |
| TC04001600.hg.1 | -2.62  | JUC04011787.hg.1 | INPP4B  |
| TC04001600.hg.1 | -2.8   | JUC04011747.hg.1 | INPP4B  |
| TC04001600.hg.1 | -4.71  | PSR04022332.hg.1 | INPP4B  |
| TC04001600.hg.1 | -5.39  | PSR04022314.hg.1 | INPP4B  |
| TC04001600.hg.1 | -5.65  | JUC04011792.hg.1 | INPP4B  |
| TC04001600.hg.1 | -6.46  | PSR04022313.hg.1 | INPP4B  |
| TC05001674.hg.1 | 2.29   | JUC05011701.hg.1 | NREP    |
| TC05001674.hg.1 | -2.09  | JUC05011710.hg.1 | NREP    |
| TC05001674.hg.1 | -2.21  | PSR05022649.hg.1 | NREP    |
| TC05001674.hg.1 | -2.53  | PSR05022621.hg.1 | NREP    |
| TC05001674.hg.1 | -2.55  | PSR05022623.hg.1 | NREP    |
| TC05001674.hg.1 | -2.73  | PSR05022624.hg.1 | NREP    |
| TC05001674.hg.1 | -3.4   | PSR05022622.hg.1 | NREP    |
| TC05003404.hg.1 | 2.29   | JUC05019272.hg.1 | BRD9    |
| TC05003404.hg.1 | 2.2    | PSR05015957.hg.1 | BRD9    |
| TC05003404.hg.1 | -2.67  | JUC05019288.hg.1 | BRD9    |
| TC05003404.hg.1 | -3.7   | JUC05019257.hg.1 | BRD9    |
| TC06001534.hg.1 | 2.29   | JUC06008573.hg.1 | GPANK1  |
| TC06001534.hg.1 | 2.02   | PSR06017650.hg.1 | GPANK1  |
| TC06001534.hg.1 | 2.01   | PSR06017662.hg.1 | GPANK1  |
| TC08001179.hg.1 | 2.29   | JUC08007796.hg.1 | SLC20A2 |
| TC08001179.hg.1 | 2.02   | JUC08007792.hg.1 | SLC20A2 |
| TC08001179.hg.1 | -2.28  | PSR08015214.hg.1 | SLC20A2 |
| TC08001179.hg.1 | -2.29  | PSR08015221.hg.1 | SLC20A2 |
| TC08001179.hg.1 | -2.59  | JUC08007800.hg.1 | SLC20A2 |
| TC09000191.hg.1 | 2.29   | PSR09002140.hg.1 | CA9     |
| TC09000191.hg.1 | -2.26  | JUC09001132.hg.1 | CA9     |
| TC09000191.hg.1 | -2.29  | PSR09002132.hg.1 | CA9     |
| TC09000191.hg.1 | -2.64  | PSR09002131.hg.1 | CA9     |
| TC09000191.hg.1 | -3.44  | PSR09002138.hg.1 | CA9     |
| TC09000191.hg.1 | -4.69  | JUC09001125.hg.1 | CA9     |
| TC09000191.hg.1 | -10.06 | JUC09001133.hg.1 | CA9     |
| TC09000191.hg.1 | -11.19 | JUC09001131.hg.1 | CA9     |
| TC09000191.hg.1 | -27.17 | PSR09002137.hg.1 | CA9     |
| TC11001513.hg.1 | 2.29   | JUC11010105.hg.1 | BDNF    |
| TC11001513.hg.1 | -2.24  | PSR11018950.hg.1 | BDNF    |
| TC11001513.hg.1 | -2.6   | PSR11018962.hg.1 | BDNF    |
| TC11001513.hg.1 | -2.6   | JUC11010104.hg.1 | BDNF    |
| TC12000804.hg.1 | 2.29   | JUC12005607.hg.1 | TDG     |
| TC12000804.hg.1 | -2.26  | JUC12005597.hg.1 | TDG     |
| TC12000804.hg.1 | -2.55  | PSR12010230.hg.1 | TDG     |
| TC16000783.hg.1 | 2.29   | JUC16006454.hg.1 | ABCA3   |
| TC16000783.hg.1 | -2.04  | JUC16006468.hg.1 | ABCA3   |
| TC16000783.hg.1 | -2.13  | PSR16011516.hg.1 | ABCA3   |
| TC16000783.hg.1 | -2.14  | PSR16011534.hg.1 | ABCA3   |
| TC16000783.hg.1 | -2.38  | JUC16006462.hg.1 | ABCA3   |
| TC16000783.hg.1 | -2.5   | PSR16011529.hg.1 | ABCA3   |
| TC16000783.hg.1 | -2.73  | JUC16006460.hg.1 | ABCA3   |
| TC16000783.hg.1 | -4.72  | JUC16006455.hg.1 | ABCA3   |
| TC20000255.hg.1 | 2.29   | PSR20003430.hg.1 | ERGIC3  |
| TC20000255.hg.1 | 2.15   | PSR20003402.hg.1 | ERGIC3  |
| TC20000255.hg.1 | 2      | JUC20001915.hg.1 | ERGIC3  |
| TC20000255.hg.1 | -2.39  | JUC20001917.hg.1 | ERGIC3  |
| TC21000353.hg.1 | 2.29   | PSR21004079.hg.1 | CCT8    |
| TC21000353.hg.1 | 2.2    | JUC21002192.hg.1 | CCT8    |
| TC22000723.hg.1 | 2.29   | JUC22005327.hg.1 | C1QTNF6 |

|                 |       |                  |          |
|-----------------|-------|------------------|----------|
| TC22000723.hg.1 | -2.11 | PSR22012770.hg.1 | C1QTNF6  |
| TC6_apd_hap1000 | 2.29  | JUC6_apd_hap1000 | EHMT2    |
| TC6_apd_hap1000 | -2.08 | PSR6_apd_hap1001 | EHMT2    |
| TC6_dbb_hap3000 | 2.29  | JUC6_dbb_hap3001 | GPANK1   |
| TC6_dbb_hap3000 | 2.22  | PSR6_dbb_hap3002 | GPANK1   |
| TC6_dbb_hap3000 | 2.03  | PSR6_dbb_hap3002 | GPANK1   |
| TC6_dbb_hap3000 | 2.01  | PSR6_dbb_hap3002 | GPANK1   |
| TC6_mann_hap400 | 2.29  | JUC6_mann_hap400 | GPANK1   |
| TC6_mann_hap400 | 2.02  | PSR6_mann_hap400 | GPANK1   |
| TC6_mann_hap400 | 2.01  | PSR6_mann_hap400 | GPANK1   |
| TC6_mcf_hap5000 | 2.29  | JUC6_mcf_hap5000 | GPANK1   |
| TC6_mcf_hap5000 | 2.02  | PSR6_mcf_hap5002 | GPANK1   |
| TC6_mcf_hap5000 | 2.01  | PSR6_mcf_hap5002 | GPANK1   |
| TC6_mcf_hap5000 | 2.29  | JUC6_mcf_hap5001 | EHMT2    |
| TC6_mcf_hap5000 | -2.08 | PSR6_mcf_hap5003 | EHMT2    |
| TC6_qbl_hap6000 | 2.29  | JUC6_qbl_hap6001 | EHMT2    |
| TC6_qbl_hap6000 | -2.08 | PSR6_qbl_hap6003 | EHMT2    |
| TC13000416.hg.1 | 2.29  | JUC13002795.hg.1 | F7       |
| TC13000416.hg.1 | 2     | PSR13004644.hg.1 | F7       |
| TC01002256.hg.1 | 2.28  | JUC01018417.hg.1 | HSPB7    |
| TC01002256.hg.1 | 2.2   | PSR01034421.hg.1 | HSPB7    |
| TC01002256.hg.1 | 2.11  | PSR01034409.hg.1 | HSPB7    |
| TC01002259.hg.1 | 2.28  | JUC01018452.hg.1 | ARHGEF19 |
| TC01002259.hg.1 | 2.19  | PSR01034466.hg.1 | ARHGEF19 |
| TC01002259.hg.1 | -2.25 | PSR01034488.hg.1 | ARHGEF19 |
| TC01002259.hg.1 | -2.52 | JUC01018461.hg.1 | ARHGEF19 |
| TC01006300.hg.1 | 2.28  | JUC01039512.hg.1 | STIL     |
| TC01006300.hg.1 | 2     | JUC01039506.hg.1 | STIL     |
| TC01006300.hg.1 | -2.66 | PSR01041161.hg.1 | STIL     |
| TC02000174.hg.1 | 2.28  | JUC02001215.hg.1 | NRBP1    |
| TC02000174.hg.1 | 2.21  | PSR02002314.hg.1 | NRBP1    |
| TC02000174.hg.1 | 2.2   | JUC02001199.hg.1 | NRBP1    |
| TC04000711.hg.1 | 2.28  | JUC04005423.hg.1 | SMAD1    |
| TC04000711.hg.1 | -2.04 | PSR04010104.hg.1 | SMAD1    |
| TC04000711.hg.1 | -3.17 | JUC04005420.hg.1 | SMAD1    |
| TC05001520.hg.1 | 2.28  | JUC05010748.hg.1 | DMGDH    |
| TC05001520.hg.1 | 2.05  | PSR05020831.hg.1 | DMGDH    |
| TC06000978.hg.1 | 2.28  | PSR06011490.hg.1 | L3MBTL3  |
| TC06000978.hg.1 | -2.12 | PSR06011510.hg.1 | L3MBTL3  |
| TC06000978.hg.1 | -2.12 | JUC06005540.hg.1 | L3MBTL3  |
| TC06000978.hg.1 | -2.42 | JUC06005543.hg.1 | L3MBTL3  |
| TC06000978.hg.1 | -2.43 | JUC06005538.hg.1 | L3MBTL3  |
| TC06000978.hg.1 | -3.26 | JUC06005554.hg.1 | L3MBTL3  |
| TC06000978.hg.1 | -4.66 | JUC06005539.hg.1 | L3MBTL3  |
| TC08000880.hg.1 | 2.28  | JUC08006014.hg.1 | C8orf42  |
| TC08000880.hg.1 | 2.09  | PSR08011616.hg.1 | C8orf42  |
| TC09000270.hg.1 | 2.28  | JUC09001528.hg.1 | KGFLP1   |
| TC09000270.hg.1 | -2.27 | PSR09002938.hg.1 | KGFLP1   |
| TC09000270.hg.1 | -3.78 | JUC09001529.hg.1 | KGFLP1   |
| TC10000211.hg.1 | 2.28  | PSR10002458.hg.1 | MAP3K8   |
| TC10000211.hg.1 | -2.13 | JUC10001326.hg.1 | MAP3K8   |
| TC10000798.hg.1 | 2.28  | PSR10009547.hg.1 | MXI1     |
| TC10000798.hg.1 | 2.13  | JUC10005325.hg.1 | MXI1     |
| TC10000798.hg.1 | -2.49 | JUC10005308.hg.1 | MXI1     |
| TC10000798.hg.1 | -3.22 | JUC10005310.hg.1 | MXI1     |
| TC11001194.hg.1 | 2.28  | JUC11008095.hg.1 | APLP2    |
| TC11001194.hg.1 | 2.03  | PSR11014996.hg.1 | APLP2    |
| TC11001355.hg.1 | 2.28  | JUC11009069.hg.1 | APBB1    |



|                 |       |                  |            |
|-----------------|-------|------------------|------------|
| TC11001355.hg.1 | 2.16  | PSR11017001.hg.1 | APBB1      |
| TC11001355.hg.1 | 2.04  | PSR11017009.hg.1 | APBB1      |
| TC11001355.hg.1 | -2.11 | JUC11009088.hg.1 | APBB1      |
| TC11001355.hg.1 | -2.15 | JUC11009079.hg.1 | APBB1      |
| TC13000273.hg.1 | 2.28  | PSR13002992.hg.1 | KLF5       |
| TC13000273.hg.1 | -2.06 | PSR13002999.hg.1 | KLF5       |
| TC13000273.hg.1 | -2.46 | PSR13002985.hg.1 | KLF5       |
| TC13000273.hg.1 | -2.72 | JUC13001872.hg.1 | KLF5       |
| TC17000184.hg.1 | 2.28  | JUC17001433.hg.1 | PIGL       |
| TC17000184.hg.1 | 2.2   | PSR17002452.hg.1 | PIGL       |
| TC17000918.hg.1 | 2.28  | JUC17006725.hg.1 | RNF213     |
| TC17000918.hg.1 | 2.02  | PSR17012012.hg.1 | RNF213     |
| TC17000918.hg.1 | -2.14 | JUC17006783.hg.1 | RNF213     |
| TC17000918.hg.1 | -2.22 | JUC17006721.hg.1 | RNF213     |
| TC17000918.hg.1 | -3.37 | JUC17006760.hg.1 | RNF213     |
| TC17001455.hg.1 | 2.28  | PSR17019186.hg.1 | IKZF3      |
| TC17001455.hg.1 | -2.34 | JUC17010896.hg.1 | IKZF3      |
| TC17001540.hg.1 | 2.28  | JUC17011528.hg.1 | EZH1       |
| TC17001540.hg.1 | -2.26 | PSR17020607.hg.1 | EZH1       |
| TC17001540.hg.1 | -2.28 | JUC17011541.hg.1 | EZH1       |
| TC17001540.hg.1 | -2.42 | JUC17011533.hg.1 | EZH1       |
| TC17001540.hg.1 | -3.1  | JUC17011518.hg.1 | EZH1       |
| TC17001734.hg.1 | 2.28  | PSR17023249.hg.1 | MTMR4      |
| TC17001734.hg.1 | 2.12  | JUC17012939.hg.1 | MTMR4      |
| TC17001734.hg.1 | -2.21 | PSR17023231.hg.1 | MTMR4      |
| TC17002878.hg.1 | 2.28  | PSR17007414.hg.1 | ITGB3      |
| TC17002878.hg.1 | -2.07 | PSR17007428.hg.1 | ITGB3      |
| TC17002878.hg.1 | -2.22 | JUC17018714.hg.1 | ITGB3      |
| TC17002878.hg.1 | -2.8  | JUC17018713.hg.1 | ITGB3      |
| TC17002879.hg.1 | 2.28  | JUC17018727.hg.1 | C17orf57   |
| TC17002879.hg.1 | 2.08  | PSR17007448.hg.1 | C17orf57   |
| TC17002879.hg.1 | -2.45 | JUC17018731.hg.1 | C17orf57   |
| TC17002879.hg.1 | -2.6  | JUC17018748.hg.1 | C17orf57   |
| TC17002879.hg.1 | -3.41 | JUC17018717.hg.1 | C17orf57   |
| TC17002879.hg.1 | -5.16 | JUC17018721.hg.1 | C17orf57   |
| TC18000033.hg.1 | 2.28  | JUC18000180.hg.1 | ARHGAP28   |
| TC18000033.hg.1 | -2.08 | JUC18000181.hg.1 | ARHGAP28   |
| TC18000033.hg.1 | -2.62 | PSR18000302.hg.1 | ARHGAP28   |
| TC19001127.hg.1 | 2.28  | JUC19008862.hg.1 | CD320      |
| TC19001127.hg.1 | 2.17  | PSR19015517.hg.1 | CD320      |
| TC02000032.hg.1 | 2.28  | JUC02000208.hg.1 | LOC150622, |
| TC02000032.hg.1 | 2     | PSR02000383.hg.1 | LOC150622, |
| TC01000873.hg.1 | 2.27  | PSR01013844.hg.1 | SLC44A3    |
| TC01000873.hg.1 | 2.17  | JUC01007321.hg.1 | SLC44A3    |
| TC01000873.hg.1 | -2.81 | JUC01007304.hg.1 | SLC44A3    |
| TC01000873.hg.1 | -2.96 | PSR01013829.hg.1 | SLC44A3    |
| TC01000873.hg.1 | -2.98 | PSR01013849.hg.1 | SLC44A3    |
| TC01000873.hg.1 | -3.35 | PSR01013831.hg.1 | SLC44A3    |
| TC01000873.hg.1 | -5.58 | JUC01007316.hg.1 | SLC44A3    |
| TC01002911.hg.1 | 2.27  | JUC01024348.hg.1 | FRRS1      |
| TC01002911.hg.1 | 2.25  | JUC01024343.hg.1 | FRRS1      |
| TC01002911.hg.1 | 2.2   | PSR01045289.hg.1 | FRRS1      |
| TC01002911.hg.1 | 2.11  | JUC01024338.hg.1 | FRRS1      |
| TC01002911.hg.1 | 2.04  | PSR01045288.hg.1 | FRRS1      |
| TC01002911.hg.1 | 2.02  | PSR01045292.hg.1 | FRRS1      |
| TC01002911.hg.1 | -2.04 | PSR01045293.hg.1 | FRRS1      |
| TC01002911.hg.1 | -2.27 | JUC01024336.hg.1 | FRRS1      |
| TC01002911.hg.1 | -2.31 | PSR01045290.hg.1 | FRRS1      |

|                  |        |                   |             |
|------------------|--------|-------------------|-------------|
| TC01002911.hg.1  | -2.34  | JUC01024339.hg.1  | FRRS1       |
| TC01002911.hg.1  | -2.36  | PSR01045275.hg.1  | FRRS1       |
| TC01002911.hg.1  | -2.39  | PSR01045278.hg.1  | FRRS1       |
| TC02000250.hg.1  | 2.27   | JUC02001930.hg.1  | LOC728730   |
| TC02000250.hg.1  | -2.48  | PSR02003748.hg.1  | LOC728730   |
| TC02002510.hg.1  | 2.27   | JUC02020981.hg.1  | FASTKD1     |
| TC02002510.hg.1  | -2.25  | PSR02039843.hg.1  | FASTKD1     |
| TC03001608.hg.1  | 2.27   | PSR03029025.hg.1  | FILIP1L     |
| TC03001608.hg.1  | 2.16   | PSR03029019.hg.1  | FILIP1L     |
| TC03001608.hg.1  | 2.13   | PSR03028999.hg.1  | FILIP1L     |
| TC03001608.hg.1  | -2     | PSR03029006.hg.1  | FILIP1L     |
| TC03001608.hg.1  | -2.62  | JUC03014270.hg.1  | FILIP1L     |
| TC05000725.hg.1  | 2.27   | JUC05005461.hg.1  | SLC4A9      |
| TC05000725.hg.1  | 2.11   | JUC05005441.hg.1  | SLC4A9      |
| TC05000725.hg.1  | 2.07   | PSR05010297.hg.1  | SLC4A9      |
| TC07000065.hg.1  | 2.27   | JUC07000448.hg.1  | RAC1        |
| TC07000065.hg.1  | 2.22   | PSR07001055.hg.1  | RAC1        |
| TC07000594.hg.1  | 2.27   | JUC07004139.hg.1  | CPSF4       |
| TC07000594.hg.1  | 2.2    | PSR07008796.hg.1  | CPSF4       |
| TC07000594.hg.1  | -2.4   | JUC07004132.hg.1  | CPSF4       |
| TC07000594.hg.1  | -2.44  | PSR07008792.hg.1  | CPSF4       |
| TC07000594.hg.1  | -2.7   | PSR07008793.hg.1  | CPSF4       |
| TC0X000357.hg.1  | 2.27   | PSR0X004610.hg.1  | HEPH        |
| TC0X000357.hg.1  | 2.04   | JUC0X002218.hg.1  | HEPH        |
| TC0X001535.hg.1  | 2.27   | PSR0X020512.hg.1  | UBL4A       |
| TC0X001535.hg.1  | 2.02   | JUC0X010245.hg.1  | UBL4A       |
| TC12000369.hg.1  | 2.27   | PSR12004547.hg.1  | PRPH        |
| TC12000369.hg.1  | -2.11  | JUC12002480.hg.1  | PRPH        |
| TC12000369.hg.1  | -2.23  | PSR12004554.hg.1  | PRPH        |
| TC12000979.hg.1  | 2.27   | JUC12007088.hg.1  | HIP1R       |
| TC12000979.hg.1  | -2.27  | JUC12007073.hg.1  | HIP1R       |
| TC12000979.hg.1  | -2.95  | JUC12007089.hg.1  | HIP1R       |
| TC12000979.hg.1  | -3.06  | PSR12012873.hg.1  | HIP1R       |
| TC12000979.hg.1  | -5.11  | JUC12007085.hg.1  | HIP1R       |
| TC14000131.hg.1  | 2.27   | JUC14000471.hg.1  | OXA1L       |
| TC14000131.hg.1  | 2.09   | PSR14001071.hg.1  | OXA1L       |
| TC14001343.hg.1  | 2.27   | PSR14015259.hg.1  | TMED8       |
| TC14001343.hg.1  | 2.25   | JUC14007753.hg.1  | TMED8       |
| TC17_ctg5_hap100 | 2.27   | PSR17_ctg5_hap100 | LRRC37A2, L |
| TC17_ctg5_hap100 | -3.06  | JUC17_ctg5_hap100 | LRRC37A2, L |
| TC17001560.hg.1  | 2.27   | JUC17011705.hg.1  | ETV4        |
| TC17001560.hg.1  | -2.27  | PSR17020897.hg.1  | ETV4        |
| TC17001589.hg.1  | 2.27   | JUC17012020.hg.1  | KIF18B      |
| TC17001589.hg.1  | -2.16  | PSR17021421.hg.1  | KIF18B      |
| TC20000051.hg.1  | 2.27   | JUC20000395.hg.1  | PRNP        |
| TC20000051.hg.1  | 2.23   | PSR20000809.hg.1  | PRNP        |
| TC6_apd_hap1000  | 2.27   | PSR6_apd_hap1000  | GABBR1      |
| TC6_apd_hap1000  | 2      | JUC6_apd_hap1000  | GABBR1      |
| TC6_apd_hap1000  | -2.18  | JUC6_apd_hap1000  | GABBR1      |
| TC6_cox_hap2000  | 2.27   | JUC6_cox_hap2001  | GPANK1      |
| TC6_cox_hap2000  | 2.01   | PSR6_cox_hap2002  | GPANK1      |
| TC02000755.hg.1  | 2.27   | JUC02006246.hg.1  | TMEM177     |
| TC02000755.hg.1  | 2.16   | JUC02006238.hg.1  | TMEM177     |
| TC02000755.hg.1  | 2      | PSR02011810.hg.1  | TMEM177     |
| TC01001337.hg.1  | 2.26   | PSR01020997.hg.1  | CD1D        |
| TC01001337.hg.1  | 2.2    | PSR01020995.hg.1  | CD1D        |
| TC01001337.hg.1  | -2.47  | PSR01021002.hg.1  | CD1D        |
| TC01001337.hg.1  | -13.26 | JUC01011189.hg.1  | CD1D        |

|                 |       |                  |         |
|-----------------|-------|------------------|---------|
| TC02000328.hg.1 | 2.26  | PSR02005012.hg.1 | CCDC85A |
| TC02000328.hg.1 | 2.23  | PSR02005005.hg.1 | CCDC85A |
| TC02000328.hg.1 | 2.16  | PSR02005009.hg.1 | CCDC85A |
| TC02000328.hg.1 | 2.11  | PSR02005013.hg.1 | CCDC85A |
| TC02000328.hg.1 | 2.1   | PSR02005006.hg.1 | CCDC85A |
| TC02000328.hg.1 | 2.08  | JUC02002627.hg.1 | CCDC85A |
| TC02000328.hg.1 | -2    | JUC02002621.hg.1 | CCDC85A |
| TC02000328.hg.1 | -2.31 | PSR02005017.hg.1 | CCDC85A |
| TC02000328.hg.1 | -2.6  | PSR02005020.hg.1 | CCDC85A |
| TC02000328.hg.1 | -2.61 | PSR02005021.hg.1 | CCDC85A |
| TC02000328.hg.1 | -3.29 | JUC02002620.hg.1 | CCDC85A |
| TC02001386.hg.1 | 2.26  | JUC02011545.hg.1 | PSMD1   |
| TC02001386.hg.1 | 2.02  | JUC02011548.hg.1 | PSMD1   |
| TC02001386.hg.1 | -2.58 | PSR02021772.hg.1 | PSMD1   |
| TC02001978.hg.1 | 2.26  | JUC02016450.hg.1 | SFXN5   |
| TC02001978.hg.1 | 2.13  | JUC02016461.hg.1 | SFXN5   |
| TC02001978.hg.1 | -2.15 | PSR02031575.hg.1 | SFXN5   |
| TC02001978.hg.1 | -2.16 | PSR02031555.hg.1 | SFXN5   |
| TC02001978.hg.1 | -2.18 | PSR02031567.hg.1 | SFXN5   |
| TC02001978.hg.1 | -2.19 | JUC02016478.hg.1 | SFXN5   |
| TC02001978.hg.1 | -2.25 | JUC02016472.hg.1 | SFXN5   |
| TC02002121.hg.1 | 2.26  | JUC02017767.hg.1 | ACTR1B  |
| TC02002121.hg.1 | -2.03 | PSR02034458.hg.1 | ACTR1B  |
| TC02005063.hg.1 | 2.26  | JUC02033337.hg.1 | BAZ2B   |
| TC02005063.hg.1 | -2.15 | PSR02038714.hg.1 | BAZ2B   |
| TC02005063.hg.1 | -2.22 | JUC02033334.hg.1 | BAZ2B   |
| TC03001203.hg.1 | 2.26  | PSR03020637.hg.1 | ZFYVE20 |
| TC03001203.hg.1 | 2.23  | JUC03010331.hg.1 | ZFYVE20 |
| TC03001203.hg.1 | -2.01 | JUC03010314.hg.1 | ZFYVE20 |
| TC05001644.hg.1 | 2.26  | PSR05022352.hg.1 | GIN1    |
| TC05001644.hg.1 | 2.26  | JUC05011545.hg.1 | GIN1    |
| TC05001644.hg.1 | 2.19  | PSR05022355.hg.1 | GIN1    |
| TC05001644.hg.1 | -2.23 | PSR05022361.hg.1 | GIN1    |
| TC06001959.hg.1 | 2.26  | PSR06024128.hg.1 | MMS22L  |
| TC06001959.hg.1 | -2    | PSR06024105.hg.1 | MMS22L  |
| TC06001959.hg.1 | -2.01 | PSR06024101.hg.1 | MMS22L  |
| TC06001959.hg.1 | -2.02 | PSR06024086.hg.1 | MMS22L  |
| TC06001959.hg.1 | -2.07 | PSR06024096.hg.1 | MMS22L  |
| TC06001959.hg.1 | -2.13 | JUC06011810.hg.1 | MMS22L  |
| TC06001959.hg.1 | -2.29 | PSR06024099.hg.1 | MMS22L  |
| TC06001959.hg.1 | -2.6  | JUC06011790.hg.1 | MMS22L  |
| TC06004050.hg.1 | 2.26  | PSR06018440.hg.1 | PBX2    |
| TC06004050.hg.1 | 2.08  | JUC06020561.hg.1 | PBX2    |
| TC07001303.hg.1 | 2.26  | JUC07009903.hg.1 | AMPH    |
| TC07001303.hg.1 | -2.14 | PSR07020202.hg.1 | AMPH    |
| TC07001548.hg.1 | 2.26  | JUC07011519.hg.1 | PION    |
| TC07001548.hg.1 | 2.15  | PSR07023278.hg.1 | PION    |
| TC07001548.hg.1 | -2.4  | JUC07011528.hg.1 | PION    |
| TC07003367.hg.1 | 2.26  | PSR07025283.hg.1 | TRIM4   |
| TC07003367.hg.1 | -2.43 | JUC07021507.hg.1 | TRIM4   |
| TC0X000385.hg.1 | 2.26  | PSR0X005139.hg.1 | NONO    |
| TC0X000385.hg.1 | -2.2  | JUC0X002519.hg.1 | NONO    |
| TC0X000568.hg.1 | 2.26  | JUC0X003697.hg.1 | PLS3    |
| TC0X000568.hg.1 | -2.47 | PSR0X007468.hg.1 | PLS3    |
| TC0X000568.hg.1 | -2.84 | JUC0X003698.hg.1 | PLS3    |
| TC0X000568.hg.1 | -3.47 | PSR0X007473.hg.1 | PLS3    |
| TC11001728.hg.1 | 2.26  | JUC11010730.hg.1 | LRP4    |
| TC11001728.hg.1 | -2.06 | PSR11020147.hg.1 | LRP4    |

|                  |        |                   |            |
|------------------|--------|-------------------|------------|
| TC11001728.hg.1  | -2.28  | JUC11010708.hg.1  | LRP4       |
| TC11001728.hg.1  | -3.21  | JUC11010725.hg.1  | LRP4       |
| TC11001814.hg.1  | 2.26   | PSR11020979.hg.1  | GLYATL2    |
| TC11001814.hg.1  | 2.01   | JUC11011193.hg.1  | GLYATL2    |
| TC12000496.hg.1  | 2.26   | PSR12006292.hg.1  | CDK2       |
| TC12000496.hg.1  | 2.25   | JUC12003363.hg.1  | CDK2       |
| TC12000496.hg.1  | 2.24   | PSR12006282.hg.1  | CDK2       |
| TC12003251.hg.1  | 2.26   | PSR12008188.hg.1  | RAB3IP     |
| TC12003251.hg.1  | -3.39  | JUC12020119.hg.1  | RAB3IP     |
| TC13000458.hg.1  | 2.26   | PSR13005225.hg.1  | CRYL1      |
| TC13000458.hg.1  | 2.24   | PSR13005227.hg.1  | CRYL1      |
| TC13000458.hg.1  | -2.36  | JUC13003131.hg.1  | CRYL1      |
| TC16002074.hg.1  | 2.26   | PSR16006477.hg.1  | MT1M       |
| TC16002074.hg.1  | -5.52  | JUC16013728.hg.1  | MT1M       |
| TC16002074.hg.1  | -7.3   | PSR16006478.hg.1  | MT1M       |
| TC16002074.hg.1  | -10.63 | PSR16006475.hg.1  | MT1M       |
| TC17_ctg5_hap100 | 2.26   | PSR17_ctg5_hap100 | PLEKHM1, M |
| TC17_ctg5_hap100 | 2.16   | JUC17_ctg5_hap100 | PLEKHM1, M |
| TC17_ctg5_hap100 | 2.05   | PSR17_ctg5_hap100 | PLEKHM1, M |
| TC17001465.hg.1  | 2.26   | PSR17019465.hg.1  | TNS4       |
| TC17001465.hg.1  | 2.1    | JUC17011027.hg.1  | TNS4       |
| TC17001465.hg.1  | -2.21  | PSR17019472.hg.1  | TNS4       |
| TC17001465.hg.1  | -2.99  | JUC17011026.hg.1  | TNS4       |
| TC19001485.hg.1  | 2.26   | JUC19011589.hg.1  | ZNF571     |
| TC19001485.hg.1  | -3.26  | PSR19020146.hg.1  | ZNF571     |
| TC22000337.hg.1  | 2.26   | JUC22002390.hg.1  | ACO2       |
| TC22000337.hg.1  | 2.21   | PSR22006504.hg.1  | ACO2       |
| TC22000337.hg.1  | 2.05   | PSR22006505.hg.1  | ACO2       |
| TC22000337.hg.1  | -2.05  | PSR22006491.hg.1  | ACO2       |
| TC22001428.hg.1  | 2.26   | JUC22008626.hg.1  | MTMR3      |
| TC22001428.hg.1  | -2.06  | JUC22008617.hg.1  | MTMR3      |
| TC22001428.hg.1  | -2.54  | PSR22003793.hg.1  | MTMR3      |
| TC22001428.hg.1  | -2.67  | PSR22003802.hg.1  | MTMR3      |
| TC6_apd_hap1000  | 2.26   | PSR6_apd_hap1001  | PBX2       |
| TC6_apd_hap1000  | 2.08   | JUC6_apd_hap1000  | PBX2       |
| TC6_cox_hap2000  | 2.26   | PSR6_cox_hap2003  | PBX2       |
| TC6_cox_hap2000  | 2.08   | JUC6_cox_hap2001  | PBX2       |
| TC6_cox_hap2000  | 2.26   | PSR6_cox_hap2002  | GABBR1     |
| TC6_cox_hap2000  | -2.19  | JUC6_cox_hap2002  | GABBR1     |
| TC6_dbb_hap3000  | 2.26   | PSR6_dbb_hap3002  | GABBR1     |
| TC6_dbb_hap3000  | -2.19  | JUC6_dbb_hap3001  | GABBR1     |
| TC6_mcf_hap5000  | 2.26   | PSR6_mcf_hap5001  | GABBR1     |
| TC6_mcf_hap5000  | -2.19  | JUC6_mcf_hap5001  | GABBR1     |
| TC6_ssto_hap7000 | 2.26   | PSR6_ssto_hap7003 | PBX2       |
| TC6_ssto_hap7000 | 2.08   | JUC6_ssto_hap7001 | PBX2       |
| TC6_ssto_hap7000 | -2     | PSR6_ssto_hap7003 | PBX2       |
| TC01000975.hg.1  | 2.25   | JUC01008141.hg.1  | C1orf88    |
| TC01000975.hg.1  | -2.05  | PSR01015569.hg.1  | C1orf88    |
| TC01001871.hg.1  | 2.25   | JUC01015713.hg.1  | ZNF678     |
| TC01001871.hg.1  | -2.1   | PSR01029127.hg.1  | ZNF678     |
| TC01003087.hg.1  | 2.25   | JUC01025678.hg.1  | LOC728855, |
| TC01003087.hg.1  | 2.12   | JUC01025690.hg.1  | LOC728855, |
| TC01003087.hg.1  | -2.11  | PSR01047850.hg.1  | LOC728855, |
| TC01003087.hg.1  | -2.15  | PSR01047862.hg.1  | LOC728855, |
| TC01003087.hg.1  | -2.18  | JUC01025689.hg.1  | LOC728855, |
| TC01003087.hg.1  | -3.56  | PSR01047816.hg.1  | LOC728855, |
| TC01003091.hg.1  | 2.25   | JUC01025715.hg.1  | LOC728875  |
| TC01003091.hg.1  | 2.12   | JUC01025725.hg.1  | LOC728875  |

|                 |       |                  |             |
|-----------------|-------|------------------|-------------|
| TC01003091.hg.1 | -2.11 | PSR01047924.hg.1 | LOC728875   |
| TC01003091.hg.1 | -2.15 | PSR01047935.hg.1 | LOC728875   |
| TC01003091.hg.1 | -2.18 | JUC01025724.hg.1 | LOC728875   |
| TC01003091.hg.1 | -2.85 | JUC01025714.hg.1 | LOC728875   |
| TC02000233.hg.1 | 2.25  | JUC02001818.hg.1 | CCDC75      |
| TC02000233.hg.1 | 2.04  | JUC02001820.hg.1 | CCDC75      |
| TC02000233.hg.1 | -2.28 | PSR02003454.hg.1 | CCDC75      |
| TC02000365.hg.1 | 2.25  | JUC02002898.hg.1 | LOC1005070  |
| TC02000365.hg.1 | -2.25 | PSR02005593.hg.1 | LOC1005070  |
| TC02000620.hg.1 | 2.25  | JUC02005198.hg.1 | IL1R1       |
| TC02000620.hg.1 | 2.07  | JUC02005200.hg.1 | IL1R1       |
| TC02000620.hg.1 | -2.02 | JUC02005210.hg.1 | IL1R1       |
| TC02000620.hg.1 | -2.07 | PSR02009815.hg.1 | IL1R1       |
| TC02000620.hg.1 | -2.12 | JUC02005192.hg.1 | IL1R1       |
| TC02000620.hg.1 | -2.16 | PSR02009840.hg.1 | IL1R1       |
| TC02000620.hg.1 | -2.27 | PSR02009806.hg.1 | IL1R1       |
| TC02000620.hg.1 | -2.27 | PSR02009811.hg.1 | IL1R1       |
| TC02000620.hg.1 | -2.29 | PSR02009814.hg.1 | IL1R1       |
| TC02000620.hg.1 | -3.02 | JUC02005209.hg.1 | IL1R1       |
| TC02001102.hg.1 | 2.25  | JUC02008833.hg.1 |             |
| TC02001102.hg.1 | 2.11  | PSR02016543.hg.1 |             |
| TC03003333.hg.1 | 2.25  | PSR03036923.hg.1 | ETV5        |
| TC03003333.hg.1 | -2.94 | JUC03023240.hg.1 | ETV5        |
| TC04000874.hg.1 | 2.25  | JUC04006443.hg.1 | NEIL3       |
| TC04000874.hg.1 | 2.2   | PSR04011998.hg.1 | NEIL3       |
| TC04000874.hg.1 | -2.09 | JUC04006437.hg.1 | NEIL3       |
| TC04000874.hg.1 | -3.21 | JUC04006439.hg.1 | NEIL3       |
| TC06000283.hg.1 | 2.25  | JUC06001083.hg.1 | ZKSCAN3     |
| TC06000283.hg.1 | 2.19  | JUC06001082.hg.1 | ZKSCAN3     |
| TC06000283.hg.1 | 2.16  | PSR06002361.hg.1 | ZKSCAN3     |
| TC06000283.hg.1 | 2.08  | PSR06002363.hg.1 | ZKSCAN3     |
| TC06000283.hg.1 | 2.03  | JUC06001086.hg.1 | ZKSCAN3     |
| TC06000283.hg.1 | -2.44 | JUC06001078.hg.1 | ZKSCAN3     |
| TC06001014.hg.1 | 2.25  | JUC06005809.hg.1 | LINC00271   |
| TC06001014.hg.1 | 2.18  | JUC06005815.hg.1 | LINC00271   |
| TC06001014.hg.1 | -2.67 | PSR06011929.hg.1 | LINC00271   |
| TC08001729.hg.1 | 2.25  | PSR08022806.hg.1 | FAM83H      |
| TC08001729.hg.1 | -2.4  | JUC08011720.hg.1 | FAM83H      |
| TC10000314.hg.1 | 2.25  | JUC10002090.hg.1 | ANXA8L1, AN |
| TC10000314.hg.1 | 2.06  | JUC10002092.hg.1 | ANXA8L1, AN |
| TC10000314.hg.1 | -2.09 | JUC10002099.hg.1 | ANXA8L1, AN |
| TC10000314.hg.1 | -2.17 | JUC10002084.hg.1 | ANXA8L1, AN |
| TC10000314.hg.1 | -2.24 | JUC10002089.hg.1 | ANXA8L1, AN |
| TC10000314.hg.1 | -2.77 | PSR10003589.hg.1 | ANXA8L1, AN |
| TC10000314.hg.1 | -4.29 | PSR10003616.hg.1 | ANXA8L1, AN |
| TC10000314.hg.1 | -6.02 | JUC10002097.hg.1 | ANXA8L1, AN |
| TC10000559.hg.1 | 2.25  | PSR10006022.hg.1 | LOC1001329  |
| TC10000559.hg.1 | -2.39 | JUC10003487.hg.1 | LOC1001329  |
| TC10001257.hg.1 | 2.25  | PSR10015657.hg.1 | FAM25C, FAM |
| TC10001257.hg.1 | 2.01  | JUC10009074.hg.1 | FAM25C, FAM |
| TC11000734.hg.1 | 2.25  | JUC11004972.hg.1 | NADSYN1     |
| TC11000734.hg.1 | 2.17  | PSR11009597.hg.1 | NADSYN1     |
| TC12003291.hg.1 | 2.25  | PSR12003125.hg.1 | SSPN        |
| TC12003291.hg.1 | 2.22  | JUC12020583.hg.1 | SSPN        |
| TC12003291.hg.1 | 2.17  | PSR12003122.hg.1 | SSPN        |
| TC12003291.hg.1 | -2.06 | JUC12020587.hg.1 | SSPN        |
| TC12003291.hg.1 | -2.1  | PSR12003119.hg.1 | SSPN        |
| TC13000876.hg.1 | 2.25  | JUC13005783.hg.1 | CARS2       |

|                  |       |                   |             |
|------------------|-------|-------------------|-------------|
| TC13000876.hg.1  | 2.16  | PSR13009812.hg.1  | CARS2       |
| TC6_qbl_hap60002 | 2.25  | PSR6_qbl_hap60021 | GABBR1      |
| TC6_qbl_hap60002 | -2.19 | JUC6_qbl_hap60020 | GABBR1      |
| TC01000253.hg.1  | 2.24  | PSR01003968.hg.1  | OTUD3       |
| TC01000253.hg.1  | 2.02  | JUC01002127.hg.1  | OTUD3       |
| TC01000475.hg.1  | 2.24  | PSR01007378.hg.1  | DNALI1      |
| TC01000475.hg.1  | -2.06 | JUC01003833.hg.1  | DNALI1      |
| TC01000475.hg.1  | -2.57 | JUC01003839.hg.1  | DNALI1      |
| TC01003903.hg.1  | 2.24  | JUC01031194.hg.1  | CDC42BPA    |
| TC01003903.hg.1  | -2.07 | JUC01031165.hg.1  | CDC42BPA    |
| TC01003903.hg.1  | -2.09 | JUC01031182.hg.1  | CDC42BPA    |
| TC01003903.hg.1  | -2.09 | JUC01031201.hg.1  | CDC42BPA    |
| TC01003903.hg.1  | -2.63 | PSR01059520.hg.1  | CDC42BPA    |
| TC01003903.hg.1  | -3.01 | JUC01031181.hg.1  | CDC42BPA    |
| TC02002698.hg.1  | 2.24  | PSR02043501.hg.1  | GPR1        |
| TC02002698.hg.1  | 2.18  | PSR02043499.hg.1  | GPR1        |
| TC02002698.hg.1  | 2.1   | PSR02043502.hg.1  | GPR1        |
| TC02002698.hg.1  | -3.48 | PSR02043511.hg.1  | GPR1        |
| TC02002698.hg.1  | -3.62 | JUC02022794.hg.1  | GPR1        |
| TC02002698.hg.1  | -5.29 | PSR02043513.hg.1  | GPR1        |
| TC02002698.hg.1  | -7.49 | JUC02022793.hg.1  | GPR1        |
| TC05002169.hg.1  | 2.24  | PSR05030493.hg.1  | GNB2L1, SNC |
| TC05002169.hg.1  | -2    | JUC05015448.hg.1  | GNB2L1, SNC |
| TC05002169.hg.1  | -2.2  | JUC05015433.hg.1  | GNB2L1, SNC |
| TC06000931.hg.1  | 2.24  | JUC06005201.hg.1  | DCBLD1      |
| TC06000931.hg.1  | -2.04 | JUC06005197.hg.1  | DCBLD1      |
| TC06000931.hg.1  | -2.07 | JUC06005196.hg.1  | DCBLD1      |
| TC06000931.hg.1  | -2.1  | JUC06005186.hg.1  | DCBLD1      |
| TC06000931.hg.1  | -2.32 | PSR06010879.hg.1  | DCBLD1      |
| TC06000931.hg.1  | -2.39 | PSR06010906.hg.1  | DCBLD1      |
| TC06000931.hg.1  | -4.15 | JUC06005198.hg.1  | DCBLD1      |
| TC07000868.hg.1  | 2.24  | JUC07006471.hg.1  | TRIM24      |
| TC07000868.hg.1  | -2.02 | PSR07013507.hg.1  | TRIM24      |
| TC07000868.hg.1  | -4.23 | JUC07006456.hg.1  | TRIM24      |
| TC08000660.hg.1  | 2.24  | JUC08004550.hg.1  | OXR1        |
| TC08000660.hg.1  | -2    | JUC08004549.hg.1  | OXR1        |
| TC08000660.hg.1  | -2.17 | JUC08004555.hg.1  | OXR1        |
| TC08000660.hg.1  | -2.32 | PSR08008996.hg.1  | OXR1        |
| TC08001590.hg.1  | 2.24  | PSR08020813.hg.1  | FBXO32      |
| TC08001590.hg.1  | -2.71 | JUC08010630.hg.1  | FBXO32      |
| TC08001590.hg.1  | -2.94 | JUC08010636.hg.1  | FBXO32      |
| TC08001590.hg.1  | -4.46 | PSR08020820.hg.1  | FBXO32      |
| TC09002886.hg.1  | 2.24  | PSR09010770.hg.1  | MAMDC4      |
| TC09002886.hg.1  | 2.23  | JUC09015621.hg.1  | MAMDC4      |
| TC09002886.hg.1  | -2.1  | JUC09015617.hg.1  | MAMDC4      |
| TC0X000572.hg.1  | 2.24  | JUC0X003745.hg.1  | WDR44       |
| TC0X000572.hg.1  | 2.17  | PSR0X007529.hg.1  | WDR44       |
| TC0X000572.hg.1  | -2.01 | JUC0X003761.hg.1  | WDR44       |
| TC0X001124.hg.1  | 2.24  | PSR0X015305.hg.1  | ZMYM3       |
| TC0X001124.hg.1  | -3.78 | JUC0X007762.hg.1  | ZMYM3       |
| TC0X001156.hg.1  | 2.24  | JUC0X007901.hg.1  | FTX         |
| TC0X001156.hg.1  | 2.04  | JUC0X007894.hg.1  | FTX         |
| TC0X001156.hg.1  | -2.09 | PSR0X015648.hg.1  | FTX         |
| TC11000026.hg.1  | 2.24  | PSR11000383.hg.1  | EPS8L2      |
| TC11000026.hg.1  | 2.19  | JUC11000214.hg.1  | EPS8L2      |
| TC11000240.hg.1  | 2.24  | JUC11001573.hg.1  | LDHA        |
| TC11000240.hg.1  | 2     | PSR11003174.hg.1  | LDHA        |
| TC11000240.hg.1  | -2.17 | PSR11003210.hg.1  | LDHA        |

|                 |       |                  |             |
|-----------------|-------|------------------|-------------|
| TC12000508.hg.1 | 2.24  | PSR12006693.hg.1 | SLC39A5     |
| TC12000508.hg.1 | -2.05 | PSR12006689.hg.1 | SLC39A5     |
| TC12000508.hg.1 | -2.11 | JUC12003467.hg.1 | SLC39A5     |
| TC14000426.hg.1 | 2.24  | JUC14002623.hg.1 | TTC9        |
| TC14000426.hg.1 | 2.11  | PSR14005132.hg.1 | TTC9        |
| TC15002761.hg.1 | 2.24  | PSR15001164.hg.1 | LOC1002886  |
| TC15002761.hg.1 | 2.02  | JUC15013241.hg.1 | LOC1002886  |
| TC15002761.hg.1 | -2.85 | JUC15013239.hg.1 | LOC1002886  |
| TC17000088.hg.1 | 2.24  | JUC17000704.hg.1 | EIF5A       |
| TC17000088.hg.1 | 2.06  | PSR17001154.hg.1 | EIF5A       |
| TC01000071.hg.1 | 2.23  | JUC01000582.hg.1 | TP73        |
| TC01000071.hg.1 | -2.01 | PSR01001130.hg.1 | TP73        |
| TC01002253.hg.1 | 2.23  | PSR01034336.hg.1 | ZBTB17      |
| TC01002253.hg.1 | -3.32 | JUC01018398.hg.1 | ZBTB17      |
| TC02002536.hg.1 | 2.23  | PSR02040226.hg.1 | OLA1        |
| TC02002536.hg.1 | -2.36 | JUC02021202.hg.1 | OLA1        |
| TC03001041.hg.1 | 2.23  | JUC03009340.hg.1 | TPRG1, LOC  |
| TC03001041.hg.1 | -2.27 | PSR03018424.hg.1 | TPRG1, LOC  |
| TC03001472.hg.1 | 2.23  | PSR03026807.hg.1 | CHDH        |
| TC03001472.hg.1 | 2.1   | PSR03026808.hg.1 | CHDH        |
| TC03001472.hg.1 | -2.06 | JUC03013056.hg.1 | CHDH        |
| TC03001472.hg.1 | -2.53 | JUC03013057.hg.1 | CHDH        |
| TC03001472.hg.1 | -2.64 | JUC03013049.hg.1 | CHDH        |
| TC04000577.hg.1 | 2.23  | JUC04004410.hg.1 | C4orf32     |
| TC04000577.hg.1 | -2.28 | PSR04008379.hg.1 | C4orf32     |
| TC04000806.hg.1 | 2.23  | JUC04005971.hg.1 | ETFDH       |
| TC04000806.hg.1 | 2.07  | JUC04005970.hg.1 | ETFDH       |
| TC04000806.hg.1 | 2.03  | JUC04005969.hg.1 | ETFDH       |
| TC04000806.hg.1 | -2.23 | JUC04005967.hg.1 | ETFDH       |
| TC04000806.hg.1 | -2.44 | PSR04011154.hg.1 | ETFDH       |
| TC05000284.hg.1 | 2.23  | JUC05001980.hg.1 | MAST4       |
| TC05000284.hg.1 | 2.07  | PSR05003684.hg.1 | MAST4       |
| TC05000284.hg.1 | -2.07 | JUC05001961.hg.1 | MAST4       |
| TC05000284.hg.1 | -2.11 | PSR05003747.hg.1 | MAST4       |
| TC05000284.hg.1 | -3.59 | JUC05001992.hg.1 | MAST4       |
| TC05000729.hg.1 | 2.23  | PSR05010436.hg.1 | TMCO6       |
| TC05000729.hg.1 | 2.08  | JUC05005539.hg.1 | TMCO6       |
| TC05000729.hg.1 | 2.06  | JUC05005532.hg.1 | TMCO6       |
| TC05000729.hg.1 | -2.14 | JUC05005528.hg.1 | TMCO6       |
| TC05000910.hg.1 | 2.23  | PSR05013174.hg.1 | LOC10050719 |
| TC05000910.hg.1 | -2.55 | PSR05013178.hg.1 | LOC10050719 |
| TC05000910.hg.1 | -2.75 | JUC05006810.hg.1 | LOC10050719 |
| TC05000910.hg.1 | -2.75 | JUC05006811.hg.1 | LOC10050719 |
| TC06000728.hg.1 | 2.23  | PSR06008723.hg.1 | KCNQ5       |
| TC06000728.hg.1 | -2.01 | JUC06003980.hg.1 | KCNQ5       |
| TC06000728.hg.1 | -2.43 | JUC06003968.hg.1 | KCNQ5       |
| TC06000728.hg.1 | -2.74 | JUC06003971.hg.1 | KCNQ5       |
| TC06000728.hg.1 | -2.97 | PSR06008696.hg.1 | KCNQ5       |
| TC06000728.hg.1 | -3.02 | JUC06003964.hg.1 | KCNQ5       |
| TC06001032.hg.1 | 2.23  | PSR06012111.hg.1 | CCDC28A     |
| TC06001032.hg.1 | -3.13 | JUC06005919.hg.1 | CCDC28A     |
| TC12000468.hg.1 | 2.23  | JUC12003291.hg.1 | PDE1B       |
| TC12000468.hg.1 | 2.17  | PSR12006089.hg.1 | PDE1B       |
| TC14001030.hg.1 | 2.23  | JUC14005880.hg.1 | BAZ1A       |
| TC14001030.hg.1 | -2.03 | PSR14011781.hg.1 | BAZ1A       |
| TC14001030.hg.1 | -2.25 | JUC14005896.hg.1 | BAZ1A       |
| TC14001030.hg.1 | -3.16 | JUC14005884.hg.1 | BAZ1A       |
| TC14001032.hg.1 | 2.23  | PSR14011807.hg.1 | LOC1005061  |

|                 |       |                   |            |
|-----------------|-------|-------------------|------------|
| TC14001032.hg.1 | 2     | JUC14005904.hg.1  | LOC1005061 |
| TC15001362.hg.1 | 2.23  | JUC15007062.hg.1  | CYP19A1    |
| TC15001362.hg.1 | -2.08 | PSR15013179.hg.1  | CYP19A1    |
| TC15001362.hg.1 | -3.14 | PSR15013171.hg.1  | CYP19A1    |
| TC15001362.hg.1 | -3.16 | PSR15013161.hg.1  | CYP19A1    |
| TC16000664.hg.1 | 2.23  | PSR16009380.hg.1  | KIAA0182   |
| TC16000664.hg.1 | 2.21  | JUC16005248.hg.1  | KIAA0182   |
| TC16000664.hg.1 | 2.14  | PSR16009393.hg.1  | KIAA0182   |
| TC16000664.hg.1 | -2.01 | JUC16005256.hg.1  | KIAA0182   |
| TC16000664.hg.1 | -2.92 | JUC16005261.hg.1  | KIAA0182   |
| TC16000664.hg.1 | -4.13 | JUC16005251.hg.1  | KIAA0182   |
| TC19000142.hg.1 | 2.23  | JUC19001355.hg.1  | SNAPC2     |
| TC19000142.hg.1 | 2.14  | PSR19002256.hg.1  | SNAPC2     |
| TC20000206.hg.1 | 2.23  | PSR20002501.hg.1  | HCK        |
| TC20000206.hg.1 | -2.31 | JUC20001354.hg.1  | HCK        |
| TC6_qbl_hap6000 | 2.23  | PSR6_qbl_hap60034 | PBX2       |
| TC6_qbl_hap6000 | 2.05  | JUC6_qbl_hap60013 | PBX2       |
| TC21001066.hg.1 | 2.23  | JUC21005228.hg.1  | C21orf33   |
| TC21001066.hg.1 | 2     | PSR21002557.hg.1  | C21orf33   |
| TC21001066.hg.1 | -2.89 | JUC21005239.hg.1  | C21orf33   |
| TC01000836.hg.1 | 2.22  | JUC01007005.hg.1  | GBP1P1     |
| TC01000836.hg.1 | 2.13  | PSR01013300.hg.1  | GBP1P1     |
| TC01000836.hg.1 | 2.06  | JUC01007007.hg.1  | GBP1P1     |
| TC01002774.hg.1 | 2.22  | PSR01043312.hg.1  | PTGER3     |
| TC01002774.hg.1 | -2.02 | JUC01023176.hg.1  | PTGER3     |
| TC01002774.hg.1 | -2.08 | PSR01043299.hg.1  | PTGER3     |
| TC01002774.hg.1 | -2.23 | PSR01043295.hg.1  | PTGER3     |
| TC01002774.hg.1 | -2.33 | PSR01043306.hg.1  | PTGER3     |
| TC01002774.hg.1 | -2.48 | PSR01043316.hg.1  | PTGER3     |
| TC01002774.hg.1 | -2.68 | PSR01043304.hg.1  | PTGER3     |
| TC01002774.hg.1 | -2.68 | PSR01043317.hg.1  | PTGER3     |
| TC01002774.hg.1 | -2.89 | PSR01043301.hg.1  | PTGER3     |
| TC01002774.hg.1 | -3.2  | PSR01043307.hg.1  | PTGER3     |
| TC01002774.hg.1 | -3.3  | JUC01023158.hg.1  | PTGER3     |
| TC01002774.hg.1 | -3.33 | PSR01043297.hg.1  | PTGER3     |
| TC01002774.hg.1 | -3.61 | PSR01043302.hg.1  | PTGER3     |
| TC01002774.hg.1 | -3.79 | JUC01023169.hg.1  | PTGER3     |
| TC01002774.hg.1 | -3.89 | JUC01023163.hg.1  | PTGER3     |
| TC01002774.hg.1 | -3.92 | JUC01023160.hg.1  | PTGER3     |
| TC01002774.hg.1 | -4.08 | JUC01023168.hg.1  | PTGER3     |
| TC01006286.hg.1 | 2.22  | JUC01039238.hg.1  | GSTM2      |
| TC01006286.hg.1 | 2.03  | PSR01015116.hg.1  | GSTM2      |
| TC01006286.hg.1 | 2     | PSR01015117.hg.1  | GSTM2      |
| TC03001216.hg.1 | 2.22  | PSR03020916.hg.1  | RFTN1      |
| TC03001216.hg.1 | 2.08  | PSR03020903.hg.1  | RFTN1      |
| TC03001216.hg.1 | 2.01  | PSR03020906.hg.1  | RFTN1      |
| TC03001216.hg.1 | -2.82 | JUC03010430.hg.1  | RFTN1      |
| TC04000274.hg.1 | 2.22  | JUC04001964.hg.1  | ATP10D     |
| TC04000274.hg.1 | -2.03 | PSR04003968.hg.1  | ATP10D     |
| TC04000274.hg.1 | -2.04 | PSR04003963.hg.1  | ATP10D     |
| TC04000274.hg.1 | -2.56 | PSR04003951.hg.1  | ATP10D     |
| TC07000112.hg.1 | 2.22  | PSR07001722.hg.1  | AHR        |
| TC07000112.hg.1 | -2.63 | JUC07000786.hg.1  | AHR        |
| TC08002585.hg.1 | 2.22  | JUC08014746.hg.1  | COPS5      |
| TC08002585.hg.1 | -3.56 | PSR08016646.hg.1  | COPS5      |
| TC0X000190.hg.1 | 2.22  | JUC0X001130.hg.1  | ATP6AP2    |
| TC0X000190.hg.1 | -2.97 | PSR0X002121.hg.1  | ATP6AP2    |
| TC0X000772.hg.1 | 2.22  | JUC0X005153.hg.1  | GDI1       |



|                 |        |                  |             |
|-----------------|--------|------------------|-------------|
| TC0X000772.hg.1 | 2.18   | PSR0X010387.hg.1 | GDI1        |
| TC0X000772.hg.1 | 2.03   | PSR0X010384.hg.1 | GDI1        |
| TC12000765.hg.1 | 2.22   | JUC12005158.hg.1 | APAF1       |
| TC12000765.hg.1 | -2.27  | JUC12005163.hg.1 | APAF1       |
| TC12000765.hg.1 | -3.03  | PSR12009644.hg.1 | APAF1       |
| TC16000538.hg.1 | 2.22   | JUC16004273.hg.1 | PLEKHG4     |
| TC16000538.hg.1 | -2     | PSR16007645.hg.1 | PLEKHG4     |
| TC16000538.hg.1 | -3.32  | PSR16007637.hg.1 | PLEKHG4     |
| TC16000538.hg.1 | -4.66  | JUC16004281.hg.1 | PLEKHG4     |
| TC17001646.hg.1 | 2.22   | PSR17022058.hg.1 | HOXB8       |
| TC17001646.hg.1 | 2.02   | JUC17012328.hg.1 | HOXB8       |
| TC17001646.hg.1 | -2.23  | PSR17022070.hg.1 | HOXB8       |
| TC17001646.hg.1 | -2.41  | PSR17022071.hg.1 | HOXB8       |
| TC17001922.hg.1 | 2.22   | PSR17026143.hg.1 | USP36       |
| TC17001922.hg.1 | -2.05  | JUC17014728.hg.1 | USP36       |
| TC17002909.hg.1 | 2.22   | JUC17019102.hg.1 | MIR10A, HO> |
| TC17002909.hg.1 | 2.03   | JUC17019107.hg.1 | MIR10A, HO> |
| TC17002909.hg.1 | -2.09  | PSR17021989.hg.1 | MIR10A, HO> |
| TC17002909.hg.1 | -2.36  | PSR17022000.hg.1 | MIR10A, HO> |
| TC19001753.hg.1 | 2.22   | JUC19013576.hg.1 |             |
| TC19001753.hg.1 | -2.09  | PSR19023883.hg.1 |             |
| TC20000565.hg.1 | 2.22   | JUC20004181.hg.1 | CPXM1       |
| TC20000565.hg.1 | -2.09  | PSR20008184.hg.1 | CPXM1       |
| TC21000261.hg.1 | 2.22   | PSR21003236.hg.1 | DIP2A       |
| TC21000261.hg.1 | 2.16   | PSR21003293.hg.1 | DIP2A       |
| TC21000261.hg.1 | 2.15   | JUC21001751.hg.1 | DIP2A       |
| TC21000261.hg.1 | -2.38  | JUC21001760.hg.1 | DIP2A       |
| TC6_mann_hap400 | 2.22   | PSR6_mann_hap400 | GABBR1      |
| TC6_mann_hap400 | -2.23  | JUC6_mann_hap400 | GABBR1      |
| TC16000979.hg.1 | 2.22   | JUC16007935.hg.1 | GTF3C1      |
| TC16000979.hg.1 | 2      | PSR16014033.hg.1 | GTF3C1      |
| TC16000979.hg.1 | -2.53  | JUC16007910.hg.1 | GTF3C1      |
| TC01006428.hg.1 | 2.21   | PSR01016782.hg.1 |             |
| TC01006428.hg.1 | 2.04   | PSR01016845.hg.1 |             |
| TC01006428.hg.1 | 2.01   | PSR01016865.hg.1 |             |
| TC01006428.hg.1 | -2.01  | JUC01043184.hg.1 |             |
| TC02000149.hg.1 | 2.21   | JUC02000913.hg.1 | HADHB       |
| TC02000149.hg.1 | -2.14  | PSR02001727.hg.1 | HADHB       |
| TC02001020.hg.1 | 2.21   | JUC02008060.hg.1 | DCAF17      |
| TC02001020.hg.1 | 2.09   | PSR02015090.hg.1 | DCAF17      |
| TC02002773.hg.1 | 2.21   | PSR02044621.hg.1 | USP37       |
| TC02002773.hg.1 | 2.13   | PSR02044605.hg.1 | USP37       |
| TC02002773.hg.1 | 2.09   | PSR02044584.hg.1 | USP37       |
| TC02002773.hg.1 | -2.26  | JUC02023382.hg.1 | USP37       |
| TC03003323.hg.1 | 2.21   | JUC03023106.hg.1 | NCK1        |
| TC03003323.hg.1 | 2.19   | PSR03013350.hg.1 | NCK1        |
| TC04001430.hg.1 | 2.21   | PSR04020011.hg.1 | MANBA       |
| TC04001430.hg.1 | 2.03   | PSR04020007.hg.1 | MANBA       |
| TC04001430.hg.1 | -2.19  | JUC04010486.hg.1 | MANBA       |
| TC05000478.hg.1 | 2.21   | JUC05003752.hg.1 | RGMB        |
| TC05000478.hg.1 | 2.03   | JUC05003744.hg.1 | RGMB        |
| TC05000478.hg.1 | -2.24  | JUC05003749.hg.1 | RGMB        |
| TC05000478.hg.1 | -2.28  | PSR05006829.hg.1 | RGMB        |
| TC05000478.hg.1 | -2.3   | PSR05006831.hg.1 | RGMB        |
| TC05000478.hg.1 | -2.45  | PSR05006832.hg.1 | RGMB        |
| TC05000478.hg.1 | -2.61  | PSR05006835.hg.1 | RGMB        |
| TC05000478.hg.1 | -2.75  | JUC05003747.hg.1 | RGMB        |
| TC05000478.hg.1 | -23.99 | PSR05006825.hg.1 | RGMB        |

|                 |       |                  |         |
|-----------------|-------|------------------|---------|
| TC05000607.hg.1 | 2.21  | JUC05004558.hg.1 | MEGF10  |
| TC05000607.hg.1 | 2.19  | JUC05004563.hg.1 | MEGF10  |
| TC05000607.hg.1 | 2.16  | JUC05004545.hg.1 | MEGF10  |
| TC05000607.hg.1 | 2.04  | PSR05008408.hg.1 | MEGF10  |
| TC05000607.hg.1 | -2.15 | PSR05008435.hg.1 | MEGF10  |
| TC05000607.hg.1 | -4.4  | JUC05004553.hg.1 | MEGF10  |
| TC05001331.hg.1 | 2.21  | JUC05009656.hg.1 | EMB     |
| TC05001331.hg.1 | -2.37 | PSR05018797.hg.1 | EMB     |
| TC05001331.hg.1 | -2.41 | JUC05009652.hg.1 | EMB     |
| TC06002136.hg.1 | 2.21  | PSR06026911.hg.1 | AHI1    |
| TC06002136.hg.1 | 2.06  | PSR06026883.hg.1 | AHI1    |
| TC06002136.hg.1 | 2.03  | JUC06013344.hg.1 | AHI1    |
| TC07000577.hg.1 | 2.21  | PSR07008445.hg.1 | DLX6    |
| TC07000577.hg.1 | -2.25 | PSR07008447.hg.1 | DLX6    |
| TC07000577.hg.1 | -2.71 | PSR07008430.hg.1 | DLX6    |
| TC07000577.hg.1 | -2.74 | PSR07008428.hg.1 | DLX6    |
| TC07000577.hg.1 | -2.96 | JUC07004051.hg.1 | DLX6    |
| TC07000577.hg.1 | -3.79 | JUC07004052.hg.1 | DLX6    |
| TC08000127.hg.1 | 2.21  | JUC08000645.hg.1 | SLC7A2  |
| TC08000127.hg.1 | -3.48 | JUC08000647.hg.1 | SLC7A2  |
| TC08000127.hg.1 | -3.97 | JUC08000648.hg.1 | SLC7A2  |
| TC08000127.hg.1 | -4.11 | JUC08000644.hg.1 | SLC7A2  |
| TC08000127.hg.1 | -4.46 | PSR08001210.hg.1 | SLC7A2  |
| TC08000127.hg.1 | -5.61 | PSR08001198.hg.1 | SLC7A2  |
| TC08000127.hg.1 | -8.5  | PSR08001201.hg.1 | SLC7A2  |
| TC09001475.hg.1 | 2.21  | JUC09009859.hg.1 | SVEP1   |
| TC09001475.hg.1 | -2.15 | JUC09009851.hg.1 | SVEP1   |
| TC09001475.hg.1 | -2.4  | PSR09018231.hg.1 | SVEP1   |
| TC09001475.hg.1 | -2.47 | PSR09018271.hg.1 | SVEP1   |
| TC09001475.hg.1 | -2.56 | JUC09009885.hg.1 | SVEP1   |
| TC09001475.hg.1 | -3.23 | PSR09018290.hg.1 | SVEP1   |
| TC09001475.hg.1 | -3.28 | JUC09009891.hg.1 | SVEP1   |
| TC09001475.hg.1 | -3.83 | PSR09018255.hg.1 | SVEP1   |
| TC09001475.hg.1 | -4.02 | JUC09009852.hg.1 | SVEP1   |
| TC09001475.hg.1 | -4.75 | PSR09018246.hg.1 | SVEP1   |
| TC09001475.hg.1 | -6.15 | JUC09009896.hg.1 | SVEP1   |
| TC09001604.hg.1 | 2.21  | PSR09020110.hg.1 | FAM129B |
| TC09001604.hg.1 | 2.13  | JUC09010899.hg.1 | FAM129B |
| TC09001604.hg.1 | 2.07  | PSR09020115.hg.1 | FAM129B |
| TC09001604.hg.1 | 2.07  | PSR09020133.hg.1 | FAM129B |
| TC09001604.hg.1 | -2.11 | JUC09010901.hg.1 | FAM129B |
| TC0X001311.hg.1 | 2.21  | JUC0X008964.hg.1 | NKRF    |
| TC0X001311.hg.1 | -2.06 | PSR0X017600.hg.1 | NKRF    |
| TC10000753.hg.1 | 2.21  | JUC10004981.hg.1 | NFKB2   |
| TC10000753.hg.1 | -2.07 | PSR10008908.hg.1 | NFKB2   |
| TC10000753.hg.1 | -2.34 | JUC10004970.hg.1 | NFKB2   |
| TC10000753.hg.1 | -2.35 | JUC10004961.hg.1 | NFKB2   |
| TC10000753.hg.1 | -2.4  | JUC10004974.hg.1 | NFKB2   |
| TC10000753.hg.1 | -2.53 | PSR10008917.hg.1 | NFKB2   |
| TC10000753.hg.1 | -4.23 | JUC10004976.hg.1 | NFKB2   |
| TC10000753.hg.1 | -5.71 | JUC10004980.hg.1 | NFKB2   |
| TC10001004.hg.1 | 2.21  | JUC10007243.hg.1 | ANKRD16 |
| TC10001004.hg.1 | -2.99 | JUC10007245.hg.1 | ANKRD16 |
| TC10001004.hg.1 | -5.08 | PSR10012504.hg.1 | ANKRD16 |
| TC10001004.hg.1 | -9.1  | PSR10012505.hg.1 | ANKRD16 |
| TC12002076.hg.1 | 2.21  | PSR12027360.hg.1 | RSRC2   |
| TC12002076.hg.1 | -2.02 | JUC12015328.hg.1 | RSRC2   |
| TC14000780.hg.1 | 2.21  | PSR14008440.hg.1 | ZNF839  |

|                 |       |                  |             |
|-----------------|-------|------------------|-------------|
| TC14000780.hg.1 | 2.08  | PSR14008443.hg.1 | ZNF839      |
| TC14000780.hg.1 | -2.01 | PSR14008432.hg.1 | ZNF839      |
| TC14000780.hg.1 | -2.38 | JUC14004282.hg.1 | ZNF839      |
| TC17000631.hg.1 | 2.21  | JUC17004369.hg.1 | CALCOCO2    |
| TC17000631.hg.1 | -2.03 | PSR17007869.hg.1 | CALCOCO2    |
| TC17000631.hg.1 | -2.05 | PSR17007868.hg.1 | CALCOCO2    |
| TC17000631.hg.1 | -2.05 | JUC17004356.hg.1 | CALCOCO2    |
| TC17000631.hg.1 | -2.12 | JUC17004372.hg.1 | CALCOCO2    |
| TC17000631.hg.1 | -2.14 | PSR17007870.hg.1 | CALCOCO2    |
| TC17000631.hg.1 | -2.27 | PSR17007833.hg.1 | CALCOCO2    |
| TC17000631.hg.1 | -2.3  | PSR17007865.hg.1 | CALCOCO2    |
| TC17000631.hg.1 | -2.38 | JUC17004358.hg.1 | CALCOCO2    |
| TC17000631.hg.1 | -2.66 | PSR17007845.hg.1 | CALCOCO2    |
| TC17000631.hg.1 | -4.57 | JUC17004371.hg.1 | CALCOCO2    |
| TC20001729.hg.1 | 2.21  | JUC20009765.hg.1 | TGIF2       |
| TC20001729.hg.1 | 2.16  | PSR20003741.hg.1 | TGIF2       |
| TC20001729.hg.1 | -2.62 | JUC20009767.hg.1 | TGIF2       |
| TC22000116.hg.1 | 2.21  | PSR22002197.hg.1 | GGTLC2      |
| TC22000116.hg.1 | -4.21 | JUC22000636.hg.1 | GGTLC2      |
| TC01003867.hg.1 | 2.2   | JUC01030817.hg.1 | TAF1A       |
| TC01003867.hg.1 | -2.03 | PSR01058822.hg.1 | TAF1A       |
| TC01003867.hg.1 | -2.26 | JUC01030823.hg.1 | TAF1A       |
| TC02000708.hg.1 | 2.2   | JUC02005824.hg.1 | CHCHD5      |
| TC02000708.hg.1 | 2.14  | PSR02011006.hg.1 | CHCHD5      |
| TC02002770.hg.1 | 2.2   | PSR02044547.hg.1 | TMBIM1      |
| TC02002770.hg.1 | 2.06  | PSR02044534.hg.1 | TMBIM1      |
| TC02002770.hg.1 | 2.06  | JUC02023352.hg.1 | TMBIM1      |
| TC02002770.hg.1 | 2.01  | PSR02044546.hg.1 | TMBIM1      |
| TC05000340.hg.1 | 2.2   | JUC05002505.hg.1 | TNPO1       |
| TC05000340.hg.1 | -2.88 | PSR05004644.hg.1 | TNPO1       |
| TC06000029.hg.1 | 2.2   | JUC06000107.hg.1 | PSMG4       |
| TC06000029.hg.1 | 2.01  | JUC06000099.hg.1 | PSMG4       |
| TC06000029.hg.1 | 2     | JUC06000108.hg.1 | PSMG4       |
| TC06000029.hg.1 | -2.66 | PSR06000249.hg.1 | PSMG4       |
| TC06001593.hg.1 | 2.2   | PSR06019400.hg.1 | LEMD2       |
| TC06001593.hg.1 | -2.24 | JUC06009238.hg.1 | LEMD2       |
| TC07000451.hg.1 | 2.2   | PSR07006110.hg.1 | EIF4H       |
| TC07000451.hg.1 | 2.1   | JUC07002959.hg.1 | EIF4H       |
| TC07000451.hg.1 | 2.03  | JUC07002956.hg.1 | EIF4H       |
| TC07000451.hg.1 | -2.07 | PSR07006109.hg.1 | EIF4H       |
| TC08001228.hg.1 | 2.2   | JUC08008210.hg.1 | RPS20, SNOI |
| TC08001228.hg.1 | 2.11  | PSR08015926.hg.1 | RPS20, SNOI |
| TC09000509.hg.1 | 2.2   | JUC09003085.hg.1 | STX17       |
| TC09000509.hg.1 | 2.08  | PSR09005541.hg.1 | STX17       |
| TC09000509.hg.1 | -2    | JUC09003078.hg.1 | STX17       |
| TC09000509.hg.1 | -2.55 | JUC09003087.hg.1 | STX17       |
| TC10001320.hg.1 | 2.2   | JUC10009728.hg.1 | RHOBTB1     |
| TC10001320.hg.1 | -2.03 | PSR10016690.hg.1 | RHOBTB1     |
| TC10001320.hg.1 | -2.15 | PSR10016691.hg.1 | RHOBTB1     |
| TC10001320.hg.1 | -2.24 | PSR10016688.hg.1 | RHOBTB1     |
| TC10001320.hg.1 | -2.6  | PSR10016684.hg.1 | RHOBTB1     |
| TC10001320.hg.1 | -2.78 | PSR10016677.hg.1 | RHOBTB1     |
| TC10001320.hg.1 | -3.14 | PSR10016695.hg.1 | RHOBTB1     |
| TC10001320.hg.1 | -3.32 | PSR10016692.hg.1 | RHOBTB1     |
| TC10001320.hg.1 | -3.46 | PSR10016672.hg.1 | RHOBTB1     |
| TC10001320.hg.1 | -4.28 | PSR10016687.hg.1 | RHOBTB1     |
| TC10001320.hg.1 | -4.91 | JUC10009736.hg.1 | RHOBTB1     |
| TC11001407.hg.1 | 2.2   | PSR11017742.hg.1 | SBF2        |

|                  |       |                   |             |
|------------------|-------|-------------------|-------------|
| TC11001407.hg.1  | 2.01  | JUC11009456.hg.1  | SBF2        |
| TC11001407.hg.1  | -2.35 | JUC11009485.hg.1  | SBF2        |
| TC11002307.hg.1  | 2.2   | JUC11014706.hg.1  | USP28       |
| TC11002307.hg.1  | 2.08  | PSR11027643.hg.1  | USP28       |
| TC11002307.hg.1  | 2.05  | JUC11014725.hg.1  | USP28       |
| TC11002307.hg.1  | -2.28 | JUC11014714.hg.1  | USP28       |
| TC12000936.hg.1  | 2.2   | JUC12006689.hg.1  | PRKAB1      |
| TC12000936.hg.1  | -2.02 | PSR12012140.hg.1  | PRKAB1      |
| TC12003246.hg.1  | 2.2   | PSR12006570.hg.1  | MYL6B       |
| TC12003246.hg.1  | -2.75 | JUC12020027.hg.1  | MYL6B       |
| TC15002805.hg.1  | 2.2   | JUC15014111.hg.1  | ULK4P1      |
| TC15002805.hg.1  | -2.39 | PSR15010387.hg.1  | ULK4P1      |
| TC15002805.hg.1  | -2.44 | JUC15014107.hg.1  | ULK4P1      |
| TC15002805.hg.1  | -2.97 | PSR15010388.hg.1  | ULK4P1      |
| TC17001302.hg.1  | 2.2   | PSR17017308.hg.1  | KIAA0100    |
| TC17001302.hg.1  | -2.1  | JUC17009783.hg.1  | KIAA0100    |
| TC17001305.hg.1  | 2.2   | PSR17017441.hg.1  | RAB34, NARI |
| TC17001305.hg.1  | 2.06  | PSR17017401.hg.1  | RAB34, NARI |
| TC17001305.hg.1  | 2.04  | JUC17009848.hg.1  | RAB34, NARI |
| TC17001305.hg.1  | 2.01  | PSR17017404.hg.1  | RAB34, NARI |
| TC19000616.hg.1  | 2.2   | PSR19008536.hg.1  | ZNF224      |
| TC19000616.hg.1  | -2.04 | PSR19008538.hg.1  | ZNF224      |
| TC19000616.hg.1  | -4.73 | JUC19005101.hg.1  | ZNF224      |
| TC21000260.hg.1  | 2.2   | JUC21001736.hg.1  | PCNT        |
| TC21000260.hg.1  | -2.25 | JUC21001682.hg.1  | PCNT        |
| TC21000260.hg.1  | -2.88 | PSR21003178.hg.1  | PCNT        |
| TC22000471.hg.1  | 2.2   | JUC22003340.hg.1  | CECR5       |
| TC22000471.hg.1  | -2.12 | PSR22008418.hg.1  | CECR5       |
| TC22000471.hg.1  | -2.27 | PSR22008422.hg.1  | CECR5       |
| TC6_apd_hap1000  | 2.2   | PSR6_apd_hap1001  | MDC1        |
| TC6_apd_hap1000  | 2.02  | PSR6_apd_hap1001  | MDC1        |
| TC6_apd_hap1000  | -2.87 | JUC6_apd_hap1000  | MDC1        |
| TC6_cox_hap2000  | 2.2   | PSR6_cox_hap2002  | MDC1        |
| TC6_cox_hap2000  | 2.02  | PSR6_cox_hap2002  | MDC1        |
| TC6_cox_hap2000  | -2.87 | JUC6_cox_hap2000  | MDC1        |
| TC6_dbb_hap3000  | 2.2   | PSR6_dbb_hap3002  | MDC1        |
| TC6_dbb_hap3000  | 2.02  | PSR6_dbb_hap3002  | MDC1        |
| TC6_dbb_hap3000  | -2.87 | JUC6_dbb_hap3000  | MDC1        |
| TC6_mann_hap4000 | 2.2   | PSR6_mann_hap4000 | MDC1        |
| TC6_mann_hap4000 | 2.02  | PSR6_mann_hap4000 | MDC1        |
| TC6_mann_hap4000 | -2.87 | JUC6_mann_hap4000 | MDC1        |
| TC6_mcf_hap5000  | 2.2   | PSR6_mcf_hap5002  | MDC1        |
| TC6_mcf_hap5000  | 2.02  | PSR6_mcf_hap5002  | MDC1        |
| TC6_mcf_hap5000  | -2.87 | JUC6_mcf_hap5000  | MDC1        |
| TC6_ssto_hap7000 | 2.2   | PSR6_ssto_hap7002 | MDC1        |
| TC6_ssto_hap7000 | 2.02  | PSR6_ssto_hap7002 | MDC1        |
| TC6_ssto_hap7000 | -2.87 | JUC6_ssto_hap7000 | MDC1        |
| TC20001739.hg.1  | 2.2   | JUC20009880.hg.1  | LINC00266-1 |
| TC20001739.hg.1  | 2     | PSR20007730.hg.1  | LINC00266-1 |
| TC01000046.hg.1  | 2.19  | PSR01000653.hg.1  | MIB2        |
| TC01000046.hg.1  | 2.14  | JUC01000318.hg.1  | MIB2        |
| TC01000046.hg.1  | 2.1   | JUC01000334.hg.1  | MIB2        |
| TC01000046.hg.1  | -2.15 | PSR01000603.hg.1  | MIB2        |
| TC01000046.hg.1  | -2.88 | PSR01000600.hg.1  | MIB2        |
| TC01000707.hg.1  | 2.19  | PSR01011313.hg.1  | USP1        |
| TC01000707.hg.1  | 2.05  | PSR01011312.hg.1  | USP1        |
| TC01000707.hg.1  | -2.02 | JUC01005847.hg.1  | USP1        |
| TC01002847.hg.1  | 2.19  | JUC01023836.hg.1  | GBP1        |

|                 |       |                  |             |
|-----------------|-------|------------------|-------------|
| TC01002847.hg.1 | -2.2  | PSR01044368.hg.1 | GBP1        |
| TC01002847.hg.1 | -2.47 | PSR01044378.hg.1 | GBP1        |
| TC01002847.hg.1 | -4.03 | JUC01023826.hg.1 | GBP1        |
| TC01002860.hg.1 | 2.19  | PSR01044516.hg.1 | LOC149351   |
| TC01002860.hg.1 | 2.09  | JUC01023879.hg.1 | LOC149351   |
| TC02000862.hg.1 | 2.19  | JUC02006810.hg.1 | C2orf27A    |
| TC02000862.hg.1 | -2.16 | PSR02012847.hg.1 | C2orf27A    |
| TC02000862.hg.1 | -2.69 | PSR02012853.hg.1 | C2orf27A    |
| TC02000862.hg.1 | -4.73 | JUC02006811.hg.1 | C2orf27A    |
| TC02000862.hg.1 | -7.46 | JUC02006813.hg.1 | C2orf27A    |
| TC02001168.hg.1 | 2.19  | PSR02017749.hg.1 | NIF3L1      |
| TC02001168.hg.1 | 2.1   | JUC02009482.hg.1 | NIF3L1      |
| TC02002278.hg.1 | 2.19  | JUC02018975.hg.1 | ERCC3       |
| TC02002278.hg.1 | 2.11  | PSR02036608.hg.1 | ERCC3       |
| TC02002278.hg.1 | -2.01 | PSR02036614.hg.1 | ERCC3       |
| TC02002284.hg.1 | 2.19  | JUC02019048.hg.1 | LIMS2       |
| TC02002284.hg.1 | 2.15  | JUC02019051.hg.1 | LIMS2       |
| TC02002284.hg.1 | -2.27 | PSR02036755.hg.1 | LIMS2       |
| TC02002284.hg.1 | -2.37 | PSR02036708.hg.1 | LIMS2       |
| TC02002284.hg.1 | -2.38 | PSR02036753.hg.1 | LIMS2       |
| TC02002284.hg.1 | -2.49 | PSR02036740.hg.1 | LIMS2       |
| TC02002284.hg.1 | -2.58 | PSR02036758.hg.1 | LIMS2       |
| TC02002284.hg.1 | -2.58 | PSR02036759.hg.1 | LIMS2       |
| TC02002284.hg.1 | -2.64 | PSR02036734.hg.1 | LIMS2       |
| TC02002284.hg.1 | -2.64 | PSR02036754.hg.1 | LIMS2       |
| TC02002284.hg.1 | -2.69 | PSR02036723.hg.1 | LIMS2       |
| TC02002284.hg.1 | -2.78 | PSR02036722.hg.1 | LIMS2       |
| TC02002284.hg.1 | -2.94 | PSR02036729.hg.1 | LIMS2       |
| TC02002284.hg.1 | -2.98 | PSR02036726.hg.1 | LIMS2       |
| TC02002284.hg.1 | -3.01 | PSR02036761.hg.1 | LIMS2       |
| TC02002284.hg.1 | -3.05 | PSR02036748.hg.1 | LIMS2       |
| TC02002284.hg.1 | -3.15 | PSR02036751.hg.1 | LIMS2       |
| TC02002284.hg.1 | -3.2  | JUC02019047.hg.1 | LIMS2       |
| TC02002284.hg.1 | -3.22 | PSR02036752.hg.1 | LIMS2       |
| TC02002284.hg.1 | -3.29 | PSR02036750.hg.1 | LIMS2       |
| TC02002284.hg.1 | -3.36 | PSR02036744.hg.1 | LIMS2       |
| TC02002284.hg.1 | -3.51 | PSR02036749.hg.1 | LIMS2       |
| TC02002284.hg.1 | -3.59 | PSR02036735.hg.1 | LIMS2       |
| TC02002284.hg.1 | -3.61 | PSR02036725.hg.1 | LIMS2       |
| TC02002284.hg.1 | -3.67 | PSR02036738.hg.1 | LIMS2       |
| TC02002284.hg.1 | -4.03 | PSR02036720.hg.1 | LIMS2       |
| TC02002284.hg.1 | -5.11 | PSR02036730.hg.1 | LIMS2       |
| TC03000715.hg.1 | 2.19  | PSR03012864.hg.1 | DNAJC13     |
| TC03000715.hg.1 | 2.05  | JUC03006491.hg.1 | DNAJC13     |
| TC03000715.hg.1 | -2.55 | JUC03006471.hg.1 | DNAJC13     |
| TC03000715.hg.1 | -3.08 | JUC03006515.hg.1 | DNAJC13     |
| TC04001220.hg.1 | 2.19  | PSR04016690.hg.1 | PPAT        |
| TC04001220.hg.1 | -2.08 | JUC04008899.hg.1 | PPAT        |
| TC04001220.hg.1 | -2.53 | PSR04016682.hg.1 | PPAT        |
| TC04001220.hg.1 | -2.91 | JUC04008897.hg.1 | PPAT        |
| TC06000423.hg.1 | 2.19  | PSR06004995.hg.1 | PHF1        |
| TC06000423.hg.1 | -2.38 | JUC06001944.hg.1 | PHF1        |
| TC06001552.hg.1 | 2.19  | JUC06008747.hg.1 | MIR1236, RD |
| TC06001552.hg.1 | 2.06  | PSR06018097.hg.1 | MIR1236, RD |
| TC06001668.hg.1 | 2.19  | PSR06019824.hg.1 | SRPK1       |
| TC06001668.hg.1 | 2.15  | JUC06009377.hg.1 | SRPK1       |
| TC06001668.hg.1 | 2.03  | PSR06019796.hg.1 | SRPK1       |
| TC07001695.hg.1 | 2.19  | JUC07012866.hg.1 | MYL10       |

|                  |       |                   |             |
|------------------|-------|-------------------|-------------|
| TC07001695.hg.1  | 2.07  | PSR07026204.hg.1  | MYL10       |
| TC07001695.hg.1  | -2.04 | PSR07026205.hg.1  | MYL10       |
| TC07001695.hg.1  | -2.37 | JUC07012869.hg.1  | MYL10       |
| TC09000247.hg.1  | 2.19  | JUC09001445.hg.1  | CBWD7       |
| TC09000247.hg.1  | 2.1   | JUC09001433.hg.1  | CBWD7       |
| TC09000247.hg.1  | -2.06 | PSR09002778.hg.1  | CBWD7       |
| TC09000247.hg.1  | -2.24 | JUC09001432.hg.1  | CBWD7       |
| TC09000247.hg.1  | -2.26 | PSR09002774.hg.1  | CBWD7       |
| TC09000247.hg.1  | -2.93 | PSR09002796.hg.1  | CBWD7       |
| TC09001628.hg.1  | 2.19  | PSR09020681.hg.1  | GOLGA2      |
| TC09001628.hg.1  | -2.52 | JUC09011096.hg.1  | GOLGA2      |
| TC0X001061.hg.1  | 2.19  | JUC0X007162.hg.1  | KDM5C       |
| TC0X001061.hg.1  | 2.16  | JUC0X007140.hg.1  | KDM5C       |
| TC0X001061.hg.1  | 2.07  | PSR0X014306.hg.1  | KDM5C       |
| TC10002930.hg.1  | 2.19  | PSR10020458.hg.1  | ERLIN1      |
| TC10002930.hg.1  | -2.66 | JUC10017067.hg.1  | ERLIN1      |
| TC12000840.hg.1  | 2.19  | PSR12010744.hg.1  | DAO         |
| TC12000840.hg.1  | 2.01  | JUC12005913.hg.1  | DAO         |
| TC12001082.hg.1  | 2.19  | PSR12014296.hg.1  | KDM5A       |
| TC12001082.hg.1  | 2.06  | JUC12007866.hg.1  | KDM5A       |
| TC12001082.hg.1  | 2     | JUC12007858.hg.1  | KDM5A       |
| TC12001082.hg.1  | -2.18 | JUC12007842.hg.1  | KDM5A       |
| TC14001350.hg.1  | 2.19  | JUC14007819.hg.1  | SNW1        |
| TC14001350.hg.1  | 2.03  | PSR14015385.hg.1  | SNW1        |
| TC14001350.hg.1  | -2.03 | JUC14007825.hg.1  | SNW1        |
| TC16000524.hg.1  | 2.19  | PSR16007303.hg.1  | CES2        |
| TC16000524.hg.1  | -3.58 | JUC16004120.hg.1  | CES2        |
| TC17001923.hg.1  | 2.19  | JUC17014757.hg.1  | LOC1006535  |
| TC17001923.hg.1  | -2.04 | PSR17026190.hg.1  | LOC1006535  |
| TC18000412.hg.1  | 2.19  | JUC18002816.hg.1  | TMEM241     |
| TC18000412.hg.1  | -2.01 | PSR18004162.hg.1  | TMEM241     |
| TC18000412.hg.1  | -2.74 | JUC18002813.hg.1  | TMEM241     |
| TC18000412.hg.1  | -3.13 | JUC18002795.hg.1  | TMEM241     |
| TC20000365.hg.1  | 2.19  | JUC20002897.hg.1  | CD40        |
| TC20000365.hg.1  | -2.12 | PSR20005317.hg.1  | CD40        |
| TC20000365.hg.1  | -2.19 | PSR20005328.hg.1  | CD40        |
| TC20000365.hg.1  | -2.36 | JUC20002887.hg.1  | CD40        |
| TC20000365.hg.1  | -2.39 | JUC20002888.hg.1  | CD40        |
| TC20000365.hg.1  | -2.66 | PSR20005326.hg.1  | CD40        |
| TC20000424.hg.1  | 2.19  | JUC20003235.hg.1  | DOK5        |
| TC20000424.hg.1  | -2.46 | JUC20003231.hg.1  | DOK5        |
| TC20000424.hg.1  | -2.62 | PSR20005889.hg.1  | DOK5        |
| TC4_gl000194_ran | 2.19  | JUC4_gl000194_ran | MAFIP, TEKT |
| TC4_gl000194_ran | -2.65 | PSR4_gl000194_ran | MAFIP, TEKT |
| TC6_ssto_hap7000 | 2.19  | PSR6_ssto_hap7001 | PHF1        |
| TC6_ssto_hap7000 | -2.38 | JUC6_ssto_hap7000 | PHF1        |
| TC01001164.hg.1  | 2.18  | JUC01009864.hg.1  | FAM91A2, LC |
| TC01001164.hg.1  | 2.06  | JUC01009873.hg.1  | FAM91A2, LC |
| TC01001164.hg.1  | -2.54 | PSR01017912.hg.1  | FAM91A2, LC |
| TC01002144.hg.1  | 2.18  | JUC01017701.hg.1  | CHD5        |
| TC01002144.hg.1  | -2.11 | PSR01033010.hg.1  | CHD5        |
| TC01002144.hg.1  | -2.43 | JUC01017722.hg.1  | CHD5        |
| TC01002144.hg.1  | -2.56 | JUC01017707.hg.1  | CHD5        |
| TC01002580.hg.1  | 2.18  | PSR01040111.hg.1  | EBNA1BP2    |
| TC01002580.hg.1  | 2.04  | JUC01021531.hg.1  | EBNA1BP2    |
| TC01002580.hg.1  | -2.12 | JUC01021540.hg.1  | EBNA1BP2    |
| TC01004040.hg.1  | 2.18  | PSR01061046.hg.1  | AKT3        |
| TC01004040.hg.1  | 2.17  | PSR01061048.hg.1  | AKT3        |

|                 |        |                  |          |
|-----------------|--------|------------------|----------|
| TC01004040.hg.1 | -3.95  | JUC01031963.hg.1 | AKT3     |
| TC02000732.hg.1 | 2.18   | JUC02006023.hg.1 | RABL2A   |
| TC02000732.hg.1 | -2.17  | PSR02011412.hg.1 | RABL2A   |
| TC02000732.hg.1 | -2.3   | JUC02006029.hg.1 | RABL2A   |
| TC02000732.hg.1 | -3.04  | JUC02006026.hg.1 | RABL2A   |
| TC02000928.hg.1 | 2.18   | PSR02013598.hg.1 | LYPD6B   |
| TC02000928.hg.1 | -2.07  | PSR02013593.hg.1 | LYPD6B   |
| TC02000928.hg.1 | -2.07  | JUC02007275.hg.1 | LYPD6B   |
| TC02000928.hg.1 | -2.39  | JUC02007283.hg.1 | LYPD6B   |
| TC03000113.hg.1 | 2.18   | PSR03002280.hg.1 | KAT2B    |
| TC03000113.hg.1 | -2.91  | JUC03001249.hg.1 | KAT2B    |
| TC03001612.hg.1 | 2.18   | PSR03029076.hg.1 | ABI3BP   |
| TC03001612.hg.1 | 2.04   | PSR03029095.hg.1 | ABI3BP   |
| TC03001612.hg.1 | -2.05  | JUC03014345.hg.1 | ABI3BP   |
| TC03001612.hg.1 | -2.07  | JUC03014318.hg.1 | ABI3BP   |
| TC03001612.hg.1 | -2.08  | PSR03029094.hg.1 | ABI3BP   |
| TC03001612.hg.1 | -2.09  | PSR03029096.hg.1 | ABI3BP   |
| TC03001612.hg.1 | -2.09  | JUC03014354.hg.1 | ABI3BP   |
| TC03001612.hg.1 | -2.12  | JUC03014383.hg.1 | ABI3BP   |
| TC03001612.hg.1 | -2.14  | JUC03014362.hg.1 | ABI3BP   |
| TC03001612.hg.1 | -2.15  | PSR03029091.hg.1 | ABI3BP   |
| TC03001612.hg.1 | -2.39  | JUC03014300.hg.1 | ABI3BP   |
| TC03001612.hg.1 | -2.66  | JUC03014344.hg.1 | ABI3BP   |
| TC03001612.hg.1 | -2.85  | JUC03014382.hg.1 | ABI3BP   |
| TC03001612.hg.1 | -3.69  | JUC03014366.hg.1 | ABI3BP   |
| TC08000109.hg.1 | 2.18   | JUC08000545.hg.1 | KIAA1456 |
| TC08000109.hg.1 | -2.04  | PSR08001021.hg.1 | KIAA1456 |
| TC08000109.hg.1 | -2.88  | PSR08001032.hg.1 | KIAA1456 |
| TC08000109.hg.1 | -3.11  | JUC08000538.hg.1 | KIAA1456 |
| TC08000109.hg.1 | -3.61  | PSR08001019.hg.1 | KIAA1456 |
| TC08000109.hg.1 | -4.22  | PSR08001022.hg.1 | KIAA1456 |
| TC08000109.hg.1 | -5.58  | PSR08001023.hg.1 | KIAA1456 |
| TC08000109.hg.1 | -9.65  | JUC08000536.hg.1 | KIAA1456 |
| TC08000109.hg.1 | -9.9   | JUC08000544.hg.1 | KIAA1456 |
| TC08000109.hg.1 | -12.22 | PSR08001026.hg.1 | KIAA1456 |
| TC08000109.hg.1 | -12.32 | PSR08001018.hg.1 | KIAA1456 |
| TC08000109.hg.1 | -14.55 | PSR08001016.hg.1 | KIAA1456 |
| TC08000109.hg.1 | -14.78 | JUC08000541.hg.1 | KIAA1456 |
| TC08000109.hg.1 | -15.42 | JUC08000542.hg.1 | KIAA1456 |
| TC08000109.hg.1 | -15.92 | PSR08001028.hg.1 | KIAA1456 |
| TC08000109.hg.1 | -16.1  | PSR08001015.hg.1 | KIAA1456 |
| TC08000109.hg.1 | -25.42 | PSR08001013.hg.1 | KIAA1456 |
| TC09000579.hg.1 | 2.18   | JUC09003623.hg.1 | ZNF618   |
| TC09000579.hg.1 | -2.51  | PSR09006529.hg.1 | ZNF618   |
| TC09001642.hg.1 | 2.18   | PSR09020915.hg.1 | SH3GLB2  |
| TC09001642.hg.1 | 2.01   | JUC09011215.hg.1 | SH3GLB2  |
| TC11000405.hg.1 | 2.18   | JUC11002780.hg.1 | NR1H3    |
| TC11000405.hg.1 | 2.09   | JUC11002784.hg.1 | NR1H3    |
| TC11000405.hg.1 | 2.03   | JUC11002777.hg.1 | NR1H3    |
| TC11000405.hg.1 | -2.16  | PSR11005202.hg.1 | NR1H3    |
| TC11000405.hg.1 | -2.19  | PSR11005144.hg.1 | NR1H3    |
| TC11001976.hg.1 | 2.18   | PSR11023721.hg.1 | PC       |
| TC11001976.hg.1 | 2.13   | JUC11012526.hg.1 | PC       |
| TC11001976.hg.1 | -2.01  | PSR11023743.hg.1 | PC       |
| TC11001976.hg.1 | -2.13  | JUC11012534.hg.1 | PC       |
| TC11001976.hg.1 | -2.7   | JUC11012536.hg.1 | PC       |
| TC11001976.hg.1 | -3.26  | JUC11012528.hg.1 | PC       |
| TC12000414.hg.1 | 2.18   | PSR12005289.hg.1 | NR4A1    |

|                 |        |                  |             |
|-----------------|--------|------------------|-------------|
| TC12000414.hg.1 | -2.23  | JUC12002931.hg.1 | NR4A1       |
| TC12000414.hg.1 | -2.63  | JUC12002926.hg.1 | NR4A1       |
| TC12002034.hg.1 | 2.18   | PSR12026749.hg.1 | GCN1L1      |
| TC12002034.hg.1 | -2.17  | JUC12014991.hg.1 | GCN1L1      |
| TC12002034.hg.1 | -3.14  | JUC12014982.hg.1 | GCN1L1      |
| TC15000575.hg.1 | 2.18   | PSR15004565.hg.1 | TLN2        |
| TC15000575.hg.1 | 2.08   | PSR15004528.hg.1 | TLN2        |
| TC15000575.hg.1 | -2.1   | PSR15004549.hg.1 | TLN2        |
| TC15000575.hg.1 | -2.14  | JUC15002211.hg.1 | TLN2        |
| TC15000575.hg.1 | -2.16  | JUC15002176.hg.1 | TLN2        |
| TC15000575.hg.1 | -2.2   | JUC15002207.hg.1 | TLN2        |
| TC15000575.hg.1 | -2.61  | JUC15002226.hg.1 | TLN2        |
| TC15000575.hg.1 | -3.53  | JUC15002209.hg.1 | TLN2        |
| TC15001098.hg.1 | 2.18   | PSR15010046.hg.1 | GOLGA8G, C  |
| TC15001098.hg.1 | -2.4   | JUC15005302.hg.1 | GOLGA8G, C  |
| TC16000382.hg.1 | 2.18   | JUC16003142.hg.1 | ZNF720      |
| TC16000382.hg.1 | -2.35  | PSR16005697.hg.1 | ZNF720      |
| TC16000382.hg.1 | -2.81  | PSR16005695.hg.1 | ZNF720      |
| TC16002072.hg.1 | 2.18   | JUC16013684.hg.1 | SRCAP       |
| TC16002072.hg.1 | 2.06   | PSR16005154.hg.1 | SRCAP       |
| TC16002072.hg.1 | 2.01   | JUC16013702.hg.1 | SRCAP       |
| TC17001298.hg.1 | 2.18   | JUC17009710.hg.1 | SGK494, SPA |
| TC17001298.hg.1 | 2.02   | JUC17009708.hg.1 | SGK494, SPA |
| TC17001298.hg.1 | -2.07  | PSR17017174.hg.1 | SGK494, SPA |
| TC17001298.hg.1 | -2.09  | JUC17009712.hg.1 | SGK494, SPA |
| TC17001298.hg.1 | -2.15  | PSR17017168.hg.1 | SGK494, SPA |
| TC17001298.hg.1 | -2.31  | JUC17009715.hg.1 | SGK494, SPA |
| TC17001298.hg.1 | -2.59  | JUC17009722.hg.1 | SGK494, SPA |
| TC17001298.hg.1 | -2.87  | JUC17009731.hg.1 | SGK494, SPA |
| TC17001298.hg.1 | -4.34  | JUC17009721.hg.1 | SGK494, SPA |
| TC17001298.hg.1 | -8.22  | JUC17009704.hg.1 | SGK494, SPA |
| TC19000455.hg.1 | 2.18   | PSR19005951.hg.1 | SCN1B       |
| TC19000455.hg.1 | 2.14   | PSR19005955.hg.1 | SCN1B       |
| TC19000455.hg.1 | -2.13  | JUC19003545.hg.1 | SCN1B       |
| TC19001293.hg.1 | 2.18   | PSR19018393.hg.1 | COMP        |
| TC19001293.hg.1 | 2.18   | JUC19010735.hg.1 | COMP        |
| TC19001293.hg.1 | -2.01  | JUC19010737.hg.1 | COMP        |
| TC19001293.hg.1 | -2.66  | JUC19010738.hg.1 | COMP        |
| TC19001293.hg.1 | -3.75  | PSR19018379.hg.1 | COMP        |
| TC19001293.hg.1 | -3.95  | JUC19010734.hg.1 | COMP        |
| TC19001293.hg.1 | -4.3   | JUC19010745.hg.1 | COMP        |
| TC19001293.hg.1 | -13.83 | PSR19018401.hg.1 | COMP        |
| TC01000232.hg.1 | 2.17   | JUC01002003.hg.1 | PADI4       |
| TC01000232.hg.1 | 2.01   | PSR01003715.hg.1 | PADI4       |
| TC01002317.hg.1 | 2.17   | PSR01035474.hg.1 | KIF17       |
| TC01002317.hg.1 | 2.16   | PSR01035481.hg.1 | KIF17       |
| TC01002317.hg.1 | 2.04   | PSR01035485.hg.1 | KIF17       |
| TC01002317.hg.1 | 2.02   | JUC01019064.hg.1 | KIF17       |
| TC03003363.hg.1 | 2.17   | PSR03011488.hg.1 | PDIA5       |
| TC03003363.hg.1 | 2.1    | JUC03023854.hg.1 | PDIA5       |
| TC03003363.hg.1 | -2.03  | JUC03023851.hg.1 | PDIA5       |
| TC05003418.hg.1 | 2.17   | JUC05019530.hg.1 | LOC1005076  |
| TC05003418.hg.1 | -2.13  | PSR05015711.hg.1 | LOC1005076  |
| TC07000030.hg.1 | 2.17   | PSR07000365.hg.1 | EIF3B       |
| TC07000030.hg.1 | 2.11   | JUC07000130.hg.1 | EIF3B       |
| TC07000030.hg.1 | -2.04  | JUC07000133.hg.1 | EIF3B       |
| TC07000030.hg.1 | -3.31  | JUC07000132.hg.1 | EIF3B       |
| TC08000975.hg.1 | 2.17   | PSR08012291.hg.1 | FAM167A     |



|                 |       |                  |             |
|-----------------|-------|------------------|-------------|
| TC08000975.hg.1 | -3.22 | PSR08012297.hg.1 | FAM167A     |
| TC08000975.hg.1 | -5.46 | PSR08012299.hg.1 | FAM167A     |
| TC08000975.hg.1 | -5.5  | PSR08012300.hg.1 | FAM167A     |
| TC08000975.hg.1 | -5.65 | PSR08012295.hg.1 | FAM167A     |
| TC08000975.hg.1 | -5.86 | PSR08012298.hg.1 | FAM167A     |
| TC08000975.hg.1 | -6.09 | JUC08006359.hg.1 | FAM167A     |
| TC08001081.hg.1 | 2.17  | JUC08007103.hg.1 | CLU         |
| TC08001081.hg.1 | 2.15  | PSR08013864.hg.1 | CLU         |
| TC08001081.hg.1 | -2.03 | PSR08013810.hg.1 | CLU         |
| TC08001081.hg.1 | -2.35 | PSR08013836.hg.1 | CLU         |
| TC08001081.hg.1 | -2.8  | PSR08013855.hg.1 | CLU         |
| TC08001081.hg.1 | -3.1  | PSR08013854.hg.1 | CLU         |
| TC08001081.hg.1 | -3.12 | PSR08013853.hg.1 | CLU         |
| TC11001536.hg.1 | 2.17  | JUC11010266.hg.1 | CSTF3       |
| TC11001536.hg.1 | 2.13  | JUC11010260.hg.1 | CSTF3       |
| TC11001536.hg.1 | 2.07  | JUC11010257.hg.1 | CSTF3       |
| TC11001536.hg.1 | 2.06  | PSR11019274.hg.1 | CSTF3       |
| TC11001536.hg.1 | 2.03  | JUC11010261.hg.1 | CSTF3       |
| TC12000219.hg.1 | 2.17  | PSR12002684.hg.1 | PLEKHA5     |
| TC12000219.hg.1 | 2.1   | PSR12002705.hg.1 | PLEKHA5     |
| TC12000219.hg.1 | 2.1   | JUC12001293.hg.1 | PLEKHA5     |
| TC12000219.hg.1 | -2.45 | JUC12001307.hg.1 | PLEKHA5     |
| TC12003236.hg.1 | 2.17  | JUC12019844.hg.1 | CLEC2D      |
| TC12003236.hg.1 | -2.66 | PSR12001941.hg.1 | CLEC2D      |
| TC14000495.hg.1 | 2.17  | JUC14003202.hg.1 | NRXN3       |
| TC14000495.hg.1 | -2.5  | PSR14006351.hg.1 | NRXN3       |
| TC14000495.hg.1 | -2.52 | PSR14006352.hg.1 | NRXN3       |
| TC14000495.hg.1 | -2.62 | PSR14006346.hg.1 | NRXN3       |
| TC14000495.hg.1 | -3.45 | JUC14003193.hg.1 | NRXN3       |
| TC14000495.hg.1 | -3.94 | JUC14003207.hg.1 | NRXN3       |
| TC14000495.hg.1 | -4.27 | PSR14006347.hg.1 | NRXN3       |
| TC14000495.hg.1 | -4.41 | JUC14003174.hg.1 | NRXN3       |
| TC14000495.hg.1 | -4.9  | PSR14006354.hg.1 | NRXN3       |
| TC14000495.hg.1 | -4.91 | PSR14006342.hg.1 | NRXN3       |
| TC14000495.hg.1 | -4.97 | PSR14006344.hg.1 | NRXN3       |
| TC14000495.hg.1 | -5.62 | PSR14006356.hg.1 | NRXN3       |
| TC14000495.hg.1 | -6.01 | PSR14006348.hg.1 | NRXN3       |
| TC14000495.hg.1 | -6.25 | PSR14006353.hg.1 | NRXN3       |
| TC14000495.hg.1 | -6.34 | JUC14003178.hg.1 | NRXN3       |
| TC14000495.hg.1 | -6.86 | PSR14006345.hg.1 | NRXN3       |
| TC14000495.hg.1 | -7.49 | PSR14006359.hg.1 | NRXN3       |
| TC14000495.hg.1 | -8.25 | JUC14003208.hg.1 | NRXN3       |
| TC14000645.hg.1 | 2.17  | PSR14007954.hg.1 | MEG3        |
| TC14000645.hg.1 | 2.01  | JUC14004070.hg.1 | MEG3        |
| TC14000645.hg.1 | 2     | JUC14004074.hg.1 | MEG3        |
| TC14000645.hg.1 | -3.3  | JUC14004065.hg.1 | MEG3        |
| TC17001011.hg.1 | 2.17  | PSR17013526.hg.1 | ITGAE       |
| TC17001011.hg.1 | -2.48 | JUC17007659.hg.1 | ITGAE       |
| TC17001107.hg.1 | 2.17  | JUC17008476.hg.1 | TMEM107, SI |
| TC17001107.hg.1 | -2.11 | PSR17014889.hg.1 | TMEM107, SI |
| TC20000339.hg.1 | 2.17  | JUC20002694.hg.1 | STK4        |
| TC20000339.hg.1 | 2.14  | PSR20004866.hg.1 | STK4        |
| TC20000339.hg.1 | 2.08  | JUC20002688.hg.1 | STK4        |
| TC20000339.hg.1 | -2.17 | JUC20002697.hg.1 | STK4        |
| TC04000528.hg.1 | 2.17  | JUC04004077.hg.1 |             |
| TC04000528.hg.1 | 2     | PSR04007790.hg.1 |             |
| TC01001305.hg.1 | 2.16  | JUC01010833.hg.1 | DAP3        |
| TC01001305.hg.1 | -2.02 | PSR01020293.hg.1 | DAP3        |

|                 |       |                  |             |
|-----------------|-------|------------------|-------------|
| TC01001305.hg.1 | -2.08 | PSR01020295.hg.1 | DAP3        |
| TC02000158.hg.1 | 2.16  | PSR02001932.hg.1 | TMEM214     |
| TC02000158.hg.1 | 2.07  | JUC02001011.hg.1 | TMEM214     |
| TC02000158.hg.1 | 2.02  | PSR02001928.hg.1 | TMEM214     |
| TC02000756.hg.1 | 2.16  | PSR02011873.hg.1 | PTPN4       |
| TC02000756.hg.1 | 2.03  | JUC02006281.hg.1 | PTPN4       |
| TC02000756.hg.1 | 2.01  | PSR02011853.hg.1 | PTPN4       |
| TC05000619.hg.1 | 2.16  | JUC05004684.hg.1 | CHSY3       |
| TC05000619.hg.1 | 2.05  | PSR05008628.hg.1 | CHSY3       |
| TC05000619.hg.1 | 2.05  | JUC05004687.hg.1 | CHSY3       |
| TC06000161.hg.1 | 2.16  | JUC06000829.hg.1 | TRIM38      |
| TC06000161.hg.1 | -3.24 | PSR06001645.hg.1 | TRIM38      |
| TC06002200.hg.1 | 2.16  | JUC06013769.hg.1 | STXBP5-AS1  |
| TC06002200.hg.1 | -2.31 | JUC06013770.hg.1 | STXBP5-AS1  |
| TC06002200.hg.1 | -2.41 | PSR06027594.hg.1 | STXBP5-AS1  |
| TC06002200.hg.1 | -2.54 | PSR06027607.hg.1 | STXBP5-AS1  |
| TC06002200.hg.1 | -3.97 | PSR06027590.hg.1 | STXBP5-AS1  |
| TC06002200.hg.1 | -4.41 | JUC06013759.hg.1 | STXBP5-AS1  |
| TC06002200.hg.1 | -4.45 | JUC06013761.hg.1 | STXBP5-AS1  |
| TC07000954.hg.1 | 2.16  | JUC07007043.hg.1 |             |
| TC07000954.hg.1 | -2.74 | PSR07014598.hg.1 |             |
| TC07001747.hg.1 | 2.16  | PSR07027193.hg.1 | LAMB1       |
| TC07001747.hg.1 | 2.1   | JUC07013341.hg.1 | LAMB1       |
| TC08000538.hg.1 | 2.16  | PSR08007310.hg.1 | WWP1        |
| TC08000538.hg.1 | -2.2  | JUC08003593.hg.1 | WWP1        |
| TC09000308.hg.1 | 2.16  | JUC09001641.hg.1 | CBWD3, CBV  |
| TC09000308.hg.1 | -2.19 | PSR09003139.hg.1 | CBWD3, CBV  |
| TC09000308.hg.1 | -2.27 | JUC09001627.hg.1 | CBWD3, CBV  |
| TC09000308.hg.1 | -2.36 | PSR09003148.hg.1 | CBWD3, CBV  |
| TC09000308.hg.1 | -2.49 | PSR09003153.hg.1 | CBWD3, CBV  |
| TC09000308.hg.1 | -3.98 | JUC09001629.hg.1 | CBWD3, CBV  |
| TC09000323.hg.1 | 2.16  | JUC09001780.hg.1 | MAMDC2      |
| TC09000323.hg.1 | 2.04  | JUC09001788.hg.1 | MAMDC2      |
| TC09000323.hg.1 | -2.18 | JUC09001781.hg.1 | MAMDC2      |
| TC09000323.hg.1 | -2.8  | JUC09001790.hg.1 | MAMDC2      |
| TC09000323.hg.1 | -3.38 | PSR09003409.hg.1 | MAMDC2      |
| TC09000323.hg.1 | -3.55 | PSR09003395.hg.1 | MAMDC2      |
| TC10000863.hg.1 | 2.16  | JUC10005843.hg.1 | FAM45A, FAM |
| TC10000863.hg.1 | 2.16  | JUC10005853.hg.1 | FAM45A, FAM |
| TC10000863.hg.1 | -2.06 | PSR10010422.hg.1 | FAM45A, FAM |
| TC10001361.hg.1 | 2.16  | JUC10010036.hg.1 | SAR1A       |
| TC10001361.hg.1 | 2.08  | PSR10017199.hg.1 | SAR1A       |
| TC17000155.hg.1 | 2.16  | PSR17002202.hg.1 | MAP2K4      |
| TC17000155.hg.1 | -2.66 | JUC17001324.hg.1 | MAP2K4      |
| TC18000282.hg.1 | 2.16  | JUC18002246.hg.1 | METTL4      |
| TC18000282.hg.1 | -2.04 | PSR18003330.hg.1 | METTL4      |
| TC18000282.hg.1 | -2.76 | JUC18002242.hg.1 | METTL4      |
| TC20000603.hg.1 | 2.16  | PSR20008781.hg.1 | FERMT1      |
| TC20000603.hg.1 | -2.54 | JUC20004532.hg.1 | FERMT1      |
| TC20000893.hg.1 | 2.16  | JUC20006314.hg.1 | PLTP        |
| TC20000893.hg.1 | -2.05 | PSR20012170.hg.1 | PLTP        |
| TC20000893.hg.1 | -2.08 | JUC20006312.hg.1 | PLTP        |
| TC20000893.hg.1 | -2.14 | JUC20006305.hg.1 | PLTP        |
| TC20000893.hg.1 | -2.7  | JUC20006297.hg.1 | PLTP        |
| TC20000893.hg.1 | -3.72 | PSR20012162.hg.1 | PLTP        |
| TC20000893.hg.1 | -3.83 | PSR20012192.hg.1 | PLTP        |
| TC20000893.hg.1 | -4    | PSR20012180.hg.1 | PLTP        |
| TC20000893.hg.1 | -4.38 | PSR20012179.hg.1 | PLTP        |

|                      |        |                       |          |
|----------------------|--------|-----------------------|----------|
| TC20000893.hg.1      | -4.56  | JUC20006306.hg.1      | PLTP     |
| TC20000893.hg.1      | -4.64  | PSR20012186.hg.1      | PLTP     |
| TC20000893.hg.1      | -4.92  | JUC20006307.hg.1      | PLTP     |
| TC21001072.hg.1      | 2.16   | PSR21004460.hg.1      | C21orf59 |
| TC21001072.hg.1      | -2.42  | JUC21005337.hg.1      | C21orf59 |
| TCUn_gl00022300.hg.1 | 2.16   | PSRUn_gl00022300.hg.1 | ZNF84    |
| TCUn_gl00022300.hg.1 | 2.07   | JUCUn_gl00022300.hg.1 | ZNF84    |
| TC01000074.hg.1      | 2.15   | PSR01001186.hg.1      | DFFB     |
| TC01000074.hg.1      | -4.39  | JUC01000621.hg.1      | DFFB     |
| TC01001026.hg.1      | 2.15   | JUC01008520.hg.1      | TTF2     |
| TC01001026.hg.1      | -2.03  | JUC01008517.hg.1      | TTF2     |
| TC01001026.hg.1      | -2.17  | PSR01016299.hg.1      | TTF2     |
| TC01001026.hg.1      | -2.42  | JUC01008533.hg.1      | TTF2     |
| TC01002452.hg.1      | 2.15   | JUC01020260.hg.1      | FABP3    |
| TC01002452.hg.1      | -2.27  | PSR01037734.hg.1      | FABP3    |
| TC01002452.hg.1      | -2.49  | JUC01020263.hg.1      | FABP3    |
| TC02001789.hg.1      | 2.15   | JUC02015101.hg.1      | THADA    |
| TC02001789.hg.1      | 2.03   | PSR02028740.hg.1      | THADA    |
| TC02001789.hg.1      | -2.02  | JUC02015098.hg.1      | THADA    |
| TC02001789.hg.1      | -2.09  | PSR02028747.hg.1      | THADA    |
| TC02001789.hg.1      | -2.1   | JUC02015053.hg.1      | THADA    |
| TC02001789.hg.1      | -2.27  | JUC02015088.hg.1      | THADA    |
| TC02001789.hg.1      | -2.68  | JUC02015092.hg.1      | THADA    |
| TC03000965.hg.1      | 2.15   | JUC03008491.hg.1      | FXR1     |
| TC03000965.hg.1      | -2.09  | JUC03008475.hg.1      | FXR1     |
| TC03000965.hg.1      | -2.15  | PSR03016670.hg.1      | FXR1     |
| TC03000965.hg.1      | -2.15  | PSR03016710.hg.1      | FXR1     |
| TC04001300.hg.1      | 2.15   | JUC04009457.hg.1      | G3BP2    |
| TC04001300.hg.1      | 2.08   | PSR04017738.hg.1      | G3BP2    |
| TC05000191.hg.1      | 2.15   | PSR05002265.hg.1      | GHR      |
| TC05000191.hg.1      | 2.09   | PSR05002251.hg.1      | GHR      |
| TC05000191.hg.1      | 2.07   | PSR05002256.hg.1      | GHR      |
| TC05000191.hg.1      | -2.37  | PSR05002267.hg.1      | GHR      |
| TC05000191.hg.1      | -2.55  | JUC05001274.hg.1      | GHR      |
| TC05003403.hg.1      | 2.15   | JUC05019238.hg.1      | ZDHHC11  |
| TC05003403.hg.1      | -2.47  | JUC05019248.hg.1      | ZDHHC11  |
| TC05003403.hg.1      | -2.53  | JUC05019229.hg.1      | ZDHHC11  |
| TC05003403.hg.1      | -2.65  | JUC05019232.hg.1      | ZDHHC11  |
| TC05003403.hg.1      | -2.96  | JUC05019244.hg.1      | ZDHHC11  |
| TC05003403.hg.1      | -3.13  | PSR05015874.hg.1      | ZDHHC11  |
| TC06001671.hg.1      | 2.15   | JUC06009429.hg.1      |          |
| TC06001671.hg.1      | 2.03   | PSR06019899.hg.1      |          |
| TC07001507.hg.1      | 2.15   | PSR07022698.hg.1      | WBSCR27  |
| TC07001507.hg.1      | 2.15   | JUC07011141.hg.1      | WBSCR27  |
| TC10001663.hg.1      | 2.15   | JUC10012635.hg.1      | GPAM     |
| TC10001663.hg.1      | -2.03  | JUC10012634.hg.1      | GPAM     |
| TC10001663.hg.1      | -2.21  | PSR10021798.hg.1      | GPAM     |
| TC10001663.hg.1      | -2.22  | JUC10012621.hg.1      | GPAM     |
| TC10001663.hg.1      | -2.35  | JUC10012633.hg.1      | GPAM     |
| TC10001663.hg.1      | -2.69  | JUC10012636.hg.1      | GPAM     |
| TC10001663.hg.1      | -2.72  | JUC10012629.hg.1      | GPAM     |
| TC10001663.hg.1      | -12.49 | PSR10021822.hg.1      | GPAM     |
| TC11000362.hg.1      | 2.15   | PSR11004487.hg.1      | TTC17    |
| TC11000362.hg.1      | -2.01  | JUC11002417.hg.1      | TTC17    |
| TC11000362.hg.1      | -2.17  | JUC11002429.hg.1      | TTC17    |
| TC12000227.hg.1      | 2.15   | JUC12001344.hg.1      | PDE3A    |
| TC12000227.hg.1      | 2.03   | PSR12002773.hg.1      | PDE3A    |
| TC14001484.hg.1      | 2.15   | JUC14008687.hg.1      | ATG2B    |

|                 |       |                  |             |
|-----------------|-------|------------------|-------------|
| TC14001484.hg.1 | 2.13  | JUC14008648.hg.1 | ATG2B       |
| TC14001484.hg.1 | 2.05  | PSR14016731.hg.1 | ATG2B       |
| TC14001484.hg.1 | -2.38 | PSR14016755.hg.1 | ATG2B       |
| TC15001471.hg.1 | 2.15  | JUC15007405.hg.1 | NEDD4       |
| TC15001471.hg.1 | 2.05  | JUC15007395.hg.1 | NEDD4       |
| TC15001471.hg.1 | -2.01 | PSR15013825.hg.1 | NEDD4       |
| TC15001471.hg.1 | -2.16 | PSR15013828.hg.1 | NEDD4       |
| TC15001471.hg.1 | -2.4  | JUC15007413.hg.1 | NEDD4       |
| TC15001471.hg.1 | -2.44 | JUC15007424.hg.1 | NEDD4       |
| TC15001471.hg.1 | -2.45 | JUC15007410.hg.1 | NEDD4       |
| TC15001471.hg.1 | -3.11 | JUC15007421.hg.1 | NEDD4       |
| TC17000718.hg.1 | 2.15  | PSR17009380.hg.1 | PRR11       |
| TC17000718.hg.1 | 2.15  | PSR17009381.hg.1 | PRR11       |
| TC17000718.hg.1 | -2.01 | JUC17005098.hg.1 | PRR11       |
| TC17000718.hg.1 | -2.02 | JUC17005102.hg.1 | PRR11       |
| TC17002859.hg.1 | 2.15  | JUC17018452.hg.1 | BPTF, LOC14 |
| TC17002859.hg.1 | -2.08 | PSR17010329.hg.1 | BPTF, LOC14 |
| TC17002859.hg.1 | -2.19 | JUC17018442.hg.1 | BPTF, LOC14 |
| TC18000380.hg.1 | 2.15  | PSR18003999.hg.1 | FAM210A     |
| TC18000380.hg.1 | 2.03  | JUC18002697.hg.1 | FAM210A     |
| TC22000260.hg.1 | 2.15  | JUC22001764.hg.1 | MCM5        |
| TC22000260.hg.1 | -2.01 | JUC22001766.hg.1 | MCM5        |
| TC22000260.hg.1 | -2.48 | JUC22001769.hg.1 | MCM5        |
| TC22000260.hg.1 | -2.55 | PSR22004876.hg.1 | MCM5        |
| TC22000433.hg.1 | 2.15  | PSR22008207.hg.1 | MAPK8IP2    |
| TC22000433.hg.1 | -6.08 | JUC22003203.hg.1 | MAPK8IP2    |
| TC22001434.hg.1 | 2.15  | PSR22009290.hg.1 | TOP3B       |
| TC22001434.hg.1 | 2.01  | JUC22008810.hg.1 | TOP3B       |
| TC22001434.hg.1 | -3.09 | JUC22008801.hg.1 | TOP3B       |
| TC22001462.hg.1 | 2.15  | PSR22003992.hg.1 | MTFP1       |
| TC22001462.hg.1 | -3.44 | JUC22009228.hg.1 | MTFP1       |
| TC01000907.hg.1 | 2.14  | PSR01014304.hg.1 | LOC1005060  |
| TC01000907.hg.1 | 2.13  | JUC01007554.hg.1 | LOC1005060  |
| TC01000907.hg.1 | 2.01  | JUC01007564.hg.1 | LOC1005060  |
| TC01002648.hg.1 | 2.14  | PSR01041407.hg.1 | TTC39A      |
| TC01002648.hg.1 | -2.07 | PSR01041376.hg.1 | TTC39A      |
| TC01002648.hg.1 | -2.15 | JUC01022124.hg.1 | TTC39A      |
| TC01002648.hg.1 | -4.36 | JUC01022127.hg.1 | TTC39A      |
| TC02000666.hg.1 | 2.14  | PSR02010326.hg.1 | GCC2        |
| TC02000666.hg.1 | -2.34 | PSR02010361.hg.1 | GCC2        |
| TC02000666.hg.1 | -2.44 | JUC02005485.hg.1 | GCC2        |
| TC02000666.hg.1 | -2.56 | PSR02010362.hg.1 | GCC2        |
| TC02000666.hg.1 | -3.57 | JUC02005466.hg.1 | GCC2        |
| TC02001859.hg.1 | 2.14  | PSR02029675.hg.1 | MTIF2       |
| TC02001859.hg.1 | -2.16 | JUC02015600.hg.1 | MTIF2       |
| TC02001859.hg.1 | -3.18 | JUC02015601.hg.1 | MTIF2       |
| TC02002167.hg.1 | 2.14  | JUC02018194.hg.1 | FHL2        |
| TC02002167.hg.1 | 2.11  | JUC02018179.hg.1 | FHL2        |
| TC02002167.hg.1 | -5.1  | PSR02035256.hg.1 | FHL2        |
| TC02005011.hg.1 | 2.14  | JUC02032175.hg.1 | GIGYF2      |
| TC02005011.hg.1 | 2.1   | JUC02032125.hg.1 | GIGYF2      |
| TC02005011.hg.1 | -2.04 | PSR02022394.hg.1 | GIGYF2      |
| TC02005011.hg.1 | -2.07 | JUC02032182.hg.1 | GIGYF2      |
| TC02005011.hg.1 | -2.12 | PSR02022319.hg.1 | GIGYF2      |
| TC02005011.hg.1 | -2.13 | JUC02032117.hg.1 | GIGYF2      |
| TC02005011.hg.1 | -2.32 | PSR02022300.hg.1 | GIGYF2      |
| TC02005011.hg.1 | -2.34 | PSR02022281.hg.1 | GIGYF2      |
| TC02005011.hg.1 | -2.41 | PSR02022352.hg.1 | GIGYF2      |

|                 |       |                  |         |
|-----------------|-------|------------------|---------|
| TC02005011.hg.1 | -2.61 | JUC02032138.hg.1 | GIGYF2  |
| TC02005011.hg.1 | -2.85 | JUC02032150.hg.1 | GIGYF2  |
| TC02005011.hg.1 | -2.88 | JUC02032134.hg.1 | GIGYF2  |
| TC02005011.hg.1 | -3.03 | JUC02032151.hg.1 | GIGYF2  |
| TC03000479.hg.1 | 2.14  | PSR03009261.hg.1 | ARL6    |
| TC03000479.hg.1 | 2.01  | JUC03004622.hg.1 | ARL6    |
| TC03000707.hg.1 | 2.14  | PSR03012677.hg.1 | ATP2C1  |
| TC03000707.hg.1 | 2     | JUC03006390.hg.1 | ATP2C1  |
| TC05001522.hg.1 | 2.14  | JUC05010761.hg.1 | HOMER1  |
| TC05001522.hg.1 | -2.22 | PSR05020877.hg.1 | HOMER1  |
| TC05002148.hg.1 | 2.14  | JUC05015353.hg.1 | FLT4    |
| TC05002148.hg.1 | 2.13  | PSR05030233.hg.1 | FLT4    |
| TC05002148.hg.1 | -3.34 | JUC05015342.hg.1 | FLT4    |
| TC06002001.hg.1 | 2.14  | PSR06024870.hg.1 | PPIL6   |
| TC06002001.hg.1 | 2.06  | PSR06024867.hg.1 | PPIL6   |
| TC06002001.hg.1 | 2.01  | JUC06012220.hg.1 | PPIL6   |
| TC07001288.hg.1 | 2.14  | PSR07020043.hg.1 | ELMO1   |
| TC07001288.hg.1 | 2.11  | PSR07020088.hg.1 | ELMO1   |
| TC07001288.hg.1 | 2.06  | PSR07020032.hg.1 | ELMO1   |
| TC07001288.hg.1 | -2.04 | JUC07009787.hg.1 | ELMO1   |
| TC07001288.hg.1 | -2.3  | JUC07009788.hg.1 | ELMO1   |
| TC07001736.hg.1 | 2.14  | JUC07013239.hg.1 | ATXN7L1 |
| TC07001736.hg.1 | 2.02  | PSR07026960.hg.1 | ATXN7L1 |
| TC07001736.hg.1 | 2.02  | PSR07026981.hg.1 | ATXN7L1 |
| TC07001736.hg.1 | -3.67 | PSR07026963.hg.1 | ATXN7L1 |
| TC11000930.hg.1 | 2.14  | JUC11006166.hg.1 |         |
| TC11000930.hg.1 | -2.15 | PSR11011644.hg.1 |         |
| TC13000394.hg.1 | 2.14  | PSR13004303.hg.1 | CARKD   |
| TC13000394.hg.1 | -3.19 | JUC13002607.hg.1 | CARKD   |
| TC13000398.hg.1 | 2.14  | JUC13002659.hg.1 | ARHGEF7 |
| TC13000398.hg.1 | -2.02 | PSR13004392.hg.1 | ARHGEF7 |
| TC13000398.hg.1 | -2.22 | JUC13002637.hg.1 | ARHGEF7 |
| TC13000398.hg.1 | -2.3  | PSR13004379.hg.1 | ARHGEF7 |
| TC13000398.hg.1 | -2.47 | JUC13002641.hg.1 | ARHGEF7 |
| TC13000398.hg.1 | -2.85 | PSR13004381.hg.1 | ARHGEF7 |
| TC15000747.hg.1 | 2.14  | JUC15003430.hg.1 | FAH     |
| TC15000747.hg.1 | 2.04  | JUC15003421.hg.1 | FAH     |
| TC15000747.hg.1 | -2.07 | PSR15006746.hg.1 | FAH     |
| TC15000747.hg.1 | -2.07 | PSR15006747.hg.1 | FAH     |
| TC17001433.hg.1 | 2.14  | PSR17018934.hg.1 | PIP4K2B |
| TC17001433.hg.1 | -2.23 | JUC17010723.hg.1 | PIP4K2B |
| TC20000947.hg.1 | 2.14  | PSR20013087.hg.1 | ZFP64   |
| TC20000947.hg.1 | 2.14  | JUC20006791.hg.1 | ZFP64   |
| TC20000947.hg.1 | -2.52 | JUC20006793.hg.1 | ZFP64   |
| TC22000478.hg.1 | 2.14  | PSR22008605.hg.1 | MICAL3  |
| TC22000478.hg.1 | -2.21 | JUC22003409.hg.1 | MICAL3  |
| TC01003942.hg.1 | 2.13  | JUC01031297.hg.1 | CCSAP   |
| TC01003942.hg.1 | -2.59 | PSR01059789.hg.1 | CCSAP   |
| TC02001033.hg.1 | 2.13  | PSR02015397.hg.1 | RAPGEF4 |
| TC02001033.hg.1 | 2.07  | PSR02015392.hg.1 | RAPGEF4 |
| TC02001033.hg.1 | -2.32 | JUC02008211.hg.1 | RAPGEF4 |
| TC02001033.hg.1 | -2.79 | JUC02008231.hg.1 | RAPGEF4 |
| TC02001033.hg.1 | -3.12 | JUC02008236.hg.1 | RAPGEF4 |
| TC03000610.hg.1 | 2.13  | PSR03011032.hg.1 | ADPRH   |
| TC03000610.hg.1 | -2.11 | JUC03005482.hg.1 | ADPRH   |
| TC03000610.hg.1 | -2.11 | JUC03005485.hg.1 | ADPRH   |
| TC03000610.hg.1 | -2.25 | PSR03011019.hg.1 | ADPRH   |
| TC03000610.hg.1 | -2.48 | PSR03011014.hg.1 | ADPRH   |

|                 |       |                  |             |
|-----------------|-------|------------------|-------------|
| TC03000610.hg.1 | -2.58 | PSR03011023.hg.1 | ADPRH       |
| TC03001560.hg.1 | 2.13  | PSR03028369.hg.1 | PDZRN3      |
| TC03001560.hg.1 | 2.01  | PSR03028392.hg.1 | PDZRN3      |
| TC03001560.hg.1 | -2.06 | JUC03013975.hg.1 | PDZRN3      |
| TC05002003.hg.1 | 2.13  | JUC05014195.hg.1 | PWWP2A      |
| TC05002003.hg.1 | -2.3  | PSR05027848.hg.1 | PWWP2A      |
| TC07003309.hg.1 | 2.13  | PSR07006829.hg.1 | DTX2, LOC10 |
| TC07003309.hg.1 | -2.24 | JUC07020593.hg.1 | DTX2, LOC10 |
| TC07003309.hg.1 | -2.44 | JUC07020590.hg.1 | DTX2, LOC10 |
| TC07003309.hg.1 | -5.57 | PSR07006854.hg.1 | DTX2, LOC10 |
| TC08001171.hg.1 | 2.13  | PSR08015087.hg.1 | ANK1        |
| TC08001171.hg.1 | -2    | PSR08015063.hg.1 | ANK1        |
| TC08001171.hg.1 | -2.42 | JUC08007712.hg.1 | ANK1        |
| TC08001171.hg.1 | -2.43 | JUC08007694.hg.1 | ANK1        |
| TC08001171.hg.1 | -2.81 | JUC08007671.hg.1 | ANK1        |
| TC08001171.hg.1 | -3.04 | JUC08007695.hg.1 | ANK1        |
| TC08001171.hg.1 | -3.05 | JUC08007700.hg.1 | ANK1        |
| TC0X002317.hg.1 | 2.13  | JUC0X012976.hg.1 | RPL36A, RPL |
| TC0X002317.hg.1 | 2.11  | PSR0X006203.hg.1 | RPL36A, RPL |
| TC0X002317.hg.1 | -2.99 | JUC0X012975.hg.1 | RPL36A, RPL |
| TC10000883.hg.1 | 2.13  | JUC10006023.hg.1 | TACC2       |
| TC10000883.hg.1 | 2.01  | PSR10010675.hg.1 | TACC2       |
| TC10000883.hg.1 | -5.16 | JUC10006041.hg.1 | TACC2       |
| TC10001315.hg.1 | 2.13  | PSR10016485.hg.1 | SLC16A9     |
| TC10001315.hg.1 | -2    | JUC10009619.hg.1 | SLC16A9     |
| TC11002449.hg.1 | 2.13  | JUC11015659.hg.1 | PRDM10      |
| TC11002449.hg.1 | -2.31 | PSR11029383.hg.1 | PRDM10      |
| TC11002449.hg.1 | -2.56 | JUC11015664.hg.1 | PRDM10      |
| TC11002449.hg.1 | -3.6  | JUC11015666.hg.1 | PRDM10      |
| TC12000779.hg.1 | 2.13  | JUC12005278.hg.1 | GAS2L3      |
| TC12000779.hg.1 | -2.26 | PSR12009815.hg.1 | GAS2L3      |
| TC12000885.hg.1 | 2.13  | PSR12011695.hg.1 | OAS3        |
| TC12000885.hg.1 | -2.35 | JUC12006422.hg.1 | OAS3        |
| TC12000885.hg.1 | -2.37 | PSR12011673.hg.1 | OAS3        |
| TC12000885.hg.1 | -2.8  | PSR12011700.hg.1 | OAS3        |
| TC12001429.hg.1 | 2.13  | JUC12010336.hg.1 | SLC38A4     |
| TC12001429.hg.1 | 2.11  | PSR12018492.hg.1 | SLC38A4     |
| TC12001429.hg.1 | -2.29 | PSR12018503.hg.1 | SLC38A4     |
| TC12001429.hg.1 | -2.33 | JUC12010345.hg.1 | SLC38A4     |
| TC12001429.hg.1 | -2.35 | PSR12018486.hg.1 | SLC38A4     |
| TC12001429.hg.1 | -2.39 | PSR12018499.hg.1 | SLC38A4     |
| TC12001429.hg.1 | -2.44 | PSR12018489.hg.1 | SLC38A4     |
| TC12001429.hg.1 | -2.58 | JUC12010327.hg.1 | SLC38A4     |
| TC12001429.hg.1 | -2.76 | PSR12018504.hg.1 | SLC38A4     |
| TC12001429.hg.1 | -3.49 | PSR12018498.hg.1 | SLC38A4     |
| TC12001429.hg.1 | -3.95 | PSR12018506.hg.1 | SLC38A4     |
| TC12001429.hg.1 | -4.18 | PSR12018507.hg.1 | SLC38A4     |
| TC12001429.hg.1 | -4.35 | JUC12010330.hg.1 | SLC38A4     |
| TC12001429.hg.1 | -4.94 | PSR12018505.hg.1 | SLC38A4     |
| TC12001429.hg.1 | -6.75 | JUC12010332.hg.1 | SLC38A4     |
| TC14001155.hg.1 | 2.13  | PSR14013201.hg.1 | DLGAP5      |
| TC14001155.hg.1 | 2.1   | JUC14006695.hg.1 | DLGAP5      |
| TC14001155.hg.1 | 2.04  | PSR14013187.hg.1 | DLGAP5      |
| TC14001155.hg.1 | -2.2  | PSR14013189.hg.1 | DLGAP5      |
| TC14001155.hg.1 | -5.03 | JUC14006694.hg.1 | DLGAP5      |
| TC16000975.hg.1 | 2.13  | JUC16007888.hg.1 | ZKSCAN2     |
| TC16000975.hg.1 | 2.1   | PSR16014007.hg.1 | ZKSCAN2     |
| TC17000309.hg.1 | 2.13  | JUC17002088.hg.1 | WSB1        |

|                 |       |                  |             |
|-----------------|-------|------------------|-------------|
| TC17000309.hg.1 | -2.52 | PSR17003696.hg.1 | WSB1        |
| TC17000309.hg.1 | -2.58 | JUC17002079.hg.1 | WSB1        |
| TC17000309.hg.1 | -3.19 | PSR17003695.hg.1 | WSB1        |
| TC17000309.hg.1 | -4.79 | PSR17003689.hg.1 | WSB1        |
| TC17001315.hg.1 | 2.13  | JUC17009937.hg.1 | TIAF1, MYO1 |
| TC17001315.hg.1 | 2.09  | PSR17017623.hg.1 | TIAF1, MYO1 |
| TC17001315.hg.1 | 2.09  | JUC17009949.hg.1 | TIAF1, MYO1 |
| TC17001315.hg.1 | -2.27 | JUC17009967.hg.1 | TIAF1, MYO1 |
| TC17001315.hg.1 | -2.32 | JUC17009931.hg.1 | TIAF1, MYO1 |
| TC17001315.hg.1 | -3.03 | JUC17009934.hg.1 | TIAF1, MYO1 |
| TC20000134.hg.1 | 2.13  | JUC20000881.hg.1 | RIN2        |
| TC20000134.hg.1 | -2.03 | PSR20001693.hg.1 | RIN2        |
| TC20000134.hg.1 | -2.03 | JUC20000894.hg.1 | RIN2        |
| TC20000134.hg.1 | -2.17 | PSR20001700.hg.1 | RIN2        |
| TC20000134.hg.1 | -2.22 | PSR20001697.hg.1 | RIN2        |
| TC20000276.hg.1 | 2.13  | JUC20002197.hg.1 | CTNNBL1     |
| TC20000276.hg.1 | 2.06  | PSR20003918.hg.1 | CTNNBL1     |
| TC20000276.hg.1 | -2.34 | JUC20002213.hg.1 | CTNNBL1     |
| TC20000758.hg.1 | 2.13  | JUC20005287.hg.1 | DUSP15      |
| TC20000758.hg.1 | -2.81 | PSR20010112.hg.1 | DUSP15      |
| TC20000758.hg.1 | -3.2  | PSR20010113.hg.1 | DUSP15      |
| TC20000758.hg.1 | -4.64 | JUC20005289.hg.1 | DUSP15      |
| TC20000758.hg.1 | -5.45 | JUC20005288.hg.1 | DUSP15      |
| TC20000758.hg.1 | -8.74 | JUC20005292.hg.1 | DUSP15      |
| TC20001027.hg.1 | 2.13  | PSR20014041.hg.1 | NKAIN4      |
| TC20001027.hg.1 | -2.28 | PSR20014025.hg.1 | NKAIN4      |
| TC20001027.hg.1 | -2.28 | PSR20014035.hg.1 | NKAIN4      |
| TC20001027.hg.1 | -2.49 | JUC20007327.hg.1 | NKAIN4      |
| TC01003273.hg.1 | 2.12  | PSR01050373.hg.1 | ILF2        |
| TC01003273.hg.1 | -2    | JUC01026634.hg.1 | ILF2        |
| TC01003279.hg.1 | 2.12  | PSR01050466.hg.1 | DENND4B     |
| TC01003279.hg.1 | -2.01 | JUC01026665.hg.1 | DENND4B     |
| TC01003279.hg.1 | -3.17 | JUC01026674.hg.1 | DENND4B     |
| TC02000326.hg.1 | 2.12  | PSR02004980.hg.1 | CCDC104     |
| TC02000326.hg.1 | 2.06  | JUC02002609.hg.1 | CCDC104     |
| TC02000326.hg.1 | -2.02 | JUC02002611.hg.1 | CCDC104     |
| TC02000326.hg.1 | -2.19 | JUC02002602.hg.1 | CCDC104     |
| TC03000190.hg.1 | 2.12  | PSR03003703.hg.1 | SLC22A14    |
| TC03000190.hg.1 | -2.77 | JUC03001985.hg.1 | SLC22A14    |
| TC03000743.hg.1 | 2.12  | JUC03006788.hg.1 | ARMC8       |
| TC03000743.hg.1 | -2.17 | JUC03006791.hg.1 | ARMC8       |
| TC03000743.hg.1 | -2.42 | JUC03006816.hg.1 | ARMC8       |
| TC03000743.hg.1 | -2.74 | PSR03013453.hg.1 | ARMC8       |
| TC03000743.hg.1 | -3.99 | JUC03006805.hg.1 | ARMC8       |
| TC03001823.hg.1 | 2.12  | JUC03016368.hg.1 | CEP70       |
| TC03001823.hg.1 | -2.04 | PSR03033011.hg.1 | CEP70       |
| TC03001823.hg.1 | -2.22 | JUC03016383.hg.1 | CEP70       |
| TC03001823.hg.1 | -2.74 | PSR03033012.hg.1 | CEP70       |
| TC03001823.hg.1 | -2.76 | JUC03016394.hg.1 | CEP70       |
| TC03001823.hg.1 | -3.3  | PSR03033010.hg.1 | CEP70       |
| TC03001823.hg.1 | -3.44 | JUC03016382.hg.1 | CEP70       |
| TC03001823.hg.1 | -3.58 | PSR03033025.hg.1 | CEP70       |
| TC03001823.hg.1 | -3.78 | PSR03033021.hg.1 | CEP70       |
| TC03001823.hg.1 | -4.02 | PSR03032991.hg.1 | CEP70       |
| TC03001823.hg.1 | -4.25 | PSR03033026.hg.1 | CEP70       |
| TC03001823.hg.1 | -4.49 | PSR03032989.hg.1 | CEP70       |
| TC03001823.hg.1 | -4.66 | PSR03033036.hg.1 | CEP70       |
| TC03001823.hg.1 | -4.7  | PSR03033024.hg.1 | CEP70       |

|                 |       |                  |              |
|-----------------|-------|------------------|--------------|
| TC03001823.hg.1 | -4.8  | PSR03033030.hg.1 | CEP70        |
| TC03001823.hg.1 | -6.3  | JUC03016386.hg.1 | CEP70        |
| TC03001823.hg.1 | -8.23 | JUC03016381.hg.1 | CEP70        |
| TC04000887.hg.1 | 2.12  | PSR04012082.hg.1 | WWC2, CLDN   |
| TC04000887.hg.1 | -5.29 | JUC04006507.hg.1 | WWC2, CLDN   |
| TC05000179.hg.1 | 2.12  | PSR05002119.hg.1 | OSMR         |
| TC05000179.hg.1 | 2.1   | JUC05001190.hg.1 | OSMR         |
| TC05000179.hg.1 | -2.04 | JUC05001198.hg.1 | OSMR         |
| TC05000179.hg.1 | -2.13 | JUC05001185.hg.1 | OSMR         |
| TC05001319.hg.1 | 2.12  | PSR05018642.hg.1 | C5orf34      |
| TC05001319.hg.1 | 2.1   | JUC05009594.hg.1 | C5orf34      |
| TC05001319.hg.1 | -3.28 | JUC05009584.hg.1 | C5orf34      |
| TC08001156.hg.1 | 2.12  | JUC08007569.hg.1 | TM2D2        |
| TC08001156.hg.1 | 2.06  | JUC08007572.hg.1 | TM2D2        |
| TC08001156.hg.1 | -2.47 | PSR08014863.hg.1 | TM2D2        |
| TC09001526.hg.1 | 2.12  | PSR09019077.hg.1 | ASTN2        |
| TC09001526.hg.1 | 2.08  | JUC09010361.hg.1 | ASTN2        |
| TC09001526.hg.1 | -2.76 | JUC09010338.hg.1 | ASTN2        |
| TC0X001073.hg.1 | 2.12  | JUC0X007405.hg.1 | WNK3         |
| TC0X001073.hg.1 | 2.03  | JUC0X007388.hg.1 | WNK3         |
| TC0X001073.hg.1 | -2.1  | PSR0X014641.hg.1 | WNK3         |
| TC0X001073.hg.1 | -2.14 | PSR0X014654.hg.1 | WNK3         |
| TC0X001073.hg.1 | -2.23 | PSR0X014650.hg.1 | WNK3         |
| TC11001015.hg.1 | 2.12  | PSR11012676.hg.1 | NCAM1        |
| TC11001015.hg.1 | 2.04  | PSR11012681.hg.1 | NCAM1        |
| TC11001015.hg.1 | -2.48 | JUC11006819.hg.1 | NCAM1        |
| TC11001015.hg.1 | -3.33 | JUC11006800.hg.1 | NCAM1        |
| TC14001038.hg.1 | 2.12  | PSR14011892.hg.1 | RALGAPA1     |
| TC14001038.hg.1 | -2.19 | JUC14005972.hg.1 | RALGAPA1     |
| TC14001038.hg.1 | -2.45 | JUC14005962.hg.1 | RALGAPA1     |
| TC14001038.hg.1 | -3.4  | JUC14005954.hg.1 | RALGAPA1     |
| TC14001308.hg.1 | 2.12  | PSR14014881.hg.1 | LTBP2        |
| TC14001308.hg.1 | -3.06 | JUC14007509.hg.1 | LTBP2        |
| TC14001499.hg.1 | 2.12  | PSR14016854.hg.1 | SETD3        |
| TC14001499.hg.1 | -2.53 | JUC14008728.hg.1 | SETD3        |
| TC15001202.hg.1 | 2.12  | PSR15010752.hg.1 | AQR          |
| TC15001202.hg.1 | -2.62 | JUC15005681.hg.1 | AQR          |
| TC17001716.hg.1 | 2.12  | JUC17012788.hg.1 | TRIM25, MIR: |
| TC17001716.hg.1 | -2.23 | PSR17023021.hg.1 | TRIM25, MIR: |
| TC17001716.hg.1 | -3.02 | JUC17012787.hg.1 | TRIM25, MIR: |
| TC17001933.hg.1 | 2.12  | PSR17026333.hg.1 | EIF4A3       |
| TC17001933.hg.1 | -2.24 | PSR17026338.hg.1 | EIF4A3       |
| TC17001933.hg.1 | -2.28 | JUC17014835.hg.1 | EIF4A3       |
| TC19002680.hg.1 | 2.12  | JUC19017784.hg.1 | ZNF433       |
| TC19002680.hg.1 | -2.12 | PSR19016619.hg.1 | ZNF433       |
| TC19000653.hg.1 | 2.12  | JUC19005430.hg.1 | QPCTL        |
| TC19000653.hg.1 | 2     | PSR19009144.hg.1 | QPCTL        |
| TC01000155.hg.1 | 2.11  | PSR01002600.hg.1 | TNFRSF1B, N  |
| TC01000155.hg.1 | -2.34 | JUC01001425.hg.1 | TNFRSF1B, N  |
| TC01002754.hg.1 | 2.11  | JUC01023030.hg.1 | SLC35D1      |
| TC01002754.hg.1 | -2.22 | PSR01043055.hg.1 | SLC35D1      |
| TC04000996.hg.1 | 2.11  | JUC04007301.hg.1 | EVC2         |
| TC04000996.hg.1 | 2.1   | JUC04007302.hg.1 | EVC2         |
| TC04000996.hg.1 | -2.08 | PSR04013756.hg.1 | EVC2         |
| TC04000996.hg.1 | -2.88 | JUC04007297.hg.1 | EVC2         |
| TC04001373.hg.1 | 2.11  | JUC04010112.hg.1 | PPM1K        |
| TC04001373.hg.1 | 2.07  | JUC04010113.hg.1 | PPM1K        |
| TC04001373.hg.1 | -2    | PSR04019228.hg.1 | PPM1K        |



|                 |       |                   |             |
|-----------------|-------|-------------------|-------------|
| TC04001373.hg.1 | -2.03 | PSR04019209.hg.1  | PPM1K       |
| TC04001373.hg.1 | -2.06 | PSR04019213.hg.1  | PPM1K       |
| TC04001373.hg.1 | -2.19 | JUC04010103.hg.1  | PPM1K       |
| TC05001457.hg.1 | 2.11  | JUC05010335.hg.1  | GTF2H2, GTF |
| TC05001457.hg.1 | -2.04 | PSR05020087.hg.1  | GTF2H2, GTF |
| TC05001457.hg.1 | -2.28 | PSR05020079.hg.1  | GTF2H2, GTF |
| TC05001457.hg.1 | -3.42 | JUC05010328.hg.1  | GTF2H2, GTF |
| TC07001348.hg.1 | 2.11  | PSR07021037.hg.1  | MYO1G       |
| TC07001348.hg.1 | 2.09  | JUC07010282.hg.1  | MYO1G       |
| TC09000690.hg.1 | 2.11  | JUC09004624.hg.1  | CERCAM, LC  |
| TC09000690.hg.1 | -2.02 | PSR09008332.hg.1  | CERCAM, LC  |
| TC09000690.hg.1 | -2.15 | PSR09008321.hg.1  | CERCAM, LC  |
| TC09000690.hg.1 | -2.19 | PSR09008334.hg.1  | CERCAM, LC  |
| TC09000690.hg.1 | -3.35 | PSR09008322.hg.1  | CERCAM, LC  |
| TC09000690.hg.1 | -4.56 | PSR09008337.hg.1  | CERCAM, LC  |
| TC09000879.hg.1 | 2.11  | JUC09006343.hg.1  | GLIS3       |
| TC09000879.hg.1 | 2.1   | PSR09011719.hg.1  | GLIS3       |
| TC09000879.hg.1 | -2    | JUC09006345.hg.1  | GLIS3       |
| TC09000879.hg.1 | -2.08 | PSR09011706.hg.1  | GLIS3       |
| TC09000879.hg.1 | -2.36 | JUC09006342.hg.1  | GLIS3       |
| TC09000879.hg.1 | -3.06 | JUC09006329.hg.1  | GLIS3       |
| TC09001618.hg.1 | 2.11  | JUC09011018.hg.1  | FAM102A     |
| TC09001618.hg.1 | -2.1  | PSR09020448.hg.1  | FAM102A     |
| TC09001618.hg.1 | -2.19 | JUC09011010.hg.1  | FAM102A     |
| TC09001618.hg.1 | -2.35 | PSR09020454.hg.1  | FAM102A     |
| TC09001618.hg.1 | -2.62 | PSR09020445.hg.1  | FAM102A     |
| TC09001618.hg.1 | -2.64 | PSR09020446.hg.1  | FAM102A     |
| TC09001618.hg.1 | -2.7  | JUC09011015.hg.1  | FAM102A     |
| TC15000808.hg.1 | 2.11  | JUC15003848.hg.1  | GOLGA6L4    |
| TC15000808.hg.1 | 2.02  | PSR15007362.hg.1  | GOLGA6L4    |
| TC15002774.hg.1 | 2.11  | JUC15013414.hg.1  | MIR628, CCF |
| TC15002774.hg.1 | 2.05  | PSR15013695.hg.1  | MIR628, CCF |
| TC16000643.hg.1 | 2.11  | JUC16005059.hg.1  | PLCG2       |
| TC16000643.hg.1 | -2.19 | JUC16005051.hg.1  | PLCG2       |
| TC16000643.hg.1 | -2.37 | JUC16005064.hg.1  | PLCG2       |
| TC16000643.hg.1 | -2.94 | PSR16009106.hg.1  | PLCG2       |
| TC16000643.hg.1 | -2.94 | JUC16005046.hg.1  | PLCG2       |
| TC16000643.hg.1 | -3.2  | JUC16005049.hg.1  | PLCG2       |
| TC16000643.hg.1 | -3.36 | JUC16005039.hg.1  | PLCG2       |
| TC16000643.hg.1 | -3.8  | JUC16005050.hg.1  | PLCG2       |
| TC16000771.hg.1 | 2.11  | PSR16011280.hg.1  | ZNF598      |
| TC16000771.hg.1 | -2.78 | JUC16006301.hg.1  | ZNF598      |
| TC17000337.hg.1 | 2.11  | JUC17002322.hg.1  | PIPOX       |
| TC17000337.hg.1 | -2.13 | PSR17004147.hg.1  | PIPOX       |
| TC18000446.hg.1 | 2.11  | PSR18004551.hg.1  | FAM59A      |
| TC18000446.hg.1 | -2.68 | JUC18003072.hg.1  | FAM59A      |
| TC6_qbl_hap6000 | 2.11  | PSR6_qbl_hap60024 | MDC1        |
| TC6_qbl_hap6000 | -2.98 | JUC6_qbl_hap60008 | MDC1        |
| TC01000503.hg.1 | 2.1   | JUC01004064.hg.1  | MFSD2A      |
| TC01000503.hg.1 | 2.03  | JUC01004068.hg.1  | MFSD2A      |
| TC01000503.hg.1 | -2.05 | PSR01007789.hg.1  | MFSD2A      |
| TC01000503.hg.1 | -2.11 | PSR01007804.hg.1  | MFSD2A      |
| TC01000503.hg.1 | -2.3  | PSR01007786.hg.1  | MFSD2A      |
| TC01000503.hg.1 | -2.32 | JUC01004067.hg.1  | MFSD2A      |
| TC01000503.hg.1 | -2.4  | PSR01007801.hg.1  | MFSD2A      |
| TC01000503.hg.1 | -2.85 | PSR01007812.hg.1  | MFSD2A      |
| TC01000503.hg.1 | -2.96 | PSR01007811.hg.1  | MFSD2A      |
| TC01000503.hg.1 | -3.23 | JUC01004076.hg.1  | MFSD2A      |

|                 |       |                  |           |
|-----------------|-------|------------------|-----------|
| TC01000503.hg.1 | -3.58 | JUC01004082.hg.1 | MFSD2A    |
| TC02002135.hg.1 | 2.1   | JUC02017958.hg.1 | REV1      |
| TC02002135.hg.1 | -2.11 | PSR02034794.hg.1 | REV1      |
| TC02002523.hg.1 | 2.1   | JUC02021145.hg.1 | SLC25A12  |
| TC02002523.hg.1 | 2.07  | JUC02021134.hg.1 | SLC25A12  |
| TC02002523.hg.1 | 2.05  | JUC02021135.hg.1 | SLC25A12  |
| TC02002523.hg.1 | -2.04 | PSR02040088.hg.1 | SLC25A12  |
| TC02002523.hg.1 | -2.32 | PSR02040072.hg.1 | SLC25A12  |
| TC02002523.hg.1 | -2.86 | PSR02040103.hg.1 | SLC25A12  |
| TC02002523.hg.1 | -3.11 | JUC02021128.hg.1 | SLC25A12  |
| TC05000860.hg.1 | 2.1   | JUC05006494.hg.1 | SGCD      |
| TC05000860.hg.1 | -2.02 | JUC05006487.hg.1 | SGCD      |
| TC05000860.hg.1 | -2.43 | JUC05006495.hg.1 | SGCD      |
| TC05000860.hg.1 | -3.21 | JUC05006488.hg.1 | SGCD      |
| TC05000860.hg.1 | -3.66 | PSR05012535.hg.1 | SGCD      |
| TC05000860.hg.1 | -3.84 | PSR05012539.hg.1 | SGCD      |
| TC05000860.hg.1 | -4.09 | PSR05012540.hg.1 | SGCD      |
| TC05000860.hg.1 | -5.26 | PSR05012544.hg.1 | SGCD      |
| TC06001440.hg.1 | 2.1   | JUC06008175.hg.1 | ZSCAN23   |
| TC06001440.hg.1 | -2    | PSR06016468.hg.1 | ZSCAN23   |
| TC06001440.hg.1 | -2.29 | JUC06008181.hg.1 | ZSCAN23   |
| TC06001440.hg.1 | -2.46 | PSR06016472.hg.1 | ZSCAN23   |
| TC06001440.hg.1 | -2.95 | PSR06016477.hg.1 | ZSCAN23   |
| TC06001440.hg.1 | -3.1  | PSR06016476.hg.1 | ZSCAN23   |
| TC06001440.hg.1 | -3.16 | PSR06016469.hg.1 | ZSCAN23   |
| TC07000162.hg.1 | 2.1   | JUC07001248.hg.1 | LOC441204 |
| TC07000162.hg.1 | -2.2  | PSR07002566.hg.1 | LOC441204 |
| TC09000817.hg.1 | 2.1   | JUC09005849.hg.1 | EGFL7     |
| TC09000817.hg.1 | -2.27 | JUC09005845.hg.1 | EGFL7     |
| TC09000817.hg.1 | -2.58 | PSR09010592.hg.1 | EGFL7     |
| TC09000817.hg.1 | -2.81 | JUC09005841.hg.1 | EGFL7     |
| TC09000817.hg.1 | -4.3  | JUC09005844.hg.1 | EGFL7     |
| TC0X000015.hg.1 | 2.1   | JUC0X000118.hg.1 | XG, XGPY2 |
| TC0X000015.hg.1 | 2.1   | JUC0X000123.hg.1 | XG, XGPY2 |
| TC0X000015.hg.1 | 2.06  | PSR0X000259.hg.1 | XG, XGPY2 |
| TC0X000098.hg.1 | 2.1   | JUC0X000732.hg.1 | MBTPS2    |
| TC0X000098.hg.1 | -2.24 | PSR0X001327.hg.1 | MBTPS2    |
| TC10000611.hg.1 | 2.1   | PSR10006660.hg.1 | SNCG      |
| TC10000611.hg.1 | -2.02 | JUC10003815.hg.1 | SNCG      |
| TC10000611.hg.1 | -2.95 | JUC10003817.hg.1 | SNCG      |
| TC10000611.hg.1 | -8.17 | PSR10006666.hg.1 | SNCG      |
| TC11001084.hg.1 | 2.1   | PSR11013701.hg.1 | C2CD2L    |
| TC11001084.hg.1 | -2.88 | JUC11007364.hg.1 | C2CD2L    |
| TC13000223.hg.1 | 2.1   | PSR13002644.hg.1 | CKAP2     |
| TC13000223.hg.1 | -2.34 | PSR13002666.hg.1 | CKAP2     |
| TC13000223.hg.1 | -2.5  | JUC13001657.hg.1 | CKAP2     |
| TC13000223.hg.1 | -2.77 | JUC13001661.hg.1 | CKAP2     |
| TC15000793.hg.1 | 2.1   | PSR15007221.hg.1 | WHAMM     |
| TC15000793.hg.1 | -2.33 | JUC15003748.hg.1 | WHAMM     |
| TC16001299.hg.1 | 2.1   | JUC16010276.hg.1 | PKD1L2    |
| TC16001299.hg.1 | -2.04 | PSR16018042.hg.1 | PKD1L2    |
| TC16001299.hg.1 | -4.17 | JUC16010248.hg.1 | PKD1L2    |
| TC19002676.hg.1 | 2.1   | JUC19017734.hg.1 | EPOR      |
| TC19002676.hg.1 | -2.06 | PSR19016459.hg.1 | EPOR      |
| TC21000241.hg.1 | 2.1   | JUC21001466.hg.1 | ADARB1    |
| TC21000241.hg.1 | -2.05 | PSR21002833.hg.1 | ADARB1    |
| TC21000241.hg.1 | -2.31 | PSR21002824.hg.1 | ADARB1    |
| TC21000241.hg.1 | -2.36 | JUC21001464.hg.1 | ADARB1    |

|                 |       |                          |             |
|-----------------|-------|--------------------------|-------------|
| TC21000241.hg.1 | -2.43 | PSR21002823.hg.1         | ADARB1      |
| TC21000241.hg.1 | -2.49 | PSR21002837.hg.1         | ADARB1      |
| TC21000241.hg.1 | -2.53 | PSR21002836.hg.1         | ADARB1      |
| TC21000241.hg.1 | -2.69 | JUC21001485.hg.1         | ADARB1      |
| TC21000241.hg.1 | -2.71 | PSR21002846.hg.1         | ADARB1      |
| TC21000241.hg.1 | -4.53 | JUC21001470.hg.1         | ADARB1      |
| TC6_apd_hap1000 | 2.1   | JUC6_apd_hap1000326.hg.1 |             |
| TC6_apd_hap1000 | -2.47 | PSR6_apd_hap1000868.hg.1 |             |
| TC6_cox_hap2000 | 2.1   | JUC6_cox_hap2000781.hg.1 |             |
| TC6_cox_hap2000 | -2.47 | PSR6_cox_hap2002195.hg.1 |             |
| TC10002932.hg.1 | 2.1   | JUC10017117.hg.1         | DCLRE1C     |
| TC10002932.hg.1 | -2    | PSR10013261.hg.1         | DCLRE1C     |
| TC14001297.hg.1 | 2.1   | JUC14007420.hg.1         | C14orf43    |
| TC14001297.hg.1 | 2.01  | JUC14007422.hg.1         | C14orf43    |
| TC14001297.hg.1 | 2     | PSR14014669.hg.1         | C14orf43    |
| TC14001297.hg.1 | -2.01 | JUC14007414.hg.1         | C14orf43    |
| TC14001297.hg.1 | -2.26 | JUC14007417.hg.1         | C14orf43    |
| TC14001297.hg.1 | -2.35 | JUC14007409.hg.1         | C14orf43    |
| TC14001297.hg.1 | -2.51 | JUC14007418.hg.1         | C14orf43    |
| TC14002204.hg.1 | 2.1   | JUC14011391.hg.1         | C14orf178   |
| TC14002204.hg.1 | 2     | PSR14006286.hg.1         | C14orf178   |
| TC01000772.hg.1 | 2.09  | JUC01006452.hg.1         | TYW3        |
| TC01000772.hg.1 | -2.11 | PSR01012303.hg.1         | TYW3        |
| TC02001512.hg.1 | 2.09  | JUC02012750.hg.1         | PXDN        |
| TC02001512.hg.1 | -2.07 | PSR02024681.hg.1         | PXDN        |
| TC02001512.hg.1 | -2.4  | PSR02024642.hg.1         | PXDN        |
| TC03000058.hg.1 | 2.09  | JUC03000663.hg.1         | TATDN2, GHF |
| TC03000058.hg.1 | -2.38 | JUC03000673.hg.1         | TATDN2, GHF |
| TC03000058.hg.1 | -2.49 | JUC03000665.hg.1         | TATDN2, GHF |
| TC03000058.hg.1 | -2.82 | PSR03001300.hg.1         | TATDN2, GHF |
| TC03000058.hg.1 | -3.45 | JUC03000675.hg.1         | TATDN2, GHF |
| TC03000760.hg.1 | 2.09  | JUC03006979.hg.1         | ZBTB38      |
| TC03000760.hg.1 | -2    | PSR03013832.hg.1         | ZBTB38      |
| TC03000760.hg.1 | -2    | JUC03006994.hg.1         | ZBTB38      |
| TC03000760.hg.1 | -2.05 | JUC03006983.hg.1         | ZBTB38      |
| TC03000760.hg.1 | -2.16 | JUC03006992.hg.1         | ZBTB38      |
| TC03000760.hg.1 | -2.2  | JUC03006990.hg.1         | ZBTB38      |
| TC03000760.hg.1 | -2.22 | PSR03013836.hg.1         | ZBTB38      |
| TC03000760.hg.1 | -2.38 | PSR03013839.hg.1         | ZBTB38      |
| TC03000760.hg.1 | -2.49 | PSR03013829.hg.1         | ZBTB38      |
| TC03000760.hg.1 | -2.59 | PSR03013847.hg.1         | ZBTB38      |
| TC03000760.hg.1 | -2.97 | JUC03006986.hg.1         | ZBTB38      |
| TC03000760.hg.1 | -3.39 | JUC03006989.hg.1         | ZBTB38      |
| TC03000760.hg.1 | -3.72 | JUC03006987.hg.1         | ZBTB38      |
| TC03001858.hg.1 | 2.09  | PSR03033553.hg.1         | PCOLCE2     |
| TC03001858.hg.1 | -2.72 | JUC03016692.hg.1         | PCOLCE2     |
| TC04001177.hg.1 | 2.09  | PSR04016287.hg.1         | FRYL        |
| TC04001177.hg.1 | 2.05  | JUC04008680.hg.1         | FRYL        |
| TC04001177.hg.1 | -2.06 | JUC04008662.hg.1         | FRYL        |
| TC04001177.hg.1 | -2.13 | JUC04008674.hg.1         | FRYL        |
| TC07000093.hg.1 | 2.09  | PSR07001498.hg.1         | TMEM106B    |
| TC07000093.hg.1 | -3.24 | JUC07000658.hg.1         | TMEM106B    |
| TC07000341.hg.1 | 2.09  | PSR07005059.hg.1         | SUMF2       |
| TC07000341.hg.1 | 2.08  | JUC07002450.hg.1         | SUMF2       |
| TC07000341.hg.1 | -4.33 | PSR07005101.hg.1         | SUMF2       |
| TC07001120.hg.1 | 2.09  | PSR07017256.hg.1         | ACTB, LOC10 |
| TC07001120.hg.1 | -2.05 | JUC07008399.hg.1         | ACTB, LOC10 |
| TC07001120.hg.1 | -2.81 | JUC07008406.hg.1         | ACTB, LOC10 |

|                 |       |                  |             |
|-----------------|-------|------------------|-------------|
| TC0X000981.hg.1 | 2.09  | JUC0X006587.hg.1 | FUNDC1      |
| TC0X000981.hg.1 | 2.03  | PSR0X013092.hg.1 | FUNDC1      |
| TC0X002322.hg.1 | 2.09  | JUC0X013060.hg.1 | PLXNB3      |
| TC0X002322.hg.1 | 2.01  | PSR0X009899.hg.1 | PLXNB3      |
| TC10000057.hg.1 | 2.09  | JUC10000342.hg.1 | LOC399715   |
| TC10000057.hg.1 | -3.2  | JUC10000338.hg.1 | LOC399715   |
| TC10000057.hg.1 | -4.69 | PSR10000658.hg.1 | LOC399715   |
| TC10000915.hg.1 | 2.09  | JUC10006530.hg.1 | BCCIP       |
| TC10000915.hg.1 | -2.29 | PSR10011206.hg.1 | BCCIP       |
| TC10001756.hg.1 | 2.09  | PSR10023250.hg.1 | MKI67       |
| TC10001756.hg.1 | 2.08  | JUC10013415.hg.1 | MKI67       |
| TC10001756.hg.1 | -3.21 | JUC10013405.hg.1 | MKI67       |
| TC13000614.hg.1 | 2.09  | PSR13007037.hg.1 | CCDC122     |
| TC13000614.hg.1 | -2.7  | JUC13004099.hg.1 | CCDC122     |
| TC15000276.hg.1 | 2.09  | JUC15000847.hg.1 | PAK6, BUB1E |
| TC15000276.hg.1 | -2.03 | PSR15001810.hg.1 | PAK6, BUB1E |
| TC15000276.hg.1 | -2.2  | PSR15001811.hg.1 | PAK6, BUB1E |
| TC15000276.hg.1 | -2.36 | PSR15001802.hg.1 | PAK6, BUB1E |
| TC15000276.hg.1 | -2.4  | JUC15000835.hg.1 | PAK6, BUB1E |
| TC15000276.hg.1 | -2.41 | PSR15001798.hg.1 | PAK6, BUB1E |
| TC15000276.hg.1 | -2.48 | JUC15000811.hg.1 | PAK6, BUB1E |
| TC15000276.hg.1 | -2.74 | PSR15001805.hg.1 | PAK6, BUB1E |
| TC15000276.hg.1 | -3.04 | JUC15000827.hg.1 | PAK6, BUB1E |
| TC15000276.hg.1 | -3.31 | JUC15000828.hg.1 | PAK6, BUB1E |
| TC15000276.hg.1 | -3.57 | JUC15000834.hg.1 | PAK6, BUB1E |
| TC15000276.hg.1 | -4.76 | PSR15001815.hg.1 | PAK6, BUB1E |
| TC17001032.hg.1 | 2.09  | PSR17013910.hg.1 | CHRNE       |
| TC17001032.hg.1 | 2.06  | JUC17007927.hg.1 | CHRNE       |
| TC17001032.hg.1 | 2     | JUC17007926.hg.1 | CHRNE       |
| TC17001032.hg.1 | -2.07 | PSR17013905.hg.1 | CHRNE       |
| TC17001032.hg.1 | -4.06 | JUC17007931.hg.1 | CHRNE       |
| TC19002624.hg.1 | 2.09  | PSR19003188.hg.1 | ZNF700      |
| TC19002624.hg.1 | 2.08  | JUC19017299.hg.1 | ZNF700      |
| TC19002624.hg.1 | 2.01  | PSR19003195.hg.1 | ZNF700      |
| TC21000340.hg.1 | 2.09  | PSR21003872.hg.1 | APP         |
| TC21000340.hg.1 | -2.4  | JUC21002070.hg.1 | APP         |
| TC22000159.hg.1 | 2.09  | JUC22000925.hg.1 | KIAA1671    |
| TC22000159.hg.1 | -2.65 | JUC22000934.hg.1 | KIAA1671    |
| TC22000159.hg.1 | -3.52 | JUC22000930.hg.1 | KIAA1671    |
| TC22000159.hg.1 | -3.84 | PSR22003008.hg.1 | KIAA1671    |
| TC22000232.hg.1 | 2.09  | JUC22001574.hg.1 | DEPDC5      |
| TC22000232.hg.1 | 2.03  | JUC22001589.hg.1 | DEPDC5      |
| TC22000232.hg.1 | -2.06 | PSR22004430.hg.1 | DEPDC5      |
| TC22000232.hg.1 | -2.25 | PSR22004435.hg.1 | DEPDC5      |
| TC22000232.hg.1 | -2.47 | JUC22001571.hg.1 | DEPDC5      |
| TC22000232.hg.1 | -2.49 | JUC22001581.hg.1 | DEPDC5      |
| TC01001314.hg.1 | 2.08  | PSR01020481.hg.1 | SEMA4A      |
| TC01001314.hg.1 | -2.27 | JUC01010914.hg.1 | SEMA4A      |
| TC01001314.hg.1 | -2.87 | JUC01010903.hg.1 | SEMA4A      |
| TC01001314.hg.1 | -3.54 | JUC01010906.hg.1 | SEMA4A      |
| TC01002319.hg.1 | 2.08  | JUC01019115.hg.1 | HP1BP3      |
| TC01002319.hg.1 | -2.06 | JUC01019119.hg.1 | HP1BP3      |
| TC01002319.hg.1 | -2.07 | PSR01035537.hg.1 | HP1BP3      |
| TC01002319.hg.1 | -2.07 | PSR01035564.hg.1 | HP1BP3      |
| TC01002351.hg.1 | 2.08  | PSR01036260.hg.1 | HMGCL       |
| TC01002351.hg.1 | -2.05 | JUC01019539.hg.1 | HMGCL       |
| TC02000089.hg.1 | 2.08  | PSR02001146.hg.1 | DDX1        |
| TC02000089.hg.1 | -2.21 | JUC02000627.hg.1 | DDX1        |

|                 |       |                  |             |
|-----------------|-------|------------------|-------------|
| TC02000089.hg.1 | -3.68 | JUC02000642.hg.1 | DDX1        |
| TC02002117.hg.1 | 2.08  | JUC02017692.hg.1 | FAHD2B, FAF |
| TC02002117.hg.1 | 2.02  | PSR02034339.hg.1 | FAHD2B, FAF |
| TC03003348.hg.1 | 2.08  | PSR03004563.hg.1 | CCBP2       |
| TC03003348.hg.1 | -2.3  | PSR03004570.hg.1 | CCBP2       |
| TC03003348.hg.1 | -2.62 | JUC03023599.hg.1 | CCBP2       |
| TC03003348.hg.1 | -2.76 | PSR03004552.hg.1 | CCBP2       |
| TC03003348.hg.1 | -2.94 | JUC03023611.hg.1 | CCBP2       |
| TC03003348.hg.1 | -2.97 | PSR03004545.hg.1 | CCBP2       |
| TC03003348.hg.1 | -2.97 | PSR03004560.hg.1 | CCBP2       |
| TC03003348.hg.1 | -3.19 | JUC03023598.hg.1 | CCBP2       |
| TC03003348.hg.1 | -3.29 | PSR03004551.hg.1 | CCBP2       |
| TC03003348.hg.1 | -3.33 | PSR03004546.hg.1 | CCBP2       |
| TC03003348.hg.1 | -3.38 | PSR03004528.hg.1 | CCBP2       |
| TC03003348.hg.1 | -3.53 | JUC03023603.hg.1 | CCBP2       |
| TC03003348.hg.1 | -3.55 | PSR03004556.hg.1 | CCBP2       |
| TC03003348.hg.1 | -3.91 | PSR03004548.hg.1 | CCBP2       |
| TC03003348.hg.1 | -3.98 | PSR03004527.hg.1 | CCBP2       |
| TC03003348.hg.1 | -4.06 | PSR03004529.hg.1 | CCBP2       |
| TC03003348.hg.1 | -4.07 | PSR03004566.hg.1 | CCBP2       |
| TC03003348.hg.1 | -4.16 | JUC03023605.hg.1 | CCBP2       |
| TC03003348.hg.1 | -4.55 | PSR03004544.hg.1 | CCBP2       |
| TC03003348.hg.1 | -4.89 | PSR03004541.hg.1 | CCBP2       |
| TC03003348.hg.1 | -4.95 | JUC03023604.hg.1 | CCBP2       |
| TC03003348.hg.1 | -4.97 | JUC03023592.hg.1 | CCBP2       |
| TC03003348.hg.1 | -5.21 | PSR03004553.hg.1 | CCBP2       |
| TC04001537.hg.1 | 2.08  | JUC04011444.hg.1 | PGRMC2, LC  |
| TC04001537.hg.1 | -2.02 | PSR04021742.hg.1 | PGRMC2, LC  |
| TC04001537.hg.1 | -2.75 | PSR04021743.hg.1 | PGRMC2, LC  |
| TC05000817.hg.1 | 2.08  | JUC05006074.hg.1 | AFAP1L1     |
| TC05000817.hg.1 | 2.07  | PSR05011679.hg.1 | AFAP1L1     |
| TC05000817.hg.1 | -3.93 | JUC05006085.hg.1 | AFAP1L1     |
| TC07001993.hg.1 | 2.08  | PSR07030612.hg.1 | EZH2        |
| TC07001993.hg.1 | 2.04  | PSR07030622.hg.1 | EZH2        |
| TC07001993.hg.1 | -2.1  | JUC07015172.hg.1 | EZH2        |
| TC07001993.hg.1 | -2.58 | JUC07015173.hg.1 | EZH2        |
| TC08000188.hg.1 | 2.08  | JUC08001256.hg.1 | SLC25A37    |
| TC08000188.hg.1 | 2.05  | PSR08002432.hg.1 | SLC25A37    |
| TC08000188.hg.1 | -2.04 | JUC08001254.hg.1 | SLC25A37    |
| TC09000611.hg.1 | 2.08  | JUC09003928.hg.1 | DAB2IP      |
| TC09000611.hg.1 | 2.03  | JUC09003924.hg.1 | DAB2IP      |
| TC09000611.hg.1 | -2.06 | JUC09003914.hg.1 | DAB2IP      |
| TC09000611.hg.1 | -2.1  | PSR09007006.hg.1 | DAB2IP      |
| TC09000611.hg.1 | -2.83 | JUC09003913.hg.1 | DAB2IP      |
| TC0X000512.hg.1 | 2.08  | JUC0X003344.hg.1 | NRK         |
| TC0X000512.hg.1 | -2.35 | PSR0X006861.hg.1 | NRK         |
| TC0X000512.hg.1 | -2.59 | JUC0X003360.hg.1 | NRK         |
| TC0X000512.hg.1 | -3.13 | PSR0X006844.hg.1 | NRK         |
| TC0X000512.hg.1 | -3.55 | PSR0X006837.hg.1 | NRK         |
| TC11001153.hg.1 | 2.08  | JUC11007890.hg.1 | PKNOX2      |
| TC11001153.hg.1 | -2.65 | JUC11007895.hg.1 | PKNOX2      |
| TC11001153.hg.1 | -3.33 | PSR11014537.hg.1 | PKNOX2      |
| TC11001153.hg.1 | -4.8  | JUC11007887.hg.1 | PKNOX2      |
| TC12000286.hg.1 | 2.08  | JUC12001734.hg.1 | DDX11       |
| TC12000286.hg.1 | -2.03 | PSR12003436.hg.1 | DDX11       |
| TC12000795.hg.1 | 2.08  | JUC12005469.hg.1 | PARPBP      |
| TC12000795.hg.1 | 2.05  | PSR12010065.hg.1 | PARPBP      |
| TC12000795.hg.1 | -2.7  | JUC12005470.hg.1 | PARPBP      |

|                 |       |                  |         |
|-----------------|-------|------------------|---------|
| TC14001366.hg.1 | 2.08  | JUC14007882.hg.1 | CEP128  |
| TC14001366.hg.1 | -2.14 | PSR14015473.hg.1 | CEP128  |
| TC14001366.hg.1 | -2.15 | JUC14007863.hg.1 | CEP128  |
| TC14001366.hg.1 | -2.81 | JUC14007887.hg.1 | CEP128  |
| TC19001911.hg.1 | 2.08  | JUC19014651.hg.1 | ZSCAN18 |
| TC19001911.hg.1 | -2.25 | PSR19025877.hg.1 | ZSCAN18 |
| TC01000729.hg.1 | 2.07  | PSR01011625.hg.1 | DNAJC6  |
| TC01000729.hg.1 | -2.04 | JUC01006037.hg.1 | DNAJC6  |
| TC01000729.hg.1 | -2.93 | JUC01006042.hg.1 | DNAJC6  |
| TC02001615.hg.1 | 2.07  | JUC02013471.hg.1 | MATN3   |
| TC02001615.hg.1 | -3.18 | PSR02025897.hg.1 | MATN3   |
| TC02001615.hg.1 | -3.45 | JUC02013470.hg.1 | MATN3   |
| TC02001615.hg.1 | -5.81 | PSR02025904.hg.1 | MATN3   |
| TC02001615.hg.1 | -7.39 | PSR02025902.hg.1 | MATN3   |
| TC03000262.hg.1 | 2.07  | JUC03002651.hg.1 | PTH1R   |
| TC03000262.hg.1 | -2.54 | JUC03002648.hg.1 | PTH1R   |
| TC03000262.hg.1 | -3.09 | JUC03002653.hg.1 | PTH1R   |
| TC03000262.hg.1 | -3.12 | PSR03005297.hg.1 | PTH1R   |
| TC03000262.hg.1 | -3.13 | PSR03005316.hg.1 | PTH1R   |
| TC03000262.hg.1 | -3.33 | JUC03002647.hg.1 | PTH1R   |
| TC03000262.hg.1 | -3.57 | JUC03002655.hg.1 | PTH1R   |
| TC03000262.hg.1 | -3.84 | PSR03005310.hg.1 | PTH1R   |
| TC03000262.hg.1 | -3.9  | JUC03002658.hg.1 | PTH1R   |
| TC03000262.hg.1 | -4    | PSR03005296.hg.1 | PTH1R   |
| TC03000262.hg.1 | -4.23 | PSR03005295.hg.1 | PTH1R   |
| TC03000262.hg.1 | -4.71 | JUC03002662.hg.1 | PTH1R   |
| TC03000262.hg.1 | -4.78 | PSR03005293.hg.1 | PTH1R   |
| TC03000262.hg.1 | -4.89 | JUC03002646.hg.1 | PTH1R   |
| TC03000262.hg.1 | -6.14 | JUC03002649.hg.1 | PTH1R   |
| TC03000262.hg.1 | -6.93 | PSR03005291.hg.1 | PTH1R   |
| TC03000262.hg.1 | -7.41 | JUC03002650.hg.1 | PTH1R   |
| TC03001110.hg.1 | 2.07  | JUC03009655.hg.1 | LRCH3   |
| TC03001110.hg.1 | -2.28 | JUC03009676.hg.1 | LRCH3   |
| TC03001110.hg.1 | -2.38 | PSR03019174.hg.1 | LRCH3   |
| TC03002133.hg.1 | 2.07  | PSR03037637.hg.1 | ATP13A3 |
| TC03002133.hg.1 | 2     | JUC03018623.hg.1 | ATP13A3 |
| TC03002133.hg.1 | -2.12 | JUC03018621.hg.1 | ATP13A3 |
| TC03002133.hg.1 | -2.17 | PSR03037605.hg.1 | ATP13A3 |
| TC03002133.hg.1 | -2.34 | JUC03018633.hg.1 | ATP13A3 |
| TC03002133.hg.1 | -2.45 | JUC03018643.hg.1 | ATP13A3 |
| TC04000826.hg.1 | 2.07  | PSR04011399.hg.1 | KLHL2   |
| TC04000826.hg.1 | -2.15 | PSR04011383.hg.1 | KLHL2   |
| TC04000826.hg.1 | -2.65 | JUC04006112.hg.1 | KLHL2   |
| TC07000524.hg.1 | 2.07  | JUC07003588.hg.1 | DBF4    |
| TC07000524.hg.1 | -2.08 | PSR07007462.hg.1 | DBF4    |
| TC07000524.hg.1 | -2.19 | JUC07003574.hg.1 | DBF4    |
| TC08000093.hg.1 | 2.07  | PSR08000912.hg.1 | FDFT1   |
| TC08000093.hg.1 | 2.03  | JUC08000503.hg.1 | FDFT1   |
| TC08001246.hg.1 | 2.07  | PSR08016101.hg.1 | NSMAF   |
| TC08001246.hg.1 | -3.15 | JUC08008312.hg.1 | NSMAF   |
| TC09001287.hg.1 | 2.07  | PSR09016105.hg.1 | AGTPBP1 |
| TC09001287.hg.1 | -2.31 | JUC09008683.hg.1 | AGTPBP1 |
| TC09001287.hg.1 | -2.37 | JUC09008672.hg.1 | AGTPBP1 |
| TC0X000358.hg.1 | 2.07  | PSR0X004617.hg.1 | AR      |
| TC0X000358.hg.1 | -2    | JUC0X002234.hg.1 | AR      |
| TC0X000358.hg.1 | -2.3  | PSR0X004649.hg.1 | AR      |
| TC0X000358.hg.1 | -2.35 | JUC0X002239.hg.1 | AR      |
| TC0X000358.hg.1 | -4.02 | PSR0X004618.hg.1 | AR      |

|                 |       |                  |         |
|-----------------|-------|------------------|---------|
| TC0X000969.hg.1 | 2.07  | JUC0X006525.hg.1 | CASK    |
| TC0X000969.hg.1 | -2.31 | PSR0X012976.hg.1 | CASK    |
| TC0X000969.hg.1 | -2.43 | JUC0X006536.hg.1 | CASK    |
| TC0X000969.hg.1 | -2.52 | PSR0X012958.hg.1 | CASK    |
| TC0X000969.hg.1 | -2.98 | JUC0X006508.hg.1 | CASK    |
| TC10000669.hg.1 | 2.07  | JUC10004302.hg.1 | SLC35G1 |
| TC10000669.hg.1 | -2.07 | PSR10007560.hg.1 | SLC35G1 |
| TC10000669.hg.1 | -2.18 | JUC10004305.hg.1 | SLC35G1 |
| TC11003493.hg.1 | 2.07  | PSR11027401.hg.1 | ALG9    |
| TC11003493.hg.1 | 2.05  | JUC11019695.hg.1 | ALG9    |
| TC11003493.hg.1 | -4.97 | JUC11019676.hg.1 | ALG9    |
| TC17001063.hg.1 | 2.07  | PSR17014237.hg.1 | PITPNM3 |
| TC17001063.hg.1 | -2.65 | PSR17014242.hg.1 | PITPNM3 |
| TC17001063.hg.1 | -2.67 | JUC17008127.hg.1 | PITPNM3 |
| TC17001063.hg.1 | -3.54 | JUC17008117.hg.1 | PITPNM3 |
| TC01002045.hg.1 | 2.06  | JUC01016927.hg.1 | ZNF672  |
| TC01002045.hg.1 | -2.15 | PSR01031177.hg.1 | ZNF672  |
| TC02000599.hg.1 | 2.06  | JUC02005002.hg.1 | INPP4A  |
| TC02000599.hg.1 | 2.05  | PSR02009421.hg.1 | INPP4A  |
| TC02000599.hg.1 | -2.28 | JUC02005015.hg.1 | INPP4A  |
| TC02002372.hg.1 | 2.06  | PSR02037399.hg.1 | ZRANB3  |
| TC02002372.hg.1 | -2.34 | JUC02019395.hg.1 | ZRANB3  |
| TC03001546.hg.1 | 2.06  | PSR03028227.hg.1 | FOXP1   |
| TC03001546.hg.1 | -3.12 | JUC03013881.hg.1 | FOXP1   |
| TC03001546.hg.1 | -3.16 | JUC03013885.hg.1 | FOXP1   |
| TC03003336.hg.1 | 2.06  | JUC03023320.hg.1 | HACL1   |
| TC03003336.hg.1 | -2.22 | PSR03020781.hg.1 | HACL1   |
| TC04000044.hg.1 | 2.06  | PSR04001106.hg.1 | HTT     |
| TC04000044.hg.1 | -2.02 | JUC04000468.hg.1 | HTT     |
| TC04000196.hg.1 | 2.06  | JUC04001436.hg.1 | PCDH7   |
| TC04000196.hg.1 | -2.63 | PSR04003027.hg.1 | PCDH7   |
| TC04000469.hg.1 | 2.06  | JUC04003403.hg.1 | PTPN13  |
| TC04000469.hg.1 | 2.04  | JUC04003418.hg.1 | PTPN13  |
| TC04000469.hg.1 | -2.1  | JUC04003406.hg.1 | PTPN13  |
| TC04000469.hg.1 | -2.46 | JUC04003443.hg.1 | PTPN13  |
| TC04000469.hg.1 | -2.59 | PSR04006713.hg.1 | PTPN13  |
| TC04000469.hg.1 | -2.59 | PSR04006759.hg.1 | PTPN13  |
| TC04000469.hg.1 | -2.73 | JUC04003407.hg.1 | PTPN13  |
| TC04000469.hg.1 | -3.07 | PSR04006712.hg.1 | PTPN13  |
| TC04000469.hg.1 | -3.07 | PSR04006736.hg.1 | PTPN13  |
| TC04000469.hg.1 | -3.21 | JUC04003399.hg.1 | PTPN13  |
| TC04000469.hg.1 | -3.68 | PSR04006714.hg.1 | PTPN13  |
| TC05001307.hg.1 | 2.06  | JUC05009501.hg.1 | OXCT1   |
| TC05001307.hg.1 | -2.21 | PSR05018470.hg.1 | OXCT1   |
| TC05001307.hg.1 | -2.32 | PSR05018463.hg.1 | OXCT1   |
| TC05001307.hg.1 | -2.39 | PSR05018478.hg.1 | OXCT1   |
| TC05001307.hg.1 | -2.48 | PSR05018467.hg.1 | OXCT1   |
| TC05001307.hg.1 | -2.62 | PSR05018484.hg.1 | OXCT1   |
| TC05001307.hg.1 | -2.63 | PSR05018474.hg.1 | OXCT1   |
| TC05001307.hg.1 | -2.67 | PSR05018469.hg.1 | OXCT1   |
| TC05001307.hg.1 | -2.86 | PSR05018464.hg.1 | OXCT1   |
| TC05001307.hg.1 | -2.88 | PSR05018486.hg.1 | OXCT1   |
| TC05001307.hg.1 | -2.99 | JUC05009495.hg.1 | OXCT1   |
| TC05001307.hg.1 | -3.03 | PSR05018458.hg.1 | OXCT1   |
| TC05001307.hg.1 | -5.08 | JUC05009515.hg.1 | OXCT1   |
| TC05001307.hg.1 | -6.23 | JUC05009509.hg.1 | OXCT1   |
| TC07001543.hg.1 | 2.06  | PSR07023218.hg.1 | POMZP3  |
| TC07001543.hg.1 | -2.12 | PSR07023222.hg.1 | POMZP3  |

|                 |       |                  |            |
|-----------------|-------|------------------|------------|
| TC07001543.hg.1 | -2.97 | JUC07011494.hg.1 | POMZP3     |
| TC07001614.hg.1 | 2.06  | PSR07024486.hg.1 | SGCE       |
| TC07001614.hg.1 | -2.06 | JUC07012208.hg.1 | SGCE       |
| TC07001614.hg.1 | -2.64 | JUC07012204.hg.1 | SGCE       |
| TC08000003.hg.1 | 2.06  | JUC08000020.hg.1 | FBXO25     |
| TC08000003.hg.1 | -2.16 | PSR08000079.hg.1 | FBXO25     |
| TC08000003.hg.1 | -3.01 | JUC08000030.hg.1 | FBXO25     |
| TC09000092.hg.1 | 2.06  | PSR09001124.hg.1 | DENND4C    |
| TC09000092.hg.1 | -2.91 | JUC09000597.hg.1 | DENND4C    |
| TC09000092.hg.1 | -3.01 | JUC09000602.hg.1 | DENND4C    |
| TC10000949.hg.1 | 2.06  | PSR10011759.hg.1 | KNDC1      |
| TC10000949.hg.1 | -2.27 | JUC10006849.hg.1 | KNDC1      |
| TC10000949.hg.1 | -3.35 | PSR10011755.hg.1 | KNDC1      |
| TC10001279.hg.1 | 2.06  | PSR10015993.hg.1 | AGAP8, PAR |
| TC10001279.hg.1 | -2.12 | JUC10009319.hg.1 | AGAP8, PAR |
| TC10001279.hg.1 | -2.12 | JUC10009321.hg.1 | AGAP8, PAR |
| TC10001279.hg.1 | -2.13 | PSR10016040.hg.1 | AGAP8, PAR |
| TC10001279.hg.1 | -2.24 | PSR10016018.hg.1 | AGAP8, PAR |
| TC10001279.hg.1 | -2.36 | JUC10009294.hg.1 | AGAP8, PAR |
| TC10001279.hg.1 | -2.47 | JUC10009316.hg.1 | AGAP8, PAR |
| TC10001279.hg.1 | -2.47 | JUC10009318.hg.1 | AGAP8, PAR |
| TC11001548.hg.1 | 2.06  | JUC11010368.hg.1 | APIP       |
| TC11001548.hg.1 | -2.51 | JUC11010370.hg.1 | APIP       |
| TC11001548.hg.1 | -2.92 | PSR11019466.hg.1 | APIP       |
| TC12001201.hg.1 | 2.06  | JUC12008777.hg.1 | DDX12P, DD |
| TC12001201.hg.1 | 2.01  | PSR12015872.hg.1 | DDX12P, DD |
| TC12001201.hg.1 | -2.05 | PSR12015873.hg.1 | DDX12P, DD |
| TC12001505.hg.1 | 2.06  | PSR12019797.hg.1 | POU6F1     |
| TC12001505.hg.1 | -2.32 | JUC12010979.hg.1 | POU6F1     |
| TC12003266.hg.1 | 2.06  | JUC12020262.hg.1 | PXMP2      |
| TC12003266.hg.1 | -2.55 | PSR12014041.hg.1 | PXMP2      |
| TC12003278.hg.1 | 2.06  | JUC12020425.hg.1 | SARNP      |
| TC12003278.hg.1 | -2.12 | JUC12020419.hg.1 | SARNP      |
| TC12003278.hg.1 | -3.03 | PSR12021035.hg.1 | SARNP      |
| TC13000176.hg.1 | 2.06  | JUC13001285.hg.1 | COG3       |
| TC13000176.hg.1 | 2.05  | JUC13001270.hg.1 | COG3       |
| TC13000176.hg.1 | -2.06 | JUC13001282.hg.1 | COG3       |
| TC13000176.hg.1 | -2.35 | PSR13002052.hg.1 | COG3       |
| TC13000176.hg.1 | -2.77 | JUC13001271.hg.1 | COG3       |
| TC14000988.hg.1 | 2.06  | JUC14005646.hg.1 | NOVA1      |
| TC14000988.hg.1 | 2.01  | PSR14011323.hg.1 | NOVA1      |
| TC14000988.hg.1 | -2.52 | PSR14011331.hg.1 | NOVA1      |
| TC15001588.hg.1 | 2.06  | PSR15015288.hg.1 | IQCH-AS1   |
| TC15001588.hg.1 | -2.45 | PSR15015304.hg.1 | IQCH-AS1   |
| TC15001588.hg.1 | -2.56 | JUC15008303.hg.1 | IQCH-AS1   |
| TC15001588.hg.1 | -2.6  | JUC15008314.hg.1 | IQCH-AS1   |
| TC15001588.hg.1 | -2.61 | JUC15008315.hg.1 | IQCH-AS1   |
| TC15001588.hg.1 | -2.63 | JUC15008321.hg.1 | IQCH-AS1   |
| TC15001588.hg.1 | -2.72 | JUC15008305.hg.1 | IQCH-AS1   |
| TC15001588.hg.1 | -2.87 | PSR15015290.hg.1 | IQCH-AS1   |
| TC15001588.hg.1 | -2.91 | JUC15008309.hg.1 | IQCH-AS1   |
| TC15001588.hg.1 | -3.1  | PSR15015311.hg.1 | IQCH-AS1   |
| TC15001588.hg.1 | -3.19 | PSR15015299.hg.1 | IQCH-AS1   |
| TC15001588.hg.1 | -3.53 | PSR15015307.hg.1 | IQCH-AS1   |
| TC15001588.hg.1 | -3.57 | JUC15008311.hg.1 | IQCH-AS1   |
| TC15001588.hg.1 | -3.72 | PSR15015302.hg.1 | IQCH-AS1   |
| TC15001588.hg.1 | -3.81 | PSR15015303.hg.1 | IQCH-AS1   |
| TC15001588.hg.1 | -3.91 | PSR15015298.hg.1 | IQCH-AS1   |



|                 |       |                  |             |
|-----------------|-------|------------------|-------------|
| TC15001588.hg.1 | -4.08 | PSR15015295.hg.1 | IQCH-AS1    |
| TC15001588.hg.1 | -4.12 | JUC15008306.hg.1 | IQCH-AS1    |
| TC15001588.hg.1 | -4.4  | PSR15015300.hg.1 | IQCH-AS1    |
| TC15001588.hg.1 | -8.64 | JUC15008310.hg.1 | IQCH-AS1    |
| TC17000848.hg.1 | 2.06  | PSR17010933.hg.1 | NUP85       |
| TC17000848.hg.1 | 2.04  | JUC17006025.hg.1 | NUP85       |
| TC17001899.hg.1 | 2.06  | PSR17025795.hg.1 | RHBDF2      |
| TC17001899.hg.1 | 2.03  | JUC17014500.hg.1 | RHBDF2      |
| TC17001899.hg.1 | -2.07 | PSR17025777.hg.1 | RHBDF2      |
| TC17001899.hg.1 | -2.14 | JUC17014503.hg.1 | RHBDF2      |
| TC17001899.hg.1 | -2.7  | PSR17025779.hg.1 | RHBDF2      |
| TC17001899.hg.1 | -2.79 | PSR17025778.hg.1 | RHBDF2      |
| TC17001899.hg.1 | -7.48 | JUC17014495.hg.1 | RHBDF2      |
| TC18000048.hg.1 | 2.06  | JUC18000337.hg.1 | TXNDC2      |
| TC18000048.hg.1 | -3.29 | PSR18000525.hg.1 | TXNDC2      |
| TC21000245.hg.1 | 2.06  | PSR21002907.hg.1 | COL18A1     |
| TC21000245.hg.1 | -2.3  | PSR21002940.hg.1 | COL18A1     |
| TC21000245.hg.1 | -2.35 | PSR21002942.hg.1 | COL18A1     |
| TC21000245.hg.1 | -2.58 | JUC21001503.hg.1 | COL18A1     |
| TC21000245.hg.1 | -3.68 | JUC21001509.hg.1 | COL18A1     |
| TC21000245.hg.1 | -3.72 | JUC21001524.hg.1 | COL18A1     |
| TC22000078.hg.1 | 2.06  | PSR22001210.hg.1 | P2RX6       |
| TC22000078.hg.1 | -2.03 | PSR22001209.hg.1 | P2RX6       |
| TC22000078.hg.1 | -2.09 | JUC22000485.hg.1 | P2RX6       |
| TC22000078.hg.1 | -2.79 | JUC22000481.hg.1 | P2RX6       |
| TC22000078.hg.1 | -3.97 | PSR22001217.hg.1 | P2RX6       |
| TC22000914.hg.1 | 2.06  | PSR22015609.hg.1 | LMF2        |
| TC22000914.hg.1 | 2.03  | PSR22015606.hg.1 | LMF2        |
| TC22000914.hg.1 | 2     | JUC22006589.hg.1 | LMF2        |
| TC01000261.hg.1 | 2.05  | JUC01002194.hg.1 | CDA         |
| TC01000261.hg.1 | -2.04 | PSR01004082.hg.1 | CDA         |
| TC01000261.hg.1 | -2.52 | JUC01002196.hg.1 | CDA         |
| TC01001981.hg.1 | 2.05  | JUC01016701.hg.1 | SDCCAG8     |
| TC01001981.hg.1 | -2.06 | PSR01030716.hg.1 | SDCCAG8     |
| TC01003697.hg.1 | 2.05  | PSR01056755.hg.1 | LMOD1       |
| TC01003697.hg.1 | -2.29 | JUC01029618.hg.1 | LMOD1       |
| TC01003697.hg.1 | -2.33 | PSR01056764.hg.1 | LMOD1       |
| TC03001273.hg.1 | 2.05  | JUC03010857.hg.1 | GLB1, TMPPI |
| TC03001273.hg.1 | -2.06 | PSR03021762.hg.1 | GLB1, TMPPI |
| TC03001273.hg.1 | -2.15 | PSR03021771.hg.1 | GLB1, TMPPI |
| TC03001273.hg.1 | -2.59 | JUC03010834.hg.1 | GLB1, TMPPI |
| TC04000213.hg.1 | 2.05  | JUC04001508.hg.1 | PGM2        |
| TC04000213.hg.1 | 2.02  | JUC04001519.hg.1 | PGM2        |
| TC04000213.hg.1 | -2.23 | PSR04003140.hg.1 | PGM2        |
| TC04000213.hg.1 | -2.92 | JUC04001503.hg.1 | PGM2        |
| TC04001760.hg.1 | 2.05  | PSR04024246.hg.1 | GPM6A       |
| TC04001760.hg.1 | -2.66 | JUC04012871.hg.1 | GPM6A       |
| TC04001760.hg.1 | -2.77 | JUC04012865.hg.1 | GPM6A       |
| TC04002922.hg.1 | 2.05  | JUC04016933.hg.1 | RASGEF1B    |
| TC04002922.hg.1 | 2.03  | PSR04018277.hg.1 | RASGEF1B    |
| TC04002922.hg.1 | -2.03 | PSR04018258.hg.1 | RASGEF1B    |
| TC04002922.hg.1 | -2.12 | PSR04018273.hg.1 | RASGEF1B    |
| TC04002922.hg.1 | -2.74 | PSR04018274.hg.1 | RASGEF1B    |
| TC04002922.hg.1 | -3.43 | JUC04016942.hg.1 | RASGEF1B    |
| TC04002922.hg.1 | -3.49 | PSR04018282.hg.1 | RASGEF1B    |
| TC05000074.hg.1 | 2.05  | PSR05000821.hg.1 | 6-Mar       |
| TC05000074.hg.1 | -3.04 | JUC05000435.hg.1 | 6-Mar       |
| TC06001207.hg.1 | 2.05  | JUC06007146.hg.1 | EXOC2       |

|                 |       |                  |           |
|-----------------|-------|------------------|-----------|
| TC06001207.hg.1 | -2.14 | PSR06014377.hg.1 | EXOC2     |
| TC06001207.hg.1 | -2.23 | JUC06007162.hg.1 | EXOC2     |
| TC06001207.hg.1 | -3.3  | JUC06007143.hg.1 | EXOC2     |
| TC06001298.hg.1 | 2.05  | PSR06015620.hg.1 | KIF13A    |
| TC06001298.hg.1 | -2.95 | PSR06015584.hg.1 | KIF13A    |
| TC06001298.hg.1 | -3.92 | JUC06007784.hg.1 | KIF13A    |
| TC07001262.hg.1 | 2.05  | JUC07009581.hg.1 | RP9P      |
| TC07001262.hg.1 | -2.08 | PSR07019692.hg.1 | RP9P      |
| TC07001262.hg.1 | -2.16 | PSR07019694.hg.1 | RP9P      |
| TC07003336.hg.1 | 2.05  | JUC07021051.hg.1 | CDK14     |
| TC07003336.hg.1 | -2.2  | PSR07007799.hg.1 | CDK14     |
| TC07003336.hg.1 | -2.46 | PSR07007801.hg.1 | CDK14     |
| TC07003336.hg.1 | -2.64 | PSR07007811.hg.1 | CDK14     |
| TC07003336.hg.1 | -3.75 | JUC07021075.hg.1 | CDK14     |
| TC09000535.hg.1 | 2.05  | JUC09003246.hg.1 | SLC44A1   |
| TC09000535.hg.1 | -2.42 | PSR09005847.hg.1 | SLC44A1   |
| TC09000535.hg.1 | -2.57 | JUC09003229.hg.1 | SLC44A1   |
| TC09000535.hg.1 | -2.59 | PSR09005846.hg.1 | SLC44A1   |
| TC09000535.hg.1 | -4.43 | JUC09003242.hg.1 | SLC44A1   |
| TC09000548.hg.1 | 2.05  | PSR09006082.hg.1 | FAM206A   |
| TC09000548.hg.1 | -3.8  | JUC09003367.hg.1 | FAM206A   |
| TC09000649.hg.1 | 2.05  | JUC09004179.hg.1 | GAPVD1    |
| TC09000649.hg.1 | -2.14 | JUC09004161.hg.1 | GAPVD1    |
| TC09000649.hg.1 | -2.5  | JUC09004194.hg.1 | GAPVD1    |
| TC09000649.hg.1 | -2.57 | PSR09007493.hg.1 | GAPVD1    |
| TC09000649.hg.1 | -3.07 | JUC09004185.hg.1 | GAPVD1    |
| TC09000826.hg.1 | 2.05  | JUC09005864.hg.1 | TRAF2     |
| TC09000826.hg.1 | -2.12 | PSR09010820.hg.1 | TRAF2     |
| TC09000826.hg.1 | -2.46 | JUC09005870.hg.1 | TRAF2     |
| TC09001298.hg.1 | 2.05  | PSR09016283.hg.1 |           |
| TC09001298.hg.1 | -2.38 | JUC09008748.hg.1 |           |
| TC09001298.hg.1 | -3.75 | PSR09016280.hg.1 |           |
| TC13000626.hg.1 | 2.05  | PSR13007101.hg.1 | NUFIP1    |
| TC13000626.hg.1 | -2.94 | JUC13004138.hg.1 | NUFIP1    |
| TC14000084.hg.1 | 2.05  | PSR14000506.hg.1 | C14orf176 |
| TC14000084.hg.1 | -2.22 | JUC14000209.hg.1 | C14orf176 |
| TC17000663.hg.1 | 2.05  | PSR17008321.hg.1 | XYLT2     |
| TC17000663.hg.1 | -2.23 | JUC17004598.hg.1 | XYLT2     |
| TC19000526.hg.1 | 2.05  | JUC19004156.hg.1 | CATSPERG  |
| TC19000526.hg.1 | -2.05 | PSR19006995.hg.1 | CATSPERG  |
| TC19000526.hg.1 | -2.17 | PSR19006992.hg.1 | CATSPERG  |
| TC19000526.hg.1 | -2.21 | PSR19006989.hg.1 | CATSPERG  |
| TC19000526.hg.1 | -2.48 | JUC19004157.hg.1 | CATSPERG  |
| TC18000440.hg.1 | 2.05  | JUC18003026.hg.1 | B4GALT6   |
| TC18000440.hg.1 | 2     | PSR18004501.hg.1 | B4GALT6   |
| TC18000440.hg.1 | -2.47 | JUC18003028.hg.1 | B4GALT6   |
| TC18000440.hg.1 | -2.54 | JUC18003027.hg.1 | B4GALT6   |
| TC01002479.hg.1 | 2.04  | JUC01020616.hg.1 | AK2       |
| TC01002479.hg.1 | -2.02 | PSR01038327.hg.1 | AK2       |
| TC01002479.hg.1 | -2.08 | JUC01020611.hg.1 | AK2       |
| TC01002479.hg.1 | -2.21 | PSR01038334.hg.1 | AK2       |
| TC01002479.hg.1 | -2.61 | PSR01038339.hg.1 | AK2       |
| TC02000547.hg.1 | 2.04  | PSR02008489.hg.1 | ANKRD36BP |
| TC02000547.hg.1 | -2.08 | JUC02004352.hg.1 | ANKRD36BP |
| TC02000547.hg.1 | -2.22 | JUC02004344.hg.1 | ANKRD36BP |
| TC02000547.hg.1 | -2.38 | PSR02008487.hg.1 | ANKRD36BP |
| TC02002024.hg.1 | 2.04  | PSR02032416.hg.1 | LRRTM1    |
| TC02002024.hg.1 | -2.52 | JUC02016749.hg.1 | LRRTM1    |

|                 |       |                  |            |
|-----------------|-------|------------------|------------|
| TC0300042.hg.1  | 2.04  | JUC03000485.hg.1 | OGG1       |
| TC0300042.hg.1  | -2.01 | PSR03000854.hg.1 | OGG1       |
| TC04001332.hg.1 | 2.04  | PSR04018329.hg.1 | HNRNPD     |
| TC04001332.hg.1 | -2.29 | JUC04009721.hg.1 | HNRNPD     |
| TC06000104.hg.1 | 2.04  | PSR06001082.hg.1 | JARID2     |
| TC06000104.hg.1 | -2.25 | JUC06000486.hg.1 | JARID2     |
| TC06000577.hg.1 | 2.04  | PSR06006478.hg.1 | BYSL       |
| TC06000577.hg.1 | -5.03 | JUC06002760.hg.1 | BYSL       |
| TC08001494.hg.1 | 2.04  | JUC08009914.hg.1 | NCALD      |
| TC08001494.hg.1 | 2.03  | JUC08009934.hg.1 | NCALD      |
| TC08001494.hg.1 | -2.34 | PSR08019549.hg.1 | NCALD      |
| TC08001494.hg.1 | -2.99 | JUC08009899.hg.1 | NCALD      |
| TC09000442.hg.1 | 2.04  | JUC09002576.hg.1 | C9orf89    |
| TC09000442.hg.1 | 2.02  | PSR09004723.hg.1 | C9orf89    |
| TC09001095.hg.1 | 2.04  | JUC09007845.hg.1 | LOC653501, |
| TC09001095.hg.1 | -3.4  | PSR09014635.hg.1 | LOC653501, |
| TC0X002345.hg.1 | 2.04  | JUC0X013295.hg.1 | LOC1001314 |
| TC0X002345.hg.1 | 2.03  | PSR0X019216.hg.1 | LOC1001314 |
| TC0X002345.hg.1 | -2.09 | PSR0X019207.hg.1 | LOC1001314 |
| TC0X002345.hg.1 | -2.91 | PSR0X019208.hg.1 | LOC1001314 |
| TC0X002345.hg.1 | -3.71 | PSR0X019209.hg.1 | LOC1001314 |
| TC10000759.hg.1 | 2.04  | PSR10009025.hg.1 | SUFU       |
| TC10000759.hg.1 | -3.49 | JUC10005030.hg.1 | SUFU       |
| TC11001289.hg.1 | 2.04  | PSR11016363.hg.1 | CARS       |
| TC11001289.hg.1 | -2.36 | JUC11008796.hg.1 | CARS       |
| TC11001289.hg.1 | -2.66 | JUC11008805.hg.1 | CARS       |
| TC11001289.hg.1 | -2.85 | PSR11016391.hg.1 | CARS       |
| TC12001224.hg.1 | 2.04  | PSR12016133.hg.1 | KLRAP1     |
| TC12001224.hg.1 | 2.01  | JUC12008909.hg.1 | KLRAP1     |
| TC12001224.hg.1 | -2.06 | JUC12008897.hg.1 | KLRAP1     |
| TC12001224.hg.1 | -2.11 | PSR12016150.hg.1 | KLRAP1     |
| TC12001224.hg.1 | -3.71 | JUC12008899.hg.1 | KLRAP1     |
| TC12001756.hg.1 | 2.04  | PSR12023287.hg.1 | E2F7       |
| TC12001756.hg.1 | -2.09 | PSR12023284.hg.1 | E2F7       |
| TC12001756.hg.1 | -2.15 | JUC12012858.hg.1 | E2F7       |
| TC12001756.hg.1 | -2.55 | JUC12012861.hg.1 | E2F7       |
| TC14001346.hg.1 | 2.04  | PSR14015304.hg.1 | C14orf133  |
| TC14001346.hg.1 | -2.8  | JUC14007762.hg.1 | C14orf133  |
| TC14001346.hg.1 | -2.83 | JUC14007773.hg.1 | C14orf133  |
| TC15000731.hg.1 | 2.04  | JUC15003348.hg.1 | PSMA4      |
| TC15000731.hg.1 | -2.05 | JUC15003339.hg.1 | PSMA4      |
| TC15000731.hg.1 | -2.87 | PSR15006574.hg.1 | PSMA4      |
| TC17000250.hg.1 | 2.04  | JUC17001986.hg.1 | SPECC1     |
| TC17000250.hg.1 | -2.03 | PSR17003450.hg.1 | SPECC1     |
| TC17000250.hg.1 | -2.09 | PSR17003452.hg.1 | SPECC1     |
| TC17000250.hg.1 | -2.25 | JUC17001995.hg.1 | SPECC1     |
| TC17000250.hg.1 | -2.37 | PSR17003473.hg.1 | SPECC1     |
| TC17000250.hg.1 | -2.37 | JUC17001980.hg.1 | SPECC1     |
| TC17000250.hg.1 | -2.43 | PSR17003465.hg.1 | SPECC1     |
| TC17000250.hg.1 | -2.57 | PSR17003454.hg.1 | SPECC1     |
| TC17000250.hg.1 | -2.85 | JUC17002000.hg.1 | SPECC1     |
| TC17000250.hg.1 | -2.92 | PSR17003461.hg.1 | SPECC1     |
| TC17000250.hg.1 | -2.94 | PSR17003453.hg.1 | SPECC1     |
| TC17000250.hg.1 | -8.97 | JUC17001988.hg.1 | SPECC1     |
| TC18000002.hg.1 | 2.04  | JUC18000001.hg.1 | ROCK1P1    |
| TC18000002.hg.1 | -2.28 | PSR18000002.hg.1 | ROCK1P1    |
| TC19000081.hg.1 | 2.04  | PSR19001304.hg.1 | CREB3L3    |
| TC19000081.hg.1 | -2.51 | JUC19000733.hg.1 | CREB3L3    |

|                 |       |                   |              |
|-----------------|-------|-------------------|--------------|
| TC20000038.hg.1 | 2.04  | PSR20000604.hg.1  | ATRN         |
| TC20000038.hg.1 | -2.09 | JUC20000268.hg.1  | ATRN         |
| TC6_qbl_hap6000 | 2.04  | PSR6_qbl_hap60035 | NOTCH4       |
| TC6_qbl_hap6000 | 2.03  | JUC6_qbl_hap60013 | NOTCH4       |
| TC6_qbl_hap6000 | -2.01 | JUC6_qbl_hap60013 | NOTCH4       |
| TC07000778.hg.1 | 2.04  | JUC07005742.hg.1  | FAM71F2      |
| TC07000778.hg.1 | -2    | PSR07012258.hg.1  | FAM71F2      |
| TC07000778.hg.1 | -2.85 | JUC07005749.hg.1  | FAM71F2      |
| TC01003080.hg.1 | 2.03  | JUC01025649.hg.1  | FLJ39739, LC |
| TC01003080.hg.1 | -2.36 | PSR01047781.hg.1  | FLJ39739, LC |
| TC01003080.hg.1 | -4.89 | JUC01025644.hg.1  | FLJ39739, LC |
| TC01003203.hg.1 | 2.03  | PSR01049115.hg.1  |              |
| TC01003203.hg.1 | 2.03  | JUC01026119.hg.1  |              |
| TC02001818.hg.1 | 2.03  | JUC02015295.hg.1  | MCFD2        |
| TC02001818.hg.1 | -2.38 | PSR02029094.hg.1  | MCFD2        |
| TC03000868.hg.1 | 2.03  | JUC03007853.hg.1  | IQCJ, SCHIP  |
| TC03000868.hg.1 | -2    | PSR03015472.hg.1  | IQCJ, SCHIP  |
| TC03000868.hg.1 | -2.06 | PSR03015422.hg.1  | IQCJ, SCHIP  |
| TC03000868.hg.1 | -2.18 | PSR03015460.hg.1  | IQCJ, SCHIP  |
| TC03000868.hg.1 | -2.21 | PSR03015466.hg.1  | IQCJ, SCHIP  |
| TC03000868.hg.1 | -2.22 | PSR03015435.hg.1  | IQCJ, SCHIP  |
| TC03000868.hg.1 | -2.23 | PSR03015478.hg.1  | IQCJ, SCHIP  |
| TC03000868.hg.1 | -2.32 | PSR03015441.hg.1  | IQCJ, SCHIP  |
| TC03000868.hg.1 | -2.33 | PSR03015415.hg.1  | IQCJ, SCHIP  |
| TC03000868.hg.1 | -2.33 | PSR03015428.hg.1  | IQCJ, SCHIP  |
| TC03000868.hg.1 | -2.52 | PSR03015467.hg.1  | IQCJ, SCHIP  |
| TC03000868.hg.1 | -2.8  | PSR03015424.hg.1  | IQCJ, SCHIP  |
| TC03000868.hg.1 | -2.84 | PSR03015430.hg.1  | IQCJ, SCHIP  |
| TC03000868.hg.1 | -2.9  | PSR03015421.hg.1  | IQCJ, SCHIP  |
| TC03000868.hg.1 | -3.02 | PSR03015416.hg.1  | IQCJ, SCHIP  |
| TC03000868.hg.1 | -3.19 | PSR03015433.hg.1  | IQCJ, SCHIP  |
| TC03000868.hg.1 | -3.22 | JUC03007846.hg.1  | IQCJ, SCHIP  |
| TC03000868.hg.1 | -3.55 | JUC03007850.hg.1  | IQCJ, SCHIP  |
| TC03000868.hg.1 | -3.67 | PSR03015420.hg.1  | IQCJ, SCHIP  |
| TC03000868.hg.1 | -3.77 | JUC03007847.hg.1  | IQCJ, SCHIP  |
| TC03000868.hg.1 | -3.91 | PSR03015412.hg.1  | IQCJ, SCHIP  |
| TC03000868.hg.1 | -4.16 | JUC03007854.hg.1  | IQCJ, SCHIP  |
| TC03000868.hg.1 | -5.41 | PSR03015434.hg.1  | IQCJ, SCHIP  |
| TC04000647.hg.1 | 2.03  | PSR04009366.hg.1  | C4orf29      |
| TC04000647.hg.1 | -2.68 | JUC04005021.hg.1  | C4orf29      |
| TC04001250.hg.1 | 2.03  | JUC04009077.hg.1  | UBA6         |
| TC04001250.hg.1 | -2.68 | PSR04017001.hg.1  | UBA6         |
| TC05000174.hg.1 | 2.03  | JUC05001160.hg.1  | EGFLAM       |
| TC05000174.hg.1 | -2.01 | PSR05002020.hg.1  | EGFLAM       |
| TC05000174.hg.1 | -2.22 | JUC05001141.hg.1  | EGFLAM       |
| TC05000174.hg.1 | -2.29 | JUC05001158.hg.1  | EGFLAM       |
| TC05000174.hg.1 | -2.81 | JUC05001147.hg.1  | EGFLAM       |
| TC05000302.hg.1 | 2.03  | PSR05004008.hg.1  | RAD17        |
| TC05000302.hg.1 | 2.02  | JUC05002159.hg.1  | RAD17        |
| TC05000400.hg.1 | 2.03  | JUC05003102.hg.1  | MSH3         |
| TC05000400.hg.1 | -2.02 | PSR05005690.hg.1  | MSH3         |
| TC06000421.hg.1 | 2.03  | JUC06001924.hg.1  | KIFC1        |
| TC06000421.hg.1 | -2.07 | PSR06004971.hg.1  | KIFC1        |
| TC06000421.hg.1 | -2.38 | JUC06001925.hg.1  | KIFC1        |
| TC06000421.hg.1 | -2.39 | JUC06001917.hg.1  | KIFC1        |
| TC06000856.hg.1 | 2.03  | JUC06004716.hg.1  | SOBP         |
| TC06000856.hg.1 | -2.19 | PSR06010063.hg.1  | SOBP         |
| TC06000856.hg.1 | -2.19 | JUC06004722.hg.1  | SOBP         |

|                  |       |                   |            |
|------------------|-------|-------------------|------------|
| TC06001507.hg.1  | 2.03  | PSR06017067.hg.1  | MDC1       |
| TC06001507.hg.1  | 2     | JUC06008395.hg.1  | MDC1       |
| TC06001507.hg.1  | -2.85 | JUC06008399.hg.1  | MDC1       |
| TC07000796.hg.1  | 2.03  | PSR07012557.hg.1  | AHCYL2     |
| TC07000796.hg.1  | -2    | JUC07005925.hg.1  | AHCYL2     |
| TC08000685.hg.1  | 2.03  | PSR08009297.hg.1  | SLC30A8    |
| TC08000685.hg.1  | -2.01 | JUC08004746.hg.1  | SLC30A8    |
| TC09000450.hg.1  | 2.03  | PSR09004850.hg.1  | PHF2       |
| TC09000450.hg.1  | -2.53 | JUC09002676.hg.1  | PHF2       |
| TC0X002360.hg.1  | 2.03  | JUC0X013482.hg.1  | LOC1002877 |
| TC0X002360.hg.1  | -2.34 | JUC0X013469.hg.1  | LOC1002877 |
| TC0X002360.hg.1  | -2.58 | JUC0X013473.hg.1  | LOC1002877 |
| TC0X002360.hg.1  | -3.39 | PSR0X006536.hg.1  | LOC1002877 |
| TC0X002360.hg.1  | -3.49 | JUC0X013478.hg.1  | LOC1002877 |
| TC0X002360.hg.1  | -3.66 | JUC0X013481.hg.1  | LOC1002877 |
| TC10000256.hg.1  | 2.03  | PSR10002963.hg.1  | HSD17B7P2  |
| TC10000256.hg.1  | -2.43 | JUC10001679.hg.1  | HSD17B7P2  |
| TC11000673.hg.1  | 2.03  | PSR11008596.hg.1  | RBM14, RBM |
| TC11000673.hg.1  | 2.03  | PSR11008597.hg.1  | RBM14, RBM |
| TC11000673.hg.1  | -2.28 | JUC11004417.hg.1  | RBM14, RBM |
| TC11000673.hg.1  | -2.34 | PSR11008563.hg.1  | RBM14, RBM |
| TC11000673.hg.1  | -2.35 | JUC11004422.hg.1  | RBM14, RBM |
| TC11000673.hg.1  | -2.73 | JUC11004428.hg.1  | RBM14, RBM |
| TC11000673.hg.1  | -2.87 | PSR11008557.hg.1  | RBM14, RBM |
| TC14000463.hg.1  | 2.03  | PSR14005796.hg.1  | YLPM1, LOC |
| TC14000463.hg.1  | -2.02 | JUC14002967.hg.1  | YLPM1, LOC |
| TC14000463.hg.1  | -2.02 | JUC14002979.hg.1  | YLPM1, LOC |
| TC14000463.hg.1  | -2.05 | JUC14002977.hg.1  | YLPM1, LOC |
| TC14000463.hg.1  | -2.8  | JUC14002973.hg.1  | YLPM1, LOC |
| TC14000463.hg.1  | -3.13 | JUC14002974.hg.1  | YLPM1, LOC |
| TC15001110.hg.1  | 2.03  | JUC15005347.hg.1  | TJP1       |
| TC15001110.hg.1  | -2.34 | PSR15010138.hg.1  | TJP1       |
| TC15001456.hg.1  | 2.03  | JUC15007251.hg.1  | MYO5A      |
| TC15001456.hg.1  | -2.03 | PSR15013531.hg.1  | MYO5A      |
| TC15001456.hg.1  | -2.08 | JUC15007267.hg.1  | MYO5A      |
| TC15001456.hg.1  | -2.47 | JUC15007257.hg.1  | MYO5A      |
| TC15001456.hg.1  | -2.71 | JUC15007235.hg.1  | MYO5A      |
| TC15001456.hg.1  | -2.79 | JUC15007246.hg.1  | MYO5A      |
| TC15001456.hg.1  | -2.9  | JUC15007256.hg.1  | MYO5A      |
| TC15001456.hg.1  | -2.95 | JUC15007266.hg.1  | MYO5A      |
| TC15001456.hg.1  | -3.08 | JUC15007238.hg.1  | MYO5A      |
| TC17000376.hg.1  | 2.03  | PSR17004790.hg.1  | PSMD11     |
| TC17000376.hg.1  | -2.04 | JUC17002754.hg.1  | PSMD11     |
| TC21000484.hg.1  | 2.03  | PSR21005871.hg.1  | TFF3       |
| TC21000484.hg.1  | -2.32 | JUC21003038.hg.1  | TFF3       |
| TC22000608.hg.1  | 2.03  | PSR22010581.hg.1  | HPS4       |
| TC22000608.hg.1  | 2     | JUC22004301.hg.1  | HPS4       |
| TC22000608.hg.1  | -2.4  | PSR22010620.hg.1  | HPS4       |
| TC22000608.hg.1  | -2.83 | JUC22004309.hg.1  | HPS4       |
| TC6_qbl_hap6000  | 2.03  | PSR6_qbl_hap60041 | TAPBP      |
| TC6_qbl_hap6000  | -3.43 | JUC6_qbl_hap60016 | TAPBP      |
| TC6_ssto_hap7000 | 2.03  | JUC6_ssto_hap7000 | KIFC1      |
| TC6_ssto_hap7000 | -2.07 | PSR6_ssto_hap7001 | KIFC1      |
| TC6_ssto_hap7000 | -2.38 | JUC6_ssto_hap7000 | KIFC1      |
| TC6_ssto_hap7000 | -2.39 | JUC6_ssto_hap7000 | KIFC1      |
| TC01000132.hg.1  | 2.02  | PSR01002122.hg.1  | PEX14      |
| TC01000132.hg.1  | -2.2  | JUC01001153.hg.1  | PEX14      |
| TC01000132.hg.1  | -2.33 | JUC01001140.hg.1  | PEX14      |

|                 |       |                  |         |
|-----------------|-------|------------------|---------|
| TC01002868.hg.1 | 2.02  | PSR01044735.hg.1 | EVI5    |
| TC01002868.hg.1 | 2.01  | JUC01024031.hg.1 | EVI5    |
| TC01002868.hg.1 | -2.08 | JUC01024034.hg.1 | EVI5    |
| TC01003392.hg.1 | 2.02  | PSR01052963.hg.1 | TAGLN2  |
| TC01003392.hg.1 | 2.02  | JUC01027711.hg.1 | TAGLN2  |
| TC01003392.hg.1 | 2     | JUC01027716.hg.1 | TAGLN2  |
| TC01003881.hg.1 | 2.02  | JUC01030977.hg.1 | NVL     |
| TC01003881.hg.1 | -2.08 | PSR01059118.hg.1 | NVL     |
| TC01003881.hg.1 | -2.77 | JUC01031002.hg.1 | NVL     |
| TC02000925.hg.1 | 2.02  | JUC02007202.hg.1 | MBD5    |
| TC02000925.hg.1 | -2.01 | JUC02007191.hg.1 | MBD5    |
| TC02000925.hg.1 | -2.04 | PSR02013486.hg.1 | MBD5    |
| TC02000925.hg.1 | -2.05 | JUC02007190.hg.1 | MBD5    |
| TC02000925.hg.1 | -2.05 | JUC02007207.hg.1 | MBD5    |
| TC02000925.hg.1 | -2.1  | JUC02007200.hg.1 | MBD5    |
| TC02000925.hg.1 | -2.16 | JUC02007201.hg.1 | MBD5    |
| TC02000925.hg.1 | -3.59 | JUC02007197.hg.1 | MBD5    |
| TC02001334.hg.1 | 2.02  | PSR02020927.hg.1 | SLC4A3  |
| TC02001334.hg.1 | -2.07 | JUC02011161.hg.1 | SLC4A3  |
| TC02001334.hg.1 | -2.12 | JUC02011142.hg.1 | SLC4A3  |
| TC02001778.hg.1 | 2.02  | JUC02015015.hg.1 | COX7A2L |
| TC02001778.hg.1 | -2.12 | PSR02028612.hg.1 | COX7A2L |
| TC02001778.hg.1 | -4.24 | JUC02015012.hg.1 | COX7A2L |
| TC02002104.hg.1 | 2.02  | PSR02033998.hg.1 | STARD7  |
| TC02002104.hg.1 | -2.26 | JUC02017505.hg.1 | STARD7  |
| TC03000863.hg.1 | 2.02  | JUC03007713.hg.1 | C3orf55 |
| TC03000863.hg.1 | -2.02 | PSR03015208.hg.1 | C3orf55 |
| TC03000863.hg.1 | -2.07 | PSR03015200.hg.1 | C3orf55 |
| TC03000863.hg.1 | -2.33 | PSR03015191.hg.1 | C3orf55 |
| TC03000863.hg.1 | -3.27 | PSR03015205.hg.1 | C3orf55 |
| TC03000863.hg.1 | -3.41 | PSR03015210.hg.1 | C3orf55 |
| TC03003381.hg.1 | 2.02  | JUC03024143.hg.1 | SLC26A6 |
| TC03003381.hg.1 | -2.04 | PSR03024296.hg.1 | SLC26A6 |
| TC03003381.hg.1 | -2.07 | PSR03024278.hg.1 | SLC26A6 |
| TC03003381.hg.1 | -2.18 | PSR03024274.hg.1 | SLC26A6 |
| TC03003381.hg.1 | -2.24 | PSR03024246.hg.1 | SLC26A6 |
| TC03003381.hg.1 | -2.28 | PSR03024263.hg.1 | SLC26A6 |
| TC03003381.hg.1 | -2.44 | PSR03024268.hg.1 | SLC26A6 |
| TC03003381.hg.1 | -2.5  | PSR03024255.hg.1 | SLC26A6 |
| TC03003381.hg.1 | -2.57 | PSR03024299.hg.1 | SLC26A6 |
| TC03003381.hg.1 | -2.63 | JUC03024138.hg.1 | SLC26A6 |
| TC03003381.hg.1 | -2.76 | PSR03024259.hg.1 | SLC26A6 |
| TC03003381.hg.1 | -2.95 | PSR03024236.hg.1 | SLC26A6 |
| TC04000653.hg.1 | 2.02  | JUC04005099.hg.1 | C4orf33 |
| TC04000653.hg.1 | -2.1  | PSR04009517.hg.1 | C4orf33 |
| TC04000653.hg.1 | -2.13 | PSR04009526.hg.1 | C4orf33 |
| TC04000653.hg.1 | -2.5  | PSR04009514.hg.1 | C4orf33 |
| TC04001577.hg.1 | 2.02  | JUC04011625.hg.1 | ELF2    |
| TC04001577.hg.1 | -2.35 | JUC04011613.hg.1 | ELF2    |
| TC04001577.hg.1 | -2.6  | PSR04022020.hg.1 | ELF2    |
| TC04001577.hg.1 | -3.12 | PSR04022021.hg.1 | ELF2    |
| TC05001934.hg.1 | 2.02  | JUC05013633.hg.1 | CAMK2A  |
| TC05001934.hg.1 | -2.68 | PSR05026782.hg.1 | CAMK2A  |
| TC09000755.hg.1 | 2.02  | JUC09005341.hg.1 | NTNG2   |
| TC09000755.hg.1 | -2.16 | PSR09009729.hg.1 | NTNG2   |
| TC09001616.hg.1 | 2.02  | JUC09010996.hg.1 | PIP5KL1 |
| TC09001616.hg.1 | -2.01 | PSR09020374.hg.1 | PIP5KL1 |
| TC09001616.hg.1 | -2.19 | JUC09010985.hg.1 | PIP5KL1 |

|                 |       |                  |            |
|-----------------|-------|------------------|------------|
| TC09001616.hg.1 | -2.44 | JUC09010997.hg.1 | PIP5KL1    |
| TC09001616.hg.1 | -2.6  | PSR09020376.hg.1 | PIP5KL1    |
| TC0X000223.hg.1 | 2.02  | JUC0X001358.hg.1 | PHF16      |
| TC0X000223.hg.1 | -2.03 | PSR0X002488.hg.1 | PHF16      |
| TC0X000223.hg.1 | -2.25 | JUC0X001353.hg.1 | PHF16      |
| TC11002195.hg.1 | 2.02  | PSR11026251.hg.1 | SNORA32, S |
| TC11002195.hg.1 | -2.62 | PSR11026237.hg.1 | SNORA32, S |
| TC11002195.hg.1 | -3.64 | JUC11013957.hg.1 | SNORA32, S |
| TC14000584.hg.1 | 2.02  | PSR14007200.hg.1 | IFI27      |
| TC14000584.hg.1 | -2.3  | JUC14003715.hg.1 | IFI27      |
| TC16000470.hg.1 | 2.02  | JUC16003639.hg.1 | MT1DP      |
| TC16000470.hg.1 | -2.23 | PSR16006502.hg.1 | MT1DP      |
| TC16000470.hg.1 | -3.39 | PSR16006499.hg.1 | MT1DP      |
| TC17000592.hg.1 | 2.02  | JUC17004100.hg.1 | MAPT       |
| TC17000592.hg.1 | -2.83 | PSR17007253.hg.1 | MAPT       |
| TC17000970.hg.1 | 2.02  | PSR17012867.hg.1 | ABR        |
| TC17000970.hg.1 | -2.14 | JUC17007327.hg.1 | ABR        |
| TC17002893.hg.1 | 2.02  | PSR17016533.hg.1 | USP32P2    |
| TC17002893.hg.1 | -2.25 | JUC17018906.hg.1 | USP32P2    |
| TC17002893.hg.1 | -4.49 | JUC17018907.hg.1 | USP32P2    |
| TC18000527.hg.1 | 2.02  | JUC18003704.hg.1 | TCF4       |
| TC18000527.hg.1 | -2.07 | PSR18005486.hg.1 | TCF4       |
| TC18000527.hg.1 | -2.37 | JUC18003672.hg.1 | TCF4       |
| TC18000527.hg.1 | -2.71 | JUC18003673.hg.1 | TCF4       |
| TC18000527.hg.1 | -4.98 | JUC18003688.hg.1 | TCF4       |
| TC6_mann_hap400 | 2.02  | JUC6_mann_hap400 | HLA-H      |
| TC6_mann_hap400 | -2.24 | PSR6_mann_hap400 | HLA-H      |
| TC02000353.hg.1 | 2.01  | PSR02005308.hg.1 | AHSA2      |
| TC02000353.hg.1 | -2.02 | JUC02002757.hg.1 | AHSA2      |
| TC02000353.hg.1 | -2.14 | JUC02002749.hg.1 | AHSA2      |
| TC02001089.hg.1 | 2.01  | JUC02008673.hg.1 | DNAJC10    |
| TC02001089.hg.1 | -2.09 | JUC02008684.hg.1 | DNAJC10    |
| TC02001089.hg.1 | -2.36 | PSR02016321.hg.1 | DNAJC10    |
| TC02001089.hg.1 | -3.03 | JUC02008691.hg.1 | DNAJC10    |
| TC02001477.hg.1 | 2.01  | JUC02012463.hg.1 | 2-Sep      |
| TC02001477.hg.1 | -2.37 | PSR02023971.hg.1 | 2-Sep      |
| TC02001477.hg.1 | -3.43 | JUC02012464.hg.1 | 2-Sep      |
| TC02002591.hg.1 | 2.01  | PSR02041557.hg.1 | FRZB       |
| TC02002591.hg.1 | -3.2  | JUC02021635.hg.1 | FRZB       |
| TC02004960.hg.1 | 2.01  | PSR02003695.hg.1 | ARHGEF33   |
| TC02004960.hg.1 | -2.61 | JUC02031679.hg.1 | ARHGEF33   |
| TC03000193.hg.1 | 2.01  | JUC03002050.hg.1 | EXOG       |
| TC03000193.hg.1 | -2.02 | PSR03003800.hg.1 | EXOG       |
| TC03000193.hg.1 | -2.14 | PSR03003763.hg.1 | EXOG       |
| TC03000193.hg.1 | -2.41 | PSR03003764.hg.1 | EXOG       |
| TC03000867.hg.1 | 2.01  | JUC03007797.hg.1 | MFSD1      |
| TC03000867.hg.1 | -2.01 | PSR03015354.hg.1 | MFSD1      |
| TC03000867.hg.1 | -2.02 | PSR03015356.hg.1 | MFSD1      |
| TC03000867.hg.1 | -2.14 | PSR03015390.hg.1 | MFSD1      |
| TC03000867.hg.1 | -2.23 | JUC03007819.hg.1 | MFSD1      |
| TC03000867.hg.1 | -2.29 | PSR03015352.hg.1 | MFSD1      |
| TC03000867.hg.1 | -2.45 | JUC03007802.hg.1 | MFSD1      |
| TC03000867.hg.1 | -2.76 | JUC03007807.hg.1 | MFSD1      |
| TC05000498.hg.1 | 2.01  | PSR05007014.hg.1 | PIIP5K2    |
| TC05000498.hg.1 | -2    | JUC05003865.hg.1 | PIIP5K2    |
| TC05000498.hg.1 | -2.04 | JUC05003839.hg.1 | PIIP5K2    |
| TC05000498.hg.1 | -2.34 | JUC05003861.hg.1 | PIIP5K2    |
| TC05000498.hg.1 | -4.36 | JUC05003847.hg.1 | PIIP5K2    |

|                 |       |                  |          |
|-----------------|-------|------------------|----------|
| TC05000935.hg.1 | 2.01  | JUC05007064.hg.1 | KCNIP1   |
| TC05000935.hg.1 | -2.12 | PSR05013587.hg.1 | KCNIP1   |
| TC05000935.hg.1 | -2.23 | PSR05013593.hg.1 | KCNIP1   |
| TC05000935.hg.1 | -2.3  | PSR05013596.hg.1 | KCNIP1   |
| TC05000935.hg.1 | -2.48 | PSR05013594.hg.1 | KCNIP1   |
| TC05000935.hg.1 | -2.66 | JUC05007055.hg.1 | KCNIP1   |
| TC05000935.hg.1 | -2.99 | PSR05013601.hg.1 | KCNIP1   |
| TC05000935.hg.1 | -3.16 | PSR05013606.hg.1 | KCNIP1   |
| TC05000935.hg.1 | -4.74 | PSR05013592.hg.1 | KCNIP1   |
| TC05000935.hg.1 | -6.17 | JUC05007056.hg.1 | KCNIP1   |
| TC06000572.hg.1 | 2.01  | JUC06002740.hg.1 | MDF1     |
| TC06000572.hg.1 | -2.04 | PSR06006418.hg.1 | MDF1     |
| TC06000572.hg.1 | -2.17 | PSR06006431.hg.1 | MDF1     |
| TC06000572.hg.1 | -2.26 | JUC06002732.hg.1 | MDF1     |
| TC06002143.hg.1 | 2.01  | JUC06013392.hg.1 | BCLAF1   |
| TC06002143.hg.1 | -2.06 | PSR06026990.hg.1 | BCLAF1   |
| TC06002143.hg.1 | -2.36 | PSR06026982.hg.1 | BCLAF1   |
| TC06002143.hg.1 | -2.83 | JUC06013387.hg.1 | BCLAF1   |
| TC06002143.hg.1 | -3.36 | JUC06013394.hg.1 | BCLAF1   |
| TC10001109.hg.1 | 2.01  | JUC10008003.hg.1 | ARHGAP21 |
| TC10001109.hg.1 | -2.05 | PSR10013927.hg.1 | ARHGAP21 |
| TC11000606.hg.1 | 2.01  | PSR11007475.hg.1 | SLC22A12 |
| TC11000606.hg.1 | -3.86 | JUC11003898.hg.1 | SLC22A12 |
| TC11002081.hg.1 | 2.01  | JUC11013180.hg.1 | PGM2L1   |
| TC11002081.hg.1 | -2.54 | PSR11024952.hg.1 | PGM2L1   |
| TC11002471.hg.1 | 2.01  | PSR11029592.hg.1 | IGSF9B   |
| TC11002471.hg.1 | -2.53 | PSR11029607.hg.1 | IGSF9B   |
| TC11002471.hg.1 | -3.18 | JUC11015781.hg.1 | IGSF9B   |
| TC11002471.hg.1 | -3.95 | JUC11015795.hg.1 | IGSF9B   |
| TC11002471.hg.1 | -4.33 | PSR11029606.hg.1 | IGSF9B   |
| TC11003446.hg.1 | 2.01  | PSR11004635.hg.1 | EXT2     |
| TC11003446.hg.1 | -2.33 | JUC11019044.hg.1 | EXT2     |
| TC12001490.hg.1 | 2.01  | PSR12019618.hg.1 | CERS5    |
| TC12001490.hg.1 | -2.01 | PSR12019605.hg.1 | CERS5    |
| TC12001490.hg.1 | -2.2  | JUC12010882.hg.1 | CERS5    |
| TC12001490.hg.1 | -2.73 | JUC12010889.hg.1 | CERS5    |
| TC12001490.hg.1 | -3.01 | PSR12019604.hg.1 | CERS5    |
| TC17000921.hg.1 | 2.01  | JUC17006842.hg.1 | RPTOR    |
| TC17000921.hg.1 | -2.19 | PSR17012101.hg.1 | RPTOR    |
| TC19000432.hg.1 | 2.01  | PSR19005639.hg.1 | GPATCH1  |
| TC19000432.hg.1 | -4.71 | JUC19003338.hg.1 | GPATCH1  |
| TC19000445.hg.1 | 2.01  | JUC19003469.hg.1 | WTIP     |
| TC19000445.hg.1 | -2.33 | PSR19005825.hg.1 | WTIP     |
| TC02001128.hg.1 | 2     | PSR02017124.hg.1 | NABP1    |
| TC02001128.hg.1 | -2.02 | PSR02017137.hg.1 | NABP1    |
| TC02001128.hg.1 | -2.5  | PSR02017148.hg.1 | NABP1    |
| TC02001128.hg.1 | -2.73 | JUC02009188.hg.1 | NABP1    |
| TC20000805.hg.1 | 2     | JUC20005687.hg.1 | RBM39    |
| TC20000805.hg.1 | -2.02 | PSR20011038.hg.1 | RBM39    |
| TC20000805.hg.1 | -2.18 | PSR20011078.hg.1 | RBM39    |
| TC20000805.hg.1 | -2.21 | PSR20011083.hg.1 | RBM39    |
| TC16000634.hg.1 | 2     | JUC16004970.hg.1 | CENPN    |
| TC16000634.hg.1 | -2.03 | PSR16008987.hg.1 | CENPN    |
| TC07000166.hg.1 | 2     | PSR07002600.hg.1 | HOXA-AS2 |
| TC07000166.hg.1 | -2.06 | PSR07002598.hg.1 | HOXA-AS2 |
| TC07000166.hg.1 | -2.09 | JUC07001277.hg.1 | HOXA-AS2 |
| TC07000166.hg.1 | -2.1  | PSR07002623.hg.1 | HOXA-AS2 |
| TC07000166.hg.1 | -2.16 | PSR07002626.hg.1 | HOXA-AS2 |



|                 |        |                  |              |
|-----------------|--------|------------------|--------------|
| TC07000166.hg.1 | -2.6   | JUC07001279.hg.1 | HOXA-AS2     |
| TC07000166.hg.1 | -2.71  | PSR07002595.hg.1 | HOXA-AS2     |
| TC07000166.hg.1 | -2.9   | PSR07002617.hg.1 | HOXA-AS2     |
| TC07000166.hg.1 | -3.28  | PSR07002602.hg.1 | HOXA-AS2     |
| TC07000166.hg.1 | -4.11  | PSR07002616.hg.1 | HOXA-AS2     |
| TC13000112.hg.1 | 2      | PSR13001221.hg.1 | PDS5B        |
| TC13000112.hg.1 | -2.06  | PSR13001254.hg.1 | PDS5B        |
| TC13000112.hg.1 | -2.34  | JUC13000762.hg.1 | PDS5B        |
| TC17001867.hg.1 | 2      | JUC17014080.hg.1 | C17orf28     |
| TC17001867.hg.1 | -2.06  | PSR17025031.hg.1 | C17orf28     |
| TC17001867.hg.1 | -2.37  | JUC17014094.hg.1 | C17orf28     |
| TC17001867.hg.1 | -2.47  | JUC17014085.hg.1 | C17orf28     |
| TC17001867.hg.1 | -3.34  | JUC17014089.hg.1 | C17orf28     |
| TC17001867.hg.1 | -3.39  | JUC17014077.hg.1 | C17orf28     |
| TC07000831.hg.1 | 2      | JUC07006222.hg.1 | LRGUK        |
| TC07000831.hg.1 | -2.07  | PSR07013083.hg.1 | LRGUK        |
| TC07000831.hg.1 | -2.08  | JUC07006216.hg.1 | LRGUK        |
| TC16000838.hg.1 | 2      | JUC16006862.hg.1 | PPL          |
| TC16000838.hg.1 | -2.08  | PSR16012198.hg.1 | PPL          |
| TC16000838.hg.1 | -2.52  | JUC16006865.hg.1 | PPL          |
| TC11003435.hg.1 | 2      | JUC11018837.hg.1 | SERGEF       |
| TC11003435.hg.1 | -2.09  | PSR11018405.hg.1 | SERGEF       |
| TC10000350.hg.1 | 2      | JUC10002381.hg.1 | DKK1         |
| TC10000350.hg.1 | -2.15  | JUC10002377.hg.1 | DKK1         |
| TC10000350.hg.1 | -2.79  | PSR10004092.hg.1 | DKK1         |
| TC10000350.hg.1 | -2.97  | PSR10004099.hg.1 | DKK1         |
| TC10000350.hg.1 | -6.93  | PSR10004094.hg.1 | DKK1         |
| TC10000350.hg.1 | -7.31  | PSR10004091.hg.1 | DKK1         |
| TC10000350.hg.1 | -9.61  | JUC10002378.hg.1 | DKK1         |
| TC10000350.hg.1 | -13.22 | PSR10004100.hg.1 | DKK1         |
| TC07000829.hg.1 | 2      | JUC07006182.hg.1 | EXOC4        |
| TC07000829.hg.1 | -2.16  | JUC07006179.hg.1 | EXOC4        |
| TC07000829.hg.1 | -3.02  | PSR07013056.hg.1 | EXOC4        |
| TC10001161.hg.1 | 2      | PSR10014626.hg.1 | EPC1         |
| TC10001161.hg.1 | 2      | JUC10008455.hg.1 | EPC1         |
| TC10001161.hg.1 | -2.17  | JUC10008468.hg.1 | EPC1         |
| TC10001161.hg.1 | -2.19  | JUC10008459.hg.1 | EPC1         |
| TC10001161.hg.1 | -2.27  | PSR10014594.hg.1 | EPC1         |
| TC08001012.hg.1 | 2      | PSR08012713.hg.1 | MTMR7        |
| TC08001012.hg.1 | -2.36  | PSR08012683.hg.1 | MTMR7        |
| TC08001012.hg.1 | -3.38  | JUC08006595.hg.1 | MTMR7        |
| TC16000305.hg.1 | 2      | JUC16002354.hg.1 | EIF3C, EIF3C |
| TC16000305.hg.1 | -2.38  | PSR16004254.hg.1 | EIF3C, EIF3C |
| TC02000573.hg.1 | 2      | JUC02004456.hg.1 | FAHD2A       |
| TC02000573.hg.1 | -3.83  | PSR02008794.hg.1 | FAHD2A       |
| TC03000213.hg.1 | 2      | JUC03002256.hg.1 |              |
| TC03000213.hg.1 | -6.97  | PSR03004251.hg.1 |              |
| TC04000336.hg.1 | 2      | PSR04004796.hg.1 | POLR2B       |
| TC04000336.hg.1 | -3.43  | JUC04002371.hg.1 | POLR2B       |
| TC09000391.hg.1 | 2      | PSR09004181.hg.1 | NAA35        |
| TC09000391.hg.1 | -2.39  | JUC09002311.hg.1 | NAA35        |
| TC09000391.hg.1 | -2.77  | JUC09002291.hg.1 | NAA35        |
| TC10000893.hg.1 | 2      | PSR10010937.hg.1 | LOC399815    |
| TC10000893.hg.1 | -2.42  | JUC10006380.hg.1 | LOC399815    |
| TC10000893.hg.1 | -9.4   | JUC10006375.hg.1 | LOC399815    |
| TC12001452.hg.1 | 2      | PSR12018986.hg.1 | KANSL2       |
| TC12001452.hg.1 | -3.23  | JUC12010632.hg.1 | KANSL2       |
| TC19000190.hg.1 | 2      | PSR19002888.hg.1 | SMARCA4      |

|                 |       |                   |             |
|-----------------|-------|-------------------|-------------|
| TC19000190.hg.1 | -2.52 | JUC19001704.hg.1  | SMARCA4     |
| TC6_cox_hap2000 | 2     | PSR6_cox_hap2004  | TAPBP       |
| TC6_cox_hap2000 | -3.48 | JUC6_cox_hap20016 | TAPBP       |
| TC6_dbb_hap3000 | 2     | PSR6_dbb_hap3004  | TAPBP       |
| TC6_dbb_hap3000 | -3.48 | JUC6_dbb_hap30015 | TAPBP       |
| TC01002482.hg.1 | -2    | JUC01020642.hg.1  | PHC2, MIR36 |
| TC01002482.hg.1 | -2.01 | JUC01020670.hg.1  | PHC2, MIR36 |
| TC01002482.hg.1 | -2.09 | PSR01038451.hg.1  | PHC2, MIR36 |
| TC01002482.hg.1 | -2.09 | JUC01020638.hg.1  | PHC2, MIR36 |
| TC01002482.hg.1 | -2.14 | PSR01038453.hg.1  | PHC2, MIR36 |
| TC01002482.hg.1 | -2.18 | PSR01038452.hg.1  | PHC2, MIR36 |
| TC01002482.hg.1 | -2.29 | JUC01020640.hg.1  | PHC2, MIR36 |
| TC01002482.hg.1 | -2.31 | PSR01038456.hg.1  | PHC2, MIR36 |
| TC01002482.hg.1 | -2.5  | JUC01020664.hg.1  | PHC2, MIR36 |
| TC01002482.hg.1 | -2.61 | PSR01038415.hg.1  | PHC2, MIR36 |
| TC01002482.hg.1 | -2.68 | PSR01038421.hg.1  | PHC2, MIR36 |
| TC01002482.hg.1 | -2.81 | JUC01020663.hg.1  | PHC2, MIR36 |
| TC02002131.hg.1 | -2    | PSR02034662.hg.1  | TSGA10      |
| TC02002131.hg.1 | -2.01 | PSR02034664.hg.1  | TSGA10      |
| TC02002131.hg.1 | -2.16 | PSR02034650.hg.1  | TSGA10      |
| TC02002131.hg.1 | -2.17 | PSR02034668.hg.1  | TSGA10      |
| TC02002131.hg.1 | -2.19 | JUC02017885.hg.1  | TSGA10      |
| TC02002131.hg.1 | -2.51 | JUC02017894.hg.1  | TSGA10      |
| TC02002131.hg.1 | -2.62 | PSR02034667.hg.1  | TSGA10      |
| TC02002131.hg.1 | -2.63 | PSR02034660.hg.1  | TSGA10      |
| TC02002131.hg.1 | -2.94 | JUC02017884.hg.1  | TSGA10      |
| TC02002131.hg.1 | -3.68 | PSR02034692.hg.1  | TSGA10      |
| TC02002131.hg.1 | -4.55 | PSR02034691.hg.1  | TSGA10      |
| TC03000181.hg.1 | -2    | PSR03003440.hg.1  | ITGA9       |
| TC03000181.hg.1 | -2.01 | JUC03001838.hg.1  | ITGA9       |
| TC03000181.hg.1 | -2.1  | PSR03003422.hg.1  | ITGA9       |
| TC03000181.hg.1 | -2.11 | PSR03003445.hg.1  | ITGA9       |
| TC03000181.hg.1 | -2.27 | PSR03003423.hg.1  | ITGA9       |
| TC03000181.hg.1 | -2.52 | JUC03001827.hg.1  | ITGA9       |
| TC08002594.hg.1 | -2    | PSR08000958.hg.1  | FAM66D      |
| TC08002594.hg.1 | -2.01 | PSR08000957.hg.1  | FAM66D      |
| TC08002594.hg.1 | -2.39 | PSR08000961.hg.1  | FAM66D      |
| TC08002594.hg.1 | -2.49 | PSR08000963.hg.1  | FAM66D      |
| TC08002594.hg.1 | -2.62 | JUC08014931.hg.1  | FAM66D      |
| TC08002594.hg.1 | -3.53 | PSR08000960.hg.1  | FAM66D      |
| TC08002594.hg.1 | -4.05 | JUC08014929.hg.1  | FAM66D      |
| TC07002041.hg.1 | -2    | PSR07031307.hg.1  | PRKAG2      |
| TC07002041.hg.1 | -2.02 | PSR07031312.hg.1  | PRKAG2      |
| TC07002041.hg.1 | -2.07 | PSR07031327.hg.1  | PRKAG2      |
| TC07002041.hg.1 | -2.11 | JUC07015523.hg.1  | PRKAG2      |
| TC07002041.hg.1 | -2.12 | PSR07031317.hg.1  | PRKAG2      |
| TC07002041.hg.1 | -2.14 | JUC07015507.hg.1  | PRKAG2      |
| TC07002041.hg.1 | -2.16 | PSR07031290.hg.1  | PRKAG2      |
| TC07002041.hg.1 | -2.19 | PSR07031326.hg.1  | PRKAG2      |
| TC07002041.hg.1 | -2.22 | PSR07031329.hg.1  | PRKAG2      |
| TC07002041.hg.1 | -2.41 | JUC07015526.hg.1  | PRKAG2      |
| TC07002041.hg.1 | -2.5  | PSR07031324.hg.1  | PRKAG2      |
| TC07002041.hg.1 | -2.55 | PSR07031315.hg.1  | PRKAG2      |
| TC07002041.hg.1 | -2.66 | PSR07031288.hg.1  | PRKAG2      |
| TC07002041.hg.1 | -3.04 | JUC07015527.hg.1  | PRKAG2      |
| TC07002041.hg.1 | -3.15 | PSR07031330.hg.1  | PRKAG2      |
| TC0X000900.hg.1 | -2    | JUC0X005940.hg.1  | PHKA2       |
| TC0X000900.hg.1 | -2.02 | JUC0X005927.hg.1  | PHKA2       |

|                 |       |                  |             |
|-----------------|-------|------------------|-------------|
| TC0X000900.hg.1 | -2.11 | JUC0X005926.hg.1 | PHKA2       |
| TC0X000900.hg.1 | -2.16 | JUC0X005907.hg.1 | PHKA2       |
| TC0X000900.hg.1 | -2.27 | PSR0X012036.hg.1 | PHKA2       |
| TC0X000900.hg.1 | -2.47 | PSR0X012021.hg.1 | PHKA2       |
| TC11002262.hg.1 | -2    | JUC11014422.hg.1 | SLC35F2     |
| TC11002262.hg.1 | -2.02 | PSR11027116.hg.1 | SLC35F2     |
| TC11002262.hg.1 | -2.32 | PSR11027113.hg.1 | SLC35F2     |
| TC14002323.hg.1 | -2    | JUC14012095.hg.1 | FLJ31306    |
| TC14002323.hg.1 | -2.02 | PSR14013414.hg.1 | FLJ31306    |
| TC14002323.hg.1 | -2.03 | PSR14013405.hg.1 | FLJ31306    |
| TC14002323.hg.1 | -2.08 | PSR14013406.hg.1 | FLJ31306    |
| TC14002323.hg.1 | -2.11 | PSR14013413.hg.1 | FLJ31306    |
| TC14002323.hg.1 | -2.17 | PSR14013411.hg.1 | FLJ31306    |
| TC14002323.hg.1 | -2.17 | PSR14013412.hg.1 | FLJ31306    |
| TC14002323.hg.1 | -2.19 | PSR14013408.hg.1 | FLJ31306    |
| TC14002323.hg.1 | -2.27 | JUC14012103.hg.1 | FLJ31306    |
| TC14002323.hg.1 | -2.31 | JUC14012101.hg.1 | FLJ31306    |
| TC14002323.hg.1 | -2.4  | PSR14013396.hg.1 | FLJ31306    |
| TC14002323.hg.1 | -2.54 | PSR14013392.hg.1 | FLJ31306    |
| TC14002323.hg.1 | -2.81 | PSR14013393.hg.1 | FLJ31306    |
| TC14002323.hg.1 | -2.84 | PSR14013407.hg.1 | FLJ31306    |
| TC14002323.hg.1 | -3.5  | JUC14012099.hg.1 | FLJ31306    |
| TC14002323.hg.1 | -3.62 | PSR14013391.hg.1 | FLJ31306    |
| TC16002102.hg.1 | -2    | PSR16014356.hg.1 | BOLA2, BOLA |
| TC16002102.hg.1 | -2.02 | PSR16014354.hg.1 | BOLA2, BOLA |
| TC16002102.hg.1 | -2.08 | JUC16014233.hg.1 | BOLA2, BOLA |
| TC22000419.hg.1 | -2    | PSR22007956.hg.1 | PANX2       |
| TC22000419.hg.1 | -2.02 | JUC22003085.hg.1 | PANX2       |
| TC22000419.hg.1 | -2.47 | JUC22003091.hg.1 | PANX2       |
| TC22000419.hg.1 | -3.41 | PSR22007959.hg.1 | PANX2       |
| TC22000419.hg.1 | -9.5  | JUC22003088.hg.1 | PANX2       |
| TC01000648.hg.1 | -2    | JUC01005460.hg.1 | SCP2        |
| TC01000648.hg.1 | -2.03 | JUC01005464.hg.1 | SCP2        |
| TC01000648.hg.1 | -2.07 | PSR01010564.hg.1 | SCP2        |
| TC01000648.hg.1 | -2.21 | JUC01005454.hg.1 | SCP2        |
| TC01000648.hg.1 | -2.3  | PSR01010570.hg.1 | SCP2        |
| TC01000648.hg.1 | -2.78 | PSR01010575.hg.1 | SCP2        |
| TC01000648.hg.1 | -4.24 | JUC01005455.hg.1 | SCP2        |
| TC01001731.hg.1 | -2    | PSR01027003.hg.1 | PFKFB2      |
| TC01001731.hg.1 | -2.03 | PSR01027037.hg.1 | PFKFB2      |
| TC01001731.hg.1 | -2.04 | PSR01027017.hg.1 | PFKFB2      |
| TC01001731.hg.1 | -2.17 | JUC01014485.hg.1 | PFKFB2      |
| TC01001731.hg.1 | -2.42 | PSR01027002.hg.1 | PFKFB2      |
| TC01001731.hg.1 | -2.59 | JUC01014463.hg.1 | PFKFB2      |
| TC01001731.hg.1 | -3.01 | JUC01014471.hg.1 | PFKFB2      |
| TC01001731.hg.1 | -3.61 | JUC01014484.hg.1 | PFKFB2      |
| TC03001269.hg.1 | -2    | JUC03010777.hg.1 | OSBPL10     |
| TC03001269.hg.1 | -2.03 | PSR03021662.hg.1 | OSBPL10     |
| TC03001269.hg.1 | -2.05 | PSR03021654.hg.1 | OSBPL10     |
| TC03001269.hg.1 | -2.37 | JUC03010797.hg.1 | OSBPL10     |
| TC03001269.hg.1 | -2.75 | JUC03010785.hg.1 | OSBPL10     |
| TC03001269.hg.1 | -3.25 | JUC03010787.hg.1 | OSBPL10     |
| TC07000923.hg.1 | -2    | JUC07006865.hg.1 | EPHB6       |
| TC07000923.hg.1 | -2.04 | PSR07014257.hg.1 | EPHB6       |
| TC0X000951.hg.1 | -2    | JUC0X006368.hg.1 |             |
| TC0X000951.hg.1 | -2.04 | PSR0X012721.hg.1 |             |
| TC11000397.hg.1 | -2    | PSR11004977.hg.1 | MDK         |
| TC11000397.hg.1 | -2.04 | PSR11004992.hg.1 | MDK         |

|                 |       |                  |             |
|-----------------|-------|------------------|-------------|
| TC11000397.hg.1 | -2.39 | JUC11002679.hg.1 | MDK         |
| TC04000046.hg.1 | -2    | JUC04000542.hg.1 | RGS12       |
| TC04000046.hg.1 | -2.05 | PSR04001218.hg.1 | RGS12       |
| TC04000046.hg.1 | -2.58 | JUC04000563.hg.1 | RGS12       |
| TC04000046.hg.1 | -3.12 | JUC04000531.hg.1 | RGS12       |
| TC04000046.hg.1 | -3.16 | JUC04000549.hg.1 | RGS12       |
| TC04000046.hg.1 | -3.78 | JUC04000539.hg.1 | RGS12       |
| TC12001301.hg.1 | -2    | PSR12017043.hg.1 | ST8SIA1     |
| TC12001301.hg.1 | -2.05 | PSR12017046.hg.1 | ST8SIA1     |
| TC12001301.hg.1 | -2.09 | PSR12017049.hg.1 | ST8SIA1     |
| TC12001301.hg.1 | -2.15 | JUC12009383.hg.1 | ST8SIA1     |
| TC12001301.hg.1 | -2.17 | PSR12017041.hg.1 | ST8SIA1     |
| TC05000816.hg.1 | -2    | PSR05011633.hg.1 | ABLIM3      |
| TC05000816.hg.1 | -2.06 | PSR05011642.hg.1 | ABLIM3      |
| TC05000816.hg.1 | -2.27 | PSR05011607.hg.1 | ABLIM3      |
| TC05000816.hg.1 | -2.3  | PSR05011610.hg.1 | ABLIM3      |
| TC05000816.hg.1 | -2.4  | PSR05011632.hg.1 | ABLIM3      |
| TC05000816.hg.1 | -2.52 | JUC05006042.hg.1 | ABLIM3      |
| TC05000816.hg.1 | -2.52 | JUC05006045.hg.1 | ABLIM3      |
| TC05000816.hg.1 | -2.66 | JUC05006050.hg.1 | ABLIM3      |
| TC05000816.hg.1 | -2.86 | PSR05011608.hg.1 | ABLIM3      |
| TC05000816.hg.1 | -3.05 | JUC05006060.hg.1 | ABLIM3      |
| TC05000816.hg.1 | -3.14 | PSR05011627.hg.1 | ABLIM3      |
| TC05000816.hg.1 | -3.24 | PSR05011629.hg.1 | ABLIM3      |
| TC05000816.hg.1 | -3.34 | PSR05011619.hg.1 | ABLIM3      |
| TC05000816.hg.1 | -3.49 | PSR05011609.hg.1 | ABLIM3      |
| TC05000816.hg.1 | -3.82 | JUC05006063.hg.1 | ABLIM3      |
| TC05000816.hg.1 | -5.01 | PSR05011652.hg.1 | ABLIM3      |
| TC22000649.hg.1 | -2    | PSR22011329.hg.1 | GATSL3, TBC |
| TC22000649.hg.1 | -2.07 | PSR22011294.hg.1 | GATSL3, TBC |
| TC22000649.hg.1 | -2.36 | JUC22004606.hg.1 | GATSL3, TBC |
| TC22000649.hg.1 | -2.39 | JUC22004631.hg.1 | GATSL3, TBC |
| TC22000649.hg.1 | -2.82 | JUC22004615.hg.1 | GATSL3, TBC |
| TC01003344.hg.1 | -2    | PSR01052256.hg.1 | GPATCH4     |
| TC01003344.hg.1 | -2.08 | PSR01052243.hg.1 | GPATCH4     |
| TC01003344.hg.1 | -2.09 | PSR01052257.hg.1 | GPATCH4     |
| TC01003344.hg.1 | -2.27 | PSR01052273.hg.1 | GPATCH4     |
| TC01003344.hg.1 | -2.82 | JUC01027368.hg.1 | GPATCH4     |
| TC11000198.hg.1 | -2    | JUC11001218.hg.1 | MICAL2      |
| TC11000198.hg.1 | -2.08 | PSR11002660.hg.1 | MICAL2      |
| TC11000198.hg.1 | -2.09 | PSR11002625.hg.1 | MICAL2      |
| TC11000198.hg.1 | -2.37 | PSR11002634.hg.1 | MICAL2      |
| TC11000198.hg.1 | -2.37 | JUC11001235.hg.1 | MICAL2      |
| TC11000198.hg.1 | -2.49 | JUC11001248.hg.1 | MICAL2      |
| TC11000198.hg.1 | -2.6  | JUC11001242.hg.1 | MICAL2      |
| TC11000198.hg.1 | -2.84 | JUC11001230.hg.1 | MICAL2      |
| TC11000198.hg.1 | -2.88 | PSR11002656.hg.1 | MICAL2      |
| TC11000198.hg.1 | -3.45 | JUC11001227.hg.1 | MICAL2      |
| TC11000198.hg.1 | -3.84 | JUC11001251.hg.1 | MICAL2      |
| TC13000744.hg.1 | -2    | PSR13008647.hg.1 | MYCBP2      |
| TC13000744.hg.1 | -2.09 | JUC13005017.hg.1 | MYCBP2      |
| TC13000744.hg.1 | -2.11 | PSR13008655.hg.1 | MYCBP2      |
| TC13000744.hg.1 | -2.85 | PSR13008572.hg.1 | MYCBP2      |
| TC13000744.hg.1 | -3.31 | JUC13005007.hg.1 | MYCBP2      |
| TC14002313.hg.1 | -2    | JUC14011946.hg.1 | APOPT1, KLC |
| TC14002313.hg.1 | -2.09 | PSR14008684.hg.1 | APOPT1, KLC |
| TC14002313.hg.1 | -2.12 | PSR14008686.hg.1 | APOPT1, KLC |
| TC14002313.hg.1 | -2.13 | JUC14011944.hg.1 | APOPT1, KLC |

|                 |       |                  |             |
|-----------------|-------|------------------|-------------|
| TC01006405.hg.1 | -2    | JUC01046662.hg.1 |             |
| TC01006405.hg.1 | -2.12 | PSR01016615.hg.1 |             |
| TC01006405.hg.1 | -2.16 | PSR01016602.hg.1 |             |
| TC01006405.hg.1 | -2.18 | JUC01046665.hg.1 |             |
| TC01006405.hg.1 | -2.24 | PSR01016611.hg.1 |             |
| TC01006405.hg.1 | -2.48 | PSR01016619.hg.1 |             |
| TC01006405.hg.1 | -2.58 | PSR01016618.hg.1 |             |
| TC01006405.hg.1 | -3.23 | PSR01016623.hg.1 |             |
| TC01006405.hg.1 | -3.32 | PSR01016612.hg.1 |             |
| TC01006405.hg.1 | -3.6  | PSR01016614.hg.1 |             |
| TC01006405.hg.1 | -3.88 | PSR01016621.hg.1 |             |
| TC01006405.hg.1 | -3.91 | PSR01016616.hg.1 |             |
| TC01006405.hg.1 | -4.09 | PSR01016622.hg.1 |             |
| TC11000313.hg.1 | -2    | JUC11002117.hg.1 | TCP11L1     |
| TC11000313.hg.1 | -2.13 | PSR11004006.hg.1 | TCP11L1     |
| TC02000002.hg.1 | -2    | JUC02000012.hg.1 | ACP1        |
| TC02000002.hg.1 | -2.14 | JUC02000006.hg.1 | ACP1        |
| TC02000002.hg.1 | -2.72 | PSR02000018.hg.1 | ACP1        |
| TC05003397.hg.1 | -2    | JUC05019132.hg.1 | LRRC70, IPO |
| TC05003397.hg.1 | -2.14 | JUC05019114.hg.1 | LRRC70, IPO |
| TC05003397.hg.1 | -2.33 | JUC05019137.hg.1 | LRRC70, IPO |
| TC05003397.hg.1 | -2.41 | PSR05003323.hg.1 | LRRC70, IPO |
| TC16000480.hg.1 | -2    | JUC16003711.hg.1 | HERPUD1     |
| TC16000480.hg.1 | -2.16 | PSR16006622.hg.1 | HERPUD1     |
| TC22000487.hg.1 | -2    | PSR22008730.hg.1 | CLTCL1      |
| TC22000487.hg.1 | -2.16 | JUC22003517.hg.1 | CLTCL1      |
| TC22000487.hg.1 | -2.24 | PSR22008700.hg.1 | CLTCL1      |
| TC22000487.hg.1 | -2.26 | PSR22008693.hg.1 | CLTCL1      |
| TC22000487.hg.1 | -2.36 | JUC22003499.hg.1 | CLTCL1      |
| TC22000487.hg.1 | -2.39 | PSR22008689.hg.1 | CLTCL1      |
| TC22000487.hg.1 | -2.5  | PSR22008705.hg.1 | CLTCL1      |
| TC22000487.hg.1 | -2.63 | PSR22008688.hg.1 | CLTCL1      |
| TC22000487.hg.1 | -2.81 | JUC22003480.hg.1 | CLTCL1      |
| TC22000487.hg.1 | -2.86 | PSR22008696.hg.1 | CLTCL1      |
| TC22000487.hg.1 | -2.98 | JUC22003519.hg.1 | CLTCL1      |
| TC22000487.hg.1 | -3.4  | JUC22003524.hg.1 | CLTCL1      |
| TC22000487.hg.1 | -3.45 | PSR22008726.hg.1 | CLTCL1      |
| TC22000487.hg.1 | -4.48 | PSR22008729.hg.1 | CLTCL1      |
| TC22000487.hg.1 | -5.76 | JUC22003486.hg.1 | CLTCL1      |
| TC05000406.hg.1 | -2    | PSR05005852.hg.1 | ATG10       |
| TC05000406.hg.1 | -2.17 | PSR05005864.hg.1 | ATG10       |
| TC05000406.hg.1 | -2.58 | JUC05003197.hg.1 | ATG10       |
| TC05000840.hg.1 | -2    | JUC05006305.hg.1 | SLC36A1     |
| TC05000840.hg.1 | -2.17 | PSR05012119.hg.1 | SLC36A1     |
| TC05000840.hg.1 | -2.2  | JUC05006313.hg.1 | SLC36A1     |
| TC05000840.hg.1 | -2.38 | PSR05012115.hg.1 | SLC36A1     |
| TC05000840.hg.1 | -2.93 | PSR05012133.hg.1 | SLC36A1     |
| TC05000840.hg.1 | -2.99 | PSR05012120.hg.1 | SLC36A1     |
| TC05000840.hg.1 | -3.14 | JUC05006303.hg.1 | SLC36A1     |
| TC05000840.hg.1 | -3.29 | PSR05012137.hg.1 | SLC36A1     |
| TC05000840.hg.1 | -3.36 | PSR05012107.hg.1 | SLC36A1     |
| TC05000840.hg.1 | -3.45 | PSR05012105.hg.1 | SLC36A1     |
| TC05000840.hg.1 | -3.73 | JUC05006310.hg.1 | SLC36A1     |
| TC05000840.hg.1 | -3.8  | PSR05012122.hg.1 | SLC36A1     |
| TC05000840.hg.1 | -3.84 | JUC05006309.hg.1 | SLC36A1     |
| TC05000840.hg.1 | -4.49 | JUC05006322.hg.1 | SLC36A1     |
| TC07003347.hg.1 | -2    | PSR07016539.hg.1 | COX19       |
| TC07003347.hg.1 | -2.17 | PSR07016534.hg.1 | COX19       |

|                 |       |                  |            |
|-----------------|-------|------------------|------------|
| TC07003347.hg.1 | -2.54 | PSR07016538.hg.1 | COX19      |
| TC07003347.hg.1 | -2.61 | PSR07016530.hg.1 | COX19      |
| TC07003347.hg.1 | -2.66 | PSR07016537.hg.1 | COX19      |
| TC07003347.hg.1 | -3.81 | JUC07021254.hg.1 | COX19      |
| TC07003344.hg.1 | -2    | JUC07021232.hg.1 | NDUFB2     |
| TC07003344.hg.1 | -2.18 | PSR07013780.hg.1 | NDUFB2     |
| TC05000066.hg.1 | -2    | PSR05000745.hg.1 | LOC1005058 |
| TC05000066.hg.1 | -2.19 | PSR05000746.hg.1 | LOC1005058 |
| TC05000066.hg.1 | -2.66 | PSR05000744.hg.1 | LOC1005058 |
| TC05000066.hg.1 | -3.04 | JUC05000409.hg.1 | LOC1005058 |
| TC12000836.hg.1 | -2    | JUC12005890.hg.1 | ISCU       |
| TC12000836.hg.1 | -2.25 | JUC12005889.hg.1 | ISCU       |
| TC12000836.hg.1 | -2.33 | PSR12010704.hg.1 | ISCU       |
| TC14002309.hg.1 | -2    | JUC14011887.hg.1 | SERPINA3   |
| TC14002309.hg.1 | -2.25 | PSR14007311.hg.1 | SERPINA3   |
| TC14002309.hg.1 | -2.73 | JUC14011884.hg.1 | SERPINA3   |
| TC10000377.hg.1 | -2    | PSR10004293.hg.1 | ARID5B     |
| TC10000377.hg.1 | -2.26 | PSR10004298.hg.1 | ARID5B     |
| TC10000377.hg.1 | -4.15 | JUC10002481.hg.1 | ARID5B     |
| TC10000377.hg.1 | -5.75 | JUC10002486.hg.1 | ARID5B     |
| TC07001663.hg.1 | -2    | JUC07012598.hg.1 | GATS       |
| TC07001663.hg.1 | -2.27 | PSR07025588.hg.1 | GATS       |
| TC08001071.hg.1 | -2    | JUC08006998.hg.1 | KCTD9      |
| TC08001071.hg.1 | -2.27 | PSR08013606.hg.1 | KCTD9      |
| TC08001071.hg.1 | -4.79 | JUC08007006.hg.1 | KCTD9      |
| TC22000702.hg.1 | -2    | PSR22012379.hg.1 | APOL2      |
| TC22000702.hg.1 | -2.27 | JUC22005142.hg.1 | APOL2      |
| TC22000702.hg.1 | -2.49 | PSR22012383.hg.1 | APOL2      |
| TC22000702.hg.1 | -2.5  | JUC22005136.hg.1 | APOL2      |
| TC22000702.hg.1 | -2.61 | PSR22012378.hg.1 | APOL2      |
| TC22000702.hg.1 | -2.89 | PSR22012387.hg.1 | APOL2      |
| TC22000702.hg.1 | -3.12 | JUC22005134.hg.1 | APOL2      |
| TC22000702.hg.1 | -3.69 | PSR22012375.hg.1 | APOL2      |
| TC01006364.hg.1 | -2    | JUC01044561.hg.1 | CLCC1      |
| TC01006364.hg.1 | -2.28 | JUC01044567.hg.1 | CLCC1      |
| TC01006364.hg.1 | -2.42 | PSR01045818.hg.1 | CLCC1      |
| TC01006364.hg.1 | -2.48 | JUC01044579.hg.1 | CLCC1      |
| TC17000065.hg.1 | -2    | JUC17000493.hg.1 | RABEP1     |
| TC17000065.hg.1 | -2.33 | PSR17000800.hg.1 | RABEP1     |
| TC06000961.hg.1 | -2    | PSR06011212.hg.1 | NCOA7      |
| TC06000961.hg.1 | -2.36 | PSR06011216.hg.1 | NCOA7      |
| TC06000961.hg.1 | -3    | PSR06011229.hg.1 | NCOA7      |
| TC06000961.hg.1 | -3.11 | JUC06005369.hg.1 | NCOA7      |
| TC06000961.hg.1 | -3.48 | JUC06005371.hg.1 | NCOA7      |
| TC07000718.hg.1 | -2    | JUC07005302.hg.1 | TES        |
| TC07000718.hg.1 | -2.36 | JUC07005296.hg.1 | TES        |
| TC07000718.hg.1 | -2.44 | PSR07011320.hg.1 | TES        |
| TC07000718.hg.1 | -2.5  | PSR07011305.hg.1 | TES        |
| TC02002492.hg.1 | -2    | PSR02039408.hg.1 | GALNT3     |
| TC02002492.hg.1 | -2.42 | PSR02039423.hg.1 | GALNT3     |
| TC02002492.hg.1 | -2.48 | PSR02039438.hg.1 | GALNT3     |
| TC02002492.hg.1 | -3.18 | PSR02039431.hg.1 | GALNT3     |
| TC02002492.hg.1 | -3.25 | PSR02039430.hg.1 | GALNT3     |
| TC02002492.hg.1 | -3.37 | PSR02039417.hg.1 | GALNT3     |
| TC02002492.hg.1 | -3.61 | PSR02039414.hg.1 | GALNT3     |
| TC02002492.hg.1 | -3.78 | PSR02039421.hg.1 | GALNT3     |
| TC02002492.hg.1 | -4.53 | PSR02039432.hg.1 | GALNT3     |
| TC02002492.hg.1 | -4.9  | PSR02039434.hg.1 | GALNT3     |

|                 |        |                  |          |
|-----------------|--------|------------------|----------|
| TC02002492.hg.1 | -4.93  | PSR02039437.hg.1 | GALNT3   |
| TC02002492.hg.1 | -6.26  | JUC02020683.hg.1 | GALNT3   |
| TC02002492.hg.1 | -6.67  | PSR02039424.hg.1 | GALNT3   |
| TC02002492.hg.1 | -6.72  | PSR02039418.hg.1 | GALNT3   |
| TC02002492.hg.1 | -7.35  | PSR02039436.hg.1 | GALNT3   |
| TC01003497.hg.1 | -2     | PSR01054349.hg.1 | SLC19A2  |
| TC01003497.hg.1 | -2.43  | PSR01054347.hg.1 | SLC19A2  |
| TC01003497.hg.1 | -3.35  | JUC01028336.hg.1 | SLC19A2  |
| TC01003497.hg.1 | -5.02  | JUC01028333.hg.1 | SLC19A2  |
| TC01003497.hg.1 | -6.74  | JUC01028332.hg.1 | SLC19A2  |
| TC14001547.hg.1 | -2     | PSR14017371.hg.1 | C14orf2  |
| TC14001547.hg.1 | -2.45  | JUC14008998.hg.1 | C14orf2  |
| TC14001547.hg.1 | -2.72  | PSR14017366.hg.1 | C14orf2  |
| TC14001547.hg.1 | -2.79  | PSR14017367.hg.1 | C14orf2  |
| TC19000389.hg.1 | -2     | PSR19005230.hg.1 | ZNF431   |
| TC19000389.hg.1 | -2.47  | PSR19005223.hg.1 | ZNF431   |
| TC19000389.hg.1 | -3.45  | JUC19003082.hg.1 | ZNF431   |
| TC12003261.hg.1 | -2     | JUC12020217.hg.1 | OGFOD2   |
| TC12003261.hg.1 | -2.59  | PSR12012923.hg.1 | OGFOD2   |
| TC08000333.hg.1 | -2     | JUC08002435.hg.1 | HGSNAT   |
| TC08000333.hg.1 | -2.65  | PSR08004928.hg.1 | HGSNAT   |
| TC15000710.hg.1 | -2     | PSR15006352.hg.1 | PSTPIP1  |
| TC15000710.hg.1 | -2.66  | JUC15003229.hg.1 | PSTPIP1  |
| TC15000710.hg.1 | -2.81  | PSR15006356.hg.1 | PSTPIP1  |
| TC15000710.hg.1 | -2.86  | JUC15003242.hg.1 | PSTPIP1  |
| TC15000710.hg.1 | -3.27  | JUC15003241.hg.1 | PSTPIP1  |
| TC15000710.hg.1 | -5.26  | PSR15006347.hg.1 | PSTPIP1  |
| TC15000710.hg.1 | -7.7   | JUC15003234.hg.1 | PSTPIP1  |
| TC15000710.hg.1 | -13.4  | JUC15003221.hg.1 | PSTPIP1  |
| TC14001223.hg.1 | -2     | JUC14007046.hg.1 | GPX2     |
| TC14001223.hg.1 | -2.88  | PSR14013933.hg.1 | GPX2     |
| TC16000990.hg.1 | -2     | JUC16008031.hg.1 | SULT1A2  |
| TC16000990.hg.1 | -6.11  | PSR16014267.hg.1 | SULT1A2  |
| TC16000990.hg.1 | -6.9   | JUC16008035.hg.1 | SULT1A2  |
| TC04000475.hg.1 | -2     | JUC04003512.hg.1 | IBSP     |
| TC04000475.hg.1 | -13.53 | PSR04006878.hg.1 | IBSP     |
| TC01000918.hg.1 | -2     | PSR01014408.hg.1 | AMY2A    |
| TC01000918.hg.1 | -2.88  | JUC01007625.hg.1 | AMY2A    |
| TC01003451.hg.1 | -2     | PSR01053790.hg.1 |          |
| TC01003451.hg.1 | -2.11  | JUC01028037.hg.1 |          |
| TC02001898.hg.1 | -2     | PSR02030423.hg.1 | TMEM17   |
| TC02001898.hg.1 | -2.23  | JUC02016007.hg.1 | TMEM17   |
| TC02002288.hg.1 | -2     | PSR02036809.hg.1 | POLR2D   |
| TC02002288.hg.1 | -2     | JUC02019083.hg.1 | POLR2D   |
| TC07001813.hg.1 | -2     | PSR07028080.hg.1 | CADPS2   |
| TC07001813.hg.1 | -2.4   | JUC07013832.hg.1 | CADPS2   |
| TC07001813.hg.1 | -2.65  | JUC07013830.hg.1 | CADPS2   |
| TC07001813.hg.1 | -3.02  | JUC07013853.hg.1 | CADPS2   |
| TC08001059.hg.1 | -2     | PSR08013506.hg.1 |          |
| TC08001059.hg.1 | -4.41  | JUC08006953.hg.1 |          |
| TC12001748.hg.1 | -2     | PSR12023128.hg.1 |          |
| TC12001748.hg.1 | -5.58  | JUC12012777.hg.1 |          |
| TC16001357.hg.1 | -2     | PSR16018837.hg.1 | FANCA    |
| TC16001357.hg.1 | -2.23  | JUC16010747.hg.1 | FANCA    |
| TC16001357.hg.1 | -2.36  | JUC16010732.hg.1 | FANCA    |
| TC16001357.hg.1 | -4.06  | JUC16010731.hg.1 | FANCA    |
| TC17000159.hg.1 | -2     | PSR17002246.hg.1 | ARHGAP44 |
| TC17000159.hg.1 | -2.47  | JUC17001359.hg.1 | ARHGAP44 |

|                 |       |                  |              |
|-----------------|-------|------------------|--------------|
| TC18001001.hg.1 | -2    | PSR18002744.hg.1 | SERPINB8     |
| TC18001001.hg.1 | -2.31 | JUC18005291.hg.1 | SERPINB8     |
| TC18001001.hg.1 | -2.67 | JUC18005287.hg.1 | SERPINB8     |
| TC18001001.hg.1 | -3.68 | JUC18005294.hg.1 | SERPINB8     |
| TC6_dbb_hap3000 | -2    | PSR6_dbb_hap3000 | LST1         |
| TC6_dbb_hap3000 | -2.92 | JUC6_dbb_hap3000 | LST1         |
| TC6_mann_hap400 | -2    | PSR6_mann_hap400 | CCHCR1       |
| TC6_mann_hap400 | -3.73 | JUC6_mann_hap400 | CCHCR1       |
| TC6_mcf_hap5000 | -2    | PSR6_mcf_hap5000 | LST1         |
| TC6_mcf_hap5000 | -2.92 | JUC6_mcf_hap5000 | LST1         |
| TC6_mcf_hap5000 | -2    | PSR6_mcf_hap5002 | CCHCR1       |
| TC6_mcf_hap5000 | -3.73 | JUC6_mcf_hap5000 | CCHCR1       |
| TC6_qbl_hap6000 | -2    | PSR6_qbl_hap6000 | LOC554223    |
| TC6_qbl_hap6000 | -4.59 | JUC6_qbl_hap6000 | LOC554223    |
| TC01000288.hg.1 | -2.01 | JUC01002376.hg.1 | EPHB2        |
| TC01000288.hg.1 | -2.13 | PSR01004427.hg.1 | EPHB2        |
| TC01000288.hg.1 | -2.47 | PSR01004433.hg.1 | EPHB2        |
| TC01000288.hg.1 | -2.57 | PSR01004445.hg.1 | EPHB2        |
| TC01000493.hg.1 | -2.01 | JUC01004025.hg.1 | MACF1        |
| TC01000493.hg.1 | -2.03 | JUC01003941.hg.1 | MACF1        |
| TC01000493.hg.1 | -2.04 | JUC01003938.hg.1 | MACF1        |
| TC01000493.hg.1 | -2.05 | JUC01003894.hg.1 | MACF1        |
| TC01000493.hg.1 | -2.09 | PSR01007547.hg.1 | MACF1        |
| TC01000493.hg.1 | -2.12 | JUC01003993.hg.1 | MACF1        |
| TC01000493.hg.1 | -2.12 | JUC01004001.hg.1 | MACF1        |
| TC01000493.hg.1 | -2.17 | JUC01004018.hg.1 | MACF1        |
| TC01000493.hg.1 | -2.27 | JUC01003979.hg.1 | MACF1        |
| TC01000493.hg.1 | -2.29 | PSR01007529.hg.1 | MACF1        |
| TC01000493.hg.1 | -2.38 | JUC01003970.hg.1 | MACF1        |
| TC01000493.hg.1 | -2.49 | PSR01007617.hg.1 | MACF1        |
| TC01000493.hg.1 | -2.51 | JUC01004008.hg.1 | MACF1        |
| TC01000493.hg.1 | -2.59 | JUC01003908.hg.1 | MACF1        |
| TC01000493.hg.1 | -2.79 | JUC01003948.hg.1 | MACF1        |
| TC01000493.hg.1 | -2.8  | JUC01003913.hg.1 | MACF1        |
| TC01000493.hg.1 | -3.04 | JUC01003959.hg.1 | MACF1        |
| TC01000493.hg.1 | -3.11 | PSR01007538.hg.1 | MACF1        |
| TC01000493.hg.1 | -3.27 | JUC01003962.hg.1 | MACF1        |
| TC01000493.hg.1 | -3.34 | JUC01003968.hg.1 | MACF1        |
| TC01000493.hg.1 | -3.39 | JUC01003976.hg.1 | MACF1        |
| TC01000493.hg.1 | -3.58 | JUC01003952.hg.1 | MACF1        |
| TC01000493.hg.1 | -3.61 | JUC01003906.hg.1 | MACF1        |
| TC01000493.hg.1 | -4    | PSR01007539.hg.1 | MACF1        |
| TC01000493.hg.1 | -4.93 | JUC01003964.hg.1 | MACF1        |
| TC01000493.hg.1 | -6.05 | JUC01003991.hg.1 | MACF1        |
| TC01000547.hg.1 | -2.01 | JUC01004522.hg.1 | SZT2, HYI-AS |
| TC01000547.hg.1 | -2.04 | JUC01004508.hg.1 | SZT2, HYI-AS |
| TC01000547.hg.1 | -2.07 | JUC01004533.hg.1 | SZT2, HYI-AS |
| TC01000547.hg.1 | -2.09 | PSR01008728.hg.1 | SZT2, HYI-AS |
| TC01000547.hg.1 | -2.11 | JUC01004498.hg.1 | SZT2, HYI-AS |
| TC01000547.hg.1 | -2.19 | JUC01004534.hg.1 | SZT2, HYI-AS |
| TC01000547.hg.1 | -2.28 | JUC01004529.hg.1 | SZT2, HYI-AS |
| TC01000547.hg.1 | -2.3  | JUC01004560.hg.1 | SZT2, HYI-AS |
| TC01000547.hg.1 | -2.43 | PSR01008731.hg.1 | SZT2, HYI-AS |
| TC01000547.hg.1 | -3.58 | JUC01004513.hg.1 | SZT2, HYI-AS |
| TC01000547.hg.1 | -3.88 | JUC01004546.hg.1 | SZT2, HYI-AS |
| TC01000547.hg.1 | -3.89 | JUC01004548.hg.1 | SZT2, HYI-AS |
| TC01000547.hg.1 | -3.98 | JUC01004555.hg.1 | SZT2, HYI-AS |
| TC01003309.hg.1 | -2.01 | PSR01051323.hg.1 | FAM189B      |



|                 |       |                  |           |
|-----------------|-------|------------------|-----------|
| TC01003309.hg.1 | -2.09 | JUC01026971.hg.1 | FAM189B   |
| TC01003309.hg.1 | -2.39 | PSR01051305.hg.1 | FAM189B   |
| TC01003309.hg.1 | -2.39 | JUC01026965.hg.1 | FAM189B   |
| TC01003309.hg.1 | -2.88 | JUC01026980.hg.1 | FAM189B   |
| TC01003725.hg.1 | -2.01 | PSR01057196.hg.1 | ETNK2     |
| TC01003725.hg.1 | -2.01 | JUC01029839.hg.1 | ETNK2     |
| TC01003725.hg.1 | -2.16 | JUC01029834.hg.1 | ETNK2     |
| TC01003725.hg.1 | -2.2  | PSR01057189.hg.1 | ETNK2     |
| TC01003725.hg.1 | -2.57 | PSR01057186.hg.1 | ETNK2     |
| TC01003725.hg.1 | -2.62 | PSR01057192.hg.1 | ETNK2     |
| TC01006299.hg.1 | -2.01 | PSR01041136.hg.1 | TAL1      |
| TC01006299.hg.1 | -2.05 | JUC01039495.hg.1 | TAL1      |
| TC01006299.hg.1 | -2.11 | PSR01041139.hg.1 | TAL1      |
| TC01006299.hg.1 | -2.15 | PSR01041126.hg.1 | TAL1      |
| TC01006299.hg.1 | -2.19 | PSR01041131.hg.1 | TAL1      |
| TC01006299.hg.1 | -2.29 | JUC01039496.hg.1 | TAL1      |
| TC01006299.hg.1 | -2.32 | PSR01041137.hg.1 | TAL1      |
| TC01006299.hg.1 | -2.39 | PSR01041127.hg.1 | TAL1      |
| TC01006299.hg.1 | -2.43 | JUC01039499.hg.1 | TAL1      |
| TC01006299.hg.1 | -2.46 | JUC01039494.hg.1 | TAL1      |
| TC01006299.hg.1 | -2.66 | JUC01039498.hg.1 | TAL1      |
| TC01006299.hg.1 | -3.52 | JUC01039492.hg.1 | TAL1      |
| TC02000364.hg.1 | -2.01 | PSR02005533.hg.1 | UGP2      |
| TC02000364.hg.1 | -2.02 | PSR02005523.hg.1 | UGP2      |
| TC02000364.hg.1 | -2.06 | PSR02005542.hg.1 | UGP2      |
| TC02000364.hg.1 | -2.33 | PSR02005505.hg.1 | UGP2      |
| TC02000364.hg.1 | -2.78 | JUC02002869.hg.1 | UGP2      |
| TC02000364.hg.1 | -2.8  | JUC02002883.hg.1 | UGP2      |
| TC02000364.hg.1 | -2.86 | JUC02002864.hg.1 | UGP2      |
| TC02000364.hg.1 | -2.95 | PSR02005534.hg.1 | UGP2      |
| TC02000364.hg.1 | -3.15 | JUC02002861.hg.1 | UGP2      |
| TC02000364.hg.1 | -3.15 | JUC02002885.hg.1 | UGP2      |
| TC02000364.hg.1 | -3.84 | JUC02002881.hg.1 | UGP2      |
| TC02001382.hg.1 | -2.01 | JUC02011513.hg.1 | LOC151484 |
| TC02001382.hg.1 | -2.05 | PSR02021689.hg.1 | LOC151484 |
| TC02001382.hg.1 | -3.32 | JUC02011509.hg.1 | LOC151484 |
| TC02001405.hg.1 | -2.01 | PSR02022225.hg.1 | EFHD1     |
| TC02001405.hg.1 | -2.05 | PSR02022216.hg.1 | EFHD1     |
| TC02001405.hg.1 | -2.21 | PSR02022217.hg.1 | EFHD1     |
| TC02001405.hg.1 | -2.61 | PSR02022214.hg.1 | EFHD1     |
| TC02001405.hg.1 | -4.18 | JUC02011785.hg.1 | EFHD1     |
| TC03001252.hg.1 | -2.01 | PSR03021453.hg.1 | NEK10     |
| TC03001252.hg.1 | -2.06 | JUC03010677.hg.1 | NEK10     |
| TC03001252.hg.1 | -2.07 | JUC03010675.hg.1 | NEK10     |
| TC03001252.hg.1 | -2.08 | PSR03021431.hg.1 | NEK10     |
| TC03001252.hg.1 | -2.08 | JUC03010656.hg.1 | NEK10     |
| TC03001252.hg.1 | -2.08 | JUC03010664.hg.1 | NEK10     |
| TC03001252.hg.1 | -2.1  | PSR03021454.hg.1 | NEK10     |
| TC03001252.hg.1 | -2.24 | PSR03021488.hg.1 | NEK10     |
| TC03001252.hg.1 | -2.3  | PSR03021436.hg.1 | NEK10     |
| TC03001252.hg.1 | -2.65 | JUC03010666.hg.1 | NEK10     |
| TC03001252.hg.1 | -2.68 | PSR03021461.hg.1 | NEK10     |
| TC03001252.hg.1 | -2.7  | PSR03021463.hg.1 | NEK10     |
| TC03001252.hg.1 | -2.85 | JUC03010652.hg.1 | NEK10     |
| TC03001252.hg.1 | -2.89 | PSR03021477.hg.1 | NEK10     |
| TC03001252.hg.1 | -6.12 | JUC03010663.hg.1 | NEK10     |
| TC03001936.hg.1 | -2.01 | JUC03017149.hg.1 | LOC730091 |
| TC03001936.hg.1 | -2.36 | PSR03034639.hg.1 | LOC730091 |

|                 |       |                  |           |
|-----------------|-------|------------------|-----------|
| TC03001936.hg.1 | -2.38 | JUC03017147.hg.1 | LOC730091 |
| TC03001936.hg.1 | -2.54 | PSR03034640.hg.1 | LOC730091 |
| TC04000142.hg.1 | -2.01 | PSR04002205.hg.1 | CC2D2A    |
| TC04000142.hg.1 | -2.05 | PSR04002206.hg.1 | CC2D2A    |
| TC04000142.hg.1 | -2.06 | JUC04001031.hg.1 | CC2D2A    |
| TC04000142.hg.1 | -2.11 | PSR04002223.hg.1 | CC2D2A    |
| TC04000142.hg.1 | -2.15 | PSR04002190.hg.1 | CC2D2A    |
| TC04000142.hg.1 | -2.17 | PSR04002176.hg.1 | CC2D2A    |
| TC04000142.hg.1 | -2.19 | PSR04002188.hg.1 | CC2D2A    |
| TC04000142.hg.1 | -2.25 | JUC04001013.hg.1 | CC2D2A    |
| TC04000142.hg.1 | -2.3  | JUC04001001.hg.1 | CC2D2A    |
| TC04000142.hg.1 | -2.35 | JUC04001010.hg.1 | CC2D2A    |
| TC04000142.hg.1 | -2.49 | JUC04001005.hg.1 | CC2D2A    |
| TC04000142.hg.1 | -2.5  | PSR04002185.hg.1 | CC2D2A    |
| TC04000142.hg.1 | -3.07 | PSR04002178.hg.1 | CC2D2A    |
| TC04000142.hg.1 | -3.12 | PSR04002179.hg.1 | CC2D2A    |
| TC04000142.hg.1 | -3.12 | JUC04001020.hg.1 | CC2D2A    |
| TC04000142.hg.1 | -6.24 | JUC04001014.hg.1 | CC2D2A    |
| TC04000214.hg.1 | -2.01 | PSR04003168.hg.1 | TBC1D1    |
| TC04000214.hg.1 | -2.05 | PSR04003209.hg.1 | TBC1D1    |
| TC04000214.hg.1 | -2.07 | JUC04001545.hg.1 | TBC1D1    |
| TC04000214.hg.1 | -2.08 | JUC04001522.hg.1 | TBC1D1    |
| TC04000214.hg.1 | -2.18 | PSR04003164.hg.1 | TBC1D1    |
| TC04000214.hg.1 | -2.19 | PSR04003215.hg.1 | TBC1D1    |
| TC04000214.hg.1 | -2.41 | JUC04001520.hg.1 | TBC1D1    |
| TC04000214.hg.1 | -3.02 | PSR04003190.hg.1 | TBC1D1    |
| TC04000260.hg.1 | -2.01 | PSR04003844.hg.1 | SHISA3    |
| TC04000260.hg.1 | -4.1  | JUC04001900.hg.1 | SHISA3    |
| TC04000260.hg.1 | -4.24 | PSR04003843.hg.1 | SHISA3    |
| TC04001725.hg.1 | -2.01 | PSR04023887.hg.1 | NEK1      |
| TC04001725.hg.1 | -2.2  | JUC04012663.hg.1 | NEK1      |
| TC04001725.hg.1 | -2.46 | JUC04012673.hg.1 | NEK1      |
| TC05001608.hg.1 | -2.01 | PSR05021961.hg.1 | GLRX      |
| TC05001608.hg.1 | -2.01 | JUC05011331.hg.1 | GLRX      |
| TC05001608.hg.1 | -2.11 | PSR05021967.hg.1 | GLRX      |
| TC05001608.hg.1 | -2.28 | PSR05021960.hg.1 | GLRX      |
| TC05001608.hg.1 | -3.02 | PSR05021962.hg.1 | GLRX      |
| TC05001742.hg.1 | -2.01 | JUC05012114.hg.1 | ALDH7A1   |
| TC05001742.hg.1 | -2.08 | PSR05023358.hg.1 | ALDH7A1   |
| TC05001742.hg.1 | -2.19 | PSR05023359.hg.1 | ALDH7A1   |
| TC05001742.hg.1 | -2.5  | JUC05012106.hg.1 | ALDH7A1   |
| TC06001943.hg.1 | -2.01 | PSR06023828.hg.1 | LYRM2     |
| TC06001943.hg.1 | -2.37 | JUC06011590.hg.1 | LYRM2     |
| TC06001943.hg.1 | -2.57 | JUC06011593.hg.1 | LYRM2     |
| TC07000689.hg.1 | -2.01 | JUC07005066.hg.1 | HBP1      |
| TC07000689.hg.1 | -2.38 | PSR07010781.hg.1 | HBP1      |
| TC07000689.hg.1 | -2.52 | JUC07005071.hg.1 | HBP1      |
| TC07001338.hg.1 | -2.01 | PSR07020841.hg.1 | CAMK2B    |
| TC07001338.hg.1 | -2.87 | JUC07010165.hg.1 | CAMK2B    |
| TC07001559.hg.1 | -2.01 | PSR07023441.hg.1 | SEMA3C    |
| TC07001559.hg.1 | -2.59 | JUC07011622.hg.1 | SEMA3C    |
| TC08001293.hg.1 | -2.01 | JUC08008559.hg.1 | ARFGEF1   |
| TC08001293.hg.1 | -2.14 | JUC08008576.hg.1 | ARFGEF1   |
| TC08001293.hg.1 | -2.25 | PSR08016704.hg.1 | ARFGEF1   |
| TC08001293.hg.1 | -2.72 | JUC08008568.hg.1 | ARFGEF1   |
| TC08001413.hg.1 | -2.01 | PSR08018394.hg.1 | RUNX1T1   |
| TC08001413.hg.1 | -2.08 | PSR08018379.hg.1 | RUNX1T1   |
| TC08001413.hg.1 | -2.09 | PSR08018369.hg.1 | RUNX1T1   |

|                 |       |                  |          |
|-----------------|-------|------------------|----------|
| TC08001413.hg.1 | -2.24 | JUC08009323.hg.1 | RUNX1T1  |
| TC08001413.hg.1 | -2.24 | JUC08009339.hg.1 | RUNX1T1  |
| TC08001413.hg.1 | -3.09 | JUC08009347.hg.1 | RUNX1T1  |
| TC08001711.hg.1 | -2.01 | JUC08011574.hg.1 | LY6H     |
| TC08001711.hg.1 | -2.11 | PSR08022510.hg.1 | LY6H     |
| TC0X000546.hg.1 | -2.01 | PSR0X007368.hg.1 | ALG13    |
| TC0X000546.hg.1 | -2.04 | PSR0X007361.hg.1 | ALG13    |
| TC0X000546.hg.1 | -2.06 | JUC0X003650.hg.1 | ALG13    |
| TC0X000546.hg.1 | -2.09 | JUC0X003635.hg.1 | ALG13    |
| TC0X000546.hg.1 | -2.12 | PSR0X007362.hg.1 | ALG13    |
| TC0X000546.hg.1 | -2.12 | JUC0X003661.hg.1 | ALG13    |
| TC0X000546.hg.1 | -2.15 | JUC0X003629.hg.1 | ALG13    |
| TC0X000546.hg.1 | -2.15 | JUC0X003655.hg.1 | ALG13    |
| TC0X000546.hg.1 | -2.2  | PSR0X007342.hg.1 | ALG13    |
| TC0X000546.hg.1 | -2.28 | PSR0X007370.hg.1 | ALG13    |
| TC0X000546.hg.1 | -2.39 | PSR0X007351.hg.1 | ALG13    |
| TC0X000546.hg.1 | -2.48 | PSR0X007312.hg.1 | ALG13    |
| TC0X000546.hg.1 | -2.58 | JUC0X003660.hg.1 | ALG13    |
| TC0X000546.hg.1 | -2.68 | JUC0X003639.hg.1 | ALG13    |
| TC0X000546.hg.1 | -2.91 | JUC0X003663.hg.1 | ALG13    |
| TC0X000546.hg.1 | -3    | JUC0X003653.hg.1 | ALG13    |
| TC0X000546.hg.1 | -3.22 | JUC0X003628.hg.1 | ALG13    |
| TC0X001141.hg.1 | -2.01 | JUC0X007809.hg.1 | HDAC8    |
| TC0X001141.hg.1 | -3.8  | PSR0X015514.hg.1 | HDAC8    |
| TC0X001306.hg.1 | -2.01 | JUC0X008937.hg.1 | KIAA1210 |
| TC0X001306.hg.1 | -2.31 | PSR0X017549.hg.1 | KIAA1210 |
| TC0X001306.hg.1 | -2.93 | JUC0X008935.hg.1 | KIAA1210 |
| TC10000576.hg.1 | -2.01 | JUC10003619.hg.1 | PLAC9    |
| TC10000576.hg.1 | -2.07 | PSR10006268.hg.1 | PLAC9    |
| TC10001439.hg.1 | -2.01 | PSR10018270.hg.1 | KCNMA1   |
| TC10001439.hg.1 | -2.03 | PSR10018223.hg.1 | KCNMA1   |
| TC10001439.hg.1 | -2.11 | PSR10018254.hg.1 | KCNMA1   |
| TC10001439.hg.1 | -2.17 | JUC10010607.hg.1 | KCNMA1   |
| TC10001439.hg.1 | -2.37 | JUC10010609.hg.1 | KCNMA1   |
| TC10001439.hg.1 | -2.42 | PSR10018253.hg.1 | KCNMA1   |
| TC10001439.hg.1 | -3.85 | JUC10010613.hg.1 | KCNMA1   |
| TC11000017.hg.1 | -2.01 | JUC11000134.hg.1 | PTDSS2   |
| TC11000017.hg.1 | -2.26 | PSR11000234.hg.1 | PTDSS2   |
| TC11000017.hg.1 | -2.62 | JUC11000136.hg.1 | PTDSS2   |
| TC11000375.hg.1 | -2.01 | JUC11002517.hg.1 | TSPAN18  |
| TC11000375.hg.1 | -2.07 | PSR11004684.hg.1 | TSPAN18  |
| TC11000375.hg.1 | -2.45 | JUC11002520.hg.1 | TSPAN18  |
| TC11000375.hg.1 | -2.78 | PSR11004701.hg.1 | TSPAN18  |
| TC11000375.hg.1 | -3.43 | JUC11002510.hg.1 | TSPAN18  |
| TC11002045.hg.1 | -2.01 | PSR11024409.hg.1 |          |
| TC11002045.hg.1 | -2.2  | JUC11012884.hg.1 |          |
| TC11002045.hg.1 | -2.45 | JUC11012881.hg.1 |          |
| TC11002045.hg.1 | -2.73 | PSR11024408.hg.1 |          |
| TC11002117.hg.1 | -2.01 | PSR11025289.hg.1 | GUCY2EP  |
| TC11002117.hg.1 | -2.09 | JUC11013364.hg.1 | GUCY2EP  |
| TC11002117.hg.1 | -2.12 | JUC11013378.hg.1 | GUCY2EP  |
| TC11002117.hg.1 | -2.18 | PSR11025271.hg.1 | GUCY2EP  |
| TC11002117.hg.1 | -2.34 | JUC11013373.hg.1 | GUCY2EP  |
| TC11002117.hg.1 | -2.67 | JUC11013381.hg.1 | GUCY2EP  |
| TC11002117.hg.1 | -2.97 | JUC11013377.hg.1 | GUCY2EP  |
| TC11002117.hg.1 | -3.48 | JUC11013365.hg.1 | GUCY2EP  |
| TC11002117.hg.1 | -4.81 | PSR11025268.hg.1 | GUCY2EP  |
| TC12000933.hg.1 | -2.01 | PSR12012105.hg.1 | CCDC60   |

|                 |       |                  |            |
|-----------------|-------|------------------|------------|
| TC12000933.hg.1 | -2.01 | PSR12012109.hg.1 | CCDC60     |
| TC12000933.hg.1 | -2.1  | PSR12012110.hg.1 | CCDC60     |
| TC12000933.hg.1 | -2.25 | JUC12006667.hg.1 | CCDC60     |
| TC14000951.hg.1 | -2.01 | JUC14005347.hg.1 | SLC7A8     |
| TC14000951.hg.1 | -2.09 | JUC14005357.hg.1 | SLC7A8     |
| TC14000951.hg.1 | -2.17 | JUC14005348.hg.1 | SLC7A8     |
| TC14000951.hg.1 | -2.2  | PSR14010513.hg.1 | SLC7A8     |
| TC14000951.hg.1 | -2.24 | JUC14005349.hg.1 | SLC7A8     |
| TC14000951.hg.1 | -2.31 | PSR14010536.hg.1 | SLC7A8     |
| TC14000951.hg.1 | -3.61 | PSR14010532.hg.1 | SLC7A8     |
| TC15002757.hg.1 | -2.01 | JUC15013171.hg.1 | GOLGA8B, L |
| TC15002757.hg.1 | -2.14 | PSR15010702.hg.1 | GOLGA8B, L |
| TC15002757.hg.1 | -2.37 | PSR15010720.hg.1 | GOLGA8B, L |
| TC16000723.hg.1 | -2.01 | JUC16005844.hg.1 | LUC7L      |
| TC16000723.hg.1 | -2.06 | PSR16010469.hg.1 | LUC7L      |
| TC16000723.hg.1 | -2.32 | PSR16010448.hg.1 | LUC7L      |
| TC16000723.hg.1 | -2.38 | JUC16005850.hg.1 | LUC7L      |
| TC16000723.hg.1 | -3.6  | PSR16010447.hg.1 | LUC7L      |
| TC17000462.hg.1 | -2.01 | JUC17003120.hg.1 | MLLT6      |
| TC17000462.hg.1 | -2.15 | PSR17005444.hg.1 | MLLT6      |
| TC17000462.hg.1 | -2.19 | JUC17003105.hg.1 | MLLT6      |
| TC17000462.hg.1 | -2.63 | JUC17003109.hg.1 | MLLT6      |
| TC17000462.hg.1 | -3.08 | JUC17003110.hg.1 | MLLT6      |
| TC20000485.hg.1 | -2.01 | JUC20003601.hg.1 |            |
| TC20000485.hg.1 | -2.17 | JUC20003602.hg.1 |            |
| TC20000485.hg.1 | -2.46 | PSR20006816.hg.1 |            |
| TC20000869.hg.1 | -2.01 | PSR20011878.hg.1 | LOC79015   |
| TC20000869.hg.1 | -2.05 | JUC20006164.hg.1 | LOC79015   |
| TC20000869.hg.1 | -2.06 | PSR20011874.hg.1 | LOC79015   |
| TC22000566.hg.1 | -2.01 | PSR22010162.hg.1 | ZNF70      |
| TC22000566.hg.1 | -2.19 | JUC22004081.hg.1 | ZNF70      |
| TC22000647.hg.1 | -2.01 | PSR22011283.hg.1 | LIF        |
| TC22000647.hg.1 | -2.42 | JUC22004597.hg.1 | LIF        |
| TC01000359.hg.1 | -2.02 | PSR01005575.hg.1 | TMEM222    |
| TC01000359.hg.1 | -2.16 | JUC01002919.hg.1 | TMEM222    |
| TC01000359.hg.1 | -2.28 | PSR01005577.hg.1 | TMEM222    |
| TC01000520.hg.1 | -2.02 | PSR01008148.hg.1 | CTPS1      |
| TC01000520.hg.1 | -2.25 | PSR01008153.hg.1 | CTPS1      |
| TC01000520.hg.1 | -2.62 | PSR01008173.hg.1 | CTPS1      |
| TC01000520.hg.1 | -2.64 | JUC01004260.hg.1 | CTPS1      |
| TC01000520.hg.1 | -2.65 | JUC01004271.hg.1 | CTPS1      |
| TC01000520.hg.1 | -2.67 | JUC01004268.hg.1 | CTPS1      |
| TC01002175.hg.1 | -2.02 | PSR01033504.hg.1 | ENO1       |
| TC01002175.hg.1 | -2.49 | JUC01017967.hg.1 | ENO1       |
| TC01002175.hg.1 | -2.56 | PSR01033508.hg.1 | ENO1       |
| TC01002889.hg.1 | -2.02 | PSR01045113.hg.1 |            |
| TC01002889.hg.1 | -2.15 | PSR01045107.hg.1 |            |
| TC01002889.hg.1 | -2.22 | PSR01045105.hg.1 |            |
| TC01002889.hg.1 | -2.26 | PSR01045109.hg.1 |            |
| TC01002889.hg.1 | -2.31 | PSR01045112.hg.1 |            |
| TC01002889.hg.1 | -2.34 | JUC01024237.hg.1 |            |
| TC01002889.hg.1 | -3.86 | JUC01024239.hg.1 |            |
| TC01002889.hg.1 | -3.87 | JUC01024247.hg.1 |            |
| TC01002889.hg.1 | -4.08 | PSR01045111.hg.1 |            |
| TC01002889.hg.1 | -4.69 | PSR01045103.hg.1 |            |
| TC01002889.hg.1 | -5.09 | PSR01045106.hg.1 |            |
| TC01002889.hg.1 | -5.54 | JUC01024238.hg.1 |            |
| TC01002889.hg.1 | -5.9  | PSR01045098.hg.1 |            |

|                 |        |                  |             |
|-----------------|--------|------------------|-------------|
| TC01002889.hg.1 | -6.44  | PSR01045116.hg.1 |             |
| TC01002889.hg.1 | -6.52  | PSR01045114.hg.1 |             |
| TC01002889.hg.1 | -6.72  | JUC01024248.hg.1 |             |
| TC01002889.hg.1 | -7.39  | PSR01045102.hg.1 |             |
| TC01002889.hg.1 | -7.52  | JUC01024241.hg.1 |             |
| TC01002889.hg.1 | -7.61  | PSR01045099.hg.1 |             |
| TC01002889.hg.1 | -9.02  | JUC01024246.hg.1 |             |
| TC01002889.hg.1 | -13.47 | JUC01024242.hg.1 |             |
| TC01004038.hg.1 | -2.02  | JUC01031931.hg.1 | CEP170      |
| TC01004038.hg.1 | -2.78  | PSR01061017.hg.1 | CEP170      |
| TC01006347.hg.1 | -2.02  | PSR01034930.hg.1 | ALDH4A1, MI |
| TC01006347.hg.1 | -2.14  | JUC01044309.hg.1 | ALDH4A1, MI |
| TC01006347.hg.1 | -2.17  | JUC01044311.hg.1 | ALDH4A1, MI |
| TC01006347.hg.1 | -2.2   | PSR01034937.hg.1 | ALDH4A1, MI |
| TC01006347.hg.1 | -2.43  | PSR01034948.hg.1 | ALDH4A1, MI |
| TC01006347.hg.1 | -2.47  | PSR01034933.hg.1 | ALDH4A1, MI |
| TC01006347.hg.1 | -4.26  | JUC01044320.hg.1 | ALDH4A1, MI |
| TC02000448.hg.1 | -2.02  | PSR02006899.hg.1 | ACTG2       |
| TC02000448.hg.1 | -2.3   | PSR02006897.hg.1 | ACTG2       |
| TC02000448.hg.1 | -2.73  | JUC02003548.hg.1 | ACTG2       |
| TC02000448.hg.1 | -3.42  | PSR02006882.hg.1 | ACTG2       |
| TC02000448.hg.1 | -4.29  | JUC02003552.hg.1 | ACTG2       |
| TC02000448.hg.1 | -5.14  | JUC02003559.hg.1 | ACTG2       |
| TC02000448.hg.1 | -5.27  | JUC02003556.hg.1 | ACTG2       |
| TC02000448.hg.1 | -5.35  | PSR02006889.hg.1 | ACTG2       |
| TC02000448.hg.1 | -6.85  | PSR02006892.hg.1 | ACTG2       |
| TC02000448.hg.1 | -7.26  | PSR02006893.hg.1 | ACTG2       |
| TC02000448.hg.1 | -7.87  | PSR02006891.hg.1 | ACTG2       |
| TC02000448.hg.1 | -8.07  | PSR02006890.hg.1 | ACTG2       |
| TC02000448.hg.1 | -11.5  | JUC02003550.hg.1 | ACTG2       |
| TC02000448.hg.1 | -12.5  | PSR02006887.hg.1 | ACTG2       |
| TC02000448.hg.1 | -16.56 | JUC02003558.hg.1 | ACTG2       |
| TC02000448.hg.1 | -16.8  | JUC02003551.hg.1 | ACTG2       |
| TC02000448.hg.1 | -17.11 | JUC02003549.hg.1 | ACTG2       |
| TC02000448.hg.1 | -18.37 | JUC02003560.hg.1 | ACTG2       |
| TC02002120.hg.1 | -2.02  | JUC02017718.hg.1 | ANKRD36B    |
| TC02002120.hg.1 | -2.05  | PSR02034413.hg.1 | ANKRD36B    |
| TC02002120.hg.1 | -2.2   | JUC02017738.hg.1 | ANKRD36B    |
| TC02002120.hg.1 | -2.22  | JUC02017702.hg.1 | ANKRD36B    |
| TC02002120.hg.1 | -2.23  | JUC02017736.hg.1 | ANKRD36B    |
| TC02002120.hg.1 | -2.53  | JUC02017707.hg.1 | ANKRD36B    |
| TC02002120.hg.1 | -2.54  | PSR02034412.hg.1 | ANKRD36B    |
| TC02002120.hg.1 | -2.74  | JUC02017720.hg.1 | ANKRD36B    |
| TC02002120.hg.1 | -2.77  | PSR02034419.hg.1 | ANKRD36B    |
| TC02002120.hg.1 | -2.77  | PSR02034445.hg.1 | ANKRD36B    |
| TC02002120.hg.1 | -2.94  | PSR02034415.hg.1 | ANKRD36B    |
| TC02002120.hg.1 | -2.95  | JUC02017704.hg.1 | ANKRD36B    |
| TC02002120.hg.1 | -3.13  | JUC02017764.hg.1 | ANKRD36B    |
| TC02002120.hg.1 | -3.13  | JUC02017766.hg.1 | ANKRD36B    |
| TC02002120.hg.1 | -3.26  | JUC02017725.hg.1 | ANKRD36B    |
| TC02002120.hg.1 | -3.27  | PSR02034427.hg.1 | ANKRD36B    |
| TC02002120.hg.1 | -3.67  | PSR02034420.hg.1 | ANKRD36B    |
| TC02002120.hg.1 | -3.8   | PSR02034416.hg.1 | ANKRD36B    |
| TC02002120.hg.1 | -4.18  | JUC02017714.hg.1 | ANKRD36B    |
| TC03000854.hg.1 | -2.02  | PSR03015126.hg.1 | LEKR1       |
| TC03000854.hg.1 | -2.16  | PSR03015128.hg.1 | LEKR1       |
| TC03000854.hg.1 | -2.26  | PSR03015130.hg.1 | LEKR1       |
| TC03000854.hg.1 | -2.28  | PSR03015129.hg.1 | LEKR1       |

|                 |       |                  |        |
|-----------------|-------|------------------|--------|
| TC03000854.hg.1 | -2.32 | JUC03007683.hg.1 | LEKR1  |
| TC03000854.hg.1 | -3.15 | PSR03015131.hg.1 | LEKR1  |
| TC03000854.hg.1 | -4.38 | PSR03015132.hg.1 | LEKR1  |
| TC03000854.hg.1 | -5.41 | PSR03015133.hg.1 | LEKR1  |
| TC03000917.hg.1 | -2.02 | PSR03016004.hg.1 | SKIL   |
| TC03000917.hg.1 | -3.14 | PSR03015988.hg.1 | SKIL   |
| TC03000917.hg.1 | -3.4  | PSR03015983.hg.1 | SKIL   |
| TC03000917.hg.1 | -3.52 | JUC03008121.hg.1 | SKIL   |
| TC03000917.hg.1 | -3.58 | PSR03015987.hg.1 | SKIL   |
| TC03000917.hg.1 | -4.14 | JUC03008124.hg.1 | SKIL   |
| TC03000917.hg.1 | -4.57 | JUC03008125.hg.1 | SKIL   |
| TC03003369.hg.1 | -2.02 | JUC03023940.hg.1 | LMLN   |
| TC03003369.hg.1 | -2.04 | PSR03019248.hg.1 | LMLN   |
| TC03003369.hg.1 | -2.14 | PSR03019255.hg.1 | LMLN   |
| TC04000161.hg.1 | -2.02 | PSR04002553.hg.1 | PACRGL |
| TC04000161.hg.1 | -2.09 | JUC04001201.hg.1 | PACRGL |
| TC04000161.hg.1 | -3.27 | PSR04002555.hg.1 | PACRGL |
| TC04000253.hg.1 | -2.02 | PSR04003633.hg.1 | UCHL1  |
| TC04000253.hg.1 | -2.62 | JUC04001791.hg.1 | UCHL1  |
| TC04000253.hg.1 | -2.65 | PSR04003652.hg.1 | UCHL1  |
| TC04000253.hg.1 | -2.79 | PSR04003635.hg.1 | UCHL1  |
| TC04000253.hg.1 | -3.32 | JUC04001794.hg.1 | UCHL1  |
| TC04000253.hg.1 | -3.98 | PSR04003651.hg.1 | UCHL1  |
| TC04000253.hg.1 | -7.96 | JUC04001782.hg.1 | UCHL1  |
| TC04000903.hg.1 | -2.02 | JUC04006649.hg.1 | SNX25  |
| TC04000903.hg.1 | -2.11 | PSR04012345.hg.1 | SNX25  |
| TC04000903.hg.1 | -3.26 | JUC04006638.hg.1 | SNX25  |
| TC04001405.hg.1 | -2.02 | JUC04010274.hg.1 | ADH5   |
| TC04001405.hg.1 | -2.13 | PSR04019584.hg.1 | ADH5   |
| TC04002921.hg.1 | -2.02 | JUC04016925.hg.1 | SDAD1  |
| TC04002921.hg.1 | -2.1  | PSR04017842.hg.1 | SDAD1  |
| TC05000795.hg.1 | -2.02 | PSR05011238.hg.1 | SH3RF2 |
| TC05000795.hg.1 | -2.04 | JUC05005828.hg.1 | SH3RF2 |
| TC05000795.hg.1 | -2.05 | JUC05005833.hg.1 | SH3RF2 |
| TC05000795.hg.1 | -2.07 | PSR05011239.hg.1 | SH3RF2 |
| TC05000795.hg.1 | -2.07 | JUC05005838.hg.1 | SH3RF2 |
| TC05000795.hg.1 | -2.09 | JUC05005834.hg.1 | SH3RF2 |
| TC05000795.hg.1 | -2.56 | PSR05011240.hg.1 | SH3RF2 |
| TC05000795.hg.1 | -2.64 | JUC05005837.hg.1 | SH3RF2 |
| TC05000795.hg.1 | -2.98 | JUC05005824.hg.1 | SH3RF2 |
| TC05000795.hg.1 | -3.93 | JUC05005830.hg.1 | SH3RF2 |
| TC05001628.hg.1 | -2.02 | PSR05022218.hg.1 | CHD1   |
| TC05001628.hg.1 | -2.93 | JUC05011471.hg.1 | CHD1   |
| TC08000571.hg.1 | -2.02 | PSR08007838.hg.1 | PDP1   |
| TC08000571.hg.1 | -6.44 | JUC08003921.hg.1 | PDP1   |
| TC08001076.hg.1 | -2.02 | PSR08013708.hg.1 | ADRA1A |
| TC08001076.hg.1 | -2.15 | PSR08013705.hg.1 | ADRA1A |
| TC08001076.hg.1 | -2.32 | JUC08007052.hg.1 | ADRA1A |
| TC08001076.hg.1 | -2.89 | JUC08007045.hg.1 | ADRA1A |
| TC08001111.hg.1 | -2.02 | PSR08014357.hg.1 | PPP2CB |
| TC08001111.hg.1 | -2.24 | JUC08007355.hg.1 | PPP2CB |
| TC08001405.hg.1 | -2.02 | PSR08018222.hg.1 | TMEM64 |
| TC08001405.hg.1 | -2.13 | PSR08018223.hg.1 | TMEM64 |
| TC08001405.hg.1 | -3.14 | PSR08018230.hg.1 | TMEM64 |
| TC08001405.hg.1 | -3.3  | PSR08018226.hg.1 | TMEM64 |
| TC08001405.hg.1 | -3.51 | PSR08018228.hg.1 | TMEM64 |
| TC08001405.hg.1 | -3.71 | PSR08018224.hg.1 | TMEM64 |
| TC08001405.hg.1 | -4.09 | PSR08018229.hg.1 | TMEM64 |

|                 |       |                  |             |
|-----------------|-------|------------------|-------------|
| TC08001405.hg.1 | -4.36 | PSR08018225.hg.1 | TMEM64      |
| TC08001405.hg.1 | -6.65 | JUC08009286.hg.1 | TMEM64      |
| TC09000013.hg.1 | -2.02 | PSR09000203.hg.1 | SMARCA2     |
| TC09000013.hg.1 | -2.07 | PSR09000251.hg.1 | SMARCA2     |
| TC09000013.hg.1 | -3.25 | JUC09000155.hg.1 | SMARCA2     |
| TC09000873.hg.1 | -2.02 | PSR09011608.hg.1 | FLJ35024    |
| TC09000873.hg.1 | -2.06 | JUC09006263.hg.1 | FLJ35024    |
| TC09000873.hg.1 | -2.55 | PSR09011587.hg.1 | FLJ35024    |
| TC09000873.hg.1 | -2.58 | PSR09011583.hg.1 | FLJ35024    |
| TC09000873.hg.1 | -2.66 | PSR09011598.hg.1 | FLJ35024    |
| TC09000873.hg.1 | -2.71 | PSR09011600.hg.1 | FLJ35024    |
| TC09000873.hg.1 | -2.86 | PSR09011602.hg.1 | FLJ35024    |
| TC09000873.hg.1 | -2.96 | PSR09011591.hg.1 | FLJ35024    |
| TC09000873.hg.1 | -2.97 | PSR09011592.hg.1 | FLJ35024    |
| TC09000873.hg.1 | -3.35 | JUC09006257.hg.1 | FLJ35024    |
| TC09000873.hg.1 | -4.09 | JUC09006256.hg.1 | FLJ35024    |
| TC09000873.hg.1 | -5.66 | JUC09006244.hg.1 | FLJ35024    |
| TC09001497.hg.1 | -2.02 | PSR09018609.hg.1 | FAM225B     |
| TC09001497.hg.1 | -2.42 | JUC09010106.hg.1 | FAM225B     |
| TC09001743.hg.1 | -2.02 | PSR09022431.hg.1 | KIAA1984-AS |
| TC09001743.hg.1 | -2.02 | JUC09012017.hg.1 | KIAA1984-AS |
| TC10000229.hg.1 | -2.02 | PSR10002653.hg.1 | LOC1005055  |
| TC10000229.hg.1 | -2.32 | JUC10001458.hg.1 | LOC1005055  |
| TC10000452.hg.1 | -2.02 | JUC10003142.hg.1 | MCU         |
| TC10000452.hg.1 | -2.09 | JUC10003136.hg.1 | MCU         |
| TC10000452.hg.1 | -2.85 | PSR10005328.hg.1 | MCU         |
| TC10000581.hg.1 | -2.02 | PSR10006303.hg.1 | FAM213A     |
| TC10000581.hg.1 | -2.03 | JUC10003641.hg.1 | FAM213A     |
| TC10000581.hg.1 | -4.22 | JUC10003635.hg.1 | FAM213A     |
| TC10000918.hg.1 | -2.02 | PSR10011298.hg.1 | DOCK1       |
| TC10000918.hg.1 | -2.08 | JUC10006564.hg.1 | DOCK1       |
| TC10000918.hg.1 | -2.99 | JUC10006587.hg.1 | DOCK1       |
| TC10001454.hg.1 | -2.02 | PSR10018462.hg.1 | SFTPA2, SFT |
| TC10001454.hg.1 | -2.11 | JUC10010761.hg.1 | SFTPA2, SFT |
| TC11000864.hg.1 | -2.02 | JUC11005733.hg.1 | TMEM126B    |
| TC11000864.hg.1 | -2.18 | PSR11010942.hg.1 | TMEM126B    |
| TC11000864.hg.1 | -2.27 | PSR11010943.hg.1 | TMEM126B    |
| TC11003494.hg.1 | -2.02 | PSR11027403.hg.1 | FDXACB1     |
| TC11003494.hg.1 | -2.08 | JUC11019699.hg.1 | FDXACB1     |
| TC11003494.hg.1 | -2.23 | PSR11027407.hg.1 | FDXACB1     |
| TC12000399.hg.1 | -2.02 | PSR12005008.hg.1 | METTL7A     |
| TC12000399.hg.1 | -2.2  | PSR12005019.hg.1 | METTL7A     |
| TC12000399.hg.1 | -2.73 | JUC12002772.hg.1 | METTL7A     |
| TC12000399.hg.1 | -3.38 | JUC12002770.hg.1 | METTL7A     |
| TC12000399.hg.1 | -3.89 | PSR12005023.hg.1 | METTL7A     |
| TC12000399.hg.1 | -5.11 | PSR12005006.hg.1 | METTL7A     |
| TC12003233.hg.1 | -2.02 | JUC12019804.hg.1 | ZNF705A, ZN |
| TC12003233.hg.1 | -2.53 | PSR12001640.hg.1 | ZNF705A, ZN |
| TC12003233.hg.1 | -3.04 | JUC12019801.hg.1 | ZNF705A, ZN |
| TC12003233.hg.1 | -3.87 | PSR12001643.hg.1 | ZNF705A, ZN |
| TC14000916.hg.1 | -2.02 | JUC14005057.hg.1 | SUPT16H     |
| TC14000916.hg.1 | -2.16 | JUC14005044.hg.1 | SUPT16H     |
| TC14000916.hg.1 | -2.2  | JUC14005047.hg.1 | SUPT16H     |
| TC14000916.hg.1 | -2.24 | PSR14009983.hg.1 | SUPT16H     |
| TC14000916.hg.1 | -2.27 | JUC14005048.hg.1 | SUPT16H     |
| TC14000916.hg.1 | -2.88 | JUC14005037.hg.1 | SUPT16H     |
| TC14000916.hg.1 | -4.39 | JUC14005052.hg.1 | SUPT16H     |
| TC14000916.hg.1 | -5.8  | JUC14005056.hg.1 | SUPT16H     |

|                 |       |                  |            |
|-----------------|-------|------------------|------------|
| TC14001224.hg.1 | -2.02 | PSR14013941.hg.1 | RAB15      |
| TC14001224.hg.1 | -2.02 | PSR14013956.hg.1 | RAB15      |
| TC14001224.hg.1 | -2.15 | PSR14013951.hg.1 | RAB15      |
| TC14001224.hg.1 | -2.18 | JUC14007049.hg.1 | RAB15      |
| TC14001224.hg.1 | -2.23 | PSR14013947.hg.1 | RAB15      |
| TC14001224.hg.1 | -2.37 | JUC14007057.hg.1 | RAB15      |
| TC14001224.hg.1 | -2.4  | PSR14013958.hg.1 | RAB15      |
| TC14001224.hg.1 | -2.48 | PSR14013955.hg.1 | RAB15      |
| TC14001224.hg.1 | -2.8  | PSR14013959.hg.1 | RAB15      |
| TC14001224.hg.1 | -2.83 | PSR14013950.hg.1 | RAB15      |
| TC14001224.hg.1 | -3.01 | PSR14013948.hg.1 | RAB15      |
| TC14001224.hg.1 | -3.21 | JUC14007050.hg.1 | RAB15      |
| TC15000445.hg.1 | -2.02 | JUC15002085.hg.1 | FAM63B     |
| TC15000445.hg.1 | -2.05 | JUC15002080.hg.1 | FAM63B     |
| TC15000445.hg.1 | -2.06 | PSR15004222.hg.1 | FAM63B     |
| TC15000445.hg.1 | -2.12 | JUC15002078.hg.1 | FAM63B     |
| TC15000445.hg.1 | -2.13 | JUC15002088.hg.1 | FAM63B     |
| TC17000180.hg.1 | -2.02 | PSR17002398.hg.1 | ADORA2B, L |
| TC17000180.hg.1 | -4.39 | JUC17001407.hg.1 | ADORA2B, L |
| TC17001724.hg.1 | -2.02 | JUC17012828.hg.1 | SRSF1      |
| TC17001724.hg.1 | -3.43 | PSR17023084.hg.1 | SRSF1      |
| TC17001789.hg.1 | -2.02 | PSR17023869.hg.1 | GH2        |
| TC17001789.hg.1 | -2.06 | JUC17013372.hg.1 | GH2        |
| TC17001974.hg.1 | -2.02 | PSR17027001.hg.1 | CCDC57     |
| TC17001974.hg.1 | -2.18 | JUC17015194.hg.1 | CCDC57     |
| TC17001974.hg.1 | -2.67 | JUC17015205.hg.1 | CCDC57     |
| TC17002847.hg.1 | -2.02 | JUC17018260.hg.1 | TRPV1      |
| TC17002847.hg.1 | -2.15 | PSR17013450.hg.1 | TRPV1      |
| TC18000999.hg.1 | -2.02 | PSR18002118.hg.1 | ELAC1      |
| TC18000999.hg.1 | -2.39 | JUC18005280.hg.1 | ELAC1      |
| TC18000999.hg.1 | -2.44 | PSR18002121.hg.1 | ELAC1      |
| TC19000406.hg.1 | -2.02 | PSR19005381.hg.1 | ZNF254     |
| TC19000406.hg.1 | -2.31 | PSR19005388.hg.1 | ZNF254     |
| TC19000406.hg.1 | -2.64 | JUC19003181.hg.1 | ZNF254     |
| TC19000406.hg.1 | -2.95 | JUC19003176.hg.1 | ZNF254     |
| TC19001088.hg.1 | -2.02 | JUC19008450.hg.1 | RFX2       |
| TC19001088.hg.1 | -2.28 | PSR19014917.hg.1 | RFX2       |
| TC20000316.hg.1 | -2.02 | JUC20002498.hg.1 | SRSF6      |
| TC20000316.hg.1 | -3.25 | PSR20004418.hg.1 | SRSF6      |
| TC21000412.hg.1 | -2.02 | PSR21004706.hg.1 | GART       |
| TC21000412.hg.1 | -2.28 | JUC21002488.hg.1 | GART       |
| TC21000412.hg.1 | -2.42 | PSR21004684.hg.1 | GART       |
| TC21000412.hg.1 | -2.6  | PSR21004672.hg.1 | GART       |
| TC21000412.hg.1 | -2.64 | PSR21004665.hg.1 | GART       |
| TC6_cox_hap2000 | -2.02 | PSR6_cox_hap2002 | CCHCR1     |
| TC6_cox_hap2000 | -3.77 | JUC6_cox_hap2000 | CCHCR1     |
| TC6_dbb_hap3000 | -2.02 | PSR6_dbb_hap3002 | CCHCR1     |
| TC6_dbb_hap3000 | -3.77 | JUC6_dbb_hap3000 | CCHCR1     |
| TC6_qbl_hap6000 | -2.02 | PSR6_qbl_hap6000 | HLA-J      |
| TC6_qbl_hap6000 | -2.37 | PSR6_qbl_hap6000 | HLA-J      |
| TC6_qbl_hap6000 | -2.65 | PSR6_qbl_hap6000 | HLA-J      |
| TC6_qbl_hap6000 | -2.81 | JUC6_qbl_hap6000 | HLA-J      |
| TC6_qbl_hap6000 | -2.87 | JUC6_qbl_hap6000 | HLA-J      |
| TC6_qbl_hap6000 | -3.94 | PSR6_qbl_hap6000 | HLA-J      |
| TC01000710.hg.1 | -2.03 | PSR01011348.hg.1 | ATG4C      |
| TC01000710.hg.1 | -2.71 | JUC01005867.hg.1 | ATG4C      |
| TC01002590.hg.1 | -2.03 | JUC01021624.hg.1 | SLC6A9     |
| TC01002590.hg.1 | -2.04 | PSR01040309.hg.1 | SLC6A9     |



|                 |       |                  |          |
|-----------------|-------|------------------|----------|
| TC01002590.hg.1 | -2.15 | JUC01021627.hg.1 | SLC6A9   |
| TC01002590.hg.1 | -2.19 | PSR01040292.hg.1 | SLC6A9   |
| TC01002590.hg.1 | -2.47 | JUC01021620.hg.1 | SLC6A9   |
| TC01002590.hg.1 | -2.66 | JUC01021619.hg.1 | SLC6A9   |
| TC01002590.hg.1 | -2.68 | JUC01021623.hg.1 | SLC6A9   |
| TC01002590.hg.1 | -3.42 | JUC01021625.hg.1 | SLC6A9   |
| TC02000051.hg.1 | -2.03 | PSR02000614.hg.1 |          |
| TC02000051.hg.1 | -2.06 | JUC02000341.hg.1 |          |
| TC02000276.hg.1 | -2.03 | PSR02004168.hg.1 | CAMKMT   |
| TC02000276.hg.1 | -2.08 | PSR02004152.hg.1 | CAMKMT   |
| TC02000276.hg.1 | -2.33 | PSR02004154.hg.1 | CAMKMT   |
| TC02000276.hg.1 | -2.34 | PSR02004175.hg.1 | CAMKMT   |
| TC02000276.hg.1 | -2.54 | PSR02004174.hg.1 | CAMKMT   |
| TC02000276.hg.1 | -2.55 | PSR02004165.hg.1 | CAMKMT   |
| TC02000276.hg.1 | -2.58 | PSR02004159.hg.1 | CAMKMT   |
| TC02000276.hg.1 | -2.65 | PSR02004158.hg.1 | CAMKMT   |
| TC02000276.hg.1 | -2.87 | PSR02004164.hg.1 | CAMKMT   |
| TC02000276.hg.1 | -3.1  | PSR02004143.hg.1 | CAMKMT   |
| TC02000276.hg.1 | -3.44 | JUC02002173.hg.1 | CAMKMT   |
| TC02001159.hg.1 | -2.03 | PSR02017488.hg.1 | SPATS2L  |
| TC02001159.hg.1 | -2.4  | JUC02009327.hg.1 | SPATS2L  |
| TC02001159.hg.1 | -3.7  | JUC02009333.hg.1 | SPATS2L  |
| TC02001614.hg.1 | -2.03 | PSR02025874.hg.1 | WDR35    |
| TC02001614.hg.1 | -2.14 | JUC02013458.hg.1 | WDR35    |
| TC02002044.hg.1 | -2.03 | JUC02016873.hg.1 | TMEM150A |
| TC02002044.hg.1 | -2.18 | JUC02016881.hg.1 | TMEM150A |
| TC02002044.hg.1 | -2.24 | PSR02032686.hg.1 | TMEM150A |
| TC02002544.hg.1 | -2.03 | PSR02040441.hg.1 | CHN1     |
| TC02002544.hg.1 | -2.04 | PSR02040436.hg.1 | CHN1     |
| TC02002544.hg.1 | -2.06 | JUC02021324.hg.1 | CHN1     |
| TC02002544.hg.1 | -2.08 | PSR02040439.hg.1 | CHN1     |
| TC02002544.hg.1 | -2.08 | JUC02021327.hg.1 | CHN1     |
| TC02002544.hg.1 | -2.16 | PSR02040430.hg.1 | CHN1     |
| TC02002544.hg.1 | -2.22 | PSR02040431.hg.1 | CHN1     |
| TC02002544.hg.1 | -2.31 | PSR02040448.hg.1 | CHN1     |
| TC02002544.hg.1 | -2.32 | PSR02040434.hg.1 | CHN1     |
| TC02002544.hg.1 | -2.35 | PSR02040429.hg.1 | CHN1     |
| TC02002544.hg.1 | -2.47 | PSR02040417.hg.1 | CHN1     |
| TC02002544.hg.1 | -2.63 | PSR02040415.hg.1 | CHN1     |
| TC02002678.hg.1 | -2.03 | PSR02043206.hg.1 | ALS2     |
| TC02002678.hg.1 | -2.07 | JUC02022649.hg.1 | ALS2     |
| TC02002678.hg.1 | -2.14 | JUC02022613.hg.1 | ALS2     |
| TC02002678.hg.1 | -2.16 | JUC02022647.hg.1 | ALS2     |
| TC02002678.hg.1 | -2.22 | PSR02043191.hg.1 | ALS2     |
| TC02002678.hg.1 | -2.44 | JUC02022632.hg.1 | ALS2     |
| TC02002678.hg.1 | -2.61 | JUC02022612.hg.1 | ALS2     |
| TC02002678.hg.1 | -2.66 | JUC02022617.hg.1 | ALS2     |
| TC02002678.hg.1 | -3.52 | JUC02022652.hg.1 | ALS2     |
| TC02002882.hg.1 | -2.03 | JUC02024252.hg.1 | USP40    |
| TC02002882.hg.1 | -2.06 | PSR02046394.hg.1 | USP40    |
| TC02002882.hg.1 | -2.26 | PSR02046398.hg.1 | USP40    |
| TC02004937.hg.1 | -2.03 | PSR02005276.hg.1 | C2orf74  |
| TC02004937.hg.1 | -2.06 | JUC02031519.hg.1 | C2orf74  |
| TC02004937.hg.1 | -2.11 | PSR02005275.hg.1 | C2orf74  |
| TC02004937.hg.1 | -2.32 | JUC02031520.hg.1 | C2orf74  |
| TC03000608.hg.1 | -2.03 | PSR03010958.hg.1 | POGLUT1  |
| TC03000608.hg.1 | -2.35 | JUC03005462.hg.1 | POGLUT1  |
| TC03000608.hg.1 | -4.46 | JUC03005459.hg.1 | POGLUT1  |

|                 |       |                  |          |
|-----------------|-------|------------------|----------|
| TC03001809.hg.1 | -2.03 | PSR03032805.hg.1 |          |
| TC03001809.hg.1 | -2.09 | JUC03016255.hg.1 |          |
| TC03001809.hg.1 | -2.15 | PSR03032802.hg.1 |          |
| TC03003375.hg.1 | -2.03 | JUC03024070.hg.1 | CCDC13   |
| TC03003375.hg.1 | -2.2  | PSR03022736.hg.1 | CCDC13   |
| TC04000254.hg.1 | -2.03 | JUC04001806.hg.1 | LIMCH1   |
| TC04000254.hg.1 | -2.06 | JUC04001849.hg.1 | LIMCH1   |
| TC04000254.hg.1 | -2.09 | JUC04001819.hg.1 | LIMCH1   |
| TC04000254.hg.1 | -2.25 | PSR04003733.hg.1 | LIMCH1   |
| TC04000254.hg.1 | -2.34 | PSR04003720.hg.1 | LIMCH1   |
| TC04000254.hg.1 | -2.91 | JUC04001803.hg.1 | LIMCH1   |
| TC04001797.hg.1 | -2.03 | JUC04012988.hg.1 | RWDD4    |
| TC04001797.hg.1 | -2.52 | PSR04024519.hg.1 | RWDD4    |
| TC05000209.hg.1 | -2.03 | JUC05001424.hg.1 | PARP8    |
| TC05000209.hg.1 | -2.05 | PSR05002508.hg.1 | PARP8    |
| TC05000209.hg.1 | -2.07 | PSR05002491.hg.1 | PARP8    |
| TC05000209.hg.1 | -2.09 | PSR05002490.hg.1 | PARP8    |
| TC05000209.hg.1 | -2.1  | JUC05001442.hg.1 | PARP8    |
| TC05000209.hg.1 | -2.11 | JUC05001407.hg.1 | PARP8    |
| TC05000209.hg.1 | -2.17 | JUC05001421.hg.1 | PARP8    |
| TC05000209.hg.1 | -2.19 | PSR05002515.hg.1 | PARP8    |
| TC05000209.hg.1 | -2.27 | PSR05002492.hg.1 | PARP8    |
| TC05000209.hg.1 | -2.51 | PSR05002514.hg.1 | PARP8    |
| TC05000209.hg.1 | -2.61 | PSR05002513.hg.1 | PARP8    |
| TC05000209.hg.1 | -2.65 | JUC05001414.hg.1 | PARP8    |
| TC05000209.hg.1 | -3.37 | JUC05001429.hg.1 | PARP8    |
| TC05000664.hg.1 | -2.03 | PSR05009160.hg.1 | PHF15    |
| TC05000664.hg.1 | -2.06 | PSR05009178.hg.1 | PHF15    |
| TC05000664.hg.1 | -2.08 | PSR05009154.hg.1 | PHF15    |
| TC05000664.hg.1 | -2.23 | PSR05009175.hg.1 | PHF15    |
| TC05000664.hg.1 | -2.35 | PSR05009145.hg.1 | PHF15    |
| TC05000664.hg.1 | -3.17 | JUC05004937.hg.1 | PHF15    |
| TC05000664.hg.1 | -4.18 | JUC05004943.hg.1 | PHF15    |
| TC05001235.hg.1 | -2.03 | JUC05008921.hg.1 | ZFR      |
| TC05001235.hg.1 | -2.55 | PSR05017391.hg.1 | ZFR      |
| TC05001854.hg.1 | -2.03 | JUC05013029.hg.1 | HBEGF    |
| TC05001854.hg.1 | -2.06 | PSR05025442.hg.1 | HBEGF    |
| TC06001754.hg.1 | -2.03 | JUC06010028.hg.1 | GTPBP2   |
| TC06001754.hg.1 | -2.7  | PSR06021070.hg.1 | GTPBP2   |
| TC07000165.hg.1 | -2.03 | JUC07001266.hg.1 | HOTAIRM1 |
| TC07000165.hg.1 | -2.04 | PSR07002590.hg.1 | HOTAIRM1 |
| TC07000165.hg.1 | -2.45 | PSR07002586.hg.1 | HOTAIRM1 |
| TC07000165.hg.1 | -2.6  | PSR07002585.hg.1 | HOTAIRM1 |
| TC07001374.hg.1 | -2.03 | PSR07021616.hg.1 | GRB10    |
| TC07001374.hg.1 | -2.12 | JUC07010620.hg.1 | GRB10    |
| TC07001374.hg.1 | -2.13 | PSR07021620.hg.1 | GRB10    |
| TC07001374.hg.1 | -2.26 | JUC07010627.hg.1 | GRB10    |
| TC07001374.hg.1 | -2.27 | PSR07021608.hg.1 | GRB10    |
| TC07001374.hg.1 | -2.3  | JUC07010619.hg.1 | GRB10    |
| TC07001374.hg.1 | -2.32 | PSR07021581.hg.1 | GRB10    |
| TC07001374.hg.1 | -2.34 | PSR07021558.hg.1 | GRB10    |
| TC07001374.hg.1 | -2.38 | PSR07021617.hg.1 | GRB10    |
| TC07001374.hg.1 | -2.41 | PSR07021611.hg.1 | GRB10    |
| TC07001374.hg.1 | -2.43 | PSR07021615.hg.1 | GRB10    |
| TC07001374.hg.1 | -2.45 | JUC07010610.hg.1 | GRB10    |
| TC07001374.hg.1 | -2.48 | PSR07021582.hg.1 | GRB10    |
| TC07001374.hg.1 | -2.48 | JUC07010593.hg.1 | GRB10    |
| TC07001374.hg.1 | -2.53 | JUC07010602.hg.1 | GRB10    |

|                 |       |                  |             |
|-----------------|-------|------------------|-------------|
| TC07001374.hg.1 | -2.56 | JUC07010599.hg.1 | GRB10       |
| TC07001374.hg.1 | -2.68 | PSR07021606.hg.1 | GRB10       |
| TC07001374.hg.1 | -2.95 | PSR07021594.hg.1 | GRB10       |
| TC07001374.hg.1 | -2.98 | PSR07021607.hg.1 | GRB10       |
| TC07001374.hg.1 | -3.25 | PSR07021595.hg.1 | GRB10       |
| TC07001374.hg.1 | -3.28 | PSR07021610.hg.1 | GRB10       |
| TC07001374.hg.1 | -3.47 | PSR07021622.hg.1 | GRB10       |
| TC07001374.hg.1 | -3.52 | JUC07010600.hg.1 | GRB10       |
| TC07001374.hg.1 | -3.63 | PSR07021589.hg.1 | GRB10       |
| TC07001374.hg.1 | -4.09 | PSR07021601.hg.1 | GRB10       |
| TC07001374.hg.1 | -4.57 | JUC07010583.hg.1 | GRB10       |
| TC07003338.hg.1 | -2.03 | PSR07009272.hg.1 | STAG3       |
| TC07003338.hg.1 | -2.19 | JUC07021133.hg.1 | STAG3       |
| TC07003338.hg.1 | -2.29 | PSR07009289.hg.1 | STAG3       |
| TC07003338.hg.1 | -2.33 | PSR07009273.hg.1 | STAG3       |
| TC07003338.hg.1 | -2.84 | JUC07021099.hg.1 | STAG3       |
| TC07003338.hg.1 | -2.98 | JUC07021103.hg.1 | STAG3       |
| TC07003338.hg.1 | -3.01 | JUC07021119.hg.1 | STAG3       |
| TC08001000.hg.1 | -2.03 | PSR08012548.hg.1 | DLC1        |
| TC08001000.hg.1 | -2.15 | PSR08012544.hg.1 | DLC1        |
| TC08001000.hg.1 | -2.21 | PSR08012506.hg.1 | DLC1        |
| TC08001000.hg.1 | -2.28 | JUC08006494.hg.1 | DLC1        |
| TC08001000.hg.1 | -2.34 | JUC08006478.hg.1 | DLC1        |
| TC08001000.hg.1 | -2.36 | JUC08006480.hg.1 | DLC1        |
| TC08001000.hg.1 | -2.46 | PSR08012522.hg.1 | DLC1        |
| TC08001000.hg.1 | -2.54 | PSR08012503.hg.1 | DLC1        |
| TC08001000.hg.1 | -2.57 | PSR08012546.hg.1 | DLC1        |
| TC08001000.hg.1 | -2.68 | JUC08006477.hg.1 | DLC1        |
| TC08001000.hg.1 | -2.72 | PSR08012550.hg.1 | DLC1        |
| TC08001000.hg.1 | -3.04 | PSR08012549.hg.1 | DLC1        |
| TC08001000.hg.1 | -3.29 | JUC08006479.hg.1 | DLC1        |
| TC08001000.hg.1 | -4.32 | JUC08006500.hg.1 | DLC1        |
| TC08001000.hg.1 | -4.4  | PSR08012553.hg.1 | DLC1        |
| TC09000171.hg.1 | -2.03 | JUC09000974.hg.1 | DNAI1       |
| TC09000171.hg.1 | -2.05 | PSR09001763.hg.1 | DNAI1       |
| TC09000171.hg.1 | -2.13 | JUC09000961.hg.1 | DNAI1       |
| TC09000171.hg.1 | -2.18 | JUC09000966.hg.1 | DNAI1       |
| TC09000171.hg.1 | -2.83 | JUC09000971.hg.1 | DNAI1       |
| TC09000171.hg.1 | -3.32 | JUC09000977.hg.1 | DNAI1       |
| TC0X000207.hg.1 | -2.03 | PSR0X002313.hg.1 | MAOA        |
| TC0X000207.hg.1 | -2.25 | PSR0X002295.hg.1 | MAOA        |
| TC0X000207.hg.1 | -2.28 | JUC0X001250.hg.1 | MAOA        |
| TC0X000207.hg.1 | -2.36 | JUC0X001263.hg.1 | MAOA        |
| TC0X000207.hg.1 | -2.46 | PSR0X002297.hg.1 | MAOA        |
| TC0X000207.hg.1 | -2.46 | PSR0X002314.hg.1 | MAOA        |
| TC0X000207.hg.1 | -2.6  | PSR0X002301.hg.1 | MAOA        |
| TC0X000801.hg.1 | -2.03 | PSR0X010970.hg.1 | ZBED1, DHR  |
| TC0X000801.hg.1 | -2.03 | JUC0X005378.hg.1 | ZBED1, DHR  |
| TC0X000801.hg.1 | -2.17 | JUC0X005364.hg.1 | ZBED1, DHR  |
| TC0X000801.hg.1 | -2.2  | JUC0X005374.hg.1 | ZBED1, DHR  |
| TC0X000801.hg.1 | -2.55 | PSR0X010981.hg.1 | ZBED1, DHR  |
| TC0X000801.hg.1 | -2.83 | JUC0X005365.hg.1 | ZBED1, DHR  |
| TC0X000801.hg.1 | -3.22 | JUC0X005377.hg.1 | ZBED1, DHR  |
| TC10000681.hg.1 | -2.03 | PSR10007907.hg.1 | ZNF518A, LC |
| TC10000681.hg.1 | -4.08 | JUC10004481.hg.1 | ZNF518A, LC |
| TC10000947.hg.1 | -2.03 | PSR10011685.hg.1 | LOC399829   |
| TC10000947.hg.1 | -2.81 | JUC10006817.hg.1 | LOC399829   |
| TC11000199.hg.1 | -2.03 | JUC11001260.hg.1 | MICALCL     |

|                 |       |                  |            |
|-----------------|-------|------------------|------------|
| TC11000199.hg.1 | -2.18 | PSR11002677.hg.1 | MICALCL    |
| TC11000877.hg.1 | -2.03 | PSR11011096.hg.1 | LOC1005063 |
| TC11000877.hg.1 | -2.13 | PSR11011094.hg.1 | LOC1005063 |
| TC11000877.hg.1 | -3.04 | JUC11005820.hg.1 | LOC1005063 |
| TC12000240.hg.1 | -2.03 | PSR12002966.hg.1 |            |
| TC12000240.hg.1 | -2.74 | JUC12001439.hg.1 |            |
| TC12000828.hg.1 | -2.03 | JUC12005829.hg.1 | BTBD11     |
| TC12000828.hg.1 | -2.08 | PSR12010597.hg.1 | BTBD11     |
| TC12000828.hg.1 | -2.15 | PSR12010602.hg.1 | BTBD11     |
| TC12000828.hg.1 | -2.17 | PSR12010601.hg.1 | BTBD11     |
| TC12000828.hg.1 | -2.18 | PSR12010603.hg.1 | BTBD11     |
| TC12000828.hg.1 | -2.66 | PSR12010604.hg.1 | BTBD11     |
| TC12000828.hg.1 | -3.05 | PSR12010618.hg.1 | BTBD11     |
| TC12000828.hg.1 | -3.97 | JUC12005830.hg.1 | BTBD11     |
| TC12001499.hg.1 | -2.03 | PSR12019712.hg.1 | SLC11A2    |
| TC12001499.hg.1 | -2.18 | PSR12019681.hg.1 | SLC11A2    |
| TC12001499.hg.1 | -2.52 | JUC12010950.hg.1 | SLC11A2    |
| TC12001535.hg.1 | -2.03 | PSR12020167.hg.1 | KRT3       |
| TC12001535.hg.1 | -3.09 | JUC12011206.hg.1 | KRT3       |
| TC14000197.hg.1 | -2.03 | JUC14000970.hg.1 | AP4S1      |
| TC14000197.hg.1 | -2.34 | JUC14000977.hg.1 | AP4S1      |
| TC14000197.hg.1 | -2.38 | PSR14002190.hg.1 | AP4S1      |
| TC15000704.hg.1 | -2.03 | JUC15003174.hg.1 | UBE2Q2     |
| TC15000704.hg.1 | -2.41 | PSR15006258.hg.1 | UBE2Q2     |
| TC15000704.hg.1 | -2.91 | PSR15006255.hg.1 | UBE2Q2     |
| TC15001104.hg.1 | -2.03 | PSR15010053.hg.1 | LOC1005070 |
| TC15001104.hg.1 | -2.96 | JUC15005317.hg.1 | LOC1005070 |
| TC15001104.hg.1 | -3.13 | JUC15005321.hg.1 | LOC1005070 |
| TC15001350.hg.1 | -2.03 | JUC15006971.hg.1 | GABPB1     |
| TC15001350.hg.1 | -2.04 | JUC15006978.hg.1 | GABPB1     |
| TC15001350.hg.1 | -2.13 | PSR15013015.hg.1 | GABPB1     |
| TC15001350.hg.1 | -2.52 | JUC15006973.hg.1 | GABPB1     |
| TC15001350.hg.1 | -2.73 | JUC15006966.hg.1 | GABPB1     |
| TC15002755.hg.1 | -2.03 | JUC15013131.hg.1 | CHRNA7, CH |
| TC15002755.hg.1 | -2.49 | PSR15001132.hg.1 | CHRNA7, CH |
| TC16001364.hg.1 | -2.03 | JUC16010783.hg.1 | PRDM7      |
| TC16001364.hg.1 | -2.07 | PSR16018887.hg.1 | PRDM7      |
| TC16001364.hg.1 | -2.31 | PSR16018885.hg.1 | PRDM7      |
| TC16001364.hg.1 | -2.87 | JUC16010792.hg.1 | PRDM7      |
| TC17000361.hg.1 | -2.03 | PSR17004513.hg.1 | LOC400590  |
| TC17000361.hg.1 | -2.21 | JUC17002552.hg.1 | LOC400590  |
| TC17000361.hg.1 | -2.9  | PSR17004511.hg.1 | LOC400590  |
| TC17001194.hg.1 | -2.03 | PSR17016274.hg.1 | TOM1L2     |
| TC17001194.hg.1 | -2.19 | JUC17009305.hg.1 | TOM1L2     |
| TC18000106.hg.1 | -2.03 | PSR18001272.hg.1 | CABYR      |
| TC18000106.hg.1 | -2.09 | PSR18001278.hg.1 | CABYR      |
| TC18000106.hg.1 | -2.15 | JUC18000884.hg.1 | CABYR      |
| TC18000106.hg.1 | -2.21 | PSR18001284.hg.1 | CABYR      |
| TC18000106.hg.1 | -2.29 | PSR18001276.hg.1 | CABYR      |
| TC18000106.hg.1 | -2.33 | JUC18000887.hg.1 | CABYR      |
| TC18000106.hg.1 | -2.64 | PSR18001280.hg.1 | CABYR      |
| TC18000106.hg.1 | -2.95 | PSR18001277.hg.1 | CABYR      |
| TC19000364.hg.1 | -2.03 | PSR19004828.hg.1 | CRTC1      |
| TC19000364.hg.1 | -2.06 | JUC19002837.hg.1 | CRTC1      |
| TC20000980.hg.1 | -2.03 | PSR20013414.hg.1 | PMEPA1     |
| TC20000980.hg.1 | -2.14 | JUC20006973.hg.1 | PMEPA1     |
| TC20000980.hg.1 | -2.15 | PSR20013411.hg.1 | PMEPA1     |
| TC20000980.hg.1 | -2.43 | PSR20013407.hg.1 | PMEPA1     |

|                 |       |                  |             |
|-----------------|-------|------------------|-------------|
| TC20000980.hg.1 | -2.89 | JUC20006976.hg.1 | PMEPA1      |
| TC20000980.hg.1 | -2.92 | PSR20013412.hg.1 | PMEPA1      |
| TC20000980.hg.1 | -2.98 | PSR20013419.hg.1 | PMEPA1      |
| TC20000980.hg.1 | -3.29 | JUC20006972.hg.1 | PMEPA1      |
| TC20000980.hg.1 | -3.37 | PSR20013408.hg.1 | PMEPA1      |
| TC22000615.hg.1 | -2.03 | PSR22010753.hg.1 |             |
| TC22000615.hg.1 | -3.2  | PSR22010752.hg.1 |             |
| TC22000615.hg.1 | -4.17 | JUC22004363.hg.1 |             |
| TC22001475.hg.1 | -2.03 | JUC22009426.hg.1 | SERHL       |
| TC22001475.hg.1 | -2.04 | JUC22009429.hg.1 | SERHL       |
| TC22001475.hg.1 | -2.59 | PSR22006877.hg.1 | SERHL       |
| TC22001475.hg.1 | -3.34 | JUC22009424.hg.1 | SERHL       |
| TC01000119.hg.1 | -2.04 | PSR01001858.hg.1 |             |
| TC01000119.hg.1 | -2.49 | JUC01000982.hg.1 |             |
| TC01001723.hg.1 | -2.04 | PSR01026879.hg.1 | IKBKE       |
| TC01001723.hg.1 | -2.15 | JUC01014395.hg.1 | IKBKE       |
| TC01001723.hg.1 | -3.77 | JUC01014397.hg.1 | IKBKE       |
| TC01002540.hg.1 | -2.04 | JUC01021188.hg.1 | PPIEL       |
| TC01002540.hg.1 | -2.16 | JUC01021194.hg.1 | PPIEL       |
| TC01002540.hg.1 | -2.21 | JUC01021189.hg.1 | PPIEL       |
| TC01002540.hg.1 | -2.29 | PSR01039502.hg.1 | PPIEL       |
| TC01002540.hg.1 | -3.53 | PSR01039504.hg.1 | PPIEL       |
| TC02001496.hg.1 | -2.04 | JUC02012713.hg.1 | FAM150B     |
| TC02001496.hg.1 | -2.13 | PSR02024544.hg.1 | FAM150B     |
| TC02001496.hg.1 | -2.49 | JUC02012712.hg.1 | FAM150B     |
| TC02002730.hg.1 | -2.04 | PSR02043828.hg.1 | KANSL1L     |
| TC02002730.hg.1 | -2.62 | PSR02043822.hg.1 | KANSL1L     |
| TC02002730.hg.1 | -2.64 | JUC02022940.hg.1 | KANSL1L     |
| TC03000756.hg.1 | -2.04 | PSR03013760.hg.1 | SLC25A36    |
| TC03000756.hg.1 | -2.12 | JUC03006934.hg.1 | SLC25A36    |
| TC03000756.hg.1 | -2.23 | PSR03013743.hg.1 | SLC25A36    |
| TC03000978.hg.1 | -2.04 | PSR03016898.hg.1 | B3GNT5, LOC |
| TC03000978.hg.1 | -2.11 | PSR03016876.hg.1 | B3GNT5, LOC |
| TC03000978.hg.1 | -2.21 | JUC03008597.hg.1 | B3GNT5, LOC |
| TC03000978.hg.1 | -2.35 | JUC03008587.hg.1 | B3GNT5, LOC |
| TC03000978.hg.1 | -2.38 | PSR03016896.hg.1 | B3GNT5, LOC |
| TC03001002.hg.1 | -2.04 | PSR03017627.hg.1 | FAM131A     |
| TC03001002.hg.1 | -2.4  | JUC03008939.hg.1 | FAM131A     |
| TC03001919.hg.1 | -2.04 | PSR03034488.hg.1 | DHX36       |
| TC03001919.hg.1 | -2.08 | PSR03034493.hg.1 | DHX36       |
| TC03001919.hg.1 | -2.29 | JUC03017047.hg.1 | DHX36       |
| TC03001919.hg.1 | -2.57 | JUC03017044.hg.1 | DHX36       |
| TC03001919.hg.1 | -3.24 | JUC03017038.hg.1 | DHX36       |
| TC03002096.hg.1 | -2.04 | PSR03037216.hg.1 | BCL6        |
| TC03002096.hg.1 | -2.23 | JUC03018403.hg.1 | BCL6        |
| TC04000173.hg.1 | -2.04 | PSR04002648.hg.1 | SOD3        |
| TC04000173.hg.1 | -2.17 | JUC04001240.hg.1 | SOD3        |
| TC04000173.hg.1 | -2.34 | PSR04002647.hg.1 | SOD3        |
| TC04000173.hg.1 | -4.57 | PSR04002645.hg.1 | SOD3        |
| TC04001328.hg.1 | -2.04 | PSR04018187.hg.1 | ANTXR2      |
| TC04001328.hg.1 | -2.14 | PSR04018195.hg.1 | ANTXR2      |
| TC04001328.hg.1 | -2.15 | PSR04018217.hg.1 | ANTXR2      |
| TC04001328.hg.1 | -3.07 | JUC04009688.hg.1 | ANTXR2      |
| TC04001419.hg.1 | -2.04 | PSR04019842.hg.1 | H2AFZ       |
| TC04001419.hg.1 | -2.06 | PSR04019832.hg.1 | H2AFZ       |
| TC04001419.hg.1 | -2.37 | JUC04010412.hg.1 | H2AFZ       |
| TC04001419.hg.1 | -2.57 | PSR04019834.hg.1 | H2AFZ       |
| TC05001243.hg.1 | -2.04 | PSR05017456.hg.1 | ADAMTS12    |

|                 |       |                  |              |
|-----------------|-------|------------------|--------------|
| TC05001243.hg.1 | -2.09 | PSR05017459.hg.1 | ADAMTS12     |
| TC05001243.hg.1 | -2.13 | JUC05008965.hg.1 | ADAMTS12     |
| TC05001243.hg.1 | -2.17 | JUC05008964.hg.1 | ADAMTS12     |
| TC05001243.hg.1 | -2.22 | JUC05008972.hg.1 | ADAMTS12     |
| TC05001243.hg.1 | -2.3  | JUC05008954.hg.1 | ADAMTS12     |
| TC05001243.hg.1 | -2.38 | PSR05017458.hg.1 | ADAMTS12     |
| TC05001243.hg.1 | -2.39 | JUC05008974.hg.1 | ADAMTS12     |
| TC05001243.hg.1 | -2.48 | JUC05008957.hg.1 | ADAMTS12     |
| TC05001243.hg.1 | -2.95 | JUC05008952.hg.1 | ADAMTS12     |
| TC05001243.hg.1 | -2.99 | PSR05017471.hg.1 | ADAMTS12     |
| TC05001243.hg.1 | -3.01 | JUC05008970.hg.1 | ADAMTS12     |
| TC05001243.hg.1 | -3.52 | PSR05017472.hg.1 | ADAMTS12     |
| TC05001243.hg.1 | -3.9  | PSR05017467.hg.1 | ADAMTS12     |
| TC05001945.hg.1 | -2.04 | PSR05026994.hg.1 | ZNF300P1     |
| TC05001945.hg.1 | -2.16 | JUC05013737.hg.1 | ZNF300P1     |
| TC06001535.hg.1 | -2.04 | PSR06017689.hg.1 | LY6G5C       |
| TC06001535.hg.1 | -2.12 | JUC06008588.hg.1 | LY6G5C       |
| TC06001535.hg.1 | -2.14 | PSR06017686.hg.1 | LY6G5C       |
| TC06001535.hg.1 | -2.18 | PSR06017677.hg.1 | LY6G5C       |
| TC06001535.hg.1 | -2.2  | JUC06008585.hg.1 | LY6G5C       |
| TC06001535.hg.1 | -2.5  | PSR06017690.hg.1 | LY6G5C       |
| TC06001535.hg.1 | -2.55 | PSR06017679.hg.1 | LY6G5C       |
| TC06001535.hg.1 | -2.69 | PSR06017687.hg.1 | LY6G5C       |
| TC06002260.hg.1 | -2.04 | PSR06028405.hg.1 | SERAC1       |
| TC06002260.hg.1 | -2.42 | JUC06014204.hg.1 | SERAC1       |
| TC07000308.hg.1 | -2.04 | JUC07002274.hg.1 | ABCA13       |
| TC07000308.hg.1 | -2.11 | PSR07004684.hg.1 | ABCA13       |
| TC07000308.hg.1 | -2.17 | JUC07002245.hg.1 | ABCA13       |
| TC07000308.hg.1 | -2.21 | JUC07002269.hg.1 | ABCA13       |
| TC07000308.hg.1 | -2.36 | PSR07004648.hg.1 | ABCA13       |
| TC07000308.hg.1 | -2.68 | JUC07002254.hg.1 | ABCA13       |
| TC07000308.hg.1 | -2.98 | JUC07002276.hg.1 | ABCA13       |
| TC07000308.hg.1 | -4.13 | PSR07004649.hg.1 | ABCA13       |
| TC07003332.hg.1 | -2.04 | PSR07006545.hg.1 | TRIM74, TRIM |
| TC07003332.hg.1 | -2.23 | PSR07006533.hg.1 | TRIM74, TRIM |
| TC07003332.hg.1 | -2.53 | JUC07020985.hg.1 | TRIM74, TRIM |
| TC07003332.hg.1 | -2.56 | PSR07006530.hg.1 | TRIM74, TRIM |
| TC08000643.hg.1 | -2.04 | PSR08008742.hg.1 | BAALC        |
| TC08000643.hg.1 | -2.07 | PSR08008740.hg.1 | BAALC        |
| TC08000643.hg.1 | -2.13 | PSR08008744.hg.1 | BAALC        |
| TC08000643.hg.1 | -2.28 | PSR08008746.hg.1 | BAALC        |
| TC08000643.hg.1 | -3.04 | PSR08008749.hg.1 | BAALC        |
| TC08000643.hg.1 | -4.66 | JUC08004447.hg.1 | BAALC        |
| TC08001110.hg.1 | -2.04 | JUC08007338.hg.1 | GSR          |
| TC08001110.hg.1 | -2.16 | PSR08014328.hg.1 | GSR          |
| TC09001286.hg.1 | -2.04 | JUC09008640.hg.1 | SLC28A3      |
| TC09001286.hg.1 | -2.11 | JUC09008659.hg.1 | SLC28A3      |
| TC09001286.hg.1 | -2.26 | PSR09016075.hg.1 | SLC28A3      |
| TC09001286.hg.1 | -2.47 | JUC09008651.hg.1 | SLC28A3      |
| TC09001286.hg.1 | -2.64 | JUC09008656.hg.1 | SLC28A3      |
| TC0X000253.hg.1 | -2.04 | PSR0X003030.hg.1 | EBP          |
| TC0X000253.hg.1 | -2.09 | JUC0X001636.hg.1 | EBP          |
| TC0X000253.hg.1 | -2.11 | JUC0X001634.hg.1 | EBP          |
| TC0X000253.hg.1 | -2.15 | PSR0X003027.hg.1 | EBP          |
| TC0X000253.hg.1 | -2.29 | PSR0X003015.hg.1 | EBP          |
| TC0X000253.hg.1 | -2.32 | PSR0X003023.hg.1 | EBP          |
| TC12000108.hg.1 | -2.04 | PSR12001476.hg.1 | CLSTN3       |
| TC12000108.hg.1 | -3.97 | JUC12000701.hg.1 | CLSTN3       |

|                 |       |                  |             |
|-----------------|-------|------------------|-------------|
| TC12000134.hg.1 | -2.04 | PSR12001727.hg.1 | RIMKLB      |
| TC12000134.hg.1 | -2.8  | JUC12000832.hg.1 | RIMKLB      |
| TC12000134.hg.1 | -3.34 | JUC12000830.hg.1 | RIMKLB      |
| TC12001583.hg.1 | -2.04 | JUC12011641.hg.1 | ITGA7       |
| TC12001583.hg.1 | -2.13 | PSR12020975.hg.1 | ITGA7       |
| TC12001583.hg.1 | -2.49 | JUC12011668.hg.1 | ITGA7       |
| TC12001583.hg.1 | -2.79 | JUC12011652.hg.1 | ITGA7       |
| TC12001583.hg.1 | -2.91 | JUC12011649.hg.1 | ITGA7       |
| TC12001583.hg.1 | -3.95 | JUC12011647.hg.1 | ITGA7       |
| TC12001583.hg.1 | -5.51 | JUC12011650.hg.1 | ITGA7       |
| TC12001726.hg.1 | -2.04 | PSR12022963.hg.1 | ZFC3H1      |
| TC12001726.hg.1 | -2.29 | JUC12012647.hg.1 | ZFC3H1      |
| TC12001726.hg.1 | -2.45 | PSR12022943.hg.1 | ZFC3H1      |
| TC14000175.hg.1 | -2.04 | PSR14001978.hg.1 |             |
| TC14000175.hg.1 | -2.04 | JUC14000845.hg.1 |             |
| TC14000175.hg.1 | -2.05 | JUC14000844.hg.1 |             |
| TC14000175.hg.1 | -2.1  | PSR14001977.hg.1 |             |
| TC14000175.hg.1 | -2.12 | PSR14001987.hg.1 |             |
| TC14000175.hg.1 | -2.18 | JUC14000853.hg.1 |             |
| TC14000175.hg.1 | -2.21 | JUC14000847.hg.1 |             |
| TC14000175.hg.1 | -2.4  | PSR14001988.hg.1 |             |
| TC14000175.hg.1 | -2.42 | PSR14001986.hg.1 |             |
| TC16001283.hg.1 | -2.04 | JUC16010170.hg.1 | ADAT1       |
| TC16001283.hg.1 | -2.18 | JUC16010171.hg.1 | ADAT1       |
| TC16001283.hg.1 | -2.53 | PSR16017868.hg.1 | ADAT1       |
| TC17000019.hg.1 | -2.04 | JUC17000101.hg.1 | HIC1        |
| TC17000019.hg.1 | -2.95 | PSR17000196.hg.1 | HIC1        |
| TC17000019.hg.1 | -2.98 | PSR17000195.hg.1 | HIC1        |
| TC19000625.hg.1 | -2.04 | PSR19008668.hg.1 | CEACAM19    |
| TC19000625.hg.1 | -2.15 | JUC19005169.hg.1 | CEACAM19    |
| TC19000625.hg.1 | -2.55 | JUC19005174.hg.1 | CEACAM19    |
| TC19000925.hg.1 | -2.04 | PSR19012711.hg.1 | ZNF471      |
| TC19000925.hg.1 | -2.22 | JUC19007205.hg.1 | ZNF471      |
| TC19001048.hg.1 | -2.04 | JUC19008058.hg.1 | PIP5K1C     |
| TC19001048.hg.1 | -2.85 | JUC19008042.hg.1 | PIP5K1C     |
| TC19001048.hg.1 | -3.51 | PSR19014290.hg.1 | PIP5K1C     |
| TC20000244.hg.1 | -2.04 | PSR20003126.hg.1 | TP53INP2    |
| TC20000244.hg.1 | -2.25 | PSR20003117.hg.1 | TP53INP2    |
| TC20000244.hg.1 | -2.37 | JUC20001755.hg.1 | TP53INP2    |
| TC20000244.hg.1 | -2.88 | JUC20001748.hg.1 | TP53INP2    |
| TC21000500.hg.1 | -2.04 | PSR21006054.hg.1 | CBS         |
| TC21000500.hg.1 | -2.08 | JUC21003099.hg.1 | CBS         |
| TC21000500.hg.1 | -2.96 | JUC21003125.hg.1 | CBS         |
| TC22000128.hg.1 | -2.04 | PSR22002257.hg.1 | RAB36       |
| TC22000128.hg.1 | -2.04 | JUC22000655.hg.1 | RAB36       |
| TC22000128.hg.1 | -2.11 | JUC22000661.hg.1 | RAB36       |
| TC22000128.hg.1 | -2.14 | PSR22002260.hg.1 | RAB36       |
| TC22000128.hg.1 | -2.4  | PSR22002250.hg.1 | RAB36       |
| TC22000128.hg.1 | -2.56 | PSR22002246.hg.1 | RAB36       |
| TC22000128.hg.1 | -2.79 | PSR22002256.hg.1 | RAB36       |
| TC01000638.hg.1 | -2.05 | JUC01005374.hg.1 | BTF3L4      |
| TC01000638.hg.1 | -2.3  | PSR01010441.hg.1 | BTF3L4      |
| TC01002616.hg.1 | -2.05 | JUC01021888.hg.1 | PIK3R3, LOC |
| TC01002616.hg.1 | -2.13 | JUC01021897.hg.1 | PIK3R3, LOC |
| TC01002616.hg.1 | -2.28 | PSR01040777.hg.1 | PIK3R3, LOC |
| TC01002616.hg.1 | -2.35 | PSR01040798.hg.1 | PIK3R3, LOC |
| TC01002616.hg.1 | -3.15 | PSR01040800.hg.1 | PIK3R3, LOC |
| TC01002616.hg.1 | -3.22 | PSR01040802.hg.1 | PIK3R3, LOC |

|                 |       |                  |             |
|-----------------|-------|------------------|-------------|
| TC01002616.hg.1 | -3.54 | PSR01040807.hg.1 | PIK3R3, LOC |
| TC01002616.hg.1 | -3.8  | JUC01021883.hg.1 | PIK3R3, LOC |
| TC01002616.hg.1 | -4.45 | PSR01040808.hg.1 | PIK3R3, LOC |
| TC01002616.hg.1 | -4.68 | PSR01040805.hg.1 | PIK3R3, LOC |
| TC01002616.hg.1 | -4.98 | PSR01040799.hg.1 | PIK3R3, LOC |
| TC02000219.hg.1 | -2.05 | JUC02001678.hg.1 | LTBP1       |
| TC02000219.hg.1 | -2.38 | PSR02003226.hg.1 | LTBP1       |
| TC02000219.hg.1 | -2.68 | PSR02003222.hg.1 | LTBP1       |
| TC02000219.hg.1 | -2.96 | PSR02003219.hg.1 | LTBP1       |
| TC02000219.hg.1 | -4.04 | JUC02001707.hg.1 | LTBP1       |
| TC02000219.hg.1 | -4.07 | JUC02001696.hg.1 | LTBP1       |
| TC02000219.hg.1 | -4.21 | PSR02003224.hg.1 | LTBP1       |
| TC02000219.hg.1 | -4.31 | JUC02001695.hg.1 | LTBP1       |
| TC02000219.hg.1 | -4.34 | PSR02003223.hg.1 | LTBP1       |
| TC02000219.hg.1 | -5.22 | JUC02001686.hg.1 | LTBP1       |
| TC02000219.hg.1 | -5.75 | JUC02001689.hg.1 | LTBP1       |
| TC02000219.hg.1 | -5.91 | JUC02001674.hg.1 | LTBP1       |
| TC02000750.hg.1 | -2.05 | PSR02011673.hg.1 | STEAP3      |
| TC02000750.hg.1 | -2.54 | JUC02006177.hg.1 | STEAP3      |
| TC02000750.hg.1 | -4.04 | PSR02011672.hg.1 | STEAP3      |
| TC02001174.hg.1 | -2.05 | JUC02009510.hg.1 | CFLAR       |
| TC02001174.hg.1 | -2.26 | PSR02017831.hg.1 | CFLAR       |
| TC02001174.hg.1 | -4.84 | PSR02017810.hg.1 | CFLAR       |
| TC02004955.hg.1 | -2.05 | PSR02002669.hg.1 | PPP1CB      |
| TC02004955.hg.1 | -2.26 | PSR02002655.hg.1 | PPP1CB      |
| TC02004955.hg.1 | -2.29 | PSR02002656.hg.1 | PPP1CB      |
| TC02004955.hg.1 | -2.39 | PSR02002672.hg.1 | PPP1CB      |
| TC02004955.hg.1 | -2.75 | PSR02002671.hg.1 | PPP1CB      |
| TC02004955.hg.1 | -2.84 | PSR02002661.hg.1 | PPP1CB      |
| TC02004955.hg.1 | -2.89 | JUC02031634.hg.1 | PPP1CB      |
| TC02004955.hg.1 | -2.94 | JUC02031637.hg.1 | PPP1CB      |
| TC02004955.hg.1 | -3.21 | JUC02031628.hg.1 | PPP1CB      |
| TC02005014.hg.1 | -2.05 | PSR02023229.hg.1 | UBE2F       |
| TC02005014.hg.1 | -2.13 | PSR02023231.hg.1 | UBE2F       |
| TC02005014.hg.1 | -2.21 | JUC02032236.hg.1 | UBE2F       |
| TC02005014.hg.1 | -2.41 | JUC02032221.hg.1 | UBE2F       |
| TC03000884.hg.1 | -2.05 | JUC03007959.hg.1 |             |
| TC03000884.hg.1 | -2.09 | PSR03015698.hg.1 |             |
| TC03000884.hg.1 | -2.48 | PSR03015697.hg.1 |             |
| TC03003391.hg.1 | -2.05 | JUC03024359.hg.1 | SLC12A8     |
| TC03003391.hg.1 | -2.08 | PSR03031344.hg.1 | SLC12A8     |
| TC03003391.hg.1 | -2.27 | PSR03031341.hg.1 | SLC12A8     |
| TC03003391.hg.1 | -2.44 | PSR03031345.hg.1 | SLC12A8     |
| TC03003391.hg.1 | -2.89 | PSR03031332.hg.1 | SLC12A8     |
| TC03003391.hg.1 | -3.3  | PSR03031334.hg.1 | SLC12A8     |
| TC05000772.hg.1 | -2.05 | JUC05005690.hg.1 | RELL2       |
| TC05000772.hg.1 | -3.31 | PSR05010977.hg.1 | RELL2       |
| TC05002108.hg.1 | -2.05 | PSR05029097.hg.1 | DBN1        |
| TC05002108.hg.1 | -2.11 | JUC05014798.hg.1 | DBN1        |
| TC05002108.hg.1 | -2.15 | JUC05014812.hg.1 | DBN1        |
| TC05002108.hg.1 | -2.31 | JUC05014803.hg.1 | DBN1        |
| TC06001290.hg.1 | -2.05 | PSR06015440.hg.1 | DTNBP1      |
| TC06001290.hg.1 | -3.82 | JUC06007691.hg.1 | DTNBP1      |
| TC07000916.hg.1 | -2.05 | JUC07006859.hg.1 | TRBV27      |
| TC07000916.hg.1 | -2.15 | JUC07006855.hg.1 | TRBV27      |
| TC07000916.hg.1 | -2.28 | PSR07014203.hg.1 | TRBV27      |
| TC07001496.hg.1 | -2.05 | JUC07011025.hg.1 | TRIM50      |
| TC07001496.hg.1 | -2.06 | PSR07022418.hg.1 | TRIM50      |



|                 |       |                  |            |
|-----------------|-------|------------------|------------|
| TC07001927.hg.1 | -2.05 | JUC07014851.hg.1 | BRAF       |
| TC07001927.hg.1 | -2.06 | PSR07029937.hg.1 | BRAF       |
| TC07001927.hg.1 | -2.12 | JUC07014849.hg.1 | BRAF       |
| TC07001927.hg.1 | -2.12 | JUC07014861.hg.1 | BRAF       |
| TC08001476.hg.1 | -2.05 | JUC08009753.hg.1 | RNF19A     |
| TC08001476.hg.1 | -2.07 | PSR08019169.hg.1 | RNF19A     |
| TC08001476.hg.1 | -2.12 | JUC08009756.hg.1 | RNF19A     |
| TC08001476.hg.1 | -2.18 | PSR08019184.hg.1 | RNF19A     |
| TC08001476.hg.1 | -2.2  | PSR08019161.hg.1 | RNF19A     |
| TC08001476.hg.1 | -2.55 | PSR08019166.hg.1 | RNF19A     |
| TC08001476.hg.1 | -2.61 | PSR08019186.hg.1 | RNF19A     |
| TC08001476.hg.1 | -2.91 | PSR08019176.hg.1 | RNF19A     |
| TC08001476.hg.1 | -3.06 | PSR08019178.hg.1 | RNF19A     |
| TC09000738.hg.1 | -2.05 | PSR09009326.hg.1 | FUBP3      |
| TC09000738.hg.1 | -3.61 | JUC09005087.hg.1 | FUBP3      |
| TC10001594.hg.1 | -2.05 | PSR10020667.hg.1 | NDUFB8, SE |
| TC10001594.hg.1 | -2.06 | PSR10020653.hg.1 | NDUFB8, SE |
| TC10001594.hg.1 | -2.21 | PSR10020666.hg.1 | NDUFB8, SE |
| TC10001594.hg.1 | -2.65 | PSR10020669.hg.1 | NDUFB8, SE |
| TC10001594.hg.1 | -2.76 | JUC10011981.hg.1 | NDUFB8, SE |
| TC10001735.hg.1 | -2.05 | PSR10023017.hg.1 | FLJ37035   |
| TC10001735.hg.1 | -2.43 | PSR10023016.hg.1 | FLJ37035   |
| TC10001735.hg.1 | -3.35 | PSR10023024.hg.1 | FLJ37035   |
| TC10001735.hg.1 | -3.98 | JUC10013281.hg.1 | FLJ37035   |
| TC10001735.hg.1 | -4.88 | PSR10023013.hg.1 | FLJ37035   |
| TC11000373.hg.1 | -2.05 | PSR11004665.hg.1 |            |
| TC11000373.hg.1 | -2.06 | JUC11002494.hg.1 |            |
| TC11000650.hg.1 | -2.05 | PSR11008199.hg.1 | BANF1      |
| TC11000650.hg.1 | -2.45 | JUC11004250.hg.1 | BANF1      |
| TC11000650.hg.1 | -2.9  | JUC11004253.hg.1 | BANF1      |
| TC11000650.hg.1 | -3.04 | PSR11008200.hg.1 | BANF1      |
| TC12000812.hg.1 | -2.05 | JUC12005666.hg.1 | CHST11     |
| TC12000812.hg.1 | -2.1  | PSR12010343.hg.1 | CHST11     |
| TC12000812.hg.1 | -2.15 | PSR12010349.hg.1 | CHST11     |
| TC12000812.hg.1 | -2.72 | JUC12005665.hg.1 | CHST11     |
| TC12001916.hg.1 | -2.05 | JUC12013960.hg.1 | NUAK1      |
| TC12001916.hg.1 | -2.3  | PSR12025025.hg.1 | NUAK1      |
| TC12001916.hg.1 | -2.68 | JUC12013955.hg.1 | NUAK1      |
| TC12001952.hg.1 | -2.05 | PSR12025379.hg.1 | MMAB       |
| TC12001952.hg.1 | -2.07 | JUC12014170.hg.1 | MMAB       |
| TC12001952.hg.1 | -2.47 | JUC12014172.hg.1 | MMAB       |
| TC14001062.hg.1 | -2.05 | PSR14012074.hg.1 | LOC283547  |
| TC14001062.hg.1 | -2.15 | PSR14012077.hg.1 | LOC283547  |
| TC14001062.hg.1 | -3.16 | JUC14006033.hg.1 | LOC283547  |
| TC15001357.hg.1 | -2.05 | PSR15013070.hg.1 | TRPM7      |
| TC15001357.hg.1 | -3    | JUC15007004.hg.1 | TRPM7      |
| TC15001989.hg.1 | -2.05 | JUC15010053.hg.1 | DNM1P46    |
| TC15001989.hg.1 | -3.63 | PSR15018461.hg.1 | DNM1P46    |
| TC16000601.hg.1 | -2.05 | JUC16004817.hg.1 | DHX38      |
| TC16000601.hg.1 | -3.29 | PSR16008676.hg.1 | DHX38      |
| TC17000077.hg.1 | -2.05 | PSR17000941.hg.1 | XAF1       |
| TC17000077.hg.1 | -2.19 | PSR17000931.hg.1 | XAF1       |
| TC17000077.hg.1 | -2.27 | JUC17000580.hg.1 | XAF1       |
| TC17000077.hg.1 | -2.3  | PSR17000937.hg.1 | XAF1       |
| TC17000077.hg.1 | -2.51 | JUC17000577.hg.1 | XAF1       |
| TC17000077.hg.1 | -2.53 | PSR17000942.hg.1 | XAF1       |
| TC17000077.hg.1 | -2.9  | PSR17000936.hg.1 | XAF1       |
| TC17000077.hg.1 | -3.25 | JUC17000574.hg.1 | XAF1       |

|                 |       |                  |          |
|-----------------|-------|------------------|----------|
| TC17000077.hg.1 | -3.42 | PSR17000946.hg.1 | XAF1     |
| TC17000077.hg.1 | -3.99 | JUC17000579.hg.1 | XAF1     |
| TC17001806.hg.1 | -2.05 | PSR17024164.hg.1 | LRRC37A3 |
| TC17001806.hg.1 | -2.08 | JUC17013513.hg.1 | LRRC37A3 |
| TC17001806.hg.1 | -3.5  | JUC17013509.hg.1 | LRRC37A3 |
| TC18000324.hg.1 | -2.05 | JUC18002538.hg.1 | PIEZO2   |
| TC18000324.hg.1 | -2.21 | PSR18003753.hg.1 | PIEZO2   |
| TC18000324.hg.1 | -2.32 | JUC18002535.hg.1 | PIEZO2   |
| TC18000324.hg.1 | -2.36 | JUC18002582.hg.1 | PIEZO2   |
| TC18000324.hg.1 | -2.4  | JUC18002552.hg.1 | PIEZO2   |
| TC18000324.hg.1 | -2.48 | JUC18002574.hg.1 | PIEZO2   |
| TC18000324.hg.1 | -2.63 | PSR18003742.hg.1 | PIEZO2   |
| TC18000324.hg.1 | -2.69 | PSR18003752.hg.1 | PIEZO2   |
| TC18000324.hg.1 | -2.73 | JUC18002549.hg.1 | PIEZO2   |
| TC18000324.hg.1 | -2.79 | JUC18002561.hg.1 | PIEZO2   |
| TC18000324.hg.1 | -3.02 | PSR18003749.hg.1 | PIEZO2   |
| TC19001445.hg.1 | -2.05 | PSR19019434.hg.1 | DMKN     |
| TC19001445.hg.1 | -2.1  | PSR19019445.hg.1 | DMKN     |
| TC19001445.hg.1 | -2.12 | PSR19019480.hg.1 | DMKN     |
| TC19001445.hg.1 | -2.13 | JUC19011287.hg.1 | DMKN     |
| TC19001445.hg.1 | -2.15 | JUC19011271.hg.1 | DMKN     |
| TC19001445.hg.1 | -3.17 | JUC19011288.hg.1 | DMKN     |
| TC19001445.hg.1 | -3.22 | PSR19019541.hg.1 | DMKN     |
| TC19001445.hg.1 | -3.62 | JUC19011308.hg.1 | DMKN     |
| TC19001445.hg.1 | -3.88 | PSR19019416.hg.1 | DMKN     |
| TC21000439.hg.1 | -2.05 | PSR21005138.hg.1 | PIGP     |
| TC21000439.hg.1 | -2.09 | JUC21002632.hg.1 | PIGP     |
| TC21000439.hg.1 | -2.1  | PSR21005144.hg.1 | PIGP     |
| TC21000439.hg.1 | -2.12 | JUC21002638.hg.1 | PIGP     |
| TC21000439.hg.1 | -2.85 | JUC21002631.hg.1 | PIGP     |
| TC6_cox_hap2000 | -2.05 | JUC6_cox_hap2000 | HLA-G    |
| TC6_cox_hap2000 | -2.58 | PSR6_cox_hap2000 | HLA-G    |
| TC6_qbl_hap6000 | -2.05 | JUC6_qbl_hap6000 | HLA-G    |
| TC6_qbl_hap6000 | -2.58 | PSR6_qbl_hap6000 | HLA-G    |
| TC01000789.hg.1 | -2.06 | PSR01012594.hg.1 | NEXN     |
| TC01000789.hg.1 | -2.08 | PSR01012576.hg.1 | NEXN     |
| TC01000789.hg.1 | -2.7  | PSR01012593.hg.1 | NEXN     |
| TC01000789.hg.1 | -3.08 | JUC01006603.hg.1 | NEXN     |
| TC01000789.hg.1 | -3.59 | PSR01012588.hg.1 | NEXN     |
| TC01000789.hg.1 | -3.79 | PSR01012573.hg.1 | NEXN     |
| TC01000789.hg.1 | -3.92 | PSR01012591.hg.1 | NEXN     |
| TC01000789.hg.1 | -5.56 | PSR01012584.hg.1 | NEXN     |
| TC01001473.hg.1 | -2.06 | PSR01022840.hg.1 | ATP1B1   |
| TC01001473.hg.1 | -2.16 | PSR01022835.hg.1 | ATP1B1   |
| TC01001473.hg.1 | -3.89 | PSR01022841.hg.1 | ATP1B1   |
| TC01001473.hg.1 | -4.1  | PSR01022839.hg.1 | ATP1B1   |
| TC01001473.hg.1 | -4.22 | PSR01022836.hg.1 | ATP1B1   |
| TC01001473.hg.1 | -5.05 | JUC01012036.hg.1 | ATP1B1   |
| TC01001473.hg.1 | -5.88 | PSR01022834.hg.1 | ATP1B1   |
| TC01001473.hg.1 | -6.8  | JUC01012037.hg.1 | ATP1B1   |
| TC01003608.hg.1 | -2.06 | PSR01055514.hg.1 | RGS16    |
| TC01003608.hg.1 | -2.68 | JUC01028950.hg.1 | RGS16    |
| TC01003608.hg.1 | -4.94 | JUC01028952.hg.1 | RGS16    |
| TC01003636.hg.1 | -2.06 | PSR01055903.hg.1 | TPR      |
| TC01003636.hg.1 | -2.27 | JUC01029144.hg.1 | TPR      |
| TC01003636.hg.1 | -2.74 | JUC01029169.hg.1 | TPR      |
| TC01003636.hg.1 | -4.22 | JUC01029184.hg.1 | TPR      |
| TC01003636.hg.1 | -4.87 | JUC01029158.hg.1 | TPR      |

|                 |       |                  |             |
|-----------------|-------|------------------|-------------|
| TC01003961.hg.1 | -2.06 | JUC01031422.hg.1 | TTC13       |
| TC01003961.hg.1 | -2.26 | JUC01031395.hg.1 | TTC13       |
| TC01003961.hg.1 | -3.09 | PSR01060009.hg.1 | TTC13       |
| TC02000240.hg.1 | -2.06 | JUC02001865.hg.1 | FAM82A1     |
| TC02000240.hg.1 | -2.55 | PSR02003590.hg.1 | FAM82A1     |
| TC02000240.hg.1 | -3.21 | JUC02001874.hg.1 | FAM82A1     |
| TC02000240.hg.1 | -3.56 | JUC02001883.hg.1 | FAM82A1     |
| TC02000304.hg.1 | -2.06 | PSR02004666.hg.1 | GTF2A1L, ST |
| TC02000304.hg.1 | -2.15 | PSR02004669.hg.1 | GTF2A1L, ST |
| TC02000304.hg.1 | -2.44 | JUC02002451.hg.1 | GTF2A1L, ST |
| TC02000304.hg.1 | -2.91 | PSR02004664.hg.1 | GTF2A1L, ST |
| TC02000304.hg.1 | -3.14 | JUC02002440.hg.1 | GTF2A1L, ST |
| TC02002480.hg.1 | -2.06 | PSR02039095.hg.1 | FAP         |
| TC02002480.hg.1 | -2.32 | PSR02039136.hg.1 | FAP         |
| TC02002480.hg.1 | -2.4  | PSR02039134.hg.1 | FAP         |
| TC02002480.hg.1 | -2.53 | JUC02020490.hg.1 | FAP         |
| TC02002480.hg.1 | -2.54 | PSR02039100.hg.1 | FAP         |
| TC02002480.hg.1 | -2.58 | PSR02039135.hg.1 | FAP         |
| TC02002480.hg.1 | -2.69 | JUC02020483.hg.1 | FAP         |
| TC02002480.hg.1 | -2.82 | JUC02020485.hg.1 | FAP         |
| TC02002480.hg.1 | -3.16 | PSR02039088.hg.1 | FAP         |
| TC02002480.hg.1 | -3.22 | JUC02020488.hg.1 | FAP         |
| TC02002579.hg.1 | -2.06 | PSR02041378.hg.1 | ZNF385B     |
| TC02002579.hg.1 | -2.13 | PSR02041405.hg.1 | ZNF385B     |
| TC02002579.hg.1 | -2.48 | PSR02041392.hg.1 | ZNF385B     |
| TC02002579.hg.1 | -2.52 | JUC02021573.hg.1 | ZNF385B     |
| TC02002579.hg.1 | -2.89 | JUC02021574.hg.1 | ZNF385B     |
| TC02002579.hg.1 | -2.91 | JUC02021559.hg.1 | ZNF385B     |
| TC02002579.hg.1 | -2.96 | PSR02041400.hg.1 | ZNF385B     |
| TC03000140.hg.1 | -2.06 | JUC03001365.hg.1 |             |
| TC03000140.hg.1 | -2.54 | PSR03002574.hg.1 |             |
| TC03000140.hg.1 | -2.67 | PSR03002575.hg.1 |             |
| TC03000202.hg.1 | -2.06 | JUC03002149.hg.1 | RPSA, SNOR  |
| TC03000202.hg.1 | -2.16 | PSR03004017.hg.1 | RPSA, SNOR  |
| TC05000134.hg.1 | -2.06 | PSR05001299.hg.1 | C5orf22     |
| TC05000134.hg.1 | -2.08 | PSR05001308.hg.1 | C5orf22     |
| TC05000134.hg.1 | -2.49 | JUC05000734.hg.1 | C5orf22     |
| TC05000134.hg.1 | -2.53 | PSR05001297.hg.1 | C5orf22     |
| TC05000134.hg.1 | -3.83 | PSR05001296.hg.1 | C5orf22     |
| TC06001873.hg.1 | -2.06 | PSR06022698.hg.1 | MB21D1      |
| TC06001873.hg.1 | -2.35 | JUC06010993.hg.1 | MB21D1      |
| TC07000495.hg.1 | -2.06 | PSR07007032.hg.1 | PTPN12      |
| TC07000495.hg.1 | -2.34 | JUC07003331.hg.1 | PTPN12      |
| TC07000495.hg.1 | -2.35 | PSR07007008.hg.1 | PTPN12      |
| TC07000495.hg.1 | -2.41 | JUC07003335.hg.1 | PTPN12      |
| TC07000495.hg.1 | -2.58 | JUC07003311.hg.1 | PTPN12      |
| TC07000562.hg.1 | -2.06 | PSR07008308.hg.1 | PEG10       |
| TC07000562.hg.1 | -2.07 | PSR07008313.hg.1 | PEG10       |
| TC07000562.hg.1 | -2.1  | PSR07008309.hg.1 | PEG10       |
| TC07000562.hg.1 | -2.32 | PSR07008307.hg.1 | PEG10       |
| TC07000562.hg.1 | -2.34 | PSR07008311.hg.1 | PEG10       |
| TC07000562.hg.1 | -2.37 | PSR07008310.hg.1 | PEG10       |
| TC07000562.hg.1 | -3.02 | JUC07003978.hg.1 | PEG10       |
| TC07000562.hg.1 | -3.33 | JUC07003979.hg.1 | PEG10       |
| TC07000562.hg.1 | -6.77 | JUC07003980.hg.1 | PEG10       |
| TC07000991.hg.1 | -2.06 | JUC07007218.hg.1 | KRBA1       |
| TC07000991.hg.1 | -2.34 | PSR07014907.hg.1 | KRBA1       |
| TC08001658.hg.1 | -2.06 | PSR08021579.hg.1 | SLA         |

|                 |       |                  |            |
|-----------------|-------|------------------|------------|
| TC08001658.hg.1 | -2.07 | JUC08011009.hg.1 | SLA        |
| TC08001658.hg.1 | -2.15 | PSR08021552.hg.1 | SLA        |
| TC08001658.hg.1 | -2.18 | JUC08011020.hg.1 | SLA        |
| TC08001658.hg.1 | -2.27 | JUC08011022.hg.1 | SLA        |
| TC08001658.hg.1 | -3.3  | JUC08011037.hg.1 | SLA        |
| TC08001658.hg.1 | -8    | JUC08011016.hg.1 | SLA        |
| TC0X000903.hg.1 | -2.06 | JUC0X006045.hg.1 | SH3KBP1    |
| TC0X000903.hg.1 | -2.18 | JUC0X006019.hg.1 | SH3KBP1    |
| TC0X000903.hg.1 | -2.31 | PSR0X012180.hg.1 | SH3KBP1    |
| TC10000253.hg.1 | -2.06 | JUC10001654.hg.1 | ZNF37A     |
| TC10000253.hg.1 | -2.58 | PSR10002928.hg.1 | ZNF37A     |
| TC10000253.hg.1 | -3.88 | PSR10002940.hg.1 | ZNF37A     |
| TC10000756.hg.1 | -2.06 | PSR10008969.hg.1 | LOC1005057 |
| TC10000756.hg.1 | -2.13 | JUC10004994.hg.1 | LOC1005057 |
| TC10001653.hg.1 | -2.06 | JUC10012577.hg.1 | LOC1005059 |
| TC10001653.hg.1 | -2.22 | PSR10021727.hg.1 | LOC1005059 |
| TC10001653.hg.1 | -2.22 | PSR10021731.hg.1 | LOC1005059 |
| TC10001653.hg.1 | -2.39 | PSR10021730.hg.1 | LOC1005059 |
| TC10001653.hg.1 | -2.6  | PSR10021722.hg.1 | LOC1005059 |
| TC12001624.hg.1 | -2.06 | JUC12012070.hg.1 | ARHGAP9    |
| TC12001624.hg.1 | -2.11 | PSR12021934.hg.1 | ARHGAP9    |
| TC12001624.hg.1 | -2.19 | JUC12012081.hg.1 | ARHGAP9    |
| TC12001624.hg.1 | -2.26 | PSR12021947.hg.1 | ARHGAP9    |
| TC12001624.hg.1 | -2.87 | JUC12012076.hg.1 | ARHGAP9    |
| TC12001890.hg.1 | -2.06 | PSR12024684.hg.1 | IGF1       |
| TC12001890.hg.1 | -2.11 | JUC12013754.hg.1 | IGF1       |
| TC12001890.hg.1 | -2.27 | PSR12024700.hg.1 | IGF1       |
| TC12002155.hg.1 | -2.06 | PSR12028270.hg.1 | ANKLE2     |
| TC12002155.hg.1 | -2.63 | JUC12015910.hg.1 | ANKLE2     |
| TC12002155.hg.1 | -2.71 | PSR12028255.hg.1 | ANKLE2     |
| TC12002155.hg.1 | -3.71 | JUC12015916.hg.1 | ANKLE2     |
| TC15000662.hg.1 | -2.06 | JUC15002872.hg.1 | BBS4       |
| TC15000662.hg.1 | -2.71 | PSR15005677.hg.1 | BBS4       |
| TC16001029.hg.1 | -2.06 | JUC16008285.hg.1 | 1-Sep      |
| TC16001029.hg.1 | -2.39 | JUC16008289.hg.1 | 1-Sep      |
| TC16001029.hg.1 | -2.41 | JUC16008284.hg.1 | 1-Sep      |
| TC16001029.hg.1 | -2.88 | PSR16014748.hg.1 | 1-Sep      |
| TC16001029.hg.1 | -4.01 | JUC16008290.hg.1 | 1-Sep      |
| TC17000919.hg.1 | -2.06 | PSR17012056.hg.1 | ENDOV, LOC |
| TC17000919.hg.1 | -2.18 | PSR17012048.hg.1 | ENDOV, LOC |
| TC17000919.hg.1 | -2.3  | PSR17012059.hg.1 | ENDOV, LOC |
| TC17000919.hg.1 | -2.59 | PSR17012054.hg.1 | ENDOV, LOC |
| TC17000919.hg.1 | -3.23 | JUC17006804.hg.1 | ENDOV, LOC |
| TC19000585.hg.1 | -2.06 | PSR19008131.hg.1 | CEACAM3    |
| TC19000585.hg.1 | -2.06 | JUC19004853.hg.1 | CEACAM3    |
| TC19000585.hg.1 | -2.09 | PSR19008133.hg.1 | CEACAM3    |
| TC19001647.hg.1 | -2.06 | PSR19022426.hg.1 | PNMAL1     |
| TC19001647.hg.1 | -2.21 | JUC19012777.hg.1 | PNMAL1     |
| TC19001647.hg.1 | -2.22 | JUC19012776.hg.1 | PNMAL1     |
| TC19001788.hg.1 | -2.06 | JUC19013827.hg.1 | ZNF577     |
| TC19001788.hg.1 | -2.26 | PSR19024296.hg.1 | ZNF577     |
| TC19001788.hg.1 | -2.31 | PSR19024302.hg.1 | ZNF577     |
| TC01002264.hg.1 | -2.07 | JUC01018520.hg.1 | CROCCP3    |
| TC01002264.hg.1 | -2.19 | JUC01018535.hg.1 | CROCCP3    |
| TC01002264.hg.1 | -2.53 | PSR01034563.hg.1 | CROCCP3    |
| TC01003004.hg.1 | -2.07 | PSR01046712.hg.1 | PHTF1      |
| TC01003004.hg.1 | -2.08 | PSR01046717.hg.1 | PHTF1      |
| TC01003004.hg.1 | -2.13 | JUC01025067.hg.1 | PHTF1      |

|                 |       |                  |             |
|-----------------|-------|------------------|-------------|
| TC01003004.hg.1 | -2.16 | PSR01046705.hg.1 | PHTF1       |
| TC01003004.hg.1 | -2.43 | PSR01046685.hg.1 | PHTF1       |
| TC01003004.hg.1 | -2.67 | JUC01025070.hg.1 | PHTF1       |
| TC01003004.hg.1 | -2.74 | JUC01025075.hg.1 | PHTF1       |
| TC01003004.hg.1 | -3.11 | JUC01025052.hg.1 | PHTF1       |
| TC01003605.hg.1 | -2.07 | PSR01055461.hg.1 | GLUL        |
| TC01003605.hg.1 | -2.08 | PSR01055455.hg.1 | GLUL        |
| TC01003605.hg.1 | -2.2  | JUC01028939.hg.1 | GLUL        |
| TC01003605.hg.1 | -2.45 | PSR01055489.hg.1 | GLUL        |
| TC01003605.hg.1 | -2.58 | PSR01055462.hg.1 | GLUL        |
| TC01003605.hg.1 | -2.78 | PSR01055445.hg.1 | GLUL        |
| TC01003605.hg.1 | -2.88 | PSR01055475.hg.1 | GLUL        |
| TC01003605.hg.1 | -3.09 | PSR01055472.hg.1 | GLUL        |
| TC01003605.hg.1 | -3.76 | PSR01055467.hg.1 | GLUL        |
| TC01003605.hg.1 | -4.23 | PSR01055466.hg.1 | GLUL        |
| TC03000374.hg.1 | -2.07 | PSR03008023.hg.1 | SLMAP, LOC  |
| TC03000374.hg.1 | -2.12 | JUC03003956.hg.1 | SLMAP, LOC  |
| TC03000374.hg.1 | -2.15 | PSR03008029.hg.1 | SLMAP, LOC  |
| TC03000374.hg.1 | -2.16 | JUC03003947.hg.1 | SLMAP, LOC  |
| TC03000374.hg.1 | -2.19 | JUC03003936.hg.1 | SLMAP, LOC  |
| TC03000374.hg.1 | -2.64 | JUC03003958.hg.1 | SLMAP, LOC  |
| TC03000374.hg.1 | -3.09 | PSR03008026.hg.1 | SLMAP, LOC  |
| TC03000374.hg.1 | -3.53 | JUC03003942.hg.1 | SLMAP, LOC  |
| TC03000374.hg.1 | -4.91 | JUC03003974.hg.1 | SLMAP, LOC  |
| TC03001869.hg.1 | -2.07 | PSR03033737.hg.1 | PLSCR1      |
| TC03001869.hg.1 | -2.1  | PSR03033765.hg.1 | PLSCR1      |
| TC03001869.hg.1 | -2.23 | PSR03033778.hg.1 | PLSCR1      |
| TC03001869.hg.1 | -2.27 | PSR03033794.hg.1 | PLSCR1      |
| TC03001869.hg.1 | -2.45 | JUC03016777.hg.1 | PLSCR1      |
| TC03001869.hg.1 | -2.51 | JUC03016788.hg.1 | PLSCR1      |
| TC03001869.hg.1 | -2.58 | PSR03033762.hg.1 | PLSCR1      |
| TC03001869.hg.1 | -4.11 | JUC03016791.hg.1 | PLSCR1      |
| TC05001966.hg.1 | -2.07 | JUC05013959.hg.1 | FAM114A2    |
| TC05001966.hg.1 | -2.36 | PSR05027351.hg.1 | FAM114A2    |
| TC06001859.hg.1 | -2.07 | PSR06022593.hg.1 | LOC10050730 |
| TC06001859.hg.1 | -2.1  | JUC06010938.hg.1 | LOC10050730 |
| TC06001859.hg.1 | -2.14 | PSR06022601.hg.1 | LOC10050730 |
| TC06001859.hg.1 | -2.16 | PSR06022592.hg.1 | LOC10050730 |
| TC06001859.hg.1 | -3.63 | PSR06022594.hg.1 | LOC10050730 |
| TC06004065.hg.1 | -2.07 | PSR06002610.hg.1 | HLA-G       |
| TC06004065.hg.1 | -2.35 | JUC06020837.hg.1 | HLA-G       |
| TC08000682.hg.1 | -2.07 | PSR08009275.hg.1 | UTP23       |
| TC08000682.hg.1 | -3.01 | JUC08004734.hg.1 | UTP23       |
| TC08000682.hg.1 | -3.84 | PSR08009277.hg.1 | UTP23       |
| TC08000682.hg.1 | -4.07 | PSR08009269.hg.1 | UTP23       |
| TC08000682.hg.1 | -4.3  | JUC08004729.hg.1 | UTP23       |
| TC08000698.hg.1 | -2.07 | PSR08009416.hg.1 | DEPTOR      |
| TC08000698.hg.1 | -2.53 | JUC08004813.hg.1 | DEPTOR      |
| TC09000965.hg.1 | -2.07 | PSR09012788.hg.1 | CDKN2B      |
| TC09000965.hg.1 | -2.82 | JUC09006956.hg.1 | CDKN2B      |
| TC09001211.hg.1 | -2.07 | PSR09015545.hg.1 | ALDH1A1     |
| TC09001211.hg.1 | -3.27 | JUC09008321.hg.1 | ALDH1A1     |
| TC10000672.hg.1 | -2.07 | JUC10004354.hg.1 | TBC1D12     |
| TC10000672.hg.1 | -2.28 | JUC10004347.hg.1 | TBC1D12     |
| TC10000672.hg.1 | -2.55 | PSR10007621.hg.1 | TBC1D12     |
| TC10000672.hg.1 | -2.8  | PSR10007634.hg.1 | TBC1D12     |
| TC10000797.hg.1 | -2.07 | PSR10009526.hg.1 | ADD3        |
| TC10000797.hg.1 | -2.08 | PSR10009514.hg.1 | ADD3        |

|                 |       |                  |              |
|-----------------|-------|------------------|--------------|
| TC10000797.hg.1 | -2.37 | PSR10009507.hg.1 | ADD3         |
| TC10000797.hg.1 | -2.48 | JUC10005277.hg.1 | ADD3         |
| TC10000797.hg.1 | -2.56 | JUC10005302.hg.1 | ADD3         |
| TC10000797.hg.1 | -2.88 | JUC10005278.hg.1 | ADD3         |
| TC10001635.hg.1 | -2.07 | JUC10012348.hg.1 | SH3PXD2A     |
| TC10001635.hg.1 | -2.32 | PSR10021389.hg.1 | SH3PXD2A     |
| TC10001635.hg.1 | -2.66 | PSR10021378.hg.1 | SH3PXD2A     |
| TC10001635.hg.1 | -2.69 | PSR10021388.hg.1 | SH3PXD2A     |
| TC10001635.hg.1 | -2.73 | PSR10021390.hg.1 | SH3PXD2A     |
| TC10001635.hg.1 | -2.87 | JUC10012362.hg.1 | SH3PXD2A     |
| TC10001635.hg.1 | -2.99 | JUC10012347.hg.1 | SH3PXD2A     |
| TC10001635.hg.1 | -3.19 | PSR10021375.hg.1 | SH3PXD2A     |
| TC10001635.hg.1 | -3.2  | PSR10021387.hg.1 | SH3PXD2A     |
| TC10001635.hg.1 | -3.26 | PSR10021383.hg.1 | SH3PXD2A     |
| TC10001635.hg.1 | -3.41 | JUC10012352.hg.1 | SH3PXD2A     |
| TC10001635.hg.1 | -3.73 | PSR10021385.hg.1 | SH3PXD2A     |
| TC10001635.hg.1 | -3.83 | PSR10021377.hg.1 | SH3PXD2A     |
| TC10001635.hg.1 | -3.99 | JUC10012354.hg.1 | SH3PXD2A     |
| TC10001635.hg.1 | -4    | JUC10012357.hg.1 | SH3PXD2A     |
| TC10001635.hg.1 | -4.2  | JUC10012356.hg.1 | SH3PXD2A     |
| TC10001635.hg.1 | -5.54 | JUC10012346.hg.1 | SH3PXD2A     |
| TC10001706.hg.1 | -2.07 | PSR10022532.hg.1 |              |
| TC10001706.hg.1 | -2.46 | PSR10022533.hg.1 |              |
| TC10001706.hg.1 | -2.5  | PSR10022535.hg.1 |              |
| TC10001706.hg.1 | -3.41 | JUC10013057.hg.1 |              |
| TC11001540.hg.1 | -2.07 | JUC11010286.hg.1 | CD59, C11orf |
| TC11001540.hg.1 | -2.46 | PSR11019304.hg.1 | CD59, C11orf |
| TC11001540.hg.1 | -3.28 | PSR11019326.hg.1 | CD59, C11orf |
| TC12001331.hg.1 | -2.07 | PSR12017464.hg.1 | TM7SF3       |
| TC12001331.hg.1 | -2.64 | JUC12009662.hg.1 | TM7SF3       |
| TC12001331.hg.1 | -2.82 | JUC12009658.hg.1 | TM7SF3       |
| TC12001971.hg.1 | -2.07 | PSR12025733.hg.1 | FAM109A      |
| TC12001971.hg.1 | -2.07 | JUC12014324.hg.1 | FAM109A      |
| TC12001971.hg.1 | -3.03 | JUC12014325.hg.1 | FAM109A      |
| TC12002150.hg.1 | -2.07 | PSR12028140.hg.1 | GALNT9       |
| TC12002150.hg.1 | -2.08 | JUC12015831.hg.1 | GALNT9       |
| TC12002150.hg.1 | -2.67 | JUC12015826.hg.1 | GALNT9       |
| TC12002150.hg.1 | -2.78 | JUC12015836.hg.1 | GALNT9       |
| TC15001653.hg.1 | -2.07 | PSR15016156.hg.1 | RPP25        |
| TC15001653.hg.1 | -2.48 | JUC15008761.hg.1 | RPP25        |
| TC15001653.hg.1 | -3.31 | PSR15016151.hg.1 | RPP25        |
| TC17000675.hg.1 | -2.07 | PSR17008818.hg.1 | LUC7L3       |
| TC17000675.hg.1 | -2.25 | JUC17004807.hg.1 | LUC7L3       |
| TC17000675.hg.1 | -2.97 | PSR17008819.hg.1 | LUC7L3       |
| TC17000983.hg.1 | -2.07 | JUC17007524.hg.1 | MIR22HG, MI  |
| TC17000983.hg.1 | -2.21 | PSR17013170.hg.1 | MIR22HG, MI  |
| TC17000983.hg.1 | -2.31 | PSR17013171.hg.1 | MIR22HG, MI  |
| TC17000983.hg.1 | -2.44 | JUC17007521.hg.1 | MIR22HG, MI  |
| TC17000983.hg.1 | -3.03 | JUC17007523.hg.1 | MIR22HG, MI  |
| TC18000145.hg.1 | -2.07 | PSR18001638.hg.1 | GALNT1       |
| TC18000145.hg.1 | -2.86 | JUC18001134.hg.1 | GALNT1       |
| TC18000433.hg.1 | -2.07 | PSR18004410.hg.1 | CDH2         |
| TC18000433.hg.1 | -2.25 | PSR18004405.hg.1 | CDH2         |
| TC18000433.hg.1 | -2.74 | JUC18002954.hg.1 | CDH2         |
| TC21000167.hg.1 | -2.07 | PSR21001597.hg.1 | KCNJ15       |
| TC21000167.hg.1 | -2.31 | JUC21000816.hg.1 | KCNJ15       |
| TC21000167.hg.1 | -2.47 | PSR21001590.hg.1 | KCNJ15       |
| TC21000167.hg.1 | -2.54 | PSR21001587.hg.1 | KCNJ15       |

|                 |        |                  |          |
|-----------------|--------|------------------|----------|
| TC21000167.hg.1 | -2.54  | JUC21000827.hg.1 | KCNJ15   |
| TC21000167.hg.1 | -2.62  | JUC21000820.hg.1 | KCNJ15   |
| TC21000167.hg.1 | -3.12  | PSR21001579.hg.1 | KCNJ15   |
| TC21000167.hg.1 | -3.17  | JUC21000824.hg.1 | KCNJ15   |
| TC21000167.hg.1 | -3.29  | PSR21001580.hg.1 | KCNJ15   |
| TC21000167.hg.1 | -3.3   | PSR21001584.hg.1 | KCNJ15   |
| TC21000167.hg.1 | -3.71  | PSR21001575.hg.1 | KCNJ15   |
| TC21000167.hg.1 | -3.71  | PSR21001578.hg.1 | KCNJ15   |
| TC21000167.hg.1 | -3.95  | PSR21001583.hg.1 | KCNJ15   |
| TC21000167.hg.1 | -4.78  | PSR21001572.hg.1 | KCNJ15   |
| TC21000167.hg.1 | -5.03  | PSR21001577.hg.1 | KCNJ15   |
| TC21000167.hg.1 | -7.93  | JUC21000812.hg.1 | KCNJ15   |
| TC21000167.hg.1 | -10.03 | JUC21000822.hg.1 | KCNJ15   |
| TC21000213.hg.1 | -2.07  | PSR21002280.hg.1 | PDXK     |
| TC21000213.hg.1 | -2.19  | PSR21002282.hg.1 | PDXK     |
| TC21000213.hg.1 | -2.23  | PSR21002283.hg.1 | PDXK     |
| TC21000213.hg.1 | -2.25  | PSR21002278.hg.1 | PDXK     |
| TC21000213.hg.1 | -2.51  | PSR21002300.hg.1 | PDXK     |
| TC21000213.hg.1 | -2.59  | PSR21002288.hg.1 | PDXK     |
| TC21000213.hg.1 | -2.84  | PSR21002311.hg.1 | PDXK     |
| TC21000213.hg.1 | -3.32  | JUC21001219.hg.1 | PDXK     |
| TC21000216.hg.1 | -2.07  | JUC21001316.hg.1 | TRAPPC10 |
| TC21000216.hg.1 | -2.08  | PSR21002472.hg.1 | TRAPPC10 |
| TC21000216.hg.1 | -2.21  | JUC21001323.hg.1 | TRAPPC10 |
| TC21000216.hg.1 | -2.48  | JUC21001300.hg.1 | TRAPPC10 |
| TC21000216.hg.1 | -2.51  | JUC21001292.hg.1 | TRAPPC10 |
| TC21000216.hg.1 | -3.09  | JUC21001311.hg.1 | TRAPPC10 |
| TC01001686.hg.1 | -2.08  | PSR01026184.hg.1 | PRELP    |
| TC01001686.hg.1 | -2.31  | PSR01026183.hg.1 | PRELP    |
| TC01001686.hg.1 | -2.59  | JUC01014024.hg.1 | PRELP    |
| TC02002008.hg.1 | -2.08  | PSR02032291.hg.1 | GCFC2    |
| TC02002008.hg.1 | -2.17  | JUC02016705.hg.1 | GCFC2    |
| TC02002545.hg.1 | -2.08  | JUC02021339.hg.1 | ATF2     |
| TC02002545.hg.1 | -2.1   | JUC02021336.hg.1 | ATF2     |
| TC02002545.hg.1 | -2.26  | PSR02040482.hg.1 | ATF2     |
| TC02002545.hg.1 | -2.49  | JUC02021352.hg.1 | ATF2     |
| TC02002619.hg.1 | -2.08  | PSR02041966.hg.1 | HIBCH    |
| TC02002619.hg.1 | -2.21  | JUC02021874.hg.1 | HIBCH    |
| TC03000461.hg.1 | -2.08  | JUC03004487.hg.1 | CHMP2B   |
| TC03000461.hg.1 | -2.33  | PSR03009024.hg.1 | CHMP2B   |
| TC03000461.hg.1 | -2.82  | JUC03004485.hg.1 | CHMP2B   |
| TC03000461.hg.1 | -3.3   | JUC03004489.hg.1 | CHMP2B   |
| TC05003399.hg.1 | -2.08  | JUC05019175.hg.1 | SRP19    |
| TC05003399.hg.1 | -2.1   | PSR05007424.hg.1 | SRP19    |
| TC05003399.hg.1 | -2.23  | JUC05019177.hg.1 | SRP19    |
| TC05003399.hg.1 | -2.33  | PSR05007436.hg.1 | SRP19    |
| TC05003399.hg.1 | -2.43  | PSR05007446.hg.1 | SRP19    |
| TC05003399.hg.1 | -2.68  | PSR05007426.hg.1 | SRP19    |
| TC05003399.hg.1 | -2.74  | PSR05007438.hg.1 | SRP19    |
| TC05003399.hg.1 | -2.86  | PSR05007437.hg.1 | SRP19    |
| TC05003399.hg.1 | -3.06  | PSR05007417.hg.1 | SRP19    |
| TC05003399.hg.1 | -3.28  | PSR05007442.hg.1 | SRP19    |
| TC05003399.hg.1 | -3.29  | JUC05019167.hg.1 | SRP19    |
| TC05003399.hg.1 | -3.32  | PSR05007443.hg.1 | SRP19    |
| TC06000060.hg.1 | -2.08  | PSR06000562.hg.1 | DSP      |
| TC06000060.hg.1 | -3.26  | JUC06000267.hg.1 | DSP      |
| TC06000595.hg.1 | -2.08  | PSR06006905.hg.1 | PTK7     |
| TC06000595.hg.1 | -2.08  | PSR06006907.hg.1 | PTK7     |

|                 |       |                  |             |
|-----------------|-------|------------------|-------------|
| TC06000595.hg.1 | -2.08 | PSR06006942.hg.1 | PTK7        |
| TC06000595.hg.1 | -2.2  | PSR06006917.hg.1 | PTK7        |
| TC06000595.hg.1 | -2.47 | JUC06002993.hg.1 | PTK7        |
| TC06000595.hg.1 | -2.63 | JUC06003004.hg.1 | PTK7        |
| TC06000595.hg.1 | -3.04 | JUC06003000.hg.1 | PTK7        |
| TC07000638.hg.1 | -2.08 | PSR07009932.hg.1 | LOC1001342  |
| TC07000638.hg.1 | -2.15 | JUC07004597.hg.1 | LOC1001342  |
| TC07000638.hg.1 | -2.29 | PSR07009934.hg.1 | LOC1001342  |
| TC07001731.hg.1 | -2.08 | PSR07026840.hg.1 | SRPK2       |
| TC07001731.hg.1 | -2.1  | JUC07013165.hg.1 | SRPK2       |
| TC0X000992.hg.1 | -2.08 | PSR0X013151.hg.1 | SLC9A7      |
| TC0X000992.hg.1 | -2.08 | JUC0X006629.hg.1 | SLC9A7      |
| TC0X000992.hg.1 | -2.21 | PSR0X013152.hg.1 | SLC9A7      |
| TC0X000992.hg.1 | -3.38 | JUC0X006618.hg.1 | SLC9A7      |
| TC11002366.hg.1 | -2.08 | JUC11015200.hg.1 | MCAM        |
| TC11002366.hg.1 | -2.09 | PSR11028506.hg.1 | MCAM        |
| TC11002366.hg.1 | -2.17 | PSR11028505.hg.1 | MCAM        |
| TC11002366.hg.1 | -2.33 | PSR11028518.hg.1 | MCAM        |
| TC11002366.hg.1 | -2.35 | PSR11028497.hg.1 | MCAM        |
| TC11002366.hg.1 | -2.78 | PSR11028521.hg.1 | MCAM        |
| TC11002366.hg.1 | -2.99 | PSR11028504.hg.1 | MCAM        |
| TC11002366.hg.1 | -3.02 | PSR11028514.hg.1 | MCAM        |
| TC11002366.hg.1 | -3.22 | JUC11015198.hg.1 | MCAM        |
| TC11002366.hg.1 | -3.43 | JUC11015197.hg.1 | MCAM        |
| TC11002366.hg.1 | -5.04 | PSR11028520.hg.1 | MCAM        |
| TC11002366.hg.1 | -8.88 | JUC11015209.hg.1 | MCAM        |
| TC13000145.hg.1 | -2.08 | PSR13001684.hg.1 | NAA16       |
| TC13000145.hg.1 | -2.12 | JUC13001024.hg.1 | NAA16       |
| TC13000145.hg.1 | -2.15 | JUC13001032.hg.1 | NAA16       |
| TC13000145.hg.1 | -2.16 | JUC13001047.hg.1 | NAA16       |
| TC13000145.hg.1 | -2.7  | PSR13001691.hg.1 | NAA16       |
| TC14001119.hg.1 | -2.08 | PSR14012638.hg.1 | CDKL1       |
| TC14001119.hg.1 | -2.13 | PSR14012633.hg.1 | CDKL1       |
| TC14001119.hg.1 | -2.32 | PSR14012647.hg.1 | CDKL1       |
| TC14001119.hg.1 | -2.32 | JUC14006348.hg.1 | CDKL1       |
| TC14001119.hg.1 | -2.57 | PSR14012645.hg.1 | CDKL1       |
| TC14001119.hg.1 | -2.88 | PSR14012632.hg.1 | CDKL1       |
| TC14001119.hg.1 | -3.12 | JUC14006356.hg.1 | CDKL1       |
| TC16000385.hg.1 | -2.08 | PSR16005729.hg.1 |             |
| TC16000385.hg.1 | -3.01 | JUC16003162.hg.1 |             |
| TC17000495.hg.1 | -2.08 | JUC17003380.hg.1 | CDC6        |
| TC17000495.hg.1 | -2.25 | PSR17005965.hg.1 | CDC6        |
| TC17000988.hg.1 | -2.08 | PSR17013220.hg.1 | SMG6        |
| TC17000988.hg.1 | -2.16 | JUC17007545.hg.1 | SMG6        |
| TC17000988.hg.1 | -2.43 | PSR17013224.hg.1 | SMG6        |
| TC17000988.hg.1 | -3.32 | JUC17007557.hg.1 | SMG6        |
| TC17001550.hg.1 | -2.08 | JUC17011583.hg.1 | AARSD1, PTG |
| TC17001550.hg.1 | -2.15 | PSR17020710.hg.1 | AARSD1, PTG |
| TC17001550.hg.1 | -2.18 | PSR17020696.hg.1 | AARSD1, PTG |
| TC17001550.hg.1 | -2.21 | PSR17020733.hg.1 | AARSD1, PTG |
| TC17001550.hg.1 | -2.29 | PSR17020750.hg.1 | AARSD1, PTG |
| TC17001550.hg.1 | -2.33 | JUC17011586.hg.1 | AARSD1, PTG |
| TC17001550.hg.1 | -2.52 | PSR17020736.hg.1 | AARSD1, PTG |
| TC17001550.hg.1 | -2.55 | JUC17011589.hg.1 | AARSD1, PTG |
| TC17001550.hg.1 | -2.72 | JUC17011584.hg.1 | AARSD1, PTG |
| TC17001550.hg.1 | -2.82 | JUC17011611.hg.1 | AARSD1, PTG |
| TC17001550.hg.1 | -2.93 | PSR17020692.hg.1 | AARSD1, PTG |
| TC17001913.hg.1 | -2.08 | PSR17025912.hg.1 | TMC6        |



|                 |       |                  |              |
|-----------------|-------|------------------|--------------|
| TC17001913.hg.1 | -2.09 | PSR17025927.hg.1 | TMC6         |
| TC17001913.hg.1 | -2.12 | JUC17014556.hg.1 | TMC6         |
| TC18000071.hg.1 | -2.08 | JUC18000507.hg.1 | C18orf1      |
| TC18000071.hg.1 | -2.46 | PSR18000824.hg.1 | C18orf1      |
| TC18000071.hg.1 | -2.78 | PSR18000827.hg.1 | C18orf1      |
| TC18000071.hg.1 | -2.84 | PSR18000829.hg.1 | C18orf1      |
| TC18000071.hg.1 | -3.15 | PSR18000820.hg.1 | C18orf1      |
| TC18000071.hg.1 | -3.86 | JUC18000504.hg.1 | C18orf1      |
| TC18000071.hg.1 | -3.96 | JUC18000503.hg.1 | C18orf1      |
| TC18000071.hg.1 | -4.5  | PSR18000825.hg.1 | C18orf1      |
| TC18000143.hg.1 | -2.08 | PSR18001623.hg.1 | ZNF397       |
| TC18000143.hg.1 | -2.14 | JUC18001126.hg.1 | ZNF397       |
| TC18000143.hg.1 | -3.07 | JUC18001124.hg.1 | ZNF397       |
| TC19000132.hg.1 | -2.08 | JUC19001247.hg.1 | STXBP2       |
| TC19000132.hg.1 | -2.51 | JUC19001230.hg.1 | STXBP2       |
| TC19000132.hg.1 | -2.76 | PSR19002055.hg.1 | STXBP2       |
| TC19000132.hg.1 | -3.78 | JUC19001245.hg.1 | STXBP2       |
| TC19000132.hg.1 | -4.25 | PSR19002054.hg.1 | STXBP2       |
| TC19000132.hg.1 | -4.65 | JUC19001255.hg.1 | STXBP2       |
| TC21000095.hg.1 | -2.08 | JUC21000344.hg.1 | C21orf7      |
| TC21000095.hg.1 | -2.16 | JUC21000351.hg.1 | C21orf7      |
| TC21000095.hg.1 | -2.2  | JUC21000352.hg.1 | C21orf7      |
| TC21000095.hg.1 | -2.21 | PSR21000576.hg.1 | C21orf7      |
| TC22000838.hg.1 | -2.08 | PSR22014134.hg.1 | NAGA         |
| TC22000838.hg.1 | -2.81 | JUC22005836.hg.1 | NAGA         |
| TC01001102.hg.1 | -2.09 | PSR01017418.hg.1 |              |
| TC01001102.hg.1 | -2.74 | JUC01008896.hg.1 |              |
| TC01001516.hg.1 | -2.09 | PSR01023434.hg.1 | DARS2        |
| TC01001516.hg.1 | -2.33 | JUC01012385.hg.1 | DARS2        |
| TC01001516.hg.1 | -2.48 | JUC01012382.hg.1 | DARS2        |
| TC01002261.hg.1 | -2.09 | PSR01034499.hg.1 | RSG1, C1orf1 |
| TC01002261.hg.1 | -2.1  | PSR01034495.hg.1 | RSG1, C1orf1 |
| TC01002261.hg.1 | -2.15 | PSR01034503.hg.1 | RSG1, C1orf1 |
| TC01002261.hg.1 | -2.15 | JUC01018472.hg.1 | RSG1, C1orf1 |
| TC01002261.hg.1 | -2.27 | PSR01034507.hg.1 | RSG1, C1orf1 |
| TC01002261.hg.1 | -2.65 | JUC01018475.hg.1 | RSG1, C1orf1 |
| TC01002261.hg.1 | -2.71 | PSR01034502.hg.1 | RSG1, C1orf1 |
| TC01002261.hg.1 | -3.94 | JUC01018471.hg.1 | RSG1, C1orf1 |
| TC05000086.hg.1 | -2.09 | PSR05001043.hg.1 | FAM105B      |
| TC05000086.hg.1 | -2.81 | JUC05000578.hg.1 | FAM105B      |
| TC05000148.hg.1 | -2.09 | PSR05001526.hg.1 | TARS         |
| TC05000148.hg.1 | -2.1  | JUC05000856.hg.1 | TARS         |
| TC05000148.hg.1 | -2.33 | PSR05001517.hg.1 | TARS         |
| TC05000148.hg.1 | -2.86 | JUC05000833.hg.1 | TARS         |
| TC08000078.hg.1 | -2.09 | JUC08000424.hg.1 | C8orf74      |
| TC08000078.hg.1 | -2.34 | PSR08000730.hg.1 | C8orf74      |
| TC08000078.hg.1 | -2.42 | JUC08000430.hg.1 | C8orf74      |
| TC08000078.hg.1 | -2.78 | PSR08000726.hg.1 | C8orf74      |
| TC10002942.hg.1 | -2.09 | PSR10006960.hg.1 | FAS          |
| TC10002942.hg.1 | -2.23 | PSR10006980.hg.1 | FAS          |
| TC10002942.hg.1 | -3.92 | JUC10017247.hg.1 | FAS          |
| TC11000690.hg.1 | -2.09 | JUC11004573.hg.1 | CARNS1       |
| TC11000690.hg.1 | -2.14 | PSR11008948.hg.1 | CARNS1       |
| TC11001968.hg.1 | -2.09 | PSR11023602.hg.1 | LOC1005055   |
| TC11001968.hg.1 | -2.16 | JUC11012455.hg.1 | LOC1005055   |
| TC12000976.hg.1 | -2.09 | PSR12012813.hg.1 | DENR         |
| TC12000976.hg.1 | -2.19 | JUC12007045.hg.1 | DENR         |
| TC12000976.hg.1 | -2.49 | JUC12007041.hg.1 | DENR         |

|                 |       |                  |         |
|-----------------|-------|------------------|---------|
| TC14000922.hg.1 | -2.09 | JUC14005119.hg.1 | METTTL3 |
| TC14000922.hg.1 | -2.91 | PSR14010078.hg.1 | METTTL3 |
| TC15000581.hg.1 | -2.09 | PSR15004652.hg.1 | RAB8B   |
| TC15000581.hg.1 | -2.18 | JUC15002267.hg.1 | RAB8B   |
| TC17001538.hg.1 | -2.09 | PSR17020560.hg.1 | PLEKHH3 |
| TC17001538.hg.1 | -2.34 | JUC17011509.hg.1 | PLEKHH3 |
| TC19000886.hg.1 | -2.09 | JUC19006953.hg.1 | NCR1    |
| TC19000886.hg.1 | -2.19 | PSR19012276.hg.1 | NCR1    |
| TC19000886.hg.1 | -2.47 | JUC19006952.hg.1 | NCR1    |
| TC19000886.hg.1 | -2.57 | JUC19006947.hg.1 | NCR1    |
| TC19001446.hg.1 | -2.09 | PSR19019549.hg.1 | SBSN    |
| TC19001446.hg.1 | -2.23 | PSR19019550.hg.1 | SBSN    |
| TC19001446.hg.1 | -2.71 | JUC19011320.hg.1 | SBSN    |
| TC19001446.hg.1 | -2.82 | PSR19019553.hg.1 | SBSN    |
| TC01003002.hg.1 | -2.1  | PSR01046673.hg.1 |         |
| TC01003002.hg.1 | -2.14 | PSR01046672.hg.1 |         |
| TC01003002.hg.1 | -2.26 | JUC01025049.hg.1 |         |
| TC01003002.hg.1 | -3.13 | JUC01025048.hg.1 |         |
| TC03001372.hg.1 | -2.1  | PSR03023686.hg.1 | MAP4    |
| TC03001372.hg.1 | -2.25 | JUC03011822.hg.1 | MAP4    |
| TC04000392.hg.1 | -2.1  | PSR04005386.hg.1 | RUFY3   |
| TC04000392.hg.1 | -2.23 | PSR04005382.hg.1 | RUFY3   |
| TC04000392.hg.1 | -2.66 | JUC04002680.hg.1 | RUFY3   |
| TC05001344.hg.1 | -2.1  | PSR05018864.hg.1 |         |
| TC05001344.hg.1 | -2.6  | JUC05009697.hg.1 |         |
| TC05001344.hg.1 | -2.98 | JUC05009695.hg.1 |         |
| TC06000016.hg.1 | -2.1  | PSR06000093.hg.1 |         |
| TC06000016.hg.1 | -2.46 | JUC06000044.hg.1 |         |
| TC06000830.hg.1 | -2.1  | JUC06004597.hg.1 | TSTD3   |
| TC06000830.hg.1 | -2.12 | PSR06009856.hg.1 | TSTD3   |
| TC06001751.hg.1 | -2.1  | JUC06009999.hg.1 | XPO5    |
| TC06001751.hg.1 | -2.33 | JUC06009993.hg.1 | XPO5    |
| TC06001751.hg.1 | -2.56 | PSR06021041.hg.1 | XPO5    |
| TC06002194.hg.1 | -2.1  | PSR06027498.hg.1 | EPM2A   |
| TC06002194.hg.1 | -2.3  | PSR06027473.hg.1 | EPM2A   |
| TC06002194.hg.1 | -3.14 | JUC06013693.hg.1 | EPM2A   |
| TC07001355.hg.1 | -2.1  | PSR07021216.hg.1 | IGFBP3  |
| TC07001355.hg.1 | -2.17 | PSR07021176.hg.1 | IGFBP3  |
| TC07001355.hg.1 | -2.26 | PSR07021166.hg.1 | IGFBP3  |
| TC07001355.hg.1 | -2.31 | JUC07010355.hg.1 | IGFBP3  |
| TC07001355.hg.1 | -2.36 | PSR07021175.hg.1 | IGFBP3  |
| TC07001355.hg.1 | -2.43 | PSR07021184.hg.1 | IGFBP3  |
| TC07001355.hg.1 | -2.85 | JUC07010344.hg.1 | IGFBP3  |
| TC07002040.hg.1 | -2.1  | PSR07031250.hg.1 | RHEB    |
| TC07002040.hg.1 | -2.93 | JUC07015488.hg.1 | RHEB    |
| TC07003339.hg.1 | -2.1  | PSR07011404.hg.1 | CAV1    |
| TC07003339.hg.1 | -2.12 | JUC07021137.hg.1 | CAV1    |
| TC07003339.hg.1 | -2.25 | PSR07011403.hg.1 | CAV1    |
| TC08002624.hg.1 | -2.1  | PSR08023464.hg.1 | COMMD5  |
| TC08002624.hg.1 | -2.36 | JUC08015365.hg.1 | COMMD5  |
| TC09000347.hg.1 | -2.1  | JUC09001989.hg.1 | PCSK5   |
| TC09000347.hg.1 | -2.23 | PSR09003676.hg.1 | PCSK5   |
| TC09000347.hg.1 | -2.53 | JUC09001983.hg.1 | PCSK5   |
| TC09000347.hg.1 | -2.54 | PSR09003711.hg.1 | PCSK5   |
| TC09000347.hg.1 | -3.23 | PSR09003709.hg.1 | PCSK5   |
| TC09000347.hg.1 | -3.38 | PSR09003705.hg.1 | PCSK5   |
| TC09000347.hg.1 | -3.52 | PSR09003684.hg.1 | PCSK5   |
| TC09000347.hg.1 | -3.6  | PSR09003693.hg.1 | PCSK5   |

|                 |        |                  |              |
|-----------------|--------|------------------|--------------|
| TC09000347.hg.1 | -4.03  | JUC09001959.hg.1 | PCSK5        |
| TC09000347.hg.1 | -4.08  | PSR09003708.hg.1 | PCSK5        |
| TC09000347.hg.1 | -4.13  | PSR09003702.hg.1 | PCSK5        |
| TC09000347.hg.1 | -4.16  | PSR09003698.hg.1 | PCSK5        |
| TC09000347.hg.1 | -4.28  | PSR09003694.hg.1 | PCSK5        |
| TC09000347.hg.1 | -4.93  | PSR09003701.hg.1 | PCSK5        |
| TC09000347.hg.1 | -5.3   | PSR09003697.hg.1 | PCSK5        |
| TC09000347.hg.1 | -5.36  | PSR09003699.hg.1 | PCSK5        |
| TC09000347.hg.1 | -5.6   | PSR09003706.hg.1 | PCSK5        |
| TC09000347.hg.1 | -5.75  | JUC09001956.hg.1 | PCSK5        |
| TC09000347.hg.1 | -6.28  | JUC09001985.hg.1 | PCSK5        |
| TC09000347.hg.1 | -10.06 | JUC09001958.hg.1 | PCSK5        |
| TC09000347.hg.1 | -10.37 | JUC09001960.hg.1 | PCSK5        |
| TC10000102.hg.1 | -2.1   | JUC10000611.hg.1 | PRPF18       |
| TC10000102.hg.1 | -2.58  | PSR10001145.hg.1 | PRPF18       |
| TC10000102.hg.1 | -2.74  | JUC10000627.hg.1 | PRPF18       |
| TC10000575.hg.1 | -2.1   | JUC10003613.hg.1 | C10orf57     |
| TC10000575.hg.1 | -2.22  | PSR10006246.hg.1 | C10orf57     |
| TC10001626.hg.1 | -2.1   | PSR10021246.hg.1 | NT5C2        |
| TC10001626.hg.1 | -2.17  | PSR10021225.hg.1 | NT5C2        |
| TC10001626.hg.1 | -2.22  | PSR10021228.hg.1 | NT5C2        |
| TC10001626.hg.1 | -2.27  | PSR10021256.hg.1 | NT5C2        |
| TC10001626.hg.1 | -2.54  | JUC10012290.hg.1 | NT5C2        |
| TC10001626.hg.1 | -3.05  | PSR10021238.hg.1 | NT5C2        |
| TC10001626.hg.1 | -3.36  | JUC10012276.hg.1 | NT5C2        |
| TC10001626.hg.1 | -3.83  | JUC10012273.hg.1 | NT5C2        |
| TC11000088.hg.1 | -2.1   | PSR11001510.hg.1 | STIM1, MIR40 |
| TC11000088.hg.1 | -2.26  | JUC11000747.hg.1 | STIM1, MIR40 |
| TC12000925.hg.1 | -2.1   | JUC12006613.hg.1 | RFC5         |
| TC12000925.hg.1 | -4.18  | PSR12012001.hg.1 | RFC5         |
| TC12001539.hg.1 | -2.1   | PSR12020221.hg.1 | KRT8         |
| TC12001539.hg.1 | -2.11  | PSR12020233.hg.1 | KRT8         |
| TC12001539.hg.1 | -2.15  | PSR12020231.hg.1 | KRT8         |
| TC12001539.hg.1 | -2.25  | JUC12011247.hg.1 | KRT8         |
| TC16000520.hg.1 | -2.1   | PSR16007266.hg.1 | CMTM3        |
| TC16000520.hg.1 | -2.92  | JUC16004104.hg.1 | CMTM3        |
| TC17000600.hg.1 | -2.1   | JUC17004145.hg.1 | NSF, NSFP1,  |
| TC17000600.hg.1 | -2.24  | PSR17007354.hg.1 | NSF, NSFP1,  |
| TC17000600.hg.1 | -2.42  | JUC17004165.hg.1 | NSF, NSFP1,  |
| TC17002872.hg.1 | -2.1   | PSR17003894.hg.1 | SARM1        |
| TC17002872.hg.1 | -2.13  | PSR17003893.hg.1 | SARM1        |
| TC17002872.hg.1 | -2.42  | JUC17018635.hg.1 | SARM1        |
| TC17002872.hg.1 | -6.56  | JUC17018630.hg.1 | SARM1        |
| TC18000264.hg.1 | -2.1   | JUC18002114.hg.1 | CTDP1        |
| TC18000264.hg.1 | -3.17  | PSR18003124.hg.1 | CTDP1        |
| TC20000696.hg.1 | -2.1   | PSR20009595.hg.1 |              |
| TC20000696.hg.1 | -2.11  | JUC20005022.hg.1 |              |
| TC01000381.hg.1 | -2.11  | JUC01003083.hg.1 | RCC1, SNHG   |
| TC01000381.hg.1 | -2.35  | JUC01003063.hg.1 | RCC1, SNHG   |
| TC01000381.hg.1 | -2.58  | PSR01005895.hg.1 | RCC1, SNHG   |
| TC01000381.hg.1 | -3.23  | JUC01003077.hg.1 | RCC1, SNHG   |
| TC01000381.hg.1 | -3.97  | PSR01005893.hg.1 | RCC1, SNHG   |
| TC01002057.hg.1 | -2.11  | JUC01016996.hg.1 | LOC1005080   |
| TC01002057.hg.1 | -2.23  | PSR01031296.hg.1 | LOC1005080   |
| TC03000407.hg.1 | -2.11  | PSR03008619.hg.1 | KBTBD8       |
| TC03000407.hg.1 | -2.68  | JUC03004302.hg.1 | KBTBD8       |
| TC03000407.hg.1 | -4.06  | PSR03008620.hg.1 | KBTBD8       |
| TC03000507.hg.1 | -2.11  | JUC03004766.hg.1 | NIT2         |

|                 |       |                  |              |
|-----------------|-------|------------------|--------------|
| TC03000507.hg.1 | -2.2  | PSR03009555.hg.1 | NIT2         |
| TC04001634.hg.1 | -2.11 | PSR04022852.hg.1 | LRBA         |
| TC04001634.hg.1 | -2.17 | PSR04022801.hg.1 | LRBA         |
| TC04001634.hg.1 | -2.27 | JUC04012030.hg.1 | LRBA         |
| TC04001634.hg.1 | -2.36 | JUC04012079.hg.1 | LRBA         |
| TC04001634.hg.1 | -2.45 | PSR04022821.hg.1 | LRBA         |
| TC04001634.hg.1 | -4.74 | JUC04012021.hg.1 | LRBA         |
| TC05002020.hg.1 | -2.11 | JUC05014314.hg.1 | NUDCD2       |
| TC05002020.hg.1 | -2.23 | PSR05028048.hg.1 | NUDCD2       |
| TC05002020.hg.1 | -2.23 | JUC05014316.hg.1 | NUDCD2       |
| TC05002020.hg.1 | -2.79 | PSR05028056.hg.1 | NUDCD2       |
| TC05002105.hg.1 | -2.11 | PSR05029031.hg.1 | F12          |
| TC05002105.hg.1 | -2.31 | JUC05014772.hg.1 | F12          |
| TC05002105.hg.1 | -6.72 | JUC05014775.hg.1 | F12          |
| TC06000574.hg.1 | -2.11 | JUC06002752.hg.1 | PRICKLE4, T  |
| TC06000574.hg.1 | -2.19 | PSR06006469.hg.1 | PRICKLE4, T  |
| TC06000574.hg.1 | -2.53 | JUC06002743.hg.1 | PRICKLE4, T  |
| TC07000208.hg.1 | -2.11 | PSR07003307.hg.1 | ZNRF2P1      |
| TC07000208.hg.1 | -2.23 | PSR07003306.hg.1 | ZNRF2P1      |
| TC07000208.hg.1 | -2.72 | JUC07001554.hg.1 | ZNRF2P1      |
| TC07000844.hg.1 | -2.11 | PSR07013377.hg.1 | C7orf73, LOC |
| TC07000844.hg.1 | -2.19 | PSR07013373.hg.1 | C7orf73, LOC |
| TC07000844.hg.1 | -2.28 | JUC07006397.hg.1 | C7orf73, LOC |
| TC07001618.hg.1 | -2.11 | PSR07024641.hg.1 | PDK4         |
| TC07001618.hg.1 | -2.57 | JUC07012247.hg.1 | PDK4         |
| TC07001618.hg.1 | -2.67 | PSR07024637.hg.1 | PDK4         |
| TC07001618.hg.1 | -3.62 | PSR07024646.hg.1 | PDK4         |
| TC07001618.hg.1 | -4.78 | PSR07024628.hg.1 | PDK4         |
| TC08000403.hg.1 | -2.11 | PSR08005653.hg.1 | SDCBP        |
| TC08000403.hg.1 | -3.82 | JUC08002799.hg.1 | SDCBP        |
| TC08001108.hg.1 | -2.11 | PSR08014278.hg.1 | LOC1001287   |
| TC08001108.hg.1 | -2.11 | PSR08014280.hg.1 | LOC1001287   |
| TC08001108.hg.1 | -4.13 | JUC08007304.hg.1 | LOC1001287   |
| TC08002595.hg.1 | -2.11 | PSR08000968.hg.1 | FAM66A       |
| TC08002595.hg.1 | -2.27 | JUC08014936.hg.1 | FAM66A       |
| TC08002595.hg.1 | -2.51 | PSR08000972.hg.1 | FAM66A       |
| TC08002595.hg.1 | -3.07 | PSR08000967.hg.1 | FAM66A       |
| TC08002595.hg.1 | -3.07 | PSR08000971.hg.1 | FAM66A       |
| TC08002595.hg.1 | -3.42 | PSR08000970.hg.1 | FAM66A       |
| TC08002595.hg.1 | -3.42 | JUC08014934.hg.1 | FAM66A       |
| TC08002595.hg.1 | -8.9  | JUC08014937.hg.1 | FAM66A       |
| TC09000614.hg.1 | -2.11 | PSR09007101.hg.1 | PTGS1        |
| TC09000614.hg.1 | -2.52 | PSR09007091.hg.1 | PTGS1        |
| TC09000614.hg.1 | -2.57 | PSR09007093.hg.1 | PTGS1        |
| TC09000614.hg.1 | -2.6  | JUC09003966.hg.1 | PTGS1        |
| TC09000614.hg.1 | -2.61 | PSR09007088.hg.1 | PTGS1        |
| TC09000614.hg.1 | -2.95 | PSR09007094.hg.1 | PTGS1        |
| TC09000614.hg.1 | -3.18 | JUC09003967.hg.1 | PTGS1        |
| TC09000614.hg.1 | -3.53 | PSR09007095.hg.1 | PTGS1        |
| TC09000614.hg.1 | -3.58 | PSR09007087.hg.1 | PTGS1        |
| TC09000614.hg.1 | -4.13 | JUC09003958.hg.1 | PTGS1        |
| TC09000614.hg.1 | -4.4  | PSR09007086.hg.1 | PTGS1        |
| TC0X002339.hg.1 | -2.11 | PSR0X018733.hg.1 | CT45A5, CT4  |
| TC0X002339.hg.1 | -2.3  | JUC0X013259.hg.1 | CT45A5, CT4  |
| TC12000591.hg.1 | -2.11 | PSR12007797.hg.1 | IRAK3        |
| TC12000591.hg.1 | -2.34 | PSR12007786.hg.1 | IRAK3        |
| TC12000591.hg.1 | -2.35 | JUC12004110.hg.1 | IRAK3        |
| TC12000591.hg.1 | -2.46 | JUC12004105.hg.1 | IRAK3        |

|                 |       |                  |             |
|-----------------|-------|------------------|-------------|
| TC12000591.hg.1 | -2.5  | PSR12007787.hg.1 | IRAK3       |
| TC12000591.hg.1 | -2.72 | PSR12007781.hg.1 | IRAK3       |
| TC12000591.hg.1 | -2.84 | PSR12007798.hg.1 | IRAK3       |
| TC12000591.hg.1 | -3.06 | JUC12004098.hg.1 | IRAK3       |
| TC14002324.hg.1 | -2.11 | JUC14012117.hg.1 | GPR135      |
| TC14002324.hg.1 | -2.15 | PSR14013461.hg.1 | GPR135      |
| TC14002324.hg.1 | -2.65 | PSR14013460.hg.1 | GPR135      |
| TC14002324.hg.1 | -5.67 | JUC14012116.hg.1 | GPR135      |
| TC16000737.hg.1 | -2.11 | JUC16005968.hg.1 | CCDC78      |
| TC16000737.hg.1 | -2.14 | PSR16010724.hg.1 | CCDC78      |
| TC16000755.hg.1 | -2.11 | JUC16006184.hg.1 | IFT140      |
| TC16000755.hg.1 | -2.36 | PSR16011069.hg.1 | IFT140      |
| TC16000755.hg.1 | -2.43 | JUC16006175.hg.1 | IFT140      |
| TC01000384.hg.1 | -2.12 | JUC01003095.hg.1 | TRNAU1AP    |
| TC01000384.hg.1 | -2.46 | PSR01005966.hg.1 | TRNAU1AP    |
| TC01002834.hg.1 | -2.12 | JUC01023721.hg.1 | ODF2L       |
| TC01002834.hg.1 | -2.14 | PSR01044187.hg.1 | ODF2L       |
| TC01002834.hg.1 | -2.27 | JUC01023722.hg.1 | ODF2L       |
| TC01002834.hg.1 | -2.35 | PSR01044185.hg.1 | ODF2L       |
| TC01002834.hg.1 | -2.35 | JUC01023732.hg.1 | ODF2L       |
| TC01002834.hg.1 | -2.41 | JUC01023737.hg.1 | ODF2L       |
| TC01002834.hg.1 | -2.43 | JUC01023736.hg.1 | ODF2L       |
| TC01002834.hg.1 | -2.62 | PSR01044203.hg.1 | ODF2L       |
| TC01002834.hg.1 | -2.63 | PSR01044157.hg.1 | ODF2L       |
| TC01002834.hg.1 | -2.66 | PSR01044156.hg.1 | ODF2L       |
| TC01002834.hg.1 | -2.71 | JUC01023727.hg.1 | ODF2L       |
| TC01002834.hg.1 | -2.79 | JUC01023740.hg.1 | ODF2L       |
| TC01002834.hg.1 | -3.33 | PSR01044194.hg.1 | ODF2L       |
| TC01003551.hg.1 | -2.12 | PSR01055054.hg.1 | RFWD2       |
| TC01003551.hg.1 | -2.33 | JUC01028712.hg.1 | RFWD2       |
| TC02001524.hg.1 | -2.12 | PSR02024819.hg.1 | ADI1        |
| TC02001524.hg.1 | -3.08 | JUC02012867.hg.1 | ADI1        |
| TC05001694.hg.1 | -2.12 | PSR05023003.hg.1 | ATG12       |
| TC05001694.hg.1 | -2.31 | JUC05011886.hg.1 | ATG12       |
| TC05001694.hg.1 | -3    | JUC05011887.hg.1 | ATG12       |
| TC07000034.hg.1 | -2.12 | PSR07000447.hg.1 | LFNG, MIR46 |
| TC07000034.hg.1 | -2.16 | JUC07000151.hg.1 | LFNG, MIR46 |
| TC07000405.hg.1 | -2.12 | PSR07005480.hg.1 | TPST1       |
| TC07000405.hg.1 | -2.41 | JUC07002622.hg.1 | TPST1       |
| TC07000405.hg.1 | -2.45 | PSR07005461.hg.1 | TPST1       |
| TC08000167.hg.1 | -2.12 | JUC08001016.hg.1 | BMP1        |
| TC08000167.hg.1 | -2.23 | JUC08001014.hg.1 | BMP1        |
| TC08000167.hg.1 | -2.28 | PSR08001886.hg.1 | BMP1        |
| TC08000167.hg.1 | -2.28 | PSR08001898.hg.1 | BMP1        |
| TC08000167.hg.1 | -2.31 | JUC08001021.hg.1 | BMP1        |
| TC08000167.hg.1 | -2.38 | JUC08001019.hg.1 | BMP1        |
| TC08000167.hg.1 | -2.53 | PSR08001881.hg.1 | BMP1        |
| TC08000167.hg.1 | -2.64 | PSR08001889.hg.1 | BMP1        |
| TC08000167.hg.1 | -3.68 | PSR08001880.hg.1 | BMP1        |
| TC0X000885.hg.1 | -2.12 | PSR0X011828.hg.1 | CTPS2       |
| TC0X000885.hg.1 | -2.33 | JUC0X005804.hg.1 | CTPS2       |
| TC10000438.hg.1 | -2.12 | JUC10003003.hg.1 | UNC5B       |
| TC10000438.hg.1 | -2.13 | PSR10005123.hg.1 | UNC5B       |
| TC10000438.hg.1 | -2.38 | PSR10005122.hg.1 | UNC5B       |
| TC10000438.hg.1 | -2.43 | JUC10003005.hg.1 | UNC5B       |
| TC11000015.hg.1 | -2.12 | PSR11000195.hg.1 | B4GALNT4    |
| TC11000015.hg.1 | -3.31 | PSR11000196.hg.1 | B4GALNT4    |
| TC11000015.hg.1 | -4.39 | JUC11000094.hg.1 | B4GALNT4    |

|                 |       |                  |             |
|-----------------|-------|------------------|-------------|
| TC16000436.hg.1 | -2.12 | PSR16006012.hg.1 | HEATR3      |
| TC16000436.hg.1 | -2.15 | PSR16006018.hg.1 | HEATR3      |
| TC16000436.hg.1 | -2.38 | PSR16006019.hg.1 | HEATR3      |
| TC16000436.hg.1 | -2.58 | JUC16003307.hg.1 | HEATR3      |
| TC20000850.hg.1 | -2.12 | JUC20006039.hg.1 | CHD6        |
| TC20000850.hg.1 | -2.14 | PSR20011653.hg.1 | CHD6        |
| TC20000850.hg.1 | -2.19 | JUC20006026.hg.1 | CHD6        |
| TC20000850.hg.1 | -2.38 | JUC20006031.hg.1 | CHD6        |
| TC01000511.hg.1 | -2.13 | PSR01007981.hg.1 | ZNF643      |
| TC01000511.hg.1 | -4.94 | JUC01004160.hg.1 | ZNF643      |
| TC02000245.hg.1 | -2.13 | PSR02003630.hg.1 | GALM        |
| TC02000245.hg.1 | -2.13 | JUC02001908.hg.1 | GALM        |
| TC02000245.hg.1 | -2.46 | JUC02001909.hg.1 | GALM        |
| TC02000245.hg.1 | -2.58 | PSR02003642.hg.1 | GALM        |
| TC02000245.hg.1 | -2.69 | JUC02001901.hg.1 | GALM        |
| TC02000245.hg.1 | -3.12 | JUC02001907.hg.1 | GALM        |
| TC02000245.hg.1 | -3.24 | PSR02003625.hg.1 | GALM        |
| TC02000245.hg.1 | -3.33 | PSR02003637.hg.1 | GALM        |
| TC02000245.hg.1 | -3.35 | PSR02003645.hg.1 | GALM        |
| TC02000245.hg.1 | -3.63 | PSR02003643.hg.1 | GALM        |
| TC02000245.hg.1 | -3.79 | PSR02003632.hg.1 | GALM        |
| TC02000802.hg.1 | -2.13 | PSR02012387.hg.1 | CCDC74B-AS  |
| TC02000802.hg.1 | -2.35 | JUC02006586.hg.1 | CCDC74B-AS  |
| TC04000182.hg.1 | -2.13 | JUC04001376.hg.1 | TBC1D19     |
| TC04000182.hg.1 | -2.54 | PSR04002945.hg.1 | TBC1D19     |
| TC04000182.hg.1 | -3.63 | PSR04002920.hg.1 | TBC1D19     |
| TC05000316.hg.1 | -2.13 | PSR05004238.hg.1 | SERF1B, SEF |
| TC05000316.hg.1 | -2.6  | JUC05002284.hg.1 | SERF1B, SEF |
| TC05001933.hg.1 | -2.13 | PSR05026730.hg.1 | PDGFRB      |
| TC05001933.hg.1 | -2.14 | PSR05026727.hg.1 | PDGFRB      |
| TC05001933.hg.1 | -2.19 | JUC05013600.hg.1 | PDGFRB      |
| TC05001933.hg.1 | -2.36 | PSR05026713.hg.1 | PDGFRB      |
| TC05001933.hg.1 | -2.56 | PSR05026708.hg.1 | PDGFRB      |
| TC05001933.hg.1 | -2.7  | PSR05026728.hg.1 | PDGFRB      |
| TC05001933.hg.1 | -2.91 | JUC05013618.hg.1 | PDGFRB      |
| TC05001933.hg.1 | -3.33 | PSR05026754.hg.1 | PDGFRB      |
| TC06000117.hg.1 | -2.13 | JUC06000578.hg.1 | KDM1B       |
| TC06000117.hg.1 | -2.17 | PSR06001245.hg.1 | KDM1B       |
| TC06000117.hg.1 | -2.41 | JUC06000598.hg.1 | KDM1B       |
| TC07001701.hg.1 | -2.13 | PSR07026229.hg.1 |             |
| TC07001701.hg.1 | -2.15 | PSR07026227.hg.1 |             |
| TC07001701.hg.1 | -6.82 | JUC07012881.hg.1 |             |
| TC08000185.hg.1 | -2.13 | JUC08001234.hg.1 | R3HCC1      |
| TC08000185.hg.1 | -2.24 | PSR08002417.hg.1 | R3HCC1      |
| TC08001130.hg.1 | -2.13 | PSR08014537.hg.1 |             |
| TC08001130.hg.1 | -3.25 | JUC08007410.hg.1 |             |
| TC09000491.hg.1 | -2.13 | JUC09002937.hg.1 | TMOD1       |
| TC09000491.hg.1 | -2.2  | JUC09002933.hg.1 | TMOD1       |
| TC09000491.hg.1 | -2.29 | PSR09005290.hg.1 | TMOD1       |
| TC09000491.hg.1 | -3.13 | JUC09002934.hg.1 | TMOD1       |
| TC09001408.hg.1 | -2.13 | JUC09009448.hg.1 | ANKS6       |
| TC09001408.hg.1 | -4.33 | PSR09017586.hg.1 | ANKS6       |
| TC0X001257.hg.1 | -2.13 | PSR0X016959.hg.1 | MORC4       |
| TC0X001257.hg.1 | -2.14 | JUC0X008631.hg.1 | MORC4       |
| TC0X001370.hg.1 | -2.13 | PSR0X018410.hg.1 | MBNL3       |
| TC0X001370.hg.1 | -2.17 | JUC0X009429.hg.1 | MBNL3       |
| TC0X001370.hg.1 | -2.18 | PSR0X018409.hg.1 | MBNL3       |
| TC0X001370.hg.1 | -2.24 | JUC0X009440.hg.1 | MBNL3       |

|                 |       |                  |         |
|-----------------|-------|------------------|---------|
| TC0X001370.hg.1 | -2.26 | PSR0X018408.hg.1 | MBNL3   |
| TC0X001370.hg.1 | -2.38 | PSR0X018435.hg.1 | MBNL3   |
| TC0X001370.hg.1 | -2.51 | PSR0X018423.hg.1 | MBNL3   |
| TC0X001370.hg.1 | -2.56 | JUC0X009425.hg.1 | MBNL3   |
| TC0X001370.hg.1 | -2.62 | PSR0X018424.hg.1 | MBNL3   |
| TC0X001370.hg.1 | -3.61 | JUC0X009439.hg.1 | MBNL3   |
| TC11001049.hg.1 | -2.13 | PSR11013081.hg.1 | TAGLN   |
| TC11001049.hg.1 | -2.14 | PSR11013078.hg.1 | TAGLN   |
| TC11001049.hg.1 | -2.17 | PSR11013082.hg.1 | TAGLN   |
| TC11001049.hg.1 | -2.51 | JUC11007005.hg.1 | TAGLN   |
| TC11002074.hg.1 | -2.13 | PSR11024851.hg.1 | UCP2    |
| TC11002074.hg.1 | -2.55 | JUC11013107.hg.1 | UCP2    |
| TC13000107.hg.1 | -2.13 | PSR13001050.hg.1 | EEF1DP3 |
| TC13000107.hg.1 | -2.28 | PSR13001049.hg.1 | EEF1DP3 |
| TC13000107.hg.1 | -2.7  | PSR13001058.hg.1 | EEF1DP3 |
| TC13000107.hg.1 | -2.86 | PSR13001055.hg.1 | EEF1DP3 |
| TC13000107.hg.1 | -3.05 | JUC13000621.hg.1 | EEF1DP3 |
| TC15000442.hg.1 | -2.13 | PSR15004195.hg.1 | LIPC    |
| TC15000442.hg.1 | -2.18 | JUC15002062.hg.1 | LIPC    |
| TC15000442.hg.1 | -2.44 | JUC15002068.hg.1 | LIPC    |
| TC15000442.hg.1 | -2.56 | PSR15004196.hg.1 | LIPC    |
| TC15000442.hg.1 | -2.58 | JUC15002069.hg.1 | LIPC    |
| TC15000442.hg.1 | -2.67 | PSR15004212.hg.1 | LIPC    |
| TC15000442.hg.1 | -2.82 | JUC15002073.hg.1 | LIPC    |
| TC15000442.hg.1 | -5.41 | JUC15002067.hg.1 | LIPC    |
| TC15001563.hg.1 | -2.13 | PSR15014924.hg.1 | PARP16  |
| TC15001563.hg.1 | -2.16 | PSR15014928.hg.1 | PARP16  |
| TC15001563.hg.1 | -3.14 | JUC15008067.hg.1 | PARP16  |
| TC15001563.hg.1 | -3.32 | JUC15008068.hg.1 | PARP16  |
| TC16000089.hg.1 | -2.13 | PSR16001643.hg.1 | FLYWCH1 |
| TC16000089.hg.1 | -2.21 | JUC16000776.hg.1 | FLYWCH1 |
| TC16000089.hg.1 | -2.23 | JUC16000769.hg.1 | FLYWCH1 |
| TC16000089.hg.1 | -2.75 | PSR16001637.hg.1 | FLYWCH1 |
| TC17000777.hg.1 | -2.13 | PSR17010127.hg.1 | MILR1   |
| TC17000777.hg.1 | -3.78 | JUC17005596.hg.1 | MILR1   |
| TC19000386.hg.1 | -2.13 | JUC19003057.hg.1 | ZNF85   |
| TC19000386.hg.1 | -2.35 | PSR19005187.hg.1 | ZNF85   |
| TC19000386.hg.1 | -2.49 | JUC19003053.hg.1 | ZNF85   |
| TC19000386.hg.1 | -3.55 | PSR19005180.hg.1 | ZNF85   |
| TC19001677.hg.1 | -2.13 | PSR19022864.hg.1 | CARD8   |
| TC19001677.hg.1 | -2.21 | JUC19013062.hg.1 | CARD8   |
| TC19001677.hg.1 | -2.35 | PSR19022868.hg.1 | CARD8   |
| TC19001677.hg.1 | -2.42 | PSR19022884.hg.1 | CARD8   |
| TC19001677.hg.1 | -5.95 | JUC19013069.hg.1 | CARD8   |
| TC22000297.hg.1 | -2.13 | PSR22005620.hg.1 | MAFF    |
| TC22000297.hg.1 | -2.58 | JUC22002065.hg.1 | MAFF    |
| TC22000297.hg.1 | -3.32 | PSR22005613.hg.1 | MAFF    |
| TC03000957.hg.1 | -2.14 | PSR03016561.hg.1 | USP13   |
| TC03000957.hg.1 | -2.19 | JUC03008437.hg.1 | USP13   |
| TC03000957.hg.1 | -2.21 | PSR03016562.hg.1 | USP13   |
| TC03000957.hg.1 | -2.21 | JUC03008428.hg.1 | USP13   |
| TC05001527.hg.1 | -2.14 | PSR05020930.hg.1 | SERINC5 |
| TC05001527.hg.1 | -2.15 | PSR05020925.hg.1 | SERINC5 |
| TC05001527.hg.1 | -2.25 | PSR05020924.hg.1 | SERINC5 |
| TC05001527.hg.1 | -2.29 | PSR05020926.hg.1 | SERINC5 |
| TC05001527.hg.1 | -2.33 | JUC05010806.hg.1 | SERINC5 |
| TC05001527.hg.1 | -3.09 | PSR05020940.hg.1 | SERINC5 |
| TC05001527.hg.1 | -3.25 | JUC05010812.hg.1 | SERINC5 |

|                 |       |                  |             |
|-----------------|-------|------------------|-------------|
| TC05001949.hg.1 | -2.14 | PSR05027134.hg.1 | CCDC69      |
| TC05001949.hg.1 | -2.23 | PSR05027151.hg.1 | CCDC69      |
| TC05001949.hg.1 | -2.65 | JUC05013821.hg.1 | CCDC69      |
| TC05001949.hg.1 | -2.82 | PSR05027152.hg.1 | CCDC69      |
| TC06000668.hg.1 | -2.14 | JUC06003554.hg.1 | LRRC1       |
| TC06000668.hg.1 | -2.16 | PSR06007986.hg.1 | LRRC1       |
| TC06000668.hg.1 | -2.41 | PSR06007988.hg.1 | LRRC1       |
| TC06000668.hg.1 | -3.44 | JUC06003550.hg.1 | LRRC1       |
| TC06000668.hg.1 | -4.46 | JUC06003560.hg.1 | LRRC1       |
| TC06000948.hg.1 | -2.14 | PSR06011035.hg.1 | PKIB        |
| TC06000948.hg.1 | -2.56 | PSR06011022.hg.1 | PKIB        |
| TC06000948.hg.1 | -7.41 | JUC06005260.hg.1 | PKIB        |
| TC06001293.hg.1 | -2.14 | PSR06015510.hg.1 | ATXN1       |
| TC06001293.hg.1 | -2.41 | PSR06015492.hg.1 | ATXN1       |
| TC06001293.hg.1 | -3.14 | JUC06007711.hg.1 | ATXN1       |
| TC07000505.hg.1 | -2.14 | PSR07007142.hg.1 | MAGI2-AS3   |
| TC07000505.hg.1 | -2.14 | PSR07007162.hg.1 | MAGI2-AS3   |
| TC07000505.hg.1 | -2.38 | PSR07007152.hg.1 | MAGI2-AS3   |
| TC07000505.hg.1 | -2.59 | PSR07007138.hg.1 | MAGI2-AS3   |
| TC07000505.hg.1 | -2.62 | PSR07007132.hg.1 | MAGI2-AS3   |
| TC07000505.hg.1 | -2.68 | JUC07003401.hg.1 | MAGI2-AS3   |
| TC07000505.hg.1 | -2.87 | PSR07007137.hg.1 | MAGI2-AS3   |
| TC07000505.hg.1 | -2.98 | PSR07007161.hg.1 | MAGI2-AS3   |
| TC07000505.hg.1 | -3.03 | PSR07007133.hg.1 | MAGI2-AS3   |
| TC07000505.hg.1 | -3.32 | PSR07007143.hg.1 | MAGI2-AS3   |
| TC07000505.hg.1 | -3.7  | PSR07007134.hg.1 | MAGI2-AS3   |
| TC07000505.hg.1 | -3.74 | PSR07007135.hg.1 | MAGI2-AS3   |
| TC07000505.hg.1 | -4.01 | PSR07007136.hg.1 | MAGI2-AS3   |
| TC07000505.hg.1 | -4.29 | PSR07007146.hg.1 | MAGI2-AS3   |
| TC07000505.hg.1 | -4.73 | PSR07007165.hg.1 | MAGI2-AS3   |
| TC07000505.hg.1 | -5.87 | JUC07003411.hg.1 | MAGI2-AS3   |
| TC07000505.hg.1 | -6.63 | JUC07003400.hg.1 | MAGI2-AS3   |
| TC07001054.hg.1 | -2.14 | JUC07007870.hg.1 | UBE3C       |
| TC07001054.hg.1 | -2.47 | JUC07007857.hg.1 | UBE3C       |
| TC07001054.hg.1 | -2.67 | PSR07016238.hg.1 | UBE3C       |
| TC07001054.hg.1 | -5.7  | JUC07007877.hg.1 | UBE3C       |
| TC0Y000358.hg.1 | -2.14 | JUC0Y001956.hg.1 | FAM197Y5, F |
| TC0Y000358.hg.1 | -2.26 | PSR0Y001487.hg.1 | FAM197Y5, F |
| TC0Y000358.hg.1 | -2.42 | PSR0Y001489.hg.1 | FAM197Y5, F |
| TC0Y000358.hg.1 | -2.65 | JUC0Y001959.hg.1 | FAM197Y5, F |
| TC10001744.hg.1 | -2.14 | PSR10023119.hg.1 | ADAM12      |
| TC10001744.hg.1 | -2.24 | PSR10023126.hg.1 | ADAM12      |
| TC10001744.hg.1 | -2.3  | JUC10013354.hg.1 | ADAM12      |
| TC10001744.hg.1 | -3.13 | JUC10013342.hg.1 | ADAM12      |
| TC10001744.hg.1 | -3.83 | PSR10023132.hg.1 | ADAM12      |
| TC10001744.hg.1 | -4.5  | JUC10013338.hg.1 | ADAM12      |
| TC11000483.hg.1 | -2.14 | PSR11005866.hg.1 | FAM111A     |
| TC11000483.hg.1 | -4.01 | JUC11003057.hg.1 | FAM111A     |
| TC14002296.hg.1 | -2.14 | PSR14002694.hg.1 | CTAGE5      |
| TC14002296.hg.1 | -2.43 | JUC14011671.hg.1 | CTAGE5      |
| TC15001335.hg.1 | -2.14 | PSR15012721.hg.1 | FBN1        |
| TC15001335.hg.1 | -3.66 | JUC15006775.hg.1 | FBN1        |
| TC16001104.hg.1 | -2.14 | PSR16015489.hg.1 | BRD7        |
| TC16001104.hg.1 | -2.6  | JUC16008676.hg.1 | BRD7        |
| TC17001164.hg.1 | -2.14 | PSR17015724.hg.1 | FAM18B2, CI |
| TC17001164.hg.1 | -2.28 | PSR17015725.hg.1 | FAM18B2, CI |
| TC17001164.hg.1 | -2.3  | PSR17015703.hg.1 | FAM18B2, CI |
| TC17001164.hg.1 | -2.36 | JUC17009041.hg.1 | FAM18B2, CI |



|                 |       |                  |             |
|-----------------|-------|------------------|-------------|
| TC17001164.hg.1 | -2.37 | PSR17015709.hg.1 | FAM18B2, CI |
| TC17001164.hg.1 | -2.42 | PSR17015718.hg.1 | FAM18B2, CI |
| TC17001164.hg.1 | -2.42 | JUC17009037.hg.1 | FAM18B2, CI |
| TC17001164.hg.1 | -2.51 | PSR17015717.hg.1 | FAM18B2, CI |
| TC17001924.hg.1 | -2.14 | JUC17014767.hg.1 | LGALS3BP    |
| TC17001924.hg.1 | -2.48 | PSR17026202.hg.1 | LGALS3BP    |
| TC17001924.hg.1 | -2.87 | JUC17014763.hg.1 | LGALS3BP    |
| TC19001077.hg.1 | -2.14 | JUC19008333.hg.1 | PLAC2       |
| TC19001077.hg.1 | -2.21 | PSR19014728.hg.1 | PLAC2       |
| TC19001077.hg.1 | -3.13 | PSR19014725.hg.1 | PLAC2       |
| TC19001643.hg.1 | -2.14 | PSR19022396.hg.1 | IGFL3       |
| TC19001643.hg.1 | -2.39 | PSR19022399.hg.1 | IGFL3       |
| TC19001643.hg.1 | -6.23 | JUC19012770.hg.1 | IGFL3       |
| TC20000764.hg.1 | -2.14 | PSR20010175.hg.1 | C20orf112   |
| TC20000764.hg.1 | -2.5  | JUC20005310.hg.1 | C20orf112   |
| TC20000764.hg.1 | -3.29 | PSR20010177.hg.1 | C20orf112   |
| TC6_apd_hap1000 | -2.14 | PSR6_apd_hap1000 | LOC554223   |
| TC6_apd_hap1000 | -4.9  | JUC6_apd_hap1000 | LOC554223   |
| TC6_cox_hap2000 | -2.14 | PSR6_cox_hap2000 | LOC554223   |
| TC6_cox_hap2000 | -4.9  | JUC6_cox_hap2000 | LOC554223   |
| TC01002935.hg.1 | -2.15 | JUC01024574.hg.1 | AMY1A, AMY  |
| TC01002935.hg.1 | -2.25 | PSR01045614.hg.1 | AMY1A, AMY  |
| TC02000460.hg.1 | -2.15 | PSR02007158.hg.1 | TTC31       |
| TC02000460.hg.1 | -2.75 | JUC02003651.hg.1 | TTC31       |
| TC02000794.hg.1 | -2.15 | PSR02012370.hg.1 |             |
| TC02000794.hg.1 | -3.13 | JUC02006581.hg.1 |             |
| TC03001590.hg.1 | -2.15 | JUC03014166.hg.1 | PROS1       |
| TC03001590.hg.1 | -2.38 | JUC03014179.hg.1 | PROS1       |
| TC03001590.hg.1 | -3.58 | JUC03014167.hg.1 | PROS1       |
| TC03001590.hg.1 | -3.66 | PSR03028708.hg.1 | PROS1       |
| TC03001590.hg.1 | -4.8  | PSR03028704.hg.1 | PROS1       |
| TC03001590.hg.1 | -4.95 | PSR03028699.hg.1 | PROS1       |
| TC03003411.hg.1 | -2.15 | PSR03025609.hg.1 | HYAL3       |
| TC03003411.hg.1 | -2.38 | JUC03024597.hg.1 | HYAL3       |
| TC04001682.hg.1 | -2.15 | PSR04023356.hg.1 | FAM198B, C4 |
| TC04001682.hg.1 | -2.33 | JUC04012349.hg.1 | FAM198B, C4 |
| TC04001682.hg.1 | -2.49 | PSR04023348.hg.1 | FAM198B, C4 |
| TC04001682.hg.1 | -2.49 | JUC04012345.hg.1 | FAM198B, C4 |
| TC04001682.hg.1 | -2.54 | PSR04023352.hg.1 | FAM198B, C4 |
| TC04001682.hg.1 | -2.68 | JUC04012348.hg.1 | FAM198B, C4 |
| TC04001682.hg.1 | -2.97 | JUC04012353.hg.1 | FAM198B, C4 |
| TC04001807.hg.1 | -2.15 | JUC04013051.hg.1 | CASP3       |
| TC04001807.hg.1 | -2.96 | PSR04024617.hg.1 | CASP3       |
| TC07000054.hg.1 | -2.15 | PSR07000881.hg.1 |             |
| TC07000054.hg.1 | -2.64 | JUC07000359.hg.1 |             |
| TC07000054.hg.1 | -3.02 | PSR07000878.hg.1 |             |
| TC07000054.hg.1 | -3.83 | JUC07000360.hg.1 |             |
| TC07000447.hg.1 | -2.15 | PSR07005938.hg.1 | CLDN4       |
| TC07000447.hg.1 | -2.32 | JUC07002866.hg.1 | CLDN4       |
| TC11001248.hg.1 | -2.15 | PSR11015789.hg.1 | PIDD        |
| TC11001248.hg.1 | -3.15 | JUC11008522.hg.1 | PIDD        |
| TC12000531.hg.1 | -2.15 | PSR12007001.hg.1 | MARS        |
| TC12000531.hg.1 | -2.18 | PSR12007028.hg.1 | MARS        |
| TC12000531.hg.1 | -2.47 | PSR12007024.hg.1 | MARS        |
| TC12000531.hg.1 | -2.7  | PSR12007031.hg.1 | MARS        |
| TC12000531.hg.1 | -2.89 | JUC12003680.hg.1 | MARS        |
| TC12000531.hg.1 | -3.54 | JUC12003697.hg.1 | MARS        |
| TC12000601.hg.1 | -2.15 | JUC12004165.hg.1 | RAP1B       |

|                  |       |                   |          |
|------------------|-------|-------------------|----------|
| TC12000601.hg.1  | -2.3  | JUC12004167.hg.1  | RAP1B    |
| TC12000601.hg.1  | -2.37 | PSR12007906.hg.1  | RAP1B    |
| TC14000458.hg.1  | -2.15 | PSR14005730.hg.1  | ISCA2    |
| TC14000458.hg.1  | -2.41 | PSR14005729.hg.1  | ISCA2    |
| TC14000458.hg.1  | -3.03 | JUC14002933.hg.1  | ISCA2    |
| TC14000628.hg.1  | -2.15 | PSR14007750.hg.1  | EML1     |
| TC14000628.hg.1  | -2.68 | JUC14003985.hg.1  | EML1     |
| TC15000742.hg.1  | -2.15 | PSR15006689.hg.1  | KIAA1024 |
| TC15000742.hg.1  | -2.25 | PSR15006687.hg.1  | KIAA1024 |
| TC15000742.hg.1  | -2.43 | PSR15006694.hg.1  | KIAA1024 |
| TC15000742.hg.1  | -2.52 | PSR15006690.hg.1  | KIAA1024 |
| TC15000742.hg.1  | -3.23 | JUC15003394.hg.1  | KIAA1024 |
| TC15000742.hg.1  | -3.29 | JUC15003395.hg.1  | KIAA1024 |
| TC15001079.hg.1  | -2.15 | PSR15009810.hg.1  | ATP10A   |
| TC15001079.hg.1  | -2.2  | PSR15009804.hg.1  | ATP10A   |
| TC15001079.hg.1  | -3.64 | JUC15005109.hg.1  | ATP10A   |
| TC16000332.hg.1  | -2.15 | JUC16002624.hg.1  | ASPHD1   |
| TC16000332.hg.1  | -2.33 | PSR16004761.hg.1  | ASPHD1   |
| TC17001807.hg.1  | -2.15 | JUC17013523.hg.1  | AMZ2P1   |
| TC17001807.hg.1  | -2.29 | JUC17013518.hg.1  | AMZ2P1   |
| TC17001807.hg.1  | -2.69 | PSR17024171.hg.1  | AMZ2P1   |
| TC17001807.hg.1  | -5.85 | JUC17013522.hg.1  | AMZ2P1   |
| TC6_cox_hap2000  | -2.15 | PSR6_cox_hap20030 | LY6G5C   |
| TC6_cox_hap2000  | -2.16 | PSR6_cox_hap20030 | LY6G5C   |
| TC6_cox_hap2000  | -2.26 | PSR6_cox_hap20030 | LY6G5C   |
| TC6_cox_hap2000  | -2.3  | PSR6_cox_hap20030 | LY6G5C   |
| TC6_cox_hap2000  | -2.32 | JUC6_cox_hap20010 | LY6G5C   |
| TC6_cox_hap2000  | -2.63 | PSR6_cox_hap20030 | LY6G5C   |
| TC6_cox_hap2000  | -2.84 | PSR6_cox_hap20030 | LY6G5C   |
| TC6_dbb_hap3000  | -2.15 | PSR6_dbb_hap30020 | LY6G5C   |
| TC6_dbb_hap3000  | -2.16 | PSR6_dbb_hap30020 | LY6G5C   |
| TC6_dbb_hap3000  | -2.26 | PSR6_dbb_hap30020 | LY6G5C   |
| TC6_dbb_hap3000  | -2.3  | PSR6_dbb_hap30020 | LY6G5C   |
| TC6_dbb_hap3000  | -2.32 | JUC6_dbb_hap30010 | LY6G5C   |
| TC6_dbb_hap3000  | -2.63 | PSR6_dbb_hap30020 | LY6G5C   |
| TC6_dbb_hap3000  | -2.84 | PSR6_dbb_hap30020 | LY6G5C   |
| TC6_mann_hap4000 | -2.15 | PSR6_mann_hap4000 | LY6G5C   |
| TC6_mann_hap4000 | -2.16 | PSR6_mann_hap4000 | LY6G5C   |
| TC6_mann_hap4000 | -2.26 | PSR6_mann_hap4000 | LY6G5C   |
| TC6_mann_hap4000 | -2.3  | PSR6_mann_hap4000 | LY6G5C   |
| TC6_mann_hap4000 | -2.32 | JUC6_mann_hap4000 | LY6G5C   |
| TC6_mann_hap4000 | -2.63 | PSR6_mann_hap4000 | LY6G5C   |
| TC6_mann_hap4000 | -2.84 | PSR6_mann_hap4000 | LY6G5C   |
| TC6_mcf_hap5000  | -2.15 | PSR6_mcf_hap50020 | LY6G5C   |
| TC6_mcf_hap5000  | -2.16 | PSR6_mcf_hap50020 | LY6G5C   |
| TC6_mcf_hap5000  | -2.26 | PSR6_mcf_hap50020 | LY6G5C   |
| TC6_mcf_hap5000  | -2.3  | PSR6_mcf_hap50020 | LY6G5C   |
| TC6_mcf_hap5000  | -2.32 | JUC6_mcf_hap50000 | LY6G5C   |
| TC6_mcf_hap5000  | -2.63 | PSR6_mcf_hap50020 | LY6G5C   |
| TC6_mcf_hap5000  | -2.84 | PSR6_mcf_hap50020 | LY6G5C   |
| TC6_qbl_hap6000  | -2.15 | PSR6_qbl_hap60029 | LY6G5C   |
| TC6_qbl_hap6000  | -2.16 | PSR6_qbl_hap60029 | LY6G5C   |
| TC6_qbl_hap6000  | -2.25 | PSR6_qbl_hap60029 | LY6G5C   |
| TC6_qbl_hap6000  | -2.3  | PSR6_qbl_hap60029 | LY6G5C   |
| TC6_qbl_hap6000  | -2.31 | JUC6_qbl_hap60011 | LY6G5C   |
| TC6_qbl_hap6000  | -2.63 | PSR6_qbl_hap60029 | LY6G5C   |
| TC6_qbl_hap6000  | -2.83 | PSR6_qbl_hap60029 | LY6G5C   |
| TC6_ssto_hap7000 | -2.15 | PSR6_ssto_hap7002 | LY6G5C   |

|                  |        |                   |            |
|------------------|--------|-------------------|------------|
| TC6_ssto_hap700C | -2.16  | PSR6_ssto_hap7002 | LY6G5C     |
| TC6_ssto_hap700C | -2.25  | PSR6_ssto_hap7002 | LY6G5C     |
| TC6_ssto_hap700C | -2.3   | PSR6_ssto_hap7002 | LY6G5C     |
| TC6_ssto_hap700C | -2.31  | JUC6_ssto_hap7001 | LY6G5C     |
| TC6_ssto_hap700C | -2.63  | PSR6_ssto_hap7002 | LY6G5C     |
| TC6_ssto_hap700C | -2.83  | PSR6_ssto_hap7002 | LY6G5C     |
| TC01000539.hg.1  | -2.16  | PSR01008513.hg.1  | FAM183A    |
| TC01000539.hg.1  | -2.59  | JUC01004386.hg.1  | FAM183A    |
| TC01000585.hg.1  | -2.16  | PSR01010000.hg.1  | FAAH       |
| TC01000585.hg.1  | -3.57  | JUC01005124.hg.1  | FAAH       |
| TC02000107.hg.1  | -2.16  | PSR02001281.hg.1  | KCNS3      |
| TC02000107.hg.1  | -2.75  | PSR02001283.hg.1  | KCNS3      |
| TC02000107.hg.1  | -2.99  | JUC02000716.hg.1  | KCNS3      |
| TC03000803.hg.1  | -2.16  | PSR03014459.hg.1  | HPS3       |
| TC03000803.hg.1  | -2.58  | JUC03007297.hg.1  | HPS3       |
| TC03000803.hg.1  | -2.59  | PSR03014462.hg.1  | HPS3       |
| TC03000803.hg.1  | -3.14  | JUC03007302.hg.1  | HPS3       |
| TC03000803.hg.1  | -16.84 | PSR03014463.hg.1  | HPS3       |
| TC03000803.hg.1  | -21.4  | PSR03014464.hg.1  | HPS3       |
| TC03000853.hg.1  | -2.16  | PSR03015100.hg.1  | TIPARP     |
| TC03000853.hg.1  | -2.58  | JUC03007667.hg.1  | TIPARP     |
| TC04001088.hg.1  | -2.16  | JUC04007973.hg.1  | CCDC149    |
| TC04001088.hg.1  | -2.38  | JUC04007986.hg.1  | CCDC149    |
| TC04001088.hg.1  | -2.39  | PSR04014972.hg.1  | CCDC149    |
| TC04001088.hg.1  | -2.45  | PSR04014981.hg.1  | CCDC149    |
| TC06001071.hg.1  | -2.16  | PSR06012679.hg.1  | STXBP5     |
| TC06001071.hg.1  | -2.22  | JUC06006232.hg.1  | STXBP5     |
| TC06001071.hg.1  | -2.4   | JUC06006212.hg.1  | STXBP5     |
| TC07000734.hg.1  | -2.16  | PSR07011718.hg.1  | ING3       |
| TC07000734.hg.1  | -2.23  | PSR07011721.hg.1  | ING3       |
| TC07000734.hg.1  | -2.35  | JUC07005488.hg.1  | ING3       |
| TC07000734.hg.1  | -2.87  | PSR07011719.hg.1  | ING3       |
| TC08000697.hg.1  | -2.16  | PSR08009410.hg.1  | NOV        |
| TC08000697.hg.1  | -2.31  | JUC08004797.hg.1  | NOV        |
| TC08000697.hg.1  | -6.6   | JUC08004798.hg.1  | NOV        |
| TC08000697.hg.1  | -8.1   | PSR08009403.hg.1  | NOV        |
| TC08002605.hg.1  | -2.16  | PSR08006151.hg.1  | C8orf46    |
| TC08002605.hg.1  | -2.79  | JUC08015086.hg.1  | C8orf46    |
| TC09002923.hg.1  | -2.16  | JUC09016094.hg.1  | GBGT1      |
| TC09002923.hg.1  | -2.24  | JUC09016104.hg.1  | GBGT1      |
| TC09002923.hg.1  | -2.3   | PSR09021529.hg.1  | GBGT1      |
| TC09002923.hg.1  | -2.7   | JUC09016093.hg.1  | GBGT1      |
| TC09002923.hg.1  | -3     | JUC09016095.hg.1  | GBGT1      |
| TC0Y000118.hg.1  | -2.16  | PSR0Y001342.hg.1  | ZBED1, DHR |
| TC0Y000118.hg.1  | -2.18  | PSR0Y001341.hg.1  | ZBED1, DHR |
| TC0Y000118.hg.1  | -2.18  | JUC0Y000858.hg.1  | ZBED1, DHR |
| TC0Y000118.hg.1  | -2.33  | JUC0Y000850.hg.1  | ZBED1, DHR |
| TC0Y000118.hg.1  | -2.36  | JUC0Y000859.hg.1  | ZBED1, DHR |
| TC0Y000118.hg.1  | -2.73  | PSR0Y001347.hg.1  | ZBED1, DHR |
| TC0Y000118.hg.1  | -3.45  | JUC0Y000856.hg.1  | ZBED1, DHR |
| TC11000302.hg.1  | -2.16  | JUC11002006.hg.1  | DNAJC24    |
| TC11000302.hg.1  | -2.22  | PSR11003843.hg.1  | DNAJC24    |
| TC11000630.hg.1  | -2.16  | PSR11007820.hg.1  |            |
| TC11000630.hg.1  | -2.63  | PSR11007819.hg.1  |            |
| TC11000630.hg.1  | -3     | JUC11004042.hg.1  |            |
| TC12001755.hg.1  | -2.16  | PSR12023268.hg.1  | CSRP2      |
| TC12001755.hg.1  | -2.84  | JUC12012849.hg.1  | CSRP2      |
| TC12001755.hg.1  | -3.07  | PSR12023270.hg.1  | CSRP2      |

|                 |       |                  |             |
|-----------------|-------|------------------|-------------|
| TC12001755.hg.1 | -5.8  | PSR12023264.hg.1 | CSRP2       |
| TC17001726.hg.1 | -2.16 | JUC17012839.hg.1 | MKS1        |
| TC17001726.hg.1 | -2.35 | PSR17023112.hg.1 | MKS1        |
| TC17001726.hg.1 | -2.36 | JUC17012849.hg.1 | MKS1        |
| TC19001576.hg.1 | -2.16 | PSR19021511.hg.1 | CEACAM8     |
| TC19001576.hg.1 | -2.35 | JUC19012322.hg.1 | CEACAM8     |
| TC6_mann_hap400 | -2.16 | JUC6_mann_hap400 | MICB        |
| TC6_mann_hap400 | -2.4  | PSR6_mann_hap400 | MICB        |
| TC6_mann_hap400 | -5.28 | JUC6_mann_hap400 | MICB        |
| TC01000086.hg.1 | -2.17 | PSR01001363.hg.1 | LINC00337   |
| TC01000086.hg.1 | -2.37 | PSR01001358.hg.1 | LINC00337   |
| TC01000086.hg.1 | -2.49 | PSR01001359.hg.1 | LINC00337   |
| TC01000086.hg.1 | -2.58 | PSR01001360.hg.1 | LINC00337   |
| TC01000086.hg.1 | -2.72 | JUC01000710.hg.1 | LINC00337   |
| TC02001973.hg.1 | -2.17 | PSR02031439.hg.1 | MCEE        |
| TC02001973.hg.1 | -2.18 | PSR02031440.hg.1 | MCEE        |
| TC02001973.hg.1 | -2.54 | JUC02016397.hg.1 | MCEE        |
| TC02001973.hg.1 | -2.66 | PSR02031429.hg.1 | MCEE        |
| TC02001973.hg.1 | -2.83 | PSR02031433.hg.1 | MCEE        |
| TC02002425.hg.1 | -2.17 | JUC02019774.hg.1 | NMI         |
| TC02002425.hg.1 | -2.77 | PSR02038052.hg.1 | NMI         |
| TC02002425.hg.1 | -3.24 | JUC02019776.hg.1 | NMI         |
| TC03000832.hg.1 | -2.17 | JUC03007510.hg.1 | MBNL1       |
| TC03000832.hg.1 | -2.34 | JUC03007519.hg.1 | MBNL1       |
| TC03000832.hg.1 | -2.37 | PSR03014845.hg.1 | MBNL1       |
| TC03000832.hg.1 | -2.42 | JUC03007526.hg.1 | MBNL1       |
| TC03000832.hg.1 | -4.23 | JUC03007537.hg.1 | MBNL1       |
| TC06000846.hg.1 | -2.17 | PSR06009983.hg.1 | AIM1        |
| TC06000846.hg.1 | -2.4  | JUC06004685.hg.1 | AIM1        |
| TC07001896.hg.1 | -2.17 | JUC07014522.hg.1 |             |
| TC07001896.hg.1 | -2.95 | PSR07029424.hg.1 |             |
| TC0X000909.hg.1 | -2.17 | JUC0X006106.hg.1 | EIF1AX      |
| TC0X000909.hg.1 | -2.58 | PSR0X012284.hg.1 | EIF1AX      |
| TC11003501.hg.1 | -2.17 | PSR11015366.hg.1 | LOC10013310 |
| TC11003501.hg.1 | -2.2  | JUC11019748.hg.1 | LOC10013310 |
| TC12001450.hg.1 | -2.17 | JUC12010611.hg.1 |             |
| TC12001450.hg.1 | -2.23 | PSR12018970.hg.1 |             |
| TC12001450.hg.1 | -2.46 | PSR12018971.hg.1 |             |
| TC14001364.hg.1 | -2.17 | PSR14015434.hg.1 | DIO2        |
| TC14001364.hg.1 | -2.38 | PSR14015433.hg.1 | DIO2        |
| TC14001364.hg.1 | -2.67 | PSR14015432.hg.1 | DIO2        |
| TC14001364.hg.1 | -2.93 | PSR14015431.hg.1 | DIO2        |
| TC14001364.hg.1 | -3.11 | JUC14007859.hg.1 | DIO2        |
| TC14001364.hg.1 | -3.17 | PSR14015422.hg.1 | DIO2        |
| TC14001364.hg.1 | -3.56 | JUC14007860.hg.1 | DIO2        |
| TC14001364.hg.1 | -5.35 | PSR14015441.hg.1 | DIO2        |
| TC14001364.hg.1 | -6.46 | JUC14007853.hg.1 | DIO2        |
| TC14001364.hg.1 | -8.85 | PSR14015443.hg.1 | DIO2        |
| TC14001436.hg.1 | -2.17 | PSR14016012.hg.1 | CCDC88C     |
| TC14001436.hg.1 | -2.8  | JUC14008209.hg.1 | CCDC88C     |
| TC14001436.hg.1 | -2.87 | JUC14008197.hg.1 | CCDC88C     |
| TC14002342.hg.1 | -2.17 | PSR14010977.hg.1 | MDP1        |
| TC14002342.hg.1 | -2.39 | JUC14012382.hg.1 | MDP1        |
| TC19001905.hg.1 | -2.17 | JUC19014611.hg.1 | ZNF814      |
| TC19001905.hg.1 | -2.22 | PSR19025802.hg.1 | ZNF814      |
| TC19001905.hg.1 | -2.23 | PSR19025809.hg.1 | ZNF814      |
| TC19001905.hg.1 | -2.28 | PSR19025806.hg.1 | ZNF814      |
| TC19001905.hg.1 | -2.28 | PSR19025808.hg.1 | ZNF814      |

|                 |       |                  |          |
|-----------------|-------|------------------|----------|
| TC19001905.hg.1 | -2.49 | PSR19025807.hg.1 | ZNF814   |
| TC19001905.hg.1 | -2.57 | PSR19025803.hg.1 | ZNF814   |
| TC22001427.hg.1 | -2.17 | JUC22008607.hg.1 | APOBEC3D |
| TC22001427.hg.1 | -2.17 | JUC22008608.hg.1 | APOBEC3D |
| TC22001427.hg.1 | -2.17 | JUC22008609.hg.1 | APOBEC3D |
| TC22001427.hg.1 | -2.2  | PSR22005800.hg.1 | APOBEC3D |
| TC22001427.hg.1 | -2.31 | JUC22008605.hg.1 | APOBEC3D |
| TC01001288.hg.1 | -2.18 | PSR01019903.hg.1 | EFNA1    |
| TC01001288.hg.1 | -2.2  | PSR01019905.hg.1 | EFNA1    |
| TC01001288.hg.1 | -2.36 | PSR01019908.hg.1 | EFNA1    |
| TC01001288.hg.1 | -2.44 | JUC01010696.hg.1 | EFNA1    |
| TC01001288.hg.1 | -6.59 | JUC01010699.hg.1 | EFNA1    |
| TC02000581.hg.1 | -2.18 | PSR02008876.hg.1 | ITPRIPL1 |
| TC02000581.hg.1 | -3.11 | PSR02008875.hg.1 | ITPRIPL1 |
| TC02000581.hg.1 | -3.41 | PSR02008877.hg.1 | ITPRIPL1 |
| TC02000581.hg.1 | -3.52 | JUC02004508.hg.1 | ITPRIPL1 |
| TC02000581.hg.1 | -3.63 | PSR02008883.hg.1 | ITPRIPL1 |
| TC02000706.hg.1 | -2.18 | PSR02010926.hg.1 | TTL      |
| TC02000706.hg.1 | -2.71 | JUC02005787.hg.1 | TTL      |
| TC03003324.hg.1 | -2.18 | PSR03013375.hg.1 | IL20RB   |
| TC03003324.hg.1 | -2.23 | PSR03013389.hg.1 | IL20RB   |
| TC03003324.hg.1 | -2.34 | JUC03023126.hg.1 | IL20RB   |
| TC03003324.hg.1 | -2.38 | PSR03013379.hg.1 | IL20RB   |
| TC03003324.hg.1 | -2.44 | JUC03023127.hg.1 | IL20RB   |
| TC03003324.hg.1 | -2.93 | JUC03023119.hg.1 | IL20RB   |
| TC03003324.hg.1 | -2.96 | JUC03023129.hg.1 | IL20RB   |
| TC03003324.hg.1 | -3.18 | PSR03013378.hg.1 | IL20RB   |
| TC03003324.hg.1 | -3.53 | PSR03013383.hg.1 | IL20RB   |
| TC05000343.hg.1 | -2.18 | JUC05002528.hg.1 | FCHO2    |
| TC05000343.hg.1 | -2.73 | JUC05002540.hg.1 | FCHO2    |
| TC05000343.hg.1 | -3.51 | PSR05004722.hg.1 | FCHO2    |
| TC11001203.hg.1 | -2.18 | PSR11015111.hg.1 | NTM      |
| TC11001203.hg.1 | -2.2  | PSR11015136.hg.1 | NTM      |
| TC11001203.hg.1 | -2.57 | PSR11015116.hg.1 | NTM      |
| TC11001203.hg.1 | -2.61 | PSR11015147.hg.1 | NTM      |
| TC11001203.hg.1 | -2.63 | PSR11015138.hg.1 | NTM      |
| TC11001203.hg.1 | -2.63 | JUC11008183.hg.1 | NTM      |
| TC11001203.hg.1 | -2.68 | PSR11015109.hg.1 | NTM      |
| TC11001203.hg.1 | -2.74 | PSR11015110.hg.1 | NTM      |
| TC11001203.hg.1 | -2.87 | PSR11015140.hg.1 | NTM      |
| TC11001203.hg.1 | -2.91 | JUC11008185.hg.1 | NTM      |
| TC11001203.hg.1 | -2.93 | PSR11015137.hg.1 | NTM      |
| TC11001203.hg.1 | -3.07 | PSR11015101.hg.1 | NTM      |
| TC11001203.hg.1 | -3.19 | JUC11008188.hg.1 | NTM      |
| TC11001203.hg.1 | -3.28 | PSR11015130.hg.1 | NTM      |
| TC11001203.hg.1 | -3.86 | PSR11015106.hg.1 | NTM      |
| TC11001203.hg.1 | -3.91 | PSR11015100.hg.1 | NTM      |
| TC11001203.hg.1 | -3.93 | PSR11015102.hg.1 | NTM      |
| TC11001203.hg.1 | -3.97 | PSR11015125.hg.1 | NTM      |
| TC11001203.hg.1 | -4.03 | PSR11015118.hg.1 | NTM      |
| TC11001203.hg.1 | -4.04 | PSR11015099.hg.1 | NTM      |
| TC11001203.hg.1 | -5.16 | PSR11015134.hg.1 | NTM      |
| TC11001203.hg.1 | -5.37 | JUC11008195.hg.1 | NTM      |
| TC11001203.hg.1 | -5.6  | PSR11015103.hg.1 | NTM      |
| TC20000588.hg.1 | -2.18 | JUC20004438.hg.1 | SLC23A2  |
| TC20000588.hg.1 | -2.98 | JUC20004436.hg.1 | SLC23A2  |
| TC20000588.hg.1 | -3.22 | PSR20008587.hg.1 | SLC23A2  |
| TC20000945.hg.1 | -2.18 | JUC20006776.hg.1 | SALL4    |

|                 |       |                  |           |
|-----------------|-------|------------------|-----------|
| TC20000945.hg.1 | -2.34 | PSR20013064.hg.1 | SALL4     |
| TC20000945.hg.1 | -2.95 | PSR20013063.hg.1 | SALL4     |
| TC20000945.hg.1 | -3.29 | JUC20006779.hg.1 | SALL4     |
| TC20000945.hg.1 | -3.37 | PSR20013065.hg.1 | SALL4     |
| TC20000945.hg.1 | -3.42 | PSR20013066.hg.1 | SALL4     |
| TC20000945.hg.1 | -3.7  | JUC20006780.hg.1 | SALL4     |
| TC20000945.hg.1 | -4.3  | JUC20006781.hg.1 | SALL4     |
| TC22000054.hg.1 | -2.18 | PSR22000693.hg.1 | RANBP1    |
| TC22000054.hg.1 | -2.21 | JUC22000317.hg.1 | RANBP1    |
| TC22000054.hg.1 | -2.27 | JUC22000319.hg.1 | RANBP1    |
| TC22000054.hg.1 | -3.3  | JUC22000318.hg.1 | RANBP1    |
| TC22000383.hg.1 | -2.18 | PSR22007423.hg.1 | FBLN1     |
| TC22000383.hg.1 | -2.18 | PSR22007467.hg.1 | FBLN1     |
| TC22000383.hg.1 | -2.3  | JUC22002801.hg.1 | FBLN1     |
| TC22000383.hg.1 | -2.36 | PSR22007418.hg.1 | FBLN1     |
| TC22000383.hg.1 | -2.38 | PSR22007461.hg.1 | FBLN1     |
| TC22000383.hg.1 | -2.43 | PSR22007414.hg.1 | FBLN1     |
| TC22000383.hg.1 | -2.49 | PSR22007429.hg.1 | FBLN1     |
| TC22000383.hg.1 | -2.53 | JUC22002802.hg.1 | FBLN1     |
| TC22000383.hg.1 | -3.06 | JUC22002805.hg.1 | FBLN1     |
| TC22000383.hg.1 | -3.54 | JUC22002822.hg.1 | FBLN1     |
| TC22000383.hg.1 | -4.24 | JUC22002797.hg.1 | FBLN1     |
| TC02001693.hg.1 | -2.19 | JUC02014292.hg.1 | SUPT7L    |
| TC02001693.hg.1 | -2.24 | PSR02027382.hg.1 | SUPT7L    |
| TC0X000622.hg.1 | -2.19 | JUC0X004161.hg.1 | SLC25A14  |
| TC0X000622.hg.1 | -2.68 | PSR0X008243.hg.1 | SLC25A14  |
| TC0X000622.hg.1 | -2.72 | PSR0X008216.hg.1 | SLC25A14  |
| TC12000434.hg.1 | -2.19 | PSR12005604.hg.1 | ESPL1     |
| TC12000434.hg.1 | -2.21 | JUC12003100.hg.1 | ESPL1     |
| TC12000434.hg.1 | -2.83 | JUC12003105.hg.1 | ESPL1     |
| TC12000434.hg.1 | -3.07 | PSR12005608.hg.1 | ESPL1     |
| TC12001136.hg.1 | -2.19 | PSR12014895.hg.1 | SCNN1A    |
| TC12001136.hg.1 | -2.69 | PSR12014889.hg.1 | SCNN1A    |
| TC12001136.hg.1 | -3.69 | JUC12008229.hg.1 | SCNN1A    |
| TC17000961.hg.1 | -2.19 | PSR17012707.hg.1 | DOC2B     |
| TC17000961.hg.1 | -3.09 | JUC17007224.hg.1 | DOC2B     |
| TC02001097.hg.1 | -2.2  | PSR02016425.hg.1 | FSIP2     |
| TC02001097.hg.1 | -2.41 | PSR02016399.hg.1 | FSIP2     |
| TC02001097.hg.1 | -2.55 | PSR02016422.hg.1 | FSIP2     |
| TC02001097.hg.1 | -2.59 | JUC02008747.hg.1 | FSIP2     |
| TC02001097.hg.1 | -3.03 | JUC02008751.hg.1 | FSIP2     |
| TC03001521.hg.1 | -2.2  | JUC03013572.hg.1 | THOC7     |
| TC03001521.hg.1 | -2.5  | PSR03027680.hg.1 | THOC7     |
| TC06002330.hg.1 | -2.2  | PSR06029229.hg.1 | THBS2     |
| TC06002330.hg.1 | -2.22 | PSR06029215.hg.1 | THBS2     |
| TC06002330.hg.1 | -2.27 | JUC06014647.hg.1 | THBS2     |
| TC06002330.hg.1 | -2.31 | PSR06029230.hg.1 | THBS2     |
| TC10000005.hg.1 | -2.2  | PSR10000065.hg.1 | C10orf108 |
| TC10000005.hg.1 | -2.37 | JUC10000035.hg.1 | C10orf108 |
| TC15000321.hg.1 | -2.2  | PSR15002621.hg.1 | HAUS2     |
| TC15000321.hg.1 | -3.21 | JUC15001245.hg.1 | HAUS2     |
| TC15000321.hg.1 | -3.36 | JUC15001251.hg.1 | HAUS2     |
| TC16002091.hg.1 | -2.2  | JUC16013925.hg.1 | TMEM231   |
| TC16002091.hg.1 | -2.41 | JUC16013924.hg.1 | TMEM231   |
| TC16002091.hg.1 | -2.57 | PSR16017845.hg.1 | TMEM231   |
| TC16002091.hg.1 | -3.07 | JUC16013927.hg.1 | TMEM231   |
| TC18000497.hg.1 | -2.2  | JUC18003483.hg.1 | ZBTB7C    |
| TC18000497.hg.1 | -2.38 | PSR18005169.hg.1 | ZBTB7C    |

|                 |       |                  |         |
|-----------------|-------|------------------|---------|
| TC18000497.hg.1 | -3.33 | JUC18003487.hg.1 | ZBTB7C  |
| TC20000879.hg.1 | -2.2  | JUC20006235.hg.1 | TP53TG5 |
| TC20000879.hg.1 | -2.35 | PSR20011990.hg.1 | TP53TG5 |
| TC22000535.hg.1 | -2.2  | PSR22009715.hg.1 | GGT2    |
| TC22000535.hg.1 | -2.46 | PSR22009705.hg.1 | GGT2    |
| TC22000535.hg.1 | -3.15 | JUC22003837.hg.1 | GGT2    |
| TC22000535.hg.1 | -3.27 | JUC22003860.hg.1 | GGT2    |
| TC22000535.hg.1 | -3.36 | JUC22003834.hg.1 | GGT2    |
| TC22000535.hg.1 | -17.6 | JUC22003842.hg.1 | GGT2    |
| TC22000889.hg.1 | -2.2  | JUC22006235.hg.1 | CELSR1  |
| TC22000889.hg.1 | -2.25 | PSR22014918.hg.1 | CELSR1  |
| TC22000889.hg.1 | -2.32 | PSR22014963.hg.1 | CELSR1  |
| TC22000889.hg.1 | -2.72 | PSR22014956.hg.1 | CELSR1  |
| TC22000889.hg.1 | -2.85 | JUC22006236.hg.1 | CELSR1  |
| TC22000889.hg.1 | -2.89 | JUC22006231.hg.1 | CELSR1  |
| TC22000889.hg.1 | -3.15 | PSR22014929.hg.1 | CELSR1  |
| TC22000889.hg.1 | -3.24 | PSR22014932.hg.1 | CELSR1  |
| TC22000889.hg.1 | -3.38 | JUC22006238.hg.1 | CELSR1  |
| TC22000889.hg.1 | -3.4  | PSR22014944.hg.1 | CELSR1  |
| TC22000889.hg.1 | -3.5  | PSR22014938.hg.1 | CELSR1  |
| TC22000889.hg.1 | -3.55 | PSR22014948.hg.1 | CELSR1  |
| TC22000889.hg.1 | -3.74 | PSR22014957.hg.1 | CELSR1  |
| TC22000889.hg.1 | -3.79 | JUC22006243.hg.1 | CELSR1  |
| TC22000889.hg.1 | -3.86 | JUC22006265.hg.1 | CELSR1  |
| TC22000889.hg.1 | -3.91 | JUC22006249.hg.1 | CELSR1  |
| TC22000889.hg.1 | -3.95 | PSR22014933.hg.1 | CELSR1  |
| TC22000889.hg.1 | -3.97 | JUC22006261.hg.1 | CELSR1  |
| TC22000889.hg.1 | -4.22 | PSR22014964.hg.1 | CELSR1  |
| TC22000889.hg.1 | -4.36 | JUC22006234.hg.1 | CELSR1  |
| TC22000889.hg.1 | -4.37 | PSR22014926.hg.1 | CELSR1  |
| TC22000889.hg.1 | -4.39 | JUC22006260.hg.1 | CELSR1  |
| TC22000889.hg.1 | -4.64 | PSR22014955.hg.1 | CELSR1  |
| TC22000889.hg.1 | -4.83 | PSR22014943.hg.1 | CELSR1  |
| TC22000889.hg.1 | -4.85 | PSR22014947.hg.1 | CELSR1  |
| TC22000889.hg.1 | -4.85 | JUC22006257.hg.1 | CELSR1  |
| TC22000889.hg.1 | -4.9  | PSR22014939.hg.1 | CELSR1  |
| TC22000889.hg.1 | -5.31 | PSR22014945.hg.1 | CELSR1  |
| TC22000889.hg.1 | -5.43 | PSR22014925.hg.1 | CELSR1  |
| TC22000889.hg.1 | -5.67 | JUC22006254.hg.1 | CELSR1  |
| TC22000889.hg.1 | -5.72 | PSR22014942.hg.1 | CELSR1  |
| TC22000889.hg.1 | -5.81 | PSR22014950.hg.1 | CELSR1  |
| TC22000889.hg.1 | -5.84 | PSR22014941.hg.1 | CELSR1  |
| TC22000889.hg.1 | -6.01 | PSR22014936.hg.1 | CELSR1  |
| TC22000889.hg.1 | -6.05 | PSR22014953.hg.1 | CELSR1  |
| TC22000889.hg.1 | -6.16 | PSR22014954.hg.1 | CELSR1  |
| TC22000889.hg.1 | -6.21 | PSR22014935.hg.1 | CELSR1  |
| TC22000889.hg.1 | -6.36 | PSR22014952.hg.1 | CELSR1  |
| TC22000889.hg.1 | -6.42 | PSR22014940.hg.1 | CELSR1  |
| TC22000889.hg.1 | -6.52 | PSR22014959.hg.1 | CELSR1  |
| TC22000889.hg.1 | -6.52 | PSR22014961.hg.1 | CELSR1  |
| TC22000889.hg.1 | -6.64 | JUC22006239.hg.1 | CELSR1  |
| TC22000889.hg.1 | -6.87 | PSR22014924.hg.1 | CELSR1  |
| TC22000889.hg.1 | -7.18 | PSR22014946.hg.1 | CELSR1  |
| TC22000889.hg.1 | -7.4  | JUC22006253.hg.1 | CELSR1  |
| TC22000889.hg.1 | -7.75 | PSR22014937.hg.1 | CELSR1  |
| TC22000889.hg.1 | -8.01 | PSR22014921.hg.1 | CELSR1  |
| TC22000889.hg.1 | -8.03 | PSR22014923.hg.1 | CELSR1  |
| TC22000889.hg.1 | -8.67 | PSR22014917.hg.1 | CELSR1  |

|                  |        |                   |          |
|------------------|--------|-------------------|----------|
| TC22000889.hg.1  | -8.7   | PSR22014931.hg.1  | CELSR1   |
| TC22000889.hg.1  | -8.91  | PSR22014919.hg.1  | CELSR1   |
| TC22000889.hg.1  | -9.04  | PSR22014922.hg.1  | CELSR1   |
| TC22000889.hg.1  | -9.96  | JUC22006262.hg.1  | CELSR1   |
| TC22000889.hg.1  | -10.22 | PSR22014934.hg.1  | CELSR1   |
| TC22000889.hg.1  | -10.95 | PSR22014920.hg.1  | CELSR1   |
| TC22000889.hg.1  | -11.97 | JUC22006241.hg.1  | CELSR1   |
| TC22000889.hg.1  | -12.19 | PSR22014930.hg.1  | CELSR1   |
| TC6_mann_hap400  | -2.2   | PSR6_mann_hap400  | HLA-DPB2 |
| TC6_mann_hap400  | -2.87  | PSR6_mann_hap400  | HLA-DPB2 |
| TC6_mann_hap400  | -3.48  | JUC6_mann_hap400  | HLA-DPB2 |
| TC6_mann_hap400  | -5.45  | JUC6_mann_hap400  | HLA-DPB2 |
| TC6_mann_hap400  | -29.21 | JUC6_mann_hap400  | HLA-DPB2 |
| TC6_qbl_hap60002 | -2.2   | PSR6_qbl_hap60018 | HLA-DPB2 |
| TC6_qbl_hap60002 | -2.87  | PSR6_qbl_hap60018 | HLA-DPB2 |
| TC6_qbl_hap60002 | -3.48  | JUC6_qbl_hap60017 | HLA-DPB2 |
| TC6_qbl_hap60002 | -5.45  | JUC6_qbl_hap60017 | HLA-DPB2 |
| TC6_qbl_hap60002 | -29.21 | JUC6_qbl_hap60017 | HLA-DPB2 |
| TC01000776.hg.1  | -2.21  | PSR01012348.hg.1  | ACADM    |
| TC01000776.hg.1  | -2.28  | PSR01012349.hg.1  | ACADM    |
| TC01000776.hg.1  | -3.02  | JUC01006489.hg.1  | ACADM    |
| TC01003218.hg.1  | -2.21  | PSR01049465.hg.1  | CDC42SE1 |
| TC01003218.hg.1  | -2.44  | PSR01049467.hg.1  | CDC42SE1 |
| TC01003218.hg.1  | -2.67  | JUC01026288.hg.1  | CDC42SE1 |
| TC01003298.hg.1  | -2.21  | PSR01050900.hg.1  | PBXIP1   |
| TC01003298.hg.1  | -2.53  | JUC01026881.hg.1  | PBXIP1   |
| TC02000280.hg.1  | -2.21  | JUC02002202.hg.1  | PRKCE    |
| TC02000280.hg.1  | -2.38  | PSR02004222.hg.1  | PRKCE    |
| TC02000280.hg.1  | -3.47  | JUC02002194.hg.1  | PRKCE    |
| TC04001403.hg.1  | -2.21  | PSR04019508.hg.1  | EIF4E    |
| TC04001403.hg.1  | -3.21  | JUC04010263.hg.1  | EIF4E    |
| TC05000165.hg.1  | -2.21  | JUC05001041.hg.1  | SLC1A3   |
| TC05000165.hg.1  | -2.23  | PSR05001875.hg.1  | SLC1A3   |
| TC05000165.hg.1  | -2.56  | PSR05001863.hg.1  | SLC1A3   |
| TC05000165.hg.1  | -2.77  | PSR05001855.hg.1  | SLC1A3   |
| TC05000165.hg.1  | -2.91  | JUC05001037.hg.1  | SLC1A3   |
| TC05000165.hg.1  | -3.17  | PSR05001870.hg.1  | SLC1A3   |
| TC05000165.hg.1  | -3.29  | JUC05001036.hg.1  | SLC1A3   |
| TC05000165.hg.1  | -3.37  | PSR05001891.hg.1  | SLC1A3   |
| TC05000165.hg.1  | -4.19  | PSR05001850.hg.1  | SLC1A3   |
| TC05000165.hg.1  | -4.21  | PSR05001884.hg.1  | SLC1A3   |
| TC05000165.hg.1  | -4.42  | PSR05001856.hg.1  | SLC1A3   |
| TC05000165.hg.1  | -4.69  | PSR05001857.hg.1  | SLC1A3   |
| TC05000165.hg.1  | -4.79  | PSR05001868.hg.1  | SLC1A3   |
| TC05000165.hg.1  | -4.91  | PSR05001893.hg.1  | SLC1A3   |
| TC05000165.hg.1  | -4.96  | JUC05001046.hg.1  | SLC1A3   |
| TC05000165.hg.1  | -5.45  | PSR05001866.hg.1  | SLC1A3   |
| TC05000165.hg.1  | -5.81  | PSR05001876.hg.1  | SLC1A3   |
| TC05000165.hg.1  | -6.01  | PSR05001862.hg.1  | SLC1A3   |
| TC05000723.hg.1  | -2.21  | PSR05010263.hg.1  | CYSTM1   |
| TC05000723.hg.1  | -2.43  | JUC05005438.hg.1  | CYSTM1   |
| TC05002081.hg.1  | -2.21  | PSR05028551.hg.1  |          |
| TC05002081.hg.1  | -2.59  | JUC05014573.hg.1  |          |
| TC06000737.hg.1  | -2.21  | JUC06004076.hg.1  | CD109    |
| TC06000737.hg.1  | -3.12  | PSR06008859.hg.1  | CD109    |
| TC07001612.hg.1  | -2.21  | JUC07012189.hg.1  | BET1     |
| TC07001612.hg.1  | -2.23  | PSR07024451.hg.1  | BET1     |
| TC07001612.hg.1  | -2.46  | PSR07024448.hg.1  | BET1     |



|                 |        |                  |            |
|-----------------|--------|------------------|------------|
| TC07001612.hg.1 | -2.48  | PSR07024452.hg.1 | BET1       |
| TC07001612.hg.1 | -2.62  | PSR07024447.hg.1 | BET1       |
| TC07003312.hg.1 | -2.21  | PSR07006934.hg.1 | CCDC146    |
| TC07003312.hg.1 | -2.32  | PSR07006931.hg.1 | CCDC146    |
| TC07003312.hg.1 | -2.32  | JUC07020670.hg.1 | CCDC146    |
| TC07003312.hg.1 | -2.75  | PSR07006932.hg.1 | CCDC146    |
| TC09001335.hg.1 | -2.21  | PSR09016737.hg.1 | OMD        |
| TC09001335.hg.1 | -2.9   | JUC09008990.hg.1 | OMD        |
| TC09001335.hg.1 | -16.19 | JUC09008989.hg.1 | OMD        |
| TC09001335.hg.1 | -19.46 | PSR09016739.hg.1 | OMD        |
| TC09001542.hg.1 | -2.21  | JUC09010539.hg.1 | C5         |
| TC09001542.hg.1 | -2.24  | JUC09010516.hg.1 | C5         |
| TC09001542.hg.1 | -2.24  | JUC09010544.hg.1 | C5         |
| TC09001542.hg.1 | -2.62  | PSR09019429.hg.1 | C5         |
| TC09001542.hg.1 | -2.65  | JUC09010538.hg.1 | C5         |
| TC09001695.hg.1 | -2.21  | PSR09021734.hg.1 | SARDH      |
| TC09001695.hg.1 | -2.32  | PSR09021736.hg.1 | SARDH      |
| TC09001695.hg.1 | -2.45  | JUC09011685.hg.1 | SARDH      |
| TC09001695.hg.1 | -2.96  | JUC09011672.hg.1 | SARDH      |
| TC09002895.hg.1 | -2.21  | PSR09016202.hg.1 | ISCA1      |
| TC09002895.hg.1 | -2.96  | JUC09015763.hg.1 | ISCA1      |
| TC0X000991.hg.1 | -2.21  | PSR0X013137.hg.1 | ZNF674     |
| TC0X000991.hg.1 | -2.53  | JUC0X006608.hg.1 | ZNF674     |
| TC0X000991.hg.1 | -2.78  | JUC0X006609.hg.1 | ZNF674     |
| TC0Y000142.hg.1 | -2.21  | PSR0Y001466.hg.1 | FAM197Y2P, |
| TC0Y000142.hg.1 | -2.41  | PSR0Y001463.hg.1 | FAM197Y2P, |
| TC0Y000142.hg.1 | -2.6   | PSR0Y001462.hg.1 | FAM197Y2P, |
| TC0Y000142.hg.1 | -2.68  | JUC0Y000910.hg.1 | FAM197Y2P, |
| TC0Y000142.hg.1 | -3.02  | PSR0Y001464.hg.1 | FAM197Y2P, |
| TC0Y000142.hg.1 | -3.31  | JUC0Y000914.hg.1 | FAM197Y2P, |
| TC11000206.hg.1 | -2.21  | JUC11001332.hg.1 | ARNTL      |
| TC11000206.hg.1 | -2.63  | JUC11001329.hg.1 | ARNTL      |
| TC11000206.hg.1 | -2.96  | JUC11001317.hg.1 | ARNTL      |
| TC11000206.hg.1 | -8.86  | PSR11002758.hg.1 | ARNTL      |
| TC12000207.hg.1 | -2.21  | JUC12001217.hg.1 | MGST1      |
| TC12000207.hg.1 | -3.25  | PSR12002583.hg.1 | MGST1      |
| TC12000674.hg.1 | -2.21  | PSR12008881.hg.1 |            |
| TC12000674.hg.1 | -2.29  | JUC12004775.hg.1 |            |
| TC14000297.hg.1 | -2.21  | PSR14003131.hg.1 | FRMD6      |
| TC14000297.hg.1 | -5.03  | JUC14001492.hg.1 | FRMD6      |
| TC16001135.hg.1 | -2.21  | PSR16015818.hg.1 | MT1G       |
| TC16001135.hg.1 | -2.89  | JUC16008874.hg.1 | MT1G       |
| TC19000012.hg.1 | -2.21  | PSR19000093.hg.1 | FSTL3      |
| TC19000012.hg.1 | -2.58  | JUC19000052.hg.1 | FSTL3      |
| TC19000117.hg.1 | -2.21  | PSR19001757.hg.1 | TNFSF9     |
| TC19000117.hg.1 | -3     | JUC19001025.hg.1 | TNFSF9     |
| TC19000990.hg.1 | -2.21  | PSR19013501.hg.1 | LPPR3      |
| TC19000990.hg.1 | -3.66  | JUC19007554.hg.1 | LPPR3      |
| TC20000822.hg.1 | -2.21  | JUC20005847.hg.1 | RBL1       |
| TC20000822.hg.1 | -2.31  | PSR20011314.hg.1 | RBL1       |
| TC02000695.hg.1 | -2.22  | PSR02010740.hg.1 | BCL2L11    |
| TC02000695.hg.1 | -2.38  | PSR02010748.hg.1 | BCL2L11    |
| TC02000695.hg.1 | -2.38  | JUC02005682.hg.1 | BCL2L11    |
| TC03001717.hg.1 | -2.22  | JUC03015551.hg.1 | ITGB5      |
| TC03001717.hg.1 | -2.27  | PSR03031225.hg.1 | ITGB5      |
| TC04000401.hg.1 | -2.22  | JUC04002741.hg.1 |            |
| TC04000401.hg.1 | -2.29  | PSR04005499.hg.1 |            |
| TC04000401.hg.1 | -3.39  | PSR04005500.hg.1 |            |

|                 |        |                  |             |
|-----------------|--------|------------------|-------------|
| TC06000327.hg.1 | -2.22  | PSR06002647.hg.1 |             |
| TC06000327.hg.1 | -3.39  | JUC06001184.hg.1 |             |
| TC06000327.hg.1 | -3.87  | JUC06001182.hg.1 |             |
| TC06000545.hg.1 | -2.22  | PSR06006033.hg.1 | FTSJD2      |
| TC06000545.hg.1 | -2.23  | JUC06002493.hg.1 | FTSJD2      |
| TC0X000727.hg.1 | -2.22  | PSR0X009365.hg.1 | HMGB3       |
| TC0X000727.hg.1 | -2.82  | PSR0X009370.hg.1 | HMGB3       |
| TC0X000727.hg.1 | -2.84  | JUC0X004750.hg.1 | HMGB3       |
| TC0X000727.hg.1 | -3.01  | PSR0X009369.hg.1 | HMGB3       |
| TC16000426.hg.1 | -2.22  | PSR16005892.hg.1 | GPT2        |
| TC16000426.hg.1 | -2.31  | JUC16003233.hg.1 | GPT2        |
| TC16000426.hg.1 | -2.35  | JUC16003224.hg.1 | GPT2        |
| TC22000850.hg.1 | -2.22  | PSR22014367.hg.1 | CYB5R3      |
| TC22000850.hg.1 | -4.91  | JUC22005906.hg.1 | CYB5R3      |
| TC22000850.hg.1 | -6.64  | JUC22005911.hg.1 | CYB5R3      |
| TC01003491.hg.1 | -2.23  | JUC01028289.hg.1 | DPT         |
| TC01003491.hg.1 | -15.29 | PSR01054273.hg.1 | DPT         |
| TC01003526.hg.1 | -2.23  | PSR01054687.hg.1 | LOC1005060  |
| TC01003526.hg.1 | -2.67  | PSR01054688.hg.1 | LOC1005060  |
| TC01003526.hg.1 | -2.74  | JUC01028529.hg.1 | LOC1005060  |
| TC03000168.hg.1 | -2.23  | PSR03003095.hg.1 | PDCD6IP     |
| TC03000168.hg.1 | -2.34  | JUC03001610.hg.1 | PDCD6IP     |
| TC04001092.hg.1 | -2.23  | PSR04015063.hg.1 | SEL1L3      |
| TC04001092.hg.1 | -2.34  | PSR04015050.hg.1 | SEL1L3      |
| TC04001092.hg.1 | -2.38  | PSR04015087.hg.1 | SEL1L3      |
| TC04001092.hg.1 | -2.44  | PSR04015060.hg.1 | SEL1L3      |
| TC04001092.hg.1 | -2.47  | PSR04015088.hg.1 | SEL1L3      |
| TC04001092.hg.1 | -2.63  | PSR04015085.hg.1 | SEL1L3      |
| TC04001092.hg.1 | -2.71  | PSR04015048.hg.1 | SEL1L3      |
| TC04001092.hg.1 | -3.35  | JUC04008025.hg.1 | SEL1L3      |
| TC04001092.hg.1 | -3.62  | PSR04015044.hg.1 | SEL1L3      |
| TC04001092.hg.1 | -4.05  | JUC04008024.hg.1 | SEL1L3      |
| TC05000657.hg.1 | -2.23  | PSR05009081.hg.1 | TCF7        |
| TC05000657.hg.1 | -2.37  | PSR05009044.hg.1 | TCF7        |
| TC05000657.hg.1 | -2.45  | JUC05004892.hg.1 | TCF7        |
| TC05000657.hg.1 | -2.7   | JUC05004885.hg.1 | TCF7        |
| TC07003310.hg.1 | -2.23  | PSR07006905.hg.1 | UPK3B       |
| TC07003310.hg.1 | -2.38  | JUC07020623.hg.1 | UPK3B       |
| TC08001032.hg.1 | -2.23  | JUC08006820.hg.1 | NUDT18      |
| TC08001032.hg.1 | -2.85  | PSR08013124.hg.1 | NUDT18      |
| TC08001184.hg.1 | -2.23  | PSR08015266.hg.1 | RNF170, MIR |
| TC08001184.hg.1 | -2.48  | JUC08007832.hg.1 | RNF170, MIR |
| TC10000702.hg.1 | -2.23  | PSR10008156.hg.1 | MARVELD1    |
| TC10000702.hg.1 | -3.13  | JUC10004561.hg.1 | MARVELD1    |
| TC02000172.hg.1 | -2.24  | JUC02001166.hg.1 | LOC1005056  |
| TC02000172.hg.1 | -2.63  | PSR02002244.hg.1 | LOC1005056  |
| TC02000172.hg.1 | -3.56  | PSR02002243.hg.1 | LOC1005056  |
| TC02000403.hg.1 | -2.24  | PSR02006067.hg.1 | ANTXR1      |
| TC02000403.hg.1 | -2.59  | PSR02006074.hg.1 | ANTXR1      |
| TC02000403.hg.1 | -3.36  | JUC02003161.hg.1 | ANTXR1      |
| TC02000403.hg.1 | -3.53  | PSR02006079.hg.1 | ANTXR1      |
| TC02000403.hg.1 | -4.37  | PSR02006078.hg.1 | ANTXR1      |
| TC02002838.hg.1 | -2.24  | PSR02045853.hg.1 | SLC19A3     |
| TC02002838.hg.1 | -3.23  | JUC02023986.hg.1 | SLC19A3     |
| TC04001703.hg.1 | -2.24  | JUC04012457.hg.1 | TRIM61      |
| TC04001703.hg.1 | -2.93  | PSR04023558.hg.1 | TRIM61      |
| TC04001703.hg.1 | -3.12  | PSR04023559.hg.1 | TRIM61      |
| TC06001089.hg.1 | -2.24  | JUC06006323.hg.1 | ULBP1       |

|                 |       |                          |              |
|-----------------|-------|--------------------------|--------------|
| TC06001089.hg.1 | -2.47 | PSR06012865.hg.1         | ULBP1        |
| TC10000401.hg.1 | -2.24 | JUC10002588.hg.1         | MYPN         |
| TC10000401.hg.1 | -2.68 | JUC10002572.hg.1         | MYPN         |
| TC10000401.hg.1 | -2.78 | PSR10004463.hg.1         | MYPN         |
| TC10000401.hg.1 | -2.83 | JUC10002573.hg.1         | MYPN         |
| TC10000401.hg.1 | -5.45 | JUC10002585.hg.1         | MYPN         |
| TC12001866.hg.1 | -2.24 | PSR12024474.hg.1         | GOLGA2P5     |
| TC12001866.hg.1 | -2.36 | JUC12013630.hg.1         | GOLGA2P5     |
| TC12001866.hg.1 | -3.46 | JUC12013632.hg.1         | GOLGA2P5     |
| TC12001866.hg.1 | -3.92 | JUC12013616.hg.1         | GOLGA2P5     |
| TC01001118.hg.1 | -2.25 | PSR01017656.hg.1         | GPR89C, GP   |
| TC01001118.hg.1 | -2.9  | JUC01009713.hg.1         | GPR89C, GP   |
| TC01001900.hg.1 | -2.25 | JUC01015969.hg.1         | RAB4A, SPH,  |
| TC01001900.hg.1 | -2.47 | PSR01029569.hg.1         | RAB4A, SPH,  |
| TC03000382.hg.1 | -2.25 | JUC03004112.hg.1         |              |
| TC03000382.hg.1 | -2.34 | PSR03008312.hg.1         |              |
| TC03003319.hg.1 | -2.25 | JUC03023066.hg.1         | NXPE3        |
| TC03003319.hg.1 | -2.34 | PSR03009737.hg.1         | NXPE3        |
| TC04000441.hg.1 | -2.25 | PSR04006375.hg.1         | LOC1005058   |
| TC04000441.hg.1 | -2.4  | PSR04006376.hg.1         | LOC1005058   |
| TC04000441.hg.1 | -2.42 | PSR04006366.hg.1         | LOC1005058   |
| TC04000441.hg.1 | -2.51 | JUC04003239.hg.1         | LOC1005058   |
| TC04000441.hg.1 | -2.79 | PSR04006367.hg.1         | LOC1005058   |
| TC04000441.hg.1 | -2.96 | PSR04006372.hg.1         | LOC1005058   |
| TC04000441.hg.1 | -3.16 | PSR04006369.hg.1         | LOC1005058   |
| TC04000441.hg.1 | -3.92 | PSR04006358.hg.1         | LOC1005058   |
| TC04000441.hg.1 | -4.09 | PSR04006374.hg.1         | LOC1005058   |
| TC04000441.hg.1 | -4.09 | JUC04003245.hg.1         | LOC1005058   |
| TC04000441.hg.1 | -4.36 | PSR04006368.hg.1         | LOC1005058   |
| TC04000441.hg.1 | -4.46 | PSR04006362.hg.1         | LOC1005058   |
| TC04000441.hg.1 | -4.58 | JUC04003236.hg.1         | LOC1005058   |
| TC04000441.hg.1 | -4.88 | PSR04006380.hg.1         | LOC1005058   |
| TC04000441.hg.1 | -5.76 | PSR04006363.hg.1         | LOC1005058   |
| TC06000346.hg.1 | -2.25 | JUC06001343.hg.1         | MDC1-AS1     |
| TC06000346.hg.1 | -2.69 | PSR06003050.hg.1         | MDC1-AS1     |
| TC09000957.hg.1 | -2.25 | PSR09012710.hg.1         | KLHL9        |
| TC09000957.hg.1 | -3    | JUC09006933.hg.1         | KLHL9        |
| TC09000957.hg.1 | -3.07 | JUC09006935.hg.1         | KLHL9        |
| TC14002322.hg.1 | -2.25 | PSR14013370.hg.1         | C14orf37     |
| TC14002322.hg.1 | -2.96 | JUC14012092.hg.1         | C14orf37     |
| TC15000436.hg.1 | -2.25 | PSR15004064.hg.1         | LOC283663    |
| TC15000436.hg.1 | -2.5  | JUC15001973.hg.1         | LOC283663    |
| TC16001257.hg.1 | -2.25 | JUC16009966.hg.1         | PMFBP1       |
| TC16001257.hg.1 | -2.45 | PSR16017545.hg.1         | PMFBP1       |
| TC16001257.hg.1 | -4.52 | JUC16009961.hg.1         | PMFBP1       |
| TC19000521.hg.1 | -2.25 | JUC19004104.hg.1         | SIPA1L3      |
| TC19000521.hg.1 | -2.35 | JUC19004090.hg.1         | SIPA1L3      |
| TC19000521.hg.1 | -2.46 | PSR19006927.hg.1         | SIPA1L3      |
| TC20000946.hg.1 | -2.25 | PSR20013070.hg.1         |              |
| TC20000946.hg.1 | -2.34 | PSR20013071.hg.1         |              |
| TC20000946.hg.1 | -2.34 | JUC20006785.hg.1         |              |
| TC20001004.hg.1 | -2.25 | JUC20007103.hg.1         | MIR1257, TAF |
| TC20001004.hg.1 | -2.31 | JUC20007113.hg.1         | MIR1257, TAF |
| TC20001004.hg.1 | -3.83 | PSR20013667.hg.1         | MIR1257, TAF |
| TC6_apd_hap1000 | -2.25 | JUC6_apd_hap1000126.hg.1 |              |
| TC6_apd_hap1000 | -2.69 | PSR6_apd_hap1000300.hg.1 |              |
| TC6_cox_hap2000 | -2.25 | JUC6_cox_hap2000273.hg.1 |              |
| TC6_cox_hap2000 | -2.69 | PSR6_cox_hap2000579.hg.1 |              |

|                  |       |                           |             |
|------------------|-------|---------------------------|-------------|
| TC6_dbb_hap3000  | -2.25 | JUC6_dbb_hap3000214.hg.1  |             |
| TC6_dbb_hap3000  | -2.69 | PSR6_dbb_hap3000568.hg.1  |             |
| TC6_mann_hap4000 | -2.25 | JUC6_mann_hap4000238.hg.1 |             |
| TC6_mann_hap4000 | -2.69 | PSR6_mann_hap4000559.hg.1 |             |
| TC6_mcf_hap5000  | -2.25 | JUC6_mcf_hap5000177.hg.1  |             |
| TC6_mcf_hap5000  | -2.69 | PSR6_mcf_hap5000468.hg.1  |             |
| TC6_ssto_hap7000 | -2.25 | JUC6_ssto_hap7000234.hg.1 |             |
| TC6_ssto_hap7000 | -2.69 | PSR6_ssto_hap7000562.hg.1 |             |
| TC03001881.hg.1  | -2.26 | PSR03033874.hg.1          |             |
| TC03001881.hg.1  | -2.47 | JUC03016831.hg.1          |             |
| TC03001881.hg.1  | -2.76 | JUC03016829.hg.1          |             |
| TC04001508.hg.1  | -2.26 | JUC04011252.hg.1          | PRDM5       |
| TC04001508.hg.1  | -2.31 | PSR04021385.hg.1          | PRDM5       |
| TC04001508.hg.1  | -2.47 | JUC04011249.hg.1          | PRDM5       |
| TC04001508.hg.1  | -2.53 | PSR04021383.hg.1          | PRDM5       |
| TC05000151.hg.1  | -2.26 | JUC05000869.hg.1          | RAI14       |
| TC05000151.hg.1  | -2.53 | PSR05001589.hg.1          | RAI14       |
| TC05001687.hg.1  | -2.26 | JUC05011849.hg.1          | PGGT1B      |
| TC05001687.hg.1  | -2.39 | JUC05011842.hg.1          | PGGT1B      |
| TC05001687.hg.1  | -2.42 | PSR05022885.hg.1          | PGGT1B      |
| TC07003335.hg.1  | -2.26 | JUC07021042.hg.1          | CLDN12      |
| TC07003335.hg.1  | -2.66 | PSR07007759.hg.1          | CLDN12      |
| TC08000545.hg.1  | -2.26 | JUC08003701.hg.1          | RIPK2       |
| TC08000545.hg.1  | -2.35 | PSR08007436.hg.1          | RIPK2       |
| TC12003264.hg.1  | -2.26 | PSR12013334.hg.1          | FAM101A, ZN |
| TC12003264.hg.1  | -2.63 | JUC12020249.hg.1          | FAM101A, ZN |
| TC14000417.hg.1  | -2.26 | PSR14005035.hg.1          | KIAA0247    |
| TC14000417.hg.1  | -2.45 | PSR14005037.hg.1          | KIAA0247    |
| TC14000417.hg.1  | -3.81 | JUC14002576.hg.1          | KIAA0247    |
| TC16000358.hg.1  | -2.26 | JUC16002843.hg.1          | RNF40       |
| TC16000358.hg.1  | -2.5  | PSR16005215.hg.1          | RNF40       |
| TC02002463.hg.1  | -2.27 | PSR02038702.hg.1          | WDSUB1      |
| TC02002463.hg.1  | -3.26 | JUC02020280.hg.1          | WDSUB1      |
| TC05000355.hg.1  | -2.27 | PSR05004914.hg.1          | RGNEF       |
| TC05000355.hg.1  | -2.6  | JUC05002634.hg.1          | RGNEF       |
| TC06000742.hg.1  | -2.27 | PSR06008914.hg.1          |             |
| TC06000742.hg.1  | -2.34 | JUC06004101.hg.1          |             |
| TC06000742.hg.1  | -2.83 | JUC06004097.hg.1          |             |
| TC12000679.hg.1  | -2.27 | PSR12008931.hg.1          | TMTC2       |
| TC12000679.hg.1  | -3.54 | JUC12004804.hg.1          | TMTC2       |
| TC15000965.hg.1  | -2.27 | PSR15008942.hg.1          |             |
| TC15000965.hg.1  | -2.52 | JUC15004734.hg.1          |             |
| TC22000610.hg.1  | -2.27 | PSR22010733.hg.1          | TPST2       |
| TC22000610.hg.1  | -2.77 | JUC22004343.hg.1          | TPST2       |
| TC01003102.hg.1  | -2.28 | JUC01025812.hg.1          |             |
| TC01003102.hg.1  | -2.53 | PSR01048114.hg.1          |             |
| TC01003102.hg.1  | -2.57 | PSR01048110.hg.1          |             |
| TC01003102.hg.1  | -3.51 | JUC01025818.hg.1          |             |
| TC01003102.hg.1  | -3.54 | PSR01048116.hg.1          |             |
| TC01003102.hg.1  | -4.01 | PSR01048115.hg.1          |             |
| TC01003102.hg.1  | -4.71 | PSR01048117.hg.1          |             |
| TC01003102.hg.1  | -5.39 | PSR01048118.hg.1          |             |
| TC01003102.hg.1  | -6.61 | PSR01048119.hg.1          |             |
| TC04001222.hg.1  | -2.28 | PSR04016726.hg.1          | HOPX        |
| TC04001222.hg.1  | -2.29 | PSR04016720.hg.1          | HOPX        |
| TC04001222.hg.1  | -2.41 | PSR04016719.hg.1          | HOPX        |
| TC04001222.hg.1  | -2.56 | PSR04016727.hg.1          | HOPX        |
| TC04001222.hg.1  | -2.57 | PSR04016730.hg.1          | HOPX        |

|                  |        |                          |             |
|------------------|--------|--------------------------|-------------|
| TC04001222.hg.1  | -2.62  | PSR04016711.hg.1         | HOPX        |
| TC04001222.hg.1  | -2.66  | PSR04016714.hg.1         | HOPX        |
| TC04001222.hg.1  | -2.85  | PSR04016713.hg.1         | HOPX        |
| TC04001222.hg.1  | -3     | PSR04016715.hg.1         | HOPX        |
| TC04001222.hg.1  | -3.61  | JUC04008906.hg.1         | HOPX        |
| TC04001222.hg.1  | -3.84  | PSR04016729.hg.1         | HOPX        |
| TC04001222.hg.1  | -3.95  | JUC04008912.hg.1         | HOPX        |
| TC04001222.hg.1  | -4     | JUC04008905.hg.1         | HOPX        |
| TC04001222.hg.1  | -4.51  | PSR04016732.hg.1         | HOPX        |
| TC05000345.hg.1  | -2.28  | PSR05004751.hg.1         | TMEM171     |
| TC05000345.hg.1  | -2.38  | PSR05004759.hg.1         | TMEM171     |
| TC05000345.hg.1  | -3.65  | PSR05004754.hg.1         | TMEM171     |
| TC05000345.hg.1  | -3.69  | JUC05002555.hg.1         | TMEM171     |
| TC05000569.hg.1  | -2.28  | PSR05007969.hg.1         | PRR16       |
| TC05000569.hg.1  | -2.51  | JUC05004343.hg.1         | PRR16       |
| TC09000351.hg.1  | -2.28  | JUC09002004.hg.1         | PCA3        |
| TC09000351.hg.1  | -2.35  | PSR09003740.hg.1         | PCA3        |
| TC10001771.hg.1  | -2.28  | PSR10023383.hg.1         | STK32C      |
| TC10001771.hg.1  | -3.22  | PSR10023382.hg.1         | STK32C      |
| TC10001771.hg.1  | -3.32  | PSR10023381.hg.1         | STK32C      |
| TC10001771.hg.1  | -4.05  | JUC10013493.hg.1         | STK32C      |
| TC11000238.hg.1  | -2.28  | JUC11001550.hg.1         | SAA1, RN5S3 |
| TC11000238.hg.1  | -2.47  | JUC11001551.hg.1         | SAA1, RN5S3 |
| TC11000238.hg.1  | -3.15  | JUC11001547.hg.1         | SAA1, RN5S3 |
| TC11000238.hg.1  | -8.01  | PSR11003124.hg.1         | SAA1, RN5S3 |
| TC11000238.hg.1  | -8.92  | PSR11003127.hg.1         | SAA1, RN5S3 |
| TC11000238.hg.1  | -12.42 | PSR11003128.hg.1         | SAA1, RN5S3 |
| TC11000238.hg.1  | -23.23 | PSR11003121.hg.1         | SAA1, RN5S3 |
| TC11001186.hg.1  | -2.28  | PSR11014949.hg.1         | KCNJ5       |
| TC11001186.hg.1  | -2.31  | JUC11008081.hg.1         | KCNJ5       |
| TC13000435.hg.1  | -2.28  | PSR13004931.hg.1         | CDC16       |
| TC13000435.hg.1  | -2.67  | JUC13002963.hg.1         | CDC16       |
| TC6_qbl_hap60000 | -2.28  | JUC6_qbl_hap6000242.hg.1 |             |
| TC6_qbl_hap60000 | -2.94  | PSR6_qbl_hap6000565.hg.1 |             |
| TC01000543.hg.1  | -2.29  | PSR01008632.hg.1         | TIE1        |
| TC01000543.hg.1  | -5.32  | JUC01004422.hg.1         | TIE1        |
| TC02001206.hg.1  | -2.29  | JUC02009951.hg.1         | NRP2        |
| TC02001206.hg.1  | -2.4   | PSR02018569.hg.1         | NRP2        |
| TC02001206.hg.1  | -2.51  | PSR02018544.hg.1         | NRP2        |
| TC02001206.hg.1  | -3.44  | JUC02009932.hg.1         | NRP2        |
| TC02001206.hg.1  | -4.22  | JUC02009953.hg.1         | NRP2        |
| TC02002674.hg.1  | -2.29  | PSR02043024.hg.1         | TRAK2       |
| TC02002674.hg.1  | -2.67  | JUC02022504.hg.1         | TRAK2       |
| TC06000985.hg.1  | -2.29  | JUC06005650.hg.1         | ENPP1       |
| TC06000985.hg.1  | -4.05  | PSR06011669.hg.1         | ENPP1       |
| TC02000104.hg.1  | -2.3   | JUC02000688.hg.1         | VSNL1       |
| TC02000104.hg.1  | -2.45  | PSR02001221.hg.1         | VSNL1       |
| TC02000104.hg.1  | -2.59  | JUC02000685.hg.1         | VSNL1       |
| TC02000104.hg.1  | -3.54  | PSR02001226.hg.1         | VSNL1       |
| TC02000104.hg.1  | -4.05  | PSR02001231.hg.1         | VSNL1       |
| TC02000104.hg.1  | -4.5   | JUC02000687.hg.1         | VSNL1       |
| TC02000104.hg.1  | -16.89 | JUC02000686.hg.1         | VSNL1       |
| TC02000104.hg.1  | -18.62 | PSR02001222.hg.1         | VSNL1       |
| TC02000104.hg.1  | -19.38 | PSR02001216.hg.1         | VSNL1       |
| TC02000104.hg.1  | -20.43 | JUC02000690.hg.1         | VSNL1       |
| TC02000104.hg.1  | -23.92 | PSR02001224.hg.1         | VSNL1       |
| TC02000104.hg.1  | -24.72 | JUC02000689.hg.1         | VSNL1       |
| TC02000104.hg.1  | -27.43 | PSR02001217.hg.1         | VSNL1       |

|                  |        |                   |            |
|------------------|--------|-------------------|------------|
| TC02000104.hg.1  | -37.84 | PSR02001234.hg.1  | VSNL1      |
| TC06000416.hg.1  | -2.3   | JUC06001891.hg.1  | HCG25      |
| TC06000416.hg.1  | -2.32  | JUC06001892.hg.1  | HCG25      |
| TC06000416.hg.1  | -3.51  | PSR06004891.hg.1  | HCG25      |
| TC06004148.hg.1  | -2.3   | PSR06016606.hg.1  | OR11A1     |
| TC06004148.hg.1  | -2.57  | JUC06021942.hg.1  | OR11A1     |
| TC07003390.hg.1  | -2.3   | PSR07003024.hg.1  | ZNRF2      |
| TC07003390.hg.1  | -2.5   | JUC07021780.hg.1  | ZNRF2      |
| TC07003390.hg.1  | -3.09  | PSR07003019.hg.1  | ZNRF2      |
| TC08002612.hg.1  | -2.3   | PSR08013467.hg.1  | ENTPD4     |
| TC08002612.hg.1  | -2.59  | PSR08013458.hg.1  | ENTPD4     |
| TC08002612.hg.1  | -2.71  | PSR08013459.hg.1  | ENTPD4     |
| TC08002612.hg.1  | -3.23  | JUC08015180.hg.1  | ENTPD4     |
| TC17000357.hg.1  | -2.3   | PSR17004475.hg.1  | ADAP2      |
| TC17000357.hg.1  | -2.54  | JUC17002533.hg.1  | ADAP2      |
| TC6_cox_hap2000  | -2.3   | JUC6_cox_hap20007 | HCG25      |
| TC6_cox_hap2000  | -2.32  | JUC6_cox_hap20007 | HCG25      |
| TC6_cox_hap2000  | -3.51  | PSR6_cox_hap20019 | HCG25      |
| TC6_cox_hap2000  | -2.3   | PSR6_cox_hap20020 | OR11A1     |
| TC6_cox_hap2000  | -2.57  | JUC6_cox_hap20020 | OR11A1     |
| TC6_dbb_hap3000  | -2.3   | JUC6_dbb_hap30006 | HCG25      |
| TC6_dbb_hap3000  | -2.32  | JUC6_dbb_hap30006 | HCG25      |
| TC6_dbb_hap3000  | -3.51  | PSR6_dbb_hap30019 | HCG25      |
| TC6_mann_hap400  | -2.3   | JUC6_mann_hap400  | HCG25      |
| TC6_mann_hap400  | -2.32  | JUC6_mann_hap400  | HCG25      |
| TC6_mann_hap400  | -3.51  | PSR6_mann_hap400  | HCG25      |
| TC6_mann_hap400  | -2.3   | PSR6_mann_hap400  | OR11A1     |
| TC6_mann_hap400  | -2.57  | JUC6_mann_hap400  | OR11A1     |
| TC6_mcf_hap5000  | -2.3   | JUC6_mcf_hap50005 | HCG25      |
| TC6_mcf_hap5000  | -2.32  | JUC6_mcf_hap50005 | HCG25      |
| TC6_mcf_hap5000  | -3.51  | PSR6_mcf_hap50017 | HCG25      |
| TC6_mcf_hap5000  | -2.3   | PSR6_mcf_hap50018 | OR11A1     |
| TC6_mcf_hap5000  | -2.57  | JUC6_mcf_hap50019 | OR11A1     |
| TC6_qbl_hap6000  | -2.3   | JUC6_qbl_hap60006 | HCG25      |
| TC6_qbl_hap6000  | -2.32  | JUC6_qbl_hap60006 | HCG25      |
| TC6_qbl_hap6000  | -3.51  | PSR6_qbl_hap60019 | HCG25      |
| TC6_ssto_hap7000 | -2.3   | JUC6_ssto_hap7000 | HCG25      |
| TC6_ssto_hap7000 | -2.32  | JUC6_ssto_hap7000 | HCG25      |
| TC6_ssto_hap7000 | -3.51  | PSR6_ssto_hap7001 | HCG25      |
| TC01003809.hg.1  | -2.31  | PSR01058204.hg.1  | BATF3      |
| TC01003809.hg.1  | -2.68  | PSR01058205.hg.1  | BATF3      |
| TC01003809.hg.1  | -3.18  | PSR01058200.hg.1  | BATF3      |
| TC01003809.hg.1  | -4.36  | JUC01030426.hg.1  | BATF3      |
| TC07001534.hg.1  | -2.31  | JUC07011420.hg.1  | HIP1       |
| TC07001534.hg.1  | -2.76  | PSR07023076.hg.1  | HIP1       |
| TC07003327.hg.1  | -2.31  | PSR07005497.hg.1  | KCTD7, RAB |
| TC07003327.hg.1  | -2.42  | JUC07020912.hg.1  | KCTD7, RAB |
| TC09000276.hg.1  | -2.31  | PSR09002975.hg.1  | PTGER4P2   |
| TC09000276.hg.1  | -2.37  | JUC09001550.hg.1  | PTGER4P2   |
| TC10001705.hg.1  | -2.31  | PSR10022494.hg.1  | TIAL1      |
| TC10001705.hg.1  | -2.68  | JUC10013045.hg.1  | TIAL1      |
| TC15000614.hg.1  | -2.31  | JUC15002467.hg.1  | ZWILCH     |
| TC15000614.hg.1  | -3.33  | PSR15005035.hg.1  | ZWILCH     |
| TC16000744.hg.1  | -2.31  | PSR16010857.hg.1  | C1QTNF8    |
| TC16000744.hg.1  | -5.08  | JUC16006054.hg.1  | C1QTNF8    |
| TC16001190.hg.1  | -2.31  | PSR16016558.hg.1  | ATP6V0D1   |
| TC16001190.hg.1  | -2.72  | JUC16009330.hg.1  | ATP6V0D1   |
| TC16001190.hg.1  | -2.8   | PSR16016557.hg.1  | ATP6V0D1   |

|                  |        |                   |             |
|------------------|--------|-------------------|-------------|
| TC17000714.hg.1  | -2.31  | JUC17005072.hg.1  | RAD51C      |
| TC17000714.hg.1  | -2.55  | PSR17009305.hg.1  | RAD51C      |
| TC17000714.hg.1  | -2.81  | JUC17005068.hg.1  | RAD51C      |
| TC20000162.hg.1  | -2.31  | JUC20001083.hg.1  | SYNDIG1     |
| TC20000162.hg.1  | -4.63  | PSR20002022.hg.1  | SYNDIG1     |
| TC20000162.hg.1  | -6.18  | PSR20002017.hg.1  | SYNDIG1     |
| TC02002646.hg.1  | -2.32  | PSR02042481.hg.1  | ANKRD44-IT  |
| TC02002646.hg.1  | -2.42  | JUC02022228.hg.1  | ANKRD44-IT  |
| TC06000954.hg.1  | -2.32  | JUC06005308.hg.1  | NKAIN2      |
| TC06000954.hg.1  | -2.67  | JUC06005294.hg.1  | NKAIN2      |
| TC06000954.hg.1  | -3.44  | JUC06005309.hg.1  | NKAIN2      |
| TC06000954.hg.1  | -4.06  | PSR06011103.hg.1  | NKAIN2      |
| TC06000954.hg.1  | -4.45  | PSR06011119.hg.1  | NKAIN2      |
| TC06000954.hg.1  | -5.77  | PSR06011100.hg.1  | NKAIN2      |
| TC06000954.hg.1  | -6.68  | PSR06011110.hg.1  | NKAIN2      |
| TC06000954.hg.1  | -7.01  | PSR06011102.hg.1  | NKAIN2      |
| TC11001908.hg.1  | -2.32  | PSR11022516.hg.1  | NRXN2       |
| TC11001908.hg.1  | -2.42  | JUC11011882.hg.1  | NRXN2       |
| TC11001908.hg.1  | -2.57  | PSR11022523.hg.1  | NRXN2       |
| TC11001908.hg.1  | -2.86  | JUC11011860.hg.1  | NRXN2       |
| TC11001908.hg.1  | -4.05  | JUC11011864.hg.1  | NRXN2       |
| TC11001908.hg.1  | -6.1   | JUC11011868.hg.1  | NRXN2       |
| TC11001908.hg.1  | -13.17 | JUC11011874.hg.1  | NRXN2       |
| TC20000284.hg.1  | -2.32  | JUC20002275.hg.1  | SNORA39, SI |
| TC20000284.hg.1  | -3.31  | PSR20004050.hg.1  | SNORA39, SI |
| TC6_ssto_hap7000 | -2.32  | JUC6_ssto_hap7000 | HLA-DPB2    |
| TC6_ssto_hap7000 | -3.24  | PSR6_ssto_hap7001 | HLA-DPB2    |
| TC6_ssto_hap7000 | -3.79  | JUC6_ssto_hap7000 | HLA-DPB2    |
| TC6_ssto_hap7000 | -19.46 | JUC6_ssto_hap7000 | HLA-DPB2    |
| TC01003566.hg.1  | -2.33  | PSR01055254.hg.1  | ABL2        |
| TC01003566.hg.1  | -3.72  | JUC01028859.hg.1  | ABL2        |
| TC02000315.hg.1  | -2.33  | JUC02002535.hg.1  | SPTBN1      |
| TC02000315.hg.1  | -2.56  | PSR02004836.hg.1  | SPTBN1      |
| TC02000315.hg.1  | -6.16  | PSR02004805.hg.1  | SPTBN1      |
| TC06000968.hg.1  | -2.33  | PSR06011324.hg.1  | RSPO3       |
| TC06000968.hg.1  | -2.58  | PSR06011321.hg.1  | RSPO3       |
| TC06000968.hg.1  | -2.65  | PSR06011322.hg.1  | RSPO3       |
| TC06000968.hg.1  | -3.51  | PSR06011323.hg.1  | RSPO3       |
| TC06000968.hg.1  | -4.15  | JUC06005427.hg.1  | RSPO3       |
| TC11000981.hg.1  | -2.33  | PSR11012279.hg.1  | DDX10       |
| TC11000981.hg.1  | -3.84  | JUC11006601.hg.1  | DDX10       |
| TC14000583.hg.1  | -2.33  | JUC14003696.hg.1  | IFI27L1     |
| TC14000583.hg.1  | -2.48  | PSR14007187.hg.1  | IFI27L1     |
| TC14000583.hg.1  | -3.2   | JUC14003699.hg.1  | IFI27L1     |
| TC14001178.hg.1  | -2.33  | PSR14013437.hg.1  | TIMM9       |
| TC14001178.hg.1  | -2.37  | JUC14006818.hg.1  | TIMM9       |
| TC14001178.hg.1  | -2.39  | PSR14013432.hg.1  | TIMM9       |
| TC14001178.hg.1  | -3.6   | JUC14006822.hg.1  | TIMM9       |
| TC15000030.hg.1  | -2.33  | PSR15000238.hg.1  | GOLGA8IP    |
| TC15000030.hg.1  | -2.53  | JUC15000148.hg.1  | GOLGA8IP    |
| TC15000030.hg.1  | -2.68  | JUC15000152.hg.1  | GOLGA8IP    |
| TC16001165.hg.1  | -2.33  | PSR16016193.hg.1  | CDH11       |
| TC16001165.hg.1  | -2.45  | PSR16016192.hg.1  | CDH11       |
| TC16001165.hg.1  | -3.11  | PSR16016189.hg.1  | CDH11       |
| TC16001165.hg.1  | -4.06  | JUC16009120.hg.1  | CDH11       |
| TC17001887.hg.1  | -2.33  | PSR17025391.hg.1  | TRIM47      |
| TC17001887.hg.1  | -3.19  | PSR17025392.hg.1  | TRIM47      |
| TC17001887.hg.1  | -3.45  | JUC17014304.hg.1  | TRIM47      |

|                           |       |                            |            |
|---------------------------|-------|----------------------------|------------|
| TC09000190.hg.1           | -2.34 | PSR09002113.hg.1           | CCDC107    |
| TC09000190.hg.1           | -2.5  | JUC09001122.hg.1           | CCDC107    |
| TC17001243.hg.1           | -2.34 | JUC17009484.hg.1           | MFAP4      |
| TC17001243.hg.1           | -2.67 | PSR17016701.hg.1           | MFAP4      |
| TC17001243.hg.1           | -2.88 | PSR17016704.hg.1           | MFAP4      |
| TC20000246.hg.1           | -2.34 | PSR20003242.hg.1           | MYH7B      |
| TC20000246.hg.1           | -3.62 | JUC20001828.hg.1           | MYH7B      |
| TC03000009.hg.1           | -2.35 | JUC03000129.hg.1           | TRNT1      |
| TC03000009.hg.1           | -2.43 | PSR03000218.hg.1           | TRNT1      |
| TC12000620.hg.1           | -2.35 | PSR12008232.hg.1           | CNOT2      |
| TC12000620.hg.1           | -3.07 | JUC12004344.hg.1           | CNOT2      |
| TC12000620.hg.1           | -3.73 | JUC12004336.hg.1           | CNOT2      |
| TC14000220.hg.1           | -2.35 | PSR14002361.hg.1           | FAM177A1   |
| TC14000220.hg.1           | -2.96 | JUC14001085.hg.1           | FAM177A1   |
| TC15001093.hg.1           | -2.35 | PSR15009998.hg.1           |            |
| TC15001093.hg.1           | -3.02 | JUC15005291.hg.1           |            |
| TC17000011.hg.1           | -2.35 | PSR17000063.hg.1           | TUSC5      |
| TC17000011.hg.1           | -3.99 | JUC17000026.hg.1           | TUSC5      |
| TC19001579.hg.1           | -2.35 | JUC19012329.hg.1           | PSG7       |
| TC19001579.hg.1           | -3.43 | PSR19021624.hg.1           | PSG7       |
| TC19001579.hg.1           | -6.22 | JUC19012324.hg.1           | PSG7       |
| TC19001579.hg.1           | -7.99 | JUC19012327.hg.1           | PSG7       |
| TC20000026.hg.1           | -2.35 | JUC20000194.hg.1           | SNORD56, S |
| TC20000026.hg.1           | -2.63 | PSR20000381.hg.1           | SNORD56, S |
| TC20001756.hg.1           | -2.35 | JUC20010073.hg.1           | ANKRD5     |
| TC20001756.hg.1           | -2.45 | PSR20001149.hg.1           | ANKRD5     |
| TC20001756.hg.1           | -3.77 | PSR20001151.hg.1           | ANKRD5     |
| TC21000189.hg.1           | -2.35 | JUC21001009.hg.1           | MX1        |
| TC21000189.hg.1           | -2.4  | PSR21001878.hg.1           | MX1        |
| TC21000189.hg.1           | -2.41 | PSR21001921.hg.1           | MX1        |
| TC21000189.hg.1           | -2.67 | PSR21001881.hg.1           | MX1        |
| TC21000189.hg.1           | -2.85 | JUC21001003.hg.1           | MX1        |
| TC22000902.hg.1           | -2.35 | JUC22006335.hg.1           | BRD1       |
| TC22000902.hg.1           | -2.62 | PSR22015076.hg.1           | BRD1       |
| TC22000902.hg.1           | -2.88 | JUC22006332.hg.1           | BRD1       |
| TC22000902.hg.1           | -5.95 | PSR22015067.hg.1           | BRD1       |
| TC02002614.hg.1           | -2.36 | PSR02041852.hg.1           | SLC40A1    |
| TC02002614.hg.1           | -3.5  | JUC02021820.hg.1           | SLC40A1    |
| TC02002614.hg.1           | -5.32 | PSR02041846.hg.1           | SLC40A1    |
| TC03001806.hg.1           | -2.36 | PSR03032790.hg.1           | KY         |
| TC03001806.hg.1           | -2.48 | JUC03016235.hg.1           | KY         |
| TC05002090.hg.1           | -2.36 | JUC05014610.hg.1           | LOC643201  |
| TC05002090.hg.1           | -2.54 | PSR05028618.hg.1           | LOC643201  |
| TC6_mann_hap40000206.hg.1 | -2.36 | PSR6_mann_hap40000206.hg.1 |            |
| TC6_mann_hap40000088.hg.1 | -3.34 | JUC6_mann_hap40000088.hg.1 |            |
| TC04000248.hg.1           | -2.37 | PSR04003612.hg.1           | NSUN7      |
| TC04000248.hg.1           | -2.64 | JUC04001776.hg.1           | NSUN7      |
| TC12000263.hg.1           | -2.37 | PSR12003166.hg.1           | STK38L     |
| TC12000263.hg.1           | -3.27 | JUC12001568.hg.1           | STK38L     |
| TC15001482.hg.1           | -2.37 | JUC15007526.hg.1           | ALDH1A2    |
| TC15001482.hg.1           | -2.76 | PSR15013973.hg.1           | ALDH1A2    |
| TC15001837.hg.1           | -2.37 | JUC15009759.hg.1           | ANPEP      |
| TC15001837.hg.1           | -2.65 | PSR15017842.hg.1           | ANPEP      |
| TC15001837.hg.1           | -3.28 | JUC15009755.hg.1           | ANPEP      |
| TC15001837.hg.1           | -3.52 | PSR15017831.hg.1           | ANPEP      |
| TC16000448.hg.1           | -2.37 | JUC16003476.hg.1           | RBL2       |
| TC16000448.hg.1           | -2.58 | PSR16006228.hg.1           | RBL2       |
| TC17001932.hg.1           | -2.37 | PSR17026317.hg.1           | TBC1D16    |



|                  |       |                   |             |
|------------------|-------|-------------------|-------------|
| TC17001932.hg.1  | -2.44 | JUC17014823.hg.1  | TBC1D16     |
| TC01000973.hg.1  | -2.38 | PSR01015521.hg.1  | RP11-165H2C |
| TC01000973.hg.1  | -15.2 | JUC01008110.hg.1  | RP11-165H2C |
| TC01001177.hg.1  | -2.38 | JUC01009927.hg.1  | VPS45       |
| TC01001177.hg.1  | -2.63 | PSR01018067.hg.1  | VPS45       |
| TC01003211.hg.1  | -2.38 | PSR01049286.hg.1  | CTSK        |
| TC01003211.hg.1  | -2.38 | PSR01049291.hg.1  | CTSK        |
| TC01003211.hg.1  | -2.45 | JUC01026196.hg.1  | CTSK        |
| TC01003211.hg.1  | -2.65 | JUC01026195.hg.1  | CTSK        |
| TC01003211.hg.1  | -3.06 | PSR01049289.hg.1  | CTSK        |
| TC01003211.hg.1  | -5.13 | JUC01026188.hg.1  | CTSK        |
| TC06000541.hg.1  | -2.38 | JUC06002448.hg.1  | PIM1        |
| TC06000541.hg.1  | -2.95 | PSR06005927.hg.1  | PIM1        |
| TC12001587.hg.1  | -2.38 | JUC12011696.hg.1  | MMP19       |
| TC12001587.hg.1  | -2.5  | JUC12011687.hg.1  | MMP19       |
| TC12001587.hg.1  | -2.76 | PSR12021091.hg.1  | MMP19       |
| TC12001587.hg.1  | -2.86 | PSR12021081.hg.1  | MMP19       |
| TC12001587.hg.1  | -2.89 | JUC12011689.hg.1  | MMP19       |
| TC12001587.hg.1  | -2.99 | PSR12021075.hg.1  | MMP19       |
| TC12001587.hg.1  | -3.16 | PSR12021076.hg.1  | MMP19       |
| TC12001587.hg.1  | -3.63 | PSR12021085.hg.1  | MMP19       |
| TC12001587.hg.1  | -3.73 | JUC12011692.hg.1  | MMP19       |
| TC12001587.hg.1  | -4.18 | PSR12021082.hg.1  | MMP19       |
| TC12001587.hg.1  | -4.66 | JUC12011688.hg.1  | MMP19       |
| TC15001691.hg.1  | -2.38 | JUC15008962.hg.1  | PEAK1       |
| TC15001691.hg.1  | -2.47 | PSR15016470.hg.1  | PEAK1       |
| TC15001691.hg.1  | -2.48 | JUC15008959.hg.1  | PEAK1       |
| TC16000473.hg.1  | -2.38 | JUC16003647.hg.1  | MT1F        |
| TC16000473.hg.1  | -2.83 | PSR16006518.hg.1  | MT1F        |
| TC16000473.hg.1  | -3.07 | PSR16006515.hg.1  | MT1F        |
| TC16000473.hg.1  | -3.21 | JUC16003648.hg.1  | MT1F        |
| TC16000473.hg.1  | -3.98 | JUC16003646.hg.1  | MT1F        |
| TC6_ssto_hap700C | -2.38 | PSR6_ssto_hap7001 | OR11A1      |
| TC6_ssto_hap700C | -2.67 | JUC6_ssto_hap7001 | OR11A1      |
| TC03000063.hg.1  | -2.39 | JUC03000722.hg.1  | SLC6A1      |
| TC03000063.hg.1  | -2.76 | JUC03000717.hg.1  | SLC6A1      |
| TC03000063.hg.1  | -2.84 | PSR03001378.hg.1  | SLC6A1      |
| TC04001598.hg.1  | -2.39 | PSR04022251.hg.1  | LOC1005076  |
| TC04001598.hg.1  | -3.55 | JUC04011731.hg.1  | LOC1005076  |
| TC10001724.hg.1  | -2.39 | PSR10022845.hg.1  |             |
| TC10001724.hg.1  | -3.82 | PSR10022847.hg.1  |             |
| TC10001724.hg.1  | -4.18 | JUC10013214.hg.1  |             |
| TC03002184.hg.1  | -2.4  | JUC03019129.hg.1  | IQCG        |
| TC03002184.hg.1  | -2.53 | PSR03038614.hg.1  | IQCG        |
| TC03002184.hg.1  | -4.17 | PSR03038624.hg.1  | IQCG        |
| TC03003343.hg.1  | -2.4  | PSR03000888.hg.1  | ARPC4       |
| TC03003343.hg.1  | -3.85 | JUC03023525.hg.1  | ARPC4       |
| TC01006320.hg.1  | -2.41 | JUC01043951.hg.1  | PPCS        |
| TC01006320.hg.1  | -3.09 | PSR01008251.hg.1  | PPCS        |
| TC02001982.hg.1  | -2.41 | PSR02031606.hg.1  | FBXO41      |
| TC02001982.hg.1  | -3.18 | JUC02016505.hg.1  | FBXO41      |
| TC02001982.hg.1  | -3.26 | PSR02031625.hg.1  | FBXO41      |
| TC02001982.hg.1  | -4.55 | PSR02031624.hg.1  | FBXO41      |
| TC02001982.hg.1  | -7.05 | JUC02016495.hg.1  | FBXO41      |
| TC05000917.hg.1  | -2.41 | JUC05006876.hg.1  | WWC1        |
| TC05000917.hg.1  | -2.93 | PSR05013285.hg.1  | WWC1        |
| TC08000137.hg.1  | -2.41 | PSR08001364.hg.1  | NAT1        |
| TC08000137.hg.1  | -2.78 | PSR08001367.hg.1  | NAT1        |

|                 |        |                  |              |
|-----------------|--------|------------------|--------------|
| TC08000137.hg.1 | -3.36  | JUC08000740.hg.1 | NAT1         |
| TC09000109.hg.1 | -2.41  | PSR09001304.hg.1 | DMRTA1       |
| TC09000109.hg.1 | -5.45  | JUC09000688.hg.1 | DMRTA1       |
| TC01000130.hg.1 | -2.42  | PSR01002089.hg.1 | APITD1-COR   |
| TC01000130.hg.1 | -3.02  | JUC01001131.hg.1 | APITD1-COR   |
| TC03001733.hg.1 | -2.42  | JUC03015701.hg.1 | ALDH1L1      |
| TC03001733.hg.1 | -3.95  | PSR03031573.hg.1 | ALDH1L1      |
| TC11000223.hg.1 | -2.42  | JUC11001431.hg.1 | C11orf58     |
| TC11000223.hg.1 | -2.56  | PSR11002940.hg.1 | C11orf58     |
| TC14000306.hg.1 | -2.42  | JUC14001538.hg.1 | PTGER2       |
| TC14000306.hg.1 | -2.95  | PSR14003219.hg.1 | PTGER2       |
| TC03001434.hg.1 | -2.43  | PSR03025915.hg.1 | C3orf18      |
| TC03001434.hg.1 | -2.63  | PSR03025911.hg.1 | C3orf18      |
| TC03001434.hg.1 | -2.65  | JUC03012678.hg.1 | C3orf18      |
| TC07001630.hg.1 | -2.43  | PSR07024788.hg.1 | ASNS         |
| TC07001630.hg.1 | -2.64  | PSR07024780.hg.1 | ASNS         |
| TC07001630.hg.1 | -2.69  | PSR07024779.hg.1 | ASNS         |
| TC07001630.hg.1 | -2.69  | JUC07012309.hg.1 | ASNS         |
| TC07001630.hg.1 | -2.74  | PSR07024778.hg.1 | ASNS         |
| TC07001630.hg.1 | -2.8   | PSR07024799.hg.1 | ASNS         |
| TC07001630.hg.1 | -4.48  | PSR07024798.hg.1 | ASNS         |
| TC19001581.hg.1 | -2.43  | PSR19021653.hg.1 | PSG2         |
| TC19001581.hg.1 | -2.81  | JUC19012343.hg.1 | PSG2         |
| TC19001581.hg.1 | -3.77  | JUC19012342.hg.1 | PSG2         |
| TC01003963.hg.1 | -2.44  | PSR01060045.hg.1 | MIR1182, FAM |
| TC01003963.hg.1 | -6.42  | JUC01031425.hg.1 | MIR1182, FAM |
| TC01003017.hg.1 | -2.45  | PSR01047098.hg.1 | TSPAN2       |
| TC01003017.hg.1 | -3.56  | PSR01047105.hg.1 | TSPAN2       |
| TC01003017.hg.1 | -3.68  | JUC01025251.hg.1 | TSPAN2       |
| TC01003546.hg.1 | -2.45  | PSR01054978.hg.1 | KIAA0040     |
| TC01003546.hg.1 | -4.49  | PSR01054979.hg.1 | KIAA0040     |
| TC01003546.hg.1 | -8.91  | JUC01028670.hg.1 | KIAA0040     |
| TC01003546.hg.1 | -10.13 | PSR01054976.hg.1 | KIAA0040     |
| TC01003546.hg.1 | -13.31 | JUC01028669.hg.1 | KIAA0040     |
| TC0X000493.hg.1 | -2.45  | PSR0X006557.hg.1 | BEX4         |
| TC0X000493.hg.1 | -2.46  | PSR0X006556.hg.1 | BEX4         |
| TC0X000493.hg.1 | -2.88  | JUC0X003235.hg.1 | BEX4         |
| TC0X000493.hg.1 | -2.99  | JUC0X003233.hg.1 | BEX4         |
| TC0X000493.hg.1 | -3.28  | PSR0X006552.hg.1 | BEX4         |
| TC0X000493.hg.1 | -3.32  | PSR0X006554.hg.1 | BEX4         |
| TC0X000493.hg.1 | -3.6   | JUC0X003234.hg.1 | BEX4         |
| TC17000582.hg.1 | -2.45  | PSR17007132.hg.1 | FMNL1        |
| TC17000582.hg.1 | -2.87  | JUC17004061.hg.1 | FMNL1        |
| TC03000378.hg.1 | -2.46  | JUC03004069.hg.1 | PXK          |
| TC03000378.hg.1 | -3.31  | PSR03008265.hg.1 | PXK          |
| TC11000325.hg.1 | -2.46  | PSR11004174.hg.1 | NAT10        |
| TC11000325.hg.1 | -3.44  | JUC11002202.hg.1 | NAT10        |
| TC12000095.hg.1 | -2.46  | PSR12001152.hg.1 | USP5         |
| TC12000095.hg.1 | -2.76  | JUC12000595.hg.1 | USP5         |
| TC03000410.hg.1 | -2.47  | PSR03008639.hg.1 |              |
| TC03000410.hg.1 | -3.49  | JUC03004313.hg.1 |              |
| TC15000816.hg.1 | -2.47  | PSR15007433.hg.1 | ZSCAN2       |
| TC15000816.hg.1 | -3.14  | JUC15003876.hg.1 | ZSCAN2       |
| TC15000816.hg.1 | -3.16  | JUC15003873.hg.1 | ZSCAN2       |
| TC22000050.hg.1 | -2.47  | JUC22000253.hg.1 | COMT, MIR47  |
| TC22000050.hg.1 | -3.63  | PSR22000517.hg.1 | COMT, MIR47  |
| TC02004930.hg.1 | -2.49  | JUC02031428.hg.1 | MRPS5        |
| TC02004930.hg.1 | -2.51  | PSR02033741.hg.1 | MRPS5        |

|                 |       |                  |             |
|-----------------|-------|------------------|-------------|
| TC02004930.hg.1 | -2.85 | PSR02033742.hg.1 | MRPS5       |
| TC05000960.hg.1 | -2.49 | JUC05007242.hg.1 |             |
| TC05000960.hg.1 | -7.23 | PSR05013967.hg.1 |             |
| TC05001601.hg.1 | -2.49 | PSR05021763.hg.1 | KIAA0825    |
| TC05001601.hg.1 | -2.62 | JUC05011193.hg.1 | KIAA0825    |
| TC05001601.hg.1 | -2.76 | JUC05011186.hg.1 | KIAA0825    |
| TC06000409.hg.1 | -2.49 | JUC06001860.hg.1 | HLA-DPB2    |
| TC06000409.hg.1 | -2.97 | PSR06004813.hg.1 | HLA-DPB2    |
| TC06000409.hg.1 | -3.91 | JUC06001859.hg.1 | HLA-DPB2    |
| TC10001349.hg.1 | -2.49 | PSR10017115.hg.1 | SLC25A16    |
| TC10001349.hg.1 | -2.64 | JUC10009988.hg.1 | SLC25A16    |
| TC10001349.hg.1 | -3.92 | JUC10009987.hg.1 | SLC25A16    |
| TC22001503.hg.1 | -2.49 | PSR22015781.hg.1 | CHKB        |
| TC22001503.hg.1 | -2.5  | JUC22009887.hg.1 | CHKB        |
| TC03000953.hg.1 | -2.5  | PSR03016423.hg.1 | MFN1        |
| TC03000953.hg.1 | -2.8  | JUC03008369.hg.1 | MFN1        |
| TC11001528.hg.1 | -2.5  | JUC11010200.hg.1 | PAX6        |
| TC11001528.hg.1 | -2.6  | PSR11019137.hg.1 | PAX6        |
| TC09000537.hg.1 | -2.51 | PSR09005921.hg.1 | FKTN        |
| TC09000537.hg.1 | -2.65 | JUC09003290.hg.1 | FKTN        |
| TC09000537.hg.1 | -2.84 | JUC09003271.hg.1 | FKTN        |
| TC01001214.hg.1 | -2.53 | JUC01010310.hg.1 | SNX27       |
| TC01001214.hg.1 | -3.37 | PSR01018865.hg.1 | SNX27       |
| TC01001214.hg.1 | -5.97 | PSR01018853.hg.1 | SNX27       |
| TCUn_gl00021900 | -2.53 | JUCUn_gl00021900 | LOC283788   |
| TCUn_gl00021900 | -3.71 | PSRUn_gl00021900 | LOC283788   |
| TC06002322.hg.1 | -2.54 | JUC06014612.hg.1 | FRMD1       |
| TC06002322.hg.1 | -2.6  | PSR06029167.hg.1 | FRMD1       |
| TC06002322.hg.1 | -5.32 | JUC06014623.hg.1 | FRMD1       |
| TC01002652.hg.1 | -2.55 | PSR01041538.hg.1 | NRD1, MIR76 |
| TC01002652.hg.1 | -2.86 | JUC01022197.hg.1 | NRD1, MIR76 |
| TC01002652.hg.1 | -3    | JUC01022183.hg.1 | NRD1, MIR76 |
| TC20000821.hg.1 | -2.55 | PSR20011270.hg.1 | SAMHD1      |
| TC20000821.hg.1 | -3.2  | JUC20005829.hg.1 | SAMHD1      |
| TC07000768.hg.1 | -2.57 | PSR07012175.hg.1 | LEP         |
| TC07000768.hg.1 | -3.27 | JUC07005735.hg.1 | LEP         |
| TC07003302.hg.1 | -2.57 | JUC07020526.hg.1 | THAP5       |
| TC07003302.hg.1 | -3.85 | PSR07027417.hg.1 | THAP5       |
| TC01001603.hg.1 | -2.59 | JUC01013318.hg.1 | PRG4        |
| TC01001603.hg.1 | -3.09 | PSR01024891.hg.1 | PRG4        |
| TC04000439.hg.1 | -2.6  | PSR04006302.hg.1 | LOC1005057  |
| TC04000439.hg.1 | -4.18 | JUC04003211.hg.1 | LOC1005057  |
| TC09000202.hg.1 | -2.6  | JUC09001248.hg.1 | GLIPR2, LOC |
| TC09000202.hg.1 | -3.15 | PSR09002318.hg.1 | GLIPR2, LOC |
| TC09000202.hg.1 | -3.22 | JUC09001253.hg.1 | GLIPR2, LOC |
| TC09000202.hg.1 | -3.62 | PSR09002315.hg.1 | GLIPR2, LOC |
| TC19001511.hg.1 | -2.6  | JUC19011845.hg.1 | FBXO27      |
| TC19001511.hg.1 | -2.78 | PSR19020654.hg.1 | FBXO27      |
| TC06001050.hg.1 | -2.61 | JUC06006034.hg.1 | AIG1        |
| TC06001050.hg.1 | -2.69 | PSR06012300.hg.1 | AIG1        |
| TC06001050.hg.1 | -2.83 | PSR06012310.hg.1 | AIG1        |
| TC06001050.hg.1 | -2.84 | PSR06012308.hg.1 | AIG1        |
| TC06001050.hg.1 | -3.2  | PSR06012307.hg.1 | AIG1        |
| TC06001050.hg.1 | -3.44 | PSR06012311.hg.1 | AIG1        |
| TC02000731.hg.1 | -2.62 | JUC02006012.hg.1 | WASH2P      |
| TC02000731.hg.1 | -3.97 | PSR02011344.hg.1 | WASH2P      |
| TC07001924.hg.1 | -2.63 | JUC07014834.hg.1 | DENND2A     |
| TC07001924.hg.1 | -2.75 | PSR07029915.hg.1 | DENND2A     |

|                 |        |                  |            |
|-----------------|--------|------------------|------------|
| TC07001924.hg.1 | -3.12  | PSR07029914.hg.1 | DENND2A    |
| TC07001924.hg.1 | -4.65  | JUC07014824.hg.1 | DENND2A    |
| TC09000541.hg.1 | -2.64  | JUC09003312.hg.1 |            |
| TC09000541.hg.1 | -2.67  | PSR09005983.hg.1 |            |
| TC09000541.hg.1 | -3.64  | PSR09005981.hg.1 |            |
| TC09000541.hg.1 | -4     | PSR09005982.hg.1 |            |
| TC01001443.hg.1 | -2.65  | PSR01022482.hg.1 | MGST3, LOC |
| TC01001443.hg.1 | -5.14  | JUC01011850.hg.1 | MGST3, LOC |
| TC03000149.hg.1 | -2.65  | JUC03001444.hg.1 | TGFBR2     |
| TC03000149.hg.1 | -2.68  | PSR03002706.hg.1 | TGFBR2     |
| TC03000149.hg.1 | -2.89  | PSR03002712.hg.1 | TGFBR2     |
| TC08001462.hg.1 | -2.65  | PSR08018921.hg.1 | NIPAL2     |
| TC08001462.hg.1 | -3.1   | JUC08009630.hg.1 | NIPAL2     |
| TC02002049.hg.1 | -2.66  | JUC02016916.hg.1 | ST3GAL5    |
| TC02002049.hg.1 | -2.7   | PSR02032801.hg.1 | ST3GAL5    |
| TC02002049.hg.1 | -3.32  | PSR02032784.hg.1 | ST3GAL5    |
| TC02002049.hg.1 | -3.42  | JUC02016918.hg.1 | ST3GAL5    |
| TC02002049.hg.1 | -3.5   | PSR02032792.hg.1 | ST3GAL5    |
| TC02002049.hg.1 | -3.6   | PSR02032787.hg.1 | ST3GAL5    |
| TC02002049.hg.1 | -3.89  | JUC02016910.hg.1 | ST3GAL5    |
| TC02002049.hg.1 | -4.12  | PSR02032785.hg.1 | ST3GAL5    |
| TC02002049.hg.1 | -5.44  | PSR02032788.hg.1 | ST3GAL5    |
| TC02002049.hg.1 | -6.45  | PSR02032791.hg.1 | ST3GAL5    |
| TC02002049.hg.1 | -7.39  | PSR02032804.hg.1 | ST3GAL5    |
| TC02002049.hg.1 | -7.62  | JUC02016906.hg.1 | ST3GAL5    |
| TC02002049.hg.1 | -8.15  | PSR02032789.hg.1 | ST3GAL5    |
| TC02002049.hg.1 | -8.38  | PSR02032772.hg.1 | ST3GAL5    |
| TC02002049.hg.1 | -8.48  | PSR02032798.hg.1 | ST3GAL5    |
| TC02002049.hg.1 | -8.8   | PSR02032809.hg.1 | ST3GAL5    |
| TC02002049.hg.1 | -9.22  | PSR02032803.hg.1 | ST3GAL5    |
| TC02002049.hg.1 | -9.24  | PSR02032780.hg.1 | ST3GAL5    |
| TC02002049.hg.1 | -9.72  | PSR02032805.hg.1 | ST3GAL5    |
| TC02002049.hg.1 | -9.93  | PSR02032799.hg.1 | ST3GAL5    |
| TC02002049.hg.1 | -9.98  | JUC02016925.hg.1 | ST3GAL5    |
| TC02002049.hg.1 | -10.68 | JUC02016911.hg.1 | ST3GAL5    |
| TC02002049.hg.1 | -10.85 | PSR02032810.hg.1 | ST3GAL5    |
| TC02002049.hg.1 | -11    | PSR02032776.hg.1 | ST3GAL5    |
| TC02002049.hg.1 | -14.03 | JUC02016912.hg.1 | ST3GAL5    |
| TC05001112.hg.1 | -2.66  | JUC05008252.hg.1 | SDHAP3     |
| TC05001112.hg.1 | -2.7   | PSR05016208.hg.1 | SDHAP3     |
| TC16002100.hg.1 | -2.66  | JUC16014181.hg.1 | LOC728888, |
| TC16002100.hg.1 | -3.03  | PSR16013714.hg.1 | LOC728888, |
| TC17000058.hg.1 | -2.66  | PSR17000672.hg.1 | ENO3       |
| TC17000058.hg.1 | -3.05  | PSR17000682.hg.1 | ENO3       |
| TC17000058.hg.1 | -3.13  | JUC17000393.hg.1 | ENO3       |
| TC22000852.hg.1 | -2.66  | PSR22014392.hg.1 | A4GALT     |
| TC22000852.hg.1 | -2.74  | PSR22014389.hg.1 | A4GALT     |
| TC22000852.hg.1 | -3.05  | JUC22005923.hg.1 | A4GALT     |
| TC04000410.hg.1 | -2.67  | JUC04002824.hg.1 | PF4V1      |
| TC04000410.hg.1 | -5.34  | PSR04005657.hg.1 | PF4V1      |
| TC04001167.hg.1 | -2.67  | PSR04016005.hg.1 | COMMD8     |
| TC04001167.hg.1 | -3.58  | JUC04008484.hg.1 | COMMD8     |
| TC11003441.hg.1 | -2.67  | PSR11001672.hg.1 | TRIM6      |
| TC11003441.hg.1 | -4.78  | JUC11018933.hg.1 | TRIM6      |
| TC16000706.hg.1 | -2.68  | PSR16010053.hg.1 | SPIRE2     |
| TC16000706.hg.1 | -3.27  | JUC16005613.hg.1 | SPIRE2     |
| TC16000706.hg.1 | -6.06  | JUC16005615.hg.1 | SPIRE2     |
| TC22000514.hg.1 | -2.68  | JUC22003741.hg.1 | GGTLC3     |

|                 |        |                  |            |
|-----------------|--------|------------------|------------|
| TC22000514.hg.1 | -3.11  | PSR22009452.hg.1 | GGTLC3     |
| TC22000514.hg.1 | -6.07  | JUC22003743.hg.1 | GGTLC3     |
| TC22000725.hg.1 | -2.68  | PSR22012791.hg.1 | RAC2       |
| TC22000725.hg.1 | -3.16  | PSR22012792.hg.1 | RAC2       |
| TC22000725.hg.1 | -3.57  | JUC22005339.hg.1 | RAC2       |
| TC22000725.hg.1 | -4.23  | JUC22005340.hg.1 | RAC2       |
| TC06001246.hg.1 | -2.7   | PSR06014811.hg.1 | F13A1      |
| TC06001246.hg.1 | -2.73  | PSR06014792.hg.1 | F13A1      |
| TC06001246.hg.1 | -3.23  | PSR06014821.hg.1 | F13A1      |
| TC06001246.hg.1 | -5.34  | PSR06014820.hg.1 | F13A1      |
| TC06001246.hg.1 | -5.62  | PSR06014814.hg.1 | F13A1      |
| TC06001246.hg.1 | -6.02  | PSR06014822.hg.1 | F13A1      |
| TC06001246.hg.1 | -6.84  | PSR06014815.hg.1 | F13A1      |
| TC06001246.hg.1 | -7.03  | JUC06007384.hg.1 | F13A1      |
| TC11003434.hg.1 | -2.7   | JUC11018831.hg.1 | REXO2      |
| TC11003434.hg.1 | -2.89  | PSR11012898.hg.1 | REXO2      |
| TC04000564.hg.1 | -2.72  | PSR04008231.hg.1 | CCDC109B   |
| TC04000564.hg.1 | -2.72  | JUC04004322.hg.1 | CCDC109B   |
| TC04000564.hg.1 | -3.3   | PSR04008233.hg.1 | CCDC109B   |
| TC04000564.hg.1 | -3.32  | PSR04008240.hg.1 | CCDC109B   |
| TC04000564.hg.1 | -3.51  | PSR04008230.hg.1 | CCDC109B   |
| TC04000564.hg.1 | -3.81  | PSR04008238.hg.1 | CCDC109B   |
| TC09000148.hg.1 | -2.72  | PSR09001657.hg.1 | TRBV20OR9- |
| TC09000148.hg.1 | -3.39  | JUC09000903.hg.1 | TRBV20OR9- |
| TC09000148.hg.1 | -3.96  | PSR09001658.hg.1 | TRBV20OR9- |
| TC10001212.hg.1 | -2.72  | PSR10015148.hg.1 | CXCL12     |
| TC10001212.hg.1 | -3.85  | PSR10015147.hg.1 | CXCL12     |
| TC10001212.hg.1 | -4.18  | PSR10015146.hg.1 | CXCL12     |
| TC10001212.hg.1 | -5.2   | PSR10015160.hg.1 | CXCL12     |
| TC10001212.hg.1 | -6.18  | PSR10015166.hg.1 | CXCL12     |
| TC10001212.hg.1 | -7.38  | PSR10015150.hg.1 | CXCL12     |
| TC10001212.hg.1 | -8.04  | JUC10008775.hg.1 | CXCL12     |
| TC10001212.hg.1 | -8.13  | PSR10015149.hg.1 | CXCL12     |
| TC10001212.hg.1 | -9.45  | JUC10008776.hg.1 | CXCL12     |
| TC10001212.hg.1 | -11.55 | JUC10008772.hg.1 | CXCL12     |
| TC10001212.hg.1 | -12.68 | PSR10015143.hg.1 | CXCL12     |
| TC01000783.hg.1 | -2.73  | PSR01012478.hg.1 | ST6GALNAC  |
| TC01000783.hg.1 | -3.26  | JUC01006548.hg.1 | ST6GALNAC  |
| TC22000382.hg.1 | -2.73  | JUC22002789.hg.1 | RIBC2      |
| TC22000382.hg.1 | -3.85  | PSR22007402.hg.1 | RIBC2      |
| TC12001350.hg.1 | -2.77  | PSR12017639.hg.1 | TMTC1      |
| TC12001350.hg.1 | -3.9   | JUC12009767.hg.1 | TMTC1      |
| TC22000178.hg.1 | -2.77  | PSR22003338.hg.1 |            |
| TC22000178.hg.1 | -3.14  | JUC22001133.hg.1 |            |
| TC0X000805.hg.1 | -2.8   | PSR0X011028.hg.1 | ARSD       |
| TC0X000805.hg.1 | -2.94  | JUC0X005396.hg.1 | ARSD       |
| TC06001806.hg.1 | -2.81  | PSR06021814.hg.1 |            |
| TC06001806.hg.1 | -4.64  | JUC06010477.hg.1 |            |
| TC0X000426.hg.1 | -2.81  | PSR0X005662.hg.1 | LPAR4      |
| TC0X000426.hg.1 | -3.38  | JUC0X002802.hg.1 | LPAR4      |
| TC12002085.hg.1 | -2.81  | PSR12027520.hg.1 | CDK2AP1    |
| TC12002085.hg.1 | -3.53  | JUC12015438.hg.1 | CDK2AP1    |
| TC04000729.hg.1 | -2.82  | JUC04005477.hg.1 | EDNRA      |
| TC04000729.hg.1 | -4.42  | JUC04005484.hg.1 | EDNRA      |
| TC04000729.hg.1 | -4.84  | PSR04010236.hg.1 | EDNRA      |
| TC04000729.hg.1 | -8.13  | PSR04010235.hg.1 | EDNRA      |
| TC04000729.hg.1 | -8.43  | JUC04005490.hg.1 | EDNRA      |
| TC04000729.hg.1 | -9.92  | PSR04010242.hg.1 | EDNRA      |

|                 |        |                          |              |
|-----------------|--------|--------------------------|--------------|
| TC6_apd_hap1000 | -2.85  | PSR6_apd_hap1000127.hg.1 |              |
| TC6_apd_hap1000 | -4.2   | JUC6_apd_hap1000066.hg.1 |              |
| TC6_cox_hap2000 | -2.85  | PSR6_cox_hap2000221.hg.1 |              |
| TC6_cox_hap2000 | -4.2   | JUC6_cox_hap2000116.hg.1 |              |
| TC19001811.hg.1 | -2.86  | JUC19013989.hg.1         | ZNF160       |
| TC19001811.hg.1 | -2.94  | PSR19024584.hg.1         | ZNF160       |
| TC14001225.hg.1 | -2.9   | JUC14007063.hg.1         | MAX          |
| TC14001225.hg.1 | -3.92  | PSR14013982.hg.1         | MAX          |
| TC14001225.hg.1 | -5.8   | PSR14013983.hg.1         | MAX          |
| TC14001225.hg.1 | -10.13 | JUC14007079.hg.1         | MAX          |
| TC02002255.hg.1 | -2.92  | JUC02018809.hg.1         |              |
| TC02002255.hg.1 | -3.05  | PSR02036350.hg.1         |              |
| TC09001337.hg.1 | -2.92  | JUC09009005.hg.1         | ECM2         |
| TC09001337.hg.1 | -3.22  | PSR09016770.hg.1         | ECM2         |
| TC6_apd_hap1000 | -2.92  | JUC6_apd_hap1000080.hg.1 | HLA-DPB2     |
| TC6_apd_hap1000 | -3.48  | PSR6_apd_hap1000080.hg.1 | HLA-DPB2     |
| TC6_apd_hap1000 | -4.59  | JUC6_apd_hap1000080.hg.1 | HLA-DPB2     |
| TC01001692.hg.1 | -2.93  | PSR01026311.hg.1         | ZBED6, ZC3H7 |
| TC01001692.hg.1 | -4.45  | JUC01014074.hg.1         | ZBED6, ZC3H7 |
| TC04001509.hg.1 | -2.93  | PSR04021419.hg.1         | NDNF         |
| TC04001509.hg.1 | -4.02  | JUC04011269.hg.1         | NDNF         |
| TC04001509.hg.1 | -4.66  | PSR04021418.hg.1         | NDNF         |
| TC04001509.hg.1 | -5.02  | PSR04021415.hg.1         | NDNF         |
| TC04001509.hg.1 | -5.59  | PSR04021412.hg.1         | NDNF         |
| TC04001509.hg.1 | -6.08  | JUC04011265.hg.1         | NDNF         |
| TC04001509.hg.1 | -6.12  | JUC04011263.hg.1         | NDNF         |
| TC04001509.hg.1 | -6.19  | PSR04021411.hg.1         | NDNF         |
| TC03001044.hg.1 | -2.94  | JUC03009378.hg.1         | LEPREL1-AS   |
| TC03001044.hg.1 | -5.77  | PSR03018493.hg.1         | LEPREL1-AS   |
| TC03001044.hg.1 | -24.25 | JUC03009377.hg.1         | LEPREL1-AS   |
| TC05000026.hg.1 | -2.95  | PSR05000394.hg.1         | C5orf38      |
| TC05000026.hg.1 | -3.62  | JUC05000210.hg.1         | C5orf38      |
| TC12001665.hg.1 | -2.95  | PSR12022351.hg.1         |              |
| TC12001665.hg.1 | -5.05  | JUC12012325.hg.1         |              |
| TC12001665.hg.1 | -9.13  | JUC12012326.hg.1         |              |
| TC11001009.hg.1 | -2.97  | PSR11012638.hg.1         | PTS          |
| TC11001009.hg.1 | -3.26  | JUC11006776.hg.1         | PTS          |
| TC01001749.hg.1 | -3.02  | JUC01014740.hg.1         | G0S2         |
| TC01001749.hg.1 | -7.46  | PSR01027386.hg.1         | G0S2         |
| TC22001465.hg.1 | -3.03  | JUC22009272.hg.1         | TRIOBP       |
| TC22001465.hg.1 | -3.76  | PSR22005325.hg.1         | TRIOBP       |
| TC22001465.hg.1 | -4.09  | PSR22005321.hg.1         | TRIOBP       |
| TC22001465.hg.1 | -4.36  | PSR22005320.hg.1         | TRIOBP       |
| TC22001465.hg.1 | -4.97  | JUC22009282.hg.1         | TRIOBP       |
| TC09000714.hg.1 | -3.08  | PSR09008992.hg.1         | LOC10050611  |
| TC09000714.hg.1 | -4.04  | PSR09008982.hg.1         | LOC10050611  |
| TC09000714.hg.1 | -4.74  | JUC09004918.hg.1         | LOC10050611  |
| TC09000714.hg.1 | -6.2   | PSR09008981.hg.1         | LOC10050611  |
| TC09000714.hg.1 | -6.53  | PSR09008983.hg.1         | LOC10050611  |
| TC11001415.hg.1 | -3.09  | PSR11017763.hg.1         | LYVE1        |
| TC11001415.hg.1 | -3.69  | JUC11009507.hg.1         | LYVE1        |
| TC6_dbb_hap3000 | -3.12  | JUC6_dbb_hap3000080.hg.1 |              |
| TC6_dbb_hap3000 | -3.39  | PSR6_dbb_hap3000247.hg.1 |              |
| TC6_dbb_hap3000 | -3.56  | JUC6_dbb_hap3000078.hg.1 |              |
| TC19001292.hg.1 | -3.13  | JUC19010724.hg.1         | CRLF1        |
| TC19001292.hg.1 | -7     | JUC19010723.hg.1         | CRLF1        |
| TC19001292.hg.1 | -7.2   | PSR19018376.hg.1         | CRLF1        |
| TC19001292.hg.1 | -8.35  | PSR19018368.hg.1         | CRLF1        |

|                  |       |                           |           |
|------------------|-------|---------------------------|-----------|
| TC19001292.hg.1  | -8.93 | PSR19018375.hg.1          | CRLF1     |
| TC21000443.hg.1  | -3.15 | PSR21005224.hg.1          | KCNJ6     |
| TC21000443.hg.1  | -4    | PSR21005222.hg.1          | KCNJ6     |
| TC21000443.hg.1  | -4.63 | JUC21002668.hg.1          | KCNJ6     |
| TC04001729.hg.1  | -3.18 | PSR04023968.hg.1          | MFAP3L    |
| TC04001729.hg.1  | -3.34 | JUC04012706.hg.1          | MFAP3L    |
| TC04001729.hg.1  | -3.43 | JUC04012695.hg.1          | MFAP3L    |
| TC04001729.hg.1  | -3.61 | PSR04023942.hg.1          | MFAP3L    |
| TC04001729.hg.1  | -4.06 | JUC04012709.hg.1          | MFAP3L    |
| TC04001729.hg.1  | -4.09 | PSR04023958.hg.1          | MFAP3L    |
| TC04001729.hg.1  | -5.13 | PSR04023957.hg.1          | MFAP3L    |
| TC04001729.hg.1  | -6.06 | PSR04023969.hg.1          | MFAP3L    |
| TC04001729.hg.1  | -6.59 | JUC04012698.hg.1          | MFAP3L    |
| TC04001729.hg.1  | -6.73 | JUC04012704.hg.1          | MFAP3L    |
| TC04001729.hg.1  | -7.31 | JUC04012702.hg.1          | MFAP3L    |
| TC04001729.hg.1  | -7.38 | PSR04023947.hg.1          | MFAP3L    |
| TC04001729.hg.1  | -7.54 | JUC04012697.hg.1          | MFAP3L    |
| TC04001729.hg.1  | -7.74 | JUC04012696.hg.1          | MFAP3L    |
| TC04001729.hg.1  | -8.4  | PSR04023966.hg.1          | MFAP3L    |
| TC04001729.hg.1  | -8.51 | JUC04012699.hg.1          | MFAP3L    |
| TC15000438.hg.1  | -3.19 | JUC15002000.hg.1          | CGNL1     |
| TC15000438.hg.1  | -4.28 | PSR15004101.hg.1          | CGNL1     |
| TC14001429.hg.1  | -3.24 | JUC14008116.hg.1          | C14orf102 |
| TC14001429.hg.1  | -3.35 | JUC14008115.hg.1          | C14orf102 |
| TC14001429.hg.1  | -3.87 | PSR14015884.hg.1          | C14orf102 |
| TC03001345.hg.1  | -3.33 | PSR03022986.hg.1          | CDCP1     |
| TC03001345.hg.1  | -3.59 | PSR03022977.hg.1          | CDCP1     |
| TC03001345.hg.1  | -4.49 | PSR03022987.hg.1          | CDCP1     |
| TC03001345.hg.1  | -10.8 | JUC03011448.hg.1          | CDCP1     |
| TC16001326.hg.1  | -3.42 | PSR16018330.hg.1          | MTHFSD    |
| TC16001326.hg.1  | -4.66 | JUC16010450.hg.1          | MTHFSD    |
| TC6_ssto_hap7000 | -3.44 | JUC6_ssto_hap7000083.hg.1 |           |
| TC6_ssto_hap7000 | -3.72 | PSR6_ssto_hap7000205.hg.1 |           |
| TC6_ssto_hap7000 | -3.92 | JUC6_ssto_hap7000081.hg.1 |           |
| TC6_apd_hap1000  | -3.52 | PSR6_apd_hap1001          | TAP2      |
| TC6_apd_hap1000  | -4.35 | JUC6_apd_hap1000          | TAP2      |
| TC6_dbb_hap3000  | -3.52 | PSR6_dbb_hap3003          | TAP2      |
| TC6_dbb_hap3000  | -4.35 | JUC6_dbb_hap3002          | TAP2      |
| TC6_ssto_hap7000 | -3.52 | PSR6_ssto_hap7003         | TAP2      |
| TC6_ssto_hap7000 | -4.35 | JUC6_ssto_hap7001         | TAP2      |
| TC06004126.hg.1  | -3.55 | PSR06018769.hg.1          | TAP2      |
| TC06004126.hg.1  | -4.38 | JUC06021749.hg.1          | TAP2      |
| TC6_mann_hap400  | -3.55 | PSR6_mann_hap400          | TAP2      |
| TC6_mann_hap400  | -4.38 | JUC6_mann_hap400          | TAP2      |
| TC6_mcf_hap5000  | -3.55 | PSR6_mcf_hap5003          | TAP2      |
| TC6_mcf_hap5000  | -4.39 | JUC6_mcf_hap5001          | TAP2      |
| TC6_qbl_hap6000  | -3.55 | PSR6_qbl_hap60037         | TAP2      |
| TC6_qbl_hap6000  | -4.39 | JUC6_qbl_hap60014         | TAP2      |
| TC6_cox_hap2000  | -3.6  | PSR6_cox_hap2003          | TAP2      |
| TC6_cox_hap2000  | -4.45 | JUC6_cox_hap20021         | TAP2      |
| TC12001405.hg.1  | -3.62 | JUC12010141.hg.1          | PRICKLE1  |
| TC12001405.hg.1  | -4.3  | PSR12018198.hg.1          | PRICKLE1  |
| TC12001405.hg.1  | -4.73 | PSR12018193.hg.1          | PRICKLE1  |
| TC12001405.hg.1  | -4.97 | PSR12018192.hg.1          | PRICKLE1  |
| TC12001405.hg.1  | -6.45 | PSR12018197.hg.1          | PRICKLE1  |
| TC12001405.hg.1  | -7.19 | JUC12010135.hg.1          | PRICKLE1  |
| TC12001405.hg.1  | -7.25 | PSR12018202.hg.1          | PRICKLE1  |
| TC12001405.hg.1  | -8.24 | JUC12010134.hg.1          | PRICKLE1  |

|                 |        |                  |          |
|-----------------|--------|------------------|----------|
| TC12001405.hg.1 | -8.81  | JUC12010144.hg.1 | PRICKLE1 |
| TC10001045.hg.1 | -3.63  | PSR10012957.hg.1 | CCDC3    |
| TC10001045.hg.1 | -4.6   | JUC10007511.hg.1 | CCDC3    |
| TC10001045.hg.1 | -5.58  | JUC10007503.hg.1 | CCDC3    |
| TC10001045.hg.1 | -5.94  | JUC10007514.hg.1 | CCDC3    |
| TC10001045.hg.1 | -7.89  | PSR10012960.hg.1 | CCDC3    |
| TC10001045.hg.1 | -8.15  | PSR10012962.hg.1 | CCDC3    |
| TC10001045.hg.1 | -8.31  | PSR10012968.hg.1 | CCDC3    |
| TC10001045.hg.1 | -8.83  | PSR10012967.hg.1 | CCDC3    |
| TC10001045.hg.1 | -9.05  | PSR10012955.hg.1 | CCDC3    |
| TC10001045.hg.1 | -9.22  | JUC10007501.hg.1 | CCDC3    |
| TC10001045.hg.1 | -9.51  | PSR10012965.hg.1 | CCDC3    |
| TC10001045.hg.1 | -10.33 | PSR10012961.hg.1 | CCDC3    |
| TC10001045.hg.1 | -10.63 | PSR10012966.hg.1 | CCDC3    |
| TC10001045.hg.1 | -10.8  | JUC10007508.hg.1 | CCDC3    |
| TC10001045.hg.1 | -12.58 | PSR10012963.hg.1 | CCDC3    |
| TC01002954.hg.1 | -3.75  | PSR01045983.hg.1 | SORT1    |
| TC01002954.hg.1 | -3.93  | PSR01045984.hg.1 | SORT1    |
| TC01002954.hg.1 | -5.12  | PSR01045985.hg.1 | SORT1    |
| TC01002954.hg.1 | -5.34  | PSR01045979.hg.1 | SORT1    |
| TC01002954.hg.1 | -5.41  | PSR01045987.hg.1 | SORT1    |
| TC01002954.hg.1 | -5.5   | PSR01045981.hg.1 | SORT1    |
| TC01002954.hg.1 | -5.95  | JUC01024745.hg.1 | SORT1    |
| TC01002954.hg.1 | -6.75  | JUC01024751.hg.1 | SORT1    |
| TC01002954.hg.1 | -6.76  | JUC01024754.hg.1 | SORT1    |
| TC01002954.hg.1 | -7.73  | PSR01045964.hg.1 | SORT1    |
| TC03002146.hg.1 | -3.79  | JUC03018777.hg.1 | APOD     |
| TC03002146.hg.1 | -4.04  | PSR03037889.hg.1 | APOD     |
| TC03002146.hg.1 | -6.23  | PSR03037886.hg.1 | APOD     |
| TC03002146.hg.1 | -6.71  | PSR03037888.hg.1 | APOD     |
| TC03002146.hg.1 | -7.04  | JUC03018781.hg.1 | APOD     |
| TC12001560.hg.1 | -4.21  | JUC12011472.hg.1 | HOXC-AS1 |
| TC12001560.hg.1 | -6.14  | PSR12020638.hg.1 | HOXC-AS1 |
| TC01001004.hg.1 | -4.47  | JUC01008369.hg.1 | OLFML3   |
| TC01001004.hg.1 | -4.79  | PSR01016022.hg.1 | OLFML3   |
| TC03001169.hg.1 | -4.48  | PSR03020238.hg.1 | TIMP4    |
| TC03001169.hg.1 | -4.55  | JUC03010111.hg.1 | TIMP4    |

















































































































|                                                      |                |        |      |
|------------------------------------------------------|----------------|--------|------|
| aldo-keto reductase family 1, member C3 (3-alpha hyd | NM_001253908,  | Coding | TRUE |
| aldo-keto reductase family 1, member C3 (3-alpha hyd | NM_001253908,  | Coding | TRUE |
| aldo-keto reductase family 1, member C3 (3-alpha hyd | NM_001253908,  | Coding | TRUE |
| neuroblastoma breakpoint family member 21-like, neu  | ENST000003094  | Coding | TRUE |
| neuroblastoma breakpoint family member 21-like, neu  | ENST000003094  | Coding | TRUE |
| neuroblastoma breakpoint family member 21-like, neu  | ENST000003094  | Coding | TRUE |
| neuroblastoma breakpoint family member 21-like, neu  | ENST000003094  | Coding | TRUE |
| neuroblastoma breakpoint family member 21-like, neu  | ENST000003094  | Coding | TRUE |
| neuroblastoma breakpoint family member 21-like, neu  | ENST000003094  | Coding | TRUE |
| neuroblastoma breakpoint family member 21-like, neu  | ENST000003094  | Coding | TRUE |
| integrin beta 1 binding protein 1                    | NM_004763, NM  | Coding | TRUE |
| integrin beta 1 binding protein 1                    | NM_004763, NM  | Coding | TRUE |
| integrin beta 1 binding protein 1                    | NM_004763, NM  | Coding | TRUE |
| integrin beta 1 binding protein 1                    | NM_004763, NM  | Coding | TRUE |
| T-box 20                                             | NM_001077653,  | Coding | TRUE |
| T-box 20                                             | NM_001077653,  | Coding | TRUE |
| T-box 20                                             | NM_001077653,  | Coding | TRUE |
| T-box 20                                             | NM_001077653,  | Coding | TRUE |
| T-box 20                                             | NM_001077653,  | Coding | TRUE |
| T-box 20                                             | NM_001077653,  | Coding | TRUE |
| mab-21-like 1 (C. elegans), microRNA 548f-5          | NM_005584, NR  | Coding | TRUE |
| mab-21-like 1 (C. elegans), microRNA 548f-5          | NM_005584, NR  | Coding | TRUE |
| mab-21-like 1 (C. elegans), microRNA 548f-5          | NM_005584, NR  | Coding | TRUE |
| mab-21-like 1 (C. elegans), microRNA 548f-5          | NM_005584, NR  | Coding | TRUE |
| major histocompatibility complex, class I, B         | NM_005514, BCC | Coding | TRUE |
| major histocompatibility complex, class I, B         | NM_005514, BCC | Coding | TRUE |
| major histocompatibility complex, class I, B         | NM_005514, BCC | Coding | TRUE |
| major histocompatibility complex, class I, B         | NM_005514, BCC | Coding | TRUE |
| major histocompatibility complex, class I, B         | NM_005514, BCC | Coding | TRUE |
| major histocompatibility complex, class I, B         | NM_005514, BCC | Coding | TRUE |
| major histocompatibility complex, class I, B         | NM_005514, BCC | Coding | TRUE |
| major histocompatibility complex, class I, B         | NM_005514, BCC | Coding | TRUE |
| major histocompatibility complex, class I, B         | NM_005514, BCC | Coding | TRUE |
| major histocompatibility complex, class I, B         | NM_005514, BCC | Coding | TRUE |
| major histocompatibility complex, class I, B         | NM_005514, BCC | Coding | TRUE |
| major histocompatibility complex, class I, B         | NM_005514, BCC | Coding | TRUE |
| major histocompatibility complex, class I, B         | NM_005514, BCC | Coding | TRUE |
| major histocompatibility complex, class I, B         | NM_005514, BCC | Coding | TRUE |
| major histocompatibility complex, class I, B         | NM_005514, BCC | Coding | TRUE |
| major histocompatibility complex, class I, B         | NM_005514, BCC | Coding | TRUE |
| major histocompatibility complex, class I, B         | NM_005514, BCC | Coding | TRUE |
| major histocompatibility complex, class I, B         | NM_005514, BCC | Coding | TRUE |
| major histocompatibility complex, class I, B         | NM_005514, BCC | Coding | TRUE |
| major histocompatibility complex, class I, B         | NM_005514, BCC | Coding | TRUE |
| major histocompatibility complex, class I, B         | NM_005514, BCC | Coding | TRUE |
| major histocompatibility complex, class I, B         | NM_005514, BCC | Coding | TRUE |
| major histocompatibility complex, class I, B         | NM_005514, BCC | Coding | TRUE |
| major histocompatibility complex, class I, B         | NM_005514, BCC | Coding | TRUE |
| major histocompatibility complex, class I, B         | NM_005514, BCC | Coding | TRUE |
| major histocompatibility complex, class I, B         | NM_005514, BCC | Coding | TRUE |
| anterior gradient 2 homolog (Xenopus laevis)         | NM_006408, ENS | Coding | TRUE |
| anterior gradient 2 homolog (Xenopus laevis)         | NM_006408, ENS | Coding | TRUE |
| anterior gradient 2 homolog (Xenopus laevis)         | NM_006408, ENS | Coding | TRUE |
| anterior gradient 2 homolog (Xenopus laevis)         | NM_006408, ENS | Coding | TRUE |
| anterior gradient 2 homolog (Xenopus laevis)         | NM_006408, ENS | Coding | TRUE |
| anterior gradient 2 homolog (Xenopus laevis)         | NM_006408, ENS | Coding | TRUE |
| anterior gradient 2 homolog (Xenopus laevis)         | NM_006408, ENS | Coding | TRUE |
| anterior gradient 2 homolog (Xenopus laevis)         | NM_006408, ENS | Coding | TRUE |
| chromosome 10 open reading frame 10                  | NM_007021, ENS | Coding | TRUE |
| chromosome 10 open reading frame 10                  | NM_007021, ENS | Coding | TRUE |
| chromosome 10 open reading frame 10                  | NM_007021, ENS | Coding | TRUE |
| adenylate kinase 5                                   | NM_012093, NM  | Coding | TRUE |
| adenylate kinase 5                                   | NM_012093, NM  | Coding | TRUE |
| adenylate kinase 5                                   | NM_012093, NM  | Coding | TRUE |
| adenylate kinase 5                                   | NM_012093, NM  | Coding | TRUE |

























|                                                            |                 |        |      |
|------------------------------------------------------------|-----------------|--------|------|
| Sad1 and UNC84 domain containing 1                         | NM_001171944,   | Coding | TRUE |
| Sad1 and UNC84 domain containing 1                         | NM_001171944,   | Coding | TRUE |
| Sad1 and UNC84 domain containing 1                         | NM_001171944,   | Coding | TRUE |
| Sad1 and UNC84 domain containing 1                         | NM_001171944,   | Coding | TRUE |
| Sad1 and UNC84 domain containing 1                         | NM_001171944,   | Coding | TRUE |
| Sad1 and UNC84 domain containing 1                         | NM_001171944,   | Coding | TRUE |
| Sad1 and UNC84 domain containing 1                         | NM_001171944,   | Coding | TRUE |
| Sad1 and UNC84 domain containing 1                         | NM_001171944,   | Coding | TRUE |
| solute carrier organic anion transporter family, member    | NM_005630, ENS  | Coding | TRUE |
| solute carrier organic anion transporter family, member    | NM_005630, ENS  | Coding | TRUE |
| solute carrier organic anion transporter family, member    | NM_005630, ENS  | Coding | TRUE |
| solute carrier organic anion transporter family, member    | NM_005630, ENS  | Coding | TRUE |
| solute carrier organic anion transporter family, member    | NM_005630, ENS  | Coding | TRUE |
| solute carrier organic anion transporter family, member    | NM_005630, ENS  | Coding | TRUE |
| solute carrier organic anion transporter family, member    | NM_005630, ENS  | Coding | TRUE |
| solute carrier organic anion transporter family, member    | NM_005630, ENS  | Coding | TRUE |
| solute carrier organic anion transporter family, member    | NM_005630, ENS  | Coding | TRUE |
| solute carrier organic anion transporter family, member    | NM_005630, ENS  | Coding | TRUE |
| solute carrier organic anion transporter family, member    | NM_005630, ENS  | Coding | TRUE |
| solute carrier organic anion transporter family, member    | NM_005630, ENS  | Coding | TRUE |
| solute carrier organic anion transporter family, member    | NM_005630, ENS  | Coding | TRUE |
| solute carrier organic anion transporter family, member    | NM_005630, ENS  | Coding | TRUE |
| solute carrier organic anion transporter family, member    | NM_005630, ENS  | Coding | TRUE |
| solute carrier organic anion transporter family, member    | NM_005630, ENS  | Coding | TRUE |
| solute carrier organic anion transporter family, member    | NM_005630, ENS  | Coding | TRUE |
| FAT tumor suppressor homolog 3 (Drosophila)                | NM_001008781,   | Coding | TRUE |
| FAT tumor suppressor homolog 3 (Drosophila)                | NM_001008781,   | Coding | TRUE |
| FAT tumor suppressor homolog 3 (Drosophila)                | NM_001008781,   | Coding | TRUE |
| FAT tumor suppressor homolog 3 (Drosophila)                | NM_001008781,   | Coding | TRUE |
| FAT tumor suppressor homolog 3 (Drosophila)                | NM_001008781,   | Coding | TRUE |
| FAT tumor suppressor homolog 3 (Drosophila)                | NM_001008781,   | Coding | TRUE |
| FAT tumor suppressor homolog 3 (Drosophila)                | NM_001008781,   | Coding | TRUE |
| solute carrier family 8 (sodium/calcium exchanger), member | NM_001112800, I | Coding | TRUE |
| solute carrier family 8 (sodium/calcium exchanger), member | NM_001112800, I | Coding | TRUE |
| solute carrier family 8 (sodium/calcium exchanger), member | NM_001112800, I | Coding | TRUE |
| solute carrier family 8 (sodium/calcium exchanger), member | NM_001112800, I | Coding | TRUE |
| solute carrier family 8 (sodium/calcium exchanger), member | NM_001112800, I | Coding | TRUE |
| solute carrier family 8 (sodium/calcium exchanger), member | NM_001112800, I | Coding | TRUE |
| solute carrier family 8 (sodium/calcium exchanger), member | NM_001112800, I | Coding | TRUE |
| solute carrier family 8 (sodium/calcium exchanger), member | NM_001112800, I | Coding | TRUE |
| solute carrier family 8 (sodium/calcium exchanger), member | NM_001112800, I | Coding | TRUE |
| selenoprotein T                                            | NM_016275, ENS  | Coding | TRUE |
| selenoprotein T                                            | NM_016275, ENS  | Coding | TRUE |
| selenoprotein T                                            | NM_016275, ENS  | Coding | TRUE |
| cytochrome b5 domain containing 1                          | NM_144607, ENS  | Coding | TRUE |
| cytochrome b5 domain containing 1                          | NM_144607, ENS  | Coding | TRUE |
| inhibitor of DNA binding 2, dominant negative helix-loop   | NM_002166, ENS  | Coding | TRUE |
| inhibitor of DNA binding 2, dominant negative helix-loop   | NM_002166, ENS  | Coding | TRUE |
| inhibitor of DNA binding 2, dominant negative helix-loop   | NM_002166, ENS  | Coding | TRUE |
| inhibitor of DNA binding 2, dominant negative helix-loop   | NM_002166, ENS  | Coding | TRUE |
| inhibitor of DNA binding 2, dominant negative helix-loop   | NM_002166, ENS  | Coding | TRUE |
| uncharacterized LOC100134259                               | NR_024452, ENS  | Coding | TRUE |
| uncharacterized LOC100134259                               | NR_024452, ENS  | Coding | TRUE |
| uncharacterized LOC100134259                               | NR_024452, ENS  | Coding | TRUE |
| uncharacterized LOC100134259                               | NR_024452, ENS  | Coding | TRUE |
| uncharacterized LOC100134259                               | NR_024452, ENS  | Coding | TRUE |
| pleckstrin homology domain containing, family A member     | NM_175058, ENS  | Coding | TRUE |
| pleckstrin homology domain containing, family A member     | NM_175058, ENS  | Coding | TRUE |
| pleckstrin homology domain containing, family A member     | NM_175058, ENS  | Coding | TRUE |

























|                                                       |                |        |      |
|-------------------------------------------------------|----------------|--------|------|
| plasminogen activator, tissue                         | NM_000930, NM  | Coding | TRUE |
| plasminogen activator, tissue                         | NM_000930, NM  | Coding | TRUE |
| aldehyde dehydrogenase 3 family, member A2            | NM_000382, NM  | Coding | TRUE |
| aldehyde dehydrogenase 3 family, member A2            | NM_000382, NM  | Coding | TRUE |
| aldehyde dehydrogenase 3 family, member A2            | NM_000382, NM  | Coding | TRUE |
| aldehyde dehydrogenase 3 family, member A2            | NM_000382, NM  | Coding | TRUE |
| aldehyde dehydrogenase 3 family, member A2            | NM_000382, NM  | Coding | TRUE |
| aldehyde dehydrogenase 3 family, member A2            | NM_000382, NM  | Coding | TRUE |
| aldehyde dehydrogenase 3 family, member A2            | NM_000382, NM  | Coding | TRUE |
| aldehyde dehydrogenase 3 family, member A2            | NM_000382, NM  | Coding | TRUE |
| aldehyde dehydrogenase 3 family, member A2            | NM_000382, NM  | Coding | TRUE |
| major histocompatibility complex, class I, C          | NM_001243042,  | Coding | TRUE |
| major histocompatibility complex, class I, C          | NM_001243042,  | Coding | TRUE |
| major histocompatibility complex, class I, C          | NM_001243042,  | Coding | TRUE |
| major histocompatibility complex, class I, C          | NM_001243042,  | Coding | TRUE |
| major histocompatibility complex, class I, C          | NM_001243042,  | Coding | TRUE |
| major histocompatibility complex, class I, C          | NM_001243042,  | Coding | TRUE |
| major histocompatibility complex, class I, C          | NM_001243042,  | Coding | TRUE |
| major histocompatibility complex, class I, C          | NM_001243042,  | Coding | TRUE |
| major histocompatibility complex, class I, C          | NM_001243042,  | Coding | TRUE |
| major histocompatibility complex, class I, C          | NM_001243042,  | Coding | TRUE |
| major histocompatibility complex, class I, C          | NM_001243042,  | Coding | TRUE |
| major histocompatibility complex, class I, C          | NM_001243042,  | Coding | TRUE |
| major histocompatibility complex, class I, C          | NM_001243042,  | Coding | TRUE |
| major histocompatibility complex, class I, C          | NM_001243042,  | Coding | TRUE |
| major histocompatibility complex, class I, C          | NM_001243042,  | Coding | TRUE |
| major histocompatibility complex, class I, C          | NM_001243042,  | Coding | TRUE |
| major histocompatibility complex, class I, C          | NM_001243042,  | Coding | TRUE |
| arsenic (+3 oxidation state) methyltransferase        | NM_020682, ENS | Coding | TRUE |
| arsenic (+3 oxidation state) methyltransferase        | NM_020682, ENS | Coding | TRUE |
| arsenic (+3 oxidation state) methyltransferase        | NM_020682, ENS | Coding | TRUE |
| HYDIN, axonemal central pair apparatus protein        | NM_017558, NM  | Coding | TRUE |
| HYDIN, axonemal central pair apparatus protein        | NM_017558, NM  | Coding | TRUE |
| HYDIN, axonemal central pair apparatus protein        | NM_017558, NM  | Coding | TRUE |
| HYDIN, axonemal central pair apparatus protein        | NM_017558, NM  | Coding | TRUE |
| HYDIN, axonemal central pair apparatus protein        | NM_017558, NM  | Coding | TRUE |
| HYDIN, axonemal central pair apparatus protein        | NM_017558, NM  | Coding | TRUE |
| HYDIN, axonemal central pair apparatus protein        | NM_017558, NM  | Coding | TRUE |
| HYDIN, axonemal central pair apparatus protein        | NM_017558, NM  | Coding | TRUE |
| HYDIN, axonemal central pair apparatus protein        | NM_017558, NM  | Coding | TRUE |
| HYDIN, axonemal central pair apparatus protein        | NM_017558, NM  | Coding | TRUE |
| HYDIN, axonemal central pair apparatus protein        | NM_017558, NM  | Coding | TRUE |
| HYDIN, axonemal central pair apparatus protein        | NM_017558, NM  | Coding | TRUE |
| HYDIN, axonemal central pair apparatus protein        | NM_017558, NM  | Coding | TRUE |
| HYDIN, axonemal central pair apparatus protein        | NM_017558, NM  | Coding | TRUE |
| HYDIN, axonemal central pair apparatus protein        | NM_017558, NM  | Coding | TRUE |
| keratin associated protein 1-5                        | NM_031957, ENS | Coding | TRUE |
| keratin associated protein 1-5                        | NM_031957, ENS | Coding | TRUE |
| keratin associated protein 1-5                        | NM_031957, ENS | Coding | TRUE |
| keratin associated protein 1-5                        | NM_031957, ENS | Coding | TRUE |
| keratin associated protein 1-5                        | NM_031957, ENS | Coding | TRUE |
| keratin associated protein 1-5                        | NM_031957, ENS | Coding | TRUE |
| keratin associated protein 1-5                        | NM_031957, ENS | Coding | TRUE |
| tumor necrosis factor receptor superfamily, member 19 | NM_018647, NM  | Coding | TRUE |
| tumor necrosis factor receptor superfamily, member 19 | NM_018647, NM  | Coding | TRUE |
| tumor necrosis factor receptor superfamily, member 19 | NM_018647, NM  | Coding | TRUE |
| tumor necrosis factor receptor superfamily, member 19 | NM_018647, NM  | Coding | TRUE |
| tumor necrosis factor receptor superfamily, member 19 | NM_018647, NM  | Coding | TRUE |
| SOX2 overlapping transcript (non-protein coding)      | NR_004053, ENS | Coding | TRUE |
| SOX2 overlapping transcript (non-protein coding)      | NR_004053, ENS | Coding | TRUE |
| SOX2 overlapping transcript (non-protein coding)      | NR_004053, ENS | Coding | TRUE |
| SOX2 overlapping transcript (non-protein coding)      | NR_004053, ENS | Coding | TRUE |
| phosphatase, orphan 2                                 | NM_001008489,  | Coding | TRUE |



|                                                      |                |        |      |
|------------------------------------------------------|----------------|--------|------|
| laminin, alpha 3                                     | NM_000227, NM  | Coding | TRUE |
| laminin, alpha 3                                     | NM_000227, NM  | Coding | TRUE |
| laminin, alpha 3                                     | NM_000227, NM  | Coding | TRUE |
| ATPase, H+ transporting, lysosomal accessory protein | NM_001017971,  | Coding | TRUE |
| ATPase, H+ transporting, lysosomal accessory protein | NM_001017971,  | Coding | TRUE |
| ATPase, H+ transporting, lysosomal accessory protein | NM_001017971,  | Coding | TRUE |
| ATPase, H+ transporting, lysosomal accessory protein | NM_001017971,  | Coding | TRUE |
| ATPase, H+ transporting, lysosomal accessory protein | NM_001017971,  | Coding | TRUE |
| ATPase, H+ transporting, lysosomal accessory protein | NM_001017971,  | Coding | TRUE |
| ATPase, H+ transporting, lysosomal accessory protein | NM_001017971,  | Coding | TRUE |
| ATPase, H+ transporting, lysosomal accessory protein | NM_001017971,  | Coding | TRUE |
| ATPase, H+ transporting, lysosomal accessory protein | NM_001017971,  | Coding | TRUE |
| ATPase, H+ transporting, lysosomal accessory protein | NM_001017971,  | Coding | TRUE |
| ATPase, H+ transporting, lysosomal accessory protein | NM_001017971,  | Coding | TRUE |
| ATPase, H+ transporting, lysosomal accessory protein | NM_001017971,  | Coding | TRUE |
| ATPase, H+ transporting, lysosomal accessory protein | NM_001017971,  | Coding | TRUE |
| major facilitator superfamily domain containing 6    | NM_017694, ENS | Coding | TRUE |
| major facilitator superfamily domain containing 6    | NM_017694, ENS | Coding | TRUE |
| major facilitator superfamily domain containing 6    | NM_017694, ENS | Coding | TRUE |
| major facilitator superfamily domain containing 6    | NM_017694, ENS | Coding | TRUE |
| major facilitator superfamily domain containing 6    | NM_017694, ENS | Coding | TRUE |
| major facilitator superfamily domain containing 6    | NM_017694, ENS | Coding | TRUE |
| major facilitator superfamily domain containing 6    | NM_017694, ENS | Coding | TRUE |
| major facilitator superfamily domain containing 6    | NM_017694, ENS | Coding | TRUE |
| major facilitator superfamily domain containing 6    | NM_017694, ENS | Coding | TRUE |
| major facilitator superfamily domain containing 6    | NM_017694, ENS | Coding | TRUE |
| collagen, type X, alpha 1                            | NM_000493, ENS | Coding | TRUE |
| collagen, type X, alpha 1                            | NM_000493, ENS | Coding | TRUE |
| collagen, type X, alpha 1                            | NM_000493, ENS | Coding | TRUE |
| collagen, type X, alpha 1                            | NM_000493, ENS | Coding | TRUE |
| collagen, type X, alpha 1                            | NM_000493, ENS | Coding | TRUE |
| collagen, type X, alpha 1                            | NM_000493, ENS | Coding | TRUE |
| collagen, type X, alpha 1                            | NM_000493, ENS | Coding | TRUE |
| monoglyceride lipase                                 | NM_001003794,  | Coding | TRUE |
| monoglyceride lipase                                 | NM_001003794,  | Coding | TRUE |
| monoglyceride lipase                                 | NM_001003794,  | Coding | TRUE |
| monoglyceride lipase                                 | NM_001003794,  | Coding | TRUE |
| monoglyceride lipase                                 | NM_001003794,  | Coding | TRUE |
| monoglyceride lipase                                 | NM_001003794,  | Coding | TRUE |
| monoglyceride lipase                                 | NM_001003794,  | Coding | TRUE |
| monoglyceride lipase                                 | NM_001003794,  | Coding | TRUE |
| monoglyceride lipase                                 | NM_001003794,  | Coding | TRUE |
| monoglyceride lipase                                 | NM_001003794,  | Coding | TRUE |
| kelch-like 13 (Drosophila)                           | NM_001168299,  | Coding | TRUE |
| kelch-like 13 (Drosophila)                           | NM_001168299,  | Coding | TRUE |
| kelch-like 13 (Drosophila)                           | NM_001168299,  | Coding | TRUE |
| kelch-like 13 (Drosophila)                           | NM_001168299,  | Coding | TRUE |
| kelch-like 13 (Drosophila)                           | NM_001168299,  | Coding | TRUE |
| kelch-like 13 (Drosophila)                           | NM_001168299,  | Coding | TRUE |
| kelch-like 13 (Drosophila)                           | NM_001168299,  | Coding | TRUE |
| kelch-like 13 (Drosophila)                           | NM_001168299,  | Coding | TRUE |
| kelch-like 13 (Drosophila)                           | NM_001168299,  | Coding | TRUE |
| kelch-like 13 (Drosophila)                           | NM_001168299,  | Coding | TRUE |
| kelch-like 13 (Drosophila)                           | NM_001168299,  | Coding | TRUE |
| kelch-like 13 (Drosophila)                           | NM_001168299,  | Coding | TRUE |
| cytoskeleton associated protein 2-like               | NM_152515, ENS | Coding | TRUE |
| cytoskeleton associated protein 2-like               | NM_152515, ENS | Coding | TRUE |
| cytoskeleton associated protein 2-like               | NM_152515, ENS | Coding | TRUE |
| cytoskeleton associated protein 2-like               | NM_152515, ENS | Coding | TRUE |
| anoctamin 1, calcium activated chloride channel      | NM_018043, NR  | Coding | TRUE |



|                                                         |                |        |      |
|---------------------------------------------------------|----------------|--------|------|
| membrane associated guanylate kinase, WW and PDZ        | NM_001142782,  | Coding | TRUE |
| ankyrin repeat and SOCS box containing 3, GPR75-A       | NM_001201965,  | Coding | TRUE |
| ankyrin repeat and SOCS box containing 3, GPR75-A       | NM_001201965,  | Coding | TRUE |
| ankyrin repeat and SOCS box containing 3, GPR75-A       | NM_001201965,  | Coding | TRUE |
| ankyrin repeat and SOCS box containing 3, GPR75-A       | NM_001201965,  | Coding | TRUE |
| contactin 3 (plasmacytoma associated)                   | NM_020872, ENS | Coding | TRUE |
| contactin 3 (plasmacytoma associated)                   | NM_020872, ENS | Coding | TRUE |
| contactin 3 (plasmacytoma associated)                   | NM_020872, ENS | Coding | TRUE |
| contactin 3 (plasmacytoma associated)                   | NM_020872, ENS | Coding | TRUE |
| contactin 3 (plasmacytoma associated)                   | NM_020872, ENS | Coding | TRUE |
| contactin 3 (plasmacytoma associated)                   | NM_020872, ENS | Coding | TRUE |
| contactin 3 (plasmacytoma associated)                   | NM_020872, ENS | Coding | TRUE |
| contactin 3 (plasmacytoma associated)                   | NM_020872, ENS | Coding | TRUE |
| contactin 3 (plasmacytoma associated)                   | NM_020872, ENS | Coding | TRUE |
| contactin 3 (plasmacytoma associated)                   | NM_020872, ENS | Coding | TRUE |
| contactin 3 (plasmacytoma associated)                   | NM_020872, ENS | Coding | TRUE |
| pleckstrin and Sec7 domain containing 3                 | NM_015310, NM  | Coding | TRUE |
| pleckstrin and Sec7 domain containing 3                 | NM_015310, NM  | Coding | TRUE |
| pleckstrin and Sec7 domain containing 3                 | NM_015310, NM  | Coding | TRUE |
| pleckstrin and Sec7 domain containing 3                 | NM_015310, NM  | Coding | TRUE |
| pleckstrin and Sec7 domain containing 3                 | NM_015310, NM  | Coding | TRUE |
| pleckstrin and Sec7 domain containing 3                 | NM_015310, NM  | Coding | TRUE |
| pleckstrin and Sec7 domain containing 3                 | NM_015310, NM  | Coding | TRUE |
| pleckstrin and Sec7 domain containing 3                 | NM_015310, NM  | Coding | TRUE |
| ATPase family, AAA domain containing 2                  | NM_014109, ENS | Coding | TRUE |
| ATPase family, AAA domain containing 2                  | NM_014109, ENS | Coding | TRUE |
| ATPase family, AAA domain containing 2                  | NM_014109, ENS | Coding | TRUE |
| ATPase family, AAA domain containing 2                  | NM_014109, ENS | Coding | TRUE |
| ATPase family, AAA domain containing 2                  | NM_014109, ENS | Coding | TRUE |
| ATPase family, AAA domain containing 2                  | NM_014109, ENS | Coding | TRUE |
| ATPase family, AAA domain containing 2                  | NM_014109, ENS | Coding | TRUE |
| ATPase family, AAA domain containing 2                  | NM_014109, ENS | Coding | TRUE |
| ATPase family, AAA domain containing 2                  | NM_014109, ENS | Coding | TRUE |
| ATPase family, AAA domain containing 2                  | NM_014109, ENS | Coding | TRUE |
| ATPase family, AAA domain containing 2                  | NM_014109, ENS | Coding | TRUE |
| ATPase family, AAA domain containing 2                  | NM_014109, ENS | Coding | TRUE |
| G protein-coupled receptor, family C, group 5, member   | NM_018653, NM  | Coding | TRUE |
| G protein-coupled receptor, family C, group 5, member   | NM_018653, NM  | Coding | TRUE |
| SAR1 homolog B (S. cerevisiae)                          | NM_001033503,  | Coding | TRUE |
| SAR1 homolog B (S. cerevisiae)                          | NM_001033503,  | Coding | TRUE |
| SAR1 homolog B (S. cerevisiae)                          | NM_001033503,  | Coding | TRUE |
| SAR1 homolog B (S. cerevisiae)                          | NM_001033503,  | Coding | TRUE |
| SAR1 homolog B (S. cerevisiae)                          | NM_001033503,  | Coding | TRUE |
| SAR1 homolog B (S. cerevisiae)                          | NM_001033503,  | Coding | TRUE |
| signal transducing adaptor family member 2              | NM_001013841,  | Coding | TRUE |
| signal transducing adaptor family member 2              | NM_001013841,  | Coding | TRUE |
| signal transducing adaptor family member 2              | NM_001013841,  | Coding | TRUE |
| signal transducing adaptor family member 2              | NM_001013841,  | Coding | TRUE |
| calmodulin 1 (phosphorylase kinase, delta), calmodulin  | NM_006888, ENS | Coding | TRUE |
| calmodulin 1 (phosphorylase kinase, delta), calmodulin  | NM_006888, ENS | Coding | TRUE |
| mitochondrial ribosomal protein S6, solute carrier fami | NM_032476, NM  | Coding | TRUE |
| mitochondrial ribosomal protein S6, solute carrier fami | NM_032476, NM  | Coding | TRUE |
| mitochondrial ribosomal protein S6, solute carrier fami | NM_032476, NM  | Coding | TRUE |
| mitochondrial ribosomal protein S6, solute carrier fami | NM_032476, NM  | Coding | TRUE |
| mitochondrial ribosomal protein S6, solute carrier fami | NM_032476, NM  | Coding | TRUE |
| mitochondrial ribosomal protein S6, solute carrier fami | NM_032476, NM  | Coding | TRUE |
| mitochondrial ribosomal protein S6, solute carrier fami | NM_032476, NM  | Coding | TRUE |
| mitochondrial ribosomal protein S6, solute carrier fami | NM_032476, NM  | Coding | TRUE |
| suppressor of cancer cell invasion                      | NM_001144877,  | Coding | TRUE |
| suppressor of cancer cell invasion                      | NM_001144877,  | Coding | TRUE |
| suppressor of cancer cell invasion                      | NM_001144877,  | Coding | TRUE |
| suppressor of cancer cell invasion                      | NM_001144877,  | Coding | TRUE |































|                                                       |                |        |      |
|-------------------------------------------------------|----------------|--------|------|
| kinesin family member 26B                             | NM_018012, ENS | Coding | TRUE |
| kinesin family member 26B                             | NM_018012, ENS | Coding | TRUE |
| kinesin family member 26B                             | NM_018012, ENS | Coding | TRUE |
| kinesin family member 26B                             | NM_018012, ENS | Coding | TRUE |
| kinesin family member 26B                             | NM_018012, ENS | Coding | TRUE |
| kinesin family member 26B                             | NM_018012, ENS | Coding | TRUE |
| kinesin family member 26B                             | NM_018012, ENS | Coding | TRUE |
| sperm flagellar 2                                     | NM_024867, NM  | Coding | TRUE |
| sperm flagellar 2                                     | NM_024867, NM  | Coding | TRUE |
| sperm flagellar 2                                     | NM_024867, NM  | Coding | TRUE |
| sperm flagellar 2                                     | NM_024867, NM  | Coding | TRUE |
| sperm flagellar 2                                     | NM_024867, NM  | Coding | TRUE |
| sperm flagellar 2                                     | NM_024867, NM  | Coding | TRUE |
| sperm flagellar 2                                     | NM_024867, NM  | Coding | TRUE |
| sperm flagellar 2                                     | NM_024867, NM  | Coding | TRUE |
| sperm flagellar 2                                     | NM_024867, NM  | Coding | TRUE |
| sperm flagellar 2                                     | NM_024867, NM  | Coding | TRUE |
| sperm flagellar 2                                     | NM_024867, NM  | Coding | TRUE |
| sperm flagellar 2                                     | NM_024867, NM  | Coding | TRUE |
| sperm flagellar 2                                     | NM_024867, NM  | Coding | TRUE |
| sperm flagellar 2                                     | NM_024867, NM  | Coding | TRUE |
| sperm flagellar 2                                     | NM_024867, NM  | Coding | TRUE |
| sperm flagellar 2                                     | NM_024867, NM  | Coding | TRUE |
| sperm flagellar 2                                     | NM_024867, NM  | Coding | TRUE |
| sperm flagellar 2                                     | NM_024867, NM  | Coding | TRUE |
| sperm flagellar 2                                     | NM_024867, NM  | Coding | TRUE |
| sperm flagellar 2                                     | NM_024867, NM  | Coding | TRUE |
| sperm flagellar 2                                     | NM_024867, NM  | Coding | TRUE |
| sperm flagellar 2                                     | NM_024867, NM  | Coding | TRUE |
| sperm flagellar 2                                     | NM_024867, NM  | Coding | TRUE |
| sperm flagellar 2                                     | NM_024867, NM  | Coding | TRUE |
| sperm flagellar 2                                     | NM_024867, NM  | Coding | TRUE |
| sperm flagellar 2                                     | NM_024867, NM  | Coding | TRUE |
| sperm flagellar 2                                     | NM_024867, NM  | Coding | TRUE |
| sperm flagellar 2                                     | NM_024867, NM  | Coding | TRUE |
| sperm flagellar 2                                     | NM_024867, NM  | Coding | TRUE |
| sperm flagellar 2                                     | NM_024867, NM  | Coding | TRUE |
| sperm flagellar 2                                     | NM_024867, NM  | Coding | TRUE |
| sperm flagellar 2                                     | NM_024867, NM  | Coding | TRUE |
| sperm flagellar 2                                     | NM_024867, NM  | Coding | TRUE |
| sperm flagellar 2                                     | NM_024867, NM  | Coding | TRUE |
| sperm flagellar 2                                     | NM_024867, NM  | Coding | TRUE |
| sperm flagellar 2                                     | NM_024867, NM  | Coding | TRUE |
| sperm flagellar 2                                     | NM_024867, NM  | Coding | TRUE |
| sperm flagellar 2                                     | NM_024867, NM  | Coding | TRUE |
| sperm flagellar 2                                     | NM_024867, NM  | Coding | TRUE |
| sperm flagellar 2                                     | NM_024867, NM  | Coding | TRUE |
| sperm flagellar 2                                     | NM_024867, NM  | Coding | TRUE |
| sperm flagellar 2                                     | NM_024867, NM  | Coding | TRUE |
| sperm flagellar 2                                     | NM_024867, NM  | Coding | TRUE |
| sperm flagellar 2                                     | NM_024867, NM  | Coding | TRUE |
| ubiquitin-conjugating enzyme E2D 3                    | NM_003340, NM  | Coding | TRUE |
| ubiquitin-conjugating enzyme E2D 3                    | NM_003340, NM  | Coding | TRUE |
| ubiquitin-conjugating enzyme E2D 3                    | NM_003340, NM  | Coding | TRUE |
| polymerase (RNA) II (DNA directed) polypeptide J3, ur | NM_001097615,  | Coding | TRUE |
| polymerase (RNA) II (DNA directed) polypeptide J3, ur | NM_001097615,  | Coding | TRUE |
| polymerase (RNA) II (DNA directed) polypeptide J3, ur | NM_001097615,  | Coding | TRUE |
| polymerase (RNA) II (DNA directed) polypeptide J3, ur | NM_001097615,  | Coding | TRUE |
| polymerase (RNA) II (DNA directed) polypeptide J3, ur | NM_001097615,  | Coding | TRUE |
| dynein, cytoplasmic 2, light intermediate chain 1     | NM_016008, NM  | Coding | TRUE |
| dynein, cytoplasmic 2, light intermediate chain 1     | NM_016008, NM  | Coding | TRUE |
| intraflagellar transport 172 homolog (Chlamydomonas   | NM_015662, ENS | Coding | TRUE |
| intraflagellar transport 172 homolog (Chlamydomonas   | NM_015662, ENS | Coding | TRUE |
| intraflagellar transport 172 homolog (Chlamydomonas   | NM_015662, ENS | Coding | TRUE |































|                                                     |                 |        |      |
|-----------------------------------------------------|-----------------|--------|------|
| collagen and calcium binding EGF domains 1          | NM_133459, ENS  | Coding | TRUE |
| collagen and calcium binding EGF domains 1          | NM_133459, ENS  | Coding | TRUE |
| collagen and calcium binding EGF domains 1          | NM_133459, ENS  | Coding | TRUE |
| collagen and calcium binding EGF domains 1          | NM_133459, ENS  | Coding | TRUE |
| collagen and calcium binding EGF domains 1          | NM_133459, ENS  | Coding | TRUE |
| collagen and calcium binding EGF domains 1          | NM_133459, ENS  | Coding | TRUE |
| v-yes-1 Yamaguchi sarcoma viral related oncogene ho | NM_001111097, N | Coding | TRUE |
| v-yes-1 Yamaguchi sarcoma viral related oncogene ho | NM_001111097, N | Coding | TRUE |
| v-yes-1 Yamaguchi sarcoma viral related oncogene ho | NM_001111097, N | Coding | TRUE |
| v-yes-1 Yamaguchi sarcoma viral related oncogene ho | NM_001111097, N | Coding | TRUE |
| v-yes-1 Yamaguchi sarcoma viral related oncogene ho | NM_001111097, N | Coding | TRUE |
| v-yes-1 Yamaguchi sarcoma viral related oncogene ho | NM_001111097, N | Coding | TRUE |
| v-yes-1 Yamaguchi sarcoma viral related oncogene ho | NM_001111097, N | Coding | TRUE |
| v-yes-1 Yamaguchi sarcoma viral related oncogene ho | NM_001111097, N | Coding | TRUE |
| stromal antigen 2                                   | NM_001042749, N | Coding | TRUE |
| stromal antigen 2                                   | NM_001042749, N | Coding | TRUE |
| stromal antigen 2                                   | NM_001042749, N | Coding | TRUE |
| stromal antigen 2                                   | NM_001042749, N | Coding | TRUE |
| stromal antigen 2                                   | NM_001042749, N | Coding | TRUE |
| stromal antigen 2                                   | NM_001042749, N | Coding | TRUE |
| stromal antigen 2                                   | NM_001042749, N | Coding | TRUE |
| DnaJ (Hsp40) homolog, subfamily C, member 12        | NM_021800, NM   | Coding | TRUE |
| DnaJ (Hsp40) homolog, subfamily C, member 12        | NM_021800, NM   | Coding | TRUE |
| DnaJ (Hsp40) homolog, subfamily C, member 12        | NM_021800, NM   | Coding | TRUE |
| DnaJ (Hsp40) homolog, subfamily C, member 12        | NM_021800, NM   | Coding | TRUE |
| DnaJ (Hsp40) homolog, subfamily C, member 12        | NM_021800, NM   | Coding | TRUE |
| DnaJ (Hsp40) homolog, subfamily C, member 12        | NM_021800, NM   | Coding | TRUE |
| DnaJ (Hsp40) homolog, subfamily C, member 12        | NM_021800, NM   | Coding | TRUE |
| DnaJ (Hsp40) homolog, subfamily C, member 12        | NM_021800, NM   | Coding | TRUE |
| DnaJ (Hsp40) homolog, subfamily C, member 12        | NM_021800, NM   | Coding | TRUE |
| collagen, type VI, alpha 1                          | NM_001848, ENS  | Coding | TRUE |
| collagen, type VI, alpha 1                          | NM_001848, ENS  | Coding | TRUE |
| collagen, type VI, alpha 1                          | NM_001848, ENS  | Coding | TRUE |
| collagen, type VI, alpha 1                          | NM_001848, ENS  | Coding | TRUE |
| collagen, type VI, alpha 1                          | NM_001848, ENS  | Coding | TRUE |
| receptor-interacting serine-threonine kinase 4      | NM_020639, ENS  | Coding | TRUE |
| receptor-interacting serine-threonine kinase 4      | NM_020639, ENS  | Coding | TRUE |
| receptor-interacting serine-threonine kinase 4      | NM_020639, ENS  | Coding | TRUE |
| receptor-interacting serine-threonine kinase 4      | NM_020639, ENS  | Coding | TRUE |
| receptor-interacting serine-threonine kinase 4      | NM_020639, ENS  | Coding | TRUE |
| receptor-interacting serine-threonine kinase 4      | NM_020639, ENS  | Coding | TRUE |
| receptor-interacting serine-threonine kinase 4      | NM_020639, ENS  | Coding | TRUE |
| receptor-interacting serine-threonine kinase 4      | NM_020639, ENS  | Coding | TRUE |
| receptor-interacting serine-threonine kinase 4      | NM_020639, ENS  | Coding | TRUE |
| receptor-interacting serine-threonine kinase 4      | NM_020639, ENS  | Coding | TRUE |
| ephrin-B1                                           | NM_004429, ENS  | Coding | TRUE |
| ephrin-B1                                           | NM_004429, ENS  | Coding | TRUE |
| ephrin-B1                                           | NM_004429, ENS  | Coding | TRUE |
| ephrin-B1                                           | NM_004429, ENS  | Coding | TRUE |
| ephrin-B1                                           | NM_004429, ENS  | Coding | TRUE |
| ephrin-B1                                           | NM_004429, ENS  | Coding | TRUE |
| ephrin-B1                                           | NM_004429, ENS  | Coding | TRUE |
| neuropilin (NRP) and tolloid (TLL)-like 2           | NM_001201477, N | Coding | TRUE |
| neuropilin (NRP) and tolloid (TLL)-like 2           | NM_001201477, N | Coding | TRUE |
| neuropilin (NRP) and tolloid (TLL)-like 2           | NM_001201477, N | Coding | TRUE |
| neuropilin (NRP) and tolloid (TLL)-like 2           | NM_001201477, N | Coding | TRUE |
| pregnancy specific beta-1-glycoprotein 9            | NM_002784, ENS  | Coding | TRUE |
| pregnancy specific beta-1-glycoprotein 9            | NM_002784, ENS  | Coding | TRUE |











|                                                        |                |        |      |
|--------------------------------------------------------|----------------|--------|------|
| histone deacetylase 11                                 | NM_001136041,  | Coding | TRUE |
| histone deacetylase 11                                 | NM_001136041,  | Coding | TRUE |
| histone deacetylase 11                                 | NM_001136041,  | Coding | TRUE |
| histone deacetylase 11                                 | NM_001136041,  | Coding | TRUE |
| polo-like kinase 2                                     | NM_001252226,  | Coding | TRUE |
| polo-like kinase 2                                     | NM_001252226,  | Coding | TRUE |
| polo-like kinase 2                                     | NM_001252226,  | Coding | TRUE |
| polo-like kinase 2                                     | NM_001252226,  | Coding | TRUE |
| polo-like kinase 2                                     | NM_001252226,  | Coding | TRUE |
| polo-like kinase 2                                     | NM_001252226,  | Coding | TRUE |
| polo-like kinase 2                                     | NM_001252226,  | Coding | TRUE |
| polo-like kinase 2                                     | NM_001252226,  | Coding | TRUE |
| polo-like kinase 2                                     | NM_001252226,  | Coding | TRUE |
| polo-like kinase 2                                     | NM_001252226,  | Coding | TRUE |
| polo-like kinase 2                                     | NM_001252226,  | Coding | TRUE |
| polo-like kinase 2                                     | NM_001252226,  | Coding | TRUE |
| polo-like kinase 2                                     | NM_001252226,  | Coding | TRUE |
| polo-like kinase 2                                     | NM_001252226,  | Coding | TRUE |
| polo-like kinase 2                                     | NM_001252226,  | Coding | TRUE |
| polo-like kinase 2                                     | NM_001252226,  | Coding | TRUE |
| polo-like kinase 2                                     | NM_001252226,  | Coding | TRUE |
| polo-like kinase 2                                     | NM_001252226,  | Coding | TRUE |
| polo-like kinase 2                                     | NM_001252226,  | Coding | TRUE |
| polo-like kinase 2                                     | NM_001252226,  | Coding | TRUE |
| transducin (beta)-like 2                               | NM_012453, ENS | Coding | TRUE |
| transducin (beta)-like 2                               | NM_012453, ENS | Coding | TRUE |
| transducin (beta)-like 2                               | NM_012453, ENS | Coding | TRUE |
| transducin (beta)-like 2                               | NM_012453, ENS | Coding | TRUE |
| transducin (beta)-like 2                               | NM_012453, ENS | Coding | TRUE |
| transducin (beta)-like 2                               | NM_012453, ENS | Coding | TRUE |
| transducin (beta)-like 2                               | NM_012453, ENS | Coding | TRUE |
| transducin (beta)-like 2                               | NM_012453, ENS | Coding | TRUE |
| transducin (beta)-like 2                               | NM_012453, ENS | Coding | TRUE |
| transducin (beta)-like 2                               | NM_012453, ENS | Coding | TRUE |
| transducin (beta)-like 2                               | NM_012453, ENS | Coding | TRUE |
| apoptotic chromatin condensation inducer 1             | NM_001164814,  | Coding | TRUE |
| apoptotic chromatin condensation inducer 1             | NM_001164814,  | Coding | TRUE |
| apoptotic chromatin condensation inducer 1             | NM_001164814,  | Coding | TRUE |
| apoptotic chromatin condensation inducer 1             | NM_001164814,  | Coding | TRUE |
| KIAA0664-like 3                                        | NR_024034, ENS | Coding | TRUE |
| KIAA0664-like 3                                        | NR_024034, ENS | Coding | TRUE |
| KIAA0664-like 3                                        | NR_024034, ENS | Coding | TRUE |
| KIAA0664-like 3                                        | NR_024034, ENS | Coding | TRUE |
| KIAA0664-like 3                                        | NR_024034, ENS | Coding | TRUE |
| KIAA0664-like 3                                        | NR_024034, ENS | Coding | TRUE |
| major histocompatibility complex, class I, H (pseudoge | NR_001434      | Coding | TRUE |
| major histocompatibility complex, class I, H (pseudoge | NR_001434      | Coding | TRUE |
| major histocompatibility complex, class I, H (pseudoge | NR_001434      | Coding | TRUE |
| major histocompatibility complex, class I, H (pseudoge | NR_001434      | Coding | TRUE |
| major histocompatibility complex, class I, H (pseudoge | NR_001434      | Coding | TRUE |
| major histocompatibility complex, class I, H (pseudoge | NR_001434      | Coding | TRUE |
| tumor necrosis factor receptor superfamily, member 9   | NM_001561, ENS | Coding | TRUE |
| tumor necrosis factor receptor superfamily, member 9   | NM_001561, ENS | Coding | TRUE |
| tumor necrosis factor receptor superfamily, member 9   | NM_001561, ENS | Coding | TRUE |
| tumor necrosis factor receptor superfamily, member 9   | NM_001561, ENS | Coding | TRUE |
| tumor necrosis factor receptor superfamily, member 9   | NM_001561, ENS | Coding | TRUE |
| tumor necrosis factor receptor superfamily, member 9   | NM_001561, ENS | Coding | TRUE |
| tumor necrosis factor receptor superfamily, member 9   | NM_001561, ENS | Coding | TRUE |
| tumor necrosis factor receptor superfamily, member 9   | NM_001561, ENS | Coding | TRUE |
| tumor necrosis factor receptor superfamily, member 9   | NM_001561, ENS | Coding | TRUE |
| SH3 domain containing, Ysc84-like 1 (S. cerevisiae)    | NM_001159597,  | Coding | TRUE |
| SH3 domain containing, Ysc84-like 1 (S. cerevisiae)    | NM_001159597,  | Coding | TRUE |





















































|                                                        |                |        |      |
|--------------------------------------------------------|----------------|--------|------|
| family with sequence similarity 160, member A1         | NM_001109977,  | Coding | TRUE |
| family with sequence similarity 160, member A1         | NM_001109977,  | Coding | TRUE |
| family with sequence similarity 160, member A1         | NM_001109977,  | Coding | TRUE |
| stathmin-like 2                                        | NM_001199214,  | Coding | TRUE |
| stathmin-like 2                                        | NM_001199214,  | Coding | TRUE |
| stathmin-like 2                                        | NM_001199214,  | Coding | TRUE |
| stathmin-like 2                                        | NM_001199214,  | Coding | TRUE |
| stathmin-like 2                                        | NM_001199214,  | Coding | TRUE |
| stathmin-like 2                                        | NM_001199214,  | Coding | TRUE |
| GLI pathogenesis-related 1 like 2                      | NM_152436, BCC | Coding | TRUE |
| GLI pathogenesis-related 1 like 2                      | NM_152436, BCC | Coding | TRUE |
| phosphorylase, glycogen, liver                         | NM_001163940,  | Coding | TRUE |
| phosphorylase, glycogen, liver                         | NM_001163940,  | Coding | TRUE |
| phosphorylase, glycogen, liver                         | NM_001163940,  | Coding | TRUE |
| phosphorylase, glycogen, liver                         | NM_001163940,  | Coding | TRUE |
| phosphorylase, glycogen, liver                         | NM_001163940,  | Coding | TRUE |
| phosphorylase, glycogen, liver                         | NM_001163940,  | Coding | TRUE |
| D site of albumin promoter (albumin D-box) binding pro | NM_001352, ENS | Coding | TRUE |
| D site of albumin promoter (albumin D-box) binding pro | NM_001352, ENS | Coding | TRUE |
| D site of albumin promoter (albumin D-box) binding pro | NM_001352, ENS | Coding | TRUE |
| D site of albumin promoter (albumin D-box) binding pro | NM_001352, ENS | Coding | TRUE |
| D site of albumin promoter (albumin D-box) binding pro | NM_001352, ENS | Coding | TRUE |
| testis-specific kinase 2                               | NM_007170, BCC | Coding | TRUE |
| testis-specific kinase 2                               | NM_007170, BCC | Coding | TRUE |
| testis-specific kinase 2                               | NM_007170, BCC | Coding | TRUE |
| testis-specific kinase 2                               | NM_007170, BCC | Coding | TRUE |
| testis-specific kinase 2                               | NM_007170, BCC | Coding | TRUE |
| testis-specific kinase 2                               | NM_007170, BCC | Coding | TRUE |
| testis-specific kinase 2                               | NM_007170, BCC | Coding | TRUE |
| neuroblastoma breakpoint family, member 9              | ENST000002818  | Coding | TRUE |
| neuroblastoma breakpoint family, member 9              | ENST000002818  | Coding | TRUE |
| neuroblastoma breakpoint family, member 9              | ENST000002818  | Coding | TRUE |
| glycosyltransferase-like domain containing 1           | NM_001006636,  | Coding | TRUE |
| glycosyltransferase-like domain containing 1           | NM_001006636,  | Coding | TRUE |
| glycosyltransferase-like domain containing 1           | NM_001006636,  | Coding | TRUE |
| glycosyltransferase-like domain containing 1           | NM_001006636,  | Coding | TRUE |
| spermatogenesis associated 6-like                      | NM_001039395,  | Coding | TRUE |
| spermatogenesis associated 6-like                      | NM_001039395,  | Coding | TRUE |
| spermatogenesis associated 6-like                      | NM_001039395,  | Coding | TRUE |
| spermatogenesis associated 6-like                      | NM_001039395,  | Coding | TRUE |
| golgin A1                                              | NM_002077, ENS | Coding | TRUE |
| golgin A1                                              | NM_002077, ENS | Coding | TRUE |
| golgin A1                                              | NM_002077, ENS | Coding | TRUE |
| golgin A1                                              | NM_002077, ENS | Coding | TRUE |
| golgin A1                                              | NM_002077, ENS | Coding | TRUE |
| glycerol kinase                                        | NM_000167, NM  | Coding | TRUE |
| glycerol kinase                                        | NM_000167, NM  | Coding | TRUE |
| glycerol kinase                                        | NM_000167, NM  | Coding | TRUE |
| glycerol kinase                                        | NM_000167, NM  | Coding | TRUE |
| glycerol kinase                                        | NM_000167, NM  | Coding | TRUE |
| glycerol kinase                                        | NM_000167, NM  | Coding | TRUE |
| glycerol kinase                                        | NM_000167, NM  | Coding | TRUE |
| kallikrein pseudogene 1                                | NR_002948      | Coding | TRUE |
| kallikrein pseudogene 1                                | NR_002948      | Coding | TRUE |
| kallikrein pseudogene 1                                | NR_002948      | Coding | TRUE |
| kallikrein pseudogene 1                                | NR_002948      | Coding | TRUE |
| kallikrein pseudogene 1                                | NR_002948      | Coding | TRUE |
| suppression of tumorigenicity 13 (colon carcinoma) (H  | NM_003932, BC1 | Coding | TRUE |

|                                                        |                |        |      |
|--------------------------------------------------------|----------------|--------|------|
| suppression of tumorigenicity 13 (colon carcinoma) (H  | NM_003932, BC1 | Coding | TRUE |
| F-box and leucine-rich repeat protein 4                | NM_012160, ENS | Coding | TRUE |
| F-box and leucine-rich repeat protein 4                | NM_012160, ENS | Coding | TRUE |
| F-box and leucine-rich repeat protein 4                | NM_012160, ENS | Coding | TRUE |
| F-box and leucine-rich repeat protein 4                | NM_012160, ENS | Coding | TRUE |
| BAI1-associated protein 2-like 1                       | NM_018842, ENS | Coding | TRUE |
| BAI1-associated protein 2-like 1                       | NM_018842, ENS | Coding | TRUE |
| BAI1-associated protein 2-like 1                       | NM_018842, ENS | Coding | TRUE |
| BAI1-associated protein 2-like 1                       | NM_018842, ENS | Coding | TRUE |
| BAI1-associated protein 2-like 1                       | NM_018842, ENS | Coding | TRUE |
| BAI1-associated protein 2-like 1                       | NM_018842, ENS | Coding | TRUE |
| BAI1-associated protein 2-like 1                       | NM_018842, ENS | Coding | TRUE |
| angiogenin, ribonuclease, RNase A family, 5, ribonucle | NM_001145, NM  | Coding | TRUE |
| angiogenin, ribonuclease, RNase A family, 5, ribonucle | NM_001145, NM  | Coding | TRUE |
| angiogenin, ribonuclease, RNase A family, 5, ribonucle | NM_001145, NM  | Coding | TRUE |
| angiogenin, ribonuclease, RNase A family, 5, ribonucle | NM_001145, NM  | Coding | TRUE |
| angiogenin, ribonuclease, RNase A family, 5, ribonucle | NM_001145, NM  | Coding | TRUE |
| angiogenin, ribonuclease, RNase A family, 5, ribonucle | NM_001145, NM  | Coding | TRUE |
| angiogenin, ribonuclease, RNase A family, 5, ribonucle | NM_001145, NM  | Coding | TRUE |
| protein kinase, AMP-activated, alpha 2 catalytic subun | NM_006252, ENS | Coding | TRUE |
| protein kinase, AMP-activated, alpha 2 catalytic subun | NM_006252, ENS | Coding | TRUE |
| protein kinase, AMP-activated, alpha 2 catalytic subun | NM_006252, ENS | Coding | TRUE |
| lysosomal protein transmembrane 5                      | NM_006762, ENS | Coding | TRUE |
| lysosomal protein transmembrane 5                      | NM_006762, ENS | Coding | TRUE |
| lysosomal protein transmembrane 5                      | NM_006762, ENS | Coding | TRUE |
| lysosomal protein transmembrane 5                      | NM_006762, ENS | Coding | TRUE |
| lysosomal protein transmembrane 5                      | NM_006762, ENS | Coding | TRUE |
| lysosomal protein transmembrane 5                      | NM_006762, ENS | Coding | TRUE |
| lysosomal protein transmembrane 5                      | NM_006762, ENS | Coding | TRUE |
| lysosomal protein transmembrane 5                      | NM_006762, ENS | Coding | TRUE |
| lysosomal protein transmembrane 5                      | NM_006762, ENS | Coding | TRUE |
| microRNA 196b                                          | ENST000005196  | Coding | TRUE |
| microRNA 196b                                          | ENST000005196  | Coding | TRUE |
| microRNA 196b                                          | ENST000005196  | Coding | TRUE |
| microRNA 196b                                          | ENST000005196  | Coding | TRUE |
| microRNA 196b                                          | ENST000005196  | Coding | TRUE |
| microRNA 196b                                          | ENST000005196  | Coding | TRUE |
| microRNA 196b                                          | ENST000005196  | Coding | TRUE |
| anillin, actin binding protein                         | NM_018685, BCC | Coding | TRUE |
| anillin, actin binding protein                         | NM_018685, BCC | Coding | TRUE |
| anillin, actin binding protein                         | NM_018685, BCC | Coding | TRUE |
| anillin, actin binding protein                         | NM_018685, BCC | Coding | TRUE |
| anillin, actin binding protein                         | NM_018685, BCC | Coding | TRUE |
| anillin, actin binding protein                         | NM_018685, BCC | Coding | TRUE |
| anillin, actin binding protein                         | NM_018685, BCC | Coding | TRUE |
| anillin, actin binding protein                         | NM_018685, BCC | Coding | TRUE |
| anillin, actin binding protein                         | NM_018685, BCC | Coding | TRUE |
| anillin, actin binding protein                         | NM_018685, BCC | Coding | TRUE |
| anillin, actin binding protein                         | NM_018685, BCC | Coding | TRUE |
| anillin, actin binding protein                         | NM_018685, BCC | Coding | TRUE |
| anillin, actin binding protein                         | NM_018685, BCC | Coding | TRUE |
| anillin, actin binding protein                         | NM_018685, BCC | Coding | TRUE |
| anillin, actin binding protein                         | NM_018685, BCC | Coding | TRUE |
| anillin, actin binding protein                         | NM_018685, BCC | Coding | TRUE |
| anillin, actin binding protein                         | NM_018685, BCC | Coding | TRUE |
| anillin, actin binding protein                         | NM_018685, BCC | Coding | TRUE |
| anillin, actin binding protein                         | NM_018685, BCC | Coding | TRUE |
| anillin, actin binding protein                         | NM_018685, BCC | Coding | TRUE |
| gamma-glutamyl hydrolase (conjugase, folylpolygamm     | NM_003878, ENS | Coding | TRUE |
| gamma-glutamyl hydrolase (conjugase, folylpolygamm     | NM_003878, ENS | Coding | TRUE |











|                                                            |                      |        |      |
|------------------------------------------------------------|----------------------|--------|------|
| hairless homolog (mouse)                                   | NM_018411, NM_018411 | Coding | TRUE |
| hairless homolog (mouse)                                   | NM_018411, NM_018411 | Coding | TRUE |
| hairless homolog (mouse)                                   | NM_018411, NM_018411 | Coding | TRUE |
| microfibrillar associated protein 5                        | NM_003480, ENS003480 | Coding | TRUE |
| microfibrillar associated protein 5                        | NM_003480, ENS003480 | Coding | TRUE |
| microfibrillar associated protein 5                        | NM_003480, ENS003480 | Coding | TRUE |
| microfibrillar associated protein 5                        | NM_003480, ENS003480 | Coding | TRUE |
| microfibrillar associated protein 5                        | NM_003480, ENS003480 | Coding | TRUE |
| microfibrillar associated protein 5                        | NM_003480, ENS003480 | Coding | TRUE |
| microfibrillar associated protein 5                        | NM_003480, ENS003480 | Coding | TRUE |
| microfibrillar associated protein 5                        | NM_003480, ENS003480 | Coding | TRUE |
| microfibrillar associated protein 5                        | NM_003480, ENS003480 | Coding | TRUE |
| microfibrillar associated protein 5                        | NM_003480, ENS003480 | Coding | TRUE |
| microfibrillar associated protein 5                        | NM_003480, ENS003480 | Coding | TRUE |
| microfibrillar associated protein 5                        | NM_003480, ENS003480 | Coding | TRUE |
| immunoglobulin superfamily containing leucine-rich repeats | NM_005545, NM_005545 | Coding | TRUE |
| immunoglobulin superfamily containing leucine-rich repeats | NM_005545, NM_005545 | Coding | TRUE |
| immunoglobulin superfamily containing leucine-rich repeats | NM_005545, NM_005545 | Coding | TRUE |
| TAR DNA binding protein                                    | NM_007375, ENS007375 | Coding | TRUE |
| TAR DNA binding protein                                    | NM_007375, ENS007375 | Coding | TRUE |
| TAR DNA binding protein                                    | NM_007375, ENS007375 | Coding | TRUE |
| TAR DNA binding protein                                    | NM_007375, ENS007375 | Coding | TRUE |
| toll-like receptor 5                                       | NM_003268, BC003268  | Coding | TRUE |
| toll-like receptor 5                                       | NM_003268, BC003268  | Coding | TRUE |
| toll-like receptor 5                                       | NM_003268, BC003268  | Coding | TRUE |
| toll-like receptor 5                                       | NM_003268, BC003268  | Coding | TRUE |
| toll-like receptor 5                                       | NM_003268, BC003268  | Coding | TRUE |
| toll-like receptor 5                                       | NM_003268, BC003268  | Coding | TRUE |
| toll-like receptor 5                                       | NM_003268, BC003268  | Coding | TRUE |
| toll-like receptor 5                                       | NM_003268, BC003268  | Coding | TRUE |
| mucin 4, cell surface associated                           | NM_004532, NM_004532 | Coding | TRUE |
| mucin 4, cell surface associated                           | NM_004532, NM_004532 | Coding | TRUE |
| mucin 4, cell surface associated                           | NM_004532, NM_004532 | Coding | TRUE |
| mucin 4, cell surface associated                           | NM_004532, NM_004532 | Coding | TRUE |
| mucin 4, cell surface associated                           | NM_004532, NM_004532 | Coding | TRUE |
| solute carrier family 4, sodium bicarbonate cotransporter  | NM_003759, NM_003759 | Coding | TRUE |
| solute carrier family 4, sodium bicarbonate cotransporter  | NM_003759, NM_003759 | Coding | TRUE |
| solute carrier family 4, sodium bicarbonate cotransporter  | NM_003759, NM_003759 | Coding | TRUE |
| solute carrier family 4, sodium bicarbonate cotransporter  | NM_003759, NM_003759 | Coding | TRUE |
| solute carrier family 4, sodium bicarbonate cotransporter  | NM_003759, NM_003759 | Coding | TRUE |
| solute carrier family 4, sodium bicarbonate cotransporter  | NM_003759, NM_003759 | Coding | TRUE |
| uncharacterized LOC100506233                               | NR_038903, ENS038903 | Coding | TRUE |
| uncharacterized LOC100506233                               | NR_038903, ENS038903 | Coding | TRUE |
| uncharacterized LOC100506233                               | NR_038903, ENS038903 | Coding | TRUE |
| uncharacterized LOC100506233                               | NR_038903, ENS038903 | Coding | TRUE |
| uncharacterized LOC100506233                               | NR_038903, ENS038903 | Coding | TRUE |
| chromatin assembly factor 1, subunit B (p60)               | NM_005441, ENS005441 | Coding | TRUE |
| chromatin assembly factor 1, subunit B (p60)               | NM_005441, ENS005441 | Coding | TRUE |
| chromatin assembly factor 1, subunit B (p60)               | NM_005441, ENS005441 | Coding | TRUE |
| chromatin assembly factor 1, subunit B (p60)               | NM_005441, ENS005441 | Coding | TRUE |
| chromatin assembly factor 1, subunit B (p60)               | NM_005441, ENS005441 | Coding | TRUE |
| uncharacterized LOC100507195                               | ENST000003604        | Coding | TRUE |
| uncharacterized LOC100507195                               | ENST000003604        | Coding | TRUE |
| uncharacterized LOC100507195                               | ENST000003604        | Coding | TRUE |
| uncharacterized LOC100507195                               | ENST000003604        | Coding | TRUE |
| uncharacterized LOC100507195                               | ENST000003604        | Coding | TRUE |
| uncharacterized LOC100507195                               | ENST000003604        | Coding | TRUE |
| uncharacterized LOC100507195                               | ENST000003604        | Coding | TRUE |
| uncharacterized LOC100507195                               | ENST000003604        | Coding | TRUE |
| uncharacterized LOC100507195                               | ENST000003604        | Coding | TRUE |
| major histocompatibility complex, class II, DR beta 3      | BC001023             | Coding | TRUE |









|                                                       |                |        |      |
|-------------------------------------------------------|----------------|--------|------|
| SPARC related modular calcium binding 1               | NM_001034852,  | Coding | TRUE |
| SPARC related modular calcium binding 1               | NM_001034852,  | Coding | TRUE |
| SPARC related modular calcium binding 1               | NM_001034852,  | Coding | TRUE |
| SPARC related modular calcium binding 1               | NM_001034852,  | Coding | TRUE |
|                                                       |                | Coding | TRUE |
|                                                       |                | Coding | TRUE |
|                                                       |                | Coding | TRUE |
|                                                       |                | Coding | TRUE |
|                                                       |                | Coding | TRUE |
|                                                       |                | Coding | TRUE |
|                                                       |                | Coding | TRUE |
|                                                       |                | Coding | TRUE |
|                                                       |                | Coding | TRUE |
|                                                       |                | Coding | TRUE |
| MF12 antisense RNA 1 (non-protein coding)             | NR_038285, ENS | Coding | TRUE |
| MF12 antisense RNA 1 (non-protein coding)             | NR_038285, ENS | Coding | TRUE |
| nicotinamide phosphoribosyltransferase                | NM_005746, ENS | Coding | TRUE |
| nicotinamide phosphoribosyltransferase                | NM_005746, ENS | Coding | TRUE |
| nicotinamide phosphoribosyltransferase                | NM_005746, ENS | Coding | TRUE |
| nicotinamide phosphoribosyltransferase                | NM_005746, ENS | Coding | TRUE |
| nicotinamide phosphoribosyltransferase                | NM_005746, ENS | Coding | TRUE |
| nicotinamide phosphoribosyltransferase                | NM_005746, ENS | Coding | TRUE |
| nicotinamide phosphoribosyltransferase                | NM_005746, ENS | Coding | TRUE |
| nicotinamide phosphoribosyltransferase                | NM_005746, ENS | Coding | TRUE |
| nicotinamide phosphoribosyltransferase                | NM_005746, ENS | Coding | TRUE |
| nicotinamide phosphoribosyltransferase                | NM_005746, ENS | Coding | TRUE |
| heat shock 70kDa protein 12A                          | NM_025015, ENS | Coding | TRUE |
| heat shock 70kDa protein 12A                          | NM_025015, ENS | Coding | TRUE |
| heat shock 70kDa protein 12A                          | NM_025015, ENS | Coding | TRUE |
| heat shock 70kDa protein 12A                          | NM_025015, ENS | Coding | TRUE |
| heat shock 70kDa protein 12A                          | NM_025015, ENS | Coding | TRUE |
| family with sequence similarity 159, member A         | NM_001042693,  | Coding | TRUE |
| family with sequence similarity 159, member A         | NM_001042693,  | Coding | TRUE |
| family with sequence similarity 159, member A         | NM_001042693,  | Coding | TRUE |
| family with sequence similarity 159, member A         | NM_001042693,  | Coding | TRUE |
| family with sequence similarity 159, member A         | NM_001042693,  | Coding | TRUE |
| family with sequence similarity 159, member A         | NM_001042693,  | Coding | TRUE |
| plexin A2                                             | NM_025179, ENS | Coding | TRUE |
| plexin A2                                             | NM_025179, ENS | Coding | TRUE |
| plexin A2                                             | NM_025179, ENS | Coding | TRUE |
| plexin A2                                             | NM_025179, ENS | Coding | TRUE |
| plexin A2                                             | NM_025179, ENS | Coding | TRUE |
| plexin A2                                             | NM_025179, ENS | Coding | TRUE |
| plexin A2                                             | NM_025179, ENS | Coding | TRUE |
| plexin A2                                             | NM_025179, ENS | Coding | TRUE |
| plexin A2                                             | NM_025179, ENS | Coding | TRUE |
| plexin A2                                             | NM_025179, ENS | Coding | TRUE |
| plexin A2                                             | NM_025179, ENS | Coding | TRUE |
| plexin A2                                             | NM_025179, ENS | Coding | TRUE |
| plexin A2                                             | NM_025179, ENS | Coding | TRUE |
| plexin A2                                             | NM_025179, ENS | Coding | TRUE |
| plexin A2                                             | NM_025179, ENS | Coding | TRUE |
| plexin A2                                             | NM_025179, ENS | Coding | TRUE |
| plexin A2                                             | NM_025179, ENS | Coding | TRUE |
| plexin A2                                             | NM_025179, ENS | Coding | TRUE |
| plexin A2                                             | NM_025179, ENS | Coding | TRUE |
| plexin A2                                             | NM_025179, ENS | Coding | TRUE |
| plexin A2                                             | NM_025179, ENS | Coding | TRUE |
| plexin A2                                             | NM_025179, ENS | Coding | TRUE |
| plexin A2                                             | NM_025179, ENS | Coding | TRUE |
| plexin A2                                             | NM_025179, ENS | Coding | TRUE |
| plexin A2                                             | NM_025179, ENS | Coding | TRUE |
| plexin A2                                             | NM_025179, ENS | Coding | TRUE |
| ArfGAP with coiled-coil, ankyrin repeat and PH domain | NM_012287, ENS | Coding | TRUE |
| ArfGAP with coiled-coil, ankyrin repeat and PH domain | NM_012287, ENS | Coding | TRUE |





|                                                    |                |        |      |
|----------------------------------------------------|----------------|--------|------|
| lysosomal trafficking regulator                    | NM_000081, ENS | Coding | TRUE |
| desmin                                             | NM_001927, ENS | Coding | TRUE |
| desmin                                             | NM_001927, ENS | Coding | TRUE |
| desmin                                             | NM_001927, ENS | Coding | TRUE |
| desmin                                             | NM_001927, ENS | Coding | TRUE |
| IQ motif containing with AAA domain 1              | NM_024726, ENS | Coding | TRUE |
| IQ motif containing with AAA domain 1              | NM_024726, ENS | Coding | TRUE |
| IQ motif containing with AAA domain 1              | NM_024726, ENS | Coding | TRUE |
| IQ motif containing with AAA domain 1              | NM_024726, ENS | Coding | TRUE |
| kinesin family member 20A                          | NM_005733, ENS | Coding | TRUE |
| kinesin family member 20A                          | NM_005733, ENS | Coding | TRUE |
| kinesin family member 20A                          | NM_005733, ENS | Coding | TRUE |
| kinesin family member 20A                          | NM_005733, ENS | Coding | TRUE |
| kinesin family member 20A                          | NM_005733, ENS | Coding | TRUE |
| kinesin family member 20A                          | NM_005733, ENS | Coding | TRUE |
| kinesin family member 20A                          | NM_005733, ENS | Coding | TRUE |
| kinesin family member 20A                          | NM_005733, ENS | Coding | TRUE |
| kinesin family member 20A                          | NM_005733, ENS | Coding | TRUE |
| kinesin family member 20A                          | NM_005733, ENS | Coding | TRUE |
| TPT1 antisense RNA 1 (non-protein coding)          | NR_024458, ENS | Coding | TRUE |
| TPT1 antisense RNA 1 (non-protein coding)          | NR_024458, ENS | Coding | TRUE |
| TPT1 antisense RNA 1 (non-protein coding)          | NR_024458, ENS | Coding | TRUE |
| TPT1 antisense RNA 1 (non-protein coding)          | NR_024458, ENS | Coding | TRUE |
| TPT1 antisense RNA 1 (non-protein coding)          | NR_024458, ENS | Coding | TRUE |
| chromosome 1 open reading frame 112                | NM_018186, ENS | Coding | TRUE |
| chromosome 1 open reading frame 112                | NM_018186, ENS | Coding | TRUE |
| chromosome 1 open reading frame 112                | NM_018186, ENS | Coding | TRUE |
| chromosome 1 open reading frame 112                | NM_018186, ENS | Coding | TRUE |
| chromosome 1 open reading frame 112                | NM_018186, ENS | Coding | TRUE |
| chromosome 1 open reading frame 112                | NM_018186, ENS | Coding | TRUE |
| chromosome 1 open reading frame 112                | NM_018186, ENS | Coding | TRUE |
| chromosome 1 open reading frame 112                | NM_018186, ENS | Coding | TRUE |
| chromosome 1 open reading frame 112                | NM_018186, ENS | Coding | TRUE |
| chromosome 1 open reading frame 112                | NM_018186, ENS | Coding | TRUE |
| chromosome 1 open reading frame 112                | NM_018186, ENS | Coding | TRUE |
| chromosome 1 open reading frame 112                | NM_018186, ENS | Coding | TRUE |
| chromosome 1 open reading frame 112                | NM_018186, ENS | Coding | TRUE |
| chromosome 1 open reading frame 112                | NM_018186, ENS | Coding | TRUE |
| chromosome 1 open reading frame 112                | NM_018186, ENS | Coding | TRUE |
| ST3 beta-galactoside alpha-2,3-sialyltransferase 1 | NM_003033, NM  | Coding | TRUE |
| ST3 beta-galactoside alpha-2,3-sialyltransferase 1 | NM_003033, NM  | Coding | TRUE |
| ST3 beta-galactoside alpha-2,3-sialyltransferase 1 | NM_003033, NM  | Coding | TRUE |
| DENN/MADD domain containing 2D                     | NM_024901, ENS | Coding | TRUE |
| DENN/MADD domain containing 2D                     | NM_024901, ENS | Coding | TRUE |
| DENN/MADD domain containing 2D                     | NM_024901, ENS | Coding | TRUE |
| zinc finger, matrin-type 4                         | NM_001135731,  | Coding | TRUE |
| zinc finger, matrin-type 4                         | NM_001135731,  | Coding | TRUE |
| zinc finger, matrin-type 4                         | NM_001135731,  | Coding | TRUE |
| zinc finger, matrin-type 4                         | NM_001135731,  | Coding | TRUE |
| zinc finger, matrin-type 4                         | NM_001135731,  | Coding | TRUE |
| zinc finger, matrin-type 4                         | NM_001135731,  | Coding | TRUE |
| zinc finger, matrin-type 4                         | NM_001135731,  | Coding | TRUE |
| zinc finger, matrin-type 4                         | NM_001135731,  | Coding | TRUE |
| zinc finger, matrin-type 4                         | NM_001135731,  | Coding | TRUE |
| zinc finger, matrin-type 4                         | NM_001135731,  | Coding | TRUE |
| zinc finger, matrin-type 4                         | NM_001135731,  | Coding | TRUE |
| zinc finger, matrin-type 4                         | NM_001135731,  | Coding | TRUE |
| zinc finger, matrin-type 4                         | NM_001135731,  | Coding | TRUE |
| nucleobindin 2                                     | NM_005013, ENS | Coding | TRUE |
| nucleobindin 2                                     | NM_005013, ENS | Coding | TRUE |
| nucleobindin 2                                     | NM_005013, ENS | Coding | TRUE |
| nucleobindin 2                                     | NM_005013, ENS | Coding | TRUE |



















|                                                         |                 |        |      |
|---------------------------------------------------------|-----------------|--------|------|
| glucocorticoid induced transcript 1                     | NM_138426, ENS  | Coding | TRUE |
| glucocorticoid induced transcript 1                     | NM_138426, ENS  | Coding | TRUE |
| glucocorticoid induced transcript 1                     | NM_138426, ENS  | Coding | TRUE |
| glucocorticoid induced transcript 1                     | NM_138426, ENS  | Coding | TRUE |
| glucocorticoid induced transcript 1                     | NM_138426, ENS  | Coding | TRUE |
| glucocorticoid induced transcript 1                     | NM_138426, ENS  | Coding | TRUE |
| cathepsin C                                             | NM_001114173, I | Coding | TRUE |
| cathepsin C                                             | NM_001114173, I | Coding | TRUE |
| cathepsin C                                             | NM_001114173, I | Coding | TRUE |
| cathepsin C                                             | NM_001114173, I | Coding | TRUE |
| cathepsin C                                             | NM_001114173, I | Coding | TRUE |
| cathepsin C                                             | NM_001114173, I | Coding | TRUE |
| cathepsin C                                             | NM_001114173, I | Coding | TRUE |
| cathepsin C                                             | NM_001114173, I | Coding | TRUE |
| cathepsin C                                             | NM_001114173, I | Coding | TRUE |
|                                                         |                 | Coding | TRUE |
|                                                         |                 | Coding | TRUE |
|                                                         |                 | Coding | TRUE |
| homeobox B6                                             | NM_018952, ENS  | Coding | TRUE |
| homeobox B6                                             | NM_018952, ENS  | Coding | TRUE |
| homeobox B6                                             | NM_018952, ENS  | Coding | TRUE |
| homeobox B6                                             | NM_018952, ENS  | Coding | TRUE |
| homeobox B6                                             | NM_018952, ENS  | Coding | TRUE |
| homeobox B6                                             | NM_018952, ENS  | Coding | TRUE |
| homeobox B6                                             | NM_018952, ENS  | Coding | TRUE |
| homeobox B6                                             | NM_018952, ENS  | Coding | TRUE |
| homeobox B6                                             | NM_018952, ENS  | Coding | TRUE |
| homeobox B6                                             | NM_018952, ENS  | Coding | TRUE |
| homeobox B6                                             | NM_018952, ENS  | Coding | TRUE |
| homeobox B6                                             | NM_018952, ENS  | Coding | TRUE |
| homeobox B6                                             | NM_018952, ENS  | Coding | TRUE |
| homeobox B6                                             | NM_018952, ENS  | Coding | TRUE |
| homeobox B6                                             | NM_018952, ENS  | Coding | TRUE |
| homeobox B6                                             | NM_018952, ENS  | Coding | TRUE |
| tryptophan rich basic protein                           | NM_001146218, I | Coding | TRUE |
| tryptophan rich basic protein                           | NM_001146218, I | Coding | TRUE |
| tryptophan rich basic protein                           | NM_001146218, I | Coding | TRUE |
| tryptophan rich basic protein                           | NM_001146218, I | Coding | TRUE |
| tryptophan rich basic protein                           | NM_001146218, I | Coding | TRUE |
| tryptophan rich basic protein                           | NM_001146218, I | Coding | TRUE |
| tryptophan rich basic protein                           | NM_001146218, I | Coding | TRUE |
| apolipoprotein B mRNA editing enzyme, catalytic poly    | NM_001006666, I | Coding | TRUE |
| apolipoprotein B mRNA editing enzyme, catalytic poly    | NM_001006666, I | Coding | TRUE |
| apolipoprotein B mRNA editing enzyme, catalytic poly    | NM_001006666, I | Coding | TRUE |
| apolipoprotein B mRNA editing enzyme, catalytic poly    | NM_001006666, I | Coding | TRUE |
| apolipoprotein B mRNA editing enzyme, catalytic poly    | NM_001006666, I | Coding | TRUE |
| apolipoprotein B mRNA editing enzyme, catalytic poly    | NM_001006666, I | Coding | TRUE |
| apolipoprotein B mRNA editing enzyme, catalytic poly    | NM_001006666, I | Coding | TRUE |
| apolipoprotein B mRNA editing enzyme, catalytic poly    | NM_001006666, I | Coding | TRUE |
| apolipoprotein B mRNA editing enzyme, catalytic poly    | NM_001006666, I | Coding | TRUE |
| apolipoprotein B mRNA editing enzyme, catalytic poly    | NM_001006666, I | Coding | TRUE |
| poly(A) binding protein, cytoplasmic 4 (inducible form) | NM_001135653, I | Coding | TRUE |
| poly(A) binding protein, cytoplasmic 4 (inducible form) | NM_001135653, I | Coding | TRUE |
| poly(A) binding protein, cytoplasmic 4 (inducible form) | NM_001135653, I | Coding | TRUE |
| poly(A) binding protein, cytoplasmic 4 (inducible form) | NM_001135653, I | Coding | TRUE |
| poly(A) binding protein, cytoplasmic 4 (inducible form) | NM_001135653, I | Coding | TRUE |
| poly(A) binding protein, cytoplasmic 4 (inducible form) | NM_001135653, I | Coding | TRUE |
| nerve growth factor (beta polypeptide)                  | NM_002506, ENS  | Coding | TRUE |
| nerve growth factor (beta polypeptide)                  | NM_002506, ENS  | Coding | TRUE |
| nerve growth factor (beta polypeptide)                  | NM_002506, ENS  | Coding | TRUE |

|                                                         |                 |        |      |
|---------------------------------------------------------|-----------------|--------|------|
| nerve growth factor (beta polypeptide)                  | NM_002506, ENS  | Coding | TRUE |
|                                                         |                 | Coding | TRUE |
|                                                         |                 | Coding | TRUE |
|                                                         |                 | Coding | TRUE |
|                                                         |                 | Coding | TRUE |
|                                                         |                 | Coding | TRUE |
|                                                         |                 | Coding | TRUE |
|                                                         |                 | Coding | TRUE |
| chemokine (C-X-C motif) ligand 13                       | NM_006419, ENS  | Coding | TRUE |
| chemokine (C-X-C motif) ligand 13                       | NM_006419, ENS  | Coding | TRUE |
| chemokine (C-X-C motif) ligand 13                       | NM_006419, ENS  | Coding | TRUE |
| chemokine (C-X-C motif) ligand 13                       | NM_006419, ENS  | Coding | TRUE |
| chemokine (C-X-C motif) ligand 13                       | NM_006419, ENS  | Coding | TRUE |
| nuclear transcription factor, X-box binding-like 1      | NM_152995, ENS  | Coding | TRUE |
| nuclear transcription factor, X-box binding-like 1      | NM_152995, ENS  | Coding | TRUE |
| nuclear transcription factor, X-box binding-like 1      | NM_152995, ENS  | Coding | TRUE |
| nuclear transcription factor, X-box binding-like 1      | NM_152995, ENS  | Coding | TRUE |
| nuclear transcription factor, X-box binding-like 1      | NM_152995, ENS  | Coding | TRUE |
| nuclear transcription factor, X-box binding-like 1      | NM_152995, ENS  | Coding | TRUE |
| nuclear transcription factor, X-box binding-like 1      | NM_152995, ENS  | Coding | TRUE |
| nuclear transcription factor, X-box binding-like 1      | NM_152995, ENS  | Coding | TRUE |
| nuclear transcription factor, X-box binding-like 1      | NM_152995, ENS  | Coding | TRUE |
| nuclear transcription factor, X-box binding-like 1      | NM_152995, ENS  | Coding | TRUE |
| nuclear transcription factor, X-box binding-like 1      | NM_152995, ENS  | Coding | TRUE |
| nuclear transcription factor, X-box binding-like 1      | NM_152995, ENS  | Coding | TRUE |
| nuclear transcription factor, X-box binding-like 1      | NM_152995, ENS  | Coding | TRUE |
| nuclear transcription factor, X-box binding-like 1      | NM_152995, ENS  | Coding | TRUE |
| nuclear transcription factor, X-box binding-like 1      | NM_152995, ENS  | Coding | TRUE |
| prolyl 4-hydroxylase, alpha polypeptide II              | NM_001017973,   | Coding | TRUE |
| prolyl 4-hydroxylase, alpha polypeptide II              | NM_001017973,   | Coding | TRUE |
| prolyl 4-hydroxylase, alpha polypeptide II              | NM_001017973,   | Coding | TRUE |
| prolyl 4-hydroxylase, alpha polypeptide II              | NM_001017973,   | Coding | TRUE |
| LMBR1 domain containing 1                               | NM_018368, ENS  | Coding | TRUE |
| LMBR1 domain containing 1                               | NM_018368, ENS  | Coding | TRUE |
| LMBR1 domain containing 1                               | NM_018368, ENS  | Coding | TRUE |
| LMBR1 domain containing 1                               | NM_018368, ENS  | Coding | TRUE |
| solute carrier family 37 (glycerol-3-phosphate transpor | NM_032295, NM   | Coding | TRUE |
| solute carrier family 37 (glycerol-3-phosphate transpor | NM_032295, NM   | Coding | TRUE |
| solute carrier family 37 (glycerol-3-phosphate transpor | NM_032295, NM   | Coding | TRUE |
| solute carrier family 37 (glycerol-3-phosphate transpor | NM_032295, NM   | Coding | TRUE |
| solute carrier family 37 (glycerol-3-phosphate transpor | NM_032295, NM   | Coding | TRUE |
| solute carrier family 37 (glycerol-3-phosphate transpor | NM_032295, NM   | Coding | TRUE |
| endothelin converting enzyme 1                          | NM_001113347, I | Coding | TRUE |
| endothelin converting enzyme 1                          | NM_001113347, I | Coding | TRUE |
| endothelin converting enzyme 1                          | NM_001113347, I | Coding | TRUE |
| endothelin converting enzyme 1                          | NM_001113347, I | Coding | TRUE |
| endothelin converting enzyme 1                          | NM_001113347, I | Coding | TRUE |
| endothelin converting enzyme 1                          | NM_001113347, I | Coding | TRUE |
| endothelin converting enzyme 1                          | NM_001113347, I | Coding | TRUE |
| endothelin converting enzyme 1                          | NM_001113347, I | Coding | TRUE |
| endothelin converting enzyme 1                          | NM_001113347, I | Coding | TRUE |
| endothelin converting enzyme 1                          | NM_001113347, I | Coding | TRUE |
| endothelin converting enzyme 1                          | NM_001113347, I | Coding | TRUE |
| endothelin converting enzyme 1                          | NM_001113347, I | Coding | TRUE |
| endothelin converting enzyme 1                          | NM_001113347, I | Coding | TRUE |
| endothelin converting enzyme 1                          | NM_001113347, I | Coding | TRUE |
| SP140 nuclear body protein                              | NM_001005176,   | Coding | TRUE |
| SP140 nuclear body protein                              | NM_001005176,   | Coding | TRUE |
| SP140 nuclear body protein                              | NM_001005176,   | Coding | TRUE |
| SP140 nuclear body protein                              | NM_001005176,   | Coding | TRUE |







|                                                                    |                            |        |      |
|--------------------------------------------------------------------|----------------------------|--------|------|
| MHC class I polypeptide-related sequence A                         | NM_000247, NR_001434       | Coding | TRUE |
| MHC class I polypeptide-related sequence A                         | NM_000247, NR_001434       | Coding | TRUE |
| MHC class I polypeptide-related sequence A                         | NM_000247, NR_001434       | Coding | TRUE |
| MHC class I polypeptide-related sequence A                         | NM_000247, NR_001434       | Coding | TRUE |
| MHC class I polypeptide-related sequence A                         | NM_000247, NR_001434       | Coding | TRUE |
| major histocompatibility complex, class I, H (pseudogene)          | NR_001434                  | Coding | TRUE |
| major histocompatibility complex, class I, H (pseudogene)          | NR_001434                  | Coding | TRUE |
| major histocompatibility complex, class I, H (pseudogene)          | NR_001434                  | Coding | TRUE |
| major histocompatibility complex, class I, H (pseudogene)          | NR_001434                  | Coding | TRUE |
| MHC class I polypeptide-related sequence A                         | NM_000247, NR_001434       | Coding | TRUE |
| MHC class I polypeptide-related sequence A                         | NM_000247, NR_001434       | Coding | TRUE |
| MHC class I polypeptide-related sequence A                         | NM_000247, NR_001434       | Coding | TRUE |
| MHC class I polypeptide-related sequence A                         | NM_000247, NR_001434       | Coding | TRUE |
| MHC class I polypeptide-related sequence A                         | NM_000247, NR_001434       | Coding | TRUE |
| MHC class I polypeptide-related sequence A                         | NM_000247, NR_001434       | Coding | TRUE |
| MHC class I polypeptide-related sequence A                         | NM_000247, NR_001434       | Coding | TRUE |
| MHC class I polypeptide-related sequence A                         | NM_000247, NR_001434       | Coding | TRUE |
| MHC class I polypeptide-related sequence A                         | NM_000247, NR_001434       | Coding | TRUE |
| MHC class I polypeptide-related sequence A                         | NM_000247, NR_001434       | Coding | TRUE |
| MHC class I polypeptide-related sequence A                         | NM_000247, NR_001434       | Coding | TRUE |
| MHC class I polypeptide-related sequence A                         | NM_000247, NR_001434       | Coding | TRUE |
| MHC class I polypeptide-related sequence A                         | NM_000247, NR_001434       | Coding | TRUE |
| MHC class I polypeptide-related sequence A                         | NM_000247, NR_001434       | Coding | TRUE |
| MHC class I polypeptide-related sequence A                         | NM_000247, NR_001434       | Coding | TRUE |
| MHC class I polypeptide-related sequence A                         | NM_000247, NR_001434       | Coding | TRUE |
| disabled homolog 2, mitogen-responsive phosphoprotein              | NM_001244871               | Coding | TRUE |
| disabled homolog 2, mitogen-responsive phosphoprotein              | NM_001244871               | Coding | TRUE |
| disabled homolog 2, mitogen-responsive phosphoprotein              | NM_001244871               | Coding | TRUE |
| disabled homolog 2, mitogen-responsive phosphoprotein              | NM_001244871               | Coding | TRUE |
| disabled homolog 2, mitogen-responsive phosphoprotein              | NM_001244871               | Coding | TRUE |
| disabled homolog 2, mitogen-responsive phosphoprotein              | NM_001244871               | Coding | TRUE |
| disabled homolog 2, mitogen-responsive phosphoprotein              | NM_001244871               | Coding | TRUE |
| serine/threonine kinase 3                                          | NM_001256312               | Coding | TRUE |
| serine/threonine kinase 3                                          | NM_001256312               | Coding | TRUE |
| serine/threonine kinase 3                                          | NM_001256312               | Coding | TRUE |
| serine/threonine kinase 3                                          | NM_001256312               | Coding | TRUE |
| serine/threonine kinase 3                                          | NM_001256312               | Coding | TRUE |
| UDP-N-acetyl-alpha-D-galactosamine:polypeptide N-acetyltransferase | NM_024642, ENSG00000180001 | Coding | TRUE |
| UDP-N-acetyl-alpha-D-galactosamine:polypeptide N-acetyltransferase | NM_024642, ENSG00000180001 | Coding | TRUE |
| UDP-N-acetyl-alpha-D-galactosamine:polypeptide N-acetyltransferase | NM_024642, ENSG00000180001 | Coding | TRUE |
| UDP-N-acetyl-alpha-D-galactosamine:polypeptide N-acetyltransferase | NM_024642, ENSG00000180001 | Coding | TRUE |
| sterile alpha motif domain containing 4A                           | NM_001161576               | Coding | TRUE |
| sterile alpha motif domain containing 4A                           | NM_001161576               | Coding | TRUE |
| sterile alpha motif domain containing 4A                           | NM_001161576               | Coding | TRUE |
| sterile alpha motif domain containing 4A                           | NM_001161576               | Coding | TRUE |
| sterile alpha motif domain containing 4A                           | NM_001161576               | Coding | TRUE |
| sterile alpha motif domain containing 4A                           | NM_001161576               | Coding | TRUE |
| sterile alpha motif domain containing 4A                           | NM_001161576               | Coding | TRUE |
| sterile alpha motif domain containing 4A                           | NM_001161576               | Coding | TRUE |
| tissue factor pathway inhibitor (lipoprotein-associated)           | NM_001032281               | Coding | TRUE |
| tissue factor pathway inhibitor (lipoprotein-associated)           | NM_001032281               | Coding | TRUE |
| tissue factor pathway inhibitor (lipoprotein-associated)           | NM_001032281               | Coding | TRUE |
| tissue factor pathway inhibitor (lipoprotein-associated)           | NM_001032281               | Coding | TRUE |
| tissue factor pathway inhibitor (lipoprotein-associated)           | NM_001032281               | Coding | TRUE |
| tissue factor pathway inhibitor (lipoprotein-associated)           | NM_001032281               | Coding | TRUE |
| tissue factor pathway inhibitor (lipoprotein-associated)           | NM_001032281               | Coding | TRUE |
| tissue factor pathway inhibitor (lipoprotein-associated)           | NM_001032281               | Coding | TRUE |
| tissue factor pathway inhibitor (lipoprotein-associated)           | NM_001032281               | Coding | TRUE |
| ectodermal-neural cortex 1 (with BTB-like domain)                  | NM_003633, ENSG00000180001 | Coding | TRUE |
| ectodermal-neural cortex 1 (with BTB-like domain)                  | NM_003633, ENSG00000180001 | Coding | TRUE |
| ectodermal-neural cortex 1 (with BTB-like domain)                  | NM_003633, ENSG00000180001 | Coding | TRUE |
| SAM and SH3 domain containing 1                                    | NM_015278, ENSG00000180001 | Coding | TRUE |
| SAM and SH3 domain containing 1                                    | NM_015278, ENSG00000180001 | Coding | TRUE |



|                                                        |                   |        |      |
|--------------------------------------------------------|-------------------|--------|------|
| topoisomerase (DNA) II alpha 170kDa                    | NM_001067, ENS    | Coding | TRUE |
| topoisomerase (DNA) II alpha 170kDa                    | NM_001067, ENS    | Coding | TRUE |
| topoisomerase (DNA) II alpha 170kDa                    | NM_001067, ENS    | Coding | TRUE |
| topoisomerase (DNA) II alpha 170kDa                    | NM_001067, ENS    | Coding | TRUE |
| topoisomerase (DNA) II alpha 170kDa                    | NM_001067, ENS    | Coding | TRUE |
| topoisomerase (DNA) II alpha 170kDa                    | NM_001067, ENS    | Coding | TRUE |
| topoisomerase (DNA) II alpha 170kDa                    | NM_001067, ENS    | Coding | TRUE |
| topoisomerase (DNA) II alpha 170kDa                    | NM_001067, ENS    | Coding | TRUE |
| topoisomerase (DNA) II alpha 170kDa                    | NM_001067, ENS    | Coding | TRUE |
| topoisomerase (DNA) II alpha 170kDa                    | NM_001067, ENS    | Coding | TRUE |
| topoisomerase (DNA) II alpha 170kDa                    | NM_001067, ENS    | Coding | TRUE |
| topoisomerase (DNA) II alpha 170kDa                    | NM_001067, ENS    | Coding | TRUE |
| topoisomerase (DNA) II alpha 170kDa                    | NM_001067, ENS    | Coding | TRUE |
| topoisomerase (DNA) II alpha 170kDa                    | NM_001067, ENS    | Coding | TRUE |
| topoisomerase (DNA) II alpha 170kDa                    | NM_001067, ENS    | Coding | TRUE |
| topoisomerase (DNA) II alpha 170kDa                    | NM_001067, ENS    | Coding | TRUE |
| ATPase, H+ transporting, lysosomal 56/58kDa, V1 sub    | NM_001692, ENS    | Coding | TRUE |
| ATPase, H+ transporting, lysosomal 56/58kDa, V1 sub    | NM_001692, ENS    | Coding | TRUE |
| ATPase, H+ transporting, lysosomal 56/58kDa, V1 sub    | NM_001692, ENS    | Coding | TRUE |
| ATPase, H+ transporting, lysosomal 56/58kDa, V1 sub    | NM_001692, ENS    | Coding | TRUE |
| ATPase, H+ transporting, lysosomal 56/58kDa, V1 sub    | NM_001692, ENS    | Coding | TRUE |
|                                                        |                   | Coding | TRUE |
|                                                        |                   | Coding | TRUE |
| mannosyl (alpha-1,6-)-glycoprotein beta-1,6-N-acetyl-g | NM_002410, ENS    | Coding | TRUE |
| mannosyl (alpha-1,6-)-glycoprotein beta-1,6-N-acetyl-g | NM_002410, ENS    | Coding | TRUE |
| mannosyl (alpha-1,6-)-glycoprotein beta-1,6-N-acetyl-g | NM_002410, ENS    | Coding | TRUE |
| mannosyl (alpha-1,6-)-glycoprotein beta-1,6-N-acetyl-g | NM_002410, ENS    | Coding | TRUE |
| mannosyl (alpha-1,6-)-glycoprotein beta-1,6-N-acetyl-g | NM_002410, ENS    | Coding | TRUE |
| carbohydrate (N-acetylglucosamine 6-O) sulfotransfer   | NM_021615, ENS    | Coding | TRUE |
| carbohydrate (N-acetylglucosamine 6-O) sulfotransfer   | NM_021615, ENS    | Coding | TRUE |
| carbohydrate (N-acetylglucosamine 6-O) sulfotransfer   | NM_021615, ENS    | Coding | TRUE |
| carbohydrate (N-acetylglucosamine 6-O) sulfotransfer   | NM_021615, ENS    | Coding | TRUE |
| carbohydrate (N-acetylglucosamine 6-O) sulfotransfer   | NM_021615, ENS    | Coding | TRUE |
| zinc finger protein 83                                 | NM_001105549, ENS | Coding | TRUE |
| zinc finger protein 83                                 | NM_001105549, ENS | Coding | TRUE |
| zinc finger protein 83                                 | NM_001105549, ENS | Coding | TRUE |
| zinc finger protein 83                                 | NM_001105549, ENS | Coding | TRUE |
| zinc finger protein 83                                 | NM_001105549, ENS | Coding | TRUE |
| zinc finger protein 83                                 | NM_001105549, ENS | Coding | TRUE |
| gamma-glutamyltransferase 7                            | NM_178026, ENS    | Coding | TRUE |
| gamma-glutamyltransferase 7                            | NM_178026, ENS    | Coding | TRUE |
| gamma-glutamyltransferase 7                            | NM_178026, ENS    | Coding | TRUE |
| gamma-glutamyltransferase 7                            | NM_178026, ENS    | Coding | TRUE |
| phosphodiesterase 4D interacting protein, phosphodie   | NM_001002810, ENS | Coding | TRUE |
| phosphodiesterase 4D interacting protein, phosphodie   | NM_001002810, ENS | Coding | TRUE |
| phosphodiesterase 4D interacting protein, phosphodie   | NM_001002810, ENS | Coding | TRUE |
| phosphodiesterase 4D interacting protein, phosphodie   | NM_001002810, ENS | Coding | TRUE |
| phosphodiesterase 4D interacting protein, phosphodie   | NM_001002810, ENS | Coding | TRUE |
| phosphodiesterase 4D interacting protein, phosphodie   | NM_001002810, ENS | Coding | TRUE |
| phosphodiesterase 4D interacting protein, phosphodie   | NM_001002810, ENS | Coding | TRUE |
| phosphodiesterase 4D interacting protein, phosphodie   | NM_001002810, ENS | Coding | TRUE |
| phosphodiesterase 4D interacting protein, phosphodie   | NM_001002810, ENS | Coding | TRUE |
| phosphodiesterase 4D interacting protein, phosphodie   | NM_001002810, ENS | Coding | TRUE |
| phosphodiesterase 4D interacting protein, phosphodie   | NM_001002810, ENS | Coding | TRUE |
| isthmin 2 homolog (zebrafish)                          | NM_182509, NM     | Coding | TRUE |
| isthmin 2 homolog (zebrafish)                          | NM_182509, NM     | Coding | TRUE |
| paraneoplastic Ma antigen 2                            | NM_007257, ENS    | Coding | TRUE |
| paraneoplastic Ma antigen 2                            | NM_007257, ENS    | Coding | TRUE |
| paraneoplastic Ma antigen 2                            | NM_007257, ENS    | Coding | TRUE |
| paraneoplastic Ma antigen 2                            | NM_007257, ENS    | Coding | TRUE |



|                                                     |                |        |      |
|-----------------------------------------------------|----------------|--------|------|
| fibroblast growth factor 13                         | NM_001139498,  | Coding | TRUE |
| uncharacterized LOC100506258                        | ENST000005042  | Coding | TRUE |
| uncharacterized LOC100506258                        | ENST000005042  | Coding | TRUE |
| uncharacterized LOC100506258                        | ENST000005042  | Coding | TRUE |
| uncharacterized LOC100506258                        | ENST000005042  | Coding | TRUE |
| uncharacterized LOC100506258                        | ENST000005042  | Coding | TRUE |
| uncharacterized LOC100506258                        | ENST000005042  | Coding | TRUE |
| potassium large conductance calcium-activated chann | NM_014505, ENS | Coding | TRUE |
| potassium large conductance calcium-activated chann | NM_014505, ENS | Coding | TRUE |
| potassium large conductance calcium-activated chann | NM_014505, ENS | Coding | TRUE |
| threonyl-tRNA synthetase-like 2                     | NM_152334, ENS | Coding | TRUE |
| threonyl-tRNA synthetase-like 2                     | NM_152334, ENS | Coding | TRUE |
| threonyl-tRNA synthetase-like 2                     | NM_152334, ENS | Coding | TRUE |
| threonyl-tRNA synthetase-like 2                     | NM_152334, ENS | Coding | TRUE |
| HECW1 intronic transcript 1 (non-protein coding)    | ENST000003222  | Coding | TRUE |
| HECW1 intronic transcript 1 (non-protein coding)    | ENST000003222  | Coding | TRUE |
| HECW1 intronic transcript 1 (non-protein coding)    | ENST000003222  | Coding | TRUE |
| HECW1 intronic transcript 1 (non-protein coding)    | ENST000003222  | Coding | TRUE |
| mediator complex subunit 24                         | NM_001079518,  | Coding | TRUE |
| mediator complex subunit 24                         | NM_001079518,  | Coding | TRUE |
| mediator complex subunit 24                         | NM_001079518,  | Coding | TRUE |
| mediator complex subunit 24                         | NM_001079518,  | Coding | TRUE |
| mediator complex subunit 24                         | NM_001079518,  | Coding | TRUE |
| mediator complex subunit 24                         | NM_001079518,  | Coding | TRUE |
| mediator complex subunit 24                         | NM_001079518,  | Coding | TRUE |
| mediator complex subunit 24                         | NM_001079518,  | Coding | TRUE |
| ELMO/CED-12 domain containing 3                     | NM_001135021,  | Coding | TRUE |
| ELMO/CED-12 domain containing 3                     | NM_001135021,  | Coding | TRUE |
| ELMO/CED-12 domain containing 3                     | NM_001135021,  | Coding | TRUE |
| ELMO/CED-12 domain containing 3                     | NM_001135021,  | Coding | TRUE |
| LIM domains containing 1                            | NM_014240, ENS | Coding | TRUE |
| LIM domains containing 1                            | NM_014240, ENS | Coding | TRUE |
| LIM domains containing 1                            | NM_014240, ENS | Coding | TRUE |
| LIM domains containing 1                            | NM_014240, ENS | Coding | TRUE |
| LIM domains containing 1                            | NM_014240, ENS | Coding | TRUE |
| LIM domains containing 1                            | NM_014240, ENS | Coding | TRUE |
| LIM domains containing 1                            | NM_014240, ENS | Coding | TRUE |
| LIM domains containing 1                            | NM_014240, ENS | Coding | TRUE |
| LIM domains containing 1                            | NM_014240, ENS | Coding | TRUE |
| LIM domains containing 1                            | NM_014240, ENS | Coding | TRUE |
| LIM domains containing 1                            | NM_014240, ENS | Coding | TRUE |
| LIM domains containing 1                            | NM_014240, ENS | Coding | TRUE |
| LIM domains containing 1                            | NM_014240, ENS | Coding | TRUE |
| LIM domains containing 1                            | NM_014240, ENS | Coding | TRUE |
| LIM domains containing 1                            | NM_014240, ENS | Coding | TRUE |
| transmembrane protein 26                            | NM_178505, ENS | Coding | TRUE |
| transmembrane protein 26                            | NM_178505, ENS | Coding | TRUE |
| transmembrane protein 26                            | NM_178505, ENS | Coding | TRUE |
| transmembrane protein 26                            | NM_178505, ENS | Coding | TRUE |
| transmembrane protein 26                            | NM_178505, ENS | Coding | TRUE |
| transmembrane protein 26                            | NM_178505, ENS | Coding | TRUE |
| transmembrane protein 26                            | NM_178505, ENS | Coding | TRUE |
| transmembrane protein 26                            | NM_178505, ENS | Coding | TRUE |
| v-ets erythroblastosis virus E26 oncogene homolog 1 | (NM_001162422, | Coding | TRUE |
| v-ets erythroblastosis virus E26 oncogene homolog 1 | (NM_001162422, | Coding | TRUE |
| v-ets erythroblastosis virus E26 oncogene homolog 1 | (NM_001162422, | Coding | TRUE |
| v-ets erythroblastosis virus E26 oncogene homolog 1 | (NM_001162422, | Coding | TRUE |
| v-ets erythroblastosis virus E26 oncogene homolog 1 | (NM_001162422, | Coding | TRUE |
| v-ets erythroblastosis virus E26 oncogene homolog 1 | (NM_001162422, | Coding | TRUE |
| v-ets erythroblastosis virus E26 oncogene homolog 1 | (NM_001162422, | Coding | TRUE |
| ADAM metallopeptidase with thrombospondin type 1 n  | NM_014272, ENS | Coding | TRUE |
| ADAM metallopeptidase with thrombospondin type 1 n  | NM_014272, ENS | Coding | TRUE |



|                                                 |                |        |      |
|-------------------------------------------------|----------------|--------|------|
| Rho guanine nucleotide exchange factor (GEF) 37 | NM_001001669,  | Coding | TRUE |
| Rho guanine nucleotide exchange factor (GEF) 37 | NM_001001669,  | Coding | TRUE |
| Rho guanine nucleotide exchange factor (GEF) 37 | NM_001001669,  | Coding | TRUE |
| Rho guanine nucleotide exchange factor (GEF) 37 | NM_001001669,  | Coding | TRUE |
| Rho guanine nucleotide exchange factor (GEF) 37 | NM_001001669,  | Coding | TRUE |
| uncharacterized LOC100506674                    | ENST000005031  | Coding | TRUE |
| uncharacterized LOC100506674                    | ENST000005031  | Coding | TRUE |
| uncharacterized LOC100506674                    | ENST000005031  | Coding | TRUE |
| uncharacterized LOC100506674                    | ENST000005031  | Coding | TRUE |
| uncharacterized LOC100506674                    | ENST000005031  | Coding | TRUE |
| uncharacterized LOC100506674                    | ENST000005031  | Coding | TRUE |
| uncharacterized LOC100506674                    | ENST000005031  | Coding | TRUE |
| uncharacterized LOC100506674                    | ENST000005031  | Coding | TRUE |
| transcriptional regulating factor 1             | NM_033502, ENS | Coding | TRUE |
| transcriptional regulating factor 1             | NM_033502, ENS | Coding | TRUE |
| transcriptional regulating factor 1             | NM_033502, ENS | Coding | TRUE |
| transcriptional regulating factor 1             | NM_033502, ENS | Coding | TRUE |
| transcriptional regulating factor 1             | NM_033502, ENS | Coding | TRUE |
| formin binding protein 1                        | NM_015033, ENS | Coding | TRUE |
| formin binding protein 1                        | NM_015033, ENS | Coding | TRUE |
| formin binding protein 1                        | NM_015033, ENS | Coding | TRUE |
| formin binding protein 1                        | NM_015033, ENS | Coding | TRUE |
| formin binding protein 1                        | NM_015033, ENS | Coding | TRUE |
| formin binding protein 1                        | NM_015033, ENS | Coding | TRUE |
| formin binding protein 1                        | NM_015033, ENS | Coding | TRUE |
| formin binding protein 1                        | NM_015033, ENS | Coding | TRUE |
| formin binding protein 1                        | NM_015033, ENS | Coding | TRUE |
| formin binding protein 1                        | NM_015033, ENS | Coding | TRUE |
| secreted frizzled-related protein 5             | NM_003015, ENS | Coding | TRUE |
| secreted frizzled-related protein 5             | NM_003015, ENS | Coding | TRUE |
| suppressor of cytokine signaling 2              | NM_003877, ENS | Coding | TRUE |
| suppressor of cytokine signaling 2              | NM_003877, ENS | Coding | TRUE |
| suppressor of cytokine signaling 2              | NM_003877, ENS | Coding | TRUE |
| suppressor of cytokine signaling 2              | NM_003877, ENS | Coding | TRUE |
| suppressor of cytokine signaling 2              | NM_003877, ENS | Coding | TRUE |
| suppressor of cytokine signaling 2              | NM_003877, ENS | Coding | TRUE |
| suppressor of cytokine signaling 2              | NM_003877, ENS | Coding | TRUE |
| suppressor of cytokine signaling 2              | NM_003877, ENS | Coding | TRUE |
| suppressor of cytokine signaling 2              | NM_003877, ENS | Coding | TRUE |
| suppressor of cytokine signaling 2              | NM_003877, ENS | Coding | TRUE |
| suppressor of cytokine signaling 2              | NM_003877, ENS | Coding | TRUE |
| suppressor of cytokine signaling 2              | NM_003877, ENS | Coding | TRUE |
| suppressor of cytokine signaling 2              | NM_003877, ENS | Coding | TRUE |
| suppressor of cytokine signaling 2              | NM_003877, ENS | Coding | TRUE |
| suppressor of cytokine signaling 2              | NM_003877, ENS | Coding | TRUE |
| suppressor of cytokine signaling 2              | NM_003877, ENS | Coding | TRUE |
| suppressor of cytokine signaling 2              | NM_003877, ENS | Coding | TRUE |
| suppressor of cytokine signaling 2              | NM_003877, ENS | Coding | TRUE |
| immunoglobulin superfamily, member 23           | NM_001205280,  | Coding | TRUE |
| immunoglobulin superfamily, member 23           | NM_001205280,  | Coding | TRUE |
| immunoglobulin superfamily, member 23           | NM_001205280,  | Coding | TRUE |
| immunoglobulin superfamily, member 23           | NM_001205280,  | Coding | TRUE |
| immunoglobulin superfamily, member 23           | NM_001205280,  | Coding | TRUE |
| immunoglobulin superfamily, member 23           | NM_001205280,  | Coding | TRUE |
| immunoglobulin superfamily, member 23           | NM_001205280,  | Coding | TRUE |
| immunoglobulin superfamily, member 23           | NM_001205280,  | Coding | TRUE |
| immunoglobulin superfamily, member 23           | NM_001205280,  | Coding | TRUE |
| xanthine dehydrogenase                          | NM_000379, ENS | Coding | TRUE |
| xanthine dehydrogenase                          | NM_000379, ENS | Coding | TRUE |
| xanthine dehydrogenase                          | NM_000379, ENS | Coding | TRUE |
| xanthine dehydrogenase                          | NM_000379, ENS | Coding | TRUE |
| RANBP2-like and GRIP domain containing 3        | NM_001144013,  | Coding | TRUE |
| RANBP2-like and GRIP domain containing 3        | NM_001144013,  | Coding | TRUE |
| zinc finger, CW type with PWWP domain 2         | NM_001040432,  | Coding | TRUE |





|                                                      |                |        |      |
|------------------------------------------------------|----------------|--------|------|
| scinderin                                            | NM_001112706,  | Coding | TRUE |
| scinderin                                            | NM_001112706,  | Coding | TRUE |
| scinderin                                            | NM_001112706,  | Coding | TRUE |
| scinderin                                            | NM_001112706,  | Coding | TRUE |
| scinderin                                            | NM_001112706,  | Coding | TRUE |
| scinderin                                            | NM_001112706,  | Coding | TRUE |
| scinderin                                            | NM_001112706,  | Coding | TRUE |
| scinderin                                            | NM_001112706,  | Coding | TRUE |
| scinderin                                            | NM_001112706,  | Coding | TRUE |
| scinderin                                            | NM_001112706,  | Coding | TRUE |
| scinderin                                            | NM_001112706,  | Coding | TRUE |
| scinderin                                            | NM_001112706,  | Coding | TRUE |
| scinderin                                            | NM_001112706,  | Coding | TRUE |
| long intergenic non-protein coding RNA 87            | NR_024493, ENS | Coding | TRUE |
| long intergenic non-protein coding RNA 87            | NR_024493, ENS | Coding | TRUE |
| long intergenic non-protein coding RNA 87            | NR_024493, ENS | Coding | TRUE |
| long intergenic non-protein coding RNA 87            | NR_024493, ENS | Coding | TRUE |
| integrin, beta-like 1 (with EGF-like repeat domains) | NM_004791, ENS | Coding | TRUE |
| integrin, beta-like 1 (with EGF-like repeat domains) | NM_004791, ENS | Coding | TRUE |
| integrin, beta-like 1 (with EGF-like repeat domains) | NM_004791, ENS | Coding | TRUE |
| integrin, beta-like 1 (with EGF-like repeat domains) | NM_004791, ENS | Coding | TRUE |
| NADH dehydrogenase (ubiquinone) complex I, assem     | NM_001039375,  | Coding | TRUE |
| NADH dehydrogenase (ubiquinone) complex I, assem     | NM_001039375,  | Coding | TRUE |
| NADH dehydrogenase (ubiquinone) complex I, assem     | NM_001039375,  | Coding | TRUE |
| NADH dehydrogenase (ubiquinone) complex I, assem     | NM_001039375,  | Coding | TRUE |
| ventricular zone expressed PH domain homolog 1 (zel  | NM_001167917,  | Coding | TRUE |
| ventricular zone expressed PH domain homolog 1 (zel  | NM_001167917,  | Coding | TRUE |
| ventricular zone expressed PH domain homolog 1 (zel  | NM_001167917,  | Coding | TRUE |
| ventricular zone expressed PH domain homolog 1 (zel  | NM_001167917,  | Coding | TRUE |
| ventricular zone expressed PH domain homolog 1 (zel  | NM_001167917,  | Coding | TRUE |
| ventricular zone expressed PH domain homolog 1 (zel  | NM_001167917,  | Coding | TRUE |
| ventricular zone expressed PH domain homolog 1 (zel  | NM_001167917,  | Coding | TRUE |
| ventricular zone expressed PH domain homolog 1 (zel  | NM_001167917,  | Coding | TRUE |
| ventricular zone expressed PH domain homolog 1 (zel  | NM_001167917,  | Coding | TRUE |
| 5-nucleotidase, ecto (CD73)                          | NM_001204813,  | Coding | TRUE |
| 5-nucleotidase, ecto (CD73)                          | NM_001204813,  | Coding | TRUE |
| 5-nucleotidase, ecto (CD73)                          | NM_001204813,  | Coding | TRUE |
| 5-nucleotidase, ecto (CD73)                          | NM_001204813,  | Coding | TRUE |
| 5-nucleotidase, ecto (CD73)                          | NM_001204813,  | Coding | TRUE |
| family with sequence similarity 110, member B        | NM_147189, ENS | Coding | TRUE |
| family with sequence similarity 110, member B        | NM_147189, ENS | Coding | TRUE |
| family with sequence similarity 110, member B        | NM_147189, ENS | Coding | TRUE |
| family with sequence similarity 110, member B        | NM_147189, ENS | Coding | TRUE |
| family with sequence similarity 110, member B        | NM_147189, ENS | Coding | TRUE |
| family with sequence similarity 110, member B        | NM_147189, ENS | Coding | TRUE |
| family with sequence similarity 110, member B        | NM_147189, ENS | Coding | TRUE |
| family with sequence similarity 110, member B        | NM_147189, ENS | Coding | TRUE |
| family with sequence similarity 110, member B        | NM_147189, ENS | Coding | TRUE |
| chromodomain helicase DNA binding protein 7          | NM_017780, ENS | Coding | TRUE |
| chromodomain helicase DNA binding protein 7          | NM_017780, ENS | Coding | TRUE |
| chromodomain helicase DNA binding protein 7          | NM_017780, ENS | Coding | TRUE |
| protein kinase, DNA-activated, catalytic polypeptide | NM_006904, NM  | Coding | TRUE |
| protein kinase, DNA-activated, catalytic polypeptide | NM_006904, NM  | Coding | TRUE |
| protein kinase, DNA-activated, catalytic polypeptide | NM_006904, NM  | Coding | TRUE |
| protein kinase, DNA-activated, catalytic polypeptide | NM_006904, NM  | Coding | TRUE |
| protein kinase, DNA-activated, catalytic polypeptide | NM_006904, NM  | Coding | TRUE |
| protein kinase, DNA-activated, catalytic polypeptide | NM_006904, NM  | Coding | TRUE |
| protein kinase, DNA-activated, catalytic polypeptide | NM_006904, NM  | Coding | TRUE |
| protein kinase, DNA-activated, catalytic polypeptide | NM_006904, NM  | Coding | TRUE |
| protein kinase, DNA-activated, catalytic polypeptide | NM_006904, NM  | Coding | TRUE |
|                                                      |                | Coding | TRUE |

















|                                                                  |                |        |      |
|------------------------------------------------------------------|----------------|--------|------|
| stimulated by retinoic acid gene 6 homolog (mouse)               | NM_001142617,  | Coding | TRUE |
| stimulated by retinoic acid gene 6 homolog (mouse)               | NM_001142617,  | Coding | TRUE |
| stimulated by retinoic acid gene 6 homolog (mouse)               | NM_001142617,  | Coding | TRUE |
| stimulated by retinoic acid gene 6 homolog (mouse)               | NM_001142617,  | Coding | TRUE |
| C-type lectin domain family 18, member B                         | NM_001011880,  | Coding | TRUE |
| C-type lectin domain family 18, member B                         | NM_001011880,  | Coding | TRUE |
| C-type lectin domain family 18, member B                         | NM_001011880,  | Coding | TRUE |
| C-type lectin domain family 18, member B                         | NM_001011880,  | Coding | TRUE |
| abhydrolase domain containing 12                                 | NM_001042472,  | Coding | TRUE |
| abhydrolase domain containing 12                                 | NM_001042472,  | Coding | TRUE |
| abhydrolase domain containing 12                                 | NM_001042472,  | Coding | TRUE |
| abhydrolase domain containing 12                                 | NM_001042472,  | Coding | TRUE |
| abhydrolase domain containing 12                                 | NM_001042472,  | Coding | TRUE |
| abhydrolase domain containing 12                                 | NM_001042472,  | Coding | TRUE |
| abhydrolase domain containing 12                                 | NM_001042472,  | Coding | TRUE |
| abhydrolase domain containing 12                                 | NM_001042472,  | Coding | TRUE |
| abhydrolase domain containing 12                                 | NM_001042472,  | Coding | TRUE |
| abhydrolase domain containing 12                                 | NM_001042472,  | Coding | TRUE |
| abhydrolase domain containing 12                                 | NM_001042472,  | Coding | TRUE |
| abhydrolase domain containing 12                                 | NM_001042472,  | Coding | TRUE |
| abhydrolase domain containing 12                                 | NM_001042472,  | Coding | TRUE |
| abhydrolase domain containing 12                                 | NM_001042472,  | Coding | TRUE |
| coiled-coil and C2 domain containing 1B                          | NM_032449, ENS | Coding | TRUE |
| coiled-coil and C2 domain containing 1B                          | NM_032449, ENS | Coding | TRUE |
| coiled-coil and C2 domain containing 1B                          | NM_032449, ENS | Coding | TRUE |
| coiled-coil and C2 domain containing 1B                          | NM_032449, ENS | Coding | TRUE |
| coiled-coil and C2 domain containing 1B                          | NM_032449, ENS | Coding | TRUE |
| coiled-coil and C2 domain containing 1B                          | NM_032449, ENS | Coding | TRUE |
| coiled-coil and C2 domain containing 1B                          | NM_032449, ENS | Coding | TRUE |
| coiled-coil and C2 domain containing 1B                          | NM_032449, ENS | Coding | TRUE |
| P450 (cytochrome) oxidoreductase, microRNA 4651                  | NM_000941, NR  | Coding | TRUE |
| P450 (cytochrome) oxidoreductase, microRNA 4651                  | NM_000941, NR  | Coding | TRUE |
| P450 (cytochrome) oxidoreductase, microRNA 4651                  | NM_000941, NR  | Coding | TRUE |
| P450 (cytochrome) oxidoreductase, microRNA 4651                  | NM_000941, NR  | Coding | TRUE |
| carbonic anhydrase XI                                            | NM_001217, ENS | Coding | TRUE |
| carbonic anhydrase XI                                            | NM_001217, ENS | Coding | TRUE |
| carbonic anhydrase XI                                            | NM_001217, ENS | Coding | TRUE |
| adenylate cyclase 3                                              | NM_004036, ENS | Coding | TRUE |
| adenylate cyclase 3                                              | NM_004036, ENS | Coding | TRUE |
| adenylate cyclase 3                                              | NM_004036, ENS | Coding | TRUE |
| adenylate cyclase 3                                              | NM_004036, ENS | Coding | TRUE |
| adenylate cyclase 3                                              | NM_004036, ENS | Coding | TRUE |
| adenylate cyclase 3                                              | NM_004036, ENS | Coding | TRUE |
| adenylate cyclase 3                                              | NM_004036, ENS | Coding | TRUE |
| adenylate cyclase 3                                              | NM_004036, ENS | Coding | TRUE |
| adenylate cyclase 3                                              | NM_004036, ENS | Coding | TRUE |
| adenylate cyclase 3                                              | NM_004036, ENS | Coding | TRUE |
| adenylate cyclase 3                                              | NM_004036, ENS | Coding | TRUE |
| adenylate cyclase 3                                              | NM_004036, ENS | Coding | TRUE |
| adenylate cyclase 3                                              | NM_004036, ENS | Coding | TRUE |
| adenylate cyclase 3                                              | NM_004036, ENS | Coding | TRUE |
| adenylate cyclase 3                                              | NM_004036, ENS | Coding | TRUE |
| adenylate cyclase 3                                              | NM_004036, ENS | Coding | TRUE |
| adenylate cyclase 3                                              | NM_004036, ENS | Coding | TRUE |
| adenylate cyclase 3                                              | NM_004036, ENS | Coding | TRUE |
| adenylate cyclase 3                                              | NM_004036, ENS | Coding | TRUE |
| adenylate cyclase 3                                              | NM_004036, ENS | Coding | TRUE |
| adenylate cyclase 3                                              | NM_004036, ENS | Coding | TRUE |
| adenylate cyclase 3                                              | NM_004036, ENS | Coding | TRUE |
| adenylate cyclase 3                                              | NM_004036, ENS | Coding | TRUE |
| adenylate cyclase 3                                              | NM_004036, ENS | Coding | TRUE |
| adenylate cyclase 3                                              | NM_004036, ENS | Coding | TRUE |
| adenylate cyclase 3                                              | NM_004036, ENS | Coding | TRUE |
| adenylate cyclase 3                                              | NM_004036, ENS | Coding | TRUE |
| adenylate cyclase 3                                              | NM_004036, ENS | Coding | TRUE |
| superkiller viralicidic activity 2-like ( <i>S. cerevisiae</i> ) | NM_006929, ENS | Coding | TRUE |
| superkiller viralicidic activity 2-like ( <i>S. cerevisiae</i> ) | NM_006929, ENS | Coding | TRUE |
| superkiller viralicidic activity 2-like ( <i>S. cerevisiae</i> ) | NM_006929, ENS | Coding | TRUE |

|                                                           |                |        |      |
|-----------------------------------------------------------|----------------|--------|------|
| Williams Beuren syndrome chromosome region 22             | NM_001202560,  | Coding | TRUE |
| Williams Beuren syndrome chromosome region 22             | NM_001202560,  | Coding | TRUE |
| Williams Beuren syndrome chromosome region 22             | NM_001202560,  | Coding | TRUE |
| Williams Beuren syndrome chromosome region 22             | NM_001202560,  | Coding | TRUE |
| AT-hook transcription factor                              | NM_030767, ENS | Coding | TRUE |
| AT-hook transcription factor                              | NM_030767, ENS | Coding | TRUE |
| AT-hook transcription factor                              | NM_030767, ENS | Coding | TRUE |
| AT-hook transcription factor                              | NM_030767, ENS | Coding | TRUE |
| nuclear factor of activated T-cells, cytoplasmic, calcine | NM_004555, NM  | Coding | TRUE |
| nuclear factor of activated T-cells, cytoplasmic, calcine | NM_004555, NM  | Coding | TRUE |
| nuclear factor of activated T-cells, cytoplasmic, calcine | NM_004555, NM  | Coding | TRUE |
| nuclear factor of activated T-cells, cytoplasmic, calcine | NM_004555, NM  | Coding | TRUE |
| sperm associated antigen 9                                | NM_001130528,  | Coding | TRUE |
| sperm associated antigen 9                                | NM_001130528,  | Coding | TRUE |
| sperm associated antigen 9                                | NM_001130528,  | Coding | TRUE |
| sperm associated antigen 9                                | NM_001130528,  | Coding | TRUE |
| sperm associated antigen 9                                | NM_001130528,  | Coding | TRUE |
| mitogen-activated protein kinase kinase kinase kinase     | NM_001042600,  | Coding | TRUE |
| mitogen-activated protein kinase kinase kinase kinase     | NM_001042600,  | Coding | TRUE |
| neuroblastoma breakpoint family, member 3, uncharac       | NM_001256416,  | Coding | TRUE |
| neuroblastoma breakpoint family, member 3, uncharac       | NM_001256416,  | Coding | TRUE |
| neuroblastoma breakpoint family, member 3, uncharac       | NM_001256416,  | Coding | TRUE |
| neuroblastoma breakpoint family, member 3, uncharac       | NM_001256416,  | Coding | TRUE |
| receptor (G protein-coupled) activity modifying protein   | NM_005855, ENS | Coding | TRUE |
| receptor (G protein-coupled) activity modifying protein   | NM_005855, ENS | Coding | TRUE |
| receptor (G protein-coupled) activity modifying protein   | NM_005855, ENS | Coding | TRUE |
| receptor (G protein-coupled) activity modifying protein   | NM_005855, ENS | Coding | TRUE |
| receptor (G protein-coupled) activity modifying protein   | NM_005855, ENS | Coding | TRUE |
| receptor (G protein-coupled) activity modifying protein   | NM_005855, ENS | Coding | TRUE |
| receptor (G protein-coupled) activity modifying protein   | NM_005855, ENS | Coding | TRUE |
| receptor (G protein-coupled) activity modifying protein   | NM_005855, ENS | Coding | TRUE |
| ubiquitin specific peptidase 34                           | NM_014709, ENS | Coding | TRUE |
| ubiquitin specific peptidase 34                           | NM_014709, ENS | Coding | TRUE |
| ubiquitin specific peptidase 34                           | NM_014709, ENS | Coding | TRUE |
| uncharacterized LOC100302640                              | NR_028303, ENS | Coding | TRUE |
| uncharacterized LOC100302640                              | NR_028303, ENS | Coding | TRUE |
| uncharacterized LOC100302640                              | NR_028303, ENS | Coding | TRUE |
| uncharacterized LOC100302640                              | NR_028303, ENS | Coding | TRUE |
| uncharacterized LOC100302640                              | NR_028303, ENS | Coding | TRUE |
| tubulin tyrosine ligase-like family, member 3             | NM_001025930,  | Coding | TRUE |
| tubulin tyrosine ligase-like family, member 3             | NM_001025930,  | Coding | TRUE |
| tubulin tyrosine ligase-like family, member 3             | NM_001025930,  | Coding | TRUE |
| tubulin tyrosine ligase-like family, member 3             | NM_001025930,  | Coding | TRUE |
| tubulin tyrosine ligase-like family, member 3             | NM_001025930,  | Coding | TRUE |
| sema domain, seven thrombospondin repeats (type 1         | NM_003966, ENS | Coding | TRUE |
| sema domain, seven thrombospondin repeats (type 1         | NM_003966, ENS | Coding | TRUE |
| sema domain, seven thrombospondin repeats (type 1         | NM_003966, ENS | Coding | TRUE |
| sema domain, seven thrombospondin repeats (type 1         | NM_003966, ENS | Coding | TRUE |
| sema domain, seven thrombospondin repeats (type 1         | NM_003966, ENS | Coding | TRUE |
| sema domain, seven thrombospondin repeats (type 1         | NM_003966, ENS | Coding | TRUE |
| sema domain, seven thrombospondin repeats (type 1         | NM_003966, ENS | Coding | TRUE |
| sema domain, seven thrombospondin repeats (type 1         | NM_003966, ENS | Coding | TRUE |
| sema domain, seven thrombospondin repeats (type 1         | NM_003966, ENS | Coding | TRUE |
| sema domain, seven thrombospondin repeats (type 1         | NM_003966, ENS | Coding | TRUE |
| HEAT repeat containing 7A, HEAT repeat-containing p       | NM_001099280,  | Coding | TRUE |
| HEAT repeat containing 7A, HEAT repeat-containing p       | NM_001099280,  | Coding | TRUE |
| HEAT repeat containing 7A, HEAT repeat-containing p       | NM_001099280,  | Coding | TRUE |
| HEAT repeat containing 7A, HEAT repeat-containing p       | NM_001099280,  | Coding | TRUE |
| HEAT repeat containing 7A, HEAT repeat-containing p       | NM_001099280,  | Coding | TRUE |
| acyl-CoA binding domain containing 5                      | NM_001042473,  | Coding | TRUE |

|                                        |                |        |      |
|----------------------------------------|----------------|--------|------|
| acyl-CoA binding domain containing 5   | NM_001042473,  | Coding | TRUE |
| acyl-CoA binding domain containing 5   | NM_001042473,  | Coding | TRUE |
| acyl-CoA binding domain containing 5   | NM_001042473,  | Coding | TRUE |
| acyl-CoA binding domain containing 5   | NM_001042473,  | Coding | TRUE |
| acyl-CoA binding domain containing 5   | NM_001042473,  | Coding | TRUE |
| heme oxygenase (decycling) 1           | NM_002133, ENS | Coding | TRUE |
| heme oxygenase (decycling) 1           | NM_002133, ENS | Coding | TRUE |
| heme oxygenase (decycling) 1           | NM_002133, ENS | Coding | TRUE |
| heme oxygenase (decycling) 1           | NM_002133, ENS | Coding | TRUE |
| heme oxygenase (decycling) 1           | NM_002133, ENS | Coding | TRUE |
| heme oxygenase (decycling) 1           | NM_002133, ENS | Coding | TRUE |
| transferrin receptor (p90, CD71)       | NM_001128148,  | Coding | TRUE |
| transferrin receptor (p90, CD71)       | NM_001128148,  | Coding | TRUE |
| transferrin receptor (p90, CD71)       | NM_001128148,  | Coding | TRUE |
| transferrin receptor (p90, CD71)       | NM_001128148,  | Coding | TRUE |
| transferrin receptor (p90, CD71)       | NM_001128148,  | Coding | TRUE |
| transferrin receptor (p90, CD71)       | NM_001128148,  | Coding | TRUE |
| transferrin receptor (p90, CD71)       | NM_001128148,  | Coding | TRUE |
| transferrin receptor (p90, CD71)       | NM_001128148,  | Coding | TRUE |
| transferrin receptor (p90, CD71)       | NM_001128148,  | Coding | TRUE |
|                                        |                | Coding | TRUE |
|                                        |                | Coding | TRUE |
| olfactomedin 1                         | NM_006334, NM  | Coding | TRUE |
| olfactomedin 1                         | NM_006334, NM  | Coding | TRUE |
| olfactomedin 1                         | NM_006334, NM  | Coding | TRUE |
| olfactomedin 1                         | NM_006334, NM  | Coding | TRUE |
| olfactomedin 1                         | NM_006334, NM  | Coding | TRUE |
| olfactomedin 1                         | NM_006334, NM  | Coding | TRUE |
| olfactomedin 1                         | NM_006334, NM  | Coding | TRUE |
| olfactomedin 1                         | NM_006334, NM  | Coding | TRUE |
| olfactomedin 1                         | NM_006334, NM  | Coding | TRUE |
| olfactomedin 1                         | NM_006334, NM  | Coding | TRUE |
| olfactomedin 1                         | NM_006334, NM  | Coding | TRUE |
| olfactomedin 1                         | NM_006334, NM  | Coding | TRUE |
| olfactomedin 1                         | NM_006334, NM  | Coding | TRUE |
| olfactomedin 1                         | NM_006334, NM  | Coding | TRUE |
| olfactomedin 1                         | NM_006334, NM  | Coding | TRUE |
| olfactomedin 1                         | NM_006334, NM  | Coding | TRUE |
| olfactomedin 1                         | NM_006334, NM  | Coding | TRUE |
| psoriasis susceptibility 1 candidate 1 | NM_014068, BC1 | Coding | TRUE |
| psoriasis susceptibility 1 candidate 1 | NM_014068, BC1 | Coding | TRUE |
| psoriasis susceptibility 1 candidate 1 | NM_014068, BC1 | Coding | TRUE |
| psoriasis susceptibility 1 candidate 1 | NM_014068, BC1 | Coding | TRUE |
|                                        |                | Coding | TRUE |
|                                        |                | Coding | TRUE |
| cyclin-dependent kinase inhibitor 2A   | NM_058195, NM  | Coding | TRUE |
| cyclin-dependent kinase inhibitor 2A   | NM_058195, NM  | Coding | TRUE |
| nuclear transcription factor Y, gamma  | NM_001142587,  | Coding | TRUE |
| nuclear transcription factor Y, gamma  | NM_001142587,  | Coding | TRUE |
| nuclear transcription factor Y, gamma  | NM_001142587,  | Coding | TRUE |
| nuclear transcription factor Y, gamma  | NM_001142587,  | Coding | TRUE |
| nuclear transcription factor Y, gamma  | NM_001142587,  | Coding | TRUE |
| nuclear transcription factor Y, gamma  | NM_001142587,  | Coding | TRUE |
| ADAM metallopeptidase domain 15        | NM_003815, NM  | Coding | TRUE |
| ADAM metallopeptidase domain 15        | NM_003815, NM  | Coding | TRUE |
| ADAM metallopeptidase domain 15        | NM_003815, NM  | Coding | TRUE |
| ADAM metallopeptidase domain 15        | NM_003815, NM  | Coding | TRUE |



|                                                                                |                 |        |      |
|--------------------------------------------------------------------------------|-----------------|--------|------|
| La ribonucleoprotein domain family, member 4                                   | NM_001170803,   | Coding | TRUE |
| La ribonucleoprotein domain family, member 4                                   | NM_001170803,   | Coding | TRUE |
| La ribonucleoprotein domain family, member 4                                   | NM_001170803,   | Coding | TRUE |
| La ribonucleoprotein domain family, member 4                                   | NM_001170803,   | Coding | TRUE |
| La ribonucleoprotein domain family, member 4                                   | NM_001170803,   | Coding | TRUE |
| WD repeat domain 62                                                            | NM_001083961,   | Coding | TRUE |
| WD repeat domain 62                                                            | NM_001083961,   | Coding | TRUE |
| WD repeat domain 62                                                            | NM_001083961,   | Coding | TRUE |
| neurotrophic tyrosine kinase, receptor, type 1                                 | NM_001007792,   | Coding | TRUE |
| neurotrophic tyrosine kinase, receptor, type 1                                 | NM_001007792,   | Coding | TRUE |
| neurotrophic tyrosine kinase, receptor, type 1                                 | NM_001007792,   | Coding | TRUE |
| erythrocyte membrane protein band 4.1 like 5                                   | NM_001184937,   | Coding | TRUE |
| erythrocyte membrane protein band 4.1 like 5                                   | NM_001184937,   | Coding | TRUE |
| erythrocyte membrane protein band 4.1 like 5                                   | NM_001184937,   | Coding | TRUE |
| erythrocyte membrane protein band 4.1 like 5                                   | NM_001184937,   | Coding | TRUE |
| erythrocyte membrane protein band 4.1 like 5                                   | NM_001184937,   | Coding | TRUE |
| erythrocyte membrane protein band 4.1 like 5                                   | NM_001184937,   | Coding | TRUE |
| erythrocyte membrane protein band 4.1 like 5                                   | NM_001184937,   | Coding | TRUE |
| erythrocyte membrane protein band 4.1 like 5                                   | NM_001184937,   | Coding | TRUE |
| erythrocyte membrane protein band 4.1 like 5                                   | NM_001184937,   | Coding | TRUE |
| erythrocyte membrane protein band 4.1 like 5                                   | NM_001184937,   | Coding | TRUE |
| erythrocyte membrane protein band 4.1 like 5                                   | NM_001184937,   | Coding | TRUE |
| erythrocyte membrane protein band 4.1 like 5                                   | NM_001184937,   | Coding | TRUE |
| erythrocyte membrane protein band 4.1 like 5                                   | NM_001184937,   | Coding | TRUE |
| erythrocyte membrane protein band 4.1 like 5                                   | NM_001184937,   | Coding | TRUE |
| erythrocyte membrane protein band 4.1 like 5                                   | NM_001184937,   | Coding | TRUE |
| erythrocyte membrane protein band 4.1 like 5                                   | NM_001184937,   | Coding | TRUE |
| erythrocyte membrane protein band 4.1 like 5                                   | NM_001184937,   | Coding | TRUE |
| erythrocyte membrane protein band 4.1 like 5                                   | NM_001184937,   | Coding | TRUE |
| erythrocyte membrane protein band 4.1 like 5                                   | NM_001184937,   | Coding | TRUE |
| erythrocyte membrane protein band 4.1 like 5                                   | NM_001184937,   | Coding | TRUE |
| solute carrier family 35, member F5                                            | NM_025181, ENS  | Coding | TRUE |
| solute carrier family 35, member F5                                            | NM_025181, ENS  | Coding | TRUE |
| calcium/calmodulin-dependent protein kinase II delta                           | NM_172127, NM   | Coding | TRUE |
| calcium/calmodulin-dependent protein kinase II delta                           | NM_172127, NM   | Coding | TRUE |
| calcium/calmodulin-dependent protein kinase II delta                           | NM_172127, NM   | Coding | TRUE |
| calcium/calmodulin-dependent protein kinase II delta                           | NM_172127, NM   | Coding | TRUE |
| mannosyl (alpha-1,3-)-glycoprotein beta-1,2-N-acetylglucosaminyl transferase 1 | NM_001114617, I | Coding | TRUE |
| mannosyl (alpha-1,3-)-glycoprotein beta-1,2-N-acetylglucosaminyl transferase 1 | NM_001114617, I | Coding | TRUE |
| mannosyl (alpha-1,3-)-glycoprotein beta-1,2-N-acetylglucosaminyl transferase 1 | NM_001114617, I | Coding | TRUE |
| psoriasis susceptibility 1 candidate 1                                         | NM_014068, ENS  | Coding | TRUE |
| psoriasis susceptibility 1 candidate 1                                         | NM_014068, ENS  | Coding | TRUE |
| psoriasis susceptibility 1 candidate 1                                         | NM_014068, ENS  | Coding | TRUE |
| psoriasis susceptibility 1 candidate 1                                         | NM_014068, ENS  | Coding | TRUE |
| lectin, galactoside-binding, soluble, 4                                        | NM_006149, ENS  | Coding | TRUE |
| lectin, galactoside-binding, soluble, 4                                        | NM_006149, ENS  | Coding | TRUE |
| ribosomal protein L23a pseudogene 82, ribosomal protein L23a pseudogene 82     | NR_026981, NR   | Coding | TRUE |
| ribosomal protein L23a pseudogene 82, ribosomal protein L23a pseudogene 82     | NR_026981, NR   | Coding | TRUE |
| ribosomal protein L23a pseudogene 82, ribosomal protein L23a pseudogene 82     | NR_026981, NR   | Coding | TRUE |
| ribosomal protein L23a pseudogene 82, ribosomal protein L23a pseudogene 82     | NR_026981, NR   | Coding | TRUE |
| ribosomal protein L23a pseudogene 82, ribosomal protein L23a pseudogene 82     | NR_026981, NR   | Coding | TRUE |
| ribosomal protein L23a pseudogene 82, ribosomal protein L23a pseudogene 82     | NR_026981, NR   | Coding | TRUE |
| psoriasis susceptibility 1 candidate 1                                         | NM_014068, BC1  | Coding | TRUE |
| psoriasis susceptibility 1 candidate 1                                         | NM_014068, BC1  | Coding | TRUE |
| psoriasis susceptibility 1 candidate 1                                         | NM_014068, BC1  | Coding | TRUE |
| psoriasis susceptibility 1 candidate 1                                         | NM_014068, BC1  | Coding | TRUE |
| odz, odd Oz/ten-m homolog 3 (Drosophila)                                       | NM_001080477,   | Coding | TRUE |
| odz, odd Oz/ten-m homolog 3 (Drosophila)                                       | NM_001080477,   | Coding | TRUE |
| odz, odd Oz/ten-m homolog 3 (Drosophila)                                       | NM_001080477,   | Coding | TRUE |
| odz, odd Oz/ten-m homolog 3 (Drosophila)                                       | NM_001080477,   | Coding | TRUE |
| Rho GTPase activating protein 26                                               | NM_001135608, I | Coding | TRUE |
| Rho GTPase activating protein 26                                               | NM_001135608, I | Coding | TRUE |
| Rho GTPase activating protein 26                                               | NM_001135608, I | Coding | TRUE |
| Rho GTPase activating protein 26                                               | NM_001135608, I | Coding | TRUE |
| Rho GTPase activating protein 26                                               | NM_001135608, I | Coding | TRUE |
| uncharacterized LOC283299                                                      | NR_036678, ENS  | Coding | TRUE |
| uncharacterized LOC283299                                                      | NR_036678, ENS  | Coding | TRUE |











|                                                         |                |        |      |
|---------------------------------------------------------|----------------|--------|------|
| long intergenic non-protein coding RNA 85               | NR_024330, BC1 | Coding | TRUE |
| psoriasis susceptibility 1 candidate 1                  | NM_014068, BC1 | Coding | TRUE |
| psoriasis susceptibility 1 candidate 1                  | NM_014068, BC1 | Coding | TRUE |
| psoriasis susceptibility 1 candidate 1                  | NM_014068, BC1 | Coding | TRUE |
| psoriasis susceptibility 1 candidate 1                  | NM_014068, BC1 | Coding | TRUE |
| psoriasis susceptibility 1 candidate 1                  | NM_014068, BC1 | Coding | TRUE |
| psoriasis susceptibility 1 candidate 1                  | NM_014068, BC1 | Coding | TRUE |
| psoriasis susceptibility 1 candidate 1                  | NM_014068, BC1 | Coding | TRUE |
| psoriasis susceptibility 1 candidate 1                  | NM_014068, BC1 | Coding | TRUE |
| zinc finger, MYM-type 1                                 | NM_024772, ENS | Coding | TRUE |
| zinc finger, MYM-type 1                                 | NM_024772, ENS | Coding | TRUE |
| zinc finger, MYM-type 1                                 | NM_024772, ENS | Coding | TRUE |
| zinc finger, MYM-type 1                                 | NM_024772, ENS | Coding | TRUE |
| zinc finger, MYM-type 1                                 | NM_024772, ENS | Coding | TRUE |
| histocompatibility antigen-related, major histocompatib | NM_001207043,  | Coding | TRUE |
| histocompatibility antigen-related, major histocompatib | NM_001207043,  | Coding | TRUE |
| histocompatibility antigen-related, major histocompatib | NM_001207043,  | Coding | TRUE |
| histocompatibility antigen-related, major histocompatib | NM_001207043,  | Coding | TRUE |
| histocompatibility antigen-related, major histocompatib | NM_001207043,  | Coding | TRUE |
| ZNRD1 antisense RNA 1 (non-protein coding)              | NR_026751, ENS | Coding | TRUE |
| ZNRD1 antisense RNA 1 (non-protein coding)              | NR_026751, ENS | Coding | TRUE |
| ZNRD1 antisense RNA 1 (non-protein coding)              | NR_026751, ENS | Coding | TRUE |
| ZNRD1 antisense RNA 1 (non-protein coding)              | NR_026751, ENS | Coding | TRUE |
| ZNRD1 antisense RNA 1 (non-protein coding)              | NR_026751, ENS | Coding | TRUE |
| ZNRD1 antisense RNA 1 (non-protein coding)              | NR_026751, ENS | Coding | TRUE |
| ZNRD1 antisense RNA 1 (non-protein coding)              | NR_026751, ENS | Coding | TRUE |
| ZNRD1 antisense RNA 1 (non-protein coding)              | NR_026751, ENS | Coding | TRUE |
| ZNRD1 antisense RNA 1 (non-protein coding)              | NR_026751, ENS | Coding | TRUE |
| ZNRD1 antisense RNA 1 (non-protein coding)              | NR_026751, ENS | Coding | TRUE |
| ZNRD1 antisense RNA 1 (non-protein coding)              | NR_026751, ENS | Coding | TRUE |
| ZNRD1 antisense RNA 1 (non-protein coding)              | NR_026751, ENS | Coding | TRUE |
| ZNRD1 antisense RNA 1 (non-protein coding)              | NR_026751, ENS | Coding | TRUE |
| ZNRD1 antisense RNA 1 (non-protein coding)              | NR_026751, ENS | Coding | TRUE |
| ZNRD1 antisense RNA 1 (non-protein coding)              | NR_026751, ENS | Coding | TRUE |
| ZNRD1 antisense RNA 1 (non-protein coding)              | NR_026751, ENS | Coding | TRUE |
| ZNRD1 antisense RNA 1 (non-protein coding)              | NR_026751, ENS | Coding | TRUE |
| ZNRD1 antisense RNA 1 (non-protein coding)              | NR_026751, ENS | Coding | TRUE |
| ZNRD1 antisense RNA 1 (non-protein coding)              | NR_026751, ENS | Coding | TRUE |
| ZNRD1 antisense RNA 1 (non-protein coding)              | NR_026751, ENS | Coding | TRUE |
| outer dense fiber of sperm tails 2                      | NM_001242352,  | Coding | TRUE |
| outer dense fiber of sperm tails 2                      | NM_001242352,  | Coding | TRUE |
| outer dense fiber of sperm tails 2                      | NM_001242352,  | Coding | TRUE |
| outer dense fiber of sperm tails 2                      | NM_001242352,  | Coding | TRUE |
| outer dense fiber of sperm tails 2                      | NM_001242352,  | Coding | TRUE |
| outer dense fiber of sperm tails 2                      | NM_001242352,  | Coding | TRUE |
| outer dense fiber of sperm tails 2                      | NM_001242352,  | Coding | TRUE |
| outer dense fiber of sperm tails 2                      | NM_001242352,  | Coding | TRUE |
| outer dense fiber of sperm tails 2                      | NM_001242352,  | Coding | TRUE |
| outer dense fiber of sperm tails 2                      | NM_001242352,  | Coding | TRUE |
| outer dense fiber of sperm tails 2                      | NM_001242352,  | Coding | TRUE |
| polymerase (DNA-directed), delta 3, accessory subuni    | NM_006591, BC1 | Coding | TRUE |
| polymerase (DNA-directed), delta 3, accessory subuni    | NM_006591, BC1 | Coding | TRUE |
| polymerase (DNA-directed), delta 3, accessory subuni    | NM_006591, BC1 | Coding | TRUE |
| uncharacterized LOC100506869                            | ENST000005469  | Coding | TRUE |
| uncharacterized LOC100506869                            | ENST000005469  | Coding | TRUE |
| SOCS2 antisense RNA 1 (non-protein coding)              | NR_038263, ENS | Coding | TRUE |
| SOCS2 antisense RNA 1 (non-protein coding)              | NR_038263, ENS | Coding | TRUE |
| SOCS2 antisense RNA 1 (non-protein coding)              | NR_038263, ENS | Coding | TRUE |
| SOCS2 antisense RNA 1 (non-protein coding)              | NR_038263, ENS | Coding | TRUE |
| SOCS2 antisense RNA 1 (non-protein coding)              | NR_038263, ENS | Coding | TRUE |
| zinc finger and BTB domain containing 46                | NM_025224, ENS | Coding | TRUE |
| zinc finger and BTB domain containing 46                | NM_025224, ENS | Coding | TRUE |
| chromosome 1 open reading frame 110                     | NM_178550, ENS | Coding | TRUE |
| chromosome 1 open reading frame 110                     | NM_178550, ENS | Coding | TRUE |

|                                                            |                |        |      |
|------------------------------------------------------------|----------------|--------|------|
| chromosome 1 open reading frame 110                        | NM_178550, ENS | Coding | TRUE |
| spondin 2, extracellular matrix protein, uncharacterized   | NM_001128325,  | Coding | TRUE |
| spondin 2, extracellular matrix protein, uncharacterized   | NM_001128325,  | Coding | TRUE |
| spondin 2, extracellular matrix protein, uncharacterized   | NM_001128325,  | Coding | TRUE |
| spondin 2, extracellular matrix protein, uncharacterized   | NM_001128325,  | Coding | TRUE |
| spondin 2, extracellular matrix protein, uncharacterized   | NM_001128325,  | Coding | TRUE |
| spondin 2, extracellular matrix protein, uncharacterized   | NM_001128325,  | Coding | TRUE |
| spondin 2, extracellular matrix protein, uncharacterized   | NM_001128325,  | Coding | TRUE |
| spondin 2, extracellular matrix protein, uncharacterized   | NM_001128325,  | Coding | TRUE |
| spondin 2, extracellular matrix protein, uncharacterized   | NM_001128325,  | Coding | TRUE |
| spondin 2, extracellular matrix protein, uncharacterized   | NM_001128325,  | Coding | TRUE |
| zinc finger protein 596                                    | NM_001042415,  | Coding | TRUE |
| zinc finger protein 596                                    | NM_001042415,  | Coding | TRUE |
| zinc finger protein 596                                    | NM_001042415,  | Coding | TRUE |
| zinc finger protein 596                                    | NM_001042415,  | Coding | TRUE |
| zinc finger protein 596                                    | NM_001042415,  | Coding | TRUE |
| zinc finger protein 596                                    | NM_001042415,  | Coding | TRUE |
| A kinase (PRKA) anchor protein 6                           | NM_004274, ENS | Coding | TRUE |
| A kinase (PRKA) anchor protein 6                           | NM_004274, ENS | Coding | TRUE |
| A kinase (PRKA) anchor protein 6                           | NM_004274, ENS | Coding | TRUE |
| unkempt homolog (Drosophila)-like                          | NM_001037125,  | Coding | TRUE |
| unkempt homolog (Drosophila)-like                          | NM_001037125,  | Coding | TRUE |
| unkempt homolog (Drosophila)-like                          | NM_001037125,  | Coding | TRUE |
| unkempt homolog (Drosophila)-like                          | NM_001037125,  | Coding | TRUE |
| unkempt homolog (Drosophila)-like                          | NM_001037125,  | Coding | TRUE |
| unkempt homolog (Drosophila)-like                          | NM_001037125,  | Coding | TRUE |
| unkempt homolog (Drosophila)-like                          | NM_001037125,  | Coding | TRUE |
| alkB, alkylation repair homolog 5 (E. coli), uncharacter   | NM_017758, ENS | Coding | TRUE |
| alkB, alkylation repair homolog 5 (E. coli), uncharacter   | NM_017758, ENS | Coding | TRUE |
| alkB, alkylation repair homolog 5 (E. coli), uncharacter   | NM_017758, ENS | Coding | TRUE |
| alkB, alkylation repair homolog 5 (E. coli), uncharacter   | NM_017758, ENS | Coding | TRUE |
| alkB, alkylation repair homolog 5 (E. coli), uncharacter   | NM_017758, ENS | Coding | TRUE |
| alkB, alkylation repair homolog 5 (E. coli), uncharacter   | NM_017758, ENS | Coding | TRUE |
| PC-esterase domain containing 1A                           | NM_022760, ENS | Coding | TRUE |
| PC-esterase domain containing 1A                           | NM_022760, ENS | Coding | TRUE |
| protocadherin gamma subfamily C, 4, protocadherin g        | BC101038, BC10 | Coding | TRUE |
| protocadherin gamma subfamily C, 4, protocadherin g        | BC101038, BC10 | Coding | TRUE |
| protocadherin gamma subfamily C, 4, protocadherin g        | BC101038, BC10 | Coding | TRUE |
| protocadherin gamma subfamily C, 4, protocadherin g        | BC101038, BC10 | Coding | TRUE |
| protocadherin gamma subfamily C, 4, protocadherin g        | BC101038, BC10 | Coding | TRUE |
| protocadherin gamma subfamily C, 4, protocadherin g        | BC101038, BC10 | Coding | TRUE |
| protocadherin gamma subfamily C, 4, protocadherin g        | BC101038, BC10 | Coding | TRUE |
| protocadherin gamma subfamily C, 4, protocadherin g        | BC101038, BC10 | Coding | TRUE |
| protocadherin gamma subfamily C, 4, protocadherin g        | BC101038, BC10 | Coding | TRUE |
| protocadherin gamma subfamily C, 4, protocadherin g        | BC101038, BC10 | Coding | TRUE |
| protocadherin gamma subfamily C, 4, protocadherin g        | BC101038, BC10 | Coding | TRUE |
| protocadherin gamma subfamily C, 4, protocadherin g        | BC101038, BC10 | Coding | TRUE |
| protocadherin gamma subfamily C, 4, protocadherin g        | BC101038, BC10 | Coding | TRUE |
| protocadherin gamma subfamily C, 4, protocadherin g        | BC101038, BC10 | Coding | TRUE |
| protocadherin gamma subfamily C, 4, protocadherin g        | BC101038, BC10 | Coding | TRUE |
| protocadherin gamma subfamily C, 4, protocadherin g        | BC101038, BC10 | Coding | TRUE |
| protocadherin gamma subfamily C, 4, protocadherin g        | BC101038, BC10 | Coding | TRUE |
| protocadherin gamma subfamily C, 4, protocadherin g        | BC101038, BC10 | Coding | TRUE |
| frizzled family receptor 6                                 | NM_001164615,  | Coding | TRUE |
| frizzled family receptor 6                                 | NM_001164615,  | Coding | TRUE |
| transcription elongation factor B (SIII), polypeptide 1 (1 | NM_001204857,  | Coding | TRUE |
| transcription elongation factor B (SIII), polypeptide 1 (1 | NM_001204857,  | Coding | TRUE |
| NDRG family member 4                                       | NM_001130487,  | Coding | TRUE |
| NDRG family member 4                                       | NM_001130487,  | Coding | TRUE |

|                                                        |                |        |      |
|--------------------------------------------------------|----------------|--------|------|
| NDRG family member 4                                   | NM_001130487,  | Coding | TRUE |
| NDRG family member 4                                   | NM_001130487,  | Coding | TRUE |
| NDRG family member 4                                   | NM_001130487,  | Coding | TRUE |
| NDRG family member 4                                   | NM_001130487,  | Coding | TRUE |
| NDRG family member 4                                   | NM_001130487,  | Coding | TRUE |
| NDRG family member 4                                   | NM_001130487,  | Coding | TRUE |
| NDRG family member 4                                   | NM_001130487,  | Coding | TRUE |
| NDRG family member 4                                   | NM_001130487,  | Coding | TRUE |
| NDRG family member 4                                   | NM_001130487,  | Coding | TRUE |
| NDRG family member 4                                   | NM_001130487,  | Coding | TRUE |
| NDRG family member 4                                   | NM_001130487,  | Coding | TRUE |
| NDRG family member 4                                   | NM_001130487,  | Coding | TRUE |
| NDRG family member 4                                   | NM_001130487,  | Coding | TRUE |
| NDRG family member 4                                   | NM_001130487,  | Coding | TRUE |
| NDRG family member 4                                   | NM_001130487,  | Coding | TRUE |
| zinc finger protein 792                                | NM_175872, ENS | Coding | TRUE |
| zinc finger protein 792                                | NM_175872, ENS | Coding | TRUE |
| pleckstrin homology domain containing, family A (phos  | NM_001161354,  | Coding | TRUE |
| pleckstrin homology domain containing, family A (phos  | NM_001161354,  | Coding | TRUE |
| pleckstrin homology domain containing, family A (phos  | NM_001161354,  | Coding | TRUE |
| pleckstrin homology domain containing, family A (phos  | NM_001161354,  | Coding | TRUE |
| integrin beta 3 binding protein (beta3-endonexin)      | NM_001206739,  | Coding | TRUE |
| integrin beta 3 binding protein (beta3-endonexin)      | NM_001206739,  | Coding | TRUE |
| integrin beta 3 binding protein (beta3-endonexin)      | NM_001206739,  | Coding | TRUE |
| integrin beta 3 binding protein (beta3-endonexin)      | NM_001206739,  | Coding | TRUE |
| integrin beta 3 binding protein (beta3-endonexin)      | NM_001206739,  | Coding | TRUE |
| integrin beta 3 binding protein (beta3-endonexin)      | NM_001206739,  | Coding | TRUE |
| exportin 7                                             | NM_015024, ENS | Coding | TRUE |
| exportin 7                                             | NM_015024, ENS | Coding | TRUE |
| exportin 7                                             | NM_015024, ENS | Coding | TRUE |
| dynein, cytoplasmic 2, heavy chain 1                   | NM_001377, NM  | Coding | TRUE |
| dynein, cytoplasmic 2, heavy chain 1                   | NM_001377, NM  | Coding | TRUE |
| dynein, cytoplasmic 2, heavy chain 1                   | NM_001377, NM  | Coding | TRUE |
| dynein, cytoplasmic 2, heavy chain 1                   | NM_001377, NM  | Coding | TRUE |
| dynein, cytoplasmic 2, heavy chain 1                   | NM_001377, NM  | Coding | TRUE |
| dynein, cytoplasmic 2, heavy chain 1                   | NM_001377, NM  | Coding | TRUE |
| dynein, cytoplasmic 2, heavy chain 1                   | NM_001377, NM  | Coding | TRUE |
| dynein, cytoplasmic 2, heavy chain 1                   | NM_001377, NM  | Coding | TRUE |
| dynein, cytoplasmic 2, heavy chain 1                   | NM_001377, NM  | Coding | TRUE |
| dynein, cytoplasmic 2, heavy chain 1                   | NM_001377, NM  | Coding | TRUE |
| dynein, cytoplasmic 2, heavy chain 1                   | NM_001377, NM  | Coding | TRUE |
| dynein, cytoplasmic 2, heavy chain 1                   | NM_001377, NM  | Coding | TRUE |
| ring finger protein 111                                | NM_017610, ENS | Coding | TRUE |
| ring finger protein 111                                | NM_017610, ENS | Coding | TRUE |
| ring finger protein 111                                | NM_017610, ENS | Coding | TRUE |
| ring finger protein 111                                | NM_017610, ENS | Coding | TRUE |
|                                                        |                | Coding | TRUE |
|                                                        |                | Coding | TRUE |
|                                                        |                | Coding | TRUE |
| ecotropic viral integration site 2B                    | NM_006495, ENS | Coding | TRUE |
| ecotropic viral integration site 2B                    | NM_006495, ENS | Coding | TRUE |
| ecotropic viral integration site 2B                    | NM_006495, ENS | Coding | TRUE |
| metallophosphoesterase domain containing 2             | NM_001145399,  | Coding | TRUE |
| metallophosphoesterase domain containing 2             | NM_001145399,  | Coding | TRUE |
| metallophosphoesterase domain containing 2             | NM_001145399,  | Coding | TRUE |
| metallophosphoesterase domain containing 2             | NM_001145399,  | Coding | TRUE |
| pseudouridylate synthase 7 homolog (S. cerevisiae)-lik | NM_001098614,  | Coding | TRUE |
| pseudouridylate synthase 7 homolog (S. cerevisiae)-lik | NM_001098614,  | Coding | TRUE |
| testis expressed 9                                     | NM_198524, ENS | Coding | TRUE |
| testis expressed 9                                     | NM_198524, ENS | Coding | TRUE |















|                                                 |                   |        |      |
|-------------------------------------------------|-------------------|--------|------|
| dipeptidyl-peptidase 4                          | NM_001935, ENS    | Coding | TRUE |
| dipeptidyl-peptidase 4                          | NM_001935, ENS    | Coding | TRUE |
| dipeptidyl-peptidase 4                          | NM_001935, ENS    | Coding | TRUE |
| dipeptidyl-peptidase 4                          | NM_001935, ENS    | Coding | TRUE |
| dipeptidyl-peptidase 4                          | NM_001935, ENS    | Coding | TRUE |
| zinc finger protein, multitype 2                | NM_012082, ENS    | Coding | TRUE |
| zinc finger protein, multitype 2                | NM_012082, ENS    | Coding | TRUE |
| zinc finger protein, multitype 2                | NM_012082, ENS    | Coding | TRUE |
| zinc finger protein, multitype 2                | NM_012082, ENS    | Coding | TRUE |
| zinc finger protein, multitype 2                | NM_012082, ENS    | Coding | TRUE |
| zinc finger protein, multitype 2                | NM_012082, ENS    | Coding | TRUE |
| zinc finger protein, multitype 2                | NM_012082, ENS    | Coding | TRUE |
| zinc finger protein, multitype 2                | NM_012082, ENS    | Coding | TRUE |
| zinc finger protein, multitype 2                | NM_012082, ENS    | Coding | TRUE |
| zinc finger protein, multitype 2                | NM_012082, ENS    | Coding | TRUE |
| zinc finger protein, multitype 2                | NM_012082, ENS    | Coding | TRUE |
| nuclear receptor subfamily 4, group A, member 3 | NM_173199, NM     | Coding | TRUE |
| nuclear receptor subfamily 4, group A, member 3 | NM_173199, NM     | Coding | TRUE |
| nuclear receptor subfamily 4, group A, member 3 | NM_173199, NM     | Coding | TRUE |
| nuclear receptor subfamily 4, group A, member 3 | NM_173199, NM     | Coding | TRUE |
| nuclear receptor subfamily 4, group A, member 3 | NM_173199, NM     | Coding | TRUE |
| nuclear receptor subfamily 4, group A, member 3 | NM_173199, NM     | Coding | TRUE |
| inositol 1,4,5-trisphosphate receptor, type 2   | NM_002223, ENS    | Coding | TRUE |
| inositol 1,4,5-trisphosphate receptor, type 2   | NM_002223, ENS    | Coding | TRUE |
| inositol 1,4,5-trisphosphate receptor, type 2   | NM_002223, ENS    | Coding | TRUE |
| inositol 1,4,5-trisphosphate receptor, type 2   | NM_002223, ENS    | Coding | TRUE |
| inositol 1,4,5-trisphosphate receptor, type 2   | NM_002223, ENS    | Coding | TRUE |
| inositol 1,4,5-trisphosphate receptor, type 2   | NM_002223, ENS    | Coding | TRUE |
| inositol 1,4,5-trisphosphate receptor, type 2   | NM_002223, ENS    | Coding | TRUE |
| oxysterol binding protein-like 1A               | NM_001242508, ENS | Coding | TRUE |
| oxysterol binding protein-like 1A               | NM_001242508, ENS | Coding | TRUE |
| oxysterol binding protein-like 1A               | NM_001242508, ENS | Coding | TRUE |
| oxysterol binding protein-like 1A               | NM_001242508, ENS | Coding | TRUE |
| oxysterol binding protein-like 1A               | NM_001242508, ENS | Coding | TRUE |
| oxysterol binding protein-like 1A               | NM_001242508, ENS | Coding | TRUE |
| oxysterol binding protein-like 1A               | NM_001242508, ENS | Coding | TRUE |
| oxysterol binding protein-like 1A               | NM_001242508, ENS | Coding | TRUE |
| oxysterol binding protein-like 1A               | NM_001242508, ENS | Coding | TRUE |
| zinc finger protein 615                         | NM_001199324, ENS | Coding | TRUE |
| zinc finger protein 615                         | NM_001199324, ENS | Coding | TRUE |
| spermatogenesis associated 17                   | NM_138796, ENS    | Coding | TRUE |
| spermatogenesis associated 17                   | NM_138796, ENS    | Coding | TRUE |
| spermatogenesis associated 17                   | NM_138796, ENS    | Coding | TRUE |
| spermatogenesis associated 17                   | NM_138796, ENS    | Coding | TRUE |
| spermatogenesis associated 17                   | NM_138796, ENS    | Coding | TRUE |
| spermatogenesis associated 17                   | NM_138796, ENS    | Coding | TRUE |
| spermatogenesis associated 17                   | NM_138796, ENS    | Coding | TRUE |
| spermatogenesis associated 17                   | NM_138796, ENS    | Coding | TRUE |
| spermatogenesis associated 17                   | NM_138796, ENS    | Coding | TRUE |
| spermatogenesis associated 17                   | NM_138796, ENS    | Coding | TRUE |
| ribosomal protein L9                            | NM_000661, NM     | Coding | TRUE |
| ribosomal protein L9                            | NM_000661, NM     | Coding | TRUE |
| ribosomal protein L9                            | NM_000661, NM     | Coding | TRUE |
| ribosomal protein L9                            | NM_000661, NM     | Coding | TRUE |
| ribosomal protein L9                            | NM_000661, NM     | Coding | TRUE |
| single-stranded DNA binding protein 2           | NM_012446, ENS    | Coding | TRUE |
| single-stranded DNA binding protein 2           | NM_012446, ENS    | Coding | TRUE |
| cullin 9                                        | NM_015089, ENS    | Coding | TRUE |
| cullin 9                                        | NM_015089, ENS    | Coding | TRUE |

|                                                           |                   |        |      |
|-----------------------------------------------------------|-------------------|--------|------|
| cullin 9                                                  | NM_015089, ENS    | Coding | TRUE |
| cullin 9                                                  | NM_015089, ENS    | Coding | TRUE |
| cullin 9                                                  | NM_015089, ENS    | Coding | TRUE |
| cullin 9                                                  | NM_015089, ENS    | Coding | TRUE |
| cullin 9                                                  | NM_015089, ENS    | Coding | TRUE |
| cullin 9                                                  | NM_015089, ENS    | Coding | TRUE |
| cullin 9                                                  | NM_015089, ENS    | Coding | TRUE |
| cullin 9                                                  | NM_015089, ENS    | Coding | TRUE |
| cullin 9                                                  | NM_015089, ENS    | Coding | TRUE |
| cullin 9                                                  | NM_015089, ENS    | Coding | TRUE |
| cullin 9                                                  | NM_015089, ENS    | Coding | TRUE |
| cullin 9                                                  | NM_015089, ENS    | Coding | TRUE |
| cullin 9                                                  | NM_015089, ENS    | Coding | TRUE |
| cullin 9                                                  | NM_015089, ENS    | Coding | TRUE |
| cullin 9                                                  | NM_015089, ENS    | Coding | TRUE |
| cullin 9                                                  | NM_015089, ENS    | Coding | TRUE |
| cullin 9                                                  | NM_015089, ENS    | Coding | TRUE |
| cullin 9                                                  | NM_015089, ENS    | Coding | TRUE |
| cullin 9                                                  | NM_015089, ENS    | Coding | TRUE |
| cullin 9                                                  | NM_015089, ENS    | Coding | TRUE |
| microcephalin 1                                           | NM_001172574, ENS | Coding | TRUE |
| microcephalin 1                                           | NM_001172574, ENS | Coding | TRUE |
| microcephalin 1                                           | NM_001172574, ENS | Coding | TRUE |
| microcephalin 1                                           | NM_001172574, ENS | Coding | TRUE |
| microcephalin 1                                           | NM_001172574, ENS | Coding | TRUE |
| microcephalin 1                                           | NM_001172574, ENS | Coding | TRUE |
| KIAA0146                                                  | NM_001080394, ENS | Coding | TRUE |
| KIAA0146                                                  | NM_001080394, ENS | Coding | TRUE |
| KIAA0146                                                  | NM_001080394, ENS | Coding | TRUE |
| KIAA0146                                                  | NM_001080394, ENS | Coding | TRUE |
| KIAA0146                                                  | NM_001080394, ENS | Coding | TRUE |
| KIAA0146                                                  | NM_001080394, ENS | Coding | TRUE |
| KIAA0146                                                  | NM_001080394, ENS | Coding | TRUE |
| KIAA0146                                                  | NM_001080394, ENS | Coding | TRUE |
| KIAA0146                                                  | NM_001080394, ENS | Coding | TRUE |
| KIAA0146                                                  | NM_001080394, ENS | Coding | TRUE |
| KIAA0146                                                  | NM_001080394, ENS | Coding | TRUE |
| KIAA0146                                                  | NM_001080394, ENS | Coding | TRUE |
| plectin                                                   | NM_201380, NM     | Coding | TRUE |
| plectin                                                   | NM_201380, NM     | Coding | TRUE |
| plectin                                                   | NM_201380, NM     | Coding | TRUE |
| plectin                                                   | NM_201380, NM     | Coding | TRUE |
| zinc finger protein 106 homolog (mouse)                   | NM_022473, ENS    | Coding | TRUE |
| zinc finger protein 106 homolog (mouse)                   | NM_022473, ENS    | Coding | TRUE |
| C-type lectin domain family 18, member C                  | NM_173619, ENS    | Coding | TRUE |
| C-type lectin domain family 18, member C                  | NM_173619, ENS    | Coding | TRUE |
| C-type lectin domain family 18, member C                  | NM_173619, ENS    | Coding | TRUE |
| C-type lectin domain family 18, member C                  | NM_173619, ENS    | Coding | TRUE |
| NADH dehydrogenase (ubiquinone) Fe-S protein 7, 20        | NM_024407, ENS    | Coding | TRUE |
| NADH dehydrogenase (ubiquinone) Fe-S protein 7, 20        | NM_024407, ENS    | Coding | TRUE |
| NADH dehydrogenase (ubiquinone) Fe-S protein 7, 20        | NM_024407, ENS    | Coding | TRUE |
| major histocompatibility complex, class I, H (pseudogene) | NR_001434         | Coding | TRUE |
| major histocompatibility complex, class I, H (pseudogene) | NR_001434         | Coding | TRUE |
| major histocompatibility complex, class I, H (pseudogene) | NR_001434         | Coding | TRUE |
| major histocompatibility complex, class I, H (pseudogene) | NR_001434         | Coding | TRUE |
| phosphogluconate dehydrogenase                            | NM_002631, ENS    | Coding | TRUE |
| phosphogluconate dehydrogenase                            | NM_002631, ENS    | Coding | TRUE |
| phosphogluconate dehydrogenase                            | NM_002631, ENS    | Coding | TRUE |
| tRNA methyltransferase 1 homolog (S. cerevisiae)-like     | NM_001202423, ENS | Coding | TRUE |
| tRNA methyltransferase 1 homolog (S. cerevisiae)-like     | NM_001202423, ENS | Coding | TRUE |
| tRNA methyltransferase 1 homolog (S. cerevisiae)-like     | NM_001202423, ENS | Coding | TRUE |
| chloride channel, voltage-sensitive Kb                    | NM_000085, NM     | Coding | TRUE |





















|                                                     |                 |        |      |
|-----------------------------------------------------|-----------------|--------|------|
|                                                     |                 | Coding | TRUE |
|                                                     |                 | Coding | TRUE |
|                                                     |                 | Coding | TRUE |
| neurofibromin 1                                     | NM_000267, NM   | Coding | TRUE |
| neurofibromin 1                                     | NM_000267, NM   | Coding | TRUE |
| neurofibromin 1                                     | NM_000267, NM   | Coding | TRUE |
| neurofibromin 1                                     | NM_000267, NM   | Coding | TRUE |
| neurofibromin 1                                     | NM_000267, NM   | Coding | TRUE |
| neurofibromin 1                                     | NM_000267, NM   | Coding | TRUE |
| neurofibromin 1                                     | NM_000267, NM   | Coding | TRUE |
| neurofibromin 1                                     | NM_000267, NM   | Coding | TRUE |
| neurofibromin 1                                     | NM_000267, NM   | Coding | TRUE |
| neurofibromin 1                                     | NM_000267, NM   | Coding | TRUE |
| neurofibromin 1                                     | NM_000267, NM   | Coding | TRUE |
| vacuolar protein sorting 53 homolog (S. cerevisiae) | NM_018289, NM   | Coding | TRUE |
| vacuolar protein sorting 53 homolog (S. cerevisiae) | NM_018289, NM   | Coding | TRUE |
| vacuolar protein sorting 53 homolog (S. cerevisiae) | NM_018289, NM   | Coding | TRUE |
| vacuolar protein sorting 53 homolog (S. cerevisiae) | NM_018289, NM   | Coding | TRUE |
| vacuolar protein sorting 53 homolog (S. cerevisiae) | NM_018289, NM   | Coding | TRUE |
| G elongation factor, mitochondrial 1                | NM_024996, ENS  | Coding | TRUE |
| G elongation factor, mitochondrial 1                | NM_024996, ENS  | Coding | TRUE |
| G elongation factor, mitochondrial 1                | NM_024996, ENS  | Coding | TRUE |
| G elongation factor, mitochondrial 1                | NM_024996, ENS  | Coding | TRUE |
| myosin, light chain 5, regulatory                   | NM_002477, BCC  | Coding | TRUE |
| myosin, light chain 5, regulatory                   | NM_002477, BCC  | Coding | TRUE |
| myosin, light chain 5, regulatory                   | NM_002477, BCC  | Coding | TRUE |
| myosin, light chain 5, regulatory                   | NM_002477, BCC  | Coding | TRUE |
| myosin, light chain 5, regulatory                   | NM_002477, BCC  | Coding | TRUE |
| myosin, light chain 5, regulatory                   | NM_002477, BCC  | Coding | TRUE |
| myosin, light chain 5, regulatory                   | NM_002477, BCC  | Coding | TRUE |
| myosin, light chain 5, regulatory                   | NM_002477, BCC  | Coding | TRUE |
| myosin, light chain 5, regulatory                   | NM_002477, BCC  | Coding | TRUE |
| myosin, light chain 5, regulatory                   | NM_002477, BCC  | Coding | TRUE |
| rhopilin associated tail protein 1-like             | NM_001201466,   | Coding | TRUE |
| rhopilin associated tail protein 1-like             | NM_001201466,   | Coding | TRUE |
| rhopilin associated tail protein 1-like             | NM_001201466,   | Coding | TRUE |
| polymerase (DNA directed) kappa                     | NM_016218, ENS  | Coding | TRUE |
| polymerase (DNA directed) kappa                     | NM_016218, ENS  | Coding | TRUE |
| polymerase (DNA directed) kappa                     | NM_016218, ENS  | Coding | TRUE |
| polymerase (DNA directed) kappa                     | NM_016218, ENS  | Coding | TRUE |
| polymerase (DNA directed) kappa                     | NM_016218, ENS  | Coding | TRUE |
| collagen, type XII, alpha 1                         | NM_004370, NM   | Coding | TRUE |
| collagen, type XII, alpha 1                         | NM_004370, NM   | Coding | TRUE |
| collagen, type XII, alpha 1                         | NM_004370, NM   | Coding | TRUE |
| collagen, type XII, alpha 1                         | NM_004370, NM   | Coding | TRUE |
| collagen, type XII, alpha 1                         | NM_004370, NM   | Coding | TRUE |
| ATP-binding cassette, sub-family C (CFTR/MRP), men  | NM_000392, ENS  | Coding | TRUE |
| ATP-binding cassette, sub-family C (CFTR/MRP), men  | NM_000392, ENS  | Coding | TRUE |
| ATP-binding cassette, sub-family C (CFTR/MRP), men  | NM_000392, ENS  | Coding | TRUE |
| ATP-binding cassette, sub-family C (CFTR/MRP), men  | NM_000392, ENS  | Coding | TRUE |
| ATP-binding cassette, sub-family C (CFTR/MRP), men  | NM_000392, ENS  | Coding | TRUE |
| KIAA1598                                            | NM_001127211, I | Coding | TRUE |
| KIAA1598                                            | NM_001127211, I | Coding | TRUE |
| KIAA1598                                            | NM_001127211, I | Coding | TRUE |
| KIAA1598                                            | NM_001127211, I | Coding | TRUE |
| KIAA1598                                            | NM_001127211, I | Coding | TRUE |
| KIAA1598                                            | NM_001127211, I | Coding | TRUE |
| leucine zipper protein 2                            | NM_001009909,   | Coding | TRUE |
| leucine zipper protein 2                            | NM_001009909,   | Coding | TRUE |
| leucine zipper protein 2                            | NM_001009909,   | Coding | TRUE |
| leucine zipper protein 2                            | NM_001009909,   | Coding | TRUE |



















|                                                    |                  |        |      |
|----------------------------------------------------|------------------|--------|------|
| galactosylceramidase                               | NM_000153, NM    | Coding | TRUE |
| galactosylceramidase                               | NM_000153, NM    | Coding | TRUE |
| galactosylceramidase                               | NM_000153, NM    | Coding | TRUE |
| chemokine (C-X-C motif) ligand 16                  | NM_022059, NM    | Coding | TRUE |
| chemokine (C-X-C motif) ligand 16                  | NM_022059, NM    | Coding | TRUE |
| chemokine (C-X-C motif) ligand 16                  | NM_022059, NM    | Coding | TRUE |
| chemokine (C-X-C motif) ligand 16                  | NM_022059, NM    | Coding | TRUE |
| chemokine (C-X-C motif) ligand 16                  | NM_022059, NM    | Coding | TRUE |
| chemokine (C-X-C motif) ligand 16                  | NM_022059, NM    | Coding | TRUE |
| enoyl CoA hydratase domain containing 2            | NM_001198961, NM | Coding | TRUE |
| enoyl CoA hydratase domain containing 2            | NM_001198961, NM | Coding | TRUE |
| enoyl CoA hydratase domain containing 2            | NM_001198961, NM | Coding | TRUE |
| enoyl CoA hydratase domain containing 2            | NM_001198961, NM | Coding | TRUE |
| SP110 nuclear body protein                         | NM_001185015, NM | Coding | TRUE |
| SP110 nuclear body protein                         | NM_001185015, NM | Coding | TRUE |
| carbonyl reductase 4                               | NM_032783, ENS   | Coding | TRUE |
| carbonyl reductase 4                               | NM_032783, ENS   | Coding | TRUE |
| carbonyl reductase 4                               | NM_032783, ENS   | Coding | TRUE |
| carbonyl reductase 4                               | NM_032783, ENS   | Coding | TRUE |
| minichromosome maintenance complex component 7     | NM_182776, NM    | Coding | TRUE |
| minichromosome maintenance complex component 7     | NM_182776, NM    | Coding | TRUE |
| minichromosome maintenance complex component 7     | NM_182776, NM    | Coding | TRUE |
| minichromosome maintenance complex component 7     | NM_182776, NM    | Coding | TRUE |
| minichromosome maintenance complex component 7     | NM_182776, NM    | Coding | TRUE |
| zinc finger protein 36, C3H type-like 1            | NM_001244698, NM | Coding | TRUE |
| zinc finger protein 36, C3H type-like 1            | NM_001244698, NM | Coding | TRUE |
| zinc finger protein 36, C3H type-like 1            | NM_001244698, NM | Coding | TRUE |
| zinc finger protein 36, C3H type-like 1            | NM_001244698, NM | Coding | TRUE |
| zinc finger protein 36, C3H type-like 1            | NM_001244698, NM | Coding | TRUE |
| zinc finger protein 36, C3H type-like 1            | NM_001244698, NM | Coding | TRUE |
| zinc finger protein 36, C3H type-like 1            | NM_001244698, NM | Coding | TRUE |
| zinc finger protein 36, C3H type-like 1            | NM_001244698, NM | Coding | TRUE |
| zinc finger protein 36, C3H type-like 1            | NM_001244698, NM | Coding | TRUE |
| ubiquitin specific peptidase 43                    | NM_153210, ENS   | Coding | TRUE |
| ubiquitin specific peptidase 43                    | NM_153210, ENS   | Coding | TRUE |
| ubiquitin specific peptidase 43                    | NM_153210, ENS   | Coding | TRUE |
| family with sequence similarity 76, member A       | NM_001143912, NM | Coding | TRUE |
| family with sequence similarity 76, member A       | NM_001143912, NM | Coding | TRUE |
| zinc finger, DHHC-type containing 15               | NM_001146256, NM | Coding | TRUE |
| zinc finger, DHHC-type containing 15               | NM_001146256, NM | Coding | TRUE |
| zinc finger, DHHC-type containing 15               | NM_001146256, NM | Coding | TRUE |
| SHC (Src homology 2 domain containing) family, mem | NM_203349, ENS   | Coding | TRUE |
| SHC (Src homology 2 domain containing) family, mem | NM_203349, ENS   | Coding | TRUE |
| SHC (Src homology 2 domain containing) family, mem | NM_203349, ENS   | Coding | TRUE |
| uncharacterized LOC644838                          | NR_038844, ENS   | Coding | TRUE |
| uncharacterized LOC644838                          | NR_038844, ENS   | Coding | TRUE |
| stabilin 1                                         | NM_015136, ENS   | Coding | TRUE |
| stabilin 1                                         | NM_015136, ENS   | Coding | TRUE |
| stabilin 1                                         | NM_015136, ENS   | Coding | TRUE |
| stabilin 1                                         | NM_015136, ENS   | Coding | TRUE |
| stabilin 1                                         | NM_015136, ENS   | Coding | TRUE |
| oxytocin receptor                                  | NM_000916, ENS   | Coding | TRUE |
| oxytocin receptor                                  | NM_000916, ENS   | Coding | TRUE |
| oxytocin receptor                                  | NM_000916, ENS   | Coding | TRUE |
| oxytocin receptor                                  | NM_000916, ENS   | Coding | TRUE |
| fibroblast growth factor 1 (acidic)                | NM_001144892, NM | Coding | TRUE |
| fibroblast growth factor 1 (acidic)                | NM_001144892, NM | Coding | TRUE |
| fibroblast growth factor 1 (acidic)                | NM_001144892, NM | Coding | TRUE |
| fibroblast growth factor 1 (acidic)                | NM_001144892, NM | Coding | TRUE |

|                                                  |                |        |      |
|--------------------------------------------------|----------------|--------|------|
| fibroblast growth factor 1 (acidic)              | NM_001144892,  | Coding | TRUE |
| fibroblast growth factor 1 (acidic)              | NM_001144892,  | Coding | TRUE |
| fibroblast growth factor 1 (acidic)              | NM_001144892,  | Coding | TRUE |
| fibroblast growth factor 1 (acidic)              | NM_001144892,  | Coding | TRUE |
| pleckstrin homology domain interacting protein   | NM_017934, ENS | Coding | TRUE |
| pleckstrin homology domain interacting protein   | NM_017934, ENS | Coding | TRUE |
| pleckstrin homology domain interacting protein   | NM_017934, ENS | Coding | TRUE |
| pleckstrin homology domain interacting protein   | NM_017934, ENS | Coding | TRUE |
| pleckstrin homology domain interacting protein   | NM_017934, ENS | Coding | TRUE |
| pleckstrin homology domain interacting protein   | NM_017934, ENS | Coding | TRUE |
| pleckstrin homology domain interacting protein   | NM_017934, ENS | Coding | TRUE |
| pleckstrin homology domain interacting protein   | NM_017934, ENS | Coding | TRUE |
| pleckstrin homology domain interacting protein   | NM_017934, ENS | Coding | TRUE |
| pleckstrin homology domain interacting protein   | NM_017934, ENS | Coding | TRUE |
| pleckstrin homology domain interacting protein   | NM_017934, ENS | Coding | TRUE |
| pleckstrin homology domain interacting protein   | NM_017934, ENS | Coding | TRUE |
| pleckstrin homology domain interacting protein   | NM_017934, ENS | Coding | TRUE |
| complement component 1, s subcomponent           | NM_001734, NM, | Coding | TRUE |
| complement component 1, s subcomponent           | NM_001734, NM, | Coding | TRUE |
| complement component 1, s subcomponent           | NM_001734, NM, | Coding | TRUE |
| SR-related CTD-associated factor 11              | NM_004719, ENS | Coding | TRUE |
| SR-related CTD-associated factor 11              | NM_004719, ENS | Coding | TRUE |
| SR-related CTD-associated factor 11              | NM_004719, ENS | Coding | TRUE |
| SR-related CTD-associated factor 11              | NM_004719, ENS | Coding | TRUE |
| SR-related CTD-associated factor 11              | NM_004719, ENS | Coding | TRUE |
| SR-related CTD-associated factor 11              | NM_004719, ENS | Coding | TRUE |
| SR-related CTD-associated factor 11              | NM_004719, ENS | Coding | TRUE |
| SR-related CTD-associated factor 11              | NM_004719, ENS | Coding | TRUE |
| ribonucleotide reductase M2                      | NM_001034, NM, | Coding | TRUE |
| ribonucleotide reductase M2                      | NM_001034, NM, | Coding | TRUE |
| ribonucleotide reductase M2                      | NM_001034, NM, | Coding | TRUE |
| ribonucleotide reductase M2                      | NM_001034, NM, | Coding | TRUE |
| ribonucleotide reductase M2                      | NM_001034, NM, | Coding | TRUE |
| ribonucleotide reductase M2                      | NM_001034, NM, | Coding | TRUE |
| dynein, cytoplasmic 1, intermediate chain 2      | NM_001378, ENS | Coding | TRUE |
| dynein, cytoplasmic 1, intermediate chain 2      | NM_001378, ENS | Coding | TRUE |
| aspartyl-tRNA synthetase                         | NM_001349, ENS | Coding | TRUE |
| aspartyl-tRNA synthetase                         | NM_001349, ENS | Coding | TRUE |
| aspartyl-tRNA synthetase                         | NM_001349, ENS | Coding | TRUE |
| aspartyl-tRNA synthetase                         | NM_001349, ENS | Coding | TRUE |
| aspartyl-tRNA synthetase                         | NM_001349, ENS | Coding | TRUE |
| synaptojanin 2                                   | NM_001178088,  | Coding | TRUE |
| synaptojanin 2                                   | NM_001178088,  | Coding | TRUE |
| synaptojanin 2                                   | NM_001178088,  | Coding | TRUE |
| synaptojanin 2                                   | NM_001178088,  | Coding | TRUE |
| synaptojanin 2                                   | NM_001178088,  | Coding | TRUE |
| synaptojanin 2                                   | NM_001178088,  | Coding | TRUE |
| synaptojanin 2                                   | NM_001178088,  | Coding | TRUE |
| synaptojanin 2                                   | NM_001178088,  | Coding | TRUE |
| synaptojanin 2                                   | NM_001178088,  | Coding | TRUE |
| synaptojanin 2                                   | NM_001178088,  | Coding | TRUE |
| synaptojanin 2                                   | NM_001178088,  | Coding | TRUE |
| synaptojanin 2                                   | NM_001178088,  | Coding | TRUE |
| synaptojanin 2                                   | NM_001178088,  | Coding | TRUE |
| synaptojanin 2                                   | NM_001178088,  | Coding | TRUE |
| synaptojanin 2                                   | NM_001178088,  | Coding | TRUE |
| synaptojanin 2                                   | NM_001178088,  | Coding | TRUE |
| thromboxane A synthase 1 (platelet)              | NM_001061, NM, | Coding | TRUE |
| thromboxane A synthase 1 (platelet)              | NM_001061, NM, | Coding | TRUE |
| thromboxane A synthase 1 (platelet)              | NM_001061, NM, | Coding | TRUE |
| thromboxane A synthase 1 (platelet)              | NM_001061, NM, | Coding | TRUE |
| thromboxane A synthase 1 (platelet)              | NM_001061, NM, | Coding | TRUE |
| thromboxane A synthase 1 (platelet)              | NM_001061, NM, | Coding | TRUE |
| thromboxane A synthase 1 (platelet)              | NM_001061, NM, | Coding | TRUE |
| WD repeat domain 11, uncharacterized LOC10050615 | NM_018117, ENS | Coding | TRUE |









|                                                        |                |        |      |
|--------------------------------------------------------|----------------|--------|------|
| spermine oxidase                                       | NM_175839, NM  | Coding | TRUE |
| spermine oxidase                                       | NM_175839, NM  | Coding | TRUE |
| spermine oxidase                                       | NM_175839, NM  | Coding | TRUE |
| spermine oxidase                                       | NM_175839, NM  | Coding | TRUE |
| meiosis inhibitor 1                                    | NM_152513, ENS | Coding | TRUE |
| meiosis inhibitor 1                                    | NM_152513, ENS | Coding | TRUE |
| meiosis inhibitor 1                                    | NM_152513, ENS | Coding | TRUE |
| meiosis inhibitor 1                                    | NM_152513, ENS | Coding | TRUE |
| meiosis inhibitor 1                                    | NM_152513, ENS | Coding | TRUE |
| neuronal pentraxin receptor                            | NM_014293, ENS | Coding | TRUE |
| neuronal pentraxin receptor                            | NM_014293, ENS | Coding | TRUE |
| neuronal pentraxin receptor                            | NM_014293, ENS | Coding | TRUE |
| serine/threonine kinase 36                             | NM_001243313,  | Coding | TRUE |
| serine/threonine kinase 36                             | NM_001243313,  | Coding | TRUE |
| serine/threonine kinase 36                             | NM_001243313,  | Coding | TRUE |
| serine/threonine kinase 36                             | NM_001243313,  | Coding | TRUE |
| serine/threonine kinase 36                             | NM_001243313,  | Coding | TRUE |
| DEAH (Asp-Glu-Ala-Asp/His) box polypeptide 57          | NM_198963, ENS | Coding | TRUE |
| DEAH (Asp-Glu-Ala-Asp/His) box polypeptide 57          | NM_198963, ENS | Coding | TRUE |
| DEAH (Asp-Glu-Ala-Asp/His) box polypeptide 57          | NM_198963, ENS | Coding | TRUE |
| DEAH (Asp-Glu-Ala-Asp/His) box polypeptide 57          | NM_198963, ENS | Coding | TRUE |
| DEAH (Asp-Glu-Ala-Asp/His) box polypeptide 57          | NM_198963, ENS | Coding | TRUE |
| DEAH (Asp-Glu-Ala-Asp/His) box polypeptide 57          | NM_198963, ENS | Coding | TRUE |
| DEAH (Asp-Glu-Ala-Asp/His) box polypeptide 57          | NM_198963, ENS | Coding | TRUE |
| thyroid hormone receptor interactor 12                 | NM_004238, BC1 | Coding | TRUE |
| thyroid hormone receptor interactor 12                 | NM_004238, BC1 | Coding | TRUE |
| thyroid hormone receptor interactor 12                 | NM_004238, BC1 | Coding | TRUE |
| thyroid hormone receptor interactor 12                 | NM_004238, BC1 | Coding | TRUE |
| three prime repair exonuclease 1, ATR interacting prot | NM_016381, NM  | Coding | TRUE |
| three prime repair exonuclease 1, ATR interacting prot | NM_016381, NM  | Coding | TRUE |
| three prime repair exonuclease 1, ATR interacting prot | NM_016381, NM  | Coding | TRUE |
| three prime repair exonuclease 1, ATR interacting prot | NM_016381, NM  | Coding | TRUE |
| three prime repair exonuclease 1, ATR interacting prot | NM_016381, NM  | Coding | TRUE |
| three prime repair exonuclease 1, ATR interacting prot | NM_016381, NM  | Coding | TRUE |
| three prime repair exonuclease 1, ATR interacting prot | NM_016381, NM  | Coding | TRUE |
| three prime repair exonuclease 1, ATR interacting prot | NM_016381, NM  | Coding | TRUE |
| three prime repair exonuclease 1, ATR interacting prot | NM_016381, NM  | Coding | TRUE |
| three prime repair exonuclease 1, ATR interacting prot | NM_016381, NM  | Coding | TRUE |
| PR domain containing 8                                 | NM_001099403,  | Coding | TRUE |
| PR domain containing 8                                 | NM_001099403,  | Coding | TRUE |
| PR domain containing 8                                 | NM_001099403,  | Coding | TRUE |
| PR domain containing 8                                 | NM_001099403,  | Coding | TRUE |
| PR domain containing 8                                 | NM_001099403,  | Coding | TRUE |
| PR domain containing 8                                 | NM_001099403,  | Coding | TRUE |
| PR domain containing 8                                 | NM_001099403,  | Coding | TRUE |
| mitochondrial ribosomal protein S28                    | NM_014018, ENS | Coding | TRUE |
| mitochondrial ribosomal protein S28                    | NM_014018, ENS | Coding | TRUE |
| aquaporin 3 (Gill blood group)                         | NM_004925, ENS | Coding | TRUE |
| aquaporin 3 (Gill blood group)                         | NM_004925, ENS | Coding | TRUE |
| aquaporin 3 (Gill blood group)                         | NM_004925, ENS | Coding | TRUE |
| aldo-keto reductase family 1, member E2                | NM_001040177,  | Coding | TRUE |
| aldo-keto reductase family 1, member E2                | NM_001040177,  | Coding | TRUE |
| aldo-keto reductase family 1, member E2                | NM_001040177,  | Coding | TRUE |
| aldo-keto reductase family 1, member E2                | NM_001040177,  | Coding | TRUE |
| aldo-keto reductase family 1, member E2                | NM_001040177,  | Coding | TRUE |
| aldo-keto reductase family 1, member E2                | NM_001040177,  | Coding | TRUE |
| amyloid beta (A4) precursor protein-binding, family B, | NM_019043, ENS | Coding | TRUE |
| amyloid beta (A4) precursor protein-binding, family B, | NM_019043, ENS | Coding | TRUE |
| amyloid beta (A4) precursor protein-binding, family B, | NM_019043, ENS | Coding | TRUE |

|                                                          |                |        |      |
|----------------------------------------------------------|----------------|--------|------|
| amyloid beta (A4) precursor protein-binding, family B,   | NM_019043, ENS | Coding | TRUE |
| amyloid beta (A4) precursor protein-binding, family B,   | NM_019043, ENS | Coding | TRUE |
| amyloid beta (A4) precursor protein-binding, family B,   | NM_019043, ENS | Coding | TRUE |
| amyloid beta (A4) precursor protein-binding, family B,   | NM_019043, ENS | Coding | TRUE |
| dynein heavy chain domain 1                              | NM_144666, NM  | Coding | TRUE |
| dynein heavy chain domain 1                              | NM_144666, NM  | Coding | TRUE |
| dynein heavy chain domain 1                              | NM_144666, NM  | Coding | TRUE |
| dynein heavy chain domain 1                              | NM_144666, NM  | Coding | TRUE |
| dynein heavy chain domain 1                              | NM_144666, NM  | Coding | TRUE |
| dynein heavy chain domain 1                              | NM_144666, NM  | Coding | TRUE |
| dynein heavy chain domain 1                              | NM_144666, NM  | Coding | TRUE |
| dynein heavy chain domain 1                              | NM_144666, NM  | Coding | TRUE |
| dynein heavy chain domain 1                              | NM_144666, NM  | Coding | TRUE |
| dynein heavy chain domain 1                              | NM_144666, NM  | Coding | TRUE |
| dynein heavy chain domain 1                              | NM_144666, NM  | Coding | TRUE |
| dynein heavy chain domain 1                              | NM_144666, NM  | Coding | TRUE |
| dynein heavy chain domain 1                              | NM_144666, NM  | Coding | TRUE |
| dynein heavy chain domain 1                              | NM_144666, NM  | Coding | TRUE |
| ataxin 3                                                 | NM_001127696,  | Coding | TRUE |
| ataxin 3                                                 | NM_001127696,  | Coding | TRUE |
| ataxin 3                                                 | NM_001127696,  | Coding | TRUE |
| ataxin 3                                                 | NM_001127696,  | Coding | TRUE |
| ataxin 3                                                 | NM_001127696,  | Coding | TRUE |
| ataxin 3                                                 | NM_001127696,  | Coding | TRUE |
| ataxin 3                                                 | NM_001127696,  | Coding | TRUE |
| ataxin 3                                                 | NM_001127696,  | Coding | TRUE |
| ataxin 3                                                 | NM_001127696,  | Coding | TRUE |
| ataxin 3                                                 | NM_001127696,  | Coding | TRUE |
| ataxin 3                                                 | NM_001127696,  | Coding | TRUE |
| ataxin 3                                                 | NM_001127696,  | Coding | TRUE |
| ataxin 3                                                 | NM_001127696,  | Coding | TRUE |
| ataxin 3                                                 | NM_001127696,  | Coding | TRUE |
| ataxin 3                                                 | NM_001127696,  | Coding | TRUE |
| ataxin 3                                                 | NM_001127696,  | Coding | TRUE |
| ataxin 3                                                 | NM_001127696,  | Coding | TRUE |
| hypoxia inducible factor 3, alpha subunit                | NM_022462, NM  | Coding | TRUE |
| hypoxia inducible factor 3, alpha subunit                | NM_022462, NM  | Coding | TRUE |
| hypoxia inducible factor 3, alpha subunit                | NM_022462, NM  | Coding | TRUE |
| hypoxia inducible factor 3, alpha subunit                | NM_022462, NM  | Coding | TRUE |
| hypoxia inducible factor 3, alpha subunit                | NM_022462, NM  | Coding | TRUE |
| hypoxia inducible factor 3, alpha subunit                | NM_022462, NM  | Coding | TRUE |
| major histocompatibility complex, class II, DR beta 1, r | NM_001243965,  | Coding | TRUE |
| major histocompatibility complex, class II, DR beta 1, r | NM_001243965,  | Coding | TRUE |
| solute carrier family 41, member 3                       | NM_001008485,  | Coding | TRUE |
| solute carrier family 41, member 3                       | NM_001008485,  | Coding | TRUE |
| solute carrier family 41, member 3                       | NM_001008485,  | Coding | TRUE |
| solute carrier family 41, member 3                       | NM_001008485,  | Coding | TRUE |
| solute carrier family 41, member 3                       | NM_001008485,  | Coding | TRUE |
| solute carrier family 41, member 3                       | NM_001008485,  | Coding | TRUE |
| solute carrier family 41, member 3                       | NM_001008485,  | Coding | TRUE |
| solute carrier family 41, member 3                       | NM_001008485,  | Coding | TRUE |
| solute carrier family 41, member 3                       | NM_001008485,  | Coding | TRUE |
| solute carrier family 41, member 3                       | NM_001008485,  | Coding | TRUE |
| solute carrier family 41, member 3                       | NM_001008485,  | Coding | TRUE |
| solute carrier family 41, member 3                       | NM_001008485,  | Coding | TRUE |
| solute carrier family 41, member 3                       | NM_001008485,  | Coding | TRUE |
| solute carrier family 41, member 3                       | NM_001008485,  | Coding | TRUE |
| solute carrier family 41, member 3                       | NM_001008485,  | Coding | TRUE |
| phosphodiesterase 5A, cGMP-specific                      | NM_001083, NM  | Coding | TRUE |
| phosphodiesterase 5A, cGMP-specific                      | NM_001083, NM  | Coding | TRUE |
| phosphodiesterase 5A, cGMP-specific                      | NM_001083, NM  | Coding | TRUE |
| phosphodiesterase 5A, cGMP-specific                      | NM_001083, NM  | Coding | TRUE |
| phosphodiesterase 5A, cGMP-specific                      | NM_001083, NM  | Coding | TRUE |
| phosphodiesterase 5A, cGMP-specific                      | NM_001083, NM  | Coding | TRUE |
| major histocompatibility complex, class I, H (pseudoge   | NR_001434      | Coding | TRUE |
| major histocompatibility complex, class I, H (pseudoge   | NR_001434      | Coding | TRUE |

|                                                           |                   |        |      |
|-----------------------------------------------------------|-------------------|--------|------|
| major histocompatibility complex, class I, H (pseudogene) | NR_001434         | Coding | TRUE |
| major histocompatibility complex, class I, H (pseudogene) | NR_001434         | Coding | TRUE |
| nibrin                                                    | NM_002485, ENS    | Coding | TRUE |
| nibrin                                                    | NM_002485, ENS    | Coding | TRUE |
| nibrin                                                    | NM_002485, ENS    | Coding | TRUE |
| nibrin                                                    | NM_002485, ENS    | Coding | TRUE |
| ATP-binding cassette, sub-family A (ABC1), member 1       | NM_005502, ENS    | Coding | TRUE |
| ATP-binding cassette, sub-family A (ABC1), member 1       | NM_005502, ENS    | Coding | TRUE |
| ATP-binding cassette, sub-family A (ABC1), member 1       | NM_005502, ENS    | Coding | TRUE |
| ATP-binding cassette, sub-family A (ABC1), member 1       | NM_005502, ENS    | Coding | TRUE |
| ATP-binding cassette, sub-family A (ABC1), member 1       | NM_005502, ENS    | Coding | TRUE |
| ATP-binding cassette, sub-family A (ABC1), member 1       | NM_005502, ENS    | Coding | TRUE |
| ATP-binding cassette, sub-family A (ABC1), member 1       | NM_005502, ENS    | Coding | TRUE |
| ATP-binding cassette, sub-family A (ABC1), member 1       | NM_005502, ENS    | Coding | TRUE |
| phosphoglycerate kinase 1, uncharacterized LOC1006        | NM_000291, ENS    | Coding | TRUE |
| phosphoglycerate kinase 1, uncharacterized LOC1006        | NM_000291, ENS    | Coding | TRUE |
| phosphoglycerate kinase 1, uncharacterized LOC1006        | NM_000291, ENS    | Coding | TRUE |
| phosphoglycerate kinase 1, uncharacterized LOC1006        | NM_000291, ENS    | Coding | TRUE |
| phosphoglycerate kinase 1, uncharacterized LOC1006        | NM_000291, ENS    | Coding | TRUE |
| phosphoglycerate kinase 1, uncharacterized LOC1006        | NM_000291, ENS    | Coding | TRUE |
| phosphoglycerate kinase 1, uncharacterized LOC1006        | NM_000291, ENS    | Coding | TRUE |
| zinc finger protein 185 (LIM domain)                      | NM_001178106, ENS | Coding | TRUE |
| zinc finger protein 185 (LIM domain)                      | NM_001178106, ENS | Coding | TRUE |
| zinc finger protein 185 (LIM domain)                      | NM_001178106, ENS | Coding | TRUE |
| zinc finger protein 185 (LIM domain)                      | NM_001178106, ENS | Coding | TRUE |
| zinc finger protein 185 (LIM domain)                      | NM_001178106, ENS | Coding | TRUE |
| zinc finger protein 185 (LIM domain)                      | NM_001178106, ENS | Coding | TRUE |
| zinc finger protein 185 (LIM domain)                      | NM_001178106, ENS | Coding | TRUE |
| zinc finger protein 185 (LIM domain)                      | NM_001178106, ENS | Coding | TRUE |
| acyl-CoA dehydrogenase, short/branched chain              | NM_001609, ENS    | Coding | TRUE |
| acyl-CoA dehydrogenase, short/branched chain              | NM_001609, ENS    | Coding | TRUE |
| acyl-CoA dehydrogenase, short/branched chain              | NM_001609, ENS    | Coding | TRUE |
| acyl-CoA dehydrogenase, short/branched chain              | NM_001609, ENS    | Coding | TRUE |
| acyl-CoA dehydrogenase, short/branched chain              | NM_001609, ENS    | Coding | TRUE |
| aryl hydrocarbon receptor nuclear translocator-like 2     | NM_001248002, ENS | Coding | TRUE |
| aryl hydrocarbon receptor nuclear translocator-like 2     | NM_001248002, ENS | Coding | TRUE |
| aryl hydrocarbon receptor nuclear translocator-like 2     | NM_001248002, ENS | Coding | TRUE |
| aryl hydrocarbon receptor nuclear translocator-like 2     | NM_001248002, ENS | Coding | TRUE |
| aryl hydrocarbon receptor nuclear translocator-like 2     | NM_001248002, ENS | Coding | TRUE |
| aryl hydrocarbon receptor nuclear translocator-like 2     | NM_001248002, ENS | Coding | TRUE |
| aryl hydrocarbon receptor nuclear translocator-like 2     | NM_001248002, ENS | Coding | TRUE |
| histone cluster 4, H4, histone cluster 2, H4b, histone c  | NM_175054, ENS    | Coding | TRUE |
| histone cluster 4, H4, histone cluster 2, H4b, histone c  | NM_175054, ENS    | Coding | TRUE |
| histone cluster 4, H4, histone cluster 2, H4b, histone c  | NM_175054, ENS    | Coding | TRUE |
| histone cluster 4, H4, histone cluster 2, H4b, histone c  | NM_175054, ENS    | Coding | TRUE |
| decorin                                                   | NM_001920, NM     | Coding | TRUE |
| decorin                                                   | NM_001920, NM     | Coding | TRUE |
| decorin                                                   | NM_001920, NM     | Coding | TRUE |
| decorin                                                   | NM_001920, NM     | Coding | TRUE |
| decorin                                                   | NM_001920, NM     | Coding | TRUE |
| mixed lineage kinase domain-like                          | NM_001142497, ENS | Coding | TRUE |
| mixed lineage kinase domain-like                          | NM_001142497, ENS | Coding | TRUE |
| mixed lineage kinase domain-like                          | NM_001142497, ENS | Coding | TRUE |
| DPH5 homolog (S. cerevisiae)                              | NM_001077394, ENS | Coding | TRUE |
| DPH5 homolog (S. cerevisiae)                              | NM_001077394, ENS | Coding | TRUE |
| DPH5 homolog (S. cerevisiae)                              | NM_001077394, ENS | Coding | TRUE |
| DPH5 homolog (S. cerevisiae)                              | NM_001077394, ENS | Coding | TRUE |
| zinc finger protein 354C                                  | NM_014594, ENS    | Coding | TRUE |
| zinc finger protein 354C                                  | NM_014594, ENS    | Coding | TRUE |
| zinc finger protein 354C                                  | NM_014594, ENS    | Coding | TRUE |
| zinc finger protein 354C                                  | NM_014594, ENS    | Coding | TRUE |

|                                                      |                |        |      |
|------------------------------------------------------|----------------|--------|------|
| sprouty homolog 4 (Drosophila)                       | NM_001127496,  | Coding | TRUE |
| sprouty homolog 4 (Drosophila)                       | NM_001127496,  | Coding | TRUE |
| sprouty homolog 4 (Drosophila)                       | NM_001127496,  | Coding | TRUE |
| sprouty homolog 4 (Drosophila)                       | NM_001127496,  | Coding | TRUE |
| sprouty homolog 4 (Drosophila)                       | NM_001127496,  | Coding | TRUE |
| sprouty homolog 4 (Drosophila)                       | NM_001127496,  | Coding | TRUE |
| sprouty homolog 4 (Drosophila)                       | NM_001127496,  | Coding | TRUE |
| sprouty homolog 4 (Drosophila)                       | NM_001127496,  | Coding | TRUE |
| sprouty homolog 4 (Drosophila)                       | NM_001127496,  | Coding | TRUE |
| sprouty homolog 4 (Drosophila)                       | NM_001127496,  | Coding | TRUE |
| sprouty homolog 4 (Drosophila)                       | NM_001127496,  | Coding | TRUE |
| oral cancer overexpressed 1                          | NM_153451, ENS | Coding | TRUE |
| oral cancer overexpressed 1                          | NM_153451, ENS | Coding | TRUE |
| oral cancer overexpressed 1                          | NM_153451, ENS | Coding | TRUE |
| paraspeckle component 1, PSPC1 overlapping transcr   | NM_001042414,  | Coding | TRUE |
| paraspeckle component 1, PSPC1 overlapping transcr   | NM_001042414,  | Coding | TRUE |
| paraspeckle component 1, PSPC1 overlapping transcr   | NM_001042414,  | Coding | TRUE |
| UDP-N-acetyl-alpha-D-galactosamine:polypeptide N-a   | NM_001168368,  | Coding | TRUE |
| UDP-N-acetyl-alpha-D-galactosamine:polypeptide N-a   | NM_001168368,  | Coding | TRUE |
| acyl-CoA synthetase medium-chain family member 5     | NM_017888, ENS | Coding | TRUE |
| acyl-CoA synthetase medium-chain family member 5     | NM_017888, ENS | Coding | TRUE |
| acyl-CoA synthetase medium-chain family member 5     | NM_017888, ENS | Coding | TRUE |
| major histocompatibility complex, class I, F         | NM_001098478,  | Coding | TRUE |
| major histocompatibility complex, class I, F         | NM_001098478,  | Coding | TRUE |
| major histocompatibility complex, class I, F         | NM_001098478,  | Coding | TRUE |
| major histocompatibility complex, class I, F         | NM_001098478,  | Coding | TRUE |
| major histocompatibility complex, class I, F         | NM_001098478,  | Coding | TRUE |
| major histocompatibility complex, class I, F         | NM_001098478,  | Coding | TRUE |
| major histocompatibility complex, class I, F         | NM_001098478,  | Coding | TRUE |
| major histocompatibility complex, class I, F         | NM_001098478,  | Coding | TRUE |
| major histocompatibility complex, class I, F         | NM_001098478,  | Coding | TRUE |
| major histocompatibility complex, class I, F         | NM_001098478,  | Coding | TRUE |
| major histocompatibility complex, class I, F         | NM_001098478,  | Coding | TRUE |
| major histocompatibility complex, class I, F         | NM_001098478,  | Coding | TRUE |
| HCLS1 binding protein 3                              | NM_022460, ENS | Coding | TRUE |
| HCLS1 binding protein 3                              | NM_022460, ENS | Coding | TRUE |
| HCLS1 binding protein 3                              | NM_022460, ENS | Coding | TRUE |
| BRCA1 associated RING domain 1                       | NM_000465, ENS | Coding | TRUE |
| BRCA1 associated RING domain 1                       | NM_000465, ENS | Coding | TRUE |
| leucine-rich repeats and immunoglobulin-like domains | NM_015541, BCC | Coding | TRUE |
| leucine-rich repeats and immunoglobulin-like domains | NM_015541, BCC | Coding | TRUE |
| leucine-rich repeats and immunoglobulin-like domains | NM_015541, BCC | Coding | TRUE |
| leucine-rich repeats and immunoglobulin-like domains | NM_015541, BCC | Coding | TRUE |
| leucine-rich repeats and immunoglobulin-like domains | NM_015541, BCC | Coding | TRUE |
| leucine-rich repeats and immunoglobulin-like domains | NM_015541, BCC | Coding | TRUE |
| leucine-rich repeats and immunoglobulin-like domains | NM_015541, BCC | Coding | TRUE |
| leucine-rich repeats and immunoglobulin-like domains | NM_015541, BCC | Coding | TRUE |
| leucine-rich repeats and immunoglobulin-like domains | NM_015541, BCC | Coding | TRUE |
| leucine-rich repeats and immunoglobulin-like domains | NM_015541, BCC | Coding | TRUE |
| serum/glucocorticoid regulated kinase 1              | NM_001143676,  | Coding | TRUE |
| serum/glucocorticoid regulated kinase 1              | NM_001143676,  | Coding | TRUE |
| serum/glucocorticoid regulated kinase 1              | NM_001143676,  | Coding | TRUE |
| serum/glucocorticoid regulated kinase 1              | NM_001143676,  | Coding | TRUE |
| serum/glucocorticoid regulated kinase 1              | NM_001143676,  | Coding | TRUE |
| serum/glucocorticoid regulated kinase 1              | NM_001143676,  | Coding | TRUE |
| serum/glucocorticoid regulated kinase 1              | NM_001143676,  | Coding | TRUE |
| serum/glucocorticoid regulated kinase 1              | NM_001143676,  | Coding | TRUE |
| serum/glucocorticoid regulated kinase 1              | NM_001143676,  | Coding | TRUE |
| serum/glucocorticoid regulated kinase 1              | NM_001143676,  | Coding | TRUE |
| serum/glucocorticoid regulated kinase 1              | NM_001143676,  | Coding | TRUE |
| serum/glucocorticoid regulated kinase 1              | NM_001143676,  | Coding | TRUE |
| keratin 18                                           | NM_000224, NM  | Coding | TRUE |
| keratin 18                                           | NM_000224, NM  | Coding | TRUE |





|                                                       |                 |        |      |
|-------------------------------------------------------|-----------------|--------|------|
| receptor accessory protein 2                          | NM_016606, BCC  | Coding | TRUE |
| cortactin binding protein 2                           | NM_033427, ENS  | Coding | TRUE |
| cortactin binding protein 2                           | NM_033427, ENS  | Coding | TRUE |
| cortactin binding protein 2                           | NM_033427, ENS  | Coding | TRUE |
| cortactin binding protein 2                           | NM_033427, ENS  | Coding | TRUE |
| glutamine and serine rich 1                           | NM_001076786,   | Coding | TRUE |
| glutamine and serine rich 1                           | NM_001076786,   | Coding | TRUE |
| glutamine and serine rich 1                           | NM_001076786,   | Coding | TRUE |
| hypothetical LOC643365, long intergenic non-protein c | NR_024609, ENS  | Coding | TRUE |
| hypothetical LOC643365, long intergenic non-protein c | NR_024609, ENS  | Coding | TRUE |
| ectonucleoside triphosphate diphosphohydrolase 6 (pu  | NM_001114089, I | Coding | TRUE |
| ectonucleoside triphosphate diphosphohydrolase 6 (pu  | NM_001114089, I | Coding | TRUE |
| ectonucleoside triphosphate diphosphohydrolase 6 (pu  | NM_001114089, I | Coding | TRUE |
| ectonucleoside triphosphate diphosphohydrolase 6 (pu  | NM_001114089, I | Coding | TRUE |
| NSL1, MIND kinetochore complex component, homolo      | NM_001042549,   | Coding | TRUE |
| NSL1, MIND kinetochore complex component, homolo      | NM_001042549,   | Coding | TRUE |
| myosin VI                                             | NM_004999, ENS  | Coding | TRUE |
| myosin VI                                             | NM_004999, ENS  | Coding | TRUE |
| myosin VI                                             | NM_004999, ENS  | Coding | TRUE |
| myosin VI                                             | NM_004999, ENS  | Coding | TRUE |
| myosin VI                                             | NM_004999, ENS  | Coding | TRUE |
| matrix metalloproteinase 16 (membrane-inserted)       | NM_005941, ENS  | Coding | TRUE |
| matrix metalloproteinase 16 (membrane-inserted)       | NM_005941, ENS  | Coding | TRUE |
| matrix metalloproteinase 16 (membrane-inserted)       | NM_005941, ENS  | Coding | TRUE |
| matrix metalloproteinase 16 (membrane-inserted)       | NM_005941, ENS  | Coding | TRUE |
| matrix metalloproteinase 16 (membrane-inserted)       | NM_005941, ENS  | Coding | TRUE |
| calpain 3, (p94)                                      | NM_024344, NM   | Coding | TRUE |
| calpain 3, (p94)                                      | NM_024344, NM   | Coding | TRUE |
| calpain 3, (p94)                                      | NM_024344, NM   | Coding | TRUE |
| calpain 3, (p94)                                      | NM_024344, NM   | Coding | TRUE |
| calpain 3, (p94)                                      | NM_024344, NM   | Coding | TRUE |
| calpain 3, (p94)                                      | NM_024344, NM   | Coding | TRUE |
| calpain 3, (p94)                                      | NM_024344, NM   | Coding | TRUE |
| calpain 3, (p94)                                      | NM_024344, NM   | Coding | TRUE |
| calpain 3, (p94)                                      | NM_024344, NM   | Coding | TRUE |
| calpain 3, (p94)                                      | NM_024344, NM   | Coding | TRUE |
| calpain 3, (p94)                                      | NM_024344, NM   | Coding | TRUE |
| calpain 3, (p94)                                      | NM_024344, NM   | Coding | TRUE |
| calpain 3, (p94)                                      | NM_024344, NM   | Coding | TRUE |
| calpain 3, (p94)                                      | NM_024344, NM   | Coding | TRUE |
| zinc finger protein 568                               | NM_001204835,   | Coding | TRUE |
| zinc finger protein 568                               | NM_001204835,   | Coding | TRUE |
| zinc finger protein 568                               | NM_001204835,   | Coding | TRUE |
| zinc finger protein 568                               | NM_001204835,   | Coding | TRUE |
| zinc finger protein 568                               | NM_001204835,   | Coding | TRUE |
| zinc finger protein 568                               | NM_001204835,   | Coding | TRUE |
| centromere protein E, 312kDa                          | NM_001813, ENS  | Coding | TRUE |
| centromere protein E, 312kDa                          | NM_001813, ENS  | Coding | TRUE |
| centromere protein E, 312kDa                          | NM_001813, ENS  | Coding | TRUE |
| centromere protein E, 312kDa                          | NM_001813, ENS  | Coding | TRUE |
| centromere protein E, 312kDa                          | NM_001813, ENS  | Coding | TRUE |
| centromere protein E, 312kDa                          | NM_001813, ENS  | Coding | TRUE |
| centromere protein E, 312kDa                          | NM_001813, ENS  | Coding | TRUE |
| centromere protein E, 312kDa                          | NM_001813, ENS  | Coding | TRUE |
| centromere protein E, 312kDa                          | NM_001813, ENS  | Coding | TRUE |
| centromere protein E, 312kDa                          | NM_001813, ENS  | Coding | TRUE |
| centromere protein E, 312kDa                          | NM_001813, ENS  | Coding | TRUE |
| centromere protein E, 312kDa                          | NM_001813, ENS  | Coding | TRUE |
| tetratricopeptide repeat domain 37                    | NM_014639, ENS  | Coding | TRUE |
| tetratricopeptide repeat domain 37                    | NM_014639, ENS  | Coding | TRUE |
| tetratricopeptide repeat domain 37                    | NM_014639, ENS  | Coding | TRUE |
| tetratricopeptide repeat domain 37                    | NM_014639, ENS  | Coding | TRUE |



|                                                                |                            |        |      |
|----------------------------------------------------------------|----------------------------|--------|------|
| small nucleolar RNA, C/D box 24, ribosomal protein L7          | NR_002447, NM_002447       | Coding | TRUE |
| small nucleolar RNA, C/D box 24, ribosomal protein L7          | NR_002447, NM_002447       | Coding | TRUE |
| small nucleolar RNA, C/D box 24, ribosomal protein L7          | NR_002447, NM_002447       | Coding | TRUE |
| small nucleolar RNA, C/D box 24, ribosomal protein L7          | NR_002447, NM_002447       | Coding | TRUE |
| small nucleolar RNA, C/D box 24, ribosomal protein L7          | NR_002447, NM_002447       | Coding | TRUE |
| heat shock transcription factor family, X linked 2, heat shock | NM_001164415, NM_001164415 | Coding | TRUE |
| heat shock transcription factor family, X linked 2, heat shock | NM_001164415, NM_001164415 | Coding | TRUE |
| early B-cell factor 3                                          | NM_001005463, NM_001005463 | Coding | TRUE |
| early B-cell factor 3                                          | NM_001005463, NM_001005463 | Coding | TRUE |
| early B-cell factor 3                                          | NM_001005463, NM_001005463 | Coding | TRUE |
| early B-cell factor 3                                          | NM_001005463, NM_001005463 | Coding | TRUE |
| early B-cell factor 3                                          | NM_001005463, NM_001005463 | Coding | TRUE |
| early B-cell factor 3                                          | NM_001005463, NM_001005463 | Coding | TRUE |
| early B-cell factor 3                                          | NM_001005463, NM_001005463 | Coding | TRUE |
| early B-cell factor 3                                          | NM_001005463, NM_001005463 | Coding | TRUE |
| early B-cell factor 3                                          | NM_001005463, NM_001005463 | Coding | TRUE |
| early B-cell factor 3                                          | NM_001005463, NM_001005463 | Coding | TRUE |
| early B-cell factor 3                                          | NM_001005463, NM_001005463 | Coding | TRUE |
| early B-cell factor 3                                          | NM_001005463, NM_001005463 | Coding | TRUE |
| early B-cell factor 3                                          | NM_001005463, NM_001005463 | Coding | TRUE |
| patatin-like phospholipase domain containing 2                 | NM_020376, ENS0000020376   | Coding | TRUE |
| patatin-like phospholipase domain containing 2                 | NM_020376, ENS0000020376   | Coding | TRUE |
|                                                                |                            | Coding | TRUE |
|                                                                |                            | Coding | TRUE |
|                                                                |                            | Coding | TRUE |
|                                                                |                            | Coding | TRUE |
| Dmx-like 2                                                     | NM_001174116, NM_001174116 | Coding | TRUE |
| Dmx-like 2                                                     | NM_001174116, NM_001174116 | Coding | TRUE |
| Dmx-like 2                                                     | NM_001174116, NM_001174116 | Coding | TRUE |
| Dmx-like 2                                                     | NM_001174116, NM_001174116 | Coding | TRUE |
| Dmx-like 2                                                     | NM_001174116, NM_001174116 | Coding | TRUE |
| Dmx-like 2                                                     | NM_001174116, NM_001174116 | Coding | TRUE |
| Dmx-like 2                                                     | NM_001174116, NM_001174116 | Coding | TRUE |
| LSM14B, SCD6 homolog B (S. cerevisiae)                         | NM_144703, ENS00000144703  | Coding | TRUE |
| LSM14B, SCD6 homolog B (S. cerevisiae)                         | NM_144703, ENS00000144703  | Coding | TRUE |
| LSM14B, SCD6 homolog B (S. cerevisiae)                         | NM_144703, ENS00000144703  | Coding | TRUE |
| l(3)mbt-like 1 (Drosophila)                                    | NM_015478, NM_015478       | Coding | TRUE |
| l(3)mbt-like 1 (Drosophila)                                    | NM_015478, NM_015478       | Coding | TRUE |
| l(3)mbt-like 1 (Drosophila)                                    | NM_015478, NM_015478       | Coding | TRUE |
| l(3)mbt-like 1 (Drosophila)                                    | NM_015478, NM_015478       | Coding | TRUE |
| cornichon homolog 3 (Drosophila), uncharacterized LC           | NM_152495, ENS00000152495  | Coding | TRUE |
| cornichon homolog 3 (Drosophila), uncharacterized LC           | NM_152495, ENS00000152495  | Coding | TRUE |
| cornichon homolog 3 (Drosophila), uncharacterized LC           | NM_152495, ENS00000152495  | Coding | TRUE |
| ankyrin repeat domain 37                                       | NM_181726, ENS00000181726  | Coding | TRUE |
| ankyrin repeat domain 37                                       | NM_181726, ENS00000181726  | Coding | TRUE |
| ankyrin repeat domain 37                                       | NM_181726, ENS00000181726  | Coding | TRUE |
| ankyrin repeat domain 37                                       | NM_181726, ENS00000181726  | Coding | TRUE |
| ankyrin repeat domain 37                                       | NM_181726, ENS00000181726  | Coding | TRUE |
| ankyrin repeat domain 37                                       | NM_181726, ENS00000181726  | Coding | TRUE |
| ankyrin repeat domain 37                                       | NM_181726, ENS00000181726  | Coding | TRUE |
| ArfGAP with RhoGAP domain, ankyrin repeat and PH domain        | NM_015230, ENS0000015230   | Coding | TRUE |
| ArfGAP with RhoGAP domain, ankyrin repeat and PH domain        | NM_015230, ENS0000015230   | Coding | TRUE |
| ArfGAP with RhoGAP domain, ankyrin repeat and PH domain        | NM_015230, ENS0000015230   | Coding | TRUE |
| ArfGAP with RhoGAP domain, ankyrin repeat and PH domain        | NM_015230, ENS0000015230   | Coding | TRUE |
| ArfGAP with RhoGAP domain, ankyrin repeat and PH domain        | NM_015230, ENS0000015230   | Coding | TRUE |
| ArfGAP with RhoGAP domain, ankyrin repeat and PH domain        | NM_015230, ENS0000015230   | Coding | TRUE |
| family with sequence similarity 173, member B                  | NM_199133, ENS00000199133  | Coding | TRUE |
| family with sequence similarity 173, member B                  | NM_199133, ENS00000199133  | Coding | TRUE |
| ATPase, H+ transporting V0 subunit e2                          | NM_001100592, NM_001100592 | Coding | TRUE |









|                                                      |                |        |      |
|------------------------------------------------------|----------------|--------|------|
| engulfment and cell motility 2                       | NM_133171, NM  | Coding | TRUE |
| engulfment and cell motility 2                       | NM_133171, NM  | Coding | TRUE |
| engulfment and cell motility 2                       | NM_133171, NM  | Coding | TRUE |
| engulfment and cell motility 2                       | NM_133171, NM  | Coding | TRUE |
| engulfment and cell motility 2                       | NM_133171, NM  | Coding | TRUE |
| engulfment and cell motility 2                       | NM_133171, NM  | Coding | TRUE |
| engulfment and cell motility 2                       | NM_133171, NM  | Coding | TRUE |
| potassium voltage-gated channel, subfamily H (eag-re | NM_002238, NM  | Coding | TRUE |
| potassium voltage-gated channel, subfamily H (eag-re | NM_002238, NM  | Coding | TRUE |
| potassium voltage-gated channel, subfamily H (eag-re | NM_002238, NM  | Coding | TRUE |
| potassium voltage-gated channel, subfamily H (eag-re | NM_002238, NM  | Coding | TRUE |
| potassium voltage-gated channel, subfamily H (eag-re | NM_002238, NM  | Coding | TRUE |
| potassium voltage-gated channel, subfamily H (eag-re | NM_002238, NM  | Coding | TRUE |
| potassium voltage-gated channel, subfamily H (eag-re | NM_002238, NM  | Coding | TRUE |
| potassium voltage-gated channel, subfamily H (eag-re | NM_002238, NM  | Coding | TRUE |
| TAP binding protein (tapasin)                        | NM_003190, NM  | Coding | TRUE |
| TAP binding protein (tapasin)                        | NM_003190, NM  | Coding | TRUE |
| zinc finger protein 273                              | NM_021148, NR  | Coding | TRUE |
| zinc finger protein 273                              | NM_021148, NR  | Coding | TRUE |
| zinc finger protein 273                              | NM_021148, NR  | Coding | TRUE |
| zinc finger protein 273                              | NM_021148, NR  | Coding | TRUE |
| ral guanine nucleotide dissociation stimulator       | NM_001042368,  | Coding | TRUE |
| ral guanine nucleotide dissociation stimulator       | NM_001042368,  | Coding | TRUE |
| ral guanine nucleotide dissociation stimulator       | NM_001042368,  | Coding | TRUE |
| ral guanine nucleotide dissociation stimulator       | NM_001042368,  | Coding | TRUE |
| ral guanine nucleotide dissociation stimulator       | NM_001042368,  | Coding | TRUE |
| ral guanine nucleotide dissociation stimulator       | NM_001042368,  | Coding | TRUE |
| ral guanine nucleotide dissociation stimulator       | NM_001042368,  | Coding | TRUE |
| glyceraldehyde-3-phosphate dehydrogenase             | NM_002046, ENS | Coding | TRUE |
| glyceraldehyde-3-phosphate dehydrogenase             | NM_002046, ENS | Coding | TRUE |
| glyceraldehyde-3-phosphate dehydrogenase             | NM_002046, ENS | Coding | TRUE |
| glyceraldehyde-3-phosphate dehydrogenase             | NM_002046, ENS | Coding | TRUE |
| glyceraldehyde-3-phosphate dehydrogenase             | NM_002046, ENS | Coding | TRUE |
| zinc and ring finger 1, E3 ubiquitin protein ligase  | NM_032268, ENS | Coding | TRUE |
| zinc and ring finger 1, E3 ubiquitin protein ligase  | NM_032268, ENS | Coding | TRUE |
| zinc and ring finger 1, E3 ubiquitin protein ligase  | NM_032268, ENS | Coding | TRUE |
| zinc and ring finger 1, E3 ubiquitin protein ligase  | NM_032268, ENS | Coding | TRUE |
| ATP synthase, H+ transporting, mitochondrial F1 comp | NM_001001937,  | Coding | TRUE |
| ATP synthase, H+ transporting, mitochondrial F1 comp | NM_001001937,  | Coding | TRUE |
| DEAH (Asp-Glu-Ala-His) box polypeptide 15            | NM_001358, ENS | Coding | TRUE |
| DEAH (Asp-Glu-Ala-His) box polypeptide 15            | NM_001358, ENS | Coding | TRUE |
| DEAH (Asp-Glu-Ala-His) box polypeptide 15            | NM_001358, ENS | Coding | TRUE |
| DEAH (Asp-Glu-Ala-His) box polypeptide 15            | NM_001358, ENS | Coding | TRUE |
| collagen, type XXV, alpha 1                          | NM_001256074,  | Coding | TRUE |
| collagen, type XXV, alpha 1                          | NM_001256074,  | Coding | TRUE |
| collagen, type XXV, alpha 1                          | NM_001256074,  | Coding | TRUE |
| collagen, type XXV, alpha 1                          | NM_001256074,  | Coding | TRUE |
| collagen, type XXV, alpha 1                          | NM_001256074,  | Coding | TRUE |
| met proto-oncogene (hepatocyte growth factor recepto | NM_000245, NM  | Coding | TRUE |
| met proto-oncogene (hepatocyte growth factor recepto | NM_000245, NM  | Coding | TRUE |
| met proto-oncogene (hepatocyte growth factor recepto | NM_000245, NM  | Coding | TRUE |
| family with sequence similarity 69, member B         | NM_152421, ENS | Coding | TRUE |
| family with sequence similarity 69, member B         | NM_152421, ENS | Coding | TRUE |
| chromosome 14 open reading frame 93                  | NM_021944, NM  | Coding | TRUE |
| chromosome 14 open reading frame 93                  | NM_021944, NM  | Coding | TRUE |
| chromosome 14 open reading frame 93                  | NM_021944, NM  | Coding | TRUE |
| paternally expressed 3, zinc finger, imprinted 2     | NM_001146184,  | Coding | TRUE |
| paternally expressed 3, zinc finger, imprinted 2     | NM_001146184,  | Coding | TRUE |
| paternally expressed 3, zinc finger, imprinted 2     | NM_001146184,  | Coding | TRUE |





|                                                          |                |        |      |
|----------------------------------------------------------|----------------|--------|------|
| survival of motor neuron 1, telomeric, survival of motor | NM_000344, NM  | Coding | TRUE |
| survival of motor neuron 1, telomeric, survival of motor | NM_000344, NM  | Coding | TRUE |
| survival of motor neuron 1, telomeric, survival of motor | NM_000344, NM  | Coding | TRUE |
| survival of motor neuron 1, telomeric, survival of motor | NM_000344, NM  | Coding | TRUE |
| solute carrier family 12 (potassium/chloride transporter | NM_006598, BCC | Coding | TRUE |
| solute carrier family 12 (potassium/chloride transporter | NM_006598, BCC | Coding | TRUE |
| solute carrier family 12 (potassium/chloride transporter | NM_006598, BCC | Coding | TRUE |
| solute carrier family 12 (potassium/chloride transporter | NM_006598, BCC | Coding | TRUE |
| solute carrier family 12 (potassium/chloride transporter | NM_006598, BCC | Coding | TRUE |
| solute carrier family 12 (potassium/chloride transporter | NM_006598, BCC | Coding | TRUE |
| solute carrier family 12 (potassium/chloride transporter | NM_006598, BCC | Coding | TRUE |
| solute carrier family 12 (potassium/chloride transporter | NM_006598, BCC | Coding | TRUE |
| solute carrier family 12 (potassium/chloride transporter | NM_006598, BCC | Coding | TRUE |
| solute carrier family 12 (potassium/chloride transporter | NM_006598, BCC | Coding | TRUE |
| myosin X                                                 | NM_012334, ENS | Coding | TRUE |
| myosin X                                                 | NM_012334, ENS | Coding | TRUE |
| myosin X                                                 | NM_012334, ENS | Coding | TRUE |
| myosin X                                                 | NM_012334, ENS | Coding | TRUE |
| myosin X                                                 | NM_012334, ENS | Coding | TRUE |
| myosin X                                                 | NM_012334, ENS | Coding | TRUE |
| myosin X                                                 | NM_012334, ENS | Coding | TRUE |
| RNA binding motif protein 33                             | NM_053043, ENS | Coding | TRUE |
| RNA binding motif protein 33                             | NM_053043, ENS | Coding | TRUE |
| RNA binding motif protein 33                             | NM_053043, ENS | Coding | TRUE |
| RNA binding motif protein 33                             | NM_053043, ENS | Coding | TRUE |
| RNA binding motif protein 33                             | NM_053043, ENS | Coding | TRUE |
| RNA binding motif protein 33                             | NM_053043, ENS | Coding | TRUE |
| RNA binding motif protein 33                             | NM_053043, ENS | Coding | TRUE |
| RNA binding motif protein 33                             | NM_053043, ENS | Coding | TRUE |
| RNA binding motif protein 33                             | NM_053043, ENS | Coding | TRUE |
| RNA binding motif protein 33                             | NM_053043, ENS | Coding | TRUE |
| RNA binding motif protein 33                             | NM_053043, ENS | Coding | TRUE |
| RNA binding motif protein 33                             | NM_053043, ENS | Coding | TRUE |
| staufen, RNA binding protein, homolog 2 (Drosophila)     | NM_001164380,  | Coding | TRUE |
| staufen, RNA binding protein, homolog 2 (Drosophila)     | NM_001164380,  | Coding | TRUE |
| COBW domain containing 6                                 | NM_001085457,  | Coding | TRUE |
| COBW domain containing 6                                 | NM_001085457,  | Coding | TRUE |
| COBW domain containing 6                                 | NM_001085457,  | Coding | TRUE |
| COBW domain containing 6                                 | NM_001085457,  | Coding | TRUE |
| COBW domain containing 6                                 | NM_001085457,  | Coding | TRUE |
| COBW domain containing 6                                 | NM_001085457,  | Coding | TRUE |
| COBW domain containing 6                                 | NM_001085457,  | Coding | TRUE |
| COBW domain containing 6                                 | NM_001085457,  | Coding | TRUE |
| COBW domain containing 6                                 | NM_001085457,  | Coding | TRUE |
| isocitrate dehydrogenase 3 (NAD+) gamma                  | NM_174869, NM  | Coding | TRUE |
| isocitrate dehydrogenase 3 (NAD+) gamma                  | NM_174869, NM  | Coding | TRUE |
| exonuclease 3-5 domain containing 2                      | NM_001193360,  | Coding | TRUE |
| exonuclease 3-5 domain containing 2                      | NM_001193360,  | Coding | TRUE |
| ERO1-like (S. cerevisiae)                                | NM_014584, ENS | Coding | TRUE |
| ERO1-like (S. cerevisiae)                                | NM_014584, ENS | Coding | TRUE |
| ERO1-like (S. cerevisiae)                                | NM_014584, ENS | Coding | TRUE |
| ERO1-like (S. cerevisiae)                                | NM_014584, ENS | Coding | TRUE |
| secretogranin V (7B2 protein)                            | NM_001144757,  | Coding | TRUE |
| secretogranin V (7B2 protein)                            | NM_001144757,  | Coding | TRUE |
| secretogranin V (7B2 protein)                            | NM_001144757,  | Coding | TRUE |
| secretogranin V (7B2 protein)                            | NM_001144757,  | Coding | TRUE |
| fructosamine 3 kinase                                    | NM_022158, ENS | Coding | TRUE |
| fructosamine 3 kinase                                    | NM_022158, ENS | Coding | TRUE |
| fructosamine 3 kinase                                    | NM_022158, ENS | Coding | TRUE |
| fructosamine 3 kinase                                    | NM_022158, ENS | Coding | TRUE |





|                                                      |                |        |      |
|------------------------------------------------------|----------------|--------|------|
| deoxyribonuclease I                                  | NM_005223, ENS | Coding | TRUE |
| scaffold attachment factor B2                        | NM_014649, ENS | Coding | TRUE |
| scaffold attachment factor B2                        | NM_014649, ENS | Coding | TRUE |
| scaffold attachment factor B2                        | NM_014649, ENS | Coding | TRUE |
| scaffold attachment factor B2                        | NM_014649, ENS | Coding | TRUE |
| major histocompatibility complex, class I, F         | NM_001098478,  | Coding | TRUE |
| major histocompatibility complex, class I, F         | NM_001098478,  | Coding | TRUE |
| major histocompatibility complex, class I, F         | NM_001098478,  | Coding | TRUE |
| major histocompatibility complex, class I, F         | NM_001098478,  | Coding | TRUE |
| major histocompatibility complex, class I, F         | NM_001098478,  | Coding | TRUE |
| major histocompatibility complex, class I, F         | NM_001098478,  | Coding | TRUE |
| major histocompatibility complex, class I, F         | NM_001098478,  | Coding | TRUE |
| major histocompatibility complex, class I, F         | NM_001098478,  | Coding | TRUE |
| major histocompatibility complex, class I, F         | NM_001098478,  | Coding | TRUE |
| major histocompatibility complex, class I, F         | NM_001098478,  | Coding | TRUE |
| major histocompatibility complex, class I, F         | NM_001098478,  | Coding | TRUE |
| major histocompatibility complex, class I, F         | NM_001098478,  | Coding | TRUE |
| major histocompatibility complex, class I, F         | NM_001098478,  | Coding | TRUE |
| loricrin                                             | NM_000427, ENS | Coding | TRUE |
| loricrin                                             | NM_000427, ENS | Coding | TRUE |
| loricrin                                             | NM_000427, ENS | Coding | TRUE |
| Ral GEF with PH domain and SH3 binding motif 2       | NM_152663, ENS | Coding | TRUE |
| Ral GEF with PH domain and SH3 binding motif 2       | NM_152663, ENS | Coding | TRUE |
| laminin, beta 3, microRNA 4260                       | NM_000228, NM, | Coding | TRUE |
| laminin, beta 3, microRNA 4260                       | NM_000228, NM, | Coding | TRUE |
| laminin, beta 3, microRNA 4260                       | NM_000228, NM, | Coding | TRUE |
| laminin, beta 3, microRNA 4260                       | NM_000228, NM, | Coding | TRUE |
| laminin, beta 3, microRNA 4260                       | NM_000228, NM, | Coding | TRUE |
| laminin, beta 3, microRNA 4260                       | NM_000228, NM, | Coding | TRUE |
| laminin, beta 3, microRNA 4260                       | NM_000228, NM, | Coding | TRUE |
| laminin, beta 3, microRNA 4260                       | NM_000228, NM, | Coding | TRUE |
| laminin, beta 3, microRNA 4260                       | NM_000228, NM, | Coding | TRUE |
| laminin, beta 3, microRNA 4260                       | NM_000228, NM, | Coding | TRUE |
| laminin, beta 3, microRNA 4260                       | NM_000228, NM, | Coding | TRUE |
| laminin, beta 3, microRNA 4260                       | NM_000228, NM, | Coding | TRUE |
| laminin, beta 3, microRNA 4260                       | NM_000228, NM, | Coding | TRUE |
| laminin, beta 3, microRNA 4260                       | NM_000228, NM, | Coding | TRUE |
| laminin, beta 3, microRNA 4260                       | NM_000228, NM, | Coding | TRUE |
| laminin, beta 3, microRNA 4260                       | NM_000228, NM, | Coding | TRUE |
| laminin, beta 3, microRNA 4260                       | NM_000228, NM, | Coding | TRUE |
| laminin, beta 3, microRNA 4260                       | NM_000228, NM, | Coding | TRUE |
| budding uninhibited by benzimidazoles 1 homolog (yea | NM_004336, ENS | Coding | TRUE |
| budding uninhibited by benzimidazoles 1 homolog (yea | NM_004336, ENS | Coding | TRUE |
| budding uninhibited by benzimidazoles 1 homolog (yea | NM_004336, ENS | Coding | TRUE |
| budding uninhibited by benzimidazoles 1 homolog (yea | NM_004336, ENS | Coding | TRUE |
| budding uninhibited by benzimidazoles 1 homolog (yea | NM_004336, ENS | Coding | TRUE |
| budding uninhibited by benzimidazoles 1 homolog (yea | NM_004336, ENS | Coding | TRUE |
| budding uninhibited by benzimidazoles 1 homolog (yea | NM_004336, ENS | Coding | TRUE |
| budding uninhibited by benzimidazoles 1 homolog (yea | NM_004336, ENS | Coding | TRUE |
| leucine rich repeat neuronal 1                       | NM_020873, ENS | Coding | TRUE |
| leucine rich repeat neuronal 1                       | NM_020873, ENS | Coding | TRUE |
| leucine rich repeat neuronal 1                       | NM_020873, ENS | Coding | TRUE |
| glucuronidase, beta                                  | NM_000181, ENS | Coding | TRUE |
| glucuronidase, beta                                  | NM_000181, ENS | Coding | TRUE |
| glucuronidase, beta                                  | NM_000181, ENS | Coding | TRUE |
| glucuronidase, beta                                  | NM_000181, ENS | Coding | TRUE |
| glucuronidase, beta                                  | NM_000181, ENS | Coding | TRUE |
| glucuronidase, beta                                  | NM_000181, ENS | Coding | TRUE |
| bromodomain and WD repeat domain containing 3        | NM_153252, ENS | Coding | TRUE |



|                                                       |                |        |      |
|-------------------------------------------------------|----------------|--------|------|
| NLR family, CARD domain containing 5                  | NM_032206, ENS | Coding | TRUE |
| NLR family, CARD domain containing 5                  | NM_032206, ENS | Coding | TRUE |
| NLR family, CARD domain containing 5                  | NM_032206, ENS | Coding | TRUE |
| NLR family, CARD domain containing 5                  | NM_032206, ENS | Coding | TRUE |
| NLR family, CARD domain containing 5                  | NM_032206, ENS | Coding | TRUE |
| NLR family, CARD domain containing 5                  | NM_032206, ENS | Coding | TRUE |
| NLR family, CARD domain containing 5                  | NM_032206, ENS | Coding | TRUE |
| matrix metallopeptidase 24 (membrane-inserted)        | NM_006690, ENS | Coding | TRUE |
| matrix metallopeptidase 24 (membrane-inserted)        | NM_006690, ENS | Coding | TRUE |
| matrix metallopeptidase 24 (membrane-inserted)        | NM_006690, ENS | Coding | TRUE |
| matrix metallopeptidase 24 (membrane-inserted)        | NM_006690, ENS | Coding | TRUE |
| matrix metallopeptidase 24 (membrane-inserted)        | NM_006690, ENS | Coding | TRUE |
| matrix metallopeptidase 24 (membrane-inserted)        | NM_006690, ENS | Coding | TRUE |
|                                                       |                | Coding | TRUE |
|                                                       |                | Coding | TRUE |
| hydroxysteroid (11-beta) dehydrogenase 1              | NM_001206741,  | Coding | TRUE |
| hydroxysteroid (11-beta) dehydrogenase 1              | NM_001206741,  | Coding | TRUE |
| hydroxysteroid (11-beta) dehydrogenase 1              | NM_001206741,  | Coding | TRUE |
| hydroxysteroid (11-beta) dehydrogenase 1              | NM_001206741,  | Coding | TRUE |
| fucosidase, alpha-L- 1, tissue                        | NM_000147, ENS | Coding | TRUE |
| fucosidase, alpha-L- 1, tissue                        | NM_000147, ENS | Coding | TRUE |
| fucosidase, alpha-L- 1, tissue                        | NM_000147, ENS | Coding | TRUE |
| fucosidase, alpha-L- 1, tissue                        | NM_000147, ENS | Coding | TRUE |
| fucosidase, alpha-L- 1, tissue                        | NM_000147, ENS | Coding | TRUE |
| fucosidase, alpha-L- 1, tissue                        | NM_000147, ENS | Coding | TRUE |
| fucosidase, alpha-L- 1, tissue                        | NM_000147, ENS | Coding | TRUE |
| collagen, type XI, alpha 1                            | NM_001190709,  | Coding | TRUE |
| collagen, type XI, alpha 1                            | NM_001190709,  | Coding | TRUE |
| collagen, type XI, alpha 1                            | NM_001190709,  | Coding | TRUE |
| collagen, type XI, alpha 1                            | NM_001190709,  | Coding | TRUE |
| collagen, type XI, alpha 1                            | NM_001190709,  | Coding | TRUE |
| collagen, type XI, alpha 1                            | NM_001190709,  | Coding | TRUE |
| collagen, type XI, alpha 1                            | NM_001190709,  | Coding | TRUE |
| collagen, type XI, alpha 1                            | NM_001190709,  | Coding | TRUE |
| collagen, type XI, alpha 1                            | NM_001190709,  | Coding | TRUE |
| collagen, type XI, alpha 1                            | NM_001190709,  | Coding | TRUE |
| collagen, type XI, alpha 1                            | NM_001190709,  | Coding | TRUE |
| collagen, type XI, alpha 1                            | NM_001190709,  | Coding | TRUE |
| collagen, type XI, alpha 1                            | NM_001190709,  | Coding | TRUE |
| collagen, type XI, alpha 1                            | NM_001190709,  | Coding | TRUE |
| collagen, type XI, alpha 1                            | NM_001190709,  | Coding | TRUE |
| collagen, type XI, alpha 1                            | NM_001190709,  | Coding | TRUE |
| collagen, type XI, alpha 1                            | NM_001190709,  | Coding | TRUE |
| collagen, type XI, alpha 1                            | NM_001190709,  | Coding | TRUE |
| collagen, type XI, alpha 1                            | NM_001190709,  | Coding | TRUE |
| collagen, type XI, alpha 1                            | NM_001190709,  | Coding | TRUE |
| collagen, type XI, alpha 1                            | NM_001190709,  | Coding | TRUE |
| collagen, type XI, alpha 1                            | NM_001190709,  | Coding | TRUE |
| collagen, type XI, alpha 1                            | NM_001190709,  | Coding | TRUE |
| collagen, type XI, alpha 1                            | NM_001190709,  | Coding | TRUE |
| ADAM metallopeptidase domain 23                       | NM_003812, ENS | Coding | TRUE |
| ADAM metallopeptidase domain 23                       | NM_003812, ENS | Coding | TRUE |
| ADAM metallopeptidase domain 23                       | NM_003812, ENS | Coding | TRUE |
| ADAM metallopeptidase domain 23                       | NM_003812, ENS | Coding | TRUE |
| ADAM metallopeptidase domain 23                       | NM_003812, ENS | Coding | TRUE |
| inhibitor of Bruton agammaglobulinemia tyrosine kinas | NM_015525, BC1 | Coding | TRUE |
| inhibitor of Bruton agammaglobulinemia tyrosine kinas | NM_015525, BC1 | Coding | TRUE |
| inhibitor of Bruton agammaglobulinemia tyrosine kinas | NM_015525, BC1 | Coding | TRUE |
| inhibitor of Bruton agammaglobulinemia tyrosine kinas | NM_015525, BC1 | Coding | TRUE |







|                                                             |                |        |      |
|-------------------------------------------------------------|----------------|--------|------|
| family with sequence similarity 115, member C               | NM_001130026,  | Coding | TRUE |
| family with sequence similarity 115, member C               | NM_001130026,  | Coding | TRUE |
| family with sequence similarity 115, member C               | NM_001130026,  | Coding | TRUE |
| family with sequence similarity 115, member C               | NM_001130026,  | Coding | TRUE |
| family with sequence similarity 115, member C               | NM_001130026,  | Coding | TRUE |
| family with sequence similarity 115, member C               | NM_001130026,  | Coding | TRUE |
| family with sequence similarity 115, member C               | NM_001130026,  | Coding | TRUE |
| family with sequence similarity 115, member C               | NM_001130026,  | Coding | TRUE |
| family with sequence similarity 115, member C               | NM_001130026,  | Coding | TRUE |
| family with sequence similarity 115, member C               | NM_001130026,  | Coding | TRUE |
| family with sequence similarity 115, member C               | NM_001130026,  | Coding | TRUE |
| family with sequence similarity 115, member C               | NM_001130026,  | Coding | TRUE |
| family with sequence similarity 115, member C               | NM_001130026,  | Coding | TRUE |
| family with sequence similarity 115, member C               | NM_001130026,  | Coding | TRUE |
| family with sequence similarity 115, member C               | NM_001130026,  | Coding | TRUE |
| family with sequence similarity 115, member C               | NM_001130026,  | Coding | TRUE |
| family with sequence similarity 115, member C               | NM_001130026,  | Coding | TRUE |
| family with sequence similarity 115, member C               | NM_001130026,  | Coding | TRUE |
| family with sequence similarity 115, member C               | NM_001130026,  | Coding | TRUE |
| limb region 1 homolog (mouse)                               | NM_022458, ENS | Coding | TRUE |
| limb region 1 homolog (mouse)                               | NM_022458, ENS | Coding | TRUE |
| limb region 1 homolog (mouse)                               | NM_022458, ENS | Coding | TRUE |
| limb region 1 homolog (mouse)                               | NM_022458, ENS | Coding | TRUE |
| limb region 1 homolog (mouse)                               | NM_022458, ENS | Coding | TRUE |
| cytochrome P450, family 51, subfamily A, polypeptide        | NM_000786, NM  | Coding | TRUE |
| cytochrome P450, family 51, subfamily A, polypeptide        | NM_000786, NM  | Coding | TRUE |
| mitogen-activated protein kinase associated protein 1       | NM_001006617,  | Coding | TRUE |
| mitogen-activated protein kinase associated protein 1       | NM_001006617,  | Coding | TRUE |
| mitogen-activated protein kinase associated protein 1       | NM_001006617,  | Coding | TRUE |
| mitogen-activated protein kinase associated protein 1       | NM_001006617,  | Coding | TRUE |
| mitogen-activated protein kinase associated protein 1       | NM_001006617,  | Coding | TRUE |
| mitogen-activated protein kinase associated protein 1       | NM_001006617,  | Coding | TRUE |
| mitogen-activated protein kinase associated protein 1       | NM_001006617,  | Coding | TRUE |
| chromosome X open reading frame 38                          | NM_144970, ENS | Coding | TRUE |
| chromosome X open reading frame 38                          | NM_144970, ENS | Coding | TRUE |
| chromosome X open reading frame 38                          | NM_144970, ENS | Coding | TRUE |
| chromosome X open reading frame 38                          | NM_144970, ENS | Coding | TRUE |
| chromosome X open reading frame 38                          | NM_144970, ENS | Coding | TRUE |
| chromosome X open reading frame 38                          | NM_144970, ENS | Coding | TRUE |
| protein phosphatase 6, regulatory subunit 3                 | NM_001164160,  | Coding | TRUE |
| protein phosphatase 6, regulatory subunit 3                 | NM_001164160,  | Coding | TRUE |
| protein phosphatase 6, regulatory subunit 3                 | NM_001164160,  | Coding | TRUE |
| protein phosphatase 6, regulatory subunit 3                 | NM_001164160,  | Coding | TRUE |
| protein phosphatase 6, regulatory subunit 3                 | NM_001164160,  | Coding | TRUE |
| tripartite motif containing 34, tripartite motif-containing | NM_001003827,  | Coding | TRUE |
| tripartite motif containing 34, tripartite motif-containing | NM_001003827,  | Coding | TRUE |
| cell death-inducing DFFA-like effector b                    | NM_014430, ENS | Coding | TRUE |
| cell death-inducing DFFA-like effector b                    | NM_014430, ENS | Coding | TRUE |
| cell death-inducing DFFA-like effector b                    | NM_014430, ENS | Coding | TRUE |
| cell death-inducing DFFA-like effector b                    | NM_014430, ENS | Coding | TRUE |
| cell death-inducing DFFA-like effector b                    | NM_014430, ENS | Coding | TRUE |
| chromosome 15 open reading frame 41                         | NM_001130010,  | Coding | TRUE |
| chromosome 15 open reading frame 41                         | NM_001130010,  | Coding | TRUE |
| chromosome 15 open reading frame 41                         | NM_001130010,  | Coding | TRUE |
| chromosome 15 open reading frame 41                         | NM_001130010,  | Coding | TRUE |
| gem (nuclear organelle) associated protein 7                | NM_024707, NM  | Coding | TRUE |
| gem (nuclear organelle) associated protein 7                | NM_024707, NM  | Coding | TRUE |
|                                                             |                | Coding | TRUE |
|                                                             |                | Coding | TRUE |
|                                                             |                | Coding | TRUE |



|                                                          |                |        |      |
|----------------------------------------------------------|----------------|--------|------|
| cadherin, EGF LAG seven-pass G-type receptor 2 (fla      | NM_001408, ENS | Coding | TRUE |
| cadherin, EGF LAG seven-pass G-type receptor 2 (fla      | NM_001408, ENS | Coding | TRUE |
| cadherin, EGF LAG seven-pass G-type receptor 2 (fla      | NM_001408, ENS | Coding | TRUE |
| cadherin, EGF LAG seven-pass G-type receptor 2 (fla      | NM_001408, ENS | Coding | TRUE |
| cadherin, EGF LAG seven-pass G-type receptor 2 (fla      | NM_001408, ENS | Coding | TRUE |
| cadherin, EGF LAG seven-pass G-type receptor 2 (fla      | NM_001408, ENS | Coding | TRUE |
| regulatory factor X, 5 (influences HLA class II expressi | NM_000449, NM  | Coding | TRUE |
| regulatory factor X, 5 (influences HLA class II expressi | NM_000449, NM  | Coding | TRUE |
| transmembrane and coiled-coil domains 1                  | NM_001256164,  | Coding | TRUE |
| transmembrane and coiled-coil domains 1                  | NM_001256164,  | Coding | TRUE |
| transmembrane and coiled-coil domains 1                  | NM_001256164,  | Coding | TRUE |
| transmembrane and coiled-coil domains 1                  | NM_001256164,  | Coding | TRUE |
| transmembrane and coiled-coil domains 1                  | NM_001256164,  | Coding | TRUE |
| Rho family GTPase 3                                      | NM_001254738,  | Coding | TRUE |
| Rho family GTPase 3                                      | NM_001254738,  | Coding | TRUE |
| Rho family GTPase 3                                      | NM_001254738,  | Coding | TRUE |
| Rho family GTPase 3                                      | NM_001254738,  | Coding | TRUE |
| Rho family GTPase 3                                      | NM_001254738,  | Coding | TRUE |
| Rho family GTPase 3                                      | NM_001254738,  | Coding | TRUE |
| CD200 molecule                                           | NM_001004196,  | Coding | TRUE |
| CD200 molecule                                           | NM_001004196,  | Coding | TRUE |
| CD200 molecule                                           | NM_001004196,  | Coding | TRUE |
| CD200 molecule                                           | NM_001004196,  | Coding | TRUE |
| CD200 molecule                                           | NM_001004196,  | Coding | TRUE |
| CD200 molecule                                           | NM_001004196,  | Coding | TRUE |
| CD200 molecule                                           | NM_001004196,  | Coding | TRUE |
| CD200 molecule                                           | NM_001004196,  | Coding | TRUE |
| sarcoglycan, beta (43kDa dystrophin-associated glyco     | NM_000232, ENS | Coding | TRUE |
| sarcoglycan, beta (43kDa dystrophin-associated glyco     | NM_000232, ENS | Coding | TRUE |
| sarcoglycan, beta (43kDa dystrophin-associated glyco     | NM_000232, ENS | Coding | TRUE |
| sarcoglycan, beta (43kDa dystrophin-associated glyco     | NM_000232, ENS | Coding | TRUE |
| sarcoglycan, beta (43kDa dystrophin-associated glyco     | NM_000232, ENS | Coding | TRUE |
| sarcoglycan, beta (43kDa dystrophin-associated glyco     | NM_000232, ENS | Coding | TRUE |
| sarcoglycan, beta (43kDa dystrophin-associated glyco     | NM_000232, ENS | Coding | TRUE |
| hexosaminidase B (beta polypeptide)                      | NM_000521, ENS | Coding | TRUE |
| hexosaminidase B (beta polypeptide)                      | NM_000521, ENS | Coding | TRUE |
| hexosaminidase B (beta polypeptide)                      | NM_000521, ENS | Coding | TRUE |
| hexosaminidase B (beta polypeptide)                      | NM_000521, ENS | Coding | TRUE |
| high mobility group AT-hook 1, high mobility group AT-f  | NM_145905, NM  | Coding | TRUE |
| high mobility group AT-hook 1, high mobility group AT-f  | NM_145905, NM  | Coding | TRUE |
| high mobility group AT-hook 1, high mobility group AT-f  | NM_145905, NM  | Coding | TRUE |
| high mobility group AT-hook 1, high mobility group AT-f  | NM_145905, NM  | Coding | TRUE |
| high mobility group AT-hook 1, high mobility group AT-f  | NM_145905, NM  | Coding | TRUE |
| high mobility group AT-hook 1, high mobility group AT-f  | NM_145905, NM  | Coding | TRUE |
| high mobility group AT-hook 1, high mobility group AT-f  | NM_145905, NM  | Coding | TRUE |
| high mobility group AT-hook 1, high mobility group AT-f  | NM_145905, NM  | Coding | TRUE |
| retinitis pigmentosa 9 (autosomal dominant)              | NM_203288, ENS | Coding | TRUE |
| retinitis pigmentosa 9 (autosomal dominant)              | NM_203288, ENS | Coding | TRUE |
| retinitis pigmentosa 9 (autosomal dominant)              | NM_203288, ENS | Coding | TRUE |
| retinitis pigmentosa 9 (autosomal dominant)              | NM_203288, ENS | Coding | TRUE |
| retinitis pigmentosa 9 (autosomal dominant)              | NM_203288, ENS | Coding | TRUE |
| retinitis pigmentosa 9 (autosomal dominant)              | NM_203288, ENS | Coding | TRUE |
|                                                          |                | Coding | TRUE |
|                                                          |                | Coding | TRUE |
| lipocalin 6                                              | NM_198946, ENS | Coding | TRUE |
| lipocalin 6                                              | NM_198946, ENS | Coding | TRUE |
| glutamate receptor, ionotropic, AMPA 3                   | NM_000828, NM  | Coding | TRUE |
| glutamate receptor, ionotropic, AMPA 3                   | NM_000828, NM  | Coding | TRUE |

|                                                             |                |        |      |
|-------------------------------------------------------------|----------------|--------|------|
| glutamate receptor, ionotropic, AMPA 3                      | NM_000828, NM  | Coding | TRUE |
| glutamate receptor, ionotropic, AMPA 3                      | NM_000828, NM  | Coding | TRUE |
| glutamate receptor, ionotropic, AMPA 3                      | NM_000828, NM  | Coding | TRUE |
| glutamate receptor, ionotropic, AMPA 3                      | NM_000828, NM  | Coding | TRUE |
| glutamate receptor, ionotropic, AMPA 3                      | NM_000828, NM  | Coding | TRUE |
| retinitis pigmentosa GTPase regulator                       | NM_000328, NM  | Coding | TRUE |
| retinitis pigmentosa GTPase regulator                       | NM_000328, NM  | Coding | TRUE |
| retinitis pigmentosa GTPase regulator                       | NM_000328, NM  | Coding | TRUE |
| retinitis pigmentosa GTPase regulator                       | NM_000328, NM  | Coding | TRUE |
| retinitis pigmentosa GTPase regulator                       | NM_000328, NM  | Coding | TRUE |
| PRA1 domain family, member 2                                | NM_007213, ENS | Coding | TRUE |
| PRA1 domain family, member 2                                | NM_007213, ENS | Coding | TRUE |
| MAP-kinase activating death domain                          | NM_130470, NM  | Coding | TRUE |
| MAP-kinase activating death domain                          | NM_130470, NM  | Coding | TRUE |
| MAP-kinase activating death domain                          | NM_130470, NM  | Coding | TRUE |
| neurexophilin 4                                             | NM_007224, ENS | Coding | TRUE |
| neurexophilin 4                                             | NM_007224, ENS | Coding | TRUE |
| neurexophilin 4                                             | NM_007224, ENS | Coding | TRUE |
| neurexophilin 4                                             | NM_007224, ENS | Coding | TRUE |
| B-cell translocation gene 1, anti-proliferative             | NM_001731, ENS | Coding | TRUE |
| B-cell translocation gene 1, anti-proliferative             | NM_001731, ENS | Coding | TRUE |
| B-cell translocation gene 1, anti-proliferative             | NM_001731, ENS | Coding | TRUE |
| T cell receptor delta joining 1, T cell receptor delta join | ENST000003904  | Coding | TRUE |
| T cell receptor delta joining 1, T cell receptor delta join | ENST000003904  | Coding | TRUE |
| T cell receptor delta joining 1, T cell receptor delta join | ENST000003904  | Coding | TRUE |
| T cell receptor delta joining 1, T cell receptor delta join | ENST000003904  | Coding | TRUE |
| T cell receptor delta joining 1, T cell receptor delta join | ENST000003904  | Coding | TRUE |
| T cell receptor delta joining 1, T cell receptor delta join | ENST000003904  | Coding | TRUE |
| golgin subfamily A member 2-like, golgin A2 pseudoge        | NR_026811, NR  | Coding | TRUE |
| golgin subfamily A member 2-like, golgin A2 pseudoge        | NR_026811, NR  | Coding | TRUE |
| golgin subfamily A member 2-like, golgin A2 pseudoge        | NR_026811, NR  | Coding | TRUE |
| golgin subfamily A member 2-like, golgin A2 pseudoge        | NR_026811, NR  | Coding | TRUE |
| golgin subfamily A member 2-like, golgin A2 pseudoge        | NR_026811, NR  | Coding | TRUE |
| arrestin, beta 2                                            | NM_004313, NM  | Coding | TRUE |
| arrestin, beta 2                                            | NM_004313, NM  | Coding | TRUE |
| arrestin, beta 2                                            | NM_004313, NM  | Coding | TRUE |
| arrestin, beta 2                                            | NM_004313, NM  | Coding | TRUE |
| arrestin, beta 2                                            | NM_004313, NM  | Coding | TRUE |
| arrestin, beta 2                                            | NM_004313, NM  | Coding | TRUE |
| arrestin, beta 2                                            | NM_004313, NM  | Coding | TRUE |
| arrestin, beta 2                                            | NM_004313, NM  | Coding | TRUE |
| arrestin, beta 2                                            | NM_004313, NM  | Coding | TRUE |
| arrestin, beta 2                                            | NM_004313, NM  | Coding | TRUE |
| arrestin, beta 2                                            | NM_004313, NM  | Coding | TRUE |
| arrestin, beta 2                                            | NM_004313, NM  | Coding | TRUE |
| arrestin, beta 2                                            | NM_004313, NM  | Coding | TRUE |
| proline rich 12                                             | NM_020719, ENS | Coding | TRUE |
| proline rich 12                                             | NM_020719, ENS | Coding | TRUE |
| branched chain keto acid dehydrogenase E1, alpha pc         | NM_000709, NM  | Coding | TRUE |
| branched chain keto acid dehydrogenase E1, alpha pc         | NM_000709, NM  | Coding | TRUE |
| branched chain keto acid dehydrogenase E1, alpha pc         | NM_000709, NM  | Coding | TRUE |
| branched chain keto acid dehydrogenase E1, alpha pc         | NM_000709, NM  | Coding | TRUE |
| sperm associated antigen 4                                  | NM_003116, ENS | Coding | TRUE |
| sperm associated antigen 4                                  | NM_003116, ENS | Coding | TRUE |
| sperm associated antigen 4                                  | NM_003116, ENS | Coding | TRUE |
| sperm associated antigen 4                                  | NM_003116, ENS | Coding | TRUE |
| sperm associated antigen 4                                  | NM_003116, ENS | Coding | TRUE |
| glutathione S-transferase mu 3 (brain)                      | NM_000849, NR  | Coding | TRUE |
| glutathione S-transferase mu 3 (brain)                      | NM_000849, NR  | Coding | TRUE |























|                                                      |                |        |      |
|------------------------------------------------------|----------------|--------|------|
| plakophilin 2                                        | NM_001005242,  | Coding | TRUE |
| plakophilin 2                                        | NM_001005242,  | Coding | TRUE |
| plakophilin 2                                        | NM_001005242,  | Coding | TRUE |
| plakophilin 2                                        | NM_001005242,  | Coding | TRUE |
| coiled-coil domain containing 144A                   | NM_014695, BC1 | Coding | TRUE |
| coiled-coil domain containing 144A                   | NM_014695, BC1 | Coding | TRUE |
| coiled-coil domain containing 144A                   | NM_014695, BC1 | Coding | TRUE |
| adrenergic, beta, receptor kinase 2                  | NM_005160, ENS | Coding | TRUE |
| adrenergic, beta, receptor kinase 2                  | NM_005160, ENS | Coding | TRUE |
| adrenergic, beta, receptor kinase 2                  | NM_005160, ENS | Coding | TRUE |
| adrenergic, beta, receptor kinase 2                  | NM_005160, ENS | Coding | TRUE |
| adrenergic, beta, receptor kinase 2                  | NM_005160, ENS | Coding | TRUE |
| adrenergic, beta, receptor kinase 2                  | NM_005160, ENS | Coding | TRUE |
| adrenergic, beta, receptor kinase 2                  | NM_005160, ENS | Coding | TRUE |
| adrenergic, beta, receptor kinase 2                  | NM_005160, ENS | Coding | TRUE |
| DEAD (Asp-Glu-Ala-Asp) box polypeptide 39B, ATP6V    | NM_004640, NR  | Coding | TRUE |
| DEAD (Asp-Glu-Ala-Asp) box polypeptide 39B, ATP6V    | NM_004640, NR  | Coding | TRUE |
| DEAD (Asp-Glu-Ala-Asp) box polypeptide 39B, ATP6V    | NM_004640, NR  | Coding | TRUE |
| dihydropyrimidine dehydrogenase                      | NM_000110, NM  | Coding | TRUE |
| dihydropyrimidine dehydrogenase                      | NM_000110, NM  | Coding | TRUE |
| NOP14 antisense RNA 1 (non-protein coding)           | NR_015453, ENS | Coding | TRUE |
| NOP14 antisense RNA 1 (non-protein coding)           | NR_015453, ENS | Coding | TRUE |
| IK cytokine, down-regulator of HLA II, microRNA 3655 | NM_006083, NR  | Coding | TRUE |
| IK cytokine, down-regulator of HLA II, microRNA 3655 | NM_006083, NR  | Coding | TRUE |
| IK cytokine, down-regulator of HLA II, microRNA 3655 | NM_006083, NR  | Coding | TRUE |
| PDZ and LIM domain 7 (enigma)                        | NM_005451, NM  | Coding | TRUE |
| PDZ and LIM domain 7 (enigma)                        | NM_005451, NM  | Coding | TRUE |
| PDZ and LIM domain 7 (enigma)                        | NM_005451, NM  | Coding | TRUE |
| PDZ and LIM domain 7 (enigma)                        | NM_005451, NM  | Coding | TRUE |
| PDZ and LIM domain 7 (enigma)                        | NM_005451, NM  | Coding | TRUE |
| islet cell autoantigen 1, 69kDa                      | NM_001136020,  | Coding | TRUE |
| islet cell autoantigen 1, 69kDa                      | NM_001136020,  | Coding | TRUE |
| islet cell autoantigen 1, 69kDa                      | NM_001136020,  | Coding | TRUE |
| islet cell autoantigen 1, 69kDa                      | NM_001136020,  | Coding | TRUE |
| islet cell autoantigen 1, 69kDa                      | NM_001136020,  | Coding | TRUE |
| islet cell autoantigen 1, 69kDa                      | NM_001136020,  | Coding | TRUE |
| islet cell autoantigen 1, 69kDa                      | NM_001136020,  | Coding | TRUE |
| islet cell autoantigen 1, 69kDa                      | NM_001136020,  | Coding | TRUE |
| islet cell autoantigen 1, 69kDa                      | NM_001136020,  | Coding | TRUE |
| islet cell autoantigen 1, 69kDa                      | NM_001136020,  | Coding | TRUE |
| islet cell autoantigen 1, 69kDa                      | NM_001136020,  | Coding | TRUE |
| islet cell autoantigen 1, 69kDa                      | NM_001136020,  | Coding | TRUE |
| islet cell autoantigen 1, 69kDa                      | NM_001136020,  | Coding | TRUE |
| islet cell autoantigen 1, 69kDa                      | NM_001136020,  | Coding | TRUE |
| islet cell autoantigen 1, 69kDa                      | NM_001136020,  | Coding | TRUE |
| islet cell autoantigen 1, 69kDa                      | NM_001136020,  | Coding | TRUE |
| islet cell autoantigen 1, 69kDa                      | NM_001136020,  | Coding | TRUE |
| islet cell autoantigen 1, 69kDa                      | NM_001136020,  | Coding | TRUE |
| islet cell autoantigen 1, 69kDa                      | NM_001136020,  | Coding | TRUE |
| islet cell autoantigen 1, 69kDa                      | NM_001136020,  | Coding | TRUE |
| islet cell autoantigen 1, 69kDa                      | NM_001136020,  | Coding | TRUE |
| islet cell autoantigen 1, 69kDa                      | NM_001136020,  | Coding | TRUE |
| islet cell autoantigen 1, 69kDa                      | NM_001136020,  | Coding | TRUE |
| islet cell autoantigen 1, 69kDa                      | NM_001136020,  | Coding | TRUE |
| islet cell autoantigen 1, 69kDa                      | NM_001136020,  | Coding | TRUE |
| islet cell autoantigen 1, 69kDa                      | NM_001136020,  | Coding | TRUE |
| islet cell autoantigen 1, 69kDa                      | NM_001136020,  | Coding | TRUE |
| islet cell autoantigen 1, 69kDa                      | NM_001136020,  | Coding | TRUE |
| islet cell autoantigen 1, 69kDa                      | NM_001136020,  | Coding | TRUE |
| zinc finger, AN1-type domain 1                       | NM_001170796,  | Coding | TRUE |
| zinc finger, AN1-type domain 1                       | NM_001170796,  | Coding | TRUE |
| zinc finger, AN1-type domain 1                       | NM_001170796,  | Coding | TRUE |
| zinc finger, AN1-type domain 1                       | NM_001170796,  | Coding | TRUE |
| four and a half LIM domains 1                        | NM_001167819,  | Coding | TRUE |
| four and a half LIM domains 1                        | NM_001167819,  | Coding | TRUE |



|                                                       |                       |        |      |
|-------------------------------------------------------|-----------------------|--------|------|
| four and a half LIM domains 1                         | NM_001167819,         | Coding | TRUE |
| four and a half LIM domains 1                         | NM_001167819,         | Coding | TRUE |
| four and a half LIM domains 1                         | NM_001167819,         | Coding | TRUE |
| four and a half LIM domains 1                         | NM_001167819,         | Coding | TRUE |
| four and a half LIM domains 1                         | NM_001167819,         | Coding | TRUE |
| four and a half LIM domains 1                         | NM_001167819,         | Coding | TRUE |
| enolase family member 4                               | NM_001242699,         | Coding | TRUE |
| enolase family member 4                               | NM_001242699,         | Coding | TRUE |
| enolase family member 4                               | NM_001242699,         | Coding | TRUE |
| enolase family member 4                               | NM_001242699,         | Coding | TRUE |
| enolase family member 4                               | NM_001242699,         | Coding | TRUE |
| enolase family member 4                               | NM_001242699,         | Coding | TRUE |
| spindle and kinetochore associated complex subunit 3  | NM_145061, NM_145061, | Coding | TRUE |
| spindle and kinetochore associated complex subunit 3  | NM_145061, NM_145061, | Coding | TRUE |
| spindle and kinetochore associated complex subunit 3  | NM_145061, NM_145061, | Coding | TRUE |
| spindle and kinetochore associated complex subunit 3  | NM_145061, NM_145061, | Coding | TRUE |
| spindle and kinetochore associated complex subunit 3  | NM_145061, NM_145061, | Coding | TRUE |
| spindle and kinetochore associated complex subunit 3  | NM_145061, NM_145061, | Coding | TRUE |
| spindle and kinetochore associated complex subunit 3  | NM_145061, NM_145061, | Coding | TRUE |
| cyclin B2                                             | NM_004701, ENS        | Coding | TRUE |
| cyclin B2                                             | NM_004701, ENS        | Coding | TRUE |
| cyclin B2                                             | NM_004701, ENS        | Coding | TRUE |
| cyclin B2                                             | NM_004701, ENS        | Coding | TRUE |
| cyclin B2                                             | NM_004701, ENS        | Coding | TRUE |
| cyclin B2                                             | NM_004701, ENS        | Coding | TRUE |
| homeobox B5                                           | NM_002147, ENS        | Coding | TRUE |
| homeobox B5                                           | NM_002147, ENS        | Coding | TRUE |
| parvin, beta                                          | NM_001003828,         | Coding | TRUE |
| parvin, beta                                          | NM_001003828,         | Coding | TRUE |
| parvin, beta                                          | NM_001003828,         | Coding | TRUE |
| ER membrane protein complex subunit 1                 | NM_015047, ENS        | Coding | TRUE |
| ER membrane protein complex subunit 1                 | NM_015047, ENS        | Coding | TRUE |
| ER membrane protein complex subunit 1                 | NM_015047, ENS        | Coding | TRUE |
| ER membrane protein complex subunit 1                 | NM_015047, ENS        | Coding | TRUE |
| ER membrane protein complex subunit 1                 | NM_015047, ENS        | Coding | TRUE |
| ER membrane protein complex subunit 1                 | NM_015047, ENS        | Coding | TRUE |
| ER membrane protein complex subunit 1                 | NM_015047, ENS        | Coding | TRUE |
| ER membrane protein complex subunit 1                 | NM_015047, ENS        | Coding | TRUE |
| ER membrane protein complex subunit 1                 | NM_015047, ENS        | Coding | TRUE |
| HEAT repeat containing 1                              | NM_018072, ENS        | Coding | TRUE |
| HEAT repeat containing 1                              | NM_018072, ENS        | Coding | TRUE |
| HEAT repeat containing 1                              | NM_018072, ENS        | Coding | TRUE |
| HEAT repeat containing 1                              | NM_018072, ENS        | Coding | TRUE |
| HEAT repeat containing 1                              | NM_018072, ENS        | Coding | TRUE |
| docking protein 1, 62kDa (downstream of tyrosine kina | NM_001197260,         | Coding | TRUE |
| docking protein 1, 62kDa (downstream of tyrosine kina | NM_001197260,         | Coding | TRUE |
| docking protein 1, 62kDa (downstream of tyrosine kina | NM_001197260,         | Coding | TRUE |
| docking protein 1, 62kDa (downstream of tyrosine kina | NM_001197260,         | Coding | TRUE |
| docking protein 1, 62kDa (downstream of tyrosine kina | NM_001197260,         | Coding | TRUE |
| docking protein 1, 62kDa (downstream of tyrosine kina | NM_001197260,         | Coding | TRUE |
| docking protein 1, 62kDa (downstream of tyrosine kina | NM_001197260,         | Coding | TRUE |
| docking protein 1, 62kDa (downstream of tyrosine kina | NM_001197260,         | Coding | TRUE |
| nuclear receptor subfamily 4, group A, member 2       | NM_006186, ENS        | Coding | TRUE |
| nuclear receptor subfamily 4, group A, member 2       | NM_006186, ENS        | Coding | TRUE |
| nuclear receptor subfamily 4, group A, member 2       | NM_006186, ENS        | Coding | TRUE |
| nuclear receptor subfamily 4, group A, member 2       | NM_006186, ENS        | Coding | TRUE |
| nuclear receptor subfamily 4, group A, member 2       | NM_006186, ENS        | Coding | TRUE |
| nuclear receptor subfamily 4, group A, member 2       | NM_006186, ENS        | Coding | TRUE |
| nuclear receptor subfamily 4, group A, member 2       | NM_006186, ENS        | Coding | TRUE |
| nuclear receptor subfamily 4, group A, member 2       | NM_006186, ENS        | Coding | TRUE |
| nuclear receptor subfamily 4, group A, member 2       | NM_006186, ENS        | Coding | TRUE |
| transmembrane protein 150C                            | NM_001080506,         | Coding | TRUE |

|                                                         |                |        |      |
|---------------------------------------------------------|----------------|--------|------|
| transmembrane protein 150C                              | NM_001080506,  | Coding | TRUE |
| transmembrane protein 150C                              | NM_001080506,  | Coding | TRUE |
| transmembrane protein 150C                              | NM_001080506,  | Coding | TRUE |
| transmembrane protein 150C                              | NM_001080506,  | Coding | TRUE |
| transmembrane protein 150C                              | NM_001080506,  | Coding | TRUE |
| transmembrane protein 150C                              | NM_001080506,  | Coding | TRUE |
| transmembrane protein 150C                              | NM_001080506,  | Coding | TRUE |
| transmembrane protein 150C                              | NM_001080506,  | Coding | TRUE |
| transmembrane protein 150C                              | NM_001080506,  | Coding | TRUE |
| transmembrane protein 150C                              | NM_001080506,  | Coding | TRUE |
| transmembrane protein 150C                              | NM_001080506,  | Coding | TRUE |
| transmembrane protein 150C                              | NM_001080506,  | Coding | TRUE |
| transmembrane protein 150C                              | NM_001080506,  | Coding | TRUE |
| transmembrane protein 150C                              | NM_001080506,  | Coding | TRUE |
| transmembrane protein 150C                              | NM_001080506,  | Coding | TRUE |
| transmembrane protein 150C                              | NM_001080506,  | Coding | TRUE |
| transmembrane protein 150C                              | NM_001080506,  | Coding | TRUE |
| transmembrane protein 150C                              | NM_001080506,  | Coding | TRUE |
| sequestosome 1                                          | NM_001142298,  | Coding | TRUE |
| sequestosome 1                                          | NM_001142298,  | Coding | TRUE |
| sequestosome 1                                          | NM_001142298,  | Coding | TRUE |
| sequestosome 1                                          | NM_001142298,  | Coding | TRUE |
| sequestosome 1                                          | NM_001142298,  | Coding | TRUE |
| sequestosome 1                                          | NM_001142298,  | Coding | TRUE |
| sequestosome 1                                          | NM_001142298,  | Coding | TRUE |
| sequestosome 1                                          | NM_001142298,  | Coding | TRUE |
| sequestosome 1                                          | NM_001142298,  | Coding | TRUE |
| sequestosome 1                                          | NM_001142298,  | Coding | TRUE |
| sequestosome 1                                          | NM_001142298,  | Coding | TRUE |
| sequestosome 1                                          | NM_001142298,  | Coding | TRUE |
| sequestosome 1                                          | NM_001142298,  | Coding | TRUE |
| major histocompatibility complex, class I, B            | NM_005514, ENS | Coding | TRUE |
| major histocompatibility complex, class I, B            | NM_005514, ENS | Coding | TRUE |
| major histocompatibility complex, class I, B            | NM_005514, ENS | Coding | TRUE |
| major histocompatibility complex, class I, B            | NM_005514, ENS | Coding | TRUE |
| major histocompatibility complex, class I, B            | NM_005514, ENS | Coding | TRUE |
| major histocompatibility complex, class I, B            | NM_005514, ENS | Coding | TRUE |
| major histocompatibility complex, class I, B            | NM_005514, ENS | Coding | TRUE |
| fibronectin type III and SPRY domain containing 1-like  | NM_001145313,  | Coding | TRUE |
| fibronectin type III and SPRY domain containing 1-like  | NM_001145313,  | Coding | TRUE |
| fibronectin type III and SPRY domain containing 1-like  | NM_001145313,  | Coding | TRUE |
| fibronectin type III and SPRY domain containing 1-like  | NM_001145313,  | Coding | TRUE |
| fibronectin type III and SPRY domain containing 1-like  | NM_001145313,  | Coding | TRUE |
| fibronectin type III and SPRY domain containing 1-like  | NM_001145313,  | Coding | TRUE |
| ubiquitin associated protein 2, small nucleolar RNA, C  | NM_018449, ENS | Coding | TRUE |
| ubiquitin associated protein 2, small nucleolar RNA, C  | NM_018449, ENS | Coding | TRUE |
| ubiquitin associated protein 2, small nucleolar RNA, C  | NM_018449, ENS | Coding | TRUE |
| ubiquitin associated protein 2, small nucleolar RNA, C  | NM_018449, ENS | Coding | TRUE |
| golgi brefeldin A resistant guanine nucleotide exchange | NM_001199378,  | Coding | TRUE |
| golgi brefeldin A resistant guanine nucleotide exchange | NM_001199378,  | Coding | TRUE |
| WW domain binding protein 1-like                        | NM_001083913,  | Coding | TRUE |
| WW domain binding protein 1-like                        | NM_001083913,  | Coding | TRUE |
| WW domain binding protein 1-like                        | NM_001083913,  | Coding | TRUE |
| WW domain binding protein 1-like                        | NM_001083913,  | Coding | TRUE |
| WW domain binding protein 1-like                        | NM_001083913,  | Coding | TRUE |
| WW domain binding protein 1-like                        | NM_001083913,  | Coding | TRUE |
| WW domain binding protein 1-like                        | NM_001083913,  | Coding | TRUE |
| KIN, antigenic determinant of recA protein homolog (m   | NM_012311, NR_ | Coding | TRUE |
| KIN, antigenic determinant of recA protein homolog (m   | NM_012311, NR_ | Coding | TRUE |
| KIN, antigenic determinant of recA protein homolog (m   | NM_012311, NR_ | Coding | TRUE |
| KIN, antigenic determinant of recA protein homolog (m   | NM_012311, NR_ | Coding | TRUE |
| nucleoporin 160kDa                                      | NM_015231, ENS | Coding | TRUE |
| nucleoporin 160kDa                                      | NM_015231, ENS | Coding | TRUE |

|                                             |                            |        |      |
|---------------------------------------------|----------------------------|--------|------|
| nucleoporin 160kDa                          | NM_015231, ENS             | Coding | TRUE |
| nucleoporin 160kDa                          | NM_015231, ENS             | Coding | TRUE |
| nucleoporin 160kDa                          | NM_015231, ENS             | Coding | TRUE |
| nucleoporin 160kDa                          | NM_015231, ENS             | Coding | TRUE |
| serum amyloid A2, RNA, 5S ribosomal 333     | NM_001127380, NM_001127380 | Coding | TRUE |
| serum amyloid A2, RNA, 5S ribosomal 333     | NM_001127380, NM_001127380 | Coding | TRUE |
| serum amyloid A2, RNA, 5S ribosomal 333     | NM_001127380, NM_001127380 | Coding | TRUE |
| serum amyloid A2, RNA, 5S ribosomal 333     | NM_001127380, NM_001127380 | Coding | TRUE |
| serum amyloid A2, RNA, 5S ribosomal 333     | NM_001127380, NM_001127380 | Coding | TRUE |
| serum amyloid A2, RNA, 5S ribosomal 333     | NM_001127380, NM_001127380 | Coding | TRUE |
| serum amyloid A2, RNA, 5S ribosomal 333     | NM_001127380, NM_001127380 | Coding | TRUE |
| serum amyloid A2, RNA, 5S ribosomal 333     | NM_001127380, NM_001127380 | Coding | TRUE |
| serum amyloid A2, RNA, 5S ribosomal 333     | NM_001127380, NM_001127380 | Coding | TRUE |
| serum amyloid A2, RNA, 5S ribosomal 333     | NM_001127380, NM_001127380 | Coding | TRUE |
| serum amyloid A2, RNA, 5S ribosomal 333     | NM_001127380, NM_001127380 | Coding | TRUE |
| serum amyloid A2, RNA, 5S ribosomal 333     | NM_001127380, NM_001127380 | Coding | TRUE |
| serum amyloid A2, RNA, 5S ribosomal 333     | NM_001127380, NM_001127380 | Coding | TRUE |
| MACRO domain containing 2                   | NM_001033087, NM_001033087 | Coding | TRUE |
| MACRO domain containing 2                   | NM_001033087, NM_001033087 | Coding | TRUE |
| MACRO domain containing 2                   | NM_001033087, NM_001033087 | Coding | TRUE |
| MACRO domain containing 2                   | NM_001033087, NM_001033087 | Coding | TRUE |
| vestigial like 4 (Drosophila)               | NM_014667, NM_014667       | Coding | TRUE |
| vestigial like 4 (Drosophila)               | NM_014667, NM_014667       | Coding | TRUE |
| vestigial like 4 (Drosophila)               | NM_014667, NM_014667       | Coding | TRUE |
| vestigial like 4 (Drosophila)               | NM_014667, NM_014667       | Coding | TRUE |
| vestigial like 4 (Drosophila)               | NM_014667, NM_014667       | Coding | TRUE |
| interleukin 17 receptor D                   | NM_017563, ENS             | Coding | TRUE |
| interleukin 17 receptor D                   | NM_017563, ENS             | Coding | TRUE |
| interleukin 17 receptor D                   | NM_017563, ENS             | Coding | TRUE |
| interleukin 17 receptor D                   | NM_017563, ENS             | Coding | TRUE |
| interleukin 17 receptor D                   | NM_017563, ENS             | Coding | TRUE |
| interleukin 17 receptor D                   | NM_017563, ENS             | Coding | TRUE |
| interleukin 17 receptor D                   | NM_017563, ENS             | Coding | TRUE |
| interleukin 17 receptor D                   | NM_017563, ENS             | Coding | TRUE |
| interleukin 17 receptor D                   | NM_017563, ENS             | Coding | TRUE |
| interleukin 17 receptor D                   | NM_017563, ENS             | Coding | TRUE |
| interleukin 17 receptor D                   | NM_017563, ENS             | Coding | TRUE |
| interleukin 17 receptor D                   | NM_017563, ENS             | Coding | TRUE |
| interleukin 17 receptor D                   | NM_017563, ENS             | Coding | TRUE |
| interleukin 17 receptor D                   | NM_017563, ENS             | Coding | TRUE |
| interleukin 17 receptor D                   | NM_017563, ENS             | Coding | TRUE |
| interleukin 17 receptor D                   | NM_017563, ENS             | Coding | TRUE |
| interleukin 17 receptor D                   | NM_017563, ENS             | Coding | TRUE |
| interleukin 17 receptor D                   | NM_017563, ENS             | Coding | TRUE |
| interleukin 17 receptor D                   | NM_017563, ENS             | Coding | TRUE |
| interleukin 17 receptor D                   | NM_017563, ENS             | Coding | TRUE |
| interleukin 17 receptor D                   | NM_017563, ENS             | Coding | TRUE |
| interleukin 17 receptor D                   | NM_017563, ENS             | Coding | TRUE |
| interleukin 17 receptor D                   | NM_017563, ENS             | Coding | TRUE |
| interleukin 17 receptor D                   | NM_017563, ENS             | Coding | TRUE |
| programmed cell death 10                    | NM_007217, NM_007217       | Coding | TRUE |
| programmed cell death 10                    | NM_007217, NM_007217       | Coding | TRUE |
| programmed cell death 10                    | NM_007217, NM_007217       | Coding | TRUE |
| programmed cell death 10                    | NM_007217, NM_007217       | Coding | TRUE |
| FAT tumor suppressor homolog 1 (Drosophila) | NM_005245, ENS             | Coding | TRUE |
| FAT tumor suppressor homolog 1 (Drosophila) | NM_005245, ENS             | Coding | TRUE |
| FAT tumor suppressor homolog 1 (Drosophila) | NM_005245, ENS             | Coding | TRUE |
| FAT tumor suppressor homolog 1 (Drosophila) | NM_005245, ENS             | Coding | TRUE |
| PHD finger protein 3                        | NM_015153, ENS             | Coding | TRUE |
| PHD finger protein 3                        | NM_015153, ENS             | Coding | TRUE |
| PHD finger protein 3                        | NM_015153, ENS             | Coding | TRUE |
| ring finger protein (C3H2C3 type) 6         | NM_005977, NM_005977       | Coding | TRUE |
| ring finger protein (C3H2C3 type) 6         | NM_005977, NM_005977       | Coding | TRUE |
| glycogen synthase 1 (muscle)                | NM_001161587, NM_001161587 | Coding | TRUE |
| glycogen synthase 1 (muscle)                | NM_001161587, NM_001161587 | Coding | TRUE |
| glycogen synthase 1 (muscle)                | NM_001161587, NM_001161587 | Coding | TRUE |



|                                                      |                |        |      |
|------------------------------------------------------|----------------|--------|------|
| dihydropyrimidinase-like 2                           | NM_001197293,  | Coding | TRUE |
| dihydropyrimidinase-like 2                           | NM_001197293,  | Coding | TRUE |
| dihydropyrimidinase-like 2                           | NM_001197293,  | Coding | TRUE |
| dihydropyrimidinase-like 2                           | NM_001197293,  | Coding | TRUE |
| dihydropyrimidinase-like 2                           | NM_001197293,  | Coding | TRUE |
| dihydropyrimidinase-like 2                           | NM_001197293,  | Coding | TRUE |
| dihydropyrimidinase-like 2                           | NM_001197293,  | Coding | TRUE |
| Ly6/neurotoxin 1                                     | NM_177477, NM  | Coding | TRUE |
| Ly6/neurotoxin 1                                     | NM_177477, NM  | Coding | TRUE |
| Ly6/neurotoxin 1                                     | NM_177477, NM  | Coding | TRUE |
| Ly6/neurotoxin 1                                     | NM_177477, NM  | Coding | TRUE |
| Ly6/neurotoxin 1                                     | NM_177477, NM  | Coding | TRUE |
| Ly6/neurotoxin 1                                     | NM_177477, NM  | Coding | TRUE |
| Ly6/neurotoxin 1                                     | NM_177477, NM  | Coding | TRUE |
| Ly6/neurotoxin 1                                     | NM_177477, NM  | Coding | TRUE |
| protein kinase, X-linked                             | NM_005044, ENS | Coding | TRUE |
| protein kinase, X-linked                             | NM_005044, ENS | Coding | TRUE |
| protein kinase, X-linked                             | NM_005044, ENS | Coding | TRUE |
| protein kinase, X-linked                             | NM_005044, ENS | Coding | TRUE |
| protein kinase, X-linked                             | NM_005044, ENS | Coding | TRUE |
| protein kinase, X-linked                             | NM_005044, ENS | Coding | TRUE |
| centrosomal protein 290kDa                           | NM_025114, ENS | Coding | TRUE |
| centrosomal protein 290kDa                           | NM_025114, ENS | Coding | TRUE |
| centrosomal protein 290kDa                           | NM_025114, ENS | Coding | TRUE |
| centrosomal protein 290kDa                           | NM_025114, ENS | Coding | TRUE |
| centrosomal protein 290kDa                           | NM_025114, ENS | Coding | TRUE |
| centrosomal protein 290kDa                           | NM_025114, ENS | Coding | TRUE |
| centrosomal protein 290kDa                           | NM_025114, ENS | Coding | TRUE |
| protogenin                                           | NM_173814, ENS | Coding | TRUE |
| protogenin                                           | NM_173814, ENS | Coding | TRUE |
| protogenin                                           | NM_173814, ENS | Coding | TRUE |
| tektin 4 pseudogene 2, tektin 4 pseudogene, MAFF int | NR_038327, NR  | Coding | TRUE |
| tektin 4 pseudogene 2, tektin 4 pseudogene, MAFF int | NR_038327, NR  | Coding | TRUE |
| tektin 4 pseudogene 2, tektin 4 pseudogene, MAFF int | NR_038327, NR  | Coding | TRUE |
| tektin 4 pseudogene 2, tektin 4 pseudogene, MAFF int | NR_038327, NR  | Coding | TRUE |
| major histocompatibility complex, class I, B         | NM_005514, BCC | Coding | TRUE |
| major histocompatibility complex, class I, B         | NM_005514, BCC | Coding | TRUE |
| major histocompatibility complex, class I, B         | NM_005514, BCC | Coding | TRUE |
| major histocompatibility complex, class I, B         | NM_005514, BCC | Coding | TRUE |
| major histocompatibility complex, class I, B         | NM_005514, BCC | Coding | TRUE |
| major histocompatibility complex, class I, B         | NM_005514, BCC | Coding | TRUE |
| proteasome (prosome, macropain) subunit, beta type,  | NM_004159, NM  | Coding | TRUE |
| proteasome (prosome, macropain) subunit, beta type,  | NM_004159, NM  | Coding | TRUE |
| proteasome (prosome, macropain) subunit, beta type,  | NM_004159, NM  | Coding | TRUE |
| DEAD (Asp-Glu-Ala-Asp) box polypeptide 39B, small r  | NM_004640, NR  | Coding | TRUE |
| DEAD (Asp-Glu-Ala-Asp) box polypeptide 39B, small r  | NM_004640, NR  | Coding | TRUE |
| DEAD (Asp-Glu-Ala-Asp) box polypeptide 39B, small r  | NM_004640, NR  | Coding | TRUE |
| DEAD (Asp-Glu-Ala-Asp) box polypeptide 39B, small r  | NM_004640, NR  | Coding | TRUE |
| DEAD (Asp-Glu-Ala-Asp) box polypeptide 39B, small r  | NM_004640, NR  | Coding | TRUE |
| WD repeat domain 26                                  | NM_025160, NM  | Coding | TRUE |
| WD repeat domain 26                                  | NM_025160, NM  | Coding | TRUE |
| HEAT repeat containing 8                             | NM_001039464,  | Coding | TRUE |
| HEAT repeat containing 8                             | NM_001039464,  | Coding | TRUE |
| HEAT repeat containing 8                             | NM_001039464,  | Coding | TRUE |
| exportin 1 (CRM1 homolog, yeast)                     | NM_003400, ENS | Coding | TRUE |
| exportin 1 (CRM1 homolog, yeast)                     | NM_003400, ENS | Coding | TRUE |
| exportin 1 (CRM1 homolog, yeast)                     | NM_003400, ENS | Coding | TRUE |
| exportin 1 (CRM1 homolog, yeast)                     | NM_003400, ENS | Coding | TRUE |









|                                                        |                |        |      |
|--------------------------------------------------------|----------------|--------|------|
| RAB GTPase activating protein 1-like                   | NM_001035230,  | Coding | TRUE |
| RAB GTPase activating protein 1-like                   | NM_001035230,  | Coding | TRUE |
| KIAA0494                                               | NM_014774, ENS | Coding | TRUE |
| KIAA0494                                               | NM_014774, ENS | Coding | TRUE |
| PCBP1 antisense RNA 1 (non-protein coding)             | NR_033872, ENS | Coding | TRUE |
| PCBP1 antisense RNA 1 (non-protein coding)             | NR_033872, ENS | Coding | TRUE |
| PCBP1 antisense RNA 1 (non-protein coding)             | NR_033872, ENS | Coding | TRUE |
| PCBP1 antisense RNA 1 (non-protein coding)             | NR_033872, ENS | Coding | TRUE |
| PCBP1 antisense RNA 1 (non-protein coding)             | NR_033872, ENS | Coding | TRUE |
| PCBP1 antisense RNA 1 (non-protein coding)             | NR_033872, ENS | Coding | TRUE |
| PCBP1 antisense RNA 1 (non-protein coding)             | NR_033872, ENS | Coding | TRUE |
| PCBP1 antisense RNA 1 (non-protein coding)             | NR_033872, ENS | Coding | TRUE |
| PCBP1 antisense RNA 1 (non-protein coding)             | NR_033872, ENS | Coding | TRUE |
| PCBP1 antisense RNA 1 (non-protein coding)             | NR_033872, ENS | Coding | TRUE |
| PCBP1 antisense RNA 1 (non-protein coding)             | NR_033872, ENS | Coding | TRUE |
| CCR4-NOT transcription complex, subunit 10             | NM_015442, ENS | Coding | TRUE |
| CCR4-NOT transcription complex, subunit 10             | NM_015442, ENS | Coding | TRUE |
| CCR4-NOT transcription complex, subunit 10             | NM_015442, ENS | Coding | TRUE |
| CCR4-NOT transcription complex, subunit 10             | NM_015442, ENS | Coding | TRUE |
| matrin 3, small nucleolar RNA host gene 4 (non-protein | NM_001194954,  | Coding | TRUE |
| matrin 3, small nucleolar RNA host gene 4 (non-protein | NM_001194954,  | Coding | TRUE |
| matrin 3, small nucleolar RNA host gene 4 (non-protein | NM_001194954,  | Coding | TRUE |
| matrin 3, small nucleolar RNA host gene 4 (non-protein | NM_001194954,  | Coding | TRUE |
| matrin 3, small nucleolar RNA host gene 4 (non-protein | NM_001194954,  | Coding | TRUE |
| matrin 3, small nucleolar RNA host gene 4 (non-protein | NM_001194954,  | Coding | TRUE |
| matrin 3, small nucleolar RNA host gene 4 (non-protein | NM_001194954,  | Coding | TRUE |
| matrin 3, small nucleolar RNA host gene 4 (non-protein | NM_001194954,  | Coding | TRUE |
| serpin peptidase inhibitor, clade B (ovalbumin), membe | NM_030666, ENS | Coding | TRUE |
| serpin peptidase inhibitor, clade B (ovalbumin), membe | NM_030666, ENS | Coding | TRUE |
| serpin peptidase inhibitor, clade B (ovalbumin), membe | NM_030666, ENS | Coding | TRUE |
| DEAD (Asp-Glu-Ala-Asp) box polypeptide 39B, small r    | NM_004640, NR_ | Coding | TRUE |
| DEAD (Asp-Glu-Ala-Asp) box polypeptide 39B, small r    | NM_004640, NR_ | Coding | TRUE |
| DEAD (Asp-Glu-Ala-Asp) box polypeptide 39B, small r    | NM_004640, NR_ | Coding | TRUE |
| DEAD (Asp-Glu-Ala-Asp) box polypeptide 39B, small r    | NM_004640, NR_ | Coding | TRUE |
| DEAD (Asp-Glu-Ala-Asp) box polypeptide 39B, small r    | NM_004640, NR_ | Coding | TRUE |
| DEAD (Asp-Glu-Ala-Asp) box polypeptide 39B, small r    | NM_004640, NR_ | Coding | TRUE |
| DEAD (Asp-Glu-Ala-Asp) box polypeptide 39B, small r    | NM_004640, NR_ | Coding | TRUE |
| DEAD (Asp-Glu-Ala-Asp) box polypeptide 39B, small r    | NM_004640, NR_ | Coding | TRUE |
| plexin A4                                              | NM_020911, NM_ | Coding | TRUE |
| plexin A4                                              | NM_020911, NM_ | Coding | TRUE |
| plexin A4                                              | NM_020911, NM_ | Coding | TRUE |
| plexin A4                                              | NM_020911, NM_ | Coding | TRUE |
| transducin-like enhancer of split 1 (E(sp1) homolog, D | NM_005077, ENS | Coding | TRUE |
| transducin-like enhancer of split 1 (E(sp1) homolog, D | NM_005077, ENS | Coding | TRUE |
| transducin-like enhancer of split 1 (E(sp1) homolog, D | NM_005077, ENS | Coding | TRUE |
| transducin-like enhancer of split 1 (E(sp1) homolog, D | NM_005077, ENS | Coding | TRUE |
| haloacid dehalogenase-like hydrolase domain containi   | NM_012080, NM_ | Coding | TRUE |
| haloacid dehalogenase-like hydrolase domain containi   | NM_012080, NM_ | Coding | TRUE |
| haloacid dehalogenase-like hydrolase domain containi   | NM_012080, NM_ | Coding | TRUE |
| haloacid dehalogenase-like hydrolase domain containi   | NM_012080, NM_ | Coding | TRUE |
| haloacid dehalogenase-like hydrolase domain containi   | NM_012080, NM_ | Coding | TRUE |
| haloacid dehalogenase-like hydrolase domain containi   | NM_012080, NM_ | Coding | TRUE |
| haloacid dehalogenase-like hydrolase domain containi   | NM_012080, NM_ | Coding | TRUE |
| HECT, UBA and WWE domain containing 1, E3 ubiquiti     | NM_031407, ENS | Coding | TRUE |
| HECT, UBA and WWE domain containing 1, E3 ubiquiti     | NM_031407, ENS | Coding | TRUE |
| HECT, UBA and WWE domain containing 1, E3 ubiquiti     | NM_031407, ENS | Coding | TRUE |
| HECT, UBA and WWE domain containing 1, E3 ubiquiti     | NM_031407, ENS | Coding | TRUE |
| HECT, UBA and WWE domain containing 1, E3 ubiquiti     | NM_031407, ENS | Coding | TRUE |
| HECT, UBA and WWE domain containing 1, E3 ubiquiti     | NM_031407, ENS | Coding | TRUE |
| FYVE, RhoGEF and PH domain containing 6                | NM_018351, ENS | Coding | TRUE |



|                                                       |                |        |      |
|-------------------------------------------------------|----------------|--------|------|
| ADAM metallopeptidase with thrombospondin type 1 n    | NM_182920, ENS | Coding | TRUE |
| ADAM metallopeptidase with thrombospondin type 1 n    | NM_182920, ENS | Coding | TRUE |
| ADAM metallopeptidase with thrombospondin type 1 n    | NM_182920, ENS | Coding | TRUE |
| nephronectin                                          | NM_001033047,  | Coding | TRUE |
| nephronectin                                          | NM_001033047,  | Coding | TRUE |
| nephronectin                                          | NM_001033047,  | Coding | TRUE |
| nephronectin                                          | NM_001033047,  | Coding | TRUE |
| nephronectin                                          | NM_001033047,  | Coding | TRUE |
| nephronectin                                          | NM_001033047,  | Coding | TRUE |
| transmembrane protein 161B                            | NM_153354, ENS | Coding | TRUE |
| transmembrane protein 161B                            | NM_153354, ENS | Coding | TRUE |
| transmembrane protein 161B                            | NM_153354, ENS | Coding | TRUE |
| transmembrane protein 161B                            | NM_153354, ENS | Coding | TRUE |
| transmembrane protein 161B                            | NM_153354, ENS | Coding | TRUE |
| CD74 molecule, major histocompatibility complex, clas | NM_001025158,  | Coding | TRUE |
| CD74 molecule, major histocompatibility complex, clas | NM_001025158,  | Coding | TRUE |
| CD74 molecule, major histocompatibility complex, clas | NM_001025158,  | Coding | TRUE |
| CD74 molecule, major histocompatibility complex, clas | NM_001025158,  | Coding | TRUE |
| CD74 molecule, major histocompatibility complex, clas | NM_001025158,  | Coding | TRUE |
| CD74 molecule, major histocompatibility complex, clas | NM_001025158,  | Coding | TRUE |
| CD74 molecule, major histocompatibility complex, clas | NM_001025158,  | Coding | TRUE |
| CD74 molecule, major histocompatibility complex, clas | NM_001025158,  | Coding | TRUE |
| CD74 molecule, major histocompatibility complex, clas | NM_001025158,  | Coding | TRUE |
| CD74 molecule, major histocompatibility complex, clas | NM_001025158,  | Coding | TRUE |
| CD74 molecule, major histocompatibility complex, clas | NM_001025158,  | Coding | TRUE |
| Ras-related GTP binding D                             | NM_021244, ENS | Coding | TRUE |
| Ras-related GTP binding D                             | NM_021244, ENS | Coding | TRUE |
| Ras-related GTP binding D                             | NM_021244, ENS | Coding | TRUE |
| Ras-related GTP binding D                             | NM_021244, ENS | Coding | TRUE |
| cAMP responsive element binding protein 3-like 2      | NM_001253775,  | Coding | TRUE |
| cAMP responsive element binding protein 3-like 2      | NM_001253775,  | Coding | TRUE |
| cAMP responsive element binding protein 3-like 2      | NM_001253775,  | Coding | TRUE |
| cAMP responsive element binding protein 3-like 2      | NM_001253775,  | Coding | TRUE |
| cAMP responsive element binding protein 3-like 2      | NM_001253775,  | Coding | TRUE |
| cAMP responsive element binding protein 3-like 2      | NM_001253775,  | Coding | TRUE |
| transmembrane protein 68                              | NM_152417, BCC | Coding | TRUE |
| transmembrane protein 68                              | NM_152417, BCC | Coding | TRUE |
| transmembrane protein 68                              | NM_152417, BCC | Coding | TRUE |
| transmembrane protein 68                              | NM_152417, BCC | Coding | TRUE |
| transmembrane protein 68                              | NM_152417, BCC | Coding | TRUE |
| transmembrane protein 68                              | NM_152417, BCC | Coding | TRUE |
| nucleoporin 214kDa                                    | NM_005085, BC1 | Coding | TRUE |
| nucleoporin 214kDa                                    | NM_005085, BC1 | Coding | TRUE |
| nucleoporin 214kDa                                    | NM_005085, BC1 | Coding | TRUE |
| nucleoporin 214kDa                                    | NM_005085, BC1 | Coding | TRUE |
| nucleoporin 214kDa                                    | NM_005085, BC1 | Coding | TRUE |
| nucleoporin 214kDa                                    | NM_005085, BC1 | Coding | TRUE |
| nucleoporin 214kDa                                    | NM_005085, BC1 | Coding | TRUE |
| heat shock protein 90kDa beta (Grp94), member 1, mi   | NM_003299, NR_ | Coding | TRUE |
| heat shock protein 90kDa beta (Grp94), member 1, mi   | NM_003299, NR_ | Coding | TRUE |
| heat shock protein 90kDa beta (Grp94), member 1, mi   | NM_003299, NR_ | Coding | TRUE |
| heat shock protein 90kDa beta (Grp94), member 1, mi   | NM_003299, NR_ | Coding | TRUE |
| cyclin-dependent kinase inhibitor 3                   | NM_001130851,  | Coding | TRUE |
| cyclin-dependent kinase inhibitor 3                   | NM_001130851,  | Coding | TRUE |
| cyclin-dependent kinase inhibitor 3                   | NM_001130851,  | Coding | TRUE |
| cyclin-dependent kinase inhibitor 3                   | NM_001130851,  | Coding | TRUE |
| KAT8 regulatory NSL complex subunit 1                 | NM_001193465,  | Coding | TRUE |
| KAT8 regulatory NSL complex subunit 1                 | NM_001193465,  | Coding | TRUE |







|                                                           |                |        |      |
|-----------------------------------------------------------|----------------|--------|------|
| LYR motif containing 1                                    | NM_001128301,  | Coding | TRUE |
| LYR motif containing 1                                    | NM_001128301,  | Coding | TRUE |
| LYR motif containing 1                                    | NM_001128301,  | Coding | TRUE |
| LYR motif containing 1                                    | NM_001128301,  | Coding | TRUE |
| LYR motif containing 1                                    | NM_001128301,  | Coding | TRUE |
| LYR motif containing 1                                    | NM_001128301,  | Coding | TRUE |
| basal cell adhesion molecule (Lutheran blood group)       | NM_001013257,  | Coding | TRUE |
| basal cell adhesion molecule (Lutheran blood group)       | NM_001013257,  | Coding | TRUE |
| basal cell adhesion molecule (Lutheran blood group)       | NM_001013257,  | Coding | TRUE |
| basal cell adhesion molecule (Lutheran blood group)       | NM_001013257,  | Coding | TRUE |
| basal cell adhesion molecule (Lutheran blood group)       | NM_001013257,  | Coding | TRUE |
| basal cell adhesion molecule (Lutheran blood group)       | NM_001013257,  | Coding | TRUE |
| basal cell adhesion molecule (Lutheran blood group)       | NM_001013257,  | Coding | TRUE |
| basal cell adhesion molecule (Lutheran blood group)       | NM_001013257,  | Coding | TRUE |
| nuclear factor of activated T-cells, cytoplasmic, calcine | NM_001136021,  | Coding | TRUE |
| nuclear factor of activated T-cells, cytoplasmic, calcine | NM_001136021,  | Coding | TRUE |
| nuclear factor of activated T-cells, cytoplasmic, calcine | NM_001136021,  | Coding | TRUE |
| nuclear factor of activated T-cells, cytoplasmic, calcine | NM_001136021,  | Coding | TRUE |
| nuclear factor of activated T-cells, cytoplasmic, calcine | NM_001136021,  | Coding | TRUE |
| nuclear factor of activated T-cells, cytoplasmic, calcine | NM_001136021,  | Coding | TRUE |
| nuclear factor of activated T-cells, cytoplasmic, calcine | NM_001136021,  | Coding | TRUE |
| nuclear factor of activated T-cells, cytoplasmic, calcine | NM_001136021,  | Coding | TRUE |
| nuclear factor of activated T-cells, cytoplasmic, calcine | NM_001136021,  | Coding | TRUE |
| nuclear factor of activated T-cells, cytoplasmic, calcine | NM_001136021,  | Coding | TRUE |
| nuclear factor of activated T-cells, cytoplasmic, calcine | NM_001136021,  | Coding | TRUE |
| nuclear factor of activated T-cells, cytoplasmic, calcine | NM_001136021,  | Coding | TRUE |
| TAF15 RNA polymerase II, TATA box binding protein (1      | NM_139215, NM  | Coding | TRUE |
| TAF15 RNA polymerase II, TATA box binding protein (1      | NM_139215, NM  | Coding | TRUE |
| TAF15 RNA polymerase II, TATA box binding protein (1      | NM_139215, NM  | Coding | TRUE |
| Ras association (RalGDS/AF-6) domain family membe         | NM_182663, NM  | Coding | TRUE |
| Ras association (RalGDS/AF-6) domain family membe         | NM_182663, NM  | Coding | TRUE |
| chromosome 1 open reading frame 186, uncharacteriz        | NM_001007544,  | Coding | TRUE |
| chromosome 1 open reading frame 186, uncharacteriz        | NM_001007544,  | Coding | TRUE |
| chromosome 1 open reading frame 186, uncharacteriz        | NM_001007544,  | Coding | TRUE |
| chromosome 1 open reading frame 186, uncharacteriz        | NM_001007544,  | Coding | TRUE |
| chromosome 1 open reading frame 186, uncharacteriz        | NM_001007544,  | Coding | TRUE |
| chromosome 1 open reading frame 186, uncharacteriz        | NM_001007544,  | Coding | TRUE |
| chromosome 1 open reading frame 186, uncharacteriz        | NM_001007544,  | Coding | TRUE |
| protein phosphatase 1, regulatory subunit 7               | NM_002712, BCC | Coding | TRUE |
| protein phosphatase 1, regulatory subunit 7               | NM_002712, BCC | Coding | TRUE |
| protein phosphatase 1, regulatory subunit 7               | NM_002712, BCC | Coding | TRUE |
| origin recognition complex, subunit 2                     | NM_006190, NR  | Coding | TRUE |
| origin recognition complex, subunit 2                     | NM_006190, NR  | Coding | TRUE |
| origin recognition complex, subunit 2                     | NM_006190, NR  | Coding | TRUE |
| origin recognition complex, subunit 2                     | NM_006190, NR  | Coding | TRUE |
| origin recognition complex, subunit 2                     | NM_006190, NR  | Coding | TRUE |
| origin recognition complex, subunit 2                     | NM_006190, NR  | Coding | TRUE |
| origin recognition complex, subunit 2                     | NM_006190, NR  | Coding | TRUE |
| centromere protein A                                      | NM_001042426,  | Coding | TRUE |
| centromere protein A                                      | NM_001042426,  | Coding | TRUE |
| centromere protein A                                      | NM_001042426,  | Coding | TRUE |
| family with sequence similarity 116, member A             | NM_152678, ENS | Coding | TRUE |
| family with sequence similarity 116, member A             | NM_152678, ENS | Coding | TRUE |
| glucan (1,4-alpha-), branching enzyme 1                   | NM_000158, ENS | Coding | TRUE |
| glucan (1,4-alpha-), branching enzyme 1                   | NM_000158, ENS | Coding | TRUE |
| glucan (1,4-alpha-), branching enzyme 1                   | NM_000158, ENS | Coding | TRUE |
| glucan (1,4-alpha-), branching enzyme 1                   | NM_000158, ENS | Coding | TRUE |
| glucan (1,4-alpha-), branching enzyme 1                   | NM_000158, ENS | Coding | TRUE |
| RAN binding protein 3-like                                | NM_001161429,  | Coding | TRUE |
| RAN binding protein 3-like                                | NM_001161429,  | Coding | TRUE |

|                                                       |                |        |      |
|-------------------------------------------------------|----------------|--------|------|
| RAN binding protein 3-like                            | NM_001161429,  | Coding | TRUE |
| RAN binding protein 3-like                            | NM_001161429,  | Coding | TRUE |
| RAN binding protein 3-like                            | NM_001161429,  | Coding | TRUE |
| RAN binding protein 3-like                            | NM_001161429,  | Coding | TRUE |
| RAN binding protein 3-like                            | NM_001161429,  | Coding | TRUE |
| RAN binding protein 3-like                            | NM_001161429,  | Coding | TRUE |
| RAN binding protein 3-like                            | NM_001161429,  | Coding | TRUE |
| RAN binding protein 3-like                            | NM_001161429,  | Coding | TRUE |
| RAN binding protein 3-like                            | NM_001161429,  | Coding | TRUE |
| RAN binding protein 3-like                            | NM_001161429,  | Coding | TRUE |
| family with sequence similarity 115, member C pseudo  | NR_015421, ENS | Coding | TRUE |
| family with sequence similarity 115, member C pseudo  | NR_015421, ENS | Coding | TRUE |
| family with sequence similarity 115, member C pseudo  | NR_015421, ENS | Coding | TRUE |
| family with sequence similarity 115, member C pseudo  | NR_015421, ENS | Coding | TRUE |
| family with sequence similarity 115, member C pseudo  | NR_015421, ENS | Coding | TRUE |
| family with sequence similarity 115, member C pseudo  | NR_015421, ENS | Coding | TRUE |
| family with sequence similarity 115, member C pseudo  | NR_015421, ENS | Coding | TRUE |
| family with sequence similarity 115, member C pseudo  | NR_015421, ENS | Coding | TRUE |
| family with sequence similarity 115, member C pseudo  | NR_015421, ENS | Coding | TRUE |
| family with sequence similarity 115, member C pseudo  | NR_015421, ENS | Coding | TRUE |
| CD72 molecule                                         | NM_001782, ENS | Coding | TRUE |
| CD72 molecule                                         | NM_001782, ENS | Coding | TRUE |
| CD72 molecule                                         | NM_001782, ENS | Coding | TRUE |
| CD72 molecule                                         | NM_001782, ENS | Coding | TRUE |
| CD72 molecule                                         | NM_001782, ENS | Coding | TRUE |
| CD72 molecule                                         | NM_001782, ENS | Coding | TRUE |
| CD72 molecule                                         | NM_001782, ENS | Coding | TRUE |
| CD72 molecule                                         | NM_001782, ENS | Coding | TRUE |
| sushi domain containing 1                             | NM_022486, ENS | Coding | TRUE |
| sushi domain containing 1                             | NM_022486, ENS | Coding | TRUE |
| sushi domain containing 1                             | NM_022486, ENS | Coding | TRUE |
| sushi domain containing 1                             | NM_022486, ENS | Coding | TRUE |
| sushi domain containing 1                             | NM_022486, ENS | Coding | TRUE |
| sushi domain containing 1                             | NM_022486, ENS | Coding | TRUE |
| sushi domain containing 1                             | NM_022486, ENS | Coding | TRUE |
| sushi domain containing 1                             | NM_022486, ENS | Coding | TRUE |
| zinc finger E-box binding homeobox 1                  | NM_001128128,  | Coding | TRUE |
| zinc finger E-box binding homeobox 1                  | NM_001128128,  | Coding | TRUE |
| zinc finger E-box binding homeobox 1                  | NM_001128128,  | Coding | TRUE |
| zinc finger E-box binding homeobox 1                  | NM_001128128,  | Coding | TRUE |
| T-cell leukemia homeobox 1                            | NM_001195517,  | Coding | TRUE |
| T-cell leukemia homeobox 1                            | NM_001195517,  | Coding | TRUE |
| polymerase (RNA) III (DNA directed) polypeptide A, 15 | NM_007055, ENS | Coding | TRUE |
| polymerase (RNA) III (DNA directed) polypeptide A, 15 | NM_007055, ENS | Coding | TRUE |
| polymerase (RNA) III (DNA directed) polypeptide A, 15 | NM_007055, ENS | Coding | TRUE |
| polymerase (RNA) III (DNA directed) polypeptide A, 15 | NM_007055, ENS | Coding | TRUE |
| polymerase (RNA) III (DNA directed) polypeptide A, 15 | NM_007055, ENS | Coding | TRUE |
| polymerase (RNA) III (DNA directed) polypeptide A, 15 | NM_007055, ENS | Coding | TRUE |
| polymerase (RNA) III (DNA directed) polypeptide A, 15 | NM_007055, ENS | Coding | TRUE |
| polymerase (RNA) III (DNA directed) polypeptide A, 15 | NM_007055, ENS | Coding | TRUE |
| polymerase (RNA) III (DNA directed) polypeptide A, 15 | NM_007055, ENS | Coding | TRUE |
| family with sequence similarity 53, member B          | NM_014661, BCC | Coding | TRUE |
| family with sequence similarity 53, member B          | NM_014661, BCC | Coding | TRUE |
| family with sequence similarity 53, member B          | NM_014661, BCC | Coding | TRUE |
| multiple EGF-like-domains 11                          | NM_032445, ENS | Coding | TRUE |
| multiple EGF-like-domains 11                          | NM_032445, ENS | Coding | TRUE |
| multiple EGF-like-domains 11                          | NM_032445, ENS | Coding | TRUE |
| multiple EGF-like-domains 11                          | NM_032445, ENS | Coding | TRUE |
| fatty acid amide hydrolase pseudogene                 | NR_045483, ENS | Coding | TRUE |
| fatty acid amide hydrolase pseudogene                 | NR_045483, ENS | Coding | TRUE |



|                                                                                |                       |        |      |
|--------------------------------------------------------------------------------|-----------------------|--------|------|
| fatty acid amide hydrolase pseudogene                                          | NR_045483, ENS        | Coding | TRUE |
| zinc finger protein 638                                                        | NM_001014972,         | Coding | TRUE |
| zinc finger protein 638                                                        | NM_001014972,         | Coding | TRUE |
| zinc finger protein 638                                                        | NM_001014972,         | Coding | TRUE |
| zinc finger protein 638                                                        | NM_001014972,         | Coding | TRUE |
| zinc finger protein 638                                                        | NM_001014972,         | Coding | TRUE |
| zinc finger protein 638                                                        | NM_001014972,         | Coding | TRUE |
| zinc finger protein 638                                                        | NM_001014972,         | Coding | TRUE |
| zinc finger protein 638                                                        | NM_001014972,         | Coding | TRUE |
| zinc finger protein 638                                                        | NM_001014972,         | Coding | TRUE |
| mannosyl (alpha-1,3-)-glycoprotein beta-1,4-N-acetylglucosaminyl transferase 1 | NM_012214, NM_012214, | Coding | TRUE |
| mannosyl (alpha-1,3-)-glycoprotein beta-1,4-N-acetylglucosaminyl transferase 1 | NM_012214, NM_012214, | Coding | TRUE |
| mannosyl (alpha-1,3-)-glycoprotein beta-1,4-N-acetylglucosaminyl transferase 1 | NM_012214, NM_012214, | Coding | TRUE |
| mannosyl (alpha-1,3-)-glycoprotein beta-1,4-N-acetylglucosaminyl transferase 1 | NM_012214, NM_012214, | Coding | TRUE |
| mannosyl (alpha-1,3-)-glycoprotein beta-1,4-N-acetylglucosaminyl transferase 1 | NM_012214, NM_012214, | Coding | TRUE |
| mannosyl (alpha-1,3-)-glycoprotein beta-1,4-N-acetylglucosaminyl transferase 1 | NM_012214, NM_012214, | Coding | TRUE |
| phosphodiesterase 6B, cGMP-specific, rod, beta                                 | NM_000283, NM_000283, | Coding | TRUE |
| phosphodiesterase 6B, cGMP-specific, rod, beta                                 | NM_000283, NM_000283, | Coding | TRUE |
| RAN binding protein 17                                                         | NM_022897, ENS        | Coding | TRUE |
| RAN binding protein 17                                                         | NM_022897, ENS        | Coding | TRUE |
| RAN binding protein 17                                                         | NM_022897, ENS        | Coding | TRUE |
| RAN binding protein 17                                                         | NM_022897, ENS        | Coding | TRUE |
| RAN binding protein 17                                                         | NM_022897, ENS        | Coding | TRUE |
| RAN binding protein 17                                                         | NM_022897, ENS        | Coding | TRUE |
| RAN binding protein 17                                                         | NM_022897, ENS        | Coding | TRUE |
| RAN binding protein 17                                                         | NM_022897, ENS        | Coding | TRUE |
| RAN binding protein 17                                                         | NM_022897, ENS        | Coding | TRUE |
| RAN binding protein 17                                                         | NM_022897, ENS        | Coding | TRUE |
| RAN binding protein 17                                                         | NM_022897, ENS        | Coding | TRUE |
| coiled-coil domain containing 132                                              | NM_017667, NM_017667, | Coding | TRUE |
| coiled-coil domain containing 132                                              | NM_017667, NM_017667, | Coding | TRUE |
| coiled-coil domain containing 132                                              | NM_017667, NM_017667, | Coding | TRUE |
| coiled-coil domain containing 132                                              | NM_017667, NM_017667, | Coding | TRUE |
| coiled-coil domain containing 132                                              | NM_017667, NM_017667, | Coding | TRUE |
| Fas-activated serine/threonine kinase                                          | NM_006712, NM_006712, | Coding | TRUE |
| Fas-activated serine/threonine kinase                                          | NM_006712, NM_006712, | Coding | TRUE |
| solute carrier family 25 (mitochondrial carrier: glutamate) 1                  | NM_001191060,         | Coding | TRUE |
| solute carrier family 25 (mitochondrial carrier: glutamate) 1                  | NM_001191060,         | Coding | TRUE |
| solute carrier family 25 (mitochondrial carrier: glutamate) 1                  | NM_001191060,         | Coding | TRUE |
| ligase IV, DNA, ATP-dependent                                                  | NM_001098268,         | Coding | TRUE |
| ligase IV, DNA, ATP-dependent                                                  | NM_001098268,         | Coding | TRUE |
| ligase IV, DNA, ATP-dependent                                                  | NM_001098268,         | Coding | TRUE |
| major histocompatibility complex, class I, B                                   | NM_005514, BCC        | Coding | TRUE |
| major histocompatibility complex, class I, B                                   | NM_005514, BCC        | Coding | TRUE |
| major histocompatibility complex, class I, B                                   | NM_005514, BCC        | Coding | TRUE |
| major histocompatibility complex, class I, B                                   | NM_005514, BCC        | Coding | TRUE |
| major histocompatibility complex, class I, B                                   | NM_005514, BCC        | Coding | TRUE |
| major histocompatibility complex, class I, B                                   | NM_005514, BCC        | Coding | TRUE |
| v-rel reticuloendotheliosis viral oncogene homolog (avian)                     | NM_002908, BC1        | Coding | TRUE |
| v-rel reticuloendotheliosis viral oncogene homolog (avian)                     | NM_002908, BC1        | Coding | TRUE |
| v-rel reticuloendotheliosis viral oncogene homolog (avian)                     | NM_002908, BC1        | Coding | TRUE |
| SP100 nuclear antigen                                                          | NM_001080391,         | Coding | TRUE |
| SP100 nuclear antigen                                                          | NM_001080391,         | Coding | TRUE |
| SP100 nuclear antigen                                                          | NM_001080391,         | Coding | TRUE |
| SP100 nuclear antigen                                                          | NM_001080391,         | Coding | TRUE |
| SP100 nuclear antigen                                                          | NM_001080391,         | Coding | TRUE |
| HEAT repeat containing 7B1                                                     | ENST000003897         | Coding | TRUE |
| HEAT repeat containing 7B1                                                     | ENST000003897         | Coding | TRUE |
| HEAT repeat containing 7B1                                                     | ENST000003897         | Coding | TRUE |

|                                                     |                |        |      |
|-----------------------------------------------------|----------------|--------|------|
| zinc finger protein 621                             | NM_001098414,  | Coding | TRUE |
| zinc finger protein 621                             | NM_001098414,  | Coding | TRUE |
| zinc finger protein 621                             | NM_001098414,  | Coding | TRUE |
| neurobeachin-like 2                                 | NM_015175, ENS | Coding | TRUE |
| neurobeachin-like 2                                 | NM_015175, ENS | Coding | TRUE |
| neurobeachin-like 2                                 | NM_015175, ENS | Coding | TRUE |
| neurobeachin-like 2                                 | NM_015175, ENS | Coding | TRUE |
| neurobeachin-like 2                                 | NM_015175, ENS | Coding | TRUE |
| DEAD (Asp-Glu-Ala-Asp) box polypeptide 60           | NM_017631, ENS | Coding | TRUE |
| DEAD (Asp-Glu-Ala-Asp) box polypeptide 60           | NM_017631, ENS | Coding | TRUE |
| DEAD (Asp-Glu-Ala-Asp) box polypeptide 60           | NM_017631, ENS | Coding | TRUE |
| DEAD (Asp-Glu-Ala-Asp) box polypeptide 60           | NM_017631, ENS | Coding | TRUE |
| DEAD (Asp-Glu-Ala-Asp) box polypeptide 60           | NM_017631, ENS | Coding | TRUE |
| DEAD (Asp-Glu-Ala-Asp) box polypeptide 60           | NM_017631, ENS | Coding | TRUE |
| DEAD (Asp-Glu-Ala-Asp) box polypeptide 60           | NM_017631, ENS | Coding | TRUE |
| DEAD (Asp-Glu-Ala-Asp) box polypeptide 60           | NM_017631, ENS | Coding | TRUE |
| DEAD (Asp-Glu-Ala-Asp) box polypeptide 60           | NM_017631, ENS | Coding | TRUE |
| DEAD (Asp-Glu-Ala-Asp) box polypeptide 60           | NM_017631, ENS | Coding | TRUE |
| DEAD (Asp-Glu-Ala-Asp) box polypeptide 60           | NM_017631, ENS | Coding | TRUE |
| DEAD (Asp-Glu-Ala-Asp) box polypeptide 60           | NM_017631, ENS | Coding | TRUE |
| ADAM metalloproteinase with thrombospondin type 1 n | NM_139056, ENS | Coding | TRUE |
| ADAM metalloproteinase with thrombospondin type 1 n | NM_139056, ENS | Coding | TRUE |
| ADAM metalloproteinase with thrombospondin type 1 n | NM_139056, ENS | Coding | TRUE |
| ADAM metalloproteinase with thrombospondin type 1 n | NM_139056, ENS | Coding | TRUE |
| ADAM metalloproteinase with thrombospondin type 1 n | NM_139056, ENS | Coding | TRUE |
| ADAM metalloproteinase with thrombospondin type 1 n | NM_139056, ENS | Coding | TRUE |
| ADAM metalloproteinase with thrombospondin type 1 n | NM_139056, ENS | Coding | TRUE |
| ADAM metalloproteinase with thrombospondin type 1 n | NM_139056, ENS | Coding | TRUE |
| ADAM metalloproteinase with thrombospondin type 1 n | NM_139056, ENS | Coding | TRUE |
| cytoplasmic FMR1 interacting protein 2              | NM_001037332,  | Coding | TRUE |
| cytoplasmic FMR1 interacting protein 2              | NM_001037332,  | Coding | TRUE |
| cytoplasmic FMR1 interacting protein 2              | NM_001037332,  | Coding | TRUE |
| cytoplasmic FMR1 interacting protein 2              | NM_001037332,  | Coding | TRUE |
| cytoplasmic FMR1 interacting protein 2              | NM_001037332,  | Coding | TRUE |
| cytoplasmic FMR1 interacting protein 2              | NM_001037332,  | Coding | TRUE |
| cytoplasmic FMR1 interacting protein 2              | NM_001037332,  | Coding | TRUE |
| cytoplasmic FMR1 interacting protein 2              | NM_001037332,  | Coding | TRUE |
| cytoplasmic FMR1 interacting protein 2              | NM_001037332,  | Coding | TRUE |
| cytoplasmic FMR1 interacting protein 2              | NM_001037332,  | Coding | TRUE |
| cytoplasmic FMR1 interacting protein 2              | NM_001037332,  | Coding | TRUE |
| cytoplasmic FMR1 interacting protein 2              | NM_001037332,  | Coding | TRUE |
| cytoplasmic FMR1 interacting protein 2              | NM_001037332,  | Coding | TRUE |
| cytoplasmic FMR1 interacting protein 2              | NM_001037332,  | Coding | TRUE |
| cytoplasmic FMR1 interacting protein 2              | NM_001037332,  | Coding | TRUE |
| UFM1-specific ligase 1                              | NM_015323, ENS | Coding | TRUE |
| UFM1-specific ligase 1                              | NM_015323, ENS | Coding | TRUE |
| glutamyl-tRNA synthase (glutamine-hydrolyzing)-like | NM_018292, ENS | Coding | TRUE |
| glutamyl-tRNA synthase (glutamine-hydrolyzing)-like | NM_018292, ENS | Coding | TRUE |
| glutamyl-tRNA synthase (glutamine-hydrolyzing)-like | NM_018292, ENS | Coding | TRUE |
| heterogeneous nuclear ribonucleoprotein H3 (2H9)    | NM_012207, NM  | Coding | TRUE |
| heterogeneous nuclear ribonucleoprotein H3 (2H9)    | NM_012207, NM  | Coding | TRUE |
| heterogeneous nuclear ribonucleoprotein H3 (2H9)    | NM_012207, NM  | Coding | TRUE |
| nucleotide binding protein-like                     | NM_001201573,  | Coding | TRUE |
| nucleotide binding protein-like                     | NM_001201573,  | Coding | TRUE |
| nucleotide binding protein-like                     | NM_001201573,  | Coding | TRUE |
| v-maf musculoaponeurotic fibrosarcoma oncogene hom  | NM_001031804,  | Coding | TRUE |
| v-maf musculoaponeurotic fibrosarcoma oncogene hom  | NM_001031804,  | Coding | TRUE |
| v-maf musculoaponeurotic fibrosarcoma oncogene hom  | NM_001031804,  | Coding | TRUE |
| HLA complex group 18 (non-protein coding)           | NR_024052, NR  | Coding | TRUE |
| HLA complex group 18 (non-protein coding)           | NR_024052, NR  | Coding | TRUE |
| DnaJ (Hsp40) homolog, subfamily B, member 2         | NM_001039550,  | Coding | TRUE |

|                                                           |                |        |      |
|-----------------------------------------------------------|----------------|--------|------|
| DnaJ (Hsp40) homolog, subfamily B, member 2               | NM_001039550,  | Coding | TRUE |
| DnaJ (Hsp40) homolog, subfamily B, member 2               | NM_001039550,  | Coding | TRUE |
| DnaJ (Hsp40) homolog, subfamily B, member 2               | NM_001039550,  | Coding | TRUE |
| DnaJ (Hsp40) homolog, subfamily B, member 2               | NM_001039550,  | Coding | TRUE |
| HemK methyltransferase family member 1                    | NM_016173, ENS | Coding | TRUE |
| HemK methyltransferase family member 1                    | NM_016173, ENS | Coding | TRUE |
| HemK methyltransferase family member 1                    | NM_016173, ENS | Coding | TRUE |
| HemK methyltransferase family member 1                    | NM_016173, ENS | Coding | TRUE |
| HemK methyltransferase family member 1                    | NM_016173, ENS | Coding | TRUE |
| HemK methyltransferase family member 1                    | NM_016173, ENS | Coding | TRUE |
| calcium channel, voltage-dependent, alpha 2/delta subunit | NM_018398, ENS | Coding | TRUE |
| calcium channel, voltage-dependent, alpha 2/delta subunit | NM_018398, ENS | Coding | TRUE |
| calcium channel, voltage-dependent, alpha 2/delta subunit | NM_018398, ENS | Coding | TRUE |
| calcium channel, voltage-dependent, alpha 2/delta subunit | NM_018398, ENS | Coding | TRUE |
| calcium channel, voltage-dependent, alpha 2/delta subunit | NM_018398, ENS | Coding | TRUE |
| calcium channel, voltage-dependent, alpha 2/delta subunit | NM_018398, ENS | Coding | TRUE |
| calcium channel, voltage-dependent, alpha 2/delta subunit | NM_018398, ENS | Coding | TRUE |
| calcium channel, voltage-dependent, alpha 2/delta subunit | NM_018398, ENS | Coding | TRUE |
| calcium channel, voltage-dependent, alpha 2/delta subunit | NM_018398, ENS | Coding | TRUE |
| calcium channel, voltage-dependent, alpha 2/delta subunit | NM_018398, ENS | Coding | TRUE |
| calcium channel, voltage-dependent, alpha 2/delta subunit | NM_018398, ENS | Coding | TRUE |
| calcium channel, voltage-dependent, alpha 2/delta subunit | NM_018398, ENS | Coding | TRUE |
| calcium channel, voltage-dependent, alpha 2/delta subunit | NM_018398, ENS | Coding | TRUE |
| calcium channel, voltage-dependent, alpha 2/delta subunit | NM_018398, ENS | Coding | TRUE |
| calcium channel, voltage-dependent, alpha 2/delta subunit | NM_018398, ENS | Coding | TRUE |
| calcium channel, voltage-dependent, alpha 2/delta subunit | NM_018398, ENS | Coding | TRUE |
| calcium channel, voltage-dependent, alpha 2/delta subunit | NM_018398, ENS | Coding | TRUE |
| calcium channel, voltage-dependent, alpha 2/delta subunit | NM_018398, ENS | Coding | TRUE |
| calcium channel, voltage-dependent, alpha 2/delta subunit | NM_018398, ENS | Coding | TRUE |
| calcium channel, voltage-dependent, alpha 2/delta subunit | NM_018398, ENS | Coding | TRUE |
| calcium channel, voltage-dependent, alpha 2/delta subunit | NM_018398, ENS | Coding | TRUE |
| calcium channel, voltage-dependent, alpha 2/delta subunit | NM_018398, ENS | Coding | TRUE |
| calcium channel, voltage-dependent, alpha 2/delta subunit | NM_018398, ENS | Coding | TRUE |
| calcium channel, voltage-dependent, alpha 2/delta subunit | NM_018398, ENS | Coding | TRUE |
| thyroid hormone receptor, beta                            | NM_000461, NM  | Coding | TRUE |
| thyroid hormone receptor, beta                            | NM_000461, NM  | Coding | TRUE |
| thyroid hormone receptor, beta                            | NM_000461, NM  | Coding | TRUE |
| thyroid hormone receptor, beta                            | NM_000461, NM  | Coding | TRUE |
| thyroid hormone receptor, beta                            | NM_000461, NM  | Coding | TRUE |
| thyroid hormone receptor, beta                            | NM_000461, NM  | Coding | TRUE |
| thyroid hormone receptor, beta                            | NM_000461, NM  | Coding | TRUE |
| thyroid hormone receptor, beta                            | NM_000461, NM  | Coding | TRUE |
| thyroid hormone receptor, beta                            | NM_000461, NM  | Coding | TRUE |
| thyroid hormone receptor, beta                            | NM_000461, NM  | Coding | TRUE |
| Rieske (Fe-S) domain containing                           | NM_001131065,  | Coding | TRUE |
| Rieske (Fe-S) domain containing                           | NM_001131065,  | Coding | TRUE |
| .1                                                        |                | Coding | TRUE |
| .1                                                        |                | Coding | TRUE |
| .1                                                        |                | Coding | TRUE |
| .1                                                        |                | Coding | TRUE |
| .1                                                        |                | Coding | TRUE |
| SIX homeobox 4                                            | NM_017420, ENS | Coding | TRUE |
| SIX homeobox 4                                            | NM_017420, ENS | Coding | TRUE |
| SIX homeobox 4                                            | NM_017420, ENS | Coding | TRUE |
| SIX homeobox 4                                            | NM_017420, ENS | Coding | TRUE |
| MPV17 mitochondrial membrane protein-like                 | NM_001128423,  | Coding | TRUE |
| MPV17 mitochondrial membrane protein-like                 | NM_001128423,  | Coding | TRUE |
| ubiquitin-conjugating enzyme E2 variant 1                 | NM_001032288,  | Coding | TRUE |
| ubiquitin-conjugating enzyme E2 variant 1                 | NM_001032288,  | Coding | TRUE |
| ubiquitin-conjugating enzyme E2 variant 1                 | NM_001032288,  | Coding | TRUE |
| ubiquitin-conjugating enzyme E2 variant 1                 | NM_001032288,  | Coding | TRUE |
| ubiquitin-conjugating enzyme E2 variant 1                 | NM_001032288,  | Coding | TRUE |
| protein phosphatase 1, regulatory (inhibitor) subunit 1C  | NM_001080545,  | Coding | TRUE |

|                                                          |                |        |      |
|----------------------------------------------------------|----------------|--------|------|
| protein phosphatase 1, regulatory (inhibitor) subunit 1C | NM_001080545,  | Coding | TRUE |
| arginine decarboxylase                                   | NM_052998, BCC | Coding | TRUE |
| arginine decarboxylase                                   | NM_052998, BCC | Coding | TRUE |
| arginine decarboxylase                                   | NM_052998, BCC | Coding | TRUE |
| galactosidase, beta 1-like                               | NM_024506, ENS | Coding | TRUE |
| galactosidase, beta 1-like                               | NM_024506, ENS | Coding | TRUE |
| galactosidase, beta 1-like                               | NM_024506, ENS | Coding | TRUE |
| galactosidase, beta 1-like                               | NM_024506, ENS | Coding | TRUE |
| galactosidase, beta 1-like                               | NM_024506, ENS | Coding | TRUE |
| galactosidase, beta 1-like                               | NM_024506, ENS | Coding | TRUE |
| galactosidase, beta 1-like                               | NM_024506, ENS | Coding | TRUE |
| galactosidase, beta 1-like                               | NM_024506, ENS | Coding | TRUE |
| galactosidase, beta 1-like                               | NM_024506, ENS | Coding | TRUE |
| galactosidase, beta 1-like                               | NM_024506, ENS | Coding | TRUE |
| galactosidase, beta 1-like                               | NM_024506, ENS | Coding | TRUE |
| galactosidase, beta 1-like                               | NM_024506, ENS | Coding | TRUE |
| nucleolin                                                | NM_005381, ENS | Coding | TRUE |
| nucleolin                                                | NM_005381, ENS | Coding | TRUE |
| nucleolin                                                | NM_005381, ENS | Coding | TRUE |
| non-SMC condensin I complex, subunit G                   | NM_022346, ENS | Coding | TRUE |
| non-SMC condensin I complex, subunit G                   | NM_022346, ENS | Coding | TRUE |
| non-SMC condensin I complex, subunit G                   | NM_022346, ENS | Coding | TRUE |
| non-SMC condensin I complex, subunit G                   | NM_022346, ENS | Coding | TRUE |
| non-SMC condensin I complex, subunit G                   | NM_022346, ENS | Coding | TRUE |
| FK506 binding protein 5                                  | NM_004117, NM  | Coding | TRUE |
| FK506 binding protein 5                                  | NM_004117, NM  | Coding | TRUE |
| FK506 binding protein 5                                  | NM_004117, NM  | Coding | TRUE |
| FK506 binding protein 5                                  | NM_004117, NM  | Coding | TRUE |
| FK506 binding protein 5                                  | NM_004117, NM  | Coding | TRUE |
| FK506 binding protein 5                                  | NM_004117, NM  | Coding | TRUE |
| FK506 binding protein 5                                  | NM_004117, NM  | Coding | TRUE |
| FK506 binding protein 5                                  | NM_004117, NM  | Coding | TRUE |
| FK506 binding protein 5                                  | NM_004117, NM  | Coding | TRUE |
| FK506 binding protein 5                                  | NM_004117, NM  | Coding | TRUE |
| FK506 binding protein 5                                  | NM_004117, NM  | Coding | TRUE |
| FK506 binding protein 5                                  | NM_004117, NM  | Coding | TRUE |
| FK506 binding protein 5                                  | NM_004117, NM  | Coding | TRUE |
| FK506 binding protein 5                                  | NM_004117, NM  | Coding | TRUE |
| FK506 binding protein 5                                  | NM_004117, NM  | Coding | TRUE |
| FK506 binding protein 5                                  | NM_004117, NM  | Coding | TRUE |
| FK506 binding protein 5                                  | NM_004117, NM  | Coding | TRUE |
| FK506 binding protein 5                                  | NM_004117, NM  | Coding | TRUE |
| glioblastoma amplified sequence                          | NM_001202469,  | Coding | TRUE |
| glioblastoma amplified sequence                          | NM_001202469,  | Coding | TRUE |
| BMP and activin membrane-bound inhibitor homolog (       | NM_012342, ENS | Coding | TRUE |
| BMP and activin membrane-bound inhibitor homolog (       | NM_012342, ENS | Coding | TRUE |
| collagen, type XIII, alpha 1                             | NM_001130103,  | Coding | TRUE |
| collagen, type XIII, alpha 1                             | NM_001130103,  | Coding | TRUE |
| collagen, type XIII, alpha 1                             | NM_001130103,  | Coding | TRUE |
| collagen, type XIII, alpha 1                             | NM_001130103,  | Coding | TRUE |
| collagen, type XIII, alpha 1                             | NM_001130103,  | Coding | TRUE |
| protein phosphatase 3, catalytic subunit, beta isozyme   | NM_001142353,  | Coding | TRUE |
| protein phosphatase 3, catalytic subunit, beta isozyme   | NM_001142353,  | Coding | TRUE |
| protein phosphatase 3, catalytic subunit, beta isozyme   | NM_001142353,  | Coding | TRUE |
| protein phosphatase 3, catalytic subunit, beta isozyme   | NM_001142353,  | Coding | TRUE |
| protein phosphatase 3, catalytic subunit, beta isozyme   | NM_001142353,  | Coding | TRUE |
| protein phosphatase 3, catalytic subunit, beta isozyme   | NM_001142353,  | Coding | TRUE |
| uncharacterized LOC100506314                             | NR_038920, ENS | Coding | TRUE |
| uncharacterized LOC100506314                             | NR_038920, ENS | Coding | TRUE |
| uncharacterized LOC100506314                             | NR_038920, ENS | Coding | TRUE |

|                                                         |                   |        |      |
|---------------------------------------------------------|-------------------|--------|------|
| uncharacterized LOC100506314                            | NR_038920, ENS    | Coding | TRUE |
| keratin 7                                               | NM_005556, ENS    | Coding | TRUE |
| keratin 7                                               | NM_005556, ENS    | Coding | TRUE |
| keratin 7                                               | NM_005556, ENS    | Coding | TRUE |
| keratin 7                                               | NM_005556, ENS    | Coding | TRUE |
| keratin 7                                               | NM_005556, ENS    | Coding | TRUE |
| keratin 7                                               | NM_005556, ENS    | Coding | TRUE |
| suppressor of cytokine signaling 7                      | NM_014598, ENS    | Coding | TRUE |
| suppressor of cytokine signaling 7                      | NM_014598, ENS    | Coding | TRUE |
| suppressor of cytokine signaling 7                      | NM_014598, ENS    | Coding | TRUE |
| suppressor of cytokine signaling 7                      | NM_014598, ENS    | Coding | TRUE |
| zinc finger protein 776                                 | NM_173632, ENS    | Coding | TRUE |
| zinc finger protein 776                                 | NM_173632, ENS    | Coding | TRUE |
| zinc finger protein 776                                 | NM_173632, ENS    | Coding | TRUE |
| zinc finger protein 776                                 | NM_173632, ENS    | Coding | TRUE |
| zinc finger protein 776                                 | NM_173632, ENS    | Coding | TRUE |
| zinc finger protein 776                                 | NM_173632, ENS    | Coding | TRUE |
| zinc finger protein 776                                 | NM_173632, ENS    | Coding | TRUE |
| chromosome 1 open reading frame 98                      | NR_040064, ENS    | Coding | TRUE |
| chromosome 1 open reading frame 98                      | NR_040064, ENS    | Coding | TRUE |
| chromosome 1 open reading frame 98                      | NR_040064, ENS    | Coding | TRUE |
| chromosome 1 open reading frame 98                      | NR_040064, ENS    | Coding | TRUE |
| zinc finger protein 692                                 | NM_001136036, ENS | Coding | TRUE |
| zinc finger protein 692                                 | NM_001136036, ENS | Coding | TRUE |
| myotilin                                                | NM_001135940, ENS | Coding | TRUE |
| myotilin                                                | NM_001135940, ENS | Coding | TRUE |
| myotilin                                                | NM_001135940, ENS | Coding | TRUE |
| myotilin                                                | NM_001135940, ENS | Coding | TRUE |
| myotilin                                                | NM_001135940, ENS | Coding | TRUE |
| myotilin                                                | NM_001135940, ENS | Coding | TRUE |
| myotilin                                                | NM_001135940, ENS | Coding | TRUE |
| myotilin                                                | NM_001135940, ENS | Coding | TRUE |
| myotilin                                                | NM_001135940, ENS | Coding | TRUE |
| ArfGAP with RhoGAP domain, ankyrin repeat and PH domain | NM_022481, ENS    | Coding | TRUE |
| ArfGAP with RhoGAP domain, ankyrin repeat and PH domain | NM_022481, ENS    | Coding | TRUE |
| ArfGAP with RhoGAP domain, ankyrin repeat and PH domain | NM_022481, ENS    | Coding | TRUE |
| ArfGAP with RhoGAP domain, ankyrin repeat and PH domain | NM_022481, ENS    | Coding | TRUE |
| ArfGAP with RhoGAP domain, ankyrin repeat and PH domain | NM_022481, ENS    | Coding | TRUE |
| ArfGAP with RhoGAP domain, ankyrin repeat and PH domain | NM_022481, ENS    | Coding | TRUE |
| ArfGAP with RhoGAP domain, ankyrin repeat and PH domain | NM_022481, ENS    | Coding | TRUE |
| ArfGAP with RhoGAP domain, ankyrin repeat and PH domain | NM_022481, ENS    | Coding | TRUE |
| ArfGAP with RhoGAP domain, ankyrin repeat and PH domain | NM_022481, ENS    | Coding | TRUE |
| ArfGAP with RhoGAP domain, ankyrin repeat and PH domain | NM_022481, ENS    | Coding | TRUE |
| ArfGAP with RhoGAP domain, ankyrin repeat and PH domain | NM_022481, ENS    | Coding | TRUE |
| ArfGAP with RhoGAP domain, ankyrin repeat and PH domain | NM_022481, ENS    | Coding | TRUE |
| ArfGAP with RhoGAP domain, ankyrin repeat and PH domain | NM_022481, ENS    | Coding | TRUE |
| ArfGAP with RhoGAP domain, ankyrin repeat and PH domain | NM_022481, ENS    | Coding | TRUE |
| ArfGAP with RhoGAP domain, ankyrin repeat and PH domain | NM_022481, ENS    | Coding | TRUE |
| ArfGAP with RhoGAP domain, ankyrin repeat and PH domain | NM_022481, ENS    | Coding | TRUE |
| ArfGAP with RhoGAP domain, ankyrin repeat and PH domain | NM_022481, ENS    | Coding | TRUE |
| ArfGAP with RhoGAP domain, ankyrin repeat and PH domain | NM_022481, ENS    | Coding | TRUE |
| ArfGAP with RhoGAP domain, ankyrin repeat and PH domain | NM_022481, ENS    | Coding | TRUE |
| ArfGAP with RhoGAP domain, ankyrin repeat and PH domain | NM_022481, ENS    | Coding | TRUE |
| ArfGAP with RhoGAP domain, ankyrin repeat and PH domain | NM_022481, ENS    | Coding | TRUE |
| ArfGAP with RhoGAP domain, ankyrin repeat and PH domain | NM_022481, ENS    | Coding | TRUE |
| ArfGAP with RhoGAP domain, ankyrin repeat and PH domain | NM_022481, ENS    | Coding | TRUE |
| ArfGAP with RhoGAP domain, ankyrin repeat and PH domain | NM_022481, ENS    | Coding | TRUE |
| RAB24, member RAS oncogene family                       | NM_001031677, ENS | Coding | TRUE |
| RAB24, member RAS oncogene family                       | NM_001031677, ENS | Coding | TRUE |
| fibronectin type III domain containing 1                | NM_032532, ENS    | Coding | TRUE |
| fibronectin type III domain containing 1                | NM_032532, ENS    | Coding | TRUE |
| fibronectin type III domain containing 1                | NM_032532, ENS    | Coding | TRUE |









|                                                         |                |        |      |
|---------------------------------------------------------|----------------|--------|------|
| protein tyrosine phosphatase, non-receptor type 3       | NM_002829, NM  | Coding | TRUE |
| protein tyrosine phosphatase, non-receptor type 3       | NM_002829, NM  | Coding | TRUE |
| protein tyrosine phosphatase, non-receptor type 3       | NM_002829, NM  | Coding | TRUE |
| protein tyrosine phosphatase, non-receptor type 3       | NM_002829, NM  | Coding | TRUE |
| carnitine O-acetyltransferase                           | NM_000755, NR  | Coding | TRUE |
| carnitine O-acetyltransferase                           | NM_000755, NR  | Coding | TRUE |
| carnitine O-acetyltransferase                           | NM_000755, NR  | Coding | TRUE |
| carnitine O-acetyltransferase                           | NM_000755, NR  | Coding | TRUE |
| carnitine O-acetyltransferase                           | NM_000755, NR  | Coding | TRUE |
| carnitine O-acetyltransferase                           | NM_000755, NR  | Coding | TRUE |
| carnitine O-acetyltransferase                           | NM_000755, NR  | Coding | TRUE |
| slingshot homolog 3 (Drosophila)                        | NM_017857, ENS | Coding | TRUE |
| slingshot homolog 3 (Drosophila)                        | NM_017857, ENS | Coding | TRUE |
| slingshot homolog 3 (Drosophila)                        | NM_017857, ENS | Coding | TRUE |
| slingshot homolog 3 (Drosophila)                        | NM_017857, ENS | Coding | TRUE |
| general transcription factor IIA, 2, 12kDa              | NM_004492, ENS | Coding | TRUE |
| general transcription factor IIA, 2, 12kDa              | NM_004492, ENS | Coding | TRUE |
| ubiquitin 1                                             | NM_001079514,  | Coding | TRUE |
| ubiquitin 1                                             | NM_001079514,  | Coding | TRUE |
| NLR family, pyrin domain containing 12                  | NM_033297, NM  | Coding | TRUE |
| NLR family, pyrin domain containing 12                  | NM_033297, NM  | Coding | TRUE |
| NLR family, pyrin domain containing 12                  | NM_033297, NM  | Coding | TRUE |
| scratch homolog 2, zinc finger protein (Drosophila), su | NM_033129, NM  | Coding | TRUE |
| scratch homolog 2, zinc finger protein (Drosophila), su | NM_033129, NM  | Coding | TRUE |
| scratch homolog 2, zinc finger protein (Drosophila), su | NM_033129, NM  | Coding | TRUE |
| gamma-glutamyltransferase 1, gamma-glutamyltransfe      | NM_005265, NM  | Coding | TRUE |
| gamma-glutamyltransferase 1, gamma-glutamyltransfe      | NM_005265, NM  | Coding | TRUE |
| gamma-glutamyltransferase 1, gamma-glutamyltransfe      | NM_005265, NM  | Coding | TRUE |
| gamma-glutamyltransferase 1, gamma-glutamyltransfe      | NM_005265, NM  | Coding | TRUE |
| gamma-glutamyltransferase 1, gamma-glutamyltransfe      | NM_005265, NM  | Coding | TRUE |
| gamma-glutamyltransferase 1, gamma-glutamyltransfe      | NM_005265, NM  | Coding | TRUE |
| gamma-glutamyltransferase 1, gamma-glutamyltransfe      | NM_005265, NM  | Coding | TRUE |
| gamma-glutamyltransferase 1, gamma-glutamyltransfe      | NM_005265, NM  | Coding | TRUE |
| gamma-glutamyltransferase 1, gamma-glutamyltransfe      | NM_005265, NM  | Coding | TRUE |
| gamma-glutamyltransferase 1, gamma-glutamyltransfe      | NM_005265, NM  | Coding | TRUE |
| gamma-glutamyltransferase 1, gamma-glutamyltransfe      | NM_005265, NM  | Coding | TRUE |
| gamma-glutamyltransferase 1, gamma-glutamyltransfe      | NM_005265, NM  | Coding | TRUE |
| gamma-glutamyltransferase 1, gamma-glutamyltransfe      | NM_005265, NM  | Coding | TRUE |
| gamma-glutamyltransferase 1, gamma-glutamyltransfe      | NM_005265, NM  | Coding | TRUE |
| gamma-glutamyltransferase 1, gamma-glutamyltransfe      | NM_005265, NM  | Coding | TRUE |
| discoidin domain receptor tyrosine kinase 1             | BC013400, NM_0 | Coding | TRUE |
| discoidin domain receptor tyrosine kinase 1             | BC013400, NM_0 | Coding | TRUE |
| discoidin domain receptor tyrosine kinase 1             | BC013400, NM_0 | Coding | TRUE |
| discoidin domain receptor tyrosine kinase 1             | BC013400, NM_0 | Coding | TRUE |
| discoidin domain receptor tyrosine kinase 1             | BC013400, NM_0 | Coding | TRUE |
| discoidin domain receptor tyrosine kinase 1             | BC013400, NM_0 | Coding | TRUE |
| discoidin domain receptor tyrosine kinase 1             | BC013400, NM_0 | Coding | TRUE |
| discoidin domain receptor tyrosine kinase 1             | BC013400, NM_0 | Coding | TRUE |
| discoidin domain receptor tyrosine kinase 1             | BC013400, NM_0 | Coding | TRUE |
| discoidin domain receptor tyrosine kinase 1             | BC013400, NM_0 | Coding | TRUE |
| discoidin domain receptor tyrosine kinase 1             | BC013400, NM_0 | Coding | TRUE |
| discoidin domain receptor tyrosine kinase 1             | BC013400, NM_0 | Coding | TRUE |
| discoidin domain receptor tyrosine kinase 1             | BC013400, NM_0 | Coding | TRUE |
| discoidin domain receptor tyrosine kinase 1             | BC013400, NM_0 | Coding | TRUE |
| discoidin domain receptor tyrosine kinase 1             | BC013400, NM_0 | Coding | TRUE |
| discoidin domain receptor tyrosine kinase 1             | BC013400, NM_0 | Coding | TRUE |
| discoidin domain receptor tyrosine kinase 1             | BC013400, NM_0 | Coding | TRUE |
| discoidin domain receptor tyrosine kinase 1             | BC013400, NM_0 | Coding | TRUE |
| trans-golgi network protein 2                           | NM_001206840,  | Coding | TRUE |
| trans-golgi network protein 2                           | NM_001206840,  | Coding | TRUE |
| trans-golgi network protein 2                           | NM_001206840,  | Coding | TRUE |
| trans-golgi network protein 2                           | NM_001206840,  | Coding | TRUE |
| trans-golgi network protein 2                           | NM_001206840,  | Coding | TRUE |
| collagen, type VIII, alpha 1                            | NM_001850, NM  | Coding | TRUE |
| collagen, type VIII, alpha 1                            | NM_001850, NM  | Coding | TRUE |
| collagen, type VIII, alpha 1                            | NM_001850, NM  | Coding | TRUE |



|                                                    |                |        |      |
|----------------------------------------------------|----------------|--------|------|
| PTK2B protein tyrosine kinase 2 beta               | NM_004103, NM  | Coding | TRUE |
| PTK2B protein tyrosine kinase 2 beta               | NM_004103, NM  | Coding | TRUE |
| PTK2B protein tyrosine kinase 2 beta               | NM_004103, NM  | Coding | TRUE |
| PTK2B protein tyrosine kinase 2 beta               | NM_004103, NM  | Coding | TRUE |
| poly(A) binding protein, cytoplasmic 1             | NM_002568, ENS | Coding | TRUE |
| poly(A) binding protein, cytoplasmic 1             | NM_002568, ENS | Coding | TRUE |
| dihydropyrimidinase-like 4                         | NM_006426, ENS | Coding | TRUE |
| dihydropyrimidinase-like 4                         | NM_006426, ENS | Coding | TRUE |
| dihydropyrimidinase-like 4                         | NM_006426, ENS | Coding | TRUE |
| dihydropyrimidinase-like 4                         | NM_006426, ENS | Coding | TRUE |
| dihydropyrimidinase-like 4                         | NM_006426, ENS | Coding | TRUE |
| dihydropyrimidinase-like 4                         | NM_006426, ENS | Coding | TRUE |
| dihydropyrimidinase-like 4                         | NM_006426, ENS | Coding | TRUE |
| dihydropyrimidinase-like 4                         | NM_006426, ENS | Coding | TRUE |
| dihydropyrimidinase-like 4                         | NM_006426, ENS | Coding | TRUE |
| dihydropyrimidinase-like 4                         | NM_006426, ENS | Coding | TRUE |
| glutamate dehydrogenase 1                          | NM_005271, ENS | Coding | TRUE |
| glutamate dehydrogenase 1                          | NM_005271, ENS | Coding | TRUE |
| glutamate dehydrogenase 1                          | NM_005271, ENS | Coding | TRUE |
| aldehyde dehydrogenase 3 family, member B1         | NM_000694, NM  | Coding | TRUE |
| aldehyde dehydrogenase 3 family, member B1         | NM_000694, NM  | Coding | TRUE |
| cysteine sulfinic acid decarboxylase               | NM_001244705,  | Coding | TRUE |
| cysteine sulfinic acid decarboxylase               | NM_001244705,  | Coding | TRUE |
| cysteine sulfinic acid decarboxylase               | NM_001244705,  | Coding | TRUE |
| breast cancer 2, early onset                       | NM_000059, ENS | Coding | TRUE |
| breast cancer 2, early onset                       | NM_000059, ENS | Coding | TRUE |
| immunoglobulin heavy constant alpha 2 (A2m marker) | ENST000003905  | Coding | TRUE |
| immunoglobulin heavy constant alpha 2 (A2m marker) | ENST000003905  | Coding | TRUE |
| immunoglobulin heavy constant alpha 2 (A2m marker) | ENST000003905  | Coding | TRUE |
| immunoglobulin heavy constant alpha 2 (A2m marker) | ENST000003905  | Coding | TRUE |
| immunoglobulin heavy constant alpha 2 (A2m marker) | ENST000003905  | Coding | TRUE |
| immunoglobulin heavy constant alpha 2 (A2m marker) | ENST000003905  | Coding | TRUE |
| immunoglobulin heavy constant alpha 2 (A2m marker) | ENST000003905  | Coding | TRUE |
| immunoglobulin heavy constant alpha 2 (A2m marker) | ENST000003905  | Coding | TRUE |
| immunoglobulin heavy constant alpha 2 (A2m marker) | ENST000003905  | Coding | TRUE |
| nuclear receptor subfamily 1, group D, member 1    | NM_021724, ENS | Coding | TRUE |
| nuclear receptor subfamily 1, group D, member 1    | NM_021724, ENS | Coding | TRUE |
| nuclear receptor subfamily 1, group D, member 1    | NM_021724, ENS | Coding | TRUE |
| thioredoxin-related transmembrane protein 3        | NM_019022, ENS | Coding | TRUE |
| thioredoxin-related transmembrane protein 3        | NM_019022, ENS | Coding | TRUE |
| thioredoxin-related transmembrane protein 3        | NM_019022, ENS | Coding | TRUE |
| thioredoxin-related transmembrane protein 3        | NM_019022, ENS | Coding | TRUE |
| signal peptide, CUB domain, EGF-like 1             | NM_173050, ENS | Coding | TRUE |
| signal peptide, CUB domain, EGF-like 1             | NM_173050, ENS | Coding | TRUE |
| signal peptide, CUB domain, EGF-like 1             | NM_173050, ENS | Coding | TRUE |
| major histocompatibility complex, class I, A       | NM_001242758,  | Coding | TRUE |
| major histocompatibility complex, class I, A       | NM_001242758,  | Coding | TRUE |
| major histocompatibility complex, class I, A       | NM_001242758,  | Coding | TRUE |
| major histocompatibility complex, class I, A       | NM_001242758,  | Coding | TRUE |
| major histocompatibility complex, class I, A       | NM_001242758,  | Coding | TRUE |
| mitochondrial ribosomal protein L44                | NM_022915, ENS | Coding | TRUE |
| mitochondrial ribosomal protein L44                | NM_022915, ENS | Coding | TRUE |
| mitochondrial ribosomal protein L44                | NM_022915, ENS | Coding | TRUE |
| THUMP domain containing 2                          | NM_025264, NR  | Coding | TRUE |
| THUMP domain containing 2                          | NM_025264, NR  | Coding | TRUE |
| THUMP domain containing 2                          | NM_025264, NR  | Coding | TRUE |
| transmembrane protein 194B                         | NM_001142645,  | Coding | TRUE |
| transmembrane protein 194B                         | NM_001142645,  | Coding | TRUE |
| transmembrane protein 194B                         | NM_001142645,  | Coding | TRUE |
| transmembrane protein 194B                         | NM_001142645,  | Coding | TRUE |

|                                                       |                |        |      |
|-------------------------------------------------------|----------------|--------|------|
| transmembrane protein 194B                            | NM_001142645,  | Coding | TRUE |
| GRB2-associated binding protein 1                     | NM_002039, NM  | Coding | TRUE |
| GRB2-associated binding protein 1                     | NM_002039, NM  | Coding | TRUE |
| GRB2-associated binding protein 1                     | NM_002039, NM  | Coding | TRUE |
| GRB2-associated binding protein 1                     | NM_002039, NM  | Coding | TRUE |
| GRB2-associated binding protein 1                     | NM_002039, NM  | Coding | TRUE |
| GRB2-associated binding protein 1                     | NM_002039, NM  | Coding | TRUE |
| GRB2-associated binding protein 1                     | NM_002039, NM  | Coding | TRUE |
| GRB2-associated binding protein 1                     | NM_002039, NM  | Coding | TRUE |
| GRB2-associated binding protein 1                     | NM_002039, NM  | Coding | TRUE |
| GRB2-associated binding protein 1                     | NM_002039, NM  | Coding | TRUE |
| GRB2-associated binding protein 1                     | NM_002039, NM  | Coding | TRUE |
| GRB2-associated binding protein 1                     | NM_002039, NM  | Coding | TRUE |
| GRB2-associated binding protein 1                     | NM_002039, NM  | Coding | TRUE |
| N-acylethanolamine acid amidase                       | NM_001042402,  | Coding | TRUE |
| N-acylethanolamine acid amidase                       | NM_001042402,  | Coding | TRUE |
| N-acylethanolamine acid amidase                       | NM_001042402,  | Coding | TRUE |
| N-acylethanolamine acid amidase                       | NM_001042402,  | Coding | TRUE |
| N-acylethanolamine acid amidase                       | NM_001042402,  | Coding | TRUE |
| N-acylethanolamine acid amidase                       | NM_001042402,  | Coding | TRUE |
| uncharacterized protein FLJ35946                      | NR_033932, ENS | Coding | TRUE |
| uncharacterized protein FLJ35946                      | NR_033932, ENS | Coding | TRUE |
| uncharacterized protein FLJ35946                      | NR_033932, ENS | Coding | TRUE |
| tRNA methyltransferase 10 homolog B (S. cerevisiae)   | NM_144964, ENS | Coding | TRUE |
| tRNA methyltransferase 10 homolog B (S. cerevisiae)   | NM_144964, ENS | Coding | TRUE |
| mitogen-activated protein kinase kinase kinase kinase | NM_004579, ENS | Coding | TRUE |
| mitogen-activated protein kinase kinase kinase kinase | NM_004579, ENS | Coding | TRUE |
| mitogen-activated protein kinase kinase kinase kinase | NM_004579, ENS | Coding | TRUE |
| mitogen-activated protein kinase kinase kinase kinase | NM_004579, ENS | Coding | TRUE |
| C1q and tumor necrosis factor related protein 5, mem  | ENST000005552  | Coding | TRUE |
| C1q and tumor necrosis factor related protein 5, mem  | ENST000005552  | Coding | TRUE |
| C1q and tumor necrosis factor related protein 5, mem  | ENST000005552  | Coding | TRUE |
| neogenin 1                                            | NM_002499, NM  | Coding | TRUE |
| neogenin 1                                            | NM_002499, NM  | Coding | TRUE |
| neogenin 1                                            | NM_002499, NM  | Coding | TRUE |
| neogenin 1                                            | NM_002499, NM  | Coding | TRUE |
| neogenin 1                                            | NM_002499, NM  | Coding | TRUE |
| neogenin 1                                            | NM_002499, NM  | Coding | TRUE |
| BCL2-like 13 (apoptosis facilitator)                  | NM_015367, ENS | Coding | TRUE |
| BCL2-like 13 (apoptosis facilitator)                  | NM_015367, ENS | Coding | TRUE |
| BCL2-like 13 (apoptosis facilitator)                  | NM_015367, ENS | Coding | TRUE |
| BCL2-like 13 (apoptosis facilitator)                  | NM_015367, ENS | Coding | TRUE |
| period homolog 3 (Drosophila)                         | NM_016831, BC1 | Coding | TRUE |
| period homolog 3 (Drosophila)                         | NM_016831, BC1 | Coding | TRUE |
| period homolog 3 (Drosophila)                         | NM_016831, BC1 | Coding | TRUE |
| period homolog 3 (Drosophila)                         | NM_016831, BC1 | Coding | TRUE |
| period homolog 3 (Drosophila)                         | NM_016831, BC1 | Coding | TRUE |
| period homolog 3 (Drosophila)                         | NM_016831, BC1 | Coding | TRUE |
| period homolog 3 (Drosophila)                         | NM_016831, BC1 | Coding | TRUE |
| YTH domain family, member 2                           | NM_001172828,  | Coding | TRUE |
| YTH domain family, member 2                           | NM_001172828,  | Coding | TRUE |
| YTH domain family, member 2                           | NM_001172828,  | Coding | TRUE |
| thioesterase superfamily member 4                     | NM_053055, ENS | Coding | TRUE |
| thioesterase superfamily member 4                     | NM_053055, ENS | Coding | TRUE |
| thioesterase superfamily member 4                     | NM_053055, ENS | Coding | TRUE |
| thioesterase superfamily member 4                     | NM_053055, ENS | Coding | TRUE |
| thioesterase superfamily member 4                     | NM_053055, ENS | Coding | TRUE |
| DnaJ (Hsp40) homolog, subfamily C, member 27          | NM_016544, NM  | Coding | TRUE |
| DnaJ (Hsp40) homolog, subfamily C, member 27          | NM_016544, NM  | Coding | TRUE |







|                                                           |                |        |      |
|-----------------------------------------------------------|----------------|--------|------|
| calcium/calmodulin-dependent protein kinase I             | NM_003656, ENS | Coding | TRUE |
| calcium/calmodulin-dependent protein kinase I             | NM_003656, ENS | Coding | TRUE |
| calcium/calmodulin-dependent protein kinase I             | NM_003656, ENS | Coding | TRUE |
| calcium/calmodulin-dependent protein kinase I             | NM_003656, ENS | Coding | TRUE |
| uncharacterized LOC100506994                              | NR_038281, NR  | Coding | TRUE |
| uncharacterized LOC100506994                              | NR_038281, NR  | Coding | TRUE |
| uncharacterized LOC100506994                              | NR_038281, NR  | Coding | TRUE |
| uncharacterized LOC100506994                              | NR_038281, NR  | Coding | TRUE |
| uncharacterized LOC100506994                              | NR_038281, NR  | Coding | TRUE |
| uncharacterized LOC100506994                              | NR_038281, NR  | Coding | TRUE |
| transmembrane protein 175                                 | NM_032326, ENS | Coding | TRUE |
| transmembrane protein 175                                 | NM_032326, ENS | Coding | TRUE |
| T-cell lymphoma invasion and metastasis 2, uncharact      | NM_012454, NM  | Coding | TRUE |
| T-cell lymphoma invasion and metastasis 2, uncharact      | NM_012454, NM  | Coding | TRUE |
| T-cell lymphoma invasion and metastasis 2, uncharact      | NM_012454, NM  | Coding | TRUE |
| T-cell lymphoma invasion and metastasis 2, uncharact      | NM_012454, NM  | Coding | TRUE |
| T-cell lymphoma invasion and metastasis 2, uncharact      | NM_012454, NM  | Coding | TRUE |
| drebrin-like                                              | NM_001014436,  | Coding | TRUE |
| drebrin-like                                              | NM_001014436,  | Coding | TRUE |
| drebrin-like                                              | NM_001014436,  | Coding | TRUE |
| basic helix-loop-helix domain containing, class B, 9      | NM_001142524,  | Coding | TRUE |
| basic helix-loop-helix domain containing, class B, 9      | NM_001142524,  | Coding | TRUE |
| basic helix-loop-helix domain containing, class B, 9      | NM_001142524,  | Coding | TRUE |
| solute carrier family 6 (neurotransmitter transporter, cr | NM_001142805,  | Coding | TRUE |
| solute carrier family 6 (neurotransmitter transporter, cr | NM_001142805,  | Coding | TRUE |
| solute carrier family 6 (neurotransmitter transporter, cr | NM_001142805,  | Coding | TRUE |
| solute carrier family 6 (neurotransmitter transporter, cr | NM_001142805,  | Coding | TRUE |
| solute carrier family 6 (neurotransmitter transporter, cr | NM_001142805,  | Coding | TRUE |
| solute carrier family 6 (neurotransmitter transporter, cr | NM_001142805,  | Coding | TRUE |
| solute carrier family 6 (neurotransmitter transporter, cr | NM_001142805,  | Coding | TRUE |
| solute carrier family 6 (neurotransmitter transporter, cr | NM_001142805,  | Coding | TRUE |
| N-myristoyltransferase 2                                  | NM_004808, ENS | Coding | TRUE |
| N-myristoyltransferase 2                                  | NM_004808, ENS | Coding | TRUE |
| N-myristoyltransferase 2                                  | NM_004808, ENS | Coding | TRUE |
| N-myristoyltransferase 2                                  | NM_004808, ENS | Coding | TRUE |
| citron (rho-interacting, serine/threonine kinase 21), mic | NM_001206999,  | Coding | TRUE |
| citron (rho-interacting, serine/threonine kinase 21), mic | NM_001206999,  | Coding | TRUE |
| citron (rho-interacting, serine/threonine kinase 21), mic | NM_001206999,  | Coding | TRUE |
| citron (rho-interacting, serine/threonine kinase 21), mic | NM_001206999,  | Coding | TRUE |
| citron (rho-interacting, serine/threonine kinase 21), mic | NM_001206999,  | Coding | TRUE |
| citron (rho-interacting, serine/threonine kinase 21), mic | NM_001206999,  | Coding | TRUE |
| citron (rho-interacting, serine/threonine kinase 21), mic | NM_001206999,  | Coding | TRUE |
| citron (rho-interacting, serine/threonine kinase 21), mic | NM_001206999,  | Coding | TRUE |
| citron (rho-interacting, serine/threonine kinase 21), mic | NM_001206999,  | Coding | TRUE |
| citron (rho-interacting, serine/threonine kinase 21), mic | NM_001206999,  | Coding | TRUE |
| citron (rho-interacting, serine/threonine kinase 21), mic | NM_001206999,  | Coding | TRUE |
| citron (rho-interacting, serine/threonine kinase 21), mic | NM_001206999,  | Coding | TRUE |
| citron (rho-interacting, serine/threonine kinase 21), mic | NM_001206999,  | Coding | TRUE |
| citron (rho-interacting, serine/threonine kinase 21), mic | NM_001206999,  | Coding | TRUE |
| citron (rho-interacting, serine/threonine kinase 21), mic | NM_001206999,  | Coding | TRUE |
| citron (rho-interacting, serine/threonine kinase 21), mic | NM_001206999,  | Coding | TRUE |
| citron (rho-interacting, serine/threonine kinase 21), mic | NM_001206999,  | Coding | TRUE |
| citron (rho-interacting, serine/threonine kinase 21), mic | NM_001206999,  | Coding | TRUE |
| citron (rho-interacting, serine/threonine kinase 21), mic | NM_001206999,  | Coding | TRUE |
| citron (rho-interacting, serine/threonine kinase 21), mic | NM_001206999,  | Coding | TRUE |
| citron (rho-interacting, serine/threonine kinase 21), mic | NM_001206999,  | Coding | TRUE |
| citron (rho-interacting, serine/threonine kinase 21), mic | NM_001206999,  | Coding | TRUE |
| citron (rho-interacting, serine/threonine kinase 21), mic | NM_001206999,  | Coding | TRUE |
| citron (rho-interacting, serine/threonine kinase 21), mic | NM_001206999,  | Coding | TRUE |
| citron (rho-interacting, serine/threonine kinase 21), mic | NM_001206999,  | Coding | TRUE |
| citron (rho-interacting, serine/threonine kinase 21), mic | NM_001206999,  | Coding | TRUE |
| citron (rho-interacting, serine/threonine kinase 21), mic | NM_001206999,  | Coding | TRUE |
| neurobeachin                                              | NM_001204197,  | Coding | TRUE |







|                                            |                |        |      |
|--------------------------------------------|----------------|--------|------|
| integrin alpha FG-GAP repeat containing 3  | NM_032039, ENS | Coding | TRUE |
| integrin alpha FG-GAP repeat containing 3  | NM_032039, ENS | Coding | TRUE |
| integrin alpha FG-GAP repeat containing 3  | NM_032039, ENS | Coding | TRUE |
| centromere protein F, 350/400kDa (mitosin) | NM_016343, ENS | Coding | TRUE |
| centromere protein F, 350/400kDa (mitosin) | NM_016343, ENS | Coding | TRUE |
| centromere protein F, 350/400kDa (mitosin) | NM_016343, ENS | Coding | TRUE |
| centromere protein F, 350/400kDa (mitosin) | NM_016343, ENS | Coding | TRUE |
| centromere protein F, 350/400kDa (mitosin) | NM_016343, ENS | Coding | TRUE |
| centromere protein F, 350/400kDa (mitosin) | NM_016343, ENS | Coding | TRUE |
| cysteine-serine-rich nuclear protein 3     | NM_001172173,  | Coding | TRUE |
| cysteine-serine-rich nuclear protein 3     | NM_001172173,  | Coding | TRUE |
| cysteine-serine-rich nuclear protein 3     | NM_001172173,  | Coding | TRUE |
| origin recognition complex, subunit 4      | NM_001190879,  | Coding | TRUE |
| origin recognition complex, subunit 4      | NM_001190879,  | Coding | TRUE |
| origin recognition complex, subunit 4      | NM_001190879,  | Coding | TRUE |
| origin recognition complex, subunit 4      | NM_001190879,  | Coding | TRUE |
| origin recognition complex, subunit 4      | NM_001190879,  | Coding | TRUE |
| origin recognition complex, subunit 4      | NM_001190879,  | Coding | TRUE |
| origin recognition complex, subunit 4      | NM_001190879,  | Coding | TRUE |
| origin recognition complex, subunit 4      | NM_001190879,  | Coding | TRUE |
| nicolin 1                                  | ENST000002735  | Coding | TRUE |
| nicolin 1                                  | ENST000002735  | Coding | TRUE |
| nicolin 1                                  | ENST000002735  | Coding | TRUE |
| nicolin 1                                  | ENST000002735  | Coding | TRUE |
| nicolin 1                                  | ENST000002735  | Coding | TRUE |
| nicolin 1                                  | ENST000002735  | Coding | TRUE |
| nicolin 1                                  | ENST000002735  | Coding | TRUE |
| solute carrier family 38, member 9         | NM_173514, ENS | Coding | TRUE |
| solute carrier family 38, member 9         | NM_173514, ENS | Coding | TRUE |
| solute carrier family 38, member 9         | NM_173514, ENS | Coding | TRUE |
| solute carrier family 38, member 9         | NM_173514, ENS | Coding | TRUE |
| solute carrier family 38, member 9         | NM_173514, ENS | Coding | TRUE |
| Sp4 transcription factor                   | NM_003112, ENS | Coding | TRUE |
| Sp4 transcription factor                   | NM_003112, ENS | Coding | TRUE |
| Sp4 transcription factor                   | NM_003112, ENS | Coding | TRUE |
| Sp4 transcription factor                   | NM_003112, ENS | Coding | TRUE |
| Sp4 transcription factor                   | NM_003112, ENS | Coding | TRUE |
| Sp4 transcription factor                   | NM_003112, ENS | Coding | TRUE |
| chromosome 7 open reading frame 10         | NM_001193311,  | Coding | TRUE |
| chromosome 7 open reading frame 10         | NM_001193311,  | Coding | TRUE |
| chromosome 7 open reading frame 10         | NM_001193311,  | Coding | TRUE |
| chromosome 7 open reading frame 10         | NM_001193311,  | Coding | TRUE |
| chromosome 7 open reading frame 10         | NM_001193311,  | Coding | TRUE |
| chromosome 7 open reading frame 10         | NM_001193311,  | Coding | TRUE |
| chromosome 7 open reading frame 10         | NM_001193311,  | Coding | TRUE |
| chromosome 7 open reading frame 10         | NM_001193311,  | Coding | TRUE |
| chromosome 7 open reading frame 10         | NM_001193311,  | Coding | TRUE |
| chromosome 7 open reading frame 10         | NM_001193311,  | Coding | TRUE |
| chromosome 7 open reading frame 10         | NM_001193311,  | Coding | TRUE |
| chromosome 7 open reading frame 10         | NM_001193311,  | Coding | TRUE |
| chromosome 7 open reading frame 10         | NM_001193311,  | Coding | TRUE |
| chromosome 7 open reading frame 10         | NM_001193311,  | Coding | TRUE |
| chromosome 7 open reading frame 10         | NM_001193311,  | Coding | TRUE |
| chromosome 7 open reading frame 10         | NM_001193311,  | Coding | TRUE |
| chromosome 7 open reading frame 10         | NM_001193311,  | Coding | TRUE |
| chromosome 7 open reading frame 10         | NM_001193311,  | Coding | TRUE |
| chromosome 7 open reading frame 10         | NM_001193311,  | Coding | TRUE |
| MyoD family inhibitor domain containing    | NM_001166345,  | Coding | TRUE |
| MyoD family inhibitor domain containing    | NM_001166345,  | Coding | TRUE |
| MyoD family inhibitor domain containing    | NM_001166345,  | Coding | TRUE |

|                                                        |                |        |      |
|--------------------------------------------------------|----------------|--------|------|
| dedicator of cytokinesis 4                             | NM_014705, ENS | Coding | TRUE |
| dedicator of cytokinesis 4                             | NM_014705, ENS | Coding | TRUE |
| dedicator of cytokinesis 4                             | NM_014705, ENS | Coding | TRUE |
| dedicator of cytokinesis 4                             | NM_014705, ENS | Coding | TRUE |
| dedicator of cytokinesis 4                             | NM_014705, ENS | Coding | TRUE |
| dedicator of cytokinesis 4                             | NM_014705, ENS | Coding | TRUE |
| dedicator of cytokinesis 4                             | NM_014705, ENS | Coding | TRUE |
| dedicator of cytokinesis 4                             | NM_014705, ENS | Coding | TRUE |
| amyloid beta (A4) precursor protein-binding, family A, | NM_001163, ENS | Coding | TRUE |
| amyloid beta (A4) precursor protein-binding, family A, | NM_001163, ENS | Coding | TRUE |
| amyloid beta (A4) precursor protein-binding, family A, | NM_001163, ENS | Coding | TRUE |
|                                                        |                | Coding | TRUE |
|                                                        |                | Coding | TRUE |
| jumonji domain containing 1C                           | NM_004241, NM  | Coding | TRUE |
| jumonji domain containing 1C                           | NM_004241, NM  | Coding | TRUE |
| jumonji domain containing 1C                           | NM_004241, NM  | Coding | TRUE |
| jumonji domain containing 1C                           | NM_004241, NM  | Coding | TRUE |
| jumonji domain containing 1C                           | NM_004241, NM  | Coding | TRUE |
| jumonji domain containing 1C                           | NM_004241, NM  | Coding | TRUE |
| ArfGAP with GTPase domain, ankyrin repeat and PH d     | NM_001144000,  | Coding | TRUE |
| ArfGAP with GTPase domain, ankyrin repeat and PH d     | NM_001144000,  | Coding | TRUE |
| ArfGAP with GTPase domain, ankyrin repeat and PH d     | NM_001144000,  | Coding | TRUE |
| dehydrogenase/reductase (SDR family) member 12         | NM_001031719,  | Coding | TRUE |
| dehydrogenase/reductase (SDR family) member 12         | NM_001031719,  | Coding | TRUE |
| ring finger and SPRY domain containing 1               | NM_133368, ENS | Coding | TRUE |
| ring finger and SPRY domain containing 1               | NM_133368, ENS | Coding | TRUE |
| nuclear pore complex interacting protein-like 3        | NM_130464, ENS | Coding | TRUE |
| nuclear pore complex interacting protein-like 3        | NM_130464, ENS | Coding | TRUE |
| nuclear pore complex interacting protein-like 3        | NM_130464, ENS | Coding | TRUE |
| RAP1 GTPase activating protein 2                       | NM_001100398,  | Coding | TRUE |
| RAP1 GTPase activating protein 2                       | NM_001100398,  | Coding | TRUE |
| RAP1 GTPase activating protein 2                       | NM_001100398,  | Coding | TRUE |
| RAP1 GTPase activating protein 2                       | NM_001100398,  | Coding | TRUE |
| RAP1 GTPase activating protein 2                       | NM_001100398,  | Coding | TRUE |
| RAP1 GTPase activating protein 2                       | NM_001100398,  | Coding | TRUE |
| RAP1 GTPase activating protein 2                       | NM_001100398,  | Coding | TRUE |
| RAP1 GTPase activating protein 2                       | NM_001100398,  | Coding | TRUE |
| RAP1 GTPase activating protein 2                       | NM_001100398,  | Coding | TRUE |
| RAP1 GTPase activating protein 2                       | NM_001100398,  | Coding | TRUE |
| acyl-CoA dehydrogenase, very long chain                | NM_000018, NM  | Coding | TRUE |
| acyl-CoA dehydrogenase, very long chain                | NM_000018, NM  | Coding | TRUE |
| acyl-CoA synthetase family member 2                    | NM_025149, ENS | Coding | TRUE |
| acyl-CoA synthetase family member 2                    | NM_025149, ENS | Coding | TRUE |
| acyl-CoA synthetase family member 2                    | NM_025149, ENS | Coding | TRUE |
| acyl-CoA synthetase family member 2                    | NM_025149, ENS | Coding | TRUE |
| acyl-CoA synthetase family member 2                    | NM_025149, ENS | Coding | TRUE |
| acyl-CoA synthetase family member 2                    | NM_025149, ENS | Coding | TRUE |
| acyl-CoA synthetase family member 2                    | NM_025149, ENS | Coding | TRUE |
| acyl-CoA synthetase family member 2                    | NM_025149, ENS | Coding | TRUE |
| B-cell CLL/lymphoma 3                                  | NM_005178, ENS | Coding | TRUE |
| B-cell CLL/lymphoma 3                                  | NM_005178, ENS | Coding | TRUE |
| B-cell CLL/lymphoma 3                                  | NM_005178, ENS | Coding | TRUE |
| B-cell CLL/lymphoma 3                                  | NM_005178, ENS | Coding | TRUE |
| B-cell CLL/lymphoma 3                                  | NM_005178, ENS | Coding | TRUE |
| B-cell CLL/lymphoma 3                                  | NM_005178, ENS | Coding | TRUE |
| B-cell CLL/lymphoma 3                                  | NM_005178, ENS | Coding | TRUE |
| phosphatase and actin regulator 2                      | NM_014721, NM  | Coding | TRUE |
| phosphatase and actin regulator 2                      | NM_014721, NM  | Coding | TRUE |
| KIAA0319-like                                          | NM_024874, ENS | Coding | TRUE |
| KIAA0319-like                                          | NM_024874, ENS | Coding | TRUE |



|                                                         |                |        |      |
|---------------------------------------------------------|----------------|--------|------|
| 1-acylglycerol-3-phosphate O-acyltransferase 1 (lysop   | NM_006411, NM_ | Coding | TRUE |
| 1-acylglycerol-3-phosphate O-acyltransferase 1 (lysop   | NM_006411, NM_ | Coding | TRUE |
| 1-acylglycerol-3-phosphate O-acyltransferase 1 (lysop   | NM_006411, NM_ | Coding | TRUE |
| 1-acylglycerol-3-phosphate O-acyltransferase 1 (lysop   | NM_006411, NM_ | Coding | TRUE |
| tenascin XB, tenascin XA (pseudogene)                   | NM_019105, NM_ | Coding | TRUE |
| tenascin XB, tenascin XA (pseudogene)                   | NM_019105, NM_ | Coding | TRUE |
| tenascin XB, tenascin XA (pseudogene)                   | NM_019105, NM_ | Coding | TRUE |
| tenascin XB                                             | NM_019105, NM_ | Coding | TRUE |
| tenascin XB                                             | NM_019105, NM_ | Coding | TRUE |
| tenascin XB                                             | NM_019105, NM_ | Coding | TRUE |
| tenascin XB                                             | NM_019105, NM_ | Coding | TRUE |
| 1-acylglycerol-3-phosphate O-acyltransferase 1 (lysop   | NM_006411, NM_ | Coding | TRUE |
| 1-acylglycerol-3-phosphate O-acyltransferase 1 (lysop   | NM_006411, NM_ | Coding | TRUE |
| 1-acylglycerol-3-phosphate O-acyltransferase 1 (lysop   | NM_006411, NM_ | Coding | TRUE |
| 1-acylglycerol-3-phosphate O-acyltransferase 1 (lysop   | NM_006411, NM_ | Coding | TRUE |
|                                                         |                | Coding | TRUE |
|                                                         |                | Coding | TRUE |
| G protein-coupled receptor 155                          | NM_001033045,  | Coding | TRUE |
| G protein-coupled receptor 155                          | NM_001033045,  | Coding | TRUE |
| G protein-coupled receptor 155                          | NM_001033045,  | Coding | TRUE |
| G protein-coupled receptor 155                          | NM_001033045,  | Coding | TRUE |
| activated leukocyte cell adhesion molecule              | NM_001243280,  | Coding | TRUE |
| activated leukocyte cell adhesion molecule              | NM_001243280,  | Coding | TRUE |
| uncharacterized LOC100507291                            | ENST000005046  | Coding | TRUE |
| uncharacterized LOC100507291                            | ENST000005046  | Coding | TRUE |
| mitochondrial ribosomal protein S25                     | NM_022497, ENS | Coding | TRUE |
| mitochondrial ribosomal protein S25                     | NM_022497, ENS | Coding | TRUE |
| mitochondrial ribosomal protein S25                     | NM_022497, ENS | Coding | TRUE |
| mitochondrial ribosomal protein S25                     | NM_022497, ENS | Coding | TRUE |
| NME/NM23 nucleoside diphosphate kinase 6                | BC012828, ENS  | Coding | TRUE |
| NME/NM23 nucleoside diphosphate kinase 6                | BC012828, ENS  | Coding | TRUE |
| NME/NM23 nucleoside diphosphate kinase 6                | BC012828, ENS  | Coding | TRUE |
| NME/NM23 nucleoside diphosphate kinase 6                | BC012828, ENS  | Coding | TRUE |
| polybromo 1                                             | NM_018165, NM_ | Coding | TRUE |
| polybromo 1                                             | NM_018165, NM_ | Coding | TRUE |
| polybromo 1                                             | NM_018165, NM_ | Coding | TRUE |
| polybromo 1                                             | NM_018165, NM_ | Coding | TRUE |
| polybromo 1                                             | NM_018165, NM_ | Coding | TRUE |
| polybromo 1                                             | NM_018165, NM_ | Coding | TRUE |
| armadillo repeat containing 2                           | NM_032131, ENS | Coding | TRUE |
| armadillo repeat containing 2                           | NM_032131, ENS | Coding | TRUE |
| armadillo repeat containing 2                           | NM_032131, ENS | Coding | TRUE |
| armadillo repeat containing 2                           | NM_032131, ENS | Coding | TRUE |
| lipase A, lysosomal acid, cholesterol esterase, unchara | NM_000235, NM_ | Coding | TRUE |
| lipase A, lysosomal acid, cholesterol esterase, unchara | NM_000235, NM_ | Coding | TRUE |
| lipase A, lysosomal acid, cholesterol esterase, unchara | NM_000235, NM_ | Coding | TRUE |
| lipase A, lysosomal acid, cholesterol esterase, unchara | NM_000235, NM_ | Coding | TRUE |
| lipase A, lysosomal acid, cholesterol esterase, unchara | NM_000235, NM_ | Coding | TRUE |
| lipase A, lysosomal acid, cholesterol esterase, unchara | NM_000235, NM_ | Coding | TRUE |
| lipase A, lysosomal acid, cholesterol esterase, unchara | NM_000235, NM_ | Coding | TRUE |
| lipase A, lysosomal acid, cholesterol esterase, unchara | NM_000235, NM_ | Coding | TRUE |
| caspase 1, apoptosis-related cysteine peptidase         | NM_001223, NM_ | Coding | TRUE |
| caspase 1, apoptosis-related cysteine peptidase         | NM_001223, NM_ | Coding | TRUE |
| caspase 1, apoptosis-related cysteine peptidase         | NM_001223, NM_ | Coding | TRUE |
| caspase 1, apoptosis-related cysteine peptidase         | NM_001223, NM_ | Coding | TRUE |
| spla/ryanodine receptor domain and SOCS box containi    | NM_001146316,  | Coding | TRUE |
| spla/ryanodine receptor domain and SOCS box containi    | NM_001146316,  | Coding | TRUE |
| WAS protein homolog associated with actin, golgi men    | NR_026589, ENS | Coding | TRUE |
| WAS protein homolog associated with actin, golgi men    | NR_026589, ENS | Coding | TRUE |

|                                                         |                |        |      |
|---------------------------------------------------------|----------------|--------|------|
| G protein-coupled receptor 56                           | NM_001145772,  | Coding | TRUE |
| G protein-coupled receptor 56                           | NM_001145772,  | Coding | TRUE |
| G protein-coupled receptor 56                           | NM_001145772,  | Coding | TRUE |
| G protein-coupled receptor 56                           | NM_001145772,  | Coding | TRUE |
| G protein-coupled receptor 56                           | NM_001145772,  | Coding | TRUE |
| G protein-coupled receptor 56                           | NM_001145772,  | Coding | TRUE |
| G protein-coupled receptor 56                           | NM_001145772,  | Coding | TRUE |
| G protein-coupled receptor 56                           | NM_001145772,  | Coding | TRUE |
| G protein-coupled receptor 56                           | NM_001145772,  | Coding | TRUE |
| G protein-coupled receptor 56                           | NM_001145772,  | Coding | TRUE |
| G protein-coupled receptor 56                           | NM_001145772,  | Coding | TRUE |
| G protein-coupled receptor 56                           | NM_001145772,  | Coding | TRUE |
| G protein-coupled receptor 56                           | NM_001145772,  | Coding | TRUE |
| solute carrier family 13 (sodium-dependent citrate tran | NM_001143838,  | Coding | TRUE |
| solute carrier family 13 (sodium-dependent citrate tran | NM_001143838,  | Coding | TRUE |
| solute carrier family 13 (sodium-dependent citrate tran | NM_001143838,  | Coding | TRUE |
| solute carrier family 13 (sodium-dependent citrate tran | NM_001143838,  | Coding | TRUE |
| solute carrier family 13 (sodium-dependent citrate tran | NM_001143838,  | Coding | TRUE |
| solute carrier family 13 (sodium-dependent citrate tran | NM_001143838,  | Coding | TRUE |
| amyloid beta (A4) precursor-like protein 1              | NM_001024807,  | Coding | TRUE |
| amyloid beta (A4) precursor-like protein 1              | NM_001024807,  | Coding | TRUE |
| amyloid beta (A4) precursor-like protein 1              | NM_001024807,  | Coding | TRUE |
| amyloid beta (A4) precursor-like protein 1              | NM_001024807,  | Coding | TRUE |
| amyloid beta (A4) precursor-like protein 1              | NM_001024807,  | Coding | TRUE |
| amyloid beta (A4) precursor-like protein 1              | NM_001024807,  | Coding | TRUE |
| amyloid beta (A4) precursor-like protein 1              | NM_001024807,  | Coding | TRUE |
| amyloid beta (A4) precursor-like protein 1              | NM_001024807,  | Coding | TRUE |
| apolipoprotein B mRNA editing enzyme, catalytic polyf   | NM_004900, ENS | Coding | TRUE |
| apolipoprotein B mRNA editing enzyme, catalytic polyf   | NM_004900, ENS | Coding | TRUE |
| apolipoprotein B mRNA editing enzyme, catalytic polyf   | NM_004900, ENS | Coding | TRUE |
| apolipoprotein B mRNA editing enzyme, catalytic polyf   | NM_004900, ENS | Coding | TRUE |
| apolipoprotein B mRNA editing enzyme, catalytic polyf   | NM_004900, ENS | Coding | TRUE |
| apolipoprotein B mRNA editing enzyme, catalytic polyf   | NM_004900, ENS | Coding | TRUE |
| apolipoprotein B mRNA editing enzyme, catalytic polyf   | NM_004900, ENS | Coding | TRUE |
| apolipoprotein B mRNA editing enzyme, catalytic polyf   | NM_004900, ENS | Coding | TRUE |
| apolipoprotein B mRNA editing enzyme, catalytic polyf   | NM_004900, ENS | Coding | TRUE |
| hydroxysteroid (17-beta) dehydrogenase 7                | NM_016371, ENS | Coding | TRUE |
| hydroxysteroid (17-beta) dehydrogenase 7                | NM_016371, ENS | Coding | TRUE |
| hydroxysteroid (17-beta) dehydrogenase 7                | NM_016371, ENS | Coding | TRUE |
| hydroxysteroid (17-beta) dehydrogenase 7                | NM_016371, ENS | Coding | TRUE |
| inositol polyphosphate-5-phosphatase, 75kDa             | NM_005540, ENS | Coding | TRUE |
| inositol polyphosphate-5-phosphatase, 75kDa             | NM_005540, ENS | Coding | TRUE |
| leucine proline-enriched proteoglycan (leprecan) 1      | NM_001146289,  | Coding | TRUE |
| leucine proline-enriched proteoglycan (leprecan) 1      | NM_001146289,  | Coding | TRUE |
| leucine proline-enriched proteoglycan (leprecan) 1      | NM_001146289,  | Coding | TRUE |
| leucine proline-enriched proteoglycan (leprecan) 1      | NM_001146289,  | Coding | TRUE |
| HECT domain containing E3 ubiquitin protein ligase 3    | NM_024602, ENS | Coding | TRUE |
| HECT domain containing E3 ubiquitin protein ligase 3    | NM_024602, ENS | Coding | TRUE |
| HECT domain containing E3 ubiquitin protein ligase 3    | NM_024602, ENS | Coding | TRUE |
| HECT domain containing E3 ubiquitin protein ligase 3    | NM_024602, ENS | Coding | TRUE |
| HECT domain containing E3 ubiquitin protein ligase 3    | NM_024602, ENS | Coding | TRUE |
| HECT domain containing E3 ubiquitin protein ligase 3    | NM_024602, ENS | Coding | TRUE |
| HECT domain containing E3 ubiquitin protein ligase 3    | NM_024602, ENS | Coding | TRUE |
| HECT domain containing E3 ubiquitin protein ligase 3    | NM_024602, ENS | Coding | TRUE |
| HECT domain containing E3 ubiquitin protein ligase 3    | NM_024602, ENS | Coding | TRUE |
| microtubule-associated protein, RP/EB family, membe     | NM_012326, ENS | Coding | TRUE |
| microtubule-associated protein, RP/EB family, membe     | NM_012326, ENS | Coding | TRUE |
| microtubule-associated protein, RP/EB family, membe     | NM_012326, ENS | Coding | TRUE |
| Holliday junction recognition protein                   | NM_018410, ENS | Coding | TRUE |
| Holliday junction recognition protein                   | NM_018410, ENS | Coding | TRUE |
| Holliday junction recognition protein                   | NM_018410, ENS | Coding | TRUE |

|                                                      |                |        |      |
|------------------------------------------------------|----------------|--------|------|
| Holliday junction recognition protein                | NM_018410, ENS | Coding | TRUE |
| Holliday junction recognition protein                | NM_018410, ENS | Coding | TRUE |
| Holliday junction recognition protein                | NM_018410, ENS | Coding | TRUE |
| Holliday junction recognition protein                | NM_018410, ENS | Coding | TRUE |
| Holliday junction recognition protein                | NM_018410, ENS | Coding | TRUE |
| integrin, alpha 1                                    | NM_181501, ENS | Coding | TRUE |
| integrin, alpha 1                                    | NM_181501, ENS | Coding | TRUE |
| integrin, alpha 1                                    | NM_181501, ENS | Coding | TRUE |
| integrin, alpha 1                                    | NM_181501, ENS | Coding | TRUE |
| small nucleolar RNA, C/D box 49A, small nucleolar RN | NR_002744, NR  | Coding | TRUE |
| small nucleolar RNA, C/D box 49A, small nucleolar RN | NR_002744, NR  | Coding | TRUE |
| small nucleolar RNA, C/D box 49A, small nucleolar RN | NR_002744, NR  | Coding | TRUE |
| small nucleolar RNA, C/D box 49A, small nucleolar RN | NR_002744, NR  | Coding | TRUE |
| small nucleolar RNA, C/D box 49A, small nucleolar RN | NR_002744, NR  | Coding | TRUE |
| small nucleolar RNA, C/D box 49A, small nucleolar RN | NR_002744, NR  | Coding | TRUE |
| small nucleolar RNA, C/D box 49A, small nucleolar RN | NR_002744, NR  | Coding | TRUE |
| uncharacterized LOC100133991                         | NR_024434, NR  | Coding | TRUE |
| uncharacterized LOC100133991                         | NR_024434, NR  | Coding | TRUE |
| DEXH (Asp-Glu-X-His) box polypeptide 58              | NM_024119, ENS | Coding | TRUE |
| DEXH (Asp-Glu-X-His) box polypeptide 58              | NM_024119, ENS | Coding | TRUE |
| DEXH (Asp-Glu-X-His) box polypeptide 58              | NM_024119, ENS | Coding | TRUE |
| DEXH (Asp-Glu-X-His) box polypeptide 58              | NM_024119, ENS | Coding | TRUE |
| DEAD/H (Asp-Glu-Ala-Asp/His) box helicase 11 like 1  | NR_046018, ENS | Coding | TRUE |
| DEAD/H (Asp-Glu-Ala-Asp/His) box helicase 11 like 1  | NR_046018, ENS | Coding | TRUE |
| DEAD/H (Asp-Glu-Ala-Asp/His) box helicase 11 like 1  | NR_046018, ENS | Coding | TRUE |
| IQ motif containing GTPase activating protein 3      | NM_178229, ENS | Coding | TRUE |
| IQ motif containing GTPase activating protein 3      | NM_178229, ENS | Coding | TRUE |
| IQ motif containing GTPase activating protein 3      | NM_178229, ENS | Coding | TRUE |
| IQ motif containing GTPase activating protein 3      | NM_178229, ENS | Coding | TRUE |
| IQ motif containing GTPase activating protein 3      | NM_178229, ENS | Coding | TRUE |
| IQ motif containing GTPase activating protein 3      | NM_178229, ENS | Coding | TRUE |
| IQ motif containing GTPase activating protein 3      | NM_178229, ENS | Coding | TRUE |
| IQ motif containing GTPase activating protein 3      | NM_178229, ENS | Coding | TRUE |
| IQ motif containing GTPase activating protein 3      | NM_178229, ENS | Coding | TRUE |
| IQ motif containing GTPase activating protein 3      | NM_178229, ENS | Coding | TRUE |
| membrane-associated ring finger (C3HC4) 7, E3 ubiqu  | NM_022826, ENS | Coding | TRUE |
| membrane-associated ring finger (C3HC4) 7, E3 ubiqu  | NM_022826, ENS | Coding | TRUE |
| heterogeneous nuclear ribonucleoprotein L-like       | NM_001142650,  | Coding | TRUE |
| heterogeneous nuclear ribonucleoprotein L-like       | NM_001142650,  | Coding | TRUE |
| heterogeneous nuclear ribonucleoprotein L-like       | NM_001142650,  | Coding | TRUE |
| DAZ interacting protein 1-like                       | NM_001170538,  | Coding | TRUE |
| DAZ interacting protein 1-like                       | NM_001170538,  | Coding | TRUE |
| DAZ interacting protein 1-like                       | NM_001170538,  | Coding | TRUE |
| DAZ interacting protein 1-like                       | NM_001170538,  | Coding | TRUE |
| DAZ interacting protein 1-like                       | NM_001170538,  | Coding | TRUE |
| DAZ interacting protein 1-like                       | NM_001170538,  | Coding | TRUE |
| DAZ interacting protein 1-like                       | NM_001170538,  | Coding | TRUE |
| DAZ interacting protein 1-like                       | NM_001170538,  | Coding | TRUE |
| DAZ interacting protein 1-like                       | NM_001170538,  | Coding | TRUE |
| heat shock 70kDa protein 4-like                      | NM_014278, ENS | Coding | TRUE |
| heat shock 70kDa protein 4-like                      | NM_014278, ENS | Coding | TRUE |
| heat shock 70kDa protein 4-like                      | NM_014278, ENS | Coding | TRUE |
| heat shock 70kDa protein 4-like                      | NM_014278, ENS | Coding | TRUE |
| heat shock 70kDa protein 4-like                      | NM_014278, ENS | Coding | TRUE |
| heat shock 70kDa protein 4-like                      | NM_014278, ENS | Coding | TRUE |
| heat shock 70kDa protein 4-like                      | NM_014278, ENS | Coding | TRUE |
| heat shock 70kDa protein 4-like                      | NM_014278, ENS | Coding | TRUE |
| heat shock 70kDa protein 4-like                      | NM_014278, ENS | Coding | TRUE |
| heat shock 70kDa protein 4-like                      | NM_014278, ENS | Coding | TRUE |
| stimulator of chondrogenesis 1                       | NM_007281, ENS | Coding | TRUE |
| stimulator of chondrogenesis 1                       | NM_007281, ENS | Coding | TRUE |
| mitochondria-localized glutamic acid-rich protein    | NM_032623, ENS | Coding | TRUE |
| mitochondria-localized glutamic acid-rich protein    | NM_032623, ENS | Coding | TRUE |



|                                                      |                |        |      |
|------------------------------------------------------|----------------|--------|------|
| mitochondria-localized glutamic acid-rich protein    | NM_032623, ENS | Coding | TRUE |
| mitochondria-localized glutamic acid-rich protein    | NM_032623, ENS | Coding | TRUE |
| protocadherin beta 9                                 | NM_019119, BC1 | Coding | TRUE |
| protocadherin beta 9                                 | NM_019119, BC1 | Coding | TRUE |
| protocadherin beta 9                                 | NM_019119, BC1 | Coding | TRUE |
| RAD1 homolog (S. pombe)                              | NM_002853, NR  | Coding | TRUE |
| RAD1 homolog (S. pombe)                              | NM_002853, NR  | Coding | TRUE |
| cysteine dioxygenase, type I                         | NM_001801, ENS | Coding | TRUE |
| cysteine dioxygenase, type I                         | NM_001801, ENS | Coding | TRUE |
| cysteine dioxygenase, type I                         | NM_001801, ENS | Coding | TRUE |
| cysteine dioxygenase, type I                         | NM_001801, ENS | Coding | TRUE |
| microRNA 23b, microRNA 24-1, microRNA 27b, chrom     | NR_029664, NR  | Coding | TRUE |
| microRNA 23b, microRNA 24-1, microRNA 27b, chrom     | NR_029664, NR  | Coding | TRUE |
| microRNA 23b, microRNA 24-1, microRNA 27b, chrom     | NR_029664, NR  | Coding | TRUE |
| microRNA 23b, microRNA 24-1, microRNA 27b, chrom     | NR_029664, NR  | Coding | TRUE |
| microRNA 23b, microRNA 24-1, microRNA 27b, chrom     | NR_029664, NR  | Coding | TRUE |
| microRNA 23b, microRNA 24-1, microRNA 27b, chrom     | NR_029664, NR  | Coding | TRUE |
| microRNA 23b, microRNA 24-1, microRNA 27b, chrom     | NR_029664, NR  | Coding | TRUE |
| microRNA 23b, microRNA 24-1, microRNA 27b, chrom     | NR_029664, NR  | Coding | TRUE |
| microRNA 23b, microRNA 24-1, microRNA 27b, chrom     | NR_029664, NR  | Coding | TRUE |
| microRNA 23b, microRNA 24-1, microRNA 27b, chrom     | NR_029664, NR  | Coding | TRUE |
| microRNA 23b, microRNA 24-1, microRNA 27b, chrom     | NR_029664, NR  | Coding | TRUE |
| microRNA 23b, microRNA 24-1, microRNA 27b, chrom     | NR_029664, NR  | Coding | TRUE |
| microRNA 23b, microRNA 24-1, microRNA 27b, chrom     | NR_029664, NR  | Coding | TRUE |
| microRNA 23b, microRNA 24-1, microRNA 27b, chrom     | NR_029664, NR  | Coding | TRUE |
| microRNA 23b, microRNA 24-1, microRNA 27b, chrom     | NR_029664, NR  | Coding | TRUE |
| microRNA 23b, microRNA 24-1, microRNA 27b, chrom     | NR_029664, NR  | Coding | TRUE |
| microRNA 23b, microRNA 24-1, microRNA 27b, chrom     | NR_029664, NR  | Coding | TRUE |
| microRNA 23b, microRNA 24-1, microRNA 27b, chrom     | NR_029664, NR  | Coding | TRUE |
| microRNA 23b, microRNA 24-1, microRNA 27b, chrom     | NR_029664, NR  | Coding | TRUE |
| calcium channel, voltage-dependent, N type, alpha 1B | NM_000718, NM  | Coding | TRUE |
| calcium channel, voltage-dependent, N type, alpha 1B | NM_000718, NM  | Coding | TRUE |
| calcium channel, voltage-dependent, N type, alpha 1B | NM_000718, NM  | Coding | TRUE |
| calcium channel, voltage-dependent, N type, alpha 1B | NM_000718, NM  | Coding | TRUE |
| calcium channel, voltage-dependent, N type, alpha 1B | NM_000718, NM  | Coding | TRUE |
|                                                      |                | Coding | TRUE |
|                                                      |                | Coding | TRUE |
|                                                      |                | Coding | TRUE |
|                                                      |                | Coding | TRUE |
|                                                      |                | Coding | TRUE |
|                                                      |                | Coding | TRUE |
|                                                      |                | Coding | TRUE |
| zinc finger and BTB domain containing 16             | NM_001018011,  | Coding | TRUE |
| zinc finger and BTB domain containing 16             | NM_001018011,  | Coding | TRUE |
| zinc finger and BTB domain containing 16             | NM_001018011,  | Coding | TRUE |
| zinc finger and BTB domain containing 16             | NM_001018011,  | Coding | TRUE |
| zinc finger and BTB domain containing 16             | NM_001018011,  | Coding | TRUE |
| zinc finger and BTB domain containing 16             | NM_001018011,  | Coding | TRUE |
| zinc finger and BTB domain containing 16             | NM_001018011,  | Coding | TRUE |
| zinc finger and BTB domain containing 16             | NM_001018011,  | Coding | TRUE |
| zinc finger, BED-type containing 5                   | NM_021211, NM  | Coding | TRUE |
| zinc finger, BED-type containing 5                   | NM_021211, NM  | Coding | TRUE |
| zinc finger, BED-type containing 5                   | NM_021211, NM  | Coding | TRUE |
| zinc finger, BED-type containing 5                   | NM_021211, NM  | Coding | TRUE |
| zinc finger, BED-type containing 5                   | NM_021211, NM  | Coding | TRUE |
| F-box protein 21                                     | NM_015002, NM  | Coding | TRUE |
| F-box protein 21                                     | NM_015002, NM  | Coding | TRUE |
| F-box protein 21                                     | NM_015002, NM  | Coding | TRUE |
| SH3 domain binding glutamic acid-rich protein        | NM_001001713,  | Coding | TRUE |
| SH3 domain binding glutamic acid-rich protein        | NM_001001713,  | Coding | TRUE |
| SH3 domain binding glutamic acid-rich protein        | NM_001001713,  | Coding | TRUE |





|                                                     |                |        |      |
|-----------------------------------------------------|----------------|--------|------|
| homeobox C6                                         | NM_004503, ENS | Coding | TRUE |
| homeobox C6                                         | NM_004503, ENS | Coding | TRUE |
| mitochondrial ribosomal protein L52                 | NM_178336, NM  | Coding | TRUE |
| mitochondrial ribosomal protein L52                 | NM_178336, NM  | Coding | TRUE |
| mitochondrial ribosomal protein L52                 | NM_178336, NM  | Coding | TRUE |
| mitochondrial ribosomal protein L52                 | NM_178336, NM  | Coding | TRUE |
| signal-regulatory protein gamma                     | NM_018556, NM  | Coding | TRUE |
| signal-regulatory protein gamma                     | NM_018556, NM  | Coding | TRUE |
| signal-regulatory protein gamma                     | NM_018556, NM  | Coding | TRUE |
| signal-regulatory protein gamma                     | NM_018556, NM  | Coding | TRUE |
| signal-regulatory protein gamma                     | NM_018556, NM  | Coding | TRUE |
| signal-regulatory protein gamma                     | NM_018556, NM  | Coding | TRUE |
| intersectin 1 (SH3 domain protein)                  | NM_001001132,  | Coding | TRUE |
| intersectin 1 (SH3 domain protein)                  | NM_001001132,  | Coding | TRUE |
| intersectin 1 (SH3 domain protein)                  | NM_001001132,  | Coding | TRUE |
| intersectin 1 (SH3 domain protein)                  | NM_001001132,  | Coding | TRUE |
| intersectin 1 (SH3 domain protein)                  | NM_001001132,  | Coding | TRUE |
| patatin-like phospholipase domain containing 3      | NM_025225, ENS | Coding | TRUE |
| patatin-like phospholipase domain containing 3      | NM_025225, ENS | Coding | TRUE |
| patatin-like phospholipase domain containing 3      | NM_025225, ENS | Coding | TRUE |
| patatin-like phospholipase domain containing 3      | NM_025225, ENS | Coding | TRUE |
| patatin-like phospholipase domain containing 3      | NM_025225, ENS | Coding | TRUE |
| patatin-like phospholipase domain containing 3      | NM_025225, ENS | Coding | TRUE |
| vacuolar protein sorting 52 homolog (S. cerevisiae) | NM_022553, BCC | Coding | TRUE |
| vacuolar protein sorting 52 homolog (S. cerevisiae) | NM_022553, BCC | Coding | TRUE |
| vacuolar protein sorting 52 homolog (S. cerevisiae) | NM_022553, BCC | Coding | TRUE |
| vacuolar protein sorting 52 homolog (S. cerevisiae) | NM_022553, BCC | Coding | TRUE |
| vacuolar protein sorting 52 homolog (S. cerevisiae) | NM_022553, BCC | Coding | TRUE |
| MTERF domain containing 2                           | NM_182501, NR  | Coding | TRUE |
| MTERF domain containing 2                           | NM_182501, NR  | Coding | TRUE |
| MTERF domain containing 2                           | NM_182501, NR  | Coding | TRUE |
| MTERF domain containing 2                           | NM_182501, NR  | Coding | TRUE |
| nuclear cap binding protein subunit 2, 20kDa        | NM_001042540,  | Coding | TRUE |
| nuclear cap binding protein subunit 2, 20kDa        | NM_001042540,  | Coding | TRUE |
| nuclear cap binding protein subunit 2, 20kDa        | NM_001042540,  | Coding | TRUE |
| nuclear cap binding protein subunit 2, 20kDa        | NM_001042540,  | Coding | TRUE |
| WD repeat domain 6                                  | NM_018031, ENS | Coding | TRUE |
| WD repeat domain 6                                  | NM_018031, ENS | Coding | TRUE |
| WD repeat domain 6                                  | NM_018031, ENS | Coding | TRUE |
| WD repeat domain 6                                  | NM_018031, ENS | Coding | TRUE |
|                                                     |                | Coding | TRUE |
|                                                     |                | Coding | TRUE |
| CD4 molecule                                        | NM_000616, NM  | Coding | TRUE |
| CD4 molecule                                        | NM_000616, NM  | Coding | TRUE |
| CD4 molecule                                        | NM_000616, NM  | Coding | TRUE |
| CD4 molecule                                        | NM_000616, NM  | Coding | TRUE |
| CD4 molecule                                        | NM_000616, NM  | Coding | TRUE |
| CD4 molecule                                        | NM_000616, NM  | Coding | TRUE |
| CD4 molecule                                        | NM_000616, NM  | Coding | TRUE |
| leukotriene A4 hydrolase                            | NM_000895, ENS | Coding | TRUE |
| leukotriene A4 hydrolase                            | NM_000895, ENS | Coding | TRUE |
| leukotriene A4 hydrolase                            | NM_000895, ENS | Coding | TRUE |
| leukotriene A4 hydrolase                            | NM_000895, ENS | Coding | TRUE |
| leukotriene A4 hydrolase                            | NM_000895, ENS | Coding | TRUE |
| family with sequence similarity 174, member B       | NM_207446, ENS | Coding | TRUE |
| family with sequence similarity 174, member B       | NM_207446, ENS | Coding | TRUE |
| family with sequence similarity 174, member B       | NM_207446, ENS | Coding | TRUE |
| family with sequence similarity 174, member B       | NM_207446, ENS | Coding | TRUE |

|                                                        |                 |        |      |
|--------------------------------------------------------|-----------------|--------|------|
| WW domain containing E3 ubiquitin protein ligase 2     | NM_007014, NM   | Coding | TRUE |
| WW domain containing E3 ubiquitin protein ligase 2     | NM_007014, NM   | Coding | TRUE |
| WW domain containing E3 ubiquitin protein ligase 2     | NM_007014, NM   | Coding | TRUE |
| WW domain containing E3 ubiquitin protein ligase 2     | NM_007014, NM   | Coding | TRUE |
| WW domain containing E3 ubiquitin protein ligase 2     | NM_007014, NM   | Coding | TRUE |
| WW domain containing E3 ubiquitin protein ligase 2     | NM_007014, NM   | Coding | TRUE |
| WW domain containing E3 ubiquitin protein ligase 2     | NM_007014, NM   | Coding | TRUE |
| membrane protein, palmitoylated 2 (MAGUK p55 subf      | NM_005374, ENS  | Coding | TRUE |
| membrane protein, palmitoylated 2 (MAGUK p55 subf      | NM_005374, ENS  | Coding | TRUE |
| membrane protein, palmitoylated 2 (MAGUK p55 subf      | NM_005374, ENS  | Coding | TRUE |
| membrane protein, palmitoylated 2 (MAGUK p55 subf      | NM_005374, ENS  | Coding | TRUE |
| membrane protein, palmitoylated 2 (MAGUK p55 subf      | NM_005374, ENS  | Coding | TRUE |
| membrane protein, palmitoylated 2 (MAGUK p55 subf      | NM_005374, ENS  | Coding | TRUE |
| NDC80 kinetochore complex component homolog (S.        | NM_006101, ENS  | Coding | TRUE |
| NDC80 kinetochore complex component homolog (S.        | NM_006101, ENS  | Coding | TRUE |
| NDC80 kinetochore complex component homolog (S.        | NM_006101, ENS  | Coding | TRUE |
| NDC80 kinetochore complex component homolog (S.        | NM_006101, ENS  | Coding | TRUE |
| NDC80 kinetochore complex component homolog (S.        | NM_006101, ENS  | Coding | TRUE |
| phosphoinositide-3-kinase interacting protein 1        | NM_001135911, I | Coding | TRUE |
| phosphoinositide-3-kinase interacting protein 1        | NM_001135911, I | Coding | TRUE |
| phosphoinositide-3-kinase interacting protein 1        | NM_001135911, I | Coding | TRUE |
| suppressor APC domain containing 1, mutS homolog 5     | NM_001039651, I | Coding | TRUE |
| suppressor APC domain containing 1, mutS homolog 5     | NM_001039651, I | Coding | TRUE |
| suppressor APC domain containing 1, mutS homolog 5     | NM_001039651, I | Coding | TRUE |
| suppressor APC domain containing 1, mutS homolog 5     | NM_001039651, I | Coding | TRUE |
| suppressor APC domain containing 1, mutS homolog 5     | NM_001039651, I | Coding | TRUE |
| suppressor APC domain containing 1, mutS homolog 5     | NM_001039651, I | Coding | TRUE |
| suppressor APC domain containing 1, mutS homolog 5     | NM_001039651, I | Coding | TRUE |
| suppressor APC domain containing 1, mutS homolog 5     | NM_001039651, I | Coding | TRUE |
| major histocompatibility complex, class I, H (pseudoge | NR_001434       | Coding | TRUE |
| major histocompatibility complex, class I, H (pseudoge | NR_001434       | Coding | TRUE |
| major histocompatibility complex, class I, H (pseudoge | NR_001434       | Coding | TRUE |
| major histocompatibility complex, class I, H (pseudoge | NR_001434       | Coding | TRUE |
| major histocompatibility complex, class I, H (pseudoge | NR_001434       | Coding | TRUE |
| major histocompatibility complex, class I, G           | NM_002127, BCC  | Coding | TRUE |
| major histocompatibility complex, class I, G           | NM_002127, BCC  | Coding | TRUE |
| major histocompatibility complex, class I, G           | NM_002127, BCC  | Coding | TRUE |
| protein kinase D3                                      | NM_005813, ENS  | Coding | TRUE |
| protein kinase D3                                      | NM_005813, ENS  | Coding | TRUE |
| protein kinase D3                                      | NM_005813, ENS  | Coding | TRUE |
| protease, serine, 42                                   | NM_182702, ENS  | Coding | TRUE |
| protease, serine, 42                                   | NM_182702, ENS  | Coding | TRUE |
| protease, serine, 42                                   | NM_182702, ENS  | Coding | TRUE |
| matrilin 2, uncharacterized LOC100506558               | NM_002380, NM   | Coding | TRUE |
| matrilin 2, uncharacterized LOC100506558               | NM_002380, NM   | Coding | TRUE |
| matrilin 2, uncharacterized LOC100506558               | NM_002380, NM   | Coding | TRUE |
| matrilin 2, uncharacterized LOC100506558               | NM_002380, NM   | Coding | TRUE |
| matrilin 2, uncharacterized LOC100506558               | NM_002380, NM   | Coding | TRUE |
| matrilin 2, uncharacterized LOC100506558               | NM_002380, NM   | Coding | TRUE |
| matrilin 2, uncharacterized LOC100506558               | NM_002380, NM   | Coding | TRUE |
| matrilin 2, uncharacterized LOC100506558               | NM_002380, NM   | Coding | TRUE |
| matrilin 2, uncharacterized LOC100506558               | NM_002380, NM   | Coding | TRUE |
| matrilin 2, uncharacterized LOC100506558               | NM_002380, NM   | Coding | TRUE |
| matrilin 2, uncharacterized LOC100506558               | NM_002380, NM   | Coding | TRUE |
| matrilin 2, uncharacterized LOC100506558               | NM_002380, NM   | Coding | TRUE |
| matrilin 2, uncharacterized LOC100506558               | NM_002380, NM   | Coding | TRUE |
| matrilin 2, uncharacterized LOC100506558               | NM_002380, NM   | Coding | TRUE |
| cathepsin L1                                           | NM_001912, NM   | Coding | TRUE |
| cathepsin L1                                           | NM_001912, NM   | Coding | TRUE |
| cathepsin L1                                           | NM_001912, NM   | Coding | TRUE |
| cathepsin L1                                           | NM_001912, NM   | Coding | TRUE |

|                                                         |                |        |      |
|---------------------------------------------------------|----------------|--------|------|
| cathepsin L1                                            | NM_001912, NM  | Coding | TRUE |
| cathepsin L1                                            | NM_001912, NM  | Coding | TRUE |
| glycoprotein M6B                                        | NM_001001994,  | Coding | TRUE |
| glycoprotein M6B                                        | NM_001001994,  | Coding | TRUE |
| glycoprotein M6B                                        | NM_001001994,  | Coding | TRUE |
| glycoprotein M6B                                        | NM_001001994,  | Coding | TRUE |
| glycoprotein M6B                                        | NM_001001994,  | Coding | TRUE |
| glycoprotein M6B                                        | NM_001001994,  | Coding | TRUE |
| glycoprotein M6B                                        | NM_001001994,  | Coding | TRUE |
| glycoprotein M6B                                        | NM_001001994,  | Coding | TRUE |
| glycoprotein M6B                                        | NM_001001994,  | Coding | TRUE |
| glycoprotein M6B                                        | NM_001001994,  | Coding | TRUE |
| glycoprotein M6B                                        | NM_001001994,  | Coding | TRUE |
| glycoprotein M6B                                        | NM_001001994,  | Coding | TRUE |
| glycoprotein M6B                                        | NM_001001994,  | Coding | TRUE |
| glycoprotein M6B                                        | NM_001001994,  | Coding | TRUE |
| glycoprotein M6B                                        | NM_001001994,  | Coding | TRUE |
| glycoprotein M6B                                        | NM_001001994,  | Coding | TRUE |
| glycoprotein M6B                                        | NM_001001994,  | Coding | TRUE |
| glycoprotein M6B                                        | NM_001001994,  | Coding | TRUE |
| glycoprotein M6B                                        | NM_001001994,  | Coding | TRUE |
| chromosome 15 open reading frame 40                     | NM_144597, NM  | Coding | TRUE |
| chromosome 15 open reading frame 40                     | NM_144597, NM  | Coding | TRUE |
| chromosome 15 open reading frame 40                     | NM_144597, NM  | Coding | TRUE |
| chromosome 15 open reading frame 40                     | NM_144597, NM  | Coding | TRUE |
| RAB11 family interacting protein 4 (class II), microRNA | NM_032932, NR  | Coding | TRUE |
| RAB11 family interacting protein 4 (class II), microRNA | NM_032932, NR  | Coding | TRUE |
| RAB11 family interacting protein 4 (class II), microRNA | NM_032932, NR  | Coding | TRUE |
| ADAM metallopeptidase domain 33                         | NM_025220, NM  | Coding | TRUE |
| ADAM metallopeptidase domain 33                         | NM_025220, NM  | Coding | TRUE |
| ADAM metallopeptidase domain 33                         | NM_025220, NM  | Coding | TRUE |
| small G protein signaling modulator 3                   | NM_015705, ENS | Coding | TRUE |
| small G protein signaling modulator 3                   | NM_015705, ENS | Coding | TRUE |
| exosome component 10                                    | NM_001001998,  | Coding | TRUE |
| exosome component 10                                    | NM_001001998,  | Coding | TRUE |
| exosome component 10                                    | NM_001001998,  | Coding | TRUE |
| exosome component 10                                    | NM_001001998,  | Coding | TRUE |
| phospholipase A2, group IIA (platelets, synovial fluid) | NM_000300, NM  | Coding | TRUE |
| phospholipase A2, group IIA (platelets, synovial fluid) | NM_000300, NM  | Coding | TRUE |
| phospholipase A2, group IIA (platelets, synovial fluid) | NM_000300, NM  | Coding | TRUE |
| RWD domain containing 3                                 | NM_015485, NM  | Coding | TRUE |
| RWD domain containing 3                                 | NM_015485, NM  | Coding | TRUE |
| POTE ankyrin domain family, member J                    | ENST000004096  | Coding | TRUE |
| POTE ankyrin domain family, member J                    | ENST000004096  | Coding | TRUE |
| POTE ankyrin domain family, member J                    | ENST000004096  | Coding | TRUE |
| coiled-coil domain containing 14                        | NM_022757, BCC | Coding | TRUE |
| coiled-coil domain containing 14                        | NM_022757, BCC | Coding | TRUE |
| coiled-coil domain containing 14                        | NM_022757, BCC | Coding | TRUE |
| coiled-coil domain containing 14                        | NM_022757, BCC | Coding | TRUE |
| coiled-coil domain containing 14                        | NM_022757, BCC | Coding | TRUE |
| coiled-coil domain containing 14                        | NM_022757, BCC | Coding | TRUE |
| uncharacterized LOC550112, uncharacterized LOC550112    | NR_015439, NR  | Coding | TRUE |
| uncharacterized LOC550112, uncharacterized LOC550112    | NR_015439, NR  | Coding | TRUE |
| uncharacterized LOC550112, uncharacterized LOC550112    | NR_015439, NR  | Coding | TRUE |
| uncharacterized LOC550112, uncharacterized LOC550112    | NR_015439, NR  | Coding | TRUE |
| uncharacterized LOC550112, uncharacterized LOC550112    | NR_015439, NR  | Coding | TRUE |
| centrosomal protein 72kDa                               | NM_018140, ENS | Coding | TRUE |
| centrosomal protein 72kDa                               | NM_018140, ENS | Coding | TRUE |
| centrosomal protein 72kDa                               | NM_018140, ENS | Coding | TRUE |
| centrosomal protein 72kDa                               | NM_018140, ENS | Coding | TRUE |

|                                                          |                          |        |      |
|----------------------------------------------------------|--------------------------|--------|------|
| KH homology domain containing 1-like, KH homology        | NM_001126063,            | Coding | TRUE |
| KH homology domain containing 1-like, KH homology        | NM_001126063,            | Coding | TRUE |
| KH homology domain containing 1-like, KH homology        | NM_001126063,            | Coding | TRUE |
| KH homology domain containing 1-like, KH homology        | NM_001126063,            | Coding | TRUE |
| KH homology domain containing 1-like, KH homology        | NM_001126063,            | Coding | TRUE |
| KH homology domain containing 1-like, KH homology        | NM_001126063,            | Coding | TRUE |
| homeobox A3                                              | NM_030661, NM_030661,    | Coding | TRUE |
| homeobox A3                                              | NM_030661, NM_030661,    | Coding | TRUE |
| homeobox A3                                              | NM_030661, NM_030661,    | Coding | TRUE |
| homeobox A3                                              | NM_030661, NM_030661,    | Coding | TRUE |
| homeobox A3                                              | NM_030661, NM_030661,    | Coding | TRUE |
| chromosome 11 open reading frame 9                       | NM_013279, NM_013279,    | Coding | TRUE |
| chromosome 11 open reading frame 9                       | NM_013279, NM_013279,    | Coding | TRUE |
| chromosome 11 open reading frame 9                       | NM_013279, NM_013279,    | Coding | TRUE |
| chromosome 11 open reading frame 9                       | NM_013279, NM_013279,    | Coding | TRUE |
| chromosome 11 open reading frame 9                       | NM_013279, NM_013279,    | Coding | TRUE |
| 2-5-oligoadenylate synthetase 1, 40/46kDa                | NM_001032409,            | Coding | TRUE |
| 2-5-oligoadenylate synthetase 1, 40/46kDa                | NM_001032409,            | Coding | TRUE |
| 2-5-oligoadenylate synthetase 1, 40/46kDa                | NM_001032409,            | Coding | TRUE |
| placental growth factor                                  | NM_001207012,            | Coding | TRUE |
| placental growth factor                                  | NM_001207012,            | Coding | TRUE |
| placental growth factor                                  | NM_001207012,            | Coding | TRUE |
| placental growth factor                                  | NM_001207012,            | Coding | TRUE |
| placental growth factor                                  | NM_001207012,            | Coding | TRUE |
| placental growth factor                                  | NM_001207012,            | Coding | TRUE |
| arginyl aminopeptidase (aminopeptidase B)                | NM_020216, ENS001207012, | Coding | TRUE |
| arginyl aminopeptidase (aminopeptidase B)                | NM_020216, ENS001207012, | Coding | TRUE |
| arginyl aminopeptidase (aminopeptidase B)                | NM_020216, ENS001207012, | Coding | TRUE |
| arginyl aminopeptidase (aminopeptidase B)                | NM_020216, ENS001207012, | Coding | TRUE |
| cysteine-rich PDZ-binding protein                        | NM_014171, ENS001207012, | Coding | TRUE |
| cysteine-rich PDZ-binding protein                        | NM_014171, ENS001207012, | Coding | TRUE |
| cysteine-rich PDZ-binding protein                        | NM_014171, ENS001207012, | Coding | TRUE |
| cysteine-rich PDZ-binding protein                        | NM_014171, ENS001207012, | Coding | TRUE |
| cysteine-rich PDZ-binding protein                        | NM_014171, ENS001207012, | Coding | TRUE |
| sterile alpha motif and leucine zipper containing kinase | NM_016653, NM_016653,    | Coding | TRUE |
| sterile alpha motif and leucine zipper containing kinase | NM_016653, NM_016653,    | Coding | TRUE |
| sterile alpha motif and leucine zipper containing kinase | NM_016653, NM_016653,    | Coding | TRUE |
| pellino E3 ubiquitin protein ligase 1                    | NM_020651, ENS001207012, | Coding | TRUE |
| pellino E3 ubiquitin protein ligase 1                    | NM_020651, ENS001207012, | Coding | TRUE |
| phosphatidylinositol glycan anchor biosynthesis, class   | NM_001127178,            | Coding | TRUE |
| phosphatidylinositol glycan anchor biosynthesis, class   | NM_001127178,            | Coding | TRUE |
| phosphatidylinositol glycan anchor biosynthesis, class   | NM_001127178,            | Coding | TRUE |
| phosphatidylinositol glycan anchor biosynthesis, class   | NM_001127178,            | Coding | TRUE |
| phosphatidylinositol glycan anchor biosynthesis, class   | NM_001127178,            | Coding | TRUE |
| phosphatidylinositol glycan anchor biosynthesis, class   | NM_001127178,            | Coding | TRUE |
| phosphatidylinositol glycan anchor biosynthesis, class   | NM_001127178,            | Coding | TRUE |
| phosphatidylinositol glycan anchor biosynthesis, class   | NM_001127178,            | Coding | TRUE |
| shroom family member 3                                   | NM_020859, ENS001207012, | Coding | TRUE |
| shroom family member 3                                   | NM_020859, ENS001207012, | Coding | TRUE |
| shroom family member 3                                   | NM_020859, ENS001207012, | Coding | TRUE |
| shroom family member 3                                   | NM_020859, ENS001207012, | Coding | TRUE |
| shroom family member 3                                   | NM_020859, ENS001207012, | Coding | TRUE |
| shroom family member 3                                   | NM_020859, ENS001207012, | Coding | TRUE |
| 3-hydroxy-3-methylglutaryl-CoA reductase                 | NM_000859, NM_000859,    | Coding | TRUE |
| 3-hydroxy-3-methylglutaryl-CoA reductase                 | NM_000859, NM_000859,    | Coding | TRUE |
| 3-hydroxy-3-methylglutaryl-CoA reductase                 | NM_000859, NM_000859,    | Coding | TRUE |
| nucleophosmin (nucleolar phosphoprotein B23, numat       | NM_001037738,            | Coding | TRUE |
| nucleophosmin (nucleolar phosphoprotein B23, numat       | NM_001037738,            | Coding | TRUE |





|                                                         |                |        |      |
|---------------------------------------------------------|----------------|--------|------|
| growth arrest-specific 7                                | NM_201433, NM  | Coding | TRUE |
| growth arrest-specific 7                                | NM_201433, NM  | Coding | TRUE |
| growth arrest-specific 7                                | NM_201433, NM  | Coding | TRUE |
| growth arrest-specific 7                                | NM_201433, NM  | Coding | TRUE |
| growth arrest-specific 7                                | NM_201433, NM  | Coding | TRUE |
| THO complex 1                                           | NM_005131, ENS | Coding | TRUE |
| THO complex 1                                           | NM_005131, ENS | Coding | TRUE |
| THO complex 1                                           | NM_005131, ENS | Coding | TRUE |
| THO complex 1                                           | NM_005131, ENS | Coding | TRUE |
| zinc finger protein 419                                 | NM_001098491,  | Coding | TRUE |
| zinc finger protein 419                                 | NM_001098491,  | Coding | TRUE |
| dual-specificity tyrosine-(Y)-phosphorylation regulated | NM_004714, NM  | Coding | TRUE |
| dual-specificity tyrosine-(Y)-phosphorylation regulated | NM_004714, NM  | Coding | TRUE |
| dual-specificity tyrosine-(Y)-phosphorylation regulated | NM_004714, NM  | Coding | TRUE |
| dual-specificity tyrosine-(Y)-phosphorylation regulated | NM_004714, NM  | Coding | TRUE |
| dual-specificity tyrosine-(Y)-phosphorylation regulated | NM_004714, NM  | Coding | TRUE |
| heat shock 70kDa protein 1A, heat shock 70kDa prote     | NM_005345, ENS | Coding | TRUE |
| heat shock 70kDa protein 1A, heat shock 70kDa prote     | NM_005345, ENS | Coding | TRUE |
| kelch-like 7 (Drosophila)                               | NM_001031710,  | Coding | TRUE |
| kelch-like 7 (Drosophila)                               | NM_001031710,  | Coding | TRUE |
| kelch-like 7 (Drosophila)                               | NM_001031710,  | Coding | TRUE |
| kelch-like 7 (Drosophila)                               | NM_001031710,  | Coding | TRUE |
| kelch-like 7 (Drosophila)                               | NM_001031710,  | Coding | TRUE |
| RNA terminal phosphate cyclase-like 1                   | NM_005772, ENS | Coding | TRUE |
| RNA terminal phosphate cyclase-like 1                   | NM_005772, ENS | Coding | TRUE |
| RNA terminal phosphate cyclase-like 1                   | NM_005772, ENS | Coding | TRUE |
| spermine synthase                                       | NM_004595, ENS | Coding | TRUE |
| spermine synthase                                       | NM_004595, ENS | Coding | TRUE |
| spermine synthase                                       | NM_004595, ENS | Coding | TRUE |
| spermine synthase                                       | NM_004595, ENS | Coding | TRUE |
| family with sequence similarity 107, member B           | NM_031453, ENS | Coding | TRUE |
| family with sequence similarity 107, member B           | NM_031453, ENS | Coding | TRUE |
| family with sequence similarity 107, member B           | NM_031453, ENS | Coding | TRUE |
| MMS19 nucleotide excision repair homolog (S. cerevis)   | NM_022362, ENS | Coding | TRUE |
| MMS19 nucleotide excision repair homolog (S. cerevis)   | NM_022362, ENS | Coding | TRUE |
| MMS19 nucleotide excision repair homolog (S. cerevis)   | NM_022362, ENS | Coding | TRUE |
| MMS19 nucleotide excision repair homolog (S. cerevis)   | NM_022362, ENS | Coding | TRUE |
| multiple endocrine neoplasia I                          | NM_000244, NM  | Coding | TRUE |
| multiple endocrine neoplasia I                          | NM_000244, NM  | Coding | TRUE |
| calcium channel, voltage-dependent, T type, alpha 1G    | NM_198397, NM  | Coding | TRUE |
| calcium channel, voltage-dependent, T type, alpha 1G    | NM_198397, NM  | Coding | TRUE |
| calcium channel, voltage-dependent, T type, alpha 1G    | NM_198397, NM  | Coding | TRUE |
| calcium channel, voltage-dependent, T type, alpha 1G    | NM_198397, NM  | Coding | TRUE |
| calcium channel, voltage-dependent, T type, alpha 1G    | NM_198397, NM  | Coding | TRUE |
| calcium channel, voltage-dependent, T type, alpha 1G    | NM_198397, NM  | Coding | TRUE |
| calcium channel, voltage-dependent, T type, alpha 1G    | NM_198397, NM  | Coding | TRUE |
| calcium channel, voltage-dependent, T type, alpha 1G    | NM_198397, NM  | Coding | TRUE |
| calcium channel, voltage-dependent, T type, alpha 1G    | NM_198397, NM  | Coding | TRUE |
| microtubule-associated protein, RP/EB family, member    | NM_001143826,  | Coding | TRUE |
| microtubule-associated protein, RP/EB family, member    | NM_001143826,  | Coding | TRUE |
| microtubule-associated protein, RP/EB family, member    | NM_001143826,  | Coding | TRUE |
| microtubule-associated protein, RP/EB family, member    | NM_001143826,  | Coding | TRUE |
| microtubule-associated protein, RP/EB family, member    | NM_001143826,  | Coding | TRUE |
| zinc finger protein 133                                 | NM_003434, NM  | Coding | TRUE |
| zinc finger protein 133                                 | NM_003434, NM  | Coding | TRUE |
| zinc finger protein 133                                 | NM_003434, NM  | Coding | TRUE |
| zinc finger protein 133                                 | NM_003434, NM  | Coding | TRUE |
| KDEL (Lys-Asp-Glu-Leu) endoplasmic reticulum protei     | NM_006855, NM  | Coding | TRUE |
| KDEL (Lys-Asp-Glu-Leu) endoplasmic reticulum protei     | NM_006855, NM  | Coding | TRUE |



|                                                          |                |        |      |
|----------------------------------------------------------|----------------|--------|------|
| COBW domain containing 5, COBW domain containing         | NM_001024916,  | Coding | TRUE |
| COBW domain containing 5, COBW domain containing         | NM_001024916,  | Coding | TRUE |
| mediator complex subunit 12                              | NM_005120, ENS | Coding | TRUE |
| mediator complex subunit 12                              | NM_005120, ENS | Coding | TRUE |
| mediator complex subunit 12                              | NM_005120, ENS | Coding | TRUE |
| neuroligin 4, Y-linked                                   | NM_001164238,  | Coding | TRUE |
| neuroligin 4, Y-linked                                   | NM_001164238,  | Coding | TRUE |
| neuroligin 4, Y-linked                                   | NM_001164238,  | Coding | TRUE |
| neuroligin 4, Y-linked                                   | NM_001164238,  | Coding | TRUE |
| neuroligin 4, Y-linked                                   | NM_001164238,  | Coding | TRUE |
| neuroligin 4, Y-linked                                   | NM_001164238,  | Coding | TRUE |
| neuroligin 4, Y-linked                                   | NM_001164238,  | Coding | TRUE |
| neuroligin 4, Y-linked                                   | NM_001164238,  | Coding | TRUE |
| neuroligin 4, Y-linked                                   | NM_001164238,  | Coding | TRUE |
| neuroligin 4, Y-linked                                   | NM_001164238,  | Coding | TRUE |
| neuroligin 4, Y-linked                                   | NM_001164238,  | Coding | TRUE |
| neuroligin 4, Y-linked                                   | NM_001164238,  | Coding | TRUE |
| neuroligin 4, Y-linked                                   | NM_001164238,  | Coding | TRUE |
| neuroligin 4, Y-linked                                   | NM_001164238,  | Coding | TRUE |
| neuroligin 4, Y-linked                                   | NM_001164238,  | Coding | TRUE |
| neuroligin 4, Y-linked                                   | NM_001164238,  | Coding | TRUE |
| neuroligin 4, Y-linked                                   | NM_001164238,  | Coding | TRUE |
| neuroligin 4, Y-linked                                   | NM_001164238,  | Coding | TRUE |
| neuroligin 4, Y-linked                                   | NM_001164238,  | Coding | TRUE |
| neuroligin 4, Y-linked                                   | NM_001164238,  | Coding | TRUE |
| DEAD (Asp-Glu-Ala-Asp) box polypeptide 50                | NM_024045, BCC | Coding | TRUE |
| DEAD (Asp-Glu-Ala-Asp) box polypeptide 50                | NM_024045, BCC | Coding | TRUE |
| DEAD (Asp-Glu-Ala-Asp) box polypeptide 50                | NM_024045, BCC | Coding | TRUE |
| DEAD (Asp-Glu-Ala-Asp) box polypeptide 50                | NM_024045, BCC | Coding | TRUE |
| acyl-CoA synthetase long-chain family member 5           | NM_016234, NM  | Coding | TRUE |
| acyl-CoA synthetase long-chain family member 5           | NM_016234, NM  | Coding | TRUE |
| acyl-CoA synthetase long-chain family member 5           | NM_016234, NM  | Coding | TRUE |
| acyl-CoA synthetase long-chain family member 5           | NM_016234, NM  | Coding | TRUE |
| acyl-CoA synthetase long-chain family member 5           | NM_016234, NM  | Coding | TRUE |
| acyl-CoA synthetase long-chain family member 5           | NM_016234, NM  | Coding | TRUE |
| transcription factor 7-like 2 (T-cell specific, HMG-box) | NM_001146274,  | Coding | TRUE |
| transcription factor 7-like 2 (T-cell specific, HMG-box) | NM_001146274,  | Coding | TRUE |
| transcription factor 7-like 2 (T-cell specific, HMG-box) | NM_001146274,  | Coding | TRUE |
| transcription factor 7-like 2 (T-cell specific, HMG-box) | NM_001146274,  | Coding | TRUE |
| transcription factor 7-like 2 (T-cell specific, HMG-box) | NM_001146274,  | Coding | TRUE |
| sodium channel, voltage-gated, type IV, beta subunit     | NM_001142348,  | Coding | TRUE |
| sodium channel, voltage-gated, type IV, beta subunit     | NM_001142348,  | Coding | TRUE |
| sodium channel, voltage-gated, type IV, beta subunit     | NM_001142348,  | Coding | TRUE |
| sodium channel, voltage-gated, type IV, beta subunit     | NM_001142348,  | Coding | TRUE |
| GLI family zinc finger 1                                 | NM_001160045,  | Coding | TRUE |
| GLI family zinc finger 1                                 | NM_001160045,  | Coding | TRUE |
| GLI family zinc finger 1                                 | NM_001160045,  | Coding | TRUE |
| polymerase (DNA directed), epsilon, catalytic subunit    | NM_006231, ENS | Coding | TRUE |
| polymerase (DNA directed), epsilon, catalytic subunit    | NM_006231, ENS | Coding | TRUE |
| polymerase (DNA directed), epsilon, catalytic subunit    | NM_006231, ENS | Coding | TRUE |
| polymerase (DNA directed), epsilon, catalytic subunit    | NM_006231, ENS | Coding | TRUE |
| polymerase (DNA directed), epsilon, catalytic subunit    | NM_006231, ENS | Coding | TRUE |
| polymerase (DNA directed), epsilon, catalytic subunit    | NM_006231, ENS | Coding | TRUE |
| polymerase (DNA directed), epsilon, catalytic subunit    | NM_006231, ENS | Coding | TRUE |
| polymerase (DNA directed), epsilon, catalytic subunit    | NM_006231, ENS | Coding | TRUE |
| UBA domain containing 2                                  | NM_001144072,  | Coding | TRUE |
| UBA domain containing 2                                  | NM_001144072,  | Coding | TRUE |
| golgin A8 family, member D, pseudogene                   | NR_027407, ENS | Coding | TRUE |
| golgin A8 family, member D, pseudogene                   | NR_027407, ENS | Coding | TRUE |
| golgin A8 family, member D, pseudogene                   | NR_027407, ENS | Coding | TRUE |



|                                                        |                |        |      |
|--------------------------------------------------------|----------------|--------|------|
| EPM2A (laforin) interacting protein 1                  | NM_014805, ENS | Coding | TRUE |
| versican                                               | NM_001164098,  | Coding | TRUE |
| versican                                               | NM_001164098,  | Coding | TRUE |
| versican                                               | NM_001164098,  | Coding | TRUE |
| versican                                               | NM_001164098,  | Coding | TRUE |
| versican                                               | NM_001164098,  | Coding | TRUE |
| collagen, type XXIII, alpha 1                          | NM_173465, ENS | Coding | TRUE |
| collagen, type XXIII, alpha 1                          | NM_173465, ENS | Coding | TRUE |
| collagen, type XXIII, alpha 1                          | NM_173465, ENS | Coding | TRUE |
| collagen, type XXIII, alpha 1                          | NM_173465, ENS | Coding | TRUE |
| collagen, type XXIII, alpha 1                          | NM_173465, ENS | Coding | TRUE |
| STEAP family member 1B                                 | NM_001164460,  | Coding | TRUE |
| STEAP family member 1B                                 | NM_001164460,  | Coding | TRUE |
| STEAP family member 1B                                 | NM_001164460,  | Coding | TRUE |
| uncharacterized LOC100507299                           | NR_039990      | Coding | TRUE |
| uncharacterized LOC100507299                           | NR_039990      | Coding | TRUE |
| uncharacterized LOC100507299                           | NR_039990      | Coding | TRUE |
| polymerase (DNA directed), alpha 2, accessory subunit  | BC002990, ENST | Coding | TRUE |
| polymerase (DNA directed), alpha 2, accessory subunit  | BC002990, ENST | Coding | TRUE |
| polymerase (DNA directed), alpha 2, accessory subunit  | BC002990, ENST | Coding | TRUE |
| signal peptide, CUB domain, EGF-like 2                 | NM_001170690,  | Coding | TRUE |
| signal peptide, CUB domain, EGF-like 2                 | NM_001170690,  | Coding | TRUE |
| signal peptide, CUB domain, EGF-like 2                 | NM_001170690,  | Coding | TRUE |
| signal peptide, CUB domain, EGF-like 2                 | NM_001170690,  | Coding | TRUE |
| signal peptide, CUB domain, EGF-like 2                 | NM_001170690,  | Coding | TRUE |
| signal peptide, CUB domain, EGF-like 2                 | NM_001170690,  | Coding | TRUE |
| signal peptide, CUB domain, EGF-like 2                 | NM_001170690,  | Coding | TRUE |
| signal peptide, CUB domain, EGF-like 2                 | NM_001170690,  | Coding | TRUE |
| farnesyltransferase, CAAX box, beta, CHURC1-FNTB       | NM_002028, ENS | Coding | TRUE |
| farnesyltransferase, CAAX box, beta, CHURC1-FNTB       | NM_002028, ENS | Coding | TRUE |
| farnesyltransferase, CAAX box, beta, CHURC1-FNTB       | NM_002028, ENS | Coding | TRUE |
| farnesyltransferase, CAAX box, beta, CHURC1-FNTB       | NM_002028, ENS | Coding | TRUE |
| platelet endothelial aggregation receptor 1            | NM_001080471,  | Coding | TRUE |
| platelet endothelial aggregation receptor 1            | NM_001080471,  | Coding | TRUE |
| platelet endothelial aggregation receptor 1            | NM_001080471,  | Coding | TRUE |
| platelet endothelial aggregation receptor 1            | NM_001080471,  | Coding | TRUE |
| tetratricopeptide repeat domain 4                      | NM_004623, ENS | Coding | TRUE |
| tetratricopeptide repeat domain 4                      | NM_004623, ENS | Coding | TRUE |
| tetratricopeptide repeat domain 4                      | NM_004623, ENS | Coding | TRUE |
| tetratricopeptide repeat domain 4                      | NM_004623, ENS | Coding | TRUE |
| ATP-binding cassette, sub-family B (MDR/TAP), member 1 | NM_005689, ENS | Coding | TRUE |
| ATP-binding cassette, sub-family B (MDR/TAP), member 1 | NM_005689, ENS | Coding | TRUE |
| ATP-binding cassette, sub-family B (MDR/TAP), member 1 | NM_005689, ENS | Coding | TRUE |
| ATP-binding cassette, sub-family B (MDR/TAP), member 1 | NM_005689, ENS | Coding | TRUE |
| ATP-binding cassette, sub-family B (MDR/TAP), member 1 | NM_005689, ENS | Coding | TRUE |
| ATP-binding cassette, sub-family B (MDR/TAP), member 1 | NM_005689, ENS | Coding | TRUE |
| ATP-binding cassette, sub-family B (MDR/TAP), member 1 | NM_005689, ENS | Coding | TRUE |
| ATP-binding cassette, sub-family B (MDR/TAP), member 1 | NM_005689, ENS | Coding | TRUE |
| ATP-binding cassette, sub-family B (MDR/TAP), member 1 | NM_005689, ENS | Coding | TRUE |
| ATP-binding cassette, sub-family B (MDR/TAP), member 1 | NM_005689, ENS | Coding | TRUE |
| ATP-binding cassette, sub-family B (MDR/TAP), member 1 | NM_005689, ENS | Coding | TRUE |
| nicotinamide nucleotide transhydrogenase               | NM_012343, NM  | Coding | TRUE |
| nicotinamide nucleotide transhydrogenase               | NM_012343, NM  | Coding | TRUE |
| nicotinamide nucleotide transhydrogenase               | NM_012343, NM  | Coding | TRUE |
| tenascin XB                                            | NM_019105, NM  | Coding | TRUE |
| tenascin XB                                            | NM_019105, NM  | Coding | TRUE |
| tenascin XB                                            | NM_019105, NM  | Coding | TRUE |
| tenascin XB                                            | NM_019105, NM  | Coding | TRUE |
| putative homeodomain transcription factor 2            | NM_001127357,  | Coding | TRUE |
| putative homeodomain transcription factor 2            | NM_001127357,  | Coding | TRUE |

|                                                        |                 |        |      |
|--------------------------------------------------------|-----------------|--------|------|
| putative homeodomain transcription factor 2            | NM_001127357,   | Coding | TRUE |
| NFKB activating protein pseudogene 1                   | NR_027131, ENS  | Coding | TRUE |
| NFKB activating protein pseudogene 1                   | NR_027131, ENS  | Coding | TRUE |
| mitogen-activated protein kinase 8 interacting protein | NM_005456, ENS  | Coding | TRUE |
| mitogen-activated protein kinase 8 interacting protein | NM_005456, ENS  | Coding | TRUE |
| mitogen-activated protein kinase 8 interacting protein | NM_005456, ENS  | Coding | TRUE |
| mitogen-activated protein kinase 8 interacting protein | NM_005456, ENS  | Coding | TRUE |
| mitogen-activated protein kinase 8 interacting protein | NM_005456, ENS  | Coding | TRUE |
| mitogen-activated protein kinase 8 interacting protein | NM_005456, ENS  | Coding | TRUE |
| mitogen-activated protein kinase 8 interacting protein | NM_005456, ENS  | Coding | TRUE |
| mitogen-activated protein kinase 8 interacting protein | NM_005456, ENS  | Coding | TRUE |
| suppression of tumorigenicity 5                        | NM_005418, NM   | Coding | TRUE |
| suppression of tumorigenicity 5                        | NM_005418, NM   | Coding | TRUE |
| suppression of tumorigenicity 5                        | NM_005418, NM   | Coding | TRUE |
| SH3 and multiple ankyrin repeat domains 2              | NM_012309, NM   | Coding | TRUE |
| SH3 and multiple ankyrin repeat domains 2              | NM_012309, NM   | Coding | TRUE |
| SH3 and multiple ankyrin repeat domains 2              | NM_012309, NM   | Coding | TRUE |
| SH3 and multiple ankyrin repeat domains 2              | NM_012309, NM   | Coding | TRUE |
| SH3 and multiple ankyrin repeat domains 2              | NM_012309, NM   | Coding | TRUE |
| SH3 and multiple ankyrin repeat domains 2              | NM_012309, NM   | Coding | TRUE |
| SH3 and multiple ankyrin repeat domains 2              | NM_012309, NM   | Coding | TRUE |
| SH3 and multiple ankyrin repeat domains 2              | NM_012309, NM   | Coding | TRUE |
| propionyl CoA carboxylase, alpha polypeptide           | NM_000282, NM   | Coding | TRUE |
| propionyl CoA carboxylase, alpha polypeptide           | NM_000282, NM   | Coding | TRUE |
| cytochrome P450, family 46, subfamily A, polypeptide   | NM_006668, ENS  | Coding | TRUE |
| cytochrome P450, family 46, subfamily A, polypeptide   | NM_006668, ENS  | Coding | TRUE |
| cytochrome P450, family 46, subfamily A, polypeptide   | NM_006668, ENS  | Coding | TRUE |
| KIAA0317                                               | NM_001039479,   | Coding | TRUE |
| KIAA0317                                               | NM_001039479,   | Coding | TRUE |
| KIAA0317                                               | NM_001039479,   | Coding | TRUE |
| KIAA0317                                               | NM_001039479,   | Coding | TRUE |
| KIAA0317                                               | NM_001039479,   | Coding | TRUE |
| cancer susceptibility candidate 5                      | NM_144508, NM   | Coding | TRUE |
| cancer susceptibility candidate 5                      | NM_144508, NM   | Coding | TRUE |
| cancer susceptibility candidate 5                      | NM_144508, NM   | Coding | TRUE |
| cancer susceptibility candidate 5                      | NM_144508, NM   | Coding | TRUE |
| cancer susceptibility candidate 5                      | NM_144508, NM   | Coding | TRUE |
| cancer susceptibility candidate 5                      | NM_144508, NM   | Coding | TRUE |
| cancer susceptibility candidate 5                      | NM_144508, NM   | Coding | TRUE |
| cancer susceptibility candidate 5                      | NM_144508, NM   | Coding | TRUE |
| coiled-coil domain containing 144C                     | NR_023380, ENS  | Coding | TRUE |
| coiled-coil domain containing 144C                     | NR_023380, ENS  | Coding | TRUE |
| coiled-coil domain containing 144C                     | NR_023380, ENS  | Coding | TRUE |
| coiled-coil domain containing 144C                     | NR_023380, ENS  | Coding | TRUE |
| coiled-coil domain containing 144C                     | NR_023380, ENS  | Coding | TRUE |
| coiled-coil domain containing 144C                     | NR_023380, ENS  | Coding | TRUE |
| coiled-coil domain containing 144C                     | NR_023380, ENS  | Coding | TRUE |
| coiled-coil domain containing 144C                     | NR_023380, ENS  | Coding | TRUE |
| coiled-coil domain containing 144C                     | NR_023380, ENS  | Coding | TRUE |
| basigin (Ok blood group)                               | NM_001728, NM   | Coding | TRUE |
| basigin (Ok blood group)                               | NM_001728, NM   | Coding | TRUE |
| basigin (Ok blood group)                               | NM_001728, NM   | Coding | TRUE |
| phosphodiesterase 4A, cAMP-specific                    | NM_001111307, N | Coding | TRUE |
| phosphodiesterase 4A, cAMP-specific                    | NM_001111307, N | Coding | TRUE |
| protein tyrosine phosphatase, receptor type, U         | NM_001195001, I | Coding | TRUE |
| protein tyrosine phosphatase, receptor type, U         | NM_001195001, I | Coding | TRUE |
| protein tyrosine phosphatase, receptor type, U         | NM_001195001, I | Coding | TRUE |
| protein tyrosine phosphatase, receptor type, U         | NM_001195001, I | Coding | TRUE |
| Rab geranylgeranyltransferase, beta subunit, small nu  | NM_004582, NR   | Coding | TRUE |
| Rab geranylgeranyltransferase, beta subunit, small nu  | NM_004582, NR   | Coding | TRUE |



|                                              |                       |        |      |
|----------------------------------------------|-----------------------|--------|------|
| chromosome 2 open reading frame 88           | NM_001042519,         | Coding | TRUE |
| chromosome 2 open reading frame 88           | NM_001042519,         | Coding | TRUE |
| diacylglycerol kinase, delta 130kDa          | NM_003648, NM_003648, | Coding | TRUE |
| diacylglycerol kinase, delta 130kDa          | NM_003648, NM_003648, | Coding | TRUE |
| diacylglycerol kinase, delta 130kDa          | NM_003648, NM_003648, | Coding | TRUE |
| diacylglycerol kinase, delta 130kDa          | NM_003648, NM_003648, | Coding | TRUE |
| diacylglycerol kinase, delta 130kDa          | NM_003648, NM_003648, | Coding | TRUE |
| diacylglycerol kinase, delta 130kDa          | NM_003648, NM_003648, | Coding | TRUE |
| diacylglycerol kinase, delta 130kDa          | NM_003648, NM_003648, | Coding | TRUE |
| diacylglycerol kinase, delta 130kDa          | NM_003648, NM_003648, | Coding | TRUE |
| diacylglycerol kinase, delta 130kDa          | NM_003648, NM_003648, | Coding | TRUE |
| diacylglycerol kinase, delta 130kDa          | NM_003648, NM_003648, | Coding | TRUE |
| diacylglycerol kinase, delta 130kDa          | NM_003648, NM_003648, | Coding | TRUE |
| EPH receptor A4                              | NM_004438, ENS        | Coding | TRUE |
| EPH receptor A4                              | NM_004438, ENS        | Coding | TRUE |
| EPH receptor A4                              | NM_004438, ENS        | Coding | TRUE |
| EPH receptor A4                              | NM_004438, ENS        | Coding | TRUE |
| EPH receptor A4                              | NM_004438, ENS        | Coding | TRUE |
| EPH receptor A4                              | NM_004438, ENS        | Coding | TRUE |
| EPH receptor A4                              | NM_004438, ENS        | Coding | TRUE |
| EPH receptor A4                              | NM_004438, ENS        | Coding | TRUE |
| EPH receptor A4                              | NM_004438, ENS        | Coding | TRUE |
| EPH receptor A4                              | NM_004438, ENS        | Coding | TRUE |
| EPH receptor A4                              | NM_004438, ENS        | Coding | TRUE |
| EPH receptor A4                              | NM_004438, ENS        | Coding | TRUE |
| bobby sox homolog (Drosophila)               | NM_001142568,         | Coding | TRUE |
| bobby sox homolog (Drosophila)               | NM_001142568,         | Coding | TRUE |
| bobby sox homolog (Drosophila)               | NM_001142568,         | Coding | TRUE |
| bobby sox homolog (Drosophila)               | NM_001142568,         | Coding | TRUE |
| bobby sox homolog (Drosophila)               | NM_001142568,         | Coding | TRUE |
| chromosome 3 open reading frame 33           | NM_173657, ENS        | Coding | TRUE |
| chromosome 3 open reading frame 33           | NM_173657, ENS        | Coding | TRUE |
| chromosome 3 open reading frame 33           | NM_173657, ENS        | Coding | TRUE |
| interferon regulatory factor 5               | NM_001098627,         | Coding | TRUE |
| interferon regulatory factor 5               | NM_001098627,         | Coding | TRUE |
| interferon regulatory factor 5               | NM_001098627,         | Coding | TRUE |
| septin 14                                    | NM_207366, ENS        | Coding | TRUE |
| septin 14                                    | NM_207366, ENS        | Coding | TRUE |
| zinc finger, DHHC-type containing 2          | NM_016353, ENS        | Coding | TRUE |
| zinc finger, DHHC-type containing 2          | NM_016353, ENS        | Coding | TRUE |
| zinc finger, DHHC-type containing 2          | NM_016353, ENS        | Coding | TRUE |
| mediator complex subunit 22                  | NM_133640, NM_133640, | Coding | TRUE |
| mediator complex subunit 22                  | NM_133640, NM_133640, | Coding | TRUE |
| serine/threonine protein kinase MST4         | NM_001042452,         | Coding | TRUE |
| serine/threonine protein kinase MST4         | NM_001042452,         | Coding | TRUE |
| serine/threonine protein kinase MST4         | NM_001042452,         | Coding | TRUE |
| serine/threonine protein kinase MST4         | NM_001042452,         | Coding | TRUE |
| serine/threonine protein kinase MST4         | NM_001042452,         | Coding | TRUE |
| serine/threonine protein kinase MST4         | NM_001042452,         | Coding | TRUE |
| family with sequence similarity 66, member C | NR_026788, ENS        | Coding | TRUE |
| family with sequence similarity 66, member C | NR_026788, ENS        | Coding | TRUE |
| family with sequence similarity 66, member C | NR_026788, ENS        | Coding | TRUE |
| family with sequence similarity 66, member C | NR_026788, ENS        | Coding | TRUE |
| family with sequence similarity 66, member C | NR_026788, ENS        | Coding | TRUE |
| family with sequence similarity 66, member C | NR_026788, ENS        | Coding | TRUE |
| family with sequence similarity 66, member C | NR_026788, ENS        | Coding | TRUE |
| family with sequence similarity 66, member C | NR_026788, ENS        | Coding | TRUE |
| family with sequence similarity 66, member C | NR_026788, ENS        | Coding | TRUE |
| nucleolar and spindle associated protein 1   | NM_001243143,         | Coding | TRUE |
| nucleolar and spindle associated protein 1   | NM_001243143,         | Coding | TRUE |





|                                                |                |        |      |
|------------------------------------------------|----------------|--------|------|
| ZNRD1 antisense RNA 1 (non-protein coding)     | NR_026751      | Coding | TRUE |
| ZNRD1 antisense RNA 1 (non-protein coding)     | NR_026751      | Coding | TRUE |
| ZNRD1 antisense RNA 1 (non-protein coding)     | NR_026751      | Coding | TRUE |
| ZNRD1 antisense RNA 1 (non-protein coding)     | NR_026751      | Coding | TRUE |
| ZNRD1 antisense RNA 1 (non-protein coding)     | NR_026751      | Coding | TRUE |
| ZNRD1 antisense RNA 1 (non-protein coding)     | NR_026751      | Coding | TRUE |
| ZNRD1 antisense RNA 1 (non-protein coding)     | NR_026751      | Coding | TRUE |
| ZNRD1 antisense RNA 1 (non-protein coding)     | NR_026751      | Coding | TRUE |
| ZNRD1 antisense RNA 1 (non-protein coding)     | NR_026751      | Coding | TRUE |
| ZNRD1 antisense RNA 1 (non-protein coding)     | NR_026751      | Coding | TRUE |
| ZNRD1 antisense RNA 1 (non-protein coding)     | NR_026751      | Coding | TRUE |
| ZNRD1 antisense RNA 1 (non-protein coding)     | NR_026751      | Coding | TRUE |
| Treacher Collins-Franceschetti syndrome 1      | NM_000356, NM  | Coding | TRUE |
| Treacher Collins-Franceschetti syndrome 1      | NM_000356, NM  | Coding | TRUE |
| Treacher Collins-Franceschetti syndrome 1      | NM_000356, NM  | Coding | TRUE |
| Treacher Collins-Franceschetti syndrome 1      | NM_000356, NM  | Coding | TRUE |
| Treacher Collins-Franceschetti syndrome 1      | NM_000356, NM  | Coding | TRUE |
| Treacher Collins-Franceschetti syndrome 1      | NM_000356, NM  | Coding | TRUE |
| ATPase, Ca++ transporting, plasma membrane 4   | NM_001001396,  | Coding | TRUE |
| ATPase, Ca++ transporting, plasma membrane 4   | NM_001001396,  | Coding | TRUE |
| ATPase, Ca++ transporting, plasma membrane 4   | NM_001001396,  | Coding | TRUE |
| ATPase, Ca++ transporting, plasma membrane 4   | NM_001001396,  | Coding | TRUE |
|                                                |                | Coding | TRUE |
|                                                |                | Coding | TRUE |
|                                                |                | Coding | TRUE |
|                                                |                | Coding | TRUE |
|                                                |                | Coding | TRUE |
|                                                |                | Coding | TRUE |
|                                                |                | Coding | TRUE |
| peptidylprolyl isomerase G (cyclophilin G)     | NM_004792, BC1 | Coding | TRUE |
| peptidylprolyl isomerase G (cyclophilin G)     | NM_004792, BC1 | Coding | TRUE |
| peptidylprolyl isomerase G (cyclophilin G)     | NM_004792, BC1 | Coding | TRUE |
| peptidylprolyl isomerase G (cyclophilin G)     | NM_004792, BC1 | Coding | TRUE |
| peptidylprolyl isomerase G (cyclophilin G)     | NM_004792, BC1 | Coding | TRUE |
| uncharacterized LOC100507487                   | ENST000005114, | Coding | TRUE |
| uncharacterized LOC100507487                   | ENST000005114, | Coding | TRUE |
| uncharacterized LOC100507487                   | ENST000005114, | Coding | TRUE |
| uncharacterized LOC100507487                   | ENST000005114, | Coding | TRUE |
| uncharacterized LOC100507487                   | ENST000005114, | Coding | TRUE |
| uncharacterized LOC100507487                   | ENST000005114, | Coding | TRUE |
| uncharacterized LOC100507487                   | ENST000005114, | Coding | TRUE |
| uncharacterized LOC100507487                   | ENST000005114, | Coding | TRUE |
| uncharacterized LOC100507487                   | ENST000005114, | Coding | TRUE |
| uncharacterized LOC100507487                   | ENST000005114, | Coding | TRUE |
| pyruvate dehydrogenase kinase, isozyme 3       | NM_001142386,  | Coding | TRUE |
| pyruvate dehydrogenase kinase, isozyme 3       | NM_001142386,  | Coding | TRUE |
| transcription elongation factor A (SII)-like 7 | NM_152278, ENS | Coding | TRUE |
| transcription elongation factor A (SII)-like 7 | NM_152278, ENS | Coding | TRUE |
| myelin protein zero-like 3                     | NM_198275, ENS | Coding | TRUE |
| myelin protein zero-like 3                     | NM_198275, ENS | Coding | TRUE |
| G protein-coupled receptor 133                 | NM_198827, BC1 | Coding | TRUE |
| G protein-coupled receptor 133                 | NM_198827, BC1 | Coding | TRUE |
| G protein-coupled receptor 133                 | NM_198827, BC1 | Coding | TRUE |
| G protein-coupled receptor 133                 | NM_198827, BC1 | Coding | TRUE |
| G protein-coupled receptor 133                 | NM_198827, BC1 | Coding | TRUE |
| G protein-coupled receptor 133                 | NM_198827, BC1 | Coding | TRUE |
| G protein-coupled receptor 133                 | NM_198827, BC1 | Coding | TRUE |
| signal recognition particle 54kDa              | NM_001146282,  | Coding | TRUE |





|                                                           |                |        |      |
|-----------------------------------------------------------|----------------|--------|------|
| tenascin C                                                | NM_002160, ENS | Coding | TRUE |
| tenascin C                                                | NM_002160, ENS | Coding | TRUE |
| tenascin C                                                | NM_002160, ENS | Coding | TRUE |
| tenascin C                                                | NM_002160, ENS | Coding | TRUE |
| tenascin C                                                | NM_002160, ENS | Coding | TRUE |
| tenascin C                                                | NM_002160, ENS | Coding | TRUE |
| tenascin C                                                | NM_002160, ENS | Coding | TRUE |
| tenascin C                                                | NM_002160, ENS | Coding | TRUE |
| tenascin C                                                | NM_002160, ENS | Coding | TRUE |
| tenascin C                                                | NM_002160, ENS | Coding | TRUE |
| tenascin C                                                | NM_002160, ENS | Coding | TRUE |
| adenylate kinase 8                                        | NM_152572, ENS | Coding | TRUE |
| adenylate kinase 8                                        | NM_152572, ENS | Coding | TRUE |
| adenylate kinase 8                                        | NM_152572, ENS | Coding | TRUE |
| 3-phosphoadenosine 5-phosphosulfate synthase 2            | NM_001015880,  | Coding | TRUE |
| 3-phosphoadenosine 5-phosphosulfate synthase 2            | NM_001015880,  | Coding | TRUE |
| Kazal-type serine peptidase inhibitor domain 1            | NM_030929, BCC | Coding | TRUE |
| Kazal-type serine peptidase inhibitor domain 1            | NM_030929, BCC | Coding | TRUE |
| stereocilin                                               | NM_153700, ENS | Coding | TRUE |
| stereocilin                                               | NM_153700, ENS | Coding | TRUE |
| stereocilin                                               | NM_153700, ENS | Coding | TRUE |
| sulfotransferase family, cytosolic, 1A, phenol-preferring | NM_001055, NM  | Coding | TRUE |
| sulfotransferase family, cytosolic, 1A, phenol-preferring | NM_001055, NM  | Coding | TRUE |
| sulfotransferase family, cytosolic, 1A, phenol-preferring | NM_001055, NM  | Coding | TRUE |
| sulfotransferase family, cytosolic, 1A, phenol-preferring | NM_001055, NM  | Coding | TRUE |
| sulfotransferase family, cytosolic, 1A, phenol-preferring | NM_001055, NM  | Coding | TRUE |
| sulfotransferase family, cytosolic, 1A, phenol-preferring | NM_001055, NM  | Coding | TRUE |
| sulfotransferase family, cytosolic, 1A, phenol-preferring | NM_001055, NM  | Coding | TRUE |
| sulfotransferase family, cytosolic, 1A, phenol-preferring | NM_001055, NM  | Coding | TRUE |
| sulfotransferase family, cytosolic, 1A, phenol-preferring | NM_001055, NM  | Coding | TRUE |
| chromosome 20 open reading frame 94                       | NM_001009608,  | Coding | TRUE |
| chromosome 20 open reading frame 94                       | NM_001009608,  | Coding | TRUE |
| chromosome 20 open reading frame 94                       | NM_001009608,  | Coding | TRUE |
| heat shock transcription factor 2 binding protein         | NM_007031, ENS | Coding | TRUE |
| heat shock transcription factor 2 binding protein         | NM_007031, ENS | Coding | TRUE |
| heat shock transcription factor 2 binding protein         | NM_007031, ENS | Coding | TRUE |
| heat shock transcription factor 2 binding protein         | NM_007031, ENS | Coding | TRUE |
| smoothelin                                                | NM_001207017,  | Coding | TRUE |
| smoothelin                                                | NM_001207017,  | Coding | TRUE |
| smoothelin                                                | NM_001207017,  | Coding | TRUE |
| smoothelin                                                | NM_001207017,  | Coding | TRUE |
| smoothelin                                                | NM_001207017,  | Coding | TRUE |
| smoothelin                                                | NM_001207017,  | Coding | TRUE |
| smoothelin                                                | NM_001207017,  | Coding | TRUE |
| smoothelin                                                | NM_001207017,  | Coding | TRUE |
| smoothelin                                                | NM_001207017,  | Coding | TRUE |
| smoothelin                                                | NM_001207017,  | Coding | TRUE |
| smoothelin                                                | NM_001207017,  | Coding | TRUE |
| smoothelin                                                | NM_001207017,  | Coding | TRUE |
| smoothelin                                                | NM_001207017,  | Coding | TRUE |
| smoothelin                                                | NM_001207017,  | Coding | TRUE |
| smoothelin                                                | NM_001207017,  | Coding | TRUE |
| smoothelin                                                | NM_001207017,  | Coding | TRUE |
| smoothelin                                                | NM_001207017,  | Coding | TRUE |
| smoothelin                                                | NM_001207017,  | Coding | TRUE |
| smoothelin                                                | NM_001207017,  | Coding | TRUE |
| smoothelin                                                | NM_001207017,  | Coding | TRUE |
| smoothelin                                                | NM_001207017,  | Coding | TRUE |
| smoothelin                                                | NM_001207017,  | Coding | TRUE |
| basic helix-loop-helix family, member e41                 | NM_030762, ENS | Coding | TRUE |
| basic helix-loop-helix family, member e41                 | NM_030762, ENS | Coding | TRUE |
| basic helix-loop-helix family, member e41                 | NM_030762, ENS | Coding | TRUE |
| transmembrane and coiled-coil domains 4                   | NM_181719, ENS | Coding | TRUE |
| transmembrane and coiled-coil domains 4                   | NM_181719, ENS | Coding | TRUE |
| transmembrane and coiled-coil domains 4                   | NM_181719, ENS | Coding | TRUE |
| transmembrane and coiled-coil domains 4                   | NM_181719, ENS | Coding | TRUE |
| transmembrane and coiled-coil domains 4                   | NM_181719, ENS | Coding | TRUE |
| transmembrane and coiled-coil domains 4                   | NM_181719, ENS | Coding | TRUE |
| transmembrane and coiled-coil domains 4                   | NM_181719, ENS | Coding | TRUE |
| transmembrane and coiled-coil domains 4                   | NM_181719, ENS | Coding | TRUE |
| unc-80 homolog (C. elegans)                               | NM_032504, NM  | Coding | TRUE |
| unc-80 homolog (C. elegans)                               | NM_032504, NM  | Coding | TRUE |

|                                                           |                |        |      |
|-----------------------------------------------------------|----------------|--------|------|
| unc-80 homolog (C. elegans)                               | NM_032504, NM  | Coding | TRUE |
| unc-80 homolog (C. elegans)                               | NM_032504, NM  | Coding | TRUE |
| unc-80 homolog (C. elegans)                               | NM_032504, NM  | Coding | TRUE |
| unc-80 homolog (C. elegans)                               | NM_032504, NM  | Coding | TRUE |
| unc-80 homolog (C. elegans)                               | NM_032504, NM  | Coding | TRUE |
| N-acetyltransferase 6 (GCN5-related)                      | NM_001200016,  | Coding | TRUE |
| N-acetyltransferase 6 (GCN5-related)                      | NM_001200016,  | Coding | TRUE |
| N-acetyltransferase 6 (GCN5-related)                      | NM_001200016,  | Coding | TRUE |
| N-acetyltransferase 6 (GCN5-related)                      | NM_001200016,  | Coding | TRUE |
| cardiomyopathy associated 5                               | NM_153610, ENS | Coding | TRUE |
| cardiomyopathy associated 5                               | NM_153610, ENS | Coding | TRUE |
| cardiomyopathy associated 5                               | NM_153610, ENS | Coding | TRUE |
| cardiomyopathy associated 5                               | NM_153610, ENS | Coding | TRUE |
| mitogen-activated protein kinase 13                       | NM_002754, ENS | Coding | TRUE |
| mitogen-activated protein kinase 13                       | NM_002754, ENS | Coding | TRUE |
| vacuolar protein sorting 41 homolog (S. cerevisiae)       | NM_014396, NM  | Coding | TRUE |
| vacuolar protein sorting 41 homolog (S. cerevisiae)       | NM_014396, NM  | Coding | TRUE |
| vacuolar protein sorting 41 homolog (S. cerevisiae)       | NM_014396, NM  | Coding | TRUE |
| vacuolar protein sorting 41 homolog (S. cerevisiae)       | NM_014396, NM  | Coding | TRUE |
| vacuolar protein sorting 41 homolog (S. cerevisiae)       | NM_014396, NM  | Coding | TRUE |
| vacuolar protein sorting 41 homolog (S. cerevisiae)       | NM_014396, NM  | Coding | TRUE |
| vacuolar protein sorting 41 homolog (S. cerevisiae)       | NM_014396, NM  | Coding | TRUE |
| homeobox containing 1                                     | NM_001135726,  | Coding | TRUE |
| homeobox containing 1                                     | NM_001135726,  | Coding | TRUE |
| homeobox containing 1                                     | NM_001135726,  | Coding | TRUE |
| homeobox containing 1                                     | NM_001135726,  | Coding | TRUE |
| microRNA 1204, Pvt1 oncogene (non-protein coding)         | NR_031609, NR  | Coding | TRUE |
| microRNA 1204, Pvt1 oncogene (non-protein coding)         | NR_031609, NR  | Coding | TRUE |
| microRNA 1204, Pvt1 oncogene (non-protein coding)         | NR_031609, NR  | Coding | TRUE |
| microRNA 1204, Pvt1 oncogene (non-protein coding)         | NR_031609, NR  | Coding | TRUE |
| triple QxxK/R motif containing                            | NM_001171795,  | Coding | TRUE |
| triple QxxK/R motif containing                            | NM_001171795,  | Coding | TRUE |
| triple QxxK/R motif containing                            | NM_001171795,  | Coding | TRUE |
| triple QxxK/R motif containing                            | NM_001171795,  | Coding | TRUE |
| triple QxxK/R motif containing                            | NM_001171795,  | Coding | TRUE |
| Friend leukemia virus integration 1                       | NM_001167681,  | Coding | TRUE |
| Friend leukemia virus integration 1                       | NM_001167681,  | Coding | TRUE |
| Friend leukemia virus integration 1                       | NM_001167681,  | Coding | TRUE |
| Friend leukemia virus integration 1                       | NM_001167681,  | Coding | TRUE |
| ubiquitin-conjugating enzyme E2Q family member 2 ps       | ENST000005584  | Coding | TRUE |
| ubiquitin-conjugating enzyme E2Q family member 2 ps       | ENST000005584  | Coding | TRUE |
| ubiquitin-conjugating enzyme E2Q family member 2 ps       | ENST000005584  | Coding | TRUE |
| ubiquitin-conjugating enzyme E2Q family member 2 ps       | ENST000005584  | Coding | TRUE |
| Src homology 2 domain containing F                        | NM_138356, ENS | Coding | TRUE |
| Src homology 2 domain containing F                        | NM_138356, ENS | Coding | TRUE |
| Src homology 2 domain containing F                        | NM_138356, ENS | Coding | TRUE |
| nuclear factor of activated T-cells, cytoplasmic, calcine | NM_006162, NM  | Coding | TRUE |
| nuclear factor of activated T-cells, cytoplasmic, calcine | NM_006162, NM  | Coding | TRUE |
| nuclear factor of activated T-cells, cytoplasmic, calcine | NM_006162, NM  | Coding | TRUE |
| kallikrein-related peptidase 4                            | NM_004917, ENS | Coding | TRUE |
| kallikrein-related peptidase 4                            | NM_004917, ENS | Coding | TRUE |
| kallikrein-related peptidase 4                            | NM_004917, ENS | Coding | TRUE |
| kallikrein-related peptidase 4                            | NM_004917, ENS | Coding | TRUE |
| kallikrein-related peptidase 4                            | NM_004917, ENS | Coding | TRUE |
| ADAM metallopeptidase with thrombospondin type 1 n        | NM_006988, BCC | Coding | TRUE |
| ADAM metallopeptidase with thrombospondin type 1 n        | NM_006988, BCC | Coding | TRUE |
| amylo-alpha-1, 6-glucosidase, 4-alpha-glucanotransfer     | NM_000028, NM  | Coding | TRUE |
| amylo-alpha-1, 6-glucosidase, 4-alpha-glucanotransfer     | NM_000028, NM  | Coding | TRUE |







|                                                          |                      |        |      |
|----------------------------------------------------------|----------------------|--------|------|
| angiotensinogen (serpin peptidase inhibitor, clade A, m  | NM_000029, ENS       | Coding | TRUE |
| angiotensinogen (serpin peptidase inhibitor, clade A, m  | NM_000029, ENS       | Coding | TRUE |
| angiotensinogen (serpin peptidase inhibitor, clade A, m  | NM_000029, ENS       | Coding | TRUE |
| N-acetylglucosamine kinase                               | NM_017567, ENS       | Coding | TRUE |
| N-acetylglucosamine kinase                               | NM_017567, ENS       | Coding | TRUE |
| N-acetylglucosamine kinase                               | NM_017567, ENS       | Coding | TRUE |
| N-acetylglucosamine kinase                               | NM_017567, ENS       | Coding | TRUE |
| phospholipase C, delta 4                                 | NM_032726, ENS       | Coding | TRUE |
| phospholipase C, delta 4                                 | NM_032726, ENS       | Coding | TRUE |
| phospholipase C, delta 4                                 | NM_032726, ENS       | Coding | TRUE |
| phospholipase C, delta 4                                 | NM_032726, ENS       | Coding | TRUE |
| phospholipase C, delta 4                                 | NM_032726, ENS       | Coding | TRUE |
| phospholipase C, delta 4                                 | NM_032726, ENS       | Coding | TRUE |
| phospholipase C, delta 4                                 | NM_032726, ENS       | Coding | TRUE |
| phospholipase C, delta 4                                 | NM_032726, ENS       | Coding | TRUE |
| phospholipase C, delta 4                                 | NM_032726, ENS       | Coding | TRUE |
| phospholipase C, delta 4                                 | NM_032726, ENS       | Coding | TRUE |
| phospholipase C, delta 4                                 | NM_032726, ENS       | Coding | TRUE |
| EGF containing fibulin-like extracellular matrix protein | NM_001039348, Coding | Coding | TRUE |
| EGF containing fibulin-like extracellular matrix protein | NM_001039348, Coding | Coding | TRUE |
| EGF containing fibulin-like extracellular matrix protein | NM_001039348, Coding | Coding | TRUE |
| EGF containing fibulin-like extracellular matrix protein | NM_001039348, Coding | Coding | TRUE |
| EGF containing fibulin-like extracellular matrix protein | NM_001039348, Coding | Coding | TRUE |
| EGF containing fibulin-like extracellular matrix protein | NM_001039348, Coding | Coding | TRUE |
| EGF containing fibulin-like extracellular matrix protein | NM_001039348, Coding | Coding | TRUE |
| EGF containing fibulin-like extracellular matrix protein | NM_001039348, Coding | Coding | TRUE |
| tumor protein p63                                        | NM_003722, NM        | Coding | TRUE |
| tumor protein p63                                        | NM_003722, NM        | Coding | TRUE |
| tumor protein p63                                        | NM_003722, NM        | Coding | TRUE |
| tumor protein p63                                        | NM_003722, NM        | Coding | TRUE |
| tumor protein p63                                        | NM_003722, NM        | Coding | TRUE |
| toll-like receptor 3                                     | NM_003265, ENS       | Coding | TRUE |
| toll-like receptor 3                                     | NM_003265, ENS       | Coding | TRUE |
| toll-like receptor 3                                     | NM_003265, ENS       | Coding | TRUE |
| coiled-coil domain containing 110                        | NM_001145411, Coding | Coding | TRUE |
| coiled-coil domain containing 110                        | NM_001145411, Coding | Coding | TRUE |
| coiled-coil domain containing 110                        | NM_001145411, Coding | Coding | TRUE |
| mitochondrial ribosomal protein S36                      | NM_033281, ENS       | Coding | TRUE |
| mitochondrial ribosomal protein S36                      | NM_033281, ENS       | Coding | TRUE |
| 1-acylglycerol-3-phosphate O-acyltransferase 1 (lysop    | NM_006411, NM        | Coding | TRUE |
| 1-acylglycerol-3-phosphate O-acyltransferase 1 (lysop    | NM_006411, NM        | Coding | TRUE |
| 1-acylglycerol-3-phosphate O-acyltransferase 1 (lysop    | NM_006411, NM        | Coding | TRUE |
| 1-acylglycerol-3-phosphate O-acyltransferase 1 (lysop    | NM_006411, NM        | Coding | TRUE |
| 1-acylglycerol-3-phosphate O-acyltransferase 1 (lysop    | NM_006411, NM        | Coding | TRUE |
| cyclin-dependent kinase 19                               | NM_015076, ENS       | Coding | TRUE |
| cyclin-dependent kinase 19                               | NM_015076, ENS       | Coding | TRUE |
| cyclin-dependent kinase 19                               | NM_015076, ENS       | Coding | TRUE |
| cyclin-dependent kinase 19                               | NM_015076, ENS       | Coding | TRUE |
| cyclin-dependent kinase 19                               | NM_015076, ENS       | Coding | TRUE |
| PHD finger protein 14                                    | NM_014660, NR        | Coding | TRUE |
| PHD finger protein 14                                    | NM_014660, NR        | Coding | TRUE |
| PHD finger protein 14                                    | NM_014660, NR        | Coding | TRUE |
| copine III                                               | NM_003909, ENS       | Coding | TRUE |
| copine III                                               | NM_003909, ENS       | Coding | TRUE |
| copine III                                               | NM_003909, ENS       | Coding | TRUE |
| copine III                                               | NM_003909, ENS       | Coding | TRUE |
| tyrosine 3-monooxygenase/tryptophan 5-monooxygen         | NM_001135699, Coding | Coding | TRUE |
| tyrosine 3-monooxygenase/tryptophan 5-monooxygen         | NM_001135699, Coding | Coding | TRUE |
| tyrosine 3-monooxygenase/tryptophan 5-monooxygen         | NM_001135699, Coding | Coding | TRUE |

|                                                         |                |        |      |
|---------------------------------------------------------|----------------|--------|------|
| variable charge, X-linked 3B, variable charge, X-linked | NM_001001888,  | Coding | TRUE |
| variable charge, X-linked 3B, variable charge, X-linked | NM_001001888,  | Coding | TRUE |
| NDUFC2-KCTD14 readthrough, NADH dehydrogenas            | NM_001203260,  | Coding | TRUE |
| NDUFC2-KCTD14 readthrough, NADH dehydrogenas            | NM_001203260,  | Coding | TRUE |
| NDUFC2-KCTD14 readthrough, NADH dehydrogenas            | NM_001203260,  | Coding | TRUE |
| NDUFC2-KCTD14 readthrough, NADH dehydrogenas            | NM_001203260,  | Coding | TRUE |
|                                                         |                | Coding | TRUE |
|                                                         |                | Coding | TRUE |
|                                                         |                | Coding | TRUE |
|                                                         |                | Coding | TRUE |
|                                                         |                | Coding | TRUE |
| basic, immunoglobulin-like variable motif containing    | NM_001159596,  | Coding | TRUE |
| basic, immunoglobulin-like variable motif containing    | NM_001159596,  | Coding | TRUE |
| basic, immunoglobulin-like variable motif containing    | NM_001159596,  | Coding | TRUE |
| basic, immunoglobulin-like variable motif containing    | NM_001159596,  | Coding | TRUE |
| basic, immunoglobulin-like variable motif containing    | NM_001159596,  | Coding | TRUE |
| adaptor-related protein complex 1, gamma 2 subunit      | NM_003917, ENS | Coding | TRUE |
| adaptor-related protein complex 1, gamma 2 subunit      | NM_003917, ENS | Coding | TRUE |
| adaptor-related protein complex 1, gamma 2 subunit      | NM_003917, ENS | Coding | TRUE |
| adaptor-related protein complex 1, gamma 2 subunit      | NM_003917, ENS | Coding | TRUE |
| adaptor-related protein complex 1, gamma 2 subunit      | NM_003917, ENS | Coding | TRUE |
| adaptor-related protein complex 1, gamma 2 subunit      | NM_003917, ENS | Coding | TRUE |
| formin 1, formin-1-like                                 | NM_001103184,  | Coding | TRUE |
| formin 1, formin-1-like                                 | NM_001103184,  | Coding | TRUE |
| formin 1, formin-1-like                                 | NM_001103184,  | Coding | TRUE |
| formin 1, formin-1-like                                 | NM_001103184,  | Coding | TRUE |
| formin 1, formin-1-like                                 | NM_001103184,  | Coding | TRUE |
| formin 1, formin-1-like                                 | NM_001103184,  | Coding | TRUE |
| corticotropin releasing hormone receptor 1              | NM_001145146,  | Coding | TRUE |
| corticotropin releasing hormone receptor 1              | NM_001145146,  | Coding | TRUE |
| corticotropin releasing hormone receptor 1              | NM_001145146,  | Coding | TRUE |
| prostaglandin F2 receptor negative regulator            | NM_020440, ENS | Coding | TRUE |
| prostaglandin F2 receptor negative regulator            | NM_020440, ENS | Coding | TRUE |
| prostaglandin F2 receptor negative regulator            | NM_020440, ENS | Coding | TRUE |
| neuron navigator 1                                      | NM_001167738,  | Coding | TRUE |
| neuron navigator 1                                      | NM_001167738,  | Coding | TRUE |
| neuron navigator 1                                      | NM_001167738,  | Coding | TRUE |
| neuron navigator 1                                      | NM_001167738,  | Coding | TRUE |
| neuron navigator 1                                      | NM_001167738,  | Coding | TRUE |
| neuron navigator 1                                      | NM_001167738,  | Coding | TRUE |
| neuron navigator 1                                      | NM_001167738,  | Coding | TRUE |
| neuron navigator 1                                      | NM_001167738,  | Coding | TRUE |
| neuron navigator 1                                      | NM_001167738,  | Coding | TRUE |
| melanoma inhibitory activity family, member 3           | NM_198551, ENS | Coding | TRUE |
| melanoma inhibitory activity family, member 3           | NM_198551, ENS | Coding | TRUE |
| melanoma inhibitory activity family, member 3           | NM_198551, ENS | Coding | TRUE |
| zinc finger and BTB domain containing 8 opposite stra   | NM_178547, ENS | Coding | TRUE |
| zinc finger and BTB domain containing 8 opposite stra   | NM_178547, ENS | Coding | TRUE |
| thrombospondin 3                                        | NM_001252607,  | Coding | TRUE |
| thrombospondin 3                                        | NM_001252607,  | Coding | TRUE |
| thrombospondin 3                                        | NM_001252607,  | Coding | TRUE |
| thrombospondin 3                                        | NM_001252607,  | Coding | TRUE |
| thrombospondin 3                                        | NM_001252607,  | Coding | TRUE |
| thrombospondin 3                                        | NM_001252607,  | Coding | TRUE |
| thrombospondin 3                                        | NM_001252607,  | Coding | TRUE |
| thrombospondin 3                                        | NM_001252607,  | Coding | TRUE |
| thrombospondin 3                                        | NM_001252607,  | Coding | TRUE |
| thrombospondin 3                                        | NM_001252607,  | Coding | TRUE |
| histamine N-methyltransferase                           | NM_001024074,  | Coding | TRUE |



|                                                       |                      |        |      |
|-------------------------------------------------------|----------------------|--------|------|
| microRNA 145, microRNA 143, MIR143 host gene (no      | NR_029686, NR        | Coding | TRUE |
| dystonin, dystonin-like                               | NM_001723, NM        | Coding | TRUE |
| dystonin, dystonin-like                               | NM_001723, NM        | Coding | TRUE |
| dystonin, dystonin-like                               | NM_001723, NM        | Coding | TRUE |
| dystonin, dystonin-like                               | NM_001723, NM        | Coding | TRUE |
| dystonin, dystonin-like                               | NM_001723, NM        | Coding | TRUE |
| dystonin, dystonin-like                               | NM_001723, NM        | Coding | TRUE |
| dystonin, dystonin-like                               | NM_001723, NM        | Coding | TRUE |
| patched 1                                             | NM_000264, NM        | Coding | TRUE |
| patched 1                                             | NM_000264, NM        | Coding | TRUE |
| patched 1                                             | NM_000264, NM        | Coding | TRUE |
| patched 1                                             | NM_000264, NM        | Coding | TRUE |
| patched 1                                             | NM_000264, NM        | Coding | TRUE |
| patched 1                                             | NM_000264, NM        | Coding | TRUE |
| patched 1                                             | NM_000264, NM        | Coding | TRUE |
| TSC22 domain family, member 3                         | NM_001015881, Coding | TRUE   |      |
| TSC22 domain family, member 3                         | NM_001015881, Coding | TRUE   |      |
| TSC22 domain family, member 3                         | NM_001015881, Coding | TRUE   |      |
| TSC22 domain family, member 3                         | NM_001015881, Coding | TRUE   |      |
| TSC22 domain family, member 3                         | NM_001015881, Coding | TRUE   |      |
| TSC22 domain family, member 3                         | NM_001015881, Coding | TRUE   |      |
| TSC22 domain family, member 3                         | NM_001015881, Coding | TRUE   |      |
| TSC22 domain family, member 3                         | NM_001015881, Coding | TRUE   |      |
| TSC22 domain family, member 3                         | NM_001015881, Coding | TRUE   |      |
| TSC22 domain family, member 3                         | NM_001015881, Coding | TRUE   |      |
| TSC22 domain family, member 3                         | NM_001015881, Coding | TRUE   |      |
| TSC22 domain family, member 3                         | NM_001015881, Coding | TRUE   |      |
| TSC22 domain family, member 3                         | NM_001015881, Coding | TRUE   |      |
| TSC22 domain family, member 3                         | NM_001015881, Coding | TRUE   |      |
| TSC22 domain family, member 3                         | NM_001015881, Coding | TRUE   |      |
| TSC22 domain family, member 3                         | NM_001015881, Coding | TRUE   |      |
| TSC22 domain family, member 3                         | NM_001015881, Coding | TRUE   |      |
| TSC22 domain family, member 3                         | NM_001015881, Coding | TRUE   |      |
| TSC22 domain family, member 3                         | NM_001015881, Coding | TRUE   |      |
| TSC22 domain family, member 3                         | NM_001015881, Coding | TRUE   |      |
| TSC22 domain family, member 3                         | NM_001015881, Coding | TRUE   |      |
| TSC22 domain family, member 3                         | NM_001015881, Coding | TRUE   |      |
| TSC22 domain family, member 3                         | NM_001015881, Coding | TRUE   |      |
| TSC22 domain family, member 3                         | NM_001015881, Coding | TRUE   |      |
| TSC22 domain family, member 3                         | NM_001015881, Coding | TRUE   |      |
| TSC22 domain family, member 3                         | NM_001015881, Coding | TRUE   |      |
| TSC22 domain family, member 3                         | NM_001015881, Coding | TRUE   |      |
| TSC22 domain family, member 3                         | NM_001015881, Coding | TRUE   |      |
| gamma-aminobutyric acid (GABA) A receptor, epsilon,   | NM_004961, NR        | Coding | TRUE |
| gamma-aminobutyric acid (GABA) A receptor, epsilon,   | NM_004961, NR        | Coding | TRUE |
| gamma-aminobutyric acid (GABA) A receptor, epsilon,   | NM_004961, NR        | Coding | TRUE |
| gamma-aminobutyric acid (GABA) A receptor, epsilon,   | NM_004961, NR        | Coding | TRUE |
| N(alpha)-acetyltransferase 10, NatA catalytic subunit | NM_001256119, Coding | TRUE   |      |
| N(alpha)-acetyltransferase 10, NatA catalytic subunit | NM_001256119, Coding | TRUE   |      |
| N(alpha)-acetyltransferase 10, NatA catalytic subunit | NM_001256119, Coding | TRUE   |      |
| cell division cycle associated 5                      | NM_080668, ENS       | Coding | TRUE |
| cell division cycle associated 5                      | NM_080668, ENS       | Coding | TRUE |
| zinc finger protein 641                               | NM_001172681, Coding | TRUE   |      |
| zinc finger protein 641                               | NM_001172681, Coding | TRUE   |      |
| POC1 centriolar protein homolog B (Chlamydomonas)     | NM_001199777, Coding | TRUE   |      |
| POC1 centriolar protein homolog B (Chlamydomonas)     | NM_001199777, Coding | TRUE   |      |
| POC1 centriolar protein homolog B (Chlamydomonas)     | NM_001199777, Coding | TRUE   |      |
| Ras and Rab interactor 3                              | NM_024832, ENS       | Coding | TRUE |
| Ras and Rab interactor 3                              | NM_024832, ENS       | Coding | TRUE |
| Ras and Rab interactor 3                              | NM_024832, ENS       | Coding | TRUE |
| Ras and Rab interactor 3                              | NM_024832, ENS       | Coding | TRUE |
| Ras and Rab interactor 3                              | NM_024832, ENS       | Coding | TRUE |
| Ras and Rab interactor 3                              | NM_024832, ENS       | Coding | TRUE |
| Ras and Rab interactor 3                              | NM_024832, ENS       | Coding | TRUE |
| Ras and Rab interactor 3                              | NM_024832, ENS       | Coding | TRUE |
| epsin 2                                               | NM_148921, NM        | Coding | TRUE |
| epsin 2                                               | NM_148921, NM        | Coding | TRUE |

|                                                         |                |        |      |
|---------------------------------------------------------|----------------|--------|------|
| epsin 2                                                 | NM_148921, NM  | Coding | TRUE |
| leucine rich repeat containing 37B pseudogene 1         | NR_015341, ENS | Coding | TRUE |
| leucine rich repeat containing 37B pseudogene 1         | NR_015341, ENS | Coding | TRUE |
| leucine rich repeat containing 37B pseudogene 1         | NR_015341, ENS | Coding | TRUE |
| FXRD domain containing ion transport regulator 1        | NM_005031, NM  | Coding | TRUE |
| FXRD domain containing ion transport regulator 1        | NM_005031, NM  | Coding | TRUE |
| FXRD domain containing ion transport regulator 1        | NM_005031, NM  | Coding | TRUE |
| FXRD domain containing ion transport regulator 1        | NM_005031, NM  | Coding | TRUE |
| FXRD domain containing ion transport regulator 1        | NM_005031, NM  | Coding | TRUE |
| FXRD domain containing ion transport regulator 1        | NM_005031, NM  | Coding | TRUE |
| FXRD domain containing ion transport regulator 1        | NM_005031, NM  | Coding | TRUE |
| DEAD (Asp-Glu-Ala-Asp) box polypeptide 27               | NM_017895, ENS | Coding | TRUE |
| DEAD (Asp-Glu-Ala-Asp) box polypeptide 27               | NM_017895, ENS | Coding | TRUE |
| tRNA methyltransferase 6 homolog (S. cerevisiae)        | NM_015939, ENS | Coding | TRUE |
| tRNA methyltransferase 6 homolog (S. cerevisiae)        | NM_015939, ENS | Coding | TRUE |
| TBC1 domain family, member 26                           | NM_178571, ENS | Coding | TRUE |
| TBC1 domain family, member 26                           | NM_178571, ENS | Coding | TRUE |
| TBC1 domain family, member 26                           | NM_178571, ENS | Coding | TRUE |
| chromosome 1 open reading frame 101                     | NM_001130957,  | Coding | TRUE |
| chromosome 1 open reading frame 101                     | NM_001130957,  | Coding | TRUE |
| chromosome 1 open reading frame 101                     | NM_001130957,  | Coding | TRUE |
| ERBB receptor feedback inhibitor 1                      | NM_018948, ENS | Coding | TRUE |
| ERBB receptor feedback inhibitor 1                      | NM_018948, ENS | Coding | TRUE |
| ERBB receptor feedback inhibitor 1                      | NM_018948, ENS | Coding | TRUE |
| ERBB receptor feedback inhibitor 1                      | NM_018948, ENS | Coding | TRUE |
| cullin-associated and neddylation-dissociated 2 (putati | NM_001162499,  | Coding | TRUE |
| cullin-associated and neddylation-dissociated 2 (putati | NM_001162499,  | Coding | TRUE |
| cullin-associated and neddylation-dissociated 2 (putati | NM_001162499,  | Coding | TRUE |
| cullin-associated and neddylation-dissociated 2 (putati | NM_001162499,  | Coding | TRUE |
| fibulin 2                                               | NM_001004019,  | Coding | TRUE |
| fibulin 2                                               | NM_001004019,  | Coding | TRUE |
| fibulin 2                                               | NM_001004019,  | Coding | TRUE |
| fibulin 2                                               | NM_001004019,  | Coding | TRUE |
| fibulin 2                                               | NM_001004019,  | Coding | TRUE |
| fibulin 2                                               | NM_001004019,  | Coding | TRUE |
| fibulin 2                                               | NM_001004019,  | Coding | TRUE |
| fibulin 2                                               | NM_001004019,  | Coding | TRUE |
| kelch-like 24 (Drosophila)                              | NM_017644, ENS | Coding | TRUE |
| kelch-like 24 (Drosophila)                              | NM_017644, ENS | Coding | TRUE |
| kelch-like 24 (Drosophila)                              | NM_017644, ENS | Coding | TRUE |
| chemokine (C-C motif) ligand 28                         | NM_148672, ENS | Coding | TRUE |
| chemokine (C-C motif) ligand 28                         | NM_148672, ENS | Coding | TRUE |
| family with sequence similarity 13, member B            | NM_001101800,  | Coding | TRUE |
| family with sequence similarity 13, member B            | NM_001101800,  | Coding | TRUE |
| family with sequence similarity 13, member B            | NM_001101800,  | Coding | TRUE |
| family with sequence similarity 13, member B            | NM_001101800,  | Coding | TRUE |
| family with sequence similarity 13, member B            | NM_001101800,  | Coding | TRUE |
| family with sequence similarity 13, member B            | NM_001101800,  | Coding | TRUE |
| transmembrane protein 173                               | NM_198282, ENS | Coding | TRUE |
| transmembrane protein 173                               | NM_198282, ENS | Coding | TRUE |
| membrane protein, palmitoylated 6 (MAGUK p55 subf       | NM_016447, ENS | Coding | TRUE |
| membrane protein, palmitoylated 6 (MAGUK p55 subf       | NM_016447, ENS | Coding | TRUE |
| membrane protein, palmitoylated 6 (MAGUK p55 subf       | NM_016447, ENS | Coding | TRUE |
| membrane protein, palmitoylated 6 (MAGUK p55 subf       | NM_016447, ENS | Coding | TRUE |
| derlin 1                                                | NM_001134671,  | Coding | TRUE |
| derlin 1                                                | NM_001134671,  | Coding | TRUE |
| derlin 1                                                | NM_001134671,  | Coding | TRUE |
| idnK, gluconokinase homolog (E. coli), chromosome 9     | NM_001001551,  | Coding | TRUE |
| idnK, gluconokinase homolog (E. coli), chromosome 9     | NM_001001551,  | Coding | TRUE |

|                                                 |                |        |      |
|-------------------------------------------------|----------------|--------|------|
| homeobox C4, homeobox C6, homeobox C5           | NM_014620, NM  | Coding | TRUE |
| homeobox C4, homeobox C6, homeobox C5           | NM_014620, NM  | Coding | TRUE |
| homeobox C4, homeobox C6, homeobox C5           | NM_014620, NM  | Coding | TRUE |
| homeobox C4, homeobox C6, homeobox C5           | NM_014620, NM  | Coding | TRUE |
| MOK protein kinase                              | NM_014226, ENS | Coding | TRUE |
| MOK protein kinase                              | NM_014226, ENS | Coding | TRUE |
| MOK protein kinase                              | NM_014226, ENS | Coding | TRUE |
| MOK protein kinase                              | NM_014226, ENS | Coding | TRUE |
| MOK protein kinase                              | NM_014226, ENS | Coding | TRUE |
| MOK protein kinase                              | NM_014226, ENS | Coding | TRUE |
| MOK protein kinase                              | NM_014226, ENS | Coding | TRUE |
| MOK protein kinase                              | NM_014226, ENS | Coding | TRUE |
| MOK protein kinase                              | NM_014226, ENS | Coding | TRUE |
| MOK protein kinase                              | NM_014226, ENS | Coding | TRUE |
| MOK protein kinase                              | NM_014226, ENS | Coding | TRUE |
| MOK protein kinase                              | NM_014226, ENS | Coding | TRUE |
| MOK protein kinase                              | NM_014226, ENS | Coding | TRUE |
| MOK protein kinase                              | NM_014226, ENS | Coding | TRUE |
| MOK protein kinase                              | NM_014226, ENS | Coding | TRUE |
| MOK protein kinase                              | NM_014226, ENS | Coding | TRUE |
| MOK protein kinase                              | NM_014226, ENS | Coding | TRUE |
| A kinase (PRKA) anchor protein 13               | NM_144767, NM  | Coding | TRUE |
| A kinase (PRKA) anchor protein 13               | NM_144767, NM  | Coding | TRUE |
| A kinase (PRKA) anchor protein 13               | NM_144767, NM  | Coding | TRUE |
| A kinase (PRKA) anchor protein 13               | NM_144767, NM  | Coding | TRUE |
| A kinase (PRKA) anchor protein 13               | NM_144767, NM  | Coding | TRUE |
| A kinase (PRKA) anchor protein 13               | NM_144767, NM  | Coding | TRUE |
| A kinase (PRKA) anchor protein 13               | NM_144767, NM  | Coding | TRUE |
| A kinase (PRKA) anchor protein 13               | NM_144767, NM  | Coding | TRUE |
| A kinase (PRKA) anchor protein 13               | NM_144767, NM  | Coding | TRUE |
| A kinase (PRKA) anchor protein 13               | NM_144767, NM  | Coding | TRUE |
| A kinase (PRKA) anchor protein 13               | NM_144767, NM  | Coding | TRUE |
| A kinase (PRKA) anchor protein 13               | NM_144767, NM  | Coding | TRUE |
| A kinase (PRKA) anchor protein 13               | NM_144767, NM  | Coding | TRUE |
| chromodomain helicase DNA binding protein 3     | NM_001005271,  | Coding | TRUE |
| chromodomain helicase DNA binding protein 3     | NM_001005271,  | Coding | TRUE |
| DEAD (Asp-Glu-Ala-Asp) box helicase 17          | NM_001098504,  | Coding | TRUE |
| DEAD (Asp-Glu-Ala-Asp) box helicase 17          | NM_001098504,  | Coding | TRUE |
| DEAD (Asp-Glu-Ala-Asp) box helicase 17          | NM_001098504,  | Coding | TRUE |
| SPC25, NDC80 kinetochore complex component, hom | NM_020675, ENS | Coding | TRUE |
| SPC25, NDC80 kinetochore complex component, hom | NM_020675, ENS | Coding | TRUE |
| SPC25, NDC80 kinetochore complex component, hom | NM_020675, ENS | Coding | TRUE |
| NIPA-like domain containing 3                   | NM_020448, BCC | Coding | TRUE |
| NIPA-like domain containing 3                   | NM_020448, BCC | Coding | TRUE |
| NIPA-like domain containing 3                   | NM_020448, BCC | Coding | TRUE |
| cell division cycle associated 8                | NM_018101, ENS | Coding | TRUE |
| cell division cycle associated 8                | NM_018101, ENS | Coding | TRUE |
| Mdm4 p53 binding protein homolog (mouse)        | NM_001204171,  | Coding | TRUE |
| Mdm4 p53 binding protein homolog (mouse)        | NM_001204171,  | Coding | TRUE |
| Mdm4 p53 binding protein homolog (mouse)        | NM_001204171,  | Coding | TRUE |
| Mdm4 p53 binding protein homolog (mouse)        | NM_001204171,  | Coding | TRUE |
| Mdm4 p53 binding protein homolog (mouse)        | NM_001204171,  | Coding | TRUE |
| lysocardiolipin acyltransferase 1               | NM_182551, NM  | Coding | TRUE |
| lysocardiolipin acyltransferase 1               | NM_182551, NM  | Coding | TRUE |
| lysocardiolipin acyltransferase 1               | NM_182551, NM  | Coding | TRUE |
| threonine synthase-like 2 (S. cerevisiae)       | NM_001244676,  | Coding | TRUE |
| threonine synthase-like 2 (S. cerevisiae)       | NM_001244676,  | Coding | TRUE |
| threonine synthase-like 2 (S. cerevisiae)       | NM_001244676,  | Coding | TRUE |
| threonine synthase-like 2 (S. cerevisiae)       | NM_001244676,  | Coding | TRUE |
| threonine synthase-like 2 (S. cerevisiae)       | NM_001244676,  | Coding | TRUE |
| threonine synthase-like 2 (S. cerevisiae)       | NM_001244676,  | Coding | TRUE |
| islet cell autoantigen 1,69kDa-like             | NM_138468, NM  | Coding | TRUE |
| islet cell autoantigen 1,69kDa-like             | NM_138468, NM  | Coding | TRUE |
| islet cell autoantigen 1,69kDa-like             | NM_138468, NM  | Coding | TRUE |
| islet cell autoantigen 1,69kDa-like             | NM_138468, NM  | Coding | TRUE |

|                                                         |                |        |      |
|---------------------------------------------------------|----------------|--------|------|
| islet cell autoantigen 1,69kDa-like                     | NM_138468, NM  | Coding | TRUE |
| islet cell autoantigen 1,69kDa-like                     | NM_138468, NM  | Coding | TRUE |
| islet cell autoantigen 1,69kDa-like                     | NM_138468, NM  | Coding | TRUE |
| Rho GTPase activating protein 24                        | NM_001025616,  | Coding | TRUE |
| Rho GTPase activating protein 24                        | NM_001025616,  | Coding | TRUE |
| Rho GTPase activating protein 24                        | NM_001025616,  | Coding | TRUE |
| UDP-N-acetyl-alpha-D-galactosamine:polypeptide N-a      | NM_017423, ENS | Coding | TRUE |
| UDP-N-acetyl-alpha-D-galactosamine:polypeptide N-a      | NM_017423, ENS | Coding | TRUE |
| UDP-N-acetyl-alpha-D-galactosamine:polypeptide N-a      | NM_017423, ENS | Coding | TRUE |
| solute carrier family 12 (sodium/potassium/chloride tra | NM_001046, ENS | Coding | TRUE |
| solute carrier family 12 (sodium/potassium/chloride tra | NM_001046, ENS | Coding | TRUE |
| solute carrier family 12 (sodium/potassium/chloride tra | NM_001046, ENS | Coding | TRUE |
| solute carrier family 12 (sodium/potassium/chloride tra | NM_001046, ENS | Coding | TRUE |
| solute carrier family 12 (sodium/potassium/chloride tra | NM_001046, ENS | Coding | TRUE |
| solute carrier family 12 (sodium/potassium/chloride tra | NM_001046, ENS | Coding | TRUE |
| solute carrier family 12 (sodium/potassium/chloride tra | NM_001046, ENS | Coding | TRUE |
| solute carrier family 12 (sodium/potassium/chloride tra | NM_001046, ENS | Coding | TRUE |
| solute carrier family 12 (sodium/potassium/chloride tra | NM_001046, ENS | Coding | TRUE |
| solute carrier family 12 (sodium/potassium/chloride tra | NM_001046, ENS | Coding | TRUE |
| dynein, cytoplasmic 1, intermediate chain 1             | NM_001135556,  | Coding | TRUE |
| dynein, cytoplasmic 1, intermediate chain 1             | NM_001135556,  | Coding | TRUE |
| dynein, cytoplasmic 1, intermediate chain 1             | NM_001135556,  | Coding | TRUE |
| dynein, cytoplasmic 1, intermediate chain 1             | NM_001135556,  | Coding | TRUE |
| dynein, cytoplasmic 1, intermediate chain 1             | NM_001135556,  | Coding | TRUE |
| dynein, cytoplasmic 1, intermediate chain 1             | NM_001135556,  | Coding | TRUE |
| dynein, cytoplasmic 1, intermediate chain 1             | NM_001135556,  | Coding | TRUE |
| dynein, cytoplasmic 1, intermediate chain 1             | NM_001135556,  | Coding | TRUE |
| dynein, cytoplasmic 1, intermediate chain 1             | NM_001135556,  | Coding | TRUE |
| dynein, cytoplasmic 1, intermediate chain 1             | NM_001135556,  | Coding | TRUE |
| Rap guanine nucleotide exchange factor (GEF) 5          | NM_012294, ENS | Coding | TRUE |
| Rap guanine nucleotide exchange factor (GEF) 5          | NM_012294, ENS | Coding | TRUE |
| Rap guanine nucleotide exchange factor (GEF) 5          | NM_012294, ENS | Coding | TRUE |
| Rap guanine nucleotide exchange factor (GEF) 5          | NM_012294, ENS | Coding | TRUE |
| Rap guanine nucleotide exchange factor (GEF) 5          | NM_012294, ENS | Coding | TRUE |
| Rap guanine nucleotide exchange factor (GEF) 5          | NM_012294, ENS | Coding | TRUE |
| Rap guanine nucleotide exchange factor (GEF) 5          | NM_012294, ENS | Coding | TRUE |
| Rap guanine nucleotide exchange factor (GEF) 5          | NM_012294, ENS | Coding | TRUE |
| Rap guanine nucleotide exchange factor (GEF) 5          | NM_012294, ENS | Coding | TRUE |
| Rap guanine nucleotide exchange factor (GEF) 5          | NM_012294, ENS | Coding | TRUE |
| Rap guanine nucleotide exchange factor (GEF) 5          | NM_012294, ENS | Coding | TRUE |
| Rap guanine nucleotide exchange factor (GEF) 5          | NM_012294, ENS | Coding | TRUE |
| Rap guanine nucleotide exchange factor (GEF) 5          | NM_012294, ENS | Coding | TRUE |
| Rap guanine nucleotide exchange factor (GEF) 5          | NM_012294, ENS | Coding | TRUE |
| KIAA1429                                                | NM_015496, NM  | Coding | TRUE |
| KIAA1429                                                | NM_015496, NM  | Coding | TRUE |
| structural maintenance of chromosomes 2                 | NM_001042550,  | Coding | TRUE |
| structural maintenance of chromosomes 2                 | NM_001042550,  | Coding | TRUE |
| structural maintenance of chromosomes 2                 | NM_001042550,  | Coding | TRUE |
| structural maintenance of chromosomes 2                 | NM_001042550,  | Coding | TRUE |
| structural maintenance of chromosomes 2                 | NM_001042550,  | Coding | TRUE |
| structural maintenance of chromosomes 2                 | NM_001042550,  | Coding | TRUE |
| structural maintenance of chromosomes 2                 | NM_001042550,  | Coding | TRUE |
| structural maintenance of chromosomes 2                 | NM_001042550,  | Coding | TRUE |
| tRNA methyltransferase 2 homolog B (S. cerevisiae)      | NM_001167970,  | Coding | TRUE |
| tRNA methyltransferase 2 homolog B (S. cerevisiae)      | NM_001167970,  | Coding | TRUE |
| tRNA methyltransferase 2 homolog B (S. cerevisiae)      | NM_001167970,  | Coding | TRUE |
| anthrax toxin receptor-like                             | NR_003601, ENS | Coding | TRUE |
| anthrax toxin receptor-like                             | NR_003601, ENS | Coding | TRUE |
| vesicle transport through interaction with t-SNAREs ho  | NM_145206, ENS | Coding | TRUE |
| vesicle transport through interaction with t-SNAREs ho  | NM_145206, ENS | Coding | TRUE |
| vesicle transport through interaction with t-SNAREs ho  | NM_145206, ENS | Coding | TRUE |
| tolloid-like 2                                          | NM_012465, ENS | Coding | TRUE |
| tolloid-like 2                                          | NM_012465, ENS | Coding | TRUE |

|                                                         |                |        |      |
|---------------------------------------------------------|----------------|--------|------|
| tolloid-like 2                                          | NM_012465, ENS | Coding | TRUE |
| tolloid-like 2                                          | NM_012465, ENS | Coding | TRUE |
| RERG antisense RNA 1 (non-protein coding)               | ENST000005412  | Coding | TRUE |
| RERG antisense RNA 1 (non-protein coding)               | ENST000005412  | Coding | TRUE |
| RAS-like, estrogen-regulated, growth inhibitor          | NM_001190726,  | Coding | TRUE |
| RAS-like, estrogen-regulated, growth inhibitor          | NM_001190726,  | Coding | TRUE |
| kinesin family member 21A                               | NM_001173463,  | Coding | TRUE |
| kinesin family member 21A                               | NM_001173463,  | Coding | TRUE |
| kinesin family member 21A                               | NM_001173463,  | Coding | TRUE |
| kinesin family member 21A                               | NM_001173463,  | Coding | TRUE |
| kinesin family member 21A                               | NM_001173463,  | Coding | TRUE |
| kinesin family member 21A                               | NM_001173463,  | Coding | TRUE |
| carboxylesterase 4A                                     | NM_001190201,  | Coding | TRUE |
| carboxylesterase 4A                                     | NM_001190201,  | Coding | TRUE |
| carboxylesterase 4A                                     | NM_001190201,  | Coding | TRUE |
| protease, serine, 53                                    | NM_001039503,  | Coding | TRUE |
| protease, serine, 53                                    | NM_001039503,  | Coding | TRUE |
| protease, serine, 53                                    | NM_001039503,  | Coding | TRUE |
| signal transducer and activator of transcription 5B     | NM_012448, ENS | Coding | TRUE |
| signal transducer and activator of transcription 5B     | NM_012448, ENS | Coding | TRUE |
| signal transducer and activator of transcription 5B     | NM_012448, ENS | Coding | TRUE |
| signal transducer and activator of transcription 5B     | NM_012448, ENS | Coding | TRUE |
| signal transducer and activator of transcription 5B     | NM_012448, ENS | Coding | TRUE |
| sterile alpha motif domain containing 14                | NM_174920, ENS | Coding | TRUE |
| sterile alpha motif domain containing 14                | NM_174920, ENS | Coding | TRUE |
| sterile alpha motif domain containing 14                | NM_174920, ENS | Coding | TRUE |
| sterile alpha motif domain containing 14                | NM_174920, ENS | Coding | TRUE |
| sterile alpha motif domain containing 14                | NM_174920, ENS | Coding | TRUE |
| sterile alpha motif domain containing 14                | NM_174920, ENS | Coding | TRUE |
| notum pectinacetylerase homolog (Drosophila)            | NM_178493, ENS | Coding | TRUE |
| notum pectinacetylerase homolog (Drosophila)            | NM_178493, ENS | Coding | TRUE |
| protein tyrosine phosphatase, receptor type, A          | NM_080840, NM  | Coding | TRUE |
| protein tyrosine phosphatase, receptor type, A          | NM_080840, NM  | Coding | TRUE |
| protein tyrosine phosphatase, receptor type, A          | NM_080840, NM  | Coding | TRUE |
| protein tyrosine phosphatase, receptor type, A          | NM_080840, NM  | Coding | TRUE |
| mutS homolog 6 (E. coli)                                | NM_000179, ENS | Coding | TRUE |
| mutS homolog 6 (E. coli)                                | NM_000179, ENS | Coding | TRUE |
| phosphoinositide-3-kinase, regulatory subunit 4         | NM_014602, ENS | Coding | TRUE |
| phosphoinositide-3-kinase, regulatory subunit 4         | NM_014602, ENS | Coding | TRUE |
| phosphoinositide-3-kinase, regulatory subunit 4         | NM_014602, ENS | Coding | TRUE |
| phosphoinositide-3-kinase, regulatory subunit 4         | NM_014602, ENS | Coding | TRUE |
| Wolf-Hirschhorn syndrome candidate 1                    | NM_133331, NM  | Coding | TRUE |
| Wolf-Hirschhorn syndrome candidate 1                    | NM_133331, NM  | Coding | TRUE |
| Wolf-Hirschhorn syndrome candidate 1                    | NM_133331, NM  | Coding | TRUE |
| Wolf-Hirschhorn syndrome candidate 1                    | NM_133331, NM  | Coding | TRUE |
| Wolf-Hirschhorn syndrome candidate 1                    | NM_133331, NM  | Coding | TRUE |
| Wolf-Hirschhorn syndrome candidate 1                    | NM_133331, NM  | Coding | TRUE |
| Wolf-Hirschhorn syndrome candidate 1                    | NM_133331, NM  | Coding | TRUE |
| Wolf-Hirschhorn syndrome candidate 1                    | NM_133331, NM  | Coding | TRUE |
| Wolf-Hirschhorn syndrome candidate 1                    | NM_133331, NM  | Coding | TRUE |
| Wolf-Hirschhorn syndrome candidate 1                    | NM_133331, NM  | Coding | TRUE |
| Wolf-Hirschhorn syndrome candidate 1                    | NM_133331, NM  | Coding | TRUE |
| ubiquitin-conjugating enzyme E2B                        | NM_003337, ENS | Coding | TRUE |
| ubiquitin-conjugating enzyme E2B                        | NM_003337, ENS | Coding | TRUE |
| collagen, type IV, alpha 3 (Goodpasture antigen) bindin | NM_001130105,  | Coding | TRUE |
| collagen, type IV, alpha 3 (Goodpasture antigen) bindin | NM_001130105,  | Coding | TRUE |
| collagen, type IV, alpha 3 (Goodpasture antigen) bindin | NM_001130105,  | Coding | TRUE |
| platelet-derived growth factor alpha polypeptide        | NM_002607, NM  | Coding | TRUE |



|                                                       |                |        |      |
|-------------------------------------------------------|----------------|--------|------|
| platelet-derived growth factor alpha polypeptide      | NM_002607, NM  | Coding | TRUE |
| platelet-derived growth factor alpha polypeptide      | NM_002607, NM  | Coding | TRUE |
| platelet-derived growth factor alpha polypeptide      | NM_002607, NM  | Coding | TRUE |
| platelet-derived growth factor alpha polypeptide      | NM_002607, NM  | Coding | TRUE |
| platelet-derived growth factor alpha polypeptide      | NM_002607, NM  | Coding | TRUE |
| platelet-derived growth factor alpha polypeptide      | NM_002607, NM  | Coding | TRUE |
| Sec61 alpha 2 subunit (S. cerevisiae)                 | NM_001142628,  | Coding | TRUE |
| Sec61 alpha 2 subunit (S. cerevisiae)                 | NM_001142628,  | Coding | TRUE |
| Sec61 alpha 2 subunit (S. cerevisiae)                 | NM_001142628,  | Coding | TRUE |
| Sec61 alpha 2 subunit (S. cerevisiae)                 | NM_001142628,  | Coding | TRUE |
| membrane protein, palmitoylated 7 (MAGUK p55 subf     | NM_173496, ENS | Coding | TRUE |
| membrane protein, palmitoylated 7 (MAGUK p55 subf     | NM_173496, ENS | Coding | TRUE |
| membrane protein, palmitoylated 7 (MAGUK p55 subf     | NM_173496, ENS | Coding | TRUE |
| cytoplasmic polyadenylation element binding protein 3 | NM_001178137,  | Coding | TRUE |
| cytoplasmic polyadenylation element binding protein 3 | NM_001178137,  | Coding | TRUE |
| cytoplasmic polyadenylation element binding protein 3 | NM_001178137,  | Coding | TRUE |
| cytoplasmic polyadenylation element binding protein 3 | NM_001178137,  | Coding | TRUE |
| cytoplasmic polyadenylation element binding protein 3 | NM_001178137,  | Coding | TRUE |
| cytoplasmic polyadenylation element binding protein 3 | NM_001178137,  | Coding | TRUE |
| cytochrome P450, family 2, subfamily C, polypeptide 8 | NM_000770, NM  | Coding | TRUE |
| cytochrome P450, family 2, subfamily C, polypeptide 8 | NM_000770, NM  | Coding | TRUE |
| cytochrome P450, family 2, subfamily C, polypeptide 8 | NM_000770, NM  | Coding | TRUE |
| cytochrome P450, family 2, subfamily C, polypeptide 8 | NM_000770, NM  | Coding | TRUE |
| autophagy related 13                                  | NM_001142673,  | Coding | TRUE |
| autophagy related 13                                  | NM_001142673,  | Coding | TRUE |
| autophagy related 13                                  | NM_001142673,  | Coding | TRUE |
| matrix metalloproteinase 7 (matrilysin, uterine)      | NM_002423, ENS | Coding | TRUE |
| matrix metalloproteinase 7 (matrilysin, uterine)      | NM_002423, ENS | Coding | TRUE |
| matrix metalloproteinase 7 (matrilysin, uterine)      | NM_002423, ENS | Coding | TRUE |
| matrix metalloproteinase 7 (matrilysin, uterine)      | NM_002423, ENS | Coding | TRUE |
| matrix metalloproteinase 7 (matrilysin, uterine)      | NM_002423, ENS | Coding | TRUE |
| ring finger protein 219                               | NM_024546, ENS | Coding | TRUE |
| ring finger protein 219                               | NM_024546, ENS | Coding | TRUE |
| ring finger protein 219                               | NM_024546, ENS | Coding | TRUE |
| tropomodulin 2 (neuronal)                             | NM_001142885,  | Coding | TRUE |
| tropomodulin 2 (neuronal)                             | NM_001142885,  | Coding | TRUE |
| uncharacterized LOC388152                             | NR_027001, ENS | Coding | TRUE |
| uncharacterized LOC388152                             | NR_027001, ENS | Coding | TRUE |
| uncharacterized LOC388152                             | NR_027001, ENS | Coding | TRUE |
| uncharacterized LOC388152                             | NR_027001, ENS | Coding | TRUE |
| uncharacterized LOC388152                             | NR_027001, ENS | Coding | TRUE |
| chemokine (C-X3-C motif) ligand 1                     | NM_002996, ENS | Coding | TRUE |
| chemokine (C-X3-C motif) ligand 1                     | NM_002996, ENS | Coding | TRUE |
| adaptor-related protein complex 1, gamma 1 subunit    | NM_001030007,  | Coding | TRUE |
| adaptor-related protein complex 1, gamma 1 subunit    | NM_001030007,  | Coding | TRUE |
| C1q and tumor necrosis factor related protein 1       | NM_198593, NM  | Coding | TRUE |
| C1q and tumor necrosis factor related protein 1       | NM_198593, NM  | Coding | TRUE |
| C1q and tumor necrosis factor related protein 1       | NM_198593, NM  | Coding | TRUE |
| C1q and tumor necrosis factor related protein 1       | NM_198593, NM  | Coding | TRUE |
| myosin VB                                             | NM_001080467,  | Coding | TRUE |
| myosin VB                                             | NM_001080467,  | Coding | TRUE |
| myosin VB                                             | NM_001080467,  | Coding | TRUE |
| myosin VB                                             | NM_001080467,  | Coding | TRUE |
| myosin VB                                             | NM_001080467,  | Coding | TRUE |
| myosin VB                                             | NM_001080467,  | Coding | TRUE |
| myosin VB                                             | NM_001080467,  | Coding | TRUE |
| myosin VB                                             | NM_001080467,  | Coding | TRUE |
| Mov10, Moloney leukemia virus 10, homolog (mouse)     | NM_001130079,  | Coding | TRUE |
| Mov10, Moloney leukemia virus 10, homolog (mouse)     | NM_001130079,  | Coding | TRUE |

|                                                            |                |        |      |
|------------------------------------------------------------|----------------|--------|------|
| Mov10, Moloney leukemia virus 10, homolog (mouse)          | NM_001130079,  | Coding | TRUE |
| Mov10, Moloney leukemia virus 10, homolog (mouse)          | NM_001130079,  | Coding | TRUE |
| Mov10, Moloney leukemia virus 10, homolog (mouse)          | NM_001130079,  | Coding | TRUE |
| Mov10, Moloney leukemia virus 10, homolog (mouse)          | NM_001130079,  | Coding | TRUE |
| Mov10, Moloney leukemia virus 10, homolog (mouse)          | NM_001130079,  | Coding | TRUE |
| Mov10, Moloney leukemia virus 10, homolog (mouse)          | NM_001130079,  | Coding | TRUE |
| Mov10, Moloney leukemia virus 10, homolog (mouse)          | NM_001130079,  | Coding | TRUE |
| Mov10, Moloney leukemia virus 10, homolog (mouse)          | NM_001130079,  | Coding | TRUE |
| small nucleolar RNA, H/ACA box 61, small nucleolar R       | NR_002987, NR_ | Coding | TRUE |
| small nucleolar RNA, H/ACA box 61, small nucleolar R       | NR_002987, NR_ | Coding | TRUE |
| small nucleolar RNA, H/ACA box 61, small nucleolar R       | NR_002987, NR_ | Coding | TRUE |
| small nucleolar RNA, H/ACA box 61, small nucleolar R       | NR_002987, NR_ | Coding | TRUE |
| small nucleolar RNA, H/ACA box 61, small nucleolar R       | NR_002987, NR_ | Coding | TRUE |
| small nucleolar RNA, H/ACA box 61, small nucleolar R       | NR_002987, NR_ | Coding | TRUE |
| MAP kinase interacting serine/threonine kinase 1           | NM_001135553,  | Coding | TRUE |
| MAP kinase interacting serine/threonine kinase 1           | NM_001135553,  | Coding | TRUE |
| MAP kinase interacting serine/threonine kinase 1           | NM_001135553,  | Coding | TRUE |
| MAP kinase interacting serine/threonine kinase 1           | NM_001135553,  | Coding | TRUE |
| MAP kinase interacting serine/threonine kinase 1           | NM_001135553,  | Coding | TRUE |
| eukaryotic translation initiation factor 2B, subunit 4 del | NM_001034116,  | Coding | TRUE |
| eukaryotic translation initiation factor 2B, subunit 4 del | NM_001034116,  | Coding | TRUE |
| eukaryotic translation initiation factor 2B, subunit 4 del | NM_001034116,  | Coding | TRUE |
| eukaryotic translation initiation factor 2B, subunit 4 del | NM_001034116,  | Coding | TRUE |
| fibroblast growth factor receptor 3                        | NM_001163213,  | Coding | TRUE |
| fibroblast growth factor receptor 3                        | NM_001163213,  | Coding | TRUE |
| cyclin D3                                                  | NM_001136017,  | Coding | TRUE |
| cyclin D3                                                  | NM_001136017,  | Coding | TRUE |
| cyclin D3                                                  | NM_001136017,  | Coding | TRUE |
| cyclin D3                                                  | NM_001136017,  | Coding | TRUE |
| cyclin D3                                                  | NM_001136017,  | Coding | TRUE |
| cyclin D3                                                  | NM_001136017,  | Coding | TRUE |
| uncharacterized LOC285878, V-set and transmembran          | NR_038994, NM_ | Coding | TRUE |
| uncharacterized LOC285878, V-set and transmembran          | NR_038994, NM_ | Coding | TRUE |
| uncharacterized LOC285878, V-set and transmembran          | NR_038994, NM_ | Coding | TRUE |
| uncharacterized LOC285878, V-set and transmembran          | NR_038994, NM_ | Coding | TRUE |
| leucine-rich repeat LGI family, member 3                   | NM_139278, ENS | Coding | TRUE |
| leucine-rich repeat LGI family, member 3                   | NM_139278, ENS | Coding | TRUE |
| leucine-rich repeat LGI family, member 3                   | NM_139278, ENS | Coding | TRUE |
| phosphoprotein associated with glycosphingolipid micr      | NM_018440, ENS | Coding | TRUE |
| phosphoprotein associated with glycosphingolipid micr      | NM_018440, ENS | Coding | TRUE |
| centriolin                                                 | NM_007018, ENS | Coding | TRUE |
| centriolin                                                 | NM_007018, ENS | Coding | TRUE |
| centriolin                                                 | NM_007018, ENS | Coding | TRUE |
| centriolin                                                 | NM_007018, ENS | Coding | TRUE |
| centriolin                                                 | NM_007018, ENS | Coding | TRUE |
| TNF receptor-associated factor 1                           | NM_001190945,  | Coding | TRUE |
| TNF receptor-associated factor 1                           | NM_001190945,  | Coding | TRUE |
| three prime repair exonuclease 2, HAUS augmin-like c       | NM_080701, NM_ | Coding | TRUE |
| three prime repair exonuclease 2, HAUS augmin-like c       | NM_080701, NM_ | Coding | TRUE |
| three prime repair exonuclease 2, HAUS augmin-like c       | NM_080701, NM_ | Coding | TRUE |
| three prime repair exonuclease 2, HAUS augmin-like c       | NM_080701, NM_ | Coding | TRUE |
| three prime repair exonuclease 2, HAUS augmin-like c       | NM_080701, NM_ | Coding | TRUE |
| three prime repair exonuclease 2, HAUS augmin-like c       | NM_080701, NM_ | Coding | TRUE |
| phosphatase and tensin homolog                             | NM_000314, ENS | Coding | TRUE |
| phosphatase and tensin homolog                             | NM_000314, ENS | Coding | TRUE |
| embryonic ectoderm development                             | NM_003797, NM_ | Coding | TRUE |
| embryonic ectoderm development                             | NM_003797, NM_ | Coding | TRUE |
| embryonic ectoderm development                             | NM_003797, NM_ | Coding | TRUE |
| nuclear receptor corepressor 2                             | NM_001077261,  | Coding | TRUE |
| nuclear receptor corepressor 2                             | NM_001077261,  | Coding | TRUE |

|                                                                      |                |        |      |
|----------------------------------------------------------------------|----------------|--------|------|
| nuclear receptor corepressor 2                                       | NM_001077261,  | Coding | TRUE |
| beta 1,3-galactosyltransferase-like                                  | NM_194318, ENS | Coding | TRUE |
| beta 1,3-galactosyltransferase-like                                  | NM_194318, ENS | Coding | TRUE |
| beta 1,3-galactosyltransferase-like                                  | NM_194318, ENS | Coding | TRUE |
| lectin, galactoside-binding, soluble, 3                              | NM_001177388,  | Coding | TRUE |
| lectin, galactoside-binding, soluble, 3                              | NM_001177388,  | Coding | TRUE |
| lectin, galactoside-binding, soluble, 3                              | NM_001177388,  | Coding | TRUE |
| salvador homolog 1 (Drosophila)                                      | NM_021818, ENS | Coding | TRUE |
| salvador homolog 1 (Drosophila)                                      | NM_021818, ENS | Coding | TRUE |
| salvador homolog 1 (Drosophila)                                      | NM_021818, ENS | Coding | TRUE |
| salvador homolog 1 (Drosophila)                                      | NM_021818, ENS | Coding | TRUE |
| salvador homolog 1 (Drosophila)                                      | NM_021818, ENS | Coding | TRUE |
| salvador homolog 1 (Drosophila)                                      | NM_021818, ENS | Coding | TRUE |
| interleukin 16, interleukin 16 (lymphocyte chemoattractant)          | NM_001172128,  | Coding | TRUE |
| interleukin 16, interleukin 16 (lymphocyte chemoattractant)          | NM_001172128,  | Coding | TRUE |
| interleukin 16, interleukin 16 (lymphocyte chemoattractant)          | NM_001172128,  | Coding | TRUE |
| interleukin 16, interleukin 16 (lymphocyte chemoattractant)          | NM_001172128,  | Coding | TRUE |
| interleukin 16, interleukin 16 (lymphocyte chemoattractant)          | NM_001172128,  | Coding | TRUE |
| interleukin 16, interleukin 16 (lymphocyte chemoattractant)          | NM_001172128,  | Coding | TRUE |
| interleukin 16, interleukin 16 (lymphocyte chemoattractant)          | NM_001172128,  | Coding | TRUE |
| interleukin 16, interleukin 16 (lymphocyte chemoattractant)          | NM_001172128,  | Coding | TRUE |
| interleukin 16, interleukin 16 (lymphocyte chemoattractant)          | NM_001172128,  | Coding | TRUE |
| microRNA 484, nudE nuclear distribution E homolog 1                  | NR_030159, NM  | Coding | TRUE |
| microRNA 484, nudE nuclear distribution E homolog 1                  | NR_030159, NM  | Coding | TRUE |
| microRNA 484, nudE nuclear distribution E homolog 1                  | NR_030159, NM  | Coding | TRUE |
| solute carrier family 9, subfamily A (NHE9, cation proton symporter) | NM_173653, ENS | Coding | TRUE |
| solute carrier family 9, subfamily A (NHE9, cation proton symporter) | NM_173653, ENS | Coding | TRUE |
| vacuolar protein sorting 37 homolog A (S. cerevisiae)                | NM_001145152,  | Coding | TRUE |
| vacuolar protein sorting 37 homolog A (S. cerevisiae)                | NM_001145152,  | Coding | TRUE |
| vacuolar protein sorting 37 homolog A (S. cerevisiae)                | NM_001145152,  | Coding | TRUE |
| axonemal dynein light chain domain containing 1                      | NM_144696, ENS | Coding | TRUE |
| axonemal dynein light chain domain containing 1                      | NM_144696, ENS | Coding | TRUE |
| axonemal dynein light chain domain containing 1                      | NM_144696, ENS | Coding | TRUE |
| axonemal dynein light chain domain containing 1                      | NM_144696, ENS | Coding | TRUE |
| F-box protein 2                                                      | NM_012168, ENS | Coding | TRUE |
| F-box protein 2                                                      | NM_012168, ENS | Coding | TRUE |
| F-box protein 2                                                      | NM_012168, ENS | Coding | TRUE |
| F-box protein 2                                                      | NM_012168, ENS | Coding | TRUE |
| F-box protein 2                                                      | NM_012168, ENS | Coding | TRUE |
| F-box protein 2                                                      | NM_012168, ENS | Coding | TRUE |
| F-box protein 2                                                      | NM_012168, ENS | Coding | TRUE |
| F-box protein 2                                                      | NM_012168, ENS | Coding | TRUE |
| F-box protein 2                                                      | NM_012168, ENS | Coding | TRUE |
| F-box protein 2                                                      | NM_012168, ENS | Coding | TRUE |
| F-box protein 2                                                      | NM_012168, ENS | Coding | TRUE |
| F-box protein 2                                                      | NM_012168, ENS | Coding | TRUE |
| potassium channel, subfamily T, member 2                             | NM_198503, ENS | Coding | TRUE |
| potassium channel, subfamily T, member 2                             | NM_198503, ENS | Coding | TRUE |
| potassium channel, subfamily T, member 2                             | NM_198503, ENS | Coding | TRUE |
| potassium channel, subfamily T, member 2                             | NM_198503, ENS | Coding | TRUE |
| potassium channel, subfamily T, member 2                             | NM_198503, ENS | Coding | TRUE |
| potassium channel, subfamily T, member 2                             | NM_198503, ENS | Coding | TRUE |
| potassium channel, subfamily T, member 2                             | NM_198503, ENS | Coding | TRUE |
| potassium channel, subfamily T, member 2                             | NM_198503, ENS | Coding | TRUE |
| potassium channel, subfamily T, member 2                             | NM_198503, ENS | Coding | TRUE |
| potassium channel, subfamily T, member 2                             | NM_198503, ENS | Coding | TRUE |
| potassium channel, subfamily T, member 2                             | NM_198503, ENS | Coding | TRUE |
| potassium channel, subfamily T, member 2                             | NM_198503, ENS | Coding | TRUE |
|                                                                      |                | Coding | TRUE |



|                                                        |                |        |      |
|--------------------------------------------------------|----------------|--------|------|
| supervillin                                            | NM_003174, NM  | Coding | TRUE |
| zinc finger protein 480                                | NM_144684, ENS | Coding | TRUE |
| zinc finger protein 480                                | NM_144684, ENS | Coding | TRUE |
| zinc finger protein 480                                | NM_144684, ENS | Coding | TRUE |
| zinc finger protein 480                                | NM_144684, ENS | Coding | TRUE |
| egf-like module containing, mucin-like, hormone recep  | NM_013447, NM  | Coding | TRUE |
| egf-like module containing, mucin-like, hormone recep  | NM_013447, NM  | Coding | TRUE |
| egf-like module containing, mucin-like, hormone recep  | NM_013447, NM  | Coding | TRUE |
| egf-like module containing, mucin-like, hormone recep  | NM_013447, NM  | Coding | TRUE |
| egf-like module containing, mucin-like, hormone recep  | NM_013447, NM  | Coding | TRUE |
| egf-like module containing, mucin-like, hormone recep  | NM_013447, NM  | Coding | TRUE |
| egf-like module containing, mucin-like, hormone recep  | NM_013447, NM  | Coding | TRUE |
| sorting nexin family member 21                         | NM_001042632,  | Coding | TRUE |
| sorting nexin family member 21                         | NM_001042632,  | Coding | TRUE |
| sorting nexin family member 21                         | NM_001042632,  | Coding | TRUE |
| sorting nexin family member 21                         | NM_001042632,  | Coding | TRUE |
| sorting nexin family member 21                         | NM_001042632,  | Coding | TRUE |
| histone deacetylase 1                                  | NM_004964, ENS | Coding | TRUE |
| histone deacetylase 1                                  | NM_004964, ENS | Coding | TRUE |
| histone deacetylase 1                                  | NM_004964, ENS | Coding | TRUE |
| leucine-rich pentatricopeptide repeat containing       | NM_133259, ENS | Coding | TRUE |
| leucine-rich pentatricopeptide repeat containing       | NM_133259, ENS | Coding | TRUE |
| leucine-rich pentatricopeptide repeat containing       | NM_133259, ENS | Coding | TRUE |
| leucine-rich pentatricopeptide repeat containing       | NM_133259, ENS | Coding | TRUE |
| leucine-rich pentatricopeptide repeat containing       | NM_133259, ENS | Coding | TRUE |
| UFM1-specific peptidase 2                              | NM_018359, NR  | Coding | TRUE |
| UFM1-specific peptidase 2                              | NM_018359, NR  | Coding | TRUE |
| UFM1-specific peptidase 2                              | NM_018359, NR  | Coding | TRUE |
| UFM1-specific peptidase 2                              | NM_018359, NR  | Coding | TRUE |
| phosphoinositide-3-kinase, regulatory subunit 1 (alpha | NM_001242466,  | Coding | TRUE |
| phosphoinositide-3-kinase, regulatory subunit 1 (alpha | NM_001242466,  | Coding | TRUE |
| phosphoinositide-3-kinase, regulatory subunit 1 (alpha | NM_001242466,  | Coding | TRUE |
| phosphoinositide-3-kinase, regulatory subunit 1 (alpha | NM_001242466,  | Coding | TRUE |
| phosphoinositide-3-kinase, regulatory subunit 1 (alpha | NM_001242466,  | Coding | TRUE |
| phosphoinositide-3-kinase, regulatory subunit 1 (alpha | NM_001242466,  | Coding | TRUE |
| phosphoinositide-3-kinase, regulatory subunit 1 (alpha | NM_001242466,  | Coding | TRUE |
| phosphoinositide-3-kinase, regulatory subunit 1 (alpha | NM_001242466,  | Coding | TRUE |
| phosphoinositide-3-kinase, regulatory subunit 1 (alpha | NM_001242466,  | Coding | TRUE |
| phosphoinositide-3-kinase, regulatory subunit 1 (alpha | NM_001242466,  | Coding | TRUE |
| phosphoinositide-3-kinase, regulatory subunit 1 (alpha | NM_001242466,  | Coding | TRUE |
| phosphoinositide-3-kinase, regulatory subunit 1 (alpha | NM_001242466,  | Coding | TRUE |
| aconitase 1, soluble                                   | NM_002197, ENS | Coding | TRUE |
| aconitase 1, soluble                                   | NM_002197, ENS | Coding | TRUE |
| aconitase 1, soluble                                   | NM_002197, ENS | Coding | TRUE |
| aconitase 1, soluble                                   | NM_002197, ENS | Coding | TRUE |
| aconitase 1, soluble                                   | NM_002197, ENS | Coding | TRUE |
| ZW10 interactor                                        | NM_032997, NM  | Coding | TRUE |
| ZW10 interactor                                        | NM_032997, NM  | Coding | TRUE |
| zinc finger, MYM-type 2                                | NM_197968, NM  | Coding | TRUE |
| zinc finger, MYM-type 2                                | NM_197968, NM  | Coding | TRUE |
| zinc finger, MYM-type 2                                | NM_197968, NM  | Coding | TRUE |
| zinc finger, MYM-type 2                                | NM_197968, NM  | Coding | TRUE |
| leucine rich repeat containing 49                      | NM_001199017,  | Coding | TRUE |
| leucine rich repeat containing 49                      | NM_001199017,  | Coding | TRUE |
| leucine rich repeat containing 49                      | NM_001199017,  | Coding | TRUE |
| leucine rich repeat containing 49                      | NM_001199017,  | Coding | TRUE |
| leucine rich repeat containing 49                      | NM_001199017,  | Coding | TRUE |
| leucine rich repeat containing 49                      | NM_001199017,  | Coding | TRUE |
| thymidine kinase 2, mitochondrial                      | NM_004614, NM  | Coding | TRUE |
| thymidine kinase 2, mitochondrial                      | NM_004614, NM  | Coding | TRUE |

|                                                         |                |        |      |
|---------------------------------------------------------|----------------|--------|------|
| thymidine kinase 2, mitochondrial                       | NM_004614, NM  | Coding | TRUE |
| coiled-coil domain containing 9                         | NM_015603, ENS | Coding | TRUE |
| coiled-coil domain containing 9                         | NM_015603, ENS | Coding | TRUE |
| nuclear receptor coactivator 3                          | NM_006534, NM  | Coding | TRUE |
| nuclear receptor coactivator 3                          | NM_006534, NM  | Coding | TRUE |
| nuclear receptor coactivator 3                          | NM_006534, NM  | Coding | TRUE |
| nuclear receptor coactivator 3                          | NM_006534, NM  | Coding | TRUE |
| nuclear receptor coactivator 3                          | NM_006534, NM  | Coding | TRUE |
| ring finger protein 215, KIAA1656 protein               | NM_001017981,  | Coding | TRUE |
| ring finger protein 215, KIAA1656 protein               | NM_001017981,  | Coding | TRUE |
| ring finger protein 215, KIAA1656 protein               | NM_001017981,  | Coding | TRUE |
| ring finger protein 215, KIAA1656 protein               | NM_001017981,  | Coding | TRUE |
| centrosomal protein 192kDa                              | NM_032142, BC1 | Coding | TRUE |
| centrosomal protein 192kDa                              | NM_032142, BC1 | Coding | TRUE |
| centrosomal protein 192kDa                              | NM_032142, BC1 | Coding | TRUE |
| DENN/MADD domain containing 2C                          | NM_001256404,  | Coding | TRUE |
| DENN/MADD domain containing 2C                          | NM_001256404,  | Coding | TRUE |
| DENN/MADD domain containing 2C                          | NM_001256404,  | Coding | TRUE |
| pleckstrin and Sec7 domain containing 4                 | NM_012455, ENS | Coding | TRUE |
| pleckstrin and Sec7 domain containing 4                 | NM_012455, ENS | Coding | TRUE |
| pleckstrin and Sec7 domain containing 4                 | NM_012455, ENS | Coding | TRUE |
| glutamate receptor, metabotropic 7                      | NM_000844, NM  | Coding | TRUE |
| glutamate receptor, metabotropic 7                      | NM_000844, NM  | Coding | TRUE |
| glutamate receptor, metabotropic 7                      | NM_000844, NM  | Coding | TRUE |
| inturned planar cell polarity effector homolog (Drosoph | NM_015693, ENS | Coding | TRUE |
| inturned planar cell polarity effector homolog (Drosoph | NM_015693, ENS | Coding | TRUE |
| inturned planar cell polarity effector homolog (Drosoph | NM_015693, ENS | Coding | TRUE |
| inturned planar cell polarity effector homolog (Drosoph | NM_015693, ENS | Coding | TRUE |
| inturned planar cell polarity effector homolog (Drosoph | NM_015693, ENS | Coding | TRUE |
| synuclein, alpha interacting protein                    | NM_001242935,  | Coding | TRUE |
| synuclein, alpha interacting protein                    | NM_001242935,  | Coding | TRUE |
| synuclein, alpha interacting protein                    | NM_001242935,  | Coding | TRUE |
| synuclein, alpha interacting protein                    | NM_001242935,  | Coding | TRUE |
| molybdenum cofactor synthesis 2                         | NM_004531, NM  | Coding | TRUE |
| molybdenum cofactor synthesis 2                         | NM_004531, NM  | Coding | TRUE |
|                                                         |                | Coding | TRUE |
|                                                         |                | Coding | TRUE |
| solute carrier family 25, member 27                     | NM_001204051,  | Coding | TRUE |
| solute carrier family 25, member 27                     | NM_001204051,  | Coding | TRUE |
| solute carrier family 25, member 27                     | NM_001204051,  | Coding | TRUE |
| solute carrier family 25, member 27                     | NM_001204051,  | Coding | TRUE |
| zinc finger protein 425                                 | NM_001001661,  | Coding | TRUE |
| zinc finger protein 425                                 | NM_001001661,  | Coding | TRUE |
| zinc finger protein 425                                 | NM_001001661,  | Coding | TRUE |
| zinc finger protein 425                                 | NM_001001661,  | Coding | TRUE |
| zinc finger protein 425                                 | NM_001001661,  | Coding | TRUE |
| uncharacterized LOC100216001                            | NR_024475, ENS | Coding | TRUE |
| uncharacterized LOC100216001                            | NR_024475, ENS | Coding | TRUE |
| uncharacterized LOC100216001                            | NR_024475, ENS | Coding | TRUE |
| uncharacterized LOC100216001                            | NR_024475, ENS | Coding | TRUE |
| uncharacterized LOC100216001                            | NR_024475, ENS | Coding | TRUE |
| uncharacterized LOC100216001                            | NR_024475, ENS | Coding | TRUE |
| uncharacterized LOC100216001                            | NR_024475, ENS | Coding | TRUE |
| uncharacterized LOC100216001                            | NR_024475, ENS | Coding | TRUE |
| nucleoporin 98kDa                                       | NM_016320, NM  | Coding | TRUE |
| nucleoporin 98kDa                                       | NM_016320, NM  | Coding | TRUE |
| nucleoporin 98kDa                                       | NM_016320, NM  | Coding | TRUE |
| nucleoporin 98kDa                                       | NM_016320, NM  | Coding | TRUE |



|                                                        |                |        |      |
|--------------------------------------------------------|----------------|--------|------|
| dopey family member 1                                  | NM_001199942,  | Coding | TRUE |
| family with sequence similarity 3, member C            | NM_001040020,  | Coding | TRUE |
| family with sequence similarity 3, member C            | NM_001040020,  | Coding | TRUE |
| family with sequence similarity 3, member C            | NM_001040020,  | Coding | TRUE |
| plasminogen receptor, C-terminal lysine transmembran   | NM_018465, ENS | Coding | TRUE |
| plasminogen receptor, C-terminal lysine transmembran   | NM_018465, ENS | Coding | TRUE |
| plasminogen receptor, C-terminal lysine transmembran   | NM_018465, ENS | Coding | TRUE |
| plasminogen receptor, C-terminal lysine transmembran   | NM_018465, ENS | Coding | TRUE |
| plasminogen receptor, C-terminal lysine transmembran   | NM_018465, ENS | Coding | TRUE |
| zinc finger protein 782                                | NM_001001662,  | Coding | TRUE |
| zinc finger protein 782                                | NM_001001662,  | Coding | TRUE |
| zinc finger protein 782                                | NM_001001662,  | Coding | TRUE |
| PHD finger protein 21A                                 | NM_001101802,  | Coding | TRUE |
| PHD finger protein 21A                                 | NM_001101802,  | Coding | TRUE |
| PHD finger protein 21A                                 | NM_001101802,  | Coding | TRUE |
| PHD finger protein 21A                                 | NM_001101802,  | Coding | TRUE |
| suppressor of variegation 4-20 homolog 1 (Drosophila   | NM_016028, NM  | Coding | TRUE |
| suppressor of variegation 4-20 homolog 1 (Drosophila   | NM_016028, NM  | Coding | TRUE |
| suppressor of variegation 4-20 homolog 1 (Drosophila   | NM_016028, NM  | Coding | TRUE |
| suppressor of variegation 4-20 homolog 1 (Drosophila   | NM_016028, NM  | Coding | TRUE |
| suppressor of variegation 4-20 homolog 1 (Drosophila   | NM_016028, NM  | Coding | TRUE |
| BUD13 homolog (S. cerevisiae)                          | NM_001159736,  | Coding | TRUE |
| BUD13 homolog (S. cerevisiae)                          | NM_001159736,  | Coding | TRUE |
| DNA-damage-inducible transcript 3                      | NM_001195053,  | Coding | TRUE |
| DNA-damage-inducible transcript 3                      | NM_001195053,  | Coding | TRUE |
| DNA-damage-inducible transcript 3                      | NM_001195053,  | Coding | TRUE |
| advillin                                               | NM_006576, ENS | Coding | TRUE |
| advillin                                               | NM_006576, ENS | Coding | TRUE |
| advillin                                               | NM_006576, ENS | Coding | TRUE |
| advillin                                               | NM_006576, ENS | Coding | TRUE |
| advillin                                               | NM_006576, ENS | Coding | TRUE |
| advillin                                               | NM_006576, ENS | Coding | TRUE |
| advillin                                               | NM_006576, ENS | Coding | TRUE |
| advillin                                               | NM_006576, ENS | Coding | TRUE |
| advillin                                               | NM_006576, ENS | Coding | TRUE |
| advillin                                               | NM_006576, ENS | Coding | TRUE |
| advillin                                               | NM_006576, ENS | Coding | TRUE |
| advillin                                               | NM_006576, ENS | Coding | TRUE |
| advillin                                               | NM_006576, ENS | Coding | TRUE |
| advillin                                               | NM_006576, ENS | Coding | TRUE |
| advillin                                               | NM_006576, ENS | Coding | TRUE |
| advillin                                               | NM_006576, ENS | Coding | TRUE |
| fibronectin leucine rich transmembrane protein 2, unch | NM_013231, ENS | Coding | TRUE |
| fibronectin leucine rich transmembrane protein 2, unch | NM_013231, ENS | Coding | TRUE |
| fibronectin leucine rich transmembrane protein 2, unch | NM_013231, ENS | Coding | TRUE |
| uncharacterized LOC26082                               | NR_026771, ENS | Coding | TRUE |
| uncharacterized LOC26082                               | NR_026771, ENS | Coding | TRUE |
| uncharacterized LOC26082                               | NR_026771, ENS | Coding | TRUE |
| uncharacterized LOC26082                               | NR_026771, ENS | Coding | TRUE |
| uncharacterized LOC26082                               | NR_026771, ENS | Coding | TRUE |
| uncharacterized LOC26082                               | NR_026771, ENS | Coding | TRUE |
| proline-serine-threonine phosphatase interacting prote | NM_024430, BCC | Coding | TRUE |
| proline-serine-threonine phosphatase interacting prote | NM_024430, BCC | Coding | TRUE |
| proline-serine-threonine phosphatase interacting prote | NM_024430, BCC | Coding | TRUE |
| signal-regulatory protein alpha                        | NM_001040022,  | Coding | TRUE |
| signal-regulatory protein alpha                        | NM_001040022,  | Coding | TRUE |
| signal-regulatory protein alpha                        | NM_001040022,  | Coding | TRUE |
| signal-regulatory protein alpha                        | NM_001040022,  | Coding | TRUE |
| collagen, type IX, alpha 3                             | NM_001853, ENS | Coding | TRUE |
| collagen, type IX, alpha 3                             | NM_001853, ENS | Coding | TRUE |
| collagen, type IX, alpha 3                             | NM_001853, ENS | Coding | TRUE |



|                                                      |                |        |      |
|------------------------------------------------------|----------------|--------|------|
| collagen, type IX, alpha 3                           | NM_001853, ENS | Coding | TRUE |
| collagen, type IX, alpha 3                           | NM_001853, ENS | Coding | TRUE |
| collagen, type IX, alpha 3                           | NM_001853, ENS | Coding | TRUE |
| collagen, type IX, alpha 3                           | NM_001853, ENS | Coding | TRUE |
| collagen, type IX, alpha 3                           | NM_001853, ENS | Coding | TRUE |
| NADH dehydrogenase (ubiquinone) flavoprotein 3, 10i  | NM_001001503,  | Coding | TRUE |
| NADH dehydrogenase (ubiquinone) flavoprotein 3, 10i  | NM_001001503,  | Coding | TRUE |
| post-GPI attachment to proteins 1                    | NM_024989, ENS | Coding | TRUE |
| post-GPI attachment to proteins 1                    | NM_024989, ENS | Coding | TRUE |
| post-GPI attachment to proteins 1                    | NM_024989, ENS | Coding | TRUE |
| post-GPI attachment to proteins 1                    | NM_024989, ENS | Coding | TRUE |
| post-GPI attachment to proteins 1                    | NM_024989, ENS | Coding | TRUE |
| zinc finger, DHHC-type containing 3                  | NM_001135179,  | Coding | TRUE |
| zinc finger, DHHC-type containing 3                  | NM_001135179,  | Coding | TRUE |
| histone deacetylase 3                                | NM_003883, ENS | Coding | TRUE |
| histone deacetylase 3                                | NM_003883, ENS | Coding | TRUE |
| histone deacetylase 3                                | NM_003883, ENS | Coding | TRUE |
| zinc finger protein 862                              | NM_001099220,  | Coding | TRUE |
| zinc finger protein 862                              | NM_001099220,  | Coding | TRUE |
| zinc finger protein 862                              | NM_001099220,  | Coding | TRUE |
| potassium voltage-gated channel, KQT-like subfamily, | NM_001204824,  | Coding | TRUE |
| potassium voltage-gated channel, KQT-like subfamily, | NM_001204824,  | Coding | TRUE |
| potassium voltage-gated channel, KQT-like subfamily, | NM_001204824,  | Coding | TRUE |
| potassium voltage-gated channel, KQT-like subfamily, | NM_001204824,  | Coding | TRUE |
| potassium voltage-gated channel, KQT-like subfamily, | NM_001204824,  | Coding | TRUE |
| potassium voltage-gated channel, KQT-like subfamily, | NM_001204824,  | Coding | TRUE |
| potassium voltage-gated channel, KQT-like subfamily, | NM_001204824,  | Coding | TRUE |
| potassium voltage-gated channel, KQT-like subfamily, | NM_001204824,  | Coding | TRUE |
| potassium voltage-gated channel, KQT-like subfamily, | NM_001204824,  | Coding | TRUE |
| potassium voltage-gated channel, KQT-like subfamily, | NM_001204824,  | Coding | TRUE |
| potassium voltage-gated channel, KQT-like subfamily, | NM_001204824,  | Coding | TRUE |
| potassium voltage-gated channel, KQT-like subfamily, | NM_001204824,  | Coding | TRUE |
| potassium voltage-gated channel, KQT-like subfamily, | NM_001204824,  | Coding | TRUE |
| potassium voltage-gated channel, KQT-like subfamily, | NM_001204824,  | Coding | TRUE |
| potassium voltage-gated channel, KQT-like subfamily, | NM_001204824,  | Coding | TRUE |
| odz, odd Oz/ten-m homolog 4 (Drosophila)             | NM_001098816,  | Coding | TRUE |
| odz, odd Oz/ten-m homolog 4 (Drosophila)             | NM_001098816,  | Coding | TRUE |
| odz, odd Oz/ten-m homolog 4 (Drosophila)             | NM_001098816,  | Coding | TRUE |
| odz, odd Oz/ten-m homolog 4 (Drosophila)             | NM_001098816,  | Coding | TRUE |
| odz, odd Oz/ten-m homolog 4 (Drosophila)             | NM_001098816,  | Coding | TRUE |
| odz, odd Oz/ten-m homolog 4 (Drosophila)             | NM_001098816,  | Coding | TRUE |
| odz, odd Oz/ten-m homolog 4 (Drosophila)             | NM_001098816,  | Coding | TRUE |
| odz, odd Oz/ten-m homolog 4 (Drosophila)             | NM_001098816,  | Coding | TRUE |
| odz, odd Oz/ten-m homolog 4 (Drosophila)             | NM_001098816,  | Coding | TRUE |
| odz, odd Oz/ten-m homolog 4 (Drosophila)             | NM_001098816,  | Coding | TRUE |
| odz, odd Oz/ten-m homolog 4 (Drosophila)             | NM_001098816,  | Coding | TRUE |
| odz, odd Oz/ten-m homolog 4 (Drosophila)             | NM_001098816,  | Coding | TRUE |
| odz, odd Oz/ten-m homolog 4 (Drosophila)             | NM_001098816,  | Coding | TRUE |
| odz, odd Oz/ten-m homolog 4 (Drosophila)             | NM_001098816,  | Coding | TRUE |
| odz, odd Oz/ten-m homolog 4 (Drosophila)             | NM_001098816,  | Coding | TRUE |
| odz, odd Oz/ten-m homolog 4 (Drosophila)             | NM_001098816,  | Coding | TRUE |
| odz, odd Oz/ten-m homolog 4 (Drosophila)             | NM_001098816,  | Coding | TRUE |
| odz, odd Oz/ten-m homolog 4 (Drosophila)             | NM_001098816,  | Coding | TRUE |
| odz, odd Oz/ten-m homolog 4 (Drosophila)             | NM_001098816,  | Coding | TRUE |
| odz, odd Oz/ten-m homolog 4 (Drosophila)             | NM_001098816,  | Coding | TRUE |
| odz, odd Oz/ten-m homolog 4 (Drosophila)             | NM_001098816,  | Coding | TRUE |
| ring finger protein 41                               | NM_001242826,  | Coding | TRUE |
| ring finger protein 41                               | NM_001242826,  | Coding | TRUE |
| ring finger protein 41                               | NM_001242826,  | Coding | TRUE |
| TGFB-induced factor homeobox 1                       | NM_003244, NM  | Coding | TRUE |
| TGFB-induced factor homeobox 1                       | NM_003244, NM  | Coding | TRUE |
| TGFB-induced factor homeobox 1                       | NM_003244, NM  | Coding | TRUE |
| TGFB-induced factor homeobox 1                       | NM_003244, NM  | Coding | TRUE |
| Rho guanine nucleotide exchange factor (GEF) 1       | NM_004706, NM  | Coding | TRUE |

|                                                      |                 |        |      |
|------------------------------------------------------|-----------------|--------|------|
| Rho guanine nucleotide exchange factor (GEF) 1       | NM_004706, NM   | Coding | TRUE |
| Rho guanine nucleotide exchange factor (GEF) 1       | NM_004706, NM   | Coding | TRUE |
| receptor tyrosine kinase-like orphan receptor 1      | NM_001083592,   | Coding | TRUE |
| receptor tyrosine kinase-like orphan receptor 1      | NM_001083592,   | Coding | TRUE |
| receptor tyrosine kinase-like orphan receptor 1      | NM_001083592,   | Coding | TRUE |
| receptor tyrosine kinase-like orphan receptor 1      | NM_001083592,   | Coding | TRUE |
| receptor tyrosine kinase-like orphan receptor 1      | NM_001083592,   | Coding | TRUE |
| receptor tyrosine kinase-like orphan receptor 1      | NM_001083592,   | Coding | TRUE |
| receptor tyrosine kinase-like orphan receptor 1      | NM_001083592,   | Coding | TRUE |
| receptor tyrosine kinase-like orphan receptor 1      | NM_001083592,   | Coding | TRUE |
| receptor tyrosine kinase-like orphan receptor 1      | NM_001083592,   | Coding | TRUE |
| receptor tyrosine kinase-like orphan receptor 1      | NM_001083592,   | Coding | TRUE |
| CUB and Sushi multiple domains 2                     | NM_052896, ENS  | Coding | TRUE |
| CUB and Sushi multiple domains 2                     | NM_052896, ENS  | Coding | TRUE |
| CUB and Sushi multiple domains 2                     | NM_052896, ENS  | Coding | TRUE |
| transmembrane protein 63A                            | NM_014698, ENS  | Coding | TRUE |
| transmembrane protein 63A                            | NM_014698, ENS  | Coding | TRUE |
| mutS homolog 2, colon cancer, nonpolyposis type 1 (E | NM_000251, ENS  | Coding | TRUE |
| mutS homolog 2, colon cancer, nonpolyposis type 1 (E | NM_000251, ENS  | Coding | TRUE |
| mutS homolog 2, colon cancer, nonpolyposis type 1 (E | NM_000251, ENS  | Coding | TRUE |
| zinc finger protein 512                              | NM_032434, ENS  | Coding | TRUE |
| zinc finger protein 512                              | NM_032434, ENS  | Coding | TRUE |
| protein kinase C, delta                              | NM_006254, NM   | Coding | TRUE |
| protein kinase C, delta                              | NM_006254, NM   | Coding | TRUE |
| protein kinase C, delta                              | NM_006254, NM   | Coding | TRUE |
| protein kinase C, delta                              | NM_006254, NM   | Coding | TRUE |
| membrane metallo-endopeptidase                       | NM_000902, NM   | Coding | TRUE |
| membrane metallo-endopeptidase                       | NM_000902, NM   | Coding | TRUE |
| membrane metallo-endopeptidase                       | NM_000902, NM   | Coding | TRUE |
| membrane metallo-endopeptidase                       | NM_000902, NM   | Coding | TRUE |
| membrane metallo-endopeptidase                       | NM_000902, NM   | Coding | TRUE |
| membrane metallo-endopeptidase                       | NM_000902, NM   | Coding | TRUE |
| membrane metallo-endopeptidase                       | NM_000902, NM   | Coding | TRUE |
| membrane metallo-endopeptidase                       | NM_000902, NM   | Coding | TRUE |
| membrane metallo-endopeptidase                       | NM_000902, NM   | Coding | TRUE |
| membrane metallo-endopeptidase                       | NM_000902, NM   | Coding | TRUE |
| membrane metallo-endopeptidase                       | NM_000902, NM   | Coding | TRUE |
| membrane metallo-endopeptidase                       | NM_000902, NM   | Coding | TRUE |
| membrane metallo-endopeptidase                       | NM_000902, NM   | Coding | TRUE |
| membrane metallo-endopeptidase                       | NM_000902, NM   | Coding | TRUE |
| membrane metallo-endopeptidase                       | NM_000902, NM   | Coding | TRUE |
| membrane metallo-endopeptidase                       | NM_000902, NM   | Coding | TRUE |
|                                                      |                 | Coding | TRUE |
|                                                      |                 | Coding | TRUE |
|                                                      |                 | Coding | TRUE |
|                                                      |                 | Coding | TRUE |
| PET112 homolog (yeast)                               | NM_004564, ENS  | Coding | TRUE |
| PET112 homolog (yeast)                               | NM_004564, ENS  | Coding | TRUE |
| PET112 homolog (yeast)                               | NM_004564, ENS  | Coding | TRUE |
| PR domain containing 6                               | NM_001136239, I | Coding | TRUE |
| PR domain containing 6                               | NM_001136239, I | Coding | TRUE |
| ephrin-A5                                            | NM_001962, ENS  | Coding | TRUE |
| ephrin-A5                                            | NM_001962, ENS  | Coding | TRUE |
| ephrin-A5                                            | NM_001962, ENS  | Coding | TRUE |
| ephrin-A5                                            | NM_001962, ENS  | Coding | TRUE |
| copine V                                             | NM_020939, ENS  | Coding | TRUE |
| copine V                                             | NM_020939, ENS  | Coding | TRUE |
| copine V                                             | NM_020939, ENS  | Coding | TRUE |

|                                                         |                 |        |      |
|---------------------------------------------------------|-----------------|--------|------|
| peptidylprolyl isomerase (cyclophilin)-like 4           | NM_139126, ENS  | Coding | TRUE |
| peptidylprolyl isomerase (cyclophilin)-like 4           | NM_139126, ENS  | Coding | TRUE |
| chromosome 6 open reading frame 130                     | NM_145063, ENS  | Coding | TRUE |
| chromosome 6 open reading frame 130                     | NM_145063, ENS  | Coding | TRUE |
| chromosome 6 open reading frame 130                     | NM_145063, ENS  | Coding | TRUE |
| chromosome 6 open reading frame 130                     | NM_145063, ENS  | Coding | TRUE |
| chromosome 6 open reading frame 130                     | NM_145063, ENS  | Coding | TRUE |
| chromosome 6 open reading frame 130                     | NM_145063, ENS  | Coding | TRUE |
| chromosome 6 open reading frame 130                     | NM_145063, ENS  | Coding | TRUE |
| solute carrier family 4, anion exchanger, member 2 (er  | NM_003040, NM   | Coding | TRUE |
| solute carrier family 4, anion exchanger, member 2 (er  | NM_003040, NM   | Coding | TRUE |
| solute carrier family 4, anion exchanger, member 2 (er  | NM_003040, NM   | Coding | TRUE |
| HECT domain containing E3 ubiquitin protein ligase 2    | NM_173497, NM   | Coding | TRUE |
| HECT domain containing E3 ubiquitin protein ligase 2    | NM_173497, NM   | Coding | TRUE |
| HECT domain containing E3 ubiquitin protein ligase 2    | NM_173497, NM   | Coding | TRUE |
| HECT domain containing E3 ubiquitin protein ligase 2    | NM_173497, NM   | Coding | TRUE |
| HECT domain containing E3 ubiquitin protein ligase 2    | NM_173497, NM   | Coding | TRUE |
| HECT domain containing E3 ubiquitin protein ligase 2    | NM_173497, NM   | Coding | TRUE |
| HECT domain containing E3 ubiquitin protein ligase 2    | NM_173497, NM   | Coding | TRUE |
| HECT domain containing E3 ubiquitin protein ligase 2    | NM_173497, NM   | Coding | TRUE |
| CDC42 binding protein kinase gamma (DMPK-like)          | NM_017525, ENS  | Coding | TRUE |
| CDC42 binding protein kinase gamma (DMPK-like)          | NM_017525, ENS  | Coding | TRUE |
| CDC42 binding protein kinase gamma (DMPK-like)          | NM_017525, ENS  | Coding | TRUE |
| growth differentiation factor 5                         | NM_000557, BCC  | Coding | TRUE |
| growth differentiation factor 5                         | NM_000557, BCC  | Coding | TRUE |
| oxysterol binding protein-like 6, microRNA 548n         | NM_001201480,   | Coding | TRUE |
| oxysterol binding protein-like 6, microRNA 548n         | NM_001201480,   | Coding | TRUE |
| oxysterol binding protein-like 6, microRNA 548n         | NM_001201480,   | Coding | TRUE |
| oxysterol binding protein-like 6, microRNA 548n         | NM_001201480,   | Coding | TRUE |
| oxysterol binding protein-like 6, microRNA 548n         | NM_001201480,   | Coding | TRUE |
| oxysterol binding protein-like 6, microRNA 548n         | NM_001201480,   | Coding | TRUE |
| oxysterol binding protein-like 6, microRNA 548n         | NM_001201480,   | Coding | TRUE |
| oxysterol binding protein-like 6, microRNA 548n         | NM_001201480,   | Coding | TRUE |
| oxysterol binding protein-like 6, microRNA 548n         | NM_001201480,   | Coding | TRUE |
| ligand of numb-protein X 1, E3 ubiquitin protein ligase | NM_001126328,   | Coding | TRUE |
| ligand of numb-protein X 1, E3 ubiquitin protein ligase | NM_001126328,   | Coding | TRUE |
| ligand of numb-protein X 1, E3 ubiquitin protein ligase | NM_001126328,   | Coding | TRUE |
| ligand of numb-protein X 1, E3 ubiquitin protein ligase | NM_001126328,   | Coding | TRUE |
| ligand of numb-protein X 1, E3 ubiquitin protein ligase | NM_001126328,   | Coding | TRUE |
| centrosomal protein 120kDa                              | NM_001166226,   | Coding | TRUE |
| centrosomal protein 120kDa                              | NM_001166226,   | Coding | TRUE |
| centrosomal protein 120kDa                              | NM_001166226,   | Coding | TRUE |
| centrosomal protein 120kDa                              | NM_001166226,   | Coding | TRUE |
| centrosomal protein 120kDa                              | NM_001166226,   | Coding | TRUE |
| centrosomal protein 120kDa                              | NM_001166226,   | Coding | TRUE |
| centrosomal protein 120kDa                              | NM_001166226,   | Coding | TRUE |
| centrosomal protein 120kDa                              | NM_001166226,   | Coding | TRUE |
| molybdenum cofactor synthesis 1                         | NM_001075098,   | Coding | TRUE |
| molybdenum cofactor synthesis 1                         | NM_001075098,   | Coding | TRUE |
| molybdenum cofactor synthesis 1                         | NM_001075098,   | Coding | TRUE |
| trinucleotide repeat containing 18                      | NM_001080495,   | Coding | TRUE |
| trinucleotide repeat containing 18                      | NM_001080495,   | Coding | TRUE |
| trinucleotide repeat containing 18                      | NM_001080495,   | Coding | TRUE |
| trinucleotide repeat containing 18                      | NM_001080495,   | Coding | TRUE |
| procollagen-lysine, 2-oxoglutarate 5-dioxygenase 3      | NM_001084, ENS  | Coding | TRUE |
| procollagen-lysine, 2-oxoglutarate 5-dioxygenase 3      | NM_001084, ENS  | Coding | TRUE |
| uncharacterized LOC100507139                            | ENST0000052114, | Coding | TRUE |
| uncharacterized LOC100507139                            | ENST0000052114, | Coding | TRUE |
|                                                         |                 | Coding | TRUE |
|                                                         |                 | Coding | TRUE |
|                                                         |                 | Coding | TRUE |
| protein tyrosine phosphatase, receptor type, E          | NM_006504, NM   | Coding | TRUE |



|                                                          |                |        |      |
|----------------------------------------------------------|----------------|--------|------|
| poly (ADP-ribose) polymerase 1                           | NM_001618, ENS | Coding | TRUE |
| hippocalcin-like 1                                       | NM_134421, NM  | Coding | TRUE |
| hippocalcin-like 1                                       | NM_134421, NM  | Coding | TRUE |
| hippocalcin-like 1                                       | NM_134421, NM  | Coding | TRUE |
| inhibitor of growth family, member 5                     | NM_032329, BCC | Coding | TRUE |
| inhibitor of growth family, member 5                     | NM_032329, BCC | Coding | TRUE |
| natural killer-tumor recognition sequence                | NM_005385, ENS | Coding | TRUE |
| natural killer-tumor recognition sequence                | NM_005385, ENS | Coding | TRUE |
| natural killer-tumor recognition sequence                | NM_005385, ENS | Coding | TRUE |
| natural killer-tumor recognition sequence                | NM_005385, ENS | Coding | TRUE |
| natural killer-tumor recognition sequence                | NM_005385, ENS | Coding | TRUE |
| eukaryotic translation initiation factor 4E family membe | NM_001134651,  | Coding | TRUE |
| eukaryotic translation initiation factor 4E family membe | NM_001134651,  | Coding | TRUE |
| eukaryotic translation initiation factor 4E family membe | NM_001134651,  | Coding | TRUE |
| eukaryotic translation initiation factor 4E family membe | NM_001134651,  | Coding | TRUE |
| MDS1 and EVI1 complex locus                              | NM_001105077,  | Coding | TRUE |
| MDS1 and EVI1 complex locus                              | NM_001105077,  | Coding | TRUE |
| MDS1 and EVI1 complex locus                              | NM_001105077,  | Coding | TRUE |
| MDS1 and EVI1 complex locus                              | NM_001105077,  | Coding | TRUE |
| MDS1 and EVI1 complex locus                              | NM_001105077,  | Coding | TRUE |
| MDS1 and EVI1 complex locus                              | NM_001105077,  | Coding | TRUE |
| MDS1 and EVI1 complex locus                              | NM_001105077,  | Coding | TRUE |
| MDS1 and EVI1 complex locus                              | NM_001105077,  | Coding | TRUE |
| MDS1 and EVI1 complex locus                              | NM_001105077,  | Coding | TRUE |
| MDS1 and EVI1 complex locus                              | NM_001105077,  | Coding | TRUE |
| MDS1 and EVI1 complex locus                              | NM_001105077,  | Coding | TRUE |
| MDS1 and EVI1 complex locus                              | NM_001105077,  | Coding | TRUE |
| MDS1 and EVI1 complex locus                              | NM_001105077,  | Coding | TRUE |
| MDS1 and EVI1 complex locus                              | NM_001105077,  | Coding | TRUE |
| MDS1 and EVI1 complex locus                              | NM_001105077,  | Coding | TRUE |
| MDS1 and EVI1 complex locus                              | NM_001105077,  | Coding | TRUE |
| MDS1 and EVI1 complex locus                              | NM_001105077,  | Coding | TRUE |
| MDS1 and EVI1 complex locus                              | NM_001105077,  | Coding | TRUE |
| MDS1 and EVI1 complex locus                              | NM_001105077,  | Coding | TRUE |
| MDS1 and EVI1 complex locus                              | NM_001105077,  | Coding | TRUE |
| general transcription factor IIH, polypeptide 2D, gener  | NM_001042490,  | Coding | TRUE |
| general transcription factor IIH, polypeptide 2D, gener  | NM_001042490,  | Coding | TRUE |
| general transcription factor IIH, polypeptide 2D, gener  | NM_001042490,  | Coding | TRUE |
| general transcription factor IIH, polypeptide 2D, gener  | NM_001042490,  | Coding | TRUE |
| general transcription factor IIH, polypeptide 2D, gener  | NM_001042490,  | Coding | TRUE |
| selenoprotein P, plasma, 1                               | NM_001085486,  | Coding | TRUE |
| selenoprotein P, plasma, 1                               | NM_001085486,  | Coding | TRUE |
| selenoprotein P, plasma, 1                               | NM_001085486,  | Coding | TRUE |
| selenoprotein P, plasma, 1                               | NM_001085486,  | Coding | TRUE |
| selenoprotein P, plasma, 1                               | NM_001085486,  | Coding | TRUE |
| selenoprotein P, plasma, 1                               | NM_001085486,  | Coding | TRUE |
| selenoprotein P, plasma, 1                               | NM_001085486,  | Coding | TRUE |
| selenoprotein P, plasma, 1                               | NM_001085486,  | Coding | TRUE |
| selenoprotein P, plasma, 1                               | NM_001085486,  | Coding | TRUE |
| enoyl-CoA delta isomerase 2                              | NM_001166010,  | Coding | TRUE |
| enoyl-CoA delta isomerase 2                              | NM_001166010,  | Coding | TRUE |
|                                                          |                | Coding | TRUE |
|                                                          |                | Coding | TRUE |
|                                                          |                | Coding | TRUE |
| ferric-chelate reductase 1-like                          | NM_014334, ENS | Coding | TRUE |
| ferric-chelate reductase 1-like                          | NM_014334, ENS | Coding | TRUE |
| haloacid dehalogenase-like hydrolase domain containi     | NM_031219, ENS | Coding | TRUE |
| haloacid dehalogenase-like hydrolase domain containi     | NM_031219, ENS | Coding | TRUE |
| ninein (GSK3B interacting protein)                       | NM_020921, NM  | Coding | TRUE |
| ninein (GSK3B interacting protein)                       | NM_020921, NM  | Coding | TRUE |
| ninein (GSK3B interacting protein)                       | NM_020921, NM  | Coding | TRUE |

|                                                         |                |        |      |
|---------------------------------------------------------|----------------|--------|------|
| cathepsin H                                             | NM_004390, ENS | Coding | TRUE |
| cathepsin H                                             | NM_004390, ENS | Coding | TRUE |
| cathepsin H                                             | NM_004390, ENS | Coding | TRUE |
| cathepsin H                                             | NM_004390, ENS | Coding | TRUE |
| cathepsin H                                             | NM_004390, ENS | Coding | TRUE |
| cathepsin H                                             | NM_004390, ENS | Coding | TRUE |
| ADP-ribosylation factor-like 17B, ADP-ribosylation fact | NM_001039083,  | Coding | TRUE |
| ADP-ribosylation factor-like 17B, ADP-ribosylation fact | NM_001039083,  | Coding | TRUE |
| ADP-ribosylation factor-like 17B, ADP-ribosylation fact | NM_001039083,  | Coding | TRUE |
| ADP-ribosylation factor-like 17B, ADP-ribosylation fact | NM_001039083,  | Coding | TRUE |
| bladder cancer associated protein                       | NM_006698, NM  | Coding | TRUE |
| bladder cancer associated protein                       | NM_006698, NM  | Coding | TRUE |
| bladder cancer associated protein                       | NM_006698, NM  | Coding | TRUE |
| suppressor APC domain containing 1, mutS homolog 5      | NM_001039651,  | Coding | TRUE |
| suppressor APC domain containing 1, mutS homolog 5      | NM_001039651,  | Coding | TRUE |
| suppressor APC domain containing 1, mutS homolog 5      | NM_001039651,  | Coding | TRUE |
| suppressor APC domain containing 1, mutS homolog 5      | NM_001039651,  | Coding | TRUE |
| suppressor APC domain containing 1, mutS homolog 5      | NM_001039651,  | Coding | TRUE |
| suppressor APC domain containing 1, mutS homolog 5      | NM_001039651,  | Coding | TRUE |
| suppressor APC domain containing 1, mutS homolog 5      | NM_001039651,  | Coding | TRUE |
| suppressor APC domain containing 1, mutS homolog 5      | NM_001039651,  | Coding | TRUE |
| suppressor APC domain containing 1, mutS homolog 5      | NM_001039651,  | Coding | TRUE |
| suppressor APC domain containing 1, mutS homolog 5      | NM_001039651,  | Coding | TRUE |
| suppressor APC domain containing 1, mutS homolog 5      | NM_001039651,  | Coding | TRUE |
| suppressor APC domain containing 1, mutS homolog 5      | NM_001039651,  | Coding | TRUE |
| suppressor APC domain containing 1, mutS homolog 5      | NM_001039651,  | Coding | TRUE |
| suppressor APC domain containing 1, mutS homolog 5      | NM_001039651,  | Coding | TRUE |
| suppressor APC domain containing 1, mutS homolog 5      | NM_001039651,  | Coding | TRUE |
| suppressor APC domain containing 1, mutS homolog 5      | NM_001039651,  | Coding | TRUE |
| suppressor APC domain containing 1, mutS homolog 5      | NM_001039651,  | Coding | TRUE |
| suppressor APC domain containing 1, mutS homolog 5      | NM_001039651,  | Coding | TRUE |
| suppressor APC domain containing 1, mutS homolog 5      | NM_001039651,  | Coding | TRUE |
| suppressor APC domain containing 1, mutS homolog 5      | NM_001039651,  | Coding | TRUE |
| suppressor APC domain containing 1, mutS homolog 5      | NM_001039651,  | Coding | TRUE |
| suppressor APC domain containing 1, mutS homolog 5      | NM_001039651,  | Coding | TRUE |
| suppressor APC domain containing 1, mutS homolog 5      | NM_001039651,  | Coding | TRUE |
| suppressor APC domain containing 1, mutS homolog 5      | NM_001039651,  | Coding | TRUE |
| synaptic Ras GTPase activating protein 1                | NM_006772      | Coding | TRUE |
| synaptic Ras GTPase activating protein 1                | NM_006772      | Coding | TRUE |
| synaptic Ras GTPase activating protein 1                | NM_006772      | Coding | TRUE |
| caspase 8, apoptosis-related cysteine peptidase         | NM_001080124,  | Coding | TRUE |
| caspase 8, apoptosis-related cysteine peptidase         | NM_001080124,  | Coding | TRUE |
| caspase 8, apoptosis-related cysteine peptidase         | NM_001080124,  | Coding | TRUE |
| solute carrier family 4, sodium bicarbonate cotransport | NM_021196, NM  | Coding | TRUE |
| solute carrier family 4, sodium bicarbonate cotransport | NM_021196, NM  | Coding | TRUE |
| interleukin 18 binding protein                          | NM_001039659,  | Coding | TRUE |
| interleukin 18 binding protein                          | NM_001039659,  | Coding | TRUE |
| interleukin 18 binding protein                          | NM_001039659,  | Coding | TRUE |
| sialidase 3 (membrane sialidase)                        | NM_006656, ENS | Coding | TRUE |
| sialidase 3 (membrane sialidase)                        | NM_006656, ENS | Coding | TRUE |
| sialidase 3 (membrane sialidase)                        | NM_006656, ENS | Coding | TRUE |
| sialidase 3 (membrane sialidase)                        | NM_006656, ENS | Coding | TRUE |
| Sp7 transcription factor                                | NM_001173467,  | Coding | TRUE |
| Sp7 transcription factor                                | NM_001173467,  | Coding | TRUE |
| Sp7 transcription factor                                | NM_001173467,  | Coding | TRUE |
| Sp7 transcription factor                                | NM_001173467,  | Coding | TRUE |
| Sp7 transcription factor                                | NM_001173467,  | Coding | TRUE |
| vacuolar protein sorting 33 homolog A (S. cerevisiae)   | NM_022916, ENS | Coding | TRUE |
| vacuolar protein sorting 33 homolog A (S. cerevisiae)   | NM_022916, ENS | Coding | TRUE |
| vacuolar protein sorting 33 homolog A (S. cerevisiae)   | NM_022916, ENS | Coding | TRUE |

|                                                          |                |        |      |
|----------------------------------------------------------|----------------|--------|------|
| vacuolar protein sorting 33 homolog A (S. cerevisiae)    | NM_022916, ENS | Coding | TRUE |
| vacuolar protein sorting 33 homolog A (S. cerevisiae)    | NM_022916, ENS | Coding | TRUE |
| cyclin-dependent kinase 8                                | NM_001260, ENS | Coding | TRUE |
| cyclin-dependent kinase 8                                | NM_001260, ENS | Coding | TRUE |
| testis-specific serine kinase 4                          | NM_001184739,  | Coding | TRUE |
| testis-specific serine kinase 4                          | NM_001184739,  | Coding | TRUE |
| testis-specific serine kinase 4                          | NM_001184739,  | Coding | TRUE |
|                                                          |                | Coding | TRUE |
|                                                          |                | Coding | TRUE |
| interleukin 12 receptor, beta 1                          | NM_005535, NM, | Coding | TRUE |
| interleukin 12 receptor, beta 1                          | NM_005535, NM, | Coding | TRUE |
| uncharacterized LOC100131320                             | NR_036537, ENS | Coding | TRUE |
| uncharacterized LOC100131320                             | NR_036537, ENS | Coding | TRUE |
| nuclear receptor subfamily 1, group D, member 2          | NM_001145425,  | Coding | TRUE |
| nuclear receptor subfamily 1, group D, member 2          | NM_001145425,  | Coding | TRUE |
| nuclear receptor subfamily 1, group D, member 2          | NM_001145425,  | Coding | TRUE |
| YEATS domain containing 2                                | NM_018023, ENS | Coding | TRUE |
| YEATS domain containing 2                                | NM_018023, ENS | Coding | TRUE |
| YEATS domain containing 2                                | NM_018023, ENS | Coding | TRUE |
| YEATS domain containing 2                                | NM_018023, ENS | Coding | TRUE |
| YEATS domain containing 2                                | NM_018023, ENS | Coding | TRUE |
| arylsulfatase B                                          | NM_000046, NM, | Coding | TRUE |
| arylsulfatase B                                          | NM_000046, NM, | Coding | TRUE |
| arylsulfatase B                                          | NM_000046, NM, | Coding | TRUE |
| arylsulfatase B                                          | NM_000046, NM, | Coding | TRUE |
| arylsulfatase B                                          | NM_000046, NM, | Coding | TRUE |
| arylsulfatase B                                          | NM_000046, NM, | Coding | TRUE |
| arylsulfatase B                                          | NM_000046, NM, | Coding | TRUE |
| TTK protein kinase                                       | NM_003318, NM, | Coding | TRUE |
| TTK protein kinase                                       | NM_003318, NM, | Coding | TRUE |
| TTK protein kinase                                       | NM_003318, NM, | Coding | TRUE |
| uncharacterized LOC100132707                             | NR_024476, NR, | Coding | TRUE |
| uncharacterized LOC100132707                             | NR_024476, NR, | Coding | TRUE |
| uncharacterized LOC100132707                             | NR_024476, NR, | Coding | TRUE |
|                                                          |                | Coding | TRUE |
|                                                          |                | Coding | TRUE |
|                                                          |                | Coding | TRUE |
|                                                          |                | Coding | TRUE |
|                                                          |                | Coding | TRUE |
|                                                          |                | Coding | TRUE |
|                                                          |                | Coding | TRUE |
| tal1                                                     | NM_006289, ENS | Coding | TRUE |
| tal1                                                     | NM_006289, ENS | Coding | TRUE |
| tal1                                                     | NM_006289, ENS | Coding | TRUE |
| zinc finger protein 92 homolog (mouse)                   | NM_001136273,  | Coding | TRUE |
| zinc finger protein 92 homolog (mouse)                   | NM_001136273,  | Coding | TRUE |
| zinc finger protein 92 homolog (mouse)                   | NM_001136273,  | Coding | TRUE |
| zinc finger protein 92 homolog (mouse)                   | NM_001136273,  | Coding | TRUE |
| exocyst complex component 6                              | NM_001013848,  | Coding | TRUE |
| exocyst complex component 6                              | NM_001013848,  | Coding | TRUE |
| exocyst complex component 6                              | NM_001013848,  | Coding | TRUE |
| exocyst complex component 6                              | NM_001013848,  | Coding | TRUE |
| transient receptor potential cation channel, subfamily C | NR_029192      | Coding | TRUE |
| transient receptor potential cation channel, subfamily C | NR_029192      | Coding | TRUE |
| tumor necrosis factor (ligand) superfamily, member 13    | NM_001145645,  | Coding | TRUE |
| tumor necrosis factor (ligand) superfamily, member 13    | NM_001145645,  | Coding | TRUE |
| tumor necrosis factor (ligand) superfamily, member 13    | NM_001145645,  | Coding | TRUE |
| coiled-coil domain containing 169                        | NM_001144981,  | Coding | TRUE |
| coiled-coil domain containing 169                        | NM_001144981,  | Coding | TRUE |

|                                                           |                |        |      |
|-----------------------------------------------------------|----------------|--------|------|
| coiled-coil domain containing 169                         | NM_001144981,  | Coding | TRUE |
| coiled-coil domain containing 169                         | NM_001144981,  | Coding | TRUE |
| coiled-coil domain containing 169                         | NM_001144981,  | Coding | TRUE |
| coiled-coil domain containing 169                         | NM_001144981,  | Coding | TRUE |
| transmembrane 6 superfamily member 1                      | NM_001144903,  | Coding | TRUE |
| transmembrane 6 superfamily member 1                      | NM_001144903,  | Coding | TRUE |
| transmembrane 6 superfamily member 1                      | NM_001144903,  | Coding | TRUE |
| transmembrane protein 106A                                | NM_145041, ENS | Coding | TRUE |
| transmembrane protein 106A                                | NM_145041, ENS | Coding | TRUE |
| transmembrane protein 106A                                | NM_145041, ENS | Coding | TRUE |
| transmembrane protein 106A                                | NM_145041, ENS | Coding | TRUE |
| transmembrane protein 106A                                | NM_145041, ENS | Coding | TRUE |
| transmembrane protein 106A                                | NM_145041, ENS | Coding | TRUE |
| transmembrane protein 106A                                | NM_145041, ENS | Coding | TRUE |
| transducin-like enhancer of split 6 (E(sp1) homolog, Df   | NM_001143986,  | Coding | TRUE |
| transducin-like enhancer of split 6 (E(sp1) homolog, Df   | NM_001143986,  | Coding | TRUE |
| transducin-like enhancer of split 6 (E(sp1) homolog, Df   | NM_001143986,  | Coding | TRUE |
| core-binding factor, runt domain, alpha subunit 2; trans  | NM_001032999,  | Coding | TRUE |
| core-binding factor, runt domain, alpha subunit 2; trans  | NM_001032999,  | Coding | TRUE |
| ATP-binding cassette, sub-family F (GCN20), member        | NM_001025091,  | Coding | TRUE |
| ATP-binding cassette, sub-family F (GCN20), member        | NM_001025091,  | Coding | TRUE |
| ATP-binding cassette, sub-family F (GCN20), member        | NM_001025091,  | Coding | TRUE |
| ATP-binding cassette, sub-family F (GCN20), member        | NM_001025091,  | Coding | TRUE |
| ATP-binding cassette, sub-family F (GCN20), member        | NM_001025091,  | Coding | TRUE |
| ATP-binding cassette, sub-family F (GCN20), member        | NM_001025091,  | Coding | TRUE |
| insulin induced gene 2                                    | NM_016133, ENS | Coding | TRUE |
| insulin induced gene 2                                    | NM_016133, ENS | Coding | TRUE |
| insulin induced gene 2                                    | NM_016133, ENS | Coding | TRUE |
| insulin induced gene 2                                    | NM_016133, ENS | Coding | TRUE |
| insulin induced gene 2                                    | NM_016133, ENS | Coding | TRUE |
| transient receptor potential cation channel, subfamily C  | NM_001251845,  | Coding | TRUE |
| transient receptor potential cation channel, subfamily C  | NM_001251845,  | Coding | TRUE |
| solute carrier family 22 (organic cation/carnitine transp | NM_003060, ENS | Coding | TRUE |
| solute carrier family 22 (organic cation/carnitine transp | NM_003060, ENS | Coding | TRUE |
| solute carrier family 22 (organic cation/carnitine transp | NM_003060, ENS | Coding | TRUE |
| solute carrier family 22 (organic cation/carnitine transp | NM_003060, ENS | Coding | TRUE |
| solute carrier family 22 (organic cation/carnitine transp | NM_003060, ENS | Coding | TRUE |
| solute carrier family 22 (organic cation/carnitine transp | NM_003060, ENS | Coding | TRUE |
| solute carrier family 22 (organic cation/carnitine transp | NM_003060, ENS | Coding | TRUE |
| required for meiotic nuclear division 5 homolog B (S. c   | NM_022762, ENS | Coding | TRUE |
| required for meiotic nuclear division 5 homolog B (S. c   | NM_022762, ENS | Coding | TRUE |
| gamma-aminobutyric acid (GABA) B receptor, 1              | NM_001470, NM  | Coding | TRUE |
| gamma-aminobutyric acid (GABA) B receptor, 1              | NM_001470, NM  | Coding | TRUE |
| gamma-aminobutyric acid (GABA) B receptor, 1              | NM_001470, NM  | Coding | TRUE |
| negative regulator of ubiquitin-like proteins 1           | NM_001243351,  | Coding | TRUE |
| negative regulator of ubiquitin-like proteins 1           | NM_001243351,  | Coding | TRUE |
| troponin T type 3 (skeletal, fast)                        | NM_001042780,  | Coding | TRUE |
| troponin T type 3 (skeletal, fast)                        | NM_001042780,  | Coding | TRUE |
| troponin T type 3 (skeletal, fast)                        | NM_001042780,  | Coding | TRUE |
| troponin T type 3 (skeletal, fast)                        | NM_001042780,  | Coding | TRUE |
| troponin T type 3 (skeletal, fast)                        | NM_001042780,  | Coding | TRUE |
| MAP/microtubule affinity-regulating kinase 2              | NM_001039469,  | Coding | TRUE |
| MAP/microtubule affinity-regulating kinase 2              | NM_001039469,  | Coding | TRUE |
| MAP/microtubule affinity-regulating kinase 2              | NM_001039469,  | Coding | TRUE |
| MAP/microtubule affinity-regulating kinase 2              | NM_001039469,  | Coding | TRUE |
| ninjurin 2                                                | NM_016533, ENS | Coding | TRUE |
| ninjurin 2                                                | NM_016533, ENS | Coding | TRUE |
| ninjurin 2                                                | NM_016533, ENS | Coding | TRUE |
| ninjurin 2                                                | NM_016533, ENS | Coding | TRUE |





|                                                         |                |        |      |
|---------------------------------------------------------|----------------|--------|------|
| long intergenic non-protein coding RNA 607              | NR_037195, ENS | Coding | TRUE |
| long intergenic non-protein coding RNA 607              | NR_037195, ENS | Coding | TRUE |
| long intergenic non-protein coding RNA 607              | NR_037195, ENS | Coding | TRUE |
| histamine receptor H1                                   | NM_001098212,  | Coding | TRUE |
| histamine receptor H1                                   | NM_001098212,  | Coding | TRUE |
| histamine receptor H1                                   | NM_001098212,  | Coding | TRUE |
| retinoic acid receptor, beta                            | NM_000965, NM, | Coding | TRUE |
| retinoic acid receptor, beta                            | NM_000965, NM, | Coding | TRUE |
| retinoic acid receptor, beta                            | NM_000965, NM, | Coding | TRUE |
| retinoic acid receptor, beta                            | NM_000965, NM, | Coding | TRUE |
| retinoic acid receptor, beta                            | NM_000965, NM, | Coding | TRUE |
| retinoic acid receptor, beta                            | NM_000965, NM, | Coding | TRUE |
| retinoic acid receptor, beta                            | NM_000965, NM, | Coding | TRUE |
| retinoic acid receptor, beta                            | NM_000965, NM, | Coding | TRUE |
| retinoic acid receptor, beta                            | NM_000965, NM, | Coding | TRUE |
| retinoic acid receptor, beta                            | NM_000965, NM, | Coding | TRUE |
| retinoic acid receptor, beta                            | NM_000965, NM, | Coding | TRUE |
| retinoic acid receptor, beta                            | NM_000965, NM, | Coding | TRUE |
| retinoic acid receptor, beta                            | NM_000965, NM, | Coding | TRUE |
| retinoic acid receptor, beta                            | NM_000965, NM, | Coding | TRUE |
| retinoic acid receptor, beta                            | NM_000965, NM, | Coding | TRUE |
| retinoic acid receptor, beta                            | NM_000965, NM, | Coding | TRUE |
| retinoic acid receptor, beta                            | NM_000965, NM, | Coding | TRUE |
| retinoic acid receptor, beta                            | NM_000965, NM, | Coding | TRUE |
| retinoic acid receptor, beta                            | NM_000965, NM, | Coding | TRUE |
| retinoic acid receptor, beta                            | NM_000965, NM, | Coding | TRUE |
| ATP-binding cassette, sub-family F (GCN20), member      | NM_018358, ENS | Coding | TRUE |
| ATP-binding cassette, sub-family F (GCN20), member      | NM_018358, ENS | Coding | TRUE |
| ATP-binding cassette, sub-family F (GCN20), member      | NM_018358, ENS | Coding | TRUE |
| inter-alpha-trypsin inhibitor heavy chain family, membe | NM_001166449,  | Coding | TRUE |
| inter-alpha-trypsin inhibitor heavy chain family, membe | NM_001166449,  | Coding | TRUE |
| inter-alpha-trypsin inhibitor heavy chain family, membe | NM_001166449,  | Coding | TRUE |
| inter-alpha-trypsin inhibitor heavy chain family, membe | NM_001166449,  | Coding | TRUE |
| inter-alpha-trypsin inhibitor heavy chain family, membe | NM_001166449,  | Coding | TRUE |
| tolloid-like 1                                          | NM_001204760,  | Coding | TRUE |
| tolloid-like 1                                          | NM_001204760,  | Coding | TRUE |
| tolloid-like 1                                          | NM_001204760,  | Coding | TRUE |
| tolloid-like 1                                          | NM_001204760,  | Coding | TRUE |
| Lyrn7 homolog (mouse)                                   | NM_181705, ENS | Coding | TRUE |
| Lyrn7 homolog (mouse)                                   | NM_181705, ENS | Coding | TRUE |
| Lyrn7 homolog (mouse)                                   | NM_181705, ENS | Coding | TRUE |
| ubiquitin specific peptidase 49                         | NM_018561, BCC | Coding | TRUE |
| ubiquitin specific peptidase 49                         | NM_018561, BCC | Coding | TRUE |
| ubiquitin specific peptidase 49                         | NM_018561, BCC | Coding | TRUE |
| pleckstrin homology domain containing, family A (phos   | NM_001197026,  | Coding | TRUE |
| pleckstrin homology domain containing, family A (phos   | NM_001197026,  | Coding | TRUE |
| pleckstrin homology domain containing, family A (phos   | NM_001197026,  | Coding | TRUE |
| pleckstrin homology domain containing, family A (phos   | NM_001197026,  | Coding | TRUE |
| DnaJ (Hsp40) homolog, subfamily B, member 6             | NM_058246, NM, | Coding | TRUE |
| DnaJ (Hsp40) homolog, subfamily B, member 6             | NM_058246, NM, | Coding | TRUE |
| DnaJ (Hsp40) homolog, subfamily B, member 6             | NM_058246, NM, | Coding | TRUE |
| DnaJ (Hsp40) homolog, subfamily B, member 6             | NM_058246, NM, | Coding | TRUE |
| DnaJ (Hsp40) homolog, subfamily B, member 6             | NM_058246, NM, | Coding | TRUE |
| zinc finger protein 704                                 | NM_001033723,  | Coding | TRUE |
| zinc finger protein 704                                 | NM_001033723,  | Coding | TRUE |
| zinc finger protein 704                                 | NM_001033723,  | Coding | TRUE |
| zinc finger protein 704                                 | NM_001033723,  | Coding | TRUE |
| zinc finger protein 704                                 | NM_001033723,  | Coding | TRUE |
| COBW domain containing 1                                | NM_001145355,  | Coding | TRUE |
| COBW domain containing 1                                | NM_001145355,  | Coding | TRUE |
| COBW domain containing 1                                | NM_001145355,  | Coding | TRUE |

|                                                          |               |        |      |
|----------------------------------------------------------|---------------|--------|------|
| COBW domain containing 1                                 | NM_001145355, | Coding | TRUE |
| COBW domain containing 1                                 | NM_001145355, | Coding | TRUE |
| COBW domain containing 1                                 | NM_001145355, | Coding | TRUE |
| COBW domain containing 1                                 | NM_001145355, | Coding | TRUE |
| COBW domain containing 1                                 | NM_001145355, | Coding | TRUE |
| COBW domain containing 1                                 | NM_001145355, | Coding | TRUE |
| COBW domain containing 1                                 | NM_001145355, | Coding | TRUE |
| nuclear factor I/B                                       | NM_001190738, | Coding | TRUE |
| nuclear factor I/B                                       | NM_001190738, | Coding | TRUE |
| CD99 molecule                                            | NM_002414, NM | Coding | TRUE |
| CD99 molecule                                            | NM_002414, NM | Coding | TRUE |
| CD99 molecule                                            | NM_002414, NM | Coding | TRUE |
| small nuclear ribonucleoprotein 35kDa (U11/U12)          | NM_022717, NM | Coding | TRUE |
| small nuclear ribonucleoprotein 35kDa (U11/U12)          | NM_022717, NM | Coding | TRUE |
| small nuclear ribonucleoprotein 35kDa (U11/U12)          | NM_022717, NM | Coding | TRUE |
| small nuclear ribonucleoprotein 35kDa (U11/U12)          | NM_022717, NM | Coding | TRUE |
| small nuclear ribonucleoprotein 35kDa (U11/U12)          | NM_022717, NM | Coding | TRUE |
| matrix Gla protein                                       | NM_000900, NM | Coding | TRUE |
| matrix Gla protein                                       | NM_000900, NM | Coding | TRUE |
| matrix Gla protein                                       | NM_000900, NM | Coding | TRUE |
| epithelial stromal interaction 1 (breast)                | NM_001002264, | Coding | TRUE |
| epithelial stromal interaction 1 (breast)                | NM_001002264, | Coding | TRUE |
| golgin A8 family, member B pseudogene                    | NR_038843     | Coding | TRUE |
| golgin A8 family, member B pseudogene                    | NR_038843     | Coding | TRUE |
| golgin A8 family, member B pseudogene                    | NR_038843     | Coding | TRUE |
| branched chain ketoacid dehydrogenase kinase             | NM_001122957, | Coding | TRUE |
| branched chain ketoacid dehydrogenase kinase             | NM_001122957, | Coding | TRUE |
| branched chain ketoacid dehydrogenase kinase             | NM_001122957, | Coding | TRUE |
| branched chain ketoacid dehydrogenase kinase             | NM_001122957, | Coding | TRUE |
| v-akt murine thymoma viral oncogene homolog 2            | NM_001626, NM | Coding | TRUE |
| v-akt murine thymoma viral oncogene homolog 2            | NM_001626, NM | Coding | TRUE |
| v-akt murine thymoma viral oncogene homolog 2            | NM_001626, NM | Coding | TRUE |
| chromosome 20 open reading frame 173                     | NM_001145350, | Coding | TRUE |
| chromosome 20 open reading frame 173                     | NM_001145350, | Coding | TRUE |
| tetratricopeptide repeat domain 3, tetratricopeptide rep | NM_001001894, | Coding | TRUE |
| tetratricopeptide repeat domain 3, tetratricopeptide rep | NM_001001894, | Coding | TRUE |
| tetratricopeptide repeat domain 3, tetratricopeptide rep | NM_001001894, | Coding | TRUE |
| tetratricopeptide repeat domain 3, tetratricopeptide rep | NM_001001894, | Coding | TRUE |
| tetratricopeptide repeat domain 3, tetratricopeptide rep | NM_001001894, | Coding | TRUE |
| suppressor APC domain containing 1, mutS homolog 5       | NM_001039651, | Coding | TRUE |
| suppressor APC domain containing 1, mutS homolog 5       | NM_001039651, | Coding | TRUE |
| suppressor APC domain containing 1, mutS homolog 5       | NM_001039651, | Coding | TRUE |
| suppressor APC domain containing 1, mutS homolog 5       | NM_001039651, | Coding | TRUE |
| suppressor APC domain containing 1, mutS homolog 5       | NM_001039651, | Coding | TRUE |
| suppressor APC domain containing 1, mutS homolog 5       | NM_001039651, | Coding | TRUE |
| suppressor APC domain containing 1, mutS homolog 5       | NM_001039651, | Coding | TRUE |
| suppressor APC domain containing 1, mutS homolog 5       | NM_001039651, | Coding | TRUE |
| suppressor APC domain containing 1, mutS homolog 5       | NM_001039651, | Coding | TRUE |
| suppressor APC domain containing 1, mutS homolog 5       | NM_001039651, | Coding | TRUE |
| suppressor APC domain containing 1, mutS homolog 5       | NM_001039651, | Coding | TRUE |
| suppressor APC domain containing 1, mutS homolog 5       | NM_001039651, | Coding | TRUE |
| suppressor APC domain containing 1, mutS homolog 5       | NM_001039651, | Coding | TRUE |
| suppressor APC domain containing 1, mutS homolog 5       | NM_001039651, | Coding | TRUE |
| suppressor APC domain containing 1, mutS homolog 5       | NM_001039651, | Coding | TRUE |
| suppressor APC domain containing 1, mutS homolog 5       | NM_001039651, | Coding | TRUE |
| suppressor APC domain containing 1, mutS homolog 5       | NM_001039651, | Coding | TRUE |
| suppressor APC domain containing 1, mutS homolog 5       | NM_001039651, | Coding | TRUE |
| suppressor APC domain containing 1, mutS homolog 5       | NM_001039651, | Coding | TRUE |
| suppressor APC domain containing 1, mutS homolog 5       | NM_001039651, | Coding | TRUE |
| proline-rich coiled-coil 2A                              | NM_004638, NM | Coding | TRUE |
| proline-rich coiled-coil 2A                              | NM_004638, NM | Coding | TRUE |
| proline-rich coiled-coil 2A                              | NM_004638, NM | Coding | TRUE |







|                                                           |                 |        |      |
|-----------------------------------------------------------|-----------------|--------|------|
| insulin, insulin-like growth factor 2 (somatomedin A), IN | NM_000207, NM   | Coding | TRUE |
| insulin, insulin-like growth factor 2 (somatomedin A), IN | NM_000207, NM   | Coding | TRUE |
| insulin, insulin-like growth factor 2 (somatomedin A), IN | NM_000207, NM   | Coding | TRUE |
| DCP1 decapping enzyme homolog B (S. cerevisiae)           | NM_152640, ENS  | Coding | TRUE |
| DCP1 decapping enzyme homolog B (S. cerevisiae)           | NM_152640, ENS  | Coding | TRUE |
| DCP1 decapping enzyme homolog B (S. cerevisiae)           | NM_152640, ENS  | Coding | TRUE |
| DCP1 decapping enzyme homolog B (S. cerevisiae)           | NM_152640, ENS  | Coding | TRUE |
| ATP-binding cassette, sub-family B (MDR/TAP), memt        | NM_001243013,   | Coding | TRUE |
| ATP-binding cassette, sub-family B (MDR/TAP), memt        | NM_001243013,   | Coding | TRUE |
| jumonji domain containing 7, phospholipase A2, group      | NM_001114632, I | Coding | TRUE |
| jumonji domain containing 7, phospholipase A2, group      | NM_001114632, I | Coding | TRUE |
| jumonji domain containing 7, phospholipase A2, group      | NM_001114632, I | Coding | TRUE |
| jumonji domain containing 7, phospholipase A2, group      | NM_001114632, I | Coding | TRUE |
| jumonji domain containing 7, phospholipase A2, group      | NM_001114632, I | Coding | TRUE |
| jumonji domain containing 7, phospholipase A2, group      | NM_001114632, I | Coding | TRUE |
| jumonji domain containing 7, phospholipase A2, group      | NM_001114632, I | Coding | TRUE |
| family with sequence similarity 18, member A              | NM_001079512,   | Coding | TRUE |
| family with sequence similarity 18, member A              | NM_001079512,   | Coding | TRUE |
| glutamyl-tRNA synthetase 2, mitochondrial (putative)      | NM_001083614,   | Coding | TRUE |
| glutamyl-tRNA synthetase 2, mitochondrial (putative)      | NM_001083614,   | Coding | TRUE |
| ATP-binding cassette, sub-family F (GCN20), member        | NM_001025091,   | Coding | TRUE |
| ATP-binding cassette, sub-family F (GCN20), member        | NM_001025091,   | Coding | TRUE |
| ATP-binding cassette, sub-family F (GCN20), member        | NM_001025091,   | Coding | TRUE |
| ATP-binding cassette, sub-family F (GCN20), member        | NM_001025091,   | Coding | TRUE |
| ATP-binding cassette, sub-family F (GCN20), member        | NM_001025091,   | Coding | TRUE |
| ATP-binding cassette, sub-family F (GCN20), member        | NM_001025091,   | Coding | TRUE |
| ATP-binding cassette, sub-family F (GCN20), member        | NM_001025091,   | Coding | TRUE |
| ATP-binding cassette, sub-family F (GCN20), member        | NM_001025091,   | Coding | TRUE |
| ATP-binding cassette, sub-family F (GCN20), member        | NM_001025091,   | Coding | TRUE |
| ATP-binding cassette, sub-family F (GCN20), member        | NM_001025091,   | Coding | TRUE |
| ATP-binding cassette, sub-family F (GCN20), member        | NM_001025091,   | Coding | TRUE |
| ATP-binding cassette, sub-family F (GCN20), member        | NM_001025091,   | Coding | TRUE |
| ATP-binding cassette, sub-family F (GCN20), member        | NM_001025091,   | Coding | TRUE |
| tectonic family member 1                                  | NM_001082537,   | Coding | TRUE |
| tectonic family member 1                                  | NM_001082537,   | Coding | TRUE |
| tectonic family member 1                                  | NM_001082537,   | Coding | TRUE |
| SWT1 RNA endoribonuclease homolog (S. cerevisiae)         | NM_001105518, I | Coding | TRUE |
| SWT1 RNA endoribonuclease homolog (S. cerevisiae)         | NM_001105518, I | Coding | TRUE |
| SWT1 RNA endoribonuclease homolog (S. cerevisiae)         | NM_001105518, I | Coding | TRUE |
| SWT1 RNA endoribonuclease homolog (S. cerevisiae)         | NM_001105518, I | Coding | TRUE |
| SWT1 RNA endoribonuclease homolog (S. cerevisiae)         | NM_001105518, I | Coding | TRUE |
| inositol polyphosphate-5-phosphatase, 145kDa              | NM_001017915,   | Coding | TRUE |
| inositol polyphosphate-5-phosphatase, 145kDa              | NM_001017915,   | Coding | TRUE |
| inositol polyphosphate-5-phosphatase, 145kDa              | NM_001017915,   | Coding | TRUE |
| inositol polyphosphate-5-phosphatase, 145kDa              | NM_001017915,   | Coding | TRUE |
| inositol polyphosphate-5-phosphatase, 145kDa              | NM_001017915,   | Coding | TRUE |
| crystallin, gamma S                                       | NM_017541, ENS  | Coding | TRUE |
| crystallin, gamma S                                       | NM_017541, ENS  | Coding | TRUE |
| leukemia inhibitory factor receptor alpha                 | NM_001127671, I | Coding | TRUE |
| leukemia inhibitory factor receptor alpha                 | NM_001127671, I | Coding | TRUE |
| leukemia inhibitory factor receptor alpha                 | NM_001127671, I | Coding | TRUE |
| leukemia inhibitory factor receptor alpha                 | NM_001127671, I | Coding | TRUE |
| leukemia inhibitory factor receptor alpha                 | NM_001127671, I | Coding | TRUE |
| leukemia inhibitory factor receptor alpha                 | NM_001127671, I | Coding | TRUE |
| leukemia inhibitory factor receptor alpha                 | NM_001127671, I | Coding | TRUE |
| leukemia inhibitory factor receptor alpha                 | NM_001127671, I | Coding | TRUE |
| leukemia inhibitory factor receptor alpha                 | NM_001127671, I | Coding | TRUE |
| leukemia inhibitory factor receptor alpha                 | NM_001127671, I | Coding | TRUE |
| leukemia inhibitory factor receptor alpha                 | NM_001127671, I | Coding | TRUE |
| leukemia inhibitory factor receptor alpha                 | NM_001127671, I | Coding | TRUE |
| uncharacterized LOC100507557                              | NR_038244, NR   | Coding | TRUE |
| uncharacterized LOC100507557                              | NR_038244, NR   | Coding | TRUE |





|                                                       |                |        |      |
|-------------------------------------------------------|----------------|--------|------|
| LY75-CD302 readthrough, CD302 molecule, lymphocy      | NM_001198759,  | Coding | TRUE |
| GPN-loop GTPase 1                                     | NM_001145047,  | Coding | TRUE |
| GPN-loop GTPase 1                                     | NM_001145047,  | Coding | TRUE |
| GPN-loop GTPase 1                                     | NM_001145047,  | Coding | TRUE |
| topoisomerase (DNA) II beta 180kDa, microRNA 4442     | NM_001068, NR_ | Coding | TRUE |
| topoisomerase (DNA) II beta 180kDa, microRNA 4442     | NM_001068, NR_ | Coding | TRUE |
| topoisomerase (DNA) II beta 180kDa, microRNA 4442     | NM_001068, NR_ | Coding | TRUE |
| topoisomerase (DNA) II beta 180kDa, microRNA 4442     | NM_001068, NR_ | Coding | TRUE |
| topoisomerase (DNA) II beta 180kDa, microRNA 4442     | NM_001068, NR_ | Coding | TRUE |
| alcohol dehydrogenase 1C (class I), gamma polypepti   | NM_000669, ENS | Coding | TRUE |
| alcohol dehydrogenase 1C (class I), gamma polypepti   | NM_000669, ENS | Coding | TRUE |
| alcohol dehydrogenase 1C (class I), gamma polypepti   | NM_000669, ENS | Coding | TRUE |
| alcohol dehydrogenase 1C (class I), gamma polypepti   | NM_000669, ENS | Coding | TRUE |
| zinc finger protein 451                               | NM_001031623,  | Coding | TRUE |
| zinc finger protein 451                               | NM_001031623,  | Coding | TRUE |
| zinc finger protein 451                               | NM_001031623,  | Coding | TRUE |
| zinc finger protein 451                               | NM_001031623,  | Coding | TRUE |
| zinc finger protein 451                               | NM_001031623,  | Coding | TRUE |
| zinc finger protein 451                               | NM_001031623,  | Coding | TRUE |
| zinc finger protein 451                               | NM_001031623,  | Coding | TRUE |
| zinc finger protein 451                               | NM_001031623,  | Coding | TRUE |
| zinc finger protein 451                               | NM_001031623,  | Coding | TRUE |
| zinc finger protein 451                               | NM_001031623,  | Coding | TRUE |
| zinc finger protein 451                               | NM_001031623,  | Coding | TRUE |
| zinc finger protein 451                               | NM_001031623,  | Coding | TRUE |
| zinc finger protein 451                               | NM_001031623,  | Coding | TRUE |
| zinc finger protein 451                               | NM_001031623,  | Coding | TRUE |
| zinc finger protein 451                               | NM_001031623,  | Coding | TRUE |
| zinc finger protein 451                               | NM_001031623,  | Coding | TRUE |
| retinoic acid receptor responder (tazarotene induced) | NM_002889, ENS | Coding | TRUE |
| retinoic acid receptor responder (tazarotene induced) | NM_002889, ENS | Coding | TRUE |
| RMI1, RecQ mediated genome instability 1, homolog (   | NM_024945, ENS | Coding | TRUE |
| RMI1, RecQ mediated genome instability 1, homolog (   | NM_024945, ENS | Coding | TRUE |
| RMI1, RecQ mediated genome instability 1, homolog (   | NM_024945, ENS | Coding | TRUE |
| RMI1, RecQ mediated genome instability 1, homolog (   | NM_024945, ENS | Coding | TRUE |
| euchromatic histone-lysine N-methyltransferase 1      | NM_001145527,  | Coding | TRUE |
| euchromatic histone-lysine N-methyltransferase 1      | NM_001145527,  | Coding | TRUE |
| euchromatic histone-lysine N-methyltransferase 1      | NM_001145527,  | Coding | TRUE |
| nucleolar protein 8                                   | NM_001256394,  | Coding | TRUE |
| nucleolar protein 8                                   | NM_001256394,  | Coding | TRUE |
| nucleolar protein 8                                   | NM_001256394,  | Coding | TRUE |
| nucleolar protein 8                                   | NM_001256394,  | Coding | TRUE |
| nucleolar protein 8                                   | NM_001256394,  | Coding | TRUE |
| nucleolar protein 8                                   | NM_001256394,  | Coding | TRUE |
| family with sequence similarity 156, member B, family | NM_001099684,  | Coding | TRUE |
| family with sequence similarity 156, member B, family | NM_001099684,  | Coding | TRUE |
| ATPase, class VI, type 11C                            | NM_001010986,  | Coding | TRUE |
| ATPase, class VI, type 11C                            | NM_001010986,  | Coding | TRUE |
| ATPase, class VI, type 11C                            | NM_001010986,  | Coding | TRUE |
| structural maintenance of chromosomes 3               | NM_005445, ENS | Coding | TRUE |
| structural maintenance of chromosomes 3               | NM_005445, ENS | Coding | TRUE |
| structural maintenance of chromosomes 3               | NM_005445, ENS | Coding | TRUE |
| structural maintenance of chromosomes 3               | NM_005445, ENS | Coding | TRUE |
| tripartite motif containing 5                         | NM_033093, NM_ | Coding | TRUE |
| tripartite motif containing 5                         | NM_033093, NM_ | Coding | TRUE |
| tripartite motif containing 5                         | NM_033093, NM_ | Coding | TRUE |
| tripartite motif containing 5                         | NM_033093, NM_ | Coding | TRUE |
| tripartite motif containing 5                         | NM_033093, NM_ | Coding | TRUE |
| tripartite motif containing 5                         | NM_033093, NM_ | Coding | TRUE |
| tripartite motif containing 5                         | NM_033093, NM_ | Coding | TRUE |
| unc-45 homolog A (C. elegans)                         | NM_001039675,  | Coding | TRUE |



|                                                            |                |        |      |
|------------------------------------------------------------|----------------|--------|------|
| signal peptide, CUB domain, EGF-like 3                     | NM_152753, ENS | Coding | TRUE |
| phosphoseryl-tRNA kinase                                   | NM_153336, ENS | Coding | TRUE |
| phosphoseryl-tRNA kinase                                   | NM_153336, ENS | Coding | TRUE |
| calcium/calmodulin-dependent protein kinase II gamma       | NM_001204492,  | Coding | TRUE |
| calcium/calmodulin-dependent protein kinase II gamma       | NM_001204492,  | Coding | TRUE |
| chromosome 11 open reading frame 30                        | NM_020193, BC1 | Coding | TRUE |
| chromosome 11 open reading frame 30                        | NM_020193, BC1 | Coding | TRUE |
| chromosome 11 open reading frame 30                        | NM_020193, BC1 | Coding | TRUE |
| chromosome 11 open reading frame 30                        | NM_020193, BC1 | Coding | TRUE |
| chromosome 11 open reading frame 30                        | NM_020193, BC1 | Coding | TRUE |
| importin 5                                                 | NM_002271, ENS | Coding | TRUE |
| importin 5                                                 | NM_002271, ENS | Coding | TRUE |
| importin 5                                                 | NM_002271, ENS | Coding | TRUE |
| importin 5                                                 | NM_002271, ENS | Coding | TRUE |
| importin 5                                                 | NM_002271, ENS | Coding | TRUE |
| sulfide quinone reductase-like (yeast)                     | NM_021199, ENS | Coding | TRUE |
| sulfide quinone reductase-like (yeast)                     | NM_021199, ENS | Coding | TRUE |
| class II, major histocompatibility complex, transactivator | NM_000246, ENS | Coding | TRUE |
| class II, major histocompatibility complex, transactivator | NM_000246, ENS | Coding | TRUE |
| class II, major histocompatibility complex, transactivator | NM_000246, ENS | Coding | TRUE |
| component of oligomeric golgi complex 1                    | NM_018714, ENS | Coding | TRUE |
| component of oligomeric golgi complex 1                    | NM_018714, ENS | Coding | TRUE |
| fms-related tyrosine kinase 3 ligand                       | NM_001204502,  | Coding | TRUE |
| fms-related tyrosine kinase 3 ligand                       | NM_001204502,  | Coding | TRUE |
| polo-like kinase 1 substrate 1                             | NM_001163022,  | Coding | TRUE |
| polo-like kinase 1 substrate 1                             | NM_001163022,  | Coding | TRUE |
| proline-rich coiled-coil 2A                                | NM_004638, NM  | Coding | TRUE |
| proline-rich coiled-coil 2A                                | NM_004638, NM  | Coding | TRUE |
| proline-rich coiled-coil 2A                                | NM_004638, NM  | Coding | TRUE |
| major histocompatibility complex, class I-related          | NM_001194999,  | Coding | TRUE |
| major histocompatibility complex, class I-related          | NM_001194999,  | Coding | TRUE |
| major histocompatibility complex, class I-related          | NM_001194999,  | Coding | TRUE |
| major histocompatibility complex, class I-related          | NM_001194999,  | Coding | TRUE |
| transcription elongation factor A (SII), 3                 | NM_003196, ENS | Coding | TRUE |
| transcription elongation factor A (SII), 3                 | NM_003196, ENS | Coding | TRUE |
| transcription elongation factor A (SII), 3                 | NM_003196, ENS | Coding | TRUE |
| transcription elongation factor A (SII), 3                 | NM_003196, ENS | Coding | TRUE |
| olfactomedin-like 2B                                       | NM_015441, BCC | Coding | TRUE |
| olfactomedin-like 2B                                       | NM_015441, BCC | Coding | TRUE |
| olfactomedin-like 2B                                       | NM_015441, BCC | Coding | TRUE |
| tenascin R (restrictin, janusin)                           | NM_003285, ENS | Coding | TRUE |
| tenascin R (restrictin, janusin)                           | NM_003285, ENS | Coding | TRUE |
| tenascin R (restrictin, janusin)                           | NM_003285, ENS | Coding | TRUE |
| E2F transcription factor 6                                 | NM_198256, NR  | Coding | TRUE |
| E2F transcription factor 6                                 | NM_198256, NR  | Coding | TRUE |
| E2F transcription factor 6                                 | NM_198256, NR  | Coding | TRUE |
| acid phosphatase-like 2                                    | NM_001037172,  | Coding | TRUE |
| acid phosphatase-like 2                                    | NM_001037172,  | Coding | TRUE |
| acid phosphatase-like 2                                    | NM_001037172,  | Coding | TRUE |
| acid phosphatase-like 2                                    | NM_001037172,  | Coding | TRUE |
|                                                            |                | Coding | TRUE |
|                                                            |                | Coding | TRUE |
| solute carrier family 35, member B3                        | NM_001142540,  | Coding | TRUE |
| solute carrier family 35, member B3                        | NM_001142540,  | Coding | TRUE |
| solute carrier family 35, member B3                        | NM_001142540,  | Coding | TRUE |
| glutathione S-transferase alpha 4                          | NM_001512, ENS | Coding | TRUE |
| glutathione S-transferase alpha 4                          | NM_001512, ENS | Coding | TRUE |
| makorin ring finger protein 1                              | NM_013446, NM  | Coding | TRUE |

|                                                          |                |        |      |
|----------------------------------------------------------|----------------|--------|------|
| makorin ring finger protein 1                            | NM_013446, NM  | Coding | TRUE |
| makorin ring finger protein 1                            | NM_013446, NM  | Coding | TRUE |
| makorin ring finger protein 1                            | NM_013446, NM  | Coding | TRUE |
| makorin ring finger protein 1                            | NM_013446, NM  | Coding | TRUE |
| KIAA1147                                                 | NM_001080392,  | Coding | TRUE |
| KIAA1147                                                 | NM_001080392,  | Coding | TRUE |
| KIAA1147                                                 | NM_001080392,  | Coding | TRUE |
| frizzled family receptor 3                               | NM_017412, NM  | Coding | TRUE |
| frizzled family receptor 3                               | NM_017412, NM  | Coding | TRUE |
| frizzled family receptor 3                               | NM_017412, NM  | Coding | TRUE |
| frizzled family receptor 3                               | NM_017412, NM  | Coding | TRUE |
| frizzled family receptor 3                               | NM_017412, NM  | Coding | TRUE |
| uncharacterized LOC100507651                             | NR_038235, ENS | Coding | TRUE |
| uncharacterized LOC100507651                             | NR_038235, ENS | Coding | TRUE |
| leucine rich repeat and sterile alpha motif containing 1 | NM_001005373,  | Coding | TRUE |
| leucine rich repeat and sterile alpha motif containing 1 | NM_001005373,  | Coding | TRUE |
| leucine rich repeat and sterile alpha motif containing 1 | NM_001005373,  | Coding | TRUE |
| leucine rich repeat and sterile alpha motif containing 1 | NM_001005373,  | Coding | TRUE |
| leucine rich repeat and sterile alpha motif containing 1 | NM_001005373,  | Coding | TRUE |
| F-box protein 10                                         | NM_012166, BC1 | Coding | TRUE |
| F-box protein 10                                         | NM_012166, BC1 | Coding | TRUE |
| F-box protein 10                                         | NM_012166, BC1 | Coding | TRUE |
| F-box protein 10                                         | NM_012166, BC1 | Coding | TRUE |
| hypoxanthine phosphoribosyltransferase 1                 | NM_000194, ENS | Coding | TRUE |
| hypoxanthine phosphoribosyltransferase 1                 | NM_000194, ENS | Coding | TRUE |
| PHD finger protein 8                                     | NM_001184896,  | Coding | TRUE |
| PHD finger protein 8                                     | NM_001184896,  | Coding | TRUE |
| PHD finger protein 8                                     | NM_001184896,  | Coding | TRUE |
| PHD finger protein 8                                     | NM_001184896,  | Coding | TRUE |
| PHD finger protein 8                                     | NM_001184896,  | Coding | TRUE |
| discs, large homolog 2 (Drosophila)                      | NM_001142699,  | Coding | TRUE |
| discs, large homolog 2 (Drosophila)                      | NM_001142699,  | Coding | TRUE |
| discs, large homolog 2 (Drosophila)                      | NM_001142699,  | Coding | TRUE |
| discs, large homolog 2 (Drosophila)                      | NM_001142699,  | Coding | TRUE |
| WNK lysine deficient protein kinase 1                    | NM_018979, NM  | Coding | TRUE |
| WNK lysine deficient protein kinase 1                    | NM_018979, NM  | Coding | TRUE |
| WNK lysine deficient protein kinase 1                    | NM_018979, NM  | Coding | TRUE |
| WNK lysine deficient protein kinase 1                    | NM_018979, NM  | Coding | TRUE |
| WNK lysine deficient protein kinase 1                    | NM_018979, NM  | Coding | TRUE |
| WNK lysine deficient protein kinase 1                    | NM_018979, NM  | Coding | TRUE |
| forkhead box J2                                          | NM_018416, ENS | Coding | TRUE |
| forkhead box J2                                          | NM_018416, ENS | Coding | TRUE |
| forkhead box J2                                          | NM_018416, ENS | Coding | TRUE |
| forkhead box J2                                          | NM_018416, ENS | Coding | TRUE |
| forkhead box J2                                          | NM_018416, ENS | Coding | TRUE |
| forkhead box J2                                          | NM_018416, ENS | Coding | TRUE |
| forkhead box J2                                          | NM_018416, ENS | Coding | TRUE |
| RAD9 homolog B (S. pombe)                                | NM_152442, ENS | Coding | TRUE |
| RAD9 homolog B (S. pombe)                                | NM_152442, ENS | Coding | TRUE |
| RAD9 homolog B (S. pombe)                                | NM_152442, ENS | Coding | TRUE |
| RAD9 homolog B (S. pombe)                                | NM_152442, ENS | Coding | TRUE |
| RAD52 homolog (S. cerevisiae), uncharacterized LOC       | NM_134424, ENS | Coding | TRUE |
| RAD52 homolog (S. cerevisiae), uncharacterized LOC       | NM_134424, ENS | Coding | TRUE |
| RAD52 homolog (S. cerevisiae), uncharacterized LOC       | NM_134424, ENS | Coding | TRUE |
| RAD52 homolog (S. cerevisiae), uncharacterized LOC       | NM_134424, ENS | Coding | TRUE |
| tripartite motif containing 9                            | NM_015163, NM  | Coding | TRUE |
| tripartite motif containing 9                            | NM_015163, NM  | Coding | TRUE |
| tripartite motif containing 9                            | NM_015163, NM  | Coding | TRUE |

|                                                             |                               |        |      |
|-------------------------------------------------------------|-------------------------------|--------|------|
| tripartite motif containing 9                               | NM_015163, NM_015163          | Coding | TRUE |
| tripartite motif containing 9                               | NM_015163, NM_015163          | Coding | TRUE |
| SLX1 structure-specific endonuclease subunit homolog        | NM_001014999, NM_001014999    | Coding | TRUE |
| SLX1 structure-specific endonuclease subunit homolog        | NM_001014999, NM_001014999    | Coding | TRUE |
| SLX1 structure-specific endonuclease subunit homolog        | NM_001014999, NM_001014999    | Coding | TRUE |
| SLX1 structure-specific endonuclease subunit homolog        | NM_001014999, NM_001014999    | Coding | TRUE |
| SLX1 structure-specific endonuclease subunit homolog        | NM_001014999, NM_001014999    | Coding | TRUE |
| SLX1 structure-specific endonuclease subunit homolog        | NM_001014999, NM_001014999    | Coding | TRUE |
| phosphatidylinositol glycan anchor biosynthesis, class      | NM_178517, ENSMUSM00000100000 | Coding | TRUE |
| phosphatidylinositol glycan anchor biosynthesis, class      | NM_178517, ENSMUSM00000100000 | Coding | TRUE |
| T-box 1                                                     | NM_080647, NM_080647          | Coding | TRUE |
| T-box 1                                                     | NM_080647, NM_080647          | Coding | TRUE |
| T-box 1                                                     | NM_080647, NM_080647          | Coding | TRUE |
| T-box 1                                                     | NM_080647, NM_080647          | Coding | TRUE |
| T-box 1                                                     | NM_080647, NM_080647          | Coding | TRUE |
| T-box 1                                                     | NM_080647, NM_080647          | Coding | TRUE |
| proline-rich coiled-coil 2A                                 | NM_004638, NM_004638          | Coding | TRUE |
| proline-rich coiled-coil 2A                                 | NM_004638, NM_004638          | Coding | TRUE |
| proline-rich coiled-coil 2A                                 | NM_004638, NM_004638          | Coding | TRUE |
| proline-rich coiled-coil 2A                                 | NM_004638, NM_004638          | Coding | TRUE |
| proline-rich coiled-coil 2A                                 | NM_004638, NM_004638          | Coding | TRUE |
| proline-rich coiled-coil 2A                                 | NM_004638, NM_004638          | Coding | TRUE |
| proline-rich coiled-coil 2A                                 | NM_004638, NM_004638          | Coding | TRUE |
| proline-rich coiled-coil 2A                                 | NM_004638, NM_004638          | Coding | TRUE |
| proline-rich coiled-coil 2A                                 | NM_004638, NM_004638          | Coding | TRUE |
| proline-rich coiled-coil 2A                                 | NM_004638, NM_004638          | Coding | TRUE |
| proline-rich coiled-coil 2A                                 | NM_004638, NM_004638          | Coding | TRUE |
| solute carrier family 37 (glycerol-3-phosphate transporter) | NM_018964, ENSMUSM00000100000 | Coding | TRUE |
| solute carrier family 37 (glycerol-3-phosphate transporter) | NM_018964, ENSMUSM00000100000 | Coding | TRUE |
| acyl-CoA dehydrogenase family, member 9                     | NM_014049, NR_014049          | Coding | TRUE |
| acyl-CoA dehydrogenase family, member 9                     | NM_014049, NR_014049          | Coding | TRUE |
| acyl-CoA dehydrogenase family, member 9                     | NM_014049, NR_014049          | Coding | TRUE |
| chromosome 3 open reading frame 37                          | NM_001006109, NM_001006109    | Coding | TRUE |
| chromosome 3 open reading frame 37                          | NM_001006109, NM_001006109    | Coding | TRUE |
| chromosome 3 open reading frame 37                          | NM_001006109, NM_001006109    | Coding | TRUE |
| chromosome 3 open reading frame 37                          | NM_001006109, NM_001006109    | Coding | TRUE |
| Rap guanine nucleotide exchange factor (GEF) 2              | NM_014247, ENSMUSM00000100000 | Coding | TRUE |
| Rap guanine nucleotide exchange factor (GEF) 2              | NM_014247, ENSMUSM00000100000 | Coding | TRUE |
| Rap guanine nucleotide exchange factor (GEF) 2              | NM_014247, ENSMUSM00000100000 | Coding | TRUE |
| Rap guanine nucleotide exchange factor (GEF) 2              | NM_014247, ENSMUSM00000100000 | Coding | TRUE |
| Rap guanine nucleotide exchange factor (GEF) 2              | NM_014247, ENSMUSM00000100000 | Coding | TRUE |
| ring finger protein 44                                      | NM_014901, ENSMUSM00000100000 | Coding | TRUE |
| ring finger protein 44                                      | NM_014901, ENSMUSM00000100000 | Coding | TRUE |
| uncharacterized LOC378805                                   | NR_015431, NR_015431          | Coding | TRUE |
| uncharacterized LOC378805                                   | NR_015431, NR_015431          | Coding | TRUE |
| uncharacterized LOC378805                                   | NR_015431, NR_015431          | Coding | TRUE |
| uncharacterized LOC378805                                   | NR_015431, NR_015431          | Coding | TRUE |
| ATPase, H+ transporting, lysosomal 50/57kDa, V1 subunit     | NM_015941, NM_015941          | Coding | TRUE |
| ATPase, H+ transporting, lysosomal 50/57kDa, V1 subunit     | NM_015941, NM_015941          | Coding | TRUE |
| ATPase, H+ transporting, lysosomal 50/57kDa, V1 subunit     | NM_015941, NM_015941          | Coding | TRUE |
| lysine (K)-specific demethylase 4C                          | NM_001146694, NM_001146694    | Coding | TRUE |
| lysine (K)-specific demethylase 4C                          | NM_001146694, NM_001146694    | Coding | TRUE |
| lysine (K)-specific demethylase 4C                          | NM_001146694, NM_001146694    | Coding | TRUE |
| lysine (K)-specific demethylase 4C                          | NM_001146694, NM_001146694    | Coding | TRUE |
| lysine (K)-specific demethylase 4C                          | NM_001146694, NM_001146694    | Coding | TRUE |
| lysine (K)-specific demethylase 4C                          | NM_001146694, NM_001146694    | Coding | TRUE |
| lysine (K)-specific demethylase 4C                          | NM_001146694, NM_001146694    | Coding | TRUE |
| lysine (K)-specific demethylase 4C                          | NM_001146694, NM_001146694    | Coding | TRUE |
| lysine (K)-specific demethylase 4C                          | NM_001146694, NM_001146694    | Coding | TRUE |
| filamin A, alpha                                            | NM_001456, NM_001456          | Coding | TRUE |
| filamin A, alpha                                            | NM_001456, NM_001456          | Coding | TRUE |









|                                                          |                |        |      |
|----------------------------------------------------------|----------------|--------|------|
| glutamate-rich 1                                         | NM_207332, ENS | Coding | TRUE |
| glutamate-rich 1                                         | NM_207332, ENS | Coding | TRUE |
| glutamate-rich 1                                         | NM_207332, ENS | Coding | TRUE |
| glutamate-rich 1                                         | NM_207332, ENS | Coding | TRUE |
| topoisomerase (DNA) I, mitochondrial                     | NM_052963, ENS | Coding | TRUE |
| topoisomerase (DNA) I, mitochondrial                     | NM_052963, ENS | Coding | TRUE |
| topoisomerase (DNA) I, mitochondrial                     | NM_052963, ENS | Coding | TRUE |
| topoisomerase (DNA) I, mitochondrial                     | NM_052963, ENS | Coding | TRUE |
| toll-interleukin 1 receptor (TIR) domain containing adaj | NM_001039661,  | Coding | TRUE |
| toll-interleukin 1 receptor (TIR) domain containing adaj | NM_001039661,  | Coding | TRUE |
| toll-interleukin 1 receptor (TIR) domain containing adaj | NM_001039661,  | Coding | TRUE |
| PTPRF interacting protein, binding protein 1 (liprin bet | NM_001198915,  | Coding | TRUE |
| PTPRF interacting protein, binding protein 1 (liprin bet | NM_001198915,  | Coding | TRUE |
| PTPRF interacting protein, binding protein 1 (liprin bet | NM_001198915,  | Coding | TRUE |
| PTPRF interacting protein, binding protein 1 (liprin bet | NM_001198915,  | Coding | TRUE |
| PTPRF interacting protein, binding protein 1 (liprin bet | NM_001198915,  | Coding | TRUE |
| PTPRF interacting protein, binding protein 1 (liprin bet | NM_001198915,  | Coding | TRUE |
| PTPRF interacting protein, binding protein 1 (liprin bet | NM_001198915,  | Coding | TRUE |
| low density lipoprotein receptor-related protein 10      | NM_014045, ENS | Coding | TRUE |
| low density lipoprotein receptor-related protein 10      | NM_014045, ENS | Coding | TRUE |
| progesterin and adipoQ receptor family member V          | NM_001104554,  | Coding | TRUE |
| progesterin and adipoQ receptor family member V          | NM_001104554,  | Coding | TRUE |
| progesterin and adipoQ receptor family member V          | NM_001104554,  | Coding | TRUE |
| progesterin and adipoQ receptor family member V          | NM_001104554,  | Coding | TRUE |
| progesterin and adipoQ receptor family member V          | NM_001104554,  | Coding | TRUE |
| progesterin and adipoQ receptor family member V          | NM_001104554,  | Coding | TRUE |
| progesterin and adipoQ receptor family member V          | NM_001104554,  | Coding | TRUE |
| high mobility group 20A                                  | NM_018200, ENS | Coding | TRUE |
| high mobility group 20A                                  | NM_018200, ENS | Coding | TRUE |
| transducin-like enhancer of split 3 (E(sp1) homolog, D   | NM_001105192,  | Coding | TRUE |
| transducin-like enhancer of split 3 (E(sp1) homolog, D   | NM_001105192,  | Coding | TRUE |
| transducin-like enhancer of split 3 (E(sp1) homolog, D   | NM_001105192,  | Coding | TRUE |
| transducin-like enhancer of split 3 (E(sp1) homolog, D   | NM_001105192,  | Coding | TRUE |
| suppressor of zeste 12 homolog pseudogene 1              | NR_024187      | Coding | TRUE |
| suppressor of zeste 12 homolog pseudogene 1              | NR_024187      | Coding | TRUE |
| suppressor of zeste 12 homolog pseudogene 1              | NR_024187      | Coding | TRUE |
| suppressor of zeste 12 homolog pseudogene 1              | NR_024187      | Coding | TRUE |
| uncharacterized LOC100507263                             | ENST000004234  | Coding | TRUE |
| uncharacterized LOC100507263                             | ENST000004234  | Coding | TRUE |
| uncharacterized LOC100507263                             | ENST000004234  | Coding | TRUE |
| uncharacterized LOC100507263                             | ENST000004234  | Coding | TRUE |
| structural maintenance of chromosomes flexible hinge     | NM_015295, ENS | Coding | TRUE |
| structural maintenance of chromosomes flexible hinge     | NM_015295, ENS | Coding | TRUE |
| structural maintenance of chromosomes flexible hinge     | NM_015295, ENS | Coding | TRUE |
| coiled-coil domain containing 61                         | NM_001080402,  | Coding | TRUE |
| coiled-coil domain containing 61                         | NM_001080402,  | Coding | TRUE |
| coiled-coil domain containing 61                         | NM_001080402,  | Coding | TRUE |
| NDRG family member 3                                     | NM_022477, NM  | Coding | TRUE |
| NDRG family member 3                                     | NM_022477, NM  | Coding | TRUE |
| major histocompatibility complex, class I, A             | NM_001242758,  | Coding | TRUE |
| major histocompatibility complex, class I, A             | NM_001242758,  | Coding | TRUE |
| major histocompatibility complex, class I, A             | NM_001242758,  | Coding | TRUE |
| chromosome 1 open reading frame 201                      | NM_001199012,  | Coding | TRUE |
| chromosome 1 open reading frame 201                      | NM_001199012,  | Coding | TRUE |
| chromosome 1 open reading frame 201                      | NM_001199012,  | Coding | TRUE |
| chromosome 1 open reading frame 201                      | NM_001199012,  | Coding | TRUE |
| chromosome 1 open reading frame 201                      | NM_001199012,  | Coding | TRUE |
| plexin B1                                                | NM_001130082,  | Coding | TRUE |
| plexin B1                                                | NM_001130082,  | Coding | TRUE |

|                                                        |                |        |      |
|--------------------------------------------------------|----------------|--------|------|
| microRNA 943, Wolf-Hirschhorn syndrome candidate 2     | NR_030641, NM  | Coding | TRUE |
| microRNA 943, Wolf-Hirschhorn syndrome candidate 2     | NR_030641, NM  | Coding | TRUE |
| amyloid beta (A4) precursor protein-binding, family B, | NM_001166050,  | Coding | TRUE |
| amyloid beta (A4) precursor protein-binding, family B, | NM_001166050,  | Coding | TRUE |
| amyloid beta (A4) precursor protein-binding, family B, | NM_001166050,  | Coding | TRUE |
| amyloid beta (A4) precursor protein-binding, family B, | NM_001166050,  | Coding | TRUE |
| amyloid beta (A4) precursor protein-binding, family B, | NM_001166050,  | Coding | TRUE |
| amyloid beta (A4) precursor protein-binding, family B, | NM_001166050,  | Coding | TRUE |
| amyloid beta (A4) precursor protein-binding, family B, | NM_001166050,  | Coding | TRUE |
| amyloid beta (A4) precursor protein-binding, family B, | NM_001166050,  | Coding | TRUE |
| amyloid beta (A4) precursor protein-binding, family B, | NM_001166050,  | Coding | TRUE |
| amyloid beta (A4) precursor protein-binding, family B, | NM_001166050,  | Coding | TRUE |
| amyloid beta (A4) precursor protein-binding, family B, | NM_001166050,  | Coding | TRUE |
| amyloid beta (A4) precursor protein-binding, family B, | NM_001166050,  | Coding | TRUE |
| amyloid beta (A4) precursor protein-binding, family B, | NM_001166050,  | Coding | TRUE |
| amyloid beta (A4) precursor protein-binding, family B, | NM_001166050,  | Coding | TRUE |
| WD repeat domain 70                                    | NM_018034, ENS | Coding | TRUE |
| WD repeat domain 70                                    | NM_018034, ENS | Coding | TRUE |
| DnaJ (Hsp40) homolog, subfamily C, member 18           | NM_152686, ENS | Coding | TRUE |
| DnaJ (Hsp40) homolog, subfamily C, member 18           | NM_152686, ENS | Coding | TRUE |
| DnaJ (Hsp40) homolog, subfamily C, member 18           | NM_152686, ENS | Coding | TRUE |
| PHD finger protein 20-like 1                           | NM_016018, NM  | Coding | TRUE |
| PHD finger protein 20-like 1                           | NM_016018, NM  | Coding | TRUE |
| PHD finger protein 20-like 1                           | NM_016018, NM  | Coding | TRUE |
| PHD finger protein 20-like 1                           | NM_016018, NM  | Coding | TRUE |
| PHD finger protein 20-like 1                           | NM_016018, NM  | Coding | TRUE |
| PHD finger protein 20-like 1                           | NM_016018, NM  | Coding | TRUE |
| PHD finger protein 20-like 1                           | NM_016018, NM  | Coding | TRUE |
| PHD finger protein 20-like 1                           | NM_016018, NM  | Coding | TRUE |
| PHD finger protein 20-like 1                           | NM_016018, NM  | Coding | TRUE |
| PHD finger protein 20-like 1                           | NM_016018, NM  | Coding | TRUE |
| PHD finger protein 20-like 1                           | NM_016018, NM  | Coding | TRUE |
| PHD finger protein 20-like 1                           | NM_016018, NM  | Coding | TRUE |
| PHD finger protein 20-like 1                           | NM_016018, NM  | Coding | TRUE |
| PHD finger protein 20-like 1                           | NM_016018, NM  | Coding | TRUE |
| fibroblast growth factor receptor 1                    | NM_001174067,  | Coding | TRUE |
| fibroblast growth factor receptor 1                    | NM_001174067,  | Coding | TRUE |
| fibroblast growth factor receptor 1                    | NM_001174067,  | Coding | TRUE |
| fibroblast growth factor receptor 1                    | NM_001174067,  | Coding | TRUE |
| fibroblast growth factor receptor 1                    | NM_001174067,  | Coding | TRUE |
| patatin-like phospholipase domain containing 7         | NM_001098537,  | Coding | TRUE |
| patatin-like phospholipase domain containing 7         | NM_001098537,  | Coding | TRUE |
| patatin-like phospholipase domain containing 7         | NM_001098537,  | Coding | TRUE |
| patatin-like phospholipase domain containing 7         | NM_001098537,  | Coding | TRUE |
| patatin-like phospholipase domain containing 7         | NM_001098537,  | Coding | TRUE |
| patatin-like phospholipase domain containing 7         | NM_001098537,  | Coding | TRUE |
| patatin-like phospholipase domain containing 7         | NM_001098537,  | Coding | TRUE |
| patatin-like phospholipase domain containing 7         | NM_001098537,  | Coding | TRUE |
| patatin-like phospholipase domain containing 7         | NM_001098537,  | Coding | TRUE |
| patatin-like phospholipase domain containing 7         | NM_001098537,  | Coding | TRUE |
| G protein-coupled receptor 64                          | NM_001079858,  | Coding | TRUE |
| G protein-coupled receptor 64                          | NM_001079858,  | Coding | TRUE |
| G protein-coupled receptor 64                          | NM_001079858,  | Coding | TRUE |
| G protein-coupled receptor 64                          | NM_001079858,  | Coding | TRUE |
| G protein-coupled receptor 64                          | NM_001079858,  | Coding | TRUE |
| G protein-coupled receptor 64                          | NM_001079858,  | Coding | TRUE |
| G protein-coupled receptor 64                          | NM_001079858,  | Coding | TRUE |
| G protein-coupled receptor 64                          | NM_001079858,  | Coding | TRUE |
| G protein-coupled receptor 64                          | NM_001079858,  | Coding | TRUE |
| G protein-coupled receptor 64                          | NM_001079858,  | Coding | TRUE |
| neuron navigator 3                                     | NM_014903, ENS | Coding | TRUE |
| neuron navigator 3                                     | NM_014903, ENS | Coding | TRUE |



|                                                         |                 |        |      |
|---------------------------------------------------------|-----------------|--------|------|
| receptor tyrosine kinase-like orphan receptor 2         | NM_004560, ENS  | Coding | TRUE |
| receptor tyrosine kinase-like orphan receptor 2         | NM_004560, ENS  | Coding | TRUE |
| receptor tyrosine kinase-like orphan receptor 2         | NM_004560, ENS  | Coding | TRUE |
| receptor tyrosine kinase-like orphan receptor 2         | NM_004560, ENS  | Coding | TRUE |
| receptor tyrosine kinase-like orphan receptor 2         | NM_004560, ENS  | Coding | TRUE |
| receptor tyrosine kinase-like orphan receptor 2         | NM_004560, ENS  | Coding | TRUE |
| receptor tyrosine kinase-like orphan receptor 2         | NM_004560, ENS  | Coding | TRUE |
| receptor tyrosine kinase-like orphan receptor 2         | NM_004560, ENS  | Coding | TRUE |
| receptor tyrosine kinase-like orphan receptor 2         | NM_004560, ENS  | Coding | TRUE |
| receptor tyrosine kinase-like orphan receptor 2         | NM_004560, ENS  | Coding | TRUE |
| RAB9B, member RAS oncogene family                       | NM_016370, ENS  | Coding | TRUE |
| RAB9B, member RAS oncogene family                       | NM_016370, ENS  | Coding | TRUE |
| eukaryotic translation initiation factor 1A, Y-linked   | NM_004681, ENS  | Coding | TRUE |
| eukaryotic translation initiation factor 1A, Y-linked   | NM_004681, ENS  | Coding | TRUE |
| eukaryotic translation initiation factor 1A, Y-linked   | NM_004681, ENS  | Coding | TRUE |
| eukaryotic translation initiation factor 1A, Y-linked   | NM_004681, ENS  | Coding | TRUE |
| eukaryotic translation initiation factor 1A, Y-linked   | NM_004681, ENS  | Coding | TRUE |
| eukaryotic translation initiation factor 1A, Y-linked   | NM_004681, ENS  | Coding | TRUE |
| eukaryotic translation initiation factor 1A, Y-linked   | NM_004681, ENS  | Coding | TRUE |
| eukaryotic translation initiation factor 1A, Y-linked   | NM_004681, ENS  | Coding | TRUE |
| eukaryotic translation initiation factor 1A, Y-linked   | NM_004681, ENS  | Coding | TRUE |
| eukaryotic translation initiation factor 1A, Y-linked   | NM_004681, ENS  | Coding | TRUE |
| annexin A8-like 2, uncharacterized LOC100652762, ar     | NM_001630, ENS  | Coding | TRUE |
| annexin A8-like 2, uncharacterized LOC100652762, ar     | NM_001630, ENS  | Coding | TRUE |
| annexin A8-like 2, uncharacterized LOC100652762, ar     | NM_001630, ENS  | Coding | TRUE |
| annexin A8-like 2, uncharacterized LOC100652762, ar     | NM_001630, ENS  | Coding | TRUE |
| annexin A8-like 2, uncharacterized LOC100652762, ar     | NM_001630, ENS  | Coding | TRUE |
| annexin A8-like 2, uncharacterized LOC100652762, ar     | NM_001630, ENS  | Coding | TRUE |
| annexin A8-like 2, uncharacterized LOC100652762, ar     | NM_001630, ENS  | Coding | TRUE |
| annexin A8-like 2, uncharacterized LOC100652762, ar     | NM_001630, ENS  | Coding | TRUE |
| annexin A8-like 2, uncharacterized LOC100652762, ar     | NM_001630, ENS  | Coding | TRUE |
| annexin A8-like 2, uncharacterized LOC100652762, ar     | NM_001630, ENS  | Coding | TRUE |
| annexin A8-like 2, uncharacterized LOC100652762, ar     | NM_001630, ENS  | Coding | TRUE |
| annexin A8-like 1, annexin A8                           | NM_001098845,   | Coding | TRUE |
| annexin A8-like 1, annexin A8                           | NM_001098845,   | Coding | TRUE |
| annexin A8-like 1, annexin A8                           | NM_001098845,   | Coding | TRUE |
| annexin A8-like 1, annexin A8                           | NM_001098845,   | Coding | TRUE |
| annexin A8-like 1, annexin A8                           | NM_001098845,   | Coding | TRUE |
| annexin A8-like 1, annexin A8                           | NM_001098845,   | Coding | TRUE |
| annexin A8-like 1, annexin A8                           | NM_001098845,   | Coding | TRUE |
| annexin A8-like 1, annexin A8                           | NM_001098845,   | Coding | TRUE |
| annexin A8-like 1, annexin A8                           | NM_001098845,   | Coding | TRUE |
| lymphocyte-specific protein 1                           | NM_002339, NM   | Coding | TRUE |
| lymphocyte-specific protein 1                           | NM_002339, NM   | Coding | TRUE |
| lymphocyte-specific protein 1                           | NM_002339, NM   | Coding | TRUE |
| protease, serine, 23                                    | NM_007173, ENS  | Coding | TRUE |
| protease, serine, 23                                    | NM_007173, ENS  | Coding | TRUE |
| protease, serine, 23                                    | NM_007173, ENS  | Coding | TRUE |
| timeless homolog (Drosophila)                           | NM_003920, ENS  | Coding | TRUE |
| timeless homolog (Drosophila)                           | NM_003920, ENS  | Coding | TRUE |
| timeless homolog (Drosophila)                           | NM_003920, ENS  | Coding | TRUE |
| timeless homolog (Drosophila)                           | NM_003920, ENS  | Coding | TRUE |
| timeless homolog (Drosophila)                           | NM_003920, ENS  | Coding | TRUE |
| timeless homolog (Drosophila)                           | NM_003920, ENS  | Coding | TRUE |
| acidic (leucine-rich) nuclear phosphoprotein 32 family, | NM_006305, ENS  | Coding | TRUE |
| acidic (leucine-rich) nuclear phosphoprotein 32 family, | NM_006305, ENS  | Coding | TRUE |
| acidic (leucine-rich) nuclear phosphoprotein 32 family, | NM_006305, ENS  | Coding | TRUE |
| ADP-ribosylation factor-like 17A, ADP-ribosylation fact | NM_001113738, I | Coding | TRUE |
| ADP-ribosylation factor-like 17A, ADP-ribosylation fact | NM_001113738, I | Coding | TRUE |
| ADP-ribosylation factor-like 17A, ADP-ribosylation fact | NM_001113738, I | Coding | TRUE |
|                                                         |                 | Coding | TRUE |
|                                                         |                 | Coding | TRUE |

|                                                                |                               |        |      |
|----------------------------------------------------------------|-------------------------------|--------|------|
| long intergenic non-protein coding RNA 478                     | NR_027790, NR_027790          | Coding | TRUE |
| long intergenic non-protein coding RNA 478                     | NR_027790, NR_027790          | Coding | TRUE |
| long intergenic non-protein coding RNA 478                     | NR_027790, NR_027790          | Coding | TRUE |
| long intergenic non-protein coding RNA 478                     | NR_027790, NR_027790          | Coding | TRUE |
| long intergenic non-protein coding RNA 478                     | NR_027790, NR_027790          | Coding | TRUE |
| polo-like kinase 3                                             | NM_004073, ENSG00000180000    | Coding | TRUE |
| polo-like kinase 3                                             | NM_004073, ENSG00000180000    | Coding | TRUE |
| RAP2C, member of RAS oncogene family                           | NM_021183, ENSG00000170000    | Coding | TRUE |
| RAP2C, member of RAS oncogene family                           | NM_021183, ENSG00000170000    | Coding | TRUE |
| RAP2C, member of RAS oncogene family                           | NM_021183, ENSG00000170000    | Coding | TRUE |
| collagen, type V, alpha 2                                      | NM_000393, ENSG00000170000    | Coding | TRUE |
| collagen, type V, alpha 2                                      | NM_000393, ENSG00000170000    | Coding | TRUE |
| collagen, type V, alpha 2                                      | NM_000393, ENSG00000170000    | Coding | TRUE |
| collagen, type V, alpha 2                                      | NM_000393, ENSG00000170000    | Coding | TRUE |
| collagen, type V, alpha 2                                      | NM_000393, ENSG00000170000    | Coding | TRUE |
| signal transducer and activator of transcription 4             | NM_001243835, ENSG00000170000 | Coding | TRUE |
| signal transducer and activator of transcription 4             | NM_001243835, ENSG00000170000 | Coding | TRUE |
| signal transducer and activator of transcription 4             | NM_001243835, ENSG00000170000 | Coding | TRUE |
| signal transducer and activator of transcription 4             | NM_001243835, ENSG00000170000 | Coding | TRUE |
| signal transducer and activator of transcription 4             | NM_001243835, ENSG00000170000 | Coding | TRUE |
| signal transducer and activator of transcription 4             | NM_001243835, ENSG00000170000 | Coding | TRUE |
| ubiquitin-like modifier activating enzyme 7                    | NM_003335, ENSG00000170000    | Coding | TRUE |
| ubiquitin-like modifier activating enzyme 7                    | NM_003335, ENSG00000170000    | Coding | TRUE |
| ubiquitin-like modifier activating enzyme 7                    | NM_003335, ENSG00000170000    | Coding | TRUE |
| ubiquitin-like modifier activating enzyme 7                    | NM_003335, ENSG00000170000    | Coding | TRUE |
| ubiquitin-like modifier activating enzyme 7                    | NM_003335, ENSG00000170000    | Coding | TRUE |
| ubiquitin-like modifier activating enzyme 7                    | NM_003335, ENSG00000170000    | Coding | TRUE |
| folliculin interacting protein 2                               | NM_020840, ENSG00000170000    | Coding | TRUE |
| folliculin interacting protein 2                               | NM_020840, ENSG00000170000    | Coding | TRUE |
| folliculin interacting protein 2                               | NM_020840, ENSG00000170000    | Coding | TRUE |
| folliculin interacting protein 2                               | NM_020840, ENSG00000170000    | Coding | TRUE |
| folliculin interacting protein 2                               | NM_020840, ENSG00000170000    | Coding | TRUE |
| folliculin interacting protein 2                               | NM_020840, ENSG00000170000    | Coding | TRUE |
| Sep (O-phosphoserine) tRNA:Sec (selenocysteine) tRNA           | NM_016955, ENSG00000170000    | Coding | TRUE |
| Sep (O-phosphoserine) tRNA:Sec (selenocysteine) tRNA           | NM_016955, ENSG00000170000    | Coding | TRUE |
| Sep (O-phosphoserine) tRNA:Sec (selenocysteine) tRNA           | NM_016955, ENSG00000170000    | Coding | TRUE |
| Sep (O-phosphoserine) tRNA:Sec (selenocysteine) tRNA           | NM_016955, ENSG00000170000    | Coding | TRUE |
| long intergenic non-protein coding RNA 340                     | NR_015410, ENSG00000170000    | Coding | TRUE |
| long intergenic non-protein coding RNA 340                     | NR_015410, ENSG00000170000    | Coding | TRUE |
| long intergenic non-protein coding RNA 340                     | NR_015410, ENSG00000170000    | Coding | TRUE |
| long intergenic non-protein coding RNA 340                     | NR_015410, ENSG00000170000    | Coding | TRUE |
| long intergenic non-protein coding RNA 340                     | NR_015410, ENSG00000170000    | Coding | TRUE |
| long intergenic non-protein coding RNA 340                     | NR_015410, ENSG00000170000    | Coding | TRUE |
| long intergenic non-protein coding RNA 340                     | NR_015410, ENSG00000170000    | Coding | TRUE |
| geminin, DNA replication inhibitor                             | NM_001251989, ENSG00000170000 | Coding | TRUE |
| geminin, DNA replication inhibitor                             | NM_001251989, ENSG00000170000 | Coding | TRUE |
| geminin, DNA replication inhibitor                             | NM_001251989, ENSG00000170000 | Coding | TRUE |
| zinc finger, DHHC-type containing 14                           | NM_024630, NM_024630          | Coding | TRUE |
| zinc finger, DHHC-type containing 14                           | NM_024630, NM_024630          | Coding | TRUE |
| zinc finger, DHHC-type containing 14                           | NM_024630, NM_024630          | Coding | TRUE |
| zinc finger, DHHC-type containing 14                           | NM_024630, NM_024630          | Coding | TRUE |
| zinc finger, DHHC-type containing 14                           | NM_024630, NM_024630          | Coding | TRUE |
| zinc finger, DHHC-type containing 14                           | NM_024630, NM_024630          | Coding | TRUE |
| zinc finger, DHHC-type containing 14                           | NM_024630, NM_024630          | Coding | TRUE |
| major histocompatibility complex, class II, DR beta 1, HLA-DRA | NM_001243965, ENSG00000170000 | Coding | TRUE |
| major histocompatibility complex, class II, DR beta 1, HLA-DRA | NM_001243965, ENSG00000170000 | Coding | TRUE |
| major histocompatibility complex, class II, DR beta 1, HLA-DRA | NM_001243965, ENSG00000170000 | Coding | TRUE |
| major histocompatibility complex, class II, DR beta 1, HLA-DRA | NM_001243965, ENSG00000170000 | Coding | TRUE |

|                                                          |                 |        |      |
|----------------------------------------------------------|-----------------|--------|------|
| major histocompatibility complex, class II, DR beta 1, H | NM_001243965,   | Coding | TRUE |
| major histocompatibility complex, class II, DR beta 1, H | NM_001243965,   | Coding | TRUE |
| major histocompatibility complex, class II, DR beta 1, H | NM_001243965,   | Coding | TRUE |
| ependymin related protein 1 (zebrafish)                  | NM_001242946,   | Coding | TRUE |
| ependymin related protein 1 (zebrafish)                  | NM_001242946,   | Coding | TRUE |
| ependymin related protein 1 (zebrafish)                  | NM_001242946,   | Coding | TRUE |
| family with sequence similarity 49, member B             | NM_016623, BCC  | Coding | TRUE |
| family with sequence similarity 49, member B             | NM_016623, BCC  | Coding | TRUE |
| family with sequence similarity 49, member B             | NM_016623, BCC  | Coding | TRUE |
| X (inactive)-specific transcript (non-protein coding)    | NR_001564, ENS  | Coding | TRUE |
| X (inactive)-specific transcript (non-protein coding)    | NR_001564, ENS  | Coding | TRUE |
| protein tyrosine phosphatase, non-receptor type 20B,     | NM_001042363,   | Coding | TRUE |
| protein tyrosine phosphatase, non-receptor type 20B,     | NM_001042363,   | Coding | TRUE |
| protein tyrosine phosphatase, non-receptor type 20B,     | NM_001042363,   | Coding | TRUE |
| chromosome 13 open reading frame 33                      | NM_032849, ENS  | Coding | TRUE |
| chromosome 13 open reading frame 33                      | NM_032849, ENS  | Coding | TRUE |
| chromosome 13 open reading frame 33                      | NM_032849, ENS  | Coding | TRUE |
| chromosome 13 open reading frame 33                      | NM_032849, ENS  | Coding | TRUE |
| chromosome 13 open reading frame 33                      | NM_032849, ENS  | Coding | TRUE |
| chromosome 13 open reading frame 33                      | NM_032849, ENS  | Coding | TRUE |
| fibulin 5                                                | NM_006329, ENS  | Coding | TRUE |
| fibulin 5                                                | NM_006329, ENS  | Coding | TRUE |
| fibulin 5                                                | NM_006329, ENS  | Coding | TRUE |
| fibulin 5                                                | NM_006329, ENS  | Coding | TRUE |
| fibulin 5                                                | NM_006329, ENS  | Coding | TRUE |
| gliomedin                                                | NM_181789, ENS  | Coding | TRUE |
| gliomedin                                                | NM_181789, ENS  | Coding | TRUE |
| gliomedin                                                | NM_181789, ENS  | Coding | TRUE |
| gliomedin                                                | NM_181789, ENS  | Coding | TRUE |
| gliomedin                                                | NM_181789, ENS  | Coding | TRUE |
| gliomedin                                                | NM_181789, ENS  | Coding | TRUE |
| gliomedin                                                | NM_181789, ENS  | Coding | TRUE |
| gliomedin                                                | NM_181789, ENS  | Coding | TRUE |
| mannosidase, alpha, class 2A, member 2                   | NM_006122, ENS  | Coding | TRUE |
| mannosidase, alpha, class 2A, member 2                   | NM_006122, ENS  | Coding | TRUE |
| cadherin 13, H-cadherin (heart)                          | NM_001220488,   | Coding | TRUE |
| cadherin 13, H-cadherin (heart)                          | NM_001220488,   | Coding | TRUE |
| cadherin 13, H-cadherin (heart)                          | NM_001220488,   | Coding | TRUE |
| cadherin 13, H-cadherin (heart)                          | NM_001220488,   | Coding | TRUE |
| cadherin 13, H-cadherin (heart)                          | NM_001220488,   | Coding | TRUE |
| suppressor of zeste 12 homolog (Drosophila)              | NM_015355, ENS  | Coding | TRUE |
| suppressor of zeste 12 homolog (Drosophila)              | NM_015355, ENS  | Coding | TRUE |
| suppressor of zeste 12 homolog (Drosophila)              | NM_015355, ENS  | Coding | TRUE |
| suppressor of zeste 12 homolog (Drosophila)              | NM_015355, ENS  | Coding | TRUE |
| retinoblastoma binding protein 8, microRNA 4741          | NM_002894, NM   | Coding | TRUE |
| retinoblastoma binding protein 8, microRNA 4741          | NM_002894, NM   | Coding | TRUE |
| retinoblastoma binding protein 8, microRNA 4741          | NM_002894, NM   | Coding | TRUE |
| retinoblastoma binding protein 8, microRNA 4741          | NM_002894, NM   | Coding | TRUE |
| retinoblastoma binding protein 8, microRNA 4741          | NM_002894, NM   | Coding | TRUE |
| laminin, alpha 1                                         | NM_005559, ENS  | Coding | TRUE |
| laminin, alpha 1                                         | NM_005559, ENS  | Coding | TRUE |
| laminin, alpha 1                                         | NM_005559, ENS  | Coding | TRUE |
| laminin, alpha 1                                         | NM_005559, ENS  | Coding | TRUE |
| laminin, alpha 1                                         | NM_005559, ENS  | Coding | TRUE |
| laminin, alpha 1                                         | NM_005559, ENS  | Coding | TRUE |
| laminin, alpha 1                                         | NM_005559, ENS  | Coding | TRUE |
| synaptotagmin III                                        | NM_001160328, I | Coding | TRUE |
| synaptotagmin III                                        | NM_001160328, I | Coding | TRUE |

|                                                                     |                |        |      |
|---------------------------------------------------------------------|----------------|--------|------|
| synaptotagmin III                                                   | NM_001160328,  | Coding | TRUE |
| synaptotagmin III                                                   | NM_001160328,  | Coding | TRUE |
|                                                                     |                | Coding | TRUE |
|                                                                     |                | Coding | TRUE |
|                                                                     |                | Coding | TRUE |
| apolipoprotein B mRNA editing enzyme, catalytic poly                | NM_014508, ENS | Coding | TRUE |
| apolipoprotein B mRNA editing enzyme, catalytic poly                | NM_014508, ENS | Coding | TRUE |
| pantothenate kinase 1                                               | NM_138316, NM  | Coding | TRUE |
| pantothenate kinase 1                                               | NM_138316, NM  | Coding | TRUE |
| pantothenate kinase 1                                               | NM_138316, NM  | Coding | TRUE |
| ERO1-like beta (S. cerevisiae)                                      | NM_019891, ENS | Coding | TRUE |
| ERO1-like beta (S. cerevisiae)                                      | NM_019891, ENS | Coding | TRUE |
| ERO1-like beta (S. cerevisiae)                                      | NM_019891, ENS | Coding | TRUE |
| ERO1-like beta (S. cerevisiae)                                      | NM_019891, ENS | Coding | TRUE |
| golgi reassembly stacking protein 2, 55kDa                          | NM_001201428,  | Coding | TRUE |
| golgi reassembly stacking protein 2, 55kDa                          | NM_001201428,  | Coding | TRUE |
| interferon induced with helicase C domain 1                         | NM_022168, ENS | Coding | TRUE |
| interferon induced with helicase C domain 1                         | NM_022168, ENS | Coding | TRUE |
| interferon induced with helicase C domain 1                         | NM_022168, ENS | Coding | TRUE |
| synapsin II                                                         | NM_003178, NM  | Coding | TRUE |
| synapsin II                                                         | NM_003178, NM  | Coding | TRUE |
| antigen p97 (melanoma associated) identified by monoclonal antibody | NM_005929, NM  | Coding | TRUE |
| antigen p97 (melanoma associated) identified by monoclonal antibody | NM_005929, NM  | Coding | TRUE |
| drosha, ribonuclease type III                                       | NM_001100412,  | Coding | TRUE |
| drosha, ribonuclease type III                                       | NM_001100412,  | Coding | TRUE |
| drosha, ribonuclease type III                                       | NM_001100412,  | Coding | TRUE |
| drosha, ribonuclease type III                                       | NM_001100412,  | Coding | TRUE |
| drosha, ribonuclease type III                                       | NM_001100412,  | Coding | TRUE |
| drosha, ribonuclease type III                                       | NM_001100412,  | Coding | TRUE |
| drosha, ribonuclease type III                                       | NM_001100412,  | Coding | TRUE |
| drosha, ribonuclease type III                                       | NM_001100412,  | Coding | TRUE |
| drosha, ribonuclease type III                                       | NM_001100412,  | Coding | TRUE |
| drosha, ribonuclease type III                                       | NM_001100412,  | Coding | TRUE |
| drosha, ribonuclease type III                                       | NM_001100412,  | Coding | TRUE |
| kelch-like 3 (Drosophila)                                           | NM_017415, ENS | Coding | TRUE |
| kelch-like 3 (Drosophila)                                           | NM_017415, ENS | Coding | TRUE |
| kelch-like 3 (Drosophila)                                           | NM_017415, ENS | Coding | TRUE |
| kelch-like 3 (Drosophila)                                           | NM_017415, ENS | Coding | TRUE |
| kelch-like 3 (Drosophila)                                           | NM_017415, ENS | Coding | TRUE |
| kelch-like 3 (Drosophila)                                           | NM_017415, ENS | Coding | TRUE |
| kelch-like 3 (Drosophila)                                           | NM_017415, ENS | Coding | TRUE |
| protease, serine, 16 (thymus)                                       | NM_005865, ENS | Coding | TRUE |
| protease, serine, 16 (thymus)                                       | NM_005865, ENS | Coding | TRUE |
| protease, serine, 16 (thymus)                                       | NM_005865, ENS | Coding | TRUE |
| PX domain containing 1                                              | NM_183373, ENS | Coding | TRUE |
| PX domain containing 1                                              | NM_183373, ENS | Coding | TRUE |
| PX domain containing 1                                              | NM_183373, ENS | Coding | TRUE |
| mitochondrial ribosomal protein L2                                  | NM_015950, ENS | Coding | TRUE |
| mitochondrial ribosomal protein L2                                  | NM_015950, ENS | Coding | TRUE |
| mitochondrial ribosomal protein L2                                  | NM_015950, ENS | Coding | TRUE |
| CAP-GLY domain containing linker protein 2                          | NM_003388, NM  | Coding | TRUE |
| CAP-GLY domain containing linker protein 2                          | NM_003388, NM  | Coding | TRUE |
| CAP-GLY domain containing linker protein 2                          | NM_003388, NM  | Coding | TRUE |
| CAP-GLY domain containing linker protein 2                          | NM_003388, NM  | Coding | TRUE |
| CD99 molecule pseudogene 1                                          | NR_033380, NR  | Coding | TRUE |
| CD99 molecule pseudogene 1                                          | NR_033380, NR  | Coding | TRUE |
| protein phosphatase 2, regulatory subunit B, beta                   | NM_013239, ENS | Coding | TRUE |
| protein phosphatase 2, regulatory subunit B, beta                   | NM_013239, ENS | Coding | TRUE |
| protein phosphatase 2, regulatory subunit B, beta                   | NM_013239, ENS | Coding | TRUE |
| protein tyrosine phosphatase, non-receptor type 20B,                | NM_001042364,  | Coding | TRUE |







|                                                        |                |        |      |
|--------------------------------------------------------|----------------|--------|------|
| inositol polyphosphate-4-phosphatase, type II, 105kDa  | NM_001101669,  | Coding | TRUE |
| inositol polyphosphate-4-phosphatase, type II, 105kDa  | NM_001101669,  | Coding | TRUE |
| inositol polyphosphate-4-phosphatase, type II, 105kDa  | NM_001101669,  | Coding | TRUE |
| inositol polyphosphate-4-phosphatase, type II, 105kDa  | NM_001101669,  | Coding | TRUE |
| inositol polyphosphate-4-phosphatase, type II, 105kDa  | NM_001101669,  | Coding | TRUE |
| inositol polyphosphate-4-phosphatase, type II, 105kDa  | NM_001101669,  | Coding | TRUE |
| inositol polyphosphate-4-phosphatase, type II, 105kDa  | NM_001101669,  | Coding | TRUE |
| inositol polyphosphate-4-phosphatase, type II, 105kDa  | NM_001101669,  | Coding | TRUE |
| neuronal regeneration related protein homolog (rat)    | NM_001142483,  | Coding | TRUE |
| neuronal regeneration related protein homolog (rat)    | NM_001142483,  | Coding | TRUE |
| neuronal regeneration related protein homolog (rat)    | NM_001142483,  | Coding | TRUE |
| neuronal regeneration related protein homolog (rat)    | NM_001142483,  | Coding | TRUE |
| neuronal regeneration related protein homolog (rat)    | NM_001142483,  | Coding | TRUE |
| neuronal regeneration related protein homolog (rat)    | NM_001142483,  | Coding | TRUE |
| neuronal regeneration related protein homolog (rat)    | NM_001142483,  | Coding | TRUE |
| neuronal regeneration related protein homolog (rat)    | NM_001142483,  | Coding | TRUE |
| bromodomain containing 9                               | NM_001009877,  | Coding | TRUE |
| bromodomain containing 9                               | NM_001009877,  | Coding | TRUE |
| bromodomain containing 9                               | NM_001009877,  | Coding | TRUE |
| bromodomain containing 9                               | NM_001009877,  | Coding | TRUE |
| G patch domain and ankyrin repeats 1                   | NM_001199237,  | Coding | TRUE |
| G patch domain and ankyrin repeats 1                   | NM_001199237,  | Coding | TRUE |
| G patch domain and ankyrin repeats 1                   | NM_001199237,  | Coding | TRUE |
| solute carrier family 20 (phosphate transporter), memb | NM_006749, ENS | Coding | TRUE |
| solute carrier family 20 (phosphate transporter), memb | NM_006749, ENS | Coding | TRUE |
| solute carrier family 20 (phosphate transporter), memb | NM_006749, ENS | Coding | TRUE |
| solute carrier family 20 (phosphate transporter), memb | NM_006749, ENS | Coding | TRUE |
| solute carrier family 20 (phosphate transporter), memb | NM_006749, ENS | Coding | TRUE |
| carbonic anhydrase IX                                  | NM_001216, ENS | Coding | TRUE |
| carbonic anhydrase IX                                  | NM_001216, ENS | Coding | TRUE |
| carbonic anhydrase IX                                  | NM_001216, ENS | Coding | TRUE |
| carbonic anhydrase IX                                  | NM_001216, ENS | Coding | TRUE |
| carbonic anhydrase IX                                  | NM_001216, ENS | Coding | TRUE |
| carbonic anhydrase IX                                  | NM_001216, ENS | Coding | TRUE |
| carbonic anhydrase IX                                  | NM_001216, ENS | Coding | TRUE |
| carbonic anhydrase IX                                  | NM_001216, ENS | Coding | TRUE |
| carbonic anhydrase IX                                  | NM_001216, ENS | Coding | TRUE |
| brain-derived neurotrophic factor                      | NM_001143805,  | Coding | TRUE |
| brain-derived neurotrophic factor                      | NM_001143805,  | Coding | TRUE |
| brain-derived neurotrophic factor                      | NM_001143805,  | Coding | TRUE |
| brain-derived neurotrophic factor                      | NM_001143805,  | Coding | TRUE |
| thymine-DNA glycosylase                                | NM_003211, ENS | Coding | TRUE |
| thymine-DNA glycosylase                                | NM_003211, ENS | Coding | TRUE |
| thymine-DNA glycosylase                                | NM_003211, ENS | Coding | TRUE |
| ATP-binding cassette, sub-family A (ABC1), member 3    | NM_001089, ENS | Coding | TRUE |
| ATP-binding cassette, sub-family A (ABC1), member 3    | NM_001089, ENS | Coding | TRUE |
| ATP-binding cassette, sub-family A (ABC1), member 3    | NM_001089, ENS | Coding | TRUE |
| ATP-binding cassette, sub-family A (ABC1), member 3    | NM_001089, ENS | Coding | TRUE |
| ATP-binding cassette, sub-family A (ABC1), member 3    | NM_001089, ENS | Coding | TRUE |
| ATP-binding cassette, sub-family A (ABC1), member 3    | NM_001089, ENS | Coding | TRUE |
| ATP-binding cassette, sub-family A (ABC1), member 3    | NM_001089, ENS | Coding | TRUE |
| ATP-binding cassette, sub-family A (ABC1), member 3    | NM_001089, ENS | Coding | TRUE |
| ATP-binding cassette, sub-family A (ABC1), member 3    | NM_001089, ENS | Coding | TRUE |
| ERGIC and golgi 3                                      | NM_015966, NM  | Coding | TRUE |
| ERGIC and golgi 3                                      | NM_015966, NM  | Coding | TRUE |
| ERGIC and golgi 3                                      | NM_015966, NM  | Coding | TRUE |
| ERGIC and golgi 3                                      | NM_015966, NM  | Coding | TRUE |
| chaperonin containing TCP1, subunit 8 (theta)          | NM_006585, ENS | Coding | TRUE |
| chaperonin containing TCP1, subunit 8 (theta)          | NM_006585, ENS | Coding | TRUE |
| C1q and tumor necrosis factor related protein 6        | NM_031910, NM  | Coding | TRUE |

|                                                        |                |        |      |
|--------------------------------------------------------|----------------|--------|------|
| C1q and tumor necrosis factor related protein 6        | NM_031910, NM  | Coding | TRUE |
| euchromatic histone-lysine N-methyltransferase 2       | NM_006709, NM  | Coding | TRUE |
| euchromatic histone-lysine N-methyltransferase 2       | NM_006709, NM  | Coding | TRUE |
| G patch domain and ankyrin repeats 1                   | NM_001199237,  | Coding | TRUE |
| G patch domain and ankyrin repeats 1                   | NM_001199237,  | Coding | TRUE |
| G patch domain and ankyrin repeats 1                   | NM_001199237,  | Coding | TRUE |
| G patch domain and ankyrin repeats 1                   | NM_001199237,  | Coding | TRUE |
| G patch domain and ankyrin repeats 1                   | NM_001199237,  | Coding | TRUE |
| G patch domain and ankyrin repeats 1                   | NM_001199237,  | Coding | TRUE |
| G patch domain and ankyrin repeats 1                   | NM_001199237,  | Coding | TRUE |
| G patch domain and ankyrin repeats 1                   | NM_001199237,  | Coding | TRUE |
| G patch domain and ankyrin repeats 1                   | NM_001199237,  | Coding | TRUE |
| G patch domain and ankyrin repeats 1                   | NM_001199237,  | Coding | TRUE |
| G patch domain and ankyrin repeats 1                   | NM_001199237,  | Coding | TRUE |
| euchromatic histone-lysine N-methyltransferase 2       | NM_006709, NM  | Coding | TRUE |
| euchromatic histone-lysine N-methyltransferase 2       | NM_006709, NM  | Coding | TRUE |
| euchromatic histone-lysine N-methyltransferase 2       | NM_006709, NM  | Coding | TRUE |
| euchromatic histone-lysine N-methyltransferase 2       | NM_006709, NM  | Coding | TRUE |
| coagulation factor VII (serum prothrombin conversion   | NM_000131, NM  | Coding | TRUE |
| coagulation factor VII (serum prothrombin conversion   | NM_000131, NM  | Coding | TRUE |
| heat shock 27kDa protein family, member 7 (cardiovas   | NM_014424, ENS | Coding | TRUE |
| heat shock 27kDa protein family, member 7 (cardiovas   | NM_014424, ENS | Coding | TRUE |
| heat shock 27kDa protein family, member 7 (cardiovas   | NM_014424, ENS | Coding | TRUE |
| Rho guanine nucleotide exchange factor (GEF) 19        | NM_153213, BCC | Coding | TRUE |
| Rho guanine nucleotide exchange factor (GEF) 19        | NM_153213, BCC | Coding | TRUE |
| Rho guanine nucleotide exchange factor (GEF) 19        | NM_153213, BCC | Coding | TRUE |
| Rho guanine nucleotide exchange factor (GEF) 19        | NM_153213, BCC | Coding | TRUE |
| SCL/TAL1 interrupting locus                            | NM_003035, NM  | Coding | TRUE |
| SCL/TAL1 interrupting locus                            | NM_003035, NM  | Coding | TRUE |
| SCL/TAL1 interrupting locus                            | NM_003035, NM  | Coding | TRUE |
| nuclear receptor binding protein 1                     | NM_013392, ENS | Coding | TRUE |
| nuclear receptor binding protein 1                     | NM_013392, ENS | Coding | TRUE |
| nuclear receptor binding protein 1                     | NM_013392, ENS | Coding | TRUE |
| SMAD family member 1                                   | NM_001003688,  | Coding | TRUE |
| SMAD family member 1                                   | NM_001003688,  | Coding | TRUE |
| SMAD family member 1                                   | NM_001003688,  | Coding | TRUE |
| dimethylglycine dehydrogenase                          | NM_013391, ENS | Coding | TRUE |
| dimethylglycine dehydrogenase                          | NM_013391, ENS | Coding | TRUE |
| l(3)mbt-like 3 (Drosophila)                            | NM_001007102,  | Coding | TRUE |
| l(3)mbt-like 3 (Drosophila)                            | NM_001007102,  | Coding | TRUE |
| l(3)mbt-like 3 (Drosophila)                            | NM_001007102,  | Coding | TRUE |
| l(3)mbt-like 3 (Drosophila)                            | NM_001007102,  | Coding | TRUE |
| l(3)mbt-like 3 (Drosophila)                            | NM_001007102,  | Coding | TRUE |
| l(3)mbt-like 3 (Drosophila)                            | NM_001007102,  | Coding | TRUE |
| l(3)mbt-like 3 (Drosophila)                            | NM_001007102,  | Coding | TRUE |
| chromosome 8 open reading frame 42                     | NM_001256113,  | Coding | TRUE |
| chromosome 8 open reading frame 42                     | NM_001256113,  | Coding | TRUE |
| fibroblast growth factor 7 pseudogene                  | NR_003674, ENS | Coding | TRUE |
| fibroblast growth factor 7 pseudogene                  | NR_003674, ENS | Coding | TRUE |
| fibroblast growth factor 7 pseudogene                  | NR_003674, ENS | Coding | TRUE |
| mitogen-activated protein kinase kinase kinase 8       | NM_001244134,  | Coding | TRUE |
| mitogen-activated protein kinase kinase kinase 8       | NM_001244134,  | Coding | TRUE |
| MAX interactor 1                                       | NM_130439, NM  | Coding | TRUE |
| MAX interactor 1                                       | NM_130439, NM  | Coding | TRUE |
| MAX interactor 1                                       | NM_130439, NM  | Coding | TRUE |
| MAX interactor 1                                       | NM_130439, NM  | Coding | TRUE |
| amyloid beta (A4) precursor-like protein 2             | NM_001142276,  | Coding | TRUE |
| amyloid beta (A4) precursor-like protein 2             | NM_001142276,  | Coding | TRUE |
| amyloid beta (A4) precursor protein-binding, family B, | NM_145689, NM  | Coding | TRUE |



|                                                         |                |        |      |
|---------------------------------------------------------|----------------|--------|------|
| ferric-chelate reductase 1                              | NM_001013660,  | Coding | TRUE |
| ferric-chelate reductase 1                              | NM_001013660,  | Coding | TRUE |
| ferric-chelate reductase 1                              | NM_001013660,  | Coding | TRUE |
| uncharacterized LOC728730                               | NR_037875, ENS | Coding | TRUE |
| uncharacterized LOC728730                               | NR_037875, ENS | Coding | TRUE |
| FAST kinase domains 1                                   | NM_024622, ENS | Coding | TRUE |
| FAST kinase domains 1                                   | NM_024622, ENS | Coding | TRUE |
| filamin A interacting protein 1-like                    | NM_014890, NM  | Coding | TRUE |
| filamin A interacting protein 1-like                    | NM_014890, NM  | Coding | TRUE |
| filamin A interacting protein 1-like                    | NM_014890, NM  | Coding | TRUE |
| filamin A interacting protein 1-like                    | NM_014890, NM  | Coding | TRUE |
| filamin A interacting protein 1-like                    | NM_014890, NM  | Coding | TRUE |
| solute carrier family 4, sodium bicarbonate cotransport | NM_031467, ENS | Coding | TRUE |
| solute carrier family 4, sodium bicarbonate cotransport | NM_031467, ENS | Coding | TRUE |
| solute carrier family 4, sodium bicarbonate cotransport | NM_031467, ENS | Coding | TRUE |
| ras-related C3 botulinum toxin substrate 1 (rho family, | NM_006908, NM  | Coding | TRUE |
| ras-related C3 botulinum toxin substrate 1 (rho family, | NM_006908, NM  | Coding | TRUE |
| cleavage and polyadenylation specific factor 4, 30kDa   | NM_001081559,  | Coding | TRUE |
| cleavage and polyadenylation specific factor 4, 30kDa   | NM_001081559,  | Coding | TRUE |
| cleavage and polyadenylation specific factor 4, 30kDa   | NM_001081559,  | Coding | TRUE |
| cleavage and polyadenylation specific factor 4, 30kDa   | NM_001081559,  | Coding | TRUE |
| cleavage and polyadenylation specific factor 4, 30kDa   | NM_001081559,  | Coding | TRUE |
| hephaestin                                              | NM_001130860,  | Coding | TRUE |
| hephaestin                                              | NM_001130860,  | Coding | TRUE |
| ubiquitin-like 4A                                       | NM_014235, ENS | Coding | TRUE |
| ubiquitin-like 4A                                       | NM_014235, ENS | Coding | TRUE |
| peripherin                                              | NM_006262, ENS | Coding | TRUE |
| peripherin                                              | NM_006262, ENS | Coding | TRUE |
| peripherin                                              | NM_006262, ENS | Coding | TRUE |
| huntingtin interacting protein 1 related                | NM_003959, ENS | Coding | TRUE |
| huntingtin interacting protein 1 related                | NM_003959, ENS | Coding | TRUE |
| huntingtin interacting protein 1 related                | NM_003959, ENS | Coding | TRUE |
| huntingtin interacting protein 1 related                | NM_003959, ENS | Coding | TRUE |
| huntingtin interacting protein 1 related                | NM_003959, ENS | Coding | TRUE |
| oxidase (cytochrome c) assembly 1-like                  | NM_005015, ENS | Coding | TRUE |
| oxidase (cytochrome c) assembly 1-like                  | NM_005015, ENS | Coding | TRUE |
| transmembrane emp24 protein transport domain conta      | NM_213601, ENS | Coding | TRUE |
| transmembrane emp24 protein transport domain conta      | NM_213601, ENS | Coding | TRUE |
| leucine rich repeat containing 37, member A2, leucine   | NM_001006607,  | Coding | TRUE |
| leucine rich repeat containing 37, member A2, leucine   | NM_001006607,  | Coding | TRUE |
| ets variant 4                                           | NM_001079675,  | Coding | TRUE |
| ets variant 4                                           | NM_001079675,  | Coding | TRUE |
| kinesin family member 18B                               | NM_001080443,  | Coding | TRUE |
| kinesin family member 18B                               | NM_001080443,  | Coding | TRUE |
| prion protein                                           | NM_000311, NM  | Coding | TRUE |
| prion protein                                           | NM_000311, NM  | Coding | TRUE |
| gamma-aminobutyric acid (GABA) B receptor, 1            | NM_001470, NM  | Coding | TRUE |
| gamma-aminobutyric acid (GABA) B receptor, 1            | NM_001470, NM  | Coding | TRUE |
| gamma-aminobutyric acid (GABA) B receptor, 1            | NM_001470, NM  | Coding | TRUE |
| G patch domain and ankyrin repeats 1                    | NM_001199237,  | Coding | TRUE |
| G patch domain and ankyrin repeats 1                    | NM_001199237,  | Coding | TRUE |
| transmembrane protein 177                               | NM_001105199,  | Coding | TRUE |
| transmembrane protein 177                               | NM_001105199,  | Coding | TRUE |
| transmembrane protein 177                               | NM_001105199,  | Coding | TRUE |
| CD1d molecule                                           | NM_001766, BCC | Coding | TRUE |
| CD1d molecule                                           | NM_001766, BCC | Coding | TRUE |
| CD1d molecule                                           | NM_001766, BCC | Coding | TRUE |
| CD1d molecule                                           | NM_001766, BCC | Coding | TRUE |

|                                                       |                |        |      |
|-------------------------------------------------------|----------------|--------|------|
| coiled-coil domain containing 85A                     | NM_001080433,  | Coding | TRUE |
| coiled-coil domain containing 85A                     | NM_001080433,  | Coding | TRUE |
| coiled-coil domain containing 85A                     | NM_001080433,  | Coding | TRUE |
| coiled-coil domain containing 85A                     | NM_001080433,  | Coding | TRUE |
| coiled-coil domain containing 85A                     | NM_001080433,  | Coding | TRUE |
| coiled-coil domain containing 85A                     | NM_001080433,  | Coding | TRUE |
| coiled-coil domain containing 85A                     | NM_001080433,  | Coding | TRUE |
| coiled-coil domain containing 85A                     | NM_001080433,  | Coding | TRUE |
| coiled-coil domain containing 85A                     | NM_001080433,  | Coding | TRUE |
| coiled-coil domain containing 85A                     | NM_001080433,  | Coding | TRUE |
| coiled-coil domain containing 85A                     | NM_001080433,  | Coding | TRUE |
| coiled-coil domain containing 85A                     | NM_001080433,  | Coding | TRUE |
| coiled-coil domain containing 85A                     | NM_001080433,  | Coding | TRUE |
| proteasome (prosome, macropain) 26S subunit, non-A    | NM_001191037,  | Coding | TRUE |
| proteasome (prosome, macropain) 26S subunit, non-A    | NM_001191037,  | Coding | TRUE |
| proteasome (prosome, macropain) 26S subunit, non-A    | NM_001191037,  | Coding | TRUE |
| sideroflexin 5                                        | NM_144579, ENS | Coding | TRUE |
| sideroflexin 5                                        | NM_144579, ENS | Coding | TRUE |
| sideroflexin 5                                        | NM_144579, ENS | Coding | TRUE |
| sideroflexin 5                                        | NM_144579, ENS | Coding | TRUE |
| sideroflexin 5                                        | NM_144579, ENS | Coding | TRUE |
| sideroflexin 5                                        | NM_144579, ENS | Coding | TRUE |
| sideroflexin 5                                        | NM_144579, ENS | Coding | TRUE |
| ARP1 actin-related protein 1 homolog B, centractin be | NM_005735, ENS | Coding | TRUE |
| ARP1 actin-related protein 1 homolog B, centractin be | NM_005735, ENS | Coding | TRUE |
| bromodomain adjacent to zinc finger domain, 2B        | NM_013450, ENS | Coding | TRUE |
| bromodomain adjacent to zinc finger domain, 2B        | NM_013450, ENS | Coding | TRUE |
| bromodomain adjacent to zinc finger domain, 2B        | NM_013450, ENS | Coding | TRUE |
| zinc finger, FYVE domain containing 20                | NM_022340, ENS | Coding | TRUE |
| zinc finger, FYVE domain containing 20                | NM_022340, ENS | Coding | TRUE |
| zinc finger, FYVE domain containing 20                | NM_022340, ENS | Coding | TRUE |
| gypsy retrotransposon integrase 1                     | NM_017676, ENS | Coding | TRUE |
| gypsy retrotransposon integrase 1                     | NM_017676, ENS | Coding | TRUE |
| gypsy retrotransposon integrase 1                     | NM_017676, ENS | Coding | TRUE |
| gypsy retrotransposon integrase 1                     | NM_017676, ENS | Coding | TRUE |
| MMS22-like, DNA repair protein                        | NM_198468, ENS | Coding | TRUE |
| MMS22-like, DNA repair protein                        | NM_198468, ENS | Coding | TRUE |
| MMS22-like, DNA repair protein                        | NM_198468, ENS | Coding | TRUE |
| MMS22-like, DNA repair protein                        | NM_198468, ENS | Coding | TRUE |
| MMS22-like, DNA repair protein                        | NM_198468, ENS | Coding | TRUE |
| MMS22-like, DNA repair protein                        | NM_198468, ENS | Coding | TRUE |
| MMS22-like, DNA repair protein                        | NM_198468, ENS | Coding | TRUE |
| MMS22-like, DNA repair protein                        | NM_198468, ENS | Coding | TRUE |
| MMS22-like, DNA repair protein                        | NM_198468, ENS | Coding | TRUE |
| pre-B-cell leukemia homeobox 2                        | NM_002586, BCC | Coding | TRUE |
| pre-B-cell leukemia homeobox 2                        | NM_002586, BCC | Coding | TRUE |
| amphiphysin                                           | NM_001635, NM  | Coding | TRUE |
| amphiphysin                                           | NM_001635, NM  | Coding | TRUE |
| pigeon homolog (Drosophila)                           | NM_017439, ENS | Coding | TRUE |
| pigeon homolog (Drosophila)                           | NM_017439, ENS | Coding | TRUE |
| pigeon homolog (Drosophila)                           | NM_017439, ENS | Coding | TRUE |
| tripartite motif containing 4                         | NM_033017, NM  | Coding | TRUE |
| tripartite motif containing 4                         | NM_033017, NM  | Coding | TRUE |
| non-POU domain containing, octamer-binding            | NM_001145408,  | Coding | TRUE |
| non-POU domain containing, octamer-binding            | NM_001145408,  | Coding | TRUE |
| plastin 3                                             | NM_001136025,  | Coding | TRUE |
| plastin 3                                             | NM_001136025,  | Coding | TRUE |
| plastin 3                                             | NM_001136025,  | Coding | TRUE |
| plastin 3                                             | NM_001136025,  | Coding | TRUE |
| low density lipoprotein receptor-related protein 4    | NM_002334, ENS | Coding | TRUE |
| low density lipoprotein receptor-related protein 4    | NM_002334, ENS | Coding | TRUE |

|                                                       |                |        |      |
|-------------------------------------------------------|----------------|--------|------|
| low density lipoprotein receptor-related protein 4    | NM_002334, ENS | Coding | TRUE |
| low density lipoprotein receptor-related protein 4    | NM_002334, ENS | Coding | TRUE |
| glycine-N-acyltransferase-like 2                      | NM_145016, BCC | Coding | TRUE |
| glycine-N-acyltransferase-like 2                      | NM_145016, BCC | Coding | TRUE |
| cyclin-dependent kinase 2                             | NM_001798, NM  | Coding | TRUE |
| cyclin-dependent kinase 2                             | NM_001798, NM  | Coding | TRUE |
| cyclin-dependent kinase 2                             | NM_001798, NM  | Coding | TRUE |
| RAB3A interacting protein (rabin3)                    | NM_001024647,  | Coding | TRUE |
| RAB3A interacting protein (rabin3)                    | NM_001024647,  | Coding | TRUE |
| crystallin, lambda 1                                  | NM_015974, ENS | Coding | TRUE |
| crystallin, lambda 1                                  | NM_015974, ENS | Coding | TRUE |
| crystallin, lambda 1                                  | NM_015974, ENS | Coding | TRUE |
| metallothionein 1M                                    | NM_176870, ENS | Coding | TRUE |
| metallothionein 1M                                    | NM_176870, ENS | Coding | TRUE |
| metallothionein 1M                                    | NM_176870, ENS | Coding | TRUE |
| metallothionein 1M                                    | NM_176870, ENS | Coding | TRUE |
| pleckstrin homology domain containing, family M (with | NM_014798, NR  | Coding | TRUE |
| pleckstrin homology domain containing, family M (with | NM_014798, NR  | Coding | TRUE |
| pleckstrin homology domain containing, family M (with | NM_014798, NR  | Coding | TRUE |
| tensin 4                                              | NM_032865, ENS | Coding | TRUE |
| tensin 4                                              | NM_032865, ENS | Coding | TRUE |
| tensin 4                                              | NM_032865, ENS | Coding | TRUE |
| tensin 4                                              | NM_032865, ENS | Coding | TRUE |
| zinc finger protein 571                               | NM_016536, ENS | Coding | TRUE |
| zinc finger protein 571                               | NM_016536, ENS | Coding | TRUE |
| aconitase 2, mitochondrial                            | NM_001098, ENS | Coding | TRUE |
| aconitase 2, mitochondrial                            | NM_001098, ENS | Coding | TRUE |
| aconitase 2, mitochondrial                            | NM_001098, ENS | Coding | TRUE |
| aconitase 2, mitochondrial                            | NM_001098, ENS | Coding | TRUE |
| myotubularin related protein 3                        | NM_021090, NM  | Coding | TRUE |
| myotubularin related protein 3                        | NM_021090, NM  | Coding | TRUE |
| myotubularin related protein 3                        | NM_021090, NM  | Coding | TRUE |
| myotubularin related protein 3                        | NM_021090, NM  | Coding | TRUE |
| pre-B-cell leukemia homeobox 2                        | NM_002586, BCC | Coding | TRUE |
| pre-B-cell leukemia homeobox 2                        | NM_002586, BCC | Coding | TRUE |
| pre-B-cell leukemia homeobox 2                        | NM_002586, BCC | Coding | TRUE |
| pre-B-cell leukemia homeobox 2                        | NM_002586, BCC | Coding | TRUE |
| gamma-aminobutyric acid (GABA) B receptor, 1          | NM_001470, NM  | Coding | TRUE |
| gamma-aminobutyric acid (GABA) B receptor, 1          | NM_001470, NM  | Coding | TRUE |
| gamma-aminobutyric acid (GABA) B receptor, 1          | NM_001470, NM  | Coding | TRUE |
| gamma-aminobutyric acid (GABA) B receptor, 1          | NM_001470, NM  | Coding | TRUE |
| gamma-aminobutyric acid (GABA) B receptor, 1          | NM_001470, NM  | Coding | TRUE |
| gamma-aminobutyric acid (GABA) B receptor, 1          | NM_001470, NM  | Coding | TRUE |
| pre-B-cell leukemia homeobox 2                        | NM_002586, BCC | Coding | TRUE |
| pre-B-cell leukemia homeobox 2                        | NM_002586, BCC | Coding | TRUE |
| pre-B-cell leukemia homeobox 2                        | NM_002586, BCC | Coding | TRUE |
| chromosome 1 open reading frame 88                    | NM_181643, BCC | Coding | TRUE |
| chromosome 1 open reading frame 88                    | NM_181643, BCC | Coding | TRUE |
| zinc finger protein 678                               | NM_178549, NR  | Coding | TRUE |
| zinc finger protein 678                               | NM_178549, NR  | Coding | TRUE |
| uncharacterized LOC728855, uncharacterized LOC72      | NR_024510, NR  | Coding | TRUE |
| uncharacterized LOC728855, uncharacterized LOC72      | NR_024510, NR  | Coding | TRUE |
| uncharacterized LOC728855, uncharacterized LOC72      | NR_024510, NR  | Coding | TRUE |
| uncharacterized LOC728855, uncharacterized LOC72      | NR_024510, NR  | Coding | TRUE |
| uncharacterized LOC728855, uncharacterized LOC72      | NR_024510, NR  | Coding | TRUE |
| uncharacterized LOC728855, uncharacterized LOC72      | NR_024510, NR  | Coding | TRUE |
| uncharacterized LOC728875                             | ENST000004117  | Coding | TRUE |
| uncharacterized LOC728875                             | ENST000004117  | Coding | TRUE |

|                                                        |                   |        |      |
|--------------------------------------------------------|-------------------|--------|------|
| uncharacterized LOC728875                              | ENST000004117     | Coding | TRUE |
| uncharacterized LOC728875                              | ENST000004117     | Coding | TRUE |
| uncharacterized LOC728875                              | ENST000004117     | Coding | TRUE |
| uncharacterized LOC728875                              | ENST000004117     | Coding | TRUE |
| coiled-coil domain containing 75                       | NM_174931, ENS    | Coding | TRUE |
| coiled-coil domain containing 75                       | NM_174931, ENS    | Coding | TRUE |
| coiled-coil domain containing 75                       | NM_174931, ENS    | Coding | TRUE |
| uncharacterized LOC100507006                           | ENST000004513     | Coding | TRUE |
| uncharacterized LOC100507006                           | ENST000004513     | Coding | TRUE |
| interleukin 1 receptor, type I                         | NM_000877, ENS    | Coding | TRUE |
| interleukin 1 receptor, type I                         | NM_000877, ENS    | Coding | TRUE |
| interleukin 1 receptor, type I                         | NM_000877, ENS    | Coding | TRUE |
| interleukin 1 receptor, type I                         | NM_000877, ENS    | Coding | TRUE |
| interleukin 1 receptor, type I                         | NM_000877, ENS    | Coding | TRUE |
| interleukin 1 receptor, type I                         | NM_000877, ENS    | Coding | TRUE |
| interleukin 1 receptor, type I                         | NM_000877, ENS    | Coding | TRUE |
| interleukin 1 receptor, type I                         | NM_000877, ENS    | Coding | TRUE |
| interleukin 1 receptor, type I                         | NM_000877, ENS    | Coding | TRUE |
| interleukin 1 receptor, type I                         | NM_000877, ENS    | Coding | TRUE |
|                                                        |                   | Coding | TRUE |
|                                                        |                   | Coding | TRUE |
| ets variant 5                                          | NM_004454, ENS    | Coding | TRUE |
| ets variant 5                                          | NM_004454, ENS    | Coding | TRUE |
| nei endonuclease VIII-like 3 (E. coli)                 | NM_018248, ENS    | Coding | TRUE |
| nei endonuclease VIII-like 3 (E. coli)                 | NM_018248, ENS    | Coding | TRUE |
| nei endonuclease VIII-like 3 (E. coli)                 | NM_018248, ENS    | Coding | TRUE |
| nei endonuclease VIII-like 3 (E. coli)                 | NM_018248, ENS    | Coding | TRUE |
| zinc finger with KRAB and SCAN domains 3               | NM_001242894, ENS | Coding | TRUE |
| zinc finger with KRAB and SCAN domains 3               | NM_001242894, ENS | Coding | TRUE |
| zinc finger with KRAB and SCAN domains 3               | NM_001242894, ENS | Coding | TRUE |
| zinc finger with KRAB and SCAN domains 3               | NM_001242894, ENS | Coding | TRUE |
| zinc finger with KRAB and SCAN domains 3               | NM_001242894, ENS | Coding | TRUE |
| zinc finger with KRAB and SCAN domains 3               | NM_001242894, ENS | Coding | TRUE |
| long intergenic non-protein coding RNA 271             | NR_026805, ENS    | Coding | TRUE |
| long intergenic non-protein coding RNA 271             | NR_026805, ENS    | Coding | TRUE |
| long intergenic non-protein coding RNA 271             | NR_026805, ENS    | Coding | TRUE |
| family with sequence similarity 83, member H           | NM_198488, ENS    | Coding | TRUE |
| family with sequence similarity 83, member H           | NM_198488, ENS    | Coding | TRUE |
| annexin A8-like 1, annexin A8                          | NM_001098845, ENS | Coding | TRUE |
| annexin A8-like 1, annexin A8                          | NM_001098845, ENS | Coding | TRUE |
| annexin A8-like 1, annexin A8                          | NM_001098845, ENS | Coding | TRUE |
| annexin A8-like 1, annexin A8                          | NM_001098845, ENS | Coding | TRUE |
| annexin A8-like 1, annexin A8                          | NM_001098845, ENS | Coding | TRUE |
| annexin A8-like 1, annexin A8                          | NM_001098845, ENS | Coding | TRUE |
| annexin A8-like 1, annexin A8                          | NM_001098845, ENS | Coding | TRUE |
| annexin A8-like 1, annexin A8                          | NM_001098845, ENS | Coding | TRUE |
| annexin A8-like 1, annexin A8                          | NM_001098845, ENS | Coding | TRUE |
| uncharacterized LOC100132987                           | NR_038985, ENS    | Coding | TRUE |
| uncharacterized LOC100132987                           | NR_038985, ENS    | Coding | TRUE |
| family with sequence similarity 25, member C, family w | NM_001137548, ENS | Coding | TRUE |
| family with sequence similarity 25, member C, family w | NM_001137548, ENS | Coding | TRUE |
| NAD synthetase 1                                       | NM_018161, ENS    | Coding | TRUE |
| NAD synthetase 1                                       | NM_018161, ENS    | Coding | TRUE |
| sarcospan                                              | NM_001135823, ENS | Coding | TRUE |
| sarcospan                                              | NM_001135823, ENS | Coding | TRUE |
| sarcospan                                              | NM_001135823, ENS | Coding | TRUE |
| sarcospan                                              | NM_001135823, ENS | Coding | TRUE |
| sarcospan                                              | NM_001135823, ENS | Coding | TRUE |
| cysteinyl-tRNA synthetase 2, mitochondrial (putative)  | NM_024537, ENS    | Coding | TRUE |



|                                                         |                |        |      |
|---------------------------------------------------------|----------------|--------|------|
| cysteinyl-tRNA synthetase 2, mitochondrial (putative)   | NM_024537, ENS | Coding | TRUE |
| gamma-aminobutyric acid (GABA) B receptor, 1            | NM_001470, NM  | Coding | TRUE |
| gamma-aminobutyric acid (GABA) B receptor, 1            | NM_001470, NM  | Coding | TRUE |
| OTU domain containing 3                                 | NM_015207, ENS | Coding | TRUE |
| OTU domain containing 3                                 | NM_015207, ENS | Coding | TRUE |
| dynein, axonemal, light intermediate chain 1            | NM_003462, ENS | Coding | TRUE |
| dynein, axonemal, light intermediate chain 1            | NM_003462, ENS | Coding | TRUE |
| dynein, axonemal, light intermediate chain 1            | NM_003462, ENS | Coding | TRUE |
| CDC42 binding protein kinase alpha (DMPK-like)          | NM_003607, NM  | Coding | TRUE |
| CDC42 binding protein kinase alpha (DMPK-like)          | NM_003607, NM  | Coding | TRUE |
| CDC42 binding protein kinase alpha (DMPK-like)          | NM_003607, NM  | Coding | TRUE |
| CDC42 binding protein kinase alpha (DMPK-like)          | NM_003607, NM  | Coding | TRUE |
| CDC42 binding protein kinase alpha (DMPK-like)          | NM_003607, NM  | Coding | TRUE |
| CDC42 binding protein kinase alpha (DMPK-like)          | NM_003607, NM  | Coding | TRUE |
| G protein-coupled receptor 1                            | NM_001098199,  | Coding | TRUE |
| G protein-coupled receptor 1                            | NM_001098199,  | Coding | TRUE |
| G protein-coupled receptor 1                            | NM_001098199,  | Coding | TRUE |
| G protein-coupled receptor 1                            | NM_001098199,  | Coding | TRUE |
| G protein-coupled receptor 1                            | NM_001098199,  | Coding | TRUE |
| G protein-coupled receptor 1                            | NM_001098199,  | Coding | TRUE |
| G protein-coupled receptor 1                            | NM_001098199,  | Coding | TRUE |
| guanine nucleotide binding protein (G protein), beta pc | NM_006098, NR  | Coding | TRUE |
| guanine nucleotide binding protein (G protein), beta pc | NM_006098, NR  | Coding | TRUE |
| guanine nucleotide binding protein (G protein), beta pc | NM_006098, NR  | Coding | TRUE |
| discoidin, CUB and LCCL domain containing 1             | NM_173674, ENS | Coding | TRUE |
| discoidin, CUB and LCCL domain containing 1             | NM_173674, ENS | Coding | TRUE |
| discoidin, CUB and LCCL domain containing 1             | NM_173674, ENS | Coding | TRUE |
| discoidin, CUB and LCCL domain containing 1             | NM_173674, ENS | Coding | TRUE |
| discoidin, CUB and LCCL domain containing 1             | NM_173674, ENS | Coding | TRUE |
| discoidin, CUB and LCCL domain containing 1             | NM_173674, ENS | Coding | TRUE |
| discoidin, CUB and LCCL domain containing 1             | NM_173674, ENS | Coding | TRUE |
| discoidin, CUB and LCCL domain containing 1             | NM_173674, ENS | Coding | TRUE |
| tripartite motif containing 24                          | NM_003852, NM  | Coding | TRUE |
| tripartite motif containing 24                          | NM_003852, NM  | Coding | TRUE |
| tripartite motif containing 24                          | NM_003852, NM  | Coding | TRUE |
| oxidation resistance 1                                  | NM_001198532,  | Coding | TRUE |
| oxidation resistance 1                                  | NM_001198532,  | Coding | TRUE |
| oxidation resistance 1                                  | NM_001198532,  | Coding | TRUE |
| oxidation resistance 1                                  | NM_001198532,  | Coding | TRUE |
| F-box protein 32                                        | NM_001242463,  | Coding | TRUE |
| F-box protein 32                                        | NM_001242463,  | Coding | TRUE |
| F-box protein 32                                        | NM_001242463,  | Coding | TRUE |
| F-box protein 32                                        | NM_001242463,  | Coding | TRUE |
| MAM domain containing 4                                 | NM_206920, ENS | Coding | TRUE |
| MAM domain containing 4                                 | NM_206920, ENS | Coding | TRUE |
| MAM domain containing 4                                 | NM_206920, ENS | Coding | TRUE |
| WD repeat domain 44                                     | NM_001184965,  | Coding | TRUE |
| WD repeat domain 44                                     | NM_001184965,  | Coding | TRUE |
| WD repeat domain 44                                     | NM_001184965,  | Coding | TRUE |
| zinc finger, MYM-type 3                                 | NM_005096, NM  | Coding | TRUE |
| zinc finger, MYM-type 3                                 | NM_005096, NM  | Coding | TRUE |
| FTX transcript, XIST regulator (non-protein coding)     | NR_028379, ENS | Coding | TRUE |
| FTX transcript, XIST regulator (non-protein coding)     | NR_028379, ENS | Coding | TRUE |
| FTX transcript, XIST regulator (non-protein coding)     | NR_028379, ENS | Coding | TRUE |
| EPS8-like 2                                             | NM_022772, BC1 | Coding | TRUE |
| EPS8-like 2                                             | NM_022772, BC1 | Coding | TRUE |
| lactate dehydrogenase A                                 | NM_001165414,  | Coding | TRUE |
| lactate dehydrogenase A                                 | NM_001165414,  | Coding | TRUE |
| lactate dehydrogenase A                                 | NM_001165414,  | Coding | TRUE |

|                                                               |                               |        |      |
|---------------------------------------------------------------|-------------------------------|--------|------|
| solute carrier family 39 (metal ion transporter), member 1    | NM_001135195                  | Coding | TRUE |
| solute carrier family 39 (metal ion transporter), member 1    | NM_001135195                  | Coding | TRUE |
| solute carrier family 39 (metal ion transporter), member 1    | NM_001135195                  | Coding | TRUE |
| tetratricopeptide repeat domain 9                             | NM_015351, ENSG00000181101    | Coding | TRUE |
| tetratricopeptide repeat domain 9                             | NM_015351, ENSG00000181101    | Coding | TRUE |
| OTU domain containing 7A pseudogene                           | NR_038253, NR_038253.1        | Coding | TRUE |
| OTU domain containing 7A pseudogene                           | NR_038253, NR_038253.1        | Coding | TRUE |
| OTU domain containing 7A pseudogene                           | NR_038253, NR_038253.1        | Coding | TRUE |
| eukaryotic translation initiation factor 5A                   | NM_001143760                  | Coding | TRUE |
| eukaryotic translation initiation factor 5A                   | NM_001143760                  | Coding | TRUE |
| tumor protein p73                                             | NM_001126240                  | Coding | TRUE |
| tumor protein p73                                             | NM_001126240                  | Coding | TRUE |
| zinc finger and BTB domain containing 17                      | NM_001242884                  | Coding | TRUE |
| zinc finger and BTB domain containing 17                      | NM_001242884                  | Coding | TRUE |
| Obg-like ATPase 1                                             | NM_001011708                  | Coding | TRUE |
| Obg-like ATPase 1                                             | NM_001011708                  | Coding | TRUE |
| tumor protein p63 regulated 1, uncharacterized LOC100507193   | NM_198485, ENSG00000200001    | Coding | TRUE |
| tumor protein p63 regulated 1, uncharacterized LOC100507193   | NM_198485, ENSG00000200001    | Coding | TRUE |
| choline dehydrogenase                                         | NM_018397, ENSG0000018397     | Coding | TRUE |
| choline dehydrogenase                                         | NM_018397, ENSG0000018397     | Coding | TRUE |
| choline dehydrogenase                                         | NM_018397, ENSG0000018397     | Coding | TRUE |
| choline dehydrogenase                                         | NM_018397, ENSG0000018397     | Coding | TRUE |
| choline dehydrogenase                                         | NM_018397, ENSG0000018397     | Coding | TRUE |
| chromosome 4 open reading frame 32                            | NM_152400, ENSG00000152400    | Coding | TRUE |
| chromosome 4 open reading frame 32                            | NM_152400, ENSG00000152400    | Coding | TRUE |
| electron-transferring-flavoprotein dehydrogenase              | NM_004453, ENSG0000004453     | Coding | TRUE |
| electron-transferring-flavoprotein dehydrogenase              | NM_004453, ENSG0000004453     | Coding | TRUE |
| electron-transferring-flavoprotein dehydrogenase              | NM_004453, ENSG0000004453     | Coding | TRUE |
| electron-transferring-flavoprotein dehydrogenase              | NM_004453, ENSG0000004453     | Coding | TRUE |
| electron-transferring-flavoprotein dehydrogenase              | NM_004453, ENSG0000004453     | Coding | TRUE |
| microtubule associated serine/threonine kinase family 1       | NM_001164664, ENSG00000164664 | Coding | TRUE |
| microtubule associated serine/threonine kinase family 1       | NM_001164664, ENSG00000164664 | Coding | TRUE |
| microtubule associated serine/threonine kinase family 1       | NM_001164664, ENSG00000164664 | Coding | TRUE |
| microtubule associated serine/threonine kinase family 1       | NM_001164664, ENSG00000164664 | Coding | TRUE |
| microtubule associated serine/threonine kinase family 1       | NM_001164664, ENSG00000164664 | Coding | TRUE |
| transmembrane and coiled-coil domains 6                       | NM_018502, ENSG0000018502     | Coding | TRUE |
| transmembrane and coiled-coil domains 6                       | NM_018502, ENSG0000018502     | Coding | TRUE |
| transmembrane and coiled-coil domains 6                       | NM_018502, ENSG0000018502     | Coding | TRUE |
| transmembrane and coiled-coil domains 6                       | NM_018502, ENSG0000018502     | Coding | TRUE |
| uncharacterized LOC100507193                                  | ENST000004869                 | Coding | TRUE |
| uncharacterized LOC100507193                                  | ENST000004869                 | Coding | TRUE |
| uncharacterized LOC100507193                                  | ENST000004869                 | Coding | TRUE |
| uncharacterized LOC100507193                                  | ENST000004869                 | Coding | TRUE |
| potassium voltage-gated channel, KQT-like subfamily, member 1 | NM_001160130                  | Coding | TRUE |
| potassium voltage-gated channel, KQT-like subfamily, member 1 | NM_001160130                  | Coding | TRUE |
| potassium voltage-gated channel, KQT-like subfamily, member 1 | NM_001160130                  | Coding | TRUE |
| potassium voltage-gated channel, KQT-like subfamily, member 1 | NM_001160130                  | Coding | TRUE |
| potassium voltage-gated channel, KQT-like subfamily, member 1 | NM_001160130                  | Coding | TRUE |
| potassium voltage-gated channel, KQT-like subfamily, member 1 | NM_001160130                  | Coding | TRUE |
| coiled-coil domain containing 28A                             | NM_015439, ENSG0000015439     | Coding | TRUE |
| coiled-coil domain containing 28A                             | NM_015439, ENSG0000015439     | Coding | TRUE |
| phosphodiesterase 1B, calmodulin-dependent                    | NM_000924, NM_000924.1        | Coding | TRUE |
| phosphodiesterase 1B, calmodulin-dependent                    | NM_000924, NM_000924.1        | Coding | TRUE |
| bromodomain adjacent to zinc finger domain, 1A                | NM_182648, NM_182648.1        | Coding | TRUE |
| bromodomain adjacent to zinc finger domain, 1A                | NM_182648, NM_182648.1        | Coding | TRUE |
| bromodomain adjacent to zinc finger domain, 1A                | NM_182648, NM_182648.1        | Coding | TRUE |
| bromodomain adjacent to zinc finger domain, 1A                | NM_182648, NM_182648.1        | Coding | TRUE |
| uncharacterized LOC100506157                                  | ENST000005549                 | Coding | TRUE |

|                                                                  |                |        |      |
|------------------------------------------------------------------|----------------|--------|------|
| uncharacterized LOC100506157                                     | ENST000005549  | Coding | TRUE |
| cytochrome P450, family 19, subfamily A, polypeptide             | NM_000103, NM  | Coding | TRUE |
| cytochrome P450, family 19, subfamily A, polypeptide             | NM_000103, NM  | Coding | TRUE |
| cytochrome P450, family 19, subfamily A, polypeptide             | NM_000103, NM  | Coding | TRUE |
| cytochrome P450, family 19, subfamily A, polypeptide             | NM_000103, NM  | Coding | TRUE |
| KIAA0182                                                         | NM_001134473,  | Coding | TRUE |
| KIAA0182                                                         | NM_001134473,  | Coding | TRUE |
| KIAA0182                                                         | NM_001134473,  | Coding | TRUE |
| KIAA0182                                                         | NM_001134473,  | Coding | TRUE |
| KIAA0182                                                         | NM_001134473,  | Coding | TRUE |
| KIAA0182                                                         | NM_001134473,  | Coding | TRUE |
| small nuclear RNA activating complex, polypeptide 2, 4           | NM_003083, NR  | Coding | TRUE |
| small nuclear RNA activating complex, polypeptide 2, 4           | NM_003083, NR  | Coding | TRUE |
| hemopoietic cell kinase                                          | NM_001172129,  | Coding | TRUE |
| hemopoietic cell kinase                                          | NM_001172129,  | Coding | TRUE |
| pre-B-cell leukemia homeobox 2                                   | NM_002586, BCC | Coding | TRUE |
| pre-B-cell leukemia homeobox 2                                   | NM_002586, BCC | Coding | TRUE |
| chromosome 21 open reading frame 33                              | NM_004649, NM  | Coding | TRUE |
| chromosome 21 open reading frame 33                              | NM_004649, NM  | Coding | TRUE |
| chromosome 21 open reading frame 33                              | NM_004649, NM  | Coding | TRUE |
| guanylate binding protein 1, interferon-inducible pseud          | NR_003133, ENS | Coding | TRUE |
| guanylate binding protein 1, interferon-inducible pseud          | NR_003133, ENS | Coding | TRUE |
| guanylate binding protein 1, interferon-inducible pseud          | NR_003133, ENS | Coding | TRUE |
| prostaglandin E receptor 3 (subtype EP3)                         | NM_198717, NM  | Coding | TRUE |
| prostaglandin E receptor 3 (subtype EP3)                         | NM_198717, NM  | Coding | TRUE |
| prostaglandin E receptor 3 (subtype EP3)                         | NM_198717, NM  | Coding | TRUE |
| prostaglandin E receptor 3 (subtype EP3)                         | NM_198717, NM  | Coding | TRUE |
| prostaglandin E receptor 3 (subtype EP3)                         | NM_198717, NM  | Coding | TRUE |
| prostaglandin E receptor 3 (subtype EP3)                         | NM_198717, NM  | Coding | TRUE |
| prostaglandin E receptor 3 (subtype EP3)                         | NM_198717, NM  | Coding | TRUE |
| prostaglandin E receptor 3 (subtype EP3)                         | NM_198717, NM  | Coding | TRUE |
| prostaglandin E receptor 3 (subtype EP3)                         | NM_198717, NM  | Coding | TRUE |
| prostaglandin E receptor 3 (subtype EP3)                         | NM_198717, NM  | Coding | TRUE |
| prostaglandin E receptor 3 (subtype EP3)                         | NM_198717, NM  | Coding | TRUE |
| prostaglandin E receptor 3 (subtype EP3)                         | NM_198717, NM  | Coding | TRUE |
| prostaglandin E receptor 3 (subtype EP3)                         | NM_198717, NM  | Coding | TRUE |
| prostaglandin E receptor 3 (subtype EP3)                         | NM_198717, NM  | Coding | TRUE |
| prostaglandin E receptor 3 (subtype EP3)                         | NM_198717, NM  | Coding | TRUE |
| prostaglandin E receptor 3 (subtype EP3)                         | NM_198717, NM  | Coding | TRUE |
| prostaglandin E receptor 3 (subtype EP3)                         | NM_198717, NM  | Coding | TRUE |
| prostaglandin E receptor 3 (subtype EP3)                         | NM_198717, NM  | Coding | TRUE |
| glutathione S-transferase mu 2 (muscle)                          | NM_001142368,  | Coding | TRUE |
| glutathione S-transferase mu 2 (muscle)                          | NM_001142368,  | Coding | TRUE |
| glutathione S-transferase mu 2 (muscle)                          | NM_001142368,  | Coding | TRUE |
| raftlin, lipid raft linker 1                                     | NM_015150, ENS | Coding | TRUE |
| raftlin, lipid raft linker 1                                     | NM_015150, ENS | Coding | TRUE |
| raftlin, lipid raft linker 1                                     | NM_015150, ENS | Coding | TRUE |
| raftlin, lipid raft linker 1                                     | NM_015150, ENS | Coding | TRUE |
| ATPase, class V, type 10D                                        | NM_020453, ENS | Coding | TRUE |
| ATPase, class V, type 10D                                        | NM_020453, ENS | Coding | TRUE |
| ATPase, class V, type 10D                                        | NM_020453, ENS | Coding | TRUE |
| ATPase, class V, type 10D                                        | NM_020453, ENS | Coding | TRUE |
| aryl hydrocarbon receptor                                        | NM_001621, ENS | Coding | TRUE |
| aryl hydrocarbon receptor                                        | NM_001621, ENS | Coding | TRUE |
| COP9 constitutive photomorphogenic homolog subunit               | NM_006837, ENS | Coding | TRUE |
| COP9 constitutive photomorphogenic homolog subunit               | NM_006837, ENS | Coding | TRUE |
| ATPase, H <sup>+</sup> transporting, lysosomal accessory protein | NM_005765, ENS | Coding | TRUE |
| ATPase, H <sup>+</sup> transporting, lysosomal accessory protein | NM_005765, ENS | Coding | TRUE |
| GDP dissociation inhibitor 1                                     | NM_001493, ENS | Coding | TRUE |



|                                                           |                |        |      |
|-----------------------------------------------------------|----------------|--------|------|
| multiple EGF-like-domains 10                              | NM_032446, ENS | Coding | TRUE |
| multiple EGF-like-domains 10                              | NM_032446, ENS | Coding | TRUE |
| multiple EGF-like-domains 10                              | NM_032446, ENS | Coding | TRUE |
| multiple EGF-like-domains 10                              | NM_032446, ENS | Coding | TRUE |
| multiple EGF-like-domains 10                              | NM_032446, ENS | Coding | TRUE |
| multiple EGF-like-domains 10                              | NM_032446, ENS | Coding | TRUE |
| embigin                                                   | NM_198449, ENS | Coding | TRUE |
| embigin                                                   | NM_198449, ENS | Coding | TRUE |
| embigin                                                   | NM_198449, ENS | Coding | TRUE |
| Abelson helper integration site 1                         | NM_001134830,  | Coding | TRUE |
| Abelson helper integration site 1                         | NM_001134830,  | Coding | TRUE |
| Abelson helper integration site 1                         | NM_001134830,  | Coding | TRUE |
| distal-less homeobox 6                                    | NM_005222, ENS | Coding | TRUE |
| distal-less homeobox 6                                    | NM_005222, ENS | Coding | TRUE |
| distal-less homeobox 6                                    | NM_005222, ENS | Coding | TRUE |
| distal-less homeobox 6                                    | NM_005222, ENS | Coding | TRUE |
| distal-less homeobox 6                                    | NM_005222, ENS | Coding | TRUE |
| distal-less homeobox 6                                    | NM_005222, ENS | Coding | TRUE |
| solute carrier family 7 (cationic amino acid transporter, | NM_001008539,  | Coding | TRUE |
| solute carrier family 7 (cationic amino acid transporter, | NM_001008539,  | Coding | TRUE |
| solute carrier family 7 (cationic amino acid transporter, | NM_001008539,  | Coding | TRUE |
| solute carrier family 7 (cationic amino acid transporter, | NM_001008539,  | Coding | TRUE |
| solute carrier family 7 (cationic amino acid transporter, | NM_001008539,  | Coding | TRUE |
| solute carrier family 7 (cationic amino acid transporter, | NM_001008539,  | Coding | TRUE |
| solute carrier family 7 (cationic amino acid transporter, | NM_001008539,  | Coding | TRUE |
| sushi, von Willebrand factor type A, EGF and pentraxin    | NM_153366, ENS | Coding | TRUE |
| sushi, von Willebrand factor type A, EGF and pentraxin    | NM_153366, ENS | Coding | TRUE |
| sushi, von Willebrand factor type A, EGF and pentraxin    | NM_153366, ENS | Coding | TRUE |
| sushi, von Willebrand factor type A, EGF and pentraxin    | NM_153366, ENS | Coding | TRUE |
| sushi, von Willebrand factor type A, EGF and pentraxin    | NM_153366, ENS | Coding | TRUE |
| sushi, von Willebrand factor type A, EGF and pentraxin    | NM_153366, ENS | Coding | TRUE |
| sushi, von Willebrand factor type A, EGF and pentraxin    | NM_153366, ENS | Coding | TRUE |
| sushi, von Willebrand factor type A, EGF and pentraxin    | NM_153366, ENS | Coding | TRUE |
| sushi, von Willebrand factor type A, EGF and pentraxin    | NM_153366, ENS | Coding | TRUE |
| sushi, von Willebrand factor type A, EGF and pentraxin    | NM_153366, ENS | Coding | TRUE |
| sushi, von Willebrand factor type A, EGF and pentraxin    | NM_153366, ENS | Coding | TRUE |
| sushi, von Willebrand factor type A, EGF and pentraxin    | NM_153366, ENS | Coding | TRUE |
| family with sequence similarity 129, member B             | NM_001035534,  | Coding | TRUE |
| family with sequence similarity 129, member B             | NM_001035534,  | Coding | TRUE |
| family with sequence similarity 129, member B             | NM_001035534,  | Coding | TRUE |
| family with sequence similarity 129, member B             | NM_001035534,  | Coding | TRUE |
| family with sequence similarity 129, member B             | NM_001035534,  | Coding | TRUE |
| NFKB repressing factor                                    | NM_001173488,  | Coding | TRUE |
| NFKB repressing factor                                    | NM_001173488,  | Coding | TRUE |
| nuclear factor of kappa light polypeptide gene enhance    | NM_001077493,  | Coding | TRUE |
| nuclear factor of kappa light polypeptide gene enhance    | NM_001077493,  | Coding | TRUE |
| nuclear factor of kappa light polypeptide gene enhance    | NM_001077493,  | Coding | TRUE |
| nuclear factor of kappa light polypeptide gene enhance    | NM_001077493,  | Coding | TRUE |
| nuclear factor of kappa light polypeptide gene enhance    | NM_001077493,  | Coding | TRUE |
| nuclear factor of kappa light polypeptide gene enhance    | NM_001077493,  | Coding | TRUE |
| nuclear factor of kappa light polypeptide gene enhance    | NM_001077493,  | Coding | TRUE |
| nuclear factor of kappa light polypeptide gene enhance    | NM_001077493,  | Coding | TRUE |
| nuclear factor of kappa light polypeptide gene enhance    | NM_001077493,  | Coding | TRUE |
| ankyrin repeat domain 16                                  | NM_001009941,  | Coding | TRUE |
| ankyrin repeat domain 16                                  | NM_001009941,  | Coding | TRUE |
| ankyrin repeat domain 16                                  | NM_001009941,  | Coding | TRUE |
| ankyrin repeat domain 16                                  | NM_001009941,  | Coding | TRUE |
| arginine/serine-rich coiled-coil 2                        | NM_023012, NR  | Coding | TRUE |
| arginine/serine-rich coiled-coil 2                        | NM_023012, NR  | Coding | TRUE |
| zinc finger protein 839                                   | NM_018335, ENS | Coding | TRUE |

|                                                         |                |        |      |
|---------------------------------------------------------|----------------|--------|------|
| zinc finger protein 839                                 | NM_018335, ENS | Coding | TRUE |
| zinc finger protein 839                                 | NM_018335, ENS | Coding | TRUE |
| zinc finger protein 839                                 | NM_018335, ENS | Coding | TRUE |
| calcium binding and coiled-coil domain 2                | NM_005831, ENS | Coding | TRUE |
| calcium binding and coiled-coil domain 2                | NM_005831, ENS | Coding | TRUE |
| calcium binding and coiled-coil domain 2                | NM_005831, ENS | Coding | TRUE |
| calcium binding and coiled-coil domain 2                | NM_005831, ENS | Coding | TRUE |
| calcium binding and coiled-coil domain 2                | NM_005831, ENS | Coding | TRUE |
| calcium binding and coiled-coil domain 2                | NM_005831, ENS | Coding | TRUE |
| calcium binding and coiled-coil domain 2                | NM_005831, ENS | Coding | TRUE |
| calcium binding and coiled-coil domain 2                | NM_005831, ENS | Coding | TRUE |
| calcium binding and coiled-coil domain 2                | NM_005831, ENS | Coding | TRUE |
| calcium binding and coiled-coil domain 2                | NM_005831, ENS | Coding | TRUE |
| calcium binding and coiled-coil domain 2                | NM_005831, ENS | Coding | TRUE |
| calcium binding and coiled-coil domain 2                | NM_005831, ENS | Coding | TRUE |
| TGFB-induced factor homeobox 2                          | NM_001199513,  | Coding | TRUE |
| TGFB-induced factor homeobox 2                          | NM_001199513,  | Coding | TRUE |
| TGFB-induced factor homeobox 2                          | NM_001199513,  | Coding | TRUE |
| gamma-glutamyltransferase light chain 2                 | NM_199127, BCC | Coding | TRUE |
| gamma-glutamyltransferase light chain 2                 | NM_199127, BCC | Coding | TRUE |
| TATA box binding protein (TBP)-associated factor, RNA   | NM_001201536,  | Coding | TRUE |
| TATA box binding protein (TBP)-associated factor, RNA   | NM_001201536,  | Coding | TRUE |
| TATA box binding protein (TBP)-associated factor, RNA   | NM_001201536,  | Coding | TRUE |
| coiled-coil-helix-coiled-coil-helix domain containing 5 | NM_032309, ENS | Coding | TRUE |
| coiled-coil-helix-coiled-coil-helix domain containing 5 | NM_032309, ENS | Coding | TRUE |
| transmembrane BAX inhibitor motif containing 1          | NM_022152, ENS | Coding | TRUE |
| transmembrane BAX inhibitor motif containing 1          | NM_022152, ENS | Coding | TRUE |
| transmembrane BAX inhibitor motif containing 1          | NM_022152, ENS | Coding | TRUE |
| transmembrane BAX inhibitor motif containing 1          | NM_022152, ENS | Coding | TRUE |
| transportin 1                                           | NM_002270, NM  | Coding | TRUE |
| transportin 1                                           | NM_002270, NM  | Coding | TRUE |
| proteasome (prosome, macropain) assembly chaperon       | NM_001128591,  | Coding | TRUE |
| proteasome (prosome, macropain) assembly chaperon       | NM_001128591,  | Coding | TRUE |
| proteasome (prosome, macropain) assembly chaperon       | NM_001128591,  | Coding | TRUE |
| proteasome (prosome, macropain) assembly chaperon       | NM_001128591,  | Coding | TRUE |
| LEM domain containing 2                                 | NM_001143944,  | Coding | TRUE |
| LEM domain containing 2                                 | NM_001143944,  | Coding | TRUE |
| eukaryotic translation initiation factor 4H             | NM_022170, NM  | Coding | TRUE |
| eukaryotic translation initiation factor 4H             | NM_022170, NM  | Coding | TRUE |
| eukaryotic translation initiation factor 4H             | NM_022170, NM  | Coding | TRUE |
| eukaryotic translation initiation factor 4H             | NM_022170, NM  | Coding | TRUE |
| ribosomal protein S20, small nucleolar RNA, C/D box 4   | NM_001023, NM  | Coding | TRUE |
| ribosomal protein S20, small nucleolar RNA, C/D box 4   | NM_001023, NM  | Coding | TRUE |
| syntaxin 17                                             | NM_017919, ENS | Coding | TRUE |
| syntaxin 17                                             | NM_017919, ENS | Coding | TRUE |
| syntaxin 17                                             | NM_017919, ENS | Coding | TRUE |
| syntaxin 17                                             | NM_017919, ENS | Coding | TRUE |
| Rho-related BTB domain containing 1                     | NM_001242359,  | Coding | TRUE |
| Rho-related BTB domain containing 1                     | NM_001242359,  | Coding | TRUE |
| Rho-related BTB domain containing 1                     | NM_001242359,  | Coding | TRUE |
| Rho-related BTB domain containing 1                     | NM_001242359,  | Coding | TRUE |
| Rho-related BTB domain containing 1                     | NM_001242359,  | Coding | TRUE |
| Rho-related BTB domain containing 1                     | NM_001242359,  | Coding | TRUE |
| Rho-related BTB domain containing 1                     | NM_001242359,  | Coding | TRUE |
| Rho-related BTB domain containing 1                     | NM_001242359,  | Coding | TRUE |
| Rho-related BTB domain containing 1                     | NM_001242359,  | Coding | TRUE |
| Rho-related BTB domain containing 1                     | NM_001242359,  | Coding | TRUE |
| Rho-related BTB domain containing 1                     | NM_001242359,  | Coding | TRUE |
| Rho-related BTB domain containing 1                     | NM_001242359,  | Coding | TRUE |
| Rho-related BTB domain containing 1                     | NM_001242359,  | Coding | TRUE |
| SET binding factor 2                                    | NM_030962, ENS | Coding | TRUE |

|                                                              |                    |        |      |
|--------------------------------------------------------------|--------------------|--------|------|
| SET binding factor 2                                         | NM_030962, ENS     | Coding | TRUE |
| SET binding factor 2                                         | NM_030962, ENS     | Coding | TRUE |
| ubiquitin specific peptidase 28                              | NM_020886, ENS     | Coding | TRUE |
| ubiquitin specific peptidase 28                              | NM_020886, ENS     | Coding | TRUE |
| ubiquitin specific peptidase 28                              | NM_020886, ENS     | Coding | TRUE |
| ubiquitin specific peptidase 28                              | NM_020886, ENS     | Coding | TRUE |
| protein kinase, AMP-activated, beta 1 non-catalytic subunit  | NM_006253, ENS     | Coding | TRUE |
| protein kinase, AMP-activated, beta 1 non-catalytic subunit  | NM_006253, ENS     | Coding | TRUE |
| myosin, light chain 6B, alkali, smooth muscle and non-muscle | NM_001199629, ENS  | Coding | TRUE |
| myosin, light chain 6B, alkali, smooth muscle and non-muscle | NM_001199629, ENS  | Coding | TRUE |
| unc-51-like kinase 4 (C. elegans) pseudogene 1               | ENST000003215, ENS | Coding | TRUE |
| unc-51-like kinase 4 (C. elegans) pseudogene 1               | ENST000003215, ENS | Coding | TRUE |
| unc-51-like kinase 4 (C. elegans) pseudogene 1               | ENST000003215, ENS | Coding | TRUE |
| unc-51-like kinase 4 (C. elegans) pseudogene 1               | ENST000003215, ENS | Coding | TRUE |
| KIAA0100                                                     | NM_014680, ENS     | Coding | TRUE |
| KIAA0100                                                     | NM_014680, ENS     | Coding | TRUE |
| RAB34, member RAS oncogene family, nine-amino acid motif     | NM_001144943, ENS  | Coding | TRUE |
| RAB34, member RAS oncogene family, nine-amino acid motif     | NM_001144943, ENS  | Coding | TRUE |
| RAB34, member RAS oncogene family, nine-amino acid motif     | NM_001144943, ENS  | Coding | TRUE |
| RAB34, member RAS oncogene family, nine-amino acid motif     | NM_001144943, ENS  | Coding | TRUE |
| zinc finger protein 224                                      | NM_013398, ENS     | Coding | TRUE |
| zinc finger protein 224                                      | NM_013398, ENS     | Coding | TRUE |
| zinc finger protein 224                                      | NM_013398, ENS     | Coding | TRUE |
| pericentrin                                                  | NM_006031, ENS     | Coding | TRUE |
| pericentrin                                                  | NM_006031, ENS     | Coding | TRUE |
| pericentrin                                                  | NM_006031, ENS     | Coding | TRUE |
| cat eye syndrome chromosome region, candidate 5              | NM_017829, NM      | Coding | TRUE |
| cat eye syndrome chromosome region, candidate 5              | NM_017829, NM      | Coding | TRUE |
| cat eye syndrome chromosome region, candidate 5              | NM_017829, NM      | Coding | TRUE |
| mediator of DNA-damage checkpoint 1                          | NM_014641, BC1     | Coding | TRUE |
| mediator of DNA-damage checkpoint 1                          | NM_014641, BC1     | Coding | TRUE |
| mediator of DNA-damage checkpoint 1                          | NM_014641, BC1     | Coding | TRUE |
| mediator of DNA-damage checkpoint 1                          | NM_014641, BC1     | Coding | TRUE |
| mediator of DNA-damage checkpoint 1                          | NM_014641, BC1     | Coding | TRUE |
| mediator of DNA-damage checkpoint 1                          | NM_014641, BC1     | Coding | TRUE |
| mediator of DNA-damage checkpoint 1                          | NM_014641, BC1     | Coding | TRUE |
| mediator of DNA-damage checkpoint 1                          | NM_014641, BC1     | Coding | TRUE |
| mediator of DNA-damage checkpoint 1                          | NM_014641, BC1     | Coding | TRUE |
| mediator of DNA-damage checkpoint 1                          | NM_014641, BC1     | Coding | TRUE |
| mediator of DNA-damage checkpoint 1                          | NM_014641, BC1     | Coding | TRUE |
| mediator of DNA-damage checkpoint 1                          | NM_014641, BC1     | Coding | TRUE |
| mediator of DNA-damage checkpoint 1                          | NM_014641, BC1     | Coding | TRUE |
| mediator of DNA-damage checkpoint 1                          | NM_014641, BC1     | Coding | TRUE |
| mediator of DNA-damage checkpoint 1                          | NM_014641, BC1     | Coding | TRUE |
| mediator of DNA-damage checkpoint 1                          | NM_014641, BC1     | Coding | TRUE |
| mediator of DNA-damage checkpoint 1                          | NM_014641, BC1     | Coding | TRUE |
| mediator of DNA-damage checkpoint 1                          | NM_014641, BC1     | Coding | TRUE |
| mediator of DNA-damage checkpoint 1                          | NM_014641, BC1     | Coding | TRUE |
| mediator of DNA-damage checkpoint 1                          | NM_014641, BC1     | Coding | TRUE |
| mediator of DNA-damage checkpoint 1                          | NM_014641, BC1     | Coding | TRUE |
| long intergenic non-protein coding RNA 266-1                 | BC122537, ENST     | Coding | TRUE |
| long intergenic non-protein coding RNA 266-1                 | BC122537, ENST     | Coding | TRUE |
| mindbomb E3 ubiquitin protein ligase 2                       | NM_080875, NM      | Coding | TRUE |
| mindbomb E3 ubiquitin protein ligase 2                       | NM_080875, NM      | Coding | TRUE |
| mindbomb E3 ubiquitin protein ligase 2                       | NM_080875, NM      | Coding | TRUE |
| mindbomb E3 ubiquitin protein ligase 2                       | NM_080875, NM      | Coding | TRUE |
| mindbomb E3 ubiquitin protein ligase 2                       | NM_080875, NM      | Coding | TRUE |
| ubiquitin specific peptidase 1                               | NM_001017415, ENS  | Coding | TRUE |
| ubiquitin specific peptidase 1                               | NM_001017415, ENS  | Coding | TRUE |
| ubiquitin specific peptidase 1                               | NM_001017415, ENS  | Coding | TRUE |
| guanylate binding protein 1, interferon-inducible            | NM_002053, ENS     | Coding | TRUE |

|                                                        |                |        |      |
|--------------------------------------------------------|----------------|--------|------|
| guanylate binding protein 1, interferon-inducible      | NM_002053, ENS | Coding | TRUE |
| guanylate binding protein 1, interferon-inducible      | NM_002053, ENS | Coding | TRUE |
| guanylate binding protein 1, interferon-inducible      | NM_002053, ENS | Coding | TRUE |
| uncharacterized LOC149351                              | ENST000004556  | Coding | TRUE |
| uncharacterized LOC149351                              | ENST000004556  | Coding | TRUE |
| chromosome 2 open reading frame 27A                    | NM_013310, ENS | Coding | TRUE |
| chromosome 2 open reading frame 27A                    | NM_013310, ENS | Coding | TRUE |
| chromosome 2 open reading frame 27A                    | NM_013310, ENS | Coding | TRUE |
| chromosome 2 open reading frame 27A                    | NM_013310, ENS | Coding | TRUE |
| chromosome 2 open reading frame 27A                    | NM_013310, ENS | Coding | TRUE |
| NIF3 NGG1 interacting factor 3-like 1 (S. cerevisiae)  | NM_001136039,  | Coding | TRUE |
| NIF3 NGG1 interacting factor 3-like 1 (S. cerevisiae)  | NM_001136039,  | Coding | TRUE |
| excision repair cross-complementing rodent repair defi | NM_000122, ENS | Coding | TRUE |
| excision repair cross-complementing rodent repair defi | NM_000122, ENS | Coding | TRUE |
| excision repair cross-complementing rodent repair defi | NM_000122, ENS | Coding | TRUE |
| LIM and senescent cell antigen-like domains 2          | NM_001136037,  | Coding | TRUE |
| LIM and senescent cell antigen-like domains 2          | NM_001136037,  | Coding | TRUE |
| LIM and senescent cell antigen-like domains 2          | NM_001136037,  | Coding | TRUE |
| LIM and senescent cell antigen-like domains 2          | NM_001136037,  | Coding | TRUE |
| LIM and senescent cell antigen-like domains 2          | NM_001136037,  | Coding | TRUE |
| LIM and senescent cell antigen-like domains 2          | NM_001136037,  | Coding | TRUE |
| LIM and senescent cell antigen-like domains 2          | NM_001136037,  | Coding | TRUE |
| LIM and senescent cell antigen-like domains 2          | NM_001136037,  | Coding | TRUE |
| LIM and senescent cell antigen-like domains 2          | NM_001136037,  | Coding | TRUE |
| LIM and senescent cell antigen-like domains 2          | NM_001136037,  | Coding | TRUE |
| LIM and senescent cell antigen-like domains 2          | NM_001136037,  | Coding | TRUE |
| LIM and senescent cell antigen-like domains 2          | NM_001136037,  | Coding | TRUE |
| LIM and senescent cell antigen-like domains 2          | NM_001136037,  | Coding | TRUE |
| LIM and senescent cell antigen-like domains 2          | NM_001136037,  | Coding | TRUE |
| LIM and senescent cell antigen-like domains 2          | NM_001136037,  | Coding | TRUE |
| LIM and senescent cell antigen-like domains 2          | NM_001136037,  | Coding | TRUE |
| LIM and senescent cell antigen-like domains 2          | NM_001136037,  | Coding | TRUE |
| LIM and senescent cell antigen-like domains 2          | NM_001136037,  | Coding | TRUE |
| LIM and senescent cell antigen-like domains 2          | NM_001136037,  | Coding | TRUE |
| LIM and senescent cell antigen-like domains 2          | NM_001136037,  | Coding | TRUE |
| LIM and senescent cell antigen-like domains 2          | NM_001136037,  | Coding | TRUE |
| LIM and senescent cell antigen-like domains 2          | NM_001136037,  | Coding | TRUE |
| LIM and senescent cell antigen-like domains 2          | NM_001136037,  | Coding | TRUE |
| LIM and senescent cell antigen-like domains 2          | NM_001136037,  | Coding | TRUE |
| LIM and senescent cell antigen-like domains 2          | NM_001136037,  | Coding | TRUE |
| LIM and senescent cell antigen-like domains 2          | NM_001136037,  | Coding | TRUE |
| LIM and senescent cell antigen-like domains 2          | NM_001136037,  | Coding | TRUE |
| LIM and senescent cell antigen-like domains 2          | NM_001136037,  | Coding | TRUE |
| LIM and senescent cell antigen-like domains 2          | NM_001136037,  | Coding | TRUE |
| DnaJ (Hsp40) homolog, subfamily C, member 13           | NM_015268, ENS | Coding | TRUE |
| DnaJ (Hsp40) homolog, subfamily C, member 13           | NM_015268, ENS | Coding | TRUE |
| DnaJ (Hsp40) homolog, subfamily C, member 13           | NM_015268, ENS | Coding | TRUE |
| DnaJ (Hsp40) homolog, subfamily C, member 13           | NM_015268, ENS | Coding | TRUE |
| phosphoribosyl pyrophosphate amidotransferase          | NM_002703, ENS | Coding | TRUE |
| phosphoribosyl pyrophosphate amidotransferase          | NM_002703, ENS | Coding | TRUE |
| phosphoribosyl pyrophosphate amidotransferase          | NM_002703, ENS | Coding | TRUE |
| phosphoribosyl pyrophosphate amidotransferase          | NM_002703, ENS | Coding | TRUE |
| PHD finger protein 1                                   | NM_002636, NM  | Coding | TRUE |
| PHD finger protein 1                                   | NM_002636, NM  | Coding | TRUE |
| microRNA 1236, RD RNA binding protein                  | NR_031601, NM  | Coding | TRUE |
| microRNA 1236, RD RNA binding protein                  | NR_031601, NM  | Coding | TRUE |
| SRSF protein kinase 1                                  | NM_003137, NR  | Coding | TRUE |
| SRSF protein kinase 1                                  | NM_003137, NR  | Coding | TRUE |
| SRSF protein kinase 1                                  | NM_003137, NR  | Coding | TRUE |
| myosin, light chain 10, regulatory                     | NM_138403, BCC | Coding | TRUE |



|                                                                  |                |        |      |
|------------------------------------------------------------------|----------------|--------|------|
| myosin, light chain 10, regulatory                               | NM_138403, BCC | Coding | TRUE |
| myosin, light chain 10, regulatory                               | NM_138403, BCC | Coding | TRUE |
| myosin, light chain 10, regulatory                               | NM_138403, BCC | Coding | TRUE |
| COBW domain containing 7                                         | ENST000004665  | Coding | TRUE |
| COBW domain containing 7                                         | ENST000004665  | Coding | TRUE |
| COBW domain containing 7                                         | ENST000004665  | Coding | TRUE |
| COBW domain containing 7                                         | ENST000004665  | Coding | TRUE |
| COBW domain containing 7                                         | ENST000004665  | Coding | TRUE |
| COBW domain containing 7                                         | ENST000004665  | Coding | TRUE |
| golgin A2                                                        | NM_004486, ENS | Coding | TRUE |
| golgin A2                                                        | NM_004486, ENS | Coding | TRUE |
| lysine (K)-specific demethylase 5C                               | NM_001146702,  | Coding | TRUE |
| lysine (K)-specific demethylase 5C                               | NM_001146702,  | Coding | TRUE |
| lysine (K)-specific demethylase 5C                               | NM_001146702,  | Coding | TRUE |
| ER lipid raft associated 1                                       | NM_001100626,  | Coding | TRUE |
| ER lipid raft associated 1                                       | NM_001100626,  | Coding | TRUE |
| D-amino-acid oxidase                                             | NM_001917, ENS | Coding | TRUE |
| D-amino-acid oxidase                                             | NM_001917, ENS | Coding | TRUE |
| lysine (K)-specific demethylase 5A                               | NM_001042603,  | Coding | TRUE |
| lysine (K)-specific demethylase 5A                               | NM_001042603,  | Coding | TRUE |
| lysine (K)-specific demethylase 5A                               | NM_001042603,  | Coding | TRUE |
| lysine (K)-specific demethylase 5A                               | NM_001042603,  | Coding | TRUE |
| SNW domain containing 1                                          | NM_012245, ENS | Coding | TRUE |
| SNW domain containing 1                                          | NM_012245, ENS | Coding | TRUE |
| SNW domain containing 1                                          | NM_012245, ENS | Coding | TRUE |
| carboxylesterase 2                                               | NM_003869, NM  | Coding | TRUE |
| carboxylesterase 2                                               | NM_003869, NM  | Coding | TRUE |
| differential display clone 8, TIMP metalloproteinase inhibitor 1 | NM_001243540,  | Coding | TRUE |
| differential display clone 8, TIMP metalloproteinase inhibitor 1 | NM_001243540,  | Coding | TRUE |
| transmembrane protein 241                                        | NM_032933, ENS | Coding | TRUE |
| transmembrane protein 241                                        | NM_032933, ENS | Coding | TRUE |
| transmembrane protein 241                                        | NM_032933, ENS | Coding | TRUE |
| transmembrane protein 241                                        | NM_032933, ENS | Coding | TRUE |
| CD40 molecule, TNF receptor superfamily member 5                 | NM_001250, NM  | Coding | TRUE |
| CD40 molecule, TNF receptor superfamily member 5                 | NM_001250, NM  | Coding | TRUE |
| CD40 molecule, TNF receptor superfamily member 5                 | NM_001250, NM  | Coding | TRUE |
| CD40 molecule, TNF receptor superfamily member 5                 | NM_001250, NM  | Coding | TRUE |
| CD40 molecule, TNF receptor superfamily member 5                 | NM_001250, NM  | Coding | TRUE |
| CD40 molecule, TNF receptor superfamily member 5                 | NM_001250, NM  | Coding | TRUE |
| docking protein 5                                                | NM_018431, BCC | Coding | TRUE |
| docking protein 5                                                | NM_018431, BCC | Coding | TRUE |
| docking protein 5                                                | NM_018431, BCC | Coding | TRUE |
| MAFF interacting protein, tektin 4 pseudogene 2                  | NM_001190825,  | Coding | TRUE |
| MAFF interacting protein, tektin 4 pseudogene 2                  | NM_001190825,  | Coding | TRUE |
| PHD finger protein 1                                             | NM_002636, NM  | Coding | TRUE |
| PHD finger protein 1                                             | NM_002636, NM  | Coding | TRUE |
| family with sequence similarity 91, member A2, uncharacterized   | NR_046135, NR  | Coding | TRUE |
| family with sequence similarity 91, member A2, uncharacterized   | NR_046135, NR  | Coding | TRUE |
| family with sequence similarity 91, member A2, uncharacterized   | NR_046135, NR  | Coding | TRUE |
| chromodomain helicase DNA binding protein 5                      | NM_015557, ENS | Coding | TRUE |
| chromodomain helicase DNA binding protein 5                      | NM_015557, ENS | Coding | TRUE |
| chromodomain helicase DNA binding protein 5                      | NM_015557, ENS | Coding | TRUE |
| chromodomain helicase DNA binding protein 5                      | NM_015557, ENS | Coding | TRUE |
| EBNA1 binding protein 2                                          | NM_001159936,  | Coding | TRUE |
| EBNA1 binding protein 2                                          | NM_001159936,  | Coding | TRUE |
| EBNA1 binding protein 2                                          | NM_001159936,  | Coding | TRUE |
| v-akt murine thymoma viral oncogene homolog 3 (protein)          | NM_001206729,  | Coding | TRUE |
| v-akt murine thymoma viral oncogene homolog 3 (protein)          | NM_001206729,  | Coding | TRUE |

|                                                     |                |        |      |
|-----------------------------------------------------|----------------|--------|------|
| v-akt murine thymoma viral oncogene homolog 3 (prot | NM_001206729,  | Coding | TRUE |
| RAB, member of RAS oncogene family-like 2A          | NM_007082, NM  | Coding | TRUE |
| RAB, member of RAS oncogene family-like 2A          | NM_007082, NM  | Coding | TRUE |
| RAB, member of RAS oncogene family-like 2A          | NM_007082, NM  | Coding | TRUE |
| RAB, member of RAS oncogene family-like 2A          | NM_007082, NM  | Coding | TRUE |
| LY6/PLAUR domain containing 6B                      | NM_177964, ENS | Coding | TRUE |
| LY6/PLAUR domain containing 6B                      | NM_177964, ENS | Coding | TRUE |
| LY6/PLAUR domain containing 6B                      | NM_177964, ENS | Coding | TRUE |
| LY6/PLAUR domain containing 6B                      | NM_177964, ENS | Coding | TRUE |
| K(lysine) acetyltransferase 2B                      | NM_003884, ENS | Coding | TRUE |
| K(lysine) acetyltransferase 2B                      | NM_003884, ENS | Coding | TRUE |
| ABI family, member 3 (NESH) binding protein         | NM_015429, ENS | Coding | TRUE |
| ABI family, member 3 (NESH) binding protein         | NM_015429, ENS | Coding | TRUE |
| ABI family, member 3 (NESH) binding protein         | NM_015429, ENS | Coding | TRUE |
| ABI family, member 3 (NESH) binding protein         | NM_015429, ENS | Coding | TRUE |
| ABI family, member 3 (NESH) binding protein         | NM_015429, ENS | Coding | TRUE |
| ABI family, member 3 (NESH) binding protein         | NM_015429, ENS | Coding | TRUE |
| ABI family, member 3 (NESH) binding protein         | NM_015429, ENS | Coding | TRUE |
| ABI family, member 3 (NESH) binding protein         | NM_015429, ENS | Coding | TRUE |
| ABI family, member 3 (NESH) binding protein         | NM_015429, ENS | Coding | TRUE |
| ABI family, member 3 (NESH) binding protein         | NM_015429, ENS | Coding | TRUE |
| ABI family, member 3 (NESH) binding protein         | NM_015429, ENS | Coding | TRUE |
| ABI family, member 3 (NESH) binding protein         | NM_015429, ENS | Coding | TRUE |
| ABI family, member 3 (NESH) binding protein         | NM_015429, ENS | Coding | TRUE |
| ABI family, member 3 (NESH) binding protein         | NM_015429, ENS | Coding | TRUE |
| ABI family, member 3 (NESH) binding protein         | NM_015429, ENS | Coding | TRUE |
| ABI family, member 3 (NESH) binding protein         | NM_015429, ENS | Coding | TRUE |
| KIAA1456                                            | NM_001099677,  | Coding | TRUE |
| KIAA1456                                            | NM_001099677,  | Coding | TRUE |
| KIAA1456                                            | NM_001099677,  | Coding | TRUE |
| KIAA1456                                            | NM_001099677,  | Coding | TRUE |
| KIAA1456                                            | NM_001099677,  | Coding | TRUE |
| KIAA1456                                            | NM_001099677,  | Coding | TRUE |
| KIAA1456                                            | NM_001099677,  | Coding | TRUE |
| KIAA1456                                            | NM_001099677,  | Coding | TRUE |
| KIAA1456                                            | NM_001099677,  | Coding | TRUE |
| KIAA1456                                            | NM_001099677,  | Coding | TRUE |
| KIAA1456                                            | NM_001099677,  | Coding | TRUE |
| KIAA1456                                            | NM_001099677,  | Coding | TRUE |
| KIAA1456                                            | NM_001099677,  | Coding | TRUE |
| KIAA1456                                            | NM_001099677,  | Coding | TRUE |
| KIAA1456                                            | NM_001099677,  | Coding | TRUE |
| KIAA1456                                            | NM_001099677,  | Coding | TRUE |
| KIAA1456                                            | NM_001099677,  | Coding | TRUE |
| KIAA1456                                            | NM_001099677,  | Coding | TRUE |
| zinc finger protein 618                             | NM_133374, ENS | Coding | TRUE |
| zinc finger protein 618                             | NM_133374, ENS | Coding | TRUE |
| SH3-domain GRB2-like endophilin B2                  | NM_020145, ENS | Coding | TRUE |
| SH3-domain GRB2-like endophilin B2                  | NM_020145, ENS | Coding | TRUE |
| nuclear receptor subfamily 1, group H, member 3     | NM_001130101,  | Coding | TRUE |
| nuclear receptor subfamily 1, group H, member 3     | NM_001130101,  | Coding | TRUE |
| nuclear receptor subfamily 1, group H, member 3     | NM_001130101,  | Coding | TRUE |
| nuclear receptor subfamily 1, group H, member 3     | NM_001130101,  | Coding | TRUE |
| nuclear receptor subfamily 1, group H, member 3     | NM_001130101,  | Coding | TRUE |
| pyruvate carboxylase                                | NM_001040716,  | Coding | TRUE |
| pyruvate carboxylase                                | NM_001040716,  | Coding | TRUE |
| pyruvate carboxylase                                | NM_001040716,  | Coding | TRUE |
| pyruvate carboxylase                                | NM_001040716,  | Coding | TRUE |
| pyruvate carboxylase                                | NM_001040716,  | Coding | TRUE |
| pyruvate carboxylase                                | NM_001040716,  | Coding | TRUE |
| nuclear receptor subfamily 4, group A, member 1     | NM_001202233,  | Coding | TRUE |

|                                                       |                |        |      |
|-------------------------------------------------------|----------------|--------|------|
| nuclear receptor subfamily 4, group A, member 1       | NM_001202233,  | Coding | TRUE |
| nuclear receptor subfamily 4, group A, member 1       | NM_001202233,  | Coding | TRUE |
| GCN1 general control of amino-acid synthesis 1-like 1 | NM_006836, ENS | Coding | TRUE |
| GCN1 general control of amino-acid synthesis 1-like 1 | NM_006836, ENS | Coding | TRUE |
| GCN1 general control of amino-acid synthesis 1-like 1 | NM_006836, ENS | Coding | TRUE |
| talin 2                                               | NM_015059, ENS | Coding | TRUE |
| talin 2                                               | NM_015059, ENS | Coding | TRUE |
| talin 2                                               | NM_015059, ENS | Coding | TRUE |
| talin 2                                               | NM_015059, ENS | Coding | TRUE |
| talin 2                                               | NM_015059, ENS | Coding | TRUE |
| talin 2                                               | NM_015059, ENS | Coding | TRUE |
| talin 2                                               | NM_015059, ENS | Coding | TRUE |
| talin 2                                               | NM_015059, ENS | Coding | TRUE |
| golgin A8 family, member G, golgin A8 family, member  | ENST000005248  | Coding | TRUE |
| golgin A8 family, member G, golgin A8 family, member  | ENST000005248  | Coding | TRUE |
| zinc finger protein 720                               | NM_001130913,  | Coding | TRUE |
| zinc finger protein 720                               | NM_001130913,  | Coding | TRUE |
| zinc finger protein 720                               | NM_001130913,  | Coding | TRUE |
| Snf2-related CREBBP activator protein                 | NM_006662, ENS | Coding | TRUE |
| Snf2-related CREBBP activator protein                 | NM_006662, ENS | Coding | TRUE |
| Snf2-related CREBBP activator protein                 | NM_006662, ENS | Coding | TRUE |
| uncharacterized serine/threonine-protein kinase SgK4  | NM_001174103,  | Coding | TRUE |
| uncharacterized serine/threonine-protein kinase SgK4  | NM_001174103,  | Coding | TRUE |
| uncharacterized serine/threonine-protein kinase SgK4  | NM_001174103,  | Coding | TRUE |
| uncharacterized serine/threonine-protein kinase SgK4  | NM_001174103,  | Coding | TRUE |
| uncharacterized serine/threonine-protein kinase SgK4  | NM_001174103,  | Coding | TRUE |
| uncharacterized serine/threonine-protein kinase SgK4  | NM_001174103,  | Coding | TRUE |
| uncharacterized serine/threonine-protein kinase SgK4  | NM_001174103,  | Coding | TRUE |
| uncharacterized serine/threonine-protein kinase SgK4  | NM_001174103,  | Coding | TRUE |
| uncharacterized serine/threonine-protein kinase SgK4  | NM_001174103,  | Coding | TRUE |
| uncharacterized serine/threonine-protein kinase SgK4  | NM_001174103,  | Coding | TRUE |
| sodium channel, voltage-gated, type I, beta subunit   | NM_001037, NM  | Coding | TRUE |
| sodium channel, voltage-gated, type I, beta subunit   | NM_001037, NM  | Coding | TRUE |
| sodium channel, voltage-gated, type I, beta subunit   | NM_001037, NM  | Coding | TRUE |
| cartilage oligomeric matrix protein                   | NM_000095, ENS | Coding | TRUE |
| cartilage oligomeric matrix protein                   | NM_000095, ENS | Coding | TRUE |
| cartilage oligomeric matrix protein                   | NM_000095, ENS | Coding | TRUE |
| cartilage oligomeric matrix protein                   | NM_000095, ENS | Coding | TRUE |
| cartilage oligomeric matrix protein                   | NM_000095, ENS | Coding | TRUE |
| cartilage oligomeric matrix protein                   | NM_000095, ENS | Coding | TRUE |
| cartilage oligomeric matrix protein                   | NM_000095, ENS | Coding | TRUE |
| cartilage oligomeric matrix protein                   | NM_000095, ENS | Coding | TRUE |
| peptidyl arginine deiminase, type IV                  | NM_012387, ENS | Coding | TRUE |
| peptidyl arginine deiminase, type IV                  | NM_012387, ENS | Coding | TRUE |
| kinesin family member 17                              | NM_001122819,  | Coding | TRUE |
| kinesin family member 17                              | NM_001122819,  | Coding | TRUE |
| kinesin family member 17                              | NM_001122819,  | Coding | TRUE |
| kinesin family member 17                              | NM_001122819,  | Coding | TRUE |
| protein disulfide isomerase family A, member 5        | NM_006810, NR  | Coding | TRUE |
| protein disulfide isomerase family A, member 5        | NM_006810, NR  | Coding | TRUE |
| protein disulfide isomerase family A, member 5        | NM_006810, NR  | Coding | TRUE |
| uncharacterized LOC100507602                          | ENST000004332  | Coding | TRUE |
| uncharacterized LOC100507602                          | ENST000004332  | Coding | TRUE |
| eukaryotic translation initiation factor 3, subunit B | NM_001037283,  | Coding | TRUE |
| eukaryotic translation initiation factor 3, subunit B | NM_001037283,  | Coding | TRUE |
| eukaryotic translation initiation factor 3, subunit B | NM_001037283,  | Coding | TRUE |
| eukaryotic translation initiation factor 3, subunit B | NM_001037283,  | Coding | TRUE |
| family with sequence similarity 167, member A         | NM_053279, ENS | Coding | TRUE |

|                                                        |                 |        |      |
|--------------------------------------------------------|-----------------|--------|------|
| family with sequence similarity 167, member A          | NM_053279, ENS  | Coding | TRUE |
| family with sequence similarity 167, member A          | NM_053279, ENS  | Coding | TRUE |
| family with sequence similarity 167, member A          | NM_053279, ENS  | Coding | TRUE |
| family with sequence similarity 167, member A          | NM_053279, ENS  | Coding | TRUE |
| family with sequence similarity 167, member A          | NM_053279, ENS  | Coding | TRUE |
| family with sequence similarity 167, member A          | NM_053279, ENS  | Coding | TRUE |
| clusterin                                              | NM_001831, NR   | Coding | TRUE |
| clusterin                                              | NM_001831, NR   | Coding | TRUE |
| clusterin                                              | NM_001831, NR   | Coding | TRUE |
| clusterin                                              | NM_001831, NR   | Coding | TRUE |
| clusterin                                              | NM_001831, NR   | Coding | TRUE |
| clusterin                                              | NM_001831, NR   | Coding | TRUE |
| clusterin                                              | NM_001831, NR   | Coding | TRUE |
| cleavage stimulation factor, 3 pre-RNA, subunit 3, 77k | NM_001033505,   | Coding | TRUE |
| cleavage stimulation factor, 3 pre-RNA, subunit 3, 77k | NM_001033505,   | Coding | TRUE |
| cleavage stimulation factor, 3 pre-RNA, subunit 3, 77k | NM_001033505,   | Coding | TRUE |
| cleavage stimulation factor, 3 pre-RNA, subunit 3, 77k | NM_001033505,   | Coding | TRUE |
| cleavage stimulation factor, 3 pre-RNA, subunit 3, 77k | NM_001033505,   | Coding | TRUE |
| cleavage stimulation factor, 3 pre-RNA, subunit 3, 77k | NM_001033505,   | Coding | TRUE |
| pleckstrin homology domain containing, family A mem    | NM_001143821,   | Coding | TRUE |
| pleckstrin homology domain containing, family A mem    | NM_001143821,   | Coding | TRUE |
| pleckstrin homology domain containing, family A mem    | NM_001143821,   | Coding | TRUE |
| pleckstrin homology domain containing, family A mem    | NM_001143821,   | Coding | TRUE |
| C-type lectin domain family 2, member D                | NM_001004419,   | Coding | TRUE |
| C-type lectin domain family 2, member D                | NM_001004419,   | Coding | TRUE |
| neurexin 3                                             | NM_001105250,   | Coding | TRUE |
| neurexin 3                                             | NM_001105250,   | Coding | TRUE |
| neurexin 3                                             | NM_001105250,   | Coding | TRUE |
| neurexin 3                                             | NM_001105250,   | Coding | TRUE |
| neurexin 3                                             | NM_001105250,   | Coding | TRUE |
| neurexin 3                                             | NM_001105250,   | Coding | TRUE |
| neurexin 3                                             | NM_001105250,   | Coding | TRUE |
| neurexin 3                                             | NM_001105250,   | Coding | TRUE |
| neurexin 3                                             | NM_001105250,   | Coding | TRUE |
| neurexin 3                                             | NM_001105250,   | Coding | TRUE |
| neurexin 3                                             | NM_001105250,   | Coding | TRUE |
| neurexin 3                                             | NM_001105250,   | Coding | TRUE |
| neurexin 3                                             | NM_001105250,   | Coding | TRUE |
| neurexin 3                                             | NM_001105250,   | Coding | TRUE |
| neurexin 3                                             | NM_001105250,   | Coding | TRUE |
| neurexin 3                                             | NM_001105250,   | Coding | TRUE |
| neurexin 3                                             | NM_001105250,   | Coding | TRUE |
| neurexin 3                                             | NM_001105250,   | Coding | TRUE |
| neurexin 3                                             | NM_001105250,   | Coding | TRUE |
| neurexin 3                                             | NM_001105250,   | Coding | TRUE |
| neurexin 3                                             | NM_001105250,   | Coding | TRUE |
| neurexin 3                                             | NM_001105250,   | Coding | TRUE |
| neurexin 3                                             | NM_001105250,   | Coding | TRUE |
| neurexin 3                                             | NM_001105250,   | Coding | TRUE |
| neurexin 3                                             | NM_001105250,   | Coding | TRUE |
| maternally expressed 3 (non-protein coding)            | NR_033360, NR   | Coding | TRUE |
| maternally expressed 3 (non-protein coding)            | NR_033360, NR   | Coding | TRUE |
| maternally expressed 3 (non-protein coding)            | NR_033360, NR   | Coding | TRUE |
| maternally expressed 3 (non-protein coding)            | NR_033360, NR   | Coding | TRUE |
| integrin, alpha E (antigen CD103, human mucosal lym    | NM_002208, ENS  | Coding | TRUE |
| integrin, alpha E (antigen CD103, human mucosal lym    | NM_002208, ENS  | Coding | TRUE |
| transmembrane protein 107, small nucleolar RNA, C/D    | NM_032354, NM   | Coding | TRUE |
| transmembrane protein 107, small nucleolar RNA, C/D    | NM_032354, NM   | Coding | TRUE |
| serine/threonine kinase 4                              | NM_006282, ENS  | Coding | TRUE |
| serine/threonine kinase 4                              | NM_006282, ENS  | Coding | TRUE |
| serine/threonine kinase 4                              | NM_006282, ENS  | Coding | TRUE |
| serine/threonine kinase 4                              | NM_006282, ENS  | Coding | TRUE |
|                                                        |                 | Coding | TRUE |
|                                                        |                 | Coding | TRUE |
| death associated protein 3                             | NM_001199849, I | Coding | TRUE |
| death associated protein 3                             | NM_001199849, I | Coding | TRUE |



|                                                       |                |        |      |
|-------------------------------------------------------|----------------|--------|------|
| phospholipid transfer protein                         | NM_001242920,  | Coding | TRUE |
| phospholipid transfer protein                         | NM_001242920,  | Coding | TRUE |
| phospholipid transfer protein                         | NM_001242920,  | Coding | TRUE |
| chromosome 21 open reading frame 59                   | NM_021254, NR_ | Coding | TRUE |
| chromosome 21 open reading frame 59                   | NM_021254, NR_ | Coding | TRUE |
| zinc finger protein 84                                | NM_001127372,  | Coding | TRUE |
| zinc finger protein 84                                | NM_001127372,  | Coding | TRUE |
| DNA fragmentation factor, 40kDa, beta polypeptide (ca | NM_004402, ENS | Coding | TRUE |
| DNA fragmentation factor, 40kDa, beta polypeptide (ca | NM_004402, ENS | Coding | TRUE |
| transcription termination factor, RNA polymerase II   | NM_003594, ENS | Coding | TRUE |
| transcription termination factor, RNA polymerase II   | NM_003594, ENS | Coding | TRUE |
| transcription termination factor, RNA polymerase II   | NM_003594, ENS | Coding | TRUE |
| transcription termination factor, RNA polymerase II   | NM_003594, ENS | Coding | TRUE |
| fatty acid binding protein 3, muscle and heart (mamma | NM_004102, BCC | Coding | TRUE |
| fatty acid binding protein 3, muscle and heart (mamma | NM_004102, BCC | Coding | TRUE |
| fatty acid binding protein 3, muscle and heart (mamma | NM_004102, BCC | Coding | TRUE |
| thyroid adenoma associated                            | NM_022065, NM_ | Coding | TRUE |
| thyroid adenoma associated                            | NM_022065, NM_ | Coding | TRUE |
| thyroid adenoma associated                            | NM_022065, NM_ | Coding | TRUE |
| thyroid adenoma associated                            | NM_022065, NM_ | Coding | TRUE |
| thyroid adenoma associated                            | NM_022065, NM_ | Coding | TRUE |
| thyroid adenoma associated                            | NM_022065, NM_ | Coding | TRUE |
| thyroid adenoma associated                            | NM_022065, NM_ | Coding | TRUE |
| fragile X mental retardation, autosomal homolog 1     | NM_001013438,  | Coding | TRUE |
| fragile X mental retardation, autosomal homolog 1     | NM_001013438,  | Coding | TRUE |
| fragile X mental retardation, autosomal homolog 1     | NM_001013438,  | Coding | TRUE |
| fragile X mental retardation, autosomal homolog 1     | NM_001013438,  | Coding | TRUE |
| GTPase activating protein (SH3 domain) binding prote  | NM_012297, NM_ | Coding | TRUE |
| GTPase activating protein (SH3 domain) binding prote  | NM_012297, NM_ | Coding | TRUE |
| growth hormone receptor                               | NM_000163, NM_ | Coding | TRUE |
| growth hormone receptor                               | NM_000163, NM_ | Coding | TRUE |
| growth hormone receptor                               | NM_000163, NM_ | Coding | TRUE |
| growth hormone receptor                               | NM_000163, NM_ | Coding | TRUE |
| growth hormone receptor                               | NM_000163, NM_ | Coding | TRUE |
| zinc finger, DHHC-type containing 11                  | NM_024786, ENS | Coding | TRUE |
| zinc finger, DHHC-type containing 11                  | NM_024786, ENS | Coding | TRUE |
| zinc finger, DHHC-type containing 11                  | NM_024786, ENS | Coding | TRUE |
| zinc finger, DHHC-type containing 11                  | NM_024786, ENS | Coding | TRUE |
| zinc finger, DHHC-type containing 11                  | NM_024786, ENS | Coding | TRUE |
| zinc finger, DHHC-type containing 11                  | NM_024786, ENS | Coding | TRUE |
|                                                       |                | Coding | TRUE |
|                                                       |                | Coding | TRUE |
| Williams Beuren syndrome chromosome region 27         | NM_152559, ENS | Coding | TRUE |
| Williams Beuren syndrome chromosome region 27         | NM_152559, ENS | Coding | TRUE |
| glycerol-3-phosphate acyltransferase, mitochondrial   | NM_001244949,  | Coding | TRUE |
| glycerol-3-phosphate acyltransferase, mitochondrial   | NM_001244949,  | Coding | TRUE |
| glycerol-3-phosphate acyltransferase, mitochondrial   | NM_001244949,  | Coding | TRUE |
| glycerol-3-phosphate acyltransferase, mitochondrial   | NM_001244949,  | Coding | TRUE |
| glycerol-3-phosphate acyltransferase, mitochondrial   | NM_001244949,  | Coding | TRUE |
| glycerol-3-phosphate acyltransferase, mitochondrial   | NM_001244949,  | Coding | TRUE |
| glycerol-3-phosphate acyltransferase, mitochondrial   | NM_001244949,  | Coding | TRUE |
| glycerol-3-phosphate acyltransferase, mitochondrial   | NM_001244949,  | Coding | TRUE |
| tetratricopeptide repeat domain 17                    | NM_018259, ENS | Coding | TRUE |
| tetratricopeptide repeat domain 17                    | NM_018259, ENS | Coding | TRUE |
| tetratricopeptide repeat domain 17                    | NM_018259, ENS | Coding | TRUE |
| phosphodiesterase 3A, cGMP-inhibited                  | NM_000921, NM_ | Coding | TRUE |
| phosphodiesterase 3A, cGMP-inhibited                  | NM_000921, NM_ | Coding | TRUE |
| autophagy related 2B                                  | NM_018036, ENS | Coding | TRUE |







|                                                        |                |        |      |
|--------------------------------------------------------|----------------|--------|------|
| ADP-ribosylarginine hydrolase                          | NM_001125, BCC | Coding | TRUE |
| PDZ domain containing ring finger 3                    | NM_015009, ENS | Coding | TRUE |
| PDZ domain containing ring finger 3                    | NM_015009, ENS | Coding | TRUE |
| PDZ domain containing ring finger 3                    | NM_015009, ENS | Coding | TRUE |
| PWWP domain containing 2A                              | NM_001130864,  | Coding | TRUE |
| PWWP domain containing 2A                              | NM_001130864,  | Coding | TRUE |
| deltex homolog 2 (Drosophila), protein deltex-2-like   | NM_001102594,  | Coding | TRUE |
| deltex homolog 2 (Drosophila), protein deltex-2-like   | NM_001102594,  | Coding | TRUE |
| deltex homolog 2 (Drosophila), protein deltex-2-like   | NM_001102594,  | Coding | TRUE |
| deltex homolog 2 (Drosophila), protein deltex-2-like   | NM_001102594,  | Coding | TRUE |
| ankyrin 1, erythrocytic                                | NM_000037, NM, | Coding | TRUE |
| ankyrin 1, erythrocytic                                | NM_000037, NM, | Coding | TRUE |
| ankyrin 1, erythrocytic                                | NM_000037, NM, | Coding | TRUE |
| ankyrin 1, erythrocytic                                | NM_000037, NM, | Coding | TRUE |
| ankyrin 1, erythrocytic                                | NM_000037, NM, | Coding | TRUE |
| ankyrin 1, erythrocytic                                | NM_000037, NM, | Coding | TRUE |
| ankyrin 1, erythrocytic                                | NM_000037, NM, | Coding | TRUE |
| ankyrin 1, erythrocytic                                | NM_000037, NM, | Coding | TRUE |
| ribosomal protein L36a, RPL36A-HNRNPH2 readthrou       | NM_001199972,  | Coding | TRUE |
| ribosomal protein L36a, RPL36A-HNRNPH2 readthrou       | NM_001199972,  | Coding | TRUE |
| ribosomal protein L36a, RPL36A-HNRNPH2 readthrou       | NM_001199972,  | Coding | TRUE |
| transforming, acidic coiled-coil containing protein 2  | NM_006997, NM, | Coding | TRUE |
| transforming, acidic coiled-coil containing protein 2  | NM_006997, NM, | Coding | TRUE |
| transforming, acidic coiled-coil containing protein 2  | NM_006997, NM, | Coding | TRUE |
| solute carrier family 16, member 9 (monocarboxylic ac  | NM_194298, ENS | Coding | TRUE |
| solute carrier family 16, member 9 (monocarboxylic ac  | NM_194298, ENS | Coding | TRUE |
| PR domain containing 10                                | NM_020228, NM, | Coding | TRUE |
| PR domain containing 10                                | NM_020228, NM, | Coding | TRUE |
| PR domain containing 10                                | NM_020228, NM, | Coding | TRUE |
| PR domain containing 10                                | NM_020228, NM, | Coding | TRUE |
| growth arrest-specific 2 like 3                        | NM_174942, ENS | Coding | TRUE |
| growth arrest-specific 2 like 3                        | NM_174942, ENS | Coding | TRUE |
| 2-5-oligoadenylate synthetase 3, 100kDa                | NM_006187, ENS | Coding | TRUE |
| 2-5-oligoadenylate synthetase 3, 100kDa                | NM_006187, ENS | Coding | TRUE |
| 2-5-oligoadenylate synthetase 3, 100kDa                | NM_006187, ENS | Coding | TRUE |
| 2-5-oligoadenylate synthetase 3, 100kDa                | NM_006187, ENS | Coding | TRUE |
| solute carrier family 38, member 4                     | NM_001143824,  | Coding | TRUE |
| solute carrier family 38, member 4                     | NM_001143824,  | Coding | TRUE |
| solute carrier family 38, member 4                     | NM_001143824,  | Coding | TRUE |
| solute carrier family 38, member 4                     | NM_001143824,  | Coding | TRUE |
| solute carrier family 38, member 4                     | NM_001143824,  | Coding | TRUE |
| solute carrier family 38, member 4                     | NM_001143824,  | Coding | TRUE |
| solute carrier family 38, member 4                     | NM_001143824,  | Coding | TRUE |
| solute carrier family 38, member 4                     | NM_001143824,  | Coding | TRUE |
| solute carrier family 38, member 4                     | NM_001143824,  | Coding | TRUE |
| solute carrier family 38, member 4                     | NM_001143824,  | Coding | TRUE |
| solute carrier family 38, member 4                     | NM_001143824,  | Coding | TRUE |
| solute carrier family 38, member 4                     | NM_001143824,  | Coding | TRUE |
| solute carrier family 38, member 4                     | NM_001143824,  | Coding | TRUE |
| solute carrier family 38, member 4                     | NM_001143824,  | Coding | TRUE |
| solute carrier family 38, member 4                     | NM_001143824,  | Coding | TRUE |
| solute carrier family 38, member 4                     | NM_001143824,  | Coding | TRUE |
| solute carrier family 38, member 4                     | NM_001143824,  | Coding | TRUE |
| solute carrier family 38, member 4                     | NM_001143824,  | Coding | TRUE |
| solute carrier family 38, member 4                     | NM_001143824,  | Coding | TRUE |
| discs, large (Drosophila) homolog-associated protein 5 | NM_001146015,  | Coding | TRUE |
| discs, large (Drosophila) homolog-associated protein 5 | NM_001146015,  | Coding | TRUE |
| discs, large (Drosophila) homolog-associated protein 5 | NM_001146015,  | Coding | TRUE |
| discs, large (Drosophila) homolog-associated protein 5 | NM_001146015,  | Coding | TRUE |
| discs, large (Drosophila) homolog-associated protein 5 | NM_001146015,  | Coding | TRUE |
| zinc finger with KRAB and SCAN domains 2               | NM_001012981,  | Coding | TRUE |
| zinc finger with KRAB and SCAN domains 2               | NM_001012981,  | Coding | TRUE |
| WD repeat and SOCS box containing 1                    | NM_015626, NM, | Coding | TRUE |



|                                                          |                |        |      |
|----------------------------------------------------------|----------------|--------|------|
| centrosomal protein 70kDa                                | NM_024491, ENS | Coding | TRUE |
| centrosomal protein 70kDa                                | NM_024491, ENS | Coding | TRUE |
| centrosomal protein 70kDa                                | NM_024491, ENS | Coding | TRUE |
| WW and C2 domain containing 2, claudin 22                | NM_024949, ENS | Coding | TRUE |
| WW and C2 domain containing 2, claudin 22                | NM_024949, ENS | Coding | TRUE |
| oncostatin M receptor                                    | NM_003999, NM  | Coding | TRUE |
| oncostatin M receptor                                    | NM_003999, NM  | Coding | TRUE |
| oncostatin M receptor                                    | NM_003999, NM  | Coding | TRUE |
| oncostatin M receptor                                    | NM_003999, NM  | Coding | TRUE |
| chromosome 5 open reading frame 34                       | NM_198566, ENS | Coding | TRUE |
| chromosome 5 open reading frame 34                       | NM_198566, ENS | Coding | TRUE |
| chromosome 5 open reading frame 34                       | NM_198566, ENS | Coding | TRUE |
| TM2 domain containing 2                                  | NM_001024380,  | Coding | TRUE |
| TM2 domain containing 2                                  | NM_001024380,  | Coding | TRUE |
| TM2 domain containing 2                                  | NM_001024380,  | Coding | TRUE |
| astrotactin 2                                            | NM_001184734,  | Coding | TRUE |
| astrotactin 2                                            | NM_001184734,  | Coding | TRUE |
| astrotactin 2                                            | NM_001184734,  | Coding | TRUE |
| WNK lysine deficient protein kinase 3                    | NM_001002838,  | Coding | TRUE |
| WNK lysine deficient protein kinase 3                    | NM_001002838,  | Coding | TRUE |
| WNK lysine deficient protein kinase 3                    | NM_001002838,  | Coding | TRUE |
| WNK lysine deficient protein kinase 3                    | NM_001002838,  | Coding | TRUE |
| WNK lysine deficient protein kinase 3                    | NM_001002838,  | Coding | TRUE |
| neural cell adhesion molecule 1                          | NM_000615, NM  | Coding | TRUE |
| neural cell adhesion molecule 1                          | NM_000615, NM  | Coding | TRUE |
| neural cell adhesion molecule 1                          | NM_000615, NM  | Coding | TRUE |
| neural cell adhesion molecule 1                          | NM_000615, NM  | Coding | TRUE |
| Ral GTPase activating protein, alpha subunit 1 (cataly   | NM_014990, NM  | Coding | TRUE |
| Ral GTPase activating protein, alpha subunit 1 (cataly   | NM_014990, NM  | Coding | TRUE |
| Ral GTPase activating protein, alpha subunit 1 (cataly   | NM_014990, NM  | Coding | TRUE |
| Ral GTPase activating protein, alpha subunit 1 (cataly   | NM_014990, NM  | Coding | TRUE |
| latent transforming growth factor beta binding protein 2 | NM_000428, ENS | Coding | TRUE |
| latent transforming growth factor beta binding protein 2 | NM_000428, ENS | Coding | TRUE |
| SET domain containing 3                                  | NM_032233, NM  | Coding | TRUE |
| SET domain containing 3                                  | NM_032233, NM  | Coding | TRUE |
| aquarius homolog (mouse)                                 | NM_014691, ENS | Coding | TRUE |
| aquarius homolog (mouse)                                 | NM_014691, ENS | Coding | TRUE |
| tripartite motif containing 25, microRNA 3614            | NM_005082, NR  | Coding | TRUE |
| tripartite motif containing 25, microRNA 3614            | NM_005082, NR  | Coding | TRUE |
| tripartite motif containing 25, microRNA 3614            | NM_005082, NR  | Coding | TRUE |
| eukaryotic translation initiation factor 4A3             | NM_014740, ENS | Coding | TRUE |
| eukaryotic translation initiation factor 4A3             | NM_014740, ENS | Coding | TRUE |
| eukaryotic translation initiation factor 4A3             | NM_014740, ENS | Coding | TRUE |
| zinc finger protein 433                                  | NM_001080411,  | Coding | TRUE |
| zinc finger protein 433                                  | NM_001080411,  | Coding | TRUE |
| glutaminyl-peptide cyclotransferase-like                 | NM_001163377,  | Coding | TRUE |
| glutaminyl-peptide cyclotransferase-like                 | NM_001163377,  | Coding | TRUE |
| tumor necrosis factor receptor superfamily, member 1E    | NM_001066, NR  | Coding | TRUE |
| tumor necrosis factor receptor superfamily, member 1E    | NM_001066, NR  | Coding | TRUE |
| solute carrier family 35 (UDP-glucuronic acid/UDP-N-a    | NM_015139, ENS | Coding | TRUE |
| solute carrier family 35 (UDP-glucuronic acid/UDP-N-a    | NM_015139, ENS | Coding | TRUE |
| Ellis van Creveld syndrome 2                             | NM_001166136,  | Coding | TRUE |
| Ellis van Creveld syndrome 2                             | NM_001166136,  | Coding | TRUE |
| Ellis van Creveld syndrome 2                             | NM_001166136,  | Coding | TRUE |
| Ellis van Creveld syndrome 2                             | NM_001166136,  | Coding | TRUE |
| protein phosphatase, Mg2+/Mn2+ dependent, 1K             | NM_152542, ENS | Coding | TRUE |
| protein phosphatase, Mg2+/Mn2+ dependent, 1K             | NM_152542, ENS | Coding | TRUE |
| protein phosphatase, Mg2+/Mn2+ dependent, 1K             | NM_152542, ENS | Coding | TRUE |



|                                                           |                |        |      |
|-----------------------------------------------------------|----------------|--------|------|
| major facilitator superfamily domain containing 2A        | NM_001136493,  | Coding | TRUE |
| REV1, polymerase (DNA directed)                           | NM_001037872,  | Coding | TRUE |
| REV1, polymerase (DNA directed)                           | NM_001037872,  | Coding | TRUE |
| solute carrier family 25 (aspartate/glutamate carrier), n | NM_003705, ENS | Coding | TRUE |
| solute carrier family 25 (aspartate/glutamate carrier), n | NM_003705, ENS | Coding | TRUE |
| solute carrier family 25 (aspartate/glutamate carrier), n | NM_003705, ENS | Coding | TRUE |
| solute carrier family 25 (aspartate/glutamate carrier), n | NM_003705, ENS | Coding | TRUE |
| solute carrier family 25 (aspartate/glutamate carrier), n | NM_003705, ENS | Coding | TRUE |
| solute carrier family 25 (aspartate/glutamate carrier), n | NM_003705, ENS | Coding | TRUE |
| solute carrier family 25 (aspartate/glutamate carrier), n | NM_003705, ENS | Coding | TRUE |
| sarcoglycan, delta (35kDa dystrophin-associated glyco     | NM_000337, NM  | Coding | TRUE |
| sarcoglycan, delta (35kDa dystrophin-associated glyco     | NM_000337, NM  | Coding | TRUE |
| sarcoglycan, delta (35kDa dystrophin-associated glyco     | NM_000337, NM  | Coding | TRUE |
| sarcoglycan, delta (35kDa dystrophin-associated glyco     | NM_000337, NM  | Coding | TRUE |
| sarcoglycan, delta (35kDa dystrophin-associated glyco     | NM_000337, NM  | Coding | TRUE |
| sarcoglycan, delta (35kDa dystrophin-associated glyco     | NM_000337, NM  | Coding | TRUE |
| sarcoglycan, delta (35kDa dystrophin-associated glyco     | NM_000337, NM  | Coding | TRUE |
| sarcoglycan, delta (35kDa dystrophin-associated glyco     | NM_000337, NM  | Coding | TRUE |
| sarcoglycan, delta (35kDa dystrophin-associated glyco     | NM_000337, NM  | Coding | TRUE |
| zinc finger and SCAN domain containing 23                 | NM_001012455,  | Coding | TRUE |
| zinc finger and SCAN domain containing 23                 | NM_001012455,  | Coding | TRUE |
| zinc finger and SCAN domain containing 23                 | NM_001012455,  | Coding | TRUE |
| zinc finger and SCAN domain containing 23                 | NM_001012455,  | Coding | TRUE |
| zinc finger and SCAN domain containing 23                 | NM_001012455,  | Coding | TRUE |
| zinc finger and SCAN domain containing 23                 | NM_001012455,  | Coding | TRUE |
| zinc finger and SCAN domain containing 23                 | NM_001012455,  | Coding | TRUE |
| zinc finger and SCAN domain containing 23                 | NM_001012455,  | Coding | TRUE |
| uncharacterized LOC441204                                 | NR_015364      | Coding | TRUE |
| uncharacterized LOC441204                                 | NR_015364      | Coding | TRUE |
| EGF-like-domain, multiple 7                               | NM_016215, NM  | Coding | TRUE |
| EGF-like-domain, multiple 7                               | NM_016215, NM  | Coding | TRUE |
| EGF-like-domain, multiple 7                               | NM_016215, NM  | Coding | TRUE |
| EGF-like-domain, multiple 7                               | NM_016215, NM  | Coding | TRUE |
| EGF-like-domain, multiple 7                               | NM_016215, NM  | Coding | TRUE |
| Xg blood group, Xg pseudogene, Y-linked 2                 | NM_001141919,  | Coding | TRUE |
| Xg blood group, Xg pseudogene, Y-linked 2                 | NM_001141919,  | Coding | TRUE |
| Xg blood group, Xg pseudogene, Y-linked 2                 | NM_001141919,  | Coding | TRUE |
| membrane-bound transcription factor peptidase, site 2     | NM_015884, ENS | Coding | TRUE |
| membrane-bound transcription factor peptidase, site 2     | NM_015884, ENS | Coding | TRUE |
| synuclein, gamma (breast cancer-specific protein 1)       | NM_003087, ENS | Coding | TRUE |
| synuclein, gamma (breast cancer-specific protein 1)       | NM_003087, ENS | Coding | TRUE |
| synuclein, gamma (breast cancer-specific protein 1)       | NM_003087, ENS | Coding | TRUE |
| synuclein, gamma (breast cancer-specific protein 1)       | NM_003087, ENS | Coding | TRUE |
| C2CD2-like                                                | NM_014807, ENS | Coding | TRUE |
| C2CD2-like                                                | NM_014807, ENS | Coding | TRUE |
| cytoskeleton associated protein 2                         | NM_001098525,  | Coding | TRUE |
| cytoskeleton associated protein 2                         | NM_001098525,  | Coding | TRUE |
| cytoskeleton associated protein 2                         | NM_001098525,  | Coding | TRUE |
| cytoskeleton associated protein 2                         | NM_001098525,  | Coding | TRUE |
| WAS protein homolog associated with actin, golgi men      | NM_001080435,  | Coding | TRUE |
| WAS protein homolog associated with actin, golgi men      | NM_001080435,  | Coding | TRUE |
| polycystic kidney disease 1-like 2                        | NM_001076780,  | Coding | TRUE |
| polycystic kidney disease 1-like 2                        | NM_001076780,  | Coding | TRUE |
| polycystic kidney disease 1-like 2                        | NM_001076780,  | Coding | TRUE |
| erythropoietin receptor                                   | NM_000121, NR  | Coding | TRUE |
| erythropoietin receptor                                   | NM_000121, NR  | Coding | TRUE |
| adenosine deaminase, RNA-specific, B1                     | NM_015833, NM  | Coding | TRUE |
| adenosine deaminase, RNA-specific, B1                     | NM_015833, NM  | Coding | TRUE |
| adenosine deaminase, RNA-specific, B1                     | NM_015833, NM  | Coding | TRUE |
| adenosine deaminase, RNA-specific, B1                     | NM_015833, NM  | Coding | TRUE |

|                                                       |                |        |      |
|-------------------------------------------------------|----------------|--------|------|
| adenosine deaminase, RNA-specific, B1                 | NM_015833, NM  | Coding | TRUE |
| adenosine deaminase, RNA-specific, B1                 | NM_015833, NM  | Coding | TRUE |
| adenosine deaminase, RNA-specific, B1                 | NM_015833, NM  | Coding | TRUE |
| adenosine deaminase, RNA-specific, B1                 | NM_015833, NM  | Coding | TRUE |
| adenosine deaminase, RNA-specific, B1                 | NM_015833, NM  | Coding | TRUE |
| adenosine deaminase, RNA-specific, B1                 | NM_015833, NM  | Coding | TRUE |
|                                                       |                | Coding | TRUE |
|                                                       |                | Coding | TRUE |
|                                                       |                | Coding | TRUE |
|                                                       |                | Coding | TRUE |
| DNA cross-link repair 1C                              | NM_001033855,  | Coding | TRUE |
| DNA cross-link repair 1C                              | NM_001033855,  | Coding | TRUE |
| chromosome 14 open reading frame 43                   | NM_001043318,  | Coding | TRUE |
| chromosome 14 open reading frame 43                   | NM_001043318,  | Coding | TRUE |
| chromosome 14 open reading frame 43                   | NM_001043318,  | Coding | TRUE |
| chromosome 14 open reading frame 43                   | NM_001043318,  | Coding | TRUE |
| chromosome 14 open reading frame 43                   | NM_001043318,  | Coding | TRUE |
| chromosome 14 open reading frame 43                   | NM_001043318,  | Coding | TRUE |
| chromosome 14 open reading frame 43                   | NM_001043318,  | Coding | TRUE |
| chromosome 14 open reading frame 43                   | NM_001043318,  | Coding | TRUE |
| chromosome 14 open reading frame 178                  | NM_001173978,  | Coding | TRUE |
| chromosome 14 open reading frame 178                  | NM_001173978,  | Coding | TRUE |
| tRNA-yW synthesizing protein 3 homolog (S. cerevisia  | NM_001162916,  | Coding | TRUE |
| tRNA-yW synthesizing protein 3 homolog (S. cerevisia  | NM_001162916,  | Coding | TRUE |
| peroxidasin homolog (Drosophila)                      | NM_012293, ENS | Coding | TRUE |
| peroxidasin homolog (Drosophila)                      | NM_012293, ENS | Coding | TRUE |
| peroxidasin homolog (Drosophila)                      | NM_012293, ENS | Coding | TRUE |
| TatD DNase domain containing 2, ghrelin opposite stra | NM_014760, NR  | Coding | TRUE |
| TatD DNase domain containing 2, ghrelin opposite stra | NM_014760, NR  | Coding | TRUE |
| TatD DNase domain containing 2, ghrelin opposite stra | NM_014760, NR  | Coding | TRUE |
| TatD DNase domain containing 2, ghrelin opposite stra | NM_014760, NR  | Coding | TRUE |
| TatD DNase domain containing 2, ghrelin opposite stra | NM_014760, NR  | Coding | TRUE |
| zinc finger and BTB domain containing 38              | NM_001080412,  | Coding | TRUE |
| zinc finger and BTB domain containing 38              | NM_001080412,  | Coding | TRUE |
| zinc finger and BTB domain containing 38              | NM_001080412,  | Coding | TRUE |
| zinc finger and BTB domain containing 38              | NM_001080412,  | Coding | TRUE |
| zinc finger and BTB domain containing 38              | NM_001080412,  | Coding | TRUE |
| zinc finger and BTB domain containing 38              | NM_001080412,  | Coding | TRUE |
| zinc finger and BTB domain containing 38              | NM_001080412,  | Coding | TRUE |
| zinc finger and BTB domain containing 38              | NM_001080412,  | Coding | TRUE |
| zinc finger and BTB domain containing 38              | NM_001080412,  | Coding | TRUE |
| zinc finger and BTB domain containing 38              | NM_001080412,  | Coding | TRUE |
| zinc finger and BTB domain containing 38              | NM_001080412,  | Coding | TRUE |
| zinc finger and BTB domain containing 38              | NM_001080412,  | Coding | TRUE |
| zinc finger and BTB domain containing 38              | NM_001080412,  | Coding | TRUE |
| zinc finger and BTB domain containing 38              | NM_001080412,  | Coding | TRUE |
| procollagen C-endopeptidase enhancer 2                | NM_013363, ENS | Coding | TRUE |
| procollagen C-endopeptidase enhancer 2                | NM_013363, ENS | Coding | TRUE |
| FRY-like                                              | NM_015030, ENS | Coding | TRUE |
| FRY-like                                              | NM_015030, ENS | Coding | TRUE |
| FRY-like                                              | NM_015030, ENS | Coding | TRUE |
| FRY-like                                              | NM_015030, ENS | Coding | TRUE |
| transmembrane protein 106B                            | NM_001134232,  | Coding | TRUE |
| transmembrane protein 106B                            | NM_001134232,  | Coding | TRUE |
| sulfatase modifying factor 2                          | NM_001042469,  | Coding | TRUE |
| sulfatase modifying factor 2                          | NM_001042469,  | Coding | TRUE |
| sulfatase modifying factor 2                          | NM_001042469,  | Coding | TRUE |
| actin, beta, uncharacterized LOC100505829             | NM_001101, ENS | Coding | TRUE |
| actin, beta, uncharacterized LOC100505829             | NM_001101, ENS | Coding | TRUE |
| actin, beta, uncharacterized LOC100505829             | NM_001101, ENS | Coding | TRUE |

|                                                       |                |        |      |
|-------------------------------------------------------|----------------|--------|------|
| FUN14 domain containing 1                             | NM_173794, ENS | Coding | TRUE |
| FUN14 domain containing 1                             | NM_173794, ENS | Coding | TRUE |
| plexin B3                                             | NM_001163257,  | Coding | TRUE |
| plexin B3                                             | NM_001163257,  | Coding | TRUE |
| uncharacterized LOC399715                             | NR_040079      | Coding | TRUE |
| uncharacterized LOC399715                             | NR_040079      | Coding | TRUE |
| uncharacterized LOC399715                             | NR_040079      | Coding | TRUE |
| BRCA2 and CDKN1A interacting protein                  | NM_016567, NM  | Coding | TRUE |
| BRCA2 and CDKN1A interacting protein                  | NM_016567, NM  | Coding | TRUE |
| antigen identified by monoclonal antibody Ki-67       | NM_001145966,  | Coding | TRUE |
| antigen identified by monoclonal antibody Ki-67       | NM_001145966,  | Coding | TRUE |
| antigen identified by monoclonal antibody Ki-67       | NM_001145966,  | Coding | TRUE |
| coiled-coil domain containing 122                     | NM_144974, BC1 | Coding | TRUE |
| coiled-coil domain containing 122                     | NM_144974, BC1 | Coding | TRUE |
| p21 protein (Cdc42/Rac)-activated kinase 6, budding u | NM_001128628,  | Coding | TRUE |
| p21 protein (Cdc42/Rac)-activated kinase 6, budding u | NM_001128628,  | Coding | TRUE |
| p21 protein (Cdc42/Rac)-activated kinase 6, budding u | NM_001128628,  | Coding | TRUE |
| p21 protein (Cdc42/Rac)-activated kinase 6, budding u | NM_001128628,  | Coding | TRUE |
| p21 protein (Cdc42/Rac)-activated kinase 6, budding u | NM_001128628,  | Coding | TRUE |
| p21 protein (Cdc42/Rac)-activated kinase 6, budding u | NM_001128628,  | Coding | TRUE |
| p21 protein (Cdc42/Rac)-activated kinase 6, budding u | NM_001128628,  | Coding | TRUE |
| p21 protein (Cdc42/Rac)-activated kinase 6, budding u | NM_001128628,  | Coding | TRUE |
| p21 protein (Cdc42/Rac)-activated kinase 6, budding u | NM_001128628,  | Coding | TRUE |
| p21 protein (Cdc42/Rac)-activated kinase 6, budding u | NM_001128628,  | Coding | TRUE |
| p21 protein (Cdc42/Rac)-activated kinase 6, budding u | NM_001128628,  | Coding | TRUE |
| p21 protein (Cdc42/Rac)-activated kinase 6, budding u | NM_001128628,  | Coding | TRUE |
| cholinergic receptor, nicotinic, epsilon (muscle)     | NM_000080, ENS | Coding | TRUE |
| cholinergic receptor, nicotinic, epsilon (muscle)     | NM_000080, ENS | Coding | TRUE |
| cholinergic receptor, nicotinic, epsilon (muscle)     | NM_000080, ENS | Coding | TRUE |
| cholinergic receptor, nicotinic, epsilon (muscle)     | NM_000080, ENS | Coding | TRUE |
| cholinergic receptor, nicotinic, epsilon (muscle)     | NM_000080, ENS | Coding | TRUE |
| zinc finger protein 700                               | NM_144566, ENS | Coding | TRUE |
| zinc finger protein 700                               | NM_144566, ENS | Coding | TRUE |
| zinc finger protein 700                               | NM_144566, ENS | Coding | TRUE |
| amyloid beta (A4) precursor protein                   | NM_000484, NM  | Coding | TRUE |
| amyloid beta (A4) precursor protein                   | NM_000484, NM  | Coding | TRUE |
| KIAA1671                                              | NM_001145206,  | Coding | TRUE |
| KIAA1671                                              | NM_001145206,  | Coding | TRUE |
| KIAA1671                                              | NM_001145206,  | Coding | TRUE |
| KIAA1671                                              | NM_001145206,  | Coding | TRUE |
| DEP domain containing 5                               | NM_001007188,  | Coding | TRUE |
| DEP domain containing 5                               | NM_001007188,  | Coding | TRUE |
| DEP domain containing 5                               | NM_001007188,  | Coding | TRUE |
| DEP domain containing 5                               | NM_001007188,  | Coding | TRUE |
| DEP domain containing 5                               | NM_001007188,  | Coding | TRUE |
| DEP domain containing 5                               | NM_001007188,  | Coding | TRUE |
| sema domain, immunoglobulin domain (Ig), transmem     | NM_001193300,  | Coding | TRUE |
| sema domain, immunoglobulin domain (Ig), transmem     | NM_001193300,  | Coding | TRUE |
| sema domain, immunoglobulin domain (Ig), transmem     | NM_001193300,  | Coding | TRUE |
| sema domain, immunoglobulin domain (Ig), transmem     | NM_001193300,  | Coding | TRUE |
| heterochromatin protein 1, binding protein 3          | NM_016287, ENS | Coding | TRUE |
| heterochromatin protein 1, binding protein 3          | NM_016287, ENS | Coding | TRUE |
| heterochromatin protein 1, binding protein 3          | NM_016287, ENS | Coding | TRUE |
| heterochromatin protein 1, binding protein 3          | NM_016287, ENS | Coding | TRUE |
| 3-hydroxymethyl-3-methylglutaryl-CoA lyase            | NM_000191, NM  | Coding | TRUE |
| 3-hydroxymethyl-3-methylglutaryl-CoA lyase            | NM_000191, NM  | Coding | TRUE |
| DEAD (Asp-Glu-Ala-Asp) box helicase 1                 | NM_004939, ENS | Coding | TRUE |
| DEAD (Asp-Glu-Ala-Asp) box helicase 1                 | NM_004939, ENS | Coding | TRUE |

|                                                           |                   |        |      |
|-----------------------------------------------------------|-------------------|--------|------|
| DEAD (Asp-Glu-Ala-Asp) box helicase 1                     | NM_004939, ENS    | Coding | TRUE |
| fumarylacetoacetate hydrolase domain containing 2B,       | NM_199336, ENS    | Coding | TRUE |
| fumarylacetoacetate hydrolase domain containing 2B,       | NM_199336, ENS    | Coding | TRUE |
| chemokine binding protein 2                               | NM_001296, BCC    | Coding | TRUE |
| chemokine binding protein 2                               | NM_001296, BCC    | Coding | TRUE |
| chemokine binding protein 2                               | NM_001296, BCC    | Coding | TRUE |
| chemokine binding protein 2                               | NM_001296, BCC    | Coding | TRUE |
| chemokine binding protein 2                               | NM_001296, BCC    | Coding | TRUE |
| chemokine binding protein 2                               | NM_001296, BCC    | Coding | TRUE |
| chemokine binding protein 2                               | NM_001296, BCC    | Coding | TRUE |
| chemokine binding protein 2                               | NM_001296, BCC    | Coding | TRUE |
| chemokine binding protein 2                               | NM_001296, BCC    | Coding | TRUE |
| chemokine binding protein 2                               | NM_001296, BCC    | Coding | TRUE |
| chemokine binding protein 2                               | NM_001296, BCC    | Coding | TRUE |
| chemokine binding protein 2                               | NM_001296, BCC    | Coding | TRUE |
| chemokine binding protein 2                               | NM_001296, BCC    | Coding | TRUE |
| chemokine binding protein 2                               | NM_001296, BCC    | Coding | TRUE |
| chemokine binding protein 2                               | NM_001296, BCC    | Coding | TRUE |
| chemokine binding protein 2                               | NM_001296, BCC    | Coding | TRUE |
| chemokine binding protein 2                               | NM_001296, BCC    | Coding | TRUE |
| chemokine binding protein 2                               | NM_001296, BCC    | Coding | TRUE |
| chemokine binding protein 2                               | NM_001296, BCC    | Coding | TRUE |
| chemokine binding protein 2                               | NM_001296, BCC    | Coding | TRUE |
| chemokine binding protein 2                               | NM_001296, BCC    | Coding | TRUE |
| chemokine binding protein 2                               | NM_001296, BCC    | Coding | TRUE |
| chemokine binding protein 2                               | NM_001296, BCC    | Coding | TRUE |
| chemokine binding protein 2                               | NM_001296, BCC    | Coding | TRUE |
| chemokine binding protein 2                               | NM_001296, BCC    | Coding | TRUE |
| chemokine binding protein 2                               | NM_001296, BCC    | Coding | TRUE |
| chemokine binding protein 2                               | NM_001296, BCC    | Coding | TRUE |
| chemokine binding protein 2                               | NM_001296, BCC    | Coding | TRUE |
| chemokine binding protein 2                               | NM_001296, BCC    | Coding | TRUE |
| chemokine binding protein 2                               | NM_001296, BCC    | Coding | TRUE |
| chemokine binding protein 2                               | NM_001296, BCC    | Coding | TRUE |
| progesterone receptor membrane component 2, unchar        | NM_006320, ENS    | Coding | TRUE |
| progesterone receptor membrane component 2, unchar        | NM_006320, ENS    | Coding | TRUE |
| progesterone receptor membrane component 2, unchar        | NM_006320, ENS    | Coding | TRUE |
| actin filament associated protein 1-like 1                | NM_001146337, BCC | Coding | TRUE |
| actin filament associated protein 1-like 1                | NM_001146337, BCC | Coding | TRUE |
| actin filament associated protein 1-like 1                | NM_001146337, BCC | Coding | TRUE |
| enhancer of zeste homolog 2 (Drosophila)                  | NM_001203247, BCC | Coding | TRUE |
| enhancer of zeste homolog 2 (Drosophila)                  | NM_001203247, BCC | Coding | TRUE |
| enhancer of zeste homolog 2 (Drosophila)                  | NM_001203247, BCC | Coding | TRUE |
| enhancer of zeste homolog 2 (Drosophila)                  | NM_001203247, BCC | Coding | TRUE |
| solute carrier family 25 (mitochondrial iron transporter) | NM_016612, ENS    | Coding | TRUE |
| solute carrier family 25 (mitochondrial iron transporter) | NM_016612, ENS    | Coding | TRUE |
| solute carrier family 25 (mitochondrial iron transporter) | NM_016612, ENS    | Coding | TRUE |
| DAB2 interacting protein                                  | NM_138709, NM     | Coding | TRUE |
| DAB2 interacting protein                                  | NM_138709, NM     | Coding | TRUE |
| DAB2 interacting protein                                  | NM_138709, NM     | Coding | TRUE |
| DAB2 interacting protein                                  | NM_138709, NM     | Coding | TRUE |
| DAB2 interacting protein                                  | NM_138709, NM     | Coding | TRUE |
| Nik related kinase                                        | NM_198465, ENS    | Coding | TRUE |
| Nik related kinase                                        | NM_198465, ENS    | Coding | TRUE |
| Nik related kinase                                        | NM_198465, ENS    | Coding | TRUE |
| Nik related kinase                                        | NM_198465, ENS    | Coding | TRUE |
| Nik related kinase                                        | NM_198465, ENS    | Coding | TRUE |
| PBX/knotted 1 homeobox 2                                  | NM_022062, ENS    | Coding | TRUE |
| PBX/knotted 1 homeobox 2                                  | NM_022062, ENS    | Coding | TRUE |
| PBX/knotted 1 homeobox 2                                  | NM_022062, ENS    | Coding | TRUE |
| PBX/knotted 1 homeobox 2                                  | NM_022062, ENS    | Coding | TRUE |
| DEAD/H (Asp-Glu-Ala-Asp/His) box helicase 11              | NM_152438, NM     | Coding | TRUE |
| DEAD/H (Asp-Glu-Ala-Asp/His) box helicase 11              | NM_152438, NM     | Coding | TRUE |
| PARP1 binding protein                                     | NM_017915, ENS    | Coding | TRUE |
| PARP1 binding protein                                     | NM_017915, ENS    | Coding | TRUE |
| PARP1 binding protein                                     | NM_017915, ENS    | Coding | TRUE |





|                                                                                  |
|----------------------------------------------------------------------------------|
| calcium/calmodulin-dependent serine protein kinase (NM_001126054, Coding TRUE    |
| calcium/calmodulin-dependent serine protein kinase (NM_001126054, Coding TRUE    |
| calcium/calmodulin-dependent serine protein kinase (NM_001126054, Coding TRUE    |
| calcium/calmodulin-dependent serine protein kinase (NM_001126054, Coding TRUE    |
| calcium/calmodulin-dependent serine protein kinase (NM_001126054, Coding TRUE    |
| solute carrier family 35, member G1 NM_001134658, Coding TRUE                    |
| solute carrier family 35, member G1 NM_001134658, Coding TRUE                    |
| solute carrier family 35, member G1 NM_001134658, Coding TRUE                    |
| asparagine-linked glycosylation 9, alpha-1,2-mannosyl NM_001077690, Coding TRUE  |
| asparagine-linked glycosylation 9, alpha-1,2-mannosyl NM_001077690, Coding TRUE  |
| asparagine-linked glycosylation 9, alpha-1,2-mannosyl NM_001077690, Coding TRUE  |
| PITPNM family member 3 NM_031220, NM_ Coding TRUE                                |
| PITPNM family member 3 NM_031220, NM_ Coding TRUE                                |
| PITPNM family member 3 NM_031220, NM_ Coding TRUE                                |
| PITPNM family member 3 NM_031220, NM_ Coding TRUE                                |
| zinc finger protein 672 NM_024836, ENS Coding TRUE                               |
| zinc finger protein 672 NM_024836, ENS Coding TRUE                               |
| inositol polyphosphate-4-phosphatase, type I, 107kDa NM_001134224, Coding TRUE   |
| inositol polyphosphate-4-phosphatase, type I, 107kDa NM_001134224, Coding TRUE   |
| inositol polyphosphate-4-phosphatase, type I, 107kDa NM_001134224, Coding TRUE   |
| zinc finger, RAN-binding domain containing 3 NM_032143, ENS Coding TRUE          |
| zinc finger, RAN-binding domain containing 3 NM_032143, ENS Coding TRUE          |
| forkhead box P1 NM_001012505, Coding TRUE                                        |
| forkhead box P1 NM_001012505, Coding TRUE                                        |
| forkhead box P1 NM_001012505, Coding TRUE                                        |
| 2-hydroxyacyl-CoA lyase 1 NM_012260, ENS Coding TRUE                             |
| 2-hydroxyacyl-CoA lyase 1 NM_012260, ENS Coding TRUE                             |
| huntingtin NM_002111, ENS Coding TRUE                                            |
| huntingtin NM_002111, ENS Coding TRUE                                            |
| protocadherin 7 NM_001173523, Coding TRUE                                        |
| protocadherin 7 NM_001173523, Coding TRUE                                        |
| protein tyrosine phosphatase, non-receptor type 13 (A NM_006264, NM_ Coding TRUE |
| protein tyrosine phosphatase, non-receptor type 13 (A NM_006264, NM_ Coding TRUE |
| protein tyrosine phosphatase, non-receptor type 13 (A NM_006264, NM_ Coding TRUE |
| protein tyrosine phosphatase, non-receptor type 13 (A NM_006264, NM_ Coding TRUE |
| protein tyrosine phosphatase, non-receptor type 13 (A NM_006264, NM_ Coding TRUE |
| protein tyrosine phosphatase, non-receptor type 13 (A NM_006264, NM_ Coding TRUE |
| protein tyrosine phosphatase, non-receptor type 13 (A NM_006264, NM_ Coding TRUE |
| protein tyrosine phosphatase, non-receptor type 13 (A NM_006264, NM_ Coding TRUE |
| protein tyrosine phosphatase, non-receptor type 13 (A NM_006264, NM_ Coding TRUE |
| protein tyrosine phosphatase, non-receptor type 13 (A NM_006264, NM_ Coding TRUE |
| protein tyrosine phosphatase, non-receptor type 13 (A NM_006264, NM_ Coding TRUE |
| 3-oxoacid CoA transferase 1 NM_000436, ENS Coding TRUE                           |
| 3-oxoacid CoA transferase 1 NM_000436, ENS Coding TRUE                           |
| 3-oxoacid CoA transferase 1 NM_000436, ENS Coding TRUE                           |
| 3-oxoacid CoA transferase 1 NM_000436, ENS Coding TRUE                           |
| 3-oxoacid CoA transferase 1 NM_000436, ENS Coding TRUE                           |
| 3-oxoacid CoA transferase 1 NM_000436, ENS Coding TRUE                           |
| 3-oxoacid CoA transferase 1 NM_000436, ENS Coding TRUE                           |
| 3-oxoacid CoA transferase 1 NM_000436, ENS Coding TRUE                           |
| 3-oxoacid CoA transferase 1 NM_000436, ENS Coding TRUE                           |
| 3-oxoacid CoA transferase 1 NM_000436, ENS Coding TRUE                           |
| 3-oxoacid CoA transferase 1 NM_000436, ENS Coding TRUE                           |
| 3-oxoacid CoA transferase 1 NM_000436, ENS Coding TRUE                           |
| 3-oxoacid CoA transferase 1 NM_000436, ENS Coding TRUE                           |
| 3-oxoacid CoA transferase 1 NM_000436, ENS Coding TRUE                           |
| 3-oxoacid CoA transferase 1 NM_000436, ENS Coding TRUE                           |
| 3-oxoacid CoA transferase 1 NM_000436, ENS Coding TRUE                           |
| POM121 and ZP3 fusion NM_012230, NM_ Coding TRUE                                 |
| POM121 and ZP3 fusion NM_012230, NM_ Coding TRUE                                 |



|                                                      |                |        |      |
|------------------------------------------------------|----------------|--------|------|
| IQCH antisense RNA 1 (non-protein coding)            | NR_040051, NR  | Coding | TRUE |
| IQCH antisense RNA 1 (non-protein coding)            | NR_040051, NR  | Coding | TRUE |
| IQCH antisense RNA 1 (non-protein coding)            | NR_040051, NR  | Coding | TRUE |
| IQCH antisense RNA 1 (non-protein coding)            | NR_040051, NR  | Coding | TRUE |
| nucleoporin 85kDa                                    | NM_024844, ENS | Coding | TRUE |
| nucleoporin 85kDa                                    | NM_024844, ENS | Coding | TRUE |
| rhomboid 5 homolog 2 (Drosophila)                    | NM_001005498,  | Coding | TRUE |
| rhomboid 5 homolog 2 (Drosophila)                    | NM_001005498,  | Coding | TRUE |
| rhomboid 5 homolog 2 (Drosophila)                    | NM_001005498,  | Coding | TRUE |
| rhomboid 5 homolog 2 (Drosophila)                    | NM_001005498,  | Coding | TRUE |
| rhomboid 5 homolog 2 (Drosophila)                    | NM_001005498,  | Coding | TRUE |
| rhomboid 5 homolog 2 (Drosophila)                    | NM_001005498,  | Coding | TRUE |
| rhomboid 5 homolog 2 (Drosophila)                    | NM_001005498,  | Coding | TRUE |
| thioredoxin domain containing 2 (spermatozoa)        | NM_001098529,  | Coding | TRUE |
| thioredoxin domain containing 2 (spermatozoa)        | NM_001098529,  | Coding | TRUE |
| collagen, type XVIII, alpha 1                        | NM_030582, NM  | Coding | TRUE |
| collagen, type XVIII, alpha 1                        | NM_030582, NM  | Coding | TRUE |
| collagen, type XVIII, alpha 1                        | NM_030582, NM  | Coding | TRUE |
| collagen, type XVIII, alpha 1                        | NM_030582, NM  | Coding | TRUE |
| collagen, type XVIII, alpha 1                        | NM_030582, NM  | Coding | TRUE |
| collagen, type XVIII, alpha 1                        | NM_030582, NM  | Coding | TRUE |
| purinergic receptor P2X, ligand-gated ion channel, 6 | NM_001159554,  | Coding | TRUE |
| purinergic receptor P2X, ligand-gated ion channel, 6 | NM_001159554,  | Coding | TRUE |
| purinergic receptor P2X, ligand-gated ion channel, 6 | NM_001159554,  | Coding | TRUE |
| purinergic receptor P2X, ligand-gated ion channel, 6 | NM_001159554,  | Coding | TRUE |
| purinergic receptor P2X, ligand-gated ion channel, 6 | NM_001159554,  | Coding | TRUE |
| lipase maturation factor 2                           | NM_033200, BCC | Coding | TRUE |
| lipase maturation factor 2                           | NM_033200, BCC | Coding | TRUE |
| lipase maturation factor 2                           | NM_033200, BCC | Coding | TRUE |
| cytidine deaminase                                   | NM_001785, ENS | Coding | TRUE |
| cytidine deaminase                                   | NM_001785, ENS | Coding | TRUE |
| cytidine deaminase                                   | NM_001785, ENS | Coding | TRUE |
| serologically defined colon cancer antigen 8         | NM_006642, ENS | Coding | TRUE |
| serologically defined colon cancer antigen 8         | NM_006642, ENS | Coding | TRUE |
| leiomodrin 1 (smooth muscle)                         | NM_012134, ENS | Coding | TRUE |
| leiomodrin 1 (smooth muscle)                         | NM_012134, ENS | Coding | TRUE |
| leiomodrin 1 (smooth muscle)                         | NM_012134, ENS | Coding | TRUE |
| galactosidase, beta 1, transmembrane protein with me | NM_000404, NM  | Coding | TRUE |
| galactosidase, beta 1, transmembrane protein with me | NM_000404, NM  | Coding | TRUE |
| galactosidase, beta 1, transmembrane protein with me | NM_000404, NM  | Coding | TRUE |
| galactosidase, beta 1, transmembrane protein with me | NM_000404, NM  | Coding | TRUE |
| phosphoglucomutase 2                                 | NM_018290, ENS | Coding | TRUE |
| phosphoglucomutase 2                                 | NM_018290, ENS | Coding | TRUE |
| phosphoglucomutase 2                                 | NM_018290, ENS | Coding | TRUE |
| phosphoglucomutase 2                                 | NM_018290, ENS | Coding | TRUE |
| glycoprotein M6A                                     | NM_005277, NM  | Coding | TRUE |
| glycoprotein M6A                                     | NM_005277, NM  | Coding | TRUE |
| glycoprotein M6A                                     | NM_005277, NM  | Coding | TRUE |
| RasGEF domain family, member 1B                      | NM_152545, ENS | Coding | TRUE |
| RasGEF domain family, member 1B                      | NM_152545, ENS | Coding | TRUE |
| RasGEF domain family, member 1B                      | NM_152545, ENS | Coding | TRUE |
| RasGEF domain family, member 1B                      | NM_152545, ENS | Coding | TRUE |
| RasGEF domain family, member 1B                      | NM_152545, ENS | Coding | TRUE |
| RasGEF domain family, member 1B                      | NM_152545, ENS | Coding | TRUE |
| RasGEF domain family, member 1B                      | NM_152545, ENS | Coding | TRUE |
| membrane-associated ring finger (C3HC4) 6, E3 ubiqu  | NM_005885, ENS | Coding | TRUE |
| membrane-associated ring finger (C3HC4) 6, E3 ubiqu  | NM_005885, ENS | Coding | TRUE |
| exocyst complex component 2                          | NM_018303, ENS | Coding | TRUE |

|                                                          |                   |        |      |
|----------------------------------------------------------|-------------------|--------|------|
| exocyst complex component 2                              | NM_018303, ENS    | Coding | TRUE |
| exocyst complex component 2                              | NM_018303, ENS    | Coding | TRUE |
| exocyst complex component 2                              | NM_018303, ENS    | Coding | TRUE |
| kinesin family member 13A                                | NM_001105566, ENS | Coding | TRUE |
| kinesin family member 13A                                | NM_001105566, ENS | Coding | TRUE |
| kinesin family member 13A                                | NM_001105566, ENS | Coding | TRUE |
| retinitis pigmentosa 9 pseudogene                        | NR_003500, ENS    | Coding | TRUE |
| retinitis pigmentosa 9 pseudogene                        | NR_003500, ENS    | Coding | TRUE |
| retinitis pigmentosa 9 pseudogene                        | NR_003500, ENS    | Coding | TRUE |
| cyclin-dependent kinase 14                               | NM_012395, ENS    | Coding | TRUE |
| cyclin-dependent kinase 14                               | NM_012395, ENS    | Coding | TRUE |
| cyclin-dependent kinase 14                               | NM_012395, ENS    | Coding | TRUE |
| cyclin-dependent kinase 14                               | NM_012395, ENS    | Coding | TRUE |
| cyclin-dependent kinase 14                               | NM_012395, ENS    | Coding | TRUE |
| solute carrier family 44, member 1                       | NM_080546, ENS    | Coding | TRUE |
| solute carrier family 44, member 1                       | NM_080546, ENS    | Coding | TRUE |
| solute carrier family 44, member 1                       | NM_080546, ENS    | Coding | TRUE |
| solute carrier family 44, member 1                       | NM_080546, ENS    | Coding | TRUE |
| solute carrier family 44, member 1                       | NM_080546, ENS    | Coding | TRUE |
| family with sequence similarity 206, member A            | NM_017832, ENS    | Coding | TRUE |
| family with sequence similarity 206, member A            | NM_017832, ENS    | Coding | TRUE |
| GTPase activating protein and VPS9 domains 1             | NM_015635, BC1    | Coding | TRUE |
| GTPase activating protein and VPS9 domains 1             | NM_015635, BC1    | Coding | TRUE |
| GTPase activating protein and VPS9 domains 1             | NM_015635, BC1    | Coding | TRUE |
| GTPase activating protein and VPS9 domains 1             | NM_015635, BC1    | Coding | TRUE |
| GTPase activating protein and VPS9 domains 1             | NM_015635, BC1    | Coding | TRUE |
| TNF receptor-associated factor 2                         | NM_021138, ENS    | Coding | TRUE |
| TNF receptor-associated factor 2                         | NM_021138, ENS    | Coding | TRUE |
| TNF receptor-associated factor 2                         | NM_021138, ENS    | Coding | TRUE |
|                                                          |                   | Coding | TRUE |
|                                                          |                   | Coding | TRUE |
|                                                          |                   | Coding | TRUE |
| nuclear fragile X mental retardation protein interacting | NM_012345, ENS    | Coding | TRUE |
| nuclear fragile X mental retardation protein interacting | NM_012345, ENS    | Coding | TRUE |
| chromosome 14 open reading frame 176                     | NM_001146683, ENS | Coding | TRUE |
| chromosome 14 open reading frame 176                     | NM_001146683, ENS | Coding | TRUE |
| xylosyltransferase II                                    | NM_022167, ENS    | Coding | TRUE |
| xylosyltransferase II                                    | NM_022167, ENS    | Coding | TRUE |
| catsper channel auxiliary subunit gamma                  | NM_021185, ENS    | Coding | TRUE |
| catsper channel auxiliary subunit gamma                  | NM_021185, ENS    | Coding | TRUE |
| catsper channel auxiliary subunit gamma                  | NM_021185, ENS    | Coding | TRUE |
| catsper channel auxiliary subunit gamma                  | NM_021185, ENS    | Coding | TRUE |
| catsper channel auxiliary subunit gamma                  | NM_021185, ENS    | Coding | TRUE |
| UDP-Gal:betaGlcNAc beta 1,4- galactosyltransferase,      | NM_004775, BC0    | Coding | TRUE |
| UDP-Gal:betaGlcNAc beta 1,4- galactosyltransferase,      | NM_004775, BC0    | Coding | TRUE |
| UDP-Gal:betaGlcNAc beta 1,4- galactosyltransferase,      | NM_004775, BC0    | Coding | TRUE |
| UDP-Gal:betaGlcNAc beta 1,4- galactosyltransferase,      | NM_004775, BC0    | Coding | TRUE |
| adenylate kinase 2                                       | NM_001199199, ENS | Coding | TRUE |
| adenylate kinase 2                                       | NM_001199199, ENS | Coding | TRUE |
| adenylate kinase 2                                       | NM_001199199, ENS | Coding | TRUE |
| adenylate kinase 2                                       | NM_001199199, ENS | Coding | TRUE |
| adenylate kinase 2                                       | NM_001199199, ENS | Coding | TRUE |
| ankyrin repeat domain 36B pseudogene 2                   | NR_015424, ENS    | Coding | TRUE |
| ankyrin repeat domain 36B pseudogene 2                   | NR_015424, ENS    | Coding | TRUE |
| ankyrin repeat domain 36B pseudogene 2                   | NR_015424, ENS    | Coding | TRUE |
| ankyrin repeat domain 36B pseudogene 2                   | NR_015424, ENS    | Coding | TRUE |
| leucine rich repeat transmembrane neuronal 1             | NM_178839, ENS    | Coding | TRUE |
| leucine rich repeat transmembrane neuronal 1             | NM_178839, ENS    | Coding | TRUE |

|                                                           |                |        |      |
|-----------------------------------------------------------|----------------|--------|------|
| 8-oxoguanine DNA glycosylase                              | NM_002542, NM  | Coding | TRUE |
| 8-oxoguanine DNA glycosylase                              | NM_002542, NM  | Coding | TRUE |
| heterogeneous nuclear ribonucleoprotein D (AU-rich e      | NM_001003810,  | Coding | TRUE |
| heterogeneous nuclear ribonucleoprotein D (AU-rich e      | NM_001003810,  | Coding | TRUE |
| jumonji, AT rich interactive domain 2                     | NM_004973, ENS | Coding | TRUE |
| jumonji, AT rich interactive domain 2                     | NM_004973, ENS | Coding | TRUE |
| bystin-like                                               | NM_004053, ENS | Coding | TRUE |
| bystin-like                                               | NM_004053, ENS | Coding | TRUE |
| neurocalcin delta                                         | NM_001040624,  | Coding | TRUE |
| neurocalcin delta                                         | NM_001040624,  | Coding | TRUE |
| neurocalcin delta                                         | NM_001040624,  | Coding | TRUE |
| neurocalcin delta                                         | NM_001040624,  | Coding | TRUE |
| chromosome 9 open reading frame 89                        | NM_032310, ENS | Coding | TRUE |
| chromosome 9 open reading frame 89                        | NM_032310, ENS | Coding | TRUE |
| zinc finger protein 658 pseudogene, zinc finger protein   | NR_003528, NR  | Coding | TRUE |
| zinc finger protein 658 pseudogene, zinc finger protein   | NR_003528, NR  | Coding | TRUE |
| uncharacterized LOC100131434                              | NR_027455      | Coding | TRUE |
| uncharacterized LOC100131434                              | NR_027455      | Coding | TRUE |
| uncharacterized LOC100131434                              | NR_027455      | Coding | TRUE |
| uncharacterized LOC100131434                              | NR_027455      | Coding | TRUE |
| uncharacterized LOC100131434                              | NR_027455      | Coding | TRUE |
| suppressor of fused homolog (Drosophila)                  | NM_001178133,  | Coding | TRUE |
| suppressor of fused homolog (Drosophila)                  | NM_001178133,  | Coding | TRUE |
| cysteinyl-tRNA synthetase                                 | NM_001014437,  | Coding | TRUE |
| cysteinyl-tRNA synthetase                                 | NM_001014437,  | Coding | TRUE |
| cysteinyl-tRNA synthetase                                 | NM_001014437,  | Coding | TRUE |
| cysteinyl-tRNA synthetase                                 | NM_001014437,  | Coding | TRUE |
| killer cell lectin-like receptor subfamily A pseudogene 1 | NR_028045, ENS | Coding | TRUE |
| killer cell lectin-like receptor subfamily A pseudogene 1 | NR_028045, ENS | Coding | TRUE |
| killer cell lectin-like receptor subfamily A pseudogene 1 | NR_028045, ENS | Coding | TRUE |
| killer cell lectin-like receptor subfamily A pseudogene 1 | NR_028045, ENS | Coding | TRUE |
| killer cell lectin-like receptor subfamily A pseudogene 1 | NR_028045, ENS | Coding | TRUE |
| E2F transcription factor 7                                | NM_203394, ENS | Coding | TRUE |
| E2F transcription factor 7                                | NM_203394, ENS | Coding | TRUE |
| E2F transcription factor 7                                | NM_203394, ENS | Coding | TRUE |
| E2F transcription factor 7                                | NM_203394, ENS | Coding | TRUE |
| chromosome 14 open reading frame 133                      | NM_001193314,  | Coding | TRUE |
| chromosome 14 open reading frame 133                      | NM_001193314,  | Coding | TRUE |
| chromosome 14 open reading frame 133                      | NM_001193314,  | Coding | TRUE |
| proteasome (prosome, macropain) subunit, alpha type       | NM_001102667,  | Coding | TRUE |
| proteasome (prosome, macropain) subunit, alpha type       | NM_001102667,  | Coding | TRUE |
| proteasome (prosome, macropain) subunit, alpha type       | NM_001102667,  | Coding | TRUE |
| sperm antigen with calponin homology and coiled-coil      | NM_001033553,  | Coding | TRUE |
| sperm antigen with calponin homology and coiled-coil      | NM_001033553,  | Coding | TRUE |
| sperm antigen with calponin homology and coiled-coil      | NM_001033553,  | Coding | TRUE |
| sperm antigen with calponin homology and coiled-coil      | NM_001033553,  | Coding | TRUE |
| sperm antigen with calponin homology and coiled-coil      | NM_001033553,  | Coding | TRUE |
| sperm antigen with calponin homology and coiled-coil      | NM_001033553,  | Coding | TRUE |
| sperm antigen with calponin homology and coiled-coil      | NM_001033553,  | Coding | TRUE |
| sperm antigen with calponin homology and coiled-coil      | NM_001033553,  | Coding | TRUE |
| sperm antigen with calponin homology and coiled-coil      | NM_001033553,  | Coding | TRUE |
| sperm antigen with calponin homology and coiled-coil      | NM_001033553,  | Coding | TRUE |
| sperm antigen with calponin homology and coiled-coil      | NM_001033553,  | Coding | TRUE |
| sperm antigen with calponin homology and coiled-coil      | NM_001033553,  | Coding | TRUE |
| sperm antigen with calponin homology and coiled-coil      | NM_001033553,  | Coding | TRUE |
| sperm antigen with calponin homology and coiled-coil      | NM_001033553,  | Coding | TRUE |
| Rho-associated, coiled-coil containing protein kinase 1   | NR_033770      | Coding | TRUE |
| Rho-associated, coiled-coil containing protein kinase 1   | NR_033770      | Coding | TRUE |
| cAMP responsive element binding protein 3-like 3          | NM_032607, ENS | Coding | TRUE |
| cAMP responsive element binding protein 3-like 3          | NM_032607, ENS | Coding | TRUE |

|                                                        |                 |        |      |
|--------------------------------------------------------|-----------------|--------|------|
| attractin                                              | NM_001207047,   | Coding | TRUE |
| attractin                                              | NM_001207047,   | Coding | TRUE |
| notch 4                                                | NM_004557, BC1  | Coding | TRUE |
| notch 4                                                | NM_004557, BC1  | Coding | TRUE |
| notch 4                                                | NM_004557, BC1  | Coding | TRUE |
| family with sequence similarity 71, member F2          | NM_001128926,   | Coding | TRUE |
| family with sequence similarity 71, member F2          | NM_001128926,   | Coding | TRUE |
| family with sequence similarity 71, member F2          | NM_001128926,   | Coding | TRUE |
| uncharacterized FLJ39739, uncharacterized LOC1002      | NR_027468, NR_  | Coding | TRUE |
| uncharacterized FLJ39739, uncharacterized LOC1002      | NR_027468, NR_  | Coding | TRUE |
| uncharacterized FLJ39739, uncharacterized LOC1002      | NR_027468, NR_  | Coding | TRUE |
|                                                        |                 | Coding | TRUE |
|                                                        |                 | Coding | TRUE |
| multiple coagulation factor deficiency 2               | NM_001171511, I | Coding | TRUE |
| multiple coagulation factor deficiency 2               | NM_001171511, I | Coding | TRUE |
| IQ motif containing J, schwannomin interacting protein | NM_001042705,   | Coding | TRUE |
| IQ motif containing J, schwannomin interacting protein | NM_001042705,   | Coding | TRUE |
| IQ motif containing J, schwannomin interacting protein | NM_001042705,   | Coding | TRUE |
| IQ motif containing J, schwannomin interacting protein | NM_001042705,   | Coding | TRUE |
| IQ motif containing J, schwannomin interacting protein | NM_001042705,   | Coding | TRUE |
| IQ motif containing J, schwannomin interacting protein | NM_001042705,   | Coding | TRUE |
| IQ motif containing J, schwannomin interacting protein | NM_001042705,   | Coding | TRUE |
| IQ motif containing J, schwannomin interacting protein | NM_001042705,   | Coding | TRUE |
| IQ motif containing J, schwannomin interacting protein | NM_001042705,   | Coding | TRUE |
| IQ motif containing J, schwannomin interacting protein | NM_001042705,   | Coding | TRUE |
| IQ motif containing J, schwannomin interacting protein | NM_001042705,   | Coding | TRUE |
| IQ motif containing J, schwannomin interacting protein | NM_001042705,   | Coding | TRUE |
| IQ motif containing J, schwannomin interacting protein | NM_001042705,   | Coding | TRUE |
| IQ motif containing J, schwannomin interacting protein | NM_001042705,   | Coding | TRUE |
| IQ motif containing J, schwannomin interacting protein | NM_001042705,   | Coding | TRUE |
| IQ motif containing J, schwannomin interacting protein | NM_001042705,   | Coding | TRUE |
| IQ motif containing J, schwannomin interacting protein | NM_001042705,   | Coding | TRUE |
| IQ motif containing J, schwannomin interacting protein | NM_001042705,   | Coding | TRUE |
| IQ motif containing J, schwannomin interacting protein | NM_001042705,   | Coding | TRUE |
| IQ motif containing J, schwannomin interacting protein | NM_001042705,   | Coding | TRUE |
| IQ motif containing J, schwannomin interacting protein | NM_001042705,   | Coding | TRUE |
| IQ motif containing J, schwannomin interacting protein | NM_001042705,   | Coding | TRUE |
| IQ motif containing J, schwannomin interacting protein | NM_001042705,   | Coding | TRUE |
| chromosome 4 open reading frame 29                     | NM_001039717,   | Coding | TRUE |
| chromosome 4 open reading frame 29                     | NM_001039717,   | Coding | TRUE |
| ubiquitin-like modifier activating enzyme 6            | NM_018227, ENS  | Coding | TRUE |
| ubiquitin-like modifier activating enzyme 6            | NM_018227, ENS  | Coding | TRUE |
| EGF-like, fibronectin type III and laminin G domains   | NM_001205301,   | Coding | TRUE |
| EGF-like, fibronectin type III and laminin G domains   | NM_001205301,   | Coding | TRUE |
| EGF-like, fibronectin type III and laminin G domains   | NM_001205301,   | Coding | TRUE |
| EGF-like, fibronectin type III and laminin G domains   | NM_001205301,   | Coding | TRUE |
| EGF-like, fibronectin type III and laminin G domains   | NM_001205301,   | Coding | TRUE |
| RAD17 homolog (S. pombe)                               | NM_002873, NM_  | Coding | TRUE |
| RAD17 homolog (S. pombe)                               | NM_002873, NM_  | Coding | TRUE |
| mutS homolog 3 (E. coli)                               | NM_002439, ENS  | Coding | TRUE |
| mutS homolog 3 (E. coli)                               | NM_002439, ENS  | Coding | TRUE |
| kinesin family member C1                               | NM_002263, ENS  | Coding | TRUE |
| kinesin family member C1                               | NM_002263, ENS  | Coding | TRUE |
| kinesin family member C1                               | NM_002263, ENS  | Coding | TRUE |
| kinesin family member C1                               | NM_002263, ENS  | Coding | TRUE |
| sine oculis binding protein homolog (Drosophila)       | NM_018013, ENS  | Coding | TRUE |
| sine oculis binding protein homolog (Drosophila)       | NM_018013, ENS  | Coding | TRUE |
| sine oculis binding protein homolog (Drosophila)       | NM_018013, ENS  | Coding | TRUE |

|                                                        |                |        |      |
|--------------------------------------------------------|----------------|--------|------|
| mediator of DNA-damage checkpoint 1                    | NM_014641, ENS | Coding | TRUE |
| mediator of DNA-damage checkpoint 1                    | NM_014641, ENS | Coding | TRUE |
| mediator of DNA-damage checkpoint 1                    | NM_014641, ENS | Coding | TRUE |
| adenosylhomocysteinase-like 2                          | NM_001130720,  | Coding | TRUE |
| adenosylhomocysteinase-like 2                          | NM_001130720,  | Coding | TRUE |
| solute carrier family 30 (zinc transporter), member 8  | NM_001172815,  | Coding | TRUE |
| solute carrier family 30 (zinc transporter), member 8  | NM_001172815,  | Coding | TRUE |
| PHD finger protein 2                                   | NM_005392, ENS | Coding | TRUE |
| PHD finger protein 2                                   | NM_005392, ENS | Coding | TRUE |
| uncharacterized LOC100287765                           | NR_038988, ENS | Coding | TRUE |
| uncharacterized LOC100287765                           | NR_038988, ENS | Coding | TRUE |
| uncharacterized LOC100287765                           | NR_038988, ENS | Coding | TRUE |
| uncharacterized LOC100287765                           | NR_038988, ENS | Coding | TRUE |
| uncharacterized LOC100287765                           | NR_038988, ENS | Coding | TRUE |
| uncharacterized LOC100287765                           | NR_038988, ENS | Coding | TRUE |
| hydroxysteroid (17-beta) dehydrogenase 7 pseudogen     | NR_003086, ENS | Coding | TRUE |
| hydroxysteroid (17-beta) dehydrogenase 7 pseudogen     | NR_003086, ENS | Coding | TRUE |
| RNA binding motif protein 14, RNA binding motif protei | NM_001198836,  | Coding | TRUE |
| RNA binding motif protein 14, RNA binding motif protei | NM_001198836,  | Coding | TRUE |
| RNA binding motif protein 14, RNA binding motif protei | NM_001198836,  | Coding | TRUE |
| RNA binding motif protein 14, RNA binding motif protei | NM_001198836,  | Coding | TRUE |
| RNA binding motif protein 14, RNA binding motif protei | NM_001198836,  | Coding | TRUE |
| RNA binding motif protein 14, RNA binding motif protei | NM_001198836,  | Coding | TRUE |
| RNA binding motif protein 14, RNA binding motif protei | NM_001198836,  | Coding | TRUE |
| RNA binding motif protein 14, RNA binding motif protei | NM_001198836,  | Coding | TRUE |
| YLP motif containing 1, uncharacterized LOC1005065     | NM_019589, ENS | Coding | TRUE |
| YLP motif containing 1, uncharacterized LOC1005065     | NM_019589, ENS | Coding | TRUE |
| YLP motif containing 1, uncharacterized LOC1005065     | NM_019589, ENS | Coding | TRUE |
| YLP motif containing 1, uncharacterized LOC1005065     | NM_019589, ENS | Coding | TRUE |
| YLP motif containing 1, uncharacterized LOC1005065     | NM_019589, ENS | Coding | TRUE |
| YLP motif containing 1, uncharacterized LOC1005065     | NM_019589, ENS | Coding | TRUE |
| tight junction protein 1 (zona occludens 1)            | NM_003257, NM  | Coding | TRUE |
| tight junction protein 1 (zona occludens 1)            | NM_003257, NM  | Coding | TRUE |
| myosin VA (heavy chain 12, myosin)                     | NM_000259, NM  | Coding | TRUE |
| myosin VA (heavy chain 12, myosin)                     | NM_000259, NM  | Coding | TRUE |
| myosin VA (heavy chain 12, myosin)                     | NM_000259, NM  | Coding | TRUE |
| myosin VA (heavy chain 12, myosin)                     | NM_000259, NM  | Coding | TRUE |
| myosin VA (heavy chain 12, myosin)                     | NM_000259, NM  | Coding | TRUE |
| myosin VA (heavy chain 12, myosin)                     | NM_000259, NM  | Coding | TRUE |
| myosin VA (heavy chain 12, myosin)                     | NM_000259, NM  | Coding | TRUE |
| myosin VA (heavy chain 12, myosin)                     | NM_000259, NM  | Coding | TRUE |
| myosin VA (heavy chain 12, myosin)                     | NM_000259, NM  | Coding | TRUE |
| myosin VA (heavy chain 12, myosin)                     | NM_000259, NM  | Coding | TRUE |
| proteasome (prosome, macropain) 26S subunit, non-A     | NM_002815, ENS | Coding | TRUE |
| proteasome (prosome, macropain) 26S subunit, non-A     | NM_002815, ENS | Coding | TRUE |
| trefoil factor 3 (intestinal)                          | NM_003226, ENS | Coding | TRUE |
| trefoil factor 3 (intestinal)                          | NM_003226, ENS | Coding | TRUE |
| Hermansky-Pudlak syndrome 4                            | NM_022081, NM  | Coding | TRUE |
| Hermansky-Pudlak syndrome 4                            | NM_022081, NM  | Coding | TRUE |
| Hermansky-Pudlak syndrome 4                            | NM_022081, NM  | Coding | TRUE |
| Hermansky-Pudlak syndrome 4                            | NM_022081, NM  | Coding | TRUE |
| TAP binding protein (tapasin)                          | NM_003190, NM  | Coding | TRUE |
| TAP binding protein (tapasin)                          | NM_003190, NM  | Coding | TRUE |
| kinesin family member C1                               | NM_002263, BC1 | Coding | TRUE |
| kinesin family member C1                               | NM_002263, BC1 | Coding | TRUE |
| kinesin family member C1                               | NM_002263, BC1 | Coding | TRUE |
| kinesin family member C1                               | NM_002263, BC1 | Coding | TRUE |
| peroxisomal biogenesis factor 14                       | NM_004565, ENS | Coding | TRUE |
| peroxisomal biogenesis factor 14                       | NM_004565, ENS | Coding | TRUE |
| peroxisomal biogenesis factor 14                       | NM_004565, ENS | Coding | TRUE |



|                                                       |                |        |      |
|-------------------------------------------------------|----------------|--------|------|
| ecotropic viral integration site 5                    | NM_005665, ENS | Coding | TRUE |
| ecotropic viral integration site 5                    | NM_005665, ENS | Coding | TRUE |
| ecotropic viral integration site 5                    | NM_005665, ENS | Coding | TRUE |
| transgelin 2                                          | NM_003564, ENS | Coding | TRUE |
| transgelin 2                                          | NM_003564, ENS | Coding | TRUE |
| transgelin 2                                          | NM_003564, ENS | Coding | TRUE |
| nuclear VCP-like                                      | NM_001243146,  | Coding | TRUE |
| nuclear VCP-like                                      | NM_001243146,  | Coding | TRUE |
| nuclear VCP-like                                      | NM_001243146,  | Coding | TRUE |
| methyl-CpG binding domain protein 5                   | NM_018328, ENS | Coding | TRUE |
| methyl-CpG binding domain protein 5                   | NM_018328, ENS | Coding | TRUE |
| methyl-CpG binding domain protein 5                   | NM_018328, ENS | Coding | TRUE |
| methyl-CpG binding domain protein 5                   | NM_018328, ENS | Coding | TRUE |
| methyl-CpG binding domain protein 5                   | NM_018328, ENS | Coding | TRUE |
| methyl-CpG binding domain protein 5                   | NM_018328, ENS | Coding | TRUE |
| methyl-CpG binding domain protein 5                   | NM_018328, ENS | Coding | TRUE |
| methyl-CpG binding domain protein 5                   | NM_018328, ENS | Coding | TRUE |
| methyl-CpG binding domain protein 5                   | NM_018328, ENS | Coding | TRUE |
| solute carrier family 4, anion exchanger, member 3    | NM_005070, NM, | Coding | TRUE |
| solute carrier family 4, anion exchanger, member 3    | NM_005070, NM, | Coding | TRUE |
| solute carrier family 4, anion exchanger, member 3    | NM_005070, NM, | Coding | TRUE |
| cytochrome c oxidase subunit VIIa polypeptide 2 like  | NM_004718, ENS | Coding | TRUE |
| cytochrome c oxidase subunit VIIa polypeptide 2 like  | NM_004718, ENS | Coding | TRUE |
| cytochrome c oxidase subunit VIIa polypeptide 2 like  | NM_004718, ENS | Coding | TRUE |
| StAR-related lipid transfer (START) domain containing | NM_020151, ENS | Coding | TRUE |
| StAR-related lipid transfer (START) domain containing | NM_020151, ENS | Coding | TRUE |
| chromosome 3 open reading frame 55                    | NR_024016, NM, | Coding | TRUE |
| chromosome 3 open reading frame 55                    | NR_024016, NM, | Coding | TRUE |
| chromosome 3 open reading frame 55                    | NR_024016, NM, | Coding | TRUE |
| chromosome 3 open reading frame 55                    | NR_024016, NM, | Coding | TRUE |
| chromosome 3 open reading frame 55                    | NR_024016, NM, | Coding | TRUE |
| chromosome 3 open reading frame 55                    | NR_024016, NM, | Coding | TRUE |
| solute carrier family 26, member 6                    | NM_001040454,  | Coding | TRUE |
| solute carrier family 26, member 6                    | NM_001040454,  | Coding | TRUE |
| solute carrier family 26, member 6                    | NM_001040454,  | Coding | TRUE |
| solute carrier family 26, member 6                    | NM_001040454,  | Coding | TRUE |
| solute carrier family 26, member 6                    | NM_001040454,  | Coding | TRUE |
| solute carrier family 26, member 6                    | NM_001040454,  | Coding | TRUE |
| solute carrier family 26, member 6                    | NM_001040454,  | Coding | TRUE |
| solute carrier family 26, member 6                    | NM_001040454,  | Coding | TRUE |
| solute carrier family 26, member 6                    | NM_001040454,  | Coding | TRUE |
| solute carrier family 26, member 6                    | NM_001040454,  | Coding | TRUE |
| solute carrier family 26, member 6                    | NM_001040454,  | Coding | TRUE |
| solute carrier family 26, member 6                    | NM_001040454,  | Coding | TRUE |
| solute carrier family 26, member 6                    | NM_001040454,  | Coding | TRUE |
| solute carrier family 26, member 6                    | NM_001040454,  | Coding | TRUE |
| chromosome 4 open reading frame 33                    | NM_001099783,  | Coding | TRUE |
| chromosome 4 open reading frame 33                    | NM_001099783,  | Coding | TRUE |
| chromosome 4 open reading frame 33                    | NM_001099783,  | Coding | TRUE |
| chromosome 4 open reading frame 33                    | NM_001099783,  | Coding | TRUE |
| E74-like factor 2 (ets domain transcription factor)   | NM_201999, NM, | Coding | TRUE |
| E74-like factor 2 (ets domain transcription factor)   | NM_201999, NM, | Coding | TRUE |
| E74-like factor 2 (ets domain transcription factor)   | NM_201999, NM, | Coding | TRUE |
| E74-like factor 2 (ets domain transcription factor)   | NM_201999, NM, | Coding | TRUE |
| calcium/calmodulin-dependent protein kinase II alpha  | NM_015981, NM, | Coding | TRUE |
| calcium/calmodulin-dependent protein kinase II alpha  | NM_015981, NM, | Coding | TRUE |
| netrin G2                                             | NM_032536, ENS | Coding | TRUE |
| netrin G2                                             | NM_032536, ENS | Coding | TRUE |
| phosphatidylinositol-4-phosphate 5-kinase-like 1      | NM_173492, NM, | Coding | TRUE |
| phosphatidylinositol-4-phosphate 5-kinase-like 1      | NM_173492, NM, | Coding | TRUE |
| phosphatidylinositol-4-phosphate 5-kinase-like 1      | NM_173492, NM, | Coding | TRUE |





|                                                            |                |        |      |
|------------------------------------------------------------|----------------|--------|------|
| HOXA cluster antisense RNA 2 (non-protein coding)          | ENST000005175  | Coding | TRUE |
| HOXA cluster antisense RNA 2 (non-protein coding)          | ENST000005175  | Coding | TRUE |
| HOXA cluster antisense RNA 2 (non-protein coding)          | ENST000005175  | Coding | TRUE |
| HOXA cluster antisense RNA 2 (non-protein coding)          | ENST000005175  | Coding | TRUE |
| HOXA cluster antisense RNA 2 (non-protein coding)          | ENST000005175  | Coding | TRUE |
| PDS5, regulator of cohesion maintenance, homolog B         | NM_015032, ENS | Coding | TRUE |
| PDS5, regulator of cohesion maintenance, homolog B         | NM_015032, ENS | Coding | TRUE |
| PDS5, regulator of cohesion maintenance, homolog B         | NM_015032, ENS | Coding | TRUE |
| chromosome 17 open reading frame 28                        | NM_030630, ENS | Coding | TRUE |
| chromosome 17 open reading frame 28                        | NM_030630, ENS | Coding | TRUE |
| chromosome 17 open reading frame 28                        | NM_030630, ENS | Coding | TRUE |
| chromosome 17 open reading frame 28                        | NM_030630, ENS | Coding | TRUE |
| chromosome 17 open reading frame 28                        | NM_030630, ENS | Coding | TRUE |
| chromosome 17 open reading frame 28                        | NM_030630, ENS | Coding | TRUE |
| chromosome 17 open reading frame 28                        | NM_030630, ENS | Coding | TRUE |
| leucine-rich repeats and guanylate kinase domain con       | NM_144648, ENS | Coding | TRUE |
| leucine-rich repeats and guanylate kinase domain con       | NM_144648, ENS | Coding | TRUE |
| leucine-rich repeats and guanylate kinase domain con       | NM_144648, ENS | Coding | TRUE |
| periplakin                                                 | NM_002705, ENS | Coding | TRUE |
| periplakin                                                 | NM_002705, ENS | Coding | TRUE |
| periplakin                                                 | NM_002705, ENS | Coding | TRUE |
| secretion regulating guanine nucleotide exchange fact      | NM_012139, ENS | Coding | TRUE |
| secretion regulating guanine nucleotide exchange fact      | NM_012139, ENS | Coding | TRUE |
| dickkopf 1 homolog (Xenopus laevis)                        | NM_012242, ENS | Coding | TRUE |
| dickkopf 1 homolog (Xenopus laevis)                        | NM_012242, ENS | Coding | TRUE |
| dickkopf 1 homolog (Xenopus laevis)                        | NM_012242, ENS | Coding | TRUE |
| dickkopf 1 homolog (Xenopus laevis)                        | NM_012242, ENS | Coding | TRUE |
| dickkopf 1 homolog (Xenopus laevis)                        | NM_012242, ENS | Coding | TRUE |
| dickkopf 1 homolog (Xenopus laevis)                        | NM_012242, ENS | Coding | TRUE |
| dickkopf 1 homolog (Xenopus laevis)                        | NM_012242, ENS | Coding | TRUE |
| dickkopf 1 homolog (Xenopus laevis)                        | NM_012242, ENS | Coding | TRUE |
| dickkopf 1 homolog (Xenopus laevis)                        | NM_012242, ENS | Coding | TRUE |
| exocyst complex component 4                                | NM_001037126,  | Coding | TRUE |
| exocyst complex component 4                                | NM_001037126,  | Coding | TRUE |
| exocyst complex component 4                                | NM_001037126,  | Coding | TRUE |
| enhancer of polycomb homolog 1 (Drosophila)                | NM_025209, ENS | Coding | TRUE |
| enhancer of polycomb homolog 1 (Drosophila)                | NM_025209, ENS | Coding | TRUE |
| enhancer of polycomb homolog 1 (Drosophila)                | NM_025209, ENS | Coding | TRUE |
| enhancer of polycomb homolog 1 (Drosophila)                | NM_025209, ENS | Coding | TRUE |
| enhancer of polycomb homolog 1 (Drosophila)                | NM_025209, ENS | Coding | TRUE |
| myotubularin related protein 7                             | NM_004686, ENS | Coding | TRUE |
| myotubularin related protein 7                             | NM_004686, ENS | Coding | TRUE |
| myotubularin related protein 7                             | NM_004686, ENS | Coding | TRUE |
| eukaryotic translation initiation factor 3, subunit C, euk | NM_001037808,  | Coding | TRUE |
| eukaryotic translation initiation factor 3, subunit C, euk | NM_001037808,  | Coding | TRUE |
| fumarylacetoacetate hydrolase domain containing 2A         | NM_016044, ENS | Coding | TRUE |
| fumarylacetoacetate hydrolase domain containing 2A         | NM_016044, ENS | Coding | TRUE |
|                                                            |                | Coding | TRUE |
|                                                            |                | Coding | TRUE |
| polymerase (RNA) II (DNA directed) polypeptide B, 14       | NM_000938, ENS | Coding | TRUE |
| polymerase (RNA) II (DNA directed) polypeptide B, 14       | NM_000938, ENS | Coding | TRUE |
| N(alpha)-acetyltransferase 35, NatC auxiliary subunit      | NM_024635, ENS | Coding | TRUE |
| N(alpha)-acetyltransferase 35, NatC auxiliary subunit      | NM_024635, ENS | Coding | TRUE |
| N(alpha)-acetyltransferase 35, NatC auxiliary subunit      | NM_024635, ENS | Coding | TRUE |
| chromosome 10 open reading frame 88 pseudogene             | NR_027282, ENS | Coding | TRUE |
| chromosome 10 open reading frame 88 pseudogene             | NR_027282, ENS | Coding | TRUE |
| chromosome 10 open reading frame 88 pseudogene             | NR_027282, ENS | Coding | TRUE |
| KAT8 regulatory NSL complex subunit 2                      | NM_017822, ENS | Coding | TRUE |
| KAT8 regulatory NSL complex subunit 2                      | NM_017822, ENS | Coding | TRUE |
| SWI/SNF related, matrix associated, actin dependent f      | NM_001128844,  | Coding | TRUE |

|                                                       |                |        |      |
|-------------------------------------------------------|----------------|--------|------|
| SWI/SNF related, matrix associated, actin dependent f | NM_001128844,  | Coding | TRUE |
| TAP binding protein (tapasin)                         | NM_003190, NM  | Coding | TRUE |
| TAP binding protein (tapasin)                         | NM_003190, NM  | Coding | TRUE |
| TAP binding protein (tapasin)                         | NM_003190, NM  | Coding | TRUE |
| TAP binding protein (tapasin)                         | NM_003190, NM  | Coding | TRUE |
| polyhomeotic homolog 2 (Drosophila), microRNA 3605    | NM_004427, NM  | Coding | TRUE |
| polyhomeotic homolog 2 (Drosophila), microRNA 3605    | NM_004427, NM  | Coding | TRUE |
| polyhomeotic homolog 2 (Drosophila), microRNA 3605    | NM_004427, NM  | Coding | TRUE |
| polyhomeotic homolog 2 (Drosophila), microRNA 3605    | NM_004427, NM  | Coding | TRUE |
| polyhomeotic homolog 2 (Drosophila), microRNA 3605    | NM_004427, NM  | Coding | TRUE |
| polyhomeotic homolog 2 (Drosophila), microRNA 3605    | NM_004427, NM  | Coding | TRUE |
| polyhomeotic homolog 2 (Drosophila), microRNA 3605    | NM_004427, NM  | Coding | TRUE |
| polyhomeotic homolog 2 (Drosophila), microRNA 3605    | NM_004427, NM  | Coding | TRUE |
| polyhomeotic homolog 2 (Drosophila), microRNA 3605    | NM_004427, NM  | Coding | TRUE |
| polyhomeotic homolog 2 (Drosophila), microRNA 3605    | NM_004427, NM  | Coding | TRUE |
| polyhomeotic homolog 2 (Drosophila), microRNA 3605    | NM_004427, NM  | Coding | TRUE |
| polyhomeotic homolog 2 (Drosophila), microRNA 3605    | NM_004427, NM  | Coding | TRUE |
| polyhomeotic homolog 2 (Drosophila), microRNA 3605    | NM_004427, NM  | Coding | TRUE |
| polyhomeotic homolog 2 (Drosophila), microRNA 3605    | NM_004427, NM  | Coding | TRUE |
| testis specific, 10                                   | NM_025244, NM  | Coding | TRUE |
| testis specific, 10                                   | NM_025244, NM  | Coding | TRUE |
| testis specific, 10                                   | NM_025244, NM  | Coding | TRUE |
| testis specific, 10                                   | NM_025244, NM  | Coding | TRUE |
| testis specific, 10                                   | NM_025244, NM  | Coding | TRUE |
| testis specific, 10                                   | NM_025244, NM  | Coding | TRUE |
| testis specific, 10                                   | NM_025244, NM  | Coding | TRUE |
| testis specific, 10                                   | NM_025244, NM  | Coding | TRUE |
| testis specific, 10                                   | NM_025244, NM  | Coding | TRUE |
| testis specific, 10                                   | NM_025244, NM  | Coding | TRUE |
| testis specific, 10                                   | NM_025244, NM  | Coding | TRUE |
| testis specific, 10                                   | NM_025244, NM  | Coding | TRUE |
| testis specific, 10                                   | NM_025244, NM  | Coding | TRUE |
| testis specific, 10                                   | NM_025244, NM  | Coding | TRUE |
| integrin, alpha 9                                     | NM_002207, BCC | Coding | TRUE |
| integrin, alpha 9                                     | NM_002207, BCC | Coding | TRUE |
| integrin, alpha 9                                     | NM_002207, BCC | Coding | TRUE |
| integrin, alpha 9                                     | NM_002207, BCC | Coding | TRUE |
| integrin, alpha 9                                     | NM_002207, BCC | Coding | TRUE |
| integrin, alpha 9                                     | NM_002207, BCC | Coding | TRUE |
| family with sequence similarity 66, member D          | NR_027425, ENS | Coding | TRUE |
| family with sequence similarity 66, member D          | NR_027425, ENS | Coding | TRUE |
| family with sequence similarity 66, member D          | NR_027425, ENS | Coding | TRUE |
| family with sequence similarity 66, member D          | NR_027425, ENS | Coding | TRUE |
| family with sequence similarity 66, member D          | NR_027425, ENS | Coding | TRUE |
| family with sequence similarity 66, member D          | NR_027425, ENS | Coding | TRUE |
| family with sequence similarity 66, member D          | NR_027425, ENS | Coding | TRUE |
| protein kinase, AMP-activated, gamma 2 non-catalytic  | NM_001040633,  | Coding | TRUE |
| protein kinase, AMP-activated, gamma 2 non-catalytic  | NM_001040633,  | Coding | TRUE |
| protein kinase, AMP-activated, gamma 2 non-catalytic  | NM_001040633,  | Coding | TRUE |
| protein kinase, AMP-activated, gamma 2 non-catalytic  | NM_001040633,  | Coding | TRUE |
| protein kinase, AMP-activated, gamma 2 non-catalytic  | NM_001040633,  | Coding | TRUE |
| protein kinase, AMP-activated, gamma 2 non-catalytic  | NM_001040633,  | Coding | TRUE |
| protein kinase, AMP-activated, gamma 2 non-catalytic  | NM_001040633,  | Coding | TRUE |
| protein kinase, AMP-activated, gamma 2 non-catalytic  | NM_001040633,  | Coding | TRUE |
| protein kinase, AMP-activated, gamma 2 non-catalytic  | NM_001040633,  | Coding | TRUE |
| protein kinase, AMP-activated, gamma 2 non-catalytic  | NM_001040633,  | Coding | TRUE |
| protein kinase, AMP-activated, gamma 2 non-catalytic  | NM_001040633,  | Coding | TRUE |
| protein kinase, AMP-activated, gamma 2 non-catalytic  | NM_001040633,  | Coding | TRUE |
| protein kinase, AMP-activated, gamma 2 non-catalytic  | NM_001040633,  | Coding | TRUE |
| protein kinase, AMP-activated, gamma 2 non-catalytic  | NM_001040633,  | Coding | TRUE |
| protein kinase, AMP-activated, gamma 2 non-catalytic  | NM_001040633,  | Coding | TRUE |
| phosphorylase kinase, alpha 2 (liver)                 | NM_000292, ENS | Coding | TRUE |
| phosphorylase kinase, alpha 2 (liver)                 | NM_000292, ENS | Coding | TRUE |

|                                                     |                |        |      |
|-----------------------------------------------------|----------------|--------|------|
| phosphorylase kinase, alpha 2 (liver)               | NM_000292, ENS | Coding | TRUE |
| phosphorylase kinase, alpha 2 (liver)               | NM_000292, ENS | Coding | TRUE |
| phosphorylase kinase, alpha 2 (liver)               | NM_000292, ENS | Coding | TRUE |
| phosphorylase kinase, alpha 2 (liver)               | NM_000292, ENS | Coding | TRUE |
| solute carrier family 35, member F2                 | NM_017515, ENS | Coding | TRUE |
| solute carrier family 35, member F2                 | NM_017515, ENS | Coding | TRUE |
| solute carrier family 35, member F2                 | NM_017515, ENS | Coding | TRUE |
| uncharacterized LOC379025                           | NR_029434, NR  | Coding | TRUE |
| uncharacterized LOC379025                           | NR_029434, NR  | Coding | TRUE |
| uncharacterized LOC379025                           | NR_029434, NR  | Coding | TRUE |
| uncharacterized LOC379025                           | NR_029434, NR  | Coding | TRUE |
| uncharacterized LOC379025                           | NR_029434, NR  | Coding | TRUE |
| uncharacterized LOC379025                           | NR_029434, NR  | Coding | TRUE |
| uncharacterized LOC379025                           | NR_029434, NR  | Coding | TRUE |
| uncharacterized LOC379025                           | NR_029434, NR  | Coding | TRUE |
| uncharacterized LOC379025                           | NR_029434, NR  | Coding | TRUE |
| uncharacterized LOC379025                           | NR_029434, NR  | Coding | TRUE |
| uncharacterized LOC379025                           | NR_029434, NR  | Coding | TRUE |
| uncharacterized LOC379025                           | NR_029434, NR  | Coding | TRUE |
| uncharacterized LOC379025                           | NR_029434, NR  | Coding | TRUE |
| uncharacterized LOC379025                           | NR_029434, NR  | Coding | TRUE |
| uncharacterized LOC379025                           | NR_029434, NR  | Coding | TRUE |
| uncharacterized LOC379025                           | NR_029434, NR  | Coding | TRUE |
| uncharacterized LOC379025                           | NR_029434, NR  | Coding | TRUE |
| uncharacterized LOC379025                           | NR_029434, NR  | Coding | TRUE |
| uncharacterized LOC379025                           | NR_029434, NR  | Coding | TRUE |
| uncharacterized LOC379025                           | NR_029434, NR  | Coding | TRUE |
| uncharacterized LOC379025                           | NR_029434, NR  | Coding | TRUE |
| uncharacterized LOC379025                           | NR_029434, NR  | Coding | TRUE |
| uncharacterized LOC379025                           | NR_029434, NR  | Coding | TRUE |
| uncharacterized LOC379025                           | NR_029434, NR  | Coding | TRUE |
| bolA homolog 2 (E. coli), bolA homolog 2B (E. coli) | NM_001031827,  | Coding | TRUE |
| bolA homolog 2 (E. coli), bolA homolog 2B (E. coli) | NM_001031827,  | Coding | TRUE |
| bolA homolog 2 (E. coli), bolA homolog 2B (E. coli) | NM_001031827,  | Coding | TRUE |
| pannexin 2                                          | NM_001160300,  | Coding | TRUE |
| pannexin 2                                          | NM_001160300,  | Coding | TRUE |
| pannexin 2                                          | NM_001160300,  | Coding | TRUE |
| pannexin 2                                          | NM_001160300,  | Coding | TRUE |
| pannexin 2                                          | NM_001160300,  | Coding | TRUE |
| sterol carrier protein 2                            | NM_001007250,  | Coding | TRUE |
| sterol carrier protein 2                            | NM_001007250,  | Coding | TRUE |
| sterol carrier protein 2                            | NM_001007250,  | Coding | TRUE |
| sterol carrier protein 2                            | NM_001007250,  | Coding | TRUE |
| sterol carrier protein 2                            | NM_001007250,  | Coding | TRUE |
| sterol carrier protein 2                            | NM_001007250,  | Coding | TRUE |
| sterol carrier protein 2                            | NM_001007250,  | Coding | TRUE |
| sterol carrier protein 2                            | NM_001007250,  | Coding | TRUE |
| 6-phosphofructo-2-kinase/fructose-2,6-biphosphatase | NM_001018053,  | Coding | TRUE |
| 6-phosphofructo-2-kinase/fructose-2,6-biphosphatase | NM_001018053,  | Coding | TRUE |
| 6-phosphofructo-2-kinase/fructose-2,6-biphosphatase | NM_001018053,  | Coding | TRUE |
| 6-phosphofructo-2-kinase/fructose-2,6-biphosphatase | NM_001018053,  | Coding | TRUE |
| 6-phosphofructo-2-kinase/fructose-2,6-biphosphatase | NM_001018053,  | Coding | TRUE |
| 6-phosphofructo-2-kinase/fructose-2,6-biphosphatase | NM_001018053,  | Coding | TRUE |
| 6-phosphofructo-2-kinase/fructose-2,6-biphosphatase | NM_001018053,  | Coding | TRUE |
| 6-phosphofructo-2-kinase/fructose-2,6-biphosphatase | NM_001018053,  | Coding | TRUE |
| 6-phosphofructo-2-kinase/fructose-2,6-biphosphatase | NM_001018053,  | Coding | TRUE |
| oxysterol binding protein-like 10                   | NM_001174060,  | Coding | TRUE |
| oxysterol binding protein-like 10                   | NM_001174060,  | Coding | TRUE |
| oxysterol binding protein-like 10                   | NM_001174060,  | Coding | TRUE |
| oxysterol binding protein-like 10                   | NM_001174060,  | Coding | TRUE |
| oxysterol binding protein-like 10                   | NM_001174060,  | Coding | TRUE |
| oxysterol binding protein-like 10                   | NM_001174060,  | Coding | TRUE |
| EPH receptor B6                                     | NM_004445, ENS | Coding | TRUE |
| EPH receptor B6                                     | NM_004445, ENS | Coding | TRUE |
|                                                     |                | Coding | TRUE |
|                                                     |                | Coding | TRUE |
| midkine (neurite growth-promoting factor 2)         | NM_001012333,  | Coding | TRUE |
| midkine (neurite growth-promoting factor 2)         | NM_001012333,  | Coding | TRUE |



|                                                         |                |        |      |
|---------------------------------------------------------|----------------|--------|------|
|                                                         |                | Coding | TRUE |
|                                                         |                | Coding | TRUE |
|                                                         |                | Coding | TRUE |
|                                                         |                | Coding | TRUE |
|                                                         |                | Coding | TRUE |
|                                                         |                | Coding | TRUE |
|                                                         |                | Coding | TRUE |
|                                                         |                | Coding | TRUE |
|                                                         |                | Coding | TRUE |
|                                                         |                | Coding | TRUE |
|                                                         |                | Coding | TRUE |
|                                                         |                | Coding | TRUE |
|                                                         |                | Coding | TRUE |
|                                                         |                | Coding | TRUE |
|                                                         |                | Coding | TRUE |
| t-complex 11 (mouse)-like 1                             | NM_018393, NM  | Coding | TRUE |
| t-complex 11 (mouse)-like 1                             | NM_018393, NM  | Coding | TRUE |
| acid phosphatase 1, soluble                             | NM_001040649,  | Coding | TRUE |
| acid phosphatase 1, soluble                             | NM_001040649,  | Coding | TRUE |
| acid phosphatase 1, soluble                             | NM_001040649,  | Coding | TRUE |
| leucine rich repeat containing 70, importin 11          | NM_181506, NM  | Coding | TRUE |
| leucine rich repeat containing 70, importin 11          | NM_181506, NM  | Coding | TRUE |
| leucine rich repeat containing 70, importin 11          | NM_181506, NM  | Coding | TRUE |
| leucine rich repeat containing 70, importin 11          | NM_181506, NM  | Coding | TRUE |
| homocysteine-inducible, endoplasmic reticulum stress    | NM_001010990,  | Coding | TRUE |
| homocysteine-inducible, endoplasmic reticulum stress    | NM_001010990,  | Coding | TRUE |
| clathrin, heavy chain-like 1                            | NM_001835, NM  | Coding | TRUE |
| clathrin, heavy chain-like 1                            | NM_001835, NM  | Coding | TRUE |
| clathrin, heavy chain-like 1                            | NM_001835, NM  | Coding | TRUE |
| clathrin, heavy chain-like 1                            | NM_001835, NM  | Coding | TRUE |
| clathrin, heavy chain-like 1                            | NM_001835, NM  | Coding | TRUE |
| clathrin, heavy chain-like 1                            | NM_001835, NM  | Coding | TRUE |
| clathrin, heavy chain-like 1                            | NM_001835, NM  | Coding | TRUE |
| clathrin, heavy chain-like 1                            | NM_001835, NM  | Coding | TRUE |
| clathrin, heavy chain-like 1                            | NM_001835, NM  | Coding | TRUE |
| clathrin, heavy chain-like 1                            | NM_001835, NM  | Coding | TRUE |
| clathrin, heavy chain-like 1                            | NM_001835, NM  | Coding | TRUE |
| clathrin, heavy chain-like 1                            | NM_001835, NM  | Coding | TRUE |
| clathrin, heavy chain-like 1                            | NM_001835, NM  | Coding | TRUE |
| clathrin, heavy chain-like 1                            | NM_001835, NM  | Coding | TRUE |
| clathrin, heavy chain-like 1                            | NM_001835, NM  | Coding | TRUE |
| clathrin, heavy chain-like 1                            | NM_001835, NM  | Coding | TRUE |
| clathrin, heavy chain-like 1                            | NM_001835, NM  | Coding | TRUE |
| clathrin, heavy chain-like 1                            | NM_001835, NM  | Coding | TRUE |
| clathrin, heavy chain-like 1                            | NM_001835, NM  | Coding | TRUE |
| clathrin, heavy chain-like 1                            | NM_001835, NM  | Coding | TRUE |
| clathrin, heavy chain-like 1                            | NM_001835, NM  | Coding | TRUE |
| autophagy related 10                                    | NM_001131028,  | Coding | TRUE |
| autophagy related 10                                    | NM_001131028,  | Coding | TRUE |
| autophagy related 10                                    | NM_001131028,  | Coding | TRUE |
| solute carrier family 36 (proton/amino acid symporter), | NM_078483, ENS | Coding | TRUE |
| solute carrier family 36 (proton/amino acid symporter), | NM_078483, ENS | Coding | TRUE |
| solute carrier family 36 (proton/amino acid symporter), | NM_078483, ENS | Coding | TRUE |
| solute carrier family 36 (proton/amino acid symporter), | NM_078483, ENS | Coding | TRUE |
| solute carrier family 36 (proton/amino acid symporter), | NM_078483, ENS | Coding | TRUE |
| solute carrier family 36 (proton/amino acid symporter), | NM_078483, ENS | Coding | TRUE |
| solute carrier family 36 (proton/amino acid symporter), | NM_078483, ENS | Coding | TRUE |
| solute carrier family 36 (proton/amino acid symporter), | NM_078483, ENS | Coding | TRUE |
| solute carrier family 36 (proton/amino acid symporter), | NM_078483, ENS | Coding | TRUE |
| solute carrier family 36 (proton/amino acid symporter), | NM_078483, ENS | Coding | TRUE |
| solute carrier family 36 (proton/amino acid symporter), | NM_078483, ENS | Coding | TRUE |
| solute carrier family 36 (proton/amino acid symporter), | NM_078483, ENS | Coding | TRUE |
| solute carrier family 36 (proton/amino acid symporter), | NM_078483, ENS | Coding | TRUE |
| solute carrier family 36 (proton/amino acid symporter), | NM_078483, ENS | Coding | TRUE |
| solute carrier family 36 (proton/amino acid symporter), | NM_078483, ENS | Coding | TRUE |
| solute carrier family 36 (proton/amino acid symporter), | NM_078483, ENS | Coding | TRUE |
| solute carrier family 36 (proton/amino acid symporter), | NM_078483, ENS | Coding | TRUE |
| COX19 cytochrome c oxidase assembly homolog (S. c       | NM_001031617,  | Coding | TRUE |
| COX19 cytochrome c oxidase assembly homolog (S. c       | NM_001031617,  | Coding | TRUE |





|                                                           |                |        |      |
|-----------------------------------------------------------|----------------|--------|------|
| UDP-N-acetyl-alpha-D-galactosamine:polypeptide N-a        | NM_004482, ENS | Coding | TRUE |
| UDP-N-acetyl-alpha-D-galactosamine:polypeptide N-a        | NM_004482, ENS | Coding | TRUE |
| UDP-N-acetyl-alpha-D-galactosamine:polypeptide N-a        | NM_004482, ENS | Coding | TRUE |
| UDP-N-acetyl-alpha-D-galactosamine:polypeptide N-a        | NM_004482, ENS | Coding | TRUE |
| UDP-N-acetyl-alpha-D-galactosamine:polypeptide N-a        | NM_004482, ENS | Coding | TRUE |
| solute carrier family 19 (thiamine transporter), member   | NM_006996, ENS | Coding | TRUE |
| solute carrier family 19 (thiamine transporter), member   | NM_006996, ENS | Coding | TRUE |
| solute carrier family 19 (thiamine transporter), member   | NM_006996, ENS | Coding | TRUE |
| solute carrier family 19 (thiamine transporter), member   | NM_006996, ENS | Coding | TRUE |
| solute carrier family 19 (thiamine transporter), member   | NM_006996, ENS | Coding | TRUE |
| chromosome 14 open reading frame 2                        | NM_001127393,  | Coding | TRUE |
| chromosome 14 open reading frame 2                        | NM_001127393,  | Coding | TRUE |
| chromosome 14 open reading frame 2                        | NM_001127393,  | Coding | TRUE |
| chromosome 14 open reading frame 2                        | NM_001127393,  | Coding | TRUE |
| zinc finger protein 431                                   | NM_133473, ENS | Coding | TRUE |
| zinc finger protein 431                                   | NM_133473, ENS | Coding | TRUE |
| zinc finger protein 431                                   | NM_133473, ENS | Coding | TRUE |
| 2-oxoglutarate and iron-dependent oxygenase domain        | NM_024623, BC1 | Coding | TRUE |
| 2-oxoglutarate and iron-dependent oxygenase domain        | NM_024623, BC1 | Coding | TRUE |
| heparan-alpha-glucosaminide N-acetyltransferase           | NM_152419, ENS | Coding | TRUE |
| heparan-alpha-glucosaminide N-acetyltransferase           | NM_152419, ENS | Coding | TRUE |
| proline-serine-threonine phosphatase interacting prote    | NM_003978, ENS | Coding | TRUE |
| proline-serine-threonine phosphatase interacting prote    | NM_003978, ENS | Coding | TRUE |
| proline-serine-threonine phosphatase interacting prote    | NM_003978, ENS | Coding | TRUE |
| proline-serine-threonine phosphatase interacting prote    | NM_003978, ENS | Coding | TRUE |
| proline-serine-threonine phosphatase interacting prote    | NM_003978, ENS | Coding | TRUE |
| proline-serine-threonine phosphatase interacting prote    | NM_003978, ENS | Coding | TRUE |
| proline-serine-threonine phosphatase interacting prote    | NM_003978, ENS | Coding | TRUE |
| proline-serine-threonine phosphatase interacting prote    | NM_003978, ENS | Coding | TRUE |
| glutathione peroxidase 2 (gastrointestinal)               | NM_002083, ENS | Coding | TRUE |
| glutathione peroxidase 2 (gastrointestinal)               | NM_002083, ENS | Coding | TRUE |
| sulfotransferase family, cytosolic, 1A, phenol-preferring | NM_001054, NM  | Coding | TRUE |
| sulfotransferase family, cytosolic, 1A, phenol-preferring | NM_001054, NM  | Coding | TRUE |
| sulfotransferase family, cytosolic, 1A, phenol-preferring | NM_001054, NM  | Coding | TRUE |
| integrin-binding sialoprotein                             | NM_004967, ENS | Coding | TRUE |
| integrin-binding sialoprotein                             | NM_004967, ENS | Coding | TRUE |
| amylase, alpha 2A (pancreatic)                            | NM_000699, ENS | Coding | TRUE |
| amylase, alpha 2A (pancreatic)                            | NM_000699, ENS | Coding | TRUE |
|                                                           |                | Coding | TRUE |
|                                                           |                | Coding | TRUE |
| transmembrane protein 17                                  | NM_198276, ENS | Coding | TRUE |
| transmembrane protein 17                                  | NM_198276, ENS | Coding | TRUE |
| polymerase (RNA) II (DNA directed) polypeptide D          | NM_004805, ENS | Coding | TRUE |
| polymerase (RNA) II (DNA directed) polypeptide D          | NM_004805, ENS | Coding | TRUE |
| Ca <sup>++</sup> -dependent secretion activator 2         | NM_001009571,  | Coding | TRUE |
| Ca <sup>++</sup> -dependent secretion activator 2         | NM_001009571,  | Coding | TRUE |
| Ca <sup>++</sup> -dependent secretion activator 2         | NM_001009571,  | Coding | TRUE |
| Ca <sup>++</sup> -dependent secretion activator 2         | NM_001009571,  | Coding | TRUE |
|                                                           |                | Coding | TRUE |
|                                                           |                | Coding | TRUE |
|                                                           |                | Coding | TRUE |
|                                                           |                | Coding | TRUE |
| Fanconi anemia, complementation group A                   | NM_000135, NM  | Coding | TRUE |
| Fanconi anemia, complementation group A                   | NM_000135, NM  | Coding | TRUE |
| Fanconi anemia, complementation group A                   | NM_000135, NM  | Coding | TRUE |
| Fanconi anemia, complementation group A                   | NM_000135, NM  | Coding | TRUE |
| Rho GTPase activating protein 44                          | NM_014859, ENS | Coding | TRUE |
| Rho GTPase activating protein 44                          | NM_014859, ENS | Coding | TRUE |





|                                                             |                |        |      |
|-------------------------------------------------------------|----------------|--------|------|
| uncharacterized LOC730091                                   | NR_038387, ENS | Coding | TRUE |
| uncharacterized LOC730091                                   | NR_038387, ENS | Coding | TRUE |
| coiled-coil and C2 domain containing 2A                     | NM_001080522,  | Coding | TRUE |
| coiled-coil and C2 domain containing 2A                     | NM_001080522,  | Coding | TRUE |
| coiled-coil and C2 domain containing 2A                     | NM_001080522,  | Coding | TRUE |
| coiled-coil and C2 domain containing 2A                     | NM_001080522,  | Coding | TRUE |
| coiled-coil and C2 domain containing 2A                     | NM_001080522,  | Coding | TRUE |
| coiled-coil and C2 domain containing 2A                     | NM_001080522,  | Coding | TRUE |
| coiled-coil and C2 domain containing 2A                     | NM_001080522,  | Coding | TRUE |
| coiled-coil and C2 domain containing 2A                     | NM_001080522,  | Coding | TRUE |
| coiled-coil and C2 domain containing 2A                     | NM_001080522,  | Coding | TRUE |
| coiled-coil and C2 domain containing 2A                     | NM_001080522,  | Coding | TRUE |
| coiled-coil and C2 domain containing 2A                     | NM_001080522,  | Coding | TRUE |
| coiled-coil and C2 domain containing 2A                     | NM_001080522,  | Coding | TRUE |
| coiled-coil and C2 domain containing 2A                     | NM_001080522,  | Coding | TRUE |
| coiled-coil and C2 domain containing 2A                     | NM_001080522,  | Coding | TRUE |
| coiled-coil and C2 domain containing 2A                     | NM_001080522,  | Coding | TRUE |
| coiled-coil and C2 domain containing 2A                     | NM_001080522,  | Coding | TRUE |
| coiled-coil and C2 domain containing 2A                     | NM_001080522,  | Coding | TRUE |
| TBC1 (tre-2/USP6, BUB2, cdc16) domain family, mem           | NM_001253914,  | Coding | TRUE |
| TBC1 (tre-2/USP6, BUB2, cdc16) domain family, mem           | NM_001253914,  | Coding | TRUE |
| TBC1 (tre-2/USP6, BUB2, cdc16) domain family, mem           | NM_001253914,  | Coding | TRUE |
| TBC1 (tre-2/USP6, BUB2, cdc16) domain family, mem           | NM_001253914,  | Coding | TRUE |
| TBC1 (tre-2/USP6, BUB2, cdc16) domain family, mem           | NM_001253914,  | Coding | TRUE |
| TBC1 (tre-2/USP6, BUB2, cdc16) domain family, mem           | NM_001253914,  | Coding | TRUE |
| TBC1 (tre-2/USP6, BUB2, cdc16) domain family, mem           | NM_001253914,  | Coding | TRUE |
| TBC1 (tre-2/USP6, BUB2, cdc16) domain family, mem           | NM_001253914,  | Coding | TRUE |
| shisa homolog 3 (Xenopus laevis)                            | NM_001080505,  | Coding | TRUE |
| shisa homolog 3 (Xenopus laevis)                            | NM_001080505,  | Coding | TRUE |
| shisa homolog 3 (Xenopus laevis)                            | NM_001080505,  | Coding | TRUE |
| NIMA (never in mitosis gene a)-related kinase 1             | NM_001199397,  | Coding | TRUE |
| NIMA (never in mitosis gene a)-related kinase 1             | NM_001199397,  | Coding | TRUE |
| NIMA (never in mitosis gene a)-related kinase 1             | NM_001199397,  | Coding | TRUE |
| glutaredoxin (thioltransferase)                             | NM_001118890,  | Coding | TRUE |
| glutaredoxin (thioltransferase)                             | NM_001118890,  | Coding | TRUE |
| glutaredoxin (thioltransferase)                             | NM_001118890,  | Coding | TRUE |
| glutaredoxin (thioltransferase)                             | NM_001118890,  | Coding | TRUE |
| glutaredoxin (thioltransferase)                             | NM_001118890,  | Coding | TRUE |
| aldehyde dehydrogenase 7 family, member A1                  | NM_001182, NM  | Coding | TRUE |
| aldehyde dehydrogenase 7 family, member A1                  | NM_001182, NM  | Coding | TRUE |
| aldehyde dehydrogenase 7 family, member A1                  | NM_001182, NM  | Coding | TRUE |
| aldehyde dehydrogenase 7 family, member A1                  | NM_001182, NM  | Coding | TRUE |
| LYR motif containing 2                                      | NM_020466, NR  | Coding | TRUE |
| LYR motif containing 2                                      | NM_020466, NR  | Coding | TRUE |
| LYR motif containing 2                                      | NM_020466, NR  | Coding | TRUE |
| HMG-box transcription factor 1                              | NM_012257, NM  | Coding | TRUE |
| HMG-box transcription factor 1                              | NM_012257, NM  | Coding | TRUE |
| HMG-box transcription factor 1                              | NM_012257, NM  | Coding | TRUE |
| calcium/calmodulin-dependent protein kinase II beta         | NM_172079, NM  | Coding | TRUE |
| calcium/calmodulin-dependent protein kinase II beta         | NM_172079, NM  | Coding | TRUE |
| sema domain, immunoglobulin domain (Ig), short basic        | NM_006379, ENS | Coding | TRUE |
| sema domain, immunoglobulin domain (Ig), short basic        | NM_006379, ENS | Coding | TRUE |
| ADP-ribosylation factor guanine nucleotide-exchange         | NM_006421, ENS | Coding | TRUE |
| ADP-ribosylation factor guanine nucleotide-exchange         | NM_006421, ENS | Coding | TRUE |
| ADP-ribosylation factor guanine nucleotide-exchange         | NM_006421, ENS | Coding | TRUE |
| ADP-ribosylation factor guanine nucleotide-exchange         | NM_006421, ENS | Coding | TRUE |
| runt-related transcription factor 1; translocated to, 1 (c) | NM_001198625,  | Coding | TRUE |
| runt-related transcription factor 1; translocated to, 1 (c) | NM_001198625,  | Coding | TRUE |
| runt-related transcription factor 1; translocated to, 1 (c) | NM_001198625,  | Coding | TRUE |

|                                                                       |                           |        |      |
|-----------------------------------------------------------------------|---------------------------|--------|------|
| runt-related transcription factor 1; translocated to, 1 (cyt)         | NM_001198625,             | Coding | TRUE |
| runt-related transcription factor 1; translocated to, 1 (cyt)         | NM_001198625,             | Coding | TRUE |
| runt-related transcription factor 1; translocated to, 1 (cyt)         | NM_001198625,             | Coding | TRUE |
| lymphocyte antigen 6 complex, locus H                                 | NM_002347, NM_002347,     | Coding | TRUE |
| lymphocyte antigen 6 complex, locus H                                 | NM_002347, NM_002347,     | Coding | TRUE |
| asparagine-linked glycosylation 13 homolog (S. cerevisiae)            | NM_001039210,             | Coding | TRUE |
| asparagine-linked glycosylation 13 homolog (S. cerevisiae)            | NM_001039210,             | Coding | TRUE |
| asparagine-linked glycosylation 13 homolog (S. cerevisiae)            | NM_001039210,             | Coding | TRUE |
| asparagine-linked glycosylation 13 homolog (S. cerevisiae)            | NM_001039210,             | Coding | TRUE |
| asparagine-linked glycosylation 13 homolog (S. cerevisiae)            | NM_001039210,             | Coding | TRUE |
| asparagine-linked glycosylation 13 homolog (S. cerevisiae)            | NM_001039210,             | Coding | TRUE |
| asparagine-linked glycosylation 13 homolog (S. cerevisiae)            | NM_001039210,             | Coding | TRUE |
| asparagine-linked glycosylation 13 homolog (S. cerevisiae)            | NM_001039210,             | Coding | TRUE |
| asparagine-linked glycosylation 13 homolog (S. cerevisiae)            | NM_001039210,             | Coding | TRUE |
| asparagine-linked glycosylation 13 homolog (S. cerevisiae)            | NM_001039210,             | Coding | TRUE |
| asparagine-linked glycosylation 13 homolog (S. cerevisiae)            | NM_001039210,             | Coding | TRUE |
| asparagine-linked glycosylation 13 homolog (S. cerevisiae)            | NM_001039210,             | Coding | TRUE |
| asparagine-linked glycosylation 13 homolog (S. cerevisiae)            | NM_001039210,             | Coding | TRUE |
| asparagine-linked glycosylation 13 homolog (S. cerevisiae)            | NM_001039210,             | Coding | TRUE |
| asparagine-linked glycosylation 13 homolog (S. cerevisiae)            | NM_001039210,             | Coding | TRUE |
| asparagine-linked glycosylation 13 homolog (S. cerevisiae)            | NM_001039210,             | Coding | TRUE |
| asparagine-linked glycosylation 13 homolog (S. cerevisiae)            | NM_001039210,             | Coding | TRUE |
| asparagine-linked glycosylation 13 homolog (S. cerevisiae)            | NM_001039210,             | Coding | TRUE |
| histone deacetylase 8                                                 | NM_018486, NM_018486,     | Coding | TRUE |
| histone deacetylase 8                                                 | NM_018486, NM_018486,     | Coding | TRUE |
| KIAA1210                                                              | NM_020721, ENS0000028721, | Coding | TRUE |
| KIAA1210                                                              | NM_020721, ENS0000028721, | Coding | TRUE |
| KIAA1210                                                              | NM_020721, ENS0000028721, | Coding | TRUE |
| placenta-specific 9                                                   | BC090922, ENS0000028721,  | Coding | TRUE |
| placenta-specific 9                                                   | BC090922, ENS0000028721,  | Coding | TRUE |
| potassium large conductance calcium-activated channel subunit alpha 1 | NM_001014797,             | Coding | TRUE |
| potassium large conductance calcium-activated channel subunit alpha 1 | NM_001014797,             | Coding | TRUE |
| potassium large conductance calcium-activated channel subunit alpha 1 | NM_001014797,             | Coding | TRUE |
| potassium large conductance calcium-activated channel subunit alpha 1 | NM_001014797,             | Coding | TRUE |
| potassium large conductance calcium-activated channel subunit alpha 1 | NM_001014797,             | Coding | TRUE |
| potassium large conductance calcium-activated channel subunit alpha 1 | NM_001014797,             | Coding | TRUE |
| potassium large conductance calcium-activated channel subunit alpha 1 | NM_001014797,             | Coding | TRUE |
| potassium large conductance calcium-activated channel subunit alpha 1 | NM_001014797,             | Coding | TRUE |
| phosphatidylserine synthase 2                                         | NM_030783, BC090922,      | Coding | TRUE |
| phosphatidylserine synthase 2                                         | NM_030783, BC090922,      | Coding | TRUE |
| phosphatidylserine synthase 2                                         | NM_030783, BC090922,      | Coding | TRUE |
| tetraspanin 18                                                        | NM_130783, ENS0000028721, | Coding | TRUE |
| tetraspanin 18                                                        | NM_130783, ENS0000028721, | Coding | TRUE |
| tetraspanin 18                                                        | NM_130783, ENS0000028721, | Coding | TRUE |
| tetraspanin 18                                                        | NM_130783, ENS0000028721, | Coding | TRUE |
| tetraspanin 18                                                        | NM_130783, ENS0000028721, | Coding | TRUE |
|                                                                       |                           | Coding | TRUE |
|                                                                       |                           | Coding | TRUE |
|                                                                       |                           | Coding | TRUE |
|                                                                       |                           | Coding | TRUE |
| guanylate cyclase 2E, pseudogene                                      | NR_024042                 | Coding | TRUE |
| guanylate cyclase 2E, pseudogene                                      | NR_024042                 | Coding | TRUE |
| guanylate cyclase 2E, pseudogene                                      | NR_024042                 | Coding | TRUE |
| guanylate cyclase 2E, pseudogene                                      | NR_024042                 | Coding | TRUE |
| guanylate cyclase 2E, pseudogene                                      | NR_024042                 | Coding | TRUE |
| guanylate cyclase 2E, pseudogene                                      | NR_024042                 | Coding | TRUE |
| guanylate cyclase 2E, pseudogene                                      | NR_024042                 | Coding | TRUE |
| guanylate cyclase 2E, pseudogene                                      | NR_024042                 | Coding | TRUE |
| guanylate cyclase 2E, pseudogene                                      | NR_024042                 | Coding | TRUE |
| coiled-coil domain containing 60                                      | NM_178499, BC090922,      | Coding | TRUE |











|                                                            |                |        |      |
|------------------------------------------------------------|----------------|--------|------|
| RAB15, member RAS oncogene family                          | NM_198686, ENS | Coding | TRUE |
| RAB15, member RAS oncogene family                          | NM_198686, ENS | Coding | TRUE |
| RAB15, member RAS oncogene family                          | NM_198686, ENS | Coding | TRUE |
| RAB15, member RAS oncogene family                          | NM_198686, ENS | Coding | TRUE |
| RAB15, member RAS oncogene family                          | NM_198686, ENS | Coding | TRUE |
| RAB15, member RAS oncogene family                          | NM_198686, ENS | Coding | TRUE |
| RAB15, member RAS oncogene family                          | NM_198686, ENS | Coding | TRUE |
| RAB15, member RAS oncogene family                          | NM_198686, ENS | Coding | TRUE |
| RAB15, member RAS oncogene family                          | NM_198686, ENS | Coding | TRUE |
| RAB15, member RAS oncogene family                          | NM_198686, ENS | Coding | TRUE |
| RAB15, member RAS oncogene family                          | NM_198686, ENS | Coding | TRUE |
| RAB15, member RAS oncogene family                          | NM_198686, ENS | Coding | TRUE |
| RAB15, member RAS oncogene family                          | NM_198686, ENS | Coding | TRUE |
| family with sequence similarity 63, member B               | NM_001040450,  | Coding | TRUE |
| family with sequence similarity 63, member B               | NM_001040450,  | Coding | TRUE |
| family with sequence similarity 63, member B               | NM_001040450,  | Coding | TRUE |
| family with sequence similarity 63, member B               | NM_001040450,  | Coding | TRUE |
| family with sequence similarity 63, member B               | NM_001040450,  | Coding | TRUE |
| adenosine A2b receptor, uncharacterized LOC100653          | NM_000676, ENS | Coding | TRUE |
| adenosine A2b receptor, uncharacterized LOC100653          | NM_000676, ENS | Coding | TRUE |
| serine/arginine-rich splicing factor 1                     | NM_001078166,  | Coding | TRUE |
| serine/arginine-rich splicing factor 1                     | NM_001078166,  | Coding | TRUE |
| growth hormone 2                                           | NM_002059, NM  | Coding | TRUE |
| growth hormone 2                                           | NM_002059, NM  | Coding | TRUE |
| coiled-coil domain containing 57                           | NM_198082, BCC | Coding | TRUE |
| coiled-coil domain containing 57                           | NM_198082, BCC | Coding | TRUE |
| coiled-coil domain containing 57                           | NM_198082, BCC | Coding | TRUE |
| transient receptor potential cation channel, subfamily V   | NM_018727, NM  | Coding | TRUE |
| transient receptor potential cation channel, subfamily V   | NM_018727, NM  | Coding | TRUE |
| elaC homolog 1 (E. coli)                                   | NM_018696, ENS | Coding | TRUE |
| elaC homolog 1 (E. coli)                                   | NM_018696, ENS | Coding | TRUE |
| elaC homolog 1 (E. coli)                                   | NM_018696, ENS | Coding | TRUE |
| zinc finger protein 254                                    | NM_203282, ENS | Coding | TRUE |
| zinc finger protein 254                                    | NM_203282, ENS | Coding | TRUE |
| zinc finger protein 254                                    | NM_203282, ENS | Coding | TRUE |
| zinc finger protein 254                                    | NM_203282, ENS | Coding | TRUE |
| regulatory factor X, 2 (influences HLA class II expressi   | NM_000635, NM  | Coding | TRUE |
| regulatory factor X, 2 (influences HLA class II expressi   | NM_000635, NM  | Coding | TRUE |
| serine/arginine-rich splicing factor 6                     | NM_006275, NR  | Coding | TRUE |
| serine/arginine-rich splicing factor 6                     | NM_006275, NR  | Coding | TRUE |
| phosphoribosylglycinamide formyltransferase, phospho       | NM_000819, NM  | Coding | TRUE |
| phosphoribosylglycinamide formyltransferase, phospho       | NM_000819, NM  | Coding | TRUE |
| phosphoribosylglycinamide formyltransferase, phospho       | NM_000819, NM  | Coding | TRUE |
| phosphoribosylglycinamide formyltransferase, phospho       | NM_000819, NM  | Coding | TRUE |
| phosphoribosylglycinamide formyltransferase, phospho       | NM_000819, NM  | Coding | TRUE |
| coiled-coil alpha-helical rod protein 1                    | NM_001105563,  | Coding | TRUE |
| coiled-coil alpha-helical rod protein 1                    | NM_001105563,  | Coding | TRUE |
| coiled-coil alpha-helical rod protein 1                    | NM_001105563,  | Coding | TRUE |
| coiled-coil alpha-helical rod protein 1                    | NM_001105563,  | Coding | TRUE |
| major histocompatibility complex, class I, J (pseudoge     | NR_024240      | Coding | TRUE |
| major histocompatibility complex, class I, J (pseudoge     | NR_024240      | Coding | TRUE |
| major histocompatibility complex, class I, J (pseudoge     | NR_024240      | Coding | TRUE |
| major histocompatibility complex, class I, J (pseudoge     | NR_024240      | Coding | TRUE |
| major histocompatibility complex, class I, J (pseudoge     | NR_024240      | Coding | TRUE |
| major histocompatibility complex, class I, J (pseudoge     | NR_024240      | Coding | TRUE |
| autophagy related 4C, cysteine peptidase                   | NM_032852, NM  | Coding | TRUE |
| autophagy related 4C, cysteine peptidase                   | NM_032852, NM  | Coding | TRUE |
| solute carrier family 6 (neurotransmitter transporter, gly | NM_001024845,  | Coding | TRUE |
| solute carrier family 6 (neurotransmitter transporter, gly | NM_001024845,  | Coding | TRUE |

|                                                            |                |        |      |
|------------------------------------------------------------|----------------|--------|------|
| solute carrier family 6 (neurotransmitter transporter, gly | NM_001024845,  | Coding | TRUE |
| solute carrier family 6 (neurotransmitter transporter, gly | NM_001024845,  | Coding | TRUE |
| solute carrier family 6 (neurotransmitter transporter, gly | NM_001024845,  | Coding | TRUE |
| solute carrier family 6 (neurotransmitter transporter, gly | NM_001024845,  | Coding | TRUE |
| solute carrier family 6 (neurotransmitter transporter, gly | NM_001024845,  | Coding | TRUE |
| solute carrier family 6 (neurotransmitter transporter, gly | NM_001024845,  | Coding | TRUE |
|                                                            |                | Coding | TRUE |
|                                                            |                | Coding | TRUE |
| calmodulin-lysine N-methyltransferase                      | NM_024766, ENS | Coding | TRUE |
| calmodulin-lysine N-methyltransferase                      | NM_024766, ENS | Coding | TRUE |
| calmodulin-lysine N-methyltransferase                      | NM_024766, ENS | Coding | TRUE |
| calmodulin-lysine N-methyltransferase                      | NM_024766, ENS | Coding | TRUE |
| calmodulin-lysine N-methyltransferase                      | NM_024766, ENS | Coding | TRUE |
| calmodulin-lysine N-methyltransferase                      | NM_024766, ENS | Coding | TRUE |
| calmodulin-lysine N-methyltransferase                      | NM_024766, ENS | Coding | TRUE |
| calmodulin-lysine N-methyltransferase                      | NM_024766, ENS | Coding | TRUE |
| calmodulin-lysine N-methyltransferase                      | NM_024766, ENS | Coding | TRUE |
| calmodulin-lysine N-methyltransferase                      | NM_024766, ENS | Coding | TRUE |
| calmodulin-lysine N-methyltransferase                      | NM_024766, ENS | Coding | TRUE |
| calmodulin-lysine N-methyltransferase                      | NM_024766, ENS | Coding | TRUE |
| spermatogenesis associated, serine-rich 2-like             | NM_001100422,  | Coding | TRUE |
| spermatogenesis associated, serine-rich 2-like             | NM_001100422,  | Coding | TRUE |
| spermatogenesis associated, serine-rich 2-like             | NM_001100422,  | Coding | TRUE |
| WD repeat domain 35                                        | NM_001006657,  | Coding | TRUE |
| WD repeat domain 35                                        | NM_001006657,  | Coding | TRUE |
| transmembrane protein 150A                                 | NM_001031738,  | Coding | TRUE |
| transmembrane protein 150A                                 | NM_001031738,  | Coding | TRUE |
| transmembrane protein 150A                                 | NM_001031738,  | Coding | TRUE |
| chimerin (chimaerin) 1                                     | NM_001025201,  | Coding | TRUE |
| chimerin (chimaerin) 1                                     | NM_001025201,  | Coding | TRUE |
| chimerin (chimaerin) 1                                     | NM_001025201,  | Coding | TRUE |
| chimerin (chimaerin) 1                                     | NM_001025201,  | Coding | TRUE |
| chimerin (chimaerin) 1                                     | NM_001025201,  | Coding | TRUE |
| chimerin (chimaerin) 1                                     | NM_001025201,  | Coding | TRUE |
| chimerin (chimaerin) 1                                     | NM_001025201,  | Coding | TRUE |
| chimerin (chimaerin) 1                                     | NM_001025201,  | Coding | TRUE |
| chimerin (chimaerin) 1                                     | NM_001025201,  | Coding | TRUE |
| chimerin (chimaerin) 1                                     | NM_001025201,  | Coding | TRUE |
| chimerin (chimaerin) 1                                     | NM_001025201,  | Coding | TRUE |
| chimerin (chimaerin) 1                                     | NM_001025201,  | Coding | TRUE |
| chimerin (chimaerin) 1                                     | NM_001025201,  | Coding | TRUE |
| chimerin (chimaerin) 1                                     | NM_001025201,  | Coding | TRUE |
| amyotrophic lateral sclerosis 2 (juvenile)                 | NM_001135745,  | Coding | TRUE |
| amyotrophic lateral sclerosis 2 (juvenile)                 | NM_001135745,  | Coding | TRUE |
| amyotrophic lateral sclerosis 2 (juvenile)                 | NM_001135745,  | Coding | TRUE |
| amyotrophic lateral sclerosis 2 (juvenile)                 | NM_001135745,  | Coding | TRUE |
| amyotrophic lateral sclerosis 2 (juvenile)                 | NM_001135745,  | Coding | TRUE |
| amyotrophic lateral sclerosis 2 (juvenile)                 | NM_001135745,  | Coding | TRUE |
| amyotrophic lateral sclerosis 2 (juvenile)                 | NM_001135745,  | Coding | TRUE |
| amyotrophic lateral sclerosis 2 (juvenile)                 | NM_001135745,  | Coding | TRUE |
| amyotrophic lateral sclerosis 2 (juvenile)                 | NM_001135745,  | Coding | TRUE |
| amyotrophic lateral sclerosis 2 (juvenile)                 | NM_001135745,  | Coding | TRUE |
| ubiquitin specific peptidase 40                            | NM_018218, ENS | Coding | TRUE |
| ubiquitin specific peptidase 40                            | NM_018218, ENS | Coding | TRUE |
| ubiquitin specific peptidase 40                            | NM_018218, ENS | Coding | TRUE |
| chromosome 2 open reading frame 74                         | NM_001143960,  | Coding | TRUE |
| chromosome 2 open reading frame 74                         | NM_001143960,  | Coding | TRUE |
| chromosome 2 open reading frame 74                         | NM_001143960,  | Coding | TRUE |
| chromosome 2 open reading frame 74                         | NM_001143960,  | Coding | TRUE |
| protein O-glucosyltransferase 1                            | NM_152305, NR  | Coding | TRUE |
| protein O-glucosyltransferase 1                            | NM_152305, NR  | Coding | TRUE |
| protein O-glucosyltransferase 1                            | NM_152305, NR  | Coding | TRUE |



|                                                       |                 |        |      |
|-------------------------------------------------------|-----------------|--------|------|
| growth factor receptor-bound protein 10               | NM_001001555,   | Coding | TRUE |
| growth factor receptor-bound protein 10               | NM_001001555,   | Coding | TRUE |
| growth factor receptor-bound protein 10               | NM_001001555,   | Coding | TRUE |
| growth factor receptor-bound protein 10               | NM_001001555,   | Coding | TRUE |
| growth factor receptor-bound protein 10               | NM_001001555,   | Coding | TRUE |
| growth factor receptor-bound protein 10               | NM_001001555,   | Coding | TRUE |
| growth factor receptor-bound protein 10               | NM_001001555,   | Coding | TRUE |
| growth factor receptor-bound protein 10               | NM_001001555,   | Coding | TRUE |
| growth factor receptor-bound protein 10               | NM_001001555,   | Coding | TRUE |
| growth factor receptor-bound protein 10               | NM_001001555,   | Coding | TRUE |
| growth factor receptor-bound protein 10               | NM_001001555,   | Coding | TRUE |
| growth factor receptor-bound protein 10               | NM_001001555,   | Coding | TRUE |
| stromal antigen 3                                     | NM_012447, ENS  | Coding | TRUE |
| stromal antigen 3                                     | NM_012447, ENS  | Coding | TRUE |
| stromal antigen 3                                     | NM_012447, ENS  | Coding | TRUE |
| stromal antigen 3                                     | NM_012447, ENS  | Coding | TRUE |
| stromal antigen 3                                     | NM_012447, ENS  | Coding | TRUE |
| stromal antigen 3                                     | NM_012447, ENS  | Coding | TRUE |
| stromal antigen 3                                     | NM_012447, ENS  | Coding | TRUE |
| deleted in liver cancer 1                             | NM_001164271,   | Coding | TRUE |
| deleted in liver cancer 1                             | NM_001164271,   | Coding | TRUE |
| deleted in liver cancer 1                             | NM_001164271,   | Coding | TRUE |
| deleted in liver cancer 1                             | NM_001164271,   | Coding | TRUE |
| deleted in liver cancer 1                             | NM_001164271,   | Coding | TRUE |
| deleted in liver cancer 1                             | NM_001164271,   | Coding | TRUE |
| deleted in liver cancer 1                             | NM_001164271,   | Coding | TRUE |
| deleted in liver cancer 1                             | NM_001164271,   | Coding | TRUE |
| deleted in liver cancer 1                             | NM_001164271,   | Coding | TRUE |
| deleted in liver cancer 1                             | NM_001164271,   | Coding | TRUE |
| deleted in liver cancer 1                             | NM_001164271,   | Coding | TRUE |
| deleted in liver cancer 1                             | NM_001164271,   | Coding | TRUE |
| deleted in liver cancer 1                             | NM_001164271,   | Coding | TRUE |
| deleted in liver cancer 1                             | NM_001164271,   | Coding | TRUE |
| deleted in liver cancer 1                             | NM_001164271,   | Coding | TRUE |
| deleted in liver cancer 1                             | NM_001164271,   | Coding | TRUE |
| dynein, axonemal, intermediate chain 1                | NM_012144, ENS  | Coding | TRUE |
| dynein, axonemal, intermediate chain 1                | NM_012144, ENS  | Coding | TRUE |
| dynein, axonemal, intermediate chain 1                | NM_012144, ENS  | Coding | TRUE |
| dynein, axonemal, intermediate chain 1                | NM_012144, ENS  | Coding | TRUE |
| dynein, axonemal, intermediate chain 1                | NM_012144, ENS  | Coding | TRUE |
| dynein, axonemal, intermediate chain 1                | NM_012144, ENS  | Coding | TRUE |
| dynein, axonemal, intermediate chain 1                | NM_012144, ENS  | Coding | TRUE |
| monoamine oxidase A                                   | NM_000240, ENS  | Coding | TRUE |
| monoamine oxidase A                                   | NM_000240, ENS  | Coding | TRUE |
| monoamine oxidase A                                   | NM_000240, ENS  | Coding | TRUE |
| monoamine oxidase A                                   | NM_000240, ENS  | Coding | TRUE |
| monoamine oxidase A                                   | NM_000240, ENS  | Coding | TRUE |
| monoamine oxidase A                                   | NM_000240, ENS  | Coding | TRUE |
| monoamine oxidase A                                   | NM_000240, ENS  | Coding | TRUE |
| zinc finger, BED-type containing 1, dehydrogenase/rec | NM_001171136, I | Coding | TRUE |
| zinc finger, BED-type containing 1, dehydrogenase/rec | NM_001171136, I | Coding | TRUE |
| zinc finger, BED-type containing 1, dehydrogenase/rec | NM_001171136, I | Coding | TRUE |
| zinc finger, BED-type containing 1, dehydrogenase/rec | NM_001171136, I | Coding | TRUE |
| zinc finger, BED-type containing 1, dehydrogenase/rec | NM_001171136, I | Coding | TRUE |
| zinc finger, BED-type containing 1, dehydrogenase/rec | NM_001171136, I | Coding | TRUE |
| zinc finger, BED-type containing 1, dehydrogenase/rec | NM_001171136, I | Coding | TRUE |
| zinc finger protein 518A, uncharacterized LOC100509   | NM_014803, ENS  | Coding | TRUE |
| zinc finger protein 518A, uncharacterized LOC100509   | NM_014803, ENS  | Coding | TRUE |
| uncharacterized LOC399829                             | ENST000004612   | Coding | TRUE |
| uncharacterized LOC399829                             | ENST000004612   | Coding | TRUE |
| MICAL C-terminal like                                 | NM_032867, ENS  | Coding | TRUE |

|                                                          |                |        |      |
|----------------------------------------------------------|----------------|--------|------|
| MICAL C-terminal like                                    | NM_032867, ENS | Coding | TRUE |
| uncharacterized LOC100506368                             | NR_038905, ENS | Coding | TRUE |
| uncharacterized LOC100506368                             | NR_038905, ENS | Coding | TRUE |
| uncharacterized LOC100506368                             | NR_038905, ENS | Coding | TRUE |
|                                                          |                | Coding | TRUE |
|                                                          |                | Coding | TRUE |
| BTB (POZ) domain containing 11                           | NM_001017523,  | Coding | TRUE |
| BTB (POZ) domain containing 11                           | NM_001017523,  | Coding | TRUE |
| BTB (POZ) domain containing 11                           | NM_001017523,  | Coding | TRUE |
| BTB (POZ) domain containing 11                           | NM_001017523,  | Coding | TRUE |
| BTB (POZ) domain containing 11                           | NM_001017523,  | Coding | TRUE |
| BTB (POZ) domain containing 11                           | NM_001017523,  | Coding | TRUE |
| BTB (POZ) domain containing 11                           | NM_001017523,  | Coding | TRUE |
| BTB (POZ) domain containing 11                           | NM_001017523,  | Coding | TRUE |
| BTB (POZ) domain containing 11                           | NM_001017523,  | Coding | TRUE |
| solute carrier family 11 (proton-coupled divalent metal  | NM_001174125,  | Coding | TRUE |
| solute carrier family 11 (proton-coupled divalent metal  | NM_001174125,  | Coding | TRUE |
| solute carrier family 11 (proton-coupled divalent metal  | NM_001174125,  | Coding | TRUE |
| keratin 3                                                | NM_057088, ENS | Coding | TRUE |
| keratin 3                                                | NM_057088, ENS | Coding | TRUE |
| adaptor-related protein complex 4, sigma 1 subunit       | NM_001128126,  | Coding | TRUE |
| adaptor-related protein complex 4, sigma 1 subunit       | NM_001128126,  | Coding | TRUE |
| adaptor-related protein complex 4, sigma 1 subunit       | NM_001128126,  | Coding | TRUE |
| ubiquitin-conjugating enzyme E2Q family member 2         | NM_001145335,  | Coding | TRUE |
| ubiquitin-conjugating enzyme E2Q family member 2         | NM_001145335,  | Coding | TRUE |
| ubiquitin-conjugating enzyme E2Q family member 2         | NM_001145335,  | Coding | TRUE |
| putative golgin subfamily A member 8I-like               | ENST000003402  | Coding | TRUE |
| putative golgin subfamily A member 8I-like               | ENST000003402  | Coding | TRUE |
| putative golgin subfamily A member 8I-like               | ENST000003402  | Coding | TRUE |
| GA binding protein transcription factor, beta subunit 1  | NM_016654, NM  | Coding | TRUE |
| GA binding protein transcription factor, beta subunit 1  | NM_016654, NM  | Coding | TRUE |
| GA binding protein transcription factor, beta subunit 1  | NM_016654, NM  | Coding | TRUE |
| GA binding protein transcription factor, beta subunit 1  | NM_016654, NM  | Coding | TRUE |
| GA binding protein transcription factor, beta subunit 1  | NM_016654, NM  | Coding | TRUE |
| cholinergic receptor, nicotinic, alpha 7 (neuronal), CHF | NM_001190455,  | Coding | TRUE |
| cholinergic receptor, nicotinic, alpha 7 (neuronal), CHF | NM_001190455,  | Coding | TRUE |
| PR domain containing 7                                   | NM_052996, NM  | Coding | TRUE |
| PR domain containing 7                                   | NM_052996, NM  | Coding | TRUE |
| PR domain containing 7                                   | NM_052996, NM  | Coding | TRUE |
| PR domain containing 7                                   | NM_052996, NM  | Coding | TRUE |
| uncharacterized LOC400590                                | BC062632       | Coding | TRUE |
| uncharacterized LOC400590                                | BC062632       | Coding | TRUE |
| uncharacterized LOC400590                                | BC062632       | Coding | TRUE |
| target of myb1-like 2 (chicken)                          | NM_001033551,  | Coding | TRUE |
| target of myb1-like 2 (chicken)                          | NM_001033551,  | Coding | TRUE |
| calcium binding tyrosine-(Y)-phosphorylation regulated   | NM_153769, NM  | Coding | TRUE |
| calcium binding tyrosine-(Y)-phosphorylation regulated   | NM_153769, NM  | Coding | TRUE |
| calcium binding tyrosine-(Y)-phosphorylation regulated   | NM_153769, NM  | Coding | TRUE |
| calcium binding tyrosine-(Y)-phosphorylation regulated   | NM_153769, NM  | Coding | TRUE |
| calcium binding tyrosine-(Y)-phosphorylation regulated   | NM_153769, NM  | Coding | TRUE |
| calcium binding tyrosine-(Y)-phosphorylation regulated   | NM_153769, NM  | Coding | TRUE |
| calcium binding tyrosine-(Y)-phosphorylation regulated   | NM_153769, NM  | Coding | TRUE |
| calcium binding tyrosine-(Y)-phosphorylation regulated   | NM_153769, NM  | Coding | TRUE |
| CREB regulated transcription coactivator 1               | NM_001098482,  | Coding | TRUE |
| CREB regulated transcription coactivator 1               | NM_001098482,  | Coding | TRUE |
| prostate transmembrane protein, androgen induced 1       | NM_001255976,  | Coding | TRUE |
| prostate transmembrane protein, androgen induced 1       | NM_001255976,  | Coding | TRUE |
| prostate transmembrane protein, androgen induced 1       | NM_001255976,  | Coding | TRUE |
| prostate transmembrane protein, androgen induced 1       | NM_001255976,  | Coding | TRUE |

|                                                            |                 |        |      |
|------------------------------------------------------------|-----------------|--------|------|
| prostate transmembrane protein, androgen induced 1         | NM_001255976,   | Coding | TRUE |
| prostate transmembrane protein, androgen induced 1         | NM_001255976,   | Coding | TRUE |
| prostate transmembrane protein, androgen induced 1         | NM_001255976,   | Coding | TRUE |
| prostate transmembrane protein, androgen induced 1         | NM_001255976,   | Coding | TRUE |
| prostate transmembrane protein, androgen induced 1         | NM_001255976,   | Coding | TRUE |
|                                                            |                 | Coding | TRUE |
|                                                            |                 | Coding | TRUE |
|                                                            |                 | Coding | TRUE |
| serine hydrolase-like                                      | NR_027786, ENS  | Coding | TRUE |
| serine hydrolase-like                                      | NR_027786, ENS  | Coding | TRUE |
| serine hydrolase-like                                      | NR_027786, ENS  | Coding | TRUE |
| serine hydrolase-like                                      | NR_027786, ENS  | Coding | TRUE |
|                                                            |                 | Coding | TRUE |
|                                                            |                 | Coding | TRUE |
| inhibitor of kappa light polypeptide gene enhancer in B    | NM_001193321,   | Coding | TRUE |
| inhibitor of kappa light polypeptide gene enhancer in B    | NM_001193321,   | Coding | TRUE |
| inhibitor of kappa light polypeptide gene enhancer in B    | NM_001193321,   | Coding | TRUE |
| peptidylprolyl isomerase E-like pseudogene                 | NR_003929, ENS  | Coding | TRUE |
| peptidylprolyl isomerase E-like pseudogene                 | NR_003929, ENS  | Coding | TRUE |
| peptidylprolyl isomerase E-like pseudogene                 | NR_003929, ENS  | Coding | TRUE |
| peptidylprolyl isomerase E-like pseudogene                 | NR_003929, ENS  | Coding | TRUE |
| peptidylprolyl isomerase E-like pseudogene                 | NR_003929, ENS  | Coding | TRUE |
| family with sequence similarity 150, member B              | NM_001002919,   | Coding | TRUE |
| family with sequence similarity 150, member B              | NM_001002919,   | Coding | TRUE |
| family with sequence similarity 150, member B              | NM_001002919,   | Coding | TRUE |
| KAT8 regulatory NSL complex subunit 1-like                 | NM_152519, BCC  | Coding | TRUE |
| KAT8 regulatory NSL complex subunit 1-like                 | NM_152519, BCC  | Coding | TRUE |
| KAT8 regulatory NSL complex subunit 1-like                 | NM_152519, BCC  | Coding | TRUE |
| solute carrier family 25 (pyrimidine nucleotide carrier ), | NM_001104647,   | Coding | TRUE |
| solute carrier family 25 (pyrimidine nucleotide carrier ), | NM_001104647,   | Coding | TRUE |
| solute carrier family 25 (pyrimidine nucleotide carrier ), | NM_001104647,   | Coding | TRUE |
| UDP-GlcNAc:betaGal beta-1,3-N-acetylglucosaminyltr         | NM_032047, ENS  | Coding | TRUE |
| UDP-GlcNAc:betaGal beta-1,3-N-acetylglucosaminyltr         | NM_032047, ENS  | Coding | TRUE |
| UDP-GlcNAc:betaGal beta-1,3-N-acetylglucosaminyltr         | NM_032047, ENS  | Coding | TRUE |
| UDP-GlcNAc:betaGal beta-1,3-N-acetylglucosaminyltr         | NM_032047, ENS  | Coding | TRUE |
| UDP-GlcNAc:betaGal beta-1,3-N-acetylglucosaminyltr         | NM_032047, ENS  | Coding | TRUE |
| family with sequence similarity 131, member A              | NM_001171093,   | Coding | TRUE |
| family with sequence similarity 131, member A              | NM_001171093,   | Coding | TRUE |
| DEAH (Asp-Glu-Ala-His) box polypeptide 36                  | NM_001114397, I | Coding | TRUE |
| DEAH (Asp-Glu-Ala-His) box polypeptide 36                  | NM_001114397, I | Coding | TRUE |
| DEAH (Asp-Glu-Ala-His) box polypeptide 36                  | NM_001114397, I | Coding | TRUE |
| DEAH (Asp-Glu-Ala-His) box polypeptide 36                  | NM_001114397, I | Coding | TRUE |
| DEAH (Asp-Glu-Ala-His) box polypeptide 36                  | NM_001114397, I | Coding | TRUE |
| B-cell CLL/lymphoma 6                                      | NM_001130845,   | Coding | TRUE |
| B-cell CLL/lymphoma 6                                      | NM_001130845,   | Coding | TRUE |
| superoxide dismutase 3, extracellular                      | NM_003102, ENS  | Coding | TRUE |
| superoxide dismutase 3, extracellular                      | NM_003102, ENS  | Coding | TRUE |
| superoxide dismutase 3, extracellular                      | NM_003102, ENS  | Coding | TRUE |
| superoxide dismutase 3, extracellular                      | NM_003102, ENS  | Coding | TRUE |
| anthrax toxin receptor 2                                   | NM_001145794,   | Coding | TRUE |
| anthrax toxin receptor 2                                   | NM_001145794,   | Coding | TRUE |
| anthrax toxin receptor 2                                   | NM_001145794,   | Coding | TRUE |
| anthrax toxin receptor 2                                   | NM_001145794,   | Coding | TRUE |
| H2A histone family, member Z                               | NM_002106, ENS  | Coding | TRUE |
| H2A histone family, member Z                               | NM_002106, ENS  | Coding | TRUE |
| H2A histone family, member Z                               | NM_002106, ENS  | Coding | TRUE |
| H2A histone family, member Z                               | NM_002106, ENS  | Coding | TRUE |
| ADAM metallopeptidase with thrombospondin type 1 n         | NM_030955, ENS  | Coding | TRUE |



|                                                             |                   |        |      |
|-------------------------------------------------------------|-------------------|--------|------|
| ADAM metallopeptidase with thrombospondin type 1 n          | NM_030955, ENS    | Coding | TRUE |
| ADAM metallopeptidase with thrombospondin type 1 n          | NM_030955, ENS    | Coding | TRUE |
| ADAM metallopeptidase with thrombospondin type 1 n          | NM_030955, ENS    | Coding | TRUE |
| ADAM metallopeptidase with thrombospondin type 1 n          | NM_030955, ENS    | Coding | TRUE |
| ADAM metallopeptidase with thrombospondin type 1 n          | NM_030955, ENS    | Coding | TRUE |
| ADAM metallopeptidase with thrombospondin type 1 n          | NM_030955, ENS    | Coding | TRUE |
| ADAM metallopeptidase with thrombospondin type 1 n          | NM_030955, ENS    | Coding | TRUE |
| ADAM metallopeptidase with thrombospondin type 1 n          | NM_030955, ENS    | Coding | TRUE |
| ADAM metallopeptidase with thrombospondin type 1 n          | NM_030955, ENS    | Coding | TRUE |
| ADAM metallopeptidase with thrombospondin type 1 n          | NM_030955, ENS    | Coding | TRUE |
| ADAM metallopeptidase with thrombospondin type 1 n          | NM_030955, ENS    | Coding | TRUE |
| ADAM metallopeptidase with thrombospondin type 1 n          | NM_030955, ENS    | Coding | TRUE |
| ADAM metallopeptidase with thrombospondin type 1 n          | NM_030955, ENS    | Coding | TRUE |
| ADAM metallopeptidase with thrombospondin type 1 n          | NM_030955, ENS    | Coding | TRUE |
| zinc finger protein 300 pseudogene 1                        | NR_026867, ENS    | Coding | TRUE |
| zinc finger protein 300 pseudogene 1                        | NR_026867, ENS    | Coding | TRUE |
| lymphocyte antigen 6 complex, locus G5C                     | NM_025262, ENS    | Coding | TRUE |
| lymphocyte antigen 6 complex, locus G5C                     | NM_025262, ENS    | Coding | TRUE |
| lymphocyte antigen 6 complex, locus G5C                     | NM_025262, ENS    | Coding | TRUE |
| lymphocyte antigen 6 complex, locus G5C                     | NM_025262, ENS    | Coding | TRUE |
| lymphocyte antigen 6 complex, locus G5C                     | NM_025262, ENS    | Coding | TRUE |
| lymphocyte antigen 6 complex, locus G5C                     | NM_025262, ENS    | Coding | TRUE |
| lymphocyte antigen 6 complex, locus G5C                     | NM_025262, ENS    | Coding | TRUE |
| lymphocyte antigen 6 complex, locus G5C                     | NM_025262, ENS    | Coding | TRUE |
| lymphocyte antigen 6 complex, locus G5C                     | NM_025262, ENS    | Coding | TRUE |
| serine active site containing 1                             | NM_032861, ENS    | Coding | TRUE |
| serine active site containing 1                             | NM_032861, ENS    | Coding | TRUE |
| ATP-binding cassette, sub-family A (ABC1), member 1         | NM_152701, ENS    | Coding | TRUE |
| ATP-binding cassette, sub-family A (ABC1), member 1         | NM_152701, ENS    | Coding | TRUE |
| ATP-binding cassette, sub-family A (ABC1), member 1         | NM_152701, ENS    | Coding | TRUE |
| ATP-binding cassette, sub-family A (ABC1), member 1         | NM_152701, ENS    | Coding | TRUE |
| ATP-binding cassette, sub-family A (ABC1), member 1         | NM_152701, ENS    | Coding | TRUE |
| ATP-binding cassette, sub-family A (ABC1), member 1         | NM_152701, ENS    | Coding | TRUE |
| ATP-binding cassette, sub-family A (ABC1), member 1         | NM_152701, ENS    | Coding | TRUE |
| ATP-binding cassette, sub-family A (ABC1), member 1         | NM_152701, ENS    | Coding | TRUE |
| ATP-binding cassette, sub-family A (ABC1), member 1         | NM_152701, ENS    | Coding | TRUE |
| tripartite motif containing 74, tripartite motif containing | NM_198853, ENS    | Coding | TRUE |
| tripartite motif containing 74, tripartite motif containing | NM_198853, ENS    | Coding | TRUE |
| tripartite motif containing 74, tripartite motif containing | NM_198853, ENS    | Coding | TRUE |
| tripartite motif containing 74, tripartite motif containing | NM_198853, ENS    | Coding | TRUE |
| brain and acute leukemia, cytoplasmic                       | NM_001024372, ENS | Coding | TRUE |
| brain and acute leukemia, cytoplasmic                       | NM_001024372, ENS | Coding | TRUE |
| brain and acute leukemia, cytoplasmic                       | NM_001024372, ENS | Coding | TRUE |
| brain and acute leukemia, cytoplasmic                       | NM_001024372, ENS | Coding | TRUE |
| brain and acute leukemia, cytoplasmic                       | NM_001024372, ENS | Coding | TRUE |
| brain and acute leukemia, cytoplasmic                       | NM_001024372, ENS | Coding | TRUE |
| glutathione reductase                                       | NM_000637, NM     | Coding | TRUE |
| glutathione reductase                                       | NM_000637, NM     | Coding | TRUE |
| solute carrier family 28 (sodium-coupled nucleoside tra     | NM_001199633, NM  | Coding | TRUE |
| solute carrier family 28 (sodium-coupled nucleoside tra     | NM_001199633, NM  | Coding | TRUE |
| solute carrier family 28 (sodium-coupled nucleoside tra     | NM_001199633, NM  | Coding | TRUE |
| solute carrier family 28 (sodium-coupled nucleoside tra     | NM_001199633, NM  | Coding | TRUE |
| solute carrier family 28 (sodium-coupled nucleoside tra     | NM_001199633, NM  | Coding | TRUE |
| emopamil binding protein (sterol isomerase)                 | NM_006579, ENS    | Coding | TRUE |
| emopamil binding protein (sterol isomerase)                 | NM_006579, ENS    | Coding | TRUE |
| emopamil binding protein (sterol isomerase)                 | NM_006579, ENS    | Coding | TRUE |
| emopamil binding protein (sterol isomerase)                 | NM_006579, ENS    | Coding | TRUE |
| emopamil binding protein (sterol isomerase)                 | NM_006579, ENS    | Coding | TRUE |
| emopamil binding protein (sterol isomerase)                 | NM_006579, ENS    | Coding | TRUE |
| calsyntenin 3                                               | NM_014718, ENS    | Coding | TRUE |
| calsyntenin 3                                               | NM_014718, ENS    | Coding | TRUE |



|                                                          |                |        |      |
|----------------------------------------------------------|----------------|--------|------|
| phosphoinositide-3-kinase, regulatory subunit 3 (gamn    | NM_001114172,  | Coding | TRUE |
| phosphoinositide-3-kinase, regulatory subunit 3 (gamn    | NM_001114172,  | Coding | TRUE |
| phosphoinositide-3-kinase, regulatory subunit 3 (gamn    | NM_001114172,  | Coding | TRUE |
| phosphoinositide-3-kinase, regulatory subunit 3 (gamn    | NM_001114172,  | Coding | TRUE |
| phosphoinositide-3-kinase, regulatory subunit 3 (gamn    | NM_001114172,  | Coding | TRUE |
| latent transforming growth factor beta binding protein 1 | NM_000627, NM  | Coding | TRUE |
| latent transforming growth factor beta binding protein 1 | NM_000627, NM  | Coding | TRUE |
| latent transforming growth factor beta binding protein 1 | NM_000627, NM  | Coding | TRUE |
| latent transforming growth factor beta binding protein 1 | NM_000627, NM  | Coding | TRUE |
| latent transforming growth factor beta binding protein 1 | NM_000627, NM  | Coding | TRUE |
| latent transforming growth factor beta binding protein 1 | NM_000627, NM  | Coding | TRUE |
| latent transforming growth factor beta binding protein 1 | NM_000627, NM  | Coding | TRUE |
| latent transforming growth factor beta binding protein 1 | NM_000627, NM  | Coding | TRUE |
| latent transforming growth factor beta binding protein 1 | NM_000627, NM  | Coding | TRUE |
| latent transforming growth factor beta binding protein 1 | NM_000627, NM  | Coding | TRUE |
| latent transforming growth factor beta binding protein 1 | NM_000627, NM  | Coding | TRUE |
| latent transforming growth factor beta binding protein 1 | NM_000627, NM  | Coding | TRUE |
| latent transforming growth factor beta binding protein 1 | NM_000627, NM  | Coding | TRUE |
| latent transforming growth factor beta binding protein 1 | NM_000627, NM  | Coding | TRUE |
| latent transforming growth factor beta binding protein 1 | NM_000627, NM  | Coding | TRUE |
| latent transforming growth factor beta binding protein 1 | NM_000627, NM  | Coding | TRUE |
| latent transforming growth factor beta binding protein 1 | NM_000627, NM  | Coding | TRUE |
| STEAP family member 3, metalloredutase                   | NM_001008410,  | Coding | TRUE |
| STEAP family member 3, metalloredutase                   | NM_001008410,  | Coding | TRUE |
| STEAP family member 3, metalloredutase                   | NM_001008410,  | Coding | TRUE |
| CASP8 and FADD-like apoptosis regulator                  | NM_001127183,  | Coding | TRUE |
| CASP8 and FADD-like apoptosis regulator                  | NM_001127183,  | Coding | TRUE |
| CASP8 and FADD-like apoptosis regulator                  | NM_001127183,  | Coding | TRUE |
| protein phosphatase 1, catalytic subunit, beta isozyme   | NM_002709, NM  | Coding | TRUE |
| protein phosphatase 1, catalytic subunit, beta isozyme   | NM_002709, NM  | Coding | TRUE |
| protein phosphatase 1, catalytic subunit, beta isozyme   | NM_002709, NM  | Coding | TRUE |
| protein phosphatase 1, catalytic subunit, beta isozyme   | NM_002709, NM  | Coding | TRUE |
| protein phosphatase 1, catalytic subunit, beta isozyme   | NM_002709, NM  | Coding | TRUE |
| protein phosphatase 1, catalytic subunit, beta isozyme   | NM_002709, NM  | Coding | TRUE |
| protein phosphatase 1, catalytic subunit, beta isozyme   | NM_002709, NM  | Coding | TRUE |
| protein phosphatase 1, catalytic subunit, beta isozyme   | NM_002709, NM  | Coding | TRUE |
| protein phosphatase 1, catalytic subunit, beta isozyme   | NM_002709, NM  | Coding | TRUE |
| protein phosphatase 1, catalytic subunit, beta isozyme   | NM_002709, NM  | Coding | TRUE |
| ubiquitin-conjugating enzyme E2F (putative)              | NM_080678, ENS | Coding | TRUE |
| ubiquitin-conjugating enzyme E2F (putative)              | NM_080678, ENS | Coding | TRUE |
| ubiquitin-conjugating enzyme E2F (putative)              | NM_080678, ENS | Coding | TRUE |
| ubiquitin-conjugating enzyme E2F (putative)              | NM_080678, ENS | Coding | TRUE |
|                                                          |                | Coding | TRUE |
|                                                          |                | Coding | TRUE |
|                                                          |                | Coding | TRUE |
| solute carrier family 12 (potassium/chloride transporter | NM_001195483,  | Coding | TRUE |
| solute carrier family 12 (potassium/chloride transporter | NM_001195483,  | Coding | TRUE |
| solute carrier family 12 (potassium/chloride transporter | NM_001195483,  | Coding | TRUE |
| solute carrier family 12 (potassium/chloride transporter | NM_001195483,  | Coding | TRUE |
| solute carrier family 12 (potassium/chloride transporter | NM_001195483,  | Coding | TRUE |
| solute carrier family 12 (potassium/chloride transporter | NM_001195483,  | Coding | TRUE |
| REL2-like 2                                              | NM_001130029,  | Coding | TRUE |
| REL2-like 2                                              | NM_001130029,  | Coding | TRUE |
| drebrin 1                                                | NM_004395, NM  | Coding | TRUE |
| drebrin 1                                                | NM_004395, NM  | Coding | TRUE |
| drebrin 1                                                | NM_004395, NM  | Coding | TRUE |
| drebrin 1                                                | NM_004395, NM  | Coding | TRUE |
| dystrobrevin binding protein 1                           | NM_032122, NM  | Coding | TRUE |
| dystrobrevin binding protein 1                           | NM_032122, NM  | Coding | TRUE |
| T cell receptor beta variable 27                         | ENST000003903  | Coding | TRUE |
| T cell receptor beta variable 27                         | ENST000003903  | Coding | TRUE |
| T cell receptor beta variable 27                         | ENST000003903  | Coding | TRUE |
| tripartite motif containing 50                           | NM_178125, ENS | Coding | TRUE |
| tripartite motif containing 50                           | NM_178125, ENS | Coding | TRUE |





|                                                       |                 |        |      |
|-------------------------------------------------------|-----------------|--------|------|
| tetratricopeptide repeat domain 13                    | NM_001122835,   | Coding | TRUE |
| tetratricopeptide repeat domain 13                    | NM_001122835,   | Coding | TRUE |
| tetratricopeptide repeat domain 13                    | NM_001122835,   | Coding | TRUE |
| family with sequence similarity 82, member A1         | NM_001170792,   | Coding | TRUE |
| family with sequence similarity 82, member A1         | NM_001170792,   | Coding | TRUE |
| family with sequence similarity 82, member A1         | NM_001170792,   | Coding | TRUE |
| family with sequence similarity 82, member A1         | NM_001170792,   | Coding | TRUE |
| general transcription factor IIA, 1-like, STON1-GTF2A | NM_001193487,   | Coding | TRUE |
| general transcription factor IIA, 1-like, STON1-GTF2A | NM_001193487,   | Coding | TRUE |
| general transcription factor IIA, 1-like, STON1-GTF2A | NM_001193487,   | Coding | TRUE |
| general transcription factor IIA, 1-like, STON1-GTF2A | NM_001193487,   | Coding | TRUE |
| general transcription factor IIA, 1-like, STON1-GTF2A | NM_001193487,   | Coding | TRUE |
| fibroblast activation protein, alpha                  | NM_004460, ENS  | Coding | TRUE |
| fibroblast activation protein, alpha                  | NM_004460, ENS  | Coding | TRUE |
| fibroblast activation protein, alpha                  | NM_004460, ENS  | Coding | TRUE |
| fibroblast activation protein, alpha                  | NM_004460, ENS  | Coding | TRUE |
| fibroblast activation protein, alpha                  | NM_004460, ENS  | Coding | TRUE |
| fibroblast activation protein, alpha                  | NM_004460, ENS  | Coding | TRUE |
| fibroblast activation protein, alpha                  | NM_004460, ENS  | Coding | TRUE |
| fibroblast activation protein, alpha                  | NM_004460, ENS  | Coding | TRUE |
| fibroblast activation protein, alpha                  | NM_004460, ENS  | Coding | TRUE |
| fibroblast activation protein, alpha                  | NM_004460, ENS  | Coding | TRUE |
| zinc finger protein 385B                              | NM_001113397, I | Coding | TRUE |
| zinc finger protein 385B                              | NM_001113397, I | Coding | TRUE |
| zinc finger protein 385B                              | NM_001113397, I | Coding | TRUE |
| zinc finger protein 385B                              | NM_001113397, I | Coding | TRUE |
| zinc finger protein 385B                              | NM_001113397, I | Coding | TRUE |
| zinc finger protein 385B                              | NM_001113397, I | Coding | TRUE |
| zinc finger protein 385B                              | NM_001113397, I | Coding | TRUE |
|                                                       |                 | Coding | TRUE |
|                                                       |                 | Coding | TRUE |
|                                                       |                 | Coding | TRUE |
| ribosomal protein SA, small nucleolar RNA, H/ACA box  | NM_001012321,   | Coding | TRUE |
| ribosomal protein SA, small nucleolar RNA, H/ACA box  | NM_001012321,   | Coding | TRUE |
| chromosome 5 open reading frame 22                    | NM_018356, ENS  | Coding | TRUE |
| chromosome 5 open reading frame 22                    | NM_018356, ENS  | Coding | TRUE |
| chromosome 5 open reading frame 22                    | NM_018356, ENS  | Coding | TRUE |
| chromosome 5 open reading frame 22                    | NM_018356, ENS  | Coding | TRUE |
| chromosome 5 open reading frame 22                    | NM_018356, ENS  | Coding | TRUE |
| Mab-21 domain containing 1                            | NM_138441, ENS  | Coding | TRUE |
| Mab-21 domain containing 1                            | NM_138441, ENS  | Coding | TRUE |
| protein tyrosine phosphatase, non-receptor type 12    | NM_001131008, I | Coding | TRUE |
| protein tyrosine phosphatase, non-receptor type 12    | NM_001131008, I | Coding | TRUE |
| protein tyrosine phosphatase, non-receptor type 12    | NM_001131008, I | Coding | TRUE |
| protein tyrosine phosphatase, non-receptor type 12    | NM_001131008, I | Coding | TRUE |
| protein tyrosine phosphatase, non-receptor type 12    | NM_001131008, I | Coding | TRUE |
| paternally expressed 10                               | NM_001040152,   | Coding | TRUE |
| paternally expressed 10                               | NM_001040152,   | Coding | TRUE |
| paternally expressed 10                               | NM_001040152,   | Coding | TRUE |
| paternally expressed 10                               | NM_001040152,   | Coding | TRUE |
| paternally expressed 10                               | NM_001040152,   | Coding | TRUE |
| paternally expressed 10                               | NM_001040152,   | Coding | TRUE |
| paternally expressed 10                               | NM_001040152,   | Coding | TRUE |
| paternally expressed 10                               | NM_001040152,   | Coding | TRUE |
| paternally expressed 10                               | NM_001040152,   | Coding | TRUE |
| KRAB-A domain containing 1                            | NM_032534, ENS  | Coding | TRUE |
| KRAB-A domain containing 1                            | NM_032534, ENS  | Coding | TRUE |
| Src-like-adaptor                                      | NM_001045556,   | Coding | TRUE |

|                                                        |                 |        |      |
|--------------------------------------------------------|-----------------|--------|------|
| Src-like-adaptor                                       | NM_001045556,   | Coding | TRUE |
| Src-like-adaptor                                       | NM_001045556,   | Coding | TRUE |
| Src-like-adaptor                                       | NM_001045556,   | Coding | TRUE |
| Src-like-adaptor                                       | NM_001045556,   | Coding | TRUE |
| Src-like-adaptor                                       | NM_001045556,   | Coding | TRUE |
| Src-like-adaptor                                       | NM_001045556,   | Coding | TRUE |
| SH3-domain kinase binding protein 1                    | NM_001024666,   | Coding | TRUE |
| SH3-domain kinase binding protein 1                    | NM_001024666,   | Coding | TRUE |
| SH3-domain kinase binding protein 1                    | NM_001024666,   | Coding | TRUE |
| zinc finger protein 37A                                | NM_001007094,   | Coding | TRUE |
| zinc finger protein 37A                                | NM_001007094,   | Coding | TRUE |
| zinc finger protein 37A                                | NM_001007094,   | Coding | TRUE |
| uncharacterized LOC100505761                           | NR_038937, NR_  | Coding | TRUE |
| uncharacterized LOC100505761                           | NR_038937, NR_  | Coding | TRUE |
| uncharacterized LOC100505933                           | NR_038943       | Coding | TRUE |
| uncharacterized LOC100505933                           | NR_038943       | Coding | TRUE |
| uncharacterized LOC100505933                           | NR_038943       | Coding | TRUE |
| uncharacterized LOC100505933                           | NR_038943       | Coding | TRUE |
| uncharacterized LOC100505933                           | NR_038943       | Coding | TRUE |
| uncharacterized LOC100505933                           | NR_038943       | Coding | TRUE |
| Rho GTPase activating protein 9                        | NM_032496, NM_  | Coding | TRUE |
| Rho GTPase activating protein 9                        | NM_032496, NM_  | Coding | TRUE |
| Rho GTPase activating protein 9                        | NM_032496, NM_  | Coding | TRUE |
| Rho GTPase activating protein 9                        | NM_032496, NM_  | Coding | TRUE |
| Rho GTPase activating protein 9                        | NM_032496, NM_  | Coding | TRUE |
| insulin-like growth factor 1 (somatomedin C)           | NM_001111283, I | Coding | TRUE |
| insulin-like growth factor 1 (somatomedin C)           | NM_001111283, I | Coding | TRUE |
| insulin-like growth factor 1 (somatomedin C)           | NM_001111283, I | Coding | TRUE |
| ankyrin repeat and LEM domain containing 2             | NM_015114, ENS  | Coding | TRUE |
| ankyrin repeat and LEM domain containing 2             | NM_015114, ENS  | Coding | TRUE |
| ankyrin repeat and LEM domain containing 2             | NM_015114, ENS  | Coding | TRUE |
| ankyrin repeat and LEM domain containing 2             | NM_015114, ENS  | Coding | TRUE |
| Bardet-Biedl syndrome 4                                | NM_001252678,   | Coding | TRUE |
| Bardet-Biedl syndrome 4                                | NM_001252678,   | Coding | TRUE |
| septin 1                                               | NM_052838, ENS  | Coding | TRUE |
| septin 1                                               | NM_052838, ENS  | Coding | TRUE |
| septin 1                                               | NM_052838, ENS  | Coding | TRUE |
| septin 1                                               | NM_052838, ENS  | Coding | TRUE |
| septin 1                                               | NM_052838, ENS  | Coding | TRUE |
| endonuclease V, uncharacterized LOC100507440           | NM_001164637,   | Coding | TRUE |
| endonuclease V, uncharacterized LOC100507440           | NM_001164637,   | Coding | TRUE |
| endonuclease V, uncharacterized LOC100507440           | NM_001164637,   | Coding | TRUE |
| endonuclease V, uncharacterized LOC100507440           | NM_001164637,   | Coding | TRUE |
| endonuclease V, uncharacterized LOC100507440           | NM_001164637,   | Coding | TRUE |
| carcinoembryonic antigen-related cell adhesion molecul | NM_001815, ENS  | Coding | TRUE |
| carcinoembryonic antigen-related cell adhesion molecul | NM_001815, ENS  | Coding | TRUE |
| carcinoembryonic antigen-related cell adhesion molecul | NM_001815, ENS  | Coding | TRUE |
| paraneoplastic Ma antigen family-like 1                | NM_001103149,   | Coding | TRUE |
| paraneoplastic Ma antigen family-like 1                | NM_001103149,   | Coding | TRUE |
| paraneoplastic Ma antigen family-like 1                | NM_001103149,   | Coding | TRUE |
| zinc finger protein 577                                | NM_001135590,   | Coding | TRUE |
| zinc finger protein 577                                | NM_001135590,   | Coding | TRUE |
| zinc finger protein 577                                | NM_001135590,   | Coding | TRUE |
| ciliary rootlet coiled-coil, rootletin pseudogene 3    | NR_023386       | Coding | TRUE |
| ciliary rootlet coiled-coil, rootletin pseudogene 3    | NR_023386       | Coding | TRUE |
| ciliary rootlet coiled-coil, rootletin pseudogene 3    | NR_023386       | Coding | TRUE |
| putative homeodomain transcription factor 1            | NM_006608, ENS  | Coding | TRUE |
| putative homeodomain transcription factor 1            | NM_006608, ENS  | Coding | TRUE |
| putative homeodomain transcription factor 1            | NM_006608, ENS  | Coding | TRUE |

|                                                         |                |        |      |
|---------------------------------------------------------|----------------|--------|------|
| putative homeodomain transcription factor 1             | NM_006608, ENS | Coding | TRUE |
| putative homeodomain transcription factor 1             | NM_006608, ENS | Coding | TRUE |
| putative homeodomain transcription factor 1             | NM_006608, ENS | Coding | TRUE |
| putative homeodomain transcription factor 1             | NM_006608, ENS | Coding | TRUE |
| putative homeodomain transcription factor 1             | NM_006608, ENS | Coding | TRUE |
| glutamate-ammonia ligase                                | NM_001033044,  | Coding | TRUE |
| glutamate-ammonia ligase                                | NM_001033044,  | Coding | TRUE |
| glutamate-ammonia ligase                                | NM_001033044,  | Coding | TRUE |
| glutamate-ammonia ligase                                | NM_001033044,  | Coding | TRUE |
| glutamate-ammonia ligase                                | NM_001033044,  | Coding | TRUE |
| glutamate-ammonia ligase                                | NM_001033044,  | Coding | TRUE |
| glutamate-ammonia ligase                                | NM_001033044,  | Coding | TRUE |
| glutamate-ammonia ligase                                | NM_001033044,  | Coding | TRUE |
| glutamate-ammonia ligase                                | NM_001033044,  | Coding | TRUE |
| glutamate-ammonia ligase                                | NM_001033044,  | Coding | TRUE |
| sarcolemma associated protein, uncharacterized LOC      | NM_007159, ENS | Coding | TRUE |
| sarcolemma associated protein, uncharacterized LOC      | NM_007159, ENS | Coding | TRUE |
| sarcolemma associated protein, uncharacterized LOC      | NM_007159, ENS | Coding | TRUE |
| sarcolemma associated protein, uncharacterized LOC      | NM_007159, ENS | Coding | TRUE |
| sarcolemma associated protein, uncharacterized LOC      | NM_007159, ENS | Coding | TRUE |
| sarcolemma associated protein, uncharacterized LOC      | NM_007159, ENS | Coding | TRUE |
| sarcolemma associated protein, uncharacterized LOC      | NM_007159, ENS | Coding | TRUE |
| sarcolemma associated protein, uncharacterized LOC      | NM_007159, ENS | Coding | TRUE |
| sarcolemma associated protein, uncharacterized LOC      | NM_007159, ENS | Coding | TRUE |
| sarcolemma associated protein, uncharacterized LOC      | NM_007159, ENS | Coding | TRUE |
| phospholipid scramblase 1                               | NM_021105, ENS | Coding | TRUE |
| phospholipid scramblase 1                               | NM_021105, ENS | Coding | TRUE |
| phospholipid scramblase 1                               | NM_021105, ENS | Coding | TRUE |
| phospholipid scramblase 1                               | NM_021105, ENS | Coding | TRUE |
| phospholipid scramblase 1                               | NM_021105, ENS | Coding | TRUE |
| phospholipid scramblase 1                               | NM_021105, ENS | Coding | TRUE |
| phospholipid scramblase 1                               | NM_021105, ENS | Coding | TRUE |
| phospholipid scramblase 1                               | NM_021105, ENS | Coding | TRUE |
| family with sequence similarity 114, member A2          | NM_018691, ENS | Coding | TRUE |
| family with sequence similarity 114, member A2          | NM_018691, ENS | Coding | TRUE |
| uncharacterized LOC100507367                            | ENST000004127  | Coding | TRUE |
| uncharacterized LOC100507367                            | ENST000004127  | Coding | TRUE |
| uncharacterized LOC100507367                            | ENST000004127  | Coding | TRUE |
| uncharacterized LOC100507367                            | ENST000004127  | Coding | TRUE |
| uncharacterized LOC100507367                            | ENST000004127  | Coding | TRUE |
| major histocompatibility complex, class I, G            | NM_002127, ENS | Coding | TRUE |
| major histocompatibility complex, class I, G            | NM_002127, ENS | Coding | TRUE |
| UTP23, small subunit (SSU) processome component,        | NM_032334, ENS | Coding | TRUE |
| UTP23, small subunit (SSU) processome component,        | NM_032334, ENS | Coding | TRUE |
| UTP23, small subunit (SSU) processome component,        | NM_032334, ENS | Coding | TRUE |
| UTP23, small subunit (SSU) processome component,        | NM_032334, ENS | Coding | TRUE |
| UTP23, small subunit (SSU) processome component,        | NM_032334, ENS | Coding | TRUE |
| DEP domain containing MTOR-interacting protein          | NM_022783, ENS | Coding | TRUE |
| DEP domain containing MTOR-interacting protein          | NM_022783, ENS | Coding | TRUE |
| cyclin-dependent kinase inhibitor 2B (p15, inhibits CDK | NM_004936, NM  | Coding | TRUE |
| cyclin-dependent kinase inhibitor 2B (p15, inhibits CDK | NM_004936, NM  | Coding | TRUE |
| aldehyde dehydrogenase 1 family, member A1              | NM_000689, ENS | Coding | TRUE |
| aldehyde dehydrogenase 1 family, member A1              | NM_000689, ENS | Coding | TRUE |
| TBC1 domain family, member 12                           | NM_015188, ENS | Coding | TRUE |
| TBC1 domain family, member 12                           | NM_015188, ENS | Coding | TRUE |
| TBC1 domain family, member 12                           | NM_015188, ENS | Coding | TRUE |
| TBC1 domain family, member 12                           | NM_015188, ENS | Coding | TRUE |
| adducin 3 (gamma)                                       | NM_001121, NM  | Coding | TRUE |
| adducin 3 (gamma)                                       | NM_001121, NM  | Coding | TRUE |



|                                                        |                            |        |      |
|--------------------------------------------------------|----------------------------|--------|------|
| adducin 3 (gamma)                                      | NM_001121, NM_001121       | Coding | TRUE |
| adducin 3 (gamma)                                      | NM_001121, NM_001121       | Coding | TRUE |
| adducin 3 (gamma)                                      | NM_001121, NM_001121       | Coding | TRUE |
| adducin 3 (gamma)                                      | NM_001121, NM_001121       | Coding | TRUE |
| SH3 and PX domains 2A                                  | NM_014631, ENS014631       | Coding | TRUE |
| SH3 and PX domains 2A                                  | NM_014631, ENS014631       | Coding | TRUE |
| SH3 and PX domains 2A                                  | NM_014631, ENS014631       | Coding | TRUE |
| SH3 and PX domains 2A                                  | NM_014631, ENS014631       | Coding | TRUE |
| SH3 and PX domains 2A                                  | NM_014631, ENS014631       | Coding | TRUE |
| SH3 and PX domains 2A                                  | NM_014631, ENS014631       | Coding | TRUE |
| SH3 and PX domains 2A                                  | NM_014631, ENS014631       | Coding | TRUE |
| SH3 and PX domains 2A                                  | NM_014631, ENS014631       | Coding | TRUE |
| SH3 and PX domains 2A                                  | NM_014631, ENS014631       | Coding | TRUE |
| SH3 and PX domains 2A                                  | NM_014631, ENS014631       | Coding | TRUE |
| SH3 and PX domains 2A                                  | NM_014631, ENS014631       | Coding | TRUE |
| SH3 and PX domains 2A                                  | NM_014631, ENS014631       | Coding | TRUE |
| SH3 and PX domains 2A                                  | NM_014631, ENS014631       | Coding | TRUE |
| SH3 and PX domains 2A                                  | NM_014631, ENS014631       | Coding | TRUE |
| SH3 and PX domains 2A                                  | NM_014631, ENS014631       | Coding | TRUE |
| SH3 and PX domains 2A                                  | NM_014631, ENS014631       | Coding | TRUE |
| SH3 and PX domains 2A                                  | NM_014631, ENS014631       | Coding | TRUE |
|                                                        |                            | Coding | TRUE |
|                                                        |                            | Coding | TRUE |
|                                                        |                            | Coding | TRUE |
|                                                        |                            | Coding | TRUE |
| CD59 molecule, complement regulatory protein, chrom    | NM_000611, NM_000611       | Coding | TRUE |
| CD59 molecule, complement regulatory protein, chrom    | NM_000611, NM_000611       | Coding | TRUE |
| CD59 molecule, complement regulatory protein, chrom    | NM_000611, NM_000611       | Coding | TRUE |
| transmembrane 7 superfamily member 3                   | NM_016551, ENS016551       | Coding | TRUE |
| transmembrane 7 superfamily member 3                   | NM_016551, ENS016551       | Coding | TRUE |
| transmembrane 7 superfamily member 3                   | NM_016551, ENS016551       | Coding | TRUE |
| family with sequence similarity 109, member A          | NM_001177996, NM_001177996 | Coding | TRUE |
| family with sequence similarity 109, member A          | NM_001177996, NM_001177996 | Coding | TRUE |
| family with sequence similarity 109, member A          | NM_001177996, NM_001177996 | Coding | TRUE |
| UDP-N-acetyl-alpha-D-galactosamine:polypeptide N-a     | NM_001122636, NM_001122636 | Coding | TRUE |
| UDP-N-acetyl-alpha-D-galactosamine:polypeptide N-a     | NM_001122636, NM_001122636 | Coding | TRUE |
| UDP-N-acetyl-alpha-D-galactosamine:polypeptide N-a     | NM_001122636, NM_001122636 | Coding | TRUE |
| UDP-N-acetyl-alpha-D-galactosamine:polypeptide N-a     | NM_001122636, NM_001122636 | Coding | TRUE |
| ribonuclease P/MRP 25kDa subunit                       | NM_017793, ENS017793       | Coding | TRUE |
| ribonuclease P/MRP 25kDa subunit                       | NM_017793, ENS017793       | Coding | TRUE |
| ribonuclease P/MRP 25kDa subunit                       | NM_017793, ENS017793       | Coding | TRUE |
| LUC7-like 3 (S. cerevisiae)                            | NM_006107, NM_006107       | Coding | TRUE |
| LUC7-like 3 (S. cerevisiae)                            | NM_006107, NM_006107       | Coding | TRUE |
| LUC7-like 3 (S. cerevisiae)                            | NM_006107, NM_006107       | Coding | TRUE |
| MIR22 host gene (non-protein coding), microRNA 22      | NR_028502, NR_028502       | Coding | TRUE |
| MIR22 host gene (non-protein coding), microRNA 22      | NR_028502, NR_028502       | Coding | TRUE |
| MIR22 host gene (non-protein coding), microRNA 22      | NR_028502, NR_028502       | Coding | TRUE |
| MIR22 host gene (non-protein coding), microRNA 22      | NR_028502, NR_028502       | Coding | TRUE |
| MIR22 host gene (non-protein coding), microRNA 22      | NR_028502, NR_028502       | Coding | TRUE |
| UDP-N-acetyl-alpha-D-galactosamine:polypeptide N-a     | NM_020474, ENS020474       | Coding | TRUE |
| UDP-N-acetyl-alpha-D-galactosamine:polypeptide N-a     | NM_020474, ENS020474       | Coding | TRUE |
| cadherin 2, type 1, N-cadherin (neuronal)              | NM_001792, ENS001792       | Coding | TRUE |
| cadherin 2, type 1, N-cadherin (neuronal)              | NM_001792, ENS001792       | Coding | TRUE |
| cadherin 2, type 1, N-cadherin (neuronal)              | NM_001792, ENS001792       | Coding | TRUE |
| potassium inwardly-rectifying channel, subfamily J, me | NM_002243, NM_002243       | Coding | TRUE |
| potassium inwardly-rectifying channel, subfamily J, me | NM_002243, NM_002243       | Coding | TRUE |
| potassium inwardly-rectifying channel, subfamily J, me | NM_002243, NM_002243       | Coding | TRUE |
| potassium inwardly-rectifying channel, subfamily J, me | NM_002243, NM_002243       | Coding | TRUE |

|                                                        |                  |        |      |
|--------------------------------------------------------|------------------|--------|------|
| potassium inwardly-rectifying channel, subfamily J, me | NM_002243, NM    | Coding | TRUE |
| potassium inwardly-rectifying channel, subfamily J, me | NM_002243, NM    | Coding | TRUE |
| potassium inwardly-rectifying channel, subfamily J, me | NM_002243, NM    | Coding | TRUE |
| potassium inwardly-rectifying channel, subfamily J, me | NM_002243, NM    | Coding | TRUE |
| potassium inwardly-rectifying channel, subfamily J, me | NM_002243, NM    | Coding | TRUE |
| potassium inwardly-rectifying channel, subfamily J, me | NM_002243, NM    | Coding | TRUE |
| potassium inwardly-rectifying channel, subfamily J, me | NM_002243, NM    | Coding | TRUE |
| potassium inwardly-rectifying channel, subfamily J, me | NM_002243, NM    | Coding | TRUE |
| potassium inwardly-rectifying channel, subfamily J, me | NM_002243, NM    | Coding | TRUE |
| potassium inwardly-rectifying channel, subfamily J, me | NM_002243, NM    | Coding | TRUE |
| potassium inwardly-rectifying channel, subfamily J, me | NM_002243, NM    | Coding | TRUE |
| potassium inwardly-rectifying channel, subfamily J, me | NM_002243, NM    | Coding | TRUE |
| potassium inwardly-rectifying channel, subfamily J, me | NM_002243, NM    | Coding | TRUE |
| pyridoxal (pyridoxine, vitamin B6) kinase              | NM_003681, ENS   | Coding | TRUE |
| pyridoxal (pyridoxine, vitamin B6) kinase              | NM_003681, ENS   | Coding | TRUE |
| pyridoxal (pyridoxine, vitamin B6) kinase              | NM_003681, ENS   | Coding | TRUE |
| pyridoxal (pyridoxine, vitamin B6) kinase              | NM_003681, ENS   | Coding | TRUE |
| pyridoxal (pyridoxine, vitamin B6) kinase              | NM_003681, ENS   | Coding | TRUE |
| pyridoxal (pyridoxine, vitamin B6) kinase              | NM_003681, ENS   | Coding | TRUE |
| pyridoxal (pyridoxine, vitamin B6) kinase              | NM_003681, ENS   | Coding | TRUE |
| pyridoxal (pyridoxine, vitamin B6) kinase              | NM_003681, ENS   | Coding | TRUE |
| pyridoxal (pyridoxine, vitamin B6) kinase              | NM_003681, ENS   | Coding | TRUE |
| trafficking protein particle complex 10                | NM_003274, ENS   | Coding | TRUE |
| trafficking protein particle complex 10                | NM_003274, ENS   | Coding | TRUE |
| trafficking protein particle complex 10                | NM_003274, ENS   | Coding | TRUE |
| trafficking protein particle complex 10                | NM_003274, ENS   | Coding | TRUE |
| trafficking protein particle complex 10                | NM_003274, ENS   | Coding | TRUE |
| trafficking protein particle complex 10                | NM_003274, ENS   | Coding | TRUE |
| proline/arginine-rich end leucine-rich repeat protein  | NM_002725, NM    | Coding | TRUE |
| proline/arginine-rich end leucine-rich repeat protein  | NM_002725, NM    | Coding | TRUE |
| proline/arginine-rich end leucine-rich repeat protein  | NM_002725, NM    | Coding | TRUE |
| GC-rich sequence DNA-binding factor 2                  | NM_001201334, NM | Coding | TRUE |
| GC-rich sequence DNA-binding factor 2                  | NM_001201334, NM | Coding | TRUE |
| activating transcription factor 2                      | NM_001880, NM    | Coding | TRUE |
| activating transcription factor 2                      | NM_001880, NM    | Coding | TRUE |
| activating transcription factor 2                      | NM_001880, NM    | Coding | TRUE |
| activating transcription factor 2                      | NM_001880, NM    | Coding | TRUE |
| 3-hydroxyisobutyryl-CoA hydrolase                      | NM_014362, NM    | Coding | TRUE |
| 3-hydroxyisobutyryl-CoA hydrolase                      | NM_014362, NM    | Coding | TRUE |
| charged multivesicular body protein 2B                 | NM_001244644, NM | Coding | TRUE |
| charged multivesicular body protein 2B                 | NM_001244644, NM | Coding | TRUE |
| charged multivesicular body protein 2B                 | NM_001244644, NM | Coding | TRUE |
| charged multivesicular body protein 2B                 | NM_001244644, NM | Coding | TRUE |
| signal recognition particle 19kDa                      | NM_001204193, NM | Coding | TRUE |
| signal recognition particle 19kDa                      | NM_001204193, NM | Coding | TRUE |
| signal recognition particle 19kDa                      | NM_001204193, NM | Coding | TRUE |
| signal recognition particle 19kDa                      | NM_001204193, NM | Coding | TRUE |
| signal recognition particle 19kDa                      | NM_001204193, NM | Coding | TRUE |
| signal recognition particle 19kDa                      | NM_001204193, NM | Coding | TRUE |
| signal recognition particle 19kDa                      | NM_001204193, NM | Coding | TRUE |
| signal recognition particle 19kDa                      | NM_001204193, NM | Coding | TRUE |
| signal recognition particle 19kDa                      | NM_001204193, NM | Coding | TRUE |
| signal recognition particle 19kDa                      | NM_001204193, NM | Coding | TRUE |
| signal recognition particle 19kDa                      | NM_001204193, NM | Coding | TRUE |
| signal recognition particle 19kDa                      | NM_001204193, NM | Coding | TRUE |
| signal recognition particle 19kDa                      | NM_001204193, NM | Coding | TRUE |
| desmoplakin                                            | NM_001008844, NM | Coding | TRUE |
| desmoplakin                                            | NM_001008844, NM | Coding | TRUE |
| PTK7 protein tyrosine kinase 7                         | NM_002821, NM    | Coding | TRUE |
| PTK7 protein tyrosine kinase 7                         | NM_002821, NM    | Coding | TRUE |

|                                                          |                |        |      |
|----------------------------------------------------------|----------------|--------|------|
| PTK7 protein tyrosine kinase 7                           | NM_002821, NM  | Coding | TRUE |
| PTK7 protein tyrosine kinase 7                           | NM_002821, NM  | Coding | TRUE |
| PTK7 protein tyrosine kinase 7                           | NM_002821, NM  | Coding | TRUE |
| PTK7 protein tyrosine kinase 7                           | NM_002821, NM  | Coding | TRUE |
| PTK7 protein tyrosine kinase 7                           | NM_002821, NM  | Coding | TRUE |
| uncharacterized LOC100134216, mucin 3B, cell surfac      | ENST000003195  | Coding | TRUE |
| uncharacterized LOC100134216, mucin 3B, cell surfac      | ENST000003195  | Coding | TRUE |
| uncharacterized LOC100134216, mucin 3B, cell surfac      | ENST000003195  | Coding | TRUE |
| SRSF protein kinase 2                                    | NM_182692, NM  | Coding | TRUE |
| SRSF protein kinase 2                                    | NM_182692, NM  | Coding | TRUE |
| solute carrier family 9, subfamily A (NHE7, cation protc | NM_032591, ENS | Coding | TRUE |
| solute carrier family 9, subfamily A (NHE7, cation protc | NM_032591, ENS | Coding | TRUE |
| solute carrier family 9, subfamily A (NHE7, cation protc | NM_032591, ENS | Coding | TRUE |
| solute carrier family 9, subfamily A (NHE7, cation protc | NM_032591, ENS | Coding | TRUE |
| melanoma cell adhesion molecule                          | NM_006500, ENS | Coding | TRUE |
| melanoma cell adhesion molecule                          | NM_006500, ENS | Coding | TRUE |
| melanoma cell adhesion molecule                          | NM_006500, ENS | Coding | TRUE |
| melanoma cell adhesion molecule                          | NM_006500, ENS | Coding | TRUE |
| melanoma cell adhesion molecule                          | NM_006500, ENS | Coding | TRUE |
| melanoma cell adhesion molecule                          | NM_006500, ENS | Coding | TRUE |
| melanoma cell adhesion molecule                          | NM_006500, ENS | Coding | TRUE |
| melanoma cell adhesion molecule                          | NM_006500, ENS | Coding | TRUE |
| melanoma cell adhesion molecule                          | NM_006500, ENS | Coding | TRUE |
| melanoma cell adhesion molecule                          | NM_006500, ENS | Coding | TRUE |
| melanoma cell adhesion molecule                          | NM_006500, ENS | Coding | TRUE |
| melanoma cell adhesion molecule                          | NM_006500, ENS | Coding | TRUE |
| melanoma cell adhesion molecule                          | NM_006500, ENS | Coding | TRUE |
| N(alpha)-acetyltransferase 16, NatA auxiliary subunit    | NM_024561, NM  | Coding | TRUE |
| N(alpha)-acetyltransferase 16, NatA auxiliary subunit    | NM_024561, NM  | Coding | TRUE |
| N(alpha)-acetyltransferase 16, NatA auxiliary subunit    | NM_024561, NM  | Coding | TRUE |
| N(alpha)-acetyltransferase 16, NatA auxiliary subunit    | NM_024561, NM  | Coding | TRUE |
| N(alpha)-acetyltransferase 16, NatA auxiliary subunit    | NM_024561, NM  | Coding | TRUE |
| cyclin-dependent kinase-like 1 (CDC2-related kinase)     | NM_004196, ENS | Coding | TRUE |
| cyclin-dependent kinase-like 1 (CDC2-related kinase)     | NM_004196, ENS | Coding | TRUE |
| cyclin-dependent kinase-like 1 (CDC2-related kinase)     | NM_004196, ENS | Coding | TRUE |
| cyclin-dependent kinase-like 1 (CDC2-related kinase)     | NM_004196, ENS | Coding | TRUE |
| cyclin-dependent kinase-like 1 (CDC2-related kinase)     | NM_004196, ENS | Coding | TRUE |
| cyclin-dependent kinase-like 1 (CDC2-related kinase)     | NM_004196, ENS | Coding | TRUE |
| cyclin-dependent kinase-like 1 (CDC2-related kinase)     | NM_004196, ENS | Coding | TRUE |
|                                                          |                | Coding | TRUE |
|                                                          |                | Coding | TRUE |
| cell division cycle 6 homolog (S. cerevisiae)            | NM_001254, ENS | Coding | TRUE |
| cell division cycle 6 homolog (S. cerevisiae)            | NM_001254, ENS | Coding | TRUE |
| smg-6 homolog, nonsense mediated mRNA decay fac          | NM_017575, NM  | Coding | TRUE |
| smg-6 homolog, nonsense mediated mRNA decay fac          | NM_017575, NM  | Coding | TRUE |
| smg-6 homolog, nonsense mediated mRNA decay fac          | NM_017575, NM  | Coding | TRUE |
| smg-6 homolog, nonsense mediated mRNA decay fac          | NM_017575, NM  | Coding | TRUE |
| alanyl-tRNA synthetase domain containing 1, PTGES3       | ENST000003602  | Coding | TRUE |
| alanyl-tRNA synthetase domain containing 1, PTGES3       | ENST000003602  | Coding | TRUE |
| alanyl-tRNA synthetase domain containing 1, PTGES3       | ENST000003602  | Coding | TRUE |
| alanyl-tRNA synthetase domain containing 1, PTGES3       | ENST000003602  | Coding | TRUE |
| alanyl-tRNA synthetase domain containing 1, PTGES3       | ENST000003602  | Coding | TRUE |
| alanyl-tRNA synthetase domain containing 1, PTGES3       | ENST000003602  | Coding | TRUE |
| alanyl-tRNA synthetase domain containing 1, PTGES3       | ENST000003602  | Coding | TRUE |
| alanyl-tRNA synthetase domain containing 1, PTGES3       | ENST000003602  | Coding | TRUE |
| alanyl-tRNA synthetase domain containing 1, PTGES3       | ENST000003602  | Coding | TRUE |
| alanyl-tRNA synthetase domain containing 1, PTGES3       | ENST000003602  | Coding | TRUE |
| alanyl-tRNA synthetase domain containing 1, PTGES3       | ENST000003602  | Coding | TRUE |
| alanyl-tRNA synthetase domain containing 1, PTGES3       | ENST000003602  | Coding | TRUE |
| alanyl-tRNA synthetase domain containing 1, PTGES3       | ENST000003602  | Coding | TRUE |
| transmembrane channel-like 6                             | NM_007267, NM  | Coding | TRUE |

|                                                  |                |        |      |
|--------------------------------------------------|----------------|--------|------|
| transmembrane channel-like 6                     | NM_007267, NM  | Coding | TRUE |
| transmembrane channel-like 6                     | NM_007267, NM  | Coding | TRUE |
| chromosome 18 open reading frame 1               | NM_001003674,  | Coding | TRUE |
| chromosome 18 open reading frame 1               | NM_001003674,  | Coding | TRUE |
| chromosome 18 open reading frame 1               | NM_001003674,  | Coding | TRUE |
| chromosome 18 open reading frame 1               | NM_001003674,  | Coding | TRUE |
| chromosome 18 open reading frame 1               | NM_001003674,  | Coding | TRUE |
| chromosome 18 open reading frame 1               | NM_001003674,  | Coding | TRUE |
| chromosome 18 open reading frame 1               | NM_001003674,  | Coding | TRUE |
| chromosome 18 open reading frame 1               | NM_001003674,  | Coding | TRUE |
| chromosome 18 open reading frame 1               | NM_001003674,  | Coding | TRUE |
| zinc finger protein 397                          | NM_001135178,  | Coding | TRUE |
| zinc finger protein 397                          | NM_001135178,  | Coding | TRUE |
| zinc finger protein 397                          | NM_001135178,  | Coding | TRUE |
| syntaxin binding protein 2                       | NM_001127396,  | Coding | TRUE |
| syntaxin binding protein 2                       | NM_001127396,  | Coding | TRUE |
| syntaxin binding protein 2                       | NM_001127396,  | Coding | TRUE |
| syntaxin binding protein 2                       | NM_001127396,  | Coding | TRUE |
| syntaxin binding protein 2                       | NM_001127396,  | Coding | TRUE |
| syntaxin binding protein 2                       | NM_001127396,  | Coding | TRUE |
| chromosome 21 open reading frame 7               | NM_020152, ENS | Coding | TRUE |
| chromosome 21 open reading frame 7               | NM_020152, ENS | Coding | TRUE |
| chromosome 21 open reading frame 7               | NM_020152, ENS | Coding | TRUE |
| chromosome 21 open reading frame 7               | NM_020152, ENS | Coding | TRUE |
| N-acetylgalactosaminidase, alpha-                | NM_000262, ENS | Coding | TRUE |
| N-acetylgalactosaminidase, alpha-                | NM_000262, ENS | Coding | TRUE |
|                                                  |                | Coding | TRUE |
|                                                  |                | Coding | TRUE |
| aspartyl-tRNA synthetase 2, mitochondrial        | NM_018122, ENS | Coding | TRUE |
| aspartyl-tRNA synthetase 2, mitochondrial        | NM_018122, ENS | Coding | TRUE |
| aspartyl-tRNA synthetase 2, mitochondrial        | NM_018122, ENS | Coding | TRUE |
| REM2 and RAB-like small GTPase 1, chromosome 1 c | NM_030907, BCC | Coding | TRUE |
| REM2 and RAB-like small GTPase 1, chromosome 1 c | NM_030907, BCC | Coding | TRUE |
| REM2 and RAB-like small GTPase 1, chromosome 1 c | NM_030907, BCC | Coding | TRUE |
| REM2 and RAB-like small GTPase 1, chromosome 1 c | NM_030907, BCC | Coding | TRUE |
| REM2 and RAB-like small GTPase 1, chromosome 1 c | NM_030907, BCC | Coding | TRUE |
| REM2 and RAB-like small GTPase 1, chromosome 1 c | NM_030907, BCC | Coding | TRUE |
| REM2 and RAB-like small GTPase 1, chromosome 1 c | NM_030907, BCC | Coding | TRUE |
| REM2 and RAB-like small GTPase 1, chromosome 1 c | NM_030907, BCC | Coding | TRUE |
| REM2 and RAB-like small GTPase 1, chromosome 1 c | NM_030907, BCC | Coding | TRUE |
| family with sequence similarity 105, member B    | NM_138348, ENS | Coding | TRUE |
| family with sequence similarity 105, member B    | NM_138348, ENS | Coding | TRUE |
| threonyl-tRNA synthetase                         | NM_152295, ENS | Coding | TRUE |
| threonyl-tRNA synthetase                         | NM_152295, ENS | Coding | TRUE |
| threonyl-tRNA synthetase                         | NM_152295, ENS | Coding | TRUE |
| threonyl-tRNA synthetase                         | NM_152295, ENS | Coding | TRUE |
| chromosome 8 open reading frame 74               | NM_001040032,  | Coding | TRUE |
| chromosome 8 open reading frame 74               | NM_001040032,  | Coding | TRUE |
| chromosome 8 open reading frame 74               | NM_001040032,  | Coding | TRUE |
| chromosome 8 open reading frame 74               | NM_001040032,  | Coding | TRUE |
| Fas (TNF receptor superfamily, member 6)         | NM_000043, NM  | Coding | TRUE |
| Fas (TNF receptor superfamily, member 6)         | NM_000043, NM  | Coding | TRUE |
| Fas (TNF receptor superfamily, member 6)         | NM_000043, NM  | Coding | TRUE |
| carosine synthase 1                              | NM_020811, NM  | Coding | TRUE |
| carosine synthase 1                              | NM_020811, NM  | Coding | TRUE |
| uncharacterized LOC100505554                     | ENST000005251  | Coding | TRUE |
| uncharacterized LOC100505554                     | ENST000005251  | Coding | TRUE |
| density-regulated protein                        | NM_003677, ENS | Coding | TRUE |
| density-regulated protein                        | NM_003677, ENS | Coding | TRUE |
| density-regulated protein                        | NM_003677, ENS | Coding | TRUE |



|                                                        |                 |        |      |
|--------------------------------------------------------|-----------------|--------|------|
| proprotein convertase subtilisin/kexin type 5          | NM_001190482,   | Coding | TRUE |
| proprotein convertase subtilisin/kexin type 5          | NM_001190482,   | Coding | TRUE |
| proprotein convertase subtilisin/kexin type 5          | NM_001190482,   | Coding | TRUE |
| proprotein convertase subtilisin/kexin type 5          | NM_001190482,   | Coding | TRUE |
| proprotein convertase subtilisin/kexin type 5          | NM_001190482,   | Coding | TRUE |
| proprotein convertase subtilisin/kexin type 5          | NM_001190482,   | Coding | TRUE |
| proprotein convertase subtilisin/kexin type 5          | NM_001190482,   | Coding | TRUE |
| proprotein convertase subtilisin/kexin type 5          | NM_001190482,   | Coding | TRUE |
| proprotein convertase subtilisin/kexin type 5          | NM_001190482,   | Coding | TRUE |
| proprotein convertase subtilisin/kexin type 5          | NM_001190482,   | Coding | TRUE |
| proprotein convertase subtilisin/kexin type 5          | NM_001190482,   | Coding | TRUE |
| proprotein convertase subtilisin/kexin type 5          | NM_001190482,   | Coding | TRUE |
| proprotein convertase subtilisin/kexin type 5          | NM_001190482,   | Coding | TRUE |
| proprotein convertase subtilisin/kexin type 5          | NM_001190482,   | Coding | TRUE |
| PRP18 pre-mRNA processing factor 18 homolog (S. ca     | NM_003675, ENS  | Coding | TRUE |
| PRP18 pre-mRNA processing factor 18 homolog (S. ca     | NM_003675, ENS  | Coding | TRUE |
| PRP18 pre-mRNA processing factor 18 homolog (S. ca     | NM_003675, ENS  | Coding | TRUE |
| chromosome 10 open reading frame 57                    | NM_025125, ENS  | Coding | TRUE |
| chromosome 10 open reading frame 57                    | NM_025125, ENS  | Coding | TRUE |
| 5-nucleotidase, cytosolic II                           | NM_001134373,   | Coding | TRUE |
| 5-nucleotidase, cytosolic II                           | NM_001134373,   | Coding | TRUE |
| 5-nucleotidase, cytosolic II                           | NM_001134373,   | Coding | TRUE |
| 5-nucleotidase, cytosolic II                           | NM_001134373,   | Coding | TRUE |
| 5-nucleotidase, cytosolic II                           | NM_001134373,   | Coding | TRUE |
| 5-nucleotidase, cytosolic II                           | NM_001134373,   | Coding | TRUE |
| 5-nucleotidase, cytosolic II                           | NM_001134373,   | Coding | TRUE |
| 5-nucleotidase, cytosolic II                           | NM_001134373,   | Coding | TRUE |
| stromal interaction molecule 1, microRNA 4687          | NM_003156, NR   | Coding | TRUE |
| stromal interaction molecule 1, microRNA 4687          | NM_003156, NR   | Coding | TRUE |
| replication factor C (activator 1) 5, 36.5kDa          | NM_001130112, I | Coding | TRUE |
| replication factor C (activator 1) 5, 36.5kDa          | NM_001130112, I | Coding | TRUE |
| keratin 8                                              | NM_001256282,   | Coding | TRUE |
| keratin 8                                              | NM_001256282,   | Coding | TRUE |
| keratin 8                                              | NM_001256282,   | Coding | TRUE |
| keratin 8                                              | NM_001256282,   | Coding | TRUE |
| CKLF-like MARVEL transmembrane domain containing       | NR_037613, NM   | Coding | TRUE |
| CKLF-like MARVEL transmembrane domain containing       | NR_037613, NM   | Coding | TRUE |
| N-ethylmaleimide-sensitive factor, N-ethylmaleimide-se | NM_006178, NR   | Coding | TRUE |
| N-ethylmaleimide-sensitive factor, N-ethylmaleimide-se | NM_006178, NR   | Coding | TRUE |
| N-ethylmaleimide-sensitive factor, N-ethylmaleimide-se | NM_006178, NR   | Coding | TRUE |
| sterile alpha and TIR motif containing 1               | NM_015077, ENS  | Coding | TRUE |
| sterile alpha and TIR motif containing 1               | NM_015077, ENS  | Coding | TRUE |
| sterile alpha and TIR motif containing 1               | NM_015077, ENS  | Coding | TRUE |
| sterile alpha and TIR motif containing 1               | NM_015077, ENS  | Coding | TRUE |
| CTD (carboxy-terminal domain, RNA polymerase II, pc    | NM_004715, NM   | Coding | TRUE |
| CTD (carboxy-terminal domain, RNA polymerase II, pc    | NM_004715, NM   | Coding | TRUE |
|                                                        |                 | Coding | TRUE |
|                                                        |                 | Coding | TRUE |
| regulator of chromosome condensation 1, small nucle    | NM_001048199,   | Coding | TRUE |
| regulator of chromosome condensation 1, small nucle    | NM_001048199,   | Coding | TRUE |
| regulator of chromosome condensation 1, small nucle    | NM_001048199,   | Coding | TRUE |
| regulator of chromosome condensation 1, small nucle    | NM_001048199,   | Coding | TRUE |
| regulator of chromosome condensation 1, small nucle    | NM_001048199,   | Coding | TRUE |
| uncharacterized LOC100508047                           | ENST000004245   | Coding | TRUE |
| uncharacterized LOC100508047                           | ENST000004245   | Coding | TRUE |
| kelch repeat and BTB (POZ) domain containing 8         | NM_032505, ENS  | Coding | TRUE |
| kelch repeat and BTB (POZ) domain containing 8         | NM_032505, ENS  | Coding | TRUE |
| kelch repeat and BTB (POZ) domain containing 8         | NM_032505, ENS  | Coding | TRUE |
| nitrilase family, member 2                             | NM_020202, ENS  | Coding | TRUE |

|                                                        |                |        |      |
|--------------------------------------------------------|----------------|--------|------|
| nitrilase family, member 2                             | NM_020202, ENS | Coding | TRUE |
| LPS-responsive vesicle trafficking, beach and anchor c | NM_006726, NM  | Coding | TRUE |
| LPS-responsive vesicle trafficking, beach and anchor c | NM_006726, NM  | Coding | TRUE |
| LPS-responsive vesicle trafficking, beach and anchor c | NM_006726, NM  | Coding | TRUE |
| LPS-responsive vesicle trafficking, beach and anchor c | NM_006726, NM  | Coding | TRUE |
| LPS-responsive vesicle trafficking, beach and anchor c | NM_006726, NM  | Coding | TRUE |
| LPS-responsive vesicle trafficking, beach and anchor c | NM_006726, NM  | Coding | TRUE |
| NudC domain containing 2                               | NM_145266, ENS | Coding | TRUE |
| NudC domain containing 2                               | NM_145266, ENS | Coding | TRUE |
| NudC domain containing 2                               | NM_145266, ENS | Coding | TRUE |
| NudC domain containing 2                               | NM_145266, ENS | Coding | TRUE |
| coagulation factor XII (Hageman factor)                | NM_000505, ENS | Coding | TRUE |
| coagulation factor XII (Hageman factor)                | NM_000505, ENS | Coding | TRUE |
| coagulation factor XII (Hageman factor)                | NM_000505, ENS | Coding | TRUE |
| prickle homolog 4 (Drosophila), translocase of outer m | NM_013397, NM  | Coding | TRUE |
| prickle homolog 4 (Drosophila), translocase of outer m | NM_013397, NM  | Coding | TRUE |
| prickle homolog 4 (Drosophila), translocase of outer m | NM_013397, NM  | Coding | TRUE |
| zinc and ring finger 2 pseudogene 1                    | NR_003502      | Coding | TRUE |
| zinc and ring finger 2 pseudogene 1                    | NR_003502      | Coding | TRUE |
| zinc and ring finger 2 pseudogene 1                    | NR_003502      | Coding | TRUE |
| chromosome 7 open reading frame 73, uncharacterize     | NM_001130929,  | Coding | TRUE |
| chromosome 7 open reading frame 73, uncharacterize     | NM_001130929,  | Coding | TRUE |
| chromosome 7 open reading frame 73, uncharacterize     | NM_001130929,  | Coding | TRUE |
| pyruvate dehydrogenase kinase, isozyme 4               | NM_002612, ENS | Coding | TRUE |
| pyruvate dehydrogenase kinase, isozyme 4               | NM_002612, ENS | Coding | TRUE |
| pyruvate dehydrogenase kinase, isozyme 4               | NM_002612, ENS | Coding | TRUE |
| pyruvate dehydrogenase kinase, isozyme 4               | NM_002612, ENS | Coding | TRUE |
| pyruvate dehydrogenase kinase, isozyme 4               | NM_002612, ENS | Coding | TRUE |
| pyruvate dehydrogenase kinase, isozyme 4               | NM_002612, ENS | Coding | TRUE |
| syndecan binding protein (syntenin)                    | NM_005625, NM  | Coding | TRUE |
| syndecan binding protein (syntenin)                    | NM_005625, NM  | Coding | TRUE |
| uncharacterized LOC100128750                           | ENST000005175  | Coding | TRUE |
| uncharacterized LOC100128750                           | ENST000005175  | Coding | TRUE |
| uncharacterized LOC100128750                           | ENST000005175  | Coding | TRUE |
| family with sequence similarity 66, member A           | NR_026789, ENS | Coding | TRUE |
| family with sequence similarity 66, member A           | NR_026789, ENS | Coding | TRUE |
| family with sequence similarity 66, member A           | NR_026789, ENS | Coding | TRUE |
| family with sequence similarity 66, member A           | NR_026789, ENS | Coding | TRUE |
| family with sequence similarity 66, member A           | NR_026789, ENS | Coding | TRUE |
| family with sequence similarity 66, member A           | NR_026789, ENS | Coding | TRUE |
| family with sequence similarity 66, member A           | NR_026789, ENS | Coding | TRUE |
| family with sequence similarity 66, member A           | NR_026789, ENS | Coding | TRUE |
| prostaglandin-endoperoxide synthase 1 (prostaglandin   | NM_000962, NM  | Coding | TRUE |
| prostaglandin-endoperoxide synthase 1 (prostaglandin   | NM_000962, NM  | Coding | TRUE |
| prostaglandin-endoperoxide synthase 1 (prostaglandin   | NM_000962, NM  | Coding | TRUE |
| prostaglandin-endoperoxide synthase 1 (prostaglandin   | NM_000962, NM  | Coding | TRUE |
| prostaglandin-endoperoxide synthase 1 (prostaglandin   | NM_000962, NM  | Coding | TRUE |
| prostaglandin-endoperoxide synthase 1 (prostaglandin   | NM_000962, NM  | Coding | TRUE |
| prostaglandin-endoperoxide synthase 1 (prostaglandin   | NM_000962, NM  | Coding | TRUE |
| prostaglandin-endoperoxide synthase 1 (prostaglandin   | NM_000962, NM  | Coding | TRUE |
| prostaglandin-endoperoxide synthase 1 (prostaglandin   | NM_000962, NM  | Coding | TRUE |
| prostaglandin-endoperoxide synthase 1 (prostaglandin   | NM_000962, NM  | Coding | TRUE |
| prostaglandin-endoperoxide synthase 1 (prostaglandin   | NM_000962, NM  | Coding | TRUE |
| prostaglandin-endoperoxide synthase 1 (prostaglandin   | NM_000962, NM  | Coding | TRUE |
| prostaglandin-endoperoxide synthase 1 (prostaglandin   | NM_000962, NM  | Coding | TRUE |
| prostaglandin-endoperoxide synthase 1 (prostaglandin   | NM_000962, NM  | Coding | TRUE |
| prostaglandin-endoperoxide synthase 1 (prostaglandin   | NM_000962, NM  | Coding | TRUE |
| prostaglandin-endoperoxide synthase 1 (prostaglandin   | NM_000962, NM  | Coding | TRUE |
| cancer/testis antigen family 45, member A5, cancer/tes | NM_001007551,  | Coding | TRUE |
| cancer/testis antigen family 45, member A5, cancer/tes | NM_001007551,  | Coding | TRUE |
| interleukin-1 receptor-associated kinase 3             | NM_001142523,  | Coding | TRUE |
| interleukin-1 receptor-associated kinase 3             | NM_001142523,  | Coding | TRUE |
| interleukin-1 receptor-associated kinase 3             | NM_001142523,  | Coding | TRUE |
| interleukin-1 receptor-associated kinase 3             | NM_001142523,  | Coding | TRUE |





|                                                          |                 |        |      |
|----------------------------------------------------------|-----------------|--------|------|
| HEAT repeat containing 3                                 | NM_182922, ENS  | Coding | TRUE |
| HEAT repeat containing 3                                 | NM_182922, ENS  | Coding | TRUE |
| HEAT repeat containing 3                                 | NM_182922, ENS  | Coding | TRUE |
| HEAT repeat containing 3                                 | NM_182922, ENS  | Coding | TRUE |
| chromodomain helicase DNA binding protein 6              | NM_032221, ENS  | Coding | TRUE |
| chromodomain helicase DNA binding protein 6              | NM_032221, ENS  | Coding | TRUE |
| chromodomain helicase DNA binding protein 6              | NM_032221, ENS  | Coding | TRUE |
| chromodomain helicase DNA binding protein 6              | NM_032221, ENS  | Coding | TRUE |
| zinc finger protein 643                                  | NM_023070, ENS  | Coding | TRUE |
| zinc finger protein 643                                  | NM_023070, ENS  | Coding | TRUE |
| galactose mutarotase (aldose 1-epimerase)                | NM_138801, ENS  | Coding | TRUE |
| galactose mutarotase (aldose 1-epimerase)                | NM_138801, ENS  | Coding | TRUE |
| galactose mutarotase (aldose 1-epimerase)                | NM_138801, ENS  | Coding | TRUE |
| galactose mutarotase (aldose 1-epimerase)                | NM_138801, ENS  | Coding | TRUE |
| galactose mutarotase (aldose 1-epimerase)                | NM_138801, ENS  | Coding | TRUE |
| galactose mutarotase (aldose 1-epimerase)                | NM_138801, ENS  | Coding | TRUE |
| galactose mutarotase (aldose 1-epimerase)                | NM_138801, ENS  | Coding | TRUE |
| galactose mutarotase (aldose 1-epimerase)                | NM_138801, ENS  | Coding | TRUE |
| galactose mutarotase (aldose 1-epimerase)                | NM_138801, ENS  | Coding | TRUE |
| galactose mutarotase (aldose 1-epimerase)                | NM_138801, ENS  | Coding | TRUE |
| galactose mutarotase (aldose 1-epimerase)                | NM_138801, ENS  | Coding | TRUE |
| galactose mutarotase (aldose 1-epimerase)                | NM_138801, ENS  | Coding | TRUE |
| galactose mutarotase (aldose 1-epimerase)                | NM_138801, ENS  | Coding | TRUE |
| CCDC74B antisense RNA 1 (non-protein coding)             | NR_033903, ENS  | Coding | TRUE |
| CCDC74B antisense RNA 1 (non-protein coding)             | NR_033903, ENS  | Coding | TRUE |
| TBC1 domain family, member 19                            | NM_018317, ENS  | Coding | TRUE |
| TBC1 domain family, member 19                            | NM_018317, ENS  | Coding | TRUE |
| TBC1 domain family, member 19                            | NM_018317, ENS  | Coding | TRUE |
| small EDRK-rich factor 1B (centromeric), small EDRK-     | NM_001178087, I | Coding | TRUE |
| small EDRK-rich factor 1B (centromeric), small EDRK-     | NM_001178087, I | Coding | TRUE |
| platelet-derived growth factor receptor, beta polypeptid | NM_002609, ENS  | Coding | TRUE |
| platelet-derived growth factor receptor, beta polypeptid | NM_002609, ENS  | Coding | TRUE |
| platelet-derived growth factor receptor, beta polypeptid | NM_002609, ENS  | Coding | TRUE |
| platelet-derived growth factor receptor, beta polypeptid | NM_002609, ENS  | Coding | TRUE |
| platelet-derived growth factor receptor, beta polypeptid | NM_002609, ENS  | Coding | TRUE |
| platelet-derived growth factor receptor, beta polypeptid | NM_002609, ENS  | Coding | TRUE |
| platelet-derived growth factor receptor, beta polypeptid | NM_002609, ENS  | Coding | TRUE |
| platelet-derived growth factor receptor, beta polypeptid | NM_002609, ENS  | Coding | TRUE |
| lysine (K)-specific demethylase 1B                       | NM_153042, ENS  | Coding | TRUE |
| lysine (K)-specific demethylase 1B                       | NM_153042, ENS  | Coding | TRUE |
| lysine (K)-specific demethylase 1B                       | NM_153042, ENS  | Coding | TRUE |
|                                                          |                 | Coding | TRUE |
|                                                          |                 | Coding | TRUE |
|                                                          |                 | Coding | TRUE |
| R3H domain and coiled-coil containing 1                  | NM_001136108, I | Coding | TRUE |
| R3H domain and coiled-coil containing 1                  | NM_001136108, I | Coding | TRUE |
|                                                          |                 | Coding | TRUE |
|                                                          |                 | Coding | TRUE |
| tropomodulin 1                                           | NM_001166116, I | Coding | TRUE |
| tropomodulin 1                                           | NM_001166116, I | Coding | TRUE |
| tropomodulin 1                                           | NM_001166116, I | Coding | TRUE |
| tropomodulin 1                                           | NM_001166116, I | Coding | TRUE |
| ankyrin repeat and sterile alpha motif domain containir  | NM_173551, ENS  | Coding | TRUE |
| ankyrin repeat and sterile alpha motif domain containir  | NM_173551, ENS  | Coding | TRUE |
| MORC family CW-type zinc finger 4                        | NM_024657, NM   | Coding | TRUE |
| MORC family CW-type zinc finger 4                        | NM_024657, NM   | Coding | TRUE |
| muscleblind-like splicing regulator 3                    | NM_001170701, I | Coding | TRUE |
| muscleblind-like splicing regulator 3                    | NM_001170701, I | Coding | TRUE |
| muscleblind-like splicing regulator 3                    | NM_001170701, I | Coding | TRUE |
| muscleblind-like splicing regulator 3                    | NM_001170701, I | Coding | TRUE |



|                                                         |                |        |      |
|---------------------------------------------------------|----------------|--------|------|
| coiled-coil domain containing 69                        | NM_015621, ENS | Coding | TRUE |
| coiled-coil domain containing 69                        | NM_015621, ENS | Coding | TRUE |
| coiled-coil domain containing 69                        | NM_015621, ENS | Coding | TRUE |
| coiled-coil domain containing 69                        | NM_015621, ENS | Coding | TRUE |
| leucine rich repeat containing 1                        | NM_018214, ENS | Coding | TRUE |
| leucine rich repeat containing 1                        | NM_018214, ENS | Coding | TRUE |
| leucine rich repeat containing 1                        | NM_018214, ENS | Coding | TRUE |
| leucine rich repeat containing 1                        | NM_018214, ENS | Coding | TRUE |
| leucine rich repeat containing 1                        | NM_018214, ENS | Coding | TRUE |
| protein kinase (cAMP-dependent, catalytic) inhibitor be | NM_032471, NM  | Coding | TRUE |
| protein kinase (cAMP-dependent, catalytic) inhibitor be | NM_032471, NM  | Coding | TRUE |
| protein kinase (cAMP-dependent, catalytic) inhibitor be | NM_032471, NM  | Coding | TRUE |
| ataxin 1                                                | NM_001128164,  | Coding | TRUE |
| ataxin 1                                                | NM_001128164,  | Coding | TRUE |
| ataxin 1                                                | NM_001128164,  | Coding | TRUE |
| MAGI2 antisense RNA 3 (non-protein coding)              | NR_038344, NR  | Coding | TRUE |
| MAGI2 antisense RNA 3 (non-protein coding)              | NR_038344, NR  | Coding | TRUE |
| MAGI2 antisense RNA 3 (non-protein coding)              | NR_038344, NR  | Coding | TRUE |
| MAGI2 antisense RNA 3 (non-protein coding)              | NR_038344, NR  | Coding | TRUE |
| MAGI2 antisense RNA 3 (non-protein coding)              | NR_038344, NR  | Coding | TRUE |
| MAGI2 antisense RNA 3 (non-protein coding)              | NR_038344, NR  | Coding | TRUE |
| MAGI2 antisense RNA 3 (non-protein coding)              | NR_038344, NR  | Coding | TRUE |
| MAGI2 antisense RNA 3 (non-protein coding)              | NR_038344, NR  | Coding | TRUE |
| MAGI2 antisense RNA 3 (non-protein coding)              | NR_038344, NR  | Coding | TRUE |
| MAGI2 antisense RNA 3 (non-protein coding)              | NR_038344, NR  | Coding | TRUE |
| MAGI2 antisense RNA 3 (non-protein coding)              | NR_038344, NR  | Coding | TRUE |
| MAGI2 antisense RNA 3 (non-protein coding)              | NR_038344, NR  | Coding | TRUE |
| MAGI2 antisense RNA 3 (non-protein coding)              | NR_038344, NR  | Coding | TRUE |
| MAGI2 antisense RNA 3 (non-protein coding)              | NR_038344, NR  | Coding | TRUE |
| MAGI2 antisense RNA 3 (non-protein coding)              | NR_038344, NR  | Coding | TRUE |
| MAGI2 antisense RNA 3 (non-protein coding)              | NR_038344, NR  | Coding | TRUE |
| MAGI2 antisense RNA 3 (non-protein coding)              | NR_038344, NR  | Coding | TRUE |
| ubiquitin protein ligase E3C                            | NM_014671, ENS | Coding | TRUE |
| ubiquitin protein ligase E3C                            | NM_014671, ENS | Coding | TRUE |
| ubiquitin protein ligase E3C                            | NM_014671, ENS | Coding | TRUE |
| ubiquitin protein ligase E3C                            | NM_014671, ENS | Coding | TRUE |
| family with sequence similarity 197, Y-linked, member   | ENST000004205  | Coding | TRUE |
| family with sequence similarity 197, Y-linked, member   | ENST000004205  | Coding | TRUE |
| family with sequence similarity 197, Y-linked, member   | ENST000004205  | Coding | TRUE |
| family with sequence similarity 197, Y-linked, member   | ENST000004205  | Coding | TRUE |
| ADAM metallopeptidase domain 12                         | NM_003474, NM  | Coding | TRUE |
| ADAM metallopeptidase domain 12                         | NM_003474, NM  | Coding | TRUE |
| ADAM metallopeptidase domain 12                         | NM_003474, NM  | Coding | TRUE |
| ADAM metallopeptidase domain 12                         | NM_003474, NM  | Coding | TRUE |
| ADAM metallopeptidase domain 12                         | NM_003474, NM  | Coding | TRUE |
| ADAM metallopeptidase domain 12                         | NM_003474, NM  | Coding | TRUE |
| family with sequence similarity 111, member A           | NM_001142519,  | Coding | TRUE |
| family with sequence similarity 111, member A           | NM_001142519,  | Coding | TRUE |
| CTAGE family, member 5                                  | NM_001247989,  | Coding | TRUE |
| CTAGE family, member 5                                  | NM_001247989,  | Coding | TRUE |
| fibrillin 1                                             | NM_000138, ENS | Coding | TRUE |
| fibrillin 1                                             | NM_000138, ENS | Coding | TRUE |
| bromodomain containing 7                                | NM_001173984,  | Coding | TRUE |
| bromodomain containing 7                                | NM_001173984,  | Coding | TRUE |
| family with sequence similarity 18, member B2, CMT1,    | NM_001135036,  | Coding | TRUE |
| family with sequence similarity 18, member B2, CMT1,    | NM_001135036,  | Coding | TRUE |
| family with sequence similarity 18, member B2, CMT1,    | NM_001135036,  | Coding | TRUE |
| family with sequence similarity 18, member B2, CMT1,    | NM_001135036,  | Coding | TRUE |

|                                                         |                |        |      |
|---------------------------------------------------------|----------------|--------|------|
| family with sequence similarity 18, member B2, CMT1     | NM_001135036,  | Coding | TRUE |
| family with sequence similarity 18, member B2, CMT1     | NM_001135036,  | Coding | TRUE |
| family with sequence similarity 18, member B2, CMT1     | NM_001135036,  | Coding | TRUE |
| family with sequence similarity 18, member B2, CMT1     | NM_001135036,  | Coding | TRUE |
| lectin, galactoside-binding, soluble, 3 binding protein | NM_005567, ENS | Coding | TRUE |
| lectin, galactoside-binding, soluble, 3 binding protein | NM_005567, ENS | Coding | TRUE |
| lectin, galactoside-binding, soluble, 3 binding protein | NM_005567, ENS | Coding | TRUE |
| placenta-specific 2 (non-protein coding)                | NR_027064, ENS | Coding | TRUE |
| placenta-specific 2 (non-protein coding)                | NR_027064, ENS | Coding | TRUE |
| placenta-specific 2 (non-protein coding)                | NR_027064, ENS | Coding | TRUE |
| IGF-like family member 3                                | NM_207393, ENS | Coding | TRUE |
| IGF-like family member 3                                | NM_207393, ENS | Coding | TRUE |
| IGF-like family member 3                                | NM_207393, ENS | Coding | TRUE |
| chromosome 20 open reading frame 112                    | NM_080616, ENS | Coding | TRUE |
| chromosome 20 open reading frame 112                    | NM_080616, ENS | Coding | TRUE |
| chromosome 20 open reading frame 112                    | NM_080616, ENS | Coding | TRUE |
| histocompatibility antigen-related                      | NM_001207043,  | Coding | TRUE |
| histocompatibility antigen-related                      | NM_001207043,  | Coding | TRUE |
| histocompatibility antigen-related                      | NM_001207043,  | Coding | TRUE |
| histocompatibility antigen-related                      | NM_001207043,  | Coding | TRUE |
| amylase, alpha 1A (salivary), amylase, alpha 1B (saliv  | NM_004038, NM  | Coding | TRUE |
| amylase, alpha 1A (salivary), amylase, alpha 1B (saliv  | NM_004038, NM  | Coding | TRUE |
| tetratricopeptide repeat domain 31                      | NM_022492, NR  | Coding | TRUE |
| tetratricopeptide repeat domain 31                      | NM_022492, NR  | Coding | TRUE |
|                                                         |                | Coding | TRUE |
|                                                         |                | Coding | TRUE |
| protein S (alpha)                                       | NM_000313, ENS | Coding | TRUE |
| protein S (alpha)                                       | NM_000313, ENS | Coding | TRUE |
| protein S (alpha)                                       | NM_000313, ENS | Coding | TRUE |
| protein S (alpha)                                       | NM_000313, ENS | Coding | TRUE |
| protein S (alpha)                                       | NM_000313, ENS | Coding | TRUE |
| protein S (alpha)                                       | NM_000313, ENS | Coding | TRUE |
| hyaluronoglucosaminidase 3                              | NM_001200029,  | Coding | TRUE |
| hyaluronoglucosaminidase 3                              | NM_001200029,  | Coding | TRUE |
| family with sequence similarity 198, member B           | NM_001031700,  | Coding | TRUE |
| family with sequence similarity 198, member B           | NM_001031700,  | Coding | TRUE |
| family with sequence similarity 198, member B           | NM_001031700,  | Coding | TRUE |
| family with sequence similarity 198, member B           | NM_001031700,  | Coding | TRUE |
| family with sequence similarity 198, member B           | NM_001031700,  | Coding | TRUE |
| family with sequence similarity 198, member B           | NM_001031700,  | Coding | TRUE |
| family with sequence similarity 198, member B           | NM_001031700,  | Coding | TRUE |
| family with sequence similarity 198, member B           | NM_001031700,  | Coding | TRUE |
| caspase 3, apoptosis-related cysteine peptidase         | NM_004346, NM  | Coding | TRUE |
| caspase 3, apoptosis-related cysteine peptidase         | NM_004346, NM  | Coding | TRUE |
|                                                         |                | Coding | TRUE |
|                                                         |                | Coding | TRUE |
|                                                         |                | Coding | TRUE |
|                                                         |                | Coding | TRUE |
| claudin 4                                               | NM_001305, ENS | Coding | TRUE |
| claudin 4                                               | NM_001305, ENS | Coding | TRUE |
| p53-induced death domain protein                        | NM_145886, NM  | Coding | TRUE |
| p53-induced death domain protein                        | NM_145886, NM  | Coding | TRUE |
| methionyl-tRNA synthetase                               | NM_004990, ENS | Coding | TRUE |
| methionyl-tRNA synthetase                               | NM_004990, ENS | Coding | TRUE |
| methionyl-tRNA synthetase                               | NM_004990, ENS | Coding | TRUE |
| methionyl-tRNA synthetase                               | NM_004990, ENS | Coding | TRUE |
| methionyl-tRNA synthetase                               | NM_004990, ENS | Coding | TRUE |
| methionyl-tRNA synthetase                               | NM_004990, ENS | Coding | TRUE |
| RAP1B, member of RAS oncogene family                    | NM_001010942,  | Coding | TRUE |



|                                                        |                 |        |      |
|--------------------------------------------------------|-----------------|--------|------|
| lymphocyte antigen 6 complex, locus G5C                | NM_025262       | Coding | TRUE |
| lymphocyte antigen 6 complex, locus G5C                | NM_025262       | Coding | TRUE |
| lymphocyte antigen 6 complex, locus G5C                | NM_025262       | Coding | TRUE |
| lymphocyte antigen 6 complex, locus G5C                | NM_025262       | Coding | TRUE |
| lymphocyte antigen 6 complex, locus G5C                | NM_025262       | Coding | TRUE |
| lymphocyte antigen 6 complex, locus G5C                | NM_025262       | Coding | TRUE |
| family with sequence similarity 183, member A          | NM_001101376    | Coding | TRUE |
| family with sequence similarity 183, member A          | NM_001101376    | Coding | TRUE |
| fatty acid amide hydrolase                             | NM_001441, ENS  | Coding | TRUE |
| fatty acid amide hydrolase                             | NM_001441, ENS  | Coding | TRUE |
| potassium voltage-gated channel, delayed-rectifier, su | NM_002252, ENS  | Coding | TRUE |
| potassium voltage-gated channel, delayed-rectifier, su | NM_002252, ENS  | Coding | TRUE |
| potassium voltage-gated channel, delayed-rectifier, su | NM_002252, ENS  | Coding | TRUE |
| Hermansky-Pudlak syndrome 3                            | NM_032383, ENS  | Coding | TRUE |
| Hermansky-Pudlak syndrome 3                            | NM_032383, ENS  | Coding | TRUE |
| Hermansky-Pudlak syndrome 3                            | NM_032383, ENS  | Coding | TRUE |
| Hermansky-Pudlak syndrome 3                            | NM_032383, ENS  | Coding | TRUE |
| Hermansky-Pudlak syndrome 3                            | NM_032383, ENS  | Coding | TRUE |
| Hermansky-Pudlak syndrome 3                            | NM_032383, ENS  | Coding | TRUE |
| Hermansky-Pudlak syndrome 3                            | NM_032383, ENS  | Coding | TRUE |
| TCDD-inducible poly(ADP-ribose) polymerase             | NM_001184717    | Coding | TRUE |
| TCDD-inducible poly(ADP-ribose) polymerase             | NM_001184717    | Coding | TRUE |
| coiled-coil domain containing 149                      | NM_001130726    | Coding | TRUE |
| coiled-coil domain containing 149                      | NM_001130726    | Coding | TRUE |
| coiled-coil domain containing 149                      | NM_001130726    | Coding | TRUE |
| coiled-coil domain containing 149                      | NM_001130726    | Coding | TRUE |
| syntaxin binding protein 5 (tomosyn)                   | NM_001127715    | Coding | TRUE |
| syntaxin binding protein 5 (tomosyn)                   | NM_001127715    | Coding | TRUE |
| syntaxin binding protein 5 (tomosyn)                   | NM_001127715    | Coding | TRUE |
| inhibitor of growth family, member 3                   | NM_198267, NM   | Coding | TRUE |
| inhibitor of growth family, member 3                   | NM_198267, NM   | Coding | TRUE |
| inhibitor of growth family, member 3                   | NM_198267, NM   | Coding | TRUE |
| inhibitor of growth family, member 3                   | NM_198267, NM   | Coding | TRUE |
| nephroblastoma overexpressed                           | NM_002514, ENS  | Coding | TRUE |
| nephroblastoma overexpressed                           | NM_002514, ENS  | Coding | TRUE |
| nephroblastoma overexpressed                           | NM_002514, ENS  | Coding | TRUE |
| nephroblastoma overexpressed                           | NM_002514, ENS  | Coding | TRUE |
| chromosome 8 open reading frame 46                     | NM_152765, ENS  | Coding | TRUE |
| chromosome 8 open reading frame 46                     | NM_152765, ENS  | Coding | TRUE |
| globoside alpha-1,3-N-acetylgalactosaminyltransferase  | NM_021996, ENS  | Coding | TRUE |
| globoside alpha-1,3-N-acetylgalactosaminyltransferase  | NM_021996, ENS  | Coding | TRUE |
| globoside alpha-1,3-N-acetylgalactosaminyltransferase  | NM_021996, ENS  | Coding | TRUE |
| globoside alpha-1,3-N-acetylgalactosaminyltransferase  | NM_021996, ENS  | Coding | TRUE |
| globoside alpha-1,3-N-acetylgalactosaminyltransferase  | NM_021996, ENS  | Coding | TRUE |
| globoside alpha-1,3-N-acetylgalactosaminyltransferase  | NM_021996, ENS  | Coding | TRUE |
| zinc finger, BED-type containing 1, dehydrogenase/rec  | NM_001171136, I | Coding | TRUE |
| zinc finger, BED-type containing 1, dehydrogenase/rec  | NM_001171136, I | Coding | TRUE |
| zinc finger, BED-type containing 1, dehydrogenase/rec  | NM_001171136, I | Coding | TRUE |
| zinc finger, BED-type containing 1, dehydrogenase/rec  | NM_001171136, I | Coding | TRUE |
| zinc finger, BED-type containing 1, dehydrogenase/rec  | NM_001171136, I | Coding | TRUE |
| zinc finger, BED-type containing 1, dehydrogenase/rec  | NM_001171136, I | Coding | TRUE |
| zinc finger, BED-type containing 1, dehydrogenase/rec  | NM_001171136, I | Coding | TRUE |
| DnaJ (Hsp40) homolog, subfamily C, member 24           | NM_181706, ENS  | Coding | TRUE |
| DnaJ (Hsp40) homolog, subfamily C, member 24           | NM_181706, ENS  | Coding | TRUE |
|                                                        |                 | Coding | TRUE |
|                                                        |                 | Coding | TRUE |
|                                                        |                 | Coding | TRUE |
| cysteine and glycine-rich protein 2                    | NM_001321, ENS  | Coding | TRUE |
| cysteine and glycine-rich protein 2                    | NM_001321, ENS  | Coding | TRUE |
| cysteine and glycine-rich protein 2                    | NM_001321, ENS  | Coding | TRUE |







|                                                            |                |        |      |
|------------------------------------------------------------|----------------|--------|------|
| sal-like 4 (Drosophila)                                    | NM_020436, ENS | Coding | TRUE |
| sal-like 4 (Drosophila)                                    | NM_020436, ENS | Coding | TRUE |
| sal-like 4 (Drosophila)                                    | NM_020436, ENS | Coding | TRUE |
| sal-like 4 (Drosophila)                                    | NM_020436, ENS | Coding | TRUE |
| sal-like 4 (Drosophila)                                    | NM_020436, ENS | Coding | TRUE |
| sal-like 4 (Drosophila)                                    | NM_020436, ENS | Coding | TRUE |
| sal-like 4 (Drosophila)                                    | NM_020436, ENS | Coding | TRUE |
| sal-like 4 (Drosophila)                                    | NM_020436, ENS | Coding | TRUE |
| RAN binding protein 1                                      | NM_002882, ENS | Coding | TRUE |
| RAN binding protein 1                                      | NM_002882, ENS | Coding | TRUE |
| RAN binding protein 1                                      | NM_002882, ENS | Coding | TRUE |
| RAN binding protein 1                                      | NM_002882, ENS | Coding | TRUE |
| fibulin 1                                                  | NM_001996, NM  | Coding | TRUE |
| fibulin 1                                                  | NM_001996, NM  | Coding | TRUE |
| fibulin 1                                                  | NM_001996, NM  | Coding | TRUE |
| fibulin 1                                                  | NM_001996, NM  | Coding | TRUE |
| fibulin 1                                                  | NM_001996, NM  | Coding | TRUE |
| fibulin 1                                                  | NM_001996, NM  | Coding | TRUE |
| fibulin 1                                                  | NM_001996, NM  | Coding | TRUE |
| fibulin 1                                                  | NM_001996, NM  | Coding | TRUE |
| fibulin 1                                                  | NM_001996, NM  | Coding | TRUE |
| fibulin 1                                                  | NM_001996, NM  | Coding | TRUE |
| fibulin 1                                                  | NM_001996, NM  | Coding | TRUE |
| fibulin 1                                                  | NM_001996, NM  | Coding | TRUE |
| suppressor of Ty 7 (S. cerevisiae)-like                    | NM_014860, ENS | Coding | TRUE |
| suppressor of Ty 7 (S. cerevisiae)-like                    | NM_014860, ENS | Coding | TRUE |
| solute carrier family 25 (mitochondrial carrier, brain), m | NM_003951, NM  | Coding | TRUE |
| solute carrier family 25 (mitochondrial carrier, brain), m | NM_003951, NM  | Coding | TRUE |
| solute carrier family 25 (mitochondrial carrier, brain), m | NM_003951, NM  | Coding | TRUE |
| extra spindle pole bodies homolog 1 (S. cerevisiae)        | NM_012291, ENS | Coding | TRUE |
| extra spindle pole bodies homolog 1 (S. cerevisiae)        | NM_012291, ENS | Coding | TRUE |
| extra spindle pole bodies homolog 1 (S. cerevisiae)        | NM_012291, ENS | Coding | TRUE |
| extra spindle pole bodies homolog 1 (S. cerevisiae)        | NM_012291, ENS | Coding | TRUE |
| sodium channel, non-voltage-gated 1 alpha subunit          | NM_001159576,  | Coding | TRUE |
| sodium channel, non-voltage-gated 1 alpha subunit          | NM_001159576,  | Coding | TRUE |
| sodium channel, non-voltage-gated 1 alpha subunit          | NM_001159576,  | Coding | TRUE |
| double C2-like domains, beta                               | NM_003585, ENS | Coding | TRUE |
| double C2-like domains, beta                               | NM_003585, ENS | Coding | TRUE |
| fibrous sheath interacting protein 2                       | NM_173651, ENS | Coding | TRUE |
| fibrous sheath interacting protein 2                       | NM_173651, ENS | Coding | TRUE |
| fibrous sheath interacting protein 2                       | NM_173651, ENS | Coding | TRUE |
| fibrous sheath interacting protein 2                       | NM_173651, ENS | Coding | TRUE |
| fibrous sheath interacting protein 2                       | NM_173651, ENS | Coding | TRUE |
| THO complex 7 homolog (Drosophila)                         | NM_025075, ENS | Coding | TRUE |
| THO complex 7 homolog (Drosophila)                         | NM_025075, ENS | Coding | TRUE |
| thrombospondin 2                                           | NM_003247, ENS | Coding | TRUE |
| thrombospondin 2                                           | NM_003247, ENS | Coding | TRUE |
| thrombospondin 2                                           | NM_003247, ENS | Coding | TRUE |
| thrombospondin 2                                           | NM_003247, ENS | Coding | TRUE |
| chromosome 10 open reading frame 108                       | NR_027151, NR  | Coding | TRUE |
| chromosome 10 open reading frame 108                       | NR_027151, NR  | Coding | TRUE |
| HAUS augmin-like complex, subunit 2                        | NM_001130447,  | Coding | TRUE |
| HAUS augmin-like complex, subunit 2                        | NM_001130447,  | Coding | TRUE |
| HAUS augmin-like complex, subunit 2                        | NM_001130447,  | Coding | TRUE |
| transmembrane protein 231                                  | NM_001077416,  | Coding | TRUE |
| transmembrane protein 231                                  | NM_001077416,  | Coding | TRUE |
| transmembrane protein 231                                  | NM_001077416,  | Coding | TRUE |
| transmembrane protein 231                                  | NM_001077416,  | Coding | TRUE |
| zinc finger and BTB domain containing 7C                   | NM_001039360,  | Coding | TRUE |
| zinc finger and BTB domain containing 7C                   | NM_001039360,  | Coding | TRUE |



|                                                             |                |        |      |
|-------------------------------------------------------------|----------------|--------|------|
| cadherin, EGF LAG seven-pass G-type receptor 1 (fla         | NM_014246, ENS | Coding | TRUE |
| cadherin, EGF LAG seven-pass G-type receptor 1 (fla         | NM_014246, ENS | Coding | TRUE |
| cadherin, EGF LAG seven-pass G-type receptor 1 (fla         | NM_014246, ENS | Coding | TRUE |
| cadherin, EGF LAG seven-pass G-type receptor 1 (fla         | NM_014246, ENS | Coding | TRUE |
| cadherin, EGF LAG seven-pass G-type receptor 1 (fla         | NM_014246, ENS | Coding | TRUE |
| cadherin, EGF LAG seven-pass G-type receptor 1 (fla         | NM_014246, ENS | Coding | TRUE |
| cadherin, EGF LAG seven-pass G-type receptor 1 (fla         | NM_014246, ENS | Coding | TRUE |
| cadherin, EGF LAG seven-pass G-type receptor 1 (fla         | NM_014246, ENS | Coding | TRUE |
| major histocompatibility complex, class II, DP beta 2 (p    | NR_001435      | Coding | TRUE |
| major histocompatibility complex, class II, DP beta 2 (p    | NR_001435      | Coding | TRUE |
| major histocompatibility complex, class II, DP beta 2 (p    | NR_001435      | Coding | TRUE |
| major histocompatibility complex, class II, DP beta 2 (p    | NR_001435      | Coding | TRUE |
| major histocompatibility complex, class II, DP beta 2 (p    | NR_001435      | Coding | TRUE |
| major histocompatibility complex, class II, DP beta 2 (p    | NR_001435      | Coding | TRUE |
| major histocompatibility complex, class II, DP beta 2 (p    | NR_001435      | Coding | TRUE |
| major histocompatibility complex, class II, DP beta 2 (p    | NR_001435      | Coding | TRUE |
| major histocompatibility complex, class II, DP beta 2 (p    | NR_001435      | Coding | TRUE |
| major histocompatibility complex, class II, DP beta 2 (p    | NR_001435      | Coding | TRUE |
| major histocompatibility complex, class II, DP beta 2 (p    | NR_001435      | Coding | TRUE |
| acyl-CoA dehydrogenase, C-4 to C-12 straight chain          | NM_000016, NM  | Coding | TRUE |
| acyl-CoA dehydrogenase, C-4 to C-12 straight chain          | NM_000016, NM  | Coding | TRUE |
| acyl-CoA dehydrogenase, C-4 to C-12 straight chain          | NM_000016, NM  | Coding | TRUE |
| CDC42 small effector 1                                      | NM_001038707,  | Coding | TRUE |
| CDC42 small effector 1                                      | NM_001038707,  | Coding | TRUE |
| CDC42 small effector 1                                      | NM_001038707,  | Coding | TRUE |
| pre-B-cell leukemia homeobox interacting protein 1          | NM_020524, ENS | Coding | TRUE |
| pre-B-cell leukemia homeobox interacting protein 1          | NM_020524, ENS | Coding | TRUE |
| protein kinase C, epsilon                                   | NM_005400, ENS | Coding | TRUE |
| protein kinase C, epsilon                                   | NM_005400, ENS | Coding | TRUE |
| protein kinase C, epsilon                                   | NM_005400, ENS | Coding | TRUE |
| eukaryotic translation initiation factor 4E                 | NM_001130678,  | Coding | TRUE |
| eukaryotic translation initiation factor 4E                 | NM_001130678,  | Coding | TRUE |
| solute carrier family 1 (glial high affinity glutamate tran | NM_004172, NM  | Coding | TRUE |
| solute carrier family 1 (glial high affinity glutamate tran | NM_004172, NM  | Coding | TRUE |
| solute carrier family 1 (glial high affinity glutamate tran | NM_004172, NM  | Coding | TRUE |
| solute carrier family 1 (glial high affinity glutamate tran | NM_004172, NM  | Coding | TRUE |
| solute carrier family 1 (glial high affinity glutamate tran | NM_004172, NM  | Coding | TRUE |
| solute carrier family 1 (glial high affinity glutamate tran | NM_004172, NM  | Coding | TRUE |
| solute carrier family 1 (glial high affinity glutamate tran | NM_004172, NM  | Coding | TRUE |
| solute carrier family 1 (glial high affinity glutamate tran | NM_004172, NM  | Coding | TRUE |
| solute carrier family 1 (glial high affinity glutamate tran | NM_004172, NM  | Coding | TRUE |
| solute carrier family 1 (glial high affinity glutamate tran | NM_004172, NM  | Coding | TRUE |
| solute carrier family 1 (glial high affinity glutamate tran | NM_004172, NM  | Coding | TRUE |
| solute carrier family 1 (glial high affinity glutamate tran | NM_004172, NM  | Coding | TRUE |
| solute carrier family 1 (glial high affinity glutamate tran | NM_004172, NM  | Coding | TRUE |
| solute carrier family 1 (glial high affinity glutamate tran | NM_004172, NM  | Coding | TRUE |
| solute carrier family 1 (glial high affinity glutamate tran | NM_004172, NM  | Coding | TRUE |
| solute carrier family 1 (glial high affinity glutamate tran | NM_004172, NM  | Coding | TRUE |
| solute carrier family 1 (glial high affinity glutamate tran | NM_004172, NM  | Coding | TRUE |
| solute carrier family 1 (glial high affinity glutamate tran | NM_004172, NM  | Coding | TRUE |
| solute carrier family 1 (glial high affinity glutamate tran | NM_004172, NM  | Coding | TRUE |
| solute carrier family 1 (glial high affinity glutamate tran | NM_004172, NM  | Coding | TRUE |
| cysteine-rich transmembrane module containing 1             | NM_032412, ENS | Coding | TRUE |
| cysteine-rich transmembrane module containing 1             | NM_032412, ENS | Coding | TRUE |
|                                                             |                | Coding | TRUE |
|                                                             |                | Coding | TRUE |
| CD109 molecule                                              | NM_001159587,  | Coding | TRUE |
| CD109 molecule                                              | NM_001159587,  | Coding | TRUE |
| blocked early in transport 1 homolog (S. cerevisiae)        | NM_005868, BCC | Coding | TRUE |
| blocked early in transport 1 homolog (S. cerevisiae)        | NM_005868, BCC | Coding | TRUE |
| blocked early in transport 1 homolog (S. cerevisiae)        | NM_005868, BCC | Coding | TRUE |

|                                                         |                      |        |      |
|---------------------------------------------------------|----------------------|--------|------|
| blocked early in transport 1 homolog (S. cerevisiae)    | NM_005868, BCC       | Coding | TRUE |
| blocked early in transport 1 homolog (S. cerevisiae)    | NM_005868, BCC       | Coding | TRUE |
| coiled-coil domain containing 146                       | NM_020879, BCC       | Coding | TRUE |
| coiled-coil domain containing 146                       | NM_020879, BCC       | Coding | TRUE |
| coiled-coil domain containing 146                       | NM_020879, BCC       | Coding | TRUE |
| coiled-coil domain containing 146                       | NM_020879, BCC       | Coding | TRUE |
| osteomodulin                                            | NM_005014, ENS       | Coding | TRUE |
| osteomodulin                                            | NM_005014, ENS       | Coding | TRUE |
| osteomodulin                                            | NM_005014, ENS       | Coding | TRUE |
| osteomodulin                                            | NM_005014, ENS       | Coding | TRUE |
| complement component 5                                  | NM_001735, ENS       | Coding | TRUE |
| complement component 5                                  | NM_001735, ENS       | Coding | TRUE |
| complement component 5                                  | NM_001735, ENS       | Coding | TRUE |
| complement component 5                                  | NM_001735, ENS       | Coding | TRUE |
| complement component 5                                  | NM_001735, ENS       | Coding | TRUE |
| sarcosine dehydrogenase                                 | NM_001134707, ENS    | Coding | TRUE |
| sarcosine dehydrogenase                                 | NM_001134707, ENS    | Coding | TRUE |
| sarcosine dehydrogenase                                 | NM_001134707, ENS    | Coding | TRUE |
| sarcosine dehydrogenase                                 | NM_001134707, ENS    | Coding | TRUE |
| iron-sulfur cluster assembly 1 homolog (S. cerevisiae)  | NM_030940, ENS       | Coding | TRUE |
| iron-sulfur cluster assembly 1 homolog (S. cerevisiae)  | NM_030940, ENS       | Coding | TRUE |
| zinc finger protein 674                                 | NM_001039891, ENS    | Coding | TRUE |
| zinc finger protein 674                                 | NM_001039891, ENS    | Coding | TRUE |
| zinc finger protein 674                                 | NM_001039891, ENS    | Coding | TRUE |
| family with sequence similarity 197, Y-linked, member 1 | NR_001553, ENS       | Coding | TRUE |
| family with sequence similarity 197, Y-linked, member 1 | NR_001553, ENS       | Coding | TRUE |
| family with sequence similarity 197, Y-linked, member 1 | NR_001553, ENS       | Coding | TRUE |
| family with sequence similarity 197, Y-linked, member 1 | NR_001553, ENS       | Coding | TRUE |
| family with sequence similarity 197, Y-linked, member 1 | NR_001553, ENS       | Coding | TRUE |
| family with sequence similarity 197, Y-linked, member 1 | NR_001553, ENS       | Coding | TRUE |
| aryl hydrocarbon receptor nuclear translocator-like 1   | NM_001030272, ENS    | Coding | TRUE |
| aryl hydrocarbon receptor nuclear translocator-like 1   | NM_001030272, ENS    | Coding | TRUE |
| aryl hydrocarbon receptor nuclear translocator-like 1   | NM_001030272, ENS    | Coding | TRUE |
| aryl hydrocarbon receptor nuclear translocator-like 1   | NM_001030272, ENS    | Coding | TRUE |
| microsomal glutathione S-transferase 1                  | NM_020300, NM_020300 | Coding | TRUE |
| microsomal glutathione S-transferase 1                  | NM_020300, NM_020300 | Coding | TRUE |
|                                                         |                      | Coding | TRUE |
|                                                         |                      | Coding | TRUE |
| FERM domain containing 6                                | NM_001042481, ENS    | Coding | TRUE |
| FERM domain containing 6                                | NM_001042481, ENS    | Coding | TRUE |
| metallothionein 1G                                      | NM_005950, ENS       | Coding | TRUE |
| metallothionein 1G                                      | NM_005950, ENS       | Coding | TRUE |
| follistatin-like 3 (secreted glycoprotein)              | NM_005860, ENS       | Coding | TRUE |
| follistatin-like 3 (secreted glycoprotein)              | NM_005860, ENS       | Coding | TRUE |
| tumor necrosis factor (ligand) superfamily, member 9    | NM_003811, ENS       | Coding | TRUE |
| tumor necrosis factor (ligand) superfamily, member 9    | NM_003811, ENS       | Coding | TRUE |
| lipid phosphate phosphatase-related protein type 3      | NM_024888, ENS       | Coding | TRUE |
| lipid phosphate phosphatase-related protein type 3      | NM_024888, ENS       | Coding | TRUE |
| retinoblastoma-like 1 (p107)                            | NM_002895, NM_002895 | Coding | TRUE |
| retinoblastoma-like 1 (p107)                            | NM_002895, NM_002895 | Coding | TRUE |
| BCL2-like 11 (apoptosis facilitator)                    | NM_207002, NM_207002 | Coding | TRUE |
| BCL2-like 11 (apoptosis facilitator)                    | NM_207002, NM_207002 | Coding | TRUE |
| BCL2-like 11 (apoptosis facilitator)                    | NM_207002, NM_207002 | Coding | TRUE |
| integrin, beta 5                                        | NM_002213, ENS       | Coding | TRUE |
| integrin, beta 5                                        | NM_002213, ENS       | Coding | TRUE |
|                                                         |                      | Coding | TRUE |
|                                                         |                      | Coding | TRUE |
|                                                         |                      | Coding | TRUE |

|                                                           |                                                       |        |      |
|-----------------------------------------------------------|-------------------------------------------------------|--------|------|
|                                                           |                                                       | Coding | TRUE |
|                                                           |                                                       | Coding | TRUE |
|                                                           |                                                       | Coding | TRUE |
| FtsJ methyltransferase domain containing 2                | NM_015050, ENS                                        | Coding | TRUE |
| FtsJ methyltransferase domain containing 2                | NM_015050, ENS                                        | Coding | TRUE |
| high mobility group box 3                                 | NM_005342, ENS                                        | Coding | TRUE |
| high mobility group box 3                                 | NM_005342, ENS                                        | Coding | TRUE |
| high mobility group box 3                                 | NM_005342, ENS                                        | Coding | TRUE |
| high mobility group box 3                                 | NM_005342, ENS                                        | Coding | TRUE |
| glutamic pyruvate transaminase (alanine aminotransferase) | NM_001142466, ENS                                     | Coding | TRUE |
| glutamic pyruvate transaminase (alanine aminotransferase) | NM_001142466, ENS                                     | Coding | TRUE |
| glutamic pyruvate transaminase (alanine aminotransferase) | NM_001142466, ENS                                     | Coding | TRUE |
| cytochrome b5 reductase 3                                 | NM_007326, NM_007326, NM_007326, NM_007326            | Coding | TRUE |
| cytochrome b5 reductase 3                                 | NM_007326, NM_007326, NM_007326, NM_007326            | Coding | TRUE |
| cytochrome b5 reductase 3                                 | NM_007326, NM_007326, NM_007326, NM_007326            | Coding | TRUE |
| dermatopontin                                             | NM_001937, ENS                                        | Coding | TRUE |
| dermatopontin                                             | NM_001937, ENS                                        | Coding | TRUE |
| uncharacterized LOC100506023                              | NR_037845                                             | Coding | TRUE |
| uncharacterized LOC100506023                              | NR_037845                                             | Coding | TRUE |
| uncharacterized LOC100506023                              | NR_037845                                             | Coding | TRUE |
| programmed cell death 6 interacting protein               | NM_001162429, ENS                                     | Coding | TRUE |
| programmed cell death 6 interacting protein               | NM_001162429, ENS                                     | Coding | TRUE |
| sel-1 suppressor of lin-12-like 3 (C. elegans)            | NM_015187, ENS                                        | Coding | TRUE |
| sel-1 suppressor of lin-12-like 3 (C. elegans)            | NM_015187, ENS                                        | Coding | TRUE |
| sel-1 suppressor of lin-12-like 3 (C. elegans)            | NM_015187, ENS                                        | Coding | TRUE |
| sel-1 suppressor of lin-12-like 3 (C. elegans)            | NM_015187, ENS                                        | Coding | TRUE |
| sel-1 suppressor of lin-12-like 3 (C. elegans)            | NM_015187, ENS                                        | Coding | TRUE |
| sel-1 suppressor of lin-12-like 3 (C. elegans)            | NM_015187, ENS                                        | Coding | TRUE |
| sel-1 suppressor of lin-12-like 3 (C. elegans)            | NM_015187, ENS                                        | Coding | TRUE |
| sel-1 suppressor of lin-12-like 3 (C. elegans)            | NM_015187, ENS                                        | Coding | TRUE |
| sel-1 suppressor of lin-12-like 3 (C. elegans)            | NM_015187, ENS                                        | Coding | TRUE |
| sel-1 suppressor of lin-12-like 3 (C. elegans)            | NM_015187, ENS                                        | Coding | TRUE |
| sel-1 suppressor of lin-12-like 3 (C. elegans)            | NM_015187, ENS                                        | Coding | TRUE |
| transcription factor 7 (T-cell specific, HMG-box)         | NM_201634, NM_201634, NM_201634, NM_201634            | Coding | TRUE |
| transcription factor 7 (T-cell specific, HMG-box)         | NM_201634, NM_201634, NM_201634, NM_201634            | Coding | TRUE |
| transcription factor 7 (T-cell specific, HMG-box)         | NM_201634, NM_201634, NM_201634, NM_201634            | Coding | TRUE |
| transcription factor 7 (T-cell specific, HMG-box)         | NM_201634, NM_201634, NM_201634, NM_201634            | Coding | TRUE |
| uroplakin 3B                                              | NM_030570, NM_030570, NM_030570, NM_030570            | Coding | TRUE |
| uroplakin 3B                                              | NM_030570, NM_030570, NM_030570, NM_030570            | Coding | TRUE |
| nudix (nucleoside diphosphate linked moiety X)-type m     | NM_024815, ENS                                        | Coding | TRUE |
| nudix (nucleoside diphosphate linked moiety X)-type m     | NM_024815, ENS                                        | Coding | TRUE |
| ring finger protein 170, microRNA 4469                    | NM_001160223, ENS                                     | Coding | TRUE |
| ring finger protein 170, microRNA 4469                    | NM_001160223, ENS                                     | Coding | TRUE |
| MARVEL domain containing 1                                | NM_031484, ENS                                        | Coding | TRUE |
| MARVEL domain containing 1                                | NM_031484, ENS                                        | Coding | TRUE |
| uncharacterized LOC100505605                              | ENST000004470                                         | Coding | TRUE |
| uncharacterized LOC100505605                              | ENST000004470                                         | Coding | TRUE |
| uncharacterized LOC100505605                              | ENST000004470                                         | Coding | TRUE |
| anthrax toxin receptor 1                                  | NM_018153, NM_018153, NM_018153, NM_018153, NM_018153 | Coding | TRUE |
| anthrax toxin receptor 1                                  | NM_018153, NM_018153, NM_018153, NM_018153, NM_018153 | Coding | TRUE |
| anthrax toxin receptor 1                                  | NM_018153, NM_018153, NM_018153, NM_018153, NM_018153 | Coding | TRUE |
| anthrax toxin receptor 1                                  | NM_018153, NM_018153, NM_018153, NM_018153, NM_018153 | Coding | TRUE |
| anthrax toxin receptor 1                                  | NM_018153, NM_018153, NM_018153, NM_018153, NM_018153 | Coding | TRUE |
| solute carrier family 19, member 3                        | NM_025243, ENS                                        | Coding | TRUE |
| solute carrier family 19, member 3                        | NM_025243, ENS                                        | Coding | TRUE |
| tripartite motif containing 61                            | NM_001012414, ENS                                     | Coding | TRUE |
| tripartite motif containing 61                            | NM_001012414, ENS                                     | Coding | TRUE |
| tripartite motif containing 61                            | NM_001012414, ENS                                     | Coding | TRUE |
| UL16 binding protein 1                                    | NM_025218, ENS                                        | Coding | TRUE |

|                                                       |                |        |      |
|-------------------------------------------------------|----------------|--------|------|
| UL16 binding protein 1                                | NM_025218, ENS | Coding | TRUE |
| myopalladin                                           | NM_001256267,  | Coding | TRUE |
| myopalladin                                           | NM_001256267,  | Coding | TRUE |
| myopalladin                                           | NM_001256267,  | Coding | TRUE |
| myopalladin                                           | NM_001256267,  | Coding | TRUE |
| myopalladin                                           | NM_001256267,  | Coding | TRUE |
| golgin A2 pseudogene 5                                | NR_024261, NR_ | Coding | TRUE |
| golgin A2 pseudogene 5                                | NR_024261, NR_ | Coding | TRUE |
| golgin A2 pseudogene 5                                | NR_024261, NR_ | Coding | TRUE |
| golgin A2 pseudogene 5                                | NR_024261, NR_ | Coding | TRUE |
| G protein-coupled receptor 89C, G protein-coupled rec | NM_001097616,  | Coding | TRUE |
| G protein-coupled receptor 89C, G protein-coupled rec | NM_001097616,  | Coding | TRUE |
| RAB4A, member RAS oncogene family, S-phase resp       | NM_004578, NM_ | Coding | TRUE |
| RAB4A, member RAS oncogene family, S-phase resp       | NM_004578, NM_ | Coding | TRUE |
|                                                       |                | Coding | TRUE |
|                                                       |                | Coding | TRUE |
| neurexophilin and PC-esterase domain family, membe    | NM_001134456,  | Coding | TRUE |
| neurexophilin and PC-esterase domain family, membe    | NM_001134456,  | Coding | TRUE |
| uncharacterized LOC100505875                          | NR_038342, ENS | Coding | TRUE |
| uncharacterized LOC100505875                          | NR_038342, ENS | Coding | TRUE |
| uncharacterized LOC100505875                          | NR_038342, ENS | Coding | TRUE |
| uncharacterized LOC100505875                          | NR_038342, ENS | Coding | TRUE |
| uncharacterized LOC100505875                          | NR_038342, ENS | Coding | TRUE |
| uncharacterized LOC100505875                          | NR_038342, ENS | Coding | TRUE |
| uncharacterized LOC100505875                          | NR_038342, ENS | Coding | TRUE |
| uncharacterized LOC100505875                          | NR_038342, ENS | Coding | TRUE |
| uncharacterized LOC100505875                          | NR_038342, ENS | Coding | TRUE |
| uncharacterized LOC100505875                          | NR_038342, ENS | Coding | TRUE |
| uncharacterized LOC100505875                          | NR_038342, ENS | Coding | TRUE |
| uncharacterized LOC100505875                          | NR_038342, ENS | Coding | TRUE |
| uncharacterized LOC100505875                          | NR_038342, ENS | Coding | TRUE |
| uncharacterized LOC100505875                          | NR_038342, ENS | Coding | TRUE |
| uncharacterized LOC100505875                          | NR_038342, ENS | Coding | TRUE |
| MDC1 antisense RNA 1 (non-protein coding)             | ENST000004421  | Coding | TRUE |
| MDC1 antisense RNA 1 (non-protein coding)             | ENST000004421  | Coding | TRUE |
| kelch-like 9 (Drosophila)                             | NM_018847, ENS | Coding | TRUE |
| kelch-like 9 (Drosophila)                             | NM_018847, ENS | Coding | TRUE |
| kelch-like 9 (Drosophila)                             | NM_018847, ENS | Coding | TRUE |
| chromosome 14 open reading frame 37                   | NM_001001872,  | Coding | TRUE |
| chromosome 14 open reading frame 37                   | NM_001001872,  | Coding | TRUE |
| uncharacterized LOC283663                             | NR_024433, ENS | Coding | TRUE |
| uncharacterized LOC283663                             | NR_024433, ENS | Coding | TRUE |
| polyamine modulated factor 1 binding protein 1        | NM_001160213,  | Coding | TRUE |
| polyamine modulated factor 1 binding protein 1        | NM_001160213,  | Coding | TRUE |
| polyamine modulated factor 1 binding protein 1        | NM_001160213,  | Coding | TRUE |
| signal-induced proliferation-associated 1 like 3      | NM_015073, ENS | Coding | TRUE |
| signal-induced proliferation-associated 1 like 3      | NM_015073, ENS | Coding | TRUE |
| signal-induced proliferation-associated 1 like 3      | NM_015073, ENS | Coding | TRUE |
|                                                       |                | Coding | TRUE |
|                                                       |                | Coding | TRUE |
|                                                       |                | Coding | TRUE |
| microRNA 1257, TAF4 RNA polymerase II, TATA box b     | NR_031658, NM_ | Coding | TRUE |
| microRNA 1257, TAF4 RNA polymerase II, TATA box b     | NR_031658, NM_ | Coding | TRUE |
| microRNA 1257, TAF4 RNA polymerase II, TATA box b     | NR_031658, NM_ | Coding | TRUE |
|                                                       |                | Coding | TRUE |
|                                                       |                | Coding | TRUE |
|                                                       |                | Coding | TRUE |
|                                                       |                | Coding | TRUE |







|                                                       |                 |        |      |
|-------------------------------------------------------|-----------------|--------|------|
| visinin-like 1                                        | NM_003385, ENS  | Coding | TRUE |
| HLA complex group 25 (non-protein coding)             | NR_044997, ENS  | Coding | TRUE |
| HLA complex group 25 (non-protein coding)             | NR_044997, ENS  | Coding | TRUE |
| HLA complex group 25 (non-protein coding)             | NR_044997, ENS  | Coding | TRUE |
| olfactory receptor, family 11, subfamily A, member 1  | NM_013937, ENS  | Coding | TRUE |
| olfactory receptor, family 11, subfamily A, member 1  | NM_013937, ENS  | Coding | TRUE |
| zinc and ring finger 2                                | NM_147128, ENS  | Coding | TRUE |
| zinc and ring finger 2                                | NM_147128, ENS  | Coding | TRUE |
| zinc and ring finger 2                                | NM_147128, ENS  | Coding | TRUE |
| ectonucleoside triphosphate diphosphohydrolase 4      | NM_001128930, I | Coding | TRUE |
| ectonucleoside triphosphate diphosphohydrolase 4      | NM_001128930, I | Coding | TRUE |
| ectonucleoside triphosphate diphosphohydrolase 4      | NM_001128930, I | Coding | TRUE |
| ectonucleoside triphosphate diphosphohydrolase 4      | NM_001128930, I | Coding | TRUE |
| ArfGAP with dual PH domains 2                         | NM_018404, ENS  | Coding | TRUE |
| ArfGAP with dual PH domains 2                         | NM_018404, ENS  | Coding | TRUE |
| HLA complex group 25 (non-protein coding)             | NR_044997       | Coding | TRUE |
| HLA complex group 25 (non-protein coding)             | NR_044997       | Coding | TRUE |
| HLA complex group 25 (non-protein coding)             | NR_044997       | Coding | TRUE |
| olfactory receptor, family 11, subfamily A, member 1  | NM_013937, BC1  | Coding | TRUE |
| olfactory receptor, family 11, subfamily A, member 1  | NM_013937, BC1  | Coding | TRUE |
| HLA complex group 25 (non-protein coding)             | NR_044997       | Coding | TRUE |
| HLA complex group 25 (non-protein coding)             | NR_044997       | Coding | TRUE |
| HLA complex group 25 (non-protein coding)             | NR_044997       | Coding | TRUE |
| HLA complex group 25 (non-protein coding)             | NR_044997       | Coding | TRUE |
| HLA complex group 25 (non-protein coding)             | NR_044997       | Coding | TRUE |
| HLA complex group 25 (non-protein coding)             | NR_044997       | Coding | TRUE |
| HLA complex group 25 (non-protein coding)             | NR_044997       | Coding | TRUE |
| olfactory receptor, family 11, subfamily A, member 1  | NM_013937, BC1  | Coding | TRUE |
| olfactory receptor, family 11, subfamily A, member 1  | NM_013937, BC1  | Coding | TRUE |
| HLA complex group 25 (non-protein coding)             | NR_044997       | Coding | TRUE |
| HLA complex group 25 (non-protein coding)             | NR_044997       | Coding | TRUE |
| HLA complex group 25 (non-protein coding)             | NR_044997       | Coding | TRUE |
| olfactory receptor, family 11, subfamily A, member 1  | NM_013937, BC1  | Coding | TRUE |
| olfactory receptor, family 11, subfamily A, member 1  | NM_013937, BC1  | Coding | TRUE |
| HLA complex group 25 (non-protein coding)             | NR_044997       | Coding | TRUE |
| HLA complex group 25 (non-protein coding)             | NR_044997       | Coding | TRUE |
| HLA complex group 25 (non-protein coding)             | NR_044997       | Coding | TRUE |
| HLA complex group 25 (non-protein coding)             | NR_044997       | Coding | TRUE |
| HLA complex group 25 (non-protein coding)             | NR_044997       | Coding | TRUE |
| HLA complex group 25 (non-protein coding)             | NR_044997       | Coding | TRUE |
| basic leucine zipper transcription factor, ATF-like 3 | NM_018664, ENS  | Coding | TRUE |
| basic leucine zipper transcription factor, ATF-like 3 | NM_018664, ENS  | Coding | TRUE |
| basic leucine zipper transcription factor, ATF-like 3 | NM_018664, ENS  | Coding | TRUE |
| basic leucine zipper transcription factor, ATF-like 3 | NM_018664, ENS  | Coding | TRUE |
| huntingtin interacting protein 1                      | NM_001243198, I | Coding | TRUE |
| huntingtin interacting protein 1                      | NM_001243198, I | Coding | TRUE |
| potassium channel tetramerisation domain containing   | NM_001167961, I | Coding | TRUE |
| potassium channel tetramerisation domain containing   | NM_001167961, I | Coding | TRUE |
| prostaglandin E receptor 4 (subtype EP4) pseudogene   | NR_024496       | Coding | TRUE |
| prostaglandin E receptor 4 (subtype EP4) pseudogene   | NR_024496       | Coding | TRUE |
| TIA1 cytotoxic granule-associated RNA binding protein | NM_001033925, I | Coding | TRUE |
| TIA1 cytotoxic granule-associated RNA binding protein | NM_001033925, I | Coding | TRUE |
| Zwilch, kinetochore associated, homolog (Drosophila)  | NM_017975, NR_  | Coding | TRUE |
| Zwilch, kinetochore associated, homolog (Drosophila)  | NM_017975, NR_  | Coding | TRUE |
| C1q and tumor necrosis factor related protein 8       | NM_207419, ENS  | Coding | TRUE |
| C1q and tumor necrosis factor related protein 8       | NM_207419, ENS  | Coding | TRUE |
| ATPase, H+ transporting, lysosomal 38kDa, V0 subunit  | NM_004691, ENS  | Coding | TRUE |
| ATPase, H+ transporting, lysosomal 38kDa, V0 subunit  | NM_004691, ENS  | Coding | TRUE |
| ATPase, H+ transporting, lysosomal 38kDa, V0 subunit  | NM_004691, ENS  | Coding | TRUE |

|                                                                   |                |        |      |
|-------------------------------------------------------------------|----------------|--------|------|
| RAD51 homolog C ( <i>S. cerevisiae</i> )                          | NM_002876, NM  | Coding | TRUE |
| RAD51 homolog C ( <i>S. cerevisiae</i> )                          | NM_002876, NM  | Coding | TRUE |
| RAD51 homolog C ( <i>S. cerevisiae</i> )                          | NM_002876, NM  | Coding | TRUE |
| synapse differentiation inducing 1                                | NM_024893, ENS | Coding | TRUE |
| synapse differentiation inducing 1                                | NM_024893, ENS | Coding | TRUE |
| synapse differentiation inducing 1                                | NM_024893, ENS | Coding | TRUE |
| ANKRD44 intronic transcript 1 (non-protein coding)                | ENST000004281  | Coding | TRUE |
| ANKRD44 intronic transcript 1 (non-protein coding)                | ENST000004281  | Coding | TRUE |
| Na <sup>+</sup> /K <sup>+</sup> transporting ATPase interacting 2 | NM_001040214,  | Coding | TRUE |
| Na <sup>+</sup> /K <sup>+</sup> transporting ATPase interacting 2 | NM_001040214,  | Coding | TRUE |
| Na <sup>+</sup> /K <sup>+</sup> transporting ATPase interacting 2 | NM_001040214,  | Coding | TRUE |
| Na <sup>+</sup> /K <sup>+</sup> transporting ATPase interacting 2 | NM_001040214,  | Coding | TRUE |
| Na <sup>+</sup> /K <sup>+</sup> transporting ATPase interacting 2 | NM_001040214,  | Coding | TRUE |
| Na <sup>+</sup> /K <sup>+</sup> transporting ATPase interacting 2 | NM_001040214,  | Coding | TRUE |
| Na <sup>+</sup> /K <sup>+</sup> transporting ATPase interacting 2 | NM_001040214,  | Coding | TRUE |
| Na <sup>+</sup> /K <sup>+</sup> transporting ATPase interacting 2 | NM_001040214,  | Coding | TRUE |
| neurexin 2                                                        | NM_138734, NM  | Coding | TRUE |
| neurexin 2                                                        | NM_138734, NM  | Coding | TRUE |
| neurexin 2                                                        | NM_138734, NM  | Coding | TRUE |
| neurexin 2                                                        | NM_138734, NM  | Coding | TRUE |
| neurexin 2                                                        | NM_138734, NM  | Coding | TRUE |
| neurexin 2                                                        | NM_138734, NM  | Coding | TRUE |
| neurexin 2                                                        | NM_138734, NM  | Coding | TRUE |
| small nucleolar RNA, H/ACA box 39, small nucleolar R              | NR_002972, NR  | Coding | TRUE |
| small nucleolar RNA, H/ACA box 39, small nucleolar R              | NR_002972, NR  | Coding | TRUE |
| major histocompatibility complex, class II, DP beta 2 (p          | NR_001435      | Coding | TRUE |
| major histocompatibility complex, class II, DP beta 2 (p          | NR_001435      | Coding | TRUE |
| major histocompatibility complex, class II, DP beta 2 (p          | NR_001435      | Coding | TRUE |
| major histocompatibility complex, class II, DP beta 2 (p          | NR_001435      | Coding | TRUE |
| v-abl Abelson murine leukemia viral oncogene homolo               | NM_001136001,  | Coding | TRUE |
| v-abl Abelson murine leukemia viral oncogene homolo               | NM_001136001,  | Coding | TRUE |
| spectrin, beta, non-erythrocytic 1                                | NM_178313, NM  | Coding | TRUE |
| spectrin, beta, non-erythrocytic 1                                | NM_178313, NM  | Coding | TRUE |
| spectrin, beta, non-erythrocytic 1                                | NM_178313, NM  | Coding | TRUE |
| R-spondin 3                                                       | NM_032784, ENS | Coding | TRUE |
| R-spondin 3                                                       | NM_032784, ENS | Coding | TRUE |
| R-spondin 3                                                       | NM_032784, ENS | Coding | TRUE |
| R-spondin 3                                                       | NM_032784, ENS | Coding | TRUE |
| R-spondin 3                                                       | NM_032784, ENS | Coding | TRUE |
| DEAD (Asp-Glu-Ala-Asp) box polypeptide 10                         | NM_004398, ENS | Coding | TRUE |
| DEAD (Asp-Glu-Ala-Asp) box polypeptide 10                         | NM_004398, ENS | Coding | TRUE |
| interferon, alpha-inducible protein 27-like 1                     | NM_145249, NM  | Coding | TRUE |
| interferon, alpha-inducible protein 27-like 1                     | NM_145249, NM  | Coding | TRUE |
| interferon, alpha-inducible protein 27-like 1                     | NM_145249, NM  | Coding | TRUE |
| translocase of inner mitochondrial membrane 9 homok               | NM_012460, ENS | Coding | TRUE |
| translocase of inner mitochondrial membrane 9 homok               | NM_012460, ENS | Coding | TRUE |
| translocase of inner mitochondrial membrane 9 homok               | NM_012460, ENS | Coding | TRUE |
| translocase of inner mitochondrial membrane 9 homok               | NM_012460, ENS | Coding | TRUE |
| golgin A8 family, member I, pseudogene                            | NR_024074, ENS | Coding | TRUE |
| golgin A8 family, member I, pseudogene                            | NR_024074, ENS | Coding | TRUE |
| golgin A8 family, member I, pseudogene                            | NR_024074, ENS | Coding | TRUE |
| cadherin 11, type 2, OB-cadherin (osteoblast)                     | NM_001797, ENS | Coding | TRUE |
| cadherin 11, type 2, OB-cadherin (osteoblast)                     | NM_001797, ENS | Coding | TRUE |
| cadherin 11, type 2, OB-cadherin (osteoblast)                     | NM_001797, ENS | Coding | TRUE |
| cadherin 11, type 2, OB-cadherin (osteoblast)                     | NM_001797, ENS | Coding | TRUE |
| tripartite motif containing 47                                    | NM_033452, ENS | Coding | TRUE |
| tripartite motif containing 47                                    | NM_033452, ENS | Coding | TRUE |
| tripartite motif containing 47                                    | NM_033452, ENS | Coding | TRUE |

|                                                                 |                       |        |      |
|-----------------------------------------------------------------|-----------------------|--------|------|
| coiled-coil domain containing 107                               | NM_001195200,         | Coding | TRUE |
| coiled-coil domain containing 107                               | NM_001195200,         | Coding | TRUE |
| microfibrillar-associated protein 4                             | NM_001198695,         | Coding | TRUE |
| microfibrillar-associated protein 4                             | NM_001198695,         | Coding | TRUE |
| microfibrillar-associated protein 4                             | NM_001198695,         | Coding | TRUE |
| myosin, heavy chain 7B, cardiac muscle, beta                    | NM_020884, ENS        | Coding | TRUE |
| myosin, heavy chain 7B, cardiac muscle, beta                    | NM_020884, ENS        | Coding | TRUE |
| tRNA nucleotidyl transferase, CCA-adding, 1                     | NM_182916, ENS        | Coding | TRUE |
| tRNA nucleotidyl transferase, CCA-adding, 1                     | NM_182916, ENS        | Coding | TRUE |
| CCR4-NOT transcription complex, subunit 2                       | NM_001199302,         | Coding | TRUE |
| CCR4-NOT transcription complex, subunit 2                       | NM_001199302,         | Coding | TRUE |
| CCR4-NOT transcription complex, subunit 2                       | NM_001199302,         | Coding | TRUE |
| family with sequence similarity 177, member A1                  | NM_001079519,         | Coding | TRUE |
| family with sequence similarity 177, member A1                  | NM_001079519,         | Coding | TRUE |
|                                                                 |                       | Coding | TRUE |
|                                                                 |                       | Coding | TRUE |
| tumor suppressor candidate 5                                    | NM_172367, ENS        | Coding | TRUE |
| tumor suppressor candidate 5                                    | NM_172367, ENS        | Coding | TRUE |
| pregnancy specific beta-1-glycoprotein 7 (gene/pseudogene)      | NM_001206650,         | Coding | TRUE |
| pregnancy specific beta-1-glycoprotein 7 (gene/pseudogene)      | NM_001206650,         | Coding | TRUE |
| pregnancy specific beta-1-glycoprotein 7 (gene/pseudogene)      | NM_001206650,         | Coding | TRUE |
| pregnancy specific beta-1-glycoprotein 7 (gene/pseudogene)      | NM_001206650,         | Coding | TRUE |
| small nucleolar RNA, C/D box 56, small nucleolar RNA            | ENST000004135         | Coding | TRUE |
| small nucleolar RNA, C/D box 56, small nucleolar RNA            | ENST000004135         | Coding | TRUE |
| ankyrin repeat domain 5                                         | NM_022096, NM_022096, | Coding | TRUE |
| ankyrin repeat domain 5                                         | NM_022096, NM_022096, | Coding | TRUE |
| ankyrin repeat domain 5                                         | NM_022096, NM_022096, | Coding | TRUE |
| myxovirus (influenza virus) resistance 1, interferon-inducible  | NM_001144925,         | Coding | TRUE |
| myxovirus (influenza virus) resistance 1, interferon-inducible  | NM_001144925,         | Coding | TRUE |
| myxovirus (influenza virus) resistance 1, interferon-inducible  | NM_001144925,         | Coding | TRUE |
| myxovirus (influenza virus) resistance 1, interferon-inducible  | NM_001144925,         | Coding | TRUE |
| myxovirus (influenza virus) resistance 1, interferon-inducible  | NM_001144925,         | Coding | TRUE |
| bromodomain containing 1                                        | NM_014577, ENS        | Coding | TRUE |
| bromodomain containing 1                                        | NM_014577, ENS        | Coding | TRUE |
| bromodomain containing 1                                        | NM_014577, ENS        | Coding | TRUE |
| bromodomain containing 1                                        | NM_014577, ENS        | Coding | TRUE |
| solute carrier family 40 (iron-regulated transporter), member 1 | NM_014585, ENS        | Coding | TRUE |
| solute carrier family 40 (iron-regulated transporter), member 1 | NM_014585, ENS        | Coding | TRUE |
| solute carrier family 40 (iron-regulated transporter), member 1 | NM_014585, ENS        | Coding | TRUE |
| kyphoscoliosis peptidase                                        | NM_178554, ENS        | Coding | TRUE |
| kyphoscoliosis peptidase                                        | NM_178554, ENS        | Coding | TRUE |
| centrosomal protein 192kDa pseudogene                           | NR_036494, ENS        | Coding | TRUE |
| centrosomal protein 192kDa pseudogene                           | NR_036494, ENS        | Coding | TRUE |
|                                                                 |                       | Coding | TRUE |
|                                                                 |                       | Coding | TRUE |
| NOP2/Sun domain family, member 7                                | NM_024677, ENS        | Coding | TRUE |
| NOP2/Sun domain family, member 7                                | NM_024677, ENS        | Coding | TRUE |
| serine/threonine kinase 38 like                                 | NM_015000, ENS        | Coding | TRUE |
| serine/threonine kinase 38 like                                 | NM_015000, ENS        | Coding | TRUE |
| aldehyde dehydrogenase 1 family, member A2                      | NM_001206897,         | Coding | TRUE |
| aldehyde dehydrogenase 1 family, member A2                      | NM_001206897,         | Coding | TRUE |
| alanyl (membrane) aminopeptidase                                | NM_001150, ENS        | Coding | TRUE |
| alanyl (membrane) aminopeptidase                                | NM_001150, ENS        | Coding | TRUE |
| alanyl (membrane) aminopeptidase                                | NM_001150, ENS        | Coding | TRUE |
| alanyl (membrane) aminopeptidase                                | NM_001150, ENS        | Coding | TRUE |
| retinoblastoma-like 2 (p130)                                    | NM_005611, ENS        | Coding | TRUE |
| retinoblastoma-like 2 (p130)                                    | NM_005611, ENS        | Coding | TRUE |
| TBC1 domain family, member 16                                   | NM_019020, ENS        | Coding | TRUE |

|                                                           |                 |        |      |
|-----------------------------------------------------------|-----------------|--------|------|
| TBC1 domain family, member 16                             | NM_019020, ENS  | Coding | TRUE |
| CHIA-like pseudogene                                      | NR_003928, ENS  | Coding | TRUE |
| CHIA-like pseudogene                                      | NR_003928, ENS  | Coding | TRUE |
| vacuolar protein sorting 45 homolog (S. cerevisiae)       | NM_007259, BCC  | Coding | TRUE |
| vacuolar protein sorting 45 homolog (S. cerevisiae)       | NM_007259, BCC  | Coding | TRUE |
| cathepsin K                                               | NM_000396, ENS  | Coding | TRUE |
| cathepsin K                                               | NM_000396, ENS  | Coding | TRUE |
| cathepsin K                                               | NM_000396, ENS  | Coding | TRUE |
| cathepsin K                                               | NM_000396, ENS  | Coding | TRUE |
| cathepsin K                                               | NM_000396, ENS  | Coding | TRUE |
| cathepsin K                                               | NM_000396, ENS  | Coding | TRUE |
| pim-1 oncogene                                            | NM_001243186,   | Coding | TRUE |
| pim-1 oncogene                                            | NM_001243186,   | Coding | TRUE |
| matrix metalloproteinase 19                               | NM_002429, BCC  | Coding | TRUE |
| matrix metalloproteinase 19                               | NM_002429, BCC  | Coding | TRUE |
| matrix metalloproteinase 19                               | NM_002429, BCC  | Coding | TRUE |
| matrix metalloproteinase 19                               | NM_002429, BCC  | Coding | TRUE |
| matrix metalloproteinase 19                               | NM_002429, BCC  | Coding | TRUE |
| matrix metalloproteinase 19                               | NM_002429, BCC  | Coding | TRUE |
| matrix metalloproteinase 19                               | NM_002429, BCC  | Coding | TRUE |
| matrix metalloproteinase 19                               | NM_002429, BCC  | Coding | TRUE |
| matrix metalloproteinase 19                               | NM_002429, BCC  | Coding | TRUE |
| matrix metalloproteinase 19                               | NM_002429, BCC  | Coding | TRUE |
| matrix metalloproteinase 19                               | NM_002429, BCC  | Coding | TRUE |
| matrix metalloproteinase 19                               | NM_002429, BCC  | Coding | TRUE |
| matrix metalloproteinase 19                               | NM_002429, BCC  | Coding | TRUE |
| matrix metalloproteinase 19                               | NM_002429, BCC  | Coding | TRUE |
| NKF3 kinase family member                                 | NM_024776, ENS  | Coding | TRUE |
| NKF3 kinase family member                                 | NM_024776, ENS  | Coding | TRUE |
| NKF3 kinase family member                                 | NM_024776, ENS  | Coding | TRUE |
| metallothionein 1F                                        | NM_005949, ENS  | Coding | TRUE |
| metallothionein 1F                                        | NM_005949, ENS  | Coding | TRUE |
| metallothionein 1F                                        | NM_005949, ENS  | Coding | TRUE |
| metallothionein 1F                                        | NM_005949, ENS  | Coding | TRUE |
| metallothionein 1F                                        | NM_005949, ENS  | Coding | TRUE |
| olfactory receptor, family 11, subfamily A, member 1      | NM_013937, BC1  | Coding | TRUE |
| olfactory receptor, family 11, subfamily A, member 1      | NM_013937, BC1  | Coding | TRUE |
| solute carrier family 6 (neurotransmitter transporter, G/ | NM_003042, ENS  | Coding | TRUE |
| solute carrier family 6 (neurotransmitter transporter, G/ | NM_003042, ENS  | Coding | TRUE |
| solute carrier family 6 (neurotransmitter transporter, G/ | NM_003042, ENS  | Coding | TRUE |
| uncharacterized LOC100507639                              | ENST000005066   | Coding | TRUE |
| uncharacterized LOC100507639                              | ENST000005066   | Coding | TRUE |
|                                                           |                 | Coding | TRUE |
|                                                           |                 | Coding | TRUE |
|                                                           |                 | Coding | TRUE |
| IQ motif containing G                                     | NM_001134435, I | Coding | TRUE |
| IQ motif containing G                                     | NM_001134435, I | Coding | TRUE |
| IQ motif containing G                                     | NM_001134435, I | Coding | TRUE |
| actin related protein 2/3 complex, subunit 4, 20kDa       | NM_001024959,   | Coding | TRUE |
| actin related protein 2/3 complex, subunit 4, 20kDa       | NM_001024959,   | Coding | TRUE |
| phosphopantothienoylcysteine synthetase                   | NM_001077447,   | Coding | TRUE |
| phosphopantothienoylcysteine synthetase                   | NM_001077447,   | Coding | TRUE |
| F-box protein 41                                          | NM_001080410,   | Coding | TRUE |
| F-box protein 41                                          | NM_001080410,   | Coding | TRUE |
| F-box protein 41                                          | NM_001080410,   | Coding | TRUE |
| F-box protein 41                                          | NM_001080410,   | Coding | TRUE |
| F-box protein 41                                          | NM_001080410,   | Coding | TRUE |
| WW and C2 domain containing 1                             | NM_001161661, I | Coding | TRUE |
| WW and C2 domain containing 1                             | NM_001161661, I | Coding | TRUE |
| N-acetyltransferase 1 (arylamine N-acetyltransferase)     | NM_000662, NM   | Coding | TRUE |
| N-acetyltransferase 1 (arylamine N-acetyltransferase)     | NM_000662, NM   | Coding | TRUE |

|                                                       |                |        |      |
|-------------------------------------------------------|----------------|--------|------|
| N-acetyltransferase 1 (arylamine N-acetyltransferase) | NM_000662, NM  | Coding | TRUE |
| DMRT-like family A1                                   | NM_022160, ENS | Coding | TRUE |
| DMRT-like family A1                                   | NM_022160, ENS | Coding | TRUE |
| APITD1-CORT readthrough, cortistatin, apoptosis-indu  | NM_001243768,  | Coding | TRUE |
| APITD1-CORT readthrough, cortistatin, apoptosis-indu  | NM_001243768,  | Coding | TRUE |
| aldehyde dehydrogenase 1 family, member L1            | NM_012190, ENS | Coding | TRUE |
| aldehyde dehydrogenase 1 family, member L1            | NM_012190, ENS | Coding | TRUE |
| chromosome 11 open reading frame 58                   | NM_014267, ENS | Coding | TRUE |
| chromosome 11 open reading frame 58                   | NM_014267, ENS | Coding | TRUE |
| prostaglandin E receptor 2 (subtype EP2), 53kDa       | NM_000956, ENS | Coding | TRUE |
| prostaglandin E receptor 2 (subtype EP2), 53kDa       | NM_000956, ENS | Coding | TRUE |
| chromosome 3 open reading frame 18                    | NM_001171740,  | Coding | TRUE |
| chromosome 3 open reading frame 18                    | NM_001171740,  | Coding | TRUE |
| chromosome 3 open reading frame 18                    | NM_001171740,  | Coding | TRUE |
| asparagine synthetase (glutamine-hydrolyzing)         | NM_001178075,  | Coding | TRUE |
| asparagine synthetase (glutamine-hydrolyzing)         | NM_001178075,  | Coding | TRUE |
| asparagine synthetase (glutamine-hydrolyzing)         | NM_001178075,  | Coding | TRUE |
| asparagine synthetase (glutamine-hydrolyzing)         | NM_001178075,  | Coding | TRUE |
| asparagine synthetase (glutamine-hydrolyzing)         | NM_001178075,  | Coding | TRUE |
| asparagine synthetase (glutamine-hydrolyzing)         | NM_001178075,  | Coding | TRUE |
| asparagine synthetase (glutamine-hydrolyzing)         | NM_001178075,  | Coding | TRUE |
| asparagine synthetase (glutamine-hydrolyzing)         | NM_001178075,  | Coding | TRUE |
| pregnancy specific beta-1-glycoprotein 2              | NM_031246, BCC | Coding | TRUE |
| pregnancy specific beta-1-glycoprotein 2              | NM_031246, BCC | Coding | TRUE |
| pregnancy specific beta-1-glycoprotein 2              | NM_031246, BCC | Coding | TRUE |
| microRNA 1182, family with sequence similarity 89, me | NR_031593, NM  | Coding | TRUE |
| microRNA 1182, family with sequence similarity 89, me | NR_031593, NM  | Coding | TRUE |
| tetraspanin 2                                         | NM_005725, ENS | Coding | TRUE |
| tetraspanin 2                                         | NM_005725, ENS | Coding | TRUE |
| tetraspanin 2                                         | NM_005725, ENS | Coding | TRUE |
| KIAA0040                                              | NM_001162893,  | Coding | TRUE |
| KIAA0040                                              | NM_001162893,  | Coding | TRUE |
| KIAA0040                                              | NM_001162893,  | Coding | TRUE |
| KIAA0040                                              | NM_001162893,  | Coding | TRUE |
| KIAA0040                                              | NM_001162893,  | Coding | TRUE |
| brain expressed, X-linked 4                           | NM_001080425,  | Coding | TRUE |
| brain expressed, X-linked 4                           | NM_001080425,  | Coding | TRUE |
| brain expressed, X-linked 4                           | NM_001080425,  | Coding | TRUE |
| brain expressed, X-linked 4                           | NM_001080425,  | Coding | TRUE |
| brain expressed, X-linked 4                           | NM_001080425,  | Coding | TRUE |
| brain expressed, X-linked 4                           | NM_001080425,  | Coding | TRUE |
| brain expressed, X-linked 4                           | NM_001080425,  | Coding | TRUE |
| brain expressed, X-linked 4                           | NM_001080425,  | Coding | TRUE |
| formin-like 1                                         | NM_005892, ENS | Coding | TRUE |
| formin-like 1                                         | NM_005892, ENS | Coding | TRUE |
| PX domain containing serine/threonine kinase          | NM_017771, ENS | Coding | TRUE |
| PX domain containing serine/threonine kinase          | NM_017771, ENS | Coding | TRUE |
| N-acetyltransferase 10 (GCN5-related)                 | NM_001144030,  | Coding | TRUE |
| N-acetyltransferase 10 (GCN5-related)                 | NM_001144030,  | Coding | TRUE |
| ubiquitin specific peptidase 5 (isopeptidase T)       | NM_001098536,  | Coding | TRUE |
| ubiquitin specific peptidase 5 (isopeptidase T)       | NM_001098536,  | Coding | TRUE |
|                                                       |                | Coding | TRUE |
|                                                       |                | Coding | TRUE |
| zinc finger and SCAN domain containing 2              | NM_001007072,  | Coding | TRUE |
| zinc finger and SCAN domain containing 2              | NM_001007072,  | Coding | TRUE |
| zinc finger and SCAN domain containing 2              | NM_001007072,  | Coding | TRUE |
| catechol-O-methyltransferase, microRNA 4761           | NM_007310, NM  | Coding | TRUE |
| catechol-O-methyltransferase, microRNA 4761           | NM_007310, NM  | Coding | TRUE |
| mitochondrial ribosomal protein S5                    | NM_031902, BCC | Coding | TRUE |
| mitochondrial ribosomal protein S5                    | NM_031902, BCC | Coding | TRUE |

|                                                           |                 |        |      |
|-----------------------------------------------------------|-----------------|--------|------|
| mitochondrial ribosomal protein S5                        | NM_031902, BC0  | Coding | TRUE |
|                                                           |                 | Coding | TRUE |
|                                                           |                 | Coding | TRUE |
| KIAA0825                                                  | NM_001145678, I | Coding | TRUE |
| KIAA0825                                                  | NM_001145678, I | Coding | TRUE |
| KIAA0825                                                  | NM_001145678, I | Coding | TRUE |
| major histocompatibility complex, class II, DP beta 2 (p  | NR_001435, ENS  | Coding | TRUE |
| major histocompatibility complex, class II, DP beta 2 (p  | NR_001435, ENS  | Coding | TRUE |
| major histocompatibility complex, class II, DP beta 2 (p  | NR_001435, ENS  | Coding | TRUE |
| solute carrier family 25 (mitochondrial carrier; Graves c | NM_152707, ENS  | Coding | TRUE |
| solute carrier family 25 (mitochondrial carrier; Graves c | NM_152707, ENS  | Coding | TRUE |
| solute carrier family 25 (mitochondrial carrier; Graves c | NM_152707, ENS  | Coding | TRUE |
| choline kinase beta                                       | NM_005198, ENS  | Coding | TRUE |
| choline kinase beta                                       | NM_005198, ENS  | Coding | TRUE |
| mitofusin 1                                               | NM_033540, ENS  | Coding | TRUE |
| mitofusin 1                                               | NM_033540, ENS  | Coding | TRUE |
| paired box 6                                              | NM_000280, NM   | Coding | TRUE |
| paired box 6                                              | NM_000280, NM   | Coding | TRUE |
| fukutin                                                   | NM_006731, NM   | Coding | TRUE |
| fukutin                                                   | NM_006731, NM   | Coding | TRUE |
| fukutin                                                   | NM_006731, NM   | Coding | TRUE |
| sorting nexin family member 27                            | NM_030918, ENS  | Coding | TRUE |
| sorting nexin family member 27                            | NM_030918, ENS  | Coding | TRUE |
| sorting nexin family member 27                            | NM_030918, ENS  | Coding | TRUE |
| FSHD region gene 1 pseudogene                             | NR_027436, BC0  | Coding | TRUE |
| FSHD region gene 1 pseudogene                             | NR_027436, BC0  | Coding | TRUE |
| FERM domain containing 1                                  | NM_001122841, I | Coding | TRUE |
| FERM domain containing 1                                  | NM_001122841, I | Coding | TRUE |
| FERM domain containing 1                                  | NM_001122841, I | Coding | TRUE |
| nardilysin (N-arginine dibasic convertase), microRNA 7    | NM_001101662, I | Coding | TRUE |
| nardilysin (N-arginine dibasic convertase), microRNA 7    | NM_001101662, I | Coding | TRUE |
| nardilysin (N-arginine dibasic convertase), microRNA 7    | NM_001101662, I | Coding | TRUE |
| SAM domain and HD domain 1                                | NM_015474, ENS  | Coding | TRUE |
| SAM domain and HD domain 1                                | NM_015474, ENS  | Coding | TRUE |
| leptin                                                    | NM_000230, ENS  | Coding | TRUE |
| leptin                                                    | NM_000230, ENS  | Coding | TRUE |
| THAP domain containing 5                                  | NM_001130475, I | Coding | TRUE |
| THAP domain containing 5                                  | NM_001130475, I | Coding | TRUE |
| proteoglycan 4                                            | NM_001127708, I | Coding | TRUE |
| proteoglycan 4                                            | NM_001127708, I | Coding | TRUE |
| uncharacterized LOC100505702                              | NR_038303, NR   | Coding | TRUE |
| uncharacterized LOC100505702                              | NR_038303, NR   | Coding | TRUE |
| GLI pathogenesis-related 2, uncharacterized LOC1006       | NM_022343, ENS  | Coding | TRUE |
| GLI pathogenesis-related 2, uncharacterized LOC1006       | NM_022343, ENS  | Coding | TRUE |
| GLI pathogenesis-related 2, uncharacterized LOC1006       | NM_022343, ENS  | Coding | TRUE |
| GLI pathogenesis-related 2, uncharacterized LOC1006       | NM_022343, ENS  | Coding | TRUE |
| F-box protein 27                                          | NM_178820, ENS  | Coding | TRUE |
| F-box protein 27                                          | NM_178820, ENS  | Coding | TRUE |
| androgen-induced 1                                        | NM_016108, ENS  | Coding | TRUE |
| androgen-induced 1                                        | NM_016108, ENS  | Coding | TRUE |
| androgen-induced 1                                        | NM_016108, ENS  | Coding | TRUE |
| androgen-induced 1                                        | NM_016108, ENS  | Coding | TRUE |
| androgen-induced 1                                        | NM_016108, ENS  | Coding | TRUE |
| androgen-induced 1                                        | NM_016108, ENS  | Coding | TRUE |
| WAS protein family homolog 2 pseudogene                   | NR_024077       | Coding | TRUE |
| WAS protein family homolog 2 pseudogene                   | NR_024077       | Coding | TRUE |
| DENN/MADD domain containing 2A                            | NM_015689, ENS  | Coding | TRUE |
| DENN/MADD domain containing 2A                            | NM_015689, ENS  | Coding | TRUE |

|                                                          |                |        |      |
|----------------------------------------------------------|----------------|--------|------|
| DENN/MADD domain containing 2A                           | NM_015689, ENS | Coding | TRUE |
| DENN/MADD domain containing 2A                           | NM_015689, ENS | Coding | TRUE |
|                                                          |                | Coding | TRUE |
|                                                          |                | Coding | TRUE |
|                                                          |                | Coding | TRUE |
|                                                          |                | Coding | TRUE |
| microsomal glutathione S-transferase 3, uncharacteriz    | NM_004528, ENS | Coding | TRUE |
| microsomal glutathione S-transferase 3, uncharacteriz    | NM_004528, ENS | Coding | TRUE |
| transforming growth factor, beta receptor II (70/80kDa)  | NM_001024847,  | Coding | TRUE |
| transforming growth factor, beta receptor II (70/80kDa)  | NM_001024847,  | Coding | TRUE |
| transforming growth factor, beta receptor II (70/80kDa)  | NM_001024847,  | Coding | TRUE |
| NIPA-like domain containing 2                            | NM_024759, ENS | Coding | TRUE |
| NIPA-like domain containing 2                            | NM_024759, ENS | Coding | TRUE |
| ST3 beta-galactoside alpha-2,3-sialyltransferase 5       | NM_001042437,  | Coding | TRUE |
| ST3 beta-galactoside alpha-2,3-sialyltransferase 5       | NM_001042437,  | Coding | TRUE |
| ST3 beta-galactoside alpha-2,3-sialyltransferase 5       | NM_001042437,  | Coding | TRUE |
| ST3 beta-galactoside alpha-2,3-sialyltransferase 5       | NM_001042437,  | Coding | TRUE |
| ST3 beta-galactoside alpha-2,3-sialyltransferase 5       | NM_001042437,  | Coding | TRUE |
| ST3 beta-galactoside alpha-2,3-sialyltransferase 5       | NM_001042437,  | Coding | TRUE |
| ST3 beta-galactoside alpha-2,3-sialyltransferase 5       | NM_001042437,  | Coding | TRUE |
| ST3 beta-galactoside alpha-2,3-sialyltransferase 5       | NM_001042437,  | Coding | TRUE |
| ST3 beta-galactoside alpha-2,3-sialyltransferase 5       | NM_001042437,  | Coding | TRUE |
| ST3 beta-galactoside alpha-2,3-sialyltransferase 5       | NM_001042437,  | Coding | TRUE |
| ST3 beta-galactoside alpha-2,3-sialyltransferase 5       | NM_001042437,  | Coding | TRUE |
| ST3 beta-galactoside alpha-2,3-sialyltransferase 5       | NM_001042437,  | Coding | TRUE |
| ST3 beta-galactoside alpha-2,3-sialyltransferase 5       | NM_001042437,  | Coding | TRUE |
| ST3 beta-galactoside alpha-2,3-sialyltransferase 5       | NM_001042437,  | Coding | TRUE |
| ST3 beta-galactoside alpha-2,3-sialyltransferase 5       | NM_001042437,  | Coding | TRUE |
| ST3 beta-galactoside alpha-2,3-sialyltransferase 5       | NM_001042437,  | Coding | TRUE |
| ST3 beta-galactoside alpha-2,3-sialyltransferase 5       | NM_001042437,  | Coding | TRUE |
| ST3 beta-galactoside alpha-2,3-sialyltransferase 5       | NM_001042437,  | Coding | TRUE |
| ST3 beta-galactoside alpha-2,3-sialyltransferase 5       | NM_001042437,  | Coding | TRUE |
| ST3 beta-galactoside alpha-2,3-sialyltransferase 5       | NM_001042437,  | Coding | TRUE |
| ST3 beta-galactoside alpha-2,3-sialyltransferase 5       | NM_001042437,  | Coding | TRUE |
| ST3 beta-galactoside alpha-2,3-sialyltransferase 5       | NM_001042437,  | Coding | TRUE |
| ST3 beta-galactoside alpha-2,3-sialyltransferase 5       | NM_001042437,  | Coding | TRUE |
| ST3 beta-galactoside alpha-2,3-sialyltransferase 5       | NM_001042437,  | Coding | TRUE |
| ST3 beta-galactoside alpha-2,3-sialyltransferase 5       | NM_001042437,  | Coding | TRUE |
| ST3 beta-galactoside alpha-2,3-sialyltransferase 5       | NM_001042437,  | Coding | TRUE |
| ST3 beta-galactoside alpha-2,3-sialyltransferase 5       | NM_001042437,  | Coding | TRUE |
| succinate dehydrogenase complex, subunit A, flavoproc    | NR_003263, ENS | Coding | TRUE |
| succinate dehydrogenase complex, subunit A, flavoproc    | NR_003263, ENS | Coding | TRUE |
| nuclear pore complex-interacting protein-like 3-like, nu | ENST000003573  | Coding | TRUE |
| nuclear pore complex-interacting protein-like 3-like, nu | ENST000003573  | Coding | TRUE |
| enolase 3 (beta, muscle)                                 | NM_001193503,  | Coding | TRUE |
| enolase 3 (beta, muscle)                                 | NM_001193503,  | Coding | TRUE |
| enolase 3 (beta, muscle)                                 | NM_001193503,  | Coding | TRUE |
| alpha 1,4-galactosyltransferase                          | NM_017436, BCC | Coding | TRUE |
| alpha 1,4-galactosyltransferase                          | NM_017436, BCC | Coding | TRUE |
| alpha 1,4-galactosyltransferase                          | NM_017436, BCC | Coding | TRUE |
| platelet factor 4 variant 1                              | NM_002620, ENS | Coding | TRUE |
| platelet factor 4 variant 1                              | NM_002620, ENS | Coding | TRUE |
| COMM domain containing 8                                 | NM_017845, BCC | Coding | TRUE |
| COMM domain containing 8                                 | NM_017845, BCC | Coding | TRUE |
| tripartite motif containing 6                            | NM_001003818,  | Coding | TRUE |
| tripartite motif containing 6                            | NM_001003818,  | Coding | TRUE |
| spire homolog 2 (Drosophila)                             | NM_032451, ENS | Coding | TRUE |
| spire homolog 2 (Drosophila)                             | NM_032451, ENS | Coding | TRUE |
| spire homolog 2 (Drosophila)                             | NM_032451, ENS | Coding | TRUE |
| gamma-glutamyltransferase light chain 3                  | ENST000004049  | Coding | TRUE |





|                                                          |                 |        |      |
|----------------------------------------------------------|-----------------|--------|------|
|                                                          |                 | Coding | TRUE |
|                                                          |                 | Coding | TRUE |
|                                                          |                 | Coding | TRUE |
|                                                          |                 | Coding | TRUE |
| zinc finger protein 160                                  | NM_033288, NM   | Coding | TRUE |
| zinc finger protein 160                                  | NM_033288, NM   | Coding | TRUE |
| MYC associated factor X                                  | NM_145114, NM   | Coding | TRUE |
| MYC associated factor X                                  | NM_145114, NM   | Coding | TRUE |
| MYC associated factor X                                  | NM_145114, NM   | Coding | TRUE |
| MYC associated factor X                                  | NM_145114, NM   | Coding | TRUE |
|                                                          |                 | Coding | TRUE |
|                                                          |                 | Coding | TRUE |
| extracellular matrix protein 2, female organ and adipoc  | NM_001197295, I | Coding | TRUE |
| extracellular matrix protein 2, female organ and adipoc  | NM_001197295, I | Coding | TRUE |
| major histocompatibility complex, class II, DP beta 2 (p | NR_001435       | Coding | TRUE |
| major histocompatibility complex, class II, DP beta 2 (p | NR_001435       | Coding | TRUE |
| major histocompatibility complex, class II, DP beta 2 (p | NR_001435       | Coding | TRUE |
| zinc finger, BED-type containing 6, zinc finger CCCH-t   | NM_001174108, I | Coding | TRUE |
| zinc finger, BED-type containing 6, zinc finger CCCH-t   | NM_001174108, I | Coding | TRUE |
| neuron-derived neurotrophic factor                       | NM_024574, ENS  | Coding | TRUE |
| neuron-derived neurotrophic factor                       | NM_024574, ENS  | Coding | TRUE |
| neuron-derived neurotrophic factor                       | NM_024574, ENS  | Coding | TRUE |
| neuron-derived neurotrophic factor                       | NM_024574, ENS  | Coding | TRUE |
| neuron-derived neurotrophic factor                       | NM_024574, ENS  | Coding | TRUE |
| neuron-derived neurotrophic factor                       | NM_024574, ENS  | Coding | TRUE |
| neuron-derived neurotrophic factor                       | NM_024574, ENS  | Coding | TRUE |
| neuron-derived neurotrophic factor                       | NM_024574, ENS  | Coding | TRUE |
| neuron-derived neurotrophic factor                       | NM_024574, ENS  | Coding | TRUE |
| LEPREL1 antisense RNA 1 (non-protein coding)             | ENST000004122   | Coding | TRUE |
| LEPREL1 antisense RNA 1 (non-protein coding)             | ENST000004122   | Coding | TRUE |
| LEPREL1 antisense RNA 1 (non-protein coding)             | ENST000004122   | Coding | TRUE |
| chromosome 5 open reading frame 38                       | NM_178569, BC1  | Coding | TRUE |
| chromosome 5 open reading frame 38                       | NM_178569, BC1  | Coding | TRUE |
|                                                          |                 | Coding | TRUE |
|                                                          |                 | Coding | TRUE |
|                                                          |                 | Coding | TRUE |
| 6-pyruvoyltetrahydropterin synthase                      | NM_000317, ENS  | Coding | TRUE |
| 6-pyruvoyltetrahydropterin synthase                      | NM_000317, ENS  | Coding | TRUE |
| G0/G1switch 2                                            | NM_015714, ENS  | Coding | TRUE |
| G0/G1switch 2                                            | NM_015714, ENS  | Coding | TRUE |
| TRIO and F-actin binding protein                         | NM_001039141, I | Coding | TRUE |
| TRIO and F-actin binding protein                         | NM_001039141, I | Coding | TRUE |
| TRIO and F-actin binding protein                         | NM_001039141, I | Coding | TRUE |
| TRIO and F-actin binding protein                         | NM_001039141, I | Coding | TRUE |
| TRIO and F-actin binding protein                         | NM_001039141, I | Coding | TRUE |
| uncharacterized LOC100506119                             | ENST000004231   | Coding | TRUE |
| uncharacterized LOC100506119                             | ENST000004231   | Coding | TRUE |
| uncharacterized LOC100506119                             | ENST000004231   | Coding | TRUE |
| uncharacterized LOC100506119                             | ENST000004231   | Coding | TRUE |
| uncharacterized LOC100506119                             | ENST000004231   | Coding | TRUE |
| lymphatic vessel endothelial hyaluronan receptor 1       | NM_006691, ENS  | Coding | TRUE |
| lymphatic vessel endothelial hyaluronan receptor 1       | NM_006691, ENS  | Coding | TRUE |
|                                                          |                 | Coding | TRUE |
|                                                          |                 | Coding | TRUE |
|                                                          |                 | Coding | TRUE |
| cytokine receptor-like factor 1                          | NM_004750, ENS  | Coding | TRUE |
| cytokine receptor-like factor 1                          | NM_004750, ENS  | Coding | TRUE |
| cytokine receptor-like factor 1                          | NM_004750, ENS  | Coding | TRUE |
| cytokine receptor-like factor 1                          | NM_004750, ENS  | Coding | TRUE |



|                                                   |                |        |      |
|---------------------------------------------------|----------------|--------|------|
| prickle homolog 1 (Drosophila)                    | NM_001144882,  | Coding | TRUE |
| coiled-coil domain containing 3                   | NM_031455, ENS | Coding | TRUE |
| coiled-coil domain containing 3                   | NM_031455, ENS | Coding | TRUE |
| coiled-coil domain containing 3                   | NM_031455, ENS | Coding | TRUE |
| coiled-coil domain containing 3                   | NM_031455, ENS | Coding | TRUE |
| coiled-coil domain containing 3                   | NM_031455, ENS | Coding | TRUE |
| coiled-coil domain containing 3                   | NM_031455, ENS | Coding | TRUE |
| coiled-coil domain containing 3                   | NM_031455, ENS | Coding | TRUE |
| coiled-coil domain containing 3                   | NM_031455, ENS | Coding | TRUE |
| coiled-coil domain containing 3                   | NM_031455, ENS | Coding | TRUE |
| coiled-coil domain containing 3                   | NM_031455, ENS | Coding | TRUE |
| coiled-coil domain containing 3                   | NM_031455, ENS | Coding | TRUE |
| coiled-coil domain containing 3                   | NM_031455, ENS | Coding | TRUE |
| coiled-coil domain containing 3                   | NM_031455, ENS | Coding | TRUE |
| coiled-coil domain containing 3                   | NM_031455, ENS | Coding | TRUE |
| coiled-coil domain containing 3                   | NM_031455, ENS | Coding | TRUE |
| coiled-coil domain containing 3                   | NM_031455, ENS | Coding | TRUE |
| coiled-coil domain containing 3                   | NM_031455, ENS | Coding | TRUE |
| sortilin 1                                        | NM_001205228,  | Coding | TRUE |
| sortilin 1                                        | NM_001205228,  | Coding | TRUE |
| sortilin 1                                        | NM_001205228,  | Coding | TRUE |
| sortilin 1                                        | NM_001205228,  | Coding | TRUE |
| sortilin 1                                        | NM_001205228,  | Coding | TRUE |
| sortilin 1                                        | NM_001205228,  | Coding | TRUE |
| sortilin 1                                        | NM_001205228,  | Coding | TRUE |
| sortilin 1                                        | NM_001205228,  | Coding | TRUE |
| sortilin 1                                        | NM_001205228,  | Coding | TRUE |
| sortilin 1                                        | NM_001205228,  | Coding | TRUE |
| sortilin 1                                        | NM_001205228,  | Coding | TRUE |
| apolipoprotein D                                  | NM_001647, ENS | Coding | TRUE |
| apolipoprotein D                                  | NM_001647, ENS | Coding | TRUE |
| apolipoprotein D                                  | NM_001647, ENS | Coding | TRUE |
| apolipoprotein D                                  | NM_001647, ENS | Coding | TRUE |
| apolipoprotein D                                  | NM_001647, ENS | Coding | TRUE |
| HOXC cluster antisense RNA 1 (non-protein coding) | ENST000005057  | Coding | TRUE |
| HOXC cluster antisense RNA 1 (non-protein coding) | ENST000005057  | Coding | TRUE |
| olfactomedin-like 3                               | NM_020190, ENS | Coding | TRUE |
| olfactomedin-like 3                               | NM_020190, ENS | Coding | TRUE |
| TIMP metalloproteinase inhibitor 4                | NM_003256, ENS | Coding | TRUE |
| TIMP metalloproteinase inhibitor 4                | NM_003256, ENS | Coding | TRUE |











































































































































|      |     |     |      |       |       |
|------|-----|-----|------|-------|-------|
| TRUE | 1/1 | 1/1 | 7.1  | 8.3   | -2.3  |
| TRUE | 1/1 | 1/1 | 7.1  | 8.3   | -2.3  |
| TRUE | 1/1 | 1/1 | 7.1  | 8.3   | -2.3  |
| TRUE | 1/1 | 1/1 | 7.1  | 8.3   | -2.3  |
| TRUE | 1/1 | 1/1 | 7.1  | 8.3   | -2.3  |
| TRUE | 1/1 | 1/1 | 7.1  | 8.3   | -2.3  |
| TRUE | 1/1 | 1/1 | 7.1  | 8.3   | -2.3  |
| TRUE | 1/1 | 1/1 | 7.1  | 8.3   | -2.3  |
| TRUE | 1/1 | 1/1 | 6.59 | 5.05  | 2.9   |
| TRUE | 1/1 | 1/1 | 6.59 | 5.05  | 2.9   |
| TRUE | 1/1 | 1/1 | 6.59 | 5.05  | 2.9   |
| TRUE | 1/1 | 1/1 | 6.59 | 5.05  | 2.9   |
| TRUE | 1/1 | 1/1 | 6.59 | 5.05  | 2.9   |
| TRUE | 1/1 | 1/1 | 6.59 | 5.05  | 2.9   |
| TRUE | 1/1 | 1/1 | 6.59 | 5.05  | 2.9   |
| TRUE | 1/1 | 1/1 | 6.59 | 5.05  | 2.9   |
| TRUE | 1/1 | 1/1 | 6.59 | 5.05  | 2.9   |
| TRUE | 1/1 | 1/1 | 6.59 | 5.05  | 2.9   |
| TRUE | 1/1 | 1/1 | 6.59 | 5.05  | 2.9   |
| TRUE | 1/1 | 1/1 | 6.59 | 5.05  | 2.9   |
| TRUE | 1/1 | 1/1 | 6.59 | 5.05  | 2.9   |
| TRUE | 1/1 | 1/1 | 6.59 | 5.05  | 2.9   |
| TRUE | 1/1 | 1/1 | 6.59 | 5.05  | 2.9   |
| TRUE | 1/1 | 1/1 | 6.59 | 5.05  | 2.9   |
| TRUE | 1/1 | 1/1 | 6.59 | 5.05  | 2.9   |
| TRUE | 1/1 | 1/1 | 6.59 | 5.05  | 2.9   |
| TRUE | 1/1 | 1/1 | 6.59 | 5.05  | 2.9   |
| TRUE | 1/1 | 1/1 | 6.59 | 5.05  | 2.9   |
| TRUE | 1/1 | 1/1 | 4.39 | 3.67  | 1.64  |
| TRUE | 1/1 | 1/1 | 4.39 | 3.67  | 1.64  |
| TRUE | 1/1 | 1/1 | 4.39 | 3.67  | 1.64  |
| TRUE | 1/1 | 1/1 | 4.39 | 3.67  | 1.64  |
| TRUE | 1/1 | 1/1 | 4.39 | 3.67  | 1.64  |
| TRUE | 1/1 | 1/1 | 4.39 | 3.67  | 1.64  |
| TRUE | 1/1 | 1/1 | 4.39 | 3.67  | 1.64  |
| TRUE | 1/1 | 1/1 | 4.39 | 3.67  | 1.64  |
| TRUE | 1/1 | 1/1 | 4.39 | 3.67  | 1.64  |
| TRUE | 1/1 | 1/1 | 4.39 | 3.67  | 1.64  |
| TRUE | 1/1 | 1/1 | 5.52 | 6.9   | -2.6  |
| TRUE | 1/1 | 1/1 | 5.52 | 6.9   | -2.6  |
| TRUE | 1/1 | 1/1 | 5.52 | 6.9   | -2.6  |
| TRUE | 1/1 | 1/1 | 5.52 | 6.9   | -2.6  |
| TRUE | 1/1 | 1/1 | 5.52 | 6.9   | -2.6  |
| TRUE | 1/1 | 1/1 | 5.52 | 6.9   | -2.6  |
| TRUE | 1/1 | 1/1 | 5.52 | 6.9   | -2.6  |
| TRUE | 1/1 | 1/1 | 5.52 | 6.9   | -2.6  |
| TRUE | 1/1 | 1/1 | 5.52 | 6.9   | -2.6  |
| TRUE | 1/1 | 1/1 | 5.52 | 6.9   | -2.6  |
| TRUE | 1/1 | 1/1 | 5.52 | 6.9   | -2.6  |
| TRUE | 1/1 | 1/1 | 9.83 | 10.4  | -1.49 |
| TRUE | 1/1 | 1/1 | 9.83 | 10.4  | -1.49 |
| TRUE | 1/1 | 1/1 | 9.83 | 10.4  | -1.49 |
| TRUE | 1/1 | 1/1 | 6.61 | 7.27  | -1.58 |
| TRUE | 1/1 | 1/1 | 6.61 | 7.27  | -1.58 |
| TRUE | 1/1 | 1/1 | 8.86 | 11.24 | -5.22 |
| TRUE | 1/1 | 1/1 | 8.86 | 11.24 | -5.22 |
| TRUE | 1/1 | 1/1 | 8.86 | 11.24 | -5.22 |
| TRUE | 1/1 | 1/1 | 8.86 | 11.24 | -5.22 |
| TRUE | 1/1 | 1/1 | 8.86 | 11.24 | -5.22 |
| TRUE | 1/1 | 1/1 | 5.13 | 7.62  | -5.6  |
| TRUE | 1/1 | 1/1 | 5.13 | 7.62  | -5.6  |
| TRUE | 1/1 | 1/1 | 5.13 | 7.62  | -5.6  |
| TRUE | 1/1 | 1/1 | 5.13 | 7.62  | -5.6  |
| TRUE | 1/1 | 1/1 | 5.13 | 7.62  | -5.6  |
| TRUE | 1/1 | 1/1 | 6.61 | 5.08  | 2.9   |
| TRUE | 1/1 | 1/1 | 6.61 | 5.08  | 2.9   |
| TRUE | 1/1 | 1/1 | 6.61 | 5.08  | 2.9   |























|      |     |     |       |       |       |
|------|-----|-----|-------|-------|-------|
| TRUE | 1/1 | 1/1 | 8.38  | 5.8   | 5.99  |
| TRUE | 1/1 | 1/1 | 8.38  | 5.8   | 5.99  |
| TRUE | 1/1 | 1/1 | 7.47  | 10.32 | -7.23 |
| TRUE | 1/1 | 1/1 | 7.47  | 10.32 | -7.23 |
| TRUE | 1/1 | 1/1 | 7.47  | 10.32 | -7.23 |
| TRUE | 1/1 | 1/1 | 7.47  | 10.32 | -7.23 |
| TRUE | 1/1 | 1/1 | 7.47  | 10.32 | -7.23 |
| TRUE | 1/1 | 1/1 | 7.47  | 10.32 | -7.23 |
| TRUE | 1/1 | 1/1 | 7.47  | 10.32 | -7.23 |
| TRUE | 1/1 | 1/1 | 7.47  | 10.32 | -7.23 |
| TRUE | 1/1 | 1/1 | 7.47  | 10.32 | -7.23 |
| TRUE | 1/1 | 1/1 | 10.02 | 11    | -1.98 |
| TRUE | 1/1 | 1/1 | 10.02 | 11    | -1.98 |
| TRUE | 1/1 | 1/1 | 10.02 | 11    | -1.98 |
| TRUE | 1/1 | 1/1 | 10.02 | 11    | -1.98 |
| TRUE | 1/1 | 1/1 | 10.02 | 11    | -1.98 |
| TRUE | 1/1 | 1/1 | 10.02 | 11    | -1.98 |
| TRUE | 1/1 | 1/1 | 10.02 | 11    | -1.98 |
| TRUE | 1/1 | 1/1 | 10.02 | 11    | -1.98 |
| TRUE | 1/1 | 1/1 | 10.02 | 11    | -1.98 |
| TRUE | 1/1 | 1/1 | 10.02 | 11    | -1.98 |
| TRUE | 1/1 | 1/1 | 10.02 | 11    | -1.98 |
| TRUE | 1/1 | 1/1 | 10.02 | 11    | -1.98 |
| TRUE | 1/1 | 1/1 | 10.02 | 11    | -1.98 |
| TRUE | 1/1 | 1/1 | 10.02 | 11    | -1.98 |
| TRUE | 1/1 | 1/1 | 10.02 | 11    | -1.98 |
| TRUE | 1/1 | 1/1 | 10.02 | 11    | -1.98 |
| TRUE | 1/1 | 1/1 | 10.02 | 11    | -1.98 |
| TRUE | 1/1 | 1/1 | 10.02 | 11    | -1.98 |
| TRUE | 1/1 | 1/1 | 6.67  | 7.95  | -2.43 |
| TRUE | 1/1 | 1/1 | 6.67  | 7.95  | -2.43 |
| TRUE | 1/1 | 1/1 | 6.67  | 7.95  | -2.43 |
| TRUE | 1/1 | 1/1 | 4.68  | 4.22  | 1.37  |
| TRUE | 1/1 | 1/1 | 4.68  | 4.22  | 1.37  |
| TRUE | 1/1 | 1/1 | 4.68  | 4.22  | 1.37  |
| TRUE | 1/1 | 1/1 | 4.68  | 4.22  | 1.37  |
| TRUE | 1/1 | 1/1 | 4.68  | 4.22  | 1.37  |
| TRUE | 1/1 | 1/1 | 4.68  | 4.22  | 1.37  |
| TRUE | 1/1 | 1/1 | 4.68  | 4.22  | 1.37  |
| TRUE | 1/1 | 1/1 | 4.68  | 4.22  | 1.37  |
| TRUE | 1/1 | 1/1 | 4.68  | 4.22  | 1.37  |
| TRUE | 1/1 | 1/1 | 4.68  | 4.22  | 1.37  |
| TRUE | 1/1 | 1/1 | 4.68  | 4.22  | 1.37  |
| TRUE | 1/1 | 1/1 | 4.68  | 4.22  | 1.37  |
| TRUE | 1/1 | 1/1 | 4.68  | 4.22  | 1.37  |
| TRUE | 1/1 | 1/1 | 4.68  | 4.22  | 1.37  |
| TRUE | 1/1 | 1/1 | 4.68  | 4.22  | 1.37  |
| TRUE | 1/1 | 1/1 | 4.68  | 4.22  | 1.37  |
| TRUE | 1/1 | 1/1 | 4.69  | 7.81  | -8.67 |
| TRUE | 1/1 | 1/1 | 4.69  | 7.81  | -8.67 |
| TRUE | 1/1 | 1/1 | 4.69  | 7.81  | -8.67 |
| TRUE | 1/1 | 1/1 | 4.69  | 7.81  | -8.67 |
| TRUE | 1/1 | 1/1 | 4.69  | 7.81  | -8.67 |
| TRUE | 1/1 | 1/1 | 4.69  | 7.81  | -8.67 |
| TRUE | 1/1 | 1/1 | 4.69  | 7.81  | -8.67 |
| TRUE | 1/1 | 1/1 | 4.69  | 7.81  | -8.67 |
| TRUE | 1/1 | 1/1 | 4.69  | 7.81  | -8.67 |
| TRUE | 1/1 | 1/1 | 6.39  | 5.38  | 2.02  |
| TRUE | 1/1 | 1/1 | 6.39  | 5.38  | 2.02  |
| TRUE | 1/1 | 1/1 | 6.39  | 5.38  | 2.02  |
| TRUE | 1/1 | 1/1 | 6.39  | 5.38  | 2.02  |
| TRUE | 1/1 | 1/1 | 6.39  | 5.38  | 2.02  |
| TRUE | 1/1 | 1/1 | 4.58  | 4.9   | -1.25 |
| TRUE | 1/1 | 1/1 | 4.58  | 4.9   | -1.25 |
| TRUE | 1/1 | 1/1 | 4.58  | 4.9   | -1.25 |
| TRUE | 1/1 | 1/1 | 4.58  | 4.9   | -1.25 |
| TRUE | 1/1 | 1/1 | 3.28  | 4.45  | -2.25 |







|      |     |     |       |       |       |
|------|-----|-----|-------|-------|-------|
| TRUE | 1/1 | 1/1 | 5.65  | 6.27  | -1.54 |
| TRUE | 1/1 | 1/1 | 6.75  | 7.11  | -1.28 |
| TRUE | 1/1 | 1/1 | 6.75  | 7.11  | -1.28 |
| TRUE | 1/1 | 1/1 | 6.75  | 7.11  | -1.28 |
| TRUE | 1/1 | 1/1 | 6.75  | 7.11  | -1.28 |
| TRUE | 1/1 | 1/1 | 3.82  | 4.72  | -1.86 |
| TRUE | 1/1 | 1/1 | 3.82  | 4.72  | -1.86 |
| TRUE | 1/1 | 1/1 | 3.82  | 4.72  | -1.86 |
| TRUE | 1/1 | 1/1 | 3.82  | 4.72  | -1.86 |
| TRUE | 1/1 | 1/1 | 3.82  | 4.72  | -1.86 |
| TRUE | 1/1 | 1/1 | 3.82  | 4.72  | -1.86 |
| TRUE | 1/1 | 1/1 | 3.82  | 4.72  | -1.86 |
| TRUE | 1/1 | 1/1 | 3.82  | 4.72  | -1.86 |
| TRUE | 1/1 | 1/1 | 3.82  | 4.72  | -1.86 |
| TRUE | 1/1 | 1/1 | 3.82  | 4.72  | -1.86 |
| TRUE | 1/1 | 1/1 | 3.82  | 4.72  | -1.86 |
| TRUE | 1/1 | 1/1 | 3.82  | 4.72  | -1.86 |
| TRUE | 1/1 | 1/1 | 6.13  | 6.56  | -1.35 |
| TRUE | 1/1 | 1/1 | 6.13  | 6.56  | -1.35 |
| TRUE | 1/1 | 1/1 | 6.13  | 6.56  | -1.35 |
| TRUE | 1/1 | 1/1 | 6.13  | 6.56  | -1.35 |
| TRUE | 1/1 | 1/1 | 6.13  | 6.56  | -1.35 |
| TRUE | 1/1 | 1/1 | 6.13  | 6.56  | -1.35 |
| TRUE | 1/1 | 1/1 | 6.13  | 6.56  | -1.35 |
| TRUE | 1/1 | 1/1 | 6.13  | 6.56  | -1.35 |
| TRUE | 1/1 | 1/1 | 6.13  | 6.56  | -1.35 |
| TRUE | 1/1 | 1/1 | 4.45  | 5.33  | -1.84 |
| TRUE | 1/1 | 1/1 | 4.45  | 5.33  | -1.84 |
| TRUE | 1/1 | 1/1 | 4.45  | 5.33  | -1.84 |
| TRUE | 1/1 | 1/1 | 4.45  | 5.33  | -1.84 |
| TRUE | 1/1 | 1/1 | 4.45  | 5.33  | -1.84 |
| TRUE | 1/1 | 1/1 | 4.45  | 5.33  | -1.84 |
| TRUE | 1/1 | 1/1 | 4.45  | 5.33  | -1.84 |
| TRUE | 1/1 | 1/1 | 4.45  | 5.33  | -1.84 |
| TRUE | 1/1 | 1/1 | 4.45  | 5.33  | -1.84 |
| TRUE | 1/1 | 1/1 | 4.45  | 5.33  | -1.84 |
| TRUE | 1/1 | 1/1 | 4.45  | 5.33  | -1.84 |
| TRUE | 1/1 | 1/1 | 4.45  | 5.33  | -1.84 |
| TRUE | 1/1 | 1/1 | 6.37  | 7.33  | -1.94 |
| TRUE | 1/1 | 1/1 | 6.37  | 7.33  | -1.94 |
| TRUE | 1/1 | 1/1 | 7.82  | 7.48  | 1.26  |
| TRUE | 1/1 | 1/1 | 7.82  | 7.48  | 1.26  |
| TRUE | 1/1 | 1/1 | 7.82  | 7.48  | 1.26  |
| TRUE | 1/1 | 1/1 | 7.82  | 7.48  | 1.26  |
| TRUE | 1/1 | 1/1 | 7.82  | 7.48  | 1.26  |
| TRUE | 1/1 | 1/1 | 7.82  | 7.48  | 1.26  |
| TRUE | 1/1 | 1/1 | 7.82  | 7.48  | 1.26  |
| TRUE | 1/1 | 1/1 | 7.82  | 7.48  | 1.26  |
| TRUE | 1/1 | 1/1 | 5.94  | 6.09  | -1.11 |
| TRUE | 1/1 | 1/1 | 5.94  | 6.09  | -1.11 |
| TRUE | 1/1 | 1/1 | 5.94  | 6.09  | -1.11 |
| TRUE | 1/1 | 1/1 | 5.94  | 6.09  | -1.11 |
| TRUE | 1/1 | 1/1 | 10.21 | 10.4  | -1.14 |
| TRUE | 1/1 | 1/1 | 10.21 | 10.4  | -1.14 |
| TRUE | 1/1 | 1/1 | 8.45  | 10.07 | -3.06 |
| TRUE | 1/1 | 1/1 | 8.45  | 10.07 | -3.06 |
| TRUE | 1/1 | 1/1 | 8.45  | 10.07 | -3.06 |
| TRUE | 1/1 | 1/1 | 8.45  | 10.07 | -3.06 |
| TRUE | 1/1 | 1/1 | 8.45  | 10.07 | -3.06 |
| TRUE | 1/1 | 1/1 | 8.45  | 10.07 | -3.06 |
| TRUE | 1/1 | 1/1 | 8.45  | 10.07 | -3.06 |
| TRUE | 1/1 | 1/1 | 5.32  | 6.65  | -2.5  |
| TRUE | 1/1 | 1/1 | 5.32  | 6.65  | -2.5  |
| TRUE | 1/1 | 1/1 | 5.32  | 6.65  | -2.5  |
| TRUE | 1/1 | 1/1 | 5.32  | 6.65  | -2.5  |









|      |     |     |      |      |       |
|------|-----|-----|------|------|-------|
| TRUE | 1/1 | 1/1 | 6.22 | 9.52 | -9.86 |
| TRUE | 1/1 | 1/1 | 6.22 | 9.52 | -9.86 |
| TRUE | 1/1 | 1/1 | 6.22 | 9.52 | -9.86 |
| TRUE | 1/1 | 1/1 | 6.22 | 9.52 | -9.86 |
| TRUE | 1/1 | 1/1 | 5.73 | 5.65 | 1.06  |
| TRUE | 1/1 | 1/1 | 5.73 | 5.65 | 1.06  |
| TRUE | 1/1 | 1/1 | 5.73 | 5.65 | 1.06  |
| TRUE | 1/1 | 1/1 | 5.73 | 5.65 | 1.06  |
| TRUE | 1/1 | 1/1 | 6.74 | 7.36 | -1.53 |
| TRUE | 1/1 | 1/1 | 6.74 | 7.36 | -1.53 |
| TRUE | 1/1 | 1/1 | 6.74 | 7.36 | -1.53 |
| TRUE | 1/1 | 1/1 | 6.74 | 7.36 | -1.53 |
| TRUE | 1/1 | 1/1 | 6.74 | 7.36 | -1.53 |
| TRUE | 1/1 | 1/1 | 6.74 | 7.36 | -1.53 |
| TRUE | 1/1 | 1/1 | 6.74 | 7.36 | -1.53 |
| TRUE | 1/1 | 1/1 | 9.85 | 6.22 | 12.41 |
| TRUE | 1/1 | 1/1 | 9.85 | 6.22 | 12.41 |
| TRUE | 1/1 | 1/1 | 9.85 | 6.22 | 12.41 |
| TRUE | 1/1 | 1/1 | 9.85 | 6.22 | 12.41 |
| TRUE | 1/1 | 1/1 | 9.85 | 6.22 | 12.41 |
| TRUE | 1/1 | 1/1 | 9.85 | 6.22 | 12.41 |
| TRUE | 1/1 | 1/1 | 9.85 | 6.22 | 12.41 |
| TRUE | 1/1 | 1/1 | 9.85 | 6.22 | 12.41 |
| TRUE | 1/1 | 1/1 | 9.85 | 6.22 | 12.41 |
| TRUE | 1/1 | 1/1 | 6.95 | 5.28 | 3.18  |
| TRUE | 1/1 | 1/1 | 6.95 | 5.28 | 3.18  |
| TRUE | 1/1 | 1/1 | 6.95 | 5.28 | 3.18  |
| TRUE | 1/1 | 1/1 | 6.95 | 5.28 | 3.18  |
| TRUE | 1/1 | 1/1 | 6.95 | 5.28 | 3.18  |
| TRUE | 1/1 | 1/1 | 6.95 | 5.28 | 3.18  |
| TRUE | 1/1 | 1/1 | 6.95 | 5.28 | 3.18  |
| TRUE | 1/1 | 1/1 | 6.95 | 5.28 | 3.18  |
| TRUE | 1/1 | 1/1 | 6.95 | 5.28 | 3.18  |
| TRUE | 1/1 | 1/1 | 6.95 | 5.28 | 3.18  |
| TRUE | 1/1 | 1/1 | 6.95 | 5.28 | 3.18  |
| TRUE | 1/1 | 1/1 | 6.95 | 5.28 | 3.18  |
| TRUE | 1/1 | 1/1 | 6.95 | 5.28 | 3.18  |
| TRUE | 1/1 | 1/1 | 6.95 | 5.28 | 3.18  |
| TRUE | 1/1 | 1/1 | 6.95 | 5.28 | 3.18  |
| TRUE | 1/1 | 1/1 | 6.95 | 5.28 | 3.18  |
| TRUE | 1/1 | 1/1 | 6.95 | 5.28 | 3.18  |
| TRUE | 1/1 | 1/1 | 6.95 | 5.28 | 3.18  |
| TRUE | 1/1 | 1/1 | 6.95 | 5.28 | 3.18  |
| TRUE | 1/1 | 1/1 | 6.95 | 5.28 | 3.18  |
| TRUE | 1/1 | 1/1 | 6.95 | 5.28 | 3.18  |
| TRUE | 1/1 | 1/1 | 6.95 | 5.28 | 3.18  |
| TRUE | 1/1 | 1/1 | 6.95 | 5.28 | 3.18  |
| TRUE | 1/1 | 1/1 | 6.95 | 5.28 | 3.18  |
| TRUE | 1/1 | 1/1 | 6.95 | 5.28 | 3.18  |
| TRUE | 1/1 | 1/1 | 6.95 | 5.28 | 3.18  |
| TRUE | 1/1 | 1/1 | 6.95 | 5.28 | 3.18  |
| TRUE | 1/1 | 1/1 | 6.95 | 5.28 | 3.18  |
| TRUE | 1/1 | 1/1 | 7.83 | 7.61 | 1.17  |
| TRUE | 1/1 | 1/1 | 7.83 | 7.61 | 1.17  |
| TRUE | 1/1 | 1/1 | 7.83 | 7.61 | 1.17  |





















































|      |     |     |       |      |       |
|------|-----|-----|-------|------|-------|
| TRUE | 1/1 | 1/1 | 5.7   | 7.91 | -4.64 |
| TRUE | 1/1 | 1/1 | 5.7   | 7.91 | -4.64 |
| TRUE | 1/1 | 1/1 | 5.7   | 7.91 | -4.64 |
| TRUE | 1/1 | 1/1 | 5.7   | 7.91 | -4.64 |
| TRUE | 1/1 | 1/1 | 5.7   | 7.91 | -4.64 |
| TRUE | 1/1 | 1/1 | 5.7   | 7.91 | -4.64 |
| TRUE | 1/1 | 1/1 | 6.02  | 7.16 | -2.21 |
| TRUE | 1/1 | 1/1 | 6.02  | 7.16 | -2.21 |
| TRUE | 1/1 | 1/1 | 6.02  | 7.16 | -2.21 |
| TRUE | 1/1 | 1/1 | 6.02  | 7.16 | -2.21 |
| TRUE | 1/1 | 1/1 | 6.02  | 7.16 | -2.21 |
| TRUE | 1/1 | 1/1 | 6.02  | 7.16 | -2.21 |
| TRUE | 1/1 | 1/1 | 6.02  | 7.16 | -2.21 |
| TRUE | 1/1 | 1/1 | 6.02  | 7.16 | -2.21 |
| TRUE | 1/1 | 1/1 | 6.02  | 7.16 | -2.21 |
| TRUE | 1/1 | 1/1 | 6.91  | 7.76 | -1.8  |
| TRUE | 1/1 | 1/1 | 6.91  | 7.76 | -1.8  |
| TRUE | 1/1 | 1/1 | 6.91  | 7.76 | -1.8  |
| TRUE | 1/1 | 1/1 | 6.91  | 7.76 | -1.8  |
| TRUE | 1/1 | 1/1 | 6.91  | 7.76 | -1.8  |
| TRUE | 1/1 | 1/1 | 6.91  | 7.76 | -1.8  |
| TRUE | 1/1 | 1/1 | 6.91  | 7.76 | -1.8  |
| TRUE | 1/1 | 1/1 | 6.91  | 7.76 | -1.8  |
| TRUE | 1/1 | 1/1 | 6.91  | 7.76 | -1.8  |
| TRUE | 1/1 | 1/1 | 5.82  | 4.04 | 3.45  |
| TRUE | 1/1 | 1/1 | 5.82  | 4.04 | 3.45  |
| TRUE | 1/1 | 1/1 | 5.82  | 4.04 | 3.45  |
| TRUE | 1/1 | 1/1 | 5.82  | 4.04 | 3.45  |
| TRUE | 1/1 | 1/1 | 5.82  | 4.04 | 3.45  |
| TRUE | 1/1 | 1/1 | 5.82  | 4.04 | 3.45  |
| TRUE | 1/1 | 1/1 | 5.82  | 4.04 | 3.45  |
| TRUE | 1/1 | 1/1 | 5.82  | 4.04 | 3.45  |
| TRUE | 1/1 | 1/1 | 5.82  | 4.04 | 3.45  |
| TRUE | 1/1 | 1/1 | 5.82  | 4.04 | 3.45  |
| TRUE | 1/1 | 1/1 | 12.16 | 12.7 | -1.45 |
| TRUE | 1/1 | 1/1 | 12.16 | 12.7 | -1.45 |
| TRUE | 1/1 | 1/1 | 12.16 | 12.7 | -1.45 |
| TRUE | 1/1 | 1/1 | 12.16 | 12.7 | -1.45 |
| TRUE | 1/1 | 1/1 | 12.16 | 12.7 | -1.45 |
| TRUE | 1/1 | 1/1 | 6.58  | 7.38 | -1.74 |
| TRUE | 1/1 | 1/1 | 6.58  | 7.38 | -1.74 |
| TRUE | 1/1 | 1/1 | 6.58  | 7.38 | -1.74 |
| TRUE | 1/1 | 1/1 | 6.58  | 7.38 | -1.74 |
| TRUE | 1/1 | 1/1 | 6.58  | 7.38 | -1.74 |
| TRUE | 1/1 | 1/1 | 6.58  | 7.38 | -1.74 |
| TRUE | 1/1 | 1/1 | 6.58  | 7.38 | -1.74 |
| TRUE | 1/1 | 1/1 | 6.58  | 7.38 | -1.74 |
| TRUE | 1/1 | 1/1 | 6.58  | 7.38 | -1.74 |
| TRUE | 1/1 | 1/1 | 6.58  | 7.38 | -1.74 |
| TRUE | 1/1 | 1/1 | 6.58  | 7.38 | -1.74 |
| TRUE | 1/1 | 1/1 | 6.14  | 7.54 | -2.64 |
| TRUE | 1/1 | 1/1 | 6.14  | 7.54 | -2.64 |
| TRUE | 1/1 | 1/1 | 6.14  | 7.54 | -2.64 |
| TRUE | 1/1 | 1/1 | 6.14  | 7.54 | -2.64 |
| TRUE | 1/1 | 1/1 | 6.14  | 7.54 | -2.64 |
| TRUE | 1/1 | 1/1 | 6.14  | 7.54 | -2.64 |
| TRUE | 1/1 | 1/1 | 6.14  | 7.54 | -2.64 |
| TRUE | 1/1 | 1/1 | 6.14  | 7.54 | -2.64 |
| TRUE | 1/1 | 1/1 | 6.14  | 7.54 | -2.64 |
| TRUE | 1/1 | 1/1 | 5.44  | 7.39 | -3.85 |
| TRUE | 1/1 | 1/1 | 5.44  | 7.39 | -3.85 |
| TRUE | 1/1 | 1/1 | 5.44  | 7.39 | -3.85 |
| TRUE | 1/1 | 1/1 | 5.44  | 7.39 | -3.85 |
| TRUE | 1/1 | 1/1 | 4.5   | 5.94 | -2.71 |
| TRUE | 1/1 | 1/1 | 4.5   | 5.94 | -2.71 |























|      |     |     |      |      |       |
|------|-----|-----|------|------|-------|
| TRUE | 1/1 | 1/1 | 9.95 | 7.11 | 7.2   |
| TRUE | 1/1 | 1/1 | 9.95 | 7.11 | 7.2   |
| TRUE | 1/1 | 1/1 | 9.95 | 7.11 | 7.2   |
| TRUE | 1/1 | 1/1 | 9.95 | 7.11 | 7.2   |
| TRUE | 1/1 | 1/1 | 3.51 | 3.01 | 1.42  |
| TRUE | 1/1 | 1/1 | 3.51 | 3.01 | 1.42  |
| TRUE | 1/1 | 1/1 | 3.51 | 3.01 | 1.42  |
| TRUE | 1/1 | 1/1 | 3.51 | 3.01 | 1.42  |
| TRUE | 1/1 | 1/1 | 3.51 | 3.01 | 1.42  |
| TRUE | 1/1 | 1/1 | 3.51 | 3.01 | 1.42  |
| TRUE | 1/1 | 1/1 | 3.51 | 3.01 | 1.42  |
| TRUE | 1/1 | 1/1 | 3.51 | 3.01 | 1.42  |
| TRUE | 1/1 | 1/1 | 3.51 | 3.01 | 1.42  |
| TRUE | 1/1 | 1/1 | 3.51 | 3.01 | 1.42  |
| TRUE | 1/1 | 1/1 | 3.51 | 3.01 | 1.42  |
| TRUE | 1/1 | 1/1 | 3.51 | 3.01 | 1.42  |
| TRUE | 1/1 | 1/1 | 3.51 | 3.01 | 1.42  |
| TRUE | 1/1 | 1/1 | 3.51 | 3.01 | 1.42  |
| TRUE | 1/1 | 1/1 | 3.51 | 3.01 | 1.42  |
| TRUE | 1/1 | 1/1 | 3.51 | 3.01 | 1.42  |
| TRUE | 1/1 | 1/1 | 3.51 | 3.01 | 1.42  |
| TRUE | 1/1 | 1/1 | 3.51 | 3.01 | 1.42  |
| TRUE | 1/1 | 1/1 | 7.2  | 8.09 | -1.86 |
| TRUE | 1/1 | 1/1 | 7.2  | 8.09 | -1.86 |
| TRUE | 1/1 | 1/1 | 7.2  | 8.09 | -1.86 |
| TRUE | 1/1 | 1/1 | 7.2  | 8.09 | -1.86 |
| TRUE | 1/1 | 1/1 | 7.2  | 8.09 | -1.86 |
| TRUE | 1/1 | 1/1 | 8.39 | 8.85 | -1.38 |
| TRUE | 1/1 | 1/1 | 8.39 | 8.85 | -1.38 |
| TRUE | 1/1 | 1/1 | 5.74 | 5.63 | 1.08  |
| TRUE | 1/1 | 1/1 | 5.74 | 5.63 | 1.08  |
| TRUE | 1/1 | 1/1 | 5.74 | 5.63 | 1.08  |
| TRUE | 1/1 | 1/1 | 4.58 | 5.95 | -2.58 |
| TRUE | 1/1 | 1/1 | 4.58 | 5.95 | -2.58 |
| TRUE | 1/1 | 1/1 | 4.58 | 5.95 | -2.58 |
| TRUE | 1/1 | 1/1 | 4.58 | 5.95 | -2.58 |
| TRUE | 1/1 | 1/1 | 4.58 | 5.95 | -2.58 |
| TRUE | 1/1 | 1/1 | 4.58 | 5.95 | -2.58 |
| TRUE | 1/1 | 1/1 | 4.58 | 5.95 | -2.58 |
| TRUE | 1/1 | 1/1 | 4.58 | 5.95 | -2.58 |
| TRUE | 1/1 | 1/1 | 4.58 | 5.95 | -2.58 |
| TRUE | 1/1 | 1/1 | 4.58 | 5.95 | -2.58 |
| TRUE | 1/1 | 1/1 | 4.58 | 5.95 | -2.58 |
| TRUE | 1/1 | 1/1 | 4.58 | 5.95 | -2.58 |
| TRUE | 1/1 | 1/1 | 4.58 | 5.95 | -2.58 |
| TRUE | 1/1 | 1/1 | 4.58 | 5.95 | -2.58 |
| TRUE | 1/1 | 1/1 | 4.58 | 5.95 | -2.58 |
| TRUE | 1/1 | 1/1 | 4.58 | 5.95 | -2.58 |
| TRUE | 1/1 | 1/1 | 5.95 | 6.91 | -1.95 |
| TRUE | 1/1 | 1/1 | 5.95 | 6.91 | -1.95 |
| TRUE | 1/1 | 1/1 | 5.95 | 6.91 | -1.95 |
| TRUE | 1/1 | 1/1 | 5.95 | 6.91 | -1.95 |
| TRUE | 1/1 | 1/1 | 5.95 | 6.91 | -1.95 |
| TRUE | 1/1 | 1/1 | 5.95 | 6.91 | -1.95 |
| TRUE | 1/1 | 1/1 | 5.95 | 6.91 | -1.95 |
| TRUE | 1/1 | 1/1 | 5.95 | 6.91 | -1.95 |
| TRUE | 1/1 | 1/1 | 5.95 | 6.91 | -1.95 |
| TRUE | 1/1 | 1/1 | 5.95 | 6.91 | -1.95 |
| TRUE | 1/1 | 1/1 | 5.95 | 6.91 | -1.95 |
| TRUE | 1/1 | 1/1 | 9.06 | 9.24 | -1.13 |
| TRUE | 1/1 | 1/1 | 9.06 | 9.24 | -1.13 |
| TRUE | 1/1 | 1/1 | 9.06 | 9.24 | -1.13 |
| TRUE | 1/1 | 1/1 | 7.91 | 9.88 | -3.92 |























|      |     |     |       |       |       |
|------|-----|-----|-------|-------|-------|
| TRUE | 1/1 | 1/1 | 7.17  | 9.36  | -4.55 |
| TRUE | 1/1 | 1/1 | 7.17  | 9.36  | -4.55 |
| TRUE | 1/1 | 1/1 | 7.17  | 9.36  | -4.55 |
| TRUE | 1/1 | 1/1 | 7.17  | 9.36  | -4.55 |
| TRUE | 1/1 | 1/1 | 7.17  | 9.36  | -4.55 |
| TRUE | 1/1 | 1/1 | 7.17  | 9.36  | -4.55 |
| TRUE | 1/1 | 1/1 | 7.17  | 9.36  | -4.55 |
| TRUE | 1/1 | 1/1 | 5.57  | 6.94  | -2.59 |
| TRUE | 1/1 | 1/1 | 5.57  | 6.94  | -2.59 |
| TRUE | 1/1 | 1/1 | 5.57  | 6.94  | -2.59 |
| TRUE | 1/1 | 1/1 | 5.57  | 6.94  | -2.59 |
| TRUE | 1/1 | 1/1 | 5.57  | 6.94  | -2.59 |
| TRUE | 1/1 | 1/1 | 5.57  | 6.94  | -2.59 |
| TRUE | 1/1 | 1/1 | 5.57  | 6.94  | -2.59 |
| TRUE | 1/1 | 1/1 | 5.57  | 6.94  | -2.59 |
| TRUE | 1/1 | 1/1 | 5.57  | 6.94  | -2.59 |
| TRUE | 1/1 | 1/1 | 5.57  | 6.94  | -2.59 |
| TRUE | 1/1 | 1/1 | 5.57  | 6.94  | -2.59 |
| TRUE | 1/1 | 1/1 | 5.82  | 7.94  | -4.34 |
| TRUE | 1/1 | 1/1 | 5.82  | 7.94  | -4.34 |
| TRUE | 1/1 | 1/1 | 5.82  | 7.94  | -4.34 |
| TRUE | 1/1 | 1/1 | 5.82  | 7.94  | -4.34 |
| TRUE | 1/1 | 1/1 | 9.83  | 10.16 | -1.26 |
| TRUE | 1/1 | 1/1 | 9.83  | 10.16 | -1.26 |
| TRUE | 1/1 | 1/1 | 9.83  | 10.16 | -1.26 |
| TRUE | 1/1 | 1/1 | 9.83  | 10.16 | -1.26 |
| TRUE | 1/1 | 1/1 | 9.83  | 10.16 | -1.26 |
| TRUE | 1/1 | 1/1 | 9.83  | 10.16 | -1.26 |
| TRUE | 1/1 | 1/1 | 9.83  | 10.16 | -1.26 |
| TRUE | 1/1 | 1/1 | 10    | 12.18 | -4.51 |
| TRUE | 1/1 | 1/1 | 10    | 12.18 | -4.51 |
| TRUE | 1/1 | 1/1 | 10    | 12.18 | -4.51 |
| TRUE | 1/1 | 1/1 | 10    | 12.18 | -4.51 |
| TRUE | 1/1 | 1/1 | 10    | 12.18 | -4.51 |
| TRUE | 1/1 | 1/1 | 10    | 12.18 | -4.51 |
| TRUE | 1/1 | 1/1 | 10    | 12.18 | -4.51 |
| TRUE | 1/1 | 1/1 | 10    | 12.18 | -4.51 |
| TRUE | 1/1 | 1/1 | 10    | 12.18 | -4.51 |
| TRUE | 1/1 | 1/1 | 10    | 12.18 | -4.51 |
| TRUE | 1/1 | 1/1 | 10    | 12.18 | -4.51 |
| TRUE | 1/1 | 1/1 | 10    | 12.18 | -4.51 |
| TRUE | 1/1 | 1/1 | 10    | 12.18 | -4.51 |
| TRUE | 1/1 | 1/1 | 10    | 12.18 | -4.51 |
| TRUE | 1/1 | 1/1 | 10    | 12.18 | -4.51 |
| TRUE | 1/1 | 1/1 | 10    | 12.18 | -4.51 |
| TRUE | 1/1 | 1/1 | 10    | 12.18 | -4.51 |
| TRUE | 1/1 | 1/1 | 6.02  | 7.79  | -3.42 |
| TRUE | 1/1 | 1/1 | 6.02  | 7.79  | -3.42 |
| TRUE | 1/1 | 1/1 | 6.02  | 7.79  | -3.42 |
| TRUE | 1/1 | 1/1 | 6.02  | 7.79  | -3.42 |
| TRUE | 1/1 | 1/1 | 6.02  | 7.79  | -3.42 |
| TRUE | 1/1 | 1/1 | 6.02  | 7.79  | -3.42 |
| TRUE | 1/1 | 1/1 | 6.02  | 7.79  | -3.42 |
| TRUE | 1/1 | 1/1 | 6.36  | 7     | -1.56 |
| TRUE | 1/1 | 1/1 | 6.36  | 7     | -1.56 |
| TRUE | 1/1 | 1/1 | 6.36  | 7     | -1.56 |
| TRUE | 1/1 | 1/1 | 6.36  | 7     | -1.56 |
| TRUE | 1/1 | 1/1 | 6.36  | 7     | -1.56 |
| TRUE | 1/1 | 1/1 | 6.36  | 7     | -1.56 |
| TRUE | 1/1 | 1/1 | 6.36  | 7     | -1.56 |
| TRUE | 1/1 | 1/1 | 11.73 | 12.33 | -1.51 |
| TRUE | 1/1 | 1/1 | 11.73 | 12.33 | -1.51 |
| TRUE | 1/1 | 1/1 | 4.15  | 3.69  | 1.37  |



|      |     |     |      |       |       |
|------|-----|-----|------|-------|-------|
| TRUE | 1/1 | 1/1 | 5.83 | 7.21  | -2.61 |
| TRUE | 1/1 | 1/1 | 5.83 | 7.21  | -2.61 |
| TRUE | 1/1 | 1/1 | 5.83 | 7.21  | -2.61 |
| TRUE | 1/1 | 1/1 | 8.97 | 9.93  | -1.95 |
| TRUE | 1/1 | 1/1 | 8.97 | 9.93  | -1.95 |
| TRUE | 1/1 | 1/1 | 8.97 | 9.93  | -1.95 |
| TRUE | 1/1 | 1/1 | 8.97 | 9.93  | -1.95 |
| TRUE | 1/1 | 1/1 | 8.97 | 9.93  | -1.95 |
| TRUE | 1/1 | 1/1 | 9.05 | 10.12 | -2.09 |
| TRUE | 1/1 | 1/1 | 9.05 | 10.12 | -2.09 |
| TRUE | 1/1 | 1/1 | 9.05 | 10.12 | -2.09 |
| TRUE | 1/1 | 1/1 | 9.05 | 10.12 | -2.09 |
| TRUE | 1/1 | 1/1 | 9.05 | 10.12 | -2.09 |
| TRUE | 1/1 | 1/1 | 9.05 | 10.12 | -2.09 |
| TRUE | 1/1 | 1/1 | 9.05 | 10.12 | -2.09 |
| TRUE | 1/1 | 1/1 | 9.05 | 10.12 | -2.09 |
| TRUE | 1/1 | 1/1 | 9.05 | 10.12 | -2.09 |
| TRUE | 1/1 | 1/1 | 9.05 | 10.12 | -2.09 |
| TRUE | 1/1 | 1/1 | 9.05 | 10.12 | -2.09 |
| TRUE | 1/1 | 1/1 | 9.05 | 10.12 | -2.09 |
| TRUE | 1/1 | 1/1 | 9.05 | 10.12 | -2.09 |
| TRUE | 1/1 | 1/1 | 9.05 | 10.12 | -2.09 |
| TRUE | 1/1 | 1/1 | 9.05 | 10.12 | -2.09 |
| TRUE | 1/1 | 1/1 | 9.05 | 10.12 | -2.09 |
| TRUE | 1/1 | 1/1 | 9.05 | 10.12 | -2.09 |
| TRUE | 1/1 | 1/1 | 7.92 | 7.86  | 1.04  |
| TRUE | 1/1 | 1/1 | 7.92 | 7.86  | 1.04  |
| TRUE | 1/1 | 1/1 | 7.92 | 7.86  | 1.04  |
| TRUE | 1/1 | 1/1 | 6.95 | 7.77  | -1.77 |
| TRUE | 1/1 | 1/1 | 6.95 | 7.77  | -1.77 |
| TRUE | 1/1 | 1/1 | 6.95 | 7.77  | -1.77 |
| TRUE | 1/1 | 1/1 | 6.95 | 7.77  | -1.77 |
| TRUE | 1/1 | 1/1 | 6.95 | 7.77  | -1.77 |
| TRUE | 1/1 | 1/1 | 6.95 | 7.77  | -1.77 |
| TRUE | 1/1 | 1/1 | 6.95 | 7.77  | -1.77 |
| TRUE | 1/1 | 1/1 | 6.95 | 7.77  | -1.77 |
| TRUE | 1/1 | 1/1 | 6.56 | 7.64  | -2.13 |
| TRUE | 1/1 | 1/1 | 6.56 | 7.64  | -2.13 |
| TRUE | 1/1 | 1/1 | 6.56 | 7.64  | -2.13 |
| TRUE | 1/1 | 1/1 | 6.56 | 7.64  | -2.13 |
| TRUE | 1/1 | 1/1 | 6.56 | 7.64  | -2.13 |
| TRUE | 1/1 | 1/1 | 3.23 | 4.29  | -2.1  |
| TRUE | 1/1 | 1/1 | 3.23 | 4.29  | -2.1  |
| TRUE | 1/1 | 1/1 | 3.23 | 4.29  | -2.1  |
| TRUE | 1/1 | 1/1 | 3.23 | 4.29  | -2.1  |
| TRUE | 1/1 | 1/1 | 3.23 | 4.29  | -2.1  |
| TRUE | 1/1 | 1/1 | 3.23 | 4.29  | -2.1  |
| TRUE | 1/1 | 1/1 | 3.23 | 4.29  | -2.1  |
| TRUE | 1/1 | 1/1 | 3.23 | 4.29  | -2.1  |
| TRUE | 1/1 | 1/1 | 3.23 | 4.29  | -2.1  |
| TRUE | 1/1 | 1/1 | 3.23 | 4.29  | -2.1  |
| TRUE | 1/1 | 1/1 | 3.23 | 4.29  | -2.1  |
| TRUE | 1/1 | 1/1 | 3.23 | 4.29  | -2.1  |
| TRUE | 1/1 | 1/1 | 3.23 | 4.29  | -2.1  |
| TRUE | 1/1 | 1/1 | 3.23 | 4.29  | -2.1  |
| TRUE | 1/1 | 1/1 | 3.23 | 4.29  | -2.1  |
| TRUE | 1/1 | 1/1 | 3.23 | 4.29  | -2.1  |
| TRUE | 1/1 | 1/1 | 3.23 | 4.29  | -2.1  |
| TRUE | 1/1 | 1/1 | 3.23 | 4.29  | -2.1  |
| TRUE | 1/1 | 1/1 | 8.06 | 8.13  | -1.05 |
| TRUE | 1/1 | 1/1 | 8.06 | 8.13  | -1.05 |















|      |     |     |      |       |       |
|------|-----|-----|------|-------|-------|
| TRUE | 1/1 | 1/1 | 6.65 | 8.81  | -4.48 |
| TRUE | 1/1 | 1/1 | 6.65 | 8.81  | -4.48 |
| TRUE | 1/1 | 1/1 | 6.65 | 8.81  | -4.48 |
| TRUE | 1/1 | 1/1 | 5.59 | 3.66  | 3.82  |
| TRUE | 1/1 | 1/1 | 5.59 | 3.66  | 3.82  |
| TRUE | 1/1 | 1/1 | 5.59 | 3.66  | 3.82  |
| TRUE | 1/1 | 1/1 | 5.59 | 3.66  | 3.82  |
| TRUE | 1/1 | 1/1 | 5.59 | 3.66  | 3.82  |
| TRUE | 1/1 | 1/1 | 5.59 | 3.66  | 3.82  |
| TRUE | 1/1 | 1/1 | 5.59 | 3.66  | 3.82  |
| TRUE | 1/1 | 1/1 | 4.73 | 4.44  | 1.22  |
| TRUE | 1/1 | 1/1 | 4.73 | 4.44  | 1.22  |
| TRUE | 1/1 | 1/1 | 8.1  | 9.84  | -3.35 |
| TRUE | 1/1 | 1/1 | 8.1  | 9.84  | -3.35 |
| TRUE | 1/1 | 1/1 | 8.1  | 9.84  | -3.35 |
| TRUE | 1/1 | 1/1 | 8.1  | 9.84  | -3.35 |
| TRUE | 1/1 | 1/1 | 8.1  | 9.84  | -3.35 |
| TRUE | 1/1 | 1/1 | 8.1  | 9.84  | -3.35 |
| TRUE | 1/1 | 1/1 | 8.1  | 9.84  | -3.35 |
| TRUE | 1/1 | 1/1 | 5.85 | 7.61  | -3.39 |
| TRUE | 1/1 | 1/1 | 5.85 | 7.61  | -3.39 |
| TRUE | 1/1 | 1/1 | 5.85 | 7.61  | -3.39 |
| TRUE | 1/1 | 1/1 | 5.85 | 7.61  | -3.39 |
| TRUE | 1/1 | 1/1 | 5.85 | 7.61  | -3.39 |
| TRUE | 1/1 | 1/1 | 5.85 | 7.61  | -3.39 |
| TRUE | 1/1 | 1/1 | 4.74 | 6.93  | -4.56 |
| TRUE | 1/1 | 1/1 | 4.74 | 6.93  | -4.56 |
| TRUE | 1/1 | 1/1 | 4.74 | 6.93  | -4.56 |
| TRUE | 1/1 | 1/1 | 4.74 | 6.93  | -4.56 |
| TRUE | 1/1 | 1/1 | 4.74 | 6.93  | -4.56 |
| TRUE | 1/1 | 1/1 | 4.74 | 6.93  | -4.56 |
| TRUE | 1/1 | 1/1 | 4.74 | 6.93  | -4.56 |
| TRUE | 1/1 | 1/1 | 9.26 | 9.36  | -1.07 |
| TRUE | 1/1 | 1/1 | 9.26 | 9.36  | -1.07 |
| TRUE | 1/1 | 1/1 | 9.26 | 9.36  | -1.07 |
| TRUE | 1/1 | 1/1 | 7.6  | 7.59  | 1.01  |
| TRUE | 1/1 | 1/1 | 7.6  | 7.59  | 1.01  |
| TRUE | 1/1 | 1/1 | 7.6  | 7.59  | 1.01  |
| TRUE | 1/1 | 1/1 | 7.6  | 7.59  | 1.01  |
| TRUE | 1/1 | 1/1 | 4.06 | 3.59  | 1.39  |
| TRUE | 1/1 | 1/1 | 4.06 | 3.59  | 1.39  |
| TRUE | 1/1 | 1/1 | 4.06 | 3.59  | 1.39  |
| TRUE | 1/1 | 1/1 | 4.06 | 3.59  | 1.39  |
| TRUE | 1/1 | 1/1 | 5.87 | 5.88  | -1    |
| TRUE | 1/1 | 1/1 | 5.87 | 5.88  | -1    |
| TRUE | 1/1 | 1/1 | 5.87 | 5.88  | -1    |
| TRUE | 1/1 | 1/1 | 5.87 | 5.88  | -1    |
| TRUE | 1/1 | 1/1 | 5.87 | 5.88  | -1    |
| TRUE | 1/1 | 1/1 | 4.69 | 5.19  | -1.41 |
| TRUE | 1/1 | 1/1 | 4.69 | 5.19  | -1.41 |
| TRUE | 1/1 | 1/1 | 4.69 | 5.19  | -1.41 |
| TRUE | 1/1 | 1/1 | 4.69 | 5.19  | -1.41 |
| TRUE | 1/1 | 1/1 | 4.69 | 5.19  | -1.41 |
| TRUE | 1/1 | 1/1 | 4.69 | 5.19  | -1.41 |
| TRUE | 1/1 | 1/1 | 5.85 | 4.41  | 2.73  |
| TRUE | 1/1 | 1/1 | 5.85 | 4.41  | 2.73  |
| TRUE | 1/1 | 1/1 | 5.85 | 4.41  | 2.73  |
| TRUE | 1/1 | 1/1 | 5.85 | 4.41  | 2.73  |
| TRUE | 1/1 | 1/1 | 5.85 | 4.41  | 2.73  |
| TRUE | 1/1 | 1/1 | 9.66 | 10.02 | -1.28 |











|      |     |     |       |       |       |
|------|-----|-----|-------|-------|-------|
| TRUE | 1/1 | 1/1 | 6.08  | 7.77  | -3.22 |
| TRUE | 1/1 | 1/1 | 6.08  | 7.77  | -3.22 |
| TRUE | 1/1 | 1/1 | 6.08  | 7.77  | -3.22 |
| TRUE | 1/1 | 1/1 | 12.49 | 8.89  | 12.17 |
| TRUE | 1/1 | 1/1 | 12.49 | 8.89  | 12.17 |
| TRUE | 1/1 | 1/1 | 12.49 | 8.89  | 12.17 |
| TRUE | 1/1 | 1/1 | 12.49 | 8.89  | 12.17 |
| TRUE | 1/1 | 1/1 | 12.49 | 8.89  | 12.17 |
| TRUE | 1/1 | 1/1 | 12.49 | 8.89  | 12.17 |
| TRUE | 1/1 | 1/1 | 12.49 | 8.89  | 12.17 |
| TRUE | 1/1 | 1/1 | 12.49 | 8.89  | 12.17 |
| TRUE | 1/1 | 1/1 | 12.49 | 8.89  | 12.17 |
| TRUE | 1/1 | 1/1 | 12.49 | 8.89  | 12.17 |
| TRUE | 1/1 | 1/1 | 12.49 | 8.89  | 12.17 |
| TRUE | 1/1 | 1/1 | 12.49 | 8.89  | 12.17 |
| TRUE | 1/1 | 1/1 | 12.49 | 8.89  | 12.17 |
| TRUE | 1/1 | 1/1 | 11.39 | 11.21 | 1.14  |
| TRUE | 1/1 | 1/1 | 11.39 | 11.21 | 1.14  |
| TRUE | 1/1 | 1/1 | 11.39 | 11.21 | 1.14  |
| TRUE | 1/1 | 1/1 | 7.03  | 7.42  | -1.32 |
| TRUE | 1/1 | 1/1 | 7.03  | 7.42  | -1.32 |
| TRUE | 1/1 | 1/1 | 7.03  | 7.42  | -1.32 |
| TRUE | 1/1 | 1/1 | 7.03  | 7.42  | -1.32 |
| TRUE | 1/1 | 1/1 | 4.02  | 5.45  | -2.69 |
| TRUE | 1/1 | 1/1 | 4.02  | 5.45  | -2.69 |
| TRUE | 1/1 | 1/1 | 4.02  | 5.45  | -2.69 |
| TRUE | 1/1 | 1/1 | 4.02  | 5.45  | -2.69 |
| TRUE | 1/1 | 1/1 | 4.02  | 5.45  | -2.69 |
| TRUE | 1/1 | 1/1 | 4.02  | 5.45  | -2.69 |
| TRUE | 1/1 | 1/1 | 4.02  | 5.45  | -2.69 |
| TRUE | 1/1 | 1/1 | 4.02  | 5.45  | -2.69 |
| TRUE | 1/1 | 1/1 | 5.2   | 4.93  | 1.21  |
| TRUE | 1/1 | 1/1 | 5.2   | 4.93  | 1.21  |
| TRUE | 1/1 | 1/1 | 5.2   | 4.93  | 1.21  |
| TRUE | 1/1 | 1/1 | 5.2   | 4.93  | 1.21  |
| TRUE | 1/1 | 1/1 | 5.2   | 4.93  | 1.21  |
| TRUE | 1/1 | 1/1 | 6.66  | 7.95  | -2.44 |
| TRUE | 1/1 | 1/1 | 6.66  | 7.95  | -2.44 |
| TRUE | 1/1 | 1/1 | 6.66  | 7.95  | -2.44 |
| TRUE | 1/1 | 1/1 | 6.66  | 7.95  | -2.44 |
| TRUE | 1/1 | 1/1 | 6.66  | 7.95  | -2.44 |
| TRUE | 1/1 | 1/1 | 6.66  | 7.95  | -2.44 |
| TRUE | 1/1 | 1/1 | 5.81  | 7.03  | -2.33 |
| TRUE | 1/1 | 1/1 | 5.81  | 7.03  | -2.33 |
| TRUE | 1/1 | 1/1 | 5.81  | 7.03  | -2.33 |
| TRUE | 1/1 | 1/1 | 5.81  | 7.03  | -2.33 |
| TRUE | 1/1 | 1/1 | 5.81  | 7.03  | -2.33 |
| TRUE | 1/1 | 1/1 | 4.81  | 5.81  | -2    |
| TRUE | 1/1 | 1/1 | 4.81  | 5.81  | -2    |
| TRUE | 1/1 | 1/1 | 4.81  | 5.81  | -2    |
| TRUE | 1/1 | 1/1 | 4.81  | 5.81  | -2    |
| TRUE | 1/1 | 1/1 | 4.81  | 5.81  | -2    |
| TRUE | 1/1 | 1/1 | 6.58  | 6     | 1.49  |
| TRUE | 1/1 | 1/1 | 6.58  | 6     | 1.49  |
| TRUE | 1/1 | 1/1 | 6.58  | 6     | 1.49  |
| TRUE | 1/1 | 1/1 | 6.58  | 6     | 1.49  |
| TRUE | 1/1 | 1/1 | 6.58  | 6     | 1.49  |
| TRUE | 1/1 | 1/1 | 6.58  | 6     | 1.49  |
| TRUE | 1/1 | 1/1 | 6.58  | 6     | 1.49  |
| TRUE | 1/1 | 1/1 | 6.58  | 6     | 1.49  |
| TRUE | 1/1 | 1/1 | 5.19  | 4.88  | 1.24  |



|      |     |     |       |      |       |
|------|-----|-----|-------|------|-------|
| TRUE | 1/1 | 1/1 | 5.19  | 4.88 | 1.24  |
| TRUE | 1/1 | 1/1 | 5.19  | 4.88 | 1.24  |
| TRUE | 1/1 | 1/1 | 8.06  | 9.66 | -3.02 |
| TRUE | 1/1 | 1/1 | 8.06  | 9.66 | -3.02 |
| TRUE | 1/1 | 1/1 | 8.06  | 9.66 | -3.02 |
| TRUE | 1/1 | 1/1 | 8.06  | 9.66 | -3.02 |
| TRUE | 1/1 | 1/1 | 8.06  | 9.66 | -3.02 |
| TRUE | 1/1 | 1/1 | 8.06  | 9.66 | -3.02 |
| TRUE | 1/1 | 1/1 | 8.06  | 9.66 | -3.02 |
| TRUE | 1/1 | 1/1 | 8.06  | 9.66 | -3.02 |
| TRUE | 1/1 | 1/1 | 8.06  | 9.66 | -3.02 |
| TRUE | 1/1 | 1/1 | 8.06  | 9.66 | -3.02 |
| TRUE | 1/1 | 1/1 | 8.06  | 9.66 | -3.02 |
| TRUE | 1/1 | 1/1 | 8.06  | 9.66 | -3.02 |
| TRUE | 1/1 | 1/1 | 8.06  | 9.66 | -3.02 |
| TRUE | 1/1 | 1/1 | 8.06  | 9.66 | -3.02 |
| TRUE | 1/1 | 1/1 | 5.07  | 5.98 | -1.88 |
| TRUE | 1/1 | 1/1 | 5.07  | 5.98 | -1.88 |
| TRUE | 1/1 | 1/1 | 5.07  | 5.98 | -1.88 |
| TRUE | 1/1 | 1/1 | 6.08  | 5.79 | 1.22  |
| TRUE | 1/1 | 1/1 | 6.08  | 5.79 | 1.22  |
| TRUE | 1/1 | 1/1 | 6.08  | 5.79 | 1.22  |
| TRUE | 1/1 | 1/1 | 6.08  | 5.79 | 1.22  |
| TRUE | 1/1 | 1/1 | 6.08  | 5.79 | 1.22  |
| TRUE | 1/1 | 1/1 | 6.08  | 5.79 | 1.22  |
| TRUE | 1/1 | 1/1 | 6.08  | 5.79 | 1.22  |
| TRUE | 1/1 | 1/1 | 8.44  | 7.68 | 1.69  |
| TRUE | 1/1 | 1/1 | 8.44  | 7.68 | 1.69  |
| TRUE | 1/1 | 1/1 | 8.44  | 7.68 | 1.69  |
| TRUE | 1/1 | 1/1 | 4.62  | 6.51 | -3.72 |
| TRUE | 1/1 | 1/1 | 4.62  | 6.51 | -3.72 |
| TRUE | 1/1 | 1/1 | 4.62  | 6.51 | -3.72 |
| TRUE | 1/1 | 1/1 | 4.62  | 6.51 | -3.72 |
| TRUE | 1/1 | 1/1 | 4.62  | 6.51 | -3.72 |
| TRUE | 1/1 | 1/1 | 4.97  | 4.42 | 1.46  |
| TRUE | 1/1 | 1/1 | 4.97  | 4.42 | 1.46  |
| TRUE | 1/1 | 1/1 | 4.97  | 4.42 | 1.46  |
| TRUE | 1/1 | 1/1 | 4.97  | 4.42 | 1.46  |
| TRUE | 1/1 | 1/1 | 4.97  | 4.42 | 1.46  |
| TRUE | 1/1 | 1/1 | 11.32 | 10.3 | 2.03  |
| TRUE | 1/1 | 1/1 | 11.32 | 10.3 | 2.03  |
| TRUE | 1/1 | 1/1 | 11.32 | 10.3 | 2.03  |
| TRUE | 1/1 | 1/1 | 11.32 | 10.3 | 2.03  |
| TRUE | 1/1 | 1/1 | 11.32 | 10.3 | 2.03  |
| TRUE | 1/1 | 1/1 | 11.32 | 10.3 | 2.03  |
| TRUE | 1/1 | 1/1 | 11.32 | 10.3 | 2.03  |
| TRUE | 1/1 | 1/1 | 8.49  | 9.15 | -1.58 |
| TRUE | 1/1 | 1/1 | 8.49  | 9.15 | -1.58 |
| TRUE | 1/1 | 1/1 | 8.49  | 9.15 | -1.58 |
| TRUE | 1/1 | 1/1 | 8.49  | 9.15 | -1.58 |
| TRUE | 1/1 | 1/1 | 8.49  | 9.15 | -1.58 |
| TRUE | 1/1 | 1/1 | 8.49  | 9.15 | -1.58 |
| TRUE | 1/1 | 1/1 | 5.75  | 6.28 | -1.45 |
| TRUE | 1/1 | 1/1 | 5.75  | 6.28 | -1.45 |
| TRUE | 1/1 | 1/1 | 5.75  | 6.28 | -1.45 |
| TRUE | 1/1 | 1/1 | 5.75  | 6.28 | -1.45 |
| TRUE | 1/1 | 1/1 | 6.45  | 8.17 | -3.28 |
| TRUE | 1/1 | 1/1 | 6.45  | 8.17 | -3.28 |
| TRUE | 1/1 | 1/1 | 6.45  | 8.17 | -3.28 |
| TRUE | 1/1 | 1/1 | 6.45  | 8.17 | -3.28 |
| TRUE | 1/1 | 1/1 | 6.45  | 8.17 | -3.28 |











|      |     |     |       |       |       |
|------|-----|-----|-------|-------|-------|
| TRUE | 1/1 | 1/1 | 6.01  | 6.94  | -1.9  |
| TRUE | 1/1 | 1/1 | 6.22  | 5.09  | 2.18  |
| TRUE | 1/1 | 1/1 | 6.22  | 5.09  | 2.18  |
| TRUE | 1/1 | 1/1 | 6.22  | 5.09  | 2.18  |
| TRUE | 1/1 | 1/1 | 6.22  | 5.09  | 2.18  |
| TRUE | 1/1 | 1/1 | 6.6   | 5.75  | 1.8   |
| TRUE | 1/1 | 1/1 | 6.6   | 5.75  | 1.8   |
| TRUE | 1/1 | 1/1 | 6.6   | 5.75  | 1.8   |
| TRUE | 1/1 | 1/1 | 6.6   | 5.75  | 1.8   |
| TRUE | 1/1 | 1/1 | 5.02  | 6.32  | -2.46 |
| TRUE | 1/1 | 1/1 | 5.02  | 6.32  | -2.46 |
| TRUE | 1/1 | 1/1 | 5.02  | 6.32  | -2.46 |
| TRUE | 1/1 | 1/1 | 5.02  | 6.32  | -2.46 |
| TRUE | 1/1 | 1/1 | 5.02  | 6.32  | -2.46 |
| TRUE | 1/1 | 1/1 | 5.02  | 6.32  | -2.46 |
| TRUE | 1/1 | 1/1 | 5.02  | 6.32  | -2.46 |
| TRUE | 1/1 | 1/1 | 5.02  | 6.32  | -2.46 |
| TRUE | 1/1 | 1/1 | 5.02  | 6.32  | -2.46 |
| TRUE | 1/1 | 1/1 | 5.02  | 6.32  | -2.46 |
| TRUE | 1/1 | 1/1 | 5.02  | 6.32  | -2.46 |
| TRUE | 1/1 | 1/1 | 10.17 | 10.78 | -1.52 |
| TRUE | 1/1 | 1/1 | 10.17 | 10.78 | -1.52 |
| TRUE | 1/1 | 1/1 | 10.17 | 10.78 | -1.52 |
| TRUE | 1/1 | 1/1 | 10.17 | 10.78 | -1.52 |
| TRUE | 1/1 | 1/1 | 10.17 | 10.78 | -1.52 |
| TRUE | 1/1 | 1/1 | 4.8   | 4.34  | 1.37  |
| TRUE | 1/1 | 1/1 | 4.8   | 4.34  | 1.37  |
| TRUE | 1/1 | 1/1 | 4.8   | 4.34  | 1.37  |
| TRUE | 1/1 | 1/1 | 4.8   | 4.34  | 1.37  |
| TRUE | 1/1 | 1/1 | 4.8   | 4.34  | 1.37  |
| TRUE | 1/1 | 1/1 | 4.8   | 4.34  | 1.37  |
| TRUE | 1/1 | 1/1 | 4.8   | 4.34  | 1.37  |
| TRUE | 1/1 | 1/1 | 4.8   | 4.34  | 1.37  |
| TRUE | 1/1 | 1/1 | 4.8   | 4.34  | 1.37  |
| TRUE | 1/1 | 1/1 | 4.8   | 4.34  | 1.37  |
| TRUE | 1/1 | 1/1 | 4.8   | 4.34  | 1.37  |
| TRUE | 1/1 | 1/1 | 4.8   | 4.34  | 1.37  |
| TRUE | 1/1 | 1/1 | 4.8   | 4.34  | 1.37  |
| TRUE | 1/1 | 1/1 | 4.8   | 4.34  | 1.37  |
| TRUE | 1/1 | 1/1 | 4.8   | 4.34  | 1.37  |
| TRUE | 1/1 | 1/1 | 4.8   | 4.34  | 1.37  |
| TRUE | 1/1 | 1/1 | 4.8   | 4.34  | 1.37  |
| TRUE | 1/1 | 1/1 | 4.8   | 4.34  | 1.37  |
| TRUE | 1/1 | 1/1 | 4.8   | 4.34  | 1.37  |
| TRUE | 1/1 | 1/1 | 7.61  | 8.11  | -1.42 |
| TRUE | 1/1 | 1/1 | 7.61  | 8.11  | -1.42 |
| TRUE | 1/1 | 1/1 | 7.61  | 8.11  | -1.42 |
| TRUE | 1/1 | 1/1 | 5.87  | 6.39  | -1.43 |
| TRUE | 1/1 | 1/1 | 5.87  | 6.39  | -1.43 |
| TRUE | 1/1 | 1/1 | 5.87  | 6.39  | -1.43 |
| TRUE | 1/1 | 1/1 | 4.64  | 6.63  | -3.98 |
| TRUE | 1/1 | 1/1 | 4.64  | 6.63  | -3.98 |
| TRUE | 1/1 | 1/1 | 4.64  | 6.63  | -3.98 |
| TRUE | 1/1 | 1/1 | 4.64  | 6.63  | -3.98 |
| TRUE | 1/1 | 1/1 | 4.64  | 6.63  | -3.98 |
| TRUE | 1/1 | 1/1 | 4.64  | 6.63  | -3.98 |
| TRUE | 1/1 | 1/1 | 4.64  | 6.63  | -3.98 |
| TRUE | 1/1 | 1/1 | 4.64  | 6.63  | -3.98 |
| TRUE | 1/1 | 1/1 | 4.64  | 6.63  | -3.98 |
| TRUE | 1/1 | 1/1 | 4.64  | 6.63  | -3.98 |
| TRUE | 1/1 | 1/1 | 4.64  | 6.63  | -3.98 |
| TRUE | 1/1 | 1/1 | 4.64  | 6.63  | -3.98 |
| TRUE | 1/1 | 1/1 | 4.64  | 6.63  | -3.98 |
| TRUE | 1/1 | 1/1 | 4.64  | 6.63  | -3.98 |
| TRUE | 1/1 | 1/1 | 8.98  | 10.3  | -2.48 |
| TRUE | 1/1 | 1/1 | 8.98  | 10.3  | -2.48 |
| TRUE | 1/1 | 1/1 | 8.98  | 10.3  | -2.48 |
| TRUE | 1/1 | 1/1 | 8.98  | 10.3  | -2.48 |























|      |     |     |      |      |       |
|------|-----|-----|------|------|-------|
| TRUE | 1/1 | 1/1 | 6.4  | 8.2  | -3.46 |
| TRUE | 1/1 | 1/1 | 3.82 | 5.02 | -2.3  |
| TRUE | 1/1 | 1/1 | 3.82 | 5.02 | -2.3  |
| TRUE | 1/1 | 1/1 | 3.82 | 5.02 | -2.3  |
| TRUE | 1/1 | 1/1 | 3.82 | 5.02 | -2.3  |
| TRUE | 1/1 | 1/1 | 3.82 | 5.02 | -2.3  |
| TRUE | 1/1 | 1/1 | 3.82 | 5.02 | -2.3  |
| TRUE | 1/1 | 1/1 | 3.82 | 5.02 | -2.3  |
| TRUE | 1/1 | 1/1 | 3.82 | 5.02 | -2.3  |
| TRUE | 1/1 | 1/1 | 8.28 | 3.02 | 38.31 |
| TRUE | 1/1 | 1/1 | 8.28 | 3.02 | 38.31 |
| TRUE | 1/1 | 1/1 | 8.28 | 3.02 | 38.31 |
| TRUE | 1/1 | 1/1 | 8.28 | 3.02 | 38.31 |
| TRUE | 1/1 | 1/1 | 8.28 | 3.02 | 38.31 |
| TRUE | 1/1 | 1/1 | 7.09 | 6.43 | 1.59  |
| TRUE | 1/1 | 1/1 | 7.09 | 6.43 | 1.59  |
| TRUE | 1/1 | 1/1 | 7.09 | 6.43 | 1.59  |
| TRUE | 1/1 | 1/1 | 7.09 | 6.43 | 1.59  |
| TRUE | 1/1 | 1/1 | 7.09 | 6.43 | 1.59  |
| TRUE | 1/1 | 1/1 | 7.09 | 6.43 | 1.59  |
| TRUE | 1/1 | 1/1 | 7.09 | 6.43 | 1.59  |
| TRUE | 1/1 | 1/1 | 7.09 | 6.43 | 1.59  |
| TRUE | 1/1 | 1/1 | 7.09 | 6.43 | 1.59  |
| TRUE | 1/1 | 1/1 | 7.09 | 6.43 | 1.59  |
| TRUE | 1/1 | 1/1 | 7.09 | 6.43 | 1.59  |
| TRUE | 1/1 | 1/1 | 7.09 | 6.43 | 1.59  |
| TRUE | 1/1 | 1/1 | 7.09 | 6.43 | 1.59  |
| TRUE | 1/1 | 1/1 | 7.09 | 6.43 | 1.59  |
| TRUE | 1/1 | 1/1 | 9.35 | 9.64 | -1.23 |
| TRUE | 1/1 | 1/1 | 9.35 | 9.64 | -1.23 |
| TRUE | 1/1 | 1/1 | 9.35 | 9.64 | -1.23 |
| TRUE | 1/1 | 1/1 | 9.35 | 9.64 | -1.23 |
| TRUE | 1/1 | 1/1 | 8.17 | 9.2  | -2.05 |
| TRUE | 1/1 | 1/1 | 8.17 | 9.2  | -2.05 |
| TRUE | 1/1 | 1/1 | 8.17 | 9.2  | -2.05 |
| TRUE | 1/1 | 1/1 | 8.17 | 9.2  | -2.05 |
| TRUE | 1/1 | 1/1 | 8.14 | 8.23 | -1.06 |
| TRUE | 1/1 | 1/1 | 8.14 | 8.23 | -1.06 |
| TRUE | 1/1 | 1/1 | 8.14 | 8.23 | -1.06 |
| TRUE | 1/1 | 1/1 | 8.14 | 8.23 | -1.06 |
| TRUE | 1/1 | 1/1 | 8.14 | 8.23 | -1.06 |
| TRUE | 1/1 | 1/1 | 8.14 | 8.23 | -1.06 |
| TRUE | 1/1 | 1/1 | 7.82 | 9.02 | -2.3  |
| TRUE | 1/1 | 1/1 | 7.82 | 9.02 | -2.3  |
| TRUE | 1/1 | 1/1 | 7.82 | 9.02 | -2.3  |
| TRUE | 1/1 | 1/1 | 7.82 | 9.02 | -2.3  |
| TRUE | 1/1 | 1/1 | 7.82 | 9.02 | -2.3  |
| TRUE | 1/1 | 1/1 | 7.82 | 9.02 | -2.3  |
| TRUE | 1/1 | 1/1 | 7.82 | 9.02 | -2.3  |
| TRUE | 1/1 | 1/1 | 7.82 | 9.02 | -2.3  |
| TRUE | 1/1 | 1/1 | 7.82 | 9.02 | -2.3  |
| TRUE | 1/1 | 1/1 | 7.82 | 9.02 | -2.3  |
| TRUE | 1/1 | 1/1 | 7.82 | 9.02 | -2.3  |
| TRUE | 1/1 | 1/1 | 7.82 | 9.02 | -2.3  |
| TRUE | 1/1 | 1/1 | 7.82 | 9.02 | -2.3  |
| TRUE | 1/1 | 1/1 | 7.82 | 9.02 | -2.3  |
| TRUE | 1/1 | 1/1 | 7.82 | 9.02 | -2.3  |
| TRUE | 1/1 | 1/1 | 7.82 | 9.02 | -2.3  |
| TRUE | 1/1 | 1/1 | 7.82 | 9.02 | -2.3  |
| TRUE | 1/1 | 1/1 | 7.82 | 9.02 | -2.3  |
| TRUE | 1/1 | 1/1 | 7.82 | 9.02 | -2.3  |
| TRUE | 1/1 | 1/1 | 4.52 | 4.66 | -1.11 |
| TRUE | 1/1 | 1/1 | 4.52 | 4.66 | -1.11 |
| TRUE | 1/1 | 1/1 | 4.52 | 4.66 | -1.11 |
| TRUE | 1/1 | 1/1 | 4.52 | 4.66 | -1.11 |





|      |     |     |       |       |       |
|------|-----|-----|-------|-------|-------|
| TRUE | 1/1 | 1/1 | 8.48  | 9.95  | -2.77 |
| TRUE | 1/1 | 1/1 | 8.48  | 9.95  | -2.77 |
| TRUE | 1/1 | 1/1 | 8.48  | 9.95  | -2.77 |
| TRUE | 1/1 | 1/1 | 8.48  | 9.95  | -2.77 |
| TRUE | 1/1 | 1/1 | 8.48  | 9.95  | -2.77 |
| TRUE | 1/1 | 1/1 | 8.13  | 9.48  | -2.55 |
| TRUE | 1/1 | 1/1 | 8.13  | 9.48  | -2.55 |
| TRUE | 1/1 | 1/1 | 8.13  | 9.48  | -2.55 |
| TRUE | 1/1 | 1/1 | 8.13  | 9.48  | -2.55 |
| TRUE | 1/1 | 1/1 | 8.13  | 9.48  | -2.55 |
| TRUE | 1/1 | 1/1 | 8.48  | 9.95  | -2.77 |
| TRUE | 1/1 | 1/1 | 8.48  | 9.95  | -2.77 |
| TRUE | 1/1 | 1/1 | 8.48  | 9.95  | -2.77 |
| TRUE | 1/1 | 1/1 | 8.48  | 9.95  | -2.77 |
| TRUE | 1/1 | 1/1 | 8.48  | 9.95  | -2.77 |
| TRUE | 1/1 | 1/1 | 8.48  | 9.95  | -2.77 |
| TRUE | 1/1 | 1/1 | 8.48  | 9.95  | -2.77 |
| TRUE | 1/1 | 1/1 | 8.48  | 9.95  | -2.77 |
| TRUE | 1/1 | 1/1 | 8.48  | 9.95  | -2.77 |
| TRUE | 1/1 | 1/1 | 8.48  | 9.95  | -2.77 |
| TRUE | 1/1 | 1/1 | 8.48  | 9.95  | -2.77 |
| TRUE | 1/1 | 1/1 | 8.48  | 9.95  | -2.77 |
| TRUE | 1/1 | 1/1 | 8.48  | 9.95  | -2.77 |
| TRUE | 1/1 | 1/1 | 8.48  | 9.95  | -2.77 |
| TRUE | 1/1 | 1/1 | 8.48  | 9.95  | -2.77 |
| TRUE | 1/1 | 1/1 | 8.48  | 9.95  | -2.77 |
| TRUE | 1/1 | 1/1 | 8.48  | 9.95  | -2.77 |
| TRUE | 1/1 | 1/1 | 11.39 | 12.05 | -1.59 |
| TRUE | 1/1 | 1/1 | 11.39 | 12.05 | -1.59 |
| TRUE | 1/1 | 1/1 | 11.39 | 12.05 | -1.59 |
| TRUE | 1/1 | 1/1 | 11.39 | 12.05 | -1.59 |
| TRUE | 1/1 | 1/1 | 11.39 | 12.05 | -1.59 |
| TRUE | 1/1 | 1/1 | 11.39 | 12.05 | -1.59 |
| TRUE | 1/1 | 1/1 | 8.26  | 8.67  | -1.34 |
| TRUE | 1/1 | 1/1 | 8.26  | 8.67  | -1.34 |
| TRUE | 1/1 | 1/1 | 8.26  | 8.67  | -1.34 |
| TRUE | 1/1 | 1/1 | 8.26  | 8.67  | -1.34 |
| TRUE | 1/1 | 1/1 | 8.26  | 8.67  | -1.34 |
| TRUE | 1/1 | 1/1 | 4.5   | 4.89  | -1.31 |
| TRUE | 1/1 | 1/1 | 4.5   | 4.89  | -1.31 |
| TRUE | 1/1 | 1/1 | 4.5   | 4.89  | -1.31 |
| TRUE | 1/1 | 1/1 | 4.5   | 4.89  | -1.31 |
| TRUE | 1/1 | 1/1 | 8.68  | 9.54  | -1.81 |
| TRUE | 1/1 | 1/1 | 8.68  | 9.54  | -1.81 |
| TRUE | 1/1 | 1/1 | 8.68  | 9.54  | -1.81 |
| TRUE | 1/1 | 1/1 | 8.68  | 9.54  | -1.81 |
| TRUE | 1/1 | 1/1 | 8.68  | 9.54  | -1.81 |
| TRUE | 1/1 | 1/1 | 8.68  | 9.54  | -1.81 |
| TRUE | 1/1 | 1/1 | 8.68  | 9.54  | -1.81 |
| TRUE | 1/1 | 1/1 | 8.68  | 9.54  | -1.81 |
| TRUE | 1/1 | 1/1 | 8.68  | 9.54  | -1.81 |
| TRUE | 1/1 | 1/1 | 8.68  | 9.54  | -1.81 |
| TRUE | 1/1 | 1/1 | 6.18  | 7.54  | -2.58 |
| TRUE | 1/1 | 1/1 | 6.18  | 7.54  | -2.58 |
| TRUE | 1/1 | 1/1 | 6.18  | 7.54  | -2.58 |
| TRUE | 1/1 | 1/1 | 6.18  | 7.54  | -2.58 |
| TRUE | 1/1 | 1/1 | 6.18  | 7.54  | -2.58 |
| TRUE | 1/1 | 1/1 | 6.18  | 7.54  | -2.58 |
| TRUE | 1/1 | 1/1 | 6.18  | 7.54  | -2.58 |
| TRUE | 1/1 | 1/1 | 6.18  | 7.54  | -2.58 |
| TRUE | 1/1 | 1/1 | 6.18  | 7.54  | -2.58 |
| TRUE | 1/1 | 1/1 | 6.18  | 7.54  | -2.58 |
| TRUE | 1/1 | 1/1 | 7.25  | 6.49  | 1.69  |
| TRUE | 1/1 | 1/1 | 7.25  | 6.49  | 1.69  |
| TRUE | 1/1 | 1/1 | 7.25  | 6.49  | 1.69  |
| TRUE | 1/1 | 1/1 | 6.74  | 8.83  | -4.25 |
| TRUE | 1/1 | 1/1 | 6.74  | 8.83  | -4.25 |



|      |     |     |      |      |       |
|------|-----|-----|------|------|-------|
| TRUE | 1/1 | 1/1 | 4.49 | 5.95 | -2.75 |
| TRUE | 1/1 | 1/1 | 4.49 | 5.95 | -2.75 |
| TRUE | 1/1 | 1/1 | 4.49 | 5.95 | -2.75 |
| TRUE | 1/1 | 1/1 | 4.49 | 5.95 | -2.75 |
| TRUE | 1/1 | 1/1 | 4.49 | 5.95 | -2.75 |
| TRUE | 1/1 | 1/1 | 4.49 | 5.95 | -2.75 |
| TRUE | 1/1 | 1/1 | 4.49 | 5.95 | -2.75 |
| TRUE | 1/1 | 1/1 | 4.49 | 5.95 | -2.75 |
| TRUE | 1/1 | 1/1 | 4.49 | 5.95 | -2.75 |
| TRUE | 1/1 | 1/1 | 4.49 | 5.95 | -2.75 |
| TRUE | 1/1 | 1/1 | 4.49 | 5.95 | -2.75 |
| TRUE | 1/1 | 1/1 | 4.49 | 5.95 | -2.75 |
| TRUE | 1/1 | 1/1 | 4.49 | 5.95 | -2.75 |
| TRUE | 1/1 | 1/1 | 4.49 | 5.95 | -2.75 |
| TRUE | 1/1 | 1/1 | 4.49 | 5.95 | -2.75 |
| TRUE | 1/1 | 1/1 | 4.49 | 5.95 | -2.75 |
| TRUE | 1/1 | 1/1 | 5.9  | 6.1  | -1.15 |
| TRUE | 1/1 | 1/1 | 5.9  | 6.1  | -1.15 |
| TRUE | 1/1 | 1/1 | 5.9  | 6.1  | -1.15 |
| TRUE | 1/1 | 1/1 | 5.9  | 6.1  | -1.15 |
| TRUE | 1/1 | 1/1 | 5.9  | 6.1  | -1.15 |
| TRUE | 1/1 | 1/1 | 5.9  | 6.1  | -1.15 |
| TRUE | 1/1 | 1/1 | 4.49 | 3.95 | 1.45  |
| TRUE | 1/1 | 1/1 | 4.49 | 3.95 | 1.45  |
| TRUE | 1/1 | 1/1 | 6.7  | 7.83 | -2.2  |
| TRUE | 1/1 | 1/1 | 6.7  | 7.83 | -2.2  |
| TRUE | 1/1 | 1/1 | 6.7  | 7.83 | -2.2  |
| TRUE | 1/1 | 1/1 | 6.7  | 7.83 | -2.2  |
| TRUE | 1/1 | 1/1 | 6.7  | 7.83 | -2.2  |
| TRUE | 1/1 | 1/1 | 6.43 | 5.14 | 2.45  |
| TRUE | 1/1 | 1/1 | 6.43 | 5.14 | 2.45  |
| TRUE | 1/1 | 1/1 | 6.43 | 5.14 | 2.45  |
| TRUE | 1/1 | 1/1 | 6.43 | 5.14 | 2.45  |
| TRUE | 1/1 | 1/1 | 6.43 | 5.14 | 2.45  |
| TRUE | 1/1 | 1/1 | 6.76 | 7.16 | -1.32 |
| TRUE | 1/1 | 1/1 | 6.76 | 7.16 | -1.32 |
| TRUE | 1/1 | 1/1 | 6.76 | 7.16 | -1.32 |
| TRUE | 1/1 | 1/1 | 6.76 | 7.16 | -1.32 |
| TRUE | 1/1 | 1/1 | 6.76 | 7.16 | -1.32 |
| TRUE | 1/1 | 1/1 | 6.76 | 7.16 | -1.32 |
| TRUE | 1/1 | 1/1 | 7.56 | 8.07 | -1.43 |
| TRUE | 1/1 | 1/1 | 7.56 | 8.07 | -1.43 |
| TRUE | 1/1 | 1/1 | 7.56 | 8.07 | -1.43 |
| TRUE | 1/1 | 1/1 | 7.56 | 8.07 | -1.43 |
| TRUE | 1/1 | 1/1 | 9.35 | 9.11 | 1.18  |
| TRUE | 1/1 | 1/1 | 9.35 | 9.11 | 1.18  |
| TRUE | 1/1 | 1/1 | 9.35 | 9.11 | 1.18  |
| TRUE | 1/1 | 1/1 | 9.35 | 9.11 | 1.18  |
| TRUE | 1/1 | 1/1 | 9.35 | 9.11 | 1.18  |
| TRUE | 1/1 | 1/1 | 9.35 | 9.11 | 1.18  |
| TRUE | 1/1 | 1/1 | 9.35 | 9.11 | 1.18  |
| TRUE | 1/1 | 1/1 | 9.35 | 9.11 | 1.18  |
| TRUE | 1/1 | 1/1 | 9.35 | 9.11 | 1.18  |
| TRUE | 1/1 | 1/1 | 9.35 | 9.11 | 1.18  |
| TRUE | 1/1 | 1/1 | 9.35 | 9.11 | 1.18  |
| TRUE | 1/1 | 1/1 | 9.35 | 9.11 | 1.18  |
| TRUE | 1/1 | 1/1 | 5.86 | 5.78 | 1.05  |
| TRUE | 1/1 | 1/1 | 5.86 | 5.78 | 1.05  |
| TRUE | 1/1 | 1/1 | 5.23 | 6.11 | -1.84 |
| TRUE | 1/1 | 1/1 | 5.23 | 6.11 | -1.84 |
| TRUE | 1/1 | 1/1 | 5.23 | 6.11 | -1.84 |
| TRUE | 1/1 | 1/1 | 5.23 | 6.11 | -1.84 |



|      |     |     |      |      |       |
|------|-----|-----|------|------|-------|
| TRUE | 1/1 | 1/1 | 5.12 | 5.93 | -1.75 |
| TRUE | 1/1 | 1/1 | 4.01 | 4.84 | -1.78 |
| TRUE | 1/1 | 1/1 | 4.01 | 4.84 | -1.78 |
| TRUE | 1/1 | 1/1 | 4.01 | 4.84 | -1.78 |
| TRUE | 1/1 | 1/1 | 4.01 | 4.84 | -1.78 |
| TRUE | 1/1 | 1/1 | 4.01 | 4.84 | -1.78 |
| TRUE | 1/1 | 1/1 | 4.01 | 4.84 | -1.78 |
| TRUE | 1/1 | 1/1 | 4.01 | 4.84 | -1.78 |
| TRUE | 1/1 | 1/1 | 7.16 | 5.34 | 3.54  |
| TRUE | 1/1 | 1/1 | 7.16 | 5.34 | 3.54  |
| TRUE | 1/1 | 1/1 | 7.16 | 5.34 | 3.54  |
| TRUE | 1/1 | 1/1 | 5.2  | 5.93 | -1.65 |
| TRUE | 1/1 | 1/1 | 5.2  | 5.93 | -1.65 |
| TRUE | 1/1 | 1/1 | 5.2  | 5.93 | -1.65 |
| TRUE | 1/1 | 1/1 | 5.2  | 5.93 | -1.65 |
| TRUE | 1/1 | 1/1 | 4.86 | 3.15 | 3.27  |
| TRUE | 1/1 | 1/1 | 4.86 | 3.15 | 3.27  |
| TRUE | 1/1 | 1/1 | 4.86 | 3.15 | 3.27  |
| TRUE | 1/1 | 1/1 | 4.86 | 3.15 | 3.27  |
| TRUE | 1/1 | 1/1 | 8.51 | 8.44 | 1.05  |
| TRUE | 1/1 | 1/1 | 8.51 | 8.44 | 1.05  |
| TRUE | 1/1 | 1/1 | 8.51 | 8.44 | 1.05  |
| TRUE | 1/1 | 1/1 | 8.51 | 8.44 | 1.05  |
| TRUE | 1/1 | 1/1 | 8.51 | 8.44 | 1.05  |
| TRUE | 1/1 | 1/1 | 8.51 | 8.44 | 1.05  |
| TRUE | 1/1 | 1/1 | 8.51 | 8.44 | 1.05  |
| TRUE | 1/1 | 1/1 | 8.51 | 8.44 | 1.05  |
| TRUE | 1/1 | 1/1 | 8.51 | 8.44 | 1.05  |
| TRUE | 1/1 | 1/1 | 8.51 | 8.44 | 1.05  |
| TRUE | 1/1 | 1/1 | 7.4  | 7.14 | 1.2   |
| TRUE | 1/1 | 1/1 | 7.4  | 7.14 | 1.2   |
| TRUE | 1/1 | 1/1 | 7.4  | 7.14 | 1.2   |
| TRUE | 1/1 | 1/1 | 7.4  | 7.14 | 1.2   |
| TRUE | 1/1 | 1/1 | 6.6  | 8.25 | -3.14 |
| TRUE | 1/1 | 1/1 | 6.6  | 8.25 | -3.14 |
| TRUE | 1/1 | 1/1 | 6.6  | 8.25 | -3.14 |
| TRUE | 1/1 | 1/1 | 6.6  | 8.25 | -3.14 |
| TRUE | 1/1 | 1/1 | 6.6  | 8.25 | -3.14 |
| TRUE | 1/1 | 1/1 | 6.6  | 8.25 | -3.14 |
| TRUE | 1/1 | 1/1 | 6.6  | 8.25 | -3.14 |
| TRUE | 1/1 | 1/1 | 6.6  | 8.25 | -3.14 |
| TRUE | 1/1 | 1/1 | 6.6  | 8.25 | -3.14 |
| TRUE | 1/1 | 1/1 | 6.6  | 8.25 | -3.14 |
| TRUE | 1/1 | 1/1 | 6.6  | 8.25 | -3.14 |
| TRUE | 1/1 | 1/1 | 3.96 | 5.53 | -2.98 |
| TRUE | 1/1 | 1/1 | 3.96 | 5.53 | -2.98 |
| TRUE | 1/1 | 1/1 | 3.96 | 5.53 | -2.98 |
| TRUE | 1/1 | 1/1 | 3.96 | 5.53 | -2.98 |
| TRUE | 1/1 | 1/1 | 3.96 | 5.53 | -2.98 |
| TRUE | 1/1 | 1/1 | 3.96 | 5.53 | -2.98 |
| TRUE | 1/1 | 1/1 | 3.96 | 5.53 | -2.98 |
| TRUE | 1/1 | 1/1 | 3.96 | 5.53 | -2.98 |
| TRUE | 1/1 | 1/1 | 7.55 | 8.89 | -2.52 |
| TRUE | 1/1 | 1/1 | 7.55 | 8.89 | -2.52 |
| TRUE | 1/1 | 1/1 | 7.55 | 8.89 | -2.52 |
| TRUE | 1/1 | 1/1 | 7.55 | 8.89 | -2.52 |
| TRUE | 1/1 | 1/1 | 7.55 | 8.89 | -2.52 |
| TRUE | 1/1 | 1/1 | 7.55 | 8.89 | -2.52 |
| TRUE | 1/1 | 1/1 | 7.55 | 8.89 | -2.52 |
| TRUE | 1/1 | 1/1 | 7.55 | 8.89 | -2.52 |
| TRUE | 1/1 | 1/1 | 7.35 | 6.76 | 1.51  |
| TRUE | 1/1 | 1/1 | 7.35 | 6.76 | 1.51  |









|      |     |     |       |      |       |
|------|-----|-----|-------|------|-------|
| TRUE | 1/1 | 1/1 | 4.39  | 5.36 | -1.97 |
| TRUE | 1/1 | 1/1 | 4.39  | 5.36 | -1.97 |
| TRUE | 1/1 | 1/1 | 4.39  | 5.36 | -1.97 |
| TRUE | 1/1 | 1/1 | 4.39  | 5.36 | -1.97 |
| TRUE | 1/1 | 1/1 | 4.39  | 5.36 | -1.97 |
| TRUE | 1/1 | 1/1 | 4.39  | 5.36 | -1.97 |
| TRUE | 1/1 | 1/1 | 4.39  | 5.36 | -1.97 |
| TRUE | 1/1 | 1/1 | 4.39  | 5.36 | -1.97 |
| TRUE | 1/1 | 1/1 | 4.39  | 5.36 | -1.97 |
| TRUE | 1/1 | 1/1 | 4.39  | 5.36 | -1.97 |
| TRUE | 1/1 | 1/1 | 4.39  | 5.36 | -1.97 |
| TRUE | 1/1 | 1/1 | 4.39  | 5.36 | -1.97 |
| TRUE | 1/1 | 1/1 | 4.39  | 5.36 | -1.97 |
| TRUE | 1/1 | 1/1 | 4.39  | 5.36 | -1.97 |
| TRUE | 1/1 | 1/1 | 5.83  | 5.88 | -1.03 |
| TRUE | 1/1 | 1/1 | 5.83  | 5.88 | -1.03 |
| TRUE | 1/1 | 1/1 | 5.83  | 5.88 | -1.03 |
| TRUE | 1/1 | 1/1 | 5.83  | 5.88 | -1.03 |
| TRUE | 1/1 | 1/1 | 10.55 | 9.22 | 2.51  |
| TRUE | 1/1 | 1/1 | 10.55 | 9.22 | 2.51  |
| TRUE | 1/1 | 1/1 | 10.55 | 9.22 | 2.51  |
| TRUE | 1/1 | 1/1 | 10.55 | 9.22 | 2.51  |
| TRUE | 1/1 | 1/1 | 6.34  | 5.7  | 1.55  |
| TRUE | 1/1 | 1/1 | 6.34  | 5.7  | 1.55  |
| TRUE | 1/1 | 1/1 | 6.34  | 5.7  | 1.55  |
| TRUE | 1/1 | 1/1 | 6.34  | 5.7  | 1.55  |
| TRUE | 1/1 | 1/1 | 5.95  | 5.08 | 1.82  |
| TRUE | 1/1 | 1/1 | 5.95  | 5.08 | 1.82  |
| TRUE | 1/1 | 1/1 | 5.95  | 5.08 | 1.82  |
| TRUE | 1/1 | 1/1 | 5.95  | 5.08 | 1.82  |
| TRUE | 1/1 | 1/1 | 5.95  | 5.08 | 1.82  |
| TRUE | 1/1 | 1/1 | 5.95  | 5.08 | 1.82  |
| TRUE | 1/1 | 1/1 | 5.95  | 5.08 | 1.82  |
| TRUE | 1/1 | 1/1 | 5.95  | 5.08 | 1.82  |
| TRUE | 1/1 | 1/1 | 7.22  | 9.86 | -6.22 |
| TRUE | 1/1 | 1/1 | 7.22  | 9.86 | -6.22 |
| TRUE | 1/1 | 1/1 | 7.22  | 9.86 | -6.22 |
| TRUE | 1/1 | 1/1 | 7.22  | 9.86 | -6.22 |
| TRUE | 1/1 | 1/1 | 7.22  | 9.86 | -6.22 |
| TRUE | 1/1 | 1/1 | 7.09  | 8.59 | -2.83 |
| TRUE | 1/1 | 1/1 | 7.09  | 8.59 | -2.83 |
| TRUE | 1/1 | 1/1 | 7.09  | 8.59 | -2.83 |
| TRUE | 1/1 | 1/1 | 7.09  | 8.59 | -2.83 |
| TRUE | 1/1 | 1/1 | 7.09  | 8.59 | -2.83 |
| TRUE | 1/1 | 1/1 | 7.09  | 8.59 | -2.83 |
| TRUE | 1/1 | 1/1 | 7.09  | 8.59 | -2.83 |
| TRUE | 1/1 | 1/1 | 7.09  | 8.59 | -2.83 |
| TRUE | 1/1 | 1/1 | 7.09  | 8.59 | -2.83 |
| TRUE | 1/1 | 1/1 | 7.09  | 8.59 | -2.83 |
| TRUE | 1/1 | 1/1 | 5.23  | 5.06 | 1.12  |
| TRUE | 1/1 | 1/1 | 5.23  | 5.06 | 1.12  |
| TRUE | 1/1 | 1/1 | 5.23  | 5.06 | 1.12  |
| TRUE | 1/1 | 1/1 | 6.88  | 7.01 | -1.1  |
| TRUE | 1/1 | 1/1 | 6.88  | 7.01 | -1.1  |
| TRUE | 1/1 | 1/1 | 6.88  | 7.01 | -1.1  |
| TRUE | 1/1 | 1/1 | 6.88  | 7.01 | -1.1  |
| TRUE | 1/1 | 1/1 | 6.88  | 7.01 | -1.1  |
| TRUE | 1/1 | 1/1 | 6.88  | 7.01 | -1.1  |
| TRUE | 1/1 | 1/1 | 6.88  | 7.01 | -1.1  |
| TRUE | 1/1 | 1/1 | 6.88  | 7.01 | -1.1  |
| TRUE | 1/1 | 1/1 | 6.88  | 7.01 | -1.1  |
| TRUE | 1/1 | 1/1 | 6.88  | 7.01 | -1.1  |
| TRUE | 1/1 | 1/1 | 6.88  | 7.01 | -1.1  |
| TRUE | 1/1 | 1/1 | 6.88  | 7.01 | -1.1  |
| TRUE | 1/1 | 1/1 | 6.88  | 7.01 | -1.1  |
| TRUE | 1/1 | 1/1 | 6.88  | 7.01 | -1.1  |
| TRUE | 1/1 | 1/1 | 6.38  | 5.13 | 2.37  |

|      |     |     |      |      |       |
|------|-----|-----|------|------|-------|
| TRUE | 1/1 | 1/1 | 6.38 | 5.13 | 2.37  |
| TRUE | 1/1 | 1/1 | 6.38 | 5.13 | 2.37  |
| TRUE | 1/1 | 1/1 | 7.35 | 6.9  | 1.37  |
| TRUE | 1/1 | 1/1 | 7.35 | 6.9  | 1.37  |
| TRUE | 1/1 | 1/1 | 7.35 | 6.9  | 1.37  |
| TRUE | 1/1 | 1/1 | 7.35 | 6.9  | 1.37  |
| TRUE | 1/1 | 1/1 | 7.35 | 6.9  | 1.37  |
| TRUE | 1/1 | 1/1 | 6.32 | 7.99 | -3.19 |
| TRUE | 1/1 | 1/1 | 6.32 | 7.99 | -3.19 |
| TRUE | 1/1 | 1/1 | 6.32 | 7.99 | -3.19 |
| TRUE | 1/1 | 1/1 | 6.32 | 7.99 | -3.19 |
| TRUE | 1/1 | 1/1 | 6.32 | 7.99 | -3.19 |
| TRUE | 1/1 | 1/1 | 6.32 | 7.99 | -3.19 |
| TRUE | 1/1 | 1/1 | 6.32 | 7.99 | -3.19 |
| TRUE | 1/1 | 1/1 | 6.32 | 7.99 | -3.19 |
| TRUE | 1/1 | 1/1 | 6.32 | 7.99 | -3.19 |
| TRUE | 1/1 | 1/1 | 6.32 | 7.99 | -3.19 |
| TRUE | 1/1 | 1/1 | 3.96 | 4.88 | -1.89 |
| TRUE | 1/1 | 1/1 | 3.96 | 4.88 | -1.89 |
| TRUE | 1/1 | 1/1 | 3.96 | 4.88 | -1.89 |
| TRUE | 1/1 | 1/1 | 3.96 | 4.88 | -1.89 |
| TRUE | 1/1 | 1/1 | 3.96 | 4.88 | -1.89 |
| TRUE | 1/1 | 1/1 | 3.96 | 4.88 | -1.89 |
| TRUE | 1/1 | 1/1 | 3.96 | 4.88 | -1.89 |
| TRUE | 1/1 | 1/1 | 3.96 | 4.88 | -1.89 |
| TRUE | 1/1 | 1/1 | 3.96 | 4.88 | -1.89 |
| TRUE | 1/1 | 1/1 | 8.42 | 8.83 | -1.33 |
| TRUE | 1/1 | 1/1 | 8.42 | 8.83 | -1.33 |
| TRUE | 1/1 | 1/1 | 8.42 | 8.83 | -1.33 |
| TRUE | 1/1 | 1/1 | 8.42 | 8.83 | -1.33 |
| TRUE | 1/1 | 1/1 | 8.42 | 8.83 | -1.33 |
| TRUE | 1/1 | 1/1 | 8.42 | 8.83 | -1.33 |
| TRUE | 1/1 | 1/1 | 8.42 | 8.83 | -1.33 |
| TRUE | 1/1 | 1/1 | 8.42 | 8.83 | -1.33 |
| TRUE | 1/1 | 1/1 | 5.07 | 5.04 | 1.02  |
| TRUE | 1/1 | 1/1 | 5.07 | 5.04 | 1.02  |
| TRUE | 1/1 | 1/1 | 5.07 | 5.04 | 1.02  |
| TRUE | 1/1 | 1/1 | 5.07 | 5.04 | 1.02  |
| TRUE | 1/1 | 1/1 | 5.74 | 5.8  | -1.04 |
| TRUE | 1/1 | 1/1 | 5.74 | 5.8  | -1.04 |
| TRUE | 1/1 | 1/1 | 5.74 | 5.8  | -1.04 |
| TRUE | 1/1 | 1/1 | 3.77 | 3.2  | 1.49  |
| TRUE | 1/1 | 1/1 | 3.77 | 3.2  | 1.49  |
| TRUE | 1/1 | 1/1 | 4.61 | 5.29 | -1.6  |
| TRUE | 1/1 | 1/1 | 4.61 | 5.29 | -1.6  |
| TRUE | 1/1 | 1/1 | 4.61 | 5.29 | -1.6  |
| TRUE | 1/1 | 1/1 | 4.61 | 5.29 | -1.6  |
| TRUE | 1/1 | 1/1 | 4.61 | 5.29 | -1.6  |
| TRUE | 1/1 | 1/1 | 4.61 | 5.29 | -1.6  |
| TRUE | 1/1 | 1/1 | 4.61 | 5.29 | -1.6  |
| TRUE | 1/1 | 1/1 | 4.61 | 5.29 | -1.6  |
| TRUE | 1/1 | 1/1 | 4.61 | 5.29 | -1.6  |
| TRUE | 1/1 | 1/1 | 4.61 | 5.29 | -1.6  |
| TRUE | 1/1 | 1/1 | 4.61 | 5.29 | -1.6  |
| TRUE | 1/1 | 1/1 | 5.43 | 4.99 | 1.35  |
| TRUE | 1/1 | 1/1 | 5.43 | 4.99 | 1.35  |
| TRUE | 1/1 | 1/1 | 5.43 | 4.99 | 1.35  |
| TRUE | 1/1 | 1/1 | 5.43 | 4.99 | 1.35  |
| TRUE | 1/1 | 1/1 | 5.43 | 4.99 | 1.35  |
| TRUE | 1/1 | 1/1 | 9.26 | 10.9 | -3.12 |
| TRUE | 1/1 | 1/1 | 9.26 | 10.9 | -3.12 |
| TRUE | 1/1 | 1/1 | 9.26 | 10.9 | -3.12 |
| TRUE | 1/1 | 1/1 | 9.26 | 10.9 | -3.12 |
| TRUE | 1/1 | 1/1 | 9.26 | 10.9 | -3.12 |

|      |     |     |      |      |       |
|------|-----|-----|------|------|-------|
| TRUE | 1/1 | 1/1 | 9.26 | 10.9 | -3.12 |
| TRUE | 1/1 | 1/1 | 9.26 | 10.9 | -3.12 |
| TRUE | 1/1 | 1/1 | 9.26 | 10.9 | -3.12 |
| TRUE | 1/1 | 1/1 | 9.26 | 10.9 | -3.12 |
| TRUE | 1/1 | 1/1 | 6.69 | 8.05 | -2.58 |
| TRUE | 1/1 | 1/1 | 6.69 | 8.05 | -2.58 |
| TRUE | 1/1 | 1/1 | 6.69 | 8.05 | -2.58 |
| TRUE | 1/1 | 1/1 | 6.69 | 8.05 | -2.58 |
| TRUE | 1/1 | 1/1 | 6.69 | 8.05 | -2.58 |
| TRUE | 1/1 | 1/1 | 6.69 | 8.05 | -2.58 |
| TRUE | 1/1 | 1/1 | 6.69 | 8.05 | -2.58 |
| TRUE | 1/1 | 1/1 | 6.69 | 8.05 | -2.58 |
| TRUE | 1/1 | 1/1 | 6.69 | 8.05 | -2.58 |
| TRUE | 1/1 | 1/1 | 6.69 | 8.05 | -2.58 |
| TRUE | 1/1 | 1/1 | 6.69 | 8.05 | -2.58 |
| TRUE | 1/1 | 1/1 | 6.69 | 8.05 | -2.58 |
| TRUE | 1/1 | 1/1 | 6.69 | 8.05 | -2.58 |
| TRUE | 1/1 | 1/1 | 6.69 | 8.05 | -2.58 |
| TRUE | 1/1 | 1/1 | 6.69 | 8.05 | -2.58 |
| TRUE | 1/1 | 1/1 | 6.69 | 8.05 | -2.58 |
| TRUE | 1/1 | 1/1 | 6.69 | 8.05 | -2.58 |
| TRUE | 1/1 | 1/1 | 6.69 | 8.05 | -2.58 |
| TRUE | 1/1 | 1/1 | 6.69 | 8.05 | -2.58 |
| TRUE | 1/1 | 1/1 | 6.69 | 8.05 | -2.58 |
| TRUE | 1/1 | 1/1 | 6.69 | 8.05 | -2.58 |
| TRUE | 1/1 | 1/1 | 6.69 | 8.05 | -2.58 |
| TRUE | 1/1 | 1/1 | 7.14 | 6.8  | 1.26  |
| TRUE | 1/1 | 1/1 | 7.14 | 6.8  | 1.26  |
| TRUE | 1/1 | 1/1 | 7.14 | 6.8  | 1.26  |
| TRUE | 1/1 | 1/1 | 7.14 | 6.8  | 1.26  |
| TRUE | 1/1 | 1/1 | 5.54 | 5.8  | -1.2  |
| TRUE | 1/1 | 1/1 | 5.54 | 5.8  | -1.2  |
| TRUE | 1/1 | 1/1 | 7.04 | 8.82 | -3.45 |
| TRUE | 1/1 | 1/1 | 7.04 | 8.82 | -3.45 |
| TRUE | 1/1 | 1/1 | 7.04 | 8.82 | -3.45 |
| TRUE | 1/1 | 1/1 | 7.04 | 8.82 | -3.45 |
| TRUE | 1/1 | 1/1 | 7.04 | 8.82 | -3.45 |
| TRUE | 1/1 | 1/1 | 6.27 | 7.34 | -2.1  |
| TRUE | 1/1 | 1/1 | 6.27 | 7.34 | -2.1  |
| TRUE | 1/1 | 1/1 | 6.27 | 7.34 | -2.1  |
| TRUE | 1/1 | 1/1 | 6.27 | 7.34 | -2.1  |
| TRUE | 1/1 | 1/1 | 6.27 | 7.34 | -2.1  |
| TRUE | 1/1 | 1/1 | 6.27 | 7.34 | -2.1  |
| TRUE | 1/1 | 1/1 | 6.27 | 7.34 | -2.1  |
| TRUE | 1/1 | 1/1 | 6.27 | 7.34 | -2.1  |
| TRUE | 1/1 | 1/1 | 6.27 | 7.34 | -2.1  |
| TRUE | 1/1 | 1/1 | 6.27 | 7.34 | -2.1  |
| TRUE | 1/1 | 1/1 | 6.27 | 7.34 | -2.1  |
| TRUE | 1/1 | 1/1 | 6.27 | 7.34 | -2.1  |
| TRUE | 1/1 | 1/1 | 6.27 | 7.34 | -2.1  |
| TRUE | 1/1 | 1/1 | 6.27 | 7.34 | -2.1  |
| TRUE | 1/1 | 1/1 | 6.27 | 7.34 | -2.1  |
| TRUE | 1/1 | 1/1 | 6.27 | 7.34 | -2.1  |
| TRUE | 1/1 | 1/1 | 6.27 | 7.34 | -2.1  |
| TRUE | 1/1 | 1/1 | 5.41 | 5.71 | -1.23 |
| TRUE | 1/1 | 1/1 | 5.41 | 5.71 | -1.23 |
| TRUE | 1/1 | 1/1 | 5.41 | 5.71 | -1.23 |
| TRUE | 1/1 | 1/1 | 5.41 | 5.71 | -1.23 |
| TRUE | 1/1 | 1/1 | 7.55 | 7.57 | -1.01 |
| TRUE | 1/1 | 1/1 | 7.55 | 7.57 | -1.01 |
| TRUE | 1/1 | 1/1 | 4.3  | 4.11 | 1.14  |
| TRUE | 1/1 | 1/1 | 4.3  | 4.11 | 1.14  |









|      |     |     |       |      |       |
|------|-----|-----|-------|------|-------|
| TRUE | 1/1 | 1/1 | 4.73  | 5.91 | -2.26 |
| TRUE | 1/1 | 1/1 | 4.73  | 5.91 | -2.26 |
| TRUE | 1/1 | 1/1 | 5.2   | 5.78 | -1.5  |
| TRUE | 1/1 | 1/1 | 5.2   | 5.78 | -1.5  |
| TRUE | 1/1 | 1/1 | 5.2   | 5.78 | -1.5  |
| TRUE | 1/1 | 1/1 | 5.2   | 5.78 | -1.5  |
| TRUE | 1/1 | 1/1 | 5.2   | 5.78 | -1.5  |
| TRUE | 1/1 | 1/1 | 5.2   | 5.78 | -1.5  |
| TRUE | 1/1 | 1/1 | 5.2   | 5.78 | -1.5  |
| TRUE | 1/1 | 1/1 | 5.2   | 5.78 | -1.5  |
| TRUE | 1/1 | 1/1 | 5.2   | 5.78 | -1.5  |
| TRUE | 1/1 | 1/1 | 10.33 | 6.74 | 11.99 |
| TRUE | 1/1 | 1/1 | 10.33 | 6.74 | 11.99 |
| TRUE | 1/1 | 1/1 | 10.33 | 6.74 | 11.99 |
| TRUE | 1/1 | 1/1 | 10.33 | 6.74 | 11.99 |
| TRUE | 1/1 | 1/1 | 10.33 | 6.74 | 11.99 |
| TRUE | 1/1 | 1/1 | 10.33 | 6.74 | 11.99 |
| TRUE | 1/1 | 1/1 | 10.33 | 6.74 | 11.99 |
| TRUE | 1/1 | 1/1 | 10.33 | 6.74 | 11.99 |
| TRUE | 1/1 | 1/1 | 10.33 | 6.74 | 11.99 |
| TRUE | 1/1 | 1/1 | 10.33 | 6.74 | 11.99 |
| TRUE | 1/1 | 1/1 | 10.33 | 6.74 | 11.99 |
| TRUE | 1/1 | 1/1 | 10.33 | 6.74 | 11.99 |
| TRUE | 1/1 | 1/1 | 10.33 | 6.74 | 11.99 |
| TRUE | 1/1 | 1/1 | 10.33 | 6.74 | 11.99 |
| TRUE | 1/1 | 1/1 | 10.33 | 6.74 | 11.99 |
| TRUE | 1/1 | 1/1 | 10.33 | 6.74 | 11.99 |
| TRUE | 1/1 | 1/1 | 10.33 | 6.74 | 11.99 |
| TRUE | 1/1 | 1/1 | 7.36  | 8.49 | -2.2  |
| TRUE | 1/1 | 1/1 | 7.36  | 8.49 | -2.2  |
| TRUE | 1/1 | 1/1 | 7.36  | 8.49 | -2.2  |
| TRUE | 1/1 | 1/1 | 7.36  | 8.49 | -2.2  |
| TRUE | 1/1 | 1/1 | 7.36  | 8.49 | -2.2  |
| TRUE | 1/1 | 1/1 | 7.36  | 8.49 | -2.2  |
| TRUE | 1/1 | 1/1 | 6.68  | 4.76 | 3.8   |
| TRUE | 1/1 | 1/1 | 6.68  | 4.76 | 3.8   |
| TRUE | 1/1 | 1/1 | 6.68  | 4.76 | 3.8   |
| TRUE | 1/1 | 1/1 | 6.68  | 4.76 | 3.8   |
| TRUE | 1/1 | 1/1 | 6.68  | 4.76 | 3.8   |
| TRUE | 1/1 | 1/1 | 6.68  | 4.76 | 3.8   |
| TRUE | 1/1 | 1/1 | 6.68  | 4.76 | 3.8   |
| TRUE | 1/1 | 1/1 | 6.68  | 4.76 | 3.8   |
| TRUE | 1/1 | 1/1 | 6.68  | 4.76 | 3.8   |
| TRUE | 1/1 | 1/1 | 6.68  | 4.76 | 3.8   |
| TRUE | 1/1 | 1/1 | 6.68  | 4.76 | 3.8   |
| TRUE | 1/1 | 1/1 | 6.68  | 4.76 | 3.8   |
| TRUE | 1/1 | 1/1 | 6.68  | 4.76 | 3.8   |
| TRUE | 1/1 | 1/1 | 6.68  | 4.76 | 3.8   |
| TRUE | 1/1 | 1/1 | 6.68  | 4.76 | 3.8   |
| TRUE | 1/1 | 1/1 | 6.68  | 4.76 | 3.8   |
| TRUE | 1/1 | 1/1 | 6.68  | 4.76 | 3.8   |
| TRUE | 1/1 | 1/1 | 6.68  | 4.76 | 3.8   |
| TRUE | 1/1 | 1/1 | 6.68  | 4.76 | 3.8   |
| TRUE | 1/1 | 1/1 | 6.68  | 4.76 | 3.8   |
| TRUE | 1/1 | 1/1 | 6.29  | 6.39 | -1.08 |
| TRUE | 1/1 | 1/1 | 6.29  | 6.39 | -1.08 |
| TRUE | 1/1 | 1/1 | 6.29  | 6.39 | -1.08 |
| TRUE | 1/1 | 1/1 | 6.29  | 6.39 | -1.08 |
| TRUE | 1/1 | 1/1 | 6.29  | 6.39 | -1.08 |
| TRUE | 1/1 | 1/1 | 6.4   | 6.83 | -1.35 |



|      |     |     |      |      |       |
|------|-----|-----|------|------|-------|
| TRUE | 1/1 | 1/1 | 6.17 | 5.89 | 1.21  |
| TRUE | 1/1 | 1/1 | 6.17 | 5.89 | 1.21  |
| TRUE | 1/1 | 1/1 | 6.17 | 5.89 | 1.21  |
| TRUE | 1/1 | 1/1 | 6.17 | 5.89 | 1.21  |
| TRUE | 1/1 | 1/1 | 7.13 | 6.64 | 1.4   |
| TRUE | 1/1 | 1/1 | 7.13 | 6.64 | 1.4   |
| TRUE | 1/1 | 1/1 | 7.13 | 6.64 | 1.4   |
| TRUE | 1/1 | 1/1 | 7.13 | 6.64 | 1.4   |
| TRUE | 1/1 | 1/1 | 7.22 | 8.05 | -1.77 |
| TRUE | 1/1 | 1/1 | 7.22 | 8.05 | -1.77 |
| TRUE | 1/1 | 1/1 | 7.22 | 8.05 | -1.77 |
| TRUE | 1/1 | 1/1 | 7.22 | 8.05 | -1.77 |
| TRUE | 1/1 | 1/1 | 7.22 | 8.05 | -1.77 |
| TRUE | 1/1 | 1/1 | 7.22 | 8.05 | -1.77 |
| TRUE | 1/1 | 1/1 | 7.22 | 8.05 | -1.77 |
| TRUE | 1/1 | 1/1 | 7.22 | 8.05 | -1.77 |
| TRUE | 1/1 | 1/1 | 7.22 | 8.05 | -1.77 |
| TRUE | 1/1 | 1/1 | 7.22 | 8.05 | -1.77 |
| TRUE | 1/1 | 1/1 | 7.22 | 8.05 | -1.77 |
| TRUE | 1/1 | 1/1 | 7.22 | 8.05 | -1.77 |
| TRUE | 1/1 | 1/1 | 7.22 | 8.05 | -1.77 |
| TRUE | 1/1 | 1/1 | 7.1  | 7.61 | -1.42 |
| TRUE | 1/1 | 1/1 | 7.1  | 7.61 | -1.42 |
| TRUE | 1/1 | 1/1 | 7.1  | 7.61 | -1.42 |
| TRUE | 1/1 | 1/1 | 7.1  | 7.61 | -1.42 |
| TRUE | 1/1 | 1/1 | 7.1  | 7.61 | -1.42 |
| TRUE | 1/1 | 1/1 | 7.1  | 7.61 | -1.42 |
| TRUE | 1/1 | 1/1 | 7.1  | 7.61 | -1.42 |
| TRUE | 1/1 | 1/1 | 7.1  | 7.61 | -1.42 |
| TRUE | 1/1 | 1/1 | 7.35 | 7.59 | -1.18 |
| TRUE | 1/1 | 1/1 | 7.35 | 7.59 | -1.18 |
| TRUE | 1/1 | 1/1 | 7.35 | 7.59 | -1.18 |
| TRUE | 1/1 | 1/1 | 7.35 | 7.59 | -1.18 |
| TRUE | 1/1 | 1/1 | 5.89 | 6.7  | -1.76 |
| TRUE | 1/1 | 1/1 | 5.89 | 6.7  | -1.76 |
| TRUE | 1/1 | 1/1 | 5.89 | 6.7  | -1.76 |
| TRUE | 1/1 | 1/1 | 8.03 | 9.22 | -2.28 |
| TRUE | 1/1 | 1/1 | 8.03 | 9.22 | -2.28 |
| TRUE | 1/1 | 1/1 | 8.03 | 9.22 | -2.28 |
| TRUE | 1/1 | 1/1 | 8.03 | 9.22 | -2.28 |
| TRUE | 1/1 | 1/1 | 8.03 | 9.22 | -2.28 |
| TRUE | 1/1 | 1/1 | 8.03 | 9.22 | -2.28 |
| TRUE | 1/1 | 1/1 | 8.03 | 9.22 | -2.28 |
| TRUE | 1/1 | 1/1 | 8.03 | 9.22 | -2.28 |
| TRUE | 1/1 | 1/1 | 8.03 | 9.22 | -2.28 |
| TRUE | 1/1 | 1/1 | 8.03 | 9.22 | -2.28 |
| TRUE | 1/1 | 1/1 | 8.03 | 9.22 | -2.28 |
| TRUE | 1/1 | 1/1 | 8.03 | 9.22 | -2.28 |
| TRUE | 1/1 | 1/1 | 8.03 | 9.22 | -2.28 |
| TRUE | 1/1 | 1/1 | 8.03 | 9.22 | -2.28 |
| TRUE | 1/1 | 1/1 | 8.03 | 9.22 | -2.28 |
| TRUE | 1/1 | 1/1 | 8.03 | 9.22 | -2.28 |
| TRUE | 1/1 | 1/1 | 8.03 | 9.22 | -2.28 |
| TRUE | 1/1 | 1/1 | 8.03 | 9.22 | -2.28 |
| TRUE | 1/1 | 1/1 | 8.03 | 9.22 | -2.28 |
| TRUE | 1/1 | 1/1 | 8.03 | 9.22 | -2.28 |
| TRUE | 1/1 | 1/1 | 6.91 | 6.79 | 1.08  |
| TRUE | 1/1 | 1/1 | 6.91 | 6.79 | 1.08  |
| TRUE | 1/1 | 1/1 | 6.91 | 6.79 | 1.08  |

|      |     |     |      |      |       |
|------|-----|-----|------|------|-------|
| TRUE | 1/1 | 1/1 | 7.77 | 8.09 | -1.25 |
| TRUE | 1/1 | 1/1 | 7.77 | 8.09 | -1.25 |
| TRUE | 1/1 | 1/1 | 7.77 | 8.09 | -1.25 |
| TRUE | 1/1 | 1/1 | 7.77 | 8.09 | -1.25 |
| TRUE | 1/1 | 1/1 | 7.04 | 7.24 | -1.15 |
| TRUE | 1/1 | 1/1 | 7.04 | 7.24 | -1.15 |
| TRUE | 1/1 | 1/1 | 7.04 | 7.24 | -1.15 |
| TRUE | 1/1 | 1/1 | 7.04 | 7.24 | -1.15 |
| TRUE | 1/1 | 1/1 | 8.22 | 8.46 | -1.18 |
| TRUE | 1/1 | 1/1 | 8.22 | 8.46 | -1.18 |
| TRUE | 1/1 | 1/1 | 8.22 | 8.46 | -1.18 |
| TRUE | 1/1 | 1/1 | 8.22 | 8.46 | -1.18 |
| TRUE | 1/1 | 1/1 | 8.23 | 8.84 | -1.52 |
| TRUE | 1/1 | 1/1 | 8.23 | 8.84 | -1.52 |
| TRUE | 1/1 | 1/1 | 8.23 | 8.84 | -1.52 |
| TRUE | 1/1 | 1/1 | 8.23 | 8.84 | -1.52 |
| TRUE | 1/1 | 1/1 | 8.23 | 8.84 | -1.52 |
| TRUE | 1/1 | 1/1 | 8.23 | 8.84 | -1.52 |
| TRUE | 1/1 | 1/1 | 5.33 | 5.36 | -1.02 |
| TRUE | 1/1 | 1/1 | 5.33 | 5.36 | -1.02 |
| TRUE | 1/1 | 1/1 | 6.4  | 6.93 | -1.45 |
| TRUE | 1/1 | 1/1 | 6.4  | 6.93 | -1.45 |
| TRUE | 1/1 | 1/1 | 6.4  | 6.93 | -1.45 |
| TRUE | 1/1 | 1/1 | 6.4  | 6.93 | -1.45 |
| TRUE | 1/1 | 1/1 | 9    | 7.68 | 2.49  |
| TRUE | 1/1 | 1/1 | 9    | 7.68 | 2.49  |
| TRUE | 1/1 | 1/1 | 9    | 7.68 | 2.49  |
| TRUE | 1/1 | 1/1 | 9    | 7.68 | 2.49  |
| TRUE | 1/1 | 1/1 | 9    | 7.68 | 2.49  |
| TRUE | 1/1 | 1/1 | 9    | 7.68 | 2.49  |
| TRUE | 1/1 | 1/1 | 9    | 7.68 | 2.49  |
| TRUE | 1/1 | 1/1 | 7.6  | 7.63 | -1.02 |
| TRUE | 1/1 | 1/1 | 7.6  | 7.63 | -1.02 |
| TRUE | 1/1 | 1/1 | 7.6  | 7.63 | -1.02 |
| TRUE | 1/1 | 1/1 | 6.77 | 6.31 | 1.37  |
| TRUE | 1/1 | 1/1 | 6.77 | 6.31 | 1.37  |
| TRUE | 1/1 | 1/1 | 6.77 | 6.31 | 1.37  |
| TRUE | 1/1 | 1/1 | 6.77 | 6.31 | 1.37  |
| TRUE | 1/1 | 1/1 | 6.77 | 6.31 | 1.37  |
| TRUE | 1/1 | 1/1 | 8.13 | 8.3  | -1.13 |
| TRUE | 1/1 | 1/1 | 8.13 | 8.3  | -1.13 |
| TRUE | 1/1 | 1/1 | 8.13 | 8.3  | -1.13 |
| TRUE | 1/1 | 1/1 | 8.13 | 8.3  | -1.13 |
| TRUE | 1/1 | 1/1 | 8.13 | 8.3  | -1.13 |
| TRUE | 1/1 | 1/1 | 7.25 | 5.81 | 2.72  |
| TRUE | 1/1 | 1/1 | 7.25 | 5.81 | 2.72  |
| TRUE | 1/1 | 1/1 | 7.25 | 5.81 | 2.72  |
| TRUE | 1/1 | 1/1 | 7.25 | 5.81 | 2.72  |
| TRUE | 1/1 | 1/1 | 7.25 | 5.81 | 2.72  |
| TRUE | 1/1 | 1/1 | 7.25 | 5.81 | 2.72  |
| TRUE | 1/1 | 1/1 | 7.25 | 5.81 | 2.72  |
| TRUE | 1/1 | 1/1 | 7.25 | 5.81 | 2.72  |
| TRUE | 1/1 | 1/1 | 7.25 | 5.81 | 2.72  |
| TRUE | 1/1 | 1/1 | 7.38 | 7.41 | -1.02 |
| TRUE | 1/1 | 1/1 | 7.38 | 7.41 | -1.02 |
| TRUE | 1/1 | 1/1 | 7.38 | 7.41 | -1.02 |
| TRUE | 1/1 | 1/1 | 7.38 | 7.41 | -1.02 |
| TRUE | 1/1 | 1/1 | 7.38 | 7.41 | -1.02 |
| TRUE | 1/1 | 1/1 | 6.3  | 6.88 | -1.5  |



|      |     |     |      |      |       |
|------|-----|-----|------|------|-------|
| TRUE | 1/1 | 1/1 | 7.89 | 8.58 | -1.62 |
| TRUE | 1/1 | 1/1 | 7.89 | 8.58 | -1.62 |
| TRUE | 1/1 | 1/1 | 7.89 | 8.58 | -1.62 |
| TRUE | 1/1 | 1/1 | 7.89 | 8.58 | -1.62 |
| TRUE | 1/1 | 1/1 | 7.89 | 8.58 | -1.62 |
| TRUE | 1/1 | 1/1 | 7.89 | 8.58 | -1.62 |
| TRUE | 1/1 | 1/1 | 7.89 | 8.58 | -1.62 |
| TRUE | 1/1 | 1/1 | 7.89 | 8.58 | -1.62 |
| TRUE | 1/1 | 1/1 | 7.89 | 8.58 | -1.62 |
| TRUE | 1/1 | 1/1 | 7.64 | 7.83 | -1.14 |
| TRUE | 1/1 | 1/1 | 7.64 | 7.83 | -1.14 |
| TRUE | 1/1 | 1/1 | 7.64 | 7.83 | -1.14 |
| TRUE | 1/1 | 1/1 | 7.64 | 7.83 | -1.14 |
| TRUE | 1/1 | 1/1 | 7.64 | 7.83 | -1.14 |
| TRUE | 1/1 | 1/1 | 4.93 | 2.98 | 3.84  |
| TRUE | 1/1 | 1/1 | 4.93 | 2.98 | 3.84  |
| TRUE | 1/1 | 1/1 | 4.93 | 2.98 | 3.84  |
| TRUE | 1/1 | 1/1 | 4.93 | 2.98 | 3.84  |
| TRUE | 1/1 | 1/1 | 4.93 | 2.98 | 3.84  |
| TRUE | 1/1 | 1/1 | 4.93 | 2.98 | 3.84  |
| TRUE | 1/1 | 1/1 | 4.93 | 2.98 | 3.84  |
| TRUE | 1/1 | 1/1 | 4.93 | 2.98 | 3.84  |
| TRUE | 1/1 | 1/1 | 4.93 | 2.98 | 3.84  |
| TRUE | 1/1 | 1/1 | 4.93 | 2.98 | 3.84  |
| TRUE | 1/1 | 1/1 | 4.93 | 2.98 | 3.84  |
| TRUE | 1/1 | 1/1 | 5.82 | 7.3  | -2.79 |
| TRUE | 1/1 | 1/1 | 5.82 | 7.3  | -2.79 |
| TRUE | 1/1 | 1/1 | 5.82 | 7.3  | -2.79 |
| TRUE | 1/1 | 1/1 | 5.82 | 7.3  | -2.79 |
| TRUE | 1/1 | 1/1 | 5.82 | 7.3  | -2.79 |
| TRUE | 1/1 | 1/1 | 5.43 | 4.63 | 1.74  |
| TRUE | 1/1 | 1/1 | 5.43 | 4.63 | 1.74  |
| TRUE | 1/1 | 1/1 | 8.33 | 6.88 | 2.72  |
| TRUE | 1/1 | 1/1 | 8.33 | 6.88 | 2.72  |
| TRUE | 1/1 | 1/1 | 8.33 | 6.88 | 2.72  |
| TRUE | 1/1 | 1/1 | 8.33 | 6.88 | 2.72  |
| TRUE | 1/1 | 1/1 | 8.33 | 6.88 | 2.72  |
| TRUE | 1/1 | 1/1 | 6.6  | 5.36 | 2.36  |
| TRUE | 1/1 | 1/1 | 6.6  | 5.36 | 2.36  |
| TRUE | 1/1 | 1/1 | 6.6  | 5.36 | 2.36  |
| TRUE | 1/1 | 1/1 | 6.6  | 5.36 | 2.36  |
| TRUE | 1/1 | 1/1 | 5.34 | 6.58 | -2.37 |
| TRUE | 1/1 | 1/1 | 5.34 | 6.58 | -2.37 |
| TRUE | 1/1 | 1/1 | 5.34 | 6.58 | -2.37 |
| TRUE | 1/1 | 1/1 | 5.34 | 6.58 | -2.37 |
| TRUE | 1/1 | 1/1 | 5.34 | 6.58 | -2.37 |
| TRUE | 1/1 | 1/1 | 5.34 | 6.58 | -2.37 |
| TRUE | 1/1 | 1/1 | 5.34 | 6.58 | -2.37 |
| TRUE | 1/1 | 1/1 | 5.34 | 6.58 | -2.37 |
| TRUE | 1/1 | 1/1 | 5.34 | 6.58 | -2.37 |
| TRUE | 1/1 | 1/1 | 5.34 | 6.58 | -2.37 |
| TRUE | 1/1 | 1/1 | 5.85 | 5.52 | 1.25  |
| TRUE | 1/1 | 1/1 | 5.85 | 5.52 | 1.25  |
| TRUE | 1/1 | 1/1 | 8.1  | 8.44 | -1.26 |
| TRUE | 1/1 | 1/1 | 8.1  | 8.44 | -1.26 |
| TRUE | 1/1 | 1/1 | 8.1  | 8.44 | -1.26 |
| TRUE | 1/1 | 1/1 | 9.36 | 9.82 | -1.37 |
| TRUE | 1/1 | 1/1 | 9.36 | 9.82 | -1.37 |
| TRUE | 1/1 | 1/1 | 9.36 | 9.82 | -1.37 |
| TRUE | 1/1 | 1/1 | 9.36 | 9.82 | -1.37 |
| TRUE | 1/1 | 1/1 | 9.36 | 9.82 | -1.37 |
| TRUE | 1/1 | 1/1 | 6.91 | 6.15 | 1.69  |
| TRUE | 1/1 | 1/1 | 6.91 | 6.15 | 1.69  |

|      |     |     |      |      |       |
|------|-----|-----|------|------|-------|
| TRUE | 1/1 | 1/1 | 7.3  | 7.51 | -1.15 |
| TRUE | 1/1 | 1/1 | 7.3  | 7.51 | -1.15 |
| TRUE | 1/1 | 1/1 | 7.3  | 7.51 | -1.15 |
| TRUE | 1/1 | 1/1 | 7.3  | 7.51 | -1.15 |
| TRUE | 1/1 | 1/1 | 7.3  | 7.51 | -1.15 |
| TRUE | 1/1 | 1/1 | 5.26 | 5.21 | 1.03  |
| TRUE | 1/1 | 1/1 | 5.26 | 5.21 | 1.03  |
| TRUE | 1/1 | 1/1 | 5.26 | 5.21 | 1.03  |
| TRUE | 1/1 | 1/1 | 6.06 | 6.02 | 1.03  |
| TRUE | 1/1 | 1/1 | 6.06 | 6.02 | 1.03  |
| TRUE | 1/1 | 1/1 | 6.06 | 6.02 | 1.03  |
| TRUE | 1/1 | 1/1 | 5.37 | 6.49 | -2.17 |
| TRUE | 1/1 | 1/1 | 5.37 | 6.49 | -2.17 |
| TRUE | 1/1 | 1/1 | 5.37 | 6.49 | -2.17 |
| TRUE | 1/1 | 1/1 | 5.37 | 6.49 | -2.17 |
| TRUE | 1/1 | 1/1 | 5.37 | 6.49 | -2.17 |
| TRUE | 1/1 | 1/1 | 5.37 | 6.49 | -2.17 |
| TRUE | 1/1 | 1/1 | 5.37 | 6.49 | -2.17 |
| TRUE | 1/1 | 1/1 | 5.37 | 6.49 | -2.17 |
| TRUE | 1/1 | 1/1 | 5.37 | 6.49 | -2.17 |
| TRUE | 1/1 | 1/1 | 5.37 | 6.49 | -2.17 |
| TRUE | 1/1 | 1/1 | 5.37 | 6.49 | -2.17 |
| TRUE | 1/1 | 1/1 | 5.37 | 6.49 | -2.17 |
| TRUE | 1/1 | 1/1 | 5.37 | 6.49 | -2.17 |
| TRUE | 1/1 | 1/1 | 5.37 | 6.49 | -2.17 |
| TRUE | 1/1 | 1/1 | 5.37 | 6.49 | -2.17 |
| TRUE | 1/1 | 1/1 | 7.89 | 7.16 | 1.66  |
| TRUE | 1/1 | 1/1 | 7.89 | 7.16 | 1.66  |
| TRUE | 1/1 | 1/1 | 9.68 | 9.62 | 1.04  |
| TRUE | 1/1 | 1/1 | 9.68 | 9.62 | 1.04  |
| TRUE | 1/1 | 1/1 | 9.68 | 9.62 | 1.04  |
| TRUE | 1/1 | 1/1 | 9.68 | 9.62 | 1.04  |
| TRUE | 1/1 | 1/1 | 7.84 | 7.91 | -1.05 |
| TRUE | 1/1 | 1/1 | 7.84 | 7.91 | -1.05 |
| TRUE | 1/1 | 1/1 | 7.84 | 7.91 | -1.05 |
| TRUE | 1/1 | 1/1 | 3.4  | 3.86 | -1.38 |
| TRUE | 1/1 | 1/1 | 3.4  | 3.86 | -1.38 |
| TRUE | 1/1 | 1/1 | 3.4  | 3.86 | -1.38 |
| TRUE | 1/1 | 1/1 | 3.4  | 3.86 | -1.38 |
| TRUE | 1/1 | 1/1 | 5.5  | 5.42 | 1.06  |
| TRUE | 1/1 | 1/1 | 5.5  | 5.42 | 1.06  |
| TRUE | 1/1 | 1/1 | 8.65 | 8.55 | 1.08  |
| TRUE | 1/1 | 1/1 | 8.65 | 8.55 | 1.08  |
| TRUE | 1/1 | 1/1 | 8.65 | 8.55 | 1.08  |
| TRUE | 1/1 | 1/1 | 8.65 | 8.55 | 1.08  |
| TRUE | 1/1 | 1/1 | 8.65 | 8.55 | 1.08  |
| TRUE | 1/1 | 1/1 | 3.4  | 3.86 | -1.38 |
| TRUE | 1/1 | 1/1 | 3.4  | 3.86 | -1.38 |
| TRUE | 1/1 | 1/1 | 3.4  | 3.86 | -1.38 |
| TRUE | 1/1 | 1/1 | 3.4  | 3.86 | -1.38 |
| TRUE | 1/1 | 1/1 | 8.32 | 7.6  | 1.65  |
| TRUE | 1/1 | 1/1 | 8.32 | 7.6  | 1.65  |
| TRUE | 1/1 | 1/1 | 8.32 | 7.6  | 1.65  |
| TRUE | 1/1 | 1/1 | 8.32 | 7.6  | 1.65  |
| TRUE | 1/1 | 1/1 | 4.92 | 4.72 | 1.15  |
| TRUE | 1/1 | 1/1 | 4.92 | 4.72 | 1.15  |
| TRUE | 1/1 | 1/1 | 4.92 | 4.72 | 1.15  |
| TRUE | 1/1 | 1/1 | 4.92 | 4.72 | 1.15  |
| TRUE | 1/1 | 1/1 | 4.92 | 4.72 | 1.15  |
| TRUE | 1/1 | 1/1 | 5.04 | 3.88 | 2.23  |
| TRUE | 1/1 | 1/1 | 5.04 | 3.88 | 2.23  |









|      |     |     |       |       |       |
|------|-----|-----|-------|-------|-------|
| TRUE | 1/1 | 1/1 | 5.65  | 4.87  | 1.72  |
| TRUE | 1/1 | 1/1 | 5.65  | 4.87  | 1.72  |
| TRUE | 1/1 | 1/1 | 5.65  | 4.87  | 1.72  |
| TRUE | 1/1 | 1/1 | 5.65  | 4.87  | 1.72  |
| TRUE | 1/1 | 1/1 | 5.65  | 4.87  | 1.72  |
| TRUE | 1/1 | 1/1 | 5.65  | 4.87  | 1.72  |
| TRUE | 1/1 | 1/1 | 4.51  | 5.48  | -1.95 |
| TRUE | 1/1 | 1/1 | 4.51  | 5.48  | -1.95 |
| TRUE | 1/1 | 1/1 | 5.16  | 5.68  | -1.43 |
| TRUE | 1/1 | 1/1 | 5.16  | 5.68  | -1.43 |
| TRUE | 1/1 | 1/1 | 5.16  | 5.68  | -1.43 |
| TRUE | 1/1 | 1/1 | 5.16  | 5.68  | -1.43 |
| TRUE | 1/1 | 1/1 | 5.16  | 5.68  | -1.43 |
| TRUE | 1/1 | 1/1 | 5.53  | 6.65  | -2.17 |
| TRUE | 1/1 | 1/1 | 5.53  | 6.65  | -2.17 |
| TRUE | 1/1 | 1/1 | 5.53  | 6.65  | -2.17 |
| TRUE | 1/1 | 1/1 | 5.53  | 6.65  | -2.17 |
| TRUE | 1/1 | 1/1 | 11.16 | 12.09 | -1.91 |
| TRUE | 1/1 | 1/1 | 11.16 | 12.09 | -1.91 |
| TRUE | 1/1 | 1/1 | 11.16 | 12.09 | -1.91 |
| TRUE | 1/1 | 1/1 | 11.16 | 12.09 | -1.91 |
| TRUE | 1/1 | 1/1 | 11.16 | 12.09 | -1.91 |
| TRUE | 1/1 | 1/1 | 11.16 | 12.09 | -1.91 |
| TRUE | 1/1 | 1/1 | 11.16 | 12.09 | -1.91 |
| TRUE | 1/1 | 1/1 | 11.16 | 12.09 | -1.91 |
| TRUE | 1/1 | 1/1 | 11.16 | 12.09 | -1.91 |
| TRUE | 1/1 | 1/1 | 11.16 | 12.09 | -1.91 |
| TRUE | 1/1 | 1/1 | 11.16 | 12.09 | -1.91 |
| TRUE | 1/1 | 1/1 | 11.16 | 12.09 | -1.91 |
| TRUE | 1/1 | 1/1 | 11.16 | 12.09 | -1.91 |
| TRUE | 1/1 | 1/1 | 11.16 | 12.09 | -1.91 |
| TRUE | 1/1 | 1/1 | 5.01  | 6.19  | -2.27 |
| TRUE | 1/1 | 1/1 | 5.01  | 6.19  | -2.27 |
| TRUE | 1/1 | 1/1 | 5.01  | 6.19  | -2.27 |
| TRUE | 1/1 | 1/1 | 5.01  | 6.19  | -2.27 |
| TRUE | 1/1 | 1/1 | 5.01  | 6.19  | -2.27 |
| TRUE | 1/1 | 1/1 | 5.01  | 6.19  | -2.27 |
| TRUE | 1/1 | 1/1 | 6.5   | 6.93  | -1.35 |
| TRUE | 1/1 | 1/1 | 6.5   | 6.93  | -1.35 |
| TRUE | 1/1 | 1/1 | 6.5   | 6.93  | -1.35 |
| TRUE | 1/1 | 1/1 | 6.5   | 6.93  | -1.35 |
| TRUE | 1/1 | 1/1 | 6.5   | 6.93  | -1.35 |
| TRUE | 1/1 | 1/1 | 5.22  | 5.12  | 1.07  |
| TRUE | 1/1 | 1/1 | 5.22  | 5.12  | 1.07  |
| TRUE | 1/1 | 1/1 | 5.22  | 5.12  | 1.07  |
| TRUE | 1/1 | 1/1 | 4.16  | 5.61  | -2.73 |
| TRUE | 1/1 | 1/1 | 4.16  | 5.61  | -2.73 |
| TRUE | 1/1 | 1/1 | 5.1   | 5.79  | -1.61 |
| TRUE | 1/1 | 1/1 | 5.1   | 5.79  | -1.61 |
| TRUE | 1/1 | 1/1 | 5.1   | 5.79  | -1.61 |
| TRUE | 1/1 | 1/1 | 7.16  | 6.97  | 1.14  |
| TRUE | 1/1 | 1/1 | 7.16  | 6.97  | 1.14  |
| TRUE | 1/1 | 1/1 | 7.16  | 6.97  | 1.14  |
| TRUE | 1/1 | 1/1 | 8.2   | 8.42  | -1.16 |
| TRUE | 1/1 | 1/1 | 8.2   | 8.42  | -1.16 |
| TRUE | 1/1 | 1/1 | 8.2   | 8.42  | -1.16 |
| TRUE | 1/1 | 1/1 | 6.36  | 5.7   | 1.58  |
| TRUE | 1/1 | 1/1 | 6.36  | 5.7   | 1.58  |
| TRUE | 1/1 | 1/1 | 6.36  | 5.7   | 1.58  |
| TRUE | 1/1 | 1/1 | 6.36  | 5.7   | 1.58  |
| TRUE | 1/1 | 1/1 | 6.36  | 5.7   | 1.58  |
| TRUE | 1/1 | 1/1 | 6.44  | 6.51  | -1.05 |

|      |     |     |      |      |       |
|------|-----|-----|------|------|-------|
| TRUE | 1/1 | 1/1 | 6.44 | 6.51 | -1.05 |
| TRUE | 1/1 | 1/1 | 3.42 | 3.86 | -1.36 |
| TRUE | 1/1 | 1/1 | 3.42 | 3.86 | -1.36 |
| TRUE | 1/1 | 1/1 | 3.42 | 3.86 | -1.36 |
| TRUE | 1/1 | 1/1 | 3.42 | 3.86 | -1.36 |
| TRUE | 1/1 | 1/1 | 3.42 | 3.86 | -1.36 |
| TRUE | 1/1 | 1/1 | 3.42 | 3.86 | -1.36 |
| TRUE | 1/1 | 1/1 | 3.42 | 3.86 | -1.36 |
| TRUE | 1/1 | 1/1 | 3.42 | 3.86 | -1.36 |
| TRUE | 1/1 | 1/1 | 3.42 | 3.86 | -1.36 |
| TRUE | 1/1 | 1/1 | 5.2  | 5.77 | -1.48 |
| TRUE | 1/1 | 1/1 | 5.2  | 5.77 | -1.48 |
| TRUE | 1/1 | 1/1 | 5.2  | 5.77 | -1.48 |
| TRUE | 1/1 | 1/1 | 5.2  | 5.77 | -1.48 |
| TRUE | 1/1 | 1/1 | 5.2  | 5.77 | -1.48 |
| TRUE | 1/1 | 1/1 | 6.63 | 7.93 | -2.46 |
| TRUE | 1/1 | 1/1 | 6.63 | 7.93 | -2.46 |
| TRUE | 1/1 | 1/1 | 6.63 | 7.93 | -2.46 |
| TRUE | 1/1 | 1/1 | 6.63 | 7.93 | -2.46 |
| TRUE | 1/1 | 1/1 | 6.63 | 7.93 | -2.46 |
| TRUE | 1/1 | 1/1 | 4.62 | 5.95 | -2.5  |
| TRUE | 1/1 | 1/1 | 4.62 | 5.95 | -2.5  |
| TRUE | 1/1 | 1/1 | 4.62 | 5.95 | -2.5  |
| TRUE | 1/1 | 1/1 | 4.62 | 5.95 | -2.5  |
| TRUE | 1/1 | 1/1 | 4.62 | 5.95 | -2.5  |
| TRUE | 1/1 | 1/1 | 4.62 | 5.95 | -2.5  |
| TRUE | 1/1 | 1/1 | 4.62 | 5.95 | -2.5  |
| TRUE | 1/1 | 1/1 | 4.62 | 5.95 | -2.5  |
| TRUE | 1/1 | 1/1 | 4.62 | 5.95 | -2.5  |
| TRUE | 1/1 | 1/1 | 4.62 | 5.95 | -2.5  |
| TRUE | 1/1 | 1/1 | 4.62 | 5.95 | -2.5  |
| TRUE | 1/1 | 1/1 | 4.62 | 5.95 | -2.5  |
| TRUE | 1/1 | 1/1 | 4.62 | 5.95 | -2.5  |
| TRUE | 1/1 | 1/1 | 4.62 | 5.95 | -2.5  |
| TRUE | 1/1 | 1/1 | 4.62 | 5.95 | -2.5  |
| TRUE | 1/1 | 1/1 | 4.62 | 5.95 | -2.5  |
| TRUE | 1/1 | 1/1 | 4.62 | 5.95 | -2.5  |
| TRUE | 1/1 | 1/1 | 4.62 | 5.95 | -2.5  |
| TRUE | 1/1 | 1/1 | 4.62 | 5.95 | -2.5  |
| TRUE | 1/1 | 1/1 | 4.62 | 5.95 | -2.5  |
| TRUE | 1/1 | 1/1 | 6.98 | 7.71 | -1.66 |
| TRUE | 1/1 | 1/1 | 6.98 | 7.71 | -1.66 |
| TRUE | 1/1 | 1/1 | 6.98 | 7.71 | -1.66 |
| TRUE | 1/1 | 1/1 | 6.98 | 7.71 | -1.66 |
| TRUE | 1/1 | 1/1 | 6.98 | 7.71 | -1.66 |
| TRUE | 1/1 | 1/1 | 6.98 | 7.71 | -1.66 |
| TRUE | 1/1 | 1/1 | 6.98 | 7.71 | -1.66 |
| TRUE | 1/1 | 1/1 | 6.98 | 7.71 | -1.66 |
| TRUE | 1/1 | 1/1 | 6.98 | 7.71 | -1.66 |
| TRUE | 1/1 | 1/1 | 6.98 | 7.71 | -1.66 |
| TRUE | 1/1 | 1/1 | 6.98 | 7.71 | -1.66 |
| TRUE | 1/1 | 1/1 | 5.75 | 6.36 | -1.53 |
| TRUE | 1/1 | 1/1 | 5.75 | 6.36 | -1.53 |
| TRUE | 1/1 | 1/1 | 5.75 | 6.36 | -1.53 |
| TRUE | 1/1 | 1/1 | 4.4  | 4.03 | 1.29  |
| TRUE | 1/1 | 1/1 | 4.4  | 4.03 | 1.29  |
| TRUE | 1/1 | 1/1 | 4.6  | 6.56 | -3.87 |
| TRUE | 1/1 | 1/1 | 4.6  | 6.56 | -3.87 |
| TRUE | 1/1 | 1/1 | 4.6  | 6.56 | -3.87 |
| TRUE | 1/1 | 1/1 | 4.6  | 6.56 | -3.87 |
| TRUE | 1/1 | 1/1 | 4.6  | 6.56 | -3.87 |
| TRUE | 1/1 | 1/1 | 6.04 | 6.21 | -1.12 |
| TRUE | 1/1 | 1/1 | 6.04 | 6.21 | -1.12 |
| TRUE | 1/1 | 1/1 | 4.26 | 5.59 | -2.51 |
| TRUE | 1/1 | 1/1 | 4.26 | 5.59 | -2.51 |

|      |     |     |      |       |       |
|------|-----|-----|------|-------|-------|
| TRUE | 1/1 | 1/1 | 4.26 | 5.59  | -2.51 |
| TRUE | 1/1 | 1/1 | 8.03 | 7.58  | 1.36  |
| TRUE | 1/1 | 1/1 | 8.03 | 7.58  | 1.36  |
| TRUE | 1/1 | 1/1 | 8.03 | 7.58  | 1.36  |
| TRUE | 1/1 | 1/1 | 8.03 | 7.58  | 1.36  |
| TRUE | 1/1 | 1/1 | 8.03 | 7.58  | 1.36  |
| TRUE | 1/1 | 1/1 | 8.03 | 7.58  | 1.36  |
| TRUE | 1/1 | 1/1 | 8.03 | 7.58  | 1.36  |
| TRUE | 1/1 | 1/1 | 8.03 | 7.58  | 1.36  |
| TRUE | 1/1 | 1/1 | 8.03 | 7.58  | 1.36  |
| TRUE | 1/1 | 1/1 | 8.03 | 7.58  | 1.36  |
| TRUE | 1/1 | 1/1 | 8.03 | 7.58  | 1.36  |
| TRUE | 1/1 | 1/1 | 4.45 | 5.44  | -1.99 |
| TRUE | 1/1 | 1/1 | 4.45 | 5.44  | -1.99 |
| TRUE | 1/1 | 1/1 | 4.45 | 5.44  | -1.99 |
| TRUE | 1/1 | 1/1 | 4.45 | 5.44  | -1.99 |
| TRUE | 1/1 | 1/1 | 4.45 | 5.44  | -1.99 |
| TRUE | 1/1 | 1/1 | 4.45 | 5.44  | -1.99 |
| TRUE | 1/1 | 1/1 | 4.45 | 5.44  | -1.99 |
| TRUE | 1/1 | 1/1 | 3.62 | 4.06  | -1.36 |
| TRUE | 1/1 | 1/1 | 3.62 | 4.06  | -1.36 |
| TRUE | 1/1 | 1/1 | 3.62 | 4.06  | -1.36 |
| TRUE | 1/1 | 1/1 | 7.35 | 7.67  | -1.25 |
| TRUE | 1/1 | 1/1 | 7.35 | 7.67  | -1.25 |
| TRUE | 1/1 | 1/1 | 7.35 | 7.67  | -1.25 |
| TRUE | 1/1 | 1/1 | 7.35 | 7.67  | -1.25 |
| TRUE | 1/1 | 1/1 | 7.35 | 7.67  | -1.25 |
| TRUE | 1/1 | 1/1 | 7.35 | 7.67  | -1.25 |
| TRUE | 1/1 | 1/1 | 7.35 | 7.67  | -1.25 |
| TRUE | 1/1 | 1/1 | 7.35 | 7.67  | -1.25 |
| TRUE | 1/1 | 1/1 | 9.22 | 10.42 | -2.3  |
| TRUE | 1/1 | 1/1 | 9.22 | 10.42 | -2.3  |
| TRUE | 1/1 | 1/1 | 9.22 | 10.42 | -2.3  |
| TRUE | 1/1 | 1/1 | 9.22 | 10.42 | -2.3  |
| TRUE | 1/1 | 1/1 | 9.22 | 10.42 | -2.3  |
| TRUE | 1/1 | 1/1 | 9.22 | 10.42 | -2.3  |
| TRUE | 1/1 | 1/1 | 8.21 | 8.53  | -1.25 |
| TRUE | 1/1 | 1/1 | 8.21 | 8.53  | -1.25 |
| TRUE | 1/1 | 1/1 | 9.65 | 10.47 | -1.77 |
| TRUE | 1/1 | 1/1 | 9.65 | 10.47 | -1.77 |
| TRUE | 1/1 | 1/1 | 9.65 | 10.47 | -1.77 |
| TRUE | 1/1 | 1/1 | 9.65 | 10.47 | -1.77 |
| TRUE | 1/1 | 1/1 | 9.65 | 10.47 | -1.77 |
| TRUE | 1/1 | 1/1 | 9.65 | 10.47 | -1.77 |
| TRUE | 1/1 | 1/1 | 9.65 | 10.47 | -1.77 |
| TRUE | 1/1 | 1/1 | 9.65 | 10.47 | -1.77 |
| TRUE | 1/1 | 1/1 | 9.65 | 10.47 | -1.77 |
| TRUE | 1/1 | 1/1 | 9.65 | 10.47 | -1.77 |
| TRUE | 1/1 | 1/1 | 9.65 | 10.47 | -1.77 |
| TRUE | 1/1 | 1/1 | 9.65 | 10.47 | -1.77 |
| TRUE | 1/1 | 1/1 | 9.65 | 10.47 | -1.77 |
| TRUE | 1/1 | 1/1 | 9.65 | 10.47 | -1.77 |
| TRUE | 1/1 | 1/1 | 9.65 | 10.47 | -1.77 |
| TRUE | 1/1 | 1/1 | 9.65 | 10.47 | -1.77 |
| TRUE | 1/1 | 1/1 | 9.65 | 10.47 | -1.77 |
| TRUE | 1/1 | 1/1 | 9.65 | 10.47 | -1.77 |
| TRUE | 1/1 | 1/1 | 9.65 | 10.47 | -1.77 |
| TRUE | 1/1 | 1/1 | 9.65 | 10.47 | -1.77 |
| TRUE | 1/1 | 1/1 | 9.65 | 10.47 | -1.77 |
| TRUE | 1/1 | 1/1 | 9.65 | 10.47 | -1.77 |
| TRUE | 1/1 | 1/1 | 9.65 | 10.47 | -1.77 |
| TRUE | 1/1 | 1/1 | 8.14 | 8.38  | -1.18 |
| TRUE | 1/1 | 1/1 | 8.14 | 8.38  | -1.18 |
| TRUE | 1/1 | 1/1 | 4.99 | 5.73  | -1.67 |
| TRUE | 1/1 | 1/1 | 4.99 | 5.73  | -1.67 |
| TRUE | 1/1 | 1/1 | 6.39 | 7.37  | -1.98 |
| TRUE | 1/1 | 1/1 | 6.39 | 7.37  | -1.98 |

|      |     |     |      |      |       |
|------|-----|-----|------|------|-------|
| TRUE | 1/1 | 1/1 | 6.39 | 7.37 | -1.98 |
| TRUE | 1/1 | 1/1 | 6.39 | 7.37 | -1.98 |
| TRUE | 1/1 | 1/1 | 6.39 | 7.37 | -1.98 |
| TRUE | 1/1 | 1/1 | 6.39 | 7.37 | -1.98 |
| TRUE | 1/1 | 1/1 | 6.39 | 7.37 | -1.98 |
| TRUE | 1/1 | 1/1 | 6.39 | 7.37 | -1.98 |
| TRUE | 1/1 | 1/1 | 6.39 | 7.37 | -1.98 |
| TRUE | 1/1 | 1/1 | 6.39 | 7.37 | -1.98 |
| TRUE | 1/1 | 1/1 | 6.39 | 7.37 | -1.98 |
| TRUE | 1/1 | 1/1 | 6.39 | 7.37 | -1.98 |
| TRUE | 1/1 | 1/1 | 6.39 | 7.37 | -1.98 |
| TRUE | 1/1 | 1/1 | 6.39 | 7.37 | -1.98 |
| TRUE | 1/1 | 1/1 | 6.39 | 7.37 | -1.98 |
| TRUE | 1/1 | 1/1 | 6.39 | 7.37 | -1.98 |
| TRUE | 1/1 | 1/1 | 6.39 | 7.37 | -1.98 |
| TRUE | 1/1 | 1/1 | 6.39 | 7.37 | -1.98 |
| TRUE | 1/1 | 1/1 | 5.37 | 5.57 | -1.15 |
| TRUE | 1/1 | 1/1 | 5.37 | 5.57 | -1.15 |
| TRUE | 1/1 | 1/1 | 6.83 | 7.47 | -1.56 |
| TRUE | 1/1 | 1/1 | 6.83 | 7.47 | -1.56 |
| TRUE | 1/1 | 1/1 | 6.83 | 7.47 | -1.56 |
| TRUE | 1/1 | 1/1 | 6.83 | 7.47 | -1.56 |
| TRUE | 1/1 | 1/1 | 5.75 | 6.38 | -1.55 |
| TRUE | 1/1 | 1/1 | 5.75 | 6.38 | -1.55 |
| TRUE | 1/1 | 1/1 | 5.75 | 6.38 | -1.55 |
| TRUE | 1/1 | 1/1 | 5.75 | 6.38 | -1.55 |
| TRUE | 1/1 | 1/1 | 5.75 | 6.38 | -1.55 |
| TRUE | 1/1 | 1/1 | 5.75 | 6.38 | -1.55 |
| TRUE | 1/1 | 1/1 | 5.75 | 6.38 | -1.55 |
| TRUE | 1/1 | 1/1 | 5.75 | 6.38 | -1.55 |
| TRUE | 1/1 | 1/1 | 9.3  | 9.96 | -1.58 |
| TRUE | 1/1 | 1/1 | 9.3  | 9.96 | -1.58 |
| TRUE | 1/1 | 1/1 | 9.3  | 9.96 | -1.58 |
| TRUE | 1/1 | 1/1 | 4.68 | 4.95 | -1.21 |
| TRUE | 1/1 | 1/1 | 4.68 | 4.95 | -1.21 |
| TRUE | 1/1 | 1/1 | 4.68 | 4.95 | -1.21 |
| TRUE | 1/1 | 1/1 | 4.68 | 4.95 | -1.21 |
| TRUE | 1/1 | 1/1 | 4.68 | 4.95 | -1.21 |
| TRUE | 1/1 | 1/1 | 4.68 | 4.95 | -1.21 |
| TRUE | 1/1 | 1/1 | 4.68 | 4.95 | -1.21 |
| TRUE | 1/1 | 1/1 | 4.68 | 4.95 | -1.21 |
| TRUE | 1/1 | 1/1 | 4.68 | 4.95 | -1.21 |
| TRUE | 1/1 | 1/1 | 4.68 | 4.95 | -1.21 |
| TRUE | 1/1 | 1/1 | 4.68 | 4.95 | -1.21 |
| TRUE | 1/1 | 1/1 | 4.68 | 4.95 | -1.21 |
| TRUE | 1/1 | 1/1 | 4.68 | 4.95 | -1.21 |
| TRUE | 1/1 | 1/1 | 4.68 | 4.95 | -1.21 |
| TRUE | 1/1 | 1/1 | 7.74 | 8.3  | -1.47 |
| TRUE | 1/1 | 1/1 | 7.74 | 8.3  | -1.47 |
| TRUE | 1/1 | 1/1 | 7.74 | 8.3  | -1.47 |
| TRUE | 1/1 | 1/1 | 7.74 | 8.3  | -1.47 |
| TRUE | 1/1 | 1/1 | 2.96 | 3.29 | -1.26 |
| TRUE | 1/1 | 1/1 | 2.96 | 3.29 | -1.26 |
| TRUE | 1/1 | 1/1 | 2.96 | 3.29 | -1.26 |
| TRUE | 1/1 | 1/1 | 3.07 | 3.46 | -1.31 |
| TRUE | 1/1 | 1/1 | 3.07 | 3.46 | -1.31 |
| TRUE | 1/1 | 1/1 | 3.07 | 3.46 | -1.31 |
| TRUE | 1/1 | 1/1 | 5.68 | 5.46 | 1.17  |
| TRUE | 1/1 | 1/1 | 5.68 | 5.46 | 1.17  |
| TRUE | 1/1 | 1/1 | 5.68 | 5.46 | 1.17  |
| TRUE | 1/1 | 1/1 | 5.68 | 5.46 | 1.17  |
| TRUE | 1/1 | 1/1 | 5.45 | 6.05 | -1.52 |
| TRUE | 1/1 | 1/1 | 5.45 | 6.05 | -1.52 |
| TRUE | 1/1 | 1/1 | 3.25 | 3.48 | -1.18 |
| TRUE | 1/1 | 1/1 | 3.25 | 3.48 | -1.18 |







|      |     |     |       |       |       |
|------|-----|-----|-------|-------|-------|
| TRUE | 1/1 | 1/1 | 5.76  | 6.41  | -1.57 |
| TRUE | 1/1 | 1/1 | 5.76  | 6.41  | -1.57 |
| TRUE | 1/1 | 1/1 | 5.76  | 6.41  | -1.57 |
| TRUE | 1/1 | 1/1 | 5.76  | 6.41  | -1.57 |
| TRUE | 1/1 | 1/1 | 5.76  | 6.41  | -1.57 |
| TRUE | 1/1 | 1/1 | 5.76  | 6.41  | -1.57 |
| TRUE | 1/1 | 1/1 | 3.85  | 4.82  | -1.96 |
| TRUE | 1/1 | 1/1 | 3.85  | 4.82  | -1.96 |
| TRUE | 1/1 | 1/1 | 6.9   | 7.18  | -1.21 |
| TRUE | 1/1 | 1/1 | 6.9   | 7.18  | -1.21 |
| TRUE | 1/1 | 1/1 | 6.9   | 7.18  | -1.21 |
| TRUE | 1/1 | 1/1 | 5.96  | 6.3   | -1.27 |
| TRUE | 1/1 | 1/1 | 5.96  | 6.3   | -1.27 |
| TRUE | 1/1 | 1/1 | 5.96  | 6.3   | -1.27 |
| TRUE | 1/1 | 1/1 | 4.21  | 3.99  | 1.16  |
| TRUE | 1/1 | 1/1 | 4.21  | 3.99  | 1.16  |
| TRUE | 1/1 | 1/1 | 6.04  | 6.11  | -1.05 |
| TRUE | 1/1 | 1/1 | 6.04  | 6.11  | -1.05 |
| TRUE | 1/1 | 1/1 | 6.04  | 6.11  | -1.05 |
| TRUE | 1/1 | 1/1 | 6.04  | 6.11  | -1.05 |
| TRUE | 1/1 | 1/1 | 6.04  | 6.11  | -1.05 |
| TRUE | 1/1 | 1/1 | 6.04  | 6.11  | -1.05 |
| TRUE | 1/1 | 1/1 | 10.34 | 10.01 | 1.25  |
| TRUE | 1/1 | 1/1 | 10.34 | 10.01 | 1.25  |
| TRUE | 1/1 | 1/1 | 10.34 | 10.01 | 1.25  |
| TRUE | 1/1 | 1/1 | 10.34 | 10.01 | 1.25  |
| TRUE | 1/1 | 1/1 | 10.34 | 10.01 | 1.25  |
| TRUE | 1/1 | 1/1 | 5.19  | 6.43  | -2.37 |
| TRUE | 1/1 | 1/1 | 5.19  | 6.43  | -2.37 |
| TRUE | 1/1 | 1/1 | 5.19  | 6.43  | -2.37 |
| TRUE | 1/1 | 1/1 | 5.19  | 6.43  | -2.37 |
| TRUE | 1/1 | 1/1 | 5.19  | 6.43  | -2.37 |
| TRUE | 1/1 | 1/1 | 5.19  | 6.43  | -2.37 |
| TRUE | 1/1 | 1/1 | 5.19  | 6.43  | -2.37 |
| TRUE | 1/1 | 1/1 | 5.19  | 6.43  | -2.37 |
| TRUE | 1/1 | 1/1 | 5.19  | 6.43  | -2.37 |
| TRUE | 1/1 | 1/1 | 5.19  | 6.43  | -2.37 |
| TRUE | 1/1 | 1/1 | 5.19  | 6.43  | -2.37 |
| TRUE | 1/1 | 1/1 | 5.19  | 6.43  | -2.37 |
| TRUE | 1/1 | 1/1 | 5.19  | 6.43  | -2.37 |
| TRUE | 1/1 | 1/1 | 5.19  | 6.43  | -2.37 |
| TRUE | 1/1 | 1/1 | 5.19  | 6.43  | -2.37 |
| TRUE | 1/1 | 1/1 | 5.19  | 6.43  | -2.37 |
| TRUE | 1/1 | 1/1 | 5.19  | 6.43  | -2.37 |
| TRUE | 1/1 | 1/1 | 5.19  | 6.43  | -2.37 |
| TRUE | 1/1 | 1/1 | 5.19  | 6.43  | -2.37 |
| TRUE | 1/1 | 1/1 | 5.19  | 6.43  | -2.37 |
| TRUE | 1/1 | 1/1 | 5.19  | 6.43  | -2.37 |
| TRUE | 1/1 | 1/1 | 5.19  | 6.43  | -2.37 |
| TRUE | 1/1 | 1/1 | 5.19  | 6.43  | -2.37 |
| TRUE | 1/1 | 1/1 | 5.19  | 6.43  | -2.37 |
| TRUE | 1/1 | 1/1 | 5.19  | 6.43  | -2.37 |
| TRUE | 1/1 | 1/1 | 5.19  | 6.43  | -2.37 |
| TRUE | 1/1 | 1/1 | 5.19  | 6.43  | -2.37 |
| TRUE | 1/1 | 1/1 | 5.62  | 6.66  | -2.06 |
| TRUE | 1/1 | 1/1 | 5.62  | 6.66  | -2.06 |
| TRUE | 1/1 | 1/1 | 5.62  | 6.66  | -2.06 |









|      |     |     |      |      |       |
|------|-----|-----|------|------|-------|
| TRUE | 1/1 | 1/1 | 5.49 | 6.24 | -1.68 |
| TRUE | 1/1 | 1/1 | 5.49 | 6.24 | -1.68 |
| TRUE | 1/1 | 1/1 | 5.49 | 6.24 | -1.68 |
| TRUE | 1/1 | 1/1 | 5.49 | 6.24 | -1.68 |
| TRUE | 1/1 | 1/1 | 5.49 | 6.24 | -1.68 |
| TRUE | 1/1 | 1/1 | 5.49 | 6.24 | -1.68 |
| TRUE | 1/1 | 1/1 | 5.49 | 6.24 | -1.68 |
| TRUE | 1/1 | 1/1 | 5.49 | 6.24 | -1.68 |
| TRUE | 1/1 | 1/1 | 5.49 | 6.24 | -1.68 |
| TRUE | 1/1 | 1/1 | 5.49 | 6.24 | -1.68 |
| TRUE | 1/1 | 1/1 | 5.49 | 6.24 | -1.68 |
| TRUE | 1/1 | 1/1 | 5.49 | 6.24 | -1.68 |
| TRUE | 1/1 | 1/1 | 5.49 | 6.24 | -1.68 |
| TRUE | 1/1 | 1/1 | 5.49 | 6.24 | -1.68 |
| TRUE | 1/1 | 1/1 | 5.49 | 6.24 | -1.68 |
| TRUE | 1/1 | 1/1 | 5.49 | 6.24 | -1.68 |
| TRUE | 1/1 | 1/1 | 5.49 | 6.24 | -1.68 |
| TRUE | 1/1 | 1/1 | 5.49 | 6.24 | -1.68 |
| TRUE | 1/1 | 1/1 | 7.4  | 7.67 | -1.21 |
| TRUE | 1/1 | 1/1 | 7.4  | 7.67 | -1.21 |
| TRUE | 1/1 | 1/1 | 7.4  | 7.67 | -1.21 |
| TRUE | 1/1 | 1/1 | 7.4  | 7.67 | -1.21 |
| TRUE | 1/1 | 1/1 | 7.4  | 7.67 | -1.21 |
| TRUE | 1/1 | 1/1 | 7.4  | 7.67 | -1.21 |
| TRUE | 1/1 | 1/1 | 7.4  | 7.67 | -1.21 |
| TRUE | 1/1 | 1/1 | 7.47 | 7.84 | -1.29 |
| TRUE | 1/1 | 1/1 | 7.47 | 7.84 | -1.29 |
| TRUE | 1/1 | 1/1 | 7.47 | 7.84 | -1.29 |
| TRUE | 1/1 | 1/1 | 7.47 | 7.84 | -1.29 |
| TRUE | 1/1 | 1/1 | 7.47 | 7.84 | -1.29 |
| TRUE | 1/1 | 1/1 | 7.47 | 7.84 | -1.29 |
| TRUE | 1/1 | 1/1 | 7.47 | 7.84 | -1.29 |
| TRUE | 1/1 | 1/1 | 7.47 | 7.84 | -1.29 |
| TRUE | 1/1 | 1/1 | 7.47 | 7.84 | -1.29 |
| TRUE | 1/1 | 1/1 | 7.47 | 7.84 | -1.29 |
| TRUE | 1/1 | 1/1 | 7.47 | 7.84 | -1.29 |
| TRUE | 1/1 | 1/1 | 7.47 | 7.84 | -1.29 |
| TRUE | 1/1 | 1/1 | 7.47 | 7.84 | -1.29 |
| TRUE | 1/1 | 1/1 | 8.86 | 9.17 | -1.24 |
| TRUE | 1/1 | 1/1 | 8.86 | 9.17 | -1.24 |
| TRUE | 1/1 | 1/1 | 8.86 | 9.17 | -1.24 |
| TRUE | 1/1 | 1/1 | 8.86 | 9.17 | -1.24 |
| TRUE | 1/1 | 1/1 | 7.17 | 7.77 | -1.52 |
| TRUE | 1/1 | 1/1 | 7.17 | 7.77 | -1.52 |
| TRUE | 1/1 | 1/1 | 7.59 | 7    | 1.51  |
| TRUE | 1/1 | 1/1 | 7.59 | 7    | 1.51  |
| TRUE | 1/1 | 1/1 | 7.59 | 7    | 1.51  |
| TRUE | 1/1 | 1/1 | 7.59 | 7    | 1.51  |
| TRUE | 1/1 | 1/1 | 7.63 | 7.58 | 1.04  |
| TRUE | 1/1 | 1/1 | 7.63 | 7.58 | 1.04  |
| TRUE | 1/1 | 1/1 | 7.63 | 7.58 | 1.04  |
| TRUE | 1/1 | 1/1 | 8.46 | 9.33 | -1.82 |
| TRUE | 1/1 | 1/1 | 8.46 | 9.33 | -1.82 |
| TRUE | 1/1 | 1/1 | 8.46 | 9.33 | -1.82 |
| TRUE | 1/1 | 1/1 | 8.46 | 9.33 | -1.82 |
| TRUE | 1/1 | 1/1 | 8.76 | 9.21 | -1.37 |
| TRUE | 1/1 | 1/1 | 8.76 | 9.21 | -1.37 |
| TRUE | 1/1 | 1/1 | 8.76 | 9.21 | -1.37 |
| TRUE | 1/1 | 1/1 | 5.29 | 6.11 | -1.76 |
| TRUE | 1/1 | 1/1 | 5.29 | 6.11 | -1.76 |
| TRUE | 1/1 | 1/1 | 5.29 | 6.11 | -1.76 |
| TRUE | 1/1 | 1/1 | 5.95 | 5.59 | 1.28  |

















|      |     |     |       |       |       |
|------|-----|-----|-------|-------|-------|
| TRUE | 1/1 | 1/1 | 7.61  | 8.43  | -1.77 |
| TRUE | 1/1 | 1/1 | 8.38  | 8.65  | -1.21 |
| TRUE | 1/1 | 1/1 | 8.38  | 8.65  | -1.21 |
| TRUE | 1/1 | 1/1 | 8.38  | 8.65  | -1.21 |
| TRUE | 1/1 | 1/1 | 8.06  | 8.91  | -1.81 |
| TRUE | 1/1 | 1/1 | 8.06  | 8.91  | -1.81 |
| TRUE | 1/1 | 1/1 | 8.06  | 8.91  | -1.81 |
| TRUE | 1/1 | 1/1 | 8.06  | 8.91  | -1.81 |
| TRUE | 1/1 | 1/1 | 8.06  | 8.91  | -1.81 |
| TRUE | 1/1 | 1/1 | 8.06  | 8.91  | -1.81 |
| TRUE | 1/1 | 1/1 | 8.06  | 8.91  | -1.81 |
| TRUE | 1/1 | 1/1 | 8.09  | 8.72  | -1.55 |
| TRUE | 1/1 | 1/1 | 8.09  | 8.72  | -1.55 |
| TRUE | 1/1 | 1/1 | 8.66  | 8.99  | -1.26 |
| TRUE | 1/1 | 1/1 | 8.66  | 8.99  | -1.26 |
| TRUE | 1/1 | 1/1 | 8.66  | 8.99  | -1.26 |
| TRUE | 1/1 | 1/1 | 6.06  | 6.66  | -1.52 |
| TRUE | 1/1 | 1/1 | 6.06  | 6.66  | -1.52 |
| TRUE | 1/1 | 1/1 | 6.06  | 6.66  | -1.52 |
| TRUE | 1/1 | 1/1 | 6.06  | 6.66  | -1.52 |
| TRUE | 1/1 | 1/1 | 6.06  | 6.66  | -1.52 |
| TRUE | 1/1 | 1/1 | 12.4  | 10.11 | 4.88  |
| TRUE | 1/1 | 1/1 | 12.4  | 10.11 | 4.88  |
| TRUE | 1/1 | 1/1 | 12.4  | 10.11 | 4.88  |
| TRUE | 1/1 | 1/1 | 12.4  | 10.11 | 4.88  |
| TRUE | 1/1 | 1/1 | 12.4  | 10.11 | 4.88  |
| TRUE | 1/1 | 1/1 | 12.4  | 10.11 | 4.88  |
| TRUE | 1/1 | 1/1 | 12.4  | 10.11 | 4.88  |
| TRUE | 1/1 | 1/1 | 12.4  | 10.11 | 4.88  |
| TRUE | 1/1 | 1/1 | 12.4  | 10.11 | 4.88  |
| TRUE | 1/1 | 1/1 | 12.4  | 10.11 | 4.88  |
| TRUE | 1/1 | 1/1 | 12.4  | 10.11 | 4.88  |
| TRUE | 1/1 | 1/1 | 7.54  | 8.58  | -2.05 |
| TRUE | 1/1 | 1/1 | 7.54  | 8.58  | -2.05 |
| TRUE | 1/1 | 1/1 | 7.54  | 8.58  | -2.05 |
| TRUE | 1/1 | 1/1 | 7.54  | 8.58  | -2.05 |
| TRUE | 1/1 | 1/1 | 7.54  | 8.58  | -2.05 |
| TRUE | 1/1 | 1/1 | 7.54  | 8.58  | -2.05 |
| TRUE | 1/1 | 1/1 | 7.54  | 8.58  | -2.05 |
| TRUE | 1/1 | 1/1 | 7.54  | 8.58  | -2.05 |
| TRUE | 1/1 | 1/1 | 7.54  | 8.58  | -2.05 |
| TRUE | 1/1 | 1/1 | 7.54  | 8.58  | -2.05 |
| TRUE | 1/1 | 1/1 | 7.54  | 8.58  | -2.05 |
| TRUE | 1/1 | 1/1 | 7.54  | 8.58  | -2.05 |
| TRUE | 1/1 | 1/1 | 7.54  | 8.58  | -2.05 |
| TRUE | 1/1 | 1/1 | 7.54  | 8.58  | -2.05 |
| TRUE | 1/1 | 1/1 | 7.54  | 8.58  | -2.05 |
| TRUE | 1/1 | 1/1 | 7.54  | 8.58  | -2.05 |
| TRUE | 1/1 | 1/1 | 7.54  | 8.58  | -2.05 |
| TRUE | 1/1 | 1/1 | 7.54  | 8.58  | -2.05 |
| TRUE | 1/1 | 1/1 | 6.06  | 6.22  | -1.12 |
| TRUE | 1/1 | 1/1 | 6.06  | 6.22  | -1.12 |
| TRUE | 1/1 | 1/1 | 3.72  | 4.74  | -2.04 |
| TRUE | 1/1 | 1/1 | 3.72  | 4.74  | -2.04 |
| TRUE | 1/1 | 1/1 | 3.72  | 4.74  | -2.04 |
| TRUE | 1/1 | 1/1 | 3.72  | 4.74  | -2.04 |
| TRUE | 1/1 | 1/1 | 3.72  | 4.74  | -2.04 |
| TRUE | 1/1 | 1/1 | 3.72  | 4.74  | -2.04 |
| TRUE | 1/1 | 1/1 | 3.72  | 4.74  | -2.04 |
| TRUE | 1/1 | 1/1 | 3.72  | 4.74  | -2.04 |
| TRUE | 1/1 | 1/1 | 3.72  | 4.74  | -2.04 |
| TRUE | 1/1 | 1/1 | 6.93  | 6.82  | 1.08  |
| TRUE | 1/1 | 1/1 | 6.93  | 6.82  | 1.08  |
| TRUE | 1/1 | 1/1 | 10.16 | 10.67 | -1.42 |
| TRUE | 1/1 | 1/1 | 10.16 | 10.67 | -1.42 |
| TRUE | 1/1 | 1/1 | 10.16 | 10.67 | -1.42 |





|      |     |     |       |      |       |
|------|-----|-----|-------|------|-------|
| TRUE | 1/1 | 1/1 | 5.1   | 4.5  | 1.52  |
| TRUE | 1/1 | 1/1 | 5.1   | 4.5  | 1.52  |
| TRUE | 1/1 | 1/1 | 5.1   | 4.5  | 1.52  |
| TRUE | 1/1 | 1/1 | 8.08  | 8.43 | -1.27 |
| TRUE | 1/1 | 1/1 | 8.08  | 8.43 | -1.27 |
| TRUE | 1/1 | 1/1 | 8.08  | 8.43 | -1.27 |
| TRUE | 1/1 | 1/1 | 8.08  | 8.43 | -1.27 |
| TRUE | 1/1 | 1/1 | 8.08  | 8.43 | -1.27 |
| TRUE | 1/1 | 1/1 | 8.08  | 8.43 | -1.27 |
| TRUE | 1/1 | 1/1 | 8.08  | 8.43 | -1.27 |
| TRUE | 1/1 | 1/1 | 8.08  | 8.43 | -1.27 |
| TRUE | 1/1 | 1/1 | 8.08  | 8.43 | -1.27 |
| TRUE | 1/1 | 1/1 | 8.08  | 8.43 | -1.27 |
| TRUE | 1/1 | 1/1 | 8.08  | 8.43 | -1.27 |
| TRUE | 1/1 | 1/1 | 8.08  | 8.43 | -1.27 |
| TRUE | 1/1 | 1/1 | 8.23  | 8.47 | -1.18 |
| TRUE | 1/1 | 1/1 | 8.23  | 8.47 | -1.18 |
| TRUE | 1/1 | 1/1 | 8.23  | 8.47 | -1.18 |
| TRUE | 1/1 | 1/1 | 8.23  | 8.47 | -1.18 |
| TRUE | 1/1 | 1/1 | 8.23  | 8.47 | -1.18 |
| TRUE | 1/1 | 1/1 | 8.23  | 8.47 | -1.18 |
| TRUE | 1/1 | 1/1 | 5.9   | 5.39 | 1.42  |
| TRUE | 1/1 | 1/1 | 5.9   | 5.39 | 1.42  |
| TRUE | 1/1 | 1/1 | 5.9   | 5.39 | 1.42  |
| TRUE | 1/1 | 1/1 | 5.9   | 5.39 | 1.42  |
| TRUE | 1/1 | 1/1 | 5.46  | 6.16 | -1.63 |
| TRUE | 1/1 | 1/1 | 5.46  | 6.16 | -1.63 |
| TRUE | 1/1 | 1/1 | 5.46  | 6.16 | -1.63 |
| TRUE | 1/1 | 1/1 | 5.46  | 6.16 | -1.63 |
| TRUE | 1/1 | 1/1 | 5.46  | 6.16 | -1.63 |
| TRUE | 1/1 | 1/1 | 5.46  | 6.16 | -1.63 |
| TRUE | 1/1 | 1/1 | 5.46  | 6.16 | -1.63 |
| TRUE | 1/1 | 1/1 | 5.46  | 6.16 | -1.63 |
| TRUE | 1/1 | 1/1 | 5.84  | 5.93 | -1.07 |
| TRUE | 1/1 | 1/1 | 5.84  | 5.93 | -1.07 |
| TRUE | 1/1 | 1/1 | 5.84  | 5.93 | -1.07 |
| TRUE | 1/1 | 1/1 | 7.26  | 7.78 | -1.44 |
| TRUE | 1/1 | 1/1 | 7.26  | 7.78 | -1.44 |
| TRUE | 1/1 | 1/1 | 7.26  | 7.78 | -1.44 |
| TRUE | 1/1 | 1/1 | 7.26  | 7.78 | -1.44 |
| TRUE | 1/1 | 1/1 | 7.26  | 7.78 | -1.44 |
| TRUE | 1/1 | 1/1 | 12.45 | 11.9 | 1.47  |
| TRUE | 1/1 | 1/1 | 12.45 | 11.9 | 1.47  |
| TRUE | 1/1 | 1/1 | 12.45 | 11.9 | 1.47  |
| TRUE | 1/1 | 1/1 | 12.45 | 11.9 | 1.47  |
| TRUE | 1/1 | 1/1 | 12.45 | 11.9 | 1.47  |
| TRUE | 1/1 | 1/1 | 3.88  | 3.86 | 1.01  |
| TRUE | 1/1 | 1/1 | 3.88  | 3.86 | 1.01  |
| TRUE | 1/1 | 1/1 | 3.88  | 3.86 | 1.01  |
| TRUE | 1/1 | 1/1 | 3.88  | 3.86 | 1.01  |
| TRUE | 1/1 | 1/1 | 3.88  | 3.86 | 1.01  |
| TRUE | 1/1 | 1/1 | 7.47  | 7.77 | -1.23 |
| TRUE | 1/1 | 1/1 | 7.47  | 7.77 | -1.23 |
| TRUE | 1/1 | 1/1 | 7.47  | 7.77 | -1.23 |
| TRUE | 1/1 | 1/1 | 7.47  | 7.77 | -1.23 |
| TRUE | 1/1 | 1/1 | 7.47  | 7.77 | -1.23 |
| TRUE | 1/1 | 1/1 | 7.47  | 7.77 | -1.23 |
| TRUE | 1/1 | 1/1 | 4.21  | 3.07 | 2.2   |
| TRUE | 1/1 | 1/1 | 4.21  | 3.07 | 2.2   |
| TRUE | 1/1 | 1/1 | 4.21  | 3.07 | 2.2   |
| TRUE | 1/1 | 1/1 | 4.21  | 3.07 | 2.2   |



















|      |     |     |      |       |       |
|------|-----|-----|------|-------|-------|
| TRUE | 1/1 | 1/1 | 6.25 | 5.74  | 1.42  |
| TRUE | 1/1 | 1/1 | 6.25 | 5.74  | 1.42  |
| TRUE | 1/1 | 1/1 | 6.25 | 5.74  | 1.42  |
| TRUE | 1/1 | 1/1 | 6.3  | 8.01  | -3.26 |
| TRUE | 1/1 | 1/1 | 6.3  | 8.01  | -3.26 |
| TRUE | 1/1 | 1/1 | 6.3  | 8.01  | -3.26 |
| TRUE | 1/1 | 1/1 | 6.3  | 8.01  | -3.26 |
| TRUE | 1/1 | 1/1 | 6.3  | 8.01  | -3.26 |
| TRUE | 1/1 | 1/1 | 6.3  | 8.01  | -3.26 |
| TRUE | 1/1 | 1/1 | 6.3  | 8.01  | -3.26 |
| TRUE | 1/1 | 1/1 | 7.13 | 7.22  | -1.06 |
| TRUE | 1/1 | 1/1 | 7.13 | 7.22  | -1.06 |
| TRUE | 1/1 | 1/1 | 7.13 | 7.22  | -1.06 |
| TRUE | 1/1 | 1/1 | 7.13 | 7.22  | -1.06 |
| TRUE | 1/1 | 1/1 | 6.86 | 7.08  | -1.17 |
| TRUE | 1/1 | 1/1 | 6.86 | 7.08  | -1.17 |
| TRUE | 1/1 | 1/1 | 5.1  | 5.77  | -1.59 |
| TRUE | 1/1 | 1/1 | 5.1  | 5.77  | -1.59 |
| TRUE | 1/1 | 1/1 | 5.1  | 5.77  | -1.59 |
| TRUE | 1/1 | 1/1 | 5.1  | 5.77  | -1.59 |
| TRUE | 1/1 | 1/1 | 6.76 | 7.15  | -1.31 |
| TRUE | 1/1 | 1/1 | 6.76 | 7.15  | -1.31 |
| TRUE | 1/1 | 1/1 | 6.76 | 7.15  | -1.31 |
| TRUE | 1/1 | 1/1 | 6.76 | 7.15  | -1.31 |
| TRUE | 1/1 | 1/1 | 6.76 | 7.15  | -1.31 |
| TRUE | 1/1 | 1/1 | 9.36 | 10.68 | -2.49 |
| TRUE | 1/1 | 1/1 | 9.36 | 10.68 | -2.49 |
| TRUE | 1/1 | 1/1 | 9.36 | 10.68 | -2.49 |
| TRUE | 1/1 | 1/1 | 9.36 | 10.68 | -2.49 |
| TRUE | 1/1 | 1/1 | 9.36 | 10.68 | -2.49 |
| TRUE | 1/1 | 1/1 | 9.36 | 10.68 | -2.49 |
| TRUE | 1/1 | 1/1 | 9.36 | 10.68 | -2.49 |
| TRUE | 1/1 | 1/1 | 9.36 | 10.68 | -2.49 |
| TRUE | 1/1 | 1/1 | 5.82 | 5.05  | 1.71  |
| TRUE | 1/1 | 1/1 | 5.82 | 5.05  | 1.71  |
| TRUE | 1/1 | 1/1 | 5.82 | 5.05  | 1.71  |
| TRUE | 1/1 | 1/1 | 6.21 | 6.08  | 1.09  |
| TRUE | 1/1 | 1/1 | 6.21 | 6.08  | 1.09  |
| TRUE | 1/1 | 1/1 | 5.49 | 4.43  | 2.08  |
| TRUE | 1/1 | 1/1 | 5.49 | 4.43  | 2.08  |
| TRUE | 1/1 | 1/1 | 5.49 | 4.43  | 2.08  |
| TRUE | 1/1 | 1/1 | 5.33 | 4.3   | 2.04  |
| TRUE | 1/1 | 1/1 | 5.33 | 4.3   | 2.04  |
| TRUE | 1/1 | 1/1 | 5.33 | 4.3   | 2.04  |
| TRUE | 1/1 | 1/1 | 2.94 | 3.46  | -1.43 |
| TRUE | 1/1 | 1/1 | 2.94 | 3.46  | -1.43 |
| TRUE | 1/1 | 1/1 | 6.59 | 6.48  | 1.08  |
| TRUE | 1/1 | 1/1 | 6.59 | 6.48  | 1.08  |
| TRUE | 1/1 | 1/1 | 6.59 | 6.48  | 1.08  |
| TRUE | 1/1 | 1/1 | 6.59 | 6.48  | 1.08  |
| TRUE | 1/1 | 1/1 | 6.59 | 6.48  | 1.08  |
| TRUE | 1/1 | 1/1 | 7.42 | 6.3   | 2.17  |
| TRUE | 1/1 | 1/1 | 7.42 | 6.3   | 2.17  |
| TRUE | 1/1 | 1/1 | 7.42 | 6.3   | 2.17  |
| TRUE | 1/1 | 1/1 | 7.42 | 6.3   | 2.17  |
| TRUE | 1/1 | 1/1 | 6.1  | 7.31  | -2.32 |
| TRUE | 1/1 | 1/1 | 6.1  | 7.31  | -2.32 |
| TRUE | 1/1 | 1/1 | 6.1  | 7.31  | -2.32 |
| TRUE | 1/1 | 1/1 | 6.1  | 7.31  | -2.32 |









|      |     |     |      |       |       |
|------|-----|-----|------|-------|-------|
| TRUE | 1/1 | 1/1 | 6.9  | 8.26  | -2.56 |
| TRUE | 1/1 | 1/1 | 6.9  | 8.26  | -2.56 |
| TRUE | 1/1 | 1/1 | 6.9  | 8.26  | -2.56 |
| TRUE | 1/1 | 1/1 | 6.9  | 8.26  | -2.56 |
| TRUE | 1/1 | 1/1 | 5.55 | 5.69  | -1.1  |
| TRUE | 1/1 | 1/1 | 5.55 | 5.69  | -1.1  |
| TRUE | 1/1 | 1/1 | 5.55 | 5.69  | -1.1  |
| TRUE | 1/1 | 1/1 | 5.55 | 5.69  | -1.1  |
| TRUE | 1/1 | 1/1 | 5.55 | 5.69  | -1.1  |
| TRUE | 1/1 | 1/1 | 5.55 | 5.69  | -1.1  |
| TRUE | 1/1 | 1/1 | 7.22 | 8.61  | -2.63 |
| TRUE | 1/1 | 1/1 | 7.22 | 8.61  | -2.63 |
| TRUE | 1/1 | 1/1 | 7.22 | 8.61  | -2.63 |
| TRUE | 1/1 | 1/1 | 8.17 | 8.13  | 1.03  |
| TRUE | 1/1 | 1/1 | 8.17 | 8.13  | 1.03  |
| TRUE | 1/1 | 1/1 | 8.17 | 8.13  | 1.03  |
| TRUE | 1/1 | 1/1 | 8.17 | 8.13  | 1.03  |
| TRUE | 1/1 | 1/1 | 8.17 | 8.13  | 1.03  |
| TRUE | 1/1 | 1/1 | 5.7  | 5.83  | -1.1  |
| TRUE | 1/1 | 1/1 | 5.7  | 5.83  | -1.1  |
| TRUE | 1/1 | 1/1 | 5.7  | 5.83  | -1.1  |
| TRUE | 1/1 | 1/1 | 5.7  | 5.83  | -1.1  |
| TRUE | 1/1 | 1/1 | 5.7  | 5.83  | -1.1  |
| TRUE | 1/1 | 1/1 | 5.7  | 5.83  | -1.1  |
| TRUE | 1/1 | 1/1 | 5.7  | 5.83  | -1.1  |
| TRUE | 1/1 | 1/1 | 9.81 | 10.11 | -1.23 |
| TRUE | 1/1 | 1/1 | 9.81 | 10.11 | -1.23 |
| TRUE | 1/1 | 1/1 | 9.81 | 10.11 | -1.23 |
| TRUE | 1/1 | 1/1 | 9.81 | 10.11 | -1.23 |
| TRUE | 1/1 | 1/1 | 5.27 | 5.7   | -1.34 |
| TRUE | 1/1 | 1/1 | 5.27 | 5.7   | -1.34 |
| TRUE | 1/1 | 1/1 | 5.27 | 5.7   | -1.34 |
| TRUE | 1/1 | 1/1 | 5.27 | 5.7   | -1.34 |
| TRUE | 1/1 | 1/1 | 5.27 | 5.7   | -1.34 |
| TRUE | 1/1 | 1/1 | 5.27 | 5.7   | -1.34 |
| TRUE | 1/1 | 1/1 | 5.27 | 5.7   | -1.34 |
| TRUE | 1/1 | 1/1 | 5.27 | 5.7   | -1.34 |
| TRUE | 1/1 | 1/1 | 5.27 | 5.7   | -1.34 |
| TRUE | 1/1 | 1/1 | 5.27 | 5.7   | -1.34 |
| TRUE | 1/1 | 1/1 | 5.27 | 5.7   | -1.34 |
| TRUE | 1/1 | 1/1 | 5.5  | 6.65  | -2.22 |
| TRUE | 1/1 | 1/1 | 5.5  | 6.65  | -2.22 |
| TRUE | 1/1 | 1/1 | 5.5  | 6.65  | -2.22 |
| TRUE | 1/1 | 1/1 | 5.5  | 6.65  | -2.22 |
| TRUE | 1/1 | 1/1 | 5.5  | 6.65  | -2.22 |
| TRUE | 1/1 | 1/1 | 5.5  | 6.65  | -2.22 |
| TRUE | 1/1 | 1/1 | 5.5  | 6.65  | -2.22 |
| TRUE | 1/1 | 1/1 | 4.79 | 5     | -1.16 |
| TRUE | 1/1 | 1/1 | 4.79 | 5     | -1.16 |
| TRUE | 1/1 | 1/1 | 6.94 | 6.28  | 1.58  |
| TRUE | 1/1 | 1/1 | 6.94 | 6.28  | 1.58  |
| TRUE | 1/1 | 1/1 | 6.94 | 6.28  | 1.58  |
| TRUE | 1/1 | 1/1 | 6.88 | 6.02  | 1.81  |
| TRUE | 1/1 | 1/1 | 6.88 | 6.02  | 1.81  |
| TRUE | 1/1 | 1/1 | 6.88 | 6.02  | 1.81  |
| TRUE | 1/1 | 1/1 | 6.88 | 6.02  | 1.81  |
| TRUE | 1/1 | 1/1 | 6.88 | 6.02  | 1.81  |
| TRUE | 1/1 | 1/1 | 6.88 | 6.02  | 1.81  |
| TRUE | 1/1 | 1/1 | 5.62 | 4.51  | 2.16  |
| TRUE | 1/1 | 1/1 | 5.62 | 4.51  | 2.16  |
| TRUE | 1/1 | 1/1 | 5.62 | 4.51  | 2.16  |





|      |     |     |       |       |       |
|------|-----|-----|-------|-------|-------|
| TRUE | 1/1 | 1/1 | 8.55  | 10.32 | -3.43 |
| TRUE | 1/1 | 1/1 | 8.55  | 10.32 | -3.43 |
| TRUE | 1/1 | 1/1 | 8.09  | 7.31  | 1.72  |
| TRUE | 1/1 | 1/1 | 8.09  | 7.31  | 1.72  |
| TRUE | 1/1 | 1/1 | 8.09  | 7.31  | 1.72  |
| TRUE | 1/1 | 1/1 | 8.09  | 7.31  | 1.72  |
| TRUE | 1/1 | 1/1 | 8.09  | 7.31  | 1.72  |
| TRUE | 1/1 | 1/1 | 6.43  | 7.28  | -1.8  |
| TRUE | 1/1 | 1/1 | 6.43  | 7.28  | -1.8  |
| TRUE | 1/1 | 1/1 | 6.43  | 7.28  | -1.8  |
| TRUE | 1/1 | 1/1 | 6.43  | 7.28  | -1.8  |
| TRUE | 1/1 | 1/1 | 6.43  | 7.28  | -1.8  |
| TRUE | 1/1 | 1/1 | 6.43  | 7.28  | -1.8  |
| TRUE | 1/1 | 1/1 | 6.43  | 7.28  | -1.8  |
| TRUE | 1/1 | 1/1 | 6.43  | 7.28  | -1.8  |
| TRUE | 1/1 | 1/1 | 10.26 | 11.69 | -2.69 |
| TRUE | 1/1 | 1/1 | 10.26 | 11.69 | -2.69 |
| TRUE | 1/1 | 1/1 | 10.26 | 11.69 | -2.69 |
| TRUE | 1/1 | 1/1 | 10.26 | 11.69 | -2.69 |
| TRUE | 1/1 | 1/1 | 10.26 | 11.69 | -2.69 |
| TRUE | 1/1 | 1/1 | 10.26 | 11.69 | -2.69 |
| TRUE | 1/1 | 1/1 | 10.26 | 11.69 | -2.69 |
| TRUE | 1/1 | 1/1 | 10.26 | 11.69 | -2.69 |
| TRUE | 1/1 | 1/1 | 5.91  | 6.1   | -1.14 |
| TRUE | 1/1 | 1/1 | 5.91  | 6.1   | -1.14 |
| TRUE | 1/1 | 1/1 | 5.91  | 6.1   | -1.14 |
| TRUE | 1/1 | 1/1 | 5.91  | 6.1   | -1.14 |
| TRUE | 1/1 | 1/1 | 5.91  | 6.1   | -1.14 |
| TRUE | 1/1 | 1/1 | 5.91  | 6.1   | -1.14 |
| TRUE | 1/1 | 1/1 | 5.91  | 6.1   | -1.14 |
| TRUE | 1/1 | 1/1 | 5.91  | 6.1   | -1.14 |
| TRUE | 1/1 | 1/1 | 4.82  | 5.85  | -2.04 |
| TRUE | 1/1 | 1/1 | 4.82  | 5.85  | -2.04 |
| TRUE | 1/1 | 1/1 | 4.82  | 5.85  | -2.04 |
| TRUE | 1/1 | 1/1 | 4.82  | 5.85  | -2.04 |
| TRUE | 1/1 | 1/1 | 4.82  | 5.85  | -2.04 |
| TRUE | 1/1 | 1/1 | 4.4   | 3.84  | 1.48  |
| TRUE | 1/1 | 1/1 | 4.4   | 3.84  | 1.48  |
| TRUE | 1/1 | 1/1 | 4.4   | 3.84  | 1.48  |
| TRUE | 1/1 | 1/1 | 4.4   | 3.84  | 1.48  |
| TRUE | 1/1 | 1/1 | 4.4   | 3.84  | 1.48  |
| TRUE | 1/1 | 1/1 | 4.4   | 3.84  | 1.48  |
| TRUE | 1/1 | 1/1 | 3.13  | 4.62  | -2.81 |
| TRUE | 1/1 | 1/1 | 3.13  | 4.62  | -2.81 |
| TRUE | 1/1 | 1/1 | 3.13  | 4.62  | -2.81 |
| TRUE | 1/1 | 1/1 | 3.13  | 4.62  | -2.81 |
| TRUE | 1/1 | 1/1 | 12.8  | 12.9  | -1.07 |
| TRUE | 1/1 | 1/1 | 12.8  | 12.9  | -1.07 |
| TRUE | 1/1 | 1/1 | 12.8  | 12.9  | -1.07 |
| TRUE | 1/1 | 1/1 | 12.8  | 12.9  | -1.07 |
| TRUE | 1/1 | 1/1 | 12.8  | 12.9  | -1.07 |
| TRUE | 1/1 | 1/1 | 5.88  | 6.11  | -1.17 |
| TRUE | 1/1 | 1/1 | 5.88  | 6.11  | -1.17 |
| TRUE | 1/1 | 1/1 | 5.88  | 6.11  | -1.17 |
| TRUE | 1/1 | 1/1 | 5.63  | 5.76  | -1.09 |
| TRUE | 1/1 | 1/1 | 5.63  | 5.76  | -1.09 |
| TRUE | 1/1 | 1/1 | 5.63  | 5.76  | -1.09 |
| TRUE | 1/1 | 1/1 | 5.63  | 5.76  | -1.09 |
| TRUE | 1/1 | 1/1 | 4.91  | 5.26  | -1.27 |
| TRUE | 1/1 | 1/1 | 4.91  | 5.26  | -1.27 |
| TRUE | 1/1 | 1/1 | 4.91  | 5.26  | -1.27 |
| TRUE | 1/1 | 1/1 | 4.91  | 5.26  | -1.27 |

|      |     |     |      |       |       |
|------|-----|-----|------|-------|-------|
| TRUE | 1/1 | 1/1 | 6.6  | 7.67  | -2.09 |
| TRUE | 1/1 | 1/1 | 6.6  | 7.67  | -2.09 |
| TRUE | 1/1 | 1/1 | 6.6  | 7.67  | -2.09 |
| TRUE | 1/1 | 1/1 | 6.6  | 7.67  | -2.09 |
| TRUE | 1/1 | 1/1 | 6.6  | 7.67  | -2.09 |
| TRUE | 1/1 | 1/1 | 6.6  | 7.67  | -2.09 |
| TRUE | 1/1 | 1/1 | 6.6  | 7.67  | -2.09 |
| TRUE | 1/1 | 1/1 | 6.6  | 7.67  | -2.09 |
| TRUE | 1/1 | 1/1 | 6.6  | 7.67  | -2.09 |
| TRUE | 1/1 | 1/1 | 6.6  | 7.67  | -2.09 |
| TRUE | 1/1 | 1/1 | 6.6  | 7.67  | -2.09 |
| TRUE | 1/1 | 1/1 | 5.53 | 5.53  | 1     |
| TRUE | 1/1 | 1/1 | 5.53 | 5.53  | 1     |
| TRUE | 1/1 | 1/1 | 5.53 | 5.53  | 1     |
| TRUE | 1/1 | 1/1 | 7.99 | 7.22  | 1.7   |
| TRUE | 1/1 | 1/1 | 7.99 | 7.22  | 1.7   |
| TRUE | 1/1 | 1/1 | 7.99 | 7.22  | 1.7   |
| TRUE | 1/1 | 1/1 | 6.44 | 5.81  | 1.55  |
| TRUE | 1/1 | 1/1 | 6.44 | 5.81  | 1.55  |
| TRUE | 1/1 | 1/1 | 5.12 | 4.6   | 1.43  |
| TRUE | 1/1 | 1/1 | 5.12 | 4.6   | 1.43  |
| TRUE | 1/1 | 1/1 | 5.12 | 4.6   | 1.43  |
| TRUE | 1/1 | 1/1 | 8.94 | 10.35 | -2.66 |
| TRUE | 1/1 | 1/1 | 8.94 | 10.35 | -2.66 |
| TRUE | 1/1 | 1/1 | 8.94 | 10.35 | -2.66 |
| TRUE | 1/1 | 1/1 | 8.94 | 10.35 | -2.66 |
| TRUE | 1/1 | 1/1 | 8.94 | 10.35 | -2.66 |
| TRUE | 1/1 | 1/1 | 8.94 | 10.35 | -2.66 |
| TRUE | 1/1 | 1/1 | 8.94 | 10.35 | -2.66 |
| TRUE | 1/1 | 1/1 | 8.94 | 10.35 | -2.66 |
| TRUE | 1/1 | 1/1 | 8.94 | 10.35 | -2.66 |
| TRUE | 1/1 | 1/1 | 8.94 | 10.35 | -2.66 |
| TRUE | 1/1 | 1/1 | 8.94 | 10.35 | -2.66 |
| TRUE | 1/1 | 1/1 | 8.94 | 10.35 | -2.66 |
| TRUE | 1/1 | 1/1 | 8.94 | 10.35 | -2.66 |
| TRUE | 1/1 | 1/1 | 8.94 | 10.35 | -2.66 |
| TRUE | 1/1 | 1/1 | 7.07 | 7.31  | -1.18 |
| TRUE | 1/1 | 1/1 | 7.07 | 7.31  | -1.18 |
| TRUE | 1/1 | 1/1 | 7.07 | 7.31  | -1.18 |
| TRUE | 1/1 | 1/1 | 4.79 | 5.21  | -1.34 |
| TRUE | 1/1 | 1/1 | 4.79 | 5.21  | -1.34 |
| TRUE | 1/1 | 1/1 | 7.93 | 9.07  | -2.2  |
| TRUE | 1/1 | 1/1 | 7.93 | 9.07  | -2.2  |
| TRUE | 1/1 | 1/1 | 7.93 | 9.07  | -2.2  |
| TRUE | 1/1 | 1/1 | 7.93 | 9.07  | -2.2  |
| TRUE | 1/1 | 1/1 | 7.93 | 9.07  | -2.2  |
| TRUE | 1/1 | 1/1 | 7.93 | 9.07  | -2.2  |
| TRUE | 1/1 | 1/1 | 7.93 | 9.07  | -2.2  |
| TRUE | 1/1 | 1/1 | 7.93 | 9.07  | -2.2  |
| TRUE | 1/1 | 1/1 | 7.93 | 9.07  | -2.2  |
| TRUE | 1/1 | 1/1 | 9.74 | 8.73  | 2.02  |
| TRUE | 1/1 | 1/1 | 9.74 | 8.73  | 2.02  |
| TRUE | 1/1 | 1/1 | 9.74 | 8.73  | 2.02  |
| TRUE | 1/1 | 1/1 | 9.74 | 8.73  | 2.02  |
| TRUE | 1/1 | 1/1 | 9.74 | 8.73  | 2.02  |
| TRUE | 1/1 | 1/1 | 9.74 | 8.73  | 2.02  |
| TRUE | 1/1 | 1/1 | 9.74 | 8.73  | 2.02  |
| TRUE | 1/1 | 1/1 | 9.74 | 8.73  | 2.02  |
| TRUE | 1/1 | 1/1 | 9.74 | 8.73  | 2.02  |
| TRUE | 1/1 | 1/1 | 9.74 | 8.73  | 2.02  |
| TRUE | 1/1 | 1/1 | 9.74 | 8.73  | 2.02  |
| TRUE | 1/1 | 1/1 | 9.74 | 8.73  | 2.02  |
| TRUE | 1/1 | 1/1 | 9.74 | 8.73  | 2.02  |
| TRUE | 1/1 | 1/1 | 5.27 | 6.31  | -2.06 |
| TRUE | 1/1 | 1/1 | 5.27 | 6.31  | -2.06 |



|      |     |     |      |      |       |
|------|-----|-----|------|------|-------|
| TRUE | 1/1 | 1/1 | 7.51 | 8.7  | -2.28 |
| TRUE | 1/1 | 1/1 | 5.31 | 5.25 | 1.04  |
| TRUE | 1/1 | 1/1 | 5.31 | 5.25 | 1.04  |
| TRUE | 1/1 | 1/1 | 5.31 | 5.25 | 1.04  |
| TRUE | 1/1 | 1/1 | 5.31 | 5.25 | 1.04  |
| TRUE | 1/1 | 1/1 | 7.91 | 8.75 | -1.79 |
| TRUE | 1/1 | 1/1 | 7.91 | 8.75 | -1.79 |
| TRUE | 1/1 | 1/1 | 7.91 | 8.75 | -1.79 |
| TRUE | 1/1 | 1/1 | 6.02 | 5.61 | 1.33  |
| TRUE | 1/1 | 1/1 | 6.02 | 5.61 | 1.33  |
| TRUE | 1/1 | 1/1 | 7.06 | 7.24 | -1.14 |
| TRUE | 1/1 | 1/1 | 7.06 | 7.24 | -1.14 |
| TRUE | 1/1 | 1/1 | 7.06 | 7.24 | -1.14 |
| TRUE | 1/1 | 1/1 | 7.06 | 7.24 | -1.14 |
| TRUE | 1/1 | 1/1 | 7.91 | 7.99 | -1.06 |
| TRUE | 1/1 | 1/1 | 7.91 | 7.99 | -1.06 |
| TRUE | 1/1 | 1/1 | 6.86 | 6.56 | 1.23  |
| TRUE | 1/1 | 1/1 | 6.86 | 6.56 | 1.23  |
| TRUE | 1/1 | 1/1 | 6.86 | 6.56 | 1.23  |
| TRUE | 1/1 | 1/1 | 6.86 | 6.56 | 1.23  |
| TRUE | 1/1 | 1/1 | 6.86 | 6.56 | 1.23  |
| TRUE | 1/1 | 1/1 | 3.89 | 3.23 | 1.58  |
| TRUE | 1/1 | 1/1 | 3.89 | 3.23 | 1.58  |
| TRUE | 1/1 | 1/1 | 3.89 | 3.23 | 1.58  |
| TRUE | 1/1 | 1/1 | 3.89 | 3.23 | 1.58  |
| TRUE | 1/1 | 1/1 | 3.89 | 3.23 | 1.58  |
| TRUE | 1/1 | 1/1 | 6.32 | 5.79 | 1.45  |
| TRUE | 1/1 | 1/1 | 6.32 | 5.79 | 1.45  |
| TRUE | 1/1 | 1/1 | 6.32 | 5.79 | 1.45  |
| TRUE | 1/1 | 1/1 | 6.32 | 5.79 | 1.45  |
| TRUE | 1/1 | 1/1 | 6.32 | 5.79 | 1.45  |
| TRUE | 1/1 | 1/1 | 6.32 | 5.79 | 1.45  |
| TRUE | 1/1 | 1/1 | 6.32 | 5.79 | 1.45  |
| TRUE | 1/1 | 1/1 | 6.32 | 5.79 | 1.45  |
| TRUE | 1/1 | 1/1 | 6.32 | 5.79 | 1.45  |
| TRUE | 1/1 | 1/1 | 6.32 | 5.79 | 1.45  |
| TRUE | 1/1 | 1/1 | 6.32 | 5.79 | 1.45  |
| TRUE | 1/1 | 1/1 | 6.32 | 5.79 | 1.45  |
| TRUE | 1/1 | 1/1 | 6.12 | 6.37 | -1.19 |
| TRUE | 1/1 | 1/1 | 6.12 | 6.37 | -1.19 |
| TRUE | 1/1 | 1/1 | 6.12 | 6.37 | -1.19 |
| TRUE | 1/1 | 1/1 | 6.12 | 6.37 | -1.19 |
| TRUE | 1/1 | 1/1 | 6.12 | 6.37 | -1.19 |
| TRUE | 1/1 | 1/1 | 3.28 | 3.89 | -1.52 |
| TRUE | 1/1 | 1/1 | 3.28 | 3.89 | -1.52 |
| TRUE | 1/1 | 1/1 | 3.28 | 3.89 | -1.52 |
| TRUE | 1/1 | 1/1 | 3.28 | 3.89 | -1.52 |
| TRUE | 1/1 | 1/1 | 3.28 | 3.89 | -1.52 |
| TRUE | 1/1 | 1/1 | 3.28 | 3.89 | -1.52 |
| TRUE | 1/1 | 1/1 | 3.28 | 3.89 | -1.52 |
| TRUE | 1/1 | 1/1 | 3.28 | 3.89 | -1.52 |
| TRUE | 1/1 | 1/1 | 3.28 | 3.89 | -1.52 |
| TRUE | 1/1 | 1/1 | 3.28 | 3.89 | -1.52 |
| TRUE | 1/1 | 1/1 | 7.45 | 7.44 | 1.01  |
| TRUE | 1/1 | 1/1 | 7.45 | 7.44 | 1.01  |
| TRUE | 1/1 | 1/1 | 7.45 | 7.44 | 1.01  |
| TRUE | 1/1 | 1/1 | 7.45 | 7.44 | 1.01  |

|      |     |     |      |      |       |
|------|-----|-----|------|------|-------|
| TRUE | 1/1 | 1/1 | 7.45 | 7.44 | 1.01  |
| TRUE | 1/1 | 1/1 | 4.56 | 4.36 | 1.14  |
| TRUE | 1/1 | 1/1 | 4.56 | 4.36 | 1.14  |
| TRUE | 1/1 | 1/1 | 6.23 | 6.43 | -1.14 |
| TRUE | 1/1 | 1/1 | 6.23 | 6.43 | -1.14 |
| TRUE | 1/1 | 1/1 | 5.88 | 6.68 | -1.74 |
| TRUE | 1/1 | 1/1 | 5.88 | 6.68 | -1.74 |
| TRUE | 1/1 | 1/1 | 5.88 | 6.68 | -1.74 |
| TRUE | 1/1 | 1/1 | 5.88 | 6.68 | -1.74 |
| TRUE | 1/1 | 1/1 | 5.88 | 6.68 | -1.74 |
| TRUE | 1/1 | 1/1 | 5.88 | 6.68 | -1.74 |
| TRUE | 1/1 | 1/1 | 7.55 | 7.27 | 1.22  |
| TRUE | 1/1 | 1/1 | 7.55 | 7.27 | 1.22  |
| TRUE | 1/1 | 1/1 | 7.55 | 7.27 | 1.22  |
| TRUE | 1/1 | 1/1 | 7.55 | 7.27 | 1.22  |
| TRUE | 1/1 | 1/1 | 7.55 | 7.27 | 1.22  |
| TRUE | 1/1 | 1/1 | 7.55 | 7.27 | 1.22  |
| TRUE | 1/1 | 1/1 | 6.49 | 7.5  | -2.01 |
| TRUE | 1/1 | 1/1 | 6.49 | 7.5  | -2.01 |
| TRUE | 1/1 | 1/1 | 6.49 | 7.5  | -2.01 |
| TRUE | 1/1 | 1/1 | 6.49 | 7.5  | -2.01 |
| TRUE | 1/1 | 1/1 | 6.49 | 7.5  | -2.01 |
| TRUE | 1/1 | 1/1 | 7.64 | 7.84 | -1.15 |
| TRUE | 1/1 | 1/1 | 7.64 | 7.84 | -1.15 |
| TRUE | 1/1 | 1/1 | 8.66 | 9.67 | -2.02 |
| TRUE | 1/1 | 1/1 | 8.66 | 9.67 | -2.02 |
| TRUE | 1/1 | 1/1 | 8.66 | 9.67 | -2.02 |
| TRUE | 1/1 | 1/1 | 7.76 | 8.08 | -1.24 |
| TRUE | 1/1 | 1/1 | 7.76 | 8.08 | -1.24 |
| TRUE | 1/1 | 1/1 | 7.76 | 8.08 | -1.24 |
| TRUE | 1/1 | 1/1 | 6.35 | 6.72 | -1.29 |
| TRUE | 1/1 | 1/1 | 6.35 | 6.72 | -1.29 |
| TRUE | 1/1 | 1/1 | 6.35 | 6.72 | -1.29 |
| TRUE | 1/1 | 1/1 | 6.35 | 6.72 | -1.29 |
| TRUE | 1/1 | 1/1 | 6.35 | 6.72 | -1.29 |
| TRUE | 1/1 | 1/1 | 7.4  | 7.51 | -1.08 |
| TRUE | 1/1 | 1/1 | 7.4  | 7.51 | -1.08 |
| TRUE | 1/1 | 1/1 | 7.4  | 7.51 | -1.08 |
| TRUE | 1/1 | 1/1 | 7.4  | 7.51 | -1.08 |
| TRUE | 1/1 | 1/1 | 7.4  | 7.51 | -1.08 |
| TRUE | 1/1 | 1/1 | 7.19 | 8.51 | -2.5  |
| TRUE | 1/1 | 1/1 | 7.19 | 8.51 | -2.5  |
| TRUE | 1/1 | 1/1 | 7.19 | 8.51 | -2.5  |
| TRUE | 1/1 | 1/1 | 7.19 | 8.51 | -2.5  |
| TRUE | 1/1 | 1/1 | 7.19 | 8.51 | -2.5  |
| TRUE | 1/1 | 1/1 | 7.19 | 8.51 | -2.5  |
| TRUE | 1/1 | 1/1 | 7.19 | 8.51 | -2.5  |
| TRUE | 1/1 | 1/1 | 7.19 | 8.51 | -2.5  |
| TRUE | 1/1 | 1/1 | 7.19 | 8.51 | -2.5  |
| TRUE | 1/1 | 1/1 | 6.62 | 7.32 | -1.63 |
| TRUE | 1/1 | 1/1 | 6.62 | 7.32 | -1.63 |
| TRUE | 1/1 | 1/1 | 6.62 | 7.32 | -1.63 |
| TRUE | 1/1 | 1/1 | 6.62 | 7.32 | -1.63 |
| TRUE | 1/1 | 1/1 | 6.62 | 7.32 | -1.63 |

|      |     |     |       |       |       |
|------|-----|-----|-------|-------|-------|
| TRUE | 1/1 | 1/1 | 10.77 | 11.06 | -1.22 |
| TRUE | 1/1 | 1/1 | 10.77 | 11.06 | -1.22 |
| TRUE | 1/1 | 1/1 | 10.77 | 11.06 | -1.22 |
| TRUE | 1/1 | 1/1 | 10.77 | 11.06 | -1.22 |
| TRUE | 1/1 | 1/1 | 10.77 | 11.06 | -1.22 |
| TRUE | 1/1 | 1/1 | 3.99  | 4.92  | -1.91 |
| TRUE | 1/1 | 1/1 | 3.99  | 4.92  | -1.91 |
| TRUE | 1/1 | 1/1 | 5.28  | 6.49  | -2.31 |
| TRUE | 1/1 | 1/1 | 5.28  | 6.49  | -2.31 |
| TRUE | 1/1 | 1/1 | 5.28  | 6.49  | -2.31 |
| TRUE | 1/1 | 1/1 | 5.28  | 6.49  | -2.31 |
| TRUE | 1/1 | 1/1 | 5.28  | 6.49  | -2.31 |
| TRUE | 1/1 | 1/1 | 5.28  | 6.49  | -2.31 |
| TRUE | 1/1 | 1/1 | 5.28  | 6.49  | -2.31 |
| TRUE | 1/1 | 1/1 | 5.28  | 6.49  | -2.31 |
| TRUE | 1/1 | 1/1 | 5.28  | 6.49  | -2.31 |
| TRUE | 1/1 | 1/1 | 5.28  | 6.49  | -2.31 |
| TRUE | 1/1 | 1/1 | 5.28  | 6.49  | -2.31 |
| TRUE | 1/1 | 1/1 | 5.28  | 6.49  | -2.31 |
| TRUE | 1/1 | 1/1 | 5.28  | 6.49  | -2.31 |
| TRUE | 1/1 | 1/1 | 5.28  | 6.49  | -2.31 |
| TRUE | 1/1 | 1/1 | 5.28  | 6.49  | -2.31 |
| TRUE | 1/1 | 1/1 | 5.28  | 6.49  | -2.31 |
| TRUE | 1/1 | 1/1 | 5.28  | 6.49  | -2.31 |
| TRUE | 1/1 | 1/1 | 5.28  | 6.49  | -2.31 |
| TRUE | 1/1 | 1/1 | 8.8   | 9.57  | -1.7  |
| TRUE | 1/1 | 1/1 | 8.8   | 9.57  | -1.7  |
| TRUE | 1/1 | 1/1 | 3.04  | 4.02  | -1.97 |
| TRUE | 1/1 | 1/1 | 3.04  | 4.02  | -1.97 |
| TRUE | 1/1 | 1/1 | 3.04  | 4.02  | -1.97 |
| TRUE | 1/1 | 1/1 | 3.04  | 4.02  | -1.97 |
| TRUE | 1/1 | 1/1 | 3.04  | 4.02  | -1.97 |
| TRUE | 1/1 | 1/1 | 6.23  | 6.87  | -1.55 |
| TRUE | 1/1 | 1/1 | 6.23  | 6.87  | -1.55 |
| TRUE | 1/1 | 1/1 | 6.23  | 6.87  | -1.55 |
| TRUE | 1/1 | 1/1 | 6.23  | 6.87  | -1.55 |
| TRUE | 1/1 | 1/1 | 6.23  | 6.87  | -1.55 |
| TRUE | 1/1 | 1/1 | 6.23  | 6.87  | -1.55 |
| TRUE | 1/1 | 1/1 | 6.23  | 6.87  | -1.55 |
| TRUE | 1/1 | 1/1 | 6.23  | 6.87  | -1.55 |
| TRUE | 1/1 | 1/1 | 6.23  | 6.87  | -1.55 |
| TRUE | 1/1 | 1/1 | 6.23  | 6.87  | -1.55 |
| TRUE | 1/1 | 1/1 | 6.58  | 7.23  | -1.57 |
| TRUE | 1/1 | 1/1 | 6.58  | 7.23  | -1.57 |
| TRUE | 1/1 | 1/1 | 6.58  | 7.23  | -1.57 |
| TRUE | 1/1 | 1/1 | 6.29  | 6.56  | -1.21 |
| TRUE | 1/1 | 1/1 | 6.29  | 6.56  | -1.21 |
| TRUE | 1/1 | 1/1 | 6.29  | 6.56  | -1.21 |
| TRUE | 1/1 | 1/1 | 6.29  | 6.56  | -1.21 |
| TRUE | 1/1 | 1/1 | 4.32  | 4.53  | -1.16 |
| TRUE | 1/1 | 1/1 | 4.32  | 4.53  | -1.16 |
| TRUE | 1/1 | 1/1 | 4.32  | 4.53  | -1.16 |
| TRUE | 1/1 | 1/1 | 5.24  | 6.67  | -2.7  |
| TRUE | 1/1 | 1/1 | 5.24  | 6.67  | -2.7  |
| TRUE | 1/1 | 1/1 | 5.24  | 6.67  | -2.7  |
| TRUE | 1/1 | 1/1 | 5.24  | 6.67  | -2.7  |
| TRUE | 1/1 | 1/1 | 5.24  | 6.67  | -2.7  |
| TRUE | 1/1 | 1/1 | 5.24  | 6.67  | -2.7  |
| TRUE | 1/1 | 1/1 | 5.24  | 6.67  | -2.7  |
| TRUE | 1/1 | 1/1 | 5.24  | 6.67  | -2.7  |
| TRUE | 1/1 | 1/1 | 3.52  | 3.08  | 1.36  |
| TRUE | 1/1 | 1/1 | 3.52  | 3.08  | 1.36  |
| TRUE | 1/1 | 1/1 | 3.52  | 3.08  | 1.36  |
| TRUE | 1/1 | 1/1 | 3.52  | 3.08  | 1.36  |
| TRUE | 1/1 | 1/1 | 3.52  | 3.08  | 1.36  |
| TRUE | 1/1 | 1/1 | 3.52  | 3.08  | 1.36  |
| TRUE | 1/1 | 1/1 | 3.52  | 3.08  | 1.36  |
| TRUE | 1/1 | 1/1 | 5.85  | 5.3   | 1.46  |
| TRUE | 1/1 | 1/1 | 5.85  | 5.3   | 1.46  |
| TRUE | 1/1 | 1/1 | 7.6   | 7.93  | -1.26 |







|      |     |     |      |      |       |
|------|-----|-----|------|------|-------|
| TRUE | 1/1 | 1/1 | 8.03 | 5.19 | 7.17  |
| TRUE | 1/1 | 1/1 | 5.92 | 5.48 | 1.36  |
| TRUE | 1/1 | 1/1 | 5.92 | 5.48 | 1.36  |
| TRUE | 1/1 | 1/1 | 5.92 | 5.48 | 1.36  |
| TRUE | 1/1 | 1/1 | 7.75 | 7.7  | 1.04  |
| TRUE | 1/1 | 1/1 | 7.75 | 7.7  | 1.04  |
| TRUE | 1/1 | 1/1 | 7.75 | 7.7  | 1.04  |
| TRUE | 1/1 | 1/1 | 7.75 | 7.7  | 1.04  |
| TRUE | 1/1 | 1/1 | 7.75 | 7.7  | 1.04  |
| TRUE | 1/1 | 1/1 | 7.75 | 7.7  | 1.04  |
| TRUE | 1/1 | 1/1 | 7.75 | 7.7  | 1.04  |
| TRUE | 1/1 | 1/1 | 6.14 | 6.8  | -1.58 |
| TRUE | 1/1 | 1/1 | 6.14 | 6.8  | -1.58 |
| TRUE | 1/1 | 1/1 | 6.14 | 6.8  | -1.58 |
| TRUE | 1/1 | 1/1 | 6.14 | 6.8  | -1.58 |
| TRUE | 1/1 | 1/1 | 6.14 | 6.8  | -1.58 |
| TRUE | 1/1 | 1/1 | 6.41 | 7.4  | -1.99 |
| TRUE | 1/1 | 1/1 | 6.41 | 7.4  | -1.99 |
| TRUE | 1/1 | 1/1 | 6.41 | 7.4  | -1.99 |
| TRUE | 1/1 | 1/1 | 6.41 | 7.4  | -1.99 |
| TRUE | 1/1 | 1/1 | 6.41 | 7.4  | -1.99 |
| TRUE | 1/1 | 1/1 | 7.88 | 8.31 | -1.35 |
| TRUE | 1/1 | 1/1 | 7.88 | 8.31 | -1.35 |
| TRUE | 1/1 | 1/1 | 4.83 | 5.51 | -1.59 |
| TRUE | 1/1 | 1/1 | 4.83 | 5.51 | -1.59 |
| TRUE | 1/1 | 1/1 | 4.83 | 5.51 | -1.59 |
| TRUE | 1/1 | 1/1 | 4.83 | 5.51 | -1.59 |
| TRUE | 1/1 | 1/1 | 4.83 | 5.51 | -1.59 |
| TRUE | 1/1 | 1/1 | 4.83 | 5.51 | -1.59 |
| TRUE | 1/1 | 1/1 | 4.83 | 5.51 | -1.59 |
| TRUE | 1/1 | 1/1 | 4.83 | 5.51 | -1.59 |
| TRUE | 1/1 | 1/1 | 8.46 | 8.81 | -1.27 |
| TRUE | 1/1 | 1/1 | 8.46 | 8.81 | -1.27 |
| TRUE | 1/1 | 1/1 | 8.46 | 8.81 | -1.27 |
| TRUE | 1/1 | 1/1 | 8.46 | 8.81 | -1.27 |
| TRUE | 1/1 | 1/1 | 8.46 | 8.81 | -1.27 |
| TRUE | 1/1 | 1/1 | 6.83 | 7.68 | -1.81 |
| TRUE | 1/1 | 1/1 | 6.83 | 7.68 | -1.81 |
| TRUE | 1/1 | 1/1 | 6.83 | 7.68 | -1.81 |
| TRUE | 1/1 | 1/1 | 6.83 | 7.68 | -1.81 |
| TRUE | 1/1 | 1/1 | 6.71 | 7.04 | -1.26 |
| TRUE | 1/1 | 1/1 | 6.71 | 7.04 | -1.26 |
| TRUE | 1/1 | 1/1 | 6.71 | 7.04 | -1.26 |
| TRUE | 1/1 | 1/1 | 6.71 | 7.04 | -1.26 |
| TRUE | 1/1 | 1/1 | 6.71 | 7.04 | -1.26 |
| TRUE | 1/1 | 1/1 | 6.71 | 7.04 | -1.26 |
| TRUE | 1/1 | 1/1 | 6.71 | 7.04 | -1.26 |
| TRUE | 1/1 | 1/1 | 6.66 | 6.84 | -1.13 |
| TRUE | 1/1 | 1/1 | 6.66 | 6.84 | -1.13 |
| TRUE | 1/1 | 1/1 | 6.66 | 6.84 | -1.13 |
| TRUE | 1/1 | 1/1 | 7.44 | 7.83 | -1.31 |
| TRUE | 1/1 | 1/1 | 7.44 | 7.83 | -1.31 |
| TRUE | 1/1 | 1/1 | 7.23 | 5.7  | 2.88  |
| TRUE | 1/1 | 1/1 | 7.23 | 5.7  | 2.88  |
| TRUE | 1/1 | 1/1 | 7.23 | 5.7  | 2.88  |
| TRUE | 1/1 | 1/1 | 7.23 | 5.7  | 2.88  |
| TRUE | 1/1 | 1/1 | 7.23 | 5.7  | 2.88  |



|      |     |     |       |       |       |
|------|-----|-----|-------|-------|-------|
| TRUE | 1/1 | 1/1 | 7.8   | 8.21  | -1.33 |
| TRUE | 1/1 | 1/1 | 7.8   | 8.21  | -1.33 |
| TRUE | 1/1 | 1/1 | 7.8   | 8.21  | -1.33 |
| TRUE | 1/1 | 1/1 | 7.8   | 8.21  | -1.33 |
| TRUE | 1/1 | 1/1 | 7.8   | 8.21  | -1.33 |
| TRUE | 1/1 | 1/1 | 7.8   | 8.21  | -1.33 |
| TRUE | 1/1 | 1/1 | 7.8   | 8.21  | -1.33 |
| TRUE | 1/1 | 1/1 | 6.77  | 4.99  | 3.44  |
| TRUE | 1/1 | 1/1 | 6.77  | 4.99  | 3.44  |
| TRUE | 1/1 | 1/1 | 6.77  | 4.99  | 3.44  |
| TRUE | 1/1 | 1/1 | 6.77  | 4.99  | 3.44  |
| TRUE | 1/1 | 1/1 | 6.77  | 4.99  | 3.44  |
| TRUE | 1/1 | 1/1 | 6.77  | 4.99  | 3.44  |
| TRUE | 1/1 | 1/1 | 6.77  | 4.99  | 3.44  |
| TRUE | 1/1 | 1/1 | 6.77  | 4.99  | 3.44  |
| TRUE | 1/1 | 1/1 | 10.15 | 11.16 | -2.01 |
| TRUE | 1/1 | 1/1 | 10.15 | 11.16 | -2.01 |
| TRUE | 1/1 | 1/1 | 6.97  | 6.35  | 1.53  |
| TRUE | 1/1 | 1/1 | 6.97  | 6.35  | 1.53  |
| TRUE | 1/1 | 1/1 | 6.97  | 6.35  | 1.53  |
| TRUE | 1/1 | 1/1 | 6.97  | 6.35  | 1.53  |
| TRUE | 1/1 | 1/1 | 6.44  | 7.23  | -1.72 |
| TRUE | 1/1 | 1/1 | 6.44  | 7.23  | -1.72 |
| TRUE | 1/1 | 1/1 | 6.44  | 7.23  | -1.72 |
| TRUE | 1/1 | 1/1 | 6.44  | 7.23  | -1.72 |
| TRUE | 1/1 | 1/1 | 6.44  | 7.23  | -1.72 |
| TRUE | 1/1 | 1/1 | 6.44  | 7.23  | -1.72 |
| TRUE | 1/1 | 1/1 | 6.44  | 7.23  | -1.72 |
| TRUE | 1/1 | 1/1 | 12.34 | 13.1  | -1.69 |
| TRUE | 1/1 | 1/1 | 12.34 | 13.1  | -1.69 |
| TRUE | 1/1 | 1/1 | 12.34 | 13.1  | -1.69 |
| TRUE | 1/1 | 1/1 | 12.34 | 13.1  | -1.69 |
| TRUE | 1/1 | 1/1 | 12.34 | 13.1  | -1.69 |
| TRUE | 1/1 | 1/1 | 7.43  | 8.57  | -2.21 |
| TRUE | 1/1 | 1/1 | 7.43  | 8.57  | -2.21 |
| TRUE | 1/1 | 1/1 | 7.43  | 8.57  | -2.21 |
| TRUE | 1/1 | 1/1 | 7.43  | 8.57  | -2.21 |
| TRUE | 1/1 | 1/1 | 8.26  | 8.57  | -1.24 |
| TRUE | 1/1 | 1/1 | 8.26  | 8.57  | -1.24 |
| TRUE | 1/1 | 1/1 | 4.28  | 5.16  | -1.85 |
| TRUE | 1/1 | 1/1 | 4.28  | 5.16  | -1.85 |
| TRUE | 1/1 | 1/1 | 4.28  | 5.16  | -1.85 |
| TRUE | 1/1 | 1/1 | 4.28  | 5.16  | -1.85 |
| TRUE | 1/1 | 1/1 | 5.08  | 4.73  | 1.28  |
| TRUE | 1/1 | 1/1 | 5.08  | 4.73  | 1.28  |
| TRUE | 1/1 | 1/1 | 5.08  | 4.73  | 1.28  |
| TRUE | 1/1 | 1/1 | 5.08  | 4.73  | 1.28  |
| TRUE | 1/1 | 1/1 | 5.08  | 4.73  | 1.28  |
| TRUE | 1/1 | 1/1 | 7.63  | 7.86  | -1.17 |
| TRUE | 1/1 | 1/1 | 7.63  | 7.86  | -1.17 |
| TRUE | 1/1 | 1/1 | 7.63  | 7.86  | -1.17 |
| TRUE | 1/1 | 1/1 | 6.5   | 7.16  | -1.58 |
| TRUE | 1/1 | 1/1 | 6.5   | 7.16  | -1.58 |
| TRUE | 1/1 | 1/1 | 5.45  | 5.41  | 1.03  |
| TRUE | 1/1 | 1/1 | 5.45  | 5.41  | 1.03  |
| TRUE | 1/1 | 1/1 | 5.45  | 5.41  | 1.03  |
| TRUE | 1/1 | 1/1 | 6.09  | 6.18  | -1.06 |
| TRUE | 1/1 | 1/1 | 6.09  | 6.18  | -1.06 |
| TRUE | 1/1 | 1/1 | 6.09  | 6.18  | -1.06 |



|      |     |     |       |       |       |
|------|-----|-----|-------|-------|-------|
| TRUE | 1/1 | 1/1 | 7.24  | 7.94  | -1.62 |
| TRUE | 1/1 | 1/1 | 7.24  | 7.94  | -1.62 |
| TRUE | 1/1 | 1/1 | 7.24  | 7.94  | -1.62 |
| TRUE | 1/1 | 1/1 | 7.24  | 7.94  | -1.62 |
| TRUE | 1/1 | 1/1 | 7.34  | 8.41  | -2.1  |
| TRUE | 1/1 | 1/1 | 7.34  | 8.41  | -2.1  |
| TRUE | 1/1 | 1/1 | 7.34  | 8.41  | -2.1  |
| TRUE | 1/1 | 1/1 | 7.34  | 8.41  | -2.1  |
| TRUE | 1/1 | 1/1 | 7.34  | 8.41  | -2.1  |
| TRUE | 1/1 | 1/1 | 7.34  | 8.41  | -2.1  |
| TRUE | 1/1 | 1/1 | 7.34  | 8.41  | -2.1  |
| TRUE | 1/1 | 1/1 | 7.34  | 8.41  | -2.1  |
| TRUE | 1/1 | 1/1 | 7.34  | 8.41  | -2.1  |
| TRUE | 1/1 | 1/1 | 7.34  | 8.41  | -2.1  |
| TRUE | 1/1 | 1/1 | 7.34  | 8.41  | -2.1  |
| TRUE | 1/1 | 1/1 | 7.34  | 8.41  | -2.1  |
| TRUE | 1/1 | 1/1 | 8.21  | 9.18  | -1.96 |
| TRUE | 1/1 | 1/1 | 8.21  | 9.18  | -1.96 |
| TRUE | 1/1 | 1/1 | 8.21  | 9.18  | -1.96 |
| TRUE | 1/1 | 1/1 | 8.21  | 9.18  | -1.96 |
| TRUE | 1/1 | 1/1 | 8.21  | 9.18  | -1.96 |
| TRUE | 1/1 | 1/1 | 8.21  | 9.18  | -1.96 |
| TRUE | 1/1 | 1/1 | 8.21  | 9.18  | -1.96 |
| TRUE | 1/1 | 1/1 | 8.21  | 9.18  | -1.96 |
| TRUE | 1/1 | 1/1 | 8.21  | 9.18  | -1.96 |
| TRUE | 1/1 | 1/1 | 7.3   | 8.23  | -1.91 |
| TRUE | 1/1 | 1/1 | 7.3   | 8.23  | -1.91 |
| TRUE | 1/1 | 1/1 | 7.3   | 8.23  | -1.91 |
| TRUE | 1/1 | 1/1 | 7.3   | 8.23  | -1.91 |
| TRUE | 1/1 | 1/1 | 7.3   | 8.23  | -1.91 |
| TRUE | 1/1 | 1/1 | 7.3   | 8.23  | -1.91 |
| TRUE | 1/1 | 1/1 | 7.3   | 8.23  | -1.91 |
| TRUE | 1/1 | 1/1 | 7.3   | 8.23  | -1.91 |
| TRUE | 1/1 | 1/1 | 7.3   | 8.23  | -1.91 |
| TRUE | 1/1 | 1/1 | 7.3   | 8.23  | -1.91 |
| TRUE | 1/1 | 1/1 | 7.3   | 8.23  | -1.91 |
| TRUE | 1/1 | 1/1 | 7.3   | 8.23  | -1.91 |
| TRUE | 1/1 | 1/1 | 7.3   | 8.23  | -1.91 |
| TRUE | 1/1 | 1/1 | 7.3   | 8.23  | -1.91 |
| TRUE | 1/1 | 1/1 | 8.21  | 7.94  | 1.2   |
| TRUE | 1/1 | 1/1 | 8.21  | 7.94  | 1.2   |
| TRUE | 1/1 | 1/1 | 7.51  | 7.44  | 1.05  |
| TRUE | 1/1 | 1/1 | 7.51  | 7.44  | 1.05  |
| TRUE | 1/1 | 1/1 | 7.51  | 7.44  | 1.05  |
| TRUE | 1/1 | 1/1 | 7.51  | 7.44  | 1.05  |
| TRUE | 1/1 | 1/1 | 7.51  | 7.44  | 1.05  |
| TRUE | 1/1 | 1/1 | 7.51  | 7.44  | 1.05  |
| TRUE | 1/1 | 1/1 | 7.51  | 7.44  | 1.05  |
| TRUE | 1/1 | 1/1 | 7.51  | 7.44  | 1.05  |
| TRUE | 1/1 | 1/1 | 7.51  | 7.44  | 1.05  |
| TRUE | 1/1 | 1/1 | 7.51  | 7.44  | 1.05  |
| TRUE | 1/1 | 1/1 | 7.51  | 7.44  | 1.05  |
| TRUE | 1/1 | 1/1 | 10.74 | 10.86 | -1.09 |
| TRUE | 1/1 | 1/1 | 10.74 | 10.86 | -1.09 |
| TRUE | 1/1 | 1/1 | 7.08  | 7.93  | -1.8  |
| TRUE | 1/1 | 1/1 | 7.08  | 7.93  | -1.8  |
| TRUE | 1/1 | 1/1 | 6.46  | 8.13  | -3.18 |
| TRUE | 1/1 | 1/1 | 6.46  | 8.13  | -3.18 |
| TRUE | 1/1 | 1/1 | 6.46  | 8.13  | -3.18 |
| TRUE | 1/1 | 1/1 | 6.46  | 8.13  | -3.18 |
| TRUE | 1/1 | 1/1 | 4.6   | 5.17  | -1.48 |
| TRUE | 1/1 | 1/1 | 4.6   | 5.17  | -1.48 |
| TRUE | 1/1 | 1/1 | 4.6   | 5.17  | -1.48 |
| TRUE | 1/1 | 1/1 | 4.6   | 5.17  | -1.48 |
| TRUE | 1/1 | 1/1 | 6.25  | 7.47  | -2.34 |
| TRUE | 1/1 | 1/1 | 6.25  | 7.47  | -2.34 |
| TRUE | 1/1 | 1/1 | 6.25  | 7.47  | -2.34 |
| TRUE | 1/1 | 1/1 | 6.25  | 7.47  | -2.34 |



|      |     |     |      |       |       |
|------|-----|-----|------|-------|-------|
| TRUE | 1/1 | 1/1 | 7.51 | 8.42  | -1.89 |
| TRUE | 1/1 | 1/1 | 5.87 | 6.32  | -1.37 |
| TRUE | 1/1 | 1/1 | 5.87 | 6.32  | -1.37 |
| TRUE | 1/1 | 1/1 | 5.87 | 6.32  | -1.37 |
| TRUE | 1/1 | 1/1 | 5.87 | 6.32  | -1.37 |
| TRUE | 1/1 | 1/1 | 9.62 | 10.74 | -2.18 |
| TRUE | 1/1 | 1/1 | 9.62 | 10.74 | -2.18 |
| TRUE | 1/1 | 1/1 | 9.62 | 10.74 | -2.18 |
| TRUE | 1/1 | 1/1 | 9.62 | 10.74 | -2.18 |
| TRUE | 1/1 | 1/1 | 9.62 | 10.74 | -2.18 |
| TRUE | 1/1 | 1/1 | 9.62 | 10.74 | -2.18 |
| TRUE | 1/1 | 1/1 | 9.62 | 10.74 | -2.18 |
| TRUE | 1/1 | 1/1 | 7    | 7.46  | -1.38 |
| TRUE | 1/1 | 1/1 | 7    | 7.46  | -1.38 |
| TRUE | 1/1 | 1/1 | 7    | 7.46  | -1.38 |
| TRUE | 1/1 | 1/1 | 7    | 7.46  | -1.38 |
| TRUE | 1/1 | 1/1 | 7    | 7.46  | -1.38 |
| TRUE | 1/1 | 1/1 | 7    | 7.46  | -1.38 |
| TRUE | 1/1 | 1/1 | 7.21 | 8.51  | -2.46 |
| TRUE | 1/1 | 1/1 | 7.21 | 8.51  | -2.46 |
| TRUE | 1/1 | 1/1 | 6.32 | 6.47  | -1.11 |
| TRUE | 1/1 | 1/1 | 6.32 | 6.47  | -1.11 |
| TRUE | 1/1 | 1/1 | 6.32 | 6.47  | -1.11 |
| TRUE | 1/1 | 1/1 | 6.32 | 6.47  | -1.11 |
| TRUE | 1/1 | 1/1 | 6.32 | 6.47  | -1.11 |
| TRUE | 1/1 | 1/1 | 4.3  | 4.76  | -1.37 |
| TRUE | 1/1 | 1/1 | 4.3  | 4.76  | -1.37 |
| TRUE | 1/1 | 1/1 | 4.3  | 4.76  | -1.37 |
| TRUE | 1/1 | 1/1 | 4.3  | 4.76  | -1.37 |
| TRUE | 1/1 | 1/1 | 8.93 | 9.17  | -1.18 |
| TRUE | 1/1 | 1/1 | 8.93 | 9.17  | -1.18 |
| TRUE | 1/1 | 1/1 | 8.93 | 9.17  | -1.18 |
| TRUE | 1/1 | 1/1 | 8.93 | 9.17  | -1.18 |
| TRUE | 1/1 | 1/1 | 8.93 | 9.17  | -1.18 |
| TRUE | 1/1 | 1/1 | 8.93 | 9.17  | -1.18 |
| TRUE | 1/1 | 1/1 | 8.93 | 9.17  | -1.18 |
| TRUE | 1/1 | 1/1 | 8.93 | 9.17  | -1.18 |
| TRUE | 1/1 | 1/1 | 8.93 | 9.17  | -1.18 |
| TRUE | 1/1 | 1/1 | 8.29 | 7.93  | 1.28  |
| TRUE | 1/1 | 1/1 | 8.29 | 7.93  | 1.28  |
| TRUE | 1/1 | 1/1 | 8.29 | 7.93  | 1.28  |
| TRUE | 1/1 | 1/1 | 6.28 | 7.19  | -1.89 |
| TRUE | 1/1 | 1/1 | 6.28 | 7.19  | -1.89 |
| TRUE | 1/1 | 1/1 | 6.28 | 7.19  | -1.89 |
| TRUE | 1/1 | 1/1 | 6.28 | 7.19  | -1.89 |
| TRUE | 1/1 | 1/1 | 6.28 | 7.19  | -1.89 |
| TRUE | 1/1 | 1/1 | 6.28 | 7.19  | -1.89 |
| TRUE | 1/1 | 1/1 | 6.32 | 6.58  | -1.2  |
| TRUE | 1/1 | 1/1 | 6.32 | 6.58  | -1.2  |
| TRUE | 1/1 | 1/1 | 6.32 | 6.58  | -1.2  |
| TRUE | 1/1 | 1/1 | 6.32 | 6.58  | -1.2  |
| TRUE | 1/1 | 1/1 | 6.32 | 6.58  | -1.2  |
| TRUE | 1/1 | 1/1 | 5.77 | 6.38  | -1.53 |
| TRUE | 1/1 | 1/1 | 5.77 | 6.38  | -1.53 |
| TRUE | 1/1 | 1/1 | 5.77 | 6.38  | -1.53 |
| TRUE | 1/1 | 1/1 | 5.77 | 6.38  | -1.53 |
| TRUE | 1/1 | 1/1 | 5.77 | 6.38  | -1.53 |







|      |     |     |       |      |       |
|------|-----|-----|-------|------|-------|
| TRUE | 1/1 | 1/1 | 6.42  | 5.65 | 1.71  |
| TRUE | 1/1 | 1/1 | 6.42  | 5.65 | 1.71  |
| TRUE | 1/1 | 1/1 | 6.42  | 5.65 | 1.71  |
| TRUE | 1/1 | 1/1 | 6.42  | 5.65 | 1.71  |
| TRUE | 1/1 | 1/1 | 6.42  | 5.65 | 1.71  |
| TRUE | 1/1 | 1/1 | 6.42  | 5.65 | 1.71  |
| TRUE | 1/1 | 1/1 | 6.42  | 5.65 | 1.71  |
| TRUE | 1/1 | 1/1 | 7.88  | 6.59 | 2.44  |
| TRUE | 1/1 | 1/1 | 7.88  | 6.59 | 2.44  |
| TRUE | 1/1 | 1/1 | 7.88  | 6.59 | 2.44  |
| TRUE | 1/1 | 1/1 | 7.88  | 6.59 | 2.44  |
| TRUE | 1/1 | 1/1 | 7.88  | 6.59 | 2.44  |
| TRUE | 1/1 | 1/1 | 7.88  | 6.59 | 2.44  |
| TRUE | 1/1 | 1/1 | 7.88  | 6.59 | 2.44  |
| TRUE | 1/1 | 1/1 | 4.73  | 4.05 | 1.6   |
| TRUE | 1/1 | 1/1 | 4.73  | 4.05 | 1.6   |
| TRUE | 1/1 | 1/1 | 3.72  | 4.59 | -1.83 |
| TRUE | 1/1 | 1/1 | 3.72  | 4.59 | -1.83 |
| TRUE | 1/1 | 1/1 | 3.72  | 4.59 | -1.83 |
| TRUE | 1/1 | 1/1 | 3.72  | 4.59 | -1.83 |
| TRUE | 1/1 | 1/1 | 6.6   | 7.91 | -2.47 |
| TRUE | 1/1 | 1/1 | 6.6   | 7.91 | -2.47 |
| TRUE | 1/1 | 1/1 | 6.6   | 7.91 | -2.47 |
| TRUE | 1/1 | 1/1 | 6.6   | 7.91 | -2.47 |
| TRUE | 1/1 | 1/1 | 6.6   | 7.91 | -2.47 |
| TRUE | 1/1 | 1/1 | 6.6   | 7.91 | -2.47 |
| TRUE | 1/1 | 1/1 | 6.6   | 7.91 | -2.47 |
| TRUE | 1/1 | 1/1 | 10.66 | 8.67 | 3.96  |
| TRUE | 1/1 | 1/1 | 10.66 | 8.67 | 3.96  |
| TRUE | 1/1 | 1/1 | 10.66 | 8.67 | 3.96  |
| TRUE | 1/1 | 1/1 | 10.66 | 8.67 | 3.96  |
| TRUE | 1/1 | 1/1 | 10.66 | 8.67 | 3.96  |
| TRUE | 1/1 | 1/1 | 10.66 | 8.67 | 3.96  |
| TRUE | 1/1 | 1/1 | 10.66 | 8.67 | 3.96  |
| TRUE | 1/1 | 1/1 | 10.66 | 8.67 | 3.96  |
| TRUE | 1/1 | 1/1 | 10.66 | 8.67 | 3.96  |
| TRUE | 1/1 | 1/1 | 10.66 | 8.67 | 3.96  |
| TRUE | 1/1 | 1/1 | 10.66 | 8.67 | 3.96  |
| TRUE | 1/1 | 1/1 | 10.66 | 8.67 | 3.96  |
| TRUE | 1/1 | 1/1 | 10.66 | 8.67 | 3.96  |
| TRUE | 1/1 | 1/1 | 10.66 | 8.67 | 3.96  |
| TRUE | 1/1 | 1/1 | 10.66 | 8.67 | 3.96  |
| TRUE | 1/1 | 1/1 | 10.66 | 8.67 | 3.96  |
| TRUE | 1/1 | 1/1 | 10.66 | 8.67 | 3.96  |
| TRUE | 1/1 | 1/1 | 10.66 | 8.67 | 3.96  |
| TRUE | 1/1 | 1/1 | 10.66 | 8.67 | 3.96  |
| TRUE | 1/1 | 1/1 | 10.66 | 8.67 | 3.96  |
| TRUE | 1/1 | 1/1 | 10.66 | 8.67 | 3.96  |
| TRUE | 1/1 | 1/1 | 10.66 | 8.67 | 3.96  |
| TRUE | 1/1 | 1/1 | 10.66 | 8.67 | 3.96  |
| TRUE | 1/1 | 1/1 | 4.79  | 4.56 | 1.18  |
| TRUE | 1/1 | 1/1 | 4.79  | 4.56 | 1.18  |
| TRUE | 1/1 | 1/1 | 4.79  | 4.56 | 1.18  |
| TRUE | 1/1 | 1/1 | 4.79  | 4.56 | 1.18  |
| TRUE | 1/1 | 1/1 | 4.79  | 4.56 | 1.18  |
| TRUE | 1/1 | 1/1 | 6.58  | 6.78 | -1.15 |
| TRUE | 1/1 | 1/1 | 6.58  | 6.78 | -1.15 |
| TRUE | 1/1 | 1/1 | 6.58  | 6.78 | -1.15 |
| TRUE | 1/1 | 1/1 | 6.58  | 6.78 | -1.15 |





|      |     |     |      |      |       |
|------|-----|-----|------|------|-------|
| TRUE | 1/1 | 1/1 | 6.22 | 7.64 | -2.68 |
| TRUE | 1/1 | 1/1 | 6.22 | 7.64 | -2.68 |
| TRUE | 1/1 | 1/1 | 6.22 | 7.64 | -2.68 |
| TRUE | 1/1 | 1/1 | 6.22 | 7.64 | -2.68 |
| TRUE | 1/1 | 1/1 | 6.22 | 7.64 | -2.68 |
| TRUE | 1/1 | 1/1 | 6.22 | 7.64 | -2.68 |
| TRUE | 1/1 | 1/1 | 6.22 | 7.64 | -2.68 |
| TRUE | 1/1 | 1/1 | 6.22 | 7.64 | -2.68 |
| TRUE | 1/1 | 1/1 | 6.22 | 7.64 | -2.68 |
| TRUE | 1/1 | 1/1 | 6.22 | 7.64 | -2.68 |
| TRUE | 1/1 | 1/1 | 6.22 | 7.64 | -2.68 |
| TRUE | 1/1 | 1/1 | 6.22 | 7.64 | -2.68 |
| TRUE | 1/1 | 1/1 | 6.22 | 7.64 | -2.68 |
| TRUE | 1/1 | 1/1 | 6.22 | 7.64 | -2.68 |
| TRUE | 1/1 | 1/1 | 6.22 | 7.64 | -2.68 |
| TRUE | 1/1 | 1/1 | 6.22 | 7.64 | -2.68 |
| TRUE | 1/1 | 1/1 | 6.22 | 7.64 | -2.68 |
| TRUE | 1/1 | 1/1 | 6.22 | 7.64 | -2.68 |
| TRUE | 1/1 | 1/1 | 6.22 | 7.64 | -2.68 |
| TRUE | 1/1 | 1/1 | 7.42 | 8.12 | -1.63 |
| TRUE | 1/1 | 1/1 | 7.42 | 8.12 | -1.63 |
| TRUE | 1/1 | 1/1 | 7.42 | 8.12 | -1.63 |
| TRUE | 1/1 | 1/1 | 7.42 | 8.12 | -1.63 |
| TRUE | 1/1 | 1/1 | 7.42 | 8.12 | -1.63 |
| TRUE | 1/1 | 1/1 | 6.87 | 6.67 | 1.15  |
| TRUE | 1/1 | 1/1 | 6.87 | 6.67 | 1.15  |
| TRUE | 1/1 | 1/1 | 8.67 | 7.93 | 1.67  |
| TRUE | 1/1 | 1/1 | 8.67 | 7.93 | 1.67  |
| TRUE | 1/1 | 1/1 | 8.67 | 7.93 | 1.67  |
| TRUE | 1/1 | 1/1 | 8.67 | 7.93 | 1.67  |
| TRUE | 1/1 | 1/1 | 8.67 | 7.93 | 1.67  |
| TRUE | 1/1 | 1/1 | 8.67 | 7.93 | 1.67  |
| TRUE | 1/1 | 1/1 | 8.67 | 7.93 | 1.67  |
| TRUE | 1/1 | 1/1 | 5.55 | 6.78 | -2.35 |
| TRUE | 1/1 | 1/1 | 5.55 | 6.78 | -2.35 |
| TRUE | 1/1 | 1/1 | 5.55 | 6.78 | -2.35 |
| TRUE | 1/1 | 1/1 | 5.55 | 6.78 | -2.35 |
| TRUE | 1/1 | 1/1 | 5.55 | 6.78 | -2.35 |
| TRUE | 1/1 | 1/1 | 5.55 | 6.78 | -2.35 |
| TRUE | 1/1 | 1/1 | 7.82 | 7.71 | 1.08  |
| TRUE | 1/1 | 1/1 | 7.82 | 7.71 | 1.08  |
| TRUE | 1/1 | 1/1 | 7.82 | 7.71 | 1.08  |
| TRUE | 1/1 | 1/1 | 7.82 | 7.71 | 1.08  |
| TRUE | 1/1 | 1/1 | 7.82 | 7.71 | 1.08  |
| TRUE | 1/1 | 1/1 | 5.05 | 5.72 | -1.59 |
| TRUE | 1/1 | 1/1 | 5.05 | 5.72 | -1.59 |
| TRUE | 1/1 | 1/1 | 5.7  | 6.49 | -1.73 |
| TRUE | 1/1 | 1/1 | 5.7  | 6.49 | -1.73 |
| TRUE | 1/1 | 1/1 | 5.7  | 6.49 | -1.73 |
| TRUE | 1/1 | 1/1 | 5.7  | 6.49 | -1.73 |
| TRUE | 1/1 | 1/1 | 5.7  | 6.49 | -1.73 |
| TRUE | 1/1 | 1/1 | 7.11 | 7.75 | -1.56 |
| TRUE | 1/1 | 1/1 | 7.11 | 7.75 | -1.56 |
| TRUE | 1/1 | 1/1 | 7.11 | 7.75 | -1.56 |
| TRUE | 1/1 | 1/1 | 7.11 | 7.75 | -1.56 |
| TRUE | 1/1 | 1/1 | 6.13 | 6.78 | -1.57 |
| TRUE | 1/1 | 1/1 | 6.13 | 6.78 | -1.57 |
| TRUE | 1/1 | 1/1 | 6.21 | 5.64 | 1.49  |
| TRUE | 1/1 | 1/1 | 6.21 | 5.64 | 1.49  |
| TRUE | 1/1 | 1/1 | 6.21 | 5.64 | 1.49  |



|      |     |     |      |       |       |
|------|-----|-----|------|-------|-------|
| TRUE | 1/1 | 1/1 | 6.06 | 6.86  | -1.74 |
| TRUE | 1/1 | 1/1 | 6.06 | 6.86  | -1.74 |
| TRUE | 1/1 | 1/1 | 6.06 | 6.86  | -1.74 |
| TRUE | 1/1 | 1/1 | 6.06 | 6.86  | -1.74 |
| TRUE | 1/1 | 1/1 | 6.06 | 6.86  | -1.74 |
| TRUE | 1/1 | 1/1 | 6.06 | 6.86  | -1.74 |
| TRUE | 1/1 | 1/1 | 5.83 | 5.92  | -1.07 |
| TRUE | 1/1 | 1/1 | 5.83 | 5.92  | -1.07 |
| TRUE | 1/1 | 1/1 | 9.33 | 9.03  | 1.23  |
| TRUE | 1/1 | 1/1 | 9.33 | 9.03  | 1.23  |
| TRUE | 1/1 | 1/1 | 9.33 | 9.03  | 1.23  |
| TRUE | 1/1 | 1/1 | 9.33 | 9.03  | 1.23  |
| TRUE | 1/1 | 1/1 | 9.33 | 9.03  | 1.23  |
| TRUE | 1/1 | 1/1 | 9.33 | 9.03  | 1.23  |
| TRUE | 1/1 | 1/1 | 7.53 | 8.87  | -2.53 |
| TRUE | 1/1 | 1/1 | 7.53 | 8.87  | -2.53 |
| TRUE | 1/1 | 1/1 | 7.53 | 8.87  | -2.53 |
| TRUE | 1/1 | 1/1 | 7.53 | 8.87  | -2.53 |
| TRUE | 1/1 | 1/1 | 7.53 | 8.87  | -2.53 |
| TRUE | 1/1 | 1/1 | 7.53 | 8.87  | -2.53 |
| TRUE | 1/1 | 1/1 | 7.53 | 8.87  | -2.53 |
| TRUE | 1/1 | 1/1 | 5.17 | 3.52  | 3.12  |
| TRUE | 1/1 | 1/1 | 5.17 | 3.52  | 3.12  |
| TRUE | 1/1 | 1/1 | 5.17 | 3.52  | 3.12  |
| TRUE | 1/1 | 1/1 | 5.17 | 3.52  | 3.12  |
| TRUE | 1/1 | 1/1 | 5.17 | 3.52  | 3.12  |
| TRUE | 1/1 | 1/1 | 5.17 | 3.52  | 3.12  |
| TRUE | 1/1 | 1/1 | 5.17 | 3.52  | 3.12  |
| TRUE | 1/1 | 1/1 | 5.17 | 3.52  | 3.12  |
| TRUE | 1/1 | 1/1 | 5.17 | 3.52  | 3.12  |
| TRUE | 1/1 | 1/1 | 5.17 | 3.52  | 3.12  |
| TRUE | 1/1 | 1/1 | 9.23 | 10.47 | -2.37 |
| TRUE | 1/1 | 1/1 | 9.23 | 10.47 | -2.37 |
| TRUE | 1/1 | 1/1 | 9.23 | 10.47 | -2.37 |
| TRUE | 1/1 | 1/1 | 9.23 | 10.47 | -2.37 |
| TRUE | 1/1 | 1/1 | 9.23 | 10.47 | -2.37 |
| TRUE | 1/1 | 1/1 | 9.23 | 10.47 | -2.37 |
| TRUE | 1/1 | 1/1 | 9.23 | 10.47 | -2.37 |
| TRUE | 1/1 | 1/1 | 9.23 | 10.47 | -2.37 |
| TRUE | 1/1 | 1/1 | 9.16 | 9.87  | -1.63 |
| TRUE | 1/1 | 1/1 | 9.16 | 9.87  | -1.63 |
| TRUE | 1/1 | 1/1 | 9.16 | 9.87  | -1.63 |
| TRUE | 1/1 | 1/1 | 9.16 | 9.87  | -1.63 |
| TRUE | 1/1 | 1/1 | 7.73 | 8.48  | -1.69 |
| TRUE | 1/1 | 1/1 | 7.73 | 8.48  | -1.69 |
| TRUE | 1/1 | 1/1 | 7.73 | 8.48  | -1.69 |
| TRUE | 1/1 | 1/1 | 7.73 | 8.48  | -1.69 |
| TRUE | 1/1 | 1/1 | 7.73 | 8.48  | -1.69 |
| TRUE | 1/1 | 1/1 | 7.73 | 8.48  | -1.69 |
| TRUE | 1/1 | 1/1 | 7.73 | 8.48  | -1.69 |
| TRUE | 1/1 | 1/1 | 7.73 | 8.48  | -1.69 |
| TRUE | 1/1 | 1/1 | 7.23 | 8.13  | -1.87 |
| TRUE | 1/1 | 1/1 | 7.23 | 8.13  | -1.87 |
| TRUE | 1/1 | 1/1 | 7.23 | 8.13  | -1.87 |
| TRUE | 1/1 | 1/1 | 7.23 | 8.13  | -1.87 |
| TRUE | 1/1 | 1/1 | 7.23 | 8.13  | -1.87 |
| TRUE | 1/1 | 1/1 | 7.23 | 8.13  | -1.87 |
| TRUE | 1/1 | 1/1 | 7.23 | 8.13  | -1.87 |
| TRUE | 1/1 | 1/1 | 7.23 | 8.13  | -1.87 |
| TRUE | 1/1 | 1/1 | 4.36 | 5.13  | -1.7  |
| TRUE | 1/1 | 1/1 | 4.36 | 5.13  | -1.7  |
| TRUE | 1/1 | 1/1 | 5.75 | 5.99  | -1.18 |
| TRUE | 1/1 | 1/1 | 5.75 | 5.99  | -1.18 |
| TRUE | 1/1 | 1/1 | 5.42 | 5.04  | 1.3   |
| TRUE | 1/1 | 1/1 | 5.42 | 5.04  | 1.3   |

|      |     |     |      |      |       |
|------|-----|-----|------|------|-------|
| TRUE | 1/1 | 1/1 | 5.42 | 5.04 | 1.3   |
| TRUE | 1/1 | 1/1 | 5.42 | 5.04 | 1.3   |
| TRUE | 1/1 | 1/1 | 5.42 | 5.04 | 1.3   |
| TRUE | 1/1 | 1/1 | 5.42 | 5.04 | 1.3   |
| TRUE | 1/1 | 1/1 | 5.42 | 5.04 | 1.3   |
| TRUE | 1/1 | 1/1 | 5.29 | 4.95 | 1.26  |
| TRUE | 1/1 | 1/1 | 5.29 | 4.95 | 1.26  |
| TRUE | 1/1 | 1/1 | 5.29 | 4.95 | 1.26  |
| TRUE | 1/1 | 1/1 | 5.29 | 4.95 | 1.26  |
| TRUE | 1/1 | 1/1 | 5.29 | 4.95 | 1.26  |
| TRUE | 1/1 | 1/1 | 9.95 | 10.4 | -1.36 |
| TRUE | 1/1 | 1/1 | 9.95 | 10.4 | -1.36 |
| TRUE | 1/1 | 1/1 | 7.41 | 7.64 | -1.17 |
| TRUE | 1/1 | 1/1 | 7.41 | 7.64 | -1.17 |
| TRUE | 1/1 | 1/1 | 7.41 | 7.64 | -1.17 |
| TRUE | 1/1 | 1/1 | 7.41 | 8.94 | -2.88 |
| TRUE | 1/1 | 1/1 | 7.41 | 8.94 | -2.88 |
| TRUE | 1/1 | 1/1 | 7.41 | 8.94 | -2.88 |
| TRUE | 1/1 | 1/1 | 7.41 | 8.94 | -2.88 |
| TRUE | 1/1 | 1/1 | 8.27 | 9.79 | -2.87 |
| TRUE | 1/1 | 1/1 | 8.27 | 9.79 | -2.87 |
| TRUE | 1/1 | 1/1 | 8.27 | 9.79 | -2.87 |
| TRUE | 1/1 | 1/1 | 3.43 | 4.42 | -1.98 |
| TRUE | 1/1 | 1/1 | 3.43 | 4.42 | -1.98 |
| TRUE | 1/1 | 1/1 | 3.43 | 4.42 | -1.98 |
| TRUE | 1/1 | 1/1 | 3.43 | 4.42 | -1.98 |
| TRUE | 1/1 | 1/1 | 3.43 | 4.42 | -1.98 |
| TRUE | 1/1 | 1/1 | 3.43 | 4.42 | -1.98 |
| TRUE | 1/1 | 1/1 | 7.11 | 7.52 | -1.33 |
| TRUE | 1/1 | 1/1 | 7.11 | 7.52 | -1.33 |
| TRUE | 1/1 | 1/1 | 7.11 | 7.52 | -1.33 |
| TRUE | 1/1 | 1/1 | 7.11 | 7.52 | -1.33 |
| TRUE | 1/1 | 1/1 | 7.11 | 7.52 | -1.33 |
| TRUE | 1/1 | 1/1 | 6.83 | 7.76 | -1.9  |
| TRUE | 1/1 | 1/1 | 6.83 | 7.76 | -1.9  |
| TRUE | 1/1 | 1/1 | 6.83 | 7.76 | -1.9  |
| TRUE | 1/1 | 1/1 | 6.83 | 7.76 | -1.9  |
| TRUE | 1/1 | 1/1 | 6.83 | 7.76 | -1.9  |
| TRUE | 1/1 | 1/1 | 6.83 | 7.76 | -1.9  |
| TRUE | 1/1 | 1/1 | 6.83 | 7.76 | -1.9  |
| TRUE | 1/1 | 1/1 | 6.83 | 7.76 | -1.9  |
| TRUE | 1/1 | 1/1 | 6.83 | 7.76 | -1.9  |
| TRUE | 1/1 | 1/1 | 6.83 | 7.76 | -1.9  |
| TRUE | 1/1 | 1/1 | 6.83 | 7.76 | -1.9  |
| TRUE | 1/1 | 1/1 | 6.83 | 7.76 | -1.9  |
| TRUE | 1/1 | 1/1 | 6.83 | 7.76 | -1.9  |
| TRUE | 1/1 | 1/1 | 6.83 | 7.76 | -1.9  |
| TRUE | 1/1 | 1/1 | 6.83 | 7.76 | -1.9  |
| TRUE | 1/1 | 1/1 | 7.89 | 8.17 | -1.22 |
| TRUE | 1/1 | 1/1 | 7.89 | 8.17 | -1.22 |
| TRUE | 1/1 | 1/1 | 7.76 | 8.64 | -1.83 |
| TRUE | 1/1 | 1/1 | 7.76 | 8.64 | -1.83 |
| TRUE | 1/1 | 1/1 | 7.76 | 8.64 | -1.83 |
| TRUE | 1/1 | 1/1 | 7.76 | 8.64 | -1.83 |
| TRUE | 1/1 | 1/1 | 6.21 | 6.68 | -1.39 |
| TRUE | 1/1 | 1/1 | 6.21 | 6.68 | -1.39 |
| TRUE | 1/1 | 1/1 | 6.21 | 6.68 | -1.39 |
| TRUE | 1/1 | 1/1 | 6.21 | 6.68 | -1.39 |
| TRUE | 1/1 | 1/1 | 6.21 | 6.68 | -1.39 |
| TRUE | 1/1 | 1/1 | 9.09 | 9.97 | -1.83 |
| TRUE | 1/1 | 1/1 | 9.09 | 9.97 | -1.83 |













|      |     |     |       |       |       |
|------|-----|-----|-------|-------|-------|
| TRUE | 1/1 | 1/1 | 8.82  | 9.6   | -1.71 |
| TRUE | 1/1 | 1/1 | 8.82  | 9.6   | -1.71 |
| TRUE | 1/1 | 1/1 | 8.82  | 9.6   | -1.71 |
| TRUE | 1/1 | 1/1 | 8.82  | 9.6   | -1.71 |
| TRUE | 1/1 | 1/1 | 8.82  | 9.6   | -1.71 |
| TRUE | 1/1 | 1/1 | 8.82  | 9.6   | -1.71 |
| TRUE | 1/1 | 1/1 | 8.82  | 9.6   | -1.71 |
| TRUE | 1/1 | 1/1 | 8.82  | 9.6   | -1.71 |
| TRUE | 1/1 | 1/1 | 8.82  | 9.6   | -1.71 |
| TRUE | 1/1 | 1/1 | 8.82  | 9.6   | -1.71 |
| TRUE | 1/1 | 1/1 | 8.82  | 9.6   | -1.71 |
| TRUE | 1/1 | 1/1 | 7.6   | 8.45  | -1.79 |
| TRUE | 1/1 | 1/1 | 7.6   | 8.45  | -1.79 |
| TRUE | 1/1 | 1/1 | 7.6   | 8.45  | -1.79 |
| TRUE | 1/1 | 1/1 | 7.6   | 8.45  | -1.79 |
| TRUE | 1/1 | 1/1 | 7.6   | 8.45  | -1.79 |
| TRUE | 1/1 | 1/1 | 7.6   | 8.45  | -1.79 |
| TRUE | 1/1 | 1/1 | 7.6   | 8.45  | -1.79 |
| TRUE | 1/1 | 1/1 | 7.6   | 8.45  | -1.79 |
| TRUE | 1/1 | 1/1 | 7.6   | 8.45  | -1.79 |
| TRUE | 1/1 | 1/1 | 7.6   | 8.45  | -1.79 |
| TRUE | 1/1 | 1/1 | 10.32 | 11.03 | -1.64 |
| TRUE | 1/1 | 1/1 | 10.32 | 11.03 | -1.64 |
| TRUE | 1/1 | 1/1 | 10.32 | 11.03 | -1.64 |
| TRUE | 1/1 | 1/1 | 10.32 | 11.03 | -1.64 |
| TRUE | 1/1 | 1/1 | 7.2   | 7.52  | -1.25 |
| TRUE | 1/1 | 1/1 | 7.2   | 7.52  | -1.25 |
| TRUE | 1/1 | 1/1 | 7.2   | 7.52  | -1.25 |
| TRUE | 1/1 | 1/1 | 7.2   | 7.52  | -1.25 |
| TRUE | 1/1 | 1/1 | 3.83  | 4.92  | -2.13 |
| TRUE | 1/1 | 1/1 | 3.83  | 4.92  | -2.13 |
| TRUE | 1/1 | 1/1 | 3.83  | 4.92  | -2.13 |
| TRUE | 1/1 | 1/1 | 8.02  | 10.48 | -5.5  |
| TRUE | 1/1 | 1/1 | 8.02  | 10.48 | -5.5  |
| TRUE | 1/1 | 1/1 | 8.18  | 8.79  | -1.52 |
| TRUE | 1/1 | 1/1 | 8.18  | 8.79  | -1.52 |
| TRUE | 1/1 | 1/1 | 8.18  | 8.79  | -1.52 |
| TRUE | 1/1 | 1/1 | 8.18  | 8.79  | -1.52 |
| TRUE | 1/1 | 1/1 | 7.01  | 6.29  | 1.64  |
| TRUE | 1/1 | 1/1 | 7.01  | 6.29  | 1.64  |
| TRUE | 1/1 | 1/1 | 7.01  | 6.29  | 1.64  |
| TRUE | 1/1 | 1/1 | 5.28  | 5.81  | -1.45 |
| TRUE | 1/1 | 1/1 | 5.28  | 5.81  | -1.45 |
| TRUE | 1/1 | 1/1 | 5.28  | 5.81  | -1.45 |
| TRUE | 1/1 | 1/1 | 4.45  | 3.98  | 1.39  |
| TRUE | 1/1 | 1/1 | 4.45  | 3.98  | 1.39  |
| TRUE | 1/1 | 1/1 | 5.85  | 4.08  | 3.43  |
| TRUE | 1/1 | 1/1 | 5.85  | 4.08  | 3.43  |
| TRUE | 1/1 | 1/1 | 5.85  | 4.08  | 3.43  |
| TRUE | 1/1 | 1/1 | 6.44  | 6.61  | -1.13 |
| TRUE | 1/1 | 1/1 | 6.44  | 6.61  | -1.13 |
| TRUE | 1/1 | 1/1 | 6.44  | 6.61  | -1.13 |
| TRUE | 1/1 | 1/1 | 6.44  | 6.61  | -1.13 |
| TRUE | 1/1 | 1/1 | 6.44  | 6.61  | -1.13 |
| TRUE | 1/1 | 1/1 | 6.44  | 6.61  | -1.13 |
| TRUE | 1/1 | 1/1 | 4.55  | 4.8   | -1.19 |
| TRUE | 1/1 | 1/1 | 4.55  | 4.8   | -1.19 |
| TRUE | 1/1 | 1/1 | 4.55  | 4.8   | -1.19 |
| TRUE | 1/1 | 1/1 | 4.55  | 4.8   | -1.19 |
| TRUE | 1/1 | 1/1 | 4.55  | 4.8   | -1.19 |

|      |     |     |      |      |       |
|------|-----|-----|------|------|-------|
| TRUE | 1/1 | 1/1 | 4.55 | 4.8  | -1.19 |
| TRUE | 1/1 | 1/1 | 4.55 | 4.8  | -1.19 |
| TRUE | 1/1 | 1/1 | 4.55 | 4.8  | -1.19 |
| TRUE | 1/1 | 1/1 | 6.57 | 7.23 | -1.57 |
| TRUE | 1/1 | 1/1 | 6.57 | 7.23 | -1.57 |
| TRUE | 1/1 | 1/1 | 6.57 | 7.23 | -1.57 |
| TRUE | 1/1 | 1/1 | 6.57 | 7.23 | -1.57 |
| TRUE | 1/1 | 1/1 | 5.2  | 6.15 | -1.93 |
| TRUE | 1/1 | 1/1 | 5.2  | 6.15 | -1.93 |
| TRUE | 1/1 | 1/1 | 6.15 | 6.55 | -1.32 |
| TRUE | 1/1 | 1/1 | 6.15 | 6.55 | -1.32 |
| TRUE | 1/1 | 1/1 | 6.15 | 6.55 | -1.32 |
| TRUE | 1/1 | 1/1 | 6.15 | 6.55 | -1.32 |
| TRUE | 1/1 | 1/1 | 4.91 | 5.6  | -1.61 |
| TRUE | 1/1 | 1/1 | 4.91 | 5.6  | -1.61 |
| TRUE | 1/1 | 1/1 | 4.91 | 5.6  | -1.61 |
| TRUE | 1/1 | 1/1 | 6.52 | 6.73 | -1.16 |
| TRUE | 1/1 | 1/1 | 6.52 | 6.73 | -1.16 |
| TRUE | 1/1 | 1/1 | 6.01 | 6.59 | -1.5  |
| TRUE | 1/1 | 1/1 | 6.01 | 6.59 | -1.5  |
| TRUE | 1/1 | 1/1 | 6.01 | 6.59 | -1.5  |
| TRUE | 1/1 | 1/1 | 6.01 | 6.59 | -1.5  |
| TRUE | 1/1 | 1/1 | 6.01 | 6.59 | -1.5  |
| TRUE | 1/1 | 1/1 | 6.01 | 6.59 | -1.5  |
| TRUE | 1/1 | 1/1 | 6.28 | 5.71 | 1.49  |
| TRUE | 1/1 | 1/1 | 6.28 | 5.71 | 1.49  |
| TRUE | 1/1 | 1/1 | 6.28 | 5.71 | 1.49  |
| TRUE | 1/1 | 1/1 | 6.28 | 5.71 | 1.49  |
| TRUE | 1/1 | 1/1 | 4.93 | 5.5  | -1.49 |
| TRUE | 1/1 | 1/1 | 4.93 | 5.5  | -1.49 |
| TRUE | 1/1 | 1/1 | 6.62 | 8.06 | -2.72 |
| TRUE | 1/1 | 1/1 | 6.62 | 8.06 | -2.72 |
| TRUE | 1/1 | 1/1 | 6.62 | 8.06 | -2.72 |
| TRUE | 1/1 | 1/1 | 6.62 | 8.06 | -2.72 |
| TRUE | 1/1 | 1/1 | 6.62 | 8.06 | -2.72 |
| TRUE | 1/1 | 1/1 | 6.62 | 8.06 | -2.72 |
| TRUE | 1/1 | 1/1 | 6.62 | 8.06 | -2.72 |
| TRUE | 1/1 | 1/1 | 6.62 | 8.06 | -2.72 |
| TRUE | 1/1 | 1/1 | 7.53 | 5.18 | 5.09  |
| TRUE | 1/1 | 1/1 | 7.53 | 5.18 | 5.09  |
| TRUE | 1/1 | 1/1 | 7.53 | 5.18 | 5.09  |
| TRUE | 1/1 | 1/1 | 7.53 | 5.18 | 5.09  |
| TRUE | 1/1 | 1/1 | 7.53 | 5.18 | 5.09  |
| TRUE | 1/1 | 1/1 | 5.2  | 6.15 | -1.93 |
| TRUE | 1/1 | 1/1 | 5.2  | 6.15 | -1.93 |
| TRUE | 1/1 | 1/1 | 5.2  | 6.15 | -1.93 |
| TRUE | 1/1 | 1/1 | 5.2  | 6.15 | -1.93 |
| TRUE | 1/1 | 1/1 | 5.2  | 6.15 | -1.93 |
| TRUE | 1/1 | 1/1 | 5.2  | 6.15 | -1.93 |
| TRUE | 1/1 | 1/1 | 5.2  | 6.15 | -1.93 |
| TRUE | 1/1 | 1/1 | 5.2  | 6.15 | -1.93 |
| TRUE | 1/1 | 1/1 | 5.2  | 6.15 | -1.93 |
| TRUE | 1/1 | 1/1 | 5.2  | 6.15 | -1.93 |
| TRUE | 1/1 | 1/1 | 7.16 | 7.13 | 1.02  |
| TRUE | 1/1 | 1/1 | 7.16 | 7.13 | 1.02  |
| TRUE | 1/1 | 1/1 | 7.16 | 7.13 | 1.02  |
| TRUE | 1/1 | 1/1 | 7.16 | 7.13 | 1.02  |
| TRUE | 1/1 | 1/1 | 7.16 | 7.13 | 1.02  |

|      |     |     |      |       |       |
|------|-----|-----|------|-------|-------|
| TRUE | 1/1 | 1/1 | 7.16 | 7.13  | 1.02  |
| TRUE | 1/1 | 1/1 | 7.16 | 7.13  | 1.02  |
| TRUE | 1/1 | 1/1 | 7.16 | 7.13  | 1.02  |
| TRUE | 1/1 | 1/1 | 7.16 | 7.13  | 1.02  |
| TRUE | 1/1 | 1/1 | 6.24 | 5.64  | 1.52  |
| TRUE | 1/1 | 1/1 | 6.24 | 5.64  | 1.52  |
| TRUE | 1/1 | 1/1 | 6.24 | 5.64  | 1.52  |
| TRUE | 1/1 | 1/1 | 6.24 | 5.64  | 1.52  |
| TRUE | 1/1 | 1/1 | 6.24 | 5.64  | 1.52  |
| TRUE | 1/1 | 1/1 | 6.24 | 5.64  | 1.52  |
| TRUE | 1/1 | 1/1 | 6.58 | 6.71  | -1.1  |
| TRUE | 1/1 | 1/1 | 6.58 | 6.71  | -1.1  |
| TRUE | 1/1 | 1/1 | 6.58 | 6.71  | -1.1  |
| TRUE | 1/1 | 1/1 | 6.58 | 6.71  | -1.1  |
| TRUE | 1/1 | 1/1 | 6.58 | 6.71  | -1.1  |
| TRUE | 1/1 | 1/1 | 6.58 | 6.71  | -1.1  |
| TRUE | 1/1 | 1/1 | 5.56 | 6.09  | -1.44 |
| TRUE | 1/1 | 1/1 | 5.56 | 6.09  | -1.44 |
| TRUE | 1/1 | 1/1 | 5.56 | 6.09  | -1.44 |
| TRUE | 1/1 | 1/1 | 5.56 | 6.09  | -1.44 |
| TRUE | 1/1 | 1/1 | 10.7 | 11.51 | -1.74 |
| TRUE | 1/1 | 1/1 | 10.7 | 11.51 | -1.74 |
| TRUE | 1/1 | 1/1 | 10.7 | 11.51 | -1.74 |
| TRUE | 1/1 | 1/1 | 7.48 | 7.97  | -1.41 |
| TRUE | 1/1 | 1/1 | 7.48 | 7.97  | -1.41 |
| TRUE | 1/1 | 1/1 | 7.48 | 7.97  | -1.41 |
| TRUE | 1/1 | 1/1 | 7.48 | 7.97  | -1.41 |
| TRUE | 1/1 | 1/1 | 5.64 | 6.23  | -1.5  |
| TRUE | 1/1 | 1/1 | 5.64 | 6.23  | -1.5  |
| TRUE | 1/1 | 1/1 | 5.64 | 6.23  | -1.5  |
| TRUE | 1/1 | 1/1 | 5.64 | 6.23  | -1.5  |
| TRUE | 1/1 | 1/1 | 5.64 | 6.23  | -1.5  |
| TRUE | 1/1 | 1/1 | 7.53 | 8.27  | -1.66 |
| TRUE | 1/1 | 1/1 | 7.53 | 8.27  | -1.66 |
| TRUE | 1/1 | 1/1 | 7.53 | 8.27  | -1.66 |
| TRUE | 1/1 | 1/1 | 7.53 | 8.27  | -1.66 |
| TRUE | 1/1 | 1/1 | 7.53 | 8.27  | -1.66 |
| TRUE | 1/1 | 1/1 | 7.53 | 8.27  | -1.66 |
| TRUE | 1/1 | 1/1 | 7.53 | 8.27  | -1.66 |
| TRUE | 1/1 | 1/1 | 7.53 | 8.27  | -1.66 |
| TRUE | 1/1 | 1/1 | 7.53 | 8.27  | -1.66 |
| TRUE | 1/1 | 1/1 | 3.93 | 3.53  | 1.31  |
| TRUE | 1/1 | 1/1 | 3.93 | 3.53  | 1.31  |
| TRUE | 1/1 | 1/1 | 3.93 | 3.53  | 1.31  |
| TRUE | 1/1 | 1/1 | 3.93 | 3.53  | 1.31  |
| TRUE | 1/1 | 1/1 | 3.93 | 3.53  | 1.31  |
| TRUE | 1/1 | 1/1 | 3.93 | 3.53  | 1.31  |
| TRUE | 1/1 | 1/1 | 3.93 | 3.53  | 1.31  |
| TRUE | 1/1 | 1/1 | 7    | 8.27  | -2.4  |
| TRUE | 1/1 | 1/1 | 7    | 8.27  | -2.4  |
| TRUE | 1/1 | 1/1 | 7    | 8.27  | -2.4  |
| TRUE | 1/1 | 1/1 | 7    | 8.27  | -2.4  |
| TRUE | 1/1 | 1/1 | 7    | 8.27  | -2.4  |
| TRUE | 1/1 | 1/1 | 7    | 8.27  | -2.4  |
| TRUE | 1/1 | 1/1 | 7    | 8.27  | -2.4  |
| TRUE | 1/1 | 1/1 | 5.9  | 5.11  | 1.73  |
| TRUE | 1/1 | 1/1 | 5.9  | 5.11  | 1.73  |
| TRUE | 1/1 | 1/1 | 5.9  | 5.11  | 1.73  |
| TRUE | 1/1 | 1/1 | 5.9  | 5.11  | 1.73  |
| TRUE | 1/1 | 1/1 | 5.9  | 5.11  | 1.73  |







|      |     |     |       |       |       |
|------|-----|-----|-------|-------|-------|
| TRUE | 1/1 | 1/1 | 5.6   | 3.93  | 3.2   |
| TRUE | 1/1 | 1/1 | 5.6   | 3.93  | 3.2   |
| TRUE | 1/1 | 1/1 | 5.6   | 3.93  | 3.2   |
| TRUE | 1/1 | 1/1 | 5.6   | 3.93  | 3.2   |
| TRUE | 1/1 | 1/1 | 5.73  | 5.95  | -1.17 |
| TRUE | 1/1 | 1/1 | 5.73  | 5.95  | -1.17 |
| TRUE | 1/1 | 1/1 | 5.73  | 5.95  | -1.17 |
| TRUE | 1/1 | 1/1 | 4.18  | 4.83  | -1.57 |
| TRUE | 1/1 | 1/1 | 4.18  | 4.83  | -1.57 |
| TRUE | 1/1 | 1/1 | 4.18  | 4.83  | -1.57 |
| TRUE | 1/1 | 1/1 | 4.18  | 4.83  | -1.57 |
| TRUE | 1/1 | 1/1 | 4.18  | 4.83  | -1.57 |
| TRUE | 1/1 | 1/1 | 4.18  | 4.83  | -1.57 |
| TRUE | 1/1 | 1/1 | 4.18  | 4.83  | -1.57 |
| TRUE | 1/1 | 1/1 | 4.18  | 4.83  | -1.57 |
| TRUE | 1/1 | 1/1 | 10.18 | 10.63 | -1.36 |
| TRUE | 1/1 | 1/1 | 10.18 | 10.63 | -1.36 |
| TRUE | 1/1 | 1/1 | 10.18 | 10.63 | -1.36 |
| TRUE | 1/1 | 1/1 | 8.69  | 8.01  | 1.6   |
| TRUE | 1/1 | 1/1 | 8.69  | 8.01  | 1.6   |
| TRUE | 1/1 | 1/1 | 6.64  | 7.18  | -1.46 |
| TRUE | 1/1 | 1/1 | 6.64  | 7.18  | -1.46 |
| TRUE | 1/1 | 1/1 | 8.06  | 8.3   | -1.18 |
| TRUE | 1/1 | 1/1 | 8.06  | 8.3   | -1.18 |
| TRUE | 1/1 | 1/1 | 8.06  | 8.3   | -1.18 |
| TRUE | 1/1 | 1/1 | 10.43 | 9.19  | 2.36  |
| TRUE | 1/1 | 1/1 | 10.43 | 9.19  | 2.36  |
| TRUE | 1/1 | 1/1 | 10.43 | 9.19  | 2.36  |
| TRUE | 1/1 | 1/1 | 10.43 | 9.19  | 2.36  |
| TRUE | 1/1 | 1/1 | 10.43 | 9.19  | 2.36  |
| TRUE | 1/1 | 1/1 | 4.37  | 3.15  | 2.33  |
| TRUE | 1/1 | 1/1 | 4.37  | 3.15  | 2.33  |
| TRUE | 1/1 | 1/1 | 4.37  | 3.15  | 2.33  |
| TRUE | 1/1 | 1/1 | 4.37  | 3.15  | 2.33  |
| TRUE | 1/1 | 1/1 | 4.37  | 3.15  | 2.33  |
| TRUE | 1/1 | 1/1 | 4.37  | 3.15  | 2.33  |
| TRUE | 1/1 | 1/1 | 4.37  | 3.15  | 2.33  |
| TRUE | 1/1 | 1/1 | 4.37  | 3.15  | 2.33  |
| TRUE | 1/1 | 1/1 | 4.37  | 3.15  | 2.33  |
| TRUE | 1/1 | 1/1 | 4.37  | 3.15  | 2.33  |
| TRUE | 1/1 | 1/1 | 4.37  | 3.15  | 2.33  |
| TRUE | 1/1 | 1/1 | 4.37  | 3.15  | 2.33  |
| TRUE | 1/1 | 1/1 | 4.37  | 3.15  | 2.33  |
| TRUE | 1/1 | 1/1 | 4.37  | 3.15  | 2.33  |
| TRUE | 1/1 | 1/1 | 4.37  | 3.15  | 2.33  |
| TRUE | 1/1 | 1/1 | 4.37  | 3.15  | 2.33  |
| TRUE | 1/1 | 1/1 | 4.37  | 3.15  | 2.33  |
| TRUE | 1/1 | 1/1 | 4.37  | 3.15  | 2.33  |
| TRUE | 1/1 | 1/1 | 4.37  | 3.15  | 2.33  |
| TRUE | 1/1 | 1/1 | 4.37  | 3.15  | 2.33  |
| TRUE | 1/1 | 1/1 | 4.37  | 3.15  | 2.33  |
| TRUE | 1/1 | 1/1 | 4.37  | 3.15  | 2.33  |
| TRUE | 1/1 | 1/1 | 4.37  | 3.15  | 2.33  |
| TRUE | 1/1 | 1/1 | 4.37  | 3.15  | 2.33  |
| TRUE | 1/1 | 1/1 | 4.37  | 3.15  | 2.33  |
| TRUE | 1/1 | 1/1 | 4.37  | 3.15  | 2.33  |
| TRUE | 1/1 | 1/1 | 4.37  | 3.15  | 2.33  |
| TRUE | 1/1 | 1/1 | 7.2   | 6.88  | 1.25  |
| TRUE | 1/1 | 1/1 | 7.2   | 6.88  | 1.25  |
| TRUE | 1/1 | 1/1 | 7.2   | 6.88  | 1.25  |
| TRUE | 1/1 | 1/1 | 7.2   | 6.88  | 1.25  |
| TRUE | 1/1 | 1/1 | 11.21 | 11.87 | -1.57 |
| TRUE | 1/1 | 1/1 | 11.21 | 11.87 | -1.57 |

|      |     |     |       |       |       |
|------|-----|-----|-------|-------|-------|
| TRUE | 1/1 | 1/1 | 11.21 | 11.87 | -1.57 |
| TRUE | 1/1 | 1/1 | 11.21 | 11.87 | -1.57 |
| TRUE | 1/1 | 1/1 | 11.21 | 11.87 | -1.57 |
| TRUE | 1/1 | 1/1 | 11.21 | 11.87 | -1.57 |
| TRUE | 1/1 | 1/1 | 11.21 | 11.87 | -1.57 |
| TRUE | 1/1 | 1/1 | 11.21 | 11.87 | -1.57 |
| TRUE | 1/1 | 1/1 | 4.54  | 5.23  | -1.61 |
| TRUE | 1/1 | 1/1 | 4.54  | 5.23  | -1.61 |
| TRUE | 1/1 | 1/1 | 4.54  | 5.23  | -1.61 |
| TRUE | 1/1 | 1/1 | 4.54  | 5.23  | -1.61 |
| TRUE | 1/1 | 1/1 | 4.54  | 5.23  | -1.61 |
| TRUE | 1/1 | 1/1 | 4.54  | 5.23  | -1.61 |
| TRUE | 1/1 | 1/1 | 4.54  | 5.23  | -1.61 |
| TRUE | 1/1 | 1/1 | 3.87  | 5.01  | -2.21 |
| TRUE | 1/1 | 1/1 | 3.87  | 5.01  | -2.21 |
| TRUE | 1/1 | 1/1 | 3.87  | 5.01  | -2.21 |
| TRUE | 1/1 | 1/1 | 3.87  | 5.01  | -2.21 |
| TRUE | 1/1 | 1/1 | 3.87  | 5.01  | -2.21 |
| TRUE | 1/1 | 1/1 | 3.87  | 5.01  | -2.21 |
| TRUE | 1/1 | 1/1 | 3.83  | 5.11  | -2.43 |
| TRUE | 1/1 | 1/1 | 3.83  | 5.11  | -2.43 |
| TRUE | 1/1 | 1/1 | 3.83  | 5.11  | -2.43 |
| TRUE | 1/1 | 1/1 | 3.83  | 5.11  | -2.43 |
| TRUE | 1/1 | 1/1 | 3.83  | 5.11  | -2.43 |
| TRUE | 1/1 | 1/1 | 3.83  | 5.11  | -2.43 |
| TRUE | 1/1 | 1/1 | 7.27  | 8.12  | -1.8  |
| TRUE | 1/1 | 1/1 | 7.27  | 8.12  | -1.8  |
| TRUE | 1/1 | 1/1 | 8.38  | 8.81  | -1.35 |
| TRUE | 1/1 | 1/1 | 8.38  | 8.81  | -1.35 |
| TRUE | 1/1 | 1/1 | 8.38  | 8.81  | -1.35 |
| TRUE | 1/1 | 1/1 | 7.3   | 8.09  | -1.73 |
| TRUE | 1/1 | 1/1 | 7.3   | 8.09  | -1.73 |
| TRUE | 1/1 | 1/1 | 7.3   | 8.09  | -1.73 |
| TRUE | 1/1 | 1/1 | 7.3   | 8.09  | -1.73 |
| TRUE | 1/1 | 1/1 | 7.3   | 8.09  | -1.73 |
| TRUE | 1/1 | 1/1 | 7.3   | 8.09  | -1.73 |
| TRUE | 1/1 | 1/1 | 7.3   | 8.09  | -1.73 |
| TRUE | 1/1 | 1/1 | 7.3   | 8.09  | -1.73 |
| TRUE | 1/1 | 1/1 | 7.3   | 8.09  | -1.73 |
| TRUE | 1/1 | 1/1 | 6.86  | 6.84  | 1.01  |
| TRUE | 1/1 | 1/1 | 6.86  | 6.84  | 1.01  |
| TRUE | 1/1 | 1/1 | 6.86  | 6.84  | 1.01  |
| TRUE | 1/1 | 1/1 | 6.86  | 6.84  | 1.01  |
| TRUE | 1/1 | 1/1 | 6.86  | 6.84  | 1.01  |
| TRUE | 1/1 | 1/1 | 7.17  | 8.29  | -2.17 |
| TRUE | 1/1 | 1/1 | 7.17  | 8.29  | -2.17 |
| TRUE | 1/1 | 1/1 | 7.17  | 8.29  | -2.17 |
| TRUE | 1/1 | 1/1 | 7.17  | 8.29  | -2.17 |
| TRUE | 1/1 | 1/1 | 7.17  | 8.29  | -2.17 |
| TRUE | 1/1 | 1/1 | 7.17  | 8.29  | -2.17 |
| TRUE | 1/1 | 1/1 | 7.17  | 8.29  | -2.17 |
| TRUE | 1/1 | 1/1 | 7.17  | 8.29  | -2.17 |
| TRUE | 1/1 | 1/1 | 5.55  | 6.6   | -2.06 |
| TRUE | 1/1 | 1/1 | 5.55  | 6.6   | -2.06 |
| TRUE | 1/1 | 1/1 | 5.55  | 6.6   | -2.06 |
| TRUE | 1/1 | 1/1 | 5.55  | 6.6   | -2.06 |
| TRUE | 1/1 | 1/1 | 5.55  | 6.6   | -2.06 |
| TRUE | 1/1 | 1/1 | 5.55  | 6.6   | -2.06 |
| TRUE | 1/1 | 1/1 | 5.55  | 6.6   | -2.06 |
| TRUE | 1/1 | 1/1 | 5.55  | 6.6   | -2.06 |
| TRUE | 1/1 | 1/1 | 9.69  | 6.36  | 10.03 |

|      |     |     |       |       |       |
|------|-----|-----|-------|-------|-------|
| TRUE | 1/1 | 1/1 | 9.69  | 6.36  | 10.03 |
| TRUE | 1/1 | 1/1 | 9.69  | 6.36  | 10.03 |
| TRUE | 1/1 | 1/1 | 9.69  | 6.36  | 10.03 |
| TRUE | 1/1 | 1/1 | 9.69  | 6.36  | 10.03 |
| TRUE | 1/1 | 1/1 | 9.69  | 6.36  | 10.03 |
| TRUE | 1/1 | 1/1 | 9.69  | 6.36  | 10.03 |
| TRUE | 1/1 | 1/1 | 9.69  | 6.36  | 10.03 |
| TRUE | 1/1 | 1/1 | 9.69  | 6.36  | 10.03 |
| TRUE | 1/1 | 1/1 | 9.69  | 6.36  | 10.03 |
| TRUE | 1/1 | 1/1 | 9.69  | 6.36  | 10.03 |
| TRUE | 1/1 | 1/1 | 9.69  | 6.36  | 10.03 |
| TRUE | 1/1 | 1/1 | 9.69  | 6.36  | 10.03 |
| TRUE | 1/1 | 1/1 | 9.69  | 6.36  | 10.03 |
| TRUE | 1/1 | 1/1 | 9.69  | 6.36  | 10.03 |
| TRUE | 1/1 | 1/1 | 9.69  | 6.36  | 10.03 |
| TRUE | 1/1 | 1/1 | 9.69  | 6.36  | 10.03 |
| TRUE | 1/1 | 1/1 | 10.48 | 11.26 | -1.72 |
| TRUE | 1/1 | 1/1 | 10.48 | 11.26 | -1.72 |
| TRUE | 1/1 | 1/1 | 10.48 | 11.26 | -1.72 |
| TRUE | 1/1 | 1/1 | 10.48 | 11.26 | -1.72 |
| TRUE | 1/1 | 1/1 | 10.48 | 11.26 | -1.72 |
| TRUE | 1/1 | 1/1 | 10.48 | 11.26 | -1.72 |
| TRUE | 1/1 | 1/1 | 10.48 | 11.26 | -1.72 |
| TRUE | 1/1 | 1/1 | 10.48 | 11.26 | -1.72 |
| TRUE | 1/1 | 1/1 | 10.48 | 11.26 | -1.72 |
| TRUE | 1/1 | 1/1 | 10.48 | 11.26 | -1.72 |
| TRUE | 1/1 | 1/1 | 10.48 | 11.26 | -1.72 |
| TRUE | 1/1 | 1/1 | 10.48 | 11.26 | -1.72 |
| TRUE | 1/1 | 1/1 | 10.48 | 11.26 | -1.72 |
| TRUE | 1/1 | 1/1 | 10.48 | 11.26 | -1.72 |
| TRUE | 1/1 | 1/1 | 10.48 | 11.26 | -1.72 |
| TRUE | 1/1 | 1/1 | 10.12 | 11.16 | -2.06 |
| TRUE | 1/1 | 1/1 | 10.12 | 11.16 | -2.06 |
| TRUE | 1/1 | 1/1 | 10.12 | 11.16 | -2.06 |
| TRUE | 1/1 | 1/1 | 10.12 | 11.16 | -2.06 |
| TRUE | 1/1 | 1/1 | 10.12 | 11.16 | -2.06 |
| TRUE | 1/1 | 1/1 | 10.12 | 11.16 | -2.06 |
| TRUE | 1/1 | 1/1 | 10.12 | 11.16 | -2.06 |
| TRUE | 1/1 | 1/1 | 10.12 | 11.16 | -2.06 |
| TRUE | 1/1 | 1/1 | 10.12 | 11.16 | -2.06 |
| TRUE | 1/1 | 1/1 | 4.28  | 4.58  | -1.23 |
| TRUE | 1/1 | 1/1 | 4.28  | 4.58  | -1.23 |
| TRUE | 1/1 | 1/1 | 4.28  | 4.58  | -1.23 |
| TRUE | 1/1 | 1/1 | 4.28  | 4.58  | -1.23 |
| TRUE | 1/1 | 1/1 | 4.28  | 4.58  | -1.23 |
| TRUE | 1/1 | 1/1 | 4.28  | 4.58  | -1.23 |
| TRUE | 1/1 | 1/1 | 9.11  | 8.51  | 1.51  |
| TRUE | 1/1 | 1/1 | 9.11  | 8.51  | 1.51  |
| TRUE | 1/1 | 1/1 | 9.11  | 8.51  | 1.51  |
| TRUE | 1/1 | 1/1 | 9.11  | 8.51  | 1.51  |
| TRUE | 1/1 | 1/1 | 8.71  | 9.08  | -1.29 |
| TRUE | 1/1 | 1/1 | 8.71  | 9.08  | -1.29 |
| TRUE | 1/1 | 1/1 | 9.14  | 7.93  | 2.3   |
| TRUE | 1/1 | 1/1 | 9.14  | 7.93  | 2.3   |
| TRUE | 1/1 | 1/1 | 9.14  | 7.93  | 2.3   |
| TRUE | 1/1 | 1/1 | 9.14  | 7.93  | 2.3   |
| TRUE | 1/1 | 1/1 | 9.14  | 7.93  | 2.3   |
| TRUE | 1/1 | 1/1 | 9.14  | 7.93  | 2.3   |
| TRUE | 1/1 | 1/1 | 9.14  | 7.93  | 2.3   |
| TRUE | 1/1 | 1/1 | 5.96  | 5.74  | 1.17  |
| TRUE | 1/1 | 1/1 | 5.96  | 5.74  | 1.17  |
| TRUE | 1/1 | 1/1 | 5.96  | 5.74  | 1.17  |
| TRUE | 1/1 | 1/1 | 5.96  | 5.74  | 1.17  |
| TRUE | 1/1 | 1/1 | 6.19  | 6.03  | 1.11  |
| TRUE | 1/1 | 1/1 | 6.19  | 6.03  | 1.11  |

|      |     |     |       |       |       |
|------|-----|-----|-------|-------|-------|
| TRUE | 1/1 | 1/1 | 6.19  | 6.03  | 1.11  |
| TRUE | 1/1 | 1/1 | 6.19  | 6.03  | 1.11  |
| TRUE | 1/1 | 1/1 | 6.19  | 6.03  | 1.11  |
| TRUE | 1/1 | 1/1 | 6.19  | 6.03  | 1.11  |
| TRUE | 1/1 | 1/1 | 9.01  | 6.21  | 6.99  |
| TRUE | 1/1 | 1/1 | 9.01  | 6.21  | 6.99  |
| TRUE | 1/1 | 1/1 | 9.01  | 6.21  | 6.99  |
| TRUE | 1/1 | 1/1 | 9.01  | 6.21  | 6.99  |
| TRUE | 1/1 | 1/1 | 9.01  | 6.21  | 6.99  |
| TRUE | 1/1 | 1/1 | 9.01  | 6.21  | 6.99  |
| TRUE | 1/1 | 1/1 | 9.01  | 6.21  | 6.99  |
| TRUE | 1/1 | 1/1 | 9.01  | 6.21  | 6.99  |
| TRUE | 1/1 | 1/1 | 9.01  | 6.21  | 6.99  |
| TRUE | 1/1 | 1/1 | 9.01  | 6.21  | 6.99  |
| TRUE | 1/1 | 1/1 | 9.01  | 6.21  | 6.99  |
| TRUE | 1/1 | 1/1 | 9.01  | 6.21  | 6.99  |
| TRUE | 1/1 | 1/1 | 9.01  | 6.21  | 6.99  |
| TRUE | 1/1 | 1/1 | 9.01  | 6.21  | 6.99  |
| TRUE | 1/1 | 1/1 | 9.01  | 6.21  | 6.99  |
| TRUE | 1/1 | 1/1 | 3.34  | 3.57  | -1.17 |
| TRUE | 1/1 | 1/1 | 3.34  | 3.57  | -1.17 |
| TRUE | 1/1 | 1/1 | 3.34  | 3.57  | -1.17 |
| TRUE | 1/1 | 1/1 | 3.34  | 3.57  | -1.17 |
| TRUE | 1/1 | 1/1 | 9.31  | 9.17  | 1.1   |
| TRUE | 1/1 | 1/1 | 9.31  | 9.17  | 1.1   |
| TRUE | 1/1 | 1/1 | 9.31  | 9.17  | 1.1   |
| TRUE | 1/1 | 1/1 | 9.31  | 9.17  | 1.1   |
| TRUE | 1/1 | 1/1 | 9.31  | 9.17  | 1.1   |
| TRUE | 1/1 | 1/1 | 9.31  | 9.17  | 1.1   |
| TRUE | 1/1 | 1/1 | 4.51  | 5.71  | -2.29 |
| TRUE | 1/1 | 1/1 | 4.51  | 5.71  | -2.29 |
| TRUE | 1/1 | 1/1 | 4.51  | 5.71  | -2.29 |
| TRUE | 1/1 | 1/1 | 4.51  | 5.71  | -2.29 |
| TRUE | 1/1 | 1/1 | 4.51  | 5.71  | -2.29 |
| TRUE | 1/1 | 1/1 | 4.51  | 5.71  | -2.29 |
| TRUE | 1/1 | 1/1 | 4.51  | 5.71  | -2.29 |
| TRUE | 1/1 | 1/1 | 4.51  | 5.71  | -2.29 |
| TRUE | 1/1 | 1/1 | 4.51  | 5.71  | -2.29 |
| TRUE | 1/1 | 1/1 | 4.51  | 5.71  | -2.29 |
| TRUE | 1/1 | 1/1 | 4.51  | 5.71  | -2.29 |
| TRUE | 1/1 | 1/1 | 4.51  | 5.71  | -2.29 |
| TRUE | 1/1 | 1/1 | 4.51  | 5.71  | -2.29 |
| TRUE | 1/1 | 1/1 | 4.51  | 5.71  | -2.29 |
| TRUE | 1/1 | 1/1 | 4.51  | 5.71  | -2.29 |
| TRUE | 1/1 | 1/1 | 4.51  | 5.71  | -2.29 |
| TRUE | 1/1 | 1/1 | 4.51  | 5.71  | -2.29 |
| TRUE | 1/1 | 1/1 | 4.51  | 5.71  | -2.29 |
| TRUE | 1/1 | 1/1 | 7.52  | 7.53  | -1.01 |
| TRUE | 1/1 | 1/1 | 7.52  | 7.53  | -1.01 |
| TRUE | 1/1 | 1/1 | 7.52  | 7.53  | -1.01 |
| TRUE | 1/1 | 1/1 | 7.52  | 7.53  | -1.01 |
| TRUE | 1/1 | 1/1 | 10.53 | 11.41 | -1.83 |
| TRUE | 1/1 | 1/1 | 10.53 | 11.41 | -1.83 |
| TRUE | 1/1 | 1/1 | 10.53 | 11.41 | -1.83 |
| TRUE | 1/1 | 1/1 | 10.53 | 11.41 | -1.83 |
| TRUE | 1/1 | 1/1 | 7.8   | 8.28  | -1.39 |
| TRUE | 1/1 | 1/1 | 7.8   | 8.28  | -1.39 |
| TRUE | 1/1 | 1/1 | 7.8   | 8.28  | -1.39 |
| TRUE | 1/1 | 1/1 | 7.05  | 6.93  | 1.09  |
| TRUE | 1/1 | 1/1 | 7.05  | 6.93  | 1.09  |
| TRUE | 1/1 | 1/1 | 7.58  | 8.91  | -2.51 |
| TRUE | 1/1 | 1/1 | 7.58  | 8.91  | -2.51 |
| TRUE | 1/1 | 1/1 | 7.58  | 8.91  | -2.51 |



|      |     |     |       |       |       |
|------|-----|-----|-------|-------|-------|
| TRUE | 1/1 | 1/1 | 9.78  | 11.25 | -2.75 |
| TRUE | 1/1 | 1/1 | 9.78  | 11.25 | -2.75 |
| TRUE | 1/1 | 1/1 | 9.78  | 11.25 | -2.75 |
| TRUE | 1/1 | 1/1 | 9.78  | 11.25 | -2.75 |
| TRUE | 1/1 | 1/1 | 9.78  | 11.25 | -2.75 |
| TRUE | 1/1 | 1/1 | 9.78  | 11.25 | -2.75 |
| TRUE | 1/1 | 1/1 | 9.78  | 11.25 | -2.75 |
| TRUE | 1/1 | 1/1 | 8.72  | 10.04 | -2.49 |
| TRUE | 1/1 | 1/1 | 8.72  | 10.04 | -2.49 |
| TRUE | 1/1 | 1/1 | 8.72  | 10.04 | -2.49 |
| TRUE | 1/1 | 1/1 | 8.72  | 10.04 | -2.49 |
| TRUE | 1/1 | 1/1 | 8.72  | 10.04 | -2.49 |
| TRUE | 1/1 | 1/1 | 8.72  | 10.04 | -2.49 |
| TRUE | 1/1 | 1/1 | 8.72  | 10.04 | -2.49 |
| TRUE | 1/1 | 1/1 | 8.72  | 10.04 | -2.49 |
| TRUE | 1/1 | 1/1 | 5.96  | 6.62  | -1.58 |
| TRUE | 1/1 | 1/1 | 5.96  | 6.62  | -1.58 |
| TRUE | 1/1 | 1/1 | 5.96  | 6.62  | -1.58 |
| TRUE | 1/1 | 1/1 | 5.96  | 6.62  | -1.58 |
| TRUE | 1/1 | 1/1 | 5.96  | 6.62  | -1.58 |
| TRUE | 1/1 | 1/1 | 5.96  | 6.62  | -1.58 |
| TRUE | 1/1 | 1/1 | 4.04  | 4.53  | -1.41 |
| TRUE | 1/1 | 1/1 | 4.04  | 4.53  | -1.41 |
| TRUE | 1/1 | 1/1 | 4.04  | 4.53  | -1.41 |
| TRUE | 1/1 | 1/1 | 4.04  | 4.53  | -1.41 |
| TRUE | 1/1 | 1/1 | 4.04  | 4.53  | -1.41 |
| TRUE | 1/1 | 1/1 | 4.04  | 4.53  | -1.41 |
| TRUE | 1/1 | 1/1 | 4.04  | 4.53  | -1.41 |
| TRUE | 1/1 | 1/1 | 5.36  | 5.52  | -1.11 |
| TRUE | 1/1 | 1/1 | 5.36  | 5.52  | -1.11 |
| TRUE | 1/1 | 1/1 | 5.36  | 5.52  | -1.11 |
| TRUE | 1/1 | 1/1 | 8.85  | 10.1  | -2.37 |
| TRUE | 1/1 | 1/1 | 8.85  | 10.1  | -2.37 |
| TRUE | 1/1 | 1/1 | 8.85  | 10.1  | -2.37 |
| TRUE | 1/1 | 1/1 | 8.85  | 10.1  | -2.37 |
| TRUE | 1/1 | 1/1 | 9.78  | 10.81 | -2.04 |
| TRUE | 1/1 | 1/1 | 9.78  | 10.81 | -2.04 |
| TRUE | 1/1 | 1/1 | 9.78  | 10.81 | -2.04 |
| TRUE | 1/1 | 1/1 | 9.78  | 10.81 | -2.04 |
| TRUE | 1/1 | 1/1 | 9.78  | 10.81 | -2.04 |
| TRUE | 1/1 | 1/1 | 5.93  | 6.05  | -1.09 |
| TRUE | 1/1 | 1/1 | 5.93  | 6.05  | -1.09 |
| TRUE | 1/1 | 1/1 | 5.93  | 6.05  | -1.09 |
| TRUE | 1/1 | 1/1 | 10.34 | 10.77 | -1.35 |
| TRUE | 1/1 | 1/1 | 10.34 | 10.77 | -1.35 |
| TRUE | 1/1 | 1/1 | 10.34 | 10.77 | -1.35 |
| TRUE | 1/1 | 1/1 | 10.34 | 10.77 | -1.35 |
| TRUE | 1/1 | 1/1 | 10.34 | 10.77 | -1.35 |
| TRUE | 1/1 | 1/1 | 7.79  | 8.49  | -1.63 |
| TRUE | 1/1 | 1/1 | 7.79  | 8.49  | -1.63 |
| TRUE | 1/1 | 1/1 | 6.04  | 6.09  | -1.03 |
| TRUE | 1/1 | 1/1 | 6.04  | 6.09  | -1.03 |
| TRUE | 1/1 | 1/1 | 6.04  | 6.09  | -1.03 |
| TRUE | 1/1 | 1/1 | 6.27  | 7.18  | -1.88 |
| TRUE | 1/1 | 1/1 | 6.27  | 7.18  | -1.88 |
| TRUE | 1/1 | 1/1 | 6.27  | 7.18  | -1.88 |
| TRUE | 1/1 | 1/1 | 6.27  | 7.18  | -1.88 |





|      |     |     |       |       |       |
|------|-----|-----|-------|-------|-------|
| TRUE | 1/1 | 1/1 | 5.68  | 6.19  | -1.42 |
| TRUE | 1/1 | 1/1 | 5.68  | 6.19  | -1.42 |
| TRUE | 1/1 | 1/1 | 6.07  | 6.91  | -1.8  |
| TRUE | 1/1 | 1/1 | 6.07  | 6.91  | -1.8  |
| TRUE | 1/1 | 1/1 | 6.07  | 6.91  | -1.8  |
| TRUE | 1/1 | 1/1 | 6.07  | 6.91  | -1.8  |
| TRUE | 1/1 | 1/1 | 6.07  | 6.91  | -1.8  |
| TRUE | 1/1 | 1/1 | 6.07  | 6.91  | -1.8  |
| TRUE | 1/1 | 1/1 | 6.07  | 6.91  | -1.8  |
| TRUE | 1/1 | 1/1 | 5.6   | 6.01  | -1.33 |
| TRUE | 1/1 | 1/1 | 5.6   | 6.01  | -1.33 |
| TRUE | 1/1 | 1/1 | 5.6   | 6.01  | -1.33 |
| TRUE | 1/1 | 1/1 | 5.6   | 6.01  | -1.33 |
| TRUE | 1/1 | 1/1 | 5.6   | 6.01  | -1.33 |
| TRUE | 1/1 | 1/1 | 5.6   | 6.01  | -1.33 |
| TRUE | 1/1 | 1/1 | 5.6   | 6.01  | -1.33 |
| TRUE | 1/1 | 1/1 | 5.09  | 5.41  | -1.25 |
| TRUE | 1/1 | 1/1 | 5.09  | 5.41  | -1.25 |
| TRUE | 1/1 | 1/1 | 5.09  | 5.41  | -1.25 |
| TRUE | 1/1 | 1/1 | 5.09  | 5.41  | -1.25 |
| TRUE | 1/1 | 1/1 | 5.09  | 5.41  | -1.25 |
| TRUE | 1/1 | 1/1 | 5.09  | 5.41  | -1.25 |
| TRUE | 1/1 | 1/1 | 5.09  | 5.41  | -1.25 |
| TRUE | 1/1 | 1/1 | 5.09  | 5.41  | -1.25 |
| TRUE | 1/1 | 1/1 | 4.43  | 5.05  | -1.54 |
| TRUE | 1/1 | 1/1 | 4.43  | 5.05  | -1.54 |
| TRUE | 1/1 | 1/1 | 4.43  | 5.05  | -1.54 |
| TRUE | 1/1 | 1/1 | 4.43  | 5.05  | -1.54 |
| TRUE | 1/1 | 1/1 | 4.43  | 5.05  | -1.54 |
| TRUE | 1/1 | 1/1 | 4.43  | 5.05  | -1.54 |
| TRUE | 1/1 | 1/1 | 4.43  | 5.05  | -1.54 |
| TRUE | 1/1 | 1/1 | 11.29 | 11.31 | -1.01 |
| TRUE | 1/1 | 1/1 | 11.29 | 11.31 | -1.01 |
| TRUE | 1/1 | 1/1 | 5.5   | 4.67  | 1.78  |
| TRUE | 1/1 | 1/1 | 5.5   | 4.67  | 1.78  |
| TRUE | 1/1 | 1/1 | 5.5   | 4.67  | 1.78  |
| TRUE | 1/1 | 1/1 | 5.5   | 4.67  | 1.78  |
| TRUE | 1/1 | 1/1 | 5.5   | 4.67  | 1.78  |
| TRUE | 1/1 | 1/1 | 5.5   | 4.67  | 1.78  |
| TRUE | 1/1 | 1/1 | 5.5   | 4.67  | 1.78  |
| TRUE | 1/1 | 1/1 | 5.5   | 4.67  | 1.78  |
| TRUE | 1/1 | 1/1 | 3.46  | 4.32  | -1.81 |
| TRUE | 1/1 | 1/1 | 3.46  | 4.32  | -1.81 |
| TRUE | 1/1 | 1/1 | 3.46  | 4.32  | -1.81 |
| TRUE | 1/1 | 1/1 | 3.46  | 4.32  | -1.81 |
| TRUE | 1/1 | 1/1 | 3.46  | 4.32  | -1.81 |
| TRUE | 1/1 | 1/1 | 3.46  | 4.32  | -1.81 |
| TRUE | 1/1 | 1/1 | 3.46  | 4.32  | -1.81 |
| TRUE | 1/1 | 1/1 | 9.29  | 9.31  | -1.01 |
| TRUE | 1/1 | 1/1 | 9.29  | 9.31  | -1.01 |
| TRUE | 1/1 | 1/1 | 6.32  | 6.88  | -1.47 |
| TRUE | 1/1 | 1/1 | 6.32  | 6.88  | -1.47 |
| TRUE | 1/1 | 1/1 | 6.32  | 6.88  | -1.47 |
| TRUE | 1/1 | 1/1 | 6.32  | 6.88  | -1.47 |
| TRUE | 1/1 | 1/1 | 6.32  | 6.88  | -1.47 |
| TRUE | 1/1 | 1/1 | 6.32  | 6.88  | -1.47 |
| TRUE | 1/1 | 1/1 | 9.72  | 10.1  | -1.3  |
| TRUE | 1/1 | 1/1 | 9.72  | 10.1  | -1.3  |
| TRUE | 1/1 | 1/1 | 6.08  | 6.53  | -1.36 |
| TRUE | 1/1 | 1/1 | 6.08  | 6.53  | -1.36 |
| TRUE | 1/1 | 1/1 | 6.08  | 6.53  | -1.36 |
| TRUE | 1/1 | 1/1 | 6.08  | 6.53  | -1.36 |
| TRUE | 1/1 | 1/1 | 6.08  | 6.53  | -1.36 |



|      |     |     |       |       |       |
|------|-----|-----|-------|-------|-------|
| TRUE | 1/1 | 1/1 | 5.67  | 5.42  | 1.19  |
| TRUE | 1/1 | 1/1 | 5.67  | 5.42  | 1.19  |
| TRUE | 1/1 | 1/1 | 8.78  | 9.15  | -1.3  |
| TRUE | 1/1 | 1/1 | 8.78  | 9.15  | -1.3  |
| TRUE | 1/1 | 1/1 | 8.13  | 7.81  | 1.24  |
| TRUE | 1/1 | 1/1 | 8.13  | 7.81  | 1.24  |
| TRUE | 1/1 | 1/1 | 8.13  | 7.81  | 1.24  |
| TRUE | 1/1 | 1/1 | 8.13  | 7.81  | 1.24  |
| TRUE | 1/1 | 1/1 | 8.13  | 7.81  | 1.24  |
| TRUE | 1/1 | 1/1 | 8.13  | 7.81  | 1.24  |
| TRUE | 1/1 | 1/1 | 8.13  | 7.81  | 1.24  |
| TRUE | 1/1 | 1/1 | 8.13  | 7.81  | 1.24  |
| TRUE | 1/1 | 1/1 | 8.13  | 7.81  | 1.24  |
| TRUE | 1/1 | 1/1 | 8.13  | 7.81  | 1.24  |
| TRUE | 1/1 | 1/1 | 8.13  | 7.81  | 1.24  |
| TRUE | 1/1 | 1/1 | 8.13  | 7.81  | 1.24  |
| TRUE | 1/1 | 1/1 | 5.62  | 5.82  | -1.15 |
| TRUE | 1/1 | 1/1 | 5.62  | 5.82  | -1.15 |
| TRUE | 1/1 | 1/1 | 5.62  | 5.82  | -1.15 |
| TRUE | 1/1 | 1/1 | 5.62  | 5.82  | -1.15 |
| TRUE | 1/1 | 1/1 | 8.88  | 9.05  | -1.12 |
| TRUE | 1/1 | 1/1 | 8.88  | 9.05  | -1.12 |
| TRUE | 1/1 | 1/1 | 8.88  | 9.05  | -1.12 |
| TRUE | 1/1 | 1/1 | 8.88  | 9.05  | -1.12 |
| TRUE | 1/1 | 1/1 | 8.88  | 9.05  | -1.12 |
| TRUE | 1/1 | 1/1 | 8.88  | 9.05  | -1.12 |
| TRUE | 1/1 | 1/1 | 8.88  | 9.05  | -1.12 |
| TRUE | 1/1 | 1/1 | 8.88  | 9.05  | -1.12 |
| TRUE | 1/1 | 1/1 | 8.88  | 9.05  | -1.12 |
| TRUE | 1/1 | 1/1 | 7.5   | 8.49  | -1.99 |
| TRUE | 1/1 | 1/1 | 7.5   | 8.49  | -1.99 |
| TRUE | 1/1 | 1/1 | 7.5   | 8.49  | -1.99 |
| TRUE | 1/1 | 1/1 | 10.19 | 10.61 | -1.33 |
| TRUE | 1/1 | 1/1 | 10.19 | 10.61 | -1.33 |
| TRUE | 1/1 | 1/1 | 10.19 | 10.61 | -1.33 |
| TRUE | 1/1 | 1/1 | 10.19 | 10.61 | -1.33 |
| TRUE | 1/1 | 1/1 | 10.19 | 10.61 | -1.33 |
| TRUE | 1/1 | 1/1 | 10.19 | 10.61 | -1.33 |
| TRUE | 1/1 | 1/1 | 10.19 | 10.61 | -1.33 |
| TRUE | 1/1 | 1/1 | 10.19 | 10.61 | -1.33 |
| TRUE | 1/1 | 1/1 | 7.01  | 7.3   | -1.22 |
| TRUE | 1/1 | 1/1 | 7.01  | 7.3   | -1.22 |
| TRUE | 1/1 | 1/1 | 7.01  | 7.3   | -1.22 |
| TRUE | 1/1 | 1/1 | 7.01  | 7.3   | -1.22 |
| TRUE | 1/1 | 1/1 | 6.96  | 7.44  | -1.39 |
| TRUE | 1/1 | 1/1 | 6.96  | 7.44  | -1.39 |
| TRUE | 1/1 | 1/1 | 6.96  | 7.44  | -1.39 |
| TRUE | 1/1 | 1/1 | 6.96  | 7.44  | -1.39 |
| TRUE | 1/1 | 1/1 | 6.73  | 7.94  | -2.31 |
| TRUE | 1/1 | 1/1 | 6.73  | 7.94  | -2.31 |
| TRUE | 1/1 | 1/1 | 6.73  | 7.94  | -2.31 |
| TRUE | 1/1 | 1/1 | 6.73  | 7.94  | -2.31 |
| TRUE | 1/1 | 1/1 | 6.73  | 7.94  | -2.31 |
| TRUE | 1/1 | 1/1 | 6.73  | 7.94  | -2.31 |
| TRUE | 1/1 | 1/1 | 6.73  | 7.94  | -2.31 |
| TRUE | 1/1 | 1/1 | 6.73  | 7.94  | -2.31 |
| TRUE | 1/1 | 1/1 | 9.17  | 9.54  | -1.29 |
| TRUE | 1/1 | 1/1 | 9.17  | 9.54  | -1.29 |
| TRUE | 1/1 | 1/1 | 9.17  | 9.54  | -1.29 |
| TRUE | 1/1 | 1/1 | 9.17  | 9.54  | -1.29 |
| TRUE | 1/1 | 1/1 | 9.17  | 9.54  | -1.29 |
| TRUE | 1/1 | 1/1 | 9.17  | 9.54  | -1.29 |
| TRUE | 1/1 | 1/1 | 3.83  | 3.75  | 1.05  |



|      |     |     |      |       |       |
|------|-----|-----|------|-------|-------|
| TRUE | 1/1 | 1/1 | 7.24 | 5.08  | 4.47  |
| TRUE | 1/1 | 1/1 | 7.24 | 5.08  | 4.47  |
| TRUE | 1/1 | 1/1 | 7.24 | 5.08  | 4.47  |
| TRUE | 1/1 | 1/1 | 4.85 | 3.93  | 1.89  |
| TRUE | 1/1 | 1/1 | 4.85 | 3.93  | 1.89  |
| TRUE | 1/1 | 1/1 | 4.85 | 3.93  | 1.89  |
| TRUE | 1/1 | 1/1 | 4.85 | 3.93  | 1.89  |
| TRUE | 1/1 | 1/1 | 4.85 | 3.93  | 1.89  |
| TRUE | 1/1 | 1/1 | 4.85 | 3.93  | 1.89  |
| TRUE | 1/1 | 1/1 | 7.49 | 7.62  | -1.1  |
| TRUE | 1/1 | 1/1 | 7.49 | 7.62  | -1.1  |
| TRUE | 1/1 | 1/1 | 7.49 | 7.62  | -1.1  |
| TRUE | 1/1 | 1/1 | 7.49 | 7.62  | -1.1  |
| TRUE | 1/1 | 1/1 | 7.49 | 7.62  | -1.1  |
| TRUE | 1/1 | 1/1 | 5.31 | 6.47  | -2.23 |
| TRUE | 1/1 | 1/1 | 5.31 | 6.47  | -2.23 |
| TRUE | 1/1 | 1/1 | 5.31 | 6.47  | -2.23 |
| TRUE | 1/1 | 1/1 | 5.31 | 6.47  | -2.23 |
| TRUE | 1/1 | 1/1 | 5.31 | 6.47  | -2.23 |
| TRUE | 1/1 | 1/1 | 5.31 | 6.47  | -2.23 |
| TRUE | 1/1 | 1/1 | 5.31 | 6.47  | -2.23 |
| TRUE | 1/1 | 1/1 | 5.31 | 6.47  | -2.23 |
| TRUE | 1/1 | 1/1 | 5.31 | 6.47  | -2.23 |
| TRUE | 1/1 | 1/1 | 5.31 | 6.47  | -2.23 |
| TRUE | 1/1 | 1/1 | 5.31 | 6.47  | -2.23 |
| TRUE | 1/1 | 1/1 | 5.31 | 6.47  | -2.23 |
| TRUE | 1/1 | 1/1 | 5.31 | 6.47  | -2.23 |
| TRUE | 1/1 | 1/1 | 5.66 | 6.61  | -1.94 |
| TRUE | 1/1 | 1/1 | 5.66 | 6.61  | -1.94 |
| TRUE | 1/1 | 1/1 | 5.66 | 6.61  | -1.94 |
| TRUE | 1/1 | 1/1 | 5.66 | 6.61  | -1.94 |
| TRUE | 1/1 | 1/1 | 9.76 | 10.85 | -2.13 |
| TRUE | 1/1 | 1/1 | 9.76 | 10.85 | -2.13 |
| TRUE | 1/1 | 1/1 | 9.76 | 10.85 | -2.13 |
| TRUE | 1/1 | 1/1 | 9.76 | 10.85 | -2.13 |
| TRUE | 1/1 | 1/1 | 9.76 | 10.85 | -2.13 |
| TRUE | 1/1 | 1/1 | 9.76 | 10.85 | -2.13 |
| TRUE | 1/1 | 1/1 | 5.91 | 6.63  | -1.64 |
| TRUE | 1/1 | 1/1 | 5.91 | 6.63  | -1.64 |
| TRUE | 1/1 | 1/1 | 5.91 | 6.63  | -1.64 |
| TRUE | 1/1 | 1/1 | 5.91 | 6.63  | -1.64 |
| TRUE | 1/1 | 1/1 | 5.91 | 6.63  | -1.64 |
| TRUE | 1/1 | 1/1 | 5.91 | 6.63  | -1.64 |
| TRUE | 1/1 | 1/1 | 8.68 | 9.23  | -1.47 |
| TRUE | 1/1 | 1/1 | 8.68 | 9.23  | -1.47 |
| TRUE | 1/1 | 1/1 | 8.68 | 9.23  | -1.47 |
| TRUE | 1/1 | 1/1 | 8.68 | 9.23  | -1.47 |
| TRUE | 1/1 | 1/1 | 8.68 | 9.23  | -1.47 |
| TRUE | 1/1 | 1/1 | 8.68 | 9.23  | -1.47 |
| TRUE | 1/1 | 1/1 | 9.92 | 10.99 | -2.1  |
| TRUE | 1/1 | 1/1 | 9.92 | 10.99 | -2.1  |
| TRUE | 1/1 | 1/1 | 9.92 | 10.99 | -2.1  |
| TRUE | 1/1 | 1/1 | 9.92 | 10.99 | -2.1  |
| TRUE | 1/1 | 1/1 | 5.28 | 6.26  | -1.96 |
| TRUE | 1/1 | 1/1 | 5.28 | 6.26  | -1.96 |
| TRUE | 1/1 | 1/1 | 5.28 | 6.26  | -1.96 |
| TRUE | 1/1 | 1/1 | 5.28 | 6.26  | -1.96 |
| TRUE | 1/1 | 1/1 | 8    | 8.18  | -1.13 |
| TRUE | 1/1 | 1/1 | 8    | 8.18  | -1.13 |

|      |     |     |       |       |       |
|------|-----|-----|-------|-------|-------|
| TRUE | 1/1 | 1/1 | 8     | 8.18  | -1.13 |
| TRUE | 1/1 | 1/1 | 8     | 8.18  | -1.13 |
| TRUE | 1/1 | 1/1 | 8.86  | 8.61  | 1.19  |
| TRUE | 1/1 | 1/1 | 8.86  | 8.61  | 1.19  |
| TRUE | 1/1 | 1/1 | 8.86  | 8.61  | 1.19  |
| TRUE | 1/1 | 1/1 | 8.86  | 8.61  | 1.19  |
| TRUE | 1/1 | 1/1 | 6.78  | 7.19  | -1.33 |
| TRUE | 1/1 | 1/1 | 6.78  | 7.19  | -1.33 |
| TRUE | 1/1 | 1/1 | 6.78  | 7.19  | -1.33 |
| TRUE | 1/1 | 1/1 | 6.78  | 7.19  | -1.33 |
| TRUE | 1/1 | 1/1 | 6.78  | 7.19  | -1.33 |
| TRUE | 1/1 | 1/1 | 6.78  | 7.19  | -1.33 |
| TRUE | 1/1 | 1/1 | 6.78  | 7.19  | -1.33 |
| TRUE | 1/1 | 1/1 | 6.78  | 7.19  | -1.33 |
| TRUE | 1/1 | 1/1 | 6.78  | 7.19  | -1.33 |
| TRUE | 1/1 | 1/1 | 6.78  | 7.19  | -1.33 |
| TRUE | 1/1 | 1/1 | 10.92 | 11.78 | -1.81 |
| TRUE | 1/1 | 1/1 | 10.92 | 11.78 | -1.81 |
| TRUE | 1/1 | 1/1 | 10.92 | 11.78 | -1.81 |
| TRUE | 1/1 | 1/1 | 3.33  | 3.85  | -1.43 |
| TRUE | 1/1 | 1/1 | 3.33  | 3.85  | -1.43 |
| TRUE | 1/1 | 1/1 | 3.33  | 3.85  | -1.43 |
| TRUE | 1/1 | 1/1 | 3.33  | 3.85  | -1.43 |
| TRUE | 1/1 | 1/1 | 3.33  | 3.85  | -1.43 |
| TRUE | 1/1 | 1/1 | 9.09  | 9.98  | -1.86 |
| TRUE | 1/1 | 1/1 | 9.09  | 9.98  | -1.86 |
| TRUE | 1/1 | 1/1 | 9.09  | 9.98  | -1.86 |
| TRUE | 1/1 | 1/1 | 9.09  | 9.98  | -1.86 |
| TRUE | 1/1 | 1/1 | 9.09  | 9.98  | -1.86 |
| TRUE | 1/1 | 1/1 | 4.94  | 6.28  | -2.54 |
| TRUE | 1/1 | 1/1 | 4.94  | 6.28  | -2.54 |
| TRUE | 1/1 | 1/1 | 4.94  | 6.28  | -2.54 |
| TRUE | 1/1 | 1/1 | 4.94  | 6.28  | -2.54 |
| TRUE | 1/1 | 1/1 | 4.94  | 6.28  | -2.54 |
| TRUE | 1/1 | 1/1 | 4.94  | 6.28  | -2.54 |
| TRUE | 1/1 | 1/1 | 4.94  | 6.28  | -2.54 |
| TRUE | 1/1 | 1/1 | 4.94  | 6.28  | -2.54 |
| TRUE | 1/1 | 1/1 | 4.94  | 6.28  | -2.54 |
| TRUE | 1/1 | 1/1 | 5.44  | 6.32  | -1.83 |
| TRUE | 1/1 | 1/1 | 5.44  | 6.32  | -1.83 |
| TRUE | 1/1 | 1/1 | 5.44  | 6.32  | -1.83 |
| TRUE | 1/1 | 1/1 | 5.44  | 6.32  | -1.83 |
| TRUE | 1/1 | 1/1 | 5.44  | 6.32  | -1.83 |
| TRUE | 1/1 | 1/1 | 6.27  | 6.27  | -1.01 |
| TRUE | 1/1 | 1/1 | 6.27  | 6.27  | -1.01 |
| TRUE | 1/1 | 1/1 | 6.27  | 6.27  | -1.01 |
| TRUE | 1/1 | 1/1 | 6.27  | 6.27  | -1.01 |
| TRUE | 1/1 | 1/1 | 6.27  | 6.27  | -1.01 |
| TRUE | 1/1 | 1/1 | 6.96  | 7.31  | -1.28 |
| TRUE | 1/1 | 1/1 | 6.96  | 7.31  | -1.28 |
| TRUE | 1/1 | 1/1 | 7.02  | 6.54  | 1.39  |
| TRUE | 1/1 | 1/1 | 7.02  | 6.54  | 1.39  |
| TRUE | 1/1 | 1/1 | 7.02  | 6.54  | 1.39  |
| TRUE | 1/1 | 1/1 | 7.46  | 7.47  | -1    |
| TRUE | 1/1 | 1/1 | 7.46  | 7.47  | -1    |
| TRUE | 1/1 | 1/1 | 7.78  | 4.51  | 9.64  |
| TRUE | 1/1 | 1/1 | 7.78  | 4.51  | 9.64  |
| TRUE | 1/1 | 1/1 | 7.78  | 4.51  | 9.64  |
| TRUE | 1/1 | 1/1 | 7.78  | 4.51  | 9.64  |
| TRUE | 1/1 | 1/1 | 7.78  | 4.51  | 9.64  |







|      |     |     |      |      |       |
|------|-----|-----|------|------|-------|
| TRUE | 1/1 | 1/1 | 6.26 | 7.2  | -1.92 |
| TRUE | 1/1 | 1/1 | 6.26 | 7.2  | -1.92 |
| TRUE | 1/1 | 1/1 | 6.26 | 7.2  | -1.92 |
| TRUE | 1/1 | 1/1 | 6.26 | 7.2  | -1.92 |
| TRUE | 1/1 | 1/1 | 6.26 | 7.2  | -1.92 |
| TRUE | 1/1 | 1/1 | 6.26 | 7.2  | -1.92 |
| TRUE | 1/1 | 1/1 | 6.16 | 7.41 | -2.38 |
| TRUE | 1/1 | 1/1 | 6.16 | 7.41 | -2.38 |
| TRUE | 1/1 | 1/1 | 6.16 | 7.41 | -2.38 |
| TRUE | 1/1 | 1/1 | 6.16 | 7.41 | -2.38 |
| TRUE | 1/1 | 1/1 | 6.16 | 7.41 | -2.38 |
| TRUE | 1/1 | 1/1 | 6.16 | 7.41 | -2.38 |
| TRUE | 1/1 | 1/1 | 6.16 | 7.41 | -2.38 |
| TRUE | 1/1 | 1/1 | 6.16 | 7.41 | -2.38 |
| TRUE | 1/1 | 1/1 | 6.16 | 7.41 | -2.38 |
| TRUE | 1/1 | 1/1 | 6.16 | 7.41 | -2.38 |
| TRUE | 1/1 | 1/1 | 7.71 | 5.45 | 4.79  |
| TRUE | 1/1 | 1/1 | 7.71 | 5.45 | 4.79  |
| TRUE | 1/1 | 1/1 | 7.71 | 5.45 | 4.79  |
| TRUE | 1/1 | 1/1 | 7.71 | 5.45 | 4.79  |
| TRUE | 1/1 | 1/1 | 7.71 | 5.45 | 4.79  |
| TRUE | 1/1 | 1/1 | 7.71 | 5.45 | 4.79  |
| TRUE | 1/1 | 1/1 | 7.71 | 5.45 | 4.79  |
| TRUE | 1/1 | 1/1 | 7.71 | 5.45 | 4.79  |
| TRUE | 1/1 | 1/1 | 7.71 | 5.45 | 4.79  |
| TRUE | 1/1 | 1/1 | 7.71 | 5.45 | 4.79  |
| TRUE | 1/1 | 1/1 | 7.71 | 5.45 | 4.79  |
| TRUE | 1/1 | 1/1 | 7.71 | 5.45 | 4.79  |
| TRUE | 1/1 | 1/1 | 7.71 | 5.45 | 4.79  |
| TRUE | 1/1 | 1/1 | 7.71 | 5.45 | 4.79  |
| TRUE | 1/1 | 1/1 | 7.71 | 5.45 | 4.79  |
| TRUE | 1/1 | 1/1 | 7.71 | 5.45 | 4.79  |
| TRUE | 1/1 | 1/1 | 7.71 | 5.45 | 4.79  |
| TRUE | 1/1 | 1/1 | 7.64 | 8.04 | -1.32 |
| TRUE | 1/1 | 1/1 | 7.64 | 8.04 | -1.32 |
| TRUE | 1/1 | 1/1 | 7.64 | 8.04 | -1.32 |
| TRUE | 1/1 | 1/1 | 5.28 | 5.89 | -1.53 |
| TRUE | 1/1 | 1/1 | 5.28 | 5.89 | -1.53 |
| TRUE | 1/1 | 1/1 | 5.73 | 6.5  | -1.71 |
| TRUE | 1/1 | 1/1 | 5.73 | 6.5  | -1.71 |
| TRUE | 1/1 | 1/1 | 5.73 | 6.5  | -1.71 |
| TRUE | 1/1 | 1/1 | 5.73 | 6.5  | -1.71 |
| TRUE | 1/1 | 1/1 | 5.73 | 6.5  | -1.71 |
| TRUE | 1/1 | 1/1 | 5.73 | 6.5  | -1.71 |
| TRUE | 1/1 | 1/1 | 5.73 | 6.5  | -1.71 |
| TRUE | 1/1 | 1/1 | 5.73 | 6.5  | -1.71 |
| TRUE | 1/1 | 1/1 | 5.73 | 6.5  | -1.71 |
| TRUE | 1/1 | 1/1 | 9.32 | 9.49 | -1.12 |
| TRUE | 1/1 | 1/1 | 9.32 | 9.49 | -1.12 |
| TRUE | 1/1 | 1/1 | 9.32 | 9.49 | -1.12 |
| TRUE | 1/1 | 1/1 | 6.16 | 6.63 | -1.38 |
| TRUE | 1/1 | 1/1 | 6.16 | 6.63 | -1.38 |
| TRUE | 1/1 | 1/1 | 6.16 | 6.63 | -1.38 |
| TRUE | 1/1 | 1/1 | 6.16 | 6.63 | -1.38 |
| TRUE | 1/1 | 1/1 | 6.16 | 6.63 | -1.38 |
| TRUE | 1/1 | 1/1 | 6.16 | 6.63 | -1.38 |
| TRUE | 1/1 | 1/1 | 6.16 | 6.63 | -1.38 |
| TRUE | 1/1 | 1/1 | 6.16 | 6.63 | -1.38 |
| TRUE | 1/1 | 1/1 | 6.16 | 6.63 | -1.38 |
| TRUE | 1/1 | 1/1 | 5.18 | 6.04 | -1.81 |
| TRUE | 1/1 | 1/1 | 5.18 | 6.04 | -1.81 |
| TRUE | 1/1 | 1/1 | 5.18 | 6.04 | -1.81 |
| TRUE | 1/1 | 1/1 | 6.51 | 5.89 | 1.53  |
| TRUE | 1/1 | 1/1 | 6.51 | 5.89 | 1.53  |
| TRUE | 1/1 | 1/1 | 7.88 | 9.24 | -2.57 |
| TRUE | 1/1 | 1/1 | 7.88 | 9.24 | -2.57 |
| TRUE | 1/1 | 1/1 | 7.88 | 9.24 | -2.57 |
| TRUE | 1/1 | 1/1 | 7.88 | 9.24 | -2.57 |
| TRUE | 1/1 | 1/1 | 7.88 | 9.24 | -2.57 |
| TRUE | 1/1 | 1/1 | 9.78 | 3.21 | 94.63 |
| TRUE | 1/1 | 1/1 | 9.78 | 3.21 | 94.63 |



|      |     |     |      |       |       |
|------|-----|-----|------|-------|-------|
| TRUE | 1/1 | 1/1 | 5.08 | 4.78  | 1.24  |
| TRUE | 1/1 | 1/1 | 6.11 | 6.18  | -1.05 |
| TRUE | 1/1 | 1/1 | 6.11 | 6.18  | -1.05 |
| TRUE | 1/1 | 1/1 | 6.11 | 6.18  | -1.05 |
| TRUE | 1/1 | 1/1 | 6.11 | 6.18  | -1.05 |
| TRUE | 1/1 | 1/1 | 6.11 | 6.18  | -1.05 |
| TRUE | 1/1 | 1/1 | 6.11 | 6.18  | -1.05 |
| TRUE | 1/1 | 1/1 | 6.11 | 6.18  | -1.05 |
| TRUE | 1/1 | 1/1 | 6.11 | 6.18  | -1.05 |
| TRUE | 1/1 | 1/1 | 6.11 | 6.18  | -1.05 |
| TRUE | 1/1 | 1/1 | 6.11 | 6.18  | -1.05 |
| TRUE | 1/1 | 1/1 | 3.32 | 4.32  | -2.01 |
| TRUE | 1/1 | 1/1 | 3.32 | 4.32  | -2.01 |
| TRUE | 1/1 | 1/1 | 3.32 | 4.32  | -2.01 |
| TRUE | 1/1 | 1/1 | 3.32 | 4.32  | -2.01 |
| TRUE | 1/1 | 1/1 | 3.32 | 4.32  | -2.01 |
| TRUE | 1/1 | 1/1 | 3.32 | 4.32  | -2.01 |
| TRUE | 1/1 | 1/1 | 3.32 | 4.32  | -2.01 |
| TRUE | 1/1 | 1/1 | 5.24 | 5.04  | 1.14  |
| TRUE | 1/1 | 1/1 | 5.24 | 5.04  | 1.14  |
| TRUE | 1/1 | 1/1 | 7.26 | 6.5   | 1.7   |
| TRUE | 1/1 | 1/1 | 7.26 | 6.5   | 1.7   |
| TRUE | 1/1 | 1/1 | 7.26 | 6.5   | 1.7   |
| TRUE | 1/1 | 1/1 | 7.26 | 6.5   | 1.7   |
| TRUE | 1/1 | 1/1 | 7.26 | 6.5   | 1.7   |
| TRUE | 1/1 | 1/1 | 7.26 | 6.5   | 1.7   |
| TRUE | 1/1 | 1/1 | 7.26 | 6.5   | 1.7   |
| TRUE | 1/1 | 1/1 | 7.26 | 6.5   | 1.7   |
| TRUE | 1/1 | 1/1 | 7.26 | 6.5   | 1.7   |
| TRUE | 1/1 | 1/1 | 7.26 | 6.5   | 1.7   |
| TRUE | 1/1 | 1/1 | 7.26 | 6.5   | 1.7   |
| TRUE | 1/1 | 1/1 | 7.26 | 6.5   | 1.7   |
| TRUE | 1/1 | 1/1 | 7.26 | 6.5   | 1.7   |
| TRUE | 1/1 | 1/1 | 7.26 | 6.5   | 1.7   |
| TRUE | 1/1 | 1/1 | 4.49 | 4.27  | 1.17  |
| TRUE | 1/1 | 1/1 | 4.49 | 4.27  | 1.17  |
| TRUE | 1/1 | 1/1 | 4.49 | 4.27  | 1.17  |
| TRUE | 1/1 | 1/1 | 4.49 | 4.27  | 1.17  |
| TRUE | 1/1 | 1/1 | 4.49 | 4.27  | 1.17  |
| TRUE | 1/1 | 1/1 | 8.04 | 8.03  | 1.01  |
| TRUE | 1/1 | 1/1 | 8.04 | 8.03  | 1.01  |
| TRUE | 1/1 | 1/1 | 6.26 | 6.67  | -1.33 |
| TRUE | 1/1 | 1/1 | 6.26 | 6.67  | -1.33 |
| TRUE | 1/1 | 1/1 | 6.26 | 6.67  | -1.33 |
| TRUE | 1/1 | 1/1 | 5.49 | 5.26  | 1.18  |
| TRUE | 1/1 | 1/1 | 5.49 | 5.26  | 1.18  |
| TRUE | 1/1 | 1/1 | 5.49 | 5.26  | 1.18  |
| TRUE | 1/1 | 1/1 | 9.7  | 10.69 | -1.98 |
| TRUE | 1/1 | 1/1 | 9.7  | 10.69 | -1.98 |
| TRUE | 1/1 | 1/1 | 9.7  | 10.69 | -1.98 |
| TRUE | 1/1 | 1/1 | 9.7  | 10.69 | -1.98 |
| TRUE | 1/1 | 1/1 | 9.7  | 10.69 | -1.98 |
| TRUE | 1/1 | 1/1 | 9.7  | 10.69 | -1.98 |
| TRUE | 1/1 | 1/1 | 5.73 | 6.21  | -1.39 |
| TRUE | 1/1 | 1/1 | 5.73 | 6.21  | -1.39 |
| TRUE | 1/1 | 1/1 | 5.73 | 6.21  | -1.39 |
| TRUE | 1/1 | 1/1 | 7.82 | 7.99  | -1.13 |
| TRUE | 1/1 | 1/1 | 7.82 | 7.99  | -1.13 |
| TRUE | 1/1 | 1/1 | 7.82 | 7.99  | -1.13 |
| TRUE | 1/1 | 1/1 | 7.82 | 7.99  | -1.13 |
| TRUE | 1/1 | 1/1 | 7.82 | 7.99  | -1.13 |
| TRUE | 1/1 | 1/1 | 4.4  | 4.33  | 1.05  |
| TRUE | 1/1 | 1/1 | 4.4  | 4.33  | 1.05  |
| TRUE | 1/1 | 1/1 | 4.4  | 4.33  | 1.05  |

|      |     |     |      |      |       |
|------|-----|-----|------|------|-------|
| TRUE | 1/1 | 1/1 | 6.77 | 7.34 | -1.49 |
| TRUE | 1/1 | 1/1 | 6.77 | 7.34 | -1.49 |
| TRUE | 1/1 | 1/1 | 6.77 | 7.34 | -1.49 |
| TRUE | 1/1 | 1/1 | 6.46 | 6.48 | -1.01 |
| TRUE | 1/1 | 1/1 | 6.46 | 6.48 | -1.01 |
| TRUE | 1/1 | 1/1 | 6.46 | 6.48 | -1.01 |
| TRUE | 1/1 | 1/1 | 6.46 | 6.48 | -1.01 |
| TRUE | 1/1 | 1/1 | 6.46 | 6.48 | -1.01 |
| TRUE | 1/1 | 1/1 | 3.27 | 4.12 | -1.8  |
| TRUE | 1/1 | 1/1 | 3.27 | 4.12 | -1.8  |
| TRUE | 1/1 | 1/1 | 3.27 | 4.12 | -1.8  |
| TRUE | 1/1 | 1/1 | 3.27 | 4.12 | -1.8  |
| TRUE | 1/1 | 1/1 | 3.27 | 4.12 | -1.8  |
| TRUE | 1/1 | 1/1 | 3.27 | 4.12 | -1.8  |
| TRUE | 1/1 | 1/1 | 3.27 | 4.12 | -1.8  |
| TRUE | 1/1 | 1/1 | 3.27 | 4.12 | -1.8  |
| TRUE | 1/1 | 1/1 | 3.27 | 4.12 | -1.8  |
| TRUE | 1/1 | 1/1 | 3.27 | 4.12 | -1.8  |
| TRUE | 1/1 | 1/1 | 3.27 | 4.12 | -1.8  |
| TRUE | 1/1 | 1/1 | 3.27 | 4.12 | -1.8  |
| TRUE | 1/1 | 1/1 | 6.03 | 5.14 | 1.85  |
| TRUE | 1/1 | 1/1 | 6.03 | 5.14 | 1.85  |
| TRUE | 1/1 | 1/1 | 6.03 | 5.14 | 1.85  |
| TRUE | 1/1 | 1/1 | 6.03 | 5.14 | 1.85  |
| TRUE | 1/1 | 1/1 | 6.03 | 5.14 | 1.85  |
| TRUE | 1/1 | 1/1 | 6.03 | 5.14 | 1.85  |
| TRUE | 1/1 | 1/1 | 6.03 | 5.14 | 1.85  |
| TRUE | 1/1 | 1/1 | 6.03 | 5.14 | 1.85  |
| TRUE | 1/1 | 1/1 | 6.03 | 5.14 | 1.85  |
| TRUE | 1/1 | 1/1 | 6.03 | 5.14 | 1.85  |
| TRUE | 1/1 | 1/1 | 6.03 | 5.14 | 1.85  |
| TRUE | 1/1 | 1/1 | 6.03 | 5.14 | 1.85  |
| TRUE | 1/1 | 1/1 | 4.58 | 5.25 | -1.59 |
| TRUE | 1/1 | 1/1 | 4.58 | 5.25 | -1.59 |
| TRUE | 1/1 | 1/1 | 4.58 | 5.25 | -1.59 |
| TRUE | 1/1 | 1/1 | 4.58 | 5.25 | -1.59 |
| TRUE | 1/1 | 1/1 | 4.58 | 5.25 | -1.59 |
| TRUE | 1/1 | 1/1 | 4.58 | 5.25 | -1.59 |
| TRUE | 1/1 | 1/1 | 4.58 | 5.25 | -1.59 |
| TRUE | 1/1 | 1/1 | 4.58 | 5.25 | -1.59 |
| TRUE | 1/1 | 1/1 | 4.58 | 5.25 | -1.59 |
| TRUE | 1/1 | 1/1 | 4.58 | 5.25 | -1.59 |
| TRUE | 1/1 | 1/1 | 4.58 | 5.25 | -1.59 |
| TRUE | 1/1 | 1/1 | 4.58 | 5.25 | -1.59 |
| TRUE | 1/1 | 1/1 | 4.58 | 5.25 | -1.59 |
| TRUE | 1/1 | 1/1 | 4.58 | 5.25 | -1.59 |
| TRUE | 1/1 | 1/1 | 4.58 | 5.25 | -1.59 |
| TRUE | 1/1 | 1/1 | 7.54 | 7.88 | -1.26 |
| TRUE | 1/1 | 1/1 | 7.54 | 7.88 | -1.26 |
| TRUE | 1/1 | 1/1 | 5.7  | 5.7  | -1    |
| TRUE | 1/1 | 1/1 | 5.7  | 5.7  | -1    |
| TRUE | 1/1 | 1/1 | 5.7  | 5.7  | -1    |
| TRUE | 1/1 | 1/1 | 8.29 | 8.78 | -1.41 |
| TRUE | 1/1 | 1/1 | 8.29 | 8.78 | -1.41 |
| TRUE | 1/1 | 1/1 | 8.29 | 8.78 | -1.41 |
| TRUE | 1/1 | 1/1 | 5.11 | 5.66 | -1.47 |
| TRUE | 1/1 | 1/1 | 5.11 | 5.66 | -1.47 |
| TRUE | 1/1 | 1/1 | 5.11 | 5.66 | -1.47 |
| TRUE | 1/1 | 1/1 | 6.9  | 7.84 | -1.93 |
| TRUE | 1/1 | 1/1 | 6.9  | 7.84 | -1.93 |
| TRUE | 1/1 | 1/1 | 6.9  | 7.84 | -1.93 |
| TRUE | 1/1 | 1/1 | 6.47 | 7.27 | -1.74 |
| TRUE | 1/1 | 1/1 | 6.47 | 7.27 | -1.74 |
| TRUE | 1/1 | 1/1 | 8.42 | 8.97 | -1.47 |



|      |     |     |       |      |       |
|------|-----|-----|-------|------|-------|
| TRUE | 1/1 | 1/1 | 4.37  | 4.66 | -1.23 |
| TRUE | 1/1 | 1/1 | 6.47  | 6.63 | -1.12 |
| TRUE | 1/1 | 1/1 | 6.47  | 6.63 | -1.12 |
| TRUE | 1/1 | 1/1 | 6.47  | 6.63 | -1.12 |
| TRUE | 1/1 | 1/1 | 6.42  | 7.46 | -2.07 |
| TRUE | 1/1 | 1/1 | 6.42  | 7.46 | -2.07 |
| TRUE | 1/1 | 1/1 | 6.42  | 7.46 | -2.07 |
| TRUE | 1/1 | 1/1 | 6.42  | 7.46 | -2.07 |
| TRUE | 1/1 | 1/1 | 6.42  | 7.46 | -2.07 |
| TRUE | 1/1 | 1/1 | 6.42  | 7.46 | -2.07 |
| TRUE | 1/1 | 1/1 | 6.42  | 7.46 | -2.07 |
| TRUE | 1/1 | 1/1 | 6.42  | 7.46 | -2.07 |
| TRUE | 1/1 | 1/1 | 6.42  | 7.46 | -2.07 |
| TRUE | 1/1 | 1/1 | 6.42  | 7.46 | -2.07 |
| TRUE | 1/1 | 1/1 | 6.42  | 7.46 | -2.07 |
| TRUE | 1/1 | 1/1 | 8.26  | 8.67 | -1.33 |
| TRUE | 1/1 | 1/1 | 8.26  | 8.67 | -1.33 |
| TRUE | 1/1 | 1/1 | 8.26  | 8.67 | -1.33 |
| TRUE | 1/1 | 1/1 | 3.73  | 4.12 | -1.31 |
| TRUE | 1/1 | 1/1 | 3.73  | 4.12 | -1.31 |
| TRUE | 1/1 | 1/1 | 3.73  | 4.12 | -1.31 |
| TRUE | 1/1 | 1/1 | 3.73  | 4.12 | -1.31 |
| TRUE | 1/1 | 1/1 | 3.73  | 4.12 | -1.31 |
| TRUE | 1/1 | 1/1 | 10.18 | 5.19 | 31.79 |
| TRUE | 1/1 | 1/1 | 10.18 | 5.19 | 31.79 |
| TRUE | 1/1 | 1/1 | 10.18 | 5.19 | 31.79 |
| TRUE | 1/1 | 1/1 | 10.18 | 5.19 | 31.79 |
| TRUE | 1/1 | 1/1 | 10.18 | 5.19 | 31.79 |
| TRUE | 1/1 | 1/1 | 10.18 | 5.19 | 31.79 |
| TRUE | 1/1 | 1/1 | 10.18 | 5.19 | 31.79 |
| TRUE | 1/1 | 1/1 | 10.18 | 5.19 | 31.79 |
| TRUE | 1/1 | 1/1 | 10.18 | 5.19 | 31.79 |
| TRUE | 1/1 | 1/1 | 10.18 | 5.19 | 31.79 |
| TRUE | 1/1 | 1/1 | 10.18 | 5.19 | 31.79 |
| TRUE | 1/1 | 1/1 | 10.18 | 5.19 | 31.79 |
| TRUE | 1/1 | 1/1 | 10.18 | 5.19 | 31.79 |
| TRUE | 1/1 | 1/1 | 10.18 | 5.19 | 31.79 |
| TRUE | 1/1 | 1/1 | 10.18 | 5.19 | 31.79 |
| TRUE | 1/1 | 1/1 | 10.18 | 5.19 | 31.79 |
| TRUE | 1/1 | 1/1 | 10.18 | 5.19 | 31.79 |
| TRUE | 1/1 | 1/1 | 8.95  | 9.59 | -1.56 |
| TRUE | 1/1 | 1/1 | 8.95  | 9.59 | -1.56 |
| TRUE | 1/1 | 1/1 | 6.88  | 7.83 | -1.94 |
| TRUE | 1/1 | 1/1 | 6.88  | 7.83 | -1.94 |
| TRUE | 1/1 | 1/1 | 6.19  | 5.95 | 1.18  |
| TRUE | 1/1 | 1/1 | 6.19  | 5.95 | 1.18  |
| TRUE | 1/1 | 1/1 | 6.19  | 5.95 | 1.18  |
| TRUE | 1/1 | 1/1 | 6.19  | 5.95 | 1.18  |
| TRUE | 1/1 | 1/1 | 6.19  | 5.95 | 1.18  |
| TRUE | 1/1 | 1/1 | 8.04  | 8.04 | 1.01  |
| TRUE | 1/1 | 1/1 | 8.04  | 8.04 | 1.01  |
| TRUE | 1/1 | 1/1 | 8.04  | 8.04 | 1.01  |
| TRUE | 1/1 | 1/1 | 8.04  | 8.04 | 1.01  |
| TRUE | 1/1 | 1/1 | 8.04  | 8.04 | 1.01  |
| TRUE | 1/1 | 1/1 | 8.04  | 8.04 | 1.01  |
| TRUE | 1/1 | 1/1 | 4.66  | 5.01 | -1.27 |
| TRUE | 1/1 | 1/1 | 4.66  | 5.01 | -1.27 |
| TRUE | 1/1 | 1/1 | 4.66  | 5.01 | -1.27 |

|      |     |     |       |      |       |
|------|-----|-----|-------|------|-------|
| TRUE | 1/1 | 1/1 | 4.66  | 5.01 | -1.27 |
| TRUE | 1/1 | 1/1 | 7.27  | 8.25 | -1.97 |
| TRUE | 1/1 | 1/1 | 7.27  | 8.25 | -1.97 |
| TRUE | 1/1 | 1/1 | 7.27  | 8.25 | -1.97 |
| TRUE | 1/1 | 1/1 | 7.27  | 8.25 | -1.97 |
| TRUE | 1/1 | 1/1 | 7.27  | 8.25 | -1.97 |
| TRUE | 1/1 | 1/1 | 7.27  | 8.25 | -1.97 |
| TRUE | 1/1 | 1/1 | 6.87  | 7.86 | -1.98 |
| TRUE | 1/1 | 1/1 | 6.87  | 7.86 | -1.98 |
| TRUE | 1/1 | 1/1 | 6.87  | 7.86 | -1.98 |
| TRUE | 1/1 | 1/1 | 6.87  | 7.86 | -1.98 |
| TRUE | 1/1 | 1/1 | 5.31  | 6.3  | -1.98 |
| TRUE | 1/1 | 1/1 | 5.31  | 6.3  | -1.98 |
| TRUE | 1/1 | 1/1 | 5.31  | 6.3  | -1.98 |
| TRUE | 1/1 | 1/1 | 5.31  | 6.3  | -1.98 |
| TRUE | 1/1 | 1/1 | 5.31  | 6.3  | -1.98 |
| TRUE | 1/1 | 1/1 | 5.31  | 6.3  | -1.98 |
| TRUE | 1/1 | 1/1 | 5.31  | 6.3  | -1.98 |
| TRUE | 1/1 | 1/1 | 4.26  | 3.14 | 2.17  |
| TRUE | 1/1 | 1/1 | 4.26  | 3.14 | 2.17  |
| TRUE | 1/1 | 1/1 | 4.26  | 3.14 | 2.17  |
| TRUE | 1/1 | 1/1 | 4.26  | 3.14 | 2.17  |
| TRUE | 1/1 | 1/1 | 7.13  | 7.35 | -1.17 |
| TRUE | 1/1 | 1/1 | 7.13  | 7.35 | -1.17 |
| TRUE | 1/1 | 1/1 | 4.34  | 3.03 | 2.47  |
| TRUE | 1/1 | 1/1 | 4.34  | 3.03 | 2.47  |
| TRUE | 1/1 | 1/1 | 4.34  | 3.03 | 2.47  |
| TRUE | 1/1 | 1/1 | 4.34  | 3.03 | 2.47  |
| TRUE | 1/1 | 1/1 | 4.34  | 3.03 | 2.47  |
| TRUE | 1/1 | 1/1 | 4.34  | 3.03 | 2.47  |
| TRUE | 1/1 | 1/1 | 4.34  | 3.03 | 2.47  |
| TRUE | 1/1 | 1/1 | 4.34  | 3.03 | 2.47  |
| TRUE | 1/1 | 1/1 | 4.34  | 3.03 | 2.47  |
| TRUE | 1/1 | 1/1 | 4.34  | 3.03 | 2.47  |
| TRUE | 1/1 | 1/1 | 4.34  | 3.03 | 2.47  |
| TRUE | 1/1 | 1/1 | 5.46  | 6.17 | -1.63 |
| TRUE | 1/1 | 1/1 | 5.46  | 6.17 | -1.63 |
| TRUE | 1/1 | 1/1 | 5.46  | 6.17 | -1.63 |
| TRUE | 1/1 | 1/1 | 5.46  | 6.17 | -1.63 |
| TRUE | 1/1 | 1/1 | 5.46  | 6.17 | -1.63 |
| TRUE | 1/1 | 1/1 | 5.46  | 6.17 | -1.63 |
| TRUE | 1/1 | 1/1 | 5.46  | 6.17 | -1.63 |
| TRUE | 1/1 | 1/1 | 5.46  | 6.17 | -1.63 |
| TRUE | 1/1 | 1/1 | 5.46  | 6.17 | -1.63 |
| TRUE | 1/1 | 1/1 | 5.46  | 6.17 | -1.63 |
| TRUE | 1/1 | 1/1 | 5.46  | 6.17 | -1.63 |
| TRUE | 1/1 | 1/1 | 5.46  | 6.17 | -1.63 |
| TRUE | 1/1 | 1/1 | 5.46  | 6.17 | -1.63 |
| TRUE | 1/1 | 1/1 | 5.46  | 6.17 | -1.63 |
| TRUE | 1/1 | 1/1 | 5.46  | 6.17 | -1.63 |
| TRUE | 1/1 | 1/1 | 5.46  | 6.17 | -1.63 |
| TRUE | 1/1 | 1/1 | 5.46  | 6.17 | -1.63 |
| TRUE | 1/1 | 1/1 | 5.46  | 6.17 | -1.63 |
| TRUE | 1/1 | 1/1 | 5.46  | 6.17 | -1.63 |
| TRUE | 1/1 | 1/1 | 5.46  | 6.17 | -1.63 |
| TRUE | 1/1 | 1/1 | 7.33  | 7.89 | -1.48 |
| TRUE | 1/1 | 1/1 | 7.33  | 7.89 | -1.48 |
| TRUE | 1/1 | 1/1 | 11.83 | 10.7 | 2.2   |
| TRUE | 1/1 | 1/1 | 11.83 | 10.7 | 2.2   |
| TRUE | 1/1 | 1/1 | 11.83 | 10.7 | 2.2   |









|      |     |     |       |       |       |
|------|-----|-----|-------|-------|-------|
| TRUE | 1/1 | 1/1 | 6.08  | 6.7   | -1.54 |
| TRUE | 1/1 | 1/1 | 6.08  | 6.7   | -1.54 |
| TRUE | 1/1 | 1/1 | 6.08  | 6.7   | -1.54 |
| TRUE | 1/1 | 1/1 | 6.08  | 6.7   | -1.54 |
| TRUE | 1/1 | 1/1 | 8.95  | 9.69  | -1.67 |
| TRUE | 1/1 | 1/1 | 8.95  | 9.69  | -1.67 |
| TRUE | 1/1 | 1/1 | 8.95  | 9.69  | -1.67 |
| TRUE | 1/1 | 1/1 | 8.95  | 9.69  | -1.67 |
| TRUE | 1/1 | 1/1 | 8.95  | 9.69  | -1.67 |
| TRUE | 1/1 | 1/1 | 8.95  | 9.69  | -1.67 |
| TRUE | 1/1 | 1/1 | 8.95  | 9.69  | -1.67 |
| TRUE | 1/1 | 1/1 | 8.95  | 9.69  | -1.67 |
| TRUE | 1/1 | 1/1 | 7.31  | 7.97  | -1.57 |
| TRUE | 1/1 | 1/1 | 7.31  | 7.97  | -1.57 |
| TRUE | 1/1 | 1/1 | 7.31  | 7.97  | -1.57 |
| TRUE | 1/1 | 1/1 | 7.31  | 7.97  | -1.57 |
| TRUE | 1/1 | 1/1 | 8.78  | 9     | -1.16 |
| TRUE | 1/1 | 1/1 | 8.78  | 9     | -1.16 |
| TRUE | 1/1 | 1/1 | 6.6   | 7.07  | -1.38 |
| TRUE | 1/1 | 1/1 | 6.6   | 7.07  | -1.38 |
| TRUE | 1/1 | 1/1 | 5.37  | 5.1   | 1.21  |
| TRUE | 1/1 | 1/1 | 5.37  | 5.1   | 1.21  |
| TRUE | 1/1 | 1/1 | 5.37  | 5.1   | 1.21  |
| TRUE | 1/1 | 1/1 | 8.34  | 9.2   | -1.81 |
| TRUE | 1/1 | 1/1 | 8.34  | 9.2   | -1.81 |
| TRUE | 1/1 | 1/1 | 8.34  | 9.2   | -1.81 |
| TRUE | 1/1 | 1/1 | 6.87  | 7.34  | -1.38 |
| TRUE | 1/1 | 1/1 | 6.87  | 7.34  | -1.38 |
| TRUE | 1/1 | 1/1 | 6.87  | 7.34  | -1.38 |
| TRUE | 1/1 | 1/1 | 6.87  | 7.34  | -1.38 |
| TRUE | 1/1 | 1/1 | 6.87  | 7.34  | -1.38 |
| TRUE | 1/1 | 1/1 | 6.87  | 7.34  | -1.38 |
| TRUE | 1/1 | 1/1 | 6.87  | 7.34  | -1.38 |
| TRUE | 1/1 | 1/1 | 6.87  | 7.34  | -1.38 |
| TRUE | 1/1 | 1/1 | 6.87  | 7.34  | -1.38 |
| TRUE | 1/1 | 1/1 | 6.87  | 7.34  | -1.38 |
| TRUE | 1/1 | 1/1 | 6.87  | 7.34  | -1.38 |
| TRUE | 1/1 | 1/1 | 6.87  | 7.8   | -1.91 |
| TRUE | 1/1 | 1/1 | 6.87  | 7.8   | -1.91 |
| TRUE | 1/1 | 1/1 | 6.87  | 7.8   | -1.91 |
| TRUE | 1/1 | 1/1 | 6.87  | 7.8   | -1.91 |
| TRUE | 1/1 | 1/1 | 6.87  | 7.8   | -1.91 |
| TRUE | 1/1 | 1/1 | 6.87  | 7.8   | -1.91 |
| TRUE | 1/1 | 1/1 | 6.87  | 7.8   | -1.91 |
| TRUE | 1/1 | 1/1 | 6.87  | 7.8   | -1.91 |
| TRUE | 1/1 | 1/1 | 6.87  | 7.8   | -1.91 |
| TRUE | 1/1 | 1/1 | 6.87  | 7.8   | -1.91 |
| TRUE | 1/1 | 1/1 | 6.87  | 7.8   | -1.91 |
| TRUE | 1/1 | 1/1 | 6.87  | 7.8   | -1.91 |
| TRUE | 1/1 | 1/1 | 6.87  | 7.8   | -1.91 |
| TRUE | 1/1 | 1/1 | 8.38  | 9.12  | -1.67 |
| TRUE | 1/1 | 1/1 | 8.38  | 9.12  | -1.67 |
| TRUE | 1/1 | 1/1 | 8.38  | 9.12  | -1.67 |
| TRUE | 1/1 | 1/1 | 8.38  | 9.12  | -1.67 |
| TRUE | 1/1 | 1/1 | 8.38  | 9.12  | -1.67 |
| TRUE | 1/1 | 1/1 | 12.53 | 12.42 | 1.07  |
| TRUE | 1/1 | 1/1 | 12.53 | 12.42 | 1.07  |
| TRUE | 1/1 | 1/1 | 12.53 | 12.42 | 1.07  |



|      |     |     |       |       |       |
|------|-----|-----|-------|-------|-------|
| TRUE | 1/1 | 1/1 | 7.78  | 5.73  | 4.13  |
| TRUE | 1/1 | 1/1 | 7.78  | 5.73  | 4.13  |
| TRUE | 1/1 | 1/1 | 7.78  | 5.73  | 4.13  |
| TRUE | 1/1 | 1/1 | 7.78  | 5.73  | 4.13  |
| TRUE | 1/1 | 1/1 | 11.2  | 11.36 | -1.12 |
| TRUE | 1/1 | 1/1 | 11.2  | 11.36 | -1.12 |
| TRUE | 1/1 | 1/1 | 6.47  | 7.19  | -1.65 |
| TRUE | 1/1 | 1/1 | 6.47  | 7.19  | -1.65 |
| TRUE | 1/1 | 1/1 | 6.47  | 7.19  | -1.65 |
| TRUE | 1/1 | 1/1 | 6.47  | 7.19  | -1.65 |
| TRUE | 1/1 | 1/1 | 6.47  | 7.19  | -1.65 |
| TRUE | 1/1 | 1/1 | 6.47  | 7.19  | -1.65 |
| TRUE | 1/1 | 1/1 | 6.47  | 7.19  | -1.65 |
| TRUE | 1/1 | 1/1 | 6.47  | 7.19  | -1.65 |
| TRUE | 1/1 | 1/1 | 6.47  | 7.19  | -1.65 |
| TRUE | 1/1 | 1/1 | 6.47  | 7.19  | -1.65 |
| TRUE | 1/1 | 1/1 | 8.82  | 9.37  | -1.46 |
| TRUE | 1/1 | 1/1 | 8.82  | 9.37  | -1.46 |
| TRUE | 1/1 | 1/1 | 8.82  | 9.37  | -1.46 |
| TRUE | 1/1 | 1/1 | 8.74  | 9.48  | -1.67 |
| TRUE | 1/1 | 1/1 | 8.74  | 9.48  | -1.67 |
| TRUE | 1/1 | 1/1 | 6.96  | 6.79  | 1.12  |
| TRUE | 1/1 | 1/1 | 6.96  | 6.79  | 1.12  |
| TRUE | 1/1 | 1/1 | 6.96  | 6.79  | 1.12  |
| TRUE | 1/1 | 1/1 | 3.29  | 3.1   | 1.14  |
| TRUE | 1/1 | 1/1 | 3.29  | 3.1   | 1.14  |
| TRUE | 1/1 | 1/1 | 6     | 5.79  | 1.16  |
| TRUE | 1/1 | 1/1 | 6     | 5.79  | 1.16  |
| TRUE | 1/1 | 1/1 | 6     | 5.79  | 1.16  |
| TRUE | 1/1 | 1/1 | 6     | 5.79  | 1.16  |
| TRUE | 1/1 | 1/1 | 6     | 5.79  | 1.16  |
| TRUE | 1/1 | 1/1 | 6     | 5.79  | 1.16  |
| TRUE | 1/1 | 1/1 | 6     | 5.79  | 1.16  |
| TRUE | 1/1 | 1/1 | 6     | 5.79  | 1.16  |
| TRUE | 1/1 | 1/1 | 7.27  | 8.58  | -2.49 |
| TRUE | 1/1 | 1/1 | 7.27  | 8.58  | -2.49 |
| TRUE | 1/1 | 1/1 | 7.27  | 8.58  | -2.49 |
| TRUE | 1/1 | 1/1 | 6     | 7.33  | -2.51 |
| TRUE | 1/1 | 1/1 | 6     | 7.33  | -2.51 |
| TRUE | 1/1 | 1/1 | 6     | 7.33  | -2.51 |
| TRUE | 1/1 | 1/1 | 6     | 7.33  | -2.51 |
| TRUE | 1/1 | 1/1 | 8.09  | 7.25  | 1.78  |
| TRUE | 1/1 | 1/1 | 8.09  | 7.25  | 1.78  |
| TRUE | 1/1 | 1/1 | 8.09  | 7.25  | 1.78  |
| TRUE | 1/1 | 1/1 | 10.19 | 11.21 | -2.03 |
| TRUE | 1/1 | 1/1 | 10.19 | 11.21 | -2.03 |
| TRUE | 1/1 | 1/1 | 10.19 | 11.21 | -2.03 |
| TRUE | 1/1 | 1/1 | 10.19 | 11.21 | -2.03 |
| TRUE | 1/1 | 1/1 | 10.19 | 11.21 | -2.03 |
| TRUE | 1/1 | 1/1 | 7.73  | 7.41  | 1.25  |
| TRUE | 1/1 | 1/1 | 7.73  | 7.41  | 1.25  |
| TRUE | 1/1 | 1/1 | 7.73  | 7.41  | 1.25  |
| TRUE | 1/1 | 1/1 | 6.62  | 5.76  | 1.82  |
| TRUE | 1/1 | 1/1 | 6.62  | 5.76  | 1.82  |
| TRUE | 1/1 | 1/1 | 6.62  | 5.76  | 1.82  |
| TRUE | 1/1 | 1/1 | 5.22  | 5.76  | -1.45 |
| TRUE | 1/1 | 1/1 | 5.22  | 5.76  | -1.45 |
| TRUE | 1/1 | 1/1 | 5.22  | 5.76  | -1.45 |
| TRUE | 1/1 | 1/1 | 5.22  | 5.76  | -1.45 |

|      |     |     |      |      |       |
|------|-----|-----|------|------|-------|
| TRUE | 1/1 | 1/1 | 5.22 | 5.76 | -1.45 |
| TRUE | 1/1 | 1/1 | 8.7  | 9.93 | -2.36 |
| TRUE | 1/1 | 1/1 | 8.7  | 9.93 | -2.36 |
| TRUE | 1/1 | 1/1 | 8.7  | 9.93 | -2.36 |
| TRUE | 1/1 | 1/1 | 8.7  | 9.93 | -2.36 |
| TRUE | 1/1 | 1/1 | 8.7  | 9.93 | -2.36 |
| TRUE | 1/1 | 1/1 | 8.7  | 9.93 | -2.36 |
| TRUE | 1/1 | 1/1 | 8.7  | 9.93 | -2.36 |
| TRUE | 1/1 | 1/1 | 8.7  | 9.93 | -2.36 |
| TRUE | 1/1 | 1/1 | 8.7  | 9.93 | -2.36 |
| TRUE | 1/1 | 1/1 | 8.7  | 9.93 | -2.36 |
| TRUE | 1/1 | 1/1 | 8.7  | 9.93 | -2.36 |
| TRUE | 1/1 | 1/1 | 8.7  | 9.93 | -2.36 |
| TRUE | 1/1 | 1/1 | 8.7  | 9.93 | -2.36 |
| TRUE | 1/1 | 1/1 | 8.7  | 9.93 | -2.36 |
| TRUE | 1/1 | 1/1 | 7.07 | 5.98 | 2.12  |
| TRUE | 1/1 | 1/1 | 7.07 | 5.98 | 2.12  |
| TRUE | 1/1 | 1/1 | 7.07 | 5.98 | 2.12  |
| TRUE | 1/1 | 1/1 | 7.07 | 5.98 | 2.12  |
| TRUE | 1/1 | 1/1 | 7.07 | 5.98 | 2.12  |
| TRUE | 1/1 | 1/1 | 7.07 | 5.98 | 2.12  |
| TRUE | 1/1 | 1/1 | 7.07 | 5.98 | 2.12  |
| TRUE | 1/1 | 1/1 | 7.07 | 5.98 | 2.12  |
| TRUE | 1/1 | 1/1 | 4.4  | 4.91 | -1.42 |
| TRUE | 1/1 | 1/1 | 4.4  | 4.91 | -1.42 |
| TRUE | 1/1 | 1/1 | 4.4  | 4.91 | -1.42 |
| TRUE | 1/1 | 1/1 | 4.81 | 4.96 | -1.1  |
| TRUE | 1/1 | 1/1 | 4.81 | 4.96 | -1.1  |
| TRUE | 1/1 | 1/1 | 6.56 | 6.59 | -1.02 |
| TRUE | 1/1 | 1/1 | 6.56 | 6.59 | -1.02 |
| TRUE | 1/1 | 1/1 | 6.56 | 6.59 | -1.02 |
| TRUE | 1/1 | 1/1 | 6.56 | 6.59 | -1.02 |
| TRUE | 1/1 | 1/1 | 6.08 | 5.66 | 1.34  |
| TRUE | 1/1 | 1/1 | 6.08 | 5.66 | 1.34  |
| TRUE | 1/1 | 1/1 | 6.08 | 5.66 | 1.34  |
| TRUE | 1/1 | 1/1 | 8.39 | 9.53 | -2.2  |
| TRUE | 1/1 | 1/1 | 8.39 | 9.53 | -2.2  |
| TRUE | 1/1 | 1/1 | 8.39 | 9.53 | -2.2  |
| TRUE | 1/1 | 1/1 | 8.39 | 9.53 | -2.2  |
| TRUE | 1/1 | 1/1 | 8.39 | 9.53 | -2.2  |
| TRUE | 1/1 | 1/1 | 8.39 | 9.53 | -2.2  |
| TRUE | 1/1 | 1/1 | 8.39 | 9.53 | -2.2  |
| TRUE | 1/1 | 1/1 | 6.98 | 7.75 | -1.7  |
| TRUE | 1/1 | 1/1 | 6.98 | 7.75 | -1.7  |
| TRUE | 1/1 | 1/1 | 6.98 | 7.75 | -1.7  |
| TRUE | 1/1 | 1/1 | 6.98 | 7.75 | -1.7  |
| TRUE | 1/1 | 1/1 | 6.97 | 8.32 | -2.55 |
| TRUE | 1/1 | 1/1 | 6.97 | 8.32 | -2.55 |
| TRUE | 1/1 | 1/1 | 6.97 | 8.32 | -2.55 |
| TRUE | 1/1 | 1/1 | 6.97 | 8.32 | -2.55 |
| TRUE | 1/1 | 1/1 | 6.97 | 8.32 | -2.55 |
| TRUE | 1/1 | 1/1 | 6.97 | 8.32 | -2.55 |
| TRUE | 1/1 | 1/1 | 6.97 | 8.32 | -2.55 |
| TRUE | 1/1 | 1/1 | 8.47 | 8.59 | -1.08 |
| TRUE | 1/1 | 1/1 | 8.47 | 8.59 | -1.08 |
| TRUE | 1/1 | 1/1 | 8.47 | 8.59 | -1.08 |
| TRUE | 1/1 | 1/1 | 7.65 | 7.4  | 1.18  |
| TRUE | 1/1 | 1/1 | 7.65 | 7.4  | 1.18  |
| TRUE | 1/1 | 1/1 | 7.65 | 7.4  | 1.18  |
| TRUE | 1/1 | 1/1 | 7.65 | 7.4  | 1.18  |
| TRUE | 1/1 | 1/1 | 7.65 | 7.4  | 1.18  |
| TRUE | 1/1 | 1/1 | 4.09 | 5.26 | -2.25 |
| TRUE | 1/1 | 1/1 | 4.09 | 5.26 | -2.25 |









|      |     |     |      |       |       |
|------|-----|-----|------|-------|-------|
| TRUE | 1/1 | 1/1 | 6.29 | 7.22  | -1.91 |
| TRUE | 1/1 | 1/1 | 6.29 | 7.22  | -1.91 |
| TRUE | 1/1 | 1/1 | 6.29 | 7.22  | -1.91 |
| TRUE | 1/1 | 1/1 | 6.29 | 7.22  | -1.91 |
| TRUE | 1/1 | 1/1 | 6.03 | 6.63  | -1.51 |
| TRUE | 1/1 | 1/1 | 6.03 | 6.63  | -1.51 |
| TRUE | 1/1 | 1/1 | 6.03 | 6.63  | -1.51 |
| TRUE | 1/1 | 1/1 | 6.03 | 6.63  | -1.51 |
| TRUE | 1/1 | 1/1 | 6.03 | 6.63  | -1.51 |
| TRUE | 1/1 | 1/1 | 6.03 | 6.63  | -1.51 |
| TRUE | 1/1 | 1/1 | 8.79 | 8.46  | 1.25  |
| TRUE | 1/1 | 1/1 | 8.79 | 8.46  | 1.25  |
| TRUE | 1/1 | 1/1 | 6.36 | 6.49  | -1.1  |
| TRUE | 1/1 | 1/1 | 6.36 | 6.49  | -1.1  |
| TRUE | 1/1 | 1/1 | 6.36 | 6.49  | -1.1  |
| TRUE | 1/1 | 1/1 | 6.36 | 6.49  | -1.1  |
| TRUE | 1/1 | 1/1 | 6.36 | 6.49  | -1.1  |
| TRUE | 1/1 | 1/1 | 6.36 | 6.49  | -1.1  |
| TRUE | 1/1 | 1/1 | 7.77 | 7.88  | -1.08 |
| TRUE | 1/1 | 1/1 | 7.77 | 7.88  | -1.08 |
| TRUE | 1/1 | 1/1 | 7.77 | 7.88  | -1.08 |
| TRUE | 1/1 | 1/1 | 4.13 | 4.5   | -1.3  |
| TRUE | 1/1 | 1/1 | 4.13 | 4.5   | -1.3  |
| TRUE | 1/1 | 1/1 | 4.13 | 4.5   | -1.3  |
| TRUE | 1/1 | 1/1 | 9.84 | 10.66 | -1.76 |
| TRUE | 1/1 | 1/1 | 9.84 | 10.66 | -1.76 |
| TRUE | 1/1 | 1/1 | 9.84 | 10.66 | -1.76 |
| TRUE | 1/1 | 1/1 | 9.84 | 10.66 | -1.76 |
| TRUE | 1/1 | 1/1 | 9.84 | 10.66 | -1.76 |
| TRUE | 1/1 | 1/1 | 9.84 | 10.66 | -1.76 |
| TRUE | 1/1 | 1/1 | 9.84 | 10.66 | -1.76 |
| TRUE | 1/1 | 1/1 | 6.11 | 6.74  | -1.54 |
| TRUE | 1/1 | 1/1 | 6.11 | 6.74  | -1.54 |
| TRUE | 1/1 | 1/1 | 6.11 | 6.74  | -1.54 |
| TRUE | 1/1 | 1/1 | 6.11 | 6.74  | -1.54 |
| TRUE | 1/1 | 1/1 | 4.93 | 5.81  | -1.84 |
| TRUE | 1/1 | 1/1 | 4.93 | 5.81  | -1.84 |
| TRUE | 1/1 | 1/1 | 4.93 | 5.81  | -1.84 |
| TRUE | 1/1 | 1/1 | 4.93 | 5.81  | -1.84 |
| TRUE | 1/1 | 1/1 | 4.93 | 5.81  | -1.84 |
| TRUE | 1/1 | 1/1 | 4.93 | 5.81  | -1.84 |
| TRUE | 1/1 | 1/1 | 4.93 | 5.81  | -1.84 |
| TRUE | 1/1 | 1/1 | 4.93 | 5.81  | -1.84 |
| TRUE | 1/1 | 1/1 | 4.93 | 5.81  | -1.84 |
| TRUE | 1/1 | 1/1 | 4.93 | 5.81  | -1.84 |
| TRUE | 1/1 | 1/1 | 4.93 | 5.81  | -1.84 |
| TRUE | 1/1 | 1/1 | 4.93 | 5.81  | -1.84 |
| TRUE | 1/1 | 1/1 | 4.93 | 5.81  | -1.84 |
| TRUE | 1/1 | 1/1 | 4.93 | 5.81  | -1.84 |
| TRUE | 1/1 | 1/1 | 4.93 | 5.81  | -1.84 |
| TRUE | 1/1 | 1/1 | 4.93 | 5.81  | -1.84 |
| TRUE | 1/1 | 1/1 | 4.93 | 5.81  | -1.84 |
| TRUE | 1/1 | 1/1 | 4.93 | 5.81  | -1.84 |
| TRUE | 1/1 | 1/1 | 4.93 | 5.81  | -1.84 |
| TRUE | 1/1 | 1/1 | 4.93 | 5.81  | -1.84 |
| TRUE | 1/1 | 1/1 | 4.93 | 5.81  | -1.84 |
| TRUE | 1/1 | 1/1 | 4.93 | 5.81  | -1.84 |
| TRUE | 1/1 | 1/1 | 5.14 | 6.06  | -1.88 |



|      |     |     |      |      |       |
|------|-----|-----|------|------|-------|
| TRUE | 1/1 | 1/1 | 5.44 | 5.03 | 1.33  |
| TRUE | 1/1 | 1/1 | 7.82 | 8.37 | -1.46 |
| TRUE | 1/1 | 1/1 | 7.82 | 8.37 | -1.46 |
| TRUE | 1/1 | 1/1 | 7.82 | 8.37 | -1.46 |
| TRUE | 1/1 | 1/1 | 7.82 | 8.37 | -1.46 |
| TRUE | 1/1 | 1/1 | 5.18 | 5.18 | -1    |
| TRUE | 1/1 | 1/1 | 5.18 | 5.18 | -1    |
| TRUE | 1/1 | 1/1 | 5.18 | 5.18 | -1    |
| TRUE | 1/1 | 1/1 | 5.18 | 5.18 | -1    |
| TRUE | 1/1 | 1/1 | 5.18 | 5.18 | -1    |
| TRUE | 1/1 | 1/1 | 4.09 | 4.95 | -1.81 |
| TRUE | 1/1 | 1/1 | 4.09 | 4.95 | -1.81 |
| TRUE | 1/1 | 1/1 | 4.09 | 4.95 | -1.81 |
| TRUE | 1/1 | 1/1 | 6.85 | 7.86 | -2.02 |
| TRUE | 1/1 | 1/1 | 6.85 | 7.86 | -2.02 |
| TRUE | 1/1 | 1/1 | 6.85 | 7.86 | -2.02 |
| TRUE | 1/1 | 1/1 | 6.85 | 7.86 | -2.02 |
| TRUE | 1/1 | 1/1 | 4.89 | 5.72 | -1.78 |
| TRUE | 1/1 | 1/1 | 4.89 | 5.72 | -1.78 |
| TRUE | 1/1 | 1/1 | 4.89 | 5.72 | -1.78 |
| TRUE | 1/1 | 1/1 | 4.89 | 5.72 | -1.78 |
| TRUE | 1/1 | 1/1 | 4.89 | 5.72 | -1.78 |
| TRUE | 1/1 | 1/1 | 4.89 | 5.72 | -1.78 |
| TRUE | 1/1 | 1/1 | 4.89 | 5.72 | -1.78 |
| TRUE | 1/1 | 1/1 | 4.89 | 5.72 | -1.78 |
| TRUE | 1/1 | 1/1 | 4.89 | 5.72 | -1.78 |
| TRUE | 1/1 | 1/1 | 4.89 | 5.72 | -1.78 |
| TRUE | 1/1 | 1/1 | 4.89 | 5.72 | -1.78 |
| TRUE | 1/1 | 1/1 | 7.74 | 8.72 | -1.98 |
| TRUE | 1/1 | 1/1 | 7.74 | 8.72 | -1.98 |
| TRUE | 1/1 | 1/1 | 7.74 | 8.72 | -1.98 |
| TRUE | 1/1 | 1/1 | 7.74 | 8.72 | -1.98 |
| TRUE | 1/1 | 1/1 | 7.74 | 8.72 | -1.98 |
| TRUE | 1/1 | 1/1 | 7.74 | 8.72 | -1.98 |
| TRUE | 1/1 | 1/1 | 7.74 | 8.72 | -1.98 |
| TRUE | 1/1 | 1/1 | 7.74 | 8.72 | -1.98 |
| TRUE | 1/1 | 1/1 | 7.74 | 8.72 | -1.98 |
| TRUE | 1/1 | 1/1 | 7.74 | 8.72 | -1.98 |
| TRUE | 1/1 | 1/1 | 7.74 | 8.72 | -1.98 |
| TRUE | 1/1 | 1/1 | 5.35 | 5.43 | -1.06 |
| TRUE | 1/1 | 1/1 | 5.35 | 5.43 | -1.06 |
| TRUE | 1/1 | 1/1 | 7.56 | 7.35 | 1.15  |
| TRUE | 1/1 | 1/1 | 7.56 | 7.35 | 1.15  |
| TRUE | 1/1 | 1/1 | 7.56 | 7.35 | 1.15  |
| TRUE | 1/1 | 1/1 | 7.56 | 7.35 | 1.15  |
| TRUE | 1/1 | 1/1 | 7.56 | 7.35 | 1.15  |
| TRUE | 1/1 | 1/1 | 7.56 | 7.35 | 1.15  |
| TRUE | 1/1 | 1/1 | 4.63 | 5.46 | -1.77 |
| TRUE | 1/1 | 1/1 | 4.63 | 5.46 | -1.77 |
| TRUE | 1/1 | 1/1 | 4.63 | 5.46 | -1.77 |
| TRUE | 1/1 | 1/1 | 4.63 | 5.46 | -1.77 |
| TRUE | 1/1 | 1/1 | 5.29 | 6.38 | -2.12 |
| TRUE | 1/1 | 1/1 | 5.29 | 6.38 | -2.12 |
| TRUE | 1/1 | 1/1 | 5.29 | 6.38 | -2.12 |
| TRUE | 1/1 | 1/1 | 5.29 | 6.38 | -2.12 |
| TRUE | 1/1 | 1/1 | 5.29 | 6.38 | -2.12 |
| TRUE | 1/1 | 1/1 | 5.29 | 6.38 | -2.12 |
| TRUE | 1/1 | 1/1 | 9.48 | 10.2 | -1.65 |
| TRUE | 1/1 | 1/1 | 9.48 | 10.2 | -1.65 |
| TRUE | 1/1 | 1/1 | 9.48 | 10.2 | -1.65 |
| TRUE | 1/1 | 1/1 | 9.48 | 10.2 | -1.65 |
| TRUE | 1/1 | 1/1 | 9.48 | 10.2 | -1.65 |

|      |     |     |      |      |       |
|------|-----|-----|------|------|-------|
| TRUE | 1/1 | 1/1 | 9.48 | 10.2 | -1.65 |
| TRUE | 1/1 | 1/1 | 9.48 | 10.2 | -1.65 |
| TRUE | 1/1 | 1/1 | 9.48 | 10.2 | -1.65 |
| TRUE | 1/1 | 1/1 | 3.29 | 4.19 | -1.88 |
| TRUE | 1/1 | 1/1 | 3.29 | 4.19 | -1.88 |
| TRUE | 1/1 | 1/1 | 3.29 | 4.19 | -1.88 |
| TRUE | 1/1 | 1/1 | 3.29 | 4.19 | -1.88 |
| TRUE | 1/1 | 1/1 | 3.29 | 4.19 | -1.88 |
| TRUE | 1/1 | 1/1 | 3.29 | 4.19 | -1.88 |
| TRUE | 1/1 | 1/1 | 4.22 | 3.69 | 1.44  |
| TRUE | 1/1 | 1/1 | 4.22 | 3.69 | 1.44  |
| TRUE | 1/1 | 1/1 | 4.22 | 3.69 | 1.44  |
| TRUE | 1/1 | 1/1 | 5.5  | 6.24 | -1.67 |
| TRUE | 1/1 | 1/1 | 5.5  | 6.24 | -1.67 |
| TRUE | 1/1 | 1/1 | 5.5  | 6.24 | -1.67 |
| TRUE | 1/1 | 1/1 | 5.5  | 6.24 | -1.67 |
| TRUE | 1/1 | 1/1 | 5.5  | 6.24 | -1.67 |
| TRUE | 1/1 | 1/1 | 5.5  | 6.24 | -1.67 |
| TRUE | 1/1 | 1/1 | 5.5  | 6.24 | -1.67 |
| TRUE | 1/1 | 1/1 | 5.5  | 6.24 | -1.67 |
| TRUE | 1/1 | 1/1 | 8.14 | 7.15 | 1.99  |
| TRUE | 1/1 | 1/1 | 8.14 | 7.15 | 1.99  |
| TRUE | 1/1 | 1/1 | 8.14 | 7.15 | 1.99  |
| TRUE | 1/1 | 1/1 | 8.14 | 7.15 | 1.99  |
| TRUE | 1/1 | 1/1 | 8.14 | 7.15 | 1.99  |
| TRUE | 1/1 | 1/1 | 8.14 | 7.15 | 1.99  |
| TRUE | 1/1 | 1/1 | 8.14 | 7.15 | 1.99  |
| TRUE | 1/1 | 1/1 | 7.61 | 7    | 1.52  |
| TRUE | 1/1 | 1/1 | 7.61 | 7    | 1.52  |
| TRUE | 1/1 | 1/1 | 7.61 | 7    | 1.52  |
| TRUE | 1/1 | 1/1 | 7.61 | 7    | 1.52  |
| TRUE | 1/1 | 1/1 | 7.61 | 7    | 1.52  |
| TRUE | 1/1 | 1/1 | 5.51 | 6.38 | -1.83 |
| TRUE | 1/1 | 1/1 | 5.51 | 6.38 | -1.83 |
| TRUE | 1/1 | 1/1 | 5.51 | 6.38 | -1.83 |
| TRUE | 1/1 | 1/1 | 5.51 | 6.38 | -1.83 |
| TRUE | 1/1 | 1/1 | 5.51 | 6.38 | -1.83 |
| TRUE | 1/1 | 1/1 | 5.51 | 6.38 | -1.83 |
| TRUE | 1/1 | 1/1 | 7.34 | 5.36 | 3.96  |
| TRUE | 1/1 | 1/1 | 7.34 | 5.36 | 3.96  |
| TRUE | 1/1 | 1/1 | 7.34 | 5.36 | 3.96  |
| TRUE | 1/1 | 1/1 | 7.34 | 5.36 | 3.96  |
| TRUE | 1/1 | 1/1 | 7.34 | 5.36 | 3.96  |
| TRUE | 1/1 | 1/1 | 7.34 | 5.36 | 3.96  |
| TRUE | 1/1 | 1/1 | 7.34 | 5.36 | 3.96  |
| TRUE | 1/1 | 1/1 | 7.34 | 5.36 | 3.96  |
| TRUE | 1/1 | 1/1 | 7.34 | 5.36 | 3.96  |
| TRUE | 1/1 | 1/1 | 7.34 | 5.36 | 3.96  |
| TRUE | 1/1 | 1/1 | 7.34 | 5.36 | 3.96  |
| TRUE | 1/1 | 1/1 | 7.34 | 5.36 | 3.96  |
| TRUE | 1/1 | 1/1 | 7.34 | 5.36 | 3.96  |
| TRUE | 1/1 | 1/1 | 7.34 | 5.36 | 3.96  |
| TRUE | 1/1 | 1/1 | 7.34 | 5.36 | 3.96  |
| TRUE | 1/1 | 1/1 | 7.34 | 5.36 | 3.96  |
| TRUE | 1/1 | 1/1 | 7.34 | 5.36 | 3.96  |
| TRUE | 1/1 | 1/1 | 7.34 | 5.36 | 3.96  |
| TRUE | 1/1 | 1/1 | 7.34 | 5.36 | 3.96  |
| TRUE | 1/1 | 1/1 | 9.25 | 9.33 | -1.06 |
| TRUE | 1/1 | 1/1 | 9.25 | 9.33 | -1.06 |
| TRUE | 1/1 | 1/1 | 9.25 | 9.33 | -1.06 |

|      |     |     |       |       |       |
|------|-----|-----|-------|-------|-------|
| TRUE | 1/1 | 1/1 | 5.93  | 5.63  | 1.23  |
| TRUE | 1/1 | 1/1 | 5.93  | 5.63  | 1.23  |
| TRUE | 1/1 | 1/1 | 5.93  | 5.63  | 1.23  |
| TRUE | 1/1 | 1/1 | 5.93  | 5.63  | 1.23  |
| TRUE | 1/1 | 1/1 | 5.93  | 5.63  | 1.23  |
| TRUE | 1/1 | 1/1 | 5.93  | 5.63  | 1.23  |
| TRUE | 1/1 | 1/1 | 5.93  | 5.63  | 1.23  |
| TRUE | 1/1 | 1/1 | 5.93  | 5.63  | 1.23  |
| TRUE | 1/1 | 1/1 | 4.67  | 4.47  | 1.15  |
| TRUE | 1/1 | 1/1 | 4.67  | 4.47  | 1.15  |
| TRUE | 1/1 | 1/1 | 4.67  | 4.47  | 1.15  |
| TRUE | 1/1 | 1/1 | 3.36  | 4.22  | -1.82 |
| TRUE | 1/1 | 1/1 | 3.36  | 4.22  | -1.82 |
| TRUE | 1/1 | 1/1 | 7.57  | 7.09  | 1.4   |
| TRUE | 1/1 | 1/1 | 7.57  | 7.09  | 1.4   |
| TRUE | 1/1 | 1/1 | 7.57  | 7.09  | 1.4   |
| TRUE | 1/1 | 1/1 | 7.57  | 7.09  | 1.4   |
| TRUE | 1/1 | 1/1 | 7.57  | 7.09  | 1.4   |
| TRUE | 1/1 | 1/1 | 7.57  | 7.09  | 1.4   |
| TRUE | 1/1 | 1/1 | 7.57  | 7.09  | 1.4   |
| TRUE | 1/1 | 1/1 | 6.93  | 7.35  | -1.34 |
| TRUE | 1/1 | 1/1 | 6.93  | 7.35  | -1.34 |
| TRUE | 1/1 | 1/1 | 6.93  | 7.35  | -1.34 |
| TRUE | 1/1 | 1/1 | 6.66  | 7     | -1.26 |
| TRUE | 1/1 | 1/1 | 6.66  | 7     | -1.26 |
| TRUE | 1/1 | 1/1 | 8.06  | 8.01  | 1.03  |
| TRUE | 1/1 | 1/1 | 8.06  | 8.01  | 1.03  |
| TRUE | 1/1 | 1/1 | 11.16 | 11.24 | -1.06 |
| TRUE | 1/1 | 1/1 | 11.16 | 11.24 | -1.06 |
| TRUE | 1/1 | 1/1 | 11.16 | 11.24 | -1.06 |
| TRUE | 1/1 | 1/1 | 6.38  | 6.73  | -1.28 |
| TRUE | 1/1 | 1/1 | 6.38  | 6.73  | -1.28 |
| TRUE | 1/1 | 1/1 | 6.38  | 6.73  | -1.28 |
| TRUE | 1/1 | 1/1 | 6.38  | 6.73  | -1.28 |
| TRUE | 1/1 | 1/1 | 6.38  | 6.73  | -1.28 |
| TRUE | 1/1 | 1/1 | 6.38  | 6.73  | -1.28 |
| TRUE | 1/1 | 1/1 | 6.38  | 6.73  | -1.28 |
| TRUE | 1/1 | 1/1 | 6.38  | 6.73  | -1.28 |
| TRUE | 1/1 | 1/1 | 6.38  | 6.73  | -1.28 |
| TRUE | 1/1 | 1/1 | 6.38  | 6.73  | -1.28 |
| TRUE | 1/1 | 1/1 | 9.16  | 9.25  | -1.06 |
| TRUE | 1/1 | 1/1 | 9.16  | 9.25  | -1.06 |
| TRUE | 1/1 | 1/1 | 5.95  | 6.51  | -1.47 |
| TRUE | 1/1 | 1/1 | 5.95  | 6.51  | -1.47 |
| TRUE | 1/1 | 1/1 | 5.95  | 6.51  | -1.47 |
| TRUE | 1/1 | 1/1 | 5.95  | 6.51  | -1.47 |
| TRUE | 1/1 | 1/1 | 5.95  | 6.51  | -1.47 |
| TRUE | 1/1 | 1/1 | 5.95  | 6.51  | -1.47 |
| TRUE | 1/1 | 1/1 | 5.95  | 6.51  | -1.47 |
| TRUE | 1/1 | 1/1 | 7.85  | 9.26  | -2.66 |
| TRUE | 1/1 | 1/1 | 7.85  | 9.26  | -2.66 |
| TRUE | 1/1 | 1/1 | 7.85  | 9.26  | -2.66 |
| TRUE | 1/1 | 1/1 | 7.85  | 9.26  | -2.66 |
| TRUE | 1/1 | 1/1 | 7.85  | 9.26  | -2.66 |
| TRUE | 1/1 | 1/1 | 7.85  | 9.26  | -2.66 |
| TRUE | 1/1 | 1/1 | 7.85  | 9.26  | -2.66 |
| TRUE | 1/1 | 1/1 | 8.25  | 8.54  | -1.23 |
| TRUE | 1/1 | 1/1 | 8.25  | 8.54  | -1.23 |
| TRUE | 1/1 | 1/1 | 8.15  | 9.11  | -1.95 |
| TRUE | 1/1 | 1/1 | 8.15  | 9.11  | -1.95 |





|      |     |     |       |      |       |
|------|-----|-----|-------|------|-------|
| TRUE | 1/1 | 1/1 | 9.15  | 9.59 | -1.35 |
| TRUE | 1/1 | 1/1 | 9.15  | 9.59 | -1.35 |
| TRUE | 1/1 | 1/1 | 9.15  | 9.59 | -1.35 |
| TRUE | 1/1 | 1/1 | 9.15  | 9.59 | -1.35 |
| TRUE | 1/1 | 1/1 | 6.04  | 6.28 | -1.18 |
| TRUE | 1/1 | 1/1 | 6.04  | 6.28 | -1.18 |
| TRUE | 1/1 | 1/1 | 6.04  | 6.28 | -1.18 |
| TRUE | 1/1 | 1/1 | 5.79  | 6.02 | -1.18 |
| TRUE | 1/1 | 1/1 | 5.79  | 6.02 | -1.18 |
| TRUE | 1/1 | 1/1 | 5.79  | 6.02 | -1.18 |
| TRUE | 1/1 | 1/1 | 5.79  | 6.02 | -1.18 |
| TRUE | 1/1 | 1/1 | 9.15  | 9.59 | -1.35 |
| TRUE | 1/1 | 1/1 | 9.15  | 9.59 | -1.35 |
| TRUE | 1/1 | 1/1 | 9.15  | 9.59 | -1.35 |
| TRUE | 1/1 | 1/1 | 9.15  | 9.59 | -1.35 |
| TRUE | 1/1 | 1/1 | 4.1   | 4.83 | -1.66 |
| TRUE | 1/1 | 1/1 | 4.1   | 4.83 | -1.66 |
| TRUE | 1/1 | 1/1 | 5.64  | 6.57 | -1.91 |
| TRUE | 1/1 | 1/1 | 5.64  | 6.57 | -1.91 |
| TRUE | 1/1 | 1/1 | 5.64  | 6.57 | -1.91 |
| TRUE | 1/1 | 1/1 | 5.64  | 6.57 | -1.91 |
| TRUE | 1/1 | 1/1 | 10.59 | 9.36 | 2.35  |
| TRUE | 1/1 | 1/1 | 10.59 | 9.36 | 2.35  |
| TRUE | 1/1 | 1/1 | 6.13  | 6.9  | -1.7  |
| TRUE | 1/1 | 1/1 | 6.13  | 6.9  | -1.7  |
| TRUE | 1/1 | 1/1 | 6.7   | 7.39 | -1.62 |
| TRUE | 1/1 | 1/1 | 6.7   | 7.39 | -1.62 |
| TRUE | 1/1 | 1/1 | 6.7   | 7.39 | -1.62 |
| TRUE | 1/1 | 1/1 | 6.7   | 7.39 | -1.62 |
| TRUE | 1/1 | 1/1 | 7.08  | 7.32 | -1.18 |
| TRUE | 1/1 | 1/1 | 7.08  | 7.32 | -1.18 |
| TRUE | 1/1 | 1/1 | 7.08  | 7.32 | -1.18 |
| TRUE | 1/1 | 1/1 | 7.08  | 7.32 | -1.18 |
| TRUE | 1/1 | 1/1 | 7.04  | 7.48 | -1.36 |
| TRUE | 1/1 | 1/1 | 7.04  | 7.48 | -1.36 |
| TRUE | 1/1 | 1/1 | 7.04  | 7.48 | -1.36 |
| TRUE | 1/1 | 1/1 | 7.04  | 7.48 | -1.36 |
| TRUE | 1/1 | 1/1 | 7.04  | 7.48 | -1.36 |
| TRUE | 1/1 | 1/1 | 7.04  | 7.48 | -1.36 |
| TRUE | 1/1 | 1/1 | 4.56  | 4.18 | 1.3   |
| TRUE | 1/1 | 1/1 | 4.56  | 4.18 | 1.3   |
| TRUE | 1/1 | 1/1 | 4.56  | 4.18 | 1.3   |
| TRUE | 1/1 | 1/1 | 4.56  | 4.18 | 1.3   |
| TRUE | 1/1 | 1/1 | 6.76  | 6.14 | 1.53  |
| TRUE | 1/1 | 1/1 | 6.76  | 6.14 | 1.53  |
| TRUE | 1/1 | 1/1 | 6.76  | 6.14 | 1.53  |
| TRUE | 1/1 | 1/1 | 6.76  | 6.14 | 1.53  |
| TRUE | 1/1 | 1/1 | 6.76  | 6.14 | 1.53  |
| TRUE | 1/1 | 1/1 | 6.76  | 6.14 | 1.53  |
| TRUE | 1/1 | 1/1 | 6.76  | 6.14 | 1.53  |
| TRUE | 1/1 | 1/1 | 3.97  | 4.63 | -1.58 |
| TRUE | 1/1 | 1/1 | 3.97  | 4.63 | -1.58 |
| TRUE | 1/1 | 1/1 | 3.97  | 4.63 | -1.58 |
| TRUE | 1/1 | 1/1 | 3.97  | 4.63 | -1.58 |
| TRUE | 1/1 | 1/1 | 6.23  | 5.79 | 1.36  |
| TRUE | 1/1 | 1/1 | 6.23  | 5.79 | 1.36  |
| TRUE | 1/1 | 1/1 | 8.32  | 7.15 | 2.25  |
| TRUE | 1/1 | 1/1 | 8.32  | 7.15 | 2.25  |



|      |     |     |       |       |       |
|------|-----|-----|-------|-------|-------|
| TRUE | 1/1 | 1/1 | 4.97  | 5.98  | -2.02 |
| TRUE | 1/1 | 1/1 | 4.97  | 5.98  | -2.02 |
| TRUE | 1/1 | 1/1 | 4.97  | 5.98  | -2.02 |
| TRUE | 1/1 | 1/1 | 4.97  | 5.98  | -2.02 |
| TRUE | 1/1 | 1/1 | 4.97  | 5.98  | -2.02 |
| TRUE | 1/1 | 1/1 | 8     | 7.16  | 1.79  |
| TRUE | 1/1 | 1/1 | 8     | 7.16  | 1.79  |
| TRUE | 1/1 | 1/1 | 8     | 7.16  | 1.79  |
| TRUE | 1/1 | 1/1 | 8     | 7.16  | 1.79  |
| TRUE | 1/1 | 1/1 | 10.06 | 10.65 | -1.5  |
| TRUE | 1/1 | 1/1 | 10.06 | 10.65 | -1.5  |
| TRUE | 1/1 | 1/1 | 10.06 | 10.65 | -1.5  |
| TRUE | 1/1 | 1/1 | 10.06 | 10.65 | -1.5  |
| TRUE | 1/1 | 1/1 | 10.06 | 10.65 | -1.5  |
| TRUE | 1/1 | 1/1 | 10.06 | 10.65 | -1.5  |
| TRUE | 1/1 | 1/1 | 5.7   | 6.33  | -1.55 |
| TRUE | 1/1 | 1/1 | 5.7   | 6.33  | -1.55 |
| TRUE | 1/1 | 1/1 | 5.79  | 6.61  | -1.77 |
| TRUE | 1/1 | 1/1 | 5.79  | 6.61  | -1.77 |
| TRUE | 1/1 | 1/1 | 5.79  | 6.61  | -1.77 |
| TRUE | 1/1 | 1/1 | 5.79  | 6.61  | -1.77 |
| TRUE | 1/1 | 1/1 | 4.78  | 5.57  | -1.74 |
| TRUE | 1/1 | 1/1 | 4.78  | 5.57  | -1.74 |
| TRUE | 1/1 | 1/1 | 4.78  | 5.57  | -1.74 |
| TRUE | 1/1 | 1/1 | 5.37  | 5.95  | -1.5  |
| TRUE | 1/1 | 1/1 | 5.37  | 5.95  | -1.5  |
| TRUE | 1/1 | 1/1 | 5.37  | 5.95  | -1.5  |
| TRUE | 1/1 | 1/1 | 5.37  | 5.95  | -1.5  |
| TRUE | 1/1 | 1/1 | 5.37  | 5.95  | -1.5  |
| TRUE | 1/1 | 1/1 | 5.37  | 5.95  | -1.5  |
| TRUE | 1/1 | 1/1 | 5.37  | 5.95  | -1.5  |
| TRUE | 1/1 | 1/1 | 5.37  | 5.95  | -1.5  |
| TRUE | 1/1 | 1/1 | 5.37  | 5.95  | -1.5  |
| TRUE | 1/1 | 1/1 | 5.37  | 5.95  | -1.5  |
| TRUE | 1/1 | 1/1 | 7.78  | 7.86  | -1.06 |
| TRUE | 1/1 | 1/1 | 7.78  | 7.86  | -1.06 |
| TRUE | 1/1 | 1/1 | 7.48  | 7.58  | -1.07 |
| TRUE | 1/1 | 1/1 | 7.48  | 7.58  | -1.07 |
| TRUE | 1/1 | 1/1 | 7.48  | 7.58  | -1.07 |
| TRUE | 1/1 | 1/1 | 4.84  | 5.44  | -1.51 |
| TRUE | 1/1 | 1/1 | 4.84  | 5.44  | -1.51 |
| TRUE | 1/1 | 1/1 | 4.84  | 5.44  | -1.51 |
| TRUE | 1/1 | 1/1 | 4.84  | 5.44  | -1.51 |
| TRUE | 1/1 | 1/1 | 4.84  | 5.44  | -1.51 |
| TRUE | 1/1 | 1/1 | 4.84  | 5.44  | -1.51 |
| TRUE | 1/1 | 1/1 | 4.84  | 5.44  | -1.51 |
| TRUE | 1/1 | 1/1 | 4.84  | 5.44  | -1.51 |
| TRUE | 1/1 | 1/1 | 4.84  | 5.44  | -1.51 |
| TRUE | 1/1 | 1/1 | 4.88  | 6.13  | -2.38 |
| TRUE | 1/1 | 1/1 | 4.88  | 6.13  | -2.38 |
| TRUE | 1/1 | 1/1 | 4.88  | 6.13  | -2.38 |
| TRUE | 1/1 | 1/1 | 4.88  | 6.13  | -2.38 |
| TRUE | 1/1 | 1/1 | 4.88  | 6.13  | -2.38 |
| TRUE | 1/1 | 1/1 | 4.88  | 6.13  | -2.38 |
| TRUE | 1/1 | 1/1 | 4.88  | 6.13  | -2.38 |
| TRUE | 1/1 | 1/1 | 5.12  | 5.45  | -1.25 |
| TRUE | 1/1 | 1/1 | 5.12  | 5.45  | -1.25 |
| TRUE | 1/1 | 1/1 | 6.19  | 7.37  | -2.25 |
| TRUE | 1/1 | 1/1 | 6.19  | 7.37  | -2.25 |





|      |     |     |      |      |       |
|------|-----|-----|------|------|-------|
| TRUE | 1/1 | 1/1 | 4.31 | 5.28 | -1.96 |
| TRUE | 1/1 | 1/1 | 4.91 | 4.84 | 1.04  |
| TRUE | 1/1 | 1/1 | 4.91 | 4.84 | 1.04  |
| TRUE | 1/1 | 1/1 | 4.91 | 4.84 | 1.04  |
| TRUE | 1/1 | 1/1 | 4.36 | 4.54 | -1.13 |
| TRUE | 1/1 | 1/1 | 4.36 | 4.54 | -1.13 |
| TRUE | 1/1 | 1/1 | 4.36 | 4.54 | -1.13 |
| TRUE | 1/1 | 1/1 | 4.36 | 4.54 | -1.13 |
| TRUE | 1/1 | 1/1 | 4.36 | 4.54 | -1.13 |
| TRUE | 1/1 | 1/1 | 4.36 | 4.54 | -1.13 |
| TRUE | 1/1 | 1/1 | 4.36 | 4.54 | -1.13 |
| TRUE | 1/1 | 1/1 | 4.36 | 4.54 | -1.13 |
| TRUE | 1/1 | 1/1 | 4.36 | 4.54 | -1.13 |
| TRUE | 1/1 | 1/1 | 4.36 | 4.54 | -1.13 |
| TRUE | 1/1 | 1/1 | 4.36 | 4.54 | -1.13 |
| TRUE | 1/1 | 1/1 | 5.66 | 6.15 | -1.4  |
| TRUE | 1/1 | 1/1 | 5.66 | 6.15 | -1.4  |
| TRUE | 1/1 | 1/1 | 5.66 | 6.15 | -1.4  |
| TRUE | 1/1 | 1/1 | 5.53 | 5.41 | 1.08  |
| TRUE | 1/1 | 1/1 | 5.53 | 5.41 | 1.08  |
| TRUE | 1/1 | 1/1 | 5.53 | 5.41 | 1.08  |
| TRUE | 1/1 | 1/1 | 5.53 | 5.41 | 1.08  |
| TRUE | 1/1 | 1/1 | 8.42 | 9.45 | -2.05 |
| TRUE | 1/1 | 1/1 | 8.42 | 9.45 | -2.05 |
| TRUE | 1/1 | 1/1 | 8.42 | 9.45 | -2.05 |
| TRUE | 1/1 | 1/1 | 8.42 | 9.45 | -2.05 |
| TRUE | 1/1 | 1/1 | 6.22 | 5.88 | 1.27  |
| TRUE | 1/1 | 1/1 | 6.22 | 5.88 | 1.27  |
| TRUE | 1/1 | 1/1 | 6.22 | 5.88 | 1.27  |
| TRUE | 1/1 | 1/1 | 6.22 | 5.88 | 1.27  |
| TRUE | 1/1 | 1/1 | 6.22 | 5.88 | 1.27  |
| TRUE | 1/1 | 1/1 | 6.22 | 5.88 | 1.27  |
| TRUE | 1/1 | 1/1 | 6.22 | 5.88 | 1.27  |
| TRUE | 1/1 | 1/1 | 6.22 | 5.88 | 1.27  |
| TRUE | 1/1 | 1/1 | 6.22 | 5.88 | 1.27  |
| TRUE | 1/1 | 1/1 | 6.22 | 5.88 | 1.27  |
| TRUE | 1/1 | 1/1 | 6.22 | 5.88 | 1.27  |
| TRUE | 1/1 | 1/1 | 6.22 | 5.88 | 1.27  |
| TRUE | 1/1 | 1/1 | 6.22 | 5.88 | 1.27  |
| TRUE | 1/1 | 1/1 | 6.22 | 5.88 | 1.27  |
| TRUE | 1/1 | 1/1 | 6.69 | 7.12 | -1.35 |
| TRUE | 1/1 | 1/1 | 6.69 | 7.12 | -1.35 |
| TRUE | 1/1 | 1/1 | 6.69 | 7.12 | -1.35 |
| TRUE | 1/1 | 1/1 | 6.69 | 7.12 | -1.35 |
| TRUE | 1/1 | 1/1 | 7.17 | 7.48 | -1.24 |
| TRUE | 1/1 | 1/1 | 7.17 | 7.48 | -1.24 |
| TRUE | 1/1 | 1/1 | 7.17 | 7.48 | -1.24 |
| TRUE | 1/1 | 1/1 | 7.17 | 7.48 | -1.24 |
| TRUE | 1/1 | 1/1 | 7.17 | 7.48 | -1.24 |
| TRUE | 1/1 | 1/1 | 7.17 | 7.48 | -1.24 |
| TRUE | 1/1 | 1/1 | 7.17 | 7.48 | -1.24 |
| TRUE | 1/1 | 1/1 | 7.17 | 7.48 | -1.24 |
| TRUE | 1/1 | 1/1 | 7.17 | 7.48 | -1.24 |
| TRUE | 1/1 | 1/1 | 7.17 | 7.48 | -1.24 |
| TRUE | 1/1 | 1/1 | 7.17 | 7.48 | -1.24 |
| TRUE | 1/1 | 1/1 | 7.17 | 7.48 | -1.24 |
| TRUE | 1/1 | 1/1 | 7.17 | 7.48 | -1.24 |
| TRUE | 1/1 | 1/1 | 7.17 | 7.48 | -1.24 |
| TRUE | 1/1 | 1/1 | 7.17 | 7.48 | -1.24 |
| TRUE | 1/1 | 1/1 | 7.17 | 7.48 | -1.24 |
| TRUE | 1/1 | 1/1 | 7.17 | 7.48 | -1.24 |
| TRUE | 1/1 | 1/1 | 7.17 | 7.48 | -1.24 |
| TRUE | 1/1 | 1/1 | 5.71 | 6.18 | -1.38 |
| TRUE | 1/1 | 1/1 | 5.71 | 6.18 | -1.38 |
| TRUE | 1/1 | 1/1 | 5.71 | 6.18 | -1.38 |
| TRUE | 1/1 | 1/1 | 5.71 | 6.18 | -1.38 |
| TRUE | 1/1 | 1/1 | 5.71 | 6.18 | -1.38 |

|      |     |     |      |      |       |
|------|-----|-----|------|------|-------|
| TRUE | 1/1 | 1/1 | 7.85 | 9.48 | -3.09 |
| TRUE | 1/1 | 1/1 | 7.85 | 9.48 | -3.09 |
| TRUE | 1/1 | 1/1 | 5.43 | 4.65 | 1.73  |
| TRUE | 1/1 | 1/1 | 5.43 | 4.65 | 1.73  |
| TRUE | 1/1 | 1/1 | 5.43 | 4.65 | 1.73  |
| TRUE | 1/1 | 1/1 | 5.43 | 4.65 | 1.73  |
| TRUE | 1/1 | 1/1 | 5.43 | 4.65 | 1.73  |
| TRUE | 1/1 | 1/1 | 4.44 | 4.77 | -1.26 |
| TRUE | 1/1 | 1/1 | 4.44 | 4.77 | -1.26 |
| TRUE | 1/1 | 1/1 | 4.44 | 4.77 | -1.26 |
| TRUE | 1/1 | 1/1 | 4.44 | 4.77 | -1.26 |
| TRUE | 1/1 | 1/1 | 4.44 | 4.77 | -1.26 |
| TRUE | 1/1 | 1/1 | 4.44 | 4.77 | -1.26 |
| TRUE | 1/1 | 1/1 | 8.48 | 8.21 | 1.2   |
| TRUE | 1/1 | 1/1 | 8.48 | 8.21 | 1.2   |
| TRUE | 1/1 | 1/1 | 8.48 | 8.21 | 1.2   |
| TRUE | 1/1 | 1/1 | 8.48 | 8.21 | 1.2   |
| TRUE | 1/1 | 1/1 | 8.48 | 8.21 | 1.2   |
| TRUE | 1/1 | 1/1 | 8.48 | 8.21 | 1.2   |
| TRUE | 1/1 | 1/1 | 6.78 | 5.01 | 3.4   |
| TRUE | 1/1 | 1/1 | 6.78 | 5.01 | 3.4   |
| TRUE | 1/1 | 1/1 | 6.78 | 5.01 | 3.4   |
| TRUE | 1/1 | 1/1 | 6.78 | 5.01 | 3.4   |
| TRUE | 1/1 | 1/1 | 6.78 | 5.01 | 3.4   |
| TRUE | 1/1 | 1/1 | 6.78 | 5.01 | 3.4   |
| TRUE | 1/1 | 1/1 | 7.2  | 7.33 | -1.1  |
| TRUE | 1/1 | 1/1 | 7.2  | 7.33 | -1.1  |
| TRUE | 1/1 | 1/1 | 7.2  | 7.33 | -1.1  |
| TRUE | 1/1 | 1/1 | 7.2  | 7.33 | -1.1  |
| TRUE | 1/1 | 1/1 | 7.2  | 7.33 | -1.1  |
| TRUE | 1/1 | 1/1 | 6.5  | 6.71 | -1.16 |
| TRUE | 1/1 | 1/1 | 6.5  | 6.71 | -1.16 |
| TRUE | 1/1 | 1/1 | 6.5  | 6.71 | -1.16 |
| TRUE | 1/1 | 1/1 | 6.5  | 6.71 | -1.16 |
| TRUE | 1/1 | 1/1 | 6.74 | 6.92 | -1.13 |
| TRUE | 1/1 | 1/1 | 6.74 | 6.92 | -1.13 |
| TRUE | 1/1 | 1/1 | 6.74 | 6.92 | -1.13 |
| TRUE | 1/1 | 1/1 | 6.74 | 6.92 | -1.13 |
| TRUE | 1/1 | 1/1 | 7.56 | 7.93 | -1.29 |
| TRUE | 1/1 | 1/1 | 7.56 | 7.93 | -1.29 |
| TRUE | 1/1 | 1/1 | 7.56 | 7.93 | -1.29 |
| TRUE | 1/1 | 1/1 | 7.56 | 7.93 | -1.29 |
| TRUE | 1/1 | 1/1 | 3.93 | 4.87 | -1.92 |
| TRUE | 1/1 | 1/1 | 3.93 | 4.87 | -1.92 |
| TRUE | 1/1 | 1/1 | 5.45 | 6.43 | -1.98 |
| TRUE | 1/1 | 1/1 | 5.45 | 6.43 | -1.98 |
| TRUE | 1/1 | 1/1 | 5.45 | 6.43 | -1.98 |
| TRUE | 1/1 | 1/1 | 5.45 | 6.43 | -1.98 |
| TRUE | 1/1 | 1/1 | 5.45 | 6.43 | -1.98 |
| TRUE | 1/1 | 1/1 | 5.45 | 6.43 | -1.98 |
| TRUE | 1/1 | 1/1 | 7.81 | 8.7  | -1.85 |
| TRUE | 1/1 | 1/1 | 7.81 | 8.7  | -1.85 |
| TRUE | 1/1 | 1/1 | 7.81 | 8.7  | -1.85 |
| TRUE | 1/1 | 1/1 | 7.81 | 8.7  | -1.85 |
| TRUE | 1/1 | 1/1 | 7.81 | 8.7  | -1.85 |
| TRUE | 1/1 | 1/1 | 6.15 | 6.78 | -1.55 |
| TRUE | 1/1 | 1/1 | 6.15 | 6.78 | -1.55 |
| TRUE | 1/1 | 1/1 | 6.15 | 6.78 | -1.55 |
| TRUE | 1/1 | 1/1 | 6.15 | 6.78 | -1.55 |

|      |     |     |      |      |       |
|------|-----|-----|------|------|-------|
| TRUE | 1/1 | 1/1 | 8.44 | 9.8  | -2.57 |
| TRUE | 1/1 | 1/1 | 8.44 | 9.8  | -2.57 |
| TRUE | 1/1 | 1/1 | 8.44 | 9.8  | -2.57 |
| TRUE | 1/1 | 1/1 | 8.44 | 9.8  | -2.57 |
| TRUE | 1/1 | 1/1 | 8.44 | 9.8  | -2.57 |
| TRUE | 1/1 | 1/1 | 8.44 | 9.8  | -2.57 |
| TRUE | 1/1 | 1/1 | 8.44 | 9.8  | -2.57 |
| TRUE | 1/1 | 1/1 | 8.44 | 9.8  | -2.57 |
| TRUE | 1/1 | 1/1 | 6.29 | 6.8  | -1.43 |
| TRUE | 1/1 | 1/1 | 6.29 | 6.8  | -1.43 |
| TRUE | 1/1 | 1/1 | 6.29 | 6.8  | -1.43 |
| TRUE | 1/1 | 1/1 | 6.29 | 6.8  | -1.43 |
| TRUE | 1/1 | 1/1 | 6.29 | 6.8  | -1.43 |
| TRUE | 1/1 | 1/1 | 6.29 | 6.8  | -1.43 |
| TRUE | 1/1 | 1/1 | 4    | 3.56 | 1.36  |
| TRUE | 1/1 | 1/1 | 4    | 3.56 | 1.36  |
| TRUE | 1/1 | 1/1 | 4    | 3.56 | 1.36  |
| TRUE | 1/1 | 1/1 | 4    | 3.56 | 1.36  |
| TRUE | 1/1 | 1/1 | 4    | 3.56 | 1.36  |
| TRUE | 1/1 | 1/1 | 5.68 | 6.18 | -1.42 |
| TRUE | 1/1 | 1/1 | 5.68 | 6.18 | -1.42 |
| TRUE | 1/1 | 1/1 | 5.68 | 6.18 | -1.42 |
| TRUE | 1/1 | 1/1 | 5.59 | 5.94 | -1.27 |
| TRUE | 1/1 | 1/1 | 5.59 | 5.94 | -1.27 |
| TRUE | 1/1 | 1/1 | 5.59 | 5.94 | -1.27 |
| TRUE | 1/1 | 1/1 | 5.59 | 5.94 | -1.27 |
| TRUE | 1/1 | 1/1 | 5.59 | 5.94 | -1.27 |
| TRUE | 1/1 | 1/1 | 5.59 | 5.94 | -1.27 |
| TRUE | 1/1 | 1/1 | 5.59 | 5.94 | -1.27 |
| TRUE | 1/1 | 1/1 | 5.59 | 5.94 | -1.27 |
| TRUE | 1/1 | 1/1 | 7.95 | 9.42 | -2.78 |
| TRUE | 1/1 | 1/1 | 7.95 | 9.42 | -2.78 |
| TRUE | 1/1 | 1/1 | 7.95 | 9.42 | -2.78 |
| TRUE | 1/1 | 1/1 | 7.95 | 9.42 | -2.78 |
| TRUE | 1/1 | 1/1 | 7.95 | 9.42 | -2.78 |
| TRUE | 1/1 | 1/1 | 7.39 | 8.2  | -1.76 |
| TRUE | 1/1 | 1/1 | 7.39 | 8.2  | -1.76 |
| TRUE | 1/1 | 1/1 | 7.39 | 8.2  | -1.76 |
| TRUE | 1/1 | 1/1 | 7.82 | 7.85 | -1.02 |
| TRUE | 1/1 | 1/1 | 7.82 | 7.85 | -1.02 |
| TRUE | 1/1 | 1/1 | 7.82 | 7.85 | -1.02 |
| TRUE | 1/1 | 1/1 | 4.08 | 4.6  | -1.44 |
| TRUE | 1/1 | 1/1 | 4.08 | 4.6  | -1.44 |
| TRUE | 1/1 | 1/1 | 4.08 | 4.6  | -1.44 |
| TRUE | 1/1 | 1/1 | 5.35 | 5.9  | -1.46 |
| TRUE | 1/1 | 1/1 | 5.35 | 5.9  | -1.46 |
| TRUE | 1/1 | 1/1 | 5.35 | 5.9  | -1.46 |
| TRUE | 1/1 | 1/1 | 5.35 | 5.9  | -1.46 |
| TRUE | 1/1 | 1/1 | 5.35 | 5.9  | -1.46 |
| TRUE | 1/1 | 1/1 | 5.35 | 5.9  | -1.46 |
| TRUE | 1/1 | 1/1 | 5.35 | 5.9  | -1.46 |
| TRUE | 1/1 | 1/1 | 5.35 | 5.9  | -1.46 |
| TRUE | 1/1 | 1/1 | 5.35 | 5.9  | -1.46 |
| TRUE | 1/1 | 1/1 | 5.35 | 5.9  | -1.46 |
| TRUE | 1/1 | 1/1 | 5.35 | 5.9  | -1.46 |
| TRUE | 1/1 | 1/1 | 5.35 | 5.9  | -1.46 |
| TRUE | 1/1 | 1/1 | 7.72 | 8.86 | -2.2  |
| TRUE | 1/1 | 1/1 | 7.72 | 8.86 | -2.2  |
| TRUE | 1/1 | 1/1 | 7.72 | 8.86 | -2.2  |
| TRUE | 1/1 | 1/1 | 7.72 | 8.86 | -2.2  |



|      |     |     |      |      |       |
|------|-----|-----|------|------|-------|
| TRUE | 1/1 | 1/1 | 7.72 | 8.86 | -2.2  |
| TRUE | 1/1 | 1/1 | 7.72 | 8.86 | -2.2  |
| TRUE | 1/1 | 1/1 | 7.6  | 5.58 | 4.06  |
| TRUE | 1/1 | 1/1 | 7.6  | 5.58 | 4.06  |
| TRUE | 1/1 | 1/1 | 7.6  | 5.58 | 4.06  |
| TRUE | 1/1 | 1/1 | 7.6  | 5.58 | 4.06  |
| TRUE | 1/1 | 1/1 | 7.6  | 5.58 | 4.06  |
| TRUE | 1/1 | 1/1 | 7.6  | 5.58 | 4.06  |
| TRUE | 1/1 | 1/1 | 7.6  | 5.58 | 4.06  |
| TRUE | 1/1 | 1/1 | 7.6  | 5.58 | 4.06  |
| TRUE | 1/1 | 1/1 | 7.6  | 5.58 | 4.06  |
| TRUE | 1/1 | 1/1 | 7.6  | 5.58 | 4.06  |
| TRUE | 1/1 | 1/1 | 7.6  | 5.58 | 4.06  |
| TRUE | 1/1 | 1/1 | 7.6  | 5.58 | 4.06  |
| TRUE | 1/1 | 1/1 | 7.6  | 5.58 | 4.06  |
| TRUE | 1/1 | 1/1 | 7.6  | 5.58 | 4.06  |
| TRUE | 1/1 | 1/1 | 7.6  | 5.58 | 4.06  |
| TRUE | 1/1 | 1/1 | 7.6  | 5.58 | 4.06  |
| TRUE | 1/1 | 1/1 | 7.6  | 5.58 | 4.06  |
| TRUE | 1/1 | 1/1 | 7.6  | 5.58 | 4.06  |
| TRUE | 1/1 | 1/1 | 7.6  | 5.58 | 4.06  |
| TRUE | 1/1 | 1/1 | 6.32 | 6.78 | -1.38 |
| TRUE | 1/1 | 1/1 | 6.32 | 6.78 | -1.38 |
| TRUE | 1/1 | 1/1 | 6.32 | 6.78 | -1.38 |
| TRUE | 1/1 | 1/1 | 6.32 | 6.78 | -1.38 |
| TRUE | 1/1 | 1/1 | 4.74 | 5.19 | -1.37 |
| TRUE | 1/1 | 1/1 | 4.74 | 5.19 | -1.37 |
| TRUE | 1/1 | 1/1 | 4.74 | 5.19 | -1.37 |
| TRUE | 1/1 | 1/1 | 6.92 | 6.44 | 1.4   |
| TRUE | 1/1 | 1/1 | 6.92 | 6.44 | 1.4   |
| TRUE | 1/1 | 1/1 | 6.92 | 6.44 | 1.4   |
| TRUE | 1/1 | 1/1 | 7.09 | 7.12 | -1.02 |
| TRUE | 1/1 | 1/1 | 7.09 | 7.12 | -1.02 |
| TRUE | 1/1 | 1/1 | 9.92 | 9.14 | 1.71  |
| TRUE | 1/1 | 1/1 | 9.92 | 9.14 | 1.71  |
| TRUE | 1/1 | 1/1 | 9.92 | 9.14 | 1.71  |
| TRUE | 1/1 | 1/1 | 9.92 | 9.14 | 1.71  |
| TRUE | 1/1 | 1/1 | 4.34 | 4.17 | 1.13  |
| TRUE | 1/1 | 1/1 | 4.34 | 4.17 | 1.13  |
| TRUE | 1/1 | 1/1 | 4.34 | 4.17 | 1.13  |
| TRUE | 1/1 | 1/1 | 4.03 | 4.41 | -1.3  |
| TRUE | 1/1 | 1/1 | 4.03 | 4.41 | -1.3  |
| TRUE | 1/1 | 1/1 | 9.6  | 9.37 | 1.17  |
| TRUE | 1/1 | 1/1 | 9.6  | 9.37 | 1.17  |
| TRUE | 1/1 | 1/1 | 9.6  | 9.37 | 1.17  |
| TRUE | 1/1 | 1/1 | 8.49 | 8.5  | -1.01 |
| TRUE | 1/1 | 1/1 | 8.49 | 8.5  | -1.01 |
| TRUE | 1/1 | 1/1 | 8.49 | 8.5  | -1.01 |
| TRUE | 1/1 | 1/1 | 8.49 | 8.5  | -1.01 |
| TRUE | 1/1 | 1/1 | 8.49 | 8.5  | -1.01 |
| TRUE | 1/1 | 1/1 | 6.13 | 6.89 | -1.69 |
| TRUE | 1/1 | 1/1 | 6.13 | 6.89 | -1.69 |
| TRUE | 1/1 | 1/1 | 6.13 | 6.89 | -1.69 |
| TRUE | 1/1 | 1/1 | 6.13 | 6.89 | -1.69 |
| TRUE | 1/1 | 1/1 | 6.13 | 6.89 | -1.69 |
| TRUE | 1/1 | 1/1 | 5.54 | 6.05 | -1.42 |
| TRUE | 1/1 | 1/1 | 5.54 | 6.05 | -1.42 |
| TRUE | 1/1 | 1/1 | 5.54 | 6.05 | -1.42 |
| TRUE | 1/1 | 1/1 | 5.54 | 6.05 | -1.42 |

|      |     |     |      |      |       |
|------|-----|-----|------|------|-------|
| TRUE | 1/1 | 1/1 | 4.78 | 5.05 | -1.2  |
| TRUE | 1/1 | 1/1 | 4.78 | 5.05 | -1.2  |
| TRUE | 1/1 | 1/1 | 4.78 | 5.05 | -1.2  |
| TRUE | 1/1 | 1/1 | 4.78 | 5.05 | -1.2  |
| TRUE | 1/1 | 1/1 | 4.78 | 5.05 | -1.2  |
| TRUE | 1/1 | 1/1 | 4.78 | 5.05 | -1.2  |
| TRUE | 1/1 | 1/1 | 7.33 | 7.37 | -1.03 |
| TRUE | 1/1 | 1/1 | 7.33 | 7.37 | -1.03 |
| TRUE | 1/1 | 1/1 | 7.33 | 7.37 | -1.03 |
| TRUE | 1/1 | 1/1 | 7.33 | 7.37 | -1.03 |
| TRUE | 1/1 | 1/1 | 7.33 | 7.37 | -1.03 |
| TRUE | 1/1 | 1/1 | 5.9  | 5.76 | 1.11  |
| TRUE | 1/1 | 1/1 | 5.9  | 5.76 | 1.11  |
| TRUE | 1/1 | 1/1 | 5.9  | 5.76 | 1.11  |
| TRUE | 1/1 | 1/1 | 5.9  | 5.76 | 1.11  |
| TRUE | 1/1 | 1/1 | 5.9  | 5.76 | 1.11  |
| TRUE | 1/1 | 1/1 | 4.98 | 4.82 | 1.12  |
| TRUE | 1/1 | 1/1 | 4.98 | 4.82 | 1.12  |
| TRUE | 1/1 | 1/1 | 4.98 | 4.82 | 1.12  |
| TRUE | 1/1 | 1/1 | 6.98 | 7.44 | -1.38 |
| TRUE | 1/1 | 1/1 | 6.98 | 7.44 | -1.38 |
| TRUE | 1/1 | 1/1 | 6.98 | 7.44 | -1.38 |
| TRUE | 1/1 | 1/1 | 6.98 | 7.44 | -1.38 |
| TRUE | 1/1 | 1/1 | 6.98 | 7.44 | -1.38 |
| TRUE | 1/1 | 1/1 | 6.98 | 7.44 | -1.38 |
| TRUE | 1/1 | 1/1 | 8.28 | 8.89 | -1.52 |
| TRUE | 1/1 | 1/1 | 8.28 | 8.89 | -1.52 |
| TRUE | 1/1 | 1/1 | 8.28 | 8.89 | -1.52 |
| TRUE | 1/1 | 1/1 | 8.28 | 8.89 | -1.52 |
| TRUE | 1/1 | 1/1 | 7.57 | 8.62 | -2.08 |
| TRUE | 1/1 | 1/1 | 7.57 | 8.62 | -2.08 |
| TRUE | 1/1 | 1/1 | 7.57 | 8.62 | -2.08 |
| TRUE | 1/1 | 1/1 | 7.57 | 8.62 | -2.08 |
| TRUE | 1/1 | 1/1 | 7.57 | 8.62 | -2.08 |
| TRUE | 1/1 | 1/1 | 7.72 | 8.46 | -1.67 |
| TRUE | 1/1 | 1/1 | 7.72 | 8.46 | -1.67 |
| TRUE | 1/1 | 1/1 | 7.72 | 8.46 | -1.67 |
| TRUE | 1/1 | 1/1 | 5.35 | 6.07 | -1.65 |
| TRUE | 1/1 | 1/1 | 5.35 | 6.07 | -1.65 |
| TRUE | 1/1 | 1/1 | 7.09 | 7.34 | -1.2  |
| TRUE | 1/1 | 1/1 | 7.09 | 7.34 | -1.2  |
| TRUE | 1/1 | 1/1 | 7.09 | 7.34 | -1.2  |
| TRUE | 1/1 | 1/1 | 7.09 | 7.34 | -1.2  |
| TRUE | 1/1 | 1/1 | 7.09 | 7.34 | -1.2  |
| TRUE | 1/1 | 1/1 | 7.09 | 7.34 | -1.2  |
| TRUE | 1/1 | 1/1 | 7.09 | 7.34 | -1.2  |
| TRUE | 1/1 | 1/1 | 6.96 | 7.76 | -1.74 |
| TRUE | 1/1 | 1/1 | 6.96 | 7.76 | -1.74 |
| TRUE | 1/1 | 1/1 | 6.96 | 7.76 | -1.74 |
| TRUE | 1/1 | 1/1 | 6.96 | 7.76 | -1.74 |
| TRUE | 1/1 | 1/1 | 6.96 | 7.76 | -1.74 |
| TRUE | 1/1 | 1/1 | 6.96 | 7.76 | -1.74 |
| TRUE | 1/1 | 1/1 | 7.18 | 6.91 | 1.2   |
| TRUE | 1/1 | 1/1 | 7.18 | 6.91 | 1.2   |
| TRUE | 1/1 | 1/1 | 7.18 | 6.91 | 1.2   |
| TRUE | 1/1 | 1/1 | 9.33 | 9.87 | -1.45 |
| TRUE | 1/1 | 1/1 | 9.33 | 9.87 | -1.45 |



|      |     |     |       |       |       |
|------|-----|-----|-------|-------|-------|
| TRUE | 1/1 | 1/1 | 7.9   | 5.89  | 4.03  |
| TRUE | 1/1 | 1/1 | 7.9   | 5.89  | 4.03  |
| TRUE | 1/1 | 1/1 | 7.9   | 5.89  | 4.03  |
| TRUE | 1/1 | 1/1 | 7.9   | 5.89  | 4.03  |
| TRUE | 1/1 | 1/1 | 7.9   | 5.89  | 4.03  |
| TRUE | 1/1 | 1/1 | 5.78  | 6.11  | -1.26 |
| TRUE | 1/1 | 1/1 | 5.78  | 6.11  | -1.26 |
| TRUE | 1/1 | 1/1 | 5.78  | 6.11  | -1.26 |
| TRUE | 1/1 | 1/1 | 5.78  | 6.11  | -1.26 |
| TRUE | 1/1 | 1/1 | 5.54  | 6.13  | -1.5  |
| TRUE | 1/1 | 1/1 | 5.54  | 6.13  | -1.5  |
| TRUE | 1/1 | 1/1 | 6.9   | 7.67  | -1.7  |
| TRUE | 1/1 | 1/1 | 6.9   | 7.67  | -1.7  |
| TRUE | 1/1 | 1/1 | 6.9   | 7.67  | -1.7  |
| TRUE | 1/1 | 1/1 | 6.9   | 7.67  | -1.7  |
| TRUE | 1/1 | 1/1 | 6.9   | 7.67  | -1.7  |
| TRUE | 1/1 | 1/1 | 8.74  | 9.45  | -1.64 |
| TRUE | 1/1 | 1/1 | 8.74  | 9.45  | -1.64 |
| TRUE | 1/1 | 1/1 | 6.38  | 6.83  | -1.37 |
| TRUE | 1/1 | 1/1 | 6.38  | 6.83  | -1.37 |
| TRUE | 1/1 | 1/1 | 6.38  | 6.83  | -1.37 |
| TRUE | 1/1 | 1/1 | 6.38  | 6.83  | -1.37 |
| TRUE | 1/1 | 1/1 | 6.38  | 6.83  | -1.37 |
| TRUE | 1/1 | 1/1 | 6.38  | 6.83  | -1.37 |
| TRUE | 1/1 | 1/1 | 7.23  | 7.73  | -1.41 |
| TRUE | 1/1 | 1/1 | 7.23  | 7.73  | -1.41 |
| TRUE | 1/1 | 1/1 | 7.23  | 7.73  | -1.41 |
| TRUE | 1/1 | 1/1 | 6.35  | 7.4   | -2.07 |
| TRUE | 1/1 | 1/1 | 6.35  | 7.4   | -2.07 |
| TRUE | 1/1 | 1/1 | 6.35  | 7.4   | -2.07 |
| TRUE | 1/1 | 1/1 | 6.35  | 7.4   | -2.07 |
| TRUE | 1/1 | 1/1 | 5.95  | 5.75  | 1.14  |
| TRUE | 1/1 | 1/1 | 5.95  | 5.75  | 1.14  |
| TRUE | 1/1 | 1/1 | 5.95  | 5.75  | 1.14  |
| TRUE | 1/1 | 1/1 | 7.63  | 7.85  | -1.17 |
| TRUE | 1/1 | 1/1 | 7.63  | 7.85  | -1.17 |
| TRUE | 1/1 | 1/1 | 7.63  | 7.85  | -1.17 |
| TRUE | 1/1 | 1/1 | 7.63  | 7.85  | -1.17 |
| TRUE | 1/1 | 1/1 | 7.83  | 8.05  | -1.16 |
| TRUE | 1/1 | 1/1 | 7.83  | 8.05  | -1.16 |
| TRUE | 1/1 | 1/1 | 6.22  | 5.58  | 1.56  |
| TRUE | 1/1 | 1/1 | 6.22  | 5.58  | 1.56  |
| TRUE | 1/1 | 1/1 | 6.22  | 5.58  | 1.56  |
| TRUE | 1/1 | 1/1 | 6.22  | 5.58  | 1.56  |
| TRUE | 1/1 | 1/1 | 6.22  | 5.58  | 1.56  |
| TRUE | 1/1 | 1/1 | 6.22  | 5.58  | 1.56  |
| TRUE | 1/1 | 1/1 | 6.22  | 5.58  | 1.56  |
| TRUE | 1/1 | 1/1 | 6.22  | 5.58  | 1.56  |
| TRUE | 1/1 | 1/1 | 8.34  | 9.41  | -2.1  |
| TRUE | 1/1 | 1/1 | 8.34  | 9.41  | -2.1  |
| TRUE | 1/1 | 1/1 | 8.34  | 9.41  | -2.1  |
| TRUE | 1/1 | 1/1 | 8.34  | 9.41  | -2.1  |
| TRUE | 1/1 | 1/1 | 8.34  | 9.41  | -2.1  |
| TRUE | 1/1 | 1/1 | 6.14  | 6.36  | -1.17 |
| TRUE | 1/1 | 1/1 | 6.14  | 6.36  | -1.17 |
| TRUE | 1/1 | 1/1 | 6.14  | 6.36  | -1.17 |
| TRUE | 1/1 | 1/1 | 6.14  | 6.36  | -1.17 |
| TRUE | 1/1 | 1/1 | 10.77 | 11.06 | -1.22 |
| TRUE | 1/1 | 1/1 | 10.77 | 11.06 | -1.22 |



|      |     |     |      |      |       |
|------|-----|-----|------|------|-------|
| TRUE | 1/1 | 1/1 | 7.14 | 6.82 | 1.24  |
| TRUE | 1/1 | 1/1 | 7.14 | 6.82 | 1.24  |
| TRUE | 1/1 | 1/1 | 8.25 | 8.55 | -1.23 |
| TRUE | 1/1 | 1/1 | 8.25 | 8.55 | -1.23 |
| TRUE | 1/1 | 1/1 | 8.25 | 8.55 | -1.23 |
| TRUE | 1/1 | 1/1 | 5.63 | 3.84 | 3.46  |
| TRUE | 1/1 | 1/1 | 5.63 | 3.84 | 3.46  |
| TRUE | 1/1 | 1/1 | 5.63 | 3.84 | 3.46  |
| TRUE | 1/1 | 1/1 | 5.63 | 3.84 | 3.46  |
| TRUE | 1/1 | 1/1 | 5.63 | 3.84 | 3.46  |
| TRUE | 1/1 | 1/1 | 5.63 | 3.84 | 3.46  |
| TRUE | 1/1 | 1/1 | 5.63 | 3.84 | 3.46  |
| TRUE | 1/1 | 1/1 | 5.63 | 3.84 | 3.46  |
| TRUE | 1/1 | 1/1 | 5.63 | 3.84 | 3.46  |
| TRUE | 1/1 | 1/1 | 5.63 | 3.84 | 3.46  |
| TRUE | 1/1 | 1/1 | 5.63 | 3.84 | 3.46  |
| TRUE | 1/1 | 1/1 | 5.63 | 3.84 | 3.46  |
| TRUE | 1/1 | 1/1 | 5.63 | 3.84 | 3.46  |
| TRUE | 1/1 | 1/1 | 5.63 | 3.84 | 3.46  |
| TRUE | 1/1 | 1/1 | 5.63 | 3.84 | 3.46  |
| TRUE | 1/1 | 1/1 | 5.63 | 3.84 | 3.46  |
| TRUE | 1/1 | 1/1 | 5.63 | 3.84 | 3.46  |
| TRUE | 1/1 | 1/1 | 5.63 | 3.84 | 3.46  |
| TRUE | 1/1 | 1/1 | 5.63 | 3.84 | 3.46  |
| TRUE | 1/1 | 1/1 | 5.63 | 3.84 | 3.46  |
| TRUE | 1/1 | 1/1 | 5.63 | 3.84 | 3.46  |
| TRUE | 1/1 | 1/1 | 5.63 | 3.84 | 3.46  |
| TRUE | 1/1 | 1/1 | 5.63 | 3.84 | 3.46  |
| TRUE | 1/1 | 1/1 | 5.17 | 5.58 | -1.33 |
| TRUE | 1/1 | 1/1 | 5.17 | 5.58 | -1.33 |
| TRUE | 1/1 | 1/1 | 5.17 | 5.58 | -1.33 |
| TRUE | 1/1 | 1/1 | 5.17 | 5.58 | -1.33 |
| TRUE | 1/1 | 1/1 | 4.95 | 5.77 | -1.77 |
| TRUE | 1/1 | 1/1 | 4.95 | 5.77 | -1.77 |
| TRUE | 1/1 | 1/1 | 4.95 | 5.77 | -1.77 |
| TRUE | 1/1 | 1/1 | 4.95 | 5.77 | -1.77 |
| TRUE | 1/1 | 1/1 | 4.95 | 5.77 | -1.77 |
| TRUE | 1/1 | 1/1 | 4.95 | 5.77 | -1.77 |
| TRUE | 1/1 | 1/1 | 4.95 | 5.77 | -1.77 |
| TRUE | 1/1 | 1/1 | 8.38 | 8.79 | -1.33 |
| TRUE | 1/1 | 1/1 | 8.38 | 8.79 | -1.33 |
| TRUE | 1/1 | 1/1 | 8.38 | 8.79 | -1.33 |
| TRUE | 1/1 | 1/1 | 8.38 | 8.79 | -1.33 |
| TRUE | 1/1 | 1/1 | 8.38 | 8.79 | -1.33 |
| TRUE | 1/1 | 1/1 | 4.44 | 5.61 | -2.25 |
| TRUE | 1/1 | 1/1 | 4.44 | 5.61 | -2.25 |
| TRUE | 1/1 | 1/1 | 4.44 | 5.61 | -2.25 |
| TRUE | 1/1 | 1/1 | 4.44 | 5.61 | -2.25 |
| TRUE | 1/1 | 1/1 | 5.54 | 5.07 | 1.38  |
| TRUE | 1/1 | 1/1 | 5.54 | 5.07 | 1.38  |
| TRUE | 1/1 | 1/1 | 5.54 | 5.07 | 1.38  |
| TRUE | 1/1 | 1/1 | 6.15 | 6.43 | -1.21 |
| TRUE | 1/1 | 1/1 | 6.15 | 6.43 | -1.21 |
| TRUE | 1/1 | 1/1 | 6.15 | 6.43 | -1.21 |
| TRUE | 1/1 | 1/1 | 6.15 | 6.43 | -1.21 |
| TRUE | 1/1 | 1/1 | 6.15 | 6.43 | -1.21 |
| TRUE | 1/1 | 1/1 | 6.15 | 6.43 | -1.21 |
| TRUE | 1/1 | 1/1 | 6.15 | 6.43 | -1.21 |
| TRUE | 1/1 | 1/1 | 8.51 | 8.12 | 1.31  |
| TRUE | 1/1 | 1/1 | 8.51 | 8.12 | 1.31  |
| TRUE | 1/1 | 1/1 | 5.62 | 5.49 | 1.1   |
| TRUE | 1/1 | 1/1 | 5.62 | 5.49 | 1.1   |
| TRUE | 1/1 | 1/1 | 5.62 | 5.49 | 1.1   |

|      |     |     |      |      |       |
|------|-----|-----|------|------|-------|
| TRUE | 1/1 | 1/1 | 5.62 | 5.49 | 1.1   |
| TRUE | 1/1 | 1/1 | 5.92 | 6.95 | -2.04 |
| TRUE | 1/1 | 1/1 | 5.92 | 6.95 | -2.04 |
| TRUE | 1/1 | 1/1 | 5.92 | 6.95 | -2.04 |
| TRUE | 1/1 | 1/1 | 5.92 | 6.95 | -2.04 |
| TRUE | 1/1 | 1/1 | 5.92 | 6.95 | -2.04 |
| TRUE | 1/1 | 1/1 | 5.92 | 6.95 | -2.04 |
| TRUE | 1/1 | 1/1 | 5.92 | 6.95 | -2.04 |
| TRUE | 1/1 | 1/1 | 5.92 | 6.95 | -2.04 |
| TRUE | 1/1 | 1/1 | 5.92 | 6.95 | -2.04 |
| TRUE | 1/1 | 1/1 | 5.92 | 6.95 | -2.04 |
| TRUE | 1/1 | 1/1 | 5.92 | 6.95 | -2.04 |
| TRUE | 1/1 | 1/1 | 5.92 | 6.95 | -2.04 |
| TRUE | 1/1 | 1/1 | 5.92 | 6.95 | -2.04 |
| TRUE | 1/1 | 1/1 | 5.92 | 6.95 | -2.04 |
| TRUE | 1/1 | 1/1 | 5.92 | 6.95 | -2.04 |
| TRUE | 1/1 | 1/1 | 6.9  | 7.24 | -1.26 |
| TRUE | 1/1 | 1/1 | 6.9  | 7.24 | -1.26 |
| TRUE | 1/1 | 1/1 | 6.9  | 7.24 | -1.26 |
| TRUE | 1/1 | 1/1 | 6.29 | 6.88 | -1.5  |
| TRUE | 1/1 | 1/1 | 6.29 | 6.88 | -1.5  |
| TRUE | 1/1 | 1/1 | 6.29 | 6.88 | -1.5  |
| TRUE | 1/1 | 1/1 | 6.29 | 6.88 | -1.5  |
| TRUE | 1/1 | 1/1 | 5.4  | 5.13 | 1.21  |
| TRUE | 1/1 | 1/1 | 5.4  | 5.13 | 1.21  |
| TRUE | 1/1 | 1/1 | 5.82 | 6.27 | -1.36 |
| TRUE | 1/1 | 1/1 | 5.82 | 6.27 | -1.36 |
| TRUE | 1/1 | 1/1 | 5.82 | 6.27 | -1.36 |
| TRUE | 1/1 | 1/1 | 5.82 | 6.27 | -1.36 |
| TRUE | 1/1 | 1/1 | 5.82 | 6.27 | -1.36 |
| TRUE | 1/1 | 1/1 | 5.82 | 6.27 | -1.36 |
| TRUE | 1/1 | 1/1 | 5.82 | 6.27 | -1.36 |
| TRUE | 1/1 | 1/1 | 5.82 | 6.27 | -1.36 |
| TRUE | 1/1 | 1/1 | 5.82 | 6.27 | -1.36 |
| TRUE | 1/1 | 1/1 | 5.82 | 6.27 | -1.36 |
| TRUE | 1/1 | 1/1 | 5.82 | 6.27 | -1.36 |
| TRUE | 1/1 | 1/1 | 5.82 | 6.27 | -1.36 |
| TRUE | 1/1 | 1/1 | 5.82 | 6.27 | -1.36 |
| TRUE | 1/1 | 1/1 | 5.82 | 6.27 | -1.36 |
| TRUE | 1/1 | 1/1 | 5.82 | 6.27 | -1.36 |
| TRUE | 1/1 | 1/1 | 5.82 | 6.27 | -1.36 |
| TRUE | 1/1 | 1/1 | 7.89 | 9.11 | -2.33 |
| TRUE | 1/1 | 1/1 | 7.89 | 9.11 | -2.33 |
| TRUE | 1/1 | 1/1 | 7.89 | 9.11 | -2.33 |
| TRUE | 1/1 | 1/1 | 7.89 | 9.11 | -2.33 |
| TRUE | 1/1 | 1/1 | 7.89 | 9.11 | -2.33 |
| TRUE | 1/1 | 1/1 | 7.89 | 9.11 | -2.33 |
| TRUE | 1/1 | 1/1 | 7.89 | 9.11 | -2.33 |
| TRUE | 1/1 | 1/1 | 7.89 | 9.11 | -2.33 |
| TRUE | 1/1 | 1/1 | 7.89 | 9.11 | -2.33 |
| TRUE | 1/1 | 1/1 | 7.89 | 9.11 | -2.33 |
| TRUE | 1/1 | 1/1 | 7.89 | 9.11 | -2.33 |
| TRUE | 1/1 | 1/1 | 7.89 | 9.11 | -2.33 |
| TRUE | 1/1 | 1/1 | 7.89 | 9.11 | -2.33 |
| TRUE | 1/1 | 1/1 | 7.89 | 9.11 | -2.33 |
| TRUE | 1/1 | 1/1 | 8.87 | 9.53 | -1.57 |
| TRUE | 1/1 | 1/1 | 8.87 | 9.53 | -1.57 |
| TRUE | 1/1 | 1/1 | 8.87 | 9.53 | -1.57 |
| TRUE | 1/1 | 1/1 | 4.98 | 4.67 | 1.24  |
| TRUE | 1/1 | 1/1 | 4.98 | 4.67 | 1.24  |
| TRUE | 1/1 | 1/1 | 4.98 | 4.67 | 1.24  |
| TRUE | 1/1 | 1/1 | 4.98 | 4.67 | 1.24  |
| TRUE | 1/1 | 1/1 | 4.98 | 4.67 | 1.24  |
| TRUE | 1/1 | 1/1 | 5.93 | 6.15 | -1.17 |

|      |     |     |       |       |       |
|------|-----|-----|-------|-------|-------|
| TRUE | 1/1 | 1/1 | 5.93  | 6.15  | -1.17 |
| TRUE | 1/1 | 1/1 | 10.33 | 10.18 | 1.11  |
| TRUE | 1/1 | 1/1 | 10.33 | 10.18 | 1.11  |
| TRUE | 1/1 | 1/1 | 10.33 | 10.18 | 1.11  |
| TRUE | 1/1 | 1/1 | 10.33 | 10.18 | 1.11  |
| TRUE | 1/1 | 1/1 | 10.33 | 10.18 | 1.11  |
| TRUE | 1/1 | 1/1 | 7.06  | 6.8   | 1.2   |
| TRUE | 1/1 | 1/1 | 7.06  | 6.8   | 1.2   |
| TRUE | 1/1 | 1/1 | 7.06  | 6.8   | 1.2   |
| TRUE | 1/1 | 1/1 | 7.06  | 6.8   | 1.2   |
| TRUE | 1/1 | 1/1 | 7.06  | 6.8   | 1.2   |
| TRUE | 1/1 | 1/1 | 9.57  | 9.17  | 1.32  |
| TRUE | 1/1 | 1/1 | 9.57  | 9.17  | 1.32  |
| TRUE | 1/1 | 1/1 | 9.57  | 9.17  | 1.32  |
| TRUE | 1/1 | 1/1 | 5.96  | 5.84  | 1.09  |
| TRUE | 1/1 | 1/1 | 5.96  | 5.84  | 1.09  |
| TRUE | 1/1 | 1/1 | 5.96  | 5.84  | 1.09  |
| TRUE | 1/1 | 1/1 | 5.69  | 6.24  | -1.46 |
| TRUE | 1/1 | 1/1 | 5.69  | 6.24  | -1.46 |
| TRUE | 1/1 | 1/1 | 5.69  | 6.24  | -1.46 |
| TRUE | 1/1 | 1/1 | 5.55  | 6.08  | -1.45 |
| TRUE | 1/1 | 1/1 | 5.55  | 6.08  | -1.45 |
| TRUE | 1/1 | 1/1 | 5.55  | 6.08  | -1.45 |
| TRUE | 1/1 | 1/1 | 5.55  | 6.08  | -1.45 |
| TRUE | 1/1 | 1/1 | 5.55  | 6.08  | -1.45 |
| TRUE | 1/1 | 1/1 | 5.55  | 6.08  | -1.45 |
| TRUE | 1/1 | 1/1 | 8.5   | 9.04  | -1.46 |
| TRUE | 1/1 | 1/1 | 8.5   | 9.04  | -1.46 |
| TRUE | 1/1 | 1/1 | 8.5   | 9.04  | -1.46 |
| TRUE | 1/1 | 1/1 | 8.5   | 9.04  | -1.46 |
| TRUE | 1/1 | 1/1 | 6.57  | 6.99  | -1.33 |
| TRUE | 1/1 | 1/1 | 6.57  | 6.99  | -1.33 |
| TRUE | 1/1 | 1/1 | 6.57  | 6.99  | -1.33 |
| TRUE | 1/1 | 1/1 | 6.57  | 6.99  | -1.33 |
| TRUE | 1/1 | 1/1 | 6.54  | 6.39  | 1.1   |
| TRUE | 1/1 | 1/1 | 6.54  | 6.39  | 1.1   |
| TRUE | 1/1 | 1/1 | 6.54  | 6.39  | 1.1   |
| TRUE | 1/1 | 1/1 | 6.54  | 6.39  | 1.1   |
| TRUE | 1/1 | 1/1 | 5.5   | 6.5   | -2    |
| TRUE | 1/1 | 1/1 | 5.5   | 6.5   | -2    |
| TRUE | 1/1 | 1/1 | 5.5   | 6.5   | -2    |
| TRUE | 1/1 | 1/1 | 5.5   | 6.5   | -2    |
| TRUE | 1/1 | 1/1 | 5.5   | 6.5   | -2    |
| TRUE | 1/1 | 1/1 | 5.5   | 6.5   | -2    |
| TRUE | 1/1 | 1/1 | 5.5   | 6.5   | -2    |
| TRUE | 1/1 | 1/1 | 5.5   | 6.5   | -2    |
| TRUE | 1/1 | 1/1 | 5.5   | 6.5   | -2    |
| TRUE | 1/1 | 1/1 | 8.14  | 8.22  | -1.06 |
| TRUE | 1/1 | 1/1 | 8.14  | 8.22  | -1.06 |
| TRUE | 1/1 | 1/1 | 8.14  | 8.22  | -1.06 |
| TRUE | 1/1 | 1/1 | 5.86  | 6.03  | -1.13 |
| TRUE | 1/1 | 1/1 | 5.86  | 6.03  | -1.13 |
| TRUE | 1/1 | 1/1 | 5.86  | 6.03  | -1.13 |
| TRUE | 1/1 | 1/1 | 5.86  | 6.03  | -1.13 |
| TRUE | 1/1 | 1/1 | 7.52  | 7.06  | 1.38  |
| TRUE | 1/1 | 1/1 | 7.52  | 7.06  | 1.38  |



|      |     |     |      |       |       |
|------|-----|-----|------|-------|-------|
| TRUE | 1/1 | 1/1 | 7.52 | 7.06  | 1.38  |
| TRUE | 1/1 | 1/1 | 6.29 | 6.61  | -1.24 |
| TRUE | 1/1 | 1/1 | 6.29 | 6.61  | -1.24 |
| TRUE | 1/1 | 1/1 | 6.11 | 7.03  | -1.89 |
| TRUE | 1/1 | 1/1 | 6.11 | 7.03  | -1.89 |
| TRUE | 1/1 | 1/1 | 6.11 | 7.03  | -1.89 |
| TRUE | 1/1 | 1/1 | 6.11 | 7.03  | -1.89 |
| TRUE | 1/1 | 1/1 | 6.11 | 7.03  | -1.89 |
| TRUE | 1/1 | 1/1 | 6.11 | 7.03  | -1.89 |
| TRUE | 1/1 | 1/1 | 6.11 | 7.03  | -1.89 |
| TRUE | 1/1 | 1/1 | 6.11 | 7.03  | -1.89 |
| TRUE | 1/1 | 1/1 | 6.11 | 7.03  | -1.89 |
| TRUE | 1/1 | 1/1 | 8.14 | 7.82  | 1.25  |
| TRUE | 1/1 | 1/1 | 8.14 | 7.82  | 1.25  |
| TRUE | 1/1 | 1/1 | 8.14 | 7.82  | 1.25  |
| TRUE | 1/1 | 1/1 | 6.42 | 6.63  | -1.16 |
| TRUE | 1/1 | 1/1 | 6.42 | 6.63  | -1.16 |
| TRUE | 1/1 | 1/1 | 6.42 | 6.63  | -1.16 |
| TRUE | 1/1 | 1/1 | 6.42 | 6.63  | -1.16 |
| TRUE | 1/1 | 1/1 | 6.42 | 6.63  | -1.16 |
| TRUE | 1/1 | 1/1 | 6.42 | 6.63  | -1.16 |
| TRUE | 1/1 | 1/1 | 6.42 | 6.63  | -1.16 |
| TRUE | 1/1 | 1/1 | 6.42 | 6.63  | -1.16 |
| TRUE | 1/1 | 1/1 | 6.31 | 6.24  | 1.04  |
| TRUE | 1/1 | 1/1 | 6.31 | 6.24  | 1.04  |
| TRUE | 1/1 | 1/1 | 5.97 | 5.91  | 1.04  |
| TRUE | 1/1 | 1/1 | 5.97 | 5.91  | 1.04  |
| TRUE | 1/1 | 1/1 | 5.97 | 5.91  | 1.04  |
| TRUE | 1/1 | 1/1 | 8.37 | 8.03  | 1.27  |
| TRUE | 1/1 | 1/1 | 8.37 | 8.03  | 1.27  |
| TRUE | 1/1 | 1/1 | 8.37 | 8.03  | 1.27  |
| TRUE | 1/1 | 1/1 | 8.37 | 8.03  | 1.27  |
| TRUE | 1/1 | 1/1 | 8.37 | 8.03  | 1.27  |
| TRUE | 1/1 | 1/1 | 3.5  | 4.31  | -1.75 |
| TRUE | 1/1 | 1/1 | 3.5  | 4.31  | -1.75 |
| TRUE | 1/1 | 1/1 | 3.5  | 4.31  | -1.75 |
| TRUE | 1/1 | 1/1 | 3.5  | 4.31  | -1.75 |
| TRUE | 1/1 | 1/1 | 3.5  | 4.31  | -1.75 |
| TRUE | 1/1 | 1/1 | 3.5  | 4.31  | -1.75 |
| TRUE | 1/1 | 1/1 | 3.5  | 4.31  | -1.75 |
| TRUE | 1/1 | 1/1 | 5.21 | 5.8   | -1.5  |
| TRUE | 1/1 | 1/1 | 5.21 | 5.8   | -1.5  |
| TRUE | 1/1 | 1/1 | 5.21 | 5.8   | -1.5  |
| TRUE | 1/1 | 1/1 | 5.21 | 5.8   | -1.5  |
| TRUE | 1/1 | 1/1 | 5.21 | 5.8   | -1.5  |
| TRUE | 1/1 | 1/1 | 5.21 | 5.8   | -1.5  |
| TRUE | 1/1 | 1/1 | 5.21 | 5.8   | -1.5  |
| TRUE | 1/1 | 1/1 | 5.21 | 5.8   | -1.5  |
| TRUE | 1/1 | 1/1 | 5.21 | 5.8   | -1.5  |
| TRUE | 1/1 | 1/1 | 10.1 | 10.99 | -1.85 |
| TRUE | 1/1 | 1/1 | 10.1 | 10.99 | -1.85 |
| TRUE | 1/1 | 1/1 | 10.1 | 10.99 | -1.85 |
| TRUE | 1/1 | 1/1 | 7.57 | 8.03  | -1.38 |
| TRUE | 1/1 | 1/1 | 7.57 | 8.03  | -1.38 |
| TRUE | 1/1 | 1/1 | 7.05 | 7.8   | -1.69 |
| TRUE | 1/1 | 1/1 | 7.05 | 7.8   | -1.69 |
| TRUE | 1/1 | 1/1 | 7.05 | 7.8   | -1.69 |
| TRUE | 1/1 | 1/1 | 7.05 | 7.8   | -1.69 |
| TRUE | 1/1 | 1/1 | 7.13 | 7.16  | -1.02 |
| TRUE | 1/1 | 1/1 | 7.13 | 7.16  | -1.02 |



|      |     |     |      |      |       |
|------|-----|-----|------|------|-------|
| TRUE | 1/1 | 1/1 | 5.47 | 3.1  | 5.16  |
| TRUE | 1/1 | 1/1 | 5.47 | 3.1  | 5.16  |
| TRUE | 1/1 | 1/1 | 6.76 | 7.64 | -1.83 |
| TRUE | 1/1 | 1/1 | 6.76 | 7.64 | -1.83 |
| TRUE | 1/1 | 1/1 | 6.76 | 7.64 | -1.83 |
| TRUE | 1/1 | 1/1 | 6.76 | 7.64 | -1.83 |
| TRUE | 1/1 | 1/1 | 6.76 | 7.64 | -1.83 |
| TRUE | 1/1 | 1/1 | 6.76 | 7.64 | -1.83 |
| TRUE | 1/1 | 1/1 | 6.76 | 7.64 | -1.83 |
| TRUE | 1/1 | 1/1 | 6.76 | 7.64 | -1.83 |
| TRUE | 1/1 | 1/1 | 6.76 | 7.64 | -1.83 |
| TRUE | 1/1 | 1/1 | 6.76 | 7.64 | -1.83 |
| TRUE | 1/1 | 1/1 | 7.5  | 5.92 | 3     |
| TRUE | 1/1 | 1/1 | 7.5  | 5.92 | 3     |
| TRUE | 1/1 | 1/1 | 7.5  | 5.92 | 3     |
| TRUE | 1/1 | 1/1 | 7.5  | 5.92 | 3     |
| TRUE | 1/1 | 1/1 | 7.5  | 5.92 | 3     |
| TRUE | 1/1 | 1/1 | 7.5  | 5.92 | 3     |
| TRUE | 1/1 | 1/1 | 7.5  | 5.92 | 3     |
| TRUE | 1/1 | 1/1 | 7.5  | 5.92 | 3     |
| TRUE | 1/1 | 1/1 | 7.5  | 5.92 | 3     |
| TRUE | 1/1 | 1/1 | 7.5  | 5.92 | 3     |
| TRUE | 1/1 | 1/1 | 7.5  | 5.92 | 3     |
| TRUE | 1/1 | 1/1 | 7.5  | 5.92 | 3     |
| TRUE | 1/1 | 1/1 | 8.15 | 8.35 | -1.15 |
| TRUE | 1/1 | 1/1 | 8.15 | 8.35 | -1.15 |
| TRUE | 1/1 | 1/1 | 8.15 | 8.35 | -1.15 |
| TRUE | 1/1 | 1/1 | 8.15 | 8.35 | -1.15 |
| TRUE | 1/1 | 1/1 | 8.15 | 8.35 | -1.15 |
| TRUE | 1/1 | 1/1 | 5.22 | 5.57 | -1.27 |
| TRUE | 1/1 | 1/1 | 5.22 | 5.57 | -1.27 |
| TRUE | 1/1 | 1/1 | 5.22 | 5.57 | -1.27 |
| TRUE | 1/1 | 1/1 | 6.21 | 6.53 | -1.25 |
| TRUE | 1/1 | 1/1 | 6.21 | 6.53 | -1.25 |
| TRUE | 1/1 | 1/1 | 6.21 | 6.53 | -1.25 |
| TRUE | 1/1 | 1/1 | 3.3  | 3.09 | 1.16  |
| TRUE | 1/1 | 1/1 | 3.3  | 3.09 | 1.16  |
| TRUE | 1/1 | 1/1 | 6.77 | 7.3  | -1.45 |
| TRUE | 1/1 | 1/1 | 6.77 | 7.3  | -1.45 |
| TRUE | 1/1 | 1/1 | 6.77 | 7.3  | -1.45 |
| TRUE | 1/1 | 1/1 | 7.05 | 7.65 | -1.52 |
| TRUE | 1/1 | 1/1 | 7.05 | 7.65 | -1.52 |
| TRUE | 1/1 | 1/1 | 6.74 | 7.8  | -2.08 |
| TRUE | 1/1 | 1/1 | 6.74 | 7.8  | -2.08 |
| TRUE | 1/1 | 1/1 | 6.74 | 7.8  | -2.08 |
| TRUE | 1/1 | 1/1 | 6.74 | 7.8  | -2.08 |
| TRUE | 1/1 | 1/1 | 6.74 | 7.8  | -2.08 |
| TRUE | 1/1 | 1/1 | 6.74 | 7.8  | -2.08 |
| TRUE | 1/1 | 1/1 | 7.16 | 8.46 | -2.46 |
| TRUE | 1/1 | 1/1 | 7.16 | 8.46 | -2.46 |
| TRUE | 1/1 | 1/1 | 7.16 | 8.46 | -2.46 |
| TRUE | 1/1 | 1/1 | 7.16 | 8.46 | -2.46 |
| TRUE | 1/1 | 1/1 | 7.16 | 8.46 | -2.46 |
| TRUE | 1/1 | 1/1 | 7.16 | 8.46 | -2.46 |
| TRUE | 1/1 | 1/1 | 7.16 | 8.46 | -2.46 |
| TRUE | 1/1 | 1/1 | 7.16 | 8.46 | -2.46 |
| TRUE | 1/1 | 1/1 | 7.16 | 8.46 | -2.46 |
| TRUE | 1/1 | 1/1 | 7.16 | 8.46 | -2.46 |
| TRUE | 1/1 | 1/1 | 5.2  | 6.52 | -2.48 |
| TRUE | 1/1 | 1/1 | 5.2  | 6.52 | -2.48 |



|      |     |     |      |      |       |
|------|-----|-----|------|------|-------|
| TRUE | 1/1 | 1/1 | 4.45 | 5.27 | -1.77 |
| TRUE | 1/1 | 1/1 | 4.45 | 5.27 | -1.77 |
| TRUE | 1/1 | 1/1 | 4.45 | 5.27 | -1.77 |
| TRUE | 1/1 | 1/1 | 4.45 | 5.27 | -1.77 |
| TRUE | 1/1 | 1/1 | 4.45 | 5.27 | -1.77 |
| TRUE | 1/1 | 1/1 | 4.45 | 5.27 | -1.77 |
| TRUE | 1/1 | 1/1 | 4.45 | 5.27 | -1.77 |
| TRUE | 1/1 | 1/1 | 4.45 | 5.27 | -1.77 |
| TRUE | 1/1 | 1/1 | 4.45 | 5.27 | -1.77 |
| TRUE | 1/1 | 1/1 | 4.45 | 5.27 | -1.77 |
| TRUE | 1/1 | 1/1 | 4.45 | 5.27 | -1.77 |
| TRUE | 1/1 | 1/1 | 4.45 | 5.27 | -1.77 |
| TRUE | 1/1 | 1/1 | 4.45 | 5.27 | -1.77 |
| TRUE | 1/1 | 1/1 | 6.7  | 7.06 | -1.28 |
| TRUE | 1/1 | 1/1 | 6.7  | 7.06 | -1.28 |
| TRUE | 1/1 | 1/1 | 6.7  | 7.06 | -1.28 |
| TRUE | 1/1 | 1/1 | 6.7  | 7.06 | -1.28 |
| TRUE | 1/1 | 1/1 | 6.7  | 7.06 | -1.28 |
| TRUE | 1/1 | 1/1 | 6.7  | 7.06 | -1.28 |
| TRUE | 1/1 | 1/1 | 6.7  | 7.06 | -1.28 |
| TRUE | 1/1 | 1/1 | 6.7  | 7.06 | -1.28 |
| TRUE | 1/1 | 1/1 | 6.7  | 7.06 | -1.28 |
| TRUE | 1/1 | 1/1 | 8.6  | 9.65 | -2.08 |
| TRUE | 1/1 | 1/1 | 8.6  | 9.65 | -2.08 |
| TRUE | 1/1 | 1/1 | 8.6  | 9.65 | -2.08 |
| TRUE | 1/1 | 1/1 | 8.6  | 9.65 | -2.08 |
| TRUE | 1/1 | 1/1 | 4.89 | 5.71 | -1.76 |
| TRUE | 1/1 | 1/1 | 4.89 | 5.71 | -1.76 |
| TRUE | 1/1 | 1/1 | 4.89 | 5.71 | -1.76 |
| TRUE | 1/1 | 1/1 | 4.89 | 5.71 | -1.76 |
| TRUE | 1/1 | 1/1 | 4.89 | 5.71 | -1.76 |
| TRUE | 1/1 | 1/1 | 5.38 | 4.51 | 1.82  |
| TRUE | 1/1 | 1/1 | 5.38 | 4.51 | 1.82  |
| TRUE | 1/1 | 1/1 | 5.94 | 6.52 | -1.5  |
| TRUE | 1/1 | 1/1 | 5.94 | 6.52 | -1.5  |
| TRUE | 1/1 | 1/1 | 5.94 | 6.52 | -1.5  |
| TRUE | 1/1 | 1/1 | 5.94 | 6.52 | -1.5  |
| TRUE | 1/1 | 1/1 | 5.94 | 6.52 | -1.5  |
| TRUE | 1/1 | 1/1 | 5.12 | 3.93 | 2.27  |
| TRUE | 1/1 | 1/1 | 5.12 | 3.93 | 2.27  |
| TRUE | 1/1 | 1/1 | 5.12 | 3.93 | 2.27  |
| TRUE | 1/1 | 1/1 | 5.12 | 3.93 | 2.27  |
| TRUE | 1/1 | 1/1 | 5.12 | 3.93 | 2.27  |
| TRUE | 1/1 | 1/1 | 5.12 | 3.93 | 2.27  |
| TRUE | 1/1 | 1/1 | 5.12 | 3.93 | 2.27  |
| TRUE | 1/1 | 1/1 | 5.12 | 3.93 | 2.27  |
| TRUE | 1/1 | 1/1 | 5.12 | 3.93 | 2.27  |
| TRUE | 1/1 | 1/1 | 5.12 | 3.93 | 2.27  |
| TRUE | 1/1 | 1/1 | 5.12 | 3.93 | 2.27  |
| TRUE | 1/1 | 1/1 | 5.12 | 3.93 | 2.27  |
| TRUE | 1/1 | 1/1 | 5.12 | 3.93 | 2.27  |
| TRUE | 1/1 | 1/1 | 5.12 | 3.93 | 2.27  |
| TRUE | 1/1 | 1/1 | 5.12 | 3.93 | 2.27  |
| TRUE | 1/1 | 1/1 | 8.01 | 9.49 | -2.8  |
| TRUE | 1/1 | 1/1 | 8.01 | 9.49 | -2.8  |
| TRUE | 1/1 | 1/1 | 5.72 | 6.6  | -1.84 |
| TRUE | 1/1 | 1/1 | 5.72 | 6.6  | -1.84 |
| TRUE | 1/1 | 1/1 | 4.35 | 5.19 | -1.79 |
| TRUE | 1/1 | 1/1 | 4.35 | 5.19 | -1.79 |
| TRUE | 1/1 | 1/1 | 6.11 | 6.18 | -1.05 |
| TRUE | 1/1 | 1/1 | 6.11 | 6.18 | -1.05 |
| TRUE | 1/1 | 1/1 | 6.11 | 6.18 | -1.05 |
| TRUE | 1/1 | 1/1 | 6.11 | 6.18 | -1.05 |
| TRUE | 1/1 | 1/1 | 6.11 | 6.18 | -1.05 |
| TRUE | 1/1 | 1/1 | 6.11 | 6.18 | -1.05 |
| TRUE | 1/1 | 1/1 | 6.11 | 6.18 | -1.05 |
| TRUE | 1/1 | 1/1 | 6.11 | 6.18 | -1.05 |
| TRUE | 1/1 | 1/1 | 7    | 7.97 | -1.95 |





|      |     |     |       |       |       |
|------|-----|-----|-------|-------|-------|
| TRUE | 1/1 | 1/1 | 12.04 | 12.45 | -1.32 |
| TRUE | 1/1 | 1/1 | 12.04 | 12.45 | -1.32 |
| TRUE | 1/1 | 1/1 | 12.04 | 12.45 | -1.32 |
| TRUE | 1/1 | 1/1 | 12.04 | 12.45 | -1.32 |
| TRUE | 1/1 | 1/1 | 12.04 | 12.45 | -1.32 |
| TRUE | 1/1 | 1/1 | 12.04 | 12.45 | -1.32 |
| TRUE | 1/1 | 1/1 | 12.04 | 12.45 | -1.32 |
| TRUE | 1/1 | 1/1 | 12.04 | 12.45 | -1.32 |
| TRUE | 1/1 | 1/1 | 12.04 | 12.45 | -1.32 |
| TRUE | 1/1 | 1/1 | 12.04 | 12.45 | -1.32 |
| TRUE | 1/1 | 1/1 | 12.04 | 12.45 | -1.32 |
| TRUE | 1/1 | 1/1 | 6.33  | 6.74  | -1.34 |
| TRUE | 1/1 | 1/1 | 6.33  | 6.74  | -1.34 |
| TRUE | 1/1 | 1/1 | 6.33  | 6.74  | -1.34 |
| TRUE | 1/1 | 1/1 | 9.85  | 10.44 | -1.5  |
| TRUE | 1/1 | 1/1 | 9.85  | 10.44 | -1.5  |
| TRUE | 1/1 | 1/1 | 6.31  | 6.91  | -1.52 |
| TRUE | 1/1 | 1/1 | 6.31  | 6.91  | -1.52 |
| TRUE | 1/1 | 1/1 | 4.63  | 4.49  | 1.1   |
| TRUE | 1/1 | 1/1 | 4.63  | 4.49  | 1.1   |
| TRUE | 1/1 | 1/1 | 4.63  | 4.49  | 1.1   |
| TRUE | 1/1 | 1/1 | 6.67  | 7.52  | -1.8  |
| TRUE | 1/1 | 1/1 | 6.67  | 7.52  | -1.8  |
| TRUE | 1/1 | 1/1 | 6.67  | 7.52  | -1.8  |
| TRUE | 1/1 | 1/1 | 6.67  | 7.52  | -1.8  |
| TRUE | 1/1 | 1/1 | 6.67  | 7.52  | -1.8  |
| TRUE | 1/1 | 1/1 | 6.67  | 7.52  | -1.8  |
| TRUE | 1/1 | 1/1 | 6.67  | 7.52  | -1.8  |
| TRUE | 1/1 | 1/1 | 6.67  | 7.52  | -1.8  |
| TRUE | 1/1 | 1/1 | 6.67  | 7.52  | -1.8  |
| TRUE | 1/1 | 1/1 | 6.67  | 7.52  | -1.8  |
| TRUE | 1/1 | 1/1 | 6.67  | 7.52  | -1.8  |
| TRUE | 1/1 | 1/1 | 6.67  | 7.52  | -1.8  |
| TRUE | 1/1 | 1/1 | 6.67  | 7.52  | -1.8  |
| TRUE | 1/1 | 1/1 | 6.67  | 7.52  | -1.8  |
| TRUE | 1/1 | 1/1 | 4.35  | 4.69  | -1.27 |
| TRUE | 1/1 | 1/1 | 4.35  | 4.69  | -1.27 |
| TRUE | 1/1 | 1/1 | 4.35  | 4.69  | -1.27 |
| TRUE | 1/1 | 1/1 | 5.38  | 4.79  | 1.51  |
| TRUE | 1/1 | 1/1 | 5.38  | 4.79  | 1.51  |
| TRUE | 1/1 | 1/1 | 5.38  | 4.79  | 1.51  |
| TRUE | 1/1 | 1/1 | 5.38  | 4.79  | 1.51  |
| TRUE | 1/1 | 1/1 | 8.25  | 9.02  | -1.7  |
| TRUE | 1/1 | 1/1 | 8.25  | 9.02  | -1.7  |
| TRUE | 1/1 | 1/1 | 8.25  | 9.02  | -1.7  |
| TRUE | 1/1 | 1/1 | 8.25  | 9.02  | -1.7  |
| TRUE | 1/1 | 1/1 | 8.25  | 9.02  | -1.7  |
| TRUE | 1/1 | 1/1 | 8.25  | 9.02  | -1.7  |
| TRUE | 1/1 | 1/1 | 8.25  | 9.02  | -1.7  |
| TRUE | 1/1 | 1/1 | 8.25  | 9.02  | -1.7  |
| TRUE | 1/1 | 1/1 | 8.25  | 9.02  | -1.7  |
| TRUE | 1/1 | 1/1 | 8.25  | 9.02  | -1.7  |
| TRUE | 1/1 | 1/1 | 8.25  | 9.02  | -1.7  |
| TRUE | 1/1 | 1/1 | 8.25  | 9.02  | -1.7  |
| TRUE | 1/1 | 1/1 | 8.25  | 9.02  | -1.7  |
| TRUE | 1/1 | 1/1 | 8.25  | 9.02  | -1.7  |
| TRUE | 1/1 | 1/1 | 8.25  | 9.02  | -1.7  |
| TRUE | 1/1 | 1/1 | 8.04  | 9.66  | -3.07 |
| TRUE | 1/1 | 1/1 | 8.04  | 9.66  | -3.07 |
| TRUE | 1/1 | 1/1 | 8.04  | 9.66  | -3.07 |
| TRUE | 1/1 | 1/1 | 6.1   | 6.17  | -1.05 |
| TRUE | 1/1 | 1/1 | 6.1   | 6.17  | -1.05 |
| TRUE | 1/1 | 1/1 | 6.1   | 6.17  | -1.05 |
| TRUE | 1/1 | 1/1 | 6.1   | 6.17  | -1.05 |
| TRUE | 1/1 | 1/1 | 6.1   | 6.17  | -1.05 |
| TRUE | 1/1 | 1/1 | 6.1   | 6.17  | -1.05 |
| TRUE | 1/1 | 1/1 | 4.1   | 3.92  | 1.13  |
| TRUE | 1/1 | 1/1 | 4.1   | 3.92  | 1.13  |



|      |     |     |      |      |       |
|------|-----|-----|------|------|-------|
| TRUE | 1/1 | 1/1 | 4.1  | 3.92 | 1.13  |
| TRUE | 1/1 | 1/1 | 4.1  | 3.92 | 1.13  |
| TRUE | 1/1 | 1/1 | 4.1  | 3.92 | 1.13  |
| TRUE | 1/1 | 1/1 | 4.1  | 3.92 | 1.13  |
| TRUE | 1/1 | 1/1 | 4.1  | 3.92 | 1.13  |
| TRUE | 1/1 | 1/1 | 7.52 | 8.13 | -1.52 |
| TRUE | 1/1 | 1/1 | 7.52 | 8.13 | -1.52 |
| TRUE | 1/1 | 1/1 | 7.52 | 8.13 | -1.52 |
| TRUE | 1/1 | 1/1 | 7.52 | 8.13 | -1.52 |
| TRUE | 1/1 | 1/1 | 4.13 | 4.75 | -1.54 |
| TRUE | 1/1 | 1/1 | 4.13 | 4.75 | -1.54 |
| TRUE | 1/1 | 1/1 | 4.13 | 4.75 | -1.54 |
| TRUE | 1/1 | 1/1 | 4.13 | 4.75 | -1.54 |
| TRUE | 1/1 | 1/1 | 5.51 | 5.21 | 1.24  |
| TRUE | 1/1 | 1/1 | 5.51 | 5.21 | 1.24  |
| TRUE | 1/1 | 1/1 | 6.81 | 7.49 | -1.6  |
| TRUE | 1/1 | 1/1 | 6.81 | 7.49 | -1.6  |
| TRUE | 1/1 | 1/1 | 6.81 | 7.49 | -1.6  |
| TRUE | 1/1 | 1/1 | 6.81 | 7.49 | -1.6  |
| TRUE | 1/1 | 1/1 | 6.81 | 7.49 | -1.6  |
| TRUE | 1/1 | 1/1 | 6.81 | 7.49 | -1.6  |
| TRUE | 1/1 | 1/1 | 6.81 | 7.49 | -1.6  |
| TRUE | 1/1 | 1/1 | 7.27 | 7.38 | -1.08 |
| TRUE | 1/1 | 1/1 | 7.27 | 7.38 | -1.08 |
| TRUE | 1/1 | 1/1 | 7.27 | 7.38 | -1.08 |
| TRUE | 1/1 | 1/1 | 7.27 | 7.38 | -1.08 |
| TRUE | 1/1 | 1/1 | 7.77 | 8.52 | -1.68 |
| TRUE | 1/1 | 1/1 | 7.77 | 8.52 | -1.68 |
| TRUE | 1/1 | 1/1 | 7.77 | 8.52 | -1.68 |
| TRUE | 1/1 | 1/1 | 7.77 | 8.52 | -1.68 |
| TRUE | 1/1 | 1/1 | 7.65 | 8.19 | -1.45 |
| TRUE | 1/1 | 1/1 | 7.65 | 8.19 | -1.45 |
| TRUE | 1/1 | 1/1 | 7.65 | 8.19 | -1.45 |
| TRUE | 1/1 | 1/1 | 7.65 | 8.19 | -1.45 |
| TRUE | 1/1 | 1/1 | 7.65 | 8.19 | -1.45 |
| TRUE | 1/1 | 1/1 | 6.41 | 7.01 | -1.52 |
| TRUE | 1/1 | 1/1 | 6.41 | 7.01 | -1.52 |
| TRUE | 1/1 | 1/1 | 6.41 | 7.01 | -1.52 |
| TRUE | 1/1 | 1/1 | 6.41 | 7.01 | -1.52 |
| TRUE | 1/1 | 1/1 | 5.69 | 5.05 | 1.56  |
| TRUE | 1/1 | 1/1 | 5.69 | 5.05 | 1.56  |
| TRUE | 1/1 | 1/1 | 5.69 | 5.05 | 1.56  |
| TRUE | 1/1 | 1/1 | 5.69 | 5.05 | 1.56  |
| TRUE | 1/1 | 1/1 | 7.38 | 8    | -1.53 |
| TRUE | 1/1 | 1/1 | 7.38 | 8    | -1.53 |
| TRUE | 1/1 | 1/1 | 7.38 | 8    | -1.53 |
| TRUE | 1/1 | 1/1 | 7.9  | 8.38 | -1.39 |
| TRUE | 1/1 | 1/1 | 7.9  | 8.38 | -1.39 |
| TRUE | 1/1 | 1/1 | 7.9  | 8.38 | -1.39 |
| TRUE | 1/1 | 1/1 | 6.92 | 5.18 | 3.34  |
| TRUE | 1/1 | 1/1 | 6.92 | 5.18 | 3.34  |
| TRUE | 1/1 | 1/1 | 6.92 | 5.18 | 3.34  |
| TRUE | 1/1 | 1/1 | 6.92 | 5.18 | 3.34  |
| TRUE | 1/1 | 1/1 | 6.92 | 5.18 | 3.34  |
| TRUE | 1/1 | 1/1 | 8.39 | 9.5  | -2.15 |
| TRUE | 1/1 | 1/1 | 8.39 | 9.5  | -2.15 |
| TRUE | 1/1 | 1/1 | 5.79 | 6.03 | -1.18 |
| TRUE | 1/1 | 1/1 | 5.79 | 6.03 | -1.18 |

|      |     |     |       |       |       |
|------|-----|-----|-------|-------|-------|
| TRUE | 1/1 | 1/1 | 5.79  | 6.03  | -1.18 |
| TRUE | 1/1 | 1/1 | 5.63  | 6.38  | -1.69 |
| TRUE | 1/1 | 1/1 | 5.63  | 6.38  | -1.69 |
| TRUE | 1/1 | 1/1 | 5.63  | 6.38  | -1.69 |
| TRUE | 1/1 | 1/1 | 5.63  | 6.38  | -1.69 |
| TRUE | 1/1 | 1/1 | 5.63  | 6.38  | -1.69 |
| TRUE | 1/1 | 1/1 | 8.16  | 8.1   | 1.04  |
| TRUE | 1/1 | 1/1 | 8.16  | 8.1   | 1.04  |
| TRUE | 1/1 | 1/1 | 8.16  | 8.1   | 1.04  |
| TRUE | 1/1 | 1/1 | 7     | 7.9   | -1.86 |
| TRUE | 1/1 | 1/1 | 7     | 7.9   | -1.86 |
| TRUE | 1/1 | 1/1 | 7     | 7.9   | -1.86 |
| TRUE | 1/1 | 1/1 | 6.04  | 6.04  | 1     |
| TRUE | 1/1 | 1/1 | 6.04  | 6.04  | 1     |
| TRUE | 1/1 | 1/1 | 6.04  | 6.04  | 1     |
| TRUE | 1/1 | 1/1 | 6.04  | 6.04  | 1     |
| TRUE | 1/1 | 1/1 | 6.04  | 6.04  | 1     |
| TRUE | 1/1 | 1/1 | 6.04  | 6.04  | 1     |
| TRUE | 1/1 | 1/1 | 6.5   | 7.59  | -2.13 |
| TRUE | 1/1 | 1/1 | 6.5   | 7.59  | -2.13 |
| TRUE | 1/1 | 1/1 | 6.5   | 7.59  | -2.13 |
| TRUE | 1/1 | 1/1 | 6.5   | 7.59  | -2.13 |
| TRUE | 1/1 | 1/1 | 9.17  | 9.83  | -1.58 |
| TRUE | 1/1 | 1/1 | 9.17  | 9.83  | -1.58 |
| TRUE | 1/1 | 1/1 | 9.17  | 9.83  | -1.58 |
| TRUE | 1/1 | 1/1 | 11.37 | 10.45 | 1.89  |
| TRUE | 1/1 | 1/1 | 11.37 | 10.45 | 1.89  |
| TRUE | 1/1 | 1/1 | 11.37 | 10.45 | 1.89  |
| TRUE | 1/1 | 1/1 | 11.37 | 10.45 | 1.89  |
| TRUE | 1/1 | 1/1 | 6.64  | 7.1   | -1.38 |
| TRUE | 1/1 | 1/1 | 6.64  | 7.1   | -1.38 |
| TRUE | 1/1 | 1/1 | 6.64  | 7.1   | -1.38 |
| TRUE | 1/1 | 1/1 | 6.64  | 7.1   | -1.38 |
| TRUE | 1/1 | 1/1 | 6.64  | 7.1   | -1.38 |
| TRUE | 1/1 | 1/1 | 6.64  | 7.1   | -1.38 |
| TRUE | 1/1 | 1/1 | 6.64  | 7.1   | -1.38 |
| TRUE | 1/1 | 1/1 | 6.64  | 7.1   | -1.38 |
| TRUE | 1/1 | 1/1 | 6.64  | 7.1   | -1.38 |
| TRUE | 1/1 | 1/1 | 6.64  | 7.1   | -1.38 |
| TRUE | 1/1 | 1/1 | 6.64  | 7.1   | -1.38 |
| TRUE | 1/1 | 1/1 | 6.64  | 7.1   | -1.38 |
| TRUE | 1/1 | 1/1 | 6.64  | 7.1   | -1.38 |
| TRUE | 1/1 | 1/1 | 6.64  | 7.1   | -1.38 |
| TRUE | 1/1 | 1/1 | 6.64  | 7.1   | -1.38 |
| TRUE | 1/1 | 1/1 | 6.64  | 7.1   | -1.38 |
| TRUE | 1/1 | 1/1 | 6.64  | 7.1   | -1.38 |
| TRUE | 1/1 | 1/1 | 6.64  | 7.1   | -1.38 |
| TRUE | 1/1 | 1/1 | 6.64  | 7.1   | -1.38 |
| TRUE | 1/1 | 1/1 | 6.64  | 7.1   | -1.38 |
| TRUE | 1/1 | 1/1 | 6.64  | 7.1   | -1.38 |
| TRUE | 1/1 | 1/1 | 6.64  | 7.1   | -1.38 |
| TRUE | 1/1 | 1/1 | 6.64  | 7.1   | -1.38 |
| TRUE | 1/1 | 1/1 | 6.64  | 7.1   | -1.38 |
| TRUE | 1/1 | 1/1 | 6.34  | 6.11  | 1.17  |
| TRUE | 1/1 | 1/1 | 6.34  | 6.11  | 1.17  |
| TRUE | 1/1 | 1/1 | 3.98  | 4.83  | -1.81 |
| TRUE | 1/1 | 1/1 | 3.98  | 4.83  | -1.81 |
| TRUE | 1/1 | 1/1 | 3.98  | 4.83  | -1.81 |
| TRUE | 1/1 | 1/1 | 3.98  | 4.83  | -1.81 |
| TRUE | 1/1 | 1/1 | 5.09  | 5.94  | -1.8  |
| TRUE | 1/1 | 1/1 | 5.09  | 5.94  | -1.8  |
| TRUE | 1/1 | 1/1 | 5.09  | 5.94  | -1.8  |



|      |     |     |       |       |       |
|------|-----|-----|-------|-------|-------|
| TRUE | 1/1 | 1/1 | 6.27  | 7.25  | -1.98 |
| TRUE | 1/1 | 1/1 | 6.27  | 7.25  | -1.98 |
| TRUE | 1/1 | 1/1 | 6.27  | 7.25  | -1.98 |
| TRUE | 1/1 | 1/1 | 10.58 | 11.06 | -1.4  |
| TRUE | 1/1 | 1/1 | 10.58 | 11.06 | -1.4  |
| TRUE | 1/1 | 1/1 | 10.58 | 11.06 | -1.4  |
| TRUE | 1/1 | 1/1 | 10.58 | 11.06 | -1.4  |
| TRUE | 1/1 | 1/1 | 5.16  | 5.44  | -1.21 |
| TRUE | 1/1 | 1/1 | 5.16  | 5.44  | -1.21 |
| TRUE | 1/1 | 1/1 | 5.16  | 5.44  | -1.21 |
| TRUE | 1/1 | 1/1 | 5.16  | 5.44  | -1.21 |
| TRUE | 1/1 | 1/1 | 5.16  | 5.44  | -1.21 |
| TRUE | 1/1 | 1/1 | 5.16  | 5.44  | -1.21 |
| TRUE | 1/1 | 1/1 | 5.16  | 5.44  | -1.21 |
| TRUE | 1/1 | 1/1 | 5.16  | 5.44  | -1.21 |
| TRUE | 1/1 | 1/1 | 5.16  | 5.44  | -1.21 |
| TRUE | 1/1 | 1/1 | 5.16  | 5.44  | -1.21 |
| TRUE | 1/1 | 1/1 | 5.16  | 5.44  | -1.21 |
| TRUE | 1/1 | 1/1 | 5.16  | 5.44  | -1.21 |
| TRUE | 1/1 | 1/1 | 11.25 | 12.64 | -2.64 |
| TRUE | 1/1 | 1/1 | 11.25 | 12.64 | -2.64 |
| TRUE | 1/1 | 1/1 | 11.25 | 12.64 | -2.64 |
| TRUE | 1/1 | 1/1 | 11.25 | 12.64 | -2.64 |
| TRUE | 1/1 | 1/1 | 11.25 | 12.64 | -2.64 |
| TRUE | 1/1 | 1/1 | 11.25 | 12.64 | -2.64 |
| TRUE | 1/1 | 1/1 | 11.25 | 12.64 | -2.64 |
| TRUE | 1/1 | 1/1 | 11.25 | 12.64 | -2.64 |
| TRUE | 1/1 | 1/1 | 11.25 | 12.64 | -2.64 |
| TRUE | 1/1 | 1/1 | 11.25 | 12.64 | -2.64 |
| TRUE | 1/1 | 1/1 | 4.42  | 4.71  | -1.22 |
| TRUE | 1/1 | 1/1 | 4.42  | 4.71  | -1.22 |
| TRUE | 1/1 | 1/1 | 4.42  | 4.71  | -1.22 |
| TRUE | 1/1 | 1/1 | 4.42  | 4.71  | -1.22 |
| TRUE | 1/1 | 1/1 | 4.42  | 4.71  | -1.22 |
| TRUE | 1/1 | 1/1 | 5.78  | 5.32  | 1.38  |
| TRUE | 1/1 | 1/1 | 5.78  | 5.32  | 1.38  |
| TRUE | 1/1 | 1/1 | 5.78  | 5.32  | 1.38  |
| TRUE | 1/1 | 1/1 | 4.27  | 5.18  | -1.88 |
| TRUE | 1/1 | 1/1 | 4.27  | 5.18  | -1.88 |
| TRUE | 1/1 | 1/1 | 4.27  | 5.18  | -1.88 |
| TRUE | 1/1 | 1/1 | 6.56  | 6.34  | 1.17  |
| TRUE | 1/1 | 1/1 | 6.56  | 6.34  | 1.17  |
| TRUE | 1/1 | 1/1 | 9.4   | 9.74  | -1.26 |
| TRUE | 1/1 | 1/1 | 9.4   | 9.74  | -1.26 |
| TRUE | 1/1 | 1/1 | 9.4   | 9.74  | -1.26 |
| TRUE | 1/1 | 1/1 | 9.4   | 9.74  | -1.26 |
| TRUE | 1/1 | 1/1 | 9.4   | 9.74  | -1.26 |
| TRUE | 1/1 | 1/1 | 6.44  | 7.46  | -2.04 |
| TRUE | 1/1 | 1/1 | 6.44  | 7.46  | -2.04 |
| TRUE | 1/1 | 1/1 | 6.44  | 7.46  | -2.04 |
| TRUE | 1/1 | 1/1 | 6.44  | 7.46  | -2.04 |
| TRUE | 1/1 | 1/1 | 6.44  | 7.46  | -2.04 |
| TRUE | 1/1 | 1/1 | 6.3   | 6.19  | 1.08  |
| TRUE | 1/1 | 1/1 | 6.3   | 6.19  | 1.08  |
| TRUE | 1/1 | 1/1 | 6.3   | 6.19  | 1.08  |
| TRUE | 1/1 | 1/1 | 8.61  | 9.59  | -1.97 |
| TRUE | 1/1 | 1/1 | 8.61  | 9.59  | -1.97 |
| TRUE | 1/1 | 1/1 | 8.61  | 9.59  | -1.97 |
| TRUE | 1/1 | 1/1 | 8.61  | 9.59  | -1.97 |
| TRUE | 1/1 | 1/1 | 10.06 | 10.48 | -1.34 |
| TRUE | 1/1 | 1/1 | 10.06 | 10.48 | -1.34 |
| TRUE | 1/1 | 1/1 | 10.06 | 10.48 | -1.34 |

|      |     |     |       |       |       |
|------|-----|-----|-------|-------|-------|
| TRUE | 1/1 | 1/1 | 5.16  | 5.26  | -1.07 |
| TRUE | 1/1 | 1/1 | 5.16  | 5.26  | -1.07 |
| TRUE | 1/1 | 1/1 | 11.15 | 11.31 | -1.12 |
| TRUE | 1/1 | 1/1 | 11.15 | 11.31 | -1.12 |
| TRUE | 1/1 | 1/1 | 11.15 | 11.31 | -1.12 |
| TRUE | 1/1 | 1/1 | 11.15 | 11.31 | -1.12 |
| TRUE | 1/1 | 1/1 | 5.49  | 3.8   | 3.24  |
| TRUE | 1/1 | 1/1 | 5.49  | 3.8   | 3.24  |
| TRUE | 1/1 | 1/1 | 5.49  | 3.8   | 3.24  |
| TRUE | 1/1 | 1/1 | 5.49  | 3.8   | 3.24  |
| TRUE | 1/1 | 1/1 | 5.49  | 3.8   | 3.24  |
| TRUE | 1/1 | 1/1 | 6.51  | 6.71  | -1.15 |
| TRUE | 1/1 | 1/1 | 6.51  | 6.71  | -1.15 |
| TRUE | 1/1 | 1/1 | 6.51  | 6.71  | -1.15 |
| TRUE | 1/1 | 1/1 | 6.51  | 6.71  | -1.15 |
| TRUE | 1/1 | 1/1 | 6.51  | 6.71  | -1.15 |
| TRUE | 1/1 | 1/1 | 6.68  | 7.01  | -1.26 |
| TRUE | 1/1 | 1/1 | 6.68  | 7.01  | -1.26 |
| TRUE | 1/1 | 1/1 | 6.68  | 7.01  | -1.26 |
| TRUE | 1/1 | 1/1 | 6.68  | 7.01  | -1.26 |
| TRUE | 1/1 | 1/1 | 6.68  | 7.01  | -1.26 |
| TRUE | 1/1 | 1/1 | 6.68  | 7.01  | -1.26 |
| TRUE | 1/1 | 1/1 | 5.79  | 6.26  | -1.38 |
| TRUE | 1/1 | 1/1 | 5.79  | 6.26  | -1.38 |
| TRUE | 1/1 | 1/1 | 5.79  | 6.26  | -1.38 |
| TRUE | 1/1 | 1/1 | 5.79  | 6.26  | -1.38 |
| TRUE | 1/1 | 1/1 | 5.79  | 6.26  | -1.38 |
| TRUE | 1/1 | 1/1 | 5.79  | 6.26  | -1.38 |
| TRUE | 1/1 | 1/1 | 5.91  | 5.69  | 1.16  |
| TRUE | 1/1 | 1/1 | 5.91  | 5.69  | 1.16  |
| TRUE | 1/1 | 1/1 | 5.91  | 5.69  | 1.16  |
| TRUE | 1/1 | 1/1 | 7.33  | 8.32  | -1.98 |
| TRUE | 1/1 | 1/1 | 7.33  | 8.32  | -1.98 |
| TRUE | 1/1 | 1/1 | 7.33  | 8.32  | -1.98 |
| TRUE | 1/1 | 1/1 | 9.71  | 10.51 | -1.74 |
| TRUE | 1/1 | 1/1 | 9.71  | 10.51 | -1.74 |
| TRUE | 1/1 | 1/1 | 9.71  | 10.51 | -1.74 |
| TRUE | 1/1 | 1/1 | 9.71  | 10.51 | -1.74 |
| TRUE | 1/1 | 1/1 | 9.71  | 10.51 | -1.74 |
| TRUE | 1/1 | 1/1 | 9.71  | 10.51 | -1.74 |
| TRUE | 1/1 | 1/1 | 9.71  | 10.51 | -1.74 |
| TRUE | 1/1 | 1/1 | 9.71  | 10.51 | -1.74 |
| TRUE | 1/1 | 1/1 | 6.49  | 6.79  | -1.23 |
| TRUE | 1/1 | 1/1 | 6.49  | 6.79  | -1.23 |
| TRUE | 1/1 | 1/1 | 6.49  | 6.79  | -1.23 |
| TRUE | 1/1 | 1/1 | 8.91  | 8.49  | 1.34  |
| TRUE | 1/1 | 1/1 | 8.91  | 8.49  | 1.34  |
| TRUE | 1/1 | 1/1 | 8.53  | 9.26  | -1.65 |
| TRUE | 1/1 | 1/1 | 8.53  | 9.26  | -1.65 |
| TRUE | 1/1 | 1/1 | 8.53  | 9.26  | -1.65 |
| TRUE | 1/1 | 1/1 | 8.53  | 9.26  | -1.65 |
| TRUE | 1/1 | 1/1 | 8.53  | 9.26  | -1.65 |
| TRUE | 1/1 | 1/1 | 8.53  | 9.26  | -1.65 |
| TRUE | 1/1 | 1/1 | 8.53  | 9.26  | -1.65 |
| TRUE | 1/1 | 1/1 | 8.53  | 9.26  | -1.65 |
| TRUE | 1/1 | 1/1 | 8.53  | 9.26  | -1.65 |
| TRUE | 1/1 | 1/1 | 8.53  | 9.26  | -1.65 |
| TRUE | 1/1 | 1/1 | 8.53  | 9.26  | -1.65 |
| TRUE | 1/1 | 1/1 | 8.53  | 9.26  | -1.65 |
| TRUE | 1/1 | 1/1 | 7.95  | 6.02  | 3.81  |



|      |     |     |       |      |       |
|------|-----|-----|-------|------|-------|
| TRUE | 1/1 | 1/1 | 8.68  | 6.4  | 4.85  |
| TRUE | 1/1 | 1/1 | 7.78  | 7.89 | -1.08 |
| TRUE | 1/1 | 1/1 | 7.78  | 7.89 | -1.08 |
| TRUE | 1/1 | 1/1 | 7.78  | 7.89 | -1.08 |
| TRUE | 1/1 | 1/1 | 7.78  | 7.89 | -1.08 |
| TRUE | 1/1 | 1/1 | 7.78  | 7.89 | -1.08 |
| TRUE | 1/1 | 1/1 | 7.78  | 7.89 | -1.08 |
| TRUE | 1/1 | 1/1 | 7.78  | 7.89 | -1.08 |
| TRUE | 1/1 | 1/1 | 7.78  | 7.89 | -1.08 |
| TRUE | 1/1 | 1/1 | 6.89  | 7.61 | -1.64 |
| TRUE | 1/1 | 1/1 | 6.89  | 7.61 | -1.64 |
| TRUE | 1/1 | 1/1 | 6.89  | 7.61 | -1.64 |
| TRUE | 1/1 | 1/1 | 6.89  | 7.61 | -1.64 |
| TRUE | 1/1 | 1/1 | 6.89  | 7.61 | -1.64 |
| TRUE | 1/1 | 1/1 | 6.89  | 7.61 | -1.64 |
| TRUE | 1/1 | 1/1 | 6.89  | 7.61 | -1.64 |
| TRUE | 1/1 | 1/1 | 6.89  | 7.61 | -1.64 |
| TRUE | 1/1 | 1/1 | 10.69 | 8.78 | 3.76  |
| TRUE | 1/1 | 1/1 | 10.69 | 8.78 | 3.76  |
| TRUE | 1/1 | 1/1 | 10.69 | 8.78 | 3.76  |
| TRUE | 1/1 | 1/1 | 10.69 | 8.78 | 3.76  |
| TRUE | 1/1 | 1/1 | 10.69 | 8.78 | 3.76  |
| TRUE | 1/1 | 1/1 | 10.69 | 8.78 | 3.76  |
| TRUE | 1/1 | 1/1 | 10.69 | 8.78 | 3.76  |
| TRUE | 1/1 | 1/1 | 10.69 | 8.78 | 3.76  |
| TRUE | 1/1 | 1/1 | 10.69 | 8.78 | 3.76  |
| TRUE | 1/1 | 1/1 | 10.69 | 8.78 | 3.76  |
| TRUE | 1/1 | 1/1 | 10.69 | 8.78 | 3.76  |
| TRUE | 1/1 | 1/1 | 10.69 | 8.78 | 3.76  |
| TRUE | 1/1 | 1/1 | 10.69 | 8.78 | 3.76  |
| TRUE | 1/1 | 1/1 | 10.69 | 8.78 | 3.76  |
| TRUE | 1/1 | 1/1 | 10.69 | 8.78 | 3.76  |
| TRUE | 1/1 | 1/1 | 10.69 | 8.78 | 3.76  |
| TRUE | 1/1 | 1/1 | 10.69 | 8.78 | 3.76  |
| TRUE | 1/1 | 1/1 | 10.69 | 8.78 | 3.76  |
| TRUE | 1/1 | 1/1 | 10.69 | 8.78 | 3.76  |
| TRUE | 1/1 | 1/1 | 10.69 | 8.78 | 3.76  |
| TRUE | 1/1 | 1/1 | 10.69 | 8.78 | 3.76  |
| TRUE | 1/1 | 1/1 | 10.69 | 8.78 | 3.76  |
| TRUE | 1/1 | 1/1 | 10.69 | 8.78 | 3.76  |
| TRUE | 1/1 | 1/1 | 10.69 | 8.78 | 3.76  |
| TRUE | 1/1 | 1/1 | 10.69 | 8.78 | 3.76  |
| TRUE | 1/1 | 1/1 | 7.39  | 8.38 | -1.98 |
| TRUE | 1/1 | 1/1 | 7.39  | 8.38 | -1.98 |
| TRUE | 1/1 | 1/1 | 7.39  | 8.38 | -1.98 |
| TRUE | 1/1 | 1/1 | 7.39  | 8.38 | -1.98 |
| TRUE | 1/1 | 1/1 | 8.54  | 8.74 | -1.15 |
| TRUE | 1/1 | 1/1 | 8.54  | 8.74 | -1.15 |
| TRUE | 1/1 | 1/1 | 8.54  | 8.74 | -1.15 |
| TRUE | 1/1 | 1/1 | 5.92  | 6.2  | -1.21 |
| TRUE | 1/1 | 1/1 | 5.92  | 6.2  | -1.21 |
| TRUE | 1/1 | 1/1 | 7.39  | 7.54 | -1.11 |
| TRUE | 1/1 | 1/1 | 7.39  | 7.54 | -1.11 |
| TRUE | 1/1 | 1/1 | 6.95  | 7.27 | -1.24 |
| TRUE | 1/1 | 1/1 | 6.95  | 7.27 | -1.24 |
| TRUE | 1/1 | 1/1 | 6.95  | 7.27 | -1.24 |
| TRUE | 1/1 | 1/1 | 7.1   | 7.85 | -1.69 |
| TRUE | 1/1 | 1/1 | 7.1   | 7.85 | -1.69 |
| TRUE | 1/1 | 1/1 | 7.1   | 7.85 | -1.69 |
| TRUE | 1/1 | 1/1 | 7.1   | 7.85 | -1.69 |
| TRUE | 1/1 | 1/1 | 7.1   | 7.85 | -1.69 |
| TRUE | 1/1 | 1/1 | 7.1   | 7.85 | -1.69 |
| TRUE | 1/1 | 1/1 | 7.1   | 7.85 | -1.69 |
| TRUE | 1/1 | 1/1 | 7.1   | 7.85 | -1.69 |
| TRUE | 1/1 | 1/1 | 7.1   | 7.85 | -1.69 |
| TRUE | 1/1 | 1/1 | 7.29  | 8.32 | -2.05 |
| TRUE | 1/1 | 1/1 | 7.29  | 8.32 | -2.05 |

|      |     |     |      |       |       |
|------|-----|-----|------|-------|-------|
| TRUE | 1/1 | 1/1 | 7.29 | 8.32  | -2.05 |
| TRUE | 1/1 | 1/1 | 7.44 | 8.01  | -1.48 |
| TRUE | 1/1 | 1/1 | 7.44 | 8.01  | -1.48 |
| TRUE | 1/1 | 1/1 | 7.44 | 8.01  | -1.48 |
| TRUE | 1/1 | 1/1 | 5.66 | 6.87  | -2.31 |
| TRUE | 1/1 | 1/1 | 5.66 | 6.87  | -2.31 |
| TRUE | 1/1 | 1/1 | 5.66 | 6.87  | -2.31 |
| TRUE | 1/1 | 1/1 | 5.66 | 6.87  | -2.31 |
| TRUE | 1/1 | 1/1 | 5.66 | 6.87  | -2.31 |
| TRUE | 1/1 | 1/1 | 5.66 | 6.87  | -2.31 |
| TRUE | 1/1 | 1/1 | 5.66 | 6.87  | -2.31 |
| TRUE | 1/1 | 1/1 | 6.12 | 6.31  | -1.14 |
| TRUE | 1/1 | 1/1 | 6.12 | 6.31  | -1.14 |
| TRUE | 1/1 | 1/1 | 7.75 | 6.85  | 1.87  |
| TRUE | 1/1 | 1/1 | 7.75 | 6.85  | 1.87  |
| TRUE | 1/1 | 1/1 | 4.25 | 4.23  | 1.02  |
| TRUE | 1/1 | 1/1 | 4.25 | 4.23  | 1.02  |
| TRUE | 1/1 | 1/1 | 4.25 | 4.23  | 1.02  |
| TRUE | 1/1 | 1/1 | 4.27 | 3.72  | 1.47  |
| TRUE | 1/1 | 1/1 | 4.27 | 3.72  | 1.47  |
| TRUE | 1/1 | 1/1 | 4.27 | 3.72  | 1.47  |
| TRUE | 1/1 | 1/1 | 9.11 | 11.56 | -5.46 |
| TRUE | 1/1 | 1/1 | 9.11 | 11.56 | -5.46 |
| TRUE | 1/1 | 1/1 | 9.11 | 11.56 | -5.46 |
| TRUE | 1/1 | 1/1 | 9.11 | 11.56 | -5.46 |
| TRUE | 1/1 | 1/1 | 6.77 | 6     | 1.7   |
| TRUE | 1/1 | 1/1 | 6.77 | 6     | 1.7   |
| TRUE | 1/1 | 1/1 | 6.77 | 6     | 1.7   |
| TRUE | 1/1 | 1/1 | 6.77 | 6     | 1.7   |
| TRUE | 1/1 | 1/1 | 6.78 | 7.75  | -1.95 |
| TRUE | 1/1 | 1/1 | 6.78 | 7.75  | -1.95 |
| TRUE | 1/1 | 1/1 | 6.78 | 7.75  | -1.95 |
| TRUE | 1/1 | 1/1 | 6.78 | 7.75  | -1.95 |
| TRUE | 1/1 | 1/1 | 6.78 | 7.75  | -1.95 |
| TRUE | 1/1 | 1/1 | 6.78 | 7.75  | -1.95 |
| TRUE | 1/1 | 1/1 | 6.78 | 7.75  | -1.95 |
| TRUE | 1/1 | 1/1 | 6.78 | 7.75  | -1.95 |
| TRUE | 1/1 | 1/1 | 6.78 | 7.75  | -1.95 |
| TRUE | 1/1 | 1/1 | 5.42 | 5.78  | -1.29 |
| TRUE | 1/1 | 1/1 | 5.42 | 5.78  | -1.29 |
| TRUE | 1/1 | 1/1 | 5.42 | 5.78  | -1.29 |
| TRUE | 1/1 | 1/1 | 7.77 | 7.98  | -1.16 |
| TRUE | 1/1 | 1/1 | 7.77 | 7.98  | -1.16 |
| TRUE | 1/1 | 1/1 | 6.94 | 6.43  | 1.42  |
| TRUE | 1/1 | 1/1 | 6.94 | 6.43  | 1.42  |
| TRUE | 1/1 | 1/1 | 6.94 | 6.43  | 1.42  |
| TRUE | 1/1 | 1/1 | 6.94 | 6.43  | 1.42  |
| TRUE | 1/1 | 1/1 | 6.94 | 6.43  | 1.42  |
| TRUE | 1/1 | 1/1 | 6.94 | 6.43  | 1.42  |
| TRUE | 1/1 | 1/1 | 8.21 | 8.86  | -1.57 |
| TRUE | 1/1 | 1/1 | 8.21 | 8.86  | -1.57 |
| TRUE | 1/1 | 1/1 | 8.04 | 8.04  | -1    |
| TRUE | 1/1 | 1/1 | 8.04 | 8.04  | -1    |
| TRUE | 1/1 | 1/1 | 8.04 | 8.04  | -1    |
| TRUE | 1/1 | 1/1 | 8.04 | 8.04  | -1    |
| TRUE | 1/1 | 1/1 | 9.78 | 9.95  | -1.13 |
| TRUE | 1/1 | 1/1 | 9.78 | 9.95  | -1.13 |
| TRUE | 1/1 | 1/1 | 9.78 | 9.95  | -1.13 |
| TRUE | 1/1 | 1/1 | 6.43 | 7.05  | -1.55 |
| TRUE | 1/1 | 1/1 | 6.43 | 7.05  | -1.55 |



|      |     |     |       |       |       |
|------|-----|-----|-------|-------|-------|
| TRUE | 1/1 | 1/1 | 7.23  | 8.31  | -2.11 |
| TRUE | 1/1 | 1/1 | 7.23  | 8.31  | -2.11 |
| TRUE | 1/1 | 1/1 | 7.23  | 8.31  | -2.11 |
| TRUE | 1/1 | 1/1 | 7.23  | 8.31  | -2.11 |
| TRUE | 1/1 | 1/1 | 6.36  | 5.9   | 1.38  |
| TRUE | 1/1 | 1/1 | 6.36  | 5.9   | 1.38  |
| TRUE | 1/1 | 1/1 | 6.36  | 5.9   | 1.38  |
| TRUE | 1/1 | 1/1 | 6.36  | 5.9   | 1.38  |
| TRUE | 1/1 | 1/1 | 6.36  | 5.9   | 1.38  |
| TRUE | 1/1 | 1/1 | 6.36  | 5.9   | 1.38  |
| TRUE | 1/1 | 1/1 | 6.36  | 5.9   | 1.38  |
| TRUE | 1/1 | 1/1 | 6.36  | 5.9   | 1.38  |
| TRUE | 1/1 | 1/1 | 6.36  | 5.9   | 1.38  |
| TRUE | 1/1 | 1/1 | 6.36  | 5.9   | 1.38  |
| TRUE | 1/1 | 1/1 | 6.36  | 5.9   | 1.38  |
| TRUE | 1/1 | 1/1 | 6.36  | 5.9   | 1.38  |
| TRUE | 1/1 | 1/1 | 6.36  | 5.9   | 1.38  |
| TRUE | 1/1 | 1/1 | 6.36  | 5.9   | 1.38  |
| TRUE | 1/1 | 1/1 | 6.36  | 5.9   | 1.38  |
| TRUE | 1/1 | 1/1 | 6.36  | 5.9   | 1.38  |
| TRUE | 1/1 | 1/1 | 7.83  | 6.51  | 2.49  |
| TRUE | 1/1 | 1/1 | 7.83  | 6.51  | 2.49  |
| TRUE | 1/1 | 1/1 | 7.83  | 6.51  | 2.49  |
| TRUE | 1/1 | 1/1 | 7.83  | 6.51  | 2.49  |
| TRUE | 1/1 | 1/1 | 7.83  | 6.51  | 2.49  |
| TRUE | 1/1 | 1/1 | 7.83  | 6.51  | 2.49  |
| TRUE | 1/1 | 1/1 | 7.83  | 6.51  | 2.49  |
| TRUE | 1/1 | 1/1 | 7.83  | 6.51  | 2.49  |
| TRUE | 1/1 | 1/1 | 7.83  | 6.51  | 2.49  |
| TRUE | 1/1 | 1/1 | 7.83  | 6.51  | 2.49  |
| TRUE | 1/1 | 1/1 | 7.83  | 6.51  | 2.49  |
| TRUE | 1/1 | 1/1 | 7.83  | 6.51  | 2.49  |
| TRUE | 1/1 | 1/1 | 7.83  | 6.51  | 2.49  |
| TRUE | 1/1 | 1/1 | 7.83  | 6.51  | 2.49  |
| TRUE | 1/1 | 1/1 | 7.83  | 6.51  | 2.49  |
| TRUE | 1/1 | 1/1 | 7.67  | 8.08  | -1.33 |
| TRUE | 1/1 | 1/1 | 7.67  | 8.08  | -1.33 |
| TRUE | 1/1 | 1/1 | 10.22 | 10.65 | -1.35 |
| TRUE | 1/1 | 1/1 | 10.22 | 10.65 | -1.35 |
| TRUE | 1/1 | 1/1 | 10.22 | 10.65 | -1.35 |
| TRUE | 1/1 | 1/1 | 3.44  | 3.61  | -1.12 |
| TRUE | 1/1 | 1/1 | 3.44  | 3.61  | -1.12 |
| TRUE | 1/1 | 1/1 | 3.44  | 3.61  | -1.12 |
| TRUE | 1/1 | 1/1 | 8.32  | 8.88  | -1.48 |
| TRUE | 1/1 | 1/1 | 8.32  | 8.88  | -1.48 |
| TRUE | 1/1 | 1/1 | 8.32  | 8.88  | -1.48 |
| TRUE | 1/1 | 1/1 | 5.09  | 6.15  | -2.08 |
| TRUE | 1/1 | 1/1 | 5.09  | 6.15  | -2.08 |
| TRUE | 1/1 | 1/1 | 6.4   | 7.01  | -1.52 |
| TRUE | 1/1 | 1/1 | 6.4   | 7.01  | -1.52 |
| TRUE | 1/1 | 1/1 | 6.4   | 7.01  | -1.52 |
| TRUE | 1/1 | 1/1 | 6.4   | 7.01  | -1.52 |
| TRUE | 1/1 | 1/1 | 6.4   | 7.01  | -1.52 |
| TRUE | 1/1 | 1/1 | 7.96  | 8.36  | -1.32 |
| TRUE | 1/1 | 1/1 | 7.96  | 8.36  | -1.32 |
| TRUE | 1/1 | 1/1 | 7.96  | 8.36  | -1.32 |
| TRUE | 1/1 | 1/1 | 7.79  | 8.08  | -1.22 |
| TRUE | 1/1 | 1/1 | 7.79  | 8.08  | -1.22 |
| TRUE | 1/1 | 1/1 | 7.79  | 8.08  | -1.22 |
| TRUE | 1/1 | 1/1 | 7.79  | 8.08  | -1.22 |
| TRUE | 1/1 | 1/1 | 7.79  | 8.08  | -1.22 |
| TRUE | 1/1 | 1/1 | 7.79  | 8.08  | -1.22 |
| TRUE | 1/1 | 1/1 | 7.79  | 8.08  | -1.22 |
| TRUE | 1/1 | 1/1 | 5.15  | 5.91  | -1.7  |
| TRUE | 1/1 | 1/1 | 5.15  | 5.91  | -1.7  |
| TRUE | 1/1 | 1/1 | 5.15  | 5.91  | -1.7  |
| TRUE | 1/1 | 1/1 | 5.15  | 5.91  | -1.7  |



|      |     |     |      |      |       |
|------|-----|-----|------|------|-------|
| TRUE | 1/1 | 1/1 | 5.79 | 4.87 | 1.89  |
| TRUE | 1/1 | 1/1 | 5.79 | 4.87 | 1.89  |
| TRUE | 1/1 | 1/1 | 4.54 | 5.21 | -1.6  |
| TRUE | 1/1 | 1/1 | 4.54 | 5.21 | -1.6  |
| TRUE | 1/1 | 1/1 | 6.74 | 8.19 | -2.74 |
| TRUE | 1/1 | 1/1 | 6.74 | 8.19 | -2.74 |
| TRUE | 1/1 | 1/1 | 4.42 | 4.99 | -1.48 |
| TRUE | 1/1 | 1/1 | 4.42 | 4.99 | -1.48 |
| TRUE | 1/1 | 1/1 | 4.42 | 4.99 | -1.48 |
| TRUE | 1/1 | 1/1 | 4.42 | 4.99 | -1.48 |
| TRUE | 1/1 | 1/1 | 4.42 | 4.99 | -1.48 |
| TRUE | 1/1 | 1/1 | 4.42 | 4.99 | -1.48 |
| TRUE | 1/1 | 1/1 | 5.39 | 4.91 | 1.4   |
| TRUE | 1/1 | 1/1 | 5.39 | 4.91 | 1.4   |
| TRUE | 1/1 | 1/1 | 5.39 | 4.91 | 1.4   |
| TRUE | 1/1 | 1/1 | 7.01 | 6.82 | 1.14  |
| TRUE | 1/1 | 1/1 | 7.01 | 6.82 | 1.14  |
| TRUE | 1/1 | 1/1 | 7.01 | 6.82 | 1.14  |
| TRUE | 1/1 | 1/1 | 7.58 | 8.21 | -1.55 |
| TRUE | 1/1 | 1/1 | 7.58 | 8.21 | -1.55 |
| TRUE | 1/1 | 1/1 | 7.58 | 8.21 | -1.55 |
| TRUE | 1/1 | 1/1 | 7.58 | 8.21 | -1.55 |
| TRUE | 1/1 | 1/1 | 7.58 | 8.21 | -1.55 |
| TRUE | 1/1 | 1/1 | 6.38 | 6.77 | -1.32 |
| TRUE | 1/1 | 1/1 | 6.38 | 6.77 | -1.32 |
| TRUE | 1/1 | 1/1 | 6.38 | 6.77 | -1.32 |
| TRUE | 1/1 | 1/1 | 6.38 | 6.77 | -1.32 |
| TRUE | 1/1 | 1/1 | 6.38 | 6.77 | -1.32 |
| TRUE | 1/1 | 1/1 | 6.38 | 6.77 | -1.32 |
| TRUE | 1/1 | 1/1 | 6.79 | 6.52 | 1.21  |
| TRUE | 1/1 | 1/1 | 6.79 | 6.52 | 1.21  |
| TRUE | 1/1 | 1/1 | 8.31 | 8.41 | -1.08 |
| TRUE | 1/1 | 1/1 | 8.31 | 8.41 | -1.08 |
| TRUE | 1/1 | 1/1 | 8.31 | 8.41 | -1.08 |
| TRUE | 1/1 | 1/1 | 8.31 | 8.41 | -1.08 |
| TRUE | 1/1 | 1/1 | 5.97 | 6.86 | -1.86 |
| TRUE | 1/1 | 1/1 | 5.97 | 6.86 | -1.86 |
| TRUE | 1/1 | 1/1 | 8.13 | 8.4  | -1.2  |
| TRUE | 1/1 | 1/1 | 8.13 | 8.4  | -1.2  |
| TRUE | 1/1 | 1/1 | 8.13 | 8.4  | -1.2  |
| TRUE | 1/1 | 1/1 | 8.13 | 8.4  | -1.2  |
| TRUE | 1/1 | 1/1 | 7.17 | 7.85 | -1.6  |
| TRUE | 1/1 | 1/1 | 7.17 | 7.85 | -1.6  |
| TRUE | 1/1 | 1/1 | 7.17 | 7.85 | -1.6  |
| TRUE | 1/1 | 1/1 | 7.17 | 7.85 | -1.6  |
| TRUE | 1/1 | 1/1 | 7.17 | 7.85 | -1.6  |
| TRUE | 1/1 | 1/1 | 7.17 | 7.85 | -1.6  |
| TRUE | 1/1 | 1/1 | 7.17 | 7.85 | -1.6  |
| TRUE | 1/1 | 1/1 | 7.17 | 7.85 | -1.6  |
| TRUE | 1/1 | 1/1 | 7.17 | 7.85 | -1.6  |
| TRUE | 1/1 | 1/1 | 7.17 | 7.85 | -1.6  |
| TRUE | 1/1 | 1/1 | 7.17 | 7.85 | -1.6  |
| TRUE | 1/1 | 1/1 | 7.17 | 7.85 | -1.6  |
| TRUE | 1/1 | 1/1 | 7.17 | 7.85 | -1.6  |
| TRUE | 1/1 | 1/1 | 7.17 | 7.85 | -1.6  |
| TRUE | 1/1 | 1/1 | 7.17 | 7.85 | -1.6  |
| TRUE | 1/1 | 1/1 | 5.86 | 6.19 | -1.25 |
| TRUE | 1/1 | 1/1 | 5.86 | 6.19 | -1.25 |
| TRUE | 1/1 | 1/1 | 6.06 | 6.28 | -1.16 |
| TRUE | 1/1 | 1/1 | 6.06 | 6.28 | -1.16 |
| TRUE | 1/1 | 1/1 | 6.06 | 6.28 | -1.16 |
| TRUE | 1/1 | 1/1 | 8.77 | 7.28 | 2.82  |

|      |     |     |       |      |       |
|------|-----|-----|-------|------|-------|
| TRUE | 1/1 | 1/1 | 8.77  | 7.28 | 2.82  |
| TRUE | 1/1 | 1/1 | 8.77  | 7.28 | 2.82  |
| TRUE | 1/1 | 1/1 | 8.77  | 7.28 | 2.82  |
| TRUE | 1/1 | 1/1 | 8.77  | 7.28 | 2.82  |
| TRUE | 1/1 | 1/1 | 8.77  | 7.28 | 2.82  |
| TRUE | 1/1 | 1/1 | 8.77  | 7.28 | 2.82  |
| TRUE | 1/1 | 1/1 | 5.92  | 6.4  | -1.39 |
| TRUE | 1/1 | 1/1 | 5.92  | 6.4  | -1.39 |
| TRUE | 1/1 | 1/1 | 5.92  | 6.4  | -1.39 |
| TRUE | 1/1 | 1/1 | 5.92  | 6.4  | -1.39 |
| TRUE | 1/1 | 1/1 | 5.44  | 5.32 | 1.08  |
| TRUE | 1/1 | 1/1 | 5.44  | 5.32 | 1.08  |
| TRUE | 1/1 | 1/1 | 5.44  | 5.32 | 1.08  |
| TRUE | 1/1 | 1/1 | 3.96  | 3.91 | 1.04  |
| TRUE | 1/1 | 1/1 | 3.96  | 3.91 | 1.04  |
| TRUE | 1/1 | 1/1 | 3.96  | 3.91 | 1.04  |
| TRUE | 1/1 | 1/1 | 3.96  | 3.91 | 1.04  |
| TRUE | 1/1 | 1/1 | 3.96  | 3.91 | 1.04  |
| TRUE | 1/1 | 1/1 | 3.24  | 2.7  | 1.46  |
| TRUE | 1/1 | 1/1 | 3.24  | 2.7  | 1.46  |
| TRUE | 1/1 | 1/1 | 3.24  | 2.7  | 1.46  |
| TRUE | 1/1 | 1/1 | 3.24  | 2.7  | 1.46  |
| TRUE | 1/1 | 1/1 | 8.89  | 8.97 | -1.06 |
| TRUE | 1/1 | 1/1 | 8.89  | 8.97 | -1.06 |
| TRUE | 1/1 | 1/1 | 8.89  | 8.97 | -1.06 |
| TRUE | 1/1 | 1/1 | 11.82 | 6.26 | 47.22 |
| TRUE | 1/1 | 1/1 | 11.82 | 6.26 | 47.22 |
| TRUE | 1/1 | 1/1 | 11.82 | 6.26 | 47.22 |
| TRUE | 1/1 | 1/1 | 11.82 | 6.26 | 47.22 |
| TRUE | 1/1 | 1/1 | 11.82 | 6.26 | 47.22 |
| TRUE | 1/1 | 1/1 | 4.6   | 5.01 | -1.32 |
| TRUE | 1/1 | 1/1 | 4.6   | 5.01 | -1.32 |
| TRUE | 1/1 | 1/1 | 4.6   | 5.01 | -1.32 |
| TRUE | 1/1 | 1/1 | 5.94  | 6.98 | -2.04 |
| TRUE | 1/1 | 1/1 | 5.94  | 6.98 | -2.04 |
| TRUE | 1/1 | 1/1 | 7.04  | 7.54 | -1.42 |
| TRUE | 1/1 | 1/1 | 7.04  | 7.54 | -1.42 |
| TRUE | 1/1 | 1/1 | 7.04  | 7.54 | -1.42 |
| TRUE | 1/1 | 1/1 | 7.04  | 7.54 | -1.42 |
| TRUE | 1/1 | 1/1 | 7.04  | 7.54 | -1.42 |
| TRUE | 1/1 | 1/1 | 7.72  | 8.76 | -2.06 |
| TRUE | 1/1 | 1/1 | 7.72  | 8.76 | -2.06 |
| TRUE | 1/1 | 1/1 | 9.36  | 9.6  | -1.18 |
| TRUE | 1/1 | 1/1 | 9.36  | 9.6  | -1.18 |
| TRUE | 1/1 | 1/1 | 8.31  | 9.39 | -2.11 |
| TRUE | 1/1 | 1/1 | 8.31  | 9.39 | -2.11 |
| TRUE | 1/1 | 1/1 | 8.31  | 9.39 | -2.11 |
| TRUE | 1/1 | 1/1 | 8.31  | 9.39 | -2.11 |
| TRUE | 1/1 | 1/1 | 4.29  | 4.91 | -1.54 |
| TRUE | 1/1 | 1/1 | 4.29  | 4.91 | -1.54 |
| TRUE | 1/1 | 1/1 | 4.29  | 4.91 | -1.54 |
| TRUE | 1/1 | 1/1 | 4.29  | 4.91 | -1.54 |
| TRUE | 1/1 | 1/1 | 4.29  | 4.91 | -1.54 |
| TRUE | 1/1 | 1/1 | 4.29  | 4.91 | -1.54 |
| TRUE | 1/1 | 1/1 | 4.29  | 4.91 | -1.54 |
| TRUE | 1/1 | 1/1 | 4.29  | 4.91 | -1.54 |
| TRUE | 1/1 | 1/1 | 7.45  | 8.11 | -1.59 |
| TRUE | 1/1 | 1/1 | 7.45  | 8.11 | -1.59 |

|      |     |     |       |      |       |
|------|-----|-----|-------|------|-------|
| TRUE | 1/1 | 1/1 | 7.45  | 8.11 | -1.59 |
| TRUE | 1/1 | 1/1 | 7.45  | 8.11 | -1.59 |
| TRUE | 1/1 | 1/1 | 7.45  | 8.11 | -1.59 |
| TRUE | 1/1 | 1/1 | 7.45  | 8.11 | -1.59 |
| TRUE | 1/1 | 1/1 | 7.45  | 8.11 | -1.59 |
| TRUE | 1/1 | 1/1 | 7.45  | 8.11 | -1.59 |
| TRUE | 1/1 | 1/1 | 7.45  | 8.11 | -1.59 |
| TRUE | 1/1 | 1/1 | 8.15  | 8.26 | -1.08 |
| TRUE | 1/1 | 1/1 | 8.15  | 8.26 | -1.08 |
| TRUE | 1/1 | 1/1 | 8.15  | 8.26 | -1.08 |
| TRUE | 1/1 | 1/1 | 8.15  | 8.26 | -1.08 |
| TRUE | 1/1 | 1/1 | 8.15  | 8.26 | -1.08 |
| TRUE | 1/1 | 1/1 | 8.15  | 8.26 | -1.08 |
| TRUE | 1/1 | 1/1 | 7.7   | 7.71 | -1.01 |
| TRUE | 1/1 | 1/1 | 7.7   | 7.71 | -1.01 |
| TRUE | 1/1 | 1/1 | 7.7   | 7.71 | -1.01 |
| TRUE | 1/1 | 1/1 | 7.7   | 7.71 | -1.01 |
| TRUE | 1/1 | 1/1 | 7.7   | 7.71 | -1.01 |
| TRUE | 1/1 | 1/1 | 7.9   | 8.38 | -1.4  |
| TRUE | 1/1 | 1/1 | 7.9   | 8.38 | -1.4  |
| TRUE | 1/1 | 1/1 | 7.9   | 8.38 | -1.4  |
| TRUE | 1/1 | 1/1 | 7.9   | 8.38 | -1.4  |
| TRUE | 1/1 | 1/1 | 6.87  | 6.83 | 1.03  |
| TRUE | 1/1 | 1/1 | 6.87  | 6.83 | 1.03  |
| TRUE | 1/1 | 1/1 | 10.86 | 9.77 | 2.14  |
| TRUE | 1/1 | 1/1 | 10.86 | 9.77 | 2.14  |
| TRUE | 1/1 | 1/1 | 10.86 | 9.77 | 2.14  |
| TRUE | 1/1 | 1/1 | 10.86 | 9.77 | 2.14  |
| TRUE | 1/1 | 1/1 | 10.86 | 9.77 | 2.14  |
| TRUE | 1/1 | 1/1 | 10.86 | 9.77 | 2.14  |
| TRUE | 1/1 | 1/1 | 6.17  | 5.85 | 1.25  |
| TRUE | 1/1 | 1/1 | 6.17  | 5.85 | 1.25  |
| TRUE | 1/1 | 1/1 | 6.17  | 5.85 | 1.25  |
| TRUE | 1/1 | 1/1 | 6.17  | 5.85 | 1.25  |
| TRUE | 1/1 | 1/1 | 5.58  | 5.94 | -1.29 |
| TRUE | 1/1 | 1/1 | 5.58  | 5.94 | -1.29 |
| TRUE | 1/1 | 1/1 | 5.58  | 5.94 | -1.29 |
| TRUE | 1/1 | 1/1 | 5.54  | 6.95 | -2.67 |
| TRUE | 1/1 | 1/1 | 5.54  | 6.95 | -2.67 |
| TRUE | 1/1 | 1/1 | 4.12  | 4.22 | -1.07 |
| TRUE | 1/1 | 1/1 | 4.12  | 4.22 | -1.07 |
| TRUE | 1/1 | 1/1 | 4.12  | 4.22 | -1.07 |
| TRUE | 1/1 | 1/1 | 4.12  | 4.22 | -1.07 |
| TRUE | 1/1 | 1/1 | 4.12  | 4.22 | -1.07 |
| TRUE | 1/1 | 1/1 | 5.82  | 5.69 | 1.1   |
| TRUE | 1/1 | 1/1 | 5.82  | 5.69 | 1.1   |
| TRUE | 1/1 | 1/1 | 8     | 7.67 | 1.26  |
| TRUE | 1/1 | 1/1 | 8     | 7.67 | 1.26  |
| TRUE | 1/1 | 1/1 | 8     | 7.67 | 1.26  |
| TRUE | 1/1 | 1/1 | 8     | 7.67 | 1.26  |
| TRUE | 1/1 | 1/1 | 8     | 7.67 | 1.26  |
| TRUE | 1/1 | 1/1 | 8     | 7.67 | 1.26  |
| TRUE | 1/1 | 1/1 | 9.99  | 9.87 | 1.09  |
| TRUE | 1/1 | 1/1 | 9.99  | 9.87 | 1.09  |
| TRUE | 1/1 | 1/1 | 5.09  | 5.38 | -1.23 |
| TRUE | 1/1 | 1/1 | 5.09  | 5.38 | -1.23 |
| TRUE | 1/1 | 1/1 | 5.09  | 5.38 | -1.23 |
| TRUE | 1/1 | 1/1 | 8.89  | 8.51 | 1.29  |
| TRUE | 1/1 | 1/1 | 8.89  | 8.51 | 1.29  |

|      |     |     |      |       |       |
|------|-----|-----|------|-------|-------|
| TRUE | 1/1 | 1/1 | 8.89 | 8.51  | 1.29  |
| TRUE | 1/1 | 1/1 | 5.25 | 4.94  | 1.23  |
| TRUE | 1/1 | 1/1 | 5.25 | 4.94  | 1.23  |
| TRUE | 1/1 | 1/1 | 5.25 | 4.94  | 1.23  |
| TRUE | 1/1 | 1/1 | 5.25 | 4.94  | 1.23  |
| TRUE | 1/1 | 1/1 | 9.52 | 10.05 | -1.44 |
| TRUE | 1/1 | 1/1 | 9.52 | 10.05 | -1.44 |
| TRUE | 1/1 | 1/1 | 9.52 | 10.05 | -1.44 |
| TRUE | 1/1 | 1/1 | 8.46 | 9.82  | -2.57 |
| TRUE | 1/1 | 1/1 | 8.46 | 9.82  | -2.57 |
| TRUE | 1/1 | 1/1 | 8.46 | 9.82  | -2.57 |
| TRUE | 1/1 | 1/1 | 8.46 | 9.82  | -2.57 |
| TRUE | 1/1 | 1/1 | 8.46 | 9.82  | -2.57 |
| TRUE | 1/1 | 1/1 | 8.46 | 9.82  | -2.57 |
| TRUE | 1/1 | 1/1 | 8.46 | 9.82  | -2.57 |
| TRUE | 1/1 | 1/1 | 8.46 | 9.82  | -2.57 |
| TRUE | 1/1 | 1/1 | 7.48 | 6.53  | 1.94  |
| TRUE | 1/1 | 1/1 | 7.48 | 6.53  | 1.94  |
| TRUE | 1/1 | 1/1 | 7.48 | 6.53  | 1.94  |
| TRUE | 1/1 | 1/1 | 7.48 | 6.53  | 1.94  |
| TRUE | 1/1 | 1/1 | 7.48 | 6.53  | 1.94  |
| TRUE | 1/1 | 1/1 | 7.48 | 6.53  | 1.94  |
| TRUE | 1/1 | 1/1 | 7.48 | 6.53  | 1.94  |
| TRUE | 1/1 | 1/1 | 7.48 | 6.53  | 1.94  |
| TRUE | 1/1 | 1/1 | 7.48 | 6.53  | 1.94  |
| TRUE | 1/1 | 1/1 | 6.9  | 7.53  | -1.55 |
| TRUE | 1/1 | 1/1 | 6.9  | 7.53  | -1.55 |
| TRUE | 1/1 | 1/1 | 6.9  | 7.53  | -1.55 |
| TRUE | 1/1 | 1/1 | 6.86 | 6.8   | 1.04  |
| TRUE | 1/1 | 1/1 | 6.86 | 6.8   | 1.04  |
| TRUE | 1/1 | 1/1 | 8.27 | 8.68  | -1.32 |
| TRUE | 1/1 | 1/1 | 8.27 | 8.68  | -1.32 |
| TRUE | 1/1 | 1/1 | 8.27 | 8.68  | -1.32 |
| TRUE | 1/1 | 1/1 | 3.02 | 3.21  | -1.14 |
| TRUE | 1/1 | 1/1 | 3.02 | 3.21  | -1.14 |
| TRUE | 1/1 | 1/1 | 3.02 | 3.21  | -1.14 |
| TRUE | 1/1 | 1/1 | 3.02 | 3.21  | -1.14 |
| TRUE | 1/1 | 1/1 | 7.55 | 8.42  | -1.83 |
| TRUE | 1/1 | 1/1 | 7.55 | 8.42  | -1.83 |
| TRUE | 1/1 | 1/1 | 7.55 | 8.42  | -1.83 |
| TRUE | 1/1 | 1/1 | 7.55 | 8.42  | -1.83 |
| TRUE | 1/1 | 1/1 | 7.55 | 8.42  | -1.83 |
| TRUE | 1/1 | 1/1 | 7.55 | 8.42  | -1.83 |
| TRUE | 1/1 | 1/1 | 7.55 | 8.42  | -1.83 |
| TRUE | 1/1 | 1/1 | 7.55 | 8.42  | -1.83 |
| TRUE | 1/1 | 1/1 | 7.55 | 8.42  | -1.83 |
| TRUE | 1/1 | 1/1 | 7.55 | 8.42  | -1.83 |
| TRUE | 1/1 | 1/1 | 7.55 | 8.42  | -1.83 |
| TRUE | 1/1 | 1/1 | 7.55 | 8.42  | -1.83 |
| TRUE | 1/1 | 1/1 | 7.55 | 8.42  | -1.83 |
| TRUE | 1/1 | 1/1 | 7.55 | 8.42  | -1.83 |
| TRUE | 1/1 | 1/1 | 5.53 | 4.68  | 1.81  |
| TRUE | 1/1 | 1/1 | 5.53 | 4.68  | 1.81  |
| TRUE | 1/1 | 1/1 | 5.53 | 4.68  | 1.81  |
| TRUE | 1/1 | 1/1 | 5.53 | 4.68  | 1.81  |
| TRUE | 1/1 | 1/1 | 5.53 | 4.68  | 1.81  |
| TRUE | 1/1 | 1/1 | 5.53 | 4.68  | 1.81  |
| TRUE | 1/1 | 1/1 | 5.53 | 4.68  | 1.81  |
| TRUE | 1/1 | 1/1 | 5.53 | 4.68  | 1.81  |
| TRUE | 1/1 | 1/1 | 5.53 | 4.68  | 1.81  |
| TRUE | 1/1 | 1/1 | 5.53 | 4.68  | 1.81  |
| TRUE | 1/1 | 1/1 | 5.53 | 4.68  | 1.81  |
| TRUE | 1/1 | 1/1 | 5.53 | 4.68  | 1.81  |
| TRUE | 1/1 | 1/1 | 5.53 | 4.68  | 1.81  |
| TRUE | 1/1 | 1/1 | 5.53 | 4.68  | 1.81  |
| TRUE | 1/1 | 1/1 | 5.53 | 4.68  | 1.81  |
| TRUE | 1/1 | 1/1 | 5.53 | 4.68  | 1.81  |
| TRUE | 1/1 | 1/1 | 5.53 | 4.68  | 1.81  |
| TRUE | 1/1 | 1/1 | 5.53 | 4.68  | 1.81  |
| TRUE | 1/1 | 1/1 | 5.53 | 4.68  | 1.81  |
| TRUE | 1/1 | 1/1 | 3.88 | 4.54  | -1.58 |



|      |     |     |       |      |       |
|------|-----|-----|-------|------|-------|
| TRUE | 1/1 | 1/1 | 7.52  | 7.07 | 1.37  |
| TRUE | 1/1 | 1/1 | 6.97  | 6.95 | 1.02  |
| TRUE | 1/1 | 1/1 | 6.97  | 6.95 | 1.02  |
| TRUE | 1/1 | 1/1 | 6.97  | 6.95 | 1.02  |
| TRUE | 1/1 | 1/1 | 5.35  | 5.49 | -1.1  |
| TRUE | 1/1 | 1/1 | 5.35  | 5.49 | -1.1  |
| TRUE | 1/1 | 1/1 | 5.35  | 5.49 | -1.1  |
| TRUE | 1/1 | 1/1 | 5.35  | 5.49 | -1.1  |
| TRUE | 1/1 | 1/1 | 5.35  | 5.49 | -1.1  |
| TRUE | 1/1 | 1/1 | 5.35  | 5.49 | -1.1  |
| TRUE | 1/1 | 1/1 | 7.48  | 8    | -1.44 |
| TRUE | 1/1 | 1/1 | 7.48  | 8    | -1.44 |
| TRUE | 1/1 | 1/1 | 7.48  | 8    | -1.44 |
| TRUE | 1/1 | 1/1 | 7.48  | 8    | -1.44 |
| TRUE | 1/1 | 1/1 | 7.48  | 8    | -1.44 |
| TRUE | 1/1 | 1/1 | 7.94  | 8.41 | -1.38 |
| TRUE | 1/1 | 1/1 | 7.94  | 8.41 | -1.38 |
| TRUE | 1/1 | 1/1 | 7.94  | 8.41 | -1.38 |
| TRUE | 1/1 | 1/1 | 6.77  | 7.46 | -1.62 |
| TRUE | 1/1 | 1/1 | 6.77  | 7.46 | -1.62 |
| TRUE | 1/1 | 1/1 | 6.77  | 7.46 | -1.62 |
| TRUE | 1/1 | 1/1 | 6.77  | 7.46 | -1.62 |
| TRUE | 1/1 | 1/1 | 6.77  | 7.46 | -1.62 |
| TRUE | 1/1 | 1/1 | 6.78  | 6.99 | -1.16 |
| TRUE | 1/1 | 1/1 | 6.78  | 6.99 | -1.16 |
| TRUE | 1/1 | 1/1 | 6.78  | 6.99 | -1.16 |
| TRUE | 1/1 | 1/1 | 6.78  | 6.99 | -1.16 |
| TRUE | 1/1 | 1/1 | 10.12 | 9.21 | 1.88  |
| TRUE | 1/1 | 1/1 | 10.12 | 9.21 | 1.88  |
| TRUE | 1/1 | 1/1 | 10.12 | 9.21 | 1.88  |
| TRUE | 1/1 | 1/1 | 10.12 | 9.21 | 1.88  |
| TRUE | 1/1 | 1/1 | 10.12 | 9.21 | 1.88  |
| TRUE | 1/1 | 1/1 | 10.12 | 9.21 | 1.88  |
| TRUE | 1/1 | 1/1 | 10.12 | 9.21 | 1.88  |
| TRUE | 1/1 | 1/1 | 10.12 | 9.21 | 1.88  |
| TRUE | 1/1 | 1/1 | 10.12 | 9.21 | 1.88  |
| TRUE | 1/1 | 1/1 | 10.12 | 9.21 | 1.88  |
| TRUE | 1/1 | 1/1 | 10.12 | 9.21 | 1.88  |
| TRUE | 1/1 | 1/1 | 8.59  | 8.75 | -1.12 |
| TRUE | 1/1 | 1/1 | 8.59  | 8.75 | -1.12 |
| TRUE | 1/1 | 1/1 | 8.59  | 8.75 | -1.12 |
| TRUE | 1/1 | 1/1 | 8.59  | 8.75 | -1.12 |
| TRUE | 1/1 | 1/1 | 8.59  | 8.75 | -1.12 |
| TRUE | 1/1 | 1/1 | 4.61  | 4.76 | -1.11 |
| TRUE | 1/1 | 1/1 | 4.61  | 4.76 | -1.11 |
| TRUE | 1/1 | 1/1 | 8.63  | 8.17 | 1.38  |
| TRUE | 1/1 | 1/1 | 8.63  | 8.17 | 1.38  |
| TRUE | 1/1 | 1/1 | 8.63  | 8.17 | 1.38  |
| TRUE | 1/1 | 1/1 | 8.63  | 8.17 | 1.38  |
| TRUE | 1/1 | 1/1 | 5.8   | 6.51 | -1.64 |
| TRUE | 1/1 | 1/1 | 5.8   | 6.51 | -1.64 |
| TRUE | 1/1 | 1/1 | 5.8   | 6.51 | -1.64 |
| TRUE | 1/1 | 1/1 | 5.8   | 6.51 | -1.64 |
| TRUE | 1/1 | 1/1 | 5.8   | 6.51 | -1.64 |
| TRUE | 1/1 | 1/1 | 7.48  | 7.22 | 1.19  |
| TRUE | 1/1 | 1/1 | 7.48  | 7.22 | 1.19  |



|      |     |     |      |      |       |
|------|-----|-----|------|------|-------|
| TRUE | 1/1 | 1/1 | 7.48 | 7.22 | 1.19  |
| TRUE | 1/1 | 1/1 | 6.84 | 6.9  | -1.04 |
| TRUE | 1/1 | 1/1 | 6.84 | 6.9  | -1.04 |
| TRUE | 1/1 | 1/1 | 8.65 | 7.7  | 1.93  |
| TRUE | 1/1 | 1/1 | 8.65 | 7.7  | 1.93  |
| TRUE | 1/1 | 1/1 | 8.65 | 7.7  | 1.93  |
| TRUE | 1/1 | 1/1 | 8.65 | 7.7  | 1.93  |
| TRUE | 1/1 | 1/1 | 8.65 | 7.7  | 1.93  |
| TRUE | 1/1 | 1/1 | 8.65 | 7.7  | 1.93  |
| TRUE | 1/1 | 1/1 | 6.28 | 6.62 | -1.27 |
| TRUE | 1/1 | 1/1 | 6.28 | 6.62 | -1.27 |
| TRUE | 1/1 | 1/1 | 6.28 | 6.62 | -1.27 |
| TRUE | 1/1 | 1/1 | 6.28 | 6.62 | -1.27 |
| TRUE | 1/1 | 1/1 | 6.28 | 6.62 | -1.27 |
| TRUE | 1/1 | 1/1 | 6.32 | 6.48 | -1.11 |
| TRUE | 1/1 | 1/1 | 6.32 | 6.48 | -1.11 |
| TRUE | 1/1 | 1/1 | 6.32 | 6.48 | -1.11 |
| TRUE | 1/1 | 1/1 | 4.94 | 5.41 | -1.38 |
| TRUE | 1/1 | 1/1 | 4.94 | 5.41 | -1.38 |
| TRUE | 1/1 | 1/1 | 4.94 | 5.41 | -1.38 |
| TRUE | 1/1 | 1/1 | 5.78 | 5.39 | 1.31  |
| TRUE | 1/1 | 1/1 | 5.78 | 5.39 | 1.31  |
| TRUE | 1/1 | 1/1 | 5.78 | 5.39 | 1.31  |
| TRUE | 1/1 | 1/1 | 4.09 | 4.08 | 1.01  |
| TRUE | 1/1 | 1/1 | 4.09 | 4.08 | 1.01  |
| TRUE | 1/1 | 1/1 | 4.09 | 4.08 | 1.01  |
| TRUE | 1/1 | 1/1 | 5.51 | 5.13 | 1.3   |
| TRUE | 1/1 | 1/1 | 5.51 | 5.13 | 1.3   |
| TRUE | 1/1 | 1/1 | 5.51 | 5.13 | 1.3   |
| TRUE | 1/1 | 1/1 | 5.51 | 5.13 | 1.3   |
| TRUE | 1/1 | 1/1 | 5.51 | 5.13 | 1.3   |
| TRUE | 1/1 | 1/1 | 4.17 | 3.99 | 1.13  |
| TRUE | 1/1 | 1/1 | 4.17 | 3.99 | 1.13  |
| TRUE | 1/1 | 1/1 | 4.17 | 3.99 | 1.13  |
| TRUE | 1/1 | 1/1 | 4.17 | 3.99 | 1.13  |
| TRUE | 1/1 | 1/1 | 9    | 8.84 | 1.12  |
| TRUE | 1/1 | 1/1 | 9    | 8.84 | 1.12  |
| TRUE | 1/1 | 1/1 | 5.34 | 5.73 | -1.31 |
| TRUE | 1/1 | 1/1 | 5.34 | 5.73 | -1.31 |
| TRUE | 1/1 | 1/1 | 6.13 | 6.88 | -1.68 |
| TRUE | 1/1 | 1/1 | 6.13 | 6.88 | -1.68 |
| TRUE | 1/1 | 1/1 | 6.13 | 6.88 | -1.68 |
| TRUE | 1/1 | 1/1 | 6.13 | 6.88 | -1.68 |
| TRUE | 1/1 | 1/1 | 4.51 | 5.56 | -2.06 |
| TRUE | 1/1 | 1/1 | 4.51 | 5.56 | -2.06 |
| TRUE | 1/1 | 1/1 | 4.51 | 5.56 | -2.06 |
| TRUE | 1/1 | 1/1 | 4.51 | 5.56 | -2.06 |
| TRUE | 1/1 | 1/1 | 4.51 | 5.56 | -2.06 |
| TRUE | 1/1 | 1/1 | 4.31 | 2.82 | 2.82  |
| TRUE | 1/1 | 1/1 | 4.31 | 2.82 | 2.82  |
| TRUE | 1/1 | 1/1 | 4.31 | 2.82 | 2.82  |
| TRUE | 1/1 | 1/1 | 4.31 | 2.82 | 2.82  |
| TRUE | 1/1 | 1/1 | 4.31 | 2.82 | 2.82  |
| TRUE | 1/1 | 1/1 | 4.31 | 2.82 | 2.82  |
| TRUE | 1/1 | 1/1 | 4.31 | 2.82 | 2.82  |
| TRUE | 1/1 | 1/1 | 4.31 | 2.82 | 2.82  |
| TRUE | 1/1 | 1/1 | 9.93 | 9.77 | 1.12  |
| TRUE | 1/1 | 1/1 | 9.93 | 9.77 | 1.12  |
| TRUE | 1/1 | 1/1 | 9.93 | 9.77 | 1.12  |
| TRUE | 1/1 | 1/1 | 9.93 | 9.77 | 1.12  |



|      |     |     |      |      |       |
|------|-----|-----|------|------|-------|
| TRUE | 1/1 | 1/1 | 5.74 | 5.76 | -1.01 |
| TRUE | 1/1 | 1/1 | 7.83 | 8.36 | -1.45 |
| TRUE | 1/1 | 1/1 | 7.83 | 8.36 | -1.45 |
| TRUE | 1/1 | 1/1 | 7.83 | 8.36 | -1.45 |
| TRUE | 1/1 | 1/1 | 7.49 | 6.37 | 2.18  |
| TRUE | 1/1 | 1/1 | 7.49 | 6.37 | 2.18  |
| TRUE | 1/1 | 1/1 | 7.49 | 6.37 | 2.18  |
| TRUE | 1/1 | 1/1 | 7.49 | 6.37 | 2.18  |
| TRUE | 1/1 | 1/1 | 7.49 | 6.37 | 2.18  |
| TRUE | 1/1 | 1/1 | 7.49 | 6.37 | 2.18  |
| TRUE | 1/1 | 1/1 | 4.31 | 4.73 | -1.34 |
| TRUE | 1/1 | 1/1 | 4.31 | 4.73 | -1.34 |
| TRUE | 1/1 | 1/1 | 4.31 | 4.73 | -1.34 |
| TRUE | 1/1 | 1/1 | 8.39 | 9.26 | -1.82 |
| TRUE | 1/1 | 1/1 | 8.39 | 9.26 | -1.82 |
| TRUE | 1/1 | 1/1 | 8.39 | 9.26 | -1.82 |
| TRUE | 1/1 | 1/1 | 8.39 | 9.26 | -1.82 |
| TRUE | 1/1 | 1/1 | 6.77 | 7.02 | -1.19 |
| TRUE | 1/1 | 1/1 | 6.77 | 7.02 | -1.19 |
| TRUE | 1/1 | 1/1 | 6.77 | 7.02 | -1.19 |
| TRUE | 1/1 | 1/1 | 6.77 | 7.02 | -1.19 |
| TRUE | 1/1 | 1/1 | 6.77 | 7.02 | -1.19 |
| TRUE | 1/1 | 1/1 | 6.09 | 6.18 | -1.06 |
| TRUE | 1/1 | 1/1 | 6.09 | 6.18 | -1.06 |
| TRUE | 1/1 | 1/1 | 6.84 | 7.35 | -1.42 |
| TRUE | 1/1 | 1/1 | 6.84 | 7.35 | -1.42 |
| TRUE | 1/1 | 1/1 | 6.84 | 7.35 | -1.42 |
| TRUE | 1/1 | 1/1 | 6.26 | 4.63 | 3.11  |
| TRUE | 1/1 | 1/1 | 6.26 | 4.63 | 3.11  |
| TRUE | 1/1 | 1/1 | 6.26 | 4.63 | 3.11  |
| TRUE | 1/1 | 1/1 | 6.26 | 4.63 | 3.11  |
| TRUE | 1/1 | 1/1 | 6.26 | 4.63 | 3.11  |
| TRUE | 1/1 | 1/1 | 6.26 | 4.63 | 3.11  |
| TRUE | 1/1 | 1/1 | 6.26 | 4.63 | 3.11  |
| TRUE | 1/1 | 1/1 | 6.26 | 4.63 | 3.11  |
| TRUE | 1/1 | 1/1 | 6.26 | 4.63 | 3.11  |
| TRUE | 1/1 | 1/1 | 6.26 | 4.63 | 3.11  |
| TRUE | 1/1 | 1/1 | 6.26 | 4.63 | 3.11  |
| TRUE | 1/1 | 1/1 | 6.26 | 4.63 | 3.11  |
| TRUE | 1/1 | 1/1 | 6.26 | 4.63 | 3.11  |
| TRUE | 1/1 | 1/1 | 6.26 | 4.63 | 3.11  |
| TRUE | 1/1 | 1/1 | 6.26 | 4.63 | 3.11  |
| TRUE | 1/1 | 1/1 | 6.26 | 4.63 | 3.11  |
| TRUE | 1/1 | 1/1 | 8.62 | 9.88 | -2.39 |
| TRUE | 1/1 | 1/1 | 8.62 | 9.88 | -2.39 |
| TRUE | 1/1 | 1/1 | 8.62 | 9.88 | -2.39 |
| TRUE | 1/1 | 1/1 | 3.69 | 4.25 | -1.48 |
| TRUE | 1/1 | 1/1 | 3.69 | 4.25 | -1.48 |
| TRUE | 1/1 | 1/1 | 3.69 | 4.25 | -1.48 |
| TRUE | 1/1 | 1/1 | 3.69 | 4.25 | -1.48 |
| TRUE | 1/1 | 1/1 | 3.69 | 4.25 | -1.48 |
| TRUE | 1/1 | 1/1 | 5.56 | 6.21 | -1.57 |
| TRUE | 1/1 | 1/1 | 5.56 | 6.21 | -1.57 |
| TRUE | 1/1 | 1/1 | 5.56 | 6.21 | -1.57 |
| TRUE | 1/1 | 1/1 | 8.91 | 9.28 | -1.29 |
| TRUE | 1/1 | 1/1 | 8.91 | 9.28 | -1.29 |
| TRUE | 1/1 | 1/1 | 8.91 | 9.28 | -1.29 |
| TRUE | 1/1 | 1/1 | 8.91 | 9.28 | -1.29 |
| TRUE | 1/1 | 1/1 | 6.19 | 6.54 | -1.28 |
| TRUE | 1/1 | 1/1 | 6.19 | 6.54 | -1.28 |
| TRUE | 1/1 | 1/1 | 6.19 | 6.54 | -1.28 |

|      |     |     |      |      |       |
|------|-----|-----|------|------|-------|
| TRUE | 1/1 | 1/1 | 6.19 | 6.54 | -1.28 |
| TRUE | 1/1 | 1/1 | 6.19 | 6.54 | -1.28 |
| TRUE | 1/1 | 1/1 | 6.19 | 6.54 | -1.28 |
| TRUE | 1/1 | 1/1 | 6.19 | 6.54 | -1.28 |
| TRUE | 1/1 | 1/1 | 6.19 | 6.54 | -1.28 |
| TRUE | 1/1 | 1/1 | 9.6  | 9.5  | 1.07  |
| TRUE | 1/1 | 1/1 | 9.6  | 9.5  | 1.07  |
| TRUE | 1/1 | 1/1 | 5.44 | 6.29 | -1.81 |
| TRUE | 1/1 | 1/1 | 5.44 | 6.29 | -1.81 |
| TRUE | 1/1 | 1/1 | 5.44 | 6.29 | -1.81 |
| TRUE | 1/1 | 1/1 | 5.44 | 6.29 | -1.81 |
| TRUE | 1/1 | 1/1 | 5.44 | 6.29 | -1.81 |
| TRUE | 1/1 | 1/1 | 5.44 | 6.29 | -1.81 |
| TRUE | 1/1 | 1/1 | 9.46 | 9.69 | -1.18 |
| TRUE | 1/1 | 1/1 | 9.46 | 9.69 | -1.18 |
| TRUE | 1/1 | 1/1 | 9    | 9.23 | -1.17 |
| TRUE | 1/1 | 1/1 | 9    | 9.23 | -1.17 |
| TRUE | 1/1 | 1/1 | 9    | 9.23 | -1.17 |
| TRUE | 1/1 | 1/1 | 6.34 | 7.02 | -1.6  |
| TRUE | 1/1 | 1/1 | 6.34 | 7.02 | -1.6  |
| TRUE | 1/1 | 1/1 | 6.34 | 7.02 | -1.6  |
| TRUE | 1/1 | 1/1 | 5.52 | 6.33 | -1.75 |
| TRUE | 1/1 | 1/1 | 5.52 | 6.33 | -1.75 |
| TRUE | 1/1 | 1/1 | 5.52 | 6.33 | -1.75 |
| TRUE | 1/1 | 1/1 | 5.52 | 6.33 | -1.75 |
| TRUE | 1/1 | 1/1 | 5.52 | 6.33 | -1.75 |
| TRUE | 1/1 | 1/1 | 5.52 | 6.33 | -1.75 |
| TRUE | 1/1 | 1/1 | 5.52 | 6.33 | -1.75 |
| TRUE | 1/1 | 1/1 | 5.52 | 6.33 | -1.75 |
| TRUE | 1/1 | 1/1 | 5.52 | 6.33 | -1.75 |
| TRUE | 1/1 | 1/1 | 5.52 | 6.33 | -1.75 |
| TRUE | 1/1 | 1/1 | 5.52 | 6.33 | -1.75 |
| TRUE | 1/1 | 1/1 | 5.52 | 6.33 | -1.75 |
| TRUE | 1/1 | 1/1 | 5.52 | 6.33 | -1.75 |
| TRUE | 1/1 | 1/1 | 5.52 | 6.33 | -1.75 |
| TRUE | 1/1 | 1/1 | 8.73 | 6.13 | 6.07  |
| TRUE | 1/1 | 1/1 | 8.73 | 6.13 | 6.07  |
| TRUE | 1/1 | 1/1 | 8.73 | 6.13 | 6.07  |
| TRUE | 1/1 | 1/1 | 8.73 | 6.13 | 6.07  |
| TRUE | 1/1 | 1/1 | 8.73 | 6.13 | 6.07  |
| TRUE | 1/1 | 1/1 | 8.73 | 6.13 | 6.07  |
| TRUE | 1/1 | 1/1 | 8.73 | 6.13 | 6.07  |
| TRUE | 1/1 | 1/1 | 8.73 | 6.13 | 6.07  |
| TRUE | 1/1 | 1/1 | 8.73 | 6.13 | 6.07  |
| TRUE | 1/1 | 1/1 | 8.73 | 6.13 | 6.07  |
| TRUE | 1/1 | 1/1 | 8.73 | 6.13 | 6.07  |
| TRUE | 1/1 | 1/1 | 8.73 | 6.13 | 6.07  |
| TRUE | 1/1 | 1/1 | 8.73 | 6.13 | 6.07  |
| TRUE | 1/1 | 1/1 | 8.73 | 6.13 | 6.07  |
| TRUE | 1/1 | 1/1 | 8.73 | 6.13 | 6.07  |
| TRUE | 1/1 | 1/1 | 8.73 | 6.13 | 6.07  |
| TRUE | 1/1 | 1/1 | 8.73 | 6.13 | 6.07  |
| TRUE | 1/1 | 1/1 | 8.73 | 6.13 | 6.07  |
| TRUE | 1/1 | 1/1 | 8.73 | 6.13 | 6.07  |
| TRUE | 1/1 | 1/1 | 8.73 | 6.13 | 6.07  |
| TRUE | 1/1 | 1/1 | 8.73 | 6.13 | 6.07  |
| TRUE | 1/1 | 1/1 | 8.73 | 6.13 | 6.07  |
| TRUE | 1/1 | 1/1 | 8.02 | 8.04 | -1.02 |
| TRUE | 1/1 | 1/1 | 8.02 | 8.04 | -1.02 |
| TRUE | 1/1 | 1/1 | 8.02 | 8.04 | -1.02 |
| TRUE | 1/1 | 1/1 | 7.57 | 8.04 | -1.39 |
| TRUE | 1/1 | 1/1 | 7.57 | 8.04 | -1.39 |
| TRUE | 1/1 | 1/1 | 7.57 | 8.04 | -1.39 |
| TRUE | 1/1 | 1/1 | 7.57 | 8.04 | -1.39 |
| TRUE | 1/1 | 1/1 | 7.25 | 7.26 | -1    |

|      |     |     |      |      |       |
|------|-----|-----|------|------|-------|
| TRUE | 1/1 | 1/1 | 7.25 | 7.26 | -1    |
| TRUE | 1/1 | 1/1 | 7.25 | 7.26 | -1    |
| TRUE | 1/1 | 1/1 | 8.97 | 7.54 | 2.7   |
| TRUE | 1/1 | 1/1 | 8.97 | 7.54 | 2.7   |
| TRUE | 1/1 | 1/1 | 8.97 | 7.54 | 2.7   |
| TRUE | 1/1 | 1/1 | 8.97 | 7.54 | 2.7   |
| TRUE | 1/1 | 1/1 | 8.97 | 7.54 | 2.7   |
| TRUE | 1/1 | 1/1 | 8.97 | 7.54 | 2.7   |
| TRUE | 1/1 | 1/1 | 8.97 | 7.54 | 2.7   |
| TRUE | 1/1 | 1/1 | 8.97 | 7.54 | 2.7   |
| TRUE | 1/1 | 1/1 | 8.97 | 7.54 | 2.7   |
| TRUE | 1/1 | 1/1 | 8.97 | 7.54 | 2.7   |
| TRUE | 1/1 | 1/1 | 6.06 | 5.86 | 1.15  |
| TRUE | 1/1 | 1/1 | 6.06 | 5.86 | 1.15  |
| TRUE | 1/1 | 1/1 | 6.06 | 5.86 | 1.15  |
| TRUE | 1/1 | 1/1 | 8.23 | 8.69 | -1.38 |
| TRUE | 1/1 | 1/1 | 8.23 | 8.69 | -1.38 |
| TRUE | 1/1 | 1/1 | 4.38 | 4.86 | -1.39 |
| TRUE | 1/1 | 1/1 | 4.38 | 4.86 | -1.39 |
| TRUE | 1/1 | 1/1 | 4.38 | 4.86 | -1.39 |
| TRUE | 1/1 | 1/1 | 6.43 | 6.67 | -1.17 |
| TRUE | 1/1 | 1/1 | 6.43 | 6.67 | -1.17 |
| TRUE | 1/1 | 1/1 | 7.35 | 8.14 | -1.73 |
| TRUE | 1/1 | 1/1 | 7.35 | 8.14 | -1.73 |
| TRUE | 1/1 | 1/1 | 7.35 | 8.14 | -1.73 |
| TRUE | 1/1 | 1/1 | 7.35 | 8.14 | -1.73 |
| TRUE | 1/1 | 1/1 | 8.93 | 6.26 | 6.34  |
| TRUE | 1/1 | 1/1 | 8.93 | 6.26 | 6.34  |
| TRUE | 1/1 | 1/1 | 8.93 | 6.26 | 6.34  |
| TRUE | 1/1 | 1/1 | 8.93 | 6.26 | 6.34  |
| TRUE | 1/1 | 1/1 | 8.93 | 6.26 | 6.34  |
| TRUE | 1/1 | 1/1 | 8.93 | 6.26 | 6.34  |
| TRUE | 1/1 | 1/1 | 8.93 | 6.26 | 6.34  |
| TRUE | 1/1 | 1/1 | 8.93 | 6.26 | 6.34  |
| TRUE | 1/1 | 1/1 | 8.93 | 6.26 | 6.34  |
| TRUE | 1/1 | 1/1 | 8.93 | 6.26 | 6.34  |
| TRUE | 1/1 | 1/1 | 8.93 | 6.26 | 6.34  |
| TRUE | 1/1 | 1/1 | 8.93 | 6.26 | 6.34  |
| TRUE | 1/1 | 1/1 | 8.93 | 6.26 | 6.34  |
| TRUE | 1/1 | 1/1 | 8.93 | 6.26 | 6.34  |
| TRUE | 1/1 | 1/1 | 8.93 | 6.26 | 6.34  |
| TRUE | 1/1 | 1/1 | 8.93 | 6.26 | 6.34  |
| TRUE | 1/1 | 1/1 | 5.2  | 4.73 | 1.39  |
| TRUE | 1/1 | 1/1 | 5.2  | 4.73 | 1.39  |
| TRUE | 1/1 | 1/1 | 5.2  | 4.73 | 1.39  |
| TRUE | 1/1 | 1/1 | 5.2  | 4.73 | 1.39  |
| TRUE | 1/1 | 1/1 | 5.18 | 5.27 | -1.07 |
| TRUE | 1/1 | 1/1 | 5.18 | 5.27 | -1.07 |
| TRUE | 1/1 | 1/1 | 5.18 | 5.27 | -1.07 |
| TRUE | 1/1 | 1/1 | 6.8  | 6.03 | 1.7   |
| TRUE | 1/1 | 1/1 | 6.8  | 6.03 | 1.7   |
| TRUE | 1/1 | 1/1 | 9.03 | 6.67 | 5.14  |
| TRUE | 1/1 | 1/1 | 9.03 | 6.67 | 5.14  |
| TRUE | 1/1 | 1/1 | 9.03 | 6.67 | 5.14  |
| TRUE | 1/1 | 1/1 | 9.03 | 6.67 | 5.14  |
| TRUE | 1/1 | 1/1 | 5.04 | 5.4  | -1.28 |
| TRUE | 1/1 | 1/1 | 5.04 | 5.4  | -1.28 |
| TRUE | 1/1 | 1/1 | 5.04 | 5.4  | -1.28 |

|      |     |     |      |      |       |
|------|-----|-----|------|------|-------|
| TRUE | 1/1 | 1/1 | 7.19 | 7.23 | -1.03 |
| TRUE | 1/1 | 1/1 | 7.19 | 7.23 | -1.03 |
| TRUE | 1/1 | 1/1 | 6    | 5.89 | 1.08  |
| TRUE | 1/1 | 1/1 | 6    | 5.89 | 1.08  |
| TRUE | 1/1 | 1/1 | 6    | 5.89 | 1.08  |
| TRUE | 1/1 | 1/1 | 6    | 5.89 | 1.08  |
| TRUE | 1/1 | 1/1 | 6    | 5.89 | 1.08  |
| TRUE | 1/1 | 1/1 | 6    | 5.89 | 1.08  |
| TRUE | 1/1 | 1/1 | 6    | 5.89 | 1.08  |
| TRUE | 1/1 | 1/1 | 8.4  | 8.1  | 1.23  |
| TRUE | 1/1 | 1/1 | 8.4  | 8.1  | 1.23  |
| TRUE | 1/1 | 1/1 | 8.4  | 8.1  | 1.23  |
| TRUE | 1/1 | 1/1 | 7.63 | 6.31 | 2.51  |
| TRUE | 1/1 | 1/1 | 7.63 | 6.31 | 2.51  |
| TRUE | 1/1 | 1/1 | 7.63 | 6.31 | 2.51  |
| TRUE | 1/1 | 1/1 | 7.63 | 6.31 | 2.51  |
| TRUE | 1/1 | 1/1 | 7.63 | 6.31 | 2.51  |
| TRUE | 1/1 | 1/1 | 7.63 | 6.31 | 2.51  |
| TRUE | 1/1 | 1/1 | 7.63 | 6.31 | 2.51  |
| TRUE | 1/1 | 1/1 | 7.63 | 6.31 | 2.51  |
| TRUE | 1/1 | 1/1 | 7.63 | 6.31 | 2.51  |
| TRUE | 1/1 | 1/1 | 7.26 | 7.03 | 1.17  |
| TRUE | 1/1 | 1/1 | 7.26 | 7.03 | 1.17  |
| TRUE | 1/1 | 1/1 | 7.26 | 7.03 | 1.17  |
| TRUE | 1/1 | 1/1 | 5.55 | 6.51 | -1.93 |
| TRUE | 1/1 | 1/1 | 5.55 | 6.51 | -1.93 |
| TRUE | 1/1 | 1/1 | 6.41 | 5.46 | 1.93  |
| TRUE | 1/1 | 1/1 | 6.41 | 5.46 | 1.93  |
| TRUE | 1/1 | 1/1 | 6.41 | 5.46 | 1.93  |
| TRUE | 1/1 | 1/1 | 6.41 | 5.46 | 1.93  |
| TRUE | 1/1 | 1/1 | 6.41 | 5.46 | 1.93  |
| TRUE | 1/1 | 1/1 | 6.41 | 5.46 | 1.93  |
| TRUE | 1/1 | 1/1 | 6.41 | 5.46 | 1.93  |
| TRUE | 1/1 | 1/1 | 6.41 | 5.46 | 1.93  |
| TRUE | 1/1 | 1/1 | 6.41 | 5.46 | 1.93  |
| TRUE | 1/1 | 1/1 | 5.95 | 6.1  | -1.11 |
| TRUE | 1/1 | 1/1 | 5.95 | 6.1  | -1.11 |
| TRUE | 1/1 | 1/1 | 5.95 | 6.1  | -1.11 |
| TRUE | 1/1 | 1/1 | 5.95 | 6.1  | -1.11 |
| TRUE | 1/1 | 1/1 | 5.95 | 6.1  | -1.11 |
| TRUE | 1/1 | 1/1 | 6.05 | 6.64 | -1.51 |
| TRUE | 1/1 | 1/1 | 6.05 | 6.64 | -1.51 |
| TRUE | 1/1 | 1/1 | 6.05 | 6.64 | -1.51 |
| TRUE | 1/1 | 1/1 | 6.05 | 6.64 | -1.51 |
| TRUE | 1/1 | 1/1 | 6.05 | 6.64 | -1.51 |
| TRUE | 1/1 | 1/1 | 6.05 | 6.64 | -1.51 |
| TRUE | 1/1 | 1/1 | 6.05 | 6.64 | -1.51 |
| TRUE | 1/1 | 1/1 | 7.34 | 8.29 | -1.93 |
| TRUE | 1/1 | 1/1 | 7.34 | 8.29 | -1.93 |
| TRUE | 1/1 | 1/1 | 7.34 | 8.29 | -1.93 |
| TRUE | 1/1 | 1/1 | 6.21 | 6.74 | -1.44 |
| TRUE | 1/1 | 1/1 | 6.21 | 6.74 | -1.44 |
| TRUE | 1/1 | 1/1 | 6.21 | 6.74 | -1.44 |
| TRUE | 1/1 | 1/1 | 6.21 | 6.74 | -1.44 |
| TRUE | 1/1 | 1/1 | 7.77 | 8.15 | -1.3  |
| TRUE | 1/1 | 1/1 | 7.77 | 8.15 | -1.3  |
| TRUE | 1/1 | 1/1 | 4.79 | 5.34 | -1.47 |
| TRUE | 1/1 | 1/1 | 4.79 | 5.34 | -1.47 |
| TRUE | 1/1 | 1/1 | 5    | 4.43 | 1.49  |
| TRUE | 1/1 | 1/1 | 5    | 4.43 | 1.49  |
| TRUE | 1/1 | 1/1 | 5    | 4.43 | 1.49  |
| TRUE | 1/1 | 1/1 | 6.33 | 6.64 | -1.25 |



|      |     |     |      |      |       |
|------|-----|-----|------|------|-------|
| TRUE | 1/1 | 1/1 | 6.59 | 7.67 | -2.12 |
| TRUE | 1/1 | 1/1 | 7.3  | 8.03 | -1.66 |
| TRUE | 1/1 | 1/1 | 7.3  | 8.03 | -1.66 |
| TRUE | 1/1 | 1/1 | 7.3  | 8.03 | -1.66 |
| TRUE | 1/1 | 1/1 | 5.63 | 6.25 | -1.53 |
| TRUE | 1/1 | 1/1 | 5.63 | 6.25 | -1.53 |
| TRUE | 1/1 | 1/1 | 7.5  | 7.92 | -1.34 |
| TRUE | 1/1 | 1/1 | 7.5  | 7.92 | -1.34 |
| TRUE | 1/1 | 1/1 | 7.5  | 7.92 | -1.34 |
| TRUE | 1/1 | 1/1 | 7.5  | 7.92 | -1.34 |
| TRUE | 1/1 | 1/1 | 7.5  | 7.92 | -1.34 |
| TRUE | 1/1 | 1/1 | 6.9  | 7.81 | -1.88 |
| TRUE | 1/1 | 1/1 | 6.9  | 7.81 | -1.88 |
| TRUE | 1/1 | 1/1 | 6.9  | 7.81 | -1.88 |
| TRUE | 1/1 | 1/1 | 6.9  | 7.81 | -1.88 |
| TRUE | 1/1 | 1/1 | 4.55 | 3.28 | 2.4   |
| TRUE | 1/1 | 1/1 | 4.55 | 3.28 | 2.4   |
| TRUE | 1/1 | 1/1 | 4.55 | 3.28 | 2.4   |
| TRUE | 1/1 | 1/1 | 4.55 | 3.28 | 2.4   |
| TRUE | 1/1 | 1/1 | 4.55 | 3.28 | 2.4   |
| TRUE | 1/1 | 1/1 | 4.55 | 3.28 | 2.4   |
| TRUE | 1/1 | 1/1 | 4.55 | 3.28 | 2.4   |
| TRUE | 1/1 | 1/1 | 4.55 | 3.28 | 2.4   |
| TRUE | 1/1 | 1/1 | 4.55 | 3.28 | 2.4   |
| TRUE | 1/1 | 1/1 | 4.55 | 3.28 | 2.4   |
| TRUE | 1/1 | 1/1 | 4.55 | 3.28 | 2.4   |
| TRUE | 1/1 | 1/1 | 4.55 | 3.28 | 2.4   |
| TRUE | 1/1 | 1/1 | 4.55 | 3.28 | 2.4   |
| TRUE | 1/1 | 1/1 | 4.55 | 3.28 | 2.4   |
| TRUE | 1/1 | 1/1 | 4.55 | 3.28 | 2.4   |
| TRUE | 1/1 | 1/1 | 4.55 | 3.28 | 2.4   |
| TRUE | 1/1 | 1/1 | 4.55 | 3.28 | 2.4   |
| TRUE | 1/1 | 1/1 | 4.55 | 3.28 | 2.4   |
| TRUE | 1/1 | 1/1 | 4.55 | 3.28 | 2.4   |
| TRUE | 1/1 | 1/1 | 4.55 | 3.28 | 2.4   |
| TRUE | 1/1 | 1/1 | 4.55 | 3.28 | 2.4   |
| TRUE | 1/1 | 1/1 | 4.55 | 3.28 | 2.4   |
| TRUE | 1/1 | 1/1 | 7.25 | 6.99 | 1.2   |
| TRUE | 1/1 | 1/1 | 7.25 | 6.99 | 1.2   |
| TRUE | 1/1 | 1/1 | 7.25 | 6.99 | 1.2   |
| TRUE | 1/1 | 1/1 | 7.25 | 6.99 | 1.2   |
| TRUE | 1/1 | 1/1 | 7.25 | 6.99 | 1.2   |
| TRUE | 1/1 | 1/1 | 8.85 | 9.6  | -1.68 |
| TRUE | 1/1 | 1/1 | 8.85 | 9.6  | -1.68 |
| TRUE | 1/1 | 1/1 | 8.85 | 9.6  | -1.68 |
| TRUE | 1/1 | 1/1 | 8.85 | 9.6  | -1.68 |
| TRUE | 1/1 | 1/1 | 8.85 | 9.6  | -1.68 |
| TRUE | 1/1 | 1/1 | 8.85 | 9.6  | -1.68 |
| TRUE | 1/1 | 1/1 | 8.85 | 9.6  | -1.68 |
| TRUE | 1/1 | 1/1 | 8.85 | 9.6  | -1.68 |
| TRUE | 1/1 | 1/1 | 8.85 | 9.6  | -1.68 |
| TRUE | 1/1 | 1/1 | 8.8  | 9.36 | -1.47 |
| TRUE | 1/1 | 1/1 | 8.8  | 9.36 | -1.47 |
| TRUE | 1/1 | 1/1 | 5.26 | 6.15 | -1.84 |
| TRUE | 1/1 | 1/1 | 5.26 | 6.15 | -1.84 |
| TRUE | 1/1 | 1/1 | 5.26 | 6.15 | -1.84 |
| TRUE | 1/1 | 1/1 | 4.13 | 5.13 | -2    |
| TRUE | 1/1 | 1/1 | 4.13 | 5.13 | -2    |
| TRUE | 1/1 | 1/1 | 6.31 | 7.07 | -1.69 |
| TRUE | 1/1 | 1/1 | 6.31 | 7.07 | -1.69 |
| TRUE | 1/1 | 1/1 | 7.26 | 7.44 | -1.14 |
| TRUE | 1/1 | 1/1 | 7.26 | 7.44 | -1.14 |
| TRUE | 1/1 | 1/1 | 7.26 | 7.44 | -1.14 |



|      |     |     |      |      |       |
|------|-----|-----|------|------|-------|
| TRUE | 1/1 | 1/1 | 5.66 | 6.12 | -1.37 |
| TRUE | 1/1 | 1/1 | 5.66 | 6.12 | -1.37 |
| TRUE | 1/1 | 1/1 | 5.66 | 6.12 | -1.37 |
| TRUE | 1/1 | 1/1 | 5.66 | 6.12 | -1.37 |
| TRUE | 1/1 | 1/1 | 5.66 | 6.12 | -1.37 |
| TRUE | 1/1 | 1/1 | 5.66 | 6.12 | -1.37 |
| TRUE | 1/1 | 1/1 | 8.52 | 9.32 | -1.75 |
| TRUE | 1/1 | 1/1 | 8.52 | 9.32 | -1.75 |
| TRUE | 1/1 | 1/1 | 8.52 | 9.32 | -1.75 |
| TRUE | 1/1 | 1/1 | 8.52 | 9.32 | -1.75 |
| TRUE | 1/1 | 1/1 | 8.32 | 8.09 | 1.17  |
| TRUE | 1/1 | 1/1 | 8.32 | 8.09 | 1.17  |
| TRUE | 1/1 | 1/1 | 8.32 | 8.09 | 1.17  |
| TRUE | 1/1 | 1/1 | 5.64 | 5.83 | -1.14 |
| TRUE | 1/1 | 1/1 | 5.64 | 5.83 | -1.14 |
| TRUE | 1/1 | 1/1 | 5.64 | 5.83 | -1.14 |
| TRUE | 1/1 | 1/1 | 5.64 | 5.83 | -1.14 |
| TRUE | 1/1 | 1/1 | 5.64 | 5.83 | -1.14 |
| TRUE | 1/1 | 1/1 | 5.64 | 5.83 | -1.14 |
| TRUE | 1/1 | 1/1 | 5.64 | 5.83 | -1.14 |
| TRUE | 1/1 | 1/1 | 5.64 | 5.83 | -1.14 |
| TRUE | 1/1 | 1/1 | 5.64 | 5.83 | -1.14 |
| TRUE | 1/1 | 1/1 | 5.64 | 5.83 | -1.14 |
| TRUE | 1/1 | 1/1 | 8.09 | 8.62 | -1.44 |
| TRUE | 1/1 | 1/1 | 8.09 | 8.62 | -1.44 |
| TRUE | 1/1 | 1/1 | 8.09 | 8.62 | -1.44 |
| TRUE | 1/1 | 1/1 | 8.09 | 8.62 | -1.44 |
| TRUE | 1/1 | 1/1 | 5.64 | 5.83 | -1.14 |
| TRUE | 1/1 | 1/1 | 5.64 | 5.83 | -1.14 |
| TRUE | 1/1 | 1/1 | 5.64 | 5.83 | -1.14 |
| TRUE | 1/1 | 1/1 | 5.64 | 5.83 | -1.14 |
| TRUE | 1/1 | 1/1 | 5.64 | 5.83 | -1.14 |
| TRUE | 1/1 | 1/1 | 5.64 | 5.83 | -1.14 |
| TRUE | 1/1 | 1/1 | 5.64 | 5.83 | -1.14 |
| TRUE | 1/1 | 1/1 | 5.64 | 5.83 | -1.14 |
| TRUE | 1/1 | 1/1 | 7.34 | 7.87 | -1.44 |
| TRUE | 1/1 | 1/1 | 7.34 | 7.87 | -1.44 |
| TRUE | 1/1 | 1/1 | 7.34 | 7.87 | -1.44 |
| TRUE | 1/1 | 1/1 | 6.07 | 6.52 | -1.37 |
| TRUE | 1/1 | 1/1 | 6.07 | 6.52 | -1.37 |
| TRUE | 1/1 | 1/1 | 6.07 | 6.52 | -1.37 |
| TRUE | 1/1 | 1/1 | 4.94 | 5.22 | -1.21 |
| TRUE | 1/1 | 1/1 | 4.94 | 5.22 | -1.21 |
| TRUE | 1/1 | 1/1 | 7.28 | 7.38 | -1.07 |
| TRUE | 1/1 | 1/1 | 7.28 | 7.38 | -1.07 |
| TRUE | 1/1 | 1/1 | 7.28 | 7.38 | -1.07 |
| TRUE | 1/1 | 1/1 | 6.4  | 7.36 | -1.95 |
| TRUE | 1/1 | 1/1 | 6.4  | 7.36 | -1.95 |
| TRUE | 1/1 | 1/1 | 6.4  | 7.36 | -1.95 |
| TRUE | 1/1 | 1/1 | 6.4  | 7.36 | -1.95 |
| TRUE | 1/1 | 1/1 | 7.3  | 5.85 | 2.73  |
| TRUE | 1/1 | 1/1 | 7.3  | 5.85 | 2.73  |
| TRUE | 1/1 | 1/1 | 7.3  | 5.85 | 2.73  |
| TRUE | 1/1 | 1/1 | 7.3  | 5.85 | 2.73  |
| TRUE | 1/1 | 1/1 | 7.3  | 5.85 | 2.73  |
| TRUE | 1/1 | 1/1 | 5.99 | 6.42 | -1.35 |
| TRUE | 1/1 | 1/1 | 5.99 | 6.42 | -1.35 |
| TRUE | 1/1 | 1/1 | 5.99 | 6.42 | -1.35 |

|      |     |     |       |       |       |
|------|-----|-----|-------|-------|-------|
| TRUE | 1/1 | 1/1 | 5.99  | 6.42  | -1.35 |
| TRUE | 1/1 | 1/1 | 5.99  | 6.42  | -1.35 |
| TRUE | 1/1 | 1/1 | 6.79  | 6.66  | 1.1   |
| TRUE | 1/1 | 1/1 | 6.79  | 6.66  | 1.1   |
| TRUE | 1/1 | 1/1 | 5.1   | 5.64  | -1.45 |
| TRUE | 1/1 | 1/1 | 5.1   | 5.64  | -1.45 |
| TRUE | 1/1 | 1/1 | 5.1   | 5.64  | -1.45 |
| TRUE | 1/1 | 1/1 | 5.29  | 4.63  | 1.58  |
| TRUE | 1/1 | 1/1 | 5.29  | 4.63  | 1.58  |
| TRUE | 1/1 | 1/1 | 6.04  | 5.99  | 1.04  |
| TRUE | 1/1 | 1/1 | 6.04  | 5.99  | 1.04  |
| TRUE | 1/1 | 1/1 | 3.33  | 4.24  | -1.88 |
| TRUE | 1/1 | 1/1 | 3.33  | 4.24  | -1.88 |
| TRUE | 1/1 | 1/1 | 7.44  | 7.8   | -1.29 |
| TRUE | 1/1 | 1/1 | 7.44  | 7.8   | -1.29 |
| TRUE | 1/1 | 1/1 | 7.44  | 7.8   | -1.29 |
| TRUE | 1/1 | 1/1 | 7.34  | 8.52  | -2.26 |
| TRUE | 1/1 | 1/1 | 7.34  | 8.52  | -2.26 |
| TRUE | 1/1 | 1/1 | 7.34  | 8.52  | -2.26 |
| TRUE | 1/1 | 1/1 | 7.34  | 8.52  | -2.26 |
| TRUE | 1/1 | 1/1 | 7.34  | 8.52  | -2.26 |
| TRUE | 1/1 | 1/1 | 8.71  | 9.91  | -2.3  |
| TRUE | 1/1 | 1/1 | 8.71  | 9.91  | -2.3  |
| TRUE | 1/1 | 1/1 | 8.71  | 9.91  | -2.3  |
| TRUE | 1/1 | 1/1 | 8.71  | 9.91  | -2.3  |
| TRUE | 1/1 | 1/1 | 8.71  | 9.91  | -2.3  |
| TRUE | 1/1 | 1/1 | 8.71  | 9.91  | -2.3  |
| TRUE | 1/1 | 1/1 | 3.3   | 3.54  | -1.18 |
| TRUE | 1/1 | 1/1 | 3.3   | 3.54  | -1.18 |
| TRUE | 1/1 | 1/1 | 3.3   | 3.54  | -1.18 |
| TRUE | 1/1 | 1/1 | 6.63  | 7.22  | -1.52 |
| TRUE | 1/1 | 1/1 | 6.63  | 7.22  | -1.52 |
| TRUE | 1/1 | 1/1 | 6.63  | 7.22  | -1.52 |
| TRUE | 1/1 | 1/1 | 4.84  | 5.44  | -1.51 |
| TRUE | 1/1 | 1/1 | 4.84  | 5.44  | -1.51 |
| TRUE | 1/1 | 1/1 | 4.84  | 5.44  | -1.51 |
| TRUE | 1/1 | 1/1 | 4.84  | 5.44  | -1.51 |
| TRUE | 1/1 | 1/1 | 4.84  | 5.44  | -1.51 |
| TRUE | 1/1 | 1/1 | 4.84  | 5.44  | -1.51 |
| TRUE | 1/1 | 1/1 | 4.84  | 5.44  | -1.51 |
| TRUE | 1/1 | 1/1 | 4.84  | 5.44  | -1.51 |
| TRUE | 1/1 | 1/1 | 10.16 | 10.45 | -1.22 |
| TRUE | 1/1 | 1/1 | 10.16 | 10.45 | -1.22 |
| TRUE | 1/1 | 1/1 | 10.16 | 10.45 | -1.22 |
| TRUE | 1/1 | 1/1 | 5.69  | 5.68  | 1     |
| TRUE | 1/1 | 1/1 | 5.69  | 5.68  | 1     |
| TRUE | 1/1 | 1/1 | 5.69  | 5.68  | 1     |
| TRUE | 1/1 | 1/1 | 5.69  | 5.68  | 1     |
| TRUE | 1/1 | 1/1 | 3.24  | 3.82  | -1.5  |
| TRUE | 1/1 | 1/1 | 3.24  | 3.82  | -1.5  |
| TRUE | 1/1 | 1/1 | 3.24  | 3.82  | -1.5  |
| TRUE | 1/1 | 1/1 | 3.24  | 3.82  | -1.5  |
| TRUE | 1/1 | 1/1 | 6.89  | 6.97  | -1.06 |
| TRUE | 1/1 | 1/1 | 6.89  | 6.97  | -1.06 |
| TRUE | 1/1 | 1/1 | 3.77  | 4.12  | -1.27 |
| TRUE | 1/1 | 1/1 | 3.77  | 4.12  | -1.27 |
| TRUE | 1/1 | 1/1 | 3.77  | 4.12  | -1.27 |
| TRUE | 1/1 | 1/1 | 3.99  | 3.12  | 1.83  |
| TRUE | 1/1 | 1/1 | 3.99  | 3.12  | 1.83  |

|      |     |     |      |      |       |
|------|-----|-----|------|------|-------|
| TRUE | 1/1 | 1/1 | 3.99 | 3.12 | 1.83  |
| TRUE | 1/1 | 1/1 | 3.99 | 3.12 | 1.83  |
| TRUE | 1/1 | 1/1 | 3.99 | 3.12 | 1.83  |
| TRUE | 1/1 | 1/1 | 3.99 | 3.12 | 1.83  |
| TRUE | 1/1 | 1/1 | 6.47 | 4.65 | 3.52  |
| TRUE | 1/1 | 1/1 | 6.47 | 4.65 | 3.52  |
| TRUE | 1/1 | 1/1 | 6.47 | 4.65 | 3.52  |
| TRUE | 1/1 | 1/1 | 6.37 | 7.18 | -1.75 |
| TRUE | 1/1 | 1/1 | 6.37 | 7.18 | -1.75 |
| TRUE | 1/1 | 1/1 | 6.37 | 7.18 | -1.75 |
| TRUE | 1/1 | 1/1 | 6.37 | 7.18 | -1.75 |
| TRUE | 1/1 | 1/1 | 6.37 | 7.18 | -1.75 |
| TRUE | 1/1 | 1/1 | 6.37 | 7.18 | -1.75 |
| TRUE | 1/1 | 1/1 | 6.37 | 7.18 | -1.75 |
| TRUE | 1/1 | 1/1 | 6.37 | 7.18 | -1.75 |
| TRUE | 1/1 | 1/1 | 5.2  | 5.26 | -1.04 |
| TRUE | 1/1 | 1/1 | 5.2  | 5.26 | -1.04 |
| TRUE | 1/1 | 1/1 | 5.2  | 5.26 | -1.04 |
| TRUE | 1/1 | 1/1 | 6.78 | 7.35 | -1.49 |
| TRUE | 1/1 | 1/1 | 6.78 | 7.35 | -1.49 |
| TRUE | 1/1 | 1/1 | 7.71 | 7.81 | -1.07 |
| TRUE | 1/1 | 1/1 | 7.71 | 7.81 | -1.07 |
| TRUE | 1/1 | 1/1 | 7.71 | 7.81 | -1.07 |
| TRUE | 1/1 | 1/1 | 7.71 | 7.81 | -1.07 |
| TRUE | 1/1 | 1/1 | 7.71 | 7.81 | -1.07 |
| TRUE | 1/1 | 1/1 | 7.71 | 7.81 | -1.07 |
| TRUE | 1/1 | 1/1 | 7.71 | 7.81 | -1.07 |
| TRUE | 1/1 | 1/1 | 7.71 | 7.81 | -1.07 |
| TRUE | 1/1 | 1/1 | 4.84 | 5.99 | -2.21 |
| TRUE | 1/1 | 1/1 | 4.84 | 5.99 | -2.21 |
| TRUE | 1/1 | 1/1 | 4.84 | 5.99 | -2.21 |
| TRUE | 1/1 | 1/1 | 4.84 | 5.99 | -2.21 |
| TRUE | 1/1 | 1/1 | 4.84 | 5.99 | -2.21 |
| TRUE | 1/1 | 1/1 | 6.56 | 7.18 | -1.54 |
| TRUE | 1/1 | 1/1 | 6.56 | 7.18 | -1.54 |
| TRUE | 1/1 | 1/1 | 6.33 | 6.84 | -1.42 |
| TRUE | 1/1 | 1/1 | 6.33 | 6.84 | -1.42 |
| TRUE | 1/1 | 1/1 | 6.33 | 6.84 | -1.42 |
| TRUE | 1/1 | 1/1 | 6.33 | 6.84 | -1.42 |
| TRUE | 1/1 | 1/1 | 6.33 | 6.84 | -1.42 |
| TRUE | 1/1 | 1/1 | 6.33 | 6.84 | -1.42 |
| TRUE | 1/1 | 1/1 | 7.1  | 7.57 | -1.39 |
| TRUE | 1/1 | 1/1 | 7.1  | 7.57 | -1.39 |
| TRUE | 1/1 | 1/1 | 8.11 | 8.53 | -1.34 |
| TRUE | 1/1 | 1/1 | 8.11 | 8.53 | -1.34 |
| TRUE | 1/1 | 1/1 | 8.11 | 8.53 | -1.34 |
| TRUE | 1/1 | 1/1 | 8.39 | 8.66 | -1.21 |
| TRUE | 1/1 | 1/1 | 8.39 | 8.66 | -1.21 |
| TRUE | 1/1 | 1/1 | 6.88 | 7.28 | -1.32 |
| TRUE | 1/1 | 1/1 | 6.88 | 7.28 | -1.32 |
| TRUE | 1/1 | 1/1 | 6.88 | 7.28 | -1.32 |
| TRUE | 1/1 | 1/1 | 6.88 | 7.28 | -1.32 |
| TRUE | 1/1 | 1/1 | 6.88 | 7.28 | -1.32 |
| TRUE | 1/1 | 1/1 | 7.09 | 7.12 | -1.02 |
| TRUE | 1/1 | 1/1 | 7.09 | 7.12 | -1.02 |
| TRUE | 1/1 | 1/1 | 7.09 | 7.12 | -1.02 |
| TRUE | 1/1 | 1/1 | 7.09 | 7.12 | -1.02 |
| TRUE | 1/1 | 1/1 | 8.75 | 6.31 | 5.39  |
| TRUE | 1/1 | 1/1 | 8.75 | 6.31 | 5.39  |
| TRUE | 1/1 | 1/1 | 8.75 | 6.31 | 5.39  |
| TRUE | 1/1 | 1/1 | 8.75 | 6.31 | 5.39  |



|      |     |     |      |      |       |
|------|-----|-----|------|------|-------|
| TRUE | 1/1 | 1/1 | 6.39 | 3.66 | 6.63  |
| TRUE | 1/1 | 1/1 | 6.39 | 3.66 | 6.63  |
| TRUE | 1/1 | 1/1 | 6.39 | 3.66 | 6.63  |
| TRUE | 1/1 | 1/1 | 6.72 | 6.41 | 1.24  |
| TRUE | 1/1 | 1/1 | 6.72 | 6.41 | 1.24  |
| TRUE | 1/1 | 1/1 | 6.72 | 6.41 | 1.24  |
| TRUE | 1/1 | 1/1 | 7.21 | 5.06 | 4.43  |
| TRUE | 1/1 | 1/1 | 7.21 | 5.06 | 4.43  |
| TRUE | 1/1 | 1/1 | 7.21 | 5.06 | 4.43  |
| TRUE | 1/1 | 1/1 | 7.21 | 5.06 | 4.43  |
| TRUE | 1/1 | 1/1 | 7.21 | 5.06 | 4.43  |
| TRUE | 1/1 | 1/1 | 7.21 | 5.06 | 4.43  |
| TRUE | 1/1 | 1/1 | 7.21 | 5.06 | 4.43  |
| TRUE | 1/1 | 1/1 | 7.21 | 5.06 | 4.43  |
| TRUE | 1/1 | 1/1 | 7.21 | 5.06 | 4.43  |
| TRUE | 1/1 | 1/1 | 7.21 | 5.06 | 4.43  |
| TRUE | 1/1 | 1/1 | 7.21 | 5.06 | 4.43  |
| TRUE | 1/1 | 1/1 | 7.21 | 5.06 | 4.43  |
| TRUE | 1/1 | 1/1 | 7.21 | 5.06 | 4.43  |
| TRUE | 1/1 | 1/1 | 7.21 | 5.06 | 4.43  |
| TRUE | 1/1 | 1/1 | 7.21 | 5.06 | 4.43  |
| TRUE | 1/1 | 1/1 | 7.21 | 5.06 | 4.43  |
| TRUE | 1/1 | 1/1 | 7.21 | 5.06 | 4.43  |
| TRUE | 1/1 | 1/1 | 7.21 | 5.06 | 4.43  |
| TRUE | 1/1 | 1/1 | 7.21 | 5.06 | 4.43  |
| TRUE | 1/1 | 1/1 | 7.21 | 5.06 | 4.43  |
| TRUE | 1/1 | 1/1 | 7.11 | 7.43 | -1.25 |
| TRUE | 1/1 | 1/1 | 7.11 | 7.43 | -1.25 |
| TRUE | 1/1 | 1/1 | 7.11 | 7.43 | -1.25 |
| TRUE | 1/1 | 1/1 | 5.92 | 5.31 | 1.53  |
| TRUE | 1/1 | 1/1 | 5.92 | 5.31 | 1.53  |
| TRUE | 1/1 | 1/1 | 5.92 | 5.31 | 1.53  |
| TRUE | 1/1 | 1/1 | 5.92 | 5.31 | 1.53  |
| TRUE | 1/1 | 1/1 | 5.92 | 5.31 | 1.53  |
| TRUE | 1/1 | 1/1 | 5.92 | 5.31 | 1.53  |
| TRUE | 1/1 | 1/1 | 3.59 | 3.14 | 1.37  |
| TRUE | 1/1 | 1/1 | 3.59 | 3.14 | 1.37  |
| TRUE | 1/1 | 1/1 | 3.59 | 3.14 | 1.37  |
| TRUE | 1/1 | 1/1 | 3.59 | 3.14 | 1.37  |
| TRUE | 1/1 | 1/1 | 3.61 | 4.09 | -1.39 |
| TRUE | 1/1 | 1/1 | 3.61 | 4.09 | -1.39 |
| TRUE | 1/1 | 1/1 | 3.61 | 4.09 | -1.39 |
| TRUE | 1/1 | 1/1 | 4.95 | 5.35 | -1.32 |
| TRUE | 1/1 | 1/1 | 4.95 | 5.35 | -1.32 |
| TRUE | 1/1 | 1/1 | 4.95 | 5.35 | -1.32 |
| TRUE | 1/1 | 1/1 | 5.56 | 5.64 | -1.06 |
| TRUE | 1/1 | 1/1 | 5.56 | 5.64 | -1.06 |
| TRUE | 1/1 | 1/1 | 5.56 | 5.64 | -1.06 |
| TRUE | 1/1 | 1/1 | 5.56 | 5.64 | -1.06 |
| TRUE | 1/1 | 1/1 | 9    | 8.91 | 1.07  |
| TRUE | 1/1 | 1/1 | 9    | 8.91 | 1.07  |
| TRUE | 1/1 | 1/1 | 9    | 8.91 | 1.07  |
| TRUE | 1/1 | 1/1 | 9    | 8.91 | 1.07  |
| TRUE | 1/1 | 1/1 | 9    | 8.91 | 1.07  |
| TRUE | 1/1 | 1/1 | 7.56 | 7.12 | 1.35  |
| TRUE | 1/1 | 1/1 | 7.56 | 7.12 | 1.35  |
| TRUE | 1/1 | 1/1 | 7.56 | 7.12 | 1.35  |
| TRUE | 1/1 | 1/1 | 7.56 | 7.12 | 1.35  |
| TRUE | 1/1 | 1/1 | 7.56 | 7.12 | 1.35  |
| TRUE | 1/1 | 1/1 | 7.02 | 6.8  | 1.17  |
| TRUE | 1/1 | 1/1 | 7.02 | 6.8  | 1.17  |
| TRUE | 1/1 | 1/1 | 7.02 | 6.8  | 1.17  |

|      |     |     |       |       |       |
|------|-----|-----|-------|-------|-------|
| TRUE | 1/1 | 1/1 | 7.02  | 6.8   | 1.17  |
| TRUE | 1/1 | 1/1 | 7.02  | 6.8   | 1.17  |
| TRUE | 1/1 | 1/1 | 7.02  | 6.8   | 1.17  |
| TRUE | 1/1 | 1/1 | 7.02  | 6.8   | 1.17  |
| TRUE | 1/1 | 1/1 | 7.02  | 6.8   | 1.17  |
| TRUE | 1/1 | 1/1 | 7.02  | 6.8   | 1.17  |
| TRUE | 1/1 | 1/1 | 7.02  | 6.8   | 1.17  |
| TRUE | 1/1 | 1/1 | 7.02  | 6.8   | 1.17  |
| TRUE | 1/1 | 1/1 | 8.28  | 9.18  | -1.87 |
| TRUE | 1/1 | 1/1 | 8.28  | 9.18  | -1.87 |
| TRUE | 1/1 | 1/1 | 10.82 | 11.21 | -1.31 |
| TRUE | 1/1 | 1/1 | 10.82 | 11.21 | -1.31 |
| TRUE | 1/1 | 1/1 | 10.82 | 11.21 | -1.31 |
| TRUE | 1/1 | 1/1 | 6.07  | 6.42  | -1.28 |
| TRUE | 1/1 | 1/1 | 6.07  | 6.42  | -1.28 |
| TRUE | 1/1 | 1/1 | 6.07  | 6.42  | -1.28 |
| TRUE | 1/1 | 1/1 | 6.07  | 6.42  | -1.28 |
| TRUE | 1/1 | 1/1 | 6.07  | 6.42  | -1.28 |
| TRUE | 1/1 | 1/1 | 11.02 | 12.23 | -2.32 |
| TRUE | 1/1 | 1/1 | 11.02 | 12.23 | -2.32 |
| TRUE | 1/1 | 1/1 | 11.02 | 12.23 | -2.32 |
| TRUE | 1/1 | 1/1 | 4.86  | 4.89  | -1.02 |
| TRUE | 1/1 | 1/1 | 4.86  | 4.89  | -1.02 |
| TRUE | 1/1 | 1/1 | 6.49  | 6.24  | 1.19  |
| TRUE | 1/1 | 1/1 | 6.49  | 6.24  | 1.19  |
| TRUE | 1/1 | 1/1 | 6.49  | 6.24  | 1.19  |
| TRUE | 1/1 | 1/1 | 8.33  | 9.14  | -1.75 |
| TRUE | 1/1 | 1/1 | 8.33  | 9.14  | -1.75 |
| TRUE | 1/1 | 1/1 | 8.33  | 9.14  | -1.75 |
| TRUE | 1/1 | 1/1 | 8.33  | 9.14  | -1.75 |
| TRUE | 1/1 | 1/1 | 9.41  | 9.89  | -1.39 |
| TRUE | 1/1 | 1/1 | 9.41  | 9.89  | -1.39 |
| TRUE | 1/1 | 1/1 | 9.41  | 9.89  | -1.39 |
| TRUE | 1/1 | 1/1 | 4.85  | 5.03  | -1.13 |
| TRUE | 1/1 | 1/1 | 4.85  | 5.03  | -1.13 |
| TRUE | 1/1 | 1/1 | 9.09  | 9.24  | -1.11 |
| TRUE | 1/1 | 1/1 | 9.09  | 9.24  | -1.11 |
| TRUE | 1/1 | 1/1 | 9.09  | 9.24  | -1.11 |
| TRUE | 1/1 | 1/1 | 9.09  | 9.24  | -1.11 |
| TRUE | 1/1 | 1/1 | 9.09  | 9.24  | -1.11 |
| TRUE | 1/1 | 1/1 | 5.41  | 5.58  | -1.12 |
| TRUE | 1/1 | 1/1 | 5.41  | 5.58  | -1.12 |
| TRUE | 1/1 | 1/1 | 5.41  | 5.58  | -1.12 |
| TRUE | 1/1 | 1/1 | 5.41  | 5.58  | -1.12 |
| TRUE | 1/1 | 1/1 | 5.41  | 5.58  | -1.12 |
| TRUE | 1/1 | 1/1 | 5.41  | 5.58  | -1.12 |
| TRUE | 1/1 | 1/1 | 5.63  | 5.8   | -1.12 |
| TRUE | 1/1 | 1/1 | 5.63  | 5.8   | -1.12 |
| TRUE | 1/1 | 1/1 | 5.63  | 5.8   | -1.12 |
| TRUE | 1/1 | 1/1 | 5.63  | 5.8   | -1.12 |
| TRUE | 1/1 | 1/1 | 5.63  | 5.8   | -1.12 |
| TRUE | 1/1 | 1/1 | 5.63  | 5.8   | -1.12 |
| TRUE | 1/1 | 1/1 | 5.63  | 5.8   | -1.12 |
| TRUE | 1/1 | 1/1 | 5.63  | 5.8   | -1.12 |
| TRUE | 1/1 | 1/1 | 5.63  | 5.8   | -1.12 |
| TRUE | 1/1 | 1/1 | 5.63  | 5.8   | -1.12 |
| TRUE | 1/1 | 1/1 | 8.1   | 8.61  | -1.42 |
| TRUE | 1/1 | 1/1 | 8.1   | 8.61  | -1.42 |
| TRUE | 1/1 | 1/1 | 8.1   | 8.61  | -1.42 |









|      |     |     |      |      |       |
|------|-----|-----|------|------|-------|
| TRUE | 1/1 | 1/1 | 12.4 | 9.56 | 7.13  |
| TRUE | 1/1 | 1/1 | 12.4 | 9.56 | 7.13  |
| TRUE | 1/1 | 1/1 | 12.4 | 9.56 | 7.13  |
| TRUE | 1/1 | 1/1 | 8.37 | 9.09 | -1.64 |
| TRUE | 1/1 | 1/1 | 8.37 | 9.09 | -1.64 |
| TRUE | 1/1 | 1/1 | 8.37 | 9.09 | -1.64 |
| TRUE | 1/1 | 1/1 | 8.37 | 9.09 | -1.64 |
| TRUE | 1/1 | 1/1 | 6.13 | 6.16 | -1.02 |
| TRUE | 1/1 | 1/1 | 6.13 | 6.16 | -1.02 |
| TRUE | 1/1 | 1/1 | 6.7  | 6.72 | -1.01 |
| TRUE | 1/1 | 1/1 | 6.7  | 6.72 | -1.01 |
| TRUE | 1/1 | 1/1 | 6.7  | 6.72 | -1.01 |
| TRUE | 1/1 | 1/1 | 6.7  | 6.72 | -1.01 |
| TRUE | 1/1 | 1/1 | 6.7  | 6.72 | -1.01 |
| TRUE | 1/1 | 1/1 | 6.7  | 6.72 | -1.01 |
| TRUE | 1/1 | 1/1 | 4.55 | 4.31 | 1.18  |
| TRUE | 1/1 | 1/1 | 4.55 | 4.31 | 1.18  |
| TRUE | 1/1 | 1/1 | 6.27 | 6.52 | -1.19 |
| TRUE | 1/1 | 1/1 | 6.27 | 6.52 | -1.19 |
| TRUE | 1/1 | 1/1 | 7.68 | 7.76 | -1.05 |
| TRUE | 1/1 | 1/1 | 7.68 | 7.76 | -1.05 |
| TRUE | 1/1 | 1/1 | 7.68 | 7.76 | -1.05 |
| TRUE | 1/1 | 1/1 | 7.68 | 7.76 | -1.05 |
| TRUE | 1/1 | 1/1 | 7.68 | 7.76 | -1.05 |
| TRUE | 1/1 | 1/1 | 7.68 | 7.76 | -1.05 |
| TRUE | 1/1 | 1/1 | 7.68 | 7.76 | -1.05 |
| TRUE | 1/1 | 1/1 | 7.68 | 7.76 | -1.05 |
| TRUE | 1/1 | 1/1 | 7.68 | 7.76 | -1.05 |
| TRUE | 1/1 | 1/1 | 7.68 | 7.76 | -1.05 |
| TRUE | 1/1 | 1/1 | 7.68 | 7.76 | -1.05 |
| TRUE | 1/1 | 1/1 | 7.68 | 7.76 | -1.05 |
| TRUE | 1/1 | 1/1 | 7.68 | 7.76 | -1.05 |
| TRUE | 1/1 | 1/1 | 7.68 | 7.76 | -1.05 |
| TRUE | 1/1 | 1/1 | 7.42 | 8.12 | -1.62 |
| TRUE | 1/1 | 1/1 | 7.42 | 8.12 | -1.62 |
| TRUE | 1/1 | 1/1 | 7.42 | 8.12 | -1.62 |
| TRUE | 1/1 | 1/1 | 4.2  | 4.63 | -1.35 |
| TRUE | 1/1 | 1/1 | 4.2  | 4.63 | -1.35 |
| TRUE | 1/1 | 1/1 | 4.2  | 4.63 | -1.35 |
| TRUE | 1/1 | 1/1 | 4.2  | 4.63 | -1.35 |
| TRUE | 1/1 | 1/1 | 4.2  | 4.63 | -1.35 |
| TRUE | 1/1 | 1/1 | 5.54 | 5.52 | 1.01  |
| TRUE | 1/1 | 1/1 | 5.54 | 5.52 | 1.01  |
| TRUE | 1/1 | 1/1 | 5.54 | 5.52 | 1.01  |
| TRUE | 1/1 | 1/1 | 5.54 | 5.52 | 1.01  |
| TRUE | 1/1 | 1/1 | 5.54 | 5.52 | 1.01  |
| TRUE | 1/1 | 1/1 | 4.78 | 4.93 | -1.1  |
| TRUE | 1/1 | 1/1 | 4.78 | 4.93 | -1.1  |
| TRUE | 1/1 | 1/1 | 7.24 | 5.61 | 3.08  |
| TRUE | 1/1 | 1/1 | 7.24 | 5.61 | 3.08  |
| TRUE | 1/1 | 1/1 | 7.24 | 5.61 | 3.08  |
| TRUE | 1/1 | 1/1 | 7.24 | 5.61 | 3.08  |
| TRUE | 1/1 | 1/1 | 7.24 | 5.61 | 3.08  |
| TRUE | 1/1 | 1/1 | 7.24 | 5.61 | 3.08  |
| TRUE | 1/1 | 1/1 | 7.24 | 5.61 | 3.08  |
| TRUE | 1/1 | 1/1 | 7.24 | 5.61 | 3.08  |
| TRUE | 1/1 | 1/1 | 7.24 | 5.61 | 3.08  |
| TRUE | 1/1 | 1/1 | 7.24 | 5.61 | 3.08  |
| TRUE | 1/1 | 1/1 | 7.24 | 5.61 | 3.08  |
| TRUE | 1/1 | 1/1 | 7.24 | 5.61 | 3.08  |
| TRUE | 1/1 | 1/1 | 6.12 | 6.43 | -1.24 |
| TRUE | 1/1 | 1/1 | 6.12 | 6.43 | -1.24 |

|      |     |     |      |      |       |
|------|-----|-----|------|------|-------|
| TRUE | 1/1 | 1/1 | 8.31 | 6.88 | 2.68  |
| TRUE | 1/1 | 1/1 | 8.31 | 6.88 | 2.68  |
| TRUE | 1/1 | 1/1 | 8.31 | 6.88 | 2.68  |
| TRUE | 1/1 | 1/1 | 8.31 | 6.88 | 2.68  |
| TRUE | 1/1 | 1/1 | 8.31 | 6.88 | 2.68  |
| TRUE | 1/1 | 1/1 | 8.31 | 6.88 | 2.68  |
| TRUE | 1/1 | 1/1 | 8.31 | 6.88 | 2.68  |
| TRUE | 1/1 | 1/1 | 8.31 | 6.88 | 2.68  |
| TRUE | 1/1 | 1/1 | 8.31 | 6.88 | 2.68  |
| TRUE | 1/1 | 1/1 | 8.31 | 6.88 | 2.68  |
| TRUE | 1/1 | 1/1 | 8.31 | 6.88 | 2.68  |
| TRUE | 1/1 | 1/1 | 8.31 | 6.88 | 2.68  |
| TRUE | 1/1 | 1/1 | 8.31 | 6.88 | 2.68  |
| TRUE | 1/1 | 1/1 | 8.31 | 6.88 | 2.68  |
| TRUE | 1/1 | 1/1 | 8.31 | 6.88 | 2.68  |
| TRUE | 1/1 | 1/1 | 8.31 | 6.88 | 2.68  |
| TRUE | 1/1 | 1/1 | 8.31 | 6.88 | 2.68  |
| TRUE | 1/1 | 1/1 | 8.31 | 6.88 | 2.68  |
| TRUE | 1/1 | 1/1 | 8.31 | 6.88 | 2.68  |
| TRUE | 1/1 | 1/1 | 8.31 | 6.88 | 2.68  |
| TRUE | 1/1 | 1/1 | 8.31 | 6.88 | 2.68  |
| TRUE | 1/1 | 1/1 | 8.31 | 6.88 | 2.68  |
| TRUE | 1/1 | 1/1 | 8.31 | 6.88 | 2.68  |
| TRUE | 1/1 | 1/1 | 8.31 | 6.88 | 2.68  |
| TRUE | 1/1 | 1/1 | 8.31 | 6.88 | 2.68  |
| TRUE | 1/1 | 1/1 | 8.31 | 6.88 | 2.68  |
| TRUE | 1/1 | 1/1 | 8.31 | 6.88 | 2.68  |
| TRUE | 1/1 | 1/1 | 6.89 | 7.74 | -1.8  |
| TRUE | 1/1 | 1/1 | 6.89 | 7.74 | -1.8  |
| TRUE | 1/1 | 1/1 | 6.89 | 7.74 | -1.8  |
| TRUE | 1/1 | 1/1 | 6.89 | 7.74 | -1.8  |
| TRUE | 1/1 | 1/1 | 6.89 | 7.74 | -1.8  |
| TRUE | 1/1 | 1/1 | 6.89 | 7.74 | -1.8  |
| TRUE | 1/1 | 1/1 | 5.37 | 4.77 | 1.51  |
| TRUE | 1/1 | 1/1 | 5.37 | 4.77 | 1.51  |
| TRUE | 1/1 | 1/1 | 5.37 | 4.77 | 1.51  |
| TRUE | 1/1 | 1/1 | 3.39 | 4.41 | -2.03 |
| TRUE | 1/1 | 1/1 | 3.39 | 4.41 | -2.03 |
| TRUE | 1/1 | 1/1 | 3.39 | 4.41 | -2.03 |
| TRUE | 1/1 | 1/1 | 6.14 | 5.92 | 1.16  |
| TRUE | 1/1 | 1/1 | 6.14 | 5.92 | 1.16  |
| TRUE | 1/1 | 1/1 | 6.14 | 5.92 | 1.16  |
| TRUE | 1/1 | 1/1 | 5.86 | 5.72 | 1.1   |
| TRUE | 1/1 | 1/1 | 5.86 | 5.72 | 1.1   |
| TRUE | 1/1 | 1/1 | 5.86 | 5.72 | 1.1   |
| TRUE | 1/1 | 1/1 | 9.21 | 9.45 | -1.18 |
| TRUE | 1/1 | 1/1 | 9.21 | 9.45 | -1.18 |
| TRUE | 1/1 | 1/1 | 9.21 | 9.45 | -1.18 |
| TRUE | 1/1 | 1/1 | 5.67 | 6.18 | -1.42 |
| TRUE | 1/1 | 1/1 | 5.67 | 6.18 | -1.42 |
| TRUE | 1/1 | 1/1 | 5.67 | 6.18 | -1.42 |
| TRUE | 1/1 | 1/1 | 6.12 | 6.82 | -1.63 |
| TRUE | 1/1 | 1/1 | 6.12 | 6.82 | -1.63 |
| TRUE | 1/1 | 1/1 | 6.12 | 6.82 | -1.63 |
| TRUE | 1/1 | 1/1 | 6.12 | 6.82 | -1.63 |
| TRUE | 1/1 | 1/1 | 6.12 | 6.82 | -1.63 |
| TRUE | 1/1 | 1/1 | 6.12 | 6.82 | -1.63 |
| TRUE | 1/1 | 1/1 | 6.12 | 6.82 | -1.63 |
| TRUE | 1/1 | 1/1 | 6.12 | 6.82 | -1.63 |
| TRUE | 1/1 | 1/1 | 6.12 | 6.82 | -1.63 |
| TRUE | 1/1 | 1/1 | 6.12 | 6.82 | -1.63 |
| TRUE | 1/1 | 1/1 | 4.09 | 4.68 | -1.5  |
| TRUE | 1/1 | 1/1 | 4.09 | 4.68 | -1.5  |
| TRUE | 1/1 | 1/1 | 4.09 | 4.68 | -1.5  |
| TRUE | 1/1 | 1/1 | 4.09 | 4.68 | -1.5  |
| TRUE | 1/1 | 1/1 | 4.09 | 4.68 | -1.5  |

|      |     |     |      |      |       |
|------|-----|-----|------|------|-------|
| TRUE | 1/1 | 1/1 | 4.09 | 4.68 | -1.5  |
| TRUE | 1/1 | 1/1 | 6.44 | 6.36 | 1.06  |
| TRUE | 1/1 | 1/1 | 6.44 | 6.36 | 1.06  |
| TRUE | 1/1 | 1/1 | 6.44 | 6.36 | 1.06  |
| TRUE | 1/1 | 1/1 | 6.2  | 6.96 | -1.69 |
| TRUE | 1/1 | 1/1 | 6.2  | 6.96 | -1.69 |
| TRUE | 1/1 | 1/1 | 6.2  | 6.96 | -1.69 |
| TRUE | 1/1 | 1/1 | 6.2  | 6.96 | -1.69 |
| TRUE | 1/1 | 1/1 | 6.2  | 6.96 | -1.69 |
| TRUE | 1/1 | 1/1 | 3.94 | 3.75 | 1.14  |
| TRUE | 1/1 | 1/1 | 3.94 | 3.75 | 1.14  |
| TRUE | 1/1 | 1/1 | 3.94 | 3.75 | 1.14  |
| TRUE | 1/1 | 1/1 | 3.94 | 3.75 | 1.14  |
| TRUE | 1/1 | 1/1 | 7.9  | 7.86 | 1.03  |
| TRUE | 1/1 | 1/1 | 7.9  | 7.86 | 1.03  |
| TRUE | 1/1 | 1/1 | 7.9  | 7.86 | 1.03  |
| TRUE | 1/1 | 1/1 | 7.9  | 7.86 | 1.03  |
| TRUE | 1/1 | 1/1 | 7.9  | 7.86 | 1.03  |
| TRUE | 1/1 | 1/1 | 7.9  | 7.86 | 1.03  |
| TRUE | 1/1 | 1/1 | 7.9  | 7.86 | 1.03  |
| TRUE | 1/1 | 1/1 | 7.9  | 7.86 | 1.03  |
| TRUE | 1/1 | 1/1 | 7.9  | 7.86 | 1.03  |
| TRUE | 1/1 | 1/1 | 7.9  | 7.86 | 1.03  |
| TRUE | 1/1 | 1/1 | 7.9  | 7.86 | 1.03  |
| TRUE | 1/1 | 1/1 | 7.9  | 7.86 | 1.03  |
| TRUE | 1/1 | 1/1 | 7.9  | 7.86 | 1.03  |
| TRUE | 1/1 | 1/1 | 7.9  | 7.86 | 1.03  |
| TRUE | 1/1 | 1/1 | 7.9  | 7.86 | 1.03  |
| TRUE | 1/1 | 1/1 | 7.9  | 7.86 | 1.03  |
| TRUE | 1/1 | 1/1 | 6.68 | 6.45 | 1.18  |
| TRUE | 1/1 | 1/1 | 6.68 | 6.45 | 1.18  |
| TRUE | 1/1 | 1/1 | 2.77 | 3.89 | -2.17 |
| TRUE | 1/1 | 1/1 | 2.77 | 3.89 | -2.17 |
| TRUE | 1/1 | 1/1 | 2.77 | 3.89 | -2.17 |
| TRUE | 1/1 | 1/1 | 2.77 | 3.89 | -2.17 |
| TRUE | 1/1 | 1/1 | 6.89 | 6.86 | 1.02  |
| TRUE | 1/1 | 1/1 | 6.89 | 6.86 | 1.02  |
| TRUE | 1/1 | 1/1 | 6.89 | 6.86 | 1.02  |
| TRUE | 1/1 | 1/1 | 7.1  | 7    | 1.07  |
| TRUE | 1/1 | 1/1 | 7.1  | 7    | 1.07  |
| TRUE | 1/1 | 1/1 | 7.1  | 7    | 1.07  |
| TRUE | 1/1 | 1/1 | 7.1  | 7    | 1.07  |
| TRUE | 1/1 | 1/1 | 7.1  | 7    | 1.07  |
| TRUE | 1/1 | 1/1 | 7.1  | 7    | 1.07  |
| TRUE | 1/1 | 1/1 | 6.76 | 6.75 | 1.01  |
| TRUE | 1/1 | 1/1 | 6.76 | 6.75 | 1.01  |
| TRUE | 1/1 | 1/1 | 6.32 | 6.94 | -1.53 |
| TRUE | 1/1 | 1/1 | 6.32 | 6.94 | -1.53 |
| TRUE | 1/1 | 1/1 | 6.32 | 6.94 | -1.53 |
| TRUE | 1/1 | 1/1 | 6.25 | 6.62 | -1.29 |
| TRUE | 1/1 | 1/1 | 6.25 | 6.62 | -1.29 |
| TRUE | 1/1 | 1/1 | 6.25 | 6.62 | -1.29 |
| TRUE | 1/1 | 1/1 | 6.25 | 6.62 | -1.29 |
| TRUE | 1/1 | 1/1 | 5.67 | 6.63 | -1.95 |
| TRUE | 1/1 | 1/1 | 5.67 | 6.63 | -1.95 |
| TRUE | 1/1 | 1/1 | 5.67 | 6.63 | -1.95 |
| TRUE | 1/1 | 1/1 | 5.67 | 6.63 | -1.95 |
| TRUE | 1/1 | 1/1 | 5.67 | 6.63 | -1.95 |
| TRUE | 1/1 | 1/1 | 5.67 | 6.63 | -1.95 |
| TRUE | 1/1 | 1/1 | 7.24 | 7.88 | -1.56 |

|      |     |     |      |      |       |
|------|-----|-----|------|------|-------|
| TRUE | 1/1 | 1/1 | 7.24 | 7.88 | -1.56 |
| TRUE | 1/1 | 1/1 | 7.24 | 7.88 | -1.56 |
| TRUE | 1/1 | 1/1 | 7.24 | 7.88 | -1.56 |
| TRUE | 1/1 | 1/1 | 8.35 | 8.41 | -1.04 |
| TRUE | 1/1 | 1/1 | 8.35 | 8.41 | -1.04 |
| TRUE | 1/1 | 1/1 | 8.08 | 8.39 | -1.24 |
| TRUE | 1/1 | 1/1 | 8.08 | 8.39 | -1.24 |
| TRUE | 1/1 | 1/1 | 3.52 | 4.67 | -2.22 |
| TRUE | 1/1 | 1/1 | 3.52 | 4.67 | -2.22 |
| TRUE | 1/1 | 1/1 | 3.52 | 4.67 | -2.22 |
| TRUE | 1/1 | 1/1 | 8.49 | 9.7  | -2.32 |
| TRUE | 1/1 | 1/1 | 8.49 | 9.7  | -2.32 |
| TRUE | 1/1 | 1/1 | 8.49 | 9.7  | -2.32 |
| TRUE | 1/1 | 1/1 | 8.49 | 9.7  | -2.32 |
| TRUE | 1/1 | 1/1 | 8.49 | 9.7  | -2.32 |
| TRUE | 1/1 | 1/1 | 8.49 | 9.7  | -2.32 |
| TRUE | 1/1 | 1/1 | 8.49 | 9.7  | -2.32 |
| TRUE | 1/1 | 1/1 | 8.49 | 9.7  | -2.32 |
| TRUE | 1/1 | 1/1 | 5.07 | 4.74 | 1.26  |
| TRUE | 1/1 | 1/1 | 5.07 | 4.74 | 1.26  |
| TRUE | 1/1 | 1/1 | 4.63 | 4.51 | 1.09  |
| TRUE | 1/1 | 1/1 | 4.63 | 4.51 | 1.09  |
| TRUE | 1/1 | 1/1 | 5.36 | 4.95 | 1.33  |
| TRUE | 1/1 | 1/1 | 5.36 | 4.95 | 1.33  |
| TRUE | 1/1 | 1/1 | 5.36 | 4.95 | 1.33  |
| TRUE | 1/1 | 1/1 | 5.36 | 4.95 | 1.33  |
| TRUE | 1/1 | 1/1 | 5.36 | 4.95 | 1.33  |
| TRUE | 1/1 | 1/1 | 5.36 | 4.95 | 1.33  |
| TRUE | 1/1 | 1/1 | 5.36 | 4.95 | 1.33  |
| TRUE | 1/1 | 1/1 | 5.36 | 4.95 | 1.33  |
| TRUE | 1/1 | 1/1 | 4.28 | 3.88 | 1.32  |
| TRUE | 1/1 | 1/1 | 4.28 | 3.88 | 1.32  |
| TRUE | 1/1 | 1/1 | 4.28 | 3.88 | 1.32  |
| TRUE | 1/1 | 1/1 | 4.28 | 3.88 | 1.32  |
| TRUE | 1/1 | 1/1 | 4.28 | 3.88 | 1.32  |
| TRUE | 1/1 | 1/1 | 4.28 | 3.88 | 1.32  |
| TRUE | 1/1 | 1/1 | 9.07 | 8.52 | 1.47  |
| TRUE | 1/1 | 1/1 | 9.07 | 8.52 | 1.47  |
| TRUE | 1/1 | 1/1 | 3.58 | 3.74 | -1.12 |
| TRUE | 1/1 | 1/1 | 3.58 | 3.74 | -1.12 |
| TRUE | 1/1 | 1/1 | 7.08 | 7.38 | -1.24 |
| TRUE | 1/1 | 1/1 | 7.08 | 7.38 | -1.24 |
| TRUE | 1/1 | 1/1 | 7.08 | 7.38 | -1.24 |
| TRUE | 1/1 | 1/1 | 3.07 | 2.6  | 1.38  |
| TRUE | 1/1 | 1/1 | 3.07 | 2.6  | 1.38  |
| TRUE | 1/1 | 1/1 | 3.07 | 2.6  | 1.38  |
| TRUE | 1/1 | 1/1 | 9.22 | 9.43 | -1.16 |
| TRUE | 1/1 | 1/1 | 9.22 | 9.43 | -1.16 |
| TRUE | 1/1 | 1/1 | 7.9  | 7.48 | 1.33  |
| TRUE | 1/1 | 1/1 | 7.9  | 7.48 | 1.33  |
| TRUE | 1/1 | 1/1 | 7.9  | 7.48 | 1.33  |
| TRUE | 1/1 | 1/1 | 7.83 | 7.89 | -1.04 |
| TRUE | 1/1 | 1/1 | 7.83 | 7.89 | -1.04 |
| TRUE | 1/1 | 1/1 | 7.83 | 7.89 | -1.04 |
| TRUE | 1/1 | 1/1 | 6.9  | 7.81 | -1.88 |
| TRUE | 1/1 | 1/1 | 6.9  | 7.81 | -1.88 |
| TRUE | 1/1 | 1/1 | 6.9  | 7.81 | -1.88 |
| TRUE | 1/1 | 1/1 | 6.9  | 7.81 | -1.88 |
| TRUE | 1/1 | 1/1 | 6.9  | 7.81 | -1.88 |

|      |     |     |      |      |       |
|------|-----|-----|------|------|-------|
| TRUE | 1/1 | 1/1 | 6.9  | 7.81 | -1.88 |
| TRUE | 1/1 | 1/1 | 4.12 | 3.82 | 1.23  |
| TRUE | 1/1 | 1/1 | 4.12 | 3.82 | 1.23  |
| TRUE | 1/1 | 1/1 | 8.04 | 8.06 | -1.02 |
| TRUE | 1/1 | 1/1 | 8.04 | 8.06 | -1.02 |
| TRUE | 1/1 | 1/1 | 7.82 | 8.15 | -1.26 |
| TRUE | 1/1 | 1/1 | 7.82 | 8.15 | -1.26 |
| TRUE | 1/1 | 1/1 | 7.82 | 8.15 | -1.26 |
| TRUE | 1/1 | 1/1 | 7.82 | 8.15 | -1.26 |
| TRUE | 1/1 | 1/1 | 7.82 | 8.15 | -1.26 |
| TRUE | 1/1 | 1/1 | 9.28 | 9.57 | -1.22 |
| TRUE | 1/1 | 1/1 | 9.28 | 9.57 | -1.22 |
| TRUE | 1/1 | 1/1 | 9.28 | 9.57 | -1.22 |
| TRUE | 1/1 | 1/1 | 9.28 | 9.57 | -1.22 |
| TRUE | 1/1 | 1/1 | 9.28 | 9.57 | -1.22 |
| TRUE | 1/1 | 1/1 | 6.68 | 7.62 | -1.92 |
| TRUE | 1/1 | 1/1 | 6.68 | 7.62 | -1.92 |
| TRUE | 1/1 | 1/1 | 5.58 | 5.55 | 1.02  |
| TRUE | 1/1 | 1/1 | 5.58 | 5.55 | 1.02  |
| TRUE | 1/1 | 1/1 | 5.58 | 5.55 | 1.02  |
| TRUE | 1/1 | 1/1 | 8.66 | 9.23 | -1.49 |
| TRUE | 1/1 | 1/1 | 8.66 | 9.23 | -1.49 |
| TRUE | 1/1 | 1/1 | 7.55 | 8.29 | -1.68 |
| TRUE | 1/1 | 1/1 | 7.55 | 8.29 | -1.68 |
| TRUE | 1/1 | 1/1 | 5.47 | 6.05 | -1.49 |
| TRUE | 1/1 | 1/1 | 5.47 | 6.05 | -1.49 |
| TRUE | 1/1 | 1/1 | 8.2  | 8.68 | -1.4  |
| TRUE | 1/1 | 1/1 | 8.2  | 8.68 | -1.4  |
| TRUE | 1/1 | 1/1 | 8.2  | 8.68 | -1.4  |
| TRUE | 1/1 | 1/1 | 8.02 | 8.79 | -1.71 |
| TRUE | 1/1 | 1/1 | 8.02 | 8.79 | -1.71 |
| TRUE | 1/1 | 1/1 | 8.02 | 8.79 | -1.71 |
| TRUE | 1/1 | 1/1 | 8.02 | 8.79 | -1.71 |
| TRUE | 1/1 | 1/1 | 7.64 | 8.19 | -1.46 |
| TRUE | 1/1 | 1/1 | 7.64 | 8.19 | -1.46 |
| TRUE | 1/1 | 1/1 | 7.64 | 8.19 | -1.46 |
| TRUE | 1/1 | 1/1 | 7.64 | 8.19 | -1.46 |
| TRUE | 1/1 | 1/1 | 9.34 | 8.84 | 1.42  |
| TRUE | 1/1 | 1/1 | 9.34 | 8.84 | 1.42  |
| TRUE | 1/1 | 1/1 | 9.34 | 8.84 | 1.42  |
| TRUE | 1/1 | 1/1 | 4.61 | 4.44 | 1.12  |
| TRUE | 1/1 | 1/1 | 4.61 | 4.44 | 1.12  |
| TRUE | 1/1 | 1/1 | 4.61 | 4.44 | 1.12  |
| TRUE | 1/1 | 1/1 | 5.01 | 4.65 | 1.28  |
| TRUE | 1/1 | 1/1 | 5.01 | 4.65 | 1.28  |
| TRUE | 1/1 | 1/1 | 5.01 | 4.65 | 1.28  |
| TRUE | 1/1 | 1/1 | 8.98 | 8.74 | 1.17  |
| TRUE | 1/1 | 1/1 | 8.98 | 8.74 | 1.17  |
| TRUE | 1/1 | 1/1 | 8.98 | 8.74 | 1.17  |
| TRUE | 1/1 | 1/1 | 8.98 | 8.74 | 1.17  |
| TRUE | 1/1 | 1/1 | 3.73 | 4.79 | -2.09 |
| TRUE | 1/1 | 1/1 | 3.73 | 4.79 | -2.09 |
| TRUE | 1/1 | 1/1 | 7.55 | 7.68 | -1.09 |
| TRUE | 1/1 | 1/1 | 7.55 | 7.68 | -1.09 |
| TRUE | 1/1 | 1/1 | 7.55 | 7.68 | -1.09 |
| TRUE | 1/1 | 1/1 | 8.34 | 8.66 | -1.25 |
| TRUE | 1/1 | 1/1 | 8.34 | 8.66 | -1.25 |
| TRUE | 1/1 | 1/1 | 8.19 | 8.7  | -1.42 |

|      |     |     |      |      |       |
|------|-----|-----|------|------|-------|
| TRUE | 1/1 | 1/1 | 8.19 | 8.7  | -1.42 |
| TRUE | 1/1 | 1/1 | 8.19 | 8.7  | -1.42 |
| TRUE | 1/1 | 1/1 | 8.19 | 8.7  | -1.42 |
| TRUE | 1/1 | 1/1 | 8.19 | 8.7  | -1.42 |
| TRUE | 1/1 | 1/1 | 6.11 | 7.09 | -1.97 |
| TRUE | 1/1 | 1/1 | 6.11 | 7.09 | -1.97 |
| TRUE | 1/1 | 1/1 | 6.11 | 7.09 | -1.97 |
| TRUE | 1/1 | 1/1 | 3.62 | 5.13 | -2.85 |
| TRUE | 1/1 | 1/1 | 3.62 | 5.13 | -2.85 |
| TRUE | 1/1 | 1/1 | 3.62 | 5.13 | -2.85 |
| TRUE | 1/1 | 1/1 | 3.62 | 5.13 | -2.85 |
| TRUE | 1/1 | 1/1 | 3.62 | 5.13 | -2.85 |
| TRUE | 1/1 | 1/1 | 4.95 | 4.99 | -1.03 |
| TRUE | 1/1 | 1/1 | 4.95 | 4.99 | -1.03 |
| TRUE | 1/1 | 1/1 | 6.37 | 6.84 | -1.38 |
| TRUE | 1/1 | 1/1 | 6.37 | 6.84 | -1.38 |
| TRUE | 1/1 | 1/1 | 6.37 | 6.84 | -1.38 |
| TRUE | 1/1 | 1/1 | 6.37 | 6.84 | -1.38 |
| TRUE | 1/1 | 1/1 | 6.37 | 6.84 | -1.38 |
| TRUE | 1/1 | 1/1 | 7.89 | 6.21 | 3.2   |
| TRUE | 1/1 | 1/1 | 7.89 | 6.21 | 3.2   |
| TRUE | 1/1 | 1/1 | 7.89 | 6.21 | 3.2   |
| TRUE | 1/1 | 1/1 | 7.89 | 6.21 | 3.2   |
| TRUE | 1/1 | 1/1 | 5.37 | 6.15 | -1.71 |
| TRUE | 1/1 | 1/1 | 5.37 | 6.15 | -1.71 |
| TRUE | 1/1 | 1/1 | 6.69 | 6.99 | -1.23 |
| TRUE | 1/1 | 1/1 | 6.69 | 6.99 | -1.23 |
| TRUE | 1/1 | 1/1 | 6.69 | 6.99 | -1.23 |
| TRUE | 1/1 | 1/1 | 6.69 | 6.99 | -1.23 |
| TRUE | 1/1 | 1/1 | 6.69 | 6.99 | -1.23 |
| TRUE | 1/1 | 1/1 | 4.04 | 3.6  | 1.35  |
| TRUE | 1/1 | 1/1 | 4.04 | 3.6  | 1.35  |
| TRUE | 1/1 | 1/1 | 4.04 | 3.6  | 1.35  |
| TRUE | 1/1 | 1/1 | 4.04 | 3.6  | 1.35  |
| TRUE | 1/1 | 1/1 | 10   | 9.72 | 1.22  |
| TRUE | 1/1 | 1/1 | 10   | 9.72 | 1.22  |
| TRUE | 1/1 | 1/1 | 10   | 9.72 | 1.22  |
| TRUE | 1/1 | 1/1 | 10   | 9.72 | 1.22  |
| TRUE | 1/1 | 1/1 | 10   | 9.72 | 1.22  |
| TRUE | 1/1 | 1/1 | 7.96 | 9.01 | -2.07 |
| TRUE | 1/1 | 1/1 | 7.96 | 9.01 | -2.07 |
| TRUE | 1/1 | 1/1 | 7.96 | 9.01 | -2.07 |
| TRUE | 1/1 | 1/1 | 7.96 | 9.01 | -2.07 |
| TRUE | 1/1 | 1/1 | 7.96 | 9.01 | -2.07 |
| TRUE | 1/1 | 1/1 | 7.96 | 9.01 | -2.07 |
| TRUE | 1/1 | 1/1 | 3.38 | 2.89 | 1.4   |
| TRUE | 1/1 | 1/1 | 3.38 | 2.89 | 1.4   |
| TRUE | 1/1 | 1/1 | 3.38 | 2.89 | 1.4   |
| TRUE | 1/1 | 1/1 | 3.38 | 2.89 | 1.4   |
| TRUE | 1/1 | 1/1 | 6.26 | 6.6  | -1.27 |
| TRUE | 1/1 | 1/1 | 6.26 | 6.6  | -1.27 |
| TRUE | 1/1 | 1/1 | 6.26 | 6.6  | -1.27 |
| TRUE | 1/1 | 1/1 | 6.26 | 6.6  | -1.27 |
| TRUE | 1/1 | 1/1 | 5.39 | 6.17 | -1.72 |
| TRUE | 1/1 | 1/1 | 5.39 | 6.17 | -1.72 |
| TRUE | 1/1 | 1/1 | 5.39 | 6.17 | -1.72 |

|      |     |     |       |       |       |
|------|-----|-----|-------|-------|-------|
| TRUE | 1/1 | 1/1 | 5.39  | 6.17  | -1.72 |
| TRUE | 1/1 | 1/1 | 5.39  | 6.17  | -1.72 |
| TRUE | 1/1 | 1/1 | 7.27  | 7.1   | 1.12  |
| TRUE | 1/1 | 1/1 | 7.27  | 7.1   | 1.12  |
| TRUE | 1/1 | 1/1 | 7.27  | 7.1   | 1.12  |
| TRUE | 1/1 | 1/1 | 7.26  | 7.1   | 1.12  |
| TRUE | 1/1 | 1/1 | 7.26  | 7.1   | 1.12  |
| TRUE | 1/1 | 1/1 | 7.26  | 7.1   | 1.12  |
| TRUE | 1/1 | 1/1 | 4.13  | 3.67  | 1.38  |
| TRUE | 1/1 | 1/1 | 4.13  | 3.67  | 1.38  |
| TRUE | 1/1 | 1/1 | 6.83  | 7.8   | -1.95 |
| TRUE | 1/1 | 1/1 | 6.83  | 7.8   | -1.95 |
| TRUE | 1/1 | 1/1 | 6.83  | 7.8   | -1.95 |
| TRUE | 1/1 | 1/1 | 6.83  | 7.8   | -1.95 |
| TRUE | 1/1 | 1/1 | 6.83  | 7.8   | -1.95 |
| TRUE | 1/1 | 1/1 | 6.83  | 7.8   | -1.95 |
| TRUE | 1/1 | 1/1 | 8.09  | 8.57  | -1.39 |
| TRUE | 1/1 | 1/1 | 8.09  | 8.57  | -1.39 |
| TRUE | 1/1 | 1/1 | 8.09  | 8.57  | -1.39 |
| TRUE | 1/1 | 1/1 | 8.09  | 8.57  | -1.39 |
| TRUE | 1/1 | 1/1 | 8.09  | 8.57  | -1.39 |
| TRUE | 1/1 | 1/1 | 8.09  | 8.57  | -1.39 |
| TRUE | 1/1 | 1/1 | 8.09  | 8.57  | -1.39 |
| TRUE | 1/1 | 1/1 | 8.09  | 8.57  | -1.39 |
| TRUE | 1/1 | 1/1 | 8.09  | 8.57  | -1.39 |
| TRUE | 1/1 | 1/1 | 8.09  | 8.57  | -1.39 |
| TRUE | 1/1 | 1/1 | 8.09  | 8.57  | -1.39 |
| TRUE | 1/1 | 1/1 | 4.9   | 5.28  | -1.3  |
| TRUE | 1/1 | 1/1 | 4.9   | 5.28  | -1.3  |
| TRUE | 1/1 | 1/1 | 7.23  | 7.62  | -1.31 |
| TRUE | 1/1 | 1/1 | 7.23  | 7.62  | -1.31 |
| TRUE | 1/1 | 1/1 | 7.23  | 7.62  | -1.31 |
| TRUE | 1/1 | 1/1 | 6.7   | 7.64  | -1.92 |
| TRUE | 1/1 | 1/1 | 6.7   | 7.64  | -1.92 |
| TRUE | 1/1 | 1/1 | 6.7   | 7.64  | -1.92 |
| TRUE | 1/1 | 1/1 | 6.7   | 7.64  | -1.92 |
| TRUE | 1/1 | 1/1 | 6.81  | 7.4   | -1.51 |
| TRUE | 1/1 | 1/1 | 6.81  | 7.4   | -1.51 |
| TRUE | 1/1 | 1/1 | 6.81  | 7.4   | -1.51 |
| TRUE | 1/1 | 1/1 | 6.81  | 7.4   | -1.51 |
| TRUE | 1/1 | 1/1 | 6.81  | 7.4   | -1.51 |
| TRUE | 1/1 | 1/1 | 7.57  | 7.67  | -1.07 |
| TRUE | 1/1 | 1/1 | 7.57  | 7.67  | -1.07 |
| TRUE | 1/1 | 1/1 | 5.78  | 6.34  | -1.47 |
| TRUE | 1/1 | 1/1 | 5.78  | 6.34  | -1.47 |
| TRUE | 1/1 | 1/1 | 5.78  | 6.34  | -1.47 |
| TRUE | 1/1 | 1/1 | 5.78  | 6.34  | -1.47 |
| TRUE | 1/1 | 1/1 | 5.13  | 5.85  | -1.65 |
| TRUE | 1/1 | 1/1 | 5.13  | 5.85  | -1.65 |
| TRUE | 1/1 | 1/1 | 5.13  | 5.85  | -1.65 |
| TRUE | 1/1 | 1/1 | 6.4   | 6.72  | -1.25 |
| TRUE | 1/1 | 1/1 | 6.4   | 6.72  | -1.25 |
| TRUE | 1/1 | 1/1 | 6.4   | 6.72  | -1.25 |
| TRUE | 1/1 | 1/1 | 6.4   | 6.72  | -1.25 |
| TRUE | 1/1 | 1/1 | 6.4   | 6.72  | -1.25 |
| TRUE | 1/1 | 1/1 | 6.4   | 6.72  | -1.25 |
| TRUE | 1/1 | 1/1 | 6.4   | 6.72  | -1.25 |
| TRUE | 1/1 | 1/1 | 6.4   | 6.72  | -1.25 |
| TRUE | 1/1 | 1/1 | 10.77 | 10.74 | 1.03  |
| TRUE | 1/1 | 1/1 | 10.77 | 10.74 | 1.03  |



|      |     |     |       |       |       |
|------|-----|-----|-------|-------|-------|
| TRUE | 1/1 | 1/1 | 10.77 | 10.74 | 1.03  |
| TRUE | 1/1 | 1/1 | 10.77 | 10.74 | 1.03  |
| TRUE | 1/1 | 1/1 | 10.77 | 10.74 | 1.03  |
| TRUE | 1/1 | 1/1 | 9.08  | 9.36  | -1.21 |
| TRUE | 1/1 | 1/1 | 9.08  | 9.36  | -1.21 |
| TRUE | 1/1 | 1/1 | 9.08  | 9.36  | -1.21 |
| TRUE | 1/1 | 1/1 | 9.08  | 9.36  | -1.21 |
| TRUE | 1/1 | 1/1 | 5.6   | 4.95  | 1.57  |
| TRUE | 1/1 | 1/1 | 5.6   | 4.95  | 1.57  |
| TRUE | 1/1 | 1/1 | 5.6   | 4.95  | 1.57  |
| TRUE | 1/1 | 1/1 | 7.56  | 7.62  | -1.05 |
| TRUE | 1/1 | 1/1 | 7.56  | 7.62  | -1.05 |
| TRUE | 1/1 | 1/1 | 7.56  | 7.62  | -1.05 |
| TRUE | 1/1 | 1/1 | 7.56  | 7.62  | -1.05 |
| TRUE | 1/1 | 1/1 | 7.56  | 7.62  | -1.05 |
| TRUE | 1/1 | 1/1 | 4.98  | 5.51  | -1.44 |
| TRUE | 1/1 | 1/1 | 4.98  | 5.51  | -1.44 |
| TRUE | 1/1 | 1/1 | 6.28  | 4.42  | 3.63  |
| TRUE | 1/1 | 1/1 | 6.28  | 4.42  | 3.63  |
| TRUE | 1/1 | 1/1 | 6.28  | 4.42  | 3.63  |
| TRUE | 1/1 | 1/1 | 6.28  | 4.42  | 3.63  |
| TRUE | 1/1 | 1/1 | 6.28  | 4.42  | 3.63  |
| TRUE | 1/1 | 1/1 | 3.99  | 4.89  | -1.86 |
| TRUE | 1/1 | 1/1 | 3.99  | 4.89  | -1.86 |
| TRUE | 1/1 | 1/1 | 8.41  | 8.89  | -1.39 |
| TRUE | 1/1 | 1/1 | 8.41  | 8.89  | -1.39 |
| TRUE | 1/1 | 1/1 | 6.77  | 7.5   | -1.66 |
| TRUE | 1/1 | 1/1 | 6.77  | 7.5   | -1.66 |
| TRUE | 1/1 | 1/1 | 7.06  | 6.79  | 1.21  |
| TRUE | 1/1 | 1/1 | 7.06  | 6.79  | 1.21  |
| TRUE | 1/1 | 1/1 | 8.47  | 8.99  | -1.44 |
| TRUE | 1/1 | 1/1 | 8.47  | 8.99  | -1.44 |
| TRUE | 1/1 | 1/1 | 8.47  | 8.99  | -1.44 |
| TRUE | 1/1 | 1/1 | 8.47  | 8.99  | -1.44 |
| TRUE | 1/1 | 1/1 | 4.2   | 4.29  | -1.06 |
| TRUE | 1/1 | 1/1 | 4.2   | 4.29  | -1.06 |
| TRUE | 1/1 | 1/1 | 8.28  | 9.2   | -1.9  |
| TRUE | 1/1 | 1/1 | 8.28  | 9.2   | -1.9  |
| TRUE | 1/1 | 1/1 | 8.28  | 9.2   | -1.9  |
| TRUE | 1/1 | 1/1 | 6.12  | 6.68  | -1.48 |
| TRUE | 1/1 | 1/1 | 6.12  | 6.68  | -1.48 |
| TRUE | 1/1 | 1/1 | 8.37  | 8.71  | -1.27 |
| TRUE | 1/1 | 1/1 | 8.37  | 8.71  | -1.27 |
| TRUE | 1/1 | 1/1 | 8.37  | 8.71  | -1.27 |
| TRUE | 1/1 | 1/1 | 8.37  | 8.71  | -1.27 |
| TRUE | 1/1 | 1/1 | 7.25  | 7.56  | -1.24 |
| TRUE | 1/1 | 1/1 | 7.25  | 7.56  | -1.24 |
| TRUE | 1/1 | 1/1 | 7.25  | 7.56  | -1.24 |
| TRUE | 1/1 | 1/1 | 7.25  | 7.56  | -1.24 |
| TRUE | 1/1 | 1/1 | 7.25  | 7.56  | -1.24 |
| TRUE | 1/1 | 1/1 | 5.75  | 6.92  | -2.25 |
| TRUE | 1/1 | 1/1 | 5.75  | 6.92  | -2.25 |
| TRUE | 1/1 | 1/1 | 5.75  | 6.92  | -2.25 |
| TRUE | 1/1 | 1/1 | 5.75  | 6.92  | -2.25 |
| TRUE | 1/1 | 1/1 | 5.75  | 6.92  | -2.25 |
| TRUE | 1/1 | 1/1 | 6.59  | 4.51  | 4.22  |





|      |     |     |       |       |       |
|------|-----|-----|-------|-------|-------|
| TRUE | 1/1 | 1/1 | 6.33  | 6.28  | 1.04  |
| TRUE | 1/1 | 1/1 | 6.33  | 6.28  | 1.04  |
| TRUE | 1/1 | 1/1 | 6.33  | 6.28  | 1.04  |
| TRUE | 1/1 | 1/1 | 6.33  | 6.28  | 1.04  |
| TRUE | 1/1 | 1/1 | 6.36  | 6.61  | -1.19 |
| TRUE | 1/1 | 1/1 | 6.36  | 6.61  | -1.19 |
| TRUE | 1/1 | 1/1 | 6.36  | 6.61  | -1.19 |
| TRUE | 1/1 | 1/1 | 6.36  | 6.61  | -1.19 |
| TRUE | 1/1 | 1/1 | 6.62  | 7.2   | -1.49 |
| TRUE | 1/1 | 1/1 | 6.62  | 7.2   | -1.49 |
| TRUE | 1/1 | 1/1 | 6.62  | 7.2   | -1.49 |
| TRUE | 1/1 | 1/1 | 7.69  | 8.73  | -2.06 |
| TRUE | 1/1 | 1/1 | 7.69  | 8.73  | -2.06 |
| TRUE | 1/1 | 1/1 | 7.69  | 8.73  | -2.06 |
| TRUE | 1/1 | 1/1 | 7.69  | 8.73  | -2.06 |
| TRUE | 1/1 | 1/1 | 7.69  | 8.73  | -2.06 |
| TRUE | 1/1 | 1/1 | 7.69  | 8.73  | -2.06 |
| TRUE | 1/1 | 1/1 | 7.69  | 8.73  | -2.06 |
| TRUE | 1/1 | 1/1 | 7.69  | 8.73  | -2.06 |
| TRUE | 1/1 | 1/1 | 9.78  | 10.32 | -1.46 |
| TRUE | 1/1 | 1/1 | 9.78  | 10.32 | -1.46 |
| TRUE | 1/1 | 1/1 | 4.48  | 5.17  | -1.62 |
| TRUE | 1/1 | 1/1 | 4.48  | 5.17  | -1.62 |
| TRUE | 1/1 | 1/1 | 4.48  | 5.17  | -1.62 |
| TRUE | 1/1 | 1/1 | 4.48  | 5.17  | -1.62 |
| TRUE | 1/1 | 1/1 | 4.48  | 5.17  | -1.62 |
| TRUE | 1/1 | 1/1 | 4.48  | 5.17  | -1.62 |
| TRUE | 1/1 | 1/1 | 4.48  | 5.17  | -1.62 |
| TRUE | 1/1 | 1/1 | 7.63  | 7.65  | -1.01 |
| TRUE | 1/1 | 1/1 | 7.63  | 7.65  | -1.01 |
| TRUE | 1/1 | 1/1 | 7.86  | 8.06  | -1.15 |
| TRUE | 1/1 | 1/1 | 7.86  | 8.06  | -1.15 |
| TRUE | 1/1 | 1/1 | 7.86  | 8.06  | -1.15 |
| TRUE | 1/1 | 1/1 | 7.86  | 8.06  | -1.15 |
| TRUE | 1/1 | 1/1 | 6.87  | 7     | -1.09 |
| TRUE | 1/1 | 1/1 | 6.87  | 7     | -1.09 |
| TRUE | 1/1 | 1/1 | 6.87  | 7     | -1.09 |
| TRUE | 1/1 | 1/1 | 6.87  | 7     | -1.09 |
| TRUE | 1/1 | 1/1 | 5.04  | 4.76  | 1.22  |
| TRUE | 1/1 | 1/1 | 5.04  | 4.76  | 1.22  |
| TRUE | 1/1 | 1/1 | 5.04  | 4.76  | 1.22  |
| TRUE | 1/1 | 1/1 | 5.04  | 4.76  | 1.22  |
| TRUE | 1/1 | 1/1 | 6.9   | 6.99  | -1.07 |
| TRUE | 1/1 | 1/1 | 6.9   | 6.99  | -1.07 |
| TRUE | 1/1 | 1/1 | 6.9   | 6.99  | -1.07 |
| TRUE | 1/1 | 1/1 | 6.78  | 6.83  | -1.04 |
| TRUE | 1/1 | 1/1 | 6.78  | 6.83  | -1.04 |
| TRUE | 1/1 | 1/1 | 6.78  | 6.83  | -1.04 |
| TRUE | 1/1 | 1/1 | 8.59  | 9.31  | -1.65 |
| TRUE | 1/1 | 1/1 | 8.59  | 9.31  | -1.65 |
| TRUE | 1/1 | 1/1 | 10.21 | 10.97 | -1.69 |
| TRUE | 1/1 | 1/1 | 10.21 | 10.97 | -1.69 |
| TRUE | 1/1 | 1/1 | 10.21 | 10.97 | -1.69 |
| TRUE | 1/1 | 1/1 | 7.57  | 8.17  | -1.52 |
| TRUE | 1/1 | 1/1 | 7.57  | 8.17  | -1.52 |
| TRUE | 1/1 | 1/1 | 7.57  | 8.17  | -1.52 |
| TRUE | 1/1 | 1/1 | 7.57  | 8.17  | -1.52 |
| TRUE | 1/1 | 1/1 | 7.57  | 8.17  | -1.52 |
| TRUE | 1/1 | 1/1 | 6.17  | 6.35  | -1.13 |
| TRUE | 1/1 | 1/1 | 6.17  | 6.35  | -1.13 |

|      |     |     |       |       |       |
|------|-----|-----|-------|-------|-------|
| TRUE | 1/1 | 1/1 | 7.81  | 8.07  | -1.2  |
| TRUE | 1/1 | 1/1 | 7.81  | 8.07  | -1.2  |
| TRUE | 1/1 | 1/1 | 10.64 | 9.18  | 2.75  |
| TRUE | 1/1 | 1/1 | 10.64 | 9.18  | 2.75  |
| TRUE | 1/1 | 1/1 | 10.64 | 9.18  | 2.75  |
| TRUE | 1/1 | 1/1 | 10.64 | 9.18  | 2.75  |
| TRUE | 1/1 | 1/1 | 10.64 | 9.18  | 2.75  |
| TRUE | 1/1 | 1/1 | 10.64 | 9.18  | 2.75  |
| TRUE | 1/1 | 1/1 | 10.64 | 9.18  | 2.75  |
| TRUE | 1/1 | 1/1 | 10.64 | 9.18  | 2.75  |
| TRUE | 1/1 | 1/1 | 10.64 | 9.18  | 2.75  |
| TRUE | 1/1 | 1/1 | 10.64 | 9.18  | 2.75  |
| TRUE | 1/1 | 1/1 | 10.64 | 9.18  | 2.75  |
| TRUE | 1/1 | 1/1 | 10.64 | 9.18  | 2.75  |
| TRUE | 1/1 | 1/1 | 10.64 | 9.18  | 2.75  |
| TRUE | 1/1 | 1/1 | 10.64 | 9.18  | 2.75  |
| TRUE | 1/1 | 1/1 | 6.68  | 6.57  | 1.08  |
| TRUE | 1/1 | 1/1 | 6.68  | 6.57  | 1.08  |
| TRUE | 1/1 | 1/1 | 6.16  | 6.73  | -1.48 |
| TRUE | 1/1 | 1/1 | 6.16  | 6.73  | -1.48 |
| TRUE | 1/1 | 1/1 | 6.16  | 6.73  | -1.48 |
| TRUE | 1/1 | 1/1 | 8.2   | 7.19  | 2.01  |
| TRUE | 1/1 | 1/1 | 8.2   | 7.19  | 2.01  |
| TRUE | 1/1 | 1/1 | 8.2   | 7.19  | 2.01  |
| TRUE | 1/1 | 1/1 | 8.2   | 7.19  | 2.01  |
| TRUE | 1/1 | 1/1 | 8.2   | 7.19  | 2.01  |
| TRUE | 1/1 | 1/1 | 8.2   | 7.19  | 2.01  |
| TRUE | 1/1 | 1/1 | 8.2   | 7.19  | 2.01  |
| TRUE | 1/1 | 1/1 | 8.2   | 7.19  | 2.01  |
| TRUE | 1/1 | 1/1 | 8.2   | 7.19  | 2.01  |
| TRUE | 1/1 | 1/1 | 8.2   | 7.19  | 2.01  |
| TRUE | 1/1 | 1/1 | 8.2   | 7.19  | 2.01  |
| TRUE | 1/1 | 1/1 | 8.2   | 7.19  | 2.01  |
| TRUE | 1/1 | 1/1 | 8.2   | 7.19  | 2.01  |
| TRUE | 1/1 | 1/1 | 8.2   | 7.19  | 2.01  |
| TRUE | 1/1 | 1/1 | 8.2   | 7.19  | 2.01  |
| TRUE | 1/1 | 1/1 | 8.2   | 7.19  | 2.01  |
| TRUE | 1/1 | 1/1 | 10.36 | 10.89 | -1.44 |
| TRUE | 1/1 | 1/1 | 10.36 | 10.89 | -1.44 |
| TRUE | 1/1 | 1/1 | 10.36 | 10.89 | -1.44 |
| TRUE | 1/1 | 1/1 | 10.36 | 10.89 | -1.44 |
| TRUE | 1/1 | 1/1 | 10.36 | 10.89 | -1.44 |
| TRUE | 1/1 | 1/1 | 6.63  | 6.27  | 1.29  |
| TRUE | 1/1 | 1/1 | 6.63  | 6.27  | 1.29  |
| TRUE | 1/1 | 1/1 | 6.63  | 6.27  | 1.29  |
| TRUE | 1/1 | 1/1 | 6.63  | 6.27  | 1.29  |
| TRUE | 1/1 | 1/1 | 6.63  | 6.27  | 1.29  |
| TRUE | 1/1 | 1/1 | 6.63  | 6.27  | 1.29  |
| TRUE | 1/1 | 1/1 | 6.63  | 6.27  | 1.29  |
| TRUE | 1/1 | 1/1 | 6.63  | 6.27  | 1.29  |
| TRUE | 1/1 | 1/1 | 6.63  | 6.27  | 1.29  |
| TRUE | 1/1 | 1/1 | 6.63  | 6.27  | 1.29  |
| TRUE | 1/1 | 1/1 | 6.63  | 6.27  | 1.29  |
| TRUE | 1/1 | 1/1 | 4.19  | 4.97  | -1.72 |
| TRUE | 1/1 | 1/1 | 4.19  | 4.97  | -1.72 |
| TRUE | 1/1 | 1/1 | 4.19  | 4.97  | -1.72 |
| TRUE | 1/1 | 1/1 | 4.19  | 4.97  | -1.72 |
| TRUE | 1/1 | 1/1 | 4.19  | 4.97  | -1.72 |
| TRUE | 1/1 | 1/1 | 4.19  | 4.97  | -1.72 |
| TRUE | 1/1 | 1/1 | 4.19  | 4.97  | -1.72 |
| TRUE | 1/1 | 1/1 | 4.19  | 4.97  | -1.72 |
| TRUE | 1/1 | 1/1 | 4.19  | 4.97  | -1.72 |
| TRUE | 1/1 | 1/1 | 4.19  | 4.97  | -1.72 |
| TRUE | 1/1 | 1/1 | 4.19  | 4.97  | -1.72 |
| TRUE | 1/1 | 1/1 | 4.19  | 4.97  | -1.72 |
| TRUE | 1/1 | 1/1 | 4.19  | 4.97  | -1.72 |
| TRUE | 1/1 | 1/1 | 4.19  | 4.97  | -1.72 |
| TRUE | 1/1 | 1/1 | 7.03  | 5.36  | 3.19  |
| TRUE | 1/1 | 1/1 | 7.03  | 5.36  | 3.19  |



|      |     |     |       |       |       |
|------|-----|-----|-------|-------|-------|
| TRUE | 1/1 | 1/1 | 7.71  | 5.65  | 4.17  |
| TRUE | 1/1 | 1/1 | 7.71  | 5.65  | 4.17  |
| TRUE | 1/1 | 1/1 | 7.71  | 5.65  | 4.17  |
| TRUE | 1/1 | 1/1 | 7.71  | 5.65  | 4.17  |
| TRUE | 1/1 | 1/1 | 7.71  | 5.65  | 4.17  |
| TRUE | 1/1 | 1/1 | 7.71  | 5.65  | 4.17  |
| TRUE | 1/1 | 1/1 | 7.71  | 5.65  | 4.17  |
| TRUE | 1/1 | 1/1 | 7.71  | 5.65  | 4.17  |
| TRUE | 1/1 | 1/1 | 7.71  | 5.65  | 4.17  |
| TRUE | 1/1 | 1/1 | 7.71  | 5.65  | 4.17  |
| TRUE | 1/1 | 1/1 | 3.14  | 3.03  | 1.08  |
| TRUE | 1/1 | 1/1 | 3.14  | 3.03  | 1.08  |
| TRUE | 1/1 | 1/1 | 5.48  | 3.03  | 5.49  |
| TRUE | 1/1 | 1/1 | 5.48  | 3.03  | 5.49  |
| TRUE | 1/1 | 1/1 | 5.48  | 3.03  | 5.49  |
| TRUE | 1/1 | 1/1 | 5.48  | 3.03  | 5.49  |
| TRUE | 1/1 | 1/1 | 5.48  | 3.03  | 5.49  |
| TRUE | 1/1 | 1/1 | 5.48  | 3.03  | 5.49  |
| TRUE | 1/1 | 1/1 | 5.48  | 3.03  | 5.49  |
| TRUE | 1/1 | 1/1 | 5.48  | 3.03  | 5.49  |
| TRUE | 1/1 | 1/1 | 5.48  | 3.03  | 5.49  |
| TRUE | 1/1 | 1/1 | 5.48  | 3.03  | 5.49  |
| TRUE | 1/1 | 1/1 | 5.48  | 3.03  | 5.49  |
| TRUE | 1/1 | 1/1 | 5.48  | 3.03  | 5.49  |
| TRUE | 1/1 | 1/1 | 6.48  | 5.19  | 2.45  |
| TRUE | 1/1 | 1/1 | 6.48  | 5.19  | 2.45  |
| TRUE | 1/1 | 1/1 | 6.48  | 5.19  | 2.45  |
| TRUE | 1/1 | 1/1 | 6.48  | 5.19  | 2.45  |
| TRUE | 1/1 | 1/1 | 6.48  | 5.19  | 2.45  |
| TRUE | 1/1 | 1/1 | 6.48  | 5.19  | 2.45  |
| TRUE | 1/1 | 1/1 | 6.48  | 5.19  | 2.45  |
| TRUE | 1/1 | 1/1 | 6.48  | 5.19  | 2.45  |
| TRUE | 1/1 | 1/1 | 6.48  | 5.19  | 2.45  |
| TRUE | 1/1 | 1/1 | 6.48  | 5.19  | 2.45  |
| TRUE | 1/1 | 1/1 | 6.48  | 5.19  | 2.45  |
| TRUE | 1/1 | 1/1 | 6.48  | 5.19  | 2.45  |
| TRUE | 1/1 | 1/1 | 6.48  | 5.19  | 2.45  |
| TRUE | 1/1 | 1/1 | 6.6   | 5.31  | 2.45  |
| TRUE | 1/1 | 1/1 | 6.6   | 5.31  | 2.45  |
| TRUE | 1/1 | 1/1 | 6.6   | 5.31  | 2.45  |
| TRUE | 1/1 | 1/1 | 6.6   | 5.31  | 2.45  |
| TRUE | 1/1 | 1/1 | 6.6   | 5.31  | 2.45  |
| TRUE | 1/1 | 1/1 | 6.6   | 5.31  | 2.45  |
| TRUE | 1/1 | 1/1 | 6.6   | 5.31  | 2.45  |
| TRUE | 1/1 | 1/1 | 6.6   | 5.31  | 2.45  |
| TRUE | 1/1 | 1/1 | 6.6   | 5.31  | 2.45  |
| TRUE | 1/1 | 1/1 | 6.6   | 5.31  | 2.45  |
| TRUE | 1/1 | 1/1 | 6.6   | 5.31  | 2.45  |
| TRUE | 1/1 | 1/1 | 9.15  | 9.75  | -1.51 |
| TRUE | 1/1 | 1/1 | 9.15  | 9.75  | -1.51 |
| TRUE | 1/1 | 1/1 | 9.15  | 9.75  | -1.51 |
| TRUE | 1/1 | 1/1 | 10.76 | 10.62 | 1.1   |
| TRUE | 1/1 | 1/1 | 10.76 | 10.62 | 1.1   |
| TRUE | 1/1 | 1/1 | 10.76 | 10.62 | 1.1   |
| TRUE | 1/1 | 1/1 | 4.83  | 4.67  | 1.12  |
| TRUE | 1/1 | 1/1 | 4.83  | 4.67  | 1.12  |
| TRUE | 1/1 | 1/1 | 4.83  | 4.67  | 1.12  |
| TRUE | 1/1 | 1/1 | 4.83  | 4.67  | 1.12  |
| TRUE | 1/1 | 1/1 | 4.83  | 4.67  | 1.12  |
| TRUE | 1/1 | 1/1 | 4.83  | 4.67  | 1.12  |
| TRUE | 1/1 | 1/1 | 7.23  | 7.95  | -1.64 |
| TRUE | 1/1 | 1/1 | 7.23  | 7.95  | -1.64 |
| TRUE | 1/1 | 1/1 | 7.23  | 7.95  | -1.64 |
| TRUE | 1/1 | 1/1 | 8.08  | 8.86  | -1.72 |
| TRUE | 1/1 | 1/1 | 8.08  | 8.86  | -1.72 |
| TRUE | 1/1 | 1/1 | 8.08  | 8.86  | -1.72 |
| TRUE | 1/1 | 1/1 | 4.09  | 4.62  | -1.44 |
| TRUE | 1/1 | 1/1 | 4.09  | 4.62  | -1.44 |

|      |     |     |      |       |       |
|------|-----|-----|------|-------|-------|
| TRUE | 1/1 | 1/1 | 5.34 | 6.49  | -2.21 |
| TRUE | 1/1 | 1/1 | 5.34 | 6.49  | -2.21 |
| TRUE | 1/1 | 1/1 | 5.34 | 6.49  | -2.21 |
| TRUE | 1/1 | 1/1 | 5.34 | 6.49  | -2.21 |
| TRUE | 1/1 | 1/1 | 5.34 | 6.49  | -2.21 |
| TRUE | 1/1 | 1/1 | 7.5  | 6.81  | 1.6   |
| TRUE | 1/1 | 1/1 | 7.5  | 6.81  | 1.6   |
| TRUE | 1/1 | 1/1 | 5.98 | 6.11  | -1.1  |
| TRUE | 1/1 | 1/1 | 5.98 | 6.11  | -1.1  |
| TRUE | 1/1 | 1/1 | 5.98 | 6.11  | -1.1  |
| TRUE | 1/1 | 1/1 | 9.29 | 9.05  | 1.18  |
| TRUE | 1/1 | 1/1 | 9.29 | 9.05  | 1.18  |
| TRUE | 1/1 | 1/1 | 9.29 | 9.05  | 1.18  |
| TRUE | 1/1 | 1/1 | 9.29 | 9.05  | 1.18  |
| TRUE | 1/1 | 1/1 | 9.29 | 9.05  | 1.18  |
| TRUE | 1/1 | 1/1 | 3.59 | 3.56  | 1.02  |
| TRUE | 1/1 | 1/1 | 3.59 | 3.56  | 1.02  |
| TRUE | 1/1 | 1/1 | 3.59 | 3.56  | 1.02  |
| TRUE | 1/1 | 1/1 | 3.59 | 3.56  | 1.02  |
| TRUE | 1/1 | 1/1 | 3.59 | 3.56  | 1.02  |
| TRUE | 1/1 | 1/1 | 3.59 | 3.56  | 1.02  |
| TRUE | 1/1 | 1/1 | 9.33 | 10.23 | -1.87 |
| TRUE | 1/1 | 1/1 | 9.33 | 10.23 | -1.87 |
| TRUE | 1/1 | 1/1 | 9.33 | 10.23 | -1.87 |
| TRUE | 1/1 | 1/1 | 9.33 | 10.23 | -1.87 |
| TRUE | 1/1 | 1/1 | 9.33 | 10.23 | -1.87 |
| TRUE | 1/1 | 1/1 | 9.33 | 10.23 | -1.87 |
| TRUE | 1/1 | 1/1 | 9.03 | 7.98  | 2.07  |
| TRUE | 1/1 | 1/1 | 9.03 | 7.98  | 2.07  |
| TRUE | 1/1 | 1/1 | 9.03 | 7.98  | 2.07  |
| TRUE | 1/1 | 1/1 | 9.03 | 7.98  | 2.07  |
| TRUE | 1/1 | 1/1 | 9.03 | 7.98  | 2.07  |
| TRUE | 1/1 | 1/1 | 9.03 | 7.98  | 2.07  |
| TRUE | 1/1 | 1/1 | 4.49 | 5.14  | -1.56 |
| TRUE | 1/1 | 1/1 | 4.49 | 5.14  | -1.56 |
| TRUE | 1/1 | 1/1 | 4.49 | 5.14  | -1.56 |
| TRUE | 1/1 | 1/1 | 4.49 | 5.14  | -1.56 |
| TRUE | 1/1 | 1/1 | 4.35 | 3.64  | 1.63  |
| TRUE | 1/1 | 1/1 | 4.35 | 3.64  | 1.63  |
| TRUE | 1/1 | 1/1 | 4.35 | 3.64  | 1.63  |
| TRUE | 1/1 | 1/1 | 4.35 | 3.64  | 1.63  |
| TRUE | 1/1 | 1/1 | 4.35 | 3.64  | 1.63  |
| TRUE | 1/1 | 1/1 | 4.35 | 3.64  | 1.63  |
| TRUE | 1/1 | 1/1 | 5.31 | 4.83  | 1.39  |
| TRUE | 1/1 | 1/1 | 5.31 | 4.83  | 1.39  |
| TRUE | 1/1 | 1/1 | 5.31 | 4.83  | 1.39  |
| TRUE | 1/1 | 1/1 | 6.26 | 6.64  | -1.3  |
| TRUE | 1/1 | 1/1 | 6.26 | 6.64  | -1.3  |
| TRUE | 1/1 | 1/1 | 6.26 | 6.64  | -1.3  |
| TRUE | 1/1 | 1/1 | 6.26 | 6.64  | -1.3  |
| TRUE | 1/1 | 1/1 | 6.26 | 6.64  | -1.3  |
| TRUE | 1/1 | 1/1 | 6.26 | 6.64  | -1.3  |
| TRUE | 1/1 | 1/1 | 5.79 | 4.53  | 2.4   |
| TRUE | 1/1 | 1/1 | 5.79 | 4.53  | 2.4   |
| TRUE | 1/1 | 1/1 | 5.79 | 4.53  | 2.4   |
| TRUE | 1/1 | 1/1 | 5.79 | 4.53  | 2.4   |



|      |     |     |       |       |       |
|------|-----|-----|-------|-------|-------|
| TRUE | 1/1 | 1/1 | 5.79  | 4.53  | 2.4   |
| TRUE | 1/1 | 1/1 | 5.79  | 4.53  | 2.4   |
| TRUE | 1/1 | 1/1 | 5.79  | 4.53  | 2.4   |
| TRUE | 1/1 | 1/1 | 7.65  | 6.85  | 1.74  |
| TRUE | 1/1 | 1/1 | 7.65  | 6.85  | 1.74  |
| TRUE | 1/1 | 1/1 | 7.65  | 6.85  | 1.74  |
| TRUE | 1/1 | 1/1 | 6.02  | 5.78  | 1.18  |
| TRUE | 1/1 | 1/1 | 6.02  | 5.78  | 1.18  |
| TRUE | 1/1 | 1/1 | 6.02  | 5.78  | 1.18  |
| TRUE | 1/1 | 1/1 | 7.55  | 9.84  | -4.87 |
| TRUE | 1/1 | 1/1 | 7.55  | 9.84  | -4.87 |
| TRUE | 1/1 | 1/1 | 4.03  | 4.45  | -1.34 |
| TRUE | 1/1 | 1/1 | 4.03  | 4.45  | -1.34 |
| TRUE | 1/1 | 1/1 | 4.03  | 4.45  | -1.34 |
| TRUE | 1/1 | 1/1 | 6.44  | 7.63  | -2.28 |
| TRUE | 1/1 | 1/1 | 6.44  | 7.63  | -2.28 |
| TRUE | 1/1 | 1/1 | 6.44  | 7.63  | -2.28 |
| TRUE | 1/1 | 1/1 | 6.44  | 7.63  | -2.28 |
| TRUE | 1/1 | 1/1 | 6.44  | 7.63  | -2.28 |
| TRUE | 1/1 | 1/1 | 6.44  | 7.63  | -2.28 |
| TRUE | 1/1 | 1/1 | 11.48 | 9.39  | 4.26  |
| TRUE | 1/1 | 1/1 | 11.48 | 9.39  | 4.26  |
| TRUE | 1/1 | 1/1 | 11.48 | 9.39  | 4.26  |
| TRUE | 1/1 | 1/1 | 11.48 | 9.39  | 4.26  |
| TRUE | 1/1 | 1/1 | 11.48 | 9.39  | 4.26  |
| TRUE | 1/1 | 1/1 | 6.29  | 4.89  | 2.64  |
| TRUE | 1/1 | 1/1 | 6.29  | 4.89  | 2.64  |
| TRUE | 1/1 | 1/1 | 6.29  | 4.89  | 2.64  |
| TRUE | 1/1 | 1/1 | 6.29  | 4.89  | 2.64  |
| TRUE | 1/1 | 1/1 | 6.29  | 4.89  | 2.64  |
| TRUE | 1/1 | 1/1 | 6.29  | 4.89  | 2.64  |
| TRUE | 1/1 | 1/1 | 6.29  | 4.89  | 2.64  |
| TRUE | 1/1 | 1/1 | 6.29  | 4.89  | 2.64  |
| TRUE | 1/1 | 1/1 | 6.29  | 4.89  | 2.64  |
| TRUE | 1/1 | 1/1 | 7.39  | 7.91  | -1.44 |
| TRUE | 1/1 | 1/1 | 7.39  | 7.91  | -1.44 |
| TRUE | 1/1 | 1/1 | 9.68  | 10.13 | -1.37 |
| TRUE | 1/1 | 1/1 | 9.68  | 10.13 | -1.37 |
| TRUE | 1/1 | 1/1 | 9.68  | 10.13 | -1.37 |
| TRUE | 1/1 | 1/1 | 9.68  | 10.13 | -1.37 |
| TRUE | 1/1 | 1/1 | 9.68  | 10.13 | -1.37 |
| TRUE | 1/1 | 1/1 | 8.01  | 8.12  | -1.08 |
| TRUE | 1/1 | 1/1 | 8.01  | 8.12  | -1.08 |
| TRUE | 1/1 | 1/1 | 8.01  | 8.12  | -1.08 |
| TRUE | 1/1 | 1/1 | 8.01  | 8.12  | -1.08 |
| TRUE | 1/1 | 1/1 | 7.37  | 5.97  | 2.64  |
| TRUE | 1/1 | 1/1 | 7.37  | 5.97  | 2.64  |
| TRUE | 1/1 | 1/1 | 7.37  | 5.97  | 2.64  |
| TRUE | 1/1 | 1/1 | 7.37  | 5.97  | 2.64  |
| TRUE | 1/1 | 1/1 | 7.37  | 5.97  | 2.64  |
| TRUE | 1/1 | 1/1 | 4.95  | 5.26  | -1.24 |
| TRUE | 1/1 | 1/1 | 4.95  | 5.26  | -1.24 |
| TRUE | 1/1 | 1/1 | 4.95  | 5.26  | -1.24 |
| TRUE | 1/1 | 1/1 | 4.95  | 5.26  | -1.24 |
| TRUE | 1/1 | 1/1 | 4.95  | 5.26  | -1.24 |
| TRUE | 1/1 | 1/1 | 4.95  | 5.26  | -1.24 |
| TRUE | 1/1 | 1/1 | 4.96  | 5.08  | -1.08 |
| TRUE | 1/1 | 1/1 | 4.96  | 5.08  | -1.08 |

|      |     |     |       |       |       |
|------|-----|-----|-------|-------|-------|
| TRUE | 1/1 | 1/1 | 4.96  | 5.08  | -1.08 |
| TRUE | 1/1 | 1/1 | 4.96  | 5.08  | -1.08 |
| TRUE | 1/1 | 1/1 | 6.41  | 7.47  | -2.08 |
| TRUE | 1/1 | 1/1 | 6.41  | 7.47  | -2.08 |
| TRUE | 1/1 | 1/1 | 6.41  | 7.47  | -2.08 |
| TRUE | 1/1 | 1/1 | 8.44  | 9.47  | -2.04 |
| TRUE | 1/1 | 1/1 | 8.44  | 9.47  | -2.04 |
| TRUE | 1/1 | 1/1 | 4.48  | 4.18  | 1.23  |
| TRUE | 1/1 | 1/1 | 4.48  | 4.18  | 1.23  |
| TRUE | 1/1 | 1/1 | 4.48  | 4.18  | 1.23  |
| TRUE | 1/1 | 1/1 | 4.96  | 5.97  | -2.02 |
| TRUE | 1/1 | 1/1 | 4.96  | 5.97  | -2.02 |
| TRUE | 1/1 | 1/1 | 4.96  | 5.97  | -2.02 |
| TRUE | 1/1 | 1/1 | 4.96  | 5.97  | -2.02 |
| TRUE | 1/1 | 1/1 | 10.89 | 11.13 | -1.18 |
| TRUE | 1/1 | 1/1 | 10.89 | 11.13 | -1.18 |
| TRUE | 1/1 | 1/1 | 3.73  | 4.57  | -1.79 |
| TRUE | 1/1 | 1/1 | 3.73  | 4.57  | -1.79 |
| TRUE | 1/1 | 1/1 | 3.73  | 4.57  | -1.79 |
| TRUE | 1/1 | 1/1 | 5.59  | 5.01  | 1.5   |
| TRUE | 1/1 | 1/1 | 5.59  | 5.01  | 1.5   |
| TRUE | 1/1 | 1/1 | 9.34  | 9.52  | -1.14 |
| TRUE | 1/1 | 1/1 | 9.34  | 9.52  | -1.14 |
| TRUE | 1/1 | 1/1 | 8.42  | 8.04  | 1.3   |
| TRUE | 1/1 | 1/1 | 8.42  | 8.04  | 1.3   |
| TRUE | 1/1 | 1/1 | 8.42  | 8.04  | 1.3   |
| TRUE | 1/1 | 1/1 | 8.42  | 8.04  | 1.3   |
| TRUE | 1/1 | 1/1 | 8.42  | 8.04  | 1.3   |
| TRUE | 1/1 | 1/1 | 8.42  | 8.04  | 1.3   |
| TRUE | 1/1 | 1/1 | 8.42  | 8.04  | 1.3   |
| TRUE | 1/1 | 1/1 | 8.42  | 8.04  | 1.3   |
| TRUE | 1/1 | 1/1 | 8.42  | 8.04  | 1.3   |
| TRUE | 1/1 | 1/1 | 6.15  | 6.05  | 1.07  |
| TRUE | 1/1 | 1/1 | 6.15  | 6.05  | 1.07  |
| TRUE | 1/1 | 1/1 | 6.15  | 6.05  | 1.07  |
| TRUE | 1/1 | 1/1 | 6.15  | 6.05  | 1.07  |
| TRUE | 1/1 | 1/1 | 6.15  | 6.05  | 1.07  |
| TRUE | 1/1 | 1/1 | 6.15  | 6.05  | 1.07  |
| TRUE | 1/1 | 1/1 | 6.15  | 6.05  | 1.07  |
| TRUE | 1/1 | 1/1 | 4.61  | 4.9   | -1.22 |
| TRUE | 1/1 | 1/1 | 4.61  | 4.9   | -1.22 |
| TRUE | 1/1 | 1/1 | 4.61  | 4.9   | -1.22 |
| TRUE | 1/1 | 1/1 | 9.81  | 9.31  | 1.41  |
| TRUE | 1/1 | 1/1 | 9.81  | 9.31  | 1.41  |
| TRUE | 1/1 | 1/1 | 9.81  | 9.31  | 1.41  |
| TRUE | 1/1 | 1/1 | 7.44  | 8.04  | -1.51 |
| TRUE | 1/1 | 1/1 | 7.44  | 8.04  | -1.51 |
| TRUE | 1/1 | 1/1 | 7.44  | 8.04  | -1.51 |
| TRUE | 1/1 | 1/1 | 7.2   | 8.02  | -1.77 |
| TRUE | 1/1 | 1/1 | 7.2   | 8.02  | -1.77 |
| TRUE | 1/1 | 1/1 | 7.2   | 8.02  | -1.77 |
| TRUE | 1/1 | 1/1 | 7.2   | 8.02  | -1.77 |
| TRUE | 1/1 | 1/1 | 8.32  | 8.45  | -1.1  |
| TRUE | 1/1 | 1/1 | 8.32  | 8.45  | -1.1  |
| TRUE | 1/1 | 1/1 | 5.94  | 6.31  | -1.29 |
| TRUE | 1/1 | 1/1 | 5.94  | 6.31  | -1.29 |
| TRUE | 1/1 | 1/1 | 5.94  | 6.31  | -1.29 |
| TRUE | 1/1 | 1/1 | 4.03  | 4.45  | -1.34 |

|      |     |     |      |      |       |
|------|-----|-----|------|------|-------|
| TRUE | 1/1 | 1/1 | 4.03 | 4.45 | -1.34 |
| TRUE | 1/1 | 1/1 | 4.03 | 4.45 | -1.34 |
| TRUE | 1/1 | 1/1 | 7.06 | 5.53 | 2.89  |
| TRUE | 1/1 | 1/1 | 7.06 | 5.53 | 2.89  |
| TRUE | 1/1 | 1/1 | 7.06 | 5.53 | 2.89  |
| TRUE | 1/1 | 1/1 | 7.06 | 5.53 | 2.89  |
| TRUE | 1/1 | 1/1 | 7.06 | 5.53 | 2.89  |
| TRUE | 1/1 | 1/1 | 7.06 | 5.53 | 2.89  |
| TRUE | 1/1 | 1/1 | 7.06 | 5.53 | 2.89  |
| TRUE | 1/1 | 1/1 | 7.06 | 5.53 | 2.89  |
| TRUE | 1/1 | 1/1 | 7.06 | 5.53 | 2.89  |
| TRUE | 1/1 | 1/1 | 7.06 | 5.53 | 2.89  |
| TRUE | 1/1 | 1/1 | 7.06 | 5.53 | 2.89  |
| TRUE | 1/1 | 1/1 | 7.06 | 5.53 | 2.89  |
| TRUE | 1/1 | 1/1 | 7.06 | 5.53 | 2.89  |
| TRUE | 1/1 | 1/1 | 7.06 | 5.53 | 2.89  |
| TRUE | 1/1 | 1/1 | 7.06 | 5.53 | 2.89  |
| TRUE | 1/1 | 1/1 | 7.06 | 5.53 | 2.89  |
| TRUE | 1/1 | 1/1 | 7.06 | 5.53 | 2.89  |
| TRUE | 1/1 | 1/1 | 7.06 | 5.53 | 2.89  |
| TRUE | 1/1 | 1/1 | 7.06 | 5.53 | 2.89  |
| TRUE | 1/1 | 1/1 | 7.06 | 5.53 | 2.89  |
| TRUE | 1/1 | 1/1 | 7.06 | 5.53 | 2.89  |
| TRUE | 1/1 | 1/1 | 7.06 | 5.53 | 2.89  |
| TRUE | 1/1 | 1/1 | 7.06 | 5.53 | 2.89  |
| TRUE | 1/1 | 1/1 | 7.06 | 5.53 | 2.89  |
| TRUE | 1/1 | 1/1 | 7.06 | 5.53 | 2.89  |
| TRUE | 1/1 | 1/1 | 7.06 | 5.53 | 2.89  |
| TRUE | 1/1 | 1/1 | 7.06 | 5.53 | 2.89  |
| TRUE | 1/1 | 1/1 | 7.06 | 5.53 | 2.89  |
| TRUE | 1/1 | 1/1 | 7.06 | 5.53 | 2.89  |
| TRUE | 1/1 | 1/1 | 7.06 | 5.53 | 2.89  |
| TRUE | 1/1 | 1/1 | 7.06 | 5.53 | 2.89  |
| TRUE | 1/1 | 1/1 | 7.06 | 5.53 | 2.89  |
| TRUE | 1/1 | 1/1 | 7.06 | 5.53 | 2.89  |
| TRUE | 1/1 | 1/1 | 7.06 | 5.53 | 2.89  |
| TRUE | 1/1 | 1/1 | 7.06 | 5.53 | 2.89  |
| TRUE | 1/1 | 1/1 | 7.06 | 5.53 | 2.89  |
| TRUE | 1/1 | 1/1 | 6.99 | 7.77 | -1.73 |
| TRUE | 1/1 | 1/1 | 6.99 | 7.77 | -1.73 |
| TRUE | 1/1 | 1/1 | 4.06 | 4.55 | -1.4  |
| TRUE | 1/1 | 1/1 | 4.06 | 4.55 | -1.4  |
| TRUE | 1/1 | 1/1 | 4.18 | 4.23 | -1.04 |
| TRUE | 1/1 | 1/1 | 4.18 | 4.23 | -1.04 |
| TRUE | 1/1 | 1/1 | 4.18 | 4.23 | -1.04 |
| TRUE | 1/1 | 1/1 | 4.18 | 4.23 | -1.04 |
| TRUE | 1/1 | 1/1 | 6.42 | 7.24 | -1.77 |
| TRUE | 1/1 | 1/1 | 6.42 | 7.24 | -1.77 |
| TRUE | 1/1 | 1/1 | 6.42 | 7.24 | -1.77 |
| TRUE | 1/1 | 1/1 | 8.51 | 9.29 | -1.71 |
| TRUE | 1/1 | 1/1 | 8.51 | 9.29 | -1.71 |
| TRUE | 1/1 | 1/1 | 8.51 | 9.29 | -1.71 |
| TRUE | 1/1 | 1/1 | 8.05 | 8.2  | -1.11 |
| TRUE | 1/1 | 1/1 | 8.05 | 8.2  | -1.11 |
| TRUE | 1/1 | 1/1 | 8.05 | 8.2  | -1.11 |
| TRUE | 1/1 | 1/1 | 9.7  | 8.19 | 2.85  |
| TRUE | 1/1 | 1/1 | 9.7  | 8.19 | 2.85  |
| TRUE | 1/1 | 1/1 | 9.7  | 8.19 | 2.85  |
| TRUE | 1/1 | 1/1 | 5.85 | 6.3  | -1.37 |
| TRUE | 1/1 | 1/1 | 5.85 | 6.3  | -1.37 |

|      |     |     |       |      |       |
|------|-----|-----|-------|------|-------|
| TRUE | 1/1 | 1/1 | 5.85  | 6.3  | -1.37 |
| TRUE | 1/1 | 1/1 | 5.85  | 6.3  | -1.37 |
| TRUE | 1/1 | 1/1 | 5.85  | 6.3  | -1.37 |
| TRUE | 1/1 | 1/1 | 5.85  | 6.3  | -1.37 |
| TRUE | 1/1 | 1/1 | 5.85  | 6.3  | -1.37 |
| TRUE | 1/1 | 1/1 | 5.85  | 6.3  | -1.37 |
| TRUE | 1/1 | 1/1 | 9.91  | 10.4 | -1.41 |
| TRUE | 1/1 | 1/1 | 9.91  | 10.4 | -1.41 |
| TRUE | 1/1 | 1/1 | 7.16  | 7.32 | -1.11 |
| TRUE | 1/1 | 1/1 | 7.16  | 7.32 | -1.11 |
| TRUE | 1/1 | 1/1 | 7.16  | 7.32 | -1.11 |
| TRUE | 1/1 | 1/1 | 7.16  | 7.32 | -1.11 |
| TRUE | 1/1 | 1/1 | 7.48  | 8.1  | -1.53 |
| TRUE | 1/1 | 1/1 | 7.48  | 8.1  | -1.53 |
| TRUE | 1/1 | 1/1 | 7.48  | 8.1  | -1.53 |
| TRUE | 1/1 | 1/1 | 7.48  | 8.1  | -1.53 |
| TRUE | 1/1 | 1/1 | 7.48  | 8.1  | -1.53 |
| TRUE | 1/1 | 1/1 | 7.48  | 8.1  | -1.53 |
| TRUE | 1/1 | 1/1 | 5.52  | 5.48 | 1.03  |
| TRUE | 1/1 | 1/1 | 5.52  | 5.48 | 1.03  |
| TRUE | 1/1 | 1/1 | 8.53  | 7.37 | 2.23  |
| TRUE | 1/1 | 1/1 | 8.53  | 7.37 | 2.23  |
| TRUE | 1/1 | 1/1 | 5.37  | 5.4  | -1.02 |
| TRUE | 1/1 | 1/1 | 5.37  | 5.4  | -1.02 |
| TRUE | 1/1 | 1/1 | 5.37  | 5.4  | -1.02 |
| TRUE | 1/1 | 1/1 | 5.37  | 5.4  | -1.02 |
| TRUE | 1/1 | 1/1 | 5.37  | 5.4  | -1.02 |
| TRUE | 1/1 | 1/1 | 10.23 | 11.4 | -2.24 |
| TRUE | 1/1 | 1/1 | 10.23 | 11.4 | -2.24 |
| TRUE | 1/1 | 1/1 | 10.23 | 11.4 | -2.24 |
| TRUE | 1/1 | 1/1 | 10.23 | 11.4 | -2.24 |
| TRUE | 1/1 | 1/1 | 10.23 | 11.4 | -2.24 |
| TRUE | 1/1 | 1/1 | 6.94  | 7.01 | -1.05 |
| TRUE | 1/1 | 1/1 | 6.94  | 7.01 | -1.05 |
| TRUE | 1/1 | 1/1 | 6.94  | 7.01 | -1.05 |
| TRUE | 1/1 | 1/1 | 6.61  | 6.58 | 1.02  |
| TRUE | 1/1 | 1/1 | 6.61  | 6.58 | 1.02  |
| TRUE | 1/1 | 1/1 | 6.61  | 6.58 | 1.02  |
| TRUE | 1/1 | 1/1 | 6.61  | 6.58 | 1.02  |
| TRUE | 1/1 | 1/1 | 6.61  | 6.58 | 1.02  |
| TRUE | 1/1 | 1/1 | 6     | 6.02 | -1.01 |
| TRUE | 1/1 | 1/1 | 6     | 6.02 | -1.01 |
| TRUE | 1/1 | 1/1 | 6     | 6.02 | -1.01 |
| TRUE | 1/1 | 1/1 | 6     | 6.02 | -1.01 |
| TRUE | 1/1 | 1/1 | 5.57  | 5.69 | -1.09 |
| TRUE | 1/1 | 1/1 | 5.57  | 5.69 | -1.09 |
| TRUE | 1/1 | 1/1 | 5.57  | 5.69 | -1.09 |
| TRUE | 1/1 | 1/1 | 5.57  | 5.69 | -1.09 |
| TRUE | 1/1 | 1/1 | 5.57  | 5.69 | -1.09 |
| TRUE | 1/1 | 1/1 | 5.57  | 5.69 | -1.09 |
| TRUE | 1/1 | 1/1 | 5.47  | 5.58 | -1.08 |
| TRUE | 1/1 | 1/1 | 5.47  | 5.58 | -1.08 |
| TRUE | 1/1 | 1/1 | 5.47  | 5.58 | -1.08 |
| TRUE | 1/1 | 1/1 | 5.47  | 5.58 | -1.08 |
| TRUE | 1/1 | 1/1 | 5.47  | 5.58 | -1.08 |

|      |     |     |       |       |       |
|------|-----|-----|-------|-------|-------|
| TRUE | 1/1 | 1/1 | 5.47  | 5.58  | -1.08 |
| TRUE | 1/1 | 1/1 | 5.47  | 5.58  | -1.08 |
| TRUE | 1/1 | 1/1 | 5.47  | 5.58  | -1.08 |
| TRUE | 1/1 | 1/1 | 5.47  | 5.58  | -1.08 |
| TRUE | 1/1 | 1/1 | 5.47  | 5.58  | -1.08 |
| TRUE | 1/1 | 1/1 | 5.47  | 5.58  | -1.08 |
| TRUE | 1/1 | 1/1 | 5.47  | 5.58  | -1.08 |
| TRUE | 1/1 | 1/1 | 5.47  | 5.58  | -1.08 |
| TRUE | 1/1 | 1/1 | 11.04 | 11.33 | -1.22 |
| TRUE | 1/1 | 1/1 | 11.04 | 11.33 | -1.22 |
| TRUE | 1/1 | 1/1 | 11.04 | 11.33 | -1.22 |
| TRUE | 1/1 | 1/1 | 11.04 | 11.33 | -1.22 |
| TRUE | 1/1 | 1/1 | 11.04 | 11.33 | -1.22 |
| TRUE | 1/1 | 1/1 | 11.04 | 11.33 | -1.22 |
| TRUE | 1/1 | 1/1 | 11.04 | 11.33 | -1.22 |
| TRUE | 1/1 | 1/1 | 6.94  | 7.04  | -1.08 |
| TRUE | 1/1 | 1/1 | 6.94  | 7.04  | -1.08 |
| TRUE | 1/1 | 1/1 | 6.94  | 7.04  | -1.08 |
| TRUE | 1/1 | 1/1 | 6.94  | 7.04  | -1.08 |
| TRUE | 1/1 | 1/1 | 7.44  | 8.05  | -1.53 |
| TRUE | 1/1 | 1/1 | 7.44  | 8.05  | -1.53 |
| TRUE | 1/1 | 1/1 | 7.44  | 8.05  | -1.53 |
| TRUE | 1/1 | 1/1 | 8.06  | 7.57  | 1.41  |
| TRUE | 1/1 | 1/1 | 8.06  | 7.57  | 1.41  |
| TRUE | 1/1 | 1/1 | 8.06  | 7.57  | 1.41  |
| TRUE | 1/1 | 1/1 | 8.06  | 7.57  | 1.41  |
| TRUE | 1/1 | 1/1 | 8.06  | 7.57  | 1.41  |
| TRUE | 1/1 | 1/1 | 6.27  | 7.32  | -2.07 |
| TRUE | 1/1 | 1/1 | 6.27  | 7.32  | -2.07 |
| TRUE | 1/1 | 1/1 | 6.27  | 7.32  | -2.07 |
| TRUE | 1/1 | 1/1 | 6.27  | 7.32  | -2.07 |
| TRUE | 1/1 | 1/1 | 6.27  | 7.32  | -2.07 |
| TRUE | 1/1 | 1/1 | 6.27  | 7.32  | -2.07 |
| TRUE | 1/1 | 1/1 | 6.27  | 7.32  | -2.07 |
| TRUE | 1/1 | 1/1 | 6.27  | 7.32  | -2.07 |
| TRUE | 1/1 | 1/1 | 6.27  | 7.32  | -2.07 |
| TRUE | 1/1 | 1/1 | 6.27  | 7.32  | -2.07 |
| TRUE | 1/1 | 1/1 | 6.51  | 5.84  | 1.59  |
| TRUE | 1/1 | 1/1 | 6.51  | 5.84  | 1.59  |
| TRUE | 1/1 | 1/1 | 6.51  | 5.84  | 1.59  |
| TRUE | 1/1 | 1/1 | 6.51  | 5.84  | 1.59  |
| TRUE | 1/1 | 1/1 | 6.18  | 5.92  | 1.19  |
| TRUE | 1/1 | 1/1 | 6.18  | 5.92  | 1.19  |
| TRUE | 1/1 | 1/1 | 6.18  | 5.92  | 1.19  |
| TRUE | 1/1 | 1/1 | 6.32  | 6.57  | -1.19 |
| TRUE | 1/1 | 1/1 | 6.32  | 6.57  | -1.19 |
| TRUE | 1/1 | 1/1 | 6.32  | 6.57  | -1.19 |
| TRUE | 1/1 | 1/1 | 6.32  | 6.57  | -1.19 |
| TRUE | 1/1 | 1/1 | 6.32  | 6.57  | -1.19 |
| TRUE | 1/1 | 1/1 | 6.32  | 6.57  | -1.19 |
| TRUE | 1/1 | 1/1 | 6.32  | 6.57  | -1.19 |
| TRUE | 1/1 | 1/1 | 6.32  | 6.57  | -1.19 |
| TRUE | 1/1 | 1/1 | 10.6  | 10.98 | -1.3  |
| TRUE | 1/1 | 1/1 | 10.6  | 10.98 | -1.3  |
| TRUE | 1/1 | 1/1 | 10.6  | 10.98 | -1.3  |
| TRUE | 1/1 | 1/1 | 10.6  | 10.98 | -1.3  |
| TRUE | 1/1 | 1/1 | 6.22  | 6.67  | -1.37 |
| TRUE | 1/1 | 1/1 | 6.22  | 6.67  | -1.37 |
| TRUE | 1/1 | 1/1 | 8.04  | 7.69  | 1.27  |

|      |     |     |       |       |       |
|------|-----|-----|-------|-------|-------|
| TRUE | 1/1 | 1/1 | 8.04  | 7.69  | 1.27  |
| TRUE | 1/1 | 1/1 | 7.17  | 7.31  | -1.1  |
| TRUE | 1/1 | 1/1 | 7.17  | 7.31  | -1.1  |
| TRUE | 1/1 | 1/1 | 7.44  | 8.05  | -1.53 |
| TRUE | 1/1 | 1/1 | 7.44  | 8.05  | -1.53 |
| TRUE | 1/1 | 1/1 | 7.44  | 8.05  | -1.53 |
| TRUE | 1/1 | 1/1 | 7.44  | 8.05  | -1.53 |
| TRUE | 1/1 | 1/1 | 7.44  | 8.05  | -1.53 |
| TRUE | 1/1 | 1/1 | 7.44  | 8.05  | -1.53 |
| TRUE | 1/1 | 1/1 | 7.44  | 8.05  | -1.53 |
| TRUE | 1/1 | 1/1 | 7.44  | 8.05  | -1.53 |
| TRUE | 1/1 | 1/1 | 7.44  | 8.05  | -1.53 |
| TRUE | 1/1 | 1/1 | 7.44  | 8.05  | -1.53 |
| TRUE | 1/1 | 1/1 | 7.44  | 8.05  | -1.53 |
| TRUE | 1/1 | 1/1 | 7.17  | 7.31  | -1.1  |
| TRUE | 1/1 | 1/1 | 7.17  | 7.31  | -1.1  |
| TRUE | 1/1 | 1/1 | 7.17  | 7.31  | -1.11 |
| TRUE | 1/1 | 1/1 | 7.17  | 7.31  | -1.11 |
| TRUE | 1/1 | 1/1 | 5.78  | 5.76  | 1.01  |
| TRUE | 1/1 | 1/1 | 5.78  | 5.76  | 1.01  |
| TRUE | 1/1 | 1/1 | 7.98  | 8.58  | -1.52 |
| TRUE | 1/1 | 1/1 | 7.98  | 8.58  | -1.52 |
| TRUE | 1/1 | 1/1 | 7.98  | 8.58  | -1.52 |
| TRUE | 1/1 | 1/1 | 7.72  | 6.76  | 1.95  |
| TRUE | 1/1 | 1/1 | 7.72  | 6.76  | 1.95  |
| TRUE | 1/1 | 1/1 | 7.72  | 6.76  | 1.95  |
| TRUE | 1/1 | 1/1 | 7.72  | 6.76  | 1.95  |
| TRUE | 1/1 | 1/1 | 5.73  | 5.09  | 1.57  |
| TRUE | 1/1 | 1/1 | 5.73  | 5.09  | 1.57  |
| TRUE | 1/1 | 1/1 | 5.73  | 5.09  | 1.57  |
| TRUE | 1/1 | 1/1 | 10.18 | 10.38 | -1.14 |
| TRUE | 1/1 | 1/1 | 10.18 | 10.38 | -1.14 |
| TRUE | 1/1 | 1/1 | 10.18 | 10.38 | -1.14 |
| TRUE | 1/1 | 1/1 | 8.56  | 7.81  | 1.68  |
| TRUE | 1/1 | 1/1 | 8.56  | 7.81  | 1.68  |
| TRUE | 1/1 | 1/1 | 8.56  | 7.81  | 1.68  |
| TRUE | 1/1 | 1/1 | 4.58  | 4.46  | 1.09  |
| TRUE | 1/1 | 1/1 | 4.58  | 4.46  | 1.09  |
| TRUE | 1/1 | 1/1 | 5.67  | 5.95  | -1.21 |
| TRUE | 1/1 | 1/1 | 5.67  | 5.95  | -1.21 |
| TRUE | 1/1 | 1/1 | 5.67  | 5.95  | -1.21 |
| TRUE | 1/1 | 1/1 | 5.67  | 5.95  | -1.21 |
| TRUE | 1/1 | 1/1 | 5.67  | 5.95  | -1.21 |
| TRUE | 1/1 | 1/1 | 5.67  | 5.95  | -1.21 |
| TRUE | 1/1 | 1/1 | 6.01  | 6.38  | -1.29 |
| TRUE | 1/1 | 1/1 | 6.01  | 6.38  | -1.29 |
| TRUE | 1/1 | 1/1 | 5.01  | 5.15  | -1.11 |
| TRUE | 1/1 | 1/1 | 5.01  | 5.15  | -1.11 |
| TRUE | 1/1 | 1/1 | 5.01  | 5.15  | -1.11 |
| TRUE | 1/1 | 1/1 | 6.93  | 6.93  | -1    |
| TRUE | 1/1 | 1/1 | 6.93  | 6.93  | -1    |
| TRUE | 1/1 | 1/1 | 8.73  | 9.48  | -1.68 |
| TRUE | 1/1 | 1/1 | 8.73  | 9.48  | -1.68 |
| TRUE | 1/1 | 1/1 | 8.73  | 9.48  | -1.68 |
| TRUE | 1/1 | 1/1 | 8.73  | 9.48  | -1.68 |
| TRUE | 1/1 | 1/1 | 9.89  | 10.54 | -1.56 |
| TRUE | 1/1 | 1/1 | 9.89  | 10.54 | -1.56 |
| TRUE | 1/1 | 1/1 | 6.75  | 7.51  | -1.7  |



|      |     |     |       |       |       |
|------|-----|-----|-------|-------|-------|
| TRUE | 1/1 | 1/1 | 4.38  | 3.34  | 2.06  |
| TRUE | 1/1 | 1/1 | 4.38  | 3.34  | 2.06  |
| TRUE | 1/1 | 1/1 | 4.38  | 3.34  | 2.06  |
| TRUE | 1/1 | 1/1 | 6.84  | 6.43  | 1.32  |
| TRUE | 1/1 | 1/1 | 6.84  | 6.43  | 1.32  |
| TRUE | 1/1 | 1/1 | 5.28  | 5.31  | -1.02 |
| TRUE | 1/1 | 1/1 | 5.28  | 5.31  | -1.02 |
| TRUE | 1/1 | 1/1 | 7.67  | 8.31  | -1.55 |
| TRUE | 1/1 | 1/1 | 7.67  | 8.31  | -1.55 |
| TRUE | 1/1 | 1/1 | 7.67  | 8.31  | -1.55 |
| TRUE | 1/1 | 1/1 | 7.67  | 8.31  | -1.55 |
| TRUE | 1/1 | 1/1 | 7.67  | 8.31  | -1.55 |
| TRUE | 1/1 | 1/1 | 5.35  | 5.23  | 1.09  |
| TRUE | 1/1 | 1/1 | 5.35  | 5.23  | 1.09  |
| TRUE | 1/1 | 1/1 | 5.35  | 5.23  | 1.09  |
| TRUE | 1/1 | 1/1 | 10.95 | 10.98 | -1.02 |
| TRUE | 1/1 | 1/1 | 10.95 | 10.98 | -1.02 |
| TRUE | 1/1 | 1/1 | 8.88  | 7.96  | 1.9   |
| TRUE | 1/1 | 1/1 | 8.88  | 7.96  | 1.9   |
| TRUE | 1/1 | 1/1 | 8.88  | 7.96  | 1.9   |
| TRUE | 1/1 | 1/1 | 8.88  | 7.96  | 1.9   |
| TRUE | 1/1 | 1/1 | 8.88  | 7.96  | 1.9   |
| TRUE | 1/1 | 1/1 | 4.96  | 4.56  | 1.32  |
| TRUE | 1/1 | 1/1 | 4.96  | 4.56  | 1.32  |
| TRUE | 1/1 | 1/1 | 7.15  | 7.23  | -1.06 |
| TRUE | 1/1 | 1/1 | 7.15  | 7.23  | -1.06 |
| TRUE | 1/1 | 1/1 | 6.46  | 7.21  | -1.68 |
| TRUE | 1/1 | 1/1 | 6.46  | 7.21  | -1.68 |
| TRUE | 1/1 | 1/1 | 6.46  | 7.21  | -1.68 |
| TRUE | 1/1 | 1/1 | 6.5   | 6.27  | 1.18  |
| TRUE | 1/1 | 1/1 | 6.5   | 6.27  | 1.18  |
| TRUE | 1/1 | 1/1 | 6.5   | 6.27  | 1.18  |
| TRUE | 1/1 | 1/1 | 6.5   | 6.27  | 1.18  |
| TRUE | 1/1 | 1/1 | 6.5   | 6.27  | 1.18  |
| TRUE | 1/1 | 1/1 | 10.96 | 11.13 | -1.13 |
| TRUE | 1/1 | 1/1 | 10.96 | 11.13 | -1.13 |
| TRUE | 1/1 | 1/1 | 6.45  | 7.2   | -1.68 |
| TRUE | 1/1 | 1/1 | 6.45  | 7.2   | -1.68 |
| TRUE | 1/1 | 1/1 | 6.64  | 7.11  | -1.38 |
| TRUE | 1/1 | 1/1 | 6.64  | 7.11  | -1.38 |
| TRUE | 1/1 | 1/1 | 5.35  | 5.4   | -1.03 |
| TRUE | 1/1 | 1/1 | 5.35  | 5.4   | -1.03 |
| TRUE | 1/1 | 1/1 | 6.06  | 6.35  | -1.23 |
| TRUE | 1/1 | 1/1 | 6.06  | 6.35  | -1.23 |
| TRUE | 1/1 | 1/1 | 9.79  | 10.47 | -1.61 |
| TRUE | 1/1 | 1/1 | 9.79  | 10.47 | -1.61 |
| TRUE | 1/1 | 1/1 | 7.97  | 8.51  | -1.45 |
| TRUE | 1/1 | 1/1 | 7.97  | 8.51  | -1.45 |
| TRUE | 1/1 | 1/1 | 7.97  | 8.51  | -1.45 |
| TRUE | 1/1 | 1/1 | 7.45  | 8.05  | -1.52 |
| TRUE | 1/1 | 1/1 | 7.45  | 8.05  | -1.52 |
| TRUE | 1/1 | 1/1 | 6.68  | 7     | -1.25 |
| TRUE | 1/1 | 1/1 | 6.68  | 7     | -1.25 |
| TRUE | 1/1 | 1/1 | 6.68  | 7     | -1.25 |
| TRUE | 1/1 | 1/1 | 5.91  | 6.67  | -1.69 |
| TRUE | 1/1 | 1/1 | 5.91  | 6.67  | -1.69 |
| TRUE | 1/1 | 1/1 | 5.91  | 6.67  | -1.69 |
| TRUE | 1/1 | 1/1 | 5.91  | 6.67  | -1.69 |



|      |     |     |      |      |       |
|------|-----|-----|------|------|-------|
| TRUE | 1/1 | 1/1 | 6.48 | 7.66 | -2.26 |
| TRUE | 1/1 | 1/1 | 6.48 | 7.66 | -2.26 |
| TRUE | 1/1 | 1/1 | 6.48 | 7.66 | -2.26 |
| TRUE | 1/1 | 1/1 | 6.48 | 7.66 | -2.26 |
| TRUE | 1/1 | 1/1 | 6.48 | 7.66 | -2.26 |
| TRUE | 1/1 | 1/1 | 6.48 | 7.66 | -2.26 |
| TRUE | 1/1 | 1/1 | 6.48 | 7.66 | -2.26 |
| TRUE | 1/1 | 1/1 | 6.48 | 7.66 | -2.26 |
| TRUE | 1/1 | 1/1 | 6.48 | 7.66 | -2.26 |
| TRUE | 1/1 | 1/1 | 6.48 | 7.66 | -2.26 |
| TRUE | 1/1 | 1/1 | 6.48 | 7.66 | -2.26 |
| TRUE | 1/1 | 1/1 | 6.48 | 7.66 | -2.26 |
| TRUE | 1/1 | 1/1 | 8.31 | 8.1  | 1.16  |
| TRUE | 1/1 | 1/1 | 8.31 | 8.1  | 1.16  |
| TRUE | 1/1 | 1/1 | 8.31 | 8.1  | 1.16  |
| TRUE | 1/1 | 1/1 | 7.3  | 6.67 | 1.55  |
| TRUE | 1/1 | 1/1 | 7.3  | 6.67 | 1.55  |
| TRUE | 1/1 | 1/1 | 7.3  | 6.67 | 1.55  |
| TRUE | 1/1 | 1/1 | 7.3  | 6.67 | 1.55  |
| TRUE | 1/1 | 1/1 | 7.3  | 6.67 | 1.55  |
| TRUE | 1/1 | 1/1 | 7.3  | 6.67 | 1.55  |
| TRUE | 1/1 | 1/1 | 7.3  | 6.67 | 1.55  |
| TRUE | 1/1 | 1/1 | 7.3  | 6.67 | 1.55  |
| TRUE | 1/1 | 1/1 | 7.41 | 7.76 | -1.27 |
| TRUE | 1/1 | 1/1 | 7.41 | 7.76 | -1.27 |
| TRUE | 1/1 | 1/1 | 6.95 | 6.98 | -1.02 |
| TRUE | 1/1 | 1/1 | 6.95 | 6.98 | -1.02 |
| TRUE | 1/1 | 1/1 | 6.95 | 6.98 | -1.02 |
| TRUE | 1/1 | 1/1 | 5.93 | 6.46 | -1.44 |
| TRUE | 1/1 | 1/1 | 5.93 | 6.46 | -1.44 |
| TRUE | 1/1 | 1/1 | 5.93 | 6.46 | -1.44 |
| TRUE | 1/1 | 1/1 | 4.11 | 4.98 | -1.83 |
| TRUE | 1/1 | 1/1 | 4.11 | 4.98 | -1.83 |
| TRUE | 1/1 | 1/1 | 4.11 | 4.98 | -1.83 |
| TRUE | 1/1 | 1/1 | 4.11 | 4.98 | -1.83 |
| TRUE | 1/1 | 1/1 | 4.1  | 3.56 | 1.45  |
| TRUE | 1/1 | 1/1 | 4.1  | 3.56 | 1.45  |
| TRUE | 1/1 | 1/1 | 4.1  | 3.56 | 1.45  |
| TRUE | 1/1 | 1/1 | 4.1  | 3.56 | 1.45  |
| TRUE | 1/1 | 1/1 | 4.1  | 3.56 | 1.45  |
| TRUE | 1/1 | 1/1 | 4.1  | 3.56 | 1.45  |
| TRUE | 1/1 | 1/1 | 4.1  | 3.56 | 1.45  |
| TRUE | 1/1 | 1/1 | 4.1  | 3.56 | 1.45  |
| TRUE | 1/1 | 1/1 | 7.52 | 8.03 | -1.43 |
| TRUE | 1/1 | 1/1 | 7.52 | 8.03 | -1.43 |
| TRUE | 1/1 | 1/1 | 6.32 | 6.16 | 1.11  |
| TRUE | 1/1 | 1/1 | 6.32 | 6.16 | 1.11  |
| TRUE | 1/1 | 1/1 | 6.11 | 6.08 | 1.03  |
| TRUE | 1/1 | 1/1 | 6.11 | 6.08 | 1.03  |
| TRUE | 1/1 | 1/1 | 6.11 | 6.08 | 1.03  |
| TRUE | 1/1 | 1/1 | 7.57 | 7.91 | -1.27 |
| TRUE | 1/1 | 1/1 | 7.57 | 7.91 | -1.27 |
| TRUE | 1/1 | 1/1 | 9.49 | 9.68 | -1.14 |
| TRUE | 1/1 | 1/1 | 9.49 | 9.68 | -1.14 |
| TRUE | 1/1 | 1/1 | 9.38 | 8.56 | 1.76  |
| TRUE | 1/1 | 1/1 | 9.38 | 8.56 | 1.76  |
| TRUE | 1/1 | 1/1 | 9.38 | 8.56 | 1.76  |
| TRUE | 1/1 | 1/1 | 9.38 | 8.56 | 1.76  |
| TRUE | 1/1 | 1/1 | 7.73 | 6.66 | 2.1   |
| TRUE | 1/1 | 1/1 | 7.73 | 6.66 | 2.1   |



|      |     |     |      |      |       |
|------|-----|-----|------|------|-------|
| TRUE | 1/1 | 1/1 | 9.25 | 9.04 | 1.15  |
| TRUE | 1/1 | 1/1 | 9.25 | 9.04 | 1.15  |
| TRUE | 1/1 | 1/1 | 9.25 | 9.04 | 1.15  |
| TRUE | 1/1 | 1/1 | 9.25 | 9.04 | 1.15  |
| TRUE | 1/1 | 1/1 | 4.46 | 4.3  | 1.11  |
| TRUE | 1/1 | 1/1 | 4.46 | 4.3  | 1.11  |
| TRUE | 1/1 | 1/1 | 4.46 | 4.3  | 1.11  |
| TRUE | 1/1 | 1/1 | 3.71 | 3.52 | 1.15  |
| TRUE | 1/1 | 1/1 | 3.71 | 3.52 | 1.15  |
| TRUE | 1/1 | 1/1 | 9.1  | 7.72 | 2.61  |
| TRUE | 1/1 | 1/1 | 9.1  | 7.72 | 2.61  |
| TRUE | 1/1 | 1/1 | 9.1  | 7.72 | 2.61  |
| TRUE | 1/1 | 1/1 | 9.1  | 7.72 | 2.61  |
| TRUE | 1/1 | 1/1 | 9.1  | 7.72 | 2.61  |
| TRUE | 1/1 | 1/1 | 9.1  | 7.72 | 2.61  |
| TRUE | 1/1 | 1/1 | 9.1  | 7.72 | 2.61  |
| TRUE | 1/1 | 1/1 | 9.1  | 7.72 | 2.61  |
| TRUE | 1/1 | 1/1 | 9.1  | 7.72 | 2.61  |
| TRUE | 1/1 | 1/1 | 9.1  | 7.72 | 2.61  |
| TRUE | 1/1 | 1/1 | 9.1  | 7.72 | 2.61  |
| TRUE | 1/1 | 1/1 | 9.1  | 7.72 | 2.61  |
| TRUE | 1/1 | 1/1 | 3.45 | 3.5  | -1.04 |
| TRUE | 1/1 | 1/1 | 3.45 | 3.5  | -1.04 |
| TRUE | 1/1 | 1/1 | 7.58 | 8.07 | -1.4  |
| TRUE | 1/1 | 1/1 | 7.58 | 8.07 | -1.4  |
| TRUE | 1/1 | 1/1 | 4.38 | 4.67 | -1.22 |
| TRUE | 1/1 | 1/1 | 4.38 | 4.67 | -1.22 |
| TRUE | 1/1 | 1/1 | 4.38 | 4.67 | -1.22 |
| TRUE | 1/1 | 1/1 | 4.38 | 4.67 | -1.22 |
| TRUE | 1/1 | 1/1 | 4.97 | 5.87 | -1.86 |
| TRUE | 1/1 | 1/1 | 4.97 | 5.87 | -1.86 |
| TRUE | 1/1 | 1/1 | 4.97 | 5.87 | -1.86 |
| TRUE | 1/1 | 1/1 | 4.97 | 5.87 | -1.86 |
| TRUE | 1/1 | 1/1 | 4.97 | 5.87 | -1.86 |
| TRUE | 1/1 | 1/1 | 4.97 | 5.87 | -1.86 |
| TRUE | 1/1 | 1/1 | 5.8  | 5.91 | -1.08 |
| TRUE | 1/1 | 1/1 | 5.8  | 5.91 | -1.08 |
| TRUE | 1/1 | 1/1 | 5.8  | 5.91 | -1.08 |
| TRUE | 1/1 | 1/1 | 6.28 | 6.92 | -1.56 |
| TRUE | 1/1 | 1/1 | 6.28 | 6.92 | -1.56 |
| TRUE | 1/1 | 1/1 | 6.69 | 5.35 | 2.52  |
| TRUE | 1/1 | 1/1 | 6.69 | 5.35 | 2.52  |
| TRUE | 1/1 | 1/1 | 6.69 | 5.35 | 2.52  |
| TRUE | 1/1 | 1/1 | 6.69 | 5.35 | 2.52  |
| TRUE | 1/1 | 1/1 | 6.69 | 5.35 | 2.52  |
| TRUE | 1/1 | 1/1 | 6.69 | 5.35 | 2.52  |
| TRUE | 1/1 | 1/1 | 6.69 | 5.35 | 2.52  |
| TRUE | 1/1 | 1/1 | 6.69 | 5.35 | 2.52  |
| TRUE | 1/1 | 1/1 | 6.69 | 5.35 | 2.52  |
| TRUE | 1/1 | 1/1 | 6.17 | 6.45 | -1.21 |
| TRUE | 1/1 | 1/1 | 6.17 | 6.45 | -1.21 |
| TRUE | 1/1 | 1/1 | 5.94 | 6.6  | -1.59 |
| TRUE | 1/1 | 1/1 | 5.94 | 6.6  | -1.59 |
| TRUE | 1/1 | 1/1 | 7.54 | 8.21 | -1.59 |
| TRUE | 1/1 | 1/1 | 7.54 | 8.21 | -1.59 |
| TRUE | 1/1 | 1/1 | 9.17 | 8.2  | 1.96  |
| TRUE | 1/1 | 1/1 | 9.17 | 8.2  | 1.96  |
| TRUE | 1/1 | 1/1 | 9.17 | 8.2  | 1.96  |
| TRUE | 1/1 | 1/1 | 9.17 | 8.2  | 1.96  |
| TRUE | 1/1 | 1/1 | 9.17 | 8.2  | 1.96  |
| TRUE | 1/1 | 1/1 | 7.62 | 7.71 | -1.06 |

|      |     |     |       |       |       |
|------|-----|-----|-------|-------|-------|
| TRUE | 1/1 | 1/1 | 7.62  | 7.71  | -1.06 |
| TRUE | 1/1 | 1/1 | 7.96  | 8.49  | -1.44 |
| TRUE | 1/1 | 1/1 | 7.96  | 8.49  | -1.44 |
| TRUE | 1/1 | 1/1 | 4.62  | 5.01  | -1.32 |
| TRUE | 1/1 | 1/1 | 4.62  | 5.01  | -1.32 |
| TRUE | 1/1 | 1/1 | 7.85  | 7.84  | 1     |
| TRUE | 1/1 | 1/1 | 7.85  | 7.84  | 1     |
| TRUE | 1/1 | 1/1 | 7.85  | 7.84  | 1     |
| TRUE | 1/1 | 1/1 | 8.8   | 8.33  | 1.39  |
| TRUE | 1/1 | 1/1 | 8.8   | 8.33  | 1.39  |
| TRUE | 1/1 | 1/1 | 8.8   | 8.33  | 1.39  |
| TRUE | 1/1 | 1/1 | 8.8   | 8.33  | 1.39  |
| TRUE | 1/1 | 1/1 | 8.8   | 8.33  | 1.39  |
| TRUE | 1/1 | 1/1 | 8.8   | 8.33  | 1.39  |
| TRUE | 1/1 | 1/1 | 8.8   | 8.33  | 1.39  |
| TRUE | 1/1 | 1/1 | 8.38  | 5.93  | 5.49  |
| TRUE | 1/1 | 1/1 | 8.38  | 5.93  | 5.49  |
| TRUE | 1/1 | 1/1 | 8.38  | 5.93  | 5.49  |
| TRUE | 1/1 | 1/1 | 8.38  | 5.93  | 5.49  |
| TRUE | 1/1 | 1/1 | 8.38  | 5.93  | 5.49  |
| TRUE | 1/1 | 1/1 | 8.38  | 5.93  | 5.49  |
| TRUE | 1/1 | 1/1 | 8.38  | 5.93  | 5.49  |
| TRUE | 1/1 | 1/1 | 8.38  | 5.93  | 5.49  |
| TRUE | 1/1 | 1/1 | 12.59 | 12.69 | -1.07 |
| TRUE | 1/1 | 1/1 | 12.59 | 12.69 | -1.07 |
| TRUE | 1/1 | 1/1 | 12.59 | 12.69 | -1.07 |
| TRUE | 1/1 | 1/1 | 8.22  | 7.03  | 2.29  |
| TRUE | 1/1 | 1/1 | 8.22  | 7.03  | 2.29  |
| TRUE | 1/1 | 1/1 | 8.22  | 7.03  | 2.29  |
| TRUE | 1/1 | 1/1 | 8.22  | 7.03  | 2.29  |
| TRUE | 1/1 | 1/1 | 8.22  | 7.03  | 2.29  |
| TRUE | 1/1 | 1/1 | 8.22  | 7.03  | 2.29  |
| TRUE | 1/1 | 1/1 | 8.22  | 7.03  | 2.29  |
| TRUE | 1/1 | 1/1 | 8.22  | 7.03  | 2.29  |
| TRUE | 1/1 | 1/1 | 8.52  | 8.64  | -1.09 |
| TRUE | 1/1 | 1/1 | 8.52  | 8.64  | -1.09 |
| TRUE | 1/1 | 1/1 | 8.52  | 8.64  | -1.09 |
| TRUE | 1/1 | 1/1 | 6.92  | 6.71  | 1.15  |
| TRUE | 1/1 | 1/1 | 6.92  | 6.71  | 1.15  |
| TRUE | 1/1 | 1/1 | 6.92  | 6.71  | 1.15  |
| TRUE | 1/1 | 1/1 | 6.92  | 6.71  | 1.15  |
| TRUE | 1/1 | 1/1 | 10.25 | 7.68  | 5.94  |
| TRUE | 1/1 | 1/1 | 10.25 | 7.68  | 5.94  |
| TRUE | 1/1 | 1/1 | 10.25 | 7.68  | 5.94  |
| TRUE | 1/1 | 1/1 | 10.25 | 7.68  | 5.94  |
| TRUE | 1/1 | 1/1 | 6.45  | 6.52  | -1.05 |
| TRUE | 1/1 | 1/1 | 6.45  | 6.52  | -1.05 |
| TRUE | 1/1 | 1/1 | 6.45  | 6.52  | -1.05 |
| TRUE | 1/1 | 1/1 | 6.3   | 6.49  | -1.14 |
| TRUE | 1/1 | 1/1 | 6.3   | 6.49  | -1.14 |
| TRUE | 1/1 | 1/1 | 6.3   | 6.49  | -1.14 |
| TRUE | 1/1 | 1/1 | 6.82  | 7.34  | -1.43 |
| TRUE | 1/1 | 1/1 | 6.82  | 7.34  | -1.43 |
| TRUE | 1/1 | 1/1 | 8.93  | 8.87  | 1.04  |
| TRUE | 1/1 | 1/1 | 8.93  | 8.87  | 1.04  |
| TRUE | 1/1 | 1/1 | 8.93  | 8.87  | 1.04  |
| TRUE | 1/1 | 1/1 | 7.51  | 8.04  | -1.45 |
| TRUE | 1/1 | 1/1 | 7.51  | 8.04  | -1.45 |
| TRUE | 1/1 | 1/1 | 12.38 | 12.54 | -1.12 |
| TRUE | 1/1 | 1/1 | 12.38 | 12.54 | -1.12 |
| TRUE | 1/1 | 1/1 | 12.38 | 12.54 | -1.12 |

|      |     |     |       |      |       |
|------|-----|-----|-------|------|-------|
| TRUE | 1/1 | 1/1 | 6.08  | 5.57 | 1.43  |
| TRUE | 1/1 | 1/1 | 6.08  | 5.57 | 1.43  |
| TRUE | 1/1 | 1/1 | 6.08  | 5.57 | 1.43  |
| TRUE | 1/1 | 1/1 | 6.7   | 7.3  | -1.52 |
| TRUE | 1/1 | 1/1 | 6.7   | 7.3  | -1.52 |
| TRUE | 1/1 | 1/1 | 4.89  | 4.94 | -1.03 |
| TRUE | 1/1 | 1/1 | 4.89  | 4.94 | -1.03 |
| TRUE | 1/1 | 1/1 | 4.89  | 4.94 | -1.03 |
| TRUE | 1/1 | 1/1 | 10.45 | 10.6 | -1.11 |
| TRUE | 1/1 | 1/1 | 10.45 | 10.6 | -1.11 |
| TRUE | 1/1 | 1/1 | 6.32  | 6.05 | 1.2   |
| TRUE | 1/1 | 1/1 | 6.32  | 6.05 | 1.2   |
| TRUE | 1/1 | 1/1 | 6.6   | 6.57 | 1.02  |
| TRUE | 1/1 | 1/1 | 6.6   | 6.57 | 1.02  |
| TRUE | 1/1 | 1/1 | 9.65  | 9.76 | -1.08 |
| TRUE | 1/1 | 1/1 | 9.65  | 9.76 | -1.08 |
| TRUE | 1/1 | 1/1 | 4.21  | 4.09 | 1.08  |
| TRUE | 1/1 | 1/1 | 4.21  | 4.09 | 1.08  |
| TRUE | 1/1 | 1/1 | 6.04  | 6.74 | -1.63 |
| TRUE | 1/1 | 1/1 | 6.04  | 6.74 | -1.63 |
| TRUE | 1/1 | 1/1 | 6.04  | 6.74 | -1.63 |
| TRUE | 1/1 | 1/1 | 6.04  | 6.74 | -1.63 |
| TRUE | 1/1 | 1/1 | 6.04  | 6.74 | -1.63 |
| TRUE | 1/1 | 1/1 | 5.67  | 4.91 | 1.7   |
| TRUE | 1/1 | 1/1 | 5.67  | 4.91 | 1.7   |
| TRUE | 1/1 | 1/1 | 6.88  | 7.43 | -1.47 |
| TRUE | 1/1 | 1/1 | 6.88  | 7.43 | -1.47 |
| TRUE | 1/1 | 1/1 | 6.88  | 7.43 | -1.47 |
| TRUE | 1/1 | 1/1 | 6.88  | 7.43 | -1.47 |
| TRUE | 1/1 | 1/1 | 6.88  | 7.43 | -1.47 |
| TRUE | 1/1 | 1/1 | 8.07  | 7.85 | 1.16  |
| TRUE | 1/1 | 1/1 | 8.07  | 7.85 | 1.16  |
| TRUE | 1/1 | 1/1 | 8.07  | 7.85 | 1.16  |
| TRUE | 1/1 | 1/1 | 8.07  | 7.85 | 1.16  |
| TRUE | 1/1 | 1/1 | 8.07  | 7.85 | 1.16  |
| TRUE | 1/1 | 1/1 | 6.92  | 7.37 | -1.36 |
| TRUE | 1/1 | 1/1 | 6.92  | 7.37 | -1.36 |
| TRUE | 1/1 | 1/1 | 6.92  | 7.37 | -1.36 |
| TRUE | 1/1 | 1/1 | 6.92  | 7.37 | -1.36 |
| TRUE | 1/1 | 1/1 | 3.99  | 3.72 | 1.21  |
| TRUE | 1/1 | 1/1 | 3.99  | 3.72 | 1.21  |
| TRUE | 1/1 | 1/1 | 3.99  | 3.72 | 1.21  |
| TRUE | 1/1 | 1/1 | 3.99  | 3.72 | 1.21  |
| TRUE | 1/1 | 1/1 | 6.63  | 4.82 | 3.5   |
| TRUE | 1/1 | 1/1 | 6.63  | 4.82 | 3.5   |
| TRUE | 1/1 | 1/1 | 6.63  | 4.82 | 3.5   |
| TRUE | 1/1 | 1/1 | 6.63  | 4.82 | 3.5   |
| TRUE | 1/1 | 1/1 | 6.63  | 4.82 | 3.5   |
| TRUE | 1/1 | 1/1 | 5.37  | 5.95 | -1.49 |
| TRUE | 1/1 | 1/1 | 5.37  | 5.95 | -1.49 |
| TRUE | 1/1 | 1/1 | 4.95  | 4.69 | 1.19  |
| TRUE | 1/1 | 1/1 | 4.95  | 4.69 | 1.19  |
| TRUE | 1/1 | 1/1 | 6.97  | 6.85 | 1.08  |
| TRUE | 1/1 | 1/1 | 6.97  | 6.85 | 1.08  |
| TRUE | 1/1 | 1/1 | 6.97  | 6.85 | 1.08  |
| TRUE | 1/1 | 1/1 | 6.97  | 6.85 | 1.08  |
| TRUE | 1/1 | 1/1 | 3.38  | 3.75 | -1.29 |

|      |     |     |      |       |       |
|------|-----|-----|------|-------|-------|
| TRUE | 1/1 | 1/1 | 3.38 | 3.75  | -1.29 |
| TRUE | 1/1 | 1/1 | 4.83 | 4     | 1.78  |
| TRUE | 1/1 | 1/1 | 4.83 | 4     | 1.78  |
| TRUE | 1/1 | 1/1 | 4.83 | 4     | 1.78  |
| TRUE | 1/1 | 1/1 | 4.83 | 4     | 1.78  |
| TRUE | 1/1 | 1/1 | 6.82 | 7.45  | -1.55 |
| TRUE | 1/1 | 1/1 | 6.82 | 7.45  | -1.55 |
| TRUE | 1/1 | 1/1 | 6.82 | 7.45  | -1.55 |
| TRUE | 1/1 | 1/1 | 6.82 | 7.45  | -1.55 |
| TRUE | 1/1 | 1/1 | 6.82 | 7.45  | -1.55 |
| TRUE | 1/1 | 1/1 | 6.82 | 7.45  | -1.55 |
| TRUE | 1/1 | 1/1 | 7.02 | 7.91  | -1.86 |
| TRUE | 1/1 | 1/1 | 7.02 | 7.91  | -1.86 |
| TRUE | 1/1 | 1/1 | 5.09 | 4.92  | 1.12  |
| TRUE | 1/1 | 1/1 | 5.09 | 4.92  | 1.12  |
| TRUE | 1/1 | 1/1 | 7.54 | 8.03  | -1.41 |
| TRUE | 1/1 | 1/1 | 7.54 | 8.03  | -1.41 |
| TRUE | 1/1 | 1/1 | 7.17 | 7.54  | -1.29 |
| TRUE | 1/1 | 1/1 | 7.17 | 7.54  | -1.29 |
| TRUE | 1/1 | 1/1 | 7.17 | 7.54  | -1.29 |
| TRUE | 1/1 | 1/1 | 5.97 | 5.33  | 1.57  |
| TRUE | 1/1 | 1/1 | 5.97 | 5.33  | 1.57  |
| TRUE | 1/1 | 1/1 | 5.97 | 5.33  | 1.57  |
| TRUE | 1/1 | 1/1 | 9.14 | 7.39  | 3.38  |
| TRUE | 1/1 | 1/1 | 9.14 | 7.39  | 3.38  |
| TRUE | 1/1 | 1/1 | 9.14 | 7.39  | 3.38  |
| TRUE | 1/1 | 1/1 | 9.14 | 7.39  | 3.38  |
| TRUE | 1/1 | 1/1 | 9.14 | 7.39  | 3.38  |
| TRUE | 1/1 | 1/1 | 9.14 | 7.39  | 3.38  |
| TRUE | 1/1 | 1/1 | 9.14 | 7.39  | 3.38  |
| TRUE | 1/1 | 1/1 | 9.14 | 7.39  | 3.38  |
| TRUE | 1/1 | 1/1 | 9.14 | 7.39  | 3.38  |
| TRUE | 1/1 | 1/1 | 9.14 | 7.39  | 3.38  |
| TRUE | 1/1 | 1/1 | 9.14 | 7.39  | 3.38  |
| TRUE | 1/1 | 1/1 | 9.14 | 7.39  | 3.38  |
| TRUE | 1/1 | 1/1 | 9.14 | 7.39  | 3.38  |
| TRUE | 1/1 | 1/1 | 9.14 | 7.39  | 3.38  |
| TRUE | 1/1 | 1/1 | 9.14 | 7.39  | 3.38  |
| TRUE | 1/1 | 1/1 | 9.14 | 7.39  | 3.38  |
| TRUE | 1/1 | 1/1 | 9.14 | 7.39  | 3.38  |
| TRUE | 1/1 | 1/1 | 9.14 | 7.39  | 3.38  |
| TRUE | 1/1 | 1/1 | 9.14 | 7.39  | 3.38  |
| TRUE | 1/1 | 1/1 | 9.96 | 10.25 | -1.22 |
| TRUE | 1/1 | 1/1 | 9.96 | 10.25 | -1.22 |
| TRUE | 1/1 | 1/1 | 9.96 | 10.25 | -1.22 |
| TRUE | 1/1 | 1/1 | 8.06 | 8.82  | -1.7  |
| TRUE | 1/1 | 1/1 | 8.06 | 8.82  | -1.7  |
| TRUE | 1/1 | 1/1 | 8.06 | 8.82  | -1.7  |
| TRUE | 1/1 | 1/1 | 8.06 | 8.82  | -1.7  |
| TRUE | 1/1 | 1/1 | 9.63 | 8.01  | 3.09  |
| TRUE | 1/1 | 1/1 | 9.63 | 8.01  | 3.09  |
| TRUE | 1/1 | 1/1 | 9.63 | 8.01  | 3.09  |
| TRUE | 1/1 | 1/1 | 9.63 | 8.01  | 3.09  |
| TRUE | 1/1 | 1/1 | 9.25 | 9.97  | -1.65 |
| TRUE | 1/1 | 1/1 | 9.25 | 9.97  | -1.65 |
| TRUE | 1/1 | 1/1 | 6.78 | 6.78  | -1    |
| TRUE | 1/1 | 1/1 | 6.78 | 6.78  | -1    |
| TRUE | 1/1 | 1/1 | 9.61 | 9.98  | -1.29 |
| TRUE | 1/1 | 1/1 | 9.61 | 9.98  | -1.29 |
| TRUE | 1/1 | 1/1 | 10.1 | 10.71 | -1.52 |



|      |     |     |      |      |       |
|------|-----|-----|------|------|-------|
| TRUE | 1/1 | 1/1 | 5.59 | 5.62 | -1.02 |
| TRUE | 1/1 | 1/1 | 5.59 | 5.62 | -1.02 |
| TRUE | 1/1 | 1/1 | 5.59 | 5.62 | -1.02 |
| TRUE | 1/1 | 1/1 | 5.59 | 5.62 | -1.02 |
| TRUE | 1/1 | 1/1 | 5.59 | 5.62 | -1.02 |
| TRUE | 1/1 | 1/1 | 5.59 | 5.62 | -1.02 |
| TRUE | 1/1 | 1/1 | 3.61 | 3.18 | 1.35  |
| TRUE | 1/1 | 1/1 | 3.61 | 3.18 | 1.35  |
| TRUE | 1/1 | 1/1 | 3.61 | 3.18 | 1.35  |
| TRUE | 1/1 | 1/1 | 6.83 | 7.18 | -1.28 |
| TRUE | 1/1 | 1/1 | 6.83 | 7.18 | -1.28 |
| TRUE | 1/1 | 1/1 | 6.83 | 7.18 | -1.28 |
| TRUE | 1/1 | 1/1 | 7.03 | 5.75 | 2.44  |
| TRUE | 1/1 | 1/1 | 7.03 | 5.75 | 2.44  |
| TRUE | 1/1 | 1/1 | 7.03 | 5.75 | 2.44  |
| TRUE | 1/1 | 1/1 | 7.03 | 5.75 | 2.44  |
| TRUE | 1/1 | 1/1 | 7.03 | 5.75 | 2.44  |
| TRUE | 1/1 | 1/1 | 7.03 | 5.75 | 2.44  |
| TRUE | 1/1 | 1/1 | 9.56 | 6.58 | 7.89  |
| TRUE | 1/1 | 1/1 | 9.56 | 6.58 | 7.89  |
| TRUE | 1/1 | 1/1 | 9.56 | 6.58 | 7.89  |
| TRUE | 1/1 | 1/1 | 9.56 | 6.58 | 7.89  |
| TRUE | 1/1 | 1/1 | 9.56 | 6.58 | 7.89  |
| TRUE | 1/1 | 1/1 | 9.56 | 6.58 | 7.89  |
| TRUE | 1/1 | 1/1 | 9.56 | 6.58 | 7.89  |
| TRUE | 1/1 | 1/1 | 9.56 | 6.58 | 7.89  |
| TRUE | 1/1 | 1/1 | 9.56 | 6.58 | 7.89  |
| TRUE | 1/1 | 1/1 | 9.56 | 6.58 | 7.89  |
| TRUE | 1/1 | 1/1 | 9.19 | 7.18 | 4.03  |
| TRUE | 1/1 | 1/1 | 9.19 | 7.18 | 4.03  |
| TRUE | 1/1 | 1/1 | 9.19 | 7.18 | 4.03  |
| TRUE | 1/1 | 1/1 | 9.19 | 7.18 | 4.03  |
| TRUE | 1/1 | 1/1 | 9.19 | 7.18 | 4.03  |
| TRUE | 1/1 | 1/1 | 9.19 | 7.18 | 4.03  |
| TRUE | 1/1 | 1/1 | 9.19 | 7.18 | 4.03  |
| TRUE | 1/1 | 1/1 | 9.19 | 7.18 | 4.03  |
| TRUE | 1/1 | 1/1 | 9.19 | 7.18 | 4.03  |
| TRUE | 1/1 | 1/1 | 9.19 | 7.18 | 4.03  |
| TRUE | 1/1 | 1/1 | 9.19 | 7.18 | 4.03  |
| TRUE | 1/1 | 1/1 | 8.66 | 9.56 | -1.87 |
| TRUE | 1/1 | 1/1 | 8.66 | 9.56 | -1.87 |
| TRUE | 1/1 | 1/1 | 8.66 | 9.56 | -1.87 |
| TRUE | 1/1 | 1/1 | 8.66 | 9.56 | -1.87 |
| TRUE | 1/1 | 1/1 | 8.66 | 9.56 | -1.87 |
| TRUE | 1/1 | 1/1 | 5.76 | 6.26 | -1.42 |
| TRUE | 1/1 | 1/1 | 5.76 | 6.26 | -1.42 |
| TRUE | 1/1 | 1/1 | 6.97 | 7.49 | -1.44 |
| TRUE | 1/1 | 1/1 | 6.97 | 7.49 | -1.44 |
| TRUE | 1/1 | 1/1 | 6.97 | 7.49 | -1.44 |
| TRUE | 1/1 | 1/1 | 6.97 | 7.49 | -1.44 |
| TRUE | 1/1 | 1/1 | 6.97 | 7.49 | -1.44 |
| TRUE | 1/1 | 1/1 | 6.97 | 7.49 | -1.44 |
| TRUE | 1/1 | 1/1 | 6.97 | 7.49 | -1.44 |
| TRUE | 1/1 | 1/1 | 6.97 | 7.49 | -1.44 |
| TRUE | 1/1 | 1/1 | 6.97 | 7.49 | -1.44 |
| TRUE | 1/1 | 1/1 | 6.97 | 7.49 | -1.44 |
| TRUE | 1/1 | 1/1 | 6.91 | 7.01 | -1.07 |
| TRUE | 1/1 | 1/1 | 6.91 | 7.01 | -1.07 |
| TRUE | 1/1 | 1/1 | 6.91 | 7.01 | -1.07 |
| TRUE | 1/1 | 1/1 | 6.91 | 7.01 | -1.07 |
| TRUE | 1/1 | 1/1 | 6.26 | 6.51 | -1.19 |
| TRUE | 1/1 | 1/1 | 6.26 | 6.51 | -1.19 |
| TRUE | 1/1 | 1/1 | 5.01 | 5.67 | -1.57 |



|      |     |     |       |       |       |
|------|-----|-----|-------|-------|-------|
| TRUE | 1/1 | 1/1 | 5.01  | 5.67  | -1.57 |
| TRUE | 1/1 | 1/1 | 5.01  | 5.67  | -1.57 |
| TRUE | 1/1 | 1/1 | 5.01  | 5.67  | -1.57 |
| TRUE | 1/1 | 1/1 | 8.94  | 8.32  | 1.54  |
| TRUE | 1/1 | 1/1 | 8.94  | 8.32  | 1.54  |
| TRUE | 1/1 | 1/1 | 8.94  | 8.32  | 1.54  |
| TRUE | 1/1 | 1/1 | 8.94  | 8.32  | 1.54  |
| TRUE | 1/1 | 1/1 | 8.94  | 8.32  | 1.54  |
| TRUE | 1/1 | 1/1 | 8.94  | 8.32  | 1.54  |
| TRUE | 1/1 | 1/1 | 8.94  | 8.32  | 1.54  |
| TRUE | 1/1 | 1/1 | 8.94  | 8.32  | 1.54  |
| TRUE | 1/1 | 1/1 | 8.94  | 8.32  | 1.54  |
| TRUE | 1/1 | 1/1 | 8.94  | 8.32  | 1.54  |
| TRUE | 1/1 | 1/1 | 8.94  | 8.32  | 1.54  |
| TRUE | 1/1 | 1/1 | 8.94  | 8.32  | 1.54  |
| TRUE | 1/1 | 1/1 | 8.94  | 8.32  | 1.54  |
| TRUE | 1/1 | 1/1 | 8.94  | 8.32  | 1.54  |
| TRUE | 1/1 | 1/1 | 6.39  | 6.72  | -1.26 |
| TRUE | 1/1 | 1/1 | 6.39  | 6.72  | -1.26 |
| TRUE | 1/1 | 1/1 | 6.39  | 6.72  | -1.26 |
| TRUE | 1/1 | 1/1 | 6.68  | 6.76  | -1.06 |
| TRUE | 1/1 | 1/1 | 6.68  | 6.76  | -1.06 |
| TRUE | 1/1 | 1/1 | 3.59  | 3.54  | 1.04  |
| TRUE | 1/1 | 1/1 | 3.59  | 3.54  | 1.04  |
| TRUE | 1/1 | 1/1 | 3.59  | 3.54  | 1.04  |
| TRUE | 1/1 | 1/1 | 7.81  | 8.12  | -1.23 |
| TRUE | 1/1 | 1/1 | 7.81  | 8.12  | -1.23 |
| TRUE | 1/1 | 1/1 | 10.49 | 11.24 | -1.67 |
| TRUE | 1/1 | 1/1 | 10.49 | 11.24 | -1.67 |
| TRUE | 1/1 | 1/1 | 10.49 | 11.24 | -1.67 |
| TRUE | 1/1 | 1/1 | 10.49 | 11.24 | -1.67 |
| TRUE | 1/1 | 1/1 | 9.25  | 9.71  | -1.37 |
| TRUE | 1/1 | 1/1 | 9.25  | 9.71  | -1.37 |
| TRUE | 1/1 | 1/1 | 8.99  | 9.31  | -1.25 |
| TRUE | 1/1 | 1/1 | 8.99  | 9.31  | -1.25 |
| TRUE | 1/1 | 1/1 | 8.99  | 9.31  | -1.25 |
| TRUE | 1/1 | 1/1 | 8.99  | 9.31  | -1.25 |
| TRUE | 1/1 | 1/1 | 6.61  | 6.98  | -1.29 |
| TRUE | 1/1 | 1/1 | 6.61  | 6.98  | -1.29 |
| TRUE | 1/1 | 1/1 | 10.02 | 10.22 | -1.15 |
| TRUE | 1/1 | 1/1 | 10.02 | 10.22 | -1.15 |
| TRUE | 1/1 | 1/1 | 10.02 | 10.22 | -1.15 |
| TRUE | 1/1 | 1/1 | 10.02 | 10.22 | -1.15 |
| TRUE | 1/1 | 1/1 | 11.31 | 11.3  | 1.01  |
| TRUE | 1/1 | 1/1 | 11.31 | 11.3  | 1.01  |
| TRUE | 1/1 | 1/1 | 5.96  | 6.38  | -1.34 |
| TRUE | 1/1 | 1/1 | 5.96  | 6.38  | -1.34 |
| TRUE | 1/1 | 1/1 | 5.96  | 6.38  | -1.34 |
| TRUE | 1/1 | 1/1 | 5.96  | 6.38  | -1.34 |
| TRUE | 1/1 | 1/1 | 8.42  | 7.17  | 2.38  |
| TRUE | 1/1 | 1/1 | 8.42  | 7.17  | 2.38  |
| TRUE | 1/1 | 1/1 | 8.42  | 7.17  | 2.38  |
| TRUE | 1/1 | 1/1 | 8.42  | 7.17  | 2.38  |
| TRUE | 1/1 | 1/1 | 8.42  | 7.17  | 2.38  |
| TRUE | 1/1 | 1/1 | 8.42  | 7.17  | 2.38  |
| TRUE | 1/1 | 1/1 | 8.42  | 7.17  | 2.38  |
| TRUE | 1/1 | 1/1 | 8.42  | 7.17  | 2.38  |
| TRUE | 1/1 | 1/1 | 8.42  | 7.17  | 2.38  |
| TRUE | 1/1 | 1/1 | 8.42  | 7.17  | 2.38  |
| TRUE | 1/1 | 1/1 | 8.42  | 7.17  | 2.38  |
| TRUE | 1/1 | 1/1 | 8.42  | 7.17  | 2.38  |
| TRUE | 1/1 | 1/1 | 8.42  | 7.17  | 2.38  |
| TRUE | 1/1 | 1/1 | 8.25  | 8.93  | -1.61 |

|      |     |     |       |       |       |
|------|-----|-----|-------|-------|-------|
| TRUE | 1/1 | 1/1 | 8.25  | 8.93  | -1.61 |
| TRUE | 1/1 | 1/1 | 8.25  | 8.93  | -1.61 |
| TRUE | 1/1 | 1/1 | 5.96  | 6.77  | -1.75 |
| TRUE | 1/1 | 1/1 | 5.96  | 6.77  | -1.75 |
| TRUE | 1/1 | 1/1 | 5.96  | 6.77  | -1.75 |
| TRUE | 1/1 | 1/1 | 5.96  | 6.77  | -1.75 |
| TRUE | 1/1 | 1/1 | 8.27  | 7.93  | 1.27  |
| TRUE | 1/1 | 1/1 | 8.27  | 7.93  | 1.27  |
| TRUE | 1/1 | 1/1 | 6.1   | 6.48  | -1.3  |
| TRUE | 1/1 | 1/1 | 6.1   | 6.48  | -1.3  |
| TRUE | 1/1 | 1/1 | 10.4  | 8.27  | 4.4   |
| TRUE | 1/1 | 1/1 | 10.4  | 8.27  | 4.4   |
| TRUE | 1/1 | 1/1 | 10.4  | 8.27  | 4.4   |
| TRUE | 1/1 | 1/1 | 10.4  | 8.27  | 4.4   |
| TRUE | 1/1 | 1/1 | 8.04  | 8.05  | -1.01 |
| TRUE | 1/1 | 1/1 | 8.04  | 8.05  | -1.01 |
| TRUE | 1/1 | 1/1 | 9.35  | 10.02 | -1.59 |
| TRUE | 1/1 | 1/1 | 9.35  | 10.02 | -1.59 |
| TRUE | 1/1 | 1/1 | 9.35  | 10.02 | -1.59 |
| TRUE | 1/1 | 1/1 | 9.35  | 10.02 | -1.59 |
| TRUE | 1/1 | 1/1 | 5.25  | 5.38  | -1.09 |
| TRUE | 1/1 | 1/1 | 5.25  | 5.38  | -1.09 |
| TRUE | 1/1 | 1/1 | 5.25  | 5.38  | -1.09 |
| TRUE | 1/1 | 1/1 | 5.4   | 5.55  | -1.11 |
| TRUE | 1/1 | 1/1 | 5.4   | 5.55  | -1.11 |
| TRUE | 1/1 | 1/1 | 5.4   | 5.55  | -1.11 |
| TRUE | 1/1 | 1/1 | 7.01  | 7.43  | -1.34 |
| TRUE | 1/1 | 1/1 | 7.01  | 7.43  | -1.34 |
| TRUE | 1/1 | 1/1 | 7.01  | 7.43  | -1.34 |
| TRUE | 1/1 | 1/1 | 6.15  | 6.5   | -1.27 |
| TRUE | 1/1 | 1/1 | 6.15  | 6.5   | -1.27 |
| TRUE | 1/1 | 1/1 | 6.15  | 6.5   | -1.27 |
| TRUE | 1/1 | 1/1 | 6.15  | 6.5   | -1.27 |
| TRUE | 1/1 | 1/1 | 6.15  | 6.5   | -1.27 |
| TRUE | 1/1 | 1/1 | 6.15  | 6.5   | -1.27 |
| TRUE | 1/1 | 1/1 | 6.15  | 6.5   | -1.27 |
| TRUE | 1/1 | 1/1 | 6.15  | 6.5   | -1.27 |
| TRUE | 1/1 | 1/1 | 6.15  | 6.5   | -1.27 |
| TRUE | 1/1 | 1/1 | 6.15  | 6.5   | -1.27 |
| TRUE | 1/1 | 1/1 | 6.15  | 6.5   | -1.27 |
| TRUE | 1/1 | 1/1 | 6.15  | 6.5   | -1.27 |
| TRUE | 1/1 | 1/1 | 6.15  | 6.5   | -1.27 |
| TRUE | 1/1 | 1/1 | 6.15  | 6.5   | -1.27 |
| TRUE | 1/1 | 1/1 | 6.15  | 6.5   | -1.27 |
| TRUE | 1/1 | 1/1 | 6.15  | 6.5   | -1.27 |
| TRUE | 1/1 | 1/1 | 6.15  | 6.5   | -1.27 |
| TRUE | 1/1 | 1/1 | 6.15  | 6.5   | -1.27 |
| TRUE | 1/1 | 1/1 | 6.15  | 6.5   | -1.27 |
| TRUE | 1/1 | 1/1 | 6.15  | 6.5   | -1.27 |
| TRUE | 1/1 | 1/1 | 6.15  | 6.5   | -1.27 |
| TRUE | 1/1 | 1/1 | 5.9   | 6.95  | -2.07 |
| TRUE | 1/1 | 1/1 | 5.9   | 6.95  | -2.07 |
| TRUE | 1/1 | 1/1 | 7.51  | 7.52  | -1.01 |
| TRUE | 1/1 | 1/1 | 7.51  | 7.52  | -1.01 |
| TRUE | 1/1 | 1/1 | 7.51  | 7.52  | -1.01 |
| TRUE | 1/1 | 1/1 | 7.51  | 7.52  | -1.01 |
| TRUE | 1/1 | 1/1 | 7.51  | 7.52  | -1.01 |
| TRUE | 1/1 | 1/1 | 5.29  | 5.9   | -1.52 |
| TRUE | 1/1 | 1/1 | 5.29  | 5.9   | -1.52 |
| TRUE | 1/1 | 1/1 | 5.29  | 5.9   | -1.52 |
| TRUE | 1/1 | 1/1 | 10.71 | 9.06  | 3.14  |

|      |     |     |       |      |       |
|------|-----|-----|-------|------|-------|
| TRUE | 1/1 | 1/1 | 10.71 | 9.06 | 3.14  |
| TRUE | 1/1 | 1/1 | 10.71 | 9.06 | 3.14  |
| TRUE | 1/1 | 1/1 | 10.71 | 9.06 | 3.14  |
| TRUE | 1/1 | 1/1 | 4.87  | 5.85 | -1.97 |
| TRUE | 1/1 | 1/1 | 4.87  | 5.85 | -1.97 |
| TRUE | 1/1 | 1/1 | 4.91  | 5    | -1.07 |
| TRUE | 1/1 | 1/1 | 4.91  | 5    | -1.07 |
| TRUE | 1/1 | 1/1 | 4.91  | 5    | -1.07 |
| TRUE | 1/1 | 1/1 | 4.91  | 5    | -1.07 |
| TRUE | 1/1 | 1/1 | 4.91  | 5    | -1.07 |
| TRUE | 1/1 | 1/1 | 7.54  | 7.93 | -1.31 |
| TRUE | 1/1 | 1/1 | 7.54  | 7.93 | -1.31 |
| TRUE | 1/1 | 1/1 | 7.69  | 7.8  | -1.08 |
| TRUE | 1/1 | 1/1 | 7.69  | 7.8  | -1.08 |
| TRUE | 1/1 | 1/1 | 7.69  | 7.8  | -1.08 |
| TRUE | 1/1 | 1/1 | 10.06 | 8.26 | 3.49  |
| TRUE | 1/1 | 1/1 | 10.06 | 8.26 | 3.49  |
| TRUE | 1/1 | 1/1 | 10.06 | 8.26 | 3.49  |
| TRUE | 1/1 | 1/1 | 10.06 | 8.26 | 3.49  |
| TRUE | 1/1 | 1/1 | 10.06 | 8.26 | 3.49  |
| TRUE | 1/1 | 1/1 | 10.06 | 8.26 | 3.49  |
| TRUE | 1/1 | 1/1 | 10.06 | 8.26 | 3.49  |
| TRUE | 1/1 | 1/1 | 10.06 | 8.26 | 3.49  |
| TRUE | 1/1 | 1/1 | 10.06 | 8.26 | 3.49  |
| TRUE | 1/1 | 1/1 | 10.06 | 8.26 | 3.49  |
| TRUE | 1/1 | 1/1 | 10.06 | 8.26 | 3.49  |
| TRUE | 1/1 | 1/1 | 10.06 | 8.26 | 3.49  |
| TRUE | 1/1 | 1/1 | 10.06 | 8.26 | 3.49  |
| TRUE | 1/1 | 1/1 | 10.06 | 8.26 | 3.49  |
| TRUE | 1/1 | 1/1 | 10.06 | 8.26 | 3.49  |
| TRUE | 1/1 | 1/1 | 10.06 | 8.26 | 3.49  |
| TRUE | 1/1 | 1/1 | 10.06 | 8.26 | 3.49  |
| TRUE | 1/1 | 1/1 | 10.06 | 8.26 | 3.49  |
| TRUE | 1/1 | 1/1 | 10.06 | 8.26 | 3.49  |
| TRUE | 1/1 | 1/1 | 10.06 | 8.26 | 3.49  |
| TRUE | 1/1 | 1/1 | 10.06 | 8.26 | 3.49  |
| TRUE | 1/1 | 1/1 | 10.06 | 8.26 | 3.49  |
| TRUE | 1/1 | 1/1 | 10.06 | 8.26 | 3.49  |
| TRUE | 1/1 | 1/1 | 10.06 | 8.26 | 3.49  |
| TRUE | 1/1 | 1/1 | 10.06 | 8.26 | 3.49  |
| TRUE | 1/1 | 1/1 | 6.28  | 6.47 | -1.14 |
| TRUE | 1/1 | 1/1 | 6.28  | 6.47 | -1.14 |
| TRUE | 1/1 | 1/1 | 6.28  | 6.47 | -1.14 |
| TRUE | 1/1 | 1/1 | 6.28  | 6.47 | -1.14 |
| TRUE | 1/1 | 1/1 | 5.04  | 5.08 | -1.02 |
| TRUE | 1/1 | 1/1 | 5.04  | 5.08 | -1.02 |
| TRUE | 1/1 | 1/1 | 5.04  | 5.08 | -1.02 |
| TRUE | 1/1 | 1/1 | 5.04  | 5.08 | -1.02 |
| TRUE | 1/1 | 1/1 | 7.86  | 8.33 | -1.39 |
| TRUE | 1/1 | 1/1 | 7.86  | 8.33 | -1.39 |
| TRUE | 1/1 | 1/1 | 8.8   | 9.19 | -1.31 |
| TRUE | 1/1 | 1/1 | 8.8   | 9.19 | -1.31 |
| TRUE | 1/1 | 1/1 | 7.15  | 7.73 | -1.49 |
| TRUE | 1/1 | 1/1 | 7.15  | 7.73 | -1.49 |
| TRUE | 1/1 | 1/1 | 7.15  | 7.73 | -1.49 |
| TRUE | 1/1 | 1/1 | 4.86  | 4.74 | 1.09  |

|      |     |     |       |       |       |
|------|-----|-----|-------|-------|-------|
| TRUE | 1/1 | 1/1 | 4.86  | 4.74  | 1.09  |
| TRUE | 1/1 | 1/1 | 4.86  | 4.74  | 1.09  |
| TRUE | 1/1 | 1/1 | 4.86  | 4.74  | 1.09  |
| TRUE | 1/1 | 1/1 | 6.23  | 6.19  | 1.03  |
| TRUE | 1/1 | 1/1 | 6.23  | 6.19  | 1.03  |
| TRUE | 1/1 | 1/1 | 6.23  | 6.19  | 1.03  |
| TRUE | 1/1 | 1/1 | 6.23  | 6.19  | 1.03  |
| TRUE | 1/1 | 1/1 | 6.23  | 6.19  | 1.03  |
| TRUE | 1/1 | 1/1 | 6.23  | 6.19  | 1.03  |
| TRUE | 1/1 | 1/1 | 6.23  | 6.19  | 1.03  |
| TRUE | 1/1 | 1/1 | 7.41  | 7.63  | -1.16 |
| TRUE | 1/1 | 1/1 | 7.41  | 7.63  | -1.16 |
| TRUE | 1/1 | 1/1 | 8.55  | 9.18  | -1.56 |
| TRUE | 1/1 | 1/1 | 8.55  | 9.18  | -1.56 |
| TRUE | 1/1 | 1/1 | 8.55  | 9.18  | -1.56 |
| TRUE | 1/1 | 1/1 | 8.3   | 8.72  | -1.34 |
| TRUE | 1/1 | 1/1 | 8.3   | 8.72  | -1.34 |
| TRUE | 1/1 | 1/1 | 4.16  | 4.18  | -1.01 |
| TRUE | 1/1 | 1/1 | 4.16  | 4.18  | -1.01 |
| TRUE | 1/1 | 1/1 | 6.6   | 6.83  | -1.18 |
| TRUE | 1/1 | 1/1 | 6.6   | 6.83  | -1.18 |
| TRUE | 1/1 | 1/1 | 6.6   | 6.83  | -1.18 |
| TRUE | 1/1 | 1/1 | 6.6   | 6.83  | -1.18 |
| TRUE | 1/1 | 1/1 | 6.8   | 7.23  | -1.35 |
| TRUE | 1/1 | 1/1 | 6.8   | 7.23  | -1.35 |
| TRUE | 1/1 | 1/1 | 6.8   | 7.23  | -1.35 |
| TRUE | 1/1 | 1/1 | 7.2   | 8.08  | -1.83 |
| TRUE | 1/1 | 1/1 | 7.2   | 8.08  | -1.83 |
| TRUE | 1/1 | 1/1 | 12.02 | 11.94 | 1.06  |
| TRUE | 1/1 | 1/1 | 12.02 | 11.94 | 1.06  |
| TRUE | 1/1 | 1/1 | 7.01  | 6.42  | 1.51  |
| TRUE | 1/1 | 1/1 | 7.01  | 6.42  | 1.51  |
| TRUE | 1/1 | 1/1 | 7.01  | 6.42  | 1.51  |
| TRUE | 1/1 | 1/1 | 7.01  | 6.42  | 1.51  |
| TRUE | 1/1 | 1/1 | 6.09  | 6.71  | -1.53 |
| TRUE | 1/1 | 1/1 | 6.09  | 6.71  | -1.53 |
| TRUE | 1/1 | 1/1 | 6.09  | 6.71  | -1.53 |
| TRUE | 1/1 | 1/1 | 6.09  | 6.71  | -1.53 |
| TRUE | 1/1 | 1/1 | 6.09  | 6.71  | -1.53 |
| TRUE | 1/1 | 1/1 | 6.33  | 6.61  | -1.22 |
| TRUE | 1/1 | 1/1 | 6.33  | 6.61  | -1.22 |
| TRUE | 1/1 | 1/1 | 6.33  | 6.61  | -1.22 |
| TRUE | 1/1 | 1/1 | 9.82  | 10.61 | -1.73 |
| TRUE | 1/1 | 1/1 | 9.82  | 10.61 | -1.73 |
| TRUE | 1/1 | 1/1 | 7.81  | 8.28  | -1.39 |
| TRUE | 1/1 | 1/1 | 7.81  | 8.28  | -1.39 |
| TRUE | 1/1 | 1/1 | 9.36  | 9.12  | 1.19  |
| TRUE | 1/1 | 1/1 | 9.36  | 9.12  | 1.19  |
| TRUE | 1/1 | 1/1 | 9.36  | 9.12  | 1.19  |
| TRUE | 1/1 | 1/1 | 5.53  | 5.45  | 1.06  |
| TRUE | 1/1 | 1/1 | 5.53  | 5.45  | 1.06  |
| TRUE | 1/1 | 1/1 | 5.53  | 5.45  | 1.06  |
| TRUE | 1/1 | 1/1 | 5.53  | 5.45  | 1.06  |
| TRUE | 1/1 | 1/1 | 7.1   | 7.06  | 1.03  |
| TRUE | 1/1 | 1/1 | 7.1   | 7.06  | 1.03  |
| TRUE | 1/1 | 1/1 | 7.1   | 7.06  | 1.03  |
| TRUE | 1/1 | 1/1 | 9.34  | 9.85  | -1.42 |
| TRUE | 1/1 | 1/1 | 9.34  | 9.85  | -1.42 |

|      |     |     |       |       |       |
|------|-----|-----|-------|-------|-------|
| TRUE | 1/1 | 1/1 | 9.34  | 9.85  | -1.42 |
| TRUE | 1/1 | 1/1 | 8.81  | 9.09  | -1.22 |
| TRUE | 1/1 | 1/1 | 8.81  | 9.09  | -1.22 |
| TRUE | 1/1 | 1/1 | 8.81  | 9.09  | -1.22 |
| TRUE | 1/1 | 1/1 | 8.81  | 9.09  | -1.22 |
| TRUE | 1/1 | 1/1 | 4.25  | 3.7   | 1.46  |
| TRUE | 1/1 | 1/1 | 4.25  | 3.7   | 1.46  |
| TRUE | 1/1 | 1/1 | 4.25  | 3.7   | 1.46  |
| TRUE | 1/1 | 1/1 | 4.25  | 3.7   | 1.46  |
| TRUE | 1/1 | 1/1 | 7.38  | 8.19  | -1.76 |
| TRUE | 1/1 | 1/1 | 7.38  | 8.19  | -1.76 |
| TRUE | 1/1 | 1/1 | 12.26 | 12.27 | -1    |
| TRUE | 1/1 | 1/1 | 12.26 | 12.27 | -1    |
| TRUE | 1/1 | 1/1 | 12.26 | 12.27 | -1    |
| TRUE | 1/1 | 1/1 | 12.26 | 12.27 | -1    |
| TRUE | 1/1 | 1/1 | 12.26 | 12.27 | -1    |
| TRUE | 1/1 | 1/1 | 12.26 | 12.27 | -1    |
| TRUE | 1/1 | 1/1 | 12.26 | 12.27 | -1    |
| TRUE | 1/1 | 1/1 | 12.26 | 12.27 | -1    |
| TRUE | 1/1 | 1/1 | 12.26 | 12.27 | -1    |
| TRUE | 1/1 | 1/1 | 12.26 | 12.27 | -1    |
| TRUE | 1/1 | 1/1 | 12.26 | 12.27 | -1    |
| TRUE | 1/1 | 1/1 | 12.26 | 12.27 | -1    |
| TRUE | 1/1 | 1/1 | 12.26 | 12.27 | -1    |
| TRUE | 1/1 | 1/1 | 12.26 | 12.27 | -1    |
| TRUE | 1/1 | 1/1 | 12.26 | 12.27 | -1    |
| TRUE | 1/1 | 1/1 | 8.75  | 4.46  | 19.57 |
| TRUE | 1/1 | 1/1 | 8.75  | 4.46  | 19.57 |
| TRUE | 1/1 | 1/1 | 8.75  | 4.46  | 19.57 |
| TRUE | 1/1 | 1/1 | 8.75  | 4.46  | 19.57 |
| TRUE | 1/1 | 1/1 | 8.75  | 4.46  | 19.57 |
| TRUE | 1/1 | 1/1 | 8.75  | 4.46  | 19.57 |
| TRUE | 1/1 | 1/1 | 8.75  | 4.46  | 19.57 |
| TRUE | 1/1 | 1/1 | 8.75  | 4.46  | 19.57 |
| TRUE | 1/1 | 1/1 | 8.75  | 4.46  | 19.57 |
| TRUE | 1/1 | 1/1 | 8.75  | 4.46  | 19.57 |
| TRUE | 1/1 | 1/1 | 8.75  | 4.46  | 19.57 |
| TRUE | 1/1 | 1/1 | 8.75  | 4.46  | 19.57 |
| TRUE | 1/1 | 1/1 | 8.75  | 4.46  | 19.57 |
| TRUE | 1/1 | 1/1 | 8.75  | 4.46  | 19.57 |
| TRUE | 1/1 | 1/1 | 8.75  | 4.46  | 19.57 |
| TRUE | 1/1 | 1/1 | 8.75  | 4.46  | 19.57 |
| TRUE | 1/1 | 1/1 | 8.75  | 4.46  | 19.57 |
| TRUE | 1/1 | 1/1 | 7.22  | 7.16  | 1.04  |
| TRUE | 1/1 | 1/1 | 7.22  | 7.16  | 1.04  |
| TRUE | 1/1 | 1/1 | 7.25  | 7.58  | -1.27 |
| TRUE | 1/1 | 1/1 | 7.25  | 7.58  | -1.27 |
| TRUE | 1/1 | 1/1 | 5.92  | 6.01  | -1.06 |
| TRUE | 1/1 | 1/1 | 5.92  | 6.01  | -1.06 |
| TRUE | 1/1 | 1/1 | 5.92  | 6.01  | -1.06 |
| TRUE | 1/1 | 1/1 | 5.92  | 6.01  | -1.06 |
| TRUE | 1/1 | 1/1 | 5.92  | 6.01  | -1.06 |
| TRUE | 1/1 | 1/1 | 6.66  | 7.37  | -1.63 |
| TRUE | 1/1 | 1/1 | 6.66  | 7.37  | -1.63 |
| TRUE | 1/1 | 1/1 | 6.66  | 7.37  | -1.63 |
| TRUE | 1/1 | 1/1 | 6.66  | 7.37  | -1.63 |
| TRUE | 1/1 | 1/1 | 6.66  | 7.37  | -1.63 |
| TRUE | 1/1 | 1/1 | 6.66  | 7.37  | -1.63 |
| TRUE | 1/1 | 1/1 | 6.66  | 7.37  | -1.63 |
| TRUE | 1/1 | 1/1 | 7.69  | 7.77  | -1.06 |

|      |     |     |       |      |       |
|------|-----|-----|-------|------|-------|
| TRUE | 1/1 | 1/1 | 7.69  | 7.77 | -1.06 |
| TRUE | 1/1 | 1/1 | 7.69  | 7.77 | -1.06 |
| TRUE | 1/1 | 1/1 | 8.04  | 8.64 | -1.52 |
| TRUE | 1/1 | 1/1 | 8.04  | 8.64 | -1.52 |
| TRUE | 1/1 | 1/1 | 8.04  | 8.64 | -1.52 |
| TRUE | 1/1 | 1/1 | 6.27  | 6.72 | -1.36 |
| TRUE | 1/1 | 1/1 | 6.27  | 6.72 | -1.36 |
| TRUE | 1/1 | 1/1 | 6.27  | 6.72 | -1.36 |
| TRUE | 1/1 | 1/1 | 6.27  | 6.72 | -1.36 |
| TRUE | 1/1 | 1/1 | 6.27  | 6.72 | -1.36 |
| TRUE | 1/1 | 1/1 | 6.27  | 6.72 | -1.36 |
| TRUE | 1/1 | 1/1 | 6.27  | 6.72 | -1.36 |
| TRUE | 1/1 | 1/1 | 6.27  | 6.72 | -1.36 |
| TRUE | 1/1 | 1/1 | 6.27  | 6.72 | -1.36 |
| TRUE | 1/1 | 1/1 | 6.27  | 6.72 | -1.36 |
| TRUE | 1/1 | 1/1 | 5.81  | 5.7  | 1.08  |
| TRUE | 1/1 | 1/1 | 5.81  | 5.7  | 1.08  |
| TRUE | 1/1 | 1/1 | 7.11  | 6.88 | 1.17  |
| TRUE | 1/1 | 1/1 | 7.11  | 6.88 | 1.17  |
| TRUE | 1/1 | 1/1 | 7.11  | 6.88 | 1.17  |
| TRUE | 1/1 | 1/1 | 7.8   | 8.2  | -1.32 |
| TRUE | 1/1 | 1/1 | 7.8   | 8.2  | -1.32 |
| TRUE | 1/1 | 1/1 | 7.8   | 8.2  | -1.32 |
| TRUE | 1/1 | 1/1 | 5.36  | 5.55 | -1.14 |
| TRUE | 1/1 | 1/1 | 5.36  | 5.55 | -1.14 |
| TRUE | 1/1 | 1/1 | 5.36  | 5.55 | -1.14 |
| TRUE | 1/1 | 1/1 | 5.36  | 5.55 | -1.14 |
| TRUE | 1/1 | 1/1 | 5.36  | 5.55 | -1.14 |
| TRUE | 1/1 | 1/1 | 5.36  | 5.55 | -1.14 |
| TRUE | 1/1 | 1/1 | 5.36  | 5.55 | -1.14 |
| TRUE | 1/1 | 1/1 | 5.36  | 5.55 | -1.14 |
| TRUE | 1/1 | 1/1 | 5.36  | 5.55 | -1.14 |
| TRUE | 1/1 | 1/1 | 5.36  | 5.55 | -1.14 |
| TRUE | 1/1 | 1/1 | 5.36  | 5.55 | -1.14 |
| TRUE | 1/1 | 1/1 | 6.91  | 8.06 | -2.22 |
| TRUE | 1/1 | 1/1 | 6.91  | 8.06 | -2.22 |
| TRUE | 1/1 | 1/1 | 6.91  | 8.06 | -2.22 |
| TRUE | 1/1 | 1/1 | 12.93 | 7.66 | 38.71 |
| TRUE | 1/1 | 1/1 | 12.93 | 7.66 | 38.71 |
| TRUE | 1/1 | 1/1 | 12.93 | 7.66 | 38.71 |
| TRUE | 1/1 | 1/1 | 12.93 | 7.66 | 38.71 |
| TRUE | 1/1 | 1/1 | 12.93 | 7.66 | 38.71 |
| TRUE | 1/1 | 1/1 | 12.93 | 7.66 | 38.71 |
| TRUE | 1/1 | 1/1 | 12.93 | 7.66 | 38.71 |
| TRUE | 1/1 | 1/1 | 12.93 | 7.66 | 38.71 |
| TRUE | 1/1 | 1/1 | 5.82  | 5.91 | -1.06 |
| TRUE | 1/1 | 1/1 | 5.82  | 5.91 | -1.06 |
| TRUE | 1/1 | 1/1 | 5.77  | 6.37 | -1.52 |
| TRUE | 1/1 | 1/1 | 5.77  | 6.37 | -1.52 |
| TRUE | 1/1 | 1/1 | 5.77  | 6.37 | -1.52 |
| TRUE | 1/1 | 1/1 | 5.77  | 6.37 | -1.52 |
| TRUE | 1/1 | 1/1 | 8.25  | 8.74 | -1.4  |
| TRUE | 1/1 | 1/1 | 8.25  | 8.74 | -1.4  |
| TRUE | 1/1 | 1/1 | 8.25  | 8.74 | -1.4  |
| TRUE | 1/1 | 1/1 | 7.15  | 7.41 | -1.2  |
| TRUE | 1/1 | 1/1 | 7.15  | 7.41 | -1.2  |
| TRUE | 1/1 | 1/1 | 7.8   | 8.09 | -1.22 |
| TRUE | 1/1 | 1/1 | 7.8   | 8.09 | -1.22 |
| TRUE | 1/1 | 1/1 | 7.8   | 8.09 | -1.22 |
| TRUE | 1/1 | 1/1 | 7.8   | 8.09 | -1.22 |
| TRUE | 1/1 | 1/1 | 8.31  | 5.71 | 6.07  |

|      |     |     |       |       |       |
|------|-----|-----|-------|-------|-------|
| TRUE | 1/1 | 1/1 | 8.31  | 5.71  | 6.07  |
| TRUE | 1/1 | 1/1 | 8.31  | 5.71  | 6.07  |
| TRUE | 1/1 | 1/1 | 8.31  | 5.71  | 6.07  |
| TRUE | 1/1 | 1/1 | 8.31  | 5.71  | 6.07  |
| TRUE | 1/1 | 1/1 | 8.31  | 5.71  | 6.07  |
| TRUE | 1/1 | 1/1 | 8.31  | 5.71  | 6.07  |
| TRUE | 1/1 | 1/1 | 11.93 | 12.42 | -1.41 |
| TRUE | 1/1 | 1/1 | 11.93 | 12.42 | -1.41 |
| TRUE | 1/1 | 1/1 | 11.93 | 12.42 | -1.41 |
| TRUE | 1/1 | 1/1 | 11.93 | 12.42 | -1.41 |
| TRUE | 1/1 | 1/1 | 11.93 | 12.42 | -1.41 |
| TRUE | 1/1 | 1/1 | 11.93 | 12.42 | -1.41 |
| TRUE | 1/1 | 1/1 | 11.93 | 12.42 | -1.41 |
| TRUE | 1/1 | 1/1 | 5.58  | 5.98  | -1.31 |
| TRUE | 1/1 | 1/1 | 5.58  | 5.98  | -1.31 |
| TRUE | 1/1 | 1/1 | 5.58  | 5.98  | -1.31 |
| TRUE | 1/1 | 1/1 | 5.58  | 5.98  | -1.31 |
| TRUE | 1/1 | 1/1 | 5.58  | 5.98  | -1.31 |
| TRUE | 1/1 | 1/1 | 6.39  | 6.55  | -1.11 |
| TRUE | 1/1 | 1/1 | 6.39  | 6.55  | -1.11 |
| TRUE | 1/1 | 1/1 | 6.39  | 6.55  | -1.11 |
| TRUE | 1/1 | 1/1 | 6.39  | 6.55  | -1.11 |
| TRUE | 1/1 | 1/1 | 5.02  | 5.47  | -1.36 |
| TRUE | 1/1 | 1/1 | 5.02  | 5.47  | -1.36 |
| TRUE | 1/1 | 1/1 | 5.34  | 5.52  | -1.13 |
| TRUE | 1/1 | 1/1 | 5.34  | 5.52  | -1.13 |
| TRUE | 1/1 | 1/1 | 5.34  | 5.52  | -1.13 |
| TRUE | 1/1 | 1/1 | 5.34  | 5.52  | -1.13 |
| TRUE | 1/1 | 1/1 | 5.34  | 5.52  | -1.13 |
| TRUE | 1/1 | 1/1 | 5.34  | 5.52  | -1.13 |
| TRUE | 1/1 | 1/1 | 5.34  | 5.52  | -1.13 |
| TRUE | 1/1 | 1/1 | 5.34  | 5.52  | -1.13 |
| TRUE | 1/1 | 1/1 | 5.34  | 5.52  | -1.13 |
| TRUE | 1/1 | 1/1 | 5.34  | 5.52  | -1.13 |
| TRUE | 1/1 | 1/1 | 5.34  | 5.52  | -1.13 |
| TRUE | 1/1 | 1/1 | 5.34  | 5.52  | -1.13 |
| TRUE | 1/1 | 1/1 | 5.34  | 5.52  | -1.13 |
| TRUE | 1/1 | 1/1 | 5.34  | 5.52  | -1.13 |
| TRUE | 1/1 | 1/1 | 5.34  | 5.52  | -1.13 |
| TRUE | 1/1 | 1/1 | 5.34  | 5.52  | -1.13 |
| TRUE | 1/1 | 1/1 | 5.34  | 5.52  | -1.13 |
| TRUE | 1/1 | 1/1 | 5.34  | 5.52  | -1.13 |
| TRUE | 1/1 | 1/1 | 5.34  | 5.52  | -1.13 |
| TRUE | 1/1 | 1/1 | 5.34  | 5.52  | -1.13 |
| TRUE | 1/1 | 1/1 | 8.91  | 9.62  | -1.64 |
| TRUE | 1/1 | 1/1 | 8.91  | 9.62  | -1.64 |
| TRUE | 1/1 | 1/1 | 8.91  | 9.62  | -1.64 |
| TRUE | 1/1 | 1/1 | 8.91  | 9.62  | -1.64 |
| TRUE | 1/1 | 1/1 | 5.43  | 4.97  | 1.37  |
| TRUE | 1/1 | 1/1 | 5.43  | 4.97  | 1.37  |
| TRUE | 1/1 | 1/1 | 6.06  | 6.65  | -1.5  |
| TRUE | 1/1 | 1/1 | 6.06  | 6.65  | -1.5  |
| TRUE | 1/1 | 1/1 | 5.63  | 6.24  | -1.52 |
| TRUE | 1/1 | 1/1 | 5.63  | 6.24  | -1.52 |
| TRUE | 1/1 | 1/1 | 5.63  | 6.24  | -1.52 |
| TRUE | 1/1 | 1/1 | 5.63  | 6.24  | -1.52 |
| TRUE | 1/1 | 1/1 | 5.95  | 5.93  | 1.01  |
| TRUE | 1/1 | 1/1 | 5.95  | 5.93  | 1.01  |
| TRUE | 1/1 | 1/1 | 7.15  | 6.98  | 1.13  |
| TRUE | 1/1 | 1/1 | 7.15  | 6.98  | 1.13  |





|      |     |     |      |      |       |
|------|-----|-----|------|------|-------|
| TRUE | 1/1 | 1/1 | 9.15 | 6.87 | 4.85  |
| TRUE | 1/1 | 1/1 | 9.15 | 6.87 | 4.85  |
| TRUE | 1/1 | 1/1 | 9.15 | 6.87 | 4.85  |
| TRUE | 1/1 | 1/1 | 6.12 | 6.24 | -1.09 |
| TRUE | 1/1 | 1/1 | 6.12 | 6.24 | -1.09 |
| TRUE | 1/1 | 1/1 | 6.42 | 6.99 | -1.48 |
| TRUE | 1/1 | 1/1 | 6.42 | 6.99 | -1.48 |
| TRUE | 1/1 | 1/1 | 6.39 | 6.73 | -1.27 |
| TRUE | 1/1 | 1/1 | 6.39 | 6.73 | -1.27 |
| TRUE | 1/1 | 1/1 | 5.47 | 6.2  | -1.66 |
| TRUE | 1/1 | 1/1 | 5.47 | 6.2  | -1.66 |
| TRUE | 1/1 | 1/1 | 5.47 | 6.2  | -1.66 |
| TRUE | 1/1 | 1/1 | 5.47 | 6.2  | -1.66 |
| TRUE | 1/1 | 1/1 | 6.54 | 5.6  | 1.92  |
| TRUE | 1/1 | 1/1 | 6.54 | 5.6  | 1.92  |
| TRUE | 1/1 | 1/1 | 6.54 | 5.6  | 1.92  |
| TRUE | 1/1 | 1/1 | 7.47 | 6.7  | 1.7   |
| TRUE | 1/1 | 1/1 | 7.47 | 6.7  | 1.7   |
| TRUE | 1/1 | 1/1 | 7.47 | 6.7  | 1.7   |
| TRUE | 1/1 | 1/1 | 7.47 | 6.7  | 1.7   |
| TRUE | 1/1 | 1/1 | 7.47 | 6.7  | 1.7   |
| TRUE | 1/1 | 1/1 | 7.47 | 6.7  | 1.7   |
| TRUE | 1/1 | 1/1 | 7.47 | 6.7  | 1.7   |
| TRUE | 1/1 | 1/1 | 8.03 | 8.39 | -1.29 |
| TRUE | 1/1 | 1/1 | 8.03 | 8.39 | -1.29 |
| TRUE | 1/1 | 1/1 | 8.03 | 8.39 | -1.29 |
| TRUE | 1/1 | 1/1 | 8.03 | 8.39 | -1.29 |
| TRUE | 1/1 | 1/1 | 9.18 | 9.26 | -1.06 |
| TRUE | 1/1 | 1/1 | 9.18 | 9.26 | -1.06 |
| TRUE | 1/1 | 1/1 | 5.8  | 6.26 | -1.38 |
| TRUE | 1/1 | 1/1 | 5.8  | 6.26 | -1.38 |
| TRUE | 1/1 | 1/1 | 5.8  | 6.26 | -1.38 |
| TRUE | 1/1 | 1/1 | 5.8  | 6.26 | -1.38 |
| TRUE | 1/1 | 1/1 | 5.8  | 6.26 | -1.38 |
| TRUE | 1/1 | 1/1 | 5.06 | 4.68 | 1.31  |
| TRUE | 1/1 | 1/1 | 5.06 | 4.68 | 1.31  |
| TRUE | 1/1 | 1/1 | 5.06 | 4.68 | 1.31  |
| TRUE | 1/1 | 1/1 | 5.06 | 4.68 | 1.31  |
| TRUE | 1/1 | 1/1 | 5.06 | 4.68 | 1.31  |
| TRUE | 1/1 | 1/1 | 5.06 | 4.68 | 1.31  |
| TRUE | 1/1 | 1/1 | 5.21 | 5.72 | -1.42 |
| TRUE | 1/1 | 1/1 | 5.21 | 5.72 | -1.42 |
| TRUE | 1/1 | 1/1 | 6.28 | 6.76 | -1.4  |
| TRUE | 1/1 | 1/1 | 6.28 | 6.76 | -1.4  |
| TRUE | 1/1 | 1/1 | 7.71 | 6.09 | 3.06  |
| TRUE | 1/1 | 1/1 | 7.71 | 6.09 | 3.06  |
| TRUE | 1/1 | 1/1 | 7.71 | 6.09 | 3.06  |
| TRUE | 1/1 | 1/1 | 7.71 | 6.09 | 3.06  |
| TRUE | 1/1 | 1/1 | 7.71 | 6.09 | 3.06  |
| TRUE | 1/1 | 1/1 | 7.71 | 6.09 | 3.06  |
| TRUE | 1/1 | 1/1 | 7.71 | 6.09 | 3.06  |
| TRUE | 1/1 | 1/1 | 7.71 | 6.09 | 3.06  |
| TRUE | 1/1 | 1/1 | 7.71 | 6.09 | 3.06  |
| TRUE | 1/1 | 1/1 | 7.74 | 7.93 | -1.14 |
| TRUE | 1/1 | 1/1 | 7.74 | 7.93 | -1.14 |
| TRUE | 1/1 | 1/1 | 7.74 | 7.93 | -1.14 |
| TRUE | 1/1 | 1/1 | 8.16 | 7    | 2.23  |
| TRUE | 1/1 | 1/1 | 8.16 | 7    | 2.23  |
| TRUE | 1/1 | 1/1 | 6.26 | 6.61 | -1.27 |



|      |     |     |      |      |       |
|------|-----|-----|------|------|-------|
| TRUE | 1/1 | 1/1 | 6.62 | 6.55 | 1.04  |
| TRUE | 1/1 | 1/1 | 6.62 | 6.55 | 1.04  |
| TRUE | 1/1 | 1/1 | 6.62 | 6.55 | 1.04  |
| TRUE | 1/1 | 1/1 | 6.62 | 6.55 | 1.04  |
| TRUE | 1/1 | 1/1 | 4.02 | 4.32 | -1.23 |
| TRUE | 1/1 | 1/1 | 4.02 | 4.32 | -1.23 |
| TRUE | 1/1 | 1/1 | 6.67 | 6.98 | -1.23 |
| TRUE | 1/1 | 1/1 | 6.67 | 6.98 | -1.23 |
| TRUE | 1/1 | 1/1 | 7.44 | 6.82 | 1.54  |
| TRUE | 1/1 | 1/1 | 7.44 | 6.82 | 1.54  |
| TRUE | 1/1 | 1/1 | 6.04 | 5.83 | 1.15  |
| TRUE | 1/1 | 1/1 | 6.04 | 5.83 | 1.15  |
| TRUE | 1/1 | 1/1 | 6.04 | 5.83 | 1.15  |
| TRUE | 1/1 | 1/1 | 5.74 | 6.39 | -1.57 |
| TRUE | 1/1 | 1/1 | 5.74 | 6.39 | -1.57 |
| TRUE | 1/1 | 1/1 | 5.74 | 6.39 | -1.57 |
| TRUE | 1/1 | 1/1 | 6.43 | 6.8  | -1.29 |
| TRUE | 1/1 | 1/1 | 6.43 | 6.8  | -1.29 |
| TRUE | 1/1 | 1/1 | 6.43 | 6.8  | -1.29 |
| TRUE | 1/1 | 1/1 | 6.43 | 6.8  | -1.29 |
| TRUE | 1/1 | 1/1 | 6.43 | 6.8  | -1.29 |
| TRUE | 1/1 | 1/1 | 6.66 | 7.17 | -1.42 |
| TRUE | 1/1 | 1/1 | 6.66 | 7.17 | -1.42 |
| TRUE | 1/1 | 1/1 | 6.66 | 7.17 | -1.42 |
| TRUE | 1/1 | 1/1 | 6.66 | 7.17 | -1.42 |
| TRUE | 1/1 | 1/1 | 5.99 | 4.7  | 2.44  |
| TRUE | 1/1 | 1/1 | 5.99 | 4.7  | 2.44  |
| TRUE | 1/1 | 1/1 | 7.25 | 7.43 | -1.13 |
| TRUE | 1/1 | 1/1 | 7.25 | 7.43 | -1.13 |
| TRUE | 1/1 | 1/1 | 7.64 | 7.62 | 1.01  |
| TRUE | 1/1 | 1/1 | 7.64 | 7.62 | 1.01  |
| TRUE | 1/1 | 1/1 | 7.64 | 7.62 | 1.01  |
| TRUE | 1/1 | 1/1 | 7.64 | 7.62 | 1.01  |
| TRUE | 1/1 | 1/1 | 7.64 | 7.62 | 1.01  |
| TRUE | 1/1 | 1/1 | 7.64 | 7.62 | 1.01  |
| TRUE | 1/1 | 1/1 | 7.83 | 7.76 | 1.05  |
| TRUE | 1/1 | 1/1 | 7.83 | 7.76 | 1.05  |
| TRUE | 1/1 | 1/1 | 7.83 | 7.76 | 1.05  |
| TRUE | 1/1 | 1/1 | 7.83 | 7.76 | 1.05  |
| TRUE | 1/1 | 1/1 | 7.57 | 7.97 | -1.32 |
| TRUE | 1/1 | 1/1 | 7.57 | 7.97 | -1.32 |
| TRUE | 1/1 | 1/1 | 7.78 | 8.07 | -1.22 |
| TRUE | 1/1 | 1/1 | 7.78 | 8.07 | -1.22 |
| TRUE | 1/1 | 1/1 | 7.78 | 8.07 | -1.22 |
| TRUE | 1/1 | 1/1 | 6.81 | 7.34 | -1.44 |
| TRUE | 1/1 | 1/1 | 6.81 | 7.34 | -1.44 |
| TRUE | 1/1 | 1/1 | 5.56 | 6.32 | -1.7  |
| TRUE | 1/1 | 1/1 | 5.56 | 6.32 | -1.7  |
| TRUE | 1/1 | 1/1 | 3.75 | 3.71 | 1.03  |
| TRUE | 1/1 | 1/1 | 3.75 | 3.71 | 1.03  |
| TRUE | 1/1 | 1/1 | 3.75 | 3.71 | 1.03  |
| TRUE | 1/1 | 1/1 | 3.75 | 3.71 | 1.03  |
| TRUE | 1/1 | 1/1 | 3.75 | 3.71 | 1.03  |
| TRUE | 1/1 | 1/1 | 6.8  | 5.8  | 2     |
| TRUE | 1/1 | 1/1 | 6.8  | 5.8  | 2     |
| TRUE | 1/1 | 1/1 | 6.8  | 5.8  | 2     |
| TRUE | 1/1 | 1/1 | 6.8  | 5.8  | 2     |
| TRUE | 1/1 | 1/1 | 6.8  | 5.8  | 2     |

|      |     |     |       |       |       |
|------|-----|-----|-------|-------|-------|
| TRUE | 1/1 | 1/1 | 6.8   | 5.8   | 2     |
| TRUE | 1/1 | 1/1 | 7.53  | 8.14  | -1.53 |
| TRUE | 1/1 | 1/1 | 7.53  | 8.14  | -1.53 |
| TRUE | 1/1 | 1/1 | 7.53  | 8.14  | -1.53 |
| TRUE | 1/1 | 1/1 | 7.13  | 6.98  | 1.11  |
| TRUE | 1/1 | 1/1 | 7.13  | 6.98  | 1.11  |
| TRUE | 1/1 | 1/1 | 7.54  | 7.62  | -1.06 |
| TRUE | 1/1 | 1/1 | 7.54  | 7.62  | -1.06 |
| TRUE | 1/1 | 1/1 | 7.54  | 7.62  | -1.06 |
| TRUE | 1/1 | 1/1 | 7.54  | 7.62  | -1.06 |
| TRUE | 1/1 | 1/1 | 5.45  | 5.43  | 1.01  |
| TRUE | 1/1 | 1/1 | 5.45  | 5.43  | 1.01  |
| TRUE | 1/1 | 1/1 | 5.45  | 5.43  | 1.01  |
| TRUE | 1/1 | 1/1 | 5.45  | 5.43  | 1.01  |
| TRUE | 1/1 | 1/1 | 5.45  | 5.43  | 1.01  |
| TRUE | 1/1 | 1/1 | 5.45  | 5.43  | 1.01  |
| TRUE | 1/1 | 1/1 | 5.45  | 5.43  | 1.01  |
| TRUE | 1/1 | 1/1 | 5.45  | 5.43  | 1.01  |
| TRUE | 1/1 | 1/1 | 10.44 | 10.53 | -1.06 |
| TRUE | 1/1 | 1/1 | 10.44 | 10.53 | -1.06 |
| TRUE | 1/1 | 1/1 | 10.44 | 10.53 | -1.06 |
| TRUE | 1/1 | 1/1 | 6.94  | 7.19  | -1.19 |
| TRUE | 1/1 | 1/1 | 6.94  | 7.19  | -1.19 |
| TRUE | 1/1 | 1/1 | 6.94  | 7.19  | -1.19 |
| TRUE | 1/1 | 1/1 | 4.37  | 4.2   | 1.12  |
| TRUE | 1/1 | 1/1 | 4.37  | 4.2   | 1.12  |
| TRUE | 1/1 | 1/1 | 6.53  | 6.97  | -1.36 |
| TRUE | 1/1 | 1/1 | 6.53  | 6.97  | -1.36 |
| TRUE | 1/1 | 1/1 | 6.53  | 6.97  | -1.36 |
| TRUE | 1/1 | 1/1 | 6.53  | 6.97  | -1.36 |
| TRUE | 1/1 | 1/1 | 6.76  | 6.02  | 1.67  |
| TRUE | 1/1 | 1/1 | 6.76  | 6.02  | 1.67  |
| TRUE | 1/1 | 1/1 | 5.84  | 6.06  | -1.17 |
| TRUE | 1/1 | 1/1 | 5.84  | 6.06  | -1.17 |
| TRUE | 1/1 | 1/1 | 5.84  | 6.06  | -1.17 |
| TRUE | 1/1 | 1/1 | 5.84  | 6.06  | -1.17 |
| TRUE | 1/1 | 1/1 | 5.11  | 2.99  | 4.35  |
| TRUE | 1/1 | 1/1 | 5.11  | 2.99  | 4.35  |
| TRUE | 1/1 | 1/1 | 5.11  | 2.99  | 4.35  |
| TRUE | 1/1 | 1/1 | 5.11  | 2.99  | 4.35  |
| TRUE | 1/1 | 1/1 | 5.11  | 2.99  | 4.35  |
| TRUE | 1/1 | 1/1 | 5.11  | 2.99  | 4.35  |
| TRUE | 1/1 | 1/1 | 5.11  | 2.99  | 4.35  |
| TRUE | 1/1 | 1/1 | 5.11  | 2.99  | 4.35  |
| TRUE | 1/1 | 1/1 | 5.11  | 2.99  | 4.35  |
| TRUE | 1/1 | 1/1 | 5.11  | 2.99  | 4.35  |
| TRUE | 1/1 | 1/1 | 5.11  | 2.99  | 4.35  |
| TRUE | 1/1 | 1/1 | 5.11  | 2.99  | 4.35  |
| TRUE | 1/1 | 1/1 | 5.11  | 2.99  | 4.35  |
| TRUE | 1/1 | 1/1 | 5.11  | 2.99  | 4.35  |
| TRUE | 1/1 | 1/1 | 5.11  | 2.99  | 4.35  |
| TRUE | 1/1 | 1/1 | 5.11  | 2.99  | 4.35  |
| TRUE | 1/1 | 1/1 | 5.11  | 2.99  | 4.35  |
| TRUE | 1/1 | 1/1 | 3.65  | 4.3   | -1.57 |
| TRUE | 1/1 | 1/1 | 3.65  | 4.3   | -1.57 |
| TRUE | 1/1 | 1/1 | 3.65  | 4.3   | -1.57 |
| TRUE | 1/1 | 1/1 | 3.65  | 4.3   | -1.57 |
| TRUE | 1/1 | 1/1 | 3.65  | 4.3   | -1.57 |
| TRUE | 1/1 | 1/1 | 5.81  | 6.08  | -1.2  |
| TRUE | 1/1 | 1/1 | 5.81  | 6.08  | -1.2  |
| TRUE | 1/1 | 1/1 | 9.37  | 9.83  | -1.38 |



|      |     |     |       |       |       |
|------|-----|-----|-------|-------|-------|
| TRUE | 1/1 | 1/1 | 7.45  | 5.13  | 5     |
| TRUE | 1/1 | 1/1 | 7.45  | 5.13  | 5     |
| TRUE | 1/1 | 1/1 | 7.45  | 5.13  | 5     |
| TRUE | 1/1 | 1/1 | 6.54  | 7.22  | -1.61 |
| TRUE | 1/1 | 1/1 | 6.54  | 7.22  | -1.61 |
| TRUE | 1/1 | 1/1 | 10.22 | 10.89 | -1.59 |
| TRUE | 1/1 | 1/1 | 10.22 | 10.89 | -1.59 |
| TRUE | 1/1 | 1/1 | 10.22 | 10.89 | -1.59 |
| TRUE | 1/1 | 1/1 | 10.22 | 10.89 | -1.59 |
| TRUE | 1/1 | 1/1 | 3.5   | 3.75  | -1.19 |
| TRUE | 1/1 | 1/1 | 3.5   | 3.75  | -1.19 |
| TRUE | 1/1 | 1/1 | 3.5   | 3.75  | -1.19 |
| TRUE | 1/1 | 1/1 | 6.45  | 6.59  | -1.1  |
| TRUE | 1/1 | 1/1 | 6.45  | 6.59  | -1.1  |
| TRUE | 1/1 | 1/1 | 6.45  | 6.59  | -1.1  |
| TRUE | 1/1 | 1/1 | 4.73  | 4.69  | 1.03  |
| TRUE | 1/1 | 1/1 | 4.73  | 4.69  | 1.03  |
| TRUE | 1/1 | 1/1 | 4.73  | 4.69  | 1.03  |
| TRUE | 1/1 | 1/1 | 5.29  | 4.21  | 2.1   |
| TRUE | 1/1 | 1/1 | 5.29  | 4.21  | 2.1   |
| TRUE | 1/1 | 1/1 | 5.29  | 4.21  | 2.1   |
| TRUE | 1/1 | 1/1 | 5.29  | 4.21  | 2.1   |
| TRUE | 1/1 | 1/1 | 5.29  | 4.21  | 2.1   |
| TRUE | 1/1 | 1/1 | 6.15  | 5.51  | 1.57  |
| TRUE | 1/1 | 1/1 | 6.15  | 5.51  | 1.57  |
| TRUE | 1/1 | 1/1 | 6.15  | 5.51  | 1.57  |
| TRUE | 1/1 | 1/1 | 6.15  | 5.51  | 1.57  |
| TRUE | 1/1 | 1/1 | 7.01  | 7.58  | -1.48 |
| TRUE | 1/1 | 1/1 | 7.01  | 7.58  | -1.48 |
| TRUE | 1/1 | 1/1 | 7.01  | 7.58  | -1.48 |
| TRUE | 1/1 | 1/1 | 7.01  | 7.58  | -1.48 |
| TRUE | 1/1 | 1/1 | 10.95 | 9.6   | 2.54  |
| TRUE | 1/1 | 1/1 | 10.95 | 9.6   | 2.54  |
| TRUE | 1/1 | 1/1 | 9.02  | 9.04  | -1.01 |
| TRUE | 1/1 | 1/1 | 9.02  | 9.04  | -1.01 |
| TRUE | 1/1 | 1/1 | 6.79  | 6.96  | -1.13 |
| TRUE | 1/1 | 1/1 | 6.79  | 6.96  | -1.13 |
| TRUE | 1/1 | 1/1 | 7.6   | 8.54  | -1.91 |
| TRUE | 1/1 | 1/1 | 7.6   | 8.54  | -1.91 |
| TRUE | 1/1 | 1/1 | 7.6   | 8.54  | -1.91 |
| TRUE | 1/1 | 1/1 | 8.83  | 8.98  | -1.11 |
| TRUE | 1/1 | 1/1 | 8.83  | 8.98  | -1.11 |
| TRUE | 1/1 | 1/1 | 8.83  | 8.98  | -1.11 |
| TRUE | 1/1 | 1/1 | 5.16  | 5.6   | -1.36 |
| TRUE | 1/1 | 1/1 | 5.16  | 5.6   | -1.36 |
| TRUE | 1/1 | 1/1 | 7.74  | 8.52  | -1.71 |
| TRUE | 1/1 | 1/1 | 7.74  | 8.52  | -1.71 |
| TRUE | 1/1 | 1/1 | 5.87  | 5.8   | 1.05  |
| TRUE | 1/1 | 1/1 | 5.87  | 5.8   | 1.05  |
| TRUE | 1/1 | 1/1 | 6.74  | 6.11  | 1.54  |
| TRUE | 1/1 | 1/1 | 6.74  | 6.11  | 1.54  |
| TRUE | 1/1 | 1/1 | 5.89  | 6.11  | -1.16 |
| TRUE | 1/1 | 1/1 | 5.89  | 6.11  | -1.16 |
| TRUE | 1/1 | 1/1 | 5.89  | 6.11  | -1.16 |
| TRUE | 1/1 | 1/1 | 5.89  | 6.11  | -1.16 |
| TRUE | 1/1 | 1/1 | 4.6   | 4.5   | 1.07  |
| TRUE | 1/1 | 1/1 | 4.6   | 4.5   | 1.07  |
| TRUE | 1/1 | 1/1 | 4.6   | 4.5   | 1.07  |



|      |     |     |      |      |       |
|------|-----|-----|------|------|-------|
| TRUE | 1/1 | 1/1 | 7.22 | 5.75 | 2.77  |
| TRUE | 1/1 | 1/1 | 5.87 | 5.86 | 1.01  |
| TRUE | 1/1 | 1/1 | 5.87 | 5.86 | 1.01  |
| TRUE | 1/1 | 1/1 | 6.66 | 6.08 | 1.5   |
| TRUE | 1/1 | 1/1 | 6.66 | 6.08 | 1.5   |
| TRUE | 1/1 | 1/1 | 6.66 | 6.08 | 1.5   |
| TRUE | 1/1 | 1/1 | 6.66 | 6.08 | 1.5   |
| TRUE | 1/1 | 1/1 | 6.66 | 6.08 | 1.5   |
| TRUE | 1/1 | 1/1 | 6.66 | 6.08 | 1.5   |
| TRUE | 1/1 | 1/1 | 6.66 | 6.08 | 1.5   |
| TRUE | 1/1 | 1/1 | 6.66 | 6.08 | 1.5   |
| TRUE | 1/1 | 1/1 | 8.65 | 6.42 | 4.69  |
| TRUE | 1/1 | 1/1 | 8.65 | 6.42 | 4.69  |
| TRUE | 1/1 | 1/1 | 8.65 | 6.42 | 4.69  |
| TRUE | 1/1 | 1/1 | 8.65 | 6.42 | 4.69  |
| TRUE | 1/1 | 1/1 | 8.65 | 6.42 | 4.69  |
| TRUE | 1/1 | 1/1 | 8.65 | 6.42 | 4.69  |
| TRUE | 1/1 | 1/1 | 8.65 | 6.42 | 4.69  |
| TRUE | 1/1 | 1/1 | 8.65 | 6.42 | 4.69  |
| TRUE | 1/1 | 1/1 | 8.65 | 6.42 | 4.69  |
| TRUE | 1/1 | 1/1 | 5.16 | 5.27 | -1.08 |
| TRUE | 1/1 | 1/1 | 5.16 | 5.27 | -1.08 |
| TRUE | 1/1 | 1/1 | 5.16 | 5.27 | -1.08 |
| TRUE | 1/1 | 1/1 | 5.16 | 5.27 | -1.08 |
| TRUE | 1/1 | 1/1 | 5.16 | 5.27 | -1.08 |
| TRUE | 1/1 | 1/1 | 5.16 | 5.27 | -1.08 |
| TRUE | 1/1 | 1/1 | 5.16 | 5.27 | -1.08 |
| TRUE | 1/1 | 1/1 | 5.16 | 5.27 | -1.08 |
| TRUE | 1/1 | 1/1 | 5.42 | 5.18 | 1.18  |
| TRUE | 1/1 | 1/1 | 5.42 | 5.18 | 1.18  |
| TRUE | 1/1 | 1/1 | 7.81 | 7.86 | -1.03 |
| TRUE | 1/1 | 1/1 | 7.81 | 7.86 | -1.03 |
| TRUE | 1/1 | 1/1 | 7.81 | 7.86 | -1.03 |
| TRUE | 1/1 | 1/1 | 7.81 | 7.86 | -1.03 |
| TRUE | 1/1 | 1/1 | 7.81 | 7.86 | -1.03 |
| TRUE | 1/1 | 1/1 | 7.24 | 6.94 | 1.24  |
| TRUE | 1/1 | 1/1 | 7.24 | 6.94 | 1.24  |
| TRUE | 1/1 | 1/1 | 7.24 | 6.94 | 1.24  |
| TRUE | 1/1 | 1/1 | 8.56 | 8.85 | -1.22 |
| TRUE | 1/1 | 1/1 | 8.56 | 8.85 | -1.22 |
| TRUE | 1/1 | 1/1 | 6.17 | 7.08 | -1.87 |
| TRUE | 1/1 | 1/1 | 6.17 | 7.08 | -1.87 |
| TRUE | 1/1 | 1/1 | 6.17 | 7.08 | -1.87 |
| TRUE | 1/1 | 1/1 | 6.17 | 7.08 | -1.87 |
| TRUE | 1/1 | 1/1 | 6.99 | 7.21 | -1.16 |
| TRUE | 1/1 | 1/1 | 6.99 | 7.21 | -1.16 |
| TRUE | 1/1 | 1/1 | 6.26 | 6.96 | -1.62 |
| TRUE | 1/1 | 1/1 | 6.26 | 6.96 | -1.62 |
| TRUE | 1/1 | 1/1 | 6.26 | 6.96 | -1.62 |
| TRUE | 1/1 | 1/1 | 6.26 | 6.96 | -1.62 |
| TRUE | 1/1 | 1/1 | 6.81 | 6.98 | -1.13 |
| TRUE | 1/1 | 1/1 | 6.81 | 6.98 | -1.13 |
| TRUE | 1/1 | 1/1 | 4.67 | 4.84 | -1.12 |
| TRUE | 1/1 | 1/1 | 4.67 | 4.84 | -1.12 |
| TRUE | 1/1 | 1/1 | 4.67 | 4.84 | -1.12 |
| TRUE | 1/1 | 1/1 | 6.73 | 7.09 | -1.28 |
| TRUE | 1/1 | 1/1 | 6.73 | 7.09 | -1.28 |
| TRUE | 1/1 | 1/1 | 9.4  | 7.84 | 2.95  |
| TRUE | 1/1 | 1/1 | 9.4  | 7.84 | 2.95  |
| TRUE | 1/1 | 1/1 | 9.4  | 7.84 | 2.95  |
| TRUE | 1/1 | 1/1 | 9.4  | 7.84 | 2.95  |



|      |     |     |       |       |       |
|------|-----|-----|-------|-------|-------|
| TRUE | 1/1 | 1/1 | 9.4   | 7.84  | 2.95  |
| TRUE | 1/1 | 1/1 | 9.4   | 7.84  | 2.95  |
| TRUE | 1/1 | 1/1 | 9.4   | 7.84  | 2.95  |
| TRUE | 1/1 | 1/1 | 9.4   | 7.84  | 2.95  |
| TRUE | 1/1 | 1/1 | 9.4   | 7.84  | 2.95  |
| TRUE | 1/1 | 1/1 | 9.4   | 7.84  | 2.95  |
| TRUE | 1/1 | 1/1 | 9.4   | 7.84  | 2.95  |
| TRUE | 1/1 | 1/1 | 5.39  | 6.11  | -1.65 |
| TRUE | 1/1 | 1/1 | 5.39  | 6.11  | -1.65 |
| TRUE | 1/1 | 1/1 | 5.39  | 6.11  | -1.65 |
| TRUE | 1/1 | 1/1 | 5.39  | 6.11  | -1.65 |
| TRUE | 1/1 | 1/1 | 5.99  | 6.2   | -1.15 |
| TRUE | 1/1 | 1/1 | 5.99  | 6.2   | -1.15 |
| TRUE | 1/1 | 1/1 | 7.14  | 7.53  | -1.32 |
| TRUE | 1/1 | 1/1 | 7.14  | 7.53  | -1.32 |
| TRUE | 1/1 | 1/1 | 7.14  | 7.53  | -1.32 |
| TRUE | 1/1 | 1/1 | 7.14  | 7.53  | -1.32 |
| TRUE | 1/1 | 1/1 | 7.14  | 7.53  | -1.32 |
| TRUE | 1/1 | 1/1 | 7.14  | 7.53  | -1.32 |
| TRUE | 1/1 | 1/1 | 7.14  | 7.53  | -1.32 |
| TRUE | 1/1 | 1/1 | 7.14  | 7.53  | -1.32 |
| TRUE | 1/1 | 1/1 | 7.14  | 7.53  | -1.32 |
| TRUE | 1/1 | 1/1 | 4.68  | 4.72  | -1.02 |
| TRUE | 1/1 | 1/1 | 4.68  | 4.72  | -1.02 |
| TRUE | 1/1 | 1/1 | 6.19  | 5.95  | 1.18  |
| TRUE | 1/1 | 1/1 | 6.19  | 5.95  | 1.18  |
| TRUE | 1/1 | 1/1 | 10.28 | 9.92  | 1.29  |
| TRUE | 1/1 | 1/1 | 10.28 | 9.92  | 1.29  |
| TRUE | 1/1 | 1/1 | 10.28 | 9.92  | 1.29  |
| TRUE | 1/1 | 1/1 | 5.58  | 5.48  | 1.07  |
| TRUE | 1/1 | 1/1 | 5.58  | 5.48  | 1.07  |
| TRUE | 1/1 | 1/1 | 5.58  | 5.48  | 1.07  |
| TRUE | 1/1 | 1/1 | 5.58  | 5.48  | 1.07  |
| TRUE | 1/1 | 1/1 | 5.58  | 5.48  | 1.07  |
| TRUE | 1/1 | 1/1 | 8.95  | 8.46  | 1.4   |
| TRUE | 1/1 | 1/1 | 8.95  | 8.46  | 1.4   |
| TRUE | 1/1 | 1/1 | 8.95  | 8.46  | 1.4   |
| TRUE | 1/1 | 1/1 | 8.95  | 8.46  | 1.4   |
| TRUE | 1/1 | 1/1 | 8.95  | 8.46  | 1.4   |
| TRUE | 1/1 | 1/1 | 8.95  | 8.46  | 1.4   |
| TRUE | 1/1 | 1/1 | 8.95  | 8.46  | 1.4   |
| TRUE | 1/1 | 1/1 | 8.95  | 8.46  | 1.4   |
| TRUE | 1/1 | 1/1 | 8.95  | 8.46  | 1.4   |
| TRUE | 1/1 | 1/1 | 8.95  | 8.46  | 1.4   |
| TRUE | 1/1 | 1/1 | 8.95  | 8.46  | 1.4   |
| TRUE | 1/1 | 1/1 | 8.95  | 8.46  | 1.4   |
| TRUE | 1/1 | 1/1 | 8.95  | 8.46  | 1.4   |
| TRUE | 1/1 | 1/1 | 8.95  | 8.46  | 1.4   |
| TRUE | 1/1 | 1/1 | 8.95  | 8.46  | 1.4   |
| TRUE | 1/1 | 1/1 | 8.95  | 8.46  | 1.4   |
| TRUE | 1/1 | 1/1 | 8.95  | 8.46  | 1.4   |
| TRUE | 1/1 | 1/1 | 8.53  | 8.89  | -1.29 |
| TRUE | 1/1 | 1/1 | 8.53  | 8.89  | -1.29 |
| TRUE | 1/1 | 1/1 | 5.54  | 5.41  | 1.1   |
| TRUE | 1/1 | 1/1 | 5.54  | 5.41  | 1.1   |
| TRUE | 1/1 | 1/1 | 5.54  | 5.41  | 1.1   |
| TRUE | 1/1 | 1/1 | 5.54  | 5.41  | 1.1   |
| TRUE | 1/1 | 1/1 | 8.51  | 9.13  | -1.54 |
| TRUE | 1/1 | 1/1 | 8.51  | 9.13  | -1.54 |
| TRUE | 1/1 | 1/1 | 10.99 | 11.38 | -1.31 |
| TRUE | 1/1 | 1/1 | 10.99 | 11.38 | -1.31 |
| TRUE | 1/1 | 1/1 | 10.99 | 11.38 | -1.31 |
| TRUE | 1/1 | 1/1 | 13.06 | 13    | 1.05  |
| TRUE | 1/1 | 1/1 | 13.06 | 13    | 1.05  |
| TRUE | 1/1 | 1/1 | 13.06 | 13    | 1.05  |

|      |     |     |       |       |       |
|------|-----|-----|-------|-------|-------|
| TRUE | 1/1 | 1/1 | 5.75  | 6.37  | -1.54 |
| TRUE | 1/1 | 1/1 | 5.75  | 6.37  | -1.54 |
| TRUE | 1/1 | 1/1 | 7.04  | 7.25  | -1.15 |
| TRUE | 1/1 | 1/1 | 7.04  | 7.25  | -1.15 |
| TRUE | 1/1 | 1/1 | 4.41  | 4.8   | -1.31 |
| TRUE | 1/1 | 1/1 | 4.41  | 4.8   | -1.31 |
| TRUE | 1/1 | 1/1 | 4.41  | 4.8   | -1.31 |
| TRUE | 1/1 | 1/1 | 7.95  | 7.63  | 1.25  |
| TRUE | 1/1 | 1/1 | 7.95  | 7.63  | 1.25  |
| TRUE | 1/1 | 1/1 | 5.08  | 6.03  | -1.94 |
| TRUE | 1/1 | 1/1 | 5.08  | 6.03  | -1.94 |
| TRUE | 1/1 | 1/1 | 5.08  | 6.03  | -1.94 |
| TRUE | 1/1 | 1/1 | 4.15  | 4.47  | -1.25 |
| TRUE | 1/1 | 1/1 | 4.15  | 4.47  | -1.25 |
| TRUE | 1/1 | 1/1 | 5.36  | 5.61  | -1.19 |
| TRUE | 1/1 | 1/1 | 5.36  | 5.61  | -1.19 |
| TRUE | 1/1 | 1/1 | 5.36  | 5.61  | -1.19 |
| TRUE | 1/1 | 1/1 | 5.36  | 5.61  | -1.19 |
| TRUE | 1/1 | 1/1 | 5.36  | 5.61  | -1.19 |
| TRUE | 1/1 | 1/1 | 5.36  | 5.61  | -1.19 |
| TRUE | 1/1 | 1/1 | 5.36  | 5.61  | -1.19 |
| TRUE | 1/1 | 1/1 | 5.36  | 5.61  | -1.19 |
| TRUE | 1/1 | 1/1 | 5.36  | 5.61  | -1.19 |
| TRUE | 1/1 | 1/1 | 5.36  | 5.61  | -1.19 |
| TRUE | 1/1 | 1/1 | 5.36  | 5.61  | -1.19 |
| TRUE | 1/1 | 1/1 | 5.36  | 5.61  | -1.19 |
| TRUE | 1/1 | 1/1 | 5.36  | 5.61  | -1.19 |
| TRUE | 1/1 | 1/1 | 5.36  | 5.61  | -1.19 |
| TRUE | 1/1 | 1/1 | 5.36  | 5.61  | -1.19 |
| TRUE | 1/1 | 1/1 | 5.36  | 5.61  | -1.19 |
| TRUE | 1/1 | 1/1 | 5.36  | 5.61  | -1.19 |
| TRUE | 1/1 | 1/1 | 5.79  | 5.93  | -1.1  |
| TRUE | 1/1 | 1/1 | 5.79  | 5.93  | -1.1  |
| TRUE | 1/1 | 1/1 | 5.79  | 5.93  | -1.1  |
| TRUE | 1/1 | 1/1 | 5.79  | 5.93  | -1.1  |
| TRUE | 1/1 | 1/1 | 5.79  | 5.93  | -1.1  |
| TRUE | 1/1 | 1/1 | 6.03  | 6.64  | -1.53 |
| TRUE | 1/1 | 1/1 | 6.03  | 6.64  | -1.53 |
| TRUE | 1/1 | 1/1 | 6.03  | 6.64  | -1.53 |
| TRUE | 1/1 | 1/1 | 10.93 | 11.1  | -1.13 |
| TRUE | 1/1 | 1/1 | 10.93 | 11.1  | -1.13 |
| TRUE | 1/1 | 1/1 | 6.13  | 6.12  | 1     |
| TRUE | 1/1 | 1/1 | 6.13  | 6.12  | 1     |
| TRUE | 1/1 | 1/1 | 6.13  | 6.12  | 1     |
| TRUE | 1/1 | 1/1 | 6.13  | 6.12  | 1     |
| TRUE | 1/1 | 1/1 | 6.29  | 6.56  | -1.21 |
| TRUE | 1/1 | 1/1 | 6.29  | 6.56  | -1.21 |
| TRUE | 1/1 | 1/1 | 6.29  | 6.56  | -1.21 |
| TRUE | 1/1 | 1/1 | 6.29  | 6.56  | -1.21 |
| TRUE | 1/1 | 1/1 | 6.29  | 6.56  | -1.21 |
| TRUE | 1/1 | 1/1 | 6.29  | 6.56  | -1.21 |
| TRUE | 1/1 | 1/1 | 5.98  | 6.54  | -1.47 |
| TRUE | 1/1 | 1/1 | 5.98  | 6.54  | -1.47 |
| TRUE | 1/1 | 1/1 | 5.98  | 6.54  | -1.47 |
| TRUE | 1/1 | 1/1 | 5.98  | 6.54  | -1.47 |
| TRUE | 1/1 | 1/1 | 9.95  | 10.13 | -1.14 |
| TRUE | 1/1 | 1/1 | 9.95  | 10.13 | -1.14 |
| TRUE | 1/1 | 1/1 | 9.95  | 10.13 | -1.14 |
| TRUE | 1/1 | 1/1 | 9.95  | 10.13 | -1.14 |
| TRUE | 1/1 | 1/1 | 6.35  | 6.95  | -1.52 |
| TRUE | 1/1 | 1/1 | 6.35  | 6.95  | -1.52 |
| TRUE | 1/1 | 1/1 | 8.05  | 8.17  | -1.09 |
| TRUE | 1/1 | 1/1 | 8.05  | 8.17  | -1.09 |

|      |     |     |       |      |       |
|------|-----|-----|-------|------|-------|
| TRUE | 1/1 | 1/1 | 8.05  | 8.17 | -1.09 |
| TRUE | 1/1 | 1/1 | 7.17  | 7.84 | -1.58 |
| TRUE | 1/1 | 1/1 | 7.17  | 7.84 | -1.58 |
| TRUE | 1/1 | 1/1 | 6.31  | 4.3  | 4.03  |
| TRUE | 1/1 | 1/1 | 6.31  | 4.3  | 4.03  |
| TRUE | 1/1 | 1/1 | 6.31  | 4.3  | 4.03  |
| TRUE | 1/1 | 1/1 | 6.31  | 4.3  | 4.03  |
| TRUE | 1/1 | 1/1 | 6.31  | 4.3  | 4.03  |
| TRUE | 1/1 | 1/1 | 6.31  | 4.3  | 4.03  |
| TRUE | 1/1 | 1/1 | 6.31  | 4.3  | 4.03  |
| TRUE | 1/1 | 1/1 | 6.31  | 4.3  | 4.03  |
| TRUE | 1/1 | 1/1 | 6.31  | 4.3  | 4.03  |
| TRUE | 1/1 | 1/1 | 6.31  | 4.3  | 4.03  |
| TRUE | 1/1 | 1/1 | 6.31  | 4.3  | 4.03  |
| TRUE | 1/1 | 1/1 | 6.31  | 4.3  | 4.03  |
| TRUE | 1/1 | 1/1 | 6.31  | 4.3  | 4.03  |
| TRUE | 1/1 | 1/1 | 6.31  | 4.3  | 4.03  |
| TRUE | 1/1 | 1/1 | 6.31  | 4.3  | 4.03  |
| TRUE | 1/1 | 1/1 | 6.31  | 4.3  | 4.03  |
| TRUE | 1/1 | 1/1 | 6.31  | 4.3  | 4.03  |
| TRUE | 1/1 | 1/1 | 6.31  | 4.3  | 4.03  |
| TRUE | 1/1 | 1/1 | 6.31  | 4.3  | 4.03  |
| TRUE | 1/1 | 1/1 | 6.31  | 4.3  | 4.03  |
| TRUE | 1/1 | 1/1 | 6.31  | 4.3  | 4.03  |
| TRUE | 1/1 | 1/1 | 6.31  | 4.3  | 4.03  |
| TRUE | 1/1 | 1/1 | 6.31  | 4.3  | 4.03  |
| TRUE | 1/1 | 1/1 | 6.31  | 4.3  | 4.03  |
| TRUE | 1/1 | 1/1 | 6.31  | 4.3  | 4.03  |
| TRUE | 1/1 | 1/1 | 6.31  | 4.3  | 4.03  |
| TRUE | 1/1 | 1/1 | 6.31  | 4.3  | 4.03  |
| TRUE | 1/1 | 1/1 | 6.31  | 4.3  | 4.03  |
| TRUE | 1/1 | 1/1 | 6.31  | 4.3  | 4.03  |
| TRUE | 1/1 | 1/1 | 6.31  | 4.3  | 4.03  |
| TRUE | 1/1 | 1/1 | 6.31  | 4.3  | 4.03  |
| TRUE | 1/1 | 1/1 | 6.31  | 4.3  | 4.03  |
| TRUE | 1/1 | 1/1 | 10.24 | 10.1 | 1.1   |
| TRUE | 1/1 | 1/1 | 10.24 | 10.1 | 1.1   |
| TRUE | 1/1 | 1/1 | 10.24 | 10.1 | 1.1   |
| TRUE | 1/1 | 1/1 | 6.04  | 5.63 | 1.33  |
| TRUE | 1/1 | 1/1 | 6.04  | 5.63 | 1.33  |
| TRUE | 1/1 | 1/1 | 6.04  | 5.63 | 1.33  |
| TRUE | 1/1 | 1/1 | 5.05  | 5.15 | -1.07 |
| TRUE | 1/1 | 1/1 | 5.05  | 5.15 | -1.07 |
| TRUE | 1/1 | 1/1 | 5.05  | 5.15 | -1.07 |
| TRUE | 1/1 | 1/1 | 5.05  | 5.15 | -1.07 |
| TRUE | 1/1 | 1/1 | 9.15  | 9.77 | -1.53 |
| TRUE | 1/1 | 1/1 | 9.15  | 9.77 | -1.53 |
| TRUE | 1/1 | 1/1 | 9.15  | 9.77 | -1.53 |
| TRUE | 1/1 | 1/1 | 7.86  | 7.26 | 1.52  |
| TRUE | 1/1 | 1/1 | 7.86  | 7.26 | 1.52  |
| TRUE | 1/1 | 1/1 | 7.86  | 7.26 | 1.52  |
| TRUE | 1/1 | 1/1 | 7.86  | 7.26 | 1.52  |
| TRUE | 1/1 | 1/1 | 7.86  | 7.26 | 1.52  |
| TRUE | 1/1 | 1/1 | 6.87  | 6.3  | 1.48  |
| TRUE | 1/1 | 1/1 | 6.87  | 6.3  | 1.48  |
| TRUE | 1/1 | 1/1 | 6.87  | 6.3  | 1.48  |
| TRUE | 1/1 | 1/1 | 6.87  | 6.3  | 1.48  |
| TRUE | 1/1 | 1/1 | 6.87  | 6.3  | 1.48  |
| TRUE | 1/1 | 1/1 | 6.76  | 7.33 | -1.48 |
| TRUE | 1/1 | 1/1 | 6.76  | 7.33 | -1.48 |
| TRUE | 1/1 | 1/1 | 6.76  | 7.33 | -1.48 |
| TRUE | 1/1 | 1/1 | 6.76  | 7.33 | -1.48 |
| TRUE | 1/1 | 1/1 | 5.7   | 5.79 | -1.07 |
| TRUE | 1/1 | 1/1 | 5.7   | 5.79 | -1.07 |
| TRUE | 1/1 | 1/1 | 4.11  | 4.15 | -1.03 |
| TRUE | 1/1 | 1/1 | 4.11  | 4.15 | -1.03 |
| TRUE | 1/1 | 1/1 | 4.11  | 4.15 | -1.03 |

|      |     |     |      |      |       |
|------|-----|-----|------|------|-------|
| TRUE | 1/1 | 1/1 | 3.68 | 3.7  | -1.01 |
| TRUE | 1/1 | 1/1 | 3.68 | 3.7  | -1.01 |
| TRUE | 1/1 | 1/1 | 3.68 | 3.7  | -1.01 |
| TRUE | 1/1 | 1/1 | 3.68 | 3.7  | -1.01 |
| TRUE | 1/1 | 1/1 | 6.59 | 6.62 | -1.02 |
| TRUE | 1/1 | 1/1 | 6.59 | 6.62 | -1.02 |
| TRUE | 1/1 | 1/1 | 6.76 | 6.39 | 1.3   |
| TRUE | 1/1 | 1/1 | 6.76 | 6.39 | 1.3   |
| TRUE | 1/1 | 1/1 | 6.76 | 6.39 | 1.3   |
| TRUE | 1/1 | 1/1 | 9.85 | 5.98 | 14.65 |
| TRUE | 1/1 | 1/1 | 9.85 | 5.98 | 14.65 |
| TRUE | 1/1 | 1/1 | 9.85 | 5.98 | 14.65 |
| TRUE | 1/1 | 1/1 | 9.85 | 5.98 | 14.65 |
| TRUE | 1/1 | 1/1 | 9.85 | 5.98 | 14.65 |
| TRUE | 1/1 | 1/1 | 9.84 | 7.54 | 4.9   |
| TRUE | 1/1 | 1/1 | 9.84 | 7.54 | 4.9   |
| TRUE | 1/1 | 1/1 | 9.84 | 7.54 | 4.9   |
| TRUE | 1/1 | 1/1 | 9.84 | 7.54 | 4.9   |
| TRUE | 1/1 | 1/1 | 9.84 | 7.54 | 4.9   |
| TRUE | 1/1 | 1/1 | 9.84 | 7.54 | 4.9   |
| TRUE | 1/1 | 1/1 | 9.84 | 7.54 | 4.9   |
| TRUE | 1/1 | 1/1 | 9.84 | 7.54 | 4.9   |
| TRUE | 1/1 | 1/1 | 9.84 | 7.54 | 4.9   |
| TRUE | 1/1 | 1/1 | 9.84 | 7.54 | 4.9   |
| TRUE | 1/1 | 1/1 | 9.84 | 7.54 | 4.9   |
| TRUE | 1/1 | 1/1 | 9.84 | 7.54 | 4.9   |
| TRUE | 1/1 | 1/1 | 9.84 | 7.54 | 4.9   |
| TRUE | 1/1 | 1/1 | 9.84 | 7.54 | 4.9   |
| TRUE | 1/1 | 1/1 | 9.84 | 7.54 | 4.9   |
| TRUE | 1/1 | 1/1 | 9.84 | 7.54 | 4.9   |
| TRUE | 1/1 | 1/1 | 9.84 | 7.54 | 4.9   |
| TRUE | 1/1 | 1/1 | 8.17 | 8.61 | -1.35 |
| TRUE | 1/1 | 1/1 | 8.17 | 8.61 | -1.35 |
| TRUE | 1/1 | 1/1 | 8.17 | 8.61 | -1.35 |
| TRUE | 1/1 | 1/1 | 8.57 | 9.17 | -1.51 |
| TRUE | 1/1 | 1/1 | 8.57 | 9.17 | -1.51 |
| TRUE | 1/1 | 1/1 | 8.57 | 9.17 | -1.51 |
| TRUE | 1/1 | 1/1 | 8.57 | 9.17 | -1.51 |
| TRUE | 1/1 | 1/1 | 8.57 | 9.17 | -1.51 |
| TRUE | 1/1 | 1/1 | 8.57 | 9.17 | -1.51 |
| TRUE | 1/1 | 1/1 | 8.57 | 9.17 | -1.51 |
| TRUE | 1/1 | 1/1 | 5.38 | 4.71 | 1.59  |
| TRUE | 1/1 | 1/1 | 5.38 | 4.71 | 1.59  |
| TRUE | 1/1 | 1/1 | 5.38 | 4.71 | 1.59  |
| TRUE | 1/1 | 1/1 | 4.81 | 4.14 | 1.6   |
| TRUE | 1/1 | 1/1 | 4.81 | 4.14 | 1.6   |
| TRUE | 1/1 | 1/1 | 4.81 | 4.14 | 1.6   |
| TRUE | 1/1 | 1/1 | 9.11 | 9.08 | 1.02  |
| TRUE | 1/1 | 1/1 | 9.11 | 9.08 | 1.02  |
| TRUE | 1/1 | 1/1 | 8.73 | 8.62 | 1.08  |
| TRUE | 1/1 | 1/1 | 8.73 | 8.62 | 1.08  |
| TRUE | 1/1 | 1/1 | 5.21 | 5.16 | 1.03  |
| TRUE | 1/1 | 1/1 | 5.21 | 5.16 | 1.03  |
| TRUE | 1/1 | 1/1 | 5.21 | 5.16 | 1.03  |
| TRUE | 1/1 | 1/1 | 6.23 | 6.84 | -1.52 |
| TRUE | 1/1 | 1/1 | 6.23 | 6.84 | -1.52 |
| TRUE | 1/1 | 1/1 | 6.23 | 6.84 | -1.52 |
| TRUE | 1/1 | 1/1 | 6.23 | 6.84 | -1.52 |
| TRUE | 1/1 | 1/1 | 6.23 | 6.84 | -1.52 |

|      |     |     |       |      |       |
|------|-----|-----|-------|------|-------|
| TRUE | 1/1 | 1/1 | 8.5   | 7.51 | 1.99  |
| TRUE | 1/1 | 1/1 | 8.5   | 7.51 | 1.99  |
| TRUE | 1/1 | 1/1 | 8.5   | 7.51 | 1.99  |
| TRUE | 1/1 | 1/1 | 8.5   | 7.51 | 1.99  |
| TRUE | 1/1 | 1/1 | 8.5   | 7.51 | 1.99  |
| TRUE | 1/1 | 1/1 | 6.9   | 6.47 | 1.35  |
| TRUE | 1/1 | 1/1 | 6.9   | 6.47 | 1.35  |
| TRUE | 1/1 | 1/1 | 6.9   | 6.47 | 1.35  |
| TRUE | 1/1 | 1/1 | 7.91  | 8.24 | -1.26 |
| TRUE | 1/1 | 1/1 | 7.91  | 8.24 | -1.26 |
| TRUE | 1/1 | 1/1 | 7.91  | 8.24 | -1.26 |
| TRUE | 1/1 | 1/1 | 6.19  | 6.68 | -1.41 |
| TRUE | 1/1 | 1/1 | 6.19  | 6.68 | -1.41 |
| TRUE | 1/1 | 1/1 | 6.19  | 6.68 | -1.41 |
| TRUE | 1/1 | 1/1 | 6.19  | 6.68 | -1.41 |
| TRUE | 1/1 | 1/1 | 7.58  | 7.95 | -1.3  |
| TRUE | 1/1 | 1/1 | 7.58  | 7.95 | -1.3  |
| TRUE | 1/1 | 1/1 | 7.22  | 7.55 | -1.25 |
| TRUE | 1/1 | 1/1 | 7.22  | 7.55 | -1.25 |
| TRUE | 1/1 | 1/1 | 7.22  | 7.55 | -1.25 |
| TRUE | 1/1 | 1/1 | 4.87  | 4.99 | -1.09 |
| TRUE | 1/1 | 1/1 | 4.87  | 4.99 | -1.09 |
| TRUE | 1/1 | 1/1 | 10.33 | 9.78 | 1.47  |
| TRUE | 1/1 | 1/1 | 10.33 | 9.78 | 1.47  |
| TRUE | 1/1 | 1/1 | 10.33 | 9.78 | 1.47  |
| TRUE | 1/1 | 1/1 | 6.86  | 7.12 | -1.19 |
| TRUE | 1/1 | 1/1 | 6.86  | 7.12 | -1.19 |
| TRUE | 1/1 | 1/1 | 6.95  | 7.27 | -1.25 |
| TRUE | 1/1 | 1/1 | 6.95  | 7.27 | -1.25 |
| TRUE | 1/1 | 1/1 | 4.98  | 4.42 | 1.48  |
| TRUE | 1/1 | 1/1 | 4.98  | 4.42 | 1.48  |
| TRUE | 1/1 | 1/1 | 7.6   | 5.6  | 4.01  |
| TRUE | 1/1 | 1/1 | 7.6   | 5.6  | 4.01  |
| TRUE | 1/1 | 1/1 | 7.6   | 5.6  | 4.01  |
| TRUE | 1/1 | 1/1 | 7.6   | 5.6  | 4.01  |
| TRUE | 1/1 | 1/1 | 7.6   | 5.6  | 4.01  |
| TRUE | 1/1 | 1/1 | 7.6   | 5.6  | 4.01  |
| TRUE | 1/1 | 1/1 | 7.6   | 5.6  | 4.01  |
| TRUE | 1/1 | 1/1 | 7.6   | 5.6  | 4.01  |
| TRUE | 1/1 | 1/1 | 7.6   | 5.6  | 4.01  |
| TRUE | 1/1 | 1/1 | 7.6   | 5.6  | 4.01  |
| TRUE | 1/1 | 1/1 | 7.6   | 5.6  | 4.01  |
| TRUE | 1/1 | 1/1 | 7.66  | 6.09 | 2.97  |
| TRUE | 1/1 | 1/1 | 7.66  | 6.09 | 2.97  |
| TRUE | 1/1 | 1/1 | 7.66  | 6.09 | 2.97  |
| TRUE | 1/1 | 1/1 | 7.66  | 6.09 | 2.97  |
| TRUE | 1/1 | 1/1 | 7.66  | 6.09 | 2.97  |
| TRUE | 1/1 | 1/1 | 7.66  | 6.09 | 2.97  |
| TRUE | 1/1 | 1/1 | 7.66  | 6.09 | 2.97  |
| TRUE | 1/1 | 1/1 | 7.66  | 6.09 | 2.97  |
| TRUE | 1/1 | 1/1 | 7.66  | 6.09 | 2.97  |
| TRUE | 1/1 | 1/1 | 7.66  | 6.09 | 2.97  |
| TRUE | 1/1 | 1/1 | 7.66  | 6.09 | 2.97  |
| TRUE | 1/1 | 1/1 | 7.66  | 6.09 | 2.97  |
| TRUE | 1/1 | 1/1 | 7.66  | 6.09 | 2.97  |
| TRUE | 1/1 | 1/1 | 7.66  | 6.09 | 2.97  |
| TRUE | 1/1 | 1/1 | 7.66  | 6.09 | 2.97  |
| TRUE | 1/1 | 1/1 | 7.66  | 6.09 | 2.97  |
| TRUE | 1/1 | 1/1 | 7.75  | 8.34 | -1.5  |
| TRUE | 1/1 | 1/1 | 7.75  | 8.34 | -1.5  |



|      |     |     |      |      |       |
|------|-----|-----|------|------|-------|
| TRUE | 1/1 | 1/1 | 7.21 | 5.42 | 3.46  |
| TRUE | 1/1 | 1/1 | 7.21 | 5.42 | 3.46  |
| TRUE | 1/1 | 1/1 | 7.21 | 5.42 | 3.46  |
| TRUE | 1/1 | 1/1 | 7.21 | 5.42 | 3.46  |
| TRUE | 1/1 | 1/1 | 6.92 | 7.23 | -1.24 |
| TRUE | 1/1 | 1/1 | 6.92 | 7.23 | -1.24 |
| TRUE | 1/1 | 1/1 | 6.46 | 7.06 | -1.53 |
| TRUE | 1/1 | 1/1 | 6.46 | 7.06 | -1.53 |
| TRUE | 1/1 | 1/1 | 6.46 | 7.06 | -1.53 |
| TRUE | 1/1 | 1/1 | 6.46 | 7.06 | -1.53 |
| TRUE | 1/1 | 1/1 | 6.46 | 7.06 | -1.53 |
| TRUE | 1/1 | 1/1 | 6.46 | 7.06 | -1.53 |
| TRUE | 1/1 | 1/1 | 6.46 | 7.06 | -1.53 |
| TRUE | 1/1 | 1/1 | 6.46 | 7.06 | -1.53 |
| TRUE | 1/1 | 1/1 | 6.46 | 7.06 | -1.53 |
| TRUE | 1/1 | 1/1 | 6.46 | 7.06 | -1.53 |
| TRUE | 1/1 | 1/1 | 5.54 | 5.02 | 1.44  |
| TRUE | 1/1 | 1/1 | 5.54 | 5.02 | 1.44  |
| TRUE | 1/1 | 1/1 | 6.77 | 7.07 | -1.23 |
| TRUE | 1/1 | 1/1 | 6.77 | 7.07 | -1.23 |
| TRUE | 1/1 | 1/1 | 6.77 | 7.07 | -1.23 |
| TRUE | 1/1 | 1/1 | 6.77 | 7.07 | -1.23 |
| TRUE | 1/1 | 1/1 | 6.77 | 7.07 | -1.23 |
| TRUE | 1/1 | 1/1 | 6.77 | 7.07 | -1.23 |
| TRUE | 1/1 | 1/1 | 6.17 | 6.4  | -1.17 |
| TRUE | 1/1 | 1/1 | 6.17 | 6.4  | -1.17 |
| TRUE | 1/1 | 1/1 | 6.17 | 6.4  | -1.17 |
| TRUE | 1/1 | 1/1 | 6.17 | 6.4  | -1.17 |
| TRUE | 1/1 | 1/1 | 6.17 | 6.4  | -1.17 |
| TRUE | 1/1 | 1/1 | 8.41 | 8.86 | -1.37 |
| TRUE | 1/1 | 1/1 | 8.41 | 8.86 | -1.37 |
| TRUE | 1/1 | 1/1 | 8.41 | 8.86 | -1.37 |
| TRUE | 1/1 | 1/1 | 7.06 | 7.14 | -1.06 |
| TRUE | 1/1 | 1/1 | 7.06 | 7.14 | -1.06 |
| TRUE | 1/1 | 1/1 | 7.06 | 7.14 | -1.06 |
| TRUE | 1/1 | 1/1 | 5.95 | 5.98 | -1.02 |
| TRUE | 1/1 | 1/1 | 5.95 | 5.98 | -1.02 |
| TRUE | 1/1 | 1/1 | 7.72 | 6.28 | 2.71  |
| TRUE | 1/1 | 1/1 | 7.72 | 6.28 | 2.71  |
| TRUE | 1/1 | 1/1 | 7.72 | 6.28 | 2.71  |
| TRUE | 1/1 | 1/1 | 8.33 | 7.96 | 1.28  |
| TRUE | 1/1 | 1/1 | 8.33 | 7.96 | 1.28  |
| TRUE | 1/1 | 1/1 | 8.33 | 7.96 | 1.28  |
| TRUE | 1/1 | 1/1 | 8.33 | 7.96 | 1.28  |
| TRUE | 1/1 | 1/1 | 7.98 | 8.01 | -1.02 |
| TRUE | 1/1 | 1/1 | 7.98 | 8.01 | -1.02 |
| TRUE | 1/1 | 1/1 | 7.98 | 8.01 | -1.02 |
| TRUE | 1/1 | 1/1 | 7.98 | 8.01 | -1.02 |
| TRUE | 1/1 | 1/1 | 3.32 | 2.85 | 1.38  |
| TRUE | 1/1 | 1/1 | 3.32 | 2.85 | 1.38  |
| TRUE | 1/1 | 1/1 | 3.32 | 2.85 | 1.38  |
| TRUE | 1/1 | 1/1 | 5.41 | 4.08 | 2.51  |
| TRUE | 1/1 | 1/1 | 5.41 | 4.08 | 2.51  |
| TRUE | 1/1 | 1/1 | 5.41 | 4.08 | 2.51  |
| TRUE | 1/1 | 1/1 | 5.41 | 4.08 | 2.51  |
| TRUE | 1/1 | 1/1 | 5.41 | 4.08 | 2.51  |
| TRUE | 1/1 | 1/1 | 5.41 | 4.08 | 2.51  |
| TRUE | 1/1 | 1/1 | 9.04 | 9.4  | -1.28 |
| TRUE | 1/1 | 1/1 | 9.04 | 9.4  | -1.28 |
| TRUE | 1/1 | 1/1 | 6.82 | 7.04 | -1.17 |

|      |     |     |      |      |       |
|------|-----|-----|------|------|-------|
| TRUE | 1/1 | 1/1 | 6.82 | 7.04 | -1.17 |
| TRUE | 1/1 | 1/1 | 6.82 | 7.04 | -1.17 |
| TRUE | 1/1 | 1/1 | 6.82 | 7.04 | -1.17 |
| TRUE | 1/1 | 1/1 | 7.06 | 7.76 | -1.63 |
| TRUE | 1/1 | 1/1 | 7.06 | 7.76 | -1.63 |
| TRUE | 1/1 | 1/1 | 7.06 | 7.76 | -1.63 |
| TRUE | 1/1 | 1/1 | 8.05 | 8.25 | -1.15 |
| TRUE | 1/1 | 1/1 | 8.05 | 8.25 | -1.15 |
| TRUE | 1/1 | 1/1 | 8.05 | 8.25 | -1.15 |
| TRUE | 1/1 | 1/1 | 8.06 | 7.19 | 1.82  |
| TRUE | 1/1 | 1/1 | 8.06 | 7.19 | 1.82  |
| TRUE | 1/1 | 1/1 | 8.06 | 7.19 | 1.82  |
| TRUE | 1/1 | 1/1 | 8.06 | 7.19 | 1.82  |
| TRUE | 1/1 | 1/1 | 8.06 | 7.19 | 1.82  |
| TRUE | 1/1 | 1/1 | 8.06 | 7.19 | 1.82  |
| TRUE | 1/1 | 1/1 | 9.96 | 8.67 | 2.45  |
| TRUE | 1/1 | 1/1 | 9.96 | 8.67 | 2.45  |
| TRUE | 1/1 | 1/1 | 9.96 | 8.67 | 2.45  |
| TRUE | 1/1 | 1/1 | 9.96 | 8.67 | 2.45  |
| TRUE | 1/1 | 1/1 | 9.96 | 8.67 | 2.45  |
| TRUE | 1/1 | 1/1 | 8.01 | 8.61 | -1.51 |
| TRUE | 1/1 | 1/1 | 8.01 | 8.61 | -1.51 |
| TRUE | 1/1 | 1/1 | 6.85 | 6.85 | -1.01 |
| TRUE | 1/1 | 1/1 | 6.85 | 6.85 | -1.01 |
| TRUE | 1/1 | 1/1 | 6.85 | 6.85 | -1.01 |
| TRUE | 1/1 | 1/1 | 6.85 | 6.85 | -1.01 |
| TRUE | 1/1 | 1/1 | 6.85 | 6.85 | -1.01 |
| TRUE | 1/1 | 1/1 | 6.42 | 6.51 | -1.07 |
| TRUE | 1/1 | 1/1 | 6.42 | 6.51 | -1.07 |
| TRUE | 1/1 | 1/1 | 6.42 | 6.51 | -1.07 |
| TRUE | 1/1 | 1/1 | 5.16 | 4.05 | 2.15  |
| TRUE | 1/1 | 1/1 | 5.16 | 4.05 | 2.15  |
| TRUE | 1/1 | 1/1 | 5.16 | 4.05 | 2.15  |
| TRUE | 1/1 | 1/1 | 5.23 | 5.75 | -1.44 |
| TRUE | 1/1 | 1/1 | 5.23 | 5.75 | -1.44 |
| TRUE | 1/1 | 1/1 | 4.81 | 5.18 | -1.29 |
| TRUE | 1/1 | 1/1 | 4.81 | 5.18 | -1.29 |
| TRUE | 1/1 | 1/1 | 7.5  | 8.1  | -1.52 |
| TRUE | 1/1 | 1/1 | 7.5  | 8.1  | -1.52 |
| TRUE | 1/1 | 1/1 | 4.42 | 4.04 | 1.3   |
| TRUE | 1/1 | 1/1 | 4.42 | 4.04 | 1.3   |
| TRUE | 1/1 | 1/1 | 4.42 | 4.04 | 1.3   |
| TRUE | 1/1 | 1/1 | 4.42 | 4.04 | 1.3   |
| TRUE | 1/1 | 1/1 | 4.42 | 4.04 | 1.3   |
| TRUE | 1/1 | 1/1 | 6.99 | 7.62 | -1.54 |
| TRUE | 1/1 | 1/1 | 6.99 | 7.62 | -1.54 |
| TRUE | 1/1 | 1/1 | 6.99 | 7.62 | -1.54 |
| TRUE | 1/1 | 1/1 | 6.99 | 7.62 | -1.54 |
| TRUE | 1/1 | 1/1 | 9.38 | 10   | -1.54 |
| TRUE | 1/1 | 1/1 | 9.38 | 10   | -1.54 |
| TRUE | 1/1 | 1/1 | 9.38 | 10   | -1.54 |
| TRUE | 1/1 | 1/1 | 9.38 | 10   | -1.54 |
| TRUE | 1/1 | 1/1 | 9.38 | 10   | -1.54 |
| TRUE | 1/1 | 1/1 | 4.7  | 5.12 | -1.34 |
| TRUE | 1/1 | 1/1 | 4.7  | 5.12 | -1.34 |
| TRUE | 1/1 | 1/1 | 4.7  | 5.12 | -1.34 |
| TRUE | 1/1 | 1/1 | 4.7  | 5.12 | -1.34 |
| TRUE | 1/1 | 1/1 | 5.68 | 5.45 | 1.17  |
| TRUE | 1/1 | 1/1 | 5.68 | 5.45 | 1.17  |



|      |     |     |      |      |       |
|------|-----|-----|------|------|-------|
| TRUE | 1/1 | 1/1 | 8.14 | 8.18 | -1.03 |
| TRUE | 1/1 | 1/1 | 8.14 | 8.18 | -1.03 |
| TRUE | 1/1 | 1/1 | 9.02 | 9.29 | -1.21 |
| TRUE | 1/1 | 1/1 | 9.02 | 9.29 | -1.21 |
| TRUE | 1/1 | 1/1 | 6.08 | 6.41 | -1.26 |
| TRUE | 1/1 | 1/1 | 6.08 | 6.41 | -1.26 |
| TRUE | 1/1 | 1/1 | 6.67 | 6.1  | 1.48  |
| TRUE | 1/1 | 1/1 | 6.67 | 6.1  | 1.48  |
| TRUE | 1/1 | 1/1 | 5.68 | 5.2  | 1.39  |
| TRUE | 1/1 | 1/1 | 5.68 | 5.2  | 1.39  |
| TRUE | 1/1 | 1/1 | 5.68 | 5.2  | 1.39  |
| TRUE | 1/1 | 1/1 | 5.68 | 5.2  | 1.39  |
| TRUE | 1/1 | 1/1 | 8.64 | 9.03 | -1.31 |
| TRUE | 1/1 | 1/1 | 8.64 | 9.03 | -1.31 |
| TRUE | 1/1 | 1/1 | 3.29 | 3.57 | -1.22 |
| TRUE | 1/1 | 1/1 | 3.29 | 3.57 | -1.22 |
| TRUE | 1/1 | 1/1 | 6.04 | 6.01 | 1.02  |
| TRUE | 1/1 | 1/1 | 6.04 | 6.01 | 1.02  |
| TRUE | 1/1 | 1/1 | 6.04 | 6.01 | 1.02  |
| TRUE | 1/1 | 1/1 | 6.04 | 6.01 | 1.02  |
| TRUE | 1/1 | 1/1 | 6.04 | 6.01 | 1.02  |
| TRUE | 1/1 | 1/1 | 6.54 | 7.06 | -1.43 |
| TRUE | 1/1 | 1/1 | 6.54 | 7.06 | -1.43 |
| TRUE | 1/1 | 1/1 | 7.97 | 7.83 | 1.1   |
| TRUE | 1/1 | 1/1 | 7.97 | 7.83 | 1.1   |
| TRUE | 1/1 | 1/1 | 7.97 | 7.83 | 1.1   |
| TRUE | 1/1 | 1/1 | 7.97 | 7.83 | 1.1   |
| TRUE | 1/1 | 1/1 | 4.89 | 4.92 | -1.02 |
| TRUE | 1/1 | 1/1 | 4.89 | 4.92 | -1.02 |
| TRUE | 1/1 | 1/1 | 4.89 | 4.92 | -1.02 |
| TRUE | 1/1 | 1/1 | 4.89 | 4.92 | -1.02 |
| TRUE | 1/1 | 1/1 | 4.89 | 4.92 | -1.02 |
| TRUE | 1/1 | 1/1 | 4.31 | 4.24 | 1.05  |
| TRUE | 1/1 | 1/1 | 4.31 | 4.24 | 1.05  |
| TRUE | 1/1 | 1/1 | 4.31 | 4.24 | 1.05  |
| TRUE | 1/1 | 1/1 | 4.31 | 4.24 | 1.05  |
| TRUE | 1/1 | 1/1 | 8.46 | 8.64 | -1.13 |
| TRUE | 1/1 | 1/1 | 8.46 | 8.64 | -1.13 |
| TRUE | 1/1 | 1/1 | 8.46 | 8.64 | -1.13 |
| TRUE | 1/1 | 1/1 | 9.02 | 8.75 | 1.2   |
| TRUE | 1/1 | 1/1 | 9.02 | 8.75 | 1.2   |
| TRUE | 1/1 | 1/1 | 9.02 | 8.75 | 1.2   |
| TRUE | 1/1 | 1/1 | 8.67 | 7.28 | 2.62  |
| TRUE | 1/1 | 1/1 | 8.67 | 7.28 | 2.62  |
| TRUE | 1/1 | 1/1 | 8.67 | 7.28 | 2.62  |
| TRUE | 1/1 | 1/1 | 8.67 | 7.28 | 2.62  |
| TRUE | 1/1 | 1/1 | 8.67 | 7.28 | 2.62  |
| TRUE | 1/1 | 1/1 | 8.67 | 7.28 | 2.62  |
| TRUE | 1/1 | 1/1 | 8.67 | 7.28 | 2.62  |
| TRUE | 1/1 | 1/1 | 8.67 | 7.28 | 2.62  |
| TRUE | 1/1 | 1/1 | 8.67 | 7.28 | 2.62  |
| TRUE | 1/1 | 1/1 | 8.67 | 7.28 | 2.62  |
| TRUE | 1/1 | 1/1 | 8.67 | 7.28 | 2.62  |
| TRUE | 1/1 | 1/1 | 8.67 | 7.28 | 2.62  |
| TRUE | 1/1 | 1/1 | 8.67 | 7.28 | 2.62  |
| TRUE | 1/1 | 1/1 | 8.67 | 7.28 | 2.62  |
| TRUE | 1/1 | 1/1 | 6.16 | 6.04 | 1.09  |
| TRUE | 1/1 | 1/1 | 6.16 | 6.04 | 1.09  |
| TRUE | 1/1 | 1/1 | 5.5  | 5.28 | 1.17  |
| TRUE | 1/1 | 1/1 | 5.5  | 5.28 | 1.17  |



|      |     |     |       |       |       |
|------|-----|-----|-------|-------|-------|
| TRUE | 1/1 | 1/1 | 5.7   | 6.06  | -1.28 |
| TRUE | 1/1 | 1/1 | 5.7   | 6.06  | -1.28 |
| TRUE | 1/1 | 1/1 | 5.7   | 6.06  | -1.28 |
| TRUE | 1/1 | 1/1 | 6.55  | 7.04  | -1.4  |
| TRUE | 1/1 | 1/1 | 6.55  | 7.04  | -1.4  |
| TRUE | 1/1 | 1/1 | 3.46  | 3.33  | 1.1   |
| TRUE | 1/1 | 1/1 | 3.46  | 3.33  | 1.1   |
| TRUE | 1/1 | 1/1 | 8.24  | 8.61  | -1.3  |
| TRUE | 1/1 | 1/1 | 8.24  | 8.61  | -1.3  |
| TRUE | 1/1 | 1/1 | 6.56  | 6.65  | -1.06 |
| TRUE | 1/1 | 1/1 | 6.56  | 6.65  | -1.06 |
| TRUE | 1/1 | 1/1 | 6.56  | 6.65  | -1.06 |
| TRUE | 1/1 | 1/1 | 6.56  | 6.65  | -1.06 |
| TRUE | 1/1 | 1/1 | 6.56  | 6.65  | -1.06 |
| TRUE | 1/1 | 1/1 | 6.56  | 6.65  | -1.06 |
| TRUE | 1/1 | 1/1 | 6.56  | 6.65  | -1.06 |
| TRUE | 1/1 | 1/1 | 4.69  | 4.84  | -1.11 |
| TRUE | 1/1 | 1/1 | 4.69  | 4.84  | -1.11 |
| TRUE | 1/1 | 1/1 | 8.77  | 8.84  | -1.05 |
| TRUE | 1/1 | 1/1 | 8.77  | 8.84  | -1.05 |
| TRUE | 1/1 | 1/1 | 8.77  | 8.84  | -1.05 |
| TRUE | 1/1 | 1/1 | 8.77  | 8.84  | -1.05 |
| TRUE | 1/1 | 1/1 | 8.77  | 8.84  | -1.05 |
| TRUE | 1/1 | 1/1 | 8.77  | 8.84  | -1.05 |
| TRUE | 1/1 | 1/1 | 8.77  | 8.84  | -1.05 |
| TRUE | 1/1 | 1/1 | 8.77  | 8.84  | -1.05 |
| TRUE | 1/1 | 1/1 | 8.77  | 8.84  | -1.05 |
| TRUE | 1/1 | 1/1 | 8.77  | 8.84  | -1.05 |
| TRUE | 1/1 | 1/1 | 6.84  | 6.93  | -1.06 |
| TRUE | 1/1 | 1/1 | 6.84  | 6.93  | -1.06 |
| TRUE | 1/1 | 1/1 | 6.84  | 6.93  | -1.06 |
| TRUE | 1/1 | 1/1 | 6.84  | 6.93  | -1.06 |
| TRUE | 1/1 | 1/1 | 6.84  | 6.93  | -1.06 |
| TRUE | 1/1 | 1/1 | 6.84  | 6.93  | -1.06 |
| TRUE | 1/1 | 1/1 | 6.84  | 6.93  | -1.06 |
| TRUE | 1/1 | 1/1 | 6.84  | 6.93  | -1.06 |
| TRUE | 1/1 | 1/1 | 10.12 | 8.95  | 2.25  |
| TRUE | 1/1 | 1/1 | 10.12 | 8.95  | 2.25  |
| TRUE | 1/1 | 1/1 | 6.83  | 7.46  | -1.55 |
| TRUE | 1/1 | 1/1 | 6.83  | 7.46  | -1.55 |
| TRUE | 1/1 | 1/1 | 6.83  | 7.46  | -1.55 |
| TRUE | 1/1 | 1/1 | 6.83  | 7.46  | -1.55 |
| TRUE | 1/1 | 1/1 | 6.83  | 7.46  | -1.55 |
| TRUE | 1/1 | 1/1 | 6.83  | 7.46  | -1.55 |
| TRUE | 1/1 | 1/1 | 6.83  | 7.46  | -1.55 |
| TRUE | 1/1 | 1/1 | 6.83  | 7.46  | -1.55 |
| TRUE | 1/1 | 1/1 | 6.83  | 7.46  | -1.55 |
| TRUE | 1/1 | 1/1 | 6.83  | 7.46  | -1.55 |
| TRUE | 1/1 | 1/1 | 8.28  | 8.42  | -1.1  |
| TRUE | 1/1 | 1/1 | 8.28  | 8.42  | -1.1  |
| TRUE | 1/1 | 1/1 | 6.82  | 6.95  | -1.09 |
| TRUE | 1/1 | 1/1 | 6.82  | 6.95  | -1.09 |
| TRUE | 1/1 | 1/1 | 6.95  | 7.29  | -1.27 |
| TRUE | 1/1 | 1/1 | 6.95  | 7.29  | -1.27 |
| TRUE | 1/1 | 1/1 | 6.95  | 7.29  | -1.27 |
| TRUE | 1/1 | 1/1 | 6.95  | 7.29  | -1.27 |
| TRUE | 1/1 | 1/1 | 9.78  | 10.78 | -2    |
| TRUE | 1/1 | 1/1 | 9.78  | 10.78 | -2    |
| TRUE | 1/1 | 1/1 | 5.14  | 5.27  | -1.09 |
| TRUE | 1/1 | 1/1 | 5.14  | 5.27  | -1.09 |
| TRUE | 1/1 | 1/1 | 5.14  | 5.27  | -1.09 |
| TRUE | 1/1 | 1/1 | 5.14  | 5.27  | -1.09 |
| TRUE | 1/1 | 1/1 | 7.39  | 7.61  | -1.17 |
| TRUE | 1/1 | 1/1 | 7.39  | 7.61  | -1.17 |
| TRUE | 1/1 | 1/1 | 7.39  | 7.61  | -1.17 |

|      |     |     |       |       |       |
|------|-----|-----|-------|-------|-------|
| TRUE | 1/1 | 1/1 | 5.32  | 5.53  | -1.15 |
| TRUE | 1/1 | 1/1 | 5.32  | 5.53  | -1.15 |
| TRUE | 1/1 | 1/1 | 5.32  | 5.53  | -1.15 |
| TRUE | 1/1 | 1/1 | 11.13 | 11.74 | -1.53 |
| TRUE | 1/1 | 1/1 | 11.13 | 11.74 | -1.53 |
| TRUE | 1/1 | 1/1 | 11.13 | 11.74 | -1.53 |
| TRUE | 1/1 | 1/1 | 4.97  | 5.04  | -1.05 |
| TRUE | 1/1 | 1/1 | 4.97  | 5.04  | -1.05 |
| TRUE | 1/1 | 1/1 | 4.97  | 5.04  | -1.05 |
| TRUE | 1/1 | 1/1 | 7.93  | 7.84  | 1.06  |
| TRUE | 1/1 | 1/1 | 7.93  | 7.84  | 1.06  |
| TRUE | 1/1 | 1/1 | 7.93  | 7.84  | 1.06  |
| TRUE | 1/1 | 1/1 | 7.93  | 7.84  | 1.06  |
| TRUE | 1/1 | 1/1 | 7.93  | 7.84  | 1.06  |
| TRUE | 1/1 | 1/1 | 7.93  | 7.84  | 1.06  |
| TRUE | 1/1 | 1/1 | 7.93  | 7.84  | 1.06  |
| TRUE | 1/1 | 1/1 | 7.93  | 7.84  | 1.06  |
| TRUE | 1/1 | 1/1 | 7.93  | 7.84  | 1.06  |
| TRUE | 1/1 | 1/1 | 7.33  | 7.68  | -1.27 |
| TRUE | 1/1 | 1/1 | 7.33  | 7.68  | -1.27 |
| TRUE | 1/1 | 1/1 | 7.33  | 7.68  | -1.27 |
| TRUE | 1/1 | 1/1 | 9.43  | 9.38  | 1.04  |
| TRUE | 1/1 | 1/1 | 9.43  | 9.38  | 1.04  |
| TRUE | 1/1 | 1/1 | 9.43  | 9.38  | 1.04  |
| TRUE | 1/1 | 1/1 | 9.49  | 9.04  | 1.36  |
| TRUE | 1/1 | 1/1 | 9.49  | 9.04  | 1.36  |
| TRUE | 1/1 | 1/1 | 7.84  | 6.29  | 2.93  |
| TRUE | 1/1 | 1/1 | 7.84  | 6.29  | 2.93  |
| TRUE | 1/1 | 1/1 | 7.84  | 6.29  | 2.93  |
| TRUE | 1/1 | 1/1 | 7.84  | 6.29  | 2.93  |
| TRUE | 1/1 | 1/1 | 7.84  | 6.29  | 2.93  |
| TRUE | 1/1 | 1/1 | 7.84  | 6.29  | 2.93  |
| TRUE | 1/1 | 1/1 | 7.84  | 6.29  | 2.93  |
| TRUE | 1/1 | 1/1 | 8.23  | 6.83  | 2.65  |
| TRUE | 1/1 | 1/1 | 8.23  | 6.83  | 2.65  |
| TRUE | 1/1 | 1/1 | 8.23  | 6.83  | 2.65  |
| TRUE | 1/1 | 1/1 | 8.23  | 6.83  | 2.65  |
| TRUE | 1/1 | 1/1 | 8.23  | 6.83  | 2.65  |
| TRUE | 1/1 | 1/1 | 8.23  | 6.83  | 2.65  |
| TRUE | 1/1 | 1/1 | 8.23  | 6.83  | 2.65  |
| TRUE | 1/1 | 1/1 | 8.23  | 6.83  | 2.65  |
| TRUE | 1/1 | 1/1 | 8.23  | 6.83  | 2.65  |
| TRUE | 1/1 | 1/1 | 8.23  | 6.83  | 2.65  |
| TRUE | 1/1 | 1/1 | 8.23  | 6.83  | 2.65  |
| TRUE | 1/1 | 1/1 | 8.23  | 6.83  | 2.65  |
| TRUE | 1/1 | 1/1 | 8.23  | 6.83  | 2.65  |
| TRUE | 1/1 | 1/1 | 8.23  | 6.83  | 2.65  |
| TRUE | 1/1 | 1/1 | 5.11  | 4.35  | 1.69  |
| TRUE | 1/1 | 1/1 | 5.11  | 4.35  | 1.69  |
| TRUE | 1/1 | 1/1 | 5.11  | 4.35  | 1.69  |
| TRUE | 1/1 | 1/1 | 5.11  | 4.35  | 1.69  |
| TRUE | 1/1 | 1/1 | 7.42  | 7.78  | -1.29 |
| TRUE | 1/1 | 1/1 | 7.42  | 7.78  | -1.29 |
| TRUE | 1/1 | 1/1 | 7.42  | 7.78  | -1.29 |
| TRUE | 1/1 | 1/1 | 7.42  | 7.78  | -1.29 |
| TRUE | 1/1 | 1/1 | 6.02  | 5.91  | 1.08  |
| TRUE | 1/1 | 1/1 | 6.02  | 5.91  | 1.08  |
| TRUE | 1/1 | 1/1 | 6.59  | 6.06  | 1.44  |
| TRUE | 1/1 | 1/1 | 6.59  | 6.06  | 1.44  |
| TRUE | 1/1 | 1/1 | 6.68  | 6.5   | 1.13  |
| TRUE | 1/1 | 1/1 | 6.68  | 6.5   | 1.13  |
| TRUE | 1/1 | 1/1 | 6.68  | 6.5   | 1.13  |

|      |     |     |      |      |       |
|------|-----|-----|------|------|-------|
| TRUE | 1/1 | 1/1 | 6.68 | 6.5  | 1.13  |
| TRUE | 1/1 | 1/1 | 6.68 | 6.5  | 1.13  |
| TRUE | 1/1 | 1/1 | 4.47 | 4.77 | -1.23 |
| TRUE | 1/1 | 1/1 | 4.47 | 4.77 | -1.23 |
| TRUE | 1/1 | 1/1 | 4.47 | 4.77 | -1.23 |
| TRUE | 1/1 | 1/1 | 6.59 | 6.83 | -1.19 |
| TRUE | 1/1 | 1/1 | 6.59 | 6.83 | -1.19 |
| TRUE | 1/1 | 1/1 | 6.59 | 6.83 | -1.19 |
| TRUE | 1/1 | 1/1 | 4.19 | 4.28 | -1.06 |
| TRUE | 1/1 | 1/1 | 4.19 | 4.28 | -1.06 |
| TRUE | 1/1 | 1/1 | 9.23 | 8.1  | 2.19  |
| TRUE | 1/1 | 1/1 | 9.23 | 8.1  | 2.19  |
| TRUE | 1/1 | 1/1 | 9.23 | 8.1  | 2.19  |
| TRUE | 1/1 | 1/1 | 5.35 | 5.51 | -1.12 |
| TRUE | 1/1 | 1/1 | 5.35 | 5.51 | -1.12 |
| TRUE | 1/1 | 1/1 | 8.37 | 9.13 | -1.7  |
| TRUE | 1/1 | 1/1 | 8.37 | 9.13 | -1.7  |
| TRUE | 1/1 | 1/1 | 6.64 | 7.02 | -1.3  |
| TRUE | 1/1 | 1/1 | 6.64 | 7.02 | -1.3  |
| TRUE | 1/1 | 1/1 | 6.64 | 7.02 | -1.3  |
| TRUE | 1/1 | 1/1 | 9.98 | 9.68 | 1.24  |
| TRUE | 1/1 | 1/1 | 9.98 | 9.68 | 1.24  |
| TRUE | 1/1 | 1/1 | 9.98 | 9.68 | 1.24  |
| TRUE | 1/1 | 1/1 | 9.98 | 9.68 | 1.24  |
| TRUE | 1/1 | 1/1 | 9.98 | 9.68 | 1.24  |
| TRUE | 1/1 | 1/1 | 7.7  | 8.74 | -2.05 |
| TRUE | 1/1 | 1/1 | 7.7  | 8.74 | -2.05 |
| TRUE | 1/1 | 1/1 | 6.99 | 6.84 | 1.11  |
| TRUE | 1/1 | 1/1 | 6.99 | 6.84 | 1.11  |
| TRUE | 1/1 | 1/1 | 6.99 | 6.84 | 1.11  |
| TRUE | 1/1 | 1/1 | 8.28 | 8.06 | 1.17  |
| TRUE | 1/1 | 1/1 | 8.28 | 8.06 | 1.17  |
| TRUE | 1/1 | 1/1 | 8.28 | 8.06 | 1.17  |
| TRUE | 1/1 | 1/1 | 8.28 | 8.06 | 1.17  |
| TRUE | 1/1 | 1/1 | 9.13 | 9.18 | -1.03 |
| TRUE | 1/1 | 1/1 | 9.13 | 9.18 | -1.03 |
| TRUE | 1/1 | 1/1 | 9.13 | 9.18 | -1.03 |
| TRUE | 1/1 | 1/1 | 4.65 | 5.23 | -1.5  |
| TRUE | 1/1 | 1/1 | 4.65 | 5.23 | -1.5  |
| TRUE | 1/1 | 1/1 | 5.3  | 5.16 | 1.1   |
| TRUE | 1/1 | 1/1 | 5.3  | 5.16 | 1.1   |
| TRUE | 1/1 | 1/1 | 6.84 | 6.55 | 1.23  |
| TRUE | 1/1 | 1/1 | 6.84 | 6.55 | 1.23  |
| TRUE | 1/1 | 1/1 | 6.84 | 6.55 | 1.23  |
| TRUE | 1/1 | 1/1 | 6.84 | 6.55 | 1.23  |
| TRUE | 1/1 | 1/1 | 8.86 | 8.15 | 1.64  |
| TRUE | 1/1 | 1/1 | 8.86 | 8.15 | 1.64  |
| TRUE | 1/1 | 1/1 | 8.86 | 8.15 | 1.64  |
| TRUE | 1/1 | 1/1 | 8.86 | 8.15 | 1.64  |
| TRUE | 1/1 | 1/1 | 8.86 | 8.15 | 1.64  |
| TRUE | 1/1 | 1/1 | 8.86 | 8.15 | 1.64  |
| TRUE | 1/1 | 1/1 | 8.86 | 8.15 | 1.64  |
| TRUE | 1/1 | 1/1 | 8.86 | 8.15 | 1.64  |
| TRUE | 1/1 | 1/1 | 8.86 | 8.15 | 1.64  |
| TRUE | 1/1 | 1/1 | 7.72 | 7.61 | 1.08  |
| TRUE | 1/1 | 1/1 | 7.72 | 7.61 | 1.08  |
| TRUE | 1/1 | 1/1 | 7.72 | 7.61 | 1.08  |
| TRUE | 1/1 | 1/1 | 7.72 | 7.61 | 1.08  |
| TRUE | 1/1 | 1/1 | 7.72 | 7.61 | 1.08  |

|      |     |     |      |       |       |
|------|-----|-----|------|-------|-------|
| TRUE | 1/1 | 1/1 | 6.77 | 5.14  | 3.1   |
| TRUE | 1/1 | 1/1 | 6.77 | 5.14  | 3.1   |
| TRUE | 1/1 | 1/1 | 6.77 | 5.14  | 3.1   |
| TRUE | 1/1 | 1/1 | 6.77 | 5.14  | 3.1   |
| TRUE | 1/1 | 1/1 | 6.77 | 5.14  | 3.1   |
| TRUE | 1/1 | 1/1 | 6.77 | 5.14  | 3.1   |
| TRUE | 1/1 | 1/1 | 6.77 | 5.14  | 3.1   |
| TRUE | 1/1 | 1/1 | 6.77 | 5.14  | 3.1   |
| TRUE | 1/1 | 1/1 | 6.77 | 5.14  | 3.1   |
| TRUE | 1/1 | 1/1 | 6.77 | 5.14  | 3.1   |
| TRUE | 1/1 | 1/1 | 6.77 | 5.14  | 3.1   |
| TRUE | 1/1 | 1/1 | 8.71 | 7.8   | 1.88  |
| TRUE | 1/1 | 1/1 | 8.71 | 7.8   | 1.88  |
| TRUE | 1/1 | 1/1 | 8.71 | 7.8   | 1.88  |
| TRUE | 1/1 | 1/1 | 8.71 | 7.8   | 1.88  |
| TRUE | 1/1 | 1/1 | 8.71 | 7.8   | 1.88  |
| TRUE | 1/1 | 1/1 | 7.66 | 7.63  | 1.02  |
| TRUE | 1/1 | 1/1 | 7.66 | 7.63  | 1.02  |
| TRUE | 1/1 | 1/1 | 7.66 | 7.63  | 1.02  |
| TRUE | 1/1 | 1/1 | 7.66 | 7.63  | 1.02  |
| TRUE | 1/1 | 1/1 | 7.66 | 7.63  | 1.02  |
| TRUE | 1/1 | 1/1 | 7.66 | 7.63  | 1.02  |
| TRUE | 1/1 | 1/1 | 9.57 | 9.83  | -1.2  |
| TRUE | 1/1 | 1/1 | 9.57 | 9.83  | -1.2  |
| TRUE | 1/1 | 1/1 | 6.07 | 5.8   | 1.21  |
| TRUE | 1/1 | 1/1 | 6.07 | 5.8   | 1.21  |
| TRUE | 1/1 | 1/1 | 6.05 | 5.36  | 1.62  |
| TRUE | 1/1 | 1/1 | 6.05 | 5.36  | 1.62  |
| TRUE | 1/1 | 1/1 | 5.9  | 6.05  | -1.11 |
| TRUE | 1/1 | 1/1 | 5.9  | 6.05  | -1.11 |
| TRUE | 1/1 | 1/1 | 5.9  | 6.05  | -1.11 |
| TRUE | 1/1 | 1/1 | 5.9  | 6.05  | -1.11 |
| TRUE | 1/1 | 1/1 | 5.9  | 6.05  | -1.11 |
| TRUE | 1/1 | 1/1 | 9.71 | 10.31 | -1.51 |
| TRUE | 1/1 | 1/1 | 9.71 | 10.31 | -1.51 |
| TRUE | 1/1 | 1/1 | 7.96 | 8.41  | -1.36 |
| TRUE | 1/1 | 1/1 | 7.96 | 8.41  | -1.36 |
| TRUE | 1/1 | 1/1 | 7.96 | 8.41  | -1.36 |
| TRUE | 1/1 | 1/1 | 7.96 | 8.41  | -1.36 |
| TRUE | 1/1 | 1/1 | 7.96 | 8.41  | -1.36 |
| TRUE | 1/1 | 1/1 | 7.4  | 7.2   | 1.15  |
| TRUE | 1/1 | 1/1 | 7.4  | 7.2   | 1.15  |
| TRUE | 1/1 | 1/1 | 6.17 | 6.19  | -1.01 |
| TRUE | 1/1 | 1/1 | 6.17 | 6.19  | -1.01 |
| TRUE | 1/1 | 1/1 | 7.96 | 7.66  | 1.23  |
| TRUE | 1/1 | 1/1 | 7.96 | 7.66  | 1.23  |
| TRUE | 1/1 | 1/1 | 8    | 8.77  | -1.7  |
| TRUE | 1/1 | 1/1 | 8    | 8.77  | -1.7  |
| TRUE | 1/1 | 1/1 | 8    | 8.77  | -1.7  |
| TRUE | 1/1 | 1/1 | 8    | 8.77  | -1.7  |
| TRUE | 1/1 | 1/1 | 9    | 8.95  | 1.04  |
| TRUE | 1/1 | 1/1 | 9    | 8.95  | 1.04  |
| TRUE | 1/1 | 1/1 | 9    | 8.95  | 1.04  |
| TRUE | 1/1 | 1/1 | 9    | 8.95  | 1.04  |
| TRUE | 1/1 | 1/1 | 7.46 | 6.95  | 1.42  |
| TRUE | 1/1 | 1/1 | 7.46 | 6.95  | 1.42  |
| TRUE | 1/1 | 1/1 | 6.57 | 5.86  | 1.64  |
| TRUE | 1/1 | 1/1 | 6.57 | 5.86  | 1.64  |
| TRUE | 1/1 | 1/1 | 6.57 | 5.86  | 1.64  |
| TRUE | 1/1 | 1/1 | 6.57 | 5.86  | 1.64  |
| TRUE | 1/1 | 1/1 | 6.57 | 5.86  | 1.64  |

|      |     |     |       |      |       |
|------|-----|-----|-------|------|-------|
| TRUE | 1/1 | 1/1 | 6.57  | 5.86 | 1.64  |
| TRUE | 1/1 | 1/1 | 6.57  | 5.86 | 1.64  |
| TRUE | 1/1 | 1/1 | 6.57  | 5.86 | 1.64  |
| TRUE | 1/1 | 1/1 | 6.57  | 5.86 | 1.64  |
| TRUE | 1/1 | 1/1 | 6.57  | 5.86 | 1.64  |
| TRUE | 1/1 | 1/1 | 8.36  | 7.82 | 1.45  |
| TRUE | 1/1 | 1/1 | 8.36  | 7.82 | 1.45  |
| TRUE | 1/1 | 1/1 | 8.36  | 7.82 | 1.45  |
| TRUE | 1/1 | 1/1 | 5.92  | 6.06 | -1.1  |
| TRUE | 1/1 | 1/1 | 5.92  | 6.06 | -1.1  |
| TRUE | 1/1 | 1/1 | 5.92  | 6.06 | -1.1  |
| TRUE | 1/1 | 1/1 | 5.92  | 6.06 | -1.1  |
| TRUE | 1/1 | 1/1 | 5.92  | 6.06 | -1.1  |
| TRUE | 1/1 | 1/1 | 5.92  | 6.06 | -1.1  |
| TRUE | 1/1 | 1/1 | 3.89  | 3.32 | 1.48  |
| TRUE | 1/1 | 1/1 | 3.89  | 3.32 | 1.48  |
| TRUE | 1/1 | 1/1 | 3.89  | 3.32 | 1.48  |
| TRUE | 1/1 | 1/1 | 6     | 6.27 | -1.21 |
| TRUE | 1/1 | 1/1 | 6     | 6.27 | -1.21 |
| TRUE | 1/1 | 1/1 | 6     | 6.27 | -1.21 |
| TRUE | 1/1 | 1/1 | 6.24  | 6.86 | -1.54 |
| TRUE | 1/1 | 1/1 | 6.24  | 6.86 | -1.54 |
| TRUE | 1/1 | 1/1 | 9.79  | 6.28 | 11.38 |
| TRUE | 1/1 | 1/1 | 9.79  | 6.28 | 11.38 |
| TRUE | 1/1 | 1/1 | 9.79  | 6.28 | 11.38 |
| TRUE | 1/1 | 1/1 | 9.79  | 6.28 | 11.38 |
| TRUE | 1/1 | 1/1 | 9.79  | 6.28 | 11.38 |
| TRUE | 1/1 | 1/1 | 9.79  | 6.28 | 11.38 |
| TRUE | 1/1 | 1/1 | 9.79  | 6.28 | 11.38 |
| TRUE | 1/1 | 1/1 | 9.79  | 6.28 | 11.38 |
| TRUE | 1/1 | 1/1 | 5.6   | 5.81 | -1.15 |
| TRUE | 1/1 | 1/1 | 5.6   | 5.81 | -1.15 |
| TRUE | 1/1 | 1/1 | 5.6   | 5.81 | -1.15 |
| TRUE | 1/1 | 1/1 | 8.14  | 7.87 | 1.21  |
| TRUE | 1/1 | 1/1 | 8.14  | 7.87 | 1.21  |
| TRUE | 1/1 | 1/1 | 8.14  | 7.87 | 1.21  |
| TRUE | 1/1 | 1/1 | 8.14  | 7.87 | 1.21  |
| TRUE | 1/1 | 1/1 | 8.14  | 7.87 | 1.21  |
| TRUE | 1/1 | 1/1 | 4.24  | 3.57 | 1.6   |
| TRUE | 1/1 | 1/1 | 4.24  | 3.57 | 1.6   |
| TRUE | 1/1 | 1/1 | 4.24  | 3.57 | 1.6   |
| TRUE | 1/1 | 1/1 | 10.22 | 9.46 | 1.69  |
| TRUE | 1/1 | 1/1 | 10.22 | 9.46 | 1.69  |
| TRUE | 1/1 | 1/1 | 7.13  | 7.53 | -1.32 |
| TRUE | 1/1 | 1/1 | 7.13  | 7.53 | -1.32 |
| TRUE | 1/1 | 1/1 | 7.88  | 4.68 | 9.19  |
| TRUE | 1/1 | 1/1 | 7.88  | 4.68 | 9.19  |
| TRUE | 1/1 | 1/1 | 7.94  | 8.19 | -1.19 |
| TRUE | 1/1 | 1/1 | 7.94  | 8.19 | -1.19 |
| TRUE | 1/1 | 1/1 | 6.89  | 7.14 | -1.19 |
| TRUE | 1/1 | 1/1 | 6.89  | 7.14 | -1.19 |
| TRUE | 1/1 | 1/1 | 6.89  | 7.14 | -1.19 |
| TRUE | 1/1 | 1/1 | 4.02  | 4.43 | -1.33 |
| TRUE | 1/1 | 1/1 | 4.02  | 4.43 | -1.33 |
| TRUE | 1/1 | 1/1 | 4.02  | 4.43 | -1.33 |
| TRUE | 1/1 | 1/1 | 6.18  | 6.42 | -1.18 |
| TRUE | 1/1 | 1/1 | 6.18  | 6.42 | -1.18 |
| TRUE | 1/1 | 1/1 | 7.4   | 7.51 | -1.08 |





|      |     |     |      |      |       |
|------|-----|-----|------|------|-------|
| TRUE | 1/1 | 1/1 | 6.92 | 6.93 | -1.01 |
| TRUE | 1/1 | 1/1 | 6.92 | 6.93 | -1.01 |
| TRUE | 1/1 | 1/1 | 6.92 | 6.93 | -1.01 |
| TRUE | 1/1 | 1/1 | 6.92 | 6.93 | -1.01 |
| TRUE | 1/1 | 1/1 | 6.23 | 5.29 | 1.93  |
| TRUE | 1/1 | 1/1 | 6.23 | 5.29 | 1.93  |
| TRUE | 1/1 | 1/1 | 6.23 | 5.29 | 1.93  |
| TRUE | 1/1 | 1/1 | 6.77 | 5.78 | 1.99  |
| TRUE | 1/1 | 1/1 | 6.77 | 5.78 | 1.99  |
| TRUE | 1/1 | 1/1 | 6.77 | 5.78 | 1.99  |
| TRUE | 1/1 | 1/1 | 6.77 | 5.78 | 1.99  |
| TRUE | 1/1 | 1/1 | 6.77 | 5.78 | 1.99  |
| TRUE | 1/1 | 1/1 | 6.77 | 5.78 | 1.99  |
| TRUE | 1/1 | 1/1 | 6.77 | 5.78 | 1.99  |
| TRUE | 1/1 | 1/1 | 6.77 | 5.78 | 1.99  |
| TRUE | 1/1 | 1/1 | 6.77 | 5.78 | 1.99  |
| TRUE | 1/1 | 1/1 | 6.77 | 5.78 | 1.99  |
| TRUE | 1/1 | 1/1 | 6.77 | 5.78 | 1.99  |
| TRUE | 1/1 | 1/1 | 6.77 | 5.78 | 1.99  |
| TRUE | 1/1 | 1/1 | 6.77 | 5.78 | 1.99  |
| TRUE | 1/1 | 1/1 | 6.77 | 5.78 | 1.99  |
| TRUE | 1/1 | 1/1 | 6.77 | 5.78 | 1.99  |
| TRUE | 1/1 | 1/1 | 6.77 | 5.78 | 1.99  |
| TRUE | 1/1 | 1/1 | 8.28 | 7.32 | 1.95  |
| TRUE | 1/1 | 1/1 | 8.28 | 7.32 | 1.95  |
| TRUE | 1/1 | 1/1 | 8.28 | 7.32 | 1.95  |
| TRUE | 1/1 | 1/1 | 7.76 | 7.74 | 1.01  |
| TRUE | 1/1 | 1/1 | 7.76 | 7.74 | 1.01  |
| TRUE | 1/1 | 1/1 | 7.76 | 7.74 | 1.01  |
| TRUE | 1/1 | 1/1 | 7.76 | 7.74 | 1.01  |
| TRUE | 1/1 | 1/1 | 7.76 | 7.74 | 1.01  |
| TRUE | 1/1 | 1/1 | 6.6  | 6.78 | -1.13 |
| TRUE | 1/1 | 1/1 | 6.6  | 6.78 | -1.13 |
| TRUE | 1/1 | 1/1 | 6.6  | 6.78 | -1.13 |
| TRUE | 1/1 | 1/1 | 6.6  | 6.78 | -1.13 |
| TRUE | 1/1 | 1/1 | 6.6  | 6.78 | -1.13 |
| TRUE | 1/1 | 1/1 | 6.6  | 6.78 | -1.13 |
| TRUE | 1/1 | 1/1 | 7.03 | 6.18 | 1.8   |
| TRUE | 1/1 | 1/1 | 7.03 | 6.18 | 1.8   |
| TRUE | 1/1 | 1/1 | 7.03 | 6.18 | 1.8   |
| TRUE | 1/1 | 1/1 | 7.03 | 6.18 | 1.8   |
| TRUE | 1/1 | 1/1 | 7.03 | 6.18 | 1.8   |
| TRUE | 1/1 | 1/1 | 7.03 | 6.18 | 1.8   |
| TRUE | 1/1 | 1/1 | 7.03 | 6.18 | 1.8   |
| TRUE | 1/1 | 1/1 | 7.03 | 6.18 | 1.8   |
| TRUE | 1/1 | 1/1 | 9.23 | 8.42 | 1.76  |
| TRUE | 1/1 | 1/1 | 9.23 | 8.42 | 1.76  |
| TRUE | 1/1 | 1/1 | 9.23 | 8.42 | 1.76  |
| TRUE | 1/1 | 1/1 | 9.23 | 8.42 | 1.76  |
| TRUE | 1/1 | 1/1 | 9.23 | 8.42 | 1.76  |
| TRUE | 1/1 | 1/1 | 6.54 | 6.03 | 1.42  |
| TRUE | 1/1 | 1/1 | 6.54 | 6.03 | 1.42  |
| TRUE | 1/1 | 1/1 | 2.6  | 2.58 | 1.01  |
| TRUE | 1/1 | 1/1 | 2.6  | 2.58 | 1.01  |
| TRUE | 1/1 | 1/1 | 8.68 | 7.67 | 2.01  |
| TRUE | 1/1 | 1/1 | 8.68 | 7.67 | 2.01  |







|      |     |     |       |       |       |
|------|-----|-----|-------|-------|-------|
| TRUE | 1/1 | 1/1 | 6.97  | 4.17  | 6.97  |
| TRUE | 1/1 | 1/1 | 6.97  | 4.17  | 6.97  |
| TRUE | 1/1 | 1/1 | 6.97  | 4.17  | 6.97  |
| TRUE | 1/1 | 1/1 | 6.97  | 4.17  | 6.97  |
| TRUE | 1/1 | 1/1 | 6.97  | 4.17  | 6.97  |
| TRUE | 1/1 | 1/1 | 8.42  | 5.68  | 6.68  |
| TRUE | 1/1 | 1/1 | 8.42  | 5.68  | 6.68  |
| TRUE | 1/1 | 1/1 | 8.42  | 5.68  | 6.68  |
| TRUE | 1/1 | 1/1 | 8.42  | 5.68  | 6.68  |
| TRUE | 1/1 | 1/1 | 8.42  | 5.68  | 6.68  |
| TRUE | 1/1 | 1/1 | 8.91  | 8.72  | 1.14  |
| TRUE | 1/1 | 1/1 | 8.91  | 8.72  | 1.14  |
| TRUE | 1/1 | 1/1 | 8.91  | 8.72  | 1.14  |
| TRUE | 1/1 | 1/1 | 8.91  | 8.72  | 1.14  |
| TRUE | 1/1 | 1/1 | 8.91  | 8.72  | 1.14  |
| TRUE | 1/1 | 1/1 | 7.97  | 7.11  | 1.81  |
| TRUE | 1/1 | 1/1 | 7.97  | 7.11  | 1.81  |
| TRUE | 1/1 | 1/1 | 7.97  | 7.11  | 1.81  |
| TRUE | 1/1 | 1/1 | 6.19  | 6.22  | -1.02 |
| TRUE | 1/1 | 1/1 | 6.19  | 6.22  | -1.02 |
| TRUE | 1/1 | 1/1 | 10.28 | 10.52 | -1.18 |
| TRUE | 1/1 | 1/1 | 10.28 | 10.52 | -1.18 |
| TRUE | 1/1 | 1/1 | 6.05  | 6.16  | -1.08 |
| TRUE | 1/1 | 1/1 | 6.05  | 6.16  | -1.08 |
| TRUE | 1/1 | 1/1 | 6.05  | 6.16  | -1.08 |
| TRUE | 1/1 | 1/1 | 6.05  | 6.16  | -1.08 |
| TRUE | 1/1 | 1/1 | 6.05  | 6.16  | -1.08 |
| TRUE | 1/1 | 1/1 | 6.05  | 6.16  | -1.08 |
| TRUE | 1/1 | 1/1 | 6.05  | 6.16  | -1.08 |
| TRUE | 1/1 | 1/1 | 6.05  | 6.16  | -1.08 |
| TRUE | 1/1 | 1/1 | 6.34  | 5.87  | 1.39  |
| TRUE | 1/1 | 1/1 | 6.34  | 5.87  | 1.39  |
| TRUE | 1/1 | 1/1 | 6.24  | 6.48  | -1.18 |
| TRUE | 1/1 | 1/1 | 6.24  | 6.48  | -1.18 |
| TRUE | 1/1 | 1/1 | 6.24  | 6.48  | -1.18 |
| TRUE | 1/1 | 1/1 | 10.76 | 6.1   | 25.31 |
| TRUE | 1/1 | 1/1 | 10.76 | 6.1   | 25.31 |
| TRUE | 1/1 | 1/1 | 3.65  | 3.49  | 1.12  |
| TRUE | 1/1 | 1/1 | 3.65  | 3.49  | 1.12  |
| TRUE | 1/1 | 1/1 | 4.05  | 3.2   | 1.81  |
| TRUE | 1/1 | 1/1 | 4.05  | 3.2   | 1.81  |
| TRUE | 1/1 | 1/1 | 5.63  | 5.72  | -1.07 |
| TRUE | 1/1 | 1/1 | 5.63  | 5.72  | -1.07 |
| TRUE | 1/1 | 1/1 | 8.35  | 7.82  | 1.45  |
| TRUE | 1/1 | 1/1 | 8.35  | 7.82  | 1.45  |
| TRUE | 1/1 | 1/1 | 3.62  | 3.37  | 1.19  |
| TRUE | 1/1 | 1/1 | 3.62  | 3.37  | 1.19  |
| TRUE | 1/1 | 1/1 | 3.62  | 3.37  | 1.19  |
| TRUE | 1/1 | 1/1 | 3.62  | 3.37  | 1.19  |
| TRUE | 1/1 | 1/1 | 5.53  | 4.72  | 1.76  |
| TRUE | 1/1 | 1/1 | 5.53  | 4.72  | 1.76  |
| TRUE | 1/1 | 1/1 | 5.52  | 4.51  | 2.02  |
| TRUE | 1/1 | 1/1 | 5.52  | 4.51  | 2.02  |
| TRUE | 1/1 | 1/1 | 5     | 4.94  | 1.05  |
| TRUE | 1/1 | 1/1 | 5     | 4.94  | 1.05  |
| TRUE | 1/1 | 1/1 | 5     | 4.94  | 1.05  |
| TRUE | 1/1 | 1/1 | 5     | 4.94  | 1.05  |
| TRUE | 1/1 | 1/1 | 4.98  | 5.07  | -1.06 |
| TRUE | 1/1 | 1/1 | 4.98  | 5.07  | -1.06 |

|      |     |     |       |       |       |
|------|-----|-----|-------|-------|-------|
| TRUE | 1/1 | 1/1 | 7.87  | 6.96  | 1.89  |
| TRUE | 1/1 | 1/1 | 7.87  | 6.96  | 1.89  |
| TRUE | 1/1 | 1/1 | 7.87  | 6.96  | 1.89  |
| TRUE | 1/1 | 1/1 | 7.87  | 6.96  | 1.89  |
| TRUE | 1/1 | 1/1 | 6.36  | 6.45  | -1.07 |
| TRUE | 1/1 | 1/1 | 6.36  | 6.45  | -1.07 |
| TRUE | 1/1 | 1/1 | 7.04  | 7.05  | -1.01 |
| TRUE | 1/1 | 1/1 | 7.04  | 7.05  | -1.01 |
| TRUE | 1/1 | 1/1 | 6.36  | 6.45  | -1.07 |
| TRUE | 1/1 | 1/1 | 6.36  | 6.45  | -1.07 |
| TRUE | 1/1 | 1/1 | 7.04  | 7.05  | -1.01 |
| TRUE | 1/1 | 1/1 | 7.04  | 7.05  | -1.01 |
| TRUE | 1/1 | 1/1 | 7.98  | 7.89  | 1.06  |
| TRUE | 1/1 | 1/1 | 7.98  | 7.89  | 1.06  |
| TRUE | 1/1 | 1/1 | 8.39  | 7.34  | 2.07  |
| TRUE | 1/1 | 1/1 | 8.39  | 7.34  | 2.07  |
| TRUE | 1/1 | 1/1 | 8.39  | 7.34  | 2.07  |
| TRUE | 1/1 | 1/1 | 8.39  | 7.34  | 2.07  |
| TRUE | 1/1 | 1/1 | 11.29 | 10.77 | 1.43  |
| TRUE | 1/1 | 1/1 | 11.29 | 10.77 | 1.43  |
| TRUE | 1/1 | 1/1 | 11.29 | 10.77 | 1.43  |
| TRUE | 1/1 | 1/1 | 11.29 | 10.77 | 1.43  |
| TRUE | 1/1 | 1/1 | 11.29 | 10.77 | 1.43  |
| TRUE | 1/1 | 1/1 | 11.29 | 10.77 | 1.43  |
| TRUE | 1/1 | 1/1 | 11.29 | 10.77 | 1.43  |
| TRUE | 1/1 | 1/1 | 11.29 | 10.77 | 1.43  |
| TRUE | 1/1 | 1/1 | 11.29 | 10.77 | 1.43  |
| TRUE | 1/1 | 1/1 | 11.29 | 10.77 | 1.43  |
| TRUE | 1/1 | 1/1 | 11.29 | 10.77 | 1.43  |
| TRUE | 1/1 | 1/1 | 11.29 | 10.77 | 1.43  |
| TRUE | 1/1 | 1/1 | 11.29 | 10.77 | 1.43  |
| TRUE | 1/1 | 1/1 | 11.29 | 10.77 | 1.43  |
| TRUE | 1/1 | 1/1 | 11.29 | 10.77 | 1.43  |
| TRUE | 1/1 | 1/1 | 11.29 | 10.77 | 1.43  |
| TRUE | 1/1 | 1/1 | 11.29 | 10.77 | 1.43  |
| TRUE | 1/1 | 1/1 | 11.29 | 10.77 | 1.43  |
| TRUE | 1/1 | 1/1 | 11.29 | 10.77 | 1.43  |
| TRUE | 1/1 | 1/1 | 11.29 | 10.77 | 1.43  |
| TRUE | 1/1 | 1/1 | 11.29 | 10.77 | 1.43  |
| TRUE | 1/1 | 1/1 | 11.29 | 10.77 | 1.43  |
| TRUE | 1/1 | 1/1 | 11.29 | 10.77 | 1.43  |
| TRUE | 1/1 | 1/1 | 11.29 | 10.77 | 1.43  |
| TRUE | 1/1 | 1/1 | 11.29 | 10.77 | 1.43  |
| TRUE | 1/1 | 1/1 | 7     | 7.23  | -1.17 |
| TRUE | 1/1 | 1/1 | 7     | 7.23  | -1.17 |
| TRUE | 1/1 | 1/1 | 7     | 7.23  | -1.17 |
| TRUE | 1/1 | 1/1 | 7     | 7.23  | -1.17 |
| TRUE | 1/1 | 1/1 | 7     | 7.23  | -1.17 |
| TRUE | 1/1 | 1/1 | 7     | 7.23  | -1.17 |
| TRUE | 1/1 | 1/1 | 7     | 7.23  | -1.17 |
| TRUE | 1/1 | 1/1 | 7     | 7.23  | -1.17 |
| TRUE | 1/1 | 1/1 | 7     | 7.23  | -1.17 |
| TRUE | 1/1 | 1/1 | 7     | 7.23  | -1.17 |
| TRUE | 1/1 | 1/1 | 7     | 7.23  | -1.17 |
| TRUE | 1/1 | 1/1 | 7     | 7.23  | -1.17 |
| TRUE | 1/1 | 1/1 | 7     | 7.23  | -1.17 |
| TRUE | 1/1 | 1/1 | 7     | 7.23  | -1.17 |
| TRUE | 1/1 | 1/1 | 7     | 7.23  | -1.17 |
| TRUE | 1/1 | 1/1 | 7     | 7.23  | -1.17 |
| TRUE | 1/1 | 1/1 | 7     | 7.23  | -1.17 |
| TRUE | 1/1 | 1/1 | 7     | 7.23  | -1.17 |
| TRUE | 1/1 | 1/1 | 7     | 7.23  | -1.17 |
| TRUE | 1/1 | 1/1 | 7.73  | 7.78  | -1.04 |



|      |     |     |       |      |       |
|------|-----|-----|-------|------|-------|
| TRUE | 1/1 | 1/1 | 4.85  | 3.65 | 2.3   |
| TRUE | 1/1 | 1/1 | 4.85  | 3.65 | 2.3   |
| TRUE | 1/1 | 1/1 | 7.5   | 6.2  | 2.46  |
| TRUE | 1/1 | 1/1 | 7.5   | 6.2  | 2.46  |
| TRUE | 1/1 | 1/1 | 7.5   | 6.2  | 2.46  |
| TRUE | 1/1 | 1/1 | 7.5   | 6.2  | 2.46  |
| TRUE | 1/1 | 1/1 | 7.5   | 6.2  | 2.46  |
| TRUE | 1/1 | 1/1 | 7.5   | 6.2  | 2.46  |
| TRUE | 1/1 | 1/1 | 7.5   | 6.2  | 2.46  |
| TRUE | 1/1 | 1/1 | 7.5   | 6.2  | 2.46  |
| TRUE | 1/1 | 1/1 | 7.5   | 6.2  | 2.46  |
| TRUE | 1/1 | 1/1 | 7.5   | 6.2  | 2.46  |
| TRUE | 1/1 | 1/1 | 7.5   | 6.2  | 2.46  |
| TRUE | 1/1 | 1/1 | 7.5   | 6.2  | 2.46  |
| TRUE | 1/1 | 1/1 | 7.5   | 6.2  | 2.46  |
| TRUE | 1/1 | 1/1 | 7.5   | 6.2  | 2.46  |
| TRUE | 1/1 | 1/1 | 7.5   | 6.2  | 2.46  |
| TRUE | 1/1 | 1/1 | 7.5   | 6.2  | 2.46  |
| TRUE | 1/1 | 1/1 | 7.5   | 6.2  | 2.46  |
| TRUE | 1/1 | 1/1 | 8.19  | 7.27 | 1.89  |
| TRUE | 1/1 | 1/1 | 8.19  | 7.27 | 1.89  |
| TRUE | 1/1 | 1/1 | 8.19  | 7.27 | 1.89  |
| TRUE | 1/1 | 1/1 | 8.19  | 7.27 | 1.89  |
| TRUE | 1/1 | 1/1 | 8.19  | 7.27 | 1.89  |
| TRUE | 1/1 | 1/1 | 8.19  | 7.27 | 1.89  |
| TRUE | 1/1 | 1/1 | 8.19  | 7.27 | 1.89  |
| TRUE | 1/1 | 1/1 | 8.19  | 7.27 | 1.89  |
| TRUE | 1/1 | 1/1 | 8.19  | 7.27 | 1.89  |
| TRUE | 1/1 | 1/1 | 8.19  | 7.27 | 1.89  |
| TRUE | 1/1 | 1/1 | 6.8   | 8.36 | -2.94 |
| TRUE | 1/1 | 1/1 | 6.8   | 8.36 | -2.94 |
| TRUE | 1/1 | 1/1 | 6.8   | 8.36 | -2.94 |
| TRUE | 1/1 | 1/1 | 5     | 5.02 | -1.01 |
| TRUE | 1/1 | 1/1 | 5     | 5.02 | -1.01 |
| TRUE | 1/1 | 1/1 | 5     | 5.02 | -1.01 |
| TRUE | 1/1 | 1/1 | 10.45 | 10.8 | -1.27 |
| TRUE | 1/1 | 1/1 | 10.45 | 10.8 | -1.27 |
| TRUE | 1/1 | 1/1 | 10.45 | 10.8 | -1.27 |
| TRUE | 1/1 | 1/1 | 10.45 | 10.8 | -1.27 |
| TRUE | 1/1 | 1/1 | 10.45 | 10.8 | -1.27 |
| TRUE | 1/1 | 1/1 | 6.98  | 6.72 | 1.2   |
| TRUE | 1/1 | 1/1 | 6.98  | 6.72 | 1.2   |
| TRUE | 1/1 | 1/1 | 6.98  | 6.72 | 1.2   |
| TRUE | 1/1 | 1/1 | 6.98  | 6.72 | 1.2   |
| TRUE | 1/1 | 1/1 | 7.8   | 7.16 | 1.56  |
| TRUE | 1/1 | 1/1 | 7.8   | 7.16 | 1.56  |
| TRUE | 1/1 | 1/1 | 7.8   | 7.16 | 1.56  |
| TRUE | 1/1 | 1/1 | 7.59  | 8.09 | -1.41 |
| TRUE | 1/1 | 1/1 | 7.59  | 8.09 | -1.41 |
| TRUE | 1/1 | 1/1 | 7.59  | 8.09 | -1.41 |
| TRUE | 1/1 | 1/1 | 5.57  | 5.17 | 1.33  |
| TRUE | 1/1 | 1/1 | 5.57  | 5.17 | 1.33  |
| TRUE | 1/1 | 1/1 | 10.04 | 8.93 | 2.16  |
| TRUE | 1/1 | 1/1 | 10.04 | 8.93 | 2.16  |
| TRUE | 1/1 | 1/1 | 8.04  | 7.99 | 1.04  |
| TRUE | 1/1 | 1/1 | 8.04  | 7.99 | 1.04  |
| TRUE | 1/1 | 1/1 | 8.04  | 7.99 | 1.04  |
| TRUE | 1/1 | 1/1 | 8.04  | 7.99 | 1.04  |
| TRUE | 1/1 | 1/1 | 7.12  | 6.57 | 1.47  |
| TRUE | 1/1 | 1/1 | 7.12  | 6.57 | 1.47  |
| TRUE | 1/1 | 1/1 | 7.12  | 6.57 | 1.47  |



|      |     |     |      |      |       |
|------|-----|-----|------|------|-------|
| TRUE | 1/1 | 1/1 | 7.12 | 6.57 | 1.47  |
| TRUE | 1/1 | 1/1 | 7.12 | 6.57 | 1.47  |
| TRUE | 1/1 | 1/1 | 7.12 | 6.57 | 1.47  |
| TRUE | 1/1 | 1/1 | 6.9  | 6.25 | 1.57  |
| TRUE | 1/1 | 1/1 | 6.9  | 6.25 | 1.57  |
| TRUE | 1/1 | 1/1 | 8.77 | 8.32 | 1.37  |
| TRUE | 1/1 | 1/1 | 8.77 | 8.32 | 1.37  |
| TRUE | 1/1 | 1/1 | 8.77 | 8.32 | 1.37  |
| TRUE | 1/1 | 1/1 | 8.77 | 8.32 | 1.37  |
| TRUE | 1/1 | 1/1 | 8.77 | 8.32 | 1.37  |
| TRUE | 1/1 | 1/1 | 8.77 | 8.32 | 1.37  |
| TRUE | 1/1 | 1/1 | 8.77 | 8.32 | 1.37  |
| TRUE | 1/1 | 1/1 | 8.77 | 8.32 | 1.37  |
| TRUE | 1/1 | 1/1 | 8.77 | 8.32 | 1.37  |
| TRUE | 1/1 | 1/1 | 8.77 | 8.32 | 1.37  |
| TRUE | 1/1 | 1/1 | 8.77 | 8.32 | 1.37  |
| TRUE | 1/1 | 1/1 | 8.77 | 8.32 | 1.37  |
| TRUE | 1/1 | 1/1 | 8.77 | 8.32 | 1.37  |
| TRUE | 1/1 | 1/1 | 8.77 | 8.32 | 1.37  |
| TRUE | 1/1 | 1/1 | 8.77 | 8.32 | 1.37  |
| TRUE | 1/1 | 1/1 | 8.77 | 8.32 | 1.37  |
| TRUE | 1/1 | 1/1 | 8.77 | 8.32 | 1.37  |
| TRUE | 1/1 | 1/1 | 8.77 | 8.32 | 1.37  |
| TRUE | 1/1 | 1/1 | 8.64 | 8.43 | 1.16  |
| TRUE | 1/1 | 1/1 | 8.64 | 8.43 | 1.16  |
| TRUE | 1/1 | 1/1 | 3.8  | 3.57 | 1.17  |
| TRUE | 1/1 | 1/1 | 3.8  | 3.57 | 1.17  |
| TRUE | 1/1 | 1/1 | 3.8  | 3.57 | 1.17  |
| TRUE | 1/1 | 1/1 | 8.5  | 7.95 | 1.46  |
| TRUE | 1/1 | 1/1 | 8.5  | 7.95 | 1.46  |
| TRUE | 1/1 | 1/1 | 9.98 | 9.14 | 1.8   |
| TRUE | 1/1 | 1/1 | 9.98 | 9.14 | 1.8   |
| TRUE | 1/1 | 1/1 | 9.98 | 9.14 | 1.8   |
| TRUE | 1/1 | 1/1 | 9.98 | 9.14 | 1.8   |
| TRUE | 1/1 | 1/1 | 9.98 | 9.14 | 1.8   |
| TRUE | 1/1 | 1/1 | 9.98 | 9.14 | 1.8   |
| TRUE | 1/1 | 1/1 | 9.98 | 9.14 | 1.8   |
| TRUE | 1/1 | 1/1 | 9.98 | 9.14 | 1.8   |
| TRUE | 1/1 | 1/1 | 9.98 | 9.14 | 1.8   |
| TRUE | 1/1 | 1/1 | 7.45 | 7.49 | -1.03 |
| TRUE | 1/1 | 1/1 | 7.45 | 7.49 | -1.03 |
| TRUE | 1/1 | 1/1 | 7.45 | 7.49 | -1.03 |
| TRUE | 1/1 | 1/1 | 9    | 7.6  | 2.64  |
| TRUE | 1/1 | 1/1 | 9    | 7.6  | 2.64  |
| TRUE | 1/1 | 1/1 | 9    | 7.6  | 2.64  |
| TRUE | 1/1 | 1/1 | 9    | 7.6  | 2.64  |
| TRUE | 1/1 | 1/1 | 9    | 7.6  | 2.64  |
| TRUE | 1/1 | 1/1 | 6.01 | 6.05 | -1.03 |
| TRUE | 1/1 | 1/1 | 6.01 | 6.05 | -1.03 |
| TRUE | 1/1 | 1/1 | 6.01 | 6.05 | -1.03 |
| TRUE | 1/1 | 1/1 | 6.01 | 6.05 | -1.03 |
| TRUE | 1/1 | 1/1 | 4.32 | 3.46 | 1.82  |
| TRUE | 1/1 | 1/1 | 4.32 | 3.46 | 1.82  |
| TRUE | 1/1 | 1/1 | 4.32 | 3.46 | 1.82  |
| TRUE | 1/1 | 1/1 | 4.32 | 3.46 | 1.82  |
| TRUE | 1/1 | 1/1 | 4.32 | 3.46 | 1.82  |
| TRUE | 1/1 | 1/1 | 4.32 | 3.46 | 1.82  |
| TRUE | 1/1 | 1/1 | 4.32 | 3.46 | 1.82  |
| TRUE | 1/1 | 1/1 | 4.32 | 3.46 | 1.82  |
| TRUE | 1/1 | 1/1 | 4.32 | 3.46 | 1.82  |
| TRUE | 1/1 | 1/1 | 4.78 | 4.27 | 1.43  |









|      |     |     |      |      |       |
|------|-----|-----|------|------|-------|
| TRUE | 1/1 | 1/1 | 8.81 | 7.24 | 2.98  |
| TRUE | 1/1 | 1/1 | 8.81 | 7.24 | 2.98  |
| TRUE | 1/1 | 1/1 | 8.81 | 7.24 | 2.98  |
| TRUE | 1/1 | 1/1 | 8.81 | 7.24 | 2.98  |
| TRUE | 1/1 | 1/1 | 8.81 | 7.24 | 2.98  |
| TRUE | 1/1 | 1/1 | 8.81 | 7.24 | 2.98  |
| TRUE | 1/1 | 1/1 | 8.81 | 7.24 | 2.98  |
| TRUE | 1/1 | 1/1 | 8.81 | 7.24 | 2.98  |
| TRUE | 1/1 | 1/1 | 8.81 | 7.24 | 2.98  |
| TRUE | 1/1 | 1/1 | 8.81 | 7.24 | 2.98  |
| TRUE | 1/1 | 1/1 | 8.81 | 7.24 | 2.98  |
| TRUE | 1/1 | 1/1 | 8.81 | 7.24 | 2.98  |
| TRUE | 1/1 | 1/1 | 8.81 | 7.24 | 2.98  |
| TRUE | 1/1 | 1/1 | 8.81 | 7.24 | 2.98  |
| TRUE | 1/1 | 1/1 | 8.81 | 7.24 | 2.98  |
| TRUE | 1/1 | 1/1 | 6.4  | 4.97 | 2.68  |
| TRUE | 1/1 | 1/1 | 6.4  | 4.97 | 2.68  |
| TRUE | 1/1 | 1/1 | 6.4  | 4.97 | 2.68  |
| TRUE | 1/1 | 1/1 | 6.4  | 4.97 | 2.68  |
| TRUE | 1/1 | 1/1 | 6.4  | 4.97 | 2.68  |
| TRUE | 1/1 | 1/1 | 6.4  | 4.97 | 2.68  |
| TRUE | 1/1 | 1/1 | 8.74 | 8.69 | 1.04  |
| TRUE | 1/1 | 1/1 | 8.74 | 8.69 | 1.04  |
| TRUE | 1/1 | 1/1 | 7.92 | 7.68 | 1.18  |
| TRUE | 1/1 | 1/1 | 7.92 | 7.68 | 1.18  |
| TRUE | 1/1 | 1/1 | 4.77 | 4.3  | 1.38  |
| TRUE | 1/1 | 1/1 | 4.77 | 4.3  | 1.38  |
| TRUE | 1/1 | 1/1 | 6.58 | 6.27 | 1.24  |
| TRUE | 1/1 | 1/1 | 6.58 | 6.27 | 1.24  |
| TRUE | 1/1 | 1/1 | 6.58 | 6.27 | 1.24  |
| TRUE | 1/1 | 1/1 | 5.92 | 5.78 | 1.1   |
| TRUE | 1/1 | 1/1 | 5.92 | 5.78 | 1.1   |
| TRUE | 1/1 | 1/1 | 5.27 | 4.68 | 1.51  |
| TRUE | 1/1 | 1/1 | 5.27 | 4.68 | 1.51  |
| TRUE | 1/1 | 1/1 | 5.27 | 4.68 | 1.51  |
| TRUE | 1/1 | 1/1 | 7.66 | 7.35 | 1.23  |
| TRUE | 1/1 | 1/1 | 7.66 | 7.35 | 1.23  |
| TRUE | 1/1 | 1/1 | 7.66 | 7.35 | 1.23  |
| TRUE | 1/1 | 1/1 | 7.66 | 7.35 | 1.23  |
| TRUE | 1/1 | 1/1 | 6.58 | 7    | -1.34 |
| TRUE | 1/1 | 1/1 | 6.58 | 7    | -1.34 |
| TRUE | 1/1 | 1/1 | 9.53 | 8.41 | 2.17  |
| TRUE | 1/1 | 1/1 | 9.53 | 8.41 | 2.17  |
| TRUE | 1/1 | 1/1 | 8.62 | 8.1  | 1.43  |
| TRUE | 1/1 | 1/1 | 8.62 | 8.1  | 1.43  |
| TRUE | 1/1 | 1/1 | 8.62 | 8.1  | 1.43  |
| TRUE | 1/1 | 1/1 | 8.62 | 8.1  | 1.43  |
| TRUE | 1/1 | 1/1 | 8.62 | 8.1  | 1.43  |
| TRUE | 1/1 | 1/1 | 7.05 | 7.05 | 1     |
| TRUE | 1/1 | 1/1 | 7.05 | 7.05 | 1     |
| TRUE | 1/1 | 1/1 | 7.05 | 7.05 | 1     |
| TRUE | 1/1 | 1/1 | 7.05 | 7.05 | 1     |
| TRUE | 1/1 | 1/1 | 6.51 | 6.28 | 1.17  |
| TRUE | 1/1 | 1/1 | 6.51 | 6.28 | 1.17  |
| TRUE | 1/1 | 1/1 | 6.51 | 6.28 | 1.17  |
| TRUE | 1/1 | 1/1 | 6.51 | 6.28 | 1.17  |
| TRUE | 1/1 | 1/1 | 6.51 | 6.28 | 1.17  |
| TRUE | 1/1 | 1/1 | 6.51 | 6.28 | 1.17  |
| TRUE | 1/1 | 1/1 | 6.98 | 6.82 | 1.12  |
| TRUE | 1/1 | 1/1 | 6.98 | 6.82 | 1.12  |
| TRUE | 1/1 | 1/1 | 9.39 | 8.28 | 2.16  |
| TRUE | 1/1 | 1/1 | 9.39 | 8.28 | 2.16  |

|      |     |     |       |      |       |
|------|-----|-----|-------|------|-------|
| TRUE | 1/1 | 1/1 | 9.39  | 8.28 | 2.16  |
| TRUE | 1/1 | 1/1 | 9.39  | 8.28 | 2.16  |
| TRUE | 1/1 | 1/1 | 9.39  | 8.28 | 2.16  |
| TRUE | 1/1 | 1/1 | 9.39  | 8.28 | 2.16  |
| TRUE | 1/1 | 1/1 | 9.39  | 8.28 | 2.16  |
| TRUE | 1/1 | 1/1 | 9.39  | 8.28 | 2.16  |
| TRUE | 1/1 | 1/1 | 5.66  | 4.79 | 1.82  |
| TRUE | 1/1 | 1/1 | 5.66  | 4.79 | 1.82  |
| TRUE | 1/1 | 1/1 | 6.88  | 5.29 | 3     |
| TRUE | 1/1 | 1/1 | 6.88  | 5.29 | 3     |
| TRUE | 1/1 | 1/1 | 6.88  | 5.29 | 3     |
| TRUE | 1/1 | 1/1 | 6.88  | 5.29 | 3     |
| TRUE | 1/1 | 1/1 | 6.88  | 5.29 | 3     |
| TRUE | 1/1 | 1/1 | 6.88  | 5.29 | 3     |
| TRUE | 1/1 | 1/1 | 6.88  | 5.29 | 3     |
| TRUE | 1/1 | 1/1 | 6.88  | 5.29 | 3     |
| TRUE | 1/1 | 1/1 | 6.88  | 5.29 | 3     |
| TRUE | 1/1 | 1/1 | 6.88  | 5.29 | 3     |
| TRUE | 1/1 | 1/1 | 6.88  | 5.29 | 3     |
| TRUE | 1/1 | 1/1 | 6.88  | 5.29 | 3     |
| TRUE | 1/1 | 1/1 | 6.88  | 5.29 | 3     |
| TRUE | 1/1 | 1/1 | 6.88  | 5.29 | 3     |
| TRUE | 1/1 | 1/1 | 6.88  | 5.29 | 3     |
| TRUE | 1/1 | 1/1 | 10.26 | 9.74 | 1.43  |
| TRUE | 1/1 | 1/1 | 10.26 | 9.74 | 1.43  |
| TRUE | 1/1 | 1/1 | 10.26 | 9.74 | 1.43  |
| TRUE | 1/1 | 1/1 | 5.03  | 4.87 | 1.12  |
| TRUE | 1/1 | 1/1 | 5.03  | 4.87 | 1.12  |
| TRUE | 1/1 | 1/1 | 8.82  | 7.81 | 2     |
| TRUE | 1/1 | 1/1 | 8.82  | 7.81 | 2     |
| TRUE | 1/1 | 1/1 | 8.82  | 7.81 | 2     |
| TRUE | 1/1 | 1/1 | 7.62  | 6.61 | 2.01  |
| TRUE | 1/1 | 1/1 | 7.62  | 6.61 | 2.01  |
| TRUE | 1/1 | 1/1 | 7.62  | 6.61 | 2.01  |
| TRUE | 1/1 | 1/1 | 7.62  | 6.61 | 2.01  |
| TRUE | 1/1 | 1/1 | 7.62  | 6.61 | 2.01  |
| TRUE | 1/1 | 1/1 | 7.62  | 6.61 | 2.01  |
| TRUE | 1/1 | 1/1 | 7.62  | 6.61 | 2.01  |
| TRUE | 1/1 | 1/1 | 7.62  | 6.61 | 2.01  |
| TRUE | 1/1 | 1/1 | 7.62  | 6.61 | 2.01  |
| TRUE | 1/1 | 1/1 | 7.62  | 6.61 | 2.01  |
| TRUE | 1/1 | 1/1 | 7.62  | 6.61 | 2.01  |
| TRUE | 1/1 | 1/1 | 7.62  | 6.61 | 2.01  |
| TRUE | 1/1 | 1/1 | 7.62  | 6.61 | 2.01  |
| TRUE | 1/1 | 1/1 | 7.62  | 6.61 | 2.01  |
| TRUE | 1/1 | 1/1 | 7.62  | 6.61 | 2.01  |
| TRUE | 1/1 | 1/1 | 7.62  | 6.61 | 2.01  |
| TRUE | 1/1 | 1/1 | 7.62  | 6.61 | 2.01  |
| TRUE | 1/1 | 1/1 | 6.79  | 6.95 | -1.12 |
| TRUE | 1/1 | 1/1 | 6.79  | 6.95 | -1.12 |
| TRUE | 1/1 | 1/1 | 6.79  | 6.95 | -1.12 |
| TRUE | 1/1 | 1/1 | 6.79  | 6.95 | -1.12 |
| TRUE | 1/1 | 1/1 | 6.79  | 6.95 | -1.12 |
| TRUE | 1/1 | 1/1 | 6.79  | 6.95 | -1.12 |
| TRUE | 1/1 | 1/1 | 6.79  | 6.95 | -1.12 |
| TRUE | 1/1 | 1/1 | 6.79  | 6.95 | -1.12 |
| TRUE | 1/1 | 1/1 | 6.79  | 6.95 | -1.12 |
| TRUE | 1/1 | 1/1 | 6.79  | 6.95 | -1.12 |
| TRUE | 1/1 | 1/1 | 6.79  | 6.95 | -1.12 |
| TRUE | 1/1 | 1/1 | 6.79  | 6.95 | -1.12 |
| TRUE | 1/1 | 1/1 | 6.79  | 6.95 | -1.12 |
| TRUE | 1/1 | 1/1 | 6.79  | 6.95 | -1.12 |
| TRUE | 1/1 | 1/1 | 6.97  | 7.03 | -1.04 |
| TRUE | 1/1 | 1/1 | 6.97  | 7.03 | -1.04 |
| TRUE | 1/1 | 1/1 | 6.97  | 7.03 | -1.04 |
| TRUE | 1/1 | 1/1 | 6.17  | 5.87 | 1.23  |
| TRUE | 1/1 | 1/1 | 6.17  | 5.87 | 1.23  |
| TRUE | 1/1 | 1/1 | 6.17  | 5.87 | 1.23  |
| TRUE | 1/1 | 1/1 | 6.17  | 5.87 | 1.23  |
| TRUE | 1/1 | 1/1 | 6.14  | 5.26 | 1.84  |
| TRUE | 1/1 | 1/1 | 6.14  | 5.26 | 1.84  |
| TRUE | 1/1 | 1/1 | 6.14  | 5.26 | 1.84  |







|      |     |     |       |      |       |
|------|-----|-----|-------|------|-------|
| TRUE | 1/1 | 1/1 | 4.75  | 3.79 | 1.95  |
| TRUE | 1/1 | 1/1 | 7.67  | 6.27 | 2.63  |
| TRUE | 1/1 | 1/1 | 7.67  | 6.27 | 2.63  |
| TRUE | 1/1 | 1/1 | 7.67  | 6.27 | 2.63  |
| TRUE | 1/1 | 1/1 | 3.12  | 3    | 1.09  |
| TRUE | 1/1 | 1/1 | 3.12  | 3    | 1.09  |
| TRUE | 1/1 | 1/1 | 6.89  | 5.42 | 2.77  |
| TRUE | 1/1 | 1/1 | 6.89  | 5.42 | 2.77  |
| TRUE | 1/1 | 1/1 | 6.89  | 5.42 | 2.77  |
| TRUE | 1/1 | 1/1 | 6.89  | 5.42 | 2.77  |
| TRUE | 1/1 | 1/1 | 6.89  | 5.42 | 2.77  |
| TRUE | 1/1 | 1/1 | 6.89  | 5.42 | 2.77  |
| TRUE | 1/1 | 1/1 | 6.89  | 5.42 | 2.77  |
| TRUE | 1/1 | 1/1 | 6.89  | 5.42 | 2.77  |
| TRUE | 1/1 | 1/1 | 6.89  | 5.42 | 2.77  |
| TRUE | 1/1 | 1/1 | 7.37  | 7.69 | -1.25 |
| TRUE | 1/1 | 1/1 | 7.37  | 7.69 | -1.25 |
| TRUE | 1/1 | 1/1 | 7.37  | 7.69 | -1.25 |
| TRUE | 1/1 | 1/1 | 4.94  | 4.54 | 1.32  |
| TRUE | 1/1 | 1/1 | 4.94  | 4.54 | 1.32  |
| TRUE | 1/1 | 1/1 | 4.38  | 3.64 | 1.66  |
| TRUE | 1/1 | 1/1 | 4.38  | 3.64 | 1.66  |
| TRUE | 1/1 | 1/1 | 4.38  | 3.64 | 1.66  |
| TRUE | 1/1 | 1/1 | 8.31  | 7.07 | 2.36  |
| TRUE | 1/1 | 1/1 | 8.31  | 7.07 | 2.36  |
| TRUE | 1/1 | 1/1 | 8.31  | 7.07 | 2.36  |
| TRUE | 1/1 | 1/1 | 8.27  | 7.21 | 2.08  |
| TRUE | 1/1 | 1/1 | 8.27  | 7.21 | 2.08  |
| TRUE | 1/1 | 1/1 | 8.27  | 7.21 | 2.08  |
| TRUE | 1/1 | 1/1 | 7.3   | 7.09 | 1.16  |
| TRUE | 1/1 | 1/1 | 7.3   | 7.09 | 1.16  |
| TRUE | 1/1 | 1/1 | 7.3   | 7.09 | 1.16  |
| TRUE | 1/1 | 1/1 | 7.3   | 7.09 | 1.16  |
| TRUE | 1/1 | 1/1 | 7.3   | 7.09 | 1.16  |
| TRUE | 1/1 | 1/1 | 6.39  | 5.6  | 1.73  |
| TRUE | 1/1 | 1/1 | 6.39  | 5.6  | 1.73  |
| TRUE | 1/1 | 1/1 | 4.74  | 4.07 | 1.59  |
| TRUE | 1/1 | 1/1 | 4.74  | 4.07 | 1.59  |
| TRUE | 1/1 | 1/1 | 4.74  | 4.07 | 1.59  |
| TRUE | 1/1 | 1/1 | 4.74  | 4.07 | 1.59  |
| TRUE | 1/1 | 1/1 | 7.11  | 5.86 | 2.38  |
| TRUE | 1/1 | 1/1 | 7.11  | 5.86 | 2.38  |
| TRUE | 1/1 | 1/1 | 7.11  | 5.86 | 2.38  |
| TRUE | 1/1 | 1/1 | 7.94  | 8.45 | -1.43 |
| TRUE | 1/1 | 1/1 | 7.94  | 8.45 | -1.43 |
| TRUE | 1/1 | 1/1 | 6.5   | 5.12 | 2.6   |
| TRUE | 1/1 | 1/1 | 6.5   | 5.12 | 2.6   |
| TRUE | 1/1 | 1/1 | 6.5   | 5.12 | 2.6   |
| TRUE | 1/1 | 1/1 | 6.5   | 5.12 | 2.6   |
| TRUE | 1/1 | 1/1 | 6.5   | 5.12 | 2.6   |
| TRUE | 1/1 | 1/1 | 6.5   | 5.12 | 2.6   |
| TRUE | 1/1 | 1/1 | 6.5   | 5.12 | 2.6   |
| TRUE | 1/1 | 1/1 | 6.5   | 5.12 | 2.6   |
| TRUE | 1/1 | 1/1 | 6.5   | 5.12 | 2.6   |
| TRUE | 1/1 | 1/1 | 7.81  | 7.61 | 1.14  |
| TRUE | 1/1 | 1/1 | 7.81  | 7.61 | 1.14  |
| TRUE | 1/1 | 1/1 | 10.63 | 8.98 | 3.14  |
| TRUE | 1/1 | 1/1 | 10.63 | 8.98 | 3.14  |
| TRUE | 1/1 | 1/1 | 10.63 | 8.98 | 3.14  |
| TRUE | 1/1 | 1/1 | 10.63 | 8.98 | 3.14  |

|      |     |     |       |       |       |
|------|-----|-----|-------|-------|-------|
| TRUE | 1/1 | 1/1 | 10.63 | 8.98  | 3.14  |
| TRUE | 1/1 | 1/1 | 10.63 | 8.98  | 3.14  |
| TRUE | 1/1 | 1/1 | 10.63 | 8.98  | 3.14  |
| TRUE | 1/1 | 1/1 | 10.63 | 8.98  | 3.14  |
| TRUE | 1/1 | 1/1 | 10.63 | 8.98  | 3.14  |
| TRUE | 1/1 | 1/1 | 8.03  | 8.39  | -1.28 |
| TRUE | 1/1 | 1/1 | 8.03  | 8.39  | -1.28 |
| TRUE | 1/1 | 1/1 | 8.03  | 8.39  | -1.28 |
| TRUE | 1/1 | 1/1 | 5.85  | 6.12  | -1.21 |
| TRUE | 1/1 | 1/1 | 5.85  | 6.12  | -1.21 |
| TRUE | 1/1 | 1/1 | 5.85  | 6.12  | -1.21 |
| TRUE | 1/1 | 1/1 | 5.85  | 6.12  | -1.21 |
| TRUE | 1/1 | 1/1 | 6.91  | 6.46  | 1.36  |
| TRUE | 1/1 | 1/1 | 6.91  | 6.46  | 1.36  |
| TRUE | 1/1 | 1/1 | 6.82  | 6.97  | -1.11 |
| TRUE | 1/1 | 1/1 | 6.82  | 6.97  | -1.11 |
| TRUE | 1/1 | 1/1 | 6.82  | 6.97  | -1.11 |
| TRUE | 1/1 | 1/1 | 5.53  | 4.88  | 1.57  |
| TRUE | 1/1 | 1/1 | 5.53  | 4.88  | 1.57  |
| TRUE | 1/1 | 1/1 | 5.53  | 4.88  | 1.57  |
| TRUE | 1/1 | 1/1 | 5.53  | 4.88  | 1.57  |
| TRUE | 1/1 | 1/1 | 5.53  | 4.88  | 1.57  |
| TRUE | 1/1 | 1/1 | 4.38  | 3.37  | 2.02  |
| TRUE | 1/1 | 1/1 | 4.38  | 3.37  | 2.02  |
| TRUE | 1/1 | 1/1 | 4.38  | 3.37  | 2.02  |
| TRUE | 1/1 | 1/1 | 7.5   | 7.11  | 1.31  |
| TRUE | 1/1 | 1/1 | 7.5   | 7.11  | 1.31  |
| TRUE | 1/1 | 1/1 | 7.5   | 7.11  | 1.31  |
| TRUE | 1/1 | 1/1 | 8.24  | 8.33  | -1.07 |
| TRUE | 1/1 | 1/1 | 8.24  | 8.33  | -1.07 |
| TRUE | 1/1 | 1/1 | 8.24  | 8.33  | -1.07 |
| TRUE | 1/1 | 1/1 | 6.97  | 6.29  | 1.61  |
| TRUE | 1/1 | 1/1 | 6.97  | 6.29  | 1.61  |
| TRUE | 1/1 | 1/1 | 6.97  | 6.29  | 1.61  |
| TRUE | 1/1 | 1/1 | 6.97  | 6.29  | 1.61  |
| TRUE | 1/1 | 1/1 | 6.97  | 6.29  | 1.61  |
| TRUE | 1/1 | 1/1 | 6.86  | 6.93  | -1.05 |
| TRUE | 1/1 | 1/1 | 6.86  | 6.93  | -1.05 |
| TRUE | 1/1 | 1/1 | 6.31  | 6.34  | -1.02 |
| TRUE | 1/1 | 1/1 | 6.31  | 6.34  | -1.02 |
| TRUE | 1/1 | 1/1 | 6.31  | 6.34  | -1.02 |
| TRUE | 1/1 | 1/1 | 6.31  | 6.34  | -1.02 |
| TRUE | 1/1 | 1/1 | 6.31  | 6.34  | -1.02 |
| TRUE | 1/1 | 1/1 | 9.54  | 10.21 | -1.59 |
| TRUE | 1/1 | 1/1 | 9.54  | 10.21 | -1.59 |
| TRUE | 1/1 | 1/1 | 7.96  | 8.91  | -1.94 |
| TRUE | 1/1 | 1/1 | 7.96  | 8.91  | -1.94 |
| TRUE | 1/1 | 1/1 | 7.96  | 8.91  | -1.94 |
| TRUE | 1/1 | 1/1 | 7.96  | 8.91  | -1.94 |
| TRUE | 1/1 | 1/1 | 9.39  | 8.42  | 1.95  |
| TRUE | 1/1 | 1/1 | 9.39  | 8.42  | 1.95  |
| TRUE | 1/1 | 1/1 | 9.39  | 8.42  | 1.95  |
| TRUE | 1/1 | 1/1 | 9.39  | 8.42  | 1.95  |
| TRUE | 1/1 | 1/1 | 8.23  | 7.12  | 2.17  |
| TRUE | 1/1 | 1/1 | 8.23  | 7.12  | 2.17  |
| TRUE | 1/1 | 1/1 | 8.23  | 7.12  | 2.17  |
| TRUE | 1/1 | 1/1 | 8.23  | 7.12  | 2.17  |
| TRUE | 1/1 | 1/1 | 6.62  | 4.87  | 3.37  |

|      |     |     |      |      |       |
|------|-----|-----|------|------|-------|
| TRUE | 1/1 | 1/1 | 6.62 | 4.87 | 3.37  |
| TRUE | 1/1 | 1/1 | 6.62 | 4.87 | 3.37  |
| TRUE | 1/1 | 1/1 | 6.62 | 4.87 | 3.37  |
| TRUE | 1/1 | 1/1 | 6.62 | 4.87 | 3.37  |
| TRUE | 1/1 | 1/1 | 6.62 | 4.87 | 3.37  |
| TRUE | 1/1 | 1/1 | 6.62 | 4.87 | 3.37  |
| TRUE | 1/1 | 1/1 | 6.62 | 4.87 | 3.37  |
| TRUE | 1/1 | 1/1 | 6.62 | 4.87 | 3.37  |
| TRUE | 1/1 | 1/1 | 6.62 | 4.87 | 3.37  |
| TRUE | 1/1 | 1/1 | 6.62 | 4.87 | 3.37  |
| TRUE | 1/1 | 1/1 | 6.62 | 4.87 | 3.37  |
| TRUE | 1/1 | 1/1 | 6.62 | 4.87 | 3.37  |
| TRUE | 1/1 | 1/1 | 6.62 | 4.87 | 3.37  |
| TRUE | 1/1 | 1/1 | 6.62 | 4.87 | 3.37  |
| TRUE | 1/1 | 1/1 | 6.62 | 4.87 | 3.37  |
| TRUE | 1/1 | 1/1 | 4.28 | 4.06 | 1.17  |
| TRUE | 1/1 | 1/1 | 4.28 | 4.06 | 1.17  |
| TRUE | 1/1 | 1/1 | 7.04 | 5.97 | 2.09  |
| TRUE | 1/1 | 1/1 | 7.04 | 5.97 | 2.09  |
| TRUE | 1/1 | 1/1 | 7.04 | 5.97 | 2.09  |
| TRUE | 1/1 | 1/1 | 7.04 | 5.97 | 2.09  |
| TRUE | 1/1 | 1/1 | 7.04 | 5.97 | 2.09  |
| TRUE | 1/1 | 1/1 | 7.04 | 5.97 | 2.09  |
| TRUE | 1/1 | 1/1 | 7.04 | 5.97 | 2.09  |
| TRUE | 1/1 | 1/1 | 7.04 | 5.97 | 2.09  |
| TRUE | 1/1 | 1/1 | 7.04 | 5.97 | 2.09  |
| TRUE | 1/1 | 1/1 | 7.97 | 7.22 | 1.67  |
| TRUE | 1/1 | 1/1 | 7.97 | 7.22 | 1.67  |
| TRUE | 1/1 | 1/1 | 4.2  | 4.26 | -1.04 |
| TRUE | 1/1 | 1/1 | 4.2  | 4.26 | -1.04 |
| TRUE | 1/1 | 1/1 | 4.2  | 4.26 | -1.04 |
| TRUE | 1/1 | 1/1 | 4.2  | 4.26 | -1.04 |
| TRUE | 1/1 | 1/1 | 4.2  | 4.26 | -1.04 |
| TRUE | 1/1 | 1/1 | 4.2  | 4.26 | -1.04 |
| TRUE | 1/1 | 1/1 | 4.2  | 4.26 | -1.04 |
| TRUE | 1/1 | 1/1 | 4.2  | 4.26 | -1.04 |
| TRUE | 1/1 | 1/1 | 4.2  | 4.26 | -1.04 |
| TRUE | 1/1 | 1/1 | 6.92 | 6.47 | 1.36  |
| TRUE | 1/1 | 1/1 | 6.92 | 6.47 | 1.36  |
| TRUE | 1/1 | 1/1 | 6.92 | 6.47 | 1.36  |
| TRUE | 1/1 | 1/1 | 6.92 | 6.47 | 1.36  |
| TRUE | 1/1 | 1/1 | 5.83 | 4.82 | 2.03  |
| TRUE | 1/1 | 1/1 | 5.83 | 4.82 | 2.03  |
| TRUE | 1/1 | 1/1 | 5.83 | 4.82 | 2.03  |
| TRUE | 1/1 | 1/1 | 5.83 | 4.82 | 2.03  |
| TRUE | 1/1 | 1/1 | 5.83 | 4.82 | 2.03  |
| TRUE | 1/1 | 1/1 | 5.83 | 4.82 | 2.03  |
| TRUE | 1/1 | 1/1 | 9.9  | 9.01 | 1.86  |
| TRUE | 1/1 | 1/1 | 9.9  | 9.01 | 1.86  |
| TRUE | 1/1 | 1/1 | 3.69 | 3.43 | 1.19  |
| TRUE | 1/1 | 1/1 | 3.69 | 3.43 | 1.19  |
| TRUE | 1/1 | 1/1 | 3.69 | 3.43 | 1.19  |
| TRUE | 1/1 | 1/1 | 3.69 | 3.43 | 1.19  |
| TRUE | 1/1 | 1/1 | 3.69 | 3.43 | 1.19  |
| TRUE | 1/1 | 1/1 | 7.2  | 6.16 | 2.07  |
| TRUE | 1/1 | 1/1 | 7.2  | 6.16 | 2.07  |
| TRUE | 1/1 | 1/1 | 7.2  | 6.16 | 2.07  |
| TRUE | 1/1 | 1/1 | 7.2  | 6.16 | 2.07  |
| TRUE | 1/1 | 1/1 | 7.2  | 6.16 | 2.07  |
| TRUE | 1/1 | 1/1 | 7.2  | 6.16 | 2.07  |
| TRUE | 1/1 | 1/1 | 7    | 7.26 | -1.2  |
| TRUE | 1/1 | 1/1 | 7    | 7.26 | -1.2  |



|      |     |     |       |      |       |
|------|-----|-----|-------|------|-------|
| TRUE | 1/1 | 1/1 | 6.02  | 4.02 | 4.01  |
| TRUE | 1/1 | 1/1 | 6.02  | 4.02 | 4.01  |
| TRUE | 1/1 | 1/1 | 6.02  | 4.02 | 4.01  |
| TRUE | 1/1 | 1/1 | 6.02  | 4.02 | 4.01  |
| TRUE | 1/1 | 1/1 | 6.02  | 4.02 | 4.01  |
| TRUE | 1/1 | 1/1 | 9.29  | 7.93 | 2.57  |
| TRUE | 1/1 | 1/1 | 9.29  | 7.93 | 2.57  |
| TRUE | 1/1 | 1/1 | 9.29  | 7.93 | 2.57  |
| TRUE | 1/1 | 1/1 | 9.29  | 7.93 | 2.57  |
| TRUE | 1/1 | 1/1 | 9.29  | 7.93 | 2.57  |
| TRUE | 1/1 | 1/1 | 9.29  | 7.93 | 2.57  |
| TRUE | 1/1 | 1/1 | 9.29  | 7.93 | 2.57  |
| TRUE | 1/1 | 1/1 | 9.29  | 7.93 | 2.57  |
| TRUE | 1/1 | 1/1 | 9.29  | 7.93 | 2.57  |
| TRUE | 1/1 | 1/1 | 9.29  | 7.93 | 2.57  |
| TRUE | 1/1 | 1/1 | 9.29  | 7.93 | 2.57  |
| TRUE | 1/1 | 1/1 | 9.29  | 7.93 | 2.57  |
| TRUE | 1/1 | 1/1 | 9.29  | 7.93 | 2.57  |
| TRUE | 1/1 | 1/1 | 9.87  | 9.65 | 1.16  |
| TRUE | 1/1 | 1/1 | 9.87  | 9.65 | 1.16  |
| TRUE | 1/1 | 1/1 | 9.87  | 9.65 | 1.16  |
| TRUE | 1/1 | 1/1 | 8.37  | 8.31 | 1.04  |
| TRUE | 1/1 | 1/1 | 8.37  | 8.31 | 1.04  |
| TRUE | 1/1 | 1/1 | 8.37  | 8.31 | 1.04  |
| TRUE | 1/1 | 1/1 | 10.82 | 9.54 | 2.44  |
| TRUE | 1/1 | 1/1 | 10.82 | 9.54 | 2.44  |
| TRUE | 1/1 | 1/1 | 10.82 | 9.54 | 2.44  |
| TRUE | 1/1 | 1/1 | 10.82 | 9.54 | 2.44  |
| TRUE | 1/1 | 1/1 | 10.82 | 9.54 | 2.44  |
| TRUE | 1/1 | 1/1 | 10.82 | 9.54 | 2.44  |
| TRUE | 1/1 | 1/1 | 10.82 | 9.54 | 2.44  |
| TRUE | 1/1 | 1/1 | 10.82 | 9.54 | 2.44  |
| TRUE | 1/1 | 1/1 | 10.82 | 9.54 | 2.44  |
| TRUE | 1/1 | 1/1 | 7.19  | 6.61 | 1.49  |
| TRUE | 1/1 | 1/1 | 7.19  | 6.61 | 1.49  |
| TRUE | 1/1 | 1/1 | 7.19  | 6.61 | 1.49  |
| TRUE | 1/1 | 1/1 | 7.19  | 6.61 | 1.49  |
| TRUE | 1/1 | 1/1 | 3.09  | 2.77 | 1.25  |
| TRUE | 1/1 | 1/1 | 3.09  | 2.77 | 1.25  |
| TRUE | 1/1 | 1/1 | 3.09  | 2.77 | 1.25  |
| TRUE | 1/1 | 1/1 | 6.16  | 5.71 | 1.36  |
| TRUE | 1/1 | 1/1 | 6.16  | 5.71 | 1.36  |
| TRUE | 1/1 | 1/1 | 6.16  | 5.71 | 1.36  |
| TRUE | 1/1 | 1/1 | 6.16  | 5.71 | 1.36  |
| TRUE | 1/1 | 1/1 | 6.16  | 5.71 | 1.36  |
| TRUE | 1/1 | 1/1 | 6.16  | 5.71 | 1.36  |
| TRUE | 1/1 | 1/1 | 5.69  | 5.78 | -1.07 |
| TRUE | 1/1 | 1/1 | 5.69  | 5.78 | -1.07 |
| TRUE | 1/1 | 1/1 | 8.6   | 7.64 | 1.95  |
| TRUE | 1/1 | 1/1 | 8.6   | 7.64 | 1.95  |
| TRUE | 1/1 | 1/1 | 8.6   | 7.64 | 1.95  |
| TRUE | 1/1 | 1/1 | 8.6   | 7.64 | 1.95  |
| TRUE | 1/1 | 1/1 | 6.07  | 6.14 | -1.05 |
| TRUE | 1/1 | 1/1 | 6.07  | 6.14 | -1.05 |
| TRUE | 1/1 | 1/1 | 5.31  | 4.41 | 1.86  |
| TRUE | 1/1 | 1/1 | 5.31  | 4.41 | 1.86  |
| TRUE | 1/1 | 1/1 | 5.31  | 4.41 | 1.86  |
| TRUE | 1/1 | 1/1 | 6.72  | 6.58 | 1.1   |
| TRUE | 1/1 | 1/1 | 6.72  | 6.58 | 1.1   |







|      |     |     |       |       |       |
|------|-----|-----|-------|-------|-------|
| TRUE | 1/1 | 1/1 | 7.36  | 6.58  | 1.71  |
| TRUE | 1/1 | 1/1 | 7.36  | 6.58  | 1.71  |
| TRUE | 1/1 | 1/1 | 7.36  | 6.58  | 1.71  |
| TRUE | 1/1 | 1/1 | 4.43  | 3.71  | 1.64  |
| TRUE | 1/1 | 1/1 | 4.43  | 3.71  | 1.64  |
| TRUE | 1/1 | 1/1 | 4.43  | 3.71  | 1.64  |
| TRUE | 1/1 | 1/1 | 4.43  | 3.71  | 1.64  |
| TRUE | 1/1 | 1/1 | 3.94  | 3.85  | 1.06  |
| TRUE | 1/1 | 1/1 | 3.94  | 3.85  | 1.06  |
| TRUE | 1/1 | 1/1 | 3.94  | 3.85  | 1.06  |
| TRUE | 1/1 | 1/1 | 3.94  | 3.85  | 1.06  |
| TRUE | 1/1 | 1/1 | 3.94  | 3.85  | 1.06  |
| TRUE | 1/1 | 1/1 | 3.94  | 3.85  | 1.06  |
| TRUE | 1/1 | 1/1 | 8.57  | 7.25  | 2.51  |
| TRUE | 1/1 | 1/1 | 8.57  | 7.25  | 2.51  |
| TRUE | 1/1 | 1/1 | 8.57  | 7.25  | 2.51  |
| TRUE | 1/1 | 1/1 | 8.57  | 7.25  | 2.51  |
| TRUE | 1/1 | 1/1 | 8.57  | 7.25  | 2.51  |
| TRUE | 1/1 | 1/1 | 8.57  | 7.25  | 2.51  |
| TRUE | 1/1 | 1/1 | 8.57  | 7.25  | 2.51  |
| TRUE | 1/1 | 1/1 | 8.57  | 7.25  | 2.51  |
| TRUE | 1/1 | 1/1 | 8.57  | 7.25  | 2.51  |
| TRUE | 1/1 | 1/1 | 8.57  | 7.25  | 2.51  |
| TRUE | 1/1 | 1/1 | 8.57  | 7.25  | 2.51  |
| TRUE | 1/1 | 1/1 | 8.57  | 7.25  | 2.51  |
| TRUE | 1/1 | 1/1 | 8.57  | 7.25  | 2.51  |
| TRUE | 1/1 | 1/1 | 8.57  | 7.25  | 2.51  |
| TRUE | 1/1 | 1/1 | 8.57  | 7.25  | 2.51  |
| TRUE | 1/1 | 1/1 | 4.85  | 4.01  | 1.79  |
| TRUE | 1/1 | 1/1 | 4.85  | 4.01  | 1.79  |
| TRUE | 1/1 | 1/1 | 4.85  | 4.01  | 1.79  |
| TRUE | 1/1 | 1/1 | 4.85  | 4.01  | 1.79  |
| TRUE | 1/1 | 1/1 | 4.85  | 4.01  | 1.79  |
| TRUE | 1/1 | 1/1 | 4.85  | 4.01  | 1.79  |
| TRUE | 1/1 | 1/1 | 4.85  | 4.01  | 1.79  |
| TRUE | 1/1 | 1/1 | 4.85  | 4.01  | 1.79  |
| TRUE | 1/1 | 1/1 | 4.85  | 4.01  | 1.79  |
| TRUE | 1/1 | 1/1 | 4.77  | 3.77  | 1.99  |
| TRUE | 1/1 | 1/1 | 4.77  | 3.77  | 1.99  |
| TRUE | 1/1 | 1/1 | 4.77  | 3.77  | 1.99  |
| TRUE | 1/1 | 1/1 | 10.52 | 10.65 | -1.09 |
| TRUE | 1/1 | 1/1 | 10.52 | 10.65 | -1.09 |
| TRUE | 1/1 | 1/1 | 7.71  | 7.16  | 1.47  |
| TRUE | 1/1 | 1/1 | 7.71  | 7.16  | 1.47  |
| TRUE | 1/1 | 1/1 | 7.71  | 7.16  | 1.47  |
| TRUE | 1/1 | 1/1 | 7.71  | 7.16  | 1.47  |
| TRUE | 1/1 | 1/1 | 7.71  | 7.16  | 1.47  |
| TRUE | 1/1 | 1/1 | 3.68  | 4.01  | -1.26 |
| TRUE | 1/1 | 1/1 | 3.68  | 4.01  | -1.26 |
| TRUE | 1/1 | 1/1 | 8.95  | 8.6   | 1.28  |
| TRUE | 1/1 | 1/1 | 8.95  | 8.6   | 1.28  |
| TRUE | 1/1 | 1/1 | 8.95  | 8.6   | 1.28  |
| TRUE | 1/1 | 1/1 | 8.95  | 8.6   | 1.28  |
| TRUE | 1/1 | 1/1 | 8.95  | 8.6   | 1.28  |
| TRUE | 1/1 | 1/1 | 6.9   | 7.67  | -1.71 |
| TRUE | 1/1 | 1/1 | 6.9   | 7.67  | -1.71 |
| TRUE | 1/1 | 1/1 | 6.9   | 7.67  | -1.71 |
| TRUE | 1/1 | 1/1 | 6.9   | 7.67  | -1.71 |
| TRUE | 1/1 | 1/1 | 6.9   | 7.67  | -1.71 |
| TRUE | 1/1 | 1/1 | 6.9   | 7.67  | -1.71 |
| TRUE | 1/1 | 1/1 | 6.9   | 7.67  | -1.71 |
| TRUE | 1/1 | 1/1 | 6.9   | 7.67  | -1.71 |
| TRUE | 1/1 | 1/1 | 6.9   | 7.67  | -1.71 |
| TRUE | 1/1 | 1/1 | 6.9   | 7.67  | -1.71 |
| TRUE | 1/1 | 1/1 | 6.9   | 7.67  | -1.71 |
| TRUE | 1/1 | 1/1 | 6.9   | 7.67  | -1.71 |
| TRUE | 1/1 | 1/1 | 6.31  | 6.27  | 1.03  |
| TRUE | 1/1 | 1/1 | 6.31  | 6.27  | 1.03  |
| TRUE | 1/1 | 1/1 | 5.31  | 4.57  | 1.66  |

|      |     |     |       |      |       |
|------|-----|-----|-------|------|-------|
| TRUE | 1/1 | 1/1 | 5.31  | 4.57 | 1.66  |
| TRUE | 1/1 | 1/1 | 5.31  | 4.57 | 1.66  |
| TRUE | 1/1 | 1/1 | 5.31  | 4.57 | 1.66  |
| TRUE | 1/1 | 1/1 | 5.31  | 4.57 | 1.66  |
| TRUE | 1/1 | 1/1 | 5.31  | 4.57 | 1.66  |
| TRUE | 1/1 | 1/1 | 5.31  | 4.57 | 1.66  |
| TRUE | 1/1 | 1/1 | 9.08  | 8.59 | 1.4   |
| TRUE | 1/1 | 1/1 | 9.08  | 8.59 | 1.4   |
| TRUE | 1/1 | 1/1 | 9.08  | 8.59 | 1.4   |
| TRUE | 1/1 | 1/1 | 6.68  | 6.8  | -1.09 |
| TRUE | 1/1 | 1/1 | 6.68  | 6.8  | -1.09 |
| TRUE | 1/1 | 1/1 | 6.68  | 6.8  | -1.09 |
| TRUE | 1/1 | 1/1 | 6.38  | 5.92 | 1.37  |
| TRUE | 1/1 | 1/1 | 6.38  | 5.92 | 1.37  |
| TRUE | 1/1 | 1/1 | 4.8   | 3.72 | 2.12  |
| TRUE | 1/1 | 1/1 | 4.8   | 3.72 | 2.12  |
| TRUE | 1/1 | 1/1 | 4.8   | 3.72 | 2.12  |
| TRUE | 1/1 | 1/1 | 4.8   | 3.72 | 2.12  |
| TRUE | 1/1 | 1/1 | 4.8   | 3.72 | 2.12  |
| TRUE | 1/1 | 1/1 | 5.09  | 4.33 | 1.7   |
| TRUE | 1/1 | 1/1 | 5.09  | 4.33 | 1.7   |
| TRUE | 1/1 | 1/1 | 5.09  | 4.33 | 1.7   |
| TRUE | 1/1 | 1/1 | 5.09  | 4.33 | 1.7   |
| TRUE | 1/1 | 1/1 | 5.09  | 4.33 | 1.7   |
| TRUE | 1/1 | 1/1 | 10.46 | 8.96 | 2.84  |
| TRUE | 1/1 | 1/1 | 10.46 | 8.96 | 2.84  |
| TRUE | 1/1 | 1/1 | 10.46 | 8.96 | 2.84  |
| TRUE | 1/1 | 1/1 | 8.92  | 7.68 | 2.38  |
| TRUE | 1/1 | 1/1 | 8.92  | 7.68 | 2.38  |
| TRUE | 1/1 | 1/1 | 8.92  | 7.68 | 2.38  |
| TRUE | 1/1 | 1/1 | 8.92  | 7.68 | 2.38  |
| TRUE | 1/1 | 1/1 | 7.69  | 7.22 | 1.38  |
| TRUE | 1/1 | 1/1 | 7.69  | 7.22 | 1.38  |
| TRUE | 1/1 | 1/1 | 5.65  | 5.62 | 1.02  |
| TRUE | 1/1 | 1/1 | 5.65  | 5.62 | 1.02  |
| TRUE | 1/1 | 1/1 | 5.65  | 5.62 | 1.02  |
| TRUE | 1/1 | 1/1 | 5.65  | 5.62 | 1.02  |
| TRUE | 1/1 | 1/1 | 5.65  | 5.62 | 1.02  |
| TRUE | 1/1 | 1/1 | 7.5   | 7.34 | 1.11  |
| TRUE | 1/1 | 1/1 | 7.5   | 7.34 | 1.11  |
| TRUE | 1/1 | 1/1 | 7.5   | 7.34 | 1.11  |
| TRUE | 1/1 | 1/1 | 7.5   | 7.34 | 1.11  |
| TRUE | 1/1 | 1/1 | 7.5   | 7.34 | 1.11  |
| TRUE | 1/1 | 1/1 | 5.98  | 5.55 | 1.34  |
| TRUE | 1/1 | 1/1 | 5.98  | 5.55 | 1.34  |
| TRUE | 1/1 | 1/1 | 5.98  | 5.55 | 1.34  |
| TRUE | 1/1 | 1/1 | 6.39  | 5.32 | 2.1   |
| TRUE | 1/1 | 1/1 | 6.39  | 5.32 | 2.1   |
| TRUE | 1/1 | 1/1 | 6.39  | 5.32 | 2.1   |
| TRUE | 1/1 | 1/1 | 6.4   | 6.11 | 1.22  |
| TRUE | 1/1 | 1/1 | 6.4   | 6.11 | 1.22  |
| TRUE | 1/1 | 1/1 | 6.4   | 6.11 | 1.22  |
| TRUE | 1/1 | 1/1 | 6.45  | 6.61 | -1.12 |
| TRUE | 1/1 | 1/1 | 6.45  | 6.61 | -1.12 |
| TRUE | 1/1 | 1/1 | 6.45  | 6.61 | -1.12 |
| TRUE | 1/1 | 1/1 | 6.88  | 5.84 | 2.06  |
| TRUE | 1/1 | 1/1 | 6.88  | 5.84 | 2.06  |
| TRUE | 1/1 | 1/1 | 6.88  | 5.84 | 2.06  |

|      |     |     |       |      |       |
|------|-----|-----|-------|------|-------|
| TRUE | 1/1 | 1/1 | 6.88  | 5.84 | 2.06  |
| TRUE | 1/1 | 1/1 | 6.88  | 5.84 | 2.06  |
| TRUE | 1/1 | 1/1 | 6.88  | 5.84 | 2.06  |
| TRUE | 1/1 | 1/1 | 6.88  | 5.84 | 2.06  |
| TRUE | 1/1 | 1/1 | 6.88  | 5.84 | 2.06  |
| TRUE | 1/1 | 1/1 | 11.13 | 9.52 | 3.05  |
| TRUE | 1/1 | 1/1 | 11.13 | 9.52 | 3.05  |
| TRUE | 1/1 | 1/1 | 11.13 | 9.52 | 3.05  |
| TRUE | 1/1 | 1/1 | 11.13 | 9.52 | 3.05  |
| TRUE | 1/1 | 1/1 | 11.13 | 9.52 | 3.05  |
| TRUE | 1/1 | 1/1 | 11.13 | 9.52 | 3.05  |
| TRUE | 1/1 | 1/1 | 11.13 | 9.52 | 3.05  |
| TRUE | 1/1 | 1/1 | 11.13 | 9.52 | 3.05  |
| TRUE | 1/1 | 1/1 | 11.13 | 9.52 | 3.05  |
| TRUE | 1/1 | 1/1 | 11.13 | 9.52 | 3.05  |
| TRUE | 1/1 | 1/1 | 11.13 | 9.52 | 3.05  |
| TRUE | 1/1 | 1/1 | 8.6   | 7.74 | 1.8   |
| TRUE | 1/1 | 1/1 | 8.6   | 7.74 | 1.8   |
| TRUE | 1/1 | 1/1 | 8.6   | 7.74 | 1.8   |
| TRUE | 1/1 | 1/1 | 8.6   | 7.74 | 1.8   |
| TRUE | 1/1 | 1/1 | 8.6   | 7.74 | 1.8   |
| TRUE | 1/1 | 1/1 | 8.6   | 7.74 | 1.8   |
| TRUE | 1/1 | 1/1 | 8.6   | 7.74 | 1.8   |
| TRUE | 1/1 | 1/1 | 8.6   | 7.74 | 1.8   |
| TRUE | 1/1 | 1/1 | 8.6   | 7.74 | 1.8   |
| TRUE | 1/1 | 1/1 | 8.6   | 7.74 | 1.8   |
| TRUE | 1/1 | 1/1 | 8.6   | 7.74 | 1.8   |
| TRUE | 1/1 | 1/1 | 8.51  | 7.41 | 2.14  |
| TRUE | 1/1 | 1/1 | 8.51  | 7.41 | 2.14  |
| TRUE | 1/1 | 1/1 | 8.51  | 7.41 | 2.14  |
| TRUE | 1/1 | 1/1 | 8.51  | 7.41 | 2.14  |
| TRUE | 1/1 | 1/1 | 8.51  | 7.41 | 2.14  |
| TRUE | 1/1 | 1/1 | 8.51  | 7.41 | 2.14  |
| TRUE | 1/1 | 1/1 | 8.51  | 7.41 | 2.14  |
| TRUE | 1/1 | 1/1 | 8.51  | 7.41 | 2.14  |
| TRUE | 1/1 | 1/1 | 8.51  | 7.41 | 2.14  |
| TRUE | 1/1 | 1/1 | 6.27  | 6.36 | -1.06 |
| TRUE | 1/1 | 1/1 | 6.27  | 6.36 | -1.06 |
| TRUE | 1/1 | 1/1 | 5.35  | 4.5  | 1.79  |
| TRUE | 1/1 | 1/1 | 5.35  | 4.5  | 1.79  |
| TRUE | 1/1 | 1/1 | 5.35  | 4.5  | 1.79  |
| TRUE | 1/1 | 1/1 | 5.35  | 4.5  | 1.79  |
| TRUE | 1/1 | 1/1 | 5.35  | 4.5  | 1.79  |
| TRUE | 1/1 | 1/1 | 7.55  | 8.27 | -1.66 |
| TRUE | 1/1 | 1/1 | 7.55  | 8.27 | -1.66 |
| TRUE | 1/1 | 1/1 | 8.19  | 8.43 | -1.18 |
| TRUE | 1/1 | 1/1 | 8.19  | 8.43 | -1.18 |
| TRUE | 1/1 | 1/1 | 8.19  | 8.43 | -1.18 |
| TRUE | 1/1 | 1/1 | 8.19  | 8.43 | -1.18 |
| TRUE | 1/1 | 1/1 | 8.19  | 8.43 | -1.18 |
| TRUE | 1/1 | 1/1 | 7.58  | 6.6  | 1.97  |
| TRUE | 1/1 | 1/1 | 7.58  | 6.6  | 1.97  |
| TRUE | 1/1 | 1/1 | 8.53  | 7.2  | 2.51  |
| TRUE | 1/1 | 1/1 | 8.53  | 7.2  | 2.51  |
| TRUE | 1/1 | 1/1 | 3.34  | 2.9  | 1.35  |
| TRUE | 1/1 | 1/1 | 3.34  | 2.9  | 1.35  |
| TRUE | 1/1 | 1/1 | 7.27  | 6.47 | 1.74  |
| TRUE | 1/1 | 1/1 | 7.27  | 6.47 | 1.74  |
| TRUE | 1/1 | 1/1 | 7.27  | 6.47 | 1.74  |
| TRUE | 1/1 | 1/1 | 7.27  | 6.47 | 1.74  |
| TRUE | 1/1 | 1/1 | 8.02  | 7.56 | 1.37  |
| TRUE | 1/1 | 1/1 | 8.02  | 7.56 | 1.37  |

|      |     |     |       |       |       |
|------|-----|-----|-------|-------|-------|
| TRUE | 1/1 | 1/1 | 8.02  | 7.56  | 1.37  |
| TRUE | 1/1 | 1/1 | 8.02  | 7.56  | 1.37  |
| TRUE | 1/1 | 1/1 | 8.02  | 7.56  | 1.37  |
| TRUE | 1/1 | 1/1 | 8.02  | 7.56  | 1.37  |
| TRUE | 1/1 | 1/1 | 8.81  | 7.33  | 2.78  |
| TRUE | 1/1 | 1/1 | 8.81  | 7.33  | 2.78  |
| TRUE | 1/1 | 1/1 | 8.81  | 7.33  | 2.78  |
| TRUE | 1/1 | 1/1 | 8.81  | 7.33  | 2.78  |
| TRUE | 1/1 | 1/1 | 8.81  | 7.33  | 2.78  |
| TRUE | 1/1 | 1/1 | 8.81  | 7.33  | 2.78  |
| TRUE | 1/1 | 1/1 | 8.81  | 7.33  | 2.78  |
| TRUE | 1/1 | 1/1 | 8.81  | 7.33  | 2.78  |
| TRUE | 1/1 | 1/1 | 8.81  | 7.33  | 2.78  |
| TRUE | 1/1 | 1/1 | 8.81  | 7.33  | 2.78  |
| TRUE | 1/1 | 1/1 | 8.81  | 7.33  | 2.78  |
| TRUE | 1/1 | 1/1 | 8.81  | 7.33  | 2.78  |
| TRUE | 1/1 | 1/1 | 8.81  | 7.33  | 2.78  |
| TRUE | 1/1 | 1/1 | 8.81  | 7.33  | 2.78  |
| TRUE | 1/1 | 1/1 | 8.81  | 7.33  | 2.78  |
| TRUE | 1/1 | 1/1 | 8.81  | 7.33  | 2.78  |
| TRUE | 1/1 | 1/1 | 8.81  | 7.33  | 2.78  |
| TRUE | 1/1 | 1/1 | 8.81  | 7.33  | 2.78  |
| TRUE | 1/1 | 1/1 | 8.81  | 7.33  | 2.78  |
| TRUE | 1/1 | 1/1 | 3.85  | 2.74  | 2.16  |
| TRUE | 1/1 | 1/1 | 3.85  | 2.74  | 2.16  |
| TRUE | 1/1 | 1/1 | 3.85  | 2.74  | 2.16  |
| TRUE | 1/1 | 1/1 | 3.85  | 2.74  | 2.16  |
| TRUE | 1/1 | 1/1 | 10.92 | 11.33 | -1.32 |
| TRUE | 1/1 | 1/1 | 10.92 | 11.33 | -1.32 |
| TRUE | 1/1 | 1/1 | 10.92 | 11.33 | -1.32 |
| TRUE | 1/1 | 1/1 | 8.18  | 7.9   | 1.22  |
| TRUE | 1/1 | 1/1 | 8.18  | 7.9   | 1.22  |
| TRUE | 1/1 | 1/1 | 8.18  | 7.9   | 1.22  |
| TRUE | 1/1 | 1/1 | 6.31  | 5.85  | 1.38  |
| TRUE | 1/1 | 1/1 | 6.31  | 5.85  | 1.38  |
| TRUE | 1/1 | 1/1 | 6.31  | 5.85  | 1.38  |
| TRUE | 1/1 | 1/1 | 5.62  | 5.17  | 1.37  |
| TRUE | 1/1 | 1/1 | 5.62  | 5.17  | 1.37  |
| TRUE | 1/1 | 1/1 | 5.62  | 5.17  | 1.37  |
| TRUE | 1/1 | 1/1 | 5.62  | 5.17  | 1.37  |
| TRUE | 1/1 | 1/1 | 6.92  | 5.36  | 2.95  |
| TRUE | 1/1 | 1/1 | 6.92  | 5.36  | 2.95  |
| TRUE | 1/1 | 1/1 | 6.92  | 5.36  | 2.95  |
| TRUE | 1/1 | 1/1 | 7.6   | 7.39  | 1.15  |
| TRUE | 1/1 | 1/1 | 7.6   | 7.39  | 1.15  |
| TRUE | 1/1 | 1/1 | 7.6   | 7.39  | 1.15  |
| TRUE | 1/1 | 1/1 | 9.03  | 7.88  | 2.23  |
| TRUE | 1/1 | 1/1 | 9.03  | 7.88  | 2.23  |
| TRUE | 1/1 | 1/1 | 9.03  | 7.88  | 2.23  |
| TRUE | 1/1 | 1/1 | 9.03  | 7.88  | 2.23  |
| TRUE | 1/1 | 1/1 | 9.03  | 7.88  | 2.23  |
| TRUE | 1/1 | 1/1 | 10.18 | 8.98  | 2.3   |
| TRUE | 1/1 | 1/1 | 10.18 | 8.98  | 2.3   |
| TRUE | 1/1 | 1/1 | 8.02  | 7.06  | 1.94  |
| TRUE | 1/1 | 1/1 | 8.02  | 7.06  | 1.94  |
| TRUE | 1/1 | 1/1 | 8.02  | 7.06  | 1.94  |
| TRUE | 1/1 | 1/1 | 6.24  | 4.11  | 4.37  |
| TRUE | 1/1 | 1/1 | 6.24  | 4.11  | 4.37  |
| TRUE | 1/1 | 1/1 | 6.24  | 4.11  | 4.37  |
| TRUE | 1/1 | 1/1 | 6.24  | 4.11  | 4.37  |

|      |     |     |       |       |       |
|------|-----|-----|-------|-------|-------|
| TRUE | 1/1 | 1/1 | 6.24  | 4.11  | 4.37  |
| TRUE | 1/1 | 1/1 | 6.24  | 4.11  | 4.37  |
| TRUE | 1/1 | 1/1 | 6.24  | 4.11  | 4.37  |
| TRUE | 1/1 | 1/1 | 6.24  | 4.11  | 4.37  |
| TRUE | 1/1 | 1/1 | 6.24  | 4.11  | 4.37  |
| TRUE | 1/1 | 1/1 | 6.24  | 4.11  | 4.37  |
| TRUE | 1/1 | 1/1 | 6.24  | 4.11  | 4.37  |
| TRUE | 1/1 | 1/1 | 6.24  | 4.11  | 4.37  |
| TRUE | 1/1 | 1/1 | 6.24  | 4.11  | 4.37  |
| TRUE | 1/1 | 1/1 | 6.24  | 4.11  | 4.37  |
| TRUE | 1/1 | 1/1 | 6.24  | 4.11  | 4.37  |
| TRUE | 1/1 | 1/1 | 6.24  | 4.11  | 4.37  |
| TRUE | 1/1 | 1/1 | 6.24  | 4.11  | 4.37  |
| TRUE | 1/1 | 1/1 | 6.24  | 4.11  | 4.37  |
| TRUE | 1/1 | 1/1 | 6.24  | 4.11  | 4.37  |
| TRUE | 1/1 | 1/1 | 6.24  | 4.11  | 4.37  |
| TRUE | 1/1 | 1/1 | 10.62 | 9.64  | 1.97  |
| TRUE | 1/1 | 1/1 | 10.62 | 9.64  | 1.97  |
| TRUE | 1/1 | 1/1 | 10.62 | 9.64  | 1.97  |
| TRUE | 1/1 | 1/1 | 10.62 | 9.64  | 1.97  |
| TRUE | 1/1 | 1/1 | 10.62 | 9.64  | 1.97  |
| TRUE | 1/1 | 1/1 | 10.62 | 9.64  | 1.97  |
| TRUE | 1/1 | 1/1 | 10.62 | 9.64  | 1.97  |
| TRUE | 1/1 | 1/1 | 10.62 | 9.64  | 1.97  |
| TRUE | 1/1 | 1/1 | 10.62 | 9.64  | 1.97  |
| TRUE | 1/1 | 1/1 | 10.62 | 9.64  | 1.97  |
| TRUE | 1/1 | 1/1 | 7.83  | 6.96  | 1.83  |
| TRUE | 1/1 | 1/1 | 7.83  | 6.96  | 1.83  |
| TRUE | 1/1 | 1/1 | 7.83  | 6.96  | 1.83  |
| TRUE | 1/1 | 1/1 | 7.83  | 6.96  | 1.83  |
| TRUE | 1/1 | 1/1 | 7.83  | 6.96  | 1.83  |
| TRUE | 1/1 | 1/1 | 7.83  | 6.96  | 1.83  |
| TRUE | 1/1 | 1/1 | 7.83  | 6.96  | 1.83  |
| TRUE | 1/1 | 1/1 | 12.57 | 10.92 | 3.14  |
| TRUE | 1/1 | 1/1 | 12.57 | 10.92 | 3.14  |
| TRUE | 1/1 | 1/1 | 12.57 | 10.92 | 3.14  |
| TRUE | 1/1 | 1/1 | 6.16  | 6.43  | -1.21 |
| TRUE | 1/1 | 1/1 | 6.16  | 6.43  | -1.21 |
| TRUE | 1/1 | 1/1 | 8.93  | 8.8   | 1.1   |
| TRUE | 1/1 | 1/1 | 8.93  | 8.8   | 1.1   |
| TRUE | 1/1 | 1/1 | 8.93  | 8.8   | 1.1   |
| TRUE | 1/1 | 1/1 | 8.93  | 8.8   | 1.1   |
| TRUE | 1/1 | 1/1 | 5.26  | 4.91  | 1.27  |
| TRUE | 1/1 | 1/1 | 5.26  | 4.91  | 1.27  |
| TRUE | 1/1 | 1/1 | 6.94  | 6.53  | 1.32  |
| TRUE | 1/1 | 1/1 | 6.94  | 6.53  | 1.32  |
| TRUE | 1/1 | 1/1 | 6.94  | 6.53  | 1.32  |
| TRUE | 1/1 | 1/1 | 6.94  | 6.53  | 1.32  |
| TRUE | 1/1 | 1/1 | 9.26  | 7.92  | 2.53  |
| TRUE | 1/1 | 1/1 | 9.26  | 7.92  | 2.53  |
| TRUE | 1/1 | 1/1 | 9.26  | 7.92  | 2.53  |
| TRUE | 1/1 | 1/1 | 9.26  | 7.92  | 2.53  |
| TRUE | 1/1 | 1/1 | 9.26  | 7.92  | 2.53  |
| TRUE | 1/1 | 1/1 | 9.26  | 7.92  | 2.53  |
| TRUE | 1/1 | 1/1 | 9.26  | 7.92  | 2.53  |
| TRUE | 1/1 | 1/1 | 9.26  | 7.92  | 2.53  |
| TRUE | 1/1 | 1/1 | 9.26  | 7.92  | 2.53  |
| TRUE | 1/1 | 1/1 | 9.26  | 7.92  | 2.53  |
| TRUE | 1/1 | 1/1 | 9.26  | 7.92  | 2.53  |
| TRUE | 1/1 | 1/1 | 9.26  | 7.92  | 2.53  |
| TRUE | 1/1 | 1/1 | 9.26  | 7.92  | 2.53  |
| TRUE | 1/1 | 1/1 | 9.26  | 7.92  | 2.53  |
| TRUE | 1/1 | 1/1 | 9.26  | 7.92  | 2.53  |
| TRUE | 1/1 | 1/1 | 7.54  | 7.53  | 1     |
| TRUE | 1/1 | 1/1 | 7.54  | 7.53  | 1     |
| TRUE | 1/1 | 1/1 | 9.14  | 7.83  | 2.48  |
| TRUE | 1/1 | 1/1 | 9.14  | 7.83  | 2.48  |

|      |     |     |      |      |       |
|------|-----|-----|------|------|-------|
| TRUE | 1/1 | 1/1 | 9.14 | 7.83 | 2.48  |
| TRUE | 1/1 | 1/1 | 9.14 | 7.83 | 2.48  |
| TRUE | 1/1 | 1/1 | 9.14 | 7.83 | 2.48  |
| TRUE | 1/1 | 1/1 | 9.14 | 7.83 | 2.48  |
| TRUE | 1/1 | 1/1 | 9.14 | 7.83 | 2.48  |
| TRUE | 1/1 | 1/1 | 5.14 | 4.65 | 1.4   |
| TRUE | 1/1 | 1/1 | 5.14 | 4.65 | 1.4   |
| TRUE | 1/1 | 1/1 | 5.14 | 4.65 | 1.4   |
| TRUE | 1/1 | 1/1 | 6.94 | 7.2  | -1.2  |
| TRUE | 1/1 | 1/1 | 6.94 | 7.2  | -1.2  |
| TRUE | 1/1 | 1/1 | 7.12 | 7.75 | -1.55 |
| TRUE | 1/1 | 1/1 | 7.12 | 7.75 | -1.55 |
| TRUE | 1/1 | 1/1 | 7.12 | 7.75 | -1.55 |
| TRUE | 1/1 | 1/1 | 7.12 | 7.75 | -1.55 |
| TRUE | 1/1 | 1/1 | 7.52 | 5.98 | 2.92  |
| TRUE | 1/1 | 1/1 | 7.52 | 5.98 | 2.92  |
| TRUE | 1/1 | 1/1 | 7.52 | 5.98 | 2.92  |
| TRUE | 1/1 | 1/1 | 7.52 | 5.98 | 2.92  |
| TRUE | 1/1 | 1/1 | 7.52 | 5.98 | 2.92  |
| TRUE | 1/1 | 1/1 | 7.52 | 5.98 | 2.92  |
| TRUE | 1/1 | 1/1 | 7.52 | 5.98 | 2.92  |
| TRUE | 1/1 | 1/1 | 7.52 | 5.98 | 2.92  |
| TRUE | 1/1 | 1/1 | 7.52 | 5.98 | 2.92  |
| TRUE | 1/1 | 1/1 | 7.52 | 5.98 | 2.92  |
| TRUE | 1/1 | 1/1 | 7.52 | 5.98 | 2.92  |
| TRUE | 1/1 | 1/1 | 7.52 | 5.98 | 2.92  |
| TRUE | 1/1 | 1/1 | 7.52 | 5.98 | 2.92  |
| TRUE | 1/1 | 1/1 | 7.4  | 6.59 | 1.75  |
| TRUE | 1/1 | 1/1 | 7.4  | 6.59 | 1.75  |
| TRUE | 1/1 | 1/1 | 7.4  | 6.59 | 1.75  |
| TRUE | 1/1 | 1/1 | 7.4  | 6.59 | 1.75  |
| TRUE | 1/1 | 1/1 | 7.4  | 6.59 | 1.75  |
| TRUE | 1/1 | 1/1 | 8.27 | 6.98 | 2.44  |
| TRUE | 1/1 | 1/1 | 8.27 | 6.98 | 2.44  |
| TRUE | 1/1 | 1/1 | 8.27 | 6.98 | 2.44  |
| TRUE | 1/1 | 1/1 | 8.27 | 6.98 | 2.44  |
| TRUE | 1/1 | 1/1 | 8.27 | 6.98 | 2.44  |
| TRUE | 1/1 | 1/1 | 8.27 | 6.98 | 2.44  |
| TRUE | 1/1 | 1/1 | 8.27 | 6.98 | 2.44  |
| TRUE | 1/1 | 1/1 | 7.4  | 6.75 | 1.57  |
| TRUE | 1/1 | 1/1 | 7.4  | 6.75 | 1.57  |
| TRUE | 1/1 | 1/1 | 3.97 | 3.48 | 1.4   |
| TRUE | 1/1 | 1/1 | 3.97 | 3.48 | 1.4   |
| TRUE | 1/1 | 1/1 | 7.14 | 7.05 | 1.07  |
| TRUE | 1/1 | 1/1 | 7.14 | 7.05 | 1.07  |
| TRUE | 1/1 | 1/1 | 7.14 | 7.05 | 1.07  |
| TRUE | 1/1 | 1/1 | 7.14 | 7.05 | 1.07  |
| TRUE | 1/1 | 1/1 | 6.99 | 6.17 | 1.77  |
| TRUE | 1/1 | 1/1 | 6.99 | 6.17 | 1.77  |
| TRUE | 1/1 | 1/1 | 6.99 | 6.17 | 1.77  |
| TRUE | 1/1 | 1/1 | 6.99 | 6.17 | 1.77  |
| TRUE | 1/1 | 1/1 | 6.99 | 6.17 | 1.77  |
| TRUE | 1/1 | 1/1 | 6.99 | 6.17 | 1.77  |
| TRUE | 1/1 | 1/1 | 6.99 | 6.17 | 1.77  |
| TRUE | 1/1 | 1/1 | 6.99 | 6.17 | 1.77  |
| TRUE | 1/1 | 1/1 | 6.99 | 6.17 | 1.77  |
| TRUE | 1/1 | 1/1 | 6.99 | 6.17 | 1.77  |
| TRUE | 1/1 | 1/1 | 6.99 | 6.17 | 1.77  |
| TRUE | 1/1 | 1/1 | 6.99 | 6.17 | 1.77  |
| TRUE | 1/1 | 1/1 | 6.99 | 6.17 | 1.77  |
| TRUE | 1/1 | 1/1 | 6.72 | 6.53 | 1.15  |

|      |     |     |      |      |       |
|------|-----|-----|------|------|-------|
| TRUE | 1/1 | 1/1 | 6.72 | 6.53 | 1.15  |
| TRUE | 1/1 | 1/1 | 6.72 | 6.53 | 1.15  |
| TRUE | 1/1 | 1/1 | 8.8  | 6.75 | 4.15  |
| TRUE | 1/1 | 1/1 | 8.8  | 6.75 | 4.15  |
| TRUE | 1/1 | 1/1 | 8.8  | 6.75 | 4.15  |
| TRUE | 1/1 | 1/1 | 8.8  | 6.75 | 4.15  |
| TRUE | 1/1 | 1/1 | 8.8  | 6.75 | 4.15  |
| TRUE | 1/1 | 1/1 | 8.8  | 6.75 | 4.15  |
| TRUE | 1/1 | 1/1 | 8.8  | 6.75 | 4.15  |
| TRUE | 1/1 | 1/1 | 8.8  | 6.75 | 4.15  |
| TRUE | 1/1 | 1/1 | 8.8  | 6.75 | 4.15  |
| TRUE | 1/1 | 1/1 | 5.5  | 5.89 | -1.31 |
| TRUE | 1/1 | 1/1 | 5.5  | 5.89 | -1.31 |
| TRUE | 1/1 | 1/1 | 5.5  | 5.89 | -1.31 |
| TRUE | 1/1 | 1/1 | 5.96 | 6.07 | -1.08 |
| TRUE | 1/1 | 1/1 | 5.96 | 6.07 | -1.08 |
| TRUE | 1/1 | 1/1 | 5.96 | 6.07 | -1.08 |
| TRUE | 1/1 | 1/1 | 5.96 | 6.07 | -1.08 |
| TRUE | 1/1 | 1/1 | 5.96 | 6.07 | -1.08 |
| TRUE | 1/1 | 1/1 | 5.96 | 6.07 | -1.08 |
| TRUE | 1/1 | 1/1 | 5.96 | 6.07 | -1.08 |
| TRUE | 1/1 | 1/1 | 4.18 | 4.5  | -1.25 |
| TRUE | 1/1 | 1/1 | 4.18 | 4.5  | -1.25 |
| TRUE | 1/1 | 1/1 | 4.18 | 4.5  | -1.25 |
| TRUE | 1/1 | 1/1 | 4.18 | 4.5  | -1.25 |
| TRUE | 1/1 | 1/1 | 7.83 | 8.37 | -1.46 |
| TRUE | 1/1 | 1/1 | 7.83 | 8.37 | -1.46 |
| TRUE | 1/1 | 1/1 | 4.8  | 3.94 | 1.82  |
| TRUE | 1/1 | 1/1 | 4.8  | 3.94 | 1.82  |
| TRUE | 1/1 | 1/1 | 5.28 | 5.36 | -1.05 |
| TRUE | 1/1 | 1/1 | 5.28 | 5.36 | -1.05 |
| TRUE | 1/1 | 1/1 | 5.28 | 5.36 | -1.05 |
| TRUE | 1/1 | 1/1 | 7.29 | 6.35 | 1.92  |
| TRUE | 1/1 | 1/1 | 7.29 | 6.35 | 1.92  |
| TRUE | 1/1 | 1/1 | 7.29 | 6.35 | 1.92  |
| TRUE | 1/1 | 1/1 | 7.29 | 6.35 | 1.92  |
| TRUE | 1/1 | 1/1 | 7.29 | 6.35 | 1.92  |
| TRUE | 1/1 | 1/1 | 7.29 | 6.35 | 1.92  |
| TRUE | 1/1 | 1/1 | 7.29 | 6.35 | 1.92  |
| TRUE | 1/1 | 1/1 | 7.29 | 6.35 | 1.92  |
| TRUE | 1/1 | 1/1 | 7.54 | 7.35 | 1.14  |
| TRUE | 1/1 | 1/1 | 7.54 | 7.35 | 1.14  |
| TRUE | 1/1 | 1/1 | 7.31 | 6.95 | 1.29  |
| TRUE | 1/1 | 1/1 | 7.31 | 6.95 | 1.29  |
| TRUE | 1/1 | 1/1 | 7.31 | 6.95 | 1.29  |
| TRUE | 1/1 | 1/1 | 7.31 | 6.95 | 1.29  |
| TRUE | 1/1 | 1/1 | 6.51 | 5.57 | 1.91  |
| TRUE | 1/1 | 1/1 | 6.51 | 5.57 | 1.91  |
| TRUE | 1/1 | 1/1 | 6.51 | 5.57 | 1.91  |
| TRUE | 1/1 | 1/1 | 6.51 | 5.57 | 1.91  |
| TRUE | 1/1 | 1/1 | 7.5  | 6.5  | 2.01  |
| TRUE | 1/1 | 1/1 | 7.5  | 6.5  | 2.01  |
| TRUE | 1/1 | 1/1 | 7.5  | 6.5  | 2.01  |
| TRUE | 1/1 | 1/1 | 6.76 | 6.71 | 1.03  |
| TRUE | 1/1 | 1/1 | 6.76 | 6.71 | 1.03  |
| TRUE | 1/1 | 1/1 | 6.14 | 5.97 | 1.12  |
| TRUE | 1/1 | 1/1 | 6.14 | 5.97 | 1.12  |
| TRUE | 1/1 | 1/1 | 5.54 | 5.12 | 1.34  |
| TRUE | 1/1 | 1/1 | 5.54 | 5.12 | 1.34  |
| TRUE | 1/1 | 1/1 | 5.54 | 5.12 | 1.34  |





|      |     |     |       |       |       |
|------|-----|-----|-------|-------|-------|
| TRUE | 1/1 | 1/1 | 9.3   | 7.08  | 4.66  |
| TRUE | 1/1 | 1/1 | 9.3   | 7.08  | 4.66  |
| TRUE | 1/1 | 1/1 | 9.3   | 7.08  | 4.66  |
| TRUE | 1/1 | 1/1 | 9.3   | 7.08  | 4.66  |
| TRUE | 1/1 | 1/1 | 9.3   | 7.08  | 4.66  |
| TRUE | 1/1 | 1/1 | 9.3   | 7.08  | 4.66  |
| TRUE | 1/1 | 1/1 | 9.3   | 7.08  | 4.66  |
| TRUE | 1/1 | 1/1 | 9.3   | 7.08  | 4.66  |
| TRUE | 1/1 | 1/1 | 9.3   | 7.08  | 4.66  |
| TRUE | 1/1 | 1/1 | 9.3   | 7.08  | 4.66  |
| TRUE | 1/1 | 1/1 | 9.3   | 7.08  | 4.66  |
| TRUE | 1/1 | 1/1 | 9.3   | 7.08  | 4.66  |
| TRUE | 1/1 | 1/1 | 9.3   | 7.08  | 4.66  |
| TRUE | 1/1 | 1/1 | 9.3   | 7.08  | 4.66  |
| TRUE | 1/1 | 1/1 | 9.3   | 7.08  | 4.66  |
| TRUE | 1/1 | 1/1 | 7.84  | 7.77  | 1.05  |
| TRUE | 1/1 | 1/1 | 7.84  | 7.77  | 1.05  |
| TRUE | 1/1 | 1/1 | 7.84  | 7.77  | 1.05  |
| TRUE | 1/1 | 1/1 | 9.51  | 9.88  | -1.3  |
| TRUE | 1/1 | 1/1 | 9.51  | 9.88  | -1.3  |
| TRUE | 1/1 | 1/1 | 8.98  | 8.87  | 1.08  |
| TRUE | 1/1 | 1/1 | 8.98  | 8.87  | 1.08  |
| TRUE | 1/1 | 1/1 | 8.98  | 8.87  | 1.08  |
| TRUE | 1/1 | 1/1 | 8.98  | 8.87  | 1.08  |
| TRUE | 1/1 | 1/1 | 8.98  | 8.87  | 1.08  |
| TRUE | 1/1 | 1/1 | 8.98  | 8.87  | 1.08  |
| TRUE | 1/1 | 1/1 | 8.98  | 8.87  | 1.08  |
| TRUE | 1/1 | 1/1 | 8.98  | 8.87  | 1.08  |
| TRUE | 1/1 | 1/1 | 8.98  | 8.87  | 1.08  |
| TRUE | 1/1 | 1/1 | 8.98  | 8.87  | 1.08  |
| TRUE | 1/1 | 1/1 | 8.98  | 8.87  | 1.08  |
| TRUE | 1/1 | 1/1 | 8.89  | 8.2   | 1.61  |
| TRUE | 1/1 | 1/1 | 8.89  | 8.2   | 1.61  |
| TRUE | 1/1 | 1/1 | 4.61  | 5.19  | -1.5  |
| TRUE | 1/1 | 1/1 | 4.61  | 5.19  | -1.5  |
| TRUE | 1/1 | 1/1 | 6.37  | 7     | -1.54 |
| TRUE | 1/1 | 1/1 | 6.37  | 7     | -1.54 |
| TRUE | 1/1 | 1/1 | 6.37  | 7     | -1.54 |
| TRUE | 1/1 | 1/1 | 6.37  | 7     | -1.54 |
| TRUE | 1/1 | 1/1 | 10.99 | 10.26 | 1.66  |
| TRUE | 1/1 | 1/1 | 10.99 | 10.26 | 1.66  |
| TRUE | 1/1 | 1/1 | 7.43  | 7.46  | -1.02 |
| TRUE | 1/1 | 1/1 | 7.43  | 7.46  | -1.02 |
| TRUE | 1/1 | 1/1 | 7.43  | 7.46  | -1.02 |
| TRUE | 1/1 | 1/1 | 6.67  | 6.89  | -1.16 |
| TRUE | 1/1 | 1/1 | 6.67  | 6.89  | -1.16 |
| TRUE | 1/1 | 1/1 | 6.67  | 6.89  | -1.16 |
| TRUE | 1/1 | 1/1 | 6.67  | 6.89  | -1.16 |
| TRUE | 1/1 | 1/1 | 7.89  | 7.57  | 1.25  |
| TRUE | 1/1 | 1/1 | 7.89  | 7.57  | 1.25  |
| TRUE | 1/1 | 1/1 | 4.43  | 3.76  | 1.59  |
| TRUE | 1/1 | 1/1 | 4.43  | 3.76  | 1.59  |
| TRUE | 1/1 | 1/1 | 7.5   | 7.63  | -1.09 |
| TRUE | 1/1 | 1/1 | 7.5   | 7.63  | -1.09 |
| TRUE | 1/1 | 1/1 | 7.5   | 7.63  | -1.09 |
| TRUE | 1/1 | 1/1 | 7.5   | 7.63  | -1.09 |
| TRUE | 1/1 | 1/1 | 7.5   | 7.63  | -1.09 |
| TRUE | 1/1 | 1/1 | 8.64  | 8.75  | -1.08 |
| TRUE | 1/1 | 1/1 | 8.64  | 8.75  | -1.08 |
| TRUE | 1/1 | 1/1 | 3.61  | 2.5   | 2.16  |
| TRUE | 1/1 | 1/1 | 3.61  | 2.5   | 2.16  |
| TRUE | 1/1 | 1/1 | 3.61  | 2.5   | 2.16  |
| TRUE | 1/1 | 1/1 | 9.28  | 9.06  | 1.16  |

|      |     |     |       |       |       |
|------|-----|-----|-------|-------|-------|
| TRUE | 1/1 | 1/1 | 9.28  | 9.06  | 1.16  |
| TRUE | 1/1 | 1/1 | 7.12  | 6.16  | 1.95  |
| TRUE | 1/1 | 1/1 | 7.12  | 6.16  | 1.95  |
| TRUE | 1/1 | 1/1 | 7.12  | 6.16  | 1.95  |
| TRUE | 1/1 | 1/1 | 7.12  | 6.16  | 1.95  |
| TRUE | 1/1 | 1/1 | 7.12  | 6.16  | 1.95  |
| TRUE | 1/1 | 1/1 | 7.12  | 6.16  | 1.95  |
| TRUE | 1/1 | 1/1 | 7.12  | 6.16  | 1.95  |
| TRUE | 1/1 | 1/1 | 6.34  | 5.38  | 1.95  |
| TRUE | 1/1 | 1/1 | 6.34  | 5.38  | 1.95  |
| TRUE | 1/1 | 1/1 | 6.34  | 5.38  | 1.95  |
| TRUE | 1/1 | 1/1 | 6.34  | 5.38  | 1.95  |
| TRUE | 1/1 | 1/1 | 6.34  | 5.38  | 1.95  |
| TRUE | 1/1 | 1/1 | 6.92  | 6.49  | 1.35  |
| TRUE | 1/1 | 1/1 | 6.92  | 6.49  | 1.35  |
| TRUE | 1/1 | 1/1 | 6.92  | 6.49  | 1.35  |
| TRUE | 1/1 | 1/1 | 6.5   | 5.88  | 1.53  |
| TRUE | 1/1 | 1/1 | 6.5   | 5.88  | 1.53  |
| TRUE | 1/1 | 1/1 | 6.5   | 5.88  | 1.53  |
| TRUE | 1/1 | 1/1 | 8.82  | 8.31  | 1.43  |
| TRUE | 1/1 | 1/1 | 8.82  | 8.31  | 1.43  |
| TRUE | 1/1 | 1/1 | 8.82  | 8.31  | 1.43  |
| TRUE | 1/1 | 1/1 | 10.97 | 10.79 | 1.13  |
| TRUE | 1/1 | 1/1 | 10.97 | 10.79 | 1.13  |
| TRUE | 1/1 | 1/1 | 10.97 | 10.79 | 1.13  |
| TRUE | 1/1 | 1/1 | 8.36  | 6.24  | 4.33  |
| TRUE | 1/1 | 1/1 | 8.36  | 6.24  | 4.33  |
| TRUE | 1/1 | 1/1 | 8.36  | 6.24  | 4.33  |
| TRUE | 1/1 | 1/1 | 8.36  | 6.24  | 4.33  |
| TRUE | 1/1 | 1/1 | 8.36  | 6.24  | 4.33  |
| TRUE | 1/1 | 1/1 | 8.36  | 6.24  | 4.33  |
| TRUE | 1/1 | 1/1 | 10.64 | 10.58 | 1.04  |
| TRUE | 1/1 | 1/1 | 10.64 | 10.58 | 1.04  |
| TRUE | 1/1 | 1/1 | 5.64  | 5.17  | 1.38  |
| TRUE | 1/1 | 1/1 | 5.64  | 5.17  | 1.38  |
| TRUE | 1/1 | 1/1 | 5.64  | 5.17  | 1.38  |
| TRUE | 1/1 | 1/1 | 6.42  | 6.67  | -1.19 |
| TRUE | 1/1 | 1/1 | 6.42  | 6.67  | -1.19 |
| TRUE | 1/1 | 1/1 | 6.42  | 6.67  | -1.19 |
| TRUE | 1/1 | 1/1 | 6.42  | 6.67  | -1.19 |
| TRUE | 1/1 | 1/1 | 6.42  | 6.67  | -1.19 |
| TRUE | 1/1 | 1/1 | 6.42  | 6.67  | -1.19 |
| TRUE | 1/1 | 1/1 | 6.42  | 6.67  | -1.19 |
| TRUE | 1/1 | 1/1 | 6.42  | 6.67  | -1.19 |
| TRUE | 1/1 | 1/1 | 6.42  | 6.67  | -1.19 |
| TRUE | 1/1 | 1/1 | 7.01  | 5.12  | 3.69  |
| TRUE | 1/1 | 1/1 | 7.01  | 5.12  | 3.69  |
| TRUE | 1/1 | 1/1 | 7.01  | 5.12  | 3.69  |
| TRUE | 1/1 | 1/1 | 7.01  | 5.12  | 3.69  |
| TRUE | 1/1 | 1/1 | 7.01  | 5.12  | 3.69  |
| TRUE | 1/1 | 1/1 | 7.01  | 5.12  | 3.69  |
| TRUE | 1/1 | 1/1 | 7.01  | 5.12  | 3.69  |
| TRUE | 1/1 | 1/1 | 7.01  | 5.12  | 3.69  |
| TRUE | 1/1 | 1/1 | 7.01  | 5.12  | 3.69  |
| TRUE | 1/1 | 1/1 | 7.01  | 5.12  | 3.69  |
| TRUE | 1/1 | 1/1 | 7.01  | 5.12  | 3.69  |
| TRUE | 1/1 | 1/1 | 7.01  | 5.12  | 3.69  |
| TRUE | 1/1 | 1/1 | 7.01  | 5.12  | 3.69  |
| TRUE | 1/1 | 1/1 | 7.01  | 5.12  | 3.69  |
| TRUE | 1/1 | 1/1 | 7.01  | 5.12  | 3.69  |
| TRUE | 1/1 | 1/1 | 7.01  | 5.12  | 3.69  |
| TRUE | 1/1 | 1/1 | 7.01  | 5.12  | 3.69  |
| TRUE | 1/1 | 1/1 | 7.01  | 5.12  | 3.69  |
| TRUE | 1/1 | 1/1 | 7.01  | 5.12  | 3.69  |
| TRUE | 1/1 | 1/1 | 7.01  | 5.12  | 3.69  |
| TRUE | 1/1 | 1/1 | 7.01  | 5.12  | 3.69  |
| TRUE | 1/1 | 1/1 | 7.01  | 5.12  | 3.69  |
| TRUE | 1/1 | 1/1 | 7.01  | 5.12  | 3.69  |
| TRUE | 1/1 | 1/1 | 3.68  | 3.31  | 1.29  |
| TRUE | 1/1 | 1/1 | 3.68  | 3.31  | 1.29  |
| TRUE | 1/1 | 1/1 | 6.29  | 4.78  | 2.83  |
| TRUE | 1/1 | 1/1 | 6.29  | 4.78  | 2.83  |
| TRUE | 1/1 | 1/1 | 6.29  | 4.78  | 2.83  |
| TRUE | 1/1 | 1/1 | 6.29  | 4.78  | 2.83  |

|      |     |     |       |      |       |
|------|-----|-----|-------|------|-------|
| TRUE | 1/1 | 1/1 | 6.29  | 4.78 | 2.83  |
| TRUE | 1/1 | 1/1 | 6.29  | 4.78 | 2.83  |
| TRUE | 1/1 | 1/1 | 6.29  | 4.78 | 2.83  |
| TRUE | 1/1 | 1/1 | 6.29  | 4.78 | 2.83  |
| TRUE | 1/1 | 1/1 | 7.42  | 7.72 | -1.23 |
| TRUE | 1/1 | 1/1 | 7.42  | 7.72 | -1.23 |
| TRUE | 1/1 | 1/1 | 7.42  | 7.72 | -1.23 |
| TRUE | 1/1 | 1/1 | 7.42  | 7.72 | -1.23 |
| TRUE | 1/1 | 1/1 | 6.6   | 6.36 | 1.18  |
| TRUE | 1/1 | 1/1 | 6.6   | 6.36 | 1.18  |
| TRUE | 1/1 | 1/1 | 6.44  | 6.6  | -1.12 |
| TRUE | 1/1 | 1/1 | 6.44  | 6.6  | -1.12 |
| TRUE | 1/1 | 1/1 | 6.44  | 6.6  | -1.12 |
| TRUE | 1/1 | 1/1 | 6.15  | 6.6  | -1.37 |
| TRUE | 1/1 | 1/1 | 6.15  | 6.6  | -1.37 |
| TRUE | 1/1 | 1/1 | 6.19  | 5.12 | 2.11  |
| TRUE | 1/1 | 1/1 | 6.19  | 5.12 | 2.11  |
| TRUE | 1/1 | 1/1 | 6.19  | 5.12 | 2.11  |
| TRUE | 1/1 | 1/1 | 6.19  | 5.12 | 2.11  |
| TRUE | 1/1 | 1/1 | 6.19  | 5.12 | 2.11  |
| TRUE | 1/1 | 1/1 | 6.19  | 5.12 | 2.11  |
| TRUE | 1/1 | 1/1 | 6.19  | 5.12 | 2.11  |
| TRUE | 1/1 | 1/1 | 6.19  | 5.12 | 2.11  |
| TRUE | 1/1 | 1/1 | 6.19  | 5.12 | 2.11  |
| TRUE | 1/1 | 1/1 | 6.19  | 5.12 | 2.11  |
| TRUE | 1/1 | 1/1 | 6.19  | 5.12 | 2.11  |
| TRUE | 1/1 | 1/1 | 6.19  | 5.12 | 2.11  |
| TRUE | 1/1 | 1/1 | 6.19  | 5.12 | 2.11  |
| TRUE | 1/1 | 1/1 | 6.19  | 5.12 | 2.11  |
| TRUE | 1/1 | 1/1 | 6.19  | 5.12 | 2.11  |
| TRUE | 1/1 | 1/1 | 6.19  | 5.12 | 2.11  |
| TRUE | 1/1 | 1/1 | 6.19  | 5.12 | 2.11  |
| TRUE | 1/1 | 1/1 | 6.35  | 6.11 | 1.18  |
| TRUE | 1/1 | 1/1 | 6.35  | 6.11 | 1.18  |
| TRUE | 1/1 | 1/1 | 8.42  | 8.39 | 1.02  |
| TRUE | 1/1 | 1/1 | 8.42  | 8.39 | 1.02  |
| TRUE | 1/1 | 1/1 | 8.42  | 8.39 | 1.02  |
| TRUE | 1/1 | 1/1 | 8.42  | 8.39 | 1.02  |
| TRUE | 1/1 | 1/1 | 8.42  | 8.39 | 1.02  |
| TRUE | 1/1 | 1/1 | 6.48  | 5.98 | 1.42  |
| TRUE | 1/1 | 1/1 | 6.48  | 5.98 | 1.42  |
| TRUE | 1/1 | 1/1 | 10.54 | 9.41 | 2.2   |
| TRUE | 1/1 | 1/1 | 10.54 | 9.41 | 2.2   |
| TRUE | 1/1 | 1/1 | 10.54 | 9.41 | 2.2   |
| TRUE | 1/1 | 1/1 | 9.96  | 8.88 | 2.12  |
| TRUE | 1/1 | 1/1 | 9.96  | 8.88 | 2.12  |
| TRUE | 1/1 | 1/1 | 9.96  | 8.88 | 2.12  |
| TRUE | 1/1 | 1/1 | 9.96  | 8.88 | 2.12  |
| TRUE | 1/1 | 1/1 | 9.96  | 8.88 | 2.12  |
| TRUE | 1/1 | 1/1 | 9.96  | 8.88 | 2.12  |
| TRUE | 1/1 | 1/1 | 9.96  | 8.88 | 2.12  |
| TRUE | 1/1 | 1/1 | 9.96  | 8.88 | 2.12  |
| TRUE | 1/1 | 1/1 | 9.96  | 8.88 | 2.12  |
| TRUE | 1/1 | 1/1 | 9.96  | 8.88 | 2.12  |
| TRUE | 1/1 | 1/1 | 6.07  | 6.49 | -1.34 |
| TRUE | 1/1 | 1/1 | 6.07  | 6.49 | -1.34 |
| TRUE | 1/1 | 1/1 | 9.59  | 8.13 | 2.76  |
| TRUE | 1/1 | 1/1 | 9.59  | 8.13 | 2.76  |
| TRUE | 1/1 | 1/1 | 9.59  | 8.13 | 2.76  |
| TRUE | 1/1 | 1/1 | 9.59  | 8.13 | 2.76  |
| TRUE | 1/1 | 1/1 | 5.77  | 6.17 | -1.32 |
| TRUE | 1/1 | 1/1 | 5.77  | 6.17 | -1.32 |
| TRUE | 1/1 | 1/1 | 5.77  | 6.17 | -1.32 |

|      |     |     |       |      |       |
|------|-----|-----|-------|------|-------|
| TRUE | 1/1 | 1/1 | 5.8   | 4.79 | 2.01  |
| TRUE | 1/1 | 1/1 | 5.8   | 4.79 | 2.01  |
| TRUE | 1/1 | 1/1 | 5.8   | 4.79 | 2.01  |
| TRUE | 1/1 | 1/1 | 5.8   | 4.79 | 2.01  |
| TRUE | 1/1 | 1/1 | 6.43  | 6.69 | -1.2  |
| TRUE | 1/1 | 1/1 | 6.43  | 6.69 | -1.2  |
| TRUE | 1/1 | 1/1 | 6.43  | 6.69 | -1.2  |
| TRUE | 1/1 | 1/1 | 6.43  | 6.69 | -1.2  |
| TRUE | 1/1 | 1/1 | 4.67  | 4.02 | 1.56  |
| TRUE | 1/1 | 1/1 | 4.67  | 4.02 | 1.56  |
| TRUE | 1/1 | 1/1 | 7.73  | 5.96 | 3.41  |
| TRUE | 1/1 | 1/1 | 7.73  | 5.96 | 3.41  |
| TRUE | 1/1 | 1/1 | 7.73  | 5.96 | 3.41  |
| TRUE | 1/1 | 1/1 | 7.73  | 5.96 | 3.41  |
| TRUE | 1/1 | 1/1 | 7.73  | 5.96 | 3.41  |
| TRUE | 1/1 | 1/1 | 7.73  | 5.96 | 3.41  |
| TRUE | 1/1 | 1/1 | 7.73  | 5.96 | 3.41  |
| TRUE | 1/1 | 1/1 | 7.73  | 5.96 | 3.41  |
| TRUE | 1/1 | 1/1 | 7.73  | 5.96 | 3.41  |
| TRUE | 1/1 | 1/1 | 7.73  | 5.96 | 3.41  |
| TRUE | 1/1 | 1/1 | 7.73  | 5.96 | 3.41  |
| TRUE | 1/1 | 1/1 | 7.73  | 5.96 | 3.41  |
| TRUE | 1/1 | 1/1 | 7.73  | 5.96 | 3.41  |
| TRUE | 1/1 | 1/1 | 7.73  | 5.96 | 3.41  |
| TRUE | 1/1 | 1/1 | 5.6   | 5.01 | 1.5   |
| TRUE | 1/1 | 1/1 | 5.6   | 5.01 | 1.5   |
| TRUE | 1/1 | 1/1 | 8.44  | 7.33 | 2.16  |
| TRUE | 1/1 | 1/1 | 8.44  | 7.33 | 2.16  |
| TRUE | 1/1 | 1/1 | 8.44  | 7.33 | 2.16  |
| TRUE | 1/1 | 1/1 | 8.39  | 8.12 | 1.2   |
| TRUE | 1/1 | 1/1 | 8.39  | 8.12 | 1.2   |
| TRUE | 1/1 | 1/1 | 10.07 | 8.62 | 2.74  |
| TRUE | 1/1 | 1/1 | 10.07 | 8.62 | 2.74  |
| TRUE | 1/1 | 1/1 | 10.07 | 8.62 | 2.74  |
| TRUE | 1/1 | 1/1 | 10.07 | 8.62 | 2.74  |
| TRUE | 1/1 | 1/1 | 10.07 | 8.62 | 2.74  |
| TRUE | 1/1 | 1/1 | 10.07 | 8.62 | 2.74  |
| TRUE | 1/1 | 1/1 | 10.07 | 8.62 | 2.74  |
| TRUE | 1/1 | 1/1 | 10.07 | 8.62 | 2.74  |
| TRUE | 1/1 | 1/1 | 10.07 | 8.62 | 2.74  |
| TRUE | 1/1 | 1/1 | 7.22  | 6.49 | 1.66  |
| TRUE | 1/1 | 1/1 | 7.22  | 6.49 | 1.66  |
| TRUE | 1/1 | 1/1 | 7.22  | 6.49 | 1.66  |
| TRUE | 1/1 | 1/1 | 5.83  | 4.61 | 2.33  |
| TRUE | 1/1 | 1/1 | 5.83  | 4.61 | 2.33  |
| TRUE | 1/1 | 1/1 | 5.83  | 4.61 | 2.33  |
| TRUE | 1/1 | 1/1 | 8.13  | 7.67 | 1.38  |
| TRUE | 1/1 | 1/1 | 8.13  | 7.67 | 1.38  |
| TRUE | 1/1 | 1/1 | 5.28  | 4.84 | 1.36  |
| TRUE | 1/1 | 1/1 | 5.28  | 4.84 | 1.36  |
| TRUE | 1/1 | 1/1 | 4.67  | 5.08 | -1.33 |
| TRUE | 1/1 | 1/1 | 4.67  | 5.08 | -1.33 |
| TRUE | 1/1 | 1/1 | 4.67  | 5.08 | -1.33 |
| TRUE | 1/1 | 1/1 | 4.67  | 5.08 | -1.33 |
| TRUE | 1/1 | 1/1 | 7.11  | 7.33 | -1.16 |
| TRUE | 1/1 | 1/1 | 7.11  | 7.33 | -1.16 |
| TRUE | 1/1 | 1/1 | 7.13  | 7.57 | -1.36 |
| TRUE | 1/1 | 1/1 | 7.13  | 7.57 | -1.36 |
| TRUE | 1/1 | 1/1 | 5.54  | 4.33 | 2.31  |
| TRUE | 1/1 | 1/1 | 5.54  | 4.33 | 2.31  |
| TRUE | 1/1 | 1/1 | 5.54  | 4.33 | 2.31  |
| TRUE | 1/1 | 1/1 | 5.54  | 4.33 | 2.31  |



|      |     |     |       |       |       |
|------|-----|-----|-------|-------|-------|
| TRUE | 1/1 | 1/1 | 5.15  | 4.04  | 2.16  |
| TRUE | 1/1 | 1/1 | 5.15  | 4.04  | 2.16  |
| TRUE | 1/1 | 1/1 | 5.15  | 4.04  | 2.16  |
| TRUE | 1/1 | 1/1 | 5.15  | 4.04  | 2.16  |
| TRUE | 1/1 | 1/1 | 7.58  | 6.21  | 2.58  |
| TRUE | 1/1 | 1/1 | 7.58  | 6.21  | 2.58  |
| TRUE | 1/1 | 1/1 | 7.58  | 6.21  | 2.58  |
| TRUE | 1/1 | 1/1 | 7.58  | 6.21  | 2.58  |
| TRUE | 1/1 | 1/1 | 7.58  | 6.21  | 2.58  |
| TRUE | 1/1 | 1/1 | 3.99  | 3.46  | 1.45  |
| TRUE | 1/1 | 1/1 | 3.99  | 3.46  | 1.45  |
| TRUE | 1/1 | 1/1 | 3.99  | 3.46  | 1.45  |
| TRUE | 1/1 | 1/1 | 8.84  | 8.65  | 1.14  |
| TRUE | 1/1 | 1/1 | 8.84  | 8.65  | 1.14  |
| TRUE | 1/1 | 1/1 | 8.84  | 8.65  | 1.14  |
| TRUE | 1/1 | 1/1 | 8.65  | 6.7   | 3.86  |
| TRUE | 1/1 | 1/1 | 8.65  | 6.7   | 3.86  |
| TRUE | 1/1 | 1/1 | 8.65  | 6.7   | 3.86  |
| TRUE | 1/1 | 1/1 | 8.65  | 6.7   | 3.86  |
| TRUE | 1/1 | 1/1 | 8.65  | 6.7   | 3.86  |
| TRUE | 1/1 | 1/1 | 8.65  | 6.7   | 3.86  |
| TRUE | 1/1 | 1/1 | 8.65  | 6.7   | 3.86  |
| TRUE | 1/1 | 1/1 | 8.65  | 6.7   | 3.86  |
| TRUE | 1/1 | 1/1 | 8.65  | 6.7   | 3.86  |
| TRUE | 1/1 | 1/1 | 8.65  | 6.7   | 3.86  |
| TRUE | 1/1 | 1/1 | 8.65  | 6.7   | 3.86  |
| TRUE | 1/1 | 1/1 | 8.65  | 6.7   | 3.86  |
| TRUE | 1/1 | 1/1 | 8.65  | 6.7   | 3.86  |
| TRUE | 1/1 | 1/1 | 8.65  | 6.7   | 3.86  |
| TRUE | 1/1 | 1/1 | 8.65  | 6.7   | 3.86  |
| TRUE | 1/1 | 1/1 | 8.65  | 6.7   | 3.86  |
| TRUE | 1/1 | 1/1 | 7.28  | 6.99  | 1.22  |
| TRUE | 1/1 | 1/1 | 7.28  | 6.99  | 1.22  |
| TRUE | 1/1 | 1/1 | 7.28  | 6.99  | 1.22  |
| TRUE | 1/1 | 1/1 | 7.28  | 6.99  | 1.22  |
| TRUE | 1/1 | 1/1 | 4.45  | 3.47  | 1.97  |
| TRUE | 1/1 | 1/1 | 4.45  | 3.47  | 1.97  |
| TRUE | 1/1 | 1/1 | 4.45  | 3.47  | 1.97  |
| TRUE | 1/1 | 1/1 | 4.45  | 3.47  | 1.97  |
| TRUE | 1/1 | 1/1 | 10.44 | 9.07  | 2.59  |
| TRUE | 1/1 | 1/1 | 10.44 | 9.07  | 2.59  |
| TRUE | 1/1 | 1/1 | 10.44 | 9.07  | 2.59  |
| TRUE | 1/1 | 1/1 | 10.44 | 9.07  | 2.59  |
| TRUE | 1/1 | 1/1 | 10.44 | 9.07  | 2.59  |
| TRUE | 1/1 | 1/1 | 10.44 | 9.07  | 2.59  |
| TRUE | 1/1 | 1/1 | 6.38  | 6.16  | 1.17  |
| TRUE | 1/1 | 1/1 | 6.38  | 6.16  | 1.17  |
| TRUE | 1/1 | 1/1 | 6.09  | 5.6   | 1.4   |
| TRUE | 1/1 | 1/1 | 6.09  | 5.6   | 1.4   |
| TRUE | 1/1 | 1/1 | 11.71 | 10.88 | 1.78  |
| TRUE | 1/1 | 1/1 | 11.71 | 10.88 | 1.78  |
| TRUE | 1/1 | 1/1 | 7.5   | 7.83  | -1.26 |
| TRUE | 1/1 | 1/1 | 7.5   | 7.83  | -1.26 |
| TRUE | 1/1 | 1/1 | 7.54  | 7.47  | 1.05  |
| TRUE | 1/1 | 1/1 | 7.54  | 7.47  | 1.05  |
| TRUE | 1/1 | 1/1 | 7.54  | 7.47  | 1.05  |
| TRUE | 1/1 | 1/1 | 7.54  | 7.47  | 1.05  |

|      |     |     |       |      |       |
|------|-----|-----|-------|------|-------|
| TRUE | 1/1 | 1/1 | 7.54  | 7.47 | 1.05  |
| TRUE | 1/1 | 1/1 | 7.54  | 7.47 | 1.05  |
| TRUE | 1/1 | 1/1 | 7.54  | 7.47 | 1.05  |
| TRUE | 1/1 | 1/1 | 7.54  | 7.47 | 1.05  |
| TRUE | 1/1 | 1/1 | 6.37  | 7.1  | -1.66 |
| TRUE | 1/1 | 1/1 | 6.37  | 7.1  | -1.66 |
| TRUE | 1/1 | 1/1 | 6.37  | 7.1  | -1.66 |
| TRUE | 1/1 | 1/1 | 6.54  | 5.39 | 2.21  |
| TRUE | 1/1 | 1/1 | 6.54  | 5.39 | 2.21  |
| TRUE | 1/1 | 1/1 | 6.54  | 5.39 | 2.21  |
| TRUE | 1/1 | 1/1 | 8.11  | 3.92 | 18.36 |
| TRUE | 1/1 | 1/1 | 8.11  | 3.92 | 18.36 |
| TRUE | 1/1 | 1/1 | 8.11  | 3.92 | 18.36 |
| TRUE | 1/1 | 1/1 | 7.36  | 6.95 | 1.33  |
| TRUE | 1/1 | 1/1 | 7.36  | 6.95 | 1.33  |
| TRUE | 1/1 | 1/1 | 7.36  | 6.95 | 1.33  |
| TRUE | 1/1 | 1/1 | 8.15  | 7.97 | 1.13  |
| TRUE | 1/1 | 1/1 | 8.15  | 7.97 | 1.13  |
| TRUE | 1/1 | 1/1 | 8.15  | 7.97 | 1.13  |
| TRUE | 1/1 | 1/1 | 8.15  | 7.97 | 1.13  |
| TRUE | 1/1 | 1/1 | 3.44  | 3.7  | -1.2  |
| TRUE | 1/1 | 1/1 | 3.44  | 3.7  | -1.2  |
| TRUE | 1/1 | 1/1 | 6.45  | 6.57 | -1.08 |
| TRUE | 1/1 | 1/1 | 6.45  | 6.57 | -1.08 |
| TRUE | 1/1 | 1/1 | 5.45  | 4.89 | 1.47  |
| TRUE | 1/1 | 1/1 | 5.45  | 4.89 | 1.47  |
| TRUE | 1/1 | 1/1 | 9.22  | 6.43 | 6.91  |
| TRUE | 1/1 | 1/1 | 9.22  | 6.43 | 6.91  |
| TRUE | 1/1 | 1/1 | 9.22  | 6.43 | 6.91  |
| TRUE | 1/1 | 1/1 | 9.22  | 6.43 | 6.91  |
| TRUE | 1/1 | 1/1 | 9.22  | 6.43 | 6.91  |
| TRUE | 1/1 | 1/1 | 9.22  | 6.43 | 6.91  |
| TRUE | 1/1 | 1/1 | 6.48  | 6.37 | 1.08  |
| TRUE | 1/1 | 1/1 | 6.48  | 6.37 | 1.08  |
| TRUE | 1/1 | 1/1 | 8.15  | 6.74 | 2.65  |
| TRUE | 1/1 | 1/1 | 8.15  | 6.74 | 2.65  |
| TRUE | 1/1 | 1/1 | 8.15  | 6.74 | 2.65  |
| TRUE | 1/1 | 1/1 | 8.15  | 6.74 | 2.65  |
| TRUE | 1/1 | 1/1 | 8.15  | 6.74 | 2.65  |
| TRUE | 1/1 | 1/1 | 8.15  | 6.74 | 2.65  |
| TRUE | 1/1 | 1/1 | 7.35  | 6.86 | 1.41  |
| TRUE | 1/1 | 1/1 | 7.35  | 6.86 | 1.41  |
| TRUE | 1/1 | 1/1 | 4.5   | 3.06 | 2.73  |
| TRUE | 1/1 | 1/1 | 4.5   | 3.06 | 2.73  |
| TRUE | 1/1 | 1/1 | 4.5   | 3.06 | 2.73  |
| TRUE | 1/1 | 1/1 | 4.5   | 3.06 | 2.73  |
| TRUE | 1/1 | 1/1 | 5.35  | 4.95 | 1.32  |
| TRUE | 1/1 | 1/1 | 5.35  | 4.95 | 1.32  |
| TRUE | 1/1 | 1/1 | 7.27  | 7.06 | 1.16  |
| TRUE | 1/1 | 1/1 | 7.27  | 7.06 | 1.16  |
| TRUE | 1/1 | 1/1 | 9.14  | 7.93 | 2.32  |
| TRUE | 1/1 | 1/1 | 9.14  | 7.93 | 2.32  |
| TRUE | 1/1 | 1/1 | 9.14  | 7.93 | 2.32  |
| TRUE | 1/1 | 1/1 | 9.14  | 7.93 | 2.32  |
| TRUE | 1/1 | 1/1 | 9.14  | 7.93 | 2.32  |
| TRUE | 1/1 | 1/1 | 9.14  | 7.93 | 2.32  |
| TRUE | 1/1 | 1/1 | 10.11 | 8.82 | 2.43  |





|      |     |     |       |      |       |
|------|-----|-----|-------|------|-------|
| TRUE | 1/1 | 1/1 | 7.03  | 5.89 | 2.2   |
| TRUE | 1/1 | 1/1 | 7.03  | 5.89 | 2.2   |
| TRUE | 1/1 | 1/1 | 7.03  | 5.89 | 2.2   |
| TRUE | 1/1 | 1/1 | 7.03  | 5.89 | 2.2   |
| TRUE | 1/1 | 1/1 | 7.03  | 5.89 | 2.2   |
| TRUE | 1/1 | 1/1 | 7.03  | 5.89 | 2.2   |
| TRUE | 1/1 | 1/1 | 4.29  | 3.84 | 1.36  |
| TRUE | 1/1 | 1/1 | 4.29  | 3.84 | 1.36  |
| TRUE | 1/1 | 1/1 | 5.87  | 5.52 | 1.27  |
| TRUE | 1/1 | 1/1 | 5.87  | 5.52 | 1.27  |
| TRUE | 1/1 | 1/1 | 6.59  | 5.23 | 2.57  |
| TRUE | 1/1 | 1/1 | 6.59  | 5.23 | 2.57  |
| TRUE | 1/1 | 1/1 | 6.59  | 5.23 | 2.57  |
| TRUE | 1/1 | 1/1 | 8.99  | 9.18 | -1.15 |
| TRUE | 1/1 | 1/1 | 8.99  | 9.18 | -1.15 |
| TRUE | 1/1 | 1/1 | 8.99  | 9.18 | -1.15 |
| TRUE | 1/1 | 1/1 | 8.99  | 9.18 | -1.15 |
| TRUE | 1/1 | 1/1 | 8.99  | 9.18 | -1.15 |
| TRUE | 1/1 | 1/1 | 8.99  | 9.18 | -1.15 |
| TRUE | 1/1 | 1/1 | 8.31  | 7.35 | 1.95  |
| TRUE | 1/1 | 1/1 | 8.31  | 7.35 | 1.95  |
| TRUE | 1/1 | 1/1 | 5.82  | 5.93 | -1.08 |
| TRUE | 1/1 | 1/1 | 5.82  | 5.93 | -1.08 |
| TRUE | 1/1 | 1/1 | 5.82  | 5.93 | -1.08 |
| TRUE | 1/1 | 1/1 | 5.82  | 5.93 | -1.08 |
| TRUE | 1/1 | 1/1 | 9.09  | 8.68 | 1.32  |
| TRUE | 1/1 | 1/1 | 9.09  | 8.68 | 1.32  |
| TRUE | 1/1 | 1/1 | 9.09  | 8.68 | 1.32  |
| TRUE | 1/1 | 1/1 | 6.17  | 6.12 | 1.03  |
| TRUE | 1/1 | 1/1 | 6.17  | 6.12 | 1.03  |
| TRUE | 1/1 | 1/1 | 6.17  | 6.12 | 1.03  |
| TRUE | 1/1 | 1/1 | 6.17  | 6.12 | 1.03  |
| TRUE | 1/1 | 1/1 | 12.98 | 9.17 | 14.02 |
| TRUE | 1/1 | 1/1 | 12.98 | 9.17 | 14.02 |
| TRUE | 1/1 | 1/1 | 12.98 | 9.17 | 14.02 |
| TRUE | 1/1 | 1/1 | 12.98 | 9.17 | 14.02 |
| TRUE | 1/1 | 1/1 | 4.92  | 4.51 | 1.33  |
| TRUE | 1/1 | 1/1 | 4.92  | 4.51 | 1.33  |
| TRUE | 1/1 | 1/1 | 6.71  | 7.5  | -1.72 |
| TRUE | 1/1 | 1/1 | 6.71  | 7.5  | -1.72 |
| TRUE | 1/1 | 1/1 | 6.71  | 7.5  | -1.72 |
| TRUE | 1/1 | 1/1 | 6.71  | 7.5  | -1.72 |
| TRUE | 1/1 | 1/1 | 6.71  | 7.5  | -1.72 |
| TRUE | 1/1 | 1/1 | 7.06  | 7.22 | -1.12 |
| TRUE | 1/1 | 1/1 | 7.06  | 7.22 | -1.12 |
| TRUE | 1/1 | 1/1 | 7.06  | 7.22 | -1.12 |
| TRUE | 1/1 | 1/1 | 7.06  | 7.22 | -1.12 |
| TRUE | 1/1 | 1/1 | 7.06  | 7.22 | -1.12 |
| TRUE | 1/1 | 1/1 | 7.06  | 7.22 | -1.12 |
| TRUE | 1/1 | 1/1 | 7.31  | 6.18 | 2.19  |
| TRUE | 1/1 | 1/1 | 7.31  | 6.18 | 2.19  |
| TRUE | 1/1 | 1/1 | 7.01  | 7.01 | -1    |
| TRUE | 1/1 | 1/1 | 7.01  | 7.01 | -1    |
| TRUE | 1/1 | 1/1 | 7.01  | 7.01 | -1    |
| TRUE | 1/1 | 1/1 | 8.87  | 6.48 | 5.24  |
| TRUE | 1/1 | 1/1 | 8.87  | 6.48 | 5.24  |
| TRUE | 1/1 | 1/1 | 8.87  | 6.48 | 5.24  |

|      |     |     |       |       |       |
|------|-----|-----|-------|-------|-------|
| TRUE | 1/1 | 1/1 | 8.87  | 6.48  | 5.24  |
| TRUE | 1/1 | 1/1 | 5.87  | 5.88  | -1    |
| TRUE | 1/1 | 1/1 | 5.87  | 5.88  | -1    |
| TRUE | 1/1 | 1/1 | 5.87  | 5.88  | -1    |
| TRUE | 1/1 | 1/1 | 4.09  | 4.04  | 1.04  |
| TRUE | 1/1 | 1/1 | 4.09  | 4.04  | 1.04  |
| TRUE | 1/1 | 1/1 | 6.56  | 6.29  | 1.21  |
| TRUE | 1/1 | 1/1 | 6.56  | 6.29  | 1.21  |
| TRUE | 1/1 | 1/1 | 6.56  | 6.29  | 1.21  |
| TRUE | 1/1 | 1/1 | 5.55  | 4.43  | 2.18  |
| TRUE | 1/1 | 1/1 | 5.55  | 4.43  | 2.18  |
| TRUE | 1/1 | 1/1 | 5.55  | 4.43  | 2.18  |
| TRUE | 1/1 | 1/1 | 5.55  | 4.43  | 2.18  |
| TRUE | 1/1 | 1/1 | 5.55  | 4.43  | 2.18  |
| TRUE | 1/1 | 1/1 | 6.66  | 6.45  | 1.15  |
| TRUE | 1/1 | 1/1 | 6.66  | 6.45  | 1.15  |
| TRUE | 1/1 | 1/1 | 6.66  | 6.45  | 1.15  |
| TRUE | 1/1 | 1/1 | 6.66  | 6.45  | 1.15  |
| TRUE | 1/1 | 1/1 | 6.66  | 6.45  | 1.15  |
| TRUE | 1/1 | 1/1 | 5.49  | 5.67  | -1.13 |
| TRUE | 1/1 | 1/1 | 5.49  | 5.67  | -1.13 |
| TRUE | 1/1 | 1/1 | 5.49  | 5.67  | -1.13 |
| TRUE | 1/1 | 1/1 | 11.04 | 10.68 | 1.28  |
| TRUE | 1/1 | 1/1 | 11.04 | 10.68 | 1.28  |
| TRUE | 1/1 | 1/1 | 11.04 | 10.68 | 1.28  |
| TRUE | 1/1 | 1/1 | 11.04 | 10.68 | 1.28  |
| TRUE | 1/1 | 1/1 | 11.04 | 10.68 | 1.28  |
| TRUE | 1/1 | 1/1 | 7.15  | 6.01  | 2.21  |
| TRUE | 1/1 | 1/1 | 7.15  | 6.01  | 2.21  |
| TRUE | 1/1 | 1/1 | 4.52  | 3.65  | 1.82  |
| TRUE | 1/1 | 1/1 | 4.52  | 3.65  | 1.82  |
| TRUE | 1/1 | 1/1 | 7.47  | 7.72  | -1.18 |
| TRUE | 1/1 | 1/1 | 7.47  | 7.72  | -1.18 |
| TRUE | 1/1 | 1/1 | 9.23  | 9.88  | -1.57 |
| TRUE | 1/1 | 1/1 | 9.23  | 9.88  | -1.57 |
| TRUE | 1/1 | 1/1 | 4.52  | 3.54  | 1.98  |
| TRUE | 1/1 | 1/1 | 4.52  | 3.54  | 1.98  |
| TRUE | 1/1 | 1/1 | 4.52  | 3.54  | 1.98  |
| TRUE | 1/1 | 1/1 | 7.49  | 4.91  | 5.98  |
| TRUE | 1/1 | 1/1 | 7.49  | 4.91  | 5.98  |
| TRUE | 1/1 | 1/1 | 7.49  | 4.91  | 5.98  |
| TRUE | 1/1 | 1/1 | 7.49  | 4.91  | 5.98  |
| TRUE | 1/1 | 1/1 | 7.49  | 4.91  | 5.98  |
| TRUE | 1/1 | 1/1 | 7.49  | 4.91  | 5.98  |
| TRUE | 1/1 | 1/1 | 7.49  | 4.91  | 5.98  |
| TRUE | 1/1 | 1/1 | 7.49  | 4.91  | 5.98  |
| TRUE | 1/1 | 1/1 | 7.49  | 4.91  | 5.98  |
| TRUE | 1/1 | 1/1 | 7.49  | 4.91  | 5.98  |
| TRUE | 1/1 | 1/1 | 7.49  | 4.91  | 5.98  |
| TRUE | 1/1 | 1/1 | 7.49  | 4.91  | 5.98  |
| TRUE | 1/1 | 1/1 | 7.49  | 4.91  | 5.98  |
| TRUE | 1/1 | 1/1 | 5.41  | 4.96  | 1.37  |
| TRUE | 1/1 | 1/1 | 5.41  | 4.96  | 1.37  |
| TRUE | 1/1 | 1/1 | 5.41  | 4.96  | 1.37  |
| TRUE | 1/1 | 1/1 | 5.49  | 5.14  | 1.28  |
| TRUE | 1/1 | 1/1 | 5.49  | 5.14  | 1.28  |
| TRUE | 1/1 | 1/1 | 6.96  | 6.48  | 1.39  |
| TRUE | 1/1 | 1/1 | 6.96  | 6.48  | 1.39  |
| TRUE | 1/1 | 1/1 | 6.96  | 6.48  | 1.39  |
| TRUE | 1/1 | 1/1 | 6.96  | 6.48  | 1.39  |
| TRUE | 1/1 | 1/1 | 6.96  | 6.48  | 1.39  |

|      |     |     |      |      |       |
|------|-----|-----|------|------|-------|
| TRUE | 1/1 | 1/1 | 6.96 | 6.48 | 1.39  |
| TRUE | 1/1 | 1/1 | 6.96 | 6.48 | 1.39  |
| TRUE | 1/1 | 1/1 | 5.9  | 6.53 | -1.55 |
| TRUE | 1/1 | 1/1 | 5.9  | 6.53 | -1.55 |
| TRUE | 1/1 | 1/1 | 5.9  | 6.53 | -1.55 |
| TRUE | 1/1 | 1/1 | 5.9  | 6.53 | -1.55 |
| TRUE | 1/1 | 1/1 | 5.9  | 6.53 | -1.55 |
| TRUE | 1/1 | 1/1 | 5.9  | 6.53 | -1.55 |
| TRUE | 1/1 | 1/1 | 6.95 | 7.61 | -1.57 |
| TRUE | 1/1 | 1/1 | 6.95 | 7.61 | -1.57 |
| TRUE | 1/1 | 1/1 | 6.95 | 7.61 | -1.57 |
| TRUE | 1/1 | 1/1 | 6.95 | 7.61 | -1.57 |
| TRUE | 1/1 | 1/1 | 6.95 | 7.61 | -1.57 |
| TRUE | 1/1 | 1/1 | 6.95 | 7.61 | -1.57 |
| TRUE | 1/1 | 1/1 | 5.9  | 4.04 | 3.61  |
| TRUE | 1/1 | 1/1 | 5.9  | 4.04 | 3.61  |
| TRUE | 1/1 | 1/1 | 5.9  | 4.04 | 3.61  |
| TRUE | 1/1 | 1/1 | 5.9  | 4.04 | 3.61  |
| TRUE | 1/1 | 1/1 | 5.9  | 4.04 | 3.61  |
| TRUE | 1/1 | 1/1 | 5.9  | 4.04 | 3.61  |
| TRUE | 1/1 | 1/1 | 7.65 | 7.17 | 1.4   |
| TRUE | 1/1 | 1/1 | 7.65 | 7.17 | 1.4   |
| TRUE | 1/1 | 1/1 | 5.88 | 4.55 | 2.53  |
| TRUE | 1/1 | 1/1 | 5.88 | 4.55 | 2.53  |
| TRUE | 1/1 | 1/1 | 5.88 | 4.55 | 2.53  |
| TRUE | 1/1 | 1/1 | 5.88 | 4.55 | 2.53  |
| TRUE | 1/1 | 1/1 | 5.88 | 4.55 | 2.53  |
| TRUE | 1/1 | 1/1 | 5.88 | 4.55 | 2.53  |
| TRUE | 1/1 | 1/1 | 5.88 | 4.55 | 2.53  |
| TRUE | 1/1 | 1/1 | 5.88 | 4.55 | 2.53  |
| TRUE | 1/1 | 1/1 | 5.88 | 4.55 | 2.53  |
| TRUE | 1/1 | 1/1 | 5.88 | 4.55 | 2.53  |
| TRUE | 1/1 | 1/1 | 5.88 | 4.55 | 2.53  |
| TRUE | 1/1 | 1/1 | 7.32 | 7.28 | 1.03  |
| TRUE | 1/1 | 1/1 | 7.32 | 7.28 | 1.03  |
| TRUE | 1/1 | 1/1 | 7.32 | 7.28 | 1.03  |
| TRUE | 1/1 | 1/1 | 7.52 | 5.72 | 3.47  |
| TRUE | 1/1 | 1/1 | 7.52 | 5.72 | 3.47  |
| TRUE | 1/1 | 1/1 | 7.52 | 5.72 | 3.47  |
| TRUE | 1/1 | 1/1 | 7.52 | 5.72 | 3.47  |
| TRUE | 1/1 | 1/1 | 7.52 | 5.72 | 3.47  |
| TRUE | 1/1 | 1/1 | 7.52 | 5.72 | 3.47  |
| TRUE | 1/1 | 1/1 | 7.52 | 5.72 | 3.47  |
| TRUE | 1/1 | 1/1 | 7.52 | 5.72 | 3.47  |
| TRUE | 1/1 | 1/1 | 7.52 | 5.72 | 3.47  |
| TRUE | 1/1 | 1/1 | 7.52 | 5.72 | 3.47  |
| TRUE | 1/1 | 1/1 | 7.52 | 5.72 | 3.47  |
| TRUE | 1/1 | 1/1 | 7.52 | 5.72 | 3.47  |
| TRUE | 1/1 | 1/1 | 7.52 | 5.72 | 3.47  |
| TRUE | 1/1 | 1/1 | 7.52 | 5.72 | 3.47  |
| TRUE | 1/1 | 1/1 | 7.52 | 5.72 | 3.47  |
| TRUE | 1/1 | 1/1 | 7.52 | 5.72 | 3.47  |
| TRUE | 1/1 | 1/1 | 7.52 | 5.72 | 3.47  |
| TRUE | 1/1 | 1/1 | 7.52 | 5.72 | 3.47  |
| TRUE | 1/1 | 1/1 | 7.52 | 5.72 | 3.47  |
| TRUE | 1/1 | 1/1 | 7.52 | 5.72 | 3.47  |
| TRUE | 1/1 | 1/1 | 7.52 | 5.72 | 3.47  |
| TRUE | 1/1 | 1/1 | 7.52 | 5.72 | 3.47  |
| TRUE | 1/1 | 1/1 | 7.52 | 5.72 | 3.47  |
| TRUE | 1/1 | 1/1 | 7.52 | 5.72 | 3.47  |
| TRUE | 1/1 | 1/1 | 7.52 | 5.72 | 3.47  |
| TRUE | 1/1 | 1/1 | 7.52 | 5.72 | 3.47  |
| TRUE | 1/1 | 1/1 | 7.52 | 5.72 | 3.47  |
| TRUE | 1/1 | 1/1 | 6.97 | 7.3  | -1.26 |
| TRUE | 1/1 | 1/1 | 6.97 | 7.3  | -1.26 |
| TRUE | 1/1 | 1/1 | 6.97 | 7.3  | -1.26 |
| TRUE | 1/1 | 1/1 | 6.62 | 4.92 | 3.26  |

|      |     |     |       |       |       |
|------|-----|-----|-------|-------|-------|
| TRUE | 1/1 | 1/1 | 6.62  | 4.92  | 3.26  |
| TRUE | 1/1 | 1/1 | 6.62  | 4.92  | 3.26  |
| TRUE | 1/1 | 1/1 | 6.62  | 4.92  | 3.26  |
| TRUE | 1/1 | 1/1 | 6.62  | 4.92  | 3.26  |
| TRUE | 1/1 | 1/1 | 6.62  | 4.92  | 3.26  |
| TRUE | 1/1 | 1/1 | 6.62  | 4.92  | 3.26  |
| TRUE | 1/1 | 1/1 | 6.62  | 4.92  | 3.26  |
| TRUE | 1/1 | 1/1 | 6.62  | 4.92  | 3.26  |
| TRUE | 1/1 | 1/1 | 7.39  | 7.3   | 1.07  |
| TRUE | 1/1 | 1/1 | 7.39  | 7.3   | 1.07  |
| TRUE | 1/1 | 1/1 | 7.39  | 7.3   | 1.07  |
| TRUE | 1/1 | 1/1 | 7.39  | 7.3   | 1.07  |
| TRUE | 1/1 | 1/1 | 10.07 | 8.84  | 2.33  |
| TRUE | 1/1 | 1/1 | 10.07 | 8.84  | 2.33  |
| TRUE | 1/1 | 1/1 | 10.07 | 8.84  | 2.33  |
| TRUE | 1/1 | 1/1 | 10.07 | 8.84  | 2.33  |
| TRUE | 1/1 | 1/1 | 10.07 | 8.84  | 2.33  |
| TRUE | 1/1 | 1/1 | 10.07 | 8.84  | 2.33  |
| TRUE | 1/1 | 1/1 | 10.07 | 8.84  | 2.33  |
| TRUE | 1/1 | 1/1 | 10.07 | 8.84  | 2.33  |
| TRUE | 1/1 | 1/1 | 10.07 | 8.84  | 2.33  |
| TRUE | 1/1 | 1/1 | 10.07 | 8.84  | 2.33  |
| TRUE | 1/1 | 1/1 | 10.07 | 8.84  | 2.33  |
| TRUE | 1/1 | 1/1 | 10.07 | 8.84  | 2.33  |
| TRUE | 1/1 | 1/1 | 10.07 | 8.84  | 2.33  |
| TRUE | 1/1 | 1/1 | 10.07 | 8.84  | 2.33  |
| TRUE | 1/1 | 1/1 | 10.07 | 8.84  | 2.33  |
| TRUE | 1/1 | 1/1 | 9.67  | 9.16  | 1.43  |
| TRUE | 1/1 | 1/1 | 9.67  | 9.16  | 1.43  |
| TRUE | 1/1 | 1/1 | 4.44  | 4.29  | 1.12  |
| TRUE | 1/1 | 1/1 | 4.44  | 4.29  | 1.12  |
| TRUE | 1/1 | 1/1 | 4.44  | 4.29  | 1.12  |
| TRUE | 1/1 | 1/1 | 5.11  | 5.36  | -1.19 |
| TRUE | 1/1 | 1/1 | 5.11  | 5.36  | -1.19 |
| TRUE | 1/1 | 1/1 | 5.11  | 5.36  | -1.19 |
| TRUE | 1/1 | 1/1 | 5.11  | 5.36  | -1.19 |
| TRUE | 1/1 | 1/1 | 6.34  | 5.53  | 1.76  |
| TRUE | 1/1 | 1/1 | 6.34  | 5.53  | 1.76  |
| TRUE | 1/1 | 1/1 | 6.34  | 5.53  | 1.76  |
| TRUE | 1/1 | 1/1 | 6.59  | 6.78  | -1.14 |
| TRUE | 1/1 | 1/1 | 6.59  | 6.78  | -1.14 |
| TRUE | 1/1 | 1/1 | 3.52  | 2.66  | 1.82  |
| TRUE | 1/1 | 1/1 | 3.52  | 2.66  | 1.82  |
| TRUE | 1/1 | 1/1 | 3.52  | 2.66  | 1.82  |
| TRUE | 1/1 | 1/1 | 3.52  | 2.66  | 1.82  |
| TRUE | 1/1 | 1/1 | 3.52  | 2.66  | 1.82  |
| TRUE | 1/1 | 1/1 | 6.86  | 7.15  | -1.23 |
| TRUE | 1/1 | 1/1 | 6.86  | 7.15  | -1.23 |
| TRUE | 1/1 | 1/1 | 11.88 | 10.74 | 2.2   |
| TRUE | 1/1 | 1/1 | 11.88 | 10.74 | 2.2   |
| TRUE | 1/1 | 1/1 | 11.88 | 10.74 | 2.2   |
| TRUE | 1/1 | 1/1 | 11.88 | 10.74 | 2.2   |
| TRUE | 1/1 | 1/1 | 4.99  | 4.58  | 1.33  |
| TRUE | 1/1 | 1/1 | 4.99  | 4.58  | 1.33  |
| TRUE | 1/1 | 1/1 | 7.31  | 6.83  | 1.4   |
| TRUE | 1/1 | 1/1 | 7.31  | 6.83  | 1.4   |
| TRUE | 1/1 | 1/1 | 7.31  | 6.83  | 1.4   |
| TRUE | 1/1 | 1/1 | 7.93  | 7.88  | 1.03  |
| TRUE | 1/1 | 1/1 | 7.93  | 7.88  | 1.03  |
| TRUE | 1/1 | 1/1 | 7.93  | 7.88  | 1.03  |
| TRUE | 1/1 | 1/1 | 7.93  | 7.88  | 1.03  |
| TRUE | 1/1 | 1/1 | 4.56  | 4.13  | 1.35  |
| TRUE | 1/1 | 1/1 | 4.56  | 4.13  | 1.35  |



|      |     |     |      |      |       |
|------|-----|-----|------|------|-------|
| TRUE | 1/1 | 1/1 | 8.55 | 5.28 | 9.65  |
| TRUE | 1/1 | 1/1 | 8.55 | 5.28 | 9.65  |
| TRUE | 1/1 | 1/1 | 8.55 | 5.28 | 9.65  |
| TRUE | 1/1 | 1/1 | 8.55 | 5.28 | 9.65  |
| TRUE | 1/1 | 1/1 | 8.55 | 5.28 | 9.65  |
| TRUE | 1/1 | 1/1 | 8.55 | 5.28 | 9.65  |
| TRUE | 1/1 | 1/1 | 8.55 | 5.28 | 9.65  |
| TRUE | 1/1 | 1/1 | 8.55 | 5.28 | 9.65  |
| TRUE | 1/1 | 1/1 | 8.55 | 5.28 | 9.65  |
| TRUE | 1/1 | 1/1 | 5.2  | 4.9  | 1.23  |
| TRUE | 1/1 | 1/1 | 5.2  | 4.9  | 1.23  |
| TRUE | 1/1 | 1/1 | 5.2  | 4.9  | 1.23  |
| TRUE | 1/1 | 1/1 | 5.2  | 4.9  | 1.23  |
| TRUE | 1/1 | 1/1 | 5.2  | 4.9  | 1.23  |
| TRUE | 1/1 | 1/1 | 5.2  | 4.9  | 1.23  |
| TRUE | 1/1 | 1/1 | 5.2  | 4.9  | 1.23  |
| TRUE | 1/1 | 1/1 | 5.2  | 4.9  | 1.23  |
| TRUE | 1/1 | 1/1 | 5.2  | 4.9  | 1.23  |
| TRUE | 1/1 | 1/1 | 5.2  | 4.9  | 1.23  |
| TRUE | 1/1 | 1/1 | 5.2  | 4.9  | 1.23  |
| TRUE | 1/1 | 1/1 | 5.2  | 4.9  | 1.23  |
| TRUE | 1/1 | 1/1 | 7.9  | 7.58 | 1.25  |
| TRUE | 1/1 | 1/1 | 7.9  | 7.58 | 1.25  |
| TRUE | 1/1 | 1/1 | 7.9  | 7.58 | 1.25  |
| TRUE | 1/1 | 1/1 | 8.59 | 7.93 | 1.59  |
| TRUE | 1/1 | 1/1 | 8.59 | 7.93 | 1.59  |
| TRUE | 1/1 | 1/1 | 8.59 | 7.93 | 1.59  |
| TRUE | 1/1 | 1/1 | 6.33 | 6.52 | -1.15 |
| TRUE | 1/1 | 1/1 | 6.33 | 6.52 | -1.15 |
| TRUE | 1/1 | 1/1 | 4.71 | 4.93 | -1.17 |
| TRUE | 1/1 | 1/1 | 4.71 | 4.93 | -1.17 |
| TRUE | 1/1 | 1/1 | 4.71 | 4.93 | -1.17 |
| TRUE | 1/1 | 1/1 | 8.41 | 7.99 | 1.34  |
| TRUE | 1/1 | 1/1 | 8.41 | 7.99 | 1.34  |
| TRUE | 1/1 | 1/1 | 6.27 | 3.92 | 5.12  |
| TRUE | 1/1 | 1/1 | 6.27 | 3.92 | 5.12  |
| TRUE | 1/1 | 1/1 | 6.27 | 3.92 | 5.12  |
| TRUE | 1/1 | 1/1 | 6.27 | 3.92 | 5.12  |
| TRUE | 1/1 | 1/1 | 6.27 | 3.92 | 5.12  |
| TRUE | 1/1 | 1/1 | 6.27 | 3.92 | 5.12  |
| TRUE | 1/1 | 1/1 | 6.27 | 3.92 | 5.12  |
| TRUE | 1/1 | 1/1 | 6.27 | 3.92 | 5.12  |
| TRUE | 1/1 | 1/1 | 6.27 | 3.92 | 5.12  |
| TRUE | 1/1 | 1/1 | 6.27 | 3.92 | 5.12  |
| TRUE | 1/1 | 1/1 | 6.27 | 3.92 | 5.12  |
| TRUE | 1/1 | 1/1 | 6.27 | 3.92 | 5.12  |
| TRUE | 1/1 | 1/1 | 6.27 | 3.92 | 5.12  |
| TRUE | 1/1 | 1/1 | 6.27 | 3.92 | 5.12  |
| TRUE | 1/1 | 1/1 | 6.27 | 3.92 | 5.12  |
| TRUE | 1/1 | 1/1 | 6.27 | 3.92 | 5.12  |
| TRUE | 1/1 | 1/1 | 6.27 | 3.92 | 5.12  |
| TRUE | 1/1 | 1/1 | 6.27 | 3.92 | 5.12  |
| TRUE | 1/1 | 1/1 | 6.27 | 3.92 | 5.12  |
| TRUE | 1/1 | 1/1 | 6.27 | 3.92 | 5.12  |
| TRUE | 1/1 | 1/1 | 6.27 | 3.92 | 5.12  |
| TRUE | 1/1 | 1/1 | 6.27 | 3.92 | 5.12  |
| TRUE | 1/1 | 1/1 | 6.27 | 3.92 | 5.12  |
| TRUE | 1/1 | 1/1 | 8.92 | 8.86 | 1.05  |
| TRUE | 1/1 | 1/1 | 8.92 | 8.86 | 1.05  |
| TRUE | 1/1 | 1/1 | 3.5  | 2.87 | 1.54  |
| TRUE | 1/1 | 1/1 | 3.5  | 2.87 | 1.54  |
| TRUE | 1/1 | 1/1 | 8.42 | 8.63 | -1.15 |
| TRUE | 1/1 | 1/1 | 8.42 | 8.63 | -1.15 |
| TRUE | 1/1 | 1/1 | 7.84 | 7.82 | 1.02  |
| TRUE | 1/1 | 1/1 | 7.84 | 7.82 | 1.02  |
| TRUE | 1/1 | 1/1 | 7.84 | 7.82 | 1.02  |

|      |     |     |       |       |       |
|------|-----|-----|-------|-------|-------|
| TRUE | 1/1 | 1/1 | 7.84  | 7.82  | 1.02  |
| TRUE | 1/1 | 1/1 | 7.84  | 7.82  | 1.02  |
| TRUE | 1/1 | 1/1 | 5.59  | 5.05  | 1.46  |
| TRUE | 1/1 | 1/1 | 5.59  | 5.05  | 1.46  |
| TRUE | 1/1 | 1/1 | 5.59  | 5.05  | 1.46  |
| TRUE | 1/1 | 1/1 | 5.59  | 5.05  | 1.46  |
| TRUE | 1/1 | 1/1 | 11.27 | 7.27  | 15.98 |
| TRUE | 1/1 | 1/1 | 11.27 | 7.27  | 15.98 |
| TRUE | 1/1 | 1/1 | 11.27 | 7.27  | 15.98 |
| TRUE | 1/1 | 1/1 | 11.27 | 7.27  | 15.98 |
| TRUE | 1/1 | 1/1 | 4.45  | 4.65  | -1.15 |
| TRUE | 1/1 | 1/1 | 4.45  | 4.65  | -1.15 |
| TRUE | 1/1 | 1/1 | 4.45  | 4.65  | -1.15 |
| TRUE | 1/1 | 1/1 | 4.45  | 4.65  | -1.15 |
| TRUE | 1/1 | 1/1 | 4.45  | 4.65  | -1.15 |
| TRUE | 1/1 | 1/1 | 6.54  | 6.57  | -1.02 |
| TRUE | 1/1 | 1/1 | 6.54  | 6.57  | -1.02 |
| TRUE | 1/1 | 1/1 | 6.54  | 6.57  | -1.02 |
| TRUE | 1/1 | 1/1 | 6.54  | 6.57  | -1.02 |
| TRUE | 1/1 | 1/1 | 8.75  | 8.57  | 1.13  |
| TRUE | 1/1 | 1/1 | 8.75  | 8.57  | 1.13  |
| TRUE | 1/1 | 1/1 | 7.27  | 6.46  | 1.75  |
| TRUE | 1/1 | 1/1 | 7.27  | 6.46  | 1.75  |
| TRUE | 1/1 | 1/1 | 7.27  | 6.46  | 1.75  |
| TRUE | 1/1 | 1/1 | 5.16  | 3.86  | 2.46  |
| TRUE | 1/1 | 1/1 | 5.16  | 3.86  | 2.46  |
| TRUE | 1/1 | 1/1 | 5.16  | 3.86  | 2.46  |
| TRUE | 1/1 | 1/1 | 5.16  | 3.86  | 2.46  |
| TRUE | 1/1 | 1/1 | 5.16  | 3.86  | 2.46  |
| TRUE | 1/1 | 1/1 | 6.5   | 6.08  | 1.34  |
| TRUE | 1/1 | 1/1 | 6.5   | 6.08  | 1.34  |
| TRUE | 1/1 | 1/1 | 6.5   | 6.08  | 1.34  |
| TRUE | 1/1 | 1/1 | 6.5   | 6.08  | 1.34  |
| TRUE | 1/1 | 1/1 | 10.63 | 10.48 | 1.11  |
| TRUE | 1/1 | 1/1 | 10.63 | 10.48 | 1.11  |
| TRUE | 1/1 | 1/1 | 3.34  | 2.93  | 1.33  |
| TRUE | 1/1 | 1/1 | 3.34  | 2.93  | 1.33  |
| TRUE | 1/1 | 1/1 | 8.91  | 9.01  | -1.07 |
| TRUE | 1/1 | 1/1 | 8.91  | 9.01  | -1.07 |
| TRUE | 1/1 | 1/1 | 6.73  | 4.99  | 3.35  |
| TRUE | 1/1 | 1/1 | 6.73  | 4.99  | 3.35  |
| TRUE | 1/1 | 1/1 | 10.84 | 9.38  | 2.75  |
| TRUE | 1/1 | 1/1 | 10.84 | 9.38  | 2.75  |
| TRUE | 1/1 | 1/1 | 6.8   | 6.96  | -1.12 |
| TRUE | 1/1 | 1/1 | 6.8   | 6.96  | -1.12 |
| TRUE | 1/1 | 1/1 | 6.96  | 7.25  | -1.22 |
| TRUE | 1/1 | 1/1 | 6.96  | 7.25  | -1.22 |
| TRUE | 1/1 | 1/1 | 3.99  | 4.9   | -1.89 |
| TRUE | 1/1 | 1/1 | 3.99  | 4.9   | -1.89 |
| TRUE | 1/1 | 1/1 | 5.72  | 5.71  | 1.01  |
| TRUE | 1/1 | 1/1 | 5.72  | 5.71  | 1.01  |
| TRUE | 1/1 | 1/1 | 5.72  | 5.71  | 1.01  |
| TRUE | 1/1 | 1/1 | 11.42 | 10.94 | 1.39  |
| TRUE | 1/1 | 1/1 | 11.42 | 10.94 | 1.39  |
| TRUE | 1/1 | 1/1 | 5.38  | 4.85  | 1.45  |
| TRUE | 1/1 | 1/1 | 5.38  | 4.85  | 1.45  |
| TRUE | 1/1 | 1/1 | 5.38  | 4.85  | 1.45  |

|      |     |     |       |       |       |
|------|-----|-----|-------|-------|-------|
| TRUE | 1/1 | 1/1 | 6.2   | 5.73  | 1.39  |
| TRUE | 1/1 | 1/1 | 6.2   | 5.73  | 1.39  |
| TRUE | 1/1 | 1/1 | 6.2   | 5.73  | 1.39  |
| TRUE | 1/1 | 1/1 | 6.94  | 7.2   | -1.2  |
| TRUE | 1/1 | 1/1 | 6.94  | 7.2   | -1.2  |
| TRUE | 1/1 | 1/1 | 6.92  | 5.61  | 2.47  |
| TRUE | 1/1 | 1/1 | 6.92  | 5.61  | 2.47  |
| TRUE | 1/1 | 1/1 | 6.92  | 5.61  | 2.47  |
| TRUE | 1/1 | 1/1 | 6.92  | 5.61  | 2.47  |
| TRUE | 1/1 | 1/1 | 6.79  | 6.7   | 1.06  |
| TRUE | 1/1 | 1/1 | 6.79  | 6.7   | 1.06  |
| TRUE | 1/1 | 1/1 | 6.79  | 6.7   | 1.06  |
| TRUE | 1/1 | 1/1 | 12.01 | 12.17 | -1.12 |
| TRUE | 1/1 | 1/1 | 12.01 | 12.17 | -1.12 |
| TRUE | 1/1 | 1/1 | 12.01 | 12.17 | -1.12 |
| TRUE | 1/1 | 1/1 | 12.52 | 6.16  | 81.86 |
| TRUE | 1/1 | 1/1 | 12.52 | 6.16  | 81.86 |
| TRUE | 1/1 | 1/1 | 6.11  | 4.74  | 2.58  |
| TRUE | 1/1 | 1/1 | 6.11  | 4.74  | 2.58  |
| TRUE | 1/1 | 1/1 | 6.11  | 4.74  | 2.58  |
| TRUE | 1/1 | 1/1 | 9.08  | 9.24  | -1.12 |
| TRUE | 1/1 | 1/1 | 9.08  | 9.24  | -1.12 |
| TRUE | 1/1 | 1/1 | 7.2   | 5.92  | 2.44  |
| TRUE | 1/1 | 1/1 | 7.2   | 5.92  | 2.44  |
| TRUE | 1/1 | 1/1 | 7.2   | 5.92  | 2.44  |
| TRUE | 1/1 | 1/1 | 7.2   | 5.92  | 2.44  |
| TRUE | 1/1 | 1/1 | 7.2   | 5.92  | 2.44  |
| TRUE | 1/1 | 1/1 | 7.2   | 5.92  | 2.44  |
| TRUE | 1/1 | 1/1 | 7.2   | 5.92  | 2.44  |
| TRUE | 1/1 | 1/1 | 7.2   | 5.92  | 2.44  |
| TRUE | 1/1 | 1/1 | 7.2   | 5.92  | 2.44  |
| TRUE | 1/1 | 1/1 | 7.2   | 5.92  | 2.44  |
| TRUE | 1/1 | 1/1 | 7.2   | 5.92  | 2.44  |
| TRUE | 1/1 | 1/1 | 6.74  | 6.24  | 1.42  |
| TRUE | 1/1 | 1/1 | 6.74  | 6.24  | 1.42  |
| TRUE | 1/1 | 1/1 | 6.74  | 6.24  | 1.42  |
| TRUE | 1/1 | 1/1 | 6.74  | 6.24  | 1.42  |
| TRUE | 1/1 | 1/1 | 6.67  | 6.65  | 1.02  |
| TRUE | 1/1 | 1/1 | 6.67  | 6.65  | 1.02  |
| TRUE | 1/1 | 1/1 | 8.28  | 7.98  | 1.23  |
| TRUE | 1/1 | 1/1 | 8.28  | 7.98  | 1.23  |
| TRUE | 1/1 | 1/1 | 7.34  | 7.39  | -1.04 |
| TRUE | 1/1 | 1/1 | 7.34  | 7.39  | -1.04 |
| TRUE | 1/1 | 1/1 | 9.67  | 8.75  | 1.88  |
| TRUE | 1/1 | 1/1 | 9.67  | 8.75  | 1.88  |
| TRUE | 1/1 | 1/1 | 8.25  | 7.88  | 1.29  |
| TRUE | 1/1 | 1/1 | 8.25  | 7.88  | 1.29  |
| TRUE | 1/1 | 1/1 | 8.25  | 7.88  | 1.29  |
| TRUE | 1/1 | 1/1 | 11.07 | 11.18 | -1.08 |
| TRUE | 1/1 | 1/1 | 11.07 | 11.18 | -1.08 |
| TRUE | 1/1 | 1/1 | 11.07 | 11.18 | -1.08 |
| TRUE | 1/1 | 1/1 | 11.07 | 11.18 | -1.08 |
| TRUE | 1/1 | 1/1 | 11.07 | 11.18 | -1.08 |
| TRUE | 1/1 | 1/1 | 5.34  | 5.51  | -1.12 |
| TRUE | 1/1 | 1/1 | 5.34  | 5.51  | -1.12 |
| TRUE | 1/1 | 1/1 | 5.88  | 4.39  | 2.81  |
| TRUE | 1/1 | 1/1 | 5.88  | 4.39  | 2.81  |
| TRUE | 1/1 | 1/1 | 5.88  | 4.39  | 2.81  |
| TRUE | 1/1 | 1/1 | 8.03  | 6.15  | 3.68  |



|      |     |     |      |      |       |
|------|-----|-----|------|------|-------|
| TRUE | 1/1 | 1/1 | 8.03 | 6.15 | 3.68  |
| TRUE | 1/1 | 1/1 | 4.39 | 4.67 | -1.21 |
| TRUE | 1/1 | 1/1 | 4.39 | 4.67 | -1.21 |
| TRUE | 1/1 | 1/1 | 4.39 | 4.67 | -1.21 |
| TRUE | 1/1 | 1/1 | 4.39 | 4.67 | -1.21 |
| TRUE | 1/1 | 1/1 | 4.39 | 4.67 | -1.21 |
| TRUE | 1/1 | 1/1 | 7    | 6.75 | 1.19  |
| TRUE | 1/1 | 1/1 | 7    | 6.75 | 1.19  |
| TRUE | 1/1 | 1/1 | 7    | 6.75 | 1.19  |
| TRUE | 1/1 | 1/1 | 7    | 6.75 | 1.19  |
| TRUE | 1/1 | 1/1 | 8.33 | 7.72 | 1.53  |
| TRUE | 1/1 | 1/1 | 8.33 | 7.72 | 1.53  |
| TRUE | 1/1 | 1/1 | 7.38 | 7.38 | -1.01 |
| TRUE | 1/1 | 1/1 | 7.38 | 7.38 | -1.01 |
| TRUE | 1/1 | 1/1 | 3.31 | 2.8  | 1.42  |
| TRUE | 1/1 | 1/1 | 3.31 | 2.8  | 1.42  |
| TRUE | 1/1 | 1/1 | 6.07 | 6.17 | -1.07 |
| TRUE | 1/1 | 1/1 | 6.07 | 6.17 | -1.07 |
| TRUE | 1/1 | 1/1 | 4.52 | 2.66 | 3.64  |
| TRUE | 1/1 | 1/1 | 4.52 | 2.66 | 3.64  |
| TRUE | 1/1 | 1/1 | 4.52 | 2.66 | 3.64  |
| TRUE | 1/1 | 1/1 | 4.52 | 2.66 | 3.64  |
| TRUE | 1/1 | 1/1 | 4.52 | 2.66 | 3.64  |
| TRUE | 1/1 | 1/1 | 4.52 | 2.66 | 3.64  |
| TRUE | 1/1 | 1/1 | 4.52 | 2.66 | 3.64  |
| TRUE | 1/1 | 1/1 | 4.52 | 2.66 | 3.64  |
| TRUE | 1/1 | 1/1 | 4.52 | 2.66 | 3.64  |
| TRUE | 1/1 | 1/1 | 4.52 | 2.66 | 3.64  |
| TRUE | 1/1 | 1/1 | 4.52 | 2.66 | 3.64  |
| TRUE | 1/1 | 1/1 | 4.52 | 2.66 | 3.64  |
| TRUE | 1/1 | 1/1 | 4.52 | 2.66 | 3.64  |
| TRUE | 1/1 | 1/1 | 4.52 | 2.66 | 3.64  |
| TRUE | 1/1 | 1/1 | 4.52 | 2.66 | 3.64  |
| TRUE | 1/1 | 1/1 | 4.52 | 2.66 | 3.64  |
| TRUE | 1/1 | 1/1 | 4.52 | 2.66 | 3.64  |
| TRUE | 1/1 | 1/1 | 4.52 | 2.66 | 3.64  |
| TRUE | 1/1 | 1/1 | 5.12 | 5.15 | -1.02 |
| TRUE | 1/1 | 1/1 | 5.12 | 5.15 | -1.02 |
| TRUE | 1/1 | 1/1 | 7.76 | 7.82 | -1.04 |
| TRUE | 1/1 | 1/1 | 7.76 | 7.82 | -1.04 |
| TRUE | 1/1 | 1/1 | 7.76 | 7.82 | -1.04 |
| TRUE | 1/1 | 1/1 | 5.28 | 5.96 | -1.61 |
| TRUE | 1/1 | 1/1 | 5.28 | 5.96 | -1.61 |
| TRUE | 1/1 | 1/1 | 6.6  | 5.77 | 1.78  |
| TRUE | 1/1 | 1/1 | 6.6  | 5.77 | 1.78  |
| TRUE | 1/1 | 1/1 | 4.39 | 3.79 | 1.51  |
| TRUE | 1/1 | 1/1 | 4.39 | 3.79 | 1.51  |
| TRUE | 1/1 | 1/1 | 4.39 | 3.79 | 1.51  |
| TRUE | 1/1 | 1/1 | 8.1  | 8.09 | 1.01  |
| TRUE | 1/1 | 1/1 | 8.1  | 8.09 | 1.01  |
| TRUE | 1/1 | 1/1 | 8.1  | 8.09 | 1.01  |
| TRUE | 1/1 | 1/1 | 4.42 | 3.09 | 2.51  |
| TRUE | 1/1 | 1/1 | 4.42 | 3.09 | 2.51  |
| TRUE | 1/1 | 1/1 | 4.42 | 3.09 | 2.51  |
| TRUE | 1/1 | 1/1 | 7.43 | 7.63 | -1.15 |
| TRUE | 1/1 | 1/1 | 7.43 | 7.63 | -1.15 |
| TRUE | 1/1 | 1/1 | 7.43 | 7.63 | -1.15 |
| TRUE | 1/1 | 1/1 | 5.12 | 5.15 | -1.02 |
| TRUE | 1/1 | 1/1 | 5.12 | 5.15 | -1.02 |
| TRUE | 1/1 | 1/1 | 5.12 | 5.15 | -1.02 |
| TRUE | 1/1 | 1/1 | 5.12 | 5.15 | -1.02 |

|      |     |     |      |      |       |
|------|-----|-----|------|------|-------|
| TRUE | 1/1 | 1/1 | 5.12 | 5.15 | -1.02 |
| TRUE | 1/1 | 1/1 | 5.12 | 5.15 | -1.02 |
| TRUE | 1/1 | 1/1 | 5.12 | 5.15 | -1.02 |
| TRUE | 1/1 | 1/1 | 5.12 | 5.15 | -1.02 |
| TRUE | 1/1 | 1/1 | 5.12 | 5.15 | -1.02 |
| TRUE | 1/1 | 1/1 | 5.12 | 5.15 | -1.02 |
| TRUE | 1/1 | 1/1 | 5.12 | 5.15 | -1.02 |
| TRUE | 1/1 | 1/1 | 5.12 | 5.15 | -1.02 |
| TRUE | 1/1 | 1/1 | 5.12 | 5.15 | -1.02 |
| TRUE | 1/1 | 1/1 | 5.76 | 5.09 | 1.59  |
| TRUE | 1/1 | 1/1 | 5.76 | 5.09 | 1.59  |
| TRUE | 1/1 | 1/1 | 5.76 | 5.09 | 1.59  |
| TRUE | 1/1 | 1/1 | 6.94 | 6.5  | 1.36  |
| TRUE | 1/1 | 1/1 | 6.94 | 6.5  | 1.36  |
| TRUE | 1/1 | 1/1 | 6.94 | 6.5  | 1.36  |
| TRUE | 1/1 | 1/1 | 6.94 | 6.5  | 1.36  |
| TRUE | 1/1 | 1/1 | 8.73 | 8.49 | 1.18  |
| TRUE | 1/1 | 1/1 | 8.73 | 8.49 | 1.18  |
| TRUE | 1/1 | 1/1 | 6.86 | 6.61 | 1.19  |
| TRUE | 1/1 | 1/1 | 6.86 | 6.61 | 1.19  |
| TRUE | 1/1 | 1/1 | 6.86 | 6.61 | 1.19  |
| TRUE | 1/1 | 1/1 | 8.49 | 8.3  | 1.14  |
| TRUE | 1/1 | 1/1 | 8.49 | 8.3  | 1.14  |
| TRUE | 1/1 | 1/1 | 7.76 | 7.72 | 1.02  |
| TRUE | 1/1 | 1/1 | 7.76 | 7.72 | 1.02  |
| TRUE | 1/1 | 1/1 | 7.31 | 6.68 | 1.55  |
| TRUE | 1/1 | 1/1 | 7.31 | 6.68 | 1.55  |
| TRUE | 1/1 | 1/1 | 8.99 | 8.54 | 1.36  |
| TRUE | 1/1 | 1/1 | 8.99 | 8.54 | 1.36  |
| TRUE | 1/1 | 1/1 | 8.99 | 8.54 | 1.36  |
| TRUE | 1/1 | 1/1 | 7.34 | 7.4  | -1.04 |
| TRUE | 1/1 | 1/1 | 7.34 | 7.4  | -1.04 |
| TRUE | 1/1 | 1/1 | 4.73 | 5.19 | -1.37 |
| TRUE | 1/1 | 1/1 | 4.73 | 5.19 | -1.37 |
| TRUE | 1/1 | 1/1 | 6.55 | 6.84 | -1.22 |
| TRUE | 1/1 | 1/1 | 6.55 | 6.84 | -1.22 |
| TRUE | 1/1 | 1/1 | 4.37 | 3.72 | 1.56  |
| TRUE | 1/1 | 1/1 | 4.37 | 3.72 | 1.56  |
| TRUE | 1/1 | 1/1 | 4.37 | 3.72 | 1.56  |
| TRUE | 1/1 | 1/1 | 4.16 | 3.71 | 1.37  |
| TRUE | 1/1 | 1/1 | 4.16 | 3.71 | 1.37  |
| TRUE | 1/1 | 1/1 | 3.19 | 3.16 | 1.02  |
| TRUE | 1/1 | 1/1 | 3.19 | 3.16 | 1.02  |
| TRUE | 1/1 | 1/1 | 9.61 | 8.82 | 1.72  |
| TRUE | 1/1 | 1/1 | 9.61 | 8.82 | 1.72  |
| TRUE | 1/1 | 1/1 | 7.76 | 4.98 | 6.86  |
| TRUE | 1/1 | 1/1 | 7.76 | 4.98 | 6.86  |
| TRUE | 1/1 | 1/1 | 7.76 | 4.98 | 6.86  |
| TRUE | 1/1 | 1/1 | 7.76 | 4.98 | 6.86  |
| TRUE | 1/1 | 1/1 | 7.76 | 4.98 | 6.86  |
| TRUE | 1/1 | 1/1 | 7.76 | 4.98 | 6.86  |
| TRUE | 1/1 | 1/1 | 7.76 | 4.98 | 6.86  |
| TRUE | 1/1 | 1/1 | 7.76 | 4.98 | 6.86  |
| TRUE | 1/1 | 1/1 | 7.76 | 4.98 | 6.86  |
| TRUE | 1/1 | 1/1 | 7.76 | 4.98 | 6.86  |
| TRUE | 1/1 | 1/1 | 7.76 | 4.98 | 6.86  |
| TRUE | 1/1 | 1/1 | 5.72 | 3.98 | 3.34  |
| TRUE | 1/1 | 1/1 | 5.72 | 3.98 | 3.34  |
| TRUE | 1/1 | 1/1 | 5.72 | 3.98 | 3.34  |
| TRUE | 1/1 | 1/1 | 5.72 | 3.98 | 3.34  |
| TRUE | 1/1 | 1/1 | 5.72 | 3.98 | 3.34  |



|      |     |     |       |       |       |
|------|-----|-----|-------|-------|-------|
| TRUE | 1/1 | 1/1 | 8.87  | 4.34  | 23.11 |
| TRUE | 1/1 | 1/1 | 6.08  | 6.8   | -1.64 |
| TRUE | 1/1 | 1/1 | 6.08  | 6.8   | -1.64 |
| TRUE | 1/1 | 1/1 | 6.08  | 6.8   | -1.64 |
| TRUE | 1/1 | 1/1 | 3.55  | 2.66  | 1.84  |
| TRUE | 1/1 | 1/1 | 3.55  | 2.66  | 1.84  |
| TRUE | 1/1 | 1/1 | 6.48  | 7.25  | -1.7  |
| TRUE | 1/1 | 1/1 | 6.48  | 7.25  | -1.7  |
| TRUE | 1/1 | 1/1 | 6.48  | 7.25  | -1.7  |
| TRUE | 1/1 | 1/1 | 8.51  | 8.39  | 1.09  |
| TRUE | 1/1 | 1/1 | 8.51  | 8.39  | 1.09  |
| TRUE | 1/1 | 1/1 | 8.51  | 8.39  | 1.09  |
| TRUE | 1/1 | 1/1 | 8.51  | 8.39  | 1.09  |
| TRUE | 1/1 | 1/1 | 4.72  | 4.8   | -1.06 |
| TRUE | 1/1 | 1/1 | 4.72  | 4.8   | -1.06 |
| TRUE | 1/1 | 1/1 | 6.08  | 6.8   | -1.64 |
| TRUE | 1/1 | 1/1 | 6.08  | 6.8   | -1.64 |
| TRUE | 1/1 | 1/1 | 6.08  | 6.8   | -1.64 |
| TRUE | 1/1 | 1/1 | 3.55  | 2.66  | 1.84  |
| TRUE | 1/1 | 1/1 | 3.55  | 2.66  | 1.84  |
| TRUE | 1/1 | 1/1 | 6.08  | 6.8   | -1.64 |
| TRUE | 1/1 | 1/1 | 6.08  | 6.8   | -1.64 |
| TRUE | 1/1 | 1/1 | 6.08  | 6.8   | -1.64 |
| TRUE | 1/1 | 1/1 | 6.08  | 6.8   | -1.64 |
| TRUE | 1/1 | 1/1 | 6.08  | 6.8   | -1.64 |
| TRUE | 1/1 | 1/1 | 6.08  | 6.8   | -1.64 |
| TRUE | 1/1 | 1/1 | 6.08  | 6.8   | -1.64 |
| TRUE | 1/1 | 1/1 | 6.08  | 6.8   | -1.64 |
| TRUE | 1/1 | 1/1 | 6.08  | 6.8   | -1.64 |
| TRUE | 1/1 | 1/1 | 6.08  | 6.8   | -1.64 |
| TRUE | 1/1 | 1/1 | 6.08  | 6.8   | -1.64 |
| TRUE | 1/1 | 1/1 | 6.08  | 6.8   | -1.64 |
| TRUE | 1/1 | 1/1 | 6.08  | 6.8   | -1.64 |
| TRUE | 1/1 | 1/1 | 6.08  | 6.8   | -1.64 |
| TRUE | 1/1 | 1/1 | 6.08  | 6.8   | -1.64 |
| TRUE | 1/1 | 1/1 | 3.55  | 2.66  | 1.84  |
| TRUE | 1/1 | 1/1 | 3.55  | 2.66  | 1.84  |
| TRUE | 1/1 | 1/1 | 6.08  | 6.8   | -1.64 |
| TRUE | 1/1 | 1/1 | 6.08  | 6.8   | -1.64 |
| TRUE | 1/1 | 1/1 | 6.08  | 6.8   | -1.64 |
| TRUE | 1/1 | 1/1 | 6.08  | 6.8   | -1.64 |
| TRUE | 1/1 | 1/1 | 6.08  | 6.8   | -1.64 |
| TRUE | 1/1 | 1/1 | 6.08  | 6.8   | -1.64 |
| TRUE | 1/1 | 1/1 | 6.08  | 6.8   | -1.64 |
| TRUE | 1/1 | 1/1 | 6.08  | 6.8   | -1.64 |
| TRUE | 1/1 | 1/1 | 6.08  | 6.8   | -1.64 |
| TRUE | 1/1 | 1/1 | 6.08  | 6.8   | -1.64 |
| TRUE | 1/1 | 1/1 | 6.08  | 6.8   | -1.64 |
| TRUE | 1/1 | 1/1 | 6.08  | 6.8   | -1.64 |
| TRUE | 1/1 | 1/1 | 6.08  | 6.8   | -1.64 |
| TRUE | 1/1 | 1/1 | 6.08  | 6.8   | -1.64 |
| TRUE | 1/1 | 1/1 | 6.08  | 6.8   | -1.64 |
| TRUE | 1/1 | 1/1 | 6.08  | 6.8   | -1.64 |
| TRUE | 1/1 | 1/1 | 6.08  | 6.8   | -1.64 |
| TRUE | 1/1 | 1/1 | 6.08  | 6.8   | -1.64 |
| TRUE | 1/1 | 1/1 | 5.74  | 4.43  | 2.49  |
| TRUE | 1/1 | 1/1 | 5.74  | 4.43  | 2.49  |
| TRUE | 1/1 | 1/1 | 5.74  | 4.43  | 2.49  |
| TRUE | 1/1 | 1/1 | 5.74  | 4.43  | 2.49  |
| TRUE | 1/1 | 1/1 | 8.75  | 7.53  | 2.33  |
| TRUE | 1/1 | 1/1 | 8.75  | 7.53  | 2.33  |
| TRUE | 1/1 | 1/1 | 7.03  | 7     | 1.02  |
| TRUE | 1/1 | 1/1 | 7.03  | 7     | 1.02  |
| TRUE | 1/1 | 1/1 | 5.79  | 5.44  | 1.27  |
| TRUE | 1/1 | 1/1 | 5.79  | 5.44  | 1.27  |
| TRUE | 1/1 | 1/1 | 8.31  | 8.04  | 1.21  |
| TRUE | 1/1 | 1/1 | 8.31  | 8.04  | 1.21  |
| TRUE | 1/1 | 1/1 | 4.98  | 4.59  | 1.31  |
| TRUE | 1/1 | 1/1 | 4.98  | 4.59  | 1.31  |
| TRUE | 1/1 | 1/1 | 5.6   | 4.65  | 1.94  |
| TRUE | 1/1 | 1/1 | 5.6   | 4.65  | 1.94  |
| TRUE | 1/1 | 1/1 | 10.25 | 10.28 | -1.02 |
| TRUE | 1/1 | 1/1 | 10.25 | 10.28 | -1.02 |
| TRUE | 1/1 | 1/1 | 10.25 | 10.28 | -1.02 |

|      |     |     |       |       |       |
|------|-----|-----|-------|-------|-------|
| TRUE | 1/1 | 1/1 | 7.2   | 6.96  | 1.18  |
| TRUE | 1/1 | 1/1 | 7.2   | 6.96  | 1.18  |
| TRUE | 1/1 | 1/1 | 7.2   | 6.96  | 1.18  |
| TRUE | 1/1 | 1/1 | 8.89  | 6.32  | 5.96  |
| TRUE | 1/1 | 1/1 | 8.89  | 6.32  | 5.96  |
| TRUE | 1/1 | 1/1 | 8.89  | 6.32  | 5.96  |
| TRUE | 1/1 | 1/1 | 5.5   | 4.29  | 2.31  |
| TRUE | 1/1 | 1/1 | 5.5   | 4.29  | 2.31  |
| TRUE | 1/1 | 1/1 | 6.75  | 3.68  | 8.35  |
| TRUE | 1/1 | 1/1 | 6.75  | 3.68  | 8.35  |
| TRUE | 1/1 | 1/1 | 6.75  | 3.68  | 8.35  |
| TRUE | 1/1 | 1/1 | 6.75  | 3.68  | 8.35  |
| TRUE | 1/1 | 1/1 | 6.75  | 3.68  | 8.35  |
| TRUE | 1/1 | 1/1 | 6.75  | 3.68  | 8.35  |
| TRUE | 1/1 | 1/1 | 6.75  | 3.68  | 8.35  |
| TRUE | 1/1 | 1/1 | 6.75  | 3.68  | 8.35  |
| TRUE | 1/1 | 1/1 | 6.53  | 6.26  | 1.2   |
| TRUE | 1/1 | 1/1 | 6.53  | 6.26  | 1.2   |
| TRUE | 1/1 | 1/1 | 6.53  | 6.26  | 1.2   |
| TRUE | 1/1 | 1/1 | 6.53  | 6.26  | 1.2   |
| TRUE | 1/1 | 1/1 | 6.53  | 6.26  | 1.2   |
| TRUE | 1/1 | 1/1 | 6.53  | 6.26  | 1.2   |
| TRUE | 1/1 | 1/1 | 6.53  | 6.26  | 1.2   |
| TRUE | 1/1 | 1/1 | 6.53  | 6.26  | 1.2   |
| TRUE | 1/1 | 1/1 | 6.35  | 6.02  | 1.25  |
| TRUE | 1/1 | 1/1 | 6.35  | 6.02  | 1.25  |
| TRUE | 1/1 | 1/1 | 4.32  | 4.61  | -1.22 |
| TRUE | 1/1 | 1/1 | 4.32  | 4.61  | -1.22 |
| TRUE | 1/1 | 1/1 | 4.32  | 4.61  | -1.22 |
| TRUE | 1/1 | 1/1 | 4.32  | 4.61  | -1.22 |
| TRUE | 1/1 | 1/1 | 7.69  | 7.6   | 1.06  |
| TRUE | 1/1 | 1/1 | 7.69  | 7.6   | 1.06  |
| TRUE | 1/1 | 1/1 | 9.82  | 10.36 | -1.45 |
| TRUE | 1/1 | 1/1 | 9.82  | 10.36 | -1.45 |
| TRUE | 1/1 | 1/1 | 9.82  | 10.36 | -1.45 |
| TRUE | 1/1 | 1/1 | 7.92  | 6.01  | 3.75  |
| TRUE | 1/1 | 1/1 | 7.92  | 6.01  | 3.75  |
| TRUE | 1/1 | 1/1 | 7.92  | 6.01  | 3.75  |
| TRUE | 1/1 | 1/1 | 7.92  | 6.01  | 3.75  |
| TRUE | 1/1 | 1/1 | 7.92  | 6.01  | 3.75  |
| TRUE | 1/1 | 1/1 | 6.15  | 6.16  | -1.01 |
| TRUE | 1/1 | 1/1 | 6.15  | 6.16  | -1.01 |
| TRUE | 1/1 | 1/1 | 7.4   | 6.71  | 1.62  |
| TRUE | 1/1 | 1/1 | 7.4   | 6.71  | 1.62  |
| TRUE | 1/1 | 1/1 | 7.4   | 6.71  | 1.62  |
| TRUE | 1/1 | 1/1 | 6.67  | 6.2   | 1.39  |
| TRUE | 1/1 | 1/1 | 6.67  | 6.2   | 1.39  |
| TRUE | 1/1 | 1/1 | 6.67  | 6.2   | 1.39  |
| TRUE | 1/1 | 1/1 | 6.67  | 6.2   | 1.39  |
| TRUE | 1/1 | 1/1 | 8.55  | 7.72  | 1.78  |
| TRUE | 1/1 | 1/1 | 8.55  | 7.72  | 1.78  |
| TRUE | 1/1 | 1/1 | 8.55  | 7.72  | 1.78  |
| TRUE | 1/1 | 1/1 | 11.44 | 10.06 | 2.59  |
| TRUE | 1/1 | 1/1 | 11.44 | 10.06 | 2.59  |
| TRUE | 1/1 | 1/1 | 11.44 | 10.06 | 2.59  |
| TRUE | 1/1 | 1/1 | 11.44 | 10.06 | 2.59  |
| TRUE | 1/1 | 1/1 | 7.35  | 7.44  | -1.06 |
| TRUE | 1/1 | 1/1 | 7.35  | 7.44  | -1.06 |
| TRUE | 1/1 | 1/1 | 7.35  | 7.44  | -1.06 |

|      |     |     |       |       |       |
|------|-----|-----|-------|-------|-------|
| TRUE | 1/1 | 1/1 | 7.11  | 6.7   | 1.34  |
| TRUE | 1/1 | 1/1 | 7.11  | 6.7   | 1.34  |
| TRUE | 1/1 | 1/1 | 12.15 | 10.43 | 3.28  |
| TRUE | 1/1 | 1/1 | 12.15 | 10.43 | 3.28  |
| TRUE | 1/1 | 1/1 | 12.15 | 10.43 | 3.28  |
| TRUE | 1/1 | 1/1 | 5.04  | 4.77  | 1.2   |
| TRUE | 1/1 | 1/1 | 5.04  | 4.77  | 1.2   |
| TRUE | 1/1 | 1/1 | 5.3   | 5.08  | 1.16  |
| TRUE | 1/1 | 1/1 | 5.3   | 5.08  | 1.16  |
| TRUE | 1/1 | 1/1 | 9.62  | 9.44  | 1.13  |
| TRUE | 1/1 | 1/1 | 9.62  | 9.44  | 1.13  |
| TRUE | 1/1 | 1/1 | 9.62  | 9.44  | 1.13  |
| TRUE | 1/1 | 1/1 | 7.74  | 7.31  | 1.34  |
| TRUE | 1/1 | 1/1 | 7.74  | 7.31  | 1.34  |
| TRUE | 1/1 | 1/1 | 4.96  | 4.81  | 1.11  |
| TRUE | 1/1 | 1/1 | 4.96  | 4.81  | 1.11  |
| TRUE | 1/1 | 1/1 | 6.41  | 5.73  | 1.6   |
| TRUE | 1/1 | 1/1 | 6.41  | 5.73  | 1.6   |
| TRUE | 1/1 | 1/1 | 3.46  | 4.15  | -1.6  |
| TRUE | 1/1 | 1/1 | 3.46  | 4.15  | -1.6  |
| TRUE | 1/1 | 1/1 | 3.46  | 4.15  | -1.6  |
| TRUE | 1/1 | 1/1 | 3.46  | 4.15  | -1.6  |
| TRUE | 1/1 | 1/1 | 7.42  | 7.22  | 1.15  |
| TRUE | 1/1 | 1/1 | 7.42  | 7.22  | 1.15  |
| TRUE | 1/1 | 1/1 | 5.04  | 4.73  | 1.24  |
| TRUE | 1/1 | 1/1 | 5.04  | 4.73  | 1.24  |
| TRUE | 1/1 | 1/1 | 5.04  | 4.73  | 1.24  |
| TRUE | 1/1 | 1/1 | 4.47  | 4.13  | 1.27  |
| TRUE | 1/1 | 1/1 | 4.47  | 4.13  | 1.27  |
| TRUE | 1/1 | 1/1 | 4.47  | 4.13  | 1.27  |
| TRUE | 1/1 | 1/1 | 4.47  | 4.13  | 1.27  |
| TRUE | 1/1 | 1/1 | 4.47  | 4.13  | 1.27  |
| TRUE | 1/1 | 1/1 | 6.42  | 6.52  | -1.07 |
| TRUE | 1/1 | 1/1 | 6.42  | 6.52  | -1.07 |
| TRUE | 1/1 | 1/1 | 6.42  | 6.52  | -1.07 |
| TRUE | 1/1 | 1/1 | 6.42  | 6.52  | -1.07 |
| TRUE | 1/1 | 1/1 | 9.45  | 9.34  | 1.08  |
| TRUE | 1/1 | 1/1 | 9.45  | 9.34  | 1.08  |
| TRUE | 1/1 | 1/1 | 9.45  | 9.34  | 1.08  |
| TRUE | 1/1 | 1/1 | 5.44  | 5.75  | -1.24 |
| TRUE | 1/1 | 1/1 | 5.44  | 5.75  | -1.24 |
| TRUE | 1/1 | 1/1 | 5.47  | 4.84  | 1.54  |
| TRUE | 1/1 | 1/1 | 5.47  | 4.84  | 1.54  |
| TRUE | 1/1 | 1/1 | 6.35  | 5.9   | 1.37  |
| TRUE | 1/1 | 1/1 | 6.35  | 5.9   | 1.37  |
| TRUE | 1/1 | 1/1 | 3.71  | 3.24  | 1.38  |
| TRUE | 1/1 | 1/1 | 3.71  | 3.24  | 1.38  |
| TRUE | 1/1 | 1/1 | 9.33  | 8.05  | 2.42  |
| TRUE | 1/1 | 1/1 | 9.33  | 8.05  | 2.42  |
| TRUE | 1/1 | 1/1 | 3.8   | 3.32  | 1.39  |
| TRUE | 1/1 | 1/1 | 3.8   | 3.32  | 1.39  |
| TRUE | 1/1 | 1/1 | 11.12 | 8.63  | 5.62  |
| TRUE | 1/1 | 1/1 | 11.12 | 8.63  | 5.62  |
| TRUE | 1/1 | 1/1 | 11.12 | 8.63  | 5.62  |
| TRUE | 1/1 | 1/1 | 11.12 | 8.63  | 5.62  |
| TRUE | 1/1 | 1/1 | 7.37  | 7.59  | -1.16 |
| TRUE | 1/1 | 1/1 | 7.37  | 7.59  | -1.16 |
| TRUE | 1/1 | 1/1 | 7.26  | 7.23  | 1.02  |

|      |     |     |       |      |       |
|------|-----|-----|-------|------|-------|
| TRUE | 1/1 | 1/1 | 7.26  | 7.23 | 1.02  |
| TRUE | 1/1 | 1/1 | 4.43  | 4.22 | 1.16  |
| TRUE | 1/1 | 1/1 | 4.43  | 4.22 | 1.16  |
| TRUE | 1/1 | 1/1 | 7.98  | 7.57 | 1.33  |
| TRUE | 1/1 | 1/1 | 7.98  | 7.57 | 1.33  |
| TRUE | 1/1 | 1/1 | 11.24 | 8.92 | 4.99  |
| TRUE | 1/1 | 1/1 | 11.24 | 8.92 | 4.99  |
| TRUE | 1/1 | 1/1 | 11.24 | 8.92 | 4.99  |
| TRUE | 1/1 | 1/1 | 11.24 | 8.92 | 4.99  |
| TRUE | 1/1 | 1/1 | 11.24 | 8.92 | 4.99  |
| TRUE | 1/1 | 1/1 | 11.24 | 8.92 | 4.99  |
| TRUE | 1/1 | 1/1 | 8.99  | 7.9  | 2.12  |
| TRUE | 1/1 | 1/1 | 8.99  | 7.9  | 2.12  |
| TRUE | 1/1 | 1/1 | 7.64  | 5.32 | 4.98  |
| TRUE | 1/1 | 1/1 | 7.64  | 5.32 | 4.98  |
| TRUE | 1/1 | 1/1 | 7.64  | 5.32 | 4.98  |
| TRUE | 1/1 | 1/1 | 7.64  | 5.32 | 4.98  |
| TRUE | 1/1 | 1/1 | 7.64  | 5.32 | 4.98  |
| TRUE | 1/1 | 1/1 | 7.64  | 5.32 | 4.98  |
| TRUE | 1/1 | 1/1 | 7.64  | 5.32 | 4.98  |
| TRUE | 1/1 | 1/1 | 7.64  | 5.32 | 4.98  |
| TRUE | 1/1 | 1/1 | 7.64  | 5.32 | 4.98  |
| TRUE | 1/1 | 1/1 | 7.64  | 5.32 | 4.98  |
| TRUE | 1/1 | 1/1 | 7.64  | 5.32 | 4.98  |
| TRUE | 1/1 | 1/1 | 7.64  | 5.32 | 4.98  |
| TRUE | 1/1 | 1/1 | 7.64  | 5.32 | 4.98  |
| TRUE | 1/1 | 1/1 | 10.59 | 9.8  | 1.72  |
| TRUE | 1/1 | 1/1 | 10.59 | 9.8  | 1.72  |
| TRUE | 1/1 | 1/1 | 10.59 | 9.8  | 1.72  |
| TRUE | 1/1 | 1/1 | 10.86 | 7.98 | 7.39  |
| TRUE | 1/1 | 1/1 | 10.86 | 7.98 | 7.39  |
| TRUE | 1/1 | 1/1 | 10.86 | 7.98 | 7.39  |
| TRUE | 1/1 | 1/1 | 10.86 | 7.98 | 7.39  |
| TRUE | 1/1 | 1/1 | 10.86 | 7.98 | 7.39  |
| TRUE | 1/1 | 1/1 | 3.6   | 2.66 | 1.91  |
| TRUE | 1/1 | 1/1 | 3.6   | 2.66 | 1.91  |
| TRUE | 1/1 | 1/1 | 5.61  | 5.39 | 1.16  |
| TRUE | 1/1 | 1/1 | 5.61  | 5.39 | 1.16  |
| TRUE | 1/1 | 1/1 | 5.61  | 5.39 | 1.16  |
| TRUE | 1/1 | 1/1 | 3.75  | 4.62 | -1.83 |
| TRUE | 1/1 | 1/1 | 3.75  | 4.62 | -1.83 |
| TRUE | 1/1 | 1/1 | 5.67  | 3.75 | 3.8   |
| TRUE | 1/1 | 1/1 | 5.67  | 3.75 | 3.8   |
| TRUE | 1/1 | 1/1 | 5.67  | 3.75 | 3.8   |
| TRUE | 1/1 | 1/1 | 5.81  | 5.78 | 1.02  |
| TRUE | 1/1 | 1/1 | 5.81  | 5.78 | 1.02  |
| TRUE | 1/1 | 1/1 | 5.81  | 5.78 | 1.02  |
| TRUE | 1/1 | 1/1 | 9.95  | 9.56 | 1.31  |
| TRUE | 1/1 | 1/1 | 9.95  | 9.56 | 1.31  |
| TRUE | 1/1 | 1/1 | 7.21  | 7.02 | 1.14  |
| TRUE | 1/1 | 1/1 | 7.21  | 7.02 | 1.14  |
| TRUE | 1/1 | 1/1 | 6.71  | 6.47 | 1.18  |
| TRUE | 1/1 | 1/1 | 6.71  | 6.47 | 1.18  |
| TRUE | 1/1 | 1/1 | 6.71  | 6.47 | 1.18  |
| TRUE | 1/1 | 1/1 | 6.71  | 6.47 | 1.18  |
| TRUE | 1/1 | 1/1 | 6.71  | 6.47 | 1.18  |
| TRUE | 1/1 | 1/1 | 7.78  | 7.3  | 1.39  |
| TRUE | 1/1 | 1/1 | 7.78  | 7.3  | 1.39  |
| TRUE | 1/1 | 1/1 | 4.58  | 3.64 | 1.92  |
| TRUE | 1/1 | 1/1 | 4.58  | 3.64 | 1.92  |

|      |     |     |       |       |       |
|------|-----|-----|-------|-------|-------|
| TRUE | 1/1 | 1/1 | 4.58  | 3.64  | 1.92  |
| TRUE | 1/1 | 1/1 | 4.26  | 4.9   | -1.56 |
| TRUE | 1/1 | 1/1 | 4.26  | 4.9   | -1.56 |
| TRUE | 1/1 | 1/1 | 5.12  | 4.96  | 1.12  |
| TRUE | 1/1 | 1/1 | 5.12  | 4.96  | 1.12  |
| TRUE | 1/1 | 1/1 | 5.71  | 5.52  | 1.14  |
| TRUE | 1/1 | 1/1 | 5.71  | 5.52  | 1.14  |
| TRUE | 1/1 | 1/1 | 9.44  | 9.22  | 1.17  |
| TRUE | 1/1 | 1/1 | 9.44  | 9.22  | 1.17  |
| TRUE | 1/1 | 1/1 | 9.93  | 7.93  | 4     |
| TRUE | 1/1 | 1/1 | 9.93  | 7.93  | 4     |
| TRUE | 1/1 | 1/1 | 6.09  | 5.96  | 1.09  |
| TRUE | 1/1 | 1/1 | 6.09  | 5.96  | 1.09  |
| TRUE | 1/1 | 1/1 | 6.09  | 5.96  | 1.09  |
| TRUE | 1/1 | 1/1 | 8.43  | 7.05  | 2.6   |
| TRUE | 1/1 | 1/1 | 8.43  | 7.05  | 2.6   |
| TRUE | 1/1 | 1/1 | 8.43  | 7.05  | 2.6   |
| TRUE | 1/1 | 1/1 | 8.43  | 7.05  | 2.6   |
| TRUE | 1/1 | 1/1 | 8.43  | 7.05  | 2.6   |
| TRUE | 1/1 | 1/1 | 8.43  | 7.05  | 2.6   |
| TRUE | 1/1 | 1/1 | 8.43  | 7.05  | 2.6   |
| TRUE | 1/1 | 1/1 | 3.61  | 3.98  | -1.28 |
| TRUE | 1/1 | 1/1 | 3.61  | 3.98  | -1.28 |
| TRUE | 1/1 | 1/1 | 3.61  | 3.98  | -1.28 |
| TRUE | 1/1 | 1/1 | 6.46  | 5.04  | 2.68  |
| TRUE | 1/1 | 1/1 | 6.46  | 5.04  | 2.68  |
| TRUE | 1/1 | 1/1 | 9.27  | 7.39  | 3.68  |
| TRUE | 1/1 | 1/1 | 9.27  | 7.39  | 3.68  |
| TRUE | 1/1 | 1/1 | 9.27  | 7.39  | 3.68  |
| TRUE | 1/1 | 1/1 | 10.48 | 7     | 11.18 |
| TRUE | 1/1 | 1/1 | 10.48 | 7     | 11.18 |
| TRUE | 1/1 | 1/1 | 10.48 | 7     | 11.18 |
| TRUE | 1/1 | 1/1 | 10.48 | 7     | 11.18 |
| TRUE | 1/1 | 1/1 | 10.48 | 7     | 11.18 |
| TRUE | 1/1 | 1/1 | 7.63  | 6.69  | 1.92  |
| TRUE | 1/1 | 1/1 | 7.63  | 6.69  | 1.92  |
| TRUE | 1/1 | 1/1 | 7.63  | 6.69  | 1.92  |
| TRUE | 1/1 | 1/1 | 7.63  | 6.69  | 1.92  |
| TRUE | 1/1 | 1/1 | 7.63  | 6.69  | 1.92  |
| TRUE | 1/1 | 1/1 | 7.63  | 6.69  | 1.92  |
| TRUE | 1/1 | 1/1 | 7.63  | 6.69  | 1.92  |
| TRUE | 1/1 | 1/1 | 6     | 6.03  | -1.02 |
| TRUE | 1/1 | 1/1 | 6     | 6.03  | -1.02 |
| TRUE | 1/1 | 1/1 | 8.5   | 8.65  | -1.11 |
| TRUE | 1/1 | 1/1 | 8.5   | 8.65  | -1.11 |
| TRUE | 1/1 | 1/1 | 7.1   | 7.29  | -1.14 |
| TRUE | 1/1 | 1/1 | 7.1   | 7.29  | -1.14 |
| TRUE | 1/1 | 1/1 | 7.37  | 7.34  | 1.02  |
| TRUE | 1/1 | 1/1 | 7.37  | 7.34  | 1.02  |
| TRUE | 1/1 | 1/1 | 5.5   | 6.21  | -1.63 |
| TRUE | 1/1 | 1/1 | 5.5   | 6.21  | -1.63 |
| TRUE | 1/1 | 1/1 | 5.93  | 5.9   | 1.02  |
| TRUE | 1/1 | 1/1 | 5.93  | 5.9   | 1.02  |
| TRUE | 1/1 | 1/1 | 5.93  | 5.9   | 1.02  |
| TRUE | 1/1 | 1/1 | 10.15 | 10.36 | -1.16 |
| TRUE | 1/1 | 1/1 | 10.15 | 10.36 | -1.16 |
| TRUE | 1/1 | 1/1 | 7.12  | 7.57  | -1.36 |
| TRUE | 1/1 | 1/1 | 7.12  | 7.57  | -1.36 |



|      |     |     |      |      |       |
|------|-----|-----|------|------|-------|
| TRUE | 1/1 | 1/1 | 7.12 | 7.57 | -1.36 |
| TRUE | 1/1 | 1/1 | 5.68 | 3.11 | 5.91  |
| TRUE | 1/1 | 1/1 | 5.68 | 3.11 | 5.91  |
| TRUE | 1/1 | 1/1 | 5.85 | 5.3  | 1.46  |
| TRUE | 1/1 | 1/1 | 5.85 | 5.3  | 1.46  |
| TRUE | 1/1 | 1/1 | 5.85 | 5.3  | 1.46  |
| TRUE | 1/1 | 1/1 | 5    | 5.18 | -1.13 |
| TRUE | 1/1 | 1/1 | 5    | 5.18 | -1.13 |
| TRUE | 1/1 | 1/1 | 5    | 5.18 | -1.13 |
| TRUE | 1/1 | 1/1 | 6.71 | 6.14 | 1.49  |
| TRUE | 1/1 | 1/1 | 6.71 | 6.14 | 1.49  |
| TRUE | 1/1 | 1/1 | 6.71 | 6.14 | 1.49  |
| TRUE | 1/1 | 1/1 | 7.35 | 7.93 | -1.5  |
| TRUE | 1/1 | 1/1 | 7.35 | 7.93 | -1.5  |
| TRUE | 1/1 | 1/1 | 7.27 | 6.52 | 1.68  |
| TRUE | 1/1 | 1/1 | 7.27 | 6.52 | 1.68  |
| TRUE | 1/1 | 1/1 | 3.81 | 3.14 | 1.59  |
| TRUE | 1/1 | 1/1 | 3.81 | 3.14 | 1.59  |
| TRUE | 1/1 | 1/1 | 5.53 | 5.86 | -1.26 |
| TRUE | 1/1 | 1/1 | 5.53 | 5.86 | -1.26 |
| TRUE | 1/1 | 1/1 | 5.53 | 5.86 | -1.26 |
| TRUE | 1/1 | 1/1 | 7.23 | 7.42 | -1.14 |
| TRUE | 1/1 | 1/1 | 7.23 | 7.42 | -1.14 |
| TRUE | 1/1 | 1/1 | 7.23 | 7.42 | -1.14 |
| TRUE | 1/1 | 1/1 | 9.34 | 9    | 1.26  |
| TRUE | 1/1 | 1/1 | 9.34 | 9    | 1.26  |
| TRUE | 1/1 | 1/1 | 5.96 | 5.69 | 1.21  |
| TRUE | 1/1 | 1/1 | 5.96 | 5.69 | 1.21  |
| TRUE | 1/1 | 1/1 | 5.96 | 5.69 | 1.21  |
| TRUE | 1/1 | 1/1 | 9.02 | 9.2  | -1.13 |
| TRUE | 1/1 | 1/1 | 9.02 | 9.2  | -1.13 |
| TRUE | 1/1 | 1/1 | 9.02 | 9.2  | -1.13 |
| TRUE | 1/1 | 1/1 | 6.11 | 5.35 | 1.69  |
| TRUE | 1/1 | 1/1 | 6.11 | 5.35 | 1.69  |
| TRUE | 1/1 | 1/1 | 7.68 | 5.91 | 3.41  |
| TRUE | 1/1 | 1/1 | 7.68 | 5.91 | 3.41  |
| TRUE | 1/1 | 1/1 | 7.93 | 8.2  | -1.21 |
| TRUE | 1/1 | 1/1 | 7.93 | 8.2  | -1.21 |
| TRUE | 1/1 | 1/1 | 8.65 | 6.75 | 3.72  |
| TRUE | 1/1 | 1/1 | 8.65 | 6.75 | 3.72  |
| TRUE | 1/1 | 1/1 | 4.11 | 3.48 | 1.55  |
| TRUE | 1/1 | 1/1 | 4.11 | 3.48 | 1.55  |
| TRUE | 1/1 | 1/1 | 9.29 | 7.97 | 2.49  |
| TRUE | 1/1 | 1/1 | 9.29 | 7.97 | 2.49  |
| TRUE | 1/1 | 1/1 | 9.29 | 7.97 | 2.49  |
| TRUE | 1/1 | 1/1 | 9.29 | 7.97 | 2.49  |
| TRUE | 1/1 | 1/1 | 7.44 | 6.33 | 2.17  |
| TRUE | 1/1 | 1/1 | 7.44 | 6.33 | 2.17  |
| TRUE | 1/1 | 1/1 | 9.34 | 8.59 | 1.68  |
| TRUE | 1/1 | 1/1 | 9.34 | 8.59 | 1.68  |
| TRUE | 1/1 | 1/1 | 9.34 | 8.59 | 1.68  |
| TRUE | 1/1 | 1/1 | 9.34 | 8.59 | 1.68  |
| TRUE | 1/1 | 1/1 | 9.34 | 8.59 | 1.68  |
| TRUE | 1/1 | 1/1 | 9.34 | 8.59 | 1.68  |
| TRUE | 1/1 | 1/1 | 8.39 | 8.76 | -1.29 |
| TRUE | 1/1 | 1/1 | 8.39 | 8.76 | -1.29 |
| TRUE | 1/1 | 1/1 | 4.83 | 5.06 | -1.18 |
| TRUE | 1/1 | 1/1 | 4.83 | 5.06 | -1.18 |

|      |     |     |       |       |       |
|------|-----|-----|-------|-------|-------|
| TRUE | 1/1 | 1/1 | 4.83  | 5.06  | -1.18 |
| TRUE | 1/1 | 1/1 | 4.83  | 5.06  | -1.18 |
| TRUE | 1/1 | 1/1 | 5.47  | 3.67  | 3.49  |
| TRUE | 1/1 | 1/1 | 5.47  | 3.67  | 3.49  |
| TRUE | 1/1 | 1/1 | 5.47  | 3.67  | 3.49  |
| TRUE | 1/1 | 1/1 | 5.47  | 3.67  | 3.49  |
| TRUE | 1/1 | 1/1 | 5.47  | 3.67  | 3.49  |
| TRUE | 1/1 | 1/1 | 9.86  | 9.72  | 1.1   |
| TRUE | 1/1 | 1/1 | 9.86  | 9.72  | 1.1   |
| TRUE | 1/1 | 1/1 | 10.17 | 9.08  | 2.12  |
| TRUE | 1/1 | 1/1 | 10.17 | 9.08  | 2.12  |
| TRUE | 1/1 | 1/1 | 10.17 | 9.08  | 2.12  |
| TRUE | 1/1 | 1/1 | 8.67  | 8.41  | 1.2   |
| TRUE | 1/1 | 1/1 | 8.67  | 8.41  | 1.2   |
| TRUE | 1/1 | 1/1 | 8.52  | 5.09  | 10.81 |
| TRUE | 1/1 | 1/1 | 8.52  | 5.09  | 10.81 |
| TRUE | 1/1 | 1/1 | 8.52  | 5.09  | 10.81 |
| TRUE | 1/1 | 1/1 | 8.52  | 5.09  | 10.81 |
| TRUE | 1/1 | 1/1 | 8.52  | 5.09  | 10.81 |
| TRUE | 1/1 | 1/1 | 8.52  | 5.09  | 10.81 |
| TRUE | 1/1 | 1/1 | 8.52  | 5.09  | 10.81 |
| TRUE | 1/1 | 1/1 | 8.52  | 5.09  | 10.81 |
| TRUE | 1/1 | 1/1 | 8.52  | 5.09  | 10.81 |
| TRUE | 1/1 | 1/1 | 8.52  | 5.09  | 10.81 |
| TRUE | 1/1 | 1/1 | 8.52  | 5.09  | 10.81 |
| TRUE | 1/1 | 1/1 | 8.52  | 5.09  | 10.81 |
| TRUE | 1/1 | 1/1 | 8.52  | 5.09  | 10.81 |
| TRUE | 1/1 | 1/1 | 8.52  | 5.09  | 10.81 |
| TRUE | 1/1 | 1/1 | 8.52  | 5.09  | 10.81 |
| TRUE | 1/1 | 1/1 | 8.52  | 5.09  | 10.81 |
| TRUE | 1/1 | 1/1 | 8.52  | 5.09  | 10.81 |
| TRUE | 1/1 | 1/1 | 8.52  | 5.09  | 10.81 |
| TRUE | 1/1 | 1/1 | 8.52  | 5.09  | 10.81 |
| TRUE | 1/1 | 1/1 | 8.52  | 5.09  | 10.81 |
| TRUE | 1/1 | 1/1 | 8.52  | 5.09  | 10.81 |
| TRUE | 1/1 | 1/1 | 8.52  | 5.09  | 10.81 |
| TRUE | 1/1 | 1/1 | 8.52  | 5.09  | 10.81 |
| TRUE | 1/1 | 1/1 | 8.52  | 5.09  | 10.81 |
| TRUE | 1/1 | 1/1 | 8.52  | 5.09  | 10.81 |
| TRUE | 1/1 | 1/1 | 8.52  | 5.09  | 10.81 |
| TRUE | 1/1 | 1/1 | 8.52  | 5.09  | 10.81 |
| TRUE | 1/1 | 1/1 | 7.39  | 7.66  | -1.21 |
| TRUE | 1/1 | 1/1 | 7.39  | 7.66  | -1.21 |
| TRUE | 1/1 | 1/1 | 10.88 | 11.04 | -1.12 |
| TRUE | 1/1 | 1/1 | 10.88 | 11.04 | -1.12 |
| TRUE | 1/1 | 1/1 | 5.42  | 5.18  | 1.18  |
| TRUE | 1/1 | 1/1 | 5.42  | 5.18  | 1.18  |
| TRUE | 1/1 | 1/1 | 5.42  | 5.18  | 1.18  |
| TRUE | 1/1 | 1/1 | 6.96  | 6.79  | 1.12  |
| TRUE | 1/1 | 1/1 | 6.96  | 6.79  | 1.12  |
| TRUE | 1/1 | 1/1 | 6.96  | 6.79  | 1.12  |
| TRUE | 1/1 | 1/1 | 6.88  | 6.99  | -1.07 |
| TRUE | 1/1 | 1/1 | 6.88  | 6.99  | -1.07 |
| TRUE | 1/1 | 1/1 | 6.26  | 5.15  | 2.16  |
| TRUE | 1/1 | 1/1 | 6.26  | 5.15  | 2.16  |
| TRUE | 1/1 | 1/1 | 6.5   | 6.32  | 1.13  |
| TRUE | 1/1 | 1/1 | 6.5   | 6.32  | 1.13  |
| TRUE | 1/1 | 1/1 | 6.02  | 5.99  | 1.02  |
| TRUE | 1/1 | 1/1 | 6.02  | 5.99  | 1.02  |
| TRUE | 1/1 | 1/1 | 6.02  | 5.99  | 1.02  |
| TRUE | 1/1 | 1/1 | 6.44  | 6     | 1.36  |



|      |     |     |       |       |       |
|------|-----|-----|-------|-------|-------|
| TRUE | 1/1 | 1/1 | 5.25  | 4.42  | 1.79  |
| TRUE | 1/1 | 1/1 | 5.25  | 4.42  | 1.79  |
| TRUE | 1/1 | 1/1 | 5.25  | 4.42  | 1.79  |
| TRUE | 1/1 | 1/1 | 5.25  | 4.42  | 1.79  |
| TRUE | 1/1 | 1/1 | 6.47  | 7.01  | -1.46 |
| TRUE | 1/1 | 1/1 | 6.47  | 7.01  | -1.46 |
| TRUE | 1/1 | 1/1 | 10.35 | 10.34 | 1.01  |
| TRUE | 1/1 | 1/1 | 10.35 | 10.34 | 1.01  |
| TRUE | 1/1 | 1/1 | 10.35 | 10.34 | 1.01  |
| TRUE | 1/1 | 1/1 | 10.35 | 10.34 | 1.01  |
| TRUE | 1/1 | 1/1 | 4.9   | 5.01  | -1.09 |
| TRUE | 1/1 | 1/1 | 4.9   | 5.01  | -1.09 |
| TRUE | 1/1 | 1/1 | 9.2   | 8.95  | 1.19  |
| TRUE | 1/1 | 1/1 | 9.2   | 8.95  | 1.19  |
| TRUE | 1/1 | 1/1 | 4.91  | 4.86  | 1.04  |
| TRUE | 1/1 | 1/1 | 4.91  | 4.86  | 1.04  |
| TRUE | 1/1 | 1/1 | 4.91  | 4.86  | 1.04  |
| TRUE | 1/1 | 1/1 | 8.59  | 8.72  | -1.1  |
| TRUE | 1/1 | 1/1 | 8.59  | 8.72  | -1.1  |
| TRUE | 1/1 | 1/1 | 8.37  | 6.04  | 5.02  |
| TRUE | 1/1 | 1/1 | 8.37  | 6.04  | 5.02  |
| TRUE | 1/1 | 1/1 | 8.37  | 6.04  | 5.02  |
| TRUE | 1/1 | 1/1 | 8.37  | 6.04  | 5.02  |
| TRUE | 1/1 | 1/1 | 8.37  | 6.04  | 5.02  |
| TRUE | 1/1 | 1/1 | 8.37  | 6.04  | 5.02  |
| TRUE | 1/1 | 1/1 | 8.37  | 6.04  | 5.02  |
| TRUE | 1/1 | 1/1 | 8.37  | 6.04  | 5.02  |
| TRUE | 1/1 | 1/1 | 8.37  | 6.04  | 5.02  |
| TRUE | 1/1 | 1/1 | 7.06  | 7.78  | -1.65 |
| TRUE | 1/1 | 1/1 | 7.06  | 7.78  | -1.65 |
| TRUE | 1/1 | 1/1 | 7.06  | 7.78  | -1.65 |
| TRUE | 1/1 | 1/1 | 6.81  | 6.71  | 1.07  |
| TRUE | 1/1 | 1/1 | 6.81  | 6.71  | 1.07  |
| TRUE | 1/1 | 1/1 | 4.71  | 4.38  | 1.26  |
| TRUE | 1/1 | 1/1 | 4.71  | 4.38  | 1.26  |
| TRUE | 1/1 | 1/1 | 4.71  | 4.38  | 1.26  |
| TRUE | 1/1 | 1/1 | 8.26  | 7.39  | 1.82  |
| TRUE | 1/1 | 1/1 | 8.26  | 7.39  | 1.82  |
| TRUE | 1/1 | 1/1 | 7.1   | 7.33  | -1.17 |
| TRUE | 1/1 | 1/1 | 7.1   | 7.33  | -1.17 |
| TRUE | 1/1 | 1/1 | 7.84  | 7.83  | 1.01  |
| TRUE | 1/1 | 1/1 | 7.84  | 7.83  | 1.01  |
| TRUE | 1/1 | 1/1 | 7.84  | 7.83  | 1.01  |
| TRUE | 1/1 | 1/1 | 7.84  | 7.83  | 1.01  |
| TRUE | 1/1 | 1/1 | 7.84  | 7.83  | 1.01  |
| TRUE | 1/1 | 1/1 | 10.32 | 8.01  | 4.99  |
| TRUE | 1/1 | 1/1 | 10.32 | 8.01  | 4.99  |
| TRUE | 1/1 | 1/1 | 10.32 | 8.01  | 4.99  |
| TRUE | 1/1 | 1/1 | 10.32 | 8.01  | 4.99  |
| TRUE | 1/1 | 1/1 | 10.32 | 8.01  | 4.99  |
| TRUE | 1/1 | 1/1 | 7.54  | 5     | 5.8   |
| TRUE | 1/1 | 1/1 | 7.54  | 5     | 5.8   |
| TRUE | 1/1 | 1/1 | 6.13  | 5.78  | 1.28  |
| TRUE | 1/1 | 1/1 | 6.13  | 5.78  | 1.28  |
| TRUE | 1/1 | 1/1 | 6.13  | 5.78  | 1.28  |
| TRUE | 1/1 | 1/1 | 10.53 | 7.11  | 10.72 |
| TRUE | 1/1 | 1/1 | 10.53 | 7.11  | 10.72 |
| TRUE | 1/1 | 1/1 | 10.53 | 7.11  | 10.72 |
| TRUE | 1/1 | 1/1 | 10.53 | 7.11  | 10.72 |



|      |     |     |       |      |       |
|------|-----|-----|-------|------|-------|
| TRUE | 1/1 | 1/1 | 9.02  | 6.44 | 5.96  |
| TRUE | 1/1 | 1/1 | 9.56  | 6.29 | 9.63  |
| TRUE | 1/1 | 1/1 | 9.56  | 6.29 | 9.63  |
| TRUE | 1/1 | 1/1 | 9.56  | 6.29 | 9.63  |
| TRUE | 1/1 | 1/1 | 9.56  | 6.29 | 9.63  |
| TRUE | 1/1 | 1/1 | 9.56  | 6.29 | 9.63  |
| TRUE | 1/1 | 1/1 | 9.56  | 6.29 | 9.63  |
| TRUE | 1/1 | 1/1 | 9.56  | 6.29 | 9.63  |
| TRUE | 1/1 | 1/1 | 9.56  | 6.29 | 9.63  |
| TRUE | 1/1 | 1/1 | 9.56  | 6.29 | 9.63  |
| TRUE | 1/1 | 1/1 | 9.56  | 6.29 | 9.63  |
| TRUE | 1/1 | 1/1 | 9.56  | 6.29 | 9.63  |
| TRUE | 1/1 | 1/1 | 9.56  | 6.29 | 9.63  |
| TRUE | 1/1 | 1/1 | 9.56  | 6.29 | 9.63  |
| TRUE | 1/1 | 1/1 | 9.56  | 6.29 | 9.63  |
| TRUE | 1/1 | 1/1 | 9.56  | 6.29 | 9.63  |
| TRUE | 1/1 | 1/1 | 9.56  | 6.29 | 9.63  |
| TRUE | 1/1 | 1/1 | 9.56  | 6.29 | 9.63  |
| TRUE | 1/1 | 1/1 | 10.71 | 8.15 | 5.91  |
| TRUE | 1/1 | 1/1 | 10.71 | 8.15 | 5.91  |
| TRUE | 1/1 | 1/1 | 10.71 | 8.15 | 5.91  |
| TRUE | 1/1 | 1/1 | 10.71 | 8.15 | 5.91  |
| TRUE | 1/1 | 1/1 | 10.71 | 8.15 | 5.91  |
| TRUE | 1/1 | 1/1 | 10.71 | 8.15 | 5.91  |
| TRUE | 1/1 | 1/1 | 10.71 | 8.15 | 5.91  |
| TRUE | 1/1 | 1/1 | 10.71 | 8.15 | 5.91  |
| TRUE | 1/1 | 1/1 | 10.71 | 8.15 | 5.91  |
| TRUE | 1/1 | 1/1 | 10.71 | 8.15 | 5.91  |
| TRUE | 1/1 | 1/1 | 10.71 | 8.15 | 5.91  |
| TRUE | 1/1 | 1/1 | 10.71 | 8.15 | 5.91  |
| TRUE | 1/1 | 1/1 | 10.71 | 8.15 | 5.91  |
| TRUE | 1/1 | 1/1 | 10.64 | 8.11 | 5.79  |
| TRUE | 1/1 | 1/1 | 10.64 | 8.11 | 5.79  |
| TRUE | 1/1 | 1/1 | 10.64 | 8.11 | 5.79  |
| TRUE | 1/1 | 1/1 | 10.64 | 8.11 | 5.79  |
| TRUE | 1/1 | 1/1 | 10.64 | 8.11 | 5.79  |
| TRUE | 1/1 | 1/1 | 6.33  | 6.34 | -1.01 |
| TRUE | 1/1 | 1/1 | 6.33  | 6.34 | -1.01 |
| TRUE | 1/1 | 1/1 | 10.57 | 8.29 | 4.85  |
| TRUE | 1/1 | 1/1 | 10.57 | 8.29 | 4.85  |
| TRUE | 1/1 | 1/1 | 9.4   | 6.23 | 9.01  |
| TRUE | 1/1 | 1/1 | 9.4   | 6.23 | 9.01  |

| Chromosome | Genomic Position      | Eligible   | 6 PSR/JUC Expressed | 4 PSR/JUC Expressed |
|------------|-----------------------|------------|---------------------|---------------------|
| 2          | 20232411 - 20251789   | T - 66.67% | TRUE                | FALSE               |
| 2          | 20232411 - 20251789   |            | TRUE                | TRUE                |
| 1          | 111659954 - 111682838 |            | TRUE                | FALSE               |
| 1          | 111659954 - 111682838 |            | TRUE                | TRUE                |
| 1          | 111659954 - 111682838 |            | TRUE                | FALSE               |
| 1          | 111659954 - 111682838 | F - 37.50% | TRUE                | TRUE                |
| 1          | 111659954 - 111682838 |            | TRUE                | TRUE                |
| 1          | 111659954 - 111682838 |            | TRUE                | TRUE                |
| 1          | 111659954 - 111682838 |            | FALSE               | TRUE                |
| 17         | 30335037 - 30380519   | F - 37.50% | TRUE                | TRUE                |
| 17         | 30335037 - 30380519   |            | TRUE                | FALSE               |
| 17         | 30335037 - 30380519   |            | TRUE                | TRUE                |
| 18         | 66382491 - 66722426   |            | TRUE                | FALSE               |
| 18         | 66382491 - 66722426   | F - 33.33% | TRUE                | TRUE                |
| 18         | 66382491 - 66722426   |            | TRUE                | TRUE                |
| 18         | 66382491 - 66722426   | F - 33.33% | TRUE                | TRUE                |
| 18         | 66382491 - 66722426   | F - 22.22% | TRUE                | TRUE                |
| 18         | 66382491 - 66722426   | F - 44.44% | FALSE               | TRUE                |
| 18         | 66382491 - 66722426   | F - 22.22% | TRUE                | TRUE                |
| 18         | 66382491 - 66722426   | F - 11.11% | FALSE               | TRUE                |
| 18         | 66382491 - 66722426   |            | FALSE               | TRUE                |
| 18         | 66382491 - 66722426   |            | TRUE                | TRUE                |
| 18         | 66382491 - 66722426   | F - 11.11% | FALSE               | TRUE                |
| 18         | 66382491 - 66722426   | F - 22.22% | FALSE               | TRUE                |
| 18         | 66382491 - 66722426   |            | TRUE                | TRUE                |
| 18         | 66382491 - 66722426   | F - 11.11% | FALSE               | TRUE                |
| 18         | 66382491 - 66722426   |            | FALSE               | TRUE                |
| 18         | 66382491 - 66722426   | T - 66.67% | TRUE                | TRUE                |
| 18         | 66382491 - 66722426   |            | FALSE               | TRUE                |
| 18         | 66382491 - 66722426   |            | FALSE               | TRUE                |
| 3          | 41236328 - 41301587   |            | TRUE                | FALSE               |
| 3          | 41236328 - 41301587   | F - 4.17%  | TRUE                | TRUE                |
| 3          | 41236328 - 41301587   | F - 16.67% | TRUE                | FALSE               |
| 3          | 41236328 - 41301587   | F - 16.67% | TRUE                | TRUE                |
| 3          | 41236328 - 41301587   |            | TRUE                | TRUE                |
| 3          | 41236328 - 41301587   | F - 37.50% | TRUE                | TRUE                |
| 3          | 41236328 - 41301587   | F - 20.83% | TRUE                | TRUE                |
| 3          | 41236328 - 41301587   |            | TRUE                | FALSE               |
| 3          | 41236328 - 41301587   |            | TRUE                | FALSE               |
| 3          | 41236328 - 41301587   |            | TRUE                | TRUE                |
| 3          | 41236328 - 41301587   |            | TRUE                | TRUE                |
| 3          | 41236328 - 41301587   | F - 4.17%  | TRUE                | TRUE                |
| 3          | 41236328 - 41301587   |            | TRUE                | TRUE                |
| 3          | 41236328 - 41301587   | F - 33.33% | FALSE               | TRUE                |
| 3          | 41236328 - 41301587   | F - 4.17%  | FALSE               | TRUE                |
| 3          | 41236328 - 41301587   |            | TRUE                | TRUE                |
| 3          | 41236328 - 41301587   | F - 4.17%  | FALSE               | TRUE                |
| 14         | 34393421 - 34638972   |            | TRUE                | FALSE               |
| 14         | 34393421 - 34638972   | F - 14.29% | TRUE                | TRUE                |
| 14         | 34393421 - 34638972   |            | TRUE                | TRUE                |
| 14         | 34393421 - 34638972   | F - 14.29% | TRUE                | TRUE                |
| 14         | 34393421 - 34638972   | T - 50.00% | TRUE                | TRUE                |
| 14         | 34393421 - 34638972   | F - 42.86% | TRUE                | TRUE                |
| 14         | 34393421 - 34638972   | F - 28.57% | TRUE                | TRUE                |
| 14         | 34393421 - 34638972   |            | FALSE               | TRUE                |
| 14         | 34393421 - 34638972   | F - 7.14%  | FALSE               | TRUE                |
| 14         | 34393421 - 34638972   | T - 57.14% | TRUE                | TRUE                |

|    |                     |             |       |       |
|----|---------------------|-------------|-------|-------|
| 14 | 34393421 - 34638972 | T - 78.57%  | TRUE  | TRUE  |
| 14 | 34393421 - 34638972 | F - 42.86%  | TRUE  | TRUE  |
| 14 | 34393421 - 34638972 | F - 35.71%  | FALSE | TRUE  |
| 14 | 34393421 - 34638972 | T - 64.29%  | FALSE | TRUE  |
| 14 | 34393421 - 34638972 |             | FALSE | TRUE  |
| 14 | 34393421 - 34638972 | T - 71.43%  | TRUE  | TRUE  |
| 14 | 34393421 - 34638972 | T - 71.43%  | FALSE | TRUE  |
| 14 | 34393421 - 34638972 | T - 78.57%  | TRUE  | TRUE  |
| 14 | 34393421 - 34638972 |             | FALSE | TRUE  |
| 14 | 34393421 - 34638972 |             | FALSE | TRUE  |
| 11 | 74407474 - 74442430 |             | TRUE  | FALSE |
| 11 | 74407474 - 74442430 |             | TRUE  | TRUE  |
| 11 | 74407474 - 74442430 | F - 9.09%   | FALSE | TRUE  |
| 11 | 74407474 - 74442430 |             | TRUE  | TRUE  |
| 11 | 74407474 - 74442430 | F - 18.18%  | TRUE  | TRUE  |
| 11 | 74407474 - 74442430 | F - 9.09%   | FALSE | TRUE  |
| 11 | 74407474 - 74442430 | T - 90.91%  | TRUE  | TRUE  |
| 11 | 74407474 - 74442430 | F - 9.09%   | TRUE  | TRUE  |
| 11 | 74407474 - 74442430 | T - 72.73%  | TRUE  | TRUE  |
| 11 | 74407474 - 74442430 | T - 63.64%  | TRUE  | TRUE  |
| 11 | 74407474 - 74442430 | F - 27.27%  | TRUE  | TRUE  |
| 11 | 74407474 - 74442430 | T - 100.00% | FALSE | TRUE  |
| 11 | 74407474 - 74442430 | T - 54.55%  | TRUE  | TRUE  |
| 11 | 74407474 - 74442430 | T - 81.82%  | FALSE | TRUE  |
| 11 | 74407474 - 74442430 |             | FALSE | TRUE  |
| 11 | 74407474 - 74442430 |             | FALSE | TRUE  |
| 11 | 74407474 - 74442430 |             | FALSE | TRUE  |
| 11 | 74407474 - 74442430 |             | FALSE | TRUE  |
| 11 | 74407474 - 74442430 |             | FALSE | TRUE  |
| 11 | 74407474 - 74442430 |             | FALSE | TRUE  |
| 11 | 74407474 - 74442430 |             | FALSE | TRUE  |
| 11 | 74407474 - 74442430 |             | FALSE | TRUE  |
| 9  | 87283466 - 87638505 |             | TRUE  | FALSE |
| 9  | 87283466 - 87638505 | F - 29.41%  | TRUE  | TRUE  |
| 9  | 87283466 - 87638505 | F - 23.53%  | TRUE  | TRUE  |
| 9  | 87283466 - 87638505 |             | TRUE  | TRUE  |
| 9  | 87283466 - 87638505 | F - 29.41%  | TRUE  | TRUE  |
| 9  | 87283466 - 87638505 | F - 11.76%  | FALSE | TRUE  |
| 9  | 87283466 - 87638505 | F - 41.18%  | TRUE  | TRUE  |
| 9  | 87283466 - 87638505 | F - 17.65%  | FALSE | TRUE  |
| 9  | 87283466 - 87638505 |             | TRUE  | TRUE  |
| 9  | 87283466 - 87638505 | T - 64.71%  | TRUE  | TRUE  |
| 9  | 87283466 - 87638505 | F - 47.06%  | TRUE  | TRUE  |
| 9  | 87283466 - 87638505 | T - 58.82%  | TRUE  | TRUE  |
| 9  | 87283466 - 87638505 | F - 23.53%  | FALSE | TRUE  |
| 9  | 87283466 - 87638505 | F - 23.53%  | FALSE | TRUE  |
| 9  | 87283466 - 87638505 | F - 29.41%  | FALSE | TRUE  |
| 9  | 87283466 - 87638505 |             | TRUE  | TRUE  |
| 9  | 87283466 - 87638505 | F - 23.53%  | FALSE | TRUE  |
| 9  | 87283466 - 87638505 |             | FALSE | TRUE  |
| 9  | 87283466 - 87638505 |             | FALSE | TRUE  |
| 9  | 87283466 - 87638505 | F - 35.29%  | FALSE | TRUE  |
| 9  | 87283466 - 87638505 | T - 94.12%  | FALSE | TRUE  |
| 9  | 87283466 - 87638505 |             | FALSE | TRUE  |
| 9  | 87283466 - 87638505 |             | TRUE  | TRUE  |
| 9  | 87283466 - 87638505 | F - 23.53%  | FALSE | TRUE  |
| 9  | 87283466 - 87638505 | T - 76.47%  | TRUE  | TRUE  |
| 9  | 87283466 - 87638505 |             | FALSE | TRUE  |
| 9  | 87283466 - 87638505 | T - 94.12%  | FALSE | TRUE  |



|    |                       |            |       |       |
|----|-----------------------|------------|-------|-------|
| 9  | 87283466 - 87638505   | F - 41.18% | FALSE | TRUE  |
| 9  | 87283466 - 87638505   | T - 94.12% | TRUE  | TRUE  |
| 9  | 87283466 - 87638505   |            | FALSE | TRUE  |
| 9  | 87283466 - 87638505   | T - 94.12% | FALSE | TRUE  |
| 9  | 87283466 - 87638505   |            | FALSE | TRUE  |
| 9  | 87283466 - 87638505   |            | FALSE | TRUE  |
| 9  | 87283466 - 87638505   | T - 94.12% | TRUE  | TRUE  |
| 9  | 87283466 - 87638505   |            | FALSE | TRUE  |
| 9  | 87283466 - 87638505   |            | FALSE | TRUE  |
| 5  | 79287134 - 79379110   |            | TRUE  | TRUE  |
| 5  | 79287134 - 79379110   |            | TRUE  | TRUE  |
| 5  | 79287134 - 79379110   |            | TRUE  | FALSE |
| 5  | 79287134 - 79379110   |            | TRUE  | TRUE  |
| 5  | 79287134 - 79379110   |            | TRUE  | TRUE  |
| 5  | 79287134 - 79379110   | T - 55.56% | TRUE  | TRUE  |
| 5  | 79287134 - 79379110   |            | TRUE  | TRUE  |
| 11 | 102706528 - 102714534 | F - 11.11% | TRUE  | TRUE  |
| 11 | 102706528 - 102714534 |            | FALSE | TRUE  |
| 11 | 102706528 - 102714534 | F - 11.11% | FALSE | TRUE  |
| 11 | 102706528 - 102714534 |            | FALSE | TRUE  |
| 11 | 102706528 - 102714534 |            | FALSE | TRUE  |
| 11 | 102706528 - 102714534 | T - 55.56% | FALSE | TRUE  |
| 11 | 102706528 - 102714534 | F - 33.33% | FALSE | TRUE  |
| 11 | 102706528 - 102714534 |            | FALSE | TRUE  |
| 11 | 102706528 - 102714534 | T - 88.89% | FALSE | TRUE  |
| 11 | 102706528 - 102714534 |            | FALSE | TRUE  |
| 11 | 102706528 - 102714534 |            | TRUE  | TRUE  |
| 4  | 23756664 - 23905712   |            | TRUE  | TRUE  |
| 4  | 23756664 - 23905712   |            | TRUE  | TRUE  |
| 4  | 23756664 - 23905712   |            | TRUE  | TRUE  |
| 4  | 23756664 - 23905712   | F - 5.00%  | FALSE | TRUE  |
| 4  | 23756664 - 23905712   |            | FALSE | TRUE  |
| 4  | 23756664 - 23905712   | F - 5.00%  | TRUE  | TRUE  |
| 4  | 23756664 - 23905712   |            | TRUE  | TRUE  |
| 4  | 23756664 - 23905712   | F - 5.00%  | TRUE  | TRUE  |
| 4  | 23756664 - 23905712   | F - 5.00%  | TRUE  | TRUE  |
| 4  | 23756664 - 23905712   |            | FALSE | TRUE  |
| 4  | 23756664 - 23905712   |            | FALSE | TRUE  |
| 4  | 23756664 - 23905712   | F - 5.00%  | FALSE | TRUE  |
| 4  | 23756664 - 23905712   | F - 5.00%  | TRUE  | TRUE  |
| 4  | 23756664 - 23905712   |            | FALSE | TRUE  |
| 4  | 23756664 - 23905712   | F - 5.00%  | FALSE | TRUE  |
| 4  | 23756664 - 23905712   |            | FALSE | TRUE  |
| 4  | 23756664 - 23905712   | F - 10.00% | FALSE | TRUE  |
| 4  | 23756664 - 23905712   |            | FALSE | TRUE  |
| 4  | 23756664 - 23905712   | F - 5.00%  | FALSE | TRUE  |
| 4  | 23756664 - 23905712   | F - 40.00% | TRUE  | TRUE  |
| 4  | 23756664 - 23905712   | F - 35.00% | FALSE | TRUE  |
| 4  | 23756664 - 23905712   | F - 10.00% | FALSE | TRUE  |
| 4  | 23756664 - 23905712   | F - 15.00% | FALSE | TRUE  |
| 4  | 23756664 - 23905712   |            | FALSE | TRUE  |
| 4  | 23756664 - 23905712   | F - 5.00%  | FALSE | TRUE  |
| 4  | 23756664 - 23905712   | F - 25.00% | TRUE  | TRUE  |
| 4  | 23756664 - 23905712   | F - 45.00% | TRUE  | TRUE  |
| 4  | 23756664 - 23905712   | F - 10.00% | TRUE  | TRUE  |
| 4  | 23756664 - 23905712   |            | FALSE | TRUE  |
| 4  | 23756664 - 23905712   | F - 20.00% | FALSE | TRUE  |
| 4  | 23756664 - 23905712   | F - 20.00% | FALSE | TRUE  |

|   |                       |            |       |       |
|---|-----------------------|------------|-------|-------|
| 4 | 23756664 - 23905712   | F - 45.00% | TRUE  | TRUE  |
| 4 | 23756664 - 23905712   |            | TRUE  | TRUE  |
| 7 | 136553399 - 136705002 | F - 16.67% | TRUE  | TRUE  |
| 7 | 136553399 - 136705002 |            | FALSE | TRUE  |
| 7 | 136553399 - 136705002 | F - 33.33% | TRUE  | TRUE  |
| 7 | 136553399 - 136705002 |            | TRUE  | TRUE  |
| 7 | 136553399 - 136705002 | F - 11.11% | FALSE | TRUE  |
| 7 | 136553399 - 136705002 | F - 11.11% | TRUE  | TRUE  |
| 7 | 136553399 - 136705002 | T - 94.44% | TRUE  | TRUE  |
| 7 | 136553399 - 136705002 | F - 5.56%  | TRUE  | TRUE  |
| 7 | 136553399 - 136705002 |            | FALSE | TRUE  |
| 7 | 136553399 - 136705002 |            | FALSE | TRUE  |
| 7 | 136553399 - 136705002 |            | FALSE | TRUE  |
| 7 | 136553399 - 136705002 | F - 22.22% | TRUE  | TRUE  |
| 7 | 136553399 - 136705002 | F - 16.67% | FALSE | TRUE  |
| 7 | 136553399 - 136705002 |            | FALSE | TRUE  |
| 7 | 136553399 - 136705002 | T - 77.78% | FALSE | TRUE  |
| 3 | 148880197 - 148939842 |            | FALSE | TRUE  |
| 3 | 148880197 - 148939842 |            | FALSE | TRUE  |
| 3 | 148880197 - 148939842 |            | TRUE  | TRUE  |
| 3 | 148880197 - 148939842 | F - 9.09%  | FALSE | TRUE  |
| 3 | 148880197 - 148939842 | F - 9.09%  | FALSE | TRUE  |
| 3 | 148880197 - 148939842 |            | TRUE  | TRUE  |
| 3 | 148880197 - 148939842 |            | FALSE | TRUE  |
| 3 | 148880197 - 148939842 | F - 4.55%  | TRUE  | TRUE  |
| 3 | 148880197 - 148939842 | F - 13.64% | TRUE  | TRUE  |
| 3 | 148880197 - 148939842 | F - 13.64% | TRUE  | TRUE  |
| 3 | 148880197 - 148939842 |            | FALSE | TRUE  |
| 3 | 148880197 - 148939842 | F - 18.18% | FALSE | TRUE  |
| 3 | 148880197 - 148939842 | F - 4.55%  | FALSE | TRUE  |
| 3 | 148880197 - 148939842 | F - 9.09%  | TRUE  | TRUE  |
| 3 | 148880197 - 148939842 | F - 4.55%  | FALSE | TRUE  |
| 3 | 148880197 - 148939842 |            | FALSE | TRUE  |
| 3 | 148880197 - 148939842 | F - 13.64% | TRUE  | TRUE  |
| 3 | 148880197 - 148939842 |            | FALSE | TRUE  |
| 3 | 148880197 - 148939842 |            | FALSE | TRUE  |
| 3 | 148880197 - 148939842 |            | TRUE  | TRUE  |
| 3 | 148880197 - 148939842 | F - 4.55%  | FALSE | TRUE  |
| 3 | 148880197 - 148939842 | F - 9.09%  | FALSE | TRUE  |
| 3 | 148880197 - 148939842 |            | TRUE  | TRUE  |
| 3 | 148880197 - 148939842 | T - 68.18% | FALSE | TRUE  |
| 3 | 148880197 - 148939842 | T - 59.09% | TRUE  | TRUE  |
| 3 | 148880197 - 148939842 | T - 63.64% | FALSE | TRUE  |
| 3 | 148880197 - 148939842 | F - 40.91% | TRUE  | TRUE  |
| 3 | 148880197 - 148939842 |            | TRUE  | TRUE  |
| 7 | 43152198 - 43602938   |            | TRUE  | FALSE |
| 7 | 43152198 - 43602938   |            | TRUE  | FALSE |
| 7 | 43152198 - 43602938   | F - 26.67% | TRUE  | TRUE  |
| 7 | 43152198 - 43602938   |            | TRUE  | FALSE |
| 7 | 43152198 - 43602938   |            | TRUE  | TRUE  |
| 7 | 43152198 - 43602938   | F - 26.67% | TRUE  | TRUE  |
| 7 | 43152198 - 43602938   |            | TRUE  | FALSE |
| 7 | 43152198 - 43602938   |            | TRUE  | TRUE  |
| 7 | 43152198 - 43602938   |            | TRUE  | TRUE  |
| 7 | 43152198 - 43602938   |            | TRUE  | TRUE  |
| 7 | 43152198 - 43602938   |            | TRUE  | TRUE  |
| 7 | 43152198 - 43602938   | F - 33.33% | TRUE  | FALSE |
| 7 | 43152198 - 43602938   |            | TRUE  | FALSE |
| 7 | 43152198 - 43602938   | F - 33.33% | TRUE  | TRUE  |

|    |                       |            |       |       |
|----|-----------------------|------------|-------|-------|
| 7  | 43152198 - 43602938   | F - 26.67% | TRUE  | FALSE |
| 7  | 43152198 - 43602938   |            | TRUE  | TRUE  |
| 7  | 43152198 - 43602938   |            | TRUE  | TRUE  |
| 7  | 43152198 - 43602938   | F - 33.33% | TRUE  | TRUE  |
| 7  | 43152198 - 43602938   | F - 33.33% | TRUE  | TRUE  |
| 7  | 43152198 - 43602938   | F - 13.33% | TRUE  | TRUE  |
| 7  | 43152198 - 43602938   | F - 40.00% | TRUE  | TRUE  |
| 7  | 43152198 - 43602938   |            | TRUE  | FALSE |
| 7  | 43152198 - 43602938   | F - 46.67% | TRUE  | TRUE  |
| 7  | 43152198 - 43602938   | F - 20.00% | TRUE  | TRUE  |
| 7  | 43152198 - 43602938   | F - 40.00% | TRUE  | TRUE  |
| 7  | 43152198 - 43602938   |            | TRUE  | TRUE  |
| 7  | 43152198 - 43602938   | F - 33.33% | TRUE  | TRUE  |
| 7  | 43152198 - 43602938   | F - 33.33% | TRUE  | TRUE  |
| 7  | 43152198 - 43602938   | F - 20.00% | TRUE  | TRUE  |
| 7  | 43152198 - 43602938   | F - 33.33% | TRUE  | TRUE  |
| 7  | 43152198 - 43602938   |            | FALSE | TRUE  |
| 7  | 43152198 - 43602938   |            | TRUE  | TRUE  |
| 7  | 43152198 - 43602938   | F - 6.67%  | TRUE  | TRUE  |
| 7  | 43152198 - 43602938   | F - 13.33% | FALSE | TRUE  |
| 7  | 43152198 - 43602938   | F - 6.67%  | TRUE  | TRUE  |
| 7  | 43152198 - 43602938   |            | TRUE  | TRUE  |
| 7  | 43152198 - 43602938   |            | TRUE  | TRUE  |
| 12 | 57628686 - 57634498   | F - 16.67% | TRUE  | TRUE  |
| 12 | 57628686 - 57634498   |            | TRUE  | TRUE  |
| 12 | 57628686 - 57634498   | F - 16.67% | TRUE  | TRUE  |
| 12 | 57628686 - 57634498   | T - 50.00% | TRUE  | TRUE  |
| 12 | 57628686 - 57634498   |            | FALSE | TRUE  |
| 12 | 57628686 - 57634498   | T - 66.67% | TRUE  | TRUE  |
| 12 | 57628686 - 57634498   | T - 66.67% | TRUE  | TRUE  |
| 12 | 57628686 - 57634498   | F - 16.67% | TRUE  | TRUE  |
| 12 | 57628686 - 57634498   | F - 16.67% | FALSE | TRUE  |
| 12 | 57628686 - 57634498   |            | FALSE | TRUE  |
| 7  | 130126016 - 130146138 | F - 11.11% | TRUE  | TRUE  |
| 7  | 130126016 - 130146138 | F - 3.70%  | TRUE  | TRUE  |
| 7  | 130126016 - 130146138 |            | FALSE | TRUE  |
| 7  | 130126016 - 130146138 | F - 3.70%  | FALSE | TRUE  |
| 7  | 130126016 - 130146138 | F - 7.41%  | TRUE  | TRUE  |
| 7  | 130126016 - 130146138 | F - 7.41%  | FALSE | TRUE  |
| 7  | 130126016 - 130146138 | F - 7.41%  | TRUE  | TRUE  |
| 7  | 130126016 - 130146138 | F - 22.22% | FALSE | TRUE  |
| 7  | 130126016 - 130146138 |            | TRUE  | TRUE  |
| 7  | 130126016 - 130146138 |            | TRUE  | TRUE  |
| 7  | 130126016 - 130146138 |            | FALSE | TRUE  |
| 7  | 130126016 - 130146138 |            | TRUE  | TRUE  |
| 7  | 130126016 - 130146138 | F - 3.70%  | FALSE | TRUE  |
| 7  | 130126016 - 130146138 |            | TRUE  | TRUE  |
| 7  | 130126016 - 130146138 | F - 3.70%  | FALSE | TRUE  |
| 7  | 130126016 - 130146138 | F - 3.70%  | TRUE  | TRUE  |
| 7  | 130126016 - 130146138 | F - 3.70%  | FALSE | TRUE  |
| 7  | 130126016 - 130146138 | F - 3.70%  | TRUE  | TRUE  |
| 7  | 130126016 - 130146138 | F - 3.70%  | FALSE | TRUE  |
| 7  | 130126016 - 130146138 | F - 11.11% | TRUE  | TRUE  |
| 7  | 130126016 - 130146138 |            | FALSE | TRUE  |
| 7  | 130126016 - 130146138 | T - 81.48% | TRUE  | TRUE  |
| 7  | 130126016 - 130146138 |            | FALSE | TRUE  |
| 7  | 130126016 - 130146138 |            | TRUE  | TRUE  |
| 7  | 130126016 - 130146138 | T - 81.48% | TRUE  | TRUE  |
| 7  | 130126016 - 130146138 |            | FALSE | TRUE  |

|    |                       |            |       |       |
|----|-----------------------|------------|-------|-------|
| 7  | 130126016 - 130146138 | T - 77.78% | TRUE  | TRUE  |
| 7  | 130126016 - 130146138 | T - 55.56% | TRUE  | TRUE  |
| 7  | 130126016 - 130146138 | T - 81.48% | TRUE  | TRUE  |
| 7  | 130126016 - 130146138 |            | TRUE  | TRUE  |
| 7  | 130126016 - 130146138 |            | TRUE  | TRUE  |
| 7  | 130126016 - 130146138 |            | FALSE | TRUE  |
| 18 | 43304092 - 43332485   |            | TRUE  | FALSE |
| 18 | 43304092 - 43332485   |            | TRUE  | TRUE  |
| 18 | 43304092 - 43332485   | F - 46.67% | TRUE  | TRUE  |
| 18 | 43304092 - 43332485   | T - 80.00% | TRUE  | TRUE  |
| 18 | 43304092 - 43332485   | T - 80.00% | TRUE  | TRUE  |
| 9  | 121915736 - 122131745 |            | TRUE  | TRUE  |
| 9  | 121915736 - 122131745 | T - 71.43% | TRUE  | TRUE  |
| 9  | 121915736 - 122131745 | F - 14.29% | FALSE | TRUE  |
| 9  | 121915736 - 122131745 | F - 42.86% | FALSE | TRUE  |
| 9  | 121915736 - 122131745 |            | TRUE  | TRUE  |
| 9  | 121915736 - 122131745 | T - 85.71% | TRUE  | TRUE  |
| 9  | 121915736 - 122131745 |            | TRUE  | TRUE  |
| 9  | 121915736 - 122131745 |            | TRUE  | TRUE  |
| 9  | 121915736 - 122131745 |            | TRUE  | TRUE  |
| 13 | 38136719 - 38183563   |            | TRUE  | FALSE |
| 13 | 38136719 - 38183563   | F - 4.76%  | TRUE  | TRUE  |
| 13 | 38136719 - 38183563   | F - 9.52%  | TRUE  | TRUE  |
| 13 | 38136719 - 38183563   |            | TRUE  | TRUE  |
| 13 | 38136719 - 38183563   | T - 76.19% | TRUE  | TRUE  |
| 13 | 38136719 - 38183563   | F - 4.76%  | TRUE  | TRUE  |
| 13 | 38136719 - 38183563   |            | TRUE  | TRUE  |
| 13 | 38136719 - 38183563   |            | TRUE  | TRUE  |
| 13 | 38136719 - 38183563   | T - 52.38% | TRUE  | TRUE  |
| 13 | 38136719 - 38183563   | F - 47.62% | TRUE  | TRUE  |
| 13 | 38136719 - 38183563   |            | TRUE  | TRUE  |
| 13 | 38136719 - 38183563   |            | TRUE  | TRUE  |
| 13 | 38136719 - 38183563   | T - 85.71% | TRUE  | TRUE  |
| 13 | 38136719 - 38183563   |            | TRUE  | TRUE  |
| 13 | 38136719 - 38183563   | T - 66.67% | TRUE  | TRUE  |
| 13 | 38136719 - 38183563   | T - 66.67% | TRUE  | TRUE  |
| 13 | 38136719 - 38183563   | F - 42.86% | TRUE  | TRUE  |
| 13 | 38136719 - 38183563   |            | TRUE  | TRUE  |
| 13 | 38136719 - 38183563   | F - 42.86% | TRUE  | FALSE |
| 5  | 95726040 - 95769847   |            | TRUE  | TRUE  |
| 5  | 95726040 - 95769847   |            | FALSE | TRUE  |
| 5  | 95726040 - 95769847   | F - 12.50% | TRUE  | TRUE  |
| 5  | 95726040 - 95769847   | F - 37.50% | FALSE | TRUE  |
| 5  | 95726040 - 95769847   | F - 25.00% | TRUE  | TRUE  |
| 5  | 95726040 - 95769847   | F - 37.50% | FALSE | TRUE  |
| 5  | 95726040 - 95769847   | F - 25.00% | FALSE | TRUE  |
| 5  | 95726040 - 95769847   | F - 25.00% | TRUE  | TRUE  |
| 5  | 95726040 - 95769847   | T - 50.00% | TRUE  | TRUE  |
| 5  | 95726040 - 95769847   |            | FALSE | TRUE  |
| 5  | 95726040 - 95769847   | T - 75.00% | FALSE | TRUE  |
| 5  | 95726040 - 95769847   |            | TRUE  | TRUE  |
| 5  | 95726040 - 95769847   | T - 87.50% | TRUE  | TRUE  |
| 5  | 95726040 - 95769847   |            | TRUE  | TRUE  |
| 5  | 95726040 - 95769847   |            | TRUE  | TRUE  |
| 5  | 95726040 - 95769847   | T - 75.00% | TRUE  | TRUE  |
| 5  | 95726040 - 95769847   | T - 62.50% | TRUE  | TRUE  |
| 5  | 95726040 - 95769847   | T - 62.50% | TRUE  | TRUE  |
| 5  | 95726040 - 95769847   |            | TRUE  | TRUE  |

|            |                       |             |       |       |
|------------|-----------------------|-------------|-------|-------|
| 5          | 95726040 - 95769847   |             | FALSE | TRUE  |
| 5          | 95726040 - 95769847   |             | FALSE | TRUE  |
| 5          | 95726040 - 95769847   | T - 87.50%  | FALSE | TRUE  |
| 5          | 95726040 - 95769847   | T - 87.50%  | FALSE | TRUE  |
| 5          | 95726040 - 95769847   |             | FALSE | TRUE  |
| 8          | 23699428 - 23712320   |             | TRUE  | TRUE  |
| 8          | 23699428 - 23712320   | F - 20.00%  | FALSE | TRUE  |
| 8          | 23699428 - 23712320   |             | FALSE | TRUE  |
| 8          | 23699428 - 23712320   | T - 60.00%  | FALSE | TRUE  |
| 8          | 23699428 - 23712320   | T - 100.00% | TRUE  | TRUE  |
| 8          | 23699428 - 23712320   |             | FALSE | TRUE  |
| 8          | 23699428 - 23712320   |             | TRUE  | TRUE  |
| 9          | 114659046 - 114697649 |             | TRUE  | TRUE  |
| 9          | 114659046 - 114697649 | F - 42.86%  | TRUE  | TRUE  |
| 9          | 114659046 - 114697649 | F - 42.86%  | FALSE | TRUE  |
| 9          | 114659046 - 114697649 | F - 28.57%  | TRUE  | TRUE  |
| 9          | 114659046 - 114697649 | F - 14.29%  | FALSE | TRUE  |
| 9          | 114659046 - 114697649 |             | TRUE  | TRUE  |
| 9          | 114659046 - 114697649 | F - 14.29%  | FALSE | TRUE  |
| 9          | 114659046 - 114697649 | F - 14.29%  | TRUE  | TRUE  |
| 9          | 114659046 - 114697649 |             | TRUE  | TRUE  |
| 2          | 216225163 - 216300895 | F - 1.96%   | TRUE  | TRUE  |
| 2          | 216225163 - 216300895 | F - 1.96%   | TRUE  | TRUE  |
| 2          | 216225163 - 216300895 | F - 1.96%   | TRUE  | TRUE  |
| 2          | 216225163 - 216300895 | F - 1.96%   | TRUE  | TRUE  |
| 2          | 216225163 - 216300895 | F - 1.96%   | TRUE  | TRUE  |
| 2          | 216225163 - 216300895 | F - 1.96%   | TRUE  | TRUE  |
| 2          | 216225163 - 216300895 | F - 1.96%   | TRUE  | TRUE  |
| 2          | 216225163 - 216300895 | F - 3.92%   | TRUE  | FALSE |
| 2          | 216225163 - 216300895 | F - 3.92%   | TRUE  | TRUE  |
| 2          | 216225163 - 216300895 | F - 5.88%   | TRUE  | TRUE  |
| 2          | 216225163 - 216300895 | F - 1.96%   | TRUE  | TRUE  |
| 2          | 216225163 - 216300895 | F - 3.92%   | TRUE  | TRUE  |
| 2          | 216225163 - 216300895 | F - 3.92%   | TRUE  | TRUE  |
| 2          | 216225163 - 216300895 | F - 3.92%   | TRUE  | TRUE  |
| 2          | 216225163 - 216300895 | F - 5.88%   | TRUE  | TRUE  |
| 2          | 216225163 - 216300895 | F - 5.88%   | TRUE  | TRUE  |
| 2          | 216225163 - 216300895 | F - 3.92%   | TRUE  | TRUE  |
| 2          | 216225163 - 216300895 | F - 3.92%   | TRUE  | TRUE  |
| 2          | 216225163 - 216300895 | F - 3.92%   | TRUE  | TRUE  |
| 2          | 216225163 - 216300895 | F - 1.96%   | TRUE  | TRUE  |
| 2          | 216225163 - 216300895 | F - 1.96%   | TRUE  | TRUE  |
| 2          | 216225163 - 216300895 | F - 1.96%   | TRUE  | TRUE  |
| 2          | 216225163 - 216300895 | F - 3.92%   | TRUE  | TRUE  |
| 2          | 216225163 - 216300895 |             | TRUE  | TRUE  |
| 2          | 216225163 - 216300895 | F - 41.18%  | TRUE  | TRUE  |
| 2          | 216225163 - 216300895 | T - 62.75%  | TRUE  | TRUE  |
| 2          | 216225163 - 216300895 |             | TRUE  | TRUE  |
| 2          | 216225163 - 216300895 |             | TRUE  | FALSE |
| 2          | 216225163 - 216300895 |             | TRUE  | TRUE  |
| 2          | 216225163 - 216300895 |             | TRUE  | FALSE |
| 2          | 216225163 - 216300895 | T - 64.71%  | TRUE  | TRUE  |
| 2          | 216225163 - 216300895 | T - 52.94%  | TRUE  | TRUE  |
| 2          | 216225163 - 216300895 | F - 21.57%  | TRUE  | TRUE  |
| 6_mcf_hap5 | 1292221 - 1295564     | T - 85.71%  | TRUE  | TRUE  |
| 6_mcf_hap5 | 1292221 - 1295564     | F - 14.29%  | TRUE  | FALSE |
| 6_mcf_hap5 | 1292221 - 1295564     | F - 28.57%  | TRUE  | FALSE |
| 6_mcf_hap5 | 1292221 - 1295564     | F - 7.14%   | TRUE  | TRUE  |

|            |                     |            |       |       |
|------------|---------------------|------------|-------|-------|
| 6_mcf_hap5 | 1292221 - 1295564   |            | TRUE  | TRUE  |
| 6_mcf_hap5 | 1292221 - 1295564   | F - 7.14%  | FALSE | TRUE  |
| 6_mcf_hap5 | 1292221 - 1295564   |            | TRUE  | TRUE  |
| 6_mcf_hap5 | 1292221 - 1295564   |            | FALSE | TRUE  |
| 1          | 66258193 - 66840262 | F - 38.10% | TRUE  | TRUE  |
| 1          | 66258193 - 66840262 |            | TRUE  | TRUE  |
| 1          | 66258193 - 66840262 | T - 66.67% | TRUE  | TRUE  |
| 1          | 66258193 - 66840262 | F - 42.86% | TRUE  | TRUE  |
| 1          | 66258193 - 66840262 |            | TRUE  | TRUE  |
| 1          | 66258193 - 66840262 | T - 66.67% | TRUE  | FALSE |
| 1          | 66258193 - 66840262 | T - 57.14% | TRUE  | TRUE  |
| 1          | 66258193 - 66840262 | T - 66.67% | TRUE  | TRUE  |
| 1          | 66258193 - 66840262 | F - 14.29% | TRUE  | FALSE |
| 1          | 66258193 - 66840262 |            | TRUE  | TRUE  |
| 1          | 66258193 - 66840262 |            | FALSE | TRUE  |
| 1          | 66258193 - 66840262 |            | TRUE  | TRUE  |
| 1          | 66258193 - 66840262 |            | TRUE  | TRUE  |
| 1          | 66258193 - 66840262 | F - 38.10% | TRUE  | TRUE  |
| 1          | 66258193 - 66840262 |            | TRUE  | TRUE  |
| 1          | 66258193 - 66840262 | F - 9.52%  | TRUE  | FALSE |
| 1          | 66258193 - 66840262 | F - 4.76%  | TRUE  | TRUE  |
| 1          | 66258193 - 66840262 | F - 14.29% | TRUE  | TRUE  |
| 1          | 66258193 - 66840262 | F - 9.52%  | FALSE | TRUE  |
| 1          | 66258193 - 66840262 | F - 9.52%  | FALSE | TRUE  |
| 1          | 66258193 - 66840262 | T - 61.90% | FALSE | TRUE  |
| 1          | 66258193 - 66840262 | F - 14.29% | TRUE  | TRUE  |
| 1          | 66258193 - 66840262 | F - 42.86% | FALSE | TRUE  |
| 1          | 66258193 - 66840262 | T - 80.95% | TRUE  | TRUE  |
| 1          | 66258193 - 66840262 | T - 66.67% | TRUE  | TRUE  |
| 1          | 66258193 - 66840262 | F - 9.52%  | FALSE | TRUE  |
| 1          | 66258193 - 66840262 |            | TRUE  | TRUE  |
| 1          | 66258193 - 66840262 |            | FALSE | TRUE  |
| 1          | 66258193 - 66840262 |            | TRUE  | TRUE  |
| 1          | 66258193 - 66840262 |            | TRUE  | TRUE  |
| 1          | 66258193 - 66840262 |            | TRUE  | TRUE  |
| 1          | 66258193 - 66840262 |            | TRUE  | TRUE  |
| 3          | 52728504 - 52740048 |            | TRUE  | TRUE  |
| 3          | 52728504 - 52740048 | F - 3.85%  | TRUE  | TRUE  |
| 6_dbb_hap3 | 1202397 - 1207037   | T - 77.78% | TRUE  | TRUE  |
| 6_dbb_hap3 | 1202397 - 1207037   | F - 11.11% | TRUE  | FALSE |
| 6_dbb_hap3 | 1202397 - 1207037   | F - 33.33% | TRUE  | FALSE |
| 6_dbb_hap3 | 1202397 - 1207037   | F - 5.56%  | TRUE  | TRUE  |
| 6_dbb_hap3 | 1202397 - 1207037   |            | TRUE  | TRUE  |
| 6_dbb_hap3 | 1202397 - 1207037   | F - 5.56%  | TRUE  | TRUE  |
| 6_dbb_hap3 | 1202397 - 1207037   | F - 5.56%  | FALSE | TRUE  |
| 6_dbb_hap3 | 1202397 - 1207037   | F - 33.33% | TRUE  | TRUE  |
| 6_dbb_hap3 | 1202397 - 1207037   |            | TRUE  | TRUE  |
| 6_dbb_hap3 | 1202397 - 1207037   |            | FALSE | TRUE  |
| 13         | 36342789 - 36705514 |            | TRUE  | FALSE |
| 13         | 36342789 - 36705514 | T - 62.50% | TRUE  | TRUE  |
| 13         | 36342789 - 36705514 | F - 43.75% | TRUE  | TRUE  |
| 13         | 36342789 - 36705514 |            | TRUE  | TRUE  |
| 13         | 36342789 - 36705514 | F - 43.75% | TRUE  | TRUE  |
| 13         | 36342789 - 36705514 |            | TRUE  | FALSE |
| 13         | 36342789 - 36705514 |            | TRUE  | TRUE  |
| 13         | 36342789 - 36705514 |            | TRUE  | TRUE  |
| 13         | 36342789 - 36705514 | F - 12.50% | TRUE  | TRUE  |
| 13         | 36342789 - 36705514 | F - 18.75% | TRUE  | TRUE  |
| 13         | 36342789 - 36705514 | F - 43.75% | TRUE  | TRUE  |

|   |                     |            |       |       |
|---|---------------------|------------|-------|-------|
| Y | 15346461 - 15592553 |            | TRUE  | FALSE |
| Y | 15346461 - 15592553 |            | TRUE  | FALSE |
| Y | 15346461 - 15592553 | T - 85.71% | TRUE  | FALSE |
| Y | 15346461 - 15592553 | T - 71.43% | TRUE  | FALSE |
| Y | 15346461 - 15592553 | T - 85.00% | TRUE  | TRUE  |
| Y | 15346461 - 15592553 |            | TRUE  | FALSE |
| Y | 15346461 - 15592553 | T - 90.71% | TRUE  | FALSE |
| Y | 15346461 - 15592553 | T - 89.29% | TRUE  | TRUE  |
| Y | 15346461 - 15592553 |            | TRUE  | FALSE |
| Y | 15346461 - 15592553 | T - 87.14% | TRUE  | TRUE  |
| Y | 15346461 - 15592553 |            | TRUE  | FALSE |
| Y | 15346461 - 15592553 |            | TRUE  | FALSE |
| Y | 15346461 - 15592553 | T - 84.29% | TRUE  | TRUE  |
| Y | 15346461 - 15592553 | T - 91.43% | TRUE  | TRUE  |
| Y | 15346461 - 15592553 |            | TRUE  | FALSE |
| Y | 15346461 - 15592553 |            | TRUE  | FALSE |
| Y | 15346461 - 15592553 | T - 52.14% | TRUE  | FALSE |
| Y | 15346461 - 15592553 |            | TRUE  | FALSE |
| Y | 15346461 - 15592553 | T - 52.14% | TRUE  | TRUE  |
| Y | 15346461 - 15592553 | T - 92.14% | TRUE  | TRUE  |
| Y | 15346461 - 15592553 | F - 2.14%  | TRUE  | FALSE |
| Y | 15346461 - 15592553 | T - 92.86% | TRUE  | FALSE |
| Y | 15346461 - 15592553 |            | TRUE  | TRUE  |
| Y | 15346461 - 15592553 | T - 52.14% | TRUE  | FALSE |
| Y | 15346461 - 15592553 | F - 0.71%  | TRUE  | FALSE |
| Y | 15346461 - 15592553 | F - 0.71%  | TRUE  | FALSE |
| Y | 15346461 - 15592553 | F - 30.71% | TRUE  | TRUE  |
| Y | 15346461 - 15592553 | T - 95.00% | TRUE  | TRUE  |
| Y | 15346461 - 15592553 | F - 10.71% | TRUE  | TRUE  |
| Y | 15346461 - 15592553 | F - 35.71% | TRUE  | TRUE  |
| Y | 15346461 - 15592553 |            | TRUE  | TRUE  |
| Y | 15346461 - 15592553 | F - 18.57% | TRUE  | FALSE |
| Y | 15346461 - 15592553 |            | TRUE  | TRUE  |
| Y | 15346461 - 15592553 |            | TRUE  | TRUE  |
| Y | 15346461 - 15592553 |            | TRUE  | FALSE |
| Y | 15346461 - 15592553 | F - 22.86% | TRUE  | TRUE  |
| Y | 15346461 - 15592553 | T - 90.71% | TRUE  | TRUE  |
| Y | 15346461 - 15592553 | T - 96.43% | TRUE  | TRUE  |
| Y | 15346461 - 15592553 |            | TRUE  | TRUE  |
| Y | 15346461 - 15592553 | T - 93.57% | TRUE  | FALSE |
| Y | 15346461 - 15592553 | F - 0.71%  | TRUE  | FALSE |
| Y | 15346461 - 15592553 | F - 26.43% | TRUE  | TRUE  |
| Y | 15346461 - 15592553 | T - 72.86% | TRUE  | FALSE |
| Y | 15346461 - 15592553 | T - 52.14% | TRUE  | TRUE  |
| Y | 15346461 - 15592553 |            | TRUE  | TRUE  |
| Y | 15346461 - 15592553 | T - 89.29% | TRUE  | TRUE  |
| Y | 15346461 - 15592553 |            | TRUE  | TRUE  |
| Y | 15346461 - 15592553 | F - 0.71%  | TRUE  | TRUE  |
| Y | 15346461 - 15592553 | T - 95.71% | TRUE  | TRUE  |
| Y | 15346461 - 15592553 |            | TRUE  | TRUE  |
| Y | 15346461 - 15592553 | T - 93.57% | TRUE  | TRUE  |
| Y | 15346461 - 15592553 |            | TRUE  | FALSE |
| Y | 15346461 - 15592553 | F - 3.57%  | TRUE  | TRUE  |
| Y | 15346461 - 15592553 |            | TRUE  | TRUE  |
| Y | 15346461 - 15592553 |            | TRUE  | FALSE |
| Y | 15346461 - 15592553 |            | FALSE | TRUE  |
| Y | 15346461 - 15592553 |            | TRUE  | TRUE  |
| Y | 15346461 - 15592553 |            | TRUE  | TRUE  |

|   |                         |            |       |       |
|---|-------------------------|------------|-------|-------|
| Y | 15346461 - 15592553     |            | FALSE | TRUE  |
| Y | 15346461 - 15592553     | F - 27.86% | TRUE  | TRUE  |
| Y | 15346461 - 15592553     | F - 0.71%  | TRUE  | TRUE  |
| Y | 15346461 - 15592553     | F - 38.57% | TRUE  | TRUE  |
| Y | 15346461 - 15592553     |            | TRUE  | TRUE  |
| Y | 15346461 - 15592553     | F - 0.71%  | TRUE  | TRUE  |
| Y | 15346461 - 15592553     |            | TRUE  | TRUE  |
| Y | 15346461 - 15592553     | T - 77.86% | TRUE  | TRUE  |
| Y | 15346461 - 15592553     |            | TRUE  | TRUE  |
| Y | 15346461 - 15592553     | T - 68.57% | TRUE  | TRUE  |
| Y | 15346461 - 15592553     | T - 92.14% | TRUE  | TRUE  |
| Y | 15346461 - 15592553     | F - 0.71%  | TRUE  | TRUE  |
| Y | 15346461 - 15592553     |            | FALSE | TRUE  |
| Y | 15346461 - 15592553     |            | FALSE | TRUE  |
| Y | 15346461 - 15592553     |            | TRUE  | TRUE  |
| Y | 15346461 - 15592553     |            | FALSE | TRUE  |
| Y | 15346461 - 15592553     |            | TRUE  | TRUE  |
| Y | 15346461 - 15592553     |            | FALSE | TRUE  |
| Y | 15346461 - 15592553     |            | FALSE | TRUE  |
| Y | 15346461 - 15592553     |            | FALSE | TRUE  |
| Y | 15346461 - 15592553     |            | FALSE | TRUE  |
| Y | 15346461 - 15592553     |            | FALSE | TRUE  |
| Y | 15346461 - 15592553     |            | FALSE | TRUE  |
| Y | 15346461 - 15592553     |            | TRUE  | TRUE  |
| Y | 15346461 - 15592553     |            | FALSE | TRUE  |
|   | 8 86376081 - 86393722   | F - 12.50% | TRUE  | TRUE  |
|   | 8 86376081 - 86393722   | F - 37.50% | TRUE  | TRUE  |
|   | 8 86376081 - 86393722   | F - 12.50% | FALSE | TRUE  |
|   | 8 86376081 - 86393722   |            | TRUE  | TRUE  |
|   | 8 86376081 - 86393722   |            | FALSE | TRUE  |
|   | 8 86376081 - 86393722   | T - 87.50% | TRUE  | TRUE  |
|   | 8 86376081 - 86393722   | T - 50.00% | FALSE | TRUE  |
|   | 8 86376081 - 86393722   |            | TRUE  | TRUE  |
|   | 8 86376081 - 86393722   | T - 87.50% | FALSE | TRUE  |
|   | 8 86376081 - 86393722   |            | TRUE  | TRUE  |
|   | 8 86376081 - 86393722   |            | TRUE  | TRUE  |
|   | 8 86376081 - 86393722   | T - 62.50% | FALSE | TRUE  |
|   | 3 189674517 - 189840226 | F - 7.69%  | FALSE | TRUE  |
|   | 3 189674517 - 189840226 | F - 23.08% | FALSE | TRUE  |
|   | 3 189674517 - 189840226 | F - 7.69%  | FALSE | TRUE  |
|   | 3 189674517 - 189840226 | F - 7.69%  | TRUE  | TRUE  |
|   | 3 189674517 - 189840226 | F - 7.69%  | FALSE | TRUE  |
|   | 3 189674517 - 189840226 | F - 7.69%  | TRUE  | TRUE  |
|   | 3 189674517 - 189840226 | F - 15.38% | TRUE  | TRUE  |
|   | 3 189674517 - 189840226 | F - 7.69%  | FALSE | TRUE  |
|   | 3 189674517 - 189840226 |            | FALSE | TRUE  |
|   | 3 189674517 - 189840226 | F - 7.69%  | FALSE | TRUE  |
|   | 3 189674517 - 189840226 | F - 7.69%  | FALSE | TRUE  |
|   | 3 189674517 - 189840226 |            | TRUE  | TRUE  |
|   | 3 189674517 - 189840226 |            | TRUE  | TRUE  |
|   | 3 189674517 - 189840226 |            | FALSE | TRUE  |
|   | 10 6186843 - 6277507    |            | TRUE  | FALSE |
|   | 10 6186843 - 6277507    |            | TRUE  | TRUE  |
|   | 10 6186843 - 6277507    | F - 32.26% | TRUE  | TRUE  |
|   | 10 6186843 - 6277507    | F - 6.45%  | TRUE  | TRUE  |
|   | 10 6186843 - 6277507    | F - 3.23%  | TRUE  | TRUE  |
|   | 10 6186843 - 6277507    | F - 6.45%  | TRUE  | TRUE  |
|   | 10 6186843 - 6277507    | F - 9.68%  | TRUE  | TRUE  |
|   | 10 6186843 - 6277507    | F - 3.23%  | TRUE  | TRUE  |



|    |                       |             |       |       |
|----|-----------------------|-------------|-------|-------|
| 10 | 6186843 - 6277507     |             | FALSE | TRUE  |
| 10 | 6186843 - 6277507     |             | FALSE | TRUE  |
| 10 | 6186843 - 6277507     | F - 41.94%  | TRUE  | TRUE  |
| 10 | 6186843 - 6277507     |             | FALSE | TRUE  |
| 10 | 6186843 - 6277507     |             | FALSE | TRUE  |
| 10 | 6186843 - 6277507     |             | FALSE | TRUE  |
| 10 | 6186843 - 6277507     |             | FALSE | TRUE  |
| 10 | 6186843 - 6277507     | F - 6.45%   | FALSE | TRUE  |
| 10 | 6186843 - 6277507     | F - 9.68%   | TRUE  | TRUE  |
| 10 | 6186843 - 6277507     |             | FALSE | TRUE  |
| 10 | 6186843 - 6277507     |             | FALSE | TRUE  |
| 10 | 6186843 - 6277507     |             | FALSE | TRUE  |
| 10 | 6186843 - 6277507     |             | TRUE  | TRUE  |
| 10 | 4934796 - 5022159     |             | TRUE  | TRUE  |
| 10 | 4934796 - 5022159     | F - 25.00%  | TRUE  | TRUE  |
| 10 | 4934796 - 5022159     | F - 25.00%  | TRUE  | TRUE  |
| 10 | 4934796 - 5022159     | F - 25.00%  | TRUE  | TRUE  |
| 10 | 4934796 - 5022159     | F - 25.00%  | TRUE  | TRUE  |
| 10 | 4934796 - 5022159     |             | FALSE | TRUE  |
| 10 | 4934796 - 5022159     |             | TRUE  | TRUE  |
| 10 | 4934796 - 5022159     |             | FALSE | TRUE  |
| 10 | 4934796 - 5022159     | T - 58.33%  | FALSE | TRUE  |
| 10 | 4934796 - 5022159     | F - 8.33%   | FALSE | TRUE  |
| 10 | 4934796 - 5022159     | F - 16.67%  | FALSE | TRUE  |
| 10 | 4934796 - 5022159     | F - 8.33%   | TRUE  | TRUE  |
| 10 | 4934796 - 5022159     | F - 8.33%   | FALSE | TRUE  |
| 10 | 4934796 - 5022159     | F - 8.33%   | FALSE | TRUE  |
| 10 | 4934796 - 5022159     |             | TRUE  | TRUE  |
| 10 | 4934796 - 5022159     | F - 8.33%   | FALSE | TRUE  |
| 10 | 4934796 - 5022159     | F - 25.00%  | TRUE  | TRUE  |
| 10 | 4934796 - 5022159     | T - 100.00% | TRUE  | TRUE  |
| 8  | 23154410 - 23282841   |             | TRUE  | TRUE  |
| 8  | 23154410 - 23282841   |             | TRUE  | TRUE  |
| 8  | 23154410 - 23282841   |             | TRUE  | TRUE  |
| 8  | 23154410 - 23282841   |             | TRUE  | TRUE  |
| 8  | 23154410 - 23282841   |             | TRUE  | TRUE  |
| 8  | 23154410 - 23282841   | F - 5.56%   | TRUE  | TRUE  |
| 8  | 23154410 - 23282841   |             | FALSE | TRUE  |
| 8  | 23154410 - 23282841   | F - 16.67%  | FALSE | TRUE  |
| 8  | 23154410 - 23282841   | F - 5.56%   | FALSE | TRUE  |
| 8  | 23154410 - 23282841   | F - 5.56%   | FALSE | TRUE  |
| 8  | 23154410 - 23282841   | F - 11.11%  | FALSE | TRUE  |
| 8  | 23154410 - 23282841   |             | TRUE  | TRUE  |
| 8  | 23154410 - 23282841   | F - 5.56%   | TRUE  | TRUE  |
| 8  | 23154410 - 23282841   |             | FALSE | TRUE  |
| 8  | 23154410 - 23282841   | F - 5.56%   | TRUE  | TRUE  |
| 1  | 163038396 - 163046592 |             | TRUE  | TRUE  |
| 1  | 163038396 - 163046592 |             | TRUE  | TRUE  |
| 1  | 163038396 - 163046592 | F - 6.67%   | TRUE  | FALSE |
| 1  | 163038396 - 163046592 | F - 46.67%  | TRUE  | TRUE  |
| 1  | 163038396 - 163046592 |             | TRUE  | TRUE  |
| 1  | 163038396 - 163046592 | T - 80.00%  | TRUE  | TRUE  |
| 1  | 163038396 - 163046592 | F - 6.67%   | FALSE | TRUE  |
| 1  | 163038396 - 163046592 | F - 13.33%  | FALSE | TRUE  |
| 1  | 163038396 - 163046592 | T - 66.67%  | FALSE | TRUE  |
| 1  | 163038396 - 163046592 | T - 73.33%  | TRUE  | TRUE  |
| 1  | 163038396 - 163046592 | T - 73.33%  | TRUE  | TRUE  |
| 1  | 163038396 - 163046592 |             | TRUE  | TRUE  |

|    |                     |            |       |       |
|----|---------------------|------------|-------|-------|
| 3  | 47626762 - 47823596 | F - 14.29% | TRUE  | FALSE |
| 3  | 47626762 - 47823596 |            | FALSE | TRUE  |
| 20 | 36756863 - 36794980 |            | TRUE  | TRUE  |
| 20 | 36756863 - 36794980 |            | TRUE  | TRUE  |
| 20 | 36756863 - 36794980 | F - 5.88%  | TRUE  | TRUE  |
| 20 | 36756863 - 36794980 | F - 11.76% | FALSE | TRUE  |
| 20 | 36756863 - 36794980 | F - 5.88%  | TRUE  | TRUE  |
| 20 | 36756863 - 36794980 | T - 88.24% | TRUE  | TRUE  |
| 20 | 36756863 - 36794980 | F - 11.76% | FALSE | TRUE  |
| 20 | 36756863 - 36794980 |            | FALSE | TRUE  |
| 20 | 36756863 - 36794980 |            | FALSE | TRUE  |
| 20 | 36756863 - 36794980 | F - 11.76% | TRUE  | TRUE  |
| 20 | 36756863 - 36794980 |            | FALSE | TRUE  |
| 20 | 36756863 - 36794980 |            | FALSE | TRUE  |
| 20 | 36756863 - 36794980 |            | FALSE | TRUE  |
| 20 | 36756863 - 36794980 |            | FALSE | TRUE  |
| 20 | 36756863 - 36794980 |            | TRUE  | TRUE  |
| 20 | 36756863 - 36794980 |            | FALSE | TRUE  |
| 6  | 43737921 - 43754224 |            | TRUE  | TRUE  |
| 6  | 43737921 - 43754224 | F - 2.63%  | TRUE  | TRUE  |
| 6  | 43737921 - 43754224 | T - 52.63% | TRUE  | TRUE  |
| 6  | 43737921 - 43754224 | T - 60.53% | TRUE  | TRUE  |
| 6  | 43737921 - 43754224 | F - 5.26%  | TRUE  | TRUE  |
| 6  | 43737921 - 43754224 | F - 10.53% | TRUE  | TRUE  |
| 6  | 43737921 - 43754224 | F - 2.63%  | FALSE | TRUE  |
| 6  | 43737921 - 43754224 | T - 63.16% | FALSE | TRUE  |
| 6  | 43737921 - 43754224 |            | FALSE | TRUE  |
| 6  | 43737921 - 43754224 |            | FALSE | TRUE  |
| 6  | 43737921 - 43754224 | F - 10.53% | TRUE  | TRUE  |
| 6  | 43737921 - 43754224 | F - 2.63%  | FALSE | TRUE  |
| 6  | 43737921 - 43754224 |            | TRUE  | TRUE  |
| 6  | 43737921 - 43754224 | F - 34.21% | TRUE  | TRUE  |
| 6  | 43737921 - 43754224 |            | FALSE | TRUE  |
| 6  | 43737921 - 43754224 | T - 52.63% | TRUE  | TRUE  |
| 6  | 43737921 - 43754224 |            | TRUE  | TRUE  |
| 6  | 43737921 - 43754224 | F - 2.63%  | FALSE | TRUE  |
| 6  | 43737921 - 43754224 |            | FALSE | TRUE  |
| 19 | 43696854 - 43709926 | F - 10.00% | TRUE  | TRUE  |
| 19 | 43696854 - 43709926 |            | TRUE  | TRUE  |
| 19 | 43696854 - 43709926 | F - 10.00% | TRUE  | TRUE  |
| 19 | 43696854 - 43709926 | F - 10.00% | TRUE  | TRUE  |
| 19 | 43696854 - 43709926 |            | FALSE | TRUE  |
| 19 | 43696854 - 43709926 | F - 10.00% | TRUE  | TRUE  |
| 19 | 43696854 - 43709926 | T - 80.00% | TRUE  | TRUE  |
| 19 | 43696854 - 43709926 | T - 70.00% | FALSE | TRUE  |
| 19 | 43696854 - 43709926 |            | TRUE  | TRUE  |
| 19 | 43696854 - 43709926 |            | FALSE | TRUE  |
| 19 | 43696854 - 43709926 |            | FALSE | TRUE  |
| 19 | 43696854 - 43709926 | T - 70.00% | TRUE  | TRUE  |
| 9  | 43684885 - 43924049 |            | TRUE  | FALSE |
| 9  | 43684885 - 43924049 |            | TRUE  | TRUE  |
| 9  | 43684885 - 43924049 | F - 25.00% | TRUE  | TRUE  |
| 9  | 43684885 - 43924049 |            | TRUE  | TRUE  |
| 9  | 43684885 - 43924049 | F - 37.50% | TRUE  | TRUE  |
| 9  | 43684885 - 43924049 | F - 25.00% | TRUE  | TRUE  |
| 9  | 43684885 - 43924049 | T - 50.00% | TRUE  | TRUE  |
| 9  | 43684885 - 43924049 | F - 31.25% | TRUE  | TRUE  |
| 9  | 43684885 - 43924049 |            | FALSE | TRUE  |

|            |                       |             |       |       |
|------------|-----------------------|-------------|-------|-------|
| 9          | 43684885 - 43924049   |             | TRUE  | TRUE  |
| 9          | 43684885 - 43924049   | F - 25.00%  | TRUE  | TRUE  |
| 9          | 43684885 - 43924049   | F - 25.00%  | TRUE  | TRUE  |
| 9          | 43684885 - 43924049   | F - 37.50%  | TRUE  | TRUE  |
| 9          | 43684885 - 43924049   | T - 56.25%  | TRUE  | TRUE  |
| 9          | 43684885 - 43924049   |             | TRUE  | TRUE  |
| 9          | 43684885 - 43924049   |             | TRUE  | TRUE  |
| 9          | 43684885 - 43924049   | F - 18.75%  | FALSE | TRUE  |
| 9          | 43684885 - 43924049   | T - 50.00%  | FALSE | TRUE  |
| 9          | 43684885 - 43924049   | F - 43.75%  | TRUE  | TRUE  |
| 9          | 43684885 - 43924049   | F - 6.25%   | TRUE  | TRUE  |
| 9          | 43684885 - 43924049   | F - 43.75%  | TRUE  | TRUE  |
| 9          | 43684885 - 43924049   | F - 43.75%  | TRUE  | TRUE  |
| 9          | 43684885 - 43924049   | T - 56.25%  | TRUE  | TRUE  |
| 9          | 43684885 - 43924049   |             | TRUE  | TRUE  |
| 9          | 43684885 - 43924049   | T - 56.25%  | TRUE  | TRUE  |
| 9          | 43684885 - 43924049   |             | FALSE | TRUE  |
| 9          | 43684885 - 43924049   |             | FALSE | TRUE  |
| 6_qbl_hap6 | 1201814 - 1206454     | T - 86.67%  | TRUE  | TRUE  |
| 6_qbl_hap6 | 1201814 - 1206454     | F - 13.33%  | TRUE  | FALSE |
| 6_qbl_hap6 | 1201814 - 1206454     | F - 6.67%   | TRUE  | TRUE  |
| 6_qbl_hap6 | 1201814 - 1206454     |             | TRUE  | TRUE  |
| 6_qbl_hap6 | 1201814 - 1206454     | T - 93.33%  | TRUE  | TRUE  |
| 6_qbl_hap6 | 1201814 - 1206454     |             | TRUE  | TRUE  |
| 6_qbl_hap6 | 1201814 - 1206454     |             | FALSE | TRUE  |
| 5          | 145492589 - 145562294 |             | TRUE  | TRUE  |
| 5          | 145492589 - 145562294 |             | FALSE | TRUE  |
| 5          | 145492589 - 145562294 | F - 7.41%   | TRUE  | TRUE  |
| 5          | 145492589 - 145562294 |             | TRUE  | TRUE  |
| 5          | 145492589 - 145562294 |             | FALSE | TRUE  |
| 5          | 145492589 - 145562294 | F - 29.63%  | FALSE | TRUE  |
| 1          | 36771988 - 36787379   | F - 18.18%  | TRUE  | TRUE  |
| 1          | 36771988 - 36787379   | F - 18.18%  | TRUE  | TRUE  |
| 1          | 36771988 - 36787379   | F - 36.36%  | TRUE  | TRUE  |
| 1          | 36771988 - 36787379   |             | TRUE  | TRUE  |
| 1          | 36771988 - 36787379   | F - 36.36%  | FALSE | TRUE  |
| 1          | 36771988 - 36787379   |             | FALSE | TRUE  |
| 1          | 36771988 - 36787379   |             | TRUE  | TRUE  |
| 1          | 36771988 - 36787379   | T - 72.73%  | TRUE  | TRUE  |
| 1          | 36771988 - 36787379   | T - 81.82%  | TRUE  | TRUE  |
| 1          | 36771988 - 36787379   | T - 63.64%  | TRUE  | TRUE  |
| 1          | 36771988 - 36787379   | T - 63.64%  | TRUE  | TRUE  |
| 1          | 36771988 - 36787379   |             | TRUE  | TRUE  |
| 1          | 36771988 - 36787379   | T - 81.82%  | TRUE  | TRUE  |
| 1          | 36771988 - 36787379   |             | TRUE  | TRUE  |
| 10         | 10826402 - 10836943   | F - 25.00%  | TRUE  | TRUE  |
| 10         | 10826402 - 10836943   | T - 100.00% | TRUE  | TRUE  |
| 10         | 10826402 - 10836943   | T - 100.00% | TRUE  | TRUE  |
| 10         | 10826402 - 10836943   |             | FALSE | TRUE  |
| 10         | 10826402 - 10836943   |             | FALSE | TRUE  |
| 10         | 10826402 - 10836943   | T - 75.00%  | FALSE | TRUE  |
| 12         | 51785101 - 51909547   |             | TRUE  | FALSE |
| 12         | 51785101 - 51909547   |             | TRUE  | TRUE  |
| 12         | 51785101 - 51909547   |             | TRUE  | FALSE |
| 12         | 51785101 - 51909547   | F - 18.18%  | TRUE  | FALSE |
| 12         | 51785101 - 51909547   | F - 22.73%  | TRUE  | TRUE  |
| 12         | 51785101 - 51909547   | F - 4.55%   | TRUE  | TRUE  |
| 12         | 51785101 - 51909547   | F - 31.82%  | TRUE  | TRUE  |

|    |                       |            |       |       |
|----|-----------------------|------------|-------|-------|
| 12 | 51785101 - 51909547   | F - 9.09%  | FALSE | TRUE  |
| 12 | 51785101 - 51909547   | F - 27.27% | TRUE  | TRUE  |
| 12 | 51785101 - 51909547   |            | TRUE  | TRUE  |
| 12 | 51785101 - 51909547   | T - 86.36% | TRUE  | TRUE  |
| 12 | 51785101 - 51909547   | F - 45.45% | TRUE  | TRUE  |
| 12 | 51785101 - 51909547   | T - 86.36% | TRUE  | TRUE  |
| 12 | 51785101 - 51909547   | F - 4.55%  | FALSE | TRUE  |
| 12 | 51785101 - 51909547   | F - 22.73% | TRUE  | TRUE  |
| 12 | 51785101 - 51909547   | F - 9.09%  | TRUE  | TRUE  |
| 12 | 51785101 - 51909547   | F - 4.55%  | TRUE  | TRUE  |
| 12 | 51785101 - 51909547   |            | FALSE | TRUE  |
| 12 | 51785101 - 51909547   |            | FALSE | TRUE  |
| 12 | 51785101 - 51909547   |            | FALSE | TRUE  |
| 1  | 205473684 - 205501921 |            | TRUE  | TRUE  |
| 1  | 205473684 - 205501921 |            | TRUE  | FALSE |
| 1  | 205473684 - 205501921 |            | TRUE  | TRUE  |
| 1  | 205473684 - 205501921 |            | TRUE  | TRUE  |
| 1  | 205473684 - 205501921 |            | TRUE  | TRUE  |
| 1  | 205473684 - 205501921 | F - 20.00% | TRUE  | TRUE  |
| 1  | 205473684 - 205501921 | F - 20.00% | TRUE  | TRUE  |
| 1  | 205473684 - 205501921 |            | TRUE  | TRUE  |
| 1  | 205473684 - 205501921 | F - 34.29% | TRUE  | TRUE  |
| 1  | 205473684 - 205501921 | F - 5.71%  | FALSE | TRUE  |
| 1  | 205473684 - 205501921 | F - 22.86% | FALSE | TRUE  |
| 1  | 205473684 - 205501921 | F - 37.14% | FALSE | TRUE  |
| 1  | 205473684 - 205501921 | F - 2.86%  | TRUE  | TRUE  |
| 1  | 205473684 - 205501921 | F - 11.43% | TRUE  | TRUE  |
| 1  | 205473684 - 205501921 | T - 54.29% | TRUE  | TRUE  |
| 1  | 205473684 - 205501921 | T - 68.57% | TRUE  | TRUE  |
| 1  | 205473684 - 205501921 | F - 2.86%  | TRUE  | TRUE  |
| 1  | 205473684 - 205501921 | F - 11.43% | TRUE  | TRUE  |
| 1  | 205473684 - 205501921 | F - 2.86%  | TRUE  | TRUE  |
| 1  | 205473684 - 205501921 | F - 11.43% | TRUE  | TRUE  |
| 1  | 205473684 - 205501921 | F - 11.43% | TRUE  | TRUE  |
| 1  | 205473684 - 205501921 |            | FALSE | TRUE  |
| 1  | 205473684 - 205501921 |            | FALSE | TRUE  |
| 1  | 205473684 - 205501921 | F - 2.86%  | TRUE  | TRUE  |
| 1  | 205473684 - 205501921 |            | TRUE  | TRUE  |
| 1  | 205473684 - 205501921 | T - 60.00% | FALSE | TRUE  |
| 1  | 205473684 - 205501921 | F - 48.57% | FALSE | TRUE  |
| 1  | 205473684 - 205501921 |            | TRUE  | TRUE  |
| 1  | 205473684 - 205501921 | F - 5.71%  | TRUE  | TRUE  |
| 1  | 205473684 - 205501921 | T - 51.43% | TRUE  | TRUE  |
| 1  | 205473684 - 205501921 | T - 51.43% | TRUE  | TRUE  |
| 1  | 205473684 - 205501921 | F - 5.71%  | FALSE | TRUE  |
| 1  | 205473684 - 205501921 | F - 2.86%  | FALSE | TRUE  |
| 1  | 205473684 - 205501921 |            | FALSE | TRUE  |
| 1  | 205473684 - 205501921 |            | TRUE  | TRUE  |
| 1  | 205473684 - 205501921 |            | FALSE | TRUE  |
| 1  | 205473684 - 205501921 | T - 60.00% | FALSE | TRUE  |
| 1  | 205473684 - 205501921 | T - 57.14% | TRUE  | TRUE  |
| 1  | 205473684 - 205501921 |            | FALSE | TRUE  |
| 1  | 205473684 - 205501921 | T - 57.14% | TRUE  | TRUE  |
| 1  | 205473684 - 205501921 | F - 48.57% | FALSE | TRUE  |
| 1  | 205473684 - 205501921 |            | FALSE | TRUE  |
| 1  | 205473684 - 205501921 | F - 48.57% | TRUE  | TRUE  |
| 1  | 205473684 - 205501921 | F - 34.29% | TRUE  | TRUE  |
| 1  | 205473684 - 205501921 |            | FALSE | TRUE  |

|            |                       |             |       |       |
|------------|-----------------------|-------------|-------|-------|
| 1          | 205473684 - 205501921 | T - 54.29%  | TRUE  | TRUE  |
| 1          | 205473684 - 205501921 |             | FALSE | TRUE  |
| 1          | 205473684 - 205501921 | T - 60.00%  | TRUE  | TRUE  |
| 1          | 205473684 - 205501921 |             | FALSE | TRUE  |
| 6          | 138483053 - 138665800 |             | TRUE  | TRUE  |
| 6          | 138483053 - 138665800 | T - 75.00%  | FALSE | TRUE  |
| 6          | 138483053 - 138665800 |             | FALSE | TRUE  |
| 6          | 138483053 - 138665800 |             | FALSE | TRUE  |
| 6          | 138483053 - 138665800 |             | TRUE  | TRUE  |
| 6          | 138483053 - 138665800 |             | TRUE  | TRUE  |
| 6          | 138483053 - 138665800 | T - 75.00%  | TRUE  | TRUE  |
| 6          | 138483053 - 138665800 | T - 75.00%  | TRUE  | TRUE  |
| 6          | 138483053 - 138665800 | T - 75.00%  | TRUE  | TRUE  |
| 6          | 138483053 - 138665800 | T - 75.00%  | TRUE  | TRUE  |
| 6          | 138483053 - 138665800 |             | FALSE | TRUE  |
| 6          | 138483053 - 138665800 |             | TRUE  | TRUE  |
| 6          | 138483053 - 138665800 | T - 100.00% | TRUE  | TRUE  |
| 6          | 138483053 - 138665800 | T - 75.00%  | TRUE  | TRUE  |
| 6          | 138483053 - 138665800 | T - 75.00%  | TRUE  | TRUE  |
| 6          | 138483053 - 138665800 |             | TRUE  | TRUE  |
| 6          | 138483053 - 138665800 |             | FALSE | TRUE  |
| 6          | 138483053 - 138665800 |             | TRUE  | TRUE  |
| 6          | 138483053 - 138665800 | T - 75.00%  | TRUE  | TRUE  |
| 6          | 138483053 - 138665800 |             | TRUE  | TRUE  |
| 6          | 138483053 - 138665800 |             | TRUE  | TRUE  |
| 6          | 138483053 - 138665800 | T - 75.00%  | TRUE  | TRUE  |
| 6          | 138483053 - 138665800 |             | FALSE | TRUE  |
| 6          | 138483053 - 138665800 | T - 75.00%  | TRUE  | TRUE  |
| 6          | 138483053 - 138665800 |             | TRUE  | TRUE  |
| 6          | 138483053 - 138665800 |             | TRUE  | TRUE  |
| 6          | 138483053 - 138665800 |             | FALSE | TRUE  |
| 6          | 138483053 - 138665800 |             | FALSE | TRUE  |
| 9          | 67926761 - 67970293   |             | TRUE  | FALSE |
| 9          | 67926761 - 67970293   | T - 100.00% | TRUE  | TRUE  |
| 9          | 67926761 - 67970293   |             | TRUE  | TRUE  |
| 9          | 67926761 - 67970293   |             | TRUE  | TRUE  |
| 9          | 67926761 - 67970293   |             | FALSE | TRUE  |
| 6_cox_hap2 | 3423477 - 3429617     |             | TRUE  | TRUE  |
| 6_cox_hap2 | 3423477 - 3429617     | F - 6.67%   | TRUE  | TRUE  |
| 6_cox_hap2 | 3423477 - 3429617     | F - 13.33%  | TRUE  | TRUE  |
| 6_cox_hap2 | 3423477 - 3429617     | F - 20.00%  | TRUE  | TRUE  |
| 6_cox_hap2 | 3423477 - 3429617     | F - 20.00%  | TRUE  | TRUE  |
| 6_cox_hap2 | 3423477 - 3429617     | F - 6.67%   | FALSE | TRUE  |
| 6_cox_hap2 | 3423477 - 3429617     | F - 20.00%  | FALSE | TRUE  |
| 6_cox_hap2 | 3423477 - 3429617     | F - 46.67%  | TRUE  | TRUE  |
| 6_cox_hap2 | 3423477 - 3429617     | F - 6.67%   | TRUE  | TRUE  |
| 6_cox_hap2 | 3423477 - 3429617     | F - 6.67%   | TRUE  | TRUE  |
| 6_cox_hap2 | 3423477 - 3429617     | F - 26.67%  | TRUE  | TRUE  |
| 6_cox_hap2 | 3423477 - 3429617     | F - 40.00%  | TRUE  | TRUE  |
| 6_cox_hap2 | 3423477 - 3429617     | F - 6.67%   | FALSE | TRUE  |
| 6_cox_hap2 | 3423477 - 3429617     | F - 46.67%  | TRUE  | TRUE  |
| 6_cox_hap2 | 3423477 - 3429617     | F - 46.67%  | TRUE  | TRUE  |
| 6_cox_hap2 | 3423477 - 3429617     | F - 40.00%  | TRUE  | TRUE  |
| 6_cox_hap2 | 3423477 - 3429617     | T - 53.33%  | TRUE  | TRUE  |
| 6_cox_hap2 | 3423477 - 3429617     |             | TRUE  | TRUE  |
| 6_cox_hap2 | 3423477 - 3429617     | F - 46.67%  | TRUE  | TRUE  |
| 6_cox_hap2 | 3423477 - 3429617     | T - 53.33%  | TRUE  | TRUE  |
| 6_cox_hap2 | 3423477 - 3429617     | T - 53.33%  | TRUE  | TRUE  |

|            |                   |            |       |      |
|------------|-------------------|------------|-------|------|
| 6_cox_hap2 | 3423477 - 3429617 |            | TRUE  | TRUE |
| 6_cox_hap2 | 3423477 - 3429617 |            | TRUE  | TRUE |
| 6_cox_hap2 | 3423477 - 3429617 |            | FALSE | TRUE |
| 6_dbb_hap3 | 3199309 - 3205449 |            | TRUE  | TRUE |
| 6_dbb_hap3 | 3199309 - 3205449 | F - 6.67%  | TRUE  | TRUE |
| 6_dbb_hap3 | 3199309 - 3205449 | F - 13.33% | TRUE  | TRUE |
| 6_dbb_hap3 | 3199309 - 3205449 | F - 20.00% | TRUE  | TRUE |
| 6_dbb_hap3 | 3199309 - 3205449 | F - 20.00% | TRUE  | TRUE |
| 6_dbb_hap3 | 3199309 - 3205449 | F - 6.67%  | FALSE | TRUE |
| 6_dbb_hap3 | 3199309 - 3205449 | F - 20.00% | FALSE | TRUE |
| 6_dbb_hap3 | 3199309 - 3205449 | F - 46.67% | TRUE  | TRUE |
| 6_dbb_hap3 | 3199309 - 3205449 | F - 6.67%  | TRUE  | TRUE |
| 6_dbb_hap3 | 3199309 - 3205449 | F - 6.67%  | TRUE  | TRUE |
| 6_dbb_hap3 | 3199309 - 3205449 | F - 26.67% | TRUE  | TRUE |
| 6_dbb_hap3 | 3199309 - 3205449 | F - 40.00% | TRUE  | TRUE |
| 6_dbb_hap3 | 3199309 - 3205449 | F - 6.67%  | FALSE | TRUE |
| 6_dbb_hap3 | 3199309 - 3205449 | F - 46.67% | TRUE  | TRUE |
| 6_dbb_hap3 | 3199309 - 3205449 | F - 46.67% | TRUE  | TRUE |
| 6_dbb_hap3 | 3199309 - 3205449 | F - 40.00% | TRUE  | TRUE |
| 6_dbb_hap3 | 3199309 - 3205449 | T - 53.33% | TRUE  | TRUE |
| 6_dbb_hap3 | 3199309 - 3205449 |            | TRUE  | TRUE |
| 6_dbb_hap3 | 3199309 - 3205449 | F - 46.67% | TRUE  | TRUE |
| 6_dbb_hap3 | 3199309 - 3205449 | T - 53.33% | TRUE  | TRUE |
| 6_dbb_hap3 | 3199309 - 3205449 | T - 53.33% | TRUE  | TRUE |
| 6_dbb_hap3 | 3199309 - 3205449 |            | TRUE  | TRUE |
| 6_dbb_hap3 | 3199309 - 3205449 |            | TRUE  | TRUE |
| 6_dbb_hap3 | 3199309 - 3205449 |            | FALSE | TRUE |
| 6_mcf_hap5 | 3293565 - 3299705 |            | TRUE  | TRUE |
| 6_mcf_hap5 | 3293565 - 3299705 | F - 6.67%  | TRUE  | TRUE |
| 6_mcf_hap5 | 3293565 - 3299705 | F - 13.33% | TRUE  | TRUE |
| 6_mcf_hap5 | 3293565 - 3299705 | F - 20.00% | TRUE  | TRUE |
| 6_mcf_hap5 | 3293565 - 3299705 | F - 20.00% | TRUE  | TRUE |
| 6_mcf_hap5 | 3293565 - 3299705 | F - 6.67%  | FALSE | TRUE |
| 6_mcf_hap5 | 3293565 - 3299705 | F - 20.00% | FALSE | TRUE |
| 6_mcf_hap5 | 3293565 - 3299705 | F - 6.67%  | FALSE | TRUE |
| 6_mcf_hap5 | 3293565 - 3299705 | F - 46.67% | TRUE  | TRUE |
| 6_mcf_hap5 | 3293565 - 3299705 | F - 6.67%  | TRUE  | TRUE |
| 6_mcf_hap5 | 3293565 - 3299705 | F - 6.67%  | TRUE  | TRUE |
| 6_mcf_hap5 | 3293565 - 3299705 | F - 26.67% | TRUE  | TRUE |
| 6_mcf_hap5 | 3293565 - 3299705 | F - 40.00% | TRUE  | TRUE |
| 6_mcf_hap5 | 3293565 - 3299705 | F - 6.67%  | FALSE | TRUE |
| 6_mcf_hap5 | 3293565 - 3299705 | F - 46.67% | TRUE  | TRUE |
| 6_mcf_hap5 | 3293565 - 3299705 | F - 46.67% | TRUE  | TRUE |
| 6_mcf_hap5 | 3293565 - 3299705 | F - 40.00% | TRUE  | TRUE |
| 6_mcf_hap5 | 3293565 - 3299705 | T - 53.33% | TRUE  | TRUE |
| 6_mcf_hap5 | 3293565 - 3299705 |            | TRUE  | TRUE |
| 6_mcf_hap5 | 3293565 - 3299705 | F - 46.67% | TRUE  | TRUE |
| 6_mcf_hap5 | 3293565 - 3299705 | T - 53.33% | TRUE  | TRUE |
| 6_mcf_hap5 | 3293565 - 3299705 | T - 53.33% | TRUE  | TRUE |
| 6_mcf_hap5 | 3293565 - 3299705 |            | TRUE  | TRUE |
| 6_mcf_hap5 | 3293565 - 3299705 |            | TRUE  | TRUE |
| 6_mcf_hap5 | 3293565 - 3299705 |            | FALSE | TRUE |
| 6_qbl_hap6 | 3207515 - 3213655 |            | TRUE  | TRUE |
| 6_qbl_hap6 | 3207515 - 3213655 | F - 6.67%  | TRUE  | TRUE |
| 6_qbl_hap6 | 3207515 - 3213655 | F - 13.33% | TRUE  | TRUE |
| 6_qbl_hap6 | 3207515 - 3213655 | F - 20.00% | TRUE  | TRUE |
| 6_qbl_hap6 | 3207515 - 3213655 | F - 20.00% | TRUE  | TRUE |
| 6_qbl_hap6 | 3207515 - 3213655 | F - 6.67%  | FALSE | TRUE |

|             |                     |            |       |       |
|-------------|---------------------|------------|-------|-------|
| 6_qbl_hap6  | 3207515 - 3213655   | F - 20.00% | FALSE | TRUE  |
| 6_qbl_hap6  | 3207515 - 3213655   | F - 46.67% | TRUE  | TRUE  |
| 6_qbl_hap6  | 3207515 - 3213655   | F - 6.67%  | TRUE  | TRUE  |
| 6_qbl_hap6  | 3207515 - 3213655   | F - 6.67%  | TRUE  | TRUE  |
| 6_qbl_hap6  | 3207515 - 3213655   | F - 26.67% | TRUE  | TRUE  |
| 6_qbl_hap6  | 3207515 - 3213655   | F - 40.00% | TRUE  | TRUE  |
| 6_qbl_hap6  | 3207515 - 3213655   | F - 6.67%  | FALSE | TRUE  |
| 6_qbl_hap6  | 3207515 - 3213655   | F - 46.67% | TRUE  | TRUE  |
| 6_qbl_hap6  | 3207515 - 3213655   | F - 46.67% | TRUE  | TRUE  |
| 6_qbl_hap6  | 3207515 - 3213655   | F - 40.00% | TRUE  | TRUE  |
| 6_qbl_hap6  | 3207515 - 3213655   | T - 53.33% | TRUE  | TRUE  |
| 6_qbl_hap6  | 3207515 - 3213655   |            | TRUE  | TRUE  |
| 6_qbl_hap6  | 3207515 - 3213655   | F - 46.67% | TRUE  | TRUE  |
| 6_qbl_hap6  | 3207515 - 3213655   | T - 53.33% | TRUE  | TRUE  |
| 6_qbl_hap6  | 3207515 - 3213655   | T - 53.33% | TRUE  | TRUE  |
| 6_qbl_hap6  | 3207515 - 3213655   |            | TRUE  | TRUE  |
| 6_qbl_hap6  | 3207515 - 3213655   |            | TRUE  | TRUE  |
| 6_qbl_hap6  | 3207515 - 3213655   |            | FALSE | TRUE  |
| 6_ssto_hap7 | 3246431 - 3252571   |            | TRUE  | TRUE  |
| 6_ssto_hap7 | 3246431 - 3252571   | F - 6.67%  | TRUE  | TRUE  |
| 6_ssto_hap7 | 3246431 - 3252571   | F - 13.33% | TRUE  | TRUE  |
| 6_ssto_hap7 | 3246431 - 3252571   | F - 20.00% | TRUE  | TRUE  |
| 6_ssto_hap7 | 3246431 - 3252571   | F - 20.00% | TRUE  | TRUE  |
| 6_ssto_hap7 | 3246431 - 3252571   | F - 6.67%  | FALSE | TRUE  |
| 6_ssto_hap7 | 3246431 - 3252571   | F - 20.00% | FALSE | TRUE  |
| 6_ssto_hap7 | 3246431 - 3252571   | F - 6.67%  | FALSE | TRUE  |
| 6_ssto_hap7 | 3246431 - 3252571   | F - 46.67% | TRUE  | TRUE  |
| 6_ssto_hap7 | 3246431 - 3252571   | F - 6.67%  | TRUE  | TRUE  |
| 6_ssto_hap7 | 3246431 - 3252571   | F - 6.67%  | TRUE  | TRUE  |
| 6_ssto_hap7 | 3246431 - 3252571   | F - 26.67% | TRUE  | TRUE  |
| 6_ssto_hap7 | 3246431 - 3252571   | F - 40.00% | TRUE  | TRUE  |
| 6_ssto_hap7 | 3246431 - 3252571   | F - 6.67%  | FALSE | TRUE  |
| 6_ssto_hap7 | 3246431 - 3252571   | F - 46.67% | TRUE  | TRUE  |
| 6_ssto_hap7 | 3246431 - 3252571   | F - 46.67% | TRUE  | TRUE  |
| 6_ssto_hap7 | 3246431 - 3252571   | F - 40.00% | TRUE  | TRUE  |
| 6_ssto_hap7 | 3246431 - 3252571   | T - 53.33% | TRUE  | TRUE  |
| 6_ssto_hap7 | 3246431 - 3252571   |            | TRUE  | TRUE  |
| 6_ssto_hap7 | 3246431 - 3252571   | F - 46.67% | TRUE  | TRUE  |
| 6_ssto_hap7 | 3246431 - 3252571   | T - 53.33% | TRUE  | TRUE  |
| 6_ssto_hap7 | 3246431 - 3252571   | T - 53.33% | TRUE  | TRUE  |
| 6_ssto_hap7 | 3246431 - 3252571   |            | TRUE  | TRUE  |
| 6_ssto_hap7 | 3246431 - 3252571   |            | TRUE  | TRUE  |
| 6_ssto_hap7 | 3246431 - 3252571   |            | FALSE | TRUE  |
| 15          | 94774767 - 95027181 |            | TRUE  | FALSE |
| 15          | 94774767 - 95027181 | F - 35.29% | TRUE  | TRUE  |
| 15          | 63613577 - 63674360 |            | TRUE  | TRUE  |
| 15          | 63613577 - 63674360 | F - 40.00% | TRUE  | TRUE  |
| 15          | 63613577 - 63674360 | F - 10.00% | TRUE  | TRUE  |
| 15          | 63613577 - 63674360 | F - 10.00% | TRUE  | TRUE  |
| 15          | 63613577 - 63674360 | T - 90.00% | TRUE  | TRUE  |
| 15          | 63613577 - 63674360 |            | FALSE | TRUE  |
| 15          | 63613577 - 63674360 | F - 10.00% | TRUE  | TRUE  |
| 15          | 63613577 - 63674360 | F - 30.00% | TRUE  | TRUE  |
| 15          | 63613577 - 63674360 |            | TRUE  | TRUE  |
| 15          | 63613577 - 63674360 |            | FALSE | TRUE  |
| 15          | 63613577 - 63674360 |            | TRUE  | TRUE  |
| 15          | 63613577 - 63674360 |            | FALSE | TRUE  |
| 11          | 45669239 - 45687206 |            | TRUE  | TRUE  |

|    |                       |            |       |       |
|----|-----------------------|------------|-------|-------|
| 11 | 45669239 - 45687206   | T - 83.33% | TRUE  | TRUE  |
| 11 | 45669239 - 45687206   | T - 66.67% | TRUE  | TRUE  |
| 11 | 45669239 - 45687206   | F - 16.67% | TRUE  | TRUE  |
| 11 | 45669239 - 45687206   |            | FALSE | TRUE  |
| 11 | 45669239 - 45687206   |            | TRUE  | TRUE  |
| 11 | 45669239 - 45687206   | T - 50.00% | TRUE  | TRUE  |
| 11 | 45669239 - 45687206   |            | TRUE  | TRUE  |
| 11 | 45669239 - 45687206   | F - 16.67% | FALSE | TRUE  |
| 11 | 45669239 - 45687206   | T - 66.67% | TRUE  | TRUE  |
| 3  | 132316081 - 132337811 |            | TRUE  | TRUE  |
| 3  | 132316081 - 132337811 | T - 66.67% | TRUE  | TRUE  |
| 3  | 132316081 - 132337811 | T - 50.00% | FALSE | TRUE  |
| 3  | 132316081 - 132337811 |            | FALSE | TRUE  |
| 3  | 132316081 - 132337811 | T - 83.33% | FALSE | TRUE  |
| 3  | 132316081 - 132337811 | T - 83.33% | TRUE  | TRUE  |
| 2  | 101622395 - 101869328 |            | TRUE  | FALSE |
| 2  | 101622395 - 101869328 | F - 20.00% | TRUE  | TRUE  |
| 2  | 101622395 - 101869328 |            | TRUE  | TRUE  |
| 2  | 101622395 - 101869328 | F - 13.33% | TRUE  | TRUE  |
| 2  | 101622395 - 101869328 |            | TRUE  | TRUE  |
| 2  | 101622395 - 101869328 | F - 6.67%  | FALSE | TRUE  |
| 2  | 101622395 - 101869328 | F - 20.00% | TRUE  | TRUE  |
| 2  | 101622395 - 101869328 | F - 6.67%  | TRUE  | TRUE  |
| 2  | 101622395 - 101869328 |            | TRUE  | TRUE  |
| 2  | 101622395 - 101869328 | F - 20.00% | TRUE  | TRUE  |
| 2  | 101622395 - 101869328 | F - 6.67%  | TRUE  | TRUE  |
| 2  | 101622395 - 101869328 | F - 6.67%  | FALSE | TRUE  |
| 2  | 101622395 - 101869328 | F - 20.00% | TRUE  | TRUE  |
| 2  | 101622395 - 101869328 | F - 6.67%  | FALSE | TRUE  |
| 2  | 101622395 - 101869328 |            | FALSE | TRUE  |
| 2  | 101622395 - 101869328 |            | FALSE | TRUE  |
| 2  | 101622395 - 101869328 | F - 6.67%  | TRUE  | TRUE  |
| 2  | 101622395 - 101869328 | F - 6.67%  | FALSE | TRUE  |
| 2  | 101622395 - 101869328 | F - 40.00% | TRUE  | TRUE  |
| 2  | 101622395 - 101869328 | F - 6.67%  | FALSE | TRUE  |
| 2  | 101622395 - 101869328 | F - 40.00% | TRUE  | TRUE  |
| 2  | 101622395 - 101869328 | F - 40.00% | TRUE  | TRUE  |
| 2  | 101622395 - 101869328 | F - 40.00% | TRUE  | TRUE  |
| 2  | 101622395 - 101869328 | F - 46.67% | TRUE  | TRUE  |
| 2  | 101622395 - 101869328 |            | FALSE | TRUE  |
| 2  | 101622395 - 101869328 |            | FALSE | TRUE  |
| 2  | 101622395 - 101869328 | F - 40.00% | TRUE  | TRUE  |
| 2  | 101622395 - 101869328 | F - 13.33% | FALSE | TRUE  |
| 2  | 101622395 - 101869328 |            | TRUE  | TRUE  |
| 2  | 101622395 - 101869328 | F - 46.67% | TRUE  | TRUE  |
| 2  | 101622395 - 101869328 |            | TRUE  | TRUE  |
| 2  | 101622395 - 101869328 |            | TRUE  | TRUE  |
| 2  | 101622395 - 101869328 |            | TRUE  | TRUE  |
| 2  | 101622395 - 101869328 |            | TRUE  | TRUE  |
| 7  | 33944523 - 34195484   |            | TRUE  | TRUE  |
| 7  | 33944523 - 34195484   | F - 22.22% | TRUE  | TRUE  |
| 7  | 33944523 - 34195484   |            | TRUE  | TRUE  |
| 7  | 33944523 - 34195484   | F - 11.11% | TRUE  | TRUE  |
| 7  | 33944523 - 34195484   |            | FALSE | TRUE  |
| 7  | 33944523 - 34195484   | F - 11.11% | FALSE | TRUE  |
| 7  | 33944523 - 34195484   | F - 11.11% | TRUE  | TRUE  |
| 7  | 33944523 - 34195484   |            | TRUE  | TRUE  |
| 7  | 33944523 - 34195484   | F - 44.44% | TRUE  | TRUE  |
| 7  | 33944523 - 34195484   |            | TRUE  | TRUE  |
| 7  | 33944523 - 34195484   | T - 77.78% | TRUE  | TRUE  |



|    |                       |            |       |       |
|----|-----------------------|------------|-------|-------|
| 7  | 33944523 - 34195484   | F - 44.44% | TRUE  | TRUE  |
| 7  | 33944523 - 34195484   |            | TRUE  | TRUE  |
| 7  | 33944523 - 34195484   | F - 33.33% | FALSE | TRUE  |
| 7  | 33944523 - 34195484   |            | TRUE  | TRUE  |
| 7  | 33944523 - 34195484   |            | FALSE | TRUE  |
| 1  | 118148556 - 118171011 |            | TRUE  | TRUE  |
| 1  | 118148556 - 118171011 |            | TRUE  | TRUE  |
| 1  | 118148556 - 118171011 | T - 80.00% | TRUE  | TRUE  |
| 1  | 118148556 - 118171011 | F - 40.00% | TRUE  | TRUE  |
| 1  | 118148556 - 118171011 | T - 80.00% | TRUE  | TRUE  |
| 1  | 118148556 - 118171011 |            | TRUE  | TRUE  |
| 7  | 107788071 - 108097161 |            | TRUE  | TRUE  |
| 7  | 107788071 - 108097161 |            | TRUE  | TRUE  |
| 7  | 107788071 - 108097161 |            | TRUE  | FALSE |
| 7  | 107788071 - 108097161 |            | TRUE  | FALSE |
| 7  | 107788071 - 108097161 |            | TRUE  | TRUE  |
| 7  | 107788071 - 108097161 |            | TRUE  | FALSE |
| 7  | 107788071 - 108097161 |            | TRUE  | TRUE  |
| 7  | 107788071 - 108097161 | T - 71.88% | TRUE  | TRUE  |
| 7  | 107788071 - 108097161 | T - 59.38% | TRUE  | TRUE  |
| 7  | 107788071 - 108097161 | T - 62.50% | TRUE  | FALSE |
| 7  | 107788071 - 108097161 |            | TRUE  | TRUE  |
| 7  | 107788071 - 108097161 |            | TRUE  | FALSE |
| 7  | 107788071 - 108097161 |            | TRUE  | TRUE  |
| 7  | 107788071 - 108097161 | F - 46.88% | TRUE  | TRUE  |
| 7  | 107788071 - 108097161 | T - 53.13% | TRUE  | TRUE  |
| 7  | 107788071 - 108097161 | T - 53.13% | TRUE  | TRUE  |
| 7  | 107788071 - 108097161 | F - 46.88% | TRUE  | TRUE  |
| 7  | 107788071 - 108097161 | T - 53.13% | TRUE  | TRUE  |
| 7  | 107788071 - 108097161 |            | TRUE  | TRUE  |
| 7  | 107788071 - 108097161 | T - 53.13% | TRUE  | FALSE |
| 7  | 107788071 - 108097161 | T - 53.13% | TRUE  | TRUE  |
| 7  | 107788071 - 108097161 | F - 18.75% | TRUE  | TRUE  |
| 7  | 107788071 - 108097161 | F - 3.13%  | TRUE  | TRUE  |
| 7  | 107788071 - 108097161 | F - 43.75% | TRUE  | TRUE  |
| 7  | 107788071 - 108097161 |            | TRUE  | TRUE  |
| 7  | 107788071 - 108097161 | F - 3.13%  | TRUE  | TRUE  |
| 7  | 107788071 - 108097161 |            | TRUE  | TRUE  |
| 7  | 107788071 - 108097161 | F - 3.13%  | FALSE | TRUE  |
| 7  | 107788071 - 108097161 | F - 37.50% | FALSE | TRUE  |
| 7  | 107788071 - 108097161 | F - 37.50% | TRUE  | TRUE  |
| 7  | 107788071 - 108097161 |            | FALSE | TRUE  |
| 7  | 107788071 - 108097161 |            | TRUE  | TRUE  |
| 7  | 107788071 - 108097161 | F - 9.38%  | FALSE | TRUE  |
| 7  | 107788071 - 108097161 | F - 3.13%  | TRUE  | TRUE  |
| 7  | 107788071 - 108097161 | F - 6.25%  | FALSE | TRUE  |
| 7  | 107788071 - 108097161 |            | TRUE  | TRUE  |
| 7  | 107788071 - 108097161 | F - 9.38%  | FALSE | TRUE  |
| 7  | 107788071 - 108097161 |            | FALSE | TRUE  |
| 7  | 107788071 - 108097161 |            | FALSE | TRUE  |
| 7  | 107788071 - 108097161 |            | FALSE | TRUE  |
| 11 | 114128509 - 114184007 | F - 37.50% | TRUE  | FALSE |
| 11 | 114128509 - 114184007 | F - 12.50% | TRUE  | FALSE |
| 11 | 114128509 - 114184007 |            | TRUE  | FALSE |
| 11 | 114128509 - 114184007 | F - 12.50% | TRUE  | FALSE |
| 11 | 114128509 - 114184007 | F - 25.00% | TRUE  | TRUE  |
| 11 | 114128509 - 114184007 | F - 25.00% | TRUE  | TRUE  |
| 1  | 110230418 - 110236367 |            | TRUE  | FALSE |

|    |                       |             |       |       |
|----|-----------------------|-------------|-------|-------|
| 1  | 110230418 - 110236367 |             | TRUE  | FALSE |
| 1  | 110230418 - 110236367 | T - 66.67%  | TRUE  | TRUE  |
| 18 | 14179096 - 14227049   |             | TRUE  | FALSE |
| 18 | 14179096 - 14227049   |             | TRUE  | TRUE  |
| 18 | 14179096 - 14227049   |             | TRUE  | TRUE  |
| 18 | 14179096 - 14227049   |             | TRUE  | TRUE  |
| 18 | 14179096 - 14227049   | F - 40.00%  | FALSE | TRUE  |
| 9  | 40498481 - 40633261   |             | TRUE  | FALSE |
| 9  | 40498481 - 40633261   | T - 100.00% | TRUE  | TRUE  |
| 9  | 40498481 - 40633261   | T - 100.00% | TRUE  | TRUE  |
| 9  | 40498481 - 40633261   | T - 100.00% | TRUE  | TRUE  |
| 9  | 40498481 - 40633261   |             | TRUE  | TRUE  |
| 9  | 40498481 - 40633261   |             | FALSE | TRUE  |
| 9  | 40498481 - 40633261   |             | FALSE | TRUE  |
| 9  | 18473892 - 18910948   |             | TRUE  | TRUE  |
| 9  | 18473892 - 18910948   |             | TRUE  | FALSE |
| 9  | 18473892 - 18910948   | F - 7.69%   | TRUE  | TRUE  |
| 9  | 18473892 - 18910948   |             | TRUE  | TRUE  |
| 9  | 18473892 - 18910948   | F - 42.31%  | TRUE  | TRUE  |
| 9  | 18473892 - 18910948   | F - 7.69%   | FALSE | TRUE  |
| 9  | 18473892 - 18910948   |             | TRUE  | TRUE  |
| 9  | 18473892 - 18910948   |             | TRUE  | TRUE  |
| 9  | 18473892 - 18910948   | F - 7.69%   | TRUE  | TRUE  |
| 9  | 18473892 - 18910948   | F - 34.62%  | FALSE | TRUE  |
| 9  | 18473892 - 18910948   | F - 3.85%   | TRUE  | TRUE  |
| 9  | 18473892 - 18910948   | F - 23.08%  | TRUE  | TRUE  |
| 9  | 18473892 - 18910948   | F - 7.69%   | FALSE | TRUE  |
| 9  | 18473892 - 18910948   | F - 34.62%  | FALSE | TRUE  |
| 9  | 18473892 - 18910948   |             | TRUE  | TRUE  |
| 9  | 18473892 - 18910948   |             | TRUE  | TRUE  |
| 9  | 18473892 - 18910948   | F - 26.92%  | FALSE | TRUE  |
| 9  | 18473892 - 18910948   | F - 7.69%   | TRUE  | TRUE  |
| 9  | 18473892 - 18910948   |             | FALSE | TRUE  |
| 9  | 18473892 - 18910948   |             | FALSE | TRUE  |
| 9  | 18473892 - 18910948   |             | TRUE  | TRUE  |
| 9  | 18473892 - 18910948   | F - 46.15%  | TRUE  | TRUE  |
| 9  | 18473892 - 18910948   | F - 34.62%  | TRUE  | TRUE  |
| 9  | 18473892 - 18910948   | F - 46.15%  | TRUE  | TRUE  |
| 9  | 18473892 - 18910948   |             | FALSE | TRUE  |
| 9  | 18473892 - 18910948   |             | FALSE | TRUE  |
| 9  | 18473892 - 18910948   | F - 19.23%  | TRUE  | TRUE  |
| 9  | 18473892 - 18910948   |             | TRUE  | TRUE  |
| 9  | 18473892 - 18910948   |             | FALSE | TRUE  |
| 9  | 18473892 - 18910948   | F - 34.62%  | TRUE  | TRUE  |
| 9  | 18473892 - 18910948   |             | FALSE | TRUE  |
| 9  | 18473892 - 18910948   | F - 26.92%  | FALSE | TRUE  |
| 9  | 18473892 - 18910948   | F - 34.62%  | TRUE  | TRUE  |
| 9  | 18473892 - 18910948   | F - 38.46%  | TRUE  | TRUE  |
| 9  | 18473892 - 18910948   |             | FALSE | TRUE  |
| 9  | 18473892 - 18910948   | F - 34.62%  | TRUE  | TRUE  |
| 9  | 18473892 - 18910948   | F - 46.15%  | TRUE  | TRUE  |
| 9  | 18473892 - 18910948   |             | FALSE | TRUE  |
| 9  | 18473892 - 18910948   | F - 34.62%  | TRUE  | TRUE  |
| 9  | 18473892 - 18910948   | F - 46.15%  | TRUE  | TRUE  |
| 9  | 18473892 - 18910948   |             | TRUE  | TRUE  |
| 9  | 18473892 - 18910948   |             | TRUE  | TRUE  |
| 9  | 18473892 - 18910948   |             | FALSE | TRUE  |
| 9  | 18473892 - 18910948   | F - 30.77%  | FALSE | TRUE  |

|   |                       |            |       |       |
|---|-----------------------|------------|-------|-------|
| 8 | 17501303 - 17658426   |            | TRUE  | FALSE |
| 8 | 17501303 - 17658426   |            | FALSE | TRUE  |
| 8 | 17501303 - 17658426   |            | TRUE  | TRUE  |
| 8 | 17501303 - 17658426   | F - 2.70%  | TRUE  | FALSE |
| 8 | 17501303 - 17658426   | F - 2.70%  | TRUE  | TRUE  |
| 8 | 17501303 - 17658426   |            | TRUE  | TRUE  |
| 8 | 17501303 - 17658426   |            | TRUE  | TRUE  |
| 8 | 17501303 - 17658426   | F - 2.70%  | TRUE  | FALSE |
| 8 | 17501303 - 17658426   | F - 2.70%  | TRUE  | TRUE  |
| 8 | 17501303 - 17658426   |            | TRUE  | TRUE  |
| 8 | 17501303 - 17658426   | F - 5.41%  | FALSE | TRUE  |
| 8 | 17501303 - 17658426   | T - 54.05% | TRUE  | TRUE  |
| 8 | 17501303 - 17658426   | F - 2.70%  | TRUE  | TRUE  |
| 8 | 17501303 - 17658426   | F - 8.11%  | FALSE | TRUE  |
| 8 | 17501303 - 17658426   |            | TRUE  | TRUE  |
| 8 | 17501303 - 17658426   | F - 2.70%  | FALSE | TRUE  |
| 8 | 17501303 - 17658426   | F - 27.03% | TRUE  | TRUE  |
| 8 | 17501303 - 17658426   | F - 48.65% | TRUE  | TRUE  |
| 8 | 17501303 - 17658426   |            | TRUE  | TRUE  |
| 1 | 186798032 - 186958113 | F - 28.57% | TRUE  | TRUE  |
| 1 | 186798032 - 186958113 |            | TRUE  | TRUE  |
| 1 | 186798032 - 186958113 | F - 14.29% | TRUE  | TRUE  |
| 1 | 186798032 - 186958113 |            | TRUE  | TRUE  |
| 1 | 186798032 - 186958113 |            | FALSE | TRUE  |
| 1 | 186798032 - 186958113 |            | FALSE | TRUE  |
| 1 | 186798032 - 186958113 |            | TRUE  | TRUE  |
| 1 | 186798032 - 186958113 |            | FALSE | TRUE  |
| 1 | 186798032 - 186958113 | T - 85.71% | TRUE  | TRUE  |
| 1 | 186798032 - 186958113 |            | TRUE  | TRUE  |
| 1 | 186798032 - 186958113 |            | TRUE  | TRUE  |
| 1 | 186798032 - 186958113 |            | FALSE | TRUE  |
| 1 | 186798032 - 186958113 | T - 57.14% | TRUE  | TRUE  |
| 1 | 186798032 - 186958113 | T - 57.14% | FALSE | TRUE  |
| 1 | 186798032 - 186958113 |            | FALSE | TRUE  |
| 6 | 132617194 - 132722684 |            | TRUE  | FALSE |
| 6 | 132617194 - 132722684 | F - 14.29% | TRUE  | TRUE  |
| 6 | 132617194 - 132722684 | F - 14.29% | FALSE | TRUE  |
| 6 | 132617194 - 132722684 | F - 28.57% | TRUE  | TRUE  |
| 6 | 132617194 - 132722684 | T - 57.14% | TRUE  | TRUE  |
| 6 | 132617194 - 132722684 |            | FALSE | TRUE  |
| 6 | 132617194 - 132722684 | F - 28.57% | FALSE | TRUE  |
| 6 | 132617194 - 132722684 |            | TRUE  | TRUE  |
| 6 | 132617194 - 132722684 |            | TRUE  | TRUE  |
| 6 | 132617194 - 132722684 | T - 85.71% | TRUE  | TRUE  |
| 6 | 132617194 - 132722684 |            | TRUE  | TRUE  |
| 1 | 44509600 - 44570647   |            | TRUE  | TRUE  |
| 1 | 44509600 - 44570647   | F - 20.00% | TRUE  | TRUE  |
| 1 | 44509600 - 44570647   | F - 20.00% | TRUE  | TRUE  |
| 1 | 44509600 - 44570647   |            | TRUE  | TRUE  |
| 1 | 44509600 - 44570647   |            | FALSE | TRUE  |
| 1 | 44509600 - 44570647   |            | TRUE  | TRUE  |
| 1 | 44509600 - 44570647   |            | TRUE  | TRUE  |
| 1 | 44509600 - 44570647   | T - 80.00% | TRUE  | TRUE  |
| 1 | 44509600 - 44570647   |            | FALSE | TRUE  |
| 1 | 44509600 - 44570647   | F - 40.00% | TRUE  | TRUE  |
| 1 | 44509600 - 44570647   |            | TRUE  | TRUE  |
| 1 | 44509600 - 44570647   | T - 60.00% | FALSE | TRUE  |
| 1 | 44509600 - 44570647   | F - 20.00% | TRUE  | TRUE  |

|    |                       |             |       |      |
|----|-----------------------|-------------|-------|------|
| 1  | 44509600 - 44570647   | F - 20.00%  | FALSE | TRUE |
| 1  | 44509600 - 44570647   |             | FALSE | TRUE |
| 11 | 9482069 - 9550071     |             | TRUE  | TRUE |
| 11 | 9482069 - 9550071     |             | TRUE  | TRUE |
| 11 | 9482069 - 9550071     | F - 6.67%   | TRUE  | TRUE |
| 11 | 9482069 - 9550071     |             | TRUE  | TRUE |
| 1  | 153600402 - 153604515 |             | TRUE  | TRUE |
| 1  | 153600402 - 153604515 | F - 14.29%  | TRUE  | TRUE |
| 1  | 153600402 - 153604515 | T - 100.00% | TRUE  | TRUE |
| 1  | 153600402 - 153604515 |             | TRUE  | TRUE |
| 1  | 153600402 - 153604515 |             | FALSE | TRUE |
| 1  | 153600402 - 153604515 | F - 14.29%  | FALSE | TRUE |
| 1  | 153600402 - 153604515 | F - 14.29%  | FALSE | TRUE |
| 5  | 90664541 - 90679176   | F - 23.08%  | TRUE  | TRUE |
| 5  | 90664541 - 90679176   | F - 7.69%   | TRUE  | TRUE |
| 5  | 90664541 - 90679176   | F - 7.69%   | TRUE  | TRUE |
| 5  | 90664541 - 90679176   |             | TRUE  | TRUE |
| 5  | 90664541 - 90679176   |             | TRUE  | TRUE |
| 5  | 90664541 - 90679176   | F - 15.38%  | TRUE  | TRUE |
| 5  | 90664541 - 90679176   |             | FALSE | TRUE |
| 5  | 90664541 - 90679176   | F - 23.08%  | TRUE  | TRUE |
| 5  | 90664541 - 90679176   | F - 23.08%  | TRUE  | TRUE |
| 5  | 90664541 - 90679176   | F - 30.77%  | TRUE  | TRUE |
| 11 | 10326227 - 10328944   | F - 20.00%  | TRUE  | TRUE |
| 11 | 10326227 - 10328944   | F - 20.00%  | TRUE  | TRUE |
| 11 | 10326227 - 10328944   |             | TRUE  | TRUE |
| 11 | 10326227 - 10328944   | F - 20.00%  | FALSE | TRUE |
| 11 | 10326227 - 10328944   | F - 10.00%  | FALSE | TRUE |
| 11 | 10326227 - 10328944   |             | TRUE  | TRUE |
| 11 | 10326227 - 10328944   |             | FALSE | TRUE |
| 11 | 10326227 - 10328944   | F - 10.00%  | TRUE  | TRUE |
| 11 | 10326227 - 10328944   | T - 60.00%  | TRUE  | TRUE |
| 11 | 10326227 - 10328944   |             | TRUE  | TRUE |
| 8  | 19261672 - 19615540   |             | TRUE  | TRUE |
| 8  | 19261672 - 19615540   |             | TRUE  | TRUE |
| 8  | 19261672 - 19615540   |             | TRUE  | TRUE |
| 8  | 19261672 - 19615540   |             | TRUE  | TRUE |
| 8  | 19261672 - 19615540   |             | TRUE  | TRUE |
| 8  | 19261672 - 19615540   | F - 4.35%   | TRUE  | TRUE |
| 8  | 19261672 - 19615540   |             | TRUE  | TRUE |
| 8  | 19261672 - 19615540   | F - 17.39%  | TRUE  | TRUE |
| 8  | 19261672 - 19615540   |             | TRUE  | TRUE |
| 8  | 19261672 - 19615540   | F - 4.35%   | TRUE  | TRUE |
| 8  | 19261672 - 19615540   | F - 4.35%   | TRUE  | TRUE |
| 8  | 19261672 - 19615540   |             | TRUE  | TRUE |
| 8  | 19261672 - 19615540   |             | TRUE  | TRUE |
| 8  | 19261672 - 19615540   |             | TRUE  | TRUE |
| 8  | 19261672 - 19615540   | F - 4.35%   | FALSE | TRUE |
| 8  | 19261672 - 19615540   | F - 4.35%   | TRUE  | TRUE |
| 8  | 19261672 - 19615540   |             | TRUE  | TRUE |
| 8  | 19261672 - 19615540   |             | TRUE  | TRUE |
| 8  | 19261672 - 19615540   |             | TRUE  | TRUE |
| 8  | 19261672 - 19615540   |             | TRUE  | TRUE |
| 8  | 19261672 - 19615540   | F - 21.74%  | TRUE  | TRUE |
| 8  | 19261672 - 19615540   | F - 4.35%   | TRUE  | TRUE |
| 8  | 19261672 - 19615540   | F - 13.04%  | TRUE  | TRUE |
| 8  | 19261672 - 19615540   | F - 8.70%   | TRUE  | TRUE |
| 8  | 19261672 - 19615540   |             | TRUE  | TRUE |
| 8  | 19261672 - 19615540   | F - 13.04%  | TRUE  | TRUE |

|    |                       |             |       |       |
|----|-----------------------|-------------|-------|-------|
| 8  | 19261672 - 19615540   | F - 4.35%   | FALSE | TRUE  |
| 8  | 19261672 - 19615540   | F - 26.09%  | TRUE  | TRUE  |
| 8  | 19261672 - 19615540   | F - 17.39%  | FALSE | TRUE  |
| 8  | 19261672 - 19615540   |             | TRUE  | TRUE  |
| 8  | 19261672 - 19615540   |             | TRUE  | TRUE  |
| 8  | 19261672 - 19615540   |             | FALSE | TRUE  |
| 8  | 19261672 - 19615540   | F - 4.35%   | FALSE | TRUE  |
| 8  | 19261672 - 19615540   |             | FALSE | TRUE  |
| 8  | 19261672 - 19615540   | F - 13.04%  | FALSE | TRUE  |
| 8  | 19261672 - 19615540   |             | FALSE | TRUE  |
| 8  | 19261672 - 19615540   | F - 4.35%   | FALSE | TRUE  |
| 8  | 19261672 - 19615540   | F - 4.35%   | FALSE | TRUE  |
| 8  | 19261672 - 19615540   |             | FALSE | TRUE  |
| 8  | 19261672 - 19615540   | F - 8.70%   | TRUE  | TRUE  |
| 8  | 19261672 - 19615540   | F - 26.09%  | TRUE  | TRUE  |
| 8  | 19261672 - 19615540   |             | TRUE  | TRUE  |
| 4  | 15704573 - 15739936   |             | TRUE  | TRUE  |
| 4  | 15704573 - 15739936   |             | FALSE | TRUE  |
| 4  | 15704573 - 15739936   | F - 16.67%  | FALSE | TRUE  |
| 4  | 15704573 - 15739936   | F - 16.67%  | TRUE  | TRUE  |
| 4  | 15704573 - 15739936   |             | TRUE  | TRUE  |
| 4  | 15704573 - 15739936   | F - 16.67%  | TRUE  | TRUE  |
| 4  | 15704573 - 15739936   | F - 33.33%  | FALSE | TRUE  |
| 4  | 15704573 - 15739936   | F - 16.67%  | FALSE | TRUE  |
| 4  | 15704573 - 15739936   | F - 16.67%  | TRUE  | TRUE  |
| 4  | 15704573 - 15739936   |             | FALSE | TRUE  |
| 4  | 15704573 - 15739936   | T - 50.00%  | TRUE  | TRUE  |
| 2  | 224616403 - 224702744 |             | TRUE  | FALSE |
| 2  | 224616403 - 224702744 |             | TRUE  | FALSE |
| 2  | 224616403 - 224702744 |             | TRUE  | TRUE  |
| 2  | 224616403 - 224702744 |             | TRUE  | TRUE  |
| 2  | 224616403 - 224702744 |             | TRUE  | TRUE  |
| 2  | 224616403 - 224702744 | F - 6.67%   | TRUE  | TRUE  |
| 2  | 224616403 - 224702744 | F - 6.67%   | TRUE  | TRUE  |
| 2  | 224616403 - 224702744 | F - 6.67%   | TRUE  | TRUE  |
| 2  | 224616403 - 224702744 | T - 93.33%  | TRUE  | TRUE  |
| 2  | 224616403 - 224702744 |             | FALSE | TRUE  |
| 2  | 224616403 - 224702744 | F - 6.67%   | TRUE  | TRUE  |
| 2  | 224616403 - 224702744 | F - 13.33%  | TRUE  | TRUE  |
| 2  | 224616403 - 224702744 | T - 86.67%  | TRUE  | TRUE  |
| 2  | 224616403 - 224702744 | F - 20.00%  | TRUE  | TRUE  |
| 2  | 224616403 - 224702744 |             | TRUE  | TRUE  |
| 2  | 224616403 - 224702744 | F - 46.67%  | FALSE | TRUE  |
| 2  | 224616403 - 224702744 |             | FALSE | TRUE  |
| 1  | 193028552 - 193060907 | F - 45.45%  | TRUE  | TRUE  |
| 1  | 193028552 - 193060907 | F - 18.18%  | TRUE  | TRUE  |
| 1  | 193028552 - 193060907 |             | FALSE | TRUE  |
| 8  | 77318889 - 77436591   | T - 100.00% | TRUE  | TRUE  |
| 8  | 77318889 - 77436591   |             | FALSE | TRUE  |
| 8  | 77318889 - 77436591   |             | FALSE | TRUE  |
| 8  | 77318889 - 77436591   | T - 100.00% | FALSE | TRUE  |
| 8  | 77318889 - 77436591   |             | FALSE | TRUE  |
| 17 | 78440633 - 78450404   |             | TRUE  | FALSE |
| 17 | 78440633 - 78450404   | T - 66.67%  | TRUE  | TRUE  |
| 17 | 78440633 - 78450404   | F - 33.33%  | TRUE  | TRUE  |
| 17 | 78440633 - 78450404   |             | TRUE  | TRUE  |
| 17 | 78440633 - 78450404   | T - 100.00% | TRUE  | TRUE  |
| 6  | 33043703 - 33057473   |             | TRUE  | FALSE |

|    |                     |            |       |       |
|----|---------------------|------------|-------|-------|
| 6  | 33043703 - 33057473 | F - 22.22% | FALSE | TRUE  |
| 6  | 33043703 - 33057473 |            | TRUE  | TRUE  |
| 6  | 33043703 - 33057473 | F - 11.11% | TRUE  | TRUE  |
| 6  | 33043703 - 33057473 |            | TRUE  | TRUE  |
| 6  | 33043703 - 33057473 |            | TRUE  | TRUE  |
| 6  | 33043703 - 33057473 | F - 22.22% | TRUE  | TRUE  |
| 6  | 33043703 - 33057473 | F - 11.11% | FALSE | TRUE  |
| 6  | 33043703 - 33057473 |            | TRUE  | TRUE  |
| 6  | 33043703 - 33057473 |            | FALSE | TRUE  |
| 6  | 33043703 - 33057473 | T - 61.11% | FALSE | TRUE  |
| 6  | 33043703 - 33057473 | F - 5.56%  | TRUE  | TRUE  |
| 6  | 33043703 - 33057473 | F - 5.56%  | TRUE  | TRUE  |
| 6  | 33043703 - 33057473 | F - 11.11% | TRUE  | TRUE  |
| 6  | 33043703 - 33057473 |            | TRUE  | TRUE  |
| 6  | 33043703 - 33057473 | T - 94.44% | TRUE  | TRUE  |
| 6  | 33043703 - 33057473 | F - 38.89% | FALSE | TRUE  |
| 6  | 33043703 - 33057473 | F - 22.22% | TRUE  | TRUE  |
| 6  | 33043703 - 33057473 |            | TRUE  | TRUE  |
| 6  | 31913486 - 31919861 |            | TRUE  | TRUE  |
| 6  | 31913486 - 31919861 | F - 5.88%  | TRUE  | TRUE  |
| 6  | 31913486 - 31919861 | F - 5.88%  | TRUE  | TRUE  |
| 6  | 31913486 - 31919861 |            | TRUE  | TRUE  |
| 6  | 31913486 - 31919861 | F - 5.88%  | TRUE  | TRUE  |
| 6  | 31913486 - 31919861 | F - 17.65% | TRUE  | TRUE  |
| 6  | 31913486 - 31919861 | F - 5.88%  | FALSE | TRUE  |
| 6  | 31913486 - 31919861 | F - 17.65% | FALSE | TRUE  |
| 6  | 31913486 - 31919861 | F - 29.41% | FALSE | TRUE  |
| 6  | 31913486 - 31919861 | F - 11.76% | TRUE  | TRUE  |
| 6  | 31913486 - 31919861 | F - 41.18% | TRUE  | TRUE  |
| 6  | 31913486 - 31919861 | F - 11.76% | TRUE  | TRUE  |
| 6  | 31913486 - 31919861 | F - 41.18% | TRUE  | TRUE  |
| 6  | 31913486 - 31919861 | F - 35.29% | FALSE | TRUE  |
| 6  | 31913486 - 31919861 | F - 5.88%  | FALSE | TRUE  |
| 6  | 31913486 - 31919861 | F - 41.18% | TRUE  | TRUE  |
| 6  | 31913486 - 31919861 | F - 41.18% | TRUE  | TRUE  |
| 6  | 31913486 - 31919861 | F - 35.29% | TRUE  | TRUE  |
| 6  | 31913486 - 31919861 |            | TRUE  | TRUE  |
| 6  | 31913486 - 31919861 | T - 52.94% | TRUE  | TRUE  |
| 6  | 31913486 - 31919861 | F - 41.18% | TRUE  | TRUE  |
| 6  | 31913486 - 31919861 | F - 47.06% | TRUE  | TRUE  |
| 6  | 31913486 - 31919861 | F - 47.06% | TRUE  | TRUE  |
| 6  | 31913486 - 31919861 |            | FALSE | TRUE  |
| 6  | 31913486 - 31919861 |            | FALSE | TRUE  |
| 6  | 31913486 - 31919861 | F - 35.29% | TRUE  | TRUE  |
| 6  | 31913486 - 31919861 |            | TRUE  | TRUE  |
| 6  | 31913486 - 31919861 |            | FALSE | TRUE  |
| 1  | 43824599 - 43828874 |            | TRUE  | FALSE |
| 1  | 43824599 - 43828874 | F - 8.33%  | TRUE  | TRUE  |
| 1  | 43824599 - 43828874 | F - 16.67% | TRUE  | TRUE  |
| 1  | 43824599 - 43828874 | F - 8.33%  | TRUE  | TRUE  |
| 1  | 43824599 - 43828874 | F - 25.00% | TRUE  | TRUE  |
| 1  | 43824599 - 43828874 | T - 83.33% | TRUE  | TRUE  |
| 1  | 43824599 - 43828874 | F - 33.33% | TRUE  | TRUE  |
| 1  | 43824599 - 43828874 | T - 75.00% | TRUE  | TRUE  |
| 1  | 43824599 - 43828874 |            | FALSE | TRUE  |
| 17 | 7942358 - 7952452   | T - 70.00% | TRUE  | FALSE |
| 17 | 7942358 - 7952452   |            | TRUE  | FALSE |
| 17 | 7942358 - 7952452   |            | TRUE  | FALSE |

|    |                       |             |       |       |
|----|-----------------------|-------------|-------|-------|
| 17 | 7942358 - 7952452     | T - 80.00%  | TRUE  | FALSE |
| 17 | 7942358 - 7952452     | T - 100.00% | TRUE  | TRUE  |
| 17 | 7942358 - 7952452     | T - 100.00% | TRUE  | TRUE  |
| 17 | 7942358 - 7952452     | T - 100.00% | TRUE  | TRUE  |
| 17 | 7942358 - 7952452     |             | TRUE  | TRUE  |
| 17 | 7942358 - 7952452     |             | TRUE  | TRUE  |
| 17 | 7942358 - 7952452     | T - 60.00%  | TRUE  | TRUE  |
| 17 | 7942358 - 7952452     |             | FALSE | TRUE  |
| 17 | 7942358 - 7952452     | T - 80.00%  | TRUE  | TRUE  |
| 8  | 80947105 - 81143467   |             | TRUE  | FALSE |
| 8  | 80947105 - 81143467   |             | TRUE  | FALSE |
| 8  | 80947105 - 81143467   |             | TRUE  | TRUE  |
| 8  | 80947105 - 81143467   |             | TRUE  | TRUE  |
| 8  | 80947105 - 81143467   |             | TRUE  | FALSE |
| 8  | 80947105 - 81143467   | F - 15.00%  | TRUE  | TRUE  |
| 8  | 80947105 - 81143467   | F - 35.00%  | TRUE  | TRUE  |
| 8  | 80947105 - 81143467   |             | TRUE  | TRUE  |
| 8  | 80947105 - 81143467   |             | TRUE  | TRUE  |
| 8  | 80947105 - 81143467   |             | TRUE  | TRUE  |
| 8  | 80947105 - 81143467   | F - 2.50%   | FALSE | TRUE  |
| 8  | 80947105 - 81143467   | F - 27.50%  | TRUE  | TRUE  |
| 8  | 80947105 - 81143467   |             | TRUE  | TRUE  |
| 8  | 80947105 - 81143467   | F - 7.50%   | FALSE | TRUE  |
| 8  | 80947105 - 81143467   | F - 5.00%   | TRUE  | TRUE  |
| 8  | 80947105 - 81143467   | F - 22.50%  | TRUE  | TRUE  |
| 8  | 80947105 - 81143467   | F - 2.50%   | TRUE  | TRUE  |
| 8  | 80947105 - 81143467   | F - 20.00%  | TRUE  | TRUE  |
| 8  | 80947105 - 81143467   | F - 32.50%  | FALSE | TRUE  |
| 8  | 80947105 - 81143467   | F - 5.00%   | TRUE  | TRUE  |
| 8  | 80947105 - 81143467   | F - 7.50%   | TRUE  | TRUE  |
| 8  | 80947105 - 81143467   |             | TRUE  | TRUE  |
| 8  | 80947105 - 81143467   | F - 2.50%   | TRUE  | TRUE  |
| 8  | 80947105 - 81143467   | F - 2.50%   | TRUE  | TRUE  |
| 8  | 80947105 - 81143467   | F - 25.00%  | FALSE | TRUE  |
| 8  | 80947105 - 81143467   | F - 7.50%   | TRUE  | TRUE  |
| 8  | 80947105 - 81143467   | F - 2.50%   | FALSE | TRUE  |
| 8  | 80947105 - 81143467   | F - 27.50%  | FALSE | TRUE  |
| 8  | 80947105 - 81143467   | F - 2.50%   | FALSE | TRUE  |
| 8  | 80947105 - 81143467   | F - 2.50%   | TRUE  | TRUE  |
| 8  | 80947105 - 81143467   | F - 5.00%   | FALSE | TRUE  |
| 8  | 80947105 - 81143467   |             | TRUE  | TRUE  |
| 8  | 80947105 - 81143467   | F - 2.50%   | FALSE | TRUE  |
| 8  | 80947105 - 81143467   | T - 72.50%  | FALSE | TRUE  |
| 8  | 80947105 - 81143467   | F - 15.00%  | FALSE | TRUE  |
| 8  | 80947105 - 81143467   | F - 22.50%  | TRUE  | TRUE  |
| 15 | 63889552 - 63894627   |             | TRUE  | FALSE |
| 15 | 63889552 - 63894627   | T - 100.00% | TRUE  | FALSE |
| 1  | 203148059 - 203155922 | F - 18.18%  | TRUE  | TRUE  |
| 1  | 203148059 - 203155922 | F - 9.09%   | TRUE  | TRUE  |
| 1  | 203148059 - 203155922 | T - 63.64%  | TRUE  | TRUE  |
| 1  | 203148059 - 203155922 | F - 36.36%  | FALSE | TRUE  |
| 1  | 203148059 - 203155922 | F - 9.09%   | TRUE  | TRUE  |
| 1  | 203148059 - 203155922 | F - 18.18%  | FALSE | TRUE  |
| 1  | 203148059 - 203155922 |             | TRUE  | TRUE  |
| 1  | 203148059 - 203155922 |             | TRUE  | TRUE  |
| 1  | 203148059 - 203155922 | T - 72.73%  | FALSE | TRUE  |
| 1  | 203148059 - 203155922 |             | FALSE | TRUE  |
| 6  | 12290529 - 12297427   | T - 83.33%  | TRUE  | TRUE  |

|    |                     |             |       |       |
|----|---------------------|-------------|-------|-------|
| 6  | 12290529 - 12297427 | T - 66.67%  | FALSE | TRUE  |
| 6  | 12290529 - 12297427 | F - 16.67%  | TRUE  | TRUE  |
| 6  | 12290529 - 12297427 | F - 16.67%  | TRUE  | TRUE  |
| 6  | 12290529 - 12297427 | T - 100.00% | TRUE  | TRUE  |
| 6  | 12290529 - 12297427 | T - 100.00% | TRUE  | TRUE  |
| 6  | 12290529 - 12297427 | T - 50.00%  | FALSE | TRUE  |
| 6  | 12290529 - 12297427 |             | FALSE | TRUE  |
| 11 | 85405265 - 85522184 | F - 21.21%  | TRUE  | TRUE  |
| 11 | 85405265 - 85522184 | F - 3.03%   | TRUE  | TRUE  |
| 11 | 85405265 - 85522184 | F - 15.15%  | TRUE  | TRUE  |
| 11 | 85405265 - 85522184 | F - 12.12%  | TRUE  | TRUE  |
| 11 | 85405265 - 85522184 | T - 63.64%  | TRUE  | TRUE  |
| 11 | 85405265 - 85522184 |             | TRUE  | TRUE  |
| 11 | 85405265 - 85522184 | F - 3.03%   | TRUE  | TRUE  |
| 11 | 85405265 - 85522184 |             | FALSE | TRUE  |
| 11 | 85405265 - 85522184 |             | FALSE | TRUE  |
| 11 | 85405265 - 85522184 |             | FALSE | TRUE  |
| 11 | 85405265 - 85522184 | T - 57.58%  | FALSE | TRUE  |
| 11 | 85405265 - 85522184 | F - 9.09%   | TRUE  | TRUE  |
| 11 | 85405265 - 85522184 |             | FALSE | TRUE  |
| 11 | 85405265 - 85522184 | F - 18.18%  | TRUE  | TRUE  |
| 11 | 85405265 - 85522184 |             | TRUE  | TRUE  |
| 11 | 85405265 - 85522184 | F - 33.33%  | TRUE  | TRUE  |
| 11 | 85405265 - 85522184 |             | TRUE  | TRUE  |
| 11 | 85405265 - 85522184 |             | TRUE  | TRUE  |
| 11 | 85405265 - 85522184 | F - 24.24%  | TRUE  | TRUE  |
| 11 | 85405265 - 85522184 |             | TRUE  | TRUE  |
| 11 | 85405265 - 85522184 | F - 48.48%  | TRUE  | TRUE  |
| 11 | 85405265 - 85522184 |             | TRUE  | TRUE  |
| 11 | 85405265 - 85522184 | F - 6.06%   | TRUE  | TRUE  |
| 11 | 85405265 - 85522184 | F - 42.42%  | TRUE  | TRUE  |
| 11 | 85405265 - 85522184 | F - 42.42%  | TRUE  | TRUE  |
| 11 | 85405265 - 85522184 | F - 45.45%  | TRUE  | TRUE  |
| 11 | 85405265 - 85522184 | F - 36.36%  | TRUE  | TRUE  |
| 11 | 85405265 - 85522184 |             | TRUE  | TRUE  |
| 11 | 85405265 - 85522184 | T - 69.70%  | TRUE  | TRUE  |
| 11 | 85405265 - 85522184 |             | TRUE  | TRUE  |
| 11 | 85405265 - 85522184 | F - 3.03%   | FALSE | TRUE  |
| 11 | 85405265 - 85522184 |             | TRUE  | TRUE  |
| 11 | 85405265 - 85522184 |             | FALSE | TRUE  |
| 11 | 85405265 - 85522184 | F - 45.45%  | TRUE  | TRUE  |
| 11 | 85405265 - 85522184 | T - 66.67%  | TRUE  | TRUE  |
| 11 | 85405265 - 85522184 | F - 45.45%  | TRUE  | TRUE  |
| 11 | 85405265 - 85522184 |             | FALSE | TRUE  |
| 11 | 85405265 - 85522184 |             | TRUE  | TRUE  |
| 11 | 85405265 - 85522184 |             | TRUE  | TRUE  |
| 11 | 85405265 - 85522184 |             | TRUE  | TRUE  |
| 11 | 85405265 - 85522184 |             | TRUE  | TRUE  |
| 11 | 85405265 - 85522184 |             | TRUE  | TRUE  |
| 10 | 98978996 - 99052430 |             | TRUE  | FALSE |
| 10 | 98978996 - 99052430 |             | TRUE  | TRUE  |
| 10 | 98978996 - 99052430 | T - 68.42%  | TRUE  | TRUE  |
| 7  | 93514709 - 93520303 |             | TRUE  | FALSE |
| 7  | 93514709 - 93520303 |             | TRUE  | FALSE |
| 7  | 93514709 - 93520303 | T - 100.00% | TRUE  | TRUE  |
| 7  | 93514709 - 93520303 | T - 71.43%  | TRUE  | FALSE |
| 7  | 93514709 - 93520303 | T - 85.71%  | TRUE  | FALSE |
| 7  | 93514709 - 93520303 | T - 71.43%  | TRUE  | TRUE  |
| 7  | 93514709 - 93520303 | F - 28.57%  | TRUE  | TRUE  |



|            |                       |             |       |       |
|------------|-----------------------|-------------|-------|-------|
| 15         | 39157523 - 39410914   |             | TRUE  | FALSE |
| 15         | 39157523 - 39410914   | T - 100.00% | TRUE  | TRUE  |
| 15         | 39157523 - 39410914   |             | TRUE  | TRUE  |
| 15         | 39157523 - 39410914   | T - 100.00% | TRUE  | TRUE  |
| 15         | 39157523 - 39410914   | T - 100.00% | TRUE  | TRUE  |
| 15         | 39157523 - 39410914   | T - 100.00% | TRUE  | TRUE  |
| 15         | 39157523 - 39410914   | T - 100.00% | TRUE  | TRUE  |
| 15         | 39157523 - 39410914   | T - 100.00% | TRUE  | FALSE |
| 15         | 39157523 - 39410914   | T - 100.00% | TRUE  | TRUE  |
| 15         | 39157523 - 39410914   | T - 100.00% | TRUE  | TRUE  |
| 15         | 39157523 - 39410914   | T - 100.00% | TRUE  | TRUE  |
| 15         | 39157523 - 39410914   | T - 100.00% | TRUE  | TRUE  |
| 15         | 39157523 - 39410914   |             | FALSE | TRUE  |
| 3          | 187871072 - 188608460 |             | TRUE  | TRUE  |
| 3          | 187871072 - 188608460 |             | TRUE  | FALSE |
| 3          | 187871072 - 188608460 |             | TRUE  | TRUE  |
| 3          | 187871072 - 188608460 | F - 7.69%   | TRUE  | TRUE  |
| 3          | 187871072 - 188608460 | F - 7.69%   | TRUE  | TRUE  |
| 3          | 187871072 - 188608460 | F - 3.85%   | TRUE  | TRUE  |
| 3          | 187871072 - 188608460 |             | FALSE | TRUE  |
| 17         | 73713474 - 73753899   |             | TRUE  | FALSE |
| 17         | 73713474 - 73753899   |             | TRUE  | TRUE  |
| 17         | 73713474 - 73753899   |             | TRUE  | TRUE  |
| 17         | 73713474 - 73753899   |             | TRUE  | FALSE |
| 17         | 73713474 - 73753899   | T - 80.00%  | TRUE  | FALSE |
| 17         | 73713474 - 73753899   |             | TRUE  | FALSE |
| 17         | 73713474 - 73753899   |             | TRUE  | FALSE |
| 17         | 73713474 - 73753899   |             | TRUE  | TRUE  |
| 17         | 73713474 - 73753899   |             | TRUE  | FALSE |
| 17         | 73713474 - 73753899   |             | TRUE  | TRUE  |
| 1          | 803451 - 812283       |             | TRUE  | TRUE  |
| 1          | 803451 - 812283       | T - 50.00%  | TRUE  | FALSE |
| 6_cox_hap2 | 4487883 - 4501576     |             | TRUE  | FALSE |
| 6_cox_hap2 | 4487883 - 4501576     | F - 18.75%  | FALSE | TRUE  |
| 6_cox_hap2 | 4487883 - 4501576     |             | TRUE  | TRUE  |
| 6_cox_hap2 | 4487883 - 4501576     | F - 6.25%   | TRUE  | TRUE  |
| 6_cox_hap2 | 4487883 - 4501576     |             | TRUE  | TRUE  |
| 6_cox_hap2 | 4487883 - 4501576     | F - 18.75%  | TRUE  | TRUE  |
| 6_cox_hap2 | 4487883 - 4501576     | F - 6.25%   | TRUE  | TRUE  |
| 6_cox_hap2 | 4487883 - 4501576     | F - 6.25%   | TRUE  | TRUE  |
| 6_cox_hap2 | 4487883 - 4501576     | T - 56.25%  | FALSE | TRUE  |
| 6_cox_hap2 | 4487883 - 4501576     |             | TRUE  | TRUE  |
| 6_qbl_hap6 | 4276154 - 4289926     |             | TRUE  | FALSE |
| 6_qbl_hap6 | 4276154 - 4289926     | F - 18.75%  | FALSE | TRUE  |
| 6_qbl_hap6 | 4276154 - 4289926     |             | TRUE  | TRUE  |
| 6_qbl_hap6 | 4276154 - 4289926     | F - 6.25%   | TRUE  | TRUE  |
| 6_qbl_hap6 | 4276154 - 4289926     |             | TRUE  | TRUE  |
| 6_qbl_hap6 | 4276154 - 4289926     | F - 18.75%  | TRUE  | TRUE  |
| 6_qbl_hap6 | 4276154 - 4289926     | F - 12.50%  | FALSE | TRUE  |
| 6_qbl_hap6 | 4276154 - 4289926     |             | FALSE | TRUE  |
| 6_qbl_hap6 | 4276154 - 4289926     | T - 56.25%  | FALSE | TRUE  |
| 6_qbl_hap6 | 4276154 - 4289926     | F - 6.25%   | TRUE  | TRUE  |
| 6_qbl_hap6 | 4276154 - 4289926     | F - 6.25%   | TRUE  | TRUE  |
| 6_qbl_hap6 | 4276154 - 4289926     | F - 12.50%  | TRUE  | TRUE  |
| 6_qbl_hap6 | 4276154 - 4289926     |             | TRUE  | TRUE  |
| 6_qbl_hap6 | 4276154 - 4289926     | F - 37.50%  | FALSE | TRUE  |
| 6_qbl_hap6 | 4276154 - 4289926     | T - 93.75%  | TRUE  | TRUE  |
| 6_qbl_hap6 | 4276154 - 4289926     |             | TRUE  | TRUE  |
| 10         | 3109712 - 3179904     |             | TRUE  | FALSE |

|    |                     |            |       |       |
|----|---------------------|------------|-------|-------|
| 10 | 3109712 - 3179904   |            | TRUE  | TRUE  |
| 10 | 3109712 - 3179904   | F - 26.32% | TRUE  | TRUE  |
| 10 | 3109712 - 3179904   | F - 15.79% | TRUE  | TRUE  |
| 10 | 3109712 - 3179904   | F - 10.53% | TRUE  | TRUE  |
| 10 | 3109712 - 3179904   | F - 5.26%  | FALSE | TRUE  |
| 10 | 3109712 - 3179904   | F - 10.53% | TRUE  | TRUE  |
| 10 | 3109712 - 3179904   |            | TRUE  | TRUE  |
| 10 | 3109712 - 3179904   | F - 5.26%  | TRUE  | TRUE  |
| 10 | 3109712 - 3179904   | F - 15.79% | FALSE | TRUE  |
| 10 | 3109712 - 3179904   |            | TRUE  | TRUE  |
| 10 | 3109712 - 3179904   | F - 5.26%  | TRUE  | TRUE  |
| 10 | 3109712 - 3179904   |            | TRUE  | TRUE  |
| 10 | 3109712 - 3179904   | F - 21.05% | TRUE  | TRUE  |
| 10 | 3109712 - 3179904   |            | TRUE  | TRUE  |
| 10 | 3109712 - 3179904   | F - 26.32% | TRUE  | TRUE  |
| 10 | 3109712 - 3179904   | F - 10.53% | TRUE  | TRUE  |
| 10 | 3109712 - 3179904   | F - 5.26%  | FALSE | TRUE  |
| 10 | 3109712 - 3179904   | F - 5.26%  | TRUE  | TRUE  |
| 10 | 3109712 - 3179904   | F - 5.26%  | FALSE | TRUE  |
| 10 | 3109712 - 3179904   | F - 5.26%  | FALSE | TRUE  |
| 10 | 3109712 - 3179904   | F - 5.26%  | TRUE  | TRUE  |
| Y  | 21865751 - 21906825 |            | TRUE  | FALSE |
| Y  | 21865751 - 21906825 | T - 70.00% | TRUE  | FALSE |
| Y  | 21865751 - 21906825 |            | TRUE  | TRUE  |
| Y  | 21865751 - 21906825 | T - 70.00% | TRUE  | FALSE |
| Y  | 21865751 - 21906825 |            | TRUE  | FALSE |
| Y  | 21865751 - 21906825 | T - 65.00% | TRUE  | TRUE  |
| Y  | 21865751 - 21906825 | T - 65.00% | TRUE  | TRUE  |
| Y  | 21865751 - 21906825 |            | TRUE  | TRUE  |
| Y  | 21865751 - 21906825 | T - 60.00% | TRUE  | TRUE  |
| Y  | 21865751 - 21906825 | T - 50.00% | TRUE  | FALSE |
| Y  | 21865751 - 21906825 | T - 70.00% | TRUE  | FALSE |
| Y  | 21865751 - 21906825 |            | TRUE  | FALSE |
| Y  | 21865751 - 21906825 | T - 60.00% | TRUE  | TRUE  |
| Y  | 21865751 - 21906825 | T - 75.00% | TRUE  | TRUE  |
| Y  | 21865751 - 21906825 | T - 65.00% | TRUE  | TRUE  |
| Y  | 21865751 - 21906825 | T - 70.00% | TRUE  | TRUE  |
| Y  | 21865751 - 21906825 |            | TRUE  | TRUE  |
| Y  | 21865751 - 21906825 |            | TRUE  | TRUE  |
| Y  | 21865751 - 21906825 | T - 80.00% | TRUE  | TRUE  |
| Y  | 21865751 - 21906825 | T - 80.00% | TRUE  | TRUE  |
| Y  | 21865751 - 21906825 | T - 65.00% | TRUE  | TRUE  |
| Y  | 21865751 - 21906825 |            | TRUE  | TRUE  |
| Y  | 21865751 - 21906825 | F - 5.00%  | TRUE  | TRUE  |
| Y  | 21865751 - 21906825 |            | TRUE  | TRUE  |
| Y  | 21865751 - 21906825 |            | TRUE  | TRUE  |
| Y  | 21865751 - 21906825 | T - 75.00% | TRUE  | TRUE  |
| Y  | 21865751 - 21906825 | F - 10.00% | TRUE  | TRUE  |
| Y  | 21865751 - 21906825 |            | TRUE  | TRUE  |
| Y  | 21865751 - 21906825 | T - 75.00% | TRUE  | TRUE  |
| Y  | 21865751 - 21906825 |            | TRUE  | TRUE  |
| Y  | 21865751 - 21906825 | F - 5.00%  | TRUE  | TRUE  |
| Y  | 21865751 - 21906825 | F - 5.00%  | FALSE | TRUE  |
| Y  | 21865751 - 21906825 | F - 15.00% | TRUE  | TRUE  |
| Y  | 21865751 - 21906825 |            | TRUE  | TRUE  |
| Y  | 21865751 - 21906825 | T - 70.00% | TRUE  | TRUE  |
| Y  | 21865751 - 21906825 |            | FALSE | TRUE  |
| Y  | 21865751 - 21906825 | T - 70.00% | TRUE  | TRUE  |

|             |                       |            |       |       |
|-------------|-----------------------|------------|-------|-------|
| Y           | 21865751 - 21906825   |            | TRUE  | TRUE  |
| Y           | 21865751 - 21906825   |            | TRUE  | TRUE  |
| Y           | 21865751 - 21906825   |            | TRUE  | TRUE  |
| Y           | 21865751 - 21906825   |            | TRUE  | TRUE  |
| Y           | 21865751 - 21906825   |            | FALSE | TRUE  |
| 6_dbb_hap3  | 4325042 - 4338804     |            | TRUE  | FALSE |
| 6_dbb_hap3  | 4325042 - 4338804     | F - 18.75% | FALSE | TRUE  |
| 6_dbb_hap3  | 4325042 - 4338804     |            | TRUE  | TRUE  |
| 6_dbb_hap3  | 4325042 - 4338804     | F - 6.25%  | TRUE  | TRUE  |
| 6_dbb_hap3  | 4325042 - 4338804     |            | TRUE  | TRUE  |
| 6_dbb_hap3  | 4325042 - 4338804     |            | TRUE  | TRUE  |
| 6_dbb_hap3  | 4325042 - 4338804     | F - 18.75% | TRUE  | TRUE  |
| 6_dbb_hap3  | 4325042 - 4338804     | F - 12.50% | FALSE | TRUE  |
| 6_dbb_hap3  | 4325042 - 4338804     |            | FALSE | TRUE  |
| 6_dbb_hap3  | 4325042 - 4338804     | T - 56.25% | FALSE | TRUE  |
| 6_dbb_hap3  | 4325042 - 4338804     | F - 6.25%  | TRUE  | TRUE  |
| 6_dbb_hap3  | 4325042 - 4338804     | F - 6.25%  | TRUE  | TRUE  |
| 6_dbb_hap3  | 4325042 - 4338804     | F - 12.50% | TRUE  | TRUE  |
| 6_dbb_hap3  | 4325042 - 4338804     |            | TRUE  | TRUE  |
| 6_dbb_hap3  | 4325042 - 4338804     | T - 93.75% | TRUE  | TRUE  |
| 6_dbb_hap3  | 4325042 - 4338804     | F - 37.50% | FALSE | TRUE  |
| 6_dbb_hap3  | 4325042 - 4338804     |            | TRUE  | TRUE  |
| 6_ssto_hap7 | 4524207 - 4537977     |            | TRUE  | FALSE |
| 6_ssto_hap7 | 4524207 - 4537977     | F - 18.75% | FALSE | TRUE  |
| 6_ssto_hap7 | 4524207 - 4537977     |            | TRUE  | TRUE  |
| 6_ssto_hap7 | 4524207 - 4537977     | F - 6.25%  | TRUE  | TRUE  |
| 6_ssto_hap7 | 4524207 - 4537977     |            | TRUE  | TRUE  |
| 6_ssto_hap7 | 4524207 - 4537977     |            | TRUE  | TRUE  |
| 6_ssto_hap7 | 4524207 - 4537977     | F - 18.75% | TRUE  | TRUE  |
| 6_ssto_hap7 | 4524207 - 4537977     | F - 12.50% | FALSE | TRUE  |
| 6_ssto_hap7 | 4524207 - 4537977     |            | FALSE | TRUE  |
| 6_ssto_hap7 | 4524207 - 4537977     | T - 56.25% | FALSE | TRUE  |
| 6_ssto_hap7 | 4524207 - 4537977     | F - 6.25%  | TRUE  | TRUE  |
| 6_ssto_hap7 | 4524207 - 4537977     | F - 6.25%  | TRUE  | TRUE  |
| 6_ssto_hap7 | 4524207 - 4537977     | F - 12.50% | TRUE  | TRUE  |
| 6_ssto_hap7 | 4524207 - 4537977     |            | TRUE  | TRUE  |
| 6_ssto_hap7 | 4524207 - 4537977     | T - 93.75% | TRUE  | TRUE  |
| 6_ssto_hap7 | 4524207 - 4537977     | F - 37.50% | FALSE | TRUE  |
| 6_ssto_hap7 | 4524207 - 4537977     |            | TRUE  | TRUE  |
| 4           | 113739239 - 114309884 |            | TRUE  | TRUE  |
| 4           | 113739239 - 114309884 |            | TRUE  | TRUE  |
| 4           | 113739239 - 114309884 |            | TRUE  | FALSE |
| 4           | 113739239 - 114309884 |            | TRUE  | TRUE  |
| 4           | 113739239 - 114309884 | F - 42.11% | TRUE  | TRUE  |
| 4           | 113739239 - 114309884 |            | TRUE  | TRUE  |
| 4           | 113739239 - 114309884 |            | TRUE  | TRUE  |
| 4           | 113739239 - 114309884 |            | TRUE  | TRUE  |
| 4           | 113739239 - 114309884 |            | TRUE  | TRUE  |
| 4           | 113739239 - 114309884 |            | TRUE  | TRUE  |
| 4           | 113739239 - 114309884 | F - 42.11% | TRUE  | TRUE  |
| 4           | 113739239 - 114309884 | F - 36.84% | TRUE  | TRUE  |
| 4           | 113739239 - 114309884 | F - 36.84% | TRUE  | TRUE  |
| 4           | 113739239 - 114309884 |            | TRUE  | TRUE  |
| 4           | 113739239 - 114309884 | F - 36.84% | TRUE  | TRUE  |
| 4           | 113739239 - 114309884 | F - 36.84% | TRUE  | TRUE  |
| 4           | 113739239 - 114309884 |            | TRUE  | TRUE  |
| 4           | 113739239 - 114309884 | F - 2.63%  | TRUE  | TRUE  |
| 4           | 113739239 - 114309884 | F - 44.74% | TRUE  | TRUE  |

|             |                       |            |       |       |
|-------------|-----------------------|------------|-------|-------|
| 4           | 113739239 - 114309884 | F - 39.47% | TRUE  | TRUE  |
| 4           | 113739239 - 114309884 |            | TRUE  | TRUE  |
| 4           | 113739239 - 114309884 |            | TRUE  | FALSE |
| 4           | 113739239 - 114309884 |            | TRUE  | TRUE  |
| 4           | 113739239 - 114309884 | F - 36.84% | TRUE  | TRUE  |
| 4           | 113739239 - 114309884 | F - 36.84% | TRUE  | TRUE  |
| 4           | 113739239 - 114309884 | F - 36.84% | TRUE  | TRUE  |
| 4           | 113739239 - 114309884 | F - 36.84% | TRUE  | TRUE  |
| 4           | 113739239 - 114309884 | F - 36.84% | TRUE  | TRUE  |
| 4           | 113739239 - 114309884 | F - 36.84% | TRUE  | TRUE  |
| 4           | 113739239 - 114309884 | F - 36.84% | TRUE  | TRUE  |
| 4           | 113739239 - 114309884 |            | TRUE  | TRUE  |
| 4           | 113739239 - 114309884 | F - 36.84% | TRUE  | TRUE  |
| 4           | 113739239 - 114309884 | F - 36.84% | TRUE  | TRUE  |
| 4           | 113739239 - 114309884 | F - 13.16% | TRUE  | TRUE  |
| 4           | 113739239 - 114309884 | F - 44.74% | TRUE  | TRUE  |
| 4           | 113739239 - 114309884 |            | TRUE  | TRUE  |
| 4           | 113739239 - 114309884 | F - 34.21% | TRUE  | TRUE  |
| 4           | 113739239 - 114309884 |            | TRUE  | TRUE  |
| 4           | 113739239 - 114309884 | F - 36.84% | TRUE  | TRUE  |
| 4           | 113739239 - 114309884 |            | TRUE  | TRUE  |
| 4           | 113739239 - 114309884 |            | TRUE  | TRUE  |
| 4           | 113739239 - 114309884 | T - 50.00% | TRUE  | TRUE  |
| 4           | 113739239 - 114309884 | T - 52.63% | TRUE  | TRUE  |
| 4           | 113739239 - 114309884 |            | TRUE  | TRUE  |
| 6_mann_hap4 | 4501243 - 4554476     |            | TRUE  | FALSE |
| 6_mann_hap4 | 4501243 - 4554476     | F - 17.65% | FALSE | TRUE  |
| 6_mann_hap4 | 4501243 - 4554476     |            | TRUE  | TRUE  |
| 6_mann_hap4 | 4501243 - 4554476     | F - 5.88%  | TRUE  | TRUE  |
| 6_mann_hap4 | 4501243 - 4554476     |            | TRUE  | TRUE  |
| 6_mann_hap4 | 4501243 - 4554476     |            | TRUE  | TRUE  |
| 6_mann_hap4 | 4501243 - 4554476     | F - 17.65% | TRUE  | TRUE  |
| 6_mann_hap4 | 4501243 - 4554476     | F - 11.76% | FALSE | TRUE  |
| 6_mann_hap4 | 4501243 - 4554476     |            | FALSE | TRUE  |
| 6_mann_hap4 | 4501243 - 4554476     | T - 58.82% | FALSE | TRUE  |
| 6_mann_hap4 | 4501243 - 4554476     | F - 5.88%  | TRUE  | TRUE  |
| 6_mann_hap4 | 4501243 - 4554476     | F - 5.88%  | TRUE  | TRUE  |
| 6_mann_hap4 | 4501243 - 4554476     | F - 11.76% | TRUE  | TRUE  |
| 6_mann_hap4 | 4501243 - 4554476     |            | TRUE  | TRUE  |
| 6_mann_hap4 | 4501243 - 4554476     | T - 94.12% | TRUE  | TRUE  |
| 6_mann_hap4 | 4501243 - 4554476     | F - 35.29% | FALSE | TRUE  |
| 6_mann_hap4 | 4501243 - 4554476     |            | TRUE  | TRUE  |
| 6_apd_hap1  | 4330504 - 4344264     |            | TRUE  | FALSE |
| 6_apd_hap1  | 4330504 - 4344264     | F - 18.75% | FALSE | TRUE  |
| 6_apd_hap1  | 4330504 - 4344264     |            | TRUE  | TRUE  |
| 6_apd_hap1  | 4330504 - 4344264     | F - 6.25%  | TRUE  | TRUE  |
| 6_apd_hap1  | 4330504 - 4344264     |            | TRUE  | TRUE  |
| 6_apd_hap1  | 4330504 - 4344264     |            | TRUE  | TRUE  |
| 6_apd_hap1  | 4330504 - 4344264     | F - 18.75% | TRUE  | TRUE  |
| 6_apd_hap1  | 4330504 - 4344264     | F - 12.50% | FALSE | TRUE  |
| 6_apd_hap1  | 4330504 - 4344264     |            | FALSE | TRUE  |
| 6_apd_hap1  | 4330504 - 4344264     | T - 56.25% | FALSE | TRUE  |
| 6_apd_hap1  | 4330504 - 4344264     | F - 6.25%  | TRUE  | TRUE  |
| 6_apd_hap1  | 4330504 - 4344264     | F - 6.25%  | TRUE  | TRUE  |
| 6_apd_hap1  | 4330504 - 4344264     | F - 12.50% | TRUE  | TRUE  |
| 6_apd_hap1  | 4330504 - 4344264     |            | TRUE  | TRUE  |
| 6_apd_hap1  | 4330504 - 4344264     | T - 93.75% | TRUE  | TRUE  |
| 6_apd_hap1  | 4330504 - 4344264     | F - 37.50% | FALSE | TRUE  |
| 6_apd_hap1  | 4330504 - 4344264     |            | TRUE  | TRUE  |



|    |                       |            |       |       |
|----|-----------------------|------------|-------|-------|
| 8  | 121072019 - 121384275 |            | TRUE  | TRUE  |
| 8  | 121072019 - 121384275 | F - 21.43% | TRUE  | TRUE  |
| 8  | 121072019 - 121384275 |            | TRUE  | TRUE  |
| 8  | 121072019 - 121384275 |            | TRUE  | TRUE  |
| 8  | 121072019 - 121384275 | F - 7.14%  | TRUE  | TRUE  |
| 8  | 121072019 - 121384275 |            | FALSE | TRUE  |
| 10 | 120794356 - 120840396 | T - 54.55% | TRUE  | TRUE  |
| 10 | 120794356 - 120840396 |            | TRUE  | TRUE  |
| 9  | 39072764 - 39288456   |            | TRUE  | FALSE |
| 9  | 39072764 - 39288456   |            | TRUE  | TRUE  |
| 9  | 39072764 - 39288456   |            | TRUE  | TRUE  |
| 9  | 39072764 - 39288456   |            | TRUE  | TRUE  |
| 9  | 39072764 - 39288456   |            | TRUE  | TRUE  |
| 9  | 39072764 - 39288456   | F - 36.84% | TRUE  | TRUE  |
| 9  | 39072764 - 39288456   |            | TRUE  | TRUE  |
| 9  | 39072764 - 39288456   | F - 26.32% | TRUE  | TRUE  |
| 9  | 39072764 - 39288456   |            | TRUE  | TRUE  |
| 9  | 39072764 - 39288456   | F - 42.11% | TRUE  | TRUE  |
| 9  | 39072764 - 39288456   | F - 42.11% | TRUE  | TRUE  |
| 9  | 39072764 - 39288456   | F - 31.58% | TRUE  | TRUE  |
| 9  | 39072764 - 39288456   |            | TRUE  | TRUE  |
| 9  | 39072764 - 39288456   | T - 68.42% | TRUE  | TRUE  |
| 9  | 39072764 - 39288456   |            | FALSE | TRUE  |
| 9  | 39072764 - 39288456   | T - 63.16% | TRUE  | TRUE  |
| 9  | 39072764 - 39288456   |            | FALSE | TRUE  |
| 9  | 39072764 - 39288456   |            | FALSE | TRUE  |
| 9  | 39072764 - 39288456   | T - 68.42% | TRUE  | TRUE  |
| 9  | 39072764 - 39288456   |            | TRUE  | TRUE  |
| 9  | 39072764 - 39288456   |            | FALSE | TRUE  |
| 9  | 39072764 - 39288456   |            | FALSE | TRUE  |
| 1  | 143391526 - 143404415 |            | TRUE  | TRUE  |
| 1  | 143391526 - 143404415 |            | TRUE  | TRUE  |
| 1  | 143391526 - 143404415 |            | TRUE  | TRUE  |
| 1  | 143391526 - 143404415 |            | TRUE  | TRUE  |
| 1  | 143391526 - 143404415 |            | TRUE  | TRUE  |
| 1  | 143391526 - 143404415 | F - 11.11% | TRUE  | TRUE  |
| 1  | 143391526 - 143404415 | F - 44.44% | TRUE  | TRUE  |
| 1  | 143391526 - 143404415 | T - 55.56% | TRUE  | TRUE  |
| 1  | 143391526 - 143404415 | F - 11.11% | FALSE | TRUE  |
| 1  | 143391526 - 143404415 | F - 22.22% | TRUE  | TRUE  |
| 1  | 143391526 - 143404415 | F - 22.22% | FALSE | TRUE  |
| 1  | 143391526 - 143404415 | F - 22.22% | TRUE  | TRUE  |
| 1  | 143391526 - 143404415 |            | TRUE  | TRUE  |
| 1  | 143391526 - 143404415 | F - 11.11% | FALSE | TRUE  |
| 1  | 143391526 - 143404415 | F - 44.44% | FALSE | TRUE  |
| 1  | 143391526 - 143404415 | F - 11.11% | TRUE  | TRUE  |
| 1  | 143391526 - 143404415 | T - 55.56% | TRUE  | TRUE  |
| 3  | 4535032 - 4889524     | F - 7.14%  | TRUE  | TRUE  |
| 3  | 4535032 - 4889524     | T - 57.14% | TRUE  | TRUE  |
| 3  | 4535032 - 4889524     |            | TRUE  | TRUE  |
| 3  | 4535032 - 4889524     |            | TRUE  | TRUE  |
| 3  | 4535032 - 4889524     |            | TRUE  | TRUE  |
| 3  | 4535032 - 4889524     | F - 42.86% | TRUE  | TRUE  |
| 3  | 4535032 - 4889524     | F - 46.43% | TRUE  | TRUE  |
| 3  | 4535032 - 4889524     |            | TRUE  | TRUE  |
| 3  | 4535032 - 4889524     |            | TRUE  | TRUE  |
| 3  | 4535032 - 4889524     |            | TRUE  | TRUE  |
| 3  | 4535032 - 4889524     |            | TRUE  | TRUE  |
| 3  | 4535032 - 4889524     | F - 3.57%  | TRUE  | TRUE  |

|   |                   |            |       |       |
|---|-------------------|------------|-------|-------|
| 3 | 4535032 - 4889524 | F - 7.14%  | TRUE  | TRUE  |
| 3 | 4535032 - 4889524 | F - 10.71% | FALSE | TRUE  |
| 3 | 4535032 - 4889524 | F - 3.57%  | TRUE  | TRUE  |
| 3 | 4535032 - 4889524 | F - 35.71% | FALSE | TRUE  |
| 3 | 4535032 - 4889524 | F - 3.57%  | TRUE  | TRUE  |
| 3 | 4535032 - 4889524 |            | TRUE  | TRUE  |
| 3 | 4535032 - 4889524 |            | TRUE  | TRUE  |
| 3 | 4535032 - 4889524 | F - 17.86% | TRUE  | TRUE  |
| 3 | 4535032 - 4889524 |            | TRUE  | TRUE  |
| 3 | 4535032 - 4889524 | F - 3.57%  | FALSE | TRUE  |
| 3 | 4535032 - 4889524 |            | TRUE  | TRUE  |
| 3 | 4535032 - 4889524 |            | TRUE  | TRUE  |
| 3 | 4535032 - 4889524 | F - 3.57%  | TRUE  | TRUE  |
| 3 | 4535032 - 4889524 |            | TRUE  | TRUE  |
| 3 | 4535032 - 4889524 |            | TRUE  | TRUE  |
| 3 | 4535032 - 4889524 | F - 3.57%  | TRUE  | TRUE  |
| 3 | 4535032 - 4889524 |            | TRUE  | TRUE  |
| 3 | 4535032 - 4889524 |            | FALSE | TRUE  |
| 3 | 4535032 - 4889524 | F - 7.14%  | TRUE  | TRUE  |
| 3 | 4535032 - 4889524 | F - 35.71% | TRUE  | TRUE  |
| 3 | 4535032 - 4889524 |            | TRUE  | TRUE  |
| 3 | 4535032 - 4889524 | F - 35.71% | TRUE  | TRUE  |
| 3 | 4535032 - 4889524 | F - 46.43% | FALSE | TRUE  |
| 3 | 4535032 - 4889524 |            | FALSE | TRUE  |
| 3 | 4535032 - 4889524 |            | FALSE | TRUE  |
| 3 | 4535032 - 4889524 |            | FALSE | TRUE  |
| 3 | 4535032 - 4889524 | F - 21.43% | FALSE | TRUE  |
| 3 | 4535032 - 4889524 | F - 42.86% | TRUE  | TRUE  |
| 3 | 4535032 - 4889524 | F - 3.57%  | TRUE  | TRUE  |
| 3 | 4535032 - 4889524 |            | TRUE  | TRUE  |
| 3 | 4535032 - 4889524 | T - 64.29% | TRUE  | TRUE  |
| 3 | 4535032 - 4889524 |            | FALSE | TRUE  |
| 3 | 4535032 - 4889524 |            | FALSE | TRUE  |
| 3 | 4535032 - 4889524 |            | FALSE | TRUE  |
| 1 | 1981909 - 2116834 |            | TRUE  | TRUE  |
| 1 | 1981909 - 2116834 | F - 2.94%  | TRUE  | TRUE  |
| 1 | 1981909 - 2116834 | F - 8.82%  | TRUE  | TRUE  |
| 1 | 1981909 - 2116834 |            | TRUE  | FALSE |
| 1 | 1981909 - 2116834 | F - 2.94%  | TRUE  | TRUE  |
| 1 | 1981909 - 2116834 | F - 5.88%  | TRUE  | TRUE  |
| 1 | 1981909 - 2116834 |            | TRUE  | FALSE |
| 1 | 1981909 - 2116834 | F - 5.88%  | FALSE | TRUE  |
| 1 | 1981909 - 2116834 | F - 2.94%  | TRUE  | TRUE  |
| 1 | 1981909 - 2116834 | F - 14.71% | TRUE  | TRUE  |
| 1 | 1981909 - 2116834 |            | TRUE  | FALSE |
| 1 | 1981909 - 2116834 | F - 5.88%  | TRUE  | TRUE  |
| 1 | 1981909 - 2116834 | F - 5.88%  | TRUE  | TRUE  |
| 1 | 1981909 - 2116834 | F - 14.71% | TRUE  | TRUE  |
| 1 | 1981909 - 2116834 | F - 11.76% | TRUE  | TRUE  |
| 1 | 1981909 - 2116834 | F - 2.94%  | TRUE  | TRUE  |
| 1 | 1981909 - 2116834 | F - 2.94%  | TRUE  | TRUE  |
| 1 | 1981909 - 2116834 | F - 2.94%  | TRUE  | TRUE  |
| 1 | 1981909 - 2116834 | F - 41.18% | TRUE  | TRUE  |
| 1 | 1981909 - 2116834 | F - 17.65% | TRUE  | TRUE  |
| 1 | 1981909 - 2116834 |            | TRUE  | TRUE  |
| 1 | 1981909 - 2116834 | F - 5.88%  | FALSE | TRUE  |
| 1 | 1981909 - 2116834 | F - 2.94%  | FALSE | TRUE  |
| 1 | 1981909 - 2116834 | F - 2.94%  | TRUE  | TRUE  |
| 1 | 1981909 - 2116834 | F - 2.94%  | FALSE | TRUE  |
| 1 | 1981909 - 2116834 | F - 35.29% | TRUE  | TRUE  |

|             |                     |            |       |       |
|-------------|---------------------|------------|-------|-------|
| 1           | 1981909 - 2116834   | F - 5.88%  | TRUE  | TRUE  |
| 1           | 1981909 - 2116834   | F - 41.18% | FALSE | TRUE  |
| 1           | 1981909 - 2116834   | F - 44.12% | TRUE  | TRUE  |
| 1           | 1981909 - 2116834   | F - 2.94%  | TRUE  | TRUE  |
| 1           | 1981909 - 2116834   | F - 41.18% | TRUE  | TRUE  |
| 1           | 1981909 - 2116834   |            | FALSE | TRUE  |
| 1           | 1981909 - 2116834   | F - 38.24% | TRUE  | TRUE  |
| 1           | 1981909 - 2116834   | F - 41.18% | TRUE  | TRUE  |
| 1           | 1981909 - 2116834   | F - 20.59% | FALSE | TRUE  |
| 1           | 1981909 - 2116834   | F - 5.88%  | FALSE | TRUE  |
| 1           | 1981909 - 2116834   | F - 2.94%  | TRUE  | TRUE  |
| 1           | 1981909 - 2116834   | F - 2.94%  | FALSE | TRUE  |
| 6_mann_hap4 | 3256541 - 3261361   |            | TRUE  | TRUE  |
| 6_mann_hap4 | 3256541 - 3261361   | F - 7.69%  | TRUE  | TRUE  |
| 6_mann_hap4 | 3256541 - 3261361   | F - 15.38% | TRUE  | TRUE  |
| 6_mann_hap4 | 3256541 - 3261361   | F - 23.08% | TRUE  | TRUE  |
| 6_mann_hap4 | 3256541 - 3261361   | F - 23.08% | TRUE  | TRUE  |
| 6_mann_hap4 | 3256541 - 3261361   | F - 23.08% | FALSE | TRUE  |
| 6_mann_hap4 | 3256541 - 3261361   | T - 53.85% | TRUE  | TRUE  |
| 6_mann_hap4 | 3256541 - 3261361   | F - 7.69%  | TRUE  | TRUE  |
| 6_mann_hap4 | 3256541 - 3261361   | F - 7.69%  | TRUE  | TRUE  |
| 6_mann_hap4 | 3256541 - 3261361   | F - 30.77% | TRUE  | TRUE  |
| 6_mann_hap4 | 3256541 - 3261361   | F - 46.15% | TRUE  | TRUE  |
| 6_mann_hap4 | 3256541 - 3261361   | T - 53.85% | TRUE  | TRUE  |
| 6_mann_hap4 | 3256541 - 3261361   | F - 7.69%  | FALSE | TRUE  |
| 6_mann_hap4 | 3256541 - 3261361   | T - 53.85% | TRUE  | TRUE  |
| 6_mann_hap4 | 3256541 - 3261361   | F - 46.15% | TRUE  | TRUE  |
| 6_mann_hap4 | 3256541 - 3261361   |            | FALSE | TRUE  |
| 6_mann_hap4 | 3256541 - 3261361   |            | FALSE | TRUE  |
| 6_mann_hap4 | 3256541 - 3261361   |            | TRUE  | TRUE  |
| 8           | 31496902 - 32622558 |            | TRUE  | TRUE  |
| 8           | 31496902 - 32622558 |            | TRUE  | FALSE |
| 8           | 31496902 - 32622558 | F - 12.50% | TRUE  | TRUE  |
| 8           | 31496902 - 32622558 |            | TRUE  | TRUE  |
| 8           | 31496902 - 32622558 | F - 45.83% | TRUE  | TRUE  |
| 8           | 31496902 - 32622558 | F - 43.75% | TRUE  | TRUE  |
| 8           | 31496902 - 32622558 | F - 20.83% | TRUE  | TRUE  |
| 8           | 31496902 - 32622558 |            | TRUE  | TRUE  |
| 8           | 31496902 - 32622558 |            | TRUE  | TRUE  |
| 8           | 31496902 - 32622558 | T - 68.75% | TRUE  | TRUE  |
| 8           | 31496902 - 32622558 |            | TRUE  | TRUE  |
| 8           | 31496902 - 32622558 |            | TRUE  | TRUE  |
| 8           | 31496902 - 32622558 | F - 2.08%  | TRUE  | TRUE  |
| 8           | 31496902 - 32622558 | T - 54.17% | TRUE  | TRUE  |
| 8           | 31496902 - 32622558 | F - 2.08%  | TRUE  | TRUE  |
| 8           | 31496902 - 32622558 | F - 6.25%  | TRUE  | TRUE  |
| 8           | 31496902 - 32622558 | F - 33.33% | TRUE  | TRUE  |
| 8           | 31496902 - 32622558 | F - 2.08%  | TRUE  | TRUE  |
| 8           | 31496902 - 32622558 | F - 37.50% | TRUE  | TRUE  |
| 8           | 31496902 - 32622558 | F - 4.17%  | TRUE  | TRUE  |
| 8           | 31496902 - 32622558 |            | TRUE  | TRUE  |
| 8           | 31496902 - 32622558 | T - 54.17% | TRUE  | TRUE  |
| 8           | 31496902 - 32622558 | T - 72.92% | TRUE  | TRUE  |
| 8           | 31496902 - 32622558 | F - 8.33%  | TRUE  | TRUE  |
| 8           | 31496902 - 32622558 | F - 4.17%  | TRUE  | TRUE  |
| 8           | 31496902 - 32622558 | T - 52.08% | TRUE  | FALSE |
| 8           | 31496902 - 32622558 | F - 6.25%  | FALSE | TRUE  |
| 8           | 31496902 - 32622558 | F - 6.25%  | TRUE  | TRUE  |



|    |                     |            |       |       |
|----|---------------------|------------|-------|-------|
| 8  | 31496902 - 32622558 |            | TRUE  | TRUE  |
| 8  | 31496902 - 32622558 | T - 68.75% | TRUE  | TRUE  |
| 8  | 31496902 - 32622558 | F - 35.42% | TRUE  | TRUE  |
| 8  | 31496902 - 32622558 |            | TRUE  | TRUE  |
| 8  | 31496902 - 32622558 | F - 43.75% | TRUE  | TRUE  |
| 8  | 31496902 - 32622558 | T - 70.83% | TRUE  | TRUE  |
| 8  | 31496902 - 32622558 | F - 41.67% | TRUE  | TRUE  |
| 8  | 31496902 - 32622558 | F - 39.58% | FALSE | TRUE  |
| 8  | 31496902 - 32622558 |            | TRUE  | TRUE  |
| 8  | 31496902 - 32622558 |            | TRUE  | TRUE  |
| 2  | 75059782 - 75120486 |            | TRUE  | FALSE |
| 2  | 75059782 - 75120486 | F - 14.29% | TRUE  | FALSE |
| 2  | 75059782 - 75120486 | F - 14.29% | TRUE  | TRUE  |
| 2  | 75059782 - 75120486 | F - 14.29% | TRUE  | TRUE  |
| 2  | 75059782 - 75120486 | T - 85.71% | TRUE  | TRUE  |
| 2  | 75059782 - 75120486 |            | FALSE | TRUE  |
| 2  | 75059782 - 75120486 | T - 85.71% | TRUE  | TRUE  |
| 2  | 75059782 - 75120486 |            | FALSE | TRUE  |
| 2  | 75059782 - 75120486 |            | TRUE  | TRUE  |
| 2  | 75059782 - 75120486 | T - 57.14% | FALSE | TRUE  |
| 2  | 75059782 - 75120486 | T - 71.43% | FALSE | TRUE  |
| 2  | 75059782 - 75120486 |            | TRUE  | TRUE  |
| 2  | 75059782 - 75120486 |            | TRUE  | TRUE  |
| 2  | 75059782 - 75120486 | T - 85.71% | FALSE | TRUE  |
| 2  | 75059782 - 75120486 |            | TRUE  | TRUE  |
| 2  | 75059782 - 75120486 | T - 85.71% | TRUE  | TRUE  |
| 2  | 75059782 - 75120486 | T - 85.71% | FALSE | TRUE  |
| 2  | 75059782 - 75120486 |            | TRUE  | TRUE  |
| 2  | 75059782 - 75120486 |            | FALSE | TRUE  |
| 19 | 6677846 - 6730573   | F - 6.67%  | TRUE  | TRUE  |
| 19 | 6677846 - 6730573   | F - 6.67%  | TRUE  | TRUE  |
| 19 | 6677846 - 6730573   | F - 6.67%  | TRUE  | TRUE  |
| 19 | 6677846 - 6730573   | F - 13.33% | TRUE  | TRUE  |
| 19 | 6677846 - 6730573   | F - 6.67%  | TRUE  | TRUE  |
| 19 | 6677846 - 6730573   | F - 6.67%  | TRUE  | TRUE  |
| 19 | 6677846 - 6730573   | F - 6.67%  | FALSE | TRUE  |
| 19 | 6677846 - 6730573   | F - 6.67%  | TRUE  | TRUE  |
| 19 | 6677846 - 6730573   | F - 6.67%  | TRUE  | TRUE  |
| 19 | 6677846 - 6730573   | F - 6.67%  | FALSE | TRUE  |
| 19 | 6677846 - 6730573   | F - 6.67%  | TRUE  | TRUE  |
| 19 | 6677846 - 6730573   |            | TRUE  | TRUE  |
| 19 | 6677846 - 6730573   | F - 20.00% | TRUE  | TRUE  |
| 19 | 6677846 - 6730573   |            | FALSE | TRUE  |
| 19 | 6677846 - 6730573   |            | FALSE | TRUE  |
| 19 | 6677846 - 6730573   |            | TRUE  | TRUE  |
| 19 | 6677846 - 6730573   |            | FALSE | TRUE  |
| 19 | 6677846 - 6730573   | F - 20.00% | TRUE  | TRUE  |
| 19 | 6677846 - 6730573   | F - 20.00% | TRUE  | TRUE  |
| 19 | 6677846 - 6730573   | F - 20.00% | TRUE  | TRUE  |
| 19 | 6677846 - 6730573   | F - 26.67% | TRUE  | TRUE  |
| 19 | 6677846 - 6730573   | F - 26.67% | TRUE  | TRUE  |
| 19 | 6677846 - 6730573   |            | TRUE  | TRUE  |
| 19 | 6677846 - 6730573   |            | TRUE  | TRUE  |
| 19 | 6677846 - 6730573   | F - 26.67% | TRUE  | TRUE  |
| 19 | 6677846 - 6730573   |            | FALSE | TRUE  |
| 19 | 6677846 - 6730573   | F - 26.67% | TRUE  | TRUE  |
| 19 | 6677846 - 6730573   |            | TRUE  | TRUE  |
| 19 | 6677846 - 6730573   |            | TRUE  | TRUE  |

|    |                       |             |       |       |
|----|-----------------------|-------------|-------|-------|
| 19 | 6677846 - 6730573     | F - 26.67%  | TRUE  | TRUE  |
| 19 | 6677846 - 6730573     | F - 20.00%  | TRUE  | TRUE  |
| 19 | 6677846 - 6730573     | F - 33.33%  | TRUE  | TRUE  |
| 19 | 6677846 - 6730573     |             | TRUE  | TRUE  |
| 19 | 6677846 - 6730573     | F - 26.67%  | TRUE  | TRUE  |
| 19 | 6677846 - 6730573     |             | FALSE | TRUE  |
| 19 | 6677846 - 6730573     |             | TRUE  | TRUE  |
| 19 | 6677846 - 6730573     |             | TRUE  | TRUE  |
| 19 | 6677846 - 6730573     |             | FALSE | TRUE  |
| 22 | 24376133 - 24384680   |             | TRUE  | TRUE  |
| 22 | 24376133 - 24384680   |             | TRUE  | TRUE  |
| 22 | 24376133 - 24384680   |             | TRUE  | TRUE  |
| 22 | 24376133 - 24384680   | F - 4.76%   | TRUE  | TRUE  |
| 22 | 24376133 - 24384680   | F - 4.76%   | TRUE  | TRUE  |
| 22 | 24376133 - 24384680   |             | TRUE  | TRUE  |
| 22 | 24376133 - 24384680   | F - 9.52%   | TRUE  | TRUE  |
| 22 | 24376133 - 24384680   | F - 14.29%  | TRUE  | TRUE  |
| 22 | 24376133 - 24384680   | F - 9.52%   | FALSE | TRUE  |
| 22 | 24376133 - 24384680   |             | TRUE  | TRUE  |
| 22 | 24376133 - 24384680   | F - 9.52%   | TRUE  | TRUE  |
| 22 | 24376133 - 24384680   | F - 4.76%   | FALSE | TRUE  |
| 22 | 24376133 - 24384680   | F - 4.76%   | TRUE  | TRUE  |
| 22 | 24376133 - 24384680   | T - 61.90%  | TRUE  | TRUE  |
| 22 | 24376133 - 24384680   |             | TRUE  | TRUE  |
| 22 | 24376133 - 24384680   |             | FALSE | TRUE  |
| 12 | 57145945 - 57181574   |             | TRUE  | FALSE |
| 12 | 57145945 - 57181574   | T - 75.00%  | TRUE  | FALSE |
| 12 | 57145945 - 57181574   | T - 75.00%  | TRUE  | TRUE  |
| 12 | 57145945 - 57181574   |             | TRUE  | TRUE  |
| 12 | 57145945 - 57181574   | F - 25.00%  | FALSE | TRUE  |
| 12 | 57145945 - 57181574   | T - 50.00%  | FALSE | TRUE  |
| 1  | 215178885 - 215410436 | F - 5.26%   | FALSE | TRUE  |
| 1  | 215178885 - 215410436 |             | TRUE  | TRUE  |
| 1  | 215178885 - 215410436 | F - 5.26%   | TRUE  | TRUE  |
| 1  | 215178885 - 215410436 |             | TRUE  | TRUE  |
| 1  | 215178885 - 215410436 | F - 47.37%  | FALSE | TRUE  |
| 1  | 215178885 - 215410436 |             | TRUE  | TRUE  |
| 1  | 215178885 - 215410436 | F - 36.84%  | TRUE  | TRUE  |
| 1  | 215178885 - 215410436 |             | FALSE | TRUE  |
| 1  | 215178885 - 215410436 | F - 5.26%   | TRUE  | TRUE  |
| 1  | 215178885 - 215410436 |             | FALSE | TRUE  |
| 1  | 215178885 - 215410436 | F - 36.84%  | FALSE | TRUE  |
| 1  | 215178885 - 215410436 |             | TRUE  | TRUE  |
| 1  | 215178885 - 215410436 | F - 21.05%  | FALSE | TRUE  |
| 1  | 215178885 - 215410436 | T - 100.00% | TRUE  | TRUE  |
| 1  | 215178885 - 215410436 | F - 36.84%  | TRUE  | TRUE  |
| 1  | 215178885 - 215410436 | F - 36.84%  | TRUE  | TRUE  |
| 1  | 215178885 - 215410436 |             | FALSE | TRUE  |
| 6  | 111876581 - 111927481 | F - 20.83%  | TRUE  | TRUE  |
| 6  | 111876581 - 111927481 | F - 16.67%  | TRUE  | TRUE  |
| 6  | 111876581 - 111927481 | F - 8.33%   | FALSE | TRUE  |
| 6  | 111876581 - 111927481 | F - 12.50%  | TRUE  | TRUE  |
| 6  | 111876581 - 111927481 | F - 4.17%   | TRUE  | TRUE  |
| 6  | 111876581 - 111927481 | F - 8.33%   | TRUE  | TRUE  |
| 6  | 111876581 - 111927481 | F - 4.17%   | FALSE | TRUE  |
| 6  | 111876581 - 111927481 |             | TRUE  | TRUE  |
| 6  | 111876581 - 111927481 | F - 12.50%  | TRUE  | TRUE  |
| 5  | 148303202 - 148442737 |             | TRUE  | FALSE |

|   |                       |            |       |       |
|---|-----------------------|------------|-------|-------|
| 5 | 148303202 - 148442737 | F - 8.33%  | TRUE  | TRUE  |
| 5 | 148303202 - 148442737 |            | TRUE  | FALSE |
| 5 | 148303202 - 148442737 |            | TRUE  | TRUE  |
| 5 | 148303202 - 148442737 |            | TRUE  | TRUE  |
| 5 | 148303202 - 148442737 | T - 62.50% | TRUE  | TRUE  |
| 5 | 148303202 - 148442737 | T - 62.50% | FALSE | TRUE  |
| 5 | 148303202 - 148442737 |            | FALSE | TRUE  |
| 5 | 148303202 - 148442737 |            | FALSE | TRUE  |
| 4 | 9772777 - 10056560    |            | TRUE  | TRUE  |
| 4 | 9772777 - 10056560    |            | TRUE  | FALSE |
| 4 | 9772777 - 10056560    |            | TRUE  | TRUE  |
| 4 | 9772777 - 10056560    |            | FALSE | TRUE  |
| 4 | 9772777 - 10056560    | F - 5.88%  | TRUE  | TRUE  |
| 4 | 9772777 - 10056560    | F - 5.88%  | TRUE  | TRUE  |
| 4 | 9772777 - 10056560    |            | TRUE  | TRUE  |
| 4 | 9772777 - 10056560    | F - 11.76% | TRUE  | TRUE  |
| 4 | 9772777 - 10056560    | F - 5.88%  | TRUE  | TRUE  |
| 4 | 9772777 - 10056560    |            | FALSE | TRUE  |
| 4 | 9772777 - 10056560    |            | TRUE  | TRUE  |
| 4 | 9772777 - 10056560    |            | TRUE  | TRUE  |
| 3 | 186933873 - 187009810 |            | TRUE  | FALSE |
| 3 | 186933873 - 187009810 |            | TRUE  | TRUE  |
| 3 | 186933873 - 187009810 | F - 8.70%  | TRUE  | TRUE  |
| 3 | 186933873 - 187009810 | F - 4.35%  | TRUE  | TRUE  |
| 3 | 186933873 - 187009810 | F - 4.35%  | FALSE | TRUE  |
| 3 | 186933873 - 187009810 |            | TRUE  | TRUE  |
| 3 | 186933873 - 187009810 | F - 4.35%  | FALSE | TRUE  |
| 3 | 186933873 - 187009810 |            | TRUE  | TRUE  |
| 3 | 186933873 - 187009810 | F - 4.35%  | TRUE  | TRUE  |
| 3 | 186933873 - 187009810 | F - 4.35%  | FALSE | TRUE  |
| 3 | 186933873 - 187009810 | F - 4.35%  | FALSE | TRUE  |
| 3 | 186933873 - 187009810 | F - 30.43% | TRUE  | TRUE  |
| 3 | 186933873 - 187009810 | F - 13.04% | TRUE  | TRUE  |
| 3 | 186933873 - 187009810 |            | TRUE  | TRUE  |
| 3 | 186933873 - 187009810 |            | TRUE  | TRUE  |
| 3 | 186933873 - 187009810 | F - 13.04% | FALSE | TRUE  |
| 3 | 186933873 - 187009810 |            | FALSE | TRUE  |
| 3 | 186933873 - 187009810 | T - 65.22% | TRUE  | TRUE  |
| 3 | 186933873 - 187009810 | F - 8.70%  | TRUE  | TRUE  |
| 3 | 186933873 - 187009810 | F - 17.39% | TRUE  | TRUE  |
| 3 | 186933873 - 187009810 | F - 4.35%  | TRUE  | TRUE  |
| 3 | 186933873 - 187009810 | F - 8.70%  | TRUE  | TRUE  |
| 3 | 186933873 - 187009810 | T - 65.22% | TRUE  | TRUE  |
| 3 | 186933873 - 187009810 |            | FALSE | TRUE  |
| 3 | 186933873 - 187009810 | F - 13.04% | TRUE  | TRUE  |
| 3 | 186933873 - 187009810 | F - 47.83% | FALSE | TRUE  |
| 3 | 186933873 - 187009810 |            | TRUE  | TRUE  |
| 3 | 186933873 - 187009810 | F - 8.70%  | FALSE | TRUE  |
| 3 | 186933873 - 187009810 | F - 13.04% | TRUE  | TRUE  |
| 3 | 186933873 - 187009810 | T - 56.52% | TRUE  | TRUE  |
| 3 | 186933873 - 187009810 | T - 78.26% | TRUE  | TRUE  |
| 3 | 186933873 - 187009810 | T - 60.87% | FALSE | TRUE  |
| 3 | 186933873 - 187009810 | F - 47.83% | TRUE  | TRUE  |
| 3 | 186933873 - 187009810 | T - 69.57% | TRUE  | TRUE  |
| 3 | 186933873 - 187009810 |            | FALSE | TRUE  |
| 3 | 186933873 - 187009810 |            | FALSE | TRUE  |
| 3 | 186933873 - 187009810 |            | FALSE | TRUE  |
| 3 | 186933873 - 187009810 |            | TRUE  | TRUE  |

|   |                     |             |       |       |
|---|---------------------|-------------|-------|-------|
| X | 47077259 - 47089396 |             | TRUE  | TRUE  |
| X | 47077259 - 47089396 |             | TRUE  | FALSE |
| X | 47077259 - 47089396 | F - 12.50%  | TRUE  | TRUE  |
| X | 47077259 - 47089396 | F - 6.25%   | TRUE  | TRUE  |
| X | 47077259 - 47089396 |             | TRUE  | TRUE  |
| X | 47077259 - 47089396 | F - 12.50%  | TRUE  | TRUE  |
| X | 47077259 - 47089396 | F - 3.13%   | TRUE  | TRUE  |
| X | 47077259 - 47089396 | F - 12.50%  | TRUE  | TRUE  |
| X | 47077259 - 47089396 | F - 3.13%   | TRUE  | TRUE  |
| X | 47077259 - 47089396 | F - 6.25%   | TRUE  | TRUE  |
| X | 47077259 - 47089396 | F - 9.38%   | TRUE  | TRUE  |
| X | 47077259 - 47089396 | F - 31.25%  | TRUE  | TRUE  |
| X | 47077259 - 47089396 | F - 3.13%   | TRUE  | TRUE  |
| 1 | 62701837 - 62785085 | F - 44.44%  | TRUE  | FALSE |
| 1 | 62701837 - 62785085 | T - 66.67%  | TRUE  | FALSE |
| 1 | 62701837 - 62785085 | T - 100.00% | TRUE  | FALSE |
| 1 | 62701837 - 62785085 |             | TRUE  | FALSE |
| 1 | 62701837 - 62785085 | T - 77.78%  | TRUE  | TRUE  |
| 1 | 62701837 - 62785085 | T - 77.78%  | TRUE  | TRUE  |
| 1 | 62701837 - 62785085 |             | TRUE  | TRUE  |
| 1 | 62701837 - 62785085 |             | TRUE  | TRUE  |
| 1 | 62701837 - 62785085 | T - 77.78%  | TRUE  | TRUE  |
| 1 | 62701837 - 62785085 | F - 33.33%  | TRUE  | TRUE  |
| 1 | 62701837 - 62785085 |             | TRUE  | TRUE  |
| 1 | 62701837 - 62785085 | T - 55.56%  | TRUE  | FALSE |
| 1 | 62701837 - 62785085 | T - 100.00% | TRUE  | TRUE  |
| 1 | 62701837 - 62785085 | T - 77.78%  | TRUE  | TRUE  |
| 1 | 62701837 - 62785085 | F - 44.44%  | TRUE  | TRUE  |
| 1 | 62701837 - 62785085 |             | FALSE | TRUE  |
| 7 | 70597155 - 71178585 |             | TRUE  | FALSE |
| 7 | 70597155 - 71178585 |             | TRUE  | FALSE |
| 7 | 70597155 - 71178585 | T - 66.67%  | TRUE  | TRUE  |
| 7 | 70597155 - 71178585 | T - 100.00% | TRUE  | TRUE  |
| 7 | 70597155 - 71178585 |             | TRUE  | FALSE |
| 7 | 70597155 - 71178585 | T - 100.00% | TRUE  | TRUE  |
| 7 | 70597155 - 71178585 |             | TRUE  | TRUE  |
| 7 | 70597155 - 71178585 |             | TRUE  | FALSE |
| 7 | 70597155 - 71178585 | F - 22.22%  | TRUE  | TRUE  |
| 7 | 70597155 - 71178585 | F - 11.11%  | TRUE  | TRUE  |
| 7 | 70597155 - 71178585 |             | FALSE | TRUE  |
| 7 | 70597155 - 71178585 | F - 22.22%  | FALSE | TRUE  |
| 3 | 48601506 - 48632700 |             | TRUE  | TRUE  |
| 3 | 48601506 - 48632700 |             | TRUE  | FALSE |
| 3 | 48601506 - 48632700 |             | TRUE  | TRUE  |
| 3 | 48601506 - 48632700 | F - 25.00%  | TRUE  | TRUE  |
| 3 | 48601506 - 48632700 | F - 25.00%  | TRUE  | TRUE  |
| 3 | 48601506 - 48632700 |             | TRUE  | FALSE |
| 3 | 48601506 - 48632700 | F - 33.33%  | TRUE  | TRUE  |
| 3 | 48601506 - 48632700 | F - 25.00%  | TRUE  | TRUE  |
| 3 | 48601506 - 48632700 |             | TRUE  | FALSE |
| 3 | 48601506 - 48632700 |             | TRUE  | FALSE |
| 3 | 48601506 - 48632700 | F - 25.00%  | TRUE  | TRUE  |
| 3 | 48601506 - 48632700 | F - 25.00%  | TRUE  | TRUE  |
| 3 | 48601506 - 48632700 | F - 25.00%  | TRUE  | TRUE  |
| 3 | 48601506 - 48632700 | F - 25.00%  | TRUE  | TRUE  |
| 3 | 48601506 - 48632700 |             | TRUE  | FALSE |
| 3 | 48601506 - 48632700 | F - 41.67%  | TRUE  | FALSE |
| 3 | 48601506 - 48632700 | F - 25.00%  | TRUE  | TRUE  |

|    |                       |            |       |       |
|----|-----------------------|------------|-------|-------|
| 3  | 48601506 - 48632700   | F - 25.00% | TRUE  | TRUE  |
| 3  | 48601506 - 48632700   | F - 25.00% | TRUE  | TRUE  |
| 3  | 48601506 - 48632700   |            | TRUE  | TRUE  |
| 3  | 48601506 - 48632700   | F - 25.00% | TRUE  | TRUE  |
| 3  | 48601506 - 48632700   | F - 25.00% | TRUE  | TRUE  |
| 3  | 48601506 - 48632700   | F - 33.33% | TRUE  | TRUE  |
| 3  | 48601506 - 48632700   | F - 25.00% | TRUE  | TRUE  |
| 3  | 48601506 - 48632700   | F - 25.00% | TRUE  | TRUE  |
| 3  | 48601506 - 48632700   | F - 33.33% | TRUE  | TRUE  |
| 3  | 48601506 - 48632700   | F - 25.00% | TRUE  | TRUE  |
| 3  | 48601506 - 48632700   |            | TRUE  | TRUE  |
| 3  | 48601506 - 48632700   |            | TRUE  | FALSE |
| 3  | 48601506 - 48632700   |            | TRUE  | TRUE  |
| 3  | 48601506 - 48632700   |            | TRUE  | TRUE  |
| 3  | 48601506 - 48632700   |            | TRUE  | TRUE  |
| 3  | 48601506 - 48632700   | F - 33.33% | TRUE  | TRUE  |
| 3  | 48601506 - 48632700   | F - 33.33% | FALSE | TRUE  |
| 3  | 48601506 - 48632700   | F - 33.33% | FALSE | TRUE  |
| 3  | 48601506 - 48632700   |            | TRUE  | TRUE  |
| 3  | 48601506 - 48632700   | F - 25.00% | FALSE | TRUE  |
| 17 | 19641297 - 19651746   | F - 4.17%  | TRUE  | TRUE  |
| 17 | 19641297 - 19651746   | F - 25.00% | TRUE  | TRUE  |
| 17 | 19641297 - 19651746   | F - 8.33%  | FALSE | TRUE  |
| 17 | 19641297 - 19651746   |            | TRUE  | TRUE  |
| 17 | 19641297 - 19651746   | F - 8.33%  | TRUE  | TRUE  |
| 17 | 19641297 - 19651746   | F - 8.33%  | FALSE | TRUE  |
| 17 | 19641297 - 19651746   | F - 12.50% | TRUE  | TRUE  |
| 17 | 19641297 - 19651746   |            | TRUE  | TRUE  |
| 17 | 19641297 - 19651746   | F - 12.50% | TRUE  | TRUE  |
| 17 | 19641297 - 19651746   | F - 4.17%  | FALSE | TRUE  |
| 17 | 19641297 - 19651746   | T - 66.67% | TRUE  | TRUE  |
| 17 | 19641297 - 19651746   |            | TRUE  | TRUE  |
| 17 | 19641297 - 19651746   | F - 16.67% | TRUE  | TRUE  |
| 17 | 19641297 - 19651746   | F - 12.50% | FALSE | TRUE  |
| 17 | 19641297 - 19651746   | F - 12.50% | TRUE  | TRUE  |
| 17 | 19641297 - 19651746   | F - 4.17%  | FALSE | TRUE  |
| 17 | 19641297 - 19651746   | F - 37.50% | TRUE  | TRUE  |
| 17 | 19641297 - 19651746   |            | FALSE | TRUE  |
| 17 | 19641297 - 19651746   | T - 75.00% | TRUE  | TRUE  |
| 17 | 19641297 - 19651746   | T - 83.33% | FALSE | TRUE  |
| 17 | 19641297 - 19651746   |            | FALSE | TRUE  |
| 17 | 19641297 - 19651746   |            | TRUE  | TRUE  |
| 17 | 19641297 - 19651746   |            | TRUE  | TRUE  |
| 17 | 19641297 - 19651746   |            | TRUE  | TRUE  |
| 17 | 19641297 - 19651746   | T - 75.00% | TRUE  | TRUE  |
| 17 | 19641297 - 19651746   | T - 66.67% | FALSE | TRUE  |
| 17 | 19641297 - 19651746   | T - 75.00% | FALSE | TRUE  |
| 17 | 19641297 - 19651746   | F - 45.83% | TRUE  | TRUE  |
| 17 | 19641297 - 19651746   | T - 83.33% | TRUE  | TRUE  |
| 17 | 19641297 - 19651746   |            | FALSE | TRUE  |
| 17 | 19641297 - 19651746   | T - 95.83% | FALSE | TRUE  |
| 17 | 19641297 - 19651746   |            | FALSE | TRUE  |
| 17 | 19641297 - 19651746   | T - 87.50% | FALSE | TRUE  |
| 17 | 19641297 - 19651746   |            | FALSE | TRUE  |
| 17 | 19641297 - 19651746   |            | FALSE | TRUE  |
| 17 | 19641297 - 19651746   |            | FALSE | TRUE  |
| 1  | 204797779 - 204991950 |            | TRUE  | FALSE |
| 1  | 204797779 - 204991950 | F - 2.17%  | TRUE  | FALSE |

|    |                       |            |       |      |
|----|-----------------------|------------|-------|------|
| 1  | 204797779 - 204991950 |            | TRUE  | TRUE |
| 1  | 204797779 - 204991950 |            | TRUE  | TRUE |
| 1  | 204797779 - 204991950 |            | TRUE  | TRUE |
| 1  | 204797779 - 204991950 |            | TRUE  | TRUE |
| 1  | 204797779 - 204991950 |            | TRUE  | TRUE |
| 1  | 204797779 - 204991950 |            | FALSE | TRUE |
| 1  | 204797779 - 204991950 |            | FALSE | TRUE |
| 1  | 204797779 - 204991950 | F - 2.17%  | TRUE  | TRUE |
| 1  | 204797779 - 204991950 |            | TRUE  | TRUE |
| 1  | 204797779 - 204991950 |            | FALSE | TRUE |
| 1  | 204797779 - 204991950 |            | TRUE  | TRUE |
| 1  | 204797779 - 204991950 |            | TRUE  | TRUE |
| 1  | 204797779 - 204991950 | F - 2.17%  | TRUE  | TRUE |
| 1  | 204797779 - 204991950 | F - 39.13% | TRUE  | TRUE |
| 1  | 204797779 - 204991950 | F - 2.17%  | TRUE  | TRUE |
| 1  | 204797779 - 204991950 | F - 6.52%  | TRUE  | TRUE |
| 1  | 204797779 - 204991950 |            | FALSE | TRUE |
| 1  | 204797779 - 204991950 | F - 6.52%  | FALSE | TRUE |
| 1  | 204797779 - 204991950 | F - 2.17%  | TRUE  | TRUE |
| 1  | 204797779 - 204991950 |            | FALSE | TRUE |
| 1  | 204797779 - 204991950 | F - 2.17%  | TRUE  | TRUE |
| 1  | 204797779 - 204991950 |            | FALSE | TRUE |
| 1  | 204797779 - 204991950 | F - 2.17%  | FALSE | TRUE |
| 1  | 204797779 - 204991950 | F - 28.26% | TRUE  | TRUE |
| 1  | 204797779 - 204991950 |            | TRUE  | TRUE |
| 1  | 204797779 - 204991950 |            | FALSE | TRUE |
| 1  | 204797779 - 204991950 |            | TRUE  | TRUE |
| 1  | 204797779 - 204991950 | F - 43.48% | TRUE  | TRUE |
| 1  | 204797779 - 204991950 | T - 56.52% | TRUE  | TRUE |
| 1  | 204797779 - 204991950 |            | TRUE  | TRUE |
| 1  | 204797779 - 204991950 | F - 2.17%  | TRUE  | TRUE |
| 1  | 204797779 - 204991950 | T - 63.04% | TRUE  | TRUE |
| 1  | 204797779 - 204991950 |            | FALSE | TRUE |
| 1  | 204797779 - 204991950 |            | TRUE  | TRUE |
| 1  | 204797779 - 204991950 |            | TRUE  | TRUE |
| 1  | 204797779 - 204991950 |            | TRUE  | TRUE |
| 1  | 204797779 - 204991950 | F - 17.39% | TRUE  | TRUE |
| 8  | 119935796 - 119964439 | T - 50.00% | FALSE | TRUE |
| 8  | 119935796 - 119964439 | F - 16.67% | TRUE  | TRUE |
| 8  | 119935796 - 119964439 |            | FALSE | TRUE |
| 8  | 119935796 - 119964439 | F - 33.33% | TRUE  | TRUE |
| 8  | 119935796 - 119964439 |            | TRUE  | TRUE |
| 14 | 94843084 - 94857030   |            | TRUE  | TRUE |
| 14 | 94843084 - 94857030   | T - 84.62% | TRUE  | TRUE |
| 14 | 94843084 - 94857030   |            | TRUE  | TRUE |
| 14 | 94843084 - 94857030   | F - 7.69%  | TRUE  | TRUE |
| 14 | 94843084 - 94857030   |            | TRUE  | TRUE |
| 14 | 94843084 - 94857030   |            | TRUE  | TRUE |
| 14 | 94843084 - 94857030   | T - 50.00% | FALSE | TRUE |
| 14 | 94843084 - 94857030   | F - 11.54% | TRUE  | TRUE |
| 14 | 94843084 - 94857030   |            | TRUE  | TRUE |
| 14 | 94843084 - 94857030   |            | TRUE  | TRUE |
| 14 | 94843084 - 94857030   |            | TRUE  | TRUE |
| 14 | 94843084 - 94857030   |            | FALSE | TRUE |
| 14 | 94843084 - 94857030   |            | TRUE  | TRUE |
| 14 | 94843084 - 94857030   |            | TRUE  | TRUE |
| 14 | 94843084 - 94857030   | T - 65.38% | TRUE  | TRUE |
| 14 | 94843084 - 94857030   |            | FALSE | TRUE |

|    |                       |            |       |       |
|----|-----------------------|------------|-------|-------|
| 14 | 94843084 - 94857030   |            | TRUE  | TRUE  |
| 14 | 94843084 - 94857030   |            | TRUE  | TRUE  |
| 14 | 94843084 - 94857030   |            | FALSE | TRUE  |
| 17 | 48133332 - 48167849   |            | TRUE  | TRUE  |
| 17 | 48133332 - 48167849   |            | TRUE  | TRUE  |
| 17 | 48133332 - 48167849   | F - 4.76%  | TRUE  | TRUE  |
| 17 | 48133332 - 48167849   |            | TRUE  | TRUE  |
| 17 | 48133332 - 48167849   | F - 4.76%  | TRUE  | TRUE  |
| 17 | 48133332 - 48167849   | F - 4.76%  | TRUE  | TRUE  |
| 17 | 48133332 - 48167849   | F - 14.29% | TRUE  | TRUE  |
| 17 | 48133332 - 48167849   | F - 14.29% | TRUE  | TRUE  |
| 17 | 48133332 - 48167849   | F - 4.76%  | TRUE  | TRUE  |
| 17 | 48133332 - 48167849   | F - 4.76%  | TRUE  | TRUE  |
| 17 | 48133332 - 48167849   | F - 33.33% | TRUE  | TRUE  |
| 17 | 48133332 - 48167849   | F - 42.86% | TRUE  | TRUE  |
| 17 | 48133332 - 48167849   | F - 42.86% | TRUE  | TRUE  |
| 17 | 48133332 - 48167849   |            | TRUE  | TRUE  |
| 17 | 48133332 - 48167849   |            | FALSE | TRUE  |
| 17 | 48133332 - 48167849   | F - 4.76%  | TRUE  | TRUE  |
| 17 | 48133332 - 48167849   |            | FALSE | TRUE  |
| 17 | 48133332 - 48167849   |            | FALSE | TRUE  |
| 17 | 48133332 - 48167849   |            | FALSE | TRUE  |
| 3  | 147111209 - 147228080 | F - 25.00% | TRUE  | TRUE  |
| 3  | 147111209 - 147228080 |            | TRUE  | FALSE |
| 3  | 147111209 - 147228080 | F - 37.50% | TRUE  | FALSE |
| 3  | 147111209 - 147228080 | F - 25.00% | TRUE  | FALSE |
| 3  | 147111209 - 147228080 |            | TRUE  | FALSE |
| 14 | 23765112 - 23772057   |            | TRUE  | FALSE |
| 14 | 23765112 - 23772057   |            | TRUE  | TRUE  |
| 14 | 23765112 - 23772057   | F - 33.33% | TRUE  | TRUE  |
| 14 | 23765112 - 23772057   | F - 33.33% | TRUE  | TRUE  |
| 14 | 23765112 - 23772057   |            | TRUE  | TRUE  |
| 14 | 23765112 - 23772057   | F - 33.33% | TRUE  | TRUE  |
| 14 | 23765112 - 23772057   |            | TRUE  | TRUE  |
| 14 | 23765112 - 23772057   | F - 14.29% | TRUE  | TRUE  |
| 3  | 27414214 - 27525911   |            | TRUE  | FALSE |
| 3  | 27414214 - 27525911   |            | TRUE  | TRUE  |
| 3  | 27414214 - 27525911   | F - 2.78%  | TRUE  | TRUE  |
| 3  | 27414214 - 27525911   | F - 11.11% | TRUE  | TRUE  |
| 3  | 27414214 - 27525911   | F - 8.33%  | TRUE  | TRUE  |
| 3  | 27414214 - 27525911   | F - 2.78%  | TRUE  | TRUE  |
| 3  | 27414214 - 27525911   |            | TRUE  | TRUE  |
| 3  | 27414214 - 27525911   | F - 41.67% | TRUE  | TRUE  |
| 3  | 27414214 - 27525911   |            | TRUE  | TRUE  |
| 3  | 27414214 - 27525911   | F - 2.78%  | TRUE  | TRUE  |
| 3  | 27414214 - 27525911   | F - 2.78%  | FALSE | TRUE  |
| 3  | 27414214 - 27525911   | T - 86.11% | TRUE  | TRUE  |
| 3  | 27414214 - 27525911   |            | TRUE  | TRUE  |
| 3  | 27414214 - 27525911   |            | TRUE  | TRUE  |
| 3  | 27414214 - 27525911   |            | FALSE | TRUE  |
| 7  | 43648055 - 43769316   |            | TRUE  | FALSE |
| 7  | 43648055 - 43769316   | F - 4.00%  | TRUE  | TRUE  |
| 7  | 43648055 - 43769316   |            | TRUE  | FALSE |
| 7  | 43648055 - 43769316   |            | TRUE  | FALSE |
| 7  | 43648055 - 43769316   | F - 8.00%  | FALSE | TRUE  |
| 2  | 46520806 - 46613842   | F - 7.69%  | TRUE  | TRUE  |
| 2  | 46520806 - 46613842   | F - 7.69%  | TRUE  | TRUE  |
| 2  | 46520806 - 46613842   | F - 7.69%  | TRUE  | TRUE  |

|    |                       |            |       |       |
|----|-----------------------|------------|-------|-------|
| 2  | 46520806 - 46613842   |            | TRUE  | TRUE  |
| 2  | 46520806 - 46613842   | F - 7.69%  | FALSE | TRUE  |
| 2  | 46520806 - 46613842   | F - 7.69%  | TRUE  | TRUE  |
| 2  | 46520806 - 46613842   |            | TRUE  | TRUE  |
| 2  | 46520806 - 46613842   |            | TRUE  | TRUE  |
| 2  | 46520806 - 46613842   | T - 53.85% | TRUE  | TRUE  |
| 2  | 46520806 - 46613842   |            | TRUE  | TRUE  |
| 2  | 46520806 - 46613842   | F - 30.77% | TRUE  | TRUE  |
| 2  | 46520806 - 46613842   |            | TRUE  | TRUE  |
| 2  | 46520806 - 46613842   |            | TRUE  | TRUE  |
| 12 | 7023491 - 7032861     | F - 9.09%  | TRUE  | TRUE  |
| 12 | 7023491 - 7032861     | F - 36.36% | TRUE  | TRUE  |
| 12 | 7023491 - 7032861     | F - 9.09%  | TRUE  | TRUE  |
| 12 | 7023491 - 7032861     | F - 9.09%  | FALSE | TRUE  |
| 12 | 7023491 - 7032861     | T - 72.73% | TRUE  | TRUE  |
| 12 | 7023491 - 7032861     |            | TRUE  | TRUE  |
| 12 | 7023491 - 7032861     |            | FALSE | TRUE  |
| 12 | 7023491 - 7032861     |            | TRUE  | TRUE  |
| 12 | 7023491 - 7032861     |            | FALSE | TRUE  |
| 12 | 7023491 - 7032861     | T - 63.64% | TRUE  | TRUE  |
| 12 | 7023491 - 7032861     |            | FALSE | TRUE  |
| 12 | 7023491 - 7032861     | F - 9.09%  | TRUE  | TRUE  |
| 12 | 7023491 - 7032861     |            | TRUE  | TRUE  |
| 12 | 7023491 - 7032861     |            | FALSE | TRUE  |
| 12 | 7023491 - 7032861     | T - 72.73% | TRUE  | TRUE  |
| 10 | 88426549 - 88495825   |            | TRUE  | FALSE |
| 10 | 88426549 - 88495825   |            | TRUE  | TRUE  |
| 10 | 88426549 - 88495825   |            | TRUE  | TRUE  |
| 10 | 88426549 - 88495825   | F - 26.09% | TRUE  | TRUE  |
| 10 | 88426549 - 88495825   | F - 34.78% | FALSE | TRUE  |
| 1  | 156052364 - 156109880 |            | TRUE  | FALSE |
| 1  | 156052364 - 156109880 |            | TRUE  | FALSE |
| 1  | 156052364 - 156109880 |            | TRUE  | TRUE  |
| 1  | 156052364 - 156109880 | F - 2.44%  | TRUE  | TRUE  |
| 1  | 156052364 - 156109880 |            | TRUE  | TRUE  |
| 1  | 156052364 - 156109880 | F - 2.44%  | TRUE  | TRUE  |
| 6  | 36644237 - 36655116   |            | TRUE  | FALSE |
| 6  | 36644237 - 36655116   | F - 11.76% | TRUE  | TRUE  |
| 5  | 58264865 - 59817947   |            | TRUE  | FALSE |
| 5  | 58264865 - 59817947   | F - 2.22%  | TRUE  | TRUE  |
| 5  | 58264865 - 59817947   | F - 6.67%  | TRUE  | TRUE  |
| 5  | 58264865 - 59817947   | F - 2.22%  | TRUE  | TRUE  |
| 5  | 58264865 - 59817947   | F - 4.44%  | TRUE  | TRUE  |
| 5  | 58264865 - 59817947   | F - 2.22%  | TRUE  | TRUE  |
| 5  | 58264865 - 59817947   | T - 51.11% | TRUE  | TRUE  |
| 5  | 58264865 - 59817947   |            | TRUE  | TRUE  |
| 5  | 58264865 - 59817947   | F - 4.44%  | TRUE  | TRUE  |
| 5  | 58264865 - 59817947   | T - 51.11% | TRUE  | TRUE  |
| 5  | 58264865 - 59817947   | F - 2.22%  | TRUE  | TRUE  |
| 5  | 58264865 - 59817947   |            | TRUE  | TRUE  |
| 5  | 58264865 - 59817947   | F - 4.44%  | TRUE  | TRUE  |
| 5  | 58264865 - 59817947   | F - 4.44%  | TRUE  | TRUE  |
| 5  | 58264865 - 59817947   | T - 57.78% | TRUE  | TRUE  |
| 5  | 58264865 - 59817947   | F - 37.78% | TRUE  | TRUE  |
| 5  | 58264865 - 59817947   | F - 11.11% | FALSE | TRUE  |
| 5  | 58264865 - 59817947   | F - 2.22%  | FALSE | TRUE  |
| 5  | 58264865 - 59817947   |            | FALSE | TRUE  |
| 5  | 58264865 - 59817947   | F - 2.22%  | FALSE | TRUE  |



|    |                       |             |       |       |
|----|-----------------------|-------------|-------|-------|
| 5  | 58264865 - 59817947   | F - 4.44%   | TRUE  | TRUE  |
| 5  | 58264865 - 59817947   |             | FALSE | TRUE  |
| 5  | 58264865 - 59817947   | F - 13.33%  | FALSE | TRUE  |
| 5  | 58264865 - 59817947   | F - 17.78%  | TRUE  | TRUE  |
| 5  | 58264865 - 59817947   | F - 8.89%   | FALSE | TRUE  |
| 5  | 58264865 - 59817947   | F - 28.89%  | FALSE | TRUE  |
| 5  | 58264865 - 59817947   |             | FALSE | TRUE  |
| 5  | 58264865 - 59817947   |             | FALSE | TRUE  |
| 5  | 58264865 - 59817947   | F - 2.22%   | TRUE  | TRUE  |
| 5  | 58264865 - 59817947   |             | FALSE | TRUE  |
| 5  | 58264865 - 59817947   |             | TRUE  | TRUE  |
| 5  | 58264865 - 59817947   | F - 31.11%  | TRUE  | TRUE  |
| 5  | 58264865 - 59817947   | F - 35.56%  | TRUE  | TRUE  |
| 5  | 58264865 - 59817947   | F - 26.67%  | TRUE  | TRUE  |
| 5  | 58264865 - 59817947   |             | FALSE | TRUE  |
| 5  | 58264865 - 59817947   | F - 35.56%  | TRUE  | TRUE  |
| 17 | 4891425 - 4900905     |             | TRUE  | FALSE |
| 17 | 4891425 - 4900905     | T - 100.00% | TRUE  | TRUE  |
| 5  | 80256491 - 80525985   |             | TRUE  | FALSE |
| 5  | 80256491 - 80525985   |             | TRUE  | FALSE |
| 5  | 80256491 - 80525985   |             | TRUE  | FALSE |
| 5  | 80256491 - 80525985   |             | TRUE  | FALSE |
| 5  | 80256491 - 80525985   |             | TRUE  | FALSE |
| 5  | 80256491 - 80525985   | T - 66.67%  | TRUE  | FALSE |
| 5  | 80256491 - 80525985   | T - 55.56%  | TRUE  | FALSE |
| 5  | 80256491 - 80525985   |             | TRUE  | FALSE |
| 5  | 80256491 - 80525985   |             | TRUE  | FALSE |
| 5  | 80256491 - 80525985   | T - 55.56%  | TRUE  | TRUE  |
| 5  | 80256491 - 80525985   |             | TRUE  | TRUE  |
| 5  | 80256491 - 80525985   | T - 66.67%  | TRUE  | TRUE  |
| 5  | 80256491 - 80525985   | T - 66.67%  | TRUE  | TRUE  |
| 5  | 80256491 - 80525985   | T - 66.67%  | TRUE  | TRUE  |
| 5  | 80256491 - 80525985   | F - 11.11%  | TRUE  | TRUE  |
| 5  | 80256491 - 80525985   |             | TRUE  | FALSE |
| 5  | 80256491 - 80525985   |             | TRUE  | FALSE |
| 5  | 80256491 - 80525985   | T - 66.67%  | TRUE  | TRUE  |
| 5  | 80256491 - 80525985   | T - 66.67%  | TRUE  | FALSE |
| 5  | 80256491 - 80525985   | T - 55.56%  | TRUE  | TRUE  |
| 5  | 80256491 - 80525985   | T - 55.56%  | TRUE  | TRUE  |
| 5  | 80256491 - 80525985   |             | TRUE  | FALSE |
| 5  | 80256491 - 80525985   | T - 55.56%  | TRUE  | TRUE  |
| 5  | 80256491 - 80525985   | T - 55.56%  | TRUE  | TRUE  |
| 5  | 80256491 - 80525985   | T - 55.56%  | TRUE  | TRUE  |
| 5  | 80256491 - 80525985   |             | TRUE  | TRUE  |
| 5  | 80256491 - 80525985   | F - 11.11%  | TRUE  | FALSE |
| 5  | 80256491 - 80525985   | T - 55.56%  | TRUE  | FALSE |
| 5  | 80256491 - 80525985   | F - 11.11%  | TRUE  | FALSE |
| 5  | 80256491 - 80525985   | T - 55.56%  | TRUE  | TRUE  |
| 5  | 80256491 - 80525985   |             | TRUE  | FALSE |
| 5  | 80256491 - 80525985   |             | TRUE  | TRUE  |
| 5  | 80256491 - 80525985   |             | TRUE  | FALSE |
| 5  | 80256491 - 80525985   |             | TRUE  | FALSE |
| 5  | 80256491 - 80525985   | F - 11.11%  | TRUE  | TRUE  |
| 5  | 80256491 - 80525985   |             | TRUE  | TRUE  |
| 1  | 186640923 - 186649559 | F - 12.50%  | FALSE | TRUE  |
| 1  | 186640923 - 186649559 |             | FALSE | TRUE  |
| 1  | 186640923 - 186649559 | T - 87.50%  | TRUE  | TRUE  |
| 1  | 186640923 - 186649559 |             | TRUE  | TRUE  |

|    |                       |             |       |       |
|----|-----------------------|-------------|-------|-------|
| 1  | 186640923 - 186649559 | T - 62.50%  | FALSE | TRUE  |
| 1  | 186640923 - 186649559 | T - 87.50%  | TRUE  | TRUE  |
| 1  | 186640923 - 186649559 |             | FALSE | TRUE  |
| 1  | 236681300 - 236716281 | T - 87.50%  | TRUE  | TRUE  |
| 1  | 236681300 - 236716281 |             | TRUE  | TRUE  |
| 1  | 236681300 - 236716281 |             | TRUE  | TRUE  |
| 1  | 236681300 - 236716281 | T - 93.75%  | TRUE  | TRUE  |
| 1  | 236681300 - 236716281 |             | TRUE  | TRUE  |
| 1  | 236681300 - 236716281 | F - 9.38%   | TRUE  | TRUE  |
| 1  | 236681300 - 236716281 |             | TRUE  | FALSE |
| 1  | 236681300 - 236716281 |             | TRUE  | TRUE  |
| 1  | 236681300 - 236716281 |             | TRUE  | TRUE  |
| 1  | 236681300 - 236716281 | F - 40.63%  | TRUE  | TRUE  |
| 2  | 191829084 - 191885686 |             | TRUE  | FALSE |
| 2  | 191829084 - 191885686 |             | TRUE  | FALSE |
| 2  | 191829084 - 191885686 |             | TRUE  | TRUE  |
| 2  | 191829084 - 191885686 | F - 5.00%   | FALSE | TRUE  |
| 2  | 191829084 - 191885686 | F - 5.00%   | TRUE  | TRUE  |
| 2  | 191829084 - 191885686 | T - 50.00%  | TRUE  | TRUE  |
| 2  | 191829084 - 191885686 | F - 5.00%   | TRUE  | TRUE  |
| 2  | 191829084 - 191885686 | T - 70.00%  | TRUE  | TRUE  |
| 2  | 191829084 - 191885686 |             | TRUE  | TRUE  |
| 6  | 41242999 - 41254457   |             | TRUE  | TRUE  |
| 6  | 41242999 - 41254457   | F - 16.67%  | FALSE | TRUE  |
| 6  | 41242999 - 41254457   | T - 66.67%  | TRUE  | TRUE  |
| 6  | 41242999 - 41254457   | F - 33.33%  | FALSE | TRUE  |
| 6  | 41242999 - 41254457   | T - 100.00% | TRUE  | TRUE  |
| 15 | 84322838 - 84708594   |             | TRUE  | FALSE |
| 15 | 84322838 - 84708594   |             | TRUE  | FALSE |
| 15 | 84322838 - 84708594   |             | TRUE  | FALSE |
| 15 | 84322838 - 84708594   |             | TRUE  | TRUE  |
| 15 | 84322838 - 84708594   |             | TRUE  | TRUE  |
| 15 | 84322838 - 84708594   |             | TRUE  | TRUE  |
| 15 | 84322838 - 84708594   | T - 83.33%  | TRUE  | TRUE  |
| 15 | 84322838 - 84708594   |             | TRUE  | TRUE  |
| 15 | 84322838 - 84708594   | T - 83.33%  | TRUE  | TRUE  |
| 15 | 84322838 - 84708594   | T - 83.33%  | TRUE  | TRUE  |
| 15 | 84322838 - 84708594   | T - 100.00% | TRUE  | TRUE  |
| 15 | 84322838 - 84708594   |             | TRUE  | TRUE  |
| 15 | 84322838 - 84708594   |             | TRUE  | FALSE |
| 15 | 84322838 - 84708594   |             | TRUE  | TRUE  |
| 15 | 84322838 - 84708594   | T - 83.33%  | TRUE  | TRUE  |
| 15 | 84322838 - 84708594   |             | TRUE  | FALSE |
| 15 | 84322838 - 84708594   |             | TRUE  | TRUE  |
| 15 | 84322838 - 84708594   | T - 83.33%  | TRUE  | TRUE  |
| 15 | 84322838 - 84708594   |             | TRUE  | TRUE  |
| 15 | 84322838 - 84708594   | T - 100.00% | TRUE  | TRUE  |
| 15 | 84322838 - 84708594   | T - 83.33%  | TRUE  | TRUE  |
| 15 | 84322838 - 84708594   | T - 83.33%  | TRUE  | TRUE  |
| 15 | 84322838 - 84708594   |             | TRUE  | TRUE  |
| 15 | 84322838 - 84708594   | T - 100.00% | TRUE  | TRUE  |
| 15 | 84322838 - 84708594   |             | TRUE  | TRUE  |
| 15 | 84322838 - 84708594   | T - 66.67%  | TRUE  | TRUE  |
| 15 | 84322838 - 84708594   |             | TRUE  | TRUE  |
| 15 | 84322838 - 84708594   | T - 66.67%  | TRUE  | TRUE  |
| 15 | 84322838 - 84708594   | T - 50.00%  | TRUE  | FALSE |
| 15 | 84322838 - 84708594   |             | TRUE  | TRUE  |
| 15 | 84322838 - 84708594   | T - 66.67%  | TRUE  | FALSE |

|    |                       |            |       |       |
|----|-----------------------|------------|-------|-------|
| 15 | 84322838 - 84708594   | F - 33.33% | TRUE  | FALSE |
| 15 | 84322838 - 84708594   | F - 16.67% | TRUE  | TRUE  |
| 15 | 84322838 - 84708594   |            | FALSE | TRUE  |
| 21 | 48018531 - 48025121   | F - 16.67% | TRUE  | TRUE  |
| 21 | 48018531 - 48025121   | T - 66.67% | TRUE  | TRUE  |
| 21 | 48018531 - 48025121   | F - 33.33% | TRUE  | TRUE  |
| 21 | 48018531 - 48025121   | T - 83.33% | TRUE  | TRUE  |
| 21 | 48018531 - 48025121   | F - 33.33% | FALSE | TRUE  |
| 21 | 48018531 - 48025121   | F - 33.33% | TRUE  | TRUE  |
| 21 | 48018531 - 48025121   |            | FALSE | TRUE  |
| 3  | 177159709 - 177470093 |            | TRUE  | FALSE |
| 3  | 177159709 - 177470093 | F - 25.00% | TRUE  | TRUE  |
| 3  | 177159709 - 177470093 | F - 25.00% | TRUE  | TRUE  |
| 21 | 35885440 - 35987441   | F - 5.56%  | FALSE | TRUE  |
| 21 | 35885440 - 35987441   | F - 16.67% | TRUE  | TRUE  |
| 21 | 35885440 - 35987441   |            | TRUE  | TRUE  |
| 21 | 35885440 - 35987441   |            | TRUE  | TRUE  |
| 21 | 35885440 - 35987441   | F - 5.56%  | TRUE  | TRUE  |
| 21 | 35885440 - 35987441   | F - 22.22% | TRUE  | TRUE  |
| 21 | 35885440 - 35987441   | F - 11.11% | TRUE  | TRUE  |
| 21 | 35885440 - 35987441   | F - 5.56%  | FALSE | TRUE  |
| 21 | 35885440 - 35987441   | F - 5.56%  | FALSE | TRUE  |
| 21 | 35885440 - 35987441   | F - 11.11% | TRUE  | TRUE  |
| 21 | 35885440 - 35987441   |            | TRUE  | TRUE  |
| 21 | 35885440 - 35987441   | F - 22.22% | TRUE  | TRUE  |
| 21 | 35885440 - 35987441   |            | FALSE | TRUE  |
| 7  | 55086714 - 55324313   |            | TRUE  | TRUE  |
| 7  | 55086714 - 55324313   |            | TRUE  | FALSE |
| 7  | 55086714 - 55324313   | T - 57.69% | TRUE  | TRUE  |
| 7  | 55086714 - 55324313   | F - 11.54% | FALSE | TRUE  |
| 7  | 55086714 - 55324313   | F - 3.85%  | FALSE | TRUE  |
| 7  | 55086714 - 55324313   | F - 42.31% | TRUE  | TRUE  |
| 7  | 55086714 - 55324313   |            | TRUE  | TRUE  |
| 7  | 55086714 - 55324313   | F - 7.69%  | FALSE | TRUE  |
| 9  | 36336393 - 36487545   |            | TRUE  | TRUE  |
| 9  | 36336393 - 36487545   |            | TRUE  | FALSE |
| 9  | 36336393 - 36487545   | F - 27.78% | TRUE  | TRUE  |
| 10 | 105156405 - 105206049 |            | TRUE  | TRUE  |
| 10 | 105156405 - 105206049 |            | TRUE  | TRUE  |
| 10 | 105156405 - 105206049 | F - 11.11% | TRUE  | TRUE  |
| 10 | 105156405 - 105206049 |            | TRUE  | FALSE |
| 10 | 105156405 - 105206049 |            | TRUE  | FALSE |
| 10 | 105156405 - 105206049 |            | TRUE  | TRUE  |
| 10 | 105156405 - 105206049 | F - 33.33% | TRUE  | TRUE  |
| 17 | 19240867 - 19281495   |            | TRUE  | FALSE |
| 17 | 19240867 - 19281495   |            | TRUE  | TRUE  |
| 17 | 19240867 - 19281495   |            | TRUE  | TRUE  |
| 17 | 19240867 - 19281495   | F - 43.75% | TRUE  | TRUE  |
| 17 | 19240867 - 19281495   | F - 6.25%  | FALSE | TRUE  |
| 17 | 19240867 - 19281495   | F - 6.25%  | TRUE  | TRUE  |
| 17 | 19240867 - 19281495   | F - 18.75% | FALSE | TRUE  |
| 17 | 19240867 - 19281495   | F - 31.25% | TRUE  | TRUE  |
| 17 | 19240867 - 19281495   | F - 31.25% | TRUE  | TRUE  |
| 17 | 19240867 - 19281495   | F - 12.50% | TRUE  | TRUE  |
| 17 | 19240867 - 19281495   | F - 18.75% | TRUE  | TRUE  |
| 17 | 19240867 - 19281495   |            | TRUE  | TRUE  |
| 17 | 19240867 - 19281495   | F - 18.75% | TRUE  | TRUE  |
| 17 | 19240867 - 19281495   | F - 6.25%  | FALSE | TRUE  |

|             |                       |            |       |       |
|-------------|-----------------------|------------|-------|-------|
| 17          | 19240867 - 19281495   |            | FALSE | TRUE  |
| 17          | 19240867 - 19281495   |            | TRUE  | TRUE  |
| 19          | 12907634 - 12912694   |            | TRUE  | TRUE  |
| 19          | 12907634 - 12912694   | F - 27.27% | TRUE  | TRUE  |
| 19          | 12907634 - 12912694   | F - 9.09%  | TRUE  | TRUE  |
| 19          | 12907634 - 12912694   | F - 27.27% | TRUE  | TRUE  |
| 2           | 107418056 - 107503564 |            | TRUE  | TRUE  |
| 2           | 107418056 - 107503564 |            | TRUE  | FALSE |
| 2           | 107418056 - 107503564 |            | TRUE  | FALSE |
| 2           | 107418056 - 107503564 | T - 75.00% | TRUE  | TRUE  |
| 2           | 107418056 - 107503564 | T - 75.00% | TRUE  | TRUE  |
| 2           | 107418056 - 107503564 | T - 75.00% | TRUE  | FALSE |
| 2           | 107418056 - 107503564 | T - 87.50% | TRUE  | TRUE  |
| 2           | 107418056 - 107503564 |            | TRUE  | FALSE |
| 2           | 107418056 - 107503564 | T - 75.00% | TRUE  | TRUE  |
| 2           | 107418056 - 107503564 | T - 50.00% | TRUE  | TRUE  |
| 2           | 107418056 - 107503564 |            | TRUE  | FALSE |
| 2           | 107418056 - 107503564 |            | TRUE  | FALSE |
| 2           | 107418056 - 107503564 | F - 12.50% | TRUE  | TRUE  |
| 2           | 107418056 - 107503564 | F - 12.50% | TRUE  | TRUE  |
| 2           | 107418056 - 107503564 | F - 25.00% | TRUE  | TRUE  |
| 2           | 107418056 - 107503564 | T - 50.00% | TRUE  | TRUE  |
| 2           | 107418056 - 107503564 | F - 37.50% | TRUE  | TRUE  |
| 2           | 107418056 - 107503564 | T - 50.00% | TRUE  | TRUE  |
| 6_ssto_hap7 | 2655408 - 2658765     |            | TRUE  | FALSE |
| 6_ssto_hap7 | 2655408 - 2658765     |            | TRUE  | TRUE  |
| 6_ssto_hap7 | 2655408 - 2658765     | F - 12.50% | TRUE  | TRUE  |
| 6_ssto_hap7 | 2655408 - 2658765     |            | TRUE  | TRUE  |
| 6_ssto_hap7 | 2655408 - 2658765     |            | TRUE  | TRUE  |
| 6_ssto_hap7 | 2655408 - 2658765     | F - 18.75% | FALSE | TRUE  |
| 6_ssto_hap7 | 2655408 - 2658765     | F - 12.50% | TRUE  | TRUE  |
| 6_ssto_hap7 | 2655408 - 2658765     | F - 6.25%  | FALSE | TRUE  |
| 6_ssto_hap7 | 2655408 - 2658765     | F - 18.75% | FALSE | TRUE  |
| 6_ssto_hap7 | 2655408 - 2658765     | F - 18.75% | TRUE  | TRUE  |
| 6_ssto_hap7 | 2655408 - 2658765     | T - 62.50% | TRUE  | TRUE  |
| 6_ssto_hap7 | 2655408 - 2658765     | F - 43.75% | TRUE  | TRUE  |
| 6_ssto_hap7 | 2655408 - 2658765     | T - 50.00% | TRUE  | TRUE  |
| 3           | 98451080 - 98540045   |            | TRUE  | TRUE  |
| 3           | 98451080 - 98540045   | F - 3.13%  | TRUE  | FALSE |
| 3           | 98451080 - 98540045   | F - 6.25%  | TRUE  | TRUE  |
| 3           | 98451080 - 98540045   | F - 6.25%  | TRUE  | TRUE  |
| 3           | 98451080 - 98540045   | F - 3.13%  | TRUE  | TRUE  |
| 3           | 98451080 - 98540045   |            | FALSE | TRUE  |
| 3           | 98451080 - 98540045   | F - 3.13%  | TRUE  | TRUE  |
| 3           | 98451080 - 98540045   | F - 34.38% | FALSE | TRUE  |
| 3           | 98451080 - 98540045   | F - 18.75% | TRUE  | TRUE  |
| 3           | 98451080 - 98540045   | F - 3.13%  | FALSE | TRUE  |
| 3           | 98451080 - 98540045   | F - 18.75% | TRUE  | TRUE  |
| 3           | 98451080 - 98540045   | F - 3.13%  | TRUE  | TRUE  |
| 3           | 98451080 - 98540045   | F - 31.25% | TRUE  | TRUE  |
| 3           | 98451080 - 98540045   | T - 56.25% | FALSE | TRUE  |
| 3           | 98451080 - 98540045   | F - 12.50% | TRUE  | TRUE  |
| 3           | 98451080 - 98540045   | F - 3.13%  | FALSE | TRUE  |
| 3           | 98451080 - 98540045   | F - 3.13%  | TRUE  | TRUE  |
| 3           | 98451080 - 98540045   | F - 3.13%  | FALSE | TRUE  |
| 3           | 98451080 - 98540045   | F - 28.13% | TRUE  | TRUE  |
| 3           | 98451080 - 98540045   |            | FALSE | TRUE  |
| 3           | 98451080 - 98540045   | F - 6.25%  | FALSE | TRUE  |

|    |                       |             |       |       |
|----|-----------------------|-------------|-------|-------|
| 3  | 98451080 - 98540045   | T - 59.38%  | TRUE  | TRUE  |
| 3  | 98451080 - 98540045   |             | TRUE  | TRUE  |
| 3  | 98451080 - 98540045   |             | TRUE  | TRUE  |
| 3  | 98451080 - 98540045   | F - 3.13%   | FALSE | TRUE  |
| 3  | 98451080 - 98540045   | F - 15.63%  | TRUE  | TRUE  |
| 3  | 98451080 - 98540045   |             | FALSE | TRUE  |
| 3  | 98451080 - 98540045   |             | FALSE | TRUE  |
| 3  | 110788918 - 110994410 |             | TRUE  | FALSE |
| 3  | 110788918 - 110994410 |             | TRUE  | FALSE |
| 3  | 110788918 - 110994410 | F - 20.00%  | TRUE  | TRUE  |
| 3  | 110788918 - 110994410 | F - 13.33%  | TRUE  | TRUE  |
| 3  | 110788918 - 110994410 | F - 6.67%   | TRUE  | TRUE  |
| 3  | 110788918 - 110994410 | F - 33.33%  | TRUE  | TRUE  |
| 3  | 110788918 - 110994410 | F - 13.33%  | FALSE | TRUE  |
| 15 | 47476298 - 48066420   |             | TRUE  | TRUE  |
| 15 | 47476298 - 48066420   | F - 23.53%  | TRUE  | TRUE  |
| 15 | 47476298 - 48066420   | F - 17.65%  | TRUE  | TRUE  |
| 15 | 47476298 - 48066420   | F - 23.53%  | FALSE | TRUE  |
| 15 | 47476298 - 48066420   | F - 5.88%   | TRUE  | TRUE  |
| 15 | 47476298 - 48066420   | F - 11.76%  | TRUE  | TRUE  |
| 15 | 47476298 - 48066420   | F - 41.18%  | TRUE  | TRUE  |
| 15 | 47476298 - 48066420   | T - 100.00% | TRUE  | TRUE  |
| 15 | 47476298 - 48066420   | T - 100.00% | TRUE  | TRUE  |
| 15 | 47476298 - 48066420   | T - 82.35%  | FALSE | TRUE  |
| 15 | 47476298 - 48066420   | F - 17.65%  | TRUE  | TRUE  |
| 15 | 47476298 - 48066420   |             | TRUE  | TRUE  |
| 15 | 47476298 - 48066420   | T - 100.00% | TRUE  | TRUE  |
| 15 | 47476298 - 48066420   | T - 100.00% | TRUE  | TRUE  |
| 15 | 47476298 - 48066420   | F - 29.41%  | TRUE  | TRUE  |
| 15 | 47476298 - 48066420   |             | FALSE | TRUE  |
| 4  | 145567148 - 145666423 |             | TRUE  | TRUE  |
| 4  | 145567148 - 145666423 | F - 9.09%   | FALSE | TRUE  |
| 4  | 145567148 - 145666423 | F - 9.09%   | FALSE | TRUE  |
| 4  | 145567148 - 145666423 | F - 9.09%   | FALSE | TRUE  |
| 4  | 145567148 - 145666423 | F - 9.09%   | TRUE  | TRUE  |
| 4  | 145567148 - 145666423 | F - 45.45%  | TRUE  | TRUE  |
| 4  | 145567148 - 145666423 | F - 9.09%   | TRUE  | TRUE  |
| 4  | 145567148 - 145666423 | F - 27.27%  | TRUE  | TRUE  |
| 4  | 145567148 - 145666423 | F - 18.18%  | FALSE | TRUE  |
| 4  | 145567148 - 145666423 |             | TRUE  | TRUE  |
| 4  | 145567148 - 145666423 | F - 36.36%  | TRUE  | TRUE  |
| 4  | 145567148 - 145666423 | F - 9.09%   | FALSE | TRUE  |
| 4  | 145567148 - 145666423 | F - 9.09%   | TRUE  | TRUE  |
| 4  | 145567148 - 145666423 |             | TRUE  | TRUE  |
| 4  | 145567148 - 145666423 | F - 9.09%   | FALSE | TRUE  |
| 4  | 145567148 - 145666423 | F - 27.27%  | FALSE | TRUE  |
| 4  | 145567148 - 145666423 | F - 18.18%  | FALSE | TRUE  |
| 4  | 145567148 - 145666423 | F - 18.18%  | FALSE | TRUE  |
| 4  | 145567148 - 145666423 |             | FALSE | TRUE  |
| 4  | 145567148 - 145666423 |             | TRUE  | TRUE  |
| 4  | 145567148 - 145666423 | T - 72.73%  | TRUE  | TRUE  |
| 4  | 145567148 - 145666423 |             | FALSE | TRUE  |
| 4  | 145567148 - 145666423 | F - 27.27%  | FALSE | TRUE  |
| 10 | 88727949 - 88730672   | F - 20.00%  | TRUE  | TRUE  |
| 10 | 88727949 - 88730672   | T - 60.00%  | FALSE | TRUE  |
| 10 | 88727949 - 88730672   |             | TRUE  | TRUE  |
| 10 | 88727949 - 88730672   | T - 80.00%  | TRUE  | TRUE  |
| 10 | 88727949 - 88730672   | F - 40.00%  | TRUE  | TRUE  |

|    |                       |             |       |      |
|----|-----------------------|-------------|-------|------|
| 10 | 88727949 - 88730672   | T - 100.00% | TRUE  | TRUE |
| 11 | 125825691 - 125933187 |             | TRUE  | TRUE |
| 11 | 125825691 - 125933187 |             | TRUE  | TRUE |
| 11 | 125825691 - 125933187 | F - 10.00%  | TRUE  | TRUE |
| 11 | 125825691 - 125933187 | F - 10.00%  | TRUE  | TRUE |
| 11 | 125825691 - 125933187 | T - 50.00%  | TRUE  | TRUE |
| 11 | 125825691 - 125933187 | F - 10.00%  | TRUE  | TRUE |
| 11 | 125825691 - 125933187 |             | TRUE  | TRUE |
| 11 | 125825691 - 125933187 | F - 10.00%  | TRUE  | TRUE |
| 11 | 125825691 - 125933187 | F - 20.00%  | FALSE | TRUE |
| 11 | 125825691 - 125933187 |             | FALSE | TRUE |
| 11 | 125825691 - 125933187 |             | FALSE | TRUE |
| 11 | 125825691 - 125933187 | T - 60.00%  | TRUE  | TRUE |
| 11 | 125825691 - 125933187 |             | TRUE  | TRUE |
| 11 | 125825691 - 125933187 |             | TRUE  | TRUE |
| 11 | 125825691 - 125933187 |             | TRUE  | TRUE |
| 11 | 125825691 - 125933187 | T - 70.00%  | TRUE  | TRUE |
| 11 | 125825691 - 125933187 |             | FALSE | TRUE |
| 11 | 125825691 - 125933187 |             | TRUE  | TRUE |
| 11 | 125825691 - 125933187 |             | FALSE | TRUE |
| 10 | 116190869 - 116528019 |             | TRUE  | TRUE |
| 10 | 116190869 - 116528019 |             | TRUE  | TRUE |
| 10 | 116190869 - 116528019 |             | TRUE  | TRUE |
| 10 | 116190869 - 116528019 | F - 10.53%  | TRUE  | TRUE |
| 10 | 116190869 - 116528019 | T - 52.63%  | TRUE  | TRUE |
| 10 | 116190869 - 116528019 | F - 2.63%   | TRUE  | TRUE |
| 10 | 116190869 - 116528019 |             | TRUE  | TRUE |
| 10 | 116190869 - 116528019 |             | TRUE  | TRUE |
| 10 | 116190869 - 116528019 | F - 2.63%   | FALSE | TRUE |
| 10 | 116190869 - 116528019 |             | TRUE  | TRUE |
| 10 | 116190869 - 116528019 |             | TRUE  | TRUE |
| 10 | 116190869 - 116528019 |             | TRUE  | TRUE |
| 10 | 116190869 - 116528019 | F - 7.89%   | TRUE  | TRUE |
| 10 | 116190869 - 116528019 | F - 23.68%  | TRUE  | TRUE |
| 10 | 116190869 - 116528019 |             | TRUE  | TRUE |
| 10 | 116190869 - 116528019 |             | TRUE  | TRUE |
| 10 | 116190869 - 116528019 |             | FALSE | TRUE |
| 10 | 116190869 - 116528019 | F - 5.26%   | TRUE  | TRUE |
| 10 | 116190869 - 116528019 | F - 15.79%  | FALSE | TRUE |
| 10 | 116190869 - 116528019 | F - 2.63%   | TRUE  | TRUE |
| 10 | 116190869 - 116528019 | F - 18.42%  | TRUE  | TRUE |
| 10 | 116190869 - 116528019 | F - 7.89%   | TRUE  | TRUE |
| 10 | 116190869 - 116528019 | F - 2.63%   | TRUE  | TRUE |
| 10 | 116190869 - 116528019 | T - 60.53%  | TRUE  | TRUE |
| 10 | 116190869 - 116528019 | F - 2.63%   | FALSE | TRUE |
| 10 | 116190869 - 116528019 | F - 23.68%  | TRUE  | TRUE |
| 10 | 116190869 - 116528019 | F - 2.63%   | FALSE | TRUE |
| 10 | 116190869 - 116528019 |             | FALSE | TRUE |
| 10 | 116190869 - 116528019 |             | FALSE | TRUE |
| 10 | 116190869 - 116528019 | F - 31.58%  | TRUE  | TRUE |
| 10 | 116190869 - 116528019 | F - 2.63%   | TRUE  | TRUE |
| 10 | 116190869 - 116528019 | T - 86.84%  | TRUE  | TRUE |
| 10 | 116190869 - 116528019 |             | FALSE | TRUE |
| 6  | 142622991 - 142767403 | F - 11.11%  | TRUE  | TRUE |
| 6  | 142622991 - 142767403 | F - 22.22%  | TRUE  | TRUE |
| 6  | 142622991 - 142767403 |             | TRUE  | TRUE |
| 6  | 142622991 - 142767403 | F - 11.11%  | TRUE  | TRUE |
| 6  | 142622991 - 142767403 |             | FALSE | TRUE |

|    |                       |            |       |       |
|----|-----------------------|------------|-------|-------|
| 6  | 142622991 - 142767403 | T - 50.00% | TRUE  | TRUE  |
| 6  | 142622991 - 142767403 | F - 5.56%  | FALSE | TRUE  |
| 6  | 142622991 - 142767403 | F - 5.56%  | FALSE | TRUE  |
| 6  | 142622991 - 142767403 | F - 5.56%  | FALSE | TRUE  |
| 6  | 142622991 - 142767403 | T - 50.00% | TRUE  | TRUE  |
| 6  | 142622991 - 142767403 |            | FALSE | TRUE  |
| 6  | 142622991 - 142767403 |            | FALSE | TRUE  |
| 6  | 142622991 - 142767403 |            | TRUE  | TRUE  |
| 6  | 142622991 - 142767403 | T - 50.00% | TRUE  | TRUE  |
| 6  | 142622991 - 142767403 |            | FALSE | TRUE  |
| 6  | 142622991 - 142767403 |            | FALSE | TRUE  |
| 6  | 142622991 - 142767403 | T - 50.00% | FALSE | TRUE  |
| 6  | 142622991 - 142767403 |            | FALSE | TRUE  |
| 6  | 142622991 - 142767403 |            | TRUE  | TRUE  |
| 6  | 142622991 - 142767403 |            | TRUE  | TRUE  |
| 6  | 142622991 - 142767403 |            | FALSE | TRUE  |
| 7  | 128095884 - 128109251 |            | TRUE  | TRUE  |
| 7  | 128095884 - 128109251 |            | TRUE  | TRUE  |
| 7  | 128095884 - 128109251 | F - 30.00% | TRUE  | TRUE  |
| 7  | 128095884 - 128109251 | T - 70.00% | TRUE  | TRUE  |
| 7  | 128095884 - 128109251 |            | TRUE  | TRUE  |
| 7  | 128095884 - 128109251 |            | FALSE | TRUE  |
| 7  | 128095884 - 128109251 | T - 50.00% | TRUE  | TRUE  |
| 7  | 128095884 - 128109251 | T - 60.00% | TRUE  | TRUE  |
| 2  | 74759385 - 74782817   | F - 13.33% | TRUE  | TRUE  |
| 2  | 74759385 - 74782817   |            | TRUE  | TRUE  |
| 2  | 74759385 - 74782817   |            | FALSE | TRUE  |
| 2  | 74759385 - 74782817   | T - 53.33% | TRUE  | TRUE  |
| 2  | 74759385 - 74782817   | F - 40.00% | TRUE  | TRUE  |
| 2  | 74759385 - 74782817   |            | FALSE | TRUE  |
| 2  | 74759385 - 74782817   | F - 6.67%  | TRUE  | TRUE  |
| 2  | 74759385 - 74782817   | F - 6.67%  | TRUE  | TRUE  |
| 2  | 74759385 - 74782817   | F - 6.67%  | FALSE | TRUE  |
| 2  | 74759385 - 74782817   |            | FALSE | TRUE  |
| 2  | 74759385 - 74782817   | F - 13.33% | TRUE  | TRUE  |
| 2  | 74759385 - 74782817   |            | FALSE | TRUE  |
| 2  | 74759385 - 74782817   | F - 20.00% | TRUE  | TRUE  |
| 2  | 74759385 - 74782817   |            | FALSE | TRUE  |
| 5  | 139226364 - 139422884 | T - 88.89% | TRUE  | TRUE  |
| 5  | 139226364 - 139422884 |            | TRUE  | TRUE  |
| 5  | 139226364 - 139422884 |            | TRUE  | FALSE |
| 5  | 139226364 - 139422884 |            | TRUE  | TRUE  |
| 5  | 139226364 - 139422884 |            | FALSE | TRUE  |
| 10 | 5077549 - 5149878     | F - 18.18% | TRUE  | TRUE  |
| 10 | 5077549 - 5149878     | F - 36.36% | TRUE  | TRUE  |
| 10 | 5077549 - 5149878     | F - 9.09%  | FALSE | TRUE  |
| 10 | 5077549 - 5149878     | F - 9.09%  | FALSE | TRUE  |
| 10 | 5077549 - 5149878     | F - 36.36% | TRUE  | TRUE  |
| 10 | 5077549 - 5149878     | F - 18.18% | FALSE | TRUE  |
| 10 | 5077549 - 5149878     |            | FALSE | TRUE  |
| 10 | 5077549 - 5149878     | F - 9.09%  | FALSE | TRUE  |
| 10 | 5077549 - 5149878     | T - 63.64% | TRUE  | TRUE  |
| 10 | 5077549 - 5149878     | F - 9.09%  | FALSE | TRUE  |
| 10 | 5077549 - 5149878     |            | TRUE  | TRUE  |
| 10 | 5077549 - 5149878     | F - 45.45% | FALSE | TRUE  |
| 10 | 5077549 - 5149878     |            | TRUE  | TRUE  |
| 10 | 5077549 - 5149878     |            | TRUE  | TRUE  |
| 10 | 5077549 - 5149878     |            | TRUE  | TRUE  |

|             |                       |             |       |       |
|-------------|-----------------------|-------------|-------|-------|
| 10          | 5077549 - 5149878     |             | FALSE | TRUE  |
| 10          | 5077549 - 5149878     |             | FALSE | TRUE  |
| 10          | 5077549 - 5149878     | T - 63.64%  | FALSE | TRUE  |
| 1           | 146334178 - 146467744 |             | TRUE  | TRUE  |
| 1           | 146334178 - 146467744 |             | TRUE  | TRUE  |
| 1           | 146334178 - 146467744 | F - 6.67%   | TRUE  | TRUE  |
| 1           | 146334178 - 146467744 |             | TRUE  | TRUE  |
| 1           | 146334178 - 146467744 |             | TRUE  | TRUE  |
| 1           | 146334178 - 146467744 |             | TRUE  | TRUE  |
| 2           | 9543604 - 9563676     | F - 37.04%  | TRUE  | FALSE |
| 2           | 9543604 - 9563676     | F - 33.33%  | TRUE  | TRUE  |
| 2           | 9543604 - 9563676     |             | TRUE  | TRUE  |
| 2           | 9543604 - 9563676     |             | TRUE  | TRUE  |
| 7           | 35242042 - 35293758   |             | TRUE  | TRUE  |
| 7           | 35242042 - 35293758   | T - 75.00%  | TRUE  | TRUE  |
| 7           | 35242042 - 35293758   | T - 100.00% | FALSE | TRUE  |
| 7           | 35242042 - 35293758   | T - 100.00% | TRUE  | TRUE  |
| 7           | 35242042 - 35293758   |             | FALSE | TRUE  |
| 7           | 35242042 - 35293758   |             | FALSE | TRUE  |
| 13          | 36047926 - 36515382   | F - 20.00%  | TRUE  | FALSE |
| 13          | 36047926 - 36515382   | T - 60.00%  | TRUE  | TRUE  |
| 13          | 36047926 - 36515382   |             | TRUE  | TRUE  |
| 13          | 36047926 - 36515382   | T - 60.00%  | FALSE | TRUE  |
| 6_mann_hap4 | 2668104 - 2671477     |             | TRUE  | FALSE |
| 6_mann_hap4 | 2668104 - 2671477     | T - 50.00%  | TRUE  | TRUE  |
| 6_mann_hap4 | 2668104 - 2671477     |             | TRUE  | TRUE  |
| 6_mann_hap4 | 2668104 - 2671477     | F - 12.50%  | TRUE  | TRUE  |
| 6_mann_hap4 | 2668104 - 2671477     |             | TRUE  | TRUE  |
| 6_mann_hap4 | 2668104 - 2671477     |             | TRUE  | TRUE  |
| 6_mann_hap4 | 2668104 - 2671477     | F - 18.75%  | FALSE | TRUE  |
| 6_mann_hap4 | 2668104 - 2671477     | F - 12.50%  | TRUE  | TRUE  |
| 6_mann_hap4 | 2668104 - 2671477     | F - 6.25%   | TRUE  | TRUE  |
| 6_mann_hap4 | 2668104 - 2671477     | F - 6.25%   | FALSE | TRUE  |
| 6_mann_hap4 | 2668104 - 2671477     | F - 18.75%  | FALSE | TRUE  |
| 6_mann_hap4 | 2668104 - 2671477     | F - 18.75%  | TRUE  | TRUE  |
| 6_mann_hap4 | 2668104 - 2671477     | T - 62.50%  | TRUE  | TRUE  |
| 6_cox_hap2  | 2834338 - 2837710     |             | TRUE  | FALSE |
| 6_cox_hap2  | 2834338 - 2837710     | F - 18.75%  | TRUE  | FALSE |
| 6_cox_hap2  | 2834338 - 2837710     |             | TRUE  | TRUE  |
| 6_cox_hap2  | 2834338 - 2837710     | F - 12.50%  | TRUE  | TRUE  |
| 6_cox_hap2  | 2834338 - 2837710     |             | TRUE  | TRUE  |
| 6_cox_hap2  | 2834338 - 2837710     | F - 18.75%  | FALSE | TRUE  |
| 6_cox_hap2  | 2834338 - 2837710     | F - 18.75%  | FALSE | TRUE  |
| 6_cox_hap2  | 2834338 - 2837710     | F - 6.25%   | FALSE | TRUE  |
| 7           | 16831435 - 16873057   |             | TRUE  | TRUE  |
| 7           | 16831435 - 16873057   | F - 18.18%  | TRUE  | FALSE |
| 7           | 16831435 - 16873057   | F - 18.18%  | TRUE  | TRUE  |
| 7           | 16831435 - 16873057   | T - 72.73%  | TRUE  | TRUE  |
| 7           | 16831435 - 16873057   | T - 63.64%  | TRUE  | TRUE  |
| 7           | 16831435 - 16873057   | F - 9.09%   | FALSE | TRUE  |
| 7           | 16831435 - 16873057   | F - 27.27%  | FALSE | TRUE  |
| 10          | 45466429 - 45474330   |             | TRUE  | TRUE  |
| 10          | 45466429 - 45474330   | F - 14.29%  | FALSE | TRUE  |
| 10          | 45466429 - 45474330   | F - 14.29%  | FALSE | TRUE  |
| 1           | 77747662 - 78025654   |             | TRUE  | FALSE |
| 1           | 77747662 - 78025654   |             | TRUE  | TRUE  |
| 1           | 77747662 - 78025654   | F - 25.00%  | TRUE  | TRUE  |
| 1           | 77747662 - 78025654   | F - 18.75%  | FALSE | TRUE  |



|    |                       |            |       |       |
|----|-----------------------|------------|-------|-------|
| 1  | 77747662 - 78025654   | F - 6.25%  | FALSE | TRUE  |
| 1  | 77747662 - 78025654   |            | TRUE  | TRUE  |
| 1  | 77747662 - 78025654   | F - 43.75% | TRUE  | TRUE  |
| 1  | 77747662 - 78025654   | F - 43.75% | TRUE  | TRUE  |
| 1  | 77747662 - 78025654   | F - 6.25%  | FALSE | TRUE  |
| 1  | 77747662 - 78025654   |            | FALSE | TRUE  |
| 1  | 77747662 - 78025654   | T - 75.00% | TRUE  | TRUE  |
| 1  | 77747662 - 78025654   | F - 43.75% | TRUE  | TRUE  |
| 1  | 77747662 - 78025654   |            | FALSE | TRUE  |
| 1  | 77747662 - 78025654   |            | TRUE  | TRUE  |
| 1  | 77747662 - 78025654   |            | TRUE  | TRUE  |
| 1  | 77747662 - 78025654   | T - 50.00% | TRUE  | TRUE  |
| 1  | 77747662 - 78025654   | F - 43.75% | TRUE  | TRUE  |
| 1  | 77747662 - 78025654   | T - 50.00% | TRUE  | TRUE  |
| 1  | 77747662 - 78025654   | F - 43.75% | TRUE  | TRUE  |
| 1  | 77747662 - 78025654   |            | TRUE  | TRUE  |
| 1  | 77747662 - 78025654   |            | FALSE | TRUE  |
| 12 | 110465521 - 110511491 | F - 7.14%  | TRUE  | FALSE |
| 12 | 110465521 - 110511491 |            | TRUE  | TRUE  |
| 12 | 110465521 - 110511491 | F - 28.57% | FALSE | TRUE  |
| 12 | 110465521 - 110511491 | F - 21.43% | TRUE  | TRUE  |
| 12 | 110465521 - 110511491 |            | TRUE  | TRUE  |
| 12 | 110465521 - 110511491 | F - 7.14%  | TRUE  | FALSE |
| 12 | 110465521 - 110511491 | F - 28.57% | FALSE | TRUE  |
| 12 | 110465521 - 110511491 | F - 28.57% | TRUE  | TRUE  |
| 12 | 110465521 - 110511491 | F - 21.43% | TRUE  | TRUE  |
| 12 | 110465521 - 110511491 |            | TRUE  | TRUE  |
| 12 | 110465521 - 110511491 |            | TRUE  | TRUE  |
| 12 | 110465521 - 110511491 | F - 7.14%  | FALSE | TRUE  |
| 12 | 110465521 - 110511491 | F - 28.57% | FALSE | TRUE  |
| 12 | 110465521 - 110511491 |            | FALSE | TRUE  |
| 12 | 110465521 - 110511491 | F - 42.86% | TRUE  | TRUE  |
| 12 | 110465521 - 110511491 | F - 7.14%  | TRUE  | TRUE  |
| 12 | 110465521 - 110511491 | F - 14.29% | FALSE | TRUE  |
| 12 | 110465521 - 110511491 | T - 50.00% | TRUE  | TRUE  |
| 12 | 110465521 - 110511491 | T - 71.43% | TRUE  | TRUE  |
| 10 | 85954410 - 85979377   |            | TRUE  | FALSE |
| 10 | 85954410 - 85979377   |            | TRUE  | TRUE  |
| 10 | 85954410 - 85979377   |            | FALSE | TRUE  |
| 10 | 85954410 - 85979377   | T - 50.00% | TRUE  | TRUE  |
| 21 | 33997269 - 34100359   |            | TRUE  | FALSE |
| 21 | 33997269 - 34100359   |            | TRUE  | FALSE |
| 21 | 33997269 - 34100359   |            | TRUE  | TRUE  |
| 21 | 33997269 - 34100359   |            | TRUE  | TRUE  |
| 21 | 33997269 - 34100359   | F - 20.00% | TRUE  | TRUE  |
| 21 | 33997269 - 34100359   | T - 55.00% | FALSE | TRUE  |
| 21 | 33997269 - 34100359   |            | TRUE  | TRUE  |
| 21 | 33997269 - 34100359   | F - 25.00% | FALSE | TRUE  |
| 21 | 33997269 - 34100359   | F - 35.00% | TRUE  | TRUE  |
| 21 | 33997269 - 34100359   | F - 45.00% | TRUE  | TRUE  |
| 21 | 33997269 - 34100359   |            | TRUE  | TRUE  |
| 21 | 33997269 - 34100359   | F - 15.00% | TRUE  | TRUE  |
| 21 | 33997269 - 34100359   |            | FALSE | TRUE  |
| 21 | 33997269 - 34100359   |            | FALSE | TRUE  |
| 21 | 33997269 - 34100359   |            | FALSE | TRUE  |
| 2  | 102927962 - 102968497 |            | TRUE  | FALSE |
| 2  | 102927962 - 102968497 | T - 66.67% | TRUE  | TRUE  |
| 2  | 102927962 - 102968497 | F - 8.33%  | TRUE  | TRUE  |

|    |                       |            |       |       |
|----|-----------------------|------------|-------|-------|
| 2  | 102927962 - 102968497 | F - 8.33%  | FALSE | TRUE  |
| 2  | 102927962 - 102968497 | F - 8.33%  | FALSE | TRUE  |
| 2  | 102927962 - 102968497 | T - 50.00% | TRUE  | TRUE  |
| 2  | 102927962 - 102968497 | F - 16.67% | FALSE | TRUE  |
| 2  | 102927962 - 102968497 | F - 8.33%  | TRUE  | TRUE  |
| 2  | 102927962 - 102968497 | T - 50.00% | TRUE  | TRUE  |
| 2  | 102927962 - 102968497 | F - 8.33%  | TRUE  | TRUE  |
| 2  | 102927962 - 102968497 | F - 25.00% | FALSE | TRUE  |
| 2  | 102927962 - 102968497 | T - 50.00% | TRUE  | TRUE  |
| 2  | 102927962 - 102968497 |            | FALSE | TRUE  |
| 17 | 47074774 - 47133507   |            | TRUE  | FALSE |
| 17 | 47074774 - 47133507   |            | TRUE  | FALSE |
| 17 | 47074774 - 47133507   |            | TRUE  | TRUE  |
| 17 | 47074774 - 47133507   | F - 11.11% | FALSE | TRUE  |
| 17 | 47074774 - 47133507   | T - 55.56% | TRUE  | TRUE  |
| 17 | 47074774 - 47133507   | F - 11.11% | TRUE  | TRUE  |
| 1  | 94615403 - 94740624   |            | TRUE  | FALSE |
| 1  | 94615403 - 94740624   | F - 11.11% | TRUE  | TRUE  |
| 1  | 94615403 - 94740624   | F - 33.33% | TRUE  | TRUE  |
| 1  | 94615403 - 94740624   | F - 11.11% | FALSE | TRUE  |
| 1  | 94615403 - 94740624   | F - 44.44% | TRUE  | TRUE  |
| 1  | 94615403 - 94740624   | F - 22.22% | TRUE  | TRUE  |
| 1  | 94615403 - 94740624   | F - 11.11% | FALSE | TRUE  |
| 1  | 94615403 - 94740624   |            | FALSE | TRUE  |
| 1  | 94615403 - 94740624   |            | FALSE | TRUE  |
| 1  | 94615403 - 94740624   |            | TRUE  | TRUE  |
| 1  | 94615403 - 94740624   |            | TRUE  | TRUE  |
| 1  | 111743393 - 111786062 |            | TRUE  | TRUE  |
| 1  | 111743393 - 111786062 | F - 5.26%  | TRUE  | TRUE  |
| 1  | 111743393 - 111786062 | F - 15.79% | TRUE  | TRUE  |
| 1  | 111743393 - 111786062 |            | FALSE | TRUE  |
| 1  | 111743393 - 111786062 | F - 10.53% | FALSE | TRUE  |
| 1  | 111743393 - 111786062 | F - 5.26%  | TRUE  | TRUE  |
| 1  | 111743393 - 111786062 |            | FALSE | TRUE  |
| 1  | 111743393 - 111786062 | F - 5.26%  | TRUE  | TRUE  |
| 1  | 111743393 - 111786062 |            | FALSE | TRUE  |
| 1  | 111743393 - 111786062 | F - 15.79% | TRUE  | TRUE  |
| 1  | 111743393 - 111786062 | F - 21.05% | TRUE  | TRUE  |
| 1  | 111743393 - 111786062 |            | FALSE | TRUE  |
| 3  | 50337320 - 50349812   | F - 5.56%  | TRUE  | TRUE  |
| 3  | 50337320 - 50349812   |            | TRUE  | FALSE |
| 3  | 50337320 - 50349812   |            | TRUE  | TRUE  |
| 3  | 50337320 - 50349812   | F - 16.67% | TRUE  | TRUE  |
| 3  | 50337320 - 50349812   | F - 5.56%  | TRUE  | TRUE  |
| 3  | 50337320 - 50349812   | F - 22.22% | TRUE  | TRUE  |
| 3  | 50337320 - 50349812   | F - 5.56%  | TRUE  | TRUE  |
| 3  | 50337320 - 50349812   | F - 16.67% | TRUE  | TRUE  |
| 3  | 50337320 - 50349812   | F - 11.11% | TRUE  | TRUE  |
| 3  | 50337320 - 50349812   | F - 11.11% | TRUE  | TRUE  |
| 3  | 50337320 - 50349812   | T - 77.78% | TRUE  | TRUE  |
| 3  | 50337320 - 50349812   | T - 77.78% | TRUE  | TRUE  |
| 3  | 50337320 - 50349812   |            | TRUE  | TRUE  |
| 2  | 36583069 - 36778278   |            | TRUE  | FALSE |
| 2  | 36583069 - 36778278   |            | TRUE  | TRUE  |
| 2  | 36583069 - 36778278   |            | TRUE  | TRUE  |
| 2  | 36583069 - 36778278   |            | TRUE  | TRUE  |
| 2  | 36583069 - 36778278   | F - 10.00% | TRUE  | TRUE  |
| 2  | 36583069 - 36778278   |            | TRUE  | TRUE  |

|   |                       |             |       |       |
|---|-----------------------|-------------|-------|-------|
| 2 | 36583069 - 36778278   | F - 30.00%  | TRUE  | TRUE  |
| 2 | 36583069 - 36778278   |             | FALSE | TRUE  |
| 6 | 20100935 - 20212670   | T - 87.50%  | TRUE  | TRUE  |
| 6 | 20100935 - 20212670   | T - 62.50%  | TRUE  | TRUE  |
| 6 | 20100935 - 20212670   | T - 100.00% | TRUE  | TRUE  |
| 6 | 20100935 - 20212670   |             | TRUE  | TRUE  |
| 6 | 20100935 - 20212670   |             | FALSE | TRUE  |
| 6 | 20100935 - 20212670   |             | TRUE  | TRUE  |
| 6 | 20100935 - 20212670   |             | TRUE  | TRUE  |
| 6 | 20100935 - 20212670   |             | TRUE  | TRUE  |
| 6 | 20100935 - 20212670   |             | TRUE  | TRUE  |
| 6 | 20100935 - 20212670   |             | TRUE  | TRUE  |
| 6 | 20100935 - 20212670   |             | TRUE  | TRUE  |
| 6 | 20100935 - 20212670   |             | FALSE | TRUE  |
| 6 | 20100935 - 20212670   |             | TRUE  | TRUE  |
| 6 | 20100935 - 20212670   |             | TRUE  | TRUE  |
| 6 | 20100935 - 20212670   | T - 87.50%  | TRUE  | TRUE  |
| 6 | 20100935 - 20212670   | F - 37.50%  | TRUE  | TRUE  |
| 1 | 153516089 - 153522612 | F - 9.09%   | TRUE  | TRUE  |
| 1 | 153516089 - 153522612 | F - 9.09%   | TRUE  | TRUE  |
| 1 | 153516089 - 153522612 |             | FALSE | TRUE  |
| 1 | 153516089 - 153522612 | F - 9.09%   | FALSE | TRUE  |
| 1 | 153516089 - 153522612 | F - 18.18%  | TRUE  | TRUE  |
| 1 | 153516089 - 153522612 | F - 9.09%   | TRUE  | TRUE  |
| 1 | 25870071 - 25895377   |             | TRUE  | TRUE  |
| 1 | 25870071 - 25895377   | F - 27.27%  | TRUE  | TRUE  |
| 1 | 25870071 - 25895377   | F - 18.18%  | TRUE  | TRUE  |
| 1 | 25870071 - 25895377   |             | TRUE  | TRUE  |
| 1 | 25870071 - 25895377   | F - 9.09%   | TRUE  | TRUE  |
| 1 | 25870071 - 25895377   | F - 9.09%   | TRUE  | TRUE  |
| 6 | 26281283 - 26285762   |             | TRUE  | TRUE  |
| 6 | 26281283 - 26285762   | F - 25.00%  | TRUE  | TRUE  |
| 6 | 26281283 - 26285762   | F - 25.00%  | TRUE  | TRUE  |
| 8 | 134249414 - 134314265 |             | TRUE  | TRUE  |
| 8 | 134249414 - 134314265 | F - 5.00%   | TRUE  | TRUE  |
| 8 | 134249414 - 134314265 | F - 5.00%   | TRUE  | TRUE  |
| 8 | 134249414 - 134314265 | F - 20.00%  | TRUE  | FALSE |
| 8 | 134249414 - 134314265 | F - 2.50%   | TRUE  | TRUE  |
| 8 | 134249414 - 134314265 |             | TRUE  | TRUE  |
| 8 | 134249414 - 134314265 | F - 7.50%   | FALSE | TRUE  |
| 8 | 134249414 - 134314265 | F - 2.50%   | TRUE  | TRUE  |
| 8 | 134249414 - 134314265 |             | FALSE | TRUE  |
| 8 | 134249414 - 134314265 | F - 2.50%   | TRUE  | TRUE  |
| 8 | 134249414 - 134314265 |             | FALSE | TRUE  |
| 8 | 134249414 - 134314265 |             | FALSE | TRUE  |
| 8 | 134249414 - 134314265 |             | TRUE  | TRUE  |
| 8 | 134249414 - 134314265 |             | TRUE  | TRUE  |
| 8 | 134249414 - 134314265 | F - 2.50%   | TRUE  | TRUE  |
| 8 | 134249414 - 134314265 |             | TRUE  | TRUE  |
| 8 | 134249414 - 134314265 | F - 5.00%   | TRUE  | TRUE  |
| 8 | 134249414 - 134314265 |             | TRUE  | TRUE  |
| 8 | 134249414 - 134314265 |             | TRUE  | TRUE  |
| 8 | 134249414 - 134314265 |             | TRUE  | TRUE  |
| 8 | 134249414 - 134314265 |             | TRUE  | TRUE  |
| 8 | 134249414 - 134314265 |             | TRUE  | TRUE  |
| 8 | 134249414 - 134314265 | F - 2.50%   | TRUE  | TRUE  |
| 8 | 134249414 - 134314265 |             | TRUE  | TRUE  |
| 8 | 134249414 - 134314265 | F - 2.50%   | TRUE  | TRUE  |
| 8 | 134249414 - 134314265 | F - 7.50%   | TRUE  | TRUE  |
| 8 | 134249414 - 134314265 | F - 2.50%   | TRUE  | TRUE  |
| 8 | 134249414 - 134314265 | F - 5.00%   | TRUE  | TRUE  |

|    |                       |             |       |       |
|----|-----------------------|-------------|-------|-------|
| 3  | 115521210 - 117716439 |             | TRUE  | FALSE |
| 3  | 115521210 - 117716439 |             | TRUE  | TRUE  |
| 3  | 115521210 - 117716439 | F - 41.67%  | TRUE  | TRUE  |
| 3  | 115521210 - 117716439 |             | TRUE  | TRUE  |
| 3  | 115521210 - 117716439 | T - 50.00%  | TRUE  | TRUE  |
| 3  | 115521210 - 117716439 | F - 8.33%   | TRUE  | TRUE  |
| 3  | 115521210 - 117716439 | F - 33.33%  | TRUE  | TRUE  |
| 3  | 115521210 - 117716439 | F - 8.33%   | TRUE  | TRUE  |
| 3  | 115521210 - 117716439 | F - 8.33%   | FALSE | TRUE  |
| 3  | 115521210 - 117716439 | F - 8.33%   | TRUE  | TRUE  |
| 3  | 115521210 - 117716439 | F - 8.33%   | TRUE  | TRUE  |
| 3  | 115521210 - 117716439 |             | TRUE  | TRUE  |
| 3  | 115521210 - 117716439 | F - 16.67%  | TRUE  | TRUE  |
| 3  | 115521210 - 117716439 | F - 8.33%   | TRUE  | TRUE  |
| 3  | 115521210 - 117716439 |             | TRUE  | TRUE  |
| 3  | 115521210 - 117716439 | F - 8.33%   | TRUE  | TRUE  |
| 3  | 115521210 - 117716439 |             | TRUE  | TRUE  |
| 16 | 69743304 - 69760707   | T - 66.67%  | TRUE  | TRUE  |
| 16 | 69743304 - 69760707   | F - 11.11%  | TRUE  | TRUE  |
| 16 | 69743304 - 69760707   |             | TRUE  | TRUE  |
| 16 | 69743304 - 69760707   | T - 100.00% | TRUE  | TRUE  |
| 16 | 69743304 - 69760707   |             | FALSE | TRUE  |
| 16 | 69743304 - 69760707   |             | TRUE  | TRUE  |
| 16 | 69743304 - 69760707   |             | FALSE | TRUE  |
| 16 | 69743304 - 69760707   |             | TRUE  | TRUE  |
| 17 | 15531274 - 15587613   |             | TRUE  | TRUE  |
| 17 | 15531274 - 15587613   | F - 20.00%  | TRUE  | FALSE |
| 17 | 15531274 - 15587613   | F - 20.00%  | TRUE  | TRUE  |
| 17 | 15531274 - 15587613   |             | TRUE  | TRUE  |
| 17 | 15531274 - 15587613   | T - 50.00%  | TRUE  | TRUE  |
| 17 | 15531274 - 15587613   |             | TRUE  | TRUE  |
| 17 | 15531274 - 15587613   | T - 80.00%  | TRUE  | TRUE  |
| 17 | 15531274 - 15587613   | T - 70.00%  | TRUE  | TRUE  |
| 17 | 15531274 - 15587613   | T - 50.00%  | FALSE | TRUE  |
| 17 | 15531274 - 15587613   | F - 30.00%  | TRUE  | TRUE  |
| 17 | 15531274 - 15587613   |             | TRUE  | TRUE  |
| 17 | 15531274 - 15587613   | F - 10.00%  | TRUE  | TRUE  |
| 17 | 15531274 - 15587613   | T - 50.00%  | TRUE  | TRUE  |
| 17 | 15531274 - 15587613   | F - 20.00%  | TRUE  | TRUE  |
| 17 | 15531274 - 15587613   | F - 40.00%  | TRUE  | TRUE  |
| 17 | 15531274 - 15587613   | F - 20.00%  | TRUE  | TRUE  |
| 17 | 15531274 - 15587613   |             | FALSE | TRUE  |
| 17 | 15531274 - 15587613   | F - 20.00%  | TRUE  | TRUE  |
| 17 | 15531274 - 15587613   | T - 70.00%  | TRUE  | TRUE  |
| 10 | 64018916 - 64431771   |             | TRUE  | FALSE |
| 10 | 64018916 - 64431771   |             | TRUE  | FALSE |
| 10 | 64018916 - 64431771   | F - 26.32%  | TRUE  | TRUE  |
| 10 | 64018916 - 64431771   |             | TRUE  | FALSE |
| 10 | 64018916 - 64431771   | F - 47.37%  | TRUE  | TRUE  |
| 10 | 64018916 - 64431771   | F - 5.26%   | TRUE  | TRUE  |
| 1  | 155629233 - 155658823 |             | TRUE  | FALSE |
| 1  | 155629233 - 155658823 |             | TRUE  | FALSE |
| 1  | 155629233 - 155658823 | F - 18.52%  | TRUE  | TRUE  |
| 1  | 155629233 - 155658823 | F - 1.85%   | TRUE  | TRUE  |
| 1  | 155629233 - 155658823 |             | TRUE  | FALSE |
| 1  | 155629233 - 155658823 |             | TRUE  | TRUE  |
| 1  | 155629233 - 155658823 |             | FALSE | TRUE  |
| 1  | 155629233 - 155658823 | F - 7.41%   | TRUE  | TRUE  |

|    |                       |            |       |       |
|----|-----------------------|------------|-------|-------|
| 17 | 19437141 - 19482347   |            | TRUE  | TRUE  |
| 17 | 19437141 - 19482347   | F - 5.26%  | TRUE  | TRUE  |
| 17 | 19437141 - 19482347   | F - 5.26%  | TRUE  | TRUE  |
| 17 | 19437141 - 19482347   | F - 10.53% | TRUE  | TRUE  |
| 17 | 19437141 - 19482347   |            | TRUE  | TRUE  |
| 17 | 19437141 - 19482347   | F - 5.26%  | TRUE  | TRUE  |
| 17 | 19437141 - 19482347   |            | FALSE | TRUE  |
| 17 | 19437141 - 19482347   | T - 84.21% | TRUE  | TRUE  |
| 17 | 19437141 - 19482347   |            | FALSE | TRUE  |
| 17 | 19437141 - 19482347   | T - 68.42% | TRUE  | TRUE  |
| 17 | 19437141 - 19482347   |            | FALSE | TRUE  |
| 17 | 19437141 - 19482347   |            | FALSE | TRUE  |
| 17 | 19437141 - 19482347   | T - 63.16% | TRUE  | TRUE  |
| 17 | 19437141 - 19482347   | T - 84.21% | TRUE  | TRUE  |
| 17 | 19437141 - 19482347   |            | TRUE  | TRUE  |
| 17 | 19437141 - 19482347   | F - 47.37% | FALSE | TRUE  |
| 17 | 19437141 - 19482347   | T - 63.16% | FALSE | TRUE  |
| 17 | 19437141 - 19482347   |            | FALSE | TRUE  |
| 17 | 19437141 - 19482347   | T - 63.16% | TRUE  | TRUE  |
| 17 | 19437141 - 19482347   | T - 57.89% | FALSE | TRUE  |
| 17 | 19437141 - 19482347   | T - 63.16% | TRUE  | TRUE  |
| 17 | 19437141 - 19482347   | T - 52.63% | TRUE  | TRUE  |
| 17 | 19437141 - 19482347   |            | TRUE  | TRUE  |
| 17 | 19437141 - 19482347   | T - 68.42% | TRUE  | TRUE  |
| 17 | 19437141 - 19482347   |            | FALSE | TRUE  |
| 17 | 19437141 - 19482347   |            | FALSE | TRUE  |
| 19 | 43670408 - 43690688   |            | TRUE  | TRUE  |
| 19 | 43670408 - 43690688   |            | FALSE | TRUE  |
| 19 | 43670408 - 43690688   | T - 58.33% | FALSE | TRUE  |
| 19 | 43670408 - 43690688   | F - 8.33%  | FALSE | TRUE  |
| 19 | 43670408 - 43690688   |            | TRUE  | TRUE  |
| 19 | 43670408 - 43690688   | F - 8.33%  | FALSE | TRUE  |
| 19 | 43670408 - 43690688   | F - 8.33%  | FALSE | TRUE  |
| 19 | 43670408 - 43690688   | T - 75.00% | TRUE  | TRUE  |
| 19 | 43670408 - 43690688   |            | TRUE  | TRUE  |
| 19 | 43670408 - 43690688   | F - 8.33%  | TRUE  | TRUE  |
| 19 | 43670408 - 43690688   | F - 8.33%  | FALSE | TRUE  |
| 19 | 43670408 - 43690688   | F - 8.33%  | TRUE  | TRUE  |
| 19 | 43670408 - 43690688   |            | TRUE  | TRUE  |
| 19 | 43670408 - 43690688   |            | TRUE  | TRUE  |
| 16 | 15068599 - 15233196   |            | TRUE  | TRUE  |
| 16 | 15068599 - 15233196   |            | TRUE  | TRUE  |
| 16 | 15068599 - 15233196   | F - 5.56%  | TRUE  | TRUE  |
| 16 | 15068599 - 15233196   |            | FALSE | TRUE  |
| 16 | 15068599 - 15233196   |            | TRUE  | TRUE  |
| 3  | 49711435 - 49721396   |            | TRUE  | TRUE  |
| 3  | 49711435 - 49721396   | T - 55.56% | FALSE | TRUE  |
| 3  | 49711435 - 49721396   |            | TRUE  | TRUE  |
| 6  | 31236526 - 31239913   |            | TRUE  | FALSE |
| 6  | 31236526 - 31239913   | F - 20.00% | TRUE  | TRUE  |
| 6  | 31236526 - 31239913   | F - 10.00% | TRUE  | TRUE  |
| 6  | 31236526 - 31239913   |            | TRUE  | TRUE  |
| 6  | 31236526 - 31239913   |            | TRUE  | TRUE  |
| 6  | 31236526 - 31239913   | F - 5.00%  | TRUE  | TRUE  |
| 6  | 31236526 - 31239913   |            | TRUE  | TRUE  |
| 4  | 103172198 - 103274157 | F - 9.09%  | TRUE  | FALSE |
| 4  | 103172198 - 103274157 | F - 18.18% | TRUE  | TRUE  |
| 4  | 103172198 - 103274157 | F - 18.18% | TRUE  | TRUE  |

|   |                       |            |       |       |
|---|-----------------------|------------|-------|-------|
| 4 | 103172198 - 103274157 | F - 9.09%  | TRUE  | TRUE  |
| 4 | 103172198 - 103274157 | F - 9.09%  | FALSE | TRUE  |
| 4 | 103172198 - 103274157 | F - 18.18% | FALSE | TRUE  |
| 4 | 103172198 - 103274157 |            | FALSE | TRUE  |
| 4 | 103172198 - 103274157 | T - 54.55% | TRUE  | TRUE  |
| 4 | 103172198 - 103274157 | F - 27.27% | TRUE  | TRUE  |
| 8 | 28203102 - 28260218   |            | TRUE  | TRUE  |
| 8 | 28203102 - 28260218   | F - 21.43% | TRUE  | TRUE  |
| 8 | 28203102 - 28260218   |            | TRUE  | TRUE  |
| 8 | 28203102 - 28260218   |            | TRUE  | TRUE  |
| 8 | 28203102 - 28260218   |            | TRUE  | TRUE  |
| 8 | 28203102 - 28260218   |            | FALSE | TRUE  |
| 8 | 28203102 - 28260218   | F - 35.71% | TRUE  | TRUE  |
| 8 | 28203102 - 28260218   |            | TRUE  | TRUE  |
| 8 | 28203102 - 28260218   | F - 21.43% | TRUE  | TRUE  |
| 8 | 28203102 - 28260218   |            | TRUE  | TRUE  |
| 8 | 28203102 - 28260218   |            | TRUE  | TRUE  |
| 8 | 28203102 - 28260218   |            | TRUE  | TRUE  |
| 8 | 28203102 - 28260218   | F - 7.14%  | TRUE  | TRUE  |
| 8 | 28203102 - 28260218   |            | TRUE  | TRUE  |
| 8 | 28203102 - 28260218   | T - 57.14% | FALSE | TRUE  |
| 8 | 28203102 - 28260218   | F - 7.14%  | TRUE  | TRUE  |
| 8 | 28203102 - 28260218   |            | FALSE | TRUE  |
| 8 | 28203102 - 28260218   |            | TRUE  | TRUE  |
| 8 | 28203102 - 28260218   | T - 71.43% | TRUE  | TRUE  |
| 8 | 28203102 - 28260218   |            | TRUE  | TRUE  |
| 8 | 28203102 - 28260218   |            | FALSE | TRUE  |
| 8 | 28203102 - 28260218   | F - 28.57% | TRUE  | TRUE  |
| 8 | 28203102 - 28260218   |            | FALSE | TRUE  |
| 8 | 28203102 - 28260218   | F - 42.86% | FALSE | TRUE  |
| 8 | 28203102 - 28260218   |            | FALSE | TRUE  |
| 8 | 28203102 - 28260218   |            | TRUE  | TRUE  |
| 1 | 9095166 - 9148537     |            | TRUE  | FALSE |
| 1 | 9095166 - 9148537     |            | TRUE  | TRUE  |
| 1 | 9095166 - 9148537     |            | TRUE  | TRUE  |
| 1 | 9095166 - 9148537     |            | TRUE  | TRUE  |
| 1 | 9095166 - 9148537     | T - 68.18% | TRUE  | TRUE  |
| 1 | 9095166 - 9148537     | F - 4.55%  | TRUE  | FALSE |
| 1 | 9095166 - 9148537     | F - 22.73% | TRUE  | TRUE  |
| 1 | 9095166 - 9148537     |            | TRUE  | TRUE  |
| 1 | 9095166 - 9148537     |            | TRUE  | TRUE  |
| 2 | 28680012 - 28866654   |            | TRUE  | FALSE |
| 2 | 28680012 - 28866654   | T - 55.00% | TRUE  | FALSE |
| 2 | 28680012 - 28866654   | T - 55.00% | TRUE  | FALSE |
| 2 | 28680012 - 28866654   | T - 50.00% | TRUE  | FALSE |
| 2 | 28680012 - 28866654   |            | TRUE  | FALSE |
| 2 | 28680012 - 28866654   |            | TRUE  | FALSE |
| 2 | 28680012 - 28866654   |            | TRUE  | FALSE |
| 2 | 28680012 - 28866654   | T - 60.00% | TRUE  | TRUE  |
| 2 | 28680012 - 28866654   |            | TRUE  | FALSE |
| 2 | 28680012 - 28866654   |            | TRUE  | FALSE |
| 2 | 28680012 - 28866654   | T - 55.00% | TRUE  | TRUE  |
| 2 | 28680012 - 28866654   |            | TRUE  | FALSE |
| 2 | 28680012 - 28866654   |            | TRUE  | FALSE |
| 2 | 28680012 - 28866654   | T - 55.00% | TRUE  | FALSE |
| 2 | 28680012 - 28866654   | F - 25.00% | TRUE  | TRUE  |
| 2 | 28680012 - 28866654   | T - 55.00% | TRUE  | FALSE |
| 2 | 28680012 - 28866654   |            | TRUE  | TRUE  |

|   |                     |            |       |       |
|---|---------------------|------------|-------|-------|
| 2 | 28680012 - 28866654 | T - 50.00% | TRUE  | TRUE  |
| 2 | 28680012 - 28866654 | F - 30.00% | TRUE  | FALSE |
| 2 | 28680012 - 28866654 | F - 20.00% | TRUE  | FALSE |
| 2 | 28680012 - 28866654 | F - 30.00% | TRUE  | TRUE  |
| 2 | 28680012 - 28866654 | T - 55.00% | TRUE  | TRUE  |
| 2 | 28680012 - 28866654 | T - 55.00% | TRUE  | FALSE |
| 2 | 28680012 - 28866654 |            | TRUE  | TRUE  |
| 2 | 28680012 - 28866654 | T - 55.00% | TRUE  | FALSE |
| 2 | 28680012 - 28866654 | T - 55.00% | TRUE  | TRUE  |
| 2 | 28680012 - 28866654 |            | TRUE  | TRUE  |
| 2 | 28680012 - 28866654 |            | TRUE  | FALSE |
| 2 | 28680012 - 28866654 | F - 5.00%  | TRUE  | TRUE  |
| 2 | 28680012 - 28866654 | F - 30.00% | TRUE  | TRUE  |
| 2 | 28680012 - 28866654 | F - 30.00% | TRUE  | FALSE |
| 2 | 28680012 - 28866654 |            | TRUE  | TRUE  |
| 2 | 28680012 - 28866654 | F - 5.00%  | TRUE  | FALSE |
| 2 | 28680012 - 28866654 |            | TRUE  | TRUE  |
| 2 | 28680012 - 28866654 |            | TRUE  | TRUE  |
| 2 | 28680012 - 28866654 | F - 35.00% | TRUE  | FALSE |
| 2 | 28680012 - 28866654 | T - 55.00% | TRUE  | TRUE  |
| 2 | 28680012 - 28866654 | F - 5.00%  | TRUE  | TRUE  |
| 2 | 28680012 - 28866654 | F - 35.00% | TRUE  | TRUE  |
| 2 | 28680012 - 28866654 |            | TRUE  | TRUE  |
| 2 | 28680012 - 28866654 |            | TRUE  | TRUE  |
| 2 | 28680012 - 28866654 | F - 35.00% | TRUE  | FALSE |
| 2 | 28680012 - 28866654 | F - 30.00% | TRUE  | TRUE  |
| 2 | 28680012 - 28866654 | T - 55.00% | TRUE  | TRUE  |
| 2 | 28680012 - 28866654 |            | TRUE  | TRUE  |
| 2 | 28680012 - 28866654 | F - 30.00% | TRUE  | TRUE  |
| 2 | 28680012 - 28866654 |            | TRUE  | TRUE  |
| 2 | 28680012 - 28866654 |            | TRUE  | TRUE  |
| 2 | 28680012 - 28866654 |            | TRUE  | TRUE  |
| 2 | 28680012 - 28866654 | F - 30.00% | TRUE  | TRUE  |
| 2 | 28680012 - 28866654 | F - 35.00% | TRUE  | TRUE  |
| 2 | 28680012 - 28866654 | F - 5.00%  | TRUE  | TRUE  |
| 2 | 28680012 - 28866654 | T - 50.00% | TRUE  | TRUE  |
| 2 | 28680012 - 28866654 | F - 25.00% | TRUE  | TRUE  |
| 2 | 28680012 - 28866654 | F - 45.00% | TRUE  | TRUE  |
| 2 | 28680012 - 28866654 | F - 35.00% | TRUE  | TRUE  |
| 2 | 28680012 - 28866654 | F - 5.00%  | TRUE  | TRUE  |
| 2 | 28680012 - 28866654 |            | FALSE | TRUE  |
| 2 | 28680012 - 28866654 | F - 5.00%  | TRUE  | TRUE  |
| 2 | 28680012 - 28866654 | F - 15.00% | FALSE | TRUE  |
| 2 | 28680012 - 28866654 |            | TRUE  | TRUE  |
| 2 | 28680012 - 28866654 |            | TRUE  | TRUE  |
| 2 | 28680012 - 28866654 | F - 45.00% | TRUE  | TRUE  |
| 2 | 28680012 - 28866654 | F - 35.00% | TRUE  | TRUE  |
| 2 | 28680012 - 28866654 | F - 35.00% | FALSE | TRUE  |
| 2 | 28680012 - 28866654 | F - 35.00% | FALSE | TRUE  |
| 2 | 28680012 - 28866654 | F - 30.00% | TRUE  | TRUE  |
| 2 | 28680012 - 28866654 | F - 35.00% | FALSE | TRUE  |
| 2 | 28680012 - 28866654 | F - 45.00% | FALSE | TRUE  |
| Y | 14813160 - 14972768 | T - 50.00% | TRUE  | TRUE  |
| Y | 14813160 - 14972768 | T - 50.00% | TRUE  | TRUE  |
| Y | 14813160 - 14972768 |            | TRUE  | FALSE |
| Y | 14813160 - 14972768 |            | TRUE  | FALSE |
| Y | 14813160 - 14972768 |            | TRUE  | FALSE |

|   |                          |             |       |       |
|---|--------------------------|-------------|-------|-------|
| Y | 14813160 - 14972768      |             | TRUE  | FALSE |
| Y | 14813160 - 14972768      | T - 50.00%  | TRUE  | TRUE  |
| Y | 14813160 - 14972768      |             | TRUE  | TRUE  |
| Y | 14813160 - 14972768      |             | TRUE  | FALSE |
| Y | 14813160 - 14972768      | T - 50.00%  | TRUE  | TRUE  |
| Y | 14813160 - 14972768      |             | TRUE  | TRUE  |
| Y | 14813160 - 14972768      | T - 50.00%  | TRUE  | TRUE  |
| Y | 14813160 - 14972768      | T - 50.00%  | TRUE  | FALSE |
| Y | 14813160 - 14972768      |             | TRUE  | TRUE  |
| Y | 14813160 - 14972768      | T - 50.00%  | TRUE  | TRUE  |
| Y | 14813160 - 14972768      | T - 50.00%  | TRUE  | TRUE  |
| Y | 14813160 - 14972768      |             | TRUE  | TRUE  |
| Y | 14813160 - 14972768      |             | TRUE  | TRUE  |
| Y | 14813160 - 14972768      | T - 50.00%  | TRUE  | FALSE |
| Y | 14813160 - 14972768      |             | TRUE  | TRUE  |
| Y | 14813160 - 14972768      |             | TRUE  | TRUE  |
| Y | 14813160 - 14972768      | T - 50.00%  | TRUE  | TRUE  |
| Y | 14813160 - 14972768      |             | TRUE  | TRUE  |
| Y | 14813160 - 14972768      |             | TRUE  | TRUE  |
| Y | 14813160 - 14972768      | T - 50.00%  | TRUE  | FALSE |
| Y | 14813160 - 14972768      |             | TRUE  | TRUE  |
| Y | 14813160 - 14972768      |             | TRUE  | TRUE  |
| Y | 14813160 - 14972768      |             | TRUE  | TRUE  |
| Y | 14813160 - 14972768      | T - 50.00%  | TRUE  | TRUE  |
| Y | 14813160 - 14972768      |             | TRUE  | TRUE  |
| Y | 14813160 - 14972768      | T - 75.00%  | TRUE  | TRUE  |
| Y | 14813160 - 14972768      | F - 37.50%  | FALSE | TRUE  |
|   | 17 46667782 - 46683776   | F - 48.15%  | TRUE  | TRUE  |
|   | 17 46667782 - 46683776   |             | TRUE  | TRUE  |
|   | 17 46667782 - 46683776   |             | TRUE  | FALSE |
|   | 17 46667782 - 46683776   | F - 44.44%  | TRUE  | TRUE  |
|   | 17 46667782 - 46683776   | F - 14.81%  | TRUE  | TRUE  |
|   | 17 46667782 - 46683776   | F - 7.41%   | TRUE  | TRUE  |
|   | 17 46667782 - 46683776   |             | TRUE  | TRUE  |
|   | 17 46667782 - 46683776   |             | TRUE  | TRUE  |
|   | 17 46667782 - 46683776   | F - 3.70%   | FALSE | TRUE  |
|   | 10 115511213 - 115543188 |             | TRUE  | TRUE  |
|   | 10 115511213 - 115543188 |             | TRUE  | TRUE  |
|   | 10 115511213 - 115543188 | F - 8.33%   | TRUE  | TRUE  |
|   | 10 115511213 - 115543188 |             | TRUE  | TRUE  |
|   | 10 115511213 - 115543188 | F - 16.67%  | TRUE  | TRUE  |
|   | 10 115511213 - 115543188 |             | TRUE  | TRUE  |
|   | 10 115511213 - 115543188 | F - 33.33%  | FALSE | TRUE  |
|   | 10 115511213 - 115543188 | F - 33.33%  | FALSE | TRUE  |
|   | 10 115511213 - 115543188 |             | TRUE  | TRUE  |
|   | 10 115511213 - 115543188 |             | FALSE | TRUE  |
|   | 10 115511213 - 115543188 |             | FALSE | TRUE  |
|   | 10 115511213 - 115543188 |             | FALSE | TRUE  |
|   | 19 15270444 - 15311792   |             | TRUE  | TRUE  |
|   | 19 15270444 - 15311792   |             | TRUE  | TRUE  |
|   | 19 15270444 - 15311792   |             | TRUE  | TRUE  |
|   | 19 15270444 - 15311792   |             | TRUE  | TRUE  |
|   | 19 15270444 - 15311792   | T - 100.00% | TRUE  | TRUE  |



|    |                       |             |       |       |
|----|-----------------------|-------------|-------|-------|
| 19 | 15270444 - 15311792   |             | FALSE | TRUE  |
| 19 | 15270444 - 15311792   | T - 100.00% | TRUE  | TRUE  |
| 19 | 15270444 - 15311792   | T - 100.00% | TRUE  | TRUE  |
| 19 | 15270444 - 15311792   | T - 100.00% | TRUE  | TRUE  |
| 19 | 15270444 - 15311792   |             | TRUE  | TRUE  |
| 19 | 15270444 - 15311792   |             | TRUE  | TRUE  |
| 19 | 15270444 - 15311792   |             | FALSE | TRUE  |
| 19 | 15270444 - 15311792   | T - 75.00%  | TRUE  | TRUE  |
| 19 | 15270444 - 15311792   | T - 100.00% | TRUE  | TRUE  |
| 19 | 15270444 - 15311792   |             | TRUE  | TRUE  |
| 19 | 15270444 - 15311792   | T - 100.00% | TRUE  | TRUE  |
| 19 | 15270444 - 15311792   | T - 100.00% | TRUE  | TRUE  |
| 19 | 15270444 - 15311792   |             | TRUE  | TRUE  |
| 19 | 15270444 - 15311792   | T - 100.00% | TRUE  | TRUE  |
| 19 | 15270444 - 15311792   | T - 100.00% | TRUE  | TRUE  |
| 19 | 15270444 - 15311792   | T - 75.00%  | TRUE  | TRUE  |
| 19 | 15270444 - 15311792   |             | TRUE  | TRUE  |
| 15 | 39873127 - 39891667   | F - 7.14%   | TRUE  | TRUE  |
| 15 | 39873127 - 39891667   | F - 7.14%   | TRUE  | TRUE  |
| 15 | 39873127 - 39891667   | F - 14.29%  | TRUE  | TRUE  |
| 15 | 39873127 - 39891667   | F - 7.14%   | TRUE  | TRUE  |
| 15 | 39873127 - 39891667   | F - 7.14%   | TRUE  | TRUE  |
| 15 | 39873127 - 39891667   | F - 14.29%  | TRUE  | TRUE  |
| 15 | 39873127 - 39891667   | F - 14.29%  | TRUE  | TRUE  |
| 15 | 39873127 - 39891667   | F - 7.14%   | TRUE  | TRUE  |
| 15 | 39873127 - 39891667   | F - 7.14%   | TRUE  | TRUE  |
| 15 | 39873127 - 39891667   |             | TRUE  | TRUE  |
| 15 | 39873127 - 39891667   |             | TRUE  | TRUE  |
| 12 | 113594978 - 113623284 |             | TRUE  | FALSE |
| 12 | 113594978 - 113623284 | T - 66.67%  | TRUE  | TRUE  |
| 12 | 113594978 - 113623284 |             | FALSE | TRUE  |
| 11 | 33278218 - 33378569   |             | TRUE  | TRUE  |
| 11 | 33278218 - 33378569   | F - 18.18%  | TRUE  | TRUE  |
| 12 | 15066969 - 15092016   |             | TRUE  | TRUE  |
| 12 | 15066969 - 15092016   | F - 20.00%  | TRUE  | TRUE  |
| 12 | 15066969 - 15092016   | F - 20.00%  | TRUE  | TRUE  |
| 12 | 15066969 - 15092016   | T - 60.00%  | TRUE  | TRUE  |
| 12 | 15066969 - 15092016   | T - 60.00%  | FALSE | TRUE  |
| 12 | 15066969 - 15092016   |             | FALSE | TRUE  |
| 12 | 15066969 - 15092016   | T - 80.00%  | TRUE  | TRUE  |
| 12 | 15066969 - 15092016   | T - 100.00% | TRUE  | TRUE  |
| 12 | 15066969 - 15092016   |             | FALSE | TRUE  |
| 15 | 67358183 - 67487533   |             | TRUE  | FALSE |
| 15 | 67358183 - 67487533   |             | TRUE  | TRUE  |
| 15 | 67358183 - 67487533   | F - 8.33%   | TRUE  | TRUE  |
| 15 | 67358183 - 67487533   |             | FALSE | TRUE  |
| 15 | 67358183 - 67487533   | F - 25.00%  | TRUE  | TRUE  |
| 15 | 67358183 - 67487533   | F - 16.67%  | FALSE | TRUE  |
| 15 | 67358183 - 67487533   | F - 8.33%   | FALSE | TRUE  |
| 17 | 40932649 - 40949084   |             | TRUE  | TRUE  |
| 17 | 40932649 - 40949084   |             | TRUE  | TRUE  |
| 17 | 40932649 - 40949084   | T - 87.50%  | TRUE  | TRUE  |
| 17 | 40932649 - 40949084   |             | TRUE  | TRUE  |
| 17 | 40932649 - 40949084   | F - 12.50%  | FALSE | TRUE  |
| 17 | 40932649 - 40949084   |             | TRUE  | TRUE  |
| 17 | 40932649 - 40949084   | T - 50.00%  | TRUE  | TRUE  |
| 17 | 40932649 - 40949084   | F - 25.00%  | TRUE  | TRUE  |
| 17 | 40932649 - 40949084   | T - 75.00%  | TRUE  | TRUE  |

|            |                       |             |       |       |
|------------|-----------------------|-------------|-------|-------|
| 17         | 40932649 - 40949084   |             | TRUE  | TRUE  |
| 17         | 40932649 - 40949084   | T - 50.00%  | TRUE  | TRUE  |
| 17         | 40932649 - 40949084   | F - 37.50%  | TRUE  | TRUE  |
| 17         | 40932649 - 40949084   | T - 50.00%  | TRUE  | TRUE  |
| 17         | 40932649 - 40949084   |             | TRUE  | TRUE  |
| 17         | 40932649 - 40949084   | T - 75.00%  | TRUE  | TRUE  |
| 17         | 40932649 - 40949084   |             | TRUE  | TRUE  |
| 17         | 40932649 - 40949084   |             | FALSE | TRUE  |
| 17         | 40932649 - 40949084   | T - 75.00%  | TRUE  | TRUE  |
| 17         | 40932649 - 40949084   | T - 62.50%  | TRUE  | TRUE  |
| 17         | 40932649 - 40949084   | F - 37.50%  | TRUE  | TRUE  |
| 17         | 40932649 - 40949084   |             | FALSE | TRUE  |
| 17         | 40932649 - 40949084   |             | FALSE | TRUE  |
| 17         | 40932649 - 40949084   |             | FALSE | TRUE  |
| 17         | 40932649 - 40949084   | T - 100.00% | FALSE | TRUE  |
| 17         | 40932649 - 40949084   | T - 100.00% | TRUE  | TRUE  |
| 17         | 40932649 - 40949084   | T - 100.00% | TRUE  | TRUE  |
| 17         | 40932649 - 40949084   | T - 50.00%  | TRUE  | TRUE  |
| 17         | 40932649 - 40949084   |             | TRUE  | TRUE  |
| 17         | 40932649 - 40949084   |             | FALSE | TRUE  |
| 17         | 40932649 - 40949084   |             | FALSE | TRUE  |
| 8          | 27348296 - 27403081   |             | TRUE  | FALSE |
| 8          | 27348296 - 27403081   |             | TRUE  | FALSE |
| 8          | 27348296 - 27403081   |             | TRUE  | TRUE  |
| 8          | 27348296 - 27403081   |             | TRUE  | TRUE  |
| 8          | 27348296 - 27403081   |             | FALSE | TRUE  |
| 8          | 27348296 - 27403081   | T - 63.64%  | TRUE  | TRUE  |
| 8          | 27348296 - 27403081   | T - 77.27%  | TRUE  | TRUE  |
| 8          | 27348296 - 27403081   |             | FALSE | TRUE  |
| 1          | 205271187 - 205290883 |             | TRUE  | TRUE  |
| 1          | 205271187 - 205290883 |             | TRUE  | TRUE  |
| 1          | 205271187 - 205290883 |             | FALSE | TRUE  |
| 1          | 205271187 - 205290883 | F - 25.00%  | FALSE | TRUE  |
| 1          | 205271187 - 205290883 |             | TRUE  | TRUE  |
| 1          | 205271187 - 205290883 | T - 75.00%  | TRUE  | TRUE  |
| 1          | 205271187 - 205290883 |             | TRUE  | TRUE  |
| 6_cox_hap2 | 2749781 - 2753168     |             | TRUE  | FALSE |
| 6_cox_hap2 | 2749781 - 2753168     | F - 10.53%  | TRUE  | TRUE  |
| 6_cox_hap2 | 2749781 - 2753168     | F - 15.79%  | TRUE  | TRUE  |
| 6_cox_hap2 | 2749781 - 2753168     |             | TRUE  | TRUE  |
| 6_cox_hap2 | 2749781 - 2753168     |             | TRUE  | TRUE  |
| 6_cox_hap2 | 2749781 - 2753168     |             | TRUE  | TRUE  |
| 6_cox_hap2 | 2749781 - 2753168     |             | TRUE  | TRUE  |
| 6_cox_hap2 | 2749781 - 2753168     |             | TRUE  | TRUE  |
| 2          | 111143988 - 111230652 | F - 39.13%  | TRUE  | TRUE  |
| 2          | 111143988 - 111230652 |             | TRUE  | TRUE  |
| 2          | 111143988 - 111230652 | F - 39.13%  | TRUE  | TRUE  |
| 2          | 111143988 - 111230652 | F - 47.83%  | TRUE  | TRUE  |
| 2          | 111143988 - 111230652 | F - 30.43%  | TRUE  | TRUE  |
| 2          | 111143988 - 111230652 | F - 34.78%  | TRUE  | TRUE  |
| 2          | 111143988 - 111230652 |             | TRUE  | TRUE  |
| 2          | 111143988 - 111230652 | F - 43.48%  | TRUE  | TRUE  |
| 2          | 111143988 - 111230652 | F - 4.35%   | TRUE  | TRUE  |
| 2          | 111143988 - 111230652 |             | TRUE  | FALSE |
| 2          | 111143988 - 111230652 |             | TRUE  | TRUE  |
| 2          | 111143988 - 111230652 | F - 4.35%   | TRUE  | TRUE  |
| 2          | 111143988 - 111230652 |             | TRUE  | TRUE  |
| 2          | 197831741 - 198175897 |             | TRUE  | FALSE |

|    |                       |            |       |       |
|----|-----------------------|------------|-------|-------|
| 2  | 197831741 - 198175897 |            | TRUE  | TRUE  |
| 2  | 197831741 - 198175897 |            | TRUE  | TRUE  |
| 2  | 197831741 - 198175897 |            | TRUE  | TRUE  |
| 2  | 197831741 - 198175897 | T - 60.00% | TRUE  | TRUE  |
| 2  | 197831741 - 198175897 |            | TRUE  | TRUE  |
| 2  | 197831741 - 198175897 | F - 8.00%  | TRUE  | TRUE  |
| 2  | 197831741 - 198175897 | F - 8.00%  | TRUE  | TRUE  |
| 2  | 197831741 - 198175897 |            | TRUE  | TRUE  |
| 2  | 197831741 - 198175897 |            | TRUE  | TRUE  |
| 2  | 197831741 - 198175897 | F - 12.00% | TRUE  | TRUE  |
| 2  | 197831741 - 198175897 | F - 20.00% | TRUE  | TRUE  |
| 2  | 197831741 - 198175897 |            | TRUE  | TRUE  |
| 2  | 197831741 - 198175897 |            | TRUE  | TRUE  |
| 2  | 197831741 - 198175897 | F - 16.00% | TRUE  | TRUE  |
| 2  | 197831741 - 198175897 |            | TRUE  | TRUE  |
| 2  | 197831741 - 198175897 |            | TRUE  | TRUE  |
| 2  | 197831741 - 198175897 | T - 64.00% | TRUE  | TRUE  |
| 12 | 122277433 - 122326517 | F - 42.86% | TRUE  | TRUE  |
| 12 | 122277433 - 122326517 |            | FALSE | TRUE  |
| 12 | 122277433 - 122326517 | F - 28.57% | TRUE  | TRUE  |
| 12 | 122277433 - 122326517 | T - 85.71% | TRUE  | TRUE  |
| 12 | 122277433 - 122326517 |            | TRUE  | TRUE  |
| 12 | 122277433 - 122326517 |            | FALSE | TRUE  |
| 12 | 122277433 - 122326517 | F - 14.29% | FALSE | TRUE  |
| 12 | 122277433 - 122326517 | T - 85.71% | FALSE | TRUE  |
| 12 | 122277433 - 122326517 | F - 28.57% | FALSE | TRUE  |
| 12 | 122277433 - 122326517 | T - 85.71% | TRUE  | TRUE  |
| 12 | 122277433 - 122326517 |            | FALSE | TRUE  |
| 12 | 122277433 - 122326517 |            | FALSE | TRUE  |
| 14 | 93170152 - 93215047   | T - 50.00% | TRUE  | FALSE |
| 14 | 93170152 - 93215047   |            | TRUE  | TRUE  |
| 1  | 244214561 - 244220778 |            | TRUE  | FALSE |
| 1  | 244214561 - 244220778 | T - 83.33% | TRUE  | TRUE  |
| 1  | 244214561 - 244220778 |            | TRUE  | TRUE  |
| 1  | 244214561 - 244220778 |            | FALSE | TRUE  |
| 1  | 244214561 - 244220778 | F - 16.67% | TRUE  | TRUE  |
| 1  | 244214561 - 244220778 | T - 66.67% | TRUE  | TRUE  |
| 1  | 156219015 - 156252620 |            | TRUE  | FALSE |
| 1  | 156219015 - 156252620 |            | TRUE  | TRUE  |
| 1  | 156219015 - 156252620 |            | FALSE | TRUE  |
| 1  | 156219015 - 156252620 |            | FALSE | TRUE  |
| 1  | 156219015 - 156252620 | F - 33.33% | FALSE | TRUE  |
| 7  | 855528 - 914557       |            | TRUE  | FALSE |
| 7  | 855528 - 914557       | F - 4.44%  | TRUE  | TRUE  |
| 7  | 855528 - 914557       | F - 2.22%  | TRUE  | TRUE  |
| 7  | 855528 - 914557       | F - 17.78% | TRUE  | TRUE  |
| 7  | 855528 - 914557       | F - 15.56% | TRUE  | TRUE  |
| 7  | 855528 - 914557       | F - 20.00% | TRUE  | TRUE  |
| 7  | 855528 - 914557       |            | TRUE  | TRUE  |
| 7  | 855528 - 914557       | F - 2.22%  | FALSE | TRUE  |
| 7  | 855528 - 914557       | F - 2.22%  | TRUE  | TRUE  |
| 7  | 855528 - 914557       |            | FALSE | TRUE  |
| 7  | 855528 - 914557       | F - 22.22% | TRUE  | TRUE  |
| 7  | 855528 - 914557       | F - 11.11% | FALSE | TRUE  |
| 7  | 855528 - 914557       | F - 2.22%  | TRUE  | TRUE  |
| 7  | 855528 - 914557       |            | TRUE  | TRUE  |
| 7  | 855528 - 914557       | F - 2.22%  | TRUE  | TRUE  |
| 7  | 855528 - 914557       | F - 13.33% | TRUE  | TRUE  |

|    |                       |            |       |       |
|----|-----------------------|------------|-------|-------|
| 7  | 855528 - 914557       |            | TRUE  | TRUE  |
| 7  | 855528 - 914557       | F - 2.22%  | TRUE  | TRUE  |
| 7  | 855528 - 914557       |            | FALSE | TRUE  |
| 7  | 855528 - 914557       | F - 6.67%  | TRUE  | TRUE  |
| 7  | 855528 - 914557       | F - 2.22%  | TRUE  | TRUE  |
| 7  | 855528 - 914557       | F - 4.44%  | TRUE  | TRUE  |
| 7  | 855528 - 914557       | F - 22.22% | TRUE  | TRUE  |
| 7  | 855528 - 914557       | F - 2.22%  | TRUE  | TRUE  |
| 3  | 133651540 - 133771028 |            | TRUE  | TRUE  |
| 3  | 133651540 - 133771028 | T - 66.67% | TRUE  | TRUE  |
| 3  | 133651540 - 133771028 |            | TRUE  | TRUE  |
| 3  | 133651540 - 133771028 |            | TRUE  | FALSE |
| 3  | 133651540 - 133771028 | T - 50.00% | TRUE  | TRUE  |
| 3  | 133651540 - 133771028 | F - 25.00% | TRUE  | TRUE  |
| 3  | 133651540 - 133771028 |            | TRUE  | TRUE  |
| 3  | 133651540 - 133771028 |            | FALSE | TRUE  |
| 3  | 133651540 - 133771028 | F - 33.33% | TRUE  | TRUE  |
| 3  | 133651540 - 133771028 | F - 8.33%  | FALSE | TRUE  |
| 3  | 133651540 - 133771028 | F - 33.33% | TRUE  | TRUE  |
| 3  | 133651540 - 133771028 | F - 16.67% | FALSE | TRUE  |
| 3  | 133651540 - 133771028 | F - 8.33%  | FALSE | TRUE  |
| 3  | 133651540 - 133771028 |            | FALSE | TRUE  |
| 3  | 133651540 - 133771028 |            | FALSE | TRUE  |
| 3  | 133651540 - 133771028 |            | FALSE | TRUE  |
| 11 | 92085262 - 92629636   |            | TRUE  | FALSE |
| 11 | 92085262 - 92629636   |            | TRUE  | FALSE |
| 11 | 92085262 - 92629636   |            | TRUE  | TRUE  |
| 11 | 92085262 - 92629636   | T - 50.00% | TRUE  | TRUE  |
| 11 | 92085262 - 92629636   | T - 70.00% | TRUE  | TRUE  |
| 11 | 92085262 - 92629636   |            | TRUE  | FALSE |
| 11 | 92085262 - 92629636   | T - 50.00% | FALSE | TRUE  |
| 2  | 40339286 - 40838193   |            | TRUE  | FALSE |
| 2  | 40339286 - 40838193   | F - 3.85%  | TRUE  | TRUE  |
| 2  | 40339286 - 40838193   | F - 7.69%  | TRUE  | TRUE  |
| 2  | 40339286 - 40838193   | F - 11.54% | FALSE | TRUE  |
| 2  | 40339286 - 40838193   | F - 7.69%  | TRUE  | TRUE  |
| 2  | 40339286 - 40838193   | F - 38.46% | FALSE | TRUE  |
| 2  | 40339286 - 40838193   | F - 7.69%  | TRUE  | TRUE  |
| 2  | 40339286 - 40838193   | F - 3.85%  | TRUE  | TRUE  |
| 2  | 40339286 - 40838193   |            | TRUE  | TRUE  |
| 3  | 150320662 - 150348234 |            | TRUE  | FALSE |
| 3  | 150320662 - 150348234 | F - 7.14%  | TRUE  | TRUE  |
| 3  | 150320662 - 150348234 |            | FALSE | TRUE  |
| 17 | 7761064 - 7780399     |            | TRUE  | FALSE |
| 17 | 7761064 - 7780399     | T - 80.00% | TRUE  | TRUE  |
| 2  | 8818975 - 8824583     |            | FALSE | TRUE  |
| 2  | 8818975 - 8824583     | F - 16.67% | TRUE  | TRUE  |
| 2  | 8818975 - 8824583     | T - 50.00% | TRUE  | TRUE  |
| 2  | 8818975 - 8824583     | F - 16.67% | FALSE | TRUE  |
| 2  | 8818975 - 8824583     | F - 16.67% | FALSE | TRUE  |
| 2  | 47055003 - 47086146   |            | TRUE  | TRUE  |
| 2  | 47055003 - 47086146   | F - 25.00% | TRUE  | TRUE  |
| 2  | 47055003 - 47086146   |            | FALSE | TRUE  |
| 2  | 47055003 - 47086146   | T - 50.00% | FALSE | TRUE  |
| 2  | 47055003 - 47086146   | F - 25.00% | TRUE  | TRUE  |
| 11 | 16798844 - 17035990   |            | TRUE  | FALSE |
| 11 | 16798844 - 17035990   | T - 69.23% | TRUE  | TRUE  |
| 11 | 16798844 - 17035990   |            | TRUE  | TRUE  |

|    |                       |            |       |       |
|----|-----------------------|------------|-------|-------|
| 11 | 16798844 - 17035990   |            | TRUE  | TRUE  |
| 11 | 16798844 - 17035990   |            | TRUE  | TRUE  |
| 11 | 16798844 - 17035990   |            | TRUE  | TRUE  |
| 11 | 16798844 - 17035990   |            | TRUE  | FALSE |
| 11 | 16798844 - 17035990   | T - 69.23% | TRUE  | TRUE  |
| 11 | 16798844 - 17035990   |            | TRUE  | FALSE |
| 11 | 16798844 - 17035990   | T - 69.23% | TRUE  | TRUE  |
| 11 | 16798844 - 17035990   |            | TRUE  | FALSE |
| 11 | 16798844 - 17035990   | F - 15.38% | TRUE  | TRUE  |
| 11 | 16798844 - 17035990   | T - 69.23% | TRUE  | TRUE  |
| 11 | 16798844 - 17035990   | T - 84.62% | TRUE  | TRUE  |
| 11 | 16798844 - 17035990   | T - 84.62% | TRUE  | TRUE  |
| 11 | 16798844 - 17035990   | F - 7.69%  | TRUE  | TRUE  |
| 11 | 16798844 - 17035990   | F - 7.69%  | TRUE  | TRUE  |
| 11 | 16798844 - 17035990   | F - 15.38% | FALSE | TRUE  |
| 11 | 16798844 - 17035990   |            | TRUE  | TRUE  |
| 11 | 16798844 - 17035990   |            | TRUE  | TRUE  |
| 11 | 16798844 - 17035990   | F - 46.15% | FALSE | TRUE  |
| 11 | 16798844 - 17035990   |            | TRUE  | TRUE  |
| 11 | 16798844 - 17035990   |            | TRUE  | TRUE  |
| 11 | 16798844 - 17035990   |            | TRUE  | TRUE  |
| 1  | 162601163 - 162750247 | F - 20.00% | TRUE  | TRUE  |
| 1  | 162601163 - 162750247 |            | TRUE  | FALSE |
| 1  | 162601163 - 162750247 | F - 10.00% | FALSE | TRUE  |
| 3  | 29224445 - 30051886   | F - 4.55%  | TRUE  | TRUE  |
| 3  | 29224445 - 30051886   |            | TRUE  | TRUE  |
| 1  | 53708041 - 53793821   | T - 61.11% | TRUE  | TRUE  |
| 1  | 53708041 - 53793821   |            | TRUE  | TRUE  |
| 1  | 53708041 - 53793821   |            | TRUE  | TRUE  |
| 1  | 53708041 - 53793821   |            | TRUE  | TRUE  |
| 1  | 53708041 - 53793821   |            | TRUE  | TRUE  |
| 1  | 53708041 - 53793821   | F - 22.22% | TRUE  | TRUE  |
| 1  | 53708041 - 53793821   | F - 5.56%  | TRUE  | TRUE  |
| 1  | 53708041 - 53793821   | T - 55.56% | TRUE  | TRUE  |
| 1  | 53708041 - 53793821   | F - 44.44% | TRUE  | TRUE  |
| 1  | 53708041 - 53793821   | F - 33.33% | TRUE  | TRUE  |
| 1  | 53708041 - 53793821   | F - 38.89% | TRUE  | TRUE  |
| 1  | 53708041 - 53793821   |            | TRUE  | TRUE  |
| 1  | 53708041 - 53793821   |            | FALSE | TRUE  |
| 1  | 53708041 - 53793821   |            | FALSE | TRUE  |
| 1  | 53708041 - 53793821   | F - 5.56%  | FALSE | TRUE  |
| 1  | 53708041 - 53793821   |            | FALSE | TRUE  |
| 1  | 53708041 - 53793821   |            | TRUE  | TRUE  |
| 1  | 53708041 - 53793821   | F - 11.11% | FALSE | TRUE  |
| 1  | 53708041 - 53793821   | T - 66.67% | TRUE  | TRUE  |
| 1  | 53708041 - 53793821   |            | TRUE  | TRUE  |
| 1  | 53708041 - 53793821   | T - 61.11% | TRUE  | TRUE  |
| 1  | 53708041 - 53793821   |            | TRUE  | TRUE  |
| 1  | 53708041 - 53793821   |            | FALSE | TRUE  |
| 1  | 53708041 - 53793821   |            | TRUE  | TRUE  |
| 1  | 53708041 - 53793821   | T - 83.33% | TRUE  | TRUE  |
| 1  | 53708041 - 53793821   |            | FALSE | TRUE  |
| 1  | 53708041 - 53793821   |            | FALSE | TRUE  |
| 1  | 53708041 - 53793821   | T - 72.22% | TRUE  | TRUE  |
| 1  | 53708041 - 53793821   | F - 27.78% | TRUE  | TRUE  |
| 1  | 53708041 - 53793821   | T - 61.11% | TRUE  | TRUE  |
| 1  | 53708041 - 53793821   |            | FALSE | TRUE  |
| 4  | 74962754 - 74965010   | F - 40.00% | TRUE  | TRUE  |

|    |                       |             |       |       |
|----|-----------------------|-------------|-------|-------|
| 4  | 74962754 - 74965010   | T - 100.00% | TRUE  | TRUE  |
| 4  | 74962754 - 74965010   | F - 20.00%  | TRUE  | TRUE  |
| 4  | 74962754 - 74965010   | F - 20.00%  | TRUE  | TRUE  |
| 4  | 74962754 - 74965010   | T - 60.00%  | TRUE  | TRUE  |
| 4  | 74962754 - 74965010   | F - 40.00%  | FALSE | TRUE  |
| 4  | 74962754 - 74965010   |             | FALSE | TRUE  |
| 4  | 74962754 - 74965010   | F - 20.00%  | TRUE  | TRUE  |
| 4  | 74962754 - 74965010   | T - 80.00%  | FALSE | TRUE  |
| 4  | 74962754 - 74965010   |             | TRUE  | TRUE  |
| 4  | 100010008 - 100222513 |             | TRUE  | FALSE |
| 4  | 100010008 - 100222513 |             | TRUE  | FALSE |
| 4  | 100010008 - 100222513 | F - 37.50%  | TRUE  | TRUE  |
| 4  | 100010008 - 100222513 |             | TRUE  | FALSE |
| 4  | 100010008 - 100222513 | F - 12.50%  | TRUE  | TRUE  |
| 4  | 100010008 - 100222513 | F - 37.50%  | TRUE  | TRUE  |
| 4  | 100010008 - 100222513 | F - 25.00%  | FALSE | TRUE  |
| 10 | 90639491 - 90734910   |             | TRUE  | FALSE |
| 10 | 90639491 - 90734910   |             | TRUE  | TRUE  |
| 10 | 90639491 - 90734910   |             | TRUE  | TRUE  |
| 10 | 90639491 - 90734910   | F - 11.11%  | FALSE | TRUE  |
| 10 | 90639491 - 90734910   | F - 11.11%  | TRUE  | TRUE  |
| 10 | 90639491 - 90734910   | F - 22.22%  | TRUE  | TRUE  |
| 10 | 90639491 - 90734910   | F - 22.22%  | TRUE  | TRUE  |
| 10 | 90639491 - 90734910   | F - 11.11%  | FALSE | TRUE  |
| 10 | 90639491 - 90734910   |             | TRUE  | TRUE  |
| 10 | 90639491 - 90734910   | T - 55.56%  | FALSE | TRUE  |
| 10 | 90639491 - 90734910   |             | FALSE | TRUE  |
| 10 | 90639491 - 90734910   |             | TRUE  | TRUE  |
| 18 | 67671043 - 67872962   |             | TRUE  | TRUE  |
| 18 | 67671043 - 67872962   |             | TRUE  | FALSE |
| 18 | 67671043 - 67872962   |             | TRUE  | FALSE |
| 18 | 67671043 - 67872962   |             | TRUE  | FALSE |
| 18 | 67671043 - 67872962   |             | TRUE  | FALSE |
| 18 | 67671043 - 67872962   |             | TRUE  | TRUE  |
| 18 | 67671043 - 67872962   | T - 66.67%  | TRUE  | TRUE  |
| 18 | 67671043 - 67872962   | T - 77.78%  | TRUE  | TRUE  |
| 18 | 67671043 - 67872962   |             | FALSE | TRUE  |
| 18 | 67671043 - 67872962   |             | TRUE  | TRUE  |
| 5  | 127593601 - 127994878 |             | TRUE  | TRUE  |
| 5  | 127593601 - 127994878 |             | TRUE  | FALSE |
| 5  | 127593601 - 127994878 |             | TRUE  | TRUE  |
| 5  | 127593601 - 127994878 |             | FALSE | TRUE  |
| 5  | 127593601 - 127994878 |             | TRUE  | TRUE  |
| 5  | 127593601 - 127994878 |             | TRUE  | TRUE  |
| 5  | 127593601 - 127994878 |             | TRUE  | TRUE  |
| 5  | 127593601 - 127994878 | F - 10.00%  | TRUE  | TRUE  |
| 5  | 127593601 - 127994878 | T - 70.00%  | TRUE  | TRUE  |
| 5  | 127593601 - 127994878 |             | TRUE  | TRUE  |
| 5  | 127593601 - 127994878 | F - 10.00%  | FALSE | TRUE  |
| 5  | 127593601 - 127994878 | F - 20.00%  | TRUE  | TRUE  |
| 5  | 127593601 - 127994878 |             | TRUE  | TRUE  |
| 5  | 127593601 - 127994878 | T - 60.00%  | FALSE | TRUE  |
| 5  | 127593601 - 127994878 |             | TRUE  | TRUE  |
| 5  | 127593601 - 127994878 | F - 10.00%  | TRUE  | TRUE  |
| 5  | 127593601 - 127994878 | T - 50.00%  | FALSE | TRUE  |
| 5  | 127593601 - 127994878 | T - 80.00%  | TRUE  | TRUE  |
| 5  | 127593601 - 127994878 |             | FALSE | TRUE  |
| 5  | 127593601 - 127994878 | F - 30.00%  | TRUE  | TRUE  |

|    |                       |            |       |       |
|----|-----------------------|------------|-------|-------|
| 5  | 127593601 - 127994878 | F - 30.00% | FALSE | TRUE  |
| 5  | 127593601 - 127994878 |            | TRUE  | TRUE  |
| 5  | 127593601 - 127994878 | T - 60.00% | TRUE  | TRUE  |
| 5  | 127593601 - 127994878 |            | TRUE  | TRUE  |
| 5  | 127593601 - 127994878 |            | TRUE  | TRUE  |
| 5  | 127593601 - 127994878 | T - 80.00% | TRUE  | TRUE  |
| 5  | 127593601 - 127994878 |            | TRUE  | TRUE  |
| 5  | 127593601 - 127994878 |            | FALSE | TRUE  |
| 5  | 127593601 - 127994878 |            | TRUE  | TRUE  |
| 5  | 127593601 - 127994878 | T - 50.00% | TRUE  | TRUE  |
| 5  | 127593601 - 127994878 |            | FALSE | TRUE  |
| 5  | 127593601 - 127994878 | T - 80.00% | TRUE  | TRUE  |
| 5  | 127593601 - 127994878 | F - 30.00% | TRUE  | TRUE  |
| 5  | 127593601 - 127994878 | F - 30.00% | TRUE  | TRUE  |
| 5  | 127593601 - 127994878 |            | FALSE | TRUE  |
| 5  | 127593601 - 127994878 |            | TRUE  | TRUE  |
| 5  | 127593601 - 127994878 |            | TRUE  | TRUE  |
| 5  | 127593601 - 127994878 |            | TRUE  | TRUE  |
| 5  | 127593601 - 127994878 | T - 60.00% | TRUE  | TRUE  |
| 5  | 127593601 - 127994878 |            | FALSE | TRUE  |
| 5  | 127593601 - 127994878 |            | FALSE | TRUE  |
| 5  | 127593601 - 127994878 |            | TRUE  | TRUE  |
| 5  | 127593601 - 127994878 | T - 60.00% | TRUE  | TRUE  |
| 5  | 127593601 - 127994878 | T - 50.00% | TRUE  | TRUE  |
| 5  | 127593601 - 127994878 |            | TRUE  | TRUE  |
| 5  | 127593601 - 127994878 | T - 50.00% | TRUE  | TRUE  |
| 5  | 127593601 - 127994878 |            | FALSE | TRUE  |
| 5  | 127593601 - 127994878 |            | FALSE | TRUE  |
| 9  | 86451613 - 86536342   |            | TRUE  | TRUE  |
| 9  | 86451613 - 86536342   |            | TRUE  | TRUE  |
| 9  | 86451613 - 86536342   | T - 77.78% | TRUE  | FALSE |
| 9  | 86451613 - 86536342   | T - 77.78% | TRUE  | TRUE  |
| 9  | 86451613 - 86536342   |            | TRUE  | TRUE  |
| 9  | 86451613 - 86536342   |            | FALSE | TRUE  |
| 9  | 86451613 - 86536342   |            | FALSE | TRUE  |
| 10 | 77029577 - 77133258   | F - 9.09%  | TRUE  | TRUE  |
| 10 | 77029577 - 77133258   |            | TRUE  | TRUE  |
| 10 | 77029577 - 77133258   |            | TRUE  | TRUE  |
| 10 | 77029577 - 77133258   | F - 9.09%  | TRUE  | TRUE  |
| 10 | 77029577 - 77133258   | F - 9.09%  | TRUE  | TRUE  |
| 10 | 77029577 - 77133258   | F - 9.09%  | TRUE  | TRUE  |
| 10 | 77029577 - 77133258   | F - 18.18% | TRUE  | TRUE  |
| 10 | 77029577 - 77133258   | F - 18.18% | TRUE  | TRUE  |
| 10 | 77029577 - 77133258   | T - 63.64% | TRUE  | TRUE  |
| 10 | 77029577 - 77133258   | F - 9.09%  | FALSE | TRUE  |
| 10 | 77029577 - 77133258   | F - 9.09%  | TRUE  | TRUE  |
| 10 | 77029577 - 77133258   |            | TRUE  | TRUE  |
| 10 | 77029577 - 77133258   | F - 9.09%  | FALSE | TRUE  |
| 10 | 77029577 - 77133258   |            | FALSE | TRUE  |
| 10 | 77029577 - 77133258   |            | FALSE | TRUE  |
| 1  | 6521211 - 6580121     |            | TRUE  | FALSE |
| 1  | 6521211 - 6580121     |            | TRUE  | FALSE |
| 1  | 6521211 - 6580121     |            | TRUE  | TRUE  |
| 1  | 6521211 - 6580121     |            | TRUE  | TRUE  |
| 1  | 6521211 - 6580121     | F - 28.57% | TRUE  | TRUE  |
| 1  | 6521211 - 6580121     |            | TRUE  | TRUE  |
| 1  | 6521211 - 6580121     |            | TRUE  | TRUE  |
| 1  | 6521211 - 6580121     | F - 3.57%  | TRUE  | TRUE  |

|    |                       |             |       |       |
|----|-----------------------|-------------|-------|-------|
| 1  | 6521211 - 6580121     | F - 5.36%   | TRUE  | TRUE  |
| 1  | 6521211 - 6580121     | F - 1.79%   | TRUE  | FALSE |
| 1  | 6521211 - 6580121     | F - 44.64%  | TRUE  | TRUE  |
| 1  | 6521211 - 6580121     |             | TRUE  | TRUE  |
| 1  | 6521211 - 6580121     |             | TRUE  | FALSE |
| 1  | 6521211 - 6580121     |             | TRUE  | TRUE  |
| 1  | 6521211 - 6580121     | F - 44.64%  | TRUE  | TRUE  |
| 1  | 6521211 - 6580121     | F - 41.07%  | TRUE  | TRUE  |
| 1  | 6521211 - 6580121     | F - 41.07%  | TRUE  | TRUE  |
| 1  | 6521211 - 6580121     |             | TRUE  | TRUE  |
| 1  | 6521211 - 6580121     | F - 41.07%  | TRUE  | TRUE  |
| 1  | 6521211 - 6580121     | F - 41.07%  | TRUE  | TRUE  |
| 1  | 6521211 - 6580121     | F - 37.50%  | TRUE  | TRUE  |
| 1  | 6521211 - 6580121     |             | TRUE  | TRUE  |
| 1  | 6521211 - 6580121     | F - 8.93%   | TRUE  | TRUE  |
| 1  | 6521211 - 6580121     | F - 41.07%  | TRUE  | TRUE  |
| 1  | 6521211 - 6580121     | F - 28.57%  | TRUE  | TRUE  |
| 1  | 6521211 - 6580121     | F - 44.64%  | TRUE  | TRUE  |
| 1  | 6521211 - 6580121     | F - 42.86%  | TRUE  | TRUE  |
| 1  | 6521211 - 6580121     | F - 41.07%  | TRUE  | TRUE  |
| 1  | 6521211 - 6580121     |             | TRUE  | TRUE  |
| 1  | 6521211 - 6580121     | F - 41.07%  | TRUE  | TRUE  |
| 1  | 6521211 - 6580121     | F - 48.21%  | TRUE  | TRUE  |
| 1  | 6521211 - 6580121     | F - 44.64%  | TRUE  | TRUE  |
| 1  | 6521211 - 6580121     |             | TRUE  | TRUE  |
| 1  | 6521211 - 6580121     | F - 44.64%  | TRUE  | TRUE  |
| 1  | 6521211 - 6580121     | F - 42.86%  | TRUE  | TRUE  |
| 1  | 6521211 - 6580121     | F - 41.07%  | TRUE  | TRUE  |
| 1  | 6521211 - 6580121     | F - 46.43%  | TRUE  | TRUE  |
| 1  | 6521211 - 6580121     | F - 41.07%  | TRUE  | TRUE  |
| 1  | 6521211 - 6580121     | F - 46.43%  | TRUE  | TRUE  |
| 1  | 6521211 - 6580121     |             | TRUE  | TRUE  |
| 1  | 6521211 - 6580121     | F - 7.14%   | TRUE  | TRUE  |
| 1  | 6521211 - 6580121     | F - 41.07%  | TRUE  | TRUE  |
| 1  | 6521211 - 6580121     |             | TRUE  | TRUE  |
| 1  | 101185196 - 101204601 |             | TRUE  | TRUE  |
| 1  | 101185196 - 101204601 | F - 37.50%  | TRUE  | TRUE  |
| 1  | 101185196 - 101204601 |             | FALSE | TRUE  |
| 1  | 101185196 - 101204601 |             | TRUE  | TRUE  |
| 1  | 101185196 - 101204601 | T - 100.00% | FALSE | TRUE  |
| 1  | 101185196 - 101204601 |             | FALSE | TRUE  |
| 1  | 101185196 - 101204601 |             | FALSE | TRUE  |
| 1  | 179851177 - 179890583 |             | TRUE  | TRUE  |
| 1  | 179851177 - 179890583 | F - 10.00%  | TRUE  | TRUE  |
| 1  | 179851177 - 179890583 | F - 10.00%  | FALSE | TRUE  |
| 1  | 179851177 - 179890583 | T - 100.00% | TRUE  | TRUE  |
| 1  | 179851177 - 179890583 |             | TRUE  | TRUE  |
| X  | 109917084 - 110039286 | F - 30.77%  | TRUE  | TRUE  |
| X  | 109917084 - 110039286 | F - 46.15%  | TRUE  | TRUE  |
| X  | 109917084 - 110039286 |             | TRUE  | TRUE  |
| X  | 109917084 - 110039286 | F - 30.77%  | TRUE  | TRUE  |
| X  | 109917084 - 110039286 |             | TRUE  | TRUE  |
| X  | 109917084 - 110039286 |             | TRUE  | TRUE  |
| X  | 109917084 - 110039286 |             | TRUE  | TRUE  |
| X  | 109917084 - 110039286 |             | TRUE  | TRUE  |
| 11 | 18621334 - 18631802   |             | TRUE  | FALSE |
| 11 | 18621334 - 18631802   | T - 75.00%  | TRUE  | TRUE  |
| 11 | 18621334 - 18631802   | T - 75.00%  | FALSE | TRUE  |



|    |                       |            |       |       |
|----|-----------------------|------------|-------|-------|
| 11 | 18621334 - 18631802   | T - 75.00% | FALSE | TRUE  |
| 17 | 25783670 - 25953461   |            | TRUE  | TRUE  |
| 17 | 25783670 - 25953461   |            | TRUE  | TRUE  |
| 17 | 25783670 - 25953461   |            | TRUE  | FALSE |
| 17 | 25783670 - 25953461   |            | TRUE  | TRUE  |
| 17 | 25783670 - 25953461   | F - 7.69%  | FALSE | TRUE  |
| 17 | 25783670 - 25953461   |            | TRUE  | TRUE  |
| 17 | 25783670 - 25953461   | F - 38.46% | TRUE  | TRUE  |
| 17 | 25783670 - 25953461   |            | TRUE  | TRUE  |
| 17 | 25783670 - 25953461   |            | FALSE | TRUE  |
| 8  | 69242957 - 69731258   |            | TRUE  | TRUE  |
| 8  | 69242957 - 69731258   |            | TRUE  | FALSE |
| 8  | 69242957 - 69731258   | T - 64.29% | TRUE  | TRUE  |
| 8  | 69242957 - 69731258   |            | TRUE  | FALSE |
| 8  | 69242957 - 69731258   |            | TRUE  | FALSE |
| 8  | 69242957 - 69731258   | T - 64.29% | TRUE  | TRUE  |
| 8  | 69242957 - 69731258   | T - 85.71% | TRUE  | TRUE  |
| 8  | 69242957 - 69731258   | T - 71.43% | TRUE  | FALSE |
| 8  | 69242957 - 69731258   |            | TRUE  | FALSE |
| 8  | 69242957 - 69731258   | T - 64.29% | TRUE  | TRUE  |
| 8  | 69242957 - 69731258   |            | FALSE | TRUE  |
| 22 | 23521891 - 23660224   |            | TRUE  | FALSE |
| 22 | 23521891 - 23660224   |            | TRUE  | TRUE  |
| 22 | 23521891 - 23660224   |            | TRUE  | TRUE  |
| 22 | 23521891 - 23660224   | F - 36.00% | TRUE  | TRUE  |
| 11 | 126225540 - 126310752 |            | TRUE  | TRUE  |
| 11 | 126225540 - 126310752 | F - 11.11% | TRUE  | TRUE  |
| 11 | 126225540 - 126310752 | F - 5.56%  | TRUE  | TRUE  |
| 20 | 59827482 - 60515673   |            | TRUE  | FALSE |
| 20 | 59827482 - 60515673   | T - 87.50% | TRUE  | TRUE  |
| 20 | 59827482 - 60515673   |            | TRUE  | TRUE  |
| 2  | 37458774 - 37480546   |            | TRUE  | TRUE  |
| 2  | 37458774 - 37480546   |            | TRUE  | TRUE  |
| 2  | 37458774 - 37480546   |            | FALSE | TRUE  |
| 2  | 37458774 - 37480546   | T - 55.00% | TRUE  | FALSE |
| 2  | 37458774 - 37480546   | F - 15.00% | TRUE  | TRUE  |
| 2  | 37458774 - 37480546   | T - 55.00% | TRUE  | TRUE  |
| 2  | 37458774 - 37480546   |            | TRUE  | TRUE  |
| 2  | 37458774 - 37480546   |            | FALSE | TRUE  |
| 13 | 95090830 - 95131936   | F - 11.11% | TRUE  | TRUE  |
| 13 | 95090830 - 95131936   |            | TRUE  | TRUE  |
| 13 | 95090830 - 95131936   | F - 33.33% | TRUE  | TRUE  |
| 13 | 95090830 - 95131936   | T - 66.67% | FALSE | TRUE  |
| 13 | 95090830 - 95131936   |            | TRUE  | TRUE  |
| 19 | 37034517 - 37096178   |            | TRUE  | FALSE |
| 19 | 37034517 - 37096178   |            | TRUE  | TRUE  |
| 19 | 37034517 - 37096178   |            | TRUE  | TRUE  |
| 19 | 37034517 - 37096178   | T - 71.43% | TRUE  | TRUE  |
| 19 | 37034517 - 37096178   | T - 57.14% | TRUE  | TRUE  |
| 12 | 6308881 - 6347437     | F - 9.09%  | TRUE  | FALSE |
| 12 | 6308881 - 6347437     |            | TRUE  | TRUE  |
| 12 | 6308881 - 6347437     | F - 18.18% | FALSE | TRUE  |
| 12 | 6308881 - 6347437     |            | TRUE  | TRUE  |
| 12 | 6308881 - 6347437     | F - 9.09%  | FALSE | TRUE  |
| 12 | 6308881 - 6347437     | F - 9.09%  | FALSE | TRUE  |
| 12 | 6308881 - 6347437     | F - 9.09%  | TRUE  | TRUE  |
| 12 | 6308881 - 6347437     | F - 9.09%  | FALSE | TRUE  |
| 12 | 6308881 - 6347437     |            | FALSE | TRUE  |

|    |                       |             |       |       |
|----|-----------------------|-------------|-------|-------|
| 12 | 6308881 - 6347437     |             | FALSE | TRUE  |
| 12 | 6308881 - 6347437     | F - 45.45%  | TRUE  | TRUE  |
| 17 | 18601311 - 18639432   | T - 52.63%  | TRUE  | TRUE  |
| 17 | 18601311 - 18639432   |             | TRUE  | TRUE  |
| 17 | 18601311 - 18639432   |             | TRUE  | TRUE  |
| 17 | 18601311 - 18639432   | F - 21.05%  | TRUE  | TRUE  |
| 17 | 18601311 - 18639432   |             | TRUE  | TRUE  |
| 17 | 18601311 - 18639432   |             | FALSE | TRUE  |
| 17 | 18601311 - 18639432   |             | TRUE  | TRUE  |
| 17 | 18601311 - 18639432   |             | FALSE | TRUE  |
| 17 | 18601311 - 18639432   | T - 52.63%  | TRUE  | TRUE  |
| 17 | 18601311 - 18639432   | F - 42.11%  | TRUE  | TRUE  |
| 17 | 18601311 - 18639432   | F - 36.84%  | TRUE  | TRUE  |
| 17 | 18601311 - 18639432   | F - 47.37%  | TRUE  | TRUE  |
| 17 | 18601311 - 18639432   | F - 10.53%  | TRUE  | TRUE  |
| 17 | 18601311 - 18639432   | F - 36.84%  | TRUE  | TRUE  |
| 17 | 18601311 - 18639432   |             | TRUE  | TRUE  |
| 17 | 18601311 - 18639432   |             | TRUE  | TRUE  |
| 17 | 18601311 - 18639432   | F - 26.32%  | TRUE  | TRUE  |
| 17 | 18601311 - 18639432   | T - 52.63%  | TRUE  | TRUE  |
| 17 | 18601311 - 18639432   | T - 57.89%  | TRUE  | TRUE  |
| 17 | 18601311 - 18639432   | F - 36.84%  | TRUE  | TRUE  |
| 17 | 18601311 - 18639432   |             | TRUE  | TRUE  |
| 17 | 18601311 - 18639432   | F - 47.37%  | TRUE  | TRUE  |
| 17 | 18601311 - 18639432   | T - 78.95%  | TRUE  | TRUE  |
| 6  | 134308719 - 134373789 |             | TRUE  | TRUE  |
| 6  | 134308719 - 134373789 | T - 100.00% | TRUE  | TRUE  |
| 6  | 134308719 - 134373789 | T - 66.67%  | TRUE  | TRUE  |
| 11 | 7260009 - 7490276     |             | TRUE  | FALSE |
| 11 | 7260009 - 7490276     | F - 14.29%  | TRUE  | TRUE  |
| 11 | 7260009 - 7490276     |             | TRUE  | TRUE  |
| 11 | 7260009 - 7490276     | T - 57.14%  | TRUE  | TRUE  |
| 11 | 7260009 - 7490276     |             | FALSE | TRUE  |
| 5  | 218356 - 256815       |             | TRUE  | TRUE  |
| 5  | 218356 - 256815       |             | TRUE  | TRUE  |
| 5  | 218356 - 256815       |             | TRUE  | TRUE  |
| 5  | 218356 - 256815       | F - 6.90%   | TRUE  | TRUE  |
| 5  | 218356 - 256815       | F - 3.45%   | TRUE  | TRUE  |
| 5  | 218356 - 256815       |             | TRUE  | TRUE  |
| 5  | 218356 - 256815       | F - 10.34%  | TRUE  | TRUE  |
| 5  | 218356 - 256815       |             | FALSE | TRUE  |
| 5  | 218356 - 256815       |             | TRUE  | TRUE  |
| 8  | 136469700 - 136668965 |             | TRUE  | FALSE |
| 8  | 136469700 - 136668965 |             | TRUE  | FALSE |
| 8  | 136469700 - 136668965 |             | TRUE  | FALSE |
| 8  | 136469700 - 136668965 | F - 23.53%  | TRUE  | TRUE  |
| 8  | 136469700 - 136668965 | F - 11.76%  | TRUE  | TRUE  |
| 8  | 136469700 - 136668965 | T - 58.82%  | TRUE  | TRUE  |
| 8  | 136469700 - 136668965 | F - 29.41%  | TRUE  | TRUE  |
| 8  | 136469700 - 136668965 | F - 5.88%   | FALSE | TRUE  |
| 8  | 136469700 - 136668965 | F - 41.18%  | TRUE  | TRUE  |
| 8  | 136469700 - 136668965 | F - 29.41%  | TRUE  | TRUE  |
| 8  | 136469700 - 136668965 |             | FALSE | TRUE  |
| 8  | 136469700 - 136668965 | F - 5.88%   | FALSE | TRUE  |
| 8  | 136469700 - 136668965 | T - 58.82%  | TRUE  | TRUE  |
| 8  | 136469700 - 136668965 | F - 5.88%   | FALSE | TRUE  |
| 8  | 136469700 - 136668965 | F - 5.88%   | FALSE | TRUE  |
| 8  | 136469700 - 136668965 | F - 5.88%   | FALSE | TRUE  |

|    |                       |             |       |       |
|----|-----------------------|-------------|-------|-------|
| 8  | 136469700 - 136668965 |             | FALSE | TRUE  |
| 8  | 136469700 - 136668965 | F - 5.88%   | TRUE  | TRUE  |
| 8  | 136469700 - 136668965 |             | TRUE  | TRUE  |
| 12 | 49208215 - 49222726   |             | TRUE  | FALSE |
| 12 | 49208215 - 49222726   | F - 25.00%  | TRUE  | TRUE  |
| 12 | 49208215 - 49222726   |             | FALSE | TRUE  |
| 9  | 117085303 - 117088759 | T - 83.33%  | TRUE  | TRUE  |
| 9  | 117085303 - 117088759 | T - 100.00% | TRUE  | FALSE |
| 9  | 117085303 - 117088759 | T - 83.33%  | TRUE  | TRUE  |
| 9  | 117085303 - 117088759 |             | TRUE  | TRUE  |
| 9  | 117085303 - 117088759 | F - 16.67%  | TRUE  | TRUE  |
| 9  | 117085303 - 117088759 | F - 16.67%  | FALSE | TRUE  |
| 9  | 117085303 - 117088759 | T - 66.67%  | TRUE  | TRUE  |
| 1  | 70671365 - 70718735   |             | TRUE  | TRUE  |
| 1  | 70671365 - 70718735   |             | TRUE  | TRUE  |
| 1  | 70671365 - 70718735   |             | TRUE  | FALSE |
| 1  | 70671365 - 70718735   | F - 3.57%   | TRUE  | TRUE  |
| 1  | 70671365 - 70718735   |             | TRUE  | TRUE  |
| 1  | 70671365 - 70718735   |             | TRUE  | TRUE  |
| 1  | 70671365 - 70718735   |             | FALSE | TRUE  |
| 1  | 166882441 - 166944719 |             | TRUE  | FALSE |
| 1  | 166882441 - 166944719 | T - 88.89%  | TRUE  | FALSE |
| 1  | 166882441 - 166944719 |             | TRUE  | TRUE  |
| 9  | 117546915 - 117568408 | T - 50.00%  | FALSE | TRUE  |
| 9  | 117546915 - 117568408 | T - 87.50%  | FALSE | TRUE  |
| 9  | 117546915 - 117568408 | T - 75.00%  | TRUE  | TRUE  |
| 9  | 117546915 - 117568408 | F - 12.50%  | FALSE | TRUE  |
| 9  | 117546915 - 117568408 | F - 12.50%  | TRUE  | TRUE  |
| 9  | 117546915 - 117568408 | T - 62.50%  | FALSE | TRUE  |
| 9  | 117546915 - 117568408 | T - 87.50%  | TRUE  | TRUE  |
| 9  | 117546915 - 117568408 |             | FALSE | TRUE  |
| 9  | 117546915 - 117568408 | T - 75.00%  | TRUE  | TRUE  |
| 9  | 117546915 - 117568408 |             | FALSE | TRUE  |
| 9  | 117546915 - 117568408 |             | FALSE | TRUE  |
| 20 | 33459949 - 33515769   |             | TRUE  | TRUE  |
| 20 | 33459949 - 33515769   |             | TRUE  | TRUE  |
| 20 | 33459949 - 33515769   |             | TRUE  | TRUE  |
| 20 | 33459949 - 33515769   |             | TRUE  | FALSE |
| 20 | 33459949 - 33515769   |             | TRUE  | FALSE |
| 20 | 33459949 - 33515769   |             | TRUE  | TRUE  |
| 20 | 33459949 - 33515769   |             | TRUE  | TRUE  |
| 20 | 33459949 - 33515769   |             | FALSE | TRUE  |
| 20 | 33459949 - 33515769   | F - 5.71%   | TRUE  | TRUE  |
| 20 | 33459949 - 33515769   | F - 34.29%  | TRUE  | TRUE  |
| 20 | 33459949 - 33515769   | T - 51.43%  | TRUE  | TRUE  |
| 20 | 33459949 - 33515769   | F - 45.71%  | TRUE  | TRUE  |
| 20 | 33459949 - 33515769   | F - 2.86%   | FALSE | TRUE  |
| 20 | 33459949 - 33515769   | F - 48.57%  | TRUE  | TRUE  |
| 20 | 33459949 - 33515769   |             | TRUE  | TRUE  |
| 20 | 33459949 - 33515769   |             | FALSE | TRUE  |
| 1  | 17066768 - 17299474   |             | TRUE  | TRUE  |
| 1  | 17066768 - 17299474   | F - 15.00%  | TRUE  | TRUE  |
| 1  | 17066768 - 17299474   |             | TRUE  | TRUE  |
| 1  | 17066768 - 17299474   | F - 20.00%  | TRUE  | TRUE  |
| 1  | 17066768 - 17299474   |             | TRUE  | TRUE  |
| 1  | 17066768 - 17299474   |             | FALSE | TRUE  |
| 1  | 17066768 - 17299474   | T - 55.00%  | TRUE  | TRUE  |
| 1  | 17066768 - 17299474   |             | TRUE  | TRUE  |

|   |                     |            |       |       |
|---|---------------------|------------|-------|-------|
| 4 | 52709166 - 52783003 |            | TRUE  | FALSE |
| 4 | 52709166 - 52783003 | F - 6.90%  | TRUE  | TRUE  |
| 4 | 52709166 - 52783003 |            | TRUE  | FALSE |
| 4 | 52709166 - 52783003 |            | TRUE  | TRUE  |
| 4 | 52709166 - 52783003 | T - 68.97% | TRUE  | TRUE  |
| 4 | 52709166 - 52783003 | F - 3.45%  | TRUE  | TRUE  |
| 4 | 52709166 - 52783003 | T - 51.72% | TRUE  | TRUE  |
| 6 | 30844198 - 30867933 | F - 4.05%  | TRUE  | FALSE |
| 6 | 30844198 - 30867933 | F - 39.19% | TRUE  | TRUE  |
| 6 | 30844198 - 30867933 |            | TRUE  | TRUE  |
| 6 | 30844198 - 30867933 |            | TRUE  | TRUE  |
| 6 | 30844198 - 30867933 | T - 63.51% | TRUE  | TRUE  |
| 6 | 30844198 - 30867933 | F - 1.35%  | TRUE  | TRUE  |
| 6 | 30844198 - 30867933 | F - 1.35%  | TRUE  | TRUE  |
| 6 | 30844198 - 30867933 |            | TRUE  | TRUE  |
| 6 | 30844198 - 30867933 |            | TRUE  | TRUE  |
| 6 | 30844198 - 30867933 |            | TRUE  | TRUE  |
| 6 | 30844198 - 30867933 | F - 1.35%  | TRUE  | TRUE  |
| 6 | 30844198 - 30867933 | F - 1.35%  | TRUE  | TRUE  |
| 6 | 30844198 - 30867933 | F - 1.35%  | TRUE  | TRUE  |
| 6 | 30844198 - 30867933 |            | TRUE  | TRUE  |
| 6 | 30844198 - 30867933 |            | TRUE  | TRUE  |
| 6 | 30844198 - 30867933 | F - 4.05%  | TRUE  | TRUE  |
| 6 | 30844198 - 30867933 |            | TRUE  | TRUE  |
| 6 | 30844198 - 30867933 |            | TRUE  | TRUE  |
| 6 | 30844198 - 30867933 |            | FALSE | TRUE  |
| 6 | 30844198 - 30867933 | F - 1.35%  | TRUE  | TRUE  |
| 6 | 30844198 - 30867933 |            | TRUE  | TRUE  |
| 6 | 30844198 - 30867933 | F - 2.70%  | TRUE  | FALSE |
| 6 | 30844198 - 30867933 | F - 8.11%  | TRUE  | TRUE  |
| 6 | 30844198 - 30867933 | F - 1.35%  | TRUE  | TRUE  |
| 6 | 30844198 - 30867933 | F - 1.35%  | FALSE | TRUE  |
| 6 | 30844198 - 30867933 |            | TRUE  | TRUE  |
| 6 | 30844198 - 30867933 |            | TRUE  | TRUE  |
| 6 | 30844198 - 30867933 | F - 1.35%  | TRUE  | TRUE  |
| 6 | 30844198 - 30867933 | F - 5.41%  | TRUE  | TRUE  |
| 6 | 30844198 - 30867933 | F - 4.05%  | TRUE  | TRUE  |
| 6 | 30844198 - 30867933 |            | TRUE  | TRUE  |
| 6 | 30844198 - 30867933 |            | FALSE | TRUE  |
| 6 | 30844198 - 30867933 |            | FALSE | TRUE  |
| 6 | 30844198 - 30867933 | F - 1.35%  | FALSE | TRUE  |
| 6 | 30844198 - 30867933 | F - 2.70%  | TRUE  | TRUE  |
| 6 | 30844198 - 30867933 |            | FALSE | TRUE  |
| 6 | 30844198 - 30867933 | F - 1.35%  | TRUE  | TRUE  |
| 6 | 30844198 - 30867933 | F - 1.35%  | TRUE  | TRUE  |
| 6 | 30844198 - 30867933 | F - 40.54% | TRUE  | TRUE  |
| 6 | 30844198 - 30867933 | F - 1.35%  | TRUE  | TRUE  |
| 6 | 30844198 - 30867933 |            | TRUE  | TRUE  |
| 6 | 30844198 - 30867933 | F - 1.35%  | TRUE  | TRUE  |
| 6 | 30844198 - 30867933 | F - 1.35%  | TRUE  | TRUE  |
| 6 | 30844198 - 30867933 | F - 37.84% | TRUE  | TRUE  |
| 6 | 30844198 - 30867933 |            | TRUE  | TRUE  |
| 6 | 30844198 - 30867933 |            | TRUE  | TRUE  |
| 6 | 30844198 - 30867933 | T - 62.16% | TRUE  | TRUE  |
| 6 | 30844198 - 30867933 | F - 1.35%  | TRUE  | TRUE  |
| 6 | 30844198 - 30867933 |            | TRUE  | TRUE  |
| 6 | 30844198 - 30867933 | F - 2.70%  | TRUE  | TRUE  |
| 6 | 30844198 - 30867933 |            | FALSE | TRUE  |

|   |                       |            |       |       |
|---|-----------------------|------------|-------|-------|
| 6 | 30844198 - 30867933   | F - 2.70%  | TRUE  | TRUE  |
| 6 | 30844198 - 30867933   | F - 2.70%  | TRUE  | TRUE  |
| 6 | 30844198 - 30867933   | F - 4.05%  | FALSE | TRUE  |
| 6 | 30844198 - 30867933   | F - 1.35%  | TRUE  | TRUE  |
| 6 | 30844198 - 30867933   | F - 2.70%  | TRUE  | TRUE  |
| 6 | 30844198 - 30867933   |            | FALSE | TRUE  |
| 6 | 30844198 - 30867933   | F - 1.35%  | TRUE  | TRUE  |
| 6 | 30844198 - 30867933   | F - 4.05%  | TRUE  | TRUE  |
| 6 | 30844198 - 30867933   | F - 5.41%  | FALSE | TRUE  |
| 6 | 30844198 - 30867933   | T - 52.70% | FALSE | TRUE  |
| 9 | 129986544 - 130155939 |            | TRUE  | TRUE  |
| 9 | 129986544 - 130155939 | F - 3.23%  | TRUE  | FALSE |
| 9 | 129986544 - 130155939 | F - 38.71% | TRUE  | FALSE |
| 9 | 129986544 - 130155939 | F - 3.23%  | TRUE  | TRUE  |
| 9 | 129986544 - 130155939 |            | TRUE  | TRUE  |
| 9 | 129986544 - 130155939 |            | TRUE  | TRUE  |
| 9 | 129986544 - 130155939 |            | TRUE  | TRUE  |
| 9 | 129986544 - 130155939 |            | TRUE  | TRUE  |
| 9 | 129986544 - 130155939 | F - 16.13% | TRUE  | TRUE  |
| 9 | 129986544 - 130155939 | F - 16.13% | TRUE  | FALSE |
| 9 | 129986544 - 130155939 |            | TRUE  | FALSE |
| 9 | 129986544 - 130155939 | F - 3.23%  | TRUE  | TRUE  |
| 9 | 129986544 - 130155939 |            | TRUE  | TRUE  |
| 9 | 129986544 - 130155939 | F - 38.71% | TRUE  | TRUE  |
| 9 | 129986544 - 130155939 | F - 6.45%  | TRUE  | TRUE  |
| 9 | 129986544 - 130155939 | F - 32.26% | TRUE  | TRUE  |
| 9 | 129986544 - 130155939 | F - 3.23%  | FALSE | TRUE  |
| 9 | 129986544 - 130155939 | F - 3.23%  | TRUE  | TRUE  |
| 9 | 129986544 - 130155939 | F - 38.71% | TRUE  | TRUE  |
| 9 | 129986544 - 130155939 | F - 3.23%  | TRUE  | TRUE  |
| 9 | 129986544 - 130155939 | F - 35.48% | TRUE  | TRUE  |
| 9 | 129986544 - 130155939 | F - 3.23%  | TRUE  | TRUE  |
| 9 | 129986544 - 130155939 | F - 3.23%  | FALSE | TRUE  |
| 9 | 129986544 - 130155939 | F - 35.48% | TRUE  | TRUE  |
| 9 | 129986544 - 130155939 | F - 3.23%  | FALSE | TRUE  |
| 9 | 129986544 - 130155939 |            | FALSE | TRUE  |
| 9 | 129986544 - 130155939 | F - 35.48% | FALSE | TRUE  |
| 9 | 129986544 - 130155939 | F - 3.23%  | FALSE | TRUE  |
| 9 | 129986544 - 130155939 | F - 6.45%  | FALSE | TRUE  |
| 9 | 129986544 - 130155939 | F - 38.71% | TRUE  | TRUE  |
| 9 | 129986544 - 130155939 |            | TRUE  | TRUE  |
| 9 | 129986544 - 130155939 | F - 3.23%  | FALSE | TRUE  |
| 9 | 129986544 - 130155939 |            | FALSE | TRUE  |
| 9 | 129986544 - 130155939 | F - 35.48% | TRUE  | TRUE  |
| 9 | 129986544 - 130155939 |            | FALSE | TRUE  |
| 9 | 129986544 - 130155939 | F - 9.68%  | TRUE  | TRUE  |
| 9 | 129986544 - 130155939 | F - 6.45%  | TRUE  | TRUE  |
| 9 | 129986544 - 130155939 | F - 35.48% | TRUE  | TRUE  |
| 9 | 129986544 - 130155939 | F - 38.71% | TRUE  | TRUE  |
| 9 | 129986544 - 130155939 | F - 35.48% | TRUE  | TRUE  |
| 9 | 129986544 - 130155939 | F - 9.68%  | TRUE  | TRUE  |
| 9 | 129986544 - 130155939 | F - 25.81% | TRUE  | TRUE  |
| 9 | 129986544 - 130155939 | F - 19.35% | TRUE  | TRUE  |
| 9 | 129986544 - 130155939 | F - 9.68%  | FALSE | TRUE  |
| 9 | 129986544 - 130155939 | F - 3.23%  | FALSE | TRUE  |
| 9 | 129986544 - 130155939 |            | TRUE  | TRUE  |
| 9 | 129986544 - 130155939 | T - 58.06% | TRUE  | TRUE  |
| 9 | 129986544 - 130155939 | F - 35.48% | TRUE  | TRUE  |

|   |                       |            |       |       |
|---|-----------------------|------------|-------|-------|
| 9 | 129986544 - 130155939 | F - 32.26% | TRUE  | TRUE  |
| 9 | 129986544 - 130155939 |            | TRUE  | TRUE  |
| 9 | 129986544 - 130155939 | F - 35.48% | TRUE  | TRUE  |
| 9 | 129986544 - 130155939 | F - 38.71% | TRUE  | TRUE  |
| 9 | 129986544 - 130155939 |            | TRUE  | TRUE  |
| 9 | 129986544 - 130155939 |            | TRUE  | TRUE  |
| 9 | 129986544 - 130155939 | F - 22.58% | TRUE  | TRUE  |
| 9 | 129986544 - 130155939 |            | TRUE  | TRUE  |
| 9 | 129986544 - 130155939 |            | TRUE  | TRUE  |
| 9 | 129986544 - 130155939 |            | FALSE | TRUE  |
| 9 | 129986544 - 130155939 | F - 41.94% | TRUE  | TRUE  |
| 9 | 129986544 - 130155939 | F - 35.48% | TRUE  | TRUE  |
| 9 | 129986544 - 130155939 | F - 32.26% | TRUE  | TRUE  |
| 9 | 129986544 - 130155939 | T - 54.84% | TRUE  | TRUE  |
| 9 | 129986544 - 130155939 |            | TRUE  | TRUE  |
| 1 | 225083964 - 225586996 |            | TRUE  | FALSE |
| 1 | 225083964 - 225586996 |            | TRUE  | TRUE  |
| 1 | 225083964 - 225586996 |            | TRUE  | FALSE |
| 1 | 225083964 - 225586996 |            | TRUE  | FALSE |
| 1 | 225083964 - 225586996 |            | TRUE  | FALSE |
| 1 | 225083964 - 225586996 | F - 20.83% | TRUE  | FALSE |
| 1 | 225083964 - 225586996 | F - 12.50% | TRUE  | TRUE  |
| 1 | 225083964 - 225586996 | F - 16.67% | TRUE  | FALSE |
| 1 | 225083964 - 225586996 |            | TRUE  | FALSE |
| 1 | 225083964 - 225586996 | F - 29.17% | TRUE  | TRUE  |
| 1 | 225083964 - 225586996 |            | TRUE  | FALSE |
| 1 | 225083964 - 225586996 |            | TRUE  | TRUE  |
| 1 | 225083964 - 225586996 |            | TRUE  | FALSE |
| 1 | 225083964 - 225586996 |            | TRUE  | FALSE |
| 1 | 225083964 - 225586996 | F - 16.67% | TRUE  | FALSE |
| 1 | 225083964 - 225586996 |            | TRUE  | TRUE  |
| 8 | 42032236 - 42065242   |            | TRUE  | FALSE |
| 8 | 42032236 - 42065242   |            | TRUE  | FALSE |
| 8 | 42032236 - 42065242   | T - 73.91% | TRUE  | TRUE  |
| 8 | 42032236 - 42065242   |            | TRUE  | TRUE  |
| 8 | 42032236 - 42065242   | T - 65.22% | TRUE  | TRUE  |
| 8 | 42032236 - 42065242   | T - 69.57% | TRUE  | TRUE  |
| 8 | 42032236 - 42065242   | T - 69.57% | TRUE  | TRUE  |
| 8 | 42032236 - 42065242   | T - 78.26% | TRUE  | TRUE  |
| 8 | 42032236 - 42065242   | T - 65.22% | TRUE  | TRUE  |
| 8 | 42032236 - 42065242   |            | TRUE  | TRUE  |
| 8 | 42032236 - 42065242   |            | TRUE  | TRUE  |
| 8 | 42032236 - 42065242   |            | TRUE  | FALSE |
| 8 | 42032236 - 42065242   | T - 65.22% | TRUE  | TRUE  |
| 8 | 42032236 - 42065242   | F - 4.35%  | TRUE  | FALSE |
| 8 | 42032236 - 42065242   | T - 60.87% | TRUE  | TRUE  |
| 8 | 42032236 - 42065242   |            | TRUE  | TRUE  |
| 8 | 42032236 - 42065242   | F - 4.35%  | TRUE  | TRUE  |
| 8 | 42032236 - 42065242   | F - 30.43% | TRUE  | TRUE  |
| 8 | 42032236 - 42065242   | T - 60.87% | TRUE  | TRUE  |
| 8 | 42032236 - 42065242   | F - 4.35%  | TRUE  | TRUE  |
| 8 | 42032236 - 42065242   | F - 4.35%  | TRUE  | TRUE  |
| 8 | 42032236 - 42065242   |            | TRUE  | TRUE  |
| 8 | 42032236 - 42065242   |            | TRUE  | TRUE  |
| 8 | 42032236 - 42065242   |            | TRUE  | TRUE  |
| 8 | 42032236 - 42065242   | F - 4.35%  | FALSE | TRUE  |
| 8 | 42032236 - 42065242   | F - 4.35%  | TRUE  | TRUE  |
| 8 | 42032236 - 42065242   | F - 4.35%  | FALSE | TRUE  |

|             |                       |             |       |       |
|-------------|-----------------------|-------------|-------|-------|
| 8           | 42032236 - 42065242   | F - 4.35%   | FALSE | TRUE  |
| 8           | 42032236 - 42065242   |             | FALSE | TRUE  |
| 17          | 19551459 - 19580909   | F - 7.69%   | TRUE  | TRUE  |
| 17          | 19551459 - 19580909   | T - 53.85%  | TRUE  | TRUE  |
| 17          | 19551459 - 19580909   | T - 53.85%  | TRUE  | TRUE  |
| 17          | 19551459 - 19580909   | F - 15.38%  | TRUE  | TRUE  |
| 17          | 19551459 - 19580909   | T - 92.31%  | FALSE | TRUE  |
| 17          | 19551459 - 19580909   | T - 84.62%  | TRUE  | TRUE  |
| 17          | 19551459 - 19580909   | F - 30.77%  | TRUE  | TRUE  |
| 17          | 19551459 - 19580909   |             | TRUE  | TRUE  |
| 17          | 19551459 - 19580909   |             | TRUE  | TRUE  |
| 6_qbl_hap6  | 2529777 - 2533154     |             | TRUE  | FALSE |
| 6_qbl_hap6  | 2529777 - 2533154     | F - 9.52%   | TRUE  | TRUE  |
| 6_qbl_hap6  | 2529777 - 2533154     |             | TRUE  | TRUE  |
| 6_qbl_hap6  | 2529777 - 2533154     |             | TRUE  | TRUE  |
| 6_qbl_hap6  | 2529777 - 2533154     | F - 14.29%  | TRUE  | TRUE  |
| 6_qbl_hap6  | 2529777 - 2533154     | F - 9.52%   | TRUE  | TRUE  |
| 6_qbl_hap6  | 2529777 - 2533154     |             | TRUE  | TRUE  |
| 6_ssto_hap7 | 2570005 - 2573397     |             | TRUE  | FALSE |
| 6_ssto_hap7 | 2570005 - 2573397     | F - 10.00%  | TRUE  | TRUE  |
| 6_ssto_hap7 | 2570005 - 2573397     |             | TRUE  | TRUE  |
| 6_ssto_hap7 | 2570005 - 2573397     | F - 15.00%  | TRUE  | TRUE  |
| 6_ssto_hap7 | 2570005 - 2573397     | F - 10.00%  | TRUE  | TRUE  |
| 6_ssto_hap7 | 2570005 - 2573397     |             | TRUE  | TRUE  |
| 10          | 104629210 - 104661656 |             | TRUE  | TRUE  |
| 10          | 104629210 - 104661656 | T - 50.00%  | TRUE  | TRUE  |
| 10          | 104629210 - 104661656 | T - 50.00%  | TRUE  | TRUE  |
| 16          | 70841281 - 71264625   |             | TRUE  | FALSE |
| 16          | 70841281 - 71264625   |             | TRUE  | FALSE |
| 16          | 70841281 - 71264625   |             | TRUE  | FALSE |
| 16          | 70841281 - 71264625   |             | TRUE  | FALSE |
| 16          | 70841281 - 71264625   |             | TRUE  | FALSE |
| 16          | 70841281 - 71264625   |             | TRUE  | FALSE |
| 16          | 70841281 - 71264625   |             | TRUE  | FALSE |
| 16          | 70841281 - 71264625   | F - 29.41%  | TRUE  | FALSE |
| 16          | 70841281 - 71264625   |             | TRUE  | FALSE |
| 16          | 70841281 - 71264625   |             | TRUE  | FALSE |
| 16          | 70841281 - 71264625   |             | FALSE | TRUE  |
| 16          | 70841281 - 71264625   |             | FALSE | TRUE  |
| 16          | 70841281 - 71264625   |             | FALSE | TRUE  |
| 17          | 39182278 - 39183480   |             | TRUE  | TRUE  |
| 17          | 39182278 - 39183480   | T - 100.00% | TRUE  | TRUE  |
| 17          | 39182278 - 39183480   | T - 83.33%  | TRUE  | TRUE  |
| 17          | 39182278 - 39183480   | F - 33.33%  | TRUE  | TRUE  |
| 17          | 39182278 - 39183480   | T - 83.33%  | FALSE | TRUE  |
| 17          | 39182278 - 39183480   | T - 83.33%  | FALSE | TRUE  |
| 17          | 39182278 - 39183480   | T - 50.00%  | FALSE | TRUE  |
| 13          | 24144509 - 24250244   |             | TRUE  | FALSE |
| 13          | 24144509 - 24250244   | T - 50.00%  | TRUE  | TRUE  |
| 13          | 24144509 - 24250244   | F - 20.00%  | TRUE  | TRUE  |
| 13          | 24144509 - 24250244   |             | TRUE  | TRUE  |
| 13          | 24144509 - 24250244   | F - 10.00%  | FALSE | TRUE  |
| 3           | 180707558 - 181508734 | F - 42.86%  | TRUE  | FALSE |
| 3           | 180707558 - 181508734 |             | TRUE  | TRUE  |
| 3           | 180707558 - 181508734 |             | TRUE  | FALSE |
| 3           | 180707558 - 181508734 | F - 38.10%  | TRUE  | TRUE  |
| 2           | 170550964 - 170558218 |             | TRUE  | FALSE |

|    |                       |            |       |       |
|----|-----------------------|------------|-------|-------|
| 2  | 170550964 - 170558218 |            | TRUE  | TRUE  |
| 2  | 170550964 - 170558218 | T - 66.67% | TRUE  | TRUE  |
| 2  | 170550964 - 170558218 | T - 66.67% | TRUE  | TRUE  |
| 22 | 39473010 - 39483748   | F - 11.11% | TRUE  | TRUE  |
| 22 | 39473010 - 39483748   | F - 22.22% | TRUE  | TRUE  |
| 22 | 39473010 - 39483748   | F - 33.33% | TRUE  | TRUE  |
| 22 | 39473010 - 39483748   | F - 11.11% | TRUE  | TRUE  |
| 22 | 39473010 - 39483748   | F - 33.33% | FALSE | TRUE  |
| 22 | 39473010 - 39483748   | F - 11.11% | FALSE | TRUE  |
| 22 | 39473010 - 39483748   | F - 11.11% | FALSE | TRUE  |
| 22 | 39473010 - 39483748   | F - 44.44% | FALSE | TRUE  |
| 22 | 39473010 - 39483748   | F - 33.33% | FALSE | TRUE  |
| 22 | 39473010 - 39483748   |            | FALSE | TRUE  |
| 22 | 39473010 - 39483748   | F - 22.22% | FALSE | TRUE  |
| 22 | 39473010 - 39483748   | F - 33.33% | TRUE  | TRUE  |
| 22 | 39473010 - 39483748   | T - 88.89% | TRUE  | TRUE  |
| 22 | 39473010 - 39483748   |            | TRUE  | TRUE  |
| 22 | 39473010 - 39483748   | F - 33.33% | TRUE  | TRUE  |
| 22 | 39473010 - 39483748   | T - 77.78% | TRUE  | TRUE  |
| 22 | 39473010 - 39483748   |            | TRUE  | TRUE  |
| 15 | 81601394 - 81616524   | F - 42.86% | TRUE  | TRUE  |
| 15 | 81601394 - 81616524   | F - 42.86% | FALSE | TRUE  |
| 15 | 81601394 - 81616524   | F - 28.57% | TRUE  | TRUE  |
| 15 | 81601394 - 81616524   | F - 28.57% | TRUE  | TRUE  |
| 15 | 81601394 - 81616524   | F - 28.57% | TRUE  | TRUE  |
| 15 | 81601394 - 81616524   | T - 85.71% | TRUE  | TRUE  |
| 15 | 81601394 - 81616524   | F - 28.57% | TRUE  | TRUE  |
| 15 | 81601394 - 81616524   | F - 14.29% | FALSE | TRUE  |
| 15 | 81601394 - 81616524   |            | TRUE  | TRUE  |
| 21 | 36160098 - 37357047   | F - 3.03%  | TRUE  | TRUE  |
| 21 | 36160098 - 37357047   | F - 36.36% | TRUE  | TRUE  |
| 21 | 36160098 - 37357047   |            | TRUE  | TRUE  |
| 21 | 36160098 - 37357047   |            | TRUE  | TRUE  |
| 21 | 36160098 - 37357047   |            | TRUE  | TRUE  |
| 21 | 36160098 - 37357047   | T - 51.52% | TRUE  | TRUE  |
| 21 | 36160098 - 37357047   | F - 27.27% | TRUE  | TRUE  |
| 21 | 36160098 - 37357047   |            | TRUE  | TRUE  |
| 21 | 36160098 - 37357047   |            | TRUE  | FALSE |
| 21 | 36160098 - 37357047   |            | TRUE  | TRUE  |
| 2  | 12856998 - 12882860   | T - 71.43% | TRUE  | TRUE  |
| 2  | 12856998 - 12882860   |            | FALSE | TRUE  |
| 2  | 12856998 - 12882860   |            | TRUE  | TRUE  |
| 2  | 12856998 - 12882860   | F - 28.57% | TRUE  | TRUE  |
| 2  | 12856998 - 12882860   | F - 28.57% | TRUE  | TRUE  |
| 2  | 95813075 - 95831158   |            | TRUE  | FALSE |
| 2  | 95813075 - 95831158   | F - 22.22% | TRUE  | TRUE  |
| 2  | 95813075 - 95831158   | F - 11.11% | FALSE | TRUE  |
| 18 | 21269562 - 21535030   |            | TRUE  | FALSE |
| 18 | 21269562 - 21535030   |            | TRUE  | TRUE  |
| 18 | 21269562 - 21535030   |            | TRUE  | FALSE |
| 18 | 21269562 - 21535030   |            | TRUE  | FALSE |
| 18 | 21269562 - 21535030   |            | TRUE  | TRUE  |
| 18 | 21269562 - 21535030   |            | TRUE  | TRUE  |
| 18 | 21269562 - 21535030   |            | TRUE  | FALSE |
| 18 | 21269562 - 21535030   |            | TRUE  | FALSE |
| 18 | 21269562 - 21535030   |            | TRUE  | TRUE  |
| 18 | 21269562 - 21535030   |            | FALSE | TRUE  |
| 18 | 21269562 - 21535030   |            | TRUE  | TRUE  |



|    |                       |            |       |       |
|----|-----------------------|------------|-------|-------|
| 18 | 21269562 - 21535030   | T - 50.00% | FALSE | TRUE  |
| 18 | 21269562 - 21535030   | T - 66.67% | TRUE  | TRUE  |
| 18 | 21269562 - 21535030   |            | FALSE | TRUE  |
| 5  | 81574515 - 81682796   | F - 11.11% | TRUE  | FALSE |
| 5  | 81574515 - 81682796   | F - 22.22% | TRUE  | TRUE  |
| 5  | 81574515 - 81682796   |            | TRUE  | FALSE |
| 5  | 81574515 - 81682796   | F - 11.11% | TRUE  | TRUE  |
| 5  | 81574515 - 81682796   |            | FALSE | TRUE  |
| 5  | 81574515 - 81682796   |            | TRUE  | TRUE  |
| 5  | 81574515 - 81682796   | F - 22.22% | TRUE  | TRUE  |
| 5  | 81574515 - 81682796   |            | FALSE | TRUE  |
| 5  | 81574515 - 81682796   | F - 11.11% | TRUE  | TRUE  |
| 5  | 81574515 - 81682796   | F - 11.11% | TRUE  | TRUE  |
| 5  | 81574515 - 81682796   | F - 44.44% | TRUE  | TRUE  |
| 5  | 81574515 - 81682796   |            | FALSE | TRUE  |
| 2  | 191273081 - 191373931 |            | TRUE  | FALSE |
| 2  | 191273081 - 191373931 | T - 50.00% | FALSE | TRUE  |
| 2  | 191273081 - 191373931 | F - 7.14%  | TRUE  | TRUE  |
| 2  | 191273081 - 191373931 | F - 21.43% | TRUE  | TRUE  |
| 2  | 191273081 - 191373931 | F - 7.14%  | TRUE  | TRUE  |
| 2  | 191273081 - 191373931 | F - 14.29% | TRUE  | TRUE  |
| 2  | 191273081 - 191373931 | F - 28.57% | TRUE  | TRUE  |
| 2  | 191273081 - 191373931 |            | FALSE | TRUE  |
| 2  | 191273081 - 191373931 |            | TRUE  | TRUE  |
| 6  | 116440085 - 116479910 |            | TRUE  | FALSE |
| 6  | 116440085 - 116479910 |            | TRUE  | FALSE |
| 6  | 116440085 - 116479910 | F - 33.33% | TRUE  | FALSE |
| 6  | 116440085 - 116479910 | T - 50.00% | TRUE  | TRUE  |
| 6  | 116440085 - 116479910 |            | TRUE  | FALSE |
| 6  | 116440085 - 116479910 | T - 83.33% | TRUE  | TRUE  |
| 6  | 116440085 - 116479910 | F - 16.67% | TRUE  | FALSE |
| 3  | 127407909 - 127558019 |            | TRUE  | FALSE |
| 3  | 127407909 - 127558019 |            | FALSE | TRUE  |
| 3  | 127407909 - 127558019 | F - 4.55%  | TRUE  | TRUE  |
| 3  | 127407909 - 127558019 | F - 4.55%  | TRUE  | TRUE  |
| 3  | 127407909 - 127558019 |            | TRUE  | TRUE  |
| 3  | 127407909 - 127558019 | F - 9.09%  | TRUE  | TRUE  |
| 3  | 127407909 - 127558019 | F - 22.73% | FALSE | TRUE  |
| 3  | 127407909 - 127558019 | F - 4.55%  | FALSE | TRUE  |
| 3  | 127407909 - 127558019 | F - 22.73% | TRUE  | TRUE  |
| 3  | 127407909 - 127558019 |            | TRUE  | TRUE  |
| X  | 117031776 - 117251303 | F - 21.05% | TRUE  | FALSE |
| X  | 117031776 - 117251303 | F - 10.53% | FALSE | TRUE  |
| X  | 117031776 - 117251303 | F - 21.05% | FALSE | TRUE  |
| X  | 117031776 - 117251303 | F - 5.26%  | FALSE | TRUE  |
| X  | 117031776 - 117251303 |            | TRUE  | TRUE  |
| X  | 117031776 - 117251303 |            | TRUE  | TRUE  |
| X  | 117031776 - 117251303 | F - 21.05% | FALSE | TRUE  |
| X  | 117031776 - 117251303 | T - 89.47% | FALSE | TRUE  |
| X  | 117031776 - 117251303 | F - 10.53% | FALSE | TRUE  |
| X  | 117031776 - 117251303 |            | FALSE | TRUE  |
| X  | 117031776 - 117251303 | T - 89.47% | TRUE  | TRUE  |
| X  | 117031776 - 117251303 |            | FALSE | TRUE  |
| 2  | 113493930 - 113522254 |            | TRUE  | TRUE  |
| 2  | 113493930 - 113522254 |            | TRUE  | FALSE |
| 2  | 113493930 - 113522254 | T - 83.33% | TRUE  | TRUE  |
| 2  | 113493930 - 113522254 |            | FALSE | TRUE  |
| 11 | 69924408 - 70035652   |            | TRUE  | FALSE |

|            |                       |             |       |       |
|------------|-----------------------|-------------|-------|-------|
| 11         | 69924408 - 70035652   |             | TRUE  | FALSE |
| 11         | 69924408 - 70035652   |             | TRUE  | FALSE |
| 11         | 69924408 - 70035652   |             | TRUE  | FALSE |
| 11         | 69924408 - 70035652   |             | TRUE  | FALSE |
| 11         | 69924408 - 70035652   | T - 78.57%  | TRUE  | FALSE |
| 11         | 69924408 - 70035652   | T - 92.86%  | TRUE  | FALSE |
| 11         | 69924408 - 70035652   |             | TRUE  | FALSE |
| 11         | 69924408 - 70035652   | F - 7.14%   | TRUE  | TRUE  |
| 11         | 69924408 - 70035652   | F - 28.57%  | TRUE  | TRUE  |
| 11         | 69924408 - 70035652   |             | FALSE | TRUE  |
| 11         | 69924408 - 70035652   |             | FALSE | TRUE  |
| 11         | 13983914 - 14289679   |             | TRUE  | TRUE  |
| 11         | 13983914 - 14289679   | T - 100.00% | TRUE  | FALSE |
| 11         | 13983914 - 14289679   | T - 100.00% | TRUE  | TRUE  |
| 11         | 13983914 - 14289679   |             | TRUE  | FALSE |
| 11         | 13983914 - 14289679   | T - 100.00% | TRUE  | TRUE  |
| 11         | 13983914 - 14289679   |             | TRUE  | TRUE  |
| 11         | 13983914 - 14289679   |             | TRUE  | FALSE |
| 11         | 13983914 - 14289679   | T - 100.00% | TRUE  | TRUE  |
| 11         | 13983914 - 14289679   | T - 100.00% | TRUE  | TRUE  |
| 11         | 13983914 - 14289679   | T - 100.00% | TRUE  | TRUE  |
| 11         | 13983914 - 14289679   |             | TRUE  | TRUE  |
| 11         | 13983914 - 14289679   |             | TRUE  | TRUE  |
| 11         | 13983914 - 14289679   |             | TRUE  | TRUE  |
| 11         | 13983914 - 14289679   | T - 100.00% | TRUE  | TRUE  |
| 11         | 13983914 - 14289679   | T - 100.00% | TRUE  | FALSE |
| 11         | 13983914 - 14289679   |             | TRUE  | TRUE  |
| 11         | 13983914 - 14289679   | T - 100.00% | TRUE  | TRUE  |
| 11         | 13983914 - 14289679   | T - 100.00% | TRUE  | TRUE  |
| 11         | 13983914 - 14289679   | T - 100.00% | TRUE  | TRUE  |
| 11         | 13983914 - 14289679   | T - 100.00% | TRUE  | TRUE  |
| 11         | 13983914 - 14289679   |             | TRUE  | TRUE  |
| 11         | 13983914 - 14289679   | T - 100.00% | TRUE  | TRUE  |
| 11         | 13983914 - 14289679   | T - 60.00%  | TRUE  | TRUE  |
| 11         | 13983914 - 14289679   |             | TRUE  | TRUE  |
| 11         | 13983914 - 14289679   | T - 80.00%  | TRUE  | TRUE  |
| 11         | 13983914 - 14289679   |             | FALSE | TRUE  |
| 6_dbb_hap3 | 2532134 - 2535511     |             | TRUE  | FALSE |
| 6_dbb_hap3 | 2532134 - 2535511     | F - 9.52%   | TRUE  | TRUE  |
| 6_dbb_hap3 | 2532134 - 2535511     |             | TRUE  | TRUE  |
| 6_dbb_hap3 | 2532134 - 2535511     |             | TRUE  | TRUE  |
| 6_dbb_hap3 | 2532134 - 2535511     | F - 14.29%  | TRUE  | TRUE  |
| 6_dbb_hap3 | 2532134 - 2535511     |             | TRUE  | TRUE  |
| 6_dbb_hap3 | 2532134 - 2535511     | F - 9.52%   | TRUE  | TRUE  |
| 6_dbb_hap3 | 2532134 - 2535511     |             | TRUE  | TRUE  |
| 6_dbb_hap3 | 2532134 - 2535511     |             | TRUE  | TRUE  |
| 3          | 20202085 - 20227784   |             | TRUE  | TRUE  |
| 3          | 20202085 - 20227784   |             | TRUE  | FALSE |
| 3          | 20202085 - 20227784   | F - 25.71%  | TRUE  | TRUE  |
| 3          | 20202085 - 20227784   |             | TRUE  | TRUE  |
| 3          | 20202085 - 20227784   |             | TRUE  | TRUE  |
| 3          | 20202085 - 20227784   |             | TRUE  | TRUE  |
| 3          | 20202085 - 20227784   | T - 88.57%  | FALSE | TRUE  |
| 1          | 113933371 - 114228545 |             | TRUE  | FALSE |
| 1          | 113933371 - 114228545 |             | TRUE  | FALSE |
| 1          | 113933371 - 114228545 | F - 7.14%   | TRUE  | TRUE  |
| 1          | 113933371 - 114228545 |             | TRUE  | TRUE  |
| 1          | 113933371 - 114228545 |             | FALSE | TRUE  |

|    |                       |             |       |       |
|----|-----------------------|-------------|-------|-------|
| 1  | 113933371 - 114228545 |             | TRUE  | TRUE  |
| 2  | 53759810 - 54014747   |             | TRUE  | FALSE |
| 2  | 53759810 - 54014747   | F - 4.76%   | TRUE  | FALSE |
| 2  | 53759810 - 54014747   | F - 9.52%   | TRUE  | TRUE  |
| 2  | 53759810 - 54014747   |             | TRUE  | TRUE  |
| 3  | 74311719 - 74570343   |             | TRUE  | TRUE  |
| 3  | 74311719 - 74570343   |             | TRUE  | TRUE  |
| 3  | 74311719 - 74570343   | T - 75.00%  | TRUE  | TRUE  |
| 3  | 74311719 - 74570343   | T - 75.00%  | FALSE | TRUE  |
| 3  | 74311719 - 74570343   | T - 100.00% | TRUE  | TRUE  |
| 3  | 74311719 - 74570343   |             | FALSE | TRUE  |
| 3  | 74311719 - 74570343   |             | FALSE | TRUE  |
| 3  | 74311719 - 74570343   |             | FALSE | TRUE  |
| 3  | 74311719 - 74570343   | T - 100.00% | TRUE  | TRUE  |
| 3  | 74311719 - 74570343   |             | FALSE | TRUE  |
| 3  | 74311719 - 74570343   |             | FALSE | TRUE  |
| 8  | 18384811 - 18942240   |             | TRUE  | TRUE  |
| 8  | 18384811 - 18942240   | F - 4.00%   | TRUE  | TRUE  |
| 8  | 18384811 - 18942240   | F - 8.00%   | TRUE  | TRUE  |
| 8  | 18384811 - 18942240   | F - 16.00%  | TRUE  | TRUE  |
| 8  | 18384811 - 18942240   | F - 4.00%   | TRUE  | TRUE  |
| 8  | 18384811 - 18942240   |             | TRUE  | TRUE  |
| 8  | 18384811 - 18942240   |             | FALSE | TRUE  |
| 8  | 124332090 - 124428590 |             | TRUE  | TRUE  |
| 8  | 124332090 - 124428590 |             | TRUE  | TRUE  |
| 8  | 124332090 - 124428590 |             | TRUE  | FALSE |
| 8  | 124332090 - 124428590 |             | TRUE  | TRUE  |
| 8  | 124332090 - 124428590 |             | TRUE  | TRUE  |
| 8  | 124332090 - 124428590 | T - 72.73%  | TRUE  | TRUE  |
| 8  | 124332090 - 124428590 |             | TRUE  | TRUE  |
| 8  | 124332090 - 124428590 | F - 9.09%   | FALSE | TRUE  |
| 8  | 124332090 - 124428590 | F - 18.18%  | TRUE  | TRUE  |
| 8  | 124332090 - 124428590 |             | FALSE | TRUE  |
| 17 | 72427052 - 72446720   |             | TRUE  | FALSE |
| 17 | 72427052 - 72446720   | F - 7.69%   | TRUE  | TRUE  |
| 5  | 133934233 - 133984961 |             | TRUE  | FALSE |
| 5  | 133934233 - 133984961 | F - 13.33%  | TRUE  | TRUE  |
| 5  | 133934233 - 133984961 | F - 20.00%  | TRUE  | TRUE  |
| 5  | 133934233 - 133984961 | F - 6.67%   | FALSE | TRUE  |
| 5  | 133934233 - 133984961 | F - 13.33%  | TRUE  | TRUE  |
| 5  | 133934233 - 133984961 | F - 20.00%  | TRUE  | TRUE  |
| 19 | 4324040 - 4342783     |             | TRUE  | FALSE |
| 19 | 4324040 - 4342783     | T - 90.00%  | TRUE  | TRUE  |
| 19 | 4324040 - 4342783     | T - 100.00% | FALSE | TRUE  |
| 19 | 4324040 - 4342783     |             | FALSE | TRUE  |
| 14 | 90863327 - 90874619   |             | TRUE  | FALSE |
| 14 | 90863327 - 90874619   | F - 45.45%  | FALSE | TRUE  |
| 21 | 35445524 - 35732332   |             | TRUE  | FALSE |
| 21 | 35445524 - 35732332   | F - 6.25%   | FALSE | TRUE  |
| 21 | 35445524 - 35732332   |             | FALSE | TRUE  |
| 21 | 35445524 - 35732332   |             | FALSE | TRUE  |
| 21 | 35445524 - 35732332   | F - 6.25%   | TRUE  | TRUE  |
| 21 | 35445524 - 35732332   |             | TRUE  | TRUE  |
| 21 | 35445524 - 35732332   | F - 12.50%  | TRUE  | TRUE  |
| 9  | 127704888 - 127905838 |             | TRUE  | TRUE  |
| 9  | 127704888 - 127905838 |             | TRUE  | TRUE  |
| 9  | 127704888 - 127905838 | T - 75.00%  | TRUE  | TRUE  |
| 9  | 127704888 - 127905838 | F - 8.33%   | TRUE  | TRUE  |

|    |                       |            |       |       |
|----|-----------------------|------------|-------|-------|
| 9  | 127704888 - 127905838 | T - 66.67% | TRUE  | TRUE  |
| 9  | 127704888 - 127905838 |            | TRUE  | TRUE  |
| 9  | 127704888 - 127905838 | F - 8.33%  | TRUE  | TRUE  |
| 9  | 127704888 - 127905838 |            | TRUE  | TRUE  |
| 9  | 127704888 - 127905838 |            | TRUE  | TRUE  |
| 9  | 127704888 - 127905838 |            | TRUE  | TRUE  |
| 9  | 127704888 - 127905838 |            | TRUE  | TRUE  |
| 12 | 5671817 - 6055398     |            | TRUE  | FALSE |
| 12 | 5671817 - 6055398     |            | TRUE  | FALSE |
| 12 | 5671817 - 6055398     |            | TRUE  | FALSE |
| 12 | 5671817 - 6055398     | T - 71.43% | TRUE  | FALSE |
| 12 | 5671817 - 6055398     | T - 57.14% | TRUE  | FALSE |
| 12 | 5671817 - 6055398     | T - 57.14% | TRUE  | FALSE |
| 12 | 5671817 - 6055398     | T - 57.14% | TRUE  | TRUE  |
| 12 | 5671817 - 6055398     |            | TRUE  | TRUE  |
| 12 | 5671817 - 6055398     | F - 14.29% | TRUE  | TRUE  |
| 12 | 5671817 - 6055398     | F - 28.57% | FALSE | TRUE  |
| 12 | 5671817 - 6055398     | T - 57.14% | TRUE  | TRUE  |
| 12 | 5671817 - 6055398     | T - 71.43% | TRUE  | TRUE  |
| 12 | 5671817 - 6055398     | T - 71.43% | TRUE  | TRUE  |
| 12 | 5671817 - 6055398     |            | FALSE | TRUE  |
| 12 | 5671817 - 6055398     | T - 57.14% | TRUE  | TRUE  |
| 12 | 5671817 - 6055398     | T - 71.43% | TRUE  | TRUE  |
| 12 | 5671817 - 6055398     |            | TRUE  | TRUE  |
| 22 | 39966758 - 40085742   |            | TRUE  | TRUE  |
| 22 | 39966758 - 40085742   |            | TRUE  | FALSE |
| 22 | 39966758 - 40085742   |            | TRUE  | FALSE |
| 22 | 39966758 - 40085742   |            | TRUE  | FALSE |
| 22 | 39966758 - 40085742   |            | TRUE  | FALSE |
| 22 | 39966758 - 40085742   |            | TRUE  | FALSE |
| 22 | 39966758 - 40085742   | T - 90.91% | TRUE  | TRUE  |
| 22 | 39966758 - 40085742   |            | TRUE  | TRUE  |
| 22 | 39966758 - 40085742   |            | TRUE  | TRUE  |
| 22 | 39966758 - 40085742   |            | TRUE  | TRUE  |
| 22 | 39966758 - 40085742   | T - 90.91% | TRUE  | TRUE  |
| 22 | 39966758 - 40085742   |            | TRUE  | TRUE  |
| 14 | 50159823 - 50219870   | T - 60.00% | TRUE  | FALSE |
| 14 | 50159823 - 50219870   |            | TRUE  | TRUE  |
| 2  | 238536219 - 238690290 |            | TRUE  | FALSE |
| 2  | 238536219 - 238690290 |            | TRUE  | TRUE  |
| 2  | 238536219 - 238690290 |            | TRUE  | FALSE |
| 2  | 238536219 - 238690290 |            | TRUE  | TRUE  |
| 2  | 238536219 - 238690290 |            | TRUE  | TRUE  |
| 2  | 238536219 - 238690290 |            | TRUE  | FALSE |
| 2  | 238536219 - 238690290 | F - 43.48% | TRUE  | TRUE  |
| 2  | 238536219 - 238690290 |            | TRUE  | TRUE  |
| 2  | 238536219 - 238690290 |            | TRUE  | TRUE  |
| 2  | 238536219 - 238690290 | F - 4.35%  | FALSE | TRUE  |
| 2  | 238536219 - 238690290 | F - 8.70%  | TRUE  | TRUE  |
| 2  | 238536219 - 238690290 |            | FALSE | TRUE  |
| 5  | 175487692 - 175559261 |            | TRUE  | FALSE |
| 5  | 175487692 - 175559261 |            | TRUE  | FALSE |
| 5  | 175487692 - 175559261 |            | TRUE  | TRUE  |
| 5  | 175487692 - 175559261 |            | TRUE  | TRUE  |
| 5  | 175487692 - 175559261 | F - 32.14% | TRUE  | TRUE  |
| 5  | 175487692 - 175559261 | F - 7.14%  | FALSE | TRUE  |
| 8  | 66626569 - 66754557   |            | TRUE  | FALSE |
| 8  | 66626569 - 66754557   |            | TRUE  | TRUE  |

|    |                     |            |       |       |
|----|---------------------|------------|-------|-------|
| 8  | 66626569 - 66754557 |            | TRUE  | TRUE  |
| 8  | 66626569 - 66754557 | F - 8.33%  | TRUE  | TRUE  |
| 8  | 66626569 - 66754557 |            | TRUE  | TRUE  |
| 8  | 66626569 - 66754557 |            | FALSE | TRUE  |
| 8  | 66626569 - 66754557 | T - 75.00% | FALSE | TRUE  |
| 8  | 66626569 - 66754557 | F - 8.33%  | TRUE  | TRUE  |
| 12 | 96051583 - 96184930 | T - 50.00% | TRUE  | TRUE  |
| 12 | 96051583 - 96184930 | F - 12.50% | TRUE  | TRUE  |
| 12 | 96051583 - 96184930 |            | TRUE  | TRUE  |
| 12 | 96051583 - 96184930 |            | TRUE  | TRUE  |
| 12 | 96051583 - 96184930 |            | FALSE | TRUE  |
| 12 | 96051583 - 96184930 |            | TRUE  | TRUE  |
| 12 | 96051583 - 96184930 | F - 37.50% | TRUE  | TRUE  |
| 12 | 96051583 - 96184930 |            | FALSE | TRUE  |
| 12 | 96051583 - 96184930 |            | TRUE  | TRUE  |
| 1  | 66999066 - 67213982 |            | TRUE  | TRUE  |
| 1  | 66999066 - 67213982 | F - 12.00% | TRUE  | TRUE  |
| 1  | 66999066 - 67213982 | F - 12.00% | TRUE  | TRUE  |
| 1  | 66999066 - 67213982 |            | TRUE  | TRUE  |
| 1  | 66999066 - 67213982 |            | TRUE  | TRUE  |
| 1  | 66999066 - 67213982 | F - 48.00% | TRUE  | TRUE  |
| 1  | 66999066 - 67213982 | F - 48.00% | TRUE  | TRUE  |
| 1  | 66999066 - 67213982 |            | TRUE  | TRUE  |
| 1  | 66999066 - 67213982 |            | TRUE  | TRUE  |
| 1  | 66999066 - 67213982 | F - 28.00% | TRUE  | TRUE  |
| 1  | 66999066 - 67213982 | F - 16.00% | TRUE  | TRUE  |
| 1  | 66999066 - 67213982 | T - 60.00% | TRUE  | TRUE  |
| 1  | 66999066 - 67213982 | F - 4.00%  | TRUE  | TRUE  |
| 1  | 66999066 - 67213982 |            | TRUE  | TRUE  |
| 1  | 66999066 - 67213982 | F - 4.00%  | FALSE | TRUE  |
| 1  | 66999066 - 67213982 | F - 4.00%  | FALSE | TRUE  |
| 1  | 66999066 - 67213982 |            | FALSE | TRUE  |
| 1  | 66999066 - 67213982 |            | FALSE | TRUE  |
| 1  | 66999066 - 67213982 |            | FALSE | TRUE  |
| 1  | 66999066 - 67213982 | F - 12.00% | FALSE | TRUE  |
| 1  | 66999066 - 67213982 | F - 4.00%  | TRUE  | TRUE  |
| 1  | 66999066 - 67213982 |            | FALSE | TRUE  |
| 1  | 66999066 - 67213982 | T - 60.00% | TRUE  | TRUE  |
| 1  | 66999066 - 67213982 | F - 8.00%  | TRUE  | TRUE  |
| 1  | 66999066 - 67213982 | T - 60.00% | TRUE  | TRUE  |
| 1  | 66999066 - 67213982 | T - 52.00% | TRUE  | TRUE  |
| 1  | 66999066 - 67213982 |            | FALSE | TRUE  |
| 1  | 66999066 - 67213982 |            | TRUE  | TRUE  |
| 1  | 66999066 - 67213982 | F - 4.00%  | TRUE  | TRUE  |
| 1  | 66999066 - 67213982 |            | TRUE  | TRUE  |
| 1  | 66999066 - 67213982 |            | TRUE  | TRUE  |
| 1  | 66999066 - 67213982 |            | TRUE  | TRUE  |
| 1  | 66999066 - 67213982 |            | TRUE  | TRUE  |
| 1  | 66999066 - 67213982 |            | FALSE | TRUE  |
| 1  | 66999066 - 67213982 |            | TRUE  | TRUE  |
| 7  | 30791751 - 30965131 |            | TRUE  | TRUE  |
| 7  | 30791751 - 30965131 | T - 59.09% | TRUE  | TRUE  |
| 7  | 30791751 - 30965131 | T - 50.00% | TRUE  | FALSE |
| 7  | 30791751 - 30965131 | F - 27.27% | TRUE  | TRUE  |
| 7  | 30791751 - 30965131 |            | TRUE  | FALSE |
| 7  | 30791751 - 30965131 |            | TRUE  | TRUE  |
| 7  | 30791751 - 30965131 | T - 59.09% | TRUE  | TRUE  |
| 7  | 30791751 - 30965131 | F - 22.73% | TRUE  | TRUE  |
| 7  | 30791751 - 30965131 | F - 36.36% | TRUE  | TRUE  |

|    |                     |             |       |      |
|----|---------------------|-------------|-------|------|
| 7  | 30791751 - 30965131 | F - 36.36%  | TRUE  | TRUE |
| 7  | 30791751 - 30965131 | F - 36.36%  | TRUE  | TRUE |
| 7  | 30791751 - 30965131 | F - 18.18%  | TRUE  | TRUE |
| 7  | 30791751 - 30965131 |             | TRUE  | TRUE |
| 7  | 30791751 - 30965131 | F - 4.55%   | TRUE  | TRUE |
| 7  | 30791751 - 30965131 | F - 9.09%   | TRUE  | TRUE |
| 7  | 30791751 - 30965131 |             | TRUE  | TRUE |
| 7  | 30791751 - 30965131 |             | TRUE  | TRUE |
| 7  | 30791751 - 30965131 | F - 18.18%  | TRUE  | TRUE |
| 7  | 30791751 - 30965131 |             | TRUE  | TRUE |
| 7  | 30791751 - 30965131 |             | FALSE | TRUE |
| 7  | 30791751 - 30965131 |             | TRUE  | TRUE |
| 7  | 30791751 - 30965131 | F - 22.73%  | FALSE | TRUE |
| 7  | 30791751 - 30965131 | F - 18.18%  | TRUE  | TRUE |
| 7  | 30791751 - 30965131 | F - 36.36%  | TRUE  | TRUE |
| 7  | 30791751 - 30965131 | F - 4.55%   | TRUE  | TRUE |
| 7  | 30791751 - 30965131 |             | TRUE  | TRUE |
| 7  | 30791751 - 30965131 |             | TRUE  | TRUE |
| 7  | 30791751 - 30965131 |             | TRUE  | TRUE |
| 7  | 30791751 - 30965131 | F - 18.18%  | TRUE  | TRUE |
| 7  | 30791751 - 30965131 |             | TRUE  | TRUE |
| 7  | 30791751 - 30965131 | F - 4.55%   | TRUE  | TRUE |
| 7  | 30791751 - 30965131 | F - 18.18%  | TRUE  | TRUE |
| 7  | 30791751 - 30965131 | F - 27.27%  | TRUE  | TRUE |
| 7  | 30791751 - 30965131 |             | TRUE  | TRUE |
| 7  | 30791751 - 30965131 | F - 27.27%  | TRUE  | TRUE |
| 7  | 30791751 - 30965131 |             | TRUE  | TRUE |
| 7  | 30791751 - 30965131 |             | TRUE  | TRUE |
| 7  | 30791751 - 30965131 | F - 22.73%  | TRUE  | TRUE |
| 7  | 30791751 - 30965131 |             | TRUE  | TRUE |
| 7  | 30791751 - 30965131 | F - 9.09%   | TRUE  | TRUE |
| 7  | 30791751 - 30965131 |             | FALSE | TRUE |
| 7  | 30791751 - 30965131 | F - 27.27%  | TRUE  | TRUE |
| 7  | 30791751 - 30965131 |             | TRUE  | TRUE |
| 7  | 30791751 - 30965131 | F - 18.18%  | TRUE  | TRUE |
| 7  | 30791751 - 30965131 | F - 18.18%  | TRUE  | TRUE |
| 7  | 30791751 - 30965131 |             | TRUE  | TRUE |
| 7  | 30791751 - 30965131 | F - 18.18%  | TRUE  | TRUE |
| 7  | 30791751 - 30965131 | F - 9.09%   | FALSE | TRUE |
| 7  | 30791751 - 30965131 |             | FALSE | TRUE |
| 7  | 30791751 - 30965131 |             | FALSE | TRUE |
| Y  | 22917954 - 22942918 | T - 100.00% | TRUE  | TRUE |
| Y  | 22917954 - 22942918 |             | TRUE  | TRUE |
| Y  | 22917954 - 22942918 | T - 100.00% | TRUE  | TRUE |
| 11 | 35160417 - 35253949 |             | TRUE  | TRUE |
| 11 | 35160417 - 35253949 |             | TRUE  | TRUE |
| 11 | 35160417 - 35253949 |             | TRUE  | TRUE |
| 11 | 35160417 - 35253949 |             | TRUE  | TRUE |
| 11 | 35160417 - 35253949 |             | TRUE  | TRUE |
| 11 | 35160417 - 35253949 |             | TRUE  | TRUE |
| 11 | 35160417 - 35253949 |             | TRUE  | TRUE |
| 11 | 35160417 - 35253949 | F - 31.03%  | TRUE  | TRUE |
| 11 | 35160417 - 35253949 |             | TRUE  | TRUE |
| 11 | 35160417 - 35253949 | T - 51.72%  | TRUE  | TRUE |
| 11 | 35160417 - 35253949 |             | FALSE | TRUE |
| 11 | 35160417 - 35253949 |             | FALSE | TRUE |
| 11 | 35160417 - 35253949 | T - 58.62%  | TRUE  | TRUE |
| 11 | 35160417 - 35253949 |             | FALSE | TRUE |

|    |                       |             |       |       |
|----|-----------------------|-------------|-------|-------|
| 8  | 59717977 - 60031767   | T - 66.67%  | TRUE  | TRUE  |
| 8  | 59717977 - 60031767   |             | TRUE  | TRUE  |
| 8  | 59717977 - 60031767   | T - 100.00% | TRUE  | TRUE  |
| 8  | 59717977 - 60031767   |             | FALSE | TRUE  |
| 5  | 177433406 - 177482560 |             | TRUE  | FALSE |
| 5  | 177433406 - 177482560 |             | TRUE  | FALSE |
| 5  | 177433406 - 177482560 | F - 5.26%   | FALSE | TRUE  |
| 5  | 177433406 - 177482560 |             | TRUE  | TRUE  |
| 4  | 153701089 - 153839615 |             | TRUE  | FALSE |
| 4  | 153701089 - 153839615 |             | TRUE  | FALSE |
| 4  | 153701089 - 153839615 |             | TRUE  | TRUE  |
| 4  | 153701089 - 153839615 | F - 10.00%  | TRUE  | TRUE  |
| 4  | 153701089 - 153839615 |             | TRUE  | TRUE  |
| 4  | 153701089 - 153839615 | F - 10.00%  | TRUE  | TRUE  |
| 4  | 153701089 - 153839615 | F - 40.00%  | TRUE  | TRUE  |
| 17 | 1665253 - 1680859     |             | TRUE  | FALSE |
| 17 | 1665253 - 1680859     | T - 100.00% | TRUE  | TRUE  |
| 17 | 1665253 - 1680859     |             | TRUE  | TRUE  |
| 17 | 1665253 - 1680859     |             | TRUE  | FALSE |
| 17 | 1665253 - 1680859     | T - 100.00% | TRUE  | TRUE  |
| 17 | 1665253 - 1680859     |             | TRUE  | TRUE  |
| 17 | 1665253 - 1680859     | T - 100.00% | TRUE  | TRUE  |
| 17 | 1665253 - 1680859     | T - 50.00%  | TRUE  | TRUE  |
| 18 | 33877702 - 34360018   |             | TRUE  | TRUE  |
| 18 | 33877702 - 34360018   |             | TRUE  | TRUE  |
| 18 | 33877702 - 34360018   | T - 80.00%  | TRUE  | TRUE  |
| 18 | 33877702 - 34360018   | T - 70.00%  | TRUE  | TRUE  |
| 18 | 33877702 - 34360018   |             | TRUE  | TRUE  |
| 18 | 33877702 - 34360018   |             | TRUE  | TRUE  |
| 18 | 33877702 - 34360018   | T - 60.00%  | TRUE  | TRUE  |
| 18 | 33877702 - 34360018   | T - 80.00%  | TRUE  | TRUE  |
| 18 | 33877702 - 34360018   |             | TRUE  | FALSE |
| 18 | 33877702 - 34360018   | T - 60.00%  | TRUE  | TRUE  |
| 18 | 33877702 - 34360018   | T - 60.00%  | TRUE  | TRUE  |
| 18 | 33877702 - 34360018   | T - 70.00%  | TRUE  | TRUE  |
| 18 | 33877702 - 34360018   | T - 60.00%  | TRUE  | TRUE  |
| 18 | 33877702 - 34360018   | T - 60.00%  | TRUE  | TRUE  |
| 18 | 33877702 - 34360018   |             | TRUE  | TRUE  |
| 18 | 33877702 - 34360018   | T - 60.00%  | TRUE  | TRUE  |
| 18 | 33877702 - 34360018   | T - 80.00%  | TRUE  | TRUE  |
| 18 | 33877702 - 34360018   |             | TRUE  | TRUE  |
| 18 | 33877702 - 34360018   |             | TRUE  | TRUE  |
| 18 | 33877702 - 34360018   | F - 10.00%  | TRUE  | TRUE  |
| 18 | 33877702 - 34360018   | F - 10.00%  | TRUE  | TRUE  |
| 18 | 33877702 - 34360018   | T - 70.00%  | TRUE  | TRUE  |
| 18 | 33877702 - 34360018   | F - 10.00%  | TRUE  | TRUE  |
| 18 | 33877702 - 34360018   | T - 70.00%  | TRUE  | TRUE  |
| 18 | 33877702 - 34360018   | T - 80.00%  | TRUE  | TRUE  |
| 18 | 33877702 - 34360018   |             | TRUE  | TRUE  |
| 18 | 33877702 - 34360018   |             | TRUE  | TRUE  |
| 18 | 33877702 - 34360018   | F - 10.00%  | TRUE  | TRUE  |
| 18 | 33877702 - 34360018   |             | TRUE  | TRUE  |
| 18 | 33877702 - 34360018   | F - 10.00%  | FALSE | TRUE  |
| 18 | 33877702 - 34360018   |             | TRUE  | TRUE  |
| 18 | 33877702 - 34360018   |             | FALSE | TRUE  |
| 18 | 33877702 - 34360018   |             | FALSE | TRUE  |
| 12 | 23682440 - 24715524   |             | TRUE  | FALSE |
| 12 | 23682440 - 24715524   |             | TRUE  | TRUE  |
| 12 | 23682440 - 24715524   |             | TRUE  | TRUE  |

|    |                       |             |       |       |
|----|-----------------------|-------------|-------|-------|
| 12 | 23682440 - 24715524   |             | TRUE  | TRUE  |
| 12 | 23682440 - 24715524   |             | TRUE  | TRUE  |
| 12 | 23682440 - 24715524   |             | TRUE  | TRUE  |
| 12 | 23682440 - 24715524   | F - 7.69%   | TRUE  | FALSE |
| 12 | 23682440 - 24715524   |             | TRUE  | FALSE |
| 12 | 23682440 - 24715524   | F - 15.38%  | TRUE  | TRUE  |
| 12 | 23682440 - 24715524   | F - 23.08%  | TRUE  | TRUE  |
| 12 | 23682440 - 24715524   | F - 23.08%  | TRUE  | TRUE  |
| 1  | 183441506 - 183567381 |             | TRUE  | FALSE |
| 1  | 183441506 - 183567381 |             | TRUE  | TRUE  |
| 1  | 183441506 - 183567381 |             | TRUE  | TRUE  |
| 1  | 183441506 - 183567381 | T - 60.87%  | TRUE  | TRUE  |
| 13 | 36742345 - 36788752   |             | TRUE  | FALSE |
| 13 | 36742345 - 36788752   | T - 100.00% | TRUE  | FALSE |
| 5  | 96096514 - 96149848   |             | TRUE  | TRUE  |
| 5  | 96096514 - 96149848   | F - 13.33%  | TRUE  | TRUE  |
| 5  | 96096514 - 96149848   | F - 6.67%   | FALSE | TRUE  |
| 5  | 96096514 - 96149848   | F - 6.67%   | FALSE | TRUE  |
| 5  | 96096514 - 96149848   | F - 20.00%  | TRUE  | TRUE  |
| 5  | 96096514 - 96149848   | F - 6.67%   | TRUE  | TRUE  |
| 5  | 96096514 - 96149848   | F - 6.67%   | TRUE  | TRUE  |
| 5  | 96096514 - 96149848   | F - 6.67%   | FALSE | TRUE  |
| 5  | 96096514 - 96149848   | F - 20.00%  | FALSE | TRUE  |
| 5  | 96096514 - 96149848   | T - 53.33%  | TRUE  | TRUE  |
| 5  | 96096514 - 96149848   |             | TRUE  | TRUE  |
| 5  | 96096514 - 96149848   |             | FALSE | TRUE  |
| 5  | 96096514 - 96149848   |             | TRUE  | TRUE  |
| 5  | 96096514 - 96149848   |             | FALSE | TRUE  |
| 5  | 96096514 - 96149848   |             | TRUE  | TRUE  |
| 14 | 105190523 - 105213647 |             | TRUE  | TRUE  |
| 14 | 105190523 - 105213647 | F - 12.50%  | TRUE  | TRUE  |
| 14 | 105190523 - 105213647 | F - 37.50%  | FALSE | TRUE  |
| 14 | 105190523 - 105213647 | F - 25.00%  | TRUE  | TRUE  |
| 14 | 105190523 - 105213647 | F - 12.50%  | FALSE | TRUE  |
| 14 | 105190523 - 105213647 |             | TRUE  | TRUE  |
| 14 | 105190523 - 105213647 | F - 12.50%  | TRUE  | TRUE  |
| 14 | 105190523 - 105213647 | F - 25.00%  | TRUE  | TRUE  |
| 14 | 105190523 - 105213647 | F - 12.50%  | TRUE  | TRUE  |
| 14 | 105190523 - 105213647 | T - 62.50%  | TRUE  | TRUE  |
| 14 | 105190523 - 105213647 |             | FALSE | TRUE  |
| 14 | 105190523 - 105213647 | T - 75.00%  | TRUE  | TRUE  |
| 14 | 105190523 - 105213647 |             | FALSE | TRUE  |
| 14 | 105190523 - 105213647 |             | FALSE | TRUE  |
| 18 | 42747973 - 43263072   |             | TRUE  | FALSE |
| 18 | 42747973 - 43263072   |             | TRUE  | TRUE  |
| 18 | 42747973 - 43263072   | T - 83.33%  | TRUE  | TRUE  |
| 18 | 42747973 - 43263072   | T - 100.00% | TRUE  | TRUE  |
| 18 | 42747973 - 43263072   | T - 100.00% | TRUE  | TRUE  |
| 18 | 42747973 - 43263072   | F - 33.33%  | TRUE  | TRUE  |
| 18 | 42747973 - 43263072   |             | TRUE  | TRUE  |
| 18 | 42747973 - 43263072   |             | FALSE | TRUE  |
| 18 | 42747973 - 43263072   | T - 66.67%  | TRUE  | TRUE  |
| 18 | 42747973 - 43263072   | F - 33.33%  | TRUE  | TRUE  |
| 19 | 38924340 - 39078204   |             | TRUE  | FALSE |
| 19 | 38924340 - 39078204   |             | TRUE  | FALSE |
| 19 | 38924340 - 39078204   |             | TRUE  | FALSE |
| 19 | 38924340 - 39078204   | T - 66.67%  | TRUE  | TRUE  |
| 19 | 38924340 - 39078204   |             | TRUE  | TRUE  |



|    |                       |             |       |       |
|----|-----------------------|-------------|-------|-------|
| 20 | 26035250 - 26073683   |             | TRUE  | FALSE |
| 20 | 26035250 - 26073683   |             | TRUE  | TRUE  |
| 20 | 26035250 - 26073683   |             | TRUE  | FALSE |
| 20 | 26035250 - 26073683   |             | TRUE  | FALSE |
| 20 | 26035250 - 26073683   | F - 25.00%  | TRUE  | FALSE |
| 20 | 26035250 - 26073683   |             | FALSE | TRUE  |
| 20 | 26035250 - 26073683   |             | FALSE | TRUE  |
| 20 | 26035250 - 26073683   | T - 75.00%  | TRUE  | TRUE  |
| 20 | 26035250 - 26073683   | F - 12.50%  | TRUE  | TRUE  |
| 8  | 133879203 - 134147147 |             | TRUE  | TRUE  |
| 8  | 133879203 - 134147147 |             | TRUE  | FALSE |
| 8  | 133879203 - 134147147 |             | TRUE  | TRUE  |
| 8  | 133879203 - 134147147 |             | TRUE  | TRUE  |
| 8  | 133879203 - 134147147 |             | TRUE  | TRUE  |
| 8  | 133879203 - 134147147 |             | TRUE  | TRUE  |
| 8  | 133879203 - 134147147 |             | TRUE  | TRUE  |
| 8  | 133879203 - 134147147 |             | TRUE  | FALSE |
| 8  | 133879203 - 134147147 |             | TRUE  | TRUE  |
| 8  | 133879203 - 134147147 |             | TRUE  | FALSE |
| 8  | 133879203 - 134147147 | F - 23.33%  | TRUE  | TRUE  |
| 8  | 133879203 - 134147147 | F - 33.33%  | TRUE  | TRUE  |
| 8  | 133879203 - 134147147 |             | TRUE  | TRUE  |
| 8  | 133879203 - 134147147 |             | TRUE  | TRUE  |
| 8  | 133879203 - 134147147 |             | TRUE  | TRUE  |
| 8  | 133879203 - 134147147 | F - 30.00%  | TRUE  | TRUE  |
| 8  | 133879203 - 134147147 | F - 30.00%  | TRUE  | TRUE  |
| 19 | 10070237 - 10121147   |             | TRUE  | FALSE |
| 19 | 10070237 - 10121147   |             | TRUE  | TRUE  |
| 19 | 10070237 - 10121147   |             | TRUE  | TRUE  |
| 19 | 10070237 - 10121147   | T - 50.00%  | TRUE  | TRUE  |
| 19 | 10070237 - 10121147   | T - 50.00%  | TRUE  | TRUE  |
| 19 | 10070237 - 10121147   | T - 50.00%  | TRUE  | TRUE  |
| 19 | 10070237 - 10121147   | T - 50.00%  | FALSE | TRUE  |
| 19 | 10070237 - 10121147   | T - 50.00%  | TRUE  | TRUE  |
| 19 | 10070237 - 10121147   |             | FALSE | TRUE  |
| 19 | 10070237 - 10121147   |             | TRUE  | TRUE  |
| 19 | 10070237 - 10121147   |             | TRUE  | TRUE  |
| 19 | 10070237 - 10121147   | T - 100.00% | TRUE  | TRUE  |
| 19 | 10070237 - 10121147   |             | FALSE | TRUE  |
| 19 | 10070237 - 10121147   |             | TRUE  | TRUE  |
| 19 | 10070237 - 10121147   | T - 50.00%  | FALSE | TRUE  |
| 19 | 10070237 - 10121147   | T - 50.00%  | FALSE | TRUE  |
| 19 | 10070237 - 10121147   |             | FALSE | TRUE  |
| 19 | 10070237 - 10121147   |             | FALSE | TRUE  |
| 19 | 10070237 - 10121147   |             | FALSE | TRUE  |
| 19 | 10070237 - 10121147   | T - 50.00%  | TRUE  | TRUE  |
| 19 | 10070237 - 10121147   |             | TRUE  | TRUE  |
| 19 | 10070237 - 10121147   |             | FALSE | TRUE  |
| 19 | 10070237 - 10121147   |             | TRUE  | TRUE  |
| 17 | 79008947 - 79091232   |             | TRUE  | FALSE |
| 17 | 79008947 - 79091232   | F - 20.00%  | TRUE  | TRUE  |
| 17 | 79008947 - 79091232   | F - 40.00%  | TRUE  | TRUE  |
| 17 | 79008947 - 79091232   |             | TRUE  | TRUE  |
| 17 | 79008947 - 79091232   |             | TRUE  | TRUE  |
| 1  | 151170425 - 151222012 |             | TRUE  | TRUE  |
| 1  | 151170425 - 151222012 |             | TRUE  | TRUE  |
| 1  | 151170425 - 151222012 |             | TRUE  | TRUE  |
| 1  | 151170425 - 151222012 |             | TRUE  | FALSE |
| 1  | 151170425 - 151222012 |             | TRUE  | TRUE  |

|    |                       |            |       |       |
|----|-----------------------|------------|-------|-------|
| 1  | 151170425 - 151222012 | F - 4.17%  | TRUE  | TRUE  |
| 4  | 114821440 - 114900883 |            | TRUE  | FALSE |
| 4  | 114821440 - 114900883 | F - 30.00% | TRUE  | TRUE  |
| 4  | 114821440 - 114900883 |            | FALSE | TRUE  |
| 4  | 114821440 - 114900883 | T - 50.00% | TRUE  | TRUE  |
| 4  | 114821440 - 114900883 | F - 20.00% | FALSE | TRUE  |
| 4  | 114821440 - 114900883 |            | TRUE  | TRUE  |
| 1  | 155232659 - 155248282 | F - 7.14%  | TRUE  | TRUE  |
| 1  | 155232659 - 155248282 | F - 7.14%  | TRUE  | TRUE  |
| 1  | 155232659 - 155248282 | F - 7.14%  | TRUE  | TRUE  |
| 1  | 155232659 - 155248282 |            | TRUE  | TRUE  |
| 1  | 155232659 - 155248282 | F - 7.14%  | TRUE  | TRUE  |
| 1  | 155232659 - 155248282 | F - 14.29% | TRUE  | TRUE  |
| 1  | 155232659 - 155248282 | F - 7.14%  | TRUE  | TRUE  |
| 1  | 155232659 - 155248282 |            | TRUE  | TRUE  |
| X  | 5758678 - 6146904     |            | TRUE  | TRUE  |
| X  | 5758678 - 6146904     |            | TRUE  | TRUE  |
| X  | 5758678 - 6146904     | F - 13.33% | TRUE  | TRUE  |
| X  | 5758678 - 6146904     | F - 33.33% | TRUE  | TRUE  |
| X  | 5758678 - 6146904     | F - 13.33% | TRUE  | TRUE  |
| X  | 5758678 - 6146904     | F - 6.67%  | FALSE | TRUE  |
| X  | 5758678 - 6146904     |            | FALSE | TRUE  |
| X  | 5758678 - 6146904     |            | TRUE  | TRUE  |
| X  | 5758678 - 6146904     |            | TRUE  | TRUE  |
| X  | 5758678 - 6146904     | F - 13.33% | FALSE | TRUE  |
| X  | 5758678 - 6146904     | T - 73.33% | FALSE | TRUE  |
| X  | 5758678 - 6146904     | T - 93.33% | TRUE  | TRUE  |
| 8  | 103264501 - 103425069 |            | TRUE  | FALSE |
| 8  | 103264501 - 103425069 |            | TRUE  | TRUE  |
| 8  | 103264501 - 103425069 | F - 5.56%  | TRUE  | TRUE  |
| 8  | 103264501 - 103425069 | F - 5.56%  | TRUE  | TRUE  |
| 8  | 103264501 - 103425069 | F - 11.11% | TRUE  | TRUE  |
| 8  | 103264501 - 103425069 |            | TRUE  | TRUE  |
| 8  | 103264501 - 103425069 | F - 5.56%  | TRUE  | TRUE  |
| 8  | 103264501 - 103425069 |            | TRUE  | TRUE  |
| 8  | 103264501 - 103425069 |            | TRUE  | TRUE  |
| 8  | 103264501 - 103425069 |            | TRUE  | TRUE  |
| 8  | 103264501 - 103425069 |            | TRUE  | TRUE  |
| 8  | 103264501 - 103425069 |            | FALSE | TRUE  |
| 20 | 45523263 - 45817492   |            | TRUE  | TRUE  |
| 20 | 45523263 - 45817492   |            | TRUE  | FALSE |
| 20 | 45523263 - 45817492   | T - 69.23% | TRUE  | TRUE  |
| 20 | 45523263 - 45817492   |            | TRUE  | TRUE  |
| 20 | 45523263 - 45817492   |            | TRUE  | TRUE  |
| 20 | 45523263 - 45817492   |            | TRUE  | TRUE  |
| 20 | 45523263 - 45817492   |            | TRUE  | TRUE  |
| 20 | 45523263 - 45817492   |            | TRUE  | TRUE  |
| 20 | 45523263 - 45817492   |            | TRUE  | TRUE  |
| 20 | 45523263 - 45817492   | T - 61.54% | TRUE  | TRUE  |
| 20 | 45523263 - 45817492   | F - 38.46% | TRUE  | FALSE |
| 20 | 45523263 - 45817492   |            | TRUE  | FALSE |
| 20 | 45523263 - 45817492   | T - 53.85% | TRUE  | TRUE  |
| 20 | 45523263 - 45817492   | T - 69.23% | TRUE  | TRUE  |
| 20 | 45523263 - 45817492   | F - 46.15% | TRUE  | TRUE  |
| 20 | 45523263 - 45817492   | F - 46.15% | TRUE  | TRUE  |
| 20 | 45523263 - 45817492   |            | TRUE  | TRUE  |
| 20 | 45523263 - 45817492   |            | TRUE  | TRUE  |
| 20 | 45523263 - 45817492   |            | TRUE  | TRUE  |
| 20 | 45523263 - 45817492   | T - 53.85% | TRUE  | TRUE  |

|    |                       |            |       |       |
|----|-----------------------|------------|-------|-------|
| 20 | 45523263 - 45817492   | F - 7.69%  | TRUE  | TRUE  |
| 20 | 45523263 - 45817492   | F - 30.77% | TRUE  | TRUE  |
| 20 | 45523263 - 45817492   | F - 15.38% | FALSE | TRUE  |
| 20 | 45523263 - 45817492   | F - 15.38% | TRUE  | TRUE  |
| 20 | 45523263 - 45817492   |            | TRUE  | TRUE  |
| 4  | 55095264 - 55164414   |            | TRUE  | TRUE  |
| 4  | 55095264 - 55164414   |            | TRUE  | TRUE  |
| 4  | 55095264 - 55164414   |            | TRUE  | TRUE  |
| 4  | 55095264 - 55164414   |            | TRUE  | TRUE  |
| 4  | 55095264 - 55164414   | F - 12.50% | TRUE  | TRUE  |
| 4  | 55095264 - 55164414   |            | FALSE | TRUE  |
| 4  | 55095264 - 55164414   | F - 6.25%  | FALSE | TRUE  |
| 4  | 55095264 - 55164414   | F - 6.25%  | TRUE  | TRUE  |
| 4  | 55095264 - 55164414   | F - 6.25%  | TRUE  | TRUE  |
| 4  | 55095264 - 55164414   |            | TRUE  | TRUE  |
| 15 | 89787180 - 89860492   |            | TRUE  | TRUE  |
| 15 | 89787180 - 89860492   |            | TRUE  | TRUE  |
| 15 | 89787180 - 89860492   | F - 36.36% | TRUE  | TRUE  |
| 15 | 89787180 - 89860492   |            | FALSE | TRUE  |
| 1  | 173833038 - 173838020 |            | TRUE  | FALSE |
| 1  | 173833038 - 173838020 |            | TRUE  | FALSE |
| 1  | 173833038 - 173838020 | F - 9.09%  | TRUE  | TRUE  |
| 1  | 173833038 - 173838020 | F - 11.36% | TRUE  | TRUE  |
| 1  | 173833038 - 173838020 |            | FALSE | TRUE  |
| 1  | 173833038 - 173838020 |            | FALSE | TRUE  |
| 7  | 28338940 - 28865511   | F - 5.00%  | TRUE  | TRUE  |
| 7  | 28338940 - 28865511   | F - 15.00% | TRUE  | TRUE  |
| 7  | 28338940 - 28865511   | F - 5.00%  | FALSE | TRUE  |
| 7  | 28338940 - 28865511   | F - 10.00% | FALSE | TRUE  |
| 7  | 28338940 - 28865511   | F - 5.00%  | TRUE  | TRUE  |
| 7  | 28338940 - 28865511   | F - 30.00% | TRUE  | TRUE  |
| 7  | 28338940 - 28865511   | F - 10.00% | TRUE  | TRUE  |
| 7  | 28338940 - 28865511   |            | TRUE  | TRUE  |
| 7  | 28338940 - 28865511   | F - 5.00%  | TRUE  | TRUE  |
| 7  | 28338940 - 28865511   | T - 50.00% | TRUE  | TRUE  |
| 7  | 28338940 - 28865511   | T - 50.00% | TRUE  | TRUE  |
| 7  | 28338940 - 28865511   | F - 20.00% | TRUE  | TRUE  |
| 7  | 28338940 - 28865511   | F - 5.00%  | FALSE | TRUE  |
| 7  | 28338940 - 28865511   | F - 35.00% | TRUE  | TRUE  |
| 7  | 28338940 - 28865511   | F - 5.00%  | TRUE  | TRUE  |
| 7  | 28338940 - 28865511   | F - 40.00% | TRUE  | TRUE  |
| 7  | 28338940 - 28865511   | F - 35.00% | TRUE  | TRUE  |
| 7  | 28338940 - 28865511   |            | FALSE | TRUE  |
| 10 | 74766975 - 74856732   |            | TRUE  | TRUE  |
| 10 | 74766975 - 74856732   | F - 13.33% | TRUE  | TRUE  |
| 10 | 74766975 - 74856732   | F - 6.67%  | FALSE | TRUE  |
| 10 | 74766975 - 74856732   |            | TRUE  | TRUE  |
| 10 | 74766975 - 74856732   |            | FALSE | TRUE  |
| 10 | 74766975 - 74856732   |            | FALSE | TRUE  |
| 10 | 74766975 - 74856732   |            | FALSE | TRUE  |
| 10 | 74766975 - 74856732   | T - 73.33% | TRUE  | TRUE  |
| 10 | 74766975 - 74856732   |            | TRUE  | TRUE  |
| 10 | 74766975 - 74856732   | T - 80.00% | TRUE  | TRUE  |
| 20 | 48429250 - 48508779   |            | TRUE  | FALSE |
| 20 | 48429250 - 48508779   | F - 46.67% | TRUE  | TRUE  |
| 22 | 36536371 - 36562225   | F - 8.70%  | TRUE  | TRUE  |
| 22 | 36536371 - 36562225   |            | TRUE  | TRUE  |
| 22 | 36536371 - 36562225   | F - 13.04% | TRUE  | TRUE  |

|    |                       |            |       |       |
|----|-----------------------|------------|-------|-------|
| 22 | 36536371 - 36562225   | F - 30.43% | TRUE  | TRUE  |
| 22 | 36536371 - 36562225   |            | TRUE  | TRUE  |
| 22 | 36536371 - 36562225   | F - 39.13% | TRUE  | TRUE  |
| 22 | 36536371 - 36562225   | F - 4.35%  | TRUE  | TRUE  |
| 22 | 36536371 - 36562225   |            | TRUE  | TRUE  |
| 22 | 36536371 - 36562225   | T - 52.17% | TRUE  | TRUE  |
| 22 | 36536371 - 36562225   | F - 13.04% | TRUE  | TRUE  |
| 22 | 36536371 - 36562225   | T - 56.52% | TRUE  | TRUE  |
| 22 | 36536371 - 36562225   | F - 21.74% | FALSE | TRUE  |
| 22 | 36536371 - 36562225   | T - 73.91% | FALSE | TRUE  |
| 22 | 36536371 - 36562225   | T - 78.26% | TRUE  | TRUE  |
| X  | 48830134 - 48858675   |            | TRUE  | TRUE  |
| X  | 48830134 - 48858675   |            | TRUE  | TRUE  |
| X  | 48830134 - 48858675   | T - 71.43% | TRUE  | TRUE  |
| X  | 48830134 - 48858675   | T - 50.00% | FALSE | TRUE  |
| X  | 48830134 - 48858675   |            | FALSE | TRUE  |
| 13 | 24553839 - 24896673   | F - 15.63% | TRUE  | TRUE  |
| 13 | 24553839 - 24896673   | F - 6.25%  | TRUE  | TRUE  |
| 13 | 24553839 - 24896673   |            | TRUE  | TRUE  |
| 13 | 24553839 - 24896673   |            | TRUE  | TRUE  |
| 13 | 24553839 - 24896673   | F - 12.50% | TRUE  | TRUE  |
| 13 | 24553839 - 24896673   | F - 3.13%  | FALSE | TRUE  |
| 13 | 24553839 - 24896673   | F - 12.50% | TRUE  | TRUE  |
| 13 | 24553839 - 24896673   | F - 18.75% | TRUE  | TRUE  |
| 13 | 24553839 - 24896673   | F - 18.75% | TRUE  | TRUE  |
| 13 | 24553839 - 24896673   | F - 3.13%  | TRUE  | TRUE  |
| 13 | 24553839 - 24896673   | F - 18.75% | TRUE  | TRUE  |
| 13 | 24553839 - 24896673   | F - 9.38%  | TRUE  | TRUE  |
| 13 | 24553839 - 24896673   | F - 6.25%  | TRUE  | TRUE  |
| 13 | 24553839 - 24896673   | F - 18.75% | FALSE | TRUE  |
| 13 | 24553839 - 24896673   | F - 6.25%  | TRUE  | TRUE  |
| 13 | 24553839 - 24896673   | F - 12.50% | TRUE  | TRUE  |
| 13 | 24553839 - 24896673   | F - 3.13%  | FALSE | TRUE  |
| 13 | 24553839 - 24896673   |            | TRUE  | TRUE  |
| 13 | 24553839 - 24896673   |            | FALSE | TRUE  |
| 13 | 24553839 - 24896673   | F - 15.63% | TRUE  | TRUE  |
| 13 | 24553839 - 24896673   |            | FALSE | TRUE  |
| 13 | 24553839 - 24896673   | F - 3.13%  | TRUE  | TRUE  |
| 13 | 24553839 - 24896673   |            | FALSE | TRUE  |
| 13 | 24553839 - 24896673   | F - 12.50% | FALSE | TRUE  |
| 13 | 24553839 - 24896673   | F - 12.50% | TRUE  | TRUE  |
| 13 | 24553839 - 24896673   |            | TRUE  | TRUE  |
| 13 | 24553839 - 24896673   |            | FALSE | TRUE  |
| 13 | 24553839 - 24896673   |            | FALSE | TRUE  |
| 3  | 112929850 - 113006305 |            | TRUE  | FALSE |
| 3  | 112929850 - 113006305 |            | TRUE  | FALSE |
| 3  | 112929850 - 113006305 |            | TRUE  | TRUE  |
| 3  | 112929850 - 113006305 |            | TRUE  | TRUE  |
| 3  | 112929850 - 113006305 |            | FALSE | TRUE  |
| 3  | 112929850 - 113006305 | F - 4.00%  | TRUE  | TRUE  |
| 3  | 112929850 - 113006305 | F - 4.00%  | FALSE | TRUE  |
| 3  | 112929850 - 113006305 | F - 8.00%  | TRUE  | TRUE  |
| 3  | 112929850 - 113006305 |            | TRUE  | TRUE  |
| 3  | 112929850 - 113006305 |            | FALSE | TRUE  |
| 3  | 112929850 - 113006305 | F - 4.00%  | TRUE  | TRUE  |
| 3  | 112929850 - 113006305 |            | TRUE  | TRUE  |
| 3  | 112929850 - 113006305 | F - 4.00%  | TRUE  | TRUE  |
| 3  | 112929850 - 113006305 | F - 16.00% | TRUE  | TRUE  |

|   |                       |            |       |       |
|---|-----------------------|------------|-------|-------|
| 3 | 112929850 - 113006305 | F - 36.00% | FALSE | TRUE  |
| 3 | 112929850 - 113006305 | F - 4.00%  | TRUE  | TRUE  |
| 3 | 112929850 - 113006305 | F - 4.00%  | TRUE  | TRUE  |
| 3 | 112929850 - 113006305 | F - 20.00% | TRUE  | TRUE  |
| 3 | 112929850 - 113006305 | F - 20.00% | FALSE | TRUE  |
| 3 | 112929850 - 113006305 | F - 16.00% | TRUE  | TRUE  |
| 4 | 101944566 - 102268637 |            | TRUE  | TRUE  |
| 4 | 101944566 - 102268637 | F - 5.88%  | TRUE  | TRUE  |
| 4 | 101944566 - 102268637 |            | TRUE  | TRUE  |
| 4 | 101944566 - 102268637 |            | TRUE  | TRUE  |
| 8 | 19759228 - 19824770   | F - 9.09%  | TRUE  | FALSE |
| 8 | 19759228 - 19824770   |            | TRUE  | TRUE  |
| 8 | 19759228 - 19824770   |            | TRUE  | TRUE  |
| 8 | 19759228 - 19824770   |            | TRUE  | TRUE  |
| 8 | 19759228 - 19824770   | T - 90.91% | TRUE  | TRUE  |
| 8 | 19759228 - 19824770   | F - 9.09%  | FALSE | TRUE  |
| 8 | 19759228 - 19824770   | T - 54.55% | TRUE  | TRUE  |
| 8 | 19759228 - 19824770   | T - 81.82% | FALSE | TRUE  |
| 8 | 19759228 - 19824770   | F - 9.09%  | FALSE | TRUE  |
| 8 | 19759228 - 19824770   |            | FALSE | TRUE  |
| 8 | 19759228 - 19824770   | F - 45.45% | FALSE | TRUE  |
| 8 | 19759228 - 19824770   |            | FALSE | TRUE  |
| 8 | 19759228 - 19824770   | F - 45.45% | FALSE | TRUE  |
| 8 | 19759228 - 19824770   | T - 81.82% | TRUE  | TRUE  |
| 8 | 19759228 - 19824770   | F - 45.45% | FALSE | TRUE  |
| 8 | 19759228 - 19824770   | F - 45.45% | TRUE  | TRUE  |
| 8 | 19759228 - 19824770   | T - 54.55% | FALSE | TRUE  |
| 8 | 19759228 - 19824770   | F - 45.45% | TRUE  | TRUE  |
| 8 | 19759228 - 19824770   |            | TRUE  | TRUE  |
| 8 | 19759228 - 19824770   | F - 45.45% | FALSE | TRUE  |
| 8 | 19759228 - 19824770   | F - 45.45% | TRUE  | TRUE  |
| 8 | 19759228 - 19824770   |            | FALSE | TRUE  |
| 8 | 19759228 - 19824770   |            | FALSE | TRUE  |
| 2 | 178977151 - 179001531 | F - 14.29% | TRUE  | FALSE |
| 2 | 178977151 - 179001531 |            | TRUE  | TRUE  |
| 2 | 178977151 - 179001531 |            | TRUE  | TRUE  |
| 2 | 178977151 - 179001531 |            | TRUE  | TRUE  |
| 2 | 178977151 - 179001531 |            | TRUE  | TRUE  |
| 2 | 178977151 - 179001531 |            | TRUE  | FALSE |
| 2 | 178977151 - 179001531 |            | TRUE  | TRUE  |
| 2 | 178977151 - 179001531 |            | FALSE | TRUE  |
| 2 | 178977151 - 179001531 | F - 14.29% | FALSE | TRUE  |
| 5 | 10971952 - 11904155   |            | TRUE  | FALSE |
| 5 | 10971952 - 11904155   |            | TRUE  | TRUE  |
| 5 | 10971952 - 11904155   | F - 37.50% | TRUE  | FALSE |
| 5 | 10971952 - 11904155   | F - 8.33%  | TRUE  | TRUE  |
| 5 | 10971952 - 11904155   |            | TRUE  | TRUE  |
| 5 | 10971952 - 11904155   |            | TRUE  | TRUE  |
| 5 | 10971952 - 11904155   |            | TRUE  | TRUE  |
| 5 | 10971952 - 11904155   | F - 4.17%  | TRUE  | TRUE  |
| 5 | 10971952 - 11904155   | F - 29.17% | TRUE  | TRUE  |
| 5 | 10971952 - 11904155   |            | TRUE  | TRUE  |
| 5 | 10971952 - 11904155   | F - 12.50% | TRUE  | TRUE  |
| 5 | 10971952 - 11904155   | F - 33.33% | FALSE | TRUE  |
| 5 | 10971952 - 11904155   |            | TRUE  | TRUE  |
| 5 | 10971952 - 11904155   |            | TRUE  | TRUE  |
| 5 | 10971952 - 11904155   | F - 4.17%  | FALSE | TRUE  |
| 5 | 10971952 - 11904155   | T - 75.00% | TRUE  | TRUE  |

|   |                       |            |       |       |
|---|-----------------------|------------|-------|-------|
| 5 | 10971952 - 11904155   |            | TRUE  | TRUE  |
| 5 | 10971952 - 11904155   | F - 45.83% | TRUE  | TRUE  |
| 5 | 10971952 - 11904155   | F - 8.33%  | FALSE | TRUE  |
| 5 | 10971952 - 11904155   | T - 70.83% | TRUE  | TRUE  |
| 5 | 10971952 - 11904155   |            | TRUE  | TRUE  |
| 5 | 10971952 - 11904155   | F - 33.33% | TRUE  | TRUE  |
| 5 | 10971952 - 11904155   |            | TRUE  | TRUE  |
| 5 | 10971952 - 11904155   | T - 58.33% | TRUE  | TRUE  |
| 5 | 10971952 - 11904155   | F - 20.83% | FALSE | TRUE  |
| 5 | 10971952 - 11904155   | F - 4.17%  | TRUE  | TRUE  |
| 5 | 10971952 - 11904155   | F - 37.50% | TRUE  | TRUE  |
| 5 | 10971952 - 11904155   |            | FALSE | TRUE  |
| 5 | 10971952 - 11904155   |            | FALSE | TRUE  |
| 5 | 10971952 - 11904155   | T - 62.50% | FALSE | TRUE  |
| 5 | 133541305 - 133706738 |            | TRUE  | FALSE |
| 5 | 133541305 - 133706738 |            | TRUE  | TRUE  |
| 5 | 133541305 - 133706738 | F - 41.67% | TRUE  | FALSE |
| 5 | 133541305 - 133706738 |            | TRUE  | TRUE  |
| 5 | 133541305 - 133706738 |            | TRUE  | TRUE  |
| 5 | 133541305 - 133706738 |            | FALSE | TRUE  |
| 5 | 133541305 - 133706738 |            | TRUE  | TRUE  |
| 4 | 2794750 - 2842825     |            | TRUE  | TRUE  |
| 4 | 2794750 - 2842825     | F - 5.41%  | TRUE  | TRUE  |
| 4 | 2794750 - 2842825     | F - 5.41%  | TRUE  | TRUE  |
| 4 | 2794750 - 2842825     |            | TRUE  | TRUE  |
| 4 | 2794750 - 2842825     | F - 5.41%  | TRUE  | TRUE  |
| 4 | 2794750 - 2842825     |            | TRUE  | TRUE  |
| 4 | 2794750 - 2842825     | F - 10.81% | FALSE | TRUE  |
| 4 | 2794750 - 2842825     | F - 2.70%  | TRUE  | TRUE  |
| 4 | 2794750 - 2842825     | F - 5.41%  | TRUE  | TRUE  |
| 4 | 2794750 - 2842825     |            | TRUE  | TRUE  |
| 4 | 2794750 - 2842825     |            | TRUE  | TRUE  |
| 4 | 2794750 - 2842825     | F - 8.11%  | TRUE  | TRUE  |
| 4 | 2794750 - 2842825     |            | TRUE  | TRUE  |
| 4 | 2794750 - 2842825     |            | TRUE  | TRUE  |
| 4 | 2794750 - 2842825     | F - 2.70%  | TRUE  | TRUE  |
| 4 | 2794750 - 2842825     | F - 13.51% | TRUE  | TRUE  |
| 4 | 2794750 - 2842825     |            | FALSE | TRUE  |
| 4 | 2794750 - 2842825     | F - 16.22% | TRUE  | TRUE  |
| 4 | 2794750 - 2842825     | F - 2.70%  | TRUE  | TRUE  |
| 4 | 2794750 - 2842825     | F - 2.70%  | TRUE  | TRUE  |
| 4 | 2794750 - 2842825     | F - 18.92% | TRUE  | TRUE  |
| 4 | 2794750 - 2842825     | F - 2.70%  | FALSE | TRUE  |
| 4 | 2794750 - 2842825     | F - 18.92% | TRUE  | TRUE  |
| 4 | 2794750 - 2842825     |            | TRUE  | TRUE  |
| 4 | 2794750 - 2842825     | F - 2.70%  | TRUE  | TRUE  |
| 4 | 2794750 - 2842825     | F - 5.41%  | FALSE | TRUE  |
| 4 | 2794750 - 2842825     | F - 5.41%  | FALSE | TRUE  |
| 4 | 2794750 - 2842825     | F - 2.70%  | FALSE | TRUE  |
| 4 | 2794750 - 2842825     | F - 13.51% | TRUE  | TRUE  |
| 4 | 2794750 - 2842825     |            | TRUE  | TRUE  |
| 4 | 2794750 - 2842825     |            | TRUE  | TRUE  |
| 4 | 2794750 - 2842825     | F - 43.24% | TRUE  | TRUE  |
| 4 | 2794750 - 2842825     | F - 10.81% | FALSE | TRUE  |
| 4 | 2794750 - 2842825     | F - 10.81% | TRUE  | TRUE  |
| 4 | 2794750 - 2842825     | F - 2.70%  | FALSE | TRUE  |
| 4 | 2794750 - 2842825     | F - 40.54% | TRUE  | TRUE  |
| 4 | 2794750 - 2842825     |            | TRUE  | TRUE  |

|    |                       |            |       |       |
|----|-----------------------|------------|-------|-------|
| 4  | 2794750 - 2842825     | F - 43.24% | TRUE  | TRUE  |
| 4  | 2794750 - 2842825     | F - 40.54% | TRUE  | TRUE  |
| 4  | 2794750 - 2842825     |            | FALSE | TRUE  |
| 4  | 2794750 - 2842825     |            | FALSE | TRUE  |
| 10 | 120967101 - 121215131 |            | TRUE  | TRUE  |
| 10 | 120967101 - 121215131 | F - 10.00% | TRUE  | TRUE  |
| 10 | 120967101 - 121215131 | F - 20.00% | TRUE  | TRUE  |
| 10 | 120967101 - 121215131 |            | TRUE  | TRUE  |
| 10 | 120967101 - 121215131 | F - 30.00% | FALSE | TRUE  |
| 10 | 120967101 - 121215131 |            | TRUE  | TRUE  |
| 10 | 120967101 - 121215131 |            | TRUE  | TRUE  |
| 10 | 120967101 - 121215131 | F - 10.00% | TRUE  | TRUE  |
| 10 | 120967101 - 121215131 |            | FALSE | TRUE  |
| 10 | 120967101 - 121215131 | T - 60.00% | TRUE  | TRUE  |
| 10 | 120967101 - 121215131 |            | TRUE  | TRUE  |
| 10 | 120967101 - 121215131 | F - 10.00% | FALSE | TRUE  |
| 10 | 120967101 - 121215131 | F - 40.00% | TRUE  | TRUE  |
| 10 | 120967101 - 121215131 |            | TRUE  | TRUE  |
| 10 | 120967101 - 121215131 | T - 70.00% | FALSE | TRUE  |
| 10 | 120967101 - 121215131 | T - 70.00% | TRUE  | TRUE  |
| 2  | 228189867 - 228222550 |            | TRUE  | TRUE  |
| 2  | 228189867 - 228222550 | T - 64.52% | TRUE  | TRUE  |
| 2  | 228189867 - 228222550 | F - 3.23%  | TRUE  | TRUE  |
| 4  | 15606007 - 15683302   | F - 9.52%  | TRUE  | TRUE  |
| 4  | 15606007 - 15683302   |            | TRUE  | FALSE |
| 4  | 15606007 - 15683302   |            | TRUE  | TRUE  |
| 4  | 15606007 - 15683302   |            | TRUE  | TRUE  |
| 4  | 15606007 - 15683302   |            | TRUE  | FALSE |
| 4  | 15606007 - 15683302   |            | TRUE  | TRUE  |
| 8  | 38243821 - 38267045   |            | TRUE  | FALSE |
| 8  | 38243821 - 38267045   | F - 5.56%  | FALSE | TRUE  |
| 8  | 38243821 - 38267045   | F - 5.56%  | FALSE | TRUE  |
| 8  | 38243821 - 38267045   | F - 11.11% | TRUE  | TRUE  |
| 8  | 38243821 - 38267045   | F - 5.56%  | FALSE | TRUE  |
| 8  | 38243821 - 38267045   | T - 55.56% | TRUE  | TRUE  |
| 8  | 38243821 - 38267045   | T - 77.78% | TRUE  | TRUE  |
| 8  | 38243821 - 38267045   | T - 72.22% | TRUE  | TRUE  |
| 8  | 38243821 - 38267045   | F - 33.33% | TRUE  | TRUE  |
| 8  | 38243821 - 38267045   | F - 16.67% | FALSE | TRUE  |
| 8  | 38243821 - 38267045   |            | FALSE | TRUE  |
| 8  | 38243821 - 38267045   | F - 16.67% | FALSE | TRUE  |
| 8  | 38243821 - 38267045   |            | TRUE  | TRUE  |
| 8  | 38243821 - 38267045   | T - 77.78% | TRUE  | TRUE  |
| 8  | 38243821 - 38267045   | T - 72.22% | TRUE  | TRUE  |
| 8  | 38243821 - 38267045   | T - 66.67% | TRUE  | TRUE  |
| 8  | 38243821 - 38267045   |            | FALSE | TRUE  |
| 18 | 8706513 - 8832776     |            | TRUE  | FALSE |
| 18 | 8706513 - 8832776     | F - 5.00%  | TRUE  | TRUE  |
| 18 | 8706513 - 8832776     | F - 20.00% | FALSE | TRUE  |
| 18 | 8706513 - 8832776     | F - 20.00% | TRUE  | TRUE  |
| 1  | 150480487 - 150486265 | F - 6.67%  | TRUE  | TRUE  |
| 1  | 150480487 - 150486265 | F - 46.67% | TRUE  | TRUE  |
| 1  | 150480487 - 150486265 | F - 33.33% | TRUE  | FALSE |
| 1  | 150480487 - 150486265 | F - 13.33% | TRUE  | TRUE  |
| 1  | 150480487 - 150486265 |            | FALSE | TRUE  |
| 1  | 150480487 - 150486265 | F - 46.67% | TRUE  | TRUE  |
| 1  | 150480487 - 150486265 |            | TRUE  | TRUE  |
| 1  | 150480487 - 150486265 | F - 13.33% | TRUE  | TRUE  |

|    |                       |            |       |       |
|----|-----------------------|------------|-------|-------|
| 1  | 150480487 - 150486265 |            | FALSE | TRUE  |
| 1  | 150480487 - 150486265 | F - 26.67% | TRUE  | TRUE  |
| 17 | 75277492 - 75496678   |            | TRUE  | TRUE  |
| 17 | 75277492 - 75496678   |            | TRUE  | TRUE  |
| 17 | 75277492 - 75496678   | F - 4.17%  | TRUE  | TRUE  |
| 17 | 75277492 - 75496678   | F - 4.17%  | TRUE  | TRUE  |
| 17 | 75277492 - 75496678   | F - 20.83% | TRUE  | TRUE  |
| 17 | 75277492 - 75496678   | F - 16.67% | FALSE | TRUE  |
| 17 | 75277492 - 75496678   | F - 8.33%  | TRUE  | TRUE  |
| 17 | 75277492 - 75496678   | F - 8.33%  | TRUE  | TRUE  |
| 17 | 75277492 - 75496678   | F - 4.17%  | TRUE  | TRUE  |
| 17 | 75277492 - 75496678   | F - 8.33%  | FALSE | TRUE  |
| 17 | 75277492 - 75496678   | F - 8.33%  | FALSE | TRUE  |
| 17 | 75277492 - 75496678   |            | FALSE | TRUE  |
| 17 | 75277492 - 75496678   | F - 8.33%  | FALSE | TRUE  |
| 17 | 75277492 - 75496678   | F - 8.33%  | TRUE  | TRUE  |
| 17 | 75277492 - 75496678   |            | TRUE  | TRUE  |
| 17 | 75277492 - 75496678   | F - 12.50% | TRUE  | TRUE  |
| 17 | 75277492 - 75496678   |            | TRUE  | TRUE  |
| 2  | 240831867 - 240964819 |            | TRUE  | TRUE  |
| 2  | 240831867 - 240964819 | F - 25.00% | FALSE | TRUE  |
| 2  | 240831867 - 240964819 |            | TRUE  | FALSE |
| 2  | 240831867 - 240964819 |            | TRUE  | TRUE  |
| 11 | 10471868 - 10529126   |            | TRUE  | TRUE  |
| 11 | 10471868 - 10529126   |            | TRUE  | TRUE  |
| 11 | 10471868 - 10529126   | F - 28.57% | TRUE  | TRUE  |
| 11 | 10471868 - 10529126   | F - 14.29% | TRUE  | TRUE  |
| 11 | 10471868 - 10529126   |            | FALSE | TRUE  |
| 11 | 10471868 - 10529126   | F - 35.71% | TRUE  | TRUE  |
| 11 | 10471868 - 10529126   | T - 92.86% | TRUE  | TRUE  |
| 11 | 10471868 - 10529126   | F - 28.57% | TRUE  | TRUE  |
| 11 | 10471868 - 10529126   |            | TRUE  | TRUE  |
| 11 | 10471868 - 10529126   | F - 28.57% | TRUE  | TRUE  |
| 11 | 10471868 - 10529126   |            | TRUE  | TRUE  |
| 11 | 10471868 - 10529126   | F - 7.14%  | TRUE  | TRUE  |
| 11 | 10471868 - 10529126   |            | TRUE  | TRUE  |
| 11 | 10471868 - 10529126   | F - 7.14%  | FALSE | TRUE  |
| 11 | 10471868 - 10529126   | F - 7.14%  | TRUE  | TRUE  |
| 11 | 10471868 - 10529126   | T - 92.86% | TRUE  | TRUE  |
| 11 | 10471868 - 10529126   | T - 85.71% | TRUE  | TRUE  |
| 11 | 10471868 - 10529126   | T - 71.43% | TRUE  | TRUE  |
| 11 | 10471868 - 10529126   | T - 85.71% | TRUE  | TRUE  |
| 11 | 10471868 - 10529126   | T - 85.71% | FALSE | TRUE  |
| 11 | 10471868 - 10529126   |            | FALSE | TRUE  |
| 11 | 10471868 - 10529126   |            | FALSE | TRUE  |
| 11 | 10471868 - 10529126   |            | FALSE | TRUE  |
| X  | 74493894 - 74524732   | T - 63.64% | TRUE  | FALSE |
| X  | 74493894 - 74524732   |            | FALSE | TRUE  |
| X  | 45707327 - 45710920   |            | TRUE  | TRUE  |
| X  | 45707327 - 45710920   | F - 33.33% | TRUE  | TRUE  |
| 1  | 245318287 - 245866428 |            | TRUE  | FALSE |
| 1  | 245318287 - 245866428 |            | TRUE  | FALSE |
| 1  | 245318287 - 245866428 |            | TRUE  | FALSE |
| 1  | 245318287 - 245866428 |            | TRUE  | FALSE |
| 1  | 245318287 - 245866428 | F - 25.00% | TRUE  | TRUE  |
| 1  | 245318287 - 245866428 |            | TRUE  | TRUE  |
| 1  | 245318287 - 245866428 | T - 62.50% | TRUE  | TRUE  |
| 1  | 245318287 - 245866428 |            | FALSE | TRUE  |



|   |                       |            |       |       |
|---|-----------------------|------------|-------|-------|
| 1 | 245318287 - 245866428 | F - 12.50% | TRUE  | TRUE  |
| 1 | 245318287 - 245866428 | F - 12.50% | TRUE  | TRUE  |
| 1 | 245318287 - 245866428 | F - 12.50% | TRUE  | TRUE  |
| 1 | 245318287 - 245866428 |            | FALSE | TRUE  |
| 1 | 245318287 - 245866428 |            | TRUE  | TRUE  |
| 1 | 245318287 - 245866428 | F - 25.00% | TRUE  | TRUE  |
| 1 | 245318287 - 245866428 |            | TRUE  | TRUE  |
| 5 | 35617946 - 35814713   |            | TRUE  | TRUE  |
| 5 | 35617946 - 35814713   |            | TRUE  | TRUE  |
| 5 | 35617946 - 35814713   |            | TRUE  | TRUE  |
| 5 | 35617946 - 35814713   | F - 42.86% | TRUE  | TRUE  |
| 5 | 35617946 - 35814713   |            | TRUE  | TRUE  |
| 5 | 35617946 - 35814713   |            | FALSE | TRUE  |
| 5 | 35617946 - 35814713   | F - 23.81% | TRUE  | TRUE  |
| 5 | 35617946 - 35814713   |            | TRUE  | FALSE |
| 5 | 35617946 - 35814713   |            | FALSE | TRUE  |
| 5 | 35617946 - 35814713   | F - 19.05% | TRUE  | TRUE  |
| 5 | 35617946 - 35814713   |            | TRUE  | TRUE  |
| 5 | 35617946 - 35814713   | F - 19.05% | TRUE  | TRUE  |
| 5 | 35617946 - 35814713   |            | TRUE  | TRUE  |
| 5 | 35617946 - 35814713   | F - 33.33% | TRUE  | TRUE  |
| 5 | 35617946 - 35814713   | F - 19.05% | FALSE | TRUE  |
| 5 | 35617946 - 35814713   | F - 42.86% | TRUE  | TRUE  |
| 5 | 35617946 - 35814713   | F - 9.52%  | FALSE | TRUE  |
| 5 | 35617946 - 35814713   | F - 38.10% | TRUE  | TRUE  |
| 5 | 35617946 - 35814713   | F - 33.33% | TRUE  | TRUE  |
| 5 | 35617946 - 35814713   | F - 42.86% | TRUE  | TRUE  |
| 5 | 35617946 - 35814713   |            | TRUE  | TRUE  |
| 5 | 35617946 - 35814713   |            | TRUE  | TRUE  |
| 5 | 35617946 - 35814713   | F - 33.33% | TRUE  | TRUE  |
| 5 | 35617946 - 35814713   |            | TRUE  | TRUE  |
| 5 | 35617946 - 35814713   | F - 42.86% | TRUE  | TRUE  |
| 5 | 35617946 - 35814713   | F - 42.86% | TRUE  | TRUE  |
| 5 | 35617946 - 35814713   |            | TRUE  | TRUE  |
| 5 | 35617946 - 35814713   | F - 42.86% | TRUE  | TRUE  |
| 5 | 35617946 - 35814713   | F - 42.86% | FALSE | TRUE  |
| 5 | 35617946 - 35814713   | F - 23.81% | FALSE | TRUE  |
| 5 | 35617946 - 35814713   | F - 42.86% | TRUE  | TRUE  |
| 5 | 35617946 - 35814713   | F - 23.81% | TRUE  | TRUE  |
| 5 | 35617946 - 35814713   | F - 23.81% | TRUE  | TRUE  |
| 5 | 35617946 - 35814713   |            | TRUE  | TRUE  |
| 5 | 35617946 - 35814713   |            | FALSE | TRUE  |
| 5 | 35617946 - 35814713   | F - 23.81% | TRUE  | TRUE  |
| 5 | 35617946 - 35814713   |            | TRUE  | TRUE  |
| 5 | 35617946 - 35814713   | F - 4.76%  | TRUE  | TRUE  |
| 4 | 103715540 - 103790053 |            | TRUE  | TRUE  |
| 4 | 103715540 - 103790053 |            | TRUE  | TRUE  |
| 4 | 103715540 - 103790053 | F - 4.55%  | TRUE  | TRUE  |
| 7 | 102178365 - 102220258 |            | TRUE  | TRUE  |
| 7 | 102178365 - 102220258 |            | TRUE  | FALSE |
| 7 | 102178365 - 102220258 | F - 7.69%  | TRUE  | TRUE  |
| 7 | 102178365 - 102220258 |            | TRUE  | TRUE  |
| 7 | 102178365 - 102220258 | F - 23.33% | TRUE  | TRUE  |
| 2 | 44001178 - 44037149   |            | TRUE  | FALSE |
| 2 | 44001178 - 44037149   | F - 44.44% | TRUE  | TRUE  |
| 2 | 27667238 - 27712656   |            | TRUE  | TRUE  |
| 2 | 27667238 - 27712656   |            | TRUE  | TRUE  |
| 2 | 27667238 - 27712656   |            | TRUE  | TRUE  |

|    |                       |            |       |       |
|----|-----------------------|------------|-------|-------|
| 2  | 27667238 - 27712656   | F - 4.00%  | TRUE  | TRUE  |
| 2  | 27667238 - 27712656   |            | TRUE  | TRUE  |
| 2  | 27667238 - 27712656   | F - 4.00%  | FALSE | TRUE  |
| 2  | 27667238 - 27712656   |            | FALSE | TRUE  |
| 2  | 27667238 - 27712656   |            | TRUE  | TRUE  |
| 2  | 27667238 - 27712656   |            | FALSE | TRUE  |
| 2  | 27667238 - 27712656   |            | FALSE | TRUE  |
| 2  | 27667238 - 27712656   |            | FALSE | TRUE  |
| 2  | 27667238 - 27712656   |            | FALSE | TRUE  |
| 2  | 27667238 - 27712656   |            | FALSE | TRUE  |
| 17 | 70117161 - 70122561   |            | TRUE  | TRUE  |
| 17 | 70117161 - 70122561   | T - 60.00% | TRUE  | TRUE  |
| 19 | 5158506 - 5340814     |            | TRUE  | TRUE  |
| 19 | 5158506 - 5340814     |            | TRUE  | TRUE  |
| 19 | 5158506 - 5340814     |            | TRUE  | TRUE  |
| 19 | 5158506 - 5340814     |            | TRUE  | TRUE  |
| 19 | 5158506 - 5340814     |            | TRUE  | TRUE  |
| 19 | 5158506 - 5340814     | F - 25.00% | FALSE | TRUE  |
| 19 | 5158506 - 5340814     |            | TRUE  | TRUE  |
| 19 | 5158506 - 5340814     |            | TRUE  | TRUE  |
| 19 | 5158506 - 5340814     | T - 75.00% | FALSE | TRUE  |
| 19 | 5158506 - 5340814     |            | TRUE  | TRUE  |
| 7  | 128430811 - 128462187 |            | TRUE  | TRUE  |
| 7  | 128430811 - 128462187 |            | TRUE  | TRUE  |
| 7  | 128430811 - 128462187 | T - 72.73% | FALSE | TRUE  |
| 7  | 128430811 - 128462187 |            | FALSE | TRUE  |
| 11 | 72975550 - 73009664   |            | TRUE  | TRUE  |
| 11 | 72975550 - 73009664   |            | TRUE  | TRUE  |
| 11 | 72975550 - 73009664   | F - 11.11% | FALSE | TRUE  |
| 11 | 72975550 - 73009664   | F - 5.56%  | FALSE | TRUE  |
| 11 | 72975550 - 73009664   | F - 38.89% | FALSE | TRUE  |
| 11 | 72975550 - 73009664   | T - 66.67% | TRUE  | TRUE  |
| 11 | 72975550 - 73009664   | T - 94.44% | TRUE  | TRUE  |
| 11 | 72975550 - 73009664   |            | FALSE | TRUE  |
| 6  | 72596406 - 73112845   |            | TRUE  | TRUE  |
| 6  | 72596406 - 73112845   |            | TRUE  | FALSE |
| 6  | 72596406 - 73112845   |            | TRUE  | FALSE |
| 6  | 72596406 - 73112845   |            | TRUE  | TRUE  |
| 6  | 72596406 - 73112845   |            | TRUE  | TRUE  |
| 6  | 72596406 - 73112845   |            | TRUE  | FALSE |
| 6  | 72596406 - 73112845   | F - 4.44%  | TRUE  | TRUE  |
| 6  | 72596406 - 73112845   |            | TRUE  | TRUE  |
| 6  | 72596406 - 73112845   |            | TRUE  | TRUE  |
| 6  | 72596406 - 73112845   |            | TRUE  | TRUE  |
| 6  | 72596406 - 73112845   |            | TRUE  | TRUE  |
| 6  | 72596406 - 73112845   |            | TRUE  | TRUE  |
| 6  | 72596406 - 73112845   | F - 8.89%  | TRUE  | TRUE  |
| 6  | 72596406 - 73112845   | F - 6.67%  | TRUE  | FALSE |
| 6  | 72596406 - 73112845   | T - 53.33% | TRUE  | TRUE  |
| 6  | 72596406 - 73112845   | F - 6.67%  | TRUE  | TRUE  |
| 6  | 72596406 - 73112845   | T - 64.44% | TRUE  | TRUE  |
| 6  | 72596406 - 73112845   | F - 4.44%  | TRUE  | TRUE  |
| 6  | 72596406 - 73112845   | F - 4.44%  | TRUE  | TRUE  |
| 6  | 72596406 - 73112845   |            | TRUE  | TRUE  |
| 1  | 26856249 - 26901521   |            | TRUE  | TRUE  |
| 1  | 26856249 - 26901521   | F - 10.53% | FALSE | TRUE  |
| 1  | 26856249 - 26901521   |            | TRUE  | TRUE  |
| 1  | 26856249 - 26901521   | F - 21.05% | TRUE  | TRUE  |
| 1  | 26856249 - 26901521   | T - 78.95% | TRUE  | TRUE  |

|    |                       |            |       |       |
|----|-----------------------|------------|-------|-------|
| 1  | 26856249 - 26901521   | T - 78.95% | FALSE | TRUE  |
| 1  | 26856249 - 26901521   | T - 63.16% | FALSE | TRUE  |
| 1  | 26856249 - 26901521   |            | FALSE | TRUE  |
| 1  | 26856249 - 26901521   |            | FALSE | TRUE  |
| 1  | 26856249 - 26901521   |            | FALSE | TRUE  |
| 1  | 26856249 - 26901521   |            | FALSE | TRUE  |
| 1  | 26856249 - 26901521   |            | FALSE | TRUE  |
| 1  | 26856249 - 26901521   |            | FALSE | TRUE  |
| 12 | 69201956 - 69239214   |            | TRUE  | TRUE  |
| 12 | 69201956 - 69239214   | T - 75.00% | TRUE  | TRUE  |
| 12 | 69201956 - 69239214   |            | FALSE | TRUE  |
| 12 | 69201956 - 69239214   | F - 1.92%  | TRUE  | TRUE  |
| 2  | 88856259 - 88927094   |            | TRUE  | TRUE  |
| 2  | 88856259 - 88927094   | F - 10.00% | TRUE  | FALSE |
| 2  | 88856259 - 88927094   | T - 50.00% | TRUE  | FALSE |
| 2  | 88856259 - 88927094   | T - 50.00% | TRUE  | TRUE  |
| 2  | 88856259 - 88927094   | T - 50.00% | TRUE  | TRUE  |
| 12 | 7965108 - 8043744     | F - 17.65% | TRUE  | TRUE  |
| 12 | 7965108 - 8043744     | F - 29.41% | TRUE  | TRUE  |
| 12 | 7965108 - 8043744     |            | FALSE | TRUE  |
| 12 | 7965108 - 8043744     |            | TRUE  | TRUE  |
| 12 | 7965108 - 8043744     | F - 11.76% | TRUE  | TRUE  |
| 12 | 7965108 - 8043744     |            | FALSE | TRUE  |
| 12 | 7965108 - 8043744     | F - 29.41% | TRUE  | TRUE  |
| 12 | 7965108 - 8043744     | F - 17.65% | TRUE  | TRUE  |
| 12 | 7965108 - 8043744     |            | FALSE | TRUE  |
| 12 | 7965108 - 8043744     |            | TRUE  | TRUE  |
| 12 | 7965108 - 8043744     | F - 11.76% | TRUE  | TRUE  |
| 12 | 7965108 - 8043744     |            | TRUE  | TRUE  |
| 12 | 7965108 - 8043744     | F - 23.53% | TRUE  | TRUE  |
| 12 | 7965108 - 8043744     | T - 82.35% | TRUE  | TRUE  |
| 12 | 7965108 - 8043744     | F - 29.41% | TRUE  | TRUE  |
| 12 | 7965108 - 8043744     |            | FALSE | TRUE  |
| 4  | 182795591 - 183066402 |            | TRUE  | FALSE |
| 4  | 182795591 - 183066402 | F - 33.33% | TRUE  | TRUE  |
| 4  | 182795591 - 183066402 |            | TRUE  | FALSE |
| 4  | 182795591 - 183066402 | F - 22.22% | TRUE  | TRUE  |
| 4  | 182795591 - 183066402 | F - 11.11% | TRUE  | TRUE  |
| 4  | 182795591 - 183066402 | F - 11.11% | TRUE  | TRUE  |
| 4  | 182795591 - 183066402 |            | TRUE  | TRUE  |
| 4  | 182795591 - 183066402 | F - 11.11% | TRUE  | TRUE  |
| 8  | 120177273 - 120257914 |            | TRUE  | TRUE  |
| 8  | 120177273 - 120257914 | F - 11.11% | TRUE  | TRUE  |
| 8  | 120177273 - 120257914 |            | TRUE  | TRUE  |
| 8  | 120177273 - 120257914 | F - 44.44% | TRUE  | TRUE  |
| 8  | 120177273 - 120257914 |            | TRUE  | TRUE  |
| 8  | 120177273 - 120257914 | F - 11.11% | TRUE  | TRUE  |
| 8  | 120177273 - 120257914 | T - 55.56% | TRUE  | TRUE  |
| 8  | 120177273 - 120257914 | T - 66.67% | TRUE  | TRUE  |
| 8  | 120177273 - 120257914 | F - 11.11% | TRUE  | TRUE  |
| 8  | 120177273 - 120257914 | F - 11.11% | FALSE | TRUE  |
| 8  | 120177273 - 120257914 | T - 55.56% | TRUE  | TRUE  |
| 8  | 120177273 - 120257914 |            | FALSE | TRUE  |
| 10 | 18834264 - 18940551   |            | TRUE  | FALSE |
| 10 | 18834264 - 18940551   | F - 25.00% | TRUE  | TRUE  |
| 10 | 18834264 - 18940551   |            | TRUE  | TRUE  |
| 2  | 192109911 - 192290115 |            | TRUE  | TRUE  |
| 2  | 192109911 - 192290115 |            | TRUE  | FALSE |
| 2  | 192109911 - 192290115 | F - 9.09%  | TRUE  | TRUE  |

|    |                       |             |       |       |
|----|-----------------------|-------------|-------|-------|
| 2  | 192109911 - 192290115 | F - 4.55%   | TRUE  | TRUE  |
| 2  | 192109911 - 192290115 | F - 4.55%   | TRUE  | TRUE  |
| 2  | 21224301 - 21266945   |             | TRUE  | FALSE |
| 2  | 21224301 - 21266945   |             | TRUE  | FALSE |
| 2  | 21224301 - 21266945   | T - 75.00%  | TRUE  | TRUE  |
| 2  | 21224301 - 21266945   |             | TRUE  | FALSE |
| 2  | 21224301 - 21266945   |             | TRUE  | FALSE |
| 2  | 21224301 - 21266945   |             | TRUE  | FALSE |
| 2  | 21224301 - 21266945   | T - 75.00%  | TRUE  | TRUE  |
| 2  | 21224301 - 21266945   |             | TRUE  | FALSE |
| 2  | 21224301 - 21266945   |             | TRUE  | FALSE |
| 2  | 21224301 - 21266945   | T - 75.00%  | TRUE  | FALSE |
| 2  | 21224301 - 21266945   |             | TRUE  | FALSE |
| 2  | 21224301 - 21266945   | T - 100.00% | TRUE  | FALSE |
| 2  | 21224301 - 21266945   |             | TRUE  | FALSE |
| 2  | 21224301 - 21266945   | T - 100.00% | TRUE  | TRUE  |
| 2  | 21224301 - 21266945   |             | TRUE  | TRUE  |
| 2  | 21224301 - 21266945   |             | TRUE  | TRUE  |
| 2  | 21224301 - 21266945   |             | TRUE  | TRUE  |
| 2  | 21224301 - 21266945   |             | TRUE  | TRUE  |
| 2  | 21224301 - 21266945   | T - 100.00% | TRUE  | FALSE |
| 2  | 21224301 - 21266945   |             | TRUE  | TRUE  |
| 2  | 21224301 - 21266945   | T - 100.00% | TRUE  | TRUE  |
| 2  | 21224301 - 21266945   | T - 100.00% | TRUE  | FALSE |
| 2  | 21224301 - 21266945   | F - 25.00%  | TRUE  | TRUE  |
| 2  | 21224301 - 21266945   | T - 75.00%  | TRUE  | TRUE  |
| 2  | 21224301 - 21266945   |             | TRUE  | TRUE  |
| 2  | 21224301 - 21266945   | T - 50.00%  | TRUE  | TRUE  |
| 2  | 21224301 - 21266945   | T - 100.00% | TRUE  | TRUE  |
| 2  | 21224301 - 21266945   | F - 25.00%  | TRUE  | FALSE |
| 15 | 29412455 - 29862927   | T - 50.00%  | TRUE  | FALSE |
| 15 | 29412455 - 29862927   | T - 75.00%  | TRUE  | FALSE |
| 15 | 29412455 - 29862927   |             | FALSE | TRUE  |
| 1  | 86194916 - 86622626   |             | TRUE  | FALSE |
| 1  | 86194916 - 86622626   | T - 66.67%  | TRUE  | FALSE |
| 1  | 86194916 - 86622626   |             | TRUE  | FALSE |
| 1  | 86194916 - 86622626   |             | TRUE  | TRUE  |
| 1  | 86194916 - 86622626   | T - 73.33%  | TRUE  | TRUE  |
| 1  | 86194916 - 86622626   | T - 80.00%  | TRUE  | TRUE  |
| 1  | 86194916 - 86622626   |             | TRUE  | TRUE  |
| 1  | 86194916 - 86622626   | T - 73.33%  | FALSE | TRUE  |
| 1  | 86194916 - 86622626   |             | TRUE  | TRUE  |
| 1  | 86194916 - 86622626   |             | TRUE  | TRUE  |
| 1  | 86194916 - 86622626   | T - 73.33%  | TRUE  | TRUE  |
| 1  | 86194916 - 86622626   |             | FALSE | TRUE  |
| X  | 51927919 - 51935364   |             | TRUE  | FALSE |
| X  | 51927919 - 51935364   |             | TRUE  | FALSE |
| X  | 51927919 - 51935364   | F - 4.76%   | TRUE  | TRUE  |
| X  | 51927919 - 51935364   |             | TRUE  | TRUE  |
| X  | 51927919 - 51935364   | F - 33.33%  | TRUE  | TRUE  |
| X  | 51927919 - 51935364   |             | TRUE  | TRUE  |
| X  | 51927919 - 51935364   |             | TRUE  | TRUE  |
| X  | 51927919 - 51935364   | F - 4.76%   | TRUE  | TRUE  |
| 3  | 58490863 - 58523046   | F - 18.75%  | TRUE  | FALSE |
| 3  | 58490863 - 58523046   | F - 6.25%   | TRUE  | TRUE  |
| 3  | 58490863 - 58523046   |             | TRUE  | TRUE  |
| 3  | 58490863 - 58523046   | F - 12.50%  | FALSE | TRUE  |
| 3  | 58490863 - 58523046   | T - 50.00%  | TRUE  | TRUE  |

|    |                     |             |       |       |
|----|---------------------|-------------|-------|-------|
| 3  | 58490863 - 58523046 | F - 6.25%   | FALSE | TRUE  |
| 3  | 58490863 - 58523046 |             | FALSE | TRUE  |
| 3  | 58490863 - 58523046 | T - 50.00%  | TRUE  | TRUE  |
| 3  | 58490863 - 58523046 |             | TRUE  | TRUE  |
| 3  | 58490863 - 58523046 |             | FALSE | TRUE  |
| 3  | 58490863 - 58523046 | F - 43.75%  | TRUE  | TRUE  |
| 3  | 58490863 - 58523046 | T - 50.00%  | TRUE  | TRUE  |
| 3  | 58490863 - 58523046 | F - 25.00%  | TRUE  | TRUE  |
| 3  | 58490863 - 58523046 | T - 50.00%  | TRUE  | TRUE  |
| 3  | 58490863 - 58523046 |             | FALSE | TRUE  |
| 10 | 45454855 - 45490172 |             | TRUE  | TRUE  |
| 10 | 45454855 - 45490172 |             | TRUE  | TRUE  |
| 10 | 45454855 - 45490172 | F - 4.55%   | FALSE | TRUE  |
| 10 | 45454855 - 45490172 | F - 4.55%   | TRUE  | TRUE  |
| 10 | 45454855 - 45490172 | F - 4.55%   | TRUE  | TRUE  |
| 10 | 45454855 - 45490172 | F - 4.55%   | TRUE  | TRUE  |
| 10 | 45454855 - 45490172 |             | FALSE | TRUE  |
| 10 | 45454855 - 45490172 | F - 4.55%   | FALSE | TRUE  |
| 10 | 45454855 - 45490172 |             | FALSE | TRUE  |
| 10 | 45454855 - 45490172 | F - 4.55%   | TRUE  | TRUE  |
| 10 | 45454855 - 45490172 |             | TRUE  | TRUE  |
| 10 | 45454855 - 45490172 |             | TRUE  | TRUE  |
| 10 | 45454855 - 45490172 | T - 72.73%  | FALSE | TRUE  |
| 10 | 45454855 - 45490172 |             | TRUE  | TRUE  |
| 10 | 45454855 - 45490172 | F - 9.09%   | TRUE  | TRUE  |
| 10 | 45454855 - 45490172 | T - 72.73%  | TRUE  | TRUE  |
| 10 | 45454855 - 45490172 |             | TRUE  | TRUE  |
| 10 | 45454855 - 45490172 | T - 59.09%  | TRUE  | TRUE  |
| 10 | 45454855 - 45490172 | T - 77.27%  | TRUE  | TRUE  |
| 10 | 45454855 - 45490172 |             | FALSE | TRUE  |
| 21 | 34931848 - 34961267 |             | TRUE  | TRUE  |
| 21 | 34931848 - 34961267 |             | TRUE  | TRUE  |
| 21 | 34931848 - 34961267 | F - 5.88%   | TRUE  | TRUE  |
| Y  | 21729235 - 21752309 | F - 40.00%  | TRUE  | FALSE |
| Y  | 21729235 - 21752309 | T - 60.00%  | TRUE  | FALSE |
| Y  | 21729235 - 21752309 | T - 100.00% | TRUE  | TRUE  |
| Y  | 21729235 - 21752309 | T - 80.00%  | TRUE  | TRUE  |
| Y  | 21729235 - 21752309 |             | TRUE  | FALSE |
| Y  | 21729235 - 21752309 | F - 30.00%  | TRUE  | TRUE  |
| Y  | 21729235 - 21752309 | T - 50.00%  | TRUE  | FALSE |
| Y  | 21729235 - 21752309 | F - 40.00%  | TRUE  | TRUE  |
| Y  | 21729235 - 21752309 | F - 20.00%  | TRUE  | TRUE  |
| Y  | 21729235 - 21752309 |             | TRUE  | TRUE  |
| Y  | 21729235 - 21752309 | F - 20.00%  | TRUE  | FALSE |
| Y  | 21729235 - 21752309 | T - 80.00%  | TRUE  | TRUE  |
| 11 | 1411129 - 1483915   |             | TRUE  | FALSE |
| 11 | 1411129 - 1483915   |             | TRUE  | FALSE |
| 11 | 1411129 - 1483915   |             | TRUE  | TRUE  |
| 11 | 1411129 - 1483915   |             | TRUE  | FALSE |
| 11 | 1411129 - 1483915   | T - 61.11%  | TRUE  | TRUE  |
| 11 | 1411129 - 1483915   |             | TRUE  | TRUE  |
| 11 | 1411129 - 1483915   |             | FALSE | TRUE  |
| 2  | 25455496 - 25565459 |             | TRUE  | TRUE  |
| 2  | 25455496 - 25565459 |             | TRUE  | TRUE  |
| 2  | 25455496 - 25565459 | F - 4.55%   | TRUE  | TRUE  |
| 2  | 25455496 - 25565459 |             | TRUE  | TRUE  |
| 2  | 25455496 - 25565459 |             | TRUE  | TRUE  |
| 2  | 25455496 - 25565459 | T - 59.09%  | TRUE  | TRUE  |

|    |                       |             |       |       |
|----|-----------------------|-------------|-------|-------|
| 2  | 70674412 - 70781325   |             | TRUE  | FALSE |
| 2  | 70674412 - 70781325   | F - 40.00%  | FALSE | TRUE  |
| 2  | 70674412 - 70781325   |             | TRUE  | TRUE  |
| 2  | 70674412 - 70781325   | T - 53.33%  | TRUE  | TRUE  |
| 2  | 70674412 - 70781325   | F - 26.67%  | TRUE  | TRUE  |
| 2  | 70674412 - 70781325   | F - 6.67%   | TRUE  | TRUE  |
| 2  | 70674412 - 70781325   |             | TRUE  | TRUE  |
| 2  | 70674412 - 70781325   | T - 86.67%  | FALSE | TRUE  |
| 2  | 70674412 - 70781325   | F - 6.67%   | TRUE  | TRUE  |
| 2  | 70674412 - 70781325   | T - 93.33%  | TRUE  | TRUE  |
| 2  | 70674412 - 70781325   | F - 20.00%  | FALSE | TRUE  |
| 2  | 70674412 - 70781325   |             | FALSE | TRUE  |
| 2  | 70674412 - 70781325   |             | FALSE | TRUE  |
| 2  | 70674412 - 70781325   | F - 33.33%  | FALSE | TRUE  |
| 2  | 70674412 - 70781325   | F - 26.67%  | FALSE | TRUE  |
| 2  | 70674412 - 70781325   | T - 93.33%  | TRUE  | TRUE  |
| 2  | 70674412 - 70781325   | T - 60.00%  | FALSE | TRUE  |
| 2  | 70674412 - 70781325   | F - 26.67%  | FALSE | TRUE  |
| 2  | 70674412 - 70781325   | F - 40.00%  | TRUE  | TRUE  |
| 2  | 70674412 - 70781325   |             | FALSE | TRUE  |
| 5  | 141337893 - 141369856 |             | TRUE  | TRUE  |
| 5  | 141337893 - 141369856 |             | TRUE  | TRUE  |
| 5  | 141337893 - 141369856 |             | TRUE  | FALSE |
| 5  | 141337893 - 141369856 | T - 51.85%  | TRUE  | TRUE  |
| 6  | 108616098 - 108847999 |             | TRUE  | FALSE |
| 6  | 108616098 - 108847999 |             | TRUE  | FALSE |
| 6  | 108616098 - 108847999 | F - 11.11%  | TRUE  | TRUE  |
| 12 | 21950324 - 22094336   |             | TRUE  | FALSE |
| 12 | 21950324 - 22094336   | T - 62.50%  | TRUE  | TRUE  |
| 12 | 21950324 - 22094336   |             | TRUE  | FALSE |
| 12 | 21950324 - 22094336   |             | TRUE  | FALSE |
| 12 | 21950324 - 22094336   |             | TRUE  | FALSE |
| 12 | 21950324 - 22094336   | T - 62.50%  | TRUE  | TRUE  |
| 12 | 21950324 - 22094336   |             | FALSE | TRUE  |
| 12 | 21950324 - 22094336   |             | FALSE | TRUE  |
| 12 | 21950324 - 22094336   |             | TRUE  | TRUE  |
| 12 | 21950324 - 22094336   |             | FALSE | TRUE  |
| 12 | 21950324 - 22094336   |             | FALSE | TRUE  |
| 12 | 21950324 - 22094336   |             | TRUE  | TRUE  |
| 16 | 29882480 - 29910585   |             | TRUE  | FALSE |
| 16 | 29882480 - 29910585   |             | TRUE  | FALSE |
| 16 | 29882480 - 29910585   |             | TRUE  | TRUE  |
| 16 | 29882480 - 29910585   |             | TRUE  | TRUE  |
| 16 | 29882480 - 29910585   | T - 72.73%  | TRUE  | TRUE  |
| 16 | 29882480 - 29910585   |             | TRUE  | FALSE |
| 16 | 29882480 - 29910585   | T - 100.00% | TRUE  | TRUE  |
| 16 | 29882480 - 29910585   |             | TRUE  | FALSE |
| 16 | 29882480 - 29910585   | T - 100.00% | TRUE  | TRUE  |
| 16 | 29882480 - 29910585   |             | TRUE  | FALSE |
| 16 | 29882480 - 29910585   | T - 90.91%  | FALSE | TRUE  |
| 16 | 29882480 - 29910585   |             | FALSE | TRUE  |
| 2  | 173420101 - 173489823 | F - 37.50%  | FALSE | TRUE  |
| 2  | 173420101 - 173489823 | F - 12.50%  | TRUE  | TRUE  |
| 2  | 173420101 - 173489823 | F - 6.25%   | FALSE | TRUE  |
| 2  | 173420101 - 173489823 |             | FALSE | TRUE  |
| 2  | 173420101 - 173489823 | F - 18.75%  | FALSE | TRUE  |
| 2  | 173420101 - 173489823 | F - 31.25%  | TRUE  | TRUE  |
| 2  | 173420101 - 173489823 |             | FALSE | TRUE  |

|   |                       |            |       |       |
|---|-----------------------|------------|-------|-------|
| 2 | 173420101 - 173489823 |            | TRUE  | TRUE  |
| 2 | 173420101 - 173489823 | F - 6.25%  | TRUE  | TRUE  |
| 2 | 173420101 - 173489823 |            | FALSE | TRUE  |
| 2 | 173420101 - 173489823 | T - 50.00% | TRUE  | TRUE  |
| 2 | 173420101 - 173489823 | F - 12.50% | TRUE  | TRUE  |
| 2 | 173420101 - 173489823 |            | FALSE | TRUE  |
| 2 | 173420101 - 173489823 |            | FALSE | TRUE  |
| 2 | 173420101 - 173489823 |            | FALSE | TRUE  |
| 6 | 152442819 - 152958534 |            | TRUE  | FALSE |
| 6 | 152442819 - 152958534 | F - 1.75%  | TRUE  | TRUE  |
| 6 | 152442819 - 152958534 |            | TRUE  | TRUE  |
| 6 | 152442819 - 152958534 |            | TRUE  | TRUE  |
| 6 | 152442819 - 152958534 |            | TRUE  | TRUE  |
| 6 | 152442819 - 152958534 | F - 1.75%  | TRUE  | TRUE  |
| 6 | 152442819 - 152958534 | F - 1.75%  | TRUE  | TRUE  |
| 6 | 152442819 - 152958534 | F - 8.77%  | TRUE  | TRUE  |
| 6 | 152442819 - 152958534 | F - 1.75%  | TRUE  | TRUE  |
| 6 | 152442819 - 152958534 | F - 1.75%  | TRUE  | TRUE  |
| 6 | 152442819 - 152958534 | F - 1.75%  | TRUE  | TRUE  |
| 6 | 152442819 - 152958534 | F - 3.51%  | FALSE | TRUE  |
| 6 | 152442819 - 152958534 |            | FALSE | TRUE  |
| 6 | 152442819 - 152958534 |            | FALSE | TRUE  |
| 6 | 152442819 - 152958534 | F - 24.56% | FALSE | TRUE  |
| 6 | 152442819 - 152958534 | F - 28.07% | TRUE  | TRUE  |
| 6 | 152442819 - 152958534 | F - 28.07% | TRUE  | TRUE  |
| 6 | 152442819 - 152958534 |            | FALSE | TRUE  |
| 6 | 152442819 - 152958534 |            | FALSE | TRUE  |
| 6 | 152442819 - 152958534 |            | TRUE  | TRUE  |
| 6 | 152442819 - 152958534 | F - 22.81% | TRUE  | TRUE  |
| 6 | 152442819 - 152958534 |            | FALSE | TRUE  |
| 6 | 152442819 - 152958534 |            | FALSE | TRUE  |
| 6 | 152442819 - 152958534 | F - 28.07% | FALSE | TRUE  |
| 6 | 152442819 - 152958534 | F - 24.56% | TRUE  | TRUE  |
| 6 | 152442819 - 152958534 |            | FALSE | TRUE  |
| 6 | 152442819 - 152958534 |            | TRUE  | TRUE  |
| 6 | 152442819 - 152958534 |            | FALSE | TRUE  |
| 6 | 152442819 - 152958534 | F - 28.07% | TRUE  | TRUE  |
| 6 | 152442819 - 152958534 | F - 28.07% | TRUE  | TRUE  |
| 6 | 152442819 - 152958534 |            | FALSE | TRUE  |
| 7 | 120628731 - 120937498 |            | TRUE  | TRUE  |
| 7 | 120628731 - 120937498 |            | TRUE  | TRUE  |
| 7 | 120628731 - 120937498 |            | TRUE  | TRUE  |
| 7 | 120628731 - 120937498 | F - 6.67%  | TRUE  | TRUE  |
| 7 | 120628731 - 120937498 | F - 6.67%  | TRUE  | TRUE  |
| 7 | 120628731 - 120937498 | F - 33.33% | TRUE  | TRUE  |
| 7 | 120628731 - 120937498 | F - 13.33% | TRUE  | TRUE  |
| 7 | 120628731 - 120937498 |            | FALSE | TRUE  |
| 7 | 120628731 - 120937498 | F - 6.67%  | FALSE | TRUE  |
| 7 | 120628731 - 120937498 |            | FALSE | TRUE  |
| 7 | 120628731 - 120937498 |            | FALSE | TRUE  |
| 2 | 201717732 - 201729467 |            | TRUE  | TRUE  |
| 2 | 201717732 - 201729467 |            | TRUE  | TRUE  |

|   |    |                       |            |       |       |
|---|----|-----------------------|------------|-------|-------|
|   | 2  | 201717732 - 201729467 |            | TRUE  | TRUE  |
|   | 2  | 201717732 - 201729467 |            | TRUE  | TRUE  |
|   | 2  | 201717732 - 201729467 | F - 14.29% | TRUE  | TRUE  |
|   | 2  | 201717732 - 201729467 | F - 14.29% | TRUE  | TRUE  |
|   | 2  | 201717732 - 201729467 | F - 19.05% | TRUE  | TRUE  |
|   | 2  | 201717732 - 201729467 | F - 19.05% | TRUE  | TRUE  |
|   | 2  | 201717732 - 201729467 | F - 14.29% | TRUE  | TRUE  |
|   | 7  | 134127107 - 134144036 |            | TRUE  | FALSE |
|   | 7  | 134127107 - 134144036 | F - 5.56%  | TRUE  | TRUE  |
|   | 7  | 134127107 - 134144036 | F - 5.56%  | TRUE  | TRUE  |
|   | 7  | 134127107 - 134144036 | F - 16.67% | TRUE  | TRUE  |
|   | 7  | 134127107 - 134144036 | F - 5.56%  | TRUE  | TRUE  |
|   | 7  | 134127107 - 134144036 | F - 5.56%  | TRUE  | TRUE  |
|   | 7  | 134127107 - 134144036 | F - 5.56%  | TRUE  | TRUE  |
| Y |    | 21034387 - 21239302   | F - 40.00% | TRUE  | TRUE  |
| Y |    | 21034387 - 21239302   |            | TRUE  | FALSE |
| Y |    | 21034387 - 21239302   |            | TRUE  | FALSE |
| Y |    | 21034387 - 21239302   | F - 20.00% | TRUE  | TRUE  |
| Y |    | 21034387 - 21239302   | F - 40.00% | TRUE  | FALSE |
| Y |    | 21034387 - 21239302   |            | TRUE  | TRUE  |
|   | 10 | 121485559 - 121588662 | F - 33.33% | TRUE  | TRUE  |
|   | 10 | 121485559 - 121588662 |            | TRUE  | TRUE  |
|   | 10 | 121485559 - 121588662 | F - 22.22% | TRUE  | TRUE  |
|   | 10 | 121485559 - 121588662 | T - 66.67% | TRUE  | TRUE  |
|   | 10 | 121485559 - 121588662 |            | TRUE  | TRUE  |
|   | 10 | 121485559 - 121588662 | T - 55.56% | TRUE  | TRUE  |
|   | 10 | 121485559 - 121588662 |            | TRUE  | TRUE  |
|   | 10 | 121485559 - 121588662 |            | TRUE  | TRUE  |
|   | 10 | 121485559 - 121588662 | F - 11.11% | TRUE  | TRUE  |
|   | 10 | 121485559 - 121588662 | T - 66.67% | TRUE  | TRUE  |
|   | 10 | 121485559 - 121588662 | T - 66.67% | TRUE  | TRUE  |
|   | 10 | 121485559 - 121588662 |            | TRUE  | TRUE  |
|   | 10 | 121485559 - 121588662 |            | TRUE  | TRUE  |
|   | 10 | 121485559 - 121588662 |            | TRUE  | TRUE  |
|   | 3  | 53258723 - 53290130   |            | TRUE  | TRUE  |
|   | 3  | 53258723 - 53290130   | F - 4.35%  | TRUE  | TRUE  |
|   | 3  | 53258723 - 53290130   | F - 4.35%  | TRUE  | TRUE  |
|   | 3  | 53258723 - 53290130   | F - 4.35%  | TRUE  | TRUE  |
|   | 3  | 53258723 - 53290130   | F - 4.35%  | TRUE  | TRUE  |
|   | 3  | 53258723 - 53290130   | F - 4.35%  | TRUE  | TRUE  |
|   | 3  | 53258723 - 53290130   | F - 13.04% | TRUE  | TRUE  |
|   | 3  | 53258723 - 53290130   | F - 8.70%  | TRUE  | TRUE  |
|   | 3  | 53258723 - 53290130   |            | TRUE  | TRUE  |
|   | 3  | 53258723 - 53290130   | F - 8.70%  | TRUE  | TRUE  |
|   | 3  | 53258723 - 53290130   | F - 4.35%  | TRUE  | TRUE  |
|   | 3  | 53258723 - 53290130   | T - 69.57% | TRUE  | TRUE  |
|   | 3  | 53258723 - 53290130   |            | TRUE  | TRUE  |
|   | 3  | 53258723 - 53290130   |            | FALSE | TRUE  |
|   | 3  | 53258723 - 53290130   | F - 13.04% | FALSE | TRUE  |
|   | 3  | 53258723 - 53290130   |            | TRUE  | TRUE  |
|   | 3  | 53258723 - 53290130   | F - 4.35%  | TRUE  | TRUE  |
|   | 3  | 53258723 - 53290130   |            | TRUE  | TRUE  |
|   | 3  | 53258723 - 53290130   |            | FALSE | TRUE  |
| X |    | 51804923 - 51812368   |            | TRUE  | FALSE |
| X |    | 51804923 - 51812368   |            | TRUE  | FALSE |
| X |    | 51804923 - 51812368   | F - 29.17% | TRUE  | TRUE  |
| X |    | 51804923 - 51812368   | F - 4.17%  | TRUE  | TRUE  |
| X |    | 51804923 - 51812368   |            | TRUE  | TRUE  |



|   |                         |            |       |       |
|---|-------------------------|------------|-------|-------|
| X | 51804923 - 51812368     | F - 12.50% | TRUE  | TRUE  |
| X | 51804923 - 51812368     |            | TRUE  | TRUE  |
| X | 51804923 - 51812368     |            | TRUE  | TRUE  |
| X | 51804923 - 51812368     | F - 8.33%  | TRUE  | TRUE  |
| X | 148678216 - 148713568   |            | TRUE  | FALSE |
| X | 148678216 - 148713568   |            | TRUE  | TRUE  |
| X | 148678216 - 148713568   |            | TRUE  | TRUE  |
| X | 148678216 - 148713568   | T - 56.25% | TRUE  | TRUE  |
|   | 1 145289772 - 145370303 |            | TRUE  | FALSE |
|   | 1 145289772 - 145370303 | F - 4.55%  | TRUE  | TRUE  |
|   | 1 145289772 - 145370303 |            | TRUE  | FALSE |
|   | 10 23983675 - 24836772  |            | TRUE  | TRUE  |
|   | 10 23983675 - 24836772  | F - 24.14% | TRUE  | TRUE  |
|   | 10 23983675 - 24836772  |            | TRUE  | TRUE  |
|   | 10 23983675 - 24836772  |            | TRUE  | FALSE |
|   | 10 23983675 - 24836772  | F - 37.93% | TRUE  | TRUE  |
|   | 10 23983675 - 24836772  |            | TRUE  | FALSE |
|   | 10 23983675 - 24836772  |            | TRUE  | TRUE  |
|   | 10 23983675 - 24836772  |            | TRUE  | TRUE  |
|   | 10 23983675 - 24836772  |            | TRUE  | TRUE  |
|   | 10 23983675 - 24836772  |            | TRUE  | TRUE  |
|   | 10 23983675 - 24836772  |            | TRUE  | TRUE  |
|   | 10 23983675 - 24836772  |            | TRUE  | TRUE  |
|   | 10 23983675 - 24836772  | F - 44.83% | TRUE  | TRUE  |
|   | 10 23983675 - 24836772  |            | TRUE  | TRUE  |
|   | 10 23983675 - 24836772  |            | TRUE  | TRUE  |
|   | 10 23983675 - 24836772  |            | TRUE  | TRUE  |
|   | 10 23983675 - 24836772  |            | TRUE  | TRUE  |
|   | 10 23983675 - 24836772  | F - 6.90%  | FALSE | TRUE  |
|   | 10 23983675 - 24836772  | F - 3.45%  | TRUE  | TRUE  |
|   | 10 23983675 - 24836772  | F - 24.14% | TRUE  | TRUE  |
|   | 10 23983675 - 24836772  | F - 34.48% | TRUE  | TRUE  |
|   | 10 23983675 - 24836772  | F - 6.90%  | TRUE  | TRUE  |
|   | 10 23983675 - 24836772  |            | TRUE  | TRUE  |
|   | 10 23983675 - 24836772  | F - 6.90%  | TRUE  | TRUE  |
|   | 1 22004791 - 22110099   |            | TRUE  | TRUE  |
|   | 1 22004791 - 22110099   |            | TRUE  | FALSE |
|   | 1 22004791 - 22110099   | F - 4.76%  | TRUE  | TRUE  |
|   | 1 22004791 - 22110099   |            | TRUE  | TRUE  |
|   | 1 22004791 - 22110099   | T - 66.67% | TRUE  | TRUE  |
|   | 1 22004791 - 22110099   |            | TRUE  | TRUE  |
|   | 1 22004791 - 22110099   |            | FALSE | TRUE  |
|   | 1 22004791 - 22110099   |            | TRUE  | TRUE  |
|   | 4 140637546 - 141075338 |            | TRUE  | FALSE |
|   | 4 140637546 - 141075338 | T - 66.67% | TRUE  | TRUE  |
|   | 4 140637546 - 141075338 |            | TRUE  | TRUE  |
|   | 4 140637546 - 141075338 |            | TRUE  | TRUE  |
|   | 4 140637546 - 141075338 |            | TRUE  | TRUE  |
|   | 17 19581628 - 19622292  |            | TRUE  | TRUE  |
|   | 17 19581628 - 19622292  |            | TRUE  | FALSE |
|   | 17 19581628 - 19622292  | F - 6.25%  | TRUE  | TRUE  |
|   | 17 19581628 - 19622292  | F - 12.50% | TRUE  | TRUE  |
|   | 17 19581628 - 19622292  | F - 12.50% | TRUE  | TRUE  |
|   | 17 19581628 - 19622292  | F - 25.00% | FALSE | TRUE  |
|   | 17 19581628 - 19622292  | F - 6.25%  | TRUE  | TRUE  |
|   | 17 19581628 - 19622292  |            | TRUE  | TRUE  |
|   | 17 19581628 - 19622292  |            | FALSE | TRUE  |
|   | 17 19581628 - 19622292  |            | TRUE  | TRUE  |
|   | 17 19581628 - 19622292  | F - 6.25%  | FALSE | TRUE  |

|             |                       |             |       |       |
|-------------|-----------------------|-------------|-------|-------|
| 17          | 19581628 - 19622292   |             | FALSE | TRUE  |
| 17          | 19581628 - 19622292   | T - 75.00%  | FALSE | TRUE  |
| 17          | 19581628 - 19622292   | T - 87.50%  | TRUE  | TRUE  |
| 17          | 19581628 - 19622292   | F - 6.25%   | FALSE | TRUE  |
| 17          | 19581628 - 19622292   |             | FALSE | TRUE  |
| 17          | 19581628 - 19622292   | F - 6.25%   | TRUE  | TRUE  |
| 17          | 19581628 - 19622292   | F - 43.75%  | FALSE | TRUE  |
| 17          | 19581628 - 19622292   | F - 25.00%  | TRUE  | TRUE  |
| 17          | 19581628 - 19622292   |             | FALSE | TRUE  |
| 17          | 19581628 - 19622292   | F - 6.25%   | FALSE | TRUE  |
| 17          | 19581628 - 19622292   |             | TRUE  | TRUE  |
| 17          | 19581628 - 19622292   | F - 6.25%   | TRUE  | TRUE  |
| 17          | 19581628 - 19622292   |             | FALSE | TRUE  |
| 17          | 19581628 - 19622292   |             | FALSE | TRUE  |
| 17          | 19581628 - 19622292   | T - 93.75%  | TRUE  | TRUE  |
| 17          | 19581628 - 19622292   | T - 68.75%  | FALSE | TRUE  |
| 17          | 19581628 - 19622292   |             | FALSE | TRUE  |
| 17          | 19581628 - 19622292   |             | TRUE  | TRUE  |
| 17          | 19581628 - 19622292   | T - 100.00% | FALSE | TRUE  |
| 17          | 19581628 - 19622292   |             | FALSE | TRUE  |
| 17          | 19581628 - 19622292   |             | FALSE | TRUE  |
| 6_mann_hap4 | 2583421 - 2586798     |             | TRUE  | FALSE |
| 6_mann_hap4 | 2583421 - 2586798     | F - 9.52%   | TRUE  | TRUE  |
| 6_mann_hap4 | 2583421 - 2586798     |             | TRUE  | TRUE  |
| 6_mann_hap4 | 2583421 - 2586798     |             | TRUE  | TRUE  |
| 6_mann_hap4 | 2583421 - 2586798     |             | TRUE  | TRUE  |
| 6_mann_hap4 | 2583421 - 2586798     |             | FALSE | TRUE  |
| 1           | 153746830 - 153752633 |             | TRUE  | TRUE  |
| 1           | 153746830 - 153752633 | F - 7.69%   | TRUE  | TRUE  |
| 6           | 117609463 - 117747018 |             | TRUE  | FALSE |
| 6           | 117609463 - 117747018 |             | TRUE  | FALSE |
| 6           | 117609463 - 117747018 |             | TRUE  | FALSE |
| 6           | 117609463 - 117747018 |             | TRUE  | FALSE |
| 6           | 117609463 - 117747018 |             | TRUE  | FALSE |
| 6           | 117609463 - 117747018 |             | TRUE  | FALSE |
| 6           | 117609463 - 117747018 |             | TRUE  | FALSE |
| 6           | 117609463 - 117747018 |             | TRUE  | TRUE  |
| 6           | 117609463 - 117747018 | T - 83.33%  | TRUE  | FALSE |
| 6           | 117609463 - 117747018 | T - 83.33%  | TRUE  | TRUE  |
| 6           | 117609463 - 117747018 |             | TRUE  | TRUE  |
| 6           | 117609463 - 117747018 |             | TRUE  | FALSE |
| 6           | 117609463 - 117747018 | T - 83.33%  | TRUE  | TRUE  |
| 6           | 117609463 - 117747018 |             | TRUE  | TRUE  |
| 6           | 117609463 - 117747018 | T - 83.33%  | TRUE  | FALSE |
| 6           | 117609463 - 117747018 | T - 83.33%  | TRUE  | TRUE  |
| 6           | 117609463 - 117747018 |             | TRUE  | TRUE  |
| 6           | 117609463 - 117747018 |             | TRUE  | FALSE |
| 6           | 117609463 - 117747018 |             | TRUE  | FALSE |
| 6           | 117609463 - 117747018 |             | TRUE  | FALSE |
| 6           | 117609463 - 117747018 | T - 83.33%  | TRUE  | FALSE |
| 6           | 117609463 - 117747018 | T - 83.33%  | TRUE  | TRUE  |
| 6           | 117609463 - 117747018 |             | TRUE  | TRUE  |
| 6           | 117609463 - 117747018 |             | TRUE  | TRUE  |
| 6           | 117609463 - 117747018 | T - 83.33%  | TRUE  | TRUE  |
| 6           | 117609463 - 117747018 | T - 100.00% | TRUE  | FALSE |
| 6           | 117609463 - 117747018 |             | TRUE  | FALSE |
| 6           | 117609463 - 117747018 |             | TRUE  | FALSE |
| 6           | 117609463 - 117747018 | T - 83.33%  | TRUE  | FALSE |
| 6           | 117609463 - 117747018 |             | TRUE  | FALSE |

|            |                       |             |       |       |
|------------|-----------------------|-------------|-------|-------|
| 6          | 117609463 - 117747018 | F - 33.33%  | TRUE  | TRUE  |
| 6          | 117609463 - 117747018 | T - 83.33%  | TRUE  | TRUE  |
| 6          | 117609463 - 117747018 |             | TRUE  | FALSE |
| 6          | 117609463 - 117747018 |             | TRUE  | FALSE |
| 6          | 117609463 - 117747018 | T - 83.33%  | TRUE  | FALSE |
| 6          | 117609463 - 117747018 |             | TRUE  | FALSE |
| 6          | 117609463 - 117747018 | T - 83.33%  | TRUE  | FALSE |
| 6          | 117609463 - 117747018 |             | TRUE  | TRUE  |
| 6          | 117609463 - 117747018 | T - 83.33%  | TRUE  | TRUE  |
| 6          | 117609463 - 117747018 |             | TRUE  | FALSE |
| 6          | 117609463 - 117747018 | T - 83.33%  | TRUE  | TRUE  |
| 6          | 117609463 - 117747018 | T - 83.33%  | TRUE  | TRUE  |
| 6          | 117609463 - 117747018 | F - 16.67%  | TRUE  | TRUE  |
| 6          | 117609463 - 117747018 | T - 66.67%  | TRUE  | FALSE |
| 6          | 117609463 - 117747018 | T - 83.33%  | TRUE  | TRUE  |
| 6          | 117609463 - 117747018 |             | TRUE  | TRUE  |
| 7          | 128379346 - 128413477 | F - 27.27%  | TRUE  | TRUE  |
| 7          | 128379346 - 128413477 |             | TRUE  | TRUE  |
| 22         | 31556138 - 31603005   |             | TRUE  | TRUE  |
| 22         | 31556138 - 31603005   | F - 35.00%  | TRUE  | TRUE  |
| 22         | 31556138 - 31603005   |             | TRUE  | TRUE  |
| 6          | 26383324 - 26395102   |             | TRUE  | FALSE |
| 6          | 26383324 - 26395102   | F - 38.46%  | TRUE  | TRUE  |
| 2          | 110841447 - 110874143 | F - 20.00%  | TRUE  | TRUE  |
| 2          | 110841447 - 110874143 |             | FALSE | TRUE  |
| 2          | 110841447 - 110874143 | T - 80.00%  | TRUE  | TRUE  |
| 2          | 110841447 - 110874143 | T - 60.00%  | TRUE  | TRUE  |
| 2          | 110841447 - 110874143 | F - 40.00%  | FALSE | TRUE  |
| 2          | 110841447 - 110874143 | T - 100.00% | TRUE  | TRUE  |
| 2          | 110841447 - 110874143 |             | TRUE  | TRUE  |
| 5          | 77656339 - 77776562   |             | TRUE  | TRUE  |
| 5          | 77656339 - 77776562   |             | TRUE  | FALSE |
| 5          | 77656339 - 77776562   | T - 72.22%  | TRUE  | FALSE |
| 5          | 77656339 - 77776562   | F - 33.33%  | TRUE  | TRUE  |
| 5          | 77656339 - 77776562   |             | TRUE  | TRUE  |
| 5          | 77656339 - 77776562   | T - 50.00%  | TRUE  | TRUE  |
| 5          | 77656339 - 77776562   | T - 77.78%  | TRUE  | TRUE  |
| 5          | 77656339 - 77776562   | F - 5.56%   | FALSE | TRUE  |
| 5          | 77656339 - 77776562   | T - 55.56%  | TRUE  | TRUE  |
| 6_apd_hap1 | 4319165 - 4335362     |             | TRUE  | FALSE |
| 6_apd_hap1 | 4319165 - 4335362     |             | TRUE  | FALSE |
| 6_apd_hap1 | 4319165 - 4335362     | F - 7.69%   | TRUE  | TRUE  |
| 6_apd_hap1 | 4319165 - 4335362     | F - 15.38%  | TRUE  | TRUE  |
| 6_apd_hap1 | 4319165 - 4335362     | F - 46.15%  | TRUE  | TRUE  |
| 6_apd_hap1 | 4319165 - 4335362     | T - 84.62%  | TRUE  | TRUE  |
| 6_apd_hap1 | 4319165 - 4335362     | F - 46.15%  | TRUE  | TRUE  |
| 6_apd_hap1 | 4319165 - 4335362     | F - 7.69%   | TRUE  | TRUE  |
| 6_apd_hap1 | 4319165 - 4335362     | T - 92.31%  | TRUE  | TRUE  |
| 6_apd_hap1 | 4319165 - 4335362     | F - 38.46%  | TRUE  | TRUE  |
| 6_apd_hap1 | 4319165 - 4335362     |             | FALSE | TRUE  |
| 6_dbb_hap3 | 4313685 - 4329894     |             | TRUE  | FALSE |
| 6_dbb_hap3 | 4313685 - 4329894     |             | TRUE  | FALSE |
| 6_dbb_hap3 | 4313685 - 4329894     | F - 15.38%  | TRUE  | TRUE  |
| 6_dbb_hap3 | 4313685 - 4329894     | F - 7.69%   | TRUE  | TRUE  |
| 6_dbb_hap3 | 4313685 - 4329894     | F - 46.15%  | TRUE  | TRUE  |
| 6_dbb_hap3 | 4313685 - 4329894     | T - 84.62%  | TRUE  | TRUE  |
| 6_dbb_hap3 | 4313685 - 4329894     | F - 46.15%  | TRUE  | TRUE  |
| 6_dbb_hap3 | 4313685 - 4329894     | F - 7.69%   | TRUE  | TRUE  |

|             |                       |            |       |       |
|-------------|-----------------------|------------|-------|-------|
| 6_dbb_hap3  | 4313685 - 4329894     | T - 92.31% | TRUE  | TRUE  |
| 6_dbb_hap3  | 4313685 - 4329894     | F - 38.46% | TRUE  | TRUE  |
| 6_dbb_hap3  | 4313685 - 4329894     |            | FALSE | TRUE  |
| 6_mann_hap4 | 4489886 - 4506101     |            | TRUE  | FALSE |
| 6_mann_hap4 | 4489886 - 4506101     |            | TRUE  | FALSE |
| 6_mann_hap4 | 4489886 - 4506101     | F - 46.15% | TRUE  | TRUE  |
| 6_mann_hap4 | 4489886 - 4506101     | F - 15.38% | TRUE  | TRUE  |
| 6_mann_hap4 | 4489886 - 4506101     | F - 7.69%  | TRUE  | TRUE  |
| 6_mann_hap4 | 4489886 - 4506101     | F - 46.15% | TRUE  | TRUE  |
| 6_mann_hap4 | 4489886 - 4506101     | T - 84.62% | TRUE  | TRUE  |
| 6_mann_hap4 | 4489886 - 4506101     | F - 7.69%  | TRUE  | TRUE  |
| 6_mann_hap4 | 4489886 - 4506101     | T - 92.31% | TRUE  | TRUE  |
| 6_mann_hap4 | 4489886 - 4506101     | F - 38.46% | TRUE  | TRUE  |
| 6_mann_hap4 | 4489886 - 4506101     |            | FALSE | TRUE  |
| 6_mcf_hap5  | 4369219 - 4385416     |            | TRUE  | FALSE |
| 6_mcf_hap5  | 4369219 - 4385416     |            | TRUE  | FALSE |
| 6_mcf_hap5  | 4369219 - 4385416     | F - 7.69%  | TRUE  | TRUE  |
| 6_mcf_hap5  | 4369219 - 4385416     | F - 15.38% | TRUE  | TRUE  |
| 6_mcf_hap5  | 4369219 - 4385416     | F - 46.15% | TRUE  | TRUE  |
| 6_mcf_hap5  | 4369219 - 4385416     | T - 84.62% | TRUE  | TRUE  |
| 6_mcf_hap5  | 4369219 - 4385416     | F - 46.15% | TRUE  | TRUE  |
| 6_mcf_hap5  | 4369219 - 4385416     | F - 7.69%  | TRUE  | TRUE  |
| 6_mcf_hap5  | 4369219 - 4385416     | T - 92.31% | TRUE  | TRUE  |
| 6_mcf_hap5  | 4369219 - 4385416     | F - 38.46% | TRUE  | TRUE  |
| 6_mcf_hap5  | 4369219 - 4385416     |            | FALSE | TRUE  |
| 6_mcf_hap5  | 2617063 - 2620440     |            | TRUE  | FALSE |
| 6_mcf_hap5  | 2617063 - 2620440     |            | TRUE  | TRUE  |
| 6_mcf_hap5  | 2617063 - 2620440     |            | TRUE  | TRUE  |
| 6_mcf_hap5  | 2617063 - 2620440     | F - 9.52%  | TRUE  | TRUE  |
| 6_mcf_hap5  | 2617063 - 2620440     |            | TRUE  | TRUE  |
| 6_qbl_hap6  | 4264797 - 4281012     |            | TRUE  | FALSE |
| 6_qbl_hap6  | 4264797 - 4281012     |            | TRUE  | FALSE |
| 6_qbl_hap6  | 4264797 - 4281012     | F - 46.15% | TRUE  | TRUE  |
| 6_qbl_hap6  | 4264797 - 4281012     | F - 15.38% | TRUE  | TRUE  |
| 6_qbl_hap6  | 4264797 - 4281012     | F - 7.69%  | TRUE  | TRUE  |
| 6_qbl_hap6  | 4264797 - 4281012     | F - 46.15% | TRUE  | TRUE  |
| 6_qbl_hap6  | 4264797 - 4281012     | T - 84.62% | TRUE  | TRUE  |
| 6_qbl_hap6  | 4264797 - 4281012     | F - 7.69%  | TRUE  | TRUE  |
| 6_qbl_hap6  | 4264797 - 4281012     | T - 92.31% | TRUE  | TRUE  |
| 6_qbl_hap6  | 4264797 - 4281012     | F - 38.46% | TRUE  | TRUE  |
| 6_qbl_hap6  | 4264797 - 4281012     |            | FALSE | TRUE  |
| 6_ssto_hap7 | 4512850 - 4529059     |            | TRUE  | FALSE |
| 6_ssto_hap7 | 4512850 - 4529059     |            | TRUE  | FALSE |
| 6_ssto_hap7 | 4512850 - 4529059     | F - 15.38% | TRUE  | TRUE  |
| 6_ssto_hap7 | 4512850 - 4529059     | F - 7.69%  | TRUE  | TRUE  |
| 6_ssto_hap7 | 4512850 - 4529059     | F - 46.15% | TRUE  | TRUE  |
| 6_ssto_hap7 | 4512850 - 4529059     | T - 84.62% | TRUE  | TRUE  |
| 6_ssto_hap7 | 4512850 - 4529059     | F - 46.15% | TRUE  | TRUE  |
| 6_ssto_hap7 | 4512850 - 4529059     | F - 7.69%  | TRUE  | TRUE  |
| 6_ssto_hap7 | 4512850 - 4529059     | T - 92.31% | TRUE  | TRUE  |
| 6_ssto_hap7 | 4512850 - 4529059     | F - 38.46% | TRUE  | TRUE  |
| 6_ssto_hap7 | 4512850 - 4529059     |            | FALSE | TRUE  |
| 7           | 156432975 - 156469824 |            | TRUE  | TRUE  |
| 7           | 156432975 - 156469824 | F - 8.70%  | TRUE  | TRUE  |
| 7           | 156432975 - 156469824 | F - 4.35%  | TRUE  | TRUE  |
| 7           | 156432975 - 156469824 | F - 4.35%  | FALSE | TRUE  |
| X           | 114345183 - 114468635 |            | TRUE  | FALSE |
| X           | 114345183 - 114468635 |            | TRUE  | TRUE  |

|    |                       |             |       |       |
|----|-----------------------|-------------|-------|-------|
| X  | 114345183 - 114468635 | T - 100.00% | TRUE  | TRUE  |
| X  | 114345183 - 114468635 |             | TRUE  | TRUE  |
| X  | 114345183 - 114468635 |             | FALSE | TRUE  |
| X  | 114345183 - 114468635 |             | TRUE  | TRUE  |
| 7  | 18126572 - 19036993   |             | TRUE  | FALSE |
| 7  | 18126572 - 19036993   | F - 10.42%  | TRUE  | TRUE  |
| 7  | 18126572 - 19036993   | F - 2.08%   | TRUE  | TRUE  |
| 7  | 18126572 - 19036993   |             | TRUE  | TRUE  |
| 7  | 18126572 - 19036993   |             | TRUE  | TRUE  |
| 7  | 18126572 - 19036993   | F - 4.17%   | TRUE  | FALSE |
| 7  | 18126572 - 19036993   | F - 8.33%   | TRUE  | TRUE  |
| 7  | 18126572 - 19036993   | F - 10.42%  | TRUE  | TRUE  |
| 7  | 18126572 - 19036993   |             | FALSE | TRUE  |
| 7  | 18126572 - 19036993   | F - 18.75%  | TRUE  | TRUE  |
| 7  | 18126572 - 19036993   | F - 25.00%  | FALSE | TRUE  |
| 7  | 18126572 - 19036993   | F - 14.58%  | TRUE  | TRUE  |
| 7  | 18126572 - 19036993   | F - 25.00%  | TRUE  | TRUE  |
| 7  | 18126572 - 19036993   |             | TRUE  | TRUE  |
| 7  | 18126572 - 19036993   |             | FALSE | TRUE  |
| 7  | 18126572 - 19036993   | F - 25.00%  | TRUE  | TRUE  |
| 7  | 18126572 - 19036993   | F - 12.50%  | TRUE  | TRUE  |
| 7  | 18126572 - 19036993   |             | FALSE | TRUE  |
| 7  | 18126572 - 19036993   | T - 64.58%  | FALSE | TRUE  |
| 7  | 18126572 - 19036993   | F - 10.42%  | TRUE  | TRUE  |
| 7  | 18126572 - 19036993   |             | FALSE | TRUE  |
| 3  | 113682984 - 113775460 |             | TRUE  | FALSE |
| 3  | 113682984 - 113775460 |             | TRUE  | TRUE  |
| 3  | 113682984 - 113775460 | F - 45.45%  | TRUE  | TRUE  |
| 3  | 113682984 - 113775460 | F - 18.18%  | TRUE  | FALSE |
| 3  | 113682984 - 113775460 |             | TRUE  | TRUE  |
| 10 | 100007443 - 100028007 |             | TRUE  | FALSE |
| 10 | 100007443 - 100028007 |             | TRUE  | TRUE  |
| 10 | 100007443 - 100028007 |             | TRUE  | TRUE  |
| 10 | 100007443 - 100028007 |             | TRUE  | TRUE  |
| 10 | 100007443 - 100028007 |             | TRUE  | TRUE  |
| 10 | 100007443 - 100028007 |             | TRUE  | TRUE  |
| 10 | 100007443 - 100028007 |             | TRUE  | TRUE  |
| 10 | 100007443 - 100028007 |             | TRUE  | TRUE  |
| 10 | 100007443 - 100028007 | T - 100.00% | TRUE  | TRUE  |
| 10 | 100007443 - 100028007 | T - 100.00% | TRUE  | TRUE  |
| 10 | 100007443 - 100028007 |             | TRUE  | TRUE  |
| 10 | 100007443 - 100028007 | T - 100.00% | TRUE  | TRUE  |
| 11 | 123986069 - 124018428 |             | FALSE | TRUE  |
| 11 | 123986069 - 124018428 |             | TRUE  | TRUE  |
| 11 | 123986069 - 124018428 |             | TRUE  | TRUE  |
| 11 | 123986069 - 124018428 | T - 100.00% | FALSE | TRUE  |
| 11 | 123986069 - 124018428 | F - 35.71%  | TRUE  | TRUE  |
| 11 | 123986069 - 124018428 |             | TRUE  | TRUE  |
| 11 | 123986069 - 124018428 | F - 7.14%   | FALSE | TRUE  |
| 11 | 123986069 - 124018428 |             | TRUE  | TRUE  |
| 11 | 123986069 - 124018428 | T - 50.00%  | TRUE  | TRUE  |
| 11 | 123986069 - 124018428 |             | FALSE | TRUE  |
| 11 | 123986069 - 124018428 |             | TRUE  | TRUE  |
| 2  | 223289236 - 223425667 |             | TRUE  | FALSE |
| 2  | 223289236 - 223425667 |             | TRUE  | TRUE  |
| 2  | 223289236 - 223425667 | T - 100.00% | TRUE  | TRUE  |
| X  | 83313354 - 83442943   |             | TRUE  | FALSE |
| X  | 83313354 - 83442943   |             | FALSE | TRUE  |

|   |                          |            |       |       |
|---|--------------------------|------------|-------|-------|
| X | 83313354 - 83442943      |            | TRUE  | TRUE  |
| X | 83313354 - 83442943      | F - 33.33% | FALSE | TRUE  |
| X | 83313354 - 83442943      | T - 77.78% | TRUE  | TRUE  |
| X | 83313354 - 83442943      | F - 22.22% | FALSE | TRUE  |
| X | 83313354 - 83442943      | F - 33.33% | FALSE | TRUE  |
| X | 83313354 - 83442943      |            | TRUE  | TRUE  |
| X | 83313354 - 83442943      | F - 11.11% | TRUE  | TRUE  |
| X | 83313354 - 83442943      |            | FALSE | TRUE  |
| X | 83313354 - 83442943      | F - 11.11% | FALSE | TRUE  |
| X | 83313354 - 83442943      | T - 77.78% | FALSE | TRUE  |
| X | 83313354 - 83442943      |            | FALSE | TRUE  |
| X | 83313354 - 83442943      | T - 66.67% | FALSE | TRUE  |
|   | 2 36923833 - 37041937    |            | TRUE  | TRUE  |
|   | 2 36923833 - 37041937    | T - 66.67% | TRUE  | TRUE  |
|   | 2 36923833 - 37041937    | T - 80.00% | TRUE  | TRUE  |
|   | 2 36923833 - 37041937    | T - 66.67% | TRUE  | TRUE  |
|   | 2 36923833 - 37041937    | T - 86.67% | TRUE  | TRUE  |
|   | 2 36923833 - 37041937    |            | FALSE | TRUE  |
|   | 2 36923833 - 37041937    | T - 73.33% | FALSE | TRUE  |
|   | 2 36923833 - 37041937    | T - 93.33% | FALSE | TRUE  |
|   | 22 43924624 - 44208217   |            | TRUE  | TRUE  |
|   | 22 43924624 - 44208217   |            | TRUE  | TRUE  |
|   | 22 43924624 - 44208217   |            | TRUE  | FALSE |
|   | 22 43924624 - 44208217   | F - 5.26%  | TRUE  | FALSE |
|   | 22 43924624 - 44208217   | F - 36.84% | TRUE  | FALSE |
|   | 22 43924624 - 44208217   |            | TRUE  | FALSE |
|   | 22 43924624 - 44208217   | F - 47.37% | TRUE  | TRUE  |
|   | 22 43924624 - 44208217   |            | TRUE  | TRUE  |
|   | 22 43924624 - 44208217   |            | TRUE  | TRUE  |
|   | 22 43924624 - 44208217   | F - 5.26%  | TRUE  | TRUE  |
|   | 22 43924624 - 44208217   | F - 10.53% | TRUE  | TRUE  |
|   | 22 43924624 - 44208217   | F - 42.11% | TRUE  | TRUE  |
|   | 10 103113820 - 103317078 |            | TRUE  | TRUE  |
|   | 10 103113820 - 103317078 | F - 7.69%  | TRUE  | TRUE  |
|   | 10 103113820 - 103317078 | F - 46.15% | TRUE  | TRUE  |
|   | 10 103113820 - 103317078 |            | TRUE  | TRUE  |
|   | 10 103113820 - 103317078 |            | TRUE  | TRUE  |
|   | 1 61330931 - 61928465    |            | TRUE  | FALSE |
|   | 1 61330931 - 61928465    |            | TRUE  | TRUE  |
|   | 1 61330931 - 61928465    |            | TRUE  | TRUE  |
|   | 1 61330931 - 61928465    |            | TRUE  | TRUE  |
|   | 1 61330931 - 61928465    | T - 76.19% | FALSE | TRUE  |
|   | 1 61330931 - 61928465    | F - 9.52%  | FALSE | TRUE  |
|   | 6 33130458 - 33160276    |            | TRUE  | FALSE |
|   | 6 33130458 - 33160276    |            | TRUE  | TRUE  |
|   | 6 33130458 - 33160276    |            | TRUE  | TRUE  |
|   | 6 33130458 - 33160276    |            | TRUE  | TRUE  |
|   | 6 33130458 - 33160276    |            | TRUE  | FALSE |
|   | 6 33130458 - 33160276    |            | TRUE  | FALSE |
|   | 6 33130458 - 33160276    | T - 60.00% | FALSE | TRUE  |
|   | 6 33130458 - 33160276    |            | FALSE | TRUE  |
|   | 6 33130458 - 33160276    | T - 60.00% | TRUE  | TRUE  |
|   | 6 33130458 - 33160276    |            | TRUE  | TRUE  |
|   | 6 33130458 - 33160276    |            | FALSE | TRUE  |
|   | 6 33130458 - 33160276    |            | FALSE | TRUE  |
|   | 6 33130458 - 33160276    |            | FALSE | TRUE  |
|   | 18 57098171 - 57364644   | F - 16.67% | FALSE | TRUE  |
|   | 18 57098171 - 57364644   | F - 33.33% | TRUE  | TRUE  |

|    |                       |             |       |       |
|----|-----------------------|-------------|-------|-------|
| 18 | 57098171 - 57364644   | F - 33.33%  | FALSE | TRUE  |
| 18 | 57098171 - 57364644   |             | TRUE  | TRUE  |
| 18 | 57098171 - 57364644   | T - 66.67%  | FALSE | TRUE  |
| 18 | 57098171 - 57364644   | T - 66.67%  | FALSE | TRUE  |
| 18 | 57098171 - 57364644   | T - 50.00%  | TRUE  | TRUE  |
| 18 | 57098171 - 57364644   |             | TRUE  | TRUE  |
| 8  | 56792372 - 56925006   |             | TRUE  | FALSE |
| 8  | 56792372 - 56925006   | T - 55.56%  | TRUE  | TRUE  |
| 8  | 56792372 - 56925006   | T - 66.67%  | TRUE  | TRUE  |
| 8  | 56792372 - 56925006   |             | FALSE | TRUE  |
| 8  | 56792372 - 56925006   | F - 44.44%  | TRUE  | TRUE  |
| 8  | 56792372 - 56925006   | T - 55.56%  | TRUE  | TRUE  |
| 8  | 56792372 - 56925006   | F - 11.11%  | TRUE  | TRUE  |
| 8  | 56792372 - 56925006   |             | TRUE  | TRUE  |
| X  | 123094062 - 123556514 |             | TRUE  | FALSE |
| X  | 123094062 - 123556514 | F - 11.54%  | TRUE  | TRUE  |
| X  | 123094062 - 123556514 |             | TRUE  | TRUE  |
| X  | 123094062 - 123556514 | F - 30.77%  | TRUE  | TRUE  |
| X  | 123094062 - 123556514 |             | TRUE  | TRUE  |
| X  | 123094062 - 123556514 |             | FALSE | TRUE  |
| X  | 123094062 - 123556514 |             | FALSE | TRUE  |
| 10 | 69556427 - 69597937   |             | TRUE  | FALSE |
| 10 | 69556427 - 69597937   |             | TRUE  | FALSE |
| 10 | 69556427 - 69597937   |             | TRUE  | FALSE |
| 10 | 69556427 - 69597937   | F - 37.50%  | TRUE  | TRUE  |
| 10 | 69556427 - 69597937   |             | TRUE  | TRUE  |
| 10 | 69556427 - 69597937   | F - 37.50%  | TRUE  | TRUE  |
| 10 | 69556427 - 69597937   | T - 50.00%  | FALSE | TRUE  |
| 10 | 69556427 - 69597937   | F - 12.50%  | TRUE  | TRUE  |
| 10 | 69556427 - 69597937   | F - 25.00%  | FALSE | TRUE  |
| 21 | 47401651 - 47424964   |             | TRUE  | TRUE  |
| 21 | 47401651 - 47424964   | F - 9.09%   | TRUE  | TRUE  |
| 21 | 47401651 - 47424964   | F - 9.09%   | TRUE  | TRUE  |
| 21 | 47401651 - 47424964   | F - 9.09%   | TRUE  | TRUE  |
| 21 | 47401651 - 47424964   | F - 9.09%   | TRUE  | TRUE  |
| 21 | 43159529 - 43187266   |             | TRUE  | FALSE |
| 21 | 43159529 - 43187266   | F - 14.29%  | TRUE  | TRUE  |
| 21 | 43159529 - 43187266   | T - 100.00% | TRUE  | TRUE  |
| 21 | 43159529 - 43187266   |             | FALSE | TRUE  |
| 21 | 43159529 - 43187266   |             | FALSE | TRUE  |
| 21 | 43159529 - 43187266   | F - 14.29%  | TRUE  | TRUE  |
| 21 | 43159529 - 43187266   | T - 100.00% | TRUE  | TRUE  |
| 21 | 43159529 - 43187266   |             | FALSE | TRUE  |
| 21 | 43159529 - 43187266   | T - 100.00% | TRUE  | TRUE  |
| 21 | 43159529 - 43187266   |             | FALSE | TRUE  |
| X  | 68048821 - 68066029   |             | TRUE  | TRUE  |
| X  | 68048821 - 68066029   | T - 80.00%  | TRUE  | TRUE  |
| X  | 68048821 - 68066029   |             | TRUE  | TRUE  |
| X  | 68048821 - 68066029   |             | TRUE  | TRUE  |
| X  | 68048821 - 68066029   | T - 60.00%  | TRUE  | FALSE |
| X  | 68048821 - 68066029   |             | TRUE  | TRUE  |
| X  | 68048821 - 68066029   |             | FALSE | TRUE  |
| 16 | 47115431 - 47177936   | T - 60.00%  | TRUE  | TRUE  |
| 16 | 47115431 - 47177936   | T - 80.00%  | TRUE  | TRUE  |
| 16 | 47115431 - 47177936   |             | FALSE | TRUE  |
| 16 | 47115431 - 47177936   |             | TRUE  | TRUE  |
| 19 | 43757434 - 43773682   |             | TRUE  | TRUE  |
| 19 | 43757434 - 43773682   | F - 16.67%  | TRUE  | TRUE  |

|             |                       |            |       |       |
|-------------|-----------------------|------------|-------|-------|
| 19          | 43757434 - 43773682   |            | FALSE | TRUE  |
| 19          | 43757434 - 43773682   |            | TRUE  | TRUE  |
| 19          | 43757434 - 43773682   |            | FALSE | TRUE  |
| 19          | 43757434 - 43773682   | T - 66.67% | TRUE  | TRUE  |
| 19          | 43757434 - 43773682   | T - 91.67% | TRUE  | TRUE  |
| 19          | 43757434 - 43773682   | T - 66.67% | TRUE  | TRUE  |
| 19          | 43757434 - 43773682   | T - 58.33% | TRUE  | TRUE  |
| 19          | 43757434 - 43773682   | T - 91.67% | TRUE  | TRUE  |
| 19          | 43757434 - 43773682   |            | TRUE  | TRUE  |
| 19          | 43757434 - 43773682   |            | FALSE | TRUE  |
| 6_mann_hap4 | 2713997 - 2730446     | F - 7.69%  | TRUE  | TRUE  |
| 6_mann_hap4 | 2713997 - 2730446     | F - 46.15% | TRUE  | TRUE  |
| 6_mann_hap4 | 2713997 - 2730446     |            | TRUE  | TRUE  |
| 6_mann_hap4 | 2713997 - 2730446     | F - 23.08% | FALSE | TRUE  |
| 6_mann_hap4 | 2713997 - 2730446     |            | TRUE  | TRUE  |
| 6_mann_hap4 | 2713997 - 2730446     |            | TRUE  | TRUE  |
| 6_mann_hap4 | 2713997 - 2730446     |            | TRUE  | TRUE  |
| 6_mann_hap4 | 2713997 - 2730446     | F - 38.46% | TRUE  | TRUE  |
| 6_mann_hap4 | 2713997 - 2730446     |            | TRUE  | TRUE  |
| 6_mann_hap4 | 2713997 - 2730446     |            | FALSE | TRUE  |
| 11          | 110447766 - 110583912 |            | TRUE  | FALSE |
| 11          | 110447766 - 110583912 | F - 18.18% | FALSE | TRUE  |
| 11          | 110447766 - 110583912 | F - 27.27% | FALSE | TRUE  |
| 11          | 110447766 - 110583912 | F - 9.09%  | TRUE  | TRUE  |
| 1           | 79085607 - 79111830   |            | TRUE  | FALSE |
| 1           | 79085607 - 79111830   |            | TRUE  | TRUE  |
| 1           | 79085607 - 79111830   | F - 6.67%  | TRUE  | TRUE  |
| 6           | 167342992 - 167370679 | F - 5.00%  | TRUE  | TRUE  |
| 6           | 167342992 - 167370679 |            | TRUE  | TRUE  |
| 6           | 167342992 - 167370679 | F - 5.00%  | TRUE  | TRUE  |
| 6           | 167342992 - 167370679 | F - 5.00%  | TRUE  | TRUE  |
| 6           | 167342992 - 167370679 | F - 5.00%  | TRUE  | TRUE  |
| 6           | 167342992 - 167370679 | F - 10.00% | FALSE | TRUE  |
| 6           | 167342992 - 167370679 |            | FALSE | TRUE  |
| 6           | 167342992 - 167370679 | F - 5.00%  | TRUE  | TRUE  |
| 6           | 167342992 - 167370679 | F - 10.00% | TRUE  | TRUE  |
| 6           | 167342992 - 167370679 | F - 10.00% | TRUE  | TRUE  |
| 6           | 167342992 - 167370679 | T - 70.00% | TRUE  | TRUE  |
| 6           | 167342992 - 167370679 |            | FALSE | TRUE  |
| 6           | 167342992 - 167370679 | T - 65.00% | TRUE  | TRUE  |
| 6           | 167342992 - 167370679 | F - 15.00% | FALSE | TRUE  |
| 6           | 167342992 - 167370679 |            | TRUE  | TRUE  |
| 6           | 167342992 - 167370679 | F - 5.00%  | TRUE  | TRUE  |
| 6           | 167342992 - 167370679 | F - 15.00% | TRUE  | TRUE  |
| 6           | 167342992 - 167370679 |            | FALSE | TRUE  |
| 6           | 167342992 - 167370679 |            | TRUE  | TRUE  |
| 6           | 167342992 - 167370679 |            | TRUE  | TRUE  |
| 6           | 167342992 - 167370679 |            | FALSE | TRUE  |
| 1           | 84330711 - 84464833   |            | TRUE  | TRUE  |
| 1           | 84330711 - 84464833   | F - 13.04% | TRUE  | FALSE |
| 1           | 84330711 - 84464833   |            | TRUE  | TRUE  |
| 1           | 84330711 - 84464833   | F - 43.48% | FALSE | TRUE  |
| 1           | 84330711 - 84464833   | T - 56.52% | TRUE  | TRUE  |
| 1           | 84330711 - 84464833   | F - 17.39% | FALSE | TRUE  |
| 1           | 84330711 - 84464833   | F - 13.04% | FALSE | TRUE  |
| 1           | 84330711 - 84464833   | F - 13.04% | TRUE  | TRUE  |
| 1           | 84330711 - 84464833   | T - 60.87% | TRUE  | TRUE  |
| 1           | 84330711 - 84464833   | F - 8.70%  | FALSE | TRUE  |



|             |                       |             |       |       |
|-------------|-----------------------|-------------|-------|-------|
| 1           | 84330711 - 84464833   | F - 13.04%  | FALSE | TRUE  |
| 1           | 84330711 - 84464833   | F - 4.35%   | TRUE  | TRUE  |
| 1           | 84330711 - 84464833   |             | TRUE  | TRUE  |
| 1           | 84330711 - 84464833   |             | FALSE | TRUE  |
| 2           | 113969099 - 114024587 |             | TRUE  | FALSE |
| 2           | 113969099 - 114024587 | F - 5.56%   | TRUE  | TRUE  |
| 2           | 113969099 - 114024587 |             | FALSE | TRUE  |
| 2           | 113969099 - 114024587 | F - 44.44%  | TRUE  | TRUE  |
| 2           | 113969099 - 114024587 |             | TRUE  | TRUE  |
| 2           | 113969099 - 114024587 | F - 5.56%   | TRUE  | TRUE  |
| 2           | 113969099 - 114024587 | F - 5.56%   | TRUE  | TRUE  |
| 2           | 113969099 - 114024587 | F - 16.67%  | TRUE  | TRUE  |
| 2           | 113969099 - 114024587 |             | TRUE  | TRUE  |
| 2           | 113969099 - 114024587 |             | TRUE  | TRUE  |
| 2           | 113969099 - 114024587 |             | FALSE | TRUE  |
| 6           | 37321748 - 37362514   | F - 33.33%  | TRUE  | TRUE  |
| 6           | 37321748 - 37362514   |             | TRUE  | TRUE  |
| 6           | 37321748 - 37362514   |             | TRUE  | TRUE  |
| 19          | 52839498 - 52871031   |             | TRUE  | FALSE |
| 19          | 52839498 - 52871031   | T - 100.00% | TRUE  | TRUE  |
| 6           | 133561736 - 133853258 | T - 90.00%  | TRUE  | TRUE  |
| 6           | 133561736 - 133853258 |             | TRUE  | FALSE |
| 6           | 133561736 - 133853258 |             | TRUE  | FALSE |
| 6           | 133561736 - 133853258 |             | TRUE  | FALSE |
| 6           | 133561736 - 133853258 | T - 90.00%  | TRUE  | TRUE  |
| 6           | 133561736 - 133853258 |             | TRUE  | FALSE |
| 6           | 133561736 - 133853258 | F - 40.00%  | TRUE  | TRUE  |
| 6           | 133561736 - 133853258 |             | TRUE  | FALSE |
| 6           | 133561736 - 133853258 | T - 75.00%  | TRUE  | TRUE  |
| 6           | 133561736 - 133853258 | F - 40.00%  | TRUE  | FALSE |
| 6           | 133561736 - 133853258 |             | TRUE  | FALSE |
| 6           | 133561736 - 133853258 | T - 95.00%  | TRUE  | TRUE  |
| 6           | 133561736 - 133853258 | T - 85.00%  | TRUE  | FALSE |
| 6           | 133561736 - 133853258 | F - 40.00%  | TRUE  | FALSE |
| 6           | 133561736 - 133853258 |             | TRUE  | TRUE  |
| 6           | 133561736 - 133853258 | T - 85.00%  | TRUE  | FALSE |
| 6           | 133561736 - 133853258 |             | TRUE  | FALSE |
| 6           | 133561736 - 133853258 | T - 75.00%  | TRUE  | TRUE  |
| 6           | 133561736 - 133853258 | F - 5.00%   | TRUE  | FALSE |
| 6           | 133561736 - 133853258 | T - 60.00%  | TRUE  | FALSE |
| 6           | 133561736 - 133853258 | T - 55.00%  | TRUE  | TRUE  |
| 6           | 133561736 - 133853258 | T - 65.00%  | TRUE  | FALSE |
| 6           | 133561736 - 133853258 | F - 45.00%  | TRUE  | TRUE  |
| 6           | 133561736 - 133853258 |             | TRUE  | TRUE  |
| 6           | 133561736 - 133853258 | T - 70.00%  | TRUE  | FALSE |
| 6           | 133561736 - 133853258 | T - 70.00%  | TRUE  | FALSE |
| 6           | 133561736 - 133853258 | F - 40.00%  | TRUE  | FALSE |
| 6           | 133561736 - 133853258 | F - 5.00%   | TRUE  | TRUE  |
| 6           | 133561736 - 133853258 |             | TRUE  | TRUE  |
| 6           | 133561736 - 133853258 |             | TRUE  | TRUE  |
| 6_mann_hap4 | 4587774 - 4617591     |             | TRUE  | FALSE |
| 6_mann_hap4 | 4587774 - 4617591     |             | TRUE  | TRUE  |
| 6_mann_hap4 | 4587774 - 4617591     |             | TRUE  | TRUE  |
| 6_mann_hap4 | 4587774 - 4617591     |             | TRUE  | TRUE  |
| 6_mann_hap4 | 4587774 - 4617591     |             | TRUE  | FALSE |
| 6_mann_hap4 | 4587774 - 4617591     |             | TRUE  | FALSE |
| 6_mann_hap4 | 4587774 - 4617591     |             | TRUE  | TRUE  |
| 6_mann_hap4 | 4587774 - 4617591     | T - 77.78%  | FALSE | TRUE  |

|             |                         |            |       |       |
|-------------|-------------------------|------------|-------|-------|
| 6_mann_hap4 | 4587774 - 4617591       | F - 44.44% | FALSE | TRUE  |
| 6_mann_hap4 | 4587774 - 4617591       |            | FALSE | TRUE  |
| 6_mann_hap4 | 4587774 - 4617591       | F - 44.44% | TRUE  | TRUE  |
| 6_mann_hap4 | 4587774 - 4617591       |            | TRUE  | TRUE  |
| 6_mann_hap4 | 4587774 - 4617591       |            | FALSE | TRUE  |
| 6_mann_hap4 | 4587774 - 4617591       |            | FALSE | TRUE  |
| 6_mann_hap4 | 4587774 - 4617591       |            | FALSE | TRUE  |
|             | 2 157291802 - 157470247 |            | TRUE  | TRUE  |
|             | 2 157291802 - 157470247 |            | FALSE | TRUE  |
|             | 2 157291802 - 157470247 | F - 15.00% | TRUE  | TRUE  |
|             | 2 157291802 - 157470247 | F - 40.00% | TRUE  | FALSE |
|             | 2 157291802 - 157470247 | F - 15.00% | TRUE  | TRUE  |
|             | 2 157291802 - 157470247 | F - 15.00% | TRUE  | TRUE  |
|             | 2 157291802 - 157470247 | F - 5.00%  | FALSE | TRUE  |
|             | 2 157291802 - 157470247 |            | TRUE  | TRUE  |
|             | 2 157291802 - 157470247 |            | FALSE | TRUE  |
|             | 2 157291802 - 157470247 |            | TRUE  | TRUE  |
|             | 7 95034174 - 95064510   | T - 65.22% | TRUE  | FALSE |
|             | 7 95034174 - 95064510   |            | TRUE  | TRUE  |
|             | 7 95034174 - 95064510   | F - 4.35%  | TRUE  | TRUE  |
|             | 7 95034174 - 95064510   |            | TRUE  | TRUE  |
|             | 7 95034174 - 95064510   | F - 4.35%  | TRUE  | TRUE  |
|             | 7 95034174 - 95064510   | T - 60.87% | TRUE  | TRUE  |
|             | 7 95034174 - 95064510   |            | TRUE  | TRUE  |
| 6_ssto_hap7 | 4610625 - 4637414       |            | TRUE  | FALSE |
| 6_ssto_hap7 | 4610625 - 4637414       |            | TRUE  | TRUE  |
| 6_ssto_hap7 | 4610625 - 4637414       |            | TRUE  | TRUE  |
| 6_ssto_hap7 | 4610625 - 4637414       |            | TRUE  | TRUE  |
| 6_ssto_hap7 | 4610625 - 4637414       |            | TRUE  | FALSE |
| 6_ssto_hap7 | 4610625 - 4637414       |            | TRUE  | FALSE |
| 6_ssto_hap7 | 4610625 - 4637414       |            | TRUE  | TRUE  |
| 6_ssto_hap7 | 4610625 - 4637414       | F - 44.44% | FALSE | TRUE  |
| 6_ssto_hap7 | 4610625 - 4637414       |            | FALSE | TRUE  |
| 6_ssto_hap7 | 4610625 - 4637414       | F - 44.44% | TRUE  | TRUE  |
| 6_ssto_hap7 | 4610625 - 4637414       |            | TRUE  | TRUE  |
| 6_ssto_hap7 | 4610625 - 4637414       |            | FALSE | TRUE  |
| 6_ssto_hap7 | 4610625 - 4637414       |            | FALSE | TRUE  |
| 6_ssto_hap7 | 4610625 - 4637414       |            | FALSE | TRUE  |
|             | 7 87563458 - 87832204   | T - 81.82% | TRUE  | TRUE  |
|             | 7 87563458 - 87832204   |            | TRUE  | FALSE |
|             | 7 87563458 - 87832204   |            | TRUE  | FALSE |
|             | 7 87563458 - 87832204   | T - 77.27% | TRUE  | FALSE |
|             | 7 87563458 - 87832204   |            | TRUE  | FALSE |
|             | 7 87563458 - 87832204   | F - 27.27% | TRUE  | FALSE |
|             | 7 87563458 - 87832204   | T - 81.82% | TRUE  | TRUE  |
|             | 7 87563458 - 87832204   |            | TRUE  | FALSE |
|             | 7 87563458 - 87832204   | T - 68.18% | TRUE  | TRUE  |
|             | 7 87563458 - 87832204   |            | TRUE  | FALSE |
|             | 7 87563458 - 87832204   |            | TRUE  | FALSE |
|             | 7 87563458 - 87832204   |            | TRUE  | TRUE  |
|             | 7 87563458 - 87832204   | T - 77.27% | TRUE  | TRUE  |
|             | 7 87563458 - 87832204   | F - 40.91% | TRUE  | FALSE |
|             | 7 87563458 - 87832204   |            | TRUE  | TRUE  |
|             | 7 87563458 - 87832204   |            | TRUE  | FALSE |
|             | 7 87563458 - 87832204   |            | TRUE  | FALSE |
|             | 7 87563458 - 87832204   | T - 68.18% | TRUE  | FALSE |
|             | 7 87563458 - 87832204   | F - 13.64% | TRUE  | TRUE  |
|             | 7 87563458 - 87832204   | T - 59.09% | TRUE  | TRUE  |

|            |                       |             |       |       |
|------------|-----------------------|-------------|-------|-------|
| 7          | 87563458 - 87832204   |             | TRUE  | TRUE  |
| 7          | 87563458 - 87832204   |             | TRUE  | FALSE |
| 7          | 87563458 - 87832204   | T - 59.09%  | TRUE  | FALSE |
| 7          | 87563458 - 87832204   |             | TRUE  | FALSE |
| 7          | 87563458 - 87832204   | T - 59.09%  | TRUE  | TRUE  |
| 7          | 87563458 - 87832204   |             | TRUE  | TRUE  |
| 7          | 87563458 - 87832204   | T - 68.18%  | TRUE  | TRUE  |
| 7          | 87563458 - 87832204   |             | TRUE  | FALSE |
| 7          | 87563458 - 87832204   | T - 77.27%  | TRUE  | TRUE  |
| 7          | 87563458 - 87832204   |             | TRUE  | FALSE |
| 7          | 87563458 - 87832204   |             | TRUE  | TRUE  |
| 7          | 87563458 - 87832204   |             | TRUE  | FALSE |
| 7          | 87563458 - 87832204   | F - 4.55%   | TRUE  | FALSE |
| 7          | 87563458 - 87832204   |             | TRUE  | TRUE  |
| 7          | 87563458 - 87832204   |             | TRUE  | TRUE  |
| 7          | 87563458 - 87832204   | F - 4.55%   | TRUE  | TRUE  |
| 7          | 87563458 - 87832204   | F - 22.73%  | TRUE  | FALSE |
| 7          | 87563458 - 87832204   | T - 68.18%  | TRUE  | TRUE  |
| 7          | 87563458 - 87832204   | F - 4.55%   | TRUE  | FALSE |
| 7          | 87563458 - 87832204   | T - 63.64%  | TRUE  | TRUE  |
| 7          | 87563458 - 87832204   | F - 9.09%   | TRUE  | TRUE  |
| 7          | 87563458 - 87832204   | F - 36.36%  | TRUE  | TRUE  |
| 7          | 87563458 - 87832204   |             | FALSE | TRUE  |
| 7          | 87563458 - 87832204   |             | TRUE  | FALSE |
| 7          | 87563458 - 87832204   | F - 4.55%   | TRUE  | TRUE  |
| 7          | 87563458 - 87832204   | T - 50.00%  | TRUE  | TRUE  |
| 7          | 87563458 - 87832204   | F - 4.55%   | TRUE  | TRUE  |
| 7          | 87563458 - 87832204   |             | TRUE  | TRUE  |
| 7          | 87563458 - 87832204   |             | FALSE | TRUE  |
| 22         | 29663998 - 29696515   |             | TRUE  | TRUE  |
| 22         | 29663998 - 29696515   | F - 3.03%   | TRUE  | TRUE  |
| 10         | 5029967 - 5060225     | T - 72.73%  | TRUE  | TRUE  |
| 10         | 5029967 - 5060225     | F - 36.36%  | TRUE  | TRUE  |
| 10         | 5029967 - 5060225     | F - 36.36%  | FALSE | TRUE  |
| 10         | 5029967 - 5060225     | F - 45.45%  | TRUE  | TRUE  |
| 10         | 5029967 - 5060225     |             | TRUE  | TRUE  |
| 10         | 5029967 - 5060225     | F - 18.18%  | TRUE  | TRUE  |
| 5          | 170846660 - 170884630 | T - 66.67%  | TRUE  | TRUE  |
| 5          | 170846660 - 170884630 | T - 100.00% | TRUE  | FALSE |
| 5          | 170846660 - 170884630 | T - 100.00% | TRUE  | TRUE  |
| 5          | 170846660 - 170884630 |             | TRUE  | TRUE  |
| 5          | 170846660 - 170884630 | T - 66.67%  | TRUE  | TRUE  |
| 5          | 170846660 - 170884630 | T - 100.00% | TRUE  | TRUE  |
| 12         | 54402832 - 54407570   |             | TRUE  | TRUE  |
| 12         | 54402832 - 54407570   | F - 25.00%  | TRUE  | TRUE  |
| 12         | 54402832 - 54407570   | F - 25.00%  | TRUE  | TRUE  |
| 6_cox_hap2 | 4574295 - 4604112     |             | TRUE  | FALSE |
| 6_cox_hap2 | 4574295 - 4604112     |             | TRUE  | TRUE  |
| 6_cox_hap2 | 4574295 - 4604112     |             | TRUE  | TRUE  |
| 6_cox_hap2 | 4574295 - 4604112     |             | TRUE  | TRUE  |
| 6_cox_hap2 | 4574295 - 4604112     |             | TRUE  | FALSE |
| 6_cox_hap2 | 4574295 - 4604112     |             | TRUE  | FALSE |
| 6_cox_hap2 | 4574295 - 4604112     |             | TRUE  | TRUE  |
| 6_cox_hap2 | 4574295 - 4604112     | F - 44.44%  | FALSE | TRUE  |
| 6_cox_hap2 | 4574295 - 4604112     |             | FALSE | TRUE  |
| 6_cox_hap2 | 4574295 - 4604112     | F - 44.44%  | TRUE  | TRUE  |
| 6_cox_hap2 | 4574295 - 4604112     |             | TRUE  | TRUE  |
| 6_cox_hap2 | 4574295 - 4604112     |             | FALSE | TRUE  |

|            |                     |            |       |       |
|------------|---------------------|------------|-------|-------|
| 6_cox_hap2 | 4574295 - 4604112   |            | FALSE | TRUE  |
| 6_cox_hap2 | 4574295 - 4604112   |            | FALSE | TRUE  |
| 6_dbb_hap3 | 4411765 - 4441583   |            | TRUE  | FALSE |
| 6_dbb_hap3 | 4411765 - 4441583   |            | TRUE  | TRUE  |
| 6_dbb_hap3 | 4411765 - 4441583   |            | TRUE  | TRUE  |
| 6_dbb_hap3 | 4411765 - 4441583   |            | TRUE  | TRUE  |
| 6_dbb_hap3 | 4411765 - 4441583   |            | TRUE  | FALSE |
| 6_dbb_hap3 | 4411765 - 4441583   |            | TRUE  | FALSE |
| 6_dbb_hap3 | 4411765 - 4441583   |            | TRUE  | TRUE  |
| 6_dbb_hap3 | 4411765 - 4441583   | F - 44.44% | FALSE | TRUE  |
| 6_dbb_hap3 | 4411765 - 4441583   |            | FALSE | TRUE  |
| 6_dbb_hap3 | 4411765 - 4441583   | F - 44.44% | TRUE  | TRUE  |
| 6_dbb_hap3 | 4411765 - 4441583   |            | TRUE  | TRUE  |
| 6_dbb_hap3 | 4411765 - 4441583   |            | FALSE | TRUE  |
| 6_dbb_hap3 | 4411765 - 4441583   |            | FALSE | TRUE  |
| 6_dbb_hap3 | 4411765 - 4441583   |            | FALSE | TRUE  |
| 6_mcf_hap5 | 4604224 - 4634040   |            | TRUE  | FALSE |
| 6_mcf_hap5 | 4604224 - 4634040   |            | TRUE  | TRUE  |
| 6_mcf_hap5 | 4604224 - 4634040   |            | TRUE  | TRUE  |
| 6_mcf_hap5 | 4604224 - 4634040   |            | TRUE  | TRUE  |
| 6_mcf_hap5 | 4604224 - 4634040   |            | TRUE  | FALSE |
| 6_mcf_hap5 | 4604224 - 4634040   |            | TRUE  | FALSE |
| 6_mcf_hap5 | 4604224 - 4634040   |            | TRUE  | TRUE  |
| 6_mcf_hap5 | 4604224 - 4634040   | F - 44.44% | FALSE | TRUE  |
| 6_mcf_hap5 | 4604224 - 4634040   |            | FALSE | TRUE  |
| 6_mcf_hap5 | 4604224 - 4634040   | F - 44.44% | TRUE  | TRUE  |
| 6_mcf_hap5 | 4604224 - 4634040   |            | TRUE  | TRUE  |
| 6_mcf_hap5 | 4604224 - 4634040   |            | FALSE | TRUE  |
| 6_mcf_hap5 | 4604224 - 4634040   |            | FALSE | TRUE  |
| 6_mcf_hap5 | 4604224 - 4634040   |            | FALSE | TRUE  |
| 6_mcf_hap5 | 4604224 - 4634040   |            | FALSE | TRUE  |
| 6_qbl_hap6 | 4362681 - 4392498   |            | TRUE  | FALSE |
| 6_qbl_hap6 | 4362681 - 4392498   |            | TRUE  | TRUE  |
| 6_qbl_hap6 | 4362681 - 4392498   |            | TRUE  | TRUE  |
| 6_qbl_hap6 | 4362681 - 4392498   |            | TRUE  | TRUE  |
| 6_qbl_hap6 | 4362681 - 4392498   |            | TRUE  | FALSE |
| 6_qbl_hap6 | 4362681 - 4392498   |            | TRUE  | FALSE |
| 6_qbl_hap6 | 4362681 - 4392498   |            | TRUE  | TRUE  |
| 6_qbl_hap6 | 4362681 - 4392498   | F - 44.44% | FALSE | TRUE  |
| 6_qbl_hap6 | 4362681 - 4392498   |            | FALSE | TRUE  |
| 6_qbl_hap6 | 4362681 - 4392498   | F - 44.44% | TRUE  | TRUE  |
| 6_qbl_hap6 | 4362681 - 4392498   |            | TRUE  | TRUE  |
| 6_qbl_hap6 | 4362681 - 4392498   |            | FALSE | TRUE  |
| 6_qbl_hap6 | 4362681 - 4392498   |            | FALSE | TRUE  |
| 6_qbl_hap6 | 4362681 - 4392498   |            | FALSE | TRUE  |
| 3          | 13521224 - 13547924 |            | TRUE  | FALSE |
| 3          | 13521224 - 13547924 |            | TRUE  | FALSE |
| 3          | 13521224 - 13547924 |            | TRUE  | TRUE  |
| 3          | 13521224 - 13547924 |            | TRUE  | TRUE  |
| 3          | 13521224 - 13547924 | F - 8.00%  | TRUE  | TRUE  |
| 3          | 13521224 - 13547924 | F - 4.00%  | TRUE  | TRUE  |
| 3          | 13521224 - 13547924 | F - 4.00%  | FALSE | TRUE  |
| 3          | 13521224 - 13547924 | F - 36.00% | TRUE  | TRUE  |
| 3          | 13521224 - 13547924 | F - 8.00%  | TRUE  | TRUE  |
| 3          | 13521224 - 13547924 | F - 16.00% | TRUE  | TRUE  |
| 3          | 13521224 - 13547924 | F - 44.00% | TRUE  | TRUE  |
| 3          | 13521224 - 13547924 |            | TRUE  | TRUE  |
| 3          | 13521224 - 13547924 | F - 40.00% | TRUE  | TRUE  |
| 3          | 13521224 - 13547924 | F - 32.00% | TRUE  | TRUE  |

|            |                     |             |       |       |
|------------|---------------------|-------------|-------|-------|
| 3          | 13521224 - 13547924 | F - 48.00%  | TRUE  | TRUE  |
| 3          | 13521224 - 13547924 |             | TRUE  | TRUE  |
| 3          | 13521224 - 13547924 |             | FALSE | TRUE  |
| 3          | 13521224 - 13547924 | T - 68.00%  | FALSE | TRUE  |
| 5          | 57749809 - 57756087 | F - 5.00%   | TRUE  | TRUE  |
| 5          | 57749809 - 57756087 | F - 10.00%  | TRUE  | TRUE  |
| 5          | 57749809 - 57756087 | F - 10.00%  | TRUE  | TRUE  |
| 5          | 57749809 - 57756087 | F - 5.00%   | FALSE | TRUE  |
| 5          | 57749809 - 57756087 |             | TRUE  | TRUE  |
| 5          | 57749809 - 57756087 | F - 5.00%   | TRUE  | TRUE  |
| 5          | 57749809 - 57756087 | F - 5.00%   | FALSE | TRUE  |
| 5          | 57749809 - 57756087 | F - 15.00%  | TRUE  | TRUE  |
| 5          | 57749809 - 57756087 | F - 30.00%  | TRUE  | TRUE  |
| 5          | 57749809 - 57756087 |             | TRUE  | TRUE  |
| 5          | 57749809 - 57756087 | F - 5.00%   | FALSE | TRUE  |
| 5          | 57749809 - 57756087 | F - 5.00%   | FALSE | TRUE  |
| 5          | 57749809 - 57756087 |             | FALSE | TRUE  |
| 5          | 57749809 - 57756087 | F - 15.00%  | TRUE  | TRUE  |
| 5          | 57749809 - 57756087 | F - 10.00%  | TRUE  | TRUE  |
| 5          | 57749809 - 57756087 | F - 40.00%  | TRUE  | TRUE  |
| 5          | 57749809 - 57756087 | F - 20.00%  | TRUE  | TRUE  |
| 5          | 57749809 - 57756087 | F - 15.00%  | FALSE | TRUE  |
| 5          | 57749809 - 57756087 | F - 35.00%  | TRUE  | TRUE  |
| 7          | 72983277 - 72993121 |             | TRUE  | FALSE |
| 7          | 72983277 - 72993121 | F - 3.57%   | TRUE  | TRUE  |
| 7          | 72983277 - 72993121 |             | TRUE  | TRUE  |
| 7          | 72983277 - 72993121 | F - 7.14%   | FALSE | TRUE  |
| 7          | 72983277 - 72993121 | F - 3.57%   | FALSE | TRUE  |
| 7          | 72983277 - 72993121 | F - 14.29%  | TRUE  | TRUE  |
| 7          | 72983277 - 72993121 |             | TRUE  | TRUE  |
| 7          | 72983277 - 72993121 | F - 46.43%  | TRUE  | TRUE  |
| 7          | 72983277 - 72993121 |             | TRUE  | TRUE  |
| 14         | 23527773 - 23564823 | F - 5.26%   | TRUE  | TRUE  |
| 14         | 23527773 - 23564823 |             | TRUE  | TRUE  |
| 14         | 23527773 - 23564823 |             | TRUE  | TRUE  |
| 14         | 23527773 - 23564823 |             | FALSE | TRUE  |
| 16         | 31711911 - 31718758 |             | TRUE  | TRUE  |
| 16         | 31711911 - 31718758 |             | TRUE  | TRUE  |
| 16         | 31711911 - 31718758 |             | TRUE  | TRUE  |
| 16         | 31711911 - 31718758 | F - 16.67%  | TRUE  | TRUE  |
| 16         | 31711911 - 31718758 | F - 16.67%  | TRUE  | TRUE  |
| 16         | 31711911 - 31718758 | T - 66.67%  | FALSE | TRUE  |
| 6_dbb_hap3 | 1150399 - 1153860   | F - 33.33%  | TRUE  | TRUE  |
| 6_dbb_hap3 | 1150399 - 1153860   | F - 33.33%  | TRUE  | TRUE  |
| 6_dbb_hap3 | 1150399 - 1153860   |             | TRUE  | TRUE  |
| 6_dbb_hap3 | 1150399 - 1153860   |             | FALSE | TRUE  |
| 6_dbb_hap3 | 1150399 - 1153860   | F - 33.33%  | TRUE  | TRUE  |
| 6_dbb_hap3 | 1150399 - 1153860   | T - 100.00% | TRUE  | TRUE  |
| 1          | 7975931 - 8003225   |             | TRUE  | TRUE  |
| 1          | 7975931 - 8003225   | F - 20.00%  | TRUE  | TRUE  |
| 1          | 7975931 - 8003225   |             | TRUE  | TRUE  |
| 1          | 7975931 - 8003225   | T - 60.00%  | TRUE  | TRUE  |
| 1          | 7975931 - 8003225   | T - 100.00% | TRUE  | TRUE  |
| 1          | 7975931 - 8003225   | T - 60.00%  | FALSE | TRUE  |
| 1          | 7975931 - 8003225   |             | FALSE | TRUE  |
| 1          | 7975931 - 8003225   | T - 80.00%  | TRUE  | TRUE  |
| 2          | 217730 - 266398     |             | TRUE  | TRUE  |
| 2          | 217730 - 266398     |             | TRUE  | TRUE  |

|    |                       |            |       |       |
|----|-----------------------|------------|-------|-------|
| 2  | 217730 - 266398       | F - 5.26%  | TRUE  | TRUE  |
| 2  | 217730 - 266398       | F - 7.89%  | TRUE  | TRUE  |
| 2  | 217730 - 266398       | F - 7.89%  | TRUE  | TRUE  |
| 2  | 217730 - 266398       | F - 5.26%  | TRUE  | TRUE  |
| 2  | 217730 - 266398       |            | TRUE  | TRUE  |
| 2  | 217730 - 266398       | F - 2.63%  | TRUE  | TRUE  |
| 2  | 217730 - 266398       | T - 52.63% | TRUE  | TRUE  |
| 2  | 217730 - 266398       | F - 2.63%  | TRUE  | TRUE  |
| 2  | 217730 - 266398       | F - 10.53% | TRUE  | TRUE  |
| 2  | 217730 - 266398       | F - 2.63%  | FALSE | TRUE  |
| 2  | 217730 - 266398       |            | FALSE | TRUE  |
| 2  | 217730 - 266398       |            | TRUE  | TRUE  |
| 2  | 217730 - 266398       | F - 2.63%  | TRUE  | TRUE  |
| 2  | 217730 - 266398       | F - 2.63%  | TRUE  | TRUE  |
| 2  | 217730 - 266398       | F - 2.63%  | TRUE  | TRUE  |
| 2  | 217730 - 266398       |            | FALSE | TRUE  |
| 2  | 217730 - 266398       | F - 5.26%  | TRUE  | TRUE  |
| 2  | 217730 - 266398       | F - 7.89%  | FALSE | TRUE  |
| 2  | 217730 - 266398       | T - 73.68% | TRUE  | TRUE  |
| 2  | 217730 - 266398       |            | FALSE | TRUE  |
| 2  | 217730 - 266398       |            | TRUE  | TRUE  |
| 14 | 73704205 - 73741348   |            | TRUE  | FALSE |
| 14 | 73704205 - 73741348   | T - 80.00% | TRUE  | TRUE  |
| 14 | 73704205 - 73741348   | T - 66.67% | TRUE  | TRUE  |
| 14 | 73704205 - 73741348   |            | TRUE  | FALSE |
| 14 | 73704205 - 73741348   | T - 80.00% | TRUE  | FALSE |
| 1  | 142618766 - 142729975 | T - 66.67% | TRUE  | TRUE  |
| 1  | 142618766 - 142729975 |            | FALSE | TRUE  |
| 1  | 142618766 - 142729975 |            | FALSE | TRUE  |
| 1  | 142618766 - 142729975 |            | TRUE  | TRUE  |
| 1  | 142618766 - 142729975 | F - 33.33% | TRUE  | TRUE  |
| 1  | 142618766 - 142729975 |            | TRUE  | TRUE  |
| 1  | 142618766 - 142729975 | F - 16.67% | TRUE  | TRUE  |
| 1  | 142618766 - 142729975 | F - 16.67% | TRUE  | TRUE  |
| 2  | 173345568 - 173421324 |            | TRUE  | TRUE  |
| 2  | 173345568 - 173421324 | F - 20.00% | TRUE  | TRUE  |
| 2  | 173345568 - 173421324 | F - 20.00% | FALSE | TRUE  |
| 2  | 173345568 - 173421324 | F - 20.00% | TRUE  | TRUE  |
| 2  | 173345568 - 173421324 | F - 20.00% | TRUE  | TRUE  |
| 2  | 173345568 - 173421324 | F - 40.00% | TRUE  | TRUE  |
| 2  | 173345568 - 173421324 | T - 80.00% | TRUE  | TRUE  |
| 2  | 173345568 - 173421324 | F - 20.00% | FALSE | TRUE  |
| 2  | 173345568 - 173421324 | T - 60.00% | TRUE  | TRUE  |
| 2  | 173345568 - 173421324 |            | FALSE | TRUE  |
| 10 | 11047259 - 11378672   |            | TRUE  | FALSE |
| 10 | 11047259 - 11378672   |            | TRUE  | TRUE  |
| 10 | 11047259 - 11378672   |            | TRUE  | TRUE  |
| 10 | 11047259 - 11378672   | F - 23.08% | TRUE  | TRUE  |
| 10 | 11047259 - 11378672   | T - 92.31% | TRUE  | TRUE  |
| 10 | 11047259 - 11378672   |            | TRUE  | TRUE  |
| 10 | 11047259 - 11378672   | T - 96.15% | TRUE  | TRUE  |
| 10 | 11047259 - 11378672   |            | TRUE  | TRUE  |
| 10 | 11047259 - 11378672   | F - 34.62% | TRUE  | TRUE  |
| 10 | 11047259 - 11378672   | F - 15.38% | TRUE  | TRUE  |
| 10 | 11047259 - 11378672   |            | TRUE  | TRUE  |
| 10 | 11047259 - 11378672   | F - 26.92% | TRUE  | TRUE  |
| 10 | 11047259 - 11378672   | T - 57.69% | TRUE  | TRUE  |
| 10 | 11047259 - 11378672   |            | FALSE | TRUE  |

|    |                       |             |       |       |
|----|-----------------------|-------------|-------|-------|
| 10 | 11047259 - 11378672   | T - 92.31%  | TRUE  | TRUE  |
| 10 | 11047259 - 11378672   |             | FALSE | TRUE  |
| 15 | 30653443 - 30685864   |             | TRUE  | TRUE  |
| 15 | 30653443 - 30685864   | T - 100.00% | TRUE  | TRUE  |
| 15 | 30653443 - 30685864   | T - 80.00%  | TRUE  | TRUE  |
| 15 | 30653443 - 30685864   |             | TRUE  | TRUE  |
| 15 | 30653443 - 30685864   | T - 100.00% | TRUE  | TRUE  |
| 15 | 30653443 - 30685864   | F - 40.00%  | TRUE  | TRUE  |
| 10 | 80703083 - 80828817   |             | TRUE  | TRUE  |
| 10 | 80703083 - 80828817   |             | TRUE  | FALSE |
| 10 | 80703083 - 80828817   |             | TRUE  | FALSE |
| 10 | 80703083 - 80828817   |             | TRUE  | TRUE  |
| 10 | 80703083 - 80828817   |             | TRUE  | TRUE  |
| 10 | 80703083 - 80828817   | F - 12.50%  | TRUE  | TRUE  |
| 10 | 80703083 - 80828817   |             | TRUE  | TRUE  |
| 10 | 80703083 - 80828817   | T - 87.50%  | TRUE  | TRUE  |
| 1  | 151336778 - 151345209 |             | TRUE  | TRUE  |
| 1  | 151336778 - 151345209 | F - 28.00%  | TRUE  | TRUE  |
| 1  | 151336778 - 151345209 | F - 4.00%   | TRUE  | TRUE  |
| 1  | 151336778 - 151345209 | F - 4.00%   | TRUE  | TRUE  |
| 1  | 151336778 - 151345209 | F - 28.00%  | TRUE  | TRUE  |
| 1  | 151336778 - 151345209 |             | TRUE  | TRUE  |
| 3  | 40428647 - 40470110   |             | TRUE  | FALSE |
| 3  | 40428647 - 40470110   |             | TRUE  | TRUE  |
| 3  | 40428647 - 40470110   | T - 100.00% | TRUE  | TRUE  |
| 3  | 40428647 - 40470110   |             | TRUE  | FALSE |
| 3  | 40428647 - 40470110   | T - 85.71%  | TRUE  | TRUE  |
| 3  | 40428647 - 40470110   | F - 42.86%  | TRUE  | TRUE  |
| 3  | 40428647 - 40470110   | F - 14.29%  | TRUE  | TRUE  |
| 3  | 40428647 - 40470110   |             | TRUE  | TRUE  |
| 3  | 40428647 - 40470110   | F - 14.29%  | TRUE  | TRUE  |
| 4  | 47596015 - 47840123   | T - 50.00%  | TRUE  | FALSE |
| 4  | 47596015 - 47840123   | T - 66.67%  | TRUE  | FALSE |
| 4  | 47596015 - 47840123   | T - 55.56%  | TRUE  | FALSE |
| 4  | 47596015 - 47840123   | F - 16.67%  | TRUE  | TRUE  |
| 4  | 47596015 - 47840123   |             | TRUE  | FALSE |
| 4  | 47596015 - 47840123   |             | TRUE  | FALSE |
| 4  | 47596015 - 47840123   |             | TRUE  | FALSE |
| 4  | 47596015 - 47840123   | T - 50.00%  | TRUE  | FALSE |
| 4  | 47596015 - 47840123   | T - 55.56%  | TRUE  | TRUE  |
| 4  | 47596015 - 47840123   | T - 72.22%  | TRUE  | TRUE  |
| 4  | 47596015 - 47840123   |             | TRUE  | TRUE  |
| 4  | 47596015 - 47840123   |             | TRUE  | FALSE |
| 4  | 47596015 - 47840123   |             | TRUE  | TRUE  |
| 4  | 47596015 - 47840123   | T - 50.00%  | TRUE  | TRUE  |
| 4  | 47596015 - 47840123   | F - 11.11%  | TRUE  | FALSE |
| 4  | 47596015 - 47840123   |             | TRUE  | FALSE |
| 4  | 47596015 - 47840123   |             | TRUE  | FALSE |
| 4  | 47596015 - 47840123   | F - 11.11%  | TRUE  | TRUE  |
| 4  | 47596015 - 47840123   |             | TRUE  | TRUE  |
| 4  | 47596015 - 47840123   |             | TRUE  | FALSE |
| 4  | 47596015 - 47840123   |             | TRUE  | FALSE |
| 4  | 47596015 - 47840123   |             | TRUE  | TRUE  |
| 4  | 47596015 - 47840123   |             | TRUE  | TRUE  |
| 4  | 47596015 - 47840123   | T - 72.22%  | TRUE  | TRUE  |
| 4  | 47596015 - 47840123   | F - 11.11%  | TRUE  | TRUE  |
| 4  | 47596015 - 47840123   | F - 11.11%  | TRUE  | TRUE  |
| 4  | 47596015 - 47840123   | F - 5.56%   | TRUE  | FALSE |

|   |                       |            |       |       |
|---|-----------------------|------------|-------|-------|
| 1 | 161475205 - 161493803 |            | TRUE  | TRUE  |
| 1 | 161475205 - 161493803 | T - 55.56% | TRUE  | TRUE  |
| 1 | 161475205 - 161493803 | F - 16.67% | TRUE  | TRUE  |
| 1 | 161475205 - 161493803 | T - 61.11% | TRUE  | TRUE  |
| 1 | 161475205 - 161493803 | F - 5.56%  | TRUE  | FALSE |
| 1 | 161475205 - 161493803 | F - 5.56%  | TRUE  | TRUE  |
| 1 | 161475205 - 161493803 |            | FALSE | TRUE  |
| 1 | 161475205 - 161493803 | F - 5.56%  | TRUE  | TRUE  |
| 1 | 161475205 - 161493803 |            | TRUE  | TRUE  |
| 1 | 161475205 - 161493803 | T - 50.00% | FALSE | TRUE  |
| 1 | 161475205 - 161493803 |            | TRUE  | TRUE  |
| 1 | 161475205 - 161493803 | T - 61.11% | TRUE  | TRUE  |
| 1 | 161475205 - 161493803 | T - 77.78% | TRUE  | TRUE  |
| 1 | 161475205 - 161493803 |            | FALSE | TRUE  |
| 1 | 161475205 - 161493803 | T - 61.11% | TRUE  | TRUE  |
| 1 | 161475205 - 161493803 | F - 38.89% | FALSE | TRUE  |
| 2 | 63348518 - 64054977   |            | TRUE  | FALSE |
| 2 | 63348518 - 64054977   |            | TRUE  | FALSE |
| 2 | 63348518 - 64054977   |            | TRUE  | TRUE  |
| 2 | 63348518 - 64054977   | F - 36.00% | TRUE  | TRUE  |
| 2 | 63348518 - 64054977   | F - 8.00%  | TRUE  | TRUE  |
| 7 | 94023873 - 94060544   | F - 5.26%  | TRUE  | TRUE  |
| 7 | 94023873 - 94060544   | F - 10.53% | TRUE  | TRUE  |
| 7 | 94023873 - 94060544   | F - 5.26%  | TRUE  | TRUE  |
| 7 | 94023873 - 94060544   | F - 5.26%  | TRUE  | TRUE  |
| 7 | 94023873 - 94060544   | F - 21.05% | TRUE  | TRUE  |
| 7 | 94023873 - 94060544   | F - 5.26%  | TRUE  | TRUE  |
| 7 | 94023873 - 94060544   | F - 5.26%  | TRUE  | TRUE  |
| 7 | 94023873 - 94060544   | F - 10.53% | TRUE  | TRUE  |
| 7 | 94023873 - 94060544   | F - 10.53% | TRUE  | TRUE  |
| 7 | 94023873 - 94060544   | F - 5.26%  | TRUE  | TRUE  |
| 7 | 94023873 - 94060544   | F - 10.53% | TRUE  | TRUE  |
| 7 | 94023873 - 94060544   | F - 5.26%  | TRUE  | TRUE  |
| 7 | 94023873 - 94060544   |            | TRUE  | TRUE  |
| 7 | 94023873 - 94060544   |            | TRUE  | TRUE  |
| 7 | 94023873 - 94060544   | F - 36.84% | TRUE  | TRUE  |
| 7 | 94023873 - 94060544   | F - 36.84% | TRUE  | TRUE  |
| 7 | 94023873 - 94060544   |            | TRUE  | TRUE  |
| 7 | 94023873 - 94060544   | F - 31.58% | TRUE  | TRUE  |
| 7 | 94023873 - 94060544   | F - 31.58% | TRUE  | TRUE  |
| 7 | 94023873 - 94060544   |            | TRUE  | TRUE  |
| 7 | 94023873 - 94060544   | F - 36.84% | TRUE  | TRUE  |
| 7 | 94023873 - 94060544   | F - 31.58% | TRUE  | TRUE  |
| 7 | 94023873 - 94060544   | F - 31.58% | TRUE  | TRUE  |
| 7 | 94023873 - 94060544   |            | TRUE  | TRUE  |
| 7 | 94023873 - 94060544   | F - 15.79% | TRUE  | TRUE  |
| 2 | 19167729 - 19546509   |            | TRUE  | FALSE |
| 2 | 19167729 - 19546509   |            | TRUE  | TRUE  |
| 2 | 19167729 - 19546509   | F - 25.00% | TRUE  | TRUE  |
| 2 | 19167729 - 19546509   |            | FALSE | TRUE  |
| 2 | 19167729 - 19546509   | T - 75.00% | TRUE  | TRUE  |
| 2 | 19167729 - 19546509   | F - 25.00% | TRUE  | TRUE  |
| 2 | 19167729 - 19546509   |            | TRUE  | TRUE  |
| 1 | 14925200 - 15444544   |            | TRUE  | FALSE |
| 1 | 14925200 - 15444544   |            | TRUE  | TRUE  |
| 1 | 14925200 - 15444544   | F - 13.33% | TRUE  | TRUE  |
| 1 | 14925200 - 15444544   | F - 13.33% | TRUE  | TRUE  |
| 1 | 14925200 - 15444544   | F - 33.33% | FALSE | TRUE  |



|   |                       |            |       |       |
|---|-----------------------|------------|-------|-------|
| 1 | 14925200 - 15444544   |            | FALSE | TRUE  |
| 1 | 14925200 - 15444544   | F - 20.00% | FALSE | TRUE  |
| 1 | 14925200 - 15444544   |            | TRUE  | TRUE  |
| 1 | 14925200 - 15444544   |            | TRUE  | TRUE  |
| 1 | 14925200 - 15444544   | F - 13.33% | FALSE | TRUE  |
| 1 | 148250245 - 148347506 |            | TRUE  | FALSE |
| 1 | 148250245 - 148347506 | F - 2.08%  | TRUE  | TRUE  |
| 1 | 148250245 - 148347506 | F - 2.08%  | TRUE  | TRUE  |
| 1 | 148250245 - 148347506 | F - 2.08%  | TRUE  | TRUE  |
| 1 | 148250245 - 148347506 | F - 2.08%  | TRUE  | TRUE  |
| 1 | 148250245 - 148347506 | F - 2.08%  | TRUE  | TRUE  |
| 1 | 148250245 - 148347506 | F - 2.08%  | TRUE  | TRUE  |
| 1 | 148250245 - 148347506 | F - 2.08%  | TRUE  | TRUE  |
| 1 | 148250245 - 148347506 | F - 2.08%  | TRUE  | TRUE  |
| 4 | 186506598 - 186877870 | F - 1.19%  | TRUE  | TRUE  |
| 4 | 186506598 - 186877870 | F - 9.52%  | TRUE  | TRUE  |
| 4 | 186506598 - 186877870 |            | TRUE  | TRUE  |
| 4 | 186506598 - 186877870 |            | TRUE  | TRUE  |
| 4 | 186506598 - 186877870 | F - 1.19%  | TRUE  | TRUE  |
| 4 | 186506598 - 186877870 | F - 10.71% | TRUE  | TRUE  |
| 4 | 186506598 - 186877870 | F - 1.19%  | TRUE  | TRUE  |
| 4 | 186506598 - 186877870 |            | TRUE  | TRUE  |
| 4 | 186506598 - 186877870 |            | TRUE  | TRUE  |
| 4 | 186506598 - 186877870 |            | FALSE | TRUE  |
| 4 | 186506598 - 186877870 |            | TRUE  | TRUE  |
| 4 | 186506598 - 186877870 |            | FALSE | TRUE  |
| 4 | 186506598 - 186877870 |            | TRUE  | TRUE  |
| 4 | 186506598 - 186877870 |            | TRUE  | TRUE  |
| 4 | 186506598 - 186877870 | F - 3.57%  | FALSE | TRUE  |
| 4 | 186506598 - 186877870 | F - 9.52%  | TRUE  | TRUE  |
| 4 | 186506598 - 186877870 | F - 11.90% | TRUE  | TRUE  |
| 4 | 186506598 - 186877870 | F - 13.10% | TRUE  | TRUE  |
| 4 | 186506598 - 186877870 |            | TRUE  | TRUE  |
| 4 | 186506598 - 186877870 | F - 2.38%  | TRUE  | TRUE  |
| 4 | 186506598 - 186877870 | F - 5.95%  | TRUE  | TRUE  |
| 4 | 186506598 - 186877870 | F - 20.24% | TRUE  | TRUE  |
| 4 | 186506598 - 186877870 | F - 1.19%  | TRUE  | TRUE  |
| 4 | 186506598 - 186877870 | F - 5.95%  | TRUE  | TRUE  |
| 4 | 186506598 - 186877870 | F - 8.33%  | FALSE | TRUE  |
| 4 | 186506598 - 186877870 | F - 1.19%  | TRUE  | TRUE  |
| 4 | 186506598 - 186877870 | F - 8.33%  | TRUE  | TRUE  |
| 4 | 186506598 - 186877870 | F - 7.14%  | FALSE | TRUE  |
| 4 | 186506598 - 186877870 | F - 1.19%  | FALSE | TRUE  |
| 4 | 186506598 - 186877870 |            | FALSE | TRUE  |
| 4 | 186506598 - 186877870 |            | FALSE | TRUE  |
| 4 | 186506598 - 186877870 |            | TRUE  | TRUE  |
| 6 | 25081295 - 25218698   |            | TRUE  | TRUE  |
| 6 | 25081295 - 25218698   | F - 26.67% | TRUE  | TRUE  |
| 6 | 25081295 - 25218698   | F - 6.67%  | TRUE  | TRUE  |
| 6 | 25081295 - 25218698   | F - 20.00% | TRUE  | TRUE  |
| 6 | 25081295 - 25218698   | F - 13.33% | TRUE  | TRUE  |
| 6 | 25081295 - 25218698   | F - 26.67% | TRUE  | TRUE  |
| 6 | 25081295 - 25218698   | F - 6.67%  | TRUE  | TRUE  |
| 6 | 25081295 - 25218698   | F - 6.67%  | TRUE  | TRUE  |
| 6 | 25081295 - 25218698   | F - 6.67%  | TRUE  | TRUE  |
| 6 | 25081295 - 25218698   | F - 20.00% | TRUE  | TRUE  |
| 6 | 25081295 - 25218698   | F - 6.67%  | TRUE  | TRUE  |
| 6 | 25081295 - 25218698   | F - 13.33% | TRUE  | TRUE  |
| 6 | 25081295 - 25218698   | F - 6.67%  | TRUE  | TRUE  |

|            |                       |            |       |       |
|------------|-----------------------|------------|-------|-------|
| 6          | 25081295 - 25218698   | F - 13.33% | TRUE  | TRUE  |
| 6          | 25081295 - 25218698   | F - 6.67%  | TRUE  | TRUE  |
| 6          | 25081295 - 25218698   | F - 20.00% | FALSE | TRUE  |
| 6          | 25081295 - 25218698   |            | TRUE  | TRUE  |
| 8          | 68864348 - 69149265   |            | TRUE  | TRUE  |
| 8          | 68864348 - 69149265   |            | TRUE  | TRUE  |
| 8          | 68864348 - 69149265   |            | TRUE  | TRUE  |
| 8          | 68864348 - 69149265   |            | TRUE  | TRUE  |
| 8          | 68864348 - 69149265   |            | TRUE  | TRUE  |
| 8          | 68864348 - 69149265   |            | TRUE  | FALSE |
| 8          | 68864348 - 69149265   |            | TRUE  | FALSE |
| 8          | 68864348 - 69149265   | F - 27.27% | TRUE  | TRUE  |
| 8          | 68864348 - 69149265   | F - 18.18% | TRUE  | FALSE |
| 8          | 68864348 - 69149265   | F - 27.27% | TRUE  | TRUE  |
| 8          | 68864348 - 69149265   | F - 27.27% | TRUE  | TRUE  |
| 8          | 68864348 - 69149265   | F - 27.27% | TRUE  | TRUE  |
| 8          | 68864348 - 69149265   |            | TRUE  | TRUE  |
| 8          | 68864348 - 69149265   | F - 27.27% | TRUE  | TRUE  |
| 8          | 68864348 - 69149265   | F - 36.36% | TRUE  | TRUE  |
| 8          | 68864348 - 69149265   |            | TRUE  | TRUE  |
| 8          | 68864348 - 69149265   | F - 45.45% | TRUE  | TRUE  |
| 8          | 68864348 - 69149265   |            | TRUE  | TRUE  |
| 8          | 68864348 - 69149265   |            | FALSE | TRUE  |
| 15         | 74209809 - 74220589   |            | TRUE  | TRUE  |
| 15         | 74209809 - 74220589   | F - 40.00% | TRUE  | TRUE  |
| 15         | 74209809 - 74220589   | F - 20.00% | TRUE  | TRUE  |
| 15         | 74209809 - 74220589   | F - 40.00% | TRUE  | TRUE  |
| 15         | 74209809 - 74220589   |            | FALSE | TRUE  |
| 21         | 17102344 - 17252377   |            | TRUE  | TRUE  |
| 21         | 17102344 - 17252377   | T - 53.85% | TRUE  | TRUE  |
| 17         | 78010431 - 78074412   |            | TRUE  | TRUE  |
| 17         | 78010431 - 78074412   | F - 10.00% | TRUE  | TRUE  |
| 17         | 78010431 - 78074412   |            | TRUE  | FALSE |
| 6_qbl_hap6 | 1261702 - 1322419     | F - 15.38% | TRUE  | TRUE  |
| 6_qbl_hap6 | 1261702 - 1322419     | F - 7.69%  | TRUE  | FALSE |
| 6_qbl_hap6 | 1261702 - 1322419     | F - 7.69%  | TRUE  | TRUE  |
| 6_qbl_hap6 | 1261702 - 1322419     | F - 30.77% | TRUE  | TRUE  |
| 6_qbl_hap6 | 1261702 - 1322419     | F - 15.38% | TRUE  | TRUE  |
| 6_qbl_hap6 | 1261702 - 1322419     | F - 38.46% | TRUE  | TRUE  |
| 6_qbl_hap6 | 1261702 - 1322419     | F - 38.46% | TRUE  | TRUE  |
| 6_qbl_hap6 | 1261702 - 1322419     | F - 15.38% | TRUE  | TRUE  |
| 6_qbl_hap6 | 1261702 - 1322419     | T - 53.85% | TRUE  | TRUE  |
| 6_qbl_hap6 | 1261702 - 1322419     |            | TRUE  | TRUE  |
| 6_qbl_hap6 | 1261702 - 1322419     | F - 23.08% | TRUE  | TRUE  |
| 6_qbl_hap6 | 1261702 - 1322419     |            | TRUE  | TRUE  |
| 6_qbl_hap6 | 1261702 - 1322419     | F - 46.15% | FALSE | TRUE  |
| 6_qbl_hap6 | 1261702 - 1322419     |            | FALSE | TRUE  |
| X          | 149861435 - 149933576 |            | TRUE  | TRUE  |
| X          | 149861435 - 149933576 | F - 19.23% | TRUE  | TRUE  |
| X          | 149861435 - 149933576 | F - 46.15% | TRUE  | TRUE  |
| X          | 149861435 - 149933576 | F - 15.38% | TRUE  | TRUE  |
| X          | 149861435 - 149933576 | F - 46.15% | TRUE  | TRUE  |
| X          | 149861435 - 149933576 | F - 3.85%  | TRUE  | TRUE  |
| X          | 149861435 - 149933576 |            | TRUE  | TRUE  |
| X          | 149861435 - 149933576 | F - 42.31% | TRUE  | TRUE  |
| 7          | 69063905 - 70258054   |            | TRUE  | FALSE |
| 7          | 69063905 - 70258054   | F - 4.17%  | TRUE  | TRUE  |
| 7          | 69063905 - 70258054   |            | TRUE  | TRUE  |
| 22         | 17565844 - 17596584   |            | TRUE  | TRUE  |

|    |                       |             |       |       |
|----|-----------------------|-------------|-------|-------|
| 22 | 17565844 - 17596584   | T - 50.00%  | TRUE  | TRUE  |
| 22 | 17565844 - 17596584   |             | TRUE  | TRUE  |
| 22 | 17565844 - 17596584   | T - 66.67%  | TRUE  | TRUE  |
| 22 | 17565844 - 17596584   | T - 100.00% | TRUE  | TRUE  |
| 5  | 59783540 - 59843484   |             | TRUE  | TRUE  |
| 5  | 59783540 - 59843484   |             | TRUE  | TRUE  |
| 5  | 59783540 - 59843484   | F - 28.57%  | FALSE | TRUE  |
| 5  | 59783540 - 59843484   | F - 28.57%  | TRUE  | TRUE  |
| 5  | 59783540 - 59843484   | F - 28.57%  | FALSE | TRUE  |
| 7  | 98475556 - 98610866   |             | TRUE  | TRUE  |
| 7  | 98475556 - 98610866   | F - 12.50%  | TRUE  | TRUE  |
| 7  | 98475556 - 98610866   | F - 37.50%  | TRUE  | TRUE  |
| 7  | 98475556 - 98610866   |             | TRUE  | TRUE  |
| 7  | 98475556 - 98610866   |             | TRUE  | TRUE  |
| 7  | 98475556 - 98610866   |             | FALSE | TRUE  |
| 11 | 86656717 - 86666440   |             | FALSE | TRUE  |
| 11 | 86656717 - 86666440   | T - 50.00%  | TRUE  | TRUE  |
| 5  | 152869175 - 153193429 |             | TRUE  | FALSE |
| 5  | 152869175 - 153193429 |             | TRUE  | FALSE |
| 5  | 152869175 - 153193429 | F - 40.00%  | TRUE  | FALSE |
| 5  | 152869175 - 153193429 | F - 4.00%   | TRUE  | TRUE  |
| 5  | 152869175 - 153193429 | F - 4.00%   | TRUE  | TRUE  |
| 5  | 152869175 - 153193429 |             | TRUE  | TRUE  |
| 5  | 152869175 - 153193429 |             | TRUE  | FALSE |
| 5  | 152869175 - 153193429 |             | TRUE  | TRUE  |
| 5  | 152869175 - 153193429 | F - 4.00%   | FALSE | TRUE  |
| 5  | 152869175 - 153193429 | F - 44.00%  | TRUE  | TRUE  |
| 5  | 152869175 - 153193429 | F - 4.00%   | TRUE  | TRUE  |
| 5  | 152869175 - 153193429 | T - 64.00%  | TRUE  | TRUE  |
| 5  | 152869175 - 153193429 |             | FALSE | TRUE  |
| 5  | 152869175 - 153193429 | T - 56.00%  | TRUE  | TRUE  |
| 5  | 152869175 - 153193429 |             | FALSE | TRUE  |
| 7  | 46009256 - 46019790   | T - 100.00% | TRUE  | TRUE  |
| 7  | 46009256 - 46019790   |             | TRUE  | TRUE  |
| 2  | 112895962 - 112988430 |             | TRUE  | TRUE  |
| 2  | 112895962 - 112988430 | F - 9.09%   | TRUE  | TRUE  |
| 2  | 112895962 - 112988430 | F - 9.09%   | FALSE | TRUE  |
| 2  | 112895962 - 112988430 |             | FALSE | TRUE  |
| 2  | 112895962 - 112988430 | F - 9.09%   | TRUE  | TRUE  |
| 2  | 112895962 - 112988430 | F - 9.09%   | TRUE  | TRUE  |
| 2  | 112895962 - 112988430 |             | FALSE | TRUE  |
| 2  | 112895962 - 112988430 | F - 36.36%  | FALSE | TRUE  |
| 2  | 112895962 - 112988430 | F - 9.09%   | TRUE  | TRUE  |
| 2  | 112895962 - 112988430 |             | TRUE  | TRUE  |
| 2  | 112895962 - 112988430 |             | FALSE | TRUE  |
| 2  | 112895962 - 112988430 |             | FALSE | TRUE  |
| 2  | 112895962 - 112988430 | T - 63.64%  | TRUE  | TRUE  |
| 2  | 112895962 - 112988430 | T - 54.55%  | TRUE  | TRUE  |
| 3  | 141663270 - 141868386 |             | TRUE  | FALSE |
| 3  | 141663270 - 141868386 |             | FALSE | TRUE  |
| 3  | 141663270 - 141868386 |             | TRUE  | TRUE  |
| 3  | 141663270 - 141868386 | F - 11.43%  | TRUE  | TRUE  |
| 20 | 34146507 - 34195484   |             | TRUE  | TRUE  |
| 20 | 34146507 - 34195484   |             | TRUE  | TRUE  |
| 20 | 34146507 - 34195484   | F - 20.00%  | TRUE  | TRUE  |
| 20 | 34146507 - 34195484   | F - 20.00%  | TRUE  | TRUE  |
| 20 | 34146507 - 34195484   |             | TRUE  | TRUE  |
| 20 | 34146507 - 34195484   | F - 40.00%  | TRUE  | TRUE  |

|    |                       |            |       |       |
|----|-----------------------|------------|-------|-------|
| 20 | 34146507 - 34195484   | F - 40.00% | TRUE  | TRUE  |
| 20 | 34146507 - 34195484   |            | TRUE  | TRUE  |
| 20 | 34146507 - 34195484   |            | FALSE | TRUE  |
| 20 | 34146507 - 34195484   | F - 20.00% | FALSE | TRUE  |
| 20 | 34146507 - 34195484   |            | FALSE | TRUE  |
| 20 | 34146507 - 34195484   | F - 40.00% | TRUE  | TRUE  |
| 20 | 34146507 - 34195484   | F - 40.00% | FALSE | TRUE  |
| 20 | 34146507 - 34195484   | F - 20.00% | TRUE  | TRUE  |
| 20 | 34146507 - 34195484   |            | FALSE | TRUE  |
| 20 | 34146507 - 34195484   |            | FALSE | TRUE  |
| 20 | 34146507 - 34195484   |            | TRUE  | TRUE  |
| 20 | 34146507 - 34195484   |            | FALSE | TRUE  |
| 20 | 34146507 - 34195484   |            | TRUE  | TRUE  |
| 20 | 34146507 - 34195484   |            | FALSE | TRUE  |
| 20 | 34146507 - 34195484   |            | FALSE | TRUE  |
| 20 | 34146507 - 34195484   | T - 60.00% | TRUE  | TRUE  |
| 20 | 34146507 - 34195484   | F - 40.00% | FALSE | TRUE  |
| 20 | 34146507 - 34195484   |            | FALSE | TRUE  |
| 19 | 53893046 - 53930574   |            | TRUE  | TRUE  |
| 19 | 53893046 - 53930574   | T - 87.50% | TRUE  | TRUE  |
| 19 | 53893046 - 53930574   |            | FALSE | TRUE  |
| 1  | 95558073 - 95663163   | F - 12.50% | TRUE  | TRUE  |
| 1  | 95558073 - 95663163   | F - 12.50% | TRUE  | TRUE  |
| 1  | 95558073 - 95663163   |            | TRUE  | TRUE  |
| 1  | 95558073 - 95663163   | T - 62.50% | TRUE  | TRUE  |
| 1  | 95558073 - 95663163   | F - 12.50% | TRUE  | TRUE  |
| 1  | 95558073 - 95663163   |            | FALSE | TRUE  |
| 1  | 95558073 - 95663163   |            | FALSE | TRUE  |
| 1  | 95558073 - 95663163   | T - 50.00% | TRUE  | TRUE  |
| 7  | 158649269 - 158749438 |            | TRUE  | TRUE  |
| 7  | 158649269 - 158749438 |            | TRUE  | TRUE  |
| 7  | 158649269 - 158749438 | F - 33.33% | TRUE  | TRUE  |
| 7  | 77646374 - 79082890   |            | TRUE  | FALSE |
| 7  | 77646374 - 79082890   |            | TRUE  | FALSE |
| 7  | 77646374 - 79082890   | T - 58.82% | TRUE  | TRUE  |
| 7  | 77646374 - 79082890   | T - 52.94% | TRUE  | FALSE |
| 7  | 77646374 - 79082890   |            | TRUE  | FALSE |
| 7  | 77646374 - 79082890   | F - 47.06% | TRUE  | TRUE  |
| 7  | 77646374 - 79082890   | F - 41.18% | TRUE  | TRUE  |
| 7  | 77646374 - 79082890   |            | TRUE  | TRUE  |
| 7  | 77646374 - 79082890   |            | TRUE  | FALSE |
| 7  | 77646374 - 79082890   | F - 5.88%  | TRUE  | FALSE |
| 7  | 77646374 - 79082890   | F - 47.06% | TRUE  | TRUE  |
| 7  | 77646374 - 79082890   |            | TRUE  | TRUE  |
| 7  | 77646374 - 79082890   | F - 17.65% | TRUE  | FALSE |
| 7  | 77646374 - 79082890   |            | TRUE  | TRUE  |
| 7  | 77646374 - 79082890   |            | TRUE  | TRUE  |
| 7  | 77646374 - 79082890   |            | TRUE  | TRUE  |
| 7  | 77646374 - 79082890   | T - 58.82% | TRUE  | TRUE  |
| 7  | 77646374 - 79082890   |            | TRUE  | TRUE  |
| 7  | 77646374 - 79082890   | F - 35.29% | TRUE  | TRUE  |
| 7  | 77646374 - 79082890   | F - 11.76% | TRUE  | FALSE |
| 7  | 77646374 - 79082890   | F - 5.88%  | TRUE  | TRUE  |
| 7  | 77646374 - 79082890   | F - 35.29% | TRUE  | TRUE  |
| 7  | 77646374 - 79082890   | T - 64.71% | TRUE  | TRUE  |
| 7  | 77646374 - 79082890   | F - 29.41% | TRUE  | TRUE  |
| 7  | 77646374 - 79082890   |            | FALSE | TRUE  |
| 7  | 77646374 - 79082890   | F - 5.88%  | TRUE  | TRUE  |

|    |                       |             |       |       |
|----|-----------------------|-------------|-------|-------|
| 7  | 77646374 - 79082890   | F - 17.65%  | TRUE  | FALSE |
| 7  | 77646374 - 79082890   | F - 5.88%   | TRUE  | TRUE  |
| 7  | 77646374 - 79082890   | F - 29.41%  | TRUE  | TRUE  |
| 7  | 77646374 - 79082890   |             | TRUE  | TRUE  |
| 7  | 77646374 - 79082890   |             | FALSE | TRUE  |
| 4  | 89444961 - 89629693   |             | TRUE  | TRUE  |
| 4  | 89444961 - 89629693   |             | TRUE  | FALSE |
| 4  | 89444961 - 89629693   | F - 5.88%   | TRUE  | TRUE  |
| 1  | 2487078 - 2497061     |             | TRUE  | FALSE |
| 1  | 2487078 - 2497061     |             | TRUE  | FALSE |
| 1  | 2487078 - 2497061     | F - 26.09%  | TRUE  | TRUE  |
| 1  | 2487078 - 2497061     | T - 56.52%  | TRUE  | TRUE  |
| 1  | 2487078 - 2497061     | T - 52.17%  | FALSE | TRUE  |
| 1  | 2487078 - 2497061     |             | FALSE | TRUE  |
| 1  | 2487078 - 2497061     |             | TRUE  | TRUE  |
| 1  | 2487078 - 2497061     |             | FALSE | TRUE  |
| 1  | 147228332 - 147245484 |             | TRUE  | FALSE |
| 1  | 147228332 - 147245484 | T - 66.67%  | TRUE  | TRUE  |
| 1  | 147228332 - 147245484 | F - 33.33%  | TRUE  | FALSE |
| 1  | 147228332 - 147245484 | T - 66.67%  | TRUE  | FALSE |
| 1  | 147228332 - 147245484 | T - 50.00%  | TRUE  | TRUE  |
| 1  | 147228332 - 147245484 | F - 16.67%  | TRUE  | TRUE  |
| 1  | 147228332 - 147245484 | F - 16.67%  | TRUE  | TRUE  |
| 2  | 46926091 - 46990268   | F - 33.33%  | FALSE | TRUE  |
| 2  | 46926091 - 46990268   |             | TRUE  | TRUE  |
| 2  | 46926091 - 46990268   |             | TRUE  | TRUE  |
| 2  | 46926091 - 46990268   |             | FALSE | TRUE  |
| 2  | 46926091 - 46990268   | F - 16.67%  | TRUE  | TRUE  |
| 17 | 18012020 - 18083116   |             | TRUE  | FALSE |
| 17 | 18012020 - 18083116   |             | TRUE  | TRUE  |
| 17 | 18012020 - 18083116   | F - 27.78%  | TRUE  | FALSE |
| 17 | 18012020 - 18083116   |             | TRUE  | FALSE |
| 17 | 18012020 - 18083116   |             | FALSE | TRUE  |
| 21 | 44834395 - 44847008   |             | TRUE  | FALSE |
| 21 | 44834395 - 44847008   |             | TRUE  | FALSE |
| 21 | 44834395 - 44847008   | T - 100.00% | TRUE  | TRUE  |
| 21 | 44834395 - 44847008   | T - 75.00%  | TRUE  | TRUE  |
| 21 | 44834395 - 44847008   |             | TRUE  | TRUE  |
| 21 | 44834395 - 44847008   |             | TRUE  | TRUE  |
| 21 | 44834395 - 44847008   |             | TRUE  | FALSE |
| 21 | 44834395 - 44847008   |             | TRUE  | TRUE  |
| 21 | 44834395 - 44847008   |             | TRUE  | TRUE  |
| 21 | 44834395 - 44847008   | T - 75.00%  | TRUE  | TRUE  |
| 21 | 44834395 - 44847008   |             | TRUE  | TRUE  |
| 19 | 11649579 - 11661138   |             | TRUE  | TRUE  |
| 19 | 11649579 - 11661138   |             | TRUE  | TRUE  |
| 19 | 11649579 - 11661138   |             | TRUE  | TRUE  |
| 19 | 11649579 - 11661138   | T - 100.00% | TRUE  | TRUE  |
| 19 | 11649579 - 11661138   | T - 71.43%  | TRUE  | TRUE  |
| 19 | 11649579 - 11661138   | T - 71.43%  | TRUE  | TRUE  |
| 19 | 11649579 - 11661138   |             | FALSE | TRUE  |
| 19 | 11649579 - 11661138   | F - 14.29%  | TRUE  | TRUE  |
| 6  | 160100096 - 160114360 | T - 50.00%  | TRUE  | TRUE  |
| 6  | 160100096 - 160114360 | F - 44.44%  | TRUE  | TRUE  |
| 6  | 160100096 - 160114360 | F - 5.56%   | FALSE | TRUE  |
| 6  | 160100096 - 160114360 |             | TRUE  | TRUE  |
| 6  | 160100096 - 160114360 | F - 22.22%  | FALSE | TRUE  |
| 6  | 160100096 - 160114360 | F - 16.67%  | TRUE  | TRUE  |

|    |                       |            |       |       |
|----|-----------------------|------------|-------|-------|
| 6  | 160100096 - 160114360 |            | FALSE | TRUE  |
| 6  | 160100096 - 160114360 | F - 11.11% | TRUE  | TRUE  |
| 6  | 160100096 - 160114360 | F - 22.22% | TRUE  | TRUE  |
| 8  | 22402499 - 22433301   |            | TRUE  | TRUE  |
| 8  | 22402499 - 22433301   |            | TRUE  | TRUE  |
| 8  | 22402499 - 22433301   | F - 3.45%  | TRUE  | TRUE  |
| 8  | 22402499 - 22433301   | F - 34.48% | TRUE  | TRUE  |
| 8  | 22402499 - 22433301   | F - 27.59% | TRUE  | TRUE  |
| 8  | 22402499 - 22433301   | F - 37.93% | TRUE  | TRUE  |
| 8  | 22402499 - 22433301   | F - 20.69% | TRUE  | TRUE  |
| 8  | 22402499 - 22433301   | F - 10.34% | TRUE  | TRUE  |
| 14 | 64319683 - 64693167   |            | TRUE  | TRUE  |
| 14 | 64319683 - 64693167   |            | TRUE  | TRUE  |
| 14 | 64319683 - 64693167   |            | TRUE  | TRUE  |
| 14 | 64319683 - 64693167   |            | TRUE  | FALSE |
| 14 | 64319683 - 64693167   | F - 24.24% | TRUE  | FALSE |
| 14 | 64319683 - 64693167   | F - 9.09%  | TRUE  | TRUE  |
| 14 | 64319683 - 64693167   |            | TRUE  | TRUE  |
| 14 | 64319683 - 64693167   |            | TRUE  | TRUE  |
| 14 | 64319683 - 64693167   | F - 24.24% | TRUE  | TRUE  |
| 14 | 64319683 - 64693167   |            | FALSE | TRUE  |
| 14 | 64319683 - 64693167   | F - 24.24% | TRUE  | TRUE  |
| 14 | 64319683 - 64693167   |            | TRUE  | TRUE  |
| 14 | 64319683 - 64693167   |            | TRUE  | TRUE  |
| 14 | 64319683 - 64693167   | F - 6.06%  | TRUE  | TRUE  |
| 14 | 64319683 - 64693167   | F - 24.24% | TRUE  | TRUE  |
| 14 | 64319683 - 64693167   | F - 39.39% | TRUE  | TRUE  |
| 14 | 64319683 - 64693167   | F - 24.24% | TRUE  | TRUE  |
| 14 | 64319683 - 64693167   |            | TRUE  | TRUE  |
| 14 | 64319683 - 64693167   | F - 39.39% | TRUE  | TRUE  |
| 14 | 64319683 - 64693167   | F - 24.24% | TRUE  | TRUE  |
| 14 | 64319683 - 64693167   |            | TRUE  | TRUE  |
| 14 | 64319683 - 64693167   |            | FALSE | TRUE  |
| 14 | 64319683 - 64693167   |            | TRUE  | TRUE  |
| 14 | 64319683 - 64693167   |            | TRUE  | TRUE  |
| 14 | 64319683 - 64693167   |            | TRUE  | TRUE  |
| 14 | 64319683 - 64693167   | F - 24.24% | TRUE  | TRUE  |
| 14 | 64319683 - 64693167   | F - 24.24% | TRUE  | TRUE  |
| 14 | 64319683 - 64693167   | F - 24.24% | TRUE  | TRUE  |
| 14 | 64319683 - 64693167   | F - 24.24% | FALSE | TRUE  |
| 14 | 64319683 - 64693167   | F - 48.48% | TRUE  | TRUE  |
| 14 | 64319683 - 64693167   |            | TRUE  | TRUE  |
| 14 | 64319683 - 64693167   | F - 24.24% | TRUE  | TRUE  |
| 14 | 64319683 - 64693167   | F - 6.06%  | FALSE | TRUE  |
| 14 | 64319683 - 64693167   |            | TRUE  | TRUE  |
| 14 | 64319683 - 64693167   | F - 3.03%  | TRUE  | TRUE  |
| 14 | 64319683 - 64693167   | F - 30.30% | TRUE  | TRUE  |
| 14 | 64319683 - 64693167   | F - 24.24% | TRUE  | TRUE  |
| 14 | 64319683 - 64693167   | F - 24.24% | FALSE | TRUE  |
| 14 | 64319683 - 64693167   | F - 9.09%  | FALSE | TRUE  |
| 14 | 64319683 - 64693167   |            | TRUE  | TRUE  |
| 14 | 64319683 - 64693167   | F - 33.33% | TRUE  | TRUE  |
| 14 | 64319683 - 64693167   | F - 24.24% | TRUE  | TRUE  |
| 14 | 64319683 - 64693167   | F - 39.39% | TRUE  | TRUE  |
| 14 | 64319683 - 64693167   | T - 72.73% | TRUE  | TRUE  |
| 14 | 64319683 - 64693167   | F - 18.18% | TRUE  | TRUE  |
| 14 | 64319683 - 64693167   |            | TRUE  | TRUE  |
| 14 | 64319683 - 64693167   | F - 42.42% | TRUE  | TRUE  |

|            |                       |            |       |       |
|------------|-----------------------|------------|-------|-------|
| 14         | 64319683 - 64693167   |            | TRUE  | TRUE  |
| 14         | 64319683 - 64693167   |            | TRUE  | TRUE  |
| 14         | 64319683 - 64693167   |            | FALSE | TRUE  |
| 14         | 64319683 - 64693167   | F - 48.48% | TRUE  | TRUE  |
| 14         | 64319683 - 64693167   |            | TRUE  | TRUE  |
| 14         | 64319683 - 64693167   |            | TRUE  | TRUE  |
| 14         | 64319683 - 64693167   | F - 33.33% | TRUE  | TRUE  |
| 14         | 64319683 - 64693167   | F - 39.39% | TRUE  | TRUE  |
| 14         | 64319683 - 64693167   |            | TRUE  | TRUE  |
| 14         | 64319683 - 64693167   |            | FALSE | TRUE  |
| 14         | 64319683 - 64693167   |            | TRUE  | TRUE  |
| 14         | 64319683 - 64693167   |            | TRUE  | TRUE  |
| 14         | 64319683 - 64693167   |            | FALSE | TRUE  |
| 14         | 64319683 - 64693167   | F - 42.42% | TRUE  | TRUE  |
| 14         | 64319683 - 64693167   | F - 42.42% | FALSE | TRUE  |
| 14         | 64319683 - 64693167   |            | FALSE | TRUE  |
| 14         | 64319683 - 64693167   |            | FALSE | TRUE  |
| 1          | 156711899 - 156736717 |            | TRUE  | TRUE  |
| 1          | 156711899 - 156736717 | F - 15.79% | TRUE  | TRUE  |
| 1          | 156711899 - 156736717 |            | FALSE | TRUE  |
| 6          | 33032346 - 33048555   |            | TRUE  | FALSE |
| 6          | 33032346 - 33048555   |            | TRUE  | FALSE |
| 6          | 33032346 - 33048555   | F - 14.29% | TRUE  | TRUE  |
| 6          | 33032346 - 33048555   | F - 7.14%  | TRUE  | TRUE  |
| 6          | 33032346 - 33048555   | T - 50.00% | TRUE  | TRUE  |
| 6          | 33032346 - 33048555   | T - 85.71% | TRUE  | TRUE  |
| 6          | 33032346 - 33048555   | T - 50.00% | TRUE  | TRUE  |
| 6          | 33032346 - 33048555   |            | TRUE  | TRUE  |
| 6          | 33032346 - 33048555   |            | TRUE  | TRUE  |
| 6          | 33032346 - 33048555   | F - 35.71% | TRUE  | TRUE  |
| 6          | 33032346 - 33048555   | F - 35.71% | TRUE  | TRUE  |
| 6          | 33032346 - 33048555   |            | FALSE | TRUE  |
| 10         | 38090447 - 38147034   |            | TRUE  | FALSE |
| 10         | 38090447 - 38147034   | F - 38.46% | TRUE  | TRUE  |
| 10         | 38090447 - 38147034   | F - 23.08% | TRUE  | TRUE  |
| 6_cox_hap2 | 4476526 - 4492734     |            | TRUE  | FALSE |
| 6_cox_hap2 | 4476526 - 4492734     |            | TRUE  | FALSE |
| 6_cox_hap2 | 4476526 - 4492734     | F - 14.29% | TRUE  | TRUE  |
| 6_cox_hap2 | 4476526 - 4492734     | F - 7.14%  | TRUE  | TRUE  |
| 6_cox_hap2 | 4476526 - 4492734     | T - 50.00% | TRUE  | TRUE  |
| 6_cox_hap2 | 4476526 - 4492734     | T - 85.71% | TRUE  | TRUE  |
| 6_cox_hap2 | 4476526 - 4492734     | T - 50.00% | TRUE  | TRUE  |
| 6_cox_hap2 | 4476526 - 4492734     |            | TRUE  | TRUE  |
| 6_cox_hap2 | 4476526 - 4492734     | F - 42.86% | TRUE  | TRUE  |
| 6_cox_hap2 | 4476526 - 4492734     | F - 42.86% | TRUE  | TRUE  |
| 6_cox_hap2 | 4476526 - 4492734     |            | FALSE | TRUE  |
| X          | 154289897 - 154376212 |            | TRUE  | TRUE  |
| X          | 154289897 - 154376212 |            | TRUE  | TRUE  |
| X          | 154289897 - 154376212 |            | TRUE  | TRUE  |
| X          | 154289897 - 154376212 | T - 60.00% | TRUE  | TRUE  |
| 6          | 134273308 - 134308638 |            | TRUE  | TRUE  |
| 6          | 134273308 - 134308638 |            | TRUE  | FALSE |
| 6          | 134273308 - 134308638 | F - 9.09%  | TRUE  | FALSE |
| 10         | 32735041 - 33171802   |            | TRUE  | TRUE  |
| 10         | 32735041 - 33171802   |            | TRUE  | FALSE |
| 10         | 32735041 - 33171802   |            | TRUE  | TRUE  |
| 10         | 32735041 - 33171802   |            | TRUE  | TRUE  |
| 10         | 32735041 - 33171802   | F - 35.29% | TRUE  | TRUE  |

|    |                     |            |       |       |
|----|---------------------|------------|-------|-------|
| 10 | 32735041 - 33171802 |            | TRUE  | TRUE  |
| 10 | 32735041 - 33171802 | F - 29.41% | TRUE  | FALSE |
| 10 | 32735041 - 33171802 | F - 29.41% | TRUE  | TRUE  |
| 10 | 32735041 - 33171802 |            | TRUE  | FALSE |
| 10 | 32735041 - 33171802 | F - 20.59% | TRUE  | FALSE |
| 10 | 32735041 - 33171802 | F - 35.29% | TRUE  | TRUE  |
| 10 | 32735041 - 33171802 | F - 14.71% | TRUE  | TRUE  |
| 10 | 32735041 - 33171802 | F - 14.71% | TRUE  | TRUE  |
| 10 | 32735041 - 33171802 | F - 35.29% | TRUE  | TRUE  |
| 10 | 32735041 - 33171802 | F - 17.65% | TRUE  | TRUE  |
| 10 | 32735041 - 33171802 |            | FALSE | TRUE  |
| 10 | 32735041 - 33171802 | F - 29.41% | TRUE  | TRUE  |
| 10 | 32735041 - 33171802 | F - 2.94%  | TRUE  | TRUE  |
| 10 | 32735041 - 33171802 | F - 2.94%  | TRUE  | TRUE  |
| 10 | 32735041 - 33171802 |            | FALSE | TRUE  |
| 10 | 32735041 - 33171802 | F - 32.35% | TRUE  | TRUE  |
| 10 | 32735041 - 33171802 | F - 35.29% | TRUE  | TRUE  |
| 10 | 32735041 - 33171802 | T - 52.94% | TRUE  | TRUE  |
| 10 | 32735041 - 33171802 |            | TRUE  | TRUE  |
| 10 | 32735041 - 33171802 | F - 35.29% | FALSE | TRUE  |
| 10 | 32735041 - 33171802 | F - 2.94%  | TRUE  | TRUE  |
| 10 | 32735041 - 33171802 |            | TRUE  | TRUE  |
| 10 | 32735041 - 33171802 | F - 35.29% | TRUE  | TRUE  |
| 10 | 32735041 - 33171802 | F - 32.35% | TRUE  | TRUE  |
| 10 | 32735041 - 33171802 |            | FALSE | TRUE  |
| 10 | 32735041 - 33171802 | F - 32.35% | FALSE | TRUE  |
| 10 | 32735041 - 33171802 | F - 35.29% | TRUE  | TRUE  |
| 10 | 32735041 - 33171802 |            | TRUE  | TRUE  |
| 10 | 32735041 - 33171802 | F - 17.65% | TRUE  | TRUE  |
| 10 | 32735041 - 33171802 | F - 35.29% | TRUE  | TRUE  |
| 10 | 32735041 - 33171802 | F - 35.29% | FALSE | TRUE  |
| 10 | 32735041 - 33171802 | F - 14.71% | TRUE  | TRUE  |
| 10 | 32735041 - 33171802 | F - 32.35% | TRUE  | TRUE  |
| 10 | 32735041 - 33171802 | F - 35.29% | TRUE  | TRUE  |
| 10 | 32735041 - 33171802 |            | FALSE | TRUE  |
| 10 | 32735041 - 33171802 | F - 44.12% | TRUE  | TRUE  |
| 10 | 32735041 - 33171802 | F - 2.94%  | FALSE | TRUE  |
| 10 | 32735041 - 33171802 |            | TRUE  | TRUE  |
| 10 | 32735041 - 33171802 | T - 52.94% | TRUE  | TRUE  |
| 10 | 32735041 - 33171802 | F - 38.24% | TRUE  | TRUE  |
| 10 | 32735041 - 33171802 | F - 35.29% | TRUE  | TRUE  |
| 10 | 32735041 - 33171802 |            | FALSE | TRUE  |
| 17 | 47865917 - 47906458 |            | TRUE  | TRUE  |
| 17 | 47865917 - 47906458 |            | TRUE  | TRUE  |
| 17 | 47865917 - 47906458 | F - 3.33%  | TRUE  | TRUE  |
| 17 | 47865917 - 47906458 |            | TRUE  | TRUE  |
| 17 | 47865917 - 47906458 |            | TRUE  | TRUE  |
| 17 | 47865917 - 47906458 |            | TRUE  | TRUE  |
| 17 | 47865917 - 47906458 |            | TRUE  | TRUE  |
| 20 | 10618332 - 10654694 |            | FALSE | TRUE  |
| 20 | 10618332 - 10654694 | F - 12.50% | TRUE  | TRUE  |
| 20 | 10618332 - 10654694 | T - 62.50% | TRUE  | TRUE  |
| 20 | 10618332 - 10654694 | F - 12.50% | TRUE  | TRUE  |
| 20 | 10618332 - 10654694 |            | FALSE | TRUE  |
| 20 | 10618332 - 10654694 | F - 25.00% | FALSE | TRUE  |
| 20 | 10618332 - 10654694 | F - 37.50% | TRUE  | TRUE  |
| 20 | 10618332 - 10654694 |            | FALSE | TRUE  |
| 20 | 10618332 - 10654694 |            | TRUE  | TRUE  |



|    |                       |            |       |       |
|----|-----------------------|------------|-------|-------|
| 20 | 10618332 - 10654694   |            | TRUE  | TRUE  |
| 5  | 179224597 - 179233952 |            | TRUE  | TRUE  |
| 5  | 179224597 - 179233952 |            | TRUE  | TRUE  |
| 5  | 179224597 - 179233952 | F - 7.14%  | TRUE  | TRUE  |
| 5  | 179224597 - 179233952 | F - 10.71% | FALSE | TRUE  |
| 5  | 179224597 - 179233952 | F - 17.86% | TRUE  | TRUE  |
| 5  | 179224597 - 179233952 | F - 39.29% | TRUE  | TRUE  |
| 5  | 179224597 - 179233952 | F - 3.57%  | TRUE  | TRUE  |
| 5  | 179224597 - 179233952 | F - 14.29% | FALSE | TRUE  |
| 5  | 179224597 - 179233952 |            | TRUE  | TRUE  |
| 5  | 179224597 - 179233952 | F - 3.57%  | TRUE  | TRUE  |
| 5  | 179224597 - 179233952 | F - 3.57%  | FALSE | TRUE  |
| 5  | 179224597 - 179233952 | F - 3.57%  | FALSE | TRUE  |
| 5  | 179224597 - 179233952 | F - 3.57%  | TRUE  | TRUE  |
| 5  | 179224597 - 179233952 | F - 14.29% | TRUE  | TRUE  |
| 5  | 179224597 - 179233952 | F - 10.71% | TRUE  | TRUE  |
| 5  | 179224597 - 179233952 | F - 10.71% | FALSE | TRUE  |
| 7  | 20370325 - 20455382   |            | TRUE  | TRUE  |
| 7  | 20370325 - 20455382   |            | FALSE | TRUE  |
| 7  | 20370325 - 20455382   | T - 75.00% | TRUE  | TRUE  |
| 7  | 20370325 - 20455382   | F - 37.50% | FALSE | TRUE  |
| 7  | 20370325 - 20455382   | F - 25.00% | TRUE  | TRUE  |
| 7  | 20370325 - 20455382   | F - 12.50% | FALSE | TRUE  |
| 7  | 20370325 - 20455382   |            | TRUE  | TRUE  |
| 7  | 20370325 - 20455382   | F - 12.50% | TRUE  | TRUE  |
| 7  | 20370325 - 20455382   |            | TRUE  | TRUE  |
| 7  | 20370325 - 20455382   | F - 12.50% | TRUE  | TRUE  |
| 7  | 20370325 - 20455382   | T - 50.00% | TRUE  | TRUE  |
| 7  | 20370325 - 20455382   | F - 12.50% | FALSE | TRUE  |
| 7  | 20370325 - 20455382   | T - 50.00% | TRUE  | TRUE  |
| 7  | 20370325 - 20455382   |            | FALSE | TRUE  |
| 7  | 20370325 - 20455382   |            | FALSE | TRUE  |
| 7  | 20370325 - 20455382   | F - 37.50% | FALSE | TRUE  |
| 7  | 20370325 - 20455382   | T - 87.50% | TRUE  | TRUE  |
| 7  | 20370325 - 20455382   |            | TRUE  | TRUE  |
| 7  | 20370325 - 20455382   |            | FALSE | TRUE  |
| 7  | 20370325 - 20455382   |            | FALSE | TRUE  |
| 7  | 20370325 - 20455382   |            | FALSE | TRUE  |
| 12 | 112597992 - 112819896 |            | TRUE  | TRUE  |
| 12 | 112597992 - 112819896 |            | TRUE  | TRUE  |
| 12 | 112597992 - 112819896 |            | TRUE  | TRUE  |
| 12 | 112597992 - 112819896 |            | TRUE  | TRUE  |
| 12 | 112597992 - 112819896 | F - 8.33%  | TRUE  | FALSE |
| 12 | 112597992 - 112819896 |            | FALSE | TRUE  |
| 20 | 34679426 - 34820721   |            | TRUE  | TRUE  |
| 20 | 34679426 - 34820721   |            | TRUE  | TRUE  |
| 20 | 34679426 - 34820721   |            | TRUE  | TRUE  |
| 20 | 34679426 - 34820721   |            | TRUE  | TRUE  |
| 20 | 34679426 - 34820721   | F - 9.68%  | TRUE  | TRUE  |
| 20 | 34679426 - 34820721   | F - 35.48% | TRUE  | TRUE  |
| 20 | 34679426 - 34820721   |            | TRUE  | TRUE  |
| 20 | 34679426 - 34820721   |            | TRUE  | TRUE  |
| 20 | 34679426 - 34820721   |            | TRUE  | TRUE  |
| 20 | 34679426 - 34820721   |            | TRUE  | TRUE  |
| 20 | 34679426 - 34820721   |            | TRUE  | TRUE  |
| 20 | 34679426 - 34820721   | F - 3.23%  | TRUE  | TRUE  |
| 20 | 34679426 - 34820721   | F - 9.68%  | FALSE | TRUE  |
| 20 | 34679426 - 34820721   |            | TRUE  | TRUE  |
| 20 | 34679426 - 34820721   |            | TRUE  | TRUE  |

|    |                       |            |       |       |
|----|-----------------------|------------|-------|-------|
| 20 | 34679426 - 34820721   | F - 3.23%  | TRUE  | TRUE  |
| 20 | 34679426 - 34820721   |            | TRUE  | TRUE  |
| 20 | 34679426 - 34820721   | F - 12.90% | FALSE | TRUE  |
| 9  | 91933412 - 91974561   |            | TRUE  | TRUE  |
| 9  | 91933412 - 91974561   |            | TRUE  | TRUE  |
| 9  | 91933412 - 91974561   | F - 11.11% | TRUE  | TRUE  |
| 9  | 91933412 - 91974561   | F - 5.56%  | TRUE  | TRUE  |
| 9  | 91933412 - 91974561   |            | TRUE  | TRUE  |
| 9  | 91933412 - 91974561   |            | TRUE  | TRUE  |
| 6  | 130686879 - 130764509 |            | TRUE  | FALSE |
| 6  | 130686879 - 130764509 |            | TRUE  | FALSE |
| 6  | 130686879 - 130764509 | T - 77.78% | TRUE  | TRUE  |
| 6  | 130686879 - 130764509 | F - 22.22% | TRUE  | TRUE  |
| 6  | 130686879 - 130764509 | F - 33.33% | TRUE  | TRUE  |
| 6  | 130686879 - 130764509 | F - 44.44% | TRUE  | TRUE  |
| 6  | 138188351 - 138204449 | F - 7.69%  | TRUE  | TRUE  |
| 6  | 138188351 - 138204449 | F - 15.38% | FALSE | TRUE  |
| 6  | 138188351 - 138204449 |            | TRUE  | TRUE  |
| 6  | 138188351 - 138204449 |            | TRUE  | TRUE  |
| 6  | 138188351 - 138204449 | F - 15.38% | TRUE  | TRUE  |
| 6  | 138188351 - 138204449 |            | FALSE | TRUE  |
| 6  | 138188351 - 138204449 |            | FALSE | TRUE  |
| 6  | 138188351 - 138204449 | F - 7.69%  | TRUE  | TRUE  |
| 7  | 1121844 - 1133451     | F - 15.38% | TRUE  | TRUE  |
| 7  | 1121844 - 1133451     | F - 23.08% | TRUE  | TRUE  |
| 7  | 1121844 - 1133451     | T - 69.23% | FALSE | TRUE  |
| 7  | 1121844 - 1133451     | T - 53.85% | TRUE  | TRUE  |
| 7  | 1121844 - 1133451     | F - 15.38% | TRUE  | TRUE  |
| 7  | 1121844 - 1133451     | T - 69.23% | TRUE  | TRUE  |
| 7  | 1121844 - 1133451     |            | TRUE  | TRUE  |
| 7  | 1121844 - 1133451     |            | FALSE | TRUE  |
| 7  | 1121844 - 1133451     |            | TRUE  | TRUE  |
| 7  | 1121844 - 1133451     | F - 30.77% | TRUE  | TRUE  |
| 7  | 1121844 - 1133451     | T - 76.92% | TRUE  | TRUE  |
| 7  | 1121844 - 1133451     |            | FALSE | TRUE  |
| X  | 48659784 - 48683392   | F - 3.85%  | TRUE  | FALSE |
| X  | 48659784 - 48683392   |            | TRUE  | TRUE  |
| X  | 48659784 - 48683392   | F - 3.85%  | TRUE  | TRUE  |
| X  | 48659784 - 48683392   | F - 3.85%  | TRUE  | TRUE  |
| X  | 48659784 - 48683392   | F - 36.54% | TRUE  | TRUE  |
| X  | 48659784 - 48683392   | F - 1.92%  | TRUE  | TRUE  |
| X  | 48659784 - 48683392   | F - 1.92%  | TRUE  | TRUE  |
| X  | 48659784 - 48683392   | F - 3.85%  | TRUE  | TRUE  |
| X  | 48659784 - 48683392   | F - 11.54% | TRUE  | TRUE  |
| X  | 48659784 - 48683392   | F - 46.15% | TRUE  | TRUE  |
| X  | 48659784 - 48683392   |            | TRUE  | TRUE  |
| X  | 48659784 - 48683392   | T - 61.54% | FALSE | TRUE  |
| 1  | 46640745 - 46651634   |            | TRUE  | TRUE  |
| 1  | 46640745 - 46651634   |            | TRUE  | TRUE  |
| 1  | 46640745 - 46651634   |            | TRUE  | TRUE  |
| 1  | 46640745 - 46651634   | F - 46.15% | TRUE  | TRUE  |
| 1  | 46640745 - 46651634   |            | TRUE  | TRUE  |
| 1  | 46640745 - 46651634   | T - 53.85% | TRUE  | TRUE  |
| 1  | 46640745 - 46651634   | T - 69.23% | TRUE  | TRUE  |
| 1  | 240177648 - 240655529 |            | TRUE  | FALSE |
| 1  | 240177648 - 240655529 |            | TRUE  | TRUE  |
| 1  | 240177648 - 240655529 | F - 7.14%  | TRUE  | TRUE  |
| 1  | 240177648 - 240655529 | F - 7.14%  | TRUE  | TRUE  |

|    |                       |             |       |       |
|----|-----------------------|-------------|-------|-------|
| 1  | 240177648 - 240655529 |             | TRUE  | TRUE  |
| 1  | 240177648 - 240655529 | F - 14.29%  | TRUE  | TRUE  |
| 1  | 240177648 - 240655529 | F - 21.43%  | TRUE  | TRUE  |
| 1  | 240177648 - 240655529 | F - 28.57%  | TRUE  | TRUE  |
| 1  | 240177648 - 240655529 |             | TRUE  | TRUE  |
| 1  | 240177648 - 240655529 |             | TRUE  | TRUE  |
| 1  | 240177648 - 240655529 |             | TRUE  | TRUE  |
| 1  | 240177648 - 240655529 | T - 57.14%  | FALSE | TRUE  |
| 1  | 240177648 - 240655529 |             | FALSE | TRUE  |
| 1  | 240177648 - 240655529 |             | FALSE | TRUE  |
| 1  | 240177648 - 240655529 | T - 50.00%  | TRUE  | TRUE  |
| 1  | 240177648 - 240655529 | F - 42.86%  | FALSE | TRUE  |
| 1  | 240177648 - 240655529 |             | TRUE  | TRUE  |
| 1  | 240177648 - 240655529 |             | FALSE | TRUE  |
| 3  | 193853931 - 193856521 | T - 66.67%  | TRUE  | TRUE  |
| 3  | 193853931 - 193856521 | F - 33.33%  | FALSE | TRUE  |
| 3  | 193853931 - 193856521 | F - 33.33%  | TRUE  | TRUE  |
| 3  | 193853931 - 193856521 |             | FALSE | TRUE  |
| 3  | 193853931 - 193856521 | T - 100.00% | TRUE  | TRUE  |
| 3  | 193853931 - 193856521 |             | TRUE  | TRUE  |
| 3  | 193853931 - 193856521 |             | TRUE  | TRUE  |
| 2  | 217362912 - 217443903 |             | TRUE  | FALSE |
| 2  | 217362912 - 217443903 | F - 17.65%  | TRUE  | TRUE  |
| 2  | 217362912 - 217443903 |             | TRUE  | TRUE  |
| 2  | 217362912 - 217443903 | F - 11.76%  | TRUE  | TRUE  |
| 2  | 217362912 - 217443903 |             | FALSE | TRUE  |
| 2  | 196998290 - 197041227 |             | TRUE  | TRUE  |
| 2  | 196998290 - 197041227 | F - 14.29%  | TRUE  | TRUE  |
| 2  | 196998290 - 197041227 | F - 28.57%  | TRUE  | TRUE  |
| 2  | 196998290 - 197041227 | F - 42.86%  | TRUE  | TRUE  |
| 2  | 196998290 - 197041227 | F - 14.29%  | TRUE  | TRUE  |
| 2  | 196998290 - 197041227 | T - 57.14%  | TRUE  | TRUE  |
| 16 | 16043434 - 16236931   |             | TRUE  | TRUE  |
| 16 | 16043434 - 16236931   | T - 73.68%  | TRUE  | TRUE  |
| 16 | 16043434 - 16236931   |             | TRUE  | TRUE  |
| 16 | 16043434 - 16236931   |             | TRUE  | TRUE  |
| 16 | 16043434 - 16236931   |             | TRUE  | TRUE  |
| 16 | 16043434 - 16236931   | F - 15.79%  | TRUE  | TRUE  |
| 16 | 16043434 - 16236931   |             | TRUE  | TRUE  |
| 16 | 16043434 - 16236931   |             | TRUE  | TRUE  |
| 16 | 16043434 - 16236931   | T - 57.89%  | TRUE  | TRUE  |
| 16 | 16043434 - 16236931   |             | TRUE  | TRUE  |
| 16 | 16043434 - 16236931   |             | TRUE  | TRUE  |
| 9  | 36036430 - 36124452   |             | TRUE  | FALSE |
| 9  | 36036430 - 36124452   | F - 22.22%  | TRUE  | TRUE  |
| 9  | 36036430 - 36124452   |             | FALSE | TRUE  |
| 9  | 36036430 - 36124452   |             | FALSE | TRUE  |
| 9  | 470291 - 746105       |             | TRUE  | TRUE  |
| 9  | 470291 - 746105       |             | FALSE | TRUE  |
| 9  | 470291 - 746105       |             | TRUE  | TRUE  |
| 9  | 470291 - 746105       | F - 8.70%   | TRUE  | TRUE  |
| 9  | 470291 - 746105       |             | TRUE  | TRUE  |
| 9  | 470291 - 746105       |             | TRUE  | TRUE  |
| 9  | 470291 - 746105       | F - 43.48%  | TRUE  | TRUE  |
| 9  | 470291 - 746105       |             | TRUE  | TRUE  |
| 9  | 470291 - 746105       | F - 8.70%   | TRUE  | TRUE  |
| 9  | 470291 - 746105       |             | FALSE | TRUE  |
| 9  | 470291 - 746105       |             | TRUE  | TRUE  |

|    |                       |             |       |       |
|----|-----------------------|-------------|-------|-------|
| 20 | 17206752 - 17465223   | F - 27.27%  | TRUE  | TRUE  |
| 20 | 17206752 - 17465223   | F - 27.27%  | TRUE  | TRUE  |
| 20 | 17206752 - 17465223   | F - 9.09%   | FALSE | TRUE  |
| 20 | 17206752 - 17465223   |             | FALSE | TRUE  |
| 20 | 17206752 - 17465223   |             | FALSE | TRUE  |
| 20 | 17206752 - 17465223   |             | TRUE  | TRUE  |
| 1  | 146714291 - 146767447 |             | TRUE  | FALSE |
| 1  | 146714291 - 146767447 |             | TRUE  | TRUE  |
| 1  | 146714291 - 146767447 |             | TRUE  | TRUE  |
| 1  | 146714291 - 146767447 | F - 3.70%   | TRUE  | TRUE  |
| 1  | 146714291 - 146767447 | T - 85.19%  | TRUE  | TRUE  |
| 1  | 146714291 - 146767447 |             | TRUE  | TRUE  |
| 1  | 146714291 - 146767447 |             | TRUE  | TRUE  |
| 1  | 146714291 - 146767447 |             | FALSE | TRUE  |
| 1  | 146714291 - 146767447 |             | TRUE  | TRUE  |
| 2  | 56400669 - 56412905   | T - 66.67%  | TRUE  | TRUE  |
| 2  | 56400669 - 56412905   | F - 33.33%  | TRUE  | TRUE  |
| 2  | 56400669 - 56412905   |             | TRUE  | TRUE  |
| 2  | 56400669 - 56412905   | T - 100.00% | FALSE | TRUE  |
| 2  | 175424300 - 175547644 |             | TRUE  | FALSE |
| 2  | 175424300 - 175547644 |             | TRUE  | TRUE  |
| 2  | 175424300 - 175547644 |             | TRUE  | FALSE |
| 2  | 175424300 - 175547644 |             | TRUE  | TRUE  |
| 2  | 175424300 - 175547644 |             | TRUE  | TRUE  |
| 2  | 175424300 - 175547644 | F - 12.00%  | TRUE  | TRUE  |
| 2  | 175424300 - 175547644 | F - 20.00%  | TRUE  | TRUE  |
| 2  | 224839765 - 224904036 | F - 13.33%  | TRUE  | TRUE  |
| 2  | 224839765 - 224904036 | F - 6.67%   | FALSE | TRUE  |
| 2  | 224839765 - 224904036 |             | TRUE  | TRUE  |
| 2  | 224839765 - 224904036 | F - 13.33%  | TRUE  | TRUE  |
| 2  | 224839765 - 224904036 |             | TRUE  | TRUE  |
| 2  | 224839765 - 224904036 | F - 6.67%   | TRUE  | TRUE  |
| 2  | 224839765 - 224904036 | F - 6.67%   | TRUE  | TRUE  |
| 2  | 224839765 - 224904036 | F - 26.67%  | TRUE  | TRUE  |
| 2  | 224839765 - 224904036 | F - 20.00%  | FALSE | TRUE  |
| 2  | 224839765 - 224904036 | F - 13.33%  | TRUE  | TRUE  |
| 2  | 224839765 - 224904036 | F - 13.33%  | TRUE  | TRUE  |
| 2  | 224839765 - 224904036 |             | TRUE  | TRUE  |
| 2  | 224839765 - 224904036 |             | TRUE  | TRUE  |
| 2  | 224839765 - 224904036 | F - 13.33%  | TRUE  | TRUE  |
| 2  | 224839765 - 224904036 |             | TRUE  | TRUE  |
| 2  | 224839765 - 224904036 |             | TRUE  | TRUE  |
| 7  | 136912088 - 137028611 | F - 25.00%  | TRUE  | TRUE  |
| 7  | 136912088 - 137028611 | F - 25.00%  | FALSE | TRUE  |
| 7  | 136912088 - 137028611 | T - 100.00% | TRUE  | TRUE  |
| 7  | 136912088 - 137028611 | T - 100.00% | TRUE  | TRUE  |
| 7  | 136912088 - 137028611 | T - 100.00% | TRUE  | TRUE  |
| 7  | 136912088 - 137028611 |             | TRUE  | TRUE  |
| 7  | 136912088 - 137028611 |             | TRUE  | TRUE  |
| 4  | 7760440 - 7941653     |             | TRUE  | TRUE  |
| 4  | 7760440 - 7941653     |             | TRUE  | TRUE  |
| 4  | 7760440 - 7941653     |             | FALSE | TRUE  |
| 4  | 7760440 - 7941653     | T - 63.64%  | TRUE  | TRUE  |
| 4  | 7760440 - 7941653     | F - 9.09%   | FALSE | TRUE  |
| 4  | 7760440 - 7941653     |             | FALSE | TRUE  |
| 11 | 2397419 - 2418649     |             | TRUE  | FALSE |
| 11 | 2397419 - 2418649     | F - 12.50%  | TRUE  | TRUE  |
| 2  | 152341850 - 152591001 |             | TRUE  | FALSE |

|    |                       |             |       |       |
|----|-----------------------|-------------|-------|-------|
| 2  | 152341850 - 152591001 |             | TRUE  | FALSE |
| 2  | 152341850 - 152591001 |             | TRUE  | FALSE |
| 2  | 152341850 - 152591001 |             | TRUE  | FALSE |
| 2  | 152341850 - 152591001 |             | TRUE  | FALSE |
| 2  | 152341850 - 152591001 |             | TRUE  | FALSE |
| 2  | 152341850 - 152591001 |             | TRUE  | FALSE |
| 2  | 152341850 - 152591001 | F - 24.24%  | TRUE  | FALSE |
| 2  | 152341850 - 152591001 |             | TRUE  | FALSE |
| 2  | 152341850 - 152591001 | F - 27.27%  | TRUE  | TRUE  |
| 2  | 152341850 - 152591001 | F - 9.09%   | TRUE  | FALSE |
| 2  | 152341850 - 152591001 | F - 24.24%  | TRUE  | FALSE |
| 2  | 152341850 - 152591001 |             | TRUE  | FALSE |
| 2  | 152341850 - 152591001 |             | TRUE  | FALSE |
| 2  | 152341850 - 152591001 |             | TRUE  | FALSE |
| 2  | 152341850 - 152591001 |             | TRUE  | TRUE  |
| 2  | 152341850 - 152591001 | F - 27.27%  | FALSE | TRUE  |
| 13 | 51928213 - 52028400   |             | TRUE  | TRUE  |
| 13 | 51928213 - 52028400   | F - 3.45%   | TRUE  | FALSE |
| 13 | 51928213 - 52028400   |             | TRUE  | TRUE  |
| 6  | 84833960 - 84937353   |             | TRUE  | FALSE |
| 6  | 84833960 - 84937353   |             | TRUE  | FALSE |
| 6  | 84833960 - 84937353   |             | TRUE  | TRUE  |
| 6  | 84833960 - 84937353   |             | TRUE  | FALSE |
| 6  | 84833960 - 84937353   |             | TRUE  | TRUE  |
| 6  | 84833960 - 84937353   |             | TRUE  | FALSE |
| 6  | 84833960 - 84937353   | T - 54.55%  | TRUE  | TRUE  |
| 6  | 84833960 - 84937353   |             | FALSE | TRUE  |
| 13 | 32974860 - 33002315   |             | TRUE  | TRUE  |
| 13 | 32974860 - 33002315   | F - 46.15%  | TRUE  | TRUE  |
| 13 | 32974860 - 33002315   |             | FALSE | TRUE  |
| 13 | 32974860 - 33002315   |             | TRUE  | TRUE  |
| 13 | 32974860 - 33002315   | F - 7.69%   | TRUE  | TRUE  |
| 13 | 32974860 - 33002315   | F - 7.69%   | TRUE  | TRUE  |
| 13 | 32974860 - 33002315   | F - 15.38%  | FALSE | TRUE  |
| 13 | 32974860 - 33002315   | F - 7.69%   | FALSE | TRUE  |
| 13 | 32974860 - 33002315   | F - 7.69%   | FALSE | TRUE  |
| 13 | 32974860 - 33002315   | T - 53.85%  | TRUE  | TRUE  |
| 13 | 32974860 - 33002315   | F - 7.69%   | TRUE  | TRUE  |
| 13 | 32974860 - 33002315   | F - 15.38%  | TRUE  | TRUE  |
| 13 | 32974860 - 33002315   |             | TRUE  | TRUE  |
| 13 | 32974860 - 33002315   | T - 92.31%  | TRUE  | TRUE  |
| 13 | 32974860 - 33002315   | T - 69.23%  | TRUE  | TRUE  |
| 13 | 32974860 - 33002315   |             | FALSE | TRUE  |
| 13 | 32974860 - 33002315   |             | FALSE | TRUE  |
| 13 | 32974860 - 33002315   |             | TRUE  | TRUE  |
| 14 | 96671016 - 96710666   | F - 12.50%  | TRUE  | TRUE  |
| 14 | 96671016 - 96710666   | T - 75.00%  | TRUE  | TRUE  |
| 14 | 96671016 - 96710666   | F - 25.00%  | TRUE  | TRUE  |
| 14 | 96671016 - 96710666   | T - 50.00%  | FALSE | TRUE  |
| 14 | 96671016 - 96710666   | T - 87.50%  | TRUE  | TRUE  |
| 14 | 96671016 - 96710666   | T - 75.00%  | TRUE  | TRUE  |
| 14 | 96671016 - 96710666   |             | FALSE | TRUE  |
| 20 | 44441215 - 44445596   |             | TRUE  | TRUE  |
| 20 | 44441215 - 44445596   | T - 93.75%  | TRUE  | TRUE  |
| 20 | 44441215 - 44445596   | F - 6.25%   | TRUE  | TRUE  |
| 20 | 44441215 - 44445596   | F - 18.75%  | TRUE  | TRUE  |
| 20 | 44441215 - 44445596   | T - 100.00% | TRUE  | TRUE  |
| 20 | 44441215 - 44445596   | F - 12.50%  | FALSE | TRUE  |

|    |                       |             |       |       |
|----|-----------------------|-------------|-------|-------|
| 20 | 44441215 - 44445596   | T - 81.25%  | TRUE  | TRUE  |
| 20 | 44441215 - 44445596   |             | TRUE  | TRUE  |
| 20 | 44441215 - 44445596   | T - 100.00% | TRUE  | TRUE  |
| 17 | 40811266 - 40819024   |             | TRUE  | TRUE  |
| 17 | 40811266 - 40819024   | F - 33.33%  | TRUE  | TRUE  |
| 17 | 40811266 - 40819024   | T - 83.33%  | TRUE  | TRUE  |
| 17 | 40811266 - 40819024   |             | TRUE  | TRUE  |
| 17 | 40811266 - 40819024   |             | TRUE  | TRUE  |
| 3  | 114056941 - 114866127 |             | TRUE  | TRUE  |
| 3  | 114056941 - 114866127 |             | TRUE  | TRUE  |
| 3  | 114056941 - 114866127 |             | TRUE  | FALSE |
| 3  | 114056941 - 114866127 |             | TRUE  | FALSE |
| 3  | 114056941 - 114866127 |             | TRUE  | TRUE  |
| 3  | 114056941 - 114866127 | F - 6.90%   | TRUE  | TRUE  |
| 3  | 114056941 - 114866127 |             | TRUE  | TRUE  |
| 3  | 114056941 - 114866127 |             | TRUE  | TRUE  |
| 3  | 114056941 - 114866127 |             | FALSE | TRUE  |
| 3  | 114056941 - 114866127 |             | FALSE | TRUE  |
| 3  | 114056941 - 114866127 | F - 10.34%  | FALSE | TRUE  |
| 3  | 114056941 - 114866127 | F - 20.69%  | TRUE  | TRUE  |
| 3  | 114056941 - 114866127 | F - 6.90%   | TRUE  | TRUE  |
| 3  | 114056941 - 114866127 | F - 3.45%   | TRUE  | TRUE  |
| 3  | 114056941 - 114866127 |             | TRUE  | TRUE  |
| 2  | 242576628 - 242613272 | F - 2.50%   | TRUE  | TRUE  |
| 2  | 242576628 - 242613272 | F - 2.50%   | FALSE | TRUE  |
| 2  | 242576628 - 242613272 |             | FALSE | TRUE  |
| 3  | 49027319 - 49044587   |             | TRUE  | TRUE  |
| 3  | 49027319 - 49044587   |             | TRUE  | TRUE  |
| 3  | 49027319 - 49044587   |             | TRUE  | TRUE  |
| 3  | 49027319 - 49044587   | F - 20.00%  | TRUE  | TRUE  |
| 3  | 49027319 - 49044587   | F - 46.67%  | FALSE | TRUE  |
| 3  | 49027319 - 49044587   | T - 53.33%  | TRUE  | TRUE  |
| 3  | 49027319 - 49044587   | F - 13.33%  | TRUE  | TRUE  |
| 6  | 132453055 - 132490514 | F - 16.67%  | TRUE  | FALSE |
| 6  | 132453055 - 132490514 |             | TRUE  | FALSE |
| 6  | 132453055 - 132490514 |             | TRUE  | TRUE  |
| 6  | 132453055 - 132490514 | F - 16.67%  | TRUE  | TRUE  |
| 6  | 132453055 - 132490514 | F - 33.33%  | TRUE  | TRUE  |
| 13 | 21140585 - 21265576   |             | TRUE  | FALSE |
| 13 | 21140585 - 21265576   |             | TRUE  | FALSE |
| 13 | 21140585 - 21265576   |             | TRUE  | TRUE  |
| 13 | 21140585 - 21265576   |             | TRUE  | TRUE  |
| 13 | 21140585 - 21265576   | F - 11.11%  | TRUE  | TRUE  |
| 13 | 21140585 - 21265576   |             | TRUE  | FALSE |
| 13 | 21140585 - 21265576   |             | TRUE  | TRUE  |
| 13 | 21140585 - 21265576   |             | TRUE  | TRUE  |
| 13 | 21140585 - 21265576   | T - 66.67%  | TRUE  | TRUE  |
| 13 | 21140585 - 21265576   | F - 38.89%  | TRUE  | TRUE  |
| 13 | 21140585 - 21265576   |             | TRUE  | TRUE  |
| 13 | 21140585 - 21265576   |             | TRUE  | TRUE  |
| 13 | 21140585 - 21265576   |             | FALSE | TRUE  |
| 13 | 21140585 - 21265576   |             | TRUE  | TRUE  |
| 13 | 21140585 - 21265576   | T - 66.67%  | TRUE  | TRUE  |
| 13 | 21140585 - 21265576   |             | FALSE | TRUE  |
| 13 | 21140585 - 21265576   |             | FALSE | TRUE  |
| 13 | 21140585 - 21265576   |             | FALSE | TRUE  |
| 15 | 25068794 - 25244225   | F - 8.70%   | TRUE  | TRUE  |
| 15 | 25068794 - 25244225   |             | TRUE  | TRUE  |

|    |                     |            |       |       |
|----|---------------------|------------|-------|-------|
| 15 | 25068794 - 25244225 |            | TRUE  | TRUE  |
| 15 | 25068794 - 25244225 |            | FALSE | TRUE  |
| 4  | 89647106 - 90032549 | F - 15.63% | TRUE  | TRUE  |
| 4  | 89647106 - 90032549 |            | TRUE  | TRUE  |
| 4  | 89647106 - 90032549 |            | TRUE  | TRUE  |
| 4  | 89647106 - 90032549 |            | TRUE  | FALSE |
| 4  | 89647106 - 90032549 |            | TRUE  | TRUE  |
| 4  | 89647106 - 90032549 |            | TRUE  | TRUE  |
| 4  | 89647106 - 90032549 |            | TRUE  | FALSE |
| 4  | 89647106 - 90032549 | F - 25.00% | TRUE  | TRUE  |
| 4  | 89647106 - 90032549 | F - 12.50% | TRUE  | TRUE  |
| 4  | 89647106 - 90032549 | F - 25.00% | TRUE  | TRUE  |
| 4  | 89647106 - 90032549 |            | TRUE  | TRUE  |
| 4  | 89647106 - 90032549 |            | TRUE  | TRUE  |
| 4  | 89647106 - 90032549 | F - 6.25%  | TRUE  | TRUE  |
| 4  | 89647106 - 90032549 | F - 6.25%  | TRUE  | TRUE  |
| 4  | 89647106 - 90032549 | F - 18.75% | TRUE  | TRUE  |
| 4  | 89647106 - 90032549 | F - 21.88% | TRUE  | TRUE  |
| 4  | 89647106 - 90032549 | F - 18.75% | TRUE  | TRUE  |
| 4  | 89647106 - 90032549 | F - 18.75% | TRUE  | TRUE  |
| 4  | 89647106 - 90032549 |            | TRUE  | TRUE  |
| 4  | 89647106 - 90032549 | F - 3.13%  | TRUE  | TRUE  |
| 4  | 89647106 - 90032549 |            | TRUE  | TRUE  |
| 4  | 89647106 - 90032549 | F - 18.75% | TRUE  | TRUE  |
| 4  | 89647106 - 90032549 |            | TRUE  | TRUE  |
| 4  | 89647106 - 90032549 | F - 3.13%  | TRUE  | TRUE  |
| 4  | 89647106 - 90032549 |            | TRUE  | TRUE  |
| 4  | 89647106 - 90032549 | F - 6.25%  | TRUE  | TRUE  |
| 4  | 89647106 - 90032549 | F - 3.13%  | TRUE  | TRUE  |
| 4  | 89647106 - 90032549 | F - 3.13%  | TRUE  | TRUE  |
| 4  | 89647106 - 90032549 | F - 3.13%  | TRUE  | TRUE  |
| 4  | 89647106 - 90032549 | F - 3.13%  | TRUE  | TRUE  |
| 4  | 89647106 - 90032549 | T - 56.25% | FALSE | TRUE  |
| 4  | 89647106 - 90032549 |            | FALSE | TRUE  |
| 4  | 89647106 - 90032549 | F - 40.63% | TRUE  | TRUE  |
| 4  | 89647106 - 90032549 |            | TRUE  | TRUE  |
| 17 | 74138534 - 74236390 |            | TRUE  | TRUE  |
| 17 | 74138534 - 74236390 |            | TRUE  | TRUE  |
| 17 | 74138534 - 74236390 | T - 80.00% | TRUE  | TRUE  |
| 17 | 74138534 - 74236390 |            | TRUE  | FALSE |
| 17 | 74138534 - 74236390 |            | FALSE | TRUE  |
| 17 | 74138534 - 74236390 |            | FALSE | TRUE  |
| 1  | 33722146 - 33766320 |            | TRUE  | FALSE |
| 1  | 33722146 - 33766320 |            | FALSE | TRUE  |
| 1  | 33722146 - 33766320 | F - 12.50% | TRUE  | TRUE  |
| 1  | 74663896 - 75010116 |            | TRUE  | FALSE |
| 1  | 74663896 - 75010116 |            | TRUE  | TRUE  |
| 1  | 74663896 - 75010116 |            | TRUE  | FALSE |
| 1  | 74663896 - 75010116 |            | TRUE  | TRUE  |
| 1  | 74663896 - 75010116 |            | TRUE  | FALSE |
| 1  | 74663896 - 75010116 |            | TRUE  | FALSE |
| 1  | 74663896 - 75010116 | F - 37.93% | TRUE  | TRUE  |
| 1  | 74663896 - 75010116 | F - 37.93% | TRUE  | TRUE  |
| 1  | 74663896 - 75010116 | F - 41.38% | TRUE  | TRUE  |
| 1  | 74663896 - 75010116 | F - 24.14% | TRUE  | TRUE  |
| 1  | 74663896 - 75010116 | F - 37.93% | TRUE  | TRUE  |
| 1  | 74663896 - 75010116 | F - 24.14% | TRUE  | FALSE |
| 1  | 74663896 - 75010116 |            | TRUE  | TRUE  |
| 1  | 74663896 - 75010116 | F - 17.24% | TRUE  | TRUE  |

|            |                       |            |       |       |
|------------|-----------------------|------------|-------|-------|
| 1          | 74663896 - 75010116   |            | TRUE  | TRUE  |
| 1          | 74663896 - 75010116   | F - 13.79% | TRUE  | FALSE |
| 1          | 19665267 - 19812066   |            | TRUE  | FALSE |
| 1          | 19665267 - 19812066   | F - 17.65% | TRUE  | FALSE |
| 1          | 19665267 - 19812066   | F - 17.65% | TRUE  | TRUE  |
| 1          | 19665267 - 19812066   |            | FALSE | TRUE  |
| 1          | 19665267 - 19812066   |            | FALSE | TRUE  |
| 1          | 19665267 - 19812066   |            | TRUE  | TRUE  |
| 1          | 19665267 - 19812066   |            | TRUE  | TRUE  |
| 6_apd_hap1 | 1097261 - 1100722     | F - 33.33% | TRUE  | TRUE  |
| 6_apd_hap1 | 1097261 - 1100722     |            | FALSE | TRUE  |
| 6_apd_hap1 | 1097261 - 1100722     | T - 66.67% | TRUE  | TRUE  |
| 6_apd_hap1 | 1097261 - 1100722     |            | TRUE  | TRUE  |
| 6_apd_hap1 | 1097261 - 1100722     | T - 66.67% | TRUE  | TRUE  |
| 3          | 38738293 - 38835501   |            | TRUE  | FALSE |
| 3          | 38738293 - 38835501   | T - 50.00% | TRUE  | FALSE |
| 1          | 53527724 - 53551174   | T - 61.54% | TRUE  | FALSE |
| 1          | 53527724 - 53551174   |            | TRUE  | TRUE  |
| 1          | 53527724 - 53551174   | T - 61.54% | TRUE  | TRUE  |
| 1          | 53527724 - 53551174   |            | TRUE  | TRUE  |
| 1          | 53527724 - 53551174   |            | TRUE  | TRUE  |
| 1          | 53527724 - 53551174   |            | TRUE  | TRUE  |
| 1          | 53527724 - 53551174   |            | FALSE | TRUE  |
| 2          | 220114433 - 220142892 | F - 7.14%  | TRUE  | TRUE  |
| 2          | 220114433 - 220142892 | T - 50.00% | TRUE  | TRUE  |
| 2          | 220114433 - 220142892 | F - 7.14%  | TRUE  | TRUE  |
| 2          | 220114433 - 220142892 | F - 7.14%  | TRUE  | TRUE  |
| 2          | 220114433 - 220142892 | F - 14.29% | FALSE | TRUE  |
| 2          | 220114433 - 220142892 | F - 7.14%  | FALSE | TRUE  |
| 2          | 220114433 - 220142892 | F - 14.29% | TRUE  | TRUE  |
| 2          | 220114433 - 220142892 |            | TRUE  | TRUE  |
| 2          | 220114433 - 220142892 | F - 42.86% | TRUE  | TRUE  |
| 2          | 220114433 - 220142892 |            | FALSE | TRUE  |
| 2          | 220114433 - 220142892 | F - 42.86% | TRUE  | TRUE  |
| 2          | 220114433 - 220142892 | F - 7.14%  | TRUE  | TRUE  |
| 2          | 220114433 - 220142892 |            | TRUE  | TRUE  |
| 2          | 220114433 - 220142892 |            | FALSE | TRUE  |
| 2          | 220114433 - 220142892 | F - 7.14%  | TRUE  | TRUE  |
| 3          | 46753605 - 46777921   |            | TRUE  | FALSE |
| 3          | 46753605 - 46777921   | T - 50.00% | TRUE  | FALSE |
| 3          | 46753605 - 46777921   |            | FALSE | TRUE  |
| 3          | 46753605 - 46777921   | F - 40.00% | FALSE | TRUE  |
| 3          | 46753605 - 46777921   | F - 40.00% | FALSE | TRUE  |
| 1          | 143211528 - 143275032 |            | TRUE  | TRUE  |
| 1          | 143211528 - 143275032 |            | TRUE  | TRUE  |
| 1          | 143211528 - 143275032 |            | TRUE  | TRUE  |
| 1          | 143211528 - 143275032 |            | TRUE  | TRUE  |
| 1          | 143211528 - 143275032 | F - 25.00% | TRUE  | TRUE  |
| 1          | 143211528 - 143275032 |            | TRUE  | TRUE  |
| 1          | 143211528 - 143275032 | F - 8.33%  | TRUE  | TRUE  |
| 1          | 143211528 - 143275032 |            | TRUE  | TRUE  |
| 1          | 143211528 - 143275032 | F - 8.33%  | TRUE  | TRUE  |
| 1          | 143211528 - 143275032 | F - 25.00% | FALSE | TRUE  |
| 1          | 143211528 - 143275032 | F - 16.67% | TRUE  | TRUE  |
| 1          | 143211528 - 143275032 | F - 16.67% | TRUE  | TRUE  |
| 1          | 143211528 - 143275032 |            | TRUE  | TRUE  |
| 1          | 143211528 - 143275032 | F - 8.33%  | TRUE  | TRUE  |
| 1          | 143211528 - 143275032 | F - 16.67% | FALSE | TRUE  |



|             |                       |            |       |       |
|-------------|-----------------------|------------|-------|-------|
| 1           | 143211528 - 143275032 | F - 8.33%  | FALSE | TRUE  |
| 1           | 143211528 - 143275032 | F - 8.33%  | FALSE | TRUE  |
| 1           | 143211528 - 143275032 | F - 8.33%  | TRUE  | TRUE  |
| 1           | 143211528 - 143275032 |            | FALSE | TRUE  |
| 6           | 146185381 - 146285559 |            | TRUE  | FALSE |
| 6           | 146185381 - 146285559 | F - 16.67% | TRUE  | TRUE  |
| 6           | 146185381 - 146285559 |            | TRUE  | TRUE  |
| 6           | 146185381 - 146285559 |            | TRUE  | TRUE  |
| 6           | 146185381 - 146285559 | F - 5.56%  | FALSE | TRUE  |
| 6           | 146185381 - 146285559 | F - 27.78% | TRUE  | TRUE  |
| 6           | 146185381 - 146285559 |            | TRUE  | TRUE  |
| 14          | 61110132 - 61124977   |            | TRUE  | TRUE  |
| 14          | 61110132 - 61124977   | F - 14.29% | TRUE  | TRUE  |
| 14          | 61110132 - 61124977   | F - 28.57% | TRUE  | TRUE  |
| 14          | 61110132 - 61124977   | F - 28.57% | FALSE | TRUE  |
| 17          | 57642886 - 57685713   |            | TRUE  | TRUE  |
| 17          | 57642886 - 57685713   |            | TRUE  | FALSE |
| 17          | 57642886 - 57685713   | F - 11.11% | FALSE | TRUE  |
| 5           | 169805167 - 169816681 |            | TRUE  | TRUE  |
| 5           | 169805167 - 169816681 |            | TRUE  | FALSE |
| 5           | 169805167 - 169816681 | T - 50.00% | TRUE  | TRUE  |
| 10          | 102672326 - 102724893 |            | TRUE  | FALSE |
| 10          | 102672326 - 102724893 | F - 10.00% | TRUE  | TRUE  |
| 10          | 102672326 - 102724893 |            | TRUE  | TRUE  |
| 10          | 102672326 - 102724893 | F - 40.00% | TRUE  | TRUE  |
| 10          | 102672326 - 102724893 |            | TRUE  | TRUE  |
| 10          | 102672326 - 102724893 |            | TRUE  | TRUE  |
| 10          | 102672326 - 102724893 |            | FALSE | TRUE  |
| 10          | 102672326 - 102724893 |            | FALSE | TRUE  |
| 6_mann_hap4 | 2196837 - 2216014     | T - 62.50% | TRUE  | TRUE  |
| 6_mann_hap4 | 2196837 - 2216014     |            | TRUE  | TRUE  |
| 6_mann_hap4 | 2196837 - 2216014     | F - 43.75% | TRUE  | TRUE  |
| 6_mann_hap4 | 2196837 - 2216014     |            | TRUE  | TRUE  |
| 6_mann_hap4 | 2196837 - 2216014     | F - 3.13%  | TRUE  | TRUE  |
| 6_mann_hap4 | 2196837 - 2216014     | F - 3.13%  | TRUE  | TRUE  |
| 6_mann_hap4 | 2196837 - 2216014     |            | TRUE  | TRUE  |
| 6_mann_hap4 | 2196837 - 2216014     | F - 6.25%  | FALSE | TRUE  |
| 6_mann_hap4 | 2196837 - 2216014     |            | TRUE  | TRUE  |
| 6_mann_hap4 | 2196837 - 2216014     |            | TRUE  | TRUE  |
| 6_mann_hap4 | 2196837 - 2216014     |            | TRUE  | TRUE  |
| 6_mann_hap4 | 2196837 - 2216014     | F - 3.13%  | TRUE  | TRUE  |
| 6_mann_hap4 | 2196837 - 2216014     |            | FALSE | TRUE  |
| 6_mann_hap4 | 2196837 - 2216014     | F - 3.13%  | TRUE  | TRUE  |
| 6_mann_hap4 | 2196837 - 2216014     | F - 3.13%  | TRUE  | TRUE  |
| 6_mann_hap4 | 2196837 - 2216014     |            | TRUE  | TRUE  |
| 6_mann_hap4 | 2196837 - 2216014     | F - 40.63% | TRUE  | TRUE  |
| 6_mann_hap4 | 2196837 - 2216014     | F - 3.13%  | TRUE  | TRUE  |
| 6_mann_hap4 | 2196837 - 2216014     |            | TRUE  | TRUE  |
| 6_mann_hap4 | 2196837 - 2216014     | F - 3.13%  | TRUE  | TRUE  |
| 6_mann_hap4 | 2196837 - 2216014     | F - 6.25%  | TRUE  | TRUE  |
| 6_mann_hap4 | 2196837 - 2216014     |            | TRUE  | TRUE  |
| 6_mann_hap4 | 2196837 - 2216014     | T - 71.88% | FALSE | TRUE  |
| 6_qbl_hap6  | 2141739 - 2160922     | T - 62.50% | TRUE  | TRUE  |
| 6_qbl_hap6  | 2141739 - 2160922     |            | TRUE  | TRUE  |
| 6_qbl_hap6  | 2141739 - 2160922     | F - 43.75% | TRUE  | TRUE  |
| 6_qbl_hap6  | 2141739 - 2160922     |            | TRUE  | TRUE  |
| 6_qbl_hap6  | 2141739 - 2160922     | F - 3.13%  | TRUE  | TRUE  |
| 6_qbl_hap6  | 2141739 - 2160922     | F - 3.13%  | TRUE  | TRUE  |

|            |                       |             |       |       |
|------------|-----------------------|-------------|-------|-------|
| 6_qbl_hap6 | 2141739 - 2160922     |             | TRUE  | TRUE  |
| 6_qbl_hap6 | 2141739 - 2160922     | F - 6.25%   | FALSE | TRUE  |
| 6_qbl_hap6 | 2141739 - 2160922     |             | TRUE  | TRUE  |
| 6_qbl_hap6 | 2141739 - 2160922     |             | TRUE  | TRUE  |
| 6_qbl_hap6 | 2141739 - 2160922     |             | TRUE  | TRUE  |
| 6_qbl_hap6 | 2141739 - 2160922     | F - 3.13%   | TRUE  | TRUE  |
| 6_qbl_hap6 | 2141739 - 2160922     |             | FALSE | TRUE  |
| 6_qbl_hap6 | 2141739 - 2160922     | F - 3.13%   | TRUE  | TRUE  |
| 6_qbl_hap6 | 2141739 - 2160922     | F - 3.13%   | TRUE  | TRUE  |
| 6_qbl_hap6 | 2141739 - 2160922     |             | TRUE  | TRUE  |
| 6_qbl_hap6 | 2141739 - 2160922     | F - 40.63%  | TRUE  | TRUE  |
| 6_qbl_hap6 | 2141739 - 2160922     | F - 3.13%   | TRUE  | TRUE  |
| 6_qbl_hap6 | 2141739 - 2160922     |             | TRUE  | TRUE  |
| 6_qbl_hap6 | 2141739 - 2160922     | F - 3.13%   | TRUE  | TRUE  |
| 6_qbl_hap6 | 2141739 - 2160922     | F - 6.25%   | TRUE  | TRUE  |
| 6_qbl_hap6 | 2141739 - 2160922     |             | TRUE  | TRUE  |
| 6_qbl_hap6 | 2141739 - 2160922     | T - 71.88%  | FALSE | TRUE  |
| 1          | 45959598 - 45965751   |             | TRUE  | TRUE  |
| 1          | 45959598 - 45965751   |             | TRUE  | TRUE  |
| 1          | 45959598 - 45965751   |             | FALSE | TRUE  |
| 1          | 45959598 - 45965751   | F - 20.00%  | TRUE  | TRUE  |
| 1          | 45959598 - 45965751   |             | TRUE  | TRUE  |
| 1          | 45959598 - 45965751   | T - 100.00% | TRUE  | TRUE  |
| 1          | 104068313 - 104153092 |             | TRUE  | TRUE  |
| 1          | 104068313 - 104153092 |             | TRUE  | TRUE  |
| 1          | 104068313 - 104153092 |             | TRUE  | TRUE  |
| 1          | 104068313 - 104153092 | F - 9.09%   | TRUE  | TRUE  |
| 1          | 104068313 - 104153092 |             | TRUE  | FALSE |
| 1          | 104068313 - 104153092 | F - 13.64%  | TRUE  | TRUE  |
| 1          | 104068313 - 104153092 | F - 27.27%  | TRUE  | TRUE  |
| 1          | 104068313 - 104153092 | F - 13.64%  | TRUE  | TRUE  |
| 1          | 104068313 - 104153092 | F - 31.82%  | TRUE  | TRUE  |
| 1          | 104068313 - 104153092 | F - 31.82%  | TRUE  | TRUE  |
| 1          | 104068313 - 104153092 | F - 31.82%  | TRUE  | TRUE  |
| 1          | 104068313 - 104153092 |             | TRUE  | TRUE  |
| 1          | 104068313 - 104153092 |             | TRUE  | TRUE  |
| 1          | 104068313 - 104153092 |             | TRUE  | TRUE  |
| 1          | 104068313 - 104153092 | F - 31.82%  | TRUE  | TRUE  |
| 1          | 104068313 - 104153092 | F - 40.91%  | TRUE  | TRUE  |
| 1          | 104068313 - 104153092 |             | TRUE  | TRUE  |
| 1          | 104068313 - 104153092 |             | TRUE  | TRUE  |
| 1          | 104068313 - 104153092 | F - 40.91%  | TRUE  | TRUE  |
| 5          | 63461671 - 63668696   | F - 20.00%  | FALSE | TRUE  |
| 5          | 63461671 - 63668696   | T - 90.00%  | TRUE  | TRUE  |
| 5          | 63461671 - 63668696   | F - 10.00%  | FALSE | TRUE  |
| 5          | 63461671 - 63668696   | T - 90.00%  | TRUE  | TRUE  |
| 5          | 63461671 - 63668696   | T - 50.00%  | TRUE  | TRUE  |
| 5          | 63461671 - 63668696   | F - 20.00%  | TRUE  | TRUE  |
| 5          | 63461671 - 63668696   | T - 70.00%  | TRUE  | TRUE  |
| 5          | 63461671 - 63668696   | F - 20.00%  | TRUE  | TRUE  |
| 5          | 63461671 - 63668696   |             | FALSE | TRUE  |
| 5          | 63461671 - 63668696   | F - 20.00%  | TRUE  | TRUE  |
| 5          | 63461671 - 63668696   | T - 80.00%  | TRUE  | TRUE  |
| 11         | 71883483 - 71889086   |             | TRUE  | FALSE |
| 11         | 71883483 - 71889086   | T - 100.00% | TRUE  | TRUE  |
| 11         | 71883483 - 71889086   | T - 100.00% | TRUE  | TRUE  |
| 11         | 62619460 - 62623386   | F - 27.50%  | TRUE  | TRUE  |
| 11         | 62619460 - 62623386   |             | TRUE  | TRUE  |

|            |                       |            |       |       |
|------------|-----------------------|------------|-------|-------|
| 11         | 62619460 - 62623386   | F - 10.00% | TRUE  | TRUE  |
| 11         | 62619460 - 62623386   |            | TRUE  | FALSE |
| 11         | 62619460 - 62623386   | F - 12.50% | TRUE  | TRUE  |
| 11         | 62619460 - 62623386   | F - 15.00% | TRUE  | TRUE  |
| 11         | 62619460 - 62623386   | F - 7.50%  | TRUE  | TRUE  |
| 11         | 62619460 - 62623386   | F - 2.50%  | FALSE | TRUE  |
| 2          | 197063977 - 197458416 |            | TRUE  | TRUE  |
| 2          | 197063977 - 197458416 |            | TRUE  | TRUE  |
| 2          | 197063977 - 197458416 | F - 42.86% | TRUE  | TRUE  |
| 2          | 197063977 - 197458416 |            | FALSE | TRUE  |
| 2          | 197063977 - 197458416 |            | TRUE  | TRUE  |
| 2          | 197063977 - 197458416 |            | FALSE | TRUE  |
| 2          | 197063977 - 197458416 |            | TRUE  | TRUE  |
| 4          | 169277886 - 169458937 |            | TRUE  | FALSE |
| 4          | 169277886 - 169458937 |            | TRUE  | TRUE  |
| 4          | 169277886 - 169458937 |            | FALSE | TRUE  |
| 4          | 169277886 - 169458937 | F - 35.00% | TRUE  | TRUE  |
| 4          | 169277886 - 169458937 |            | TRUE  | TRUE  |
| 4          | 169277886 - 169458937 | F - 40.00% | TRUE  | TRUE  |
| 4          | 169277886 - 169458937 |            | TRUE  | FALSE |
| 4          | 169277886 - 169458937 |            | TRUE  | TRUE  |
| 4          | 169277886 - 169458937 | F - 40.00% | TRUE  | TRUE  |
| 4          | 169277886 - 169458937 | F - 10.00% | FALSE | TRUE  |
| 10         | 13480484 - 13570974   |            | TRUE  | FALSE |
| 10         | 13480484 - 13570974   |            | TRUE  | TRUE  |
| 10         | 13480484 - 13570974   | F - 12.50% | TRUE  | TRUE  |
| 10         | 13480484 - 13570974   |            | TRUE  | TRUE  |
| 10         | 13480484 - 13570974   | F - 6.25%  | TRUE  | TRUE  |
| 10         | 13480484 - 13570974   |            | TRUE  | TRUE  |
| 10         | 13480484 - 13570974   | F - 25.00% | TRUE  | TRUE  |
| 10         | 13480484 - 13570974   | T - 81.25% | FALSE | TRUE  |
| 10         | 13480484 - 13570974   |            | TRUE  | TRUE  |
| 10         | 13480484 - 13570974   |            | FALSE | TRUE  |
| 10         | 13480484 - 13570974   | F - 25.00% | TRUE  | TRUE  |
| 6_qbl_hap6 | 2661007 - 2677562     | F - 8.33%  | TRUE  | TRUE  |
| 6_qbl_hap6 | 2661007 - 2677562     |            | TRUE  | TRUE  |
| 6_qbl_hap6 | 2661007 - 2677562     | F - 41.67% | TRUE  | TRUE  |
| 6_qbl_hap6 | 2661007 - 2677562     | F - 41.67% | TRUE  | TRUE  |
| 6_qbl_hap6 | 2661007 - 2677562     | F - 33.33% | FALSE | TRUE  |
| 6_qbl_hap6 | 2661007 - 2677562     |            | TRUE  | TRUE  |
| 6_qbl_hap6 | 2661007 - 2677562     |            | TRUE  | TRUE  |
| 6_qbl_hap6 | 2661007 - 2677562     | F - 33.33% | TRUE  | TRUE  |
| 6_qbl_hap6 | 2661007 - 2677562     |            | TRUE  | TRUE  |
| 6_qbl_hap6 | 2661007 - 2677562     |            | TRUE  | TRUE  |
| 6_qbl_hap6 | 2661007 - 2677562     |            | FALSE | TRUE  |
| 6_qbl_hap6 | 2661007 - 2677562     | F - 8.33%  | FALSE | TRUE  |
| 6_qbl_hap6 | 2661007 - 2677562     |            | TRUE  | TRUE  |
| 1          | 85109390 - 85156486   | F - 5.00%  | TRUE  | FALSE |
| 1          | 85109390 - 85156486   |            | TRUE  | TRUE  |
| 1          | 85109390 - 85156486   | F - 20.00% | TRUE  | TRUE  |
| 1          | 85109390 - 85156486   |            | TRUE  | TRUE  |
| 1          | 85109390 - 85156486   | F - 30.00% | TRUE  | TRUE  |
| 1          | 85109390 - 85156486   | F - 5.00%  | TRUE  | TRUE  |
| 1          | 85109390 - 85156486   |            | TRUE  | TRUE  |
| 1          | 85109390 - 85156486   | F - 45.00% | TRUE  | TRUE  |
| 1          | 85109390 - 85156486   |            | TRUE  | TRUE  |
| 1          | 85109390 - 85156486   | F - 20.00% | FALSE | TRUE  |
| 1          | 85109390 - 85156486   | F - 5.00%  | FALSE | TRUE  |

|    |                       |            |       |       |
|----|-----------------------|------------|-------|-------|
| 1  | 85109390 - 85156486   | F - 25.00% | TRUE  | TRUE  |
| 1  | 85109390 - 85156486   |            | TRUE  | TRUE  |
| 1  | 85109390 - 85156486   | T - 80.00% | TRUE  | TRUE  |
| 1  | 85109390 - 85156486   |            | TRUE  | TRUE  |
| 3  | 37094117 - 37225180   |            | TRUE  | TRUE  |
| 3  | 37094117 - 37225180   |            | TRUE  | FALSE |
| 3  | 37094117 - 37225180   | F - 20.00% | TRUE  | TRUE  |
| 3  | 37094117 - 37225180   |            | TRUE  | TRUE  |
| 3  | 37094117 - 37225180   |            | TRUE  | FALSE |
| 3  | 37094117 - 37225180   | F - 16.00% | TRUE  | TRUE  |
| 3  | 37094117 - 37225180   | F - 8.00%  | TRUE  | TRUE  |
| 3  | 37094117 - 37225180   | F - 12.00% | TRUE  | TRUE  |
| 3  | 37094117 - 37225180   | F - 16.00% | TRUE  | TRUE  |
| 3  | 37094117 - 37225180   |            | FALSE | TRUE  |
| 3  | 37094117 - 37225180   |            | TRUE  | TRUE  |
| 4  | 185308867 - 185395734 | F - 25.00% | TRUE  | TRUE  |
| 4  | 185308867 - 185395734 |            | TRUE  | TRUE  |
| 4  | 185308867 - 185395734 | F - 8.33%  | TRUE  | TRUE  |
| 4  | 185308867 - 185395734 |            | FALSE | TRUE  |
| 4  | 185308867 - 185395734 | F - 8.33%  | TRUE  | TRUE  |
| 4  | 185308867 - 185395734 |            | TRUE  | TRUE  |
| 4  | 185308867 - 185395734 | F - 8.33%  | TRUE  | TRUE  |
| 4  | 185308867 - 185395734 |            | FALSE | TRUE  |
| 4  | 185308867 - 185395734 | F - 8.33%  | TRUE  | TRUE  |
| 4  | 185308867 - 185395734 | T - 83.33% | TRUE  | TRUE  |
| 10 | 43881065 - 43904696   | F - 47.06% | TRUE  | TRUE  |
| 10 | 43881065 - 43904696   |            | TRUE  | TRUE  |
| 1  | 110905470 - 110933704 |            | TRUE  | TRUE  |
| 1  | 110905470 - 110933704 |            | TRUE  | TRUE  |
| 1  | 110905470 - 110933704 | F - 5.56%  | TRUE  | TRUE  |
| 10 | 104678071 - 104838344 |            | TRUE  | TRUE  |
| 10 | 104678071 - 104838344 | F - 10.00% | TRUE  | TRUE  |
| 13 | 49882786 - 50020554   |            | TRUE  | TRUE  |
| 13 | 49882786 - 50020554   | F - 6.25%  | TRUE  | TRUE  |
| 13 | 49882786 - 50020554   | F - 43.75% | TRUE  | TRUE  |
| 13 | 49882786 - 50020554   | F - 6.25%  | TRUE  | TRUE  |
| 13 | 49882786 - 50020554   | F - 6.25%  | FALSE | TRUE  |
| 13 | 49882786 - 50020554   |            | FALSE | TRUE  |
| 13 | 49882786 - 50020554   | F - 25.00% | FALSE | TRUE  |
| 13 | 49882786 - 50020554   |            | TRUE  | TRUE  |
| 13 | 49882786 - 50020554   |            | TRUE  | TRUE  |
| 13 | 49882786 - 50020554   | F - 43.75% | TRUE  | TRUE  |
| 13 | 49882786 - 50020554   |            | FALSE | TRUE  |
| 13 | 49882786 - 50020554   | F - 31.25% | TRUE  | TRUE  |
| 13 | 49882786 - 50020554   | F - 37.50% | TRUE  | TRUE  |
| 13 | 49882786 - 50020554   | F - 12.50% | FALSE | TRUE  |
| 13 | 49882786 - 50020554   | F - 37.50% | FALSE | TRUE  |
| X  | 100075348 - 100096485 |            | TRUE  | FALSE |
| X  | 100075348 - 100096485 | F - 11.11% | TRUE  | TRUE  |
| X  | 100075348 - 100096485 |            | FALSE | TRUE  |
| X  | 100075348 - 100096485 |            | TRUE  | TRUE  |
| 4  | 152330368 - 152584784 | F - 25.00% | FALSE | TRUE  |
| 4  | 152330368 - 152584784 | F - 12.50% | FALSE | TRUE  |
| 4  | 152330368 - 152584784 |            | TRUE  | TRUE  |
| 4  | 152330368 - 152584784 | F - 37.50% | TRUE  | TRUE  |
| 4  | 152330368 - 152584784 |            | TRUE  | TRUE  |
| 4  | 152330368 - 152584784 |            | FALSE | TRUE  |
| 4  | 152330368 - 152584784 |            | TRUE  | TRUE  |

|    |                       |             |       |       |
|----|-----------------------|-------------|-------|-------|
| 4  | 152330368 - 152584784 |             | TRUE  | TRUE  |
| 4  | 152330368 - 152584784 | T - 62.50%  | TRUE  | TRUE  |
| 4  | 152330368 - 152584784 |             | TRUE  | TRUE  |
| 8  | 80523049 - 80578410   | T - 62.50%  | TRUE  | FALSE |
| 8  | 80523049 - 80578410   |             | TRUE  | FALSE |
| 8  | 80523049 - 80578410   | T - 100.00% | TRUE  | TRUE  |
| 8  | 80523049 - 80578410   | T - 87.50%  | TRUE  | TRUE  |
| 8  | 80523049 - 80578410   |             | TRUE  | TRUE  |
| 8  | 80523049 - 80578410   |             | FALSE | TRUE  |
| 12 | 75784850 - 75826468   | T - 88.89%  | TRUE  | TRUE  |
| 12 | 75784850 - 75826468   |             | TRUE  | FALSE |
| 14 | 51324609 - 51411454   | F - 9.09%   | TRUE  | TRUE  |
| 14 | 51324609 - 51411454   | F - 9.09%   | TRUE  | TRUE  |
| 14 | 51324609 - 51411454   | F - 45.45%  | TRUE  | TRUE  |
| 14 | 51324609 - 51411454   |             | TRUE  | TRUE  |
| 14 | 51324609 - 51411454   |             | TRUE  | TRUE  |
| 14 | 51324609 - 51411454   |             | TRUE  | TRUE  |
| 19 | 49133817 - 49140639   | T - 80.00%  | TRUE  | TRUE  |
| 19 | 49133817 - 49140639   | F - 40.00%  | FALSE | TRUE  |
| 19 | 49133817 - 49140639   | T - 100.00% | TRUE  | TRUE  |
| 19 | 49133817 - 49140639   | F - 40.00%  | FALSE | TRUE  |
| 19 | 49133817 - 49140639   |             | FALSE | TRUE  |
| 1  | 45809555 - 45956872   | T - 69.23%  | TRUE  | TRUE  |
| 1  | 45809555 - 45956872   | T - 76.92%  | TRUE  | TRUE  |
| 1  | 45809555 - 45956872   | F - 23.08%  | FALSE | TRUE  |
| 1  | 45809555 - 45956872   |             | FALSE | TRUE  |
| 1  | 45809555 - 45956872   |             | FALSE | TRUE  |
| 1  | 45809555 - 45956872   | T - 69.23%  | TRUE  | TRUE  |
| 1  | 45809555 - 45956872   | T - 76.92%  | TRUE  | TRUE  |
| 1  | 144811744 - 144830302 |             | TRUE  | TRUE  |
| 1  | 144811744 - 144830302 |             | TRUE  | TRUE  |
| 1  | 144811744 - 144830302 | F - 6.67%   | TRUE  | TRUE  |
| 2  | 144703321 - 145090135 |             | TRUE  | FALSE |
| 2  | 144703321 - 145090135 |             | TRUE  | FALSE |
| 2  | 144703321 - 145090135 | F - 9.68%   | TRUE  | TRUE  |
| 2  | 144703321 - 145090135 |             | FALSE | TRUE  |
| 9  | 4553386 - 4666674     |             | TRUE  | FALSE |
| 9  | 4553386 - 4666674     |             | FALSE | TRUE  |
| 9  | 4553386 - 4666674     |             | TRUE  | TRUE  |
| 9  | 4553386 - 4666674     | F - 10.53%  | FALSE | TRUE  |
| 9  | 127640573 - 127710292 |             | TRUE  | FALSE |
| 9  | 127640573 - 127710292 |             | TRUE  | FALSE |
| 9  | 127640573 - 127710292 |             | TRUE  | TRUE  |
| 9  | 127640573 - 127710292 |             | TRUE  | TRUE  |
| 9  | 127640573 - 127710292 | F - 11.11%  | TRUE  | TRUE  |
| X  | 30671476 - 30749577   |             | TRUE  | TRUE  |
| X  | 30671476 - 30749577   |             | TRUE  | TRUE  |
| X  | 30671476 - 30749577   | T - 68.18%  | TRUE  | TRUE  |
| X  | 30671476 - 30749577   |             | TRUE  | TRUE  |
| X  | 30671476 - 30749577   |             | TRUE  | TRUE  |
| X  | 30671476 - 30749577   |             | TRUE  | TRUE  |
| X  | 30671476 - 30749577   | F - 4.55%   | TRUE  | TRUE  |
| 19 | 51385352 - 51399654   | T - 100.00% | TRUE  | TRUE  |
| 19 | 51385352 - 51399654   | T - 50.00%  | TRUE  | TRUE  |
| 19 | 51385352 - 51399654   | T - 50.00%  | TRUE  | TRUE  |
| 19 | 51385352 - 51399654   | T - 50.00%  | TRUE  | TRUE  |
| 19 | 51385352 - 51399654   |             | FALSE | TRUE  |
| 22 | 41220539 - 41253026   | T - 53.85%  | TRUE  | TRUE  |

|    |                     |             |       |       |
|----|---------------------|-------------|-------|-------|
| 22 | 41220539 - 41253026 |             | TRUE  | TRUE  |
| 6  | 99321334 - 99395849 |             | TRUE  | TRUE  |
| 6  | 99321334 - 99395849 |             | TRUE  | TRUE  |
| 6  | 99321334 - 99395849 | T - 85.71%  | TRUE  | TRUE  |
| 6  | 99321334 - 99395849 |             | TRUE  | TRUE  |
| 7  | 97920962 - 98030427 |             | TRUE  | TRUE  |
| 7  | 97920962 - 98030427 | F - 11.11%  | TRUE  | TRUE  |
| 7  | 97920962 - 98030427 |             | TRUE  | FALSE |
| 7  | 97920962 - 98030427 | F - 11.11%  | TRUE  | TRUE  |
| 7  | 97920962 - 98030427 |             | TRUE  | TRUE  |
| 7  | 97920962 - 98030427 | F - 11.11%  | TRUE  | TRUE  |
| 7  | 97920962 - 98030427 | F - 11.11%  | TRUE  | TRUE  |
| 14 | 21152259 - 21168761 |             | TRUE  | TRUE  |
| 14 | 21152259 - 21168761 |             | TRUE  | TRUE  |
| 14 | 21152259 - 21168761 | F - 4.00%   | FALSE | TRUE  |
| 14 | 21152259 - 21168761 | F - 32.00%  | TRUE  | TRUE  |
| 14 | 21152259 - 21168761 |             | TRUE  | TRUE  |
| 14 | 21152259 - 21168761 | F - 28.00%  | TRUE  | TRUE  |
| 14 | 21152259 - 21168761 | F - 16.00%  | TRUE  | TRUE  |
| 1  | 57110990 - 57181008 | T - 100.00% | TRUE  | TRUE  |
| 1  | 57110990 - 57181008 |             | TRUE  | TRUE  |
| 1  | 57110990 - 57181008 |             | FALSE | TRUE  |
| 1  | 31205315 - 31230683 |             | TRUE  | TRUE  |
| 1  | 31205315 - 31230683 | F - 16.67%  | FALSE | TRUE  |
| 1  | 31205315 - 31230683 |             | TRUE  | TRUE  |
| 1  | 31205315 - 31230683 | T - 83.33%  | TRUE  | TRUE  |
| 1  | 31205315 - 31230683 | T - 83.33%  | TRUE  | TRUE  |
| 1  | 31205315 - 31230683 | F - 16.67%  | FALSE | TRUE  |
| 1  | 31205315 - 31230683 |             | TRUE  | TRUE  |
| 1  | 31205315 - 31230683 | T - 50.00%  | TRUE  | TRUE  |
| 7  | 27208238 - 27211534 |             | TRUE  | TRUE  |
| 7  | 27208238 - 27211534 | F - 33.33%  | TRUE  | TRUE  |
| 7  | 27208238 - 27211534 | F - 16.67%  | TRUE  | TRUE  |
| 7  | 27208238 - 27211534 | T - 66.67%  | FALSE | TRUE  |
| 7  | 27208238 - 27211534 |             | FALSE | TRUE  |
| 7  | 27208238 - 27211534 | F - 33.33%  | FALSE | TRUE  |
| 7  | 27208238 - 27211534 |             | FALSE | TRUE  |
| 7  | 36429415 - 36493400 |             | TRUE  | TRUE  |
| 7  | 36429415 - 36493400 | F - 35.29%  | FALSE | TRUE  |
| 7  | 36429415 - 36493400 |             | TRUE  | TRUE  |
| 7  | 36429415 - 36493400 | F - 5.88%   | FALSE | TRUE  |
| 7  | 36429415 - 36493400 |             | TRUE  | TRUE  |
| 7  | 36429415 - 36493400 | F - 41.18%  | FALSE | TRUE  |
| 7  | 36429415 - 36493400 | F - 5.88%   | TRUE  | TRUE  |
| 7  | 36429415 - 36493400 | F - 5.88%   | TRUE  | TRUE  |
| 7  | 36429415 - 36493400 | F - 5.88%   | FALSE | TRUE  |
| 7  | 36429415 - 36493400 |             | TRUE  | TRUE  |
| 7  | 36429415 - 36493400 |             | FALSE | TRUE  |
| 7  | 36429415 - 36493400 | F - 47.06%  | FALSE | TRUE  |
| 7  | 36429415 - 36493400 | F - 35.29%  | TRUE  | TRUE  |
| 7  | 36429415 - 36493400 | T - 52.94%  | TRUE  | TRUE  |
| 7  | 36429415 - 36493400 |             | TRUE  | TRUE  |
| 7  | 36429415 - 36493400 | F - 47.06%  | TRUE  | TRUE  |
| 7  | 36429415 - 36493400 |             | FALSE | TRUE  |
| 7  | 36429415 - 36493400 |             | FALSE | TRUE  |
| 7  | 36429415 - 36493400 | F - 41.18%  | TRUE  | TRUE  |
| 8  | 63927638 - 63951730 |             | TRUE  | TRUE  |
| 8  | 63927638 - 63951730 | F - 9.09%   | TRUE  | TRUE  |

|             |                       |            |       |       |
|-------------|-----------------------|------------|-------|-------|
| 8           | 63927638 - 63951730   | T - 54.55% | TRUE  | TRUE  |
| 8           | 63927638 - 63951730   | F - 27.27% | TRUE  | TRUE  |
| 8           | 63927638 - 63951730   |            | TRUE  | TRUE  |
| 8           | 63927638 - 63951730   | F - 27.27% | TRUE  | TRUE  |
| 8           | 63927638 - 63951730   | F - 9.09%  | FALSE | TRUE  |
| 8           | 63927638 - 63951730   |            | FALSE | TRUE  |
| 10          | 123237844 - 123357972 |            | TRUE  | TRUE  |
| 10          | 123237844 - 123357972 |            | TRUE  | TRUE  |
| 10          | 123237844 - 123357972 | F - 43.90% | TRUE  | TRUE  |
| 10          | 123237844 - 123357972 | F - 2.44%  | TRUE  | TRUE  |
| 10          | 123237844 - 123357972 |            | TRUE  | TRUE  |
| 10          | 123237844 - 123357972 |            | TRUE  | TRUE  |
| 10          | 123237844 - 123357972 |            | TRUE  | TRUE  |
| 10          | 123237844 - 123357972 | F - 34.15% | TRUE  | TRUE  |
| 10          | 123237844 - 123357972 | F - 2.44%  | TRUE  | TRUE  |
| 10          | 123237844 - 123357972 | F - 2.44%  | TRUE  | TRUE  |
| 10          | 123237844 - 123357972 |            | TRUE  | TRUE  |
| 10          | 123237844 - 123357972 | F - 39.02% | FALSE | TRUE  |
| 10          | 123237844 - 123357972 | F - 9.76%  | TRUE  | TRUE  |
| 10          | 123237844 - 123357972 | F - 2.44%  | TRUE  | TRUE  |
| 10          | 123237844 - 123357972 | F - 2.44%  | TRUE  | TRUE  |
| 10          | 123237844 - 123357972 | F - 2.44%  | FALSE | TRUE  |
| 10          | 123237844 - 123357972 |            | TRUE  | TRUE  |
| 10          | 123237844 - 123357972 | F - 2.44%  | TRUE  | TRUE  |
| 10          | 123237844 - 123357972 | F - 46.34% | TRUE  | TRUE  |
| 10          | 123237844 - 123357972 |            | TRUE  | TRUE  |
| 10          | 123237844 - 123357972 |            | TRUE  | TRUE  |
| 10          | 123237844 - 123357972 | F - 36.59% | TRUE  | TRUE  |
| 6_ssto_hap7 | 4367205 - 4430060     |            | TRUE  | TRUE  |
| 6_ssto_hap7 | 4367205 - 4430060     |            | TRUE  | TRUE  |
| 6_ssto_hap7 | 4367205 - 4430060     | F - 6.25%  | TRUE  | TRUE  |
| 2           | 66660584 - 66799891   |            | TRUE  | FALSE |
| 2           | 66660584 - 66799891   |            | TRUE  | TRUE  |
| 2           | 66660584 - 66799891   | F - 3.85%  | TRUE  | TRUE  |
| 2           | 66660584 - 66799891   |            | TRUE  | TRUE  |
| 2           | 66660584 - 66799891   | F - 3.85%  | TRUE  | TRUE  |
| 2           | 66660584 - 66799891   |            | FALSE | TRUE  |
| 2           | 66660584 - 66799891   | F - 3.85%  | TRUE  | TRUE  |
| 2           | 66660584 - 66799891   |            | TRUE  | TRUE  |
| 2           | 66660584 - 66799891   |            | TRUE  | TRUE  |
| 2           | 66660584 - 66799891   |            | FALSE | TRUE  |
| 2           | 66660584 - 66799891   |            | TRUE  | TRUE  |
| 2           | 66660584 - 66799891   |            | TRUE  | TRUE  |
| 2           | 66660584 - 66799891   | F - 7.69%  | TRUE  | TRUE  |
| 2           | 66660584 - 66799891   | F - 7.69%  | TRUE  | TRUE  |
| 2           | 66660584 - 66799891   |            | TRUE  | TRUE  |
| 2           | 66660584 - 66799891   | F - 7.69%  | TRUE  | TRUE  |
| 2           | 66660584 - 66799891   |            | TRUE  | TRUE  |
| 2           | 66660584 - 66799891   | T - 69.23% | TRUE  | TRUE  |
| 4           | 53728457 - 53733002   |            | TRUE  | FALSE |
| 4           | 53728457 - 53733002   | T - 80.00% | TRUE  | TRUE  |
| 4           | 53728457 - 53733002   | T - 80.00% | TRUE  | TRUE  |
| 4           | 53728457 - 53733002   |            | TRUE  | FALSE |
| 4           | 53728457 - 53733002   | F - 20.00% | TRUE  | TRUE  |
| 1           | 62208149 - 62644347   |            | TRUE  | TRUE  |
| 1           | 62208149 - 62644347   | F - 4.00%  | TRUE  | TRUE  |
| 1           | 62208149 - 62644347   |            | TRUE  | TRUE  |
| 1           | 62208149 - 62644347   | F - 40.00% | TRUE  | TRUE  |

|    |                     |            |       |       |
|----|---------------------|------------|-------|-------|
| 1  | 62208149 - 62644347 |            | TRUE  | TRUE  |
| 1  | 62208149 - 62644347 | F - 4.00%  | TRUE  | TRUE  |
| 1  | 62208149 - 62644347 | F - 8.00%  | TRUE  | TRUE  |
| 1  | 62208149 - 62644347 |            | FALSE | TRUE  |
| 1  | 62208149 - 62644347 |            | TRUE  | TRUE  |
| 1  | 62208149 - 62644347 | F - 12.00% | TRUE  | TRUE  |
| 1  | 62208149 - 62644347 |            | TRUE  | TRUE  |
| 1  | 62208149 - 62644347 | T - 64.00% | TRUE  | TRUE  |
| 1  | 62208149 - 62644347 | F - 4.00%  | FALSE | TRUE  |
| 1  | 62208149 - 62644347 | F - 4.00%  | TRUE  | TRUE  |
| 1  | 62208149 - 62644347 |            | TRUE  | TRUE  |
| 1  | 62208149 - 62644347 | T - 68.00% | TRUE  | TRUE  |
| 1  | 62208149 - 62644347 |            | FALSE | TRUE  |
| 1  | 62208149 - 62644347 | F - 16.00% | FALSE | TRUE  |
| 1  | 62208149 - 62644347 |            | FALSE | TRUE  |
| 1  | 62208149 - 62644347 | F - 48.00% | TRUE  | TRUE  |
| 1  | 62208149 - 62644347 | F - 24.00% | TRUE  | TRUE  |
| 1  | 62208149 - 62644347 | F - 4.00%  | TRUE  | TRUE  |
| 1  | 62208149 - 62644347 | F - 20.00% | TRUE  | TRUE  |
| 1  | 62208149 - 62644347 | F - 32.00% | TRUE  | TRUE  |
| 1  | 62208149 - 62644347 |            | TRUE  | TRUE  |
| 1  | 62208149 - 62644347 |            | TRUE  | TRUE  |
| 1  | 62208149 - 62644347 | F - 48.00% | TRUE  | TRUE  |
| 1  | 62208149 - 62644347 |            | TRUE  | TRUE  |
| 1  | 62208149 - 62644347 |            | FALSE | TRUE  |
| 11 | 7535001 - 7678358   | T - 70.59% | TRUE  | TRUE  |
| 11 | 7535001 - 7678358   | F - 17.65% | TRUE  | TRUE  |
| 11 | 7535001 - 7678358   | F - 5.88%  | TRUE  | TRUE  |
| 11 | 7535001 - 7678358   |            | FALSE | TRUE  |
| 11 | 7535001 - 7678358   | F - 17.65% | TRUE  | TRUE  |
| 11 | 7535001 - 7678358   | T - 88.24% | TRUE  | TRUE  |
| 11 | 7535001 - 7678358   | F - 17.65% | TRUE  | TRUE  |
| 11 | 7535001 - 7678358   | T - 76.47% | FALSE | TRUE  |
| 11 | 7535001 - 7678358   | F - 11.76% | TRUE  | TRUE  |
| 11 | 7535001 - 7678358   | T - 64.71% | FALSE | TRUE  |
| 11 | 7535001 - 7678358   | F - 5.88%  | TRUE  | TRUE  |
| 11 | 7535001 - 7678358   |            | FALSE | TRUE  |
| 11 | 7535001 - 7678358   |            | TRUE  | TRUE  |
| 11 | 7535001 - 7678358   |            | FALSE | TRUE  |
| 11 | 7535001 - 7678358   |            | TRUE  | TRUE  |
| 11 | 7535001 - 7678358   |            | TRUE  | TRUE  |
| 11 | 7535001 - 7678358   |            | TRUE  | TRUE  |
| 11 | 7535001 - 7678358   |            | TRUE  | TRUE  |
| 14 | 94640649 - 94746072 |            | TRUE  | TRUE  |
| 14 | 94640649 - 94746072 |            | TRUE  | FALSE |
| 14 | 94640649 - 94746072 |            | TRUE  | FALSE |
| 14 | 94640649 - 94746072 |            | TRUE  | TRUE  |
| 14 | 94640649 - 94746072 |            | TRUE  | TRUE  |
| 14 | 94640649 - 94746072 |            | TRUE  | TRUE  |
| 14 | 94640649 - 94746072 | F - 40.00% | TRUE  | TRUE  |
| 14 | 94640649 - 94746072 |            | FALSE | TRUE  |
| 1  | 29213603 - 29446558 | F - 3.45%  | TRUE  | TRUE  |
| 1  | 29213603 - 29446558 | F - 48.28% | TRUE  | TRUE  |
| 1  | 29213603 - 29446558 | T - 51.72% | TRUE  | TRUE  |
| 1  | 29213603 - 29446558 | F - 37.93% | TRUE  | TRUE  |
| 1  | 29213603 - 29446558 | F - 3.45%  | TRUE  | TRUE  |
| 1  | 29213603 - 29446558 | F - 13.79% | TRUE  | TRUE  |
| 1  | 29213603 - 29446558 |            | FALSE | TRUE  |
| 1  | 29213603 - 29446558 |            | TRUE  | TRUE  |



|   |                       |             |       |       |
|---|-----------------------|-------------|-------|-------|
| 1 | 29213603 - 29446558   |             | TRUE  | TRUE  |
| 1 | 29213603 - 29446558   |             | TRUE  | TRUE  |
| 1 | 29213603 - 29446558   |             | FALSE | TRUE  |
| 1 | 29213603 - 29446558   | F - 3.45%   | TRUE  | TRUE  |
| 1 | 29213603 - 29446558   |             | TRUE  | TRUE  |
| 1 | 29213603 - 29446558   | F - 3.45%   | FALSE | TRUE  |
| 1 | 29213603 - 29446558   | F - 10.34%  | FALSE | TRUE  |
| 1 | 29213603 - 29446558   | F - 44.83%  | TRUE  | TRUE  |
| 1 | 29213603 - 29446558   |             | TRUE  | TRUE  |
| 1 | 29213603 - 29446558   |             | FALSE | TRUE  |
| 1 | 29213603 - 29446558   |             | TRUE  | TRUE  |
| 1 | 29213603 - 29446558   |             | FALSE | TRUE  |
| 1 | 29213603 - 29446558   |             | FALSE | TRUE  |
| 1 | 29213603 - 29446558   |             | FALSE | TRUE  |
| 1 | 29213603 - 29446558   |             | FALSE | TRUE  |
| 1 | 207494817 - 207534311 | F - 33.33%  | TRUE  | TRUE  |
| 1 | 207494817 - 207534311 | F - 4.76%   | TRUE  | TRUE  |
| 1 | 207494817 - 207534311 | F - 4.76%   | TRUE  | TRUE  |
| 1 | 207494817 - 207534311 | T - 76.19%  | TRUE  | TRUE  |
| 1 | 207494817 - 207534311 | F - 42.86%  | TRUE  | TRUE  |
| 1 | 207494817 - 207534311 | T - 57.14%  | TRUE  | TRUE  |
| 1 | 207494817 - 207534311 | T - 80.95%  | TRUE  | TRUE  |
| 1 | 207494817 - 207534311 | F - 9.52%   | TRUE  | TRUE  |
| 1 | 207494817 - 207534311 |             | TRUE  | TRUE  |
| 1 | 207494817 - 207534311 | T - 71.43%  | TRUE  | TRUE  |
| 1 | 207494817 - 207534311 | T - 61.90%  | TRUE  | TRUE  |
| 1 | 207494817 - 207534311 |             | TRUE  | TRUE  |
| 1 | 207494817 - 207534311 |             | FALSE | TRUE  |
| 1 | 207494817 - 207534311 | F - 4.76%   | TRUE  | TRUE  |
| 7 | 134429003 - 134655480 | F - 2.56%   | TRUE  | TRUE  |
| 7 | 134429003 - 134655480 |             | TRUE  | FALSE |
| 7 | 134429003 - 134655480 | F - 2.56%   | TRUE  | TRUE  |
| 7 | 134429003 - 134655480 | F - 2.56%   | TRUE  | TRUE  |
| 7 | 134429003 - 134655480 | F - 5.13%   | TRUE  | TRUE  |
| 7 | 134429003 - 134655480 | F - 7.69%   | TRUE  | TRUE  |
| 7 | 134429003 - 134655480 |             | TRUE  | TRUE  |
| 7 | 134429003 - 134655480 | F - 2.56%   | TRUE  | TRUE  |
| 7 | 134429003 - 134655480 | F - 20.51%  | TRUE  | TRUE  |
| 7 | 134429003 - 134655480 |             | FALSE | TRUE  |
| 7 | 134429003 - 134655480 | F - 2.56%   | TRUE  | TRUE  |
| 7 | 134429003 - 134655480 | F - 15.38%  | TRUE  | TRUE  |
| 7 | 134429003 - 134655480 |             | TRUE  | TRUE  |
| 1 | 203181955 - 203242769 |             | TRUE  | FALSE |
| 1 | 203181955 - 203242769 |             | TRUE  | TRUE  |
| 1 | 203181955 - 203242769 |             | TRUE  | FALSE |
| 1 | 203181955 - 203242769 | T - 81.25%  | TRUE  | TRUE  |
| 1 | 203181955 - 203242769 | T - 75.00%  | TRUE  | TRUE  |
| 1 | 203181955 - 203242769 | F - 18.75%  | FALSE | TRUE  |
| 4 | 6322305 - 6565327     |             | TRUE  | FALSE |
| 4 | 6322305 - 6565327     |             | TRUE  | FALSE |
| 4 | 6322305 - 6565327     | T - 93.33%  | TRUE  | FALSE |
| 4 | 6322305 - 6565327     |             | TRUE  | FALSE |
| 4 | 6322305 - 6565327     | T - 100.00% | TRUE  | TRUE  |
| 4 | 6322305 - 6565327     |             | TRUE  | FALSE |
| 4 | 6322305 - 6565327     |             | TRUE  | FALSE |
| 4 | 6322305 - 6565327     |             | TRUE  | FALSE |
| 4 | 6322305 - 6565327     | F - 26.67%  | TRUE  | FALSE |
| 4 | 6322305 - 6565327     |             | TRUE  | FALSE |
| 4 | 6322305 - 6565327     | F - 13.33%  | TRUE  | TRUE  |

|   |                       |             |       |       |
|---|-----------------------|-------------|-------|-------|
| 4 | 6322305 - 6565327     | F - 6.67%   | TRUE  | FALSE |
| 4 | 6322305 - 6565327     | T - 86.67%  | TRUE  | TRUE  |
| 4 | 6322305 - 6565327     |             | TRUE  | TRUE  |
| 4 | 6322305 - 6565327     | T - 80.00%  | TRUE  | TRUE  |
| 4 | 6322305 - 6565327     | F - 13.33%  | TRUE  | TRUE  |
| 4 | 6322305 - 6565327     | F - 6.67%   | TRUE  | TRUE  |
| 4 | 6322305 - 6565327     | F - 13.33%  | TRUE  | TRUE  |
| 4 | 6322305 - 6565327     | F - 20.00%  | TRUE  | TRUE  |
| 4 | 6322305 - 6565327     | F - 13.33%  | FALSE | TRUE  |
| 4 | 6322305 - 6565327     | F - 6.67%   | FALSE | TRUE  |
| 4 | 6322305 - 6565327     | F - 26.67%  | TRUE  | TRUE  |
| 4 | 6322305 - 6565327     | F - 6.67%   | TRUE  | TRUE  |
| 4 | 6322305 - 6565327     |             | FALSE | TRUE  |
| 1 | 11249398 - 11256038   |             | TRUE  | FALSE |
| 1 | 11249398 - 11256038   | T - 50.00%  | TRUE  | TRUE  |
| 1 | 11249398 - 11256038   |             | TRUE  | TRUE  |
| 1 | 11249398 - 11256038   | T - 50.00%  | TRUE  | FALSE |
| 1 | 11249398 - 11256038   | T - 50.00%  | TRUE  | TRUE  |
| 1 | 11249398 - 11256038   |             | TRUE  | FALSE |
| 3 | 195590235 - 195638816 |             | TRUE  | TRUE  |
| 3 | 195590235 - 195638816 |             | TRUE  | FALSE |
| 3 | 195590235 - 195638816 | F - 3.13%   | TRUE  | TRUE  |
| 3 | 195590235 - 195638816 |             | TRUE  | TRUE  |
| 3 | 195590235 - 195638816 |             | TRUE  | TRUE  |
| 3 | 195590235 - 195638816 |             | TRUE  | FALSE |
| 3 | 195590235 - 195638816 |             | TRUE  | TRUE  |
| 3 | 195590235 - 195638816 | F - 3.13%   | TRUE  | TRUE  |
| 3 | 195590235 - 195638816 | F - 6.25%   | TRUE  | TRUE  |
| 3 | 195590235 - 195638816 | F - 15.63%  | TRUE  | TRUE  |
| 3 | 195590235 - 195638816 |             | TRUE  | TRUE  |
| 3 | 195590235 - 195638816 |             | TRUE  | TRUE  |
| 3 | 195590235 - 195638816 | F - 3.13%   | TRUE  | TRUE  |
| 3 | 195590235 - 195638816 |             | FALSE | TRUE  |
| 3 | 195590235 - 195638816 |             | FALSE | TRUE  |
| 3 | 195590235 - 195638816 |             | FALSE | TRUE  |
| 6 | 2988201 - 2991405     | T - 66.67%  | TRUE  | TRUE  |
| 6 | 2988201 - 2991405     |             | TRUE  | TRUE  |
| 6 | 2988201 - 2991405     | F - 33.33%  | FALSE | TRUE  |
| 6 | 2988201 - 2991405     | T - 100.00% | TRUE  | TRUE  |
| 8 | 21971928 - 21990897   | F - 8.33%   | TRUE  | TRUE  |
| 8 | 21971928 - 21990897   | F - 33.33%  | TRUE  | TRUE  |
| 8 | 21971928 - 21990897   | F - 25.00%  | TRUE  | TRUE  |
| 8 | 21971928 - 21990897   |             | TRUE  | TRUE  |
| 8 | 21971928 - 21990897   | F - 8.33%   | TRUE  | TRUE  |
| 8 | 21971928 - 21990897   |             | TRUE  | TRUE  |
| 8 | 21971928 - 21990897   | T - 50.00%  | TRUE  | TRUE  |
| 8 | 21971928 - 21990897   | F - 8.33%   | FALSE | TRUE  |
| 8 | 21971928 - 21990897   | F - 41.67%  | TRUE  | TRUE  |
| 8 | 21971928 - 21990897   | F - 8.33%   | FALSE | TRUE  |
| 8 | 21971928 - 21990897   | F - 16.67%  | FALSE | TRUE  |
| 8 | 21971928 - 21990897   |             | FALSE | TRUE  |
| 8 | 21971928 - 21990897   |             | TRUE  | TRUE  |
| 8 | 21971928 - 21990897   | F - 33.33%  | FALSE | TRUE  |
| 8 | 21971928 - 21990897   | F - 41.67%  | TRUE  | TRUE  |
| 8 | 21971928 - 21990897   | F - 33.33%  | TRUE  | TRUE  |
| 8 | 21971928 - 21990897   |             | FALSE | TRUE  |
| 8 | 21971928 - 21990897   |             | FALSE | TRUE  |
| 8 | 21971928 - 21990897   | F - 41.67%  | FALSE | TRUE  |

|             |                       |            |       |       |
|-------------|-----------------------|------------|-------|-------|
| 8           | 21971928 - 21990897   |            | TRUE  | TRUE  |
| 8           | 21971928 - 21990897   |            | FALSE | TRUE  |
| 8           | 21971928 - 21990897   |            | TRUE  | TRUE  |
| 12          | 8798540 - 8815480     | T - 54.55% | TRUE  | TRUE  |
| 12          | 8798540 - 8815480     |            | TRUE  | TRUE  |
| 12          | 8798540 - 8815480     |            | TRUE  | TRUE  |
| 12          | 8798540 - 8815480     |            | TRUE  | FALSE |
| 12          | 8798540 - 8815480     | F - 36.36% | TRUE  | TRUE  |
| 12          | 8798540 - 8815480     | F - 45.45% | TRUE  | TRUE  |
| 12          | 8798540 - 8815480     | T - 54.55% | TRUE  | TRUE  |
| 12          | 8798540 - 8815480     | T - 72.73% | TRUE  | TRUE  |
| 12          | 8798540 - 8815480     |            | TRUE  | FALSE |
| 12          | 8798540 - 8815480     |            | TRUE  | TRUE  |
| 12          | 8798540 - 8815480     |            | FALSE | TRUE  |
| 15          | 74466012 - 74469213   | F - 42.86% | TRUE  | TRUE  |
| 15          | 74466012 - 74469213   |            | TRUE  | TRUE  |
| 15          | 74466012 - 74469213   | F - 14.29% | FALSE | TRUE  |
| 1           | 11072414 - 11085796   |            | TRUE  | FALSE |
| 1           | 11072414 - 11085796   |            | TRUE  | TRUE  |
| 1           | 11072414 - 11085796   | F - 21.43% | TRUE  | TRUE  |
| 1           | 11072414 - 11085796   |            | TRUE  | TRUE  |
| 1           | 223282748 - 223316624 | F - 11.11% | TRUE  | TRUE  |
| 1           | 223282748 - 223316624 | T - 55.56% | TRUE  | TRUE  |
| 1           | 223282748 - 223316624 | F - 44.44% | TRUE  | TRUE  |
| 1           | 223282748 - 223316624 | F - 22.22% | TRUE  | TRUE  |
| 1           | 223282748 - 223316624 | F - 33.33% | TRUE  | TRUE  |
| 1           | 223282748 - 223316624 |            | TRUE  | TRUE  |
| 1           | 223282748 - 223316624 |            | FALSE | TRUE  |
| 3           | 195473636 - 195539148 |            | TRUE  | TRUE  |
| 3           | 195473636 - 195539148 |            | TRUE  | TRUE  |
| 3           | 195473636 - 195539148 | T - 81.82% | TRUE  | FALSE |
| 3           | 195473636 - 195539148 |            | TRUE  | TRUE  |
| 3           | 195473636 - 195539148 | T - 68.18% | TRUE  | TRUE  |
| 4           | 72053003 - 72437804   |            | TRUE  | TRUE  |
| 4           | 72053003 - 72437804   | F - 33.33% | TRUE  | TRUE  |
| 4           | 72053003 - 72437804   | F - 41.67% | TRUE  | TRUE  |
| 4           | 72053003 - 72437804   |            | TRUE  | TRUE  |
| 4           | 72053003 - 72437804   | F - 33.33% | TRUE  | TRUE  |
| 4           | 72053003 - 72437804   |            | TRUE  | TRUE  |
| 11          | 82783108 - 82817761   |            | TRUE  | TRUE  |
| 11          | 82783108 - 82817761   |            | TRUE  | TRUE  |
| 11          | 82783108 - 82817761   |            | TRUE  | TRUE  |
| 11          | 82783108 - 82817761   |            | TRUE  | TRUE  |
| 11          | 82783108 - 82817761   | T - 55.56% | FALSE | TRUE  |
| 21          | 37757676 - 37789125   |            | TRUE  | TRUE  |
| 21          | 37757676 - 37789125   | F - 40.00% | TRUE  | TRUE  |
| 21          | 37757676 - 37789125   |            | TRUE  | TRUE  |
| 21          | 37757676 - 37789125   | T - 80.00% | TRUE  | TRUE  |
| 21          | 37757676 - 37789125   |            | FALSE | TRUE  |
| 12          | 68726668 - 68845443   | F - 37.50% | TRUE  | TRUE  |
| 12          | 68726668 - 68845443   | F - 25.00% | TRUE  | FALSE |
| 12          | 68726668 - 68845443   | F - 25.00% | TRUE  | FALSE |
| 12          | 68726668 - 68845443   |            | TRUE  | FALSE |
| 12          | 68726668 - 68845443   | F - 25.00% | TRUE  | FALSE |
| 12          | 68726668 - 68845443   | F - 25.00% | TRUE  | FALSE |
| 12          | 68726668 - 68845443   | F - 12.50% | TRUE  | TRUE  |
| 12          | 68726668 - 68845443   |            | TRUE  | FALSE |
| 6_mann_hap4 | 3950416 - 4028663     |            | TRUE  | FALSE |

|             |                       |             |       |       |
|-------------|-----------------------|-------------|-------|-------|
| 6_mann_hap4 | 3950416 - 4028663     | F - 20.00%  | TRUE  | TRUE  |
| 6_mann_hap4 | 3950416 - 4028663     |             | TRUE  | FALSE |
| 1           | 65613232 - 65697828   |             | TRUE  | TRUE  |
| 1           | 65613232 - 65697828   |             | TRUE  | FALSE |
| 1           | 65613232 - 65697828   |             | TRUE  | TRUE  |
| 1           | 65613232 - 65697828   | F - 17.65%  | TRUE  | TRUE  |
| 1           | 65613232 - 65697828   | F - 5.88%   | TRUE  | TRUE  |
| 1           | 65613232 - 65697828   | F - 23.53%  | TRUE  | TRUE  |
| 1           | 65613232 - 65697828   | F - 5.88%   | FALSE | TRUE  |
| 1           | 65613232 - 65697828   | T - 70.59%  | FALSE | TRUE  |
| 1           | 65613232 - 65697828   | F - 11.76%  | TRUE  | TRUE  |
| 1           | 65613232 - 65697828   | F - 5.88%   | TRUE  | TRUE  |
| 1           | 65613232 - 65697828   | F - 11.76%  | TRUE  | TRUE  |
| 1           | 65613232 - 65697828   |             | FALSE | TRUE  |
| 7           | 99905325 - 99919819   |             | TRUE  | TRUE  |
| 7           | 99905325 - 99919819   | T - 50.00%  | TRUE  | FALSE |
| 7           | 99905325 - 99919819   | F - 25.00%  | FALSE | TRUE  |
| 8           | 139600478 - 139926249 |             | TRUE  | TRUE  |
| 8           | 139600478 - 139926249 |             | TRUE  | TRUE  |
| 8           | 139600478 - 139926249 |             | TRUE  | FALSE |
| 8           | 139600478 - 139926249 | T - 63.64%  | TRUE  | TRUE  |
| 8           | 139600478 - 139926249 | F - 27.27%  | TRUE  | TRUE  |
| 8           | 139600478 - 139926249 |             | FALSE | TRUE  |
| 15          | 30375158 - 30385702   |             | TRUE  | FALSE |
| 15          | 30375158 - 30385702   | F - 20.00%  | TRUE  | TRUE  |
| 15          | 30375158 - 30385702   |             | FALSE | TRUE  |
| 1           | 149825607 - 149832725 |             | TRUE  | TRUE  |
| 1           | 149825607 - 149832725 | F - 14.29%  | FALSE | TRUE  |
| 1           | 149825607 - 149832725 | T - 57.14%  | TRUE  | TRUE  |
| 1           | 149825607 - 149832725 | F - 28.57%  | TRUE  | TRUE  |
| 1           | 149825607 - 149832725 | T - 100.00% | TRUE  | TRUE  |
| 1           | 204391756 - 204463852 |             | TRUE  | FALSE |
| 1           | 204391756 - 204463852 |             | TRUE  | TRUE  |
| 1           | 204391756 - 204463852 |             | TRUE  | FALSE |
| 1           | 204391756 - 204463852 | F - 5.88%   | FALSE | TRUE  |
| 1           | 204391756 - 204463852 |             | FALSE | TRUE  |
| 4           | 169418217 - 169849608 |             | TRUE  | TRUE  |
| 4           | 169418217 - 169849608 | F - 4.35%   | TRUE  | TRUE  |
| 4           | 169418217 - 169849608 | F - 30.43%  | TRUE  | TRUE  |
| 4           | 169418217 - 169849608 | F - 21.74%  | TRUE  | TRUE  |
| 4           | 169418217 - 169849608 |             | TRUE  | TRUE  |
| 4           | 169418217 - 169849608 | F - 8.70%   | TRUE  | TRUE  |
| 4           | 169418217 - 169849608 |             | TRUE  | TRUE  |
| 5           | 148871760 - 148931007 |             | TRUE  | FALSE |
| 5           | 148871760 - 148931007 |             | TRUE  | FALSE |
| 5           | 148871760 - 148931007 |             | TRUE  | FALSE |
| 5           | 148871760 - 148931007 |             | TRUE  | TRUE  |
| 5           | 148871760 - 148931007 | F - 5.56%   | TRUE  | TRUE  |
| 5           | 148871760 - 148931007 | F - 11.11%  | TRUE  | TRUE  |
| 6           | 26087509 - 26098571   | F - 10.00%  | TRUE  | TRUE  |
| 6           | 26087509 - 26098571   |             | TRUE  | TRUE  |
| 6           | 26087509 - 26098571   |             | TRUE  | TRUE  |
| 6           | 26087509 - 26098571   | T - 53.33%  | TRUE  | TRUE  |
| X           | 24167290 - 24234372   |             | TRUE  | TRUE  |
| X           | 24167290 - 24234372   | F - 4.17%   | TRUE  | TRUE  |
| X           | 24167290 - 24234372   | F - 12.50%  | TRUE  | TRUE  |
| X           | 24167290 - 24234372   | F - 8.33%   | TRUE  | TRUE  |
| X           | 24167290 - 24234372   | F - 4.17%   | FALSE | TRUE  |

|            |                       |            |       |       |
|------------|-----------------------|------------|-------|-------|
| X          | 24167290 - 24234372   |            | TRUE  | TRUE  |
| X          | 24167290 - 24234372   | F - 4.17%  | TRUE  | TRUE  |
| X          | 24167290 - 24234372   | F - 4.17%  | TRUE  | TRUE  |
| X          | 24167290 - 24234372   | F - 37.50% | TRUE  | TRUE  |
| X          | 24167290 - 24234372   | T - 62.50% | TRUE  | TRUE  |
| X          | 24167290 - 24234372   | T - 58.33% | TRUE  | TRUE  |
| X          | 24167290 - 24234372   |            | TRUE  | TRUE  |
| X          | 24167290 - 24234372   |            | TRUE  | TRUE  |
| X          | 24167290 - 24234372   |            | TRUE  | TRUE  |
| X          | 24167290 - 24234372   |            | FALSE | TRUE  |
| X          | 24167290 - 24234372   |            | FALSE | TRUE  |
| X          | 24167290 - 24234372   |            | TRUE  | TRUE  |
| X          | 43625857 - 43741721   |            | TRUE  | TRUE  |
| X          | 43625857 - 43741721   |            | TRUE  | TRUE  |
| X          | 43625857 - 43741721   | F - 27.27% | TRUE  | TRUE  |
| X          | 43625857 - 43741721   |            | TRUE  | TRUE  |
| X          | 43625857 - 43741721   |            | TRUE  | TRUE  |
| X          | 43625857 - 43741721   |            | TRUE  | TRUE  |
| X          | 43625857 - 43741721   | T - 63.64% | TRUE  | TRUE  |
| X          | 43625857 - 43741721   |            | TRUE  | TRUE  |
| X          | 43625857 - 43741721   | T - 54.55% | TRUE  | TRUE  |
| X          | 43625857 - 43741721   | T - 72.73% | TRUE  | TRUE  |
| X          | 43625857 - 43741721   | T - 54.55% | FALSE | TRUE  |
| X          | 43625857 - 43741721   |            | TRUE  | TRUE  |
| X          | 43625857 - 43741721   |            | TRUE  | TRUE  |
| 6_cox_hap2 | 1369125 - 1372586     | F - 33.33% | TRUE  | TRUE  |
| 6_cox_hap2 | 1369125 - 1372586     |            | TRUE  | TRUE  |
| 6_cox_hap2 | 1369125 - 1372586     |            | FALSE | TRUE  |
| 6_cox_hap2 | 1369125 - 1372586     | F - 33.33% | TRUE  | TRUE  |
| 6_cox_hap2 | 1369125 - 1372586     | T - 66.67% | TRUE  | TRUE  |
| 6_cox_hap2 | 1369125 - 1372586     |            | TRUE  | TRUE  |
| 3          | 170779128 - 171178197 | F - 34.48% | TRUE  | TRUE  |
| 3          | 170779128 - 171178197 |            | TRUE  | TRUE  |
| 3          | 170779128 - 171178197 | F - 13.79% | TRUE  | TRUE  |
| 3          | 170779128 - 171178197 | F - 48.28% | TRUE  | TRUE  |
| 3          | 170779128 - 171178197 | F - 3.45%  | FALSE | TRUE  |
| 3          | 170779128 - 171178197 | T - 68.97% | TRUE  | TRUE  |
| 3          | 170779128 - 171178197 |            | TRUE  | TRUE  |
| 3          | 170779128 - 171178197 | T - 79.31% | FALSE | TRUE  |
| 3          | 170779128 - 171178197 | T - 65.52% | TRUE  | TRUE  |
| 3          | 170779128 - 171178197 | T - 51.72% | FALSE | TRUE  |
| 3          | 170779128 - 171178197 |            | FALSE | TRUE  |
| 3          | 170779128 - 171178197 |            | FALSE | TRUE  |
| 3          | 170779128 - 171178197 | T - 65.52% | TRUE  | TRUE  |
| 3          | 170779128 - 171178197 | F - 6.90%  | FALSE | TRUE  |
| 3          | 170779128 - 171178197 | T - 72.41% | TRUE  | TRUE  |
| 3          | 170779128 - 171178197 | T - 72.41% | TRUE  | TRUE  |
| 3          | 170779128 - 171178197 |            | FALSE | TRUE  |
| 3          | 170779128 - 171178197 |            | FALSE | TRUE  |
| 5          | 150399999 - 150408554 |            | TRUE  | FALSE |
| 5          | 150399999 - 150408554 |            | TRUE  | FALSE |
| 5          | 150399999 - 150408554 |            | TRUE  | TRUE  |
| 5          | 150399999 - 150408554 | F - 46.15% | TRUE  | TRUE  |
| 5          | 150399999 - 150408554 | T - 53.85% | TRUE  | TRUE  |
| 9          | 131873228 - 131911225 |            | TRUE  | TRUE  |
| 9          | 131873228 - 131911225 |            | TRUE  | TRUE  |
| 9          | 131873228 - 131911225 |            | TRUE  | TRUE  |
| 9          | 131873228 - 131911225 | F - 15.38% | TRUE  | TRUE  |

|    |                       |             |       |       |
|----|-----------------------|-------------|-------|-------|
| 9  | 131873228 - 131911225 |             | FALSE | TRUE  |
| 9  | 131873228 - 131911225 |             | FALSE | TRUE  |
| 9  | 131873228 - 131911225 | F - 12.82%  | TRUE  | TRUE  |
| 22 | 31608225 - 31676066   |             | TRUE  | TRUE  |
| 22 | 31608225 - 31676066   | F - 43.75%  | TRUE  | TRUE  |
| 22 | 31608225 - 31676066   |             | TRUE  | TRUE  |
| 22 | 31608225 - 31676066   | F - 37.50%  | TRUE  | TRUE  |
| 22 | 31608225 - 31676066   |             | TRUE  | FALSE |
| 22 | 31608225 - 31676066   |             | TRUE  | TRUE  |
| 22 | 31608225 - 31676066   |             | TRUE  | FALSE |
| 22 | 31608225 - 31676066   | F - 37.50%  | TRUE  | TRUE  |
| 22 | 31608225 - 31676066   | F - 37.50%  | TRUE  | TRUE  |
| 22 | 31608225 - 31676066   | F - 31.25%  | TRUE  | TRUE  |
| 22 | 31608225 - 31676066   |             | TRUE  | TRUE  |
| 3  | 195343316 - 195467994 |             | TRUE  | FALSE |
| 3  | 195343316 - 195467994 |             | TRUE  | TRUE  |
| 3  | 195343316 - 195467994 |             | TRUE  | TRUE  |
| 3  | 195343316 - 195467994 | F - 31.25%  | TRUE  | TRUE  |
| 3  | 195343316 - 195467994 |             | TRUE  | TRUE  |
| 3  | 195343316 - 195467994 |             | TRUE  | TRUE  |
| 3  | 195343316 - 195467994 | F - 6.25%   | TRUE  | TRUE  |
| 3  | 195343316 - 195467994 | F - 6.25%   | TRUE  | TRUE  |
| 3  | 195343316 - 195467994 |             | FALSE | TRUE  |
| 3  | 195343316 - 195467994 |             | TRUE  | TRUE  |
| 3  | 195343316 - 195467994 |             | TRUE  | TRUE  |
| 3  | 195343316 - 195467994 | F - 37.50%  | TRUE  | TRUE  |
| 3  | 195343316 - 195467994 | T - 56.25%  | TRUE  | TRUE  |
| 3  | 195343316 - 195467994 | T - 62.50%  | TRUE  | TRUE  |
| 3  | 195343316 - 195467994 |             | TRUE  | TRUE  |
| 3  | 195343316 - 195467994 |             | TRUE  | TRUE  |
| 3  | 108308337 - 108413693 |             | TRUE  | FALSE |
| 3  | 108308337 - 108413693 | T - 63.64%  | TRUE  | TRUE  |
| 3  | 108308337 - 108413693 |             | TRUE  | TRUE  |
| 3  | 108308337 - 108413693 |             | TRUE  | TRUE  |
| 3  | 108308337 - 108413693 |             | TRUE  | TRUE  |
| 3  | 108308337 - 108413693 |             | TRUE  | TRUE  |
| 7  | 104654626 - 104754808 |             | TRUE  | FALSE |
| 7  | 104654626 - 104754808 |             | TRUE  | TRUE  |
| 7  | 104654626 - 104754808 |             | TRUE  | FALSE |
| 7  | 104654626 - 104754808 | F - 3.13%   | TRUE  | TRUE  |
| 7  | 27202057 - 27219880   |             | TRUE  | FALSE |
| 7  | 27202057 - 27219880   | F - 21.43%  | FALSE | TRUE  |
| 7  | 27202057 - 27219880   | F - 28.57%  | TRUE  | TRUE  |
| 7  | 27202057 - 27219880   |             | TRUE  | TRUE  |
| 7  | 27202057 - 27219880   | F - 7.14%   | TRUE  | TRUE  |
| 7  | 27202057 - 27219880   |             | FALSE | TRUE  |
| 7  | 27202057 - 27219880   | F - 14.29%  | TRUE  | TRUE  |
| 7  | 27202057 - 27219880   |             | TRUE  | TRUE  |
| 7  | 27202057 - 27219880   |             | TRUE  | TRUE  |
| 7  | 27202057 - 27219880   |             | TRUE  | TRUE  |
| 7  | 27202057 - 27219880   | F - 35.71%  | FALSE | TRUE  |
| 7  | 27202057 - 27219880   |             | FALSE | TRUE  |
| 7  | 27202057 - 27219880   | F - 21.43%  | TRUE  | TRUE  |
| 7  | 27202057 - 27219880   | F - 28.57%  | TRUE  | TRUE  |
| 8  | 17666450 - 17678377   |             | TRUE  | FALSE |
| 8  | 17666450 - 17678377   | T - 50.00%  | TRUE  | TRUE  |
| 8  | 17666450 - 17678377   | T - 100.00% | TRUE  | TRUE  |
| 8  | 17666450 - 17678377   | T - 100.00% | FALSE | TRUE  |

|    |                       |             |       |       |
|----|-----------------------|-------------|-------|-------|
| 14 | 70320848 - 70499083   | F - 14.29%  | TRUE  | TRUE  |
| 14 | 70320848 - 70499083   |             | TRUE  | TRUE  |
| 14 | 70320848 - 70499083   | F - 14.29%  | TRUE  | TRUE  |
| 14 | 70320848 - 70499083   | F - 14.29%  | TRUE  | TRUE  |
| 1  | 143354963 - 143467658 |             | TRUE  | TRUE  |
| 1  | 143354963 - 143467658 |             | TRUE  | TRUE  |
| 1  | 143354963 - 143467658 | F - 10.00%  | TRUE  | TRUE  |
| 1  | 143354963 - 143467658 |             | TRUE  | TRUE  |
| 1  | 143354963 - 143467658 | F - 10.00%  | TRUE  | TRUE  |
| 1  | 143354963 - 143467658 |             | FALSE | TRUE  |
| 1  | 143354963 - 143467658 | F - 20.00%  | TRUE  | TRUE  |
| 1  | 143354963 - 143467658 | F - 20.00%  | TRUE  | TRUE  |
| 1  | 143354963 - 143467658 | F - 10.00%  | TRUE  | TRUE  |
| 3  | 196726331 - 196731615 |             | TRUE  | TRUE  |
| 3  | 196726331 - 196731615 | F - 40.00%  | TRUE  | TRUE  |
| 7  | 105888731 - 105926772 |             | TRUE  | TRUE  |
| 7  | 105888731 - 105926772 | F - 11.11%  | TRUE  | FALSE |
| 7  | 105888731 - 105926772 | F - 5.56%   | FALSE | TRUE  |
| 7  | 105888731 - 105926772 | F - 5.56%   | FALSE | TRUE  |
| 7  | 105888731 - 105926772 | F - 11.11%  | TRUE  | TRUE  |
| 7  | 105888731 - 105926772 | F - 5.56%   | FALSE | TRUE  |
| 7  | 105888731 - 105926772 | F - 5.56%   | FALSE | TRUE  |
| 7  | 105888731 - 105926772 | F - 22.22%  | TRUE  | TRUE  |
| 7  | 105888731 - 105926772 |             | TRUE  | TRUE  |
| 10 | 118430703 - 118609716 |             | TRUE  | TRUE  |
| 10 | 118430703 - 118609716 |             | TRUE  | TRUE  |
| 10 | 118430703 - 118609716 |             | TRUE  | TRUE  |
| 10 | 118430703 - 118609716 | F - 25.00%  | TRUE  | TRUE  |
| 10 | 118430703 - 118609716 | F - 37.50%  | FALSE | TRUE  |
| 1  | 53099016 - 53135355   |             | TRUE  | FALSE |
| 1  | 53099016 - 53135355   | T - 100.00% | TRUE  | TRUE  |
| 1  | 53099016 - 53135355   | T - 57.14%  | FALSE | TRUE  |
| 1  | 53099016 - 53135355   | F - 28.57%  | TRUE  | TRUE  |
| 1  | 53099016 - 53135355   | F - 28.57%  | FALSE | TRUE  |
| 1  | 53099016 - 53135355   |             | FALSE | TRUE  |
| 1  | 208195587 - 208417665 |             | TRUE  | FALSE |
| 1  | 208195587 - 208417665 |             | TRUE  | TRUE  |
| 1  | 208195587 - 208417665 |             | TRUE  | TRUE  |
| 1  | 208195587 - 208417665 |             | TRUE  | TRUE  |
| 1  | 208195587 - 208417665 |             | TRUE  | TRUE  |
| 1  | 208195587 - 208417665 |             | TRUE  | TRUE  |
| 1  | 208195587 - 208417665 | F - 30.00%  | TRUE  | TRUE  |
| 1  | 208195587 - 208417665 | F - 40.00%  | TRUE  | FALSE |
| 1  | 208195587 - 208417665 |             | TRUE  | TRUE  |
| 1  | 208195587 - 208417665 |             | TRUE  | TRUE  |
| 1  | 208195587 - 208417665 | F - 40.00%  | TRUE  | TRUE  |
| 1  | 208195587 - 208417665 | F - 30.00%  | TRUE  | TRUE  |
| 1  | 208195587 - 208417665 | F - 30.00%  | TRUE  | TRUE  |
| 1  | 208195587 - 208417665 | F - 30.00%  | TRUE  | TRUE  |
| 1  | 208195587 - 208417665 | F - 30.00%  | TRUE  | TRUE  |
| 1  | 208195587 - 208417665 | F - 30.00%  | TRUE  | TRUE  |
| 1  | 208195587 - 208417665 | F - 40.00%  | TRUE  | TRUE  |
| 1  | 208195587 - 208417665 | F - 30.00%  | TRUE  | TRUE  |
| 1  | 208195587 - 208417665 | F - 20.00%  | TRUE  | TRUE  |
| 1  | 208195587 - 208417665 | F - 10.00%  | FALSE | TRUE  |
| 1  | 208195587 - 208417665 |             | TRUE  | TRUE  |
| 1  | 208195587 - 208417665 |             | TRUE  | TRUE  |
| 3  | 194995465 - 195163817 |             | TRUE  | TRUE  |
| 3  | 194995465 - 195163817 |             | TRUE  | FALSE |

|   |    |                       |            |       |       |
|---|----|-----------------------|------------|-------|-------|
|   | 3  | 194995465 - 195163817 |            | TRUE  | TRUE  |
|   | 3  | 194995465 - 195163817 |            | TRUE  | FALSE |
|   | 3  | 194995465 - 195163817 |            | TRUE  | FALSE |
|   | 3  | 194995465 - 195163817 | F - 5.88%  | TRUE  | FALSE |
| X |    | 31132808 - 33357726   |            | TRUE  | TRUE  |
| X |    | 31132808 - 33357726   | T - 51.47% | TRUE  | TRUE  |
| X |    | 31132808 - 33357726   |            | TRUE  | FALSE |
| X |    | 31132808 - 33357726   |            | TRUE  | TRUE  |
| X |    | 31132808 - 33357726   |            | TRUE  | TRUE  |
| X |    | 31132808 - 33357726   |            | TRUE  | TRUE  |
| X |    | 31132808 - 33357726   |            | TRUE  | TRUE  |
| X |    | 31132808 - 33357726   |            | TRUE  | FALSE |
| X |    | 31132808 - 33357726   |            | TRUE  | FALSE |
| X |    | 31132808 - 33357726   |            | TRUE  | TRUE  |
| X |    | 31132808 - 33357726   | T - 52.94% | TRUE  | TRUE  |
| X |    | 31132808 - 33357726   |            | TRUE  | TRUE  |
| X |    | 31132808 - 33357726   |            | TRUE  | FALSE |
| X |    | 31132808 - 33357726   |            | TRUE  | TRUE  |
| X |    | 31132808 - 33357726   | F - 2.94%  | TRUE  | TRUE  |
| X |    | 31132808 - 33357726   |            | TRUE  | TRUE  |
| X |    | 31132808 - 33357726   |            | TRUE  | TRUE  |
| X |    | 31132808 - 33357726   |            | TRUE  | TRUE  |
| X |    | 31132808 - 33357726   |            | TRUE  | TRUE  |
| X |    | 31132808 - 33357726   |            | TRUE  | FALSE |
| X |    | 31132808 - 33357726   |            | TRUE  | TRUE  |
| X |    | 31132808 - 33357726   | F - 14.71% | TRUE  | TRUE  |
| X |    | 31132808 - 33357726   |            | TRUE  | TRUE  |
| X |    | 31132808 - 33357726   |            | TRUE  | FALSE |
| X |    | 31132808 - 33357726   | F - 2.94%  | TRUE  | TRUE  |
| X |    | 31132808 - 33357726   |            | TRUE  | TRUE  |
| X |    | 31132808 - 33357726   | F - 1.47%  | TRUE  | TRUE  |
| X |    | 31132808 - 33357726   |            | TRUE  | TRUE  |
| X |    | 31132808 - 33357726   | F - 7.35%  | TRUE  | TRUE  |
| X |    | 31132808 - 33357726   |            | TRUE  | TRUE  |
| X |    | 31132808 - 33357726   | F - 16.18% | TRUE  | TRUE  |
| X |    | 31132808 - 33357726   | F - 5.88%  | FALSE | TRUE  |
| X |    | 31132808 - 33357726   | F - 2.94%  | FALSE | TRUE  |
| X |    | 31132808 - 33357726   | F - 1.47%  | TRUE  | TRUE  |
| X |    | 31132808 - 33357726   | F - 4.41%  | FALSE | TRUE  |
| X |    | 31132808 - 33357726   | F - 1.47%  | TRUE  | TRUE  |
| X |    | 31132808 - 33357726   |            | TRUE  | TRUE  |
| X |    | 31132808 - 33357726   |            | FALSE | TRUE  |
| X |    | 31132808 - 33357726   | F - 1.47%  | FALSE | TRUE  |
| X |    | 31132808 - 33357726   |            | FALSE | TRUE  |
|   | 22 | 46692638 - 46726707   |            | TRUE  | TRUE  |
|   | 22 | 46692638 - 46726707   | T - 63.64% | FALSE | TRUE  |
|   | 22 | 46692638 - 46726707   | F - 18.18% | TRUE  | TRUE  |
|   | 22 | 46692638 - 46726707   |            | TRUE  | TRUE  |
|   | 1  | 51819935 - 51985000   | F - 14.29% | TRUE  | TRUE  |
|   | 1  | 51819935 - 51985000   |            | TRUE  | FALSE |
|   | 1  | 51819935 - 51985000   |            | TRUE  | TRUE  |
|   | 2  | 145121063 - 145282147 |            | TRUE  | TRUE  |
|   | 2  | 145121063 - 145282147 | F - 2.22%  | TRUE  | TRUE  |
|   | 2  | 145121063 - 145282147 |            | TRUE  | TRUE  |
|   | 2  | 145121063 - 145282147 |            | TRUE  | FALSE |
|   | 10 | 80828792 - 81076285   |            | TRUE  | TRUE  |
|   | 10 | 80828792 - 81076285   |            | FALSE | TRUE  |
|   | 10 | 80828792 - 81076285   |            | FALSE | TRUE  |
|   | 10 | 80828792 - 81076285   |            | TRUE  | TRUE  |



|    |                       |            |       |       |
|----|-----------------------|------------|-------|-------|
| 10 | 80828792 - 81076285   |            | TRUE  | TRUE  |
| 10 | 80828792 - 81076285   | F - 7.69%  | TRUE  | TRUE  |
| 10 | 80828792 - 81076285   |            | FALSE | TRUE  |
| 10 | 80828792 - 81076285   | F - 7.69%  | TRUE  | TRUE  |
| 10 | 80828792 - 81076285   | F - 15.38% | TRUE  | TRUE  |
| 10 | 80828792 - 81076285   |            | TRUE  | TRUE  |
| 12 | 123011795 - 123110947 |            | TRUE  | FALSE |
| 12 | 123011795 - 123110947 |            | TRUE  | TRUE  |
| 12 | 123011795 - 123110947 | T - 87.50% | TRUE  | TRUE  |
| 12 | 123011795 - 123110947 |            | FALSE | TRUE  |
| 12 | 123011795 - 123110947 |            | FALSE | TRUE  |
| 12 | 123011795 - 123110947 |            | TRUE  | TRUE  |
| 12 | 123011795 - 123110947 |            | FALSE | TRUE  |
| 12 | 123011795 - 123110947 |            | FALSE | TRUE  |
| 12 | 123011795 - 123110947 |            | TRUE  | TRUE  |
| 12 | 123011795 - 123110947 |            | FALSE | TRUE  |
| 12 | 123011795 - 123110947 |            | FALSE | TRUE  |
| 12 | 123011795 - 123110947 |            | FALSE | TRUE  |
| 12 | 123011795 - 123110947 |            | FALSE | TRUE  |
| 3  | 149086805 - 149095652 | F - 22.22% | TRUE  | TRUE  |
| 3  | 149086805 - 149095652 |            | TRUE  | TRUE  |
| 5  | 166711804 - 167691162 | F - 22.22% | TRUE  | TRUE  |
| 5  | 166711804 - 167691162 |            | TRUE  | TRUE  |
| 5  | 166711804 - 167691162 | F - 22.22% | FALSE | TRUE  |
| 5  | 166711804 - 167691162 | F - 5.56%  | FALSE | TRUE  |
| 5  | 166711804 - 167691162 |            | FALSE | TRUE  |
| 5  | 166711804 - 167691162 |            | TRUE  | TRUE  |
| 5  | 166711804 - 167691162 | F - 5.56%  | TRUE  | TRUE  |
| 5  | 166711804 - 167691162 |            | TRUE  | TRUE  |
| 5  | 166711804 - 167691162 |            | FALSE | TRUE  |
| 5  | 166711804 - 167691162 |            | TRUE  | TRUE  |
| 5  | 166711804 - 167691162 |            | TRUE  | TRUE  |
| 5  | 166711804 - 167691162 | T - 66.67% | TRUE  | TRUE  |
| 5  | 166711804 - 167691162 | F - 5.56%  | TRUE  | TRUE  |
| 5  | 166711804 - 167691162 |            | FALSE | TRUE  |
| 5  | 166711804 - 167691162 |            | TRUE  | TRUE  |
| 5  | 69776697 - 69881549   |            | TRUE  | TRUE  |
| 5  | 69776697 - 69881549   | F - 33.33% | TRUE  | TRUE  |
| 6  | 80816344 - 81055987   |            | TRUE  | TRUE  |
| 6  | 80816344 - 81055987   | F - 16.67% | FALSE | TRUE  |
| 22 | 33561991 - 34318829   |            | TRUE  | FALSE |
| 22 | 33561991 - 34318829   | F - 15.38% | TRUE  | TRUE  |
| 22 | 33561991 - 34318829   |            | TRUE  | TRUE  |
| 22 | 33561991 - 34318829   | F - 7.69%  | TRUE  | TRUE  |
| 22 | 33561991 - 34318829   | F - 3.85%  | FALSE | TRUE  |
| 22 | 33561991 - 34318829   | F - 26.92% | TRUE  | TRUE  |
| 22 | 33561991 - 34318829   | T - 61.54% | TRUE  | TRUE  |
| 22 | 33561991 - 34318829   |            | FALSE | TRUE  |
| 1  | 235824341 - 236046940 |            | TRUE  | TRUE  |
| 1  | 235824341 - 236046940 |            | TRUE  | TRUE  |
| 1  | 235824341 - 236046940 |            | TRUE  | FALSE |
| 1  | 235824341 - 236046940 |            | TRUE  | TRUE  |
| 1  | 235824341 - 236046940 |            | TRUE  | TRUE  |
| 1  | 235824341 - 236046940 |            | TRUE  | TRUE  |
| 1  | 235824341 - 236046940 |            | TRUE  | TRUE  |
| 1  | 235824341 - 236046940 | F - 14.29% | TRUE  | TRUE  |
| 1  | 235824341 - 236046940 | F - 28.57% | TRUE  | TRUE  |
| 1  | 235824341 - 236046940 |            | FALSE | TRUE  |
| 1  | 235824341 - 236046940 |            | FALSE | TRUE  |

|    |                       |            |       |       |
|----|-----------------------|------------|-------|-------|
| 1  | 235824341 - 236046940 |            | FALSE | TRUE  |
| 2  | 220283099 - 220291461 |            | TRUE  | FALSE |
| 2  | 220283099 - 220291461 | T - 60.00% | TRUE  | FALSE |
| 2  | 220283099 - 220291461 |            | TRUE  | FALSE |
| 2  | 220283099 - 220291461 | F - 20.00% | FALSE | TRUE  |
| 2  | 237232794 - 237416185 |            | TRUE  | FALSE |
| 2  | 237232794 - 237416185 | F - 6.25%  | TRUE  | TRUE  |
| 2  | 237232794 - 237416185 |            | TRUE  | TRUE  |
| 2  | 237232794 - 237416185 |            | TRUE  | TRUE  |
| 5  | 137514408 - 137523404 | F - 30.00% | TRUE  | FALSE |
| 5  | 137514408 - 137523404 |            | TRUE  | TRUE  |
| 5  | 137514408 - 137523404 | F - 10.00% | TRUE  | TRUE  |
| 5  | 137514408 - 137523404 | F - 30.00% | FALSE | TRUE  |
| 5  | 137514408 - 137523404 | F - 40.00% | TRUE  | TRUE  |
| 5  | 137514408 - 137523404 | T - 90.00% | TRUE  | TRUE  |
| 5  | 137514408 - 137523404 | T - 60.00% | TRUE  | TRUE  |
| 5  | 137514408 - 137523404 |            | FALSE | TRUE  |
| 5  | 137514408 - 137523404 |            | TRUE  | TRUE  |
| 13 | 45915480 - 45965872   |            | TRUE  | TRUE  |
| 13 | 45915480 - 45965872   |            | TRUE  | FALSE |
| 13 | 45915480 - 45965872   |            | TRUE  | TRUE  |
| 13 | 45915480 - 45965872   | F - 12.00% | TRUE  | TRUE  |
| 13 | 45915480 - 45965872   |            | TRUE  | TRUE  |
| 1  | 169631245 - 169823221 |            | TRUE  | TRUE  |
| 1  | 169631245 - 169823221 |            | TRUE  | FALSE |
| 1  | 169631245 - 169823221 | T - 60.87% | TRUE  | TRUE  |
| 1  | 169631245 - 169823221 | T - 91.30% | TRUE  | TRUE  |
| 1  | 169631245 - 169823221 |            | TRUE  | TRUE  |
| 1  | 169631245 - 169823221 | T - 95.65% | FALSE | TRUE  |
| 1  | 169631245 - 169823221 |            | FALSE | TRUE  |
| 1  | 169631245 - 169823221 |            | FALSE | TRUE  |
| 1  | 169631245 - 169823221 |            | TRUE  | TRUE  |
| 1  | 169631245 - 169823221 | T - 69.57% | TRUE  | TRUE  |
| 1  | 169631245 - 169823221 | T - 69.57% | FALSE | TRUE  |
| 1  | 169631245 - 169823221 | F - 43.48% | TRUE  | TRUE  |
| 1  | 169631245 - 169823221 |            | FALSE | TRUE  |
| 8  | 134467091 - 134584183 |            | TRUE  | FALSE |
| 8  | 134467091 - 134584183 | F - 5.26%  | FALSE | TRUE  |
| 8  | 134467091 - 134584183 |            | FALSE | TRUE  |
| 1  | 111729796 - 111747157 |            | TRUE  | TRUE  |
| 1  | 111729796 - 111747157 |            | TRUE  | TRUE  |
| 1  | 111729796 - 111747157 | F - 10.00% | TRUE  | TRUE  |
| 8  | 40388109 - 40755352   |            | TRUE  | TRUE  |
| 8  | 40388109 - 40755352   |            | TRUE  | TRUE  |
| 8  | 40388109 - 40755352   | F - 8.33%  | FALSE | TRUE  |
| 8  | 40388109 - 40755352   | F - 8.33%  | TRUE  | TRUE  |
| 8  | 40388109 - 40755352   | T - 66.67% | TRUE  | TRUE  |
| 8  | 40388109 - 40755352   | F - 25.00% | FALSE | TRUE  |
| 8  | 40388109 - 40755352   |            | FALSE | TRUE  |
| 8  | 40388109 - 40755352   | F - 41.67% | TRUE  | TRUE  |
| 8  | 40388109 - 40755352   |            | TRUE  | TRUE  |
| 8  | 40388109 - 40755352   | T - 75.00% | TRUE  | TRUE  |
| 8  | 40388109 - 40755352   |            | FALSE | TRUE  |
| 8  | 40388109 - 40755352   |            | FALSE | TRUE  |
| 11 | 17281887 - 17371521   |            | TRUE  | TRUE  |
| 11 | 17281887 - 17371521   | F - 12.50% | TRUE  | TRUE  |
| 11 | 17281887 - 17371521   | F - 18.75% | FALSE | TRUE  |
| 11 | 17281887 - 17371521   | F - 12.50% | TRUE  | TRUE  |

|    |                       |             |       |       |
|----|-----------------------|-------------|-------|-------|
| 11 | 17281887 - 17371521   | F - 6.25%   | FALSE | TRUE  |
| 11 | 17281887 - 17371521   | F - 6.25%   | TRUE  | TRUE  |
| 11 | 17281887 - 17371521   |             | TRUE  | TRUE  |
| 11 | 17281887 - 17371521   | F - 6.25%   | TRUE  | TRUE  |
| 11 | 17281887 - 17371521   | F - 6.25%   | TRUE  | TRUE  |
| 11 | 17281887 - 17371521   | F - 25.00%  | TRUE  | TRUE  |
| 11 | 17281887 - 17371521   | F - 37.50%  | TRUE  | TRUE  |
| 11 | 17281887 - 17371521   |             | TRUE  | TRUE  |
| 11 | 17281887 - 17371521   |             | FALSE | TRUE  |
| 11 | 17281887 - 17371521   | F - 12.50%  | FALSE | TRUE  |
| 2  | 218664512 - 218867718 | F - 16.13%  | TRUE  | TRUE  |
| 2  | 218664512 - 218867718 | F - 3.23%   | TRUE  | TRUE  |
| 2  | 218664512 - 218867718 |             | TRUE  | TRUE  |
| 2  | 218664512 - 218867718 | F - 3.23%   | TRUE  | TRUE  |
| 2  | 218664512 - 218867718 | F - 9.68%   | TRUE  | TRUE  |
| 2  | 218664512 - 218867718 |             | TRUE  | TRUE  |
| 2  | 218664512 - 218867718 | F - 12.90%  | TRUE  | TRUE  |
| 2  | 218664512 - 218867718 |             | TRUE  | TRUE  |
| 2  | 218664512 - 218867718 | F - 6.45%   | TRUE  | TRUE  |
| 2  | 218664512 - 218867718 | F - 9.68%   | TRUE  | TRUE  |
| 2  | 218664512 - 218867718 | F - 6.45%   | TRUE  | TRUE  |
| 2  | 218664512 - 218867718 |             | TRUE  | TRUE  |
| 2  | 218664512 - 218867718 |             | TRUE  | TRUE  |
| 2  | 218664512 - 218867718 | F - 3.23%   | TRUE  | TRUE  |
| 2  | 218664512 - 218867718 |             | FALSE | TRUE  |
| 2  | 218664512 - 218867718 | F - 3.23%   | TRUE  | TRUE  |
| 2  | 218664512 - 218867718 | F - 6.45%   | TRUE  | TRUE  |
| 2  | 218664512 - 218867718 |             | FALSE | TRUE  |
| 2  | 218664512 - 218867718 | F - 3.23%   | FALSE | TRUE  |
| 2  | 218664512 - 218867718 |             | TRUE  | TRUE  |
| 2  | 218664512 - 218867718 |             | TRUE  | TRUE  |
| 2  | 218664512 - 218867718 |             | TRUE  | TRUE  |
| 5  | 134906371 - 134914969 | T - 100.00% | TRUE  | FALSE |
| 5  | 134906371 - 134914969 |             | TRUE  | FALSE |
| 5  | 134906371 - 134914969 | T - 60.00%  | TRUE  | TRUE  |
| 5  | 134906371 - 134914969 | T - 100.00% | TRUE  | FALSE |
| 5  | 134906371 - 134914969 |             | TRUE  | FALSE |
| 5  | 134906371 - 134914969 |             | TRUE  | TRUE  |
| 5  | 134906371 - 134914969 | T - 80.00%  | TRUE  | TRUE  |
| 5  | 134906371 - 134914969 | T - 60.00%  | TRUE  | TRUE  |
| 5  | 134906371 - 134914969 | F - 40.00%  | TRUE  | TRUE  |
| 9  | 116207011 - 116360018 |             | TRUE  | TRUE  |
| 9  | 116207011 - 116360018 | F - 10.00%  | TRUE  | TRUE  |
| 9  | 116207011 - 116360018 |             | TRUE  | TRUE  |
| 9  | 116207011 - 116360018 |             | TRUE  | TRUE  |
| 9  | 116207011 - 116360018 | F - 2.50%   | TRUE  | TRUE  |
| 9  | 116207011 - 116360018 | F - 27.50%  | TRUE  | FALSE |
| 9  | 116207011 - 116360018 | F - 32.50%  | TRUE  | TRUE  |
| 9  | 116207011 - 116360018 | F - 5.00%   | TRUE  | TRUE  |
| 9  | 116207011 - 116360018 |             | TRUE  | TRUE  |
| 9  | 116207011 - 116360018 |             | TRUE  | FALSE |
| 9  | 116207011 - 116360018 |             | TRUE  | TRUE  |
| 9  | 116207011 - 116360018 | F - 20.00%  | TRUE  | TRUE  |
| 9  | 116207011 - 116360018 | F - 5.00%   | TRUE  | TRUE  |
| 9  | 116207011 - 116360018 |             | TRUE  | TRUE  |
| 9  | 116207011 - 116360018 | F - 10.00%  | TRUE  | TRUE  |
| 9  | 116207011 - 116360018 | F - 20.00%  | FALSE | TRUE  |
| 9  | 116207011 - 116360018 | F - 7.50%   | TRUE  | TRUE  |
| 9  | 116207011 - 116360018 | F - 7.50%   | TRUE  | TRUE  |

|    |                       |            |       |       |
|----|-----------------------|------------|-------|-------|
| 9  | 116207011 - 116360018 | F - 32.50% | TRUE  | TRUE  |
| 9  | 116207011 - 116360018 | F - 15.00% | TRUE  | TRUE  |
| 9  | 116207011 - 116360018 | F - 10.00% | TRUE  | TRUE  |
| 9  | 116207011 - 116360018 | F - 5.00%  | TRUE  | TRUE  |
| 9  | 116207011 - 116360018 | F - 5.00%  | TRUE  | TRUE  |
| 9  | 116207011 - 116360018 | F - 15.00% | TRUE  | TRUE  |
| 9  | 116207011 - 116360018 | F - 27.50% | TRUE  | TRUE  |
| 9  | 116207011 - 116360018 | F - 5.00%  | FALSE | TRUE  |
| 9  | 116207011 - 116360018 | F - 27.50% | FALSE | TRUE  |
| 9  | 116207011 - 116360018 | F - 5.00%  | TRUE  | TRUE  |
| 9  | 116207011 - 116360018 |            | FALSE | TRUE  |
| 9  | 116207011 - 116360018 |            | TRUE  | TRUE  |
| 9  | 116207011 - 116360018 | F - 20.00% | TRUE  | TRUE  |
| 9  | 116207011 - 116360018 | F - 10.00% | TRUE  | TRUE  |
| 9  | 116207011 - 116360018 | F - 37.50% | TRUE  | TRUE  |
| 9  | 116207011 - 116360018 | F - 2.50%  | TRUE  | TRUE  |
| 9  | 116207011 - 116360018 | F - 2.50%  | FALSE | TRUE  |
| 9  | 116207011 - 116360018 |            | FALSE | TRUE  |
| 9  | 116207011 - 116360018 | F - 2.50%  | FALSE | TRUE  |
| 12 | 8071824 - 8088892     | F - 20.00% | TRUE  | TRUE  |
| 12 | 8071824 - 8088892     | F - 30.00% | TRUE  | TRUE  |
| 12 | 8071824 - 8088892     | F - 30.00% | TRUE  | TRUE  |
| 12 | 8071824 - 8088892     | F - 10.00% | FALSE | TRUE  |
| 12 | 8071824 - 8088892     | F - 10.00% | FALSE | TRUE  |
| 12 | 8071824 - 8088892     |            | TRUE  | TRUE  |
| 12 | 8071824 - 8088892     | F - 10.00% | FALSE | TRUE  |
| 12 | 8071824 - 8088892     | F - 40.00% | TRUE  | TRUE  |
| 12 | 8071824 - 8088892     | F - 40.00% | TRUE  | TRUE  |
| 12 | 8071824 - 8088892     |            | TRUE  | TRUE  |
| 6  | 29690552 - 29706966   |            | TRUE  | TRUE  |
| 6  | 29690552 - 29706966   | F - 4.17%  | TRUE  | TRUE  |
| 6  | 29690552 - 29706966   | F - 4.17%  | TRUE  | TRUE  |
| 6  | 29690552 - 29706966   |            | FALSE | TRUE  |
| 6  | 29690552 - 29706966   |            | TRUE  | TRUE  |
| 6  | 29690552 - 29706966   |            | TRUE  | TRUE  |
| 6  | 29690552 - 29706966   | F - 8.33%  | FALSE | TRUE  |
| 6  | 29690552 - 29706966   | F - 8.33%  | TRUE  | TRUE  |
| 6  | 29690552 - 29706966   |            | TRUE  | TRUE  |
| 6  | 29690552 - 29706966   |            | FALSE | TRUE  |
| 6  | 29690552 - 29706966   | F - 8.33%  | TRUE  | TRUE  |
| 6  | 29690552 - 29706966   |            | TRUE  | TRUE  |
| 6  | 29690552 - 29706966   | F - 8.33%  | FALSE | TRUE  |
| 6  | 29690552 - 29706966   | F - 33.33% | TRUE  | TRUE  |
| 6  | 29690552 - 29706966   | F - 12.50% | FALSE | TRUE  |
| 6  | 29690552 - 29706966   | T - 62.50% | FALSE | TRUE  |
| 7  | 100770370 - 100782547 | F - 9.09%  | TRUE  | TRUE  |
| 7  | 100770370 - 100782547 | F - 9.09%  | TRUE  | TRUE  |
| 7  | 100770370 - 100782547 | F - 9.09%  | TRUE  | TRUE  |
| 7  | 100770370 - 100782547 | F - 9.09%  | TRUE  | FALSE |
| 7  | 100770370 - 100782547 |            | TRUE  | TRUE  |
| 8  | 38854388 - 38962779   |            | TRUE  | FALSE |
| 8  | 38854388 - 38962779   | F - 6.67%  | TRUE  | TRUE  |
| 9  | 141106637 - 141149300 | F - 33.33% | TRUE  | FALSE |
| 9  | 141106637 - 141149300 |            | TRUE  | TRUE  |
| 9  | 141106637 - 141149300 |            | TRUE  | TRUE  |
| 9  | 141106637 - 141149300 | T - 66.67% | TRUE  | TRUE  |
| 9  | 141106637 - 141149300 | T - 66.67% | TRUE  | TRUE  |
| 11 | 19372271 - 20143147   |            | TRUE  | FALSE |

|    |                       |            |       |       |
|----|-----------------------|------------|-------|-------|
| 11 | 19372271 - 20143147   | F - 8.70%  | TRUE  | TRUE  |
| 11 | 19372271 - 20143147   |            | TRUE  | FALSE |
| 11 | 19372271 - 20143147   | F - 4.35%  | TRUE  | TRUE  |
| 11 | 19372271 - 20143147   | F - 21.74% | TRUE  | TRUE  |
| 11 | 19372271 - 20143147   |            | TRUE  | FALSE |
| 11 | 19372271 - 20143147   |            | TRUE  | TRUE  |
| 11 | 19372271 - 20143147   | F - 17.39% | TRUE  | TRUE  |
| 11 | 19372271 - 20143147   |            | TRUE  | TRUE  |
| 19 | 14491956 - 14519537   |            | TRUE  | TRUE  |
| 19 | 14491956 - 14519537   |            | TRUE  | TRUE  |
| 19 | 14491956 - 14519537   |            | TRUE  | FALSE |
| 19 | 14491956 - 14519537   |            | TRUE  | TRUE  |
| 19 | 14491956 - 14519537   | F - 25.00% | TRUE  | TRUE  |
| 19 | 14491956 - 14519537   |            | TRUE  | TRUE  |
| 1  | 159141377 - 159173103 |            | TRUE  | TRUE  |
| 1  | 159141377 - 159173103 |            | TRUE  | TRUE  |
| 1  | 159141377 - 159173103 | T - 90.00% | TRUE  | TRUE  |
| 1  | 159141377 - 159173103 |            | TRUE  | TRUE  |
| 1  | 159141377 - 159173103 | T - 60.00% | TRUE  | TRUE  |
| 1  | 159141377 - 159173103 | T - 90.00% | TRUE  | TRUE  |
| 1  | 159141377 - 159173103 |            | TRUE  | TRUE  |
| 1  | 159141377 - 159173103 |            | TRUE  | TRUE  |
| 1  | 159141377 - 159173103 | T - 80.00% | TRUE  | TRUE  |
| 1  | 159141377 - 159173103 |            | TRUE  | TRUE  |
| 1  | 159141377 - 159173103 |            | TRUE  | TRUE  |
| 1  | 159141377 - 159173103 | F - 30.00% | TRUE  | TRUE  |
| 1  | 159141377 - 159173103 | T - 60.00% | TRUE  | TRUE  |
| 1  | 159141377 - 159173103 | F - 10.00% | FALSE | TRUE  |
| 5  | 118604387 - 118730294 | F - 46.15% | TRUE  | TRUE  |
| 5  | 118604387 - 118730294 |            | TRUE  | FALSE |
| 5  | 118604387 - 118730294 |            | TRUE  | TRUE  |
| 5  | 118604387 - 118730294 |            | FALSE | TRUE  |
| 1  | 220701568 - 220837803 |            | TRUE  | FALSE |
| 1  | 220701568 - 220837803 | T - 72.73% | TRUE  | TRUE  |
| 1  | 220701568 - 220837803 | T - 63.64% | TRUE  | TRUE  |
| 2  | 189156396 - 189460653 |            | TRUE  | TRUE  |
| 2  | 189156396 - 189460653 |            | TRUE  | TRUE  |
| 2  | 189156396 - 189460653 | F - 11.54% | TRUE  | TRUE  |
| 2  | 189156396 - 189460653 |            | TRUE  | TRUE  |
| 2  | 189156396 - 189460653 | F - 7.69%  | TRUE  | TRUE  |
| 2  | 189156396 - 189460653 | F - 3.85%  | TRUE  | TRUE  |
| 2  | 189156396 - 189460653 | F - 3.85%  | TRUE  | TRUE  |
| 2  | 189156396 - 189460653 |            | TRUE  | TRUE  |
| 2  | 189156396 - 189460653 | F - 23.08% | TRUE  | TRUE  |
| 2  | 189156396 - 189460653 | F - 19.23% | TRUE  | TRUE  |
| 8  | 141667999 - 142012315 |            | TRUE  | TRUE  |
| 8  | 141667999 - 142012315 |            | TRUE  | TRUE  |
| 8  | 141667999 - 142012315 |            | TRUE  | TRUE  |
| 8  | 141667999 - 142012315 |            | TRUE  | FALSE |
| 8  | 141667999 - 142012315 |            | TRUE  | FALSE |
| 8  | 141667999 - 142012315 |            | TRUE  | TRUE  |
| 8  | 141667999 - 142012315 |            | TRUE  | TRUE  |
| 8  | 141667999 - 142012315 |            | TRUE  | TRUE  |
| 8  | 141667999 - 142012315 | F - 1.35%  | TRUE  | TRUE  |
| 8  | 141667999 - 142012315 |            | TRUE  | FALSE |
| 8  | 141667999 - 142012315 |            | TRUE  | TRUE  |
| 8  | 141667999 - 142012315 | F - 6.76%  | TRUE  | TRUE  |
| 8  | 141667999 - 142012315 | F - 1.35%  | TRUE  | TRUE  |

|    |                       |            |       |       |
|----|-----------------------|------------|-------|-------|
| 8  | 141667999 - 142012315 | F - 18.92% | TRUE  | TRUE  |
| 8  | 141667999 - 142012315 |            | TRUE  | TRUE  |
| 8  | 141667999 - 142012315 | F - 1.35%  | TRUE  | TRUE  |
| 8  | 141667999 - 142012315 | F - 2.70%  | TRUE  | FALSE |
| 8  | 141667999 - 142012315 |            | TRUE  | TRUE  |
| 8  | 141667999 - 142012315 | F - 1.35%  | TRUE  | TRUE  |
| 8  | 141667999 - 142012315 | F - 2.70%  | TRUE  | TRUE  |
| 8  | 141667999 - 142012315 | F - 4.05%  | TRUE  | TRUE  |
| 8  | 141667999 - 142012315 | F - 5.41%  | TRUE  | TRUE  |
| 8  | 141667999 - 142012315 | F - 1.35%  | TRUE  | TRUE  |
| 8  | 141667999 - 142012315 | F - 1.35%  | TRUE  | TRUE  |
| 8  | 141667999 - 142012315 |            | TRUE  | TRUE  |
| 8  | 141667999 - 142012315 |            | TRUE  | TRUE  |
| 8  | 141667999 - 142012315 |            | TRUE  | TRUE  |
| 8  | 141667999 - 142012315 | F - 43.24% | TRUE  | TRUE  |
| 8  | 141667999 - 142012315 |            | TRUE  | TRUE  |
| 8  | 141667999 - 142012315 |            | TRUE  | TRUE  |
| 8  | 141667999 - 142012315 |            | TRUE  | TRUE  |
| 8  | 141667999 - 142012315 | F - 1.35%  | TRUE  | TRUE  |
| 8  | 141667999 - 142012315 | F - 1.35%  | FALSE | TRUE  |
| 8  | 141667999 - 142012315 |            | TRUE  | TRUE  |
| 8  | 141667999 - 142012315 |            | TRUE  | TRUE  |
| 8  | 141667999 - 142012315 | F - 43.24% | TRUE  | TRUE  |
| 8  | 141667999 - 142012315 | F - 1.35%  | TRUE  | TRUE  |
| 8  | 141667999 - 142012315 | F - 2.70%  | TRUE  | TRUE  |
| 8  | 141667999 - 142012315 |            | TRUE  | TRUE  |
| 8  | 141667999 - 142012315 | F - 28.38% | TRUE  | TRUE  |
| 8  | 141667999 - 142012315 | F - 27.03% | TRUE  | TRUE  |
| 8  | 141667999 - 142012315 | F - 24.32% | TRUE  | TRUE  |
| 8  | 141667999 - 142012315 | F - 1.35%  | TRUE  | TRUE  |
| 8  | 141667999 - 142012315 | F - 1.35%  | FALSE | TRUE  |
| 8  | 141667999 - 142012315 |            | TRUE  | TRUE  |
| 8  | 141667999 - 142012315 | F - 31.08% | TRUE  | TRUE  |
| 8  | 141667999 - 142012315 |            | TRUE  | TRUE  |
| 8  | 141667999 - 142012315 | F - 1.35%  | FALSE | TRUE  |
| 8  | 141667999 - 142012315 | F - 40.54% | TRUE  | TRUE  |
| 8  | 141667999 - 142012315 | F - 27.03% | TRUE  | TRUE  |
| 8  | 141667999 - 142012315 |            | TRUE  | TRUE  |
| 8  | 141667999 - 142012315 | F - 1.35%  | TRUE  | TRUE  |
| 8  | 141667999 - 142012315 | F - 40.54% | TRUE  | TRUE  |
| 8  | 141667999 - 142012315 | T - 52.70% | TRUE  | TRUE  |
| 8  | 141667999 - 142012315 | F - 31.08% | TRUE  | TRUE  |
| 8  | 141667999 - 142012315 | F - 4.05%  | TRUE  | TRUE  |
| 8  | 141667999 - 142012315 |            | TRUE  | TRUE  |
| 8  | 141667999 - 142012315 | F - 4.05%  | FALSE | TRUE  |
| 8  | 141667999 - 142012315 |            | FALSE | TRUE  |
| 10 | 77191211 - 78318978   |            | TRUE  | TRUE  |
| 10 | 77191211 - 78318978   | F - 10.00% | TRUE  | TRUE  |
| 10 | 77191211 - 78318978   | F - 30.00% | TRUE  | TRUE  |
| 10 | 77191211 - 78318978   |            | TRUE  | FALSE |
| 10 | 77191211 - 78318978   | F - 10.00% | TRUE  | TRUE  |
| 10 | 77191211 - 78318978   | F - 40.00% | TRUE  | TRUE  |
| 10 | 77191211 - 78318978   | F - 30.00% | TRUE  | TRUE  |
| 10 | 77191211 - 78318978   |            | TRUE  | FALSE |
| 10 | 77191211 - 78318978   |            | TRUE  | TRUE  |
| 10 | 77191211 - 78318978   | F - 10.00% | TRUE  | TRUE  |
| 10 | 77191211 - 78318978   | F - 10.00% | TRUE  | TRUE  |
| 10 | 77191211 - 78318978   |            | FALSE | TRUE  |

|    |                       |            |       |       |
|----|-----------------------|------------|-------|-------|
| 10 | 77191211 - 78318978   |            | TRUE  | TRUE  |
| 10 | 77191211 - 78318978   | F - 20.00% | TRUE  | TRUE  |
| 10 | 77191211 - 78318978   | F - 10.00% | TRUE  | TRUE  |
| 10 | 77191211 - 78318978   |            | TRUE  | TRUE  |
| 10 | 77191211 - 78318978   |            | TRUE  | TRUE  |
| 17 | 55162551 - 55198710   |            | TRUE  | TRUE  |
| 17 | 55162551 - 55198710   | F - 38.46% | TRUE  | TRUE  |
| 17 | 55162551 - 55198710   | F - 23.08% | TRUE  | TRUE  |
| 17 | 55162551 - 55198710   | F - 15.38% | TRUE  | TRUE  |
| 17 | 55162551 - 55198710   | F - 15.38% | FALSE | TRUE  |
| 17 | 55162551 - 55198710   |            | TRUE  | TRUE  |
| 17 | 55162551 - 55198710   | F - 23.08% | TRUE  | TRUE  |
| 17 | 55162551 - 55198710   |            | FALSE | TRUE  |
| 17 | 55162551 - 55198710   | F - 46.15% | TRUE  | TRUE  |
| 17 | 55162551 - 55198710   |            | FALSE | TRUE  |
| 17 | 55162551 - 55198710   | F - 23.08% | FALSE | TRUE  |
| 17 | 55162551 - 55198710   | F - 30.77% | TRUE  | TRUE  |
| 17 | 55162551 - 55198710   |            | FALSE | TRUE  |
| 17 | 55162551 - 55198710   |            | FALSE | TRUE  |
| 17 | 61509665 - 61523722   |            | TRUE  | TRUE  |
| 17 | 61509665 - 61523722   | F - 18.75% | TRUE  | FALSE |
| 17 | 61509665 - 61523722   |            | TRUE  | FALSE |
| 22 | 23412540 - 23467224   |            | TRUE  | FALSE |
| 22 | 23412540 - 23467224   | T - 55.56% | TRUE  | TRUE  |
| 22 | 23412540 - 23467224   | F - 22.22% | TRUE  | TRUE  |
| 22 | 23412540 - 23467224   |            | TRUE  | TRUE  |
| 22 | 23412540 - 23467224   | T - 66.67% | TRUE  | TRUE  |
| 22 | 23412540 - 23467224   |            | TRUE  | TRUE  |
| 22 | 23412540 - 23467224   | T - 77.78% | TRUE  | TRUE  |
| 1  | 100111431 - 100178513 |            | TRUE  | FALSE |
| 1  | 100111431 - 100178513 | F - 16.67% | TRUE  | TRUE  |
| 1  | 100111431 - 100178513 | F - 33.33% | TRUE  | TRUE  |
| 1  | 100111431 - 100178513 |            | TRUE  | TRUE  |
| 1  | 230193536 - 230417875 |            | TRUE  | TRUE  |
| 1  | 230193536 - 230417875 | F - 15.38% | TRUE  | TRUE  |
| 1  | 230193536 - 230417875 |            | TRUE  | TRUE  |
| 1  | 230193536 - 230417875 |            | TRUE  | TRUE  |
| 1  | 230193536 - 230417875 | F - 7.69%  | TRUE  | TRUE  |
| 1  | 230193536 - 230417875 | F - 15.38% | TRUE  | TRUE  |
| 1  | 230193536 - 230417875 |            | FALSE | TRUE  |
| 1  | 153591263 - 153606873 |            | TRUE  | FALSE |
| 1  | 153591263 - 153606873 | F - 27.27% | TRUE  | TRUE  |
| 1  | 153591263 - 153606873 |            | TRUE  | TRUE  |
| 1  | 153591263 - 153606873 |            | TRUE  | FALSE |
| 1  | 153591263 - 153606873 | F - 22.73% | TRUE  | TRUE  |
| 1  | 153591263 - 153606873 | F - 4.55%  | TRUE  | TRUE  |
| 1  | 153591263 - 153606873 | F - 9.09%  | TRUE  | TRUE  |
| 1  | 153591263 - 153606873 | F - 22.73% | TRUE  | TRUE  |
| 1  | 153591263 - 153606873 | F - 27.27% | TRUE  | TRUE  |
| 1  | 153591263 - 153606873 | F - 4.55%  | TRUE  | TRUE  |
| 1  | 153591263 - 153606873 |            | TRUE  | TRUE  |
| 1  | 153591263 - 153606873 | F - 18.18% | TRUE  | TRUE  |
| 1  | 153591263 - 153606873 | F - 9.09%  | TRUE  | TRUE  |
| 1  | 153591263 - 153606873 |            | TRUE  | TRUE  |
| 1  | 153591263 - 153606873 |            | TRUE  | TRUE  |
| 1  | 153591263 - 153606873 | F - 22.73% | TRUE  | TRUE  |
| 6  | 74104285 - 74127292   |            | TRUE  | FALSE |
| 6  | 74104285 - 74127292   | T - 71.43% | TRUE  | TRUE  |

|    |                       |            |       |       |
|----|-----------------------|------------|-------|-------|
| 6  | 74104285 - 74127292   |            | TRUE  | FALSE |
| 6  | 74104285 - 74127292   | F - 42.86% | FALSE | TRUE  |
| 6  | 74104285 - 74127292   | T - 57.14% | FALSE | TRUE  |
| 6  | 74104285 - 74127292   | T - 57.14% | TRUE  | TRUE  |
| 6  | 74104285 - 74127292   |            | TRUE  | TRUE  |
| 6  | 74104285 - 74127292   |            | TRUE  | TRUE  |
| 6  | 74104285 - 74127292   | F - 42.86% | FALSE | TRUE  |
| 6  | 74104285 - 74127292   | F - 14.29% | FALSE | TRUE  |
| 6  | 74104285 - 74127292   | T - 85.71% | FALSE | TRUE  |
| 6  | 74104285 - 74127292   | F - 42.86% | TRUE  | TRUE  |
| 6  | 74104285 - 74127292   |            | FALSE | TRUE  |
| 7  | 766338 - 829190       |            | TRUE  | TRUE  |
| 7  | 766338 - 829190       |            | TRUE  | TRUE  |
| 7  | 766338 - 829190       |            | TRUE  | TRUE  |
| 7  | 766338 - 829190       |            | TRUE  | TRUE  |
| 7  | 766338 - 829190       | F - 6.25%  | TRUE  | TRUE  |
| 7  | 766338 - 829190       | F - 37.50% | TRUE  | TRUE  |
| 7  | 766338 - 829190       | F - 6.25%  | TRUE  | TRUE  |
| 7  | 31790793 - 32338941   |            | TRUE  | TRUE  |
| 7  | 31790793 - 32338941   |            | TRUE  | TRUE  |
| 7  | 31790793 - 32338941   | F - 10.53% | FALSE | TRUE  |
| 7  | 31790793 - 32338941   | F - 10.53% | TRUE  | TRUE  |
| 7  | 31790793 - 32338941   | F - 5.26%  | TRUE  | TRUE  |
| 7  | 31790793 - 32338941   | F - 31.58% | FALSE | TRUE  |
| 7  | 31790793 - 32338941   | F - 5.26%  | TRUE  | TRUE  |
| 7  | 31790793 - 32338941   | F - 15.79% | TRUE  | TRUE  |
| 7  | 31790793 - 32338941   | F - 5.26%  | TRUE  | TRUE  |
| 7  | 31790793 - 32338941   |            | FALSE | TRUE  |
| 7  | 31790793 - 32338941   | F - 21.05% | TRUE  | TRUE  |
| 7  | 31790793 - 32338941   |            | TRUE  | TRUE  |
| 7  | 81575760 - 82073114   |            | TRUE  | TRUE  |
| 7  | 81575760 - 82073114   |            | TRUE  | TRUE  |
| 7  | 81575760 - 82073114   |            | TRUE  | TRUE  |
| 7  | 81575760 - 82073114   |            | TRUE  | TRUE  |
| 7  | 81575760 - 82073114   |            | TRUE  | TRUE  |
| 7  | 81575760 - 82073114   | F - 33.33% | TRUE  | TRUE  |
| 7  | 81575760 - 82073114   |            | FALSE | TRUE  |
| 10 | 125465726 - 125699783 |            | TRUE  | FALSE |
| 10 | 125465726 - 125699783 |            | TRUE  | TRUE  |
| 10 | 125465726 - 125699783 |            | TRUE  | TRUE  |
| 10 | 125465726 - 125699783 | F - 18.18% | TRUE  | TRUE  |
| 10 | 125465726 - 125699783 |            | TRUE  | TRUE  |
| 10 | 125465726 - 125699783 |            | TRUE  | FALSE |
| 10 | 125465726 - 125699783 | F - 18.18% | TRUE  | TRUE  |
| 10 | 125465726 - 125699783 | F - 18.18% | TRUE  | TRUE  |
| 10 | 125465726 - 125699783 | T - 54.55% | TRUE  | TRUE  |
| 10 | 125465726 - 125699783 |            | TRUE  | TRUE  |
| 10 | 125465726 - 125699783 | F - 27.27% | TRUE  | TRUE  |
| 10 | 125465726 - 125699783 | F - 27.27% | TRUE  | TRUE  |
| 10 | 125465726 - 125699783 |            | TRUE  | TRUE  |
| 10 | 125465726 - 125699783 | T - 72.73% | TRUE  | TRUE  |
| 10 | 125465726 - 125699783 |            | TRUE  | TRUE  |
| 10 | 125465726 - 125699783 | T - 90.91% | TRUE  | TRUE  |
| 10 | 125465726 - 125699783 | T - 90.91% | TRUE  | TRUE  |
| 10 | 125465726 - 125699783 |            | FALSE | TRUE  |
| 1  | 171810621 - 172387606 | T - 53.33% | TRUE  | TRUE  |
| 1  | 171810621 - 172387606 |            | TRUE  | TRUE  |
| 1  | 171810621 - 172387606 | T - 53.33% | TRUE  | TRUE  |



|    |                       |             |       |       |
|----|-----------------------|-------------|-------|-------|
| 1  | 171810621 - 172387606 | T - 53.33%  | TRUE  | TRUE  |
| 1  | 171810621 - 172387606 |             | FALSE | TRUE  |
| 1  | 171810621 - 172387606 |             | FALSE | TRUE  |
| 1  | 171810621 - 172387606 |             | FALSE | TRUE  |
| 9  | 123963761 - 124095121 |             | TRUE  | TRUE  |
| 9  | 123963761 - 124095121 |             | TRUE  | TRUE  |
| 9  | 123963761 - 124095121 | F - 10.00%  | TRUE  | FALSE |
| 9  | 123963761 - 124095121 | F - 10.00%  | TRUE  | TRUE  |
| 9  | 123963761 - 124095121 | F - 10.00%  | TRUE  | TRUE  |
| 9  | 123963761 - 124095121 | F - 6.67%   | TRUE  | TRUE  |
| 9  | 123963761 - 124095121 |             | TRUE  | TRUE  |
| 9  | 123963761 - 124095121 | F - 3.33%   | TRUE  | TRUE  |
| 9  | 123963761 - 124095121 |             | TRUE  | TRUE  |
| 9  | 123963761 - 124095121 | F - 3.33%   | FALSE | TRUE  |
| 9  | 123963761 - 124095121 | F - 3.33%   | FALSE | TRUE  |
| 9  | 123963761 - 124095121 |             | TRUE  | TRUE  |
| 9  | 123963761 - 124095121 | F - 6.67%   | TRUE  | TRUE  |
| 9  | 123963761 - 124095121 | F - 3.33%   | TRUE  | TRUE  |
| 9  | 123963761 - 124095121 | F - 10.00%  | TRUE  | TRUE  |
| 9  | 123963761 - 124095121 | T - 53.33%  | FALSE | TRUE  |
| 9  | 123963761 - 124095121 | F - 40.00%  | TRUE  | TRUE  |
| 9  | 123963761 - 124095121 | F - 6.67%   | TRUE  | TRUE  |
| 9  | 123963761 - 124095121 |             | TRUE  | TRUE  |
| 9  | 123963761 - 124095121 | F - 3.33%   | TRUE  | TRUE  |
| 9  | 123963761 - 124095121 |             | FALSE | TRUE  |
| 9  | 103235395 - 103339918 | T - 100.00% | TRUE  | TRUE  |
| 9  | 103235395 - 103339918 |             | TRUE  | TRUE  |
| 9  | 103235395 - 103339918 | F - 33.33%  | TRUE  | TRUE  |
| 9  | 103235395 - 103339918 |             | TRUE  | TRUE  |
| 9  | 103235395 - 103339918 | T - 66.67%  | TRUE  | TRUE  |
| 9  | 103235395 - 103339918 | T - 100.00% | FALSE | TRUE  |
| 9  | 103235395 - 103339918 |             | TRUE  | TRUE  |
| 9  | 103235395 - 103339918 |             | TRUE  | TRUE  |
| 9  | 103235395 - 103339918 |             | TRUE  | TRUE  |
| 17 | 67240576 - 67323323   |             | TRUE  | FALSE |
| 17 | 67240576 - 67323323   |             | TRUE  | FALSE |
| 17 | 67240576 - 67323323   |             | TRUE  | FALSE |
| 17 | 67240576 - 67323323   | T - 70.00%  | FALSE | TRUE  |
| 17 | 67240576 - 67323323   | T - 80.00%  | FALSE | TRUE  |
| 17 | 67240576 - 67323323   |             | TRUE  | TRUE  |
| 17 | 67240576 - 67323323   | T - 80.00%  | FALSE | TRUE  |
| 17 | 67240576 - 67323323   | F - 20.00%  | FALSE | TRUE  |
| 20 | 35380194 - 35402230   |             | TRUE  | TRUE  |
| 20 | 35380194 - 35402230   | T - 89.47%  | TRUE  | TRUE  |
| 20 | 35380194 - 35402230   | F - 26.32%  | TRUE  | TRUE  |
| 20 | 35380194 - 35402230   | T - 63.16%  | TRUE  | TRUE  |
| 20 | 35380194 - 35402230   |             | FALSE | TRUE  |
| 20 | 35380194 - 35402230   |             | TRUE  | TRUE  |
| 9  | 41588833 - 41609544   |             | FALSE | TRUE  |
| 9  | 41588833 - 41609544   | F - 33.33%  | TRUE  | TRUE  |
| 9  | 41588833 - 41609544   | F - 33.33%  | FALSE | TRUE  |
| 9  | 41588833 - 41609544   | F - 33.33%  | TRUE  | TRUE  |
| 9  | 41588833 - 41609544   | T - 66.67%  | TRUE  | TRUE  |
| X  | 131211021 - 131262050 |             | TRUE  | FALSE |
| X  | 131211021 - 131262050 | T - 85.71%  | TRUE  | FALSE |
| X  | 131211021 - 131262050 | T - 71.43%  | TRUE  | TRUE  |
| X  | 131211021 - 131262050 | T - 85.71%  | TRUE  | TRUE  |
| X  | 131211021 - 131262050 |             | TRUE  | TRUE  |

|    |                       |            |       |       |
|----|-----------------------|------------|-------|-------|
| X  | 131211021 - 131262050 |            | FALSE | TRUE  |
| X  | 131211021 - 131262050 |            | TRUE  | TRUE  |
| 14 | 69340840 - 69446157   |            | TRUE  | TRUE  |
| 14 | 69340840 - 69446157   | F - 12.50% | TRUE  | TRUE  |
| 14 | 69340840 - 69446157   |            | TRUE  | FALSE |
| 14 | 69340840 - 69446157   |            | TRUE  | TRUE  |
| 2  | 239969864 - 240323348 |            | TRUE  | FALSE |
| 2  | 239969864 - 240323348 |            | TRUE  | TRUE  |
| 2  | 239969864 - 240323348 |            | TRUE  | FALSE |
| 2  | 239969864 - 240323348 |            | FALSE | TRUE  |
| 2  | 239969864 - 240323348 |            | FALSE | TRUE  |
| 2  | 239969864 - 240323348 | T - 52.00% | TRUE  | TRUE  |
| 2  | 239969864 - 240323348 | F - 4.00%  | FALSE | TRUE  |
| 2  | 239969864 - 240323348 |            | FALSE | TRUE  |
| 2  | 239969864 - 240323348 | F - 8.00%  | FALSE | TRUE  |
| 8  | 26149007 - 26230196   |            | TRUE  | TRUE  |
| 8  | 26149007 - 26230196   |            | TRUE  | FALSE |
| 8  | 26149007 - 26230196   |            | TRUE  | TRUE  |
| 8  | 26149007 - 26230196   | F - 3.57%  | TRUE  | TRUE  |
| 9  | 112403068 - 112934792 |            | TRUE  | FALSE |
| 9  | 112403068 - 112934792 |            | TRUE  | FALSE |
| 9  | 112403068 - 112934792 | F - 18.75% | TRUE  | TRUE  |
| 9  | 112403068 - 112934792 |            | TRUE  | TRUE  |
| 9  | 112403068 - 112934792 | F - 37.50% | TRUE  | TRUE  |
| 9  | 112403068 - 112934792 |            | TRUE  | TRUE  |
| 9  | 112403068 - 112934792 | F - 15.63% | FALSE | TRUE  |
| 5  | 96211643 - 96255420   | T - 66.67% | TRUE  | TRUE  |
| 5  | 96211643 - 96255420   | T - 72.22% | TRUE  | TRUE  |
| 5  | 96211643 - 96255420   |            | TRUE  | FALSE |
| 5  | 96211643 - 96255420   |            | TRUE  | FALSE |
| 5  | 96211643 - 96255420   | T - 66.67% | TRUE  | FALSE |
| 5  | 96211643 - 96255420   | T - 72.22% | TRUE  | TRUE  |
| 5  | 96211643 - 96255420   |            | TRUE  | FALSE |
| 5  | 96211643 - 96255420   | F - 5.56%  | TRUE  | FALSE |
| 5  | 96211643 - 96255420   | T - 55.56% | TRUE  | TRUE  |
| 5  | 96211643 - 96255420   | F - 5.56%  | TRUE  | TRUE  |
| 5  | 96211643 - 96255420   | T - 61.11% | TRUE  | TRUE  |
| 5  | 96211643 - 96255420   | T - 72.22% | TRUE  | TRUE  |
| 5  | 96211643 - 96255420   | F - 5.56%  | FALSE | TRUE  |
| 5  | 96211643 - 96255420   | F - 33.33% | TRUE  | TRUE  |
| 5  | 96211643 - 96255420   | F - 16.67% | TRUE  | TRUE  |
| 5  | 96211643 - 96255420   | F - 5.56%  | FALSE | TRUE  |
| 6  | 46517445 - 46620523   |            | TRUE  | TRUE  |
| 6  | 46517445 - 46620523   |            | FALSE | TRUE  |
| 6  | 46517445 - 46620523   |            | FALSE | TRUE  |
| 6  | 46517445 - 46620523   | T - 62.50% | TRUE  | TRUE  |
| 6  | 46517445 - 46620523   | F - 12.50% | FALSE | TRUE  |
| 6  | 46517445 - 46620523   |            | TRUE  | TRUE  |
| 7  | 8008423 - 8133902     | F - 7.14%  | TRUE  | TRUE  |
| 7  | 8008423 - 8133902     |            | TRUE  | FALSE |
| 7  | 8008423 - 8133902     | F - 7.14%  | TRUE  | TRUE  |
| 7  | 8008423 - 8133902     | F - 21.43% | TRUE  | TRUE  |
| 7  | 8008423 - 8133902     |            | TRUE  | TRUE  |
| 7  | 8008423 - 8133902     | T - 50.00% | FALSE | TRUE  |
| 7  | 8008423 - 8133902     | F - 7.14%  | TRUE  | TRUE  |
| 7  | 8008423 - 8133902     |            | TRUE  | TRUE  |
| 7  | 8008423 - 8133902     |            | TRUE  | TRUE  |
| 7  | 8008423 - 8133902     | F - 7.14%  | FALSE | TRUE  |

|    |                       |            |       |       |
|----|-----------------------|------------|-------|-------|
| 7  | 8008423 - 8133902     | F - 7.14%  | TRUE  | TRUE  |
| 7  | 8008423 - 8133902     |            | TRUE  | TRUE  |
| 7  | 8008423 - 8133902     | F - 35.71% | TRUE  | TRUE  |
| 7  | 8008423 - 8133902     | F - 7.14%  | TRUE  | TRUE  |
| 7  | 8008423 - 8133902     |            | TRUE  | TRUE  |
| 7  | 8008423 - 8133902     | F - 28.57% | FALSE | TRUE  |
| 11 | 88026760 - 88070955   |            | TRUE  | TRUE  |
| 11 | 88026760 - 88070955   |            | TRUE  | TRUE  |
| 11 | 88026760 - 88070955   |            | TRUE  | TRUE  |
| 11 | 88026760 - 88070955   | T - 55.56% | TRUE  | TRUE  |
| 11 | 88026760 - 88070955   | F - 44.44% | TRUE  | TRUE  |
| 11 | 88026760 - 88070955   |            | TRUE  | TRUE  |
| 11 | 88026760 - 88070955   |            | FALSE | TRUE  |
| 11 | 88026760 - 88070955   | F - 33.33% | TRUE  | TRUE  |
| 11 | 88026760 - 88070955   |            | FALSE | TRUE  |
| 11 | 126164193 - 126174213 |            | TRUE  | FALSE |
| 11 | 126164193 - 126174213 | T - 50.00% | TRUE  | TRUE  |
| 11 | 126164193 - 126174213 | T - 50.00% | TRUE  | TRUE  |
| 17 | 46671639 - 46682354   |            | TRUE  | TRUE  |
| 17 | 46671639 - 46682354   | T - 70.00% | TRUE  | TRUE  |
| 17 | 46671639 - 46682354   | F - 10.00% | TRUE  | TRUE  |
| 17 | 46671639 - 46682354   |            | TRUE  | TRUE  |
| 17 | 46671639 - 46682354   | T - 60.00% | FALSE | TRUE  |
| 17 | 46671639 - 46682354   |            | TRUE  | TRUE  |
| 17 | 46671639 - 46682354   |            | TRUE  | TRUE  |
| 17 | 46671639 - 46682354   | T - 90.00% | TRUE  | TRUE  |
| 17 | 46671639 - 46682354   | T - 70.00% | TRUE  | TRUE  |
| 17 | 46671639 - 46682354   | T - 80.00% | TRUE  | TRUE  |
| 17 | 46671639 - 46682354   | T - 60.00% | FALSE | TRUE  |
| 17 | 46671639 - 46682354   | F - 10.00% | FALSE | TRUE  |
| 17 | 46671639 - 46682354   |            | TRUE  | TRUE  |
| 17 | 46671639 - 46682354   | T - 50.00% | TRUE  | TRUE  |
| 21 | 40752170 - 40800454   |            | TRUE  | FALSE |
| 21 | 40752170 - 40800454   |            | TRUE  | TRUE  |
| 21 | 40752170 - 40800454   |            | TRUE  | TRUE  |
| 21 | 40752170 - 40800454   |            | TRUE  | TRUE  |
| 21 | 40752170 - 40800454   |            | TRUE  | TRUE  |
| 21 | 40752170 - 40800454   | F - 26.09% | TRUE  | TRUE  |
| 21 | 40752170 - 40800454   | F - 21.74% | TRUE  | TRUE  |
| 22 | 39436609 - 39451975   |            | TRUE  | TRUE  |
| 22 | 39436609 - 39451975   | F - 25.00% | TRUE  | TRUE  |
| 22 | 39436609 - 39451975   | F - 37.50% | TRUE  | TRUE  |
| 22 | 39436609 - 39451975   | F - 25.00% | FALSE | TRUE  |
| 22 | 39436609 - 39451975   | T - 62.50% | TRUE  | TRUE  |
| 22 | 39436609 - 39451975   | F - 12.50% | TRUE  | TRUE  |
| 22 | 39436609 - 39451975   | T - 62.50% | TRUE  | TRUE  |
| 22 | 39436609 - 39451975   | F - 12.50% | TRUE  | TRUE  |
| 22 | 39436609 - 39451975   |            | TRUE  | TRUE  |
| 22 | 39436609 - 39451975   |            | FALSE | TRUE  |
| 1  | 40026485 - 40042521   |            | TRUE  | FALSE |
| 1  | 40026485 - 40042521   | F - 4.17%  | TRUE  | TRUE  |
| 1  | 40026485 - 40042521   | F - 12.50% | TRUE  | TRUE  |
| 1  | 40026485 - 40042521   | F - 16.67% | TRUE  | TRUE  |
| 1  | 40026485 - 40042521   | F - 12.50% | TRUE  | TRUE  |
| 1  | 40026485 - 40042521   | F - 41.67% | TRUE  | TRUE  |
| 1  | 115828537 - 115880857 | T - 80.00% | TRUE  | FALSE |
| 1  | 115828537 - 115880857 | F - 40.00% | TRUE  | TRUE  |
| 1  | 115828537 - 115880857 | T - 80.00% | FALSE | TRUE  |

|   |                       |             |       |       |
|---|-----------------------|-------------|-------|-------|
| 1 | 115828537 - 115880857 |             | TRUE  | TRUE  |
| 3 | 117397540 - 117409779 | T - 66.67%  | TRUE  | TRUE  |
| 3 | 117397540 - 117409779 | F - 33.33%  | TRUE  | TRUE  |
| 3 | 117397540 - 117409779 | F - 33.33%  | TRUE  | TRUE  |
| 3 | 117397540 - 117409779 | F - 33.33%  | TRUE  | TRUE  |
| 3 | 117397540 - 117409779 | T - 66.67%  | TRUE  | TRUE  |
| 3 | 117397540 - 117409779 | F - 33.33%  | FALSE | TRUE  |
| 3 | 117397540 - 117409779 |             | TRUE  | TRUE  |
| 4 | 78432907 - 78532988   | T - 100.00% | TRUE  | TRUE  |
| 4 | 78432907 - 78532988   |             | TRUE  | FALSE |
| 4 | 78432907 - 78532988   | T - 100.00% | TRUE  | TRUE  |
| 4 | 78432907 - 78532988   |             | TRUE  | FALSE |
| 4 | 78432907 - 78532988   | F - 33.33%  | FALSE | TRUE  |
| 4 | 47849257 - 47916680   |             | TRUE  | FALSE |
| 4 | 47849257 - 47916680   | T - 78.57%  | TRUE  | TRUE  |
| 4 | 47849257 - 47916680   | T - 85.71%  | TRUE  | TRUE  |
| 4 | 47849257 - 47916680   |             | TRUE  | TRUE  |
| 4 | 47849257 - 47916680   | T - 92.86%  | TRUE  | TRUE  |
| 4 | 47849257 - 47916680   |             | TRUE  | FALSE |
| 4 | 47849257 - 47916680   | T - 71.43%  | TRUE  | TRUE  |
| 4 | 47849257 - 47916680   | T - 92.86%  | TRUE  | TRUE  |
| 4 | 47849257 - 47916680   | T - 71.43%  | TRUE  | TRUE  |
| 4 | 47849257 - 47916680   |             | TRUE  | TRUE  |
| 4 | 47849257 - 47916680   |             | FALSE | TRUE  |
| 4 | 47849257 - 47916680   | F - 14.29%  | TRUE  | TRUE  |
| 4 | 47849257 - 47916680   |             | FALSE | TRUE  |
| 5 | 131527531 - 131631008 |             | TRUE  | FALSE |
| 5 | 131527531 - 131631008 |             | TRUE  | TRUE  |
| 5 | 131527531 - 131631008 |             | FALSE | TRUE  |
| 5 | 131527531 - 131631008 | F - 3.23%   | TRUE  | TRUE  |
| 6 | 70385641 - 70507049   |             | TRUE  | FALSE |
| 6 | 70385641 - 70507049   | F - 12.50%  | TRUE  | TRUE  |
| 6 | 70385641 - 70507049   |             | TRUE  | TRUE  |
| 6 | 70385641 - 70507049   | T - 50.00%  | TRUE  | TRUE  |
| 7 | 139993493 - 140104233 |             | TRUE  | FALSE |
| 7 | 139993493 - 140104233 | F - 2.70%   | TRUE  | TRUE  |
| 7 | 139993493 - 140104233 | F - 16.22%  | TRUE  | TRUE  |
| 7 | 139993493 - 140104233 | F - 43.24%  | TRUE  | TRUE  |
| 7 | 139993493 - 140104233 | F - 37.84%  | FALSE | TRUE  |
| 7 | 139993493 - 140104233 |             | TRUE  | TRUE  |
| 1 | 21543740 - 21672034   | F - 5.00%   | TRUE  | TRUE  |
| 1 | 21543740 - 21672034   | F - 5.00%   | TRUE  | TRUE  |
| 1 | 21543740 - 21672034   |             | TRUE  | TRUE  |
| 1 | 21543740 - 21672034   | F - 10.00%  | TRUE  | TRUE  |
| 1 | 21543740 - 21672034   | F - 5.00%   | TRUE  | TRUE  |
| 1 | 21543740 - 21672034   | F - 5.00%   | TRUE  | TRUE  |
| 1 | 21543740 - 21672034   | T - 50.00%  | TRUE  | TRUE  |
| 1 | 21543740 - 21672034   | F - 15.00%  | TRUE  | TRUE  |
| 1 | 21543740 - 21672034   | T - 55.00%  | TRUE  | TRUE  |
| 1 | 21543740 - 21672034   | F - 30.00%  | TRUE  | TRUE  |
| 1 | 21543740 - 21672034   |             | TRUE  | TRUE  |
| 1 | 21543740 - 21672034   | F - 30.00%  | TRUE  | TRUE  |
| 1 | 21543740 - 21672034   | F - 35.00%  | TRUE  | TRUE  |
| 1 | 21543740 - 21672034   | F - 35.00%  | TRUE  | TRUE  |
| 2 | 231090444 - 231177930 | F - 4.76%   | TRUE  | TRUE  |
| 2 | 231090444 - 231177930 | F - 38.10%  | TRUE  | TRUE  |
| 2 | 231090444 - 231177930 |             | TRUE  | FALSE |
| 2 | 231090444 - 231177930 |             | TRUE  | TRUE  |

|   |    |                       |             |       |       |
|---|----|-----------------------|-------------|-------|-------|
|   | 2  | 231090444 - 231177930 |             | FALSE | TRUE  |
|   | 3  | 9022275 - 9404987     |             | TRUE  | TRUE  |
|   | 3  | 9022275 - 9404987     |             | TRUE  | FALSE |
|   | 3  | 9022275 - 9404987     |             | TRUE  | TRUE  |
|   | 3  | 9022275 - 9404987     | F - 9.09%   | TRUE  | FALSE |
|   | 3  | 9022275 - 9404987     | F - 27.27%  | TRUE  | TRUE  |
|   | 3  | 9022275 - 9404987     |             | TRUE  | TRUE  |
|   | 3  | 9022275 - 9404987     |             | TRUE  | TRUE  |
|   | 3  | 9022275 - 9404987     |             | TRUE  | FALSE |
|   | 3  | 9022275 - 9404987     |             | TRUE  | TRUE  |
|   | 3  | 9022275 - 9404987     |             | TRUE  | TRUE  |
|   | 6  | 46188467 - 46459804   | F - 25.00%  | TRUE  | TRUE  |
|   | 6  | 46188467 - 46459804   | F - 12.50%  | TRUE  | TRUE  |
|   | 6  | 46188467 - 46459804   | F - 12.50%  | TRUE  | TRUE  |
|   | 6  | 46188467 - 46459804   | F - 37.50%  | TRUE  | TRUE  |
|   | 6  | 46188467 - 46459804   | F - 25.00%  | FALSE | TRUE  |
|   | 6  | 46188467 - 46459804   | T - 75.00%  | TRUE  | TRUE  |
|   | 6  | 46188467 - 46459804   |             | TRUE  | TRUE  |
|   | 20 | 251504 - 271419       |             | TRUE  | FALSE |
|   | 20 | 251504 - 271419       | F - 36.36%  | TRUE  | TRUE  |
|   | 20 | 251504 - 271419       |             | FALSE | TRUE  |
|   | 20 | 251504 - 271419       |             | FALSE | TRUE  |
|   | 2  | 216582766 - 216584147 |             | TRUE  | FALSE |
|   | 2  | 216582766 - 216584147 | T - 100.00% | TRUE  | TRUE  |
|   | 2  | 216582766 - 216584147 | T - 100.00% | TRUE  | TRUE  |
|   | 4  | 77558776 - 77565521   | T - 100.00% | FALSE | TRUE  |
|   | 4  | 77558776 - 77565521   |             | TRUE  | TRUE  |
|   | 4  | 77558776 - 77565521   | T - 100.00% | TRUE  | TRUE  |
|   | 4  | 77558776 - 77565521   | T - 100.00% | TRUE  | TRUE  |
|   | 8  | 6565878 - 6619021     | T - 66.67%  | TRUE  | TRUE  |
|   | 8  | 6565878 - 6619021     | F - 44.44%  | TRUE  | TRUE  |
|   | 8  | 6565878 - 6619021     | T - 55.56%  | TRUE  | TRUE  |
|   | 8  | 6565878 - 6619021     |             | TRUE  | TRUE  |
|   | 8  | 6565878 - 6619021     |             | TRUE  | TRUE  |
| X |    | 128779236 - 128788933 | T - 75.00%  | TRUE  | TRUE  |
| X |    | 128779236 - 128788933 |             | FALSE | TRUE  |
| X |    | 128779236 - 128788933 | T - 100.00% | TRUE  | TRUE  |
| X |    | 128779236 - 128788933 | T - 50.00%  | FALSE | TRUE  |
|   | 14 | 95648276 - 95786245   | F - 33.33%  | TRUE  | TRUE  |
|   | 14 | 95648276 - 95786245   |             | TRUE  | TRUE  |
|   | 14 | 95648276 - 95786245   | F - 16.67%  | TRUE  | TRUE  |
|   | 14 | 95648276 - 95786245   |             | FALSE | TRUE  |
|   | 14 | 95648276 - 95786245   | F - 33.33%  | FALSE | TRUE  |
|   | 14 | 95648276 - 95786245   | F - 16.67%  | FALSE | TRUE  |
|   | 14 | 95648276 - 95786245   | F - 33.33%  | TRUE  | TRUE  |
|   | 14 | 95648276 - 95786245   | F - 16.67%  | FALSE | TRUE  |
|   | 14 | 95648276 - 95786245   | T - 50.00%  | TRUE  | TRUE  |
|   | 14 | 95648276 - 95786245   |             | TRUE  | TRUE  |
|   | 14 | 95648276 - 95786245   | T - 50.00%  | FALSE | TRUE  |
|   | 14 | 95648276 - 95786245   | T - 83.33%  | FALSE | TRUE  |
|   | 2  | 196440701 - 196602426 | F - 15.38%  | TRUE  | TRUE  |
|   | 2  | 196440701 - 196602426 |             | FALSE | TRUE  |
|   | 2  | 196440701 - 196602426 |             | TRUE  | TRUE  |
|   | 2  | 196440701 - 196602426 | F - 7.69%   | TRUE  | TRUE  |
|   | 2  | 196440701 - 196602426 |             | FALSE | TRUE  |
|   | 2  | 196440701 - 196602426 |             | FALSE | TRUE  |
|   | 2  | 196440701 - 196602426 | F - 7.69%   | TRUE  | TRUE  |
|   | 2  | 196440701 - 196602426 | F - 7.69%   | FALSE | TRUE  |

|            |                     |            |       |       |
|------------|---------------------|------------|-------|-------|
| 7          | 13930853 - 14031050 |            | TRUE  | FALSE |
| 7          | 13930853 - 14031050 |            | TRUE  | TRUE  |
| 7          | 13930853 - 14031050 |            | FALSE | TRUE  |
| 7          | 13930853 - 14031050 |            | TRUE  | TRUE  |
| 7          | 13930853 - 14031050 | F - 2.04%  | TRUE  | TRUE  |
| 7          | 13930853 - 14031050 | F - 8.16%  | TRUE  | TRUE  |
| 7          | 13930853 - 14031050 |            | TRUE  | TRUE  |
| 7          | 13930853 - 14031050 | F - 10.20% | TRUE  | TRUE  |
| 7          | 13930853 - 14031050 | F - 8.16%  | TRUE  | TRUE  |
| 7          | 13930853 - 14031050 | T - 73.47% | TRUE  | TRUE  |
| 7          | 13930853 - 14031050 | T - 53.06% | TRUE  | TRUE  |
| 7          | 13930853 - 14031050 | F - 18.37% | FALSE | TRUE  |
| 7          | 13930853 - 14031050 | T - 67.35% | TRUE  | TRUE  |
| 6          | 31367561 - 31384016 |            | TRUE  | TRUE  |
| 6          | 31367561 - 31384016 | F - 7.69%  | TRUE  | TRUE  |
| 6          | 31367561 - 31384016 | F - 46.15% | TRUE  | TRUE  |
| 6          | 31367561 - 31384016 |            | TRUE  | TRUE  |
| 6          | 31367561 - 31384016 |            | TRUE  | TRUE  |
| 6          | 31367561 - 31384016 | F - 30.77% | TRUE  | TRUE  |
| 6          | 31367561 - 31384016 |            | TRUE  | TRUE  |
| 6          | 31367561 - 31384016 |            | TRUE  | TRUE  |
| 6          | 31367561 - 31384016 | F - 38.46% | TRUE  | TRUE  |
| 6          | 31367561 - 31384016 |            | TRUE  | TRUE  |
| 6          | 31367561 - 31384016 |            | TRUE  | TRUE  |
| 6          | 31367561 - 31384016 |            | FALSE | TRUE  |
| 6          | 31367561 - 31384016 | F - 7.69%  | FALSE | TRUE  |
| 6          | 31367561 - 31384016 |            | TRUE  | TRUE  |
| 10         | 13685706 - 14504143 |            | TRUE  | FALSE |
| 10         | 13685706 - 14504143 | F - 5.00%  | TRUE  | FALSE |
| 10         | 13685706 - 14504143 |            | TRUE  | TRUE  |
| 10         | 13685706 - 14504143 | F - 20.00% | TRUE  | TRUE  |
| 10         | 13685706 - 14504143 |            | FALSE | TRUE  |
| 10         | 13685706 - 14504143 |            | TRUE  | TRUE  |
| 10         | 13685706 - 14504143 | F - 5.00%  | FALSE | TRUE  |
| 10         | 13685706 - 14504143 | F - 15.00% | TRUE  | TRUE  |
| 10         | 13685706 - 14504143 |            | FALSE | TRUE  |
| 10         | 13685706 - 14504143 | F - 45.00% | TRUE  | TRUE  |
| 10         | 13685706 - 14504143 | F - 30.00% | FALSE | TRUE  |
| 10         | 13685706 - 14504143 | F - 5.00%  | TRUE  | TRUE  |
| 10         | 13685706 - 14504143 | F - 10.00% | TRUE  | TRUE  |
| 10         | 13685706 - 14504143 |            | TRUE  | TRUE  |
| 10         | 13685706 - 14504143 | F - 10.00% | TRUE  | TRUE  |
| 10         | 13685706 - 14504143 | F - 5.00%  | TRUE  | TRUE  |
| 10         | 13685706 - 14504143 |            | TRUE  | TRUE  |
| 10         | 13685706 - 14504143 |            | TRUE  | TRUE  |
| 10         | 13685706 - 14504143 | F - 10.00% | FALSE | TRUE  |
| 10         | 13685706 - 14504143 | F - 15.00% | FALSE | TRUE  |
| 10         | 13685706 - 14504143 |            | FALSE | TRUE  |
| 10         | 13685706 - 14504143 |            | TRUE  | TRUE  |
| 6_cox_hap2 | 2880257 - 2896716   |            | TRUE  | TRUE  |
| 6_cox_hap2 | 2880257 - 2896716   | F - 7.69%  | TRUE  | TRUE  |
| 6_cox_hap2 | 2880257 - 2896716   | F - 46.15% | TRUE  | TRUE  |
| 6_cox_hap2 | 2880257 - 2896716   |            | TRUE  | TRUE  |
| 6_cox_hap2 | 2880257 - 2896716   | F - 30.77% | FALSE | TRUE  |
| 6_cox_hap2 | 2880257 - 2896716   |            | TRUE  | TRUE  |
| 6_cox_hap2 | 2880257 - 2896716   |            | TRUE  | TRUE  |
| 6_cox_hap2 | 2880257 - 2896716   |            | TRUE  | TRUE  |
| 6_cox_hap2 | 2880257 - 2896716   | F - 38.46% | TRUE  | TRUE  |

|             |                       |            |       |       |
|-------------|-----------------------|------------|-------|-------|
| 6_cox_hap2  | 2880257 - 2896716     |            | TRUE  | TRUE  |
| 6_cox_hap2  | 2880257 - 2896716     |            | TRUE  | TRUE  |
| 6_cox_hap2  | 2880257 - 2896716     |            | FALSE | TRUE  |
| 6_cox_hap2  | 2880257 - 2896716     | F - 7.69%  | FALSE | TRUE  |
| 6_cox_hap2  | 2880257 - 2896716     |            | TRUE  | TRUE  |
| 6_qbl_hap6  | 1150076 - 1153536     | F - 33.33% | TRUE  | TRUE  |
| 6_qbl_hap6  | 1150076 - 1153536     |            | TRUE  | TRUE  |
| 6_qbl_hap6  | 1150076 - 1153536     |            | FALSE | TRUE  |
| 6_qbl_hap6  | 1150076 - 1153536     | F - 33.33% | TRUE  | TRUE  |
| 6_ssto_hap7 | 2701359 - 2717814     |            | TRUE  | TRUE  |
| 6_ssto_hap7 | 2701359 - 2717814     | F - 7.69%  | TRUE  | TRUE  |
| 6_ssto_hap7 | 2701359 - 2717814     | F - 46.15% | TRUE  | TRUE  |
| 6_ssto_hap7 | 2701359 - 2717814     |            | TRUE  | TRUE  |
| 6_ssto_hap7 | 2701359 - 2717814     | F - 30.77% | FALSE | TRUE  |
| 6_ssto_hap7 | 2701359 - 2717814     |            | TRUE  | TRUE  |
| 6_ssto_hap7 | 2701359 - 2717814     |            | TRUE  | TRUE  |
| 6_ssto_hap7 | 2701359 - 2717814     |            | TRUE  | TRUE  |
| 6_ssto_hap7 | 2701359 - 2717814     | F - 38.46% | TRUE  | TRUE  |
| 6_ssto_hap7 | 2701359 - 2717814     |            | TRUE  | TRUE  |
| 6_ssto_hap7 | 2701359 - 2717814     |            | TRUE  | TRUE  |
| 6_ssto_hap7 | 2701359 - 2717814     |            | FALSE | TRUE  |
| 6_ssto_hap7 | 2701359 - 2717814     | F - 7.69%  | FALSE | TRUE  |
| 6_ssto_hap7 | 2701359 - 2717814     |            | TRUE  | TRUE  |
| 5           | 39371776 - 39462402   |            | TRUE  | FALSE |
| 5           | 39371776 - 39462402   |            | TRUE  | TRUE  |
| 5           | 39371776 - 39462402   |            | TRUE  | TRUE  |
| 5           | 39371776 - 39462402   |            | FALSE | TRUE  |
| 5           | 39371776 - 39462402   |            | TRUE  | TRUE  |
| 5           | 39371776 - 39462402   | F - 4.76%  | TRUE  | TRUE  |
| 8           | 99413631 - 99955055   |            | TRUE  | FALSE |
| 8           | 99413631 - 99955055   |            | TRUE  | FALSE |
| 8           | 99413631 - 99955055   |            | TRUE  | FALSE |
| 8           | 99413631 - 99955055   | F - 4.17%  | TRUE  | TRUE  |
| 8           | 99413631 - 99955055   |            | TRUE  | TRUE  |
| 9           | 101569980 - 101612363 |            | TRUE  | TRUE  |
| 9           | 101569980 - 101612363 | F - 33.33% | TRUE  | TRUE  |
| 9           | 101569980 - 101612363 |            | TRUE  | TRUE  |
| 9           | 101569980 - 101612363 |            | TRUE  | TRUE  |
| 14          | 55033815 - 55260033   |            | TRUE  | FALSE |
| 14          | 55033815 - 55260033   | F - 7.14%  | TRUE  | TRUE  |
| 14          | 55033815 - 55260033   | F - 7.14%  | FALSE | TRUE  |
| 14          | 55033815 - 55260033   |            | TRUE  | TRUE  |
| 14          | 55033815 - 55260033   |            | FALSE | TRUE  |
| 14          | 55033815 - 55260033   | F - 7.14%  | FALSE | TRUE  |
| 14          | 55033815 - 55260033   |            | FALSE | TRUE  |
| 2           | 188328957 - 188430487 |            | TRUE  | TRUE  |
| 2           | 188328957 - 188430487 |            | TRUE  | TRUE  |
| 2           | 188328957 - 188430487 |            | FALSE | TRUE  |
| 2           | 188328957 - 188430487 |            | TRUE  | TRUE  |
| 2           | 188328957 - 188430487 | F - 5.88%  | FALSE | TRUE  |
| 2           | 188328957 - 188430487 | F - 5.88%  | TRUE  | TRUE  |
| 2           | 188328957 - 188430487 |            | TRUE  | TRUE  |
| 2           | 188328957 - 188430487 | F - 5.88%  | TRUE  | TRUE  |
| 5           | 73923234 - 73937249   | F - 25.00% | TRUE  | TRUE  |
| 5           | 73923234 - 73937249   | F - 12.50% | TRUE  | FALSE |
| 5           | 73923234 - 73937249   |            | TRUE  | TRUE  |
| 6           | 148593440 - 148873186 |            | TRUE  | TRUE  |
| 6           | 148593440 - 148873186 | F - 11.11% | FALSE | TRUE  |

|   |    |                       |            |       |       |
|---|----|-----------------------|------------|-------|-------|
|   | 6  | 148593440 - 148873186 | F - 33.33% | TRUE  | TRUE  |
|   | 6  | 148593440 - 148873186 | F - 11.11% | FALSE | TRUE  |
|   | 6  | 148593440 - 148873186 | F - 22.22% | TRUE  | TRUE  |
|   | 6  | 148593440 - 148873186 | F - 22.22% | TRUE  | TRUE  |
| X |    | 9754496 - 9917483     | F - 30.00% | TRUE  | TRUE  |
| X |    | 9754496 - 9917483     |            | TRUE  | TRUE  |
| X |    | 9754496 - 9917483     | F - 30.00% | TRUE  | TRUE  |
| X |    | 9754496 - 9917483     | F - 30.00% | TRUE  | TRUE  |
| X |    | 9754496 - 9917483     | T - 90.00% | TRUE  | TRUE  |
| X |    | 9754496 - 9917483     |            | FALSE | TRUE  |
| X |    | 9754496 - 9917483     | F - 30.00% | FALSE | TRUE  |
| X |    | 9754496 - 9917483     |            | FALSE | TRUE  |
| X |    | 9754496 - 9917483     |            | TRUE  | TRUE  |
| X |    | 9754496 - 9917483     | F - 30.00% | TRUE  | TRUE  |
| X |    | 9754496 - 9917483     |            | FALSE | TRUE  |
| X |    | 9754496 - 9917483     |            | FALSE | TRUE  |
| X |    | 9754496 - 9917483     | T - 60.00% | TRUE  | TRUE  |
| X |    | 9754496 - 9917483     | F - 10.00% | FALSE | TRUE  |
|   | 11 | 126293254 - 126873355 |            | TRUE  | TRUE  |
|   | 11 | 126293254 - 126873355 |            | TRUE  | TRUE  |
|   | 11 | 126293254 - 126873355 |            | TRUE  | TRUE  |
|   | 11 | 126293254 - 126873355 | T - 90.00% | TRUE  | TRUE  |
|   | 11 | 126293254 - 126873355 | F - 10.00% | FALSE | TRUE  |
|   | 11 | 126293254 - 126873355 | T - 60.00% | TRUE  | TRUE  |
|   | 11 | 126293254 - 126873355 |            | FALSE | TRUE  |
|   | 11 | 126293254 - 126873355 | T - 50.00% | TRUE  | TRUE  |
|   | 11 | 126293254 - 126873355 | F - 10.00% | FALSE | TRUE  |
|   | 11 | 126293254 - 126873355 |            | FALSE | TRUE  |
|   | 11 | 126293254 - 126873355 | F - 40.00% | FALSE | TRUE  |
|   | 11 | 126293254 - 126873355 | T - 70.00% | TRUE  | TRUE  |
|   | 11 | 126293254 - 126873355 |            | TRUE  | TRUE  |
|   | 11 | 126293254 - 126873355 | T - 90.00% | TRUE  | TRUE  |
|   | 11 | 126293254 - 126873355 |            | FALSE | TRUE  |
|   | 11 | 126293254 - 126873355 |            | FALSE | TRUE  |
|   | 11 | 126293254 - 126873355 | T - 70.00% | FALSE | TRUE  |
|   | 11 | 126293254 - 126873355 |            | FALSE | TRUE  |
|   | 11 | 126293254 - 126873355 |            | FALSE | TRUE  |
|   | 15 | 37181409 - 37393504   |            | TRUE  | TRUE  |
|   | 15 | 37181409 - 37393504   | F - 14.81% | TRUE  | TRUE  |
|   | 15 | 37181409 - 37393504   | F - 3.70%  | TRUE  | TRUE  |
|   | 15 | 37181409 - 37393504   | F - 7.41%  | TRUE  | TRUE  |
|   | 15 | 37181409 - 37393504   | F - 22.22% | TRUE  | TRUE  |
|   | 15 | 37181409 - 37393504   | F - 14.81% | TRUE  | TRUE  |
|   | 15 | 37181409 - 37393504   | T - 77.78% | FALSE | TRUE  |
|   | 15 | 37181409 - 37393504   | F - 33.33% | TRUE  | TRUE  |
|   | 15 | 37181409 - 37393504   |            | TRUE  | TRUE  |
|   | 15 | 37181409 - 37393504   | F - 3.70%  | FALSE | TRUE  |
|   | 15 | 37181409 - 37393504   | F - 25.93% | TRUE  | TRUE  |
|   | 15 | 37181409 - 37393504   | F - 37.04% | TRUE  | TRUE  |
|   | 15 | 37181409 - 37393504   | T - 81.48% | FALSE | TRUE  |
|   | 15 | 37181409 - 37393504   |            | TRUE  | TRUE  |
|   | 15 | 37181409 - 37393504   | F - 11.11% | FALSE | TRUE  |
|   | 15 | 37181409 - 37393504   | F - 7.41%  | TRUE  | TRUE  |
|   | 15 | 37181409 - 37393504   | T - 81.48% | TRUE  | TRUE  |
|   | 17 | 38544768 - 38574408   |            | TRUE  | TRUE  |
|   | 17 | 38544768 - 38574408   |            | TRUE  | TRUE  |
|   | 17 | 38544768 - 38574408   |            | TRUE  | TRUE  |
|   | 17 | 38544768 - 38574408   | F - 14.29% | TRUE  | FALSE |



|    |                       |             |       |       |
|----|-----------------------|-------------|-------|-------|
| 17 | 38544768 - 38574408   | F - 28.57%  | TRUE  | TRUE  |
| 17 | 38544768 - 38574408   |             | FALSE | TRUE  |
| 17 | 38544768 - 38574408   | F - 14.29%  | TRUE  | TRUE  |
| 17 | 38544768 - 38574408   |             | FALSE | TRUE  |
| 17 | 38544768 - 38574408   | F - 42.86%  | TRUE  | TRUE  |
| 17 | 38544768 - 38574408   | F - 14.29%  | TRUE  | TRUE  |
| 17 | 38544768 - 38574408   | T - 85.71%  | FALSE | TRUE  |
| 17 | 38544768 - 38574408   |             | FALSE | TRUE  |
| 17 | 38544768 - 38574408   | T - 100.00% | FALSE | TRUE  |
| 17 | 38544768 - 38574408   | F - 14.29%  | FALSE | TRUE  |
| 17 | 38544768 - 38574408   | T - 71.43%  | FALSE | TRUE  |
| 17 | 38544768 - 38574408   |             | FALSE | TRUE  |
| 17 | 38544768 - 38574408   |             | TRUE  | TRUE  |
| 17 | 38544768 - 38574408   | T - 85.71%  | TRUE  | TRUE  |
| 17 | 38544768 - 38574408   |             | FALSE | TRUE  |
| 2  | 71162998 - 71192561   |             | TRUE  | FALSE |
| 2  | 71162998 - 71192561   |             | TRUE  | FALSE |
| 2  | 71162998 - 71192561   |             | TRUE  | TRUE  |
| 2  | 71162998 - 71192561   | T - 53.33%  | TRUE  | FALSE |
| 2  | 71162998 - 71192561   |             | FALSE | TRUE  |
| 11 | 22850968 - 22966939   |             | TRUE  | FALSE |
| 11 | 22850968 - 22966939   | T - 100.00% | TRUE  | FALSE |
| 2  | 134877554 - 135212192 |             | TRUE  | TRUE  |
| 2  | 134877554 - 135212192 | F - 42.86%  | TRUE  | TRUE  |
| 2  | 134877554 - 135212192 | F - 42.86%  | TRUE  | TRUE  |
| 2  | 134877554 - 135212192 |             | TRUE  | TRUE  |
| 2  | 134877554 - 135212192 |             | TRUE  | TRUE  |
| 16 | 75507022 - 75529282   | T - 66.67%  | TRUE  | FALSE |
| 16 | 75507022 - 75529282   |             | TRUE  | FALSE |
| 16 | 75507022 - 75529282   | F - 16.67%  | TRUE  | FALSE |
| 16 | 75507022 - 75529282   | T - 83.33%  | TRUE  | TRUE  |
| 16 | 75507022 - 75529282   | T - 50.00%  | TRUE  | TRUE  |
| 19 | 53115618 - 53193886   |             | TRUE  | FALSE |
| 19 | 53115618 - 53193886   |             | TRUE  | TRUE  |
| 19 | 53115618 - 53193886   |             | TRUE  | TRUE  |
| 19 | 53115618 - 53193886   |             | TRUE  | FALSE |
| 19 | 53115618 - 53193886   |             | TRUE  | TRUE  |
| 19 | 53115618 - 53193886   | T - 59.09%  | TRUE  | TRUE  |
| 20 | 33432523 - 33460663   |             | TRUE  | TRUE  |
| 20 | 33432523 - 33460663   | F - 11.11%  | TRUE  | TRUE  |
| 20 | 33432523 - 33460663   |             | TRUE  | TRUE  |
| 20 | 33432523 - 33460663   |             | TRUE  | TRUE  |
| 1  | 144676437 - 145076186 |             | TRUE  | TRUE  |
| 1  | 144676437 - 145076186 | F - 5.88%   | TRUE  | TRUE  |
| 1  | 144676437 - 145076186 | F - 2.94%   | TRUE  | TRUE  |
| 1  | 144676437 - 145076186 | F - 4.41%   | TRUE  | TRUE  |
| 1  | 144676437 - 145076186 | F - 2.94%   | TRUE  | TRUE  |
| 1  | 144676437 - 145076186 | F - 2.94%   | TRUE  | TRUE  |
| 1  | 144676437 - 145076186 | F - 1.47%   | TRUE  | TRUE  |
| 1  | 144676437 - 145076186 | F - 1.47%   | TRUE  | TRUE  |
| 1  | 144676437 - 145076186 | F - 1.47%   | TRUE  | TRUE  |
| 1  | 144676437 - 145076186 |             | TRUE  | TRUE  |
| 14 | 77940738 - 77965210   | T - 78.57%  | TRUE  | FALSE |
| 14 | 77940738 - 77965210   |             | FALSE | TRUE  |
| 8  | 26362196 - 26371608   |             | TRUE  | TRUE  |
| 8  | 26362196 - 26371608   |             | TRUE  | TRUE  |
| 8  | 26362196 - 26371608   | T - 71.43%  | TRUE  | TRUE  |
| 8  | 26362196 - 26371608   | F - 14.29%  | FALSE | TRUE  |

|   |    |                       |             |       |       |
|---|----|-----------------------|-------------|-------|-------|
|   | 8  | 26362196 - 26371608   | F - 14.29%  | TRUE  | TRUE  |
|   | 8  | 26362196 - 26371608   | F - 42.86%  | TRUE  | TRUE  |
|   | 8  | 26362196 - 26371608   | F - 28.57%  | TRUE  | TRUE  |
|   | 8  | 26362196 - 26371608   | F - 21.43%  | TRUE  | TRUE  |
|   | 8  | 26362196 - 26371608   | F - 28.57%  | TRUE  | TRUE  |
|   | 8  | 26362196 - 26371608   | F - 35.71%  | TRUE  | TRUE  |
|   | 8  | 26362196 - 26371608   | F - 21.43%  | TRUE  | TRUE  |
|   | 12 | 22601517 - 22697480   |             | TRUE  | FALSE |
|   | 12 | 22601517 - 22697480   |             | TRUE  | TRUE  |
|   | 12 | 22601517 - 22697480   |             | TRUE  | TRUE  |
|   | 12 | 22601517 - 22697480   | T - 66.67%  | FALSE | TRUE  |
|   | 12 | 22601517 - 22697480   |             | FALSE | TRUE  |
|   | 19 | 19649074 - 19657468   |             | TRUE  | FALSE |
|   | 19 | 19649074 - 19657468   |             | TRUE  | TRUE  |
|   | 19 | 19649074 - 19657468   | T - 100.00% | TRUE  | TRUE  |
|   | 19 | 19649074 - 19657468   | T - 100.00% | TRUE  | TRUE  |
|   | 19 | 19649074 - 19657468   |             | TRUE  | TRUE  |
|   | 19 | 19649074 - 19657468   | T - 100.00% | TRUE  | TRUE  |
|   | 19 | 19649074 - 19657468   | T - 100.00% | TRUE  | TRUE  |
|   | 19 | 19649074 - 19657468   |             | TRUE  | TRUE  |
|   | 19 | 19649074 - 19657468   |             | TRUE  | TRUE  |
|   | 14 | 61447832 - 61550451   |             | TRUE  | FALSE |
|   | 14 | 61447832 - 61550451   |             | TRUE  | FALSE |
|   | 14 | 61447832 - 61550451   | F - 35.71%  | TRUE  | TRUE  |
|   | 14 | 61447832 - 61550451   | F - 7.14%   | TRUE  | TRUE  |
|   | 14 | 61447832 - 61550451   |             | TRUE  | TRUE  |
|   | 14 | 61447832 - 61550451   |             | TRUE  | TRUE  |
|   | 14 | 61447832 - 61550451   |             | TRUE  | TRUE  |
|   | 14 | 61447832 - 61550451   |             | TRUE  | TRUE  |
|   | 5  | 150088002 - 150138671 |             | TRUE  | TRUE  |
|   | 5  | 150088002 - 150138671 |             | TRUE  | TRUE  |
|   | 5  | 150088002 - 150138671 |             | TRUE  | TRUE  |
|   | 5  | 150088002 - 150138671 | F - 10.00%  | TRUE  | TRUE  |
|   | 5  | 150088002 - 150138671 | F - 5.00%   | FALSE | TRUE  |
|   | 6  | 71377479 - 71571718   |             | TRUE  | TRUE  |
|   | 6  | 71377479 - 71571718   | F - 21.43%  | TRUE  | TRUE  |
|   | 1  | 42929001 - 43120335   |             | TRUE  | TRUE  |
|   | 1  | 42929001 - 43120335   | F - 15.00%  | TRUE  | TRUE  |
|   | 1  | 42929001 - 43120335   | F - 45.00%  | TRUE  | TRUE  |
|   | 1  | 42929001 - 43120335   | F - 20.00%  | TRUE  | TRUE  |
|   | 1  | 42929001 - 43120335   | F - 40.00%  | TRUE  | FALSE |
|   | 1  | 42929001 - 43120335   | F - 20.00%  | TRUE  | TRUE  |
|   | 1  | 42929001 - 43120335   |             | FALSE | TRUE  |
|   | 3  | 36421836 - 36589499   |             | TRUE  | FALSE |
|   | 3  | 36421836 - 36589499   |             | TRUE  | TRUE  |
|   | 3  | 36421836 - 36589499   | T - 69.23%  | TRUE  | TRUE  |
| X |    | 137713734 - 138304939 |             | TRUE  | FALSE |
| X |    | 137713734 - 138304939 |             | TRUE  | TRUE  |
| X |    | 137713734 - 138304939 | T - 94.44%  | TRUE  | TRUE  |
| X |    | 137713734 - 138304939 |             | FALSE | TRUE  |
| X |    | 137713734 - 138304939 |             | TRUE  | TRUE  |
| X |    | 137713734 - 138304939 | T - 83.33%  | TRUE  | TRUE  |
| X |    | 137713734 - 138304939 | F - 5.56%   | TRUE  | TRUE  |
| X |    | 137713734 - 138304939 | F - 22.22%  | TRUE  | TRUE  |
| X |    | 137713734 - 138304939 | F - 16.67%  | TRUE  | TRUE  |
| X |    | 137713734 - 138304939 |             | TRUE  | TRUE  |
| X |    | 137713734 - 138304939 | F - 5.56%   | TRUE  | TRUE  |
| X |    | 137713734 - 138304939 |             | TRUE  | TRUE  |

|    |                       |             |       |       |
|----|-----------------------|-------------|-------|-------|
| X  | 137713734 - 138304939 |             | FALSE | TRUE  |
| 11 | 7448497 - 7487066     |             | TRUE  | TRUE  |
| 11 | 7448497 - 7487066     | F - 10.00%  | TRUE  | TRUE  |
| 11 | 7448497 - 7487066     |             | TRUE  | TRUE  |
| 11 | 7448497 - 7487066     | F - 10.00%  | TRUE  | TRUE  |
| 11 | 7448497 - 7487066     | F - 10.00%  | TRUE  | TRUE  |
| 11 | 7448497 - 7487066     |             | FALSE | TRUE  |
| 12 | 70760056 - 70828072   |             | TRUE  | FALSE |
| 12 | 70760056 - 70828072   | T - 50.00%  | TRUE  | TRUE  |
| 12 | 70760056 - 70828072   | T - 75.00%  | TRUE  | TRUE  |
| 15 | 102193801 - 102264807 |             | TRUE  | TRUE  |
| 15 | 102193801 - 102264807 |             | TRUE  | FALSE |
| 15 | 102193801 - 102264807 | F - 22.22%  | TRUE  | TRUE  |
| 15 | 102193801 - 102264807 | T - 88.89%  | TRUE  | TRUE  |
| 7  | 43157495 - 43202786   | T - 100.00% | TRUE  | TRUE  |
| 7  | 43157495 - 43202786   | T - 100.00% | TRUE  | TRUE  |
| 7  | 43157495 - 43202786   | T - 100.00% | TRUE  | FALSE |
| 7  | 43157495 - 43202786   |             | TRUE  | TRUE  |
| 17 | 38175350 - 38210889   | F - 48.57%  | TRUE  | FALSE |
| 17 | 38175350 - 38210889   |             | TRUE  | FALSE |
| 17 | 38175350 - 38210889   |             | TRUE  | TRUE  |
| 17 | 38175350 - 38210889   |             | TRUE  | TRUE  |
| 17 | 38175350 - 38210889   |             | TRUE  | TRUE  |
| 17 | 38175350 - 38210889   |             | FALSE | TRUE  |
| 17 | 38175350 - 38210889   | T - 60.00%  | TRUE  | TRUE  |
| 17 | 38175350 - 38210889   |             | TRUE  | TRUE  |
| 2  | 85581517 - 85618875   |             | TRUE  | FALSE |
| 2  | 85581517 - 85618875   |             | FALSE | TRUE  |
| 2  | 85581517 - 85618875   | F - 14.71%  | FALSE | TRUE  |
| 2  | 85581517 - 85618875   |             | TRUE  | TRUE  |
| 3  | 45596886 - 45727830   |             | TRUE  | TRUE  |
| 3  | 45596886 - 45727830   | F - 14.29%  | TRUE  | TRUE  |
| 3  | 45596886 - 45727830   | F - 14.29%  | FALSE | TRUE  |
| 3  | 45596886 - 45727830   | T - 57.14%  | TRUE  | TRUE  |
| 3  | 45596886 - 45727830   |             | FALSE | TRUE  |
| 3  | 45596886 - 45727830   |             | TRUE  | TRUE  |
| 3  | 45596886 - 45727830   | F - 14.29%  | TRUE  | TRUE  |
| 3  | 45596886 - 45727830   |             | TRUE  | TRUE  |
| 3  | 45596886 - 45727830   | F - 14.29%  | FALSE | TRUE  |
| 3  | 45596886 - 45727830   |             | FALSE | TRUE  |
| 3  | 45596886 - 45727830   | T - 100.00% | TRUE  | TRUE  |
| 10 | 63166401 - 63213208   | F - 33.33%  | FALSE | TRUE  |
| 10 | 63166401 - 63213208   |             | FALSE | TRUE  |
| 10 | 63166401 - 63213208   |             | FALSE | TRUE  |
| 10 | 63166401 - 63213208   | T - 55.56%  | TRUE  | TRUE  |
| 10 | 63166401 - 63213208   |             | FALSE | TRUE  |
| 10 | 63166401 - 63213208   | T - 66.67%  | TRUE  | TRUE  |
| 10 | 63166401 - 63213208   |             | FALSE | TRUE  |
| 10 | 63166401 - 63213208   | F - 33.33%  | FALSE | TRUE  |
| 11 | 128328656 - 128457453 |             | TRUE  | TRUE  |
| 11 | 128328656 - 128457453 |             | TRUE  | TRUE  |
| 11 | 128328656 - 128457453 |             | TRUE  | FALSE |
| 11 | 128328656 - 128457453 | F - 27.27%  | FALSE | TRUE  |
| 11 | 128328656 - 128457453 | F - 45.45%  | TRUE  | TRUE  |
| 11 | 128328656 - 128457453 | T - 63.64%  | TRUE  | TRUE  |
| 11 | 128328656 - 128457453 |             | FALSE | TRUE  |
| 15 | 79051545 - 79103805   |             | TRUE  | FALSE |
| 15 | 79051545 - 79103805   | T - 66.67%  | TRUE  | TRUE  |

|    |                       |             |       |       |
|----|-----------------------|-------------|-------|-------|
| 15 | 79051545 - 79103805   |             | TRUE  | TRUE  |
| 15 | 79051545 - 79103805   | T - 66.67%  | TRUE  | TRUE  |
| 15 | 79051545 - 79103805   | T - 100.00% | TRUE  | TRUE  |
| 15 | 79051545 - 79103805   | T - 100.00% | TRUE  | TRUE  |
| 15 | 79051545 - 79103805   |             | TRUE  | TRUE  |
| 17 | 79679337 - 79688042   | T - 100.00% | TRUE  | TRUE  |
| 17 | 79679337 - 79688042   | T - 85.71%  | TRUE  | TRUE  |
| 17 | 79679337 - 79688042   | T - 100.00% | FALSE | TRUE  |
| 17 | 79679337 - 79688042   |             | TRUE  | TRUE  |
| 21 | 40556102 - 40693485   | F - 40.74%  | TRUE  | TRUE  |
| 21 | 40556102 - 40693485   | F - 37.04%  | TRUE  | FALSE |
| 21 | 40556102 - 40693485   |             | TRUE  | TRUE  |
| 21 | 40556102 - 40693485   |             | TRUE  | FALSE |
| 21 | 40556102 - 40693485   |             | TRUE  | TRUE  |
| 21 | 40556102 - 40693485   |             | TRUE  | TRUE  |
| 1  | 114304454 - 114355098 | F - 14.29%  | TRUE  | FALSE |
| 1  | 114304454 - 114355098 |             | TRUE  | TRUE  |
| 3  | 50126341 - 50156454   |             | TRUE  | FALSE |
| 3  | 50126341 - 50156454   | F - 8.33%   | TRUE  | TRUE  |
| 3  | 50126341 - 50156454   |             | TRUE  | TRUE  |
| 3  | 50126341 - 50156454   | F - 2.78%   | TRUE  | FALSE |
| 3  | 50126341 - 50156454   | F - 2.78%   | TRUE  | TRUE  |
| 3  | 50126341 - 50156454   | F - 44.44%  | TRUE  | TRUE  |
| 3  | 50126341 - 50156454   |             | TRUE  | TRUE  |
| 11 | 2016406 - 2022700     | F - 5.56%   | TRUE  | TRUE  |
| 11 | 2016406 - 2022700     | F - 5.56%   | TRUE  | TRUE  |
| 11 | 2016406 - 2022700     |             | TRUE  | TRUE  |
| 11 | 2016406 - 2022700     | F - 5.56%   | TRUE  | TRUE  |
| 11 | 2016406 - 2022700     |             | TRUE  | TRUE  |
| 11 | 2016406 - 2022700     | T - 50.00%  | TRUE  | TRUE  |
| 11 | 2016406 - 2022700     |             | TRUE  | TRUE  |
| 11 | 2016406 - 2022700     | F - 11.11%  | TRUE  | TRUE  |
| 11 | 2016406 - 2022700     | F - 38.89%  | TRUE  | TRUE  |
| 11 | 2016406 - 2022700     |             | TRUE  | TRUE  |
| 12 | 31079362 - 31149537   |             | TRUE  | FALSE |
| 12 | 31079362 - 31149537   |             | TRUE  | FALSE |
| 12 | 31079362 - 31149537   |             | TRUE  | TRUE  |
| 12 | 31079362 - 31149537   |             | TRUE  | FALSE |
| 12 | 31079362 - 31149537   | T - 88.89%  | TRUE  | TRUE  |
| 12 | 31079362 - 31149537   |             | TRUE  | TRUE  |
| 20 | 24986866 - 25039616   | T - 76.47%  | TRUE  | FALSE |
| 20 | 24986866 - 25039616   | T - 76.47%  | TRUE  | TRUE  |
| 20 | 24986866 - 25039616   |             | TRUE  | TRUE  |
| 20 | 24986866 - 25039616   | T - 76.47%  | TRUE  | TRUE  |
| 20 | 24986866 - 25039616   | T - 64.71%  | TRUE  | TRUE  |
| 20 | 24986866 - 25039616   |             | FALSE | TRUE  |
| 20 | 24986866 - 25039616   |             | TRUE  | TRUE  |
| 20 | 24986866 - 25039616   |             | TRUE  | TRUE  |
| 20 | 24986866 - 25039616   |             | TRUE  | TRUE  |
| 20 | 24986866 - 25039616   |             | TRUE  | TRUE  |
| 20 | 24986866 - 25039616   |             | FALSE | TRUE  |
| 5  | 148931510 - 149014531 |             | TRUE  | TRUE  |
| 5  | 148931510 - 149014531 | F - 25.00%  | TRUE  | FALSE |
| 5  | 148931510 - 149014531 | F - 25.00%  | TRUE  | TRUE  |
| 5  | 148931510 - 149014531 | T - 75.00%  | TRUE  | TRUE  |
| 5  | 148931510 - 149014531 |             | TRUE  | TRUE  |
| 5  | 148931510 - 149014531 |             | TRUE  | TRUE  |
| 5  | 148931510 - 149014531 |             | TRUE  | TRUE  |
| 5  | 148931510 - 149014531 | T - 50.00%  | TRUE  | TRUE  |

|    |                       |             |       |       |
|----|-----------------------|-------------|-------|-------|
| 5  | 148931510 - 149014531 |             | FALSE | TRUE  |
| 5  | 148931510 - 149014531 |             | FALSE | TRUE  |
| 5  | 148931510 - 149014531 | T - 75.00%  | TRUE  | TRUE  |
| 5  | 148931510 - 149014531 | T - 50.00%  | TRUE  | TRUE  |
| 5  | 148931510 - 149014531 |             | FALSE | TRUE  |
| 5  | 44745002 - 44808879   |             | TRUE  | TRUE  |
| 5  | 44745002 - 44808879   |             | TRUE  | FALSE |
| 5  | 44745002 - 44808879   |             | TRUE  | FALSE |
| 5  | 44745002 - 44808879   | F - 12.50%  | TRUE  | FALSE |
| 5  | 44745002 - 44808879   | F - 37.50%  | TRUE  | TRUE  |
| 5  | 44745002 - 44808879   | F - 25.00%  | TRUE  | TRUE  |
| 5  | 44745002 - 44808879   | T - 87.50%  | TRUE  | FALSE |
| 6  | 42192669 - 42419865   | F - 27.27%  | TRUE  | TRUE  |
| 6  | 42192669 - 42419865   |             | TRUE  | FALSE |
| 6  | 42192669 - 42419865   |             | TRUE  | TRUE  |
| 6  | 42192669 - 42419865   | F - 27.27%  | TRUE  | TRUE  |
| 6  | 42192669 - 42419865   | T - 90.91%  | TRUE  | TRUE  |
| 9  | 132649466 - 132805473 |             | TRUE  | FALSE |
| 9  | 132649466 - 132805473 | F - 41.67%  | TRUE  | TRUE  |
| 9  | 132649466 - 132805473 |             | TRUE  | TRUE  |
| 9  | 132649466 - 132805473 | F - 29.17%  | TRUE  | TRUE  |
| 9  | 132649466 - 132805473 |             | TRUE  | TRUE  |
| 9  | 132649466 - 132805473 |             | TRUE  | TRUE  |
| 9  | 132649466 - 132805473 |             | FALSE | TRUE  |
| 9  | 132649466 - 132805473 |             | TRUE  | TRUE  |
| 9  | 132649466 - 132805473 |             | TRUE  | TRUE  |
| 10 | 99526508 - 99531756   |             | TRUE  | FALSE |
| 10 | 99526508 - 99531756   | T - 100.00% | TRUE  | TRUE  |
| 12 | 93963590 - 93977263   | F - 21.43%  | TRUE  | TRUE  |
| 12 | 93963590 - 93977263   | F - 7.14%   | FALSE | TRUE  |
| 12 | 93963590 - 93977263   | T - 85.71%  | FALSE | TRUE  |
| 12 | 93963590 - 93977263   |             | TRUE  | TRUE  |
| 12 | 93963590 - 93977263   | F - 14.29%  | FALSE | TRUE  |
| 12 | 93963590 - 93977263   | F - 28.57%  | TRUE  | TRUE  |
| 12 | 93963590 - 93977263   | T - 85.71%  | TRUE  | TRUE  |
| 12 | 93963590 - 93977263   | F - 14.29%  | FALSE | TRUE  |
| 12 | 93963590 - 93977263   | F - 7.14%   | TRUE  | TRUE  |
| 12 | 93963590 - 93977263   | T - 78.57%  | TRUE  | TRUE  |
| 12 | 93963590 - 93977263   |             | TRUE  | TRUE  |
| 12 | 93963590 - 93977263   | F - 7.14%   | FALSE | TRUE  |
| 12 | 93963590 - 93977263   | F - 7.14%   | FALSE | TRUE  |
| 12 | 93963590 - 93977263   | F - 7.14%   | FALSE | TRUE  |
| 12 | 93963590 - 93977263   | T - 85.71%  | TRUE  | TRUE  |
| 19 | 45116940 - 45140081   | F - 25.00%  | TRUE  | TRUE  |
| 19 | 45116940 - 45140081   | F - 25.00%  | TRUE  | TRUE  |
| 19 | 45116940 - 45140081   |             | TRUE  | TRUE  |
| 19 | 45116940 - 45140081   | F - 25.00%  | FALSE | TRUE  |
| 19 | 45116940 - 45140081   | T - 100.00% | TRUE  | TRUE  |
| 19 | 45116940 - 45140081   |             | FALSE | TRUE  |
| 19 | 45116940 - 45140081   | T - 50.00%  | FALSE | TRUE  |
| 19 | 45116940 - 45140081   |             | FALSE | TRUE  |
| 2  | 31178437 - 31637611   |             | TRUE  | FALSE |
| 2  | 31178437 - 31637611   | T - 60.00%  | TRUE  | TRUE  |
| 2  | 31178437 - 31637611   |             | TRUE  | FALSE |
| 2  | 31178437 - 31637611   |             | FALSE | TRUE  |
| 2  | 107007564 - 107084832 |             | TRUE  | TRUE  |
| 2  | 107007564 - 107084832 | F - 14.29%  | TRUE  | TRUE  |
| 3  | 28390637 - 28579613   |             | TRUE  | FALSE |

|    |                       |            |       |       |
|----|-----------------------|------------|-------|-------|
| 3  | 28390637 - 28579613   |            | TRUE  | FALSE |
| 3  | 28390637 - 28579613   | F - 10.00% | TRUE  | TRUE  |
| 5  | 71403061 - 71505397   |            | TRUE  | FALSE |
| 5  | 71403061 - 71505397   | F - 18.18% | TRUE  | TRUE  |
| 5  | 71403061 - 71505397   |            | TRUE  | TRUE  |
| 5  | 138282409 - 138629246 |            | TRUE  | FALSE |
| 5  | 138282409 - 138629246 |            | TRUE  | FALSE |
| 5  | 138282409 - 138629246 |            | TRUE  | TRUE  |
| 5  | 138282409 - 138629246 | F - 5.00%  | TRUE  | FALSE |
| 7  | 36363759 - 36429734   |            | TRUE  | FALSE |
| 7  | 36363759 - 36429734   | F - 8.33%  | TRUE  | TRUE  |
| 7  | 36363759 - 36429734   | F - 16.67% | TRUE  | TRUE  |
| 7  | 36363759 - 36429734   | F - 4.17%  | TRUE  | TRUE  |
| 7  | 36363759 - 36429734   | F - 25.00% | FALSE | TRUE  |
| 7  | 36363759 - 36429734   | T - 50.00% | TRUE  | TRUE  |
| 7  | 36363759 - 36429734   | F - 41.67% | TRUE  | TRUE  |
| 1  | 221874764 - 221915518 |            | TRUE  | FALSE |
| 1  | 221874764 - 221915518 | F - 25.00% | TRUE  | TRUE  |
| 1  | 221874764 - 221915518 | F - 33.33% | TRUE  | FALSE |
| 1  | 221874764 - 221915518 |            | TRUE  | TRUE  |
| 1  | 221874764 - 221915518 |            | TRUE  | TRUE  |
| 5  | 56110900 - 56191979   | T - 66.67% | TRUE  | TRUE  |
| 5  | 56110900 - 56191979   | T - 66.67% | TRUE  | TRUE  |
| 5  | 56110900 - 56191979   |            | TRUE  | TRUE  |
| 5  | 56110900 - 56191979   |            | FALSE | TRUE  |
| 5  | 56110900 - 56191979   | T - 66.67% | FALSE | TRUE  |
| 5  | 56110900 - 56191979   | T - 66.67% | TRUE  | TRUE  |
| 5  | 56110900 - 56191979   | F - 33.33% | TRUE  | TRUE  |
| 5  | 56110900 - 56191979   | T - 66.67% | TRUE  | TRUE  |
| 5  | 56110900 - 56191979   |            | FALSE | TRUE  |
| 5  | 56110900 - 56191979   |            | TRUE  | TRUE  |
| 5  | 56110900 - 56191979   |            | TRUE  | TRUE  |
| 5  | 56110900 - 56191979   |            | FALSE | TRUE  |
| 11 | 72465774 - 72504750   | F - 11.11% | TRUE  | TRUE  |
| 11 | 72465774 - 72504750   | T - 66.67% | TRUE  | TRUE  |
| 11 | 72465774 - 72504750   |            | TRUE  | TRUE  |
| 11 | 72465774 - 72504750   | F - 22.22% | TRUE  | TRUE  |
| 11 | 72465774 - 72504750   | T - 66.67% | TRUE  | TRUE  |
| 11 | 72465774 - 72504750   | T - 66.67% | TRUE  | TRUE  |
| 11 | 72465774 - 72504750   | F - 44.44% | TRUE  | TRUE  |
| 12 | 54378849 - 54384063   |            | TRUE  | TRUE  |
| 12 | 54378849 - 54384063   |            | TRUE  | TRUE  |
| 12 | 54378849 - 54384063   |            | TRUE  | TRUE  |
| 12 | 54378849 - 54384063   | F - 12.50% | FALSE | TRUE  |
| 12 | 54378849 - 54384063   | F - 12.50% | FALSE | TRUE  |
| 12 | 54378849 - 54384063   | T - 62.50% | TRUE  | TRUE  |
| 12 | 54378849 - 54384063   | F - 12.50% | TRUE  | TRUE  |
| 12 | 54378849 - 54384063   | T - 50.00% | FALSE | TRUE  |
| 12 | 54378849 - 54384063   |            | FALSE | TRUE  |
| 20 | 35806813 - 35870025   |            | TRUE  | FALSE |
| 20 | 35806813 - 35870025   | F - 5.88%  | TRUE  | TRUE  |
| 20 | 35806813 - 35870025   |            | FALSE | TRUE  |
| 7  | 12596187 - 12693228   |            | TRUE  | TRUE  |
| 7  | 12596187 - 12693228   |            | TRUE  | TRUE  |
| 7  | 12596187 - 12693228   |            | TRUE  | TRUE  |
| 7  | 12596187 - 12693228   |            | TRUE  | TRUE  |
| 7  | 12596187 - 12693228   | F - 31.25% | TRUE  | TRUE  |
| 7  | 12596187 - 12693228   |            | FALSE | TRUE  |

|   |    |                       |            |       |       |
|---|----|-----------------------|------------|-------|-------|
|   | 7  | 12596187 - 12693228   | F - 25.00% | TRUE  | TRUE  |
|   | 7  | 12596187 - 12693228   | T - 50.00% | TRUE  | TRUE  |
|   | 7  | 12596187 - 12693228   |            | FALSE | TRUE  |
|   | 7  | 12596187 - 12693228   | F - 12.50% | TRUE  | TRUE  |
|   | 7  | 12596187 - 12693228   | F - 6.25%  | TRUE  | TRUE  |
|   | 7  | 12596187 - 12693228   | F - 6.25%  | TRUE  | TRUE  |
|   | 7  | 12596187 - 12693228   | F - 37.50% | TRUE  | TRUE  |
|   | 7  | 12596187 - 12693228   | F - 6.25%  | TRUE  | TRUE  |
|   | 7  | 12596187 - 12693228   | T - 50.00% | TRUE  | TRUE  |
|   | 7  | 12596187 - 12693228   |            | TRUE  | TRUE  |
|   | 7  | 12596187 - 12693228   | T - 50.00% | TRUE  | TRUE  |
|   | 7  | 12596187 - 12693228   |            | FALSE | TRUE  |
| X |    | 134229015 - 134232733 |            | TRUE  | FALSE |
| X |    | 134229015 - 134232733 | F - 25.00% | TRUE  | TRUE  |
| X |    | 134229015 - 134232733 | T - 50.00% | TRUE  | TRUE  |
| X |    | 134229015 - 134232733 | T - 75.00% | FALSE | TRUE  |
|   | 13 | 102104966 - 102375456 | F - 8.33%  | TRUE  | FALSE |
|   | 13 | 102104966 - 102375456 | F - 8.33%  | TRUE  | TRUE  |
|   | 13 | 102104966 - 102375456 |            | FALSE | TRUE  |
|   | 13 | 102104966 - 102375456 |            | TRUE  | TRUE  |
|   | 20 | 13765596 - 13799067   |            | TRUE  | FALSE |
|   | 20 | 13765596 - 13799067   |            | TRUE  | TRUE  |
|   | 20 | 13765596 - 13799067   | F - 9.52%  | TRUE  | TRUE  |
|   | 20 | 13765596 - 13799067   |            | TRUE  | TRUE  |
|   | 3  | 156977531 - 157251408 |            | TRUE  | FALSE |
|   | 3  | 156977531 - 157251408 | F - 35.71% | TRUE  | TRUE  |
|   | 3  | 156977531 - 157251408 |            | TRUE  | TRUE  |
|   | 3  | 156977531 - 157251408 | F - 3.57%  | FALSE | TRUE  |
|   | 3  | 156977531 - 157251408 | F - 35.71% | TRUE  | TRUE  |
|   | 3  | 156977531 - 157251408 | F - 35.71% | FALSE | TRUE  |
|   | 3  | 156977531 - 157251408 | T - 64.29% | TRUE  | TRUE  |
|   | 3  | 156977531 - 157251408 |            | FALSE | TRUE  |
|   | 6  | 86159302 - 86205509   | F - 40.00% | TRUE  | TRUE  |
|   | 6  | 86159302 - 86205509   | F - 20.00% | FALSE | TRUE  |
|   | 6  | 86159302 - 86205509   |            | FALSE | TRUE  |
|   | 6  | 86159302 - 86205509   | F - 10.00% | FALSE | TRUE  |
|   | 6  | 86159302 - 86205509   | F - 20.00% | FALSE | TRUE  |
|   | 8  | 58907068 - 59116838   |            | TRUE  | TRUE  |
|   | 8  | 58907068 - 59116838   | F - 10.00% | TRUE  | TRUE  |
|   | 8  | 58907068 - 59116838   | F - 20.00% | TRUE  | TRUE  |
|   | 8  | 58907068 - 59116838   | F - 20.00% | FALSE | TRUE  |
|   | 8  | 58907068 - 59116838   | F - 10.00% | TRUE  | TRUE  |
|   | 8  | 58907068 - 59116838   | F - 40.00% | TRUE  | TRUE  |
|   | 8  | 58907068 - 59116838   | F - 10.00% | TRUE  | TRUE  |
|   | 8  | 58907068 - 59116838   | F - 20.00% | FALSE | TRUE  |
|   | 8  | 61591324 - 61780586   |            | TRUE  | TRUE  |
|   | 8  | 61591324 - 61780586   | T - 55.56% | TRUE  | TRUE  |
|   | 8  | 61591324 - 61780586   |            | TRUE  | TRUE  |
|   | 8  | 48685669 - 48872743   | T - 87.50% | TRUE  | TRUE  |
|   | 8  | 48685669 - 48872743   |            | TRUE  | FALSE |
|   | 8  | 48685669 - 48872743   |            | FALSE | TRUE  |
|   | 8  | 48685669 - 48872743   |            | TRUE  | TRUE  |
|   | 8  | 48685669 - 48872743   |            | TRUE  | TRUE  |
|   | 8  | 48685669 - 48872743   |            | TRUE  | TRUE  |
|   | 8  | 48685669 - 48872743   |            | FALSE | TRUE  |
|   | 8  | 48685669 - 48872743   |            | FALSE | TRUE  |
|   | 8  | 48685669 - 48872743   |            | FALSE | TRUE  |
|   | 12 | 76653685 - 76698911   |            | TRUE  | FALSE |

|    |                       |             |       |       |
|----|-----------------------|-------------|-------|-------|
| 12 | 76653685 - 76698911   | T - 100.00% | TRUE  | TRUE  |
| 12 | 76653685 - 76698911   | T - 100.00% | TRUE  | TRUE  |
| 16 | 69984626 - 69998141   |             | TRUE  | FALSE |
| 16 | 69984626 - 69998141   |             | TRUE  | TRUE  |
| 16 | 69984626 - 69998141   | T - 90.00%  | TRUE  | TRUE  |
| 16 | 69984626 - 69998141   | F - 30.00%  | TRUE  | TRUE  |
| 19 | 18307594 - 18314874   | F - 16.67%  | TRUE  | FALSE |
| 19 | 18307594 - 18314874   |             | FALSE | TRUE  |
| 19 | 18307594 - 18314874   | F - 16.67%  | TRUE  | TRUE  |
| 19 | 18307594 - 18314874   |             | TRUE  | TRUE  |
| 19 | 18307594 - 18314874   |             | TRUE  | TRUE  |
| 19 | 18307594 - 18314874   | T - 100.00% | TRUE  | TRUE  |
| 19 | 18307594 - 18314874   | T - 50.00%  | TRUE  | TRUE  |
| 19 | 18307594 - 18314874   | T - 50.00%  | FALSE | TRUE  |
| 19 | 18307594 - 18314874   |             | FALSE | TRUE  |
| 2  | 74785010 - 74875465   |             | TRUE  | FALSE |
| 2  | 74785010 - 74875465   | T - 71.43%  | TRUE  | TRUE  |
| 2  | 74785010 - 74875465   |             | TRUE  | TRUE  |
| 2  | 74785010 - 74875465   |             | FALSE | TRUE  |
| 2  | 74785010 - 74875465   | T - 71.43%  | TRUE  | TRUE  |
| 2  | 74785010 - 74875465   | T - 71.43%  | TRUE  | TRUE  |
| 2  | 74785010 - 74875465   |             | FALSE | TRUE  |
| 3  | 186500994 - 186507689 |             | TRUE  | TRUE  |
| 3  | 186500994 - 186507689 | F - 8.70%   | TRUE  | FALSE |
| 3  | 186500994 - 186507689 | F - 4.35%   | TRUE  | TRUE  |
| 3  | 186500994 - 186507689 | F - 4.35%   | TRUE  | TRUE  |
| 3  | 186500994 - 186507689 | F - 4.35%   | TRUE  | TRUE  |
| 3  | 186500994 - 186507689 | F - 8.70%   | TRUE  | TRUE  |
| 3  | 186500994 - 186507689 | F - 13.04%  | TRUE  | TRUE  |
| 4  | 38614322 - 38666504   |             | TRUE  | TRUE  |
| 4  | 38614322 - 38666504   |             | TRUE  | TRUE  |
| 4  | 38614322 - 38666504   | F - 16.67%  | FALSE | TRUE  |
| 4  | 38614322 - 38666504   | F - 16.67%  | FALSE | TRUE  |
| 15 | 34432875 - 34502297   |             | TRUE  | TRUE  |
| 15 | 34432875 - 34502297   |             | TRUE  | TRUE  |
| 15 | 34432875 - 34502297   | F - 14.29%  | TRUE  | TRUE  |
| 18 | 29027732 - 29058665   |             | TRUE  | FALSE |
| 18 | 29027732 - 29058665   | T - 66.67%  | TRUE  | FALSE |
| 20 | 35729629 - 35807991   |             | TRUE  | FALSE |
| 20 | 35729629 - 35807991   |             | TRUE  | TRUE  |
| 20 | 35729629 - 35807991   |             | TRUE  | FALSE |
| 20 | 35729629 - 35807991   |             | TRUE  | TRUE  |
| 20 | 35729629 - 35807991   |             | TRUE  | FALSE |
| 20 | 35729629 - 35807991   | T - 55.56%  | TRUE  | TRUE  |
| 20 | 35729629 - 35807991   | F - 5.56%   | TRUE  | TRUE  |
| 20 | 35729629 - 35807991   |             | TRUE  | TRUE  |
| 20 | 35729629 - 35807991   |             | FALSE | TRUE  |
| 20 | 35729629 - 35807991   |             | TRUE  | TRUE  |
| 2  | 103332299 - 103353347 |             | TRUE  | FALSE |
| 2  | 103332299 - 103353347 |             | TRUE  | TRUE  |
| 2  | 103332299 - 103353347 | T - 83.33%  | TRUE  | TRUE  |
| 2  | 103332299 - 103353347 |             | TRUE  | FALSE |
| 2  | 103332299 - 103353347 |             | FALSE | TRUE  |
| 10 | 7601232 - 7708961     |             | TRUE  | TRUE  |
| 10 | 7601232 - 7708961     | F - 14.29%  | TRUE  | TRUE  |
| 10 | 7601232 - 7708961     |             | TRUE  | TRUE  |
| 10 | 7601232 - 7708961     | F - 35.71%  | TRUE  | TRUE  |
| 10 | 7601232 - 7708961     |             | TRUE  | TRUE  |



|    |                       |             |       |       |
|----|-----------------------|-------------|-------|-------|
| 10 | 7601232 - 7708961     | F - 7.14%   | FALSE | TRUE  |
| 10 | 7601232 - 7708961     | T - 78.57%  | TRUE  | TRUE  |
| 10 | 7601232 - 7708961     | T - 50.00%  | TRUE  | TRUE  |
| 10 | 7601232 - 7708961     |             | TRUE  | TRUE  |
| 15 | 90728152 - 90772911   | F - 40.00%  | TRUE  | TRUE  |
| 15 | 90728152 - 90772911   | F - 20.00%  | TRUE  | TRUE  |
| 15 | 90728152 - 90772911   |             | TRUE  | TRUE  |
| 15 | 90728152 - 90772911   |             | TRUE  | TRUE  |
| 15 | 90728152 - 90772911   | F - 30.00%  | FALSE | TRUE  |
| 15 | 90728152 - 90772911   |             | FALSE | TRUE  |
| 15 | 90728152 - 90772911   |             | FALSE | TRUE  |
| 15 | 90728152 - 90772911   | T - 70.00%  | TRUE  | TRUE  |
| 15 | 90728152 - 90772911   |             | FALSE | TRUE  |
| 15 | 90728152 - 90772911   | T - 80.00%  | TRUE  | TRUE  |
| 15 | 90728152 - 90772911   | T - 80.00%  | TRUE  | TRUE  |
| 15 | 90728152 - 90772911   | T - 90.00%  | TRUE  | TRUE  |
| 15 | 90728152 - 90772911   |             | TRUE  | TRUE  |
| 15 | 90728152 - 90772911   |             | TRUE  | TRUE  |
| 15 | 90728152 - 90772911   |             | TRUE  | TRUE  |
| 15 | 90728152 - 90772911   |             | TRUE  | TRUE  |
| 15 | 90728152 - 90772911   |             | FALSE | TRUE  |
| 15 | 90728152 - 90772911   | T - 80.00%  | TRUE  | TRUE  |
| 15 | 90728152 - 90772911   |             | FALSE | TRUE  |
| 15 | 90728152 - 90772911   | F - 10.00%  | FALSE | TRUE  |
| 2  | 220462582 - 220481173 |             | TRUE  | TRUE  |
| 2  | 220462582 - 220481173 | F - 35.00%  | FALSE | TRUE  |
| 2  | 220462582 - 220481173 |             | TRUE  | TRUE  |
| 2  | 220462582 - 220481173 |             | FALSE | TRUE  |
| 3  | 186507669 - 186524847 |             | TRUE  | FALSE |
| 3  | 186507669 - 186524847 | F - 36.84%  | TRUE  | FALSE |
| 11 | 65659490 - 65667997   | F - 37.50%  | TRUE  | TRUE  |
| 11 | 65659490 - 65667997   | T - 100.00% | TRUE  | TRUE  |
| 11 | 65659490 - 65667997   | T - 75.00%  | TRUE  | TRUE  |
| 11 | 65659490 - 65667997   |             | TRUE  | TRUE  |
| 11 | 65659490 - 65667997   | F - 12.50%  | FALSE | TRUE  |
| 14 | 65171154 - 65213610   |             | TRUE  | FALSE |
| 14 | 65171154 - 65213610   |             | TRUE  | TRUE  |
| 14 | 65171154 - 65213610   |             | TRUE  | TRUE  |
| 14 | 65171154 - 65213610   | F - 25.00%  | TRUE  | TRUE  |
| 14 | 65171154 - 65213610   | F - 25.00%  | TRUE  | TRUE  |
| 14 | 65171154 - 65213610   | F - 6.25%   | TRUE  | TRUE  |
| 14 | 65171154 - 65213610   | F - 43.75%  | TRUE  | TRUE  |
| 14 | 65171154 - 65213610   | F - 6.25%   | FALSE | TRUE  |
| 14 | 65171154 - 65213610   | F - 12.50%  | TRUE  | TRUE  |
| 14 | 65171154 - 65213610   |             | TRUE  | TRUE  |
| 14 | 65171154 - 65213610   | F - 43.75%  | TRUE  | TRUE  |
| 14 | 65171154 - 65213610   |             | FALSE | TRUE  |
| 14 | 65171154 - 65213610   | T - 50.00%  | TRUE  | TRUE  |
| 14 | 65171154 - 65213610   |             | FALSE | TRUE  |
| 14 | 65171154 - 65213610   |             | TRUE  | TRUE  |
| 2  | 166713985 - 166810353 | F - 40.00%  | TRUE  | TRUE  |
| 2  | 166713985 - 166810353 |             | TRUE  | FALSE |
| 2  | 166713985 - 166810353 |             | TRUE  | FALSE |
| 2  | 166713985 - 166810353 |             | TRUE  | TRUE  |
| 15 | 28878269 - 28887567   | T - 50.00%  | TRUE  | TRUE  |
| 15 | 28878269 - 28887567   |             | TRUE  | TRUE  |
| 1  | 52838501 - 52870143   |             | TRUE  | TRUE  |
| 1  | 52838501 - 52870143   | T - 83.33%  | TRUE  | TRUE  |

|            |    |                       |             |       |       |
|------------|----|-----------------------|-------------|-------|-------|
|            | 3  | 160150233 - 160203561 |             | TRUE  | FALSE |
|            | 3  | 160150233 - 160203561 | F - 9.09%   | TRUE  | TRUE  |
|            | 3  | 160150233 - 160203561 | F - 9.09%   | FALSE | TRUE  |
|            | 3  | 160150233 - 160203561 |             | TRUE  | TRUE  |
|            | 5  | 52285156 - 52390609   |             | TRUE  | FALSE |
|            | 5  | 52285156 - 52390609   | T - 100.00% | TRUE  | TRUE  |
|            | 5  | 52285156 - 52390609   |             | TRUE  | FALSE |
|            | 5  | 52285156 - 52390609   | T - 58.33%  | TRUE  | TRUE  |
|            | 5  | 52285156 - 52390609   |             | FALSE | TRUE  |
|            | 6  | 45295894 - 45518819   |             | TRUE  | TRUE  |
|            | 6  | 45295894 - 45518819   | F - 11.76%  | TRUE  | TRUE  |
|            | 6  | 45295894 - 45518819   | F - 17.65%  | TRUE  | TRUE  |
|            | 6  | 45295894 - 45518819   | F - 5.88%   | TRUE  | TRUE  |
|            | 6  | 45295894 - 45518819   | F - 5.88%   | TRUE  | FALSE |
|            | 6  | 45295894 - 45518819   |             | TRUE  | TRUE  |
| X          |    | 101854096 - 101905073 |             | TRUE  | FALSE |
| X          |    | 101854096 - 101905073 | F - 21.74%  | TRUE  | TRUE  |
|            | 12 | 50451331 - 50477394   |             | TRUE  | TRUE  |
|            | 12 | 50451331 - 50477394   |             | TRUE  | FALSE |
|            | 12 | 50451331 - 50477394   | F - 25.00%  | TRUE  | TRUE  |
|            | 12 | 50451331 - 50477394   | F - 25.00%  | TRUE  | TRUE  |
|            | 12 | 50451331 - 50477394   |             | TRUE  | TRUE  |
|            | 12 | 50451331 - 50477394   | F - 12.50%  | FALSE | TRUE  |
|            | 12 | 54624724 - 54673955   |             | TRUE  | FALSE |
|            | 12 | 54624724 - 54673955   | F - 22.22%  | TRUE  | TRUE  |
|            | 12 | 54624724 - 54673955   |             | TRUE  | TRUE  |
|            | 12 | 54624724 - 54673955   |             | TRUE  | TRUE  |
|            | 12 | 54624724 - 54673955   |             | FALSE | TRUE  |
|            | 21 | 34961647 - 35016232   |             | TRUE  | TRUE  |
|            | 21 | 34961647 - 35016232   | T - 60.61%  | TRUE  | TRUE  |
|            | 21 | 34961647 - 35016232   |             | TRUE  | TRUE  |
|            | 21 | 34961647 - 35016232   | F - 27.27%  | FALSE | TRUE  |
| 6_qbl_hap6 |    | 2378345 - 2403713     |             | TRUE  | FALSE |
| 6_qbl_hap6 |    | 2378345 - 2403713     |             | TRUE  | FALSE |
| 6_qbl_hap6 |    | 2378345 - 2403713     |             | TRUE  | TRUE  |
| 6_qbl_hap6 |    | 2378345 - 2403713     | T - 66.67%  | TRUE  | TRUE  |
| 6_qbl_hap6 |    | 2378345 - 2403713     | F - 11.11%  | FALSE | TRUE  |
|            | 1  | 8412457 - 8877702     |             | TRUE  | TRUE  |
|            | 1  | 8412457 - 8877702     | F - 4.35%   | TRUE  | TRUE  |
|            | 1  | 8412457 - 8877702     |             | TRUE  | TRUE  |
|            | 1  | 8412457 - 8877702     |             | TRUE  | TRUE  |
|            | 1  | 8412457 - 8877702     |             | TRUE  | TRUE  |
|            | 1  | 8412457 - 8877702     |             | FALSE | TRUE  |
|            | 1  | 8412457 - 8877702     |             | TRUE  | TRUE  |
|            | 1  | 8412457 - 8877702     |             | TRUE  | TRUE  |
|            | 1  | 8412457 - 8877702     |             | TRUE  | TRUE  |
|            | 1  | 25688740 - 25756683   | T - 60.00%  | TRUE  | TRUE  |
|            | 1  | 25688740 - 25756683   |             | TRUE  | TRUE  |
|            | 1  | 25688740 - 25756683   |             | TRUE  | TRUE  |
|            | 1  | 25688740 - 25756683   |             | TRUE  | TRUE  |
|            | 1  | 25688740 - 25756683   |             | FALSE | TRUE  |
|            | 1  | 25688740 - 25756683   |             | TRUE  | TRUE  |
|            | 1  | 25688740 - 25756683   | T - 75.00%  | TRUE  | TRUE  |
|            | 1  | 25688740 - 25756683   |             | TRUE  | TRUE  |
|            | 1  | 25688740 - 25756683   |             | TRUE  | TRUE  |
|            | 1  | 25688740 - 25756683   | T - 95.00%  | TRUE  | TRUE  |
|            | 1  | 25688740 - 25756683   | T - 80.00%  | TRUE  | TRUE  |
|            | 1  | 25688740 - 25756683   |             | FALSE | TRUE  |

|    |                       |            |       |       |
|----|-----------------------|------------|-------|-------|
| 1  | 25688740 - 25756683   | T - 90.00% | FALSE | TRUE  |
| 2  | 24300303 - 24308731   |            | TRUE  | FALSE |
| 2  | 24300303 - 24308731   | F - 45.45% | TRUE  | TRUE  |
| 2  | 24300303 - 24308731   | T - 63.64% | TRUE  | TRUE  |
| 2  | 24300303 - 24308731   | F - 27.27% | TRUE  | TRUE  |
| 2  | 24300303 - 24308731   | F - 45.45% | TRUE  | TRUE  |
| 2  | 24300303 - 24308731   | F - 36.36% | FALSE | TRUE  |
| 2  | 24300303 - 24308731   | F - 36.36% | FALSE | TRUE  |
| 3  | 48555117 - 48598605   |            | TRUE  | FALSE |
| 3  | 48555117 - 48598605   |            | FALSE | TRUE  |
| 3  | 48555117 - 48598605   | F - 4.55%  | TRUE  | TRUE  |
| 3  | 48555117 - 48598605   |            | TRUE  | TRUE  |
| 3  | 48555117 - 48598605   |            | TRUE  | TRUE  |
| 3  | 48555117 - 48598605   |            | TRUE  | TRUE  |
| 3  | 48555117 - 48598605   |            | FALSE | TRUE  |
| 3  | 48555117 - 48598605   | T - 95.45% | FALSE | TRUE  |
| 5  | 134362615 - 134370503 | F - 10.00% | TRUE  | TRUE  |
| 5  | 134362615 - 134370503 |            | TRUE  | TRUE  |
| 5  | 134362615 - 134370503 |            | TRUE  | TRUE  |
| 5  | 134362615 - 134370503 | T - 80.00% | TRUE  | TRUE  |
| 5  | 134362615 - 134370503 | F - 40.00% | TRUE  | TRUE  |
| 5  | 134362615 - 134370503 | F - 10.00% | TRUE  | TRUE  |
| 5  | 134362615 - 134370503 | F - 10.00% | TRUE  | TRUE  |
| 5  | 134362615 - 134370503 |            | TRUE  | TRUE  |
| 5  | 134362615 - 134370503 | F - 30.00% | TRUE  | TRUE  |
| 5  | 134362615 - 134370503 |            | TRUE  | TRUE  |
| 5  | 158584417 - 158637061 |            | TRUE  | FALSE |
| 5  | 158584417 - 158637061 | F - 10.00% | TRUE  | TRUE  |
| 5  | 158584417 - 158637061 |            | TRUE  | TRUE  |
| 5  | 158584417 - 158637061 |            | TRUE  | TRUE  |
| 14 | 21484922 - 21539031   |            | TRUE  | TRUE  |
| 14 | 21484922 - 21539031   |            | TRUE  | TRUE  |
| 14 | 21484922 - 21539031   |            | TRUE  | TRUE  |
| 14 | 21484922 - 21539031   | F - 6.98%  | TRUE  | TRUE  |
| 14 | 21484922 - 21539031   | F - 23.26% | TRUE  | TRUE  |
| 14 | 21484922 - 21539031   | F - 27.91% | TRUE  | TRUE  |
| 14 | 21484922 - 21539031   | F - 20.93% | TRUE  | TRUE  |
| 14 | 21484922 - 21539031   |            | FALSE | TRUE  |
| 14 | 21484922 - 21539031   | F - 2.33%  | TRUE  | TRUE  |
| 14 | 21484922 - 21539031   |            | TRUE  | TRUE  |
| 14 | 21484922 - 21539031   | T - 86.05% | TRUE  | TRUE  |
| 14 | 21484922 - 21539031   |            | FALSE | TRUE  |
| 14 | 21484922 - 21539031   |            | TRUE  | TRUE  |
| 14 | 21484922 - 21539031   | F - 2.33%  | FALSE | TRUE  |
| 14 | 21484922 - 21539031   | F - 11.63% | TRUE  | TRUE  |
| 14 | 21484922 - 21539031   |            | TRUE  | TRUE  |
| 14 | 21484922 - 21539031   |            | TRUE  | TRUE  |
| 14 | 21484922 - 21539031   | T - 93.02% | TRUE  | TRUE  |
| 14 | 21484922 - 21539031   | T - 88.37% | TRUE  | TRUE  |
| 14 | 21484922 - 21539031   | F - 30.23% | TRUE  | TRUE  |
| 14 | 21484922 - 21539031   | F - 34.88% | TRUE  | TRUE  |
| 14 | 21484922 - 21539031   | F - 4.65%  | TRUE  | TRUE  |
| 14 | 21484922 - 21539031   | F - 4.65%  | TRUE  | TRUE  |
| 14 | 21484922 - 21539031   |            | TRUE  | TRUE  |
| 14 | 21484922 - 21539031   |            | TRUE  | TRUE  |
| 14 | 21484922 - 21539031   | F - 44.19% | TRUE  | TRUE  |
| 14 | 21484922 - 21539031   |            | FALSE | TRUE  |
| 14 | 21484922 - 21539031   |            | TRUE  | TRUE  |

|    |                       |             |       |       |
|----|-----------------------|-------------|-------|-------|
| 14 | 21484922 - 21539031   |             | TRUE  | TRUE  |
| 14 | 21484922 - 21539031   |             | FALSE | TRUE  |
| 14 | 21484922 - 21539031   |             | TRUE  | TRUE  |
| 14 | 21484922 - 21539031   | T - 97.67%  | TRUE  | TRUE  |
| 14 | 21484922 - 21539031   | T - 90.70%  | TRUE  | TRUE  |
| 14 | 21484922 - 21539031   |             | TRUE  | TRUE  |
| 14 | 21484922 - 21539031   | T - 100.00% | TRUE  | TRUE  |
| 14 | 21484922 - 21539031   |             | TRUE  | TRUE  |
| 14 | 21484922 - 21539031   | T - 100.00% | TRUE  | TRUE  |
| 14 | 21484922 - 21539031   |             | FALSE | TRUE  |
| 14 | 21484922 - 21539031   |             | TRUE  | TRUE  |
| 15 | 30427254 - 30439395   |             | TRUE  | FALSE |
| 15 | 30427254 - 30439395   | F - 20.00%  | TRUE  | TRUE  |
| 17 | 7482805 - 7485431     | T - 50.00%  | TRUE  | TRUE  |
| 17 | 7482805 - 7485431     |             | TRUE  | TRUE  |
| 22 | 39516172 - 39548679   |             | TRUE  | TRUE  |
| 22 | 39516172 - 39548679   |             | TRUE  | TRUE  |
| 22 | 39516172 - 39548679   | F - 18.18%  | TRUE  | TRUE  |
| 22 | 39516172 - 39548679   |             | TRUE  | TRUE  |
| 22 | 39516172 - 39548679   | T - 63.64%  | TRUE  | TRUE  |
| 22 | 39516172 - 39548679   | F - 9.09%   | TRUE  | TRUE  |
| 22 | 39516172 - 39548679   | F - 9.09%   | TRUE  | TRUE  |
| 22 | 39516172 - 39548679   | F - 18.18%  | TRUE  | TRUE  |
| 2  | 11674242 - 11782914   | F - 38.46%  | TRUE  | TRUE  |
| 2  | 11674242 - 11782914   |             | TRUE  | TRUE  |
| 2  | 11674242 - 11782914   |             | FALSE | TRUE  |
| 2  | 11674242 - 11782914   |             | FALSE | TRUE  |
| 6  | 127759551 - 127840500 | F - 8.70%   | TRUE  | TRUE  |
| 6  | 127759551 - 127840500 |             | TRUE  | FALSE |
| 6  | 127759551 - 127840500 | F - 8.70%   | TRUE  | TRUE  |
| 6  | 127759551 - 127840500 | F - 13.04%  | TRUE  | TRUE  |
| 6  | 127759551 - 127840500 | F - 30.43%  | TRUE  | TRUE  |
| 12 | 6976283 - 6980112     | F - 10.53%  | TRUE  | TRUE  |
| 12 | 6976283 - 6980112     | F - 5.26%   | TRUE  | TRUE  |
| 12 | 6976283 - 6980112     |             | TRUE  | TRUE  |
| 12 | 6976283 - 6980112     | F - 5.26%   | TRUE  | TRUE  |
| 3  | 75955846 - 77699115   |             | TRUE  | TRUE  |
| 3  | 75955846 - 77699115   | F - 18.18%  | TRUE  | TRUE  |
| 3  | 75955846 - 77699115   |             | TRUE  | TRUE  |
| 3  | 75955846 - 77699115   | F - 22.73%  | TRUE  | TRUE  |
| 3  | 75955846 - 77699115   | F - 36.36%  | TRUE  | TRUE  |
| 3  | 75955846 - 77699115   |             | TRUE  | TRUE  |
| 3  | 75955846 - 77699115   |             | TRUE  | TRUE  |
| 3  | 75955846 - 77699115   |             | TRUE  | TRUE  |
| 3  | 75955846 - 77699115   |             | TRUE  | TRUE  |
| 3  | 75955846 - 77699115   | T - 63.64%  | TRUE  | TRUE  |
| 3  | 75955846 - 77699115   |             | TRUE  | TRUE  |
| 3  | 75955846 - 77699115   | F - 4.55%   | TRUE  | TRUE  |
| 3  | 75955846 - 77699115   | T - 68.18%  | FALSE | TRUE  |
| 3  | 75955846 - 77699115   | T - 63.64%  | TRUE  | TRUE  |
| 3  | 75955846 - 77699115   |             | FALSE | TRUE  |
| 3  | 75955846 - 77699115   | F - 4.55%   | FALSE | TRUE  |
| 3  | 75955846 - 77699115   |             | TRUE  | TRUE  |
| 3  | 75955846 - 77699115   | T - 59.09%  | TRUE  | TRUE  |
| 3  | 75955846 - 77699115   | T - 63.64%  | TRUE  | TRUE  |
| 3  | 75955846 - 77699115   |             | FALSE | TRUE  |
| 3  | 75955846 - 77699115   | T - 68.18%  | TRUE  | TRUE  |
| 3  | 75955846 - 77699115   |             | FALSE | TRUE  |

|    |                       |            |       |       |
|----|-----------------------|------------|-------|-------|
| 3  | 75955846 - 77699115   | T - 59.09% | TRUE  | TRUE  |
| 3  | 75955846 - 77699115   |            | FALSE | TRUE  |
| 9  | 26947037 - 27062931   |            | TRUE  | FALSE |
| 9  | 26947037 - 27062931   |            | TRUE  | TRUE  |
| 9  | 26947037 - 27062931   |            | FALSE | TRUE  |
| 9  | 26947037 - 27062931   |            | TRUE  | TRUE  |
| 9  | 26947037 - 27062931   |            | TRUE  | FALSE |
| 9  | 26947037 - 27062931   | T - 81.25% | TRUE  | TRUE  |
| 9  | 26947037 - 27062931   |            | FALSE | TRUE  |
| 9  | 26947037 - 27062931   | T - 62.50% | TRUE  | TRUE  |
| 9  | 139869546 - 139876194 |            | TRUE  | TRUE  |
| 9  | 139869546 - 139876194 |            | TRUE  | TRUE  |
| 9  | 139869546 - 139876194 | T - 50.00% | TRUE  | TRUE  |
| 9  | 139869546 - 139876194 | F - 7.14%  | TRUE  | TRUE  |
| 9  | 139869546 - 139876194 | T - 71.43% | TRUE  | FALSE |
| 9  | 139869546 - 139876194 | F - 7.14%  | TRUE  | TRUE  |
| 9  | 139869546 - 139876194 | F - 14.29% | TRUE  | FALSE |
| 9  | 139869546 - 139876194 | F - 14.29% | TRUE  | TRUE  |
| 9  | 139869546 - 139876194 | F - 14.29% | TRUE  | TRUE  |
| 9  | 139869546 - 139876194 | F - 7.14%  | TRUE  | TRUE  |
| 9  | 139869546 - 139876194 |            | TRUE  | TRUE  |
| 9  | 139869546 - 139876194 | F - 7.14%  | TRUE  | TRUE  |
| 9  | 139869546 - 139876194 | F - 7.14%  | FALSE | TRUE  |
| 9  | 139869546 - 139876194 | F - 7.14%  | TRUE  | TRUE  |
| 9  | 139869546 - 139876194 |            | FALSE | TRUE  |
| 19 | 11200038 - 11244505   |            | TRUE  | TRUE  |
| 19 | 11200038 - 11244505   |            | FALSE | TRUE  |
| 19 | 11200038 - 11244505   |            | TRUE  | TRUE  |
| 19 | 11200038 - 11244505   |            | FALSE | TRUE  |
| 19 | 11200038 - 11244505   | F - 44.44% | TRUE  | TRUE  |
| 19 | 11200038 - 11244505   | T - 88.89% | TRUE  | TRUE  |
| 22 | 36649056 - 36663577   |            | TRUE  | FALSE |
| 22 | 36649056 - 36663577   | T - 92.59% | TRUE  | TRUE  |
| 22 | 36649056 - 36663577   | T - 74.07% | TRUE  | TRUE  |
| 22 | 36649056 - 36663577   |            | TRUE  | TRUE  |
| 22 | 36649056 - 36663577   | F - 3.70%  | TRUE  | TRUE  |
| 22 | 36649056 - 36663577   | F - 3.70%  | TRUE  | TRUE  |
| 22 | 36649056 - 36663577   |            | FALSE | TRUE  |
| 22 | 36649056 - 36663577   | F - 14.81% | TRUE  | TRUE  |
| 22 | 36649056 - 36663577   | F - 25.93% | TRUE  | TRUE  |
| 22 | 36649056 - 36663577   |            | TRUE  | TRUE  |
| 22 | 36649056 - 36663577   |            | FALSE | TRUE  |
| 22 | 36649056 - 36663577   |            | FALSE | TRUE  |
| 22 | 36649056 - 36663577   | T - 51.85% | TRUE  | TRUE  |
| 22 | 36649056 - 36663577   | F - 25.93% | TRUE  | TRUE  |
| 22 | 36649056 - 36663577   | F - 3.70%  | FALSE | TRUE  |
| 22 | 36649056 - 36663577   | F - 40.74% | TRUE  | TRUE  |
| 22 | 36649056 - 36663577   | T - 59.26% | TRUE  | TRUE  |
| 22 | 36649056 - 36663577   |            | TRUE  | TRUE  |
| 22 | 36649056 - 36663577   |            | FALSE | TRUE  |
| 22 | 36649056 - 36663577   |            | TRUE  | TRUE  |
| 22 | 36649056 - 36663577   |            | FALSE | TRUE  |
| 22 | 31884674 - 32014572   |            | TRUE  | TRUE  |
| 22 | 31884674 - 32014572   |            | TRUE  | FALSE |
| 22 | 31884674 - 32014572   |            | TRUE  | TRUE  |
| 22 | 31884674 - 32014572   |            | TRUE  | TRUE  |
| 22 | 31884674 - 32014572   | F - 45.24% | TRUE  | TRUE  |
| 4  | 8183799 - 8243530     |            | TRUE  | TRUE  |

|    |                       |             |       |       |
|----|-----------------------|-------------|-------|-------|
| 4  | 8183799 - 8243530     |             | TRUE  | TRUE  |
| 4  | 8183799 - 8243530     | F - 15.63%  | TRUE  | TRUE  |
| 4  | 8183799 - 8243530     | F - 37.50%  | TRUE  | TRUE  |
| 4  | 8183799 - 8243530     |             | FALSE | TRUE  |
| 4  | 8183799 - 8243530     | F - 40.63%  | FALSE | TRUE  |
| 4  | 8183799 - 8243530     |             | FALSE | TRUE  |
| 4  | 8183799 - 8243530     |             | FALSE | TRUE  |
| 4  | 164445450 - 165305202 |             | TRUE  | TRUE  |
| 4  | 164445450 - 165305202 |             | TRUE  | TRUE  |
| 4  | 164445450 - 165305202 | F - 5.56%   | TRUE  | TRUE  |
| 4  | 164445450 - 165305202 |             | TRUE  | TRUE  |
| 4  | 164445450 - 165305202 | F - 11.11%  | TRUE  | TRUE  |
| 4  | 164445450 - 165305202 | F - 22.22%  | TRUE  | TRUE  |
| 4  | 164445450 - 165305202 |             | TRUE  | TRUE  |
| 4  | 164445450 - 165305202 |             | TRUE  | TRUE  |
| 4  | 164445450 - 165305202 | F - 5.56%   | TRUE  | TRUE  |
| 4  | 164445450 - 165305202 | F - 11.11%  | TRUE  | TRUE  |
| 4  | 164445450 - 165305202 | F - 11.11%  | TRUE  | TRUE  |
| 4  | 164445450 - 165305202 |             | FALSE | TRUE  |
| 4  | 164445450 - 165305202 |             | TRUE  | TRUE  |
| 4  | 164445450 - 165305202 | F - 5.56%   | TRUE  | TRUE  |
| 4  | 164445450 - 165305202 |             | TRUE  | TRUE  |
| 4  | 164445450 - 165305202 | T - 61.11%  | TRUE  | TRUE  |
| 4  | 164445450 - 165305202 |             | FALSE | TRUE  |
| 4  | 164445450 - 165305202 | F - 22.22%  | TRUE  | TRUE  |
| 4  | 164445450 - 165305202 | T - 50.00%  | TRUE  | TRUE  |
| 4  | 164445450 - 165305202 |             | FALSE | TRUE  |
| 4  | 164445450 - 165305202 | F - 16.67%  | TRUE  | TRUE  |
| 2  | 201735630 - 201754026 |             | TRUE  | TRUE  |
| 2  | 201735630 - 201754026 | F - 4.76%   | TRUE  | TRUE  |
| 3  | 41288090 - 42003922   |             | TRUE  | FALSE |
| 3  | 41288090 - 42003922   | F - 35.29%  | TRUE  | TRUE  |
| 3  | 41288090 - 42003922   | F - 35.29%  | TRUE  | TRUE  |
| 3  | 41288090 - 42003922   |             | TRUE  | TRUE  |
| 3  | 41288090 - 42003922   |             | TRUE  | TRUE  |
| 3  | 41288090 - 42003922   | T - 52.94%  | TRUE  | TRUE  |
| 3  | 41288090 - 42003922   |             | FALSE | TRUE  |
| 3  | 41288090 - 42003922   |             | FALSE | TRUE  |
| 3  | 41288090 - 42003922   | F - 11.76%  | FALSE | TRUE  |
| 3  | 41288090 - 42003922   |             | FALSE | TRUE  |
| 3  | 41288090 - 42003922   |             | FALSE | TRUE  |
| X  | 71130938 - 71363424   | T - 100.00% | TRUE  | FALSE |
| X  | 71130938 - 71363424   |             | TRUE  | FALSE |
| X  | 71130938 - 71363424   | F - 25.00%  | TRUE  | TRUE  |
| X  | 71130938 - 71363424   |             | TRUE  | TRUE  |
| 10 | 104221149 - 104239484 |             | TRUE  | TRUE  |
| 10 | 104221149 - 104239484 | F - 5.56%   | TRUE  | FALSE |
| 10 | 104221149 - 104239484 |             | TRUE  | TRUE  |
| 10 | 104221149 - 104239484 |             | FALSE | TRUE  |
| 10 | 104221149 - 104239484 |             | TRUE  | TRUE  |
| 10 | 104221149 - 104239484 |             | TRUE  | TRUE  |
| 10 | 104221149 - 104239484 | F - 5.56%   | TRUE  | TRUE  |
| 10 | 104221149 - 104239484 | F - 22.22%  | TRUE  | TRUE  |
| 10 | 104221149 - 104239484 | F - 16.67%  | TRUE  | TRUE  |
| 10 | 104221149 - 104239484 | F - 16.67%  | TRUE  | TRUE  |
| 10 | 104221149 - 104239484 | F - 38.89%  | TRUE  | TRUE  |
| 13 | 43597339 - 43683306   |             | TRUE  | TRUE  |
| 13 | 43597339 - 43683306   | T - 60.00%  | TRUE  | TRUE  |

|    |                     |             |       |       |
|----|---------------------|-------------|-------|-------|
| 15 | 74471807 - 74502046 |             | TRUE  | TRUE  |
| 15 | 74471807 - 74502046 |             | TRUE  | TRUE  |
| 15 | 74471807 - 74502046 |             | TRUE  | TRUE  |
| 15 | 74471807 - 74502046 | T - 90.91%  | TRUE  | FALSE |
| 16 | 74442529 - 74455649 |             | TRUE  | FALSE |
| 16 | 74442529 - 74455649 |             | TRUE  | TRUE  |
| 16 | 74442529 - 74455649 | F - 11.11%  | TRUE  | TRUE  |
| 16 | 74442529 - 74455649 | F - 11.11%  | TRUE  | TRUE  |
| 20 | 25275379 - 25371619 |             | TRUE  | TRUE  |
| 20 | 25275379 - 25371619 |             | TRUE  | TRUE  |
| 20 | 25275379 - 25371619 |             | TRUE  | TRUE  |
| 20 | 25275379 - 25371619 | T - 75.00%  | TRUE  | TRUE  |
| 20 | 25275379 - 25371619 | F - 33.33%  | TRUE  | TRUE  |
| 20 | 25275379 - 25371619 | T - 50.00%  | TRUE  | TRUE  |
| 20 | 25275379 - 25371619 | F - 8.33%   | TRUE  | TRUE  |
| 20 | 25275379 - 25371619 |             | TRUE  | TRUE  |
| 20 | 25275379 - 25371619 | F - 8.33%   | FALSE | TRUE  |
| 20 | 25275379 - 25371619 | T - 58.33%  | TRUE  | TRUE  |
| 20 | 25275379 - 25371619 |             | TRUE  | TRUE  |
| 20 | 25275379 - 25371619 |             | TRUE  | TRUE  |
| 1  | 52811395 - 52831877 |             | TRUE  | TRUE  |
| 1  | 52811395 - 52831877 | F - 5.26%   | TRUE  | TRUE  |
| 1  | 52811395 - 52831877 | F - 5.26%   | TRUE  | TRUE  |
| 1  | 52811395 - 52831877 |             | TRUE  | TRUE  |
| 1  | 52811395 - 52831877 | F - 10.53%  | TRUE  | TRUE  |
| 1  | 52811395 - 52831877 |             | TRUE  | TRUE  |
| 1  | 52811395 - 52831877 |             | FALSE | TRUE  |
| 7  | 75528518 - 75616173 |             | TRUE  | TRUE  |
| 7  | 75528518 - 75616173 |             | TRUE  | TRUE  |
| 7  | 75528518 - 75616173 | F - 6.06%   | TRUE  | TRUE  |
| 7  | 75528518 - 75616173 | F - 3.03%   | TRUE  | TRUE  |
| 19 | 49141272 - 49149451 |             | TRUE  | TRUE  |
| 19 | 49141272 - 49149451 | T - 100.00% | TRUE  | TRUE  |
| 19 | 49141272 - 49149451 |             | FALSE | TRUE  |
| 2  | 25042038 - 25142708 | F - 5.56%   | TRUE  | TRUE  |
| 2  | 25042038 - 25142708 | F - 5.56%   | TRUE  | TRUE  |
| 2  | 25042038 - 25142708 | F - 11.11%  | TRUE  | TRUE  |
| 2  | 25042038 - 25142708 | F - 5.56%   | TRUE  | TRUE  |
| 2  | 25042038 - 25142708 |             | TRUE  | TRUE  |
| 2  | 25042038 - 25142708 | F - 5.56%   | TRUE  | TRUE  |
| 2  | 25042038 - 25142708 |             | TRUE  | TRUE  |
| 2  | 25042038 - 25142708 | F - 11.11%  | TRUE  | TRUE  |
| 2  | 25042038 - 25142708 | F - 5.56%   | TRUE  | TRUE  |
| 2  | 25042038 - 25142708 | F - 11.11%  | TRUE  | TRUE  |
| 2  | 25042038 - 25142708 |             | TRUE  | TRUE  |
| 2  | 25042038 - 25142708 | F - 5.56%   | FALSE | TRUE  |
| 2  | 25042038 - 25142708 |             | TRUE  | TRUE  |
| 2  | 25042038 - 25142708 | T - 50.00%  | TRUE  | TRUE  |
| 2  | 25042038 - 25142708 | T - 50.00%  | TRUE  | TRUE  |
| 2  | 25042038 - 25142708 | F - 38.89%  | FALSE | TRUE  |
| 2  | 25042038 - 25142708 |             | FALSE | TRUE  |
| 2  | 25042038 - 25142708 |             | TRUE  | TRUE  |
| 2  | 25042038 - 25142708 |             | FALSE | TRUE  |
| 2  | 25042038 - 25142708 |             | TRUE  | TRUE  |
| 2  | 25042038 - 25142708 |             | TRUE  | TRUE  |
| 6  | 31926581 - 31937532 |             | TRUE  | TRUE  |
| 6  | 31926581 - 31937532 | F - 9.52%   | TRUE  | TRUE  |
| 6  | 31926581 - 31937532 |             | TRUE  | TRUE  |

|    |                       |             |       |       |
|----|-----------------------|-------------|-------|-------|
| 7  | 73097355 - 73119491   |             | TRUE  | TRUE  |
| 7  | 73097355 - 73119491   | T - 51.85%  | TRUE  | FALSE |
| 7  | 73097355 - 73119491   |             | TRUE  | FALSE |
| 7  | 73097355 - 73119491   |             | FALSE | TRUE  |
| 9  | 117096433 - 117160783 | F - 4.17%   | TRUE  | FALSE |
| 9  | 117096433 - 117160783 |             | TRUE  | TRUE  |
| 9  | 117096433 - 117160783 | F - 8.33%   | TRUE  | TRUE  |
| 9  | 117096433 - 117160783 |             | TRUE  | TRUE  |
| 16 | 68118654 - 68263162   |             | TRUE  | TRUE  |
| 16 | 68118654 - 68263162   | F - 10.71%  | TRUE  | TRUE  |
| 16 | 68118654 - 68263162   | F - 10.71%  | TRUE  | TRUE  |
| 16 | 68118654 - 68263162   | F - 21.43%  | TRUE  | TRUE  |
| 17 | 49039535 - 49198226   |             | TRUE  | TRUE  |
| 17 | 49039535 - 49198226   | F - 15.63%  | TRUE  | TRUE  |
| 17 | 49039535 - 49198226   | F - 18.75%  | TRUE  | TRUE  |
| 17 | 49039535 - 49198226   |             | TRUE  | FALSE |
| 17 | 49039535 - 49198226   |             | TRUE  | TRUE  |
| 19 | 39078281 - 39108643   |             | TRUE  | FALSE |
| 19 | 39078281 - 39108643   | T - 66.67%  | TRUE  | FALSE |
| 1  | 21766621 - 21811498   |             | TRUE  | FALSE |
| 1  | 21766621 - 21811498   | F - 4.55%   | TRUE  | TRUE  |
| 1  | 21766621 - 21811498   |             | TRUE  | TRUE  |
| 1  | 21766621 - 21811498   |             | TRUE  | TRUE  |
| 2  | 238767536 - 238820756 |             | TRUE  | TRUE  |
| 2  | 238767536 - 238820756 | T - 100.00% | TRUE  | TRUE  |
| 2  | 238767536 - 238820756 | T - 50.00%  | TRUE  | TRUE  |
| 2  | 238767536 - 238820756 |             | TRUE  | TRUE  |
| 2  | 238767536 - 238820756 | T - 50.00%  | TRUE  | TRUE  |
| 2  | 238767536 - 238820756 | T - 83.33%  | TRUE  | TRUE  |
| 2  | 238767536 - 238820756 |             | TRUE  | TRUE  |
| 2  | 61414590 - 61697904   |             | TRUE  | TRUE  |
| 2  | 61414590 - 61697904   | F - 21.43%  | TRUE  | TRUE  |
| 2  | 61414590 - 61697904   |             | TRUE  | TRUE  |
| 3  | 106555658 - 106959488 |             | TRUE  | FALSE |
| 3  | 106555658 - 106959488 | F - 33.33%  | TRUE  | TRUE  |
| 3  | 106555658 - 106959488 |             | TRUE  | TRUE  |
| 3  | 106555658 - 106959488 |             | TRUE  | TRUE  |
| 3  | 106555658 - 106959488 |             | TRUE  | TRUE  |
| 3  | 9849770 - 9896822     |             | TRUE  | FALSE |
| 3  | 9849770 - 9896822     |             | TRUE  | TRUE  |
| 3  | 9849770 - 9896822     |             | TRUE  | TRUE  |
| 3  | 9849770 - 9896822     |             | TRUE  | TRUE  |
| 3  | 9849770 - 9896822     | F - 48.84%  | TRUE  | TRUE  |
| 5  | 9035138 - 9546233     |             | TRUE  | FALSE |
| 5  | 9035138 - 9546233     |             | TRUE  | TRUE  |
| 5  | 9035138 - 9546233     |             | TRUE  | TRUE  |
| 5  | 9035138 - 9546233     | T - 83.33%  | TRUE  | TRUE  |
| 5  | 9035138 - 9546233     | T - 100.00% | TRUE  | TRUE  |
| 5  | 9035138 - 9546233     | F - 16.67%  | TRUE  | TRUE  |
| 5  | 9035138 - 9546233     |             | TRUE  | TRUE  |
| 5  | 9035138 - 9546233     |             | TRUE  | TRUE  |
| 5  | 9035138 - 9546233     | F - 16.67%  | TRUE  | TRUE  |
| 8  | 145202919 - 145316843 |             | TRUE  | FALSE |
| 8  | 145202919 - 145316843 |             | TRUE  | TRUE  |
| 8  | 145202919 - 145316843 | F - 43.75%  | TRUE  | TRUE  |
| 8  | 145202919 - 145316843 |             | FALSE | TRUE  |
| 8  | 145202919 - 145316843 |             | FALSE | TRUE  |
| 10 | 27484143 - 27531068   |             | TRUE  | FALSE |



|            |                       |             |       |       |
|------------|-----------------------|-------------|-------|-------|
| 10         | 27484143 - 27531068   | F - 11.11%  | TRUE  | TRUE  |
| 10         | 27484143 - 27531068   | F - 38.89%  | TRUE  | TRUE  |
| 10         | 27484143 - 27531068   | F - 27.78%  | TRUE  | TRUE  |
| 10         | 27484143 - 27531068   |             | FALSE | TRUE  |
| 10         | 27484143 - 27531068   |             | TRUE  | TRUE  |
| 22         | 35776354 - 35790207   | F - 16.67%  | TRUE  | TRUE  |
| 22         | 35776354 - 35790207   | F - 33.33%  | TRUE  | TRUE  |
| 22         | 35776354 - 35790207   | F - 16.67%  | FALSE | TRUE  |
| 22         | 35776354 - 35790207   | F - 16.67%  | TRUE  | TRUE  |
| 22         | 35776354 - 35790207   |             | FALSE | TRUE  |
| 22         | 35776354 - 35790207   |             | TRUE  | TRUE  |
| 3          | 195754054 - 195809060 |             | TRUE  | TRUE  |
| 3          | 195754054 - 195809060 | F - 4.55%   | TRUE  | TRUE  |
| 3          | 195754054 - 195809060 |             | TRUE  | TRUE  |
| 3          | 195754054 - 195809060 |             | FALSE | TRUE  |
| 3          | 195754054 - 195809060 | F - 4.55%   | TRUE  | TRUE  |
| 3          | 195754054 - 195809060 | F - 9.09%   | TRUE  | TRUE  |
| 3          | 195754054 - 195809060 | T - 54.55%  | TRUE  | TRUE  |
| 3          | 195754054 - 195809060 |             | FALSE | TRUE  |
| 3          | 195754054 - 195809060 |             | TRUE  | TRUE  |
| 5          | 69140557 - 70291803   |             | TRUE  | TRUE  |
| 5          | 69140557 - 70291803   | F - 7.14%   | TRUE  | TRUE  |
| 9          | 137967089 - 138013030 |             | TRUE  | TRUE  |
| 9          | 137967089 - 138013030 | F - 6.25%   | TRUE  | TRUE  |
| 9          | 137967089 - 138013030 | F - 12.50%  | TRUE  | TRUE  |
| 9          | 137967089 - 138013030 | F - 18.75%  | TRUE  | TRUE  |
| 9          | 137967089 - 138013030 | F - 43.75%  | TRUE  | TRUE  |
| 9          | 137967089 - 138013030 | F - 6.25%   | TRUE  | TRUE  |
| 9          | 137967089 - 138013030 | T - 56.25%  | TRUE  | TRUE  |
| 9          | 137967089 - 138013030 | F - 25.00%  | TRUE  | TRUE  |
| 9          | 137967089 - 138013030 | F - 37.50%  | FALSE | TRUE  |
| 9          | 137967089 - 138013030 | F - 12.50%  | TRUE  | TRUE  |
| 9          | 137967089 - 138013030 | T - 68.75%  | TRUE  | TRUE  |
| 9          | 137967089 - 138013030 | T - 62.50%  | TRUE  | TRUE  |
| 9          | 137967089 - 138013030 |             | TRUE  | TRUE  |
| 9          | 137967089 - 138013030 |             | TRUE  | TRUE  |
| 9          | 137967089 - 138013030 |             | TRUE  | TRUE  |
| 9          | 137967089 - 138013030 |             | FALSE | TRUE  |
| 9          | 137967089 - 138013030 | F - 31.25%  | TRUE  | TRUE  |
| 9          | 137967089 - 138013030 |             | FALSE | TRUE  |
| 6_cox_hap2 | 2597231 - 2622591     |             | TRUE  | FALSE |
| 6_cox_hap2 | 2597231 - 2622591     |             | TRUE  | FALSE |
| 6_cox_hap2 | 2597231 - 2622591     |             | TRUE  | TRUE  |
| 6_cox_hap2 | 2597231 - 2622591     | T - 62.50%  | TRUE  | TRUE  |
| 3          | 177339170 - 177346075 |             | TRUE  | TRUE  |
| 3          | 177339170 - 177346075 | T - 100.00% | TRUE  | TRUE  |
| 9          | 21967751 - 21995300   | F - 46.67%  | TRUE  | TRUE  |
| 9          | 21967751 - 21995300   |             | TRUE  | TRUE  |
| 1          | 41157242 - 41237277   |             | TRUE  | TRUE  |
| 1          | 41157242 - 41237277   |             | TRUE  | FALSE |
| 1          | 41157242 - 41237277   | F - 6.25%   | TRUE  | TRUE  |
| 1          | 41157242 - 41237277   |             | FALSE | TRUE  |
| 1          | 41157242 - 41237277   |             | FALSE | TRUE  |
| 1          | 41157242 - 41237277   |             | TRUE  | TRUE  |
| 1          | 155023422 - 155035252 |             | TRUE  | FALSE |
| 1          | 155023422 - 155035252 |             | TRUE  | TRUE  |
| 1          | 155023422 - 155035252 | F - 2.63%   | TRUE  | TRUE  |
| 1          | 155023422 - 155035252 |             | TRUE  | TRUE  |

|    |                       |             |       |       |
|----|-----------------------|-------------|-------|-------|
| 1  | 155023422 - 155035252 | T - 73.68%  | TRUE  | TRUE  |
| 1  | 155023422 - 155035252 | F - 2.63%   | TRUE  | TRUE  |
| 1  | 155023422 - 155035252 | F - 13.16%  | TRUE  | TRUE  |
| 1  | 155023422 - 155035252 | F - 10.53%  | TRUE  | TRUE  |
| 1  | 155023422 - 155035252 | F - 7.89%   | TRUE  | TRUE  |
| 1  | 155023422 - 155035252 | F - 5.26%   | TRUE  | TRUE  |
| 1  | 155023422 - 155035252 | F - 5.26%   | TRUE  | TRUE  |
| 1  | 155023422 - 155035252 | F - 2.63%   | TRUE  | TRUE  |
| 2  | 32582096 - 32843966   |             | TRUE  | TRUE  |
| 2  | 32582096 - 32843966   | F - 7.69%   | TRUE  | TRUE  |
| 2  | 32582096 - 32843966   |             | TRUE  | TRUE  |
| 2  | 32582096 - 32843966   |             | FALSE | TRUE  |
| Y  | 21752639 - 21768160   | F - 25.00%  | TRUE  | FALSE |
| Y  | 21752639 - 21768160   | T - 50.00%  | TRUE  | FALSE |
| Y  | 21752639 - 21768160   | T - 50.00%  | TRUE  | FALSE |
| Y  | 21752639 - 21768160   | F - 25.00%  | TRUE  | TRUE  |
| Y  | 21752639 - 21768160   |             | TRUE  | FALSE |
| Y  | 21752639 - 21768160   | T - 50.00%  | TRUE  | TRUE  |
| Y  | 21752639 - 21768160   | T - 50.00%  | TRUE  | TRUE  |
| Y  | 21752639 - 21768160   | T - 75.00%  | TRUE  | FALSE |
| Y  | 21752639 - 21768160   | T - 50.00%  | TRUE  | TRUE  |
| 10 | 70320117 - 70454239   |             | TRUE  | TRUE  |
| 10 | 70320117 - 70454239   | F - 40.00%  | TRUE  | TRUE  |
| 10 | 70320117 - 70454239   |             | FALSE | TRUE  |
| 10 | 70320117 - 70454239   |             | TRUE  | TRUE  |
| 10 | 70320117 - 70454239   |             | TRUE  | TRUE  |
| 10 | 18940195 - 18948196   |             | TRUE  | TRUE  |
| 10 | 18940195 - 18948196   | T - 75.00%  | TRUE  | TRUE  |
| 11 | 637293 - 640706       |             | TRUE  | TRUE  |
| 11 | 637293 - 640706       | T - 100.00% | TRUE  | TRUE  |
| 11 | 637293 - 640706       |             | TRUE  | TRUE  |
| 11 | 637293 - 640706       |             | TRUE  | TRUE  |
| 11 | 637293 - 640706       | F - 33.33%  | TRUE  | TRUE  |
| 12 | 31433518 - 31479306   |             | TRUE  | TRUE  |
| 12 | 31433518 - 31479306   |             | TRUE  | TRUE  |
| 12 | 31433518 - 31479306   | F - 29.41%  | TRUE  | TRUE  |
| 12 | 31433518 - 31479306   | F - 5.88%   | FALSE | TRUE  |
| 18 | 657604 - 673578       |             | TRUE  | TRUE  |
| 18 | 657604 - 673578       | F - 11.11%  | TRUE  | TRUE  |
| 18 | 657604 - 673578       | T - 66.67%  | TRUE  | TRUE  |
| 18 | 657604 - 673578       |             | TRUE  | TRUE  |
| 18 | 657604 - 673578       | T - 100.00% | TRUE  | TRUE  |
| 18 | 657604 - 673578       | T - 77.78%  | TRUE  | TRUE  |
| 18 | 657604 - 673578       |             | TRUE  | TRUE  |
| 18 | 657604 - 673578       |             | FALSE | TRUE  |
| 18 | 657604 - 673578       |             | FALSE | TRUE  |
| 19 | 35739559 - 35758867   |             | TRUE  | TRUE  |
| 19 | 35739559 - 35758867   | T - 100.00% | FALSE | TRUE  |
| 20 | 17594323 - 17662940   |             | TRUE  | TRUE  |
| 20 | 17594323 - 17662940   | F - 5.88%   | TRUE  | TRUE  |
| 20 | 17594323 - 17662940   |             | TRUE  | TRUE  |
| 1  | 207925383 - 207968861 |             | TRUE  | FALSE |
| 1  | 207925383 - 207968861 |             | TRUE  | TRUE  |
| 1  | 207925383 - 207968861 |             | TRUE  | TRUE  |
| 1  | 207925383 - 207968861 | F - 10.34%  | TRUE  | TRUE  |
| 1  | 207925383 - 207968861 | F - 3.45%   | FALSE | TRUE  |
| 1  | 38076951 - 38100595   |             | TRUE  | FALSE |
| 1  | 38076951 - 38100595   | F - 20.00%  | TRUE  | TRUE  |

|            |                       |             |       |       |
|------------|-----------------------|-------------|-------|-------|
| 12         | 50794592 - 50873788   |             | TRUE  | TRUE  |
| 12         | 50794592 - 50873788   | F - 13.04%  | TRUE  | TRUE  |
| 12         | 50794592 - 50873788   | F - 4.35%   | TRUE  | TRUE  |
| 12         | 50794592 - 50873788   |             | TRUE  | TRUE  |
| 12         | 50794592 - 50873788   |             | TRUE  | TRUE  |
| 19         | 36545783 - 36596012   |             | TRUE  | TRUE  |
| 19         | 36545783 - 36596012   | F - 42.86%  | TRUE  | TRUE  |
| 19         | 36545783 - 36596012   |             | FALSE | TRUE  |
| 1          | 156785448 - 156851642 |             | TRUE  | FALSE |
| 1          | 156785448 - 156851642 |             | TRUE  | FALSE |
| 1          | 156785448 - 156851642 | T - 92.86%  | TRUE  | TRUE  |
| 2          | 120770581 - 120936697 |             | TRUE  | TRUE  |
| 2          | 120770581 - 120936697 |             | TRUE  | TRUE  |
| 2          | 120770581 - 120936697 | F - 17.65%  | TRUE  | TRUE  |
| 2          | 120770581 - 120936697 |             | TRUE  | TRUE  |
| 2          | 120770581 - 120936697 |             | FALSE | TRUE  |
| 2          | 120770581 - 120936697 | F - 41.18%  | TRUE  | TRUE  |
| 2          | 120770581 - 120936697 | F - 5.88%   | TRUE  | TRUE  |
| 2          | 120770581 - 120936697 | F - 5.88%   | FALSE | TRUE  |
| 2          | 120770581 - 120936697 | F - 11.76%  | TRUE  | TRUE  |
| 2          | 120770581 - 120936697 | T - 64.71%  | FALSE | TRUE  |
| 2          | 120770581 - 120936697 |             | FALSE | TRUE  |
| 2          | 120770581 - 120936697 |             | TRUE  | TRUE  |
| 2          | 114462588 - 114514400 |             | TRUE  | FALSE |
| 2          | 114462588 - 114514400 | F - 26.67%  | TRUE  | TRUE  |
| 4          | 114372188 - 114683083 | F - 20.83%  | TRUE  | TRUE  |
| 4          | 114372188 - 114683083 | F - 33.33%  | TRUE  | TRUE  |
| 4          | 114372188 - 114683083 |             | FALSE | TRUE  |
| 4          | 114372188 - 114683083 |             | TRUE  | TRUE  |
| 5          | 180217541 - 180242652 |             | TRUE  | FALSE |
| 5          | 180217541 - 180242652 |             | TRUE  | FALSE |
| 5          | 180217541 - 180242652 | F - 2.94%   | TRUE  | TRUE  |
| 6          | 31082527 - 31107869   |             | TRUE  | FALSE |
| 6          | 31082527 - 31107869   |             | TRUE  | FALSE |
| 6          | 31082527 - 31107869   |             | TRUE  | TRUE  |
| 6          | 31082527 - 31107869   | T - 72.73%  | TRUE  | TRUE  |
| 19         | 39292311 - 39303740   |             | TRUE  | FALSE |
| 19         | 39292311 - 39303740   | T - 100.00% | TRUE  | TRUE  |
| 22         | 51195514 - 51239737   |             | TRUE  | TRUE  |
| 22         | 51195514 - 51239737   |             | TRUE  | TRUE  |
| 22         | 51195514 - 51239737   |             | TRUE  | TRUE  |
| 22         | 51195514 - 51239737   | F - 14.29%  | TRUE  | TRUE  |
| 22         | 51195514 - 51239737   | F - 14.29%  | TRUE  | TRUE  |
| 6_dbb_hap3 | 2379699 - 2405007     |             | TRUE  | FALSE |
| 6_dbb_hap3 | 2379699 - 2405007     |             | TRUE  | FALSE |
| 6_dbb_hap3 | 2379699 - 2405007     |             | TRUE  | TRUE  |
| 6_dbb_hap3 | 2379699 - 2405007     | T - 66.67%  | TRUE  | TRUE  |
| 4          | 183065140 - 183724177 |             | TRUE  | TRUE  |
| 4          | 183065140 - 183724177 |             | TRUE  | TRUE  |
| 4          | 183065140 - 183724177 | F - 45.45%  | TRUE  | TRUE  |
| 4          | 183065140 - 183724177 | T - 63.64%  | TRUE  | TRUE  |
| 5          | 142149949 - 142608576 |             | TRUE  | FALSE |
| 5          | 142149949 - 142608576 | F - 48.00%  | TRUE  | FALSE |
| 5          | 142149949 - 142608576 |             | TRUE  | TRUE  |
| 5          | 142149949 - 142608576 |             | TRUE  | TRUE  |
| 5          | 142149949 - 142608576 |             | FALSE | TRUE  |
| 11         | 7872298 - 7927502     | T - 100.00% | TRUE  | FALSE |
| 11         | 7872298 - 7927502     | T - 100.00% | TRUE  | TRUE  |

|    |                       |             |       |       |
|----|-----------------------|-------------|-------|-------|
| 11 | 7872298 - 7927502     |             | FALSE | TRUE  |
| 5  | 135364584 - 135399507 | F - 4.35%   | TRUE  | FALSE |
| 5  | 135364584 - 135399507 |             | TRUE  | FALSE |
| 5  | 135364584 - 135399507 | F - 13.04%  | TRUE  | TRUE  |
| 5  | 135364584 - 135399507 |             | TRUE  | TRUE  |
| 5  | 135364584 - 135399507 |             | TRUE  | TRUE  |
| 5  | 135364584 - 135399507 |             | TRUE  | TRUE  |
| 5  | 34017963 - 34043937   |             | TRUE  | TRUE  |
| 5  | 34017963 - 34043937   |             | TRUE  | FALSE |
| 5  | 34017963 - 34043937   | T - 84.62%  | TRUE  | TRUE  |
| 5  | 34017963 - 34043937   |             | TRUE  | TRUE  |
| 5  | 34017963 - 34043937   | T - 69.23%  | TRUE  | TRUE  |
| 5  | 34017963 - 34043937   | T - 61.54%  | TRUE  | TRUE  |
| 5  | 34017963 - 34043937   | F - 7.69%   | TRUE  | TRUE  |
| 5  | 34017963 - 34043937   | F - 7.69%   | TRUE  | TRUE  |
| 5  | 34017963 - 34043937   | F - 46.15%  | TRUE  | FALSE |
| 5  | 34017963 - 34043937   | F - 15.38%  | TRUE  | TRUE  |
| 5  | 34017963 - 34043937   | T - 61.54%  | TRUE  | FALSE |
| 5  | 34017963 - 34043937   | F - 30.77%  | TRUE  | TRUE  |
| 5  | 34017963 - 34043937   | F - 15.38%  | FALSE | TRUE  |
| 5  | 34017963 - 34043937   | F - 7.69%   | FALSE | TRUE  |
| 5  | 34017963 - 34043937   | F - 23.08%  | TRUE  | TRUE  |
| 18 | 21108363 - 21166581   | T - 50.00%  | TRUE  | TRUE  |
| 18 | 21108363 - 21166581   |             | TRUE  | TRUE  |
| 18 | 59711458 - 59854289   |             | TRUE  | TRUE  |
| 18 | 59711458 - 59854289   | T - 75.00%  | TRUE  | TRUE  |
| 18 | 59711458 - 59854289   |             | TRUE  | TRUE  |
| 18 | 59711458 - 59854289   | T - 100.00% | TRUE  | TRUE  |
| 18 | 59711458 - 59854289   |             | TRUE  | TRUE  |
| 21 | 46683843 - 46707813   | F - 5.26%   | TRUE  | FALSE |
| 21 | 46683843 - 46707813   | T - 52.63%  | TRUE  | TRUE  |
| 21 | 46683843 - 46707813   | F - 15.79%  | TRUE  | TRUE  |
| 21 | 46683843 - 46707813   | F - 10.53%  | TRUE  | FALSE |
| 21 | 46683843 - 46707813   |             | TRUE  | TRUE  |
| 21 | 46683843 - 46707813   | F - 36.84%  | TRUE  | TRUE  |
| 21 | 46683843 - 46707813   | F - 5.26%   | TRUE  | TRUE  |
| 21 | 46683843 - 46707813   | F - 10.53%  | TRUE  | TRUE  |
| 21 | 46683843 - 46707813   | F - 10.53%  | TRUE  | TRUE  |
| 4  | 102332443 - 102995969 | T - 83.33%  | TRUE  | TRUE  |
| 4  | 102332443 - 102995969 | T - 75.00%  | TRUE  | TRUE  |
| 4  | 102332443 - 102995969 |             | TRUE  | TRUE  |
| 4  | 102332443 - 102995969 |             | TRUE  | TRUE  |
| 6  | 168227602 - 168372703 |             | TRUE  | FALSE |
| 6  | 168227602 - 168372703 |             | TRUE  | TRUE  |
| 6  | 168227602 - 168372703 | F - 6.06%   | TRUE  | TRUE  |
| 6  | 168227602 - 168372703 |             | TRUE  | TRUE  |
| 6  | 168227602 - 168372703 |             | TRUE  | TRUE  |
| 6  | 168227602 - 168372703 |             | TRUE  | TRUE  |
| 7  | 121713598 - 121784344 |             | TRUE  | TRUE  |
| 7  | 121713598 - 121784344 |             | TRUE  | TRUE  |
| 7  | 121713598 - 121784344 |             | TRUE  | TRUE  |
| 7  | 121713598 - 121784344 | T - 84.62%  | TRUE  | TRUE  |
| 11 | 121899037 - 122238681 |             | TRUE  | TRUE  |
| 11 | 121899037 - 122238681 |             | TRUE  | TRUE  |
| 11 | 121899037 - 122238681 | F - 12.50%  | TRUE  | TRUE  |
| 11 | 121899037 - 122238681 | F - 12.50%  | TRUE  | TRUE  |
| 11 | 121899037 - 122238681 | F - 12.50%  | TRUE  | TRUE  |
| 11 | 121899037 - 122238681 | F - 25.00%  | TRUE  | TRUE  |

|    |                       |            |       |       |
|----|-----------------------|------------|-------|-------|
| 11 | 121899037 - 122238681 | F - 25.00% | TRUE  | TRUE  |
| 11 | 121899037 - 122238681 |            | TRUE  | TRUE  |
| 11 | 121899037 - 122238681 |            | TRUE  | TRUE  |
| 11 | 121899037 - 122238681 |            | FALSE | TRUE  |
| 11 | 121899037 - 122238681 |            | TRUE  | TRUE  |
| 11 | 121899037 - 122238681 | F - 25.00% | TRUE  | TRUE  |
| 11 | 121899037 - 122238681 | F - 37.50% | TRUE  | TRUE  |
| 13 | 36875775 - 36944317   |            | TRUE  | TRUE  |
| 13 | 36875775 - 36944317   | F - 4.76%  | TRUE  | TRUE  |
| 13 | 36875775 - 36944317   | F - 4.76%  | FALSE | TRUE  |
| 13 | 114110134 - 114145267 |            | TRUE  | TRUE  |
| 13 | 114110134 - 114145267 |            | TRUE  | TRUE  |
| 13 | 114110134 - 114145267 |            | TRUE  | FALSE |
| 13 | 114110134 - 114145267 | F - 25.00% | TRUE  | TRUE  |
| 14 | 101402828 - 101426536 | F - 13.33% | TRUE  | FALSE |
| 14 | 101402828 - 101426536 | F - 6.67%  | TRUE  | TRUE  |
| 14 | 101402828 - 101426536 | F - 6.67%  | TRUE  | TRUE  |
| 14 | 101402828 - 101426536 |            | FALSE | TRUE  |
| 14 | 101402828 - 101426536 |            | TRUE  | FALSE |
| 14 | 101402828 - 101426536 |            | TRUE  | TRUE  |
| 14 | 101402828 - 101426536 |            | TRUE  | TRUE  |
| 14 | 101402828 - 101426536 |            | TRUE  | TRUE  |
| 14 | 101402828 - 101426536 |            | TRUE  | TRUE  |
| 14 | 101402828 - 101426536 |            | FALSE | TRUE  |
| 15 | 45315302 - 45367287   | F - 11.11% | TRUE  | FALSE |
| 15 | 45315302 - 45367287   |            | TRUE  | TRUE  |
| 15 | 45315302 - 45367287   |            | TRUE  | TRUE  |
| 15 | 45315302 - 45367287   |            | FALSE | TRUE  |
| 1  | 44870866 - 45117396   | F - 22.58% | TRUE  | TRUE  |
| 1  | 44870866 - 45117396   | F - 25.81% | TRUE  | TRUE  |
| 1  | 44870866 - 45117396   |            | TRUE  | FALSE |
| 1  | 44870866 - 45117396   | F - 25.81% | TRUE  | TRUE  |
| 1  | 44870866 - 45117396   | F - 16.13% | TRUE  | TRUE  |
| 1  | 44870866 - 45117396   |            | FALSE | TRUE  |
| 5  | 892758 - 919472       |            | TRUE  | TRUE  |
| 5  | 892758 - 919472       | F - 36.36% | TRUE  | FALSE |
| 5  | 892758 - 919472       | T - 63.64% | TRUE  | TRUE  |
| 5  | 892758 - 919472       |            | TRUE  | TRUE  |
| 5  | 892758 - 919472       | T - 54.55% | TRUE  | TRUE  |
| 5  | 892758 - 919472       |            | TRUE  | TRUE  |
| 5  | 892758 - 919472       |            | FALSE | TRUE  |
| 5  | 892758 - 919472       | F - 36.36% | FALSE | TRUE  |
| 5  | 892758 - 919472       | F - 9.09%  | FALSE | TRUE  |
| 5  | 892758 - 919472       |            | FALSE | TRUE  |
| 5  | 78907943 - 78982471   |            | TRUE  | FALSE |
| 5  | 78907943 - 78982471   | F - 34.78% | TRUE  | TRUE  |
| 5  | 78907943 - 78982471   |            | TRUE  | TRUE  |
| 5  | 78907943 - 78982471   |            | TRUE  | TRUE  |
| 5  | 78907943 - 78982471   |            | TRUE  | TRUE  |
| 8  | 38585704 - 38710546   | F - 12.24% | TRUE  | FALSE |
| 8  | 38585704 - 38710546   |            | TRUE  | TRUE  |
| 8  | 38585704 - 38710546   | F - 2.04%  | TRUE  | TRUE  |
| 8  | 38585704 - 38710546   |            | TRUE  | TRUE  |
| 10 | 75257296 - 75385711   |            | TRUE  | TRUE  |
| 10 | 75257296 - 75385711   |            | FALSE | TRUE  |
| 10 | 75257296 - 75385711   | F - 3.45%  | TRUE  | TRUE  |
| 10 | 75257296 - 75385711   | F - 3.45%  | TRUE  | TRUE  |
| 10 | 75257296 - 75385711   |            | TRUE  | TRUE  |
| 10 | 75257296 - 75385711   |            | TRUE  | TRUE  |

|    |                       |            |       |       |
|----|-----------------------|------------|-------|-------|
| 10 | 75257296 - 75385711   | F - 37.93% | TRUE  | TRUE  |
| 10 | 75257296 - 75385711   | F - 3.45%  | TRUE  | TRUE  |
| 10 | 75257296 - 75385711   | F - 3.45%  | TRUE  | TRUE  |
| 10 | 75257296 - 75385711   |            | FALSE | TRUE  |
| 10 | 75257296 - 75385711   |            | FALSE | TRUE  |
| 10 | 75257296 - 75385711   | F - 17.24% | TRUE  | TRUE  |
| 10 | 75257296 - 75385711   | F - 48.28% | TRUE  | TRUE  |
| 10 | 75257296 - 75385711   |            | FALSE | TRUE  |
| 14 | 88490894 - 88563276   | F - 22.22% | TRUE  | TRUE  |
| 14 | 88490894 - 88563276   |            | TRUE  | TRUE  |
| 14 | 88490894 - 88563276   | F - 33.33% | TRUE  | TRUE  |
| 14 | 88490894 - 88563276   | F - 33.33% | TRUE  | TRUE  |
| 15 | 92396925 - 92715665   |            | TRUE  | FALSE |
| 15 | 92396925 - 92715665   | F - 25.00% | TRUE  | TRUE  |
| 15 | 92396925 - 92715665   | F - 12.50% | TRUE  | TRUE  |
| 2  | 72403113 - 73053177   |            | TRUE  | TRUE  |
| 2  | 72403113 - 73053177   | F - 8.33%  | TRUE  | TRUE  |
| 2  | 72403113 - 73053177   | F - 8.33%  | TRUE  | TRUE  |
| 3  | 129274018 - 129325661 |            | TRUE  | FALSE |
| 3  | 129274018 - 129325661 | F - 4.55%  | TRUE  | TRUE  |
| 3  | 129274018 - 129325661 |            | TRUE  | TRUE  |
| 3  | 129274018 - 129325661 |            | TRUE  | TRUE  |
| 3  | 129274018 - 129325661 |            | TRUE  | TRUE  |
| 3  | 129274018 - 129325661 | F - 4.55%  | TRUE  | TRUE  |
| 3  | 129274018 - 129325661 |            | TRUE  | TRUE  |
| 3  | 129274018 - 129325661 | F - 27.27% | TRUE  | TRUE  |
| 3  | 129274018 - 129325661 | F - 4.55%  | TRUE  | TRUE  |
| 3  | 129274018 - 129325661 |            | TRUE  | TRUE  |
| 3  | 129274018 - 129325661 |            | FALSE | TRUE  |
| 3  | 129274018 - 129325661 | F - 36.36% | TRUE  | TRUE  |
| 3  | 129274018 - 129325661 | F - 4.55%  | TRUE  | TRUE  |
| 3  | 129274018 - 129325661 | F - 27.27% | TRUE  | TRUE  |
| 3  | 129274018 - 129325661 | F - 27.27% | TRUE  | TRUE  |
| 3  | 129274018 - 129325661 | F - 22.73% | TRUE  | TRUE  |
| 3  | 129274018 - 129325661 | F - 31.82% | TRUE  | TRUE  |
| 3  | 129274018 - 129325661 | F - 22.73% | TRUE  | TRUE  |
| 3  | 129274018 - 129325661 | F - 31.82% | TRUE  | TRUE  |
| 3  | 129274018 - 129325661 |            | TRUE  | TRUE  |
| 3  | 129274018 - 129325661 |            | TRUE  | TRUE  |
| 3  | 129274018 - 129325661 | F - 31.82% | TRUE  | TRUE  |
| 3  | 129274018 - 129325661 | F - 18.18% | TRUE  | TRUE  |
| 3  | 129274018 - 129325661 | F - 27.27% | TRUE  | TRUE  |
| 3  | 129274018 - 129325661 | F - 31.82% | TRUE  | TRUE  |
| 3  | 129274018 - 129325661 |            | TRUE  | TRUE  |
| 3  | 129274018 - 129325661 |            | FALSE | TRUE  |
| 3  | 129274018 - 129325661 |            | TRUE  | TRUE  |
| 3  | 129274018 - 129325661 | F - 4.55%  | TRUE  | TRUE  |
| 3  | 129274018 - 129325661 | F - 22.73% | TRUE  | TRUE  |
| 3  | 129274018 - 129325661 |            | FALSE | TRUE  |
| 3  | 129274018 - 129325661 |            | TRUE  | TRUE  |
| 3  | 129274018 - 129325661 | F - 22.73% | TRUE  | TRUE  |
| 3  | 129274018 - 129325661 | F - 13.64% | TRUE  | TRUE  |
| 3  | 129274018 - 129325661 |            | TRUE  | TRUE  |
| 5  | 31639517 - 32111038   |            | TRUE  | FALSE |
| 5  | 31639517 - 32111038   |            | TRUE  | FALSE |
| 5  | 31639517 - 32111038   |            | TRUE  | FALSE |
| 5  | 31639517 - 32111038   | T - 63.16% | TRUE  | TRUE  |
| 5  | 31639517 - 32111038   | F - 47.37% | TRUE  | TRUE  |

|    |                       |             |       |       |
|----|-----------------------|-------------|-------|-------|
| 5  | 31639517 - 32111038   |             | TRUE  | TRUE  |
| 5  | 31639517 - 32111038   |             | FALSE | TRUE  |
| 5  | 31639517 - 32111038   | F - 36.84%  | FALSE | TRUE  |
| 5  | 31639517 - 32111038   |             | TRUE  | TRUE  |
| 5  | 31639517 - 32111038   |             | TRUE  | TRUE  |
| 5  | 31639517 - 32111038   |             | FALSE | TRUE  |
| 6  | 133090507 - 133119747 |             | TRUE  | TRUE  |
| 6  | 133090507 - 133119747 | T - 77.78%  | TRUE  | TRUE  |
| 11 | 8633584 - 8693413     |             | TRUE  | FALSE |
| 11 | 8633584 - 8693413     |             | TRUE  | FALSE |
| 11 | 8633584 - 8693413     | F - 40.00%  | TRUE  | TRUE  |
| 11 | 8633584 - 8693413     |             | FALSE | TRUE  |
| 11 | 14899555 - 14913798   | F - 44.44%  | TRUE  | TRUE  |
| 11 | 14899555 - 14913798   | F - 33.33%  | TRUE  | TRUE  |
| 11 | 14899555 - 14913798   |             | FALSE | TRUE  |
| 11 | 14899555 - 14913798   |             | FALSE | TRUE  |
| 16 | 30064411 - 30081741   | F - 17.65%  | TRUE  | FALSE |
| 16 | 30064411 - 30081741   |             | TRUE  | TRUE  |
| 16 | 30064411 - 30081741   | F - 35.29%  | TRUE  | TRUE  |
| 16 | 30064411 - 30081741   |             | TRUE  | TRUE  |
| 16 | 30064411 - 30081741   | F - 35.29%  | TRUE  | TRUE  |
| 16 | 30064411 - 30081741   |             | TRUE  | TRUE  |
| 16 | 30064411 - 30081741   | F - 11.76%  | TRUE  | TRUE  |
| 16 | 30064411 - 30081741   |             | TRUE  | TRUE  |
| 16 | 30064411 - 30081741   |             | TRUE  | TRUE  |
| 16 | 30064411 - 30081741   | F - 11.76%  | TRUE  | TRUE  |
| 16 | 30064411 - 30081741   | F - 17.65%  | TRUE  | TRUE  |
| 16 | 56225251 - 56391356   |             | TRUE  | TRUE  |
| 16 | 56225251 - 56391356   |             | TRUE  | TRUE  |
| 16 | 56225251 - 56391356   | T - 60.00%  | TRUE  | TRUE  |
| 16 | 56225251 - 56391356   | T - 60.00%  | TRUE  | TRUE  |
| 16 | 56225251 - 56391356   |             | FALSE | TRUE  |
| 16 | 56225251 - 56391356   |             | FALSE | TRUE  |
| 1  | 55532032 - 55681039   | F - 22.22%  | TRUE  | TRUE  |
| 1  | 55532032 - 55681039   |             | TRUE  | TRUE  |
| 1  | 55532032 - 55681039   |             | TRUE  | TRUE  |
| 1  | 55532032 - 55681039   |             | TRUE  | TRUE  |
| 1  | 55532032 - 55681039   |             | FALSE | TRUE  |
| 7  | 150497491 - 150502208 |             | TRUE  | TRUE  |
| 7  | 150497491 - 150502208 |             | TRUE  | TRUE  |
| 7  | 150497491 - 150502208 | F - 46.15%  | TRUE  | TRUE  |
| 8  | 143783670 - 143808391 | T - 100.00% | TRUE  | TRUE  |
| 8  | 143783670 - 143808391 |             | TRUE  | TRUE  |
| 9  | 40760700 - 40836415   |             | TRUE  | TRUE  |
| 9  | 40760700 - 40836415   | T - 60.00%  | TRUE  | TRUE  |
| 9  | 40760700 - 40836415   | T - 60.00%  | TRUE  | TRUE  |
| 11 | 20385231 - 20405329   |             | TRUE  | TRUE  |
| 11 | 20385231 - 20405329   | F - 31.25%  | FALSE | TRUE  |
| 11 | 20385231 - 20405329   | F - 25.00%  | FALSE | TRUE  |
| 17 | 37844393 - 37884915   |             | TRUE  | FALSE |
| 17 | 37844393 - 37884915   | F - 20.00%  | TRUE  | TRUE  |
| 17 | 37844393 - 37884915   |             | TRUE  | TRUE  |
| 17 | 34083269 - 34122640   |             | TRUE  | TRUE  |
| 17 | 34083269 - 34122640   | T - 100.00% | TRUE  | TRUE  |
| 17 | 34083269 - 34122640   |             | TRUE  | FALSE |
| 17 | 34083269 - 34122640   |             | TRUE  | TRUE  |
| 17 | 34083269 - 34122640   | F - 12.50%  | TRUE  | TRUE  |
| 19 | 52196593 - 52208443   |             | TRUE  | FALSE |

|             |                       |             |       |       |
|-------------|-----------------------|-------------|-------|-------|
| 19          | 52196593 - 52208443   | T - 50.00%  | TRUE  | TRUE  |
| 6_mann_hap4 | 2430884 - 2456237     |             | TRUE  | FALSE |
| 6_mann_hap4 | 2430884 - 2456237     |             | TRUE  | FALSE |
| 6_mann_hap4 | 2430884 - 2456237     |             | TRUE  | TRUE  |
| 6_mann_hap4 | 2430884 - 2456237     | T - 66.67%  | TRUE  | TRUE  |
| 6_mcf_hap5  | 2464452 - 2489814     |             | TRUE  | FALSE |
| 6_mcf_hap5  | 2464452 - 2489814     |             | TRUE  | FALSE |
| 6_mcf_hap5  | 2464452 - 2489814     |             | TRUE  | TRUE  |
| 6_mcf_hap5  | 2464452 - 2489814     | T - 66.67%  | TRUE  | TRUE  |
| 1           | 35525387 - 35581460   |             | TRUE  | FALSE |
| 1           | 35525387 - 35581460   | F - 6.25%   | TRUE  | TRUE  |
| 1           | 35525387 - 35581460   |             | TRUE  | FALSE |
| 1           | 35525387 - 35581460   | F - 12.50%  | TRUE  | TRUE  |
| 1           | 35525387 - 35581460   |             | TRUE  | TRUE  |
| 6           | 29759100 - 29765588   | T - 66.67%  | TRUE  | TRUE  |
| 6           | 29759100 - 29765588   | F - 33.33%  | TRUE  | TRUE  |
| 6           | 29759100 - 29765588   |             | TRUE  | TRUE  |
| 6           | 29759100 - 29765588   |             | FALSE | TRUE  |
| 6           | 29759100 - 29765588   | F - 33.33%  | FALSE | TRUE  |
| 6           | 29968788 - 30029417   | F - 15.38%  | TRUE  | TRUE  |
| 6           | 29968788 - 30029417   | F - 15.38%  | TRUE  | TRUE  |
| 6           | 29968788 - 30029417   | F - 15.38%  | TRUE  | TRUE  |
| 6           | 29968788 - 30029417   | F - 7.69%   | TRUE  | TRUE  |
| 6           | 29968788 - 30029417   | F - 7.69%   | TRUE  | TRUE  |
| 6           | 29968788 - 30029417   | T - 53.85%  | TRUE  | TRUE  |
| 6           | 29968788 - 30029417   | F - 30.77%  | TRUE  | TRUE  |
| 6           | 29968788 - 30029417   |             | TRUE  | TRUE  |
| 6           | 29968788 - 30029417   | F - 7.69%   | FALSE | TRUE  |
| 6           | 29968788 - 30029417   |             | TRUE  | TRUE  |
| 6           | 29968788 - 30029417   | F - 38.46%  | TRUE  | TRUE  |
| 6           | 29968788 - 30029417   | F - 23.08%  | FALSE | TRUE  |
| 6           | 29968788 - 30029417   | F - 38.46%  | TRUE  | TRUE  |
| 6           | 29968788 - 30029417   | F - 46.15%  | FALSE | TRUE  |
| 6           | 29968788 - 30029417   | F - 7.69%   | FALSE | TRUE  |
| 6           | 29968788 - 30029417   |             | FALSE | TRUE  |
| 9           | 131217434 - 131263571 | F - 3.92%   | TRUE  | TRUE  |
| 9           | 131217434 - 131263571 |             | TRUE  | FALSE |
| 9           | 131217434 - 131263571 |             | TRUE  | TRUE  |
| 9           | 131217434 - 131263571 |             | TRUE  | TRUE  |
| 9           | 131217434 - 131263571 |             | TRUE  | TRUE  |
| 9           | 131217434 - 131263571 | F - 3.92%   | FALSE | TRUE  |
| 9           | 131217434 - 131263571 | F - 31.37%  | TRUE  | TRUE  |
| 9           | 131217434 - 131263571 |             | TRUE  | TRUE  |
| 9           | 131217434 - 131263571 |             | TRUE  | TRUE  |
| 11          | 74303575 - 74354102   |             | TRUE  | FALSE |
| 11          | 74303575 - 74354102   |             | TRUE  | FALSE |
| 11          | 74303575 - 74354102   | F - 28.57%  | TRUE  | TRUE  |
| 12          | 58937907 - 59206842   |             | TRUE  | TRUE  |
| 12          | 58937907 - 59206842   | T - 100.00% | TRUE  | TRUE  |
| 12          | 93936239 - 93965544   | T - 50.00%  | TRUE  | TRUE  |
| 12          | 93936239 - 93965544   | T - 50.00%  | FALSE | TRUE  |
| 12          | 93936239 - 93965544   |             | TRUE  | TRUE  |
| 12          | 93936239 - 93965544   |             | TRUE  | TRUE  |
| 12          | 93936239 - 93965544   | T - 100.00% | TRUE  | TRUE  |
| 20          | 62375019 - 62462597   |             | TRUE  | TRUE  |
| 20          | 62375019 - 62462597   | F - 25.00%  | TRUE  | TRUE  |
| 1           | 162794248 - 162838605 |             | TRUE  | TRUE  |
| 1           | 162794248 - 162838605 | T - 66.67%  | TRUE  | TRUE  |



|    |                       |            |       |       |
|----|-----------------------|------------|-------|-------|
| 1  | 162794248 - 162838605 | T - 83.33% | TRUE  | TRUE  |
| 4  | 1160720 - 1202750     | F - 36.67% | TRUE  | TRUE  |
| 4  | 1160720 - 1202750     |            | TRUE  | TRUE  |
| 4  | 1160720 - 1202750     | F - 30.00% | TRUE  | TRUE  |
| 4  | 1160720 - 1202750     |            | TRUE  | TRUE  |
| 4  | 1160720 - 1202750     |            | TRUE  | TRUE  |
| 4  | 1160720 - 1202750     | F - 20.00% | TRUE  | TRUE  |
| 4  | 1160720 - 1202750     |            | TRUE  | TRUE  |
| 4  | 1160720 - 1202750     |            | FALSE | TRUE  |
| 4  | 1160720 - 1202750     |            | FALSE | TRUE  |
| 4  | 1160720 - 1202750     |            | FALSE | TRUE  |
| 8  | 182137 - 197342       |            | TRUE  | TRUE  |
| 8  | 182137 - 197342       |            | TRUE  | FALSE |
| 8  | 182137 - 197342       | F - 33.33% | TRUE  | TRUE  |
| 8  | 182137 - 197342       | F - 5.56%  | TRUE  | TRUE  |
| 8  | 182137 - 197342       | F - 38.89% | TRUE  | TRUE  |
| 8  | 182137 - 197342       | T - 72.22% | TRUE  | TRUE  |
| 14 | 32798479 - 33302268   |            | TRUE  | FALSE |
| 14 | 32798479 - 33302268   | T - 70.00% | TRUE  | TRUE  |
| 14 | 32798479 - 33302268   |            | FALSE | TRUE  |
| 16 | 1413206 - 1464705     |            | TRUE  | FALSE |
| 16 | 1413206 - 1464705     |            | TRUE  | TRUE  |
| 16 | 1413206 - 1464705     | F - 4.55%  | TRUE  | TRUE  |
| 16 | 1413206 - 1464705     |            | TRUE  | TRUE  |
| 16 | 1413206 - 1464705     |            | TRUE  | TRUE  |
| 16 | 1413206 - 1464705     |            | TRUE  | TRUE  |
| 16 | 1413206 - 1464705     |            | FALSE | TRUE  |
| 17 | 18086392 - 18113268   |            | TRUE  | TRUE  |
| 17 | 18086392 - 18113268   | T - 71.43% | TRUE  | TRUE  |
| 17 | 18086392 - 18113268   |            | TRUE  | TRUE  |
| 17 | 18086392 - 18113268   | F - 14.29% | TRUE  | TRUE  |
| 17 | 18086392 - 18113268   | F - 42.86% | TRUE  | TRUE  |
| 17 | 18086392 - 18113268   | F - 28.57% | TRUE  | TRUE  |
| 20 | 2815960 - 2821836     | F - 21.43% | TRUE  | FALSE |
| 20 | 2815960 - 2821836     |            | FALSE | TRUE  |
| 5  | 140710204 - 140892548 |            | TRUE  | TRUE  |
| 5  | 140710204 - 140892548 |            | TRUE  | TRUE  |
| 5  | 140710204 - 140892548 |            | TRUE  | TRUE  |
| 5  | 140710204 - 140892548 |            | TRUE  | TRUE  |
| 5  | 140710204 - 140892548 |            | TRUE  | TRUE  |
| 5  | 140710204 - 140892548 |            | TRUE  | TRUE  |
| 5  | 140710204 - 140892548 |            | TRUE  | FALSE |
| 5  | 140710204 - 140892548 |            | TRUE  | TRUE  |
| 5  | 140710204 - 140892548 |            | TRUE  | TRUE  |
| 5  | 140710204 - 140892548 |            | TRUE  | TRUE  |
| 5  | 140710204 - 140892548 |            | TRUE  | TRUE  |
| 5  | 140710204 - 140892548 | F - 2.13%  | TRUE  | TRUE  |
| 5  | 140710204 - 140892548 |            | TRUE  | TRUE  |
| 5  | 140710204 - 140892548 | F - 4.26%  | TRUE  | TRUE  |
| 5  | 140710204 - 140892548 |            | TRUE  | TRUE  |
| 5  | 140710204 - 140892548 |            | TRUE  | TRUE  |
| 5  | 140710204 - 140892548 |            | TRUE  | TRUE  |
| 8  | 104310661 - 104345094 |            | TRUE  | FALSE |
| 8  | 104310661 - 104345094 | F - 21.43% | TRUE  | TRUE  |
| 8  | 74857354 - 74884522   |            | TRUE  | FALSE |
| 8  | 74857354 - 74884522   | T - 59.09% | TRUE  | TRUE  |
| 16 | 58497549 - 58547523   |            | TRUE  | FALSE |
| 16 | 58497549 - 58547523   |            | TRUE  | TRUE  |

|    |                       |             |       |       |
|----|-----------------------|-------------|-------|-------|
| 16 | 58497549 - 58547523   |             | TRUE  | TRUE  |
| 16 | 58497549 - 58547523   | F - 12.50%  | TRUE  | FALSE |
| 16 | 58497549 - 58547523   | F - 12.50%  | TRUE  | TRUE  |
| 16 | 58497549 - 58547523   |             | TRUE  | TRUE  |
| 16 | 58497549 - 58547523   |             | TRUE  | TRUE  |
| 16 | 58497549 - 58547523   | F - 6.25%   | TRUE  | TRUE  |
| 16 | 58497549 - 58547523   |             | FALSE | TRUE  |
| 16 | 58497549 - 58547523   | T - 93.75%  | TRUE  | TRUE  |
| 16 | 58497549 - 58547523   | F - 18.75%  | TRUE  | TRUE  |
| 16 | 58497549 - 58547523   | F - 6.25%   | FALSE | TRUE  |
| 16 | 58497549 - 58547523   | F - 6.25%   | TRUE  | TRUE  |
| 16 | 58497549 - 58547523   |             | TRUE  | TRUE  |
| 16 | 58497549 - 58547523   |             | TRUE  | TRUE  |
| 16 | 58497549 - 58547523   |             | FALSE | TRUE  |
| 19 | 35447258 - 35454953   |             | TRUE  | TRUE  |
| 19 | 35447258 - 35454953   | T - 66.67%  | TRUE  | TRUE  |
| 19 | 49340354 - 49371884   |             | TRUE  | TRUE  |
| 19 | 49340354 - 49371884   | T - 100.00% | TRUE  | TRUE  |
| 19 | 49340354 - 49371884   |             | FALSE | TRUE  |
| 19 | 49340354 - 49371884   |             | FALSE | TRUE  |
| 1  | 63906441 - 64059392   |             | TRUE  | FALSE |
| 1  | 63906441 - 64059392   | F - 4.76%   | TRUE  | TRUE  |
| 1  | 63906441 - 64059392   |             | TRUE  | TRUE  |
| 1  | 63906441 - 64059392   |             | TRUE  | TRUE  |
| 1  | 63906441 - 64059392   |             | FALSE | TRUE  |
| 1  | 63906441 - 64059392   |             | FALSE | TRUE  |
| 8  | 21777180 - 21864096   |             | TRUE  | TRUE  |
| 8  | 21777180 - 21864096   | F - 13.33%  | TRUE  | TRUE  |
| 8  | 21777180 - 21864096   | F - 6.67%   | TRUE  | TRUE  |
| 11 | 102980160 - 103350591 |             | TRUE  | TRUE  |
| 11 | 102980160 - 103350591 |             | TRUE  | FALSE |
| 11 | 102980160 - 103350591 |             | TRUE  | TRUE  |
| 11 | 102980160 - 103350591 |             | TRUE  | TRUE  |
| 11 | 102980160 - 103350591 |             | TRUE  | TRUE  |
| 11 | 102980160 - 103350591 |             | TRUE  | FALSE |
| 11 | 102980160 - 103350591 |             | TRUE  | TRUE  |
| 11 | 102980160 - 103350591 |             | TRUE  | TRUE  |
| 11 | 102980160 - 103350591 | T - 66.67%  | TRUE  | TRUE  |
| 11 | 102980160 - 103350591 |             | FALSE | TRUE  |
| 11 | 102980160 - 103350591 |             | FALSE | TRUE  |
| 15 | 59279854 - 59389618   | F - 35.71%  | TRUE  | TRUE  |
| 15 | 59279854 - 59389618   | T - 78.57%  | TRUE  | TRUE  |
| 15 | 59279854 - 59389618   |             | TRUE  | TRUE  |
| 15 | 59279854 - 59389618   |             | FALSE | TRUE  |
| 15 | 60771377 - 60922836   |             | TRUE  | TRUE  |
| 15 | 60771377 - 60922836   | T - 50.00%  | TRUE  | TRUE  |
| 15 | 60771377 - 60922836   | F - 12.50%  | FALSE | TRUE  |
| 17 | 29630788 - 29641130   |             | TRUE  | FALSE |
| 17 | 29630788 - 29641130   |             | TRUE  | TRUE  |
| 17 | 29630788 - 29641130   | T - 100.00% | TRUE  | TRUE  |
| 11 | 30406040 - 30608537   |             | TRUE  | TRUE  |
| 11 | 30406040 - 30608537   |             | TRUE  | TRUE  |
| 11 | 30406040 - 30608537   |             | TRUE  | TRUE  |
| 11 | 30406040 - 30608537   | F - 12.50%  | TRUE  | FALSE |
| 12 | 44122410 - 44152620   | T - 90.00%  | TRUE  | FALSE |
| 12 | 44122410 - 44152620   |             | FALSE | TRUE  |
| 15 | 56657625 - 56738195   |             | TRUE  | TRUE  |
| 15 | 56657625 - 56738195   | T - 87.50%  | TRUE  | TRUE  |

|    |                       |             |       |       |
|----|-----------------------|-------------|-------|-------|
| 15 | 70946893 - 71055932   | F - 38.46%  | TRUE  | TRUE  |
| 15 | 70946893 - 71055932   |             | TRUE  | TRUE  |
| 15 | 70946893 - 71055932   | T - 53.85%  | TRUE  | TRUE  |
| 15 | 70946893 - 71055932   |             | TRUE  | TRUE  |
| 15 | 70946893 - 71055932   |             | TRUE  | TRUE  |
| 1  | 24958207 - 24999772   | F - 7.14%   | TRUE  | TRUE  |
| 1  | 24958207 - 24999772   |             | TRUE  | TRUE  |
| 1  | 24958207 - 24999772   | F - 7.14%   | TRUE  | TRUE  |
| 1  | 24958207 - 24999772   |             | TRUE  | TRUE  |
| 1  | 24958207 - 24999772   |             | TRUE  | TRUE  |
| 1  | 24958207 - 24999772   | F - 10.71%  | TRUE  | TRUE  |
| 4  | 6694796 - 6698897     |             | TRUE  | FALSE |
| 4  | 6694796 - 6698897     | T - 100.00% | TRUE  | TRUE  |
| 4  | 6694796 - 6698897     |             | TRUE  | TRUE  |
| 4  | 6694796 - 6698897     | F - 25.00%  | FALSE | TRUE  |
| 4  | 26165077 - 26436752   | F - 2.50%   | TRUE  | TRUE  |
| 4  | 26165077 - 26436752   |             | TRUE  | FALSE |
| 4  | 26165077 - 26436752   |             | TRUE  | FALSE |
| 8  | 104383743 - 104395232 |             | TRUE  | TRUE  |
| 8  | 104383743 - 104395232 | T - 55.56%  | TRUE  | TRUE  |
| 8  | 104383743 - 104395232 |             | TRUE  | TRUE  |
| 8  | 104383743 - 104395232 | T - 55.56%  | TRUE  | TRUE  |
| 8  | 104383743 - 104395232 | F - 22.22%  | TRUE  | TRUE  |
| 8  | 104383743 - 104395232 | F - 22.22%  | TRUE  | TRUE  |
| 10 | 43069631 - 43134018   |             | TRUE  | TRUE  |
| 10 | 43069631 - 43134018   | F - 30.77%  | TRUE  | FALSE |
| 13 | 40918094 - 41055143   |             | TRUE  | FALSE |
| 13 | 40918094 - 41055143   | T - 50.00%  | TRUE  | TRUE  |
| 15 | 60780483 - 61521518   |             | TRUE  | TRUE  |
| 15 | 60780483 - 61521518   | F - 33.33%  | TRUE  | TRUE  |
| 15 | 60780483 - 61521518   |             | TRUE  | TRUE  |
| 15 | 60780483 - 61521518   | F - 25.00%  | TRUE  | TRUE  |
| 15 | 60780483 - 61521518   | F - 16.67%  | TRUE  | TRUE  |
| 15 | 60780483 - 61521518   | F - 16.67%  | TRUE  | TRUE  |
| 15 | 60780483 - 61521518   | F - 16.67%  | TRUE  | TRUE  |
| 16 | 56598961 - 56602869   |             | TRUE  | TRUE  |
| 16 | 56598961 - 56602869   | T - 100.00% | TRUE  | TRUE  |
| 19 | 2819872 - 2836733     | T - 66.67%  | TRUE  | FALSE |
| 19 | 2819872 - 2836733     |             | TRUE  | TRUE  |
| 19 | 2819872 - 2836733     |             | TRUE  | TRUE  |
| 1  | 38032413 - 38061586   | F - 6.67%   | TRUE  | FALSE |
| 1  | 38032413 - 38061586   |             | TRUE  | TRUE  |
| 1  | 38032413 - 38061586   |             | TRUE  | TRUE  |
| 1  | 38032413 - 38061586   |             | TRUE  | TRUE  |
| 1  | 212113741 - 212209002 |             | TRUE  | TRUE  |
| 1  | 212113741 - 212209002 |             | TRUE  | TRUE  |
| 1  | 212113741 - 212209002 | F - 6.25%   | TRUE  | TRUE  |
| 1  | 212113741 - 212209002 |             | TRUE  | TRUE  |
| 8  | 95907995 - 96128683   |             | TRUE  | TRUE  |
| 8  | 95907995 - 96128683   |             | TRUE  | FALSE |
| 8  | 95907995 - 96128683   | F - 4.35%   | TRUE  | FALSE |
| 8  | 95907995 - 96128683   |             | TRUE  | TRUE  |
| 8  | 95907995 - 96128683   |             | TRUE  | FALSE |
| 8  | 95907995 - 96128683   |             | TRUE  | TRUE  |
| 8  | 95907995 - 96128683   | F - 26.09%  | TRUE  | TRUE  |
| 8  | 95907995 - 96128683   |             | TRUE  | TRUE  |
| 8  | 95907995 - 96128683   |             | TRUE  | TRUE  |
| 8  | 95907995 - 96128683   | F - 30.43%  | FALSE | TRUE  |

|    |                       |             |       |       |
|----|-----------------------|-------------|-------|-------|
| 10 | 94833232 - 94837647   |             | TRUE  | FALSE |
| 10 | 94833232 - 94837647   | T - 100.00% | TRUE  | FALSE |
| 10 | 94833232 - 94837647   | T - 100.00% | TRUE  | TRUE  |
| 10 | 94833232 - 94837647   |             | TRUE  | FALSE |
| 10 | 94833232 - 94837647   |             | TRUE  | TRUE  |
| 10 | 94833232 - 94837647   | T - 75.00%  | TRUE  | TRUE  |
| 10 | 94833232 - 94837647   | F - 25.00%  | TRUE  | TRUE  |
| 10 | 94833232 - 94837647   | T - 50.00%  | TRUE  | TRUE  |
| 10 | 94833232 - 94837647   |             | TRUE  | TRUE  |
| 12 | 99128462 - 100378432  |             | TRUE  | TRUE  |
| 12 | 99128462 - 100378432  |             | TRUE  | TRUE  |
| 12 | 99128462 - 100378432  |             | TRUE  | TRUE  |
| 12 | 99128462 - 100378432  | T - 93.94%  | TRUE  | TRUE  |
| 12 | 99128462 - 100378432  |             | TRUE  | FALSE |
| 12 | 99128462 - 100378432  | F - 21.21%  | TRUE  | TRUE  |
| 12 | 99128462 - 100378432  | F - 15.15%  | TRUE  | TRUE  |
| 12 | 99128462 - 100378432  |             | TRUE  | TRUE  |
| 12 | 99128462 - 100378432  | F - 27.27%  | FALSE | TRUE  |
| 12 | 99128462 - 100378432  | F - 12.12%  | TRUE  | TRUE  |
| 12 | 99128462 - 100378432  | F - 24.24%  | TRUE  | TRUE  |
| 12 | 99128462 - 100378432  | F - 24.24%  | TRUE  | TRUE  |
| 12 | 99128462 - 100378432  |             | FALSE | TRUE  |
| 12 | 99128462 - 100378432  | F - 24.24%  | FALSE | TRUE  |
| 12 | 99128462 - 100378432  |             | FALSE | TRUE  |
| 12 | 99128462 - 100378432  |             | FALSE | TRUE  |
| 2  | 43864412 - 43995126   | F - 8.33%   | TRUE  | TRUE  |
| 2  | 43864412 - 43995126   | F - 16.67%  | TRUE  | TRUE  |
| 2  | 43864412 - 43995126   | T - 58.33%  | TRUE  | TRUE  |
| 2  | 43864412 - 43995126   | F - 8.33%   | FALSE | TRUE  |
| 2  | 43864412 - 43995126   |             | FALSE | TRUE  |
| 2  | 43864412 - 43995126   | F - 8.33%   | TRUE  | TRUE  |
| 2  | 43864412 - 43995126   |             | TRUE  | TRUE  |
| 2  | 43864412 - 43995126   | T - 66.67%  | TRUE  | TRUE  |
| 2  | 43864412 - 43995126   | F - 25.00%  | TRUE  | TRUE  |
| 2  | 43864412 - 43995126   |             | TRUE  | TRUE  |
| 2  | 43864412 - 43995126   |             | TRUE  | TRUE  |
| 2  | 43864412 - 43995126   |             | FALSE | TRUE  |
| 2  | 43864412 - 43995126   |             | TRUE  | TRUE  |
| 2  | 228029281 - 228179508 |             | TRUE  | TRUE  |
| 2  | 228029281 - 228179508 | F - 41.67%  | TRUE  | TRUE  |
| 2  | 228029281 - 228179508 |             | TRUE  | TRUE  |
| 2  | 228029281 - 228179508 |             | TRUE  | TRUE  |
| 2  | 228029281 - 228179508 | F - 41.67%  | TRUE  | TRUE  |
| 2  | 228029281 - 228179508 | F - 41.67%  | TRUE  | TRUE  |
| 2  | 228029281 - 228179508 |             | TRUE  | TRUE  |
| 2  | 228029281 - 228179508 |             | TRUE  | TRUE  |
| 2  | 228029281 - 228179508 | F - 41.67%  | TRUE  | TRUE  |
| 2  | 228029281 - 228179508 | F - 41.67%  | FALSE | TRUE  |
| 2  | 228029281 - 228179508 | F - 41.67%  | TRUE  | TRUE  |
| 2  | 228029281 - 228179508 | F - 41.67%  | FALSE | TRUE  |
| 2  | 153508107 - 153574511 | F - 5.00%   | TRUE  | TRUE  |
| 2  | 153508107 - 153574511 |             | TRUE  | TRUE  |
| 2  | 153508107 - 153574511 |             | TRUE  | TRUE  |
| 3  | 57994127 - 58157982   | F - 17.39%  | TRUE  | TRUE  |
| 3  | 57994127 - 58157982   | F - 8.70%   | TRUE  | TRUE  |
| 3  | 57994127 - 58157982   |             | TRUE  | TRUE  |
| 3  | 57994127 - 58157982   | F - 13.04%  | TRUE  | TRUE  |
| 3  | 57994127 - 58157982   | F - 4.35%   | TRUE  | TRUE  |

|    |                       |             |       |       |
|----|-----------------------|-------------|-------|-------|
| 5  | 87564699 - 87732502   |             | TRUE  | FALSE |
| 5  | 87564699 - 87732502   |             | TRUE  | TRUE  |
| 5  | 87564699 - 87732502   |             | TRUE  | TRUE  |
| 5  | 87564699 - 87732502   | F - 6.25%   | TRUE  | TRUE  |
| 5  | 87564699 - 87732502   |             | TRUE  | TRUE  |
| 5  | 87564699 - 87732502   |             | FALSE | TRUE  |
| 6  | 119255950 - 119352706 |             | TRUE  | TRUE  |
| 6  | 119255950 - 119352706 | T - 100.00% | TRUE  | TRUE  |
| 7  | 101928405 - 101962178 |             | TRUE  | TRUE  |
| 7  | 101928405 - 101962178 |             | FALSE | TRUE  |
| 7  | 101928405 - 101962178 | T - 83.33%  | FALSE | TRUE  |
| 15 | 40380091 - 40401093   |             | TRUE  | TRUE  |
| 15 | 40380091 - 40401093   | T - 50.00%  | TRUE  | TRUE  |
| 15 | 40380091 - 40401093   | T - 55.00%  | TRUE  | TRUE  |
| 2  | 202152994 - 202222121 |             | TRUE  | TRUE  |
| 2  | 202152994 - 202222121 | T - 76.92%  | TRUE  | TRUE  |
| 5  | 79703832 - 79775498   |             | TRUE  | TRUE  |
| 5  | 79703832 - 79775498   |             | TRUE  | TRUE  |
| 5  | 79703832 - 79775498   | T - 60.00%  | TRUE  | FALSE |
| 5  | 79703832 - 79775498   |             | TRUE  | TRUE  |
| 5  | 79703832 - 79775498   | F - 10.00%  | TRUE  | TRUE  |
| 5  | 79703832 - 79775498   |             | FALSE | TRUE  |
| 10 | 29698331 - 29776785   |             | TRUE  | TRUE  |
| 10 | 29698331 - 29776785   | F - 6.67%   | TRUE  | TRUE  |
| 10 | 29698331 - 29776785   | F - 13.33%  | TRUE  | TRUE  |
| 10 | 29698331 - 29776785   | F - 6.67%   | TRUE  | TRUE  |
| 10 | 29698331 - 29776785   |             | TRUE  | TRUE  |
| 15 | 101844133 - 102030187 | T - 75.00%  | TRUE  | TRUE  |
| 15 | 101844133 - 102030187 |             | TRUE  | TRUE  |
| 15 | 101844133 - 102030187 |             | TRUE  | TRUE  |
| 15 | 101844133 - 102030187 | T - 87.50%  | TRUE  | TRUE  |
| 15 | 101844133 - 102030187 | F - 16.67%  | TRUE  | TRUE  |
| 15 | 101844133 - 102030187 |             | FALSE | TRUE  |
| 15 | 101844133 - 102030187 |             | TRUE  | TRUE  |
| 15 | 101844133 - 102030187 | F - 8.33%   | TRUE  | TRUE  |
| 15 | 101844133 - 102030187 | F - 4.17%   | TRUE  | TRUE  |
| 15 | 101844133 - 102030187 |             | TRUE  | TRUE  |
| 15 | 101844133 - 102030187 |             | FALSE | TRUE  |
| 15 | 101844133 - 102030187 | T - 87.50%  | TRUE  | TRUE  |
| 15 | 101844133 - 102030187 | T - 95.83%  | FALSE | TRUE  |
| 15 | 101844133 - 102030187 | T - 95.83%  | TRUE  | TRUE  |
| 15 | 101844133 - 102030187 |             | TRUE  | TRUE  |
| 15 | 101844133 - 102030187 | T - 95.83%  | FALSE | TRUE  |
| 15 | 101844133 - 102030187 | T - 83.33%  | TRUE  | TRUE  |
| 15 | 101844133 - 102030187 | T - 50.00%  | FALSE | TRUE  |
| 15 | 101844133 - 102030187 |             | FALSE | TRUE  |
| 15 | 101844133 - 102030187 |             | FALSE | TRUE  |
| 15 | 101844133 - 102030187 |             | FALSE | TRUE  |
| 15 | 101844133 - 102030187 |             | FALSE | TRUE  |
| 15 | 101844133 - 102030187 |             | FALSE | TRUE  |
| 15 | 101844133 - 102030187 |             | FALSE | TRUE  |
| 15 | 101844133 - 102030187 |             | FALSE | TRUE  |
| 15 | 101844133 - 102030187 | F - 37.50%  | FALSE | TRUE  |
| 15 | 101844133 - 102030187 |             | FALSE | TRUE  |
| 15 | 101844133 - 102030187 |             | FALSE | TRUE  |
| 15 | 101844133 - 102030187 |             | FALSE | TRUE  |
| 22 | 41074754 - 41078818   |             | TRUE  | TRUE  |
| 22 | 41074754 - 41078818   |             | TRUE  | TRUE  |
| 22 | 41074754 - 41078818   | T - 85.71%  | TRUE  | TRUE  |

|    |                       |             |       |       |
|----|-----------------------|-------------|-------|-------|
| 22 | 41074754 - 41078818   | T - 57.14%  | TRUE  | TRUE  |
| 22 | 41074754 - 41078818   |             | FALSE | TRUE  |
| 22 | 41074754 - 41078818   | T - 85.71%  | TRUE  | TRUE  |
| 22 | 41074754 - 41078818   | T - 100.00% | TRUE  | TRUE  |
| 1  | 955503 - 991499       |             | TRUE  | FALSE |
| 1  | 955503 - 991499       | F - 8.33%   | TRUE  | FALSE |
| 1  | 955503 - 991499       | F - 25.00%  | TRUE  | TRUE  |
| 1  | 955503 - 991499       |             | TRUE  | TRUE  |
| 1  | 955503 - 991499       |             | TRUE  | TRUE  |
| 1  | 955503 - 991499       | F - 25.00%  | TRUE  | TRUE  |
| 1  | 955503 - 991499       |             | TRUE  | TRUE  |
| 1  | 955503 - 991499       |             | TRUE  | TRUE  |
| 1  | 955503 - 991499       |             | FALSE | TRUE  |
| 1  | 955503 - 991499       |             | TRUE  | TRUE  |
| 1  | 11994262 - 12035599   |             | TRUE  | FALSE |
| 1  | 11994262 - 12035599   | F - 6.67%   | TRUE  | TRUE  |
| 2  | 152266397 - 152364527 |             | TRUE  | TRUE  |
| 2  | 152266397 - 152364527 |             | TRUE  | FALSE |
| 2  | 152266397 - 152364527 | F - 9.09%   | TRUE  | TRUE  |
| 2  | 152266397 - 152364527 | F - 18.18%  | TRUE  | TRUE  |
| 2  | 152266397 - 152364527 |             | TRUE  | TRUE  |
| 2  | 152266397 - 152364527 |             | TRUE  | TRUE  |
| 3  | 69788586 - 70017488   |             | TRUE  | TRUE  |
| 3  | 69788586 - 70017488   |             | TRUE  | TRUE  |
| 3  | 69788586 - 70017488   | F - 7.14%   | TRUE  | TRUE  |
| 3  | 69788586 - 70017488   |             | TRUE  | TRUE  |
| 3  | 69788586 - 70017488   | F - 7.14%   | TRUE  | FALSE |
| 3  | 69788586 - 70017488   |             | TRUE  | TRUE  |
| 3  | 69788586 - 70017488   | F - 3.57%   | TRUE  | FALSE |
| 3  | 69788586 - 70017488   |             | TRUE  | TRUE  |
| 3  | 69788586 - 70017488   | F - 42.86%  | TRUE  | TRUE  |
| 3  | 184097861 - 184108524 |             | TRUE  | FALSE |
| 3  | 184097861 - 184108524 | F - 4.17%   | TRUE  | TRUE  |
| 3  | 184097861 - 184108524 |             | FALSE | TRUE  |
| 4  | 2470456 - 2517586     |             | TRUE  | TRUE  |
| 4  | 2470456 - 2517586     | F - 7.69%   | TRUE  | TRUE  |
| 4  | 2470456 - 2517586     |             | TRUE  | TRUE  |
| 4  | 2470456 - 2517586     |             | FALSE | TRUE  |
| 6  | 129204286 - 129837714 |             | TRUE  | FALSE |
| 6  | 129204286 - 129837714 |             | TRUE  | TRUE  |
| 6  | 129204286 - 129837714 |             | TRUE  | FALSE |
| 6  | 129204286 - 129837714 |             | TRUE  | TRUE  |
| 6  | 129204286 - 129837714 |             | TRUE  | FALSE |
| 6  | 129204286 - 129837714 | T - 69.23%  | TRUE  | FALSE |
| 6  | 129204286 - 129837714 | T - 76.92%  | TRUE  | TRUE  |
| 6  | 129204286 - 129837714 | T - 69.23%  | TRUE  | TRUE  |
| 6  | 129204286 - 129837714 |             | TRUE  | TRUE  |
| 6  | 129204286 - 129837714 |             | TRUE  | FALSE |
| 6  | 129204286 - 129837714 |             | TRUE  | TRUE  |
| 6  | 129204286 - 129837714 |             | TRUE  | FALSE |
| 6  | 129204286 - 129837714 |             | TRUE  | FALSE |
| 6  | 129204286 - 129837714 |             | TRUE  | FALSE |
| 6  | 129204286 - 129837714 |             | TRUE  | FALSE |
| 6  | 129204286 - 129837714 |             | TRUE  | FALSE |
| 6  | 129204286 - 129837714 |             | TRUE  | FALSE |
| 6  | 129204286 - 129837714 |             | TRUE  | FALSE |
| 6  | 129204286 - 129837714 | T - 69.23%  | TRUE  | TRUE  |
| 6  | 129204286 - 129837714 |             | TRUE  | TRUE  |

|    |                       |             |       |       |
|----|-----------------------|-------------|-------|-------|
| 6  | 129204286 - 129837714 | T - 92.31%  | TRUE  | TRUE  |
| 6  | 129204286 - 129837714 | T - 69.23%  | TRUE  | TRUE  |
| 6  | 129204286 - 129837714 | T - 76.92%  | TRUE  | TRUE  |
| 6  | 129204286 - 129837714 |             | TRUE  | FALSE |
| 6  | 129204286 - 129837714 | T - 69.23%  | TRUE  | FALSE |
| 6  | 129204286 - 129837714 |             | TRUE  | FALSE |
| 6  | 129204286 - 129837714 | T - 69.23%  | TRUE  | FALSE |
| 6  | 129204286 - 129837714 |             | TRUE  | FALSE |
| 6  | 129204286 - 129837714 |             | TRUE  | FALSE |
| 6  | 129204286 - 129837714 | T - 69.23%  | TRUE  | TRUE  |
| 6  | 129204286 - 129837714 | T - 69.23%  | TRUE  | FALSE |
| 6  | 129204286 - 129837714 |             | TRUE  | FALSE |
| 6  | 129204286 - 129837714 |             | TRUE  | FALSE |
| 6  | 129204286 - 129837714 | T - 69.23%  | TRUE  | TRUE  |
| 6  | 129204286 - 129837714 |             | TRUE  | FALSE |
| 6  | 129204286 - 129837714 | T - 69.23%  | TRUE  | TRUE  |
| 6  | 129204286 - 129837714 |             | TRUE  | FALSE |
| 6  | 129204286 - 129837714 | T - 69.23%  | TRUE  | TRUE  |
| 6  | 129204286 - 129837714 |             | TRUE  | FALSE |
| 6  | 129204286 - 129837714 | T - 76.92%  | TRUE  | TRUE  |
| 6  | 129204286 - 129837714 | T - 69.23%  | TRUE  | FALSE |
| 6  | 129204286 - 129837714 | T - 69.23%  | TRUE  | FALSE |
| 6  | 129204286 - 129837714 | T - 69.23%  | TRUE  | FALSE |
| 6  | 129204286 - 129837714 |             | TRUE  | FALSE |
| 6  | 129204286 - 129837714 | T - 76.92%  | TRUE  | TRUE  |
| 6  | 129204286 - 129837714 |             | TRUE  | TRUE  |
| 6  | 129204286 - 129837714 | T - 69.23%  | TRUE  | TRUE  |
| 6  | 129204286 - 129837714 | T - 69.23%  | TRUE  | TRUE  |
| 6  | 129204286 - 129837714 |             | TRUE  | FALSE |
| 6  | 129204286 - 129837714 |             | TRUE  | FALSE |
| 6  | 129204286 - 129837714 |             | TRUE  | TRUE  |
| 6  | 129204286 - 129837714 |             | TRUE  | FALSE |
| 6  | 129204286 - 129837714 |             | TRUE  | FALSE |
| 6  | 129204286 - 129837714 | T - 69.23%  | TRUE  | TRUE  |
| 6  | 129204286 - 129837714 |             | TRUE  | TRUE  |
| 6  | 129204286 - 129837714 | F - 7.69%   | TRUE  | TRUE  |
| 6  | 129204286 - 129837714 | T - 69.23%  | TRUE  | FALSE |
| 6  | 129204286 - 129837714 | T - 69.23%  | TRUE  | TRUE  |
| 6  | 129204286 - 129837714 | T - 69.23%  | TRUE  | TRUE  |
| 6  | 129204286 - 129837714 | T - 84.62%  | TRUE  | FALSE |
| 6  | 129204286 - 129837714 | F - 7.69%   | TRUE  | FALSE |
| 6  | 129204286 - 129837714 | T - 69.23%  | TRUE  | TRUE  |
| 6  | 129204286 - 129837714 | T - 69.23%  | TRUE  | TRUE  |
| 6  | 129204286 - 129837714 |             | TRUE  | TRUE  |
| 6  | 129204286 - 129837714 | F - 15.38%  | TRUE  | TRUE  |
| 6  | 129204286 - 129837714 |             | TRUE  | FALSE |
| 6  | 129204286 - 129837714 |             | TRUE  | TRUE  |
| 6  | 129204286 - 129837714 |             | TRUE  | FALSE |
| 6  | 129204286 - 129837714 | T - 69.23%  | TRUE  | TRUE  |
| 6  | 129204286 - 129837714 | T - 69.23%  | TRUE  | TRUE  |
| 6  | 129204286 - 129837714 |             | TRUE  | TRUE  |
| 6  | 129204286 - 129837714 | T - 61.54%  | TRUE  | FALSE |
| 6  | 129204286 - 129837714 |             | TRUE  | FALSE |
| 6  | 129204286 - 129837714 |             | TRUE  | TRUE  |
| 6  | 129204286 - 129837714 | T - 53.85%  | TRUE  | TRUE  |
| 6  | 129204286 - 129837714 |             | TRUE  | TRUE  |
| 6  | 129204286 - 129837714 |             | FALSE | TRUE  |
| 10 | 64571756 - 64679660   | T - 100.00% | TRUE  | FALSE |
| 10 | 64571756 - 64679660   |             | TRUE  | FALSE |
| 10 | 64571756 - 64679660   | T - 100.00% | TRUE  | TRUE  |
| 10 | 64571756 - 64679660   | T - 54.55%  | TRUE  | TRUE  |
| 10 | 64571756 - 64679660   |             | TRUE  | FALSE |

|    |                       |             |       |       |
|----|-----------------------|-------------|-------|-------|
| 10 | 64571756 - 64679660   | T - 81.82%  | TRUE  | FALSE |
| 10 | 64571756 - 64679660   | T - 81.82%  | TRUE  | TRUE  |
| 10 | 64571756 - 64679660   | F - 9.09%   | TRUE  | TRUE  |
| 10 | 64571756 - 64679660   | T - 81.82%  | TRUE  | FALSE |
| 10 | 64571756 - 64679660   |             | TRUE  | TRUE  |
| 10 | 64571756 - 64679660   | F - 9.09%   | TRUE  | TRUE  |
| 10 | 64571756 - 64679660   | F - 9.09%   | TRUE  | TRUE  |
| 10 | 64571756 - 64679660   |             | TRUE  | TRUE  |
| 13 | 52741844 - 52908412   |             | TRUE  | FALSE |
| 13 | 52741844 - 52908412   | F - 30.00%  | TRUE  | FALSE |
| 13 | 52741844 - 52908412   |             | TRUE  | TRUE  |
| 13 | 52741844 - 52908412   |             | TRUE  | TRUE  |
| 13 | 52741844 - 52908412   |             | TRUE  | FALSE |
| 13 | 52741844 - 52908412   | F - 10.00%  | TRUE  | TRUE  |
| 13 | 52741844 - 52908412   |             | TRUE  | TRUE  |
| 13 | 52741844 - 52908412   | F - 30.00%  | TRUE  | TRUE  |
| 17 | 48172101 - 48189516   |             | TRUE  | TRUE  |
| 17 | 48172101 - 48189516   | F - 18.18%  | TRUE  | TRUE  |
| 17 | 48172101 - 48189516   | F - 4.55%   | FALSE | TRUE  |
| 17 | 48172101 - 48189516   | F - 4.55%   | FALSE | TRUE  |
| 17 | 48172101 - 48189516   | F - 9.09%   | TRUE  | TRUE  |
| 17 | 48172101 - 48189516   | F - 4.55%   | TRUE  | TRUE  |
| 17 | 48172101 - 48189516   | F - 9.09%   | TRUE  | TRUE  |
| 17 | 48172101 - 48189516   | F - 9.09%   | FALSE | TRUE  |
| 17 | 80416060 - 80446143   |             | TRUE  | TRUE  |
| 17 | 80416060 - 80446143   | F - 13.33%  | TRUE  | TRUE  |
| 17 | 80416060 - 80446143   |             | TRUE  | TRUE  |
| 17 | 80416060 - 80446143   | T - 86.67%  | TRUE  | TRUE  |
| 17 | 20771746 - 20833046   | F - 25.00%  | TRUE  | TRUE  |
| 17 | 20771746 - 20833046   | T - 50.00%  | TRUE  | TRUE  |
| 17 | 20771746 - 20833046   |             | TRUE  | TRUE  |
| 17 | 20771746 - 20833046   |             | FALSE | TRUE  |
| 17 | 20771746 - 20833046   | T - 75.00%  | TRUE  | TRUE  |
| 17 | 20771746 - 20833046   |             | TRUE  | TRUE  |
| 17 | 20771746 - 20833046   |             | TRUE  | TRUE  |
| 19 | 9964394 - 10047070    |             | TRUE  | TRUE  |
| 19 | 9964394 - 10047070    | T - 100.00% | TRUE  | TRUE  |
| 19 | 9964394 - 10047070    |             | TRUE  | TRUE  |
| 20 | 30326904 - 30389608   |             | TRUE  | TRUE  |
| 20 | 30326904 - 30389608   |             | TRUE  | TRUE  |
| 20 | 30326904 - 30389608   | F - 33.33%  | TRUE  | TRUE  |
| 20 | 30326904 - 30389608   | T - 66.67%  | FALSE | TRUE  |
| 20 | 30326904 - 30389608   | T - 100.00% | TRUE  | TRUE  |
| 20 | 30326904 - 30389608   |             | TRUE  | TRUE  |
| 20 | 30326904 - 30389608   |             | TRUE  | TRUE  |
| 20 | 30326904 - 30389608   |             | TRUE  | TRUE  |
| 1  | 27681670 - 27693383   |             | TRUE  | TRUE  |
| 1  | 27681670 - 27693383   | F - 8.33%   | TRUE  | TRUE  |
| 2  | 162848751 - 162931052 |             | TRUE  | TRUE  |
| 2  | 162848751 - 162931052 |             | TRUE  | FALSE |
| 2  | 162848751 - 162931052 | F - 40.00%  | TRUE  | FALSE |
| 2  | 162848751 - 162931052 | T - 53.33%  | TRUE  | TRUE  |
| 2  | 162848751 - 162931052 | F - 26.67%  | TRUE  | TRUE  |
| 2  | 162848751 - 162931052 |             | TRUE  | TRUE  |
| 2  | 162848751 - 162931052 |             | TRUE  | FALSE |
| 2  | 162848751 - 162931052 |             | TRUE  | TRUE  |
| 2  | 162848751 - 162931052 | F - 20.00%  | TRUE  | TRUE  |
| 2  | 162848751 - 162931052 | T - 66.67%  | TRUE  | TRUE  |



|    |                       |            |       |       |
|----|-----------------------|------------|-------|-------|
| 2  | 162848751 - 162931052 | F - 6.67%  | TRUE  | TRUE  |
| 2  | 162848751 - 162931052 | F - 26.67% | TRUE  | TRUE  |
| 2  | 162848751 - 162931052 |            | FALSE | TRUE  |
| 2  | 162848751 - 162931052 | F - 6.67%  | TRUE  | TRUE  |
| 2  | 162848751 - 162931052 | F - 6.67%  | FALSE | TRUE  |
| 8  | 106330920 - 106816767 |            | TRUE  | TRUE  |
| 8  | 106330920 - 106816767 |            | TRUE  | FALSE |
| 8  | 106330920 - 106816767 |            | TRUE  | TRUE  |
| 8  | 106330920 - 106816767 | F - 25.00% | FALSE | TRUE  |
| 8  | 106330920 - 106816767 |            | TRUE  | TRUE  |
| 8  | 106330920 - 106816767 | F - 8.33%  | TRUE  | TRUE  |
| 8  | 106330920 - 106816767 | F - 8.33%  | TRUE  | TRUE  |
| 8  | 106330920 - 106816767 | F - 8.33%  | TRUE  | TRUE  |
| 8  | 106330920 - 106816767 | T - 58.33% | TRUE  | TRUE  |
| 8  | 106330920 - 106816767 | F - 8.33%  | FALSE | TRUE  |
| 9  | 102584137 - 102629173 | F - 16.67% | TRUE  | FALSE |
| 9  | 102584137 - 102629173 | F - 16.67% | TRUE  | FALSE |
| 9  | 102584137 - 102629173 | T - 66.67% | TRUE  | TRUE  |
| 9  | 102584137 - 102629173 |            | TRUE  | TRUE  |
| 9  | 102584137 - 102629173 |            | TRUE  | TRUE  |
| 9  | 102584137 - 102629173 |            | TRUE  | TRUE  |
| 12 | 26488285 - 26986131   |            | TRUE  | FALSE |
| 12 | 26488285 - 26986131   |            | TRUE  | TRUE  |
| 12 | 26488285 - 26986131   |            | TRUE  | TRUE  |
| 12 | 26488285 - 26986131   |            | TRUE  | TRUE  |
| 12 | 26488285 - 26986131   |            | TRUE  | TRUE  |
| 12 | 26488285 - 26986131   |            | FALSE | TRUE  |
| 12 | 26488285 - 26986131   | F - 11.11% | TRUE  | TRUE  |
| 18 | 21742008 - 21977833   |            | TRUE  | TRUE  |
| 18 | 21742008 - 21977833   | F - 10.00% | TRUE  | TRUE  |
| 18 | 21742008 - 21977833   |            | TRUE  | TRUE  |
| 18 | 21742008 - 21977833   | F - 20.00% | FALSE | TRUE  |
| 18 | 21742008 - 21977833   | T - 50.00% | TRUE  | TRUE  |
| 18 | 21742008 - 21977833   |            | TRUE  | FALSE |
| 18 | 21742008 - 21977833   | T - 50.00% | TRUE  | TRUE  |
| 18 | 21742008 - 21977833   | T - 70.00% | FALSE | TRUE  |
| 18 | 21742008 - 21977833   |            | FALSE | TRUE  |
| 19 | 52494586 - 52511483   |            | TRUE  | TRUE  |
| 19 | 52494586 - 52511483   | T - 84.62% | TRUE  | TRUE  |
| 1  | 217804666 - 218045038 |            | TRUE  | TRUE  |
| 1  | 217804666 - 218045038 | T - 57.14% | TRUE  | TRUE  |
| 1  | 217804666 - 218045038 |            | TRUE  | FALSE |
| 1  | 217804666 - 218045038 | F - 14.29% | TRUE  | TRUE  |
| 1  | 217804666 - 218045038 | F - 14.29% | TRUE  | TRUE  |
| 1  | 217804666 - 218045038 |            | FALSE | TRUE  |
| 1  | 217804666 - 218045038 |            | TRUE  | TRUE  |
| 1  | 217804666 - 218045038 | T - 57.14% | TRUE  | TRUE  |
| 1  | 217804666 - 218045038 |            | TRUE  | TRUE  |
| 1  | 217804666 - 218045038 |            | FALSE | TRUE  |
| 4  | 39455744 - 39851922   | F - 4.35%  | TRUE  | TRUE  |
| 4  | 39455744 - 39851922   |            | TRUE  | TRUE  |
| 4  | 39455744 - 39851922   |            | TRUE  | TRUE  |
| 4  | 39455744 - 39851922   |            | TRUE  | TRUE  |
| 4  | 39455744 - 39851922   | F - 4.35%  | TRUE  | TRUE  |
| 5  | 80708840 - 81047616   |            | TRUE  | FALSE |
| 5  | 80708840 - 81047616   | F - 3.70%  | TRUE  | TRUE  |
| 6  | 43149913 - 43192325   |            | TRUE  | TRUE  |
| 6  | 43149913 - 43192325   |            | TRUE  | TRUE  |

|            |                       |            |       |       |
|------------|-----------------------|------------|-------|-------|
| 6          | 43149913 - 43192325   |            | TRUE  | TRUE  |
| 6          | 43149913 - 43192325   | F - 4.55%  | TRUE  | TRUE  |
| 6          | 43149913 - 43192325   |            | TRUE  | TRUE  |
| 6          | 43149913 - 43192325   | F - 4.55%  | TRUE  | FALSE |
| 6          | 43149913 - 43192325   |            | TRUE  | TRUE  |
| 6          | 43149913 - 43192325   |            | TRUE  | TRUE  |
| 6          | 43149913 - 43192325   |            | TRUE  | TRUE  |
| 6          | 43149913 - 43192325   | F - 4.55%  | TRUE  | TRUE  |
| 6          | 43149913 - 43192325   | F - 4.55%  | TRUE  | TRUE  |
| 6          | 43149913 - 43192325   |            | TRUE  | TRUE  |
| 6          | 43149913 - 43192325   | F - 31.82% | TRUE  | TRUE  |
| 6          | 43149913 - 43192325   | F - 45.45% | TRUE  | TRUE  |
| 6          | 43149913 - 43192325   | F - 45.45% | TRUE  | TRUE  |
| 6          | 43149913 - 43192325   | F - 31.82% | TRUE  | TRUE  |
| 6          | 43149913 - 43192325   | F - 31.82% | TRUE  | TRUE  |
| 6          | 43149913 - 43192325   | F - 4.55%  | TRUE  | TRUE  |
| 6          | 43149913 - 43192325   |            | TRUE  | TRUE  |
| 6          | 43149913 - 43192325   | F - 31.82% | TRUE  | TRUE  |
| 8          | 6264113 - 6501144     |            | TRUE  | FALSE |
| 8          | 6264113 - 6501144     |            | TRUE  | FALSE |
| 8          | 6264113 - 6501144     | F - 45.45% | TRUE  | TRUE  |
| 8          | 6264113 - 6501144     |            | TRUE  | TRUE  |
| 8          | 6264113 - 6501144     | F - 9.09%  | TRUE  | TRUE  |
| 8          | 6264113 - 6501144     | F - 9.09%  | FALSE | TRUE  |
| 8          | 48173167 - 48678652   |            | TRUE  | FALSE |
| 8          | 48173167 - 48678652   |            | TRUE  | TRUE  |
| 8          | 48173167 - 48678652   |            | TRUE  | FALSE |
| 8          | 48173167 - 48678652   |            | TRUE  | TRUE  |
| 8          | 48173167 - 48678652   |            | TRUE  | TRUE  |
| 8          | 48173167 - 48678652   | F - 2.27%  | TRUE  | TRUE  |
| 8          | 48173167 - 48678652   | F - 20.45% | FALSE | TRUE  |
| 8          | 48173167 - 48678652   |            | TRUE  | TRUE  |
| 8          | 48173167 - 48678652   | F - 29.55% | TRUE  | TRUE  |
| 8          | 48173167 - 48678652   | F - 34.09% | TRUE  | TRUE  |
| 8          | 144989321 - 145050913 |            | TRUE  | TRUE  |
| 8          | 144989321 - 145050913 |            | TRUE  | TRUE  |
| 8          | 144989321 - 145050913 |            | TRUE  | TRUE  |
| 8          | 144989321 - 145050913 | F - 9.09%  | TRUE  | TRUE  |
| 15         | 42705021 - 42783336   | F - 44.44% | TRUE  | TRUE  |
| 15         | 42705021 - 42783336   |            | TRUE  | FALSE |
| 16         | 70207722 - 70220798   |            | TRUE  | FALSE |
| 16         | 70207722 - 70220798   |            | TRUE  | TRUE  |
| 16         | 70207722 - 70220798   | F - 14.29% | TRUE  | TRUE  |
| 16         | 70207722 - 70220798   | F - 14.29% | TRUE  | TRUE  |
| 19         | 1383526 - 1395588     |            | TRUE  | TRUE  |
| 19         | 1383526 - 1395588     |            | TRUE  | TRUE  |
| 19         | 1383526 - 1395588     | F - 11.76% | TRUE  | TRUE  |
| 6_mcf_hap5 | 1150036 - 1153497     | F - 33.33% | TRUE  | TRUE  |
| 6_mcf_hap5 | 1150036 - 1153497     | T - 66.67% | TRUE  | TRUE  |
| 6_mcf_hap5 | 1150036 - 1153497     | T - 66.67% | TRUE  | TRUE  |
| 6_mcf_hap5 | 1150036 - 1153497     |            | TRUE  | TRUE  |
| 1          | 10458649 - 10480233   |            | TRUE  | TRUE  |
| 1          | 10458649 - 10480233   | F - 5.88%  | TRUE  | FALSE |
| 1          | 10458649 - 10480233   | F - 5.88%  | TRUE  | FALSE |
| 1          | 185087218 - 185126230 |            | TRUE  | TRUE  |
| 1          | 185087218 - 185126230 | F - 25.00% | TRUE  | TRUE  |
| 1          | 185087218 - 185126230 |            | TRUE  | TRUE  |
| 1          | 16370247 - 16383803   | T - 62.50% | TRUE  | TRUE  |

|    |                       |             |       |       |
|----|-----------------------|-------------|-------|-------|
| 1  | 16370247 - 16383803   |             | TRUE  | FALSE |
| 1  | 16370247 - 16383803   |             | FALSE | TRUE  |
| 2  | 11817721 - 11967535   |             | TRUE  | TRUE  |
| 2  | 11817721 - 11967535   | F - 3.70%   | TRUE  | TRUE  |
| 2  | 11817721 - 11967535   | F - 29.63%  | TRUE  | TRUE  |
| 2  | 11817721 - 11967535   | F - 3.70%   | FALSE | TRUE  |
| 2  | 11817721 - 11967535   | F - 3.70%   | TRUE  | TRUE  |
| 2  | 11817721 - 11967535   | F - 7.41%   | TRUE  | TRUE  |
| 2  | 11817721 - 11967535   | F - 3.70%   | FALSE | TRUE  |
| 2  | 11817721 - 11967535   | F - 22.22%  | FALSE | TRUE  |
| 2  | 11817721 - 11967535   | F - 33.33%  | TRUE  | TRUE  |
| 2  | 11817721 - 11967535   | F - 7.41%   | TRUE  | TRUE  |
| 2  | 11817721 - 11967535   |             | FALSE | TRUE  |
| 2  | 11817721 - 11967535   |             | TRUE  | TRUE  |
| 2  | 11817721 - 11967535   | F - 7.41%   | TRUE  | TRUE  |
| 2  | 11817721 - 11967535   | F - 11.11%  | FALSE | TRUE  |
| 2  | 11817721 - 11967535   | F - 3.70%   | TRUE  | TRUE  |
| 2  | 11817721 - 11967535   | F - 48.15%  | TRUE  | TRUE  |
| 2  | 11817721 - 11967535   | F - 3.70%   | TRUE  | TRUE  |
| 2  | 11817721 - 11967535   | F - 3.70%   | FALSE | TRUE  |
| 2  | 11817721 - 11967535   | F - 7.41%   | TRUE  | TRUE  |
| 2  | 11817721 - 11967535   | F - 44.44%  | TRUE  | TRUE  |
| 2  | 11817721 - 11967535   |             | FALSE | TRUE  |
| 2  | 11817721 - 11967535   |             | TRUE  | TRUE  |
| 2  | 11817721 - 11967535   |             | FALSE | TRUE  |
| 2  | 11817721 - 11967535   |             | TRUE  | TRUE  |
| 2  | 11817721 - 11967535   |             | FALSE | TRUE  |
| 4  | 2965335 - 3042474     |             | TRUE  | FALSE |
| 4  | 2965335 - 3042474     | F - 5.88%   | TRUE  | TRUE  |
| 15 | 83517729 - 83621480   |             | TRUE  | TRUE  |
| 15 | 83517729 - 83621480   |             | TRUE  | TRUE  |
| 15 | 83517729 - 83621480   |             | TRUE  | TRUE  |
| 15 | 83517729 - 83621480   |             | TRUE  | TRUE  |
| 15 | 83517729 - 83621480   | T - 100.00% | TRUE  | TRUE  |
| 15 | 83517729 - 83621480   |             | TRUE  | TRUE  |
| 15 | 83517729 - 83621480   |             | TRUE  | TRUE  |
| 15 | 83517729 - 83621480   | T - 71.43%  | TRUE  | TRUE  |
| 15 | 83517729 - 83621480   | F - 42.86%  | TRUE  | TRUE  |
| 15 | 83517729 - 83621480   | T - 100.00% | TRUE  | TRUE  |
| 1  | 149804221 - 149811339 |             | TRUE  | TRUE  |
| 1  | 149804221 - 149811339 | F - 28.57%  | TRUE  | TRUE  |
| 1  | 149804221 - 149811339 | F - 14.29%  | FALSE | TRUE  |
| 1  | 19398604 - 19536770   | F - 5.88%   | TRUE  | TRUE  |
| 1  | 19398604 - 19536770   | F - 2.94%   | TRUE  | TRUE  |
| 1  | 19398604 - 19536770   |             | TRUE  | TRUE  |
| 1  | 19398604 - 19536770   | F - 2.94%   | TRUE  | TRUE  |
| 1  | 19398604 - 19536770   |             | TRUE  | TRUE  |
| 1  | 19398604 - 19536770   | F - 2.94%   | TRUE  | TRUE  |
| 1  | 19398604 - 19536770   | F - 8.82%   | TRUE  | TRUE  |
| 1  | 19398604 - 19536770   | F - 2.94%   | TRUE  | TRUE  |
| 1  | 19398604 - 19536770   | F - 2.94%   | TRUE  | TRUE  |
| 1  | 19398604 - 19536770   |             | TRUE  | TRUE  |
| 1  | 19398604 - 19536770   | F - 26.47%  | TRUE  | TRUE  |
| 1  | 19398604 - 19536770   | F - 2.94%   | TRUE  | TRUE  |
| 1  | 19398604 - 19536770   |             | TRUE  | TRUE  |
| 1  | 19398604 - 19536770   | F - 8.82%   | FALSE | TRUE  |
| 1  | 19398604 - 19536770   | F - 2.94%   | TRUE  | TRUE  |
| 1  | 19398604 - 19536770   | F - 5.88%   | FALSE | TRUE  |

|   |    |                       |             |       |       |
|---|----|-----------------------|-------------|-------|-------|
|   | 1  | 19398604 - 19536770   | F - 5.88%   | TRUE  | TRUE  |
|   | 1  | 19398604 - 19536770   |             | TRUE  | TRUE  |
|   | 1  | 19398604 - 19536770   | F - 5.88%   | TRUE  | TRUE  |
|   | 3  | 136560568 - 136580896 |             | TRUE  | TRUE  |
|   | 3  | 136560568 - 136580896 | F - 33.33%  | TRUE  | TRUE  |
|   | 5  | 1392905 - 1445545     |             | TRUE  | FALSE |
|   | 5  | 1392905 - 1445545     | T - 71.43%  | TRUE  | FALSE |
|   | 5  | 1392905 - 1445545     |             | FALSE | TRUE  |
|   | 7  | 107383247 - 107402083 |             | TRUE  | FALSE |
|   | 7  | 107383247 - 107402083 | F - 25.00%  | TRUE  | TRUE  |
|   | 7  | 107383247 - 107402083 |             | TRUE  | TRUE  |
| X |    | 23801275 - 23804343   |             | TRUE  | TRUE  |
| X |    | 23801275 - 23804343   |             | TRUE  | TRUE  |
| X |    | 23801275 - 23804343   | F - 6.25%   | TRUE  | TRUE  |
| X |    | 23801275 - 23804343   | F - 12.50%  | TRUE  | TRUE  |
| X |    | 133930443 - 133988641 |             | TRUE  | TRUE  |
| X |    | 133930443 - 133988641 |             | TRUE  | TRUE  |
| X |    | 133930443 - 133988641 | F - 36.36%  | TRUE  | FALSE |
| X |    | 133930443 - 133988641 | F - 40.91%  | TRUE  | TRUE  |
| X |    | 133930443 - 133988641 |             | TRUE  | TRUE  |
|   | 13 | 32605437 - 32870794   |             | TRUE  | TRUE  |
|   | 13 | 32605437 - 32870794   | T - 64.29%  | TRUE  | TRUE  |
|   | 13 | 32605437 - 32870794   | F - 7.14%   | TRUE  | TRUE  |
|   | 13 | 32605437 - 32870794   | F - 14.29%  | TRUE  | TRUE  |
|   | 13 | 32605437 - 32870794   |             | TRUE  | TRUE  |
|   | 13 | 32605437 - 32870794   |             | FALSE | TRUE  |
|   | 13 | 32605437 - 32870794   | F - 7.14%   | FALSE | TRUE  |
|   | 13 | 32605437 - 32870794   |             | TRUE  | TRUE  |
|   | 13 | 32605437 - 32870794   |             | FALSE | TRUE  |
|   | 13 | 32605437 - 32870794   |             | FALSE | TRUE  |
|   | 13 | 32605437 - 32870794   |             | FALSE | TRUE  |
|   | 13 | 32605437 - 32870794   |             | FALSE | TRUE  |
|   | 16 | 2039946 - 2044276     |             | TRUE  | FALSE |
|   | 16 | 2039946 - 2044276     | T - 100.00% | FALSE | TRUE  |
|   | 2  | 211342406 - 211543831 |             | TRUE  | TRUE  |
|   | 2  | 211342406 - 211543831 | T - 50.00%  | TRUE  | TRUE  |
|   | 2  | 211342406 - 211543831 |             | TRUE  | TRUE  |
|   | 2  | 211342406 - 211543831 |             | TRUE  | TRUE  |
|   | 2  | 211342406 - 211543831 | F - 27.78%  | TRUE  | TRUE  |
|   | 2  | 211342406 - 211543831 |             | TRUE  | TRUE  |
|   | 2  | 211342406 - 211543831 |             | FALSE | TRUE  |
|   | 4  | 419224 - 493442       | F - 10.53%  | TRUE  | TRUE  |
|   | 4  | 419224 - 493442       |             | TRUE  | TRUE  |
|   | 4  | 419224 - 493442       | T - 52.63%  | TRUE  | FALSE |
|   | 4  | 419224 - 493442       | F - 21.05%  | TRUE  | TRUE  |
|   | 8  | 67474410 - 67525529   | F - 9.09%   | TRUE  | TRUE  |
|   | 8  | 67474410 - 67525529   | F - 9.09%   | FALSE | TRUE  |
|   | 8  | 67474410 - 67525529   | F - 9.09%   | FALSE | TRUE  |
|   | 8  | 67474410 - 67525529   | T - 90.91%  | TRUE  | TRUE  |
|   | 8  | 67474410 - 67525529   | T - 54.55%  | FALSE | TRUE  |
|   | 8  | 67474410 - 67525529   |             | TRUE  | TRUE  |
|   | 8  | 67474410 - 67525529   |             | TRUE  | TRUE  |
|   | 16 | 53088945 - 53361414   |             | TRUE  | TRUE  |
|   | 16 | 53088945 - 53361414   |             | TRUE  | TRUE  |
|   | 16 | 53088945 - 53361414   | F - 14.29%  | TRUE  | TRUE  |
|   | 16 | 53088945 - 53361414   |             | TRUE  | TRUE  |
|   | 16 | 53088945 - 53361414   |             | TRUE  | TRUE  |
|   | 16 | 53088945 - 53361414   |             | TRUE  | TRUE  |
|   | 16 | 53088945 - 53361414   |             | TRUE  | TRUE  |

|    |                       |            |       |       |
|----|-----------------------|------------|-------|-------|
| 1  | 49193195 - 49244275   |            | TRUE  | TRUE  |
| 1  | 49193195 - 49244275   | T - 81.82% | TRUE  | FALSE |
| 1  | 49193195 - 49244275   | T - 72.73% | TRUE  | TRUE  |
| 1  | 49193195 - 49244275   | T - 54.55% | TRUE  | TRUE  |
| 1  | 49193195 - 49244275   |            | FALSE | TRUE  |
| 1  | 49193195 - 49244275   | T - 63.64% | TRUE  | TRUE  |
| 1  | 94458391 - 94586705   |            | TRUE  | TRUE  |
| 1  | 94458391 - 94586705   |            | TRUE  | TRUE  |
| 1  | 94458391 - 94586705   |            | TRUE  | TRUE  |
| 1  | 94458391 - 94586705   | F - 40.00% | TRUE  | TRUE  |
| 1  | 94458391 - 94586705   |            | TRUE  | TRUE  |
| 1  | 94458391 - 94586705   | F - 26.67% | FALSE | TRUE  |
| 1  | 94458391 - 94586705   | F - 13.33% | TRUE  | TRUE  |
| 1  | 94458391 - 94586705   | F - 33.33% | TRUE  | TRUE  |
| 1  | 94458391 - 94586705   | F - 6.67%  | FALSE | TRUE  |
| 1  | 94458391 - 94586705   |            | TRUE  | TRUE  |
| 1  | 94458391 - 94586705   |            | TRUE  | TRUE  |
| 1  | 94458391 - 94586705   | F - 6.67%  | TRUE  | TRUE  |
| 1  | 94458391 - 94586705   |            | TRUE  | TRUE  |
| 1  | 94458391 - 94586705   | F - 33.33% | TRUE  | TRUE  |
| 1  | 94458391 - 94586705   | F - 6.67%  | TRUE  | TRUE  |
| 1  | 94458391 - 94586705   |            | FALSE | TRUE  |
| 1  | 94458391 - 94586705   | F - 6.67%  | TRUE  | TRUE  |
| 1  | 94458391 - 94586705   | F - 33.33% | TRUE  | TRUE  |
| 1  | 94458391 - 94586705   |            | TRUE  | TRUE  |
| 1  | 94458391 - 94586705   | F - 33.33% | TRUE  | TRUE  |
| 1  | 94458391 - 94586705   |            | TRUE  | TRUE  |
| 1  | 94458391 - 94586705   | F - 33.33% | TRUE  | TRUE  |
| 1  | 94458391 - 94586705   |            | TRUE  | TRUE  |
| 1  | 94458391 - 94586705   | F - 6.67%  | TRUE  | TRUE  |
| 1  | 94458391 - 94586705   |            | FALSE | TRUE  |
| 1  | 94458391 - 94586705   | F - 26.67% | TRUE  | TRUE  |
| 1  | 94458391 - 94586705   | F - 33.33% | FALSE | TRUE  |
| 1  | 94458391 - 94586705   |            | FALSE | TRUE  |
| 1  | 94458391 - 94586705   |            | FALSE | TRUE  |
| 1  | 94458391 - 94586705   |            | FALSE | TRUE  |
| 1  | 94458391 - 94586705   | F - 33.33% | TRUE  | TRUE  |
| 1  | 94458391 - 94586705   |            | FALSE | TRUE  |
| 1  | 94458391 - 94586705   | T - 53.33% | FALSE | TRUE  |
| 1  | 94458391 - 94586705   |            | FALSE | TRUE  |
| 1  | 94458391 - 94586705   |            | FALSE | TRUE  |
| 1  | 94458391 - 94586705   | F - 26.67% | FALSE | TRUE  |
| 1  | 94458391 - 94586705   | F - 33.33% | TRUE  | TRUE  |
| 1  | 94458391 - 94586705   |            | FALSE | TRUE  |
| 1  | 94458391 - 94586705   | F - 26.67% | FALSE | TRUE  |
| 1  | 94458391 - 94586705   |            | FALSE | TRUE  |
| 1  | 94458391 - 94586705   | F - 40.00% | FALSE | TRUE  |
| 1  | 94458391 - 94586705   |            | FALSE | TRUE  |
| 7  | 47314752 - 47622156   |            | TRUE  | TRUE  |
| 7  | 47314752 - 47622156   |            | TRUE  | TRUE  |
| 7  | 47314752 - 47622156   | F - 4.55%  | TRUE  | TRUE  |
| 7  | 47314752 - 47622156   |            | TRUE  | TRUE  |
| 7  | 47314752 - 47622156   |            | FALSE | TRUE  |
| 11 | 134201768 - 134248235 |            | TRUE  | TRUE  |
| 11 | 134201768 - 134248235 |            | TRUE  | TRUE  |
| 11 | 134201768 - 134248235 |            | TRUE  | TRUE  |
| 11 | 134201768 - 134248235 | F - 14.29% | TRUE  | TRUE  |
| 11 | 134201768 - 134248235 |            | FALSE | TRUE  |
| 14 | 74318534 - 74353530   |            | TRUE  | FALSE |
| 14 | 74318534 - 74353530   | F - 10.00% | TRUE  | TRUE  |

|    |                       |            |       |       |
|----|-----------------------|------------|-------|-------|
| 14 | 74318534 - 74353530   | F - 10.00% | TRUE  | TRUE  |
| 15 | 75890424 - 75918719   | F - 37.50% | TRUE  | TRUE  |
| 15 | 75890424 - 75918719   | F - 12.50% | TRUE  | TRUE  |
| 15 | 75890424 - 75918719   | F - 25.00% | TRUE  | TRUE  |
| 15 | 75890424 - 75918719   |            | TRUE  | TRUE  |
| 15 | 75890424 - 75918719   | F - 25.00% | TRUE  | TRUE  |
| 15 | 75890424 - 75918719   |            | TRUE  | TRUE  |
| 19 | 6729925 - 6737633     |            | TRUE  | TRUE  |
| 19 | 6729925 - 6737633     | F - 14.29% | TRUE  | TRUE  |
| 20 | 25388321 - 25433264   |            | TRUE  | FALSE |
| 20 | 25388321 - 25433264   | T - 75.00% | TRUE  | TRUE  |
| 20 | 25388321 - 25433264   | F - 12.50% | TRUE  | TRUE  |
| 4  | 56262090 - 56292342   |            | TRUE  | FALSE |
| 4  | 56262090 - 56292342   |            | TRUE  | TRUE  |
| 4  | 56262090 - 56292342   |            | TRUE  | TRUE  |
| 4  | 56262090 - 56292342   | F - 18.75% | TRUE  | TRUE  |
| 4  | 56262090 - 56292342   | F - 6.25%  | TRUE  | TRUE  |
| 4  | 56262090 - 56292342   | F - 6.25%  | TRUE  | TRUE  |
| 7  | 127292202 - 127732661 |            | TRUE  | FALSE |
| 7  | 127292202 - 127732661 | F - 4.76%  | TRUE  | TRUE  |
| 7  | 127292202 - 127732661 |            | TRUE  | TRUE  |
| 7  | 127292202 - 127732661 |            | TRUE  | TRUE  |
| 15 | 43699407 - 43802926   |            | TRUE  | FALSE |
| 15 | 43699407 - 43802926   | F - 5.26%  | TRUE  | TRUE  |
| 15 | 43699407 - 43802926   |            | TRUE  | TRUE  |
| 15 | 43699407 - 43802926   |            | FALSE | TRUE  |
| 15 | 43699407 - 43802926   |            | FALSE | TRUE  |
| 15 | 43699407 - 43802926   |            | FALSE | TRUE  |
| 15 | 43699407 - 43802926   | T - 57.89% | FALSE | TRUE  |
| 15 | 43699407 - 43802926   | F - 5.26%  | FALSE | TRUE  |
| 19 | 46112658 - 46148775   |            | TRUE  | FALSE |
| 19 | 46112658 - 46148775   |            | TRUE  | TRUE  |
| 19 | 46112658 - 46148775   | F - 46.67% | TRUE  | TRUE  |
| 19 | 46112658 - 46148775   |            | TRUE  | TRUE  |
| 21 | 46340950 - 46349595   |            | TRUE  | TRUE  |
| 21 | 46340950 - 46349595   | T - 62.50% | TRUE  | FALSE |
| 1  | 110162126 - 110174677 | F - 4.17%  | TRUE  | TRUE  |
| 1  | 110162126 - 110174677 |            | FALSE | TRUE  |
| 1  | 110162126 - 110174677 |            | TRUE  | TRUE  |
| 1  | 110162126 - 110174677 |            | TRUE  | TRUE  |
| 1  | 110162126 - 110174677 | F - 12.50% | TRUE  | TRUE  |
| 1  | 110162126 - 110174677 |            | TRUE  | TRUE  |
| 1  | 110162126 - 110174677 | F - 4.17%  | FALSE | TRUE  |
| 1  | 110162126 - 110174677 |            | TRUE  | TRUE  |
| 1  | 110162126 - 110174677 | F - 4.17%  | FALSE | TRUE  |
| 1  | 110162126 - 110174677 | F - 12.50% | TRUE  | TRUE  |
| 1  | 110162126 - 110174677 | F - 25.00% | TRUE  | TRUE  |
| 1  | 110162126 - 110174677 | F - 4.17%  | TRUE  | TRUE  |
| 1  | 110162126 - 110174677 | F - 8.33%  | TRUE  | TRUE  |
| 1  | 110162126 - 110174677 | F - 29.17% | TRUE  | TRUE  |
| 1  | 110162126 - 110174677 |            | TRUE  | TRUE  |
| 6  | 112429134 - 112576141 |            | TRUE  | TRUE  |
| 6  | 112429134 - 112576141 | F - 3.13%  | TRUE  | TRUE  |
| 6  | 112429134 - 112576141 | T - 56.25% | TRUE  | TRUE  |
| 6  | 112429134 - 112576141 | F - 3.13%  | TRUE  | TRUE  |
| 6  | 112429134 - 112576141 | F - 6.25%  | TRUE  | TRUE  |
| 6  | 112429134 - 112576141 | F - 12.50% | TRUE  | TRUE  |
| 6  | 112429134 - 112576141 | F - 37.50% | TRUE  | TRUE  |

|   |    |                       |            |       |       |
|---|----|-----------------------|------------|-------|-------|
|   | 6  | 112429134 - 112576141 | F - 25.00% | TRUE  | TRUE  |
|   | 6  | 112429134 - 112576141 | F - 28.13% | TRUE  | TRUE  |
|   | 6  | 112429134 - 112576141 | F - 6.25%  | FALSE | TRUE  |
|   | 6  | 112429134 - 112576141 | F - 25.00% | TRUE  | TRUE  |
|   | 6  | 112429134 - 112576141 | F - 46.88% | TRUE  | TRUE  |
|   | 6  | 112429134 - 112576141 |            | TRUE  | TRUE  |
|   | 6  | 112429134 - 112576141 | F - 3.13%  | TRUE  | TRUE  |
|   | 6  | 112429134 - 112576141 | F - 25.00% | TRUE  | TRUE  |
|   | 6  | 112429134 - 112576141 |            | TRUE  | TRUE  |
|   | 6  | 112429134 - 112576141 |            | TRUE  | TRUE  |
|   | 6  | 112429134 - 112576141 |            | TRUE  | TRUE  |
|   | 6  | 112429134 - 112576141 |            | TRUE  | TRUE  |
|   | 6  | 112429134 - 112576141 |            | TRUE  | TRUE  |
|   | 6  | 112429134 - 112576141 | F - 25.00% | TRUE  | TRUE  |
|   | 6  | 112429134 - 112576141 |            | TRUE  | TRUE  |
|   | 6  | 112429134 - 112576141 |            | TRUE  | TRUE  |
|   | 6  | 112429134 - 112576141 | F - 34.38% | TRUE  | TRUE  |
|   | 6  | 112429134 - 112576141 |            | TRUE  | TRUE  |
|   | 6  | 112429134 - 112576141 | F - 37.50% | TRUE  | TRUE  |
|   | 6  | 112429134 - 112576141 | F - 9.38%  | FALSE | TRUE  |
|   | 6  | 112429134 - 112576141 | F - 3.13%  | FALSE | TRUE  |
|   | 6  | 112429134 - 112576141 |            | TRUE  | TRUE  |
|   | 6  | 112429134 - 112576141 |            | FALSE | TRUE  |
|   | 7  | 30028216 - 30065276   |            | TRUE  | TRUE  |
|   | 7  | 30028216 - 30065276   |            | TRUE  | TRUE  |
|   | 7  | 30028216 - 30065276   | T - 50.00% | TRUE  | TRUE  |
| X |    | 70586114 - 70752224   |            | TRUE  | TRUE  |
| X |    | 70586114 - 70752224   |            | TRUE  | TRUE  |
| X |    | 70586114 - 70752224   | F - 24.24% | TRUE  | TRUE  |
| X |    | 70586114 - 70752224   |            | TRUE  | TRUE  |
| X |    | 70586114 - 70752224   |            | TRUE  | TRUE  |
| X |    | 70586114 - 70752224   | F - 18.18% | TRUE  | TRUE  |
| X |    | 70586114 - 70752224   |            | TRUE  | TRUE  |
| X |    | 70586114 - 70752224   | F - 12.12% | TRUE  | TRUE  |
| X |    | 70586114 - 70752224   |            | TRUE  | FALSE |
|   | 11 | 64532076 - 64546316   |            | TRUE  | TRUE  |
|   | 11 | 64532076 - 64546316   | F - 2.86%  | TRUE  | FALSE |
|   | 11 | 64532076 - 64546316   |            | FALSE | TRUE  |
|   | 15 | 28356186 - 28567298   |            | TRUE  | TRUE  |
|   | 15 | 28356186 - 28567298   |            | TRUE  | TRUE  |
|   | 15 | 28356186 - 28567298   |            | TRUE  | TRUE  |
|   | 15 | 28356186 - 28567298   | F - 40.00% | TRUE  | TRUE  |
|   | 15 | 28356186 - 28567298   |            | FALSE | TRUE  |
|   | 15 | 28356186 - 28567298   |            | TRUE  | TRUE  |
|   | 15 | 28356186 - 28567298   |            | FALSE | TRUE  |
|   | 19 | 50706885 - 50813802   |            | TRUE  | FALSE |
|   | 19 | 50706885 - 50813802   |            | TRUE  | TRUE  |
|   | 19 | 50706885 - 50813802   |            | FALSE | TRUE  |
|   | 19 | 50706885 - 50813802   |            | TRUE  | TRUE  |
|   | 19 | 50706885 - 50813802   |            | FALSE | TRUE  |
|   | 19 | 50706885 - 50813802   |            | TRUE  | TRUE  |
|   | 19 | 50706885 - 50813802   |            | TRUE  | TRUE  |
|   | 19 | 50706885 - 50813802   |            | FALSE | TRUE  |
|   | 19 | 50706885 - 50813802   |            | FALSE | TRUE  |
|   | 19 | 50706885 - 50813802   | T - 81.82% | FALSE | TRUE  |
|   | 19 | 50706885 - 50813802   |            | FALSE | TRUE  |
|   | 19 | 50706885 - 50813802   |            | FALSE | TRUE  |
|   | 3  | 119316689 - 119348658 |            | TRUE  | TRUE  |
|   | 3  | 119316689 - 119348658 |            | TRUE  | TRUE  |

|    |                       |             |       |       |
|----|-----------------------|-------------|-------|-------|
| 3  | 119316689 - 119348658 | F - 9.09%   | FALSE | TRUE  |
| 9  | 111934254 - 112083244 |             | TRUE  | TRUE  |
| 9  | 111934254 - 112083244 | T - 100.00% | TRUE  | TRUE  |
| 9  | 111934254 - 112083244 | F - 33.33%  | TRUE  | TRUE  |
| 9  | 111934254 - 112083244 | F - 16.67%  | TRUE  | TRUE  |
| 9  | 111934254 - 112083244 |             | TRUE  | TRUE  |
| 9  | 111934254 - 112083244 | T - 50.00%  | TRUE  | TRUE  |
| 9  | 111934254 - 112083244 | T - 100.00% | TRUE  | TRUE  |
| 9  | 111934254 - 112083244 | T - 83.33%  | TRUE  | TRUE  |
| 9  | 111934254 - 112083244 | T - 50.00%  | TRUE  | TRUE  |
| 9  | 111934254 - 112083244 |             | FALSE | TRUE  |
| 9  | 111934254 - 112083244 | F - 33.33%  | TRUE  | TRUE  |
| 9  | 111934254 - 112083244 | T - 50.00%  | TRUE  | TRUE  |
| 9  | 111934254 - 112083244 | T - 50.00%  | TRUE  | TRUE  |
| 9  | 111934254 - 112083244 |             | TRUE  | TRUE  |
| 9  | 111934254 - 112083244 | T - 50.00%  | FALSE | TRUE  |
| 9  | 111934254 - 112083244 | T - 50.00%  | TRUE  | TRUE  |
| 9  | 111934254 - 112083244 |             | TRUE  | TRUE  |
| 9  | 111934254 - 112083244 | T - 50.00%  | TRUE  | TRUE  |
| 9  | 111934254 - 112083244 | T - 50.00%  | TRUE  | TRUE  |
| 9  | 111934254 - 112083244 |             | TRUE  | TRUE  |
| 9  | 111934254 - 112083244 | T - 100.00% | FALSE | TRUE  |
| 9  | 111934254 - 112083244 | T - 100.00% | FALSE | TRUE  |
| 9  | 111934254 - 112083244 | T - 100.00% | TRUE  | TRUE  |
| 9  | 111934254 - 112083244 | T - 100.00% | TRUE  | TRUE  |
| 10 | 14880163 - 14913740   |             | TRUE  | TRUE  |
| 10 | 14880163 - 14913740   |             | TRUE  | FALSE |
| 10 | 14880163 - 14913740   |             | TRUE  | FALSE |
| 10 | 14880163 - 14913740   | F - 13.33%  | TRUE  | FALSE |
| 10 | 14880163 - 14913740   | F - 20.00%  | FALSE | TRUE  |
| 12 | 2966847 - 2986321     |             | TRUE  | FALSE |
| 12 | 2966847 - 2986321     |             | TRUE  | FALSE |
| 12 | 2966847 - 2986321     |             | TRUE  | TRUE  |
| 12 | 2966847 - 2986321     |             | TRUE  | TRUE  |
| 12 | 2966847 - 2986321     |             | TRUE  | TRUE  |
| 12 | 2966847 - 2986321     |             | TRUE  | TRUE  |
| 12 | 2966847 - 2986321     | T - 81.82%  | FALSE | TRUE  |
| 2  | 191511472 - 191557492 | F - 29.41%  | TRUE  | TRUE  |
| 2  | 191511472 - 191557492 |             | TRUE  | FALSE |
| X  | 134382867 - 134478012 |             | TRUE  | TRUE  |
| X  | 134382867 - 134478012 | F - 11.11%  | TRUE  | TRUE  |
| X  | 134382867 - 134478012 |             | TRUE  | TRUE  |
| X  | 134382867 - 134478012 | F - 22.22%  | TRUE  | TRUE  |
| X  | 134382867 - 134478012 | T - 66.67%  | TRUE  | TRUE  |
| X  | 134382867 - 134478012 |             | TRUE  | TRUE  |
| X  | 134382867 - 134478012 |             | FALSE | TRUE  |
| X  | 134382867 - 134478012 |             | TRUE  | TRUE  |
| X  | 15756393 - 15805748   |             | FALSE | TRUE  |
| X  | 15756393 - 15805748   |             | TRUE  | TRUE  |
| X  | 15756393 - 15805748   |             | TRUE  | TRUE  |
| X  | 15756393 - 15805748   | F - 18.18%  | TRUE  | TRUE  |
| X  | 15756393 - 15805748   | F - 9.09%   | TRUE  | TRUE  |
| X  | 15756393 - 15805748   |             | TRUE  | TRUE  |
| X  | 15756393 - 15805748   | F - 9.09%   | FALSE | TRUE  |
| X  | 15756393 - 15805748   | F - 45.45%  | TRUE  | TRUE  |
| X  | 15756393 - 15805748   |             | TRUE  | TRUE  |
| X  | 15756393 - 15805748   |             | TRUE  | TRUE  |
| X  | 15756393 - 15805748   |             | TRUE  | TRUE  |



|    |                       |             |       |       |
|----|-----------------------|-------------|-------|-------|
| X  | 15756393 - 15805748   |             | FALSE | TRUE  |
| X  | 15756393 - 15805748   | F - 45.45%  | TRUE  | TRUE  |
| 11 | 107992243 - 108018891 |             | TRUE  | TRUE  |
| 11 | 107992243 - 108018891 | T - 66.67%  | TRUE  | TRUE  |
| 13 | 39612443 - 39625205   |             | TRUE  | FALSE |
| 13 | 39612443 - 39625205   |             | FALSE | TRUE  |
| 13 | 39612443 - 39625205   | F - 9.09%   | TRUE  | TRUE  |
| 15 | 69706585 - 69740764   |             | TRUE  | FALSE |
| 15 | 69706585 - 69740764   | F - 6.67%   | TRUE  | TRUE  |
| 15 | 69706585 - 69740764   |             | TRUE  | TRUE  |
| 15 | 69706585 - 69740764   |             | TRUE  | TRUE  |
| 15 | 69706585 - 69740764   | T - 60.00%  | TRUE  | TRUE  |
| 15 | 69706585 - 69740764   | T - 66.67%  | TRUE  | TRUE  |
| 15 | 69706585 - 69740764   | F - 13.33%  | TRUE  | TRUE  |
| 3  | 122103023 - 122131181 | F - 14.29%  | TRUE  | TRUE  |
| 3  | 122103023 - 122131181 | T - 85.71%  | TRUE  | TRUE  |
| 3  | 122103023 - 122131181 |             | FALSE | TRUE  |
| 3  | 122103023 - 122131181 |             | FALSE | TRUE  |
| 3  | 122103023 - 122131181 |             | TRUE  | TRUE  |
| 3  | 122103023 - 122131181 | T - 71.43%  | TRUE  | TRUE  |
| 3  | 50648951 - 50686728   | F - 23.08%  | TRUE  | TRUE  |
| 3  | 50648951 - 50686728   | F - 30.77%  | TRUE  | TRUE  |
| 3  | 50648951 - 50686728   | F - 7.69%   | FALSE | TRUE  |
| 3  | 50648951 - 50686728   | F - 7.69%   | TRUE  | TRUE  |
| 3  | 50648951 - 50686728   | F - 7.69%   | TRUE  | TRUE  |
| 3  | 50648951 - 50686728   | F - 30.77%  | FALSE | TRUE  |
| 3  | 50648951 - 50686728   | F - 7.69%   | TRUE  | TRUE  |
| 3  | 50648951 - 50686728   | F - 46.15%  | TRUE  | TRUE  |
| 3  | 50648951 - 50686728   |             | FALSE | TRUE  |
| 8  | 7812535 - 7866277     |             | TRUE  | FALSE |
| 8  | 7812535 - 7866277     | T - 100.00% | TRUE  | TRUE  |
| 8  | 7812535 - 7866277     | T - 50.00%  | TRUE  | TRUE  |
| 8  | 7812535 - 7866277     |             | FALSE | TRUE  |
| 8  | 7812535 - 7866277     | T - 50.00%  | TRUE  | TRUE  |
| X  | 3734598 - 3761935     |             | TRUE  | TRUE  |
| X  | 3734598 - 3761935     | F - 7.69%   | TRUE  | TRUE  |
| X  | 3734598 - 3761935     | F - 46.15%  | TRUE  | TRUE  |
| X  | 3734598 - 3761935     | F - 38.46%  | TRUE  | TRUE  |
| X  | 3734598 - 3761935     | F - 30.77%  | TRUE  | TRUE  |
| X  | 3734598 - 3761935     | F - 7.69%   | TRUE  | TRUE  |
| X  | 3734598 - 3761935     |             | TRUE  | TRUE  |
| X  | 3734598 - 3761935     |             | TRUE  | TRUE  |
| X  | 3734598 - 3761935     | F - 46.15%  | TRUE  | TRUE  |
| X  | 3734598 - 3761935     | F - 38.46%  | TRUE  | TRUE  |
| X  | 3734598 - 3761935     |             | FALSE | TRUE  |
| 11 | 78147007 - 78285909   | T - 50.00%  | TRUE  | TRUE  |
| 11 | 78147007 - 78285909   |             | TRUE  | TRUE  |
| 11 | 78147007 - 78285909   | F - 25.00%  | TRUE  | TRUE  |
| 11 | 78147007 - 78285909   |             | TRUE  | TRUE  |
| 1  | 43990858 - 44089343   |             | TRUE  | TRUE  |
| 1  | 43990858 - 44089343   |             | TRUE  | TRUE  |
| 1  | 43990858 - 44089343   | F - 16.00%  | FALSE | TRUE  |
| 1  | 43990858 - 44089343   |             | TRUE  | TRUE  |
| 1  | 43990858 - 44089343   |             | TRUE  | TRUE  |
| 1  | 43990858 - 44089343   | F - 4.00%   | TRUE  | TRUE  |
| 1  | 43990858 - 44089343   | F - 8.00%   | TRUE  | TRUE  |
| 1  | 43990858 - 44089343   | F - 20.00%  | TRUE  | TRUE  |
| 1  | 43990858 - 44089343   | F - 48.00%  | TRUE  | TRUE  |

|    |                       |             |       |       |
|----|-----------------------|-------------|-------|-------|
| 1  | 43990858 - 44089343   |             | FALSE | TRUE  |
| 1  | 155882834 - 155904191 |             | TRUE  | TRUE  |
| 1  | 155882834 - 155904191 | F - 6.25%   | TRUE  | TRUE  |
| 1  | 155882834 - 155904191 | F - 6.25%   | TRUE  | TRUE  |
| 3  | 197879237 - 197955678 | F - 25.00%  | TRUE  | FALSE |
| 3  | 197879237 - 197955678 | F - 25.00%  | TRUE  | TRUE  |
| 3  | 197879237 - 197955678 | F - 25.00%  | TRUE  | TRUE  |
| 3  | 197879237 - 197955678 |             | TRUE  | TRUE  |
| 3  | 197879237 - 197955678 | F - 25.00%  | TRUE  | TRUE  |
| 3  | 197879237 - 197955678 |             | TRUE  | TRUE  |
| 3  | 197879237 - 197955678 | F - 25.00%  | TRUE  | TRUE  |
| 6  | 143072604 - 143266338 |             | TRUE  | TRUE  |
| 6  | 143072604 - 143266338 | F - 33.33%  | TRUE  | TRUE  |
| 7  | 99156029 - 99174076   |             | TRUE  | FALSE |
| 7  | 99156029 - 99174076   |             | TRUE  | FALSE |
| 7  | 99156029 - 99174076   | F - 14.29%  | FALSE | TRUE  |
| 8  | 19674651 - 19709594   |             | TRUE  | FALSE |
| 8  | 19674651 - 19709594   |             | TRUE  | TRUE  |
| 8  | 19674651 - 19709594   |             | TRUE  | TRUE  |
| 8  | 19674651 - 19709594   | F - 35.00%  | TRUE  | TRUE  |
| 8  | 19674651 - 19709594   | F - 5.00%   | TRUE  | TRUE  |
| 10 | 90694831 - 90751147   | F - 7.14%   | TRUE  | TRUE  |
| 10 | 90694831 - 90751147   |             | TRUE  | TRUE  |
| 10 | 90694831 - 90751147   |             | TRUE  | TRUE  |
| 10 | 90694831 - 90751147   | F - 7.14%   | TRUE  | TRUE  |
| 10 | 90694831 - 90751147   |             | TRUE  | TRUE  |
| 10 | 90694831 - 90751147   |             | TRUE  | TRUE  |
| 10 | 90694831 - 90751147   | F - 21.43%  | TRUE  | TRUE  |
| 10 | 90694831 - 90751147   | F - 28.57%  | TRUE  | TRUE  |
| 10 | 90694831 - 90751147   |             | TRUE  | TRUE  |
| 10 | 90694831 - 90751147   | F - 21.43%  | TRUE  | TRUE  |
| 11 | 2920951 - 2946476     | F - 5.88%   | TRUE  | TRUE  |
| 11 | 2920951 - 2946476     | F - 5.88%   | TRUE  | TRUE  |
| 11 | 2920951 - 2946476     |             | TRUE  | FALSE |
| 11 | 2920951 - 2946476     | F - 5.88%   | TRUE  | TRUE  |
| 11 | 2920951 - 2946476     | F - 5.88%   | FALSE | TRUE  |
| 11 | 2920951 - 2946476     | F - 11.76%  | TRUE  | TRUE  |
| 11 | 2920951 - 2946476     | F - 11.76%  | TRUE  | TRUE  |
| 11 | 2920951 - 2946476     |             | TRUE  | TRUE  |
| 11 | 2920951 - 2946476     |             | TRUE  | TRUE  |
| 11 | 2920951 - 2946476     | F - 5.88%   | FALSE | TRUE  |
| 11 | 2920951 - 2946476     | F - 11.76%  | FALSE | TRUE  |
| 11 | 2920951 - 2946476     | F - 5.88%   | FALSE | TRUE  |
| 11 | 2920951 - 2946476     | F - 5.88%   | FALSE | TRUE  |
| 11 | 2920951 - 2946476     |             | TRUE  | TRUE  |
| 12 | 21590538 - 21624182   |             | TRUE  | TRUE  |
| 12 | 21590538 - 21624182   | T - 100.00% | TRUE  | TRUE  |
| 16 | 33204980 - 33208179   | T - 100.00% | TRUE  | TRUE  |
| 16 | 33204980 - 33208179   |             | TRUE  | TRUE  |
| 16 | 33204980 - 33208179   |             | TRUE  | TRUE  |
| 16 | 33204980 - 33208179   | T - 50.00%  | TRUE  | TRUE  |
| 16 | 33204980 - 33208179   | F - 10.00%  | TRUE  | TRUE  |
| 16 | 33204980 - 33208179   | F - 40.00%  | FALSE | TRUE  |
| 20 | 43538703 - 43587799   |             | TRUE  | FALSE |
| 20 | 43538703 - 43587799   | F - 4.17%   | TRUE  | TRUE  |
| 22 | 20850200 - 20941919   |             | TRUE  | TRUE  |
| 22 | 20850200 - 20941919   | F - 8.16%   | TRUE  | TRUE  |
| 22 | 20850200 - 20941919   | F - 2.04%   | TRUE  | TRUE  |

|    |                       |            |       |       |
|----|-----------------------|------------|-------|-------|
| 22 | 20850200 - 20941919   |            | TRUE  | TRUE  |
| 22 | 20850200 - 20941919   |            | FALSE | TRUE  |
| 1  | 151104161 - 151119140 |            | TRUE  | TRUE  |
| 1  | 151104161 - 151119140 |            | TRUE  | TRUE  |
| 1  | 151104161 - 151119140 |            | TRUE  | TRUE  |
| 1  | 151104161 - 151119140 |            | TRUE  | TRUE  |
| 1  | 151104161 - 151119140 | T - 64.29% | TRUE  | TRUE  |
| 1  | 151104161 - 151119140 | T - 78.57% | FALSE | TRUE  |
| 1  | 151104161 - 151119140 |            | FALSE | TRUE  |
| 1  | 151104161 - 151119140 |            | FALSE | TRUE  |
| 1  | 151104161 - 151119140 |            | FALSE | TRUE  |
| 1  | 155183616 - 155197325 |            | TRUE  | FALSE |
| 1  | 155183616 - 155197325 |            | TRUE  | TRUE  |
| 1  | 155183616 - 155197325 |            | TRUE  | FALSE |
| 1  | 155183616 - 155197325 | F - 18.18% | TRUE  | TRUE  |
| 1  | 155183616 - 155197325 |            | FALSE | TRUE  |
| 1  | 155183616 - 155197325 |            | FALSE | TRUE  |
| 10 | 98353069 - 98480279   |            | TRUE  | TRUE  |
| 10 | 98353069 - 98480279   |            | TRUE  | TRUE  |
| 10 | 98353069 - 98480279   | T - 60.00% | TRUE  | TRUE  |
| 10 | 98353069 - 98480279   |            | TRUE  | FALSE |
| 10 | 98353069 - 98480279   | T - 50.00% | TRUE  | TRUE  |
| 10 | 98353069 - 98480279   | T - 50.00% | TRUE  | TRUE  |
| 10 | 98353069 - 98480279   |            | TRUE  | FALSE |
| 10 | 98353069 - 98480279   |            | TRUE  | TRUE  |
| 10 | 98353069 - 98480279   | T - 50.00% | TRUE  | TRUE  |
| 10 | 98353069 - 98480279   | T - 50.00% | TRUE  | TRUE  |
| 10 | 98353069 - 98480279   |            | TRUE  | FALSE |
| 10 | 98353069 - 98480279   | T - 80.00% | TRUE  | TRUE  |
| 10 | 98353069 - 98480279   | F - 20.00% | TRUE  | TRUE  |
| 10 | 98353069 - 98480279   |            | TRUE  | TRUE  |
| 10 | 98353069 - 98480279   | T - 60.00% | TRUE  | TRUE  |
| 10 | 98353069 - 98480279   | F - 10.00% | TRUE  | TRUE  |
| 10 | 98353069 - 98480279   | F - 20.00% | TRUE  | TRUE  |
| 10 | 98353069 - 98480279   | F - 10.00% | TRUE  | TRUE  |
| 2  | 70834750 - 70995375   | T - 85.71% | TRUE  | FALSE |
| 2  | 70834750 - 70995375   |            | TRUE  | TRUE  |
| 2  | 70834750 - 70995375   |            | FALSE | TRUE  |
| 2  | 70834750 - 70995375   | F - 35.71% | TRUE  | TRUE  |
| 6  | 31982539 - 32003195   |            | TRUE  | FALSE |
| 6  | 31982539 - 32003195   | F - 3.57%  | TRUE  | TRUE  |
| 6  | 31982539 - 32003195   |            | FALSE | TRUE  |
| 6  | 31982539 - 32003195   |            | TRUE  | TRUE  |
| 6  | 31982539 - 32003195   |            | TRUE  | TRUE  |
| 6  | 31982539 - 32003195   | F - 3.57%  | TRUE  | TRUE  |
| 6  | 31982539 - 32003195   | F - 3.57%  | FALSE | TRUE  |
| 6  | 31982539 - 32003195   |            | TRUE  | TRUE  |
| 6  | 31982539 - 32003195   | F - 42.86% | TRUE  | TRUE  |
| 6  | 31982539 - 32003195   |            | TRUE  | TRUE  |
| 6  | 31982539 - 32003195   | F - 3.57%  | TRUE  | TRUE  |
| 6  | 31982539 - 32003195   | F - 3.57%  | TRUE  | TRUE  |
| 6  | 31982539 - 32003195   | F - 3.57%  | TRUE  | TRUE  |
| 6  | 31982539 - 32003195   | T - 53.57% | TRUE  | TRUE  |
| 6  | 31982539 - 32003195   |            | FALSE | TRUE  |
| 6  | 31982539 - 32003195   |            | FALSE | TRUE  |
| 6  | 31982539 - 32003195   |            | TRUE  | TRUE  |
| 6  | 31982539 - 32003195   |            | FALSE | TRUE  |
| 6  | 31982539 - 32003195   |            | FALSE | TRUE  |

|    |                       |            |       |       |
|----|-----------------------|------------|-------|-------|
| 8  | 137543041 - 137997178 | F - 42.86% | TRUE  | FALSE |
| 8  | 137543041 - 137997178 | F - 42.86% | TRUE  | FALSE |
| 8  | 137543041 - 137997178 |            | FALSE | TRUE  |
| 17 | 29421945 - 29709134   | F - 33.33% | TRUE  | TRUE  |
| 17 | 29421945 - 29709134   |            | TRUE  | TRUE  |
| 17 | 29421945 - 29709134   |            | TRUE  | TRUE  |
| 17 | 29421945 - 29709134   | F - 4.17%  | TRUE  | TRUE  |
| 17 | 29421945 - 29709134   | F - 4.17%  | TRUE  | TRUE  |
| 17 | 29421945 - 29709134   | F - 12.50% | TRUE  | FALSE |
| 17 | 29421945 - 29709134   |            | TRUE  | TRUE  |
| 17 | 29421945 - 29709134   |            | TRUE  | TRUE  |
| 17 | 29421945 - 29709134   |            | TRUE  | TRUE  |
| 17 | 29421945 - 29709134   | F - 25.00% | TRUE  | TRUE  |
| 17 | 411908 - 618096       |            | TRUE  | FALSE |
| 17 | 411908 - 618096       | T - 91.67% | TRUE  | TRUE  |
| 17 | 411908 - 618096       |            | FALSE | TRUE  |
| 17 | 411908 - 618096       | T - 50.00% | TRUE  | TRUE  |
| 17 | 411908 - 618096       |            | FALSE | TRUE  |
| 3  | 158362067 - 158410364 | T - 60.00% | TRUE  | TRUE  |
| 3  | 158362067 - 158410364 |            | TRUE  | TRUE  |
| 3  | 158362067 - 158410364 |            | TRUE  | TRUE  |
| 3  | 158362067 - 158410364 |            | TRUE  | TRUE  |
| 4  | 667369 - 675822       | F - 8.33%  | TRUE  | FALSE |
| 4  | 667369 - 675822       | F - 16.67% | TRUE  | FALSE |
| 4  | 667369 - 675822       | T - 50.00% | TRUE  | TRUE  |
| 4  | 667369 - 675822       | F - 33.33% | TRUE  | TRUE  |
| 4  | 667369 - 675822       | F - 33.33% | FALSE | TRUE  |
| 4  | 667369 - 675822       | F - 8.33%  | TRUE  | TRUE  |
| 4  | 667369 - 675822       |            | TRUE  | TRUE  |
| 4  | 667369 - 675822       | T - 83.33% | FALSE | TRUE  |
| 5  | 10441636 - 10472141   |            | TRUE  | FALSE |
| 5  | 10441636 - 10472141   | T - 62.50% | FALSE | TRUE  |
| 5  | 10441636 - 10472141   |            | FALSE | TRUE  |
| 5  | 74807581 - 74896969   | F - 26.67% | TRUE  | FALSE |
| 5  | 74807581 - 74896969   |            | TRUE  | FALSE |
| 5  | 74807581 - 74896969   |            | TRUE  | TRUE  |
| 5  | 74807581 - 74896969   | F - 3.33%  | TRUE  | TRUE  |
| 5  | 74807581 - 74896969   |            | TRUE  | TRUE  |
| 6  | 75794042 - 75915767   |            | TRUE  | TRUE  |
| 6  | 75794042 - 75915767   | F - 5.88%  | TRUE  | TRUE  |
| 6  | 75794042 - 75915767   | F - 5.88%  | TRUE  | TRUE  |
| 6  | 75794042 - 75915767   |            | TRUE  | TRUE  |
| 6  | 75794042 - 75915767   | F - 5.88%  | TRUE  | TRUE  |
| 10 | 101542463 - 101611949 |            | TRUE  | FALSE |
| 10 | 101542463 - 101611949 |            | TRUE  | TRUE  |
| 10 | 101542463 - 101611949 |            | FALSE | TRUE  |
| 10 | 101542463 - 101611949 | T - 60.00% | TRUE  | TRUE  |
| 10 | 101542463 - 101611949 |            | FALSE | TRUE  |
| 10 | 118615739 - 118886097 |            | TRUE  | FALSE |
| 10 | 118615739 - 118886097 |            | TRUE  | TRUE  |
| 10 | 118615739 - 118886097 | F - 6.67%  | TRUE  | TRUE  |
| 10 | 118615739 - 118886097 |            | TRUE  | TRUE  |
| 10 | 118615739 - 118886097 | T - 80.00% | TRUE  | TRUE  |
| 10 | 118615739 - 118886097 |            | TRUE  | TRUE  |
| 11 | 24518516 - 25104186   |            | TRUE  | FALSE |
| 11 | 24518516 - 25104186   |            | TRUE  | FALSE |
| 11 | 24518516 - 25104186   |            | TRUE  | TRUE  |
| 11 | 24518516 - 25104186   |            | TRUE  | FALSE |

|    |                       |             |       |       |
|----|-----------------------|-------------|-------|-------|
| 11 | 24518516 - 25104186   | T - 85.71%  | TRUE  | FALSE |
| 11 | 24518516 - 25104186   |             | TRUE  | TRUE  |
| 11 | 24518516 - 25104186   | T - 57.14%  | TRUE  | TRUE  |
| 11 | 24518516 - 25104186   | T - 100.00% | TRUE  | TRUE  |
| 11 | 24518516 - 25104186   | T - 85.71%  | TRUE  | TRUE  |
| 14 | 45366498 - 45376460   |             | TRUE  | TRUE  |
| 14 | 45366498 - 45376460   | T - 100.00% | TRUE  | TRUE  |
| 19 | 13317256 - 13617274   |             | TRUE  | TRUE  |
| 19 | 13317256 - 13617274   | T - 93.33%  | FALSE | TRUE  |
| 19 | 13317256 - 13617274   |             | TRUE  | TRUE  |
| 19 | 13317256 - 13617274   |             | FALSE | TRUE  |
| 19 | 13317256 - 13617274   | T - 73.33%  | TRUE  | TRUE  |
| 19 | 13317256 - 13617274   |             | TRUE  | TRUE  |
| 19 | 13317256 - 13617274   | T - 93.33%  | TRUE  | TRUE  |
| 19 | 13317256 - 13617274   | T - 93.33%  | TRUE  | TRUE  |
| 19 | 13317256 - 13617274   |             | FALSE | TRUE  |
| 19 | 13317256 - 13617274   |             | TRUE  | TRUE  |
| 19 | 13317256 - 13617274   | T - 80.00%  | TRUE  | TRUE  |
| 19 | 13317256 - 13617274   | T - 80.00%  | TRUE  | TRUE  |
| 19 | 13317256 - 13617274   |             | FALSE | TRUE  |
| 19 | 13317256 - 13617274   |             | TRUE  | TRUE  |
| 19 | 13317256 - 13617274   |             | TRUE  | TRUE  |
| 19 | 13317256 - 13617274   | T - 80.00%  | TRUE  | TRUE  |
| 19 | 13317256 - 13617274   |             | TRUE  | TRUE  |
| 19 | 13317256 - 13617274   |             | TRUE  | TRUE  |
| 19 | 13317256 - 13617274   |             | TRUE  | TRUE  |
| 19 | 13317256 - 13617274   |             | TRUE  | TRUE  |
| 19 | 13317256 - 13617274   |             | FALSE | TRUE  |
| 19 | 13317256 - 13617274   |             | FALSE | TRUE  |
| 19 | 13317256 - 13617274   |             | TRUE  | TRUE  |
| 19 | 13317256 - 13617274   |             | FALSE | TRUE  |
| 21 | 40177231 - 40196879   | F - 22.22%  | TRUE  | TRUE  |
| 21 | 40177231 - 40196879   |             | FALSE | TRUE  |
| 21 | 40177231 - 40196879   |             | TRUE  | TRUE  |
| 21 | 40177231 - 40196879   |             | FALSE | TRUE  |
| 21 | 40177231 - 40196879   | F - 11.11%  | TRUE  | TRUE  |
| 5  | 145826873 - 145891524 | F - 11.11%  | TRUE  | TRUE  |
| 5  | 145826873 - 145891524 |             | TRUE  | TRUE  |
| 5  | 40711678 - 40756077   |             | TRUE  | TRUE  |
| 5  | 40711678 - 40756077   | T - 60.00%  | TRUE  | TRUE  |
| 5  | 40711678 - 40756077   |             | TRUE  | TRUE  |
| 7  | 47834889 - 47872414   | F - 16.67%  | TRUE  | TRUE  |
| 7  | 47834889 - 47872414   | T - 83.33%  | TRUE  | TRUE  |
| 7  | 47834889 - 47872414   |             | TRUE  | TRUE  |
| 8  | 38964509 - 39142436   |             | TRUE  | TRUE  |
| 8  | 38964509 - 39142436   | T - 59.09%  | TRUE  | TRUE  |
| 8  | 38964509 - 39142436   |             | TRUE  | FALSE |
| 8  | 38964509 - 39142436   |             | TRUE  | FALSE |
| 8  | 38964509 - 39142436   |             | TRUE  | FALSE |
| 8  | 38964509 - 39142436   | T - 72.73%  | TRUE  | TRUE  |
| 8  | 38964509 - 39142436   |             | FALSE | TRUE  |
| 8  | 38964509 - 39142436   |             | FALSE | TRUE  |
| 8  | 38964509 - 39142436   |             | TRUE  | TRUE  |
| 8  | 38964509 - 39142436   |             | TRUE  | TRUE  |
| 10 | 88730498 - 88769960   | F - 25.00%  | TRUE  | TRUE  |
| 10 | 88730498 - 88769960   | T - 50.00%  | TRUE  | TRUE  |
| 10 | 88730498 - 88769960   | F - 25.00%  | TRUE  | TRUE  |
| 10 | 88730498 - 88769960   |             | TRUE  | TRUE  |

|    |                       |             |       |       |
|----|-----------------------|-------------|-------|-------|
| 10 | 88730498 - 88769960   | T - 100.00% | TRUE  | TRUE  |
| 10 | 88730498 - 88769960   |             | TRUE  | TRUE  |
| 10 | 88730498 - 88769960   |             | TRUE  | TRUE  |
| 10 | 88730498 - 88769960   |             | TRUE  | TRUE  |
| 10 | 88730498 - 88769960   | T - 75.00%  | TRUE  | TRUE  |
| 10 | 88730498 - 88769960   | T - 100.00% | TRUE  | TRUE  |
| 10 | 88730498 - 88769960   | T - 100.00% | FALSE | TRUE  |
| 10 | 88730498 - 88769960   |             | TRUE  | TRUE  |
| 10 | 88730498 - 88769960   |             | FALSE | TRUE  |
| 10 | 88730498 - 88769960   | T - 100.00% | TRUE  | TRUE  |
| 12 | 104606488 - 104744062 |             | TRUE  | TRUE  |
| 12 | 104606488 - 104744062 |             | TRUE  | TRUE  |
| 12 | 104606488 - 104744062 | F - 3.57%   | TRUE  | FALSE |
| 12 | 104606488 - 104744062 | F - 10.71%  | TRUE  | TRUE  |
| 12 | 104606488 - 104744062 | F - 17.86%  | TRUE  | TRUE  |
| 12 | 104606488 - 104744062 |             | TRUE  | TRUE  |
| 12 | 104606488 - 104744062 |             | TRUE  | TRUE  |
| 12 | 104606488 - 104744062 |             | TRUE  | TRUE  |
| 12 | 104606488 - 104744062 |             | TRUE  | TRUE  |
| 12 | 104606488 - 104744062 |             | TRUE  | TRUE  |
| 15 | 30297646 - 30338051   | T - 100.00% | TRUE  | TRUE  |
| 15 | 30297646 - 30338051   | T - 100.00% | TRUE  | TRUE  |
| 15 | 30297646 - 30338051   |             | TRUE  | TRUE  |
| 22 | 46449585 - 46501903   |             | TRUE  | TRUE  |
| 22 | 46449585 - 46501903   | F - 33.33%  | TRUE  | TRUE  |
| 22 | 46449585 - 46501903   | F - 16.67%  | TRUE  | TRUE  |
| 22 | 46449585 - 46501903   | F - 33.33%  | TRUE  | TRUE  |
| 22 | 46449585 - 46501903   | T - 66.67%  | TRUE  | TRUE  |
| 3  | 122628040 - 122747452 |             | TRUE  | FALSE |
| 3  | 122628040 - 122747452 | T - 70.83%  | FALSE | TRUE  |
| 3  | 122628040 - 122747452 |             | FALSE | TRUE  |
| 1  | 155204239 - 155214653 |             | TRUE  | TRUE  |
| 1  | 155204239 - 155214653 |             | TRUE  | FALSE |
| 1  | 155204239 - 155214653 |             | TRUE  | TRUE  |
| 1  | 155204239 - 155214653 | F - 3.85%   | TRUE  | TRUE  |
| 1  | 155204239 - 155214653 | F - 46.15%  | TRUE  | TRUE  |
| 1  | 155204239 - 155214653 |             | FALSE | TRUE  |
| 2  | 68694691 - 68858004   |             | TRUE  | FALSE |
| 2  | 68694691 - 68858004   |             | TRUE  | TRUE  |
| 2  | 68694691 - 68858004   |             | TRUE  | TRUE  |
| 2  | 68694691 - 68858004   | F - 22.22%  | TRUE  | FALSE |
| 3  | 3742498 - 4508966     |             | TRUE  | TRUE  |
| 3  | 3742498 - 4508966     | F - 5.56%   | TRUE  | FALSE |
| 3  | 3742498 - 4508966     | F - 16.67%  | TRUE  | TRUE  |
| 3  | 3742498 - 4508966     | F - 5.56%   | FALSE | TRUE  |
| 3  | 3742498 - 4508966     |             | TRUE  | TRUE  |
| 3  | 3742498 - 4508966     | T - 83.33%  | TRUE  | TRUE  |
| 3  | 3742498 - 4508966     | F - 5.56%   | TRUE  | TRUE  |
| 3  | 3742498 - 4508966     |             | FALSE | TRUE  |
| 6  | 71276620 - 71299272   | T - 100.00% | TRUE  | TRUE  |
| 6  | 71276620 - 71299272   |             | TRUE  | TRUE  |
| 6  | 31949801 - 31970458   |             | TRUE  | FALSE |
| 6  | 31949801 - 31970458   | F - 3.57%   | TRUE  | TRUE  |
| 6  | 31949801 - 31970458   |             | FALSE | TRUE  |
| 6  | 31949801 - 31970458   |             | TRUE  | TRUE  |
| 6  | 31949801 - 31970458   |             | TRUE  | TRUE  |
| 6  | 31949801 - 31970458   | F - 3.57%   | TRUE  | TRUE  |
| 6  | 31949801 - 31970458   | F - 3.57%   | FALSE | TRUE  |
| 6  | 31949801 - 31970458   |             | TRUE  | TRUE  |

|    |                       |            |       |       |
|----|-----------------------|------------|-------|-------|
| 6  | 31949801 - 31970458   | F - 39.29% | TRUE  | TRUE  |
| 6  | 31949801 - 31970458   | F - 35.71% | TRUE  | TRUE  |
| 6  | 31949801 - 31970458   |            | TRUE  | TRUE  |
| 6  | 31949801 - 31970458   | F - 3.57%  | TRUE  | TRUE  |
| 6  | 31949801 - 31970458   | F - 3.57%  | TRUE  | TRUE  |
| 6  | 31949801 - 31970458   | F - 3.57%  | TRUE  | TRUE  |
| 6  | 31949801 - 31970458   | F - 3.57%  | TRUE  | TRUE  |
| 6  | 31949801 - 31970458   |            | FALSE | TRUE  |
| 6  | 31949801 - 31970458   |            | FALSE | TRUE  |
| 6  | 31949801 - 31970458   |            | TRUE  | TRUE  |
| 6  | 31949801 - 31970458   |            | FALSE | TRUE  |
| 6  | 31949801 - 31970458   |            | FALSE | TRUE  |
| 7  | 99933688 - 99965454   | T - 50.00% | TRUE  | TRUE  |
| 7  | 99933688 - 99965454   |            | TRUE  | TRUE  |
| 7  | 99933688 - 99965454   |            | FALSE | TRUE  |
| 10 | 126085872 - 126107545 |            | TRUE  | TRUE  |
| 10 | 126085872 - 126107545 | F - 8.33%  | TRUE  | TRUE  |
| 3  | 49158547 - 49170599   | F - 9.52%  | TRUE  | TRUE  |
| 3  | 49158547 - 49170599   | F - 4.76%  | TRUE  | TRUE  |
| 3  | 49158547 - 49170599   | F - 4.76%  | TRUE  | TRUE  |
| 3  | 49158547 - 49170599   | F - 4.76%  | TRUE  | TRUE  |
| 3  | 49158547 - 49170599   | F - 9.52%  | TRUE  | TRUE  |
| 3  | 49158547 - 49170599   | F - 4.76%  | TRUE  | TRUE  |
| 3  | 49158547 - 49170599   | F - 4.76%  | TRUE  | TRUE  |
| 3  | 49158547 - 49170599   | F - 9.52%  | TRUE  | TRUE  |
| 3  | 49158547 - 49170599   |            | TRUE  | TRUE  |
| 6  | 151977826 - 152450754 |            | TRUE  | TRUE  |
| 6  | 151977826 - 152450754 |            | TRUE  | TRUE  |
| 6  | 151977826 - 152450754 |            | TRUE  | TRUE  |
| 6  | 151977826 - 152450754 | F - 2.63%  | TRUE  | TRUE  |
| 6  | 151977826 - 152450754 | T - 65.79% | TRUE  | TRUE  |
| 6  | 151977826 - 152450754 |            | TRUE  | TRUE  |
| 6  | 151977826 - 152450754 |            | FALSE | TRUE  |
| 6  | 151977826 - 152450754 |            | FALSE | TRUE  |
| 6  | 32808494 - 32812712   | T - 88.89% | TRUE  | TRUE  |
| 6  | 32808494 - 32812712   |            | TRUE  | TRUE  |
| 6  | 32808494 - 32812712   | T - 88.89% | FALSE | TRUE  |
| 11 | 118894824 - 118901616 |            | TRUE  | FALSE |
| 11 | 118894824 - 118901616 | F - 4.76%  | TRUE  | TRUE  |
| 11 | 118894824 - 118901616 | F - 33.33% | TRUE  | TRUE  |
| 11 | 118894824 - 118901616 |            | TRUE  | TRUE  |
| 11 | 118894824 - 118901616 |            | FALSE | TRUE  |
| 15 | 67835021 - 68116181   |            | TRUE  | FALSE |
| 15 | 67835021 - 68116181   | T - 80.00% | TRUE  | TRUE  |
| 15 | 67835021 - 68116181   | F - 6.67%  | TRUE  | TRUE  |
| 15 | 67835021 - 68116181   | T - 73.33% | TRUE  | TRUE  |
| 21 | 45719925 - 45747261   | F - 4.35%  | TRUE  | TRUE  |
| 21 | 45719925 - 45747261   | F - 8.70%  | TRUE  | TRUE  |
| 21 | 45719925 - 45747261   | F - 8.70%  | TRUE  | TRUE  |
| 21 | 45719925 - 45747261   | F - 30.43% | TRUE  | TRUE  |
| 21 | 45719925 - 45747261   | F - 21.74% | TRUE  | TRUE  |
| 21 | 45719925 - 45747261   | F - 13.04% | TRUE  | TRUE  |
| 21 | 45719925 - 45747261   | F - 4.35%  | TRUE  | TRUE  |
| 21 | 45719925 - 45747261   | F - 26.09% | TRUE  | TRUE  |
| 21 | 45719925 - 45747261   | F - 13.04% | FALSE | TRUE  |
| 21 | 45719925 - 45747261   | F - 13.04% | FALSE | TRUE  |
| 21 | 45719925 - 45747261   | F - 8.70%  | TRUE  | TRUE  |
| 21 | 45719925 - 45747261   |            | FALSE | TRUE  |

|             |                       |            |       |       |
|-------------|-----------------------|------------|-------|-------|
| 6_apd_hap1  | 4095498 - 4099716     | T - 88.89% | TRUE  | TRUE  |
| 6_apd_hap1  | 4095498 - 4099716     |            | TRUE  | TRUE  |
| 6_apd_hap1  | 4095498 - 4099716     | T - 88.89% | FALSE | TRUE  |
| 6_cox_hap2  | 4253021 - 4257240     | T - 88.89% | TRUE  | TRUE  |
| 6_cox_hap2  | 4253021 - 4257240     |            | TRUE  | TRUE  |
| 6_cox_hap2  | 4253021 - 4257240     | T - 88.89% | FALSE | TRUE  |
| 6_dbb_hap3  | 4089872 - 4094090     | T - 90.91% | TRUE  | TRUE  |
| 6_dbb_hap3  | 4089872 - 4094090     |            | TRUE  | TRUE  |
| 6_dbb_hap3  | 4089872 - 4094090     | T - 90.91% | FALSE | TRUE  |
| 6_mann_hap4 | 4265690 - 4269908     | T - 88.89% | TRUE  | TRUE  |
| 6_mann_hap4 | 4265690 - 4269908     |            | TRUE  | TRUE  |
| 6_mann_hap4 | 4265690 - 4269908     | T - 88.89% | FALSE | TRUE  |
| 6_mcf_hap5  | 4145371 - 4149579     | T - 88.89% | TRUE  | TRUE  |
| 6_mcf_hap5  | 4145371 - 4149579     |            | TRUE  | TRUE  |
| 6_mcf_hap5  | 4145371 - 4149579     | T - 88.89% | FALSE | TRUE  |
| 6_qbl_hap6  | 4040601 - 4044819     | T - 88.89% | TRUE  | TRUE  |
| 6_qbl_hap6  | 4040601 - 4044819     |            | TRUE  | TRUE  |
| 6_qbl_hap6  | 4040601 - 4044819     | T - 88.89% | FALSE | TRUE  |
| 3           | 39850405 - 40301812   |            | TRUE  | TRUE  |
| 3           | 39850405 - 40301812   |            | TRUE  | TRUE  |
| 3           | 39850405 - 40301812   | T - 86.67% | TRUE  | TRUE  |
| 3           | 39850405 - 40301812   |            | TRUE  | TRUE  |
| 3           | 39850405 - 40301812   | F - 20.00% | FALSE | TRUE  |
| 3           | 39850405 - 40301812   | F - 6.67%  | FALSE | TRUE  |
| 3           | 39850405 - 40301812   | F - 6.67%  | FALSE | TRUE  |
| 3           | 39850405 - 40301812   | T - 60.00% | FALSE | TRUE  |
| 3           | 39850405 - 40301812   | F - 20.00% | TRUE  | TRUE  |
| 3           | 39850405 - 40301812   | T - 86.67% | TRUE  | TRUE  |
| 3           | 39850405 - 40301812   |            | TRUE  | TRUE  |
| 3           | 39850405 - 40301812   | T - 86.67% | TRUE  | TRUE  |
| 3           | 39850405 - 40301812   |            | FALSE | TRUE  |
| 3           | 39850405 - 40301812   |            | TRUE  | TRUE  |
| 3           | 39850405 - 40301812   |            | FALSE | TRUE  |
| 10          | 122216466 - 122349367 |            | TRUE  | FALSE |
| 10          | 122216466 - 122349367 |            | TRUE  | FALSE |
| 10          | 122216466 - 122349367 | T - 75.00% | TRUE  | TRUE  |
| 10          | 122216466 - 122349367 | T - 66.67% | TRUE  | FALSE |
| 10          | 122216466 - 122349367 | T - 75.00% | TRUE  | TRUE  |
| 10          | 122216466 - 122349367 | T - 50.00% | TRUE  | FALSE |
| 10          | 122216466 - 122349367 |            | TRUE  | FALSE |
| 10          | 122216466 - 122349367 |            | TRUE  | TRUE  |
| 10          | 122216466 - 122349367 | F - 16.67% | TRUE  | TRUE  |
| 10          | 122216466 - 122349367 | F - 16.67% | TRUE  | TRUE  |
| 10          | 122216466 - 122349367 |            | TRUE  | FALSE |
| 10          | 122216466 - 122349367 | F - 8.33%  | TRUE  | TRUE  |
| 10          | 122216466 - 122349367 |            | TRUE  | TRUE  |
| 10          | 122216466 - 122349367 | F - 41.67% | TRUE  | TRUE  |
| 10          | 122216466 - 122349367 |            | TRUE  | TRUE  |
| 10          | 122216466 - 122349367 |            | TRUE  | TRUE  |
| 10          | 122216466 - 122349367 | T - 66.67% | TRUE  | TRUE  |
| 10          | 122216466 - 122349367 | F - 8.33%  | TRUE  | TRUE  |
| 20          | 20370196 - 20693266   |            | TRUE  | FALSE |
| 20          | 20370196 - 20693266   |            | TRUE  | TRUE  |
| 20          | 20370196 - 20693266   | F - 7.69%  | TRUE  | TRUE  |
| 20          | 20370196 - 20693266   |            | TRUE  | TRUE  |
| 20          | 20370196 - 20693266   |            | TRUE  | TRUE  |
| 22          | 43192508 - 43411184   |            | TRUE  | TRUE  |



|            |                       |            |       |       |
|------------|-----------------------|------------|-------|-------|
| 22         | 43192508 - 43411184   |            | TRUE  | TRUE  |
| 22         | 43192508 - 43411184   | F - 41.18% | TRUE  | TRUE  |
| 22         | 43192508 - 43411184   |            | TRUE  | TRUE  |
| 22         | 43192508 - 43411184   | F - 41.18% | TRUE  | TRUE  |
| 22         | 43192508 - 43411184   |            | TRUE  | TRUE  |
| 22         | 43192508 - 43411184   | F - 35.29% | TRUE  | TRUE  |
| 22         | 43192508 - 43411184   |            | TRUE  | TRUE  |
| 22         | 43192508 - 43411184   |            | TRUE  | FALSE |
| 22         | 43192508 - 43411184   | F - 38.24% | TRUE  | TRUE  |
| 22         | 43192508 - 43411184   | F - 26.47% | TRUE  | TRUE  |
| 22         | 43192508 - 43411184   | F - 32.35% | TRUE  | TRUE  |
| 22         | 43192508 - 43411184   | F - 32.35% | TRUE  | TRUE  |
| 22         | 43192508 - 43411184   |            | TRUE  | TRUE  |
| 22         | 43192508 - 43411184   | F - 23.53% | TRUE  | TRUE  |
| 22         | 43192508 - 43411184   | F - 41.18% | TRUE  | TRUE  |
| 22         | 43192508 - 43411184   | F - 44.12% | TRUE  | TRUE  |
| 22         | 43192508 - 43411184   | F - 38.24% | TRUE  | TRUE  |
| 22         | 43192508 - 43411184   | F - 2.94%  | TRUE  | TRUE  |
| 22         | 43192508 - 43411184   |            | TRUE  | TRUE  |
| 22         | 43192508 - 43411184   | F - 38.24% | TRUE  | TRUE  |
| 22         | 43192508 - 43411184   | F - 32.35% | TRUE  | TRUE  |
| 22         | 43192508 - 43411184   |            | TRUE  | TRUE  |
| 22         | 43192508 - 43411184   |            | FALSE | TRUE  |
| 6_dbb_hap3 | 2142855 - 2162051     |            | TRUE  | TRUE  |
| 6_dbb_hap3 | 2142855 - 2162051     | F - 45.16% | TRUE  | TRUE  |
| 6_dbb_hap3 | 2142855 - 2162051     |            | TRUE  | TRUE  |
| 6_dbb_hap3 | 2142855 - 2162051     | T - 64.52% | TRUE  | TRUE  |
| 6_dbb_hap3 | 2142855 - 2162051     | F - 3.23%  | TRUE  | TRUE  |
| 6_dbb_hap3 | 2142855 - 2162051     | F - 3.23%  | TRUE  | TRUE  |
| 6_dbb_hap3 | 2142855 - 2162051     |            | TRUE  | TRUE  |
| 6_dbb_hap3 | 2142855 - 2162051     |            | TRUE  | TRUE  |
| 6_dbb_hap3 | 2142855 - 2162051     |            | TRUE  | TRUE  |
| 6_dbb_hap3 | 2142855 - 2162051     | F - 3.23%  | TRUE  | TRUE  |
| 6_dbb_hap3 | 2142855 - 2162051     |            | FALSE | TRUE  |
| 6_dbb_hap3 | 2142855 - 2162051     | F - 3.23%  | TRUE  | TRUE  |
| 6_dbb_hap3 | 2142855 - 2162051     | F - 3.23%  | TRUE  | TRUE  |
| 6_dbb_hap3 | 2142855 - 2162051     |            | TRUE  | TRUE  |
| 6_dbb_hap3 | 2142855 - 2162051     | F - 41.94% | TRUE  | TRUE  |
| 6_dbb_hap3 | 2142855 - 2162051     | F - 3.23%  | TRUE  | TRUE  |
| 6_dbb_hap3 | 2142855 - 2162051     |            | TRUE  | TRUE  |
| 6_dbb_hap3 | 2142855 - 2162051     | F - 3.23%  | TRUE  | TRUE  |
| 6_dbb_hap3 | 2142855 - 2162051     | F - 6.45%  | TRUE  | TRUE  |
| 6_dbb_hap3 | 2142855 - 2162051     | T - 61.29% | TRUE  | TRUE  |
| 6_dbb_hap3 | 2142855 - 2162051     | F - 6.45%  | TRUE  | TRUE  |
| 6_dbb_hap3 | 2142855 - 2162051     | F - 3.23%  | TRUE  | TRUE  |
| 6_dbb_hap3 | 2142855 - 2162051     | T - 70.97% | FALSE | TRUE  |
| 1          | 111956936 - 111970399 | F - 45.45% | TRUE  | FALSE |
| 1          | 111956936 - 111970399 |            | TRUE  | FALSE |
| 1          | 111956936 - 111970399 |            | TRUE  | TRUE  |
| 2          | 139259350 - 139331818 |            | TRUE  | TRUE  |
| 2          | 139259350 - 139331818 | F - 12.50% | TRUE  | TRUE  |
| 2          | 179296141 - 179316239 |            | TRUE  | FALSE |
| 2          | 179296141 - 179316239 | F - 22.22% | TRUE  | TRUE  |
| 3          | 46899357 - 46923659   |            | TRUE  | TRUE  |
| 3          | 46899357 - 46923659   | T - 80.00% | TRUE  | TRUE  |
| 3          | 46899357 - 46923659   |            | TRUE  | TRUE  |
| 3          | 46899357 - 46923659   | T - 80.00% | TRUE  | TRUE  |
| 3          | 46899357 - 46923659   |            | TRUE  | TRUE  |

|    |                     |             |       |       |
|----|---------------------|-------------|-------|-------|
| 3  | 46899357 - 46923659 | F - 40.00%  | TRUE  | TRUE  |
| 3  | 46899357 - 46923659 |             | TRUE  | TRUE  |
| 10 | 5991038 - 6020150   |             | TRUE  | TRUE  |
| 10 | 5991038 - 6020150   |             | TRUE  | TRUE  |
| 10 | 5991038 - 6020150   |             | TRUE  | TRUE  |
| 10 | 5991038 - 6020150   | F - 3.70%   | TRUE  | TRUE  |
| 10 | 5991038 - 6020150   | T - 74.07%  | FALSE | TRUE  |
| 16 | 693262 - 818865     |             | TRUE  | TRUE  |
| 16 | 693262 - 818865     |             | TRUE  | TRUE  |
| 16 | 693262 - 818865     |             | TRUE  | TRUE  |
| 16 | 693262 - 818865     | F - 10.00%  | TRUE  | TRUE  |
| 16 | 693262 - 818865     |             | TRUE  | TRUE  |
| 16 | 693262 - 818865     |             | TRUE  | TRUE  |
| 16 | 693262 - 818865     | T - 90.00%  | TRUE  | TRUE  |
| 16 | 693262 - 818865     | F - 10.00%  | TRUE  | TRUE  |
| 16 | 693262 - 818865     |             | TRUE  | TRUE  |
| 16 | 693262 - 818865     | T - 90.00%  | TRUE  | TRUE  |
| 16 | 693262 - 818865     |             | FALSE | TRUE  |
| 16 | 693262 - 818865     |             | FALSE | TRUE  |
| 16 | 693262 - 818865     | T - 100.00% | TRUE  | TRUE  |
| 16 | 693262 - 818865     |             | FALSE | TRUE  |
| 20 | 36531499 - 36573752 |             | TRUE  | FALSE |
| 20 | 36531499 - 36573752 | T - 100.00% | TRUE  | TRUE  |
| 20 | 60883011 - 60942368 |             | TRUE  | TRUE  |
| 20 | 60883011 - 60942368 |             | TRUE  | FALSE |
| 20 | 60883011 - 60942368 |             | TRUE  | TRUE  |
| 20 | 60883011 - 60942368 |             | TRUE  | TRUE  |
| 20 | 60883011 - 60942368 |             | TRUE  | TRUE  |
| 20 | 60883011 - 60942368 | F - 17.65%  | FALSE | TRUE  |
| 20 | 60883011 - 60942368 | F - 29.41%  | TRUE  | TRUE  |
| 20 | 60883011 - 60942368 |             | FALSE | TRUE  |
| 20 | 60883011 - 60942368 | F - 11.76%  | TRUE  | TRUE  |
| 20 | 60883011 - 60942368 | F - 29.41%  | TRUE  | TRUE  |
| 20 | 60883011 - 60942368 |             | FALSE | TRUE  |
| 20 | 60883011 - 60942368 | F - 23.53%  | TRUE  | TRUE  |
| 20 | 60883011 - 60942368 |             | FALSE | TRUE  |
| 20 | 60883011 - 60942368 | F - 17.65%  | FALSE | TRUE  |
| 20 | 60883011 - 60942368 |             | FALSE | TRUE  |
| 20 | 60883011 - 60942368 | F - 17.65%  | FALSE | TRUE  |
| 20 | 60883011 - 60942368 | F - 23.53%  | FALSE | TRUE  |
| 20 | 60883011 - 60942368 |             | FALSE | TRUE  |
| 20 | 60883011 - 60942368 |             | TRUE  | TRUE  |
| 20 | 60883011 - 60942368 | F - 29.41%  | TRUE  | TRUE  |
| 20 | 60883011 - 60942368 |             | FALSE | TRUE  |
| 20 | 60883011 - 60942368 | F - 11.76%  | TRUE  | TRUE  |
| 20 | 60883011 - 60942368 |             | TRUE  | TRUE  |
| 20 | 60883011 - 60942368 | F - 11.76%  | TRUE  | TRUE  |
| 20 | 60883011 - 60942368 | F - 29.41%  | TRUE  | TRUE  |
| 20 | 60883011 - 60942368 |             | FALSE | TRUE  |
| 20 | 60883011 - 60942368 |             | TRUE  | TRUE  |
| 20 | 60883011 - 60942368 |             | TRUE  | TRUE  |
| 20 | 60883011 - 60942368 |             | FALSE | TRUE  |
| 22 | 50713408 - 50746056 | F - 15.79%  | TRUE  | TRUE  |
| 22 | 50713408 - 50746056 | F - 10.53%  | TRUE  | TRUE  |
| 22 | 50713408 - 50746056 | F - 5.26%   | TRUE  | TRUE  |
| 22 | 50713408 - 50746056 |             | TRUE  | TRUE  |
| 22 | 50713408 - 50746056 |             | TRUE  | TRUE  |
| 22 | 50713408 - 50746056 |             | TRUE  | TRUE  |

|    |                       |            |       |       |
|----|-----------------------|------------|-------|-------|
| 7  | 106685094 - 106802256 |            | TRUE  | TRUE  |
| 7  | 106685094 - 106802256 | F - 14.29% | TRUE  | TRUE  |
| 7  | 106685094 - 106802256 | T - 71.43% | TRUE  | TRUE  |
| 7  | 106685094 - 106802256 |            | FALSE | TRUE  |
| 7  | 106685094 - 106802256 | T - 85.71% | FALSE | TRUE  |
| 9  | 118916071 - 119164601 |            | TRUE  | TRUE  |
| 9  | 118916071 - 119164601 | F - 11.11% | TRUE  | TRUE  |
| 9  | 95607874 - 95640304   | F - 11.11% | TRUE  | TRUE  |
| 9  | 95607874 - 95640304   |            | FALSE | TRUE  |
| 12 | 112123857 - 112194911 |            | TRUE  | TRUE  |
| 12 | 112123857 - 112194911 | F - 10.34% | TRUE  | FALSE |
| 12 | 112123857 - 112194911 | F - 41.38% | FALSE | TRUE  |
| 12 | 112123857 - 112194911 | F - 10.34% | FALSE | TRUE  |
| 13 | 46916137 - 47012325   |            | TRUE  | FALSE |
| 13 | 46916137 - 47012325   |            | TRUE  | TRUE  |
| 13 | 46916137 - 47012325   |            | TRUE  | FALSE |
| 13 | 46916137 - 47012325   | F - 8.00%  | TRUE  | FALSE |
| 13 | 46916137 - 47012325   | F - 4.00%  | TRUE  | TRUE  |
| 13 | 46916137 - 47012325   | F - 4.00%  | TRUE  | TRUE  |
| 13 | 46916137 - 47012325   | F - 8.00%  | TRUE  | TRUE  |
| 13 | 46916137 - 47012325   |            | TRUE  | TRUE  |
| 13 | 46916137 - 47012325   |            | TRUE  | TRUE  |
| 13 | 46916137 - 47012325   |            | TRUE  | TRUE  |
| 13 | 46916137 - 47012325   | F - 8.00%  | TRUE  | TRUE  |
| 13 | 46916137 - 47012325   |            | TRUE  | TRUE  |
| 13 | 46916137 - 47012325   | F - 16.00% | FALSE | TRUE  |
| 13 | 46916137 - 47012325   |            | TRUE  | TRUE  |
| 13 | 46916137 - 47012325   |            | FALSE | TRUE  |
| 19 | 36500022 - 36505145   |            | TRUE  | FALSE |
| 19 | 36500022 - 36505145   |            | TRUE  | TRUE  |
| 19 | 36500022 - 36505145   |            | TRUE  | TRUE  |
| 19 | 36500022 - 36505145   |            | TRUE  | TRUE  |
| 19 | 36500022 - 36505145   | F - 29.17% | TRUE  | FALSE |
| 1  | 227084589 - 227175246 |            | TRUE  | TRUE  |
| 1  | 227084589 - 227175246 | T - 66.67% | TRUE  | TRUE  |
| 1  | 227084589 - 227175246 | F - 3.70%  | TRUE  | TRUE  |
| 1  | 227084589 - 227175246 | F - 3.70%  | TRUE  | FALSE |
| 1  | 227084589 - 227175246 |            | TRUE  | TRUE  |
| 1  | 227084589 - 227175246 | F - 11.11% | TRUE  | TRUE  |
| 1  | 227084589 - 227175246 |            | TRUE  | TRUE  |
| 1  | 227084589 - 227175246 | F - 3.70%  | TRUE  | TRUE  |
| 1  | 227084589 - 227175246 |            | TRUE  | TRUE  |
| 1  | 227084589 - 227175246 | F - 14.81% | TRUE  | TRUE  |
| 1  | 227084589 - 227175246 |            | TRUE  | TRUE  |
| 1  | 227084589 - 227175246 |            | TRUE  | TRUE  |
| 1  | 227084589 - 227175246 |            | TRUE  | TRUE  |
| 1  | 227084589 - 227175246 |            | TRUE  | TRUE  |
| 1  | 227084589 - 227175246 |            | TRUE  | TRUE  |
| 1  | 227084589 - 227175246 |            | TRUE  | TRUE  |
| 1  | 227084589 - 227175246 |            | TRUE  | TRUE  |
| 1  | 227084589 - 227175246 |            | TRUE  | TRUE  |
| 1  | 227084589 - 227175246 |            | FALSE | TRUE  |
| 3  | 53528683 - 53846492   |            | TRUE  | FALSE |
| 3  | 53528683 - 53846492   |            | TRUE  | FALSE |
| 3  | 53528683 - 53846492   |            | TRUE  | TRUE  |
| 3  | 53528683 - 53846492   |            | TRUE  | TRUE  |
| 3  | 53528683 - 53846492   |            | TRUE  | TRUE  |
| 3  | 53528683 - 53846492   |            | TRUE  | TRUE  |
| 3  | 53528683 - 53846492   |            | TRUE  | FALSE |
| 3  | 53528683 - 53846492   | T - 60.00% | TRUE  | FALSE |
| 3  | 53528683 - 53846492   | T - 60.00% | TRUE  | FALSE |
| 3  | 53528683 - 53846492   |            | TRUE  | TRUE  |
| 3  | 53528683 - 53846492   |            | FALSE | TRUE  |

|    |                       |            |       |       |
|----|-----------------------|------------|-------|-------|
| 3  | 53528683 - 53846492   |            | FALSE | TRUE  |
| 3  | 129366635 - 129612419 |            | TRUE  | FALSE |
| 3  | 129366635 - 129612419 | F - 10.53% | TRUE  | TRUE  |
| 3  | 129366635 - 129612419 |            | TRUE  | FALSE |
| 3  | 129366635 - 129612419 | F - 5.26%  | TRUE  | TRUE  |
| 3  | 129366635 - 129612419 |            | FALSE | TRUE  |
| 3  | 129366635 - 129612419 |            | TRUE  | TRUE  |
| 5  | 1456595 - 1524092     |            | TRUE  | TRUE  |
| 5  | 1456595 - 1524092     | T - 50.00% | TRUE  | TRUE  |
| 5  | 1456595 - 1524092     |            | TRUE  | TRUE  |
| 5  | 1456595 - 1524092     |            | TRUE  | TRUE  |
| 5  | 1456595 - 1524092     | F - 25.00% | TRUE  | TRUE  |
| 5  | 1456595 - 1524092     | F - 37.50% | FALSE | TRUE  |
| 5  | 1456595 - 1524092     | F - 12.50% | TRUE  | TRUE  |
| 5  | 1456595 - 1524092     | F - 12.50% | TRUE  | TRUE  |
| 5  | 1456595 - 1524092     |            | TRUE  | TRUE  |
| 5  | 1456595 - 1524092     | F - 37.50% | TRUE  | TRUE  |
| 5  | 1456595 - 1524092     | F - 12.50% | TRUE  | TRUE  |
| 5  | 1456595 - 1524092     |            | TRUE  | TRUE  |
| 7  | 102815462 - 102920913 |            | TRUE  | FALSE |
| 7  | 102815462 - 102920913 |            | TRUE  | FALSE |
| 7  | 102815462 - 102920913 |            | TRUE  | TRUE  |
| 7  | 102815462 - 102920913 |            | TRUE  | FALSE |
| 7  | 102815462 - 102920913 | T - 57.14% | TRUE  | TRUE  |
| 7  | 102815462 - 102920913 |            | FALSE | TRUE  |
| 7  | 102815462 - 102920913 | T - 71.43% | TRUE  | TRUE  |
| 7  | 102815462 - 102920913 |            | FALSE | TRUE  |
| 9  | 100000708 - 100139577 |            | TRUE  | TRUE  |
| 9  | 100000708 - 100139577 | F - 42.86% | TRUE  | TRUE  |
| 9  | 100000708 - 100139577 |            | TRUE  | TRUE  |
| 9  | 100000708 - 100139577 | T - 57.14% | TRUE  | TRUE  |
| 9  | 100000708 - 100139577 |            | TRUE  | TRUE  |
| 9  | 100000708 - 100139577 |            | TRUE  | TRUE  |
| 9  | 100000708 - 100139577 |            | FALSE | TRUE  |
| 9  | 100000708 - 100139577 |            | TRUE  | TRUE  |
| 9  | 100831557 - 100881494 |            | TRUE  | FALSE |
| 9  | 100831557 - 100881494 |            | TRUE  | TRUE  |
| 9  | 100831557 - 100881494 | F - 20.00% | TRUE  | TRUE  |
| 9  | 100831557 - 100881494 | F - 40.00% | TRUE  | TRUE  |
| 9  | 100831557 - 100881494 | T - 60.00% | TRUE  | TRUE  |
| 9  | 100831557 - 100881494 |            | TRUE  | TRUE  |
| 9  | 100831557 - 100881494 |            | FALSE | TRUE  |
| Y  | 2803112 - 2850547     |            | TRUE  | FALSE |
| Y  | 2803112 - 2850547     |            | FALSE | TRUE  |
| Y  | 2803112 - 2850547     | F - 23.08% | TRUE  | TRUE  |
| Y  | 2803112 - 2850547     | F - 30.77% | TRUE  | TRUE  |
| Y  | 2803112 - 2850547     |            | TRUE  | TRUE  |
| Y  | 2803112 - 2850547     | T - 84.62% | TRUE  | TRUE  |
| Y  | 2803112 - 2850547     | T - 76.92% | TRUE  | TRUE  |
| Y  | 2803112 - 2850547     |            | TRUE  | TRUE  |
| Y  | 2803112 - 2850547     |            | TRUE  | TRUE  |
| Y  | 2803112 - 2850547     |            | TRUE  | TRUE  |
| Y  | 2803112 - 2850547     |            | TRUE  | TRUE  |
| 12 | 40148823 - 40499891   |            | TRUE  | TRUE  |
| 12 | 40148823 - 40499891   | F - 12.50% | TRUE  | TRUE  |
| 12 | 40148823 - 40499891   |            | TRUE  | TRUE  |
| 14 | 88304164 - 88460009   |            | TRUE  | TRUE  |
| 14 | 88304164 - 88460009   |            | TRUE  | TRUE  |

|    |                       |             |       |       |
|----|-----------------------|-------------|-------|-------|
| 14 | 88304164 - 88460009   |             | TRUE  | TRUE  |
| 14 | 88304164 - 88460009   | F - 7.14%   | FALSE | TRUE  |
| 14 | 88304164 - 88460009   |             | TRUE  | TRUE  |
| 17 | 4636828 - 4643223     | T - 50.00%  | TRUE  | TRUE  |
| 17 | 4636828 - 4643223     |             | TRUE  | TRUE  |
| 17 | 4636828 - 4643223     | T - 100.00% | FALSE | TRUE  |
| 17 | 4636828 - 4643223     | T - 75.00%  | TRUE  | TRUE  |
| 17 | 4636828 - 4643223     |             | TRUE  | TRUE  |
| 17 | 4636828 - 4643223     | T - 100.00% | TRUE  | TRUE  |
| 1  | 53361582 - 53392851   |             | TRUE  | FALSE |
| 1  | 53361582 - 53392851   |             | TRUE  | FALSE |
| 1  | 53361582 - 53392851   |             | TRUE  | TRUE  |
| 1  | 53361582 - 53392851   | F - 17.14%  | FALSE | TRUE  |
| 2  | 231032009 - 231090444 | F - 8.70%   | TRUE  | TRUE  |
| 2  | 231032009 - 231090444 |             | TRUE  | TRUE  |
| 4  | 169784921 - 169931468 |             | TRUE  | TRUE  |
| 4  | 169784921 - 169931468 | F - 8.33%   | TRUE  | TRUE  |
| 4  | 169784921 - 169931468 |             | TRUE  | TRUE  |
| 4  | 169784921 - 169931468 | T - 83.33%  | TRUE  | TRUE  |
| 7  | 99690351 - 99699563   | F - 11.11%  | TRUE  | TRUE  |
| 7  | 99690351 - 99699563   | F - 27.78%  | TRUE  | TRUE  |
| 7  | 99690351 - 99699563   |             | TRUE  | TRUE  |
| 7  | 99690351 - 99699563   |             | TRUE  | TRUE  |
| 7  | 99690351 - 99699563   |             | TRUE  | TRUE  |
| 14 | 69254372 - 69262960   | F - 12.50%  | TRUE  | TRUE  |
| 14 | 69254372 - 69262960   |             | TRUE  | TRUE  |
| 14 | 69254372 - 69262960   | F - 12.50%  | TRUE  | TRUE  |
| 14 | 69254372 - 69262960   |             | TRUE  | TRUE  |
| 14 | 69254372 - 69262960   | F - 37.50%  | TRUE  | TRUE  |
| 14 | 69254372 - 69262960   |             | TRUE  | TRUE  |
| 14 | 69254372 - 69262960   | T - 50.00%  | TRUE  | TRUE  |
| 14 | 69254372 - 69262960   |             | TRUE  | TRUE  |
| 17 | 9548580 - 9633003     |             | TRUE  | FALSE |
| 17 | 9548580 - 9633003     |             | TRUE  | FALSE |
| 17 | 9548580 - 9633003     | T - 77.78%  | TRUE  | TRUE  |
| 1  | 28052490 - 28089633   |             | TRUE  | FALSE |
| 1  | 28052490 - 28089633   | F - 13.33%  | TRUE  | TRUE  |
| X  | 74588262 - 74743337   |             | TRUE  | TRUE  |
| X  | 74588262 - 74743337   |             | TRUE  | FALSE |
| X  | 74588262 - 74743337   | T - 66.67%  | TRUE  | TRUE  |
| 15 | 49115932 - 49255641   | F - 42.86%  | TRUE  | TRUE  |
| 15 | 49115932 - 49255641   | T - 71.43%  | TRUE  | TRUE  |
| 15 | 49115932 - 49255641   |             | TRUE  | TRUE  |
| 2  | 67350489 - 67442451   |             | TRUE  | FALSE |
| 2  | 67350489 - 67442451   | T - 66.67%  | TRUE  | TRUE  |
| 3  | 52529354 - 52558511   |             | TRUE  | FALSE |
| 3  | 52529354 - 52558511   |             | TRUE  | FALSE |
| 3  | 52529354 - 52558511   |             | TRUE  | TRUE  |
| 3  | 52529354 - 52558511   | F - 28.57%  | TRUE  | TRUE  |
| 3  | 52529354 - 52558511   | F - 21.43%  | TRUE  | FALSE |
| 3  | 8792094 - 8811314     | F - 33.33%  | TRUE  | TRUE  |
| 3  | 8792094 - 8811314     | T - 50.00%  | TRUE  | TRUE  |
| 3  | 8792094 - 8811314     | F - 16.67%  | TRUE  | TRUE  |
| 3  | 8792094 - 8811314     |             | TRUE  | TRUE  |
| 5  | 141971743 - 142077635 |             | TRUE  | TRUE  |
| 5  | 141971743 - 142077635 |             | TRUE  | TRUE  |
| 5  | 141971743 - 142077635 | F - 4.76%   | TRUE  | TRUE  |
| 5  | 141971743 - 142077635 | F - 4.76%   | TRUE  | TRUE  |

|    |                       |             |       |       |
|----|-----------------------|-------------|-------|-------|
| 5  | 141971743 - 142077635 | F - 9.52%   | TRUE  | TRUE  |
| 5  | 141971743 - 142077635 | F - 9.52%   | TRUE  | TRUE  |
| 5  | 141971743 - 142077635 | F - 4.76%   | TRUE  | TRUE  |
| 5  | 141971743 - 142077635 |             | FALSE | TRUE  |
| 6  | 79644136 - 79788011   |             | TRUE  | TRUE  |
| 6  | 79644136 - 79788011   |             | TRUE  | FALSE |
| 6  | 79644136 - 79788011   | T - 100.00% | TRUE  | TRUE  |
| 6  | 79644136 - 79788011   |             | TRUE  | TRUE  |
| 6  | 79644136 - 79788011   |             | TRUE  | TRUE  |
| 6  | 79644136 - 79788011   |             | TRUE  | FALSE |
| 6  | 79644136 - 79788011   | F - 25.00%  | TRUE  | TRUE  |
| 6  | 79644136 - 79788011   | T - 50.00%  | TRUE  | TRUE  |
| 6  | 79644136 - 79788011   | T - 50.00%  | TRUE  | TRUE  |
| 6  | 79644136 - 79788011   |             | FALSE | TRUE  |
| 6  | 79644136 - 79788011   |             | TRUE  | TRUE  |
| 12 | 7096260 - 7178336     |             | TRUE  | FALSE |
| 12 | 7096260 - 7178336     |             | TRUE  | TRUE  |
| 12 | 7096260 - 7178336     | F - 4.17%   | TRUE  | TRUE  |
| 12 | 46312914 - 46385903   |             | TRUE  | FALSE |
| 12 | 46312914 - 46385903   |             | TRUE  | FALSE |
| 12 | 46312914 - 46385903   |             | TRUE  | TRUE  |
| 12 | 46312914 - 46385903   |             | TRUE  | TRUE  |
| 12 | 46312914 - 46385903   |             | TRUE  | TRUE  |
| 12 | 46312914 - 46385903   | F - 12.50%  | TRUE  | TRUE  |
| 12 | 46312914 - 46385903   |             | TRUE  | TRUE  |
| 2  | 10262455 - 10271546   | F - 20.00%  | TRUE  | TRUE  |
| 2  | 10262455 - 10271546   | T - 73.33%  | TRUE  | TRUE  |
| 2  | 10262455 - 10271546   |             | TRUE  | TRUE  |
| 2  | 10262455 - 10271546   | F - 6.67%   | TRUE  | TRUE  |
| 2  | 10262455 - 10271546   |             | FALSE | TRUE  |
| 2  | 10262455 - 10271546   |             | FALSE | TRUE  |
| 2  | 172543919 - 172604930 |             | TRUE  | FALSE |
| 2  | 172543919 - 172604930 | F - 5.00%   | TRUE  | TRUE  |
| 2  | 136664247 - 136743670 | F - 6.25%   | TRUE  | TRUE  |
| 2  | 136664247 - 136743670 | T - 56.25%  | TRUE  | TRUE  |
| 2  | 136664247 - 136743670 |             | FALSE | TRUE  |
| 2  | 136664247 - 136743670 | F - 18.75%  | TRUE  | TRUE  |
| 2  | 136664247 - 136743670 | F - 6.25%   | TRUE  | TRUE  |
| 6  | 158402888 - 158520208 | F - 27.78%  | TRUE  | FALSE |
| 6  | 158402888 - 158520208 |             | TRUE  | TRUE  |
| 6  | 158402888 - 158520208 |             | TRUE  | TRUE  |
| 6  | 158402888 - 158520208 | F - 5.56%   | TRUE  | TRUE  |
| 6  | 158402888 - 158520208 | T - 55.56%  | TRUE  | TRUE  |
| 6  | 158402888 - 158520208 | F - 11.11%  | TRUE  | TRUE  |
| 6  | 158402888 - 158520208 | T - 55.56%  | TRUE  | TRUE  |
| 6  | 158402888 - 158520208 |             | TRUE  | TRUE  |
| 6  | 158402888 - 158520208 |             | TRUE  | TRUE  |
| 6  | 158402888 - 158520208 |             | TRUE  | TRUE  |
| 6  | 158402888 - 158520208 |             | TRUE  | TRUE  |
| 6  | 158402888 - 158520208 |             | TRUE  | TRUE  |
| 6  | 158402888 - 158520208 |             | TRUE  | TRUE  |
| 6  | 158402888 - 158520208 |             | TRUE  | TRUE  |
| 6  | 158402888 - 158520208 |             | TRUE  | TRUE  |
| 6  | 158402888 - 158520208 |             | TRUE  | TRUE  |
| 7  | 139476850 - 139720125 |             | TRUE  | TRUE  |
| 7  | 139476850 - 139720125 |             | TRUE  | FALSE |
| 7  | 139476850 - 139720125 |             | TRUE  | TRUE  |
| 7  | 139476850 - 139720125 | F - 3.03%   | TRUE  | TRUE  |
| 7  | 139476850 - 139720125 |             | FALSE | TRUE  |
| 7  | 139476850 - 139720125 | T - 72.73%  | FALSE | TRUE  |
| 7  | 139476850 - 139720125 |             | FALSE | TRUE  |
| 10 | 122610687 - 122669038 |             | TRUE  | TRUE  |

|    |                       |            |       |       |
|----|-----------------------|------------|-------|-------|
| 10 | 122610687 - 122669038 | F - 9.09%  | TRUE  | TRUE  |
| 11 | 58294344 - 58345693   |            | TRUE  | TRUE  |
| 11 | 58294344 - 58345693   | F - 25.00% | TRUE  | TRUE  |
| 11 | 58294344 - 58345693   | F - 37.50% | TRUE  | TRUE  |
| 11 | 58294344 - 58345693   | F - 12.50% | TRUE  | TRUE  |
| 11 | 58294344 - 58345693   |            | TRUE  | TRUE  |
| 13 | 113344643 - 113541482 | F - 5.00%  | TRUE  | TRUE  |
| 13 | 113344643 - 113541482 |            | TRUE  | TRUE  |
| 13 | 113344643 - 113541482 | F - 5.00%  | TRUE  | TRUE  |
| 13 | 113344643 - 113541482 |            | TRUE  | TRUE  |
| 13 | 113344643 - 113541482 |            | FALSE | TRUE  |
| 13 | 113344643 - 113541482 | F - 5.00%  | TRUE  | TRUE  |
| 13 | 113344643 - 113541482 | F - 40.00% | TRUE  | TRUE  |
| 13 | 113344643 - 113541482 | F - 5.00%  | TRUE  | TRUE  |
| 13 | 113344643 - 113541482 | F - 20.00% | TRUE  | TRUE  |
| 13 | 113344643 - 113541482 |            | TRUE  | TRUE  |
| 13 | 113344643 - 113541482 | F - 40.00% | TRUE  | TRUE  |
| 13 | 113344643 - 113541482 | F - 15.00% | TRUE  | TRUE  |
| 13 | 113344643 - 113541482 |            | TRUE  | TRUE  |
| 13 | 113344643 - 113541482 |            | TRUE  | TRUE  |
| 13 | 113344643 - 113541482 | F - 5.00%  | TRUE  | TRUE  |
| 14 | 103589779 - 103603776 | F - 30.00% | TRUE  | TRUE  |
| 14 | 103589779 - 103603776 | F - 10.00% | TRUE  | TRUE  |
| 14 | 103589779 - 103603776 | F - 10.00% | FALSE | TRUE  |
| 14 | 103589779 - 103603776 | T - 50.00% | FALSE | TRUE  |
| 14 | 103589779 - 103603776 | F - 40.00% | TRUE  | TRUE  |
| 14 | 103589779 - 103603776 |            | TRUE  | TRUE  |
| 14 | 103589779 - 103603776 |            | TRUE  | TRUE  |
| 14 | 103589779 - 103603776 | F - 30.00% | TRUE  | TRUE  |
| 14 | 103589779 - 103603776 |            | TRUE  | TRUE  |
| 14 | 103589779 - 103603776 |            | TRUE  | TRUE  |
| 14 | 103589779 - 103603776 |            | TRUE  | TRUE  |
| 1  | 210501596 - 210849638 |            | TRUE  | TRUE  |
| 1  | 210501596 - 210849638 | T - 88.89% | TRUE  | TRUE  |
| 1  | 210501596 - 210849638 |            | TRUE  | TRUE  |
| 1  | 210501596 - 210849638 | F - 5.56%  | FALSE | TRUE  |
| 2  | 71680753 - 71913898   |            | TRUE  | TRUE  |
| 2  | 71680753 - 71913898   |            | TRUE  | FALSE |
| 2  | 71680753 - 71913898   |            | TRUE  | TRUE  |
| 2  | 71680753 - 71913898   |            | TRUE  | TRUE  |
| 2  | 71680753 - 71913898   |            | TRUE  | FALSE |
| 2  | 71680753 - 71913898   |            | TRUE  | TRUE  |
| 2  | 71680753 - 71913898   |            | TRUE  | FALSE |
| 2  | 71680753 - 71913898   |            | TRUE  | TRUE  |
| 2  | 71680753 - 71913898   |            | TRUE  | TRUE  |
| 2  | 71680753 - 71913898   | T - 83.33% | TRUE  | TRUE  |
| 2  | 71680753 - 71913898   | T - 72.22% | TRUE  | TRUE  |
| 2  | 71680753 - 71913898   |            | TRUE  | TRUE  |
| 2  | 71680753 - 71913898   | F - 8.33%  | TRUE  | FALSE |
| 2  | 71680753 - 71913898   |            | TRUE  | TRUE  |
| 2  | 71680753 - 71913898   |            | TRUE  | TRUE  |
| 2  | 71680753 - 71913898   | F - 36.11% | TRUE  | TRUE  |
| 2  | 71680753 - 71913898   |            | TRUE  | TRUE  |
| 2  | 71680753 - 71913898   | T - 72.22% | TRUE  | TRUE  |
| 2  | 71680753 - 71913898   | T - 86.11% | TRUE  | TRUE  |
| 2  | 71680753 - 71913898   | T - 83.33% | TRUE  | TRUE  |
| 2  | 71680753 - 71913898   |            | TRUE  | TRUE  |
| 2  | 71680753 - 71913898   | T - 80.56% | TRUE  | TRUE  |

|    |                       |             |       |       |
|----|-----------------------|-------------|-------|-------|
| 2  | 71680753 - 71913898   | F - 2.78%   | TRUE  | TRUE  |
| 2  | 71680753 - 71913898   | F - 36.11%  | TRUE  | TRUE  |
| 2  | 71680753 - 71913898   | T - 72.22%  | TRUE  | TRUE  |
| 2  | 71680753 - 71913898   | F - 2.78%   | FALSE | TRUE  |
| 2  | 71680753 - 71913898   |             | TRUE  | TRUE  |
| 2  | 71680753 - 71913898   | F - 2.78%   | TRUE  | TRUE  |
| 2  | 71680753 - 71913898   | F - 2.78%   | TRUE  | TRUE  |
| 2  | 71680753 - 71913898   |             | TRUE  | TRUE  |
| 2  | 71680753 - 71913898   |             | TRUE  | TRUE  |
| 2  | 71680753 - 71913898   |             | TRUE  | TRUE  |
| 2  | 71680753 - 71913898   |             | TRUE  | TRUE  |
| 2  | 71680753 - 71913898   |             | TRUE  | TRUE  |
| 2  | 71680753 - 71913898   | T - 91.67%  | TRUE  | TRUE  |
| 2  | 71680753 - 71913898   |             | TRUE  | TRUE  |
| 2  | 71680753 - 71913898   |             | TRUE  | TRUE  |
| 2  | 71680753 - 71913898   |             | TRUE  | TRUE  |
| 2  | 71680753 - 71913898   | F - 2.78%   | TRUE  | TRUE  |
| 2  | 71680753 - 71913898   |             | TRUE  | TRUE  |
| 2  | 71680753 - 71913898   | F - 8.33%   | TRUE  | TRUE  |
| 2  | 71680753 - 71913898   | F - 2.78%   | FALSE | TRUE  |
| 2  | 71680753 - 71913898   |             | FALSE | TRUE  |
| 8  | 15274724 - 15624158   |             | TRUE  | TRUE  |
| 8  | 15274724 - 15624158   | T - 55.56%  | TRUE  | TRUE  |
| 8  | 15274724 - 15624158   |             | TRUE  | FALSE |
| 8  | 15274724 - 15624158   | F - 11.11%  | FALSE | TRUE  |
| 8  | 15274724 - 15624158   | F - 5.56%   | TRUE  | TRUE  |
| 8  | 15274724 - 15624158   | F - 11.11%  | TRUE  | TRUE  |
| 8  | 15274724 - 15624158   |             | TRUE  | TRUE  |
| 9  | 95883771 - 95896570   | F - 11.11%  | TRUE  | TRUE  |
| 9  | 95883771 - 95896570   | F - 22.22%  | TRUE  | TRUE  |
| 9  | 95883771 - 95896570   | F - 11.11%  | FALSE | TRUE  |
| 9  | 95883771 - 95896570   |             | TRUE  | TRUE  |
| 9  | 95883771 - 95896570   |             | TRUE  | TRUE  |
| 9  | 95883771 - 95896570   |             | FALSE | TRUE  |
| 9  | 95883771 - 95896570   |             | FALSE | TRUE  |
| 19 | 58768639 - 58790174   |             | TRUE  | TRUE  |
| 19 | 58768639 - 58790174   | T - 100.00% | TRUE  | TRUE  |
| 19 | 58768639 - 58790174   |             | TRUE  | TRUE  |
| 1  | 47649261 - 47656716   |             | TRUE  | TRUE  |
| 1  | 47649261 - 47656716   |             | FALSE | TRUE  |
| 1  | 47649261 - 47656716   | F - 16.67%  | TRUE  | TRUE  |
| 1  | 225589204 - 225616627 |             | TRUE  | TRUE  |
| 1  | 225589204 - 225616627 |             | TRUE  | TRUE  |
| 1  | 225589204 - 225616627 |             | TRUE  | TRUE  |
| 1  | 225589204 - 225616627 |             | TRUE  | TRUE  |
| 1  | 225589204 - 225616627 | F - 20.00%  | TRUE  | FALSE |
| 1  | 225589204 - 225616627 | F - 20.00%  | TRUE  | TRUE  |
| 1  | 225589204 - 225616627 | F - 10.00%  | TRUE  | TRUE  |
| 1  | 225589204 - 225616627 | F - 10.00%  | TRUE  | TRUE  |
| 1  | 225589204 - 225616627 | F - 10.00%  | TRUE  | TRUE  |
| 1  | 225589204 - 225616627 |             | FALSE | TRUE  |
| 1  | 180244515 - 180472089 |             | TRUE  | TRUE  |
| 1  | 180244515 - 180472089 | F - 40.00%  | TRUE  | TRUE  |
| 1  | 180244515 - 180472089 | T - 60.00%  | TRUE  | TRUE  |
| 1  | 180244515 - 180472089 | T - 100.00% | TRUE  | TRUE  |
| 2  | 171627623 - 171634658 | T - 100.00% | TRUE  | TRUE  |
| 2  | 171627623 - 171634658 |             | TRUE  | TRUE  |
| 2  | 171627623 - 171634658 | T - 100.00% | TRUE  | TRUE  |
| 2  | 171627623 - 171634658 | T - 100.00% | TRUE  | TRUE  |



|   |    |                       |             |       |       |
|---|----|-----------------------|-------------|-------|-------|
|   | 3  | 49946302 - 49967606   |             | TRUE  | TRUE  |
|   | 3  | 49946302 - 49967606   | F - 6.67%   | FALSE | TRUE  |
|   | 3  | 133317019 - 133380737 |             | TRUE  | TRUE  |
|   | 3  | 133317019 - 133380737 | F - 46.15%  | TRUE  | TRUE  |
|   | 5  | 123972608 - 124084500 |             | TRUE  | FALSE |
|   | 5  | 123972608 - 124084500 | F - 11.76%  | FALSE | TRUE  |
|   | 11 | 65365226 - 65381720   |             | TRUE  | TRUE  |
|   | 11 | 65365226 - 65381720   | F - 10.00%  | TRUE  | TRUE  |
|   | 12 | 13197218 - 13236383   | F - 14.29%  | TRUE  | FALSE |
|   | 12 | 13197218 - 13236383   | F - 42.86%  | TRUE  | TRUE  |
|   | 12 | 13197218 - 13236383   |             | FALSE | TRUE  |
|   | 12 | 13197218 - 13236383   |             | FALSE | TRUE  |
|   | 1  | 100810033 - 100985833 |             | TRUE  | FALSE |
|   | 1  | 100810033 - 100985833 | F - 11.11%  | TRUE  | TRUE  |
|   | 1  | 100810033 - 100985833 | F - 5.56%   | FALSE | TRUE  |
|   | 1  | 100810033 - 100985833 | F - 5.56%   | FALSE | TRUE  |
|   | 2  | 101436613 - 101613291 |             | TRUE  | FALSE |
|   | 2  | 101436613 - 101613291 |             | TRUE  | FALSE |
|   | 2  | 101436613 - 101613291 | F - 5.56%   | TRUE  | TRUE  |
|   | 2  | 128994290 - 129076171 | F - 14.29%  | TRUE  | TRUE  |
|   | 2  | 128994290 - 129076171 | T - 71.43%  | TRUE  | TRUE  |
|   | 2  | 128994290 - 129076171 |             | TRUE  | TRUE  |
|   | 2  | 128994290 - 129076171 | F - 14.29%  | TRUE  | TRUE  |
|   | 2  | 128994290 - 129076171 | F - 14.29%  | FALSE | TRUE  |
|   | 3  | 44771088 - 44778575   |             | TRUE  | FALSE |
|   | 3  | 44771088 - 44778575   | F - 12.50%  | TRUE  | TRUE  |
|   | 3  | 44771088 - 44778575   | F - 37.50%  | FALSE | TRUE  |
|   | 7  | 73613982 - 73644164   |             | TRUE  | TRUE  |
|   | 7  | 73613982 - 73644164   | T - 82.35%  | TRUE  | FALSE |
|   | 7  | 73613982 - 73644164   | T - 76.47%  | TRUE  | TRUE  |
|   | 7  | 73613982 - 73644164   |             | FALSE | TRUE  |
|   | 7  | 102553344 - 102585556 |             | TRUE  | TRUE  |
|   | 7  | 102553344 - 102585556 |             | TRUE  | FALSE |
|   | 7  | 102553344 - 102585556 | F - 25.00%  | FALSE | TRUE  |
|   | 7  | 102553344 - 102585556 | F - 12.50%  | FALSE | TRUE  |
| X |    | 48911101 - 48927510   |             | TRUE  | TRUE  |
| X |    | 48911101 - 48927510   | F - 15.38%  | TRUE  | TRUE  |
|   | 10 | 72014713 - 72043450   | T - 100.00% | TRUE  | TRUE  |
|   | 10 | 72014713 - 72043450   |             | TRUE  | TRUE  |
|   | 12 | 40590546 - 40763087   |             | TRUE  | FALSE |
|   | 12 | 40590546 - 40763087   |             | TRUE  | TRUE  |
|   | 12 | 40590546 - 40763087   |             | TRUE  | TRUE  |
|   | 12 | 40590546 - 40763087   |             | TRUE  | TRUE  |
|   | 12 | 40590546 - 40763087   | T - 58.33%  | TRUE  | TRUE  |
|   | 12 | 40590546 - 40763087   |             | FALSE | TRUE  |
|   | 12 | 40590546 - 40763087   |             | FALSE | TRUE  |
|   | 17 | 13927802 - 13928991   |             | TRUE  | TRUE  |
|   | 17 | 13927802 - 13928991   |             | TRUE  | TRUE  |
|   | 17 | 13927802 - 13928991   | T - 100.00% | TRUE  | TRUE  |
|   | 20 | 4100589 - 4168394     | T - 60.00%  | TRUE  | TRUE  |
|   | 20 | 4100589 - 4168394     | F - 5.00%   | TRUE  | TRUE  |
|   | 20 | 4100589 - 4168394     |             | TRUE  | TRUE  |
|   | 20 | 4100589 - 4168394     |             | TRUE  | TRUE  |
|   | 20 | 4100589 - 4168394     | F - 25.00%  | TRUE  | TRUE  |
|   | 20 | 4100589 - 4168394     | F - 10.00%  | FALSE | TRUE  |
|   | 20 | 4100589 - 4168394     |             | FALSE | TRUE  |
|   | 20 | 4100589 - 4168394     | F - 5.00%   | TRUE  | TRUE  |
|   | 20 | 4100589 - 4168394     | T - 50.00%  | TRUE  | TRUE  |

|    |                       |            |       |       |
|----|-----------------------|------------|-------|-------|
| 20 | 4100589 - 4168394     | F - 45.00% | FALSE | TRUE  |
| 20 | 4100589 - 4168394     | F - 5.00%  | TRUE  | TRUE  |
| 20 | 4100589 - 4168394     | T - 55.00% | TRUE  | TRUE  |
| 20 | 4100589 - 4168394     |            | FALSE | TRUE  |
| 22 | 42095503 - 42195460   |            | TRUE  | FALSE |
| 22 | 42095503 - 42195460   |            | TRUE  | FALSE |
| 22 | 42095503 - 42195460   | F - 25.00% | TRUE  | TRUE  |
| 22 | 42095503 - 42195460   | T - 65.63% | TRUE  | TRUE  |
| 22 | 42095503 - 42195460   |            | FALSE | TRUE  |
| 22 | 39214456 - 39240017   | F - 33.33% | TRUE  | TRUE  |
| 22 | 39214456 - 39240017   |            | TRUE  | TRUE  |
| 22 | 39214456 - 39240017   | T - 66.67% | FALSE | TRUE  |
| 2  | 219536749 - 219567440 |            | TRUE  | TRUE  |
| 2  | 219536749 - 219567440 |            | TRUE  | TRUE  |
| 2  | 219536749 - 219567440 |            | TRUE  | TRUE  |
| 2  | 219536749 - 219567440 | F - 36.36% | TRUE  | TRUE  |
| 2  | 219536749 - 219567440 |            | FALSE | TRUE  |
| 2  | 39024871 - 39103075   |            | TRUE  | TRUE  |
| 2  | 39024871 - 39103075   |            | TRUE  | FALSE |
| 2  | 39024871 - 39103075   |            | TRUE  | TRUE  |
| 2  | 39024871 - 39103075   |            | TRUE  | FALSE |
| 2  | 39024871 - 39103075   |            | TRUE  | TRUE  |
| 2  | 39024871 - 39103075   | F - 16.67% | FALSE | TRUE  |
| 2  | 39024871 - 39103075   |            | TRUE  | TRUE  |
| 2  | 230631930 - 230787955 |            | TRUE  | FALSE |
| 2  | 230631930 - 230787955 | F - 4.00%  | TRUE  | TRUE  |
| 2  | 230631930 - 230787955 | F - 4.00%  | TRUE  | TRUE  |
| 2  | 230631930 - 230787955 |            | FALSE | TRUE  |
| 3  | 48488114 - 48509044   | T - 51.72% | TRUE  | TRUE  |
| 3  | 48488114 - 48509044   |            | TRUE  | TRUE  |
| 3  | 48488114 - 48509044   | F - 27.59% | TRUE  | TRUE  |
| 3  | 48488114 - 48509044   |            | TRUE  | FALSE |
| 3  | 48488114 - 48509044   |            | TRUE  | TRUE  |
| 3  | 48488114 - 48509044   |            | TRUE  | FALSE |
| 3  | 48488114 - 48509044   | F - 44.83% | TRUE  | TRUE  |
| 3  | 48488114 - 48509044   |            | TRUE  | TRUE  |
| 3  | 48488114 - 48509044   | F - 41.38% | TRUE  | TRUE  |
| 4  | 81105033 - 81125483   | T - 66.67% | TRUE  | TRUE  |
| 4  | 81105033 - 81125483   |            | TRUE  | TRUE  |
| 4  | 81105033 - 81125483   |            | TRUE  | TRUE  |
| 4  | 81105033 - 81125483   |            | FALSE | TRUE  |
| 4  | 81105033 - 81125483   | F - 40.00% | FALSE | TRUE  |
| 4  | 81105033 - 81125483   | F - 33.33% | TRUE  | TRUE  |
| 4  | 81105033 - 81125483   | T - 53.33% | TRUE  | TRUE  |
| 8  | 80830952 - 80942524   | F - 45.45% | TRUE  | FALSE |
| 8  | 80830952 - 80942524   |            | TRUE  | TRUE  |
| 9  | 33441152 - 33447631   |            | TRUE  | TRUE  |
| 9  | 33441152 - 33447631   |            | TRUE  | TRUE  |
| 9  | 33441152 - 33447631   | T - 72.73% | TRUE  | TRUE  |
| 10 | 4828820 - 4890254     |            | TRUE  | TRUE  |
| 10 | 4828820 - 4890254     | T - 61.11% | TRUE  | TRUE  |
| 10 | 4828820 - 4890254     | F - 38.89% | TRUE  | TRUE  |
| 10 | 4828820 - 4890254     |            | FALSE | TRUE  |
| 10 | 4828820 - 4890254     |            | TRUE  | TRUE  |
| 10 | 4828820 - 4890254     |            | FALSE | TRUE  |
| 10 | 26726706 - 26856732   |            | TRUE  | TRUE  |
| 10 | 26726706 - 26856732   |            | TRUE  | TRUE  |
| 10 | 26726706 - 26856732   | T - 66.67% | TRUE  | TRUE  |

|            |                       |             |       |       |
|------------|-----------------------|-------------|-------|-------|
| 10         | 26726706 - 26856732   | F - 44.44%  | TRUE  | TRUE  |
| 10         | 26726706 - 26856732   |             | TRUE  | TRUE  |
| 10         | 26726706 - 26856732   | F - 11.11%  | TRUE  | TRUE  |
| 10         | 26726706 - 26856732   |             | TRUE  | TRUE  |
| 11         | 6518490 - 6593257     |             | TRUE  | TRUE  |
| 11         | 6518490 - 6593257     |             | TRUE  | TRUE  |
| 11         | 6518490 - 6593257     |             | TRUE  | TRUE  |
| 11         | 6518490 - 6593257     |             | TRUE  | TRUE  |
| 11         | 6518490 - 6593257     | F - 14.81%  | TRUE  | TRUE  |
| 11         | 6518490 - 6593257     | F - 7.41%   | TRUE  | TRUE  |
| 11         | 6518490 - 6593257     |             | TRUE  | TRUE  |
| 11         | 6518490 - 6593257     |             | TRUE  | TRUE  |
| 11         | 6518490 - 6593257     | F - 29.63%  | TRUE  | TRUE  |
| 11         | 6518490 - 6593257     |             | TRUE  | TRUE  |
| 11         | 6518490 - 6593257     | F - 3.70%   | FALSE | TRUE  |
| 11         | 6518490 - 6593257     |             | TRUE  | TRUE  |
| 11         | 6518490 - 6593257     | F - 14.81%  | TRUE  | TRUE  |
| 14         | 92524896 - 92572965   |             | TRUE  | TRUE  |
| 14         | 92524896 - 92572965   |             | TRUE  | FALSE |
| 14         | 92524896 - 92572965   |             | TRUE  | TRUE  |
| 14         | 92524896 - 92572965   |             | TRUE  | TRUE  |
| 14         | 92524896 - 92572965   |             | TRUE  | TRUE  |
| 14         | 92524896 - 92572965   |             | TRUE  | TRUE  |
| 14         | 92524896 - 92572965   |             | TRUE  | TRUE  |
| 14         | 92524896 - 92572965   | F - 47.83%  | TRUE  | TRUE  |
| 14         | 92524896 - 92572965   | T - 82.61%  | TRUE  | TRUE  |
| 14         | 92524896 - 92572965   |             | TRUE  | TRUE  |
| 14         | 92524896 - 92572965   | T - 67.39%  | TRUE  | TRUE  |
| 14         | 92524896 - 92572965   |             | FALSE | TRUE  |
| 14         | 92524896 - 92572965   | T - 79.35%  | TRUE  | TRUE  |
| 14         | 92524896 - 92572965   |             | TRUE  | TRUE  |
| 14         | 92524896 - 92572965   |             | TRUE  | TRUE  |
| 19         | 46800303 - 46846690   | F - 16.67%  | TRUE  | FALSE |
| 19         | 46800303 - 46846690   | T - 100.00% | TRUE  | FALSE |
| 19         | 46800303 - 46846690   |             | TRUE  | FALSE |
| 19         | 46800303 - 46846690   |             | TRUE  | TRUE  |
| 19         | 46800303 - 46846690   |             | TRUE  | TRUE  |
| 19         | 46800303 - 46846690   | T - 95.83%  | TRUE  | TRUE  |
| 6_apd_hap1 | 3773805 - 3787550     |             | TRUE  | FALSE |
| 6_apd_hap1 | 3773805 - 3787550     | T - 87.50%  | TRUE  | TRUE  |
| 3          | 125725198 - 125820404 |             | TRUE  | FALSE |
| 3          | 125725198 - 125820404 | F - 19.35%  | TRUE  | TRUE  |
| 3          | 125725198 - 125820404 | F - 9.68%   | TRUE  | TRUE  |
| 3          | 125725198 - 125820404 | F - 12.90%  | TRUE  | TRUE  |
| 3          | 125725198 - 125820404 | F - 6.45%   | TRUE  | FALSE |
| 3          | 125725198 - 125820404 | F - 9.68%   | TRUE  | TRUE  |
| 3          | 125725198 - 125820404 |             | TRUE  | TRUE  |
| 3          | 125725198 - 125820404 | F - 3.23%   | TRUE  | TRUE  |
| 3          | 125725198 - 125820404 | F - 3.23%   | TRUE  | TRUE  |
| 3          | 125725198 - 125820404 | F - 22.58%  | FALSE | TRUE  |
| 4          | 120415550 - 120550146 |             | TRUE  | TRUE  |
| 4          | 120415550 - 120550146 |             | TRUE  | TRUE  |
| 4          | 120415550 - 120550146 | F - 18.75%  | TRUE  | TRUE  |
| 4          | 120415550 - 120550146 | F - 6.25%   | FALSE | TRUE  |
| 4          | 120415550 - 120550146 |             | TRUE  | TRUE  |
| 4          | 120415550 - 120550146 |             | TRUE  | TRUE  |
| 6          | 29855383 - 29858856   | F - 33.33%  | TRUE  | TRUE  |
| 6          | 29855383 - 29858856   | F - 33.33%  | TRUE  | TRUE  |

|   |    |                       |             |       |       |
|---|----|-----------------------|-------------|-------|-------|
|   | 6  | 29855383 - 29858856   | T - 66.67%  | TRUE  | TRUE  |
|   | 6  | 29855383 - 29858856   |             | TRUE  | TRUE  |
|   | 8  | 90945564 - 91015456   | T - 64.71%  | TRUE  | TRUE  |
|   | 8  | 90945564 - 91015456   |             | FALSE | TRUE  |
|   | 8  | 90945564 - 91015456   |             | TRUE  | TRUE  |
|   | 8  | 90945564 - 91015456   |             | FALSE | TRUE  |
|   | 9  | 107543283 - 107690527 |             | TRUE  | TRUE  |
|   | 9  | 107543283 - 107690527 |             | TRUE  | TRUE  |
|   | 9  | 107543283 - 107690527 | F - 42.86%  | TRUE  | TRUE  |
|   | 9  | 107543283 - 107690527 | F - 42.86%  | TRUE  | TRUE  |
|   | 9  | 107543283 - 107690527 |             | TRUE  | TRUE  |
|   | 9  | 107543283 - 107690527 | F - 42.86%  | TRUE  | TRUE  |
|   | 9  | 107543283 - 107690527 |             | FALSE | TRUE  |
| X |    | 77320685 - 77384793   | F - 14.29%  | TRUE  | TRUE  |
| X |    | 77320685 - 77384793   | F - 14.29%  | TRUE  | TRUE  |
| X |    | 77320685 - 77384793   |             | TRUE  | TRUE  |
| X |    | 77320685 - 77384793   | F - 35.71%  | TRUE  | TRUE  |
| X |    | 77320685 - 77384793   | F - 21.43%  | TRUE  | TRUE  |
| X |    | 77320685 - 77384793   | F - 35.71%  | TRUE  | TRUE  |
| X |    | 77320685 - 77384793   | F - 7.14%   | TRUE  | TRUE  |
| X |    | 152082986 - 152142025 |             | TRUE  | FALSE |
| X |    | 152082986 - 152142025 | T - 84.62%  | TRUE  | TRUE  |
| X |    | 152082986 - 152142025 |             | TRUE  | TRUE  |
| X |    | 152082986 - 152142025 | T - 76.92%  | FALSE | TRUE  |
| X |    | 152082986 - 152142025 |             | FALSE | TRUE  |
| X |    | 152082986 - 152142025 | T - 84.62%  | TRUE  | TRUE  |
| X |    | 152082986 - 152142025 |             | TRUE  | TRUE  |
|   | 10 | 124768429 - 124817827 |             | TRUE  | TRUE  |
|   | 10 | 124768429 - 124817827 |             | TRUE  | TRUE  |
|   | 10 | 124768429 - 124817827 | F - 14.29%  | TRUE  | TRUE  |
|   | 10 | 124768429 - 124817827 | F - 14.29%  | TRUE  | TRUE  |
|   | 10 | 124768429 - 124817827 |             | TRUE  | TRUE  |
|   | 12 | 27485787 - 27578746   |             | TRUE  | FALSE |
|   | 12 | 27485787 - 27578746   | T - 100.00% | TRUE  | TRUE  |
|   | 12 | 27485787 - 27578746   |             | TRUE  | TRUE  |
|   | 12 | 27485787 - 27578746   |             | FALSE | TRUE  |
|   | 12 | 27485787 - 27578746   | F - 31.25%  | FALSE | TRUE  |
|   | 12 | 27485787 - 27578746   |             | FALSE | TRUE  |
|   | 12 | 14920933 - 14924065   | F - 25.00%  | TRUE  | TRUE  |
|   | 12 | 14920933 - 14924065   | T - 75.00%  | TRUE  | TRUE  |
|   | 12 | 14920933 - 14924065   |             | TRUE  | TRUE  |
|   | 12 | 14920933 - 14924065   | F - 25.00%  | TRUE  | TRUE  |
|   | 12 | 91539025 - 91576900   |             | TRUE  | TRUE  |
|   | 12 | 91539025 - 91576900   | F - 8.00%   | TRUE  | TRUE  |
|   | 12 | 91539025 - 91576900   | F - 4.00%   | TRUE  | TRUE  |
|   | 12 | 91539025 - 91576900   | F - 16.00%  | TRUE  | TRUE  |
|   | 12 | 91539025 - 91576900   |             | FALSE | TRUE  |
|   | 16 | 74705753 - 74734789   | T - 60.00%  | TRUE  | TRUE  |
|   | 16 | 74705753 - 74734789   |             | FALSE | TRUE  |
|   | 16 | 74705753 - 74734789   | F - 40.00%  | TRUE  | TRUE  |
|   | 1  | 101455179 - 101491644 |             | TRUE  | FALSE |
|   | 1  | 101455179 - 101491644 | T - 76.00%  | TRUE  | TRUE  |
|   | 1  | 101455179 - 101491644 |             | FALSE | TRUE  |
|   | 1  | 101455179 - 101491644 |             | FALSE | TRUE  |
|   | 5  | 178487416 - 178510538 |             | TRUE  | FALSE |
|   | 5  | 178487416 - 178510538 | F - 33.33%  | TRUE  | TRUE  |
|   | 5  | 178487416 - 178510538 |             | TRUE  | FALSE |
|   | 5  | 178487416 - 178510538 |             | TRUE  | TRUE  |

|            |                       |             |       |       |
|------------|-----------------------|-------------|-------|-------|
| 5          | 141689992 - 141706020 | T - 70.00%  | TRUE  | TRUE  |
| 5          | 141689992 - 141706020 | F - 10.00%  | TRUE  | TRUE  |
| 5          | 141689992 - 141706020 |             | TRUE  | TRUE  |
| 5          | 141689992 - 141706020 |             | FALSE | TRUE  |
| 5          | 141689992 - 141706020 |             | FALSE | TRUE  |
| 5          | 141689992 - 141706020 | T - 60.00%  | TRUE  | TRUE  |
| 5          | 141689992 - 141706020 |             | FALSE | TRUE  |
| 5          | 141689992 - 141706020 | T - 70.00%  | TRUE  | TRUE  |
| 5          | 141689992 - 141706020 | T - 50.00%  | TRUE  | TRUE  |
| 5          | 141689992 - 141706020 | F - 30.00%  | TRUE  | TRUE  |
| 11         | 69467844 - 69490184   |             | TRUE  | FALSE |
| 11         | 69467844 - 69490184   | F - 5.00%   | TRUE  | TRUE  |
| 11         | 69467844 - 69490184   |             | FALSE | TRUE  |
| 13         | 20248764 - 20357159   |             | TRUE  | TRUE  |
| 13         | 20248764 - 20357159   | F - 27.27%  | TRUE  | TRUE  |
| 13         | 20248764 - 20357159   | T - 54.55%  | FALSE | TRUE  |
| 14         | 69725994 - 69821190   |             | TRUE  | FALSE |
| 14         | 69725994 - 69821190   | T - 81.82%  | TRUE  | FALSE |
| 16         | 20420856 - 20452658   |             | TRUE  | FALSE |
| 16         | 20420856 - 20452658   |             | TRUE  | FALSE |
| 16         | 20420856 - 20452658   | T - 75.00%  | TRUE  | TRUE  |
| 6_cox_hap2 | 1206741 - 1223145     | F - 5.00%   | TRUE  | TRUE  |
| 6_cox_hap2 | 1206741 - 1223145     | F - 5.00%   | TRUE  | TRUE  |
| 6_cox_hap2 | 1206741 - 1223145     |             | FALSE | TRUE  |
| 6_cox_hap2 | 1206741 - 1223145     |             | TRUE  | TRUE  |
| 6_cox_hap2 | 1206741 - 1223145     |             | TRUE  | TRUE  |
| 6_cox_hap2 | 1206741 - 1223145     | F - 10.00%  | TRUE  | TRUE  |
| 6_cox_hap2 | 1206741 - 1223145     |             | TRUE  | TRUE  |
| 6_cox_hap2 | 1206741 - 1223145     |             | FALSE | TRUE  |
| 6_cox_hap2 | 1206741 - 1223145     | F - 5.00%   | TRUE  | TRUE  |
| 6_cox_hap2 | 1206741 - 1223145     |             | TRUE  | TRUE  |
| 6_cox_hap2 | 1206741 - 1223145     | F - 25.00%  | TRUE  | TRUE  |
| 2          | 20760208 - 20850864   |             | TRUE  | TRUE  |
| 2          | 20760208 - 20850864   |             | FALSE | TRUE  |
| 2          | 20760208 - 20850864   | F - 18.18%  | TRUE  | TRUE  |
| 2          | 215590370 - 215674428 |             | TRUE  | TRUE  |
| 2          | 215590370 - 215674428 | T - 65.00%  | TRUE  | TRUE  |
| 3          | 66429221 - 66551687   | F - 6.25%   | TRUE  | TRUE  |
| 3          | 66429221 - 66551687   |             | TRUE  | TRUE  |
| 3          | 66429221 - 66551687   | F - 6.25%   | TRUE  | TRUE  |
| 3          | 66429221 - 66551687   |             | TRUE  | TRUE  |
| 3          | 66429221 - 66551687   | F - 12.50%  | TRUE  | TRUE  |
| 3          | 66429221 - 66551687   | F - 6.25%   | TRUE  | TRUE  |
| 3          | 66429221 - 66551687   | F - 6.25%   | TRUE  | TRUE  |
| 3          | 66429221 - 66551687   | F - 12.50%  | TRUE  | TRUE  |
| 6          | 134490384 - 134639196 | F - 3.23%   | TRUE  | TRUE  |
| 6          | 134490384 - 134639196 | F - 3.23%   | TRUE  | TRUE  |
| 6          | 134490384 - 134639196 | T - 67.74%  | TRUE  | FALSE |
| 6          | 134490384 - 134639196 | F - 3.23%   | TRUE  | TRUE  |
| 6          | 134490384 - 134639196 |             | TRUE  | TRUE  |
| 6          | 134490384 - 134639196 | F - 6.45%   | TRUE  | TRUE  |
| 6          | 134490384 - 134639196 | F - 6.45%   | TRUE  | TRUE  |
| 6          | 134490384 - 134639196 | F - 9.68%   | FALSE | TRUE  |
| 6          | 134490384 - 134639196 |             | TRUE  | TRUE  |
| 6          | 134490384 - 134639196 |             | TRUE  | TRUE  |
| 6          | 134490384 - 134639196 | F - 16.13%  | TRUE  | TRUE  |
| 12         | 53342655 - 53346690   | T - 100.00% | TRUE  | TRUE  |
| 12         | 53342655 - 53346690   |             | TRUE  | TRUE  |

|    |                       |            |       |       |
|----|-----------------------|------------|-------|-------|
| 12 | 53342655 - 53346690   | F - 33.33% | FALSE | TRUE  |
| 12 | 53342655 - 53346690   | F - 8.33%  | TRUE  | TRUE  |
| 12 | 113659243 - 113736390 |            | TRUE  | TRUE  |
| 12 | 113659243 - 113736390 |            | TRUE  | TRUE  |
| 12 | 113659243 - 113736390 | T - 84.62% | TRUE  | TRUE  |
| 12 | 113659243 - 113736390 | T - 53.85% | TRUE  | TRUE  |
| 12 | 113659243 - 113736390 |            | TRUE  | TRUE  |
| 13 | 101706130 - 102068843 |            | TRUE  | TRUE  |
| 13 | 101706130 - 102068843 |            | TRUE  | FALSE |
| 13 | 101706130 - 102068843 | F - 20.00% | TRUE  | TRUE  |
| 13 | 101706130 - 102068843 |            | TRUE  | TRUE  |
| 13 | 101706130 - 102068843 |            | TRUE  | TRUE  |
| 13 | 101706130 - 102068843 | F - 10.00% | FALSE | TRUE  |
| 13 | 101706130 - 102068843 |            | TRUE  | FALSE |
| 13 | 101706130 - 102068843 | F - 20.00% | TRUE  | TRUE  |
| 13 | 101706130 - 102068843 | F - 20.00% | TRUE  | TRUE  |
| 13 | 101706130 - 102068843 | F - 20.00% | TRUE  | TRUE  |
| 13 | 101706130 - 102068843 | F - 40.00% | TRUE  | TRUE  |
| 13 | 101706130 - 102068843 |            | TRUE  | TRUE  |
| 13 | 101706130 - 102068843 |            | TRUE  | FALSE |
| 14 | 50704281 - 50779266   |            | TRUE  | FALSE |
| 14 | 50704281 - 50779266   | F - 25.00% | TRUE  | FALSE |
| 14 | 50704281 - 50779266   |            | TRUE  | FALSE |
| 14 | 50704281 - 50779266   |            | TRUE  | TRUE  |
| 14 | 50704281 - 50779266   |            | FALSE | TRUE  |
| 2  | 37571717 - 37600465   |            | TRUE  | TRUE  |
| 2  | 37571717 - 37600465   |            | TRUE  | FALSE |
| 2  | 37571717 - 37600465   | T - 80.00% | TRUE  | TRUE  |
| 2  | 37571717 - 37600465   |            | TRUE  | TRUE  |
| 2  | 37571717 - 37600465   | T - 70.00% | TRUE  | TRUE  |
| 2  | 37571717 - 37600465   | T - 70.00% | TRUE  | TRUE  |
| 2  | 37571717 - 37600465   | F - 30.00% | TRUE  | TRUE  |
| 2  | 37571717 - 37600465   | F - 10.00% | TRUE  | TRUE  |
| 4  | 174252527 - 174256276 | F - 10.00% | TRUE  | TRUE  |
| 4  | 174252527 - 174256276 |            | TRUE  | TRUE  |
| 4  | 174252527 - 174256276 | F - 10.00% | TRUE  | TRUE  |
| 4  | 174252527 - 174256276 | F - 10.00% | TRUE  | TRUE  |
| 4  | 174252527 - 174256276 | T - 50.00% | TRUE  | TRUE  |
| 4  | 174252527 - 174256276 |            | TRUE  | TRUE  |
| 4  | 174252527 - 174256276 |            | TRUE  | TRUE  |
| 4  | 174252527 - 174256276 | F - 30.00% | FALSE | TRUE  |
| 4  | 174252527 - 174256276 |            | TRUE  | TRUE  |
| 4  | 174252527 - 174256276 | F - 30.00% | FALSE | TRUE  |
| 5  | 66675206 - 67101066   |            | TRUE  | TRUE  |
| 5  | 66675206 - 67101066   |            | TRUE  | TRUE  |
| 5  | 66675206 - 67101066   |            | TRUE  | FALSE |
| 5  | 66675206 - 67101066   | F - 14.29% | FALSE | TRUE  |
| 5  | 94890778 - 94940806   |            | TRUE  | TRUE  |
| 5  | 94890778 - 94940806   | F - 18.18% | TRUE  | TRUE  |
| 5  | 94890778 - 94940806   |            | TRUE  | FALSE |
| 5  | 137774706 - 137782658 | F - 16.67% | TRUE  | TRUE  |
| 5  | 137774706 - 137782658 |            | TRUE  | TRUE  |
| 5  | 137774706 - 137782658 |            | TRUE  | TRUE  |
| 5  | 137774706 - 137782658 | F - 41.67% | TRUE  | TRUE  |
| 5  | 137774706 - 137782658 |            | TRUE  | TRUE  |
| 5  | 137774706 - 137782658 | F - 8.33%  | TRUE  | TRUE  |
| 5  | 137774706 - 137782658 | F - 8.33%  | TRUE  | TRUE  |
| 5  | 137774706 - 137782658 | F - 8.33%  | TRUE  | TRUE  |

|    |                       |            |       |       |
|----|-----------------------|------------|-------|-------|
| 5  | 137774706 - 137782658 | F - 16.67% | TRUE  | TRUE  |
| 7  | 117350705 - 117514193 |            | TRUE  | FALSE |
| 7  | 117350705 - 117514193 |            | TRUE  | FALSE |
| 7  | 117350705 - 117514193 |            | TRUE  | TRUE  |
| 7  | 117350705 - 117514193 | F - 42.86% | TRUE  | TRUE  |
| 11 | 32914724 - 33014862   | F - 16.67% | TRUE  | TRUE  |
| 11 | 32914724 - 33014862   |            | TRUE  | TRUE  |
| 11 | 32914724 - 33014862   |            | TRUE  | TRUE  |
| 13 | 114586610 - 114626485 | T - 75.00% | TRUE  | TRUE  |
| 13 | 114586610 - 114626485 |            | TRUE  | TRUE  |
| 20 | 25176329 - 25207365   |            | TRUE  | TRUE  |
| 20 | 25176329 - 25207365   |            | TRUE  | FALSE |
| 20 | 25176329 - 25207365   |            | TRUE  | TRUE  |
| 20 | 25176329 - 25207365   | F - 2.94%  | FALSE | TRUE  |
| 1  | 212899495 - 212965139 |            | TRUE  | TRUE  |
| 1  | 212899495 - 212965139 | F - 9.09%  | TRUE  | TRUE  |
| 6  | 76458909 - 76629254   |            | TRUE  | FALSE |
| 6  | 76458909 - 76629254   | T - 50.00% | TRUE  | TRUE  |
| 6  | 76458909 - 76629254   |            | TRUE  | TRUE  |
| 6  | 76458909 - 76629254   |            | TRUE  | TRUE  |
| 6  | 76458909 - 76629254   |            | TRUE  | TRUE  |
| 8  | 89044237 - 89340254   | T - 87.50% | TRUE  | TRUE  |
| 8  | 89044237 - 89340254   |            | TRUE  | TRUE  |
| 8  | 89044237 - 89340254   |            | TRUE  | FALSE |
| 8  | 89044237 - 89340254   |            | TRUE  | FALSE |
| 8  | 89044237 - 89340254   | T - 87.50% | TRUE  | TRUE  |
| 15 | 42640301 - 42704515   |            | TRUE  | TRUE  |
| 15 | 42640301 - 42704515   | T - 62.50% | TRUE  | TRUE  |
| 15 | 42640301 - 42704515   | F - 31.58% | FALSE | TRUE  |
| 15 | 42640301 - 42704515   | T - 62.50% | TRUE  | TRUE  |
| 15 | 42640301 - 42704515   | T - 62.50% | TRUE  | TRUE  |
| 15 | 42640301 - 42704515   |            | FALSE | TRUE  |
| 15 | 42640301 - 42704515   |            | TRUE  | TRUE  |
| 15 | 42640301 - 42704515   |            | TRUE  | TRUE  |
| 15 | 42640301 - 42704515   |            | TRUE  | TRUE  |
| 15 | 42640301 - 42704515   | T - 62.50% | TRUE  | TRUE  |
| 15 | 42640301 - 42704515   |            | FALSE | TRUE  |
| 15 | 42640301 - 42704515   |            | TRUE  | TRUE  |
| 19 | 37407231 - 37489259   |            | TRUE  | TRUE  |
| 19 | 37407231 - 37489259   |            | TRUE  | TRUE  |
| 19 | 37407231 - 37489259   | F - 22.22% | TRUE  | FALSE |
| 19 | 37407231 - 37489259   |            | TRUE  | TRUE  |
| 19 | 37407231 - 37489259   | F - 44.44% | TRUE  | TRUE  |
| 19 | 37407231 - 37489259   |            | FALSE | TRUE  |
| 4  | 104026963 - 104119566 |            | TRUE  | TRUE  |
| 4  | 104026963 - 104119566 |            | TRUE  | FALSE |
| 4  | 104026963 - 104119566 |            | TRUE  | TRUE  |
| 4  | 104026963 - 104119566 |            | TRUE  | TRUE  |
| 4  | 104026963 - 104119566 |            | TRUE  | TRUE  |
| 4  | 104026963 - 104119566 | F - 40.00% | TRUE  | TRUE  |
| 4  | 104026963 - 104119566 |            | TRUE  | TRUE  |
| 4  | 104026963 - 104119566 |            | TRUE  | TRUE  |
| 4  | 104026963 - 104119566 | F - 40.00% | TRUE  | TRUE  |
| 4  | 104026963 - 104119566 |            | TRUE  | TRUE  |
| 5  | 94799599 - 94890711   | F - 27.78% | TRUE  | TRUE  |
| 5  | 94799599 - 94890711   |            | TRUE  | TRUE  |
| 5  | 94799599 - 94890711   | F - 5.56%  | TRUE  | TRUE  |
| 5  | 94799599 - 94890711   |            | TRUE  | TRUE  |

|              |                       |             |       |       |
|--------------|-----------------------|-------------|-------|-------|
| 5            | 94799599 - 94890711   | F - 16.67%  | TRUE  | TRUE  |
| 6            | 29624758 - 29640149   |             | TRUE  | FALSE |
| 6            | 29624758 - 29640149   | F - 41.67%  | TRUE  | TRUE  |
| 7            | 99214569 - 99336131   |             | TRUE  | TRUE  |
| 7            | 99214569 - 99336131   | F - 5.88%   | TRUE  | TRUE  |
| 7            | 150076406 - 150109558 | F - 6.25%   | TRUE  | TRUE  |
| 7            | 150076406 - 150109558 | F - 18.75%  | TRUE  | TRUE  |
| 7            | 150076406 - 150109558 |             | TRUE  | TRUE  |
| 7            | 150076406 - 150109558 | F - 12.50%  | TRUE  | TRUE  |
| 7            | 150076406 - 150109558 | F - 25.00%  | TRUE  | TRUE  |
| 7            | 150076406 - 150109558 | F - 25.00%  | TRUE  | TRUE  |
| 10           | 49514698 - 49647403   |             | TRUE  | FALSE |
| 10           | 49514698 - 49647403   |             | TRUE  | TRUE  |
| 10           | 49514698 - 49647403   | T - 80.00%  | TRUE  | TRUE  |
| 10           | 49514698 - 49647403   |             | TRUE  | TRUE  |
| 10           | 49514698 - 49647403   |             | FALSE | TRUE  |
| 10           | 49514698 - 49647403   |             | TRUE  | TRUE  |
| 11           | 8040791 - 8127659     | F - 42.86%  | TRUE  | FALSE |
| 11           | 8040791 - 8127659     |             | TRUE  | TRUE  |
| 11           | 8040791 - 8127659     | T - 85.71%  | TRUE  | TRUE  |
| 11           | 8040791 - 8127659     |             | FALSE | TRUE  |
| 11           | 8040791 - 8127659     | T - 100.00% | FALSE | TRUE  |
| 11           | 6495913 - 6502709     |             | TRUE  | FALSE |
| 11           | 6495913 - 6502709     | T - 63.64%  | TRUE  | FALSE |
| 11           | 82534544 - 82612733   |             | TRUE  | TRUE  |
| 11           | 82534544 - 82612733   |             | FALSE | TRUE  |
| 11           | 82534544 - 82612733   | F - 42.86%  | TRUE  | TRUE  |
| 17_ctg5_hap1 | 563498 - 760700       |             | TRUE  | TRUE  |
| 17_ctg5_hap1 | 563498 - 760700       | F - 22.22%  | TRUE  | TRUE  |
| 17_ctg5_hap1 | 563498 - 760700       |             | TRUE  | TRUE  |
| 1            | 40157854 - 40229586   |             | TRUE  | FALSE |
| 1            | 40157854 - 40229586   |             | TRUE  | TRUE  |
| 1            | 40157854 - 40229586   | F - 20.00%  | TRUE  | TRUE  |
| 1            | 40157854 - 40229586   |             | TRUE  | FALSE |
| 1            | 40157854 - 40229586   | T - 80.00%  | FALSE | TRUE  |
| 1            | 40157854 - 40229586   |             | FALSE | TRUE  |
| 2            | 179387554 - 179484944 |             | TRUE  | TRUE  |
| 2            | 179387554 - 179484944 | F - 12.50%  | TRUE  | TRUE  |
| 2            | 179387554 - 179484944 | F - 25.00%  | TRUE  | TRUE  |
| 2            | 179387554 - 179484944 | F - 25.00%  | TRUE  | TRUE  |
| 2            | 179387554 - 179484944 |             | TRUE  | FALSE |
| 2            | 179387554 - 179484944 | F - 37.50%  | TRUE  | TRUE  |
| 5            | 7396321 - 7830194     | F - 7.14%   | TRUE  | TRUE  |
| 5            | 7396321 - 7830194     |             | TRUE  | TRUE  |
| 5            | 7396321 - 7830194     | F - 7.14%   | FALSE | TRUE  |
| 5            | 7396321 - 7830194     | F - 42.86%  | FALSE | TRUE  |
| 5            | 7396321 - 7830194     |             | TRUE  | TRUE  |
| 5            | 7396321 - 7830194     | F - 7.14%   | TRUE  | TRUE  |
| 5            | 7396321 - 7830194     | T - 57.14%  | TRUE  | TRUE  |
| 5            | 7396321 - 7830194     |             | TRUE  | TRUE  |
| 5            | 7396321 - 7830194     |             | FALSE | TRUE  |
| 5            | 7396321 - 7830194     |             | TRUE  | TRUE  |
| 5            | 7396321 - 7830194     |             | TRUE  | TRUE  |
| 5            | 179261436 - 179285887 |             | TRUE  | TRUE  |
| 5            | 179261436 - 179285887 |             | TRUE  | TRUE  |
| 5            | 179261436 - 179285887 | F - 37.50%  | TRUE  | TRUE  |
| 5            | 179261436 - 179285887 | F - 31.25%  | TRUE  | TRUE  |
| 5            | 179261436 - 179285887 | T - 62.50%  | TRUE  | TRUE  |



|   |    |                       |             |       |       |
|---|----|-----------------------|-------------|-------|-------|
|   | 9  | 136215069 - 136218281 | F - 13.64%  | TRUE  | TRUE  |
|   | 9  | 136215069 - 136218281 | F - 4.55%   | TRUE  | TRUE  |
|   | 9  | 136215069 - 136218281 |             | TRUE  | TRUE  |
|   | 9  | 136215069 - 136218281 | F - 4.55%   | TRUE  | TRUE  |
|   | 9  | 136215069 - 136218281 | F - 4.55%   | TRUE  | TRUE  |
| X |    | 148855726 - 148858528 |             | TRUE  | FALSE |
| X |    | 148855726 - 148858528 | T - 100.00% | TRUE  | TRUE  |
|   | 10 | 131633496 - 131762538 |             | TRUE  | TRUE  |
|   | 10 | 131633496 - 131762538 | F - 22.22%  | TRUE  | TRUE  |
|   | 10 | 131633496 - 131762538 |             | TRUE  | TRUE  |
|   | 10 | 131633496 - 131762538 | T - 77.78%  | TRUE  | TRUE  |
|   | 10 | 131633496 - 131762538 | T - 88.89%  | TRUE  | TRUE  |
|   | 10 | 131633496 - 131762538 | F - 11.11%  | TRUE  | TRUE  |
|   | 10 | 131633496 - 131762538 | T - 66.67%  | TRUE  | TRUE  |
|   | 10 | 131633496 - 131762538 |             | TRUE  | TRUE  |
|   | 10 | 131633496 - 131762538 | T - 66.67%  | FALSE | TRUE  |
|   | 10 | 131633496 - 131762538 | T - 66.67%  | TRUE  | TRUE  |
|   | 10 | 131633496 - 131762538 |             | FALSE | TRUE  |
|   | 10 | 131633496 - 131762538 | T - 66.67%  | FALSE | TRUE  |
|   | 11 | 818901 - 825573       |             | TRUE  | TRUE  |
|   | 11 | 818901 - 825573       | T - 75.00%  | TRUE  | TRUE  |
|   | 12 | 108233068 - 108257744 |             | TRUE  | TRUE  |
|   | 12 | 108233068 - 108257744 | T - 100.00% | FALSE | TRUE  |
|   | 12 | 108233068 - 108257744 | T - 100.00% | TRUE  | TRUE  |
|   | 12 | 108233068 - 108257744 |             | TRUE  | TRUE  |
|   | 15 | 51739908 - 51915030   |             | TRUE  | TRUE  |
|   | 15 | 51739908 - 51915030   |             | TRUE  | TRUE  |
|   | 15 | 51739908 - 51915030   |             | TRUE  | TRUE  |
|   | 15 | 51739908 - 51915030   | T - 84.62%  | TRUE  | TRUE  |
|   | 15 | 51739908 - 51915030   |             | FALSE | TRUE  |
|   | 15 | 51739908 - 51915030   |             | TRUE  | TRUE  |
|   | 15 | 51739908 - 51915030   |             | FALSE | TRUE  |
|   | 20 | 60697517 - 60710434   |             | TRUE  | FALSE |
|   | 20 | 60697517 - 60710434   |             | TRUE  | TRUE  |
|   | 20 | 60697517 - 60710434   | F - 7.69%   | TRUE  | TRUE  |
|   | 20 | 42136320 - 42179593   |             | TRUE  | TRUE  |
|   | 20 | 42136320 - 42179593   | F - 6.67%   | TRUE  | FALSE |
|   | 20 | 42136320 - 42179593   |             | TRUE  | TRUE  |
|   | 20 | 42136320 - 42179593   | F - 6.67%   | FALSE | TRUE  |
|   | 1  | 224622362 - 224928251 |             | TRUE  | TRUE  |
|   | 1  | 224622362 - 224928251 |             | TRUE  | FALSE |
|   | 1  | 224622362 - 224928251 | F - 12.50%  | FALSE | TRUE  |
|   | 4  | 186317175 - 186321782 | T - 88.89%  | TRUE  | TRUE  |
|   | 4  | 186317175 - 186321782 | F - 11.11%  | TRUE  | TRUE  |
|   | 4  | 186317175 - 186321782 | F - 33.33%  | TRUE  | TRUE  |
|   | 4  | 186317175 - 186321782 | F - 22.22%  | TRUE  | TRUE  |
|   | 4  | 186317175 - 186321782 | F - 44.44%  | TRUE  | TRUE  |
|   | 4  | 186317175 - 186321782 |             | TRUE  | TRUE  |
|   | 4  | 186317175 - 186321782 |             | FALSE | TRUE  |
|   | 4  | 36067620 - 36246131   |             | TRUE  | FALSE |
|   | 4  | 36067620 - 36246131   | T - 50.00%  | TRUE  | TRUE  |
|   | 4  | 36067620 - 36246131   |             | TRUE  | FALSE |
|   | 4  | 36067620 - 36246131   |             | TRUE  | FALSE |
|   | 4  | 36067620 - 36246131   | T - 50.00%  | TRUE  | TRUE  |
|   | 4  | 36067620 - 36246131   | F - 25.00%  | TRUE  | TRUE  |
|   | 5  | 10226438 - 10250014   |             | TRUE  | TRUE  |
|   | 5  | 10226438 - 10250014   | F - 9.09%   | FALSE | TRUE  |
|   | 7  | 149570057 - 149577787 |             | TRUE  | FALSE |

|            |                       |            |       |       |
|------------|-----------------------|------------|-------|-------|
| 7          | 149570057 - 149577787 | T - 81.25% | TRUE  | TRUE  |
| 7          | 149570057 - 149577787 | F - 6.25%  | TRUE  | TRUE  |
| 7          | 149570057 - 149577787 |            | TRUE  | TRUE  |
| 7          | 112120908 - 112130943 |            | TRUE  | FALSE |
| 7          | 112120908 - 112130943 | F - 40.00% | TRUE  | TRUE  |
| 7          | 112120908 - 112130943 | F - 20.00% | FALSE | TRUE  |
| 12         | 93164413 - 93323107   | T - 80.00% | TRUE  | FALSE |
| 12         | 93164413 - 93323107   |            | TRUE  | TRUE  |
| 15         | 29034980 - 29101720   |            | TRUE  | FALSE |
| 15         | 29034980 - 29101720   |            | TRUE  | TRUE  |
| 15         | 29034980 - 29101720   | T - 50.00% | TRUE  | TRUE  |
| 15         | 29034980 - 29101720   |            | FALSE | TRUE  |
| 17         | 26900133 - 26903952   |            | FALSE | TRUE  |
| 17         | 26900133 - 26903952   |            | FALSE | TRUE  |
| 17         | 26900133 - 26903952   |            | TRUE  | TRUE  |
| 17         | 26900133 - 26903952   | T - 75.00% | TRUE  | TRUE  |
| 17         | 26900133 - 26903952   | F - 12.50% | FALSE | TRUE  |
| 17         | 26900133 - 26903952   | T - 62.50% | TRUE  | TRUE  |
| 17         | 26900133 - 26903952   |            | TRUE  | TRUE  |
| 17         | 26900133 - 26903952   |            | TRUE  | TRUE  |
| 20         | 12989627 - 13147411   |            | TRUE  | TRUE  |
| 20         | 12989627 - 13147411   |            | TRUE  | TRUE  |
| 20         | 12989627 - 13147411   |            | TRUE  | TRUE  |
| 20         | 12989627 - 13147411   | F - 10.00% | TRUE  | TRUE  |
| 2          | 97258907 - 97308524   |            | TRUE  | FALSE |
| 2          | 97258907 - 97308524   |            | TRUE  | FALSE |
| 2          | 97258907 - 97308524   | F - 31.43% | TRUE  | TRUE  |
| 2          | 97258907 - 97308524   |            | TRUE  | TRUE  |
| 2          | 97258907 - 97308524   |            | TRUE  | TRUE  |
| 2          | 97258907 - 97308524   | F - 14.29% | TRUE  | TRUE  |
| 2          | 97258907 - 97308524   |            | TRUE  | TRUE  |
| 4          | 106629935 - 106768885 |            | TRUE  | TRUE  |
| 4          | 106629935 - 106768885 | F - 5.56%  | TRUE  | TRUE  |
| 4          | 106629935 - 106768885 | T - 77.78% | TRUE  | TRUE  |
| 4          | 106629935 - 106768885 |            | TRUE  | TRUE  |
| 4          | 106629935 - 106768885 | T - 50.00% | TRUE  | TRUE  |
| 4          | 170015361 - 170192256 | F - 25.00% | TRUE  | TRUE  |
| 4          | 170015361 - 170192256 | F - 37.50% | TRUE  | TRUE  |
| 4          | 170015361 - 170192256 | F - 12.50% | TRUE  | TRUE  |
| 4          | 170015361 - 170192256 | F - 12.50% | TRUE  | TRUE  |
| 4          | 170015361 - 170192256 |            | TRUE  | TRUE  |
| 4          | 170015361 - 170192256 | F - 37.50% | TRUE  | TRUE  |
| 4          | 170015361 - 170192256 |            | FALSE | TRUE  |
| 4          | 170015361 - 170192256 |            | TRUE  | TRUE  |
| 8          | 82711816 - 82755101   | F - 6.67%  | TRUE  | FALSE |
| 8          | 82711816 - 82755101   |            | FALSE | TRUE  |
| 18         | 3247528 - 3256234     |            | TRUE  | TRUE  |
| 18         | 3247528 - 3256234     | T - 60.00% | TRUE  | TRUE  |
| 6_dbb_hap3 | 3235382 - 3256040     |            | TRUE  | FALSE |
| 6_dbb_hap3 | 3235382 - 3256040     | T - 56.52% | TRUE  | TRUE  |
| 6_dbb_hap3 | 3235382 - 3256040     |            | FALSE | TRUE  |
| 6_dbb_hap3 | 3235382 - 3256040     |            | TRUE  | TRUE  |
| 6_dbb_hap3 | 3235382 - 3256040     | F - 4.35%  | TRUE  | TRUE  |
| 6_dbb_hap3 | 3235382 - 3256040     | F - 4.35%  | FALSE | TRUE  |
| 6_dbb_hap3 | 3235382 - 3256040     | F - 4.35%  | TRUE  | TRUE  |
| 6_dbb_hap3 | 3235382 - 3256040     |            | TRUE  | TRUE  |
| 6_dbb_hap3 | 3235382 - 3256040     | F - 47.83% | TRUE  | TRUE  |
| 6_dbb_hap3 | 3235382 - 3256040     |            | TRUE  | TRUE  |

|            |                       |            |       |       |
|------------|-----------------------|------------|-------|-------|
| 6_dbb_hap3 | 3235382 - 3256040     |            | FALSE | TRUE  |
| 6_dbb_hap3 | 3235382 - 3256040     |            | FALSE | TRUE  |
| 6_dbb_hap3 | 3235382 - 3256040     |            | TRUE  | TRUE  |
| 6_dbb_hap3 | 3235382 - 3256040     |            | FALSE | TRUE  |
| 6_dbb_hap3 | 3235382 - 3256040     |            | FALSE | TRUE  |
| 6_mcf_hap5 | 991065 - 994247       | F - 5.88%  | TRUE  | TRUE  |
| 6_mcf_hap5 | 991065 - 994247       | F - 5.88%  | TRUE  | TRUE  |
| 6_mcf_hap5 | 991065 - 994247       |            | TRUE  | TRUE  |
| 6_mcf_hap5 | 991065 - 994247       | F - 11.76% | TRUE  | TRUE  |
| 6_mcf_hap5 | 991065 - 994247       |            | TRUE  | TRUE  |
| 1          | 114356433 - 114414381 | T - 90.00% | TRUE  | TRUE  |
| 1          | 114356433 - 114414381 |            | FALSE | TRUE  |
| 1          | 114356433 - 114414381 |            | FALSE | TRUE  |
| 2          | 74881355 - 74909186   |            | TRUE  | TRUE  |
| 2          | 74881355 - 74909186   |            | TRUE  | TRUE  |
| 2          | 74881355 - 74909186   | F - 5.56%  | TRUE  | FALSE |
| 2          | 74881355 - 74909186   | T - 88.89% | FALSE | TRUE  |
| 2          | 74881355 - 74909186   |            | TRUE  | TRUE  |
| 2          | 74881355 - 74909186   |            | FALSE | TRUE  |
| 2          | 74881355 - 74909186   |            | TRUE  | TRUE  |
| 2          | 112523848 - 112642267 |            | TRUE  | FALSE |
| 2          | 112523848 - 112642267 |            | TRUE  | FALSE |
| 2          | 112523848 - 112642267 |            | TRUE  | TRUE  |
| 2          | 112523848 - 112642267 |            | TRUE  | TRUE  |
| 2          | 112523848 - 112642267 | F - 38.46% | TRUE  | TRUE  |
| 2          | 112523848 - 112642267 |            | TRUE  | TRUE  |
| 2          | 112523848 - 112642267 |            | TRUE  | TRUE  |
| 2          | 112523848 - 112642267 |            | TRUE  | TRUE  |
| 2          | 112523848 - 112642267 |            | TRUE  | TRUE  |
| 2          | 112523848 - 112642267 |            | TRUE  | TRUE  |
| 3          | 108268718 - 108308491 |            | TRUE  | TRUE  |
| 3          | 108268718 - 108308491 |            | TRUE  | TRUE  |
| 3          | 108268718 - 108308491 | F - 45.45% | FALSE | TRUE  |
| 3          | 108268718 - 108308491 |            | FALSE | TRUE  |
| 6          | 170863390 - 170881958 |            | TRUE  | FALSE |
| 6          | 170863390 - 170881958 | T - 57.14% | TRUE  | TRUE  |
| 9          | 8314246 - 10612723    |            | TRUE  | TRUE  |
| 9          | 8314246 - 10612723    |            | TRUE  | FALSE |
| 9          | 8314246 - 10612723    |            | TRUE  | FALSE |
| 9          | 8314246 - 10612723    | F - 28.00% | TRUE  | TRUE  |
| 9          | 8314246 - 10612723    | F - 4.00%  | TRUE  | FALSE |
| 9          | 8314246 - 10612723    |            | TRUE  | TRUE  |
| 9          | 8314246 - 10612723    | T - 80.00% | TRUE  | TRUE  |
| 9          | 8314246 - 10612723    | T - 88.00% | TRUE  | TRUE  |
| 9          | 8314246 - 10612723    | F - 4.00%  | TRUE  | TRUE  |
| 9          | 8314246 - 10612723    | T - 80.00% | TRUE  | TRUE  |
| 9          | 8314246 - 10612723    |            | TRUE  | FALSE |
| 9          | 8314246 - 10612723    |            | TRUE  | TRUE  |
| 9          | 8314246 - 10612723    |            | TRUE  | TRUE  |
| 9          | 8314246 - 10612723    |            | TRUE  | TRUE  |
| 9          | 8314246 - 10612723    |            | TRUE  | TRUE  |
| 9          | 8314246 - 10612723    | F - 12.00% | FALSE | TRUE  |
| 9          | 8314246 - 10612723    |            | TRUE  | FALSE |
| 9          | 8314246 - 10612723    | F - 12.00% | FALSE | TRUE  |
| 9          | 8314246 - 10612723    | F - 12.00% | FALSE | TRUE  |
| 9          | 8314246 - 10612723    | F - 8.00%  | TRUE  | TRUE  |
| 9          | 8314246 - 10612723    | F - 12.00% | FALSE | TRUE  |
| 9          | 8314246 - 10612723    | F - 12.00% | FALSE | TRUE  |
| 9          | 8314246 - 10612723    | F - 4.00%  | FALSE | TRUE  |

|              |                       |            |       |       |
|--------------|-----------------------|------------|-------|-------|
| 9            | 8314246 - 10612723    |            | FALSE | TRUE  |
| 15           | 100511643 - 100882210 | F - 20.00% | TRUE  | FALSE |
| 15           | 100511643 - 100882210 |            | TRUE  | TRUE  |
| 15           | 100511643 - 100882210 |            | FALSE | TRUE  |
| 16           | 22018959 - 22098855   |            | TRUE  | FALSE |
| 16           | 22018959 - 22098855   |            | TRUE  | FALSE |
| 16           | 22018959 - 22098855   | F - 33.33% | TRUE  | TRUE  |
| 16           | 22018959 - 22098855   |            | FALSE | TRUE  |
| 16           | 22018959 - 22098855   | F - 16.67% | TRUE  | TRUE  |
| 16           | 22018959 - 22098855   | F - 33.33% | TRUE  | TRUE  |
| 16           | 22018959 - 22098855   |            | TRUE  | TRUE  |
| 17_ctg5_hap1 | 1448483 - 1493796     |            | TRUE  | TRUE  |
| 17_ctg5_hap1 | 1448483 - 1493796     | F - 16.67% | TRUE  | TRUE  |
| 17_ctg5_hap1 | 1448483 - 1493796     |            | TRUE  | TRUE  |
| 17_ctg5_hap1 | 1448483 - 1493796     |            | TRUE  | TRUE  |
| 17_ctg5_hap1 | 1448483 - 1493796     |            | TRUE  | TRUE  |
| 21           | 34804792 - 34853499   |            | TRUE  | TRUE  |
| 21           | 34804792 - 34853499   | F - 23.53% | TRUE  | TRUE  |
| 21           | 34804792 - 34853499   | T - 52.94% | TRUE  | TRUE  |
| 21           | 34804792 - 34853499   | F - 35.29% | TRUE  | TRUE  |
| 21           | 34804792 - 34853499   | F - 5.88%  | FALSE | TRUE  |
| 1            | 16450832 - 16482582   |            | TRUE  | TRUE  |
| 1            | 16450832 - 16482582   | F - 16.67% | TRUE  | TRUE  |
| 1            | 240931554 - 241520530 |            | TRUE  | TRUE  |
| 1            | 240931554 - 241520530 |            | TRUE  | FALSE |
| 1            | 240931554 - 241520530 |            | TRUE  | TRUE  |
| 1            | 240931554 - 241520530 | T - 61.11% | TRUE  | TRUE  |
| 1            | 240931554 - 241520530 |            | TRUE  | TRUE  |
| 1            | 240931554 - 241520530 | F - 11.11% | FALSE | TRUE  |
| 1            | 240931554 - 241520530 | T - 83.33% | FALSE | TRUE  |
| 1            | 240931554 - 241520530 | T - 83.33% | TRUE  | TRUE  |
| 2            | 62900986 - 63273622   |            | TRUE  | TRUE  |
| 2            | 62900986 - 63273622   | F - 44.83% | TRUE  | TRUE  |
| 2            | 62900986 - 63273622   |            | TRUE  | TRUE  |
| 2            | 62900986 - 63273622   | F - 3.45%  | FALSE | TRUE  |
| 2            | 62900986 - 63273622   |            | TRUE  | TRUE  |
| 2            | 16730727 - 16847599   | F - 11.11% | TRUE  | FALSE |
| 2            | 16730727 - 16847599   | F - 11.11% | TRUE  | TRUE  |
| 2            | 16730727 - 16847599   | F - 11.11% | TRUE  | TRUE  |
| 2            | 16730727 - 16847599   |            | TRUE  | TRUE  |
| 2            | 24299396 - 24397519   | F - 42.86% | TRUE  | TRUE  |
| 2            | 24299396 - 24397519   |            | TRUE  | TRUE  |
| 2            | 24299396 - 24397519   |            | TRUE  | TRUE  |
| 2            | 24299396 - 24397519   | F - 42.86% | TRUE  | TRUE  |
| 2            | 24299396 - 24397519   |            | TRUE  | TRUE  |
| 2            | 24299396 - 24397519   |            | FALSE | TRUE  |
| 2            | 24299396 - 24397519   |            | TRUE  | TRUE  |
| 2            | 24299396 - 24397519   |            | FALSE | TRUE  |
| 6            | 24650205 - 24667261   |            | TRUE  | TRUE  |
| 6            | 24650205 - 24667261   | F - 10.00% | TRUE  | TRUE  |
| 6            | 24650205 - 24667261   | F - 10.00% | FALSE | TRUE  |
| 7            | 102004308 - 102067129 |            | TRUE  | TRUE  |
| 7            | 102004308 - 102067129 | F - 10.53% | TRUE  | TRUE  |
| 7            | 137073563 - 137531838 |            | TRUE  | FALSE |
| 7            | 137073563 - 137531838 | F - 6.67%  | TRUE  | FALSE |
| 7            | 137073563 - 137531838 | T - 53.33% | TRUE  | TRUE  |
| 7            | 137073563 - 137531838 |            | TRUE  | TRUE  |
| 7            | 137073563 - 137531838 | T - 53.33% | TRUE  | TRUE  |

|    |                       |            |       |       |
|----|-----------------------|------------|-------|-------|
| 7  | 137073563 - 137531838 | F - 20.00% | TRUE  | TRUE  |
| 7  | 137073563 - 137531838 | T - 53.33% | TRUE  | TRUE  |
| 7  | 137073563 - 137531838 |            | TRUE  | TRUE  |
| 7  | 137073563 - 137531838 |            | TRUE  | TRUE  |
| 7  | 137073563 - 137531838 | F - 6.67%  | TRUE  | TRUE  |
| 7  | 137073563 - 137531838 |            | TRUE  | TRUE  |
| 7  | 137073563 - 137531838 | T - 53.33% | TRUE  | TRUE  |
| 7  | 137073563 - 137531838 |            | TRUE  | TRUE  |
| 7  | 137073563 - 137531838 | F - 46.67% | TRUE  | TRUE  |
| 7  | 137073563 - 137531838 |            | TRUE  | TRUE  |
| 7  | 137073563 - 137531838 |            | FALSE | TRUE  |
| 7  | 137073563 - 137531838 | F - 40.00% | TRUE  | TRUE  |
| 8  | 94710789 - 94743755   |            | TRUE  | TRUE  |
| 8  | 94710789 - 94743755   | F - 7.14%  | TRUE  | FALSE |
| 8  | 94710789 - 94743755   | F - 3.57%  | FALSE | TRUE  |
| 8  | 94710789 - 94743755   | F - 3.57%  | FALSE | TRUE  |
| 9  | 97861336 - 98079991   | F - 6.25%  | TRUE  | TRUE  |
| 9  | 97861336 - 98079991   | F - 6.25%  | TRUE  | TRUE  |
| 9  | 97861336 - 98079991   | F - 6.25%  | TRUE  | TRUE  |
| 9  | 97861336 - 98079991   |            | TRUE  | TRUE  |
| 9  | 97861336 - 98079991   | F - 31.25% | TRUE  | TRUE  |
| 9  | 97861336 - 98079991   | F - 6.25%  | TRUE  | TRUE  |
| 9  | 97861336 - 98079991   | F - 31.25% | TRUE  | TRUE  |
| 9  | 97861336 - 98079991   | T - 56.25% | TRUE  | TRUE  |
| 9  | 97861336 - 98079991   | T - 50.00% | TRUE  | TRUE  |
| 9  | 97861336 - 98079991   | F - 12.50% | TRUE  | TRUE  |
| 10 | 100143322 - 100174978 |            | TRUE  | TRUE  |
| 10 | 100143322 - 100174978 |            | TRUE  | TRUE  |
| 10 | 100143322 - 100174978 |            | TRUE  | TRUE  |
| 10 | 100143322 - 100174978 | F - 11.11% | FALSE | TRUE  |
| 10 | 100143322 - 100174978 |            | FALSE | TRUE  |
| 10 | 100143322 - 100174978 |            | TRUE  | TRUE  |
| 10 | 100143322 - 100174978 |            | TRUE  | TRUE  |
| 10 | 100143322 - 100174978 |            | TRUE  | TRUE  |
| 10 | 100143322 - 100174978 |            | TRUE  | TRUE  |
| 10 | 100143322 - 100174978 |            | FALSE | TRUE  |
| 10 | 100143322 - 100174978 | F - 11.11% | TRUE  | TRUE  |
| 10 | 100143322 - 100174978 | F - 11.11% | TRUE  | TRUE  |
| 10 | 100143322 - 100174978 | F - 11.11% | TRUE  | TRUE  |
| 10 | 100143322 - 100174978 | F - 22.22% | TRUE  | TRUE  |
| 11 | 66512207 - 66610987   |            | TRUE  | FALSE |
| 11 | 66512207 - 66610987   |            | TRUE  | TRUE  |
| 11 | 66512207 - 66610987   | T - 72.73% | TRUE  | TRUE  |
| 11 | 66512207 - 66610987   |            | TRUE  | TRUE  |
| 11 | 66512207 - 66610987   | F - 27.27% | TRUE  | TRUE  |
| 11 | 66512207 - 66610987   | T - 81.82% | TRUE  | TRUE  |
| 13 | 45006279 - 45151283   |            | TRUE  | TRUE  |
| 13 | 45006279 - 45151283   | F - 5.88%  | TRUE  | TRUE  |
| 13 | 45006279 - 45151283   | F - 5.88%  | TRUE  | TRUE  |
| 13 | 45006279 - 45151283   |            | TRUE  | TRUE  |
| 13 | 45006279 - 45151283   | F - 17.65% | FALSE | TRUE  |
| 13 | 45006279 - 45151283   | F - 23.53% | TRUE  | TRUE  |
| 15 | 55831082 - 55881145   |            | TRUE  | TRUE  |
| 15 | 55831082 - 55881145   | T - 50.00% | TRUE  | TRUE  |
| 15 | 55831082 - 55881145   | F - 16.67% | TRUE  | TRUE  |
| 15 | 55831082 - 55881145   | F - 16.67% | TRUE  | TRUE  |
| 17 | 79523913 - 79616376   |            | TRUE  | FALSE |
| 17 | 79523913 - 79616376   | F - 10.00% | TRUE  | TRUE  |
| 17 | 79523913 - 79616376   |            | TRUE  | TRUE  |

|    |                       |             |       |       |
|----|-----------------------|-------------|-------|-------|
| 20 | 44994688 - 45061704   | F - 9.38%   | TRUE  | TRUE  |
| 20 | 44994688 - 45061704   |             | TRUE  | FALSE |
| 20 | 44994688 - 45061704   |             | TRUE  | TRUE  |
| 20 | 44994688 - 45061704   |             | TRUE  | TRUE  |
| 20 | 44994688 - 45061704   |             | TRUE  | TRUE  |
| 20 | 44994688 - 45061704   |             | TRUE  | TRUE  |
| 20 | 44994688 - 45061704   |             | TRUE  | TRUE  |
| 1  | 210851657 - 211307457 |             | TRUE  | TRUE  |
| 1  | 210851657 - 211307457 | T - 100.00% | TRUE  | TRUE  |
| 1  | 210851657 - 211307457 | F - 33.33%  | TRUE  | TRUE  |
| 1  | 210851657 - 211307457 | T - 83.33%  | TRUE  | TRUE  |
| 1  | 210851657 - 211307457 |             | TRUE  | TRUE  |
| 1  | 210851657 - 211307457 |             | TRUE  | TRUE  |
| 1  | 210851657 - 211307457 | T - 50.00%  | TRUE  | TRUE  |
| 6  | 33267471 - 33282164   |             | TRUE  | FALSE |
| 6  | 33267471 - 33282164   | T - 58.82%  | TRUE  | TRUE  |
| 7  | 64330550 - 64391955   |             | TRUE  | FALSE |
| 7  | 64330550 - 64391955   |             | TRUE  | FALSE |
| 7  | 64330550 - 64391955   | F - 21.43%  | TRUE  | TRUE  |
| 7  | 64330550 - 64391955   | F - 14.29%  | TRUE  | TRUE  |
| 9  | 135973107 - 136024721 | F - 22.22%  | TRUE  | FALSE |
| 9  | 135973107 - 136024721 |             | TRUE  | TRUE  |
| 9  | 135973107 - 136024721 | F - 14.81%  | TRUE  | TRUE  |
| 9  | 135973107 - 136024721 | F - 3.70%   | TRUE  | TRUE  |
| 9  | 135973107 - 136024721 | F - 25.93%  | TRUE  | TRUE  |
| 9  | 135973107 - 136024721 | F - 3.70%   | TRUE  | TRUE  |
| 9  | 135973107 - 136024721 | F - 7.41%   | FALSE | TRUE  |
| 12 | 6643093 - 6647537     |             | TRUE  | TRUE  |
| 12 | 6643093 - 6647537     |             | TRUE  | TRUE  |
| 12 | 6643093 - 6647537     | F - 4.55%   | TRUE  | TRUE  |
| 12 | 6643093 - 6647537     | T - 86.36%  | TRUE  | TRUE  |
| 12 | 6643093 - 6647537     | F - 18.18%  | TRUE  | TRUE  |
| 16 | 75032915 - 75144892   | T - 57.14%  | TRUE  | TRUE  |
| 16 | 75032915 - 75144892   |             | FALSE | TRUE  |
| 16 | 75032915 - 75144892   | F - 14.29%  | FALSE | TRUE  |
| 16 | 75032915 - 75144892   | F - 28.57%  | TRUE  | TRUE  |
| 18 | 43664110 - 43684300   | F - 5.56%   | TRUE  | TRUE  |
| 18 | 43664110 - 43684300   |             | TRUE  | TRUE  |
| 4  | 24519064 - 24586184   |             | TRUE  | TRUE  |
| 4  | 24519064 - 24586184   | F - 33.33%  | TRUE  | TRUE  |
| 4  | 24519064 - 24586184   | F - 6.67%   | TRUE  | TRUE  |
| 4  | 24519064 - 24586184   |             | TRUE  | FALSE |
| 4  | 109731877 - 110223813 |             | TRUE  | FALSE |
| 4  | 109731877 - 110223813 | T - 80.95%  | TRUE  | TRUE  |
| 4  | 109731877 - 110223813 |             | TRUE  | FALSE |
| 4  | 109731877 - 110223813 |             | TRUE  | TRUE  |
| 4  | 109731877 - 110223813 | T - 80.95%  | FALSE | TRUE  |
| 7  | 116312248 - 116438440 |             | TRUE  | FALSE |
| 7  | 116312248 - 116438440 |             | TRUE  | TRUE  |
| 7  | 116312248 - 116438440 | F - 11.54%  | TRUE  | TRUE  |
| 9  | 139607022 - 139619170 |             | TRUE  | TRUE  |
| 9  | 139607022 - 139619170 | F - 40.00%  | TRUE  | TRUE  |
| 14 | 23456110 - 23479375   | T - 68.42%  | TRUE  | FALSE |
| 14 | 23456110 - 23479375   | F - 31.58%  | TRUE  | TRUE  |
| 14 | 23456110 - 23479375   |             | TRUE  | FALSE |
| 19 | 57285920 - 57352097   |             | TRUE  | FALSE |
| 19 | 57285920 - 57352097   | T - 95.65%  | TRUE  | TRUE  |
| 19 | 57285920 - 57352097   |             | TRUE  | TRUE  |

|            |    |                       |             |       |       |
|------------|----|-----------------------|-------------|-------|-------|
|            | 19 | 57285920 - 57352097   | F - 39.13%  | TRUE  | TRUE  |
|            | 19 | 57285920 - 57352097   |             | FALSE | TRUE  |
|            | 19 | 57285920 - 57352097   | T - 100.00% | FALSE | TRUE  |
| 6_cox_hap2 |    | 3459557 - 3473846     |             | TRUE  | FALSE |
| 6_cox_hap2 |    | 3459557 - 3473846     | T - 56.52%  | TRUE  | TRUE  |
| 6_cox_hap2 |    | 3459557 - 3473846     |             | FALSE | TRUE  |
| 6_cox_hap2 |    | 3459557 - 3473846     |             | TRUE  | TRUE  |
| 6_cox_hap2 |    | 3459557 - 3473846     |             | TRUE  | TRUE  |
| 6_cox_hap2 |    | 3459557 - 3473846     | F - 4.35%   | TRUE  | TRUE  |
| 6_cox_hap2 |    | 3459557 - 3473846     | F - 4.35%   | FALSE | TRUE  |
| 6_cox_hap2 |    | 3459557 - 3473846     |             | TRUE  | TRUE  |
| 6_cox_hap2 |    | 3459557 - 3473846     | F - 47.83%  | TRUE  | TRUE  |
| 6_cox_hap2 |    | 3459557 - 3473846     |             | TRUE  | TRUE  |
| 6_cox_hap2 |    | 3459557 - 3473846     |             | FALSE | TRUE  |
| 6_cox_hap2 |    | 3459557 - 3473846     |             | TRUE  | TRUE  |
| 6_cox_hap2 |    | 3459557 - 3473846     |             | FALSE | TRUE  |
| 6_cox_hap2 |    | 3459557 - 3473846     |             | FALSE | TRUE  |
| 6_cox_hap2 |    | 3459557 - 3473846     |             | FALSE | TRUE  |
| 6_dbb_hap3 |    | 3268122 - 3282411     |             | TRUE  | FALSE |
| 6_dbb_hap3 |    | 3268122 - 3282411     | T - 56.52%  | TRUE  | TRUE  |
| 6_dbb_hap3 |    | 3268122 - 3282411     |             | FALSE | TRUE  |
| 6_dbb_hap3 |    | 3268122 - 3282411     |             | TRUE  | TRUE  |
| 6_dbb_hap3 |    | 3268122 - 3282411     |             | TRUE  | TRUE  |
| 6_dbb_hap3 |    | 3268122 - 3282411     | F - 4.35%   | TRUE  | TRUE  |
| 6_dbb_hap3 |    | 3268122 - 3282411     | F - 4.35%   | FALSE | TRUE  |
| 6_dbb_hap3 |    | 3268122 - 3282411     |             | TRUE  | TRUE  |
| 6_dbb_hap3 |    | 3268122 - 3282411     | F - 47.83%  | TRUE  | TRUE  |
| 6_dbb_hap3 |    | 3268122 - 3282411     |             | TRUE  | TRUE  |
| 6_dbb_hap3 |    | 3268122 - 3282411     |             | FALSE | TRUE  |
| 6_dbb_hap3 |    | 3268122 - 3282411     |             | TRUE  | TRUE  |
| 6_dbb_hap3 |    | 3268122 - 3282411     |             | FALSE | TRUE  |
| 6_dbb_hap3 |    | 3268122 - 3282411     |             | FALSE | TRUE  |
| 6_dbb_hap3 |    | 3268122 - 3282411     |             | FALSE | TRUE  |
| 6_qbl_hap6 |    | 3243591 - 3264249     |             | TRUE  | FALSE |
| 6_qbl_hap6 |    | 3243591 - 3264249     | T - 56.52%  | TRUE  | TRUE  |
| 6_qbl_hap6 |    | 3243591 - 3264249     |             | FALSE | TRUE  |
| 6_qbl_hap6 |    | 3243591 - 3264249     |             | TRUE  | TRUE  |
| 6_qbl_hap6 |    | 3243591 - 3264249     |             | TRUE  | TRUE  |
| 6_qbl_hap6 |    | 3243591 - 3264249     | F - 4.35%   | TRUE  | TRUE  |
| 6_qbl_hap6 |    | 3243591 - 3264249     | F - 4.35%   | FALSE | TRUE  |
| 6_qbl_hap6 |    | 3243591 - 3264249     |             | TRUE  | TRUE  |
| 6_qbl_hap6 |    | 3243591 - 3264249     | F - 47.83%  | TRUE  | TRUE  |
| 6_qbl_hap6 |    | 3243591 - 3264249     |             | TRUE  | TRUE  |
| 6_qbl_hap6 |    | 3243591 - 3264249     |             | FALSE | TRUE  |
| 6_qbl_hap6 |    | 3243591 - 3264249     |             | TRUE  | TRUE  |
| 6_qbl_hap6 |    | 3243591 - 3264249     |             | FALSE | TRUE  |
| 6_qbl_hap6 |    | 3243591 - 3264249     |             | FALSE | TRUE  |
| 6_qbl_hap6 |    | 3243591 - 3264249     |             | FALSE | TRUE  |
| 3          |    | 113547029 - 113666021 | F - 4.17%   | TRUE  | TRUE  |
| 3          |    | 113547029 - 113666021 | F - 8.33%   | TRUE  | TRUE  |
| 3          |    | 113547029 - 113666021 |             | TRUE  | FALSE |
| 3          |    | 113547029 - 113666021 |             | TRUE  | TRUE  |
| 3          |    | 113547029 - 113666021 | F - 4.17%   | FALSE | TRUE  |
| 3          |    | 113547029 - 113666021 | T - 66.67%  | FALSE | TRUE  |
| 3          |    | 113547029 - 113666021 | T - 58.33%  | TRUE  | TRUE  |
| 4          |    | 140222609 - 140341187 |             | TRUE  | TRUE  |
| 4          |    | 140222609 - 140341187 | F - 27.27%  | TRUE  | TRUE  |
| 4          |    | 140222609 - 140341187 |             | TRUE  | TRUE  |

|    |                       |             |       |       |
|----|-----------------------|-------------|-------|-------|
| 5  | 69345350 - 69374349   |             | TRUE  | TRUE  |
| 5  | 69345350 - 69374349   |             | TRUE  | FALSE |
| 5  | 69345350 - 69374349   | F - 37.50%  | TRUE  | TRUE  |
| 5  | 69345350 - 69374349   |             | TRUE  | TRUE  |
| 5  | 1050489 - 1112172     |             | TRUE  | TRUE  |
| 5  | 1050489 - 1112172     | F - 12.50%  | FALSE | TRUE  |
| 5  | 1050489 - 1112172     |             | TRUE  | TRUE  |
| 5  | 1050489 - 1112172     | F - 12.50%  | TRUE  | TRUE  |
| 5  | 1050489 - 1112172     |             | TRUE  | TRUE  |
| 5  | 1050489 - 1112172     | T - 50.00%  | TRUE  | TRUE  |
| 5  | 1050489 - 1112172     |             | FALSE | TRUE  |
| 5  | 1050489 - 1112172     |             | TRUE  | TRUE  |
| 5  | 1050489 - 1112172     |             | FALSE | TRUE  |
| 5  | 16662016 - 16936385   |             | TRUE  | TRUE  |
| 5  | 16662016 - 16936385   | F - 18.18%  | TRUE  | TRUE  |
| 5  | 16662016 - 16936385   |             | TRUE  | TRUE  |
| 5  | 16662016 - 16936385   | F - 4.55%   | FALSE | TRUE  |
| 5  | 16662016 - 16936385   | F - 4.55%   | TRUE  | TRUE  |
| 5  | 16662016 - 16936385   | F - 4.55%   | TRUE  | TRUE  |
| 5  | 16662016 - 16936385   | F - 45.45%  | TRUE  | TRUE  |
| 7  | 155437145 - 155574179 | F - 23.08%  | TRUE  | TRUE  |
| 7  | 155437145 - 155574179 | F - 7.69%   | TRUE  | FALSE |
| 7  | 155437145 - 155574179 | F - 7.69%   | TRUE  | TRUE  |
| 7  | 155437145 - 155574179 | F - 7.69%   | TRUE  | TRUE  |
| 7  | 155437145 - 155574179 |             | TRUE  | TRUE  |
| 7  | 155437145 - 155574179 |             | TRUE  | TRUE  |
| 7  | 155437145 - 155574179 | F - 23.08%  | TRUE  | TRUE  |
| 7  | 155437145 - 155574179 |             | TRUE  | TRUE  |
| 7  | 155437145 - 155574179 | F - 38.46%  | TRUE  | TRUE  |
| 7  | 155437145 - 155574179 | F - 7.69%   | FALSE | TRUE  |
| 7  | 155437145 - 155574179 |             | TRUE  | TRUE  |
| 8  | 74332604 - 74659943   |             | TRUE  | FALSE |
| 8  | 74332604 - 74659943   | F - 18.52%  | TRUE  | TRUE  |
| 9  | 69204538 - 69272478   |             | TRUE  | TRUE  |
| 9  | 69204538 - 69272478   |             | TRUE  | FALSE |
| 9  | 69204538 - 69272478   | F - 7.69%   | TRUE  | TRUE  |
| 9  | 69204538 - 69272478   | F - 34.62%  | TRUE  | TRUE  |
| 9  | 69204538 - 69272478   | F - 3.85%   | TRUE  | TRUE  |
| 9  | 69204538 - 69272478   | F - 19.23%  | TRUE  | TRUE  |
| 9  | 69204538 - 69272478   |             | TRUE  | TRUE  |
| 9  | 69204538 - 69272478   | F - 7.69%   | TRUE  | TRUE  |
| 9  | 69204538 - 69272478   |             | FALSE | TRUE  |
| X  | 153051221 - 153059978 |             | TRUE  | TRUE  |
| X  | 153051221 - 153059978 | F - 5.00%   | TRUE  | TRUE  |
| 14 | 69658194 - 69710737   |             | TRUE  | TRUE  |
| 14 | 69658194 - 69710737   | F - 34.78%  | TRUE  | TRUE  |
| 14 | 53106634 - 53162432   | T - 100.00% | TRUE  | TRUE  |
| 14 | 53106634 - 53162432   | T - 75.00%  | TRUE  | TRUE  |
| 14 | 53106634 - 53162432   | T - 100.00% | FALSE | TRUE  |
| 14 | 53106634 - 53162432   |             | TRUE  | TRUE  |
| 15 | 32933870 - 32989299   |             | TRUE  | TRUE  |
| 15 | 32933870 - 32989299   | T - 69.23%  | TRUE  | TRUE  |
| 15 | 32933870 - 32989299   | T - 61.54%  | FALSE | TRUE  |
| 15 | 32933870 - 32989299   | F - 15.38%  | FALSE | TRUE  |
| 17 | 80693452 - 80709073   | F - 40.00%  | TRUE  | TRUE  |
| 17 | 80693452 - 80709073   |             | TRUE  | FALSE |
| 17 | 80693452 - 80709073   | F - 40.00%  | TRUE  | TRUE  |
| 17 | 80693452 - 80709073   | F - 20.00%  | TRUE  | TRUE  |



|    |                       |             |       |       |
|----|-----------------------|-------------|-------|-------|
| 17 | 80693452 - 80709073   |             | TRUE  | TRUE  |
| 17 | 80693452 - 80709073   | F - 20.00%  | TRUE  | TRUE  |
| 17 | 3907739 - 4046314     | F - 12.50%  | TRUE  | TRUE  |
| 17 | 3907739 - 4046314     |             | TRUE  | TRUE  |
| 17 | 3907739 - 4046314     |             | TRUE  | TRUE  |
| 17 | 3907739 - 4046314     |             | TRUE  | TRUE  |
| 17 | 3907739 - 4046314     |             | TRUE  | TRUE  |
| 19 | 17434032 - 17445638   |             | TRUE  | TRUE  |
| 19 | 17434032 - 17445638   |             | TRUE  | TRUE  |
| 19 | 17434032 - 17445638   |             | TRUE  | TRUE  |
| 19 | 17434032 - 17445638   |             | TRUE  | TRUE  |
| 19 | 17434032 - 17445638   | T - 100.00% | TRUE  | TRUE  |
| 19 | 17434032 - 17445638   |             | FALSE | TRUE  |
| 3  | 12328867 - 12475855   |             | TRUE  | FALSE |
| 3  | 12328867 - 12475855   |             | TRUE  | FALSE |
| 3  | 12328867 - 12475855   | T - 87.50%  | TRUE  | TRUE  |
| 3  | 12328867 - 12475855   | F - 8.33%   | TRUE  | TRUE  |
| 3  | 12328867 - 12475855   | F - 16.67%  | TRUE  | TRUE  |
| 3  | 12328867 - 12475855   | F - 25.00%  | FALSE | TRUE  |
| 3  | 12328867 - 12475855   |             | TRUE  | TRUE  |
| 3  | 12328867 - 12475855   | F - 16.67%  | TRUE  | TRUE  |
| 3  | 12328867 - 12475855   | F - 20.83%  | FALSE | TRUE  |
| 3  | 12328867 - 12475855   | F - 29.17%  | FALSE | TRUE  |
| 3  | 12328867 - 12475855   | F - 8.33%   | FALSE | TRUE  |
| 3  | 12328867 - 12475855   |             | FALSE | TRUE  |
| 3  | 122283085 - 122294050 |             | TRUE  | TRUE  |
| 3  | 122283085 - 122294050 | F - 14.29%  | TRUE  | TRUE  |
| 3  | 127391778 - 127399769 |             | TRUE  | TRUE  |
| 3  | 127391778 - 127399769 | F - 18.18%  | TRUE  | FALSE |
| 3  | 127391778 - 127399769 |             | TRUE  | TRUE  |
| 3  | 127391778 - 127399769 |             | TRUE  | TRUE  |
| 3  | 127391778 - 127399769 |             | TRUE  | TRUE  |
| 3  | 127391778 - 127399769 |             | TRUE  | TRUE  |
| 3  | 127391778 - 127399769 | F - 13.64%  | TRUE  | TRUE  |
| 3  | 127391778 - 127399769 | F - 4.55%   | TRUE  | TRUE  |
| 5  | 43289493 - 43313614   |             | TRUE  | FALSE |
| 5  | 43289493 - 43313614   | T - 50.00%  | TRUE  | TRUE  |
| 6  | 166322290 - 166401527 |             | TRUE  | TRUE  |
| 6  | 166322290 - 166401527 | F - 20.00%  | FALSE | TRUE  |
| 8  | 72740402 - 73030628   |             | TRUE  | FALSE |
| 8  | 72740402 - 73030628   | F - 7.14%   | TRUE  | TRUE  |
| 8  | 72740402 - 73030628   |             | TRUE  | TRUE  |
| 8  | 72740402 - 73030628   | F - 7.14%   | TRUE  | TRUE  |
| 8  | 72740402 - 73030628   |             | FALSE | TRUE  |
| 8  | 33405273 - 33424643   | T - 50.00%  | TRUE  | TRUE  |
| 8  | 33405273 - 33424643   |             | TRUE  | TRUE  |
| 8  | 33405273 - 33424643   | T - 100.00% | TRUE  | TRUE  |
| 9  | 15552872 - 16061661   | T - 52.38%  | TRUE  | TRUE  |
| 9  | 15552872 - 16061661   |             | TRUE  | FALSE |
| 9  | 15552872 - 16061661   |             | TRUE  | TRUE  |
| 9  | 15552872 - 16061661   |             | TRUE  | TRUE  |
| 9  | 15552872 - 16061661   |             | FALSE | TRUE  |
| 17 | 21187968 - 21218552   | F - 12.50%  | TRUE  | TRUE  |
| 17 | 21187968 - 21218552   |             | FALSE | TRUE  |
| 17 | 21187968 - 21218552   |             | TRUE  | TRUE  |
| 17 | 21187968 - 21218552   |             | TRUE  | TRUE  |
| 17 | 21187968 - 21218552   |             | FALSE | TRUE  |
| 17 | 21187968 - 21218552   |             | FALSE | TRUE  |

|    |                       |             |       |       |
|----|-----------------------|-------------|-------|-------|
| 17 | 21187968 - 21218552   |             | TRUE  | TRUE  |
| 17 | 6481645 - 6544247     |             | TRUE  | TRUE  |
| 17 | 6481645 - 6544247     |             | TRUE  | TRUE  |
| 17 | 6481645 - 6544247     | T - 100.00% | TRUE  | TRUE  |
| 17 | 6481645 - 6544247     |             | TRUE  | TRUE  |
| 19 | 34855645 - 34893318   | F - 12.50%  | TRUE  | TRUE  |
| 19 | 34855645 - 34893318   | F - 12.50%  | TRUE  | TRUE  |
| 19 | 34855645 - 34893318   |             | TRUE  | TRUE  |
| 19 | 34855645 - 34893318   | F - 25.00%  | TRUE  | TRUE  |
| 19 | 34855645 - 34893318   | F - 25.00%  | TRUE  | TRUE  |
| 19 | 34855645 - 34893318   | F - 25.00%  | TRUE  | TRUE  |
| 19 | 34855645 - 34893318   |             | TRUE  | TRUE  |
| 22 | 23980675 - 24059610   |             | TRUE  | FALSE |
| 22 | 23980675 - 24059610   |             | TRUE  | TRUE  |
| 22 | 23980675 - 24059610   |             | TRUE  | TRUE  |
| 22 | 23980675 - 24059610   | F - 20.00%  | TRUE  | TRUE  |
| 22 | 23980675 - 24059610   |             | TRUE  | TRUE  |
| 22 | 23980675 - 24059610   |             | TRUE  | TRUE  |
| 1  | 231499497 - 231560790 | F - 25.00%  | TRUE  | TRUE  |
| 1  | 231499497 - 231560790 |             | TRUE  | TRUE  |
| 4  | 53179 - 196092        | F - 6.67%   | TRUE  | TRUE  |
| 4  | 53179 - 196092        |             | TRUE  | TRUE  |
| 4  | 53179 - 196092        | F - 13.33%  | TRUE  | TRUE  |
| 4  | 53179 - 196092        | F - 20.00%  | TRUE  | TRUE  |
| 4  | 53179 - 196092        |             | FALSE | TRUE  |
| 5  | 132028323 - 132073330 |             | TRUE  | FALSE |
| 5  | 132028323 - 132073330 | F - 46.67%  | TRUE  | TRUE  |
| 5  | 132028323 - 132073330 |             | TRUE  | TRUE  |
| 5  | 132028323 - 132073330 |             | FALSE | TRUE  |
| 6  | 144606837 - 145174170 |             | TRUE  | TRUE  |
| 6  | 144606837 - 145174170 | F - 27.78%  | TRUE  | TRUE  |
| 6  | 144606837 - 145174170 | F - 5.56%   | TRUE  | TRUE  |
| 6  | 144606837 - 145174170 |             | TRUE  | TRUE  |
| 6  | 144606837 - 145174170 | F - 5.56%   | TRUE  | TRUE  |
| 6  | 144606837 - 145174170 |             | TRUE  | TRUE  |
| 6  | 144606837 - 145174170 |             | TRUE  | TRUE  |
| 6  | 144606837 - 145174170 | F - 11.11%  | TRUE  | TRUE  |
| 6  | 144606837 - 145174170 |             | FALSE | TRUE  |
| 9  | 131581930 - 131592100 | T - 83.33%  | TRUE  | TRUE  |
| 9  | 131581930 - 131592100 |             | TRUE  | TRUE  |
| 9  | 131581930 - 131592100 |             | TRUE  | TRUE  |
| 11 | 15987995 - 16760190   |             | TRUE  | FALSE |
| 11 | 15987995 - 16760190   |             | TRUE  | FALSE |
| 11 | 15987995 - 16760190   | F - 14.29%  | TRUE  | TRUE  |
| 11 | 15987995 - 16760190   |             | TRUE  | FALSE |
| 11 | 15987995 - 16760190   | F - 7.14%   | TRUE  | TRUE  |
| 11 | 15987995 - 16760190   |             | TRUE  | TRUE  |
| 11 | 15987995 - 16760190   | F - 21.43%  | TRUE  | TRUE  |
| 14 | 95883831 - 95942173   |             | TRUE  | TRUE  |
| 14 | 95883831 - 95942173   |             | TRUE  | FALSE |
| 14 | 95883831 - 95942173   |             | TRUE  | TRUE  |
| 14 | 95883831 - 95942173   |             | TRUE  | TRUE  |
| 14 | 95883831 - 95942173   | T - 100.00% | TRUE  | TRUE  |
| 16 | 3692939 - 3713727     |             | TRUE  | TRUE  |
| 16 | 3692939 - 3713727     |             | TRUE  | TRUE  |
| 16 | 3692939 - 3713727     |             | FALSE | TRUE  |
| 16 | 3692939 - 3713727     | T - 100.00% | TRUE  | TRUE  |
| 16 | 3692939 - 3713727     |             | FALSE | TRUE  |

|             |    |                       |             |       |       |
|-------------|----|-----------------------|-------------|-------|-------|
|             | 16 | 3692939 - 3713727     |             | FALSE | TRUE  |
|             | 19 | 5587010 - 5622938     |             | TRUE  | FALSE |
|             | 19 | 5587010 - 5622938     |             | TRUE  | TRUE  |
|             | 19 | 5587010 - 5622938     | T - 77.78%  | TRUE  | TRUE  |
|             | 19 | 5587010 - 5622938     |             | TRUE  | TRUE  |
| 6_ssto_hap7 |    | 1028372 - 1044729     | F - 5.00%   | TRUE  | TRUE  |
| 6_ssto_hap7 |    | 1028372 - 1044729     | F - 5.00%   | FALSE | TRUE  |
| 6_ssto_hap7 |    | 1028372 - 1044729     |             | FALSE | TRUE  |
| 6_ssto_hap7 |    | 1028372 - 1044729     | F - 35.00%  | FALSE | TRUE  |
| 6_ssto_hap7 |    | 1028372 - 1044729     |             | TRUE  | TRUE  |
| 6_ssto_hap7 |    | 1028372 - 1044729     |             | TRUE  | TRUE  |
| 6_ssto_hap7 |    | 1028372 - 1044729     | F - 5.00%   | TRUE  | TRUE  |
| 6_ssto_hap7 |    | 1028372 - 1044729     |             | TRUE  | TRUE  |
| 6_ssto_hap7 |    | 1028372 - 1044729     |             | FALSE | TRUE  |
| 6_ssto_hap7 |    | 1028372 - 1044729     | F - 10.00%  | TRUE  | TRUE  |
| 6_ssto_hap7 |    | 1028372 - 1044729     | F - 5.00%   | TRUE  | TRUE  |
| 6_ssto_hap7 |    | 1028372 - 1044729     | F - 25.00%  | TRUE  | TRUE  |
| 6_ssto_hap7 |    | 1028372 - 1044729     |             | TRUE  | TRUE  |
|             | 1  | 153232176 - 153234600 | T - 50.00%  | TRUE  | FALSE |
|             | 1  | 153232176 - 153234600 |             | TRUE  | TRUE  |
|             | 1  | 153232176 - 153234600 | T - 100.00% | TRUE  | TRUE  |
|             | 1  | 178694300 - 179065553 |             | TRUE  | TRUE  |
|             | 1  | 178694300 - 179065553 | F - 7.69%   | TRUE  | TRUE  |
|             | 1  | 209788218 - 209825820 | F - 8.33%   | TRUE  | FALSE |
|             | 1  | 209788218 - 209825820 |             | TRUE  | TRUE  |
|             | 1  | 209788218 - 209825820 |             | TRUE  | TRUE  |
|             | 1  | 209788218 - 209825820 |             | TRUE  | TRUE  |
|             | 1  | 209788218 - 209825820 | F - 8.33%   | TRUE  | TRUE  |
|             | 1  | 209788218 - 209825820 | T - 83.33%  | FALSE | TRUE  |
|             | 1  | 209788218 - 209825820 |             | FALSE | TRUE  |
|             | 1  | 209788218 - 209825820 | T - 83.33%  | FALSE | TRUE  |
|             | 1  | 209788218 - 209825820 | F - 25.00%  | FALSE | TRUE  |
|             | 1  | 209788218 - 209825820 |             | FALSE | TRUE  |
|             | 1  | 209788218 - 209825820 |             | TRUE  | TRUE  |
|             | 1  | 209788218 - 209825820 | T - 83.33%  | TRUE  | TRUE  |
|             | 1  | 209788218 - 209825820 |             | FALSE | TRUE  |
|             | 1  | 209788218 - 209825820 | T - 75.00%  | FALSE | TRUE  |
|             | 1  | 209788218 - 209825820 |             | FALSE | TRUE  |
|             | 1  | 209788218 - 209825820 | F - 33.33%  | FALSE | TRUE  |
|             | 1  | 209788218 - 209825820 |             | FALSE | TRUE  |
|             | 2  | 111395275 - 111435691 |             | TRUE  | TRUE  |
|             | 2  | 111395275 - 111435691 |             | TRUE  | TRUE  |
|             | 2  | 111395275 - 111435691 | F - 5.56%   | TRUE  | TRUE  |
|             | 2  | 111395275 - 111435691 |             | TRUE  | TRUE  |
|             | 2  | 111395275 - 111435691 | T - 66.67%  | FALSE | TRUE  |
|             | 2  | 111395275 - 111435691 |             | TRUE  | TRUE  |
|             | 2  | 111395275 - 111435691 | T - 72.22%  | TRUE  | TRUE  |
|             | 2  | 111395275 - 111435691 |             | FALSE | TRUE  |
|             | 3  | 3841121 - 3889387     | F - 40.00%  | TRUE  | TRUE  |
|             | 3  | 3841121 - 3889387     |             | TRUE  | TRUE  |
|             | 3  | 3841121 - 3889387     |             | TRUE  | TRUE  |
|             | 7  | 65425671 - 65447301   |             | TRUE  | TRUE  |
|             | 7  | 65425671 - 65447301   |             | TRUE  | TRUE  |
|             | 7  | 65425671 - 65447301   | F - 19.05%  | TRUE  | TRUE  |
|             | 7  | 65425671 - 65447301   | F - 4.76%   | TRUE  | TRUE  |
|             | 7  | 65425671 - 65447301   |             | TRUE  | TRUE  |
|             | 7  | 65425671 - 65447301   |             | TRUE  | TRUE  |
| X           |    | 79924987 - 80065233   | F - 4.76%   | TRUE  | TRUE  |

|   |                          |             |       |       |
|---|--------------------------|-------------|-------|-------|
| X | 79924987 - 80065233      | F - 4.76%   | TRUE  | TRUE  |
| X | 79924987 - 80065233      | T - 76.19%  | FALSE | TRUE  |
| X | 79924987 - 80065233      |             | TRUE  | TRUE  |
| X | 79924987 - 80065233      |             | TRUE  | TRUE  |
| X | 79924987 - 80065233      |             | FALSE | TRUE  |
| X | 15402921 - 15511711      |             | TRUE  | TRUE  |
| X | 15402921 - 15511711      | F - 11.11%  | TRUE  | TRUE  |
| X | 15402921 - 15511711      | F - 11.11%  | FALSE | TRUE  |
| X | 15402921 - 15511711      | T - 66.67%  | FALSE | TRUE  |
| X | 15402921 - 15511711      | F - 44.44%  | FALSE | TRUE  |
| X | 15402921 - 15511711      |             | TRUE  | TRUE  |
| X | 15402921 - 15511711      |             | FALSE | TRUE  |
| X | 15402921 - 15511711      |             | TRUE  | TRUE  |
| X | 15402921 - 15511711      |             | TRUE  | TRUE  |
| X | 15402921 - 15511711      |             | FALSE | TRUE  |
| X | 15402921 - 15511711      | T - 77.78%  | TRUE  | TRUE  |
| X | 15402921 - 15511711      |             | TRUE  | TRUE  |
|   | 10 103544200 - 103578700 |             | TRUE  | FALSE |
|   | 10 103544200 - 103578700 |             | TRUE  | FALSE |
|   | 10 103544200 - 103578700 |             | TRUE  | TRUE  |
|   | 10 103544200 - 103578700 |             | TRUE  | TRUE  |
|   | 10 103544200 - 103578700 | T - 55.00%  | TRUE  | TRUE  |
|   | 11 68080077 - 68216743   | F - 20.00%  | TRUE  | TRUE  |
|   | 11 68080077 - 68216743   |             | TRUE  | TRUE  |
|   | 11 68080077 - 68216743   |             | TRUE  | TRUE  |
|   | 11 68080077 - 68216743   |             | FALSE | TRUE  |
|   | 11 68080077 - 68216743   | F - 20.00%  | TRUE  | TRUE  |
|   | 11 68080077 - 68216743   |             | TRUE  | TRUE  |
|   | 11 68080077 - 68216743   |             | TRUE  | TRUE  |
|   | 11 68080077 - 68216743   | T - 60.00%  | TRUE  | TRUE  |
|   | 11 68080077 - 68216743   | F - 20.00%  | TRUE  | TRUE  |
|   | 11 68080077 - 68216743   | T - 80.00%  | TRUE  | TRUE  |
|   | 11 68080077 - 68216743   |             | TRUE  | TRUE  |
|   | 11 68080077 - 68216743   |             | FALSE | TRUE  |
|   | 15 101419581 - 101456831 |             | TRUE  | FALSE |
|   | 15 101419581 - 101456831 | T - 75.00%  | TRUE  | TRUE  |
|   | 15 101419581 - 101456831 |             | TRUE  | FALSE |
|   | 15 101419581 - 101456831 |             | TRUE  | FALSE |
|   | 15 101419581 - 101456831 | T - 62.50%  | TRUE  | TRUE  |
|   | 15 101419581 - 101456831 |             | TRUE  | TRUE  |
|   | 15 101419581 - 101456831 | T - 100.00% | TRUE  | TRUE  |
|   | 15 101419581 - 101456831 | T - 62.50%  | TRUE  | TRUE  |
|   | 15 101419581 - 101456831 | F - 37.50%  | TRUE  | TRUE  |
|   | 15 101419581 - 101456831 | F - 12.50%  | TRUE  | TRUE  |
|   | 15 101419581 - 101456831 | T - 87.50%  | TRUE  | TRUE  |
|   | 15 101419581 - 101456831 | F - 12.50%  | TRUE  | TRUE  |
|   | 15 101419581 - 101456831 |             | TRUE  | TRUE  |
|   | 15 101419581 - 101456831 | F - 12.50%  | FALSE | TRUE  |
|   | 15 101419581 - 101456831 |             | FALSE | TRUE  |
|   | 15 101419581 - 101456831 |             | TRUE  | TRUE  |
|   | 16 27413483 - 27463363   | T - 100.00% | TRUE  | FALSE |
|   | 16 27413483 - 27463363   |             | TRUE  | TRUE  |
|   | 16 27413483 - 27463363   |             | TRUE  | TRUE  |
|   | 16 57023410 - 57117436   |             | TRUE  | FALSE |
|   | 16 57023410 - 57117436   |             | TRUE  | TRUE  |
|   | 16 57023410 - 57117436   |             | TRUE  | TRUE  |
|   | 16 57023410 - 57117436   | T - 64.71%  | TRUE  | TRUE  |
|   | 16 57023410 - 57117436   |             | TRUE  | FALSE |

|    |                       |             |       |       |
|----|-----------------------|-------------|-------|-------|
| 16 | 57023410 - 57117436   | T - 52.94%  | TRUE  | TRUE  |
| 16 | 57023410 - 57117436   |             | TRUE  | FALSE |
| 16 | 57023410 - 57117436   | T - 76.47%  | TRUE  | TRUE  |
| 16 | 57023410 - 57117436   |             | TRUE  | TRUE  |
| 16 | 57023410 - 57117436   |             | TRUE  | TRUE  |
| 16 | 57023410 - 57117436   |             | TRUE  | TRUE  |
| 16 | 57023410 - 57117436   | F - 35.29%  | TRUE  | TRUE  |
| 20 | 33814457 - 33864804   |             | TRUE  | TRUE  |
| 20 | 33814457 - 33864804   |             | TRUE  | FALSE |
| 20 | 33814457 - 33864804   | T - 100.00% | TRUE  | TRUE  |
| 20 | 33814457 - 33864804   |             | TRUE  | TRUE  |
| 20 | 33814457 - 33864804   | T - 75.00%  | TRUE  | TRUE  |
| 20 | 33814457 - 33864804   | F - 25.00%  | TRUE  | TRUE  |
| 20 | 46585043 - 46589679   |             | TRUE  | FALSE |
| 20 | 46585043 - 46589679   | T - 100.00% | TRUE  | TRUE  |
| 1  | 209859510 - 209908295 | F - 14.29%  | TRUE  | TRUE  |
| 1  | 209859510 - 209908295 | T - 100.00% | TRUE  | TRUE  |
| 1  | 209859510 - 209908295 |             | TRUE  | TRUE  |
| 1  | 209859510 - 209908295 |             | TRUE  | TRUE  |
| 1  | 24171567 - 24194859   |             | TRUE  | TRUE  |
| 1  | 24171567 - 24194859   | F - 16.67%  | TRUE  | TRUE  |
| 1  | 24171567 - 24194859   | T - 83.33%  | TRUE  | TRUE  |
| 1  | 24171567 - 24194859   |             | FALSE | TRUE  |
| 1  | 24171567 - 24194859   | T - 83.33%  | TRUE  | TRUE  |
| 1  | 24171567 - 24194859   | T - 100.00% | TRUE  | TRUE  |
| 1  | 24171567 - 24194859   | T - 100.00% | TRUE  | TRUE  |
| 1  | 103342023 - 103574052 | F - 6.67%   | TRUE  | TRUE  |
| 1  | 103342023 - 103574052 | F - 6.67%   | TRUE  | TRUE  |
| 1  | 103342023 - 103574052 | T - 66.67%  | TRUE  | TRUE  |
| 1  | 103342023 - 103574052 | T - 60.00%  | TRUE  | TRUE  |
| 1  | 103342023 - 103574052 | F - 46.67%  | TRUE  | TRUE  |
| 1  | 103342023 - 103574052 | F - 46.67%  | TRUE  | TRUE  |
| 1  | 103342023 - 103574052 | T - 60.00%  | TRUE  | TRUE  |
| 1  | 103342023 - 103574052 | T - 53.33%  | TRUE  | TRUE  |
| 1  | 103342023 - 103574052 |             | TRUE  | TRUE  |
| 1  | 103342023 - 103574052 |             | TRUE  | TRUE  |
| 1  | 103342023 - 103574052 | T - 66.67%  | TRUE  | TRUE  |
| 1  | 103342023 - 103574052 |             | TRUE  | TRUE  |
| 1  | 103342023 - 103574052 |             | TRUE  | TRUE  |
| 1  | 103342023 - 103574052 |             | TRUE  | TRUE  |
| 1  | 103342023 - 103574052 |             | TRUE  | TRUE  |
| 1  | 103342023 - 103574052 | T - 60.00%  | TRUE  | TRUE  |
| 1  | 103342023 - 103574052 |             | TRUE  | TRUE  |
| 1  | 103342023 - 103574052 |             | TRUE  | TRUE  |
| 1  | 103342023 - 103574052 | T - 53.33%  | TRUE  | TRUE  |
| 1  | 103342023 - 103574052 |             | TRUE  | TRUE  |
| 1  | 103342023 - 103574052 |             | TRUE  | TRUE  |
| 1  | 103342023 - 103574052 |             | TRUE  | TRUE  |
| 1  | 103342023 - 103574052 |             | TRUE  | TRUE  |
| 1  | 103342023 - 103574052 |             | FALSE | TRUE  |
| 2  | 207308263 - 207485851 |             | TRUE  | TRUE  |
| 2  | 207308263 - 207485851 | F - 27.27%  | TRUE  | TRUE  |
| 2  | 207308263 - 207485851 |             | TRUE  | FALSE |
| 2  | 207308263 - 207485851 |             | TRUE  | TRUE  |
| 2  | 207308263 - 207485851 |             | FALSE | TRUE  |
| 6  | 82879700 - 82957471   |             | TRUE  | FALSE |
| 6  | 82879700 - 82957471   |             | TRUE  | TRUE  |
| 6  | 82879700 - 82957471   | T - 82.35%  | TRUE  | TRUE  |
| 6  | 82879700 - 82957471   |             | FALSE | TRUE  |

|            |                     |             |       |       |
|------------|---------------------|-------------|-------|-------|
| 6          | 90352218 - 90529442 |             | TRUE  | TRUE  |
| 6          | 90352218 - 90529442 |             | TRUE  | TRUE  |
| 6          | 90352218 - 90529442 |             | TRUE  | TRUE  |
| 6          | 90352218 - 90529442 |             | FALSE | TRUE  |
| 6          | 90352218 - 90529442 |             | FALSE | TRUE  |
| 6          | 90352218 - 90529442 |             | FALSE | TRUE  |
| 6          | 90352218 - 90529442 |             | FALSE | TRUE  |
| 6          | 90352218 - 90529442 |             | FALSE | TRUE  |
| 6          | 90352218 - 90529442 | F - 37.50%  | FALSE | TRUE  |
| 6          | 90352218 - 90529442 |             | TRUE  | TRUE  |
| 6          | 90352218 - 90529442 |             | FALSE | TRUE  |
| 8          | 16884747 - 16980153 | T - 50.00%  | TRUE  | TRUE  |
| 8          | 16884747 - 16980153 | F - 12.50%  | TRUE  | TRUE  |
| 8          | 16884747 - 16980153 |             | FALSE | TRUE  |
| 8          | 16884747 - 16980153 |             | FALSE | TRUE  |
| 12         | 80838126 - 81073968 |             | TRUE  | FALSE |
| 12         | 80838126 - 81073968 |             | TRUE  | TRUE  |
| 12         | 80838126 - 81073968 | T - 66.67%  | TRUE  | FALSE |
| 12         | 80838126 - 81073968 |             | TRUE  | FALSE |
| 12         | 80838126 - 81073968 |             | TRUE  | TRUE  |
| 12         | 80838126 - 81073968 |             | FALSE | TRUE  |
| 12         | 80838126 - 81073968 |             | FALSE | TRUE  |
| 12         | 80838126 - 81073968 |             | FALSE | TRUE  |
| 12         | 80838126 - 81073968 |             | FALSE | TRUE  |
| 12         | 80838126 - 81073968 |             | FALSE | TRUE  |
| 16         | 25078258 - 25080275 |             | TRUE  | TRUE  |
| 16         | 25078258 - 25080275 | T - 100.00% | TRUE  | TRUE  |
| 17         | 43513266 - 43568146 | T - 60.00%  | TRUE  | TRUE  |
| 17         | 43513266 - 43568146 | F - 10.00%  | TRUE  | TRUE  |
| 17         | 43513266 - 43568146 |             | TRUE  | TRUE  |
| 17         | 43513266 - 43568146 |             | TRUE  | TRUE  |
| 17         | 43513266 - 43568146 | F - 40.00%  | TRUE  | TRUE  |
| 6_cox_hap2 | 2360850 - 2380033   |             | TRUE  | TRUE  |
| 6_cox_hap2 | 2360850 - 2380033   | F - 43.75%  | TRUE  | TRUE  |
| 6_cox_hap2 | 2360850 - 2380033   |             | TRUE  | TRUE  |
| 6_cox_hap2 | 2360850 - 2380033   | T - 62.50%  | TRUE  | TRUE  |
| 6_cox_hap2 | 2360850 - 2380033   | F - 3.13%   | TRUE  | TRUE  |
| 6_cox_hap2 | 2360850 - 2380033   | F - 3.13%   | TRUE  | TRUE  |
| 6_cox_hap2 | 2360850 - 2380033   |             | TRUE  | TRUE  |
| 6_cox_hap2 | 2360850 - 2380033   | F - 6.25%   | FALSE | TRUE  |
| 6_cox_hap2 | 2360850 - 2380033   |             | TRUE  | TRUE  |
| 6_cox_hap2 | 2360850 - 2380033   |             | TRUE  | TRUE  |
| 6_cox_hap2 | 2360850 - 2380033   |             | TRUE  | TRUE  |
| 6_cox_hap2 | 2360850 - 2380033   | F - 3.13%   | TRUE  | TRUE  |
| 6_cox_hap2 | 2360850 - 2380033   |             | FALSE | TRUE  |
| 6_cox_hap2 | 2360850 - 2380033   | F - 3.13%   | TRUE  | TRUE  |
| 6_cox_hap2 | 2360850 - 2380033   | F - 3.13%   | TRUE  | TRUE  |
| 6_cox_hap2 | 2360850 - 2380033   |             | TRUE  | TRUE  |
| 6_cox_hap2 | 2360850 - 2380033   | F - 40.63%  | TRUE  | TRUE  |
| 6_cox_hap2 | 2360850 - 2380033   | F - 3.13%   | TRUE  | TRUE  |
| 6_cox_hap2 | 2360850 - 2380033   |             | TRUE  | TRUE  |
| 6_cox_hap2 | 2360850 - 2380033   | F - 3.13%   | TRUE  | TRUE  |
| 6_cox_hap2 | 2360850 - 2380033   |             | TRUE  | TRUE  |
| 6_cox_hap2 | 2360850 - 2380033   | T - 71.88%  | FALSE | TRUE  |
| 6_dbb_hap3 | 991434 - 1007847    | F - 5.00%   | TRUE  | TRUE  |
| 6_dbb_hap3 | 991434 - 1007847    |             | FALSE | TRUE  |
| 6_dbb_hap3 | 991434 - 1007847    |             | TRUE  | TRUE  |
| 6_dbb_hap3 | 991434 - 1007847    |             | TRUE  | TRUE  |
| 6_dbb_hap3 | 991434 - 1007847    | F - 5.00%   | FALSE | TRUE  |

|             |                         |            |       |       |
|-------------|-------------------------|------------|-------|-------|
| 6_dbb_hap3  | 991434 - 1007847        | F - 10.00% | TRUE  | TRUE  |
| 6_dbb_hap3  | 991434 - 1007847        |            | TRUE  | TRUE  |
| 6_dbb_hap3  | 991434 - 1007847        |            | FALSE | TRUE  |
| 6_dbb_hap3  | 991434 - 1007847        | F - 5.00%  | TRUE  | TRUE  |
| 6_dbb_hap3  | 991434 - 1007847        |            | TRUE  | TRUE  |
| 6_dbb_hap3  | 991434 - 1007847        | F - 25.00% | TRUE  | TRUE  |
| 6_dbb_hap3  | 991434 - 1007847        | F - 10.00% | FALSE | TRUE  |
| 6_mann_hap4 | 991057 - 1007473        | F - 5.00%  | TRUE  | TRUE  |
| 6_mann_hap4 | 991057 - 1007473        |            | FALSE | TRUE  |
| 6_mann_hap4 | 991057 - 1007473        |            | TRUE  | TRUE  |
| 6_mann_hap4 | 991057 - 1007473        |            | TRUE  | TRUE  |
| 6_mann_hap4 | 991057 - 1007473        | F - 5.00%  | FALSE | TRUE  |
| 6_mann_hap4 | 991057 - 1007473        | F - 10.00% | TRUE  | TRUE  |
| 6_mann_hap4 | 991057 - 1007473        |            | TRUE  | TRUE  |
| 6_mann_hap4 | 991057 - 1007473        |            | FALSE | TRUE  |
| 6_mann_hap4 | 991057 - 1007473        | F - 5.00%  | TRUE  | TRUE  |
| 6_mann_hap4 | 991057 - 1007473        |            | TRUE  | TRUE  |
| 6_mann_hap4 | 991057 - 1007473        | F - 25.00% | TRUE  | TRUE  |
| 6_mann_hap4 | 991057 - 1007473        | F - 10.00% | FALSE | TRUE  |
| 6_qbl_hap6  | 991411 - 1007828        | F - 5.00%  | TRUE  | TRUE  |
| 6_qbl_hap6  | 991411 - 1007828        |            | FALSE | TRUE  |
| 6_qbl_hap6  | 991411 - 1007828        |            | TRUE  | TRUE  |
| 6_qbl_hap6  | 991411 - 1007828        |            | TRUE  | TRUE  |
| 6_qbl_hap6  | 991411 - 1007828        | F - 5.00%  | FALSE | TRUE  |
| 6_qbl_hap6  | 991411 - 1007828        | F - 10.00% | TRUE  | TRUE  |
| 6_qbl_hap6  | 991411 - 1007828        |            | TRUE  | TRUE  |
| 6_qbl_hap6  | 991411 - 1007828        |            | FALSE | TRUE  |
| 6_qbl_hap6  | 991411 - 1007828        | F - 5.00%  | TRUE  | TRUE  |
| 6_qbl_hap6  | 991411 - 1007828        |            | TRUE  | TRUE  |
| 6_qbl_hap6  | 991411 - 1007828        | F - 25.00% | TRUE  | TRUE  |
| 6_qbl_hap6  | 991411 - 1007828        | F - 10.00% | FALSE | TRUE  |
|             | 1 2252692 - 2323146     |            | TRUE  | TRUE  |
|             | 1 2252692 - 2323146     | F - 25.00% | TRUE  | FALSE |
|             | 1 2252692 - 2323146     | F - 16.67% | TRUE  | TRUE  |
|             | 1 192981496 - 193029237 | F - 4.00%  | TRUE  | TRUE  |
|             | 1 192981496 - 193029237 | T - 72.00% | TRUE  | TRUE  |
|             | 1 192981496 - 193029237 |            | FALSE | TRUE  |
|             | 1 192981496 - 193029237 |            | FALSE | TRUE  |
|             | 1 192981496 - 193029237 |            | FALSE | TRUE  |
|             | 3 194075976 - 194090472 |            | TRUE  | FALSE |
|             | 3 194075976 - 194090472 | T - 83.33% | TRUE  | TRUE  |
|             | 3 194075976 - 194090472 | T - 50.00% | TRUE  | TRUE  |
|             | 3 194075976 - 194090472 | T - 66.67% | TRUE  | TRUE  |
|             | 4 124386 - 157779       |            | TRUE  | FALSE |
|             | 4 124386 - 157779       | F - 11.11% | TRUE  | TRUE  |
|             | 4 124386 - 157779       |            | TRUE  | TRUE  |
|             | 4 124386 - 157779       |            | FALSE | TRUE  |
|             | 5 70220768 - 70249769   |            | TRUE  | TRUE  |
|             | 5 70220768 - 70249769   |            | TRUE  | FALSE |
|             | 5 70220768 - 70249769   | F - 47.62% | TRUE  | TRUE  |
|             | 5 70220768 - 70249769   |            | TRUE  | TRUE  |
|             | 6 39760142 - 39872653   |            | TRUE  | TRUE  |
|             | 6 39760142 - 39872653   | F - 8.33%  | TRUE  | TRUE  |
|             | 7 7196565 - 7288251     | F - 10.00% | TRUE  | TRUE  |
|             | 7 7196565 - 7288251     |            | FALSE | TRUE  |
|             | 7 7196565 - 7288251     | F - 10.00% | TRUE  | TRUE  |
|             | 7 7196565 - 7288251     | F - 10.00% | TRUE  | TRUE  |
|             | 7 7196565 - 7288251     |            | FALSE | TRUE  |

|             |                       |             |       |       |
|-------------|-----------------------|-------------|-------|-------|
| 7           | 143318043 - 143515397 | T - 50.00%  | FALSE | TRUE  |
| 7           | 143318043 - 143515397 |             | FALSE | TRUE  |
| 7           | 143318043 - 143515397 |             | FALSE | TRUE  |
| 7           | 143318043 - 143515397 |             | FALSE | TRUE  |
| 7           | 143318043 - 143515397 | F - 10.00%  | TRUE  | TRUE  |
| 7           | 143318043 - 143515397 | F - 5.00%   | TRUE  | TRUE  |
| 7           | 143318043 - 143515397 | F - 30.00%  | TRUE  | TRUE  |
| 7           | 143318043 - 143515397 |             | FALSE | TRUE  |
| 7           | 143318043 - 143515397 |             | FALSE | TRUE  |
| 7           | 143318043 - 143515397 |             | FALSE | TRUE  |
| 7           | 143318043 - 143515397 |             | FALSE | TRUE  |
| 7           | 143318043 - 143515397 |             | FALSE | TRUE  |
| 7           | 143318043 - 143515397 | F - 15.00%  | FALSE | TRUE  |
| 7           | 143318043 - 143515397 | F - 20.00%  | TRUE  | TRUE  |
| 7           | 143318043 - 143515397 | F - 5.00%   | TRUE  | TRUE  |
| 7           | 143318043 - 143515397 |             | TRUE  | TRUE  |
| 7           | 143318043 - 143515397 |             | TRUE  | TRUE  |
| 7           | 143318043 - 143515397 |             | FALSE | TRUE  |
| 7           | 156473570 - 156685924 |             | TRUE  | TRUE  |
| 7           | 156473570 - 156685924 | F - 3.57%   | TRUE  | FALSE |
| 7           | 156473570 - 156685924 |             | TRUE  | TRUE  |
| 7           | 156473570 - 156685924 |             | TRUE  | TRUE  |
| 7           | 156473570 - 156685924 |             | TRUE  | TRUE  |
| 7           | 91741463 - 91764117   |             | TRUE  | FALSE |
| 7           | 91741463 - 91764117   | T - 87.50%  | TRUE  | TRUE  |
| 9           | 128199672 - 128469513 | F - 8.82%   | TRUE  | TRUE  |
| 9           | 128199672 - 128469513 | F - 5.88%   | TRUE  | TRUE  |
| 9           | 128199672 - 128469513 | F - 5.88%   | FALSE | TRUE  |
| 9           | 128199672 - 128469513 | F - 5.88%   | FALSE | TRUE  |
| 9           | 128199672 - 128469513 |             | FALSE | TRUE  |
| 9           | 128199672 - 128469513 |             | FALSE | TRUE  |
| X           | 40486173 - 40506819   | F - 33.33%  | TRUE  | TRUE  |
| X           | 40486173 - 40506819   | F - 11.11%  | TRUE  | TRUE  |
| X           | 40486173 - 40506819   | F - 33.33%  | TRUE  | FALSE |
| X           | 40486173 - 40506819   | T - 100.00% | TRUE  | TRUE  |
| X           | 40486173 - 40506819   | T - 66.67%  | TRUE  | TRUE  |
| X           | 40486173 - 40506819   |             | TRUE  | TRUE  |
| 11          | 68228186 - 68382802   |             | TRUE  | FALSE |
| 11          | 68228186 - 68382802   |             | TRUE  | FALSE |
| 11          | 68228186 - 68382802   |             | TRUE  | FALSE |
| 11          | 68228186 - 68382802   | F - 3.85%   | TRUE  | TRUE  |
| 11          | 68228186 - 68382802   |             | TRUE  | TRUE  |
| 11          | 5640994 - 5687610     | T - 60.00%  | TRUE  | TRUE  |
| 11          | 5640994 - 5687610     |             | FALSE | TRUE  |
| 14          | 24774302 - 24780655   | F - 10.00%  | TRUE  | TRUE  |
| 14          | 24774302 - 24780655   |             | TRUE  | TRUE  |
| 14          | 24774302 - 24780655   | T - 80.00%  | FALSE | TRUE  |
| 14          | 24774302 - 24780655   | F - 10.00%  | TRUE  | TRUE  |
| 14          | 24774302 - 24780655   | F - 30.00%  | TRUE  | TRUE  |
| 15          | 36871812 - 37102449   |             | TRUE  | TRUE  |
| 15          | 36871812 - 37102449   | F - 42.86%  | TRUE  | TRUE  |
| 15          | 36871812 - 37102449   |             | TRUE  | TRUE  |
| 15          | 36871812 - 37102449   |             | TRUE  | TRUE  |
| 19          | 45582518 - 45594782   | T - 60.00%  | TRUE  | TRUE  |
| 19          | 45582518 - 45594782   |             | TRUE  | TRUE  |
| 6_mann_hap4 | 4082537 - 4091831     |             | TRUE  | FALSE |
| 6_mann_hap4 | 4082537 - 4091831     | T - 69.23%  | TRUE  | TRUE  |
| 6_mann_hap4 | 4082537 - 4091831     | F - 7.69%   | TRUE  | TRUE  |



|             |                       |            |       |       |
|-------------|-----------------------|------------|-------|-------|
| 6_mcf_hap5  | 3362383 - 3383040     |            | TRUE  | FALSE |
| 6_mcf_hap5  | 3362383 - 3383040     | T - 56.52% | TRUE  | TRUE  |
| 6_mcf_hap5  | 3362383 - 3383040     |            | FALSE | TRUE  |
| 6_mcf_hap5  | 3362383 - 3383040     |            | TRUE  | TRUE  |
| 6_mcf_hap5  | 3362383 - 3383040     | F - 4.35%  | TRUE  | TRUE  |
| 6_mcf_hap5  | 3362383 - 3383040     | F - 4.35%  | FALSE | TRUE  |
| 6_mcf_hap5  | 3362383 - 3383040     |            | TRUE  | TRUE  |
| 6_mcf_hap5  | 3362383 - 3383040     | F - 47.83% | TRUE  | TRUE  |
| 6_mcf_hap5  | 3362383 - 3383040     |            | TRUE  | TRUE  |
| 6_mcf_hap5  | 3362383 - 3383040     |            | FALSE | TRUE  |
| 6_mcf_hap5  | 3362383 - 3383040     |            | FALSE | TRUE  |
| 6_mcf_hap5  | 3362383 - 3383040     |            | TRUE  | TRUE  |
| 6_mcf_hap5  | 3362383 - 3383040     |            | FALSE | TRUE  |
| 6_mcf_hap5  | 3362383 - 3383040     |            | FALSE | TRUE  |
| 6_ssto_hap7 | 3315249 - 3335906     |            | TRUE  | FALSE |
| 6_ssto_hap7 | 3315249 - 3335906     | T - 56.52% | TRUE  | TRUE  |
| 6_ssto_hap7 | 3315249 - 3335906     |            | FALSE | TRUE  |
| 6_ssto_hap7 | 3315249 - 3335906     |            | TRUE  | TRUE  |
| 6_ssto_hap7 | 3315249 - 3335906     | F - 4.35%  | TRUE  | TRUE  |
| 6_ssto_hap7 | 3315249 - 3335906     | F - 4.35%  | FALSE | TRUE  |
| 6_ssto_hap7 | 3315249 - 3335906     |            | TRUE  | TRUE  |
| 6_ssto_hap7 | 3315249 - 3335906     | F - 47.83% | TRUE  | TRUE  |
| 6_ssto_hap7 | 3315249 - 3335906     |            | TRUE  | TRUE  |
| 6_ssto_hap7 | 3315249 - 3335906     |            | FALSE | TRUE  |
| 6_ssto_hap7 | 3315249 - 3335906     |            | FALSE | TRUE  |
| 6_ssto_hap7 | 3315249 - 3335906     |            | TRUE  | TRUE  |
| 6_ssto_hap7 | 3315249 - 3335906     |            | FALSE | TRUE  |
| 6_ssto_hap7 | 3315249 - 3335906     |            | FALSE | TRUE  |
| 6_ssto_hap7 | 3315249 - 3335906     |            | TRUE  | TRUE  |
| 6_ssto_hap7 | 3315249 - 3335906     |            | FALSE | TRUE  |
| 6_ssto_hap7 | 3315249 - 3335906     |            | FALSE | TRUE  |
| 6_ssto_hap7 | 3282511 - 3303168     |            | TRUE  | FALSE |
| 6_ssto_hap7 | 3282511 - 3303168     | T - 56.52% | TRUE  | TRUE  |
| 6_ssto_hap7 | 3282511 - 3303168     |            | FALSE | TRUE  |
| 6_ssto_hap7 | 3282511 - 3303168     |            | TRUE  | TRUE  |
| 6_ssto_hap7 | 3282511 - 3303168     | F - 4.35%  | TRUE  | TRUE  |
| 6_ssto_hap7 | 3282511 - 3303168     | F - 4.35%  | FALSE | TRUE  |
| 6_ssto_hap7 | 3282511 - 3303168     |            | TRUE  | TRUE  |
| 6_ssto_hap7 | 3282511 - 3303168     | F - 47.83% | TRUE  | TRUE  |
| 6_ssto_hap7 | 3282511 - 3303168     |            | TRUE  | TRUE  |
| 6_ssto_hap7 | 3282511 - 3303168     |            | FALSE | TRUE  |
| 6_ssto_hap7 | 3282511 - 3303168     |            | FALSE | TRUE  |
| 6_ssto_hap7 | 3282511 - 3303168     |            | TRUE  | TRUE  |
| 6_ssto_hap7 | 3282511 - 3303168     |            | FALSE | TRUE  |
| 6_ssto_hap7 | 3282511 - 3303168     |            | FALSE | TRUE  |
| 6_ssto_hap7 | 3282511 - 3303168     |            | TRUE  | TRUE  |
| 6_ssto_hap7 | 3282511 - 3303168     |            | FALSE | TRUE  |
| 6_ssto_hap7 | 3282511 - 3303168     |            | FALSE | TRUE  |
| 4           | 120375938 - 120473183 |            | TRUE  | TRUE  |
| 4           | 120375938 - 120473183 |            | TRUE  | TRUE  |
| 4           | 120375938 - 120473183 |            | TRUE  | TRUE  |
| 4           | 120375938 - 120473183 | F - 33.33% | TRUE  | TRUE  |
| 1           | 109792641 - 109818378 |            | TRUE  | TRUE  |
| 1           | 109792641 - 109818378 | F - 33.33% | TRUE  | TRUE  |
| 1           | 109792641 - 109818378 | F - 16.67% | TRUE  | TRUE  |
| 1           | 109792641 - 109818378 | F - 16.67% | TRUE  | TRUE  |
| 1           | 109792641 - 109818378 | F - 33.33% | TRUE  | TRUE  |
| 1           | 109792641 - 109818378 |            | TRUE  | TRUE  |
| 1           | 109792641 - 109818378 | F - 33.33% | TRUE  | TRUE  |
| 1           | 109792641 - 109818378 |            | TRUE  | TRUE  |
| 1           | 109792641 - 109818378 | T - 50.00% | TRUE  | TRUE  |
| 1           | 109792641 - 109818378 |            | TRUE  | TRUE  |
| 1           | 109792641 - 109818378 |            | TRUE  | TRUE  |
| 1           | 109792641 - 109818378 | T - 50.00% | TRUE  | TRUE  |

|   |                       |             |       |       |
|---|-----------------------|-------------|-------|-------|
| 1 | 109792641 - 109818378 | F - 33.33%  | TRUE  | TRUE  |
| 1 | 109792641 - 109818378 | F - 33.33%  | FALSE | TRUE  |
| 1 | 109792641 - 109818378 |             | TRUE  | TRUE  |
| 1 | 109792641 - 109818378 |             | FALSE | TRUE  |
| 1 | 109792641 - 109818378 |             | FALSE | TRUE  |
| 1 | 109792641 - 109818378 |             | FALSE | TRUE  |
| 1 | 151313116 - 151319833 | F - 3.85%   | TRUE  | FALSE |
| 1 | 151313116 - 151319833 |             | TRUE  | TRUE  |
| 1 | 165693528 - 165796992 |             | TRUE  | FALSE |
| 1 | 165693528 - 165796992 |             | TRUE  | FALSE |
| 1 | 165693528 - 165796992 | T - 78.57%  | TRUE  | TRUE  |
| 1 | 165693528 - 165796992 |             | FALSE | TRUE  |
| 1 | 165693528 - 165796992 |             | FALSE | TRUE  |
| 2 | 151324707 - 151395525 | F - 7.14%   | TRUE  | TRUE  |
| 2 | 151324707 - 151395525 | F - 7.14%   | FALSE | TRUE  |
| 2 | 151324707 - 151395525 | F - 42.86%  | FALSE | TRUE  |
| 2 | 151324707 - 151395525 | F - 7.14%   | TRUE  | TRUE  |
| 2 | 151324707 - 151395525 | F - 42.86%  | FALSE | TRUE  |
| 2 | 151324707 - 151395525 |             | FALSE | TRUE  |
| 3 | 112051915 - 112081659 |             | TRUE  | FALSE |
| 3 | 112051915 - 112081659 |             | TRUE  | TRUE  |
| 3 | 112051915 - 112081659 | T - 83.33%  | TRUE  | TRUE  |
| 3 | 112051915 - 112081659 |             | TRUE  | TRUE  |
| 3 | 112051915 - 112081659 | F - 16.67%  | TRUE  | TRUE  |
| 3 | 112051915 - 112081659 | T - 100.00% | TRUE  | TRUE  |
| 3 | 112051915 - 112081659 | T - 50.00%  | TRUE  | TRUE  |
| 3 | 112051915 - 112081659 |             | FALSE | TRUE  |
| 4 | 52886861 - 52904648   | F - 14.29%  | TRUE  | TRUE  |
| 4 | 52886861 - 52904648   |             | TRUE  | TRUE  |
| 4 | 52886861 - 52904648   |             | TRUE  | TRUE  |
| 4 | 52886861 - 52904648   | F - 42.86%  | TRUE  | TRUE  |
| 4 | 52886861 - 52904648   | T - 71.43%  | TRUE  | TRUE  |
| 4 | 52886861 - 52904648   | T - 57.14%  | TRUE  | TRUE  |
| 4 | 52886861 - 52904648   |             | TRUE  | TRUE  |
| 5 | 73935848 - 74018472   | F - 6.25%   | TRUE  | FALSE |
| 5 | 73935848 - 74018472   | F - 6.25%   | TRUE  | TRUE  |
| 5 | 73935848 - 74018472   | F - 18.75%  | TRUE  | TRUE  |
| 5 | 73935848 - 74018472   |             | TRUE  | TRUE  |
| 6 | 34204577 - 34214008   | F - 11.11%  | TRUE  | TRUE  |
| 6 | 34204577 - 34214008   |             | TRUE  | TRUE  |
| 6 | 34204577 - 34214008   | F - 25.93%  | TRUE  | TRUE  |
| 6 | 34204577 - 34214008   |             | TRUE  | TRUE  |
| 6 | 34204577 - 34214008   | F - 48.15%  | FALSE | TRUE  |
| 6 | 34204577 - 34214008   | T - 100.00% | TRUE  | TRUE  |
| 6 | 34204577 - 34214008   | T - 96.30%  | TRUE  | TRUE  |
| 6 | 34204577 - 34214008   | T - 88.89%  | TRUE  | TRUE  |
| 7 | 33134409 - 33149013   |             | TRUE  | TRUE  |
| 7 | 33134409 - 33149013   | T - 60.00%  | TRUE  | TRUE  |
| 7 | 33134409 - 33149013   | T - 60.00%  | TRUE  | TRUE  |
| 7 | 33134409 - 33149013   | T - 60.00%  | TRUE  | TRUE  |
| 7 | 33134409 - 33149013   |             | TRUE  | TRUE  |
| 7 | 33134409 - 33149013   | T - 80.00%  | TRUE  | TRUE  |
| 7 | 150060866 - 150069679 | T - 100.00% | TRUE  | FALSE |
| 7 | 150060866 - 150069679 |             | TRUE  | TRUE  |
| 9 | 139638469 - 139642980 |             | TRUE  | TRUE  |
| 9 | 139638469 - 139642980 | F - 28.57%  | TRUE  | FALSE |
| X | 122318006 - 122624766 | F - 37.50%  | TRUE  | TRUE  |
| X | 122318006 - 122624766 |             | TRUE  | TRUE  |

|   |                         |             |       |       |
|---|-------------------------|-------------|-------|-------|
| X | 122318006 - 122624766   |             | TRUE  | TRUE  |
| X | 122318006 - 122624766   | T - 56.25%  | TRUE  | TRUE  |
| X | 122318006 - 122624766   |             | TRUE  | TRUE  |
| X | 122318006 - 122624766   | F - 6.25%   | TRUE  | TRUE  |
| X | 122318006 - 122624766   | T - 62.50%  | TRUE  | TRUE  |
| X | 38128423 - 38186817     |             | TRUE  | FALSE |
| X | 38128423 - 38186817     |             | TRUE  | TRUE  |
| X | 38128423 - 38186817     |             | TRUE  | TRUE  |
| X | 38128423 - 38186817     |             | FALSE | TRUE  |
| X | 38128423 - 38186817     | F - 16.67%  | FALSE | TRUE  |
| X | 48928818 - 48931733     |             | TRUE  | TRUE  |
| X | 48928818 - 48931733     | F - 20.00%  | TRUE  | TRUE  |
|   | 11 47290712 - 47357945  |             | TRUE  | FALSE |
|   | 11 47290712 - 47357945  | F - 6.06%   | TRUE  | TRUE  |
|   | 11 47290712 - 47357945  |             | FALSE | TRUE  |
|   | 12 57610578 - 57620232  | F - 20.00%  | TRUE  | TRUE  |
|   | 12 57610578 - 57620232  | F - 20.00%  | FALSE | TRUE  |
|   | 12 57610578 - 57620232  |             | TRUE  | TRUE  |
|   | 12 57610578 - 57620232  | T - 60.00%  | TRUE  | TRUE  |
|   | 12 92534054 - 92539673  | T - 50.00%  | TRUE  | TRUE  |
|   | 12 92534054 - 92539673  | F - 25.00%  | TRUE  | TRUE  |
|   | 12 92534054 - 92539673  |             | TRUE  | TRUE  |
|   | 14 22918107 - 22934912  | F - 30.77%  | TRUE  | TRUE  |
|   | 14 22918107 - 22934912  | F - 7.69%   | TRUE  | TRUE  |
|   | 14 22918107 - 22934912  | F - 15.38%  | TRUE  | TRUE  |
|   | 14 22918107 - 22934912  |             | TRUE  | TRUE  |
|   | 14 22918107 - 22934912  |             | TRUE  | TRUE  |
|   | 14 22918107 - 22934912  | F - 15.38%  | TRUE  | TRUE  |
|   | 15 82944773 - 82976263  |             | TRUE  | TRUE  |
|   | 15 82944773 - 82976263  |             | TRUE  | TRUE  |
|   | 15 82944773 - 82976263  | T - 76.92%  | TRUE  | TRUE  |
|   | 15 82944773 - 82976263  |             | FALSE | TRUE  |
|   | 15 82944773 - 82976263  |             | FALSE | TRUE  |
|   | 17 4613784 - 4624795    |             | TRUE  | TRUE  |
|   | 17 4613784 - 4624795    | T - 75.00%  | TRUE  | TRUE  |
|   | 17 4613784 - 4624795    | F - 8.33%   | TRUE  | TRUE  |
|   | 17 4613784 - 4624795    | T - 100.00% | TRUE  | TRUE  |
|   | 17 4613784 - 4624795    |             | FALSE | TRUE  |
|   | 17 4613784 - 4624795    |             | TRUE  | TRUE  |
|   | 17 4613784 - 4624795    |             | TRUE  | TRUE  |
|   | 17 4613784 - 4624795    |             | TRUE  | TRUE  |
|   | 17 4613784 - 4624795    | T - 100.00% | TRUE  | TRUE  |
|   | 17 4613784 - 4624795    |             | TRUE  | TRUE  |
|   | 17 4613784 - 4624795    |             | TRUE  | TRUE  |
|   | 17 4613784 - 4624795    |             | FALSE | TRUE  |
|   | 19 50094912 - 50129696  | T - 100.00% | TRUE  | FALSE |
|   | 19 50094912 - 50129696  |             | FALSE | TRUE  |
|   | 19 41903365 - 41937250  |             | TRUE  | TRUE  |
|   | 19 41903365 - 41937250  |             | TRUE  | TRUE  |
|   | 19 41903365 - 41937250  |             | TRUE  | TRUE  |
|   | 19 41903365 - 41937250  | F - 9.09%   | TRUE  | TRUE  |
|   | 20 34203809 - 34208971  | F - 11.11%  | TRUE  | TRUE  |
|   | 20 34203809 - 34208971  | F - 44.44%  | TRUE  | TRUE  |
|   | 20 34203809 - 34208971  |             | TRUE  | FALSE |
|   | 20 34203809 - 34208971  | T - 66.67%  | TRUE  | TRUE  |
|   | 20 34203809 - 34208971  | T - 77.78%  | FALSE | TRUE  |
|   | 1 110276554 - 110284384 |             | TRUE  | FALSE |
|   | 1 110276554 - 110284384 |             | TRUE  | TRUE  |

|    |                       |             |       |       |
|----|-----------------------|-------------|-------|-------|
| 1  | 110276554 - 110284384 | F - 18.18%  | TRUE  | TRUE  |
| 3  | 135684515 - 135866752 |             | TRUE  | TRUE  |
| 3  | 135684515 - 135866752 | F - 45.45%  | TRUE  | TRUE  |
| 3  | 135684515 - 135866752 |             | TRUE  | TRUE  |
| 4  | 1050037 - 1107352     |             | TRUE  | TRUE  |
| 4  | 1050037 - 1107352     | F - 45.83%  | TRUE  | TRUE  |
| 4  | 1050037 - 1107352     | F - 41.67%  | TRUE  | TRUE  |
| 4  | 1050037 - 1107352     | F - 8.33%   | TRUE  | TRUE  |
| 7  | 110731062 - 110765509 | T - 80.00%  | TRUE  | TRUE  |
| 7  | 110731062 - 110765509 | T - 90.00%  | TRUE  | TRUE  |
| 7  | 110731062 - 110765509 | F - 30.00%  | TRUE  | FALSE |
| 7  | 110731062 - 110765509 |             | TRUE  | FALSE |
| 7  | 110731062 - 110765509 |             | TRUE  | FALSE |
| 7  | 110731062 - 110765509 | T - 60.00%  | TRUE  | FALSE |
| 7  | 110731062 - 110765509 | T - 50.00%  | TRUE  | TRUE  |
| 7  | 110731062 - 110765509 | T - 50.00%  | TRUE  | TRUE  |
| 7  | 110731062 - 110765509 | T - 70.00%  | FALSE | TRUE  |
| 7  | 110731062 - 110765509 | T - 80.00%  | TRUE  | TRUE  |
| 9  | 3218297 - 3526004     |             | TRUE  | TRUE  |
| 9  | 3218297 - 3526004     | F - 26.32%  | TRUE  | TRUE  |
| 9  | 3218297 - 3526004     |             | TRUE  | TRUE  |
| 9  | 3218297 - 3526004     | F - 47.37%  | TRUE  | TRUE  |
| 9  | 3218297 - 3526004     |             | TRUE  | TRUE  |
| 9  | 3218297 - 3526004     |             | FALSE | TRUE  |
| X  | 44732423 - 44971847   |             | TRUE  | FALSE |
| X  | 44732423 - 44971847   |             | TRUE  | TRUE  |
| X  | 44732423 - 44971847   | T - 70.37%  | TRUE  | TRUE  |
| X  | 44732423 - 44971847   | F - 3.70%   | TRUE  | TRUE  |
| X  | 44732423 - 44971847   | F - 3.70%   | TRUE  | TRUE  |
| X  | 44732423 - 44971847   | T - 62.96%  | TRUE  | TRUE  |
| X  | 44732423 - 44971847   | T - 62.96%  | TRUE  | TRUE  |
| X  | 44732423 - 44971847   |             | TRUE  | TRUE  |
| X  | 44732423 - 44971847   |             | TRUE  | TRUE  |
| 16 | 12995455 - 13334273   |             | TRUE  | FALSE |
| 16 | 12995455 - 13334273   | T - 50.00%  | TRUE  | TRUE  |
| 17 | 48541853 - 48546327   |             | TRUE  | FALSE |
| 17 | 48541853 - 48546327   |             | TRUE  | TRUE  |
| 17 | 48541853 - 48546327   | F - 28.57%  | TRUE  | TRUE  |
| 17 | 48541853 - 48546327   | F - 14.29%  | TRUE  | TRUE  |
| 17 | 48541853 - 48546327   |             | TRUE  | TRUE  |
| 17 | 48541853 - 48546327   |             | FALSE | TRUE  |
| 17 | 76170160 - 76183314   | F - 16.67%  | TRUE  | TRUE  |
| 17 | 76170160 - 76183314   |             | FALSE | TRUE  |
| 17 | 76170160 - 76183314   | F - 33.33%  | TRUE  | TRUE  |
| 17 | 76170160 - 76183314   | T - 100.00% | TRUE  | TRUE  |
| 17 | 76170160 - 76183314   |             | FALSE | TRUE  |
| 17 | 76170160 - 76183314   | T - 100.00% | TRUE  | TRUE  |
| 17 | 76170160 - 76183314   | T - 100.00% | TRUE  | TRUE  |
| 1  | 202317827 - 202557697 |             | TRUE  | TRUE  |
| 1  | 202317827 - 202557697 |             | TRUE  | FALSE |
| 1  | 202317827 - 202557697 | F - 16.67%  | FALSE | TRUE  |
| 1  | 202317827 - 202557697 |             | TRUE  | TRUE  |
| 1  | 202317827 - 202557697 | T - 50.00%  | TRUE  | TRUE  |
| 1  | 202317827 - 202557697 | F - 45.83%  | TRUE  | TRUE  |
| 1  | 202317827 - 202557697 |             | TRUE  | TRUE  |
| 1  | 202317827 - 202557697 |             | TRUE  | TRUE  |
| 1  | 202317827 - 202557697 | F - 45.83%  | TRUE  | TRUE  |
| 1  | 202317827 - 202557697 | F - 29.17%  | TRUE  | TRUE  |

|             |                       |             |       |       |
|-------------|-----------------------|-------------|-------|-------|
| 1           | 202317827 - 202557697 | F - 45.83%  | TRUE  | TRUE  |
| 1           | 202317827 - 202557697 | F - 37.50%  | TRUE  | TRUE  |
| 1           | 202317827 - 202557697 |             | TRUE  | TRUE  |
| 1           | 202317827 - 202557697 | F - 41.67%  | TRUE  | TRUE  |
| 1           | 202317827 - 202557697 |             | TRUE  | TRUE  |
| 1           | 202317827 - 202557697 | F - 4.17%   | TRUE  | TRUE  |
| 1           | 202317827 - 202557697 |             | TRUE  | TRUE  |
| 1           | 19967048 - 19984949   | T - 53.33%  | TRUE  | TRUE  |
| 1           | 19967048 - 19984949   | T - 100.00% | TRUE  | TRUE  |
| 1           | 19967048 - 19984949   | T - 53.33%  | TRUE  | TRUE  |
| 1           | 19967048 - 19984949   |             | TRUE  | TRUE  |
| 1           | 19967048 - 19984949   | T - 73.33%  | TRUE  | FALSE |
| 1           | 19967048 - 19984949   |             | TRUE  | FALSE |
| 1           | 19967048 - 19984949   | F - 13.33%  | TRUE  | FALSE |
| 1           | 19967048 - 19984949   | T - 66.67%  | TRUE  | FALSE |
| 1           | 19967048 - 19984949   |             | TRUE  | FALSE |
| 1           | 19967048 - 19984949   | F - 13.33%  | TRUE  | TRUE  |
| 1           | 19967048 - 19984949   |             | TRUE  | TRUE  |
| 1           | 19967048 - 19984949   | F - 6.67%   | TRUE  | TRUE  |
| 1           | 19967048 - 19984949   | F - 20.00%  | TRUE  | TRUE  |
| 1           | 19967048 - 19984949   | F - 13.33%  | TRUE  | TRUE  |
| 1           | 19967048 - 19984949   |             | TRUE  | TRUE  |
| 1           | 19967048 - 19984949   |             | FALSE | TRUE  |
| 1           | 19967048 - 19984949   | F - 6.67%   | FALSE | TRUE  |
| 1           | 19967048 - 19984949   |             | FALSE | TRUE  |
| 3           | 9439299 - 9520924     |             | TRUE  | FALSE |
| 3           | 9439299 - 9520924     | F - 2.70%   | TRUE  | TRUE  |
| 3           | 9439299 - 9520924     |             | TRUE  | FALSE |
| 3           | 9439299 - 9520924     |             | FALSE | TRUE  |
| 3           | 9439299 - 9520924     | F - 2.70%   | TRUE  | TRUE  |
| 3           | 9439299 - 9520924     | F - 5.41%   | FALSE | TRUE  |
| 5           | 92919043 - 92930321   |             | TRUE  | FALSE |
| 5           | 92919043 - 92930321   | F - 11.11%  | FALSE | TRUE  |
| 5           | 55230923 - 55290821   |             | TRUE  | TRUE  |
| 5           | 55230923 - 55290821   | F - 7.69%   | TRUE  | TRUE  |
| 5           | 55230923 - 55290821   |             | FALSE | TRUE  |
| 5           | 80499915 - 80597388   | T - 80.00%  | TRUE  | TRUE  |
| 5           | 80499915 - 80597388   |             | TRUE  | FALSE |
| 5           | 80499915 - 80597388   | F - 20.00%  | FALSE | TRUE  |
| 5           | 80499915 - 80597388   |             | FALSE | TRUE  |
| 14          | 91526677 - 91691703   |             | TRUE  | TRUE  |
| 14          | 91526677 - 91691703   |             | TRUE  | TRUE  |
| 14          | 91526677 - 91691703   |             | TRUE  | TRUE  |
| 14          | 91526677 - 91691703   |             | TRUE  | TRUE  |
| 14          | 91526677 - 91691703   |             | TRUE  | TRUE  |
| 14          | 91526677 - 91691703   | T - 89.80%  | TRUE  | TRUE  |
| 14          | 91526677 - 91691703   |             | TRUE  | TRUE  |
| 14          | 91526677 - 91691703   |             | TRUE  | TRUE  |
| 14          | 91526677 - 91691703   | F - 2.04%   | TRUE  | TRUE  |
| 14          | 91526677 - 91691703   |             | FALSE | TRUE  |
| 14          | 91526677 - 91691703   | F - 22.45%  | TRUE  | TRUE  |
| 14          | 91526677 - 91691703   | F - 30.61%  | TRUE  | TRUE  |
| 14          | 91526677 - 91691703   | T - 63.27%  | TRUE  | TRUE  |
| 14          | 91526677 - 91691703   |             | TRUE  | TRUE  |
| 14          | 91526677 - 91691703   | F - 16.33%  | TRUE  | TRUE  |
| 14          | 91526677 - 91691703   | T - 81.63%  | FALSE | TRUE  |
| 14          | 91526677 - 91691703   |             | FALSE | TRUE  |
| 6_ssto_hap7 | 2950986 - 2956785     |             | TRUE  | TRUE  |

|             |                         |            |       |       |
|-------------|-------------------------|------------|-------|-------|
| 6_ssto_hap7 | 2950986 - 2956785       | T - 57.14% | TRUE  | TRUE  |
|             | 2 97779233 - 97930258   |            | TRUE  | TRUE  |
|             | 2 97779233 - 97930258   | F - 40.91% | TRUE  | TRUE  |
|             | 2 97779233 - 97930258   | F - 27.27% | TRUE  | TRUE  |
|             | 2 97779233 - 97930258   |            | TRUE  | TRUE  |
|             | 2 97779233 - 97930258   |            | TRUE  | TRUE  |
|             | 2 97779233 - 97930258   |            | TRUE  | TRUE  |
|             | 2 97779233 - 97930258   | F - 36.36% | TRUE  | TRUE  |
|             | 2 97779233 - 97930258   |            | FALSE | TRUE  |
|             | 2 97779233 - 97930258   |            | TRUE  | TRUE  |
|             | 2 10923517 - 10978103   |            | TRUE  | TRUE  |
|             | 2 10923517 - 10978103   |            | TRUE  | TRUE  |
|             | 2 10923517 - 10978103   | F - 12.50% | TRUE  | TRUE  |
|             | 2 10923517 - 10978103   |            | FALSE | TRUE  |
|             | 2 10923517 - 10978103   | T - 56.25% | TRUE  | TRUE  |
|             | 2 10923517 - 10978103   | F - 6.25%  | TRUE  | TRUE  |
|             | 2 10923517 - 10978103   | F - 18.75% | TRUE  | TRUE  |
|             | 2 10923517 - 10978103   | F - 6.25%  | FALSE | TRUE  |
|             | 3 156864297 - 156878549 |            | TRUE  | FALSE |
|             | 3 156864297 - 156878549 | F - 9.09%  | TRUE  | TRUE  |
|             | 4 185570767 - 185616117 |            | TRUE  | TRUE  |
|             | 4 185570767 - 185616117 | T - 64.71% | TRUE  | FALSE |
|             | 4 185570767 - 185616117 |            | TRUE  | TRUE  |
|             | 6 30655824 - 30659197   |            | TRUE  | TRUE  |
|             | 6 30655824 - 30659197   | F - 8.33%  | TRUE  | TRUE  |
|             | 6 30655824 - 30659197   |            | FALSE | TRUE  |
|             | 6 30655824 - 30659197   |            | FALSE | TRUE  |
|             | 11 9595228 - 9615004    | F - 44.44% | TRUE  | TRUE  |
|             | 11 9595228 - 9615004    | F - 33.33% | TRUE  | TRUE  |
|             | 11 9595228 - 9615004    |            | TRUE  | TRUE  |
|             | 11 9595228 - 9615004    | F - 22.22% | FALSE | TRUE  |
|             | 11 9595228 - 9615004    | F - 11.11% | TRUE  | TRUE  |
|             | 11 9595228 - 9615004    |            | FALSE | TRUE  |
|             | 11 9595228 - 9615004    |            | TRUE  | TRUE  |
|             | 12 48366748 - 48398285  | T - 66.67% | TRUE  | TRUE  |
|             | 12 48366748 - 48398285  |            | TRUE  | TRUE  |
|             | 12 48366748 - 48398285  | F - 46.67% | TRUE  | TRUE  |
|             | 12 48366748 - 48398285  |            | TRUE  | TRUE  |
|             | 12 48366748 - 48398285  |            | TRUE  | TRUE  |
|             | 12 48366748 - 48398285  |            | TRUE  | TRUE  |
|             | 12 48366748 - 48398285  | T - 60.00% | TRUE  | TRUE  |
|             | 12 48366748 - 48398285  | T - 66.67% | TRUE  | TRUE  |
|             | 12 48366748 - 48398285  | T - 53.33% | TRUE  | TRUE  |
|             | 12 48366748 - 48398285  |            | TRUE  | TRUE  |
|             | 12 48366748 - 48398285  | F - 46.67% | TRUE  | TRUE  |
|             | 12 48366748 - 48398285  |            | TRUE  | TRUE  |
|             | 12 48366748 - 48398285  |            | TRUE  | TRUE  |
|             | 12 48366748 - 48398285  | T - 60.00% | TRUE  | TRUE  |
|             | 12 48366748 - 48398285  |            | FALSE | TRUE  |
|             | 12 48366748 - 48398285  | F - 46.67% | TRUE  | TRUE  |
|             | 12 48366748 - 48398285  |            | FALSE | TRUE  |
|             | 12 48366748 - 48398285  | T - 60.00% | FALSE | TRUE  |
|             | 12 48366748 - 48398285  |            | FALSE | TRUE  |
|             | 12 48366748 - 48398285  |            | FALSE | TRUE  |
|             | 12 48366748 - 48398285  | F - 33.33% | TRUE  | TRUE  |
|             | 12 48366748 - 48398285  |            | FALSE | TRUE  |
|             | 12 48366748 - 48398285  | T - 53.33% | FALSE | TRUE  |

|             |                       |            |       |       |
|-------------|-----------------------|------------|-------|-------|
| 12          | 48366748 - 48398285   | T - 66.67% | TRUE  | TRUE  |
| 12          | 48366748 - 48398285   |            | TRUE  | TRUE  |
| 12          | 48366748 - 48398285   | T - 60.00% | TRUE  | TRUE  |
| 12          | 48366748 - 48398285   | T - 66.67% | TRUE  | TRUE  |
| 12          | 48366748 - 48398285   | T - 66.67% | TRUE  | TRUE  |
| 12          | 48366748 - 48398285   | T - 60.00% | TRUE  | TRUE  |
| 12          | 48366748 - 48398285   | T - 66.67% | TRUE  | TRUE  |
| 12          | 48366748 - 48398285   |            | FALSE | TRUE  |
| 16          | 89334029 - 89556969   | F - 18.75% | TRUE  | FALSE |
| 16          | 89334029 - 89556969   |            | TRUE  | TRUE  |
| 16          | 89334029 - 89556969   | F - 18.75% | FALSE | TRUE  |
| 18          | 11689136 - 11885684   | F - 10.00% | TRUE  | TRUE  |
| 18          | 11689136 - 11885684   | F - 20.00% | TRUE  | FALSE |
| 18          | 11689136 - 11885684   |            | TRUE  | TRUE  |
| 6_apd_hap1  | 1967470 - 1970843     |            | TRUE  | TRUE  |
| 6_apd_hap1  | 1967470 - 1970843     | F - 9.09%  | TRUE  | TRUE  |
| 6_apd_hap1  | 1967470 - 1970843     |            | FALSE | TRUE  |
| 6_apd_hap1  | 1967470 - 1970843     |            | FALSE | TRUE  |
| 6_cox_hap2  | 2167897 - 2171270     |            | TRUE  | TRUE  |
| 6_cox_hap2  | 2167897 - 2171270     | F - 9.09%  | TRUE  | TRUE  |
| 6_cox_hap2  | 2167897 - 2171270     |            | FALSE | TRUE  |
| 6_cox_hap2  | 2167897 - 2171270     |            | FALSE | TRUE  |
| 6_dbb_hap3  | 1949486 - 1952859     |            | TRUE  | TRUE  |
| 6_dbb_hap3  | 1949486 - 1952859     | F - 9.09%  | TRUE  | TRUE  |
| 6_dbb_hap3  | 1949486 - 1952859     |            | FALSE | TRUE  |
| 6_dbb_hap3  | 1949486 - 1952859     |            | FALSE | TRUE  |
| 6_mann_hap4 | 2003920 - 2007293     |            | TRUE  | TRUE  |
| 6_mann_hap4 | 2003920 - 2007293     | F - 9.09%  | TRUE  | TRUE  |
| 6_mann_hap4 | 2003920 - 2007293     |            | FALSE | TRUE  |
| 6_mann_hap4 | 2003920 - 2007293     |            | FALSE | TRUE  |
| 6_mcf_hap5  | 2037709 - 2041082     |            | TRUE  | TRUE  |
| 6_mcf_hap5  | 2037709 - 2041082     | F - 9.09%  | TRUE  | TRUE  |
| 6_mcf_hap5  | 2037709 - 2041082     |            | FALSE | TRUE  |
| 6_mcf_hap5  | 2037709 - 2041082     |            | FALSE | TRUE  |
| 6_qbl_hap6  | 1948757 - 1952130     |            | TRUE  | TRUE  |
| 6_qbl_hap6  | 1948757 - 1952130     | F - 9.09%  | TRUE  | TRUE  |
| 6_qbl_hap6  | 1948757 - 1952130     |            | FALSE | TRUE  |
| 6_qbl_hap6  | 1948757 - 1952130     |            | FALSE | TRUE  |
| 6_ssto_hap7 | 1032128 - 1054576     |            | TRUE  | TRUE  |
| 6_ssto_hap7 | 1032128 - 1054576     | F - 20.00% | TRUE  | TRUE  |
| 6_ssto_hap7 | 1032128 - 1054576     | F - 40.00% | TRUE  | TRUE  |
| 6_ssto_hap7 | 1032128 - 1054576     |            | FALSE | TRUE  |
| 6_ssto_hap7 | 1032128 - 1054576     |            | TRUE  | TRUE  |
| 6_ssto_hap7 | 1032128 - 1054576     |            | TRUE  | TRUE  |
| 6_ssto_hap7 | 1032128 - 1054576     |            | TRUE  | TRUE  |
| 1           | 201252580 - 201302121 |            | TRUE  | TRUE  |
| 1           | 201252580 - 201302121 | T - 71.43% | FALSE | TRUE  |
| 1           | 26607819 - 26644854   |            | TRUE  | TRUE  |
| 1           | 26607819 - 26644854   |            | TRUE  | TRUE  |
| 1           | 26607819 - 26644854   | F - 32.14% | TRUE  | FALSE |
| 1           | 26607819 - 26644854   |            | TRUE  | TRUE  |
| 2           | 219128850 - 219134980 | F - 46.15% | TRUE  | FALSE |
| 2           | 219128850 - 219134980 |            | TRUE  | FALSE |
| 6           | 31606805 - 31620482   |            | TRUE  | TRUE  |
| 6           | 31606805 - 31620482   | F - 2.50%  | TRUE  | TRUE  |
| 6           | 31606805 - 31620482   | F - 7.50%  | TRUE  | TRUE  |
| 6           | 31606805 - 31620482   |            | TRUE  | TRUE  |
| 6           | 31606805 - 31620482   |            | TRUE  | TRUE  |

|            |                     |            |       |       |
|------------|---------------------|------------|-------|-------|
| 6          | 31606805 - 31620482 | F - 7.50%  | TRUE  | TRUE  |
| 6          | 31606805 - 31620482 |            | TRUE  | TRUE  |
| 6          | 31606805 - 31620482 | F - 35.00% | TRUE  | TRUE  |
| 6          | 31606805 - 31620482 | F - 2.50%  | TRUE  | TRUE  |
| 6          | 31606805 - 31620482 |            | TRUE  | TRUE  |
| 6          | 31606805 - 31620482 | F - 2.50%  | TRUE  | TRUE  |
| 7          | 74988429 - 75019819 |            | TRUE  | TRUE  |
| 7          | 74988429 - 75019819 |            | TRUE  | TRUE  |
| 7          | 74988429 - 75019819 | F - 14.29% | TRUE  | TRUE  |
| 7          | 74988429 - 75019819 |            | TRUE  | TRUE  |
| 7          | 74988429 - 75019819 |            | TRUE  | TRUE  |
| 9          | 47295855 - 47314322 |            | TRUE  | TRUE  |
| 9          | 47295855 - 47314322 | F - 44.44% | TRUE  | TRUE  |
| 9          | 47295855 - 47314322 |            | TRUE  | TRUE  |
| 9          | 47295855 - 47314322 | F - 33.33% | TRUE  | TRUE  |
| 9          | 47295855 - 47314322 |            | FALSE | TRUE  |
| 12         | 72233487 - 72320629 |            | TRUE  | FALSE |
| 12         | 72233487 - 72320629 | F - 13.04% | TRUE  | TRUE  |
| 12         | 72233487 - 72320629 | F - 4.35%  | TRUE  | TRUE  |
| 15         | 79102829 - 79190475 |            | TRUE  | TRUE  |
| 15         | 79102829 - 79190475 | F - 11.76% | TRUE  | TRUE  |
| 16         | 134273 - 188859     |            | TRUE  | TRUE  |
| 16         | 134273 - 188859     | F - 3.33%  | FALSE | TRUE  |
| 16         | 134273 - 188859     | F - 6.67%  | TRUE  | TRUE  |
| 16         | 134273 - 188859     |            | TRUE  | TRUE  |
| 16         | 134273 - 188859     | F - 3.33%  | TRUE  | TRUE  |
| 16         | 134273 - 188859     |            | TRUE  | TRUE  |
| 16         | 134273 - 188859     |            | TRUE  | TRUE  |
| 20         | 34042985 - 34099804 |            | TRUE  | TRUE  |
| 20         | 34042985 - 34099804 |            | TRUE  | TRUE  |
| 20         | 34042985 - 34099804 | F - 4.76%  | TRUE  | TRUE  |
| 20         | 34042985 - 34099804 |            | TRUE  | FALSE |
| 20         | 34042985 - 34099804 |            | TRUE  | TRUE  |
| 20         | 34042985 - 34099804 |            | TRUE  | TRUE  |
| 20         | 34042985 - 34099804 | F - 9.52%  | TRUE  | TRUE  |
| 20         | 34042985 - 34099804 |            | TRUE  | TRUE  |
| 20         | 34042985 - 34099804 |            | TRUE  | TRUE  |
| 20         | 34042985 - 34099804 | T - 57.14% | TRUE  | TRUE  |
| 20         | 34042985 - 34099804 | F - 28.57% | TRUE  | TRUE  |
| 20         | 34042985 - 34099804 |            | TRUE  | TRUE  |
| 6_cox_hap2 | 1210563 - 1233001   |            | TRUE  | TRUE  |
| 6_cox_hap2 | 1210563 - 1233001   | F - 20.00% | TRUE  | TRUE  |
| 6_cox_hap2 | 1210563 - 1233001   | F - 40.00% | TRUE  | TRUE  |
| 6_cox_hap2 | 1210563 - 1233001   |            | FALSE | TRUE  |
| 6_cox_hap2 | 1210563 - 1233001   |            | TRUE  | TRUE  |
| 6_cox_hap2 | 1210563 - 1233001   |            | TRUE  | TRUE  |
| 6_cox_hap2 | 1210563 - 1233001   |            | TRUE  | TRUE  |
| 6_mcf_hap5 | 2986492 - 3000162   |            | TRUE  | TRUE  |
| 6_mcf_hap5 | 2986492 - 3000162   | F - 2.56%  | TRUE  | TRUE  |
| 6_mcf_hap5 | 2986492 - 3000162   | F - 12.82% | TRUE  | TRUE  |
| 6_mcf_hap5 | 2986492 - 3000162   |            | TRUE  | TRUE  |
| 6_mcf_hap5 | 2986492 - 3000162   |            | TRUE  | TRUE  |
| 6_mcf_hap5 | 2986492 - 3000162   | F - 7.69%  | TRUE  | TRUE  |
| 6_mcf_hap5 | 2986492 - 3000162   |            | TRUE  | TRUE  |
| 6_mcf_hap5 | 2986492 - 3000162   | F - 33.33% | TRUE  | TRUE  |
| 6_mcf_hap5 | 2986492 - 3000162   |            | TRUE  | TRUE  |
| 6_mcf_hap5 | 2986492 - 3000162   | F - 2.56%  | TRUE  | TRUE  |
| 6_qbl_hap6 | 2900437 - 2914120   |            | TRUE  | TRUE  |



|            |                       |             |       |       |
|------------|-----------------------|-------------|-------|-------|
| 6_qbl_hap6 | 2900437 - 2914120     | F - 2.63%   | TRUE  | TRUE  |
| 6_qbl_hap6 | 2900437 - 2914120     | F - 10.53%  | TRUE  | TRUE  |
| 6_qbl_hap6 | 2900437 - 2914120     |             | TRUE  | TRUE  |
| 6_qbl_hap6 | 2900437 - 2914120     |             | TRUE  | TRUE  |
| 6_qbl_hap6 | 2900437 - 2914120     | F - 7.89%   | TRUE  | TRUE  |
| 6_qbl_hap6 | 2900437 - 2914120     |             | TRUE  | TRUE  |
| 6_qbl_hap6 | 2900437 - 2914120     | F - 2.63%   | TRUE  | TRUE  |
| 6_qbl_hap6 | 2900437 - 2914120     | F - 31.58%  | TRUE  | TRUE  |
| 6_qbl_hap6 | 2900437 - 2914120     |             | TRUE  | TRUE  |
| 6_qbl_hap6 | 2900437 - 2914120     | F - 2.63%   | TRUE  | TRUE  |
| 3          | 51976361 - 51982883   |             | TRUE  | TRUE  |
| 3          | 51976361 - 51982883   |             | TRUE  | TRUE  |
| 3          | 51976361 - 51982883   | F - 8.33%   | TRUE  | TRUE  |
| 3          | 51976361 - 51982883   | F - 8.33%   | TRUE  | TRUE  |
| 3          | 51976361 - 51982883   | F - 25.00%  | TRUE  | TRUE  |
| 3          | 51976361 - 51982883   | T - 50.00%  | TRUE  | TRUE  |
| 3          | 51976361 - 51982883   | F - 16.67%  | TRUE  | TRUE  |
| 3          | 51976361 - 51982883   | T - 83.33%  | TRUE  | TRUE  |
| 3          | 51976361 - 51982883   |             | TRUE  | TRUE  |
| 4          | 38869298 - 38947365   |             | TRUE  | TRUE  |
| 4          | 38869298 - 38947365   | F - 7.69%   | TRUE  | TRUE  |
| 4          | 38869298 - 38947365   |             | TRUE  | TRUE  |
| 4          | 38869298 - 38947365   |             | TRUE  | TRUE  |
| 4          | 85590693 - 85887544   |             | TRUE  | TRUE  |
| 4          | 85590693 - 85887544   |             | TRUE  | TRUE  |
| 4          | 85590693 - 85887544   | F - 16.67%  | TRUE  | TRUE  |
| 4          | 85590693 - 85887544   |             | FALSE | TRUE  |
| 5          | 159820155 - 159827104 | F - 16.67%  | TRUE  | TRUE  |
| 5          | 159820155 - 159827104 |             | TRUE  | TRUE  |
| 5          | 159820155 - 159827104 | T - 83.33%  | FALSE | TRUE  |
| 6          | 30710976 - 30712331   |             | FALSE | TRUE  |
| 6          | 30710976 - 30712331   | F - 33.33%  | TRUE  | TRUE  |
| 7          | 72438647 - 72476448   |             | TRUE  | TRUE  |
| 7          | 72438647 - 72476448   | F - 18.75%  | TRUE  | TRUE  |
| 7          | 72438647 - 72476448   |             | TRUE  | TRUE  |
| 7          | 72438647 - 72476448   |             | TRUE  | TRUE  |
| 10         | 43689983 - 43762367   | T - 57.14%  | TRUE  | TRUE  |
| 10         | 43689983 - 43762367   | F - 14.29%  | TRUE  | TRUE  |
| 10         | 43689983 - 43762367   |             | TRUE  | TRUE  |
| 15         | 43650370 - 43662258   |             | TRUE  | FALSE |
| 15         | 43650370 - 43662258   |             | TRUE  | TRUE  |
| 15         | 43650370 - 43662258   | T - 66.67%  | TRUE  | TRUE  |
| 16         | 52060264 - 52107847   |             | TRUE  | FALSE |
| 16         | 52060264 - 52107847   | T - 100.00% | FALSE | TRUE  |
| 19         | 52249023 - 52255150   | T - 100.00% | TRUE  | TRUE  |
| 19         | 52249023 - 52255150   |             | TRUE  | TRUE  |
| 19         | 52249023 - 52255150   |             | TRUE  | TRUE  |
| 21         | 43218385 - 43299591   |             | TRUE  | TRUE  |
| 21         | 43218385 - 43299591   |             | TRUE  | FALSE |
| 21         | 43218385 - 43299591   |             | TRUE  | TRUE  |
| 21         | 43218385 - 43299591   | T - 54.55%  | TRUE  | FALSE |
| 21         | 43218385 - 43299591   |             | TRUE  | TRUE  |
| 21         | 43218385 - 43299591   |             | TRUE  | TRUE  |
| 1          | 183155174 - 183214262 |             | TRUE  | FALSE |
| 1          | 183155174 - 183214262 |             | TRUE  | FALSE |
| 1          | 183155174 - 183214262 |             | TRUE  | FALSE |
| 1          | 183155174 - 183214262 |             | FALSE | TRUE  |
| 1          | 183155174 - 183214262 |             | FALSE | TRUE  |

|             |                       |             |       |       |
|-------------|-----------------------|-------------|-------|-------|
| 1           | 183155174 - 183214262 |             | FALSE | TRUE  |
| 1           | 183155174 - 183214262 | T - 80.00%  | FALSE | TRUE  |
| 1           | 183155174 - 183214262 |             | FALSE | TRUE  |
| 1           | 149900543 - 150227304 | F - 31.58%  | TRUE  | FALSE |
| 1           | 149900543 - 150227304 |             | TRUE  | TRUE  |
| 1           | 149900543 - 150227304 |             | TRUE  | TRUE  |
| 1           | 149900543 - 150227304 | T - 57.89%  | FALSE | TRUE  |
| 6           | 31620187 - 31625987   |             | TRUE  | TRUE  |
| 6           | 31620187 - 31625987   | T - 50.00%  | TRUE  | TRUE  |
| 8           | 42010464 - 42029191   | F - 9.09%   | TRUE  | FALSE |
| 8           | 42010464 - 42029191   |             | TRUE  | TRUE  |
| 8           | 42010464 - 42029191   | F - 18.18%  | TRUE  | FALSE |
| 8           | 42010464 - 42029191   | F - 4.55%   | TRUE  | TRUE  |
| 8           | 94741584 - 94753245   |             | TRUE  | TRUE  |
| 8           | 94741584 - 94753245   | T - 66.67%  | TRUE  | TRUE  |
| 8           | 94741584 - 94753245   | F - 22.22%  | TRUE  | TRUE  |
| 9           | 46389110 - 46391556   |             | TRUE  | TRUE  |
| 9           | 46389110 - 46391556   | T - 50.00%  | TRUE  | TRUE  |
| 11          | 72525353 - 72554719   |             | TRUE  | FALSE |
| 11          | 72525353 - 72554719   |             | TRUE  | TRUE  |
| 11          | 72525353 - 72554719   | F - 22.22%  | TRUE  | TRUE  |
| 11          | 72525353 - 72554719   | T - 100.00% | TRUE  | TRUE  |
| 11          | 72525353 - 72554719   | F - 11.11%  | TRUE  | TRUE  |
| 11          | 72525353 - 72554719   |             | FALSE | TRUE  |
| 13          | 52706779 - 52733996   |             | TRUE  | TRUE  |
| 13          | 52706779 - 52733996   |             | TRUE  | TRUE  |
| 13          | 52706779 - 52733996   | T - 84.62%  | TRUE  | TRUE  |
| 13          | 52706779 - 52733996   | T - 92.31%  | TRUE  | TRUE  |
| 17          | 26925808 - 26944395   |             | TRUE  | TRUE  |
| 17          | 26925808 - 26944395   | F - 20.00%  | TRUE  | TRUE  |
| 17          | 74306868 - 74380602   | F - 8.33%   | TRUE  | TRUE  |
| 17          | 74306868 - 74380602   | F - 8.33%   | FALSE | TRUE  |
| 17          | 74306868 - 74380602   | F - 8.33%   | TRUE  | TRUE  |
| 17          | 74306868 - 74380602   | F - 8.33%   | TRUE  | TRUE  |
| 17          | 74306868 - 74380602   |             | TRUE  | TRUE  |
| 17          | 74306868 - 74380602   | F - 8.33%   | TRUE  | TRUE  |
| 17          | 74306868 - 74380602   |             | TRUE  | TRUE  |
| 17          | 74306868 - 74380602   |             | TRUE  | TRUE  |
| 21          | 36041688 - 36090525   |             | TRUE  | FALSE |
| 21          | 36041688 - 36090525   | T - 100.00% | TRUE  | TRUE  |
| 21          | 36041688 - 36090525   |             | TRUE  | TRUE  |
| 21          | 36041688 - 36090525   | T - 50.00%  | TRUE  | TRUE  |
| 21          | 36041688 - 36090525   | T - 100.00% | TRUE  | TRUE  |
| 6_cox_hap2  | 3129806 - 3135605     |             | TRUE  | TRUE  |
| 6_cox_hap2  | 3129806 - 3135605     | T - 57.14%  | TRUE  | TRUE  |
| 6_dbb_hap3  | 2905766 - 2911566     |             | TRUE  | TRUE  |
| 6_dbb_hap3  | 2905766 - 2911566     | T - 57.14%  | TRUE  | TRUE  |
| 6_mann_hap4 | 2963076 - 2968876     |             | TRUE  | TRUE  |
| 6_mann_hap4 | 2963076 - 2968876     | T - 57.14%  | TRUE  | TRUE  |
| 6_mcf_hap5  | 2999867 - 3005667     |             | TRUE  | TRUE  |
| 6_mcf_hap5  | 2999867 - 3005667     | T - 57.14%  | TRUE  | TRUE  |
| 6_qbl_hap6  | 2913825 - 2919624     |             | TRUE  | TRUE  |
| 6_qbl_hap6  | 2913825 - 2919624     | T - 57.14%  | TRUE  | TRUE  |
| 2           | 114188270 - 114253781 |             | TRUE  | FALSE |
| 2           | 114188270 - 114253781 |             | TRUE  | TRUE  |
| 2           | 114188270 - 114253781 |             | TRUE  | FALSE |
| 2           | 114188270 - 114253781 |             | TRUE  | FALSE |
| 2           | 114188270 - 114253781 | F - 4.00%   | TRUE  | TRUE  |

|   |    |                       |             |       |       |
|---|----|-----------------------|-------------|-------|-------|
|   | 2  | 114188270 - 114253781 | F - 16.00%  | TRUE  | TRUE  |
|   | 2  | 114188270 - 114253781 |             | TRUE  | TRUE  |
|   | 2  | 114188270 - 114253781 | F - 8.00%   | TRUE  | TRUE  |
|   | 2  | 114188270 - 114253781 | F - 4.00%   | TRUE  | TRUE  |
|   | 2  | 200625259 - 200715896 | T - 100.00% | TRUE  | FALSE |
|   | 2  | 200625259 - 200715896 | T - 100.00% | TRUE  | TRUE  |
|   | 2  | 200625259 - 200715896 |             | TRUE  | TRUE  |
|   | 2  | 200625259 - 200715896 |             | FALSE | TRUE  |
|   | 2  | 200625259 - 200715896 | T - 60.00%  | FALSE | TRUE  |
|   | 3  | 118930579 - 118959950 |             | TRUE  | TRUE  |
|   | 3  | 118930579 - 118959950 |             | TRUE  | FALSE |
|   | 3  | 118930579 - 118959950 |             | TRUE  | TRUE  |
|   | 3  | 118930579 - 118959950 |             | TRUE  | TRUE  |
|   | 3  | 118930579 - 118959950 | F - 7.69%   | TRUE  | TRUE  |
|   | 3  | 118930579 - 118959950 | T - 61.54%  | TRUE  | TRUE  |
|   | 3  | 185864990 - 186080026 |             | TRUE  | FALSE |
|   | 3  | 185864990 - 186080026 | T - 72.22%  | TRUE  | TRUE  |
|   | 3  | 185864990 - 186080026 |             | FALSE | TRUE  |
|   | 3  | 185864990 - 186080026 |             | TRUE  | TRUE  |
|   | 5  | 149980642 - 150038792 |             | TRUE  | TRUE  |
|   | 5  | 149980642 - 150038792 | F - 16.67%  | TRUE  | TRUE  |
|   | 5  | 149980642 - 150038792 | F - 16.67%  | TRUE  | TRUE  |
|   | 7  | 128828713 - 128853386 |             | TRUE  | FALSE |
|   | 7  | 128828713 - 128853386 |             | TRUE  | TRUE  |
|   | 7  | 128828713 - 128853386 | F - 16.67%  | TRUE  | FALSE |
|   | 7  | 128828713 - 128853386 |             | TRUE  | TRUE  |
| X |    | 13752832 - 13787480   |             | TRUE  | FALSE |
| X |    | 13752832 - 13787480   |             | TRUE  | TRUE  |
| X |    | 13752832 - 13787480   | T - 68.42%  | TRUE  | TRUE  |
| X |    | 13752832 - 13787480   |             | TRUE  | TRUE  |
| X |    | 13752832 - 13787480   |             | FALSE | TRUE  |
| X |    | 39909068 - 40036582   | F - 17.65%  | TRUE  | FALSE |
| X |    | 39909068 - 40036582   | F - 11.76%  | TRUE  | FALSE |
| X |    | 39909068 - 40036582   | F - 5.88%   | TRUE  | TRUE  |
| X |    | 39909068 - 40036582   | F - 5.88%   | TRUE  | TRUE  |
| X |    | 39909068 - 40036582   |             | TRUE  | TRUE  |
| X |    | 39909068 - 40036582   |             | TRUE  | TRUE  |
| X |    | 39909068 - 40036582   | F - 23.53%  | TRUE  | TRUE  |
| X |    | 39909068 - 40036582   |             | TRUE  | TRUE  |
| X |    | 80369200 - 80457441   | F - 25.00%  | TRUE  | FALSE |
| X |    | 80369200 - 80457441   |             | TRUE  | FALSE |
| X |    | 80369200 - 80457441   |             | TRUE  | FALSE |
| X |    | 80369200 - 80457441   | T - 50.00%  | FALSE | TRUE  |
| X |    | 80369200 - 80457441   |             | FALSE | TRUE  |
| X |    | 80369200 - 80457441   |             | FALSE | TRUE  |
| X |    | 80369200 - 80457441   |             | FALSE | TRUE  |
| X |    | 119658446 - 119709684 | F - 30.00%  | TRUE  | TRUE  |
| X |    | 119658446 - 119709684 | F - 10.00%  | TRUE  | TRUE  |
| X |    | 119658446 - 119709684 | F - 10.00%  | TRUE  | TRUE  |
| X |    | 119658446 - 119709684 | F - 10.00%  | TRUE  | TRUE  |
| X |    | 119658446 - 119709684 | F - 10.00%  | TRUE  | TRUE  |
| X |    | 119658446 - 119709684 | T - 70.00%  | TRUE  | TRUE  |
| X |    | 119658446 - 119709684 |             | TRUE  | TRUE  |
|   | 12 | 52908359 - 52914471   | T - 83.33%  | TRUE  | TRUE  |
|   | 12 | 52908359 - 52914471   | T - 100.00% | TRUE  | TRUE  |
|   | 12 | 52908359 - 52914471   | T - 100.00% | TRUE  | TRUE  |
|   | 12 | 52908359 - 52914471   |             | TRUE  | TRUE  |
|   | 12 | 52908359 - 52914471   |             | FALSE | TRUE  |

|             |    |                       |            |       |       |
|-------------|----|-----------------------|------------|-------|-------|
|             | 12 | 52908359 - 52914471   |            | FALSE | TRUE  |
|             | 12 | 52908359 - 52914471   |            | TRUE  | TRUE  |
|             | 17 | 30677128 - 30714780   | F - 6.67%  | TRUE  | TRUE  |
|             | 17 | 30677128 - 30714780   |            | TRUE  | TRUE  |
|             | 17 | 30677128 - 30714780   |            | TRUE  | TRUE  |
| 6_cox_hap2  |    | 3007658 - 3019911     |            | TRUE  | TRUE  |
| 6_cox_hap2  |    | 3007658 - 3019911     | F - 9.09%  | TRUE  | TRUE  |
| 6_cox_hap2  |    | 3007658 - 3019911     |            | TRUE  | TRUE  |
| 6_cox_hap2  |    | 3007658 - 3019911     | F - 6.06%  | TRUE  | TRUE  |
| 6_cox_hap2  |    | 3007658 - 3019911     | F - 6.06%  | FALSE | TRUE  |
| 6_dbb_hap3  |    | 2783577 - 2795830     |            | TRUE  | TRUE  |
| 6_dbb_hap3  |    | 2783577 - 2795830     | F - 8.82%  | TRUE  | TRUE  |
| 6_dbb_hap3  |    | 2783577 - 2795830     |            | TRUE  | TRUE  |
| 6_dbb_hap3  |    | 2783577 - 2795830     | F - 5.88%  | TRUE  | TRUE  |
| 6_dbb_hap3  |    | 2783577 - 2795830     | F - 5.88%  | FALSE | TRUE  |
| 6_mann_hap4 |    | 2840912 - 2853148     |            | TRUE  | TRUE  |
| 6_mann_hap4 |    | 2840912 - 2853148     | F - 5.88%  | TRUE  | TRUE  |
| 6_mann_hap4 |    | 2840912 - 2853148     |            | TRUE  | TRUE  |
| 6_mann_hap4 |    | 2840912 - 2853148     | F - 2.94%  | TRUE  | TRUE  |
| 6_mann_hap4 |    | 2840912 - 2853148     | F - 5.88%  | FALSE | TRUE  |
| 6_mcf_hap5  |    | 2877747 - 2889999     |            | TRUE  | TRUE  |
| 6_mcf_hap5  |    | 2877747 - 2889999     | F - 8.82%  | TRUE  | TRUE  |
| 6_mcf_hap5  |    | 2877747 - 2889999     |            | TRUE  | TRUE  |
| 6_mcf_hap5  |    | 2877747 - 2889999     | F - 5.88%  | TRUE  | TRUE  |
| 6_mcf_hap5  |    | 2877747 - 2889999     | F - 5.88%  | FALSE | TRUE  |
| 6_qbl_hap6  |    | 2791677 - 2803927     |            | TRUE  | TRUE  |
| 6_qbl_hap6  |    | 2791677 - 2803927     | F - 9.09%  | TRUE  | TRUE  |
| 6_qbl_hap6  |    | 2791677 - 2803927     |            | TRUE  | TRUE  |
| 6_qbl_hap6  |    | 2791677 - 2803927     | F - 6.06%  | TRUE  | TRUE  |
| 6_qbl_hap6  |    | 2791677 - 2803927     | F - 6.06%  | FALSE | TRUE  |
|             | 1  | 85483765 - 85514223   | F - 7.14%  | TRUE  | TRUE  |
|             | 1  | 85483765 - 85514223   | T - 57.14% | TRUE  | TRUE  |
|             | 1  | 85483765 - 85514223   |            | TRUE  | TRUE  |
|             | 1  | 85483765 - 85514223   | F - 35.71% | TRUE  | TRUE  |
|             | 2  | 154728426 - 155310489 |            | TRUE  | FALSE |
|             | 2  | 154728426 - 155310489 |            | TRUE  | TRUE  |
|             | 2  | 154728426 - 155310489 | F - 20.00% | TRUE  | TRUE  |
|             | 2  | 154728426 - 155310489 |            | TRUE  | FALSE |
|             | 2  | 154728426 - 155310489 | T - 60.00% | TRUE  | FALSE |
|             | 2  | 154728426 - 155310489 |            | TRUE  | TRUE  |
|             | 2  | 154728426 - 155310489 |            | TRUE  | TRUE  |
|             | 2  | 154728426 - 155310489 | F - 20.00% | TRUE  | FALSE |
|             | 2  | 154728426 - 155310489 |            | TRUE  | FALSE |
|             | 2  | 154728426 - 155310489 |            | TRUE  | TRUE  |
|             | 2  | 154728426 - 155310489 |            | TRUE  | FALSE |
|             | 2  | 154728426 - 155310489 | F - 6.67%  | TRUE  | FALSE |
|             | 2  | 154728426 - 155310489 | T - 53.33% | TRUE  | FALSE |
|             | 2  | 154728426 - 155310489 | F - 6.67%  | TRUE  | TRUE  |
|             | 2  | 154728426 - 155310489 |            | TRUE  | TRUE  |
|             | 2  | 154728426 - 155310489 | F - 20.00% | TRUE  | TRUE  |
|             | 2  | 154728426 - 155310489 | F - 13.33% | TRUE  | TRUE  |
|             | 2  | 154728426 - 155310489 | F - 6.67%  | TRUE  | TRUE  |
|             | 2  | 154728426 - 155310489 | F - 13.33% | TRUE  | TRUE  |
|             | 2  | 100163716 - 100759201 |            | TRUE  | TRUE  |
|             | 2  | 100163716 - 100759201 |            | TRUE  | FALSE |
|             | 2  | 100163716 - 100759201 | F - 28.57% | TRUE  | FALSE |
|             | 2  | 100163716 - 100759201 |            | TRUE  | TRUE  |
|             | 2  | 100163716 - 100759201 | F - 3.57%  | TRUE  | TRUE  |

|    |                       |             |       |       |
|----|-----------------------|-------------|-------|-------|
| 2  | 100163716 - 100759201 | F - 3.57%   | TRUE  | TRUE  |
| 2  | 100163716 - 100759201 | T - 57.14%  | TRUE  | TRUE  |
| 2  | 100163716 - 100759201 | F - 7.14%   | TRUE  | TRUE  |
| 2  | 100163716 - 100759201 | T - 75.00%  | TRUE  | TRUE  |
| 2  | 100163716 - 100759201 | F - 39.29%  | TRUE  | TRUE  |
| 2  | 100163716 - 100759201 |             | TRUE  | TRUE  |
| 2  | 100163716 - 100759201 |             | TRUE  | TRUE  |
| 2  | 100163716 - 100759201 | F - 32.14%  | TRUE  | TRUE  |
| 2  | 100163716 - 100759201 | F - 17.86%  | TRUE  | TRUE  |
| 2  | 100163716 - 100759201 |             | TRUE  | TRUE  |
| 2  | 100163716 - 100759201 |             | TRUE  | TRUE  |
| 2  | 100163716 - 100759201 |             | TRUE  | TRUE  |
| 2  | 100163716 - 100759201 | T - 53.57%  | TRUE  | TRUE  |
| 2  | 100163716 - 100759201 |             | TRUE  | TRUE  |
| 2  | 100163716 - 100759201 |             | TRUE  | TRUE  |
| 3  | 14444076 - 14530857   |             | TRUE  | TRUE  |
| 3  | 14444076 - 14530857   |             | TRUE  | TRUE  |
| 3  | 14444076 - 14530857   |             | TRUE  | TRUE  |
| 3  | 14444076 - 14530857   | F - 5.26%   | TRUE  | TRUE  |
| 3  | 122399465 - 122449687 | F - 6.67%   | TRUE  | TRUE  |
| 3  | 122399465 - 122449687 |             | TRUE  | TRUE  |
| 3  | 122399465 - 122449687 | F - 46.67%  | TRUE  | TRUE  |
| 3  | 122399465 - 122449687 | F - 13.33%  | TRUE  | TRUE  |
| 3  | 122399465 - 122449687 |             | TRUE  | TRUE  |
| 3  | 122399465 - 122449687 | F - 40.00%  | TRUE  | TRUE  |
| 3  | 122399465 - 122449687 | T - 80.00%  | TRUE  | TRUE  |
| 3  | 50384761 - 50388522   |             | TRUE  | FALSE |
| 3  | 50384761 - 50388522   | F - 9.52%   | TRUE  | TRUE  |
| 3  | 50384761 - 50388522   | F - 9.52%   | TRUE  | TRUE  |
| 8  | 27947190 - 28048673   | F - 33.33%  | TRUE  | TRUE  |
| 8  | 27947190 - 28048673   |             | TRUE  | TRUE  |
| 8  | 27947190 - 28048673   |             | FALSE | TRUE  |
| 9  | 77675489 - 77703133   | F - 9.09%   | TRUE  | FALSE |
| 9  | 77675489 - 77703133   |             | TRUE  | TRUE  |
| 9  | 77675489 - 77703133   | F - 9.09%   | TRUE  | TRUE  |
| 9  | 77675489 - 77703133   | F - 9.09%   | TRUE  | TRUE  |
| 9  | 77675489 - 77703133   |             | TRUE  | TRUE  |
| 9  | 77675489 - 77703133   | T - 63.64%  | FALSE | TRUE  |
| 9  | 77675489 - 77703133   | F - 18.18%  | TRUE  | TRUE  |
| 11 | 15133970 - 15268754   | T - 92.86%  | TRUE  | TRUE  |
| 11 | 15133970 - 15268754   |             | TRUE  | FALSE |
| 11 | 15133970 - 15268754   | F - 14.29%  | TRUE  | TRUE  |
| 11 | 15133970 - 15268754   | F - 14.29%  | TRUE  | TRUE  |
| 12 | 31824071 - 31882108   | T - 53.85%  | TRUE  | FALSE |
| 12 | 31824071 - 31882108   | F - 38.46%  | TRUE  | FALSE |
| 12 | 31824071 - 31882108   | T - 76.92%  | TRUE  | TRUE  |
| 12 | 31824071 - 31882108   |             | TRUE  | TRUE  |
| 12 | 31824071 - 31882108   | T - 61.54%  | TRUE  | TRUE  |
| 12 | 31824071 - 31882108   | F - 15.38%  | TRUE  | TRUE  |
| 12 | 31824071 - 31882108   |             | TRUE  | TRUE  |
| 12 | 32943679 - 33049780   |             | TRUE  | FALSE |
| 12 | 32943679 - 33049780   |             | TRUE  | FALSE |
| 12 | 32943679 - 33049780   |             | TRUE  | FALSE |
| 12 | 32943679 - 33049780   | T - 77.78%  | TRUE  | TRUE  |
| 12 | 32943679 - 33049780   | T - 88.89%  | TRUE  | FALSE |
| 12 | 32943679 - 33049780   | T - 88.89%  | TRUE  | TRUE  |
| 12 | 32943679 - 33049780   | T - 100.00% | TRUE  | TRUE  |
| 12 | 32943679 - 33049780   | F - 44.44%  | TRUE  | TRUE  |

|            |    |                       |            |       |       |
|------------|----|-----------------------|------------|-------|-------|
|            | 12 | 32943679 - 33049780   |            | FALSE | TRUE  |
|            | 12 | 32943679 - 33049780   | F - 11.11% | FALSE | TRUE  |
|            | 12 | 32943679 - 33049780   | F - 33.33% | TRUE  | TRUE  |
|            | 12 | 32943679 - 33049780   |            | FALSE | TRUE  |
|            | 17 | 16592851 - 16681195   | F - 5.88%  | TRUE  | TRUE  |
|            | 17 | 16592851 - 16681195   | F - 29.41% | TRUE  | TRUE  |
|            | 17 | 16592851 - 16681195   |            | TRUE  | TRUE  |
|            | 22 | 25960816 - 26125258   |            | TRUE  | FALSE |
|            | 22 | 25960816 - 26125258   | F - 12.50% | TRUE  | TRUE  |
|            | 22 | 25960816 - 26125258   |            | TRUE  | TRUE  |
|            | 22 | 25960816 - 26125258   |            | TRUE  | TRUE  |
|            | 22 | 25960816 - 26125258   |            | TRUE  | FALSE |
|            | 22 | 25960816 - 26125258   | T - 50.00% | FALSE | TRUE  |
|            | 22 | 25960816 - 26125258   |            | FALSE | TRUE  |
| 6_apd_hap1 |    | 2812684 - 2821649     |            | TRUE  | TRUE  |
| 6_apd_hap1 |    | 2812684 - 2821649     | F - 7.69%  | FALSE | TRUE  |
| 6_apd_hap1 |    | 2812684 - 2821649     | F - 3.85%  | FALSE | TRUE  |
|            | 1  | 97543299 - 98386615   |            | TRUE  | FALSE |
|            | 1  | 97543299 - 98386615   | F - 44.44% | FALSE | TRUE  |
|            | 4  | 2936626 - 2963465     |            | TRUE  | TRUE  |
|            | 4  | 2936626 - 2963465     | F - 40.00% | TRUE  | TRUE  |
|            | 5  | 140026643 - 140042065 |            | TRUE  | TRUE  |
|            | 5  | 140026643 - 140042065 |            | TRUE  | FALSE |
|            | 5  | 140026643 - 140042065 | F - 5.56%  | TRUE  | TRUE  |
|            | 5  | 176910395 - 176924607 |            | TRUE  | TRUE  |
|            | 5  | 176910395 - 176924607 | F - 3.70%  | TRUE  | TRUE  |
|            | 5  | 176910395 - 176924607 |            | TRUE  | TRUE  |
|            | 5  | 176910395 - 176924607 | F - 3.70%  | TRUE  | TRUE  |
|            | 5  | 176910395 - 176924607 | T - 70.37% | TRUE  | TRUE  |
|            | 7  | 8152814 - 8302317     | T - 75.00% | TRUE  | FALSE |
|            | 7  | 8152814 - 8302317     |            | TRUE  | FALSE |
|            | 7  | 8152814 - 8302317     |            | TRUE  | FALSE |
|            | 7  | 8152814 - 8302317     | T - 78.57% | TRUE  | TRUE  |
|            | 7  | 8152814 - 8302317     | T - 78.57% | TRUE  | FALSE |
|            | 7  | 8152814 - 8302317     |            | TRUE  | FALSE |
|            | 7  | 8152814 - 8302317     | T - 64.29% | TRUE  | TRUE  |
|            | 7  | 8152814 - 8302317     | F - 7.14%  | TRUE  | TRUE  |
|            | 7  | 8152814 - 8302317     |            | TRUE  | TRUE  |
|            | 7  | 8152814 - 8302317     | F - 28.57% | FALSE | TRUE  |
|            | 7  | 8152814 - 8302317     | T - 57.14% | TRUE  | TRUE  |
|            | 7  | 8152814 - 8302317     | F - 7.14%  | FALSE | TRUE  |
|            | 7  | 8152814 - 8302317     | F - 35.71% | TRUE  | TRUE  |
|            | 7  | 8152814 - 8302317     | F - 3.57%  | FALSE | TRUE  |
|            | 7  | 8152814 - 8302317     | F - 7.14%  | FALSE | TRUE  |
|            | 7  | 8152814 - 8302317     | F - 35.71% | TRUE  | TRUE  |
|            | 7  | 8152814 - 8302317     | F - 3.57%  | FALSE | TRUE  |
|            | 7  | 8152814 - 8302317     |            | FALSE | TRUE  |
|            | 7  | 8152814 - 8302317     | F - 3.57%  | FALSE | TRUE  |
|            | 7  | 8152814 - 8302317     | F - 7.14%  | FALSE | TRUE  |
|            | 7  | 8152814 - 8302317     | T - 82.14% | FALSE | TRUE  |
|            | 7  | 8152814 - 8302317     |            | FALSE | TRUE  |
|            | 7  | 8152814 - 8302317     |            | FALSE | TRUE  |
|            | 8  | 82613566 - 82645138   |            | TRUE  | TRUE  |
|            | 8  | 82613566 - 82645138   |            | TRUE  | TRUE  |
|            | 8  | 82613566 - 82645138   | F - 11.43% | FALSE | TRUE  |
|            | 8  | 82613566 - 82645138   |            | FALSE | TRUE  |
| X          |    | 135228861 - 135293518 |            | TRUE  | TRUE  |
| X          |    | 135228861 - 135293518 |            | TRUE  | TRUE  |

|    |                       |             |       |       |
|----|-----------------------|-------------|-------|-------|
| X  | 135228861 - 135293518 | F - 13.33%  | TRUE  | TRUE  |
| X  | 135228861 - 135293518 | F - 23.33%  | TRUE  | TRUE  |
| X  | 135228861 - 135293518 | F - 3.33%   | TRUE  | TRUE  |
| X  | 135228861 - 135293518 |             | FALSE | TRUE  |
| X  | 135228861 - 135293518 | F - 3.33%   | FALSE | TRUE  |
| X  | 135228861 - 135293518 | F - 6.67%   | FALSE | TRUE  |
| 10 | 118609023 - 118671297 |             | TRUE  | TRUE  |
| 10 | 118609023 - 118671297 |             | TRUE  | TRUE  |
| 10 | 118609023 - 118671297 | T - 50.00%  | TRUE  | TRUE  |
| 10 | 118609023 - 118671297 |             | TRUE  | TRUE  |
| 10 | 118609023 - 118671297 |             | TRUE  | FALSE |
| 10 | 118609023 - 118671297 | T - 66.67%  | TRUE  | TRUE  |
| 13 | 21727734 - 21750741   | T - 60.00%  | TRUE  | TRUE  |
| 13 | 21727734 - 21750741   | T - 90.00%  | TRUE  | TRUE  |
| 13 | 21727734 - 21750741   |             | FALSE | TRUE  |
| 13 | 21727734 - 21750741   | F - 10.00%  | TRUE  | TRUE  |
| 13 | 21727734 - 21750741   | T - 70.00%  | TRUE  | TRUE  |
| 13 | 21727734 - 21750741   | T - 100.00% | TRUE  | TRUE  |
| 15 | 59397277 - 59417244   | T - 75.00%  | TRUE  | TRUE  |
| 15 | 59397277 - 59417244   | T - 100.00% | TRUE  | TRUE  |
| 15 | 59397277 - 59417244   | T - 100.00% | TRUE  | TRUE  |
| 15 | 59397277 - 59417244   | T - 100.00% | FALSE | TRUE  |
| 15 | 59397277 - 59417244   |             | FALSE | TRUE  |
| 15 | 59397277 - 59417244   |             | TRUE  | TRUE  |
| 17 | 46668619 - 46671323   |             | TRUE  | TRUE  |
| 17 | 46668619 - 46671323   | F - 33.33%  | TRUE  | TRUE  |
| 22 | 44395091 - 44565112   | F - 7.14%   | TRUE  | FALSE |
| 22 | 44395091 - 44565112   |             | TRUE  | TRUE  |
| 22 | 44395091 - 44565112   | F - 14.29%  | TRUE  | TRUE  |
| 1  | 19542158 - 19578046   | F - 5.00%   | TRUE  | TRUE  |
| 1  | 19542158 - 19578046   | F - 5.00%   | TRUE  | TRUE  |
| 1  | 19542158 - 19578046   |             | TRUE  | TRUE  |
| 1  | 19542158 - 19578046   | F - 5.00%   | TRUE  | TRUE  |
| 1  | 19542158 - 19578046   | F - 5.00%   | TRUE  | TRUE  |
| 1  | 19542158 - 19578046   | F - 5.00%   | TRUE  | TRUE  |
| 1  | 19542158 - 19578046   |             | TRUE  | TRUE  |
| 1  | 19542158 - 19578046   |             | TRUE  | TRUE  |
| 1  | 236712305 - 236767841 |             | TRUE  | TRUE  |
| 1  | 236712305 - 236767841 |             | TRUE  | TRUE  |
| 1  | 236712305 - 236767841 | T - 55.56%  | TRUE  | TRUE  |
| 1  | 236712305 - 236767841 |             | TRUE  | TRUE  |
| 1  | 236712305 - 236767841 |             | FALSE | TRUE  |
| 2  | 74776147 - 74784681   | F - 8.70%   | TRUE  | TRUE  |
| 2  | 74776147 - 74784681   | F - 4.35%   | TRUE  | TRUE  |
| 2  | 74776147 - 74784681   | F - 13.04%  | TRUE  | TRUE  |
| 2  | 74776147 - 74784681   |             | TRUE  | TRUE  |
| 2  | 74776147 - 74784681   |             | TRUE  | TRUE  |
| 2  | 74776147 - 74784681   |             | FALSE | TRUE  |
| 2  | 74776147 - 74784681   |             | FALSE | TRUE  |
| 2  | 157180944 - 157198860 | F - 16.67%  | TRUE  | TRUE  |
| 2  | 157180944 - 157198860 |             | TRUE  | TRUE  |
| 2  | 157180944 - 157198860 |             | FALSE | TRUE  |
| 2  | 157180944 - 157198860 | F - 5.56%   | TRUE  | TRUE  |
| 2  | 157180944 - 157198860 | T - 83.33%  | TRUE  | TRUE  |
| 2  | 157180944 - 157198860 | T - 77.78%  | FALSE | TRUE  |
| 2  | 157180944 - 157198860 | T - 77.78%  | TRUE  | TRUE  |
| 2  | 157180944 - 157198860 | T - 61.11%  | TRUE  | TRUE  |
| 4  | 83405604 - 83483510   |             | TRUE  | TRUE  |

|    |                       |             |       |       |
|----|-----------------------|-------------|-------|-------|
| 4  | 83405604 - 83483510   |             | TRUE  | TRUE  |
| 4  | 83405604 - 83483510   |             | TRUE  | TRUE  |
| 4  | 83405604 - 83483510   |             | TRUE  | TRUE  |
| 4  | 83405604 - 83483510   | T - 62.50%  | TRUE  | TRUE  |
| 4  | 83405604 - 83483510   |             | TRUE  | FALSE |
| 4  | 83405604 - 83483510   |             | TRUE  | TRUE  |
| 4  | 83405604 - 83483510   |             | TRUE  | TRUE  |
| 4  | 83405604 - 83483510   |             | TRUE  | TRUE  |
| 4  | 83405604 - 83483510   | T - 75.00%  | TRUE  | TRUE  |
| 4  | 83405604 - 83483510   | F - 37.50%  | TRUE  | FALSE |
| 4  | 83405604 - 83483510   |             | TRUE  | TRUE  |
| 4  | 83405604 - 83483510   | T - 75.00%  | TRUE  | FALSE |
| 4  | 83405604 - 83483510   | F - 25.00%  | TRUE  | TRUE  |
| 4  | 83405604 - 83483510   | F - 12.50%  | TRUE  | TRUE  |
| 4  | 83405604 - 83483510   | F - 12.50%  | TRUE  | TRUE  |
| 5  | 179233388 - 179265078 |             | TRUE  | TRUE  |
| 5  | 179233388 - 179265078 | F - 3.85%   | TRUE  | TRUE  |
| 5  | 179233388 - 179265078 | F - 3.85%   | TRUE  | TRUE  |
| 5  | 179233388 - 179265078 | F - 3.85%   | TRUE  | TRUE  |
| 5  | 179233388 - 179265078 | F - 3.85%   | TRUE  | TRUE  |
| 5  | 179233388 - 179265078 |             | FALSE | TRUE  |
| 5  | 179233388 - 179265078 | F - 7.69%   | TRUE  | TRUE  |
| 5  | 179233388 - 179265078 | F - 11.54%  | TRUE  | TRUE  |
| 5  | 179233388 - 179265078 | F - 26.92%  | TRUE  | TRUE  |
| 5  | 179233388 - 179265078 |             | TRUE  | TRUE  |
| 5  | 179233388 - 179265078 | F - 46.15%  | TRUE  | TRUE  |
| 6  | 31321649 - 31324989   |             | TRUE  | TRUE  |
| 6  | 31321649 - 31324989   | F - 11.11%  | TRUE  | TRUE  |
| 6  | 31321649 - 31324989   |             | TRUE  | TRUE  |
| 6  | 31321649 - 31324989   | F - 11.11%  | TRUE  | TRUE  |
| 6  | 31321649 - 31324989   | F - 44.44%  | TRUE  | TRUE  |
| 6  | 31321649 - 31324989   |             | TRUE  | TRUE  |
| 6  | 31321649 - 31324989   | T - 61.11%  | TRUE  | TRUE  |
| 9  | 108210077 - 108314714 |             | TRUE  | FALSE |
| 9  | 108210077 - 108314714 | T - 82.35%  | TRUE  | TRUE  |
| 9  | 108210077 - 108314714 |             | FALSE | TRUE  |
| 9  | 108210077 - 108314714 |             | TRUE  | TRUE  |
| 9  | 108210077 - 108314714 |             | FALSE | TRUE  |
| 9  | 108210077 - 108314714 |             | FALSE | TRUE  |
| 9  | 33921691 - 34048947   |             | TRUE  | FALSE |
| 9  | 33921691 - 34048947   | F - 3.57%   | TRUE  | TRUE  |
| 9  | 33921691 - 34048947   |             | TRUE  | TRUE  |
| 9  | 33921691 - 34048947   | F - 3.57%   | FALSE | TRUE  |
| 10 | 104005255 - 104142656 | F - 12.50%  | TRUE  | TRUE  |
| 10 | 104005255 - 104142656 |             | TRUE  | TRUE  |
| 10 | 104503727 - 104591851 |             | TRUE  | TRUE  |
| 10 | 104503727 - 104591851 | F - 14.29%  | TRUE  | TRUE  |
| 10 | 104503727 - 104591851 | F - 14.29%  | TRUE  | TRUE  |
| 10 | 104503727 - 104591851 | F - 14.29%  | TRUE  | TRUE  |
| 10 | 104503727 - 104591851 |             | FALSE | TRUE  |
| 10 | 104503727 - 104591851 | F - 14.29%  | TRUE  | TRUE  |
| 10 | 104503727 - 104591851 |             | TRUE  | TRUE  |
| 10 | 7792925 - 7829990     |             | TRUE  | FALSE |
| 10 | 7792925 - 7829990     | T - 100.00% | TRUE  | TRUE  |
| 10 | 7792925 - 7829990     |             | FALSE | TRUE  |
| 10 | 7792925 - 7829990     |             | TRUE  | TRUE  |
| 11 | 47799639 - 47870107   |             | TRUE  | FALSE |
| 11 | 47799639 - 47870107   |             | TRUE  | TRUE  |



|    |                       |            |       |       |
|----|-----------------------|------------|-------|-------|
| 11 | 47799639 - 47870107   |            | FALSE | TRUE  |
| 11 | 47799639 - 47870107   |            | TRUE  | TRUE  |
| 11 | 47799639 - 47870107   | T - 69.23% | TRUE  | TRUE  |
| 11 | 47799639 - 47870107   |            | FALSE | TRUE  |
| 11 | 18259780 - 18270221   | T - 90.00% | TRUE  | TRUE  |
| 11 | 18259780 - 18270221   | T - 90.00% | TRUE  | TRUE  |
| 11 | 18259780 - 18270221   | T - 80.00% | TRUE  | TRUE  |
| 11 | 18259780 - 18270221   | T - 50.00% | TRUE  | TRUE  |
| 11 | 18259780 - 18270221   | F - 30.00% | TRUE  | FALSE |
| 11 | 18259780 - 18270221   | F - 10.00% | TRUE  | TRUE  |
| 11 | 18259780 - 18270221   | F - 10.00% | TRUE  | TRUE  |
| 11 | 18259780 - 18270221   | F - 20.00% | TRUE  | TRUE  |
| 11 | 18259780 - 18270221   | F - 20.00% | TRUE  | FALSE |
| 11 | 18259780 - 18270221   | F - 10.00% | TRUE  | TRUE  |
| 11 | 18259780 - 18270221   |            | TRUE  | TRUE  |
| 11 | 18259780 - 18270221   |            | FALSE | TRUE  |
| 20 | 13976015 - 16033842   |            | TRUE  | TRUE  |
| 20 | 13976015 - 16033842   | F - 40.91% | TRUE  | TRUE  |
| 20 | 13976015 - 16033842   |            | TRUE  | TRUE  |
| 20 | 13976015 - 16033842   | F - 9.09%  | TRUE  | TRUE  |
| 3  | 11597544 - 11766453   |            | TRUE  | FALSE |
| 3  | 11597544 - 11766453   |            | TRUE  | TRUE  |
| 3  | 11597544 - 11766453   |            | TRUE  | TRUE  |
| 3  | 11597544 - 11766453   | F - 4.00%  | TRUE  | TRUE  |
| 3  | 11597544 - 11766453   | F - 4.00%  | TRUE  | TRUE  |
| 3  | 57124010 - 57204334   |            | TRUE  | TRUE  |
| 3  | 57124010 - 57204334   | F - 25.00% | FALSE | TRUE  |
| 3  | 57124010 - 57204334   | F - 8.33%  | TRUE  | TRUE  |
| 3  | 57124010 - 57204334   | F - 16.67% | FALSE | TRUE  |
| 3  | 57124010 - 57204334   | F - 8.33%  | TRUE  | TRUE  |
| 3  | 57124010 - 57204334   |            | TRUE  | TRUE  |
| 3  | 57124010 - 57204334   |            | TRUE  | TRUE  |
| 3  | 57124010 - 57204334   | F - 16.67% | TRUE  | TRUE  |
| 3  | 57124010 - 57204334   | T - 83.33% | TRUE  | TRUE  |
| 3  | 57124010 - 57204334   |            | TRUE  | TRUE  |
| 3  | 57124010 - 57204334   |            | TRUE  | TRUE  |
| 3  | 57124010 - 57204334   | F - 16.67% | TRUE  | TRUE  |
| 3  | 57124010 - 57204334   | F - 25.00% | TRUE  | TRUE  |
| 3  | 57124010 - 57204334   |            | TRUE  | TRUE  |
| 3  | 57124010 - 57204334   |            | FALSE | TRUE  |
| 3  | 57124010 - 57204334   | T - 75.00% | TRUE  | TRUE  |
| 3  | 57124010 - 57204334   | T - 83.33% | TRUE  | TRUE  |
| 3  | 167401086 - 167452727 |            | TRUE  | TRUE  |
| 3  | 167401086 - 167452727 |            | TRUE  | TRUE  |
| 3  | 167401086 - 167452727 | T - 60.87% | TRUE  | TRUE  |
| 3  | 167401086 - 167452727 |            | FALSE | TRUE  |
| 4  | 187508937 - 187647876 |            | TRUE  | TRUE  |
| 4  | 187508937 - 187647876 |            | TRUE  | TRUE  |
| 4  | 187508937 - 187647876 | F - 20.00% | TRUE  | TRUE  |
| 4  | 187508937 - 187647876 | F - 13.33% | FALSE | TRUE  |
| 6  | 64345725 - 64489229   |            | TRUE  | FALSE |
| 6  | 64345725 - 64489229   | F - 4.76%  | TRUE  | FALSE |
| 6  | 64345725 - 64489229   | F - 9.52%  | TRUE  | TRUE  |
| 13 | 26706253 - 26796791   | F - 21.43% | TRUE  | FALSE |
| 13 | 26706253 - 26796791   |            | TRUE  | TRUE  |
| 19 | 49471382 - 49496610   | F - 6.67%  | TRUE  | TRUE  |
| 19 | 49471382 - 49496610   | F - 6.67%  | FALSE | TRUE  |
| 19 | 49471382 - 49496610   | F - 6.67%  | TRUE  | TRUE  |

|    |                       |            |       |       |
|----|-----------------------|------------|-------|-------|
| 19 | 49471382 - 49496610   |            | TRUE  | TRUE  |
| 19 | 49471382 - 49496610   |            | TRUE  | TRUE  |
| 19 | 49471382 - 49496610   |            | FALSE | TRUE  |
| 21 | 35552978 - 35562220   |            | TRUE  | TRUE  |
| 21 | 35552978 - 35562220   |            | TRUE  | TRUE  |
| 21 | 35552978 - 35562220   |            | TRUE  | TRUE  |
| 21 | 35552978 - 35562220   | F - 20.00% | TRUE  | TRUE  |
| 21 | 35552978 - 35562220   |            | TRUE  | TRUE  |
| 1  | 148555979 - 148596267 |            | TRUE  | FALSE |
| 1  | 148555979 - 148596267 | F - 40.00% | TRUE  | TRUE  |
| 1  | 148555979 - 148596267 |            | TRUE  | TRUE  |
| 4  | 108968701 - 109090112 |            | TRUE  | FALSE |
| 4  | 108968701 - 109090112 | F - 13.79% | TRUE  | TRUE  |
| 4  | 108968701 - 109090112 | F - 13.79% | TRUE  | FALSE |
| 4  | 108968701 - 109090112 | F - 3.45%  | TRUE  | FALSE |
| 4  | 108968701 - 109090112 | T - 51.72% | TRUE  | TRUE  |
| 4  | 108968701 - 109090112 | F - 10.34% | TRUE  | TRUE  |
| 4  | 108968701 - 109090112 |            | TRUE  | TRUE  |
| 4  | 108968701 - 109090112 | F - 6.90%  | TRUE  | TRUE  |
| 4  | 108968701 - 109090112 | F - 6.90%  | TRUE  | TRUE  |
| 4  | 108968701 - 109090112 |            | TRUE  | TRUE  |
| 4  | 108968701 - 109090112 | F - 10.34% | TRUE  | TRUE  |
| 4  | 108968701 - 109090112 | F - 13.79% | TRUE  | TRUE  |
| 4  | 108968701 - 109090112 | F - 6.90%  | TRUE  | TRUE  |
| 4  | 108968701 - 109090112 |            | TRUE  | TRUE  |
| 4  | 108968701 - 109090112 | F - 3.45%  | TRUE  | TRUE  |
| 4  | 108968701 - 109090112 | F - 3.45%  | TRUE  | TRUE  |
| 4  | 108968701 - 109090112 | F - 10.34% | FALSE | TRUE  |
| 4  | 108968701 - 109090112 |            | TRUE  | TRUE  |
| 4  | 108968701 - 109090112 | F - 3.45%  | TRUE  | TRUE  |
| 4  | 108968701 - 109090112 | F - 3.45%  | FALSE | TRUE  |
| 4  | 108968701 - 109090112 |            | FALSE | TRUE  |
| 6  | 29909037 - 29913661   | F - 4.55%  | TRUE  | TRUE  |
| 6  | 29909037 - 29913661   | F - 4.55%  | FALSE | TRUE  |
| 6  | 29909037 - 29913661   | F - 4.55%  | TRUE  | TRUE  |
| 6  | 29909037 - 29913661   | F - 4.55%  | TRUE  | TRUE  |
| 6  | 29909037 - 29913661   | F - 4.55%  | FALSE | TRUE  |
| 6  | 29909037 - 29913661   | F - 27.27% | TRUE  | TRUE  |
| 6  | 29909037 - 29913661   | F - 31.82% | FALSE | TRUE  |
| 6  | 29909037 - 29913661   | F - 18.18% | FALSE | TRUE  |
| 6  | 29909037 - 29913661   |            | FALSE | TRUE  |
| 6  | 29909037 - 29913661   | F - 9.09%  | FALSE | TRUE  |
| 6  | 29909037 - 29913661   |            | FALSE | TRUE  |
| 6  | 29909037 - 29913661   |            | FALSE | TRUE  |
| 6  | 29909037 - 29913661   | T - 86.36% | TRUE  | TRUE  |
| 6  | 99880184 - 99969604   |            | TRUE  | TRUE  |
| 6  | 99880184 - 99969604   | F - 4.35%  | TRUE  | TRUE  |
| 6  | 99880184 - 99969604   |            | FALSE | TRUE  |
| 7  | 141404138 - 141438146 | T - 71.43% | TRUE  | TRUE  |
| 7  | 141404138 - 141438146 | F - 28.57% | TRUE  | TRUE  |
| 7  | 141404138 - 141438146 |            | FALSE | TRUE  |
| 7  | 141404138 - 141438146 | F - 35.71% | FALSE | TRUE  |
| 8  | 26371547 - 26515694   |            | TRUE  | TRUE  |
| 8  | 26371547 - 26515694   | F - 31.25% | TRUE  | TRUE  |
| 8  | 26371547 - 26515694   | F - 6.25%  | TRUE  | TRUE  |
| 8  | 26371547 - 26515694   | F - 6.25%  | FALSE | TRUE  |
| 8  | 26371547 - 26515694   | F - 6.25%  | FALSE | TRUE  |
| 8  | 26371547 - 26515694   | F - 12.50% | TRUE  | TRUE  |

|             |    |                       |            |       |       |
|-------------|----|-----------------------|------------|-------|-------|
|             | 8  | 26371547 - 26515694   |            | FALSE | TRUE  |
|             | 8  | 26371547 - 26515694   | F - 12.50% | TRUE  | TRUE  |
|             | 8  | 26371547 - 26515694   | F - 6.25%  | TRUE  | TRUE  |
|             | 8  | 26371547 - 26515694   |            | FALSE | TRUE  |
|             | 8  | 26371547 - 26515694   | F - 6.25%  | FALSE | TRUE  |
|             | 8  | 26371547 - 26515694   |            | FALSE | TRUE  |
|             | 8  | 26371547 - 26515694   |            | TRUE  | TRUE  |
|             | 8  | 143845752 - 143859640 |            | TRUE  | TRUE  |
|             | 8  | 143845752 - 143859640 | F - 42.86% | TRUE  | TRUE  |
|             | 8  | 143845752 - 143859640 | F - 28.57% | TRUE  | TRUE  |
|             | 8  | 143845752 - 143859640 | F - 14.29% | TRUE  | TRUE  |
|             | 8  | 143845752 - 143859640 |            | TRUE  | TRUE  |
|             | 8  | 143845752 - 143859640 |            | TRUE  | TRUE  |
|             | 8  | 143845752 - 143859640 | F - 14.29% | TRUE  | TRUE  |
|             | 8  | 143845752 - 143859640 | F - 7.14%  | TRUE  | TRUE  |
| X           |    | 3522384 - 3631675     | F - 14.29% | TRUE  | TRUE  |
| X           |    | 3522384 - 3631675     |            | TRUE  | TRUE  |
| X           |    | 3522384 - 3631675     | F - 42.86% | TRUE  | TRUE  |
| X           |    | 3522384 - 3631675     | F - 28.57% | TRUE  | TRUE  |
| X           |    | 3522384 - 3631675     | F - 42.86% | TRUE  | TRUE  |
| X           |    | 3522384 - 3631675     |            | FALSE | TRUE  |
|             | 12 | 88442790 - 88535993   |            | TRUE  | FALSE |
|             | 12 | 88442790 - 88535993   |            | TRUE  | FALSE |
|             | 12 | 88442790 - 88535993   |            | TRUE  | TRUE  |
|             | 12 | 88442790 - 88535993   | F - 33.33% | TRUE  | TRUE  |
|             | 12 | 88442790 - 88535993   |            | FALSE | TRUE  |
|             | 12 | 88442790 - 88535993   |            | FALSE | TRUE  |
|             | 12 | 88442790 - 88535993   |            | FALSE | TRUE  |
|             | 15 | 55903739 - 56035288   | T - 50.00% | TRUE  | TRUE  |
|             | 15 | 55903739 - 56035288   |            | TRUE  | TRUE  |
|             | 15 | 55903739 - 56035288   |            | FALSE | TRUE  |
|             | 21 | 9907189 - 9968593     |            | TRUE  | TRUE  |
|             | 21 | 9907189 - 9968593     |            | TRUE  | TRUE  |
|             | 21 | 9907189 - 9968593     |            | TRUE  | TRUE  |
|             | 21 | 9907189 - 9968593     | F - 25.00% | TRUE  | TRUE  |
| 6_mcf_hap5  |    | 2701429 - 2704815     |            | TRUE  | TRUE  |
| 6_mcf_hap5  |    | 2701429 - 2704815     |            | TRUE  | TRUE  |
| 6_mcf_hap5  |    | 2701429 - 2704815     | F - 11.76% | TRUE  | TRUE  |
| 6_mcf_hap5  |    | 2701429 - 2704815     |            | TRUE  | TRUE  |
| 6_mcf_hap5  |    | 2701429 - 2704815     | T - 52.94% | TRUE  | TRUE  |
| 6_mcf_hap5  |    | 2701429 - 2704815     | F - 5.88%  | TRUE  | TRUE  |
| 6_ssto_hap7 |    | 4239267 - 4243485     | T - 87.50% | TRUE  | TRUE  |
| 6_ssto_hap7 |    | 4239267 - 4243485     |            | TRUE  | TRUE  |
| 6_ssto_hap7 |    | 4239267 - 4243485     | T - 87.50% | FALSE | TRUE  |
| 6_ssto_hap7 |    | 2828801 - 2841057     |            | TRUE  | TRUE  |
| 6_ssto_hap7 |    | 2828801 - 2841057     | F - 8.82%  | TRUE  | TRUE  |
| 6_ssto_hap7 |    | 2828801 - 2841057     | F - 5.88%  | TRUE  | TRUE  |
| 6_ssto_hap7 |    | 2828801 - 2841057     | F - 5.88%  | FALSE | TRUE  |
| 6_ssto_hap7 |    | 2828801 - 2841057     | F - 2.94%  | FALSE | TRUE  |
|             | 1  | 224572845 - 224624735 |            | TRUE  | TRUE  |
|             | 1  | 224572845 - 224624735 | F - 5.56%  | TRUE  | TRUE  |
|             | 1  | 55107427 - 55175939   |            | TRUE  | FALSE |
|             | 1  | 55107427 - 55175939   | T - 63.33% | TRUE  | TRUE  |
|             | 1  | 55107427 - 55175939   | F - 40.00% | TRUE  | TRUE  |
|             | 2  | 61704984 - 61765761   |            | TRUE  | TRUE  |
|             | 2  | 61704984 - 61765761   | F - 9.38%  | TRUE  | TRUE  |
|             | 2  | 61704984 - 61765761   | F - 28.13% | TRUE  | TRUE  |
|             | 2  | 61704984 - 61765761   | F - 9.38%  | TRUE  | TRUE  |

|   |    |                       |             |       |       |
|---|----|-----------------------|-------------|-------|-------|
|   | 2  | 61704984 - 61765761   | F - 15.63%  | FALSE | TRUE  |
|   | 2  | 61704984 - 61765761   | F - 6.25%   | TRUE  | TRUE  |
|   | 2  | 61704984 - 61765761   | F - 9.38%   | FALSE | TRUE  |
|   | 2  | 61704984 - 61765761   | F - 15.63%  | TRUE  | TRUE  |
|   | 6  | 170151721 - 170181680 |             | TRUE  | TRUE  |
|   | 6  | 170151721 - 170181680 | T - 100.00% | TRUE  | TRUE  |
|   | 6  | 170151721 - 170181680 |             | FALSE | TRUE  |
|   | 6  | 170151721 - 170181680 | T - 63.64%  | TRUE  | TRUE  |
|   | 7  | 86781677 - 86825648   |             | TRUE  | TRUE  |
|   | 7  | 86781677 - 86825648   | F - 18.92%  | TRUE  | TRUE  |
|   | 7  | 86781677 - 86825648   | F - 10.81%  | FALSE | TRUE  |
|   | 7  | 86781677 - 86825648   | T - 78.38%  | FALSE | TRUE  |
|   | 7  | 142231573 - 142232120 |             | TRUE  | TRUE  |
|   | 7  | 142231573 - 142232120 | T - 66.67%  | TRUE  | TRUE  |
|   | 8  | 2584858 - 2680004     |             | TRUE  | FALSE |
|   | 8  | 2584858 - 2680004     | T - 100.00% | TRUE  | TRUE  |
| X |    | 10124985 - 10205700   |             | TRUE  | TRUE  |
| X |    | 10124985 - 10205700   |             | TRUE  | TRUE  |
| X |    | 10124985 - 10205700   | F - 37.50%  | TRUE  | TRUE  |
| X |    | 10124985 - 10205700   |             | TRUE  | TRUE  |
| X |    | 10124985 - 10205700   |             | TRUE  | TRUE  |
| X |    | 154006959 - 154049282 | F - 4.00%   | TRUE  | TRUE  |
| X |    | 154006959 - 154049282 |             | TRUE  | TRUE  |
| X |    | 154006959 - 154049282 |             | TRUE  | TRUE  |
| X |    | 154006959 - 154049282 | F - 12.00%  | TRUE  | TRUE  |
| X |    | 154006959 - 154049282 |             | FALSE | TRUE  |
|   | 12 | 122355768 - 122441833 |             | TRUE  | TRUE  |
|   | 12 | 122355768 - 122441833 | T - 85.71%  | TRUE  | TRUE  |
|   | 12 | 122355768 - 122441833 |             | TRUE  | TRUE  |
|   | 12 | 122355768 - 122441833 |             | TRUE  | TRUE  |
|   | 13 | 24304328 - 24463587   |             | TRUE  | TRUE  |
|   | 13 | 24304328 - 24463587   |             | TRUE  | TRUE  |
|   | 13 | 24304328 - 24463587   |             | TRUE  | TRUE  |
|   | 13 | 24304328 - 24463587   |             | TRUE  | TRUE  |
|   | 13 | 24304328 - 24463587   | F - 42.86%  | TRUE  | TRUE  |
|   | 18 | 10454543 - 10488698   |             | TRUE  | TRUE  |
|   | 18 | 10454543 - 10488698   | T - 100.00% | TRUE  | TRUE  |
|   | 18 | 10454543 - 10488698   | T - 100.00% | TRUE  | TRUE  |
|   | 18 | 10454543 - 10488698   | T - 100.00% | TRUE  | TRUE  |
|   | 18 | 10454543 - 10488698   | T - 66.67%  | TRUE  | TRUE  |
|   | 1  | 35641979 - 35658749   |             | TRUE  | TRUE  |
|   | 1  | 35641979 - 35658749   |             | TRUE  | TRUE  |
|   | 1  | 35641979 - 35658749   | F - 28.57%  | TRUE  | TRUE  |
|   | 1  | 35641979 - 35658749   | F - 35.71%  | TRUE  | TRUE  |
|   | 1  | 35641979 - 35658749   |             | TRUE  | TRUE  |
|   | 1  | 35641979 - 35658749   |             | TRUE  | TRUE  |
|   | 1  | 35641979 - 35658749   |             | TRUE  | TRUE  |
|   | 1  | 35641979 - 35658749   | F - 28.57%  | TRUE  | TRUE  |
|   | 1  | 35641979 - 35658749   | F - 14.29%  | TRUE  | TRUE  |
|   | 1  | 35641979 - 35658749   | F - 21.43%  | TRUE  | TRUE  |
|   | 1  | 35641979 - 35658749   | F - 21.43%  | TRUE  | TRUE  |
|   | 1  | 35641979 - 35658749   | F - 35.71%  | TRUE  | TRUE  |
|   | 1  | 35641979 - 35658749   | F - 35.71%  | TRUE  | TRUE  |
|   | 1  | 35641979 - 35658749   | F - 7.14%   | TRUE  | TRUE  |
|   | 1  | 35641979 - 35658749   | F - 21.43%  | TRUE  | TRUE  |
|   | 1  | 35641979 - 35658749   |             | TRUE  | TRUE  |
|   | 1  | 35641979 - 35658749   | F - 28.57%  | TRUE  | TRUE  |
|   | 1  | 35641979 - 35658749   | F - 28.57%  | TRUE  | TRUE  |

|    |                       |            |       |       |
|----|-----------------------|------------|-------|-------|
| 1  | 35641979 - 35658749   |            | TRUE  | TRUE  |
| 1  | 35641979 - 35658749   |            | FALSE | TRUE  |
| 2  | 220094479 - 220101391 | F - 2.94%  | TRUE  | TRUE  |
| 2  | 220094479 - 220101391 |            | TRUE  | TRUE  |
| 2  | 220094479 - 220101391 |            | TRUE  | TRUE  |
| 2  | 220094479 - 220101391 | F - 5.88%  | FALSE | TRUE  |
| 2  | 220094479 - 220101391 | F - 8.82%  | FALSE | TRUE  |
| 2  | 220094479 - 220101391 | F - 2.94%  | TRUE  | TRUE  |
| 2  | 38522022 - 38604432   |            | TRUE  | FALSE |
| 2  | 38522022 - 38604432   |            | TRUE  | TRUE  |
| 2  | 38522022 - 38604432   |            | TRUE  | TRUE  |
| 2  | 38522022 - 38604432   |            | TRUE  | FALSE |
| 2  | 38522022 - 38604432   | F - 46.15% | TRUE  | TRUE  |
| 2  | 38522022 - 38604432   |            | TRUE  | TRUE  |
| 2  | 110879888 - 110962643 |            | TRUE  | FALSE |
| 2  | 110879888 - 110962643 |            | TRUE  | TRUE  |
| 2  | 110879888 - 110962643 |            | TRUE  | TRUE  |
| 2  | 110879888 - 110962643 |            | TRUE  | TRUE  |
| 2  | 110879888 - 110962643 |            | FALSE | TRUE  |
| 2  | 110879888 - 110962643 | F - 15.00% | FALSE | TRUE  |
| 2  | 110879888 - 110962643 |            | TRUE  | TRUE  |
| 3  | 185000729 - 185206885 |            | TRUE  | TRUE  |
| 3  | 185000729 - 185206885 |            | TRUE  | TRUE  |
| 3  | 185000729 - 185206885 |            | TRUE  | TRUE  |
| 3  | 185000729 - 185206885 | F - 4.76%  | TRUE  | FALSE |
| 3  | 185000729 - 185206885 | F - 4.76%  | TRUE  | TRUE  |
| 3  | 185000729 - 185206885 |            | TRUE  | TRUE  |
| 5  | 83236373 - 83680611   | F - 12.50% | TRUE  | TRUE  |
| 5  | 83236373 - 83680611   |            | TRUE  | TRUE  |
| 6  | 150920999 - 151164799 | T - 77.78% | TRUE  | FALSE |
| 6  | 150920999 - 151164799 |            | TRUE  | FALSE |
| 6  | 150920999 - 151164799 |            | TRUE  | FALSE |
| 6  | 150920999 - 151164799 |            | TRUE  | TRUE  |
| 6  | 150920999 - 151164799 | T - 88.89% | TRUE  | TRUE  |
| 6  | 150920999 - 151164799 |            | FALSE | TRUE  |
| 6  | 150920999 - 151164799 | T - 88.89% | FALSE | TRUE  |
| 7  | 89874488 - 89940377   |            | TRUE  | FALSE |
| 7  | 89874488 - 89940377   |            | TRUE  | FALSE |
| 7  | 89874488 - 89940377   | F - 38.10% | TRUE  | TRUE  |
| 7  | 89874488 - 89940377   |            | TRUE  | TRUE  |
| 7  | 89874488 - 89940377   |            | TRUE  | TRUE  |
| 7  | 89874488 - 89940377   |            | TRUE  | TRUE  |
| 7  | 89874488 - 89940377   | F - 4.76%  | FALSE | TRUE  |
| 9  | 114758832 - 115112545 |            | TRUE  | TRUE  |
| 9  | 114758832 - 115112545 | F - 29.41% | TRUE  | TRUE  |
| 15 | 72114632 - 72410440   |            | TRUE  | TRUE  |
| 15 | 72114632 - 72410440   |            | TRUE  | FALSE |
| 15 | 72114632 - 72410440   |            | TRUE  | TRUE  |
| 15 | 72114632 - 72410440   |            | TRUE  | FALSE |
| 15 | 72114632 - 72410440   | T - 84.62% | TRUE  | TRUE  |
| 15 | 72114632 - 72410440   |            | FALSE | TRUE  |
| 17 | 40761358 - 40767256   |            | TRUE  | TRUE  |
| 17 | 40761358 - 40767256   | T - 66.67% | TRUE  | TRUE  |
| 17 | 18441115 - 18528930   |            | TRUE  | FALSE |
| 17 | 18441115 - 18528930   | F - 27.27% | TRUE  | TRUE  |
| 17 | 18441115 - 18528930   | F - 27.27% | TRUE  | TRUE  |
| 17 | 18441115 - 18528930   |            | TRUE  | TRUE  |
| 17 | 18441115 - 18528930   |            | TRUE  | TRUE  |

|             |                       |            |       |       |
|-------------|-----------------------|------------|-------|-------|
| 17          | 18441115 - 18528930   | F - 27.27% | TRUE  | TRUE  |
| 17          | 18441115 - 18528930   |            | TRUE  | TRUE  |
| 17          | 18441115 - 18528930   |            | TRUE  | TRUE  |
| 22          | 25747385 - 25801344   | T - 84.62% | TRUE  | TRUE  |
| 22          | 25747385 - 25801344   | F - 15.38% | TRUE  | TRUE  |
| 22          | 25747385 - 25801344   | F - 15.38% | TRUE  | FALSE |
| 22          | 25747385 - 25801344   | F - 23.08% | FALSE | TRUE  |
| 22          | 25747385 - 25801344   |            | TRUE  | TRUE  |
| 22          | 25747385 - 25801344   | F - 7.69%  | TRUE  | TRUE  |
| 22          | 25747385 - 25801344   |            | TRUE  | TRUE  |
| 22          | 25747385 - 25801344   | F - 15.38% | TRUE  | TRUE  |
| 22          | 25747385 - 25801344   |            | TRUE  | TRUE  |
| 6_cox_hap2  | 3116416 - 3130101     |            | TRUE  | TRUE  |
| 6_cox_hap2  | 3116416 - 3130101     | F - 2.70%  | TRUE  | TRUE  |
| 6_cox_hap2  | 3116416 - 3130101     | F - 8.11%  | TRUE  | TRUE  |
| 6_cox_hap2  | 3116416 - 3130101     |            | TRUE  | TRUE  |
| 6_cox_hap2  | 3116416 - 3130101     |            | TRUE  | TRUE  |
| 6_cox_hap2  | 3116416 - 3130101     | F - 8.11%  | TRUE  | TRUE  |
| 6_cox_hap2  | 3116416 - 3130101     |            | TRUE  | TRUE  |
| 6_cox_hap2  | 3116416 - 3130101     | F - 2.70%  | TRUE  | TRUE  |
| 6_cox_hap2  | 3116416 - 3130101     | F - 29.73% | TRUE  | TRUE  |
| 6_cox_hap2  | 3116416 - 3130101     |            | TRUE  | TRUE  |
| 6_cox_hap2  | 3116416 - 3130101     | F - 2.70%  | TRUE  | TRUE  |
| 6_dbb_hap3  | 2892376 - 2906061     |            | TRUE  | TRUE  |
| 6_dbb_hap3  | 2892376 - 2906061     | F - 2.70%  | TRUE  | TRUE  |
| 6_dbb_hap3  | 2892376 - 2906061     | F - 8.11%  | TRUE  | TRUE  |
| 6_dbb_hap3  | 2892376 - 2906061     |            | TRUE  | TRUE  |
| 6_dbb_hap3  | 2892376 - 2906061     |            | TRUE  | TRUE  |
| 6_dbb_hap3  | 2892376 - 2906061     | F - 8.11%  | TRUE  | TRUE  |
| 6_dbb_hap3  | 2892376 - 2906061     |            | TRUE  | TRUE  |
| 6_dbb_hap3  | 2892376 - 2906061     | F - 29.73% | TRUE  | TRUE  |
| 6_dbb_hap3  | 2892376 - 2906061     |            | TRUE  | TRUE  |
| 6_dbb_hap3  | 2892376 - 2906061     | F - 2.70%  | TRUE  | TRUE  |
| 6_mann_hap4 | 2949688 - 2963371     |            | TRUE  | TRUE  |
| 6_mann_hap4 | 2949688 - 2963371     | F - 2.70%  | TRUE  | TRUE  |
| 6_mann_hap4 | 2949688 - 2963371     | F - 8.11%  | TRUE  | TRUE  |
| 6_mann_hap4 | 2949688 - 2963371     |            | TRUE  | TRUE  |
| 6_mann_hap4 | 2949688 - 2963371     |            | TRUE  | TRUE  |
| 6_mann_hap4 | 2949688 - 2963371     | F - 8.11%  | TRUE  | TRUE  |
| 6_mann_hap4 | 2949688 - 2963371     |            | TRUE  | TRUE  |
| 6_mann_hap4 | 2949688 - 2963371     | F - 29.73% | TRUE  | TRUE  |
| 6_mann_hap4 | 2949688 - 2963371     |            | TRUE  | TRUE  |
| 6_mann_hap4 | 2949688 - 2963371     | F - 2.70%  | TRUE  | TRUE  |
| 6_ssto_hap7 | 2937602 - 2951281     |            | TRUE  | TRUE  |
| 6_ssto_hap7 | 2937602 - 2951281     | F - 2.70%  | TRUE  | TRUE  |
| 6_ssto_hap7 | 2937602 - 2951281     | F - 8.11%  | TRUE  | TRUE  |
| 6_ssto_hap7 | 2937602 - 2951281     |            | TRUE  | TRUE  |
| 6_ssto_hap7 | 2937602 - 2951281     |            | TRUE  | TRUE  |
| 6_ssto_hap7 | 2937602 - 2951281     | F - 8.11%  | TRUE  | TRUE  |
| 6_ssto_hap7 | 2937602 - 2951281     |            | TRUE  | TRUE  |
| 6_ssto_hap7 | 2937602 - 2951281     | F - 2.70%  | TRUE  | TRUE  |
| 6_ssto_hap7 | 2937602 - 2951281     | F - 29.73% | TRUE  | TRUE  |
| 6_ssto_hap7 | 2937602 - 2951281     |            | TRUE  | TRUE  |
| 6_ssto_hap7 | 2937602 - 2951281     | F - 2.70%  | TRUE  | TRUE  |
| 1           | 174128548 - 174964445 |            | TRUE  | FALSE |
| 1           | 174128548 - 174964445 | F - 35.29% | TRUE  | TRUE  |
| 1           | 174128548 - 174964445 |            | TRUE  | TRUE  |
| 1           | 174128548 - 174964445 | F - 2.94%  | TRUE  | TRUE  |

|    |                       |            |       |       |
|----|-----------------------|------------|-------|-------|
| 1  | 174128548 - 174964445 |            | TRUE  | TRUE  |
| 1  | 174128548 - 174964445 | F - 11.76% | FALSE | TRUE  |
| 1  | 47140831 - 47184736   | T - 50.00% | TRUE  | TRUE  |
| 1  | 47140831 - 47184736   |            | TRUE  | TRUE  |
| 2  | 70189395 - 70315686   |            | TRUE  | TRUE  |
| 2  | 70189395 - 70315686   |            | TRUE  | TRUE  |
| 2  | 70189395 - 70315686   |            | TRUE  | TRUE  |
| 2  | 70189395 - 70315686   | F - 46.67% | TRUE  | TRUE  |
| 2  | 70189395 - 70315686   |            | TRUE  | FALSE |
| 2  | 70189395 - 70315686   |            | FALSE | TRUE  |
| 2  | 70189395 - 70315686   |            | FALSE | TRUE  |
| 2  | 70189395 - 70315686   | F - 6.67%  | TRUE  | TRUE  |
| 2  | 70189395 - 70315686   |            | TRUE  | TRUE  |
| 2  | 70189395 - 70315686   |            | FALSE | TRUE  |
| 3  | 32726637 - 32815367   |            | TRUE  | TRUE  |
| 3  | 32726637 - 32815367   |            | TRUE  | TRUE  |
| 3  | 32726637 - 32815367   | T - 62.07% | TRUE  | TRUE  |
| 3  | 32726637 - 32815367   | F - 3.45%  | FALSE | TRUE  |
| 5  | 138609441 - 138667366 |            | TRUE  | TRUE  |
| 5  | 138609441 - 138667366 |            | TRUE  | FALSE |
| 5  | 138609441 - 138667366 |            | TRUE  | FALSE |
| 5  | 138609441 - 138667366 |            | TRUE  | TRUE  |
| 5  | 138609441 - 138667366 | F - 4.84%  | TRUE  | TRUE  |
| 5  | 138609441 - 138667366 |            | TRUE  | TRUE  |
| 5  | 138609441 - 138667366 | F - 1.61%  | TRUE  | TRUE  |
| 6  | 2832566 - 2842240     | F - 22.22% | TRUE  | TRUE  |
| 6  | 2832566 - 2842240     | F - 11.11% | FALSE | TRUE  |
| 6  | 2832566 - 2842240     |            | FALSE | TRUE  |
| 6  | 31497996 - 31510252   |            | TRUE  | TRUE  |
| 6  | 31497996 - 31510252   | F - 7.89%  | TRUE  | TRUE  |
| 6  | 31497996 - 31510252   |            | TRUE  | TRUE  |
| 6  | 31497996 - 31510252   | F - 5.26%  | TRUE  | TRUE  |
| 6  | 31497996 - 31510252   | F - 15.79% | TRUE  | TRUE  |
| 6  | 31497996 - 31510252   | F - 18.42% | FALSE | TRUE  |
| 6  | 31497996 - 31510252   | F - 2.63%  | FALSE | TRUE  |
| 6  | 31497996 - 31510252   | F - 5.26%  | FALSE | TRUE  |
| 7  | 131808091 - 132333447 |            | TRUE  | TRUE  |
| 7  | 131808091 - 132333447 |            | TRUE  | TRUE  |
| 7  | 131808091 - 132333447 | F - 25.00% | TRUE  | TRUE  |
| 7  | 131808091 - 132333447 |            | TRUE  | TRUE  |
| 9  | 84198598 - 84304220   |            | TRUE  | TRUE  |
| 9  | 84198598 - 84304220   | T - 50.00% | TRUE  | TRUE  |
| 9  | 84198598 - 84304220   |            | TRUE  | TRUE  |
| 9  | 84198598 - 84304220   |            | FALSE | TRUE  |
| X  | 6966961 - 7066231     |            | TRUE  | TRUE  |
| X  | 6966961 - 7066231     | F - 9.09%  | TRUE  | TRUE  |
| X  | 6966961 - 7066231     |            | TRUE  | TRUE  |
| X  | 6966961 - 7066231     | T - 54.55% | TRUE  | TRUE  |
| X  | 6966961 - 7066231     |            | TRUE  | TRUE  |
| X  | 6966961 - 7066231     |            | TRUE  | TRUE  |
| X  | 6966961 - 7066231     | T - 72.73% | TRUE  | TRUE  |
| X  | 53559057 - 53713673   |            | TRUE  | TRUE  |
| X  | 53559057 - 53713673   |            | TRUE  | FALSE |
| X  | 53559057 - 53713673   |            | TRUE  | TRUE  |
| X  | 53559057 - 53713673   | F - 5.00%  | TRUE  | TRUE  |
| X  | 53559057 - 53713673   |            | FALSE | TRUE  |
| X  | 53559057 - 53713673   | F - 25.00% | TRUE  | TRUE  |
| 12 | 95470525 - 95611240   |            | TRUE  | FALSE |

|    |                       |            |       |       |
|----|-----------------------|------------|-------|-------|
| 12 | 95470525 - 95611240   |            | TRUE  | TRUE  |
| 12 | 95470525 - 95611240   | T - 83.33% | TRUE  | FALSE |
| 12 | 95470525 - 95611240   |            | TRUE  | TRUE  |
| 15 | 72491370 - 72524163   |            | TRUE  | TRUE  |
| 15 | 72491370 - 72524163   | F - 9.09%  | TRUE  | TRUE  |
| 15 | 72491370 - 72524163   | F - 31.82% | TRUE  | TRUE  |
| 15 | 72491370 - 72524163   |            | TRUE  | TRUE  |
| 15 | 72491370 - 72524163   |            | TRUE  | TRUE  |
| 15 | 72491370 - 72524163   |            | TRUE  | TRUE  |
| 15 | 72491370 - 72524163   |            | TRUE  | TRUE  |
| 15 | 72491370 - 72524163   |            | TRUE  | TRUE  |
| 15 | 72491370 - 72524163   | F - 18.18% | TRUE  | TRUE  |
| 15 | 72491370 - 72524163   | F - 40.91% | TRUE  | TRUE  |
| 17 | 74372742 - 74383941   |            | TRUE  | TRUE  |
| 17 | 74372742 - 74383941   | F - 9.09%  | TRUE  | TRUE  |
| 1  | 161284047 - 161334535 |            | TRUE  | TRUE  |
| 1  | 161284047 - 161334535 | F - 5.88%  | TRUE  | FALSE |
| 1  | 161284047 - 161334535 |            | TRUE  | TRUE  |
| 1  | 161284047 - 161334535 |            | FALSE | TRUE  |
| 1  | 161284047 - 161334535 |            | FALSE | TRUE  |
| 1  | 180123968 - 180173165 | F - 33.33% | TRUE  | FALSE |
| 1  | 180123968 - 180173165 |            | TRUE  | TRUE  |
| 1  | 180123968 - 180173165 |            | FALSE | TRUE  |
| 2  | 170335688 - 170363165 |            | TRUE  | TRUE  |
| 2  | 170335688 - 170363165 |            | TRUE  | TRUE  |
| 2  | 170335688 - 170363165 | F - 11.11% | FALSE | TRUE  |
| 2  | 170335688 - 170363165 |            | FALSE | TRUE  |
| 2  | 170335688 - 170363165 | F - 44.44% | FALSE | TRUE  |
| 2  | 170335688 - 170363165 |            | TRUE  | TRUE  |
| 2  | 231191894 - 231268447 | F - 38.46% | TRUE  | TRUE  |
| 2  | 231191894 - 231268447 |            | TRUE  | TRUE  |
| 2  | 231191894 - 231268447 | F - 7.69%  | TRUE  | TRUE  |
| 2  | 231191894 - 231268447 |            | FALSE | TRUE  |
| 3  | 9944296 - 9958086     | F - 4.76%  | TRUE  | TRUE  |
| 3  | 9944296 - 9958086     | T - 61.90% | TRUE  | TRUE  |
| 3  | 9944296 - 9958086     |            | FALSE | TRUE  |
| 3  | 9944296 - 9958086     |            | FALSE | TRUE  |
| 3  | 9944296 - 9958086     | T - 71.43% | FALSE | TRUE  |
| 3  | 9944296 - 9958086     | T - 80.95% | FALSE | TRUE  |
| 3  | 64501331 - 64673676   |            | TRUE  | TRUE  |
| 3  | 64501331 - 64673676   |            | TRUE  | TRUE  |
| 3  | 64501331 - 64673676   |            | TRUE  | TRUE  |
| 3  | 64501331 - 64673676   |            | TRUE  | TRUE  |
| 3  | 64501331 - 64673676   |            | TRUE  | TRUE  |
| 3  | 64501331 - 64673676   | T - 52.94% | TRUE  | TRUE  |
| 3  | 64501331 - 64673676   | F - 47.06% | TRUE  | TRUE  |
| 3  | 64501331 - 64673676   | T - 58.82% | TRUE  | TRUE  |
| 3  | 64501331 - 64673676   |            | TRUE  | FALSE |
| 3  | 64501331 - 64673676   |            | TRUE  | TRUE  |
| 3  | 64501331 - 64673676   |            | TRUE  | TRUE  |
| 3  | 64501331 - 64673676   |            | TRUE  | TRUE  |
| 3  | 64501331 - 64673676   | T - 58.82% | TRUE  | TRUE  |
| 3  | 64501331 - 64673676   |            | TRUE  | TRUE  |
| 3  | 64501331 - 64673676   |            | TRUE  | TRUE  |
| 3  | 64501331 - 64673676   | F - 11.76% | TRUE  | TRUE  |
| 3  | 64501331 - 64673676   |            | TRUE  | TRUE  |
| 3  | 64501331 - 64673676   | F - 11.76% | TRUE  | TRUE  |
| 3  | 64501331 - 64673676   | T - 52.94% | TRUE  | FALSE |



|    |                       |            |       |       |
|----|-----------------------|------------|-------|-------|
| 3  | 64501331 - 64673676   | F - 5.88%  | TRUE  | TRUE  |
| 3  | 64501331 - 64673676   | F - 11.76% | TRUE  | TRUE  |
| 3  | 64501331 - 64673676   | F - 17.65% | FALSE | TRUE  |
| 4  | 106815932 - 106925184 |            | TRUE  | FALSE |
| 4  | 106815932 - 106925184 | T - 63.64% | TRUE  | FALSE |
| 4  | 106815932 - 106925184 |            | FALSE | TRUE  |
| 4  | 106815932 - 106925184 | T - 54.55% | TRUE  | TRUE  |
| 4  | 106815932 - 106925184 | F - 40.91% | FALSE | TRUE  |
| 4  | 106815932 - 106925184 |            | TRUE  | TRUE  |
| 5  | 87485450 - 87565293   | F - 9.52%  | TRUE  | TRUE  |
| 5  | 87485450 - 87565293   |            | TRUE  | TRUE  |
| 5  | 87485450 - 87565293   |            | TRUE  | FALSE |
| 5  | 87485450 - 87565293   |            | TRUE  | TRUE  |
| 5  | 87485450 - 87565293   |            | TRUE  | TRUE  |
| 5  | 149781200 - 149792499 | F - 6.25%  | TRUE  | TRUE  |
| 5  | 149781200 - 149792499 | F - 6.25%  | TRUE  | TRUE  |
| 5  | 149781200 - 149792499 | F - 6.25%  | TRUE  | TRUE  |
| 5  | 149781200 - 149792499 | F - 6.25%  | TRUE  | TRUE  |
| 5  | 149781200 - 149792499 | T - 87.50% | FALSE | TRUE  |
| 5  | 149781200 - 149792499 |            | FALSE | TRUE  |
| 5  | 149781200 - 149792499 | F - 31.25% | TRUE  | TRUE  |
| 5  | 149781200 - 149792499 |            | FALSE | TRUE  |
| 5  | 149781200 - 149792499 | T - 50.00% | FALSE | TRUE  |
| 5  | 149781200 - 149792499 | T - 93.75% | TRUE  | TRUE  |
| 5  | 149781200 - 149792499 |            | FALSE | TRUE  |
| 6  | 90074335 - 90121995   |            | TRUE  | TRUE  |
| 6  | 90074335 - 90121995   | T - 50.00% | TRUE  | TRUE  |
| 6  | 90074335 - 90121995   | F - 16.67% | TRUE  | TRUE  |
| 6  | 90074335 - 90121995   |            | FALSE | TRUE  |
| 7  | 137559725 - 137686847 |            | FALSE | TRUE  |
| 7  | 137559725 - 137686847 |            | FALSE | TRUE  |
| 7  | 137559725 - 137686847 |            | TRUE  | TRUE  |
| 7  | 137559725 - 137686847 | F - 7.69%  | TRUE  | TRUE  |
| 7  | 137559725 - 137686847 |            | FALSE | TRUE  |
| 7  | 137559725 - 137686847 | F - 7.69%  | TRUE  | TRUE  |
| 8  | 56608983 - 56685966   | F - 18.18% | TRUE  | TRUE  |
| 8  | 56608983 - 56685966   | F - 9.09%  | TRUE  | TRUE  |
| 8  | 56608983 - 56685966   | T - 59.09% | TRUE  | TRUE  |
| 8  | 56608983 - 56685966   | F - 4.55%  | TRUE  | TRUE  |
| 8  | 56608983 - 56685966   |            | FALSE | TRUE  |
| 8  | 56608983 - 56685966   |            | TRUE  | TRUE  |
| 9  | 134000948 - 134110057 |            | TRUE  | FALSE |
| 9  | 134000948 - 134110057 |            | TRUE  | TRUE  |
| 9  | 134000948 - 134110057 |            | TRUE  | TRUE  |
| 9  | 134000948 - 134110057 | F - 20.69% | TRUE  | TRUE  |
| 9  | 134000948 - 134110057 |            | TRUE  | TRUE  |
| 9  | 134000948 - 134110057 |            | TRUE  | TRUE  |
| 9  | 134000948 - 134110057 |            | TRUE  | TRUE  |
| 12 | 104324112 - 104341704 | F - 12.50% | TRUE  | TRUE  |
| 12 | 104324112 - 104341704 |            | FALSE | TRUE  |
| 12 | 104324112 - 104341704 |            | TRUE  | TRUE  |
| 12 | 104324112 - 104341704 |            | TRUE  | TRUE  |
| 14 | 54863673 - 54886936   |            | TRUE  | FALSE |
| 14 | 54863673 - 54886936   |            | TRUE  | TRUE  |
| 14 | 54863673 - 54886936   | T - 73.33% | TRUE  | TRUE  |
| 14 | 54863673 - 54886936   |            | TRUE  | TRUE  |
| 17 | 44107282 - 44302740   |            | TRUE  | TRUE  |
| 17 | 44107282 - 44302740   |            | TRUE  | TRUE  |

|    |                       |            |       |       |
|----|-----------------------|------------|-------|-------|
| 17 | 44107282 - 44302740   | F - 11.11% | TRUE  | TRUE  |
| 17 | 44107282 - 44302740   |            | TRUE  | TRUE  |
| 21 | 38591910 - 38640262   |            | TRUE  | TRUE  |
| 21 | 38591910 - 38640262   |            | TRUE  | FALSE |
| 21 | 38591910 - 38640262   | F - 8.70%  | TRUE  | TRUE  |
| 21 | 38591910 - 38640262   | F - 4.35%  | TRUE  | TRUE  |
| 2  | 241418839 - 241508626 |            | TRUE  | FALSE |
| 2  | 241418839 - 241508626 |            | TRUE  | TRUE  |
| 2  | 241418839 - 241508626 |            | TRUE  | FALSE |
| 2  | 241418839 - 241508626 | F - 36.11% | TRUE  | FALSE |
| 2  | 241418839 - 241508626 |            | TRUE  | TRUE  |
| 2  | 241418839 - 241508626 | F - 41.67% | TRUE  | TRUE  |
| 2  | 241418839 - 241508626 | F - 2.78%  | TRUE  | TRUE  |
| 2  | 241418839 - 241508626 |            | FALSE | TRUE  |
| 2  | 241418839 - 241508626 |            | FALSE | TRUE  |
| 4  | 77968311 - 77997158   |            | TRUE  | TRUE  |
| 4  | 77968311 - 77997158   | F - 7.14%  | TRUE  | TRUE  |
| 4  | 77968311 - 77997158   | F - 7.14%  | TRUE  | TRUE  |
| 8  | 17780349 - 17887457   | F - 2.78%  | TRUE  | FALSE |
| 8  | 17780349 - 17887457   | F - 2.78%  | TRUE  | TRUE  |
| 8  | 17780349 - 17887457   | F - 33.33% | TRUE  | TRUE  |
| 8  | 17780349 - 17887457   | F - 30.56% | TRUE  | TRUE  |
| 8  | 17780349 - 17887457   |            | TRUE  | TRUE  |
| 9  | 130374486 - 130457460 | F - 45.45% | TRUE  | TRUE  |
| 9  | 130374486 - 130457460 |            | TRUE  | TRUE  |
| 9  | 130374486 - 130457460 |            | TRUE  | TRUE  |
| 9  | 130374486 - 130457460 |            | TRUE  | TRUE  |
| 9  | 130374486 - 130457460 | F - 18.18% | TRUE  | TRUE  |
| 16 | 86508131 - 86542466   | F - 40.00% | TRUE  | TRUE  |
| 16 | 86508131 - 86542466   | T - 80.00% | TRUE  | TRUE  |
| 16 | 86508131 - 86542466   | T - 60.00% | TRUE  | TRUE  |
| 16 | 86508131 - 86542466   |            | FALSE | TRUE  |
| 16 | 86508131 - 86542466   |            | FALSE | TRUE  |
| 16 | 86508131 - 86542466   | F - 40.00% | TRUE  | TRUE  |
| 16 | 86508131 - 86542466   | F - 40.00% | FALSE | TRUE  |
| 16 | 86508131 - 86542466   |            | TRUE  | TRUE  |
| 17 | 18231187 - 18266856   |            | TRUE  | TRUE  |
| 17 | 18231187 - 18266856   |            | TRUE  | TRUE  |
| 17 | 18231187 - 18266856   |            | TRUE  | TRUE  |
| 17 | 18231187 - 18266856   | F - 6.25%  | TRUE  | TRUE  |
| 17 | 18231187 - 18266856   | T - 68.75% | TRUE  | TRUE  |
| 19 | 36936021 - 36980804   | F - 15.79% | TRUE  | TRUE  |
| 19 | 36936021 - 36980804   |            | TRUE  | TRUE  |
| 19 | 36936021 - 36980804   | T - 73.68% | TRUE  | TRUE  |
| 19 | 36936021 - 36980804   | F - 5.26%  | TRUE  | TRUE  |
| 19 | 36936021 - 36980804   | F - 47.37% | FALSE | TRUE  |
| 20 | 2462463 - 2505348     | F - 22.22% | TRUE  | TRUE  |
| 20 | 2462463 - 2505348     |            | TRUE  | TRUE  |
| 22 | 24110413 - 24126503   | F - 46.67% | TRUE  | TRUE  |
| 22 | 24110413 - 24126503   | F - 46.67% | TRUE  | TRUE  |
| 22 | 24110413 - 24126503   |            | TRUE  | FALSE |
| 1  | 44679125 - 44686353   |            | TRUE  | FALSE |
| 1  | 44679125 - 44686353   | F - 23.08% | TRUE  | TRUE  |
| 1  | 178818670 - 178840215 |            | TRUE  | TRUE  |
| 1  | 178818670 - 178840215 |            | TRUE  | TRUE  |
| 1  | 178818670 - 178840215 | T - 57.14% | TRUE  | FALSE |
| 1  | 178818670 - 178840215 | F - 28.57% | TRUE  | FALSE |
| 1  | 178818670 - 178840215 | T - 71.43% | TRUE  | TRUE  |

|    |                       |            |       |       |
|----|-----------------------|------------|-------|-------|
| 1  | 178818670 - 178840215 |            | TRUE  | FALSE |
| 1  | 178818670 - 178840215 | F - 28.57% | TRUE  | FALSE |
| 1  | 178818670 - 178840215 | F - 42.86% | TRUE  | FALSE |
| 2  | 219940039 - 220025587 |            | TRUE  | FALSE |
| 2  | 219940039 - 220025587 | T - 61.54% | FALSE | TRUE  |
| 7  | 112063023 - 112117258 | F - 11.54% | TRUE  | TRUE  |
| 7  | 112063023 - 112117258 |            | TRUE  | TRUE  |
| 7  | 112063023 - 112117258 | F - 3.85%  | TRUE  | TRUE  |
| 7  | 112063023 - 112117258 | F - 46.15% | TRUE  | TRUE  |
| 7  | 112063023 - 112117258 |            | TRUE  | FALSE |
| 7  | 112063023 - 112117258 | F - 3.85%  | TRUE  | TRUE  |
| 7  | 112063023 - 112117258 | F - 15.38% | TRUE  | TRUE  |
| 7  | 112063023 - 112117258 | F - 11.54% | TRUE  | TRUE  |
| 7  | 112063023 - 112117258 |            | FALSE | TRUE  |
| 13 | 31032879 - 31191734   |            | TRUE  | FALSE |
| 13 | 31032879 - 31191734   | F - 10.00% | TRUE  | TRUE  |
| 13 | 31032879 - 31191734   |            | TRUE  | FALSE |
| 13 | 31032879 - 31191734   |            | TRUE  | TRUE  |
| 14 | 104200088 - 104313927 |            | TRUE  | TRUE  |
| 14 | 104200088 - 104313927 |            | TRUE  | TRUE  |
| 14 | 104200088 - 104313927 | F - 12.50% | TRUE  | TRUE  |
| 14 | 104200088 - 104313927 | T - 50.00% | TRUE  | TRUE  |
| 14 | 104200088 - 104313927 |            | TRUE  | TRUE  |
| 14 | 104200088 - 104313927 |            | TRUE  | TRUE  |
| 14 | 104200088 - 104313927 |            | TRUE  | TRUE  |
| 15 | 20588368 - 20711433   |            | TRUE  | TRUE  |
| 15 | 20588368 - 20711433   |            | TRUE  | TRUE  |
| 15 | 20588368 - 20711433   | F - 28.57% | FALSE | TRUE  |
| 15 | 20588368 - 20711433   |            | FALSE | TRUE  |
| 15 | 20588368 - 20711433   |            | TRUE  | TRUE  |
| 15 | 20588368 - 20711433   | T - 57.14% | FALSE | TRUE  |
| 15 | 63900817 - 64126147   | T - 57.14% | TRUE  | TRUE  |
| 15 | 63900817 - 64126147   |            | TRUE  | TRUE  |
| 15 | 63900817 - 64126147   |            | TRUE  | TRUE  |
| 15 | 63900817 - 64126147   |            | FALSE | TRUE  |
| 15 | 63900817 - 64126147   |            | TRUE  | TRUE  |
| 15 | 63900817 - 64126147   | F - 28.57% | TRUE  | TRUE  |
| 15 | 63900817 - 64126147   |            | TRUE  | TRUE  |
| 15 | 63900817 - 64126147   |            | TRUE  | TRUE  |
| 15 | 63900817 - 64126147   |            | TRUE  | TRUE  |
| 15 | 63900817 - 64126147   |            | TRUE  | TRUE  |
| 15 | 63900817 - 64126147   |            | TRUE  | TRUE  |
| 15 | 63900817 - 64126147   |            | FALSE | TRUE  |
| 16 | 31212807 - 31214313   | T - 83.33% | TRUE  | TRUE  |
| 16 | 31212807 - 31214313   | F - 33.33% | TRUE  | TRUE  |
| 16 | 31212807 - 31214313   |            | TRUE  | TRUE  |
| 16 | 31212807 - 31214313   | T - 66.67% | TRUE  | TRUE  |
| 16 | 31212807 - 31214313   |            | TRUE  | TRUE  |
| 17 | 48260650 - 48279000   | F - 6.67%  | TRUE  | TRUE  |
| 17 | 48260650 - 48279000   | F - 6.67%  | TRUE  | TRUE  |
| 17 | 48260650 - 48279000   | F - 6.67%  | TRUE  | TRUE  |
| 17 | 48260650 - 48279000   | F - 6.67%  | TRUE  | TRUE  |
| 17 | 48260650 - 48279000   | F - 6.67%  | TRUE  | TRUE  |
| 17 | 48260650 - 48279000   | F - 6.67%  | TRUE  | TRUE  |
| 17 | 48260650 - 48279000   | F - 20.00% | TRUE  | TRUE  |
| 17 | 48260650 - 48279000   | F - 26.67% | TRUE  | TRUE  |
| 17 | 48260650 - 48279000   | F - 26.67% | TRUE  | TRUE  |
| 17 | 48260650 - 48279000   | F - 26.67% | TRUE  | TRUE  |
| 17 | 48260650 - 48279000   | F - 20.00% | TRUE  | TRUE  |

|             |                       |            |       |       |
|-------------|-----------------------|------------|-------|-------|
| 17          | 48260650 - 48279000   |            | TRUE  | TRUE  |
| 17          | 48260650 - 48279000   |            | TRUE  | TRUE  |
| 17          | 48260650 - 48279000   | F - 20.00% | TRUE  | TRUE  |
| 17          | 48260650 - 48279000   |            | TRUE  | TRUE  |
| 17          | 48260650 - 48279000   | F - 6.67%  | TRUE  | TRUE  |
| 19          | 19174803 - 19223704   | F - 33.33% | TRUE  | TRUE  |
| 19          | 19174803 - 19223704   |            | TRUE  | TRUE  |
| 19          | 19174803 - 19223704   | T - 66.67% | TRUE  | TRUE  |
| 19          | 19174803 - 19223704   |            | TRUE  | TRUE  |
| 20          | 57414773 - 57486250   |            | TRUE  | FALSE |
| 20          | 57414773 - 57486250   |            | TRUE  | TRUE  |
| 20          | 57414773 - 57486250   | F - 1.37%  | TRUE  | TRUE  |
| 6_dbb_hap3  | 995262 - 1017704      |            | TRUE  | TRUE  |
| 6_dbb_hap3  | 995262 - 1017704      | F - 20.00% | TRUE  | TRUE  |
| 6_dbb_hap3  | 995262 - 1017704      | F - 40.00% | TRUE  | TRUE  |
| 6_dbb_hap3  | 995262 - 1017704      |            | FALSE | TRUE  |
| 6_dbb_hap3  | 995262 - 1017704      |            | TRUE  | TRUE  |
| 6_mann_hap4 | 994885 - 1017334      |            | TRUE  | TRUE  |
| 6_mann_hap4 | 994885 - 1017334      | F - 20.00% | TRUE  | TRUE  |
| 6_mann_hap4 | 994885 - 1017334      | F - 40.00% | TRUE  | TRUE  |
| 6_mann_hap4 | 994885 - 1017334      |            | FALSE | TRUE  |
| 6_mann_hap4 | 994885 - 1017334      |            | TRUE  | TRUE  |
| 6_mann_hap4 | 3478807 - 3488712     | F - 23.53% | TRUE  | TRUE  |
| 6_mann_hap4 | 3478807 - 3488712     |            | TRUE  | FALSE |
| 6_mann_hap4 | 3478807 - 3488712     | F - 5.88%  | TRUE  | FALSE |
| 6_mann_hap4 | 3478807 - 3488712     |            | TRUE  | TRUE  |
| 6_qbl_hap6  | 995239 - 1017689      |            | TRUE  | TRUE  |
| 6_qbl_hap6  | 995239 - 1017689      | F - 20.00% | TRUE  | TRUE  |
| 6_qbl_hap6  | 995239 - 1017689      | F - 40.00% | TRUE  | TRUE  |
| 6_qbl_hap6  | 995239 - 1017689      |            | FALSE | TRUE  |
| 6_qbl_hap6  | 995239 - 1017689      |            | TRUE  | TRUE  |
| 1           | 171283347 - 171311223 |            | TRUE  | TRUE  |
| 1           | 171283347 - 171311223 |            | TRUE  | TRUE  |
| 1           | 171283347 - 171311223 |            | TRUE  | TRUE  |
| 1           | 171283347 - 171311223 | F - 16.67% | TRUE  | TRUE  |
| 2           | 42721709 - 42984087   | F - 28.00% | TRUE  | FALSE |
| 2           | 42721709 - 42984087   |            | TRUE  | FALSE |
| 2           | 42721709 - 42984087   |            | TRUE  | TRUE  |
| 2           | 42721709 - 42984087   | F - 32.00% | TRUE  | TRUE  |
| 2           | 42721709 - 42984087   |            | TRUE  | TRUE  |
| 2           | 42721709 - 42984087   | F - 8.00%  | TRUE  | TRUE  |
| 6           | 37598455 - 37667082   |            | TRUE  | FALSE |
| 6           | 37598455 - 37667082   | F - 20.00% | TRUE  | TRUE  |
| 6           | 37598455 - 37667082   |            | TRUE  | TRUE  |
| 6           | 37598455 - 37667082   | F - 6.67%  | TRUE  | FALSE |
| 6           | 37598455 - 37667082   | F - 6.67%  | TRUE  | TRUE  |
| 7           | 25174316 - 25219975   |            | TRUE  | TRUE  |
| 7           | 25174316 - 25219975   | T - 75.00% | TRUE  | TRUE  |
| 7           | 25174316 - 25219975   | T - 50.00% | TRUE  | TRUE  |
| 8           | 22844930 - 22877712   | F - 45.45% | TRUE  | TRUE  |
| 8           | 22844930 - 22877712   |            | TRUE  | TRUE  |
| 8           | 22844930 - 22877712   |            | TRUE  | TRUE  |
| 12          | 71518865 - 71835678   |            | TRUE  | FALSE |
| 12          | 71518865 - 71835678   | T - 77.78% | TRUE  | TRUE  |
| 12          | 71518865 - 71835678   | T - 88.89% | TRUE  | TRUE  |
| 12          | 71518865 - 71835678   | F - 22.22% | FALSE | TRUE  |
| 12          | 71518865 - 71835678   | F - 22.22% | TRUE  | TRUE  |
| 12          | 71518865 - 71835678   | F - 11.11% | FALSE | TRUE  |

|    |                       |             |       |       |
|----|-----------------------|-------------|-------|-------|
| 16 | 20911557 - 20936328   |             | TRUE  | TRUE  |
| 16 | 20911557 - 20936328   | F - 45.45%  | TRUE  | TRUE  |
| 16 | 20911557 - 20936328   |             | TRUE  | TRUE  |
| 16 | 20911557 - 20936328   | F - 36.36%  | TRUE  | TRUE  |
| 16 | 20911557 - 20936328   |             | TRUE  | TRUE  |
| 16 | 20911557 - 20936328   | F - 18.18%  | FALSE | TRUE  |
| 19 | 45312338 - 45324678   |             | TRUE  | TRUE  |
| 19 | 45312338 - 45324678   | T - 100.00% | TRUE  | TRUE  |
| 19 | 45312338 - 45324678   | T - 75.00%  | TRUE  | TRUE  |
| 19 | 45312338 - 45324678   |             | TRUE  | TRUE  |
| 19 | 45312338 - 45324678   |             | FALSE | TRUE  |
| 19 | 45312338 - 45324678   | T - 100.00% | TRUE  | TRUE  |
| 19 | 45312338 - 45324678   |             | FALSE | TRUE  |
| 19 | 45312338 - 45324678   |             | FALSE | TRUE  |
| 20 | 50003494 - 50179339   | T - 85.71%  | TRUE  | TRUE  |
| 20 | 50003494 - 50179339   |             | TRUE  | TRUE  |
| 20 | 50003494 - 50179339   |             | TRUE  | FALSE |
| 20 | 50003494 - 50179339   | T - 92.86%  | TRUE  | TRUE  |
| 20 | 50003494 - 50179339   | T - 57.14%  | TRUE  | TRUE  |
| 20 | 50003494 - 50179339   |             | TRUE  | TRUE  |
| 20 | 50003494 - 50179339   |             | TRUE  | TRUE  |
| 20 | 50003494 - 50179339   | T - 92.86%  | TRUE  | TRUE  |
| 20 | 50003494 - 50179339   |             | TRUE  | FALSE |
| 20 | 50003494 - 50179339   | F - 42.86%  | FALSE | TRUE  |
| 17 | 34136486 - 34174238   |             | TRUE  | TRUE  |
| 17 | 34136486 - 34174238   |             | TRUE  | FALSE |
| 17 | 34136486 - 34174238   | F - 28.57%  | TRUE  | TRUE  |
| 1  | 206680879 - 206762616 |             | TRUE  | TRUE  |
| 1  | 206680879 - 206762616 | T - 78.57%  | FALSE | TRUE  |
| 1  | 206238872 - 206306131 |             | TRUE  | TRUE  |
| 1  | 206238872 - 206306131 |             | TRUE  | TRUE  |
| 1  | 206238872 - 206306131 |             | TRUE  | FALSE |
| 1  | 206238872 - 206306131 | F - 12.50%  | TRUE  | TRUE  |
| 1  | 206238872 - 206306131 | F - 25.00%  | TRUE  | FALSE |
| 1  | 206238872 - 206306131 | T - 50.00%  | TRUE  | TRUE  |
| 1  | 206238872 - 206306131 | F - 25.00%  | FALSE | TRUE  |
| 2  | 242088991 - 242123067 |             | TRUE  | FALSE |
| 2  | 242088991 - 242123067 | F - 3.85%   | TRUE  | FALSE |
| 2  | 242088991 - 242123067 | F - 3.85%   | TRUE  | TRUE  |
| 2  | 201773696 - 201828424 |             | TRUE  | TRUE  |
| 2  | 201773696 - 201828424 | F - 10.00%  | TRUE  | TRUE  |
| 2  | 201773696 - 201828424 |             | TRUE  | TRUE  |
| 2  | 201773696 - 201828424 | F - 10.00%  | TRUE  | TRUE  |
| 2  | 201773696 - 201828424 |             | TRUE  | TRUE  |
| 2  | 201773696 - 201828424 |             | FALSE | TRUE  |
| 2  | 201773696 - 201828424 |             | TRUE  | TRUE  |
| 2  | 27008865 - 27023935   | T - 72.73%  | TRUE  | TRUE  |
| 2  | 27008865 - 27023935   |             | TRUE  | TRUE  |
| 2  | 27008865 - 27023935   | T - 100.00% | FALSE | TRUE  |
| 3  | 57611181 - 57678816   |             | TRUE  | TRUE  |
| 3  | 57611181 - 57678816   | F - 12.50%  | TRUE  | TRUE  |
| 3  | 81538850 - 81811312   | T - 50.00%  | TRUE  | TRUE  |
| 3  | 81538850 - 81811312   | F - 8.33%   | TRUE  | TRUE  |
| 3  | 81538850 - 81811312   | F - 33.33%  | FALSE | TRUE  |
| 3  | 81538850 - 81811312   | T - 50.00%  | TRUE  | TRUE  |
| 3  | 81538850 - 81811312   |             | FALSE | TRUE  |
| 5  | 36248536 - 36302216   | T - 100.00% | TRUE  | FALSE |
| 5  | 36248536 - 36302216   |             | TRUE  | FALSE |

|    |                       |             |       |       |
|----|-----------------------|-------------|-------|-------|
| 5  | 36248536 - 36302216   |             | TRUE  | TRUE  |
| 5  | 36248536 - 36302216   | T - 71.43%  | TRUE  | TRUE  |
| 5  | 36248536 - 36302216   | F - 14.29%  | TRUE  | FALSE |
| 5  | 36248536 - 36302216   |             | TRUE  | FALSE |
| 5  | 36248536 - 36302216   | T - 71.43%  | TRUE  | TRUE  |
| 5  | 36248536 - 36302216   |             | TRUE  | FALSE |
| 5  | 36248536 - 36302216   |             | TRUE  | FALSE |
| 5  | 36248536 - 36302216   | F - 14.29%  | TRUE  | FALSE |
| 5  | 36248536 - 36302216   |             | TRUE  | TRUE  |
| 7  | 143336432 - 143533810 | F - 11.11%  | TRUE  | TRUE  |
| 7  | 143336432 - 143533810 |             | FALSE | TRUE  |
| 7  | 143336432 - 143533810 | F - 11.11%  | TRUE  | TRUE  |
| 7  | 143336432 - 143533810 | F - 11.11%  | TRUE  | TRUE  |
| 7  | 143336432 - 143533810 | F - 44.44%  | FALSE | TRUE  |
| 7  | 143336432 - 143533810 |             | FALSE | TRUE  |
| 7  | 143336432 - 143533810 |             | FALSE | TRUE  |
| 7  | 143336432 - 143533810 |             | FALSE | TRUE  |
| 7  | 143336432 - 143533810 | F - 11.11%  | TRUE  | TRUE  |
| 7  | 143336432 - 143533810 |             | TRUE  | TRUE  |
| 9  | 35609530 - 35646854   | F - 25.00%  | TRUE  | TRUE  |
| 9  | 35609530 - 35646854   | F - 31.25%  | TRUE  | TRUE  |
| 9  | 35609530 - 35646854   |             | TRUE  | TRUE  |
| 9  | 35609530 - 35646854   |             | TRUE  | TRUE  |
| 9  | 35609530 - 35646854   | F - 6.25%   | TRUE  | TRUE  |
| 9  | 35609530 - 35646854   | F - 37.50%  | TRUE  | TRUE  |
| 9  | 35609530 - 35646854   | F - 18.75%  | TRUE  | TRUE  |
| 9  | 35609530 - 35646854   |             | FALSE | TRUE  |
| 9  | 114803061 - 114937688 |             | TRUE  | TRUE  |
| 9  | 114803061 - 114937688 |             | TRUE  | TRUE  |
| 9  | 114803061 - 114937688 | T - 81.82%  | TRUE  | TRUE  |
| 9  | 114803061 - 114937688 | T - 81.82%  | TRUE  | TRUE  |
| 9  | 114803061 - 114937688 | T - 54.55%  | TRUE  | TRUE  |
| 9  | 114803061 - 114937688 |             | FALSE | TRUE  |
| 9  | 114803061 - 114937688 | T - 72.73%  | TRUE  | TRUE  |
| 9  | 114803061 - 114937688 |             | FALSE | TRUE  |
| 10 | 31607424 - 31821599   | F - 13.51%  | TRUE  | TRUE  |
| 10 | 31607424 - 31821599   | F - 2.70%   | TRUE  | TRUE  |
| 10 | 31607424 - 31821599   |             | TRUE  | TRUE  |
| 10 | 31607424 - 31821599   |             | TRUE  | TRUE  |
| 10 | 102889257 - 102897546 |             | TRUE  | FALSE |
| 10 | 102889257 - 102897546 | T - 62.50%  | FALSE | TRUE  |
| 10 | 79729008 - 79789303   |             | TRUE  | TRUE  |
| 10 | 79729008 - 79789303   |             | TRUE  | FALSE |
| 10 | 79729008 - 79789303   |             | TRUE  | FALSE |
| 10 | 79729008 - 79789303   |             | TRUE  | TRUE  |
| 10 | 79729008 - 79789303   | F - 44.44%  | TRUE  | TRUE  |
| 10 | 79729008 - 79789303   |             | TRUE  | TRUE  |
| 10 | 79729008 - 79789303   |             | TRUE  | TRUE  |
| 10 | 79729008 - 79789303   |             | FALSE | TRUE  |
| 10 | 126305649 - 126480296 |             | TRUE  | TRUE  |
| 10 | 126305649 - 126480296 |             | TRUE  | TRUE  |
| 10 | 126305649 - 126480296 | F - 28.57%  | TRUE  | TRUE  |
| 15 | 66187634 - 66546085   |             | TRUE  | FALSE |
| 15 | 66187634 - 66546085   |             | TRUE  | FALSE |
| 15 | 66187634 - 66546085   | F - 5.56%   | FALSE | TRUE  |
| 15 | 66187634 - 66546085   |             | FALSE | TRUE  |
| 1  | 46899499 - 46911374   | T - 100.00% | TRUE  | TRUE  |
| 1  | 46899499 - 46911374   |             | TRUE  | TRUE  |

|            |                       |             |       |       |
|------------|-----------------------|-------------|-------|-------|
| 1          | 46899499 - 46911374   |             | FALSE | TRUE  |
| 2          | 71503691 - 71662199   |             | TRUE  | TRUE  |
| 2          | 71503691 - 71662199   |             | TRUE  | TRUE  |
| 2          | 71503691 - 71662199   |             | TRUE  | FALSE |
| 2          | 71503691 - 71662199   |             | TRUE  | TRUE  |
| 2          | 71503691 - 71662199   | F - 4.17%   | TRUE  | TRUE  |
| 2          | 71503691 - 71662199   |             | FALSE | TRUE  |
| 2          | 71503691 - 71662199   |             | FALSE | TRUE  |
| 2          | 71503691 - 71662199   |             | TRUE  | TRUE  |
| 2          | 71503691 - 71662199   | F - 43.75%  | FALSE | TRUE  |
| 2          | 99235569 - 99347589   | F - 23.08%  | TRUE  | TRUE  |
| 2          | 99235569 - 99347589   |             | TRUE  | TRUE  |
| 2          | 99235569 - 99347589   | F - 30.77%  | FALSE | TRUE  |
| 2          | 99235569 - 99347589   | T - 53.85%  | TRUE  | TRUE  |
| 2          | 99235569 - 99347589   |             | TRUE  | TRUE  |
| 2          | 99235569 - 99347589   | F - 15.38%  | TRUE  | TRUE  |
| 4          | 619363 - 664681       |             | TRUE  | TRUE  |
| 4          | 619363 - 664681       | F - 44.44%  | FALSE | TRUE  |
| 5          | 170288874 - 170727019 | F - 37.14%  | TRUE  | TRUE  |
| 5          | 170288874 - 170727019 |             | TRUE  | TRUE  |
| 5          | 170288874 - 170727019 |             | TRUE  | FALSE |
| 5          | 170288874 - 170727019 | F - 5.71%   | TRUE  | FALSE |
| 5          | 170288874 - 170727019 |             | TRUE  | TRUE  |
| 5          | 170288874 - 170727019 | F - 2.86%   | FALSE | TRUE  |
| 5          | 170288874 - 170727019 | F - 2.86%   | FALSE | TRUE  |
| 5          | 170288874 - 170727019 | F - 2.86%   | FALSE | TRUE  |
| 5          | 170288874 - 170727019 |             | TRUE  | TRUE  |
| 5          | 170288874 - 170727019 |             | TRUE  | TRUE  |
| 7          | 92861653 - 92988338   | T - 60.71%  | TRUE  | TRUE  |
| 7          | 92861653 - 92988338   |             | TRUE  | TRUE  |
| 7          | 92861653 - 92988338   | F - 42.86%  | TRUE  | TRUE  |
| 7          | 92861653 - 92988338   |             | TRUE  | FALSE |
| 7          | 92861653 - 92988338   |             | TRUE  | TRUE  |
| 7          | 150773679 - 150777953 | F - 11.54%  | TRUE  | TRUE  |
| 7          | 150773679 - 150777953 |             | TRUE  | TRUE  |
| 11         | 790475 - 798269       |             | TRUE  | FALSE |
| 11         | 790475 - 798269       | T - 100.00% | TRUE  | TRUE  |
| 11         | 790475 - 798269       |             | TRUE  | TRUE  |
| 13         | 108859792 - 108870716 |             | TRUE  | FALSE |
| 13         | 108859792 - 108870716 |             | TRUE  | TRUE  |
| 13         | 108859792 - 108870716 | F - 20.00%  | FALSE | TRUE  |
| 6_qbl_hap6 | 2615165 - 2618505     |             | TRUE  | TRUE  |
| 6_qbl_hap6 | 2615165 - 2618505     | F - 13.33%  | TRUE  | TRUE  |
| 6_qbl_hap6 | 2615165 - 2618505     | F - 6.67%   | TRUE  | TRUE  |
| 6_qbl_hap6 | 2615165 - 2618505     |             | TRUE  | TRUE  |
| 6_qbl_hap6 | 2615165 - 2618505     | T - 60.00%  | TRUE  | TRUE  |
| 6_qbl_hap6 | 2615165 - 2618505     | T - 60.00%  | TRUE  | TRUE  |
| 2          | 61108656 - 61150645   |             | TRUE  | TRUE  |
| 2          | 61108656 - 61150645   | T - 100.00% | TRUE  | TRUE  |
| 2          | 61108656 - 61150645   |             | TRUE  | TRUE  |
| 2          | 231280657 - 231410317 |             | TRUE  | TRUE  |
| 2          | 231280657 - 231410317 | F - 25.81%  | TRUE  | TRUE  |
| 2          | 231280657 - 231410317 | F - 3.23%   | TRUE  | TRUE  |
| 2          | 231280657 - 231410317 | F - 12.90%  | TRUE  | TRUE  |
| 2          | 231280657 - 231410317 | F - 22.58%  | TRUE  | TRUE  |
| 2          | 234684370 - 234742069 |             | TRUE  | FALSE |
| 2          | 234684370 - 234742069 |             | TRUE  | TRUE  |
| 2          | 234684370 - 234742069 | F - 28.57%  | TRUE  | TRUE  |

|             |                       |            |       |       |
|-------------|-----------------------|------------|-------|-------|
| 3           | 40566369 - 40616176   | F - 7.69%  | TRUE  | FALSE |
| 3           | 40566369 - 40616176   |            | TRUE  | FALSE |
| 3           | 40566369 - 40616176   | T - 76.92% | TRUE  | TRUE  |
| 3           | 47021173 - 47051194   |            | TRUE  | TRUE  |
| 3           | 47021173 - 47051194   | F - 20.00% | TRUE  | FALSE |
| 3           | 47021173 - 47051194   |            | TRUE  | TRUE  |
| 3           | 47021173 - 47051194   | F - 35.00% | TRUE  | TRUE  |
| 3           | 47021173 - 47051194   |            | FALSE | TRUE  |
| 4           | 169137442 - 169239958 |            | TRUE  | FALSE |
| 4           | 169137442 - 169239958 |            | TRUE  | TRUE  |
| 4           | 169137442 - 169239958 |            | TRUE  | TRUE  |
| 4           | 169137442 - 169239958 | T - 50.00% | TRUE  | TRUE  |
| 4           | 169137442 - 169239958 |            | TRUE  | TRUE  |
| 4           | 169137442 - 169239958 |            | TRUE  | TRUE  |
| 4           | 169137442 - 169239958 | F - 40.00% | TRUE  | TRUE  |
| 4           | 169137442 - 169239958 | F - 40.00% | TRUE  | TRUE  |
| 4           | 169137442 - 169239958 |            | TRUE  | TRUE  |
| 4           | 169137442 - 169239958 |            | TRUE  | TRUE  |
| 4           | 169137442 - 169239958 |            | TRUE  | TRUE  |
| 4           | 169137442 - 169239958 |            | TRUE  | TRUE  |
| 5           | 5140443 - 5320417     |            | TRUE  | FALSE |
| 5           | 5140443 - 5320417     | T - 87.50% | TRUE  | TRUE  |
| 5           | 5140443 - 5320417     |            | TRUE  | FALSE |
| 5           | 5140443 - 5320417     |            | TRUE  | TRUE  |
| 5           | 5140443 - 5320417     |            | TRUE  | TRUE  |
| 5           | 5140443 - 5320417     | T - 62.50% | TRUE  | TRUE  |
| 5           | 5140443 - 5320417     | F - 25.00% | TRUE  | TRUE  |
| 5           | 5140443 - 5320417     |            | TRUE  | TRUE  |
| 5           | 156693089 - 156822606 |            | TRUE  | TRUE  |
| 5           | 156693089 - 156822606 | F - 2.38%  | TRUE  | TRUE  |
| 5           | 156693089 - 156822606 | F - 2.38%  | TRUE  | TRUE  |
| 5           | 156693089 - 156822606 |            | TRUE  | TRUE  |
| 5           | 156693089 - 156822606 |            | TRUE  | FALSE |
| 5           | 156693089 - 156822606 |            | FALSE | TRUE  |
| 5           | 156693089 - 156822606 | T - 69.05% | TRUE  | TRUE  |
| 5           | 156693089 - 156822606 | F - 2.38%  | TRUE  | FALSE |
| 5           | 156693089 - 156822606 | T - 57.14% | FALSE | TRUE  |
| 5           | 156693089 - 156822606 | T - 61.90% | FALSE | TRUE  |
| 5           | 156693089 - 156822606 |            | FALSE | TRUE  |
| 5           | 156693089 - 156822606 |            | FALSE | TRUE  |
| 5           | 156693089 - 156822606 | T - 59.52% | FALSE | TRUE  |
| 5           | 156693089 - 156822606 | T - 61.90% | FALSE | TRUE  |
| 6           | 96969471 - 97003152   |            | TRUE  | FALSE |
| 6           | 96969471 - 97003152   | F - 16.67% | TRUE  | TRUE  |
| 6           | 107077441 - 107116292 |            | TRUE  | FALSE |
| 6           | 107077441 - 107116292 |            | TRUE  | TRUE  |
| 6           | 107077441 - 107116292 | F - 28.57% | FALSE | TRUE  |
| 10          | 70090931 - 70102953   | F - 5.26%  | TRUE  | FALSE |
| 10          | 70090931 - 70102953   | F - 5.26%  | TRUE  | TRUE  |
| 10          | 70090931 - 70102953   |            | TRUE  | TRUE  |
| 14          | 32030591 - 32330430   | F - 12.50% | TRUE  | TRUE  |
| 14          | 32030591 - 32330430   |            | TRUE  | TRUE  |
| 14          | 32030591 - 32330430   | T - 75.00% | TRUE  | TRUE  |
| 16          | 79627735 - 79634622   |            | TRUE  | TRUE  |
| 16          | 79627735 - 79634622   |            | TRUE  | TRUE  |
| 16          | 79627735 - 79634622   | T - 60.00% | FALSE | TRUE  |
| 6_mann_hap4 | 1603265 - 1642995     |            | TRUE  | TRUE  |
| 6_mann_hap4 | 1603265 - 1642995     | F - 40.00% | TRUE  | TRUE  |
| 2           | 220143989 - 220151622 |            | TRUE  | TRUE  |



|                |                       |            |       |       |
|----------------|-----------------------|------------|-------|-------|
| 2              | 220143989 - 220151622 |            | TRUE  | TRUE  |
| 2              | 220143989 - 220151622 | F - 4.00%  | TRUE  | TRUE  |
| 2              | 220143989 - 220151622 |            | TRUE  | TRUE  |
| 2              | 220143989 - 220151622 | F - 12.00% | TRUE  | TRUE  |
| 3              | 50606583 - 50622421   |            | TRUE  | TRUE  |
| 3              | 50606583 - 50622421   |            | TRUE  | TRUE  |
| 3              | 50606583 - 50622421   |            | TRUE  | TRUE  |
| 3              | 50606583 - 50622421   | F - 10.00% | FALSE | TRUE  |
| 3              | 50606583 - 50622421   | F - 30.00% | TRUE  | TRUE  |
| 3              | 50606583 - 50622421   |            | FALSE | TRUE  |
| 3              | 54156574 - 55108584   |            | TRUE  | TRUE  |
| 3              | 54156574 - 55108584   |            | TRUE  | FALSE |
| 3              | 54156574 - 55108584   | F - 5.88%  | TRUE  | TRUE  |
| 3              | 54156574 - 55108584   |            | TRUE  | TRUE  |
| 3              | 54156574 - 55108584   | F - 23.53% | TRUE  | TRUE  |
| 3              | 54156574 - 55108584   |            | TRUE  | TRUE  |
| 3              | 54156574 - 55108584   | T - 52.94% | TRUE  | TRUE  |
| 3              | 54156574 - 55108584   |            | TRUE  | TRUE  |
| 3              | 54156574 - 55108584   | F - 5.88%  | TRUE  | TRUE  |
| 3              | 54156574 - 55108584   |            | TRUE  | TRUE  |
| 3              | 54156574 - 55108584   | T - 58.82% | TRUE  | TRUE  |
| 3              | 54156574 - 55108584   | F - 35.29% | TRUE  | TRUE  |
| 3              | 54156574 - 55108584   | T - 64.71% | TRUE  | TRUE  |
| 3              | 54156574 - 55108584   | F - 5.88%  | FALSE | TRUE  |
| 3              | 54156574 - 55108584   |            | FALSE | TRUE  |
| 3              | 54156574 - 55108584   |            | FALSE | TRUE  |
| 3              | 54156574 - 55108584   |            | FALSE | TRUE  |
| 3              | 54156574 - 55108584   |            | FALSE | TRUE  |
| 3              | 54156574 - 55108584   |            | FALSE | TRUE  |
| 3              | 54156574 - 55108584   |            | FALSE | TRUE  |
| 3              | 54156574 - 55108584   |            | FALSE | TRUE  |
| 3              | 54156574 - 55108584   |            | FALSE | TRUE  |
| 3              | 24158645 - 24536773   | F - 8.00%  | TRUE  | FALSE |
| 3              | 24158645 - 24536773   |            | TRUE  | TRUE  |
| 3              | 24158645 - 24536773   | F - 44.00% | TRUE  | TRUE  |
| 3              | 24158645 - 24536773   | F - 4.00%  | TRUE  | TRUE  |
| 3              | 24158645 - 24536773   | F - 36.00% | FALSE | TRUE  |
| 3              | 24158645 - 24536773   |            | TRUE  | TRUE  |
| 3              | 24158645 - 24536773   |            | TRUE  | TRUE  |
| 3              | 24158645 - 24536773   | F - 12.00% | TRUE  | TRUE  |
| 3              | 24158645 - 24536773   | F - 8.00%  | TRUE  | TRUE  |
| 5              | 94982458 - 94993786   |            | TRUE  | FALSE |
| 5              | 94982458 - 94993786   | T - 84.62% | TRUE  | TRUE  |
| 1_gl000192_ran | 222732 - 407510       |            | TRUE  | FALSE |
| 1_gl000192_ran | 222732 - 407510       |            | TRUE  | FALSE |
| 1_gl000192_ran | 222732 - 407510       |            | TRUE  | TRUE  |
| 1_gl000192_ran | 222732 - 407510       | T - 50.00% | TRUE  | TRUE  |
| 1_gl000192_ran | 222732 - 407510       |            | FALSE | TRUE  |
| 14             | 61176246 - 61191066   | F - 16.67% | FALSE | TRUE  |
| 14             | 61176246 - 61191066   |            | TRUE  | TRUE  |
| 14             | 61176246 - 61191066   | F - 33.33% | TRUE  | TRUE  |
| 14             | 61176246 - 61191066   | F - 16.67% | TRUE  | TRUE  |
| 16             | 15489611 - 15503543   |            | TRUE  | FALSE |
| 16             | 15489611 - 15503543   | T - 50.00% | TRUE  | TRUE  |
| 20             | 48697661 - 48732496   |            | TRUE  | TRUE  |
| 20             | 48697661 - 48732496   | F - 38.46% | TRUE  | TRUE  |
| 20             | 48697661 - 48732496   | F - 3.85%  | TRUE  | TRUE  |
| 20             | 48697661 - 48732496   | F - 7.69%  | TRUE  | TRUE  |
| 20             | 48697661 - 48732496   |            | FALSE | TRUE  |
| 2              | 182818968 - 182996125 |            | TRUE  | TRUE  |

|    |                       |            |       |       |
|----|-----------------------|------------|-------|-------|
| 2  | 182818968 - 182996125 | F - 43.75% | TRUE  | TRUE  |
| 1  | 33546705 - 33586131   |            | TRUE  | FALSE |
| 1  | 33546705 - 33586131   | F - 19.35% | TRUE  | TRUE  |
| 1  | 33546705 - 33586131   | T - 77.42% | TRUE  | TRUE  |
| 2  | 220101328 - 220110200 |            | TRUE  | TRUE  |
| 2  | 220101328 - 220110200 | F - 5.88%  | TRUE  | TRUE  |
| 2  | 220101328 - 220110200 |            | TRUE  | TRUE  |
| 2  | 220101328 - 220110200 | F - 11.76% | FALSE | TRUE  |
| 2  | 220101328 - 220110200 | F - 5.88%  | TRUE  | TRUE  |
| 2  | 220101328 - 220110200 |            | TRUE  | TRUE  |
| 2  | 220101328 - 220110200 | T - 70.59% | FALSE | TRUE  |
| 2  | 220101328 - 220110200 |            | FALSE | TRUE  |
| 2  | 220101328 - 220110200 | F - 23.53% | FALSE | TRUE  |
| 2  | 220101328 - 220110200 | F - 11.76% | FALSE | TRUE  |
| 2  | 220101328 - 220110200 |            | TRUE  | TRUE  |
| 2  | 232318242 - 232348352 |            | TRUE  | FALSE |
| 2  | 232318242 - 232348352 | F - 14.29% | TRUE  | TRUE  |
| 2  | 232318242 - 232348352 |            | TRUE  | TRUE  |
| 4  | 17812525 - 17846487   | T - 66.67% | TRUE  | TRUE  |
| 4  | 17812525 - 17846487   |            | TRUE  | FALSE |
| 4  | 17812525 - 17846487   |            | FALSE | TRUE  |
| 4  | 17812525 - 17846487   |            | TRUE  | TRUE  |
| 4  | 17812525 - 17846487   | T - 66.67% | FALSE | TRUE  |
| 6  | 35541362 - 35696397   |            | TRUE  | FALSE |
| 6  | 35541362 - 35696397   | T - 83.33% | TRUE  | TRUE  |
| 6  | 35541362 - 35696397   | T - 83.33% | TRUE  | TRUE  |
| 6  | 35541362 - 35696397   |            | TRUE  | FALSE |
| 6  | 35541362 - 35696397   | T - 75.00% | TRUE  | TRUE  |
| 6  | 35541362 - 35696397   | F - 16.67% | TRUE  | FALSE |
| 6  | 35541362 - 35696397   |            | TRUE  | FALSE |
| 6  | 35541362 - 35696397   |            | TRUE  | FALSE |
| 6  | 35541362 - 35696397   | T - 66.67% | TRUE  | TRUE  |
| 6  | 35541362 - 35696397   |            | TRUE  | TRUE  |
| 6  | 35541362 - 35696397   |            | TRUE  | TRUE  |
| 6  | 35541362 - 35696397   | T - 50.00% | TRUE  | FALSE |
| 6  | 35541362 - 35696397   | F - 33.33% | TRUE  | TRUE  |
| 6  | 35541362 - 35696397   | F - 33.33% | TRUE  | TRUE  |
| 6  | 35541362 - 35696397   | T - 50.00% | TRUE  | TRUE  |
| 6  | 35541362 - 35696397   | T - 50.00% | TRUE  | TRUE  |
| 6  | 35541362 - 35696397   |            | TRUE  | TRUE  |
| 7  | 56032270 - 56067875   | F - 21.43% | TRUE  | TRUE  |
| 7  | 56032270 - 56067875   |            | TRUE  | TRUE  |
| 10 | 28966271 - 28971868   | F - 20.00% | TRUE  | TRUE  |
| 10 | 28966271 - 28971868   |            | TRUE  | TRUE  |
| 10 | 71561644 - 71724031   |            | TRUE  | FALSE |
| 10 | 71561644 - 71724031   |            | TRUE  | TRUE  |
| 10 | 71561644 - 71724031   | F - 4.65%  | TRUE  | TRUE  |
| 10 | 71561644 - 71724031   |            | FALSE | TRUE  |
| 10 | 71561644 - 71724031   |            | FALSE | TRUE  |
| 10 | 75196186 - 75255782   |            | TRUE  | FALSE |
| 10 | 75196186 - 75255782   | T - 82.35% | TRUE  | TRUE  |
| 10 | 75196186 - 75255782   |            | TRUE  | TRUE  |
| 10 | 75196186 - 75255782   | F - 5.88%  | TRUE  | TRUE  |
| 10 | 75196186 - 75255782   | F - 11.76% | TRUE  | TRUE  |
| 10 | 75196186 - 75255782   |            | TRUE  | TRUE  |
| 12 | 13080660 - 13137579   |            | TRUE  | FALSE |
| 12 | 13080660 - 13137579   |            | TRUE  | TRUE  |
| 12 | 13080660 - 13137579   |            | TRUE  | TRUE  |

|    |                       |             |       |       |
|----|-----------------------|-------------|-------|-------|
| 12 | 13080660 - 13137579   | F - 33.33%  | TRUE  | TRUE  |
| 12 | 52626898 - 52662180   |             | TRUE  | TRUE  |
| 12 | 52626898 - 52662180   | F - 16.67%  | TRUE  | TRUE  |
| 12 | 52626898 - 52662180   | T - 50.00%  | TRUE  | TRUE  |
| 12 | 52626898 - 52662180   | F - 16.67%  | TRUE  | TRUE  |
| 12 | 52626898 - 52662180   |             | TRUE  | TRUE  |
| 12 | 52626898 - 52662180   |             | FALSE | TRUE  |
| 17 | 36508005 - 36561846   |             | TRUE  | TRUE  |
| 17 | 36508005 - 36561846   | T - 60.00%  | TRUE  | TRUE  |
| 17 | 36508005 - 36561846   | T - 80.00%  | TRUE  | TRUE  |
| 17 | 36508005 - 36561846   | T - 80.00%  | TRUE  | TRUE  |
| 19 | 58258164 - 58269527   |             | TRUE  | TRUE  |
| 19 | 58258164 - 58269527   |             | TRUE  | TRUE  |
| 19 | 58258164 - 58269527   | F - 14.29%  | TRUE  | TRUE  |
| 19 | 58258164 - 58269527   |             | FALSE | TRUE  |
| 19 | 58258164 - 58269527   | F - 14.29%  | TRUE  | TRUE  |
| 19 | 58258164 - 58269527   | F - 42.86%  | TRUE  | TRUE  |
| 19 | 58258164 - 58269527   | F - 28.57%  | TRUE  | TRUE  |
| 1  | 200311672 - 200343482 | T - 50.00%  | TRUE  | TRUE  |
| 1  | 200311672 - 200343482 | T - 100.00% | TRUE  | TRUE  |
| 1  | 200311672 - 200343482 |             | TRUE  | FALSE |
| 1  | 200311672 - 200343482 | T - 50.00%  | TRUE  | TRUE  |
| 1  | 249144203 - 249153315 |             | TRUE  | TRUE  |
| 1  | 249144203 - 249153315 | F - 13.33%  | TRUE  | TRUE  |
| 5  | 137022410 - 137223540 | T - 69.23%  | TRUE  | FALSE |
| 5  | 137022410 - 137223540 |             | TRUE  | FALSE |
| 5  | 137022410 - 137223540 | T - 69.23%  | TRUE  | TRUE  |
| 5  | 137022410 - 137223540 | F - 46.15%  | TRUE  | TRUE  |
| 5  | 137022410 - 137223540 | T - 69.23%  | FALSE | TRUE  |
| 5  | 137022410 - 137223540 | F - 7.69%   | FALSE | TRUE  |
| 5  | 137022410 - 137223540 | F - 30.77%  | TRUE  | TRUE  |
| 5  | 137022410 - 137223540 | T - 76.92%  | FALSE | TRUE  |
| 5  | 137022410 - 137223540 | T - 69.23%  | FALSE | TRUE  |
| 5  | 141013251 - 141061800 | F - 7.69%   | TRUE  | TRUE  |
| 5  | 141013251 - 141061800 | F - 15.38%  | TRUE  | TRUE  |
| 5  | 141013251 - 141061800 |             | TRUE  | TRUE  |
| 5  | 141013251 - 141061800 | T - 61.54%  | TRUE  | TRUE  |
| 5  | 141013251 - 141061800 |             | TRUE  | TRUE  |
| 5  | 141013251 - 141061800 |             | TRUE  | TRUE  |
| 5  | 141013251 - 141061800 | T - 53.85%  | FALSE | TRUE  |
| 5  | 141013251 - 141061800 | F - 15.38%  | TRUE  | TRUE  |
| 5  | 141013251 - 141061800 |             | TRUE  | TRUE  |
| 5  | 141013251 - 141061800 |             | TRUE  | TRUE  |
| 5  | 141013251 - 141061800 |             | TRUE  | TRUE  |
| 5  | 141013251 - 141061800 | F - 46.15%  | TRUE  | TRUE  |
| 5  | 141013251 - 141061800 | T - 61.54%  | TRUE  | TRUE  |
| 5  | 141013251 - 141061800 |             | TRUE  | TRUE  |
| 5  | 141013251 - 141061800 | T - 61.54%  | TRUE  | TRUE  |
| 5  | 141013251 - 141061800 | T - 61.54%  | TRUE  | TRUE  |
| 5  | 141013251 - 141061800 | T - 53.85%  | TRUE  | TRUE  |
| 5  | 141013251 - 141061800 |             | FALSE | TRUE  |
| 5  | 141013251 - 141061800 |             | FALSE | TRUE  |
| 5  | 141013251 - 141061800 | T - 61.54%  | FALSE | TRUE  |
| 5  | 176728199 - 176730745 | F - 30.77%  | TRUE  | TRUE  |
| 5  | 176728199 - 176730745 |             | FALSE | TRUE  |
| 6  | 159590429 - 159693141 | T - 87.50%  | TRUE  | TRUE  |
| 6  | 159590429 - 159693141 | T - 87.50%  | TRUE  | TRUE  |
| 6  | 159590429 - 159693141 |             | TRUE  | TRUE  |

|    |                       |             |       |       |
|----|-----------------------|-------------|-------|-------|
| 7  | 1581871 - 1600457     | T - 60.00%  | TRUE  | TRUE  |
| 7  | 1581871 - 1600457     | T - 66.67%  | TRUE  | TRUE  |
| 7  | 1581871 - 1600457     |             | TRUE  | TRUE  |
| 7  | 1581871 - 1600457     | F - 20.00%  | TRUE  | TRUE  |
| 7  | 1581871 - 1600457     |             | TRUE  | TRUE  |
| 7  | 6010556 - 6048756     |             | TRUE  | TRUE  |
| 7  | 6010556 - 6048756     | F - 5.88%   | TRUE  | TRUE  |
| X  | 119392505 - 119445411 | F - 33.33%  | TRUE  | FALSE |
| X  | 119392505 - 119445411 |             | TRUE  | TRUE  |
| X  | 119392505 - 119445411 |             | TRUE  | TRUE  |
| X  | 119392505 - 119445411 |             | TRUE  | TRUE  |
| X  | 119392505 - 119445411 |             | FALSE | TRUE  |
| X  | 119392505 - 119445411 | T - 77.78%  | FALSE | TRUE  |
| 13 | 66876966 - 67804577   | T - 92.86%  | TRUE  | TRUE  |
| 13 | 66876966 - 67804577   | T - 57.14%  | TRUE  | TRUE  |
| 13 | 66876966 - 67804577   |             | TRUE  | TRUE  |
| 13 | 66876966 - 67804577   | F - 14.29%  | TRUE  | TRUE  |
| 13 | 66876966 - 67804577   | T - 78.57%  | TRUE  | FALSE |
| 13 | 66876966 - 67804577   |             | TRUE  | TRUE  |
| 13 | 66876966 - 67804577   |             | TRUE  | FALSE |
| 13 | 66876966 - 67804577   |             | TRUE  | FALSE |
| 13 | 66876966 - 67804577   | T - 71.43%  | TRUE  | FALSE |
| 13 | 66876966 - 67804577   | T - 71.43%  | TRUE  | TRUE  |
| 13 | 66876966 - 67804577   |             | TRUE  | TRUE  |
| 13 | 66876966 - 67804577   |             | TRUE  | TRUE  |
| 13 | 66876966 - 67804577   | F - 7.14%   | TRUE  | FALSE |
| 13 | 66876966 - 67804577   |             | TRUE  | TRUE  |
| 13 | 66876966 - 67804577   | F - 42.86%  | TRUE  | FALSE |
| 13 | 66876966 - 67804577   | T - 50.00%  | TRUE  | TRUE  |
| 13 | 66876966 - 67804577   |             | TRUE  | TRUE  |
| 13 | 113831891 - 113863029 |             | TRUE  | TRUE  |
| 13 | 113831891 - 113863029 | F - 3.33%   | TRUE  | TRUE  |
| 13 | 113831891 - 113863029 | F - 3.33%   | TRUE  | TRUE  |
| 13 | 113831891 - 113863029 | T - 80.00%  | TRUE  | TRUE  |
| 14 | 64915824 - 64971931   |             | TRUE  | TRUE  |
| 14 | 64915824 - 64971931   |             | TRUE  | TRUE  |
| 14 | 64915824 - 64971931   | T - 83.33%  | TRUE  | TRUE  |
| 14 | 64915824 - 64971931   |             | FALSE | TRUE  |
| 16 | 84853537 - 84943116   |             | TRUE  | TRUE  |
| 16 | 84853537 - 84943116   |             | TRUE  | TRUE  |
| 16 | 84853537 - 84943116   |             | TRUE  | TRUE  |
| 16 | 84853537 - 84943116   | T - 100.00% | TRUE  | TRUE  |
| 16 | 84853537 - 84943116   | F - 12.50%  | TRUE  | TRUE  |
| 16 | 84853537 - 84943116   | F - 12.50%  | TRUE  | TRUE  |
| 16 | 84853537 - 84943116   | F - 12.50%  | TRUE  | TRUE  |
| 17 | 8377523 - 8534079     |             | TRUE  | TRUE  |
| 17 | 8377523 - 8534079     |             | FALSE | TRUE  |
| 17 | 8377523 - 8534079     |             | TRUE  | TRUE  |
| 17 | 8377523 - 8534079     | T - 55.56%  | TRUE  | TRUE  |
| 17 | 8377523 - 8534079     | T - 55.56%  | TRUE  | TRUE  |
| 17 | 8377523 - 8534079     |             | TRUE  | TRUE  |
| 17 | 74561461 - 74582145   |             | TRUE  | FALSE |
| 17 | 74561461 - 74582145   |             | TRUE  | TRUE  |
| 17 | 74561461 - 74582145   | T - 100.00% | TRUE  | TRUE  |
| 17 | 74561461 - 74582145   | T - 100.00% | TRUE  | TRUE  |
| 17 | 74561461 - 74582145   | T - 100.00% | FALSE | TRUE  |
| 17 | 74561461 - 74582145   |             | TRUE  | TRUE  |
| 17 | 74561461 - 74582145   |             | FALSE | TRUE  |

|    |                       |            |       |       |
|----|-----------------------|------------|-------|-------|
| 19 | 8274197 - 8327305     |            | TRUE  | TRUE  |
| 19 | 8274197 - 8327305     | F - 11.11% | FALSE | TRUE  |
| 19 | 8274197 - 8327305     | T - 88.89% | TRUE  | TRUE  |
| 19 | 8274197 - 8327305     |            | TRUE  | TRUE  |
| 19 | 8274197 - 8327305     | F - 11.11% | TRUE  | TRUE  |
| 19 | 8274197 - 8327305     | F - 11.11% | TRUE  | TRUE  |
| 19 | 8274197 - 8327305     | T - 66.67% | TRUE  | TRUE  |
| 19 | 8274197 - 8327305     | T - 88.89% | TRUE  | TRUE  |
| 19 | 8274197 - 8327305     |            | TRUE  | TRUE  |
| 19 | 8274197 - 8327305     | T - 66.67% | TRUE  | TRUE  |
| 1  | 245133007 - 245290466 |            | TRUE  | FALSE |
| 1  | 245133007 - 245290466 |            | TRUE  | TRUE  |
| 1  | 245133007 - 245290466 |            | TRUE  | TRUE  |
| 1  | 245133007 - 245290466 | F - 14.29% | TRUE  | TRUE  |
| 1  | 245133007 - 245290466 |            | FALSE | TRUE  |
| 1  | 245133007 - 245290466 | F - 4.76%  | FALSE | TRUE  |
| 1  | 245133007 - 245290466 | F - 4.76%  | TRUE  | TRUE  |
| 1  | 245133007 - 245290466 | F - 4.76%  | TRUE  | TRUE  |
| 1  | 245133007 - 245290466 | F - 14.29% | TRUE  | TRUE  |
| 1  | 245133007 - 245290466 | F - 38.10% | TRUE  | TRUE  |
| 1  | 245133007 - 245290466 | F - 23.81% | FALSE | TRUE  |
| 1  | 245133007 - 245290466 |            | TRUE  | TRUE  |
| 1  | 245133007 - 245290466 | F - 28.57% | TRUE  | TRUE  |
| 1  | 245133007 - 245290466 |            | TRUE  | TRUE  |
| 1  | 245133007 - 245290466 | F - 19.05% | TRUE  | TRUE  |
| 1  | 245133007 - 245290466 |            | TRUE  | TRUE  |
| 1  | 245133007 - 245290466 | F - 4.76%  | TRUE  | TRUE  |
| 1  | 245133007 - 245290466 |            | FALSE | TRUE  |
| 2  | 86667770 - 86719839   | F - 5.00%  | TRUE  | TRUE  |
| 2  | 86667770 - 86719839   |            | TRUE  | TRUE  |
| 2  | 86667770 - 86719839   | F - 10.00% | TRUE  | TRUE  |
| 2  | 86667770 - 86719839   | F - 5.00%  | TRUE  | TRUE  |
| 2  | 86667770 - 86719839   |            | TRUE  | TRUE  |
| 2  | 86667770 - 86719839   |            | TRUE  | TRUE  |
| 2  | 86667770 - 86719839   | F - 25.00% | TRUE  | TRUE  |
| 2  | 86667770 - 86719839   | F - 45.00% | TRUE  | TRUE  |
| 2  | 86667770 - 86719839   |            | FALSE | TRUE  |
| 2  | 86667770 - 86719839   |            | FALSE | TRUE  |
| 4  | 175204828 - 175254531 |            | TRUE  | TRUE  |
| 4  | 175204828 - 175254531 | T - 50.00% | TRUE  | FALSE |
| 4  | 175204828 - 175254531 |            | TRUE  | TRUE  |
| 6  | 112375275 - 112392171 |            | TRUE  | TRUE  |
| 6  | 112375275 - 112392171 | F - 13.33% | TRUE  | TRUE  |
| 6  | 112375275 - 112392171 |            | TRUE  | TRUE  |
| 6  | 112375275 - 112392171 | F - 40.00% | TRUE  | TRUE  |
| 6  | 112375275 - 112392171 |            | TRUE  | TRUE  |
| 7  | 44646121 - 44748669   |            | TRUE  | TRUE  |
| 7  | 44646121 - 44748669   |            | TRUE  | TRUE  |
| 7  | 44646121 - 44748669   | F - 29.41% | FALSE | TRUE  |
| 7  | 73442119 - 73484237   |            | TRUE  | FALSE |
| 7  | 73442119 - 73484237   |            | TRUE  | TRUE  |
| 7  | 73442119 - 73484237   |            | TRUE  | FALSE |
| 7  | 73442119 - 73484237   | T - 60.78% | TRUE  | TRUE  |
| 7  | 73442119 - 73484237   |            | TRUE  | FALSE |
| 7  | 73442119 - 73484237   |            | TRUE  | TRUE  |
| 7  | 73442119 - 73484237   | T - 90.20% | TRUE  | TRUE  |
| 7  | 73442119 - 73484237   |            | TRUE  | FALSE |
| 7  | 73442119 - 73484237   | T - 58.82% | TRUE  | TRUE  |

|   |                     |            |       |       |
|---|---------------------|------------|-------|-------|
| 7 | 73442119 - 73484237 | F - 41.18% | TRUE  | TRUE  |
| 7 | 73442119 - 73484237 | T - 78.43% | TRUE  | TRUE  |
| 7 | 73442119 - 73484237 | F - 1.96%  | TRUE  | TRUE  |
| 7 | 73442119 - 73484237 |            | TRUE  | FALSE |
| 7 | 73442119 - 73484237 | T - 64.71% | TRUE  | FALSE |
| 7 | 73442119 - 73484237 |            | TRUE  | FALSE |
| 7 | 73442119 - 73484237 |            | TRUE  | TRUE  |
| 7 | 73442119 - 73484237 |            | TRUE  | FALSE |
| 7 | 73442119 - 73484237 | T - 80.39% | TRUE  | TRUE  |
| 7 | 73442119 - 73484237 | T - 58.82% | TRUE  | TRUE  |
| 7 | 73442119 - 73484237 |            | TRUE  | TRUE  |
| 7 | 73442119 - 73484237 | F - 1.96%  | TRUE  | FALSE |
| 7 | 73442119 - 73484237 | F - 1.96%  | TRUE  | TRUE  |
| 7 | 73442119 - 73484237 |            | TRUE  | TRUE  |
| 7 | 73442119 - 73484237 |            | TRUE  | TRUE  |
| 7 | 73442119 - 73484237 | F - 27.45% | TRUE  | TRUE  |
| 7 | 73442119 - 73484237 | F - 1.96%  | TRUE  | TRUE  |
| 7 | 73442119 - 73484237 |            | TRUE  | TRUE  |
| 7 | 73442119 - 73484237 | T - 66.67% | TRUE  | TRUE  |
| 7 | 73442119 - 73484237 |            | TRUE  | TRUE  |
| 7 | 73442119 - 73484237 |            | TRUE  | TRUE  |
| 7 | 73442119 - 73484237 | F - 3.92%  | TRUE  | TRUE  |
| 7 | 73442119 - 73484237 |            | TRUE  | FALSE |
| 7 | 73442119 - 73484237 | T - 90.20% | TRUE  | TRUE  |
| 7 | 73442119 - 73484237 | F - 1.96%  | TRUE  | TRUE  |
| 7 | 73442119 - 73484237 | F - 1.96%  | TRUE  | TRUE  |
| 7 | 73442119 - 73484237 |            | TRUE  | FALSE |
| 7 | 73442119 - 73484237 | T - 70.59% | TRUE  | TRUE  |
| 7 | 73442119 - 73484237 |            | TRUE  | TRUE  |
| 7 | 73442119 - 73484237 |            | TRUE  | TRUE  |
| 7 | 73442119 - 73484237 |            | TRUE  | TRUE  |
| 7 | 73442119 - 73484237 | F - 1.96%  | TRUE  | TRUE  |
| 7 | 73442119 - 73484237 | T - 66.67% | TRUE  | FALSE |
| 7 | 73442119 - 73484237 | F - 1.96%  | TRUE  | TRUE  |
| 7 | 73442119 - 73484237 |            | TRUE  | TRUE  |
| 7 | 73442119 - 73484237 | T - 68.63% | TRUE  | TRUE  |
| 7 | 73442119 - 73484237 |            | TRUE  | TRUE  |
| 7 | 73442119 - 73484237 |            | TRUE  | TRUE  |
| 7 | 73442119 - 73484237 |            | TRUE  | TRUE  |
| 7 | 73442119 - 73484237 | T - 74.51% | TRUE  | TRUE  |
| 7 | 73442119 - 73484237 | F - 3.92%  | TRUE  | TRUE  |
| 7 | 73442119 - 73484237 |            | TRUE  | TRUE  |
| 7 | 73442119 - 73484237 |            | FALSE | TRUE  |
| 7 | 73442119 - 73484237 | F - 1.96%  | TRUE  | TRUE  |
| 7 | 73442119 - 73484237 | T - 66.67% | TRUE  | TRUE  |
| 7 | 73442119 - 73484237 |            | FALSE | TRUE  |
| 7 | 73442119 - 73484237 | F - 1.96%  | TRUE  | TRUE  |
| 7 | 73442119 - 73484237 | F - 5.88%  | TRUE  | TRUE  |
| 7 | 73442119 - 73484237 | F - 1.96%  | TRUE  | TRUE  |
| 7 | 73442119 - 73484237 |            | TRUE  | TRUE  |
| 7 | 83587659 - 84122040 |            | TRUE  | FALSE |
| 7 | 83587659 - 84122040 | F - 11.11% | TRUE  | TRUE  |
| 7 | 83587659 - 84122040 |            | TRUE  | TRUE  |
| 7 | 83587659 - 84122040 | F - 11.11% | TRUE  | TRUE  |
| 7 | 83587659 - 84122040 | F - 33.33% | TRUE  | TRUE  |
| 7 | 83587659 - 84122040 | F - 22.22% | FALSE | TRUE  |
| 7 | 83587659 - 84122040 |            | FALSE | TRUE  |

|            |                       |            |       |       |
|------------|-----------------------|------------|-------|-------|
| 9          | 112137746 - 112260593 | F - 11.76% | TRUE  | FALSE |
| 9          | 112137746 - 112260593 | F - 11.76% | TRUE  | FALSE |
| 9          | 112137746 - 112260593 |            | TRUE  | TRUE  |
| 9          | 112137746 - 112260593 |            | TRUE  | TRUE  |
| 9          | 131857073 - 131873468 |            | TRUE  | TRUE  |
| 9          | 131857073 - 131873468 |            | TRUE  | TRUE  |
| 9          | 131857073 - 131873468 |            | TRUE  | TRUE  |
| 9          | 131857073 - 131873468 | F - 6.67%  | TRUE  | FALSE |
| 9          | 131857073 - 131873468 |            | TRUE  | TRUE  |
| 9          | 131857073 - 131873468 | F - 6.67%  | TRUE  | TRUE  |
| 9          | 131857073 - 131873468 | F - 6.67%  | TRUE  | TRUE  |
| 11         | 67070919 - 67080078   |            | TRUE  | TRUE  |
| 11         | 67070919 - 67080078   |            | TRUE  | TRUE  |
| 11         | 67070919 - 67080078   |            | TRUE  | TRUE  |
| 11         | 67070919 - 67080078   | T - 87.50% | TRUE  | TRUE  |
| 15         | 59930261 - 59949740   |            | TRUE  | TRUE  |
| 15         | 59930261 - 59949740   | T - 88.89% | TRUE  | TRUE  |
| 16         | 4896666 - 4932363     |            | TRUE  | TRUE  |
| 16         | 4896666 - 4932363     | F - 28.57% | TRUE  | TRUE  |
| 19         | 54296855 - 54327648   | T - 72.22% | TRUE  | FALSE |
| 19         | 54296855 - 54327648   |            | FALSE | TRUE  |
| 19         | 54296855 - 54327648   |            | FALSE | TRUE  |
| 20         | 627259 - 656825       | F - 33.33% | TRUE  | TRUE  |
| 20         | 627259 - 656825       |            | TRUE  | TRUE  |
| 20         | 627259 - 656825       | F - 44.44% | FALSE | TRUE  |
| 22         | 24979718 - 25024972   | F - 7.69%  | TRUE  | TRUE  |
| 22         | 24979718 - 25024972   |            | TRUE  | TRUE  |
| 22         | 24979718 - 25024972   |            | TRUE  | TRUE  |
| 22         | 24979718 - 25024972   | F - 41.03% | TRUE  | TRUE  |
| 22         | 24979718 - 25024972   | T - 56.41% | TRUE  | TRUE  |
| 22         | 24979718 - 25024972   |            | TRUE  | TRUE  |
| 22         | 24979718 - 25024972   |            | FALSE | TRUE  |
| 22         | 24979718 - 25024972   |            | TRUE  | TRUE  |
| 22         | 24979718 - 25024972   | T - 66.67% | FALSE | TRUE  |
| 22         | 24979718 - 25024972   |            | FALSE | TRUE  |
| 6_mcf_hap5 | 2230709 - 2241824     |            | TRUE  | TRUE  |
| 6_mcf_hap5 | 2230709 - 2241824     |            | TRUE  | TRUE  |
| 6_mcf_hap5 | 2230709 - 2241824     | F - 4.55%  | TRUE  | TRUE  |
| 6_mcf_hap5 | 2230709 - 2241824     | F - 4.55%  | TRUE  | TRUE  |
| 6_mcf_hap5 | 2230709 - 2241824     |            | TRUE  | TRUE  |
| 6_mcf_hap5 | 2230709 - 2241824     | F - 9.09%  | FALSE | TRUE  |
| 6_mcf_hap5 | 2230709 - 2241824     |            | TRUE  | TRUE  |
| 6_mcf_hap5 | 2230709 - 2241824     |            | TRUE  | TRUE  |
| 6_mcf_hap5 | 2230709 - 2241824     | T - 50.00% | TRUE  | TRUE  |
| 6_mcf_hap5 | 2230709 - 2241824     |            | TRUE  | TRUE  |
| 6_mcf_hap5 | 2230709 - 2241824     | F - 4.55%  | TRUE  | TRUE  |
| 6_mcf_hap5 | 2230709 - 2241824     |            | FALSE | TRUE  |
| 6_mcf_hap5 | 2230709 - 2241824     | F - 4.55%  | TRUE  | TRUE  |
| 6_mcf_hap5 | 2230709 - 2241824     |            | TRUE  | TRUE  |
| 6_mcf_hap5 | 2230709 - 2241824     | T - 77.27% | FALSE | TRUE  |
| 2          | 85538794 - 85555548   | F - 6.67%  | TRUE  | TRUE  |
| 2          | 85538794 - 85555548   |            | TRUE  | TRUE  |
| 2          | 85538794 - 85555548   |            | TRUE  | TRUE  |
| 2          | 85538794 - 85555548   | T - 66.67% | TRUE  | TRUE  |
| 2          | 85538794 - 85555548   | T - 53.33% | TRUE  | TRUE  |
| 3          | 99357319 - 99518070   |            | TRUE  | TRUE  |
| 3          | 99357319 - 99518070   | F - 7.69%  | TRUE  | TRUE  |
| 3          | 99357319 - 99518070   | F - 15.38% | TRUE  | TRUE  |

|   |                     |             |       |       |
|---|---------------------|-------------|-------|-------|
| 4 | 95679119 - 96079601 |             | TRUE  | TRUE  |
| 4 | 95679119 - 96079601 | T - 100.00% | TRUE  | TRUE  |
| 4 | 95679119 - 96079601 | T - 100.00% | TRUE  | TRUE  |
| 4 | 95679119 - 96079601 | F - 36.36%  | TRUE  | TRUE  |
| 4 | 95679119 - 96079601 | F - 36.36%  | TRUE  | FALSE |
| 4 | 95679119 - 96079601 |             | TRUE  | FALSE |
| 4 | 95679119 - 96079601 | F - 9.09%   | TRUE  | TRUE  |
| 4 | 95679119 - 96079601 | F - 9.09%   | TRUE  | TRUE  |
| 4 | 95679119 - 96079601 | T - 54.55%  | TRUE  | TRUE  |
| 4 | 95679119 - 96079601 | F - 9.09%   | TRUE  | TRUE  |
| 4 | 95679119 - 96079601 | F - 9.09%   | FALSE | TRUE  |
| 4 | 95679119 - 96079601 | F - 18.18%  | TRUE  | TRUE  |
| 4 | 95679119 - 96079601 | F - 27.27%  | FALSE | TRUE  |
| 8 | 27168999 - 27316908 |             | TRUE  | FALSE |
| 8 | 27168999 - 27316908 |             | TRUE  | FALSE |
| 8 | 27168999 - 27316908 | T - 53.57%  | TRUE  | TRUE  |
| 8 | 27168999 - 27316908 |             | TRUE  | FALSE |
| 8 | 27168999 - 27316908 | T - 57.14%  | TRUE  | TRUE  |
| 8 | 27168999 - 27316908 | T - 57.14%  | TRUE  | TRUE  |
| 8 | 27168999 - 27316908 |             | TRUE  | TRUE  |
| 8 | 27168999 - 27316908 | F - 7.14%   | TRUE  | TRUE  |
| 8 | 27168999 - 27316908 | T - 50.00%  | TRUE  | TRUE  |
| 8 | 27168999 - 27316908 | F - 46.43%  | TRUE  | TRUE  |
| 8 | 27168999 - 27316908 | F - 10.71%  | TRUE  | TRUE  |
| 8 | 27168999 - 27316908 | T - 60.71%  | TRUE  | TRUE  |
| 8 | 27168999 - 27316908 | T - 60.71%  | TRUE  | TRUE  |
| 8 | 27168999 - 27316908 | F - 3.57%   | TRUE  | TRUE  |
| 8 | 27168999 - 27316908 | T - 60.71%  | TRUE  | TRUE  |
| 8 | 27168999 - 27316908 | T - 53.57%  | TRUE  | TRUE  |
| 8 | 27168999 - 27316908 |             | TRUE  | TRUE  |
| 8 | 27168999 - 27316908 | T - 53.57%  | TRUE  | TRUE  |
| 8 | 27168999 - 27316908 | T - 50.00%  | TRUE  | TRUE  |
| 8 | 27168999 - 27316908 | F - 3.57%   | TRUE  | TRUE  |
| 8 | 27168999 - 27316908 | F - 3.57%   | TRUE  | TRUE  |
| 8 | 27168999 - 27316908 |             | TRUE  | TRUE  |
| 8 | 27168999 - 27316908 | F - 3.57%   | TRUE  | TRUE  |
| 8 | 27168999 - 27316908 |             | FALSE | TRUE  |
| 8 | 27168999 - 27316908 | F - 3.57%   | TRUE  | TRUE  |
| 8 | 27168999 - 27316908 |             | TRUE  | TRUE  |
| 8 | 27168999 - 27316908 | F - 7.14%   | TRUE  | TRUE  |
| 8 | 27168999 - 27316908 | F - 3.57%   | TRUE  | TRUE  |
| 8 | 27168999 - 27316908 | F - 7.14%   | TRUE  | TRUE  |
| 8 | 27168999 - 27316908 | F - 3.57%   | TRUE  | TRUE  |
| 8 | 27168999 - 27316908 |             | TRUE  | TRUE  |
| 8 | 27168999 - 27316908 |             | TRUE  | TRUE  |
| 8 | 27168999 - 27316908 | F - 21.43%  | TRUE  | TRUE  |
| 8 | 27168999 - 27316908 |             | TRUE  | TRUE  |
| 8 | 27168999 - 27316908 | F - 3.57%   | TRUE  | TRUE  |
| 8 | 27168999 - 27316908 |             | TRUE  | TRUE  |
| 8 | 27168999 - 27316908 |             | TRUE  | TRUE  |
| 8 | 27168999 - 27316908 | F - 3.57%   | TRUE  | TRUE  |
| 8 | 27168999 - 27316908 |             | TRUE  | TRUE  |
| 8 | 27168999 - 27316908 | F - 7.14%   | FALSE | TRUE  |
| 8 | 27168999 - 27316908 | F - 21.43%  | FALSE | TRUE  |
| 8 | 27168999 - 27316908 | F - 14.29%  | TRUE  | TRUE  |
| 8 | 27168999 - 27316908 | F - 25.00%  | TRUE  | TRUE  |
| 8 | 27168999 - 27316908 |             | FALSE | TRUE  |
| 8 | 27168999 - 27316908 |             | FALSE | TRUE  |



|             |                       |             |       |       |
|-------------|-----------------------|-------------|-------|-------|
| 8           | 27168999 - 27316908   |             | FALSE | TRUE  |
| 8           | 27168999 - 27316908   | F - 28.57%  | TRUE  | TRUE  |
| 8           | 27168999 - 27316908   | F - 21.43%  | TRUE  | TRUE  |
| 8           | 27168999 - 27316908   |             | FALSE | TRUE  |
| 8           | 101698044 - 101735037 |             | TRUE  | TRUE  |
| 8           | 101698044 - 101735037 | F - 32.26%  | TRUE  | TRUE  |
| 10          | 134000404 - 134019280 |             | TRUE  | TRUE  |
| 10          | 134000404 - 134019280 |             | TRUE  | TRUE  |
| 10          | 134000404 - 134019280 |             | FALSE | TRUE  |
| 10          | 134000404 - 134019280 |             | FALSE | TRUE  |
| 10          | 134000404 - 134019280 | F - 33.33%  | FALSE | TRUE  |
| 10          | 134000404 - 134019280 | F - 44.44%  | TRUE  | TRUE  |
| 10          | 134000404 - 134019280 |             | FALSE | TRUE  |
| 10          | 134000404 - 134019280 | T - 66.67%  | TRUE  | TRUE  |
| 10          | 134000404 - 134019280 |             | FALSE | TRUE  |
| 10          | 88809959 - 88854776   |             | TRUE  | TRUE  |
| 10          | 88809959 - 88854776   | F - 7.14%   | TRUE  | TRUE  |
| 10          | 88809959 - 88854776   |             | TRUE  | TRUE  |
| 11          | 67776048 - 67796743   |             | TRUE  | TRUE  |
| 11          | 67776048 - 67796743   | F - 5.56%   | TRUE  | TRUE  |
| 12          | 53551447 - 53575135   |             | TRUE  | FALSE |
| 12          | 53551447 - 53575135   | F - 15.15%  | TRUE  | TRUE  |
| 12          | 53551447 - 53575135   |             | TRUE  | TRUE  |
| 13          | 32889611 - 32973809   |             | TRUE  | TRUE  |
| 13          | 32889611 - 32973809   | F - 33.33%  | FALSE | TRUE  |
| 14          | 106053225 - 106733639 | F - 13.95%  | TRUE  | TRUE  |
| 14          | 106053225 - 106733639 |             | TRUE  | TRUE  |
| 14          | 106053225 - 106733639 |             | TRUE  | FALSE |
| 14          | 106053225 - 106733639 |             | TRUE  | FALSE |
| 14          | 106053225 - 106733639 |             | TRUE  | FALSE |
| 14          | 106053225 - 106733639 | F - 13.95%  | TRUE  | TRUE  |
| 14          | 106053225 - 106733639 | F - 13.95%  | FALSE | TRUE  |
| 14          | 106053225 - 106733639 |             | FALSE | TRUE  |
| 17          | 38249037 - 38256978   | T - 50.00%  | TRUE  | TRUE  |
| 17          | 38249037 - 38256978   |             | FALSE | TRUE  |
| 17          | 38249037 - 38256978   |             | FALSE | TRUE  |
| 18          | 66340925 - 66382362   | T - 55.56%  | TRUE  | TRUE  |
| 18          | 66340925 - 66382362   |             | FALSE | TRUE  |
| 18          | 66340925 - 66382362   |             | FALSE | TRUE  |
| 18          | 66340925 - 66382362   | T - 100.00% | TRUE  | TRUE  |
| 22          | 43599229 - 43739394   |             | TRUE  | TRUE  |
| 22          | 43599229 - 43739394   | F - 40.00%  | TRUE  | TRUE  |
| 22          | 43599229 - 43739394   |             | TRUE  | TRUE  |
| 6_mann_hap4 | 1201421 - 1206062     | F - 6.25%   | TRUE  | TRUE  |
| 6_mann_hap4 | 1201421 - 1206062     | F - 6.25%   | TRUE  | TRUE  |
| 6_mann_hap4 | 1201421 - 1206062     |             | TRUE  | TRUE  |
| 6_mann_hap4 | 1201421 - 1206062     | F - 12.50%  | TRUE  | TRUE  |
| 6_mann_hap4 | 1201421 - 1206062     |             | FALSE | TRUE  |
| 2           | 224822121 - 224832431 | T - 50.00%  | TRUE  | TRUE  |
| 2           | 224822121 - 224832431 |             | TRUE  | TRUE  |
| 2           | 224822121 - 224832431 |             | TRUE  | TRUE  |
| 2           | 39963200 - 40006416   | T - 63.64%  | TRUE  | TRUE  |
| 2           | 39963200 - 40006416   | F - 9.09%   | FALSE | TRUE  |
| 2           | 39963200 - 40006416   |             | FALSE | TRUE  |
| 2           | 191369068 - 191399468 |             | TRUE  | TRUE  |
| 2           | 191369068 - 191399468 |             | TRUE  | TRUE  |
| 2           | 191369068 - 191399468 | T - 75.00%  | TRUE  | TRUE  |
| 2           | 191369068 - 191399468 | F - 37.50%  | TRUE  | TRUE  |

|    |                       |            |       |       |
|----|-----------------------|------------|-------|-------|
| 2  | 191369068 - 191399468 |            | TRUE  | TRUE  |
| 4  | 144257915 - 144395721 |            | FALSE | TRUE  |
| 4  | 144257915 - 144395721 | F - 5.56%  | TRUE  | TRUE  |
| 4  | 144257915 - 144395721 |            | TRUE  | TRUE  |
| 4  | 144257915 - 144395721 | F - 16.67% | TRUE  | TRUE  |
| 4  | 144257915 - 144395721 | F - 5.56%  | TRUE  | TRUE  |
| 4  | 144257915 - 144395721 | F - 5.56%  | TRUE  | TRUE  |
| 4  | 144257915 - 144395721 | F - 5.56%  | TRUE  | TRUE  |
| 4  | 144257915 - 144395721 | F - 5.56%  | TRUE  | TRUE  |
| 4  | 144257915 - 144395721 | F - 5.56%  | TRUE  | TRUE  |
| 4  | 144257915 - 144395721 | F - 22.22% | TRUE  | TRUE  |
| 4  | 144257915 - 144395721 | F - 5.56%  | FALSE | TRUE  |
| 4  | 144257915 - 144395721 | F - 5.56%  | FALSE | TRUE  |
| 4  | 144257915 - 144395721 |            | TRUE  | TRUE  |
| 4  | 76831808 - 76862204   |            | TRUE  | FALSE |
| 4  | 76831808 - 76862204   | F - 12.50% | TRUE  | TRUE  |
| 4  | 76831808 - 76862204   | F - 6.25%  | FALSE | TRUE  |
| 4  | 76831808 - 76862204   | F - 18.75% | TRUE  | TRUE  |
| 4  | 76831808 - 76862204   | F - 12.50% | FALSE | TRUE  |
| 4  | 76831808 - 76862204   |            | FALSE | TRUE  |
| 5  | 98105322 - 98109173   |            | TRUE  | FALSE |
| 5  | 98105322 - 98109173   | T - 71.43% | TRUE  | TRUE  |
| 5  | 98105322 - 98109173   | F - 28.57% | FALSE | TRUE  |
| 9  | 37753802 - 37778969   |            | TRUE  | FALSE |
| 9  | 37753802 - 37778969   | F - 20.00% | FALSE | TRUE  |
| 11 | 64556290 - 64570713   |            | TRUE  | TRUE  |
| 11 | 64556290 - 64570713   |            | TRUE  | TRUE  |
| 11 | 64556290 - 64570713   |            | TRUE  | FALSE |
| 11 | 64556290 - 64570713   | F - 46.67% | FALSE | TRUE  |
| 11 | 119209652 - 119217383 | F - 44.44% | TRUE  | TRUE  |
| 11 | 119209652 - 119217383 |            | TRUE  | FALSE |
| 11 | 119209652 - 119217383 | F - 33.33% | TRUE  | TRUE  |
| 15 | 73344051 - 73597547   |            | TRUE  | TRUE  |
| 15 | 73344051 - 73597547   |            | TRUE  | TRUE  |
| 15 | 73344051 - 73597547   | F - 8.33%  | TRUE  | TRUE  |
| 15 | 73344051 - 73597547   |            | TRUE  | TRUE  |
| 15 | 73344051 - 73597547   | F - 8.33%  | TRUE  | TRUE  |
| 15 | 73344051 - 73597547   | T - 58.33% | TRUE  | TRUE  |
| 22 | 18111621 - 18213388   |            | TRUE  | TRUE  |
| 22 | 18111621 - 18213388   |            | FALSE | TRUE  |
| 22 | 18111621 - 18213388   | F - 4.35%  | TRUE  | TRUE  |
| 22 | 18111621 - 18213388   | F - 4.35%  | TRUE  | TRUE  |
| 1  | 7844380 - 7905237     | F - 9.09%  | TRUE  | TRUE  |
| 1  | 7844380 - 7905237     | F - 9.09%  | TRUE  | TRUE  |
| 1  | 7844380 - 7905237     |            | TRUE  | TRUE  |
| 1  | 7844380 - 7905237     | T - 72.73% | TRUE  | TRUE  |
| 1  | 7844380 - 7905237     | T - 63.64% | TRUE  | TRUE  |
| 1  | 7844380 - 7905237     |            | TRUE  | TRUE  |
| 1  | 7844380 - 7905237     |            | TRUE  | TRUE  |
| 1  | 29063133 - 29096287   |            | TRUE  | TRUE  |
| 1  | 29063133 - 29096287   |            | TRUE  | TRUE  |
| 1  | 29063133 - 29096287   | F - 6.25%  | TRUE  | TRUE  |
| 1  | 151843343 - 151882361 |            | TRUE  | FALSE |
| 1  | 151843343 - 151882361 |            | TRUE  | TRUE  |
| 1  | 151843343 - 151882361 | F - 12.50% | TRUE  | TRUE  |
| 1  | 151843343 - 151882361 |            | TRUE  | TRUE  |
| 1  | 151843343 - 151882361 | F - 12.50% | TRUE  | TRUE  |
| 2  | 25166505 - 25194963   | F - 18.18% | FALSE | TRUE  |
| 2  | 25166505 - 25194963   |            | TRUE  | TRUE  |

|   |    |                     |             |       |       |
|---|----|---------------------|-------------|-------|-------|
|   | 2  | 25166505 - 25194963 | F - 36.36%  | TRUE  | TRUE  |
|   | 2  | 25166505 - 25194963 | F - 45.45%  | TRUE  | TRUE  |
|   | 2  | 37064841 - 37193615 |             | TRUE  | FALSE |
|   | 2  | 37064841 - 37193615 |             | TRUE  | FALSE |
|   | 2  | 37064841 - 37193615 | T - 100.00% | TRUE  | TRUE  |
|   | 2  | 37064841 - 37193615 |             | TRUE  | TRUE  |
|   | 3  | 33537737 - 33759848 | F - 15.38%  | TRUE  | FALSE |
|   | 3  | 33537737 - 33759848 |             | FALSE | TRUE  |
|   | 3  | 33537737 - 33759848 |             | FALSE | TRUE  |
|   | 5  | 271736 - 438406     |             | TRUE  | TRUE  |
|   | 5  | 271736 - 438406     |             | TRUE  | TRUE  |
|   | 5  | 271736 - 438406     | F - 2.50%   | TRUE  | FALSE |
|   | 5  | 271736 - 438406     | F - 5.00%   | TRUE  | TRUE  |
|   | 5  | 271736 - 438406     | F - 5.00%   | FALSE | TRUE  |
|   | 5  | 271736 - 438406     |             | TRUE  | TRUE  |
|   | 5  | 271736 - 438406     | F - 2.50%   | TRUE  | TRUE  |
|   | 5  | 271736 - 438406     |             | TRUE  | TRUE  |
|   | 5  | 271736 - 438406     | F - 32.50%  | FALSE | TRUE  |
|   | 5  | 271736 - 438406     | F - 32.50%  | TRUE  | TRUE  |
|   | 5  | 271736 - 438406     |             | FALSE | TRUE  |
|   | 5  | 271736 - 438406     | F - 40.00%  | TRUE  | TRUE  |
|   | 5  | 271736 - 438406     |             | FALSE | TRUE  |
|   | 6  | 3269196 - 3457256   |             | TRUE  | TRUE  |
|   | 6  | 3269196 - 3457256   |             | TRUE  | TRUE  |
|   | 6  | 3269196 - 3457256   |             | TRUE  | TRUE  |
|   | 6  | 3269196 - 3457256   |             | TRUE  | TRUE  |
|   | 6  | 3269196 - 3457256   | T - 78.95%  | TRUE  | TRUE  |
|   | 6  | 3269196 - 3457256   |             | FALSE | TRUE  |
|   | 6  | 3269196 - 3457256   |             | FALSE | TRUE  |
|   | 6  | 3269196 - 3457256   | T - 78.95%  | TRUE  | TRUE  |
| X |    | 24712036 - 25015103 |             | TRUE  | FALSE |
| X |    | 24712036 - 25015103 |             | TRUE  | FALSE |
| X |    | 24712036 - 25015103 |             | TRUE  | TRUE  |
| X |    | 24712036 - 25015103 |             | TRUE  | TRUE  |
| X |    | 24712036 - 25015103 |             | TRUE  | TRUE  |
| X |    | 24712036 - 25015103 |             | FALSE | TRUE  |
| X |    | 24712036 - 25015103 |             | TRUE  | TRUE  |
| X |    | 24712036 - 25015103 | F - 42.86%  | FALSE | TRUE  |
|   | 10 | 97071528 - 97321171 |             | TRUE  | FALSE |
|   | 10 | 97071528 - 97321171 |             | TRUE  | TRUE  |
|   | 10 | 97071528 - 97321171 |             | TRUE  | TRUE  |
|   | 10 | 97071528 - 97321171 |             | TRUE  | TRUE  |
|   | 10 | 97071528 - 97321171 |             | TRUE  | FALSE |
|   | 10 | 97071528 - 97321171 | F - 37.50%  | FALSE | TRUE  |
|   | 10 | 97071528 - 97321171 | F - 2.50%   | FALSE | TRUE  |
|   | 10 | 97071528 - 97321171 | F - 2.50%   | TRUE  | TRUE  |
|   | 10 | 97071528 - 97321171 |             | TRUE  | TRUE  |
|   | 10 | 97071528 - 97321171 |             | TRUE  | TRUE  |
|   | 10 | 97071528 - 97321171 | F - 2.50%   | TRUE  | TRUE  |
|   | 10 | 97071528 - 97321171 |             | FALSE | TRUE  |
|   | 10 | 97071528 - 97321171 |             | TRUE  | TRUE  |
|   | 10 | 97071528 - 97321171 | T - 75.00%  | FALSE | TRUE  |
|   | 10 | 97071528 - 97321171 |             | TRUE  | TRUE  |
|   | 12 | 22199108 - 22218602 | F - 25.00%  | TRUE  | TRUE  |
|   | 12 | 22199108 - 22218602 |             | FALSE | TRUE  |
|   | 12 | 54388679 - 54397121 |             | FALSE | TRUE  |
|   | 12 | 54388679 - 54397121 |             | TRUE  | TRUE  |
|   | 12 | 54388679 - 54397121 | F - 20.00%  | TRUE  | TRUE  |

|    |                       |            |       |       |
|----|-----------------------|------------|-------|-------|
| 17 | 17714653 - 17740325   |            | TRUE  | TRUE  |
| 17 | 17714653 - 17740325   |            | TRUE  | TRUE  |
| 17 | 17714653 - 17740325   | T - 51.61% | TRUE  | TRUE  |
| 17 | 17714653 - 17740325   |            | FALSE | TRUE  |
| 17 | 17714653 - 17740325   | T - 70.97% | TRUE  | TRUE  |
| 17 | 17714653 - 17740325   | T - 54.84% | TRUE  | TRUE  |
| 17 | 17714653 - 17740325   |            | FALSE | TRUE  |
| 17 | 17714653 - 17740325   |            | TRUE  | TRUE  |
| 17 | 17714653 - 17740325   |            | TRUE  | TRUE  |
| 17 | 17714653 - 17740325   | T - 64.52% | FALSE | TRUE  |
| 20 | 5095599 - 5107272     |            | TRUE  | FALSE |
| 20 | 5095599 - 5107272     | F - 28.57% | TRUE  | TRUE  |
| 1  | 205566695 - 205649630 |            | TRUE  | TRUE  |
| 1  | 205566695 - 205649630 |            | TRUE  | TRUE  |
| 1  | 205566695 - 205649630 | F - 37.50% | TRUE  | TRUE  |
| 1  | 205566695 - 205649630 | F - 25.00% | TRUE  | TRUE  |
| 1  | 205566695 - 205649630 |            | TRUE  | TRUE  |
| 2  | 239067623 - 239077541 |            | TRUE  | TRUE  |
| 2  | 239067623 - 239077541 | F - 27.27% | TRUE  | TRUE  |
| 2  | 239067623 - 239077541 | T - 72.73% | TRUE  | TRUE  |
| 2  | 239067623 - 239077541 |            | TRUE  | TRUE  |
| 2  | 239067623 - 239077541 | F - 9.09%  | TRUE  | TRUE  |
| 3  | 48509197 - 48542259   |            | FALSE | TRUE  |
| 3  | 48509197 - 48542259   | F - 25.93% | TRUE  | TRUE  |
| 3  | 48509197 - 48542259   |            | TRUE  | TRUE  |
| 5  | 64444563 - 64777747   |            | TRUE  | TRUE  |
| 5  | 64444563 - 64777747   |            | TRUE  | TRUE  |
| 5  | 64444563 - 64777747   |            | TRUE  | TRUE  |
| 5  | 64444563 - 64777747   |            | FALSE | TRUE  |
| 5  | 64444563 - 64777747   | F - 7.14%  | FALSE | TRUE  |
| 5  | 64444563 - 64777747   |            | TRUE  | TRUE  |
| 5  | 64444563 - 64777747   |            | TRUE  | TRUE  |
| 6  | 114254192 - 114332472 |            | TRUE  | TRUE  |
| 6  | 114254192 - 114332472 | F - 19.05% | TRUE  | TRUE  |
| 6  | 114254192 - 114332472 |            | TRUE  | TRUE  |
| 6  | 114254192 - 114332472 | F - 4.76%  | TRUE  | TRUE  |
| 8  | 21547915 - 21669869   |            | TRUE  | TRUE  |
| 8  | 21547915 - 21669869   |            | TRUE  | TRUE  |
| 8  | 21547915 - 21669869   | T - 50.00% | TRUE  | TRUE  |
| 8  | 21547915 - 21669869   |            | TRUE  | TRUE  |
| 8  | 21547915 - 21669869   |            | TRUE  | TRUE  |
| 8  | 21547915 - 21669869   |            | TRUE  | FALSE |
| 8  | 21547915 - 21669869   | T - 64.29% | TRUE  | TRUE  |
| 8  | 21547915 - 21669869   |            | TRUE  | TRUE  |
| 8  | 21547915 - 21669869   |            | TRUE  | TRUE  |
| 8  | 21547915 - 21669869   | F - 7.14%  | TRUE  | TRUE  |
| 8  | 21547915 - 21669869   | T - 64.29% | TRUE  | TRUE  |
| 8  | 21547915 - 21669869   |            | TRUE  | TRUE  |
| 8  | 21547915 - 21669869   | T - 50.00% | TRUE  | TRUE  |
| 8  | 21547915 - 21669869   | T - 57.14% | TRUE  | TRUE  |
| 8  | 21547915 - 21669869   | F - 7.14%  | TRUE  | TRUE  |
| 8  | 21547915 - 21669869   | T - 57.14% | TRUE  | TRUE  |
| 8  | 21547915 - 21669869   |            | TRUE  | TRUE  |
| 8  | 21547915 - 21669869   |            | TRUE  | TRUE  |
| 8  | 21547915 - 21669869   |            | FALSE | TRUE  |
| 8  | 21547915 - 21669869   | F - 7.14%  | FALSE | TRUE  |
| 8  | 21547915 - 21669869   |            | TRUE  | TRUE  |
| 8  | 21547915 - 21669869   | F - 7.14%  | FALSE | TRUE  |

|            |                     |            |       |       |
|------------|---------------------|------------|-------|-------|
| 8          | 21547915 - 21669869 | F - 7.14%  | TRUE  | TRUE  |
| 8          | 21547915 - 21669869 | F - 7.14%  | TRUE  | TRUE  |
| 9          | 36572859 - 36677679 |            | TRUE  | TRUE  |
| 9          | 36572859 - 36677679 | F - 8.70%  | TRUE  | TRUE  |
| 9          | 36572859 - 36677679 |            | TRUE  | FALSE |
| 9          | 36572859 - 36677679 |            | TRUE  | FALSE |
| 9          | 36572859 - 36677679 | T - 78.26% | TRUE  | TRUE  |
| 9          | 36572859 - 36677679 |            | TRUE  | TRUE  |
| 9          | 36572859 - 36677679 |            | TRUE  | TRUE  |
| 6_cox_hap2 | 3606664 - 3616569   | F - 23.53% | TRUE  | TRUE  |
| 6_cox_hap2 | 3606664 - 3616569   |            | TRUE  | FALSE |
| 6_cox_hap2 | 3606664 - 3616569   | F - 5.88%  | TRUE  | FALSE |
| 6_cox_hap2 | 3606664 - 3616569   |            | TRUE  | TRUE  |
| 6_mcf_hap5 | 3515812 - 3525717   | F - 23.53% | TRUE  | TRUE  |
| 6_mcf_hap5 | 3515812 - 3525717   |            | TRUE  | FALSE |
| 6_mcf_hap5 | 3515812 - 3525717   | F - 5.88%  | TRUE  | FALSE |
| 6_mcf_hap5 | 3515812 - 3525717   |            | TRUE  | TRUE  |
| 6_qbl_hap6 | 3397003 - 3406908   | F - 23.53% | TRUE  | TRUE  |
| 6_qbl_hap6 | 3397003 - 3406908   |            | TRUE  | FALSE |
| 6_qbl_hap6 | 3397003 - 3406908   | F - 5.88%  | TRUE  | FALSE |
| 6_qbl_hap6 | 3397003 - 3406908   |            | TRUE  | TRUE  |
| 1          | 17300997 - 17308081 |            | TRUE  | TRUE  |
| 1          | 17300997 - 17308081 |            | TRUE  | TRUE  |
| 1          | 17300997 - 17308081 | T - 90.91% | TRUE  | TRUE  |
| 1          | 17300997 - 17308081 | T - 72.73% | TRUE  | TRUE  |
| 1          | 17300997 - 17308081 | F - 9.09%  | TRUE  | TRUE  |
| 1          | 17300997 - 17308081 | F - 9.09%  | TRUE  | TRUE  |
| 1          | 17300997 - 17308081 | F - 9.09%  | TRUE  | FALSE |
| 1          | 17300997 - 17308081 | F - 27.27% | TRUE  | TRUE  |
| 1          | 17300997 - 17308081 | T - 54.55% | TRUE  | TRUE  |
| 1          | 17300997 - 17308081 | F - 36.36% | TRUE  | TRUE  |
| 1          | 17300997 - 17308081 | F - 9.09%  | TRUE  | TRUE  |
| 2          | 24425733 - 24583583 | F - 5.00%  | TRUE  | TRUE  |
| 2          | 24425733 - 24583583 |            | TRUE  | TRUE  |
| 2          | 24425733 - 24583583 | F - 5.00%  | TRUE  | TRUE  |
| 2          | 24425733 - 24583583 |            | TRUE  | TRUE  |
| 2          | 24425733 - 24583583 |            | TRUE  | TRUE  |
| 2          | 24425733 - 24583583 |            | TRUE  | TRUE  |
| 2          | 24425733 - 24583583 | T - 50.00% | TRUE  | TRUE  |
| 2          | 24425733 - 24583583 |            | TRUE  | TRUE  |
| 2          | 24425733 - 24583583 |            | TRUE  | TRUE  |
| 3          | 50304990 - 50314977 |            | TRUE  | TRUE  |
| 3          | 50304990 - 50314977 |            | TRUE  | TRUE  |
| 3          | 50304990 - 50314977 |            | TRUE  | TRUE  |
| 3          | 50304990 - 50314977 | F - 3.45%  | TRUE  | TRUE  |
| 3          | 50304990 - 50314977 | T - 65.52% | TRUE  | TRUE  |
| 3          | 50304990 - 50314977 |            | FALSE | TRUE  |
| 3          | 50304990 - 50314977 | T - 65.52% | TRUE  | TRUE  |
| 3          | 50304990 - 50314977 | T - 51.72% | TRUE  | TRUE  |
| 3          | 50304990 - 50314977 |            | TRUE  | TRUE  |
| 3          | 50304990 - 50314977 | T - 82.76% | TRUE  | TRUE  |
| 3          | 50304990 - 50314977 |            | FALSE | TRUE  |
| 3          | 52443510 - 52457657 | T - 62.50% | TRUE  | FALSE |
| 3          | 52443510 - 52457657 | F - 12.50% | TRUE  | FALSE |
| 3          | 52443510 - 52457657 |            | TRUE  | TRUE  |
| 3          | 52443510 - 52457657 | F - 6.25%  | TRUE  | TRUE  |
| 3          | 52443510 - 52457657 | T - 56.25% | TRUE  | TRUE  |
| 3          | 9799026 - 9811676   |            | TRUE  | TRUE  |

|   |    |                       |            |       |       |
|---|----|-----------------------|------------|-------|-------|
|   | 3  | 9799026 - 9811676     | F - 12.50% | FALSE | TRUE  |
|   | 3  | 9799026 - 9811676     | T - 62.50% | TRUE  | TRUE  |
|   | 3  | 9799026 - 9811676     | T - 87.50% | TRUE  | TRUE  |
|   | 3  | 9799026 - 9811676     |            | TRUE  | TRUE  |
|   | 3  | 62247494 - 62355005   |            | TRUE  | TRUE  |
|   | 3  | 62247494 - 62355005   | T - 69.23% | TRUE  | TRUE  |
|   | 3  | 62247494 - 62355005   |            | TRUE  | TRUE  |
|   | 3  | 62247494 - 62355005   | F - 7.69%  | TRUE  | TRUE  |
|   | 3  | 62247494 - 62355005   |            | TRUE  | TRUE  |
|   | 4  | 926175 - 952444       |            | TRUE  | FALSE |
|   | 4  | 926175 - 952444       | T - 80.00% | TRUE  | TRUE  |
|   | 6  | 155411423 - 155582018 |            | TRUE  | TRUE  |
|   | 6  | 155411423 - 155582018 | F - 16.67% | TRUE  | TRUE  |
|   | 6  | 155411423 - 155582018 |            | TRUE  | TRUE  |
|   | 6  | 155411423 - 155582018 |            | TRUE  | TRUE  |
|   | 6  | 155411423 - 155582018 |            | TRUE  | TRUE  |
|   | 7  | 44084232 - 44101315   |            | TRUE  | TRUE  |
|   | 7  | 44084232 - 44101315   | F - 48.48% | TRUE  | TRUE  |
|   | 7  | 44084232 - 44101315   |            | TRUE  | TRUE  |
| X |    | 101975616 - 102008468 |            | TRUE  | TRUE  |
| X |    | 101975616 - 102008468 |            | TRUE  | TRUE  |
| X |    | 101975616 - 102008468 | T - 64.71% | TRUE  | TRUE  |
| X |    | 152953554 - 152962048 |            | TRUE  | TRUE  |
| X |    | 152953554 - 152962048 | F - 16.67% | TRUE  | TRUE  |
| X |    | 152953554 - 152962048 | F - 5.56%  | FALSE | TRUE  |
| X |    | 152953554 - 152962048 |            | FALSE | TRUE  |
| X |    | 152953554 - 152962048 | F - 11.11% | TRUE  | TRUE  |
| X |    | 152953554 - 152962048 | F - 5.56%  | TRUE  | TRUE  |
| X |    | 152953554 - 152962048 | F - 22.22% | TRUE  | TRUE  |
|   | 10 | 15144583 - 15210695   | F - 15.38% | TRUE  | FALSE |
|   | 10 | 15144583 - 15210695   |            | TRUE  | FALSE |
|   | 10 | 15144583 - 15210695   | F - 7.69%  | TRUE  | TRUE  |
|   | 10 | 15144583 - 15210695   | F - 15.38% | TRUE  | TRUE  |
|   | 12 | 120123595 - 120315095 | F - 9.09%  | TRUE  | TRUE  |
|   | 12 | 120123595 - 120315095 |            | TRUE  | TRUE  |
|   | 12 | 120123595 - 120315095 |            | TRUE  | TRUE  |
|   | 12 | 120123595 - 120315095 |            | TRUE  | TRUE  |
|   | 12 | 120123595 - 120315095 |            | TRUE  | TRUE  |
|   | 12 | 120123595 - 120315095 | F - 36.36% | TRUE  | TRUE  |
|   | 12 | 120123595 - 120315095 | T - 81.82% | TRUE  | TRUE  |
|   | 12 | 120123595 - 120315095 |            | FALSE | TRUE  |
|   | 12 | 120123595 - 120315095 | T - 72.73% | TRUE  | TRUE  |
|   | 12 | 120123595 - 120315095 | T - 72.73% | TRUE  | TRUE  |
|   | 12 | 120123595 - 120315095 |            | FALSE | TRUE  |
|   | 12 | 120123595 - 120315095 |            | FALSE | TRUE  |
|   | 12 | 120123595 - 120315095 | T - 72.73% | TRUE  | TRUE  |
|   | 12 | 120123595 - 120315095 |            | FALSE | TRUE  |
|   | 12 | 120123595 - 120315095 |            | FALSE | TRUE  |
|   | 12 | 120123595 - 120315095 | T - 72.73% | TRUE  | TRUE  |
|   | 12 | 120123595 - 120315095 | T - 81.82% | TRUE  | TRUE  |
|   | 12 | 120123595 - 120315095 |            | FALSE | TRUE  |
|   | 12 | 120123595 - 120315095 |            | FALSE | TRUE  |
|   | 12 | 120123595 - 120315095 |            | FALSE | TRUE  |
|   | 12 | 120123595 - 120315095 | T - 72.73% | TRUE  | TRUE  |
|   | 12 | 120123595 - 120315095 |            | TRUE  | TRUE  |
|   | 12 | 120123595 - 120315095 |            | TRUE  | TRUE  |
|   | 12 | 120123595 - 120315095 |            | FALSE | TRUE  |
|   | 13 | 35516424 - 36247159   | F - 45.00% | TRUE  | TRUE  |

|    |                       |            |       |       |
|----|-----------------------|------------|-------|-------|
| 13 | 35516424 - 36247159   |            | TRUE  | TRUE  |
| 13 | 35516424 - 36247159   |            | TRUE  | TRUE  |
| 13 | 35516424 - 36247159   |            | TRUE  | TRUE  |
| 13 | 35516424 - 36247159   |            | TRUE  | TRUE  |
| 13 | 35516424 - 36247159   |            | TRUE  | TRUE  |
| 13 | 35516424 - 36247159   | T - 50.00% | TRUE  | TRUE  |
| 13 | 35516424 - 36247159   |            | TRUE  | TRUE  |
| 13 | 35516424 - 36247159   | F - 25.00% | TRUE  | TRUE  |
| 13 | 35516424 - 36247159   | F - 5.00%  | TRUE  | TRUE  |
| 13 | 35516424 - 36247159   |            | TRUE  | TRUE  |
| 13 | 35516424 - 36247159   |            | TRUE  | TRUE  |
| 13 | 35516424 - 36247159   |            | TRUE  | TRUE  |
| 13 | 35516424 - 36247159   |            | TRUE  | TRUE  |
| 13 | 35516424 - 36247159   |            | TRUE  | TRUE  |
| 13 | 35516424 - 36247159   |            | TRUE  | TRUE  |
| 13 | 35516424 - 36247159   |            | FALSE | TRUE  |
| 17 | 48241575 - 48253293   |            | TRUE  | TRUE  |
| 17 | 48241575 - 48253293   | F - 5.88%  | TRUE  | TRUE  |
| 17 | 48241575 - 48253293   |            | TRUE  | TRUE  |
| 17 | 48241575 - 48253293   |            | FALSE | TRUE  |
| 17 | 48241575 - 48253293   |            | FALSE | TRUE  |
| 1  | 202995626 - 203047864 | F - 23.08% | TRUE  | TRUE  |
| 1  | 202995626 - 203047864 |            | TRUE  | TRUE  |
| 1  | 202995626 - 203047864 | F - 23.08% | TRUE  | TRUE  |
| 1  | 202995626 - 203047864 | F - 7.69%  | TRUE  | TRUE  |
| 1  | 202995626 - 203047864 | T - 92.31% | TRUE  | TRUE  |
| 1  | 202995626 - 203047864 |            | TRUE  | TRUE  |
| 1  | 202995626 - 203047864 | F - 23.08% | TRUE  | TRUE  |
| 1  | 202995626 - 203047864 |            | TRUE  | TRUE  |
| 1  | 202995626 - 203047864 | F - 30.77% | TRUE  | TRUE  |
| 1  | 202995626 - 203047864 |            | TRUE  | TRUE  |
| 1  | 202995626 - 203047864 |            | TRUE  | TRUE  |
| 1  | 202995626 - 203047864 |            | TRUE  | TRUE  |
| 1  | 202995626 - 203047864 | T - 53.85% | TRUE  | TRUE  |
| 1  | 202995626 - 203047864 |            | TRUE  | TRUE  |
| 1  | 202995626 - 203047864 | T - 76.92% | FALSE | TRUE  |
| 1  | 202995626 - 203047864 | T - 92.31% | TRUE  | TRUE  |
| 1  | 202995626 - 203047864 | T - 76.92% | FALSE | TRUE  |
| 1  | 202995626 - 203047864 |            | FALSE | TRUE  |
| 1  | 202995626 - 203047864 |            | FALSE | TRUE  |
| 1  | 202995626 - 203047864 |            | FALSE | TRUE  |
| 1  | 202995626 - 203047864 |            | FALSE | TRUE  |
| 1  | 202995626 - 203047864 | T - 92.31% | TRUE  | TRUE  |
| 1  | 202995626 - 203047864 |            | FALSE | TRUE  |
| 1  | 202995626 - 203047864 |            | FALSE | TRUE  |
| 1  | 202995626 - 203047864 | F - 15.38% | TRUE  | TRUE  |
| 2  | 29320560 - 29412509   | F - 21.74% | TRUE  | FALSE |
| 2  | 29320560 - 29412509   |            | FALSE | TRUE  |
| 4  | 56719782 - 56771244   | F - 7.69%  | TRUE  | TRUE  |
| 4  | 56719782 - 56771244   |            | TRUE  | FALSE |
| 4  | 56719782 - 56771244   |            | TRUE  | TRUE  |
| 4  | 56719782 - 56771244   |            | TRUE  | TRUE  |
| 5  | 96496571 - 96519005   | F - 10.00% | TRUE  | TRUE  |
| 5  | 96496571 - 96519005   |            | TRUE  | TRUE  |
| 5  | 115779251 - 115910630 |            | TRUE  | FALSE |
| 5  | 115779251 - 115910630 |            | TRUE  | FALSE |
| 5  | 115779251 - 115910630 |            | TRUE  | FALSE |
| 5  | 115779251 - 115910630 |            | TRUE  | FALSE |
| 5  | 115779251 - 115910630 |            | FALSE | TRUE  |

|   |    |                       |             |       |       |
|---|----|-----------------------|-------------|-------|-------|
|   | 5  | 115779251 - 115910630 | F - 4.55%   | TRUE  | TRUE  |
|   | 5  | 158122923 - 158526788 | F - 5.88%   | TRUE  | FALSE |
|   | 5  | 158122923 - 158526788 | T - 88.24%  | TRUE  | TRUE  |
|   | 5  | 158122923 - 158526788 |             | TRUE  | TRUE  |
|   | 5  | 158122923 - 158526788 |             | TRUE  | TRUE  |
|   | 6  | 70924764 - 71012786   |             | TRUE  | TRUE  |
|   | 6  | 70924764 - 71012786   |             | TRUE  | FALSE |
|   | 6  | 70924764 - 71012786   |             | TRUE  | FALSE |
|   | 6  | 70924764 - 71012786   |             | TRUE  | TRUE  |
|   | 6  | 70924764 - 71012786   | T - 73.33%  | TRUE  | TRUE  |
|   | 8  | 7213039 - 7243080     | T - 50.00%  | TRUE  | TRUE  |
|   | 8  | 7213039 - 7243080     | T - 100.00% | TRUE  | TRUE  |
|   | 8  | 7213039 - 7243080     |             | TRUE  | TRUE  |
|   | 9  | 34398182 - 34458568   |             | TRUE  | TRUE  |
|   | 9  | 34398182 - 34458568   |             | TRUE  | TRUE  |
|   | 9  | 34398182 - 34458568   |             | TRUE  | TRUE  |
|   | 9  | 34398182 - 34458568   | T - 64.71%  | TRUE  | TRUE  |
| X |    | 69664705 - 69725339   | F - 40.00%  | TRUE  | TRUE  |
| X |    | 69664705 - 69725339   |             | TRUE  | TRUE  |
| X |    | 69664705 - 69725339   |             | TRUE  | TRUE  |
| X |    | 69664705 - 69725339   |             | TRUE  | TRUE  |
| X |    | 69664705 - 69725339   | F - 40.00%  | TRUE  | TRUE  |
| X |    | 69664705 - 69725339   | F - 20.00%  | TRUE  | TRUE  |
| X |    | 69664705 - 69725339   | F - 40.00%  | TRUE  | TRUE  |
| X |    | 69664705 - 69725339   |             | TRUE  | TRUE  |
| X |    | 69664705 - 69725339   |             | FALSE | TRUE  |
|   | 11 | 118401756 - 118417995 |             | TRUE  | FALSE |
|   | 11 | 118401756 - 118417995 | F - 4.76%   | TRUE  | TRUE  |
|   | 11 | 118401756 - 118417995 | T - 61.90%  | TRUE  | TRUE  |
|   | 11 | 118401756 - 118417995 | T - 50.00%  | TRUE  | TRUE  |
|   | 11 | 118401756 - 118417995 | F - 9.52%   | TRUE  | TRUE  |
|   | 11 | 118401756 - 118417995 | T - 66.67%  | TRUE  | TRUE  |
|   | 11 | 118401756 - 118417995 | T - 80.95%  | TRUE  | TRUE  |
|   | 11 | 118401756 - 118417995 | F - 4.76%   | FALSE | TRUE  |
|   | 11 | 118401756 - 118417995 |             | FALSE | TRUE  |
|   | 12 | 53200327 - 53208335   | T - 100.00% | TRUE  | TRUE  |
|   | 12 | 53200327 - 53208335   |             | TRUE  | TRUE  |
|   | 13 | 99445741 - 99738879   |             | TRUE  | TRUE  |
|   | 13 | 99445741 - 99738879   | F - 2.22%   | TRUE  | TRUE  |
|   | 13 | 99445741 - 99738879   |             | FALSE | TRUE  |
|   | 13 | 99445741 - 99738879   |             | TRUE  | TRUE  |
|   | 13 | 99445741 - 99738879   |             | FALSE | TRUE  |
|   | 13 | 99445741 - 99738879   |             | FALSE | TRUE  |
|   | 13 | 103418340 - 103426161 |             | TRUE  | TRUE  |
|   | 13 | 103418340 - 103426161 | F - 40.00%  | TRUE  | TRUE  |
|   | 13 | 103418340 - 103426161 |             | TRUE  | TRUE  |
|   | 13 | 103418340 - 103426161 |             | TRUE  | TRUE  |
|   | 15 | 66839806 - 66858317   |             | TRUE  | TRUE  |
|   | 15 | 66839806 - 66858317   |             | TRUE  | TRUE  |
|   | 15 | 66839806 - 66858317   |             | TRUE  | TRUE  |
|   | 15 | 66839806 - 66858317   | T - 66.67%  | FALSE | TRUE  |
|   | 15 | 66839806 - 66858317   |             | TRUE  | TRUE  |
|   | 15 | 66839806 - 66858317   |             | FALSE | TRUE  |
|   | 16 | 284545 - 319942       |             | TRUE  | FALSE |
|   | 16 | 284545 - 319942       |             | TRUE  | TRUE  |
|   | 16 | 284545 - 319942       | F - 8.33%   | TRUE  | TRUE  |
|   | 16 | 284545 - 319942       |             | TRUE  | TRUE  |
|   | 16 | 284545 - 319942       |             | TRUE  | TRUE  |



|    |                       |            |       |       |
|----|-----------------------|------------|-------|-------|
| 16 | 284545 - 319942       |            | TRUE  | TRUE  |
| 16 | 284545 - 319942       | F - 4.17%  | TRUE  | TRUE  |
| 16 | 284545 - 319942       |            | FALSE | TRUE  |
| 1  | 214776532 - 214837931 | F - 14.29% | TRUE  | TRUE  |
| 1  | 214776532 - 214837931 |            | FALSE | TRUE  |
| 1  | 214776532 - 214837931 | F - 28.57% | FALSE | TRUE  |
| 1  | 214776532 - 214837931 | T - 57.14% | FALSE | TRUE  |
| 1  | 214776532 - 214837931 |            | TRUE  | TRUE  |
| 1  | 214776532 - 214837931 | F - 42.86% | TRUE  | TRUE  |
| 2  | 166326157 - 166545917 | T - 50.00% | TRUE  | FALSE |
| 2  | 166326157 - 166545917 |            | TRUE  | FALSE |
| 2  | 166326157 - 166545917 |            | TRUE  | TRUE  |
| 2  | 148687966 - 148779173 | F - 29.03% | TRUE  | TRUE  |
| 2  | 148687966 - 148779173 |            | TRUE  | TRUE  |
| 2  | 148687966 - 148779173 | F - 3.23%  | TRUE  | TRUE  |
| 2  | 148687966 - 148779173 |            | TRUE  | TRUE  |
| 2  | 148687966 - 148779173 |            | TRUE  | TRUE  |
| 2  | 148687966 - 148779173 | T - 61.29% | TRUE  | TRUE  |
| 2  | 148687966 - 148779173 |            | TRUE  | TRUE  |
| 3  | 49460379 - 49466759   | F - 7.14%  | TRUE  | TRUE  |
| 3  | 49460379 - 49466759   |            | TRUE  | TRUE  |
| 3  | 49460379 - 49466759   | F - 35.71% | TRUE  | TRUE  |
| 3  | 49460379 - 49466759   |            | TRUE  | TRUE  |
| 3  | 49460379 - 49466759   | F - 28.57% | TRUE  | TRUE  |
| 3  | 49460379 - 49466759   | F - 14.29% | TRUE  | TRUE  |
| 3  | 49460379 - 49466759   | F - 21.43% | TRUE  | TRUE  |
| 5  | 54921673 - 55069022   |            | TRUE  | FALSE |
| 5  | 54921673 - 55069022   | F - 17.14% | TRUE  | TRUE  |
| 5  | 54921673 - 55069022   |            | TRUE  | TRUE  |
| 5  | 54921673 - 55069022   | F - 2.86%  | FALSE | TRUE  |
| 5  | 54921673 - 55069022   |            | TRUE  | TRUE  |
| 7  | 21467652 - 21554440   | F - 11.11% | TRUE  | TRUE  |
| 7  | 21467652 - 21554440   |            | TRUE  | TRUE  |
| 7  | 21467652 - 21554440   | T - 88.89% | TRUE  | TRUE  |
| 7  | 21467652 - 21554440   |            | TRUE  | TRUE  |
| 7  | 21467652 - 21554440   |            | TRUE  | TRUE  |
| 7  | 21467652 - 21554440   | F - 11.11% | TRUE  | TRUE  |
| 7  | 40174575 - 40900366   |            | TRUE  | TRUE  |
| 7  | 40174575 - 40900366   |            | TRUE  | TRUE  |
| 7  | 40174575 - 40900366   | T - 52.94% | TRUE  | TRUE  |
| 7  | 40174575 - 40900366   | F - 5.88%  | TRUE  | TRUE  |
| 7  | 40174575 - 40900366   |            | TRUE  | TRUE  |
| 7  | 40174575 - 40900366   | F - 23.53% | TRUE  | TRUE  |
| 7  | 40174575 - 40900366   | F - 5.88%  | TRUE  | FALSE |
| 7  | 40174575 - 40900366   | F - 5.88%  | TRUE  | TRUE  |
| 7  | 40174575 - 40900366   |            | TRUE  | TRUE  |
| 7  | 40174575 - 40900366   |            | FALSE | TRUE  |
| 7  | 40174575 - 40900366   |            | TRUE  | TRUE  |
| 7  | 40174575 - 40900366   | F - 5.88%  | TRUE  | TRUE  |
| 7  | 40174575 - 40900366   | F - 5.88%  | TRUE  | TRUE  |
| 7  | 40174575 - 40900366   | T - 76.47% | TRUE  | TRUE  |
| 7  | 40174575 - 40900366   |            | FALSE | TRUE  |
| 7  | 40174575 - 40900366   |            | TRUE  | TRUE  |
| 7  | 40174575 - 40900366   |            | FALSE | TRUE  |
| 7  | 40174575 - 40900366   |            | FALSE | TRUE  |
| 7  | 114562209 - 114659970 |            | TRUE  | FALSE |
| 7  | 114562209 - 114659970 | F - 44.44% | TRUE  | TRUE  |
| 7  | 114562209 - 114659970 | F - 11.11% | FALSE | TRUE  |

|   |    |                       |             |       |       |
|---|----|-----------------------|-------------|-------|-------|
|   | 7  | 111366164 - 111846466 |             | TRUE  | FALSE |
|   | 7  | 111366164 - 111846466 |             | TRUE  | TRUE  |
|   | 7  | 111366164 - 111846466 |             | TRUE  | TRUE  |
|   | 7  | 111366164 - 111846466 | F - 37.50%  | TRUE  | TRUE  |
|   | 7  | 111366164 - 111846466 | F - 3.13%   | TRUE  | TRUE  |
|   | 7  | 111366164 - 111846466 |             | FALSE | TRUE  |
|   | 7  | 111366164 - 111846466 |             | FALSE | TRUE  |
|   | 9  | 72042449 - 72287275   |             | TRUE  | TRUE  |
|   | 9  | 72042449 - 72287275   | F - 40.00%  | TRUE  | TRUE  |
|   | 9  | 72042449 - 72287275   |             | FALSE | TRUE  |
| Y |    | 23200175 - 23206610   |             | TRUE  | TRUE  |
| Y |    | 23200175 - 23206610   | T - 100.00% | TRUE  | TRUE  |
|   | 10 | 64926981 - 65225722   |             | TRUE  | TRUE  |
|   | 10 | 64926981 - 65225722   |             | TRUE  | TRUE  |
|   | 10 | 64926981 - 65225722   | F - 4.55%   | TRUE  | TRUE  |
|   | 10 | 64926981 - 65225722   |             | TRUE  | TRUE  |
|   | 10 | 64926981 - 65225722   |             | FALSE | TRUE  |
|   | 10 | 64926981 - 65225722   |             | FALSE | TRUE  |
|   | 10 | 75434033 - 75490272   | F - 25.00%  | TRUE  | TRUE  |
|   | 10 | 75434033 - 75490272   |             | TRUE  | TRUE  |
|   | 10 | 75434033 - 75490272   |             | TRUE  | TRUE  |
|   | 13 | 52342129 - 52378293   |             | TRUE  | FALSE |
|   | 13 | 52342129 - 52378293   | F - 27.27%  | TRUE  | TRUE  |
|   | 16 | 57220209 - 57274386   |             | TRUE  | TRUE  |
|   | 16 | 57220209 - 57274386   | F - 33.33%  | TRUE  | TRUE  |
|   | 16 | 21413455 - 21458484   |             | TRUE  | TRUE  |
|   | 16 | 21413455 - 21458484   |             | TRUE  | TRUE  |
|   | 16 | 21413455 - 21458484   | F - 11.11%  | TRUE  | TRUE  |
|   | 17 | 2699732 - 2941035     |             | TRUE  | FALSE |
|   | 17 | 2699732 - 2941035     | T - 75.00%  | TRUE  | TRUE  |
|   | 17 | 2699732 - 2941035     |             | FALSE | TRUE  |
|   | 17 | 2699732 - 2941035     |             | FALSE | TRUE  |
|   | 17 | 2699732 - 2941035     |             | FALSE | TRUE  |
|   | 17 | 2699732 - 2941035     |             | FALSE | TRUE  |
|   | 17 | 2699732 - 2941035     |             | FALSE | TRUE  |
|   | 17 | 2699732 - 2941035     |             | TRUE  | TRUE  |
|   | 17 | 2699732 - 2941035     | T - 100.00% | TRUE  | TRUE  |
|   | 17 | 2699732 - 2941035     |             | FALSE | TRUE  |
|   | 17 | 7120444 - 7128587     | F - 7.69%   | TRUE  | TRUE  |
|   | 17 | 7120444 - 7128587     |             | TRUE  | TRUE  |
|   | 17 | 48503519 - 48552206   | F - 3.13%   | TRUE  | TRUE  |
|   | 17 | 48503519 - 48552206   |             | TRUE  | TRUE  |
|   | 17 | 48503519 - 48552206   | F - 12.50%  | TRUE  | FALSE |
|   | 17 | 48503519 - 48552206   | F - 37.50%  | TRUE  | TRUE  |
|   | 17 | 48503519 - 48552206   | F - 12.50%  | TRUE  | TRUE  |
|   | 17 | 48503519 - 48552206   | F - 3.13%   | TRUE  | TRUE  |
|   | 17 | 48503519 - 48552206   | F - 3.13%   | TRUE  | TRUE  |
|   | 19 | 45250962 - 45263301   | F - 16.67%  | TRUE  | TRUE  |
|   | 19 | 45250962 - 45263301   | F - 8.33%   | TRUE  | TRUE  |
|   | 19 | 45250962 - 45263301   | F - 33.33%  | TRUE  | TRUE  |
|   | 19 | 45250962 - 45263301   | F - 25.00%  | TRUE  | TRUE  |
|   | 19 | 45250962 - 45263301   | F - 16.67%  | TRUE  | TRUE  |
|   | 19 | 45250962 - 45263301   | F - 16.67%  | TRUE  | TRUE  |
|   | 19 | 45250962 - 45263301   |             | TRUE  | TRUE  |
|   | 6  | 143857982 - 144152322 |             | TRUE  | FALSE |
|   | 6  | 143857982 - 144152322 | F - 12.50%  | TRUE  | TRUE  |
|   | 1  | 35899091 - 36023551   |             | TRUE  | TRUE  |
|   | 1  | 35899091 - 36023551   |             | TRUE  | TRUE  |

|    |                       |            |       |       |
|----|-----------------------|------------|-------|-------|
| 1  | 35899091 - 36023551   | F - 3.70%  | TRUE  | TRUE  |
| 1  | 35899091 - 36023551   | F - 29.63% | TRUE  | TRUE  |
| 1  | 35899091 - 36023551   |            | TRUE  | TRUE  |
| 1  | 35899091 - 36023551   | F - 14.81% | TRUE  | TRUE  |
| 1  | 35899091 - 36023551   | F - 3.70%  | TRUE  | TRUE  |
| 1  | 35899091 - 36023551   | F - 3.70%  | TRUE  | TRUE  |
| 1  | 35899091 - 36023551   | F - 11.11% | TRUE  | TRUE  |
| 1  | 35899091 - 36023551   | F - 3.70%  | TRUE  | TRUE  |
| 1  | 35899091 - 36023551   |            | FALSE | TRUE  |
| 1  | 35899091 - 36023551   |            | TRUE  | TRUE  |
| 1  | 35899091 - 36023551   |            | TRUE  | TRUE  |
| 1  | 146214651 - 146253110 | F - 25.00% | TRUE  | TRUE  |
| 1  | 146214651 - 146253110 |            | TRUE  | TRUE  |
| 3  | 186838736 - 186898696 | T - 80.00% | TRUE  | TRUE  |
| 3  | 186838736 - 186898696 |            | TRUE  | TRUE  |
| 4  | 57204451 - 57253666   |            | TRUE  | TRUE  |
| 4  | 57204451 - 57253666   | F - 5.56%  | TRUE  | TRUE  |
| 4  | 57204451 - 57253666   |            | FALSE | TRUE  |
| 5  | 159828648 - 159848718 | F - 7.69%  | TRUE  | FALSE |
| 5  | 159828648 - 159848718 |            | FALSE | TRUE  |
| 8  | 26240414 - 26363152   | F - 14.29% | TRUE  | TRUE  |
| 8  | 26240414 - 26363152   | F - 21.43% | TRUE  | TRUE  |
| 8  | 26240414 - 26363152   |            | TRUE  | TRUE  |
| 8  | 26240414 - 26363152   |            | TRUE  | TRUE  |
| 8  | 26240414 - 26363152   | F - 35.71% | TRUE  | TRUE  |
| 8  | 26240414 - 26363152   | T - 64.29% | TRUE  | TRUE  |
| 8  | 37594097 - 37616619   |            | TRUE  | TRUE  |
| 8  | 37594097 - 37616619   |            | TRUE  | TRUE  |
| 8  | 37594097 - 37616619   |            | TRUE  | TRUE  |
| 8  | 37594097 - 37616619   |            | TRUE  | TRUE  |
| 8  | 37594097 - 37616619   | F - 5.88%  | FALSE | TRUE  |
| 8  | 37594097 - 37616619   | F - 23.53% | TRUE  | TRUE  |
| 8  | 99129521 - 99172069   |            | TRUE  | TRUE  |
| 8  | 99129521 - 99172069   | F - 37.50% | TRUE  | FALSE |
| 12 | 39045987 - 39301232   |            | TRUE  | TRUE  |
| 12 | 39045987 - 39301232   |            | TRUE  | FALSE |
| 12 | 39045987 - 39301232   |            | TRUE  | TRUE  |
| 12 | 39045987 - 39301232   | T - 87.50% | TRUE  | TRUE  |
| 12 | 39045987 - 39301232   |            | FALSE | TRUE  |
| 12 | 109176466 - 109251366 | F - 16.67% | TRUE  | TRUE  |
| 12 | 109176466 - 109251366 |            | TRUE  | TRUE  |
| 12 | 109176466 - 109251366 | F - 41.67% | TRUE  | TRUE  |
| 17 | 57936841 - 57970306   |            | TRUE  | TRUE  |
| 17 | 57936841 - 57970306   | T - 73.33% | TRUE  | TRUE  |
| 17 | 57936841 - 57970306   |            | TRUE  | TRUE  |
| 17 | 57936841 - 57970306   | T - 73.33% | FALSE | TRUE  |
| 17 | 48620419 - 48633213   |            | TRUE  | TRUE  |
| 17 | 48620419 - 48633213   |            | TRUE  | TRUE  |
| 17 | 48620419 - 48633213   | F - 2.70%  | TRUE  | TRUE  |
| 17 | 48620419 - 48633213   | F - 2.70%  | TRUE  | TRUE  |
| 17 | 48620419 - 48633213   |            | TRUE  | TRUE  |
| 17 | 48620419 - 48633213   | F - 8.11%  | TRUE  | TRUE  |
| 17 | 48620419 - 48633213   | F - 10.81% | TRUE  | TRUE  |
| 17 | 48620419 - 48633213   | F - 2.70%  | TRUE  | TRUE  |
| 17 | 48620419 - 48633213   | F - 2.70%  | FALSE | TRUE  |
| 17 | 48620419 - 48633213   |            | TRUE  | TRUE  |
| 17 | 48620419 - 48633213   | T - 67.57% | FALSE | TRUE  |
| 17 | 48620419 - 48633213   |            | TRUE  | TRUE  |

|             |                       |             |       |       |
|-------------|-----------------------|-------------|-------|-------|
| 6_apd_hap1  | 3450724 - 3460629     | F - 23.53%  | TRUE  | TRUE  |
| 6_apd_hap1  | 3450724 - 3460629     |             | TRUE  | FALSE |
| 6_apd_hap1  | 3450724 - 3460629     | F - 5.88%   | TRUE  | FALSE |
| 6_apd_hap1  | 3450724 - 3460629     |             | TRUE  | TRUE  |
| 6_cox_hap2  | 3479583 - 3547813     |             | TRUE  | TRUE  |
| 6_cox_hap2  | 3479583 - 3547813     |             | TRUE  | TRUE  |
| 6_cox_hap2  | 3479583 - 3547813     | F - 28.57%  | FALSE | TRUE  |
| 6_dbb_hap3  | 3288148 - 3356325     |             | TRUE  | TRUE  |
| 6_dbb_hap3  | 3288148 - 3356325     |             | TRUE  | TRUE  |
| 6_dbb_hap3  | 3288148 - 3356325     | T - 66.67%  | FALSE | TRUE  |
| 6_dbb_hap3  | 3288148 - 3356325     | F - 33.33%  | FALSE | TRUE  |
| 6_ssto_hap7 | 3483711 - 3493616     | F - 23.53%  | TRUE  | TRUE  |
| 6_ssto_hap7 | 3483711 - 3493616     |             | TRUE  | FALSE |
| 6_ssto_hap7 | 3483711 - 3493616     | F - 5.88%   | TRUE  | FALSE |
| 6_ssto_hap7 | 3483711 - 3493616     |             | TRUE  | TRUE  |
| 1           | 67995313 - 67998012   |             | TRUE  | TRUE  |
| 1           | 67995313 - 67998012   | T - 100.00% | TRUE  | TRUE  |
| 2           | 175296375 - 175351822 | T - 66.67%  | TRUE  | TRUE  |
| 2           | 175296375 - 175351822 |             | TRUE  | TRUE  |
| 2           | 175296375 - 175351822 | T - 66.67%  | TRUE  | TRUE  |
| 2           | 175296375 - 175351822 |             | TRUE  | TRUE  |
| 3           | 105085557 - 105295757 | F - 10.53%  | TRUE  | TRUE  |
| 3           | 105085557 - 105295757 |             | TRUE  | TRUE  |
| 3           | 139108657 - 139302161 | F - 28.57%  | TRUE  | TRUE  |
| 3           | 139108657 - 139302161 |             | FALSE | TRUE  |
| 3           | 15083967 - 15106842   |             | TRUE  | TRUE  |
| 3           | 15083967 - 15106842   |             | TRUE  | TRUE  |
| 3           | 15083967 - 15106842   | T - 81.82%  | TRUE  | TRUE  |
| 3           | 15083967 - 15106842   | F - 45.45%  | TRUE  | TRUE  |
| 3           | 48334754 - 48343175   |             | TRUE  | TRUE  |
| 3           | 48334754 - 48343175   |             | TRUE  | TRUE  |
| 3           | 48334754 - 48343175   | F - 3.85%   | TRUE  | TRUE  |
| 3           | 48334754 - 48343175   |             | TRUE  | TRUE  |
| 3           | 52579368 - 52719933   |             | TRUE  | TRUE  |
| 3           | 52579368 - 52719933   |             | TRUE  | TRUE  |
| 3           | 52579368 - 52719933   |             | TRUE  | TRUE  |
| 3           | 52579368 - 52719933   |             | TRUE  | FALSE |
| 3           | 52579368 - 52719933   | F - 40.00%  | TRUE  | FALSE |
| 3           | 52579368 - 52719933   |             | TRUE  | TRUE  |
| 6           | 109169619 - 109295352 |             | TRUE  | TRUE  |
| 6           | 109169619 - 109295352 |             | TRUE  | TRUE  |
| 6           | 109169619 - 109295352 |             | FALSE | TRUE  |
| 6           | 109169619 - 109295352 | T - 87.50%  | FALSE | TRUE  |
| 10          | 90973326 - 91174382   |             | TRUE  | FALSE |
| 10          | 90973326 - 91174382   |             | TRUE  | FALSE |
| 10          | 90973326 - 91174382   |             | TRUE  | TRUE  |
| 10          | 90973326 - 91174382   | F - 8.70%   | TRUE  | TRUE  |
| 10          | 90973326 - 91174382   | T - 60.87%  | FALSE | TRUE  |
| 10          | 90973326 - 91174382   |             | TRUE  | TRUE  |
| 10          | 90973326 - 91174382   |             | FALSE | TRUE  |
| 11          | 104896235 - 104972158 | F - 11.43%  | TRUE  | TRUE  |
| 11          | 104896235 - 104972158 |             | TRUE  | TRUE  |
| 11          | 104896235 - 104972158 | F - 14.29%  | TRUE  | TRUE  |
| 11          | 104896235 - 104972158 |             | FALSE | TRUE  |
| 12          | 6980099 - 6998522     | F - 37.50%  | TRUE  | TRUE  |
| 12          | 6980099 - 6998522     |             | FALSE | TRUE  |
| 15          | 28982729 - 29024285   |             | TRUE  | TRUE  |
| 15          | 28982729 - 29024285   | F - 12.50%  | TRUE  | TRUE  |

|    |                       |             |       |       |
|----|-----------------------|-------------|-------|-------|
| 16 | 57653650 - 57698944   | F - 17.65%  | TRUE  | TRUE  |
| 16 | 57653650 - 57698944   | F - 11.76%  | TRUE  | TRUE  |
| 16 | 57653650 - 57698944   | F - 41.18%  | TRUE  | TRUE  |
| 16 | 57653650 - 57698944   |             | TRUE  | TRUE  |
| 16 | 57653650 - 57698944   |             | TRUE  | TRUE  |
| 16 | 57653650 - 57698944   |             | TRUE  | TRUE  |
| 16 | 57653650 - 57698944   | F - 11.76%  | TRUE  | TRUE  |
| 16 | 57653650 - 57698944   |             | TRUE  | TRUE  |
| 16 | 57653650 - 57698944   | F - 11.76%  | FALSE | TRUE  |
| 16 | 57653650 - 57698944   | F - 5.88%   | TRUE  | TRUE  |
| 16 | 57653650 - 57698944   | T - 82.35%  | FALSE | TRUE  |
| 16 | 57653650 - 57698944   |             | TRUE  | TRUE  |
| 17 | 6588032 - 6616740     |             | TRUE  | FALSE |
| 17 | 6588032 - 6616740     | T - 90.91%  | TRUE  | TRUE  |
| 17 | 6588032 - 6616740     | T - 100.00% | TRUE  | TRUE  |
| 17 | 6588032 - 6616740     | T - 90.91%  | TRUE  | TRUE  |
| 17 | 6588032 - 6616740     | F - 9.09%   | TRUE  | TRUE  |
| 17 | 6588032 - 6616740     |             | TRUE  | TRUE  |
| 19 | 36359138 - 36370699   |             | TRUE  | TRUE  |
| 19 | 36359138 - 36370699   | F - 42.86%  | TRUE  | TRUE  |
| 19 | 36359138 - 36370699   | F - 14.29%  | TRUE  | TRUE  |
| 19 | 36359138 - 36370699   | T - 57.14%  | TRUE  | TRUE  |
| 19 | 36359138 - 36370699   |             | FALSE | TRUE  |
| 19 | 36359138 - 36370699   |             | TRUE  | TRUE  |
| 19 | 36359138 - 36370699   | T - 100.00% | TRUE  | TRUE  |
| 19 | 36359138 - 36370699   | T - 85.71%  | TRUE  | TRUE  |
| 22 | 39378352 - 39394225   | F - 11.11%  | TRUE  | TRUE  |
| 22 | 39378352 - 39394225   |             | TRUE  | TRUE  |
| 22 | 39378352 - 39394225   |             | TRUE  | TRUE  |
| 22 | 39378352 - 39394225   | F - 22.22%  | TRUE  | TRUE  |
| 22 | 39378352 - 39394225   |             | FALSE | TRUE  |
| 22 | 39378352 - 39394225   |             | FALSE | TRUE  |
| 22 | 39378352 - 39394225   |             | TRUE  | TRUE  |
| 22 | 39378352 - 39394225   |             | TRUE  | TRUE  |
| 1  | 162760492 - 162782608 | F - 31.25%  | TRUE  | FALSE |
| 1  | 162760492 - 162782608 | T - 68.75%  | TRUE  | TRUE  |
| 1  | 162760492 - 162782608 |             | TRUE  | TRUE  |
| 1  | 162760492 - 162782608 | T - 68.75%  | TRUE  | TRUE  |
| 1  | 38326369 - 38412729   | F - 29.41%  | TRUE  | TRUE  |
| 1  | 38326369 - 38412729   |             | FALSE | TRUE  |
| 1  | 43212006 - 43232755   |             | TRUE  | TRUE  |
| 1  | 43212006 - 43232755   | F - 10.53%  | TRUE  | TRUE  |
| 1  | 43212006 - 43232755   |             | TRUE  | FALSE |
| 1  | 43212006 - 43232755   | F - 10.53%  | TRUE  | TRUE  |
| 1  | 45468212 - 45477027   | F - 8.33%   | TRUE  | TRUE  |
| 1  | 45468212 - 45477027   |             | TRUE  | TRUE  |
| 1  | 45468212 - 45477027   | F - 16.67%  | TRUE  | TRUE  |
| 1  | 45468212 - 45477027   | F - 8.33%   | TRUE  | TRUE  |
| 1  | 45468212 - 45477027   | F - 8.33%   | TRUE  | TRUE  |
| 1  | 45468212 - 45477027   |             | TRUE  | TRUE  |
| 1  | 45468212 - 45477027   | F - 16.67%  | TRUE  | TRUE  |
| 1  | 45468212 - 45477027   | F - 16.67%  | TRUE  | TRUE  |
| 2  | 27193480 - 27250087   |             | TRUE  | TRUE  |
| 2  | 27193480 - 27250087   | F - 8.33%   | TRUE  | TRUE  |
| 2  | 27193480 - 27250087   |             | TRUE  | TRUE  |
| 2  | 234742062 - 234763212 |             | TRUE  | TRUE  |
| 2  | 234742062 - 234763212 |             | TRUE  | TRUE  |
| 2  | 234742062 - 234763212 | T - 58.33%  | TRUE  | TRUE  |

|    |                       |             |       |       |
|----|-----------------------|-------------|-------|-------|
| 2  | 234742062 - 234763212 | T - 75.00%  | TRUE  | TRUE  |
| 2  | 234742062 - 234763212 |             | TRUE  | TRUE  |
| 2  | 234742062 - 234763212 | T - 66.67%  | TRUE  | TRUE  |
| 2  | 234742062 - 234763212 |             | FALSE | TRUE  |
| 2  | 234742062 - 234763212 | T - 75.00%  | TRUE  | TRUE  |
| 5  | 52083730 - 52255037   | F - 16.67%  | TRUE  | TRUE  |
| 5  | 52083730 - 52255037   | F - 8.33%   | TRUE  | TRUE  |
| 5  | 52083730 - 52255037   |             | TRUE  | TRUE  |
| 5  | 52083730 - 52255037   |             | TRUE  | TRUE  |
| 17 | 16342289 - 16373962   |             | TRUE  | FALSE |
| 17 | 16342289 - 16373962   |             | TRUE  | FALSE |
| 17 | 16342289 - 16373962   | F - 14.04%  | TRUE  | TRUE  |
| 17 | 16342289 - 16373962   |             | TRUE  | TRUE  |
| 17 | 16342289 - 16373962   |             | FALSE | TRUE  |
| 17 | 16342289 - 16373962   | F - 8.77%   | FALSE | TRUE  |
| 17 | 43325303 - 43345997   |             | TRUE  | TRUE  |
| 17 | 43325303 - 43345997   | T - 66.67%  | TRUE  | TRUE  |
| 17 | 40253422 - 40264751   |             | TRUE  | TRUE  |
| 17 | 40253422 - 40264751   | T - 71.43%  | FALSE | TRUE  |
| 17 | 40253422 - 40264751   |             | FALSE | TRUE  |
| 17 | 40253422 - 40264751   | F - 28.57%  | TRUE  | FALSE |
| 1  | 11869 - 14409         |             | TRUE  | TRUE  |
| 1  | 11869 - 14409         | T - 100.00% | TRUE  | TRUE  |
| 1  | 11869 - 14409         | T - 80.00%  | TRUE  | TRUE  |
| 1  | 156495197 - 156542396 |             | TRUE  | TRUE  |
| 1  | 156495197 - 156542396 | F - 42.86%  | TRUE  | TRUE  |
| 1  | 156495197 - 156542396 | T - 71.43%  | TRUE  | TRUE  |
| 1  | 156495197 - 156542396 |             | FALSE | TRUE  |
| 1  | 156495197 - 156542396 | F - 42.86%  | TRUE  | TRUE  |
| 1  | 156495197 - 156542396 |             | FALSE | TRUE  |
| 1  | 156495197 - 156542396 |             | FALSE | TRUE  |
| 1  | 156495197 - 156542396 |             | FALSE | TRUE  |
| 1  | 156495197 - 156542396 |             | FALSE | TRUE  |
| 1  | 156495197 - 156542396 |             | FALSE | TRUE  |
| 2  | 160569000 - 160625359 | F - 13.33%  | TRUE  | TRUE  |
| 2  | 160569000 - 160625359 |             | FALSE | TRUE  |
| 2  | 38789120 - 38830728   |             | TRUE  | TRUE  |
| 2  | 38789120 - 38830728   |             | TRUE  | TRUE  |
| 2  | 38789120 - 38830728   | F - 37.50%  | TRUE  | TRUE  |
| 3  | 137780827 - 137834660 | F - 9.09%   | TRUE  | TRUE  |
| 3  | 137780827 - 137834660 | F - 36.36%  | TRUE  | TRUE  |
| 3  | 137780827 - 137834660 | F - 45.45%  | TRUE  | TRUE  |
| 3  | 137780827 - 137834660 | F - 18.18%  | TRUE  | TRUE  |
| 3  | 137780827 - 137834660 | T - 54.55%  | TRUE  | TRUE  |
| 3  | 137780827 - 137834660 |             | TRUE  | TRUE  |
| 3  | 137780827 - 137834660 | F - 45.45%  | TRUE  | TRUE  |
| 3  | 137780827 - 137834660 |             | TRUE  | TRUE  |
| 4  | 128702976 - 128755226 | T - 62.50%  | TRUE  | TRUE  |
| 4  | 128702976 - 128755226 | F - 12.50%  | FALSE | TRUE  |
| 4  | 128702976 - 128755226 | F - 12.50%  | TRUE  | TRUE  |
| 4  | 128702976 - 128755226 | F - 12.50%  | TRUE  | TRUE  |
| 4  | 128702976 - 128755226 | T - 50.00%  | TRUE  | TRUE  |
| 4  | 128702976 - 128755226 |             | FALSE | TRUE  |
| 4  | 128702976 - 128755226 |             | FALSE | TRUE  |
| 4  | 128702976 - 128755226 |             | TRUE  | TRUE  |
| 4  | 174309299 - 174327531 |             | TRUE  | TRUE  |
| 4  | 174309299 - 174327531 | F - 25.00%  | TRUE  | TRUE  |
| 4  | 140187317 - 140201492 | T - 50.00%  | TRUE  | TRUE  |
| 4  | 140187317 - 140201492 | T - 100.00% | TRUE  | TRUE  |

|    |                       |             |       |       |
|----|-----------------------|-------------|-------|-------|
| 4  | 140187317 - 140201492 |             | TRUE  | TRUE  |
| 4  | 140187317 - 140201492 |             | FALSE | TRUE  |
| 5  | 140566893 - 140571111 |             | TRUE  | TRUE  |
| 5  | 140566893 - 140571111 | T - 100.00% | TRUE  | TRUE  |
| 5  | 140566893 - 140571111 | T - 50.00%  | FALSE | TRUE  |
| 5  | 34905366 - 34919094   |             | TRUE  | TRUE  |
| 5  | 34905366 - 34919094   | F - 7.14%   | TRUE  | TRUE  |
| 5  | 115140430 - 115152651 |             | TRUE  | FALSE |
| 5  | 115140430 - 115152651 |             | TRUE  | TRUE  |
| 5  | 115140430 - 115152651 | T - 100.00% | TRUE  | FALSE |
| 5  | 115140430 - 115152651 | F - 16.67%  | TRUE  | TRUE  |
| 9  | 97488951 - 97849500   |             | TRUE  | TRUE  |
| 9  | 97488951 - 97849500   |             | TRUE  | FALSE |
| 9  | 97488951 - 97849500   | F - 25.64%  | TRUE  | TRUE  |
| 9  | 97488951 - 97849500   | F - 2.56%   | TRUE  | TRUE  |
| 9  | 97488951 - 97849500   |             | TRUE  | TRUE  |
| 9  | 97488951 - 97849500   |             | TRUE  | TRUE  |
| 9  | 97488951 - 97849500   | F - 25.64%  | TRUE  | TRUE  |
| 9  | 97488951 - 97849500   |             | FALSE | TRUE  |
| 9  | 97488951 - 97849500   |             | TRUE  | TRUE  |
| 9  | 97488951 - 97849500   | F - 2.56%   | FALSE | TRUE  |
| 9  | 97488951 - 97849500   |             | TRUE  | TRUE  |
| 9  | 97488951 - 97849500   | F - 12.82%  | FALSE | TRUE  |
| 9  | 97488951 - 97849500   |             | TRUE  | TRUE  |
| 9  | 97488951 - 97849500   |             | TRUE  | TRUE  |
| 9  | 97488951 - 97849500   | F - 30.77%  | TRUE  | TRUE  |
| 9  | 97488951 - 97849500   |             | FALSE | TRUE  |
| 9  | 97488951 - 97849500   | F - 2.56%   | TRUE  | TRUE  |
| 9  | 140772241 - 141019076 |             | TRUE  | FALSE |
| 9  | 140772241 - 141019076 | T - 63.16%  | FALSE | TRUE  |
| 9  | 140772241 - 141019076 |             | TRUE  | TRUE  |
| 9  | 140772241 - 141019076 |             | FALSE | TRUE  |
| 9  | 140772241 - 141019076 |             | TRUE  | TRUE  |
| Y  | 9293012 - 9344217     |             | TRUE  | FALSE |
| Y  | 9293012 - 9344217     |             | TRUE  | TRUE  |
| Y  | 9293012 - 9344217     | F - 16.67%  | TRUE  | TRUE  |
| Y  | 9293012 - 9344217     | F - 16.67%  | TRUE  | TRUE  |
| Y  | 9293012 - 9344217     |             | TRUE  | TRUE  |
| Y  | 9293012 - 9344217     |             | FALSE | TRUE  |
| Y  | 9293012 - 9344217     | F - 33.33%  | FALSE | TRUE  |
| 11 | 113930315 - 114121398 | F - 11.11%  | TRUE  | TRUE  |
| 11 | 113930315 - 114121398 | T - 88.89%  | TRUE  | TRUE  |
| 11 | 113930315 - 114121398 |             | TRUE  | TRUE  |
| 11 | 113930315 - 114121398 |             | TRUE  | TRUE  |
| 11 | 113930315 - 114121398 | F - 11.11%  | TRUE  | TRUE  |
| 11 | 113930315 - 114121398 |             | FALSE | TRUE  |
| 11 | 113930315 - 114121398 | F - 22.22%  | FALSE | TRUE  |
| 11 | 10833621 - 10879620   |             | TRUE  | FALSE |
| 11 | 10833621 - 10879620   |             | TRUE  | TRUE  |
| 11 | 10833621 - 10879620   |             | TRUE  | TRUE  |
| 11 | 10833621 - 10879620   | T - 50.00%  | TRUE  | TRUE  |
| 11 | 10833621 - 10879620   | F - 40.00%  | TRUE  | TRUE  |
| 12 | 117581146 - 117628336 |             | TRUE  | TRUE  |
| 12 | 117581146 - 117628336 | T - 90.00%  | TRUE  | TRUE  |
| 12 | 117581146 - 117628336 |             | TRUE  | TRUE  |
| 21 | 40817781 - 40887433   | T - 91.67%  | TRUE  | FALSE |
| 21 | 40817781 - 40887433   | T - 91.67%  | FALSE | TRUE  |
| 21 | 40817781 - 40887433   |             | FALSE | TRUE  |

|    |                       |            |       |       |
|----|-----------------------|------------|-------|-------|
| 22 | 35653445 - 35691800   |            | TRUE  | TRUE  |
| 22 | 35653445 - 35691800   | F - 30.77% | TRUE  | TRUE  |
| 22 | 35653445 - 35691800   |            | TRUE  | TRUE  |
| 22 | 35653445 - 35691800   |            | TRUE  | TRUE  |
| 22 | 35653445 - 35691800   | F - 38.46% | TRUE  | TRUE  |
| 22 | 35653445 - 35691800   |            | TRUE  | TRUE  |
| 1  | 1634169 - 1655966     |            | TRUE  | FALSE |
| 1  | 1634169 - 1655966     | F - 12.50% | TRUE  | TRUE  |
| 1  | 1634169 - 1655966     |            | TRUE  | TRUE  |
| 1  | 1634169 - 1655966     | T - 68.75% | TRUE  | TRUE  |
| 1  | 1634169 - 1655966     | F - 11.36% | TRUE  | TRUE  |
| 1  | 1634169 - 1655966     |            | TRUE  | TRUE  |
| 1  | 1634169 - 1655966     |            | TRUE  | TRUE  |
| 3  | 10068098 - 10143614   |            | FALSE | TRUE  |
| 3  | 10068098 - 10143614   | F - 5.88%  | TRUE  | TRUE  |
| 3  | 10068098 - 10143614   | F - 47.06% | TRUE  | TRUE  |
| 3  | 10068098 - 10143614   |            | FALSE | TRUE  |
| 3  | 10068098 - 10143614   | F - 35.29% | TRUE  | TRUE  |
| 3  | 10068098 - 10143614   |            | FALSE | TRUE  |
| 3  | 49235861 - 49295537   | F - 45.45% | TRUE  | TRUE  |
| 3  | 49235861 - 49295537   | F - 9.09%  | TRUE  | TRUE  |
| 3  | 49235861 - 49295537   |            | TRUE  | TRUE  |
| 3  | 49235861 - 49295537   | F - 18.18% | TRUE  | TRUE  |
| 3  | 49235861 - 49295537   | F - 18.18% | FALSE | TRUE  |
| 3  | 49235861 - 49295537   | F - 18.18% | TRUE  | TRUE  |
| 3  | 49235861 - 49295537   | F - 27.27% | TRUE  | TRUE  |
| 3  | 49235861 - 49295537   | T - 81.82% | TRUE  | TRUE  |
| 3  | 49235861 - 49295537   |            | FALSE | TRUE  |
| 3  | 138327448 - 138352218 |            | TRUE  | TRUE  |
| 3  | 138327448 - 138352218 | F - 46.67% | TRUE  | TRUE  |
| 3  | 138327448 - 138352218 | F - 13.33% | TRUE  | FALSE |
| 3  | 138327448 - 138352218 | F - 13.33% | TRUE  | FALSE |
| 3  | 138327448 - 138352218 | T - 60.00% | TRUE  | TRUE  |
| 3  | 138327448 - 138352218 | F - 13.33% | TRUE  | TRUE  |
| 3  | 138327448 - 138352218 |            | TRUE  | TRUE  |
| 3  | 138327448 - 138352218 | F - 20.00% | TRUE  | TRUE  |
| 3  | 138327448 - 138352218 |            | FALSE | TRUE  |
| 3  | 138327448 - 138352218 | F - 6.67%  | TRUE  | TRUE  |
| 3  | 138327448 - 138352218 |            | FALSE | TRUE  |
| 3  | 138327448 - 138352218 |            | FALSE | TRUE  |
| 3  | 138327448 - 138352218 |            | TRUE  | TRUE  |
| 3  | 138327448 - 138352218 |            | FALSE | TRUE  |
| 3  | 49977440 - 50114685   |            | TRUE  | FALSE |
| 3  | 49977440 - 50114685   |            | TRUE  | TRUE  |
| 3  | 49977440 - 50114685   | F - 3.70%  | TRUE  | TRUE  |
| 3  | 49977440 - 50114685   |            | TRUE  | TRUE  |
| 3  | 49977440 - 50114685   |            | TRUE  | TRUE  |
| 3  | 49977440 - 50114685   | F - 44.44% | TRUE  | TRUE  |
| 3  | 49977440 - 50114685   |            | TRUE  | TRUE  |
| 3  | 49977440 - 50114685   |            | FALSE | TRUE  |
| 3  | 49977440 - 50114685   |            | FALSE | TRUE  |
| 4  | 156680126 - 156728783 | F - 13.33% | FALSE | TRUE  |
| 4  | 156680126 - 156728783 | F - 46.67% | TRUE  | TRUE  |
| 4  | 156680126 - 156728783 | F - 20.00% | TRUE  | TRUE  |
| 4  | 156680126 - 156728783 |            | TRUE  | TRUE  |
| 4  | 156680126 - 156728783 | T - 86.67% | FALSE | TRUE  |
| 4  | 156680126 - 156728783 |            | TRUE  | TRUE  |
| 4  | 156680126 - 156728783 |            | TRUE  | TRUE  |



|    |                       |            |       |       |
|----|-----------------------|------------|-------|-------|
| 4  | 156680126 - 156728783 |            | FALSE | TRUE  |
| 4  | 2073645 - 2243891     | F - 30.00% | TRUE  | TRUE  |
| 4  | 2073645 - 2243891     |            | TRUE  | TRUE  |
| 4  | 2073645 - 2243891     | F - 40.00% | TRUE  | TRUE  |
| 4  | 129786076 - 130014764 |            | TRUE  | TRUE  |
| 4  | 129786076 - 130014764 |            | TRUE  | TRUE  |
| 4  | 129786076 - 130014764 | F - 6.67%  | TRUE  | TRUE  |
| 4  | 129786076 - 130014764 |            | TRUE  | FALSE |
| 4  | 129786076 - 130014764 | F - 6.67%  | TRUE  | TRUE  |
| 4  | 129786076 - 130014764 | T - 60.00% | TRUE  | TRUE  |
| 4  | 129786076 - 130014764 |            | TRUE  | FALSE |
| 4  | 129786076 - 130014764 |            | TRUE  | TRUE  |
| 4  | 129786076 - 130014764 | T - 66.67% | TRUE  | TRUE  |
| 5  | 70883115 - 70954531   | F - 43.75% | TRUE  | TRUE  |
| 5  | 70883115 - 70954531   |            | TRUE  | TRUE  |
| 5  | 70883115 - 70954531   | T - 68.75% | TRUE  | TRUE  |
| 7  | 72023729 - 72298813   |            | TRUE  | FALSE |
| 7  | 72023729 - 72298813   |            | TRUE  | FALSE |
| 7  | 72023729 - 72298813   |            | FALSE | TRUE  |
| 7  | 72023729 - 72298813   | F - 37.50% | FALSE | TRUE  |
| 8  | 103216729 - 103251346 |            | TRUE  | TRUE  |
| 8  | 103216729 - 103251346 |            | FALSE | TRUE  |
| 8  | 103216729 - 103251346 | T - 66.67% | TRUE  | TRUE  |
| 8  | 103216729 - 103251346 | F - 28.57% | FALSE | TRUE  |
| 9  | 35161989 - 35405335   |            | TRUE  | TRUE  |
| 9  | 35161989 - 35405335   | T - 80.00% | TRUE  | TRUE  |
| 9  | 35161989 - 35405335   |            | TRUE  | FALSE |
| 9  | 35161989 - 35405335   |            | TRUE  | TRUE  |
| 9  | 35161989 - 35405335   |            | TRUE  | TRUE  |
| 9  | 35161989 - 35405335   | T - 60.00% | TRUE  | TRUE  |
| 9  | 35161989 - 35405335   |            | TRUE  | TRUE  |
| 9  | 35161989 - 35405335   |            | TRUE  | FALSE |
| 9  | 35161989 - 35405335   | T - 50.00% | TRUE  | FALSE |
| 9  | 35161989 - 35405335   | T - 80.00% | TRUE  | TRUE  |
| 9  | 35161989 - 35405335   | T - 80.00% | TRUE  | TRUE  |
| 9  | 35161989 - 35405335   |            | TRUE  | TRUE  |
| 10 | 103330317 - 103369425 |            | TRUE  | FALSE |
| 10 | 103330317 - 103369425 |            | TRUE  | TRUE  |
| 10 | 103330317 - 103369425 |            | TRUE  | TRUE  |
| 10 | 103330317 - 103369425 | F - 20.00% | TRUE  | TRUE  |
| 11 | 108093559 - 108239829 |            | TRUE  | TRUE  |
| 11 | 108093559 - 108239829 |            | TRUE  | TRUE  |
| 11 | 108093559 - 108239829 |            | TRUE  | TRUE  |
| 11 | 108093559 - 108239829 |            | FALSE | TRUE  |
| 11 | 108093559 - 108239829 |            | TRUE  | TRUE  |
| 11 | 108093559 - 108239829 |            | TRUE  | TRUE  |
| 11 | 108093559 - 108239829 | F - 15.38% | TRUE  | TRUE  |
| 11 | 108093559 - 108239829 |            | TRUE  | TRUE  |
| 11 | 108093559 - 108239829 |            | TRUE  | TRUE  |
| 11 | 108093559 - 108239829 |            | TRUE  | TRUE  |
| 11 | 108093559 - 108239829 |            | TRUE  | TRUE  |
| 11 | 108093559 - 108239829 | F - 7.69%  | TRUE  | TRUE  |
| 11 | 108093559 - 108239829 |            | FALSE | TRUE  |
| 12 | 107168373 - 107283094 |            | TRUE  | TRUE  |
| 12 | 107168373 - 107283094 |            | TRUE  | TRUE  |
| 12 | 107168373 - 107283094 | T - 69.23% | TRUE  | TRUE  |
| 12 | 107168373 - 107283094 |            | TRUE  | TRUE  |
| 12 | 107168373 - 107283094 |            | FALSE | TRUE  |

|            |                       |             |       |       |
|------------|-----------------------|-------------|-------|-------|
| 12         | 54422142 - 54424607   | T - 100.00% | TRUE  | TRUE  |
| 12         | 54422142 - 54424607   |             | TRUE  | TRUE  |
| 14         | 23299092 - 23304246   | T - 70.00%  | TRUE  | FALSE |
| 14         | 23299092 - 23304246   | T - 50.00%  | TRUE  | TRUE  |
| 14         | 23299092 - 23304246   | F - 5.00%   | FALSE | TRUE  |
| 14         | 23299092 - 23304246   |             | FALSE | TRUE  |
| 20         | 1609798 - 1638425     |             | TRUE  | TRUE  |
| 20         | 1609798 - 1638425     |             | TRUE  | TRUE  |
| 20         | 1609798 - 1638425     |             | TRUE  | FALSE |
| 20         | 1609798 - 1638425     | T - 100.00% | TRUE  | TRUE  |
| 20         | 1609798 - 1638425     |             | TRUE  | TRUE  |
| 20         | 1609798 - 1638425     | T - 55.56%  | FALSE | TRUE  |
| 21         | 35014706 - 35272165   |             | TRUE  | FALSE |
| 21         | 35014706 - 35272165   | F - 26.56%  | TRUE  | FALSE |
| 21         | 35014706 - 35272165   |             | TRUE  | TRUE  |
| 21         | 35014706 - 35272165   | F - 26.56%  | TRUE  | TRUE  |
| 21         | 35014706 - 35272165   | F - 3.13%   | TRUE  | TRUE  |
| 22         | 44319619 - 44343448   |             | TRUE  | FALSE |
| 22         | 44319619 - 44343448   | F - 20.00%  | TRUE  | TRUE  |
| 22         | 44319619 - 44343448   | T - 60.00%  | TRUE  | TRUE  |
| 22         | 44319619 - 44343448   | F - 20.00%  | TRUE  | TRUE  |
| 22         | 44319619 - 44343448   | F - 20.00%  | TRUE  | TRUE  |
| 22         | 44319619 - 44343448   |             | TRUE  | TRUE  |
| 6_qbl_hap6 | 4450268 - 4472060     | F - 5.56%   | TRUE  | TRUE  |
| 6_qbl_hap6 | 4450268 - 4472060     |             | TRUE  | TRUE  |
| 6_qbl_hap6 | 4450268 - 4472060     |             | TRUE  | TRUE  |
| 6_qbl_hap6 | 4450268 - 4472060     |             | TRUE  | TRUE  |
| 6_qbl_hap6 | 4450268 - 4472060     |             | FALSE | TRUE  |
| 2          | 242014096 - 242041747 | F - 10.34%  | TRUE  | TRUE  |
| 2          | 242014096 - 242041747 | F - 48.28%  | TRUE  | TRUE  |
| 2          | 242014096 - 242041747 |             | TRUE  | FALSE |
| 2          | 242014096 - 242041747 | F - 44.83%  | TRUE  | TRUE  |
| 3          | 196662273 - 196669468 | F - 10.00%  | TRUE  | FALSE |
| 3          | 196662273 - 196669468 |             | TRUE  | TRUE  |
| 3          | 196662273 - 196669468 | F - 10.00%  | TRUE  | FALSE |
| 3          | 196662273 - 196669468 |             | FALSE | TRUE  |
| 3          | 49044495 - 49053386   |             | TRUE  | TRUE  |
| 3          | 49044495 - 49053386   |             | TRUE  | TRUE  |
| 3          | 49044495 - 49053386   |             | TRUE  | FALSE |
| 3          | 49044495 - 49053386   | F - 14.81%  | TRUE  | TRUE  |
| 9          | 134691579 - 134696375 | T - 100.00% | TRUE  | FALSE |
| 9          | 134691579 - 134696375 |             | FALSE | TRUE  |
| 12         | 6898638 - 6929976     | F - 7.69%   | TRUE  | TRUE  |
| 12         | 6898638 - 6929976     |             | TRUE  | TRUE  |
| 12         | 6898638 - 6929976     | F - 23.08%  | FALSE | TRUE  |
| 12         | 6898638 - 6929976     |             | TRUE  | TRUE  |
| 12         | 6898638 - 6929976     | F - 7.69%   | TRUE  | TRUE  |
| 12         | 6898638 - 6929976     | T - 84.62%  | TRUE  | TRUE  |
| 12         | 6898638 - 6929976     |             | FALSE | TRUE  |
| 12         | 96394606 - 96437298   | F - 10.00%  | TRUE  | TRUE  |
| 12         | 96394606 - 96437298   |             | TRUE  | TRUE  |
| 12         | 96394606 - 96437298   | F - 20.00%  | FALSE | TRUE  |
| 12         | 96394606 - 96437298   |             | TRUE  | TRUE  |
| 12         | 96394606 - 96437298   | F - 20.00%  | FALSE | TRUE  |
| 15         | 93160673 - 93353028   | F - 16.67%  | TRUE  | FALSE |
| 15         | 93160673 - 93353028   |             | TRUE  | TRUE  |
| 15         | 93160673 - 93353028   |             | FALSE | TRUE  |
| 15         | 93160673 - 93353028   | T - 100.00% | TRUE  | TRUE  |

|             |                     |             |       |       |
|-------------|---------------------|-------------|-------|-------|
| 16          | 69796209 - 69975644 | F - 7.14%   | TRUE  | TRUE  |
| 16          | 69796209 - 69975644 | F - 7.14%   | TRUE  | TRUE  |
| 16          | 69796209 - 69975644 | F - 14.29%  | FALSE | TRUE  |
| 16          | 69796209 - 69975644 |             | FALSE | TRUE  |
| 16          | 69796209 - 69975644 |             | TRUE  | TRUE  |
| 16          | 69796209 - 69975644 |             | TRUE  | TRUE  |
| 16          | 69796209 - 69975644 | T - 92.86%  | TRUE  | TRUE  |
| 17          | 41952725 - 41987068 |             | TRUE  | TRUE  |
| 17          | 41952725 - 41987068 | F - 15.38%  | TRUE  | TRUE  |
| 17          | 41952725 - 41987068 | F - 11.54%  | TRUE  | TRUE  |
| 17          | 41952725 - 41987068 | F - 11.54%  | FALSE | TRUE  |
| 17          | 41952725 - 41987068 | T - 88.46%  | TRUE  | TRUE  |
| 17          | 41952725 - 41987068 |             | FALSE | TRUE  |
| 18          | 2571510 - 2616634   |             | TRUE  | FALSE |
| 18          | 2571510 - 2616634   | T - 100.00% | TRUE  | TRUE  |
| 18          | 2571510 - 2616634   | T - 100.00% | FALSE | TRUE  |
| 18          | 2571510 - 2616634   | T - 100.00% | FALSE | TRUE  |
| 18          | 2571510 - 2616634   |             | FALSE | TRUE  |
| 22          | 31677579 - 31688524 |             | TRUE  | TRUE  |
| 22          | 31677579 - 31688524 | T - 53.33%  | TRUE  | FALSE |
| 22          | 31677579 - 31688524 |             | TRUE  | TRUE  |
| 6_ssto_hap7 | 3038543 - 3063441   | F - 35.00%  | TRUE  | TRUE  |
| 6_ssto_hap7 | 3038543 - 3063441   |             | TRUE  | TRUE  |
| 6_ssto_hap7 | 3038543 - 3063441   |             | TRUE  | FALSE |
| 6_ssto_hap7 | 3038543 - 3063441   |             | TRUE  | TRUE  |
| 6_ssto_hap7 | 3038543 - 3063441   |             | TRUE  | TRUE  |
| 6_ssto_hap7 | 3038543 - 3063441   |             | FALSE | TRUE  |
| 6_ssto_hap7 | 3038543 - 3063441   |             | FALSE | TRUE  |
| 6_ssto_hap7 | 1186740 - 1190195   |             | TRUE  | TRUE  |
| 6_ssto_hap7 | 1186740 - 1190195   | T - 50.00%  | TRUE  | TRUE  |
| 6_ssto_hap7 | 1186740 - 1190195   |             | FALSE | TRUE  |
| 6_ssto_hap7 | 1186740 - 1190195   | T - 50.00%  | TRUE  | TRUE  |
| 6_ssto_hap7 | 1186740 - 1190195   | T - 100.00% | TRUE  | TRUE  |
| 6_ssto_hap7 | 1132296 - 1136468   | F - 7.14%   | TRUE  | FALSE |
| 6_ssto_hap7 | 1132296 - 1136468   |             | TRUE  | TRUE  |
| 6_ssto_hap7 | 1132296 - 1136468   | T - 57.14%  | TRUE  | TRUE  |
| 2           | 37477645 - 37551951 |             | TRUE  | FALSE |
| 2           | 37477645 - 37551951 | F - 23.08%  | TRUE  | TRUE  |
| 2           | 37477645 - 37551951 |             | TRUE  | TRUE  |
| 3           | 46871032 - 46875585 |             | TRUE  | FALSE |
| 3           | 46871032 - 46875585 | F - 33.33%  | TRUE  | TRUE  |
| 3           | 46871032 - 46875585 | F - 33.33%  | TRUE  | TRUE  |
| 8           | 98881068 - 99048946 |             | TRUE  | TRUE  |
| 8           | 98881068 - 99048946 | T - 61.54%  | TRUE  | TRUE  |
| 8           | 98881068 - 99048946 | T - 57.69%  | TRUE  | TRUE  |
| 8           | 98881068 - 99048946 |             | FALSE | TRUE  |
| 8           | 98881068 - 99048946 | F - 38.46%  | TRUE  | TRUE  |
| 8           | 98881068 - 99048946 | T - 57.69%  | TRUE  | TRUE  |
| 8           | 98881068 - 99048946 |             | FALSE | TRUE  |
| 8           | 98881068 - 99048946 | T - 53.85%  | FALSE | TRUE  |
| 8           | 98881068 - 99048946 |             | FALSE | TRUE  |
| 8           | 98881068 - 99048946 |             | FALSE | TRUE  |
| 8           | 98881068 - 99048946 |             | FALSE | TRUE  |
| 8           | 98881068 - 99048946 |             | FALSE | TRUE  |
| 8           | 98881068 - 99048946 |             | FALSE | TRUE  |
| 8           | 98881068 - 99048946 |             | FALSE | TRUE  |
| 8           | 98881068 - 99048946 |             | FALSE | TRUE  |
| 9           | 90340434 - 90346384 | F - 35.71%  | TRUE  | FALSE |
| 9           | 90340434 - 90346384 | F - 7.14%   | TRUE  | TRUE  |
| 9           | 90340434 - 90346384 |             | FALSE | TRUE  |
| 9           | 90340434 - 90346384 | T - 71.43%  | TRUE  | TRUE  |

|   |    |                       |             |       |       |
|---|----|-----------------------|-------------|-------|-------|
|   | 9  | 90340434 - 90346384   |             | TRUE  | TRUE  |
|   | 9  | 90340434 - 90346384   |             | FALSE | TRUE  |
| X |    | 13789062 - 13956831   |             | TRUE  | TRUE  |
| X |    | 13789062 - 13956831   | T - 90.00%  | TRUE  | TRUE  |
| X |    | 13789062 - 13956831   | F - 5.00%   | TRUE  | TRUE  |
| X |    | 13789062 - 13956831   | F - 5.00%   | TRUE  | TRUE  |
| X |    | 13789062 - 13956831   | F - 5.00%   | TRUE  | TRUE  |
| X |    | 13789062 - 13956831   | F - 15.00%  | TRUE  | TRUE  |
| X |    | 13789062 - 13956831   |             | TRUE  | TRUE  |
| X |    | 13789062 - 13956831   | F - 15.00%  | TRUE  | FALSE |
| X |    | 13789062 - 13956831   | F - 10.00%  | FALSE | TRUE  |
| X |    | 13789062 - 13956831   | F - 10.00%  | TRUE  | TRUE  |
| X |    | 13789062 - 13956831   | F - 10.00%  | TRUE  | TRUE  |
| X |    | 13789062 - 13956831   |             | TRUE  | TRUE  |
| X |    | 13789062 - 13956831   | T - 55.00%  | TRUE  | TRUE  |
| X |    | 13789062 - 13956831   | F - 5.00%   | TRUE  | TRUE  |
| X |    | 13789062 - 13956831   |             | FALSE | TRUE  |
| X |    | 13789062 - 13956831   | F - 15.00%  | FALSE | TRUE  |
| X |    | 13789062 - 13956831   |             | FALSE | TRUE  |
|   | 15 | 83657253 - 83680393   | T - 100.00% | TRUE  | TRUE  |
|   | 15 | 83657253 - 83680393   | F - 18.75%  | TRUE  | FALSE |
|   | 15 | 83657253 - 83680393   | F - 6.25%   | TRUE  | TRUE  |
|   | 15 | 83657253 - 83680393   |             | TRUE  | TRUE  |
|   | 17 | 29718642 - 29865236   |             | TRUE  | TRUE  |
|   | 17 | 29718642 - 29865236   | F - 20.00%  | TRUE  | FALSE |
|   | 17 | 29718642 - 29865236   | T - 80.00%  | FALSE | TRUE  |
|   | 20 | 3648612 - 3662893     | T - 64.29%  | TRUE  | TRUE  |
|   | 20 | 3648612 - 3662893     |             | TRUE  | FALSE |
|   | 20 | 3648612 - 3662893     | F - 14.29%  | FALSE | TRUE  |
|   | 22 | 40766595 - 40806293   | F - 45.00%  | TRUE  | TRUE  |
|   | 22 | 40766595 - 40806293   |             | TRUE  | TRUE  |
|   | 1  | 11126675 - 11159943   | F - 11.76%  | TRUE  | TRUE  |
|   | 1  | 11126675 - 11159943   | F - 5.88%   | TRUE  | TRUE  |
|   | 1  | 11126675 - 11159943   |             | FALSE | TRUE  |
|   | 1  | 11126675 - 11159943   |             | TRUE  | TRUE  |
|   | 1  | 20301924 - 20306932   |             | TRUE  | FALSE |
|   | 1  | 20301924 - 20306932   |             | TRUE  | TRUE  |
|   | 1  | 20301924 - 20306932   | T - 91.67%  | FALSE | TRUE  |
|   | 1  | 95699711 - 95712781   |             | TRUE  | FALSE |
|   | 1  | 95699711 - 95712781   | T - 68.75%  | TRUE  | TRUE  |
|   | 2  | 131369054 - 131415664 |             | TRUE  | TRUE  |
|   | 2  | 131369054 - 131415664 |             | FALSE | TRUE  |
|   | 2  | 131369054 - 131415664 | F - 33.33%  | TRUE  | TRUE  |
|   | 3  | 123616152 - 123680564 |             | TRUE  | TRUE  |
|   | 3  | 123616152 - 123680564 |             | TRUE  | TRUE  |
|   | 3  | 123616152 - 123680564 | F - 3.45%   | TRUE  | TRUE  |
|   | 3  | 123616152 - 123680564 | F - 6.90%   | TRUE  | TRUE  |
|   | 3  | 123616152 - 123680564 | F - 6.90%   | TRUE  | TRUE  |
|   | 3  | 123616152 - 123680564 | F - 3.45%   | TRUE  | TRUE  |
|   | 4  | 68566996 - 68946670   | F - 36.36%  | TRUE  | FALSE |
|   | 4  | 68566996 - 68946670   | T - 54.55%  | TRUE  | TRUE  |
|   | 4  | 68566996 - 68946670   | F - 45.45%  | TRUE  | TRUE  |
|   | 4  | 68566996 - 68946670   |             | TRUE  | TRUE  |
|   | 4  | 68566996 - 68946670   |             | TRUE  | TRUE  |
|   | 5  | 612387 - 667283       |             | TRUE  | TRUE  |
|   | 5  | 612387 - 667283       |             | TRUE  | FALSE |
|   | 5  | 612387 - 667283       |             | FALSE | TRUE  |
|   | 5  | 612387 - 667283       | T - 62.50%  | TRUE  | TRUE  |

|    |                       |             |       |       |
|----|-----------------------|-------------|-------|-------|
| 6  | 73918593 - 74020088   |             | TRUE  | FALSE |
| 6  | 73918593 - 74020088   |             | TRUE  | FALSE |
| 6  | 73918593 - 74020088   |             | TRUE  | FALSE |
| 6  | 73918593 - 74020088   |             | TRUE  | FALSE |
| 6  | 73918593 - 74020088   |             | FALSE | TRUE  |
| 6  | 73918593 - 74020088   | F - 33.33%  | TRUE  | TRUE  |
| 7  | 27145809 - 27192217   |             | TRUE  | TRUE  |
| 7  | 27145809 - 27192217   |             | FALSE | TRUE  |
| 7  | 27145809 - 27192217   | F - 33.33%  | TRUE  | TRUE  |
| 7  | 27145809 - 27192217   | F - 25.00%  | TRUE  | TRUE  |
| 7  | 27145809 - 27192217   | F - 33.33%  | TRUE  | TRUE  |
| 11 | 61520121 - 61555990   |             | TRUE  | TRUE  |
| 11 | 61520121 - 61555990   |             | TRUE  | TRUE  |
| 11 | 61520121 - 61555990   | T - 75.00%  | FALSE | TRUE  |
| 11 | 61520121 - 61555990   |             | TRUE  | TRUE  |
| 11 | 61520121 - 61555990   |             | TRUE  | TRUE  |
| 12 | 113344582 - 113369991 |             | TRUE  | FALSE |
| 12 | 113344582 - 113369991 |             | TRUE  | TRUE  |
| 12 | 113344582 - 113369991 | F - 17.65%  | TRUE  | TRUE  |
| 14 | 75408533 - 75422487   |             | TRUE  | FALSE |
| 14 | 75408533 - 75422487   |             | TRUE  | TRUE  |
| 14 | 75408533 - 75422487   | T - 75.00%  | TRUE  | TRUE  |
| 14 | 75408533 - 75422487   | T - 91.67%  | FALSE | TRUE  |
| 14 | 75408533 - 75422487   |             | FALSE | TRUE  |
| 14 | 75408533 - 75422487   |             | FALSE | TRUE  |
| 1  | 201951500 - 201975275 |             | TRUE  | TRUE  |
| 1  | 201951500 - 201975275 | F - 23.53%  | TRUE  | TRUE  |
| 1  | 201951500 - 201975275 | F - 5.88%   | TRUE  | TRUE  |
| 1  | 201951500 - 201975275 | F - 5.88%   | TRUE  | TRUE  |
| 2  | 46843555 - 46852881   | F - 20.00%  | TRUE  | TRUE  |
| 2  | 46843555 - 46852881   | T - 100.00% | TRUE  | TRUE  |
| 2  | 46843555 - 46852881   | F - 20.00%  | TRUE  | TRUE  |
| 2  | 46843555 - 46852881   | T - 80.00%  | TRUE  | TRUE  |
| 2  | 46843555 - 46852881   |             | TRUE  | TRUE  |
| 2  | 173940163 - 174132738 |             | TRUE  | TRUE  |
| 2  | 173940163 - 174132738 | F - 26.67%  | TRUE  | TRUE  |
| 2  | 173940163 - 174132738 |             | TRUE  | TRUE  |
| 2  | 64319786 - 64371605   |             | TRUE  | FALSE |
| 2  | 64319786 - 64371605   | F - 18.18%  | FALSE | TRUE  |
| 4  | 492989 - 533985       |             | TRUE  | TRUE  |
| 4  | 492989 - 533985       | F - 44.44%  | TRUE  | TRUE  |
| 4  | 492989 - 533985       |             | TRUE  | TRUE  |
| 4  | 492989 - 533985       |             | TRUE  | TRUE  |
| 4  | 492989 - 533985       |             | TRUE  | TRUE  |
| 4  | 492989 - 533985       | F - 44.44%  | TRUE  | TRUE  |
| 4  | 492989 - 533985       | F - 47.22%  | TRUE  | TRUE  |
| 4  | 492989 - 533985       | F - 11.11%  | FALSE | TRUE  |
| 4  | 77356253 - 77704406   |             | TRUE  | TRUE  |
| 4  | 77356253 - 77704406   | F - 25.00%  | TRUE  | TRUE  |
| 4  | 77356253 - 77704406   | F - 6.25%   | TRUE  | TRUE  |
| 4  | 77356253 - 77704406   | F - 6.25%   | TRUE  | TRUE  |
| 4  | 77356253 - 77704406   | F - 18.75%  | TRUE  | TRUE  |
| 4  | 77356253 - 77704406   |             | TRUE  | TRUE  |
| 5  | 74632154 - 74657929   |             | TRUE  | TRUE  |
| 5  | 74632154 - 74657929   |             | FALSE | TRUE  |
| 5  | 74632154 - 74657929   | T - 52.38%  | TRUE  | TRUE  |
| 5  | 170814120 - 170838141 |             | TRUE  | TRUE  |
| 5  | 170814120 - 170838141 | F - 3.70%   | TRUE  | TRUE  |

|   |    |                       |            |       |       |
|---|----|-----------------------|------------|-------|-------|
|   | 6  | 18368779 - 18469105   | F - 25.00% | TRUE  | TRUE  |
|   | 6  | 18368779 - 18469105   | F - 25.00% | TRUE  | TRUE  |
|   | 6  | 18368779 - 18469105   |            | TRUE  | TRUE  |
|   | 8  | 60031599 - 60033905   | F - 33.33% | TRUE  | TRUE  |
|   | 8  | 60031599 - 60033905   | T - 66.67% | TRUE  | TRUE  |
|   | 8  | 60031599 - 60033905   |            | TRUE  | TRUE  |
| X |    | 16964814 - 17171403   |            | TRUE  | FALSE |
| X |    | 16964814 - 17171403   | T - 50.00% | TRUE  | TRUE  |
| X |    | 16964814 - 17171403   |            | TRUE  | TRUE  |
| X |    | 16964814 - 17171403   | F - 20.00% | TRUE  | FALSE |
| X |    | 16964814 - 17171403   | T - 50.00% | TRUE  | FALSE |
| X |    | 16964814 - 17171403   | T - 80.00% | TRUE  | TRUE  |
| X |    | 16964814 - 17171403   | F - 10.00% | TRUE  | TRUE  |
| X |    | 16964814 - 17171403   | T - 50.00% | TRUE  | TRUE  |
| X |    | 16964814 - 17171403   |            | TRUE  | TRUE  |
| X |    | 16964814 - 17171403   | T - 70.00% | FALSE | TRUE  |
| X |    | 16964814 - 17171403   | T - 50.00% | FALSE | TRUE  |
| X |    | 16964814 - 17171403   | T - 80.00% | TRUE  | TRUE  |
| X |    | 16964814 - 17171403   | T - 60.00% | TRUE  | TRUE  |
| X |    | 16964814 - 17171403   | F - 40.00% | TRUE  | TRUE  |
|   | 10 | 99624757 - 99790585   |            | TRUE  | FALSE |
|   | 10 | 99624757 - 99790585   | T - 80.00% | TRUE  | TRUE  |
|   | 10 | 99624757 - 99790585   | T - 80.00% | TRUE  | TRUE  |
|   | 10 | 99624757 - 99790585   |            | TRUE  | TRUE  |
|   | 10 | 99624757 - 99790585   |            | TRUE  | TRUE  |
|   | 10 | 99624757 - 99790585   |            | TRUE  | TRUE  |
|   | 10 | 99624757 - 99790585   |            | TRUE  | TRUE  |
|   | 10 | 99624757 - 99790585   | F - 40.00% | TRUE  | TRUE  |
|   | 10 | 99624757 - 99790585   | T - 80.00% | FALSE | TRUE  |
|   | 10 | 99624757 - 99790585   |            | FALSE | TRUE  |
|   | 11 | 25756317 - 25803305   | T - 66.67% | TRUE  | TRUE  |
|   | 11 | 25756317 - 25803305   |            | TRUE  | FALSE |
|   | 11 | 25756317 - 25803305   | T - 66.67% | TRUE  | TRUE  |
|   | 14 | 105886157 - 105937066 |            | TRUE  | FALSE |
|   | 14 | 105886157 - 105937066 | F - 8.33%  | TRUE  | TRUE  |
|   | 14 | 105886157 - 105937066 | F - 4.17%  | TRUE  | TRUE  |
|   | 14 | 105886157 - 105937066 |            | TRUE  | TRUE  |
|   | 14 | 105886157 - 105937066 |            | TRUE  | TRUE  |
|   | 17 | 7093209 - 7123369     | F - 28.57% | TRUE  | TRUE  |
|   | 17 | 7093209 - 7123369     | F - 4.76%  | TRUE  | TRUE  |
|   | 17 | 7093209 - 7123369     | F - 9.52%  | TRUE  | TRUE  |
|   | 17 | 7093209 - 7123369     | F - 4.76%  | TRUE  | TRUE  |
|   | 17 | 7093209 - 7123369     |            | TRUE  | TRUE  |
|   | 17 | 7093209 - 7123369     | T - 57.14% | TRUE  | TRUE  |
|   | 17 | 7093209 - 7123369     |            | TRUE  | TRUE  |
|   | 17 | 9813926 - 10101868    |            | TRUE  | TRUE  |
|   | 17 | 9813926 - 10101868    | T - 53.85% | TRUE  | TRUE  |
|   | 17 | 9813926 - 10101868    |            | TRUE  | TRUE  |
|   | 17 | 9813926 - 10101868    | T - 92.31% | TRUE  | TRUE  |
|   | 17 | 9813926 - 10101868    | F - 7.69%  | TRUE  | TRUE  |
|   | 17 | 9813926 - 10101868    | F - 15.38% | TRUE  | TRUE  |
|   | 17 | 9813926 - 10101868    | F - 7.69%  | TRUE  | TRUE  |
|   | 17 | 9813926 - 10101868    |            | TRUE  | TRUE  |
|   | 17 | 9813926 - 10101868    |            | TRUE  | TRUE  |
|   | 17 | 9813926 - 10101868    |            | TRUE  | TRUE  |
|   | 17 | 9813926 - 10101868    | F - 15.38% | TRUE  | TRUE  |
|   | 17 | 9813926 - 10101868    | F - 23.08% | TRUE  | TRUE  |
|   | 17 | 9813926 - 10101868    | F - 7.69%  | TRUE  | TRUE  |

|   |    |                     |             |       |       |
|---|----|---------------------|-------------|-------|-------|
|   | 17 | 9813926 - 10101868  | F - 15.38%  | FALSE | TRUE  |
|   | 17 | 9813926 - 10101868  |             | FALSE | TRUE  |
|   | 17 | 9813926 - 10101868  | F - 7.69%   | FALSE | TRUE  |
|   | 17 | 9813926 - 10101868  | F - 7.69%   | TRUE  | TRUE  |
|   | 17 | 9813926 - 10101868  |             | FALSE | TRUE  |
|   | 18 | 214520 - 268059     | T - 80.00%  | TRUE  | TRUE  |
|   | 18 | 214520 - 268059     |             | FALSE | TRUE  |
|   | 18 | 214520 - 268059     |             | FALSE | TRUE  |
|   | 18 | 214520 - 268059     |             | TRUE  | TRUE  |
|   | 19 | 57986988 - 58006048 |             | TRUE  | TRUE  |
|   | 19 | 57986988 - 58006048 | F - 46.15%  | TRUE  | TRUE  |
|   | 19 | 40315990 - 40324841 |             | TRUE  | TRUE  |
|   | 19 | 40315990 - 40324841 |             | FALSE | TRUE  |
|   | 19 | 40315990 - 40324841 |             | TRUE  | TRUE  |
|   | 19 | 40315990 - 40324841 | T - 66.67%  | TRUE  | TRUE  |
|   | 19 | 40315990 - 40324841 |             | FALSE | TRUE  |
|   | 6  | 31783241 - 31785723 |             | TRUE  | TRUE  |
|   | 6  | 31783241 - 31785723 | F - 30.00%  | TRUE  | TRUE  |
|   | 7  | 23145353 - 23215040 | F - 36.67%  | TRUE  | TRUE  |
|   | 7  | 23145353 - 23215040 | F - 10.00%  | TRUE  | TRUE  |
|   | 7  | 23145353 - 23215040 |             | TRUE  | TRUE  |
|   | 7  | 23145353 - 23215040 |             | TRUE  | TRUE  |
|   | 7  | 23145353 - 23215040 | T - 50.00%  | FALSE | TRUE  |
|   | 9  | 4792834 - 4885917   | T - 50.00%  | TRUE  | TRUE  |
|   | 9  | 4792834 - 4885917   |             | TRUE  | FALSE |
|   | 9  | 4792834 - 4885917   |             | TRUE  | TRUE  |
| X |    | 21958691 - 22025798 |             | TRUE  | TRUE  |
| X |    | 21958691 - 22025798 | F - 33.33%  | FALSE | TRUE  |
| X |    | 21958691 - 22025798 | F - 11.11%  | TRUE  | TRUE  |
| X |    | 21958691 - 22025798 |             | TRUE  | TRUE  |
|   | 10 | 14560556 - 14816896 |             | TRUE  | FALSE |
|   | 10 | 14560556 - 14816896 | T - 58.82%  | TRUE  | TRUE  |
|   | 10 | 14560556 - 14816896 |             | FALSE | TRUE  |
|   | 10 | 99218081 - 99258551 |             | TRUE  | TRUE  |
|   | 10 | 99218081 - 99258551 |             | TRUE  | TRUE  |
|   | 10 | 99218081 - 99258551 | T - 54.84%  | FALSE | TRUE  |
|   | 10 | 99218081 - 99258551 |             | TRUE  | TRUE  |
|   | 11 | 64570986 - 64578766 | F - 23.08%  | TRUE  | FALSE |
|   | 11 | 64570986 - 64578766 |             | TRUE  | TRUE  |
|   | 17 | 48638429 - 48704835 |             | TRUE  | FALSE |
|   | 17 | 48638429 - 48704835 |             | TRUE  | TRUE  |
|   | 17 | 48638429 - 48704835 |             | TRUE  | FALSE |
|   | 17 | 48638429 - 48704835 | T - 97.89%  | TRUE  | TRUE  |
|   | 17 | 48638429 - 48704835 | T - 100.00% | TRUE  | TRUE  |
|   | 17 | 48638429 - 48704835 |             | FALSE | TRUE  |
|   | 17 | 48638429 - 48704835 |             | FALSE | TRUE  |
|   | 17 | 48638429 - 48704835 |             | FALSE | TRUE  |
|   | 18 | 32556892 - 32725381 |             | TRUE  | TRUE  |
|   | 18 | 32556892 - 32725381 | F - 42.86%  | TRUE  | TRUE  |
|   | 18 | 32556892 - 32725381 | F - 14.29%  | TRUE  | TRUE  |
|   | 18 | 32556892 - 32725381 |             | TRUE  | TRUE  |
|   | 18 | 32556892 - 32725381 | F - 14.29%  | FALSE | TRUE  |
|   | 20 | 18269121 - 18297640 |             | TRUE  | FALSE |
|   | 20 | 18269121 - 18297640 |             | TRUE  | TRUE  |
|   | 20 | 18269121 - 18297640 |             | FALSE | TRUE  |
|   | 20 | 18269121 - 18297640 | F - 5.26%   | FALSE | TRUE  |
|   | 22 | 38864067 - 38879452 |             | TRUE  | TRUE  |
|   | 22 | 38864067 - 38879452 | F - 14.29%  | FALSE | TRUE  |

|   |                       |             |       |       |
|---|-----------------------|-------------|-------|-------|
| 1 | 3652548 - 3663937     | F - 40.00%  | TRUE  | TRUE  |
| 1 | 3652548 - 3663937     | F - 30.00%  | TRUE  | TRUE  |
| 1 | 3652548 - 3663937     |             | TRUE  | TRUE  |
| 1 | 3652548 - 3663937     |             | TRUE  | TRUE  |
| 1 | 3652548 - 3663937     | F - 20.00%  | TRUE  | TRUE  |
| 1 | 35447127 - 35497569   | F - 39.13%  | TRUE  | TRUE  |
| 1 | 35447127 - 35497569   | F - 43.48%  | TRUE  | TRUE  |
| 1 | 35447127 - 35497569   | F - 34.78%  | TRUE  | TRUE  |
| 1 | 35447127 - 35497569   |             | FALSE | TRUE  |
| 1 | 35447127 - 35497569   |             | TRUE  | TRUE  |
| 1 | 35447127 - 35497569   |             | FALSE | TRUE  |
| 2 | 220299568 - 220363009 | F - 3.33%   | TRUE  | TRUE  |
| 2 | 220299568 - 220363009 |             | TRUE  | TRUE  |
| 2 | 220299568 - 220363009 |             | TRUE  | TRUE  |
| 2 | 220299568 - 220363009 |             | TRUE  | TRUE  |
| 2 | 220299568 - 220363009 |             | FALSE | TRUE  |
| 2 | 3579403 - 3584463     |             | TRUE  | TRUE  |
| 2 | 3579403 - 3584463     | F - 20.00%  | TRUE  | TRUE  |
| 2 | 3579403 - 3584463     | F - 20.00%  | TRUE  | TRUE  |
| 2 | 3579403 - 3584463     | F - 40.00%  | TRUE  | TRUE  |
| 3 | 10206549 - 10285427   |             | TRUE  | TRUE  |
| 3 | 10206549 - 10285427   |             | TRUE  | TRUE  |
| 3 | 10206549 - 10285427   |             | FALSE | TRUE  |
| 3 | 10206549 - 10285427   | T - 100.00% | TRUE  | TRUE  |
| 3 | 184529931 - 184770402 | F - 5.88%   | TRUE  | TRUE  |
| 3 | 184529931 - 184770402 |             | TRUE  | FALSE |
| 3 | 184529931 - 184770402 |             | TRUE  | TRUE  |
| 3 | 184529931 - 184770402 |             | TRUE  | TRUE  |
| 3 | 184529931 - 184770402 | F - 29.41%  | TRUE  | TRUE  |
| 3 | 184529931 - 184770402 |             | TRUE  | TRUE  |
| 3 | 190023490 - 190040264 | T - 60.00%  | TRUE  | TRUE  |
| 3 | 190023490 - 190040264 |             | TRUE  | TRUE  |
| 3 | 190023490 - 190040264 | F - 40.00%  | TRUE  | TRUE  |
| 3 | 190023490 - 190040264 | T - 80.00%  | TRUE  | TRUE  |
| 3 | 190023490 - 190040264 | F - 20.00%  | TRUE  | TRUE  |
| 8 | 22462145 - 22479027   | F - 5.88%   | TRUE  | TRUE  |
| 8 | 22462145 - 22479027   |             | FALSE | TRUE  |
| 8 | 41119476 - 41167016   | F - 20.00%  | TRUE  | TRUE  |
| 8 | 41119476 - 41167016   | T - 60.00%  | TRUE  | TRUE  |
| 8 | 41119476 - 41167016   | T - 80.00%  | TRUE  | TRUE  |
| 8 | 41119476 - 41167016   | T - 100.00% | TRUE  | TRUE  |
| 8 | 41119476 - 41167016   | T - 80.00%  | TRUE  | TRUE  |
| 8 | 41119476 - 41167016   | T - 100.00% | FALSE | TRUE  |
| 8 | 41119476 - 41167016   |             | FALSE | TRUE  |
| 8 | 41119476 - 41167016   | T - 80.00%  | TRUE  | TRUE  |
| 8 | 41119476 - 41167016   | T - 100.00% | TRUE  | TRUE  |
| 8 | 41119476 - 41167016   |             | FALSE | TRUE  |
| 9 | 70432000 - 70500063   |             | TRUE  | TRUE  |
| 9 | 70432000 - 70500063   |             | TRUE  | TRUE  |
| 9 | 70432000 - 70500063   | F - 2.13%   | FALSE | TRUE  |
| 9 | 70432000 - 70500063   | F - 4.26%   | TRUE  | TRUE  |
| 9 | 70432000 - 70500063   | F - 6.38%   | TRUE  | TRUE  |
| 9 | 70432000 - 70500063   | F - 2.13%   | TRUE  | TRUE  |
| 9 | 70432000 - 70500063   | F - 6.38%   | TRUE  | TRUE  |
| 9 | 70432000 - 70500063   |             | TRUE  | TRUE  |
| 9 | 70432000 - 70500063   |             | TRUE  | TRUE  |
| 9 | 70432000 - 70500063   |             | TRUE  | TRUE  |
| 9 | 70432000 - 70500063   | F - 2.13%   | TRUE  | TRUE  |



|   |    |                       |            |       |       |
|---|----|-----------------------|------------|-------|-------|
|   | 9  | 70432000 - 70500063   | F - 10.64% | TRUE  | TRUE  |
|   | 9  | 70432000 - 70500063   |            | FALSE | TRUE  |
| X |    | 70338406 - 70362304   |            | TRUE  | TRUE  |
| X |    | 70338406 - 70362304   |            | TRUE  | TRUE  |
| X |    | 70338406 - 70362304   | F - 5.00%  | TRUE  | TRUE  |
| Y |    | 16634488 - 16957530   | T - 58.82% | TRUE  | FALSE |
| Y |    | 16634488 - 16957530   | F - 5.88%  | TRUE  | TRUE  |
| Y |    | 16634488 - 16957530   | F - 17.65% | TRUE  | TRUE  |
| Y |    | 16634488 - 16957530   | T - 76.47% | TRUE  | TRUE  |
| Y |    | 16634488 - 16957530   | T - 76.47% | TRUE  | TRUE  |
| Y |    | 16634488 - 16957530   | F - 11.76% | TRUE  | TRUE  |
| Y |    | 16634488 - 16957530   |            | TRUE  | FALSE |
| Y |    | 16634488 - 16957530   | F - 29.41% | TRUE  | TRUE  |
| Y |    | 16634488 - 16957530   | F - 17.65% | FALSE | TRUE  |
| Y |    | 16634488 - 16957530   | T - 52.94% | TRUE  | FALSE |
| Y |    | 16634488 - 16957530   | F - 17.65% | FALSE | TRUE  |
| Y |    | 16634488 - 16957530   | F - 5.88%  | TRUE  | TRUE  |
| Y |    | 16634488 - 16957530   | F - 11.76% | FALSE | TRUE  |
| Y |    | 16634488 - 16957530   | F - 5.88%  | TRUE  | FALSE |
| Y |    | 16634488 - 16957530   | F - 11.76% | TRUE  | TRUE  |
| Y |    | 16634488 - 16957530   |            | TRUE  | TRUE  |
| Y |    | 16634488 - 16957530   |            | FALSE | TRUE  |
| Y |    | 16634488 - 16957530   | F - 11.76% | TRUE  | TRUE  |
| Y |    | 16634488 - 16957530   |            | FALSE | TRUE  |
|   | 10 | 70661034 - 70706603   | F - 11.11% | TRUE  | TRUE  |
|   | 10 | 70661034 - 70706603   | F - 22.22% | TRUE  | FALSE |
|   | 10 | 70661034 - 70706603   |            | TRUE  | TRUE  |
|   | 10 | 70661034 - 70706603   | F - 44.44% | FALSE | TRUE  |
|   | 10 | 114133776 - 114188138 | F - 6.25%  | TRUE  | TRUE  |
|   | 10 | 114133776 - 114188138 |            | TRUE  | TRUE  |
|   | 10 | 114133776 - 114188138 | F - 12.50% | TRUE  | TRUE  |
|   | 10 | 114133776 - 114188138 | T - 75.00% | TRUE  | TRUE  |
|   | 10 | 114133776 - 114188138 | T - 62.50% | TRUE  | TRUE  |
|   | 10 | 114133776 - 114188138 |            | FALSE | TRUE  |
|   | 10 | 114710009 - 114927437 |            | TRUE  | TRUE  |
|   | 10 | 114710009 - 114927437 | F - 1.89%  | TRUE  | TRUE  |
|   | 10 | 114710009 - 114927437 | F - 5.66%  | TRUE  | TRUE  |
|   | 10 | 114710009 - 114927437 |            | TRUE  | TRUE  |
|   | 10 | 114710009 - 114927437 |            | TRUE  | TRUE  |
|   | 11 | 118004092 - 118023630 | T - 50.00% | TRUE  | FALSE |
|   | 11 | 118004092 - 118023630 |            | TRUE  | TRUE  |
|   | 11 | 118004092 - 118023630 | F - 37.50% | TRUE  | TRUE  |
|   | 11 | 118004092 - 118023630 |            | FALSE | TRUE  |
|   | 12 | 57853918 - 57866047   | T - 84.62% | TRUE  | TRUE  |
|   | 12 | 57853918 - 57866047   |            | TRUE  | TRUE  |
|   | 12 | 57853918 - 57866047   |            | TRUE  | TRUE  |
|   | 12 | 133200345 - 133413387 |            | TRUE  | TRUE  |
|   | 12 | 133200345 - 133413387 | F - 25.00% | TRUE  | TRUE  |
|   | 12 | 133200345 - 133413387 |            | TRUE  | TRUE  |
|   | 12 | 133200345 - 133413387 |            | FALSE | TRUE  |
|   | 12 | 133200345 - 133413387 |            | FALSE | TRUE  |
|   | 12 | 133200345 - 133413387 |            | TRUE  | TRUE  |
|   | 12 | 133200345 - 133413387 |            | FALSE | TRUE  |
|   | 13 | 99852679 - 100038753  |            | TRUE  | TRUE  |
|   | 13 | 99852679 - 100038753  | F - 5.00%  | TRUE  | TRUE  |
|   | 15 | 22702285 - 22715728   |            | TRUE  | FALSE |
|   | 15 | 22702285 - 22715728   |            | TRUE  | TRUE  |
|   | 15 | 22702285 - 22715728   | F - 16.67% | TRUE  | TRUE  |

|    |                     |             |       |       |
|----|---------------------|-------------|-------|-------|
| 15 | 22702285 - 22715728 | T - 66.67%  | TRUE  | TRUE  |
| 17 | 40834632 - 40852011 |             | TRUE  | TRUE  |
| 17 | 40834632 - 40852011 |             | TRUE  | TRUE  |
| 17 | 40834632 - 40852011 | T - 75.00%  | TRUE  | TRUE  |
| 17 | 40834632 - 40852011 | T - 100.00% | TRUE  | TRUE  |
| 17 | 40834632 - 40852011 | T - 100.00% | TRUE  | TRUE  |
| 17 | 40834632 - 40852011 |             | FALSE | TRUE  |
| 17 | 40834632 - 40852011 | T - 100.00% | TRUE  | TRUE  |
| 17 | 40834632 - 40852011 |             | FALSE | TRUE  |
| 17 | 40834632 - 40852011 |             | TRUE  | TRUE  |
| 17 | 40834632 - 40852011 |             | TRUE  | TRUE  |
| 17 | 40834632 - 40852011 | T - 100.00% | TRUE  | TRUE  |
| 17 | 40834632 - 40852011 |             | TRUE  | TRUE  |
| 17 | 40834632 - 40852011 |             | TRUE  | TRUE  |
| 17 | 40834632 - 40852011 |             | TRUE  | TRUE  |
| 17 | 15879874 - 15903031 |             | TRUE  | FALSE |
| 17 | 15879874 - 15903031 | F - 42.11%  | TRUE  | FALSE |
| 17 | 15879874 - 15903031 | F - 42.11%  | TRUE  | TRUE  |
| 18 | 670324 - 712676     |             | TRUE  | TRUE  |
| 18 | 670324 - 712676     |             | TRUE  | TRUE  |
| 18 | 670324 - 712676     | T - 75.00%  | TRUE  | TRUE  |
| 18 | 670324 - 712676     |             | TRUE  | TRUE  |
| 19 | 7069471 - 7087979   |             | TRUE  | FALSE |
| 19 | 7069471 - 7087979   | T - 100.00% | TRUE  | TRUE  |
| 19 | 1782074 - 1812275   |             | TRUE  | TRUE  |
| 19 | 1782074 - 1812275   | F - 9.09%   | TRUE  | TRUE  |
| 19 | 1782074 - 1812275   |             | TRUE  | TRUE  |
| 19 | 1782074 - 1812275   |             | TRUE  | TRUE  |
| 19 | 1782074 - 1812275   | T - 90.91%  | TRUE  | TRUE  |
| 19 | 1782074 - 1812275   |             | FALSE | TRUE  |
| 19 | 1782074 - 1812275   |             | TRUE  | TRUE  |
| 19 | 1782074 - 1812275   | F - 36.36%  | TRUE  | TRUE  |
| 19 | 1782074 - 1812275   | T - 100.00% | TRUE  | TRUE  |
| 19 | 1782074 - 1812275   |             | TRUE  | TRUE  |
| 19 | 1782074 - 1812275   |             | TRUE  | TRUE  |
| 19 | 1782074 - 1812275   | T - 100.00% | FALSE | TRUE  |
| 19 | 1782074 - 1812275   |             | FALSE | TRUE  |
| 19 | 1782074 - 1812275   |             | TRUE  | TRUE  |
| 19 | 1782074 - 1812275   | T - 100.00% | TRUE  | TRUE  |
| 19 | 1782074 - 1812275   |             | FALSE | TRUE  |
| 20 | 43160426 - 43252888 | T - 53.85%  | TRUE  | TRUE  |
| 20 | 43160426 - 43252888 | F - 7.69%   | FALSE | TRUE  |
| 20 | 43160426 - 43252888 | F - 7.69%   | FALSE | TRUE  |
| 20 | 43160426 - 43252888 | F - 7.69%   | TRUE  | TRUE  |
| 20 | 43160426 - 43252888 |             | TRUE  | TRUE  |
| 20 | 43160426 - 43252888 | F - 15.38%  | TRUE  | TRUE  |
| 20 | 43160426 - 43252888 |             | TRUE  | TRUE  |
| 20 | 43160426 - 43252888 | T - 76.92%  | TRUE  | TRUE  |
| 20 | 43160426 - 43252888 |             | TRUE  | TRUE  |
| 21 | 33031935 - 33041244 |             | TRUE  | TRUE  |
| 21 | 33031935 - 33041244 | T - 57.14%  | TRUE  | TRUE  |
| 21 | 33031935 - 33041244 | F - 14.29%  | TRUE  | TRUE  |
| 1  | 24382525 - 24438675 | T - 58.33%  | TRUE  | TRUE  |
| 1  | 24382525 - 24438675 |             | TRUE  | TRUE  |
| 1  | 24382525 - 24438675 |             | FALSE | TRUE  |
| 1  | 24382525 - 24438675 |             | FALSE | TRUE  |
| 1  | 24382525 - 24438675 |             | FALSE | TRUE  |
| 3  | 37027357 - 37034795 |             | TRUE  | FALSE |

|    |                       |            |       |       |
|----|-----------------------|------------|-------|-------|
| 3  | 37027357 - 37034795   | T - 50.00% | TRUE  | TRUE  |
| 5  | 82767284 - 82878122   |            | TRUE  | TRUE  |
| 5  | 82767284 - 82878122   |            | TRUE  | TRUE  |
| 5  | 82767284 - 82878122   | F - 27.78% | TRUE  | TRUE  |
| 5  | 82767284 - 82878122   |            | TRUE  | TRUE  |
| 5  | 82767284 - 82878122   |            | TRUE  | TRUE  |
| 5  | 177664617 - 178017556 |            | TRUE  | FALSE |
| 5  | 177664617 - 178017556 |            | TRUE  | FALSE |
| 5  | 177664617 - 178017556 |            | TRUE  | FALSE |
| 5  | 177664617 - 178017556 |            | FALSE | TRUE  |
| 5  | 177664617 - 178017556 | T - 75.00% | FALSE | TRUE  |
| 7  | 22459063 - 22672544   |            | TRUE  | TRUE  |
| 7  | 22459063 - 22672544   | F - 12.50% | TRUE  | TRUE  |
| 7  | 22459063 - 22672544   |            | FALSE | TRUE  |
| 9  | 72808914 - 72873790   |            | TRUE  | TRUE  |
| 9  | 72808914 - 72873790   |            | TRUE  | TRUE  |
| 9  | 72808914 - 72873790   | T - 50.00% | TRUE  | TRUE  |
| 11 | 65029233 - 65066156   |            | TRUE  | TRUE  |
| 11 | 65029233 - 65066156   |            | TRUE  | TRUE  |
| 11 | 65029233 - 65066156   | T - 71.43% | TRUE  | TRUE  |
| 11 | 9041047 - 9159661     |            | TRUE  | TRUE  |
| 11 | 9041047 - 9159661     |            | TRUE  | TRUE  |
| 11 | 9041047 - 9159661     | F - 7.69%  | TRUE  | FALSE |
| 11 | 9041047 - 9159661     | F - 7.69%  | TRUE  | TRUE  |
| 11 | 9041047 - 9159661     | T - 53.85% | FALSE | TRUE  |
| 11 | 9041047 - 9159661     |            | TRUE  | TRUE  |
| 11 | 9041047 - 9159661     |            | FALSE | TRUE  |
| 14 | 65453438 - 65529373   |            | TRUE  | TRUE  |
| 14 | 65453438 - 65529373   | F - 10.00% | TRUE  | FALSE |
| 14 | 65453438 - 65529373   |            | TRUE  | TRUE  |
| 14 | 65453438 - 65529373   |            | FALSE | TRUE  |
| 1  | 156863490 - 156886226 |            | TRUE  | TRUE  |
| 1  | 156863490 - 156886226 |            | TRUE  | TRUE  |
| 1  | 156863490 - 156886226 | T - 50.00% | FALSE | TRUE  |
| 1  | 156863490 - 156886226 |            | FALSE | TRUE  |
| 1  | 55181495 - 55208330   |            | TRUE  | TRUE  |
| 1  | 55181495 - 55208330   |            | TRUE  | TRUE  |
| 1  | 55181495 - 55208330   | T - 71.43% | TRUE  | TRUE  |
| 1  | 55181495 - 55208330   |            | TRUE  | TRUE  |
| 2  | 220074488 - 220083712 |            | TRUE  | TRUE  |
| 2  | 220074488 - 220083712 |            | TRUE  | TRUE  |
| 2  | 220074488 - 220083712 | F - 11.76% | TRUE  | TRUE  |
| 2  | 220074488 - 220083712 | F - 5.88%  | TRUE  | TRUE  |
| 2  | 220074488 - 220083712 | F - 29.41% | TRUE  | TRUE  |
| 2  | 220074488 - 220083712 | F - 29.41% | TRUE  | TRUE  |
| 2  | 220074488 - 220083712 | F - 5.88%  | TRUE  | TRUE  |
| 2  | 220074488 - 220083712 | F - 5.88%  | TRUE  | TRUE  |
| 2  | 220074488 - 220083712 |            | TRUE  | TRUE  |
| 2  | 220074488 - 220083712 |            | TRUE  | TRUE  |
| 5  | 43602791 - 43707507   |            | TRUE  | TRUE  |
| 5  | 43602791 - 43707507   | F - 33.33% | TRUE  | TRUE  |
| 5  | 43602791 - 43707507   |            | TRUE  | TRUE  |
| 6  | 32008931 - 32077151   |            | TRUE  | TRUE  |
| 6  | 32008931 - 32077151   | T - 57.14% | TRUE  | TRUE  |
| 6  | 32008931 - 32077151   |            | TRUE  | TRUE  |
| 6  | 32008931 - 32077151   | F - 42.86% | FALSE | TRUE  |
| 7  | 77428109 - 77586821   |            | TRUE  | TRUE  |
| 7  | 77428109 - 77586821   | F - 7.69%  | FALSE | TRUE  |

|   |    |                       |            |       |       |
|---|----|-----------------------|------------|-------|-------|
|   | 7  | 77428109 - 77586821   |            | FALSE | TRUE  |
| X |    | 119254863 - 119379122 |            | TRUE  | TRUE  |
| X |    | 119254863 - 119379122 | F - 40.00% | TRUE  | TRUE  |
|   | 11 | 45907047 - 45928016   |            | TRUE  | TRUE  |
|   | 11 | 45907047 - 45928016   |            | TRUE  | TRUE  |
|   | 11 | 45907047 - 45928016   | T - 75.00% | FALSE | TRUE  |
|   | 11 | 45907047 - 45928016   | T - 75.00% | TRUE  | TRUE  |
|   | 11 | 45907047 - 45928016   | F - 37.50% | TRUE  | TRUE  |
|   | 11 | 45907047 - 45928016   |            | FALSE | TRUE  |
|   | 11 | 45907047 - 45928016   |            | TRUE  | TRUE  |
|   | 11 | 45907047 - 45928016   | T - 75.00% | TRUE  | TRUE  |
|   | 11 | 8714898 - 8932498     | F - 26.32% | TRUE  | TRUE  |
|   | 11 | 8714898 - 8932498     |            | TRUE  | TRUE  |
|   | 11 | 8714898 - 8932498     |            | FALSE | TRUE  |
|   | 11 | 70313961 - 70963623   |            | TRUE  | FALSE |
|   | 11 | 70313961 - 70963623   |            | TRUE  | FALSE |
|   | 11 | 70313961 - 70963623   |            | TRUE  | TRUE  |
|   | 11 | 70313961 - 70963623   |            | TRUE  | TRUE  |
|   | 11 | 70313961 - 70963623   | F - 33.33% | TRUE  | TRUE  |
|   | 11 | 70313961 - 70963623   | F - 16.67% | TRUE  | TRUE  |
|   | 11 | 70313961 - 70963623   | F - 3.33%  | TRUE  | TRUE  |
|   | 13 | 100741269 - 101182691 |            | TRUE  | FALSE |
|   | 13 | 100741269 - 101182691 | T - 75.00% | FALSE | TRUE  |
|   | 14 | 100150651 - 100193638 |            | TRUE  | FALSE |
|   | 14 | 100150651 - 100193638 |            | TRUE  | TRUE  |
|   | 14 | 100150651 - 100193638 | T - 85.71% | FALSE | TRUE  |
|   | 14 | 75119880 - 75179818   |            | TRUE  | FALSE |
|   | 14 | 75119880 - 75179818   |            | TRUE  | TRUE  |
|   | 14 | 75119880 - 75179818   |            | TRUE  | TRUE  |
|   | 14 | 75119880 - 75179818   | F - 8.33%  | FALSE | TRUE  |
|   | 14 | 75119880 - 75179818   |            | FALSE | TRUE  |
|   | 15 | 40886218 - 40956540   |            | TRUE  | TRUE  |
|   | 15 | 40886218 - 40956540   | F - 44.44% | TRUE  | TRUE  |
|   | 15 | 40886218 - 40956540   |            | FALSE | TRUE  |
|   | 15 | 40886218 - 40956540   |            | TRUE  | TRUE  |
|   | 15 | 40886218 - 40956540   | T - 88.89% | FALSE | TRUE  |
|   | 15 | 40886218 - 40956540   | T - 88.89% | TRUE  | TRUE  |
|   | 15 | 40886218 - 40956540   |            | TRUE  | TRUE  |
|   | 17 | 20224477 - 20305504   |            | TRUE  | TRUE  |
|   | 17 | 20224477 - 20305504   |            | TRUE  | FALSE |
|   | 17 | 20224477 - 20305504   |            | TRUE  | TRUE  |
|   | 17 | 20224477 - 20305504   | T - 66.67% | TRUE  | TRUE  |
|   | 17 | 20224477 - 20305504   | F - 33.33% | TRUE  | TRUE  |
|   | 17 | 20224477 - 20305504   | T - 66.67% | TRUE  | TRUE  |
|   | 17 | 20224477 - 20305504   | T - 66.67% | TRUE  | TRUE  |
|   | 17 | 20224477 - 20305504   |            | TRUE  | TRUE  |
|   | 17 | 20224477 - 20305504   |            | TRUE  | TRUE  |
|   | 19 | 571310 - 583493       |            | TRUE  | TRUE  |
|   | 19 | 571310 - 583493       |            | TRUE  | TRUE  |
|   | 19 | 571310 - 583493       | F - 10.00% | FALSE | TRUE  |
|   | 19 | 10527449 - 10580307   |            | TRUE  | TRUE  |
|   | 19 | 10527449 - 10580307   | F - 13.33% | TRUE  | TRUE  |
|   | 1  | 29563028 - 29653325   |            | TRUE  | TRUE  |
|   | 1  | 29563028 - 29653325   |            | TRUE  | TRUE  |
|   | 1  | 29563028 - 29653325   | T - 56.25% | TRUE  | TRUE  |
|   | 1  | 29563028 - 29653325   |            | TRUE  | TRUE  |
|   | 1  | 76251879 - 76261100   |            | TRUE  | TRUE  |
|   | 1  | 76251879 - 76261100   | F - 4.35%  | TRUE  | TRUE  |

|    |                       |             |       |       |
|----|-----------------------|-------------|-------|-------|
| 1  | 76251879 - 76261100   | F - 4.35%   | FALSE | TRUE  |
| 1  | 76251879 - 76261100   | F - 8.70%   | FALSE | TRUE  |
| 2  | 11319887 - 11488456   |             | TRUE  | FALSE |
| 2  | 11319887 - 11488456   | F - 36.36%  | TRUE  | FALSE |
| 2  | 11319887 - 11488456   | F - 9.09%   | TRUE  | TRUE  |
| 2  | 152104454 - 152118393 | F - 20.00%  | FALSE | TRUE  |
| 2  | 152104454 - 152118393 | F - 40.00%  | TRUE  | TRUE  |
| 2  | 152104454 - 152118393 |             | FALSE | TRUE  |
| 2  | 152104454 - 152118393 |             | TRUE  | TRUE  |
| 3  | 101292939 - 101313281 | F - 7.14%   | TRUE  | TRUE  |
| 3  | 101292939 - 101313281 |             | FALSE | TRUE  |
| 5  | 141018869 - 141030986 |             | TRUE  | TRUE  |
| 5  | 141018869 - 141030986 | F - 15.38%  | TRUE  | TRUE  |
| 6  | 99720793 - 99797938   | F - 14.29%  | TRUE  | TRUE  |
| 6  | 99720793 - 99797938   |             | FALSE | TRUE  |
| 6  | 99720793 - 99797938   | F - 28.57%  | TRUE  | TRUE  |
| 6  | 99720793 - 99797938   | F - 14.29%  | FALSE | TRUE  |
| 6  | 99720793 - 99797938   | F - 42.86%  | TRUE  | TRUE  |
| 6  | 99720793 - 99797938   |             | TRUE  | TRUE  |
| 7  | 44617493 - 44621886   |             | TRUE  | TRUE  |
| 7  | 44617493 - 44621886   | F - 40.00%  | TRUE  | TRUE  |
| 8  | 42195972 - 42229331   |             | TRUE  | TRUE  |
| 8  | 42195972 - 42229331   |             | TRUE  | TRUE  |
| 8  | 42195972 - 42229331   |             | TRUE  | TRUE  |
| 8  | 42195972 - 42229331   | F - 4.76%   | TRUE  | TRUE  |
| 8  | 42195972 - 42229331   | T - 66.67%  | FALSE | TRUE  |
| 11 | 113185251 - 113254266 |             | FALSE | TRUE  |
| 11 | 113185251 - 113254266 |             | TRUE  | TRUE  |
| 11 | 113185251 - 113254266 | F - 5.00%   | TRUE  | TRUE  |
| 11 | 113185251 - 113254266 |             | TRUE  | TRUE  |
| 11 | 113185251 - 113254266 | F - 10.00%  | TRUE  | TRUE  |
| 11 | 113185251 - 113254266 | F - 35.00%  | TRUE  | TRUE  |
| 11 | 113185251 - 113254266 |             | TRUE  | TRUE  |
| 11 | 113185251 - 113254266 | F - 5.00%   | TRUE  | TRUE  |
| 11 | 113185251 - 113254266 | F - 25.00%  | TRUE  | TRUE  |
| 11 | 113185251 - 113254266 |             | FALSE | TRUE  |
| 11 | 113185251 - 113254266 | F - 25.00%  | FALSE | TRUE  |
| 11 | 117075053 - 117103241 | F - 14.29%  | TRUE  | TRUE  |
| 11 | 117075053 - 117103241 | F - 14.29%  | TRUE  | TRUE  |
| 11 | 117075053 - 117103241 |             | TRUE  | TRUE  |
| 15 | 82647286 - 82708204   |             | TRUE  | FALSE |
| 15 | 82647286 - 82708204   | T - 66.67%  | TRUE  | TRUE  |
| 15 | 82647286 - 82708204   |             | TRUE  | TRUE  |
| 15 | 82647286 - 82708204   | T - 100.00% | TRUE  | TRUE  |
| 16 | 50727514 - 50766987   |             | TRUE  | TRUE  |
| 16 | 50727514 - 50766987   |             | FALSE | TRUE  |
| 16 | 50727514 - 50766987   |             | TRUE  | TRUE  |
| 16 | 50727514 - 50766987   | F - 5.88%   | TRUE  | TRUE  |
| 2  | 190744335 - 191068210 | T - 57.14%  | TRUE  | FALSE |
| 2  | 190744335 - 191068210 | F - 28.57%  | TRUE  | FALSE |
| 2  | 190744335 - 191068210 | T - 71.43%  | TRUE  | TRUE  |
| 2  | 190744335 - 191068210 | F - 7.14%   | TRUE  | FALSE |
| 2  | 190744335 - 191068210 | F - 7.14%   | TRUE  | TRUE  |
| 2  | 190744335 - 191068210 | F - 14.29%  | TRUE  | TRUE  |
| 2  | 190744335 - 191068210 | F - 14.29%  | TRUE  | TRUE  |
| 2  | 190744335 - 191068210 | F - 14.29%  | TRUE  | TRUE  |
| 2  | 190744335 - 191068210 | F - 14.29%  | FALSE | TRUE  |
| 2  | 190744335 - 191068210 | F - 7.14%   | TRUE  | TRUE  |

|    |                       |            |       |       |
|----|-----------------------|------------|-------|-------|
| 2  | 190744335 - 191068210 |            | FALSE | TRUE  |
| 2  | 190744335 - 191068210 | F - 7.14%  | TRUE  | TRUE  |
| 2  | 234263153 - 234380750 | F - 5.56%  | TRUE  | TRUE  |
| 2  | 234263153 - 234380750 |            | TRUE  | TRUE  |
| 2  | 234263153 - 234380750 | F - 5.56%  | TRUE  | FALSE |
| 2  | 234263153 - 234380750 | F - 5.56%  | TRUE  | TRUE  |
| 2  | 234263153 - 234380750 | F - 5.56%  | TRUE  | TRUE  |
| 2  | 234263153 - 234380750 | F - 16.67% | TRUE  | TRUE  |
| 2  | 234263153 - 234380750 |            | TRUE  | TRUE  |
| 2  | 234263153 - 234380750 | F - 44.44% | TRUE  | TRUE  |
| 2  | 234263153 - 234380750 |            | FALSE | TRUE  |
| 2  | 234263153 - 234380750 |            | FALSE | TRUE  |
| 2  | 222282747 - 222438922 |            | TRUE  | FALSE |
| 2  | 222282747 - 222438922 |            | TRUE  | FALSE |
| 2  | 222282747 - 222438922 |            | TRUE  | TRUE  |
| 2  | 222282747 - 222438922 |            | TRUE  | TRUE  |
| 2  | 222282747 - 222438922 | F - 4.76%  | TRUE  | FALSE |
| 2  | 222282747 - 222438922 | T - 52.38% | TRUE  | TRUE  |
| 2  | 222282747 - 222438922 | F - 4.76%  | FALSE | TRUE  |
| 2  | 222282747 - 222438922 |            | FALSE | TRUE  |
| 2  | 222282747 - 222438922 |            | TRUE  | TRUE  |
| 2  | 222282747 - 222438922 | F - 4.76%  | TRUE  | TRUE  |
| 2  | 222282747 - 222438922 | F - 4.76%  | TRUE  | TRUE  |
| 3  | 107241783 - 107530171 |            | TRUE  | TRUE  |
| 3  | 107241783 - 107530171 | F - 2.94%  | TRUE  | TRUE  |
| 3  | 107241783 - 107530171 |            | TRUE  | TRUE  |
| 3  | 107241783 - 107530171 | F - 2.94%  | TRUE  | TRUE  |
| 3  | 107241783 - 107530171 | F - 5.88%  | TRUE  | TRUE  |
| 3  | 155480401 - 155524140 |            | TRUE  | TRUE  |
| 3  | 155480401 - 155524140 |            | TRUE  | TRUE  |
| 3  | 155480401 - 155524140 | T - 85.71% | TRUE  | TRUE  |
| 7  | 128577666 - 128590089 | F - 3.33%  | TRUE  | TRUE  |
| 7  | 128577666 - 128590089 |            | TRUE  | TRUE  |
| 7  | 128577666 - 128590089 | T - 96.67% | TRUE  | TRUE  |
| 7  | 55861237 - 55930482   |            | TRUE  | FALSE |
| 7  | 55861237 - 55930482   | T - 66.67% | TRUE  | TRUE  |
| 8  | 17013538 - 17082308   |            | TRUE  | TRUE  |
| 8  | 17013538 - 17082308   | F - 14.29% | TRUE  | FALSE |
| 8  | 17013538 - 17082308   |            | TRUE  | TRUE  |
| 9  | 136205160 - 136214986 |            | TRUE  | TRUE  |
| 9  | 136205160 - 136214986 | T - 76.92% | TRUE  | TRUE  |
| X  | 131157245 - 131209971 |            | FALSE | TRUE  |
| X  | 131157245 - 131209971 | F - 30.77% | TRUE  | TRUE  |
| X  | 131157245 - 131209971 | F - 38.46% | TRUE  | TRUE  |
| X  | 131157245 - 131209971 |            | TRUE  | TRUE  |
| X  | 131157245 - 131209971 | F - 15.38% | TRUE  | TRUE  |
| X  | 131157245 - 131209971 |            | TRUE  | TRUE  |
| 12 | 8332805 - 8368747     |            | FALSE | TRUE  |
| 12 | 8332805 - 8368747     | F - 8.33%  | TRUE  | TRUE  |
| 12 | 8332805 - 8368747     |            | TRUE  | TRUE  |
| 12 | 8332805 - 8368747     | F - 33.33% | TRUE  | TRUE  |
| 12 | 8332805 - 8368747     | F - 8.33%  | TRUE  | TRUE  |
| 12 | 8332805 - 8368747     | F - 16.67% | TRUE  | TRUE  |
| 12 | 8332805 - 8368747     | F - 25.00% | TRUE  | TRUE  |
| 12 | 8332805 - 8368747     | T - 50.00% | TRUE  | TRUE  |
| 12 | 8332805 - 8368747     | T - 75.00% | TRUE  | TRUE  |
| 15 | 41624892 - 41673248   |            | TRUE  | TRUE  |
| 15 | 41624892 - 41673248   | T - 83.33% | TRUE  | TRUE  |

|             |                     |             |       |       |
|-------------|---------------------|-------------|-------|-------|
| 15          | 41624892 - 41673248 | T - 83.33%  | TRUE  | TRUE  |
| 15          | 41624892 - 41673248 |             | TRUE  | TRUE  |
| 15          | 41624892 - 41673248 |             | FALSE | TRUE  |
| 15          | 43524793 - 43559055 |             | TRUE  | FALSE |
| 15          | 43524793 - 43559055 |             | TRUE  | TRUE  |
| 15          | 43524793 - 43559055 | T - 100.00% | FALSE | TRUE  |
| 6_apd_hap1  | 1148926 - 1153548   | F - 5.26%   | TRUE  | TRUE  |
| 6_apd_hap1  | 1148926 - 1153548   | F - 5.26%   | TRUE  | TRUE  |
| 6_apd_hap1  | 1148926 - 1153548   | F - 5.26%   | TRUE  | TRUE  |
| 6_apd_hap1  | 1148926 - 1153548   | F - 5.26%   | FALSE | TRUE  |
| 6_apd_hap1  | 1148926 - 1153548   | F - 36.84%  | TRUE  | TRUE  |
| 6_apd_hap1  | 1148926 - 1153548   | F - 5.26%   | TRUE  | TRUE  |
| 6_apd_hap1  | 1148926 - 1153548   |             | TRUE  | TRUE  |
| 6_apd_hap1  | 1148926 - 1153548   |             | FALSE | TRUE  |
| 6_apd_hap1  | 1148926 - 1153548   |             | FALSE | TRUE  |
| 6_apd_hap1  | 1148926 - 1153548   | T - 84.21%  | TRUE  | TRUE  |
| 6_apd_hap1  | 1208639 - 1269654   | F - 16.67%  | TRUE  | TRUE  |
| 6_apd_hap1  | 1208639 - 1269654   | F - 33.33%  | TRUE  | TRUE  |
| 6_apd_hap1  | 1208639 - 1269654   | F - 16.67%  | TRUE  | TRUE  |
| 6_apd_hap1  | 1208639 - 1269654   | F - 8.33%   | TRUE  | TRUE  |
| 6_apd_hap1  | 1208639 - 1269654   | F - 8.33%   | TRUE  | TRUE  |
| 6_apd_hap1  | 1208639 - 1269654   |             | FALSE | TRUE  |
| 6_apd_hap1  | 1208639 - 1269654   |             | FALSE | TRUE  |
| 6_apd_hap1  | 1208639 - 1269654   | T - 50.00%  | TRUE  | TRUE  |
| 6_apd_hap1  | 1208639 - 1269654   |             | FALSE | TRUE  |
| 6_cox_hap2  | 1420791 - 1425413   | F - 5.26%   | TRUE  | TRUE  |
| 6_cox_hap2  | 1420791 - 1425413   | F - 5.26%   | TRUE  | TRUE  |
| 6_cox_hap2  | 1420791 - 1425413   | F - 5.26%   | TRUE  | TRUE  |
| 6_cox_hap2  | 1420791 - 1425413   | F - 5.26%   | FALSE | TRUE  |
| 6_cox_hap2  | 1420791 - 1425413   | F - 36.84%  | TRUE  | TRUE  |
| 6_cox_hap2  | 1420791 - 1425413   | F - 5.26%   | TRUE  | TRUE  |
| 6_cox_hap2  | 1420791 - 1425413   |             | TRUE  | TRUE  |
| 6_cox_hap2  | 1420791 - 1425413   |             | FALSE | TRUE  |
| 6_cox_hap2  | 1420791 - 1425413   |             | FALSE | TRUE  |
| 6_cox_hap2  | 1420791 - 1425413   | T - 84.21%  | TRUE  | TRUE  |
| 6_cox_hap2  | 1480505 - 1541523   | F - 16.67%  | TRUE  | TRUE  |
| 6_cox_hap2  | 1480505 - 1541523   | F - 33.33%  | TRUE  | TRUE  |
| 6_cox_hap2  | 1480505 - 1541523   | F - 16.67%  | TRUE  | TRUE  |
| 6_cox_hap2  | 1480505 - 1541523   | F - 8.33%   | TRUE  | TRUE  |
| 6_cox_hap2  | 1480505 - 1541523   | F - 8.33%   | TRUE  | TRUE  |
| 6_cox_hap2  | 1480505 - 1541523   |             | FALSE | TRUE  |
| 6_cox_hap2  | 1480505 - 1541523   |             | FALSE | TRUE  |
| 6_cox_hap2  | 1480505 - 1541523   | T - 50.00%  | TRUE  | TRUE  |
| 6_cox_hap2  | 1480505 - 1541523   |             | FALSE | TRUE  |
| 6_dbb_hap3  | 1262134 - 1323147   | F - 16.67%  | TRUE  | TRUE  |
| 6_dbb_hap3  | 1262134 - 1323147   | F - 33.33%  | TRUE  | TRUE  |
| 6_dbb_hap3  | 1262134 - 1323147   | F - 16.67%  | TRUE  | TRUE  |
| 6_dbb_hap3  | 1262134 - 1323147   | F - 8.33%   | TRUE  | TRUE  |
| 6_dbb_hap3  | 1262134 - 1323147   | F - 8.33%   | TRUE  | TRUE  |
| 6_dbb_hap3  | 1262134 - 1323147   |             | FALSE | TRUE  |
| 6_dbb_hap3  | 1262134 - 1323147   |             | FALSE | TRUE  |
| 6_dbb_hap3  | 1262134 - 1323147   | T - 50.00%  | TRUE  | TRUE  |
| 6_dbb_hap3  | 1262134 - 1323147   |             | FALSE | TRUE  |
| 6_mann_hap4 | 1267361 - 1328014   | F - 16.67%  | TRUE  | TRUE  |
| 6_mann_hap4 | 1267361 - 1328014   | F - 33.33%  | TRUE  | TRUE  |
| 6_mann_hap4 | 1267361 - 1328014   | F - 16.67%  | TRUE  | TRUE  |
| 6_mann_hap4 | 1267361 - 1328014   | F - 8.33%   | TRUE  | TRUE  |
| 6_mann_hap4 | 1267361 - 1328014   | F - 8.33%   | TRUE  | TRUE  |

|             |                       |            |       |       |
|-------------|-----------------------|------------|-------|-------|
| 6_mann_hap4 | 1267361 - 1328014     |            | FALSE | TRUE  |
| 6_mann_hap4 | 1267361 - 1328014     | T - 50.00% | TRUE  | TRUE  |
| 6_mann_hap4 | 1267361 - 1328014     |            | FALSE | TRUE  |
| 6_mcf_hap5  | 1350652 - 1411318     | F - 16.67% | TRUE  | TRUE  |
| 6_mcf_hap5  | 1350652 - 1411318     | F - 16.67% | TRUE  | TRUE  |
| 6_mcf_hap5  | 1350652 - 1411318     | F - 8.33%  | TRUE  | TRUE  |
| 6_mcf_hap5  | 1350652 - 1411318     | F - 16.67% | TRUE  | TRUE  |
| 6_mcf_hap5  | 1350652 - 1411318     | F - 41.67% | TRUE  | TRUE  |
| 6_mcf_hap5  | 1350652 - 1411318     | F - 8.33%  | TRUE  | TRUE  |
| 6_mcf_hap5  | 1350652 - 1411318     |            | FALSE | TRUE  |
| 6_mcf_hap5  | 1350652 - 1411318     | T - 50.00% | TRUE  | TRUE  |
| 6_mcf_hap5  | 1350652 - 1411318     |            | FALSE | TRUE  |
| 5           | 149737202 - 149779871 |            | TRUE  | TRUE  |
| 5           | 149737202 - 149779871 |            | TRUE  | TRUE  |
| 5           | 149737202 - 149779871 | F - 4.55%  | TRUE  | TRUE  |
| 5           | 149737202 - 149779871 |            | TRUE  | TRUE  |
| 5           | 149737202 - 149779871 |            | FALSE | TRUE  |
| 5           | 149737202 - 149779871 |            | TRUE  | TRUE  |
| 1           | 203595689 - 203713209 |            | TRUE  | TRUE  |
| 1           | 203595689 - 203713209 | F - 11.11% | TRUE  | TRUE  |
| 1           | 203595689 - 203713209 | T - 61.11% | TRUE  | TRUE  |
| 1           | 203595689 - 203713209 |            | FALSE | TRUE  |
| 1           | 43300352 - 43312093   | F - 25.00% | TRUE  | TRUE  |
| 1           | 43300352 - 43312093   |            | TRUE  | TRUE  |
| 1           | 43300352 - 43312093   | F - 25.00% | TRUE  | TRUE  |
| 1           | 43300352 - 43312093   |            | TRUE  | TRUE  |
| 1           | 43300352 - 43312093   | T - 50.00% | TRUE  | TRUE  |
| 1           | 59348540 - 59362375   |            | TRUE  | FALSE |
| 1           | 59348540 - 59362375   | T - 50.00% | TRUE  | TRUE  |
| 2           | 170440850 - 170504696 |            | TRUE  | TRUE  |
| 2           | 170440850 - 170504696 |            | TRUE  | FALSE |
| 2           | 170440850 - 170504696 | T - 82.35% | TRUE  | TRUE  |
| 2           | 170440850 - 170504696 |            | TRUE  | TRUE  |
| 2           | 170440850 - 170504696 |            | FALSE | TRUE  |
| 4           | 129213906 - 129440549 |            | TRUE  | FALSE |
| 4           | 129213906 - 129440549 | F - 20.00% | TRUE  | TRUE  |
| 4           | 129213906 - 129440549 | F - 40.00% | TRUE  | TRUE  |
| 4           | 129213906 - 129440549 |            | TRUE  | TRUE  |
| 4           | 129213906 - 129440549 | F - 20.00% | FALSE | TRUE  |
| 4           | 129213906 - 129440549 | F - 40.00% | TRUE  | TRUE  |
| 4           | 129213906 - 129440549 | F - 20.00% | FALSE | TRUE  |
| 4           | 129213906 - 129440549 | F - 40.00% | TRUE  | TRUE  |
| 4           | 129213906 - 129440549 | F - 20.00% | TRUE  | TRUE  |
| 4           | 129213906 - 129440549 | F - 20.00% | TRUE  | TRUE  |
| 4           | 129213906 - 129440549 |            | FALSE | TRUE  |
| X           | 24483338 - 24568583   | F - 33.33% | FALSE | TRUE  |
| X           | 24483338 - 24568583   |            | FALSE | TRUE  |
| X           | 102585114 - 102587254 | T - 83.33% | TRUE  | TRUE  |
| X           | 102585114 - 102587254 |            | FALSE | TRUE  |
| 11          | 118097409 - 118123065 |            | FALSE | TRUE  |
| 11          | 118097409 - 118123065 | T - 70.00% | TRUE  | TRUE  |
| 12          | 131438452 - 131626008 |            | TRUE  | TRUE  |
| 12          | 131438452 - 131626008 |            | FALSE | TRUE  |
| 12          | 131438452 - 131626008 | F - 45.45% | FALSE | TRUE  |
| 12          | 131438452 - 131626008 |            | FALSE | TRUE  |
| 12          | 131438452 - 131626008 |            | FALSE | TRUE  |
| 12          | 131438452 - 131626008 | F - 45.45% | FALSE | TRUE  |
| 12          | 131438452 - 131626008 | F - 45.45% | FALSE | TRUE  |
| 14          | 35451163 - 35498773   | T - 81.82% | TRUE  | TRUE  |



|             |                       |             |       |       |
|-------------|-----------------------|-------------|-------|-------|
| 14          | 35451163 - 35498773   | T - 54.55%  | TRUE  | TRUE  |
| 14          | 35451163 - 35498773   |             | TRUE  | TRUE  |
| 14          | 35451163 - 35498773   | F - 9.09%   | TRUE  | TRUE  |
| 14          | 35451163 - 35498773   |             | TRUE  | TRUE  |
| 14          | 59951161 - 59972081   |             | TRUE  | TRUE  |
| 14          | 59951161 - 59972081   | F - 35.71%  | TRUE  | FALSE |
| 14          | 59951161 - 59972081   |             | TRUE  | TRUE  |
| 14          | 59951161 - 59972081   | F - 7.14%   | FALSE | TRUE  |
| 17          | 44910621 - 44964096   |             | TRUE  | TRUE  |
| 17          | 44910621 - 44964096   | F - 40.00%  | TRUE  | TRUE  |
| 17          | 44910621 - 44964096   | F - 20.00%  | TRUE  | FALSE |
| 17          | 44910621 - 44964096   | T - 100.00% | TRUE  | FALSE |
| 18          | 60190658 - 60253962   |             | TRUE  | TRUE  |
| 18          | 60190658 - 60253962   | F - 16.67%  | FALSE | TRUE  |
| 19          | 4343524 - 4360083     |             | TRUE  | TRUE  |
| 19          | 4343524 - 4360083     | T - 100.00% | TRUE  | TRUE  |
| 19          | 4343524 - 4360083     |             | TRUE  | TRUE  |
| 21          | 30671192 - 31003071   | F - 8.33%   | TRUE  | TRUE  |
| 21          | 30671192 - 31003071   | F - 16.67%  | TRUE  | TRUE  |
| 21          | 30671192 - 31003071   |             | TRUE  | TRUE  |
| 21          | 30671192 - 31003071   | F - 8.33%   | TRUE  | TRUE  |
| 21          | 30671192 - 31003071   |             | TRUE  | TRUE  |
| 21          | 30671192 - 31003071   | F - 8.33%   | TRUE  | TRUE  |
| 21          | 30671192 - 31003071   |             | TRUE  | TRUE  |
| 21          | 30671192 - 31003071   | F - 25.00%  | TRUE  | TRUE  |
| 21          | 30671192 - 31003071   |             | TRUE  | TRUE  |
| 22          | 42949865 - 42970388   | F - 6.25%   | TRUE  | TRUE  |
| 22          | 42949865 - 42970388   |             | TRUE  | TRUE  |
| 22          | 42949865 - 42970388   | T - 81.25%  | TRUE  | TRUE  |
| 22          | 42949865 - 42970388   |             | TRUE  | FALSE |
| 22          | 42949865 - 42970388   | F - 6.25%   | TRUE  | TRUE  |
| 22          | 42949865 - 42970388   | T - 62.50%  | TRUE  | TRUE  |
| 22          | 42949865 - 42970388   | F - 43.75%  | TRUE  | TRUE  |
| 22          | 42949865 - 42970388   | T - 56.25%  | TRUE  | TRUE  |
| 22          | 42949865 - 42970388   |             | FALSE | TRUE  |
| 22          | 42949865 - 42970388   |             | TRUE  | TRUE  |
| 22          | 42949865 - 42970388   | T - 56.25%  | FALSE | TRUE  |
| 6_ssto_hap7 | 1298115 - 1359860     | F - 8.33%   | TRUE  | TRUE  |
| 6_ssto_hap7 | 1298115 - 1359860     | F - 41.67%  | TRUE  | TRUE  |
| 6_ssto_hap7 | 1298115 - 1359860     | F - 16.67%  | TRUE  | TRUE  |
| 6_ssto_hap7 | 1298115 - 1359860     | F - 8.33%   | TRUE  | TRUE  |
| 6_ssto_hap7 | 1298115 - 1359860     | F - 8.33%   | TRUE  | TRUE  |
| 6_ssto_hap7 | 1298115 - 1359860     |             | FALSE | TRUE  |
| 6_ssto_hap7 | 1298115 - 1359860     |             | FALSE | TRUE  |
| 6_ssto_hap7 | 1298115 - 1359860     | T - 50.00%  | TRUE  | TRUE  |
| 6_ssto_hap7 | 1298115 - 1359860     |             | FALSE | TRUE  |
| 1           | 156433519 - 156470620 |             | TRUE  | TRUE  |
| 1           | 156433519 - 156470620 |             | TRUE  | TRUE  |
| 1           | 156433519 - 156470620 | F - 12.50%  | TRUE  | TRUE  |
| 1           | 145524891 - 145543868 |             | TRUE  | TRUE  |
| 1           | 145524891 - 145543868 |             | TRUE  | TRUE  |
| 1           | 145524891 - 145543868 |             | TRUE  | TRUE  |
| 1           | 145524891 - 145543868 |             | TRUE  | TRUE  |
| 1           | 145524891 - 145543868 |             | TRUE  | TRUE  |
| 1           | 145524891 - 145543868 |             | TRUE  | TRUE  |
| 1           | 145524891 - 145543868 |             | TRUE  | TRUE  |
| 1           | 145524891 - 145543868 |             | TRUE  | TRUE  |
| 1           | 145524891 - 145543868 |             | TRUE  | TRUE  |
| 1           | 145524891 - 145543868 | F - 7.14%   | TRUE  | TRUE  |

|   |                       |             |       |       |
|---|-----------------------|-------------|-------|-------|
| 1 | 145524891 - 145543868 |             | TRUE  | TRUE  |
| 1 | 145524891 - 145543868 | F - 7.14%   | FALSE | TRUE  |
| 1 | 145524891 - 145543868 |             | TRUE  | TRUE  |
| 2 | 108863651 - 108881807 | T - 100.00% | TRUE  | FALSE |
| 2 | 108863651 - 108881807 |             | TRUE  | FALSE |
| 3 | 25824408 - 25836025   |             | TRUE  | TRUE  |
| 3 | 25824408 - 25836025   | T - 83.33%  | TRUE  | TRUE  |
| 3 | 25824408 - 25836025   | F - 16.67%  | TRUE  | TRUE  |
| 3 | 25824408 - 25836025   | F - 8.33%   | FALSE | TRUE  |
| 3 | 114970043 - 115004194 |             | TRUE  | TRUE  |
| 3 | 114970043 - 115004194 | T - 100.00% | TRUE  | TRUE  |
| 3 | 114970043 - 115004194 |             | FALSE | TRUE  |
| 3 | 114970043 - 115004194 | T - 100.00% | TRUE  | TRUE  |
| 3 | 114970043 - 115004194 |             | FALSE | TRUE  |
| 3 | 190231840 - 190375843 |             | TRUE  | TRUE  |
| 3 | 190231840 - 190375843 |             | TRUE  | TRUE  |
| 3 | 190231840 - 190375843 | T - 76.92%  | TRUE  | TRUE  |
| 4 | 71681499 - 71705662   |             | TRUE  | TRUE  |
| 4 | 71681499 - 71705662   | F - 28.57%  | TRUE  | TRUE  |
| 4 | 38792298 - 38807199   |             | TRUE  | FALSE |
| 4 | 38792298 - 38807199   | T - 53.85%  | TRUE  | TRUE  |
| 5 | 35048861 - 35230823   |             | TRUE  | FALSE |
| 5 | 35048861 - 35230823   |             | TRUE  | FALSE |
| 5 | 35048861 - 35230823   | T - 74.07%  | TRUE  | FALSE |
| 5 | 35048861 - 35230823   |             | TRUE  | FALSE |
| 5 | 35048861 - 35230823   | F - 33.33%  | TRUE  | TRUE  |
| 5 | 35048861 - 35230823   | F - 40.74%  | TRUE  | TRUE  |
| 5 | 35048861 - 35230823   | F - 22.22%  | TRUE  | TRUE  |
| 5 | 35048861 - 35230823   | F - 3.70%   | TRUE  | TRUE  |
| 5 | 35048861 - 35230823   | F - 11.11%  | FALSE | TRUE  |
| 5 | 35048861 - 35230823   |             | TRUE  | TRUE  |
| 5 | 137450861 - 137475132 |             | TRUE  | TRUE  |
| 5 | 137450861 - 137475132 | F - 44.44%  | TRUE  | TRUE  |
| 5 | 137450861 - 137475132 |             | TRUE  | TRUE  |
| 5 | 137450861 - 137475132 |             | TRUE  | TRUE  |
| 5 | 137450861 - 137475132 |             | TRUE  | TRUE  |
| 5 | 137450861 - 137475132 | F - 11.11%  | FALSE | TRUE  |
| 5 | 137450861 - 137475132 | F - 11.11%  | FALSE | TRUE  |
| 5 | 137450861 - 137475132 | F - 11.11%  | TRUE  | TRUE  |
| 8 | 62413115 - 62627199   |             | TRUE  | TRUE  |
| 8 | 62413115 - 62627199   |             | TRUE  | TRUE  |
| 8 | 62413115 - 62627199   | F - 2.17%   | TRUE  | TRUE  |
| 8 | 62413115 - 62627199   | F - 15.22%  | TRUE  | TRUE  |
| 8 | 62413115 - 62627199   |             | TRUE  | TRUE  |
| 8 | 62413115 - 62627199   | F - 2.17%   | TRUE  | TRUE  |
| 8 | 62413115 - 62627199   |             | TRUE  | TRUE  |
| 8 | 62413115 - 62627199   |             | TRUE  | TRUE  |
| 8 | 12294522 - 12424423   | F - 20.00%  | TRUE  | TRUE  |
| 8 | 12294522 - 12424423   | T - 60.00%  | TRUE  | TRUE  |
| 8 | 12294522 - 12424423   | F - 20.00%  | FALSE | TRUE  |
| 8 | 12294522 - 12424423   |             | FALSE | TRUE  |
| 9 | 117781854 - 117880536 | F - 15.00%  | TRUE  | TRUE  |
| 9 | 117781854 - 117880536 | F - 35.00%  | TRUE  | TRUE  |
| 9 | 117781854 - 117880536 |             | TRUE  | TRUE  |
| 9 | 117781854 - 117880536 | F - 35.00%  | TRUE  | TRUE  |
| 9 | 117781854 - 117880536 |             | TRUE  | TRUE  |
| 9 | 117781854 - 117880536 |             | TRUE  | TRUE  |
| 9 | 117781854 - 117880536 | F - 45.00%  | TRUE  | TRUE  |

|    |                       |             |       |       |
|----|-----------------------|-------------|-------|-------|
| 9  | 117781854 - 117880536 |             | TRUE  | TRUE  |
| 9  | 117781854 - 117880536 |             | TRUE  | TRUE  |
| 9  | 117781854 - 117880536 | F - 35.00%  | TRUE  | TRUE  |
| 9  | 117781854 - 117880536 | F - 35.00%  | TRUE  | TRUE  |
| 9  | 117781854 - 117880536 |             | TRUE  | TRUE  |
| 9  | 117781854 - 117880536 | T - 50.00%  | TRUE  | TRUE  |
| 9  | 117781854 - 117880536 |             | TRUE  | TRUE  |
| 9  | 117781854 - 117880536 |             | TRUE  | TRUE  |
| 9  | 117781854 - 117880536 |             | TRUE  | TRUE  |
| 9  | 117781854 - 117880536 |             | TRUE  | TRUE  |
| 9  | 117781854 - 117880536 |             | TRUE  | TRUE  |
| 9  | 135600965 - 135754198 |             | TRUE  | TRUE  |
| 9  | 135600965 - 135754198 |             | TRUE  | TRUE  |
| 9  | 135600965 - 135754198 | F - 10.00%  | FALSE | TRUE  |
| 10 | 89419370 - 89507462   |             | TRUE  | TRUE  |
| 10 | 89419370 - 89507462   | F - 10.00%  | TRUE  | TRUE  |
| 10 | 102820999 - 102827891 |             | TRUE  | FALSE |
| 10 | 102820999 - 102827891 | T - 66.67%  | TRUE  | TRUE  |
| 15 | 43891596 - 43924561   | F - 22.22%  | TRUE  | FALSE |
| 15 | 43891596 - 43924561   |             | TRUE  | FALSE |
| 15 | 43891596 - 43924561   |             | TRUE  | TRUE  |
| 16 | 28616903 - 28634907   | F - 40.00%  | TRUE  | TRUE  |
| 16 | 28616903 - 28634907   | F - 40.00%  | TRUE  | TRUE  |
| 16 | 28616903 - 28634907   | F - 13.33%  | TRUE  | TRUE  |
| 16 | 28616903 - 28634907   | T - 100.00% | TRUE  | TRUE  |
| 16 | 28616903 - 28634907   |             | FALSE | TRUE  |
| 16 | 28616903 - 28634907   |             | FALSE | TRUE  |
| 16 | 28616903 - 28634907   | T - 86.67%  | FALSE | TRUE  |
| 16 | 28616903 - 28634907   |             | FALSE | TRUE  |
| 16 | 28616903 - 28634907   |             | FALSE | TRUE  |
| 20 | 10415951 - 10617477   |             | TRUE  | TRUE  |
| 20 | 10415951 - 10617477   |             | TRUE  | FALSE |
| 20 | 10415951 - 10617477   | T - 50.00%  | TRUE  | TRUE  |
| 21 | 44949072 - 45079374   |             | TRUE  | TRUE  |
| 21 | 44949072 - 45079374   | T - 80.00%  | TRUE  | TRUE  |
| 21 | 44949072 - 45079374   | T - 100.00% | TRUE  | TRUE  |
| 21 | 44949072 - 45079374   |             | FALSE | TRUE  |
| 22 | 31460091 - 31500610   | F - 13.51%  | TRUE  | TRUE  |
| 22 | 31460091 - 31500610   |             | TRUE  | TRUE  |
| 22 | 31460091 - 31500610   | F - 2.70%   | TRUE  | FALSE |
| 22 | 31460091 - 31500610   |             | FALSE | TRUE  |
| 22 | 31460091 - 31500610   |             | TRUE  | TRUE  |
| 22 | 31460091 - 31500610   |             | TRUE  | TRUE  |
| 22 | 31460091 - 31500610   | F - 5.41%   | TRUE  | TRUE  |
| 22 | 31460091 - 31500610   |             | TRUE  | TRUE  |
| 22 | 31460091 - 31500610   |             | TRUE  | TRUE  |
| 22 | 31460091 - 31500610   | F - 8.11%   | TRUE  | TRUE  |
| 22 | 31460091 - 31500610   | F - 10.81%  | TRUE  | TRUE  |
| 12 | 26272078 - 26278060   |             | TRUE  | TRUE  |
| 12 | 26272078 - 26278060   | T - 80.00%  | TRUE  | TRUE  |
| 12 | 26272078 - 26278060   |             | TRUE  | TRUE  |
| 1  | 20008706 - 20126758   |             | TRUE  | TRUE  |
| 1  | 20008706 - 20126758   |             | FALSE | TRUE  |
| 1  | 20008706 - 20126758   |             | FALSE | TRUE  |
| 1  | 20008706 - 20126758   |             | FALSE | TRUE  |
| 1  | 20008706 - 20126758   | T - 75.00%  | FALSE | TRUE  |
| 1  | 20008706 - 20126758   |             | FALSE | TRUE  |
| 2  | 210636717 - 210864024 |             | TRUE  | FALSE |
| 2  | 210636717 - 210864024 |             | TRUE  | FALSE |

|    |                       |             |       |       |
|----|-----------------------|-------------|-------|-------|
| 2  | 210636717 - 210864024 |             | TRUE  | TRUE  |
| 2  | 210636717 - 210864024 | F - 33.33%  | FALSE | TRUE  |
| 2  | 210636717 - 210864024 |             | FALSE | TRUE  |
| 2  | 210636717 - 210864024 |             | FALSE | TRUE  |
| 2  | 210636717 - 210864024 |             | TRUE  | TRUE  |
| 3  | 50333829 - 50336899   |             | TRUE  | TRUE  |
| 3  | 50333829 - 50336899   | F - 7.14%   | TRUE  | TRUE  |
| 3  | 50333829 - 50336899   | F - 35.71%  | TRUE  | TRUE  |
| 3  | 50333829 - 50336899   | F - 21.43%  | TRUE  | TRUE  |
| 5  | 78985659 - 79096063   |             | TRUE  | FALSE |
| 5  | 78985659 - 79096063   | F - 25.00%  | TRUE  | TRUE  |
| 5  | 78985659 - 79096063   | T - 50.00%  | TRUE  | TRUE  |
| 5  | 78985659 - 79096063   | F - 25.00%  | FALSE | TRUE  |
| 6  | 36095586 - 36107842   | T - 81.82%  | TRUE  | TRUE  |
| 6  | 36095586 - 36107842   |             | FALSE | TRUE  |
| 7  | 38762563 - 38971994   | F - 47.37%  | TRUE  | TRUE  |
| 7  | 38762563 - 38971994   | F - 5.26%   | TRUE  | FALSE |
| 7  | 38762563 - 38971994   | F - 36.84%  | TRUE  | TRUE  |
| 7  | 38762563 - 38971994   | F - 5.26%   | FALSE | TRUE  |
| 7  | 38762563 - 38971994   | F - 5.26%   | TRUE  | TRUE  |
| 7  | 38762563 - 38971994   |             | TRUE  | TRUE  |
| 7  | 38762563 - 38971994   |             | TRUE  | TRUE  |
| 8  | 28747911 - 28922281   |             | TRUE  | TRUE  |
| 8  | 28747911 - 28922281   |             | TRUE  | FALSE |
| 8  | 28747911 - 28922281   | F - 13.79%  | TRUE  | TRUE  |
| 8  | 28747911 - 28922281   |             | TRUE  | TRUE  |
| 8  | 128806779 - 129113499 |             | TRUE  | TRUE  |
| 8  | 128806779 - 129113499 |             | TRUE  | TRUE  |
| 8  | 128806779 - 129113499 | F - 12.00%  | TRUE  | TRUE  |
| 8  | 128806779 - 129113499 |             | TRUE  | TRUE  |
| 8  | 93895758 - 94029901   | F - 3.03%   | TRUE  | TRUE  |
| 8  | 93895758 - 94029901   |             | TRUE  | TRUE  |
| 8  | 93895758 - 94029901   | F - 6.06%   | TRUE  | TRUE  |
| 8  | 93895758 - 94029901   |             | TRUE  | TRUE  |
| 8  | 93895758 - 94029901   |             | FALSE | TRUE  |
| 11 | 128555046 - 128683162 |             | TRUE  | TRUE  |
| 11 | 128555046 - 128683162 |             | TRUE  | TRUE  |
| 11 | 128555046 - 128683162 |             | TRUE  | FALSE |
| 11 | 128555046 - 128683162 | T - 85.71%  | TRUE  | TRUE  |
| 15 | 83023773 - 83084729   |             | TRUE  | FALSE |
| 15 | 83023773 - 83084729   | T - 66.67%  | TRUE  | TRUE  |
| 15 | 83023773 - 83084729   |             | TRUE  | TRUE  |
| 15 | 83023773 - 83084729   | T - 100.00% | TRUE  | TRUE  |
| 15 | 45459411 - 45493373   | F - 23.53%  | TRUE  | TRUE  |
| 15 | 45459411 - 45493373   |             | TRUE  | TRUE  |
| 15 | 45459411 - 45493373   | F - 23.53%  | TRUE  | TRUE  |
| 18 | 77155772 - 77289325   |             | TRUE  | TRUE  |
| 18 | 77155772 - 77289325   | T - 52.38%  | TRUE  | TRUE  |
| 18 | 77155772 - 77289325   | F - 38.10%  | TRUE  | TRUE  |
| 19 | 51409608 - 51413994   |             | TRUE  | TRUE  |
| 19 | 51409608 - 51413994   | F - 9.09%   | TRUE  | TRUE  |
| 19 | 51409608 - 51413994   | F - 45.45%  | TRUE  | TRUE  |
| 19 | 51409608 - 51413994   | T - 81.82%  | TRUE  | TRUE  |
| 19 | 51409608 - 51413994   |             | TRUE  | TRUE  |
| 21 | 28208606 - 28217728   |             | TRUE  | TRUE  |
| 21 | 28208606 - 28217728   | F - 16.67%  | FALSE | TRUE  |
| 1  | 100315640 - 100389579 |             | TRUE  | TRUE  |
| 1  | 100315640 - 100389579 |             | TRUE  | TRUE  |

|   |    |                       |             |       |       |
|---|----|-----------------------|-------------|-------|-------|
|   | 1  | 100315640 - 100389579 | T - 93.33%  | TRUE  | TRUE  |
|   | 1  | 36881428 - 36916086   |             | TRUE  | TRUE  |
|   | 1  | 36881428 - 36916086   |             | TRUE  | TRUE  |
|   | 1  | 36881428 - 36916086   |             | FALSE | TRUE  |
|   | 1  | 36881428 - 36916086   | T - 66.67%  | FALSE | TRUE  |
|   | 1  | 36881428 - 36916086   |             | FALSE | TRUE  |
|   | 3  | 52715172 - 52728510   |             | TRUE  | FALSE |
|   | 3  | 52715172 - 52728510   | F - 5.00%   | TRUE  | TRUE  |
|   | 3  | 52715172 - 52728510   |             | TRUE  | TRUE  |
|   | 4  | 15683285 - 15692071   | F - 8.33%   | TRUE  | TRUE  |
|   | 4  | 15683285 - 15692071   |             | TRUE  | FALSE |
|   | 4  | 15683285 - 15692071   | T - 66.67%  | TRUE  | TRUE  |
|   | 5  | 65435799 - 65479443   |             | TRUE  | TRUE  |
|   | 5  | 65435799 - 65479443   |             | TRUE  | TRUE  |
|   | 5  | 65435799 - 65479443   |             | TRUE  | TRUE  |
|   | 5  | 65435799 - 65479443   | F - 4.55%   | TRUE  | TRUE  |
|   | 5  | 65435799 - 65479443   | F - 9.09%   | TRUE  | TRUE  |
|   | 5  | 65435799 - 65479443   |             | FALSE | TRUE  |
|   | 6  | 29694378 - 29716826   |             | TRUE  | TRUE  |
|   | 6  | 29694378 - 29716826   | F - 20.00%  | TRUE  | TRUE  |
|   | 6  | 29694378 - 29716826   |             | FALSE | TRUE  |
|   | 6  | 29694378 - 29716826   |             | TRUE  | TRUE  |
|   | 6  | 75962638 - 75994684   | T - 50.00%  | TRUE  | TRUE  |
|   | 6  | 75962638 - 75994684   | F - 12.50%  | TRUE  | TRUE  |
|   | 6  | 75962638 - 75994684   |             | TRUE  | TRUE  |
|   | 9  | 35681989 - 35691017   | F - 9.09%   | TRUE  | TRUE  |
|   | 9  | 35681989 - 35691017   | F - 18.18%  | TRUE  | TRUE  |
|   | 9  | 35681989 - 35691017   |             | TRUE  | TRUE  |
|   | 9  | 35681989 - 35691017   | F - 9.09%   | TRUE  | TRUE  |
|   | 9  | 123151147 - 123342448 |             | TRUE  | FALSE |
|   | 9  | 123151147 - 123342448 |             | TRUE  | TRUE  |
|   | 9  | 123151147 - 123342448 |             | TRUE  | TRUE  |
|   | 9  | 123151147 - 123342448 |             | TRUE  | TRUE  |
|   | 9  | 123151147 - 123342448 |             | TRUE  | TRUE  |
|   | 9  | 123151147 - 123342448 | T - 71.43%  | TRUE  | TRUE  |
|   | 9  | 123151147 - 123342448 | T - 74.29%  | TRUE  | TRUE  |
|   | 9  | 123151147 - 123342448 |             | FALSE | TRUE  |
|   | 9  | 123151147 - 123342448 |             | TRUE  | TRUE  |
|   | 9  | 123151147 - 123342448 | T - 71.43%  | TRUE  | TRUE  |
|   | 9  | 123151147 - 123342448 |             | TRUE  | TRUE  |
|   | 9  | 123151147 - 123342448 |             | TRUE  | TRUE  |
|   | 9  | 123151147 - 123342448 | F - 5.71%   | TRUE  | TRUE  |
|   | 9  | 123151147 - 123342448 |             | TRUE  | TRUE  |
|   | 9  | 123151147 - 123342448 | T - 74.29%  | TRUE  | TRUE  |
|   | 9  | 123151147 - 123342448 | T - 71.43%  | TRUE  | TRUE  |
|   | 9  | 123151147 - 123342448 | T - 65.71%  | FALSE | TRUE  |
|   | 9  | 123151147 - 123342448 |             | FALSE | TRUE  |
|   | 9  | 123151147 - 123342448 | T - 71.43%  | TRUE  | TRUE  |
|   | 9  | 123151147 - 123342448 | F - 2.86%   | TRUE  | TRUE  |
| X |    | 129040097 - 129063738 |             | TRUE  | FALSE |
| X |    | 129040097 - 129063738 | T - 100.00% | TRUE  | TRUE  |
|   | 10 | 62538089 - 62554610   |             | TRUE  | FALSE |
|   | 10 | 62538089 - 62554610   | T - 56.25%  | TRUE  | TRUE  |
|   | 10 | 62538089 - 62554610   | F - 12.50%  | TRUE  | TRUE  |
|   | 10 | 62538089 - 62554610   | T - 62.50%  | TRUE  | TRUE  |
|   | 11 | 86748886 - 87039876   | T - 81.82%  | TRUE  | TRUE  |
|   | 11 | 86748886 - 87039876   | F - 18.18%  | TRUE  | TRUE  |
|   | 11 | 86748886 - 87039876   | T - 81.82%  | TRUE  | TRUE  |

|    |                       |            |       |       |
|----|-----------------------|------------|-------|-------|
| 11 | 86748886 - 87039876   |            | TRUE  | TRUE  |
| 11 | 86748886 - 87039876   |            | TRUE  | TRUE  |
| 11 | 86748886 - 87039876   |            | TRUE  | TRUE  |
| 11 | 89057522 - 89322779   |            | TRUE  | FALSE |
| 11 | 89057522 - 89322779   |            | TRUE  | FALSE |
| 11 | 89057522 - 89322779   | T - 90.00% | TRUE  | TRUE  |
| 11 | 89057522 - 89322779   |            | TRUE  | FALSE |
| 11 | 89057522 - 89322779   | T - 66.67% | TRUE  | TRUE  |
| 11 | 89057522 - 89322779   |            | TRUE  | TRUE  |
| 11 | 89057522 - 89322779   | T - 60.00% | TRUE  | TRUE  |
| 11 | 89057522 - 89322779   |            | TRUE  | TRUE  |
| 11 | 89057522 - 89322779   | T - 66.67% | TRUE  | TRUE  |
| 11 | 89057522 - 89322779   | F - 3.33%  | TRUE  | TRUE  |
| 11 | 89057522 - 89322779   |            | TRUE  | FALSE |
| 11 | 89057522 - 89322779   | T - 86.67% | TRUE  | TRUE  |
| 11 | 89057522 - 89322779   |            | TRUE  | FALSE |
| 11 | 89057522 - 89322779   |            | TRUE  | TRUE  |
| 11 | 89057522 - 89322779   |            | TRUE  | FALSE |
| 11 | 89057522 - 89322779   | T - 86.67% | TRUE  | FALSE |
| 11 | 89057522 - 89322779   | F - 43.33% | TRUE  | TRUE  |
| 11 | 89057522 - 89322779   | T - 73.33% | TRUE  | FALSE |
| 11 | 89057522 - 89322779   |            | TRUE  | FALSE |
| 11 | 89057522 - 89322779   | F - 46.67% | TRUE  | FALSE |
| 11 | 89057522 - 89322779   | F - 6.67%  | TRUE  | TRUE  |
| 11 | 89057522 - 89322779   | F - 43.33% | TRUE  | FALSE |
| 11 | 89057522 - 89322779   |            | TRUE  | FALSE |
| 11 | 89057522 - 89322779   | F - 6.67%  | TRUE  | TRUE  |
| 11 | 89057522 - 89322779   | F - 3.33%  | TRUE  | TRUE  |
| 11 | 89057522 - 89322779   |            | TRUE  | FALSE |
| 11 | 89057522 - 89322779   |            | TRUE  | TRUE  |
| 11 | 89057522 - 89322779   |            | TRUE  | FALSE |
| 11 | 89057522 - 89322779   | F - 6.67%  | TRUE  | FALSE |
| 11 | 89057522 - 89322779   |            | TRUE  | TRUE  |
| 11 | 89057522 - 89322779   | T - 56.67% | TRUE  | TRUE  |
| 11 | 89057522 - 89322779   | F - 3.33%  | TRUE  | TRUE  |
| 11 | 89057522 - 89322779   | F - 10.00% | TRUE  | TRUE  |
| 11 | 89057522 - 89322779   | F - 10.00% | TRUE  | TRUE  |
| 14 | 81421333 - 81612646   | F - 18.18% | FALSE | TRUE  |
| 14 | 81421333 - 81612646   |            | TRUE  | TRUE  |
| 14 | 81421333 - 81612646   | F - 27.27% | TRUE  | TRUE  |
| 14 | 81421333 - 81612646   | F - 27.27% | TRUE  | TRUE  |
| 14 | 81421333 - 81612646   | F - 18.18% | TRUE  | TRUE  |
| 14 | 81421333 - 81612646   |            | TRUE  | TRUE  |
| 14 | 81421333 - 81612646   |            | FALSE | TRUE  |
| 21 | 38071433 - 38131815   | T - 70.00% | TRUE  | TRUE  |
| 21 | 38071433 - 38131815   | F - 10.00% | TRUE  | TRUE  |
| 21 | 38071433 - 38131815   | T - 60.00% | TRUE  | TRUE  |
| 21 | 38071433 - 38131815   |            | TRUE  | TRUE  |
| 21 | 38071433 - 38131815   |            | FALSE | TRUE  |
| X  | 19930978 - 19988416   |            | TRUE  | TRUE  |
| X  | 19930978 - 19988416   |            | FALSE | TRUE  |
| X  | 19930978 - 19988416   | F - 14.29% | TRUE  | TRUE  |
| X  | 19930978 - 19988416   |            | FALSE | TRUE  |
| 1  | 231664287 - 232177019 |            | TRUE  | FALSE |
| 1  | 231664287 - 232177019 |            | FALSE | TRUE  |
| 1  | 231664287 - 232177019 | F - 1.54%  | TRUE  | TRUE  |
| 1  | 231664287 - 232177019 |            | FALSE | TRUE  |
| 1  | 231664287 - 232177019 |            | FALSE | TRUE  |

|   |                       |            |       |       |
|---|-----------------------|------------|-------|-------|
| 1 | 230838269 - 230850336 | T - 60.00% | FALSE | TRUE  |
| 1 | 230838269 - 230850336 |            | FALSE | TRUE  |
| 1 | 230838269 - 230850336 | F - 40.00% | TRUE  | TRUE  |
| 2 | 71295408 - 71306935   | F - 6.90%  | TRUE  | FALSE |
| 2 | 71295408 - 71306935   |            | TRUE  | TRUE  |
| 2 | 71295408 - 71306935   |            | TRUE  | TRUE  |
| 2 | 71295408 - 71306935   | F - 3.45%  | TRUE  | TRUE  |
| 2 | 219472488 - 219501909 |            | TRUE  | TRUE  |
| 2 | 219472488 - 219501909 |            | TRUE  | FALSE |
| 2 | 219472488 - 219501909 |            | TRUE  | TRUE  |
| 2 | 219472488 - 219501909 |            | TRUE  | TRUE  |
| 2 | 219472488 - 219501909 |            | TRUE  | TRUE  |
| 2 | 219472488 - 219501909 | F - 36.36% | TRUE  | TRUE  |
| 2 | 219472488 - 219501909 |            | TRUE  | TRUE  |
| 2 | 219472488 - 219501909 | T - 54.55% | FALSE | TRUE  |
| 2 | 219472488 - 219501909 | T - 59.09% | FALSE | TRUE  |
| 2 | 219472488 - 219501909 | F - 40.91% | TRUE  | TRUE  |
| 2 | 56093097 - 56151298   | F - 19.05% | TRUE  | TRUE  |
| 2 | 56093097 - 56151298   |            | FALSE | TRUE  |
| 2 | 56093097 - 56151298   | F - 23.81% | TRUE  | TRUE  |
| 2 | 56093097 - 56151298   |            | TRUE  | TRUE  |
| 2 | 56093097 - 56151298   | F - 4.76%  | TRUE  | TRUE  |
| 2 | 56093097 - 56151298   |            | FALSE | TRUE  |
| 2 | 56093097 - 56151298   | F - 47.62% | TRUE  | TRUE  |
| 2 | 56093097 - 56151298   | F - 38.10% | TRUE  | TRUE  |
| 3 | 189349205 - 189615068 |            | TRUE  | TRUE  |
| 3 | 189349205 - 189615068 |            | TRUE  | TRUE  |
| 3 | 189349205 - 189615068 | T - 92.31% | TRUE  | TRUE  |
| 3 | 189349205 - 189615068 | T - 92.31% | FALSE | TRUE  |
| 3 | 189349205 - 189615068 |            | FALSE | TRUE  |
| 4 | 186990306 - 187006255 |            | TRUE  | TRUE  |
| 4 | 186990306 - 187006255 | F - 36.36% | FALSE | TRUE  |
| 4 | 186990306 - 187006255 |            | TRUE  | TRUE  |
| 4 | 186366336 - 186392913 | F - 7.14%  | TRUE  | FALSE |
| 4 | 186366336 - 186392913 | F - 7.14%  | TRUE  | TRUE  |
| 4 | 186366336 - 186392913 |            | TRUE  | TRUE  |
| 5 | 68513573 - 68525985   |            | TRUE  | TRUE  |
| 5 | 68513573 - 68525985   | F - 28.57% | TRUE  | TRUE  |
| 6 | 32135983 - 32145888   | F - 21.05% | TRUE  | TRUE  |
| 6 | 32135983 - 32145888   |            | TRUE  | FALSE |
| 6 | 32135983 - 32145888   | F - 5.26%  | TRUE  | FALSE |
| 6 | 32135983 - 32145888   | F - 15.79% | FALSE | TRUE  |
| 6 | 32135983 - 32145888   |            | TRUE  | TRUE  |
| 6 | 110931181 - 111137161 | F - 38.46% | TRUE  | TRUE  |
| 6 | 110931181 - 111137161 | F - 15.38% | TRUE  | TRUE  |
| 6 | 110931181 - 111137161 | F - 7.69%  | TRUE  | TRUE  |
| 6 | 110931181 - 111137161 |            | TRUE  | TRUE  |
| 6 | 110931181 - 111137161 | F - 30.77% | TRUE  | TRUE  |
| 7 | 11013499 - 11209250   | T - 68.42% | TRUE  | TRUE  |
| 7 | 11013499 - 11209250   | F - 10.53% | TRUE  | FALSE |
| 7 | 11013499 - 11209250   |            | TRUE  | TRUE  |
| 8 | 87497059 - 87573726   |            | TRUE  | TRUE  |
| 8 | 87497059 - 87573726   |            | TRUE  | TRUE  |
| 8 | 87497059 - 87573726   | F - 5.88%  | FALSE | TRUE  |
| 8 | 87497059 - 87573726   |            | FALSE | TRUE  |
| 8 | 101930804 - 101965623 |            | TRUE  | TRUE  |
| 8 | 101930804 - 101965623 | F - 7.32%  | TRUE  | TRUE  |
| 8 | 101930804 - 101965623 |            | FALSE | TRUE  |

|    |                       |            |       |       |
|----|-----------------------|------------|-------|-------|
| X  | 8432871 - 8434551     | F - 33.33% | TRUE  | TRUE  |
| X  | 8432871 - 8434551     |            | TRUE  | FALSE |
| 11 | 77726761 - 77791265   |            | TRUE  | FALSE |
| 11 | 77726761 - 77791265   | F - 31.58% | TRUE  | TRUE  |
| 11 | 77726761 - 77791265   | F - 36.84% | TRUE  | TRUE  |
| 11 | 77726761 - 77791265   | F - 42.11% | TRUE  | TRUE  |
| 12 | 27849321 - 27863703   |            | TRUE  | FALSE |
| 12 | 27849321 - 27863703   | F - 33.33% | TRUE  | FALSE |
| 12 | 27849321 - 27863703   | F - 33.33% | FALSE | TRUE  |
| 12 | 27849321 - 27863703   | F - 33.33% | TRUE  | TRUE  |
| 12 | 27849321 - 27863703   |            | TRUE  | TRUE  |
| 13 | 103451399 - 103493888 | F - 30.77% | TRUE  | FALSE |
| 13 | 103451399 - 103493888 |            | TRUE  | TRUE  |
| 13 | 103451399 - 103493888 |            | TRUE  | TRUE  |
| 13 | 103451399 - 103493888 | F - 7.69%  | TRUE  | TRUE  |
| 13 | 103451399 - 103493888 |            | FALSE | TRUE  |
| 14 | 24028774 - 24037279   |            | TRUE  | TRUE  |
| 14 | 24028774 - 24037279   |            | TRUE  | TRUE  |
| 14 | 24028774 - 24037279   | T - 58.82% | TRUE  | TRUE  |
| 14 | 24028774 - 24037279   | T - 76.47% | FALSE | TRUE  |
| 14 | 24028774 - 24037279   | T - 76.47% | TRUE  | TRUE  |
| 14 | 24028774 - 24037279   |            | FALSE | TRUE  |
| 15 | 33057747 - 33486897   |            | TRUE  | TRUE  |
| 15 | 33057747 - 33486897   | F - 33.33% | TRUE  | TRUE  |
| 15 | 33057747 - 33486897   | F - 11.11% | TRUE  | FALSE |
| 15 | 33057747 - 33486897   |            | TRUE  | TRUE  |
| 15 | 33057747 - 33486897   | F - 11.11% | TRUE  | TRUE  |
| 15 | 33057747 - 33486897   |            | TRUE  | TRUE  |
| 17 | 43861646 - 43913194   | T - 80.00% | TRUE  | FALSE |
| 17 | 43861646 - 43913194   |            | FALSE | TRUE  |
| 17 | 43861646 - 43913194   | T - 73.33% | TRUE  | TRUE  |
| 1  | 117452679 - 117532980 | T - 57.14% | TRUE  | TRUE  |
| 1  | 117452679 - 117532980 | F - 42.86% | TRUE  | TRUE  |
| 1  | 117452679 - 117532980 |            | FALSE | TRUE  |
| 1  | 201592411 - 201796102 | F - 4.76%  | TRUE  | TRUE  |
| 1  | 201592411 - 201796102 | F - 33.33% | TRUE  | TRUE  |
| 1  | 201592411 - 201796102 | F - 9.52%  | TRUE  | TRUE  |
| 1  | 201592411 - 201796102 |            | TRUE  | TRUE  |
| 1  | 201592411 - 201796102 | F - 4.76%  | TRUE  | TRUE  |
| 1  | 201592411 - 201796102 | F - 4.76%  | TRUE  | TRUE  |
| 1  | 201592411 - 201796102 |            | TRUE  | TRUE  |
| 1  | 201592411 - 201796102 |            | FALSE | TRUE  |
| 1  | 222791428 - 222856105 |            | TRUE  | FALSE |
| 1  | 222791428 - 222856105 |            | TRUE  | FALSE |
| 1  | 222791428 - 222856105 | F - 36.84% | TRUE  | TRUE  |
| 1  | 33065773 - 33116504   |            | TRUE  | TRUE  |
| 1  | 33065773 - 33116504   | F - 5.00%  | TRUE  | TRUE  |
| 1  | 155165379 - 155178969 | F - 23.81% | TRUE  | TRUE  |
| 1  | 155165379 - 155178969 |            | TRUE  | TRUE  |
| 1  | 155165379 - 155178969 | T - 61.90% | TRUE  | TRUE  |
| 1  | 155165379 - 155178969 |            | TRUE  | TRUE  |
| 1  | 155165379 - 155178969 |            | TRUE  | TRUE  |
| 1  | 155165379 - 155178969 | F - 4.76%  | TRUE  | TRUE  |
| 1  | 155165379 - 155178969 |            | TRUE  | TRUE  |
| 1  | 155165379 - 155178969 | F - 14.29% | FALSE | TRUE  |
| 1  | 155165379 - 155178969 |            | FALSE | TRUE  |
| 1  | 155165379 - 155178969 |            | FALSE | TRUE  |
| 2  | 138721590 - 138773934 |            | TRUE  | TRUE  |



|   |                       |            |       |       |
|---|-----------------------|------------|-------|-------|
| 2 | 138721590 - 138773934 |            | TRUE  | TRUE  |
| 2 | 138721590 - 138773934 | F - 41.67% | TRUE  | TRUE  |
| 2 | 138721590 - 138773934 |            | TRUE  | FALSE |
| 2 | 138721590 - 138773934 | F - 8.33%  | TRUE  | TRUE  |
| 2 | 138721590 - 138773934 |            | TRUE  | TRUE  |
| 2 | 138721590 - 138773934 | F - 8.33%  | TRUE  | TRUE  |
| 2 | 138721590 - 138773934 |            | TRUE  | TRUE  |
| 2 | 138721590 - 138773934 | F - 25.00% | TRUE  | TRUE  |
| 2 | 138721590 - 138773934 | F - 25.00% | TRUE  | TRUE  |
| 2 | 138721590 - 138773934 |            | FALSE | TRUE  |
| 2 | 138721590 - 138773934 |            | FALSE | TRUE  |
| 2 | 138721590 - 138773934 |            | TRUE  | TRUE  |
| 2 | 138721590 - 138773934 |            | TRUE  | TRUE  |
| 2 | 138721590 - 138773934 | F - 8.33%  | TRUE  | TRUE  |
| 2 | 138721590 - 138773934 | F - 8.33%  | TRUE  | TRUE  |
| 2 | 138721590 - 138773934 | F - 41.67% | TRUE  | TRUE  |
| 2 | 55399687 - 55459699   |            | TRUE  | FALSE |
| 2 | 55399687 - 55459699   |            | TRUE  | FALSE |
| 2 | 55399687 - 55459699   | F - 42.11% | TRUE  | TRUE  |
| 2 | 55399687 - 55459699   |            | TRUE  | TRUE  |
| 2 | 55399687 - 55459699   | T - 68.42% | TRUE  | TRUE  |
| 2 | 55399687 - 55459699   | T - 57.89% | TRUE  | TRUE  |
| 2 | 220238180 - 220586393 |            | TRUE  | TRUE  |
| 2 | 220238180 - 220586393 |            | TRUE  | TRUE  |
| 2 | 220238180 - 220586393 |            | TRUE  | TRUE  |
| 2 | 220238180 - 220586393 | F - 7.14%  | TRUE  | TRUE  |
| 5 | 125695788 - 125832186 |            | TRUE  | FALSE |
| 5 | 125695788 - 125832186 |            | TRUE  | TRUE  |
| 5 | 125695788 - 125832186 | F - 3.57%  | TRUE  | FALSE |
| 5 | 125695788 - 125832186 | F - 7.14%  | TRUE  | TRUE  |
| 5 | 125695788 - 125832186 | F - 14.29% | TRUE  | TRUE  |
| 5 | 125695788 - 125832186 |            | TRUE  | TRUE  |
| 5 | 125695788 - 125832186 |            | TRUE  | TRUE  |
| 5 | 125695788 - 125832186 |            | FALSE | TRUE  |
| 5 | 125695788 - 125832186 | F - 7.14%  | TRUE  | TRUE  |
| 5 | 125695788 - 125832186 | F - 7.14%  | FALSE | TRUE  |
| 5 | 125695788 - 125832186 | F - 3.57%  | TRUE  | TRUE  |
| 5 | 125695788 - 125832186 | F - 3.57%  | TRUE  | TRUE  |
| 5 | 125695788 - 125832186 | F - 3.57%  | TRUE  | TRUE  |
| 5 | 125695788 - 125832186 |            | FALSE | TRUE  |
| 5 | 125695788 - 125832186 |            | FALSE | TRUE  |
| 5 | 148786252 - 148812399 | F - 23.53% | TRUE  | TRUE  |
| 5 | 148786252 - 148812399 | T - 76.47% | TRUE  | TRUE  |
| 5 | 148786252 - 148812399 | F - 17.65% | TRUE  | TRUE  |
| 5 | 148786252 - 148812399 | F - 23.53% | TRUE  | TRUE  |
| 5 | 148786252 - 148812399 |            | TRUE  | TRUE  |
| 5 | 148786252 - 148812399 | T - 82.35% | TRUE  | TRUE  |
| 5 | 148786252 - 148812399 | T - 64.71% | TRUE  | TRUE  |
| 5 | 148786252 - 148812399 | F - 35.29% | TRUE  | TRUE  |
| 5 | 148786252 - 148812399 | F - 5.88%  | TRUE  | TRUE  |
| 5 | 148786252 - 148812399 |            | TRUE  | TRUE  |
| 5 | 148786252 - 148812399 |            | TRUE  | TRUE  |
| 5 | 148786252 - 148812399 |            | TRUE  | TRUE  |
| 5 | 148786252 - 148812399 | F - 23.53% | TRUE  | TRUE  |
| 5 | 148786252 - 148812399 |            | TRUE  | TRUE  |
| 5 | 148786252 - 148812399 |            | TRUE  | TRUE  |
| 5 | 148786252 - 148812399 | F - 23.53% | FALSE | TRUE  |
| 5 | 148786252 - 148812399 |            | FALSE | TRUE  |

|    |                       |            |       |       |
|----|-----------------------|------------|-------|-------|
| 5  | 148786252 - 148812399 |            | FALSE | TRUE  |
| 6  | 56322785 - 56819426   | F - 5.77%  | TRUE  | TRUE  |
| 6  | 56322785 - 56819426   | F - 7.69%  | TRUE  | TRUE  |
| 6  | 56322785 - 56819426   |            | FALSE | TRUE  |
| 6  | 56322785 - 56819426   |            | TRUE  | TRUE  |
| 6  | 56322785 - 56819426   |            | FALSE | TRUE  |
| 6  | 56322785 - 56819426   | F - 3.85%  | TRUE  | TRUE  |
| 6  | 56322785 - 56819426   |            | FALSE | TRUE  |
| 9  | 98205262 - 98279339   |            | TRUE  | TRUE  |
| 9  | 98205262 - 98279339   | F - 3.23%  | TRUE  | TRUE  |
| 9  | 98205262 - 98279339   | F - 9.68%  | TRUE  | TRUE  |
| 9  | 98205262 - 98279339   | F - 3.23%  | TRUE  | TRUE  |
| 9  | 98205262 - 98279339   |            | TRUE  | TRUE  |
| 9  | 98205262 - 98279339   | T - 70.97% | TRUE  | TRUE  |
| 9  | 98205262 - 98279339   |            | FALSE | TRUE  |
| X  | 106956451 - 107020572 |            | TRUE  | FALSE |
| X  | 106956451 - 107020572 | T - 62.50% | TRUE  | TRUE  |
| X  | 106956451 - 107020572 | F - 8.33%  | TRUE  | FALSE |
| X  | 106956451 - 107020572 | F - 4.17%  | TRUE  | TRUE  |
| X  | 106956451 - 107020572 |            | TRUE  | TRUE  |
| X  | 106956451 - 107020572 | F - 4.17%  | TRUE  | TRUE  |
| X  | 106956451 - 107020572 | F - 8.33%  | TRUE  | TRUE  |
| X  | 106956451 - 107020572 | F - 12.50% | TRUE  | TRUE  |
| X  | 106956451 - 107020572 | F - 4.17%  | TRUE  | TRUE  |
| X  | 106956451 - 107020572 | F - 8.33%  | TRUE  | TRUE  |
| X  | 106956451 - 107020572 | F - 4.17%  | TRUE  | TRUE  |
| X  | 106956451 - 107020572 |            | TRUE  | TRUE  |
| X  | 106956451 - 107020572 | F - 4.17%  | TRUE  | TRUE  |
| X  | 106956451 - 107020572 | F - 8.33%  | TRUE  | TRUE  |
| X  | 106956451 - 107020572 | F - 12.50% | TRUE  | TRUE  |
| X  | 106956451 - 107020572 | F - 16.67% | TRUE  | TRUE  |
| X  | 106956451 - 107020572 | T - 62.50% | TRUE  | TRUE  |
| X  | 106956451 - 107020572 |            | FALSE | TRUE  |
| X  | 151121596 - 151143152 |            | TRUE  | TRUE  |
| X  | 151121596 - 151143152 |            | TRUE  | TRUE  |
| X  | 151121596 - 151143152 | F - 4.35%  | TRUE  | TRUE  |
| X  | 151121596 - 151143152 | F - 21.74% | TRUE  | TRUE  |
| X  | 153194695 - 153200676 |            | TRUE  | FALSE |
| X  | 153194695 - 153200676 |            | TRUE  | TRUE  |
| X  | 153194695 - 153200676 | F - 4.35%  | TRUE  | TRUE  |
| 11 | 64844924 - 64851623   |            | TRUE  | FALSE |
| 11 | 64844924 - 64851623   | F - 16.67% | TRUE  | FALSE |
| 12 | 48733791 - 48745029   | F - 25.00% | TRUE  | TRUE  |
| 12 | 48733791 - 48745029   |            | TRUE  | TRUE  |
| 12 | 89813495 - 89920039   | F - 9.09%  | TRUE  | TRUE  |
| 12 | 89813495 - 89920039   |            | TRUE  | FALSE |
| 12 | 89813495 - 89920039   | F - 27.27% | TRUE  | TRUE  |
| 14 | 92980118 - 93155339   |            | TRUE  | FALSE |
| 14 | 92980118 - 93155339   |            | TRUE  | TRUE  |
| 14 | 92980118 - 93155339   | T - 90.00% | TRUE  | TRUE  |
| 14 | 92980118 - 93155339   |            | FALSE | TRUE  |
| 14 | 92980118 - 93155339   |            | FALSE | TRUE  |
| 14 | 92980118 - 93155339   |            | TRUE  | TRUE  |
| 17 | 19140690 - 19240028   | F - 5.00%  | TRUE  | TRUE  |
| 17 | 19140690 - 19240028   | F - 20.00% | TRUE  | TRUE  |

|    |                       |             |       |       |
|----|-----------------------|-------------|-------|-------|
| 17 | 19140690 - 19240028   |             | FALSE | TRUE  |
| 17 | 28903483 - 28992716   |             | TRUE  | TRUE  |
| 17 | 28903483 - 28992716   | F - 22.22%  | TRUE  | TRUE  |
| 17 | 28903483 - 28992716   |             | TRUE  | TRUE  |
| 19 | 35629728 - 35634013   | F - 25.00%  | FALSE | TRUE  |
| 19 | 35629728 - 35634013   | F - 25.00%  | TRUE  | TRUE  |
| 19 | 35629728 - 35634013   |             | TRUE  | TRUE  |
| 19 | 35629728 - 35634013   | T - 100.00% | TRUE  | TRUE  |
| 19 | 35629728 - 35634013   | T - 50.00%  | TRUE  | TRUE  |
| 19 | 35629728 - 35634013   |             | FALSE | TRUE  |
| 20 | 47835832 - 47860614   | T - 50.00%  | TRUE  | TRUE  |
| 20 | 47835832 - 47860614   |             | TRUE  | TRUE  |
| 20 | 5917881 - 5931182     |             | TRUE  | TRUE  |
| 20 | 5917881 - 5931182     | F - 20.00%  | FALSE | TRUE  |
| 17 | 15635570 - 15649479   |             | TRUE  | TRUE  |
| 17 | 15635570 - 15649479   |             | TRUE  | TRUE  |
| 17 | 15635570 - 15649479   | T - 62.50%  | TRUE  | TRUE  |
| 1  | 244617679 - 244804479 |             | TRUE  | TRUE  |
| 1  | 244617679 - 244804479 | T - 62.50%  | TRUE  | TRUE  |
| 1  | 244617679 - 244804479 |             | FALSE | TRUE  |
| 1  | 8064464 - 8086393     |             | TRUE  | TRUE  |
| 1  | 8064464 - 8086393     | T - 75.00%  | TRUE  | TRUE  |
| 1  | 8064464 - 8086393     | F - 12.50%  | TRUE  | TRUE  |
| 1  | 8064464 - 8086393     | F - 25.00%  | TRUE  | TRUE  |
| 3  | 12837971 - 12913415   |             | TRUE  | TRUE  |
| 3  | 12837971 - 12913415   |             | TRUE  | TRUE  |
| 3  | 12837971 - 12913415   | F - 12.50%  | FALSE | TRUE  |
| 3  | 12837971 - 12913415   |             | TRUE  | TRUE  |
| 3  | 13573824 - 13679922   |             | TRUE  | TRUE  |
| 3  | 13573824 - 13679922   | T - 53.85%  | FALSE | TRUE  |
| 3  | 13573824 - 13679922   |             | TRUE  | TRUE  |
| 3  | 13573824 - 13679922   |             | FALSE | TRUE  |
| 3  | 13573824 - 13679922   |             | TRUE  | TRUE  |
| 3  | 13573824 - 13679922   |             | TRUE  | TRUE  |
| 3  | 13573824 - 13679922   |             | TRUE  | TRUE  |
| 3  | 13573824 - 13679922   |             | TRUE  | TRUE  |
| 3  | 13573824 - 13679922   |             | TRUE  | TRUE  |
| 3  | 13573824 - 13679922   |             | TRUE  | TRUE  |
| 3  | 183353356 - 183402304 | F - 5.26%   | TRUE  | TRUE  |
| 3  | 183353356 - 183402304 |             | FALSE | TRUE  |
| 3  | 183353356 - 183402304 |             | TRUE  | TRUE  |
| 5  | 43376747 - 43412493   |             | TRUE  | TRUE  |
| 5  | 43376747 - 43412493   | T - 66.67%  | TRUE  | TRUE  |
| 5  | 137273642 - 137387650 |             | TRUE  | TRUE  |
| 5  | 137273642 - 137387650 |             | TRUE  | TRUE  |
| 5  | 137273642 - 137387650 | F - 6.67%   | TRUE  | TRUE  |
| 5  | 137273642 - 137387650 |             | TRUE  | TRUE  |
| 5  | 137273642 - 137387650 |             | FALSE | TRUE  |
| 5  | 137273642 - 137387650 |             | FALSE | TRUE  |
| 5  | 138855113 - 138862520 |             | TRUE  | TRUE  |
| 5  | 138855113 - 138862520 | F - 5.56%   | TRUE  | TRUE  |
| 7  | 24612887 - 24729159   |             | TRUE  | FALSE |
| 7  | 24612887 - 24729159   |             | TRUE  | TRUE  |
| 7  | 24612887 - 24729159   | F - 8.33%   | TRUE  | TRUE  |
| 7  | 24612887 - 24729159   | T - 83.33%  | FALSE | TRUE  |
| 8  | 124025458 - 124054663 |             | TRUE  | FALSE |
| 8  | 124025458 - 124054663 | F - 9.09%   | FALSE | TRUE  |
| 8  | 124025458 - 124054663 |             | FALSE | TRUE  |
| 9  | 86237872 - 86259045   | T - 77.78%  | TRUE  | TRUE  |
| 9  | 86237872 - 86259045   |             | TRUE  | TRUE  |

|    |                       |            |       |       |
|----|-----------------------|------------|-------|-------|
| 12 | 54409681 - 54449814   |            | TRUE  | TRUE  |
| 12 | 54409681 - 54449814   | T - 57.14% | TRUE  | TRUE  |
| 12 | 54409681 - 54449814   |            | TRUE  | TRUE  |
| 12 | 54409681 - 54449814   |            | FALSE | TRUE  |
| 14 | 102690837 - 102771537 |            | TRUE  | FALSE |
| 14 | 102690837 - 102771537 |            | FALSE | TRUE  |
| 14 | 102690837 - 102771537 | F - 17.39% | TRUE  | TRUE  |
| 14 | 102690837 - 102771537 |            | FALSE | TRUE  |
| 14 | 102690837 - 102771537 |            | TRUE  | TRUE  |
| 14 | 102690837 - 102771537 | F - 4.35%  | FALSE | TRUE  |
| 14 | 102690837 - 102771537 |            | FALSE | TRUE  |
| 14 | 102690837 - 102771537 |            | FALSE | TRUE  |
| 14 | 102690837 - 102771537 | F - 36.96% | TRUE  | TRUE  |
| 14 | 102690837 - 102771537 |            | FALSE | TRUE  |
| 14 | 102690837 - 102771537 |            | FALSE | TRUE  |
| 14 | 102690837 - 102771537 |            | FALSE | TRUE  |
| 14 | 102690837 - 102771537 |            | TRUE  | TRUE  |
| 15 | 85777817 - 86292586   |            | TRUE  | TRUE  |
| 15 | 85777817 - 86292586   |            | TRUE  | TRUE  |
| 15 | 85777817 - 86292586   |            | TRUE  | TRUE  |
| 15 | 85777817 - 86292586   | T - 70.59% | TRUE  | TRUE  |
| 15 | 85777817 - 86292586   |            | TRUE  | TRUE  |
| 15 | 85777817 - 86292586   | F - 47.06% | TRUE  | TRUE  |
| 15 | 85777817 - 86292586   | F - 29.41% | TRUE  | TRUE  |
| 15 | 85777817 - 86292586   | F - 5.88%  | TRUE  | TRUE  |
| 15 | 85777817 - 86292586   | F - 5.88%  | TRUE  | TRUE  |
| 15 | 85777817 - 86292586   | F - 11.76% | TRUE  | TRUE  |
| 17 | 7788123 - 7816078     | F - 47.06% | TRUE  | TRUE  |
| 17 | 7788123 - 7816078     |            | TRUE  | TRUE  |
| 22 | 38879443 - 38903665   |            | TRUE  | TRUE  |
| 22 | 38879443 - 38903665   |            | TRUE  | FALSE |
| 22 | 38879443 - 38903665   | F - 5.56%  | TRUE  | TRUE  |
| 2  | 169690645 - 169769881 |            | TRUE  | FALSE |
| 2  | 169690645 - 169769881 |            | TRUE  | FALSE |
| 2  | 169690645 - 169769881 | F - 42.86% | TRUE  | TRUE  |
| 1  | 24742245 - 24799473   |            | TRUE  | FALSE |
| 1  | 24742245 - 24799473   |            | TRUE  | TRUE  |
| 1  | 24742245 - 24799473   | F - 15.38% | FALSE | TRUE  |
| 1  | 38158090 - 38175391   | F - 11.11% | TRUE  | TRUE  |
| 1  | 38158090 - 38175391   |            | FALSE | TRUE  |
| 1  | 204485507 - 204677661 |            | TRUE  | TRUE  |
| 1  | 204485507 - 204677661 |            | TRUE  | FALSE |
| 1  | 204485507 - 204677661 |            | TRUE  | TRUE  |
| 1  | 204485507 - 204677661 | F - 3.70%  | TRUE  | TRUE  |
| 1  | 204485507 - 204677661 |            | TRUE  | TRUE  |
| 2  | 30670092 - 30867091   |            | TRUE  | FALSE |
| 2  | 30670092 - 30867091   |            | TRUE  | FALSE |
| 2  | 30670092 - 30867091   | F - 20.00% | TRUE  | TRUE  |
| 2  | 88469814 - 88486156   |            | TRUE  | TRUE  |
| 2  | 88469814 - 88486156   |            | TRUE  | FALSE |
| 2  | 88469814 - 88486156   |            | TRUE  | TRUE  |
| 2  | 88469814 - 88486156   |            | FALSE | TRUE  |
| 2  | 88469814 - 88486156   | F - 5.00%  | TRUE  | TRUE  |
| 2  | 88469814 - 88486156   |            | TRUE  | TRUE  |
| 2  | 203637873 - 203736708 |            | TRUE  | TRUE  |
| 2  | 203637873 - 203736708 |            | FALSE | TRUE  |
| 2  | 203637873 - 203736708 | F - 22.22% | TRUE  | TRUE  |
| 2  | 203637873 - 203736708 | F - 11.11% | TRUE  | TRUE  |

|   |    |                       |            |       |       |
|---|----|-----------------------|------------|-------|-------|
|   | 2  | 203637873 - 203736708 | F - 25.93% | TRUE  | TRUE  |
|   | 2  | 203637873 - 203736708 |            | TRUE  | TRUE  |
|   | 2  | 203637873 - 203736708 |            | TRUE  | TRUE  |
|   | 4  | 86396267 - 86923823   | F - 38.89% | TRUE  | TRUE  |
|   | 4  | 86396267 - 86923823   |            | FALSE | TRUE  |
|   | 4  | 86396267 - 86923823   |            | TRUE  | TRUE  |
|   | 4  | 174089904 - 174245118 | F - 9.09%  | TRUE  | TRUE  |
|   | 4  | 174089904 - 174245118 | T - 63.64% | TRUE  | TRUE  |
|   | 4  | 174089904 - 174245118 |            | FALSE | TRUE  |
|   | 5  | 127419458 - 127525380 | F - 45.45% | TRUE  | TRUE  |
|   | 5  | 127419458 - 127525380 |            | TRUE  | TRUE  |
|   | 5  | 127419458 - 127525380 | F - 9.09%  | TRUE  | TRUE  |
|   | 5  | 127419458 - 127525380 |            | FALSE | TRUE  |
|   | 5  | 127419458 - 127525380 | F - 18.18% | FALSE | TRUE  |
|   | 5  | 127419458 - 127525380 | F - 9.09%  | FALSE | TRUE  |
|   | 5  | 127419458 - 127525380 |            | TRUE  | TRUE  |
|   | 5  | 127419458 - 127525380 |            | FALSE | TRUE  |
|   | 7  | 95401818 - 95739634   | T - 75.00% | TRUE  | TRUE  |
|   | 7  | 95401818 - 95739634   |            | TRUE  | TRUE  |
|   | 7  | 95401818 - 95739634   |            | TRUE  | TRUE  |
|   | 7  | 95401818 - 95739634   |            | FALSE | TRUE  |
|   | 7  | 95401818 - 95739634   |            | FALSE | TRUE  |
|   | 7  | 95401818 - 95739634   |            | FALSE | TRUE  |
|   | 7  | 95401818 - 95739634   | F - 5.00%  | TRUE  | TRUE  |
|   | 7  | 95401818 - 95739634   | F - 5.00%  | FALSE | TRUE  |
|   | 7  | 95401818 - 95739634   |            | TRUE  | TRUE  |
|   | 7  | 22157908 - 22396763   | F - 35.29% | TRUE  | FALSE |
|   | 7  | 22157908 - 22396763   | F - 41.18% | TRUE  | TRUE  |
|   | 7  | 22157908 - 22396763   |            | TRUE  | FALSE |
|   | 7  | 22157908 - 22396763   |            | FALSE | TRUE  |
|   | 7  | 22157908 - 22396763   | F - 17.65% | TRUE  | TRUE  |
|   | 7  | 22157908 - 22396763   | F - 23.53% | TRUE  | TRUE  |
|   | 7  | 22157908 - 22396763   | F - 23.53% | FALSE | TRUE  |
|   | 7  | 22157908 - 22396763   |            | TRUE  | TRUE  |
|   | 7  | 22157908 - 22396763   | F - 23.53% | TRUE  | TRUE  |
|   | 7  | 22157908 - 22396763   | F - 23.53% | TRUE  | TRUE  |
|   | 7  | 22157908 - 22396763   | F - 23.53% | TRUE  | TRUE  |
|   | 7  | 22157908 - 22396763   |            | FALSE | TRUE  |
|   | 7  | 22157908 - 22396763   |            | FALSE | TRUE  |
|   | 8  | 95499921 - 95565757   | F - 6.67%  | TRUE  | FALSE |
|   | 8  | 95499921 - 95565757   |            | TRUE  | TRUE  |
|   | 9  | 106856541 - 106903700 | F - 29.41% | TRUE  | TRUE  |
|   | 9  | 106856541 - 106903700 |            | TRUE  | TRUE  |
|   | 9  | 106856541 - 106903700 |            | FALSE | TRUE  |
|   | 9  | 106856541 - 106903700 | T - 88.24% | TRUE  | TRUE  |
|   | 9  | 106856541 - 106903700 | T - 70.59% | TRUE  | TRUE  |
|   | 9  | 106856541 - 106903700 |            | TRUE  | TRUE  |
|   | 9  | 106856541 - 106903700 |            | TRUE  | TRUE  |
| X |    | 100264334 - 100307105 |            | TRUE  | TRUE  |
| X |    | 100264334 - 100307105 |            | TRUE  | TRUE  |
| X |    | 100264334 - 100307105 | T - 94.74% | FALSE | TRUE  |
|   | 10 | 47658234 - 47701446   |            | TRUE  | FALSE |
|   | 10 | 47658234 - 47701446   | T - 57.14% | FALSE | TRUE  |
|   | 10 | 114206756 - 114578504 |            | TRUE  | TRUE  |
|   | 10 | 114206756 - 114578504 | F - 7.69%  | TRUE  | TRUE  |
|   | 10 | 114206756 - 114578504 |            | FALSE | TRUE  |
|   | 10 | 98124363 - 98273683   | T - 87.50% | TRUE  | TRUE  |
|   | 10 | 98124363 - 98273683   | T - 87.50% | TRUE  | TRUE  |

|    |                       |             |       |       |
|----|-----------------------|-------------|-------|-------|
| 10 | 98124363 - 98273683   |             | TRUE  | FALSE |
| 10 | 98124363 - 98273683   |             | TRUE  | TRUE  |
| 12 | 15304857 - 15308217   | T - 100.00% | TRUE  | TRUE  |
| 12 | 15304857 - 15308217   |             | TRUE  | TRUE  |
| 12 | 15260716 - 15374411   | T - 55.56%  | TRUE  | TRUE  |
| 12 | 15260716 - 15374411   |             | FALSE | TRUE  |
| 12 | 39687030 - 39837192   |             | TRUE  | FALSE |
| 12 | 39687030 - 39837192   |             | TRUE  | TRUE  |
| 12 | 39687030 - 39837192   |             | TRUE  | TRUE  |
| 12 | 39687030 - 39837192   | T - 88.24%  | FALSE | TRUE  |
| 12 | 39687030 - 39837192   |             | TRUE  | TRUE  |
| 12 | 39687030 - 39837192   |             | FALSE | TRUE  |
| 16 | 67022492 - 67043661   |             | TRUE  | FALSE |
| 16 | 67022492 - 67043661   |             | FALSE | TRUE  |
| 16 | 67022492 - 67043661   | F - 33.33%  | FALSE | TRUE  |
| 16 | 31094745 - 31100949   |             | TRUE  | FALSE |
| 16 | 31094745 - 31100949   | F - 40.00%  | FALSE | TRUE  |
| 16 | 31094745 - 31100949   | T - 100.00% | TRUE  | TRUE  |
| 17 | 40351186 - 40428725   | F - 10.00%  | TRUE  | TRUE  |
| 17 | 40351186 - 40428725   |             | TRUE  | TRUE  |
| 17 | 40351186 - 40428725   | F - 10.00%  | TRUE  | TRUE  |
| 17 | 40351186 - 40428725   | F - 20.00%  | TRUE  | TRUE  |
| 17 | 40351186 - 40428725   |             | TRUE  | TRUE  |
| 17 | 48187404 - 48207246   |             | TRUE  | TRUE  |
| 17 | 48187404 - 48207246   |             | TRUE  | TRUE  |
| 17 | 48187404 - 48207246   |             | TRUE  | TRUE  |
| 17 | 48187404 - 48207246   | F - 13.33%  | TRUE  | TRUE  |
| 17 | 48187404 - 48207246   |             | FALSE | TRUE  |
| 17 | 48187404 - 48207246   | F - 6.67%   | FALSE | TRUE  |
| 17 | 79910383 - 79919716   | T - 100.00% | TRUE  | TRUE  |
| 17 | 79910383 - 79919716   |             | TRUE  | TRUE  |
| 20 | 2854066 - 3019320     | F - 40.00%  | TRUE  | FALSE |
| 20 | 2854066 - 3019320     |             | TRUE  | TRUE  |
| 20 | 2854066 - 3019320     |             | TRUE  | TRUE  |
| 20 | 2854066 - 3019320     |             | TRUE  | TRUE  |
| 2  | 48010221 - 48034092   |             | TRUE  | TRUE  |
| 2  | 48010221 - 48034092   | T - 66.67%  | TRUE  | TRUE  |
| 3  | 130397778 - 130465696 |             | TRUE  | TRUE  |
| 3  | 130397778 - 130465696 |             | TRUE  | TRUE  |
| 3  | 130397778 - 130465696 | F - 45.45%  | TRUE  | TRUE  |
| 3  | 130397778 - 130465696 |             | TRUE  | TRUE  |
| 4  | 1873123 - 1983934     | F - 2.27%   | TRUE  | TRUE  |
| 4  | 1873123 - 1983934     |             | TRUE  | TRUE  |
| 4  | 1873123 - 1983934     |             | TRUE  | TRUE  |
| 4  | 1873123 - 1983934     | F - 4.55%   | TRUE  | TRUE  |
| 4  | 1873123 - 1983934     |             | TRUE  | TRUE  |
| 4  | 1873123 - 1983934     |             | TRUE  | TRUE  |
| 4  | 1873123 - 1983934     |             | TRUE  | TRUE  |
| 4  | 1873123 - 1983934     |             | TRUE  | TRUE  |
| 4  | 1873123 - 1983934     |             | TRUE  | TRUE  |
| 4  | 1873123 - 1983934     |             | FALSE | TRUE  |
| 4  | 1873123 - 1983934     |             | FALSE | TRUE  |
| 4  | 1873123 - 1983934     |             | TRUE  | TRUE  |
| 5  | 133706870 - 133727799 |             | TRUE  | FALSE |
| 5  | 133706870 - 133727799 | F - 25.00%  | TRUE  | TRUE  |
| 5  | 74664311 - 74807963   |             | TRUE  | FALSE |
| 5  | 74664311 - 74807963   |             | TRUE  | TRUE  |
| 5  | 74664311 - 74807963   | F - 45.45%  | TRUE  | TRUE  |
| 7  | 536895 - 559933       |             | TRUE  | FALSE |

|    |                       |             |       |       |
|----|-----------------------|-------------|-------|-------|
| 7  | 536895 - 559933       | F - 22.22%  | TRUE  | TRUE  |
| 7  | 536895 - 559933       | F - 44.44%  | TRUE  | TRUE  |
| 7  | 536895 - 559933       | F - 11.11%  | TRUE  | TRUE  |
| 7  | 536895 - 559933       | F - 22.22%  | TRUE  | TRUE  |
| 7  | 536895 - 559933       | F - 11.11%  | TRUE  | TRUE  |
| 7  | 536895 - 559933       | T - 55.56%  | TRUE  | TRUE  |
| 10 | 12171636 - 12211960   |             | TRUE  | TRUE  |
| 10 | 12171636 - 12211960   |             | TRUE  | TRUE  |
| 10 | 12171636 - 12211960   |             | TRUE  | TRUE  |
| 10 | 12171636 - 12211960   | T - 75.00%  | TRUE  | TRUE  |
| 10 | 28339922 - 28591995   |             | TRUE  | TRUE  |
| 10 | 28339922 - 28591995   |             | FALSE | TRUE  |
| 10 | 28339922 - 28591995   | T - 87.50%  | TRUE  | TRUE  |
| 10 | 93808397 - 94050875   |             | TRUE  | FALSE |
| 10 | 93808397 - 94050875   | F - 25.00%  | TRUE  | FALSE |
| 10 | 93808397 - 94050875   |             | TRUE  | FALSE |
| 10 | 93808397 - 94050875   |             | FALSE | TRUE  |
| 10 | 93808397 - 94050875   |             | FALSE | TRUE  |
| 10 | 96796529 - 96829254   |             | TRUE  | FALSE |
| 10 | 96796529 - 96829254   | T - 92.86%  | TRUE  | TRUE  |
| 10 | 96796529 - 96829254   | T - 100.00% | FALSE | TRUE  |
| 10 | 96796529 - 96829254   |             | FALSE | TRUE  |
| 11 | 46638826 - 46697568   |             | TRUE  | FALSE |
| 11 | 46638826 - 46697568   | F - 10.00%  | TRUE  | FALSE |
| 11 | 46638826 - 46697568   |             | TRUE  | TRUE  |
| 11 | 102391239 - 102401484 |             | TRUE  | TRUE  |
| 11 | 102391239 - 102401484 |             | TRUE  | TRUE  |
| 11 | 102391239 - 102401484 | T - 100.00% | TRUE  | TRUE  |
| 11 | 102391239 - 102401484 | F - 16.67%  | TRUE  | FALSE |
| 11 | 102391239 - 102401484 | F - 16.67%  | TRUE  | FALSE |
| 13 | 79188421 - 79234700   |             | TRUE  | TRUE  |
| 13 | 79188421 - 79234700   | T - 75.00%  | TRUE  | TRUE  |
| 13 | 79188421 - 79234700   |             | TRUE  | TRUE  |
| 15 | 52043758 - 52108565   |             | TRUE  | TRUE  |
| 15 | 52043758 - 52108565   | T - 100.00% | TRUE  | TRUE  |
| 15 | 84867600 - 84898920   | T - 54.55%  | TRUE  | FALSE |
| 15 | 84867600 - 84898920   | F - 45.45%  | TRUE  | TRUE  |
| 15 | 84867600 - 84898920   | T - 54.55%  | TRUE  | TRUE  |
| 15 | 84867600 - 84898920   |             | FALSE | TRUE  |
| 15 | 84867600 - 84898920   |             | FALSE | TRUE  |
| 16 | 57406375 - 57418960   | F - 33.33%  | TRUE  | TRUE  |
| 16 | 57406375 - 57418960   |             | TRUE  | TRUE  |
| 16 | 71762903 - 71842979   |             | TRUE  | FALSE |
| 16 | 71762903 - 71842979   | F - 12.50%  | TRUE  | TRUE  |
| 17 | 77020251 - 77045870   | F - 10.00%  | TRUE  | TRUE  |
| 17 | 77020251 - 77045870   | F - 20.00%  | TRUE  | TRUE  |
| 17 | 77020251 - 77045870   |             | TRUE  | TRUE  |
| 17 | 77020251 - 77045870   |             | TRUE  | TRUE  |
| 18 | 47349156 - 47721451   |             | TRUE  | TRUE  |
| 18 | 47349156 - 47721451   | F - 42.86%  | TRUE  | TRUE  |
| 18 | 47349156 - 47721451   |             | FALSE | TRUE  |
| 18 | 47349156 - 47721451   | F - 42.86%  | TRUE  | TRUE  |
| 18 | 47349156 - 47721451   |             | TRUE  | TRUE  |
| 18 | 47349156 - 47721451   |             | TRUE  | TRUE  |
| 18 | 47349156 - 47721451   |             | TRUE  | TRUE  |
| 18 | 47349156 - 47721451   |             | TRUE  | TRUE  |
| 18 | 47349156 - 47721451   |             | FALSE | TRUE  |
| 1  | 113215763 - 113243368 | T - 57.14%  | TRUE  | TRUE  |
| 1  | 113215763 - 113243368 | F - 3.57%   | TRUE  | FALSE |

|    |                       |            |       |       |
|----|-----------------------|------------|-------|-------|
| 1  | 113215763 - 113243368 | F - 3.57%  | TRUE  | FALSE |
| 1  | 113215763 - 113243368 |            | TRUE  | TRUE  |
| 1  | 113215763 - 113243368 | F - 10.71% | TRUE  | TRUE  |
| 1  | 113215763 - 113243368 |            | TRUE  | TRUE  |
| 1  | 113215763 - 113243368 |            | TRUE  | TRUE  |
| 1  | 113215763 - 113243368 | T - 60.71% | TRUE  | TRUE  |
| 1  | 113215763 - 113243368 |            | FALSE | TRUE  |
| 1  | 28905050 - 28909495   |            | TRUE  | TRUE  |
| 1  | 28905050 - 28909495   | F - 4.76%  | TRUE  | TRUE  |
| 1  | 28905050 - 28909495   | T - 71.43% | TRUE  | TRUE  |
| 1  | 28905050 - 28909495   |            | FALSE | TRUE  |
| 1  | 28905050 - 28909495   |            | FALSE | TRUE  |
| 1  | 47023079 - 47069966   |            | TRUE  | TRUE  |
| 1  | 47023079 - 47069966   | F - 3.33%  | TRUE  | FALSE |
| 1  | 47023079 - 47069966   |            | TRUE  | FALSE |
| 1  | 47023079 - 47069966   | F - 3.33%  | TRUE  | TRUE  |
| 1  | 47023079 - 47069966   |            | TRUE  | TRUE  |
| 2  | 27587219 - 27593353   | F - 10.53% | TRUE  | TRUE  |
| 2  | 27587219 - 27593353   | F - 10.53% | TRUE  | TRUE  |
| 2  | 27587219 - 27593353   |            | TRUE  | TRUE  |
| 2  | 27587219 - 27593353   | F - 21.05% | TRUE  | TRUE  |
| 4  | 1795034 - 1810599     |            | TRUE  | TRUE  |
| 4  | 1795034 - 1810599     | T - 64.29% | TRUE  | FALSE |
| 6  | 41902671 - 42018095   |            | TRUE  | TRUE  |
| 6  | 41902671 - 42018095   | T - 55.17% | TRUE  | TRUE  |
| 6  | 41902671 - 42018095   | F - 6.90%  | FALSE | TRUE  |
| 6  | 41902671 - 42018095   | F - 17.24% | TRUE  | TRUE  |
| 6  | 41902671 - 42018095   |            | FALSE | TRUE  |
| 6  | 41902671 - 42018095   | F - 3.45%  | FALSE | TRUE  |
| 7  | 54610018 - 54641810   |            | TRUE  | TRUE  |
| 7  | 54610018 - 54641810   |            | FALSE | TRUE  |
| 7  | 54610018 - 54641810   | F - 7.14%  | FALSE | TRUE  |
| 7  | 54610018 - 54641810   |            | FALSE | TRUE  |
| 8  | 22004338 - 22014597   |            | TRUE  | TRUE  |
| 8  | 22004338 - 22014597   |            | TRUE  | FALSE |
| 8  | 22004338 - 22014597   | T - 75.00% | TRUE  | TRUE  |
| 8  | 81880046 - 82024303   |            | FALSE | TRUE  |
| 8  | 81880046 - 82024303   | F - 28.57% | TRUE  | TRUE  |
| 9  | 123837141 - 123939888 | F - 4.35%  | TRUE  | FALSE |
| 9  | 123837141 - 123939888 |            | TRUE  | TRUE  |
| 9  | 123837141 - 123939888 |            | TRUE  | FALSE |
| 9  | 123837141 - 123939888 |            | TRUE  | TRUE  |
| 9  | 123837141 - 123939888 |            | TRUE  | FALSE |
| 9  | 123664671 - 123691451 |            | TRUE  | TRUE  |
| 9  | 123664671 - 123691451 | F - 40.00% | TRUE  | TRUE  |
| X  | 152710178 - 152760978 |            | TRUE  | TRUE  |
| X  | 152710178 - 152760978 | F - 5.56%  | TRUE  | TRUE  |
| X  | 152710178 - 152760978 | F - 2.78%  | TRUE  | TRUE  |
| X  | 152710178 - 152760978 | F - 8.33%  | TRUE  | TRUE  |
| X  | 152710178 - 152760978 |            | FALSE | TRUE  |
| X  | 152710178 - 152760978 | F - 2.78%  | FALSE | TRUE  |
| 10 | 89622870 - 89731687   |            | TRUE  | FALSE |
| 10 | 89622870 - 89731687   | T - 50.00% | TRUE  | TRUE  |
| 11 | 85955586 - 85989785   |            | TRUE  | TRUE  |
| 11 | 85955586 - 85989785   |            | TRUE  | TRUE  |
| 11 | 85955586 - 85989785   | T - 71.43% | TRUE  | TRUE  |
| 12 | 124808957 - 125052010 | F - 5.88%  | TRUE  | TRUE  |
| 12 | 124808957 - 125052010 |            | TRUE  | TRUE  |



|    |                       |            |       |       |
|----|-----------------------|------------|-------|-------|
| 12 | 124808957 - 125052010 |            | TRUE  | TRUE  |
| 13 | 31774073 - 31906413   |            | TRUE  | TRUE  |
| 13 | 31774073 - 31906413   | T - 66.67% | TRUE  | FALSE |
| 13 | 31774073 - 31906413   | F - 16.67% | FALSE | TRUE  |
| 14 | 55595762 - 55612148   |            | TRUE  | FALSE |
| 14 | 55595762 - 55612148   | F - 10.00% | FALSE | TRUE  |
| 14 | 55595762 - 55612148   |            | TRUE  | TRUE  |
| 14 | 51100354 - 51135056   | F - 33.33% | TRUE  | TRUE  |
| 14 | 51100354 - 51135056   |            | TRUE  | TRUE  |
| 14 | 51100354 - 51135056   |            | FALSE | TRUE  |
| 14 | 51100354 - 51135056   | T - 83.33% | TRUE  | TRUE  |
| 14 | 51100354 - 51135056   |            | FALSE | TRUE  |
| 14 | 51100354 - 51135056   | F - 16.67% | TRUE  | TRUE  |
| 15 | 81475093 - 81606399   |            | TRUE  | FALSE |
| 15 | 81475093 - 81606399   |            | TRUE  | TRUE  |
| 15 | 81475093 - 81606399   |            | TRUE  | TRUE  |
| 15 | 81475093 - 81606399   |            | TRUE  | TRUE  |
| 15 | 81475093 - 81606399   | F - 4.00%  | TRUE  | TRUE  |
| 15 | 81475093 - 81606399   | F - 16.00% | TRUE  | TRUE  |
| 15 | 81475093 - 81606399   |            | TRUE  | TRUE  |
| 15 | 81475093 - 81606399   |            | FALSE | TRUE  |
| 15 | 81475093 - 81606399   |            | FALSE | TRUE  |
| 16 | 15737124 - 15820210   |            | TRUE  | TRUE  |
| 16 | 15737124 - 15820210   | F - 41.67% | FALSE | TRUE  |
| 16 | 15737124 - 15820210   | F - 8.33%  | FALSE | TRUE  |
| 3  | 142984064 - 143567373 |            | TRUE  | TRUE  |
| 3  | 142984064 - 143567373 | F - 25.00% | TRUE  | TRUE  |
| 8  | 17104080 - 17159936   |            | TRUE  | FALSE |
| 8  | 17104080 - 17159936   | F - 6.25%  | TRUE  | TRUE  |
| 8  | 17104080 - 17159936   |            | TRUE  | TRUE  |
| 1  | 179334855 - 179523870 |            | TRUE  | TRUE  |
| 1  | 179334855 - 179523870 |            | TRUE  | FALSE |
| 1  | 179334855 - 179523870 | T - 61.90% | TRUE  | TRUE  |
| 1  | 179334855 - 179523870 |            | FALSE | TRUE  |
| 1  | 11708418 - 11715842   | F - 9.09%  | TRUE  | TRUE  |
| 1  | 11708418 - 11715842   | F - 27.27% | TRUE  | TRUE  |
| 1  | 11708418 - 11715842   | F - 27.27% | TRUE  | TRUE  |
| 1  | 11708418 - 11715842   | F - 18.18% | TRUE  | TRUE  |
| 1  | 11708418 - 11715842   |            | TRUE  | TRUE  |
| 1  | 11708418 - 11715842   | T - 81.82% | FALSE | TRUE  |
| 1  | 11708418 - 11715842   |            | TRUE  | TRUE  |
| 1  | 11708418 - 11715842   | T - 54.55% | TRUE  | TRUE  |
| 1  | 11708418 - 11715842   | F - 45.45% | TRUE  | TRUE  |
| 1  | 11708418 - 11715842   |            | FALSE | TRUE  |
| 1  | 11708418 - 11715842   |            | FALSE | TRUE  |
| 1  | 11708418 - 11715842   |            | FALSE | TRUE  |
| 1  | 196194909 - 196577541 |            | TRUE  | TRUE  |
| 1  | 196194909 - 196577541 |            | TRUE  | FALSE |
| 1  | 196194909 - 196577541 |            | TRUE  | TRUE  |
| 1  | 196194909 - 196577541 | T - 94.12% | TRUE  | TRUE  |
| 1  | 196194909 - 196577541 |            | TRUE  | TRUE  |
| 1  | 196194909 - 196577541 |            | TRUE  | TRUE  |
| 1  | 196194909 - 196577541 |            | FALSE | TRUE  |
| 1  | 196194909 - 196577541 | F - 11.76% | TRUE  | TRUE  |
| 1  | 196194909 - 196577541 |            | FALSE | TRUE  |
| 1  | 196194909 - 196577541 |            | FALSE | TRUE  |
| 1  | 196194909 - 196577541 |            | FALSE | TRUE  |
| 1  | 143347958 - 143379903 | F - 22.22% | TRUE  | TRUE  |

|   |    |                       |             |       |       |
|---|----|-----------------------|-------------|-------|-------|
|   | 1  | 143347958 - 143379903 |             | TRUE  | FALSE |
|   | 1  | 143347958 - 143379903 |             | TRUE  | TRUE  |
|   | 1  | 143347958 - 143379903 |             | FALSE | TRUE  |
|   | 2  | 102123002 - 102511152 |             | TRUE  | TRUE  |
|   | 2  | 102123002 - 102511152 |             | FALSE | TRUE  |
|   | 2  | 102123002 - 102511152 | F - 2.86%   | FALSE | TRUE  |
|   | 6  | 31795512 - 31798032   |             | TRUE  | TRUE  |
|   | 6  | 31795512 - 31798032   | T - 70.00%  | TRUE  | TRUE  |
|   | 6  | 31795512 - 31798032   |             | TRUE  | TRUE  |
|   | 7  | 143947138 - 144053274 |             | TRUE  | TRUE  |
|   | 7  | 143947138 - 144053274 | F - 21.74%  | TRUE  | TRUE  |
|   | 7  | 143947138 - 144053274 | F - 17.39%  | TRUE  | TRUE  |
|   | 7  | 143947138 - 144053274 | F - 8.70%   | TRUE  | TRUE  |
|   | 7  | 143947138 - 144053274 | F - 13.04%  | TRUE  | TRUE  |
|   | 7  | 143947138 - 144053274 | F - 17.39%  | TRUE  | TRUE  |
|   | 7  | 143947138 - 144053274 | F - 4.35%   | TRUE  | TRUE  |
|   | 7  | 143947138 - 144053274 | F - 4.35%   | TRUE  | TRUE  |
|   | 7  | 143947138 - 144053274 | F - 4.35%   | TRUE  | TRUE  |
|   | 7  | 143947138 - 144053274 | F - 26.09%  | TRUE  | TRUE  |
|   | 7  | 143947138 - 144053274 | F - 4.35%   | TRUE  | TRUE  |
|   | 7  | 143947138 - 144053274 |             | TRUE  | TRUE  |
|   | 7  | 143947138 - 144053274 |             | TRUE  | TRUE  |
|   | 7  | 143947138 - 144053274 | F - 8.70%   | TRUE  | TRUE  |
|   | 7  | 143947138 - 144053274 |             | TRUE  | TRUE  |
|   | 7  | 143947138 - 144053274 | F - 4.35%   | TRUE  | TRUE  |
|   | 7  | 143947138 - 144053274 | F - 4.35%   | FALSE | TRUE  |
|   | 7  | 143947138 - 144053274 | F - 4.35%   | TRUE  | TRUE  |
|   | 7  | 143947138 - 144053274 |             | TRUE  | TRUE  |
|   | 7  | 143947138 - 144053274 |             | FALSE | TRUE  |
|   | 7  | 143947138 - 144053274 | F - 4.35%   | TRUE  | TRUE  |
|   | 7  | 143947138 - 144053274 | F - 17.39%  | TRUE  | TRUE  |
|   | 7  | 143947138 - 144053274 | F - 13.04%  | TRUE  | TRUE  |
|   | 7  | 143947138 - 144053274 | F - 4.35%   | TRUE  | TRUE  |
|   | 7  | 143947138 - 144053274 |             | FALSE | TRUE  |
|   | 7  | 143947138 - 144053274 | F - 4.35%   | TRUE  | TRUE  |
|   | 7  | 143947138 - 144053274 |             | FALSE | TRUE  |
|   | 7  | 143947138 - 144053274 |             | FALSE | TRUE  |
|   | 8  | 102190106 - 102218421 |             | TRUE  | TRUE  |
|   | 8  | 102190106 - 102218421 | F - 25.00%  | FALSE | TRUE  |
|   | 8  | 102190106 - 102218421 | F - 5.00%   | TRUE  | TRUE  |
|   | 8  | 102190106 - 102218421 | F - 5.00%   | TRUE  | TRUE  |
|   | 8  | 102190106 - 102218421 |             | FALSE | TRUE  |
| X |    | 11136239 - 11683821   |             | TRUE  | TRUE  |
| X |    | 11136239 - 11683821   | T - 93.75%  | TRUE  | TRUE  |
| X |    | 11136239 - 11683821   | F - 31.25%  | TRUE  | TRUE  |
| X |    | 11136239 - 11683821   |             | TRUE  | TRUE  |
|   | 10 | 11784356 - 11806069   | F - 12.50%  | TRUE  | TRUE  |
|   | 10 | 11784356 - 11806069   |             | TRUE  | TRUE  |
|   | 10 | 11784356 - 11806069   | F - 12.50%  | TRUE  | TRUE  |
|   | 10 | 11784356 - 11806069   | T - 75.00%  | TRUE  | TRUE  |
|   | 10 | 11784356 - 11806069   | T - 100.00% | TRUE  | TRUE  |
|   | 10 | 11784356 - 11806069   |             | FALSE | TRUE  |
|   | 10 | 29746267 - 30025864   |             | TRUE  | TRUE  |
|   | 10 | 29746267 - 30025864   |             | TRUE  | FALSE |
|   | 10 | 29746267 - 30025864   | F - 17.39%  | TRUE  | TRUE  |
|   | 10 | 29746267 - 30025864   |             | FALSE | TRUE  |
|   | 10 | 29746267 - 30025864   |             | TRUE  | TRUE  |
|   | 10 | 29746267 - 30025864   |             | FALSE | TRUE  |

|    |                       |             |       |       |
|----|-----------------------|-------------|-------|-------|
| 10 | 29746267 - 30025864   |             | TRUE  | TRUE  |
| 19 | 52800425 - 52829174   |             | TRUE  | TRUE  |
| 19 | 52800425 - 52829174   |             | TRUE  | FALSE |
| 19 | 52800425 - 52829174   | T - 90.00%  | FALSE | TRUE  |
| 19 | 14843205 - 14889353   |             | TRUE  | TRUE  |
| 19 | 14843205 - 14889353   |             | TRUE  | TRUE  |
| 19 | 14843205 - 14889353   |             | TRUE  | TRUE  |
| 19 | 14843205 - 14889353   | T - 87.50%  | TRUE  | TRUE  |
| 19 | 14843205 - 14889353   |             | TRUE  | TRUE  |
| 19 | 14843205 - 14889353   | T - 68.75%  | FALSE | TRUE  |
| 20 | 44462449 - 44471914   | F - 13.64%  | TRUE  | TRUE  |
| 20 | 44462449 - 44471914   |             | TRUE  | TRUE  |
| 20 | 44462449 - 44471914   | T - 50.00%  | TRUE  | TRUE  |
| 20 | 44462449 - 44471914   |             | FALSE | TRUE  |
| 20 | 44462449 - 44471914   |             | TRUE  | TRUE  |
| 1  | 32757687 - 32799236   | F - 11.76%  | TRUE  | TRUE  |
| 1  | 32757687 - 32799236   |             | TRUE  | TRUE  |
| 1  | 32757687 - 32799236   | F - 23.53%  | FALSE | TRUE  |
| 2  | 44113363 - 44223144   | F - 20.00%  | TRUE  | TRUE  |
| 2  | 44113363 - 44223144   |             | TRUE  | TRUE  |
| 2  | 44113363 - 44223144   | F - 6.67%   | TRUE  | TRUE  |
| 2  | 44113363 - 44223144   |             | TRUE  | TRUE  |
| 2  | 44113363 - 44223144   |             | TRUE  | TRUE  |
| 4  | 186320694 - 186347139 |             | TRUE  | TRUE  |
| 4  | 186320694 - 186347139 |             | TRUE  | TRUE  |
| 4  | 186320694 - 186347139 | T - 66.67%  | TRUE  | TRUE  |
| 4  | 186320694 - 186347139 |             | TRUE  | TRUE  |
| 5  | 67511548 - 67597649   | F - 20.00%  | TRUE  | TRUE  |
| 5  | 67511548 - 67597649   | F - 28.00%  | TRUE  | TRUE  |
| 5  | 67511548 - 67597649   |             | TRUE  | TRUE  |
| 5  | 67511548 - 67597649   | F - 20.00%  | TRUE  | TRUE  |
| 5  | 67511548 - 67597649   |             | TRUE  | TRUE  |
| 5  | 67511548 - 67597649   |             | TRUE  | TRUE  |
| 5  | 67511548 - 67597649   | F - 20.00%  | TRUE  | TRUE  |
| 5  | 67511548 - 67597649   | F - 28.00%  | TRUE  | TRUE  |
| 5  | 67511548 - 67597649   |             | FALSE | TRUE  |
| 5  | 67511548 - 67597649   |             | FALSE | TRUE  |
| 5  | 67511548 - 67597649   |             | TRUE  | TRUE  |
| 5  | 67511548 - 67597649   | F - 12.00%  | TRUE  | TRUE  |
| 9  | 32384601 - 32450834   |             | TRUE  | TRUE  |
| 9  | 32384601 - 32450834   |             | TRUE  | TRUE  |
| 9  | 32384601 - 32450834   | T - 100.00% | TRUE  | TRUE  |
| 9  | 32384601 - 32450834   |             | TRUE  | TRUE  |
| 9  | 32384601 - 32450834   | T - 100.00% | TRUE  | TRUE  |
| 10 | 58116989 - 58121036   | F - 20.00%  | TRUE  | FALSE |
| 10 | 58116989 - 58121036   |             | TRUE  | FALSE |
| 13 | 20532810 - 20665968   | F - 5.26%   | TRUE  | TRUE  |
| 13 | 20532810 - 20665968   | F - 5.26%   | TRUE  | TRUE  |
| 13 | 20532810 - 20665968   |             | TRUE  | TRUE  |
| 13 | 20532810 - 20665968   |             | FALSE | TRUE  |
| 15 | 71145578 - 71342436   |             | TRUE  | TRUE  |
| 15 | 71145578 - 71342436   | F - 11.11%  | TRUE  | TRUE  |
| 15 | 71145578 - 71342436   |             | TRUE  | TRUE  |
| 15 | 71145578 - 71342436   |             | FALSE | TRUE  |
| 15 | 71145578 - 71342436   |             | FALSE | TRUE  |
| 15 | 71145578 - 71342436   |             | TRUE  | TRUE  |
| 15 | 71145578 - 71342436   |             | TRUE  | TRUE  |
| 16 | 66503747 - 66584315   |             | TRUE  | FALSE |
| 16 | 66503747 - 66584315   |             | FALSE | TRUE  |

|    |                       |             |       |       |
|----|-----------------------|-------------|-------|-------|
| 16 | 66503747 - 66584315   | T - 92.86%  | TRUE  | TRUE  |
| 19 | 47759731 - 47775213   |             | TRUE  | TRUE  |
| 19 | 47759731 - 47775213   | T - 100.00% | TRUE  | TRUE  |
| 20 | 46130601 - 46285621   |             | TRUE  | TRUE  |
| 20 | 46130601 - 46285621   |             | TRUE  | TRUE  |
| 20 | 46130601 - 46285621   |             | FALSE | TRUE  |
| 20 | 46130601 - 46285621   |             | FALSE | TRUE  |
| 20 | 46130601 - 46285621   | F - 5.88%   | TRUE  | TRUE  |
| 22 | 30770930 - 30817760   |             | TRUE  | FALSE |
| 22 | 30770930 - 30817760   | T - 53.85%  | TRUE  | TRUE  |
| 22 | 30770930 - 30817760   |             | TRUE  | TRUE  |
| 22 | 30770930 - 30817760   |             | TRUE  | TRUE  |
| 18 | 12991361 - 13125051   |             | TRUE  | FALSE |
| 18 | 12991361 - 13125051   | T - 72.73%  | TRUE  | TRUE  |
| 18 | 12991361 - 13125051   |             | TRUE  | TRUE  |
| 1  | 115125469 - 115213043 | F - 9.09%   | TRUE  | TRUE  |
| 1  | 115125469 - 115213043 |             | FALSE | TRUE  |
| 1  | 115125469 - 115213043 | F - 18.18%  | TRUE  | TRUE  |
| 2  | 113914902 - 113960814 | T - 50.00%  | TRUE  | TRUE  |
| 2  | 113914902 - 113960814 | T - 50.00%  | TRUE  | TRUE  |
| 2  | 113914902 - 113960814 |             | TRUE  | FALSE |
| 3  | 6811688 - 7783218     |             | TRUE  | TRUE  |
| 3  | 6811688 - 7783218     |             | TRUE  | TRUE  |
| 3  | 6811688 - 7783218     | T - 81.48%  | FALSE | TRUE  |
| 4  | 128544426 - 128637934 |             | TRUE  | TRUE  |
| 4  | 128544426 - 128637934 |             | TRUE  | FALSE |
| 4  | 128544426 - 128637934 |             | TRUE  | TRUE  |
| 4  | 128544426 - 128637934 | T - 66.67%  | TRUE  | TRUE  |
| 4  | 128544426 - 128637934 | T - 50.00%  | TRUE  | TRUE  |
| 5  | 121647049 - 121799914 |             | TRUE  | FALSE |
| 5  | 121647049 - 121799914 | T - 89.74%  | TRUE  | TRUE  |
| 5  | 121647049 - 121799914 | T - 79.49%  | TRUE  | TRUE  |
| 5  | 121647049 - 121799914 |             | FALSE | TRUE  |
| 5  | 52391512 - 52405602   | T - 60.00%  | TRUE  | TRUE  |
| 5  | 52391512 - 52405602   |             | TRUE  | TRUE  |
| 5  | 137150022 - 137225025 |             | TRUE  | TRUE  |
| 5  | 137150022 - 137225025 | T - 50.00%  | TRUE  | TRUE  |
| 6  | 46620652 - 46649356   |             | TRUE  | TRUE  |
| 6  | 46620652 - 46649356   | T - 50.00%  | TRUE  | TRUE  |
| 6  | 46620652 - 46649356   | F - 25.00%  | TRUE  | TRUE  |
| 6  | 46620652 - 46649356   |             | TRUE  | TRUE  |
| 7  | 148799876 - 148823438 |             | TRUE  | TRUE  |
| 7  | 148799876 - 148823438 | F - 33.33%  | TRUE  | TRUE  |
| 7  | 148799876 - 148823438 | F - 33.33%  | TRUE  | TRUE  |
| 7  | 148799876 - 148823438 | F - 16.67%  | TRUE  | TRUE  |
| 7  | 148799876 - 148823438 | T - 66.67%  | TRUE  | TRUE  |
| 10 | 4621443 - 4720346     |             | TRUE  | FALSE |
| 10 | 4621443 - 4720346     | F - 20.00%  | TRUE  | FALSE |
| 10 | 4621443 - 4720346     | F - 20.00%  | TRUE  | TRUE  |
| 10 | 4621443 - 4720346     |             | TRUE  | TRUE  |
| 10 | 4621443 - 4720346     | T - 60.00%  | TRUE  | TRUE  |
| 10 | 4621443 - 4720346     |             | FALSE | TRUE  |
| 10 | 4621443 - 4720346     |             | TRUE  | TRUE  |
| 10 | 4621443 - 4720346     | F - 20.00%  | FALSE | TRUE  |
| 11 | 3696240 - 3819022     |             | TRUE  | TRUE  |
| 11 | 3696240 - 3819022     | F - 33.33%  | TRUE  | TRUE  |
| 11 | 3696240 - 3819022     |             | TRUE  | TRUE  |
| 11 | 3696240 - 3819022     |             | FALSE | TRUE  |

|    |                       |            |       |       |
|----|-----------------------|------------|-------|-------|
| 12 | 46576841 - 46663208   |            | TRUE  | TRUE  |
| 12 | 46576841 - 46663208   | F - 7.69%  | TRUE  | TRUE  |
| 14 | 59939335 - 59951148   |            | TRUE  | TRUE  |
| 14 | 59939335 - 59951148   | F - 10.00% | TRUE  | TRUE  |
| 14 | 59939335 - 59951148   |            | FALSE | TRUE  |
| 15 | 23435070 - 23448423   |            | TRUE  | TRUE  |
| 15 | 23435070 - 23448423   | F - 20.00% | TRUE  | TRUE  |
| 15 | 23435070 - 23448423   | T - 60.00% | TRUE  | TRUE  |
| 16 | 31191431 - 31206192   | T - 57.89% | TRUE  | TRUE  |
| 16 | 31191431 - 31206192   |            | TRUE  | FALSE |
| 21 | 32361860 - 32932290   |            | TRUE  | FALSE |
| 21 | 32361860 - 32932290   |            | TRUE  | TRUE  |
| 21 | 32361860 - 32932290   | T - 69.23% | TRUE  | TRUE  |
| 21 | 32361860 - 32932290   |            | TRUE  | TRUE  |
| 21 | 32361860 - 32932290   | T - 61.54% | TRUE  | TRUE  |
| 21 | 32361860 - 32932290   |            | TRUE  | TRUE  |
| 21 | 32361860 - 32932290   |            | FALSE | TRUE  |
| 21 | 32361860 - 32932290   |            | FALSE | TRUE  |
| 21 | 32361860 - 32932290   | F - 7.69%  | FALSE | TRUE  |
| 21 | 32361860 - 32932290   | F - 7.69%  | TRUE  | TRUE  |
| 21 | 32361860 - 32932290   |            | FALSE | TRUE  |
| 1  | 219347186 - 219386207 | F - 38.89% | TRUE  | TRUE  |
| 1  | 219347186 - 219386207 |            | TRUE  | TRUE  |
| 1  | 219347186 - 219386207 |            | FALSE | TRUE  |
| 1  | 219347186 - 219386207 |            | FALSE | TRUE  |
| 3  | 150264465 - 150303803 |            | TRUE  | TRUE  |
| 3  | 150264465 - 150303803 | T - 58.33% | TRUE  | TRUE  |
| 3  | 150264465 - 150303803 | F - 25.00% | TRUE  | TRUE  |
| 3  | 150264465 - 150303803 | T - 50.00% | TRUE  | TRUE  |
| 3  | 150264465 - 150303803 |            | TRUE  | TRUE  |
| 3  | 173114074 - 174004434 | F - 5.88%  | TRUE  | FALSE |
| 3  | 173114074 - 174004434 |            | FALSE | TRUE  |
| 4  | 135117489 - 135122903 | T - 50.00% | TRUE  | TRUE  |
| 4  | 135117489 - 135122903 |            | FALSE | TRUE  |
| 5  | 56205087 - 56221359   |            | TRUE  | FALSE |
| 5  | 56205087 - 56221359   | F - 23.08% | TRUE  | TRUE  |
| 5  | 56205087 - 56221359   |            | TRUE  | TRUE  |
| 5  | 56205087 - 56221359   |            | TRUE  | TRUE  |
| 5  | 56205087 - 56221359   | F - 23.08% | FALSE | TRUE  |
| 5  | 56205087 - 56221359   |            | FALSE | TRUE  |
| 5  | 139781399 - 139929163 | F - 2.22%  | TRUE  | FALSE |
| 5  | 139781399 - 139929163 |            | TRUE  | TRUE  |
| 5  | 139781399 - 139929163 |            | TRUE  | TRUE  |
| 5  | 74017029 - 74063196   |            | TRUE  | TRUE  |
| 5  | 74017029 - 74063196   | F - 5.00%  | TRUE  | FALSE |
| 5  | 74017029 - 74063196   | T - 55.00% | TRUE  | TRUE  |
| 5  | 33986283 - 34008220   |            | TRUE  | TRUE  |
| 5  | 33986283 - 34008220   | F - 26.67% | TRUE  | TRUE  |
| 5  | 33986283 - 34008220   | F - 33.33% | TRUE  | TRUE  |
| 5  | 33986283 - 34008220   |            | FALSE | TRUE  |
| 6  | 83777385 - 83881069   |            | TRUE  | TRUE  |
| 6  | 83777385 - 83881069   | T - 50.00% | TRUE  | TRUE  |
| 6  | 83777385 - 83881069   | T - 85.71% | TRUE  | TRUE  |
| 6  | 83777385 - 83881069   |            | FALSE | TRUE  |
| 6  | 83777385 - 83881069   |            | TRUE  | TRUE  |
| 6  | 83777385 - 83881069   |            | TRUE  | TRUE  |
| 6  | 83777385 - 83881069   |            | FALSE | TRUE  |
| 6  | 83777385 - 83881069   |            | TRUE  | TRUE  |

|    |                       |             |       |       |
|----|-----------------------|-------------|-------|-------|
| 6  | 83777385 - 83881069   | F - 28.57%  | TRUE  | TRUE  |
| 7  | 120988905 - 121036422 |             | TRUE  | TRUE  |
| 7  | 120988905 - 121036422 |             | TRUE  | TRUE  |
| 7  | 120988905 - 121036422 | F - 9.09%   | TRUE  | FALSE |
| 9  | 5357967 - 5630071     |             | TRUE  | TRUE  |
| 9  | 5357967 - 5630071     |             | TRUE  | TRUE  |
| 9  | 5357967 - 5630071     | F - 14.29%  | TRUE  | TRUE  |
| 9  | 5357967 - 5630071     |             | TRUE  | TRUE  |
| 9  | 5357967 - 5630071     |             | TRUE  | TRUE  |
| 9  | 99578754 - 99637905   | F - 10.00%  | TRUE  | TRUE  |
| 9  | 99578754 - 99637905   |             | TRUE  | TRUE  |
| 9  | 99578754 - 99637905   |             | FALSE | TRUE  |
| 11 | 45950870 - 46142985   |             | TRUE  | TRUE  |
| 11 | 45950870 - 46142985   | T - 50.00%  | TRUE  | TRUE  |
| 11 | 45950870 - 46142985   |             | TRUE  | TRUE  |
| 11 | 45950870 - 46142985   |             | FALSE | TRUE  |
| 11 | 67922330 - 67981295   | F - 40.91%  | TRUE  | TRUE  |
| 11 | 67922330 - 67981295   |             | TRUE  | TRUE  |
| 11 | 67922330 - 67981295   |             | TRUE  | TRUE  |
| 11 | 67922330 - 67981295   |             | TRUE  | TRUE  |
| 11 | 67922330 - 67981295   |             | TRUE  | TRUE  |
| 11 | 116618886 - 116643714 |             | TRUE  | FALSE |
| 11 | 116618886 - 116643714 | T - 71.43%  | FALSE | TRUE  |
| 12 | 57910371 - 57914300   |             | TRUE  | TRUE  |
| 12 | 57910371 - 57914300   |             | FALSE | TRUE  |
| 12 | 57910371 - 57914300   | T - 100.00% | TRUE  | TRUE  |
| 12 | 58191160 - 58210254   | T - 77.78%  | TRUE  | TRUE  |
| 12 | 58191160 - 58210254   | F - 44.44%  | TRUE  | TRUE  |
| 12 | 58191160 - 58210254   |             | TRUE  | FALSE |
| 12 | 58191160 - 58210254   | F - 44.44%  | TRUE  | TRUE  |
| 12 | 58191160 - 58210254   |             | TRUE  | TRUE  |
| 12 | 58191160 - 58210254   | T - 66.67%  | FALSE | TRUE  |
| 12 | 58191160 - 58210254   | T - 66.67%  | TRUE  | TRUE  |
| 12 | 58191160 - 58210254   | F - 11.11%  | TRUE  | TRUE  |
| 12 | 58191160 - 58210254   |             | FALSE | TRUE  |
| 12 | 58191160 - 58210254   | T - 66.67%  | TRUE  | TRUE  |
| 12 | 58191160 - 58210254   | F - 33.33%  | TRUE  | TRUE  |
| 12 | 58191160 - 58210254   | F - 22.22%  | FALSE | TRUE  |
| 12 | 58191160 - 58210254   | F - 22.22%  | TRUE  | TRUE  |
| 12 | 58191160 - 58210254   |             | TRUE  | TRUE  |
| 14 | 85996488 - 86095034   |             | TRUE  | TRUE  |
| 14 | 85996488 - 86095034   | F - 11.11%  | FALSE | TRUE  |
| 14 | 85996488 - 86095034   | F - 11.11%  | TRUE  | TRUE  |
| 15 | 30488239 - 30665668   |             | TRUE  | FALSE |
| 15 | 30488239 - 30665668   |             | TRUE  | TRUE  |
| 15 | 30488239 - 30665668   | F - 33.33%  | TRUE  | TRUE  |
| 15 | 30488239 - 30665668   | F - 33.33%  | TRUE  | FALSE |
| 15 | 30488239 - 30665668   | F - 33.33%  | TRUE  | TRUE  |
| 18 | 43563502 - 43652250   | T - 50.00%  | TRUE  | TRUE  |
| 18 | 43563502 - 43652250   | F - 12.50%  | TRUE  | TRUE  |
| 18 | 43563502 - 43652250   |             | TRUE  | TRUE  |
| 20 | 1874813 - 1920543     | T - 100.00% | TRUE  | TRUE  |
| 20 | 1874813 - 1920543     | F - 8.33%   | TRUE  | FALSE |
| 20 | 1874813 - 1920543     |             | FALSE | TRUE  |
| 20 | 1874813 - 1920543     |             | TRUE  | TRUE  |
| 20 | 61447596 - 61472511   | F - 37.50%  | TRUE  | TRUE  |
| 20 | 61447596 - 61472511   |             | TRUE  | TRUE  |
| 20 | 61447596 - 61472511   | F - 18.75%  | TRUE  | FALSE |

|    |                       |             |       |       |
|----|-----------------------|-------------|-------|-------|
| 20 | 61447596 - 61472511   |             | TRUE  | FALSE |
| 20 | 61447596 - 61472511   |             | TRUE  | TRUE  |
| 20 | 61447596 - 61472511   | F - 37.50%  | FALSE | TRUE  |
| 20 | 61447596 - 61472511   |             | FALSE | TRUE  |
| 20 | 61447596 - 61472511   |             | FALSE | TRUE  |
| 21 | 44299754 - 44329783   | F - 12.50%  | TRUE  | TRUE  |
| 21 | 44299754 - 44329783   |             | TRUE  | TRUE  |
| 2  | 197697728 - 197792520 | F - 44.44%  | TRUE  | TRUE  |
| 2  | 197697728 - 197792520 | T - 72.22%  | TRUE  | TRUE  |
| 2  | 197697728 - 197792520 | F - 38.89%  | TRUE  | TRUE  |
| 2  | 197697728 - 197792520 | F - 5.56%   | FALSE | TRUE  |
| 2  | 197697728 - 197792520 |             | TRUE  | TRUE  |
| 3  | 44956749 - 45017677   | F - 12.50%  | TRUE  | TRUE  |
| 3  | 44956749 - 45017677   |             | TRUE  | TRUE  |
| 5  | 141000443 - 141016437 |             | TRUE  | FALSE |
| 5  | 141000443 - 141016437 | F - 9.09%   | TRUE  | TRUE  |
| 5  | 141000443 - 141016437 |             | TRUE  | TRUE  |
| 7  | 149535456 - 149564568 | T - 62.50%  | TRUE  | TRUE  |
| 7  | 149535456 - 149564568 |             | TRUE  | TRUE  |
| 7  | 149535456 - 149564568 |             | TRUE  | TRUE  |
| 8  | 133133105 - 133493200 |             | TRUE  | TRUE  |
| 8  | 133133105 - 133493200 | T - 100.00% | TRUE  | TRUE  |
| 8  | 133133105 - 133493200 |             | TRUE  | TRUE  |
| 8  | 133133105 - 133493200 | F - 22.22%  | TRUE  | TRUE  |
| 8  | 133133105 - 133493200 | T - 55.56%  | TRUE  | TRUE  |
| 8  | 133133105 - 133493200 |             | FALSE | TRUE  |
| 8  | 133133105 - 133493200 | F - 33.33%  | FALSE | TRUE  |
| 8  | 133133105 - 133493200 | F - 44.44%  | FALSE | TRUE  |
| 8  | 133133105 - 133493200 | T - 100.00% | TRUE  | TRUE  |
| 8  | 133133105 - 133493200 |             | FALSE | TRUE  |
| 8  | 133133105 - 133493200 | T - 100.00% | FALSE | TRUE  |
| 8  | 133133105 - 133493200 |             | FALSE | TRUE  |
| 8  | 133133105 - 133493200 | T - 55.56%  | FALSE | TRUE  |
| 11 | 78363876 - 79151695   |             | TRUE  | FALSE |
| 11 | 78363876 - 79151695   |             | TRUE  | TRUE  |
| 11 | 78363876 - 79151695   | F - 42.86%  | TRUE  | TRUE  |
| 11 | 78363876 - 79151695   |             | TRUE  | FALSE |
| 11 | 78363876 - 79151695   | F - 42.86%  | TRUE  | TRUE  |
| 11 | 78363876 - 79151695   |             | TRUE  | TRUE  |
| 11 | 78363876 - 79151695   | F - 14.29%  | TRUE  | TRUE  |
| 11 | 78363876 - 79151695   | F - 14.29%  | TRUE  | FALSE |
| 11 | 78363876 - 79151695   | F - 28.57%  | TRUE  | TRUE  |
| 11 | 78363876 - 79151695   | F - 14.29%  | TRUE  | TRUE  |
| 11 | 78363876 - 79151695   | F - 28.57%  | TRUE  | TRUE  |
| 11 | 78363876 - 79151695   | F - 28.57%  | TRUE  | TRUE  |
| 11 | 78363876 - 79151695   |             | FALSE | TRUE  |
| 11 | 78363876 - 79151695   |             | TRUE  | TRUE  |
| 11 | 78363876 - 79151695   | F - 14.29%  | TRUE  | TRUE  |
| 11 | 78363876 - 79151695   |             | FALSE | TRUE  |
| 11 | 78363876 - 79151695   |             | TRUE  | TRUE  |
| 12 | 56596288 - 56615753   |             | TRUE  | TRUE  |
| 12 | 56596288 - 56615753   | F - 42.86%  | TRUE  | TRUE  |
| 12 | 56596288 - 56615753   |             | TRUE  | TRUE  |
| 18 | 3412072 - 3459976     |             | TRUE  | TRUE  |
| 18 | 3412072 - 3459976     | F - 14.81%  | TRUE  | TRUE  |
| 18 | 3412072 - 3459976     | F - 7.41%   | TRUE  | TRUE  |
| 18 | 3412072 - 3459976     | F - 7.41%   | TRUE  | TRUE  |
| 19 | 42387267 - 42434296   |             | TRUE  | FALSE |

|    |                       |            |       |       |
|----|-----------------------|------------|-------|-------|
| 19 | 42387267 - 42434296   |            | TRUE  | TRUE  |
| 19 | 42387267 - 42434296   | T - 87.50% | TRUE  | TRUE  |
| 1  | 64239690 - 64647181   |            | TRUE  | FALSE |
| 1  | 64239690 - 64647181   |            | TRUE  | TRUE  |
| 1  | 64239690 - 64647181   | T - 75.00% | TRUE  | TRUE  |
| 1  | 64239690 - 64647181   |            | TRUE  | TRUE  |
| 1  | 64239690 - 64647181   | F - 12.50% | FALSE | TRUE  |
| 1  | 64239690 - 64647181   | F - 25.00% | FALSE | TRUE  |
| 1  | 64239690 - 64647181   |            | TRUE  | TRUE  |
| 1  | 64239690 - 64647181   |            | FALSE | TRUE  |
| 1  | 64239690 - 64647181   | T - 50.00% | TRUE  | TRUE  |
| 1  | 33979609 - 34631443   |            | TRUE  | FALSE |
| 1  | 33979609 - 34631443   |            | TRUE  | TRUE  |
| 1  | 33979609 - 34631443   | F - 18.18% | TRUE  | TRUE  |
| 1  | 226033233 - 226070420 |            | TRUE  | TRUE  |
| 1  | 226033233 - 226070420 | F - 25.00% | TRUE  | TRUE  |
| 2  | 47630108 - 47906510   |            | TRUE  | TRUE  |
| 2  | 47630108 - 47906510   | T - 70.00% | TRUE  | TRUE  |
| 2  | 47630108 - 47906510   |            | TRUE  | TRUE  |
| 2  | 27805893 - 27845963   |            | TRUE  | TRUE  |
| 2  | 27805893 - 27845963   | F - 12.50% | TRUE  | TRUE  |
| 3  | 53190025 - 53226733   | F - 9.09%  | TRUE  | TRUE  |
| 3  | 53190025 - 53226733   |            | TRUE  | TRUE  |
| 3  | 53190025 - 53226733   | F - 9.09%  | TRUE  | TRUE  |
| 3  | 53190025 - 53226733   |            | FALSE | TRUE  |
| 3  | 154741913 - 154901518 | F - 19.05% | TRUE  | TRUE  |
| 3  | 154741913 - 154901518 |            | TRUE  | TRUE  |
| 3  | 154741913 - 154901518 |            | TRUE  | FALSE |
| 3  | 154741913 - 154901518 | F - 4.76%  | TRUE  | FALSE |
| 3  | 154741913 - 154901518 | F - 4.76%  | TRUE  | TRUE  |
| 3  | 154741913 - 154901518 | F - 14.29% | TRUE  | TRUE  |
| 3  | 154741913 - 154901518 | F - 14.29% | TRUE  | TRUE  |
| 3  | 154741913 - 154901518 | F - 4.76%  | TRUE  | TRUE  |
| 3  | 154741913 - 154901518 | F - 14.29% | TRUE  | TRUE  |
| 3  | 154741913 - 154901518 | F - 4.76%  | TRUE  | TRUE  |
| 3  | 154741913 - 154901518 | F - 19.05% | TRUE  | TRUE  |
| 3  | 154741913 - 154901518 |            | TRUE  | TRUE  |
| 3  | 154741913 - 154901518 |            | TRUE  | TRUE  |
| 3  | 154741913 - 154901518 | F - 4.76%  | FALSE | TRUE  |
| 3  | 154741913 - 154901518 |            | TRUE  | TRUE  |
| 3  | 154741913 - 154901518 | F - 9.52%  | TRUE  | TRUE  |
| 3  | 154741913 - 154901518 |            | FALSE | TRUE  |
| 3  | 178243275 - 178578193 | F - 42.86% | TRUE  | TRUE  |
| 3  | 178243275 - 178578193 | F - 14.29% | TRUE  | TRUE  |
| 3  | 178243275 - 178578193 |            | TRUE  | TRUE  |
| 3  | 178243275 - 178578193 |            | FALSE | TRUE  |
| 4  | 152591656 - 152682175 |            | TRUE  | TRUE  |
| 4  | 152591656 - 152682175 |            | TRUE  | TRUE  |
| 4  | 152591656 - 152682175 | T - 61.11% | TRUE  | TRUE  |
| 5  | 122424816 - 122523745 |            | TRUE  | TRUE  |
| 5  | 122424816 - 122523745 | F - 33.33% | TRUE  | TRUE  |
| 5  | 106712590 - 107006596 | F - 42.86% | TRUE  | TRUE  |
| 5  | 106712590 - 107006596 | F - 28.57% | TRUE  | TRUE  |
| 5  | 106712590 - 107006596 | T - 57.14% | TRUE  | TRUE  |
| 5  | 106712590 - 107006596 |            | FALSE | TRUE  |
| 6  | 36708552 - 36816400   |            | TRUE  | FALSE |
| 6  | 36708552 - 36816400   | T - 81.82% | TRUE  | TRUE  |
| 6  | 36708552 - 36816400   |            | FALSE | TRUE  |



|    |                       |             |       |       |
|----|-----------------------|-------------|-------|-------|
| 6  | 149825631 - 149867238 | F - 20.00%  | TRUE  | TRUE  |
| 6  | 149825631 - 149867238 |             | TRUE  | TRUE  |
| 6  | 41032517 - 41040353   |             | TRUE  | TRUE  |
| 6  | 41032517 - 41040353   | F - 5.88%   | FALSE | TRUE  |
| 6  | 41032517 - 41040353   | F - 11.76%  | FALSE | TRUE  |
| 6  | 41032517 - 41040353   | F - 5.88%   | FALSE | TRUE  |
| 6  | 41032517 - 41040353   |             | FALSE | TRUE  |
| 6  | 41032517 - 41040353   | F - 11.76%  | FALSE | TRUE  |
| 7  | 150754297 - 150773614 |             | TRUE  | TRUE  |
| 7  | 150754297 - 150773614 |             | TRUE  | FALSE |
| 7  | 150754297 - 150773614 | F - 3.85%   | FALSE | TRUE  |
| 10 | 93170096 - 93274586   |             | TRUE  | FALSE |
| 10 | 93170096 - 93274586   |             | TRUE  | TRUE  |
| 10 | 93170096 - 93274586   | F - 20.00%  | TRUE  | TRUE  |
| 10 | 93170096 - 93274586   | T - 60.00%  | TRUE  | TRUE  |
| 10 | 93170096 - 93274586   | T - 66.67%  | TRUE  | TRUE  |
| 10 | 93170096 - 93274586   | F - 20.00%  | TRUE  | TRUE  |
| 10 | 93170096 - 93274586   | F - 6.67%   | TRUE  | TRUE  |
| 11 | 64590859 - 64612041   |             | TRUE  | TRUE  |
| 11 | 64590859 - 64612041   | T - 60.00%  | TRUE  | TRUE  |
| 11 | 64590859 - 64612041   |             | TRUE  | TRUE  |
| 20 | 33897002 - 34042568   |             | TRUE  | TRUE  |
| 20 | 33897002 - 34042568   | T - 100.00% | TRUE  | TRUE  |
| 2  | 179059208 - 179541009 |             | TRUE  | TRUE  |
| 2  | 179059208 - 179541009 |             | TRUE  | FALSE |
| 2  | 179059208 - 179541009 |             | TRUE  | TRUE  |
| 2  | 179059208 - 179541009 | F - 10.53%  | FALSE | TRUE  |
| 2  | 179059208 - 179541009 | F - 5.26%   | TRUE  | TRUE  |
| 2  | 179059208 - 179541009 | T - 52.63%  | TRUE  | TRUE  |
| 2  | 179059208 - 179541009 | F - 10.53%  | TRUE  | TRUE  |
| 2  | 179059208 - 179541009 | T - 73.68%  | TRUE  | TRUE  |
| 4  | 54325468 - 54567572   | F - 40.00%  | TRUE  | FALSE |
| 4  | 54325468 - 54567572   |             | TRUE  | FALSE |
| 4  | 54325468 - 54567572   |             | TRUE  | TRUE  |
| 4  | 54325468 - 54567572   | F - 13.33%  | TRUE  | TRUE  |
| 4  | 54325468 - 54567572   |             | TRUE  | TRUE  |
| 5  | 122680579 - 122759286 | F - 7.69%   | TRUE  | FALSE |
| 5  | 122680579 - 122759286 |             | FALSE | TRUE  |
| 5  | 122680579 - 122759286 | F - 15.38%  | TRUE  | TRUE  |
| 5  | 122680579 - 122759286 |             | TRUE  | TRUE  |
| 5  | 122680579 - 122759286 |             | TRUE  | FALSE |
| 5  | 122680579 - 122759286 |             | TRUE  | TRUE  |
| 5  | 122680579 - 122759286 |             | FALSE | TRUE  |
| 6  | 39867354 - 39902290   |             | TRUE  | TRUE  |
| 6  | 39867354 - 39902290   | F - 43.75%  | TRUE  | TRUE  |
| 6  | 39867354 - 39902290   | F - 18.75%  | TRUE  | TRUE  |
| 7  | 5346421 - 5465045     |             | TRUE  | TRUE  |
| 7  | 5346421 - 5465045     |             | TRUE  | TRUE  |
| 7  | 5346421 - 5465045     | F - 14.29%  | TRUE  | TRUE  |
| 7  | 5346421 - 5465045     | F - 28.57%  | TRUE  | TRUE  |
| 7  | 100849258 - 100861701 |             | TRUE  | TRUE  |
| 7  | 100849258 - 100861701 | F - 36.84%  | TRUE  | TRUE  |
| 8  | 22547663 - 22656129   |             | TRUE  | TRUE  |
| 8  | 22547663 - 22656129   | F - 33.33%  | TRUE  | TRUE  |
| 9  | 102117622 - 102137510 |             | TRUE  | FALSE |
| 9  | 102117622 - 102137510 | F - 3.70%   | FALSE | TRUE  |
| 9  | 102117622 - 102137510 |             | TRUE  | TRUE  |
| 10 | 129705325 - 129884164 |             | TRUE  | TRUE  |

|    |                       |             |       |       |
|----|-----------------------|-------------|-------|-------|
| 10 | 129705325 - 129884164 | F - 27.27%  | TRUE  | TRUE  |
| 10 | 129705325 - 129884164 | T - 90.91%  | TRUE  | TRUE  |
| 10 | 129705325 - 129884164 |             | TRUE  | FALSE |
| 10 | 129705325 - 129884164 |             | TRUE  | TRUE  |
| 10 | 129705325 - 129884164 |             | TRUE  | TRUE  |
| 10 | 129705325 - 129884164 |             | TRUE  | TRUE  |
| 10 | 129705325 - 129884164 |             | FALSE | TRUE  |
| 11 | 10594638 - 10715535   |             | TRUE  | TRUE  |
| 11 | 10594638 - 10715535   | F - 33.33%  | TRUE  | TRUE  |
| 11 | 10594638 - 10715535   |             | FALSE | TRUE  |
| 11 | 10594638 - 10715535   |             | TRUE  | TRUE  |
| 11 | 10594638 - 10715535   |             | FALSE | TRUE  |
| 11 | 10594638 - 10715535   | F - 27.78%  | TRUE  | TRUE  |
| 11 | 10594638 - 10715535   | F - 27.78%  | TRUE  | TRUE  |
| 11 | 10594638 - 10715535   | F - 22.22%  | TRUE  | TRUE  |
| 11 | 10594638 - 10715535   | F - 38.89%  | FALSE | TRUE  |
| 11 | 10594638 - 10715535   | F - 44.44%  | FALSE | TRUE  |
| 11 | 10594638 - 10715535   |             | TRUE  | TRUE  |
| 11 | 10594638 - 10715535   | F - 33.33%  | FALSE | TRUE  |
| 11 | 10594638 - 10715535   |             | TRUE  | TRUE  |
| 11 | 10594638 - 10715535   |             | TRUE  | TRUE  |
| 11 | 10594638 - 10715535   |             | TRUE  | TRUE  |
| 11 | 10594638 - 10715535   |             | TRUE  | TRUE  |
| 11 | 10594638 - 10715535   |             | TRUE  | TRUE  |
| 11 | 10594638 - 10715535   |             | FALSE | TRUE  |
| 12 | 52643084 - 52702947   |             | TRUE  | TRUE  |
| 12 | 52643084 - 52702947   | T - 100.00% | FALSE | TRUE  |
| 12 | 52643084 - 52702947   |             | FALSE | TRUE  |
| 12 | 44187526 - 44200178   |             | TRUE  | TRUE  |
| 12 | 44187526 - 44200178   | T - 75.00%  | TRUE  | TRUE  |
| 13 | 51483814 - 51544596   |             | TRUE  | TRUE  |
| 13 | 51483814 - 51544596   | F - 18.18%  | FALSE | TRUE  |
| 13 | 51483814 - 51544596   | F - 9.09%   | TRUE  | TRUE  |
| 13 | 51483814 - 51544596   |             | TRUE  | TRUE  |
| 13 | 28009776 - 28024739   |             | TRUE  | TRUE  |
| 13 | 28009776 - 28024739   | T - 68.42%  | TRUE  | TRUE  |
| 13 | 28009776 - 28024739   | F - 5.26%   | TRUE  | TRUE  |
| 13 | 28009776 - 28024739   | F - 5.26%   | TRUE  | TRUE  |
| 13 | 28009776 - 28024739   |             | TRUE  | TRUE  |
| 16 | 27561468 - 27791692   |             | TRUE  | TRUE  |
| 16 | 27561468 - 27791692   | T - 50.00%  | TRUE  | TRUE  |
| 17 | 75082798 - 75213183   | F - 6.90%   | TRUE  | TRUE  |
| 17 | 75082798 - 75213183   | F - 3.45%   | TRUE  | TRUE  |
| 17 | 75082798 - 75213183   |             | FALSE | TRUE  |
| 17 | 75082798 - 75213183   |             | TRUE  | TRUE  |
| 17 | 26880405 - 26898887   | F - 8.33%   | TRUE  | TRUE  |
| 17 | 26880405 - 26898887   |             | TRUE  | TRUE  |
| 17 | 26880405 - 26898887   | F - 16.67%  | TRUE  | TRUE  |
| 17 | 26880405 - 26898887   | F - 25.00%  | TRUE  | TRUE  |
| 17 | 26880405 - 26898887   | F - 8.33%   | TRUE  | TRUE  |
| 1  | 224102741 - 226595801 | T - 53.85%  | TRUE  | TRUE  |
| 1  | 224102741 - 226595801 |             | TRUE  | TRUE  |
| 1  | 224102741 - 226595801 |             | TRUE  | TRUE  |
| 1  | 224102741 - 226595801 | F - 38.46%  | TRUE  | TRUE  |
| 1  | 224102741 - 226595801 | F - 30.77%  | TRUE  | TRUE  |
| 1  | 224102741 - 226595801 | F - 46.15%  | TRUE  | TRUE  |
| 1  | 224102741 - 226595801 | F - 46.15%  | TRUE  | TRUE  |
| 1  | 224102741 - 226595801 |             | FALSE | TRUE  |
| 1  | 224102741 - 226595801 | F - 38.46%  | TRUE  | TRUE  |

|    |                       |             |       |       |
|----|-----------------------|-------------|-------|-------|
| 1  | 224102741 - 226595801 | F - 46.15%  | TRUE  | TRUE  |
| 2  | 10443015 - 10567743   |             | TRUE  | TRUE  |
| 2  | 10443015 - 10567743   |             | TRUE  | TRUE  |
| 2  | 10443015 - 10567743   | T - 54.55%  | TRUE  | TRUE  |
| 2  | 242641450 - 242668896 |             | TRUE  | TRUE  |
| 2  | 242641450 - 242668896 | F - 7.14%   | TRUE  | TRUE  |
| 3  | 42642106 - 42690233   |             | TRUE  | FALSE |
| 3  | 42642106 - 42690233   |             | TRUE  | TRUE  |
| 3  | 42642106 - 42690233   |             | TRUE  | TRUE  |
| 3  | 42642106 - 42690233   | F - 25.93%  | TRUE  | TRUE  |
| 3  | 42642106 - 42690233   |             | FALSE | TRUE  |
| 3  | 71728440 - 71803924   | F - 12.50%  | TRUE  | TRUE  |
| 3  | 71728440 - 71803924   | F - 18.75%  | TRUE  | TRUE  |
| 3  | 71728440 - 71803924   | F - 18.75%  | TRUE  | TRUE  |
| 3  | 71728440 - 71803924   |             | TRUE  | TRUE  |
| 3  | 168801287 - 169381563 |             | TRUE  | FALSE |
| 3  | 168801287 - 169381563 |             | TRUE  | TRUE  |
| 3  | 168801287 - 169381563 | T - 75.76%  | TRUE  | FALSE |
| 3  | 168801287 - 169381563 | T - 72.73%  | TRUE  | FALSE |
| 3  | 168801287 - 169381563 | F - 12.12%  | TRUE  | TRUE  |
| 3  | 168801287 - 169381563 | F - 33.33%  | FALSE | TRUE  |
| 3  | 168801287 - 169381563 | T - 51.52%  | TRUE  | TRUE  |
| 3  | 168801287 - 169381563 |             | TRUE  | TRUE  |
| 3  | 168801287 - 169381563 | F - 3.03%   | TRUE  | TRUE  |
| 3  | 168801287 - 169381563 |             | FALSE | TRUE  |
| 3  | 168801287 - 169381563 | F - 24.24%  | TRUE  | TRUE  |
| 3  | 168801287 - 169381563 | F - 9.09%   | FALSE | TRUE  |
| 3  | 168801287 - 169381563 | F - 18.18%  | TRUE  | TRUE  |
| 3  | 168801287 - 169381563 |             | FALSE | TRUE  |
| 3  | 168801287 - 169381563 | F - 21.21%  | TRUE  | TRUE  |
| 3  | 168801287 - 169381563 | F - 3.03%   | TRUE  | TRUE  |
| 3  | 168801287 - 169381563 |             | FALSE | TRUE  |
| 3  | 168801287 - 169381563 |             | FALSE | TRUE  |
| 5  | 68856032 - 68890550   | F - 8.33%   | TRUE  | TRUE  |
| 5  | 68856032 - 68890550   |             | TRUE  | FALSE |
| 5  | 68856032 - 68890550   | F - 20.83%  | TRUE  | TRUE  |
| 5  | 68856032 - 68890550   | F - 4.17%   | TRUE  | TRUE  |
| 5  | 68856032 - 68890550   |             | FALSE | TRUE  |
| 5  | 42799982 - 42887494   | F - 4.35%   | TRUE  | TRUE  |
| 5  | 42799982 - 42887494   |             | TRUE  | TRUE  |
| 5  | 42799982 - 42887494   | F - 17.39%  | TRUE  | TRUE  |
| 5  | 42799982 - 42887494   |             | TRUE  | TRUE  |
| 5  | 42799982 - 42887494   | F - 4.35%   | TRUE  | TRUE  |
| 5  | 42799982 - 42887494   | F - 13.04%  | TRUE  | TRUE  |
| 5  | 42799982 - 42887494   | F - 4.35%   | FALSE | TRUE  |
| 5  | 42799982 - 42887494   |             | TRUE  | TRUE  |
| 6  | 4115923 - 4135831     |             | TRUE  | FALSE |
| 6  | 4115923 - 4135831     | F - 8.70%   | TRUE  | TRUE  |
| 7  | 1199662 - 1205594     | F - 20.00%  | TRUE  | TRUE  |
| 7  | 1199662 - 1205594     |             | FALSE | TRUE  |
| 7  | 1199662 - 1205594     |             | TRUE  | TRUE  |
| 9  | 111899167 - 111929571 | T - 100.00% | TRUE  | TRUE  |
| 9  | 111899167 - 111929571 |             | FALSE | TRUE  |
| 9  | 116135698 - 116139279 | F - 28.57%  | TRUE  | TRUE  |
| 9  | 116135698 - 116139279 |             | TRUE  | TRUE  |
| 14 | 51186481 - 51297848   |             | TRUE  | FALSE |
| 14 | 51186481 - 51297848   | F - 3.57%   | TRUE  | TRUE  |
| 14 | 51186481 - 51297848   |             | TRUE  | TRUE  |

|              |                       |            |       |       |
|--------------|-----------------------|------------|-------|-------|
| 15           | 79213400 - 79237433   | F - 12.50% | TRUE  | TRUE  |
| 15           | 79213400 - 79237433   |            | TRUE  | TRUE  |
| 15           | 79213400 - 79237433   |            | TRUE  | TRUE  |
| 15           | 79213400 - 79237433   |            | TRUE  | TRUE  |
| 15           | 79213400 - 79237433   |            | FALSE | TRUE  |
| 15           | 79213400 - 79237433   | T - 87.50% | TRUE  | TRUE  |
| 17_ctg5_hap1 | 391583 - 1247954      | F - 11.11% | TRUE  | TRUE  |
| 17_ctg5_hap1 | 391583 - 1247954      |            | TRUE  | FALSE |
| 17_ctg5_hap1 | 391583 - 1247954      |            | TRUE  | TRUE  |
| 17_ctg5_hap1 | 391583 - 1247954      | F - 22.22% | TRUE  | TRUE  |
| 20           | 36120874 - 36156333   |            | TRUE  | TRUE  |
| 20           | 36120874 - 36156333   |            | TRUE  | TRUE  |
| 20           | 36120874 - 36156333   | F - 5.26%  | TRUE  | FALSE |
| 6_dbb_hap3   | 2993299 - 3018210     | F - 43.59% | TRUE  | TRUE  |
| 6_dbb_hap3   | 2993299 - 3018210     |            | TRUE  | TRUE  |
| 6_dbb_hap3   | 2993299 - 3018210     |            | TRUE  | FALSE |
| 6_dbb_hap3   | 2993299 - 3018210     |            | TRUE  | TRUE  |
| 6_dbb_hap3   | 2993299 - 3018210     |            | TRUE  | TRUE  |
| 6_dbb_hap3   | 2993299 - 3018210     |            | FALSE | TRUE  |
| 6_dbb_hap3   | 2993299 - 3018210     |            | FALSE | TRUE  |
| 6_dbb_hap3   | 2993299 - 3018210     |            | FALSE | TRUE  |
| 6_dbb_hap3   | 2993299 - 3018210     |            | FALSE | TRUE  |
| 6_mann_hap4  | 2931334 - 2948438     | F - 5.26%  | TRUE  | TRUE  |
| 6_mann_hap4  | 2931334 - 2948438     | F - 47.37% | TRUE  | TRUE  |
| 6_mann_hap4  | 2931334 - 2948438     |            | TRUE  | TRUE  |
| 6_mann_hap4  | 2931334 - 2948438     | F - 5.26%  | TRUE  | TRUE  |
| 6_mcf_hap5   | 3087409 - 3112325     | F - 43.59% | TRUE  | TRUE  |
| 6_mcf_hap5   | 3087409 - 3112325     |            | TRUE  | TRUE  |
| 6_mcf_hap5   | 3087409 - 3112325     |            | TRUE  | FALSE |
| 6_mcf_hap5   | 3087409 - 3112325     |            | TRUE  | TRUE  |
| 6_mcf_hap5   | 3087409 - 3112325     |            | TRUE  | TRUE  |
| 6_mcf_hap5   | 3087409 - 3112325     |            | FALSE | TRUE  |
| 6_mcf_hap5   | 3087409 - 3112325     |            | FALSE | TRUE  |
| 6_mcf_hap5   | 3087409 - 3112325     |            | FALSE | TRUE  |
| 6_mcf_hap5   | 3087409 - 3112325     |            | FALSE | TRUE  |
| 6_ssto_hap7  | 4868093 - 4901710     |            | TRUE  | TRUE  |
| 6_ssto_hap7  | 4868093 - 4901710     | F - 9.09%  | TRUE  | TRUE  |
| 6_ssto_hap7  | 4868093 - 4901710     |            | TRUE  | TRUE  |
| 2            | 202098166 - 202152434 |            | TRUE  | TRUE  |
| 2            | 202098166 - 202152434 | F - 2.33%  | TRUE  | FALSE |
| 2            | 202098166 - 202152434 | T - 86.05% | FALSE | TRUE  |
| 2            | 74443369 - 74570541   |            | TRUE  | FALSE |
| 2            | 74443369 - 74570541   | T - 60.00% | TRUE  | TRUE  |
| 11           | 71709587 - 71716761   | F - 7.14%  | TRUE  | TRUE  |
| 11           | 71709587 - 71716761   | F - 10.71% | TRUE  | TRUE  |
| 11           | 71709587 - 71716761   |            | FALSE | TRUE  |
| 11           | 74699179 - 74729938   |            | FALSE | TRUE  |
| 11           | 74699179 - 74729938   | F - 7.69%  | TRUE  | TRUE  |
| 11           | 74699179 - 74729938   | F - 7.69%  | TRUE  | TRUE  |
| 11           | 74699179 - 74729938   |            | TRUE  | TRUE  |
| 12           | 53720360 - 53730166   |            | TRUE  | FALSE |
| 12           | 53720360 - 53730166   | T - 71.43% | TRUE  | TRUE  |
| 12           | 53720360 - 53730166   | F - 14.29% | TRUE  | TRUE  |
| 12           | 53720360 - 53730166   | F - 28.57% | TRUE  | TRUE  |
| 12           | 53720360 - 53730166   |            | FALSE | TRUE  |
| 12           | 122715292 - 122751068 | T - 80.00% | TRUE  | TRUE  |
| 12           | 122715292 - 122751068 | F - 20.00% | TRUE  | TRUE  |
| 12           | 122715292 - 122751068 |            | TRUE  | TRUE  |

|    |                       |             |       |       |
|----|-----------------------|-------------|-------|-------|
| 12 | 122715292 - 122751068 |             | TRUE  | TRUE  |
| 12 | 122715292 - 122751068 |             | FALSE | TRUE  |
| 13 | 26828276 - 26979375   | F - 23.08%  | TRUE  | TRUE  |
| 13 | 26828276 - 26979375   |             | FALSE | TRUE  |
| 14 | 24674903 - 24677454   |             | TRUE  | TRUE  |
| 14 | 24674903 - 24677454   | T - 60.00%  | TRUE  | TRUE  |
| 14 | 24674903 - 24677454   | T - 80.00%  | TRUE  | TRUE  |
| 15 | 84977316 - 84980581   |             | TRUE  | TRUE  |
| 15 | 84977316 - 84980581   | T - 100.00% | TRUE  | TRUE  |
| 19 | 18170371 - 18209626   | T - 100.00% | TRUE  | FALSE |
| 19 | 18170371 - 18209626   |             | TRUE  | TRUE  |
| 2  | 130724165 - 130738045 |             | TRUE  | TRUE  |
| 2  | 130724165 - 130738045 | T - 100.00% | TRUE  | TRUE  |
| 3  | 23986751 - 24022109   |             | TRUE  | FALSE |
| 3  | 23986751 - 24022109   |             | TRUE  | TRUE  |
| 3  | 23986751 - 24022109   | T - 54.55%  | TRUE  | TRUE  |
| 3  | 183415606 - 183530413 | F - 30.00%  | TRUE  | TRUE  |
| 3  | 183415606 - 183530413 | F - 10.00%  | TRUE  | TRUE  |
| 3  | 183415606 - 183530413 |             | FALSE | TRUE  |
| 3  | 183415606 - 183530413 |             | TRUE  | TRUE  |
| 3  | 183415606 - 183530413 |             | TRUE  | TRUE  |
| 3  | 183415606 - 183530413 |             | TRUE  | TRUE  |
| 5  | 78073032 - 78282357   | F - 25.00%  | TRUE  | TRUE  |
| 5  | 78073032 - 78282357   |             | TRUE  | TRUE  |
| 5  | 78073032 - 78282357   | F - 25.00%  | TRUE  | TRUE  |
| 5  | 78073032 - 78282357   |             | TRUE  | TRUE  |
| 5  | 78073032 - 78282357   | F - 37.50%  | FALSE | TRUE  |
| 5  | 78073032 - 78282357   | F - 25.00%  | TRUE  | TRUE  |
| 6  | 80713604 - 80752244   |             | TRUE  | FALSE |
| 6  | 80713604 - 80752244   |             | TRUE  | TRUE  |
| 6  | 80713604 - 80752244   | F - 46.15%  | TRUE  | TRUE  |
| 7  | 154720208 - 154741618 |             | TRUE  | FALSE |
| 7  | 154720208 - 154741618 | F - 40.00%  | TRUE  | FALSE |
| 7  | 154720208 - 154741618 | F - 40.00%  | TRUE  | TRUE  |
| 8  | 103876528 - 103990104 | F - 12.50%  | TRUE  | FALSE |
| 8  | 103876528 - 103990104 |             | TRUE  | TRUE  |
| 8  | 103876528 - 103990104 |             | FALSE | TRUE  |
| 8  | 103876528 - 103990104 | F - 25.00%  | TRUE  | TRUE  |
| 8  | 103876528 - 103990104 | F - 31.25%  | TRUE  | TRUE  |
| 8  | 103876528 - 103990104 | F - 31.25%  | TRUE  | TRUE  |
| 8  | 103876528 - 103990104 | F - 6.25%   | TRUE  | TRUE  |
| 9  | 35696945 - 35732392   | F - 8.33%   | TRUE  | TRUE  |
| 9  | 35696945 - 35732392   | F - 8.33%   | TRUE  | TRUE  |
| 9  | 35696945 - 35732392   |             | TRUE  | TRUE  |
| X  | 152683781 - 152687086 | T - 50.00%  | TRUE  | TRUE  |
| X  | 152683781 - 152687086 |             | FALSE | TRUE  |
| X  | 152683781 - 152687086 |             | FALSE | TRUE  |
| X  | 152683781 - 152687086 | T - 100.00% | FALSE | TRUE  |
| 10 | 94590935 - 94819251   | F - 29.41%  | TRUE  | FALSE |
| 10 | 94590935 - 94819251   |             | TRUE  | FALSE |
| 10 | 94590935 - 94819251   | T - 82.35%  | TRUE  | TRUE  |
| 10 | 94590935 - 94819251   |             | FALSE | TRUE  |
| 11 | 71576555 - 71639700   |             | TRUE  | FALSE |
| 11 | 71576555 - 71639700   | F - 28.57%  | TRUE  | TRUE  |
| 13 | 108903588 - 108960832 |             | TRUE  | TRUE  |
| 13 | 108903588 - 108960832 | T - 80.00%  | TRUE  | TRUE  |
| 13 | 108903588 - 108960832 |             | FALSE | TRUE  |
| 13 | 36801179 - 36871992   |             | TRUE  | FALSE |
| 13 | 36801179 - 36871992   |             | FALSE | TRUE  |

|             |                       |            |       |       |
|-------------|-----------------------|------------|-------|-------|
| 13          | 36801179 - 36871992   | F - 25.00% | TRUE  | TRUE  |
| 13          | 36801179 - 36871992   | F - 20.83% | TRUE  | TRUE  |
| 13          | 36801179 - 36871992   |            | TRUE  | TRUE  |
| 13          | 36801179 - 36871992   |            | TRUE  | TRUE  |
| 15          | 83776159 - 83806111   |            | TRUE  | TRUE  |
| 15          | 83776159 - 83806111   | T - 88.89% | TRUE  | TRUE  |
| 15          | 83776159 - 83806111   | F - 11.11% | FALSE | TRUE  |
| 17          | 41363894 - 41371957   | F - 45.45% | TRUE  | TRUE  |
| 17          | 41363894 - 41371957   |            | TRUE  | TRUE  |
| 17          | 41363894 - 41371957   |            | TRUE  | TRUE  |
| 17          | 41363894 - 41371957   |            | FALSE | TRUE  |
| 17          | 41363894 - 41371957   |            | TRUE  | TRUE  |
| 17          | 41363894 - 41371957   |            | FALSE | TRUE  |
| 17          | 41363894 - 41371957   |            | TRUE  | TRUE  |
| 19          | 2977444 - 2995182     | T - 81.25% | TRUE  | TRUE  |
| 19          | 2977444 - 2995182     | T - 56.25% | TRUE  | TRUE  |
| 19          | 2977444 - 2995182     |            | TRUE  | FALSE |
| 20          | 32077881 - 32237842   |            | TRUE  | FALSE |
| 20          | 32077881 - 32237842   | T - 76.19% | TRUE  | TRUE  |
| 6_mann_hap4 | 1887225 - 1913029     | F - 8.33%  | TRUE  | TRUE  |
| 6_mann_hap4 | 1887225 - 1913029     |            | TRUE  | TRUE  |
| 6_mann_hap4 | 1887225 - 1913029     | F - 41.67% | TRUE  | FALSE |
| 6_mcf_hap5  | 1921007 - 1946811     | F - 8.33%  | TRUE  | TRUE  |
| 6_mcf_hap5  | 1921007 - 1946811     |            | TRUE  | TRUE  |
| 6_mcf_hap5  | 1921007 - 1946811     | F - 41.67% | TRUE  | FALSE |
| 2           | 118846028 - 118868573 | F - 9.09%  | TRUE  | TRUE  |
| 2           | 118846028 - 118868573 | T - 63.64% | TRUE  | TRUE  |
| 2           | 118846028 - 118868573 |            | TRUE  | TRUE  |
| 2           | 118846028 - 118868573 |            | TRUE  | TRUE  |
| 2           | 118846028 - 118868573 |            | FALSE | TRUE  |
| 3           | 142442916 - 142526730 |            | TRUE  | TRUE  |
| 3           | 142442916 - 142526730 | F - 30.00% | TRUE  | TRUE  |
| 5           | 131705401 - 131731306 |            | TRUE  | FALSE |
| 5           | 131705401 - 131731306 | F - 15.38% | TRUE  | TRUE  |
| 5           | 131705401 - 131731306 |            | TRUE  | TRUE  |
| 5           | 131705401 - 131731306 |            | TRUE  | TRUE  |
| 5           | 131705401 - 131731306 | T - 61.54% | TRUE  | TRUE  |
| 5           | 131705401 - 131731306 |            | TRUE  | TRUE  |
| 5           | 177557997 - 177577566 |            | TRUE  | FALSE |
| 5           | 177557997 - 177577566 | F - 17.65% | TRUE  | TRUE  |
| 6           | 29570005 - 29601753   |            | TRUE  | TRUE  |
| 6           | 29570005 - 29601753   | F - 3.57%  | TRUE  | FALSE |
| 6           | 29570005 - 29601753   |            | TRUE  | TRUE  |
| 7           | 151038785 - 151075548 |            | TRUE  | TRUE  |
| 7           | 151038785 - 151075548 | F - 10.00% | TRUE  | TRUE  |
| 11          | 1940792 - 1959936     |            | TRUE  | TRUE  |
| 11          | 1940792 - 1959936     | F - 3.03%  | TRUE  | TRUE  |
| 11          | 1940792 - 1959936     |            | FALSE | TRUE  |
| 11          | 1940792 - 1959936     |            | FALSE | TRUE  |
| 11          | 1940792 - 1959936     |            | TRUE  | TRUE  |
| 11          | 63606400 - 63678492   |            | TRUE  | FALSE |
| 11          | 63606400 - 63678492   |            | TRUE  | TRUE  |
| 11          | 63606400 - 63678492   | T - 92.86% | TRUE  | TRUE  |
| 11          | 63606400 - 63678492   |            | TRUE  | TRUE  |
| 12          | 673462 - 772945       |            | TRUE  | TRUE  |
| 12          | 673462 - 772945       | T - 87.50% | TRUE  | TRUE  |
| 12          | 673462 - 772945       | T - 87.50% | TRUE  | TRUE  |
| 12          | 673462 - 772945       |            | TRUE  | TRUE  |

|    |                       |             |       |       |
|----|-----------------------|-------------|-------|-------|
| 12 | 673462 - 772945       | F - 12.50%  | TRUE  | TRUE  |
| 12 | 673462 - 772945       | T - 50.00%  | TRUE  | TRUE  |
| 12 | 673462 - 772945       | F - 37.50%  | FALSE | TRUE  |
| 12 | 673462 - 772945       | F - 25.00%  | TRUE  | TRUE  |
| 12 | 673462 - 772945       | F - 25.00%  | FALSE | TRUE  |
| 12 | 6802957 - 6810009     |             | TRUE  | TRUE  |
| 12 | 6802957 - 6810009     | T - 88.89%  | TRUE  | TRUE  |
| 12 | 6802957 - 6810009     | F - 22.22%  | TRUE  | TRUE  |
| 12 | 6802957 - 6810009     | T - 88.89%  | TRUE  | TRUE  |
| 12 | 6802957 - 6810009     |             | FALSE | TRUE  |
| 12 | 6802957 - 6810009     |             | FALSE | TRUE  |
| 13 | 113862552 - 113919399 | F - 18.75%  | TRUE  | TRUE  |
| 13 | 113862552 - 113919399 |             | TRUE  | TRUE  |
| 13 | 113862552 - 113919399 |             | TRUE  | TRUE  |
| 14 | 59655398 - 59838123   | T - 58.33%  | TRUE  | TRUE  |
| 14 | 59655398 - 59838123   |             | FALSE | TRUE  |
| 14 | 59655398 - 59838123   |             | TRUE  | TRUE  |
| 15 | 30864758 - 30892918   |             | TRUE  | TRUE  |
| 15 | 30864758 - 30892918   |             | TRUE  | TRUE  |
| 15 | 30864758 - 30892918   | T - 75.00%  | TRUE  | TRUE  |
| 15 | 30864758 - 30892918   | F - 25.00%  | TRUE  | TRUE  |
| 15 | 74900713 - 74922542   | F - 42.86%  | TRUE  | TRUE  |
| 15 | 74900713 - 74922542   | F - 7.14%   | FALSE | TRUE  |
| 15 | 74900713 - 74922542   | F - 14.29%  | TRUE  | TRUE  |
| 15 | 74900713 - 74922542   | F - 28.57%  | TRUE  | TRUE  |
| 15 | 74900713 - 74922542   |             | TRUE  | TRUE  |
| 19 | 43370613 - 43383871   |             | TRUE  | TRUE  |
| 19 | 43370613 - 43383871   | T - 100.00% | TRUE  | TRUE  |
| 19 | 43370613 - 43383871   |             | TRUE  | TRUE  |
| 19 | 43370613 - 43383871   |             | TRUE  | TRUE  |
| 19 | 43370613 - 43383871   |             | FALSE | TRUE  |
| 20 | 11871371 - 11907257   | F - 20.00%  | TRUE  | TRUE  |
| 20 | 11871371 - 11907257   |             | TRUE  | TRUE  |
| 1  | 65210778 - 65298915   | F - 42.86%  | TRUE  | TRUE  |
| 1  | 65210778 - 65298915   |             | FALSE | TRUE  |
| 1  | 169890467 - 170054349 |             | TRUE  | FALSE |
| 1  | 169890467 - 170054349 | F - 7.69%   | TRUE  | TRUE  |
| 2  | 216476286 - 216708445 |             | TRUE  | FALSE |
| 2  | 216476286 - 216708445 | F - 16.67%  | TRUE  | FALSE |
| 2  | 216476286 - 216708445 | F - 16.67%  | TRUE  | TRUE  |
| 2  | 216476286 - 216708445 | T - 50.00%  | TRUE  | FALSE |
| 2  | 216476286 - 216708445 | F - 33.33%  | TRUE  | TRUE  |
| 2  | 216476286 - 216708445 |             | TRUE  | FALSE |
| 2  | 216476286 - 216708445 | F - 33.33%  | TRUE  | TRUE  |
| 2  | 216476286 - 216708445 |             | TRUE  | FALSE |
| 2  | 216476286 - 216708445 |             | TRUE  | FALSE |
| 2  | 216476286 - 216708445 | F - 16.67%  | TRUE  | FALSE |
| 2  | 216476286 - 216708445 | F - 16.67%  | TRUE  | TRUE  |
| 2  | 216476286 - 216708445 | F - 33.33%  | TRUE  | TRUE  |
| 2  | 216476286 - 216708445 | F - 33.33%  | FALSE | TRUE  |
| 2  | 216476286 - 216708445 |             | TRUE  | TRUE  |
| 2  | 216476286 - 216708445 | F - 16.67%  | TRUE  | TRUE  |
| 2  | 216476286 - 216708445 | F - 16.67%  | TRUE  | TRUE  |
| 2  | 216476286 - 216708445 | F - 33.33%  | FALSE | TRUE  |
| 2  | 216476286 - 216708445 | F - 16.67%  | TRUE  | TRUE  |
| 2  | 216476286 - 216708445 |             | TRUE  | TRUE  |
| 2  | 216476286 - 216708445 |             | TRUE  | TRUE  |
| 2  | 216476286 - 216708445 | F - 16.67%  | TRUE  | TRUE  |

|   |                       |            |       |       |
|---|-----------------------|------------|-------|-------|
| 2 | 216476286 - 216708445 |            | TRUE  | TRUE  |
| 2 | 216476286 - 216708445 | F - 33.33% | FALSE | TRUE  |
| 2 | 216476286 - 216708445 |            | TRUE  | TRUE  |
| 3 | 11178779 - 11305243   |            | TRUE  | FALSE |
| 3 | 11178779 - 11305243   | F - 22.22% | TRUE  | TRUE  |
| 3 | 11178779 - 11305243   |            | TRUE  | TRUE  |
| 3 | 25215823 - 25639423   |            | TRUE  | TRUE  |
| 3 | 25215823 - 25639423   | T - 75.00% | TRUE  | TRUE  |
| 3 | 25215823 - 25639423   |            | TRUE  | TRUE  |
| 3 | 25215823 - 25639423   | T - 62.50% | TRUE  | TRUE  |
| 3 | 25215823 - 25639423   | F - 31.25% | TRUE  | TRUE  |
| 3 | 25215823 - 25639423   | F - 43.75% | TRUE  | FALSE |
| 3 | 25215823 - 25639423   | F - 12.50% | TRUE  | TRUE  |
| 3 | 25215823 - 25639423   |            | TRUE  | TRUE  |
| 3 | 25215823 - 25639423   | F - 25.00% | TRUE  | TRUE  |
| 3 | 25215823 - 25639423   |            | TRUE  | TRUE  |
| 3 | 25215823 - 25639423   |            | TRUE  | FALSE |
| 3 | 25215823 - 25639423   |            | TRUE  | TRUE  |
| 3 | 25215823 - 25639423   | F - 12.50% | TRUE  | TRUE  |
| 3 | 25215823 - 25639423   | F - 25.00% | TRUE  | TRUE  |
| 3 | 25215823 - 25639423   | F - 6.25%  | FALSE | TRUE  |
| 3 | 25215823 - 25639423   | F - 6.25%  | TRUE  | TRUE  |
| 3 | 25215823 - 25639423   |            | TRUE  | TRUE  |
| 3 | 183903811 - 183911800 | F - 16.67% | TRUE  | TRUE  |
| 3 | 183903811 - 183911800 | F - 12.50% | TRUE  | TRUE  |
| 3 | 183903811 - 183911800 |            | TRUE  | TRUE  |
| 3 | 52846991 - 52864755   |            | TRUE  | FALSE |
| 3 | 52846991 - 52864755   |            | TRUE  | FALSE |
| 3 | 52846991 - 52864755   | T - 65.22% | TRUE  | TRUE  |
| 3 | 52846991 - 52864755   |            | FALSE | TRUE  |
| 3 | 52846991 - 52864755   |            | TRUE  | TRUE  |
| 4 | 166794410 - 167025609 |            | TRUE  | FALSE |
| 4 | 166794410 - 167025609 | T - 81.82% | TRUE  | TRUE  |
| 4 | 166794410 - 167025609 |            | TRUE  | TRUE  |
| 4 | 166794410 - 167025609 | F - 18.18% | FALSE | TRUE  |
| 5 | 130506503 - 130541119 |            | TRUE  | TRUE  |
| 5 | 130506503 - 130541119 | F - 28.57% | TRUE  | FALSE |
| 5 | 130506503 - 130541119 | F - 14.29% | TRUE  | TRUE  |
| 6 | 41762107 - 41863099   |            | TRUE  | TRUE  |
| 6 | 41762107 - 41863099   |            | TRUE  | TRUE  |
| 6 | 41762107 - 41863099   | T - 77.78% | TRUE  | TRUE  |
| 7 | 30067020 - 30170096   |            | TRUE  | FALSE |
| 7 | 30067020 - 30170096   | T - 83.33% | TRUE  | TRUE  |
| 7 | 30067020 - 30170096   | T - 83.33% | TRUE  | TRUE  |
| 7 | 30067020 - 30170096   | F - 8.33%  | TRUE  | TRUE  |
| 7 | 157128075 - 157210133 | F - 6.67%  | TRUE  | TRUE  |
| 7 | 157128075 - 157210133 |            | TRUE  | TRUE  |
| 7 | 157128075 - 157210133 | F - 6.67%  | TRUE  | TRUE  |
| 7 | 157128075 - 157210133 |            | TRUE  | TRUE  |
| 7 | 157128075 - 157210133 | F - 6.67%  | FALSE | TRUE  |
| 8 | 81540686 - 81787016   | F - 14.29% | TRUE  | TRUE  |
| 8 | 81540686 - 81787016   | F - 14.29% | TRUE  | TRUE  |
| 8 | 81540686 - 81787016   | F - 28.57% | TRUE  | TRUE  |
| 8 | 81540686 - 81787016   |            | TRUE  | TRUE  |
| 8 | 81540686 - 81787016   | T - 57.14% | TRUE  | TRUE  |
| 9 | 121038 - 188979       |            | TRUE  | TRUE  |
| 9 | 121038 - 188979       |            | TRUE  | TRUE  |
| 9 | 121038 - 188979       |            | TRUE  | TRUE  |



|            |    |                       |             |       |       |
|------------|----|-----------------------|-------------|-------|-------|
|            | 9  | 121038 - 188979       |             | TRUE  | TRUE  |
|            | 9  | 121038 - 188979       | F - 6.45%   | FALSE | TRUE  |
|            | 9  | 121038 - 188979       | F - 3.23%   | TRUE  | TRUE  |
|            | 9  | 121038 - 188979       | F - 3.23%   | TRUE  | TRUE  |
|            | 9  | 121038 - 188979       | T - 51.61%  | TRUE  | TRUE  |
|            | 9  | 121038 - 188979       | F - 9.68%   | TRUE  | TRUE  |
|            | 9  | 121038 - 188979       | F - 3.23%   | FALSE | TRUE  |
|            | 9  | 14081842 - 14398982   | F - 18.75%  | TRUE  | TRUE  |
|            | 9  | 14081842 - 14398982   |             | TRUE  | TRUE  |
| X          |    | 2609220 - 2659350     | F - 6.67%   | TRUE  | TRUE  |
| X          |    | 2609220 - 2659350     |             | TRUE  | TRUE  |
| X          |    | 2609220 - 2659350     |             | FALSE | TRUE  |
|            | 12 | 123942188 - 123957701 |             | TRUE  | FALSE |
|            | 12 | 123942188 - 123957701 | T - 50.00%  | TRUE  | TRUE  |
|            | 12 | 123942188 - 123957701 |             | TRUE  | TRUE  |
|            | 12 | 123942188 - 123957701 |             | FALSE | TRUE  |
|            | 12 | 123942188 - 123957701 | F - 21.43%  | FALSE | TRUE  |
|            | 12 | 15034115 - 15038860   |             | TRUE  | TRUE  |
|            | 12 | 15034115 - 15038860   |             | TRUE  | TRUE  |
|            | 12 | 15034115 - 15038860   | F - 28.57%  | FALSE | TRUE  |
|            | 13 | 43460524 - 43566385   | T - 80.00%  | TRUE  | TRUE  |
|            | 13 | 43460524 - 43566385   |             | TRUE  | TRUE  |
|            | 15 | 23599895 - 23613471   |             | TRUE  | TRUE  |
|            | 15 | 23599895 - 23613471   | F - 33.33%  | TRUE  | TRUE  |
|            | 15 | 23599895 - 23613471   |             | TRUE  | TRUE  |
|            | 16 | 31117428 - 31124112   |             | FALSE | TRUE  |
|            | 16 | 31117428 - 31124112   | T - 54.55%  | TRUE  | TRUE  |
|            | 16 | 31117428 - 31124112   | F - 9.09%   | FALSE | TRUE  |
|            | 16 | 31117428 - 31124112   | T - 100.00% | TRUE  | TRUE  |
|            | 19 | 40736224 - 40791302   |             | TRUE  | TRUE  |
|            | 19 | 40736224 - 40791302   | F - 2.94%   | TRUE  | TRUE  |
|            | 19 | 40736224 - 40791302   | F - 8.82%   | FALSE | TRUE  |
|            | 20 | 34108570 - 34117481   | F - 22.22%  | TRUE  | FALSE |
|            | 20 | 34108570 - 34117481   |             | TRUE  | FALSE |
|            | 21 | 38445526 - 38575413   |             | TRUE  | TRUE  |
|            | 21 | 38445526 - 38575413   | F - 2.86%   | TRUE  | TRUE  |
|            | 21 | 38445526 - 38575413   |             | TRUE  | TRUE  |
|            | 21 | 38445526 - 38575413   |             | TRUE  | TRUE  |
|            | 21 | 38445526 - 38575413   |             | TRUE  | TRUE  |
| 6_apd_hap1 |    | 3037483 - 3047379     | F - 38.71%  | TRUE  | TRUE  |
| 6_apd_hap1 |    | 3037483 - 3047379     |             | TRUE  | TRUE  |
| 6_apd_hap1 |    | 3037483 - 3047379     |             | TRUE  | TRUE  |
| 6_apd_hap1 |    | 3037483 - 3047379     |             | FALSE | TRUE  |
| 6_apd_hap1 |    | 3037483 - 3047379     |             | FALSE | TRUE  |
| 6_apd_hap1 |    | 3037483 - 3047379     |             | FALSE | TRUE  |
| 6_apd_hap1 |    | 3037483 - 3047379     |             | FALSE | TRUE  |
| 6_cox_hap2 |    | 3217334 - 3242215     | F - 43.59%  | TRUE  | TRUE  |
| 6_cox_hap2 |    | 3217334 - 3242215     |             | TRUE  | TRUE  |
| 6_cox_hap2 |    | 3217334 - 3242215     |             | TRUE  | FALSE |
| 6_cox_hap2 |    | 3217334 - 3242215     |             | TRUE  | TRUE  |
| 6_cox_hap2 |    | 3217334 - 3242215     |             | TRUE  | TRUE  |
| 6_cox_hap2 |    | 3217334 - 3242215     |             | FALSE | TRUE  |
| 6_cox_hap2 |    | 3217334 - 3242215     |             | FALSE | TRUE  |
| 6_cox_hap2 |    | 3217334 - 3242215     |             | FALSE | TRUE  |
| 6_cox_hap2 |    | 3217334 - 3242215     |             | FALSE | TRUE  |
| 6_cox_hap2 |    | 3217334 - 3242215     |             | FALSE | TRUE  |
| 6_dbb_hap3 |    | 2874022 - 2891126     | F - 5.26%   | TRUE  | TRUE  |
| 6_dbb_hap3 |    | 2874022 - 2891126     | F - 47.37%  | TRUE  | TRUE  |
| 6_dbb_hap3 |    | 2874022 - 2891126     |             | TRUE  | TRUE  |

|            |                       |            |       |       |
|------------|-----------------------|------------|-------|-------|
| 6_dbb_hap3 | 2874022 - 2891126     | F - 5.26%  | TRUE  | TRUE  |
| 1          | 145438462 - 145442635 |            | TRUE  | TRUE  |
| 1          | 145438462 - 145442635 | F - 22.22% | TRUE  | TRUE  |
| 1          | 145438462 - 145442635 | F - 11.11% | FALSE | TRUE  |
| 1          | 145438462 - 145442635 | F - 22.22% | TRUE  | TRUE  |
| 1          | 145438462 - 145442635 | F - 11.11% | TRUE  | TRUE  |
| 1          | 164524821 - 164854300 | F - 12.00% | TRUE  | TRUE  |
| 1          | 164524821 - 164854300 | F - 4.00%  | TRUE  | TRUE  |
| 1          | 164524821 - 164854300 | F - 4.00%  | FALSE | TRUE  |
| 1          | 164524821 - 164854300 |            | FALSE | TRUE  |
| 1          | 164524821 - 164854300 |            | FALSE | TRUE  |
| 1          | 11166588 - 11322608   | F - 45.45% | TRUE  | TRUE  |
| 1          | 11166588 - 11322608   | F - 9.09%  | TRUE  | TRUE  |
| 1          | 11166588 - 11322608   | F - 36.36% | TRUE  | TRUE  |
| 1          | 11166588 - 11322608   | F - 9.09%  | TRUE  | TRUE  |
| 1          | 11166588 - 11322608   |            | TRUE  | TRUE  |
| 1          | 11166588 - 11322608   | F - 9.09%  | TRUE  | TRUE  |
| 1          | 11166588 - 11322608   | F - 9.09%  | FALSE | TRUE  |
| 1          | 93727743 - 93811582   |            | TRUE  | FALSE |
| 1          | 93727743 - 93811582   |            | TRUE  | TRUE  |
| 1          | 93727743 - 93811582   | F - 8.00%  | FALSE | TRUE  |
| 1          | 93727743 - 93811582   | F - 12.00% | TRUE  | TRUE  |
| 1          | 93727743 - 93811582   |            | FALSE | TRUE  |
| 1          | 153533584 - 153540366 |            | TRUE  | TRUE  |
| 1          | 153533584 - 153540366 |            | TRUE  | TRUE  |
| 1          | 153533584 - 153540366 |            | FALSE | TRUE  |
| 1          | 153533584 - 153540366 | F - 11.11% | TRUE  | TRUE  |
| 2          | 189839046 - 189877472 |            | TRUE  | TRUE  |
| 2          | 189839046 - 189877472 |            | TRUE  | TRUE  |
| 2          | 189839046 - 189877472 | F - 20.00% | TRUE  | TRUE  |
| 2          | 189839046 - 189877472 | F - 10.00% | TRUE  | TRUE  |
| 2          | 189839046 - 189877472 |            | TRUE  | TRUE  |
| 2          | 189839046 - 189877472 | F - 40.00% | TRUE  | TRUE  |
| 2          | 189839046 - 189877472 | F - 40.00% | TRUE  | TRUE  |
| 2          | 189839046 - 189877472 | F - 10.00% | TRUE  | TRUE  |
| 2          | 189839046 - 189877472 |            | TRUE  | FALSE |
| 2          | 189839046 - 189877472 | F - 40.00% | TRUE  | TRUE  |
| 2          | 189839046 - 189877472 |            | TRUE  | TRUE  |
| 2          | 189839046 - 189877472 | F - 10.00% | TRUE  | TRUE  |
| 2          | 210288771 - 210598842 | F - 12.00% | TRUE  | TRUE  |
| 2          | 210288771 - 210598842 |            | TRUE  | TRUE  |
| 2          | 210288771 - 210598842 |            | TRUE  | FALSE |
| 2          | 210288771 - 210598842 | F - 8.00%  | TRUE  | TRUE  |
| 2          | 210288771 - 210598842 |            | TRUE  | TRUE  |
| 2          | 210288771 - 210598842 |            | TRUE  | TRUE  |
| 2          | 210288771 - 210598842 |            | TRUE  | TRUE  |
| 2          | 210288771 - 210598842 |            | FALSE | TRUE  |
| 2          | 210288771 - 210598842 |            | TRUE  | TRUE  |
| 3          | 194207869 - 194239008 |            | TRUE  | TRUE  |
| 3          | 194207869 - 194239008 | T - 60.00% | TRUE  | TRUE  |
| 3          | 194207869 - 194239008 | F - 20.00% | TRUE  | TRUE  |
| 3          | 38048987 - 38071253   | F - 7.69%  | TRUE  | TRUE  |
| 3          | 38048987 - 38071253   | F - 7.69%  | TRUE  | TRUE  |
| 3          | 38048987 - 38071253   | F - 7.69%  | FALSE | TRUE  |
| 3          | 38048987 - 38071253   | F - 30.77% | FALSE | TRUE  |
| 3          | 38048987 - 38071253   | F - 7.69%  | TRUE  | TRUE  |
| 3          | 38048987 - 38071253   | F - 7.69%  | TRUE  | TRUE  |
| 3          | 38048987 - 38071253   |            | FALSE | TRUE  |

|    |                       |            |       |       |
|----|-----------------------|------------|-------|-------|
| 3  | 38048987 - 38071253   |            | FALSE | TRUE  |
| 3  | 195415518 - 195438746 |            | TRUE  | TRUE  |
| 3  | 195415518 - 195438746 |            | TRUE  | TRUE  |
| 3  | 195415518 - 195438746 | F - 30.77% | TRUE  | TRUE  |
| 4  | 6783102 - 6885899     |            | TRUE  | TRUE  |
| 4  | 6783102 - 6885899     | F - 14.29% | TRUE  | TRUE  |
| 4  | 6783102 - 6885899     |            | TRUE  | TRUE  |
| 4  | 6783102 - 6885899     |            | FALSE | TRUE  |
| 4  | 154073494 - 154260474 |            | TRUE  | TRUE  |
| 4  | 154073494 - 154260474 | F - 20.00% | TRUE  | TRUE  |
| 4  | 154073494 - 154260474 | F - 13.33% | FALSE | TRUE  |
| 4  | 154073494 - 154260474 | F - 6.67%  | FALSE | TRUE  |
| 4  | 154073494 - 154260474 |            | TRUE  | TRUE  |
| 4  | 154073494 - 154260474 | F - 46.67% | TRUE  | TRUE  |
| 4  | 154073494 - 154260474 |            | FALSE | TRUE  |
| 4  | 154073494 - 154260474 |            | FALSE | TRUE  |
| 5  | 142657496 - 142815077 | F - 6.45%  | TRUE  | TRUE  |
| 5  | 142657496 - 142815077 |            | TRUE  | FALSE |
| 5  | 142657496 - 142815077 | F - 3.23%  | TRUE  | TRUE  |
| 6  | 31707725 - 31732628   | F - 45.83% | TRUE  | TRUE  |
| 6  | 31707725 - 31732628   |            | TRUE  | TRUE  |
| 6  | 31707725 - 31732628   |            | TRUE  | FALSE |
| 6  | 31707725 - 31732628   |            | TRUE  | TRUE  |
| 6  | 31707725 - 31732628   |            | TRUE  | TRUE  |
| 6  | 31707725 - 31732628   |            | FALSE | TRUE  |
| 6  | 31707725 - 31732628   |            | FALSE | TRUE  |
| 6  | 31707725 - 31732628   |            | FALSE | TRUE  |
| 6  | 31707725 - 31732628   |            | FALSE | TRUE  |
| 10 | 5454514 - 5500426     | T - 50.00% | TRUE  | TRUE  |
| 10 | 5454514 - 5500426     |            | TRUE  | TRUE  |
| 10 | 5454514 - 5500426     | F - 35.71% | TRUE  | TRUE  |
| 10 | 49892921 - 50191001   |            | TRUE  | TRUE  |
| 10 | 49892921 - 50191001   | F - 33.33% | FALSE | TRUE  |
| 10 | 49892921 - 50191001   |            | FALSE | TRUE  |
| 10 | 3818188 - 3827473     |            | TRUE  | FALSE |
| 10 | 3818188 - 3827473     | T - 50.00% | TRUE  | TRUE  |
| 14 | 68286496 - 69196935   |            | TRUE  | FALSE |
| 14 | 68286496 - 69196935   | F - 41.67% | TRUE  | TRUE  |
| 15 | 72635775 - 72668817   | F - 20.00% | TRUE  | TRUE  |
| 15 | 72635775 - 72668817   |            | TRUE  | TRUE  |
| 16 | 10479912 - 10577495   | T - 61.54% | TRUE  | TRUE  |
| 16 | 10479912 - 10577495   |            | TRUE  | TRUE  |
| 22 | 30792846 - 30821291   | F - 21.43% | TRUE  | TRUE  |
| 22 | 30792846 - 30821291   |            | TRUE  | TRUE  |
| 22 | 30792846 - 30821291   |            | FALSE | TRUE  |
| 1  | 26798902 - 26803133   |            | TRUE  | TRUE  |
| 1  | 26798902 - 26803133   |            | TRUE  | TRUE  |
| 1  | 26798902 - 26803133   | T - 90.48% | TRUE  | TRUE  |
| 1  | 25568740 - 25664656   |            | TRUE  | FALSE |
| 1  | 25568740 - 25664656   | F - 7.14%  | TRUE  | TRUE  |
| 1  | 25568740 - 25664656   |            | FALSE | TRUE  |
| 1  | 89472360 - 89488549   | T - 64.29% | TRUE  | TRUE  |
| 1  | 89472360 - 89488549   |            | TRUE  | TRUE  |
| 1  | 89472360 - 89488549   | T - 85.71% | TRUE  | TRUE  |
| 1  | 89472360 - 89488549   |            | TRUE  | TRUE  |
| 1  | 89472360 - 89488549   |            | TRUE  | TRUE  |
| 1  | 89472360 - 89488549   | T - 71.43% | TRUE  | TRUE  |
| 1  | 89472360 - 89488549   | T - 50.00% | TRUE  | TRUE  |

|    |                       |            |       |       |
|----|-----------------------|------------|-------|-------|
| 1  | 177893091 - 178007142 |            | TRUE  | FALSE |
| 1  | 177893091 - 178007142 |            | TRUE  | FALSE |
| 1  | 177893091 - 178007142 |            | TRUE  | FALSE |
| 1  | 177893091 - 178007142 | F - 8.33%  | TRUE  | FALSE |
| 1  | 177893091 - 178007142 |            | FALSE | TRUE  |
| 1  | 177893091 - 178007142 |            | TRUE  | TRUE  |
| 1  | 177893091 - 178007142 |            | TRUE  | TRUE  |
| 3  | 56654160 - 56717265   |            | TRUE  | FALSE |
| 3  | 56654160 - 56717265   | F - 14.29% | TRUE  | FALSE |
| 3  | 56654160 - 56717265   |            | TRUE  | TRUE  |
| 5  | 159990127 - 160279221 | F - 31.25% | TRUE  | FALSE |
| 5  | 159990127 - 160279221 |            | TRUE  | FALSE |
| 5  | 159990127 - 160279221 | F - 37.50% | TRUE  | FALSE |
| 5  | 159990127 - 160279221 |            | FALSE | TRUE  |
| 5  | 159990127 - 160279221 |            | TRUE  | TRUE  |
| 8  | 110253148 - 110346614 | F - 45.45% | TRUE  | TRUE  |
| 8  | 110253148 - 110346614 |            | TRUE  | TRUE  |
| 9  | 79792269 - 80036457   | F - 16.67% | TRUE  | FALSE |
| 9  | 79792269 - 80036457   |            | TRUE  | TRUE  |
| 9  | 79792269 - 80036457   |            | FALSE | TRUE  |
| 9  | 79792269 - 80036457   |            | FALSE | TRUE  |
| 9  | 79792269 - 80036457   |            | TRUE  | TRUE  |
| 9  | 79792269 - 80036457   |            | TRUE  | TRUE  |
| 9  | 79792269 - 80036457   |            | FALSE | TRUE  |
| 10 | 75668935 - 75677258   | T - 62.50% | TRUE  | TRUE  |
| 10 | 75668935 - 75677258   |            | TRUE  | TRUE  |
| 10 | 75668935 - 75677258   | F - 12.50% | TRUE  | TRUE  |
| 10 | 75668935 - 75677258   |            | TRUE  | TRUE  |
| 10 | 75668935 - 75677258   | T - 62.50% | TRUE  | FALSE |
| 10 | 75668935 - 75677258   |            | TRUE  | TRUE  |
| 10 | 75668935 - 75677258   | F - 6.25%  | FALSE | TRUE  |
| 10 | 75668935 - 75677258   | T - 68.75% | TRUE  | TRUE  |
| 10 | 75668935 - 75677258   |            | TRUE  | TRUE  |
| 10 | 75668935 - 75677258   |            | TRUE  | TRUE  |
| 11 | 66233798 - 66244808   |            | TRUE  | TRUE  |
| 11 | 66233798 - 66244808   | F - 9.09%  | TRUE  | TRUE  |
| 11 | 66233798 - 66244808   | T - 81.82% | TRUE  | TRUE  |
| 11 | 2150342 - 2182571     | F - 40.48% | TRUE  | TRUE  |
| 11 | 2150342 - 2182571     |            | TRUE  | TRUE  |
| 11 | 2150342 - 2182571     | F - 40.48% | TRUE  | TRUE  |
| 11 | 2150342 - 2182571     | F - 2.38%  | TRUE  | TRUE  |
| 11 | 2150342 - 2182571     | F - 28.57% | FALSE | TRUE  |
| 11 | 2150342 - 2182571     | F - 21.43% | TRUE  | TRUE  |
| 11 | 2150342 - 2182571     | F - 28.57% | TRUE  | TRUE  |
| 11 | 2150342 - 2182571     | F - 7.14%  | TRUE  | TRUE  |
| 11 | 2150342 - 2182571     | F - 11.90% | TRUE  | TRUE  |
| 11 | 2150342 - 2182571     | F - 2.38%  | FALSE | TRUE  |
| 11 | 2150342 - 2182571     | F - 4.76%  | TRUE  | TRUE  |
| 11 | 2150342 - 2182571     | F - 2.38%  | TRUE  | TRUE  |
| 11 | 2150342 - 2182571     | F - 19.05% | TRUE  | TRUE  |
| 11 | 2150342 - 2182571     |            | TRUE  | TRUE  |
| 11 | 2150342 - 2182571     | F - 40.48% | TRUE  | TRUE  |
| 11 | 2150342 - 2182571     | F - 9.52%  | FALSE | TRUE  |
| 11 | 2150342 - 2182571     |            | FALSE | TRUE  |
| 11 | 2150342 - 2182571     |            | TRUE  | TRUE  |
| 11 | 2150342 - 2182571     | F - 16.67% | TRUE  | TRUE  |
| 11 | 2150342 - 2182571     | F - 26.19% | FALSE | TRUE  |
| 11 | 2150342 - 2182571     |            | TRUE  | TRUE  |

|             |                       |             |       |       |
|-------------|-----------------------|-------------|-------|-------|
| 11          | 2150342 - 2182571     |             | TRUE  | TRUE  |
| 11          | 2150342 - 2182571     | F - 7.14%   | FALSE | TRUE  |
| 11          | 2150342 - 2182571     |             | FALSE | TRUE  |
| 12          | 2050757 - 2113701     | F - 10.00%  | TRUE  | TRUE  |
| 12          | 2050757 - 2113701     | F - 30.00%  | TRUE  | TRUE  |
| 12          | 2050757 - 2113701     |             | TRUE  | TRUE  |
| 12          | 2050757 - 2113701     | F - 20.00%  | TRUE  | TRUE  |
| 12          | 123405498 - 123466196 | F - 20.00%  | TRUE  | TRUE  |
| 12          | 123405498 - 123466196 |             | TRUE  | TRUE  |
| 15          | 42120283 - 42427455   |             | TRUE  | TRUE  |
| 15          | 42120283 - 42427455   | F - 48.28%  | TRUE  | TRUE  |
| 15          | 42120283 - 42427455   | F - 13.79%  | TRUE  | TRUE  |
| 15          | 42120283 - 42427455   |             | TRUE  | TRUE  |
| 15          | 42120283 - 42427455   |             | FALSE | TRUE  |
| 15          | 42120283 - 42427455   |             | TRUE  | TRUE  |
| 16          | 10855083 - 10912621   |             | TRUE  | TRUE  |
| 16          | 10855083 - 10912621   | F - 27.27%  | TRUE  | FALSE |
| 16          | 23533334 - 23568696   |             | TRUE  | TRUE  |
| 16          | 23533334 - 23568696   | T - 100.00% | TRUE  | TRUE  |
| 6_cox_hap2  | 2051204 - 2077009     | F - 7.14%   | TRUE  | TRUE  |
| 6_cox_hap2  | 2051204 - 2077009     |             | TRUE  | TRUE  |
| 6_cox_hap2  | 2051204 - 2077009     | T - 50.00%  | TRUE  | FALSE |
| 6_dbb_hap3  | 1832788 - 1858594     | F - 7.14%   | TRUE  | TRUE  |
| 6_dbb_hap3  | 1832788 - 1858594     |             | TRUE  | TRUE  |
| 6_dbb_hap3  | 1832788 - 1858594     | T - 50.00%  | TRUE  | FALSE |
| 6_qbl_hap6  | 1832059 - 1857863     | F - 7.14%   | TRUE  | TRUE  |
| 6_qbl_hap6  | 1832059 - 1857863     |             | TRUE  | TRUE  |
| 6_qbl_hap6  | 1832059 - 1857863     | T - 50.00%  | TRUE  | FALSE |
| 6_ssto_hap7 | 1871431 - 1897235     | F - 7.14%   | TRUE  | TRUE  |
| 6_ssto_hap7 | 1871431 - 1897235     |             | TRUE  | TRUE  |
| 6_ssto_hap7 | 1871431 - 1897235     | T - 50.00%  | TRUE  | FALSE |
| 12          | 111051832 - 111087235 |             | TRUE  | FALSE |
| 12          | 111051832 - 111087235 |             | TRUE  | TRUE  |
| 12          | 111051832 - 111087235 | F - 12.50%  | TRUE  | TRUE  |
| 1           | 185126192 - 185260913 |             | TRUE  | TRUE  |
| 1           | 185126192 - 185260913 | F - 33.33%  | TRUE  | FALSE |
| 1           | 185126192 - 185260913 |             | TRUE  | TRUE  |
| 1           | 185126192 - 185260913 |             | FALSE | TRUE  |
| 1           | 185126192 - 185260913 |             | FALSE | TRUE  |
| 2           | 233924677 - 234116549 | F - 4.17%   | TRUE  | TRUE  |
| 2           | 233924677 - 234116549 | F - 45.83%  | FALSE | TRUE  |
| 2           | 233924677 - 234116549 |             | FALSE | TRUE  |
| 2           | 233924677 - 234116549 |             | FALSE | TRUE  |
| 2           | 233924677 - 234116549 |             | FALSE | TRUE  |
| 3           | 186256230 - 186264491 |             | TRUE  | TRUE  |
| 3           | 186256230 - 186264491 | F - 33.33%  | TRUE  | TRUE  |
| 5           | 38475065 - 38608456   |             | TRUE  | TRUE  |
| 5           | 38475065 - 38608456   | F - 8.33%   | TRUE  | FALSE |
| 5           | 38475065 - 38608456   | F - 25.00%  | TRUE  | TRUE  |
| 5           | 38475065 - 38608456   |             | TRUE  | TRUE  |
| 5           | 38475065 - 38608456   | F - 8.33%   | TRUE  | TRUE  |
| 5           | 38475065 - 38608456   | F - 8.33%   | TRUE  | TRUE  |
| 5           | 38475065 - 38608456   | F - 8.33%   | TRUE  | TRUE  |
| 5           | 38475065 - 38608456   | F - 8.33%   | TRUE  | TRUE  |
| 5           | 38475065 - 38608456   | F - 8.33%   | TRUE  | TRUE  |
| 5           | 38475065 - 38608456   | F - 8.33%   | TRUE  | TRUE  |
| 5           | 38475065 - 38608456   |             | FALSE | TRUE  |
| 6           | 146056005 - 146207721 |             | TRUE  | TRUE  |
| 6           | 146056005 - 146207721 | T - 50.00%  | FALSE | TRUE  |

|    |                       |            |       |       |
|----|-----------------------|------------|-------|-------|
| 9  | 130965658 - 131017527 |            | TRUE  | TRUE  |
| 9  | 130965658 - 131017527 | T - 82.61% | TRUE  | TRUE  |
| 9  | 130965658 - 131017527 |            | TRUE  | TRUE  |
| 9  | 130965658 - 131017527 |            | TRUE  | TRUE  |
| 9  | 130965658 - 131017527 |            | TRUE  | FALSE |
| 9  | 130965658 - 131017527 | F - 4.35%  | TRUE  | TRUE  |
| 9  | 130965658 - 131017527 |            | TRUE  | TRUE  |
| 9  | 130965658 - 131017527 | F - 8.70%  | TRUE  | TRUE  |
| 9  | 130965658 - 131017527 | F - 4.35%  | TRUE  | TRUE  |
| 9  | 130965658 - 131017527 | T - 56.52% | TRUE  | TRUE  |
| 9  | 130965658 - 131017527 | T - 52.17% | TRUE  | TRUE  |
| 9  | 130965658 - 131017527 | F - 4.35%  | TRUE  | TRUE  |
| 9  | 130965658 - 131017527 | T - 86.96% | TRUE  | TRUE  |
| 9  | 130965658 - 131017527 | F - 13.04% | TRUE  | TRUE  |
| 9  | 130965658 - 131017527 |            | TRUE  | TRUE  |
| 9  | 130965658 - 131017527 |            | TRUE  | TRUE  |
| 9  | 130965658 - 131017527 | F - 8.70%  | TRUE  | TRUE  |
| 9  | 130965658 - 131017527 |            | TRUE  | TRUE  |
| 9  | 130965658 - 131017527 | F - 43.48% | TRUE  | TRUE  |
| 9  | 130965658 - 131017527 |            | TRUE  | TRUE  |
| 9  | 130965658 - 131017527 | F - 4.35%  | TRUE  | TRUE  |
| 9  | 130965658 - 131017527 |            | TRUE  | TRUE  |
| 9  | 130965658 - 131017527 | F - 8.70%  | FALSE | TRUE  |
| 10 | 101635334 - 101769676 |            | FALSE | TRUE  |
| 10 | 101635334 - 101769676 | F - 36.36% | TRUE  | TRUE  |
| 10 | 101635334 - 101769676 |            | TRUE  | TRUE  |
| 10 | 101635334 - 101769676 | F - 27.27% | TRUE  | TRUE  |
| 10 | 101635334 - 101769676 |            | TRUE  | TRUE  |
| 11 | 115624966 - 115631345 |            | TRUE  | TRUE  |
| 11 | 115624966 - 115631345 | F - 14.29% | FALSE | TRUE  |
| 11 | 115624966 - 115631345 | F - 14.29% | FALSE | TRUE  |
| 14 | 52897308 - 53019301   |            | FALSE | TRUE  |
| 14 | 52897308 - 53019301   | F - 10.00% | TRUE  | TRUE  |
| 14 | 52897308 - 53019301   |            | TRUE  | TRUE  |
| 15 | 20767674 - 20781026   |            | TRUE  | TRUE  |
| 15 | 20767674 - 20781026   |            | TRUE  | TRUE  |
| 15 | 20767674 - 20781026   | F - 33.33% | TRUE  | TRUE  |
| 15 | 28623784 - 28637171   | F - 40.00% | TRUE  | TRUE  |
| 15 | 28623784 - 28637171   | T - 80.00% | TRUE  | TRUE  |
| 15 | 28623784 - 28637171   |            | TRUE  | TRUE  |
| 22 | 45588114 - 45636650   |            | TRUE  | TRUE  |
| 22 | 45588114 - 45636650   |            | TRUE  | TRUE  |
| 22 | 45588114 - 45636650   | F - 18.18% | TRUE  | FALSE |
| 1  | 87380331 - 87634887   |            | TRUE  | TRUE  |
| 1  | 87380331 - 87634887   |            | TRUE  | TRUE  |
| 1  | 87380331 - 87634887   | F - 8.70%  | TRUE  | TRUE  |
| 2  | 219135115 - 219211516 |            | TRUE  | TRUE  |
| 2  | 219135115 - 219211516 | F - 7.69%  | TRUE  | TRUE  |
| 2  | 219135115 - 219211516 | F - 38.46% | TRUE  | TRUE  |
| 2  | 219135115 - 219211516 | F - 7.69%  | FALSE | TRUE  |
| 2  | 219135115 - 219211516 | F - 7.69%  | FALSE | TRUE  |
| 2  | 219135115 - 219211516 |            | FALSE | TRUE  |
| 2  | 219135115 - 219211516 | T - 61.54% | TRUE  | TRUE  |
| 2  | 160625139 - 160761267 |            | TRUE  | TRUE  |
| 2  | 160625139 - 160761267 |            | TRUE  | TRUE  |
| 2  | 160625139 - 160761267 |            | TRUE  | TRUE  |
| 2  | 160625139 - 160761267 | T - 50.00% | FALSE | TRUE  |
| 2  | 160625139 - 160761267 |            | FALSE | TRUE  |

|   |    |                       |            |       |       |
|---|----|-----------------------|------------|-------|-------|
|   | 2  | 160625139 - 160761267 |            | FALSE | TRUE  |
|   | 2  | 27851114 - 27874375   | F - 23.53% | TRUE  | FALSE |
|   | 2  | 27851114 - 27874375   |            | TRUE  | TRUE  |
|   | 2  | 27851114 - 27874375   |            | TRUE  | TRUE  |
|   | 3  | 25639475 - 25706430   |            | TRUE  | TRUE  |
|   | 3  | 25639475 - 25706430   | F - 5.56%  | TRUE  | TRUE  |
|   | 3  | 25639475 - 25706430   |            | TRUE  | TRUE  |
|   | 3  | 25639475 - 25706430   |            | TRUE  | TRUE  |
|   | 3  | 25639475 - 25706430   |            | FALSE | TRUE  |
|   | 4  | 100257649 - 100274184 | T - 57.14% | TRUE  | TRUE  |
|   | 4  | 100257649 - 100274184 |            | FALSE | TRUE  |
|   | 4  | 100257649 - 100274184 | T - 85.71% | TRUE  | TRUE  |
|   | 4  | 100257649 - 100274184 |            | FALSE | TRUE  |
|   | 6  | 56951642 - 57035105   |            | TRUE  | FALSE |
|   | 6  | 56951642 - 57035105   | F - 42.86% | TRUE  | TRUE  |
|   | 6  | 56951642 - 57035105   |            | TRUE  | TRUE  |
|   | 6  | 56951642 - 57035105   | F - 28.57% | TRUE  | TRUE  |
|   | 6  | 56951642 - 57035105   |            | FALSE | TRUE  |
|   | 6  | 56951642 - 57035105   | F - 35.71% | TRUE  | TRUE  |
|   | 6  | 56951642 - 57035105   | F - 35.71% | TRUE  | TRUE  |
|   | 6  | 56951642 - 57035105   | F - 17.86% | TRUE  | TRUE  |
|   | 6  | 56951642 - 57035105   | F - 39.29% | TRUE  | TRUE  |
|   | 6  | 56951642 - 57035105   |            | TRUE  | TRUE  |
|   | 6  | 56951642 - 57035105   | F - 21.43% | TRUE  | TRUE  |
|   | 6  | 56951642 - 57035105   |            | TRUE  | TRUE  |
|   | 6  | 56951642 - 57035105   |            | TRUE  | TRUE  |
|   | 7  | 150035407 - 150038763 |            | TRUE  | TRUE  |
|   | 7  | 150035407 - 150038763 | T - 85.71% | FALSE | TRUE  |
|   | 9  | 86595626 - 86618987   |            | TRUE  | TRUE  |
|   | 9  | 86595626 - 86618987   | F - 33.33% | TRUE  | TRUE  |
|   | 9  | 86595626 - 86618987   | T - 88.89% | TRUE  | TRUE  |
|   | 9  | 86595626 - 86618987   |            | TRUE  | TRUE  |
|   | 9  | 140513444 - 140764468 | F - 8.00%  | TRUE  | TRUE  |
|   | 9  | 140513444 - 140764468 |            | TRUE  | TRUE  |
|   | 9  | 140513444 - 140764468 |            | FALSE | TRUE  |
|   | 9  | 95059640 - 95087876   |            | TRUE  | TRUE  |
|   | 9  | 95059640 - 95087876   |            | TRUE  | TRUE  |
|   | 9  | 95059640 - 95087876   | F - 33.33% | FALSE | TRUE  |
|   | 9  | 95059640 - 95087876   | F - 3.70%  | FALSE | TRUE  |
|   | 9  | 95059640 - 95087876   | T - 51.85% | FALSE | TRUE  |
|   | 9  | 95059640 - 95087876   |            | FALSE | TRUE  |
| X |    | 52976462 - 53024651   |            | TRUE  | TRUE  |
| X |    | 52976462 - 53024651   | F - 19.44% | FALSE | TRUE  |
| X |    | 138808505 - 139027435 |            | TRUE  | FALSE |
| X |    | 138808505 - 139027435 | F - 6.25%  | TRUE  | FALSE |
| X |    | 138808505 - 139027435 |            | TRUE  | TRUE  |
|   | 10 | 112327449 - 112364394 |            | TRUE  | FALSE |
|   | 10 | 112327449 - 112364394 | T - 75.00% | TRUE  | TRUE  |
|   | 10 | 112327449 - 112364394 |            | TRUE  | TRUE  |
|   | 10 | 112327449 - 112364394 |            | FALSE | TRUE  |
|   | 11 | 5684425 - 5959849     | T - 50.00% | TRUE  | TRUE  |
|   | 11 | 5684425 - 5959849     |            | FALSE | TRUE  |
|   | 11 | 5684425 - 5959849     |            | TRUE  | TRUE  |
|   | 11 | 5684425 - 5959849     |            | TRUE  | TRUE  |
|   | 11 | 5684425 - 5959849     |            | TRUE  | TRUE  |
|   | 11 | 5684425 - 5959849     | F - 5.00%  | TRUE  | TRUE  |
|   | 11 | 5684425 - 5959849     |            | TRUE  | TRUE  |
|   | 15 | 91473410 - 91497323   |            | FALSE | TRUE  |

|    |                       |             |       |       |
|----|-----------------------|-------------|-------|-------|
| 15 | 91473410 - 91497323   |             | TRUE  | TRUE  |
| 15 | 91473410 - 91497323   | F - 29.41%  | TRUE  | TRUE  |
| 15 | 91473410 - 91497323   | F - 23.53%  | TRUE  | TRUE  |
| 17 | 1397871 - 1420182     | F - 33.33%  | TRUE  | TRUE  |
| 17 | 1397871 - 1420182     |             | TRUE  | TRUE  |
| 19 | 41856816 - 41889988   |             | TRUE  | TRUE  |
| 19 | 41856816 - 41889988   | F - 37.50%  | FALSE | TRUE  |
| 20 | 5488521 - 5490648     |             | TRUE  | TRUE  |
| 20 | 5488521 - 5490648     | T - 100.00% | TRUE  | TRUE  |
| 20 | 5488521 - 5490648     | T - 100.00% | TRUE  | TRUE  |
| 21 | 27011584 - 27089874   |             | TRUE  | TRUE  |
| 21 | 27011584 - 27089874   | F - 6.25%   | TRUE  | TRUE  |
| 21 | 27011584 - 27089874   | F - 6.25%   | FALSE | TRUE  |
| 21 | 27011584 - 27089874   |             | FALSE | TRUE  |
| 21 | 27011584 - 27089874   | F - 6.25%   | FALSE | TRUE  |
| 21 | 27011584 - 27089874   |             | FALSE | TRUE  |
| 21 | 27011584 - 27089874   | F - 18.75%  | FALSE | TRUE  |
| 22 | 21400249 - 21418457   | T - 62.50%  | TRUE  | FALSE |
| 22 | 21400249 - 21418457   |             | TRUE  | TRUE  |
| 1  | 15563065 - 15726779   |             | TRUE  | FALSE |
| 1  | 15563065 - 15726779   | F - 10.00%  | TRUE  | FALSE |
| 1  | 81771845 - 82458107   | T - 74.19%  | TRUE  | TRUE  |
| 1  | 81771845 - 82458107   |             | TRUE  | FALSE |
| 1  | 81771845 - 82458107   |             | TRUE  | FALSE |
| 1  | 81771845 - 82458107   |             | FALSE | TRUE  |
| 1  | 81771845 - 82458107   |             | TRUE  | TRUE  |
| 1  | 81771845 - 82458107   | T - 67.74%  | TRUE  | TRUE  |
| 1  | 81771845 - 82458107   |             | FALSE | TRUE  |
| 1  | 182758428 - 182799519 |             | TRUE  | FALSE |
| 1  | 182758428 - 182799519 |             | FALSE | TRUE  |
| 1  | 182758428 - 182799519 |             | FALSE | TRUE  |
| 1  | 182758428 - 182799519 |             | FALSE | TRUE  |
| 1  | 182758428 - 182799519 | T - 52.17%  | FALSE | TRUE  |
| 1  | 182758428 - 182799519 |             | FALSE | TRUE  |
| 2  | 217497551 - 217529159 |             | TRUE  | FALSE |
| 2  | 217497551 - 217529159 | F - 10.00%  | FALSE | TRUE  |
| 3  | 104241218 - 104331339 | T - 100.00% | TRUE  | FALSE |
| 3  | 104241218 - 104331339 |             | TRUE  | TRUE  |
| 3  | 14186647 - 14220283   | F - 23.53%  | TRUE  | TRUE  |
| 3  | 14186647 - 14220283   | F - 5.88%   | TRUE  | TRUE  |
| 3  | 14186647 - 14220283   |             | TRUE  | TRUE  |
| 4  | 110661848 - 110723335 | T - 63.64%  | TRUE  | TRUE  |
| 4  | 110661848 - 110723335 |             | TRUE  | TRUE  |
| 4  | 110661848 - 110723335 |             | TRUE  | FALSE |
| 4  | 8594387 - 8621488     |             | TRUE  | TRUE  |
| 4  | 8594387 - 8621488     | F - 42.86%  | TRUE  | TRUE  |
| 5  | 127276118 - 127419299 |             | TRUE  | TRUE  |
| 5  | 127276118 - 127419299 |             | TRUE  | TRUE  |
| 5  | 127276118 - 127419299 | F - 41.67%  | TRUE  | TRUE  |
| 6  | 30539153 - 30564956   | F - 6.67%   | TRUE  | TRUE  |
| 6  | 30539153 - 30564956   |             | TRUE  | TRUE  |
| 6  | 30539153 - 30564956   | T - 53.33%  | TRUE  | FALSE |
| 6  | 35181839 - 35220856   | T - 83.33%  | TRUE  | TRUE  |
| 6  | 35181839 - 35220856   |             | TRUE  | TRUE  |
| 6  | 35181839 - 35220856   | F - 16.67%  | TRUE  | TRUE  |
| 6  | 35181839 - 35220856   |             | FALSE | TRUE  |
| 6  | 35181839 - 35220856   |             | TRUE  | TRUE  |
| 6  | 35181839 - 35220856   |             | TRUE  | TRUE  |



|            |                       |             |       |       |
|------------|-----------------------|-------------|-------|-------|
| 6          | 35181839 - 35220856   |             | FALSE | TRUE  |
| 10         | 124713897 - 124757029 |             | TRUE  | TRUE  |
| 10         | 124713897 - 124757029 | F - 8.33%   | TRUE  | TRUE  |
| 10         | 75572259 - 75634349   |             | TRUE  | TRUE  |
| 10         | 75572259 - 75634349   | F - 17.24%  | FALSE | TRUE  |
| 11         | 76156066 - 76264069   |             | TRUE  | TRUE  |
| 11         | 76156066 - 76264069   |             | TRUE  | TRUE  |
| 11         | 76156066 - 76264069   | F - 8.00%   | FALSE | TRUE  |
| 11         | 76156066 - 76264069   |             | TRUE  | TRUE  |
| 11         | 76156066 - 76264069   |             | TRUE  | TRUE  |
| 13         | 98605742 - 98676551   |             | TRUE  | FALSE |
| 13         | 98605742 - 98676551   | F - 2.63%   | TRUE  | FALSE |
| 13         | 98605742 - 98676551   |             | TRUE  | FALSE |
| 13         | 98605742 - 98676551   | F - 42.11%  | TRUE  | TRUE  |
| 13         | 98605742 - 98676551   |             | TRUE  | TRUE  |
| 15         | 45923346 - 45983492   | F - 25.00%  | FALSE | TRUE  |
| 15         | 45923346 - 45983492   |             | TRUE  | TRUE  |
| 16         | 10971039 - 11023624   |             | TRUE  | TRUE  |
| 16         | 10971039 - 11023624   |             | TRUE  | FALSE |
| 16         | 10971039 - 11023624   | T - 100.00% | TRUE  | TRUE  |
| 17         | 71188771 - 71204646   | T - 85.71%  | TRUE  | TRUE  |
| 17         | 71188771 - 71204646   |             | TRUE  | TRUE  |
| 19         | 49977466 - 49990894   |             | TRUE  | TRUE  |
| 19         | 49977466 - 49990894   | T - 91.67%  | TRUE  | TRUE  |
| 20         | 21106624 - 21227260   |             | TRUE  | FALSE |
| 20         | 21106624 - 21227260   | F - 10.53%  | FALSE | TRUE  |
| 6_mcf_hap5 | 2968140 - 2985242     | F - 5.26%   | TRUE  | TRUE  |
| 6_mcf_hap5 | 2968140 - 2985242     | F - 47.37%  | TRUE  | TRUE  |
| 6_mcf_hap5 | 2968140 - 2985242     |             | TRUE  | TRUE  |
| 1          | 181002561 - 181031074 | F - 30.77%  | FALSE | TRUE  |
| 1          | 181002561 - 181031074 |             | TRUE  | TRUE  |
| 1          | 181002561 - 181031074 | F - 7.69%   | TRUE  | TRUE  |
| 1          | 181002561 - 181031074 |             | TRUE  | TRUE  |
| 1          | 23707554 - 23751261   | F - 33.33%  | TRUE  | FALSE |
| 1          | 23707554 - 23751261   | T - 83.33%  | TRUE  | TRUE  |
| 1          | 23707554 - 23751261   |             | TRUE  | TRUE  |
| 1          | 23707554 - 23751261   |             | TRUE  | TRUE  |
| 1          | 161952982 - 161993644 | T - 57.14%  | TRUE  | TRUE  |
| 1          | 161952982 - 161993644 |             | TRUE  | TRUE  |
| 1          | 161952982 - 161993644 | F - 14.29%  | FALSE | TRUE  |
| 1          | 175291935 - 175712906 |             | TRUE  | FALSE |
| 1          | 175291935 - 175712906 | T - 87.50%  | TRUE  | TRUE  |
| 1          | 175291935 - 175712906 |             | FALSE | TRUE  |
| 2          | 11584501 - 11606297   |             | TRUE  | TRUE  |
| 2          | 11584501 - 11606297   |             | TRUE  | TRUE  |
| 2          | 11584501 - 11606297   | F - 4.55%   | FALSE | TRUE  |
| 3          | 140947568 - 141013748 |             | TRUE  | FALSE |
| 3          | 140947568 - 141013748 |             | TRUE  | FALSE |
| 3          | 140947568 - 141013748 | F - 9.09%   | TRUE  | TRUE  |
| 3          | 140947568 - 141013748 |             | TRUE  | TRUE  |
| 5          | 4033826 - 4041877     | T - 100.00% | TRUE  | TRUE  |
| 5          | 4033826 - 4041877     |             | TRUE  | TRUE  |
| 6          | 8413301 - 8435794     |             | TRUE  | TRUE  |
| 6          | 8413301 - 8435794     | F - 9.09%   | TRUE  | TRUE  |
| 6          | 8413301 - 8435794     | F - 18.18%  | TRUE  | TRUE  |
| 6          | 52842746 - 52860178   |             | FALSE | TRUE  |
| 6          | 52842746 - 52860178   | F - 8.33%   | TRUE  | TRUE  |
| 7          | 140152840 - 140179369 | F - 12.50%  | TRUE  | TRUE  |

|   |    |                       |            |       |       |
|---|----|-----------------------|------------|-------|-------|
|   | 7  | 140152840 - 140179369 |            | TRUE  | FALSE |
|   | 7  | 140152840 - 140179369 |            | FALSE | TRUE  |
|   | 7  | 140152840 - 140179369 |            | FALSE | TRUE  |
|   | 7  | 140152840 - 140179369 |            | FALSE | TRUE  |
|   | 7  | 141352181 - 141401955 |            | TRUE  | TRUE  |
|   | 7  | 141352181 - 141401955 | T - 50.00% | TRUE  | TRUE  |
|   | 7  | 141352181 - 141401955 | T - 50.00% | TRUE  | TRUE  |
|   | 8  | 28351722 - 28431785   |            | FALSE | TRUE  |
|   | 8  | 28351722 - 28431785   |            | TRUE  | TRUE  |
|   | 8  | 28351722 - 28431785   |            | FALSE | TRUE  |
|   | 8  | 28351722 - 28431785   | T - 71.43% | FALSE | TRUE  |
|   | 8  | 28351722 - 28431785   | T - 57.14% | TRUE  | TRUE  |
|   | 8  | 58055248 - 58152857   |            | TRUE  | TRUE  |
|   | 8  | 58055248 - 58152857   | T - 60.00% | TRUE  | TRUE  |
|   | 9  | 130213765 - 130265780 |            | TRUE  | FALSE |
|   | 9  | 130213765 - 130265780 |            | TRUE  | TRUE  |
|   | 9  | 130213765 - 130265780 | F - 15.79% | TRUE  | FALSE |
|   | 9  | 130213765 - 130265780 |            | TRUE  | TRUE  |
|   | 9  | 130213765 - 130265780 |            | FALSE | TRUE  |
|   | 9  | 37510889 - 37588929   |            | TRUE  | FALSE |
|   | 9  | 37510889 - 37588929   | T - 50.00% | TRUE  | TRUE  |
|   | 9  | 37510889 - 37588929   | F - 12.50% | TRUE  | TRUE  |
|   | 9  | 37510889 - 37588929   |            | FALSE | TRUE  |
| X |    | 133594175 - 133654543 |            | TRUE  | TRUE  |
| X |    | 133594175 - 133654543 | F - 16.67% | TRUE  | TRUE  |
| X |    | 53963109 - 54075391   |            | TRUE  | TRUE  |
| X |    | 53963109 - 54075391   | F - 7.41%  | TRUE  | TRUE  |
| X |    | 53963109 - 54075391   |            | FALSE | TRUE  |
| X |    | 53963109 - 54075391   |            | TRUE  | TRUE  |
| X |    | 53963109 - 54075391   |            | FALSE | TRUE  |
|   | 11 | 83166055 - 85338966   | T - 66.67% | TRUE  | TRUE  |
|   | 11 | 83166055 - 85338966   |            | TRUE  | TRUE  |
|   | 11 | 83166055 - 85338966   |            | FALSE | TRUE  |
|   | 11 | 83166055 - 85338966   |            | FALSE | TRUE  |
|   | 12 | 861759 - 1020618      |            | TRUE  | TRUE  |
|   | 12 | 861759 - 1020618      |            | TRUE  | FALSE |
|   | 12 | 861759 - 1020618      |            | TRUE  | TRUE  |
|   | 12 | 861759 - 1020618      |            | FALSE | TRUE  |
|   | 12 | 861759 - 1020618      |            | TRUE  | TRUE  |
|   | 12 | 861759 - 1020618      | F - 6.25%  | TRUE  | TRUE  |
|   | 12 | 8185299 - 8208118     | T - 50.00% | TRUE  | TRUE  |
|   | 12 | 8185299 - 8208118     | F - 16.67% | TRUE  | TRUE  |
|   | 12 | 8185299 - 8208118     | T - 66.67% | TRUE  | TRUE  |
|   | 12 | 8185299 - 8208118     | F - 16.67% | TRUE  | TRUE  |
|   | 12 | 8185299 - 8208118     | F - 33.33% | TRUE  | TRUE  |
|   | 12 | 8185299 - 8208118     | T - 50.00% | TRUE  | TRUE  |
|   | 12 | 8185299 - 8208118     |            | FALSE | TRUE  |
|   | 12 | 110939419 - 110969891 | T - 81.25% | TRUE  | FALSE |
|   | 12 | 110939419 - 110969891 |            | TRUE  | FALSE |
|   | 12 | 110939419 - 110969891 | F - 37.50% | FALSE | TRUE  |
|   | 12 | 110939419 - 110969891 | T - 75.00% | FALSE | TRUE  |
|   | 12 | 1021243 - 1099219     | T - 50.00% | TRUE  | TRUE  |
|   | 12 | 1021243 - 1099219     |            | FALSE | TRUE  |
|   | 12 | 1021243 - 1099219     | F - 41.67% | TRUE  | TRUE  |
|   | 12 | 1021243 - 1099219     | F - 4.17%  | FALSE | TRUE  |
|   | 14 | 51441980 - 51562779   | F - 11.11% | TRUE  | TRUE  |
|   | 14 | 51441980 - 51562779   | F - 33.33% | TRUE  | TRUE  |
|   | 14 | 51441980 - 51562779   |            | TRUE  | TRUE  |

|             |                       |            |       |       |
|-------------|-----------------------|------------|-------|-------|
| 14          | 51441980 - 51562779   | T - 55.56% | TRUE  | TRUE  |
| 14          | 51441980 - 51562779   |            | FALSE | TRUE  |
| 16          | 29465822 - 29476301   |            | TRUE  | TRUE  |
| 16          | 29465822 - 29476301   | F - 4.00%  | TRUE  | TRUE  |
| 16          | 29465822 - 29476301   |            | TRUE  | TRUE  |
| 16          | 30205164 - 30215650   |            | TRUE  | TRUE  |
| 16          | 30205164 - 30215650   | F - 3.57%  | TRUE  | TRUE  |
| 16          | 30205164 - 30215650   |            | TRUE  | TRUE  |
| 17          | 34890847 - 34895150   | F - 20.00% | TRUE  | TRUE  |
| 17          | 34890847 - 34895150   |            | FALSE | TRUE  |
| 22          | 19744226 - 19771116   |            | TRUE  | TRUE  |
| 22          | 19744226 - 19771116   | F - 12.50% | FALSE | TRUE  |
| 22          | 19744226 - 19771116   |            | TRUE  | TRUE  |
| 22          | 19744226 - 19771116   | T - 87.50% | TRUE  | TRUE  |
| 22          | 19744226 - 19771116   |            | TRUE  | TRUE  |
| 22          | 19744226 - 19771116   | T - 75.00% | TRUE  | TRUE  |
| 6_cox_hap2  | 3098067 - 3115170     | F - 5.26%  | TRUE  | TRUE  |
| 6_cox_hap2  | 3098067 - 3115170     | F - 47.37% | TRUE  | TRUE  |
| 6_cox_hap2  | 3098067 - 3115170     |            | TRUE  | TRUE  |
| 6_qbl_hap6  | 2882091 - 2899191     | F - 5.26%  | TRUE  | TRUE  |
| 6_qbl_hap6  | 2882091 - 2899191     | F - 47.37% | TRUE  | TRUE  |
| 6_qbl_hap6  | 2882091 - 2899191     |            | TRUE  | TRUE  |
| 6_ssto_hap7 | 2919253 - 2936356     | F - 5.26%  | TRUE  | TRUE  |
| 6_ssto_hap7 | 2919253 - 2936356     | F - 47.37% | TRUE  | TRUE  |
| 6_ssto_hap7 | 2919253 - 2936356     |            | TRUE  | TRUE  |
| 21          | 43916118 - 44001550   |            | TRUE  | TRUE  |
| 21          | 43916118 - 44001550   | F - 27.27% | FALSE | TRUE  |
| 3           | 128598333 - 128634910 |            | TRUE  | TRUE  |
| 3           | 128598333 - 128634910 |            | TRUE  | TRUE  |
| 3           | 128598333 - 128634910 | T - 71.43% | TRUE  | TRUE  |
| 3           | 128997671 - 129024146 |            | FALSE | TRUE  |
| 3           | 128997671 - 129024146 |            | TRUE  | TRUE  |
| 3           | 128997671 - 129024146 | F - 26.67% | TRUE  | TRUE  |
| 3           | 128997671 - 129024146 |            | TRUE  | TRUE  |
| 4           | 160025330 - 160281321 | F - 20.00% | TRUE  | TRUE  |
| 4           | 160025330 - 160281321 |            | TRUE  | FALSE |
| 4           | 160025330 - 160281321 | F - 6.67%  | TRUE  | TRUE  |
| 4           | 160025330 - 160281321 |            | TRUE  | TRUE  |
| 4           | 160025330 - 160281321 |            | TRUE  | TRUE  |
| 5           | 175953698 - 175965026 |            | TRUE  | TRUE  |
| 5           | 175953698 - 175965026 | F - 38.46% | FALSE | TRUE  |
| 7           | 130626519 - 130794935 | F - 18.18% | TRUE  | TRUE  |
| 7           | 130626519 - 130794935 | F - 18.18% | TRUE  | FALSE |
| 7           | 130626519 - 130794935 | F - 9.09%  | TRUE  | TRUE  |
| 7           | 130626519 - 130794935 |            | FALSE | TRUE  |
| 8           | 54628115 - 54756118   | F - 3.57%  | TRUE  | FALSE |
| 8           | 54628115 - 54756118   |            | TRUE  | TRUE  |
| 8           | 54628115 - 54756118   |            | TRUE  | TRUE  |
| 9           | 6720863 - 7175648     | F - 3.57%  | TRUE  | TRUE  |
| 9           | 6720863 - 7175648     |            | TRUE  | TRUE  |
| 9           | 6720863 - 7175648     |            | FALSE | TRUE  |
| 9           | 6720863 - 7175648     | F - 42.86% | TRUE  | TRUE  |
| 9           | 6720863 - 7175648     | F - 39.29% | FALSE | TRUE  |
| 9           | 6720863 - 7175648     |            | TRUE  | TRUE  |
| 9           | 6720863 - 7175648     | F - 25.00% | TRUE  | TRUE  |
| 9           | 6720863 - 7175648     | F - 21.43% | TRUE  | TRUE  |
| X           | 153576892 - 153603006 |            | TRUE  | TRUE  |
| X           | 153576892 - 153603006 | F - 4.76%  | TRUE  | TRUE  |

|    |                       |             |       |       |
|----|-----------------------|-------------|-------|-------|
| X  | 153576892 - 153603006 | F - 9.52%   | TRUE  | TRUE  |
| X  | 153576892 - 153603006 | F - 14.29%  | TRUE  | TRUE  |
| X  | 153576892 - 153603006 |             | TRUE  | TRUE  |
| 12 | 45609770 - 45834187   |             | TRUE  | TRUE  |
| 12 | 45609770 - 45834187   | F - 36.36%  | TRUE  | TRUE  |
| 12 | 45609770 - 45834187   |             | TRUE  | TRUE  |
| 12 | 45609770 - 45834187   |             | TRUE  | TRUE  |
| 13 | 42614172 - 42830716   |             | TRUE  | TRUE  |
| 13 | 42614172 - 42830716   | F - 16.67%  | TRUE  | TRUE  |
| 13 | 42614172 - 42830716   |             | FALSE | TRUE  |
| 14 | 103851701 - 103970168 |             | TRUE  | TRUE  |
| 14 | 103851701 - 103970168 | T - 80.00%  | TRUE  | TRUE  |
| 14 | 103851701 - 103970168 | F - 30.00%  | FALSE | TRUE  |
| 14 | 103851701 - 103970168 |             | TRUE  | TRUE  |
| 14 | 103851701 - 103970168 | F - 10.00%  | TRUE  | TRUE  |
| 15 | 40331512 - 40359710   |             | TRUE  | TRUE  |
| 15 | 40331512 - 40359710   | T - 83.33%  | TRUE  | TRUE  |
| 17 | 9799637 - 9808684     |             | TRUE  | FALSE |
| 17 | 9799637 - 9808684     | T - 75.00%  | TRUE  | TRUE  |
| 17 | 9799637 - 9808684     | F - 25.00%  | TRUE  | FALSE |
| 17 | 9799637 - 9808684     | F - 25.00%  | TRUE  | TRUE  |
| 17 | 9799637 - 9808684     | T - 50.00%  | TRUE  | TRUE  |
| 21 | 47649145 - 47671743   | F - 11.11%  | TRUE  | TRUE  |
| 21 | 47649145 - 47671743   |             | TRUE  | TRUE  |
| 21 | 33043313 - 33104431   | F - 23.08%  | TRUE  | TRUE  |
| 21 | 33043313 - 33104431   |             | FALSE | TRUE  |
| 22 | 31322596 - 31364284   | T - 66.67%  | TRUE  | TRUE  |
| 22 | 31322596 - 31364284   |             | TRUE  | TRUE  |
| 1  | 40997233 - 41013841   |             | TRUE  | TRUE  |
| 1  | 40997233 - 41013841   | F - 14.29%  | FALSE | TRUE  |
| 1  | 14362 - 29961         | F - 10.00%  | TRUE  | TRUE  |
| 1  | 14362 - 29961         |             | TRUE  | TRUE  |
| 1  | 14362 - 29961         |             | TRUE  | TRUE  |
| 1  | 14362 - 29961         |             | TRUE  | TRUE  |
| 2  | 169628461 - 169642939 | T - 100.00% | TRUE  | TRUE  |
| 2  | 169628461 - 169642939 |             | FALSE | TRUE  |
| 2  | 204259068 - 204400133 |             | TRUE  | TRUE  |
| 2  | 204259068 - 204400133 | F - 40.00%  | TRUE  | TRUE  |
| 2  | 204259068 - 204400133 |             | TRUE  | TRUE  |
| 3  | 98298286 - 98312567   | F - 11.11%  | TRUE  | FALSE |
| 3  | 98298286 - 98312567   |             | TRUE  | TRUE  |
| 4  | 48807229 - 48863834   |             | TRUE  | TRUE  |
| 4  | 48807229 - 48863834   | F - 13.51%  | TRUE  | TRUE  |
| 4  | 48807229 - 48863834   |             | FALSE | TRUE  |
| 4  | 48807229 - 48863834   |             | TRUE  | TRUE  |
| 4  | 128982423 - 129144086 |             | TRUE  | TRUE  |
| 4  | 128982423 - 129144086 | F - 21.74%  | TRUE  | TRUE  |
| 4  | 128982423 - 129144086 |             | TRUE  | FALSE |
| 4  | 128982423 - 129144086 |             | TRUE  | TRUE  |
| 4  | 128982423 - 129144086 |             | FALSE | TRUE  |
| 4  | 128982423 - 129144086 |             | TRUE  | TRUE  |
| 5  | 95297705 - 95970220   |             | TRUE  | TRUE  |
| 5  | 95297705 - 95970220   |             | FALSE | TRUE  |
| 5  | 95297705 - 95970220   | T - 66.67%  | TRUE  | TRUE  |
| 5  | 95297705 - 95970220   | F - 33.33%  | TRUE  | TRUE  |
| 5  | 95297705 - 95970220   |             | FALSE | TRUE  |
| 5  | 95297705 - 95970220   | F - 33.33%  | TRUE  | TRUE  |
| 5  | 172890503 - 172911587 | T - 50.00%  | TRUE  | FALSE |

|   |    |                       |             |       |       |
|---|----|-----------------------|-------------|-------|-------|
|   | 5  | 172890503 - 172911587 | T - 50.00%  | TRUE  | TRUE  |
|   | 5  | 172890503 - 172911587 | T - 100.00% | TRUE  | TRUE  |
|   | 5  | 172890503 - 172911587 | T - 50.00%  | TRUE  | TRUE  |
|   | 5  | 172890503 - 172911587 | T - 50.00%  | TRUE  | TRUE  |
|   | 5  | 172890503 - 172911587 |             | TRUE  | TRUE  |
|   | 5  | 172890503 - 172911587 | T - 50.00%  | FALSE | TRUE  |
|   | 7  | 38217808 - 38270272   |             | TRUE  | TRUE  |
|   | 7  | 38217808 - 38270272   | F - 9.09%   | TRUE  | TRUE  |
|   | 7  | 128594234 - 128695227 | F - 36.36%  | TRUE  | FALSE |
|   | 7  | 128594234 - 128695227 |             | TRUE  | TRUE  |
|   | 8  | 109213445 - 109447562 |             | TRUE  | TRUE  |
|   | 8  | 109213445 - 109447562 | F - 3.85%   | TRUE  | TRUE  |
|   | 8  | 109213445 - 109447562 |             | FALSE | TRUE  |
|   | 8  | 109213445 - 109447562 |             | TRUE  | TRUE  |
|   | 8  | 109213445 - 109447562 | F - 3.85%   | TRUE  | TRUE  |
|   | 8  | 109213445 - 109447562 |             | TRUE  | TRUE  |
| X |    | 6451659 - 6453159     | T - 55.56%  | TRUE  | TRUE  |
| X |    | 6451659 - 6453159     |             | TRUE  | FALSE |
|   | 10 | 94352825 - 94415152   | F - 25.00%  | TRUE  | TRUE  |
|   | 10 | 94352825 - 94415152   | T - 100.00% | TRUE  | TRUE  |
|   | 10 | 94352825 - 94415152   |             | TRUE  | TRUE  |
|   | 10 | 94352825 - 94415152   | T - 100.00% | TRUE  | TRUE  |
|   | 10 | 94352825 - 94415152   |             | FALSE | TRUE  |
|   | 10 | 46111039 - 46168261   |             | TRUE  | TRUE  |
|   | 10 | 46111039 - 46168261   | T - 70.00%  | TRUE  | TRUE  |
|   | 10 | 46111039 - 46168261   |             | TRUE  | TRUE  |
|   | 10 | 46111039 - 46168261   | T - 65.00%  | TRUE  | TRUE  |
|   | 10 | 46111039 - 46168261   |             | TRUE  | TRUE  |
|   | 12 | 329787 - 372039       |             | TRUE  | TRUE  |
|   | 12 | 329787 - 372039       | F - 18.18%  | TRUE  | TRUE  |
|   | 12 | 53845886 - 53874946   | F - 3.33%   | TRUE  | TRUE  |
|   | 12 | 53845886 - 53874946   |             | TRUE  | TRUE  |
|   | 19 | 6413119 - 6424822     |             | TRUE  | FALSE |
|   | 19 | 6413119 - 6424822     | T - 83.33%  | TRUE  | FALSE |
|   | 19 | 37672481 - 37709055   |             | TRUE  | TRUE  |
|   | 19 | 37672481 - 37709055   | F - 44.44%  | TRUE  | FALSE |
|   | 22 | 19117792 - 19132197   |             | TRUE  | TRUE  |
|   | 22 | 19117792 - 19132197   | F - 33.33%  | TRUE  | TRUE  |
|   | 22 | 50750392 - 50765489   | F - 20.00%  | TRUE  | TRUE  |
|   | 22 | 50750392 - 50765489   |             | TRUE  | TRUE  |
|   | 22 | 50750392 - 50765489   |             | FALSE | TRUE  |
|   | 8  | 29952914 - 29995864   |             | TRUE  | TRUE  |
|   | 8  | 29952914 - 29995864   | F - 10.00%  | TRUE  | TRUE  |
|   | 1  | 9294834 - 9331396     |             | TRUE  | TRUE  |
|   | 1  | 9294834 - 9331396     | F - 25.00%  | TRUE  | TRUE  |
|   | 1  | 89149905 - 89301938   |             | TRUE  | TRUE  |
|   | 1  | 89149905 - 89301938   | F - 6.67%   | TRUE  | TRUE  |
|   | 2  | 202252581 - 202345574 |             | TRUE  | TRUE  |
|   | 2  | 202252581 - 202345574 | F - 33.33%  | TRUE  | TRUE  |
|   | 2  | 202252581 - 202345574 | F - 6.67%   | TRUE  | TRUE  |
|   | 2  | 202252581 - 202345574 | F - 46.67%  | FALSE | TRUE  |
|   | 3  | 127317066 - 127341278 |             | TRUE  | TRUE  |
|   | 3  | 127317066 - 127341278 |             | TRUE  | FALSE |
|   | 3  | 127317066 - 127341278 | F - 47.62%  | FALSE | TRUE  |
|   | 3  | 127317066 - 127341278 |             | TRUE  | TRUE  |
|   | 3  | 127317066 - 127341278 |             | TRUE  | TRUE  |
|   | 3  | 127317066 - 127341278 |             | FALSE | TRUE  |
|   | 3  | 127317066 - 127341278 |             | FALSE | TRUE  |

|   |                       |             |       |       |
|---|-----------------------|-------------|-------|-------|
| 3 | 65339200 - 66024509   |             | TRUE  | TRUE  |
| 3 | 65339200 - 66024509   |             | TRUE  | TRUE  |
| 3 | 65339200 - 66024509   | F - 7.14%   | TRUE  | TRUE  |
| 3 | 65339200 - 66024509   | F - 7.14%   | TRUE  | FALSE |
| 3 | 65339200 - 66024509   | F - 17.86%  | TRUE  | TRUE  |
| 4 | 73939093 - 74124515   |             | TRUE  | TRUE  |
| 4 | 73939093 - 74124515   |             | TRUE  | TRUE  |
| 4 | 73939093 - 74124515   | T - 66.67%  | TRUE  | TRUE  |
| 4 | 73939093 - 74124515   |             | TRUE  | TRUE  |
| 4 | 106965474 - 107242652 |             | TRUE  | TRUE  |
| 4 | 106965474 - 107242652 |             | TRUE  | TRUE  |
| 4 | 106965474 - 107242652 | F - 3.70%   | TRUE  | TRUE  |
| 4 | 106965474 - 107242652 |             | FALSE | TRUE  |
| 4 | 106965474 - 107242652 | F - 3.70%   | TRUE  | TRUE  |
| 4 | 106965474 - 107242652 |             | TRUE  | TRUE  |
| 4 | 106965474 - 107242652 |             | FALSE | TRUE  |
| 4 | 106965474 - 107242652 | F - 3.70%   | TRUE  | TRUE  |
| 6 | 99990256 - 100016849  | T - 74.07%  | TRUE  | TRUE  |
| 6 | 99990256 - 100016849  |             | TRUE  | TRUE  |
| 7 | 7676149 - 7758238     |             | TRUE  | FALSE |
| 7 | 7676149 - 7758238     |             | TRUE  | TRUE  |
| 7 | 7676149 - 7758238     | F - 20.00%  | TRUE  | TRUE  |
| 7 | 7676149 - 7758238     | F - 10.00%  | TRUE  | TRUE  |
| 7 | 7676149 - 7758238     |             | FALSE | TRUE  |
| 7 | 81328322 - 81399754   |             | TRUE  | FALSE |
| 7 | 81328322 - 81399754   | F - 27.78%  | TRUE  | TRUE  |
| 7 | 81328322 - 81399754   | F - 27.78%  | TRUE  | FALSE |
| 7 | 81328322 - 81399754   | F - 22.22%  | TRUE  | TRUE  |
| 7 | 81328322 - 81399754   | F - 27.78%  | TRUE  | FALSE |
| 7 | 81328322 - 81399754   | T - 100.00% | TRUE  | FALSE |
| 7 | 81328322 - 81399754   | T - 55.56%  | TRUE  | TRUE  |
| 7 | 81328322 - 81399754   | F - 5.56%   | TRUE  | FALSE |
| 7 | 81328322 - 81399754   | F - 27.78%  | TRUE  | TRUE  |
| 7 | 81328322 - 81399754   |             | TRUE  | FALSE |
| 7 | 81328322 - 81399754   |             | TRUE  | FALSE |
| 7 | 81328322 - 81399754   | F - 27.78%  | TRUE  | TRUE  |
| 7 | 81328322 - 81399754   | F - 5.56%   | TRUE  | TRUE  |
| 7 | 81328322 - 81399754   |             | TRUE  | FALSE |
| 7 | 81328322 - 81399754   |             | TRUE  | FALSE |
| 7 | 81328322 - 81399754   |             | TRUE  | FALSE |
| 7 | 81328322 - 81399754   |             | TRUE  | FALSE |
| 7 | 81328322 - 81399754   | F - 27.78%  | TRUE  | TRUE  |
| 7 | 81328322 - 81399754   | F - 11.11%  | TRUE  | FALSE |
| 7 | 81328322 - 81399754   | F - 11.11%  | TRUE  | FALSE |
| 7 | 81328322 - 81399754   |             | TRUE  | FALSE |
| 7 | 81328322 - 81399754   | F - 22.22%  | TRUE  | FALSE |
| 7 | 81328322 - 81399754   | T - 50.00%  | TRUE  | TRUE  |
| 7 | 81328322 - 81399754   | T - 94.44%  | TRUE  | TRUE  |
| 7 | 81328322 - 81399754   | F - 11.11%  | TRUE  | FALSE |
| 7 | 81328322 - 81399754   | F - 16.67%  | TRUE  | FALSE |
| 7 | 81328322 - 81399754   | F - 27.78%  | TRUE  | TRUE  |
| 7 | 81328322 - 81399754   |             | TRUE  | TRUE  |
| 7 | 81328322 - 81399754   | F - 5.56%   | TRUE  | TRUE  |
| 7 | 81328322 - 81399754   | T - 88.89%  | TRUE  | TRUE  |
| 7 | 81328322 - 81399754   | F - 11.11%  | TRUE  | TRUE  |
| 7 | 81328322 - 81399754   |             | TRUE  | TRUE  |
| 7 | 81328322 - 81399754   | F - 5.56%   | TRUE  | TRUE  |
| 8 | 564744 - 688106       |             | TRUE  | TRUE  |

|             |                       |             |       |       |
|-------------|-----------------------|-------------|-------|-------|
| 8           | 564744 - 688106       | F - 7.14%   | TRUE  | TRUE  |
| 8           | 564744 - 688106       |             | FALSE | TRUE  |
| 8           | 564744 - 688106       |             | TRUE  | TRUE  |
| 8           | 564744 - 688106       |             | FALSE | TRUE  |
| 8           | 144386554 - 144442149 |             | TRUE  | TRUE  |
| 8           | 144386554 - 144442149 | F - 7.41%   | FALSE | TRUE  |
| 8           | 144386554 - 144442149 |             | TRUE  | TRUE  |
| 8           | 144386554 - 144442149 |             | TRUE  | FALSE |
| 11          | 126152960 - 126168740 | F - 7.69%   | TRUE  | TRUE  |
| 11          | 126152960 - 126168740 |             | FALSE | TRUE  |
| 11          | 126152960 - 126168740 |             | FALSE | TRUE  |
| 12          | 27677045 - 27848497   | F - 44.44%  | TRUE  | TRUE  |
| 12          | 27677045 - 27848497   | T - 55.56%  | TRUE  | TRUE  |
| 12          | 27677045 - 27848497   |             | TRUE  | TRUE  |
| 12          | 27677045 - 27848497   |             | TRUE  | TRUE  |
| 12          | 27677045 - 27848497   | T - 61.11%  | TRUE  | TRUE  |
| 12          | 27677045 - 27848497   |             | TRUE  | TRUE  |
| 12          | 27677045 - 27848497   |             | FALSE | TRUE  |
| 14          | 23340822 - 23350789   |             | TRUE  | TRUE  |
| 14          | 23340822 - 23350789   | F - 12.50%  | TRUE  | TRUE  |
| 15          | 69591286 - 69700119   |             | TRUE  | TRUE  |
| 15          | 69591286 - 69700119   |             | TRUE  | TRUE  |
| 15          | 69591286 - 69700119   |             | TRUE  | TRUE  |
| 15          | 69591286 - 69700119   | F - 44.44%  | TRUE  | TRUE  |
| 15          | 69591286 - 69700119   |             | TRUE  | TRUE  |
| 15          | 69591286 - 69700119   |             | FALSE | TRUE  |
| 15          | 77712993 - 77777949   |             | TRUE  | TRUE  |
| 15          | 77712993 - 77777949   | F - 16.67%  | TRUE  | TRUE  |
| 15          | 70340129 - 70390515   |             | TRUE  | FALSE |
| 15          | 70340129 - 70390515   |             | TRUE  | TRUE  |
| 15          | 70340129 - 70390515   | F - 3.85%   | TRUE  | TRUE  |
| 15          | 70340129 - 70390515   |             | TRUE  | TRUE  |
| 17          | 29036626 - 29097068   |             | TRUE  | FALSE |
| 17          | 29036626 - 29097068   | F - 20.00%  | TRUE  | TRUE  |
| 17          | 29036626 - 29097068   |             | TRUE  | TRUE  |
| 17          | 29036626 - 29097068   | F - 40.00%  | TRUE  | TRUE  |
| 17          | 20841851 - 20901341   |             | TRUE  | TRUE  |
| 17          | 20841851 - 20901341   | T - 100.00% | TRUE  | TRUE  |
| 17          | 20841851 - 20901341   | T - 75.00%  | TRUE  | TRUE  |
| 17          | 20841851 - 20901341   | T - 50.00%  | TRUE  | TRUE  |
| 18          | 2655886 - 2805015     |             | TRUE  | FALSE |
| 18          | 2655886 - 2805015     |             | TRUE  | TRUE  |
| 18          | 2655886 - 2805015     | T - 50.00%  | TRUE  | TRUE  |
| 19          | 46498339 - 46521874   |             | TRUE  | TRUE  |
| 19          | 46498339 - 46521874   | F - 33.33%  | TRUE  | TRUE  |
| 19          | 46498339 - 46521874   |             | FALSE | TRUE  |
| 20          | 35280169 - 35374541   | T - 50.00%  | TRUE  | TRUE  |
| 20          | 35280169 - 35374541   |             | TRUE  | TRUE  |
| 6_ssto_hap7 | 1238371 - 1243012     | F - 6.25%   | TRUE  | TRUE  |
| 6_ssto_hap7 | 1238371 - 1243012     |             | FALSE | TRUE  |
| 6_ssto_hap7 | 1238371 - 1243012     |             | FALSE | TRUE  |
| 1           | 24683489 - 24743424   |             | TRUE  | TRUE  |
| 1           | 24683489 - 24743424   | F - 8.70%   | TRUE  | TRUE  |
| 1           | 24683489 - 24743424   | F - 4.35%   | TRUE  | TRUE  |
| 1           | 24683489 - 24743424   | F - 47.83%  | TRUE  | FALSE |
| 1           | 24683489 - 24743424   |             | TRUE  | TRUE  |
| 3           | 48445261 - 48471594   | F - 26.92%  | TRUE  | TRUE  |
| 3           | 48445261 - 48471594   |             | TRUE  | TRUE  |

|    |                       |             |       |      |
|----|-----------------------|-------------|-------|------|
| 4  | 1984441 - 2043630     |             | TRUE  | TRUE |
| 4  | 1984441 - 2043630     | F - 4.55%   | TRUE  | TRUE |
| 4  | 40812044 - 41218731   |             | TRUE  | TRUE |
| 4  | 40812044 - 41218731   |             | TRUE  | TRUE |
| 4  | 40812044 - 41218731   | F - 2.56%   | TRUE  | TRUE |
| 4  | 40812044 - 41218731   | F - 23.08%  | TRUE  | TRUE |
| 4  | 40812044 - 41218731   | F - 35.90%  | TRUE  | TRUE |
| 4  | 40812044 - 41218731   | F - 12.82%  | TRUE  | TRUE |
| 4  | 40812044 - 41218731   | F - 12.82%  | FALSE | TRUE |
| 4  | 40812044 - 41218731   | F - 2.56%   | TRUE  | TRUE |
| 4  | 40812044 - 41218731   | F - 5.13%   | TRUE  | TRUE |
| 4  | 40812044 - 41218731   | F - 2.56%   | TRUE  | TRUE |
| 4  | 40812044 - 41218731   | F - 2.56%   | TRUE  | TRUE |
| 4  | 40812044 - 41218731   |             | TRUE  | TRUE |
| 5  | 37379314 - 37753537   |             | TRUE  | TRUE |
| 5  | 37379314 - 37753537   | T - 60.00%  | TRUE  | TRUE |
| 5  | 138744279 - 138780180 | F - 20.00%  | TRUE  | TRUE |
| 5  | 138744279 - 138780180 |             | TRUE  | TRUE |
| 5  | 138744279 - 138780180 |             | TRUE  | TRUE |
| 8  | 133787604 - 133861052 |             | TRUE  | TRUE |
| 8  | 133787604 - 133861052 | F - 3.45%   | TRUE  | TRUE |
| 8  | 133787604 - 133861052 | F - 10.34%  | FALSE | TRUE |
| 8  | 133787604 - 133861052 | F - 3.45%   | TRUE  | TRUE |
| 8  | 133787604 - 133861052 | F - 3.45%   | FALSE | TRUE |
| 8  | 133787604 - 133861052 | F - 24.14%  | FALSE | TRUE |
| 8  | 133787604 - 133861052 | F - 20.69%  | TRUE  | TRUE |
| 8  | 133787604 - 133861052 |             | TRUE  | TRUE |
| 8  | 133787604 - 133861052 |             | TRUE  | TRUE |
| 8  | 133787604 - 133861052 | T - 62.07%  | FALSE | TRUE |
| 8  | 133787604 - 133861052 | F - 3.45%   | TRUE  | TRUE |
| 8  | 133787604 - 133861052 | F - 3.45%   | FALSE | TRUE |
| 8  | 133787604 - 133861052 |             | FALSE | TRUE |
| 8  | 38268656 - 38326352   |             | TRUE  | TRUE |
| 8  | 38268656 - 38326352   |             | TRUE  | TRUE |
| 8  | 38268656 - 38326352   | F - 3.85%   | TRUE  | TRUE |
| 8  | 38268656 - 38326352   |             | FALSE | TRUE |
| 8  | 38268656 - 38326352   |             | FALSE | TRUE |
| 9  | 140354404 - 140444986 |             | TRUE  | TRUE |
| 9  | 140354404 - 140444986 | F - 37.50%  | TRUE  | TRUE |
| 9  | 140354404 - 140444986 |             | TRUE  | TRUE |
| 9  | 140354404 - 140444986 | F - 25.00%  | TRUE  | TRUE |
| 9  | 140354404 - 140444986 | T - 50.00%  | FALSE | TRUE |
| 9  | 140354404 - 140444986 | F - 6.25%   | TRUE  | TRUE |
| 9  | 140354404 - 140444986 | F - 43.75%  | TRUE  | TRUE |
| 9  | 140354404 - 140444986 |             | TRUE  | TRUE |
| 9  | 140354404 - 140444986 | T - 50.00%  | TRUE  | TRUE |
| X  | 19007425 - 19140755   | F - 4.17%   | TRUE  | TRUE |
| X  | 19007425 - 19140755   | T - 95.83%  | TRUE  | TRUE |
| X  | 19007425 - 19140755   |             | FALSE | TRUE |
| X  | 19007425 - 19140755   |             | FALSE | TRUE |
| X  | 19007425 - 19140755   |             | TRUE  | TRUE |
| X  | 19007425 - 19140755   | T - 100.00% | TRUE  | TRUE |
| X  | 19007425 - 19140755   | T - 91.67%  | TRUE  | TRUE |
| X  | 19007425 - 19140755   | T - 95.83%  | TRUE  | TRUE |
| X  | 19007425 - 19140755   |             | FALSE | TRUE |
| X  | 19007425 - 19140755   |             | FALSE | TRUE |
| 12 | 78225069 - 78606790   |             | TRUE  | TRUE |
| 12 | 78225069 - 78606790   |             | TRUE  | TRUE |



|    |                       |            |       |       |
|----|-----------------------|------------|-------|-------|
| 12 | 78225069 - 78606790   |            | TRUE  | TRUE  |
| 12 | 78225069 - 78606790   |            | TRUE  | FALSE |
| 12 | 78225069 - 78606790   | T - 66.67% | TRUE  | TRUE  |
| 12 | 78225069 - 78606790   | F - 16.67% | TRUE  | TRUE  |
| 12 | 78225069 - 78606790   |            | TRUE  | TRUE  |
| 12 | 78225069 - 78606790   | T - 83.33% | TRUE  | TRUE  |
| 12 | 78225069 - 78606790   |            | TRUE  | TRUE  |
| 12 | 78225069 - 78606790   | T - 66.67% | TRUE  | TRUE  |
| 12 | 78225069 - 78606790   |            | TRUE  | TRUE  |
| 12 | 78225069 - 78606790   | T - 58.33% | FALSE | TRUE  |
| 12 | 78225069 - 78606790   |            | FALSE | TRUE  |
| 12 | 124086646 - 124105482 | T - 72.73% | TRUE  | TRUE  |
| 12 | 124086646 - 124105482 |            | FALSE | TRUE  |
| 13 | 95672083 - 95953687   |            | TRUE  | TRUE  |
| 13 | 95672083 - 95953687   |            | TRUE  | TRUE  |
| 13 | 95672083 - 95953687   | F - 6.25%  | TRUE  | TRUE  |
| 13 | 95672083 - 95953687   |            | FALSE | TRUE  |
| 13 | 95672083 - 95953687   |            | FALSE | TRUE  |
| 13 | 95672083 - 95953687   | F - 25.00% | TRUE  | TRUE  |
| 13 | 95672083 - 95953687   | F - 18.75% | TRUE  | TRUE  |
| 14 | 90261013 - 90421121   | T - 92.31% | TRUE  | TRUE  |
| 14 | 90261013 - 90421121   |            | TRUE  | TRUE  |
| 14 | 90261013 - 90421121   | T - 53.85% | TRUE  | TRUE  |
| 14 | 90261013 - 90421121   |            | TRUE  | TRUE  |
| 14 | 90261013 - 90421121   |            | FALSE | TRUE  |
| 14 | 90261013 - 90421121   | F - 30.77% | FALSE | TRUE  |
| 16 | 54951749 - 54963101   |            | TRUE  | TRUE  |
| 16 | 54951749 - 54963101   | F - 7.69%  | TRUE  | TRUE  |
| 16 | 74481326 - 74641042   | T - 88.89% | TRUE  | TRUE  |
| 16 | 74481326 - 74641042   |            | TRUE  | TRUE  |
| 16 | 74481326 - 74641042   |            | FALSE | TRUE  |
| 16 | 74481326 - 74641042   |            | FALSE | TRUE  |
| 17 | 7529552 - 7531194     | T - 75.00% | TRUE  | TRUE  |
| 17 | 7529552 - 7531194     |            | TRUE  | TRUE  |
| 19 | 1065930 - 1086627     | F - 27.27% | TRUE  | FALSE |
| 19 | 1065930 - 1086627     |            | FALSE | TRUE  |
| 19 | 1065930 - 1086627     |            | TRUE  | TRUE  |
| 1  | 27561007 - 27635110   |            | FALSE | TRUE  |
| 1  | 27561007 - 27635110   | T - 77.78% | TRUE  | TRUE  |
| 2  | 168810530 - 169104651 | F - 16.67% | TRUE  | FALSE |
| 2  | 168810530 - 169104651 |            | TRUE  | TRUE  |
| 3  | 69068978 - 69101484   | F - 41.67% | TRUE  | TRUE  |
| 3  | 69068978 - 69101484   |            | TRUE  | TRUE  |
| 3  | 69068978 - 69101484   |            | TRUE  | TRUE  |
| 3  | 69068978 - 69101484   |            | TRUE  | TRUE  |
| 8  | 24151553 - 24216531   |            | TRUE  | TRUE  |
| 8  | 24151553 - 24216531   |            | FALSE | TRUE  |
| 8  | 24151553 - 24216531   | F - 42.11% | TRUE  | TRUE  |
| 8  | 24151553 - 24216531   |            | TRUE  | TRUE  |
| 9  | 94325373 - 94712444   |            | TRUE  | FALSE |
| 9  | 94325373 - 94712444   | T - 66.67% | TRUE  | TRUE  |
| 9  | 94325373 - 94712444   | F - 33.33% | TRUE  | TRUE  |
| 9  | 94325373 - 94712444   | F - 44.44% | TRUE  | FALSE |
| 9  | 94325373 - 94712444   |            | TRUE  | TRUE  |
| 9  | 94325373 - 94712444   | T - 66.67% | TRUE  | TRUE  |
| 9  | 94325373 - 94712444   | T - 55.56% | TRUE  | TRUE  |
| 9  | 94325373 - 94712444   | F - 11.11% | TRUE  | TRUE  |
| 9  | 94325373 - 94712444   |            | TRUE  | TRUE  |

|   |    |                       |             |       |       |
|---|----|-----------------------|-------------|-------|-------|
|   | 9  | 94325373 - 94712444   |             | TRUE  | TRUE  |
|   | 9  | 94325373 - 94712444   | F - 11.11%  | TRUE  | TRUE  |
|   | 9  | 94325373 - 94712444   | F - 44.44%  | TRUE  | TRUE  |
|   | 9  | 94325373 - 94712444   |             | TRUE  | TRUE  |
|   | 9  | 94325373 - 94712444   |             | TRUE  | TRUE  |
|   | 9  | 94325373 - 94712444   | F - 33.33%  | TRUE  | TRUE  |
|   | 9  | 94325373 - 94712444   | F - 11.11%  | TRUE  | TRUE  |
|   | 9  | 94325373 - 94712444   | F - 22.22%  | TRUE  | TRUE  |
|   | 9  | 94325373 - 94712444   | F - 11.11%  | TRUE  | TRUE  |
| X |    | 103031504 - 103087212 |             | TRUE  | FALSE |
| X |    | 103031504 - 103087212 | F - 16.67%  | TRUE  | TRUE  |
| Y |    | 22737611 - 22755040   | T - 71.43%  | TRUE  | FALSE |
| Y |    | 22737611 - 22755040   | T - 57.14%  | TRUE  | FALSE |
| Y |    | 22737611 - 22755040   | T - 100.00% | TRUE  | FALSE |
| Y |    | 22737611 - 22755040   | F - 14.29%  | TRUE  | FALSE |
| Y |    | 22737611 - 22755040   | T - 71.43%  | TRUE  | TRUE  |
| Y |    | 22737611 - 22755040   | F - 14.29%  | FALSE | TRUE  |
| Y |    | 22737611 - 22755040   |             | TRUE  | TRUE  |
| Y |    | 22737611 - 22755040   | F - 28.57%  | TRUE  | TRUE  |
| Y |    | 22737611 - 22755040   |             | TRUE  | TRUE  |
|   | 10 | 47742393 - 47770871   |             | TRUE  | FALSE |
|   | 10 | 47742393 - 47770871   |             | TRUE  | TRUE  |
|   | 10 | 47742393 - 47770871   |             | TRUE  | TRUE  |
|   | 10 | 47742393 - 47770871   |             | TRUE  | TRUE  |
|   | 10 | 47742393 - 47770871   |             | TRUE  | TRUE  |
|   | 10 | 47742393 - 47770871   |             | TRUE  | TRUE  |
|   | 10 | 47742393 - 47770871   | F - 7.69%   | TRUE  | TRUE  |
|   | 10 | 47742393 - 47770871   | F - 7.69%   | TRUE  | TRUE  |
|   | 10 | 47742393 - 47770871   | F - 7.69%   | TRUE  | TRUE  |
|   | 10 | 47742393 - 47770871   |             | TRUE  | TRUE  |
|   | 10 | 47157983 - 47174122   |             | TRUE  | FALSE |
|   | 10 | 47157983 - 47174122   |             | TRUE  | TRUE  |
|   | 10 | 47157983 - 47174122   |             | TRUE  | TRUE  |
|   | 10 | 47157983 - 47174122   |             | TRUE  | TRUE  |
|   | 10 | 47157983 - 47174122   | F - 20.00%  | TRUE  | TRUE  |
|   | 10 | 47157983 - 47174122   |             | TRUE  | TRUE  |
|   | 10 | 47157983 - 47174122   | F - 20.00%  | TRUE  | TRUE  |
|   | 10 | 47157983 - 47174122   |             | TRUE  | TRUE  |
|   | 11 | 1874200 - 1913497     |             | TRUE  | TRUE  |
|   | 11 | 1874200 - 1913497     | F - 5.00%   | TRUE  | TRUE  |
|   | 11 | 1874200 - 1913497     |             | TRUE  | TRUE  |
|   | 11 | 86511282 - 86663886   | F - 10.00%  | TRUE  | TRUE  |
|   | 11 | 86511282 - 86663886   |             | FALSE | TRUE  |
|   | 11 | 86511282 - 86663886   |             | FALSE | TRUE  |
|   | 12 | 56810157 - 56843200   |             | TRUE  | TRUE  |
|   | 12 | 56810157 - 56843200   |             | FALSE | TRUE  |
|   | 12 | 56810157 - 56843200   | T - 66.67%  | FALSE | TRUE  |
|   | 12 | 56810157 - 56843200   |             | FALSE | TRUE  |
|   | 12 | 56810157 - 56843200   |             | FALSE | TRUE  |
|   | 12 | 56810157 - 56843200   |             | TRUE  | TRUE  |
|   | 15 | 69039580 - 69113261   |             | TRUE  | TRUE  |
|   | 15 | 69039580 - 69113261   |             | TRUE  | TRUE  |
|   | 15 | 69039580 - 69113261   | F - 5.88%   | TRUE  | TRUE  |
|   | 17 | 44594068 - 44657088   |             | TRUE  | FALSE |
|   | 17 | 44594068 - 44657088   |             | TRUE  | TRUE  |
|   | 17 | 44594068 - 44657088   | F - 12.50%  | TRUE  | TRUE  |
|   | 19 | 52892095 - 52901010   | T - 80.00%  | TRUE  | TRUE  |
|   | 19 | 52892095 - 52901010   |             | TRUE  | TRUE  |

|    |                       |            |       |       |
|----|-----------------------|------------|-------|-------|
| 21 | 17442842 - 17982094   |            | TRUE  | TRUE  |
| 21 | 17442842 - 17982094   |            | TRUE  | TRUE  |
| 21 | 17442842 - 17982094   | F - 30.77% | TRUE  | TRUE  |
| 21 | 17442842 - 17982094   |            | TRUE  | TRUE  |
| 21 | 17442842 - 17982094   |            | FALSE | TRUE  |
| 1  | 45265897 - 45271667   |            | TRUE  | FALSE |
| 1  | 45265897 - 45271667   | F - 20.00% | TRUE  | TRUE  |
| X  | 131337053 - 131353475 |            | TRUE  | FALSE |
| X  | 131337053 - 131353475 |            | TRUE  | TRUE  |
| X  | 131337053 - 131353475 | F - 11.11% | TRUE  | TRUE  |
| 2  | 189896622 - 190044605 |            | TRUE  | TRUE  |
| 2  | 189896622 - 190044605 |            | TRUE  | TRUE  |
| 2  | 189896622 - 190044605 |            | TRUE  | TRUE  |
| 2  | 189896622 - 190044605 | F - 33.33% | TRUE  | TRUE  |
| 2  | 189896622 - 190044605 |            | TRUE  | TRUE  |
| 2  | 191894302 - 192038902 |            | TRUE  | FALSE |
| 2  | 191894302 - 192038902 |            | TRUE  | TRUE  |
| 2  | 191894302 - 192038902 | F - 4.76%  | TRUE  | TRUE  |
| 2  | 191894302 - 192038902 |            | TRUE  | TRUE  |
| 2  | 191894302 - 192038902 |            | FALSE | TRUE  |
| 2  | 191894302 - 192038902 |            | FALSE | TRUE  |
| 3  | 49842638 - 49851391   | F - 7.69%  | FALSE | TRUE  |
| 3  | 49842638 - 49851391   |            | TRUE  | TRUE  |
| 3  | 49842638 - 49851391   |            | TRUE  | TRUE  |
| 3  | 49842638 - 49851391   | F - 15.38% | TRUE  | TRUE  |
| 3  | 49842638 - 49851391   | F - 30.77% | TRUE  | TRUE  |
| 3  | 49842638 - 49851391   | F - 15.38% | TRUE  | TRUE  |
| 4  | 159690182 - 159829201 |            | TRUE  | TRUE  |
| 4  | 159690182 - 159829201 | F - 20.00% | TRUE  | TRUE  |
| 4  | 159690182 - 159829201 | F - 10.00% | TRUE  | TRUE  |
| 4  | 159690182 - 159829201 | F - 30.00% | TRUE  | TRUE  |
| 4  | 159690182 - 159829201 | F - 10.00% | FALSE | TRUE  |
| 4  | 159690182 - 159829201 |            | TRUE  | TRUE  |
| 4  | 25121627 - 25162204   |            | TRUE  | TRUE  |
| 4  | 25121627 - 25162204   | T - 84.62% | TRUE  | TRUE  |
| 4  | 25121627 - 25162204   | T - 69.23% | TRUE  | TRUE  |
| 4  | 25121627 - 25162204   |            | FALSE | TRUE  |
| 6  | 21665003 - 22214734   |            | TRUE  | TRUE  |
| 6  | 21665003 - 22214734   | F - 37.50% | TRUE  | TRUE  |
| 6  | 21665003 - 22214734   |            | TRUE  | TRUE  |
| 6  | 21665003 - 22214734   | F - 12.50% | TRUE  | TRUE  |
| 6  | 21665003 - 22214734   |            | TRUE  | TRUE  |
| 6  | 21665003 - 22214734   |            | FALSE | TRUE  |
| 6  | 21665003 - 22214734   |            | TRUE  | TRUE  |
| 6  | 24775159 - 24786327   |            | TRUE  | TRUE  |
| 6  | 24775159 - 24786327   | T - 58.33% | TRUE  | TRUE  |
| 6  | 24775159 - 24786327   | F - 8.33%  | FALSE | TRUE  |
| 6  | 157802165 - 158099178 | F - 13.33% | TRUE  | FALSE |
| 6  | 157802165 - 158099178 |            | TRUE  | TRUE  |
| 6  | 157802165 - 158099178 | T - 80.00% | TRUE  | TRUE  |
| 6  | 157802165 - 158099178 | F - 13.33% | TRUE  | TRUE  |
| 6  | 157802165 - 158099178 |            | TRUE  | TRUE  |
| 6  | 157802165 - 158099178 | T - 60.00% | FALSE | TRUE  |
| 6  | 157802165 - 158099178 |            | FALSE | TRUE  |
| 6  | 32546546 - 32578053   |            | TRUE  | FALSE |
| 6  | 32546546 - 32578053   |            | TRUE  | TRUE  |
| 6  | 32546546 - 32578053   |            | TRUE  | TRUE  |
| 6  | 32546546 - 32578053   |            | TRUE  | TRUE  |

|   |    |                       |             |       |       |
|---|----|-----------------------|-------------|-------|-------|
|   | 6  | 32546546 - 32578053   |             | TRUE  | TRUE  |
|   | 6  | 32546546 - 32578053   |             | FALSE | TRUE  |
|   | 6  | 32546546 - 32578053   | T - 92.31%  | TRUE  | TRUE  |
|   | 7  | 37960163 - 37991543   |             | TRUE  | FALSE |
|   | 7  | 37960163 - 37991543   | T - 75.00%  | TRUE  | TRUE  |
|   | 7  | 37960163 - 37991543   |             | FALSE | TRUE  |
|   | 8  | 130853716 - 131029375 | F - 19.44%  | TRUE  | TRUE  |
|   | 8  | 130853716 - 131029375 |             | TRUE  | TRUE  |
|   | 8  | 130853716 - 131029375 | F - 11.11%  | TRUE  | TRUE  |
| X |    | 73040486 - 73072588   | T - 75.00%  | TRUE  | TRUE  |
| X |    | 73040486 - 73072588   |             | TRUE  | TRUE  |
|   | 10 | 46549955 - 46641045   | F - 28.57%  | TRUE  | TRUE  |
|   | 10 | 46549955 - 46641045   |             | TRUE  | FALSE |
|   | 10 | 46549955 - 46641045   |             | FALSE | TRUE  |
|   | 13 | 31480312 - 31499709   | F - 40.00%  | TRUE  | TRUE  |
|   | 13 | 31480312 - 31499709   | T - 80.00%  | TRUE  | TRUE  |
|   | 13 | 31480312 - 31499709   | T - 60.00%  | TRUE  | TRUE  |
|   | 13 | 31480312 - 31499709   |             | TRUE  | TRUE  |
|   | 13 | 31480312 - 31499709   | T - 100.00% | TRUE  | TRUE  |
|   | 13 | 31480312 - 31499709   |             | FALSE | TRUE  |
|   | 14 | 92335755 - 92414167   | F - 22.22%  | TRUE  | TRUE  |
|   | 14 | 92335755 - 92414167   | F - 22.22%  | TRUE  | TRUE  |
|   | 14 | 92335755 - 92414167   |             | TRUE  | TRUE  |
|   | 14 | 92335755 - 92414167   | F - 22.22%  | TRUE  | TRUE  |
|   | 14 | 92335755 - 92414167   |             | FALSE | TRUE  |
|   | 15 | 51633713 - 51700210   | T - 60.00%  | TRUE  | TRUE  |
|   | 15 | 51633713 - 51700210   |             | FALSE | TRUE  |
|   | 15 | 51633713 - 51700210   |             | TRUE  | TRUE  |
|   | 15 | 51633713 - 51700210   | T - 90.00%  | FALSE | TRUE  |
|   | 15 | 51633713 - 51700210   | F - 40.00%  | TRUE  | TRUE  |
|   | 15 | 51633713 - 51700210   | F - 20.00%  | TRUE  | TRUE  |
|   | 15 | 51633713 - 51700210   | F - 30.00%  | TRUE  | TRUE  |
|   | 15 | 51633713 - 51700210   | F - 20.00%  | TRUE  | TRUE  |
|   | 15 | 91446222 - 91465815   | F - 8.33%   | TRUE  | FALSE |
|   | 15 | 91446222 - 91465815   |             | TRUE  | TRUE  |
|   | 16 | 82660399 - 83830215   | F - 18.75%  | TRUE  | TRUE  |
|   | 16 | 82660399 - 83830215   |             | TRUE  | TRUE  |
|   | 16 | 82660399 - 83830215   |             | TRUE  | TRUE  |
|   | 16 | 82660399 - 83830215   |             | FALSE | TRUE  |
|   | 16 | 82660399 - 83830215   | F - 25.00%  | TRUE  | TRUE  |
|   | 17 | 30264044 - 30328064   |             | TRUE  | FALSE |
|   | 17 | 30264044 - 30328064   | F - 14.29%  | TRUE  | TRUE  |
|   | 17 | 30264044 - 30328064   |             | TRUE  | TRUE  |
|   | 17 | 30264044 - 30328064   |             | TRUE  | TRUE  |
|   | 18 | 20513290 - 20606449   |             | TRUE  | TRUE  |
|   | 18 | 20513290 - 20606449   | F - 23.08%  | TRUE  | TRUE  |
|   | 18 | 20513290 - 20606449   | F - 7.69%   | FALSE | TRUE  |
|   | 18 | 20513290 - 20606449   | F - 38.46%  | FALSE | TRUE  |
|   | 18 | 20513290 - 20606449   | F - 7.69%   | FALSE | TRUE  |
|   | 18 | 6941743 - 7117813     |             | TRUE  | TRUE  |
|   | 18 | 6941743 - 7117813     |             | TRUE  | TRUE  |
|   | 18 | 6941743 - 7117813     |             | FALSE | TRUE  |
|   | 18 | 6941743 - 7117813     |             | TRUE  | TRUE  |
|   | 18 | 6941743 - 7117813     |             | FALSE | TRUE  |
|   | 18 | 6941743 - 7117813     | F - 27.27%  | FALSE | TRUE  |
|   | 18 | 6941743 - 7117813     |             | TRUE  | TRUE  |
|   | 19 | 51125234 - 51171651   |             | TRUE  | TRUE  |
|   | 19 | 51125234 - 51171651   | T - 100.00% | TRUE  | TRUE  |

|    |                       |             |       |       |
|----|-----------------------|-------------|-------|-------|
| 19 | 51125234 - 51171651   |             | TRUE  | TRUE  |
| 19 | 51125234 - 51171651   |             | FALSE | TRUE  |
| 20 | 25604681 - 25658710   |             | TRUE  | TRUE  |
| 20 | 25604681 - 25658710   | T - 57.14%  | TRUE  | TRUE  |
| 20 | 25604681 - 25658710   |             | FALSE | TRUE  |
| 22 | 39410088 - 39414931   | F - 33.33%  | FALSE | TRUE  |
| 22 | 39410088 - 39414931   |             | FALSE | TRUE  |
| 10 | 91339254 - 91405329   |             | TRUE  | FALSE |
| 10 | 91339254 - 91405329   | T - 83.33%  | TRUE  | TRUE  |
| 10 | 91339254 - 91405329   |             | FALSE | TRUE  |
| 1  | 236378422 - 236445339 | T - 62.50%  | TRUE  | TRUE  |
| 1  | 236378422 - 236445339 | F - 25.00%  | TRUE  | TRUE  |
| 1  | 236378422 - 236445339 | F - 37.50%  | TRUE  | TRUE  |
| 1  | 236378422 - 236445339 |             | FALSE | TRUE  |
| 2  | 171784948 - 171823643 | F - 5.56%   | TRUE  | FALSE |
| 2  | 171784948 - 171823643 |             | TRUE  | TRUE  |
| 2  | 163123589 - 163175213 |             | TRUE  | TRUE  |
| 2  | 163123589 - 163175213 | T - 57.14%  | TRUE  | TRUE  |
| 2  | 163123589 - 163175213 |             | FALSE | TRUE  |
| 3  | 12045862 - 12233532   | T - 100.00% | TRUE  | TRUE  |
| 3  | 12045862 - 12233532   |             | TRUE  | TRUE  |
| 3  | 196715492 - 196756687 |             | TRUE  | FALSE |
| 3  | 196715492 - 196756687 | F - 9.09%   | TRUE  | TRUE  |
| 5  | 31400602 - 31532303   |             | TRUE  | TRUE  |
| 5  | 31400602 - 31532303   |             | TRUE  | FALSE |
| 5  | 31400602 - 31532303   |             | TRUE  | TRUE  |
| 5  | 31400602 - 31532303   | F - 41.94%  | TRUE  | TRUE  |
| 5  | 31400602 - 31532303   | F - 3.23%   | FALSE | TRUE  |
| 5  | 31400602 - 31532303   | F - 3.23%   | FALSE | TRUE  |
| 5  | 31400602 - 31532303   |             | TRUE  | TRUE  |
| 5  | 31400602 - 31532303   |             | TRUE  | TRUE  |
| 5  | 31400602 - 31532303   |             | FALSE | TRUE  |
| 5  | 136953189 - 137071779 |             | TRUE  | FALSE |
| 5  | 136953189 - 137071779 |             | TRUE  | TRUE  |
| 5  | 136953189 - 137071779 |             | TRUE  | TRUE  |
| 5  | 136953189 - 137071779 |             | TRUE  | TRUE  |
| 5  | 136953189 - 137071779 | F - 13.64%  | FALSE | TRUE  |
| 5  | 136953189 - 137071779 |             | TRUE  | TRUE  |
| 5  | 136953189 - 137071779 |             | FALSE | TRUE  |
| 6  | 27215480 - 27224403   |             | TRUE  | TRUE  |
| 6  | 27215480 - 27224403   | F - 20.00%  | TRUE  | TRUE  |
| 6  | 27215480 - 27224403   |             | FALSE | TRUE  |
| 6  | 3722836 - 3752260     |             | TRUE  | TRUE  |
| 6  | 3722836 - 3752260     | F - 16.67%  | TRUE  | TRUE  |
| 6  | 3722836 - 3752260     |             | FALSE | TRUE  |
| 6  | 43021767 - 43027544   | F - 21.43%  | TRUE  | TRUE  |
| 6  | 43021767 - 43027544   | F - 7.14%   | TRUE  | TRUE  |
| 6  | 43021767 - 43027544   |             | TRUE  | TRUE  |
| 7  | 73703803 - 73820273   | T - 50.00%  | TRUE  | TRUE  |
| 7  | 73703803 - 73820273   | F - 7.14%   | TRUE  | TRUE  |
| 7  | 73703803 - 73820273   |             | TRUE  | TRUE  |
| 7  | 73703803 - 73820273   | F - 7.14%   | FALSE | TRUE  |
| X  | 2527306 - 2575270     |             | TRUE  | TRUE  |
| X  | 2527306 - 2575270     | F - 28.57%  | FALSE | TRUE  |
| X  | 294668 - 347690       |             | TRUE  | FALSE |
| X  | 294668 - 347690       | F - 7.69%   | TRUE  | TRUE  |
| X  | 294668 - 347690       |             | FALSE | TRUE  |
| 10 | 48736874 - 48827966   | F - 28.57%  | TRUE  | TRUE  |

|    |                     |             |       |       |
|----|---------------------|-------------|-------|-------|
| 10 | 48736874 - 48827966 |             | TRUE  | FALSE |
| 10 | 48736874 - 48827966 |             | FALSE | TRUE  |
| 10 | 61786056 - 62493284 |             | TRUE  | TRUE  |
| 10 | 61786056 - 62493284 | F - 9.09%   | TRUE  | TRUE  |
| 10 | 61786056 - 62493284 | F - 34.09%  | TRUE  | TRUE  |
| 10 | 61786056 - 62493284 |             | FALSE | TRUE  |
| 10 | 61786056 - 62493284 | F - 11.36%  | TRUE  | TRUE  |
| 10 | 61786056 - 62493284 | F - 2.27%   | TRUE  | TRUE  |
| 10 | 61786056 - 62493284 | F - 2.27%   | TRUE  | FALSE |
| 10 | 61786056 - 62493284 |             | TRUE  | TRUE  |
| 10 | 61786056 - 62493284 | F - 2.27%   | TRUE  | TRUE  |
| 10 | 61786056 - 62493284 | F - 2.27%   | TRUE  | FALSE |
| 10 | 61786056 - 62493284 | F - 9.09%   | FALSE | TRUE  |
| 10 | 61786056 - 62493284 | F - 6.82%   | TRUE  | TRUE  |
| 10 | 61786056 - 62493284 | F - 2.27%   | TRUE  | TRUE  |
| 10 | 61786056 - 62493284 |             | FALSE | TRUE  |
| 10 | 61786056 - 62493284 | F - 4.55%   | TRUE  | TRUE  |
| 10 | 61786056 - 62493284 | F - 2.27%   | FALSE | TRUE  |
| 10 | 61786056 - 62493284 |             | TRUE  | TRUE  |
| 10 | 61786056 - 62493284 | F - 4.55%   | FALSE | TRUE  |
| 10 | 61786056 - 62493284 |             | TRUE  | TRUE  |
| 10 | 61786056 - 62493284 | F - 2.27%   | TRUE  | TRUE  |
| 10 | 61786056 - 62493284 |             | TRUE  | TRUE  |
| 10 | 61786056 - 62493284 |             | TRUE  | TRUE  |
| 10 | 61786056 - 62493284 |             | TRUE  | TRUE  |
| 10 | 61786056 - 62493284 |             | TRUE  | TRUE  |
| 10 | 61786056 - 62493284 | F - 4.55%   | TRUE  | TRUE  |
| 10 | 61786056 - 62493284 |             | FALSE | TRUE  |
| 10 | 61786056 - 62493284 | F - 2.27%   | FALSE | TRUE  |
| 10 | 61786056 - 62493284 |             | FALSE | TRUE  |
| 10 | 61786056 - 62493284 | F - 6.82%   | FALSE | TRUE  |
| 10 | 61786056 - 62493284 |             | FALSE | TRUE  |
| 10 | 61786056 - 62493284 |             | FALSE | TRUE  |
| 10 | 61786056 - 62493284 |             | TRUE  | TRUE  |
| 10 | 61786056 - 62493284 |             | FALSE | TRUE  |
| 10 | 61786056 - 62493284 |             | FALSE | TRUE  |
| 11 | 9302201 - 9336327   | F - 44.44%  | TRUE  | TRUE  |
| 11 | 9302201 - 9336327   |             | TRUE  | TRUE  |
| 14 | 30421603 - 30766249 |             | TRUE  | TRUE  |
| 14 | 30421603 - 30766249 | F - 33.33%  | TRUE  | TRUE  |
| 14 | 64550950 - 64805317 |             | TRUE  | TRUE  |
| 14 | 64550950 - 64805317 |             | TRUE  | FALSE |
| 14 | 64550950 - 64805317 | T - 70.83%  | FALSE | TRUE  |
| 14 | 64550950 - 64805317 | F - 16.67%  | FALSE | TRUE  |
| 15 | 89054786 - 89089912 |             | TRUE  | TRUE  |
| 15 | 89054786 - 89089912 | F - 36.36%  | TRUE  | TRUE  |
| 15 | 89054786 - 89089912 | T - 72.73%  | TRUE  | TRUE  |
| 17 | 44363862 - 44439163 |             | TRUE  | FALSE |
| 17 | 44363862 - 44439163 |             | TRUE  | TRUE  |
| 17 | 44363862 - 44439163 | F - 9.09%   | TRUE  | TRUE  |
| 17 | 26684646 - 26690705 |             | TRUE  | TRUE  |
| 17 | 26684646 - 26690705 | F - 40.00%  | TRUE  | TRUE  |
| 17 | 26684646 - 26690705 |             | TRUE  | TRUE  |
| 19 | 18111944 - 18124911 |             | TRUE  | FALSE |
| 19 | 18111944 - 18124911 |             | TRUE  | TRUE  |
| 19 | 18111944 - 18124911 | F - 40.00%  | TRUE  | TRUE  |
| 19 | 18367906 - 18385319 | T - 100.00% | TRUE  | TRUE  |
| 19 | 18367906 - 18385319 | F - 16.67%  | TRUE  | TRUE  |

|             |    |                       |            |       |       |
|-------------|----|-----------------------|------------|-------|-------|
|             | 19 | 18367906 - 18385319   |            | TRUE  | TRUE  |
|             | 19 | 18367906 - 18385319   | T - 50.00% | TRUE  | TRUE  |
|             | 19 | 18367906 - 18385319   |            | TRUE  | TRUE  |
|             | 19 | 18367906 - 18385319   |            | TRUE  | TRUE  |
|             | 19 | 18367906 - 18385319   | F - 8.33%  | TRUE  | TRUE  |
|             | 19 | 18367906 - 18385319   | T - 75.00% | TRUE  | TRUE  |
|             | 20 | 62681189 - 62703700   |            | TRUE  | TRUE  |
|             | 20 | 62681189 - 62703700   | F - 8.00%  | FALSE | TRUE  |
| 6_cox_hap2  |    | 3357290 - 3375218     |            | TRUE  | FALSE |
| 6_cox_hap2  |    | 3357290 - 3375218     | T - 61.11% | FALSE | TRUE  |
| 6_dbb_hap3  |    | 3133118 - 3151046     |            | TRUE  | FALSE |
| 6_dbb_hap3  |    | 3133118 - 3151046     | T - 61.11% | FALSE | TRUE  |
| 6_qbl_hap6  |    | 2922643 - 2927703     |            | TRUE  | TRUE  |
| 6_qbl_hap6  |    | 2922643 - 2927703     | T - 86.67% | TRUE  | TRUE  |
| 6_qbl_hap6  |    | 2922643 - 2927703     | F - 33.33% | TRUE  | TRUE  |
| 6_ssto_hap7 |    | 2959804 - 2964865     |            | TRUE  | TRUE  |
| 6_ssto_hap7 |    | 2959804 - 2964865     | T - 86.67% | TRUE  | TRUE  |
| 6_ssto_hap7 |    | 2959804 - 2964865     | F - 33.33% | TRUE  | TRUE  |
|             | 1  | 32716840 - 32751766   | T - 83.33% | TRUE  | TRUE  |
|             | 1  | 32716840 - 32751766   |            | TRUE  | TRUE  |
|             | 1  | 192778169 - 192781407 |            | TRUE  | TRUE  |
|             | 1  | 192778169 - 192781407 | F - 16.67% | FALSE | TRUE  |
|             | 1  | 201159953 - 201198080 |            | TRUE  | TRUE  |
|             | 1  | 201159953 - 201198080 |            | TRUE  | FALSE |
|             | 1  | 201159953 - 201198080 | T - 77.78% | TRUE  | TRUE  |
|             | 1  | 201159953 - 201198080 | T - 55.56% | FALSE | TRUE  |
|             | 1  | 201159953 - 201198080 |            | FALSE | TRUE  |
|             | 1  | 43391046 - 43424847   | F - 10.00% | TRUE  | TRUE  |
|             | 1  | 43391046 - 43424847   |            | FALSE | TRUE  |
|             | 1  | 43391046 - 43424847   | F - 10.00% | TRUE  | TRUE  |
|             | 1  | 43391046 - 43424847   | F - 10.00% | TRUE  | TRUE  |
|             | 1  | 43391046 - 43424847   | T - 50.00% | FALSE | TRUE  |
|             | 1  | 247460714 - 247495148 |            | TRUE  | TRUE  |
|             | 1  | 247460714 - 247495148 | F - 27.27% | TRUE  | TRUE  |
|             | 1  | 247460714 - 247495148 | F - 9.09%  | TRUE  | TRUE  |
|             | 3  | 129158968 - 129239198 |            | TRUE  | TRUE  |
|             | 3  | 129158968 - 129239198 | T - 54.00% | TRUE  | FALSE |
|             | 3  | 129158968 - 129239198 |            | FALSE | TRUE  |
|             | 3  | 129158968 - 129239198 |            | TRUE  | TRUE  |
|             | 3  | 129158968 - 129239198 |            | TRUE  | TRUE  |
|             | 3  | 129158968 - 129239198 |            | TRUE  | TRUE  |
|             | 3  | 160117062 - 160152750 | F - 2.56%  | TRUE  | FALSE |
|             | 3  | 160117062 - 160152750 |            | TRUE  | FALSE |
|             | 3  | 160117062 - 160152750 |            | TRUE  | TRUE  |
|             | 3  | 160117062 - 160152750 |            | FALSE | TRUE  |
|             | 3  | 172468472 - 172539264 |            | TRUE  | TRUE  |
|             | 3  | 172468472 - 172539264 |            | TRUE  | TRUE  |
|             | 3  | 172468472 - 172539264 |            | TRUE  | TRUE  |
|             | 3  | 172468472 - 172539264 | F - 24.00% | TRUE  | TRUE  |
|             | 3  | 172468472 - 172539264 |            | TRUE  | TRUE  |
|             | 3  | 172468472 - 172539264 | F - 16.00% | TRUE  | TRUE  |
|             | 3  | 172468472 - 172539264 |            | TRUE  | TRUE  |
|             | 4  | 142944313 - 143768585 |            | TRUE  | TRUE  |
|             | 4  | 142944313 - 143768585 | T - 62.50% | TRUE  | TRUE  |
|             | 4  | 142944313 - 143768585 |            | TRUE  | TRUE  |
|             | 4  | 142944313 - 143768585 | F - 43.75% | TRUE  | TRUE  |
|             | 4  | 142944313 - 143768585 | T - 50.00% | FALSE | TRUE  |
|             | 4  | 142944313 - 143768585 |            | FALSE | TRUE  |

|    |                       |             |       |       |
|----|-----------------------|-------------|-------|-------|
| 4  | 142944313 - 143768585 |             | FALSE | TRUE  |
| 4  | 142944313 - 143768585 |             | FALSE | TRUE  |
| 4  | 142944313 - 143768585 |             | FALSE | TRUE  |
| 4  | 142944313 - 143768585 |             | TRUE  | TRUE  |
| 4  | 142944313 - 143768585 | F - 21.88%  | FALSE | TRUE  |
| 4  | 142944313 - 143768585 | T - 62.50%  | FALSE | TRUE  |
| 4  | 142944313 - 143768585 |             | FALSE | TRUE  |
| 4  | 142944313 - 143768585 | T - 59.38%  | FALSE | TRUE  |
| 5  | 110998318 - 111333161 |             | TRUE  | FALSE |
| 5  | 110998318 - 111333161 |             | FALSE | TRUE  |
| 5  | 110998318 - 111333161 | F - 5.26%   | TRUE  | TRUE  |
| 5  | 110998318 - 111333161 | F - 5.26%   | TRUE  | TRUE  |
| 5  | 110998318 - 111333161 | F - 7.89%   | TRUE  | TRUE  |
| 5  | 110998318 - 111333161 | F - 7.89%   | TRUE  | TRUE  |
| 5  | 110998318 - 111333161 | F - 2.63%   | TRUE  | TRUE  |
| 5  | 863850 - 892939       |             | TRUE  | TRUE  |
| 5  | 863850 - 892939       | F - 17.24%  | TRUE  | TRUE  |
| 5  | 863850 - 892939       |             | FALSE | TRUE  |
| 5  | 863850 - 892939       |             | FALSE | TRUE  |
| 6  | 31629006 - 31634060   |             | TRUE  | TRUE  |
| 6  | 31629006 - 31634060   | T - 86.67%  | TRUE  | TRUE  |
| 6  | 31629006 - 31634060   | F - 33.33%  | TRUE  | TRUE  |
| 8  | 42273993 - 42397069   |             | TRUE  | FALSE |
| 8  | 42273993 - 42397069   |             | TRUE  | FALSE |
| 8  | 42273993 - 42397069   | F - 5.56%   | FALSE | TRUE  |
| 8  | 42273993 - 42397069   | F - 5.56%   | TRUE  | TRUE  |
| 8  | 42273993 - 42397069   |             | FALSE | TRUE  |
| 9  | 35673710 - 35681156   | T - 57.14%  | TRUE  | TRUE  |
| 9  | 35673710 - 35681156   |             | FALSE | TRUE  |
| 9  | 35673710 - 35681156   | T - 57.14%  | FALSE | TRUE  |
| 9  | 35673710 - 35681156   | T - 57.14%  | FALSE | TRUE  |
| 9  | 35673710 - 35681156   | T - 71.43%  | TRUE  | TRUE  |
| 9  | 35673710 - 35681156   |             | FALSE | TRUE  |
| 9  | 35673710 - 35681156   |             | FALSE | TRUE  |
| 9  | 35673710 - 35681156   |             | FALSE | TRUE  |
| 9  | 35673710 - 35681156   | T - 71.43%  | FALSE | TRUE  |
| 11 | 27676440 - 27743605   |             | TRUE  | TRUE  |
| 11 | 27676440 - 27743605   | F - 5.56%   | FALSE | TRUE  |
| 11 | 27676440 - 27743605   | F - 16.67%  | FALSE | TRUE  |
| 11 | 27676440 - 27743605   |             | TRUE  | TRUE  |
| 12 | 104359582 - 104382656 |             | TRUE  | TRUE  |
| 12 | 104359582 - 104382656 |             | FALSE | TRUE  |
| 12 | 104359582 - 104382656 | F - 18.18%  | TRUE  | TRUE  |
| 16 | 2325877 - 2390747     |             | TRUE  | TRUE  |
| 16 | 2325877 - 2390747     |             | TRUE  | TRUE  |
| 16 | 2325877 - 2390747     | T - 85.71%  | TRUE  | TRUE  |
| 16 | 2325877 - 2390747     | T - 85.71%  | TRUE  | TRUE  |
| 16 | 2325877 - 2390747     |             | TRUE  | TRUE  |
| 16 | 2325877 - 2390747     | T - 100.00% | TRUE  | TRUE  |
| 16 | 2325877 - 2390747     |             | FALSE | TRUE  |
| 16 | 2325877 - 2390747     |             | FALSE | TRUE  |
| 20 | 34129770 - 34145405   | F - 3.45%   | TRUE  | TRUE  |
| 20 | 34129770 - 34145405   | F - 6.90%   | TRUE  | FALSE |
| 20 | 34129770 - 34145405   |             | TRUE  | TRUE  |
| 20 | 34129770 - 34145405   |             | TRUE  | TRUE  |
| 21 | 30428126 - 30446118   | F - 10.53%  | TRUE  | TRUE  |
| 21 | 30428126 - 30446118   |             | TRUE  | TRUE  |
| 22 | 37576206 - 37595425   |             | TRUE  | TRUE  |



|             |    |                       |             |       |       |
|-------------|----|-----------------------|-------------|-------|-------|
|             | 22 | 37576206 - 37595425   | F - 13.33%  | FALSE | TRUE  |
| 6_apd_hap1  |    | 3162290 - 3180225     |             | TRUE  | FALSE |
| 6_apd_hap1  |    | 3162290 - 3180225     | T - 61.11%  | FALSE | TRUE  |
| 6_dbb_hap3  |    | 2914585 - 2919640     |             | TRUE  | TRUE  |
| 6_dbb_hap3  |    | 2914585 - 2919640     | F - 40.00%  | TRUE  | TRUE  |
| 6_dbb_hap3  |    | 2914585 - 2919640     | T - 86.67%  | TRUE  | TRUE  |
| 6_dbb_hap3  |    | 2914585 - 2919640     | F - 33.33%  | TRUE  | TRUE  |
| 6_mann_hap4 |    | 2971896 - 2976950     |             | TRUE  | TRUE  |
| 6_mann_hap4 |    | 2971896 - 2976950     | T - 86.67%  | TRUE  | TRUE  |
| 6_mann_hap4 |    | 2971896 - 2976950     | F - 33.33%  | TRUE  | TRUE  |
| 6_mcf_hap5  |    | 3008686 - 3013740     |             | TRUE  | TRUE  |
| 6_mcf_hap5  |    | 3008686 - 3013740     | T - 86.67%  | TRUE  | TRUE  |
| 6_mcf_hap5  |    | 3008686 - 3013740     | F - 33.33%  | TRUE  | TRUE  |
| 6_mcf_hap5  |    | 3227409 - 3245344     |             | TRUE  | FALSE |
| 6_mcf_hap5  |    | 3227409 - 3245344     | T - 61.11%  | FALSE | TRUE  |
| 6_qbl_hap6  |    | 3141328 - 3159267     |             | TRUE  | FALSE |
| 6_qbl_hap6  |    | 3141328 - 3159267     | T - 61.11%  | FALSE | TRUE  |
|             | 13 | 113760105 - 113774995 |             | TRUE  | TRUE  |
|             | 13 | 113760105 - 113774995 | F - 9.09%   | TRUE  | FALSE |
|             | 1  | 16340523 - 16346089   |             | FALSE | TRUE  |
|             | 1  | 16340523 - 16346089   | F - 7.69%   | TRUE  | TRUE  |
|             | 1  | 16340523 - 16346089   | F - 7.69%   | TRUE  | TRUE  |
|             | 1  | 16524349 - 16539140   |             | TRUE  | TRUE  |
|             | 1  | 16524349 - 16539140   | F - 11.11%  | TRUE  | TRUE  |
|             | 1  | 16524349 - 16539140   | F - 33.33%  | TRUE  | TRUE  |
|             | 1  | 16524349 - 16539140   |             | FALSE | TRUE  |
|             | 1  | 47715811 - 47779819   |             | TRUE  | TRUE  |
|             | 1  | 47715811 - 47779819   |             | TRUE  | FALSE |
|             | 1  | 47715811 - 47779819   | F - 11.11%  | FALSE | TRUE  |
|             | 2  | 27650657 - 27665126   |             | TRUE  | TRUE  |
|             | 2  | 27650657 - 27665126   | F - 6.67%   | TRUE  | TRUE  |
|             | 2  | 27650657 - 27665126   |             | TRUE  | TRUE  |
|             | 4  | 146402346 - 146480325 |             | TRUE  | TRUE  |
|             | 4  | 146402346 - 146480325 | F - 4.76%   | FALSE | TRUE  |
|             | 4  | 146402346 - 146480325 |             | TRUE  | TRUE  |
|             | 5  | 78293429 - 78531861   |             | TRUE  | TRUE  |
|             | 5  | 78293429 - 78531861   | T - 68.75%  | TRUE  | TRUE  |
|             | 6  | 130334844 - 130462594 | T - 80.00%  | TRUE  | TRUE  |
|             | 6  | 130334844 - 130462594 | T - 100.00% | TRUE  | TRUE  |
|             | 6  | 130334844 - 130462594 |             | FALSE | TRUE  |
|             | 6  | 130334844 - 130462594 |             | TRUE  | TRUE  |
|             | 6  | 130334844 - 130462594 |             | TRUE  | TRUE  |
|             | 6  | 130334844 - 130462594 |             | FALSE | TRUE  |
|             | 6  | 130334844 - 130462594 |             | TRUE  | TRUE  |
|             | 8  | 439790 - 495781       |             | TRUE  | TRUE  |
|             | 8  | 439790 - 495781       | F - 20.00%  | TRUE  | FALSE |
|             | 9  | 46687462 - 46748386   |             | TRUE  | FALSE |
|             | 9  | 46687462 - 46748386   | T - 100.00% | TRUE  | TRUE  |
|             | 9  | 46687462 - 46748386   |             | TRUE  | TRUE  |
|             | 10 | 30722866 - 30750762   | F - 45.45%  | TRUE  | TRUE  |
|             | 10 | 30722866 - 30750762   |             | TRUE  | TRUE  |
|             | 10 | 111967363 - 112047123 | F - 5.26%   | TRUE  | FALSE |
|             | 10 | 111967363 - 112047123 |             | TRUE  | TRUE  |
|             | 10 | 111967363 - 112047123 |             | TRUE  | TRUE  |
|             | 10 | 111967363 - 112047123 |             | TRUE  | TRUE  |
|             | 11 | 129939716 - 130014706 |             | TRUE  | TRUE  |
|             | 11 | 129939716 - 130014706 | F - 10.53%  | TRUE  | TRUE  |
|             | 11 | 6416355 - 6440644     |             | TRUE  | TRUE  |

|    |                       |             |       |       |
|----|-----------------------|-------------|-------|-------|
| 11 | 6416355 - 6440644     | F - 9.52%   | TRUE  | TRUE  |
| 11 | 6416355 - 6440644     | F - 4.76%   | TRUE  | TRUE  |
| 11 | 6416355 - 6440644     |             | FALSE | TRUE  |
| 11 | 6416355 - 6440644     |             | FALSE | TRUE  |
| 13 | 73629114 - 73651676   | T - 80.00%  | TRUE  | TRUE  |
| 13 | 73629114 - 73651676   | F - 30.00%  | TRUE  | TRUE  |
| 13 | 73629114 - 73651676   | F - 40.00%  | TRUE  | TRUE  |
| 13 | 73629114 - 73651676   |             | TRUE  | TRUE  |
| 17 | 16120509 - 16229573   |             | TRUE  | TRUE  |
| 17 | 16120509 - 16229573   | F - 9.09%   | TRUE  | TRUE  |
| 17 | 78234660 - 78372581   |             | TRUE  | TRUE  |
| 17 | 78234660 - 78372581   | F - 6.25%   | TRUE  | TRUE  |
| 17 | 78234660 - 78372581   |             | TRUE  | TRUE  |
| 17 | 78234660 - 78372581   |             | TRUE  | TRUE  |
| 17 | 78234660 - 78372581   |             | TRUE  | TRUE  |
| 17 | 37913968 - 38020441   | T - 54.55%  | TRUE  | TRUE  |
| 17 | 37913968 - 38020441   |             | TRUE  | TRUE  |
| 17 | 40852293 - 40897071   |             | TRUE  | TRUE  |
| 17 | 40852293 - 40897071   | T - 66.67%  | TRUE  | TRUE  |
| 17 | 40852293 - 40897071   |             | TRUE  | TRUE  |
| 17 | 40852293 - 40897071   |             | TRUE  | TRUE  |
| 17 | 40852293 - 40897071   |             | FALSE | TRUE  |
| 17 | 56566893 - 56595251   | T - 66.67%  | TRUE  | TRUE  |
| 17 | 56566893 - 56595251   |             | TRUE  | TRUE  |
| 17 | 56566893 - 56595251   | T - 66.67%  | TRUE  | TRUE  |
| 17 | 45331208 - 45390077   | T - 100.00% | TRUE  | TRUE  |
| 17 | 45331208 - 45390077   | T - 75.00%  | TRUE  | TRUE  |
| 17 | 45331208 - 45390077   |             | TRUE  | TRUE  |
| 17 | 45331208 - 45390077   |             | FALSE | TRUE  |
| 17 | 45400656 - 45518678   |             | TRUE  | TRUE  |
| 17 | 45400656 - 45518678   | T - 80.00%  | TRUE  | FALSE |
| 17 | 45400656 - 45518678   |             | FALSE | TRUE  |
| 17 | 45400656 - 45518678   |             | FALSE | TRUE  |
| 17 | 45400656 - 45518678   |             | TRUE  | TRUE  |
| 17 | 45400656 - 45518678   |             | FALSE | TRUE  |
| 18 | 6729821 - 6915715     |             | TRUE  | TRUE  |
| 18 | 6729821 - 6915715     |             | FALSE | TRUE  |
| 18 | 6729821 - 6915715     | T - 58.33%  | FALSE | TRUE  |
| 19 | 8367011 - 8373240     |             | TRUE  | TRUE  |
| 19 | 8367011 - 8373240     | F - 16.67%  | TRUE  | TRUE  |
| 2  | 6072819 - 6141407     |             | TRUE  | FALSE |
| 2  | 6072819 - 6141407     | F - 28.57%  | TRUE  | TRUE  |
| 1  | 95285898 - 95360802   | T - 94.74%  | TRUE  | TRUE  |
| 1  | 95285898 - 95360802   |             | TRUE  | FALSE |
| 1  | 95285898 - 95360802   |             | TRUE  | TRUE  |
| 1  | 95285898 - 95360802   | F - 10.53%  | FALSE | TRUE  |
| 1  | 95285898 - 95360802   | F - 10.53%  | TRUE  | TRUE  |
| 1  | 95285898 - 95360802   | F - 26.32%  | FALSE | TRUE  |
| 1  | 95285898 - 95360802   |             | FALSE | TRUE  |
| 1  | 100174259 - 100232187 |             | TRUE  | TRUE  |
| 1  | 100174259 - 100232187 |             | TRUE  | TRUE  |
| 1  | 100174259 - 100232187 | T - 57.14%  | TRUE  | TRUE  |
| 1  | 100174259 - 100232187 |             | TRUE  | TRUE  |
| 1  | 100174259 - 100232187 | T - 57.14%  | TRUE  | TRUE  |
| 1  | 100174259 - 100232187 | T - 57.14%  | TRUE  | TRUE  |
| 1  | 100174259 - 100232187 | F - 42.86%  | TRUE  | TRUE  |
| 1  | 100174259 - 100232187 |             | TRUE  | TRUE  |
| 1  | 100174259 - 100232187 | F - 14.29%  | TRUE  | TRUE  |

|              |    |                       |             |       |       |
|--------------|----|-----------------------|-------------|-------|-------|
|              | 1  | 100174259 - 100232187 |             | FALSE | TRUE  |
|              | 1  | 100174259 - 100232187 | T - 85.71%  | FALSE | TRUE  |
|              | 1  | 100174259 - 100232187 | T - 85.71%  | FALSE | TRUE  |
|              | 2  | 39663778 - 39892483   |             | TRUE  | TRUE  |
|              | 2  | 39663778 - 39892483   | F - 8.33%   | FALSE | TRUE  |
|              | 2  | 170386259 - 170430424 |             | TRUE  | TRUE  |
|              | 2  | 170386259 - 170430424 | F - 5.56%   | TRUE  | TRUE  |
|              | 3  | 99548985 - 99833357   | F - 33.33%  | TRUE  | TRUE  |
|              | 3  | 99548985 - 99833357   | F - 5.56%   | TRUE  | TRUE  |
|              | 3  | 99548985 - 99833357   | F - 22.22%  | TRUE  | TRUE  |
|              | 3  | 99548985 - 99833357   | T - 66.67%  | TRUE  | TRUE  |
|              | 3  | 99548985 - 99833357   |             | FALSE | TRUE  |
|              | 5  | 139739787 - 139754722 |             | TRUE  | FALSE |
|              | 5  | 139739787 - 139754722 |             | TRUE  | TRUE  |
|              | 5  | 139739787 - 139754722 | T - 85.71%  | TRUE  | FALSE |
|              | 7  | 6414126 - 6443608     |             | TRUE  | TRUE  |
|              | 7  | 6414126 - 6443608     | F - 16.67%  | TRUE  | FALSE |
|              | 7  | 99036545 - 99055001   |             | TRUE  | TRUE  |
|              | 7  | 99036545 - 99055001   | F - 21.05%  | TRUE  | TRUE  |
|              | 7  | 99036545 - 99055001   |             | TRUE  | TRUE  |
|              | 7  | 99036545 - 99055001   | F - 47.37%  | TRUE  | TRUE  |
|              | 7  | 99036545 - 99055001   | F - 5.26%   | TRUE  | TRUE  |
| X            |    | 65382391 - 65488709   | T - 72.22%  | TRUE  | TRUE  |
| X            |    | 65382391 - 65488709   |             | TRUE  | TRUE  |
| X            |    | 153712056 - 153715009 | F - 12.50%  | TRUE  | FALSE |
| X            |    | 153712056 - 153715009 |             | TRUE  | FALSE |
|              | 12 | 49687485 - 49692481   | T - 66.67%  | TRUE  | TRUE  |
|              | 12 | 49687485 - 49692481   |             | TRUE  | TRUE  |
|              | 12 | 49687485 - 49692481   | T - 100.00% | FALSE | TRUE  |
|              | 12 | 123319295 - 123347507 |             | TRUE  | TRUE  |
|              | 12 | 123319295 - 123347507 |             | FALSE | TRUE  |
|              | 12 | 123319295 - 123347507 |             | FALSE | TRUE  |
|              | 12 | 123319295 - 123347507 | T - 55.56%  | FALSE | TRUE  |
|              | 12 | 123319295 - 123347507 |             | FALSE | TRUE  |
|              | 14 | 23235731 - 23241007   |             | TRUE  | TRUE  |
|              | 14 | 23235731 - 23241007   | F - 21.43%  | TRUE  | TRUE  |
|              | 14 | 77801364 - 77843452   | F - 40.00%  | TRUE  | TRUE  |
|              | 14 | 77801364 - 77843452   |             | TRUE  | TRUE  |
| 17_ctg5_hap1 |    | 193775 - 240669       | F - 20.00%  | TRUE  | TRUE  |
| 17_ctg5_hap1 |    | 193775 - 240669       |             | TRUE  | TRUE  |
|              | 17 | 41605211 - 41623762   |             | TRUE  | TRUE  |
|              | 17 | 41605211 - 41623762   | T - 92.86%  | FALSE | TRUE  |
|              | 17 | 43002082 - 43025082   |             | TRUE  | TRUE  |
|              | 17 | 43002082 - 43025082   | T - 100.00% | FALSE | TRUE  |
|              | 20 | 4666797 - 4682236     |             | FALSE | TRUE  |
|              | 20 | 4666797 - 4682236     | F - 33.33%  | TRUE  | TRUE  |
| 6_apd_hap1   |    | 873547 - 904496       | F - 5.26%   | TRUE  | FALSE |
| 6_apd_hap1   |    | 873547 - 904496       |             | TRUE  | TRUE  |
| 6_apd_hap1   |    | 873547 - 904496       |             | TRUE  | TRUE  |
| 6_cox_hap2   |    | 3138625 - 3143680     |             | TRUE  | TRUE  |
| 6_cox_hap2   |    | 3138625 - 3143680     | T - 86.67%  | TRUE  | TRUE  |
|              | 2  | 120436743 - 120481191 |             | TRUE  | FALSE |
|              | 2  | 120436743 - 120481191 |             | TRUE  | FALSE |
|              | 2  | 120436743 - 120481191 | F - 8.33%   | TRUE  | TRUE  |
|              | 1  | 158149737 - 158156216 | T - 80.00%  | TRUE  | TRUE  |
|              | 1  | 158149737 - 158156216 | T - 100.00% | FALSE | TRUE  |
|              | 1  | 158149737 - 158156216 | T - 60.00%  | TRUE  | TRUE  |
|              | 1  | 158149737 - 158156216 |             | FALSE | TRUE  |

|   |    |                       |            |       |       |
|---|----|-----------------------|------------|-------|-------|
|   | 2  | 56179254 - 56613309   | T - 50.00% | TRUE  | TRUE  |
|   | 2  | 56179254 - 56613309   | F - 16.67% | TRUE  | TRUE  |
|   | 2  | 56179254 - 56613309   | F - 16.67% | TRUE  | TRUE  |
|   | 2  | 56179254 - 56613309   | F - 33.33% | TRUE  | TRUE  |
|   | 2  | 56179254 - 56613309   | F - 33.33% | FALSE | TRUE  |
|   | 2  | 56179254 - 56613309   |            | TRUE  | TRUE  |
|   | 2  | 56179254 - 56613309   |            | TRUE  | TRUE  |
|   | 2  | 56179254 - 56613309   | T - 83.33% | TRUE  | TRUE  |
|   | 2  | 56179254 - 56613309   | T - 83.33% | TRUE  | TRUE  |
|   | 2  | 56179254 - 56613309   | T - 66.67% | TRUE  | TRUE  |
|   | 2  | 56179254 - 56613309   |            | TRUE  | TRUE  |
|   | 2  | 231921578 - 232037541 |            | TRUE  | TRUE  |
|   | 2  | 231921578 - 232037541 |            | TRUE  | TRUE  |
|   | 2  | 231921578 - 232037541 | T - 58.82% | TRUE  | TRUE  |
|   | 2  | 73169165 - 73302747   |            | TRUE  | TRUE  |
|   | 2  | 73169165 - 73302747   |            | TRUE  | TRUE  |
|   | 2  | 73169165 - 73302747   | F - 3.33%  | TRUE  | TRUE  |
|   | 2  | 73169165 - 73302747   | F - 3.33%  | TRUE  | TRUE  |
|   | 2  | 73169165 - 73302747   | F - 3.33%  | FALSE | TRUE  |
|   | 2  | 73169165 - 73302747   |            | FALSE | TRUE  |
|   | 2  | 73169165 - 73302747   |            | TRUE  | TRUE  |
|   | 2  | 98272402 - 98280570   |            | TRUE  | TRUE  |
|   | 2  | 98272402 - 98280570   | T - 71.43% | TRUE  | TRUE  |
|   | 2  | 160175490 - 160473203 |            | TRUE  | TRUE  |
|   | 2  | 160175490 - 160473203 | F - 4.17%  | FALSE | TRUE  |
|   | 2  | 160175490 - 160473203 |            | FALSE | TRUE  |
|   | 3  | 15111580 - 15140670   | F - 7.14%  | TRUE  | TRUE  |
|   | 3  | 15111580 - 15140670   |            | TRUE  | TRUE  |
|   | 3  | 15111580 - 15140670   |            | TRUE  | TRUE  |
|   | 5  | 102421704 - 102455855 | T - 54.55% | TRUE  | TRUE  |
|   | 5  | 102421704 - 102455855 |            | TRUE  | TRUE  |
|   | 5  | 102421704 - 102455855 | T - 81.82% | TRUE  | TRUE  |
|   | 5  | 102421704 - 102455855 | T - 81.82% | TRUE  | TRUE  |
|   | 6  | 97590037 - 97731093   | T - 68.75% | TRUE  | FALSE |
|   | 6  | 97590037 - 97731093   | T - 50.00% | TRUE  | TRUE  |
|   | 6  | 97590037 - 97731093   | F - 12.50% | FALSE | TRUE  |
|   | 6  | 97590037 - 97731093   | F - 25.00% | TRUE  | TRUE  |
|   | 6  | 97590037 - 97731093   | F - 25.00% | TRUE  | TRUE  |
|   | 6  | 97590037 - 97731093   |            | TRUE  | TRUE  |
|   | 6  | 97590037 - 97731093   | F - 25.00% | TRUE  | TRUE  |
|   | 6  | 97590037 - 97731093   |            | TRUE  | TRUE  |
|   | 6  | 32152510 - 32157963   | F - 12.50% | TRUE  | TRUE  |
|   | 6  | 32152510 - 32157963   |            | TRUE  | TRUE  |
|   | 7  | 38423297 - 38671167   |            | TRUE  | FALSE |
|   | 7  | 38423297 - 38671167   | F - 15.79% | FALSE | TRUE  |
|   | 7  | 76940068 - 77046115   |            | TRUE  | TRUE  |
|   | 7  | 76940068 - 77046115   | F - 12.50% | TRUE  | TRUE  |
|   | 7  | 76940068 - 77046115   |            | FALSE | TRUE  |
|   | 7  | 99488030 - 99517223   | T - 70.00% | TRUE  | TRUE  |
|   | 7  | 99488030 - 99517223   |            | TRUE  | TRUE  |
| X |    | 70503042 - 70521018   | F - 3.70%  | TRUE  | TRUE  |
| X |    | 70503042 - 70521018   |            | FALSE | TRUE  |
| X |    | 114795177 - 114885181 |            | TRUE  | FALSE |
| X |    | 114795177 - 114885181 | F - 4.35%  | TRUE  | TRUE  |
| X |    | 114795177 - 114885181 |            | FALSE | TRUE  |
| X |    | 114795177 - 114885181 | F - 4.35%  | FALSE | TRUE  |
|   | 11 | 46878268 - 46940173   |            | TRUE  | FALSE |
|   | 11 | 46878268 - 46940173   | T - 80.00% | TRUE  | TRUE  |

|              |                       |             |       |       |
|--------------|-----------------------|-------------|-------|-------|
| 11           | 46878268 - 46940173   |             | TRUE  | TRUE  |
| 11           | 46878268 - 46940173   |             | FALSE | TRUE  |
| 11           | 58601540 - 58671688   | F - 16.67%  | TRUE  | TRUE  |
| 11           | 58601540 - 58671688   |             | FALSE | TRUE  |
| 12           | 56360553 - 56366568   | F - 11.11%  | TRUE  | TRUE  |
| 12           | 56360553 - 56366568   |             | TRUE  | TRUE  |
| 12           | 56360553 - 56366568   | F - 44.44%  | TRUE  | TRUE  |
| 12           | 70132461 - 70216984   | F - 32.00%  | TRUE  | TRUE  |
| 12           | 70132461 - 70216984   |             | FALSE | TRUE  |
| 13           | 20977806 - 21100012   | F - 25.00%  | FALSE | TRUE  |
| 13           | 20977806 - 21100012   | T - 75.00%  | TRUE  | TRUE  |
| 13           | 20977806 - 21100012   |             | TRUE  | TRUE  |
| 16           | 56666534 - 56667898   | T - 100.00% | TRUE  | TRUE  |
| 16           | 56666534 - 56667898   |             | TRUE  | TRUE  |
| 16           | 56666534 - 56667898   | T - 100.00% | TRUE  | TRUE  |
| 16           | 56666534 - 56667898   | T - 50.00%  | TRUE  | TRUE  |
| 17_ctg5_hap1 | 128328 - 183214       | F - 14.29%  | TRUE  | TRUE  |
| 17_ctg5_hap1 | 128328 - 183214       |             | TRUE  | TRUE  |
| 17_ctg5_hap1 | 128328 - 183214       | F - 42.86%  | TRUE  | TRUE  |
| 17           | 38632080 - 38657854   | T - 100.00% | TRUE  | TRUE  |
| 17           | 38632080 - 38657854   |             | FALSE | TRUE  |
| 17           | 38632080 - 38657854   | T - 66.67%  | TRUE  | TRUE  |
| 17           | 38632080 - 38657854   |             | FALSE | TRUE  |
| 19           | 38045684 - 38085673   |             | TRUE  | TRUE  |
| 19           | 38045684 - 38085673   | F - 40.00%  | FALSE | TRUE  |
| 22           | 41865117 - 41924993   |             | TRUE  | TRUE  |
| 22           | 41865117 - 41924993   | F - 9.09%   | TRUE  | FALSE |
| 22           | 41865117 - 41924993   | F - 9.09%   | TRUE  | TRUE  |
| 22           | 41865117 - 41924993   | T - 54.55%  | TRUE  | TRUE  |
| 22           | 30279144 - 30426857   |             | TRUE  | TRUE  |
| 22           | 30279144 - 30426857   |             | TRUE  | TRUE  |
| 22           | 30279144 - 30426857   | F - 5.00%   | TRUE  | TRUE  |
| 22           | 30279144 - 30426857   | F - 15.00%  | TRUE  | TRUE  |
| 6_apd_hap1   | 3467251 - 3472701     | F - 14.29%  | TRUE  | TRUE  |
| 6_apd_hap1   | 3467251 - 3472701     |             | TRUE  | TRUE  |
| 6_cox_hap2   | 3623191 - 3628641     | F - 14.29%  | TRUE  | TRUE  |
| 6_cox_hap2   | 3623191 - 3628641     |             | TRUE  | TRUE  |
| 6_cox_hap2   | 1088814 - 1119772     | F - 5.26%   | TRUE  | FALSE |
| 6_cox_hap2   | 1088814 - 1119772     |             | TRUE  | TRUE  |
| 6_dbb_hap3   | 873362 - 904320       | F - 5.26%   | TRUE  | FALSE |
| 6_dbb_hap3   | 873362 - 904320       |             | TRUE  | TRUE  |
| 6_mcf_hap5   | 873208 - 904163       | F - 5.26%   | TRUE  | FALSE |
| 6_mcf_hap5   | 873208 - 904163       |             | TRUE  | TRUE  |
| 6_ssto_hap7  | 3500238 - 3505689     | F - 14.29%  | TRUE  | TRUE  |
| 6_ssto_hap7  | 3500238 - 3505689     |             | TRUE  | TRUE  |
| 6_ssto_hap7  | 3500238 - 3505689     | F - 28.57%  | FALSE | TRUE  |
| 1            | 111888910 - 111895639 |             | TRUE  | TRUE  |
| 1            | 111888910 - 111895639 | F - 12.50%  | FALSE | TRUE  |
| 1            | 227751220 - 227910352 |             | TRUE  | TRUE  |
| 1            | 227751220 - 227910352 | F - 27.27%  | FALSE | TRUE  |
| 1            | 144275888 - 144341756 |             | TRUE  | TRUE  |
| 1            | 144275888 - 144341756 |             | TRUE  | TRUE  |
| 1            | 144275888 - 144341756 | F - 16.00%  | TRUE  | TRUE  |
| 1            | 144275888 - 144341756 | F - 12.00%  | TRUE  | TRUE  |
| 1            | 144275888 - 144341756 |             | FALSE | TRUE  |
| 1            | 144275888 - 144341756 | F - 4.00%   | TRUE  | TRUE  |
| 1            | 144456138 - 144521970 |             | TRUE  | TRUE  |
| 1            | 144456138 - 144521970 |             | TRUE  | TRUE  |

|    |                       |            |       |       |
|----|-----------------------|------------|-------|-------|
| 1  | 144456138 - 144521970 | F - 17.39% | TRUE  | TRUE  |
| 1  | 144456138 - 144521970 | F - 13.04% | TRUE  | TRUE  |
| 1  | 144456138 - 144521970 |            | FALSE | TRUE  |
| 1  | 144456138 - 144521970 |            | FALSE | TRUE  |
| 2  | 37311594 - 37326387   |            | TRUE  | FALSE |
| 2  | 37311594 - 37326387   |            | TRUE  | TRUE  |
| 2  | 37311594 - 37326387   | F - 40.00% | TRUE  | TRUE  |
| 2  | 64370373 - 64479993   |            | TRUE  | TRUE  |
| 2  | 64370373 - 64479993   | F - 16.67% | FALSE | TRUE  |
| 2  | 102681004 - 102796334 |            | TRUE  | FALSE |
| 2  | 102681004 - 102796334 |            | TRUE  | TRUE  |
| 2  | 102681004 - 102796334 |            | TRUE  | TRUE  |
| 2  | 102681004 - 102796334 | F - 10.00% | TRUE  | TRUE  |
| 2  | 102681004 - 102796334 |            | FALSE | TRUE  |
| 2  | 102681004 - 102796334 | F - 15.00% | TRUE  | TRUE  |
| 2  | 102681004 - 102796334 | F - 5.00%  | TRUE  | TRUE  |
| 2  | 102681004 - 102796334 | F - 5.00%  | TRUE  | TRUE  |
| 2  | 102681004 - 102796334 | F - 5.00%  | FALSE | TRUE  |
| 2  | 102681004 - 102796334 |            | FALSE | TRUE  |
| 2  | 187867947 - 188419390 |            | TRUE  | FALSE |
| 2  | 187867947 - 188419390 | T - 66.67% | TRUE  | TRUE  |
| 3  | 185764097 - 185828107 | F - 38.89% | TRUE  | TRUE  |
| 3  | 185764097 - 185828107 |            | FALSE | TRUE  |
| 4  | 178230990 - 178284097 |            | TRUE  | TRUE  |
| 4  | 178230990 - 178284097 | T - 60.00% | TRUE  | FALSE |
| 4  | 178230990 - 178284097 |            | TRUE  | TRUE  |
| 4  | 178230990 - 178284097 |            | FALSE | TRUE  |
| 6  | 28317691 - 28336954   |            | FALSE | TRUE  |
| 6  | 28317691 - 28336954   |            | FALSE | TRUE  |
| 6  | 28317691 - 28336954   | T - 87.50% | TRUE  | TRUE  |
| 6  | 28317691 - 28336954   | F - 12.50% | FALSE | TRUE  |
| 6  | 28317691 - 28336954   |            | TRUE  | TRUE  |
| 6  | 28317691 - 28336954   |            | FALSE | TRUE  |
| 6  | 135818489 - 136037193 |            | TRUE  | FALSE |
| 6  | 135818489 - 136037193 |            | TRUE  | TRUE  |
| 6  | 135818489 - 136037193 | T - 54.55% | TRUE  | TRUE  |
| 8  | 144806103 - 144815971 | T - 60.00% | TRUE  | TRUE  |
| 8  | 144806103 - 144815971 |            | FALSE | TRUE  |
| 10 | 48255225 - 48279199   |            | TRUE  | FALSE |
| 10 | 48255225 - 48279199   |            | TRUE  | TRUE  |
| 10 | 48255225 - 48279199   |            | TRUE  | TRUE  |
| 10 | 48255225 - 48279199   |            | TRUE  | TRUE  |
| 10 | 48255225 - 48279199   |            | TRUE  | TRUE  |
| 10 | 48255225 - 48279199   | F - 46.15% | TRUE  | TRUE  |
| 10 | 48255225 - 48279199   | F - 7.69%  | TRUE  | TRUE  |
| 10 | 48255225 - 48279199   |            | TRUE  | TRUE  |
| 10 | 80008382 - 80434724   | F - 12.50% | TRUE  | TRUE  |
| 10 | 80008382 - 80434724   |            | TRUE  | TRUE  |
| 10 | 49199649 - 49207835   | F - 14.29% | TRUE  | TRUE  |
| 10 | 49199649 - 49207835   |            | TRUE  | TRUE  |
| 11 | 71164155 - 71212862   |            | TRUE  | TRUE  |
| 11 | 71164155 - 71212862   | T - 88.89% | TRUE  | TRUE  |
| 12 | 26348269 - 26405853   | T - 55.56% | TRUE  | TRUE  |
| 12 | 26348269 - 26405853   |            | TRUE  | TRUE  |
| 12 | 26348269 - 26405853   | T - 88.89% | TRUE  | TRUE  |
| 12 | 26348269 - 26405853   |            | TRUE  | TRUE  |
| 12 | 26348269 - 26405853   | T - 66.67% | TRUE  | TRUE  |
| 13 | 111290133 - 111365950 |            | TRUE  | TRUE  |

|            |    |                       |            |       |       |
|------------|----|-----------------------|------------|-------|-------|
|            | 13 | 111290133 - 111365950 | F - 42.86% | TRUE  | TRUE  |
| 6_qbl_hap6 |    | 873336 - 904294       | F - 5.26%  | TRUE  | FALSE |
| 6_qbl_hap6 |    | 873336 - 904294       |            | TRUE  | TRUE  |
|            | 1  | 20208888 - 20239438   | T - 50.00% | TRUE  | TRUE  |
|            | 1  | 20208888 - 20239438   |            | TRUE  | TRUE  |
|            | 1  | 38022520 - 38032458   | F - 10.00% | TRUE  | TRUE  |
|            | 1  | 38022520 - 38032458   |            | TRUE  | TRUE  |
|            | 1  | 38022520 - 38032458   |            | FALSE | TRUE  |
|            | 1  | 227177566 - 227506175 |            | TRUE  | FALSE |
|            | 1  | 227177566 - 227506175 |            | TRUE  | TRUE  |
|            | 1  | 227177566 - 227506175 |            | TRUE  | TRUE  |
|            | 1  | 227177566 - 227506175 |            | TRUE  | TRUE  |
|            | 1  | 227177566 - 227506175 | T - 72.00% | TRUE  | TRUE  |
|            | 1  | 227177566 - 227506175 |            | FALSE | TRUE  |
|            | 2  | 207040040 - 207082771 | T - 84.62% | TRUE  | TRUE  |
|            | 2  | 207040040 - 207082771 | T - 69.23% | TRUE  | TRUE  |
|            | 2  | 207040040 - 207082771 | T - 92.31% | TRUE  | TRUE  |
|            | 2  | 207040040 - 207082771 | F - 7.69%  | TRUE  | FALSE |
|            | 2  | 207040040 - 207082771 |            | TRUE  | FALSE |
|            | 2  | 207040040 - 207082771 | T - 61.54% | TRUE  | TRUE  |
|            | 2  | 207040040 - 207082771 |            | FALSE | TRUE  |
|            | 5  | 180663909 - 180675096 | F - 1.82%  | TRUE  | TRUE  |
|            | 5  | 180663909 - 180675096 |            | TRUE  | TRUE  |
|            | 5  | 180663909 - 180675096 |            | FALSE | TRUE  |
|            | 6  | 117803820 - 117891021 |            | TRUE  | TRUE  |
|            | 6  | 117803820 - 117891021 |            | TRUE  | TRUE  |
|            | 6  | 117803820 - 117891021 |            | TRUE  | TRUE  |
|            | 6  | 117803820 - 117891021 |            | TRUE  | TRUE  |
|            | 6  | 117803820 - 117891021 | T - 53.85% | TRUE  | TRUE  |
|            | 6  | 117803820 - 117891021 | F - 15.38% | TRUE  | TRUE  |
|            | 6  | 117803820 - 117891021 |            | FALSE | TRUE  |
|            | 7  | 138144953 - 138274738 |            | TRUE  | TRUE  |
|            | 7  | 138144953 - 138274738 | F - 37.50% | TRUE  | TRUE  |
|            | 7  | 138144953 - 138274738 |            | TRUE  | TRUE  |
|            | 8  | 107282374 - 107764922 |            | TRUE  | TRUE  |
|            | 8  | 107282374 - 107764922 |            | TRUE  | TRUE  |
|            | 8  | 107282374 - 107764922 |            | FALSE | TRUE  |
|            | 8  | 107282374 - 107764922 | F - 3.45%  | TRUE  | TRUE  |
|            | 8  | 124510127 - 124553493 | F - 40.00% | TRUE  | TRUE  |
|            | 8  | 124510127 - 124553493 |            | TRUE  | TRUE  |
|            | 8  | 124510127 - 124553493 |            | TRUE  | TRUE  |
|            | 8  | 124510127 - 124553493 | F - 10.00% | FALSE | TRUE  |
|            | 9  | 139745395 - 139755251 | T - 55.56% | TRUE  | TRUE  |
|            | 9  | 139745395 - 139755251 |            | TRUE  | TRUE  |
|            | 9  | 139745395 - 139755251 |            | FALSE | TRUE  |
| X          |    | 117480036 - 117590949 |            | TRUE  | TRUE  |
| X          |    | 117480036 - 117590949 | F - 45.45% | TRUE  | TRUE  |
| X          |    | 117480036 - 117590949 |            | FALSE | TRUE  |
| X          |    | 70459474 - 70475047   | F - 6.25%  | TRUE  | TRUE  |
| X          |    | 70459474 - 70475047   |            | FALSE | TRUE  |
| X          |    | 73247971 - 73513409   |            | TRUE  | TRUE  |
| X          |    | 73247971 - 73513409   |            | TRUE  | TRUE  |
| X          |    | 73247971 - 73513409   | F - 16.67% | TRUE  | TRUE  |
|            | 11 | 706113 - 727727       | F - 13.33% | TRUE  | TRUE  |
|            | 11 | 706113 - 727727       |            | TRUE  | TRUE  |
|            | 11 | 18415935 - 18429972   |            | TRUE  | TRUE  |
|            | 11 | 18415935 - 18429972   | F - 31.82% | TRUE  | FALSE |
|            | 11 | 18415935 - 18429972   | F - 45.45% | TRUE  | TRUE  |

|    |                       |             |       |       |
|----|-----------------------|-------------|-------|-------|
| 12 | 56623820 - 56631630   | F - 40.00%  | TRUE  | FALSE |
| 12 | 56623820 - 56631630   | F - 46.67%  | TRUE  | TRUE  |
| 12 | 56623820 - 56631630   |             | FALSE | TRUE  |
| 14 | 71108504 - 71142077   |             | TRUE  | TRUE  |
| 14 | 71108504 - 71142077   | T - 50.00%  | TRUE  | FALSE |
| 15 | 30938317 - 31065209   | T - 50.00%  | TRUE  | TRUE  |
| 15 | 30938317 - 31065209   |             | TRUE  | TRUE  |
| 15 | 30938317 - 31065209   |             | FALSE | TRUE  |
| 17 | 7210318 - 7215782     |             | TRUE  | TRUE  |
| 17 | 7210318 - 7215782     | F - 9.09%   | TRUE  | TRUE  |
| 1  | 3569084 - 3652765     |             | TRUE  | FALSE |
| 1  | 3569084 - 3652765     | F - 12.50%  | FALSE | TRUE  |
| 1  | 16268364 - 16302627   | F - 43.33%  | TRUE  | TRUE  |
| 1  | 16268364 - 16302627   |             | FALSE | TRUE  |
| 2  | 174937175 - 175113426 | F - 5.88%   | TRUE  | TRUE  |
| 2  | 174937175 - 175113426 |             | TRUE  | TRUE  |
| 3  | 188665003 - 189043093 |             | TRUE  | TRUE  |
| 3  | 188665003 - 189043093 | F - 26.32%  | FALSE | TRUE  |
| 3  | 53850324 - 53880420   | T - 100.00% | TRUE  | TRUE  |
| 3  | 53850324 - 53880420   | F - 20.00%  | TRUE  | TRUE  |
| 3  | 53850324 - 53880420   |             | FALSE | TRUE  |
| 3  | 53850324 - 53880420   |             | FALSE | TRUE  |
| 3  | 53850324 - 53880420   |             | FALSE | TRUE  |
| 4  | 113066553 - 113110237 |             | TRUE  | TRUE  |
| 4  | 113066553 - 113110237 | T - 50.00%  | FALSE | TRUE  |
| 4  | 159593277 - 159630775 |             | TRUE  | TRUE  |
| 4  | 159593277 - 159630775 |             | TRUE  | TRUE  |
| 4  | 159593277 - 159630775 |             | TRUE  | TRUE  |
| 4  | 159593277 - 159630775 |             | TRUE  | TRUE  |
| 4  | 159593277 - 159630775 | F - 13.33%  | TRUE  | TRUE  |
| 5  | 65892176 - 66465423   |             | TRUE  | TRUE  |
| 5  | 65892176 - 66465423   | F - 28.57%  | TRUE  | TRUE  |
| 5  | 65892176 - 66465423   |             | TRUE  | TRUE  |
| 5  | 65892176 - 66465423   | F - 34.29%  | FALSE | TRUE  |
| 5  | 65892176 - 66465423   |             | FALSE | TRUE  |
| 5  | 140019012 - 140024993 | T - 65.22%  | TRUE  | FALSE |
| 5  | 140019012 - 140024993 |             | TRUE  | TRUE  |
| 5  | 140019012 - 140024993 |             | TRUE  | TRUE  |
| 5  | 140019012 - 140024993 |             | TRUE  | TRUE  |
| 5  | 163723702 - 164598649 | F - 17.65%  | TRUE  | TRUE  |
| 5  | 163723702 - 164598649 | F - 5.88%   | TRUE  | TRUE  |
| 5  | 163723702 - 164598649 |             | FALSE | TRUE  |
| 5  | 163723702 - 164598649 |             | FALSE | TRUE  |
| 6  | 73331520 - 73908574   | T - 55.00%  | TRUE  | TRUE  |
| 6  | 73331520 - 73908574   |             | TRUE  | FALSE |
| 6  | 73331520 - 73908574   |             | TRUE  | TRUE  |
| 6  | 73331520 - 73908574   |             | TRUE  | TRUE  |
| 6  | 73331520 - 73908574   | T - 85.00%  | TRUE  | TRUE  |
| 6  | 73331520 - 73908574   |             | TRUE  | TRUE  |
| 6  | 139094657 - 139114456 | T - 50.00%  | TRUE  | TRUE  |
| 6  | 139094657 - 139114456 |             | TRUE  | TRUE  |
| 12 | 54943134 - 54973023   |             | TRUE  | FALSE |
| 12 | 54943134 - 54973023   | T - 90.00%  | TRUE  | FALSE |
| 14 | 35221937 - 35344853   |             | TRUE  | TRUE  |
| 14 | 35221937 - 35344853   | T - 75.00%  | TRUE  | TRUE  |
| 14 | 35221937 - 35344853   |             | TRUE  | TRUE  |
| 14 | 35221937 - 35344853   |             | TRUE  | TRUE  |
| 14 | 35390064 - 35451721   | T - 66.67%  | TRUE  | TRUE  |



|            |                       |             |       |       |
|------------|-----------------------|-------------|-------|-------|
| 14         | 35390064 - 35451721   |             | TRUE  | TRUE  |
| 15         | 51500254 - 51630807   |             | TRUE  | FALSE |
| 15         | 51500254 - 51630807   | F - 13.04%  | TRUE  | TRUE  |
| 15         | 51500254 - 51630807   | F - 26.09%  | FALSE | TRUE  |
| 15         | 51500254 - 51630807   | F - 8.70%   | FALSE | TRUE  |
| 16         | 85645023 - 85709812   | F - 17.65%  | TRUE  | TRUE  |
| 16         | 85645023 - 85709812   |             | TRUE  | TRUE  |
| 16         | 85645023 - 85709812   | F - 11.76%  | TRUE  | TRUE  |
| 16         | 85645023 - 85709812   |             | TRUE  | TRUE  |
| 16         | 85645023 - 85709812   |             | FALSE | TRUE  |
| 16         | 85645023 - 85709812   |             | TRUE  | TRUE  |
| 19         | 7985194 - 7998843     |             | TRUE  | TRUE  |
| 19         | 7985194 - 7998843     | T - 100.00% | TRUE  | TRUE  |
| 20         | 30639991 - 30689659   | T - 94.12%  | TRUE  | TRUE  |
| 20         | 30639991 - 30689659   |             | FALSE | TRUE  |
| 6_qbl_hap6 | 3413530 - 3418981     | F - 14.29%  | TRUE  | TRUE  |
| 6_qbl_hap6 | 3413530 - 3418981     |             | TRUE  | TRUE  |
| 21         | 45553487 - 45565605   |             | TRUE  | TRUE  |
| 21         | 45553487 - 45565605   | T - 53.33%  | TRUE  | TRUE  |
| 21         | 45553487 - 45565605   |             | FALSE | TRUE  |
| 1          | 89873238 - 89890493   |             | TRUE  | TRUE  |
| 1          | 89873238 - 89890493   | T - 100.00% | TRUE  | TRUE  |
| 1          | 89873238 - 89890493   |             | TRUE  | TRUE  |
| 1          | 71318036 - 71513497   | F - 7.41%   | TRUE  | TRUE  |
| 1          | 71318036 - 71513497   |             | TRUE  | TRUE  |
| 1          | 71318036 - 71513497   | F - 25.93%  | TRUE  | TRUE  |
| 1          | 71318036 - 71513497   | F - 29.63%  | TRUE  | FALSE |
| 1          | 71318036 - 71513497   | F - 11.11%  | TRUE  | TRUE  |
| 1          | 71318036 - 71513497   | T - 92.59%  | TRUE  | TRUE  |
| 1          | 71318036 - 71513497   | F - 18.52%  | TRUE  | TRUE  |
| 1          | 71318036 - 71513497   | T - 88.89%  | TRUE  | TRUE  |
| 1          | 71318036 - 71513497   | F - 11.11%  | FALSE | TRUE  |
| 1          | 71318036 - 71513497   | F - 11.11%  | TRUE  | TRUE  |
| 1          | 71318036 - 71513497   |             | TRUE  | TRUE  |
| 1          | 71318036 - 71513497   | F - 44.44%  | TRUE  | TRUE  |
| 1          | 71318036 - 71513497   | F - 14.81%  | TRUE  | TRUE  |
| 1          | 71318036 - 71513497   |             | TRUE  | TRUE  |
| 1          | 71318036 - 71513497   |             | FALSE | TRUE  |
| 1          | 71318036 - 71513497   |             | FALSE | TRUE  |
| 1          | 71318036 - 71513497   |             | TRUE  | TRUE  |
| 1          | 110210644 - 110252171 |             | TRUE  | TRUE  |
| 1          | 110210644 - 110252171 | F - 13.04%  | TRUE  | TRUE  |
| 1          | 110210644 - 110252171 | F - 8.70%   | TRUE  | TRUE  |
| 3          | 16357352 - 16555533   | F - 7.69%   | TRUE  | TRUE  |
| 3          | 16357352 - 16555533   | F - 7.69%   | FALSE | TRUE  |
| 3          | 16357352 - 16555533   | F - 7.69%   | TRUE  | TRUE  |
| 3          | 16357352 - 16555533   |             | TRUE  | TRUE  |
| 4          | 47487305 - 47595503   |             | TRUE  | FALSE |
| 4          | 47487305 - 47595503   | F - 18.18%  | TRUE  | TRUE  |
| 4          | 47487305 - 47595503   | F - 9.09%   | TRUE  | TRUE  |
| 4          | 47487305 - 47595503   | F - 18.18%  | TRUE  | TRUE  |
| 7          | 17338246 - 17385776   | F - 12.50%  | TRUE  | TRUE  |
| 7          | 17338246 - 17385776   |             | TRUE  | TRUE  |
| 8          | 67955314 - 67996018   |             | TRUE  | TRUE  |
| 8          | 67955314 - 67996018   | F - 4.76%   | FALSE | TRUE  |
| X          | 40440146 - 40465889   |             | TRUE  | TRUE  |
| X          | 40440146 - 40465889   | T - 55.56%  | TRUE  | TRUE  |
| X          | 153665259 - 153671814 |             | TRUE  | TRUE  |

|             |                         |             |       |       |
|-------------|-------------------------|-------------|-------|-------|
| X           | 153665259 - 153671814   | F - 10.00%  | TRUE  | TRUE  |
| X           | 153665259 - 153671814   | F - 15.00%  | TRUE  | TRUE  |
|             | 12 99038919 - 99129211  |             | TRUE  | TRUE  |
|             | 12 99038919 - 99129211  |             | FALSE | TRUE  |
|             | 12 99038919 - 99129211  | T - 70.00%  | TRUE  | TRUE  |
|             | 16 67311413 - 67323403  |             | TRUE  | TRUE  |
|             | 16 67311413 - 67323403  | T - 86.67%  | FALSE | TRUE  |
|             | 16 67311413 - 67323403  | T - 86.67%  | FALSE | TRUE  |
|             | 16 67311413 - 67323403  |             | FALSE | TRUE  |
|             | 17 46688446 - 46692653  | F - 16.67%  | TRUE  | TRUE  |
|             | 17 46688446 - 46692653  |             | TRUE  | TRUE  |
|             | 17 46688446 - 46692653  | F - 33.33%  | TRUE  | TRUE  |
|             | 17 46688446 - 46692653  | F - 16.67%  | TRUE  | TRUE  |
|             | 17 76791735 - 76836969  | T - 63.64%  | TRUE  | TRUE  |
|             | 17 76791735 - 76836969  |             | TRUE  | TRUE  |
|             | 17 46626232 - 46667634  |             | TRUE  | TRUE  |
|             | 17 46626232 - 46667634  |             | TRUE  | TRUE  |
|             | 17 46626232 - 46667634  | F - 3.57%   | TRUE  | TRUE  |
|             | 17 46626232 - 46667634  | F - 3.57%   | TRUE  | TRUE  |
|             | 19 51288985 - 51289467  |             | TRUE  | FALSE |
|             | 19 51288985 - 51289467  | T - 100.00% | TRUE  | TRUE  |
|             | 20 2774715 - 2781292    |             | TRUE  | TRUE  |
|             | 20 2774715 - 2781292    | T - 100.00% | FALSE | TRUE  |
|             | 21 47878812 - 47989926  | F - 7.14%   | TRUE  | FALSE |
|             | 21 47878812 - 47989926  | F - 25.00%  | TRUE  | FALSE |
|             | 21 47878812 - 47989926  |             | TRUE  | TRUE  |
|             | 21 47878812 - 47989926  |             | TRUE  | TRUE  |
| 6_mann_hap4 | 873029 - 903954         | F - 5.26%   | TRUE  | FALSE |
| 6_mann_hap4 | 873029 - 903954         |             | TRUE  | TRUE  |
|             | 16 27471934 - 27561251  |             | TRUE  | TRUE  |
|             | 16 27471934 - 27561251  | T - 80.00%  | TRUE  | TRUE  |
|             | 16 27471934 - 27561251  |             | TRUE  | TRUE  |
|             | 1 144146808 - 144224481 | F - 4.76%   | TRUE  | TRUE  |
|             | 1 144146808 - 144224481 | F - 4.76%   | TRUE  | TRUE  |
|             | 1 144146808 - 144224481 | F - 4.76%   | TRUE  | TRUE  |
|             | 1 144146808 - 144224481 |             | TRUE  | TRUE  |
|             | 2 26466038 - 26513336   |             | TRUE  | FALSE |
|             | 2 26466038 - 26513336   | F - 5.56%   | TRUE  | TRUE  |
|             | 2 172290727 - 172341562 |             | TRUE  | TRUE  |
|             | 2 172290727 - 172341562 | F - 5.88%   | TRUE  | TRUE  |
|             | 2 219314974 - 219433084 | T - 68.42%  | TRUE  | TRUE  |
|             | 2 219314974 - 219433084 | T - 63.16%  | TRUE  | TRUE  |
|             | 2 219314974 - 219433084 | T - 57.89%  | TRUE  | TRUE  |
|             | 2 219314974 - 219433084 |             | TRUE  | TRUE  |
|             | 3 136581050 - 136668665 |             | TRUE  | TRUE  |
|             | 3 136581050 - 136668665 | F - 28.57%  | TRUE  | TRUE  |
|             | 4 103552643 - 103682151 | T - 60.00%  | TRUE  | TRUE  |
|             | 4 103552643 - 103682151 | F - 10.00%  | TRUE  | TRUE  |
|             | 4 103552643 - 103682151 |             | TRUE  | TRUE  |
|             | 5 98104354 - 98134347   |             | TRUE  | TRUE  |
|             | 5 98104354 - 98134347   |             | TRUE  | TRUE  |
|             | 5 98104354 - 98134347   |             | FALSE | TRUE  |
|             | 5 98104354 - 98134347   | T - 66.67%  | TRUE  | TRUE  |
|             | 5 98104354 - 98134347   | T - 66.67%  | TRUE  | TRUE  |
|             | 5 98104354 - 98134347   | F - 22.22%  | TRUE  | TRUE  |
|             | 5 98104354 - 98134347   | F - 11.11%  | TRUE  | TRUE  |
|             | 5 98104354 - 98134347   |             | FALSE | TRUE  |
|             | 5 98104354 - 98134347   | F - 11.11%  | TRUE  | TRUE  |

|   |    |                       |            |       |       |
|---|----|-----------------------|------------|-------|-------|
|   | 5  | 126626456 - 126801429 |            | TRUE  | FALSE |
|   | 5  | 126626456 - 126801429 |            | TRUE  | TRUE  |
|   | 5  | 126626456 - 126801429 |            | TRUE  | FALSE |
|   | 5  | 126626456 - 126801429 | T - 68.75% | TRUE  | TRUE  |
|   | 5  | 126626456 - 126801429 | F - 43.75% | TRUE  | TRUE  |
|   | 5  | 126626456 - 126801429 |            | FALSE | TRUE  |
|   | 5  | 49692026 - 49739082   |            | TRUE  | FALSE |
|   | 5  | 49692026 - 49739082   | F - 9.09%  | TRUE  | TRUE  |
|   | 5  | 49692026 - 49739082   |            | FALSE | TRUE  |
|   | 6  | 135604670 - 135830219 | T - 50.00% | TRUE  | TRUE  |
|   | 6  | 135604670 - 135830219 | F - 7.69%  | TRUE  | TRUE  |
|   | 6  | 135604670 - 135830219 |            | TRUE  | TRUE  |
|   | 7  | 96634860 - 96640352   | T - 54.55% | TRUE  | TRUE  |
|   | 7  | 96634860 - 96640352   | F - 27.27% | TRUE  | TRUE  |
|   | 7  | 96634860 - 96640352   | T - 54.55% | TRUE  | TRUE  |
|   | 7  | 96634860 - 96640352   | F - 27.27% | TRUE  | TRUE  |
|   | 7  | 96634860 - 96640352   |            | TRUE  | TRUE  |
|   | 7  | 96634860 - 96640352   |            | TRUE  | TRUE  |
|   | 8  | 17354597 - 17428082   |            | TRUE  | TRUE  |
|   | 8  | 17354597 - 17428082   |            | TRUE  | FALSE |
|   | 8  | 17354597 - 17428082   |            | TRUE  | TRUE  |
|   | 8  | 17354597 - 17428082   |            | TRUE  | TRUE  |
|   | 8  | 17354597 - 17428082   | F - 41.67% | TRUE  | TRUE  |
|   | 8  | 17354597 - 17428082   | F - 25.00% | TRUE  | TRUE  |
|   | 8  | 17354597 - 17428082   | F - 41.67% | FALSE | TRUE  |
|   | 9  | 113127529 - 113342160 |            | TRUE  | FALSE |
|   | 9  | 113127529 - 113342160 |            | TRUE  | FALSE |
|   | 9  | 113127529 - 113342160 | F - 8.33%  | TRUE  | TRUE  |
|   | 9  | 113127529 - 113342160 | F - 8.33%  | TRUE  | TRUE  |
|   | 9  | 113127529 - 113342160 |            | TRUE  | TRUE  |
|   | 9  | 113127529 - 113342160 | F - 33.33% | TRUE  | TRUE  |
|   | 9  | 113127529 - 113342160 |            | TRUE  | TRUE  |
|   | 9  | 113127529 - 113342160 | F - 25.00% | TRUE  | TRUE  |
|   | 9  | 113127529 - 113342160 |            | TRUE  | TRUE  |
|   | 9  | 113127529 - 113342160 | F - 8.33%  | TRUE  | TRUE  |
|   | 9  | 113127529 - 113342160 |            | FALSE | TRUE  |
|   | 9  | 130267618 - 130341268 | F - 10.00% | FALSE | TRUE  |
|   | 9  | 130267618 - 130341268 |            | TRUE  | TRUE  |
|   | 9  | 130267618 - 130341268 | F - 10.00% | TRUE  | TRUE  |
|   | 9  | 130267618 - 130341268 | F - 40.00% | TRUE  | TRUE  |
|   | 9  | 130267618 - 130341268 |            | TRUE  | TRUE  |
| X |    | 118722300 - 118739858 |            | FALSE | TRUE  |
| X |    | 118722300 - 118739858 | F - 11.11% | FALSE | TRUE  |
|   | 10 | 104154229 - 104162281 |            | TRUE  | TRUE  |
|   | 10 | 104154229 - 104162281 | T - 92.31% | TRUE  | TRUE  |
|   | 10 | 104154229 - 104162281 |            | FALSE | TRUE  |
|   | 10 | 104154229 - 104162281 |            | TRUE  | TRUE  |
|   | 10 | 104154229 - 104162281 |            | TRUE  | TRUE  |
|   | 10 | 104154229 - 104162281 | T - 84.62% | TRUE  | TRUE  |
|   | 10 | 104154229 - 104162281 |            | FALSE | TRUE  |
|   | 10 | 104154229 - 104162281 |            | TRUE  | TRUE  |
|   | 10 | 5903689 - 5931869     |            | TRUE  | FALSE |
|   | 10 | 5903689 - 5931869     |            | FALSE | TRUE  |
|   | 10 | 5903689 - 5931869     | F - 9.09%  | TRUE  | TRUE  |
|   | 10 | 5903689 - 5931869     | F - 9.09%  | FALSE | TRUE  |
|   | 12 | 122989190 - 123011560 | F - 8.33%  | TRUE  | TRUE  |
|   | 12 | 122989190 - 123011560 |            | TRUE  | TRUE  |
|   | 14 | 102783714 - 102809044 | T - 92.31% | TRUE  | TRUE  |

|    |                       |            |       |       |
|----|-----------------------|------------|-------|-------|
| 14 | 102783714 - 102809044 | T - 61.54% | TRUE  | TRUE  |
| 14 | 102783714 - 102809044 | T - 92.31% | TRUE  | TRUE  |
| 14 | 102783714 - 102809044 |            | TRUE  | TRUE  |
| 17 | 46902123 - 46943884   |            | TRUE  | FALSE |
| 17 | 46902123 - 46943884   | F - 3.03%  | TRUE  | TRUE  |
| 17 | 46902123 - 46943884   | F - 6.06%  | TRUE  | TRUE  |
| 17 | 46902123 - 46943884   |            | FALSE | TRUE  |
| 17 | 46902123 - 46943884   |            | FALSE | TRUE  |
| 17 | 46902123 - 46943884   | F - 3.03%  | TRUE  | TRUE  |
| 17 | 46902123 - 46943884   | F - 3.03%  | FALSE | TRUE  |
| 17 | 46902123 - 46943884   | F - 21.21% | TRUE  | TRUE  |
| 17 | 46902123 - 46943884   |            | FALSE | TRUE  |
| 17 | 46902123 - 46943884   | F - 3.03%  | FALSE | TRUE  |
| 17 | 46902123 - 46943884   |            | TRUE  | TRUE  |
| 20 | 35201876 - 35222560   |            | TRUE  | TRUE  |
| 20 | 35201876 - 35222560   | F - 11.11% | TRUE  | FALSE |
| 20 | 35201876 - 35222560   |            | TRUE  | TRUE  |
| 22 | 22988780 - 22990368   | T - 80.00% | TRUE  | TRUE  |
| 22 | 22988780 - 22990368   |            | FALSE | TRUE  |
| 1  | 222731244 - 222763275 |            | TRUE  | TRUE  |
| 1  | 222731244 - 222763275 | T - 66.67% | FALSE | TRUE  |
| 1  | 222731244 - 222763275 |            | TRUE  | TRUE  |
| 2  | 113341817 - 113372008 |            | TRUE  | TRUE  |
| 2  | 113341817 - 113372008 | F - 25.00% | TRUE  | TRUE  |
| 2  | 219138915 - 219157309 | F - 6.45%  | TRUE  | TRUE  |
| 2  | 219138915 - 219157309 | F - 3.23%  | TRUE  | TRUE  |
| 2  | 219138915 - 219157309 |            | TRUE  | TRUE  |
| 2  | 219138915 - 219157309 | F - 3.23%  | FALSE | TRUE  |
| 5  | 72112139 - 72212560   |            | TRUE  | TRUE  |
| 5  | 72112139 - 72212560   | F - 4.55%  | TRUE  | TRUE  |
| 6  | 3231637 - 3303607     |            | TRUE  | FALSE |
| 6  | 3231637 - 3303607     |            | TRUE  | TRUE  |
| 6  | 3231637 - 3303607     |            | TRUE  | TRUE  |
| 6  | 3231637 - 3303607     | F - 35.71% | FALSE | TRUE  |
| 6  | 33738979 - 33756913   | F - 5.88%  | TRUE  | TRUE  |
| 6  | 33738979 - 33756913   |            | FALSE | TRUE  |
| 7  | 73588575 - 73611431   | F - 45.45% | TRUE  | TRUE  |
| 7  | 73588575 - 73611431   |            | TRUE  | TRUE  |
| 7  | 73588575 - 73611431   |            | TRUE  | TRUE  |
| 7  | 73588575 - 73611431   | F - 18.18% | TRUE  | TRUE  |
| 8  | 56979854 - 56987140   |            | TRUE  | TRUE  |
| 8  | 56979854 - 56987140   | F - 16.67% | TRUE  | TRUE  |
| 9  | 102668915 - 102736818 |            | TRUE  | TRUE  |
| 9  | 102668915 - 102736818 | T - 83.33% | TRUE  | TRUE  |
| 9  | 102668915 - 102736818 |            | TRUE  | TRUE  |
| 9  | 102668915 - 102736818 |            | TRUE  | TRUE  |
| 10 | 62629196 - 62761198   |            | TRUE  | FALSE |
| 10 | 62629196 - 62761198   | F - 31.25% | FALSE | TRUE  |
| 10 | 62629196 - 62761198   | F - 25.00% | TRUE  | TRUE  |
| 10 | 62629196 - 62761198   | F - 18.75% | TRUE  | TRUE  |
| 10 | 62629196 - 62761198   | F - 12.50% | TRUE  | TRUE  |
| 10 | 62629196 - 62761198   | F - 6.25%  | TRUE  | TRUE  |
| 10 | 62629196 - 62761198   | F - 25.00% | FALSE | TRUE  |
| 10 | 62629196 - 62761198   | F - 12.50% | FALSE | TRUE  |
| 10 | 62629196 - 62761198   | F - 6.25%  | TRUE  | TRUE  |
| 10 | 62629196 - 62761198   | F - 6.25%  | TRUE  | TRUE  |
| 10 | 62629196 - 62761198   |            | FALSE | TRUE  |
| 11 | 9800214 - 10315754    | F - 14.29% | TRUE  | TRUE  |

|             |                       |             |       |      |
|-------------|-----------------------|-------------|-------|------|
| 11          | 9800214 - 10315754    |             | TRUE  | TRUE |
| 11          | 9800214 - 10315754    |             | TRUE  | TRUE |
| 11          | 113668596 - 113746292 |             | TRUE  | TRUE |
| 11          | 113668596 - 113746292 | F - 15.38%  | TRUE  | TRUE |
| 11          | 113668596 - 113746292 |             | TRUE  | TRUE |
| 11          | 113668596 - 113746292 |             | FALSE | TRUE |
| 12          | 120105558 - 120119435 |             | TRUE  | TRUE |
| 12          | 120105558 - 120119435 | F - 11.11%  | TRUE  | TRUE |
| 12          | 56546040 - 56551771   | F - 10.00%  | TRUE  | TRUE |
| 12          | 56546040 - 56551771   |             | FALSE | TRUE |
| 15          | 32698801 - 32727250   |             | TRUE  | TRUE |
| 15          | 32698801 - 32727250   | T - 80.00%  | TRUE  | TRUE |
| 15          | 32698801 - 32727250   |             | TRUE  | TRUE |
| 15          | 32698801 - 32727250   | F - 20.00%  | TRUE  | TRUE |
| 17          | 26941458 - 26972472   | T - 75.00%  | TRUE  | TRUE |
| 17          | 26941458 - 26972472   |             | FALSE | TRUE |
| 17          | 27041299 - 27045447   | F - 6.45%   | TRUE  | TRUE |
| 17          | 27041299 - 27045447   | F - 6.45%   | TRUE  | TRUE |
| 17          | 27041299 - 27045447   |             | TRUE  | TRUE |
| 17          | 27041299 - 27045447   | F - 9.68%   | TRUE  | TRUE |
| 19          | 44598482 - 44612919   | F - 25.00%  | TRUE  | TRUE |
| 19          | 44598482 - 44612919   | T - 100.00% | TRUE  | TRUE |
| 19          | 44598482 - 44612919   |             | FALSE | TRUE |
| 21          | 47744036 - 47865682   |             | TRUE  | TRUE |
| 21          | 47744036 - 47865682   |             | TRUE  | TRUE |
| 21          | 47744036 - 47865682   | T - 50.00%  | FALSE | TRUE |
| 22          | 17618401 - 17646177   |             | TRUE  | TRUE |
| 22          | 17618401 - 17646177   | T - 80.00%  | TRUE  | TRUE |
| 22          | 17618401 - 17646177   | F - 20.00%  | TRUE  | TRUE |
| 6_apd_hap1  | 1979228 - 1997309     | F - 21.43%  | TRUE  | TRUE |
| 6_apd_hap1  | 1979228 - 1997309     | F - 42.86%  | TRUE  | TRUE |
| 6_apd_hap1  | 1979228 - 1997309     |             | FALSE | TRUE |
| 6_cox_hap2  | 2179653 - 2197735     | F - 21.43%  | TRUE  | TRUE |
| 6_cox_hap2  | 2179653 - 2197735     | F - 42.86%  | TRUE  | TRUE |
| 6_cox_hap2  | 2179653 - 2197735     |             | FALSE | TRUE |
| 6_dbb_hap3  | 1961244 - 1979325     | F - 21.43%  | TRUE  | TRUE |
| 6_dbb_hap3  | 1961244 - 1979325     | F - 42.86%  | TRUE  | TRUE |
| 6_dbb_hap3  | 1961244 - 1979325     |             | FALSE | TRUE |
| 6_mann_hap4 | 2015679 - 2033760     | F - 21.43%  | TRUE  | TRUE |
| 6_mann_hap4 | 2015679 - 2033760     | F - 42.86%  | TRUE  | TRUE |
| 6_mann_hap4 | 2015679 - 2033760     |             | FALSE | TRUE |
| 6_mcf_hap5  | 2049468 - 2067549     | F - 21.43%  | TRUE  | TRUE |
| 6_mcf_hap5  | 2049468 - 2067549     | F - 42.86%  | TRUE  | TRUE |
| 6_mcf_hap5  | 2049468 - 2067549     |             | FALSE | TRUE |
| 6_ssto_hap7 | 1999891 - 2017973     | F - 21.43%  | TRUE  | TRUE |
| 6_ssto_hap7 | 1999891 - 2017973     | F - 42.86%  | TRUE  | TRUE |
| 6_ssto_hap7 | 1999891 - 2017973     |             | FALSE | TRUE |
| 20          | 62921738 - 62944485   |             | TRUE  | TRUE |
| 20          | 62921738 - 62944485   | T - 50.00%  | TRUE  | TRUE |
| 1           | 1550795 - 1565990     | F - 6.38%   | TRUE  | TRUE |
| 1           | 1550795 - 1565990     |             | TRUE  | TRUE |
| 1           | 1550795 - 1565990     |             | TRUE  | TRUE |
| 1           | 1550795 - 1565990     | F - 6.38%   | TRUE  | TRUE |
| 1           | 1550795 - 1565990     | F - 8.51%   | FALSE | TRUE |
| 1           | 62901968 - 62917475   | F - 25.00%  | FALSE | TRUE |
| 1           | 62901968 - 62917475   | F - 12.50%  | TRUE  | TRUE |
| 1           | 62901968 - 62917475   |             | TRUE  | TRUE |
| 1           | 89517987 - 89531043   |             | TRUE  | TRUE |

|   |                       |            |       |       |
|---|-----------------------|------------|-------|-------|
| 1 | 89517987 - 89531043   | F - 18.18% | TRUE  | TRUE  |
| 1 | 89517987 - 89531043   | F - 9.09%  | TRUE  | TRUE  |
| 1 | 89517987 - 89531043   |            | TRUE  | TRUE  |
| 1 | 91295104 - 91317207   | F - 25.00% | TRUE  | TRUE  |
| 1 | 91295104 - 91317207   |            | TRUE  | TRUE  |
| 2 | 132479948 - 132524977 |            | TRUE  | TRUE  |
| 2 | 132479948 - 132524977 | F - 37.50% | TRUE  | TRUE  |
| 2 | 132479948 - 132524977 | T - 62.50% | TRUE  | TRUE  |
| 2 | 132479948 - 132524977 |            | TRUE  | TRUE  |
| 2 | 132479948 - 132524977 |            | FALSE | TRUE  |
| 2 | 201754050 - 201768655 | T - 73.33% | TRUE  | FALSE |
| 2 | 201754050 - 201768655 |            | TRUE  | FALSE |
| 2 | 128014866 - 128051752 |            | TRUE  | TRUE  |
| 2 | 128014866 - 128051752 | F - 23.53% | TRUE  | TRUE  |
| 2 | 128014866 - 128051752 | F - 11.76% | TRUE  | TRUE  |
| 2 | 128395956 - 128439360 |            | TRUE  | TRUE  |
| 2 | 128395956 - 128439360 |            | TRUE  | TRUE  |
| 2 | 128395956 - 128439360 | F - 31.25% | TRUE  | TRUE  |
| 2 | 128395956 - 128439360 | F - 3.13%  | TRUE  | TRUE  |
| 2 | 128395956 - 128439360 | F - 6.25%  | TRUE  | TRUE  |
| 2 | 128395956 - 128439360 | F - 9.38%  | TRUE  | TRUE  |
| 2 | 128395956 - 128439360 | F - 21.88% | TRUE  | TRUE  |
| 2 | 128395956 - 128439360 | F - 3.13%  | TRUE  | TRUE  |
| 2 | 128395956 - 128439360 | F - 3.13%  | FALSE | TRUE  |
| 2 | 128395956 - 128439360 | F - 6.25%  | TRUE  | TRUE  |
| 2 | 128395956 - 128439360 | F - 6.25%  | FALSE | TRUE  |
| 2 | 128395956 - 128439360 | F - 9.38%  | TRUE  | TRUE  |
| 2 | 128395956 - 128439360 | F - 6.25%  | TRUE  | TRUE  |
| 2 | 128395956 - 128439360 | F - 6.25%  | TRUE  | TRUE  |
| 2 | 128395956 - 128439360 | F - 6.25%  | TRUE  | TRUE  |
| 2 | 128395956 - 128439360 | F - 6.25%  | TRUE  | TRUE  |
| 2 | 128395956 - 128439360 | F - 15.63% | TRUE  | TRUE  |
| 2 | 128395956 - 128439360 | F - 6.25%  | TRUE  | TRUE  |
| 2 | 128395956 - 128439360 |            | TRUE  | TRUE  |
| 2 | 128395956 - 128439360 | F - 25.00% | TRUE  | TRUE  |
| 2 | 128395956 - 128439360 | F - 9.38%  | FALSE | TRUE  |
| 2 | 128395956 - 128439360 | F - 6.25%  | TRUE  | TRUE  |
| 2 | 128395956 - 128439360 | F - 12.50% | FALSE | TRUE  |
| 2 | 128395956 - 128439360 | F - 9.38%  | TRUE  | TRUE  |
| 2 | 128395956 - 128439360 | F - 3.13%  | TRUE  | TRUE  |
| 2 | 128395956 - 128439360 | F - 9.38%  | TRUE  | TRUE  |
| 2 | 128395956 - 128439360 | F - 3.13%  | TRUE  | TRUE  |
| 2 | 128395956 - 128439360 | F - 3.13%  | FALSE | TRUE  |
| 3 | 132136370 - 132257876 | F - 8.33%  | TRUE  | TRUE  |
| 3 | 132136370 - 132257876 |            | TRUE  | TRUE  |
| 3 | 132136370 - 132257876 |            | TRUE  | TRUE  |
| 3 | 132136370 - 132257876 |            | TRUE  | TRUE  |
| 4 | 57259528 - 57301802   | T - 57.14% | TRUE  | TRUE  |
| 4 | 57259528 - 57301802   |            | TRUE  | TRUE  |
| 4 | 57259528 - 57301802   | T - 57.14% | TRUE  | TRUE  |
| 4 | 57259528 - 57301802   |            | FALSE | TRUE  |
| 6 | 33378176 - 33384230   | F - 5.56%  | TRUE  | TRUE  |
| 6 | 33378176 - 33384230   |            | TRUE  | TRUE  |
| 6 | 31919864 - 31926887   |            | TRUE  | TRUE  |
| 6 | 31919864 - 31926887   | F - 10.00% | TRUE  | TRUE  |
| 6 | 35800743 - 35889119   | F - 5.56%  | TRUE  | TRUE  |
| 6 | 35800743 - 35889119   |            | TRUE  | TRUE  |
| 6 | 35800743 - 35889119   | F - 5.56%  | TRUE  | TRUE  |
| 7 | 101256605 - 101272576 |            | TRUE  | TRUE  |

|                |    |                       |             |       |       |
|----------------|----|-----------------------|-------------|-------|-------|
|                | 7  | 101256605 - 101272576 | T - 100.00% | TRUE  | TRUE  |
|                | 7  | 101256605 - 101272576 | T - 100.00% | FALSE | TRUE  |
|                | 7  | 101256605 - 101272576 |             | TRUE  | TRUE  |
|                | 9  | 42668608 - 42714962   |             | TRUE  | FALSE |
|                | 9  | 42668608 - 42714962   |             | TRUE  | FALSE |
|                | 9  | 42668608 - 42714962   | T - 62.50%  | TRUE  | TRUE  |
|                | 9  | 42668608 - 42714962   |             | TRUE  | TRUE  |
|                | 9  | 42668608 - 42714962   | F - 6.25%   | TRUE  | TRUE  |
|                | 9  | 42668608 - 42714962   | F - 37.50%  | TRUE  | TRUE  |
|                | 9  | 131018108 - 131038274 | F - 5.00%   | TRUE  | TRUE  |
|                | 9  | 131018108 - 131038274 |             | TRUE  | TRUE  |
| X              |    | 53220503 - 53254604   |             | TRUE  | TRUE  |
| X              |    | 53220503 - 53254604   |             | TRUE  | TRUE  |
| X              |    | 53220503 - 53254604   | F - 11.11%  | TRUE  | TRUE  |
|                | 10 | 101909847 - 101948091 | F - 25.00%  | TRUE  | FALSE |
|                | 10 | 101909847 - 101948091 |             | TRUE  | TRUE  |
|                | 12 | 109252708 - 109294819 | T - 80.00%  | TRUE  | FALSE |
|                | 12 | 109252708 - 109294819 |             | TRUE  | FALSE |
|                | 12 | 389223 - 498620       | F - 40.00%  | TRUE  | TRUE  |
|                | 12 | 389223 - 498620       |             | TRUE  | TRUE  |
|                | 12 | 389223 - 498620       |             | TRUE  | TRUE  |
|                | 12 | 389223 - 498620       |             | TRUE  | TRUE  |
|                | 14 | 78183942 - 78227533   |             | TRUE  | TRUE  |
|                | 14 | 78183942 - 78227533   | F - 12.50%  | TRUE  | TRUE  |
|                | 14 | 78183942 - 78227533   |             | TRUE  | TRUE  |
|                | 16 | 66968347 - 66978999   | F - 16.67%  | TRUE  | TRUE  |
|                | 16 | 66968347 - 66978999   |             | FALSE | TRUE  |
|                | 17 | 76849059 - 76921472   |             | TRUE  | TRUE  |
|                | 17 | 76849059 - 76921472   | F - 38.46%  | TRUE  | TRUE  |
|                | 18 | 20777719 - 21017925   |             | TRUE  | TRUE  |
|                | 18 | 20777719 - 21017925   | T - 72.22%  | TRUE  | TRUE  |
|                | 18 | 20777719 - 21017925   |             | FALSE | TRUE  |
|                | 18 | 20777719 - 21017925   |             | FALSE | TRUE  |
|                | 20 | 44746906 - 44758502   |             | TRUE  | TRUE  |
|                | 20 | 44746906 - 44758502   | T - 92.86%  | TRUE  | TRUE  |
|                | 20 | 44746906 - 44758502   | F - 14.29%  | TRUE  | TRUE  |
|                | 20 | 44746906 - 44758502   |             | TRUE  | TRUE  |
|                | 20 | 44746906 - 44758502   |             | TRUE  | TRUE  |
|                | 20 | 44746906 - 44758502   | F - 14.29%  | FALSE | TRUE  |
|                | 20 | 53092136 - 53267710   |             | TRUE  | TRUE  |
|                | 20 | 53092136 - 53267710   |             | TRUE  | TRUE  |
|                | 20 | 53092136 - 53267710   | T - 80.00%  | TRUE  | TRUE  |
| 4_gl000194_ran |    | 53589 - 115055        |             | TRUE  | TRUE  |
| 4_gl000194_ran |    | 53589 - 115055        | F - 16.67%  | TRUE  | TRUE  |
| 6_ssto_hap7    |    | 4858395 - 4864476     | F - 5.56%   | TRUE  | TRUE  |
| 6_ssto_hap7    |    | 4858395 - 4864476     |             | TRUE  | TRUE  |
|                | 1  | 149575482 - 149672983 |             | TRUE  | TRUE  |
|                | 1  | 149575482 - 149672983 |             | TRUE  | TRUE  |
|                | 1  | 149575482 - 149672983 | F - 7.69%   | TRUE  | TRUE  |
|                | 1  | 6161847 - 6240194     |             | TRUE  | TRUE  |
|                | 1  | 6161847 - 6240194     | T - 80.00%  | FALSE | TRUE  |
|                | 1  | 6161847 - 6240194     |             | FALSE | TRUE  |
|                | 1  | 6161847 - 6240194     |             | FALSE | TRUE  |
|                | 1  | 43629845 - 43736607   | F - 14.29%  | TRUE  | TRUE  |
|                | 1  | 43629845 - 43736607   |             | TRUE  | TRUE  |
|                | 1  | 43629845 - 43736607   |             | FALSE | TRUE  |
|                | 1  | 243651535 - 244013430 | F - 9.09%   | TRUE  | TRUE  |
|                | 1  | 243651535 - 244013430 | F - 9.09%   | TRUE  | TRUE  |

|    |                       |            |       |       |
|----|-----------------------|------------|-------|-------|
| 1  | 243651535 - 244013430 |            | FALSE | TRUE  |
| 2  | 114384806 - 114400975 |            | TRUE  | TRUE  |
| 2  | 114384806 - 114400975 | F - 3.03%  | FALSE | TRUE  |
| 2  | 114384806 - 114400975 |            | TRUE  | TRUE  |
| 2  | 114384806 - 114400975 |            | FALSE | TRUE  |
| 2  | 149894621 - 150071776 | T - 60.00% | TRUE  | TRUE  |
| 2  | 149894621 - 150071776 | F - 6.67%  | FALSE | TRUE  |
| 2  | 149894621 - 150071776 |            | FALSE | TRUE  |
| 2  | 149894621 - 150071776 |            | FALSE | TRUE  |
| 3  | 20081515 - 20195896   | T - 50.00% | TRUE  | TRUE  |
| 3  | 20081515 - 20195896   |            | FALSE | TRUE  |
| 3  | 100468000 - 100712359 | F - 3.45%  | TRUE  | TRUE  |
| 3  | 100468000 - 100712359 | F - 6.90%  | TRUE  | TRUE  |
| 3  | 100468000 - 100712359 |            | TRUE  | TRUE  |
| 3  | 100468000 - 100712359 |            | TRUE  | TRUE  |
| 3  | 100468000 - 100712359 | F - 13.79% | TRUE  | TRUE  |
| 3  | 100468000 - 100712359 | F - 20.69% | TRUE  | TRUE  |
| 3  | 100468000 - 100712359 |            | TRUE  | TRUE  |
| 3  | 100468000 - 100712359 |            | TRUE  | TRUE  |
| 3  | 100468000 - 100712359 |            | TRUE  | TRUE  |
| 3  | 100468000 - 100712359 | F - 24.14% | TRUE  | TRUE  |
| 3  | 100468000 - 100712359 |            | TRUE  | TRUE  |
| 3  | 100468000 - 100712359 |            | TRUE  | TRUE  |
| 3  | 100468000 - 100712359 |            | TRUE  | TRUE  |
| 3  | 100468000 - 100712359 |            | TRUE  | TRUE  |
| 3  | 100468000 - 100712359 |            | TRUE  | TRUE  |
| 8  | 12803151 - 12889012   |            | TRUE  | FALSE |
| 8  | 12803151 - 12889012   | T - 55.56% | TRUE  | FALSE |
| 8  | 12803151 - 12889012   | F - 22.22% | TRUE  | FALSE |
| 8  | 12803151 - 12889012   |            | TRUE  | TRUE  |
| 8  | 12803151 - 12889012   | F - 22.22% | TRUE  | FALSE |
| 8  | 12803151 - 12889012   | T - 66.67% | TRUE  | TRUE  |
| 8  | 12803151 - 12889012   | T - 55.56% | TRUE  | TRUE  |
| 8  | 12803151 - 12889012   |            | TRUE  | TRUE  |
| 8  | 12803151 - 12889012   |            | TRUE  | TRUE  |
| 8  | 12803151 - 12889012   | F - 33.33% | TRUE  | TRUE  |
| 8  | 12803151 - 12889012   | F - 22.22% | TRUE  | TRUE  |
| 8  | 12803151 - 12889012   | F - 11.11% | TRUE  | TRUE  |
| 8  | 12803151 - 12889012   |            | TRUE  | TRUE  |
| 8  | 12803151 - 12889012   |            | TRUE  | TRUE  |
| 8  | 12803151 - 12889012   | F - 44.44% | TRUE  | TRUE  |
| 8  | 12803151 - 12889012   | F - 44.44% | TRUE  | TRUE  |
| 8  | 12803151 - 12889012   | F - 22.22% | FALSE | TRUE  |
| 9  | 116638562 - 116818875 |            | TRUE  | TRUE  |
| 9  | 116638562 - 116818875 | F - 7.14%  | TRUE  | TRUE  |
| 9  | 131769315 - 131790582 | F - 6.25%  | TRUE  | TRUE  |
| 9  | 131769315 - 131790582 |            | TRUE  | TRUE  |
| 11 | 47269851 - 47290584   |            | TRUE  | TRUE  |
| 11 | 47269851 - 47290584   |            | TRUE  | TRUE  |
| 11 | 47269851 - 47290584   |            | TRUE  | TRUE  |
| 11 | 47269851 - 47290584   | T - 51.35% | FALSE | TRUE  |
| 11 | 47269851 - 47290584   | F - 2.70%  | TRUE  | TRUE  |
| 11 | 66615704 - 66725847   | F - 11.11% | TRUE  | TRUE  |
| 11 | 66615704 - 66725847   |            | TRUE  | TRUE  |
| 11 | 66615704 - 66725847   | T - 55.56% | TRUE  | TRUE  |
| 11 | 66615704 - 66725847   |            | FALSE | TRUE  |
| 11 | 66615704 - 66725847   |            | TRUE  | TRUE  |
| 11 | 66615704 - 66725847   |            | FALSE | TRUE  |
| 12 | 52416616 - 52453291   | F - 6.25%  | TRUE  | FALSE |



|    |                       |             |       |       |
|----|-----------------------|-------------|-------|-------|
| 12 | 52416616 - 52453291   |             | TRUE  | TRUE  |
| 12 | 52416616 - 52453291   |             | FALSE | TRUE  |
| 12 | 120565007 - 120632513 | T - 100.00% | TRUE  | TRUE  |
| 12 | 120565007 - 120632513 |             | FALSE | TRUE  |
| 12 | 120565007 - 120632513 |             | TRUE  | TRUE  |
| 15 | 62853564 - 63136830   | F - 8.33%   | TRUE  | TRUE  |
| 15 | 62853564 - 63136830   | F - 33.33%  | TRUE  | TRUE  |
| 15 | 62853564 - 63136830   | T - 58.33%  | TRUE  | TRUE  |
| 15 | 62853564 - 63136830   |             | FALSE | TRUE  |
| 15 | 62853564 - 63136830   |             | FALSE | TRUE  |
| 15 | 62853564 - 63136830   |             | FALSE | TRUE  |
| 15 | 62853564 - 63136830   |             | TRUE  | TRUE  |
| 15 | 62853564 - 63136830   |             | FALSE | TRUE  |
| 15 | 28764757 - 28778143   | F - 40.00%  | TRUE  | TRUE  |
| 15 | 28764757 - 28778143   |             | TRUE  | TRUE  |
| 16 | 31724550 - 31806190   |             | TRUE  | TRUE  |
| 16 | 31724550 - 31806190   | F - 15.38%  | TRUE  | TRUE  |
| 16 | 31724550 - 31806190   | F - 15.38%  | TRUE  | TRUE  |
| 16 | 30709530 - 30755602   |             | FALSE | TRUE  |
| 16 | 30709530 - 30755602   | F - 7.14%   | TRUE  | TRUE  |
| 16 | 30709530 - 30755602   |             | TRUE  | TRUE  |
| 17 | 26782770 - 26941211   |             | TRUE  | FALSE |
| 17 | 26782770 - 26941211   |             | TRUE  | TRUE  |
| 17 | 26782770 - 26941211   | F - 21.05%  | TRUE  | TRUE  |
| 17 | 26782770 - 26941211   |             | FALSE | TRUE  |
| 17 | 26782770 - 26941211   | F - 21.05%  | FALSE | TRUE  |
| 17 | 26782770 - 26941211   |             | FALSE | TRUE  |
| 17 | 26782770 - 26941211   |             | FALSE | TRUE  |
| 17 | 26782770 - 26941211   |             | FALSE | TRUE  |
| 17 | 26782770 - 26941211   |             | FALSE | TRUE  |
| 17 | 26782770 - 26941211   |             | FALSE | TRUE  |
| 19 | 35521592 - 35531353   | T - 100.00% | TRUE  | TRUE  |
| 19 | 35521592 - 35531353   | F - 25.00%  | TRUE  | TRUE  |
| 19 | 35521592 - 35531353   |             | TRUE  | TRUE  |
| 19 | 18893583 - 18902123   | T - 100.00% | TRUE  | TRUE  |
| 19 | 18893583 - 18902123   |             | TRUE  | FALSE |
| 19 | 18893583 - 18902123   |             | TRUE  | TRUE  |
| 19 | 18893583 - 18902123   |             | TRUE  | TRUE  |
| 19 | 18893583 - 18902123   | T - 88.89%  | TRUE  | FALSE |
| 19 | 18893583 - 18902123   |             | TRUE  | FALSE |
| 19 | 18893583 - 18902123   |             | TRUE  | TRUE  |
| 19 | 18893583 - 18902123   | F - 22.22%  | TRUE  | TRUE  |
| 1  | 17634690 - 17690499   |             | TRUE  | TRUE  |
| 1  | 17634690 - 17690499   | T - 55.56%  | TRUE  | TRUE  |
| 1  | 20990507 - 21044510   | F - 7.14%   | TRUE  | TRUE  |
| 1  | 20990507 - 21044510   | F - 35.71%  | TRUE  | TRUE  |
| 1  | 20990507 - 21044510   | F - 28.57%  | TRUE  | TRUE  |
| 1  | 20990507 - 21044510   |             | TRUE  | TRUE  |
| 3  | 122785856 - 122880953 | F - 11.11%  | TRUE  | TRUE  |
| 3  | 122785856 - 122880953 |             | TRUE  | TRUE  |
| 3  | 122785856 - 122880953 |             | FALSE | TRUE  |
| 5  | 180688213 - 180699308 |             | TRUE  | FALSE |
| 5  | 180688213 - 180699308 | T - 75.00%  | TRUE  | TRUE  |
| 7  | 2393721 - 2420380     | F - 4.55%   | TRUE  | TRUE  |
| 7  | 2393721 - 2420380     |             | TRUE  | TRUE  |
| 7  | 2393721 - 2420380     |             | TRUE  | TRUE  |
| 7  | 2393721 - 2420380     |             | FALSE | TRUE  |
| 8  | 11278972 - 11324276   | T - 57.14%  | TRUE  | TRUE  |

|    |                       |             |       |       |
|----|-----------------------|-------------|-------|-------|
| 8  | 11278972 - 11324276   | T - 71.43%  | TRUE  | FALSE |
| 8  | 11278972 - 11324276   | F - 28.57%  | TRUE  | TRUE  |
| 8  | 11278972 - 11324276   | F - 28.57%  | TRUE  | TRUE  |
| 8  | 11278972 - 11324276   | F - 14.29%  | TRUE  | TRUE  |
| 8  | 11278972 - 11324276   | F - 14.29%  | TRUE  | TRUE  |
| 8  | 11278972 - 11324276   |             | FALSE | TRUE  |
| 8  | 27454434 - 27472548   |             | TRUE  | TRUE  |
| 8  | 27454434 - 27472548   | F - 11.54%  | TRUE  | TRUE  |
| 8  | 27454434 - 27472548   | F - 26.92%  | TRUE  | TRUE  |
| 8  | 27454434 - 27472548   | F - 3.85%   | TRUE  | TRUE  |
| 8  | 27454434 - 27472548   | F - 7.69%   | TRUE  | TRUE  |
| 8  | 27454434 - 27472548   | F - 3.85%   | TRUE  | TRUE  |
| 8  | 27454434 - 27472548   | F - 7.69%   | TRUE  | TRUE  |
| 11 | 33106130 - 33183077   |             | TRUE  | TRUE  |
| 11 | 33106130 - 33183077   |             | TRUE  | TRUE  |
| 11 | 33106130 - 33183077   |             | TRUE  | TRUE  |
| 11 | 33106130 - 33183077   | F - 40.00%  | TRUE  | TRUE  |
| 11 | 33106130 - 33183077   |             | TRUE  | FALSE |
| 12 | 19282626 - 19529334   | F - 28.00%  | TRUE  | FALSE |
| 12 | 19282626 - 19529334   | T - 56.00%  | TRUE  | TRUE  |
| 12 | 19282626 - 19529334   |             | TRUE  | TRUE  |
| 12 | 19282626 - 19529334   |             | TRUE  | TRUE  |
| 12 | 9821233 - 9852151     |             | TRUE  | TRUE  |
| 12 | 9821233 - 9852151     | F - 3.85%   | TRUE  | TRUE  |
| 14 | 78636928 - 80330762   |             | TRUE  | FALSE |
| 14 | 78636928 - 80330762   | F - 18.75%  | TRUE  | TRUE  |
| 14 | 78636928 - 80330762   | F - 12.50%  | TRUE  | TRUE  |
| 14 | 78636928 - 80330762   | F - 31.25%  | TRUE  | TRUE  |
| 14 | 78636928 - 80330762   |             | TRUE  | TRUE  |
| 14 | 78636928 - 80330762   |             | TRUE  | TRUE  |
| 14 | 78636928 - 80330762   | T - 87.50%  | TRUE  | TRUE  |
| 14 | 78636928 - 80330762   |             | FALSE | TRUE  |
| 14 | 78636928 - 80330762   | T - 87.50%  | TRUE  | TRUE  |
| 14 | 78636928 - 80330762   | F - 43.75%  | TRUE  | TRUE  |
| 14 | 78636928 - 80330762   | T - 93.75%  | TRUE  | TRUE  |
| 14 | 78636928 - 80330762   | T - 68.75%  | TRUE  | TRUE  |
| 14 | 78636928 - 80330762   | T - 87.50%  | TRUE  | TRUE  |
| 14 | 78636928 - 80330762   | F - 31.25%  | TRUE  | TRUE  |
| 14 | 78636928 - 80330762   |             | TRUE  | TRUE  |
| 14 | 78636928 - 80330762   | T - 93.75%  | TRUE  | TRUE  |
| 14 | 78636928 - 80330762   | F - 31.25%  | TRUE  | TRUE  |
| 14 | 78636928 - 80330762   |             | TRUE  | TRUE  |
| 14 | 101245747 - 101327368 | F - 3.77%   | TRUE  | TRUE  |
| 14 | 101245747 - 101327368 |             | TRUE  | TRUE  |
| 14 | 101245747 - 101327368 |             | TRUE  | TRUE  |
| 14 | 101245747 - 101327368 |             | FALSE | TRUE  |
| 17 | 3617919 - 3704537     | T - 75.00%  | TRUE  | FALSE |
| 17 | 3617919 - 3704537     |             | FALSE | TRUE  |
| 17 | 8076297 - 8079717     |             | TRUE  | TRUE  |
| 17 | 8076297 - 8079717     | F - 33.33%  | TRUE  | TRUE  |
| 20 | 43595115 - 43708618   |             | FALSE | TRUE  |
| 20 | 43595115 - 43708618   | F - 6.67%   | TRUE  | TRUE  |
| 20 | 43595115 - 43708618   |             | TRUE  | FALSE |
| 20 | 43595115 - 43708618   |             | FALSE | TRUE  |
| 4  | 103749212 - 103765255 |             | TRUE  | FALSE |
| 4  | 103749212 - 103765255 | T - 100.00% | TRUE  | TRUE  |
| 1  | 155657751 - 155708803 |             | TRUE  | TRUE  |
| 1  | 155657751 - 155708803 | F - 48.48%  | TRUE  | TRUE  |

|    |                       |             |       |       |
|----|-----------------------|-------------|-------|-------|
| 1  | 155657751 - 155708803 | F - 3.03%   | TRUE  | TRUE  |
| 2  | 27255774 - 27264565   | F - 5.88%   | TRUE  | TRUE  |
| 2  | 27255774 - 27264565   |             | TRUE  | TRUE  |
| 2  | 27255774 - 27264565   | F - 5.88%   | TRUE  | TRUE  |
| 2  | 120517207 - 120741394 | F - 41.18%  | TRUE  | TRUE  |
| 2  | 120517207 - 120741394 |             | TRUE  | TRUE  |
| 2  | 120517207 - 120741394 | T - 58.82%  | TRUE  | TRUE  |
| 5  | 129240165 - 129522327 |             | TRUE  | FALSE |
| 5  | 129240165 - 129522327 | F - 25.00%  | TRUE  | TRUE  |
| 5  | 129240165 - 129522327 |             | TRUE  | TRUE  |
| 6  | 25963030 - 25985352   |             | TRUE  | TRUE  |
| 6  | 25963030 - 25985352   | F - 16.67%  | TRUE  | TRUE  |
| 6  | 147162525 - 147525750 |             | TRUE  | FALSE |
| 6  | 147162525 - 147525750 |             | FALSE | TRUE  |
| 6  | 147162525 - 147525750 | F - 36.36%  | TRUE  | TRUE  |
| 6  | 147162525 - 147525750 | F - 18.18%  | TRUE  | TRUE  |
| 6  | 147162525 - 147525750 | F - 27.27%  | TRUE  | TRUE  |
| 6  | 147162525 - 147525750 |             | FALSE | TRUE  |
| 6  | 147162525 - 147525750 |             | TRUE  | TRUE  |
| 7  | 143891951 - 143977640 |             | TRUE  | TRUE  |
| 7  | 143891951 - 143977640 | F - 12.50%  | TRUE  | TRUE  |
| 7  | 107564244 - 107643804 | F - 5.56%   | TRUE  | FALSE |
| 7  | 107564244 - 107643804 |             | TRUE  | FALSE |
| 8  | 87354967 - 87490649   | F - 5.88%   | TRUE  | TRUE  |
| 8  | 87354967 - 87490649   |             | TRUE  | TRUE  |
| 9  | 70849767 - 70914932   |             | TRUE  | FALSE |
| 9  | 70849767 - 70914932   | F - 4.17%   | FALSE | TRUE  |
| 9  | 70849767 - 70914932   |             | TRUE  | TRUE  |
| 9  | 70849767 - 70914932   | F - 8.33%   | TRUE  | TRUE  |
| 9  | 70849767 - 70914932   | F - 4.17%   | TRUE  | TRUE  |
| 9  | 70849767 - 70914932   |             | FALSE | TRUE  |
| 9  | 72658497 - 72841888   |             | TRUE  | FALSE |
| 9  | 72658497 - 72841888   |             | TRUE  | TRUE  |
| 9  | 72658497 - 72841888   |             | TRUE  | TRUE  |
| 9  | 72658497 - 72841888   |             | TRUE  | FALSE |
| 9  | 72658497 - 72841888   | F - 16.67%  | TRUE  | FALSE |
| 9  | 72658497 - 72841888   | T - 66.67%  | TRUE  | TRUE  |
| 10 | 120863598 - 120897496 |             | TRUE  | TRUE  |
| 10 | 120863598 - 120897496 |             | TRUE  | TRUE  |
| 10 | 120863598 - 120897496 | F - 4.55%   | FALSE | TRUE  |
| 10 | 71909960 - 71930285   |             | TRUE  | TRUE  |
| 10 | 71909960 - 71930285   | T - 50.00%  | TRUE  | TRUE  |
| 17 | 11924135 - 12047140   | F - 10.00%  | TRUE  | TRUE  |
| 17 | 11924135 - 12047140   |             | FALSE | TRUE  |
| 18 | 2537524 - 2571508     |             | TRUE  | FALSE |
| 18 | 2537524 - 2571508     | T - 83.33%  | TRUE  | TRUE  |
| 18 | 2537524 - 2571508     |             | FALSE | TRUE  |
| 20 | 6055492 - 6104191     | T - 80.00%  | TRUE  | FALSE |
| 20 | 6055492 - 6104191     |             | FALSE | TRUE  |
| 20 | 44527259 - 44541003   |             | TRUE  | TRUE  |
| 20 | 44527259 - 44541003   | T - 100.00% | TRUE  | TRUE  |
| 20 | 44527259 - 44541003   |             | TRUE  | TRUE  |
| 20 | 44527259 - 44541003   |             | TRUE  | FALSE |
| 20 | 44527259 - 44541003   |             | TRUE  | TRUE  |
| 20 | 44527259 - 44541003   | F - 42.86%  | TRUE  | TRUE  |
| 20 | 44527259 - 44541003   | F - 28.57%  | TRUE  | TRUE  |
| 20 | 44527259 - 44541003   | F - 7.14%   | TRUE  | TRUE  |
| 20 | 44527259 - 44541003   | F - 14.29%  | TRUE  | TRUE  |

|             |                       |            |       |       |
|-------------|-----------------------|------------|-------|-------|
| 20          | 44527259 - 44541003   |            | TRUE  | TRUE  |
| 20          | 44527259 - 44541003   | T - 71.43% | TRUE  | TRUE  |
| 20          | 44527259 - 44541003   |            | TRUE  | TRUE  |
| 21          | 33964389 - 33985176   | T - 62.50% | FALSE | TRUE  |
| 21          | 33964389 - 33985176   |            | FALSE | TRUE  |
| Un_gl000223 | 42780 - 68787         | F - 14.29% | TRUE  | TRUE  |
| Un_gl000223 | 42780 - 68787         |            | TRUE  | TRUE  |
| 1           | 3773845 - 3801993     | F - 12.50% | TRUE  | TRUE  |
| 1           | 3773845 - 3801993     |            | TRUE  | TRUE  |
| 1           | 117602925 - 117645492 |            | TRUE  | TRUE  |
| 1           | 117602925 - 117645492 |            | FALSE | TRUE  |
| 1           | 117602925 - 117645492 | F - 36.36% | TRUE  | TRUE  |
| 1           | 117602925 - 117645492 |            | FALSE | TRUE  |
| 1           | 31838100 - 31849697   |            | TRUE  | TRUE  |
| 1           | 31838100 - 31849697   | F - 20.00% | TRUE  | TRUE  |
| 1           | 31838100 - 31849697   |            | TRUE  | TRUE  |
| 2           | 43393800 - 43823185   |            | TRUE  | TRUE  |
| 2           | 43393800 - 43823185   | F - 2.94%  | TRUE  | FALSE |
| 2           | 43393800 - 43823185   |            | FALSE | TRUE  |
| 2           | 43393800 - 43823185   | F - 2.94%  | TRUE  | TRUE  |
| 2           | 43393800 - 43823185   |            | TRUE  | TRUE  |
| 2           | 43393800 - 43823185   |            | TRUE  | TRUE  |
| 2           | 43393800 - 43823185   |            | TRUE  | TRUE  |
| 3           | 180585929 - 180700539 |            | TRUE  | TRUE  |
| 3           | 180585929 - 180700539 |            | TRUE  | TRUE  |
| 3           | 180585929 - 180700539 | F - 3.23%  | TRUE  | TRUE  |
| 3           | 180585929 - 180700539 | F - 45.16% | TRUE  | TRUE  |
| 4           | 76567953 - 76649795   |            | TRUE  | TRUE  |
| 4           | 76567953 - 76649795   | F - 3.85%  | TRUE  | TRUE  |
| 5           | 42423877 - 42721980   | F - 4.76%  | TRUE  | FALSE |
| 5           | 42423877 - 42721980   | F - 14.29% | TRUE  | TRUE  |
| 5           | 42423877 - 42721980   | F - 4.76%  | TRUE  | TRUE  |
| 5           | 42423877 - 42721980   | F - 4.76%  | TRUE  | TRUE  |
| 5           | 42423877 - 42721980   |            | TRUE  | TRUE  |
| 5           | 795720 - 851101       |            | TRUE  | FALSE |
| 5           | 795720 - 851101       |            | FALSE | TRUE  |
| 5           | 795720 - 851101       |            | FALSE | TRUE  |
| 5           | 795720 - 851101       |            | TRUE  | TRUE  |
| 5           | 795720 - 851101       |            | FALSE | TRUE  |
| 5           | 795720 - 851101       | F - 35.71% | TRUE  | TRUE  |
| 6           | 36125845 - 36164982   |            | TRUE  | FALSE |
| 6           | 36125845 - 36164982   | T - 50.00% | TRUE  | TRUE  |
| 7           | 73248920 - 73256865   | F - 16.67% | TRUE  | TRUE  |
| 7           | 73248920 - 73256865   |            | TRUE  | TRUE  |
| 10          | 113909622 - 113975135 |            | TRUE  | TRUE  |
| 10          | 113909622 - 113975135 |            | TRUE  | TRUE  |
| 10          | 113909622 - 113975135 | F - 22.22% | TRUE  | TRUE  |
| 10          | 113909622 - 113975135 |            | TRUE  | TRUE  |
| 10          | 113909622 - 113975135 |            | TRUE  | TRUE  |
| 10          | 113909622 - 113975135 |            | TRUE  | TRUE  |
| 10          | 113909622 - 113975135 | T - 55.56% | FALSE | TRUE  |
| 11          | 43380435 - 43516483   | F - 20.00% | TRUE  | TRUE  |
| 11          | 43380435 - 43516483   |            | TRUE  | TRUE  |
| 11          | 43380435 - 43516483   |            | TRUE  | TRUE  |
| 12          | 20522179 - 20837315   |            | TRUE  | TRUE  |
| 12          | 20522179 - 20837315   | F - 16.67% | TRUE  | TRUE  |
| 14          | 96747595 - 96830207   |            | TRUE  | TRUE  |

|    |                       |             |       |       |
|----|-----------------------|-------------|-------|-------|
| 14 | 96747595 - 96830207   |             | TRUE  | TRUE  |
| 14 | 96747595 - 96830207   | F - 20.00%  | TRUE  | FALSE |
| 14 | 96747595 - 96830207   | F - 40.00%  | FALSE | TRUE  |
| 15 | 56119120 - 56285835   |             | TRUE  | TRUE  |
| 15 | 56119120 - 56285835   |             | TRUE  | TRUE  |
| 15 | 56119120 - 56285835   | F - 31.58%  | TRUE  | TRUE  |
| 15 | 56119120 - 56285835   | F - 26.32%  | TRUE  | TRUE  |
| 15 | 56119120 - 56285835   |             | FALSE | TRUE  |
| 15 | 56119120 - 56285835   |             | TRUE  | TRUE  |
| 15 | 56119120 - 56285835   |             | TRUE  | TRUE  |
| 15 | 56119120 - 56285835   |             | FALSE | TRUE  |
| 17 | 57232860 - 57284070   | F - 25.00%  | FALSE | TRUE  |
| 17 | 57232860 - 57284070   | T - 75.00%  | TRUE  | TRUE  |
| 17 | 57232860 - 57284070   |             | TRUE  | TRUE  |
| 17 | 57232860 - 57284070   |             | TRUE  | TRUE  |
| 17 | 65821637 - 65980494   |             | TRUE  | TRUE  |
| 17 | 65821637 - 65980494   | F - 38.46%  | TRUE  | TRUE  |
| 17 | 65821637 - 65980494   |             | TRUE  | TRUE  |
| 18 | 13663346 - 13726591   | T - 71.43%  | TRUE  | TRUE  |
| 18 | 13663346 - 13726591   |             | TRUE  | TRUE  |
| 22 | 35796056 - 35820495   |             | TRUE  | FALSE |
| 22 | 35796056 - 35820495   |             | TRUE  | TRUE  |
| 22 | 35796056 - 35820495   |             | TRUE  | TRUE  |
| 22 | 35796056 - 35820495   | F - 47.06%  | TRUE  | TRUE  |
| 22 | 51039114 - 51049979   | T - 100.00% | TRUE  | TRUE  |
| 22 | 51039114 - 51049979   |             | FALSE | TRUE  |
| 22 | 22311397 - 22337213   | F - 13.64%  | TRUE  | TRUE  |
| 22 | 22311397 - 22337213   |             | TRUE  | TRUE  |
| 22 | 22311397 - 22337213   |             | TRUE  | TRUE  |
| 22 | 30821518 - 30825045   | T - 75.00%  | TRUE  | TRUE  |
| 22 | 30821518 - 30825045   |             | FALSE | TRUE  |
| 1  | 101491409 - 101552821 | T - 66.67%  | TRUE  | TRUE  |
| 1  | 101491409 - 101552821 |             | TRUE  | FALSE |
| 1  | 101491409 - 101552821 |             | TRUE  | TRUE  |
| 1  | 51752930 - 51810788   | F - 24.00%  | TRUE  | TRUE  |
| 1  | 51752930 - 51810788   | T - 56.00%  | FALSE | TRUE  |
| 1  | 51752930 - 51810788   |             | FALSE | TRUE  |
| 1  | 51752930 - 51810788   |             | TRUE  | TRUE  |
| 2  | 109065017 - 109125871 | F - 16.67%  | TRUE  | TRUE  |
| 2  | 109065017 - 109125871 | F - 5.56%   | TRUE  | TRUE  |
| 2  | 109065017 - 109125871 |             | TRUE  | TRUE  |
| 2  | 109065017 - 109125871 | F - 27.78%  | TRUE  | TRUE  |
| 2  | 109065017 - 109125871 |             | FALSE | TRUE  |
| 2  | 55463731 - 55496483   | F - 6.25%   | TRUE  | TRUE  |
| 2  | 55463731 - 55496483   |             | TRUE  | TRUE  |
| 2  | 55463731 - 55496483   |             | TRUE  | TRUE  |
| 2  | 105974169 - 106055230 |             | TRUE  | TRUE  |
| 2  | 105974169 - 106055230 |             | TRUE  | TRUE  |
| 2  | 105974169 - 106055230 | T - 78.26%  | TRUE  | TRUE  |
| 2  | 233562009 - 233725289 |             | TRUE  | TRUE  |
| 2  | 233562009 - 233725289 |             | TRUE  | TRUE  |
| 2  | 233562009 - 233725289 | F - 25.40%  | TRUE  | TRUE  |
| 2  | 233562009 - 233725289 |             | TRUE  | TRUE  |
| 2  | 233562009 - 233725289 | F - 30.16%  | TRUE  | TRUE  |
| 2  | 233562009 - 233725289 |             | FALSE | TRUE  |
| 2  | 233562009 - 233725289 | F - 9.52%   | TRUE  | TRUE  |
| 2  | 233562009 - 233725289 | F - 1.59%   | TRUE  | TRUE  |
| 2  | 233562009 - 233725289 | F - 38.10%  | TRUE  | TRUE  |

|    |                       |            |       |       |
|----|-----------------------|------------|-------|-------|
| 2  | 233562009 - 233725289 |            | FALSE | TRUE  |
| 2  | 233562009 - 233725289 |            | FALSE | TRUE  |
| 2  | 233562009 - 233725289 |            | TRUE  | TRUE  |
| 2  | 233562009 - 233725289 |            | TRUE  | TRUE  |
| 3  | 97483365 - 97519953   | F - 30.77% | TRUE  | TRUE  |
| 3  | 97483365 - 97519953   |            | TRUE  | TRUE  |
| 3  | 130569369 - 130735556 | F - 46.51% | TRUE  | TRUE  |
| 3  | 130569369 - 130735556 |            | TRUE  | TRUE  |
| 5  | 78668459 - 78810040   |            | TRUE  | TRUE  |
| 5  | 78668459 - 78810040   | F - 45.45% | TRUE  | TRUE  |
| 5  | 180028506 - 180076624 |            | TRUE  | TRUE  |
| 5  | 180028506 - 180076624 | F - 38.89% | TRUE  | TRUE  |
| 5  | 180028506 - 180076624 |            | FALSE | TRUE  |
| 6  | 109711418 - 109762374 | T - 53.85% | TRUE  | TRUE  |
| 6  | 109711418 - 109762374 | T - 76.92% | TRUE  | TRUE  |
| 6  | 109711418 - 109762374 |            | TRUE  | TRUE  |
| 7  | 36892511 - 37488895   | F - 16.13% | TRUE  | FALSE |
| 7  | 36892511 - 37488895   | F - 3.23%  | TRUE  | TRUE  |
| 7  | 36892511 - 37488895   | F - 3.23%  | TRUE  | TRUE  |
| 7  | 36892511 - 37488895   |            | TRUE  | TRUE  |
| 7  | 36892511 - 37488895   |            | FALSE | TRUE  |
| 7  | 105245221 - 105517050 |            | TRUE  | TRUE  |
| 7  | 105245221 - 105517050 | F - 30.00% | TRUE  | TRUE  |
| 7  | 105245221 - 105517050 | F - 5.00%  | TRUE  | TRUE  |
| 7  | 105245221 - 105517050 | T - 60.00% | TRUE  | TRUE  |
| 11 | 94963350 - 94967093   |            | TRUE  | TRUE  |
| 11 | 94963350 - 94967093   | T - 66.67% | TRUE  | TRUE  |
| 13 | 111267807 - 111292342 | T - 82.35% | TRUE  | TRUE  |
| 13 | 111267807 - 111292342 |            | TRUE  | TRUE  |
| 13 | 111766906 - 111958084 |            | TRUE  | TRUE  |
| 13 | 111766906 - 111958084 | F - 29.03% | FALSE | TRUE  |
| 13 | 111766906 - 111958084 |            | TRUE  | TRUE  |
| 13 | 111766906 - 111958084 | F - 3.23%  | TRUE  | TRUE  |
| 13 | 111766906 - 111958084 |            | TRUE  | TRUE  |
| 13 | 111766906 - 111958084 | F - 6.45%  | TRUE  | TRUE  |
| 15 | 80445122 - 80479288   |            | TRUE  | TRUE  |
| 15 | 80445122 - 80479288   |            | TRUE  | FALSE |
| 15 | 80445122 - 80479288   | F - 25.00% | TRUE  | TRUE  |
| 15 | 80445122 - 80479288   | F - 33.33% | TRUE  | TRUE  |
| 17 | 36921942 - 36956158   | T - 80.00% | TRUE  | TRUE  |
| 17 | 36921942 - 36956158   |            | FALSE | TRUE  |
| 20 | 50668202 - 50820847   | F - 10.00% | TRUE  | FALSE |
| 20 | 50668202 - 50820847   |            | TRUE  | TRUE  |
| 20 | 50668202 - 50820847   |            | TRUE  | TRUE  |
| 22 | 18270416 - 18507325   | F - 3.45%  | TRUE  | TRUE  |
| 22 | 18270416 - 18507325   |            | TRUE  | TRUE  |
| 1  | 229456752 - 229479041 |            | TRUE  | TRUE  |
| 1  | 229456752 - 229479041 | T - 66.67% | TRUE  | TRUE  |
| 2  | 173600002 - 173917621 | T - 59.38% | TRUE  | TRUE  |
| 2  | 173600002 - 173917621 | F - 6.25%  | TRUE  | TRUE  |
| 2  | 173600002 - 173917621 |            | FALSE | TRUE  |
| 2  | 173600002 - 173917621 |            | FALSE | TRUE  |
| 2  | 173600002 - 173917621 |            | FALSE | TRUE  |
| 3  | 119298115 - 119308792 | T - 54.55% | TRUE  | TRUE  |
| 3  | 119298115 - 119308792 |            | FALSE | TRUE  |
| 3  | 119298115 - 119308792 |            | FALSE | TRUE  |
| 3  | 119298115 - 119308792 | T - 72.73% | TRUE  | TRUE  |
| 3  | 119298115 - 119308792 | F - 9.09%  | FALSE | TRUE  |

|   |    |                       |             |       |       |
|---|----|-----------------------|-------------|-------|-------|
|   | 3  | 119298115 - 119308792 | F - 18.18%  | FALSE | TRUE  |
|   | 3  | 73431582 - 73674091   | F - 4.76%   | TRUE  | TRUE  |
|   | 3  | 73431582 - 73674091   | F - 23.81%  | TRUE  | TRUE  |
|   | 3  | 73431582 - 73674091   |             | TRUE  | TRUE  |
|   | 5  | 159488808 - 159546452 |             | TRUE  | TRUE  |
|   | 5  | 159488808 - 159546452 | F - 20.00%  | FALSE | TRUE  |
|   | 7  | 76090972 - 76135312   | F - 2.70%   | TRUE  | TRUE  |
|   | 7  | 76090972 - 76135312   |             | FALSE | TRUE  |
|   | 7  | 76090972 - 76135312   |             | TRUE  | TRUE  |
|   | 7  | 76090972 - 76135312   | F - 2.70%   | FALSE | TRUE  |
|   | 8  | 41510739 - 41754280   | F - 36.67%  | TRUE  | FALSE |
|   | 8  | 41510739 - 41754280   | T - 50.00%  | FALSE | TRUE  |
|   | 8  | 41510739 - 41754280   |             | FALSE | TRUE  |
|   | 8  | 41510739 - 41754280   |             | FALSE | TRUE  |
|   | 8  | 41510739 - 41754280   |             | TRUE  | TRUE  |
|   | 8  | 41510739 - 41754280   |             | FALSE | TRUE  |
|   | 8  | 41510739 - 41754280   |             | TRUE  | TRUE  |
| X |    | 100645812 - 100651142 |             | TRUE  | TRUE  |
| X |    | 100645812 - 100651142 | F - 13.33%  | TRUE  | TRUE  |
| X |    | 100645812 - 100651142 |             | FALSE | TRUE  |
|   | 10 | 123748689 - 124014060 |             | TRUE  | FALSE |
|   | 10 | 123748689 - 124014060 | F - 2.38%   | TRUE  | FALSE |
|   | 10 | 123748689 - 124014060 |             | FALSE | TRUE  |
|   | 10 | 61410522 - 61495760   | T - 80.00%  | TRUE  | TRUE  |
|   | 10 | 61410522 - 61495760   |             | FALSE | TRUE  |
|   | 11 | 129769601 - 129872730 |             | TRUE  | TRUE  |
|   | 11 | 129769601 - 129872730 | T - 93.75%  | TRUE  | TRUE  |
|   | 11 | 129769601 - 129872730 |             | TRUE  | TRUE  |
|   | 11 | 129769601 - 129872730 |             | FALSE | TRUE  |
|   | 12 | 100967461 - 101018697 |             | TRUE  | TRUE  |
|   | 12 | 100967461 - 101018697 | F - 25.00%  | TRUE  | TRUE  |
|   | 12 | 113376157 - 113411054 | F - 10.00%  | TRUE  | TRUE  |
|   | 12 | 113376157 - 113411054 |             | FALSE | TRUE  |
|   | 12 | 113376157 - 113411054 | T - 80.00%  | FALSE | TRUE  |
|   | 12 | 113376157 - 113411054 | F - 20.00%  | TRUE  | TRUE  |
|   | 12 | 47158544 - 47219780   |             | TRUE  | FALSE |
|   | 12 | 47158544 - 47219780   | T - 100.00% | TRUE  | TRUE  |
|   | 12 | 47158544 - 47219780   | T - 77.78%  | TRUE  | FALSE |
|   | 12 | 47158544 - 47219780   |             | TRUE  | TRUE  |
|   | 12 | 47158544 - 47219780   | T - 77.78%  | TRUE  | TRUE  |
|   | 12 | 47158544 - 47219780   | T - 100.00% | TRUE  | TRUE  |
|   | 12 | 47158544 - 47219780   | T - 77.78%  | TRUE  | TRUE  |
|   | 12 | 47158544 - 47219780   |             | TRUE  | FALSE |
|   | 12 | 47158544 - 47219780   | F - 33.33%  | TRUE  | FALSE |
|   | 12 | 47158544 - 47219780   | T - 100.00% | TRUE  | FALSE |
|   | 12 | 47158544 - 47219780   | F - 22.22%  | FALSE | TRUE  |
|   | 12 | 47158544 - 47219780   | T - 66.67%  | TRUE  | TRUE  |
|   | 12 | 47158544 - 47219780   |             | TRUE  | TRUE  |
|   | 12 | 47158544 - 47219780   | F - 22.22%  | TRUE  | TRUE  |
|   | 12 | 47158544 - 47219780   |             | TRUE  | TRUE  |
|   | 14 | 55614830 - 55658396   | F - 37.50%  | TRUE  | TRUE  |
|   | 14 | 55614830 - 55658396   |             | TRUE  | TRUE  |
|   | 14 | 55614830 - 55658396   | T - 87.50%  | FALSE | TRUE  |
|   | 14 | 55614830 - 55658396   | T - 87.50%  | TRUE  | TRUE  |
|   | 14 | 55614830 - 55658396   |             | FALSE | TRUE  |
|   | 16 | 25247322 - 25269252   |             | TRUE  | TRUE  |
|   | 16 | 25247322 - 25269252   | T - 100.00% | TRUE  | TRUE  |
|   | 17 | 25621106 - 25640657   |             | TRUE  | TRUE  |

|    |                       |            |       |       |
|----|-----------------------|------------|-------|-------|
| 17 | 25621106 - 25640657   | F - 33.33% | TRUE  | TRUE  |
| 17 | 25621106 - 25640657   |            | TRUE  | TRUE  |
| 17 | 25621106 - 25640657   | F - 41.67% | TRUE  | TRUE  |
| 17 | 25621106 - 25640657   | F - 8.33%  | FALSE | TRUE  |
| 17 | 27400528 - 27507430   |            | TRUE  | TRUE  |
| 17 | 27400528 - 27507430   | F - 4.76%  | TRUE  | TRUE  |
| 17 | 27400528 - 27507430   |            | TRUE  | TRUE  |
| 17 | 27400528 - 27507430   |            | FALSE | TRUE  |
| 17 | 27400528 - 27507430   |            | TRUE  | TRUE  |
| 17 | 27400528 - 27507430   |            | FALSE | TRUE  |
| 20 | 19867165 - 19983103   |            | TRUE  | TRUE  |
| 20 | 19867165 - 19983103   | F - 18.18% | FALSE | TRUE  |
| 20 | 19867165 - 19983103   |            | TRUE  | TRUE  |
| 20 | 19867165 - 19983103   | F - 18.18% | TRUE  | TRUE  |
| 20 | 19867165 - 19983103   | F - 9.09%  | FALSE | TRUE  |
| 20 | 36322408 - 36500531   |            | TRUE  | FALSE |
| 20 | 36322408 - 36500531   | F - 14.29% | TRUE  | TRUE  |
| 20 | 36322408 - 36500531   |            | FALSE | TRUE  |
| 20 | 30435440 - 30458550   |            | TRUE  | TRUE  |
| 20 | 30435440 - 30458550   | T - 93.33% | TRUE  | TRUE  |
| 20 | 30435440 - 30458550   | T - 80.00% | TRUE  | TRUE  |
| 20 | 30435440 - 30458550   |            | TRUE  | TRUE  |
| 20 | 30435440 - 30458550   |            | FALSE | TRUE  |
| 20 | 30435440 - 30458550   |            | FALSE | TRUE  |
| 20 | 61872136 - 61904046   | T - 81.82% | TRUE  | TRUE  |
| 20 | 61872136 - 61904046   | F - 27.27% | TRUE  | TRUE  |
| 20 | 61872136 - 61904046   | F - 9.09%  | TRUE  | TRUE  |
| 20 | 61872136 - 61904046   |            | FALSE | TRUE  |
| 1  | 153634512 - 153643524 | F - 12.50% | TRUE  | TRUE  |
| 1  | 153634512 - 153643524 |            | TRUE  | TRUE  |
| 1  | 153901977 - 153919172 | F - 7.14%  | TRUE  | TRUE  |
| 1  | 153901977 - 153919172 |            | FALSE | TRUE  |
| 1  | 153901977 - 153919172 |            | TRUE  | TRUE  |
| 2  | 55746740 - 55773015   | F - 16.67% | TRUE  | TRUE  |
| 2  | 55746740 - 55773015   |            | TRUE  | TRUE  |
| 2  | 55746740 - 55773015   |            | TRUE  | TRUE  |
| 2  | 55746740 - 55773015   |            | TRUE  | TRUE  |
| 3  | 38323785 - 38360066   | F - 9.09%  | TRUE  | FALSE |
| 3  | 38323785 - 38360066   |            | TRUE  | TRUE  |
| 3  | 137906109 - 138017231 |            | TRUE  | TRUE  |
| 3  | 137906109 - 138017231 |            | TRUE  | TRUE  |
| 3  | 137906109 - 138017231 |            | FALSE | TRUE  |
| 3  | 137906109 - 138017231 | F - 2.63%  | TRUE  | TRUE  |
| 3  | 137906109 - 138017231 |            | FALSE | TRUE  |
| 3  | 138213186 - 138313380 |            | TRUE  | TRUE  |
| 3  | 138213186 - 138313380 | T - 75.00% | TRUE  | FALSE |
| 3  | 138213186 - 138313380 |            | TRUE  | TRUE  |
| 3  | 138213186 - 138313380 | F - 5.00%  | TRUE  | TRUE  |
| 3  | 138213186 - 138313380 |            | TRUE  | TRUE  |
| 3  | 138213186 - 138313380 | F - 5.00%  | TRUE  | TRUE  |
| 3  | 138213186 - 138313380 | F - 5.00%  | TRUE  | TRUE  |
| 3  | 138213186 - 138313380 | F - 10.00% | TRUE  | FALSE |
| 3  | 138213186 - 138313380 | F - 30.00% | TRUE  | TRUE  |
| 3  | 138213186 - 138313380 | T - 80.00% | TRUE  | TRUE  |
| 3  | 138213186 - 138313380 | F - 30.00% | TRUE  | FALSE |
| 3  | 138213186 - 138313380 | F - 5.00%  | TRUE  | TRUE  |
| 3  | 138213186 - 138313380 | F - 5.00%  | FALSE | TRUE  |



|   |    |                       |             |       |       |
|---|----|-----------------------|-------------|-------|-------|
|   | 3  | 138213186 - 138313380 | T - 50.00%  | TRUE  | TRUE  |
|   | 3  | 138213186 - 138313380 |             | FALSE | TRUE  |
|   | 3  | 138213186 - 138313380 |             | FALSE | TRUE  |
|   | 4  | 184020446 - 184241930 | F - 11.11%  | TRUE  | TRUE  |
|   | 4  | 184020446 - 184241930 |             | FALSE | TRUE  |
|   | 5  | 38845960 - 38945698   | F - 14.29%  | FALSE | TRUE  |
|   | 5  | 38845960 - 38945698   |             | TRUE  | FALSE |
|   | 5  | 38845960 - 38945698   |             | TRUE  | TRUE  |
|   | 5  | 38845960 - 38945698   |             | TRUE  | TRUE  |
|   | 5  | 43486803 - 43515273   | T - 50.00%  | TRUE  | TRUE  |
|   | 5  | 43486803 - 43515273   |             | TRUE  | TRUE  |
|   | 5  | 43486803 - 43515273   |             | FALSE | TRUE  |
|   | 8  | 38846327 - 38854343   |             | TRUE  | TRUE  |
|   | 8  | 38846327 - 38854343   |             | TRUE  | FALSE |
|   | 8  | 38846327 - 38854343   | F - 35.29%  | TRUE  | TRUE  |
|   | 9  | 119187504 - 120177348 | T - 78.95%  | TRUE  | TRUE  |
|   | 9  | 119187504 - 120177348 |             | TRUE  | TRUE  |
|   | 9  | 119187504 - 120177348 |             | FALSE | TRUE  |
| X |    | 54219256 - 54385075   |             | TRUE  | TRUE  |
| X |    | 54219256 - 54385075   |             | TRUE  | FALSE |
| X |    | 54219256 - 54385075   | T - 80.00%  | TRUE  | TRUE  |
| X |    | 54219256 - 54385075   | T - 60.00%  | TRUE  | TRUE  |
| X |    | 54219256 - 54385075   | T - 80.00%  | TRUE  | TRUE  |
|   | 11 | 112831969 - 113149158 | F - 47.37%  | TRUE  | FALSE |
|   | 11 | 112831969 - 113149158 | T - 78.95%  | TRUE  | TRUE  |
|   | 11 | 112831969 - 113149158 |             | TRUE  | TRUE  |
|   | 11 | 112831969 - 113149158 |             | FALSE | TRUE  |
|   | 14 | 36007558 - 36278510   | F - 8.33%   | TRUE  | TRUE  |
|   | 14 | 36007558 - 36278510   |             | FALSE | TRUE  |
|   | 14 | 36007558 - 36278510   |             | TRUE  | TRUE  |
|   | 14 | 36007558 - 36278510   |             | FALSE | TRUE  |
|   | 14 | 74964873 - 75079034   | T - 80.00%  | TRUE  | TRUE  |
|   | 14 | 74964873 - 75079034   |             | TRUE  | TRUE  |
|   | 14 | 99864083 - 99947233   | F - 7.69%   | TRUE  | TRUE  |
|   | 14 | 99864083 - 99947233   |             | TRUE  | TRUE  |
|   | 15 | 35147732 - 35262040   | F - 33.33%  | TRUE  | TRUE  |
|   | 15 | 35147732 - 35262040   |             | TRUE  | TRUE  |
|   | 17 | 54965270 - 54991409   |             | TRUE  | TRUE  |
|   | 17 | 54965270 - 54991409   | T - 80.00%  | TRUE  | TRUE  |
|   | 17 | 54965270 - 54991409   |             | FALSE | TRUE  |
|   | 17 | 78109013 - 78120982   | F - 40.00%  | TRUE  | TRUE  |
|   | 17 | 78109013 - 78120982   | T - 100.00% | TRUE  | TRUE  |
|   | 17 | 78109013 - 78120982   |             | TRUE  | TRUE  |
|   | 19 | 12125532 - 12146556   |             | TRUE  | TRUE  |
|   | 19 | 12125532 - 12146556   | T - 50.00%  | FALSE | TRUE  |
|   | 19 | 46195741 - 46244011   |             | TRUE  | TRUE  |
|   | 19 | 46195741 - 46244011   | T - 80.00%  | FALSE | TRUE  |
|   | 1  | 12227060 - 12269285   | F - 45.45%  | TRUE  | TRUE  |
|   | 1  | 12227060 - 12269285   |             | FALSE | TRUE  |
|   | 1  | 67465015 - 67520080   |             | TRUE  | TRUE  |
|   | 1  | 67465015 - 67520080   | F - 25.00%  | TRUE  | TRUE  |
|   | 4  | 5544499 - 5711275     |             | TRUE  | TRUE  |
|   | 4  | 5544499 - 5711275     |             | TRUE  | TRUE  |
|   | 4  | 5544499 - 5711275     | T - 100.00% | TRUE  | TRUE  |
|   | 4  | 5544499 - 5711275     |             | FALSE | TRUE  |
|   | 4  | 89181532 - 89205921   |             | TRUE  | TRUE  |
|   | 4  | 89181532 - 89205921   |             | TRUE  | FALSE |
|   | 4  | 89181532 - 89205921   | F - 6.25%   | TRUE  | TRUE  |

|            |                       |             |       |       |
|------------|-----------------------|-------------|-------|-------|
| 4          | 89181532 - 89205921   | F - 12.50%  | TRUE  | TRUE  |
| 4          | 89181532 - 89205921   | F - 12.50%  | TRUE  | TRUE  |
| 4          | 89181532 - 89205921   |             | TRUE  | TRUE  |
| 5          | 70330784 - 70363516   |             | TRUE  | FALSE |
| 5          | 70330784 - 70363516   | F - 4.35%   | FALSE | TRUE  |
| 5          | 70330784 - 70363516   | F - 8.70%   | TRUE  | TRUE  |
| 5          | 70330784 - 70363516   |             | FALSE | TRUE  |
| 7          | 45002260 - 45018704   | F - 26.67%  | TRUE  | TRUE  |
| 7          | 45002260 - 45018704   |             | TRUE  | FALSE |
| 9          | 131174030 - 131199630 |             | TRUE  | TRUE  |
| 9          | 131174030 - 131199630 | F - 15.00%  | TRUE  | TRUE  |
| 9          | 131174030 - 131199630 | F - 5.00%   | FALSE | TRUE  |
| 9          | 131174030 - 131199630 | F - 30.00%  | TRUE  | TRUE  |
| 9          | 131174030 - 131199630 | F - 20.00%  | FALSE | TRUE  |
| 9          | 131174030 - 131199630 | F - 15.00%  | TRUE  | TRUE  |
| 9          | 3824127 - 4348392     |             | TRUE  | FALSE |
| 9          | 3824127 - 4348392     | F - 10.81%  | TRUE  | TRUE  |
| 9          | 3824127 - 4348392     |             | FALSE | TRUE  |
| 9          | 3824127 - 4348392     | F - 5.41%   | TRUE  | TRUE  |
| 9          | 3824127 - 4348392     |             | FALSE | TRUE  |
| 9          | 3824127 - 4348392     |             | TRUE  | TRUE  |
| 9          | 130702858 - 130742812 |             | TRUE  | TRUE  |
| 9          | 130702858 - 130742812 | F - 8.33%   | TRUE  | TRUE  |
| 9          | 130702858 - 130742812 |             | TRUE  | TRUE  |
| 9          | 130702858 - 130742812 | F - 8.33%   | TRUE  | TRUE  |
| 9          | 130702858 - 130742812 | F - 33.33%  | FALSE | TRUE  |
| 9          | 130702858 - 130742812 | F - 25.00%  | TRUE  | TRUE  |
| 9          | 130702858 - 130742812 |             | TRUE  | TRUE  |
| 15         | 84904525 - 84914120   |             | TRUE  | FALSE |
| 15         | 84904525 - 84914120   | F - 20.00%  | TRUE  | TRUE  |
| 15         | 55647421 - 55700708   |             | TRUE  | FALSE |
| 15         | 55647421 - 55700708   | T - 61.54%  | TRUE  | TRUE  |
| 16         | 81812899 - 81991899   |             | TRUE  | FALSE |
| 16         | 81812899 - 81991899   |             | FALSE | TRUE  |
| 16         | 81812899 - 81991899   |             | FALSE | TRUE  |
| 16         | 81812899 - 81991899   | T - 75.00%  | FALSE | TRUE  |
| 16         | 81812899 - 81991899   |             | FALSE | TRUE  |
| 16         | 81812899 - 81991899   |             | FALSE | TRUE  |
| 16         | 81812899 - 81991899   |             | FALSE | TRUE  |
| 16         | 81812899 - 81991899   |             | FALSE | TRUE  |
| 16         | 2047768 - 2059763     | T - 66.67%  | TRUE  | TRUE  |
| 16         | 2047768 - 2059763     |             | FALSE | TRUE  |
| 17         | 27369918 - 27384236   |             | TRUE  | TRUE  |
| 17         | 27369918 - 27384236   | T - 50.00%  | TRUE  | TRUE  |
| 18         | 29843484 - 30050447   | T - 100.00% | TRUE  | TRUE  |
| 18         | 29843484 - 30050447   |             | TRUE  | TRUE  |
| 6_qbl_hap6 | 1960516 - 1978597     | F - 23.08%  | TRUE  | TRUE  |
| 6_qbl_hap6 | 1960516 - 1978597     |             | FALSE | TRUE  |
| 1          | 40420784 - 40435638   |             | TRUE  | TRUE  |
| 1          | 40420784 - 40435638   |             | TRUE  | TRUE  |
| 1          | 40420784 - 40435638   | F - 5.56%   | TRUE  | TRUE  |
| 1          | 40420784 - 40435638   | F - 16.67%  | TRUE  | TRUE  |
| 1          | 40420784 - 40435638   | F - 5.56%   | TRUE  | TRUE  |
| 1          | 40420784 - 40435638   |             | FALSE | TRUE  |
| 1          | 40420784 - 40435638   | F - 5.56%   | TRUE  | TRUE  |
| 1          | 40420784 - 40435638   | T - 61.11%  | TRUE  | TRUE  |
| 1          | 40420784 - 40435638   | T - 66.67%  | TRUE  | TRUE  |
| 1          | 40420784 - 40435638   |             | TRUE  | TRUE  |

|   |    |                       |             |       |       |
|---|----|-----------------------|-------------|-------|-------|
|   | 1  | 40420784 - 40435638   |             | TRUE  | TRUE  |
|   | 2  | 100016938 - 100106497 |             | TRUE  | TRUE  |
|   | 2  | 100016938 - 100106497 | F - 20.00%  | TRUE  | TRUE  |
|   | 2  | 172639915 - 172864766 |             | TRUE  | TRUE  |
|   | 2  | 172639915 - 172864766 |             | TRUE  | FALSE |
|   | 2  | 172639915 - 172864766 |             | TRUE  | TRUE  |
|   | 2  | 172639915 - 172864766 | F - 7.14%   | TRUE  | TRUE  |
|   | 2  | 172639915 - 172864766 | F - 7.14%   | FALSE | TRUE  |
|   | 2  | 172639915 - 172864766 | F - 7.14%   | FALSE | TRUE  |
|   | 2  | 172639915 - 172864766 |             | FALSE | TRUE  |
|   | 5  | 155135063 - 156194798 |             | TRUE  | TRUE  |
|   | 5  | 155135063 - 156194798 |             | TRUE  | FALSE |
|   | 5  | 155135063 - 156194798 |             | TRUE  | TRUE  |
|   | 5  | 155135063 - 156194798 |             | TRUE  | TRUE  |
|   | 5  | 155135063 - 156194798 | F - 20.00%  | TRUE  | TRUE  |
|   | 5  | 155135063 - 156194798 | T - 60.00%  | TRUE  | TRUE  |
|   | 5  | 155135063 - 156194798 | T - 70.00%  | TRUE  | TRUE  |
|   | 5  | 155135063 - 156194798 | F - 10.00%  | TRUE  | TRUE  |
|   | 6  | 28393287 - 28411279   |             | TRUE  | FALSE |
|   | 6  | 28393287 - 28411279   | F - 25.00%  | TRUE  | TRUE  |
|   | 6  | 28393287 - 28411279   |             | FALSE | TRUE  |
|   | 6  | 28393287 - 28411279   | F - 37.50%  | TRUE  | TRUE  |
|   | 6  | 28393287 - 28411279   | T - 62.50%  | FALSE | TRUE  |
|   | 6  | 28393287 - 28411279   | T - 50.00%  | TRUE  | TRUE  |
|   | 6  | 28393287 - 28411279   | F - 25.00%  | TRUE  | TRUE  |
|   | 7  | 26438213 - 26538594   |             | TRUE  | FALSE |
|   | 7  | 26438213 - 26538594   | F - 18.18%  | FALSE | TRUE  |
|   | 9  | 139553308 - 139567130 |             | TRUE  | TRUE  |
|   | 9  | 139553308 - 139567130 |             | FALSE | TRUE  |
|   | 9  | 139553308 - 139567130 | T - 76.92%  | TRUE  | TRUE  |
|   | 9  | 139553308 - 139567130 |             | TRUE  | TRUE  |
|   | 9  | 139553308 - 139567130 |             | TRUE  | TRUE  |
| X |    | 2670091 - 2734541     |             | TRUE  | FALSE |
| X |    | 2670091 - 2734541     |             | TRUE  | FALSE |
| X |    | 2670091 - 2734541     | F - 28.57%  | TRUE  | FALSE |
| X |    | 21857656 - 21903542   |             | TRUE  | FALSE |
| X |    | 21857656 - 21903542   | F - 14.29%  | TRUE  | TRUE  |
|   | 10 | 88718288 - 88723017   | F - 16.67%  | TRUE  | TRUE  |
|   | 10 | 88718288 - 88723017   |             | FALSE | TRUE  |
|   | 10 | 88718288 - 88723017   |             | FALSE | TRUE  |
|   | 10 | 88718288 - 88723017   | T - 100.00% | FALSE | TRUE  |
|   | 11 | 118977452 - 118989252 | T - 83.33%  | TRUE  | TRUE  |
|   | 11 | 118977452 - 118989252 |             | FALSE | TRUE  |
|   | 13 | 53029495 - 53050763   | F - 21.43%  | TRUE  | TRUE  |
|   | 13 | 53029495 - 53050763   | F - 21.43%  | FALSE | TRUE  |
|   | 13 | 53029495 - 53050763   |             | FALSE | TRUE  |
|   | 13 | 53029495 - 53050763   |             | TRUE  | TRUE  |
|   | 15 | 83477973 - 83503613   | T - 100.00% | TRUE  | TRUE  |
|   | 15 | 83477973 - 83503613   |             | TRUE  | TRUE  |
|   | 16 | 81134484 - 81253976   |             | TRUE  | TRUE  |
|   | 16 | 81134484 - 81253976   | F - 28.57%  | FALSE | TRUE  |
|   | 16 | 81134484 - 81253976   |             | FALSE | TRUE  |
|   | 19 | 11487881 - 11495018   |             | FALSE | TRUE  |
|   | 19 | 11487881 - 11495018   | T - 100.00% | TRUE  | TRUE  |
|   | 21 | 46493768 - 46646478   |             | TRUE  | TRUE  |
|   | 21 | 46493768 - 46646478   | F - 11.54%  | TRUE  | TRUE  |
|   | 21 | 46493768 - 46646478   | T - 76.92%  | TRUE  | TRUE  |
|   | 21 | 46493768 - 46646478   |             | TRUE  | TRUE  |

|            |                       |             |       |       |
|------------|-----------------------|-------------|-------|-------|
| 21         | 46493768 - 46646478   | T - 73.08%  | TRUE  | TRUE  |
| 21         | 46493768 - 46646478   | F - 11.54%  | TRUE  | TRUE  |
| 21         | 46493768 - 46646478   | F - 3.85%   | TRUE  | TRUE  |
| 21         | 46493768 - 46646478   |             | TRUE  | TRUE  |
| 21         | 46493768 - 46646478   | F - 3.85%   | TRUE  | TRUE  |
| 21         | 46493768 - 46646478   |             | TRUE  | TRUE  |
| 6_apd_hap1 | 1108937 - 1151099     |             | TRUE  | TRUE  |
| 6_apd_hap1 | 1108937 - 1151099     | T - 100.00% | TRUE  | TRUE  |
| 6_cox_hap2 | 1380801 - 1422964     |             | TRUE  | TRUE  |
| 6_cox_hap2 | 1380801 - 1422964     | T - 100.00% | TRUE  | TRUE  |
| 10         | 14939358 - 15063862   |             | TRUE  | TRUE  |
| 10         | 14939358 - 15063862   | F - 15.63%  | FALSE | TRUE  |
| 14         | 74181825 - 74256988   |             | TRUE  | TRUE  |
| 14         | 74181825 - 74256988   |             | TRUE  | TRUE  |
| 14         | 74181825 - 74256988   | F - 6.25%   | FALSE | TRUE  |
| 14         | 74181825 - 74256988   |             | FALSE | TRUE  |
| 14         | 74181825 - 74256988   |             | FALSE | TRUE  |
| 14         | 74181825 - 74256988   |             | TRUE  | TRUE  |
| 14         | 74181825 - 74256988   |             | FALSE | TRUE  |
| 14         | 78227173 - 78236085   |             | TRUE  | FALSE |
| 14         | 78227173 - 78236085   | T - 83.33%  | TRUE  | TRUE  |
| 1          | 75198836 - 75232362   |             | TRUE  | TRUE  |
| 1          | 75198836 - 75232362   | T - 85.71%  | TRUE  | TRUE  |
| 2          | 1635659 - 1748624     |             | TRUE  | FALSE |
| 2          | 1635659 - 1748624     | F - 5.88%   | FALSE | TRUE  |
| 2          | 1635659 - 1748624     | F - 11.76%  | TRUE  | TRUE  |
| 3          | 10289707 - 10335133   |             | TRUE  | TRUE  |
| 3          | 10289707 - 10335133   |             | TRUE  | TRUE  |
| 3          | 10289707 - 10335133   |             | FALSE | TRUE  |
| 3          | 10289707 - 10335133   | F - 23.68%  | TRUE  | TRUE  |
| 3          | 10289707 - 10335133   |             | TRUE  | TRUE  |
| 3          | 141043055 - 141168634 |             | TRUE  | FALSE |
| 3          | 141043055 - 141168634 | F - 3.70%   | FALSE | TRUE  |
| 3          | 141043055 - 141168634 |             | TRUE  | TRUE  |
| 3          | 141043055 - 141168634 |             | TRUE  | TRUE  |
| 3          | 141043055 - 141168634 |             | TRUE  | TRUE  |
| 3          | 141043055 - 141168634 |             | TRUE  | TRUE  |
| 3          | 141043055 - 141168634 | F - 3.70%   | TRUE  | TRUE  |
| 3          | 141043055 - 141168634 | F - 44.44%  | TRUE  | TRUE  |
| 3          | 141043055 - 141168634 | F - 18.52%  | TRUE  | TRUE  |
| 3          | 141043055 - 141168634 | F - 7.41%   | TRUE  | TRUE  |
| 3          | 141043055 - 141168634 |             | TRUE  | TRUE  |
| 3          | 141043055 - 141168634 |             | TRUE  | TRUE  |
| 3          | 141043055 - 141168634 |             | TRUE  | TRUE  |
| 3          | 142534764 - 142608045 | F - 27.27%  | TRUE  | TRUE  |
| 3          | 142534764 - 142608045 |             | TRUE  | TRUE  |
| 4          | 48499378 - 48782339   | F - 35.48%  | TRUE  | TRUE  |
| 4          | 48499378 - 48782339   |             | TRUE  | TRUE  |
| 4          | 48499378 - 48782339   |             | TRUE  | TRUE  |
| 4          | 48499378 - 48782339   |             | TRUE  | TRUE  |
| 7          | 12250848 - 12276890   | F - 25.00%  | FALSE | TRUE  |
| 7          | 12250848 - 12276890   |             | FALSE | TRUE  |
| 7          | 56131695 - 56148365   | F - 42.86%  | TRUE  | TRUE  |
| 7          | 56131695 - 56148365   |             | TRUE  | TRUE  |
| 7          | 56131695 - 56148365   | T - 50.00%  | FALSE | TRUE  |
| 7          | 5566779 - 5603415     | F - 15.38%  | TRUE  | TRUE  |
| 7          | 5566779 - 5603415     |             | FALSE | TRUE  |
| 7          | 5566779 - 5603415     |             | FALSE | TRUE  |

|    |                       |             |       |       |
|----|-----------------------|-------------|-------|-------|
| X  | 44382885 - 44402247   |             | TRUE  | TRUE  |
| X  | 44382885 - 44402247   | T - 60.00%  | TRUE  | TRUE  |
| X  | 153029651 - 153045940 |             | TRUE  | TRUE  |
| X  | 153029651 - 153045940 | T - 50.00%  | TRUE  | FALSE |
| 10 | 6319650 - 6377938     |             | TRUE  | TRUE  |
| 10 | 6319650 - 6377938     |             | FALSE | TRUE  |
| 10 | 6319650 - 6377938     | T - 100.00% | TRUE  | TRUE  |
| 10 | 127512104 - 127542264 |             | TRUE  | TRUE  |
| 10 | 127512104 - 127542264 | F - 8.33%   | FALSE | TRUE  |
| 10 | 129894923 - 129924649 | F - 16.67%  | TRUE  | TRUE  |
| 10 | 129894923 - 129924649 |             | TRUE  | TRUE  |
| 10 | 129894923 - 129924649 |             | FALSE | TRUE  |
| 13 | 44398045 - 44453827   | F - 42.86%  | TRUE  | TRUE  |
| 13 | 44398045 - 44453827   |             | FALSE | TRUE  |
| 15 | 40453210 - 40569688   |             | TRUE  | TRUE  |
| 15 | 40453210 - 40569688   | F - 33.33%  | FALSE | TRUE  |
| 15 | 40453210 - 40569688   | F - 33.33%  | TRUE  | TRUE  |
| 15 | 40453210 - 40569688   | F - 33.33%  | FALSE | TRUE  |
| 15 | 40453210 - 40569688   |             | TRUE  | TRUE  |
| 15 | 40453210 - 40569688   | F - 33.33%  | TRUE  | TRUE  |
| 15 | 40453210 - 40569688   |             | FALSE | TRUE  |
| 15 | 40453210 - 40569688   | F - 33.33%  | FALSE | TRUE  |
| 15 | 40453210 - 40569688   |             | TRUE  | TRUE  |
| 15 | 40453210 - 40569688   |             | FALSE | TRUE  |
| 15 | 40453210 - 40569688   |             | FALSE | TRUE  |
| 15 | 40453210 - 40569688   | F - 33.33%  | FALSE | TRUE  |
| 17 | 4801064 - 4806369     | T - 100.00% | TRUE  | TRUE  |
| 17 | 4801064 - 4806369     |             | TRUE  | FALSE |
| 17 | 4801064 - 4806369     |             | TRUE  | TRUE  |
| 17 | 4801064 - 4806369     | T - 100.00% | TRUE  | TRUE  |
| 17 | 4801064 - 4806369     |             | FALSE | TRUE  |
| 19 | 12035900 - 12061588   | T - 50.00%  | TRUE  | TRUE  |
| 19 | 12035900 - 12061588   |             | TRUE  | TRUE  |
| 19 | 12035900 - 12061588   | T - 75.00%  | TRUE  | TRUE  |
| 21 | 27252861 - 27543446   | F - 3.23%   | TRUE  | TRUE  |
| 21 | 27252861 - 27543446   |             | TRUE  | TRUE  |
| 22 | 25421600 - 25593415   |             | TRUE  | TRUE  |
| 22 | 25421600 - 25593415   |             | TRUE  | TRUE  |
| 22 | 25421600 - 25593415   |             | FALSE | TRUE  |
| 22 | 25421600 - 25593415   | F - 22.22%  | TRUE  | TRUE  |
| 22 | 32149937 - 32303020   |             | TRUE  | TRUE  |
| 22 | 32149937 - 32303020   |             | TRUE  | TRUE  |
| 22 | 32149937 - 32303020   | F - 27.27%  | FALSE | TRUE  |
| 22 | 32149937 - 32303020   | F - 2.27%   | FALSE | TRUE  |
| 22 | 32149937 - 32303020   |             | TRUE  | TRUE  |
| 22 | 32149937 - 32303020   |             | TRUE  | TRUE  |
| 1  | 156117157 - 156147543 | T - 50.00%  | TRUE  | TRUE  |
| 1  | 156117157 - 156147543 |             | FALSE | TRUE  |
| 1  | 156117157 - 156147543 |             | FALSE | TRUE  |
| 1  | 156117157 - 156147543 |             | FALSE | TRUE  |
| 1  | 21069154 - 21113816   |             | TRUE  | TRUE  |
| 1  | 21069154 - 21113816   |             | TRUE  | TRUE  |
| 1  | 21069154 - 21113816   | F - 13.04%  | TRUE  | TRUE  |
| 1  | 21069154 - 21113816   | F - 8.70%   | TRUE  | TRUE  |
| 1  | 24128367 - 24165110   | F - 5.88%   | TRUE  | TRUE  |
| 1  | 24128367 - 24165110   |             | FALSE | TRUE  |
| 2  | 15731302 - 15771235   | F - 9.09%   | TRUE  | TRUE  |
| 2  | 15731302 - 15771235   |             | TRUE  | TRUE  |

|   |    |                       |            |       |       |
|---|----|-----------------------|------------|-------|-------|
|   | 2  | 15731302 - 15771235   |            | FALSE | TRUE  |
|   | 2  | 97747779 - 97760619   |            | TRUE  | TRUE  |
|   | 2  | 97747779 - 97760619   | F - 8.33%  | TRUE  | TRUE  |
|   | 3  | 42846246 - 42941828   | F - 38.10% | TRUE  | TRUE  |
|   | 3  | 42846246 - 42941828   | F - 9.52%  | TRUE  | FALSE |
|   | 3  | 42846246 - 42941828   |            | TRUE  | TRUE  |
|   | 3  | 42846246 - 42941828   | F - 9.52%  | TRUE  | TRUE  |
|   | 3  | 42846246 - 42941828   |            | TRUE  | TRUE  |
|   | 3  | 42846246 - 42941828   | F - 4.76%  | FALSE | TRUE  |
|   | 3  | 42846246 - 42941828   | T - 52.38% | TRUE  | TRUE  |
|   | 3  | 42846246 - 42941828   |            | TRUE  | TRUE  |
|   | 3  | 42846246 - 42941828   | F - 4.76%  | FALSE | TRUE  |
|   | 3  | 42846246 - 42941828   | F - 19.05% | TRUE  | TRUE  |
|   | 3  | 42846246 - 42941828   | F - 4.76%  | TRUE  | TRUE  |
|   | 3  | 42846246 - 42941828   |            | TRUE  | TRUE  |
|   | 3  | 42846246 - 42941828   | T - 76.19% | TRUE  | TRUE  |
|   | 3  | 42846246 - 42941828   | F - 4.76%  | TRUE  | TRUE  |
|   | 3  | 42846246 - 42941828   | F - 4.76%  | TRUE  | TRUE  |
|   | 3  | 42846246 - 42941828   | F - 4.76%  | TRUE  | TRUE  |
|   | 3  | 42846246 - 42941828   | F - 23.81% | FALSE | TRUE  |
|   | 3  | 42846246 - 42941828   |            | TRUE  | TRUE  |
|   | 3  | 42846246 - 42941828   | F - 4.76%  | TRUE  | TRUE  |
|   | 3  | 42846246 - 42941828   | T - 71.43% | TRUE  | TRUE  |
|   | 3  | 42846246 - 42941828   |            | TRUE  | TRUE  |
|   | 3  | 42846246 - 42941828   |            | TRUE  | TRUE  |
|   | 3  | 42846246 - 42941828   | F - 4.76%  | TRUE  | TRUE  |
|   | 4  | 129190392 - 129209984 |            | TRUE  | FALSE |
|   | 4  | 129190392 - 129209984 | F - 18.18% | FALSE | TRUE  |
|   | 4  | 129190392 - 129209984 | F - 9.09%  | TRUE  | TRUE  |
|   | 5  | 148651401 - 148721367 |            | TRUE  | TRUE  |
|   | 5  | 148651401 - 148721367 | T - 63.64% | TRUE  | TRUE  |
|   | 5  | 148651401 - 148721367 |            | FALSE | TRUE  |
|   | 7  | 148504464 - 148581441 | F - 47.37% | TRUE  | TRUE  |
|   | 7  | 148504464 - 148581441 | T - 94.74% | TRUE  | TRUE  |
|   | 7  | 148504464 - 148581441 |            | TRUE  | TRUE  |
|   | 7  | 148504464 - 148581441 |            | FALSE | TRUE  |
|   | 8  | 23386318 - 23432976   |            | TRUE  | TRUE  |
|   | 8  | 23386318 - 23432976   | F - 19.05% | TRUE  | TRUE  |
|   | 8  | 23386318 - 23432976   |            | TRUE  | TRUE  |
|   | 9  | 124329336 - 124547809 |            | TRUE  | TRUE  |
|   | 9  | 124329336 - 124547809 |            | TRUE  | TRUE  |
|   | 9  | 124329336 - 124547809 |            | FALSE | TRUE  |
|   | 9  | 124329336 - 124547809 | F - 30.77% | TRUE  | TRUE  |
|   | 9  | 124329336 - 124547809 |            | FALSE | TRUE  |
| X |    | 105066536 - 105202602 |            | TRUE  | TRUE  |
| X |    | 105066536 - 105202602 | T - 55.56% | TRUE  | TRUE  |
| X |    | 105066536 - 105202602 |            | FALSE | TRUE  |
| X |    | 105066536 - 105202602 | F - 11.11% | TRUE  | TRUE  |
| X |    | 105066536 - 105202602 | F - 11.11% | TRUE  | TRUE  |
|   | 11 | 125034559 - 125303285 |            | TRUE  | TRUE  |
|   | 11 | 125034559 - 125303285 |            | FALSE | TRUE  |
|   | 11 | 125034559 - 125303285 | F - 46.15% | TRUE  | TRUE  |
|   | 11 | 125034559 - 125303285 |            | FALSE | TRUE  |
|   | 12 | 31226779 - 31257725   |            | TRUE  | TRUE  |
|   | 12 | 31226779 - 31257725   | T - 83.33% | FALSE | TRUE  |
|   | 12 | 102513956 - 102591298 |            | TRUE  | TRUE  |
|   | 12 | 102513956 - 102591298 | F - 5.00%  | TRUE  | FALSE |
|   | 12 | 102513956 - 102591298 |            | TRUE  | TRUE  |

|    |                       |            |       |       |
|----|-----------------------|------------|-------|-------|
| 14 | 80943330 - 81425828   |            | TRUE  | FALSE |
| 14 | 80943330 - 81425828   | T - 61.54% | TRUE  | TRUE  |
| 14 | 80943330 - 81425828   |            | FALSE | TRUE  |
| 14 | 80943330 - 81425828   |            | TRUE  | TRUE  |
| 19 | 58595206 - 58629793   |            | TRUE  | FALSE |
| 19 | 58595206 - 58629793   | T - 91.67% | TRUE  | TRUE  |
| 1  | 65713902 - 65881689   | F - 25.00% | TRUE  | TRUE  |
| 1  | 65713902 - 65881689   |            | TRUE  | TRUE  |
| 1  | 65713902 - 65881689   |            | FALSE | TRUE  |
| 2  | 20191813 - 20212455   |            | TRUE  | TRUE  |
| 2  | 20191813 - 20212455   | F - 16.67% | TRUE  | TRUE  |
| 2  | 20191813 - 20212455   |            | TRUE  | TRUE  |
| 2  | 20191813 - 20212455   | T - 50.00% | TRUE  | TRUE  |
| 2  | 20191813 - 20212455   | T - 83.33% | TRUE  | TRUE  |
| 3  | 46919236 - 46945289   |            | TRUE  | TRUE  |
| 3  | 46919236 - 46945289   |            | TRUE  | TRUE  |
| 3  | 46919236 - 46945289   |            | TRUE  | TRUE  |
| 3  | 46919236 - 46945289   | T - 76.92% | TRUE  | TRUE  |
| 3  | 46919236 - 46945289   | T - 84.62% | TRUE  | TRUE  |
| 3  | 46919236 - 46945289   |            | TRUE  | TRUE  |
| 3  | 46919236 - 46945289   |            | TRUE  | TRUE  |
| 3  | 46919236 - 46945289   | F - 7.69%  | TRUE  | TRUE  |
| 3  | 46919236 - 46945289   |            | TRUE  | TRUE  |
| 3  | 46919236 - 46945289   | F - 15.38% | TRUE  | TRUE  |
| 3  | 46919236 - 46945289   | F - 7.69%  | TRUE  | TRUE  |
| 3  | 46919236 - 46945289   |            | TRUE  | TRUE  |
| 3  | 46919236 - 46945289   | F - 7.69%  | TRUE  | TRUE  |
| 3  | 46919236 - 46945289   |            | TRUE  | TRUE  |
| 3  | 46919236 - 46945289   |            | TRUE  | TRUE  |
| 3  | 46919236 - 46945289   | F - 7.69%  | TRUE  | TRUE  |
| 3  | 46919236 - 46945289   |            | TRUE  | TRUE  |
| 3  | 197518097 - 197615307 |            | TRUE  | TRUE  |
| 3  | 197518097 - 197615307 |            | TRUE  | TRUE  |
| 3  | 197518097 - 197615307 | F - 4.17%  | FALSE | TRUE  |
| 3  | 194123401 - 194219093 | F - 6.67%  | TRUE  | TRUE  |
| 3  | 194123401 - 194219093 |            | TRUE  | TRUE  |
| 3  | 194123401 - 194219093 |            | TRUE  | TRUE  |
| 3  | 194123401 - 194219093 | F - 6.67%  | TRUE  | TRUE  |
| 3  | 194123401 - 194219093 |            | TRUE  | TRUE  |
| 3  | 194123401 - 194219093 |            | TRUE  | TRUE  |
| 4  | 166128770 - 166244308 | T - 86.67% | TRUE  | TRUE  |
| 4  | 166128770 - 166244308 | F - 6.67%  | FALSE | TRUE  |
| 4  | 166128770 - 166244308 |            | FALSE | TRUE  |
| 7  | 87505531 - 87538856   |            | TRUE  | FALSE |
| 7  | 87505531 - 87538856   | T - 53.85% | TRUE  | TRUE  |
| 7  | 87505531 - 87538856   |            | TRUE  | TRUE  |
| 8  | 11653082 - 11696818   | F - 12.00% | TRUE  | TRUE  |
| 8  | 11653082 - 11696818   |            | TRUE  | TRUE  |
| 8  | 59496063 - 59572404   | F - 30.00% | TRUE  | TRUE  |
| 8  | 59496063 - 59572404   |            | FALSE | TRUE  |
| 9  | 88161454 - 88356944   | T - 66.67% | TRUE  | FALSE |
| 9  | 88161454 - 88356944   |            | TRUE  | TRUE  |
| 9  | 88161454 - 88356944   |            | TRUE  | TRUE  |
| X  | 66763874 - 66950461   | T - 50.00% | TRUE  | TRUE  |
| X  | 66763874 - 66950461   |            | TRUE  | TRUE  |
| X  | 66763874 - 66950461   | F - 25.00% | TRUE  | TRUE  |
| X  | 66763874 - 66950461   |            | TRUE  | TRUE  |
| X  | 66763874 - 66950461   | T - 56.25% | TRUE  | TRUE  |

|    |                       |            |       |       |
|----|-----------------------|------------|-------|-------|
| X  | 41374187 - 41782716   |            | TRUE  | TRUE  |
| X  | 41374187 - 41782716   | F - 4.76%  | FALSE | TRUE  |
| X  | 41374187 - 41782716   |            | FALSE | TRUE  |
| X  | 41374187 - 41782716   | F - 4.76%  | TRUE  | TRUE  |
| X  | 41374187 - 41782716   |            | FALSE | TRUE  |
| 10 | 95653730 - 95715819   |            | TRUE  | TRUE  |
| 10 | 95653730 - 95715819   | F - 8.33%  | FALSE | TRUE  |
| 10 | 95653730 - 95715819   |            | TRUE  | TRUE  |
| 11 | 111652919 - 111742305 | T - 66.67% | TRUE  | TRUE  |
| 11 | 111652919 - 111742305 |            | TRUE  | TRUE  |
| 11 | 111652919 - 111742305 |            | FALSE | TRUE  |
| 17 | 6354583 - 6459877     | F - 16.67% | TRUE  | TRUE  |
| 17 | 6354583 - 6459877     | T - 66.67% | FALSE | TRUE  |
| 17 | 6354583 - 6459877     |            | TRUE  | TRUE  |
| 17 | 6354583 - 6459877     |            | TRUE  | TRUE  |
| 1  | 249132409 - 249143716 |            | TRUE  | FALSE |
| 1  | 249132409 - 249143716 | T - 75.00% | TRUE  | TRUE  |
| 2  | 99061317 - 99207496   |            | TRUE  | TRUE  |
| 2  | 99061317 - 99207496   | T - 60.00% | TRUE  | TRUE  |
| 2  | 99061317 - 99207496   |            | TRUE  | TRUE  |
| 2  | 135894486 - 136288806 | F - 17.65% | TRUE  | TRUE  |
| 2  | 135894486 - 136288806 |            | FALSE | TRUE  |
| 3  | 71003844 - 71633140   | F - 44.12% | TRUE  | TRUE  |
| 3  | 71003844 - 71633140   |            | FALSE | TRUE  |
| 3  | 71003844 - 71633140   |            | TRUE  | TRUE  |
| 3  | 15602211 - 15643338   |            | TRUE  | TRUE  |
| 3  | 15602211 - 15643338   | F - 10.53% | TRUE  | TRUE  |
| 4  | 3076408 - 3245687     | F - 14.29% | TRUE  | TRUE  |
| 4  | 3076408 - 3245687     |            | TRUE  | TRUE  |
| 4  | 30722030 - 31148423   |            | TRUE  | TRUE  |
| 4  | 30722030 - 31148423   | T - 72.73% | TRUE  | TRUE  |
| 4  | 87515468 - 87736328   |            | TRUE  | FALSE |
| 4  | 87515468 - 87736328   |            | TRUE  | TRUE  |
| 4  | 87515468 - 87736328   |            | TRUE  | FALSE |
| 4  | 87515468 - 87736328   |            | TRUE  | FALSE |
| 4  | 87515468 - 87736328   | T - 56.25% | TRUE  | TRUE  |
| 4  | 87515468 - 87736328   | T - 75.00% | TRUE  | TRUE  |
| 4  | 87515468 - 87736328   |            | TRUE  | TRUE  |
| 4  | 87515468 - 87736328   | F - 43.75% | TRUE  | TRUE  |
| 4  | 87515468 - 87736328   | F - 31.25% | TRUE  | TRUE  |
| 4  | 87515468 - 87736328   |            | TRUE  | TRUE  |
| 4  | 87515468 - 87736328   | F - 6.25%  | TRUE  | TRUE  |
| 5  | 41730167 - 41870791   |            | TRUE  | TRUE  |
| 5  | 41730167 - 41870791   | F - 38.46% | TRUE  | TRUE  |
| 5  | 41730167 - 41870791   | F - 7.69%  | TRUE  | FALSE |
| 5  | 41730167 - 41870791   | F - 7.69%  | TRUE  | TRUE  |
| 5  | 41730167 - 41870791   | F - 23.08% | TRUE  | TRUE  |
| 5  | 41730167 - 41870791   | F - 23.08% | TRUE  | TRUE  |
| 5  | 41730167 - 41870791   | F - 38.46% | TRUE  | TRUE  |
| 5  | 41730167 - 41870791   | F - 7.69%  | FALSE | TRUE  |
| 5  | 41730167 - 41870791   | F - 15.38% | TRUE  | TRUE  |
| 5  | 41730167 - 41870791   | F - 7.69%  | TRUE  | TRUE  |
| 5  | 41730167 - 41870791   |            | TRUE  | TRUE  |
| 5  | 41730167 - 41870791   | F - 7.69%  | FALSE | TRUE  |
| 5  | 41730167 - 41870791   |            | TRUE  | TRUE  |
| 5  | 41730167 - 41870791   |            | FALSE | TRUE  |
| 7  | 76239303 - 76256620   | T - 72.73% | TRUE  | TRUE  |
| 7  | 76239303 - 76256620   | T - 63.64% | TRUE  | TRUE  |



|    |                       |            |       |       |
|----|-----------------------|------------|-------|-------|
| 7  | 76239303 - 76256620   |            | TRUE  | TRUE  |
| 7  | 94214536 - 94285521   | F - 5.88%  | FALSE | TRUE  |
| 7  | 94214536 - 94285521   |            | TRUE  | TRUE  |
| 7  | 94214536 - 94285521   |            | TRUE  | TRUE  |
| 8  | 356428 - 421225       |            | TRUE  | TRUE  |
| 8  | 356428 - 421225       | F - 6.25%  | FALSE | TRUE  |
| 8  | 356428 - 421225       |            | TRUE  | TRUE  |
| 9  | 19288622 - 19374275   | T - 93.75% | TRUE  | TRUE  |
| 9  | 19288622 - 19374275   |            | TRUE  | TRUE  |
| 9  | 19288622 - 19374275   |            | FALSE | TRUE  |
| 10 | 134973951 - 135039916 | F - 40.00% | TRUE  | TRUE  |
| 10 | 134973951 - 135039916 |            | FALSE | TRUE  |
| 10 | 134973951 - 135039916 | F - 40.00% | TRUE  | TRUE  |
| 10 | 51026325 - 51729967   | F - 36.67% | TRUE  | TRUE  |
| 10 | 51026325 - 51729967   |            | TRUE  | TRUE  |
| 10 | 51026325 - 51729967   |            | TRUE  | TRUE  |
| 10 | 51026325 - 51729967   | F - 13.33% | FALSE | TRUE  |
| 10 | 51026325 - 51729967   | F - 3.33%  | TRUE  | TRUE  |
| 10 | 51026325 - 51729967   |            | FALSE | TRUE  |
| 10 | 51026325 - 51729967   |            | TRUE  | TRUE  |
| 10 | 51026325 - 51729967   |            | TRUE  | TRUE  |
| 10 | 51026325 - 51729967   |            | TRUE  | TRUE  |
| 11 | 34874641 - 34938046   |            | TRUE  | TRUE  |
| 11 | 34874641 - 34938046   |            | FALSE | TRUE  |
| 11 | 34874641 - 34938046   | F - 25.00% | TRUE  | TRUE  |
| 12 | 9570287 - 9600824     |            | TRUE  | TRUE  |
| 12 | 9570287 - 9600824     | T - 60.00% | TRUE  | TRUE  |
| 12 | 9570287 - 9600824     | T - 60.00% | FALSE | TRUE  |
| 12 | 51580719 - 51611477   | F - 12.50% | TRUE  | TRUE  |
| 12 | 51580719 - 51611477   |            | TRUE  | TRUE  |
| 12 | 133264192 - 133281577 |            | TRUE  | TRUE  |
| 12 | 133264192 - 133281577 | T - 60.00% | TRUE  | TRUE  |
| 12 | 56146247 - 56211540   |            | TRUE  | TRUE  |
| 12 | 56146247 - 56211540   |            | TRUE  | TRUE  |
| 12 | 56146247 - 56211540   | T - 88.89% | FALSE | TRUE  |
| 13 | 46039030 - 46110833   |            | TRUE  | FALSE |
| 13 | 46039030 - 46110833   |            | TRUE  | TRUE  |
| 13 | 46039030 - 46110833   |            | TRUE  | TRUE  |
| 13 | 46039030 - 46110833   | F - 10.00% | TRUE  | TRUE  |
| 13 | 46039030 - 46110833   |            | TRUE  | TRUE  |
| 14 | 26915089 - 27066960   |            | TRUE  | TRUE  |
| 14 | 26915089 - 27066960   | T - 50.00% | TRUE  | TRUE  |
| 14 | 26915089 - 27066960   | F - 14.29% | TRUE  | TRUE  |
| 15 | 67695949 - 67814182   | F - 40.00% | TRUE  | TRUE  |
| 15 | 67695949 - 67814182   | F - 20.00% | TRUE  | TRUE  |
| 15 | 67695949 - 67814182   |            | TRUE  | TRUE  |
| 15 | 67695949 - 67814182   |            | TRUE  | TRUE  |
| 15 | 67695949 - 67814182   |            | TRUE  | TRUE  |
| 15 | 67695949 - 67814182   |            | FALSE | TRUE  |
| 15 | 67695949 - 67814182   |            | TRUE  | TRUE  |
| 15 | 67695949 - 67814182   | F - 10.00% | TRUE  | TRUE  |
| 15 | 67695949 - 67814182   |            | TRUE  | TRUE  |
| 15 | 67695949 - 67814182   | F - 40.00% | TRUE  | TRUE  |
| 15 | 67695949 - 67814182   | F - 30.00% | TRUE  | TRUE  |
| 15 | 67695949 - 67814182   | F - 20.00% | TRUE  | TRUE  |
| 15 | 67695949 - 67814182   |            | TRUE  | TRUE  |
| 15 | 67695949 - 67814182   | F - 10.00% | TRUE  | TRUE  |
| 15 | 67695949 - 67814182   | F - 10.00% | TRUE  | TRUE  |
| 15 | 67695949 - 67814182   | F - 10.00% | TRUE  | TRUE  |

|    |                       |             |       |       |
|----|-----------------------|-------------|-------|-------|
| 15 | 67695949 - 67814182   | F - 40.00%  | TRUE  | TRUE  |
| 15 | 67695949 - 67814182   |             | FALSE | TRUE  |
| 15 | 67695949 - 67814182   | F - 10.00%  | TRUE  | TRUE  |
| 15 | 67695949 - 67814182   |             | FALSE | TRUE  |
| 17 | 73201597 - 73231854   | F - 12.50%  | TRUE  | TRUE  |
| 17 | 73201597 - 73231854   |             | TRUE  | FALSE |
| 17 | 74466975 - 74497509   | F - 22.22%  | FALSE | TRUE  |
| 17 | 74466975 - 74497509   |             | TRUE  | TRUE  |
| 17 | 74466975 - 74497509   | T - 77.78%  | TRUE  | TRUE  |
| 17 | 74466975 - 74497509   |             | FALSE | TRUE  |
| 17 | 74466975 - 74497509   | T - 77.78%  | TRUE  | TRUE  |
| 17 | 74466975 - 74497509   | T - 77.78%  | TRUE  | TRUE  |
| 17 | 74466975 - 74497509   |             | FALSE | TRUE  |
| 18 | 9885723 - 9888377     |             | TRUE  | FALSE |
| 18 | 9885723 - 9888377     | T - 87.50%  | TRUE  | TRUE  |
| 21 | 46825052 - 46933634   | T - 58.82%  | TRUE  | FALSE |
| 21 | 46825052 - 46933634   | T - 94.12%  | FALSE | TRUE  |
| 21 | 46825052 - 46933634   | T - 88.24%  | TRUE  | TRUE  |
| 21 | 46825052 - 46933634   |             | FALSE | TRUE  |
| 21 | 46825052 - 46933634   |             | FALSE | TRUE  |
| 21 | 46825052 - 46933634   |             | FALSE | TRUE  |
| 22 | 21369316 - 21383119   | F - 17.65%  | TRUE  | TRUE  |
| 22 | 21369316 - 21383119   | T - 94.12%  | TRUE  | TRUE  |
| 22 | 21369316 - 21383119   |             | FALSE | TRUE  |
| 22 | 21369316 - 21383119   |             | FALSE | TRUE  |
| 22 | 21369316 - 21383119   | T - 76.47%  | TRUE  | TRUE  |
| 22 | 50941376 - 50946135   | F - 8.33%   | TRUE  | FALSE |
| 22 | 50941376 - 50946135   | F - 25.00%  | TRUE  | TRUE  |
| 22 | 50941376 - 50946135   |             | FALSE | TRUE  |
| 1  | 20915441 - 20945401   |             | TRUE  | TRUE  |
| 1  | 20915441 - 20945401   | T - 100.00% | TRUE  | TRUE  |
| 1  | 20915441 - 20945401   |             | TRUE  | TRUE  |
| 1  | 243419307 - 243663394 |             | TRUE  | TRUE  |
| 1  | 243419307 - 243663394 | F - 35.00%  | TRUE  | TRUE  |
| 1  | 201865580 - 201915716 | T - 71.43%  | TRUE  | TRUE  |
| 1  | 201865580 - 201915716 |             | TRUE  | TRUE  |
| 1  | 201865580 - 201915716 | T - 85.71%  | TRUE  | TRUE  |
| 3  | 33038100 - 33138722   |             | TRUE  | FALSE |
| 3  | 33038100 - 33138722   | F - 3.03%   | FALSE | TRUE  |
| 3  | 33038100 - 33138722   | F - 3.03%   | FALSE | TRUE  |
| 3  | 33038100 - 33138722   |             | FALSE | TRUE  |
| 4  | 37828255 - 37864559   |             | TRUE  | FALSE |
| 4  | 37828255 - 37864559   |             | TRUE  | TRUE  |
| 4  | 37828255 - 37864559   | F - 33.33%  | TRUE  | TRUE  |
| 4  | 37828255 - 37864559   |             | FALSE | TRUE  |
| 4  | 176554085 - 176923815 | T - 71.43%  | TRUE  | FALSE |
| 4  | 176554085 - 176923815 |             | FALSE | TRUE  |
| 4  | 176554085 - 176923815 |             | FALSE | TRUE  |
| 4  | 82347547 - 82393082   |             | TRUE  | TRUE  |
| 4  | 82347547 - 82393082   | T - 64.29%  | TRUE  | TRUE  |
| 4  | 82347547 - 82393082   | T - 57.14%  | TRUE  | FALSE |
| 4  | 82347547 - 82393082   | F - 21.43%  | TRUE  | TRUE  |
| 4  | 82347547 - 82393082   | F - 14.29%  | TRUE  | TRUE  |
| 4  | 82347547 - 82393082   |             | TRUE  | TRUE  |
| 4  | 82347547 - 82393082   | F - 7.14%   | TRUE  | TRUE  |
| 5  | 10353815 - 10435491   | F - 5.00%   | TRUE  | TRUE  |
| 5  | 10353815 - 10435491   |             | TRUE  | TRUE  |
| 6  | 485133 - 693117       |             | TRUE  | TRUE  |

|    |                       |             |       |       |
|----|-----------------------|-------------|-------|-------|
| 6  | 485133 - 693117       | T - 75.00%  | FALSE | TRUE  |
| 6  | 485133 - 693117       |             | TRUE  | TRUE  |
| 6  | 485133 - 693117       |             | TRUE  | TRUE  |
| 6  | 17759414 - 17987854   | F - 40.91%  | TRUE  | TRUE  |
| 6  | 17759414 - 17987854   | T - 54.55%  | TRUE  | TRUE  |
| 6  | 17759414 - 17987854   |             | TRUE  | TRUE  |
| 7  | 32956427 - 32982788   |             | TRUE  | TRUE  |
| 7  | 32956427 - 32982788   | F - 20.00%  | TRUE  | TRUE  |
| 7  | 32956427 - 32982788   | F - 20.00%  | TRUE  | TRUE  |
| 7  | 90193049 - 90839905   |             | TRUE  | TRUE  |
| 7  | 90193049 - 90839905   | F - 30.43%  | FALSE | TRUE  |
| 7  | 90193049 - 90839905   | F - 4.35%   | FALSE | TRUE  |
| 7  | 90193049 - 90839905   | F - 4.35%   | FALSE | TRUE  |
| 7  | 90193049 - 90839905   |             | FALSE | TRUE  |
| 9  | 108006903 - 108201452 |             | TRUE  | TRUE  |
| 9  | 108006903 - 108201452 | T - 75.00%  | TRUE  | TRUE  |
| 9  | 108006903 - 108201452 |             | TRUE  | TRUE  |
| 9  | 108006903 - 108201452 | T - 62.50%  | TRUE  | TRUE  |
| 9  | 108006903 - 108201452 |             | TRUE  | TRUE  |
| 9  | 111696461 - 111713024 | T - 57.14%  | FALSE | TRUE  |
| 9  | 111696461 - 111713024 |             | FALSE | TRUE  |
| 9  | 128024073 - 128129486 |             | TRUE  | TRUE  |
| 9  | 128024073 - 128129486 |             | TRUE  | TRUE  |
| 9  | 128024073 - 128129486 |             | FALSE | TRUE  |
| 9  | 128024073 - 128129486 | F - 3.13%   | FALSE | TRUE  |
| 9  | 128024073 - 128129486 |             | FALSE | TRUE  |
| 9  | 139776364 - 139823673 |             | TRUE  | TRUE  |
| 9  | 139776364 - 139823673 | T - 80.95%  | TRUE  | TRUE  |
| 9  | 139776364 - 139823673 |             | FALSE | TRUE  |
| 9  | 89834788 - 89880410   | T - 100.00% | TRUE  | TRUE  |
| 9  | 89834788 - 89880410   |             | FALSE | TRUE  |
| 9  | 89834788 - 89880410   | T - 100.00% | FALSE | TRUE  |
| 13 | 45513384 - 45563618   | T - 66.67%  | TRUE  | TRUE  |
| 13 | 45513384 - 45563618   |             | FALSE | TRUE  |
| 14 | 21567096 - 21571883   | T - 100.00% | TRUE  | TRUE  |
| 14 | 21567096 - 21571883   |             | FALSE | TRUE  |
| 17 | 48423393 - 48440499   | F - 25.00%  | TRUE  | FALSE |
| 17 | 48423393 - 48440499   |             | TRUE  | TRUE  |
| 19 | 38826415 - 38861589   |             | TRUE  | TRUE  |
| 19 | 38826415 - 38861589   | T - 76.19%  | FALSE | TRUE  |
| 19 | 38826415 - 38861589   | T - 76.19%  | TRUE  | TRUE  |
| 19 | 38826415 - 38861589   | T - 66.67%  | TRUE  | TRUE  |
| 19 | 38826415 - 38861589   |             | FALSE | TRUE  |
| 18 | 29202209 - 29264686   |             | TRUE  | TRUE  |
| 18 | 29202209 - 29264686   | F - 37.50%  | TRUE  | TRUE  |
| 18 | 29202209 - 29264686   |             | TRUE  | TRUE  |
| 18 | 29202209 - 29264686   |             | TRUE  | TRUE  |
| 1  | 33473541 - 33502593   |             | TRUE  | TRUE  |
| 1  | 33473541 - 33502593   | F - 15.00%  | TRUE  | TRUE  |
| 1  | 33473541 - 33502593   |             | FALSE | TRUE  |
| 1  | 33473541 - 33502593   | F - 30.00%  | TRUE  | TRUE  |
| 1  | 33473541 - 33502593   | F - 10.00%  | TRUE  | TRUE  |
| 2  | 89065324 - 89106126   | F - 33.33%  | TRUE  | TRUE  |
| 2  | 89065324 - 89106126   |             | FALSE | TRUE  |
| 2  | 89065324 - 89106126   |             | TRUE  | TRUE  |
| 2  | 89065324 - 89106126   | T - 55.56%  | FALSE | TRUE  |
| 2  | 80515481 - 80531874   | F - 10.00%  | TRUE  | TRUE  |
| 2  | 80515481 - 80531874   |             | TRUE  | TRUE  |

|   |    |                       |             |       |       |
|---|----|-----------------------|-------------|-------|-------|
|   | 3  | 9791628 - 9829903     |             | TRUE  | TRUE  |
|   | 3  | 9791628 - 9829903     | F - 12.90%  | FALSE | TRUE  |
|   | 4  | 83273651 - 83295656   | F - 4.17%   | TRUE  | TRUE  |
|   | 4  | 83273651 - 83295656   |             | TRUE  | TRUE  |
|   | 6  | 15245734 - 15522253   | T - 77.78%  | TRUE  | TRUE  |
|   | 6  | 15245734 - 15522253   |             | FALSE | TRUE  |
|   | 6  | 41888926 - 41900784   | F - 12.50%  | TRUE  | TRUE  |
|   | 6  | 41888926 - 41900784   |             | FALSE | TRUE  |
|   | 8  | 102698770 - 103137135 |             | TRUE  | TRUE  |
|   | 8  | 102698770 - 103137135 |             | TRUE  | TRUE  |
|   | 8  | 102698770 - 103137135 | F - 5.00%   | FALSE | TRUE  |
|   | 8  | 102698770 - 103137135 |             | FALSE | TRUE  |
|   | 9  | 95858450 - 95875565   |             | TRUE  | TRUE  |
|   | 9  | 95858450 - 95875565   | F - 23.08%  | TRUE  | TRUE  |
|   | 9  | 39415985 - 39508888   |             | FALSE | TRUE  |
|   | 9  | 39415985 - 39508888   | F - 33.33%  | TRUE  | TRUE  |
| X |    | 148609130 - 148622504 |             | TRUE  | TRUE  |
| X |    | 148609130 - 148622504 | F - 23.08%  | TRUE  | TRUE  |
| X |    | 148609130 - 148622504 | F - 15.38%  | TRUE  | TRUE  |
| X |    | 148609130 - 148622504 | F - 7.69%   | TRUE  | TRUE  |
| X |    | 148609130 - 148622504 | F - 15.38%  | TRUE  | TRUE  |
|   | 10 | 104263719 - 104393292 | F - 13.33%  | TRUE  | TRUE  |
|   | 10 | 104263719 - 104393292 |             | FALSE | TRUE  |
|   | 11 | 3022152 - 3078843     | F - 8.33%   | TRUE  | TRUE  |
|   | 11 | 3022152 - 3078843     |             | FALSE | TRUE  |
|   | 11 | 3022152 - 3078843     |             | FALSE | TRUE  |
|   | 11 | 3022152 - 3078843     | F - 4.17%   | FALSE | TRUE  |
|   | 12 | 10741077 - 10752434   | F - 44.44%  | TRUE  | FALSE |
|   | 12 | 10741077 - 10752434   |             | TRUE  | TRUE  |
|   | 12 | 10741077 - 10752434   |             | FALSE | TRUE  |
|   | 12 | 10741077 - 10752434   | F - 44.44%  | TRUE  | TRUE  |
|   | 12 | 10741077 - 10752434   |             | TRUE  | TRUE  |
|   | 12 | 77415026 - 77459360   | T - 66.67%  | TRUE  | TRUE  |
|   | 12 | 77415026 - 77459360   | T - 66.67%  | FALSE | TRUE  |
|   | 12 | 77415026 - 77459360   |             | TRUE  | TRUE  |
|   | 12 | 77415026 - 77459360   |             | FALSE | TRUE  |
|   | 14 | 77893018 - 77923983   | T - 50.00%  | TRUE  | TRUE  |
|   | 14 | 77893018 - 77923983   |             | FALSE | TRUE  |
|   | 14 | 77893018 - 77923983   |             | TRUE  | TRUE  |
|   | 15 | 78832747 - 78841604   |             | TRUE  | FALSE |
|   | 15 | 78832747 - 78841604   |             | TRUE  | TRUE  |
|   | 15 | 78832747 - 78841604   | T - 84.21%  | FALSE | TRUE  |
|   | 17 | 19912614 - 20222339   |             | TRUE  | TRUE  |
|   | 17 | 19912614 - 20222339   | F - 4.76%   | TRUE  | TRUE  |
|   | 17 | 19912614 - 20222339   | F - 14.29%  | TRUE  | TRUE  |
|   | 17 | 19912614 - 20222339   |             | TRUE  | TRUE  |
|   | 17 | 19912614 - 20222339   | F - 38.10%  | TRUE  | TRUE  |
|   | 17 | 19912614 - 20222339   |             | FALSE | TRUE  |
|   | 17 | 19912614 - 20222339   | F - 47.62%  | TRUE  | TRUE  |
|   | 17 | 19912614 - 20222339   | F - 9.52%   | TRUE  | TRUE  |
|   | 17 | 19912614 - 20222339   |             | FALSE | TRUE  |
|   | 17 | 19912614 - 20222339   | F - 23.81%  | FALSE | TRUE  |
|   | 17 | 19912614 - 20222339   | F - 4.76%   | TRUE  | TRUE  |
|   | 17 | 19912614 - 20222339   |             | FALSE | TRUE  |
|   | 18 | 109065 - 122222       |             | TRUE  | TRUE  |
|   | 18 | 109065 - 122222       | T - 100.00% | TRUE  | TRUE  |
|   | 19 | 4153629 - 4173050     | T - 80.00%  | TRUE  | FALSE |
|   | 19 | 4153629 - 4173050     |             | TRUE  | TRUE  |

|            |    |                       |             |       |       |
|------------|----|-----------------------|-------------|-------|-------|
|            | 20 | 3451665 - 3631769     | T - 57.14%  | TRUE  | TRUE  |
|            | 20 | 3451665 - 3631769     |             | TRUE  | TRUE  |
| 6_qbl_hap6 |    | 3423638 - 3452865     | T - 50.00%  | TRUE  | FALSE |
| 6_qbl_hap6 |    | 3423638 - 3452865     |             | TRUE  | TRUE  |
| 6_qbl_hap6 |    | 3423638 - 3452865     |             | FALSE | TRUE  |
|            | 7  | 128312342 - 128326929 |             | TRUE  | TRUE  |
|            | 7  | 128312342 - 128326929 | F - 8.33%   | TRUE  | TRUE  |
|            | 7  | 128312342 - 128326929 |             | FALSE | TRUE  |
|            | 1  | 143647638 - 143745417 |             | TRUE  | TRUE  |
|            | 1  | 143647638 - 143745417 | F - 18.18%  | TRUE  | TRUE  |
|            | 1  | 143647638 - 143745417 |             | FALSE | TRUE  |
|            | 1  | 150521040 - 150530949 | T - 100.00% | TRUE  | FALSE |
|            | 1  | 150521040 - 150530949 |             | TRUE  | TRUE  |
|            | 2  | 47129009 - 47168994   |             | FALSE | TRUE  |
|            | 2  | 47129009 - 47168994   | T - 64.00%  | TRUE  | TRUE  |
|            | 3  | 158680024 - 159615155 |             | TRUE  | TRUE  |
|            | 3  | 158680024 - 159615155 | F - 7.32%   | TRUE  | TRUE  |
|            | 3  | 158680024 - 159615155 | F - 26.83%  | TRUE  | TRUE  |
|            | 3  | 158680024 - 159615155 | F - 4.88%   | TRUE  | TRUE  |
|            | 3  | 158680024 - 159615155 | F - 4.88%   | FALSE | TRUE  |
|            | 3  | 158680024 - 159615155 | F - 2.44%   | TRUE  | TRUE  |
|            | 3  | 158680024 - 159615155 | F - 34.15%  | TRUE  | TRUE  |
|            | 3  | 158680024 - 159615155 | F - 41.46%  | TRUE  | TRUE  |
|            | 3  | 158680024 - 159615155 | F - 19.51%  | FALSE | TRUE  |
|            | 3  | 158680024 - 159615155 | F - 17.07%  | FALSE | TRUE  |
|            | 3  | 158680024 - 159615155 | F - 2.44%   | TRUE  | TRUE  |
|            | 3  | 158680024 - 159615155 | F - 46.34%  | FALSE | TRUE  |
|            | 3  | 158680024 - 159615155 | F - 9.76%   | FALSE | TRUE  |
|            | 3  | 158680024 - 159615155 | F - 46.34%  | FALSE | TRUE  |
|            | 3  | 158680024 - 159615155 | F - 26.83%  | FALSE | TRUE  |
|            | 3  | 158680024 - 159615155 | F - 12.20%  | TRUE  | TRUE  |
|            | 3  | 158680024 - 159615155 |             | FALSE | TRUE  |
|            | 3  | 158680024 - 159615155 |             | FALSE | TRUE  |
|            | 3  | 158680024 - 159615155 | F - 2.44%   | FALSE | TRUE  |
|            | 3  | 158680024 - 159615155 |             | FALSE | TRUE  |
|            | 3  | 158680024 - 159615155 | F - 2.44%   | FALSE | TRUE  |
|            | 3  | 158680024 - 159615155 |             | FALSE | TRUE  |
|            | 3  | 158680024 - 159615155 | F - 17.07%  | FALSE | TRUE  |
|            | 4  | 128886435 - 128960866 | F - 20.00%  | TRUE  | TRUE  |
|            | 4  | 128886435 - 128960866 |             | FALSE | TRUE  |
|            | 4  | 68481479 - 68566897   |             | TRUE  | TRUE  |
|            | 4  | 68481479 - 68566897   | T - 75.00%  | FALSE | TRUE  |
|            | 5  | 38258511 - 38465582   |             | TRUE  | TRUE  |
|            | 5  | 38258511 - 38465582   | F - 5.26%   | FALSE | TRUE  |
|            | 5  | 38258511 - 38465582   |             | TRUE  | TRUE  |
|            | 5  | 38258511 - 38465582   |             | FALSE | TRUE  |
|            | 5  | 38258511 - 38465582   |             | FALSE | TRUE  |
|            | 5  | 68665120 - 68710630   | F - 17.24%  | TRUE  | TRUE  |
|            | 5  | 68665120 - 68710630   |             | TRUE  | TRUE  |
|            | 5  | 79950294 - 80172634   |             | TRUE  | FALSE |
|            | 5  | 79950294 - 80172634   | F - 16.67%  | FALSE | TRUE  |
|            | 6  | 33359313 - 33377701   |             | TRUE  | TRUE  |
|            | 6  | 33359313 - 33377701   | T - 71.43%  | FALSE | TRUE  |
|            | 6  | 33359313 - 33377701   |             | FALSE | TRUE  |
|            | 6  | 33359313 - 33377701   |             | FALSE | TRUE  |
|            | 6  | 107811162 - 107982513 |             | TRUE  | TRUE  |
|            | 6  | 107811162 - 107982513 | F - 16.67%  | FALSE | TRUE  |
|            | 6  | 107811162 - 107982513 |             | FALSE | TRUE  |

|             |    |                       |             |       |       |
|-------------|----|-----------------------|-------------|-------|-------|
|             | 6  | 30667584 - 30685666   | T - 52.63%  | TRUE  | TRUE  |
|             | 6  | 30667584 - 30685666   |             | TRUE  | TRUE  |
|             | 6  | 30667584 - 30685666   |             | FALSE | TRUE  |
|             | 7  | 128864855 - 129070052 | F - 10.00%  | TRUE  | TRUE  |
|             | 7  | 128864855 - 129070052 |             | TRUE  | TRUE  |
|             | 8  | 117962512 - 118188953 | F - 23.08%  | TRUE  | TRUE  |
|             | 8  | 117962512 - 118188953 |             | FALSE | TRUE  |
|             | 9  | 96338689 - 96441869   | T - 66.67%  | TRUE  | TRUE  |
|             | 9  | 96338689 - 96441869   |             | FALSE | TRUE  |
| X           |    | 102024089 - 102140338 |             | TRUE  | FALSE |
| X           |    | 102024089 - 102140338 |             | TRUE  | TRUE  |
| X           |    | 102024089 - 102140338 |             | TRUE  | TRUE  |
| X           |    | 102024089 - 102140338 | F - 33.33%  | FALSE | TRUE  |
| X           |    | 102024089 - 102140338 |             | FALSE | TRUE  |
| X           |    | 102024089 - 102140338 |             | FALSE | TRUE  |
|             | 10 | 38645308 - 38667433   | T - 100.00% | TRUE  | TRUE  |
|             | 10 | 38645308 - 38667433   |             | FALSE | TRUE  |
|             | 11 | 66384053 - 66435858   | F - 30.43%  | TRUE  | TRUE  |
|             | 11 | 66384053 - 66435858   | F - 34.78%  | TRUE  | TRUE  |
|             | 11 | 66384053 - 66435858   |             | TRUE  | TRUE  |
|             | 11 | 66384053 - 66435858   | F - 19.57%  | TRUE  | TRUE  |
|             | 11 | 66384053 - 66435858   |             | FALSE | TRUE  |
|             | 11 | 66384053 - 66435858   |             | TRUE  | TRUE  |
|             | 11 | 66384053 - 66435858   | F - 4.35%   | FALSE | TRUE  |
|             | 14 | 75230069 - 75322378   | F - 18.18%  | TRUE  | TRUE  |
|             | 14 | 75230069 - 75322378   |             | TRUE  | TRUE  |
|             | 14 | 75230069 - 75322378   |             | TRUE  | TRUE  |
|             | 14 | 75230069 - 75322378   |             | TRUE  | TRUE  |
|             | 14 | 75230069 - 75322378   |             | FALSE | TRUE  |
|             | 14 | 75230069 - 75322378   |             | FALSE | TRUE  |
|             | 15 | 29991571 - 30248497   |             | TRUE  | TRUE  |
|             | 15 | 29991571 - 30248497   | T - 58.82%  | FALSE | TRUE  |
|             | 15 | 52599480 - 52821247   |             | TRUE  | TRUE  |
|             | 15 | 52599480 - 52821247   | T - 52.94%  | TRUE  | TRUE  |
|             | 15 | 52599480 - 52821247   |             | TRUE  | TRUE  |
|             | 15 | 52599480 - 52821247   |             | FALSE | TRUE  |
|             | 15 | 52599480 - 52821247   |             | TRUE  | TRUE  |
|             | 15 | 52599480 - 52821247   |             | TRUE  | TRUE  |
|             | 15 | 52599480 - 52821247   |             | TRUE  | TRUE  |
|             | 15 | 52599480 - 52821247   |             | TRUE  | TRUE  |
|             | 15 | 52599480 - 52821247   |             | TRUE  | TRUE  |
|             | 15 | 52599480 - 52821247   |             | FALSE | TRUE  |
|             | 17 | 30771502 - 30809398   | F - 11.11%  | TRUE  | FALSE |
|             | 17 | 30771502 - 30809398   |             | TRUE  | TRUE  |
|             | 21 | 43731777 - 43735761   | F - 20.00%  | TRUE  | TRUE  |
|             | 21 | 43731777 - 43735761   |             | FALSE | TRUE  |
|             | 22 | 26839389 - 26879820   | F - 26.67%  | TRUE  | TRUE  |
|             | 22 | 26839389 - 26879820   |             | TRUE  | FALSE |
|             | 22 | 26839389 - 26879820   | F - 30.00%  | FALSE | TRUE  |
|             | 22 | 26839389 - 26879820   |             | FALSE | TRUE  |
| 6_qbl_hap6  |    | 4499711 - 4514410     | F - 41.18%  | TRUE  | TRUE  |
| 6_qbl_hap6  |    | 4499711 - 4514410     |             | TRUE  | TRUE  |
| 6_ssto_hap7 |    | 4839529 - 4857920     |             | TRUE  | TRUE  |
| 6_ssto_hap7 |    | 4839529 - 4857920     | T - 71.43%  | FALSE | TRUE  |
| 6_ssto_hap7 |    | 4839529 - 4857920     |             | FALSE | TRUE  |
| 6_ssto_hap7 |    | 4839529 - 4857920     |             | FALSE | TRUE  |
|             | 1  | 10532345 - 10690815   | F - 7.14%   | TRUE  | TRUE  |
|             | 1  | 10532345 - 10690815   |             | TRUE  | TRUE  |
|             | 1  | 10532345 - 10690815   |             | TRUE  | TRUE  |

|   |                       |            |       |       |
|---|-----------------------|------------|-------|-------|
| 1 | 92974253 - 93257961   | F - 15.38% | TRUE  | TRUE  |
| 1 | 92974253 - 93257961   |            | TRUE  | TRUE  |
| 1 | 92974253 - 93257961   |            | TRUE  | TRUE  |
| 1 | 159887897 - 159895522 | F - 11.11% | TRUE  | TRUE  |
| 1 | 159887897 - 159895522 |            | TRUE  | TRUE  |
| 1 | 159887897 - 159895522 |            | TRUE  | TRUE  |
| 1 | 224415036 - 224518089 |            | TRUE  | TRUE  |
| 1 | 224415036 - 224518089 | F - 40.63% | TRUE  | TRUE  |
| 1 | 224415036 - 224518089 |            | FALSE | TRUE  |
| 2 | 148778580 - 149275805 |            | TRUE  | TRUE  |
| 2 | 148778580 - 149275805 |            | FALSE | TRUE  |
| 2 | 148778580 - 149275805 | F - 5.88%  | TRUE  | TRUE  |
| 2 | 148778580 - 149275805 |            | TRUE  | TRUE  |
| 2 | 148778580 - 149275805 |            | TRUE  | TRUE  |
| 2 | 148778580 - 149275805 |            | FALSE | TRUE  |
| 2 | 148778580 - 149275805 |            | TRUE  | TRUE  |
| 2 | 148778580 - 149275805 |            | TRUE  | TRUE  |
| 2 | 220492049 - 220506702 | T - 55.56% | TRUE  | TRUE  |
| 2 | 220492049 - 220506702 |            | TRUE  | TRUE  |
| 2 | 220492049 - 220506702 |            | FALSE | TRUE  |
| 2 | 42560686 - 42596150   |            | TRUE  | FALSE |
| 2 | 42560686 - 42596150   | F - 8.33%  | TRUE  | TRUE  |
| 2 | 42560686 - 42596150   |            | TRUE  | TRUE  |
| 2 | 96850597 - 96874573   | F - 18.75% | TRUE  | TRUE  |
| 2 | 96850597 - 96874573   |            | TRUE  | TRUE  |
| 3 | 157261035 - 157395538 |            | TRUE  | FALSE |
| 3 | 157261035 - 157395538 | F - 23.08% | TRUE  | TRUE  |
| 3 | 157261035 - 157395538 | F - 7.69%  | TRUE  | FALSE |
| 3 | 157261035 - 157395538 | F - 7.69%  | TRUE  | TRUE  |
| 3 | 157261035 - 157395538 | F - 46.15% | TRUE  | TRUE  |
| 3 | 157261035 - 157395538 | F - 30.77% | FALSE | TRUE  |
| 3 | 48663156 - 48672926   |            | TRUE  | TRUE  |
| 3 | 48663156 - 48672926   | T - 51.61% | TRUE  | TRUE  |
| 3 | 48663156 - 48672926   | T - 51.61% | TRUE  | TRUE  |
| 3 | 48663156 - 48672926   | F - 12.90% | TRUE  | TRUE  |
| 3 | 48663156 - 48672926   | F - 3.23%  | TRUE  | TRUE  |
| 3 | 48663156 - 48672926   | F - 9.68%  | TRUE  | TRUE  |
| 3 | 48663156 - 48672926   | T - 74.19% | TRUE  | TRUE  |
| 3 | 48663156 - 48672926   | F - 3.23%  | TRUE  | TRUE  |
| 3 | 48663156 - 48672926   | F - 25.81% | TRUE  | TRUE  |
| 3 | 48663156 - 48672926   |            | FALSE | TRUE  |
| 3 | 48663156 - 48672926   | F - 3.23%  | TRUE  | TRUE  |
| 3 | 48663156 - 48672926   | F - 6.45%  | TRUE  | TRUE  |
| 4 | 130014472 - 130034487 |            | TRUE  | FALSE |
| 4 | 130014472 - 130034487 | F - 10.00% | TRUE  | TRUE  |
| 4 | 130014472 - 130034487 | F - 10.00% | FALSE | TRUE  |
| 4 | 130014472 - 130034487 | F - 10.00% | FALSE | TRUE  |
| 4 | 139949266 - 140098372 |            | TRUE  | TRUE  |
| 4 | 139949266 - 140098372 |            | TRUE  | TRUE  |
| 4 | 139949266 - 140098372 | F - 39.13% | TRUE  | TRUE  |
| 4 | 139949266 - 140098372 | F - 4.35%  | TRUE  | TRUE  |
| 5 | 149599054 - 149669854 |            | TRUE  | TRUE  |
| 5 | 149599054 - 149669854 | T - 66.67% | TRUE  | TRUE  |
| 9 | 135037334 - 135119921 |            | TRUE  | TRUE  |
| 9 | 135037334 - 135119921 | F - 33.33% | FALSE | TRUE  |
| 9 | 130683158 - 130693076 |            | TRUE  | FALSE |
| 9 | 130683158 - 130693076 | F - 7.69%  | TRUE  | TRUE  |
| 9 | 130683158 - 130693076 |            | TRUE  | TRUE  |

|             |    |                       |            |       |       |
|-------------|----|-----------------------|------------|-------|-------|
|             | 9  | 130683158 - 130693076 |            | FALSE | TRUE  |
|             | 9  | 130683158 - 130693076 | F - 23.08% | FALSE | TRUE  |
| X           |    | 46771711 - 46920641   |            | TRUE  | TRUE  |
| X           |    | 46771711 - 46920641   | T - 71.43% | FALSE | TRUE  |
| X           |    | 46771711 - 46920641   |            | FALSE | TRUE  |
|             | 11 | 93463438 - 93475111   | F - 5.26%  | TRUE  | TRUE  |
|             | 11 | 93463438 - 93475111   | F - 5.26%  | TRUE  | TRUE  |
|             | 11 | 93463438 - 93475111   |            | FALSE | TRUE  |
|             | 14 | 94577079 - 94583033   | F - 18.18% | TRUE  | TRUE  |
|             | 14 | 94577079 - 94583033   |            | FALSE | TRUE  |
|             | 16 | 56677599 - 56679152   |            | TRUE  | TRUE  |
|             | 16 | 56677599 - 56679152   | T - 66.67% | TRUE  | TRUE  |
|             | 16 | 56677599 - 56679152   | F - 33.33% | FALSE | TRUE  |
|             | 17 | 43971748 - 44105703   |            | TRUE  | TRUE  |
|             | 17 | 43971748 - 44105703   | T - 90.48% | TRUE  | TRUE  |
|             | 17 | 906758 - 1090616      | F - 14.29% | TRUE  | TRUE  |
|             | 17 | 906758 - 1090616      |            | TRUE  | TRUE  |
|             | 17 | 18414576 - 18432126   | F - 33.33% | TRUE  | TRUE  |
|             | 17 | 18414576 - 18432126   |            | FALSE | TRUE  |
|             | 17 | 18414576 - 18432126   |            | FALSE | TRUE  |
|             | 18 | 52889562 - 53303188   |            | TRUE  | TRUE  |
|             | 18 | 52889562 - 53303188   | F - 3.13%  | TRUE  | TRUE  |
|             | 18 | 52889562 - 53303188   |            | TRUE  | TRUE  |
|             | 18 | 52889562 - 53303188   |            | FALSE | TRUE  |
|             | 18 | 52889562 - 53303188   |            | FALSE | TRUE  |
| 6_mann_hap4 |    | 1149678 - 1153133     |            | TRUE  | TRUE  |
| 6_mann_hap4 |    | 1149678 - 1153133     | T - 50.00% | TRUE  | TRUE  |
|             | 2  | 61404553 - 61415611   | F - 20.00% | TRUE  | FALSE |
|             | 2  | 61404553 - 61415611   |            | FALSE | TRUE  |
|             | 2  | 61404553 - 61415611   |            | FALSE | TRUE  |
|             | 2  | 183580999 - 183653542 |            | TRUE  | FALSE |
|             | 2  | 183580999 - 183653542 |            | TRUE  | TRUE  |
|             | 2  | 183580999 - 183653542 | F - 6.25%  | TRUE  | TRUE  |
|             | 2  | 183580999 - 183653542 |            | TRUE  | TRUE  |
|             | 2  | 242254515 - 242293442 |            | TRUE  | TRUE  |
|             | 2  | 242254515 - 242293442 | F - 3.57%  | TRUE  | TRUE  |
|             | 2  | 242254515 - 242293442 |            | TRUE  | TRUE  |
|             | 2  | 183698002 - 183731890 | T - 66.67% | TRUE  | TRUE  |
|             | 2  | 183698002 - 183731890 |            | FALSE | TRUE  |
|             | 2  | 39146504 - 39202590   | F - 33.33% | TRUE  | FALSE |
|             | 2  | 39146504 - 39202590   |            | FALSE | TRUE  |
|             | 3  | 38537618 - 38583652   |            | TRUE  | FALSE |
|             | 3  | 38537618 - 38583652   | F - 32.14% | TRUE  | TRUE  |
|             | 3  | 38537618 - 38583652   | F - 3.57%  | TRUE  | TRUE  |
|             | 3  | 38537618 - 38583652   | F - 35.71% | TRUE  | TRUE  |
|             | 3  | 158449987 - 158547508 |            | TRUE  | FALSE |
|             | 3  | 158449987 - 158547508 | F - 3.23%  | FALSE | TRUE  |
|             | 3  | 158449987 - 158547508 | F - 3.23%  | TRUE  | TRUE  |
|             | 3  | 158449987 - 158547508 | F - 48.39% | TRUE  | TRUE  |
|             | 3  | 158449987 - 158547508 |            | TRUE  | TRUE  |
|             | 3  | 158449987 - 158547508 | F - 6.45%  | FALSE | TRUE  |
|             | 3  | 158449987 - 158547508 |            | FALSE | TRUE  |
|             | 3  | 158449987 - 158547508 |            | TRUE  | TRUE  |
|             | 5  | 102455853 - 102538937 | F - 17.39% | TRUE  | TRUE  |
|             | 5  | 102455853 - 102538937 |            | TRUE  | TRUE  |
|             | 5  | 102455853 - 102538937 |            | TRUE  | TRUE  |
|             | 5  | 102455853 - 102538937 |            | TRUE  | TRUE  |
|             | 5  | 102455853 - 102538937 |            | TRUE  | TRUE  |



|    |                       |             |       |       |
|----|-----------------------|-------------|-------|-------|
| 5  | 169780469 - 170163636 |             | TRUE  | TRUE  |
| 5  | 169780469 - 170163636 | F - 20.00%  | TRUE  | TRUE  |
| 5  | 169780469 - 170163636 | F - 6.67%   | TRUE  | TRUE  |
| 5  | 169780469 - 170163636 | F - 40.00%  | TRUE  | TRUE  |
| 5  | 169780469 - 170163636 | F - 6.67%   | TRUE  | TRUE  |
| 5  | 169780469 - 170163636 |             | TRUE  | TRUE  |
| 5  | 169780469 - 170163636 | F - 13.33%  | FALSE | TRUE  |
| 5  | 169780469 - 170163636 | F - 13.33%  | TRUE  | TRUE  |
| 5  | 169780469 - 170163636 | F - 6.67%   | FALSE | TRUE  |
| 5  | 169780469 - 170163636 |             | FALSE | TRUE  |
| 6  | 41604620 - 41621984   |             | TRUE  | FALSE |
| 6  | 41604620 - 41621984   | F - 7.69%   | TRUE  | TRUE  |
| 6  | 41604620 - 41621984   | F - 46.15%  | TRUE  | TRUE  |
| 6  | 41604620 - 41621984   |             | TRUE  | TRUE  |
| 6  | 136578001 - 136610989 |             | TRUE  | TRUE  |
| 6  | 136578001 - 136610989 | F - 6.25%   | TRUE  | TRUE  |
| 6  | 136578001 - 136610989 | F - 6.25%   | FALSE | TRUE  |
| 6  | 136578001 - 136610989 |             | TRUE  | TRUE  |
| 6  | 136578001 - 136610989 |             | TRUE  | TRUE  |
| 10 | 24872538 - 25012597   |             | TRUE  | FALSE |
| 10 | 24872538 - 25012597   | F - 7.69%   | FALSE | TRUE  |
| 11 | 64358113 - 64369820   | T - 70.00%  | TRUE  | TRUE  |
| 11 | 64358113 - 64369820   |             | FALSE | TRUE  |
| 11 | 74041361 - 74109518   |             | TRUE  | TRUE  |
| 11 | 74041361 - 74109518   | T - 100.00% | TRUE  | TRUE  |
| 11 | 133785185 - 133826880 | F - 20.00%  | TRUE  | TRUE  |
| 11 | 133785185 - 133826880 | T - 60.00%  | TRUE  | TRUE  |
| 11 | 133785185 - 133826880 |             | FALSE | TRUE  |
| 11 | 133785185 - 133826880 |             | FALSE | TRUE  |
| 11 | 133785185 - 133826880 | T - 60.00%  | TRUE  | TRUE  |
| 11 | 44117099 - 44266980   | F - 30.00%  | TRUE  | TRUE  |
| 11 | 44117099 - 44266980   |             | TRUE  | TRUE  |
| 12 | 50523581 - 50561205   | F - 10.00%  | TRUE  | TRUE  |
| 12 | 50523581 - 50561205   | F - 20.00%  | FALSE | TRUE  |
| 12 | 50523581 - 50561205   |             | TRUE  | TRUE  |
| 12 | 50523581 - 50561205   |             | FALSE | TRUE  |
| 12 | 50523581 - 50561205   | F - 10.00%  | TRUE  | TRUE  |
| 17 | 78518619 - 78940173   |             | TRUE  | TRUE  |
| 17 | 78518619 - 78940173   | F - 14.29%  | TRUE  | TRUE  |
| 19 | 33571786 - 33621318   | T - 100.00% | TRUE  | TRUE  |
| 19 | 33571786 - 33621318   |             | TRUE  | TRUE  |
| 19 | 34971874 - 34992085   |             | TRUE  | TRUE  |
| 19 | 34971874 - 34992085   | T - 100.00% | TRUE  | TRUE  |
| 2  | 192542794 - 192553251 | F - 16.67%  | TRUE  | TRUE  |
| 2  | 192542794 - 192553251 | F - 5.56%   | TRUE  | TRUE  |
| 2  | 192542794 - 192553251 | T - 66.67%  | TRUE  | TRUE  |
| 2  | 192542794 - 192553251 |             | TRUE  | TRUE  |
| 20 | 34291531 - 34330258   |             | TRUE  | TRUE  |
| 20 | 34291531 - 34330258   | F - 3.57%   | TRUE  | TRUE  |
| 20 | 34291531 - 34330258   | F - 1.79%   | TRUE  | TRUE  |
| 20 | 34291531 - 34330258   | F - 8.93%   | TRUE  | TRUE  |
| 16 | 81040103 - 81066719   |             | TRUE  | TRUE  |
| 16 | 81040103 - 81066719   | T - 75.00%  | TRUE  | TRUE  |
| 7  | 27147396 - 27173961   | F - 18.75%  | TRUE  | TRUE  |
| 7  | 27147396 - 27173961   | F - 18.75%  | TRUE  | TRUE  |
| 7  | 27147396 - 27173961   |             | FALSE | TRUE  |
| 7  | 27147396 - 27173961   | F - 12.50%  | TRUE  | TRUE  |
| 7  | 27147396 - 27173961   | F - 12.50%  | FALSE | TRUE  |

|    |                       |             |       |       |
|----|-----------------------|-------------|-------|-------|
| 7  | 27147396 - 27173961   |             | TRUE  | TRUE  |
| 7  | 27147396 - 27173961   | F - 6.25%   | TRUE  | TRUE  |
| 7  | 27147396 - 27173961   | F - 12.50%  | FALSE | TRUE  |
| 7  | 27147396 - 27173961   | F - 18.75%  | TRUE  | TRUE  |
| 7  | 27147396 - 27173961   | F - 6.25%   | TRUE  | TRUE  |
| 13 | 33160564 - 33352158   | F - 18.75%  | TRUE  | TRUE  |
| 13 | 33160564 - 33352158   | F - 25.00%  | TRUE  | TRUE  |
| 13 | 33160564 - 33352158   |             | TRUE  | TRUE  |
| 17 | 72946837 - 72968900   |             | TRUE  | TRUE  |
| 17 | 72946837 - 72968900   | T - 81.82%  | TRUE  | TRUE  |
| 17 | 72946837 - 72968900   |             | FALSE | TRUE  |
| 17 | 72946837 - 72968900   |             | TRUE  | TRUE  |
| 17 | 72946837 - 72968900   |             | FALSE | TRUE  |
| 17 | 72946837 - 72968900   |             | FALSE | TRUE  |
| 7  | 133812052 - 133949343 |             | TRUE  | FALSE |
| 7  | 133812052 - 133949343 | T - 80.00%  | TRUE  | TRUE  |
| 7  | 133812052 - 133949343 |             | FALSE | TRUE  |
| 16 | 4932508 - 4987136     |             | TRUE  | TRUE  |
| 16 | 4932508 - 4987136     | T - 50.00%  | TRUE  | TRUE  |
| 16 | 4932508 - 4987136     |             | FALSE | TRUE  |
| 11 | 17809595 - 18034709   |             | TRUE  | TRUE  |
| 11 | 17809595 - 18034709   | F - 22.22%  | TRUE  | TRUE  |
| 10 | 54074041 - 54077802   |             | TRUE  | TRUE  |
| 10 | 54074041 - 54077802   |             | TRUE  | TRUE  |
| 10 | 54074041 - 54077802   | T - 66.67%  | TRUE  | TRUE  |
| 10 | 54074041 - 54077802   | F - 33.33%  | TRUE  | TRUE  |
| 10 | 54074041 - 54077802   | F - 16.67%  | TRUE  | FALSE |
| 10 | 54074041 - 54077802   | F - 16.67%  | TRUE  | TRUE  |
| 10 | 54074041 - 54077802   |             | FALSE | TRUE  |
| 10 | 54074041 - 54077802   | F - 16.67%  | TRUE  | TRUE  |
| 7  | 132937823 - 133751342 |             | TRUE  | TRUE  |
| 7  | 132937823 - 133751342 |             | TRUE  | TRUE  |
| 7  | 132937823 - 133751342 | F - 37.14%  | TRUE  | TRUE  |
| 10 | 32556679 - 32667726   | F - 46.67%  | TRUE  | TRUE  |
| 10 | 32556679 - 32667726   |             | TRUE  | FALSE |
| 10 | 32556679 - 32667726   |             | TRUE  | TRUE  |
| 10 | 32556679 - 32667726   |             | TRUE  | TRUE  |
| 10 | 32556679 - 32667726   | F - 40.00%  | TRUE  | TRUE  |
| 8  | 17154306 - 17271040   | F - 40.00%  | TRUE  | FALSE |
| 8  | 17154306 - 17271040   | F - 20.00%  | FALSE | TRUE  |
| 8  | 17154306 - 17271040   |             | TRUE  | TRUE  |
| 16 | 28699879 - 28747053   |             | TRUE  | TRUE  |
| 16 | 28699879 - 28747053   | T - 68.42%  | TRUE  | TRUE  |
| 2  | 96068448 - 96082364   |             | TRUE  | TRUE  |
| 2  | 96068448 - 96082364   | F - 36.36%  | TRUE  | TRUE  |
| 3  | 40807698 - 40904117   |             | TRUE  | FALSE |
| 3  | 40807698 - 40904117   | T - 100.00% | TRUE  | TRUE  |
| 4  | 57843888 - 57897334   | F - 18.75%  | TRUE  | TRUE  |
| 4  | 57843888 - 57897334   |             | TRUE  | TRUE  |
| 9  | 88556057 - 88637217   | F - 14.29%  | TRUE  | TRUE  |
| 9  | 88556057 - 88637217   |             | TRUE  | TRUE  |
| 9  | 88556057 - 88637217   |             | TRUE  | TRUE  |
| 10 | 124612013 - 124658230 | F - 33.33%  | TRUE  | TRUE  |
| 10 | 124612013 - 124658230 |             | FALSE | TRUE  |
| 10 | 124612013 - 124658230 |             | FALSE | TRUE  |
| 12 | 49046995 - 49076035   | T - 81.82%  | TRUE  | TRUE  |
| 12 | 49046995 - 49076035   |             | FALSE | TRUE  |
| 19 | 11071598 - 11172958   | F - 29.17%  | TRUE  | TRUE  |

|            |    |                       |            |       |      |
|------------|----|-----------------------|------------|-------|------|
|            | 19 | 11071598 - 11172958   |            | FALSE | TRUE |
| 6_cox_hap2 |    | 4711285 - 4725976     | F - 41.18% | TRUE  | TRUE |
| 6_cox_hap2 |    | 4711285 - 4725976     |            | TRUE  | TRUE |
| 6_dbb_hap3 |    | 4548797 - 4563487     | F - 41.18% | TRUE  | TRUE |
| 6_dbb_hap3 |    | 4548797 - 4563487     |            | TRUE  | TRUE |
|            | 1  | 33789224 - 33896653   |            | TRUE  | TRUE |
|            | 1  | 33789224 - 33896653   |            | TRUE  | TRUE |
|            | 1  | 33789224 - 33896653   | F - 30.43% | TRUE  | TRUE |
|            | 1  | 33789224 - 33896653   |            | TRUE  | TRUE |
|            | 1  | 33789224 - 33896653   | F - 43.48% | TRUE  | TRUE |
|            | 1  | 33789224 - 33896653   | F - 43.48% | TRUE  | TRUE |
|            | 1  | 33789224 - 33896653   |            | FALSE | TRUE |
|            | 1  | 33789224 - 33896653   | F - 47.83% | TRUE  | TRUE |
|            | 1  | 33789224 - 33896653   |            | TRUE  | TRUE |
|            | 1  | 33789224 - 33896653   | F - 4.35%  | TRUE  | TRUE |
|            | 1  | 33789224 - 33896653   | F - 4.35%  | TRUE  | TRUE |
|            | 1  | 33789224 - 33896653   |            | FALSE | TRUE |
|            | 2  | 99613724 - 99771427   | T - 51.85% | TRUE  | TRUE |
|            | 2  | 99613724 - 99771427   | T - 55.56% | TRUE  | TRUE |
|            | 2  | 99613724 - 99771427   | F - 48.15% | FALSE | TRUE |
|            | 2  | 99613724 - 99771427   | T - 62.96% | TRUE  | TRUE |
|            | 2  | 99613724 - 99771427   |            | TRUE  | TRUE |
|            | 2  | 99613724 - 99771427   |            | TRUE  | TRUE |
|            | 2  | 99613724 - 99771427   | F - 33.33% | FALSE | TRUE |
|            | 2  | 99613724 - 99771427   | T - 51.85% | TRUE  | TRUE |
|            | 2  | 99613724 - 99771427   |            | TRUE  | TRUE |
|            | 2  | 99613724 - 99771427   | F - 3.70%  | TRUE  | TRUE |
|            | 2  | 99613724 - 99771427   | F - 11.11% | TRUE  | TRUE |
|            | 3  | 37493606 - 37865005   | F - 16.67% | TRUE  | TRUE |
|            | 3  | 37493606 - 37865005   |            | TRUE  | TRUE |
|            | 3  | 37493606 - 37865005   | T - 66.67% | TRUE  | TRUE |
|            | 3  | 37493606 - 37865005   | F - 33.33% | FALSE | TRUE |
|            | 3  | 37493606 - 37865005   | T - 66.67% | TRUE  | TRUE |
|            | 3  | 37493606 - 37865005   |            | TRUE  | TRUE |
|            | 8  | 11973284 - 12008698   | T - 66.67% | TRUE  | TRUE |
|            | 8  | 11973284 - 12008698   | F - 33.33% | FALSE | TRUE |
|            | 8  | 11973284 - 12008698   | F - 33.33% | TRUE  | TRUE |
|            | 8  | 11973284 - 12008698   | F - 33.33% | TRUE  | TRUE |
|            | 8  | 11973284 - 12008698   |            | TRUE  | TRUE |
|            | 8  | 11973284 - 12008698   | F - 33.33% | TRUE  | TRUE |
|            | 8  | 11973284 - 12008698   |            | TRUE  | TRUE |
|            | 7  | 151253201 - 151574316 | F - 23.08% | TRUE  | TRUE |
|            | 7  | 151253201 - 151574316 | F - 3.85%  | TRUE  | TRUE |
|            | 7  | 151253201 - 151574316 | F - 3.85%  | TRUE  | TRUE |
|            | 7  | 151253201 - 151574316 |            | TRUE  | TRUE |
|            | 7  | 151253201 - 151574316 | T - 50.00% | TRUE  | TRUE |
|            | 7  | 151253201 - 151574316 |            | TRUE  | TRUE |
|            | 7  | 151253201 - 151574316 | F - 3.85%  | TRUE  | TRUE |
|            | 7  | 151253201 - 151574316 | F - 11.54% | TRUE  | TRUE |
|            | 7  | 151253201 - 151574316 | F - 26.92% | FALSE | TRUE |
|            | 7  | 151253201 - 151574316 |            | FALSE | TRUE |
|            | 7  | 151253201 - 151574316 | F - 38.46% | TRUE  | TRUE |
|            | 7  | 151253201 - 151574316 | F - 7.69%  | FALSE | TRUE |
|            | 7  | 151253201 - 151574316 | F - 42.31% | FALSE | TRUE |
|            | 7  | 151253201 - 151574316 |            | TRUE  | TRUE |
|            | 7  | 151253201 - 151574316 | F - 23.08% | FALSE | TRUE |
| X          |    | 18910416 - 19002716   |            | TRUE  | TRUE |
| X          |    | 18910416 - 19002716   |            | TRUE  | TRUE |

|    |                       |             |       |      |
|----|-----------------------|-------------|-------|------|
| X  | 18910416 - 19002716   |             | TRUE  | TRUE |
| X  | 18910416 - 19002716   |             | TRUE  | TRUE |
| X  | 18910416 - 19002716   | F - 33.33%  | TRUE  | TRUE |
| X  | 18910416 - 19002716   | F - 46.67%  | TRUE  | TRUE |
| 11 | 107661717 - 107799019 |             | TRUE  | TRUE |
| 11 | 107661717 - 107799019 | F - 22.22%  | TRUE  | TRUE |
| 11 | 107661717 - 107799019 | F - 11.11%  | TRUE  | TRUE |
| 14 | 58732083 - 58764855   |             | TRUE  | TRUE |
| 14 | 58732083 - 58764855   | F - 5.56%   | TRUE  | TRUE |
| 14 | 58732083 - 58764855   | F - 5.56%   | TRUE  | TRUE |
| 14 | 58732083 - 58764855   | F - 5.56%   | TRUE  | TRUE |
| 14 | 58732083 - 58764855   | F - 16.67%  | TRUE  | TRUE |
| 14 | 58732083 - 58764855   | F - 16.67%  | FALSE | TRUE |
| 14 | 58732083 - 58764855   | F - 11.11%  | TRUE  | TRUE |
| 14 | 58732083 - 58764855   | F - 5.56%   | TRUE  | TRUE |
| 14 | 58732083 - 58764855   |             | FALSE | TRUE |
| 14 | 58732083 - 58764855   |             | TRUE  | TRUE |
| 14 | 58732083 - 58764855   | F - 16.67%  | FALSE | TRUE |
| 14 | 58732083 - 58764855   | F - 5.56%   | TRUE  | TRUE |
| 14 | 58732083 - 58764855   | F - 11.11%  | TRUE  | TRUE |
| 14 | 58732083 - 58764855   | F - 11.11%  | TRUE  | TRUE |
| 14 | 58732083 - 58764855   |             | FALSE | TRUE |
| 14 | 58732083 - 58764855   | F - 5.56%   | TRUE  | TRUE |
| 16 | 29454226 - 29466285   | F - 28.57%  | TRUE  | TRUE |
| 16 | 29454226 - 29466285   | F - 14.29%  | TRUE  | TRUE |
| 16 | 29454226 - 29466285   |             | TRUE  | TRUE |
| 22 | 50609160 - 50618724   | T - 50.00%  | TRUE  | TRUE |
| 22 | 50609160 - 50618724   |             | TRUE  | TRUE |
| 22 | 50609160 - 50618724   |             | FALSE | TRUE |
| 22 | 50609160 - 50618724   | T - 100.00% | TRUE  | TRUE |
| 22 | 50609160 - 50618724   |             | TRUE  | TRUE |
| 1  | 53392901 - 53517375   |             | TRUE  | TRUE |
| 1  | 53392901 - 53517375   |             | TRUE  | TRUE |
| 1  | 53392901 - 53517375   | F - 44.44%  | TRUE  | TRUE |
| 1  | 53392901 - 53517375   |             | TRUE  | TRUE |
| 1  | 53392901 - 53517375   | T - 55.56%  | TRUE  | TRUE |
| 1  | 53392901 - 53517375   | T - 59.26%  | TRUE  | TRUE |
| 1  | 53392901 - 53517375   |             | FALSE | TRUE |
| 1  | 207207761 - 207254369 | F - 5.56%   | FALSE | TRUE |
| 1  | 207207761 - 207254369 | F - 33.33%  | TRUE  | TRUE |
| 1  | 207207761 - 207254369 | F - 16.67%  | TRUE  | TRUE |
| 1  | 207207761 - 207254369 |             | TRUE  | TRUE |
| 1  | 207207761 - 207254369 | F - 5.56%   | FALSE | TRUE |
| 1  | 207207761 - 207254369 |             | TRUE  | TRUE |
| 1  | 207207761 - 207254369 |             | FALSE | TRUE |
| 1  | 207207761 - 207254369 |             | TRUE  | TRUE |
| 3  | 31699382 - 32119072   |             | TRUE  | TRUE |
| 3  | 31699382 - 32119072   | F - 4.55%   | TRUE  | TRUE |
| 3  | 31699382 - 32119072   | F - 4.55%   | FALSE | TRUE |
| 3  | 31699382 - 32119072   |             | TRUE  | TRUE |
| 3  | 31699382 - 32119072   |             | FALSE | TRUE |
| 3  | 31699382 - 32119072   |             | FALSE | TRUE |
| 7  | 142552792 - 142568847 |             | FALSE | TRUE |
| 7  | 142552792 - 142568847 | F - 44.44%  | FALSE | TRUE |
| X  | 36383741 - 36458375   |             | FALSE | TRUE |
| X  | 36383741 - 36458375   | T - 100.00% | TRUE  | TRUE |
| 11 | 46402306 - 46405375   | F - 10.00%  | TRUE  | TRUE |
| 11 | 46402306 - 46405375   | F - 5.00%   | FALSE | TRUE |

|    |                       |            |       |      |
|----|-----------------------|------------|-------|------|
| 11 | 46402306 - 46405375   |            | FALSE | TRUE |
| 4  | 3294755 - 3441640     |            | TRUE  | TRUE |
| 4  | 3294755 - 3441640     | F - 25.58% | TRUE  | TRUE |
| 4  | 3294755 - 3441640     |            | TRUE  | TRUE |
| 4  | 3294755 - 3441640     |            | TRUE  | TRUE |
| 4  | 3294755 - 3441640     |            | FALSE | TRUE |
| 4  | 3294755 - 3441640     |            | FALSE | TRUE |
| 12 | 22346325 - 22589975   | T - 55.56% | TRUE  | TRUE |
| 12 | 22346325 - 22589975   | F - 33.33% | TRUE  | TRUE |
| 12 | 22346325 - 22589975   | F - 11.11% | FALSE | TRUE |
| 12 | 22346325 - 22589975   |            | TRUE  | TRUE |
| 12 | 22346325 - 22589975   | T - 55.56% | TRUE  | TRUE |
| 5  | 148521046 - 148640105 | F - 4.55%  | TRUE  | TRUE |
| 5  | 148521046 - 148640105 | F - 4.55%  | TRUE  | TRUE |
| 5  | 148521046 - 148640105 | F - 18.18% | TRUE  | TRUE |
| 5  | 148521046 - 148640105 | F - 22.73% | TRUE  | TRUE |
| 5  | 148521046 - 148640105 | F - 4.55%  | TRUE  | TRUE |
| 5  | 148521046 - 148640105 |            | TRUE  | TRUE |
| 5  | 148521046 - 148640105 |            | TRUE  | TRUE |
| 5  | 148521046 - 148640105 |            | TRUE  | TRUE |
| 5  | 148521046 - 148640105 | F - 36.36% | TRUE  | TRUE |
| 5  | 148521046 - 148640105 |            | TRUE  | TRUE |
| 5  | 148521046 - 148640105 | F - 36.36% | TRUE  | TRUE |
| 5  | 148521046 - 148640105 | F - 4.55%  | TRUE  | TRUE |
| 5  | 148521046 - 148640105 | F - 4.55%  | TRUE  | TRUE |
| 5  | 148521046 - 148640105 | F - 18.18% | FALSE | TRUE |
| 5  | 148521046 - 148640105 |            | TRUE  | TRUE |
| 5  | 148521046 - 148640105 | F - 4.55%  | TRUE  | TRUE |
| 22 | 30681106 - 30723035   | F - 2.13%  | FALSE | TRUE |
| 22 | 30681106 - 30723035   | F - 19.15% | FALSE | TRUE |
| 22 | 30681106 - 30723035   |            | TRUE  | TRUE |
| 22 | 30681106 - 30723035   |            | FALSE | TRUE |
| 22 | 30681106 - 30723035   |            | TRUE  | TRUE |
| 1  | 156564100 - 156571302 | F - 12.50% | FALSE | TRUE |
| 1  | 156564100 - 156571302 | F - 31.25% | TRUE  | TRUE |
| 1  | 156564100 - 156571302 | F - 18.75% | FALSE | TRUE |
| 1  | 156564100 - 156571302 | F - 6.25%  | TRUE  | TRUE |
| 1  | 156564100 - 156571302 |            | FALSE | TRUE |
| 11 | 12115543 - 12285332   |            | FALSE | TRUE |
| 11 | 12115543 - 12285332   | T - 61.11% | TRUE  | TRUE |
| 11 | 12115543 - 12285332   | F - 16.67% | TRUE  | TRUE |
| 11 | 12115543 - 12285332   | F - 5.56%  | TRUE  | TRUE |
| 11 | 12115543 - 12285332   |            | TRUE  | TRUE |
| 11 | 12115543 - 12285332   |            | TRUE  | TRUE |
| 11 | 12115543 - 12285332   |            | TRUE  | TRUE |
| 11 | 12115543 - 12285332   |            | TRUE  | TRUE |
| 11 | 12115543 - 12285332   |            | FALSE | TRUE |
| 11 | 12115543 - 12285332   | F - 33.33% | TRUE  | TRUE |
| 11 | 12115543 - 12285332   |            | FALSE | TRUE |
| 11 | 12115543 - 12285332   |            | TRUE  | TRUE |
| 13 | 77618792 - 77901185   | F - 31.25% | TRUE  | TRUE |
| 13 | 77618792 - 77901185   |            | FALSE | TRUE |
| 13 | 77618792 - 77901185   | F - 31.25% | TRUE  | TRUE |
| 13 | 77618792 - 77901185   | F - 6.25%  | TRUE  | TRUE |
| 13 | 77618792 - 77901185   |            | TRUE  | TRUE |
| 14 | 104029299 - 104073860 |            | TRUE  | TRUE |
| 14 | 104029299 - 104073860 | T - 87.50% | TRUE  | TRUE |
| 14 | 104029299 - 104073860 | F - 12.50% | FALSE | TRUE |
| 14 | 104029299 - 104073860 |            | FALSE | TRUE |

|    |                       |             |       |       |
|----|-----------------------|-------------|-------|-------|
| 1  | 142618799 - 143257763 |             | TRUE  | TRUE  |
| 1  | 142618799 - 143257763 | F - 14.29%  | TRUE  | TRUE  |
| 1  | 142618799 - 143257763 | F - 14.29%  | TRUE  | TRUE  |
| 1  | 142618799 - 143257763 |             | TRUE  | TRUE  |
| 1  | 142618799 - 143257763 | T - 100.00% | TRUE  | TRUE  |
| 1  | 142618799 - 143257763 | F - 14.29%  | TRUE  | TRUE  |
| 1  | 142618799 - 143257763 | F - 42.86%  | TRUE  | TRUE  |
| 1  | 142618799 - 143257763 | F - 28.57%  | FALSE | TRUE  |
| 1  | 142618799 - 143257763 | F - 14.29%  | TRUE  | TRUE  |
| 1  | 142618799 - 143257763 | F - 14.29%  | TRUE  | TRUE  |
| 1  | 142618799 - 143257763 | T - 57.14%  | TRUE  | TRUE  |
| 1  | 142618799 - 143257763 | F - 14.29%  | TRUE  | TRUE  |
| 1  | 142618799 - 143257763 | F - 14.29%  | TRUE  | TRUE  |
| 11 | 33060963 - 33127488   |             | FALSE | TRUE  |
| 11 | 33060963 - 33127488   | T - 77.78%  | TRUE  | TRUE  |
| 2  | 264140 - 278283       |             | TRUE  | TRUE  |
| 2  | 264140 - 278283       |             | FALSE | TRUE  |
| 2  | 264140 - 278283       | F - 9.52%   | FALSE | TRUE  |
| 5  | 61699799 - 61924416   |             | TRUE  | TRUE  |
| 5  | 61699799 - 61924416   |             | TRUE  | TRUE  |
| 5  | 61699799 - 61924416   |             | TRUE  | TRUE  |
| 5  | 61699799 - 61924416   | F - 37.50%  | TRUE  | TRUE  |
| 16 | 56965748 - 56977793   |             | FALSE | TRUE  |
| 16 | 56965748 - 56977793   | F - 8.33%   | TRUE  | TRUE  |
| 22 | 18900087 - 19279239   | T - 52.38%  | TRUE  | FALSE |
| 22 | 18900087 - 19279239   |             | TRUE  | TRUE  |
| 22 | 18900087 - 19279239   | F - 14.29%  | TRUE  | TRUE  |
| 22 | 18900087 - 19279239   | F - 4.76%   | TRUE  | TRUE  |
| 22 | 18900087 - 19279239   |             | TRUE  | FALSE |
| 22 | 18900087 - 19279239   | F - 42.86%  | TRUE  | TRUE  |
| 22 | 18900087 - 19279239   | F - 4.76%   | TRUE  | TRUE  |
| 22 | 18900087 - 19279239   | F - 4.76%   | TRUE  | TRUE  |
| 22 | 18900087 - 19279239   |             | TRUE  | TRUE  |
| 22 | 18900087 - 19279239   | T - 80.95%  | TRUE  | TRUE  |
| 22 | 18900087 - 19279239   |             | TRUE  | TRUE  |
| 22 | 18900087 - 19279239   |             | FALSE | TRUE  |
| 22 | 18900087 - 19279239   | F - 4.76%   | TRUE  | TRUE  |
| 22 | 18900087 - 19279239   | T - 61.90%  | TRUE  | TRUE  |
| 22 | 18900087 - 19279239   |             | FALSE | TRUE  |
| 5  | 81267844 - 81572241   | F - 13.33%  | TRUE  | TRUE  |
| 5  | 81267844 - 81572241   | F - 40.00%  | TRUE  | TRUE  |
| 5  | 81267844 - 81572241   |             | TRUE  | TRUE  |
| 5  | 150816553 - 150871942 |             | TRUE  | TRUE  |
| 5  | 150816553 - 150871942 | F - 6.67%   | TRUE  | TRUE  |
| 5  | 150816553 - 150871942 |             | TRUE  | FALSE |
| 5  | 150816553 - 150871942 | F - 46.67%  | TRUE  | TRUE  |
| 5  | 150816553 - 150871942 | F - 6.67%   | TRUE  | TRUE  |
| 5  | 150816553 - 150871942 | F - 20.00%  | TRUE  | TRUE  |
| 5  | 150816553 - 150871942 |             | TRUE  | TRUE  |
| 5  | 150816553 - 150871942 | F - 6.67%   | TRUE  | TRUE  |
| 5  | 150816553 - 150871942 | F - 20.00%  | FALSE | TRUE  |
| 5  | 150816553 - 150871942 | F - 6.67%   | FALSE | TRUE  |
| 5  | 150816553 - 150871942 |             | FALSE | TRUE  |
| 5  | 150816553 - 150871942 | F - 6.67%   | TRUE  | TRUE  |
| 5  | 150816553 - 150871942 |             | TRUE  | TRUE  |
| 5  | 150816553 - 150871942 |             | TRUE  | TRUE  |
| 7  | 1004486 - 1015235     | T - 100.00% | TRUE  | TRUE  |
| 7  | 1004486 - 1015235     | F - 42.86%  | FALSE | TRUE  |

|    |                       |             |       |       |
|----|-----------------------|-------------|-------|-------|
| 7  | 1004486 - 1015235     | F - 28.57%  | TRUE  | TRUE  |
| 7  | 1004486 - 1015235     | F - 14.29%  | FALSE | TRUE  |
| 7  | 1004486 - 1015235     | F - 14.29%  | FALSE | TRUE  |
| 7  | 1004486 - 1015235     |             | TRUE  | TRUE  |
| 7  | 140396471 - 140422590 |             | TRUE  | TRUE  |
| 7  | 140396471 - 140422590 | F - 21.05%  | FALSE | TRUE  |
| 5  | 9546312 - 9550721     | F - 33.33%  | TRUE  | TRUE  |
| 5  | 9546312 - 9550721     | T - 100.00% | TRUE  | TRUE  |
| 5  | 9546312 - 9550721     | T - 100.00% | TRUE  | TRUE  |
| 5  | 9546312 - 9550721     |             | TRUE  | TRUE  |
| 12 | 108956294 - 108963160 |             | TRUE  | TRUE  |
| 12 | 108956294 - 108963160 |             | TRUE  | TRUE  |
| 12 | 108956294 - 108963160 | F - 23.53%  | TRUE  | TRUE  |
| 14 | 95078634 - 95090397   |             | TRUE  | TRUE  |
| 14 | 95078634 - 95090397   | F - 5.56%   | TRUE  | TRUE  |
| 14 | 95078634 - 95090397   |             | FALSE | TRUE  |
| 10 | 63661013 - 63856707   | T - 66.67%  | TRUE  | TRUE  |
| 10 | 63661013 - 63856707   | F - 16.67%  | TRUE  | TRUE  |
| 10 | 63661013 - 63856707   |             | TRUE  | TRUE  |
| 10 | 63661013 - 63856707   |             | FALSE | TRUE  |
| 7  | 99798276 - 99869855   |             | FALSE | TRUE  |
| 7  | 99798276 - 99869855   | F - 5.56%   | TRUE  | TRUE  |
| 8  | 25285364 - 25315992   |             | TRUE  | TRUE  |
| 8  | 25285364 - 25315992   | F - 26.67%  | TRUE  | TRUE  |
| 8  | 25285364 - 25315992   |             | FALSE | TRUE  |
| 22 | 36622255 - 36636000   | F - 15.38%  | TRUE  | TRUE  |
| 22 | 36622255 - 36636000   |             | TRUE  | TRUE  |
| 22 | 36622255 - 36636000   | T - 69.23%  | TRUE  | TRUE  |
| 22 | 36622255 - 36636000   |             | TRUE  | TRUE  |
| 22 | 36622255 - 36636000   | F - 7.69%   | TRUE  | TRUE  |
| 22 | 36622255 - 36636000   | F - 7.69%   | TRUE  | TRUE  |
| 22 | 36622255 - 36636000   |             | TRUE  | TRUE  |
| 22 | 36622255 - 36636000   | F - 46.15%  | TRUE  | TRUE  |
| 1  | 109472130 - 109506111 |             | TRUE  | TRUE  |
| 1  | 109472130 - 109506111 |             | FALSE | TRUE  |
| 1  | 109472130 - 109506111 | F - 43.75%  | FALSE | TRUE  |
| 1  | 109472130 - 109506111 |             | TRUE  | TRUE  |
| 17 | 5185558 - 5289132     |             | TRUE  | TRUE  |
| 17 | 5185558 - 5289132     | F - 6.25%   | TRUE  | TRUE  |
| 6  | 126102307 - 126253176 | F - 19.23%  | TRUE  | TRUE  |
| 6  | 126102307 - 126253176 | F - 11.54%  | TRUE  | TRUE  |
| 6  | 126102307 - 126253176 | F - 3.85%   | FALSE | TRUE  |
| 6  | 126102307 - 126253176 |             | TRUE  | TRUE  |
| 6  | 126102307 - 126253176 |             | TRUE  | TRUE  |
| 7  | 115850547 - 115898837 |             | TRUE  | TRUE  |
| 7  | 115850547 - 115898837 |             | TRUE  | TRUE  |
| 7  | 115850547 - 115898837 | F - 17.65%  | FALSE | TRUE  |
| 7  | 115850547 - 115898837 | F - 17.65%  | TRUE  | TRUE  |
| 2  | 166604101 - 166651192 | F - 30.77%  | TRUE  | TRUE  |
| 2  | 166604101 - 166651192 | F - 38.46%  | TRUE  | TRUE  |
| 2  | 166604101 - 166651192 | F - 30.77%  | TRUE  | TRUE  |
| 2  | 166604101 - 166651192 | F - 38.46%  | TRUE  | TRUE  |
| 2  | 166604101 - 166651192 | T - 69.23%  | TRUE  | FALSE |
| 2  | 166604101 - 166651192 | F - 7.69%   | TRUE  | FALSE |
| 2  | 166604101 - 166651192 | F - 7.69%   | TRUE  | FALSE |
| 2  | 166604101 - 166651192 | F - 46.15%  | TRUE  | TRUE  |
| 2  | 166604101 - 166651192 | F - 7.69%   | TRUE  | TRUE  |
| 2  | 166604101 - 166651192 | F - 30.77%  | TRUE  | TRUE  |

|    |                       |             |       |      |
|----|-----------------------|-------------|-------|------|
| 2  | 166604101 - 166651192 | F - 23.08%  | TRUE  | TRUE |
| 2  | 166604101 - 166651192 |             | TRUE  | TRUE |
| 2  | 166604101 - 166651192 | F - 7.69%   | TRUE  | TRUE |
| 2  | 166604101 - 166651192 | F - 7.69%   | TRUE  | TRUE |
| 2  | 166604101 - 166651192 | F - 7.69%   | TRUE  | TRUE |
| 1  | 169433147 - 169455241 | T - 100.00% | TRUE  | TRUE |
| 1  | 169433147 - 169455241 | F - 33.33%  | TRUE  | TRUE |
| 1  | 169433147 - 169455241 |             | TRUE  | TRUE |
| 1  | 169433147 - 169455241 |             | TRUE  | TRUE |
| 1  | 169433147 - 169455241 |             | TRUE  | TRUE |
| 14 | 104378625 - 104394606 | F - 7.69%   | TRUE  | TRUE |
| 14 | 104378625 - 104394606 |             | FALSE | TRUE |
| 14 | 104378625 - 104394606 | F - 23.08%  | FALSE | TRUE |
| 14 | 104378625 - 104394606 | F - 30.77%  | TRUE  | TRUE |
| 19 | 21324840 - 21368805   | T - 100.00% | TRUE  | TRUE |
| 19 | 21324840 - 21368805   | T - 75.00%  | TRUE  | TRUE |
| 19 | 21324840 - 21368805   |             | FALSE | TRUE |
| 12 | 123459127 - 123464590 |             | FALSE | TRUE |
| 12 | 123459127 - 123464590 | F - 19.05%  | TRUE  | TRUE |
| 8  | 42995556 - 43057998   |             | TRUE  | TRUE |
| 8  | 42995556 - 43057998   | F - 21.43%  | TRUE  | TRUE |
| 15 | 77287021 - 77329673   | T - 84.62%  | FALSE | TRUE |
| 15 | 77287021 - 77329673   |             | FALSE | TRUE |
| 15 | 77287021 - 77329673   | T - 84.62%  | FALSE | TRUE |
| 15 | 77287021 - 77329673   |             | TRUE  | TRUE |
| 15 | 77287021 - 77329673   |             | FALSE | TRUE |
| 15 | 77287021 - 77329673   | T - 84.62%  | FALSE | TRUE |
| 15 | 77287021 - 77329673   |             | FALSE | TRUE |
| 15 | 77287021 - 77329673   |             | FALSE | TRUE |
| 14 | 65405870 - 65409531   |             | FALSE | TRUE |
| 14 | 65405870 - 65409531   | F - 14.29%  | FALSE | TRUE |
| 16 | 28603264 - 28608430   |             | TRUE  | TRUE |
| 16 | 28603264 - 28608430   | T - 100.00% | FALSE | TRUE |
| 16 | 28603264 - 28608430   |             | FALSE | TRUE |
| 4  | 88720702 - 88733601   |             | TRUE  | TRUE |
| 4  | 88720702 - 88733601   | T - 50.00%  | TRUE  | TRUE |
| 1  | 104159954 - 104168402 | T - 83.33%  | FALSE | TRUE |
| 1  | 104159954 - 104168402 |             | FALSE | TRUE |
| 1  | 161732646 - 161736000 | T - 50.00%  | TRUE  | TRUE |
| 1  | 161732646 - 161736000 |             | TRUE  | TRUE |
| 2  | 62727356 - 62762780   | T - 100.00% | TRUE  | TRUE |
| 2  | 62727356 - 62762780   |             | TRUE  | TRUE |
| 2  | 128603840 - 128615731 | F - 12.50%  | TRUE  | TRUE |
| 2  | 128603840 - 128615731 |             | TRUE  | TRUE |
| 7  | 121958478 - 122526813 | T - 95.00%  | TRUE  | TRUE |
| 7  | 121958478 - 122526813 |             | FALSE | TRUE |
| 7  | 121958478 - 122526813 |             | FALSE | TRUE |
| 7  | 121958478 - 122526813 |             | TRUE  | TRUE |
| 8  | 23583844 - 23600555   | T - 100.00% | TRUE  | TRUE |
| 8  | 23583844 - 23600555   |             | FALSE | TRUE |
| 12 | 75956982 - 76377795   | T - 100.00% | FALSE | TRUE |
| 12 | 75956982 - 76377795   |             | FALSE | TRUE |
| 16 | 89803959 - 89883065   | T - 81.82%  | FALSE | TRUE |
| 16 | 89803959 - 89883065   |             | FALSE | TRUE |
| 16 | 89803959 - 89883065   |             | FALSE | TRUE |
| 16 | 89803959 - 89883065   |             | FALSE | TRUE |
| 17 | 12692829 - 12894960   | T - 85.71%  | FALSE | TRUE |
| 17 | 12692829 - 12894960   |             | FALSE | TRUE |



|             |                       |             |       |      |
|-------------|-----------------------|-------------|-------|------|
| 18          | 61637159 - 61672278   | T - 66.67%  | TRUE  | TRUE |
| 18          | 61637159 - 61672278   |             | FALSE | TRUE |
| 18          | 61637159 - 61672278   |             | TRUE  | TRUE |
| 18          | 61637159 - 61672278   |             | TRUE  | TRUE |
| 6_dbb_hap3  | 2839444 - 2842231     | T - 70.97%  | FALSE | TRUE |
| 6_dbb_hap3  | 2839444 - 2842231     |             | FALSE | TRUE |
| 6_mann_hap4 | 2458574 - 2474393     | F - 45.45%  | TRUE  | TRUE |
| 6_mann_hap4 | 2458574 - 2474393     |             | TRUE  | TRUE |
| 6_mcf_hap5  | 2933604 - 2936387     | T - 70.97%  | FALSE | TRUE |
| 6_mcf_hap5  | 2933604 - 2936387     |             | FALSE | TRUE |
| 6_mcf_hap5  | 2492152 - 2507972     | F - 45.45%  | TRUE  | TRUE |
| 6_mcf_hap5  | 2492152 - 2507972     |             | TRUE  | TRUE |
| 6_qbl_hap6  | 1059904 - 1066156     | T - 100.00% | TRUE  | TRUE |
| 6_qbl_hap6  | 1059904 - 1066156     |             | TRUE  | TRUE |
| 1           | 23037331 - 23241823   |             | TRUE  | TRUE |
| 1           | 23037331 - 23241823   | F - 8.33%   | FALSE | TRUE |
| 1           | 23037331 - 23241823   | F - 8.33%   | TRUE  | TRUE |
| 1           | 23037331 - 23241823   | F - 8.33%   | TRUE  | TRUE |
| 1           | 39546988 - 39952810   |             | FALSE | TRUE |
| 1           | 39546988 - 39952810   |             | FALSE | TRUE |
| 1           | 39546988 - 39952810   |             | TRUE  | TRUE |
| 1           | 39546988 - 39952810   |             | TRUE  | TRUE |
| 1           | 39546988 - 39952810   | F - 28.26%  | TRUE  | TRUE |
| 1           | 39546988 - 39952810   |             | TRUE  | TRUE |
| 1           | 39546988 - 39952810   |             | TRUE  | TRUE |
| 1           | 39546988 - 39952810   |             | TRUE  | TRUE |
| 1           | 39546988 - 39952810   | F - 8.70%   | TRUE  | TRUE |
| 1           | 39546988 - 39952810   |             | TRUE  | TRUE |
| 1           | 39546988 - 39952810   | F - 30.43%  | TRUE  | TRUE |
| 1           | 39546988 - 39952810   |             | TRUE  | TRUE |
| 1           | 39546988 - 39952810   |             | FALSE | TRUE |
| 1           | 39546988 - 39952810   |             | TRUE  | TRUE |
| 1           | 39546988 - 39952810   |             | TRUE  | TRUE |
| 1           | 39546988 - 39952810   |             | TRUE  | TRUE |
| 1           | 39546988 - 39952810   | F - 2.17%   | TRUE  | TRUE |
| 1           | 39546988 - 39952810   |             | TRUE  | TRUE |
| 1           | 39546988 - 39952810   |             | FALSE | TRUE |
| 1           | 39546988 - 39952810   |             | TRUE  | TRUE |
| 1           | 39546988 - 39952810   |             | TRUE  | TRUE |
| 1           | 39546988 - 39952810   |             | FALSE | TRUE |
| 1           | 39546988 - 39952810   | F - 4.35%   | TRUE  | TRUE |
| 1           | 39546988 - 39952810   |             | TRUE  | TRUE |
| 1           | 39546988 - 39952810   |             | FALSE | TRUE |
| 1           | 43855553 - 43922666   |             | TRUE  | TRUE |
| 1           | 43855553 - 43922666   |             | TRUE  | TRUE |
| 1           | 43855553 - 43922666   |             | TRUE  | TRUE |
| 1           | 43855553 - 43922666   | F - 18.75%  | TRUE  | TRUE |
| 1           | 43855553 - 43922666   |             | TRUE  | TRUE |
| 1           | 43855553 - 43922666   |             | FALSE | TRUE |
| 1           | 43855553 - 43922666   |             | TRUE  | TRUE |
| 1           | 43855553 - 43922666   |             | TRUE  | TRUE |
| 1           | 43855553 - 43922666   | F - 6.25%   | TRUE  | TRUE |
| 1           | 43855553 - 43922666   |             | TRUE  | TRUE |
| 1           | 43855553 - 43922666   |             | TRUE  | TRUE |
| 1           | 43855553 - 43922666   |             | FALSE | TRUE |
| 1           | 43855553 - 43922666   |             | TRUE  | TRUE |
| 1           | 155216996 - 155225274 | F - 44.44%  | TRUE  | TRUE |

|   |                       |            |       |      |
|---|-----------------------|------------|-------|------|
| 1 | 155216996 - 155225274 |            | TRUE  | TRUE |
| 1 | 155216996 - 155225274 | T - 77.78% | TRUE  | TRUE |
| 1 | 155216996 - 155225274 |            | TRUE  | TRUE |
| 1 | 155216996 - 155225274 |            | FALSE | TRUE |
| 1 | 204100190 - 204121307 | F - 5.26%  | TRUE  | TRUE |
| 1 | 204100190 - 204121307 |            | TRUE  | TRUE |
| 1 | 204100190 - 204121307 |            | TRUE  | TRUE |
| 1 | 204100190 - 204121307 | F - 21.05% | TRUE  | TRUE |
| 1 | 204100190 - 204121307 | F - 5.26%  | FALSE | TRUE |
| 1 | 204100190 - 204121307 | F - 10.53% | FALSE | TRUE |
| 1 | 47681963 - 47697892   | T - 66.67% | FALSE | TRUE |
| 1 | 47681963 - 47697892   |            | TRUE  | TRUE |
| 1 | 47681963 - 47697892   | F - 8.33%  | TRUE  | TRUE |
| 1 | 47681963 - 47697892   | F - 16.67% | FALSE | TRUE |
| 1 | 47681963 - 47697892   | T - 75.00% | TRUE  | TRUE |
| 1 | 47681963 - 47697892   |            | TRUE  | TRUE |
| 1 | 47681963 - 47697892   | F - 33.33% | TRUE  | TRUE |
| 1 | 47681963 - 47697892   | T - 75.00% | TRUE  | TRUE |
| 1 | 47681963 - 47697892   |            | TRUE  | TRUE |
| 1 | 47681963 - 47697892   |            | TRUE  | TRUE |
| 1 | 47681963 - 47697892   |            | FALSE | TRUE |
| 1 | 47681963 - 47697892   |            | FALSE | TRUE |
| 2 | 64068074 - 64118696   | F - 2.63%  | TRUE  | TRUE |
| 2 | 64068074 - 64118696   | F - 7.89%  | TRUE  | TRUE |
| 2 | 64068074 - 64118696   | F - 13.16% | TRUE  | TRUE |
| 2 | 64068074 - 64118696   | F - 39.47% | TRUE  | TRUE |
| 2 | 64068074 - 64118696   |            | TRUE  | TRUE |
| 2 | 64068074 - 64118696   |            | FALSE | TRUE |
| 2 | 64068074 - 64118696   |            | FALSE | TRUE |
| 2 | 64068074 - 64118696   | F - 5.26%  | TRUE  | TRUE |
| 2 | 64068074 - 64118696   |            | TRUE  | TRUE |
| 2 | 64068074 - 64118696   |            | FALSE | TRUE |
| 2 | 64068074 - 64118696   |            | TRUE  | TRUE |
| 2 | 231751215 - 231769232 |            | FALSE | TRUE |
| 2 | 231751215 - 231769232 | F - 20.00% | TRUE  | TRUE |
| 2 | 231751215 - 231769232 |            | FALSE | TRUE |
| 2 | 233470767 - 233547491 | F - 8.33%  | TRUE  | TRUE |
| 2 | 233470767 - 233547491 | F - 16.67% | TRUE  | TRUE |
| 2 | 233470767 - 233547491 | F - 25.00% | TRUE  | TRUE |
| 2 | 233470767 - 233547491 | F - 16.67% | FALSE | TRUE |
| 2 | 233470767 - 233547491 |            | TRUE  | TRUE |
| 3 | 27151576 - 27410951   | F - 33.33% | TRUE  | TRUE |
| 3 | 27151576 - 27410951   |            | FALSE | TRUE |
| 3 | 27151576 - 27410951   |            | FALSE | TRUE |
| 3 | 27151576 - 27410951   | F - 33.33% | TRUE  | TRUE |
| 3 | 27151576 - 27410951   |            | FALSE | TRUE |
| 3 | 27151576 - 27410951   |            | FALSE | TRUE |
| 3 | 27151576 - 27410951   | F - 5.56%  | TRUE  | TRUE |
| 3 | 27151576 - 27410951   | F - 22.22% | TRUE  | TRUE |
| 3 | 27151576 - 27410951   | F - 44.44% | TRUE  | TRUE |
| 3 | 27151576 - 27410951   |            | TRUE  | TRUE |
| 3 | 27151576 - 27410951   | F - 33.33% | FALSE | TRUE |
| 3 | 27151576 - 27410951   | F - 27.78% | TRUE  | TRUE |
| 3 | 27151576 - 27410951   |            | TRUE  | TRUE |
| 3 | 27151576 - 27410951   | F - 22.22% | FALSE | TRUE |
| 3 | 27151576 - 27410951   |            | FALSE | TRUE |
| 3 | 156465132 - 156534851 |            | TRUE  | TRUE |
| 3 | 156465132 - 156534851 | F - 25.00% | FALSE | TRUE |

|   |                       |             |       |      |
|---|-----------------------|-------------|-------|------|
| 3 | 156465132 - 156534851 |             | FALSE | TRUE |
| 3 | 156465132 - 156534851 | F - 25.00%  | TRUE  | TRUE |
| 4 | 15471489 - 15603180   | F - 46.43%  | TRUE  | TRUE |
| 4 | 15471489 - 15603180   | F - 46.43%  | TRUE  | TRUE |
| 4 | 15471489 - 15603180   |             | TRUE  | TRUE |
| 4 | 15471489 - 15603180   | F - 3.57%   | TRUE  | TRUE |
| 4 | 15471489 - 15603180   | F - 42.86%  | TRUE  | TRUE |
| 4 | 15471489 - 15603180   | F - 28.57%  | TRUE  | TRUE |
| 4 | 15471489 - 15603180   | F - 3.57%   | TRUE  | TRUE |
| 4 | 15471489 - 15603180   |             | TRUE  | TRUE |
| 4 | 15471489 - 15603180   |             | TRUE  | TRUE |
| 4 | 15471489 - 15603180   |             | TRUE  | TRUE |
| 4 | 15471489 - 15603180   |             | TRUE  | TRUE |
| 4 | 15471489 - 15603180   | F - 46.43%  | TRUE  | TRUE |
| 4 | 15471489 - 15603180   | F - 28.57%  | TRUE  | TRUE |
| 4 | 15471489 - 15603180   | F - 25.00%  | TRUE  | TRUE |
| 4 | 15471489 - 15603180   |             | TRUE  | TRUE |
| 4 | 15471489 - 15603180   |             | FALSE | TRUE |
| 4 | 37892705 - 38140796   | F - 3.85%   | TRUE  | TRUE |
| 4 | 37892705 - 38140796   | F - 3.85%   | TRUE  | TRUE |
| 4 | 37892705 - 38140796   |             | TRUE  | TRUE |
| 4 | 37892705 - 38140796   |             | TRUE  | TRUE |
| 4 | 37892705 - 38140796   | F - 30.77%  | TRUE  | TRUE |
| 4 | 37892705 - 38140796   | F - 3.85%   | FALSE | TRUE |
| 4 | 37892705 - 38140796   |             | TRUE  | TRUE |
| 4 | 37892705 - 38140796   | F - 19.23%  | TRUE  | TRUE |
| 4 | 42399856 - 42404504   | T - 50.00%  | TRUE  | TRUE |
| 4 | 42399856 - 42404504   |             | FALSE | TRUE |
| 4 | 42399856 - 42404504   | T - 100.00% | TRUE  | TRUE |
| 4 | 170314421 - 170533780 | T - 86.67%  | TRUE  | TRUE |
| 4 | 170314421 - 170533780 |             | FALSE | TRUE |
| 4 | 170314421 - 170533780 |             | TRUE  | TRUE |
| 5 | 95087023 - 95158709   | F - 26.67%  | TRUE  | TRUE |
| 5 | 95087023 - 95158709   |             | TRUE  | TRUE |
| 5 | 95087023 - 95158709   | F - 6.67%   | TRUE  | TRUE |
| 5 | 95087023 - 95158709   | F - 20.00%  | TRUE  | TRUE |
| 5 | 95087023 - 95158709   | F - 13.33%  | TRUE  | TRUE |
| 5 | 125877533 - 125931110 |             | FALSE | TRUE |
| 5 | 125877533 - 125931110 | F - 8.33%   | TRUE  | TRUE |
| 5 | 125877533 - 125931110 | F - 4.17%   | TRUE  | TRUE |
| 5 | 125877533 - 125931110 |             | TRUE  | TRUE |
| 6 | 90277863 - 90348474   | T - 50.00%  | TRUE  | TRUE |
| 6 | 90277863 - 90348474   |             | TRUE  | TRUE |
| 6 | 90277863 - 90348474   |             | FALSE | TRUE |
| 7 | 106809406 - 106842974 |             | TRUE  | TRUE |
| 7 | 106809406 - 106842974 | F - 10.00%  | TRUE  | TRUE |
| 7 | 106809406 - 106842974 |             | TRUE  | TRUE |
| 7 | 44256749 - 44374176   | F - 48.65%  | TRUE  | TRUE |
| 7 | 44256749 - 44374176   |             | FALSE | TRUE |
| 7 | 80371854 - 80551675   | F - 8.33%   | TRUE  | TRUE |
| 7 | 80371854 - 80551675   |             | TRUE  | TRUE |
| 8 | 68085747 - 68255912   |             | TRUE  | TRUE |
| 8 | 68085747 - 68255912   |             | TRUE  | TRUE |
| 8 | 68085747 - 68255912   | T - 69.23%  | TRUE  | TRUE |
| 8 | 68085747 - 68255912   |             | TRUE  | TRUE |
| 8 | 92967195 - 93115514   | F - 7.46%   | TRUE  | TRUE |
| 8 | 92967195 - 93115514   | F - 29.85%  | FALSE | TRUE |
| 8 | 92967195 - 93115514   | F - 26.87%  | FALSE | TRUE |

|   |    |                       |            |       |      |
|---|----|-----------------------|------------|-------|------|
|   | 8  | 92967195 - 93115514   |            | FALSE | TRUE |
|   | 8  | 92967195 - 93115514   |            | FALSE | TRUE |
|   | 8  | 92967195 - 93115514   |            | FALSE | TRUE |
|   | 8  | 144239331 - 144242128 |            | TRUE  | TRUE |
|   | 8  | 144239331 - 144242128 | F - 11.11% | FALSE | TRUE |
| X |    | 110909043 - 111003877 | F - 31.58% | TRUE  | TRUE |
| X |    | 110909043 - 111003877 | F - 21.05% | TRUE  | TRUE |
| X |    | 110909043 - 111003877 |            | TRUE  | TRUE |
| X |    | 110909043 - 111003877 |            | TRUE  | TRUE |
| X |    | 110909043 - 111003877 | F - 21.05% | TRUE  | TRUE |
| X |    | 110909043 - 111003877 |            | TRUE  | TRUE |
| X |    | 110909043 - 111003877 |            | TRUE  | TRUE |
| X |    | 110909043 - 111003877 |            | TRUE  | TRUE |
| X |    | 110909043 - 111003877 | F - 18.42% | TRUE  | TRUE |
| X |    | 110909043 - 111003877 | F - 31.58% | TRUE  | TRUE |
| X |    | 110909043 - 111003877 | F - 26.32% | TRUE  | TRUE |
| X |    | 110909043 - 111003877 | F - 2.63%  | TRUE  | TRUE |
| X |    | 110909043 - 111003877 |            | TRUE  | TRUE |
| X |    | 110909043 - 111003877 |            | TRUE  | TRUE |
| X |    | 110909043 - 111003877 |            | FALSE | TRUE |
| X |    | 110909043 - 111003877 |            | TRUE  | TRUE |
| X |    | 110909043 - 111003877 |            | FALSE | TRUE |
| X |    | 71549366 - 71792953   |            | FALSE | TRUE |
| X |    | 71549366 - 71792953   | F - 40.00% | FALSE | TRUE |
| X |    | 118212598 - 118284542 |            | TRUE  | TRUE |
| X |    | 118212598 - 118284542 | T - 66.67% | FALSE | TRUE |
| X |    | 118212598 - 118284542 |            | FALSE | TRUE |
|   | 10 | 81891477 - 81905115   |            | TRUE  | TRUE |
|   | 10 | 81891477 - 81905115   | T - 83.33% | TRUE  | TRUE |
|   | 10 | 78629359 - 79398353   | F - 2.78%  | TRUE  | TRUE |
|   | 10 | 78629359 - 79398353   | F - 2.78%  | TRUE  | TRUE |
|   | 10 | 78629359 - 79398353   | F - 5.56%  | FALSE | TRUE |
|   | 10 | 78629359 - 79398353   |            | TRUE  | TRUE |
|   | 10 | 78629359 - 79398353   |            | FALSE | TRUE |
|   | 10 | 78629359 - 79398353   | F - 5.56%  | FALSE | TRUE |
|   | 10 | 78629359 - 79398353   |            | TRUE  | TRUE |
|   | 11 | 450280 - 491399       |            | TRUE  | TRUE |
|   | 11 | 450280 - 491399       | T - 75.00% | FALSE | TRUE |
|   | 11 | 450280 - 491399       |            | FALSE | TRUE |
|   | 11 | 44748662 - 44953977   |            | TRUE  | TRUE |
|   | 11 | 44748662 - 44953977   | F - 7.14%  | TRUE  | TRUE |
|   | 11 | 44748662 - 44953977   |            | TRUE  | TRUE |
|   | 11 | 44748662 - 44953977   | F - 14.29% | TRUE  | TRUE |
|   | 11 | 44748662 - 44953977   |            | FALSE | TRUE |
|   | 11 | 71505409 - 71524905   | F - 33.33% | FALSE | TRUE |
|   | 11 | 71505409 - 71524905   |            | TRUE  | TRUE |
|   | 11 | 71505409 - 71524905   |            | FALSE | TRUE |
|   | 11 | 71505409 - 71524905   | F - 33.33% | TRUE  | TRUE |
|   | 11 | 76391210 - 76432833   | F - 33.33% | TRUE  | TRUE |
|   | 11 | 76391210 - 76432833   |            | TRUE  | TRUE |
|   | 11 | 76391210 - 76432833   |            | TRUE  | TRUE |
|   | 11 | 76391210 - 76432833   | F - 33.33% | FALSE | TRUE |
|   | 11 | 76391210 - 76432833   |            | FALSE | TRUE |
|   | 11 | 76391210 - 76432833   |            | FALSE | TRUE |
|   | 11 | 76391210 - 76432833   |            | FALSE | TRUE |
|   | 11 | 76391210 - 76432833   |            | FALSE | TRUE |
|   | 11 | 76391210 - 76432833   | F - 33.33% | FALSE | TRUE |
|   | 12 | 119772517 - 119978852 | F - 25.00% | TRUE  | TRUE |

|    |                       |             |       |       |
|----|-----------------------|-------------|-------|-------|
| 12 | 119772517 - 119978852 | F - 25.00%  | FALSE | TRUE  |
| 12 | 119772517 - 119978852 | F - 25.00%  | TRUE  | TRUE  |
| 12 | 119772517 - 119978852 |             | TRUE  | TRUE  |
| 14 | 23594504 - 23652850   |             | TRUE  | TRUE  |
| 14 | 23594504 - 23652850   |             | TRUE  | TRUE  |
| 14 | 23594504 - 23652850   |             | TRUE  | TRUE  |
| 14 | 23594504 - 23652850   | T - 86.67%  | TRUE  | TRUE  |
| 14 | 23594504 - 23652850   |             | TRUE  | TRUE  |
| 14 | 23594504 - 23652850   | F - 6.67%   | TRUE  | TRUE  |
| 14 | 23594504 - 23652850   | F - 6.67%   | TRUE  | TRUE  |
| 15 | 34817408 - 34875771   |             | TRUE  | TRUE  |
| 15 | 34817408 - 34875771   | T - 100.00% | TRUE  | TRUE  |
| 15 | 34817408 - 34875771   | F - 36.36%  | TRUE  | TRUE  |
| 16 | 238968 - 385566       |             | TRUE  | TRUE  |
| 16 | 238968 - 385566       | F - 44.83%  | TRUE  | TRUE  |
| 16 | 238968 - 385566       | F - 3.45%   | TRUE  | TRUE  |
| 16 | 238968 - 385566       |             | FALSE | TRUE  |
| 16 | 238968 - 385566       | F - 6.90%   | TRUE  | TRUE  |
| 17 | 36861795 - 36886056   |             | TRUE  | TRUE  |
| 17 | 36861795 - 36886056   | F - 35.71%  | TRUE  | TRUE  |
| 17 | 36861795 - 36886056   |             | TRUE  | TRUE  |
| 17 | 36861795 - 36886056   |             | TRUE  | TRUE  |
| 17 | 36861795 - 36886056   |             | TRUE  | TRUE  |
| 20 | 60806978 - 60811355   |             | FALSE | TRUE  |
| 20 | 60806978 - 60811355   |             | FALSE | TRUE  |
| 20 | 60806978 - 60811355   | T - 50.00%  | TRUE  | TRUE  |
| 20 | 43285092 - 43374662   | F - 12.50%  | FALSE | TRUE  |
| 20 | 43285092 - 43374662   |             | FALSE | TRUE  |
| 20 | 43285092 - 43374662   | F - 37.50%  | FALSE | TRUE  |
| 22 | 24083769 - 24093279   | T - 66.67%  | TRUE  | TRUE  |
| 22 | 24083769 - 24093279   |             | FALSE | TRUE  |
| 22 | 30636436 - 30642840   | T - 50.00%  | TRUE  | TRUE  |
| 22 | 30636436 - 30642840   |             | TRUE  | TRUE  |
| 1  | 27648636 - 27662891   | F - 13.33%  | TRUE  | TRUE  |
| 1  | 27648636 - 27662891   |             | FALSE | TRUE  |
| 1  | 27648636 - 27662891   | F - 20.00%  | TRUE  | TRUE  |
| 1  | 41445007 - 41478235   | F - 5.00%   | TRUE  | TRUE  |
| 1  | 41445007 - 41478235   | F - 10.00%  | TRUE  | TRUE  |
| 1  | 41445007 - 41478235   | F - 5.00%   | TRUE  | TRUE  |
| 1  | 41445007 - 41478235   |             | FALSE | TRUE  |
| 1  | 41445007 - 41478235   |             | TRUE  | TRUE  |
| 1  | 41445007 - 41478235   |             | TRUE  | TRUE  |
| 1  | 8921059 - 9288096     | F - 10.53%  | TRUE  | TRUE  |
| 1  | 8921059 - 9288096     |             | TRUE  | TRUE  |
| 1  | 8921059 - 9288096     | F - 10.53%  | TRUE  | TRUE  |
| 1  | 95104017 - 95285837   | T - 66.67%  | TRUE  | TRUE  |
| 1  | 95104017 - 95285837   | T - 66.67%  | TRUE  | TRUE  |
| 1  | 95104017 - 95285837   | F - 44.44%  | TRUE  | TRUE  |
| 1  | 95104017 - 95285837   | F - 33.33%  | TRUE  | FALSE |
| 1  | 95104017 - 95285837   | F - 11.11%  | TRUE  | TRUE  |
| 1  | 95104017 - 95285837   |             | TRUE  | FALSE |
| 1  | 95104017 - 95285837   |             | TRUE  | FALSE |
| 1  | 95104017 - 95285837   |             | TRUE  | TRUE  |
| 1  | 95104017 - 95285837   | F - 11.11%  | TRUE  | FALSE |
| 1  | 95104017 - 95285837   | F - 22.22%  | TRUE  | TRUE  |
| 1  | 95104017 - 95285837   | F - 11.11%  | FALSE | TRUE  |
| 1  | 95104017 - 95285837   |             | TRUE  | TRUE  |
| 1  | 95104017 - 95285837   | F - 11.11%  | TRUE  | TRUE  |

|   |                       |            |       |       |
|---|-----------------------|------------|-------|-------|
| 1 | 95104017 - 95285837   | F - 22.22% | TRUE  | TRUE  |
| 1 | 95104017 - 95285837   | T - 55.56% | TRUE  | TRUE  |
| 1 | 95104017 - 95285837   |            | TRUE  | TRUE  |
| 1 | 95104017 - 95285837   | F - 11.11% | TRUE  | TRUE  |
| 1 | 95104017 - 95285837   |            | TRUE  | TRUE  |
| 1 | 95104017 - 95285837   | F - 22.22% | TRUE  | TRUE  |
| 1 | 95104017 - 95285837   |            | TRUE  | TRUE  |
| 1 | 95104017 - 95285837   |            | TRUE  | TRUE  |
| 1 | 243287730 - 243418708 |            | TRUE  | TRUE  |
| 1 | 243287730 - 243418708 | F - 2.63%  | FALSE | TRUE  |
| 1 | 19197924 - 19229293   | T - 73.33% | TRUE  | TRUE  |
| 1 | 19197924 - 19229293   |            | TRUE  | TRUE  |
| 1 | 19197924 - 19229293   |            | TRUE  | TRUE  |
| 1 | 19197924 - 19229293   | F - 6.67%  | TRUE  | TRUE  |
| 1 | 19197924 - 19229293   | T - 73.33% | TRUE  | TRUE  |
| 1 | 19197924 - 19229293   | F - 13.33% | TRUE  | TRUE  |
| 1 | 19197924 - 19229293   |            | TRUE  | TRUE  |
| 2 | 74119390 - 74146992   | T - 57.14% | TRUE  | TRUE  |
| 2 | 74119390 - 74146992   | T - 64.29% | TRUE  | TRUE  |
| 2 | 74119390 - 74146992   |            | TRUE  | TRUE  |
| 2 | 74119390 - 74146992   | T - 78.57% | TRUE  | FALSE |
| 2 | 74119390 - 74146992   |            | TRUE  | FALSE |
| 2 | 74119390 - 74146992   |            | TRUE  | TRUE  |
| 2 | 74119390 - 74146992   |            | TRUE  | FALSE |
| 2 | 74119390 - 74146992   | F - 7.14%  | TRUE  | FALSE |
| 2 | 74119390 - 74146992   | F - 7.14%  | TRUE  | TRUE  |
| 2 | 74119390 - 74146992   | F - 7.14%  | TRUE  | FALSE |
| 2 | 74119390 - 74146992   | F - 14.29% | TRUE  | TRUE  |
| 2 | 74119390 - 74146992   | F - 21.43% | TRUE  | TRUE  |
| 2 | 74119390 - 74146992   |            | TRUE  | TRUE  |
| 2 | 74119390 - 74146992   | F - 7.14%  | TRUE  | TRUE  |
| 2 | 74119390 - 74146992   |            | TRUE  | TRUE  |
| 2 | 74119390 - 74146992   |            | TRUE  | TRUE  |
| 2 | 74119390 - 74146992   |            | FALSE | TRUE  |
| 2 | 74119390 - 74146992   |            | FALSE | TRUE  |
| 2 | 98108235 - 98206428   |            | TRUE  | TRUE  |
| 2 | 98108235 - 98206428   | F - 23.08% | TRUE  | TRUE  |
| 2 | 98108235 - 98206428   |            | TRUE  | TRUE  |
| 2 | 98108235 - 98206428   |            | TRUE  | TRUE  |
| 2 | 98108235 - 98206428   |            | TRUE  | TRUE  |
| 2 | 98108235 - 98206428   |            | TRUE  | TRUE  |
| 2 | 98108235 - 98206428   | F - 23.08% | TRUE  | TRUE  |
| 2 | 98108235 - 98206428   |            | TRUE  | TRUE  |
| 2 | 98108235 - 98206428   | F - 15.38% | TRUE  | TRUE  |
| 2 | 98108235 - 98206428   | F - 46.15% | TRUE  | TRUE  |
| 2 | 98108235 - 98206428   | F - 23.08% | TRUE  | TRUE  |
| 2 | 98108235 - 98206428   |            | FALSE | TRUE  |
| 2 | 98108235 - 98206428   |            | TRUE  | TRUE  |
| 2 | 98108235 - 98206428   |            | TRUE  | TRUE  |
| 2 | 98108235 - 98206428   |            | TRUE  | TRUE  |
| 2 | 98108235 - 98206428   | F - 15.38% | TRUE  | TRUE  |
| 2 | 98108235 - 98206428   | F - 15.38% | TRUE  | TRUE  |
| 2 | 98108235 - 98206428   | F - 23.08% | TRUE  | TRUE  |
| 2 | 98108235 - 98206428   |            | TRUE  | TRUE  |
| 3 | 156543270 - 156763918 | F - 18.18% | TRUE  | TRUE  |
| 3 | 156543270 - 156763918 | F - 9.09%  | FALSE | TRUE  |
| 3 | 156543270 - 156763918 | F - 36.36% | FALSE | TRUE  |
| 3 | 156543270 - 156763918 | F - 27.27% | FALSE | TRUE  |

|   |                       |            |       |       |
|---|-----------------------|------------|-------|-------|
| 3 | 156543270 - 156763918 |            | FALSE | TRUE  |
| 3 | 156543270 - 156763918 | F - 45.45% | FALSE | TRUE  |
| 3 | 156543270 - 156763918 | T - 54.55% | TRUE  | TRUE  |
| 3 | 156543270 - 156763918 | T - 63.64% | TRUE  | TRUE  |
| 3 | 170075466 - 170114637 | F - 6.67%  | TRUE  | TRUE  |
| 3 | 170075466 - 170114637 | F - 6.67%  | TRUE  | TRUE  |
| 3 | 170075466 - 170114637 | F - 26.67% | TRUE  | TRUE  |
| 3 | 170075466 - 170114637 |            | TRUE  | FALSE |
| 3 | 170075466 - 170114637 | T - 53.33% | TRUE  | TRUE  |
| 3 | 170075466 - 170114637 |            | TRUE  | TRUE  |
| 3 | 170075466 - 170114637 |            | FALSE | TRUE  |
| 3 | 197687071 - 197770591 |            | FALSE | TRUE  |
| 3 | 197687071 - 197770591 | F - 37.50% | TRUE  | TRUE  |
| 3 | 197687071 - 197770591 | T - 50.00% | TRUE  | TRUE  |
| 4 | 20697905 - 20754530   | F - 42.86% | TRUE  | TRUE  |
| 4 | 20697905 - 20754530   |            | FALSE | TRUE  |
| 4 | 20697905 - 20754530   | F - 2.38%  | TRUE  | TRUE  |
| 4 | 41258430 - 41270472   | F - 5.88%  | TRUE  | TRUE  |
| 4 | 41258430 - 41270472   |            | TRUE  | FALSE |
| 4 | 41258430 - 41270472   | T - 88.24% | TRUE  | TRUE  |
| 4 | 41258430 - 41270472   | F - 5.88%  | TRUE  | TRUE  |
| 4 | 41258430 - 41270472   |            | TRUE  | TRUE  |
| 4 | 41258430 - 41270472   | F - 23.53% | TRUE  | TRUE  |
| 4 | 41258430 - 41270472   |            | FALSE | TRUE  |
| 4 | 186125391 - 186291339 |            | TRUE  | TRUE  |
| 4 | 186125391 - 186291339 | T - 80.00% | FALSE | TRUE  |
| 4 | 186125391 - 186291339 |            | FALSE | TRUE  |
| 4 | 99992130 - 100009952  |            | TRUE  | TRUE  |
| 4 | 99992130 - 100009952  | F - 18.75% | TRUE  | TRUE  |
| 4 | 76871059 - 76912115   |            | TRUE  | TRUE  |
| 4 | 76871059 - 76912115   | T - 53.85% | TRUE  | TRUE  |
| 5 | 145316126 - 145461354 | F - 31.25% | TRUE  | TRUE  |
| 5 | 145316126 - 145461354 |            | FALSE | TRUE  |
| 5 | 145316126 - 145461354 |            | TRUE  | TRUE  |
| 5 | 145316126 - 145461354 | F - 31.25% | TRUE  | TRUE  |
| 5 | 145316126 - 145461354 |            | TRUE  | TRUE  |
| 5 | 145316126 - 145461354 |            | TRUE  | TRUE  |
| 5 | 145316126 - 145461354 | F - 31.25% | TRUE  | TRUE  |
| 5 | 145316126 - 145461354 |            | FALSE | TRUE  |
| 5 | 145316126 - 145461354 |            | FALSE | TRUE  |
| 5 | 145316126 - 145461354 |            | FALSE | TRUE  |
| 5 | 98190908 - 98262240   | F - 31.25% | TRUE  | TRUE  |
| 5 | 98190908 - 98262240   |            | TRUE  | TRUE  |
| 8 | 94870035 - 94938296   | F - 5.00%  | FALSE | TRUE  |
| 8 | 94870035 - 94938296   |            | TRUE  | TRUE  |
| 8 | 26605667 - 26724790   | F - 47.37% | FALSE | TRUE  |
| 8 | 26605667 - 26724790   | F - 10.53% | FALSE | TRUE  |
| 8 | 26605667 - 26724790   |            | FALSE | TRUE  |
| 8 | 26605667 - 26724790   |            | TRUE  | TRUE  |
| 8 | 30631973 - 30671830   | F - 7.69%  | TRUE  | TRUE  |
| 8 | 30631973 - 30671830   |            | TRUE  | TRUE  |
| 8 | 91634223 - 91803860   | F - 33.33% | TRUE  | TRUE  |
| 8 | 91634223 - 91803860   | F - 11.11% | TRUE  | TRUE  |
| 8 | 91634223 - 91803860   | F - 44.44% | TRUE  | TRUE  |
| 8 | 91634223 - 91803860   | F - 11.11% | FALSE | TRUE  |
| 8 | 91634223 - 91803860   | T - 55.56% | TRUE  | TRUE  |
| 8 | 91634223 - 91803860   | F - 11.11% | TRUE  | TRUE  |
| 8 | 91634223 - 91803860   | F - 22.22% | TRUE  | TRUE  |

|    |                       |             |       |       |
|----|-----------------------|-------------|-------|-------|
| 8  | 91634223 - 91803860   | F - 22.22%  | TRUE  | TRUE  |
| 8  | 91634223 - 91803860   |             | TRUE  | TRUE  |
| 9  | 2015342 - 2193624     | F - 20.00%  | TRUE  | TRUE  |
| 9  | 2015342 - 2193624     | F - 8.00%   | TRUE  | TRUE  |
| 9  | 2015342 - 2193624     |             | TRUE  | TRUE  |
| 9  | 2422702 - 2622373     | F - 28.57%  | TRUE  | TRUE  |
| 9  | 2422702 - 2622373     |             | TRUE  | TRUE  |
| 9  | 2422702 - 2622373     | F - 14.29%  | TRUE  | TRUE  |
| 9  | 2422702 - 2622373     | F - 42.86%  | TRUE  | FALSE |
| 9  | 2422702 - 2622373     | T - 57.14%  | TRUE  | TRUE  |
| 9  | 2422702 - 2622373     | F - 42.86%  | FALSE | TRUE  |
| 9  | 2422702 - 2622373     | F - 42.86%  | TRUE  | TRUE  |
| 9  | 2422702 - 2622373     | F - 14.29%  | TRUE  | TRUE  |
| 9  | 2422702 - 2622373     | F - 28.57%  | TRUE  | TRUE  |
| 9  | 2422702 - 2622373     |             | TRUE  | TRUE  |
| 9  | 2422702 - 2622373     |             | TRUE  | TRUE  |
| 9  | 2422702 - 2622373     |             | FALSE | TRUE  |
| 9  | 115865618 - 115873957 | T - 100.00% | TRUE  | TRUE  |
| 9  | 115865618 - 115873957 |             | FALSE | TRUE  |
| 9  | 139698379 - 139703300 | T - 100.00% | TRUE  | TRUE  |
| 9  | 139698379 - 139703300 |             | TRUE  | TRUE  |
| 10 | 33247414 - 33371030   | F - 33.33%  | TRUE  | TRUE  |
| 10 | 33247414 - 33371030   |             | TRUE  | TRUE  |
| 10 | 74451889 - 74647452   |             | TRUE  | TRUE  |
| 10 | 74451889 - 74647452   |             | TRUE  | TRUE  |
| 10 | 74451889 - 74647452   | F - 11.11%  | TRUE  | TRUE  |
| 10 | 82167585 - 82192753   | F - 15.38%  | TRUE  | TRUE  |
| 10 | 82167585 - 82192753   |             | TRUE  | TRUE  |
| 10 | 82167585 - 82192753   |             | FALSE | TRUE  |
| 10 | 128593978 - 129250781 | F - 10.00%  | FALSE | TRUE  |
| 10 | 128593978 - 129250781 |             | TRUE  | TRUE  |
| 10 | 128593978 - 129250781 |             | TRUE  | TRUE  |
| 10 | 81315608 - 81320163   | F - 35.71%  | TRUE  | TRUE  |
| 10 | 81315608 - 81320163   |             | FALSE | TRUE  |
| 11 | 85339622 - 85347583   |             | FALSE | TRUE  |
| 11 | 85339622 - 85347583   | F - 16.67%  | FALSE | TRUE  |
| 11 | 85339622 - 85347583   | T - 83.33%  | TRUE  | TRUE  |
| 11 | 111744780 - 111750181 | T - 60.00%  | FALSE | TRUE  |
| 11 | 111744780 - 111750181 |             | FALSE | TRUE  |
| 11 | 111744780 - 111750181 | T - 100.00% | FALSE | TRUE  |
| 12 | 51317255 - 51326300   | F - 33.33%  | TRUE  | TRUE  |
| 12 | 51317255 - 51326300   | T - 83.33%  | TRUE  | TRUE  |
| 12 | 51317255 - 51326300   |             | TRUE  | TRUE  |
| 12 | 51317255 - 51326300   |             | TRUE  | TRUE  |
| 12 | 51317255 - 51326300   | T - 50.00%  | TRUE  | TRUE  |
| 12 | 51317255 - 51326300   | F - 16.67%  | FALSE | TRUE  |
| 12 | 8325133 - 8332642     |             | TRUE  | TRUE  |
| 12 | 8325133 - 8332642     | T - 100.00% | TRUE  | TRUE  |
| 12 | 8325133 - 8332642     |             | FALSE | TRUE  |
| 12 | 8325133 - 8332642     | T - 100.00% | TRUE  | TRUE  |
| 14 | 21819631 - 21852425   |             | TRUE  | TRUE  |
| 14 | 21819631 - 21852425   |             | FALSE | TRUE  |
| 14 | 21819631 - 21852425   |             | FALSE | TRUE  |
| 14 | 21819631 - 21852425   | F - 40.00%  | TRUE  | TRUE  |
| 14 | 21819631 - 21852425   |             | TRUE  | TRUE  |
| 14 | 21819631 - 21852425   |             | TRUE  | TRUE  |
| 14 | 21819631 - 21852425   |             | FALSE | TRUE  |
| 14 | 21819631 - 21852425   |             | TRUE  | TRUE  |



|            |                     |             |       |      |
|------------|---------------------|-------------|-------|------|
| 14         | 65412532 - 65439132 | T - 87.50%  | TRUE  | TRUE |
| 14         | 65412532 - 65439132 | F - 12.50%  | TRUE  | TRUE |
| 14         | 65412532 - 65439132 | F - 37.50%  | TRUE  | TRUE |
| 14         | 65412532 - 65439132 |             | TRUE  | TRUE |
| 14         | 65412532 - 65439132 | F - 25.00%  | TRUE  | TRUE |
| 14         | 65412532 - 65439132 |             | TRUE  | TRUE |
| 14         | 65412532 - 65439132 | T - 62.50%  | TRUE  | TRUE |
| 14         | 65412532 - 65439132 | F - 12.50%  | TRUE  | TRUE |
| 14         | 65412532 - 65439132 | F - 12.50%  | TRUE  | TRUE |
| 14         | 65412532 - 65439132 | F - 12.50%  | TRUE  | TRUE |
| 14         | 65412532 - 65439132 | F - 12.50%  | TRUE  | TRUE |
| 14         | 65412532 - 65439132 | F - 12.50%  | TRUE  | TRUE |
| 14         | 65412532 - 65439132 |             | TRUE  | TRUE |
| 15         | 59063393 - 59154099 |             | TRUE  | TRUE |
| 15         | 59063393 - 59154099 |             | TRUE  | TRUE |
| 15         | 59063393 - 59154099 | T - 62.50%  | TRUE  | TRUE |
| 15         | 59063393 - 59154099 |             | FALSE | TRUE |
| 15         | 59063393 - 59154099 |             | TRUE  | TRUE |
| 17         | 15848231 - 15879210 | T - 100.00% | TRUE  | TRUE |
| 17         | 15848231 - 15879210 |             | TRUE  | TRUE |
| 17         | 56078280 - 56084707 |             | TRUE  | TRUE |
| 17         | 56078280 - 56084707 | T - 50.00%  | TRUE  | TRUE |
| 17         | 61957572 - 61959295 | T - 100.00% | TRUE  | TRUE |
| 17         | 61957572 - 61959295 |             | TRUE  | TRUE |
| 17         | 80059346 - 80170689 | F - 35.71%  | TRUE  | TRUE |
| 17         | 80059346 - 80170689 |             | FALSE | TRUE |
| 17         | 80059346 - 80170689 |             | TRUE  | TRUE |
| 17         | 3468740 - 3500392   |             | FALSE | TRUE |
| 17         | 3468740 - 3500392   | F - 15.38%  | FALSE | TRUE |
| 18         | 48494386 - 48514491 | T - 100.00% | TRUE  | TRUE |
| 18         | 48494386 - 48514491 |             | TRUE  | TRUE |
| 18         | 48494386 - 48514491 | T - 50.00%  | FALSE | TRUE |
| 19         | 24216247 - 24312654 | F - 18.18%  | TRUE  | TRUE |
| 19         | 24216247 - 24312654 | F - 18.18%  | FALSE | TRUE |
| 19         | 24216247 - 24312654 |             | FALSE | TRUE |
| 19         | 24216247 - 24312654 |             | FALSE | TRUE |
| 19         | 5993175 - 6110664   |             | TRUE  | TRUE |
| 19         | 5993175 - 6110664   | T - 80.00%  | TRUE  | TRUE |
| 20         | 42086504 - 42092245 |             | TRUE  | TRUE |
| 20         | 42086504 - 42092245 | F - 40.00%  | TRUE  | TRUE |
| 21         | 34870940 - 34915797 | F - 3.70%   | FALSE | TRUE |
| 21         | 34870940 - 34915797 |             | FALSE | TRUE |
| 21         | 34870940 - 34915797 | F - 40.74%  | TRUE  | TRUE |
| 21         | 34870940 - 34915797 | F - 40.74%  | TRUE  | TRUE |
| 21         | 34870940 - 34915797 | F - 7.41%   | FALSE | TRUE |
| 6_cox_hap2 | 2624976 - 2640772   | F - 45.45%  | TRUE  | TRUE |
| 6_cox_hap2 | 2624976 - 2640772   |             | TRUE  | TRUE |
| 6_dbb_hap3 | 2407346 - 2423143   | F - 45.45%  | TRUE  | TRUE |
| 6_dbb_hap3 | 2407346 - 2423143   |             | TRUE  | TRUE |
| 6_qbl_hap6 | 1266664 - 1270636   | T - 66.67%  | TRUE  | TRUE |
| 6_qbl_hap6 | 1266664 - 1270636   | T - 66.67%  | TRUE  | TRUE |
| 6_qbl_hap6 | 1266664 - 1270636   | F - 33.33%  | FALSE | TRUE |
| 6_qbl_hap6 | 1266664 - 1270636   |             | TRUE  | TRUE |
| 6_qbl_hap6 | 1266664 - 1270636   |             | TRUE  | TRUE |
| 6_qbl_hap6 | 1266664 - 1270636   | F - 33.33%  | TRUE  | TRUE |
| 1          | 63249777 - 63339980 | F - 11.11%  | FALSE | TRUE |
| 1          | 63249777 - 63339980 |             | FALSE | TRUE |
| 1          | 44457172 - 44497139 |             | FALSE | TRUE |
| 1          | 44457172 - 44497139 | F - 4.76%   | TRUE  | TRUE |

|   |                       |             |       |      |
|---|-----------------------|-------------|-------|------|
| 1 | 44457172 - 44497139   |             | TRUE  | TRUE |
| 1 | 44457172 - 44497139   | F - 9.52%   | FALSE | TRUE |
| 1 | 44457172 - 44497139   |             | TRUE  | TRUE |
| 1 | 44457172 - 44497139   |             | FALSE | TRUE |
| 1 | 44457172 - 44497139   |             | TRUE  | TRUE |
| 1 | 44457172 - 44497139   |             | FALSE | TRUE |
| 2 | 9778901 - 9789568     | T - 100.00% | TRUE  | TRUE |
| 2 | 9778901 - 9789568     |             | TRUE  | TRUE |
| 2 | 44589043 - 44999731   | F - 30.77%  | TRUE  | TRUE |
| 2 | 44589043 - 44999731   | F - 23.08%  | TRUE  | TRUE |
| 2 | 44589043 - 44999731   | F - 7.69%   | TRUE  | TRUE |
| 2 | 44589043 - 44999731   | F - 23.08%  | TRUE  | TRUE |
| 2 | 44589043 - 44999731   | F - 23.08%  | TRUE  | TRUE |
| 2 | 44589043 - 44999731   | F - 7.69%   | TRUE  | TRUE |
| 2 | 44589043 - 44999731   | F - 7.69%   | TRUE  | TRUE |
| 2 | 44589043 - 44999731   | F - 7.69%   | FALSE | TRUE |
| 2 | 44589043 - 44999731   | F - 7.69%   | TRUE  | TRUE |
| 2 | 44589043 - 44999731   | T - 61.54%  | TRUE  | TRUE |
| 2 | 44589043 - 44999731   |             | TRUE  | TRUE |
| 2 | 201170604 - 201346986 | F - 18.92%  | TRUE  | TRUE |
| 2 | 201170604 - 201346986 |             | FALSE | TRUE |
| 2 | 201170604 - 201346986 |             | TRUE  | TRUE |
| 2 | 20110021 - 20189892   | T - 58.33%  | TRUE  | TRUE |
| 2 | 20110021 - 20189892   |             | TRUE  | TRUE |
| 2 | 85825670 - 85830319   |             | TRUE  | TRUE |
| 2 | 85825670 - 85830319   |             | FALSE | TRUE |
| 2 | 85825670 - 85830319   | T - 56.25%  | TRUE  | TRUE |
| 2 | 175664042 - 175870107 | F - 43.48%  | TRUE  | TRUE |
| 2 | 175664042 - 175870107 | F - 43.48%  | TRUE  | TRUE |
| 2 | 175664042 - 175870107 |             | TRUE  | TRUE |
| 2 | 175664042 - 175870107 | F - 34.78%  | FALSE | TRUE |
| 2 | 175664042 - 175870107 |             | TRUE  | TRUE |
| 2 | 175664042 - 175870107 | F - 4.35%   | TRUE  | TRUE |
| 2 | 175664042 - 175870107 | F - 4.35%   | FALSE | TRUE |
| 2 | 175664042 - 175870107 | F - 30.43%  | TRUE  | TRUE |
| 2 | 175664042 - 175870107 | F - 30.43%  | TRUE  | TRUE |
| 2 | 175664042 - 175870107 | F - 4.35%   | FALSE | TRUE |
| 2 | 175664042 - 175870107 | F - 4.35%   | FALSE | TRUE |
| 2 | 175664042 - 175870107 | F - 8.70%   | TRUE  | TRUE |
| 2 | 202564986 - 202645912 | T - 50.00%  | TRUE  | TRUE |
| 2 | 202564986 - 202645912 |             | TRUE  | TRUE |
| 2 | 202564986 - 202645912 |             | FALSE | TRUE |
| 2 | 202564986 - 202645912 |             | TRUE  | TRUE |
| 2 | 202564986 - 202645912 | F - 44.44%  | TRUE  | TRUE |
| 2 | 202564986 - 202645912 |             | TRUE  | TRUE |
| 2 | 202564986 - 202645912 |             | FALSE | TRUE |
| 2 | 202564986 - 202645912 |             | FALSE | TRUE |
| 2 | 202564986 - 202645912 |             | TRUE  | TRUE |
| 2 | 234384165 - 234475428 |             | FALSE | TRUE |
| 2 | 234384165 - 234475428 | F - 4.35%   | FALSE | TRUE |
| 2 | 234384165 - 234475428 | F - 26.09%  | TRUE  | TRUE |
| 2 | 61372243 - 61391964   | F - 28.57%  | TRUE  | TRUE |
| 2 | 61372243 - 61391964   |             | TRUE  | TRUE |
| 2 | 61372243 - 61391964   | F - 42.86%  | TRUE  | TRUE |
| 2 | 61372243 - 61391964   |             | FALSE | TRUE |
| 3 | 119187785 - 119213555 | T - 61.54%  | TRUE  | TRUE |
| 3 | 119187785 - 119213555 |             | FALSE | TRUE |
| 3 | 119187785 - 119213555 |             | FALSE | TRUE |

|   |                       |             |       |       |
|---|-----------------------|-------------|-------|-------|
| 3 | 135074909 - 135158730 | F - 33.33%  | TRUE  | TRUE  |
| 3 | 135074909 - 135158730 |             | TRUE  | TRUE  |
| 3 | 135074909 - 135158730 | T - 100.00% | TRUE  | TRUE  |
| 3 | 42749761 - 42814745   |             | FALSE | TRUE  |
| 3 | 42749761 - 42814745   | F - 33.33%  | FALSE | TRUE  |
| 4 | 41361624 - 41702061   |             | FALSE | TRUE  |
| 4 | 41361624 - 41702061   |             | FALSE | TRUE  |
| 4 | 41361624 - 41702061   |             | TRUE  | TRUE  |
| 4 | 41361624 - 41702061   | F - 21.62%  | TRUE  | TRUE  |
| 4 | 41361624 - 41702061   | F - 2.70%   | TRUE  | TRUE  |
| 4 | 41361624 - 41702061   |             | FALSE | TRUE  |
| 4 | 184560788 - 184580378 |             | TRUE  | TRUE  |
| 4 | 184560788 - 184580378 | F - 7.69%   | FALSE | TRUE  |
| 5 | 49961733 - 50142356   |             | TRUE  | TRUE  |
| 5 | 49961733 - 50142356   | F - 13.89%  | TRUE  | TRUE  |
| 5 | 49961733 - 50142356   | F - 2.78%   | TRUE  | TRUE  |
| 5 | 49961733 - 50142356   | F - 2.78%   | TRUE  | TRUE  |
| 5 | 49961733 - 50142356   |             | TRUE  | TRUE  |
| 5 | 49961733 - 50142356   |             | TRUE  | TRUE  |
| 5 | 49961733 - 50142356   |             | TRUE  | TRUE  |
| 5 | 49961733 - 50142356   | F - 2.78%   | TRUE  | TRUE  |
| 5 | 49961733 - 50142356   | F - 5.56%   | TRUE  | TRUE  |
| 5 | 49961733 - 50142356   | F - 2.78%   | TRUE  | TRUE  |
| 5 | 49961733 - 50142356   | F - 2.78%   | TRUE  | TRUE  |
| 5 | 49961733 - 50142356   |             | FALSE | TRUE  |
| 5 | 49961733 - 50142356   |             | TRUE  | TRUE  |
| 5 | 133860003 - 133918918 | F - 5.56%   | TRUE  | TRUE  |
| 5 | 133860003 - 133918918 | F - 11.11%  | FALSE | TRUE  |
| 5 | 133860003 - 133918918 | F - 33.33%  | FALSE | TRUE  |
| 5 | 133860003 - 133918918 | F - 11.11%  | TRUE  | FALSE |
| 5 | 133860003 - 133918918 | F - 5.56%   | TRUE  | TRUE  |
| 5 | 133860003 - 133918918 |             | FALSE | TRUE  |
| 5 | 133860003 - 133918918 |             | TRUE  | TRUE  |
| 5 | 32354456 - 32444867   |             | FALSE | TRUE  |
| 5 | 32354456 - 32444867   | F - 6.67%   | FALSE | TRUE  |
| 5 | 139712428 - 139726216 |             | TRUE  | TRUE  |
| 5 | 139712428 - 139726216 | F - 14.29%  | TRUE  | TRUE  |
| 6 | 43573053 - 43596936   |             | FALSE | TRUE  |
| 6 | 43573053 - 43596936   | F - 5.88%   | TRUE  | TRUE  |
| 7 | 27135266 - 27139877   |             | FALSE | TRUE  |
| 7 | 27135266 - 27139877   | T - 57.14%  | TRUE  | TRUE  |
| 7 | 27135266 - 27139877   | T - 85.71%  | TRUE  | TRUE  |
| 7 | 27135266 - 27139877   | T - 71.43%  | TRUE  | TRUE  |
| 7 | 50657760 - 50861159   | F - 3.13%   | TRUE  | TRUE  |
| 7 | 50657760 - 50861159   |             | TRUE  | TRUE  |
| 7 | 50657760 - 50861159   | F - 9.38%   | TRUE  | TRUE  |
| 7 | 50657760 - 50861159   |             | TRUE  | TRUE  |
| 7 | 50657760 - 50861159   | F - 6.25%   | TRUE  | TRUE  |
| 7 | 50657760 - 50861159   |             | TRUE  | TRUE  |
| 7 | 50657760 - 50861159   | F - 12.50%  | TRUE  | TRUE  |
| 7 | 50657760 - 50861159   | T - 62.50%  | TRUE  | TRUE  |
| 7 | 50657760 - 50861159   | F - 12.50%  | TRUE  | TRUE  |
| 7 | 50657760 - 50861159   | F - 9.38%   | TRUE  | TRUE  |
| 7 | 50657760 - 50861159   | F - 6.25%   | TRUE  | TRUE  |
| 7 | 50657760 - 50861159   |             | TRUE  | TRUE  |
| 7 | 50657760 - 50861159   | F - 9.38%   | TRUE  | TRUE  |
| 7 | 50657760 - 50861159   |             | TRUE  | TRUE  |
| 7 | 50657760 - 50861159   |             | TRUE  | TRUE  |

|    |                       |             |       |       |
|----|-----------------------|-------------|-------|-------|
| 7  | 50657760 - 50861159   |             | TRUE  | TRUE  |
| 7  | 50657760 - 50861159   | F - 9.38%   | TRUE  | TRUE  |
| 7  | 50657760 - 50861159   | F - 3.13%   | TRUE  | TRUE  |
| 7  | 50657760 - 50861159   | F - 12.50%  | FALSE | TRUE  |
| 7  | 50657760 - 50861159   | F - 3.13%   | TRUE  | TRUE  |
| 7  | 50657760 - 50861159   | F - 12.50%  | TRUE  | TRUE  |
| 7  | 50657760 - 50861159   | F - 3.13%   | TRUE  | TRUE  |
| 7  | 50657760 - 50861159   |             | FALSE | TRUE  |
| 7  | 50657760 - 50861159   | F - 3.13%   | FALSE | TRUE  |
| 7  | 50657760 - 50861159   | F - 3.13%   | FALSE | TRUE  |
| 7  | 50657760 - 50861159   |             | TRUE  | TRUE  |
| 7  | 99775186 - 99812010   | F - 37.93%  | TRUE  | TRUE  |
| 7  | 99775186 - 99812010   |             | TRUE  | TRUE  |
| 7  | 99775186 - 99812010   | F - 48.28%  | TRUE  | TRUE  |
| 7  | 99775186 - 99812010   | F - 41.38%  | TRUE  | TRUE  |
| 7  | 99775186 - 99812010   |             | FALSE | TRUE  |
| 7  | 99775186 - 99812010   |             | FALSE | TRUE  |
| 7  | 99775186 - 99812010   |             | FALSE | TRUE  |
| 8  | 12940870 - 13373167   | F - 30.43%  | TRUE  | TRUE  |
| 8  | 12940870 - 13373167   | F - 34.78%  | TRUE  | TRUE  |
| 8  | 12940870 - 13373167   | F - 4.35%   | TRUE  | TRUE  |
| 8  | 12940870 - 13373167   |             | TRUE  | TRUE  |
| 8  | 12940870 - 13373167   |             | TRUE  | TRUE  |
| 8  | 12940870 - 13373167   |             | TRUE  | TRUE  |
| 8  | 12940870 - 13373167   | F - 4.35%   | TRUE  | TRUE  |
| 8  | 12940870 - 13373167   | F - 4.35%   | TRUE  | TRUE  |
| 8  | 12940870 - 13373167   | F - 30.43%  | TRUE  | TRUE  |
| 8  | 12940870 - 13373167   |             | FALSE | TRUE  |
| 8  | 12940870 - 13373167   | F - 21.74%  | TRUE  | TRUE  |
| 8  | 12940870 - 13373167   | F - 26.09%  | TRUE  | TRUE  |
| 8  | 12940870 - 13373167   |             | TRUE  | TRUE  |
| 8  | 12940870 - 13373167   |             | TRUE  | TRUE  |
| 8  | 12940870 - 13373167   | F - 4.35%   | FALSE | TRUE  |
| 9  | 34457412 - 34520982   |             | FALSE | TRUE  |
| 9  | 34457412 - 34520982   | T - 71.43%  | FALSE | TRUE  |
| 9  | 34457412 - 34520982   |             | FALSE | TRUE  |
| 9  | 34457412 - 34520982   |             | FALSE | TRUE  |
| 9  | 34457412 - 34520982   |             | TRUE  | TRUE  |
| 9  | 34457412 - 34520982   |             | FALSE | TRUE  |
| X  | 43514158 - 43606068   | T - 75.00%  | TRUE  | TRUE  |
| X  | 43514158 - 43606068   | F - 12.50%  | TRUE  | TRUE  |
| X  | 43514158 - 43606068   |             | TRUE  | FALSE |
| X  | 43514158 - 43606068   |             | TRUE  | TRUE  |
| X  | 43514158 - 43606068   | T - 50.00%  | FALSE | TRUE  |
| X  | 43514158 - 43606068   | F - 12.50%  | TRUE  | TRUE  |
| X  | 43514158 - 43606068   | F - 37.50%  | TRUE  | TRUE  |
| X  | 2137555 - 2420846     | F - 15.00%  | TRUE  | TRUE  |
| X  | 2137555 - 2420846     |             | TRUE  | TRUE  |
| X  | 2137555 - 2420846     |             | TRUE  | TRUE  |
| X  | 2137555 - 2420846     |             | TRUE  | TRUE  |
| X  | 2137555 - 2420846     | F - 35.00%  | TRUE  | TRUE  |
| X  | 2137555 - 2420846     |             | TRUE  | TRUE  |
| X  | 2137555 - 2420846     |             | TRUE  | TRUE  |
| 10 | 97889472 - 97923517   | T - 83.33%  | TRUE  | TRUE  |
| 10 | 97889472 - 97923517   |             | FALSE | TRUE  |
| 10 | 134779038 - 134789858 | T - 100.00% | FALSE | TRUE  |
| 10 | 134779038 - 134789858 |             | FALSE | TRUE  |
| 11 | 12297627 - 12380691   |             | FALSE | TRUE  |

|    |                       |             |       |       |
|----|-----------------------|-------------|-------|-------|
| 11 | 12297627 - 12380691   | F - 33.33%  | TRUE  | TRUE  |
| 11 | 86666663 - 86712001   | T - 50.00%  | TRUE  | TRUE  |
| 11 | 86666663 - 86712001   | T - 50.00%  | TRUE  | TRUE  |
| 11 | 86666663 - 86712001   |             | TRUE  | TRUE  |
| 12 | 22852793 - 23327057   | F - 20.00%  | FALSE | TRUE  |
| 12 | 22852793 - 23327057   |             | FALSE | TRUE  |
| 12 | 107712190 - 108053419 |             | TRUE  | TRUE  |
| 12 | 107712190 - 108053419 | F - 42.86%  | TRUE  | TRUE  |
| 12 | 107712190 - 108053419 | F - 7.14%   | TRUE  | TRUE  |
| 12 | 107712190 - 108053419 | T - 57.14%  | TRUE  | TRUE  |
| 12 | 107712190 - 108053419 | F - 14.29%  | TRUE  | TRUE  |
| 12 | 107712190 - 108053419 | T - 71.43%  | TRUE  | TRUE  |
| 12 | 107712190 - 108053419 | F - 21.43%  | TRUE  | TRUE  |
| 12 | 107712190 - 108053419 |             | FALSE | TRUE  |
| 12 | 51373318 - 51422349   | F - 14.29%  | TRUE  | TRUE  |
| 12 | 51373318 - 51422349   | F - 23.81%  | TRUE  | TRUE  |
| 12 | 51373318 - 51422349   |             | FALSE | TRUE  |
| 12 | 53183469 - 53189901   | T - 100.00% | FALSE | TRUE  |
| 12 | 53183469 - 53189901   |             | FALSE | TRUE  |
| 14 | 31494312 - 31565656   |             | FALSE | TRUE  |
| 14 | 31494312 - 31565656   |             | FALSE | TRUE  |
| 14 | 31494312 - 31565656   | F - 7.69%   | FALSE | TRUE  |
| 15 | 76135622 - 76193419   |             | TRUE  | TRUE  |
| 15 | 76135622 - 76193419   | T - 100.00% | TRUE  | TRUE  |
| 15 | 76135622 - 76193419   | F - 25.00%  | FALSE | TRUE  |
| 15 | 28949905 - 28957567   | T - 100.00% | TRUE  | TRUE  |
| 15 | 28949905 - 28957567   |             | FALSE | TRUE  |
| 15 | 28949905 - 28957567   |             | TRUE  | TRUE  |
| 15 | 50569389 - 50647605   |             | TRUE  | TRUE  |
| 15 | 50569389 - 50647605   |             | FALSE | TRUE  |
| 15 | 50569389 - 50647605   | T - 52.94%  | TRUE  | TRUE  |
| 15 | 50569389 - 50647605   |             | TRUE  | TRUE  |
| 15 | 50569389 - 50647605   |             | TRUE  | TRUE  |
| 15 | 32322691 - 32464722   |             | FALSE | TRUE  |
| 15 | 32322691 - 32464722   | T - 52.94%  | FALSE | TRUE  |
| 16 | 90122974 - 90142338   |             | FALSE | TRUE  |
| 16 | 90122974 - 90142338   | F - 25.00%  | FALSE | TRUE  |
| 16 | 90122974 - 90142338   | T - 100.00% | FALSE | TRUE  |
| 16 | 90122974 - 90142338   |             | FALSE | TRUE  |
| 17 | 29361032 - 29362672   | T - 100.00% | TRUE  | TRUE  |
| 17 | 29361032 - 29362672   |             | FALSE | TRUE  |
| 17 | 29361032 - 29362672   | T - 100.00% | TRUE  | TRUE  |
| 17 | 17746822 - 17875784   | F - 11.11%  | TRUE  | TRUE  |
| 17 | 17746822 - 17875784   |             | FALSE | TRUE  |
| 18 | 21718942 - 21741564   | T - 64.29%  | TRUE  | TRUE  |
| 18 | 21718942 - 21741564   | T - 100.00% | TRUE  | TRUE  |
| 18 | 21718942 - 21741564   |             | TRUE  | TRUE  |
| 18 | 21718942 - 21741564   | T - 78.57%  | TRUE  | TRUE  |
| 18 | 21718942 - 21741564   | T - 64.29%  | TRUE  | TRUE  |
| 18 | 21718942 - 21741564   |             | TRUE  | TRUE  |
| 18 | 21718942 - 21741564   | T - 85.71%  | TRUE  | TRUE  |
| 18 | 21718942 - 21741564   | F - 42.86%  | TRUE  | TRUE  |
| 19 | 18794425 - 18893143   | T - 71.43%  | TRUE  | TRUE  |
| 19 | 18794425 - 18893143   |             | FALSE | TRUE  |
| 20 | 56223448 - 56286592   | F - 38.89%  | TRUE  | TRUE  |
| 20 | 56223448 - 56286592   |             | TRUE  | TRUE  |
| 20 | 56223448 - 56286592   | F - 16.67%  | TRUE  | TRUE  |
| 20 | 56223448 - 56286592   | F - 11.11%  | TRUE  | FALSE |

|    |                       |             |       |      |
|----|-----------------------|-------------|-------|------|
| 20 | 56223448 - 56286592   |             | TRUE  | TRUE |
| 20 | 56223448 - 56286592   | F - 11.11%  | TRUE  | TRUE |
| 20 | 56223448 - 56286592   | F - 11.11%  | TRUE  | TRUE |
| 20 | 56223448 - 56286592   |             | FALSE | TRUE |
| 20 | 56223448 - 56286592   | F - 5.56%   | TRUE  | TRUE |
| 22 | 27617310 - 27622760   | T - 100.00% | TRUE  | TRUE |
| 22 | 27617310 - 27622760   | T - 66.67%  | TRUE  | TRUE |
| 22 | 27617310 - 27622760   |             | TRUE  | TRUE |
| 22 | 42896585 - 42908566   |             | TRUE  | TRUE |
| 22 | 42896585 - 42908566   |             | TRUE  | TRUE |
| 22 | 42896585 - 42908566   | T - 80.00%  | TRUE  | TRUE |
| 22 | 42896585 - 42908566   |             | TRUE  | TRUE |
| 1  | 9908376 - 9910212     | T - 100.00% | TRUE  | TRUE |
| 1  | 9908376 - 9910212     |             | FALSE | TRUE |
| 1  | 206643586 - 206670223 | T - 69.23%  | TRUE  | TRUE |
| 1  | 206643586 - 206670223 |             | TRUE  | TRUE |
| 1  | 206643586 - 206670223 |             | FALSE | TRUE |
| 1  | 39987952 - 40025370   |             | TRUE  | TRUE |
| 1  | 39987952 - 40025370   |             | FALSE | TRUE |
| 1  | 39987952 - 40025370   |             | TRUE  | TRUE |
| 1  | 39987952 - 40025370   | T - 50.00%  | TRUE  | TRUE |
| 1  | 39987952 - 40025370   | F - 37.50%  | TRUE  | TRUE |
| 2  | 279561 - 288851       |             | TRUE  | TRUE |
| 2  | 279561 - 288851       | F - 9.09%   | TRUE  | TRUE |
| 2  | 279561 - 288851       |             | TRUE  | TRUE |
| 2  | 210885435 - 211036107 | F - 7.14%   | TRUE  | TRUE |
| 2  | 210885435 - 211036107 | F - 7.14%   | TRUE  | TRUE |
| 2  | 210885435 - 211036107 |             | TRUE  | TRUE |
| 3  | 140660662 - 140698785 | T - 50.00%  | TRUE  | TRUE |
| 3  | 140660662 - 140698785 |             | TRUE  | TRUE |
| 3  | 140660662 - 140698785 | F - 5.00%   | TRUE  | TRUE |
| 3  | 182971032 - 183016292 | F - 11.11%  | FALSE | TRUE |
| 3  | 182971032 - 183016292 | F - 38.89%  | TRUE  | TRUE |
| 3  | 182971032 - 183016292 |             | TRUE  | TRUE |
| 3  | 182971032 - 183016292 |             | TRUE  | TRUE |
| 3  | 182971032 - 183016292 | F - 11.11%  | FALSE | TRUE |
| 3  | 184053714 - 184064063 | F - 14.29%  | TRUE  | TRUE |
| 3  | 184053714 - 184064063 |             | FALSE | TRUE |
| 3  | 153990335 - 154042286 | T - 52.94%  | TRUE  | TRUE |
| 3  | 153990335 - 154042286 | F - 5.88%   | TRUE  | TRUE |
| 3  | 153990335 - 154042286 |             | TRUE  | TRUE |
| 3  | 153990335 - 154042286 |             | TRUE  | TRUE |
| 3  | 153990335 - 154042286 |             | FALSE | TRUE |
| 3  | 187439165 - 187463515 | F - 6.25%   | TRUE  | TRUE |
| 3  | 187439165 - 187463515 |             | TRUE  | TRUE |
| 4  | 24797085 - 24802467   | T - 75.00%  | TRUE  | TRUE |
| 4  | 24797085 - 24802467   |             | TRUE  | TRUE |
| 4  | 24797085 - 24802467   | T - 100.00% | TRUE  | TRUE |
| 4  | 24797085 - 24802467   | T - 75.00%  | FALSE | TRUE |
| 4  | 80822303 - 81046608   | F - 26.67%  | TRUE  | TRUE |
| 4  | 80822303 - 81046608   | F - 20.00%  | TRUE  | TRUE |
| 4  | 80822303 - 81046608   | F - 6.67%   | TRUE  | TRUE |
| 4  | 80822303 - 81046608   |             | TRUE  | TRUE |
| 4  | 100869243 - 100871547 | T - 66.67%  | TRUE  | TRUE |
| 4  | 100869243 - 100871547 | F - 22.22%  | TRUE  | TRUE |
| 4  | 100869243 - 100871547 |             | TRUE  | TRUE |
| 4  | 100869243 - 100871547 | F - 22.22%  | TRUE  | TRUE |
| 5  | 33523640 - 33892297   | T - 66.67%  | TRUE  | TRUE |

|    |                       |            |       |       |
|----|-----------------------|------------|-------|-------|
| 5  | 33523640 - 33892297   | T - 66.67% | TRUE  | TRUE  |
| 5  | 33523640 - 33892297   |            | TRUE  | TRUE  |
| 5  | 33523640 - 33892297   |            | TRUE  | TRUE  |
| 5  | 33523640 - 33892297   |            | TRUE  | TRUE  |
| 5  | 33523640 - 33892297   |            | TRUE  | TRUE  |
| 5  | 33523640 - 33892297   | T - 66.67% | TRUE  | TRUE  |
| 5  | 33523640 - 33892297   |            | TRUE  | TRUE  |
| 5  | 33523640 - 33892297   |            | TRUE  | FALSE |
| 5  | 33523640 - 33892297   |            | TRUE  | TRUE  |
| 5  | 33523640 - 33892297   | F - 44.44% | TRUE  | TRUE  |
| 5  | 33523640 - 33892297   |            | TRUE  | TRUE  |
| 5  | 33523640 - 33892297   | F - 11.11% | FALSE | TRUE  |
| 5  | 33523640 - 33892297   | F - 11.11% | TRUE  | TRUE  |
| 5  | 150309998 - 150326146 | F - 25.00% | FALSE | TRUE  |
| 5  | 150309998 - 150326146 |            | FALSE | TRUE  |
| 6  | 31644461 - 31651817   | F - 8.33%  | TRUE  | TRUE  |
| 6  | 31644461 - 31651817   |            | TRUE  | TRUE  |
| 6  | 31644461 - 31651817   | F - 16.67% | TRUE  | TRUE  |
| 6  | 31644461 - 31651817   | F - 16.67% | FALSE | TRUE  |
| 6  | 31644461 - 31651817   |            | TRUE  | TRUE  |
| 6  | 31644461 - 31651817   | F - 33.33% | TRUE  | TRUE  |
| 6  | 31644461 - 31651817   | F - 41.67% | FALSE | TRUE  |
| 6  | 31644461 - 31651817   | F - 8.33%  | FALSE | TRUE  |
| 6  | 158530536 - 158589312 | F - 14.29% | TRUE  | TRUE  |
| 6  | 158530536 - 158589312 |            | TRUE  | TRUE  |
| 7  | 48211055 - 48687092   |            | FALSE | TRUE  |
| 7  | 48211055 - 48687092   | F - 25.00% | TRUE  | TRUE  |
| 7  | 48211055 - 48687092   |            | FALSE | TRUE  |
| 7  | 48211055 - 48687092   |            | FALSE | TRUE  |
| 7  | 48211055 - 48687092   | F - 33.33% | FALSE | TRUE  |
| 7  | 48211055 - 48687092   |            | FALSE | TRUE  |
| 7  | 48211055 - 48687092   |            | FALSE | TRUE  |
| 7  | 48211055 - 48687092   | F - 33.33% | FALSE | TRUE  |
| 7  | 75024337 - 75034896   | T - 87.50% | TRUE  | TRUE  |
| 7  | 75024337 - 75034896   | F - 25.00% | TRUE  | TRUE  |
| 7  | 75024337 - 75034896   |            | FALSE | TRUE  |
| 7  | 75024337 - 75034896   | F - 12.50% | TRUE  | TRUE  |
| 8  | 104152921 - 104242533 | F - 7.69%  | TRUE  | TRUE  |
| 8  | 104152921 - 104242533 | F - 46.15% | TRUE  | TRUE  |
| 8  | 104152921 - 104242533 | F - 7.69%  | FALSE | TRUE  |
| 8  | 104152921 - 104242533 | F - 7.69%  | FALSE | TRUE  |
| 8  | 104152921 - 104242533 | F - 23.08% | FALSE | TRUE  |
| 8  | 104152921 - 104242533 |            | FALSE | TRUE  |
| 8  | 30535580 - 30585486   |            | TRUE  | TRUE  |
| 8  | 30535580 - 30585486   | T - 84.62% | TRUE  | TRUE  |
| 9  | 86890372 - 86983413   |            | FALSE | TRUE  |
| 9  | 86890372 - 86983413   |            | TRUE  | TRUE  |
| 9  | 86890372 - 86983413   | T - 77.78% | TRUE  | TRUE  |
| 9  | 86890372 - 86983413   |            | TRUE  | TRUE  |
| 9  | 86890372 - 86983413   |            | FALSE | TRUE  |
| X  | 48379546 - 48387104   | T - 60.00% | TRUE  | TRUE  |
| X  | 48379546 - 48387104   |            | TRUE  | TRUE  |
| X  | 48379546 - 48387104   |            | TRUE  | TRUE  |
| X  | 48379546 - 48387104   | F - 10.00% | FALSE | TRUE  |
| X  | 48379546 - 48387104   | F - 20.00% | FALSE | TRUE  |
| X  | 48379546 - 48387104   | F - 10.00% | TRUE  | TRUE  |
| 12 | 7282795 - 7311541     | T - 77.78% | TRUE  | TRUE  |
| 12 | 7282795 - 7311541     |            | FALSE | TRUE  |

|    |                     |             |       |       |
|----|---------------------|-------------|-------|-------|
| 12 | 8834287 - 8935687   | F - 33.33%  | TRUE  | TRUE  |
| 12 | 8834287 - 8935687   |             | FALSE | TRUE  |
| 12 | 8834287 - 8935687   |             | TRUE  | TRUE  |
| 12 | 56078352 - 56106195 |             | TRUE  | TRUE  |
| 12 | 56078352 - 56106195 | T - 87.50%  | TRUE  | TRUE  |
| 12 | 56078352 - 56106195 |             | FALSE | TRUE  |
| 12 | 56078352 - 56106195 |             | TRUE  | TRUE  |
| 12 | 56078352 - 56106195 |             | FALSE | TRUE  |
| 12 | 56078352 - 56106195 |             | TRUE  | TRUE  |
| 12 | 56078352 - 56106195 |             | FALSE | TRUE  |
| 12 | 72003252 - 72057749 | F - 25.00%  | TRUE  | TRUE  |
| 12 | 72003252 - 72057749 |             | TRUE  | TRUE  |
| 12 | 72003252 - 72057749 | F - 37.50%  | FALSE | TRUE  |
| 14 | 27305934 - 27930810 | T - 66.67%  | TRUE  | TRUE  |
| 14 | 27305934 - 27930810 |             | FALSE | TRUE  |
| 14 | 27305934 - 27930810 |             | TRUE  | TRUE  |
| 14 | 27305934 - 27930810 | F - 33.33%  | TRUE  | TRUE  |
| 14 | 27305934 - 27930810 | F - 33.33%  | TRUE  | TRUE  |
| 14 | 27305934 - 27930810 |             | TRUE  | TRUE  |
| 14 | 27305934 - 27930810 |             | TRUE  | TRUE  |
| 14 | 27305934 - 27930810 | F - 33.33%  | TRUE  | TRUE  |
| 14 | 27305934 - 27930810 | F - 33.33%  | TRUE  | TRUE  |
| 16 | 75632247 - 75657221 |             | FALSE | TRUE  |
| 16 | 75632247 - 75657221 |             | TRUE  | TRUE  |
| 16 | 75632247 - 75657221 | F - 20.00%  | TRUE  | TRUE  |
| 17 | 1957448 - 1962981   |             | TRUE  | TRUE  |
| 17 | 1957448 - 1962981   | T - 50.00%  | TRUE  | TRUE  |
| 17 | 1957448 - 1962981   | F - 25.00%  | TRUE  | TRUE  |
| 19 | 45174724 - 45187631 | F - 16.67%  | TRUE  | TRUE  |
| 19 | 45174724 - 45187631 |             | TRUE  | TRUE  |
| 19 | 45174724 - 45187631 |             | TRUE  | TRUE  |
| 19 | 57019212 - 57040270 | T - 100.00% | TRUE  | TRUE  |
| 19 | 57019212 - 57040270 |             | FALSE | TRUE  |
| 19 | 3630179 - 3700477   |             | FALSE | TRUE  |
| 19 | 3630179 - 3700477   |             | TRUE  | TRUE  |
| 19 | 3630179 - 3700477   | T - 100.00% | TRUE  | TRUE  |
| 20 | 33292094 - 33301243 | T - 71.43%  | TRUE  | TRUE  |
| 20 | 33292094 - 33301243 | T - 57.14%  | TRUE  | TRUE  |
| 20 | 33292094 - 33301243 |             | TRUE  | TRUE  |
| 20 | 33292094 - 33301243 |             | TRUE  | TRUE  |
| 21 | 44473301 - 44497053 | F - 8.00%   | FALSE | TRUE  |
| 21 | 44473301 - 44497053 |             | FALSE | TRUE  |
| 21 | 44473301 - 44497053 |             | FALSE | TRUE  |
| 22 | 23487513 - 23506537 | T - 50.00%  | TRUE  | TRUE  |
| 22 | 23487513 - 23506537 |             | FALSE | TRUE  |
| 22 | 23487513 - 23506537 |             | FALSE | TRUE  |
| 22 | 23487513 - 23506537 | F - 37.50%  | TRUE  | TRUE  |
| 22 | 23487513 - 23506537 | T - 75.00%  | FALSE | TRUE  |
| 22 | 23487513 - 23506537 | T - 87.50%  | TRUE  | TRUE  |
| 22 | 23487513 - 23506537 | F - 37.50%  | TRUE  | TRUE  |
| 1  | 52521797 - 52556388 |             | TRUE  | TRUE  |
| 1  | 52521797 - 52556388 | F - 7.14%   | TRUE  | TRUE  |
| 1  | 46505812 - 46642160 |             | TRUE  | FALSE |
| 1  | 46505812 - 46642160 |             | TRUE  | TRUE  |
| 1  | 46505812 - 46642160 | T - 66.67%  | TRUE  | TRUE  |
| 1  | 46505812 - 46642160 | F - 27.78%  | TRUE  | TRUE  |
| 1  | 46505812 - 46642160 | F - 11.11%  | TRUE  | TRUE  |
| 1  | 46505812 - 46642160 | F - 11.11%  | TRUE  | TRUE  |



|   |                       |             |       |       |
|---|-----------------------|-------------|-------|-------|
| 1 | 46505812 - 46642160   | F - 22.22%  | TRUE  | TRUE  |
| 1 | 46505812 - 46642160   |             | TRUE  | TRUE  |
| 1 | 46505812 - 46642160   | F - 5.56%   | TRUE  | TRUE  |
| 1 | 46505812 - 46642160   | F - 33.33%  | TRUE  | TRUE  |
| 1 | 46505812 - 46642160   | F - 22.22%  | TRUE  | TRUE  |
| 2 | 33172039 - 33624576   |             | TRUE  | FALSE |
| 2 | 33172039 - 33624576   | F - 24.00%  | TRUE  | TRUE  |
| 2 | 33172039 - 33624576   | F - 20.00%  | TRUE  | TRUE  |
| 2 | 33172039 - 33624576   | F - 20.00%  | TRUE  | TRUE  |
| 2 | 33172039 - 33624576   |             | TRUE  | TRUE  |
| 2 | 33172039 - 33624576   |             | TRUE  | TRUE  |
| 2 | 33172039 - 33624576   | F - 20.00%  | TRUE  | TRUE  |
| 2 | 33172039 - 33624576   |             | TRUE  | TRUE  |
| 2 | 33172039 - 33624576   | F - 20.00%  | TRUE  | TRUE  |
| 2 | 33172039 - 33624576   |             | TRUE  | TRUE  |
| 2 | 33172039 - 33624576   |             | FALSE | TRUE  |
| 2 | 33172039 - 33624576   |             | TRUE  | TRUE  |
| 2 | 119981384 - 120023228 | F - 13.33%  | TRUE  | TRUE  |
| 2 | 119981384 - 120023228 |             | TRUE  | TRUE  |
| 2 | 119981384 - 120023228 | F - 20.00%  | TRUE  | TRUE  |
| 2 | 201980827 - 202037411 |             | TRUE  | TRUE  |
| 2 | 201980827 - 202037411 | F - 2.13%   | TRUE  | TRUE  |
| 2 | 201980827 - 202037411 | F - 2.13%   | TRUE  | TRUE  |
| 2 | 28974506 - 29025806   | F - 33.33%  | TRUE  | TRUE  |
| 2 | 28974506 - 29025806   | F - 6.67%   | TRUE  | TRUE  |
| 2 | 28974506 - 29025806   | F - 13.33%  | TRUE  | TRUE  |
| 2 | 28974506 - 29025806   | F - 6.67%   | FALSE | TRUE  |
| 2 | 28974506 - 29025806   | F - 6.67%   | FALSE | TRUE  |
| 2 | 28974506 - 29025806   | T - 53.33%  | TRUE  | TRUE  |
| 2 | 28974506 - 29025806   |             | TRUE  | TRUE  |
| 2 | 28974506 - 29025806   |             | TRUE  | TRUE  |
| 2 | 28974506 - 29025806   |             | FALSE | TRUE  |
| 2 | 238875469 - 238951423 | F - 3.57%   | TRUE  | TRUE  |
| 2 | 238875469 - 238951423 | F - 7.14%   | FALSE | TRUE  |
| 2 | 238875469 - 238951423 |             | FALSE | TRUE  |
| 2 | 238875469 - 238951423 |             | TRUE  | TRUE  |
| 3 | 162442527 - 162949937 |             | TRUE  | TRUE  |
| 3 | 162442527 - 162949937 | T - 50.00%  | TRUE  | TRUE  |
| 3 | 162442527 - 162949937 | T - 50.00%  | TRUE  | TRUE  |
| 3 | 124801480 - 124931708 |             | FALSE | TRUE  |
| 3 | 124801480 - 124931708 | F - 34.78%  | TRUE  | TRUE  |
| 3 | 124801480 - 124931708 | F - 47.83%  | TRUE  | TRUE  |
| 3 | 124801480 - 124931708 | F - 39.13%  | FALSE | TRUE  |
| 3 | 124801480 - 124931708 | F - 8.70%   | TRUE  | TRUE  |
| 3 | 124801480 - 124931708 | F - 8.70%   | FALSE | TRUE  |
| 5 | 141016517 - 141020644 |             | FALSE | TRUE  |
| 5 | 141016517 - 141020644 | T - 100.00% | FALSE | TRUE  |
| 5 | 176883609 - 176901402 | F - 5.26%   | TRUE  | TRUE  |
| 5 | 176883609 - 176901402 |             | TRUE  | TRUE  |
| 5 | 176883609 - 176901402 |             | FALSE | TRUE  |
| 5 | 176883609 - 176901402 |             | TRUE  | TRUE  |
| 6 | 15523032 - 15663289   | F - 44.44%  | FALSE | TRUE  |
| 6 | 15523032 - 15663289   |             | FALSE | TRUE  |
| 7 | 142413074 - 142426272 |             | FALSE | TRUE  |
| 7 | 142413074 - 142426272 |             | TRUE  | TRUE  |
| 7 | 142413074 - 142426272 | T - 60.00%  | TRUE  | TRUE  |
| 7 | 72726535 - 72742085   |             | FALSE | TRUE  |
| 7 | 72726535 - 72742085   | F - 12.50%  | TRUE  | TRUE  |

|    |                       |             |       |      |
|----|-----------------------|-------------|-------|------|
| 7  | 140424943 - 140624564 |             | TRUE  | TRUE |
| 7  | 140424943 - 140624564 | T - 62.50%  | TRUE  | TRUE |
| 7  | 140424943 - 140624564 |             | TRUE  | TRUE |
| 7  | 140424943 - 140624564 |             | TRUE  | TRUE |
| 8  | 101269288 - 101348446 |             | FALSE | TRUE |
| 8  | 101269288 - 101348446 | T - 55.56%  | TRUE  | TRUE |
| 8  | 101269288 - 101348446 |             | FALSE | TRUE |
| 8  | 101269288 - 101348446 | F - 5.56%   | TRUE  | TRUE |
| 8  | 101269288 - 101348446 | F - 27.78%  | TRUE  | TRUE |
| 8  | 101269288 - 101348446 | F - 44.44%  | TRUE  | TRUE |
| 8  | 101269288 - 101348446 | F - 16.67%  | FALSE | TRUE |
| 8  | 101269288 - 101348446 | F - 27.78%  | TRUE  | TRUE |
| 8  | 101269288 - 101348446 | F - 11.11%  | TRUE  | TRUE |
| 9  | 133454352 - 133513739 | F - 25.00%  | FALSE | TRUE |
| 9  | 133454352 - 133513739 |             | TRUE  | TRUE |
| 10 | 102246399 - 102289757 | F - 5.26%   | TRUE  | TRUE |
| 10 | 102246399 - 102289757 | F - 5.26%   | TRUE  | TRUE |
| 10 | 102246399 - 102289757 | F - 2.63%   | TRUE  | TRUE |
| 10 | 102246399 - 102289757 | F - 2.63%   | TRUE  | TRUE |
| 10 | 102246399 - 102289757 |             | FALSE | TRUE |
| 10 | 127389005 - 127408135 | T - 66.67%  | FALSE | TRUE |
| 10 | 127389005 - 127408135 | F - 33.33%  | FALSE | TRUE |
| 10 | 127389005 - 127408135 | F - 33.33%  | FALSE | TRUE |
| 10 | 127389005 - 127408135 |             | FALSE | TRUE |
| 10 | 127389005 - 127408135 | F - 33.33%  | FALSE | TRUE |
| 11 | 44490014 - 44491979   | T - 100.00% | TRUE  | TRUE |
| 11 | 44490014 - 44491979   |             | TRUE  | TRUE |
| 11 | 65769550 - 65771620   | F - 22.22%  | TRUE  | TRUE |
| 11 | 65769550 - 65771620   |             | FALSE | TRUE |
| 11 | 65769550 - 65771620   |             | FALSE | TRUE |
| 11 | 65769550 - 65771620   | F - 11.11%  | TRUE  | TRUE |
| 12 | 104849073 - 105155792 |             | TRUE  | TRUE |
| 12 | 104849073 - 105155792 | F - 37.50%  | TRUE  | TRUE |
| 12 | 104849073 - 105155792 | T - 87.50%  | TRUE  | TRUE |
| 12 | 104849073 - 105155792 |             | TRUE  | TRUE |
| 12 | 106457118 - 106533811 |             | TRUE  | TRUE |
| 12 | 106457118 - 106533811 | T - 60.00%  | TRUE  | TRUE |
| 12 | 106457118 - 106533811 |             | TRUE  | TRUE |
| 12 | 109991521 - 110011679 | F - 37.50%  | TRUE  | TRUE |
| 12 | 109991521 - 110011679 |             | FALSE | TRUE |
| 12 | 109991521 - 110011679 |             | TRUE  | TRUE |
| 14 | 39218543 - 39417477   | T - 100.00% | TRUE  | TRUE |
| 14 | 39218543 - 39417477   | T - 60.00%  | TRUE  | TRUE |
| 14 | 39218543 - 39417477   |             | TRUE  | TRUE |
| 15 | 50849352 - 50979012   | T - 71.43%  | TRUE  | TRUE |
| 15 | 50849352 - 50979012   |             | TRUE  | TRUE |
| 15 | 100330361 - 100347132 |             | FALSE | TRUE |
| 15 | 100330361 - 100347132 | F - 33.33%  | FALSE | TRUE |
| 16 | 72127615 - 72146811   |             | FALSE | TRUE |
| 16 | 72127615 - 72146811   | F - 40.00%  | FALSE | TRUE |
| 17 | 6658794 - 6678964     | F - 23.08%  | TRUE  | TRUE |
| 17 | 6658794 - 6678964     | T - 61.54%  | TRUE  | TRUE |
| 17 | 6658794 - 6678964     |             | TRUE  | TRUE |
| 17 | 6658794 - 6678964     | F - 7.69%   | TRUE  | TRUE |
| 17 | 6658794 - 6678964     |             | TRUE  | TRUE |
| 17 | 6658794 - 6678964     | F - 15.38%  | TRUE  | TRUE |
| 17 | 6658794 - 6678964     | F - 7.69%   | TRUE  | TRUE |
| 17 | 6658794 - 6678964     |             | TRUE  | TRUE |

|            |                       |             |       |       |
|------------|-----------------------|-------------|-------|-------|
| 17         | 6658794 - 6678964     | F - 7.69%   | FALSE | TRUE  |
| 17         | 6658794 - 6678964     |             | FALSE | TRUE  |
| 17         | 62850430 - 62915586   | F - 18.18%  | TRUE  | TRUE  |
| 17         | 62850430 - 62915586   |             | FALSE | TRUE  |
| 17         | 62850430 - 62915586   |             | TRUE  | TRUE  |
| 18         | 10670238 - 11148761   |             | TRUE  | TRUE  |
| 18         | 10670238 - 11148761   | F - 33.33%  | TRUE  | TRUE  |
| 18         | 10670238 - 11148761   |             | TRUE  | TRUE  |
| 18         | 10670238 - 11148761   |             | TRUE  | TRUE  |
| 18         | 10670238 - 11148761   |             | TRUE  | TRUE  |
| 18         | 10670238 - 11148761   |             | TRUE  | TRUE  |
| 18         | 10670238 - 11148761   | F - 25.00%  | TRUE  | TRUE  |
| 18         | 10670238 - 11148761   | F - 8.33%   | FALSE | TRUE  |
| 18         | 10670238 - 11148761   |             | TRUE  | TRUE  |
| 18         | 10670238 - 11148761   |             | TRUE  | TRUE  |
| 18         | 10670238 - 11148761   | F - 16.67%  | TRUE  | TRUE  |
| 19         | 35988119 - 36004560   | F - 3.57%   | FALSE | TRUE  |
| 19         | 35988119 - 36004560   | F - 9.52%   | FALSE | TRUE  |
| 19         | 35988119 - 36004560   | F - 1.19%   | TRUE  | TRUE  |
| 19         | 35988119 - 36004560   |             | FALSE | TRUE  |
| 19         | 35988119 - 36004560   |             | FALSE | TRUE  |
| 19         | 35988119 - 36004560   |             | FALSE | TRUE  |
| 19         | 35988119 - 36004560   | F - 17.86%  | TRUE  | TRUE  |
| 19         | 35988119 - 36004560   |             | TRUE  | TRUE  |
| 19         | 35988119 - 36004560   | F - 27.38%  | FALSE | TRUE  |
| 21         | 38435146 - 38445470   | F - 7.69%   | FALSE | TRUE  |
| 21         | 38435146 - 38445470   |             | FALSE | TRUE  |
| 21         | 38435146 - 38445470   | F - 7.69%   | FALSE | TRUE  |
| 21         | 38435146 - 38445470   |             | TRUE  | TRUE  |
| 21         | 38435146 - 38445470   |             | TRUE  | TRUE  |
| 6_cox_hap2 | 1310635 - 1314804     |             | TRUE  | TRUE  |
| 6_cox_hap2 | 1310635 - 1314804     | T - 57.14%  | TRUE  | TRUE  |
| 6_qbl_hap6 | 1095329 - 1099503     |             | TRUE  | TRUE  |
| 6_qbl_hap6 | 1095329 - 1099503     | T - 57.14%  | TRUE  | TRUE  |
| 1          | 78354198 - 78409580   | T - 89.47%  | TRUE  | TRUE  |
| 1          | 78354198 - 78409580   | T - 52.63%  | TRUE  | TRUE  |
| 1          | 78354198 - 78409580   | F - 10.53%  | TRUE  | FALSE |
| 1          | 78354198 - 78409580   |             | TRUE  | TRUE  |
| 1          | 78354198 - 78409580   | F - 5.26%   | TRUE  | FALSE |
| 1          | 78354198 - 78409580   | F - 36.84%  | TRUE  | TRUE  |
| 1          | 78354198 - 78409580   | F - 5.26%   | TRUE  | TRUE  |
| 1          | 78354198 - 78409580   | F - 5.26%   | TRUE  | TRUE  |
| 1          | 169074935 - 169101960 | F - 28.57%  | TRUE  | TRUE  |
| 1          | 169074935 - 169101960 | F - 14.29%  | TRUE  | TRUE  |
| 1          | 169074935 - 169101960 | F - 14.29%  | TRUE  | TRUE  |
| 1          | 169074935 - 169101960 | F - 14.29%  | TRUE  | TRUE  |
| 1          | 169074935 - 169101960 | F - 28.57%  | TRUE  | TRUE  |
| 1          | 169074935 - 169101960 |             | TRUE  | TRUE  |
| 1          | 169074935 - 169101960 | F - 14.29%  | TRUE  | TRUE  |
| 1          | 169074935 - 169101960 |             | FALSE | TRUE  |
| 1          | 182567758 - 182573548 | T - 100.00% | TRUE  | TRUE  |
| 1          | 182567758 - 182573548 |             | FALSE | TRUE  |
| 1          | 182567758 - 182573548 |             | FALSE | TRUE  |
| 1          | 186280786 - 186344864 | F - 16.67%  | TRUE  | TRUE  |
| 1          | 186280786 - 186344864 |             | TRUE  | TRUE  |
| 1          | 186280786 - 186344864 |             | TRUE  | TRUE  |
| 1          | 186280786 - 186344864 |             | TRUE  | TRUE  |
| 1          | 186280786 - 186344864 |             | FALSE | TRUE  |

|   |                       |             |       |       |
|---|-----------------------|-------------|-------|-------|
| 1 | 231041987 - 231114621 |             | TRUE  | TRUE  |
| 1 | 231041987 - 231114621 |             | FALSE | TRUE  |
| 1 | 231041987 - 231114621 | F - 7.14%   | TRUE  | TRUE  |
| 2 | 38150330 - 38294285   |             | TRUE  | TRUE  |
| 2 | 38150330 - 38294285   | F - 10.00%  | TRUE  | TRUE  |
| 2 | 38150330 - 38294285   |             | FALSE | TRUE  |
| 2 | 38150330 - 38294285   |             | TRUE  | TRUE  |
| 2 | 48756522 - 49003656   | F - 23.53%  | TRUE  | TRUE  |
| 2 | 48756522 - 49003656   | F - 14.71%  | TRUE  | TRUE  |
| 2 | 48756522 - 49003656   |             | TRUE  | TRUE  |
| 2 | 48756522 - 49003656   | T - 52.94%  | TRUE  | TRUE  |
| 2 | 48756522 - 49003656   |             | TRUE  | TRUE  |
| 2 | 163027194 - 163101661 | F - 5.56%   | TRUE  | FALSE |
| 2 | 163027194 - 163101661 | F - 5.56%   | FALSE | TRUE  |
| 2 | 163027194 - 163101661 | F - 22.22%  | TRUE  | FALSE |
| 2 | 163027194 - 163101661 |             | FALSE | TRUE  |
| 2 | 163027194 - 163101661 | F - 5.56%   | FALSE | TRUE  |
| 2 | 163027194 - 163101661 | F - 16.67%  | FALSE | TRUE  |
| 2 | 163027194 - 163101661 |             | FALSE | TRUE  |
| 2 | 163027194 - 163101661 |             | FALSE | TRUE  |
| 2 | 163027194 - 163101661 | F - 5.56%   | TRUE  | TRUE  |
| 2 | 163027194 - 163101661 |             | FALSE | TRUE  |
| 2 | 180306709 - 180726232 | T - 66.67%  | TRUE  | FALSE |
| 2 | 180306709 - 180726232 | F - 23.81%  | FALSE | TRUE  |
| 2 | 180306709 - 180726232 | F - 4.76%   | FALSE | TRUE  |
| 2 | 180306709 - 180726232 |             | TRUE  | TRUE  |
| 2 | 180306709 - 180726232 |             | FALSE | TRUE  |
| 2 | 180306709 - 180726232 |             | FALSE | TRUE  |
| 2 | 180306709 - 180726232 | F - 4.76%   | FALSE | TRUE  |
| 3 | 27844253 - 27932792   |             | TRUE  | TRUE  |
| 3 | 27844253 - 27932792   | F - 33.33%  | TRUE  | TRUE  |
| 3 | 27844253 - 27932792   | T - 66.67%  | TRUE  | TRUE  |
| 3 | 39448180 - 39454032   |             | TRUE  | TRUE  |
| 3 | 39448180 - 39454032   | T - 65.63%  | TRUE  | TRUE  |
| 5 | 31532373 - 31555165   | F - 6.25%   | TRUE  | TRUE  |
| 5 | 31532373 - 31555165   | T - 68.75%  | TRUE  | TRUE  |
| 5 | 31532373 - 31555165   |             | TRUE  | TRUE  |
| 5 | 31532373 - 31555165   | F - 6.25%   | TRUE  | TRUE  |
| 5 | 31532373 - 31555165   | F - 6.25%   | FALSE | TRUE  |
| 6 | 74123238 - 74162043   | T - 100.00% | FALSE | TRUE  |
| 6 | 74123238 - 74162043   |             | FALSE | TRUE  |
| 7 | 77166415 - 77269388   | F - 25.00%  | TRUE  | TRUE  |
| 7 | 77166415 - 77269388   |             | FALSE | TRUE  |
| 7 | 77166415 - 77269388   | F - 4.17%   | TRUE  | TRUE  |
| 7 | 77166415 - 77269388   |             | TRUE  | TRUE  |
| 7 | 77166415 - 77269388   |             | FALSE | TRUE  |
| 7 | 94285637 - 94299007   | T - 66.67%  | TRUE  | TRUE  |
| 7 | 94285637 - 94299007   | T - 55.56%  | TRUE  | TRUE  |
| 7 | 94285637 - 94299007   | T - 55.56%  | TRUE  | TRUE  |
| 7 | 94285637 - 94299007   | T - 55.56%  | TRUE  | TRUE  |
| 7 | 94285637 - 94299007   | T - 55.56%  | FALSE | TRUE  |
| 7 | 94285637 - 94299007   | F - 44.44%  | TRUE  | TRUE  |
| 7 | 94285637 - 94299007   |             | FALSE | TRUE  |
| 7 | 94285637 - 94299007   |             | TRUE  | TRUE  |
| 7 | 94285637 - 94299007   |             | FALSE | TRUE  |
| 7 | 149411872 - 149431664 |             | FALSE | TRUE  |
| 7 | 149411872 - 149431664 | T - 68.75%  | FALSE | TRUE  |
| 8 | 134048973 - 134115310 | T - 54.84%  | TRUE  | TRUE  |

|   |    |                       |            |       |      |
|---|----|-----------------------|------------|-------|------|
|   | 8  | 134048973 - 134115310 |            | TRUE  | TRUE |
|   | 8  | 134048973 - 134115310 | F - 32.26% | FALSE | TRUE |
|   | 8  | 134048973 - 134115310 |            | TRUE  | TRUE |
|   | 8  | 134048973 - 134115310 |            | TRUE  | TRUE |
|   | 8  | 134048973 - 134115310 |            | FALSE | TRUE |
|   | 8  | 134048973 - 134115310 |            | FALSE | TRUE |
| X |    | 19552083 - 19905744   |            | TRUE  | TRUE |
| X |    | 19552083 - 19905744   |            | TRUE  | TRUE |
| X |    | 19552083 - 19905744   | F - 11.11% | TRUE  | TRUE |
|   | 10 | 38383264 - 38412278   |            | TRUE  | TRUE |
|   | 10 | 38383264 - 38412278   | F - 40.00% | TRUE  | TRUE |
|   | 10 | 38383264 - 38412278   | F - 20.00% | TRUE  | TRUE |
|   | 10 | 104209574 - 104216051 | F - 25.00% | TRUE  | TRUE |
|   | 10 | 104209574 - 104216051 |            | TRUE  | TRUE |
|   | 10 | 111701029 - 111768139 |            | FALSE | TRUE |
|   | 10 | 111701029 - 111768139 | T - 50.00% | TRUE  | TRUE |
|   | 10 | 111701029 - 111768139 | F - 16.67% | TRUE  | TRUE |
|   | 10 | 111701029 - 111768139 | F - 33.33% | TRUE  | TRUE |
|   | 10 | 111701029 - 111768139 | T - 50.00% | FALSE | TRUE |
|   | 12 | 57866038 - 57882597   |            | TRUE  | TRUE |
|   | 12 | 57866038 - 57882597   | F - 13.33% | TRUE  | TRUE |
|   | 12 | 57866038 - 57882597   |            | TRUE  | TRUE |
|   | 12 | 57866038 - 57882597   | F - 33.33% | FALSE | TRUE |
|   | 12 | 57866038 - 57882597   |            | TRUE  | TRUE |
|   | 12 | 102789645 - 102874423 | F - 7.69%  | TRUE  | TRUE |
|   | 12 | 102789645 - 102874423 |            | TRUE  | TRUE |
|   | 12 | 102789645 - 102874423 | F - 15.38% | TRUE  | TRUE |
|   | 12 | 133302254 - 133338474 | F - 30.00% | TRUE  | TRUE |
|   | 12 | 133302254 - 133338474 |            | FALSE | TRUE |
|   | 12 | 133302254 - 133338474 | F - 20.00% | TRUE  | TRUE |
|   | 12 | 133302254 - 133338474 |            | TRUE  | TRUE |
|   | 15 | 72978520 - 73030817   |            | FALSE | TRUE |
|   | 15 | 72978520 - 73030817   | F - 20.00% | FALSE | TRUE |
|   | 16 | 30389454 - 30394171   |            | FALSE | TRUE |
|   | 16 | 30389454 - 30394171   |            | FALSE | TRUE |
|   | 16 | 30389454 - 30394171   |            | TRUE  | TRUE |
|   | 16 | 30389454 - 30394171   | T - 66.67% | TRUE  | TRUE |
|   | 16 | 30389454 - 30394171   |            | FALSE | TRUE |
|   | 17 | 78388965 - 78411886   | F - 5.41%  | TRUE  | TRUE |
|   | 17 | 78388965 - 78411886   | F - 5.41%  | TRUE  | TRUE |
|   | 17 | 78388965 - 78411886   | F - 48.65% | TRUE  | TRUE |
|   | 17 | 78388965 - 78411886   | F - 2.70%  | TRUE  | TRUE |
|   | 17 | 78388965 - 78411886   |            | FALSE | TRUE |
|   | 19 | 42300369 - 42316352   | F - 22.22% | FALSE | TRUE |
|   | 19 | 42300369 - 42316352   |            | TRUE  | TRUE |
|   | 19 | 42300369 - 42316352   | F - 22.22% | FALSE | TRUE |
|   | 19 | 46969748 - 46974820   | T - 85.71% | TRUE  | TRUE |
|   | 19 | 46969748 - 46974820   |            | TRUE  | TRUE |
|   | 19 | 46969748 - 46974820   |            | TRUE  | TRUE |
|   | 19 | 52359055 - 52394203   |            | FALSE | TRUE |
|   | 19 | 52359055 - 52394203   | F - 27.78% | TRUE  | TRUE |
|   | 19 | 52359055 - 52394203   | F - 5.56%  | TRUE  | TRUE |
|   | 1  | 16793931 - 16819196   |            | TRUE  | TRUE |
|   | 1  | 16793931 - 16819196   |            | FALSE | TRUE |
|   | 1  | 16793931 - 16819196   | T - 50.00% | TRUE  | TRUE |
|   | 1  | 114234854 - 114302111 | F - 5.26%  | TRUE  | TRUE |
|   | 1  | 114234854 - 114302111 | F - 26.32% | TRUE  | TRUE |
|   | 1  | 114234854 - 114302111 |            | TRUE  | TRUE |

|    |                       |            |       |      |
|----|-----------------------|------------|-------|------|
| 1  | 114234854 - 114302111 | F - 10.53% | TRUE  | TRUE |
| 1  | 114234854 - 114302111 | F - 5.26%  | TRUE  | TRUE |
| 1  | 114234854 - 114302111 |            | FALSE | TRUE |
| 1  | 114234854 - 114302111 |            | FALSE | TRUE |
| 1  | 114234854 - 114302111 |            | TRUE  | TRUE |
| 1  | 182350839 - 182361341 | F - 4.00%  | TRUE  | TRUE |
| 1  | 182350839 - 182361341 | F - 8.00%  | TRUE  | TRUE |
| 1  | 182350839 - 182361341 |            | TRUE  | TRUE |
| 1  | 182350839 - 182361341 | F - 12.00% | TRUE  | TRUE |
| 1  | 182350839 - 182361341 | F - 8.00%  | TRUE  | TRUE |
| 1  | 182350839 - 182361341 | F - 4.00%  | TRUE  | TRUE |
| 1  | 182350839 - 182361341 | F - 16.00% | TRUE  | TRUE |
| 1  | 182350839 - 182361341 | F - 16.00% | FALSE | TRUE |
| 1  | 182350839 - 182361341 | F - 4.00%  | FALSE | TRUE |
| 1  | 182350839 - 182361341 | F - 8.00%  | TRUE  | TRUE |
| 3  | 57741177 - 57914895   | F - 36.11% | TRUE  | TRUE |
| 3  | 57741177 - 57914895   |            | TRUE  | TRUE |
| 3  | 57741177 - 57914895   | F - 11.11% | TRUE  | TRUE |
| 3  | 57741177 - 57914895   |            | TRUE  | TRUE |
| 3  | 57741177 - 57914895   |            | TRUE  | TRUE |
| 3  | 57741177 - 57914895   |            | TRUE  | TRUE |
| 3  | 57741177 - 57914895   | F - 44.44% | TRUE  | TRUE |
| 3  | 57741177 - 57914895   |            | FALSE | TRUE |
| 3  | 57741177 - 57914895   |            | TRUE  | TRUE |
| 3  | 146232967 - 146262651 | F - 34.62% | TRUE  | TRUE |
| 3  | 146232967 - 146262651 | F - 7.69%  | TRUE  | TRUE |
| 3  | 146232967 - 146262651 | F - 15.38% | TRUE  | TRUE |
| 3  | 146232967 - 146262651 | F - 23.08% | FALSE | TRUE |
| 3  | 146232967 - 146262651 |            | TRUE  | TRUE |
| 3  | 146232967 - 146262651 |            | TRUE  | TRUE |
| 3  | 146232967 - 146262651 | F - 3.85%  | TRUE  | TRUE |
| 3  | 146232967 - 146262651 |            | TRUE  | TRUE |
| 5  | 153369688 - 153418497 |            | FALSE | TRUE |
| 5  | 153369688 - 153418497 | F - 4.17%  | TRUE  | TRUE |
| 6  | 71961061 - 72037787   | F - 20.00% | TRUE  | TRUE |
| 6  | 71961061 - 72037787   |            | TRUE  | TRUE |
| 6  | 71961061 - 72037787   | F - 40.00% | TRUE  | TRUE |
| 6  | 71961061 - 72037787   | F - 20.00% | TRUE  | TRUE |
| 6  | 71961061 - 72037787   | F - 40.00% | FALSE | TRUE |
| 6  | 29794744 - 29798902   | F - 46.15% | TRUE  | TRUE |
| 6  | 29794744 - 29798902   |            | TRUE  | TRUE |
| 8  | 117778742 - 117861702 | F - 33.33% | TRUE  | TRUE |
| 8  | 117778742 - 117861702 |            | FALSE | TRUE |
| 8  | 117778742 - 117861702 | F - 8.33%  | FALSE | TRUE |
| 8  | 117778742 - 117861702 | F - 8.33%  | TRUE  | TRUE |
| 8  | 117778742 - 117861702 |            | FALSE | TRUE |
| 8  | 120879659 - 121063157 | F - 12.50% | TRUE  | TRUE |
| 8  | 120879659 - 121063157 |            | TRUE  | TRUE |
| 9  | 22002902 - 22009312   | T - 50.00% | TRUE  | TRUE |
| 9  | 22002902 - 22009312   |            | TRUE  | TRUE |
| 9  | 75515578 - 75695358   | F - 8.33%  | FALSE | TRUE |
| 9  | 75515578 - 75695358   |            | TRUE  | TRUE |
| 10 | 96162186 - 96296089   |            | TRUE  | TRUE |
| 10 | 96162186 - 96296089   |            | TRUE  | TRUE |
| 10 | 96162186 - 96296089   | F - 20.00% | FALSE | TRUE |
| 10 | 96162186 - 96296089   | T - 60.00% | TRUE  | TRUE |
| 10 | 111756108 - 111895323 | F - 33.33% | TRUE  | TRUE |
| 10 | 111756108 - 111895323 | F - 46.67% | TRUE  | TRUE |

|    |                       |             |       |      |
|----|-----------------------|-------------|-------|------|
| 10 | 111756108 - 111895323 | F - 3.33%   | TRUE  | TRUE |
| 10 | 111756108 - 111895323 |             | FALSE | TRUE |
| 10 | 111756108 - 111895323 |             | TRUE  | TRUE |
| 10 | 111756108 - 111895323 |             | TRUE  | TRUE |
| 10 | 105348285 - 105615301 |             | TRUE  | TRUE |
| 10 | 105348285 - 105615301 | F - 20.00%  | TRUE  | TRUE |
| 10 | 105348285 - 105615301 | F - 20.00%  | TRUE  | TRUE |
| 10 | 105348285 - 105615301 | F - 26.67%  | TRUE  | TRUE |
| 10 | 105348285 - 105615301 | F - 6.67%   | FALSE | TRUE |
| 10 | 105348285 - 105615301 |             | TRUE  | TRUE |
| 10 | 105348285 - 105615301 |             | FALSE | TRUE |
| 10 | 105348285 - 105615301 | F - 6.67%   | TRUE  | TRUE |
| 10 | 105348285 - 105615301 | F - 26.67%  | TRUE  | TRUE |
| 10 | 105348285 - 105615301 | F - 46.67%  | TRUE  | TRUE |
| 10 | 105348285 - 105615301 |             | FALSE | TRUE |
| 10 | 105348285 - 105615301 | F - 33.33%  | TRUE  | TRUE |
| 10 | 105348285 - 105615301 | T - 73.33%  | TRUE  | TRUE |
| 10 | 105348285 - 105615301 |             | TRUE  | TRUE |
| 10 | 105348285 - 105615301 |             | FALSE | TRUE |
| 10 | 105348285 - 105615301 |             | FALSE | TRUE |
| 10 | 105348285 - 105615301 |             | TRUE  | TRUE |
| 10 | 121430230 - 121484200 | T - 50.00%  | TRUE  | TRUE |
| 10 | 121430230 - 121484200 | T - 50.00%  | TRUE  | TRUE |
| 10 | 121430230 - 121484200 | T - 50.00%  | FALSE | TRUE |
| 10 | 121430230 - 121484200 |             | TRUE  | TRUE |
| 11 | 33719654 - 33758025   |             | TRUE  | TRUE |
| 11 | 33719654 - 33758025   | T - 50.00%  | TRUE  | TRUE |
| 11 | 33719654 - 33758025   | F - 37.50%  | TRUE  | TRUE |
| 12 | 27124506 - 27167339   | T - 100.00% | TRUE  | TRUE |
| 12 | 27124506 - 27167339   |             | TRUE  | TRUE |
| 12 | 27124506 - 27167339   |             | FALSE | TRUE |
| 12 | 111798339 - 111806925 | F - 11.11%  | FALSE | TRUE |
| 12 | 111798339 - 111806925 |             | FALSE | TRUE |
| 12 | 111798339 - 111806925 |             | FALSE | TRUE |
| 12 | 132680917 - 132905935 | T - 72.73%  | TRUE  | TRUE |
| 12 | 132680917 - 132905935 |             | FALSE | TRUE |
| 12 | 132680917 - 132905935 |             | FALSE | TRUE |
| 12 | 132680917 - 132905935 |             | FALSE | TRUE |
| 15 | 75246757 - 75249805   | T - 80.00%  | TRUE  | TRUE |
| 15 | 75246757 - 75249805   |             | TRUE  | TRUE |
| 15 | 75246757 - 75249805   | F - 40.00%  | TRUE  | TRUE |
| 17 | 48796905 - 48834076   | F - 16.13%  | TRUE  | TRUE |
| 17 | 48796905 - 48834076   |             | FALSE | TRUE |
| 17 | 48796905 - 48834076   | F - 3.23%   | TRUE  | TRUE |
| 17 | 1614798 - 1619566     |             | TRUE  | TRUE |
| 17 | 1614798 - 1619566     | T - 55.56%  | TRUE  | TRUE |
| 17 | 1614798 - 1619566     | F - 44.44%  | TRUE  | TRUE |
| 17 | 1614798 - 1619566     |             | TRUE  | TRUE |
| 17 | 1614798 - 1619566     |             | TRUE  | TRUE |
| 18 | 33161003 - 33291798   | F - 37.50%  | TRUE  | TRUE |
| 18 | 33161003 - 33291798   |             | TRUE  | TRUE |
| 18 | 25530930 - 25757445   | F - 12.50%  | TRUE  | TRUE |
| 18 | 25530930 - 25757445   | F - 12.50%  | FALSE | TRUE |
| 18 | 25530930 - 25757445   |             | TRUE  | TRUE |
| 21 | 39628663 - 39673748   | T - 52.94%  | TRUE  | TRUE |
| 21 | 39628663 - 39673748   |             | TRUE  | TRUE |
| 21 | 39628663 - 39673748   | T - 100.00% | TRUE  | TRUE |
| 21 | 39628663 - 39673748   | F - 5.88%   | TRUE  | TRUE |

|    |                       |             |       |       |
|----|-----------------------|-------------|-------|-------|
| 21 | 39628663 - 39673748   |             | TRUE  | FALSE |
| 21 | 39628663 - 39673748   |             | TRUE  | TRUE  |
| 21 | 39628663 - 39673748   | F - 11.76%  | TRUE  | TRUE  |
| 21 | 39628663 - 39673748   |             | FALSE | TRUE  |
| 21 | 39628663 - 39673748   | F - 17.65%  | TRUE  | TRUE  |
| 21 | 39628663 - 39673748   | F - 5.88%   | TRUE  | TRUE  |
| 21 | 39628663 - 39673748   | T - 52.94%  | TRUE  | TRUE  |
| 21 | 39628663 - 39673748   | F - 5.88%   | TRUE  | TRUE  |
| 21 | 39628663 - 39673748   | F - 29.41%  | TRUE  | TRUE  |
| 21 | 39628663 - 39673748   | F - 5.88%   | TRUE  | TRUE  |
| 21 | 39628663 - 39673748   | F - 5.88%   | FALSE | TRUE  |
| 21 | 39628663 - 39673748   |             | TRUE  | TRUE  |
| 21 | 39628663 - 39673748   |             | FALSE | TRUE  |
| 21 | 45138975 - 45194151   | F - 36.00%  | TRUE  | TRUE  |
| 21 | 45138975 - 45194151   | F - 4.00%   | FALSE | TRUE  |
| 21 | 45138975 - 45194151   | F - 4.00%   | FALSE | TRUE  |
| 21 | 45138975 - 45194151   | F - 28.00%  | TRUE  | TRUE  |
| 21 | 45138975 - 45194151   | F - 16.00%  | TRUE  | TRUE  |
| 21 | 45138975 - 45194151   | F - 12.00%  | TRUE  | TRUE  |
| 21 | 45138975 - 45194151   | F - 4.00%   | TRUE  | TRUE  |
| 21 | 45138975 - 45194151   |             | FALSE | TRUE  |
| 21 | 45432200 - 45526433   |             | TRUE  | TRUE  |
| 21 | 45432200 - 45526433   | F - 5.00%   | TRUE  | TRUE  |
| 21 | 45432200 - 45526433   |             | TRUE  | TRUE  |
| 21 | 45432200 - 45526433   |             | TRUE  | TRUE  |
| 21 | 45432200 - 45526433   |             | FALSE | TRUE  |
| 21 | 45432200 - 45526433   |             | FALSE | TRUE  |
| 1  | 203444883 - 203460480 | T - 100.00% | TRUE  | TRUE  |
| 1  | 203444883 - 203460480 | T - 100.00% | TRUE  | TRUE  |
| 1  | 203444883 - 203460480 |             | TRUE  | TRUE  |
| 2  | 75879126 - 75938115   | F - 43.75%  | TRUE  | TRUE  |
| 2  | 75879126 - 75938115   |             | TRUE  | TRUE  |
| 2  | 175936978 - 176033110 |             | FALSE | TRUE  |
| 2  | 175936978 - 176033110 |             | FALSE | TRUE  |
| 2  | 175936978 - 176033110 | F - 4.00%   | TRUE  | TRUE  |
| 2  | 175936978 - 176033110 |             | TRUE  | TRUE  |
| 2  | 191054461 - 191208919 | F - 31.25%  | TRUE  | TRUE  |
| 2  | 191054461 - 191208919 |             | FALSE | TRUE  |
| 3  | 87276413 - 87304698   |             | TRUE  | TRUE  |
| 3  | 87276413 - 87304698   | T - 87.50%  | TRUE  | TRUE  |
| 3  | 87276413 - 87304698   |             | TRUE  | TRUE  |
| 3  | 87276413 - 87304698   |             | FALSE | TRUE  |
| 5  | 112196885 - 112228791 |             | TRUE  | FALSE |
| 5  | 112196885 - 112228791 | F - 14.29%  | TRUE  | TRUE  |
| 5  | 112196885 - 112228791 |             | TRUE  | TRUE  |
| 5  | 112196885 - 112228791 | F - 4.76%   | TRUE  | TRUE  |
| 5  | 112196885 - 112228791 | F - 28.57%  | TRUE  | TRUE  |
| 5  | 112196885 - 112228791 | F - 4.76%   | TRUE  | TRUE  |
| 5  | 112196885 - 112228791 | F - 4.76%   | FALSE | TRUE  |
| 5  | 112196885 - 112228791 | F - 4.76%   | TRUE  | TRUE  |
| 5  | 112196885 - 112228791 | F - 9.52%   | TRUE  | TRUE  |
| 5  | 112196885 - 112228791 | F - 33.33%  | TRUE  | TRUE  |
| 5  | 112196885 - 112228791 |             | FALSE | TRUE  |
| 5  | 112196885 - 112228791 | F - 28.57%  | TRUE  | TRUE  |
| 6  | 7541808 - 7586950     | T - 87.50%  | TRUE  | TRUE  |
| 6  | 7541808 - 7586950     |             | TRUE  | TRUE  |
| 6  | 43044006 - 43129457   | F - 9.09%   | TRUE  | TRUE  |
| 6  | 43044006 - 43129457   | F - 3.03%   | TRUE  | TRUE  |



|   |    |                       |            |       |      |
|---|----|-----------------------|------------|-------|------|
|   | 6  | 43044006 - 43129457   | F - 3.03%  | TRUE  | TRUE |
|   | 6  | 43044006 - 43129457   | F - 42.42% | TRUE  | TRUE |
|   | 6  | 43044006 - 43129457   |            | TRUE  | TRUE |
|   | 6  | 43044006 - 43129457   |            | TRUE  | TRUE |
|   | 6  | 43044006 - 43129457   |            | FALSE | TRUE |
|   | 7  | 100547187 - 100611118 | F - 10.00% | TRUE  | TRUE |
|   | 7  | 100547187 - 100611118 |            | FALSE | TRUE |
|   | 7  | 100547187 - 100611118 | F - 40.00% | TRUE  | TRUE |
|   | 7  | 104751151 - 105039798 | F - 15.00% | TRUE  | TRUE |
|   | 7  | 104751151 - 105039798 |            | TRUE  | TRUE |
| X |    | 46464753 - 46618490   | T - 57.14% | TRUE  | TRUE |
| X |    | 46464753 - 46618490   |            | FALSE | TRUE |
| X |    | 46464753 - 46618490   | F - 14.29% | TRUE  | TRUE |
| X |    | 46464753 - 46618490   |            | TRUE  | TRUE |
|   | 11 | 119179234 - 119187840 |            | TRUE  | TRUE |
|   | 11 | 119179234 - 119187840 | T - 57.14% | TRUE  | TRUE |
|   | 11 | 119179234 - 119187840 | F - 14.29% | TRUE  | TRUE |
|   | 11 | 119179234 - 119187840 | T - 57.14% | TRUE  | TRUE |
|   | 11 | 119179234 - 119187840 | F - 42.86% | TRUE  | TRUE |
|   | 11 | 119179234 - 119187840 | F - 42.86% | TRUE  | TRUE |
|   | 11 | 119179234 - 119187840 | T - 71.43% | TRUE  | TRUE |
|   | 11 | 119179234 - 119187840 | F - 14.29% | FALSE | TRUE |
|   | 11 | 119179234 - 119187840 |            | TRUE  | TRUE |
|   | 11 | 119179234 - 119187840 |            | FALSE | TRUE |
|   | 11 | 119179234 - 119187840 | F - 14.29% | TRUE  | TRUE |
|   | 11 | 119179234 - 119187840 |            | FALSE | TRUE |
|   | 13 | 41885341 - 41951166   | F - 43.75% | TRUE  | TRUE |
|   | 13 | 41885341 - 41951166   |            | TRUE  | TRUE |
|   | 13 | 41885341 - 41951166   |            | TRUE  | TRUE |
|   | 13 | 41885341 - 41951166   |            | FALSE | TRUE |
|   | 13 | 41885341 - 41951166   | F - 31.25% | FALSE | TRUE |
|   | 14 | 50796310 - 50883179   | F - 16.67% | TRUE  | TRUE |
|   | 14 | 50796310 - 50883179   | F - 16.67% | TRUE  | TRUE |
|   | 14 | 50796310 - 50883179   | F - 16.67% | TRUE  | TRUE |
|   | 14 | 50796310 - 50883179   |            | TRUE  | TRUE |
|   | 14 | 50796310 - 50883179   | F - 16.67% | TRUE  | TRUE |
|   | 14 | 50796310 - 50883179   | F - 16.67% | TRUE  | TRUE |
|   | 14 | 50796310 - 50883179   |            | FALSE | TRUE |
|   | 16 | 31973409 - 31985682   | T - 50.00% | TRUE  | TRUE |
|   | 16 | 31973409 - 31985682   |            | FALSE | TRUE |
|   | 17 | 38443885 - 38459413   |            | FALSE | TRUE |
|   | 17 | 38443885 - 38459413   | T - 75.00% | FALSE | TRUE |
|   | 17 | 1963133 - 2207069     | F - 33.33% | TRUE  | TRUE |
|   | 17 | 1963133 - 2207069     |            | TRUE  | TRUE |
|   | 17 | 1963133 - 2207069     | F - 33.33% | TRUE  | TRUE |
|   | 17 | 1963133 - 2207069     |            | TRUE  | TRUE |
|   | 17 | 41102543 - 41132545   |            | TRUE  | TRUE |
|   | 17 | 41102543 - 41132545   | F - 3.23%  | TRUE  | TRUE |
|   | 17 | 41102543 - 41132545   | F - 6.45%  | TRUE  | TRUE |
|   | 17 | 41102543 - 41132545   | F - 41.94% | TRUE  | TRUE |
|   | 17 | 41102543 - 41132545   | F - 29.03% | FALSE | TRUE |
|   | 17 | 41102543 - 41132545   |            | TRUE  | TRUE |
|   | 17 | 41102543 - 41132545   | F - 41.94% | FALSE | TRUE |
|   | 17 | 41102543 - 41132545   |            | FALSE | TRUE |
|   | 17 | 41102543 - 41132545   |            | TRUE  | TRUE |
|   | 17 | 41102543 - 41132545   |            | TRUE  | TRUE |
|   | 17 | 41102543 - 41132545   | F - 38.71% | TRUE  | TRUE |
|   | 17 | 76108999 - 76128488   | T - 57.14% | FALSE | TRUE |

|    |                       |             |       |       |
|----|-----------------------|-------------|-------|-------|
| 17 | 76108999 - 76128488   | T - 71.43%  | FALSE | TRUE  |
| 17 | 76108999 - 76128488   |             | FALSE | TRUE  |
| 18 | 13218786 - 13652753   |             | TRUE  | FALSE |
| 18 | 13218786 - 13652753   | F - 22.22%  | TRUE  | TRUE  |
| 18 | 13218786 - 13652753   | F - 22.22%  | TRUE  | TRUE  |
| 18 | 13218786 - 13652753   | T - 55.56%  | TRUE  | TRUE  |
| 18 | 13218786 - 13652753   | F - 33.33%  | TRUE  | TRUE  |
| 18 | 13218786 - 13652753   |             | TRUE  | TRUE  |
| 18 | 13218786 - 13652753   |             | FALSE | TRUE  |
| 18 | 13218786 - 13652753   | F - 44.44%  | FALSE | TRUE  |
| 18 | 32820994 - 32847097   | T - 75.00%  | TRUE  | TRUE  |
| 18 | 32820994 - 32847097   |             | FALSE | TRUE  |
| 18 | 32820994 - 32847097   |             | FALSE | TRUE  |
| 19 | 7701991 - 7712759     |             | TRUE  | TRUE  |
| 19 | 7701991 - 7712759     |             | TRUE  | TRUE  |
| 19 | 7701991 - 7712759     | T - 75.00%  | TRUE  | TRUE  |
| 19 | 7701991 - 7712759     |             | FALSE | TRUE  |
| 19 | 7701991 - 7712759     | T - 75.00%  | FALSE | TRUE  |
| 19 | 7701991 - 7712759     |             | FALSE | TRUE  |
| 21 | 30449792 - 30548210   |             | TRUE  | TRUE  |
| 21 | 30449792 - 30548210   |             | TRUE  | TRUE  |
| 21 | 30449792 - 30548210   |             | FALSE | TRUE  |
| 21 | 30449792 - 30548210   | T - 72.00%  | FALSE | TRUE  |
| 22 | 42428724 - 42466846   | F - 42.86%  | TRUE  | TRUE  |
| 22 | 42428724 - 42466846   |             | TRUE  | TRUE  |
| 1  | 145952372 - 145956451 | T - 100.00% | TRUE  | TRUE  |
| 1  | 145952372 - 145956451 |             | TRUE  | TRUE  |
| 1  | 173793641 - 173827684 | T - 66.67%  | FALSE | TRUE  |
| 1  | 173793641 - 173827684 |             | TRUE  | TRUE  |
| 1  | 173793641 - 173827684 |             | FALSE | TRUE  |
| 1  | 16555170 - 16563659   | F - 40.00%  | TRUE  | TRUE  |
| 1  | 16555170 - 16563659   | F - 40.00%  | TRUE  | TRUE  |
| 1  | 16555170 - 16563659   | T - 60.00%  | TRUE  | TRUE  |
| 1  | 16555170 - 16563659   |             | TRUE  | TRUE  |
| 1  | 16555170 - 16563659   | F - 40.00%  | TRUE  | TRUE  |
| 1  | 16555170 - 16563659   |             | TRUE  | TRUE  |
| 1  | 16555170 - 16563659   | F - 40.00%  | TRUE  | TRUE  |
| 1  | 16555170 - 16563659   |             | FALSE | TRUE  |
| 5  | 14664773 - 14699842   | T - 55.56%  | TRUE  | TRUE  |
| 5  | 14664773 - 14699842   |             | TRUE  | TRUE  |
| 5  | 33440802 - 33469644   | F - 4.55%   | FALSE | TRUE  |
| 5  | 33440802 - 33469644   |             | TRUE  | TRUE  |
| 5  | 33440802 - 33469644   | F - 4.55%   | FALSE | TRUE  |
| 5  | 33440802 - 33469644   |             | FALSE | TRUE  |
| 8  | 10530147 - 10558103   |             | TRUE  | TRUE  |
| 8  | 10530147 - 10558103   | F - 33.33%  | FALSE | TRUE  |
| 8  | 10530147 - 10558103   |             | FALSE | TRUE  |
| 8  | 10530147 - 10558103   | F - 11.11%  | TRUE  | TRUE  |
| 10 | 90729553 - 90775542   | F - 41.38%  | TRUE  | TRUE  |
| 10 | 90729553 - 90775542   | F - 3.45%   | TRUE  | TRUE  |
| 10 | 90729553 - 90775542   |             | FALSE | TRUE  |
| 11 | 67183149 - 67193078   |             | TRUE  | TRUE  |
| 11 | 67183149 - 67193078   | T - 63.64%  | FALSE | TRUE  |
| 11 | 66240961 - 66247704   | F - 25.00%  | TRUE  | TRUE  |
| 11 | 66240961 - 66247704   |             | FALSE | TRUE  |
| 12 | 123237321 - 123259642 | T - 100.00% | TRUE  | TRUE  |
| 12 | 123237321 - 123259642 |             | FALSE | TRUE  |
| 12 | 123237321 - 123259642 |             | TRUE  | TRUE  |

|    |                       |             |       |       |
|----|-----------------------|-------------|-------|-------|
| 14 | 21966282 - 21979517   |             | FALSE | TRUE  |
| 14 | 21966282 - 21979517   | F - 45.45%  | TRUE  | TRUE  |
| 15 | 63481668 - 63559981   | T - 100.00% | TRUE  | TRUE  |
| 15 | 63481668 - 63559981   |             | TRUE  | TRUE  |
| 17 | 40819933 - 40829048   | F - 11.11%  | TRUE  | TRUE  |
| 17 | 40819933 - 40829048   |             | TRUE  | TRUE  |
| 19 | 55417508 - 55427508   |             | FALSE | TRUE  |
| 19 | 55417508 - 55427508   | T - 100.00% | FALSE | TRUE  |
| 19 | 55417508 - 55427508   |             | TRUE  | TRUE  |
| 19 | 55417508 - 55427508   |             | TRUE  | TRUE  |
| 19 | 36014269 - 36019253   | T - 100.00% | TRUE  | TRUE  |
| 19 | 36014269 - 36019253   | T - 100.00% | TRUE  | TRUE  |
| 19 | 36014269 - 36019253   |             | FALSE | TRUE  |
| 19 | 36014269 - 36019253   | T - 100.00% | FALSE | TRUE  |
| 1  | 113554309 - 113615727 | T - 100.00% | TRUE  | TRUE  |
| 1  | 113554309 - 113615727 | T - 100.00% | TRUE  | TRUE  |
| 1  | 113554309 - 113615727 |             | TRUE  | TRUE  |
| 1  | 113554309 - 113615727 |             | FALSE | TRUE  |
| 3  | 47892180 - 48130769   | F - 26.67%  | TRUE  | TRUE  |
| 3  | 47892180 - 48130769   |             | FALSE | TRUE  |
| 4  | 71569921 - 71674336   | F - 40.91%  | TRUE  | TRUE  |
| 4  | 71569921 - 71674336   | F - 4.55%   | TRUE  | TRUE  |
| 4  | 71569921 - 71674336   |             | TRUE  | TRUE  |
| 5  | 53072474 - 53115516   | T - 100.00% | FALSE | TRUE  |
| 5  | 53072474 - 53115516   |             | TRUE  | TRUE  |
| 5  | 53072474 - 53115516   |             | TRUE  | TRUE  |
| 6  | 2391780 - 2484263     | T - 66.67%  | TRUE  | TRUE  |
| 6  | 2391780 - 2484263     |             | TRUE  | TRUE  |
| 6  | 99968569 - 100033084  |             | FALSE | TRUE  |
| 6  | 99968569 - 100033084  | F - 25.00%  | TRUE  | TRUE  |
| 6  | 43490068 - 43543812   |             | FALSE | TRUE  |
| 6  | 43490068 - 43543812   |             | FALSE | TRUE  |
| 6  | 43490068 - 43543812   | F - 44.44%  | TRUE  | TRUE  |
| 6  | 145822719 - 146057160 | F - 13.33%  | TRUE  | TRUE  |
| 6  | 145822719 - 146057160 | F - 6.67%   | FALSE | TRUE  |
| 6  | 145822719 - 146057160 |             | FALSE | TRUE  |
| 7  | 45951844 - 45961473   | T - 57.14%  | TRUE  | TRUE  |
| 7  | 45951844 - 45961473   | F - 9.52%   | TRUE  | TRUE  |
| 7  | 45951844 - 45961473   | F - 23.81%  | TRUE  | TRUE  |
| 7  | 45951844 - 45961473   |             | FALSE | TRUE  |
| 7  | 45951844 - 45961473   | F - 4.76%   | TRUE  | TRUE  |
| 7  | 45951844 - 45961473   | F - 4.76%   | TRUE  | TRUE  |
| 7  | 45951844 - 45961473   |             | TRUE  | TRUE  |
| 7  | 151163098 - 151217206 | F - 10.00%  | TRUE  | TRUE  |
| 7  | 151163098 - 151217206 |             | TRUE  | TRUE  |
| 7  | 116164839 - 116201239 | F - 30.77%  | TRUE  | TRUE  |
| 7  | 116164839 - 116201239 |             | TRUE  | TRUE  |
| 7  | 116164839 - 116201239 | F - 23.08%  | TRUE  | TRUE  |
| 8  | 146065829 - 146079121 | F - 8.33%   | TRUE  | TRUE  |
| 8  | 146065829 - 146079121 |             | TRUE  | TRUE  |
| 9  | 78505560 - 78977255   |             | TRUE  | TRUE  |
| 9  | 78505560 - 78977255   | F - 25.00%  | TRUE  | TRUE  |
| 9  | 78505560 - 78977255   |             | TRUE  | TRUE  |
| 9  | 78505560 - 78977255   | F - 8.33%   | TRUE  | FALSE |
| 9  | 78505560 - 78977255   | F - 25.00%  | TRUE  | TRUE  |
| 9  | 78505560 - 78977255   | F - 25.00%  | TRUE  | TRUE  |
| 9  | 78505560 - 78977255   | T - 75.00%  | TRUE  | TRUE  |
| 9  | 78505560 - 78977255   | F - 25.00%  | TRUE  | TRUE  |

|    |                       |             |       |      |
|----|-----------------------|-------------|-------|------|
| 9  | 78505560 - 78977255   |             | FALSE | TRUE |
| 9  | 78505560 - 78977255   | F - 25.00%  | TRUE  | TRUE |
| 9  | 78505560 - 78977255   | F - 25.00%  | TRUE  | TRUE |
| 9  | 78505560 - 78977255   | F - 25.00%  | TRUE  | TRUE |
| 9  | 78505560 - 78977255   | F - 25.00%  | TRUE  | TRUE |
| 9  | 78505560 - 78977255   | F - 25.00%  | FALSE | TRUE |
| 9  | 78505560 - 78977255   | F - 25.00%  | TRUE  | TRUE |
| 9  | 78505560 - 78977255   | F - 16.67%  | FALSE | TRUE |
| 9  | 78505560 - 78977255   | F - 25.00%  | FALSE | TRUE |
| 9  | 78505560 - 78977255   |             | FALSE | TRUE |
| 9  | 78505560 - 78977255   |             | TRUE  | TRUE |
| 9  | 78505560 - 78977255   |             | TRUE  | TRUE |
| 9  | 78505560 - 78977255   |             | TRUE  | TRUE |
| 10 | 13628927 - 13697929   |             | FALSE | TRUE |
| 10 | 13628927 - 13697929   | F - 16.67%  | FALSE | TRUE |
| 10 | 13628927 - 13697929   |             | FALSE | TRUE |
| 10 | 81838402 - 81852313   |             | TRUE  | TRUE |
| 10 | 81838402 - 81852313   | F - 15.79%  | FALSE | TRUE |
| 10 | 104845940 - 104953063 | F - 5.00%   | TRUE  | TRUE |
| 10 | 104845940 - 104953063 | F - 5.00%   | TRUE  | TRUE |
| 10 | 104845940 - 104953063 | F - 10.00%  | TRUE  | TRUE |
| 10 | 104845940 - 104953063 | F - 45.00%  | TRUE  | TRUE |
| 10 | 104845940 - 104953063 |             | TRUE  | TRUE |
| 10 | 104845940 - 104953063 | F - 25.00%  | TRUE  | TRUE |
| 10 | 104845940 - 104953063 |             | TRUE  | TRUE |
| 10 | 104845940 - 104953063 |             | TRUE  | TRUE |
| 11 | 3876932 - 4114440     | F - 10.00%  | TRUE  | TRUE |
| 11 | 3876932 - 4114440     |             | FALSE | TRUE |
| 12 | 118454506 - 118470935 |             | FALSE | TRUE |
| 12 | 118454506 - 118470935 | T - 84.62%  | FALSE | TRUE |
| 12 | 53290971 - 53343650   | T - 76.47%  | TRUE  | TRUE |
| 12 | 53290971 - 53343650   | T - 94.12%  | TRUE  | TRUE |
| 12 | 53290971 - 53343650   | T - 94.12%  | TRUE  | TRUE |
| 12 | 53290971 - 53343650   |             | TRUE  | TRUE |
| 16 | 66637935 - 66647795   | F - 8.33%   | TRUE  | TRUE |
| 16 | 66637935 - 66647795   |             | FALSE | TRUE |
| 17 | 44668035 - 44834830   |             | FALSE | TRUE |
| 17 | 44668035 - 44834830   | F - 10.00%  | TRUE  | TRUE |
| 17 | 44668035 - 44834830   |             | TRUE  | TRUE |
| 17 | 26691378 - 26728065   | T - 100.00% | TRUE  | TRUE |
| 17 | 26691378 - 26728065   | T - 100.00% | TRUE  | TRUE |
| 17 | 26691378 - 26728065   |             | TRUE  | TRUE |
| 17 | 26691378 - 26728065   |             | FALSE | TRUE |
| 18 | 77439801 - 77514510   |             | TRUE  | TRUE |
| 18 | 77439801 - 77514510   | T - 100.00% | TRUE  | TRUE |
| 20 | 22528309 - 22541562   | T - 100.00% | TRUE  | TRUE |
| 20 | 22528309 - 22541562   |             | TRUE  | TRUE |
| 1  | 28832455 - 28865708   |             | TRUE  | TRUE |
| 1  | 28832455 - 28865708   |             | TRUE  | TRUE |
| 1  | 28832455 - 28865708   | F - 25.93%  | TRUE  | TRUE |
| 1  | 28832455 - 28865708   |             | FALSE | TRUE |
| 1  | 28832455 - 28865708   | F - 14.81%  | FALSE | TRUE |
| 1  | 227615 - 267253       |             | TRUE  | TRUE |
| 1  | 227615 - 267253       | F - 40.00%  | TRUE  | TRUE |
| 3  | 67048727 - 67061634   | F - 11.11%  | FALSE | TRUE |
| 3  | 67048727 - 67061634   |             | FALSE | TRUE |
| 3  | 67048727 - 67061634   | T - 55.56%  | FALSE | TRUE |
| 3  | 100053545 - 100074478 |             | FALSE | TRUE |

|   |    |                       |             |       |       |
|---|----|-----------------------|-------------|-------|-------|
|   | 3  | 100053545 - 100074478 | F - 9.09%   | FALSE | TRUE  |
|   | 4  | 151185594 - 151936879 | F - 10.00%  | TRUE  | TRUE  |
|   | 4  | 151185594 - 151936879 | F - 5.00%   | FALSE | TRUE  |
|   | 4  | 151185594 - 151936879 |             | FALSE | TRUE  |
|   | 4  | 151185594 - 151936879 |             | TRUE  | TRUE  |
|   | 4  | 151185594 - 151936879 | F - 30.00%  | TRUE  | TRUE  |
|   | 4  | 151185594 - 151936879 |             | TRUE  | TRUE  |
|   | 5  | 162880494 - 162887146 |             | TRUE  | TRUE  |
|   | 5  | 162880494 - 162887146 | F - 20.00%  | TRUE  | TRUE  |
|   | 5  | 162880494 - 162887146 |             | TRUE  | TRUE  |
|   | 5  | 162880494 - 162887146 | F - 20.00%  | FALSE | TRUE  |
|   | 5  | 176829139 - 176836577 | F - 37.50%  | FALSE | TRUE  |
|   | 5  | 176829139 - 176836577 |             | TRUE  | TRUE  |
|   | 5  | 176829139 - 176836577 |             | FALSE | TRUE  |
|   | 6  | 41748087 - 41757879   |             | TRUE  | TRUE  |
|   | 6  | 41748087 - 41757879   | F - 27.78%  | TRUE  | TRUE  |
|   | 6  | 41748087 - 41757879   |             | TRUE  | TRUE  |
|   | 7  | 32767562 - 32794385   | T - 50.00%  | TRUE  | TRUE  |
|   | 7  | 32767562 - 32794385   | T - 50.00%  | TRUE  | TRUE  |
|   | 7  | 32767562 - 32794385   |             | TRUE  | TRUE  |
|   | 7  | 135347221 - 135378166 | T - 50.00%  | FALSE | TRUE  |
|   | 7  | 135347221 - 135378166 | F - 16.67%  | FALSE | TRUE  |
|   | 7  | 135347221 - 135378166 |             | FALSE | TRUE  |
|   | 7  | 95212809 - 95225925   | T - 55.56%  | TRUE  | TRUE  |
|   | 7  | 95212809 - 95225925   |             | TRUE  | TRUE  |
|   | 7  | 95212809 - 95225925   | F - 11.11%  | TRUE  | FALSE |
|   | 7  | 95212809 - 95225925   | F - 11.11%  | TRUE  | TRUE  |
|   | 7  | 95212809 - 95225925   | F - 11.11%  | TRUE  | TRUE  |
|   | 8  | 59465483 - 59495419   | F - 4.76%   | FALSE | TRUE  |
|   | 8  | 59465483 - 59495419   |             | FALSE | TRUE  |
|   | 8  | 30239635 - 30242917   | T - 100.00% | TRUE  | TRUE  |
|   | 8  | 30239635 - 30242917   | T - 75.00%  | FALSE | TRUE  |
|   | 8  | 30239635 - 30242917   |             | TRUE  | TRUE  |
|   | 8  | 12219528 - 12279970   | T - 66.67%  | TRUE  | TRUE  |
|   | 8  | 12219528 - 12279970   |             | TRUE  | TRUE  |
|   | 8  | 12219528 - 12279970   | F - 33.33%  | TRUE  | TRUE  |
|   | 8  | 12219528 - 12279970   | F - 33.33%  | TRUE  | TRUE  |
|   | 8  | 12219528 - 12279970   | F - 33.33%  | TRUE  | TRUE  |
|   | 8  | 12219528 - 12279970   | F - 33.33%  | TRUE  | TRUE  |
|   | 8  | 12219528 - 12279970   |             | TRUE  | TRUE  |
|   | 8  | 12219528 - 12279970   |             | FALSE | TRUE  |
|   | 9  | 125132809 - 125157982 | T - 100.00% | TRUE  | TRUE  |
|   | 9  | 125132809 - 125157982 | F - 8.33%   | TRUE  | TRUE  |
|   | 9  | 125132809 - 125157982 | T - 83.33%  | TRUE  | TRUE  |
|   | 9  | 125132809 - 125157982 |             | TRUE  | TRUE  |
|   | 9  | 125132809 - 125157982 | F - 25.00%  | TRUE  | TRUE  |
|   | 9  | 125132809 - 125157982 | F - 16.67%  | FALSE | TRUE  |
|   | 9  | 125132809 - 125157982 |             | TRUE  | TRUE  |
|   | 9  | 125132809 - 125157982 | F - 16.67%  | TRUE  | TRUE  |
|   | 9  | 125132809 - 125157982 | F - 16.67%  | TRUE  | TRUE  |
|   | 9  | 125132809 - 125157982 |             | TRUE  | TRUE  |
|   | 9  | 125132809 - 125157982 | F - 25.00%  | TRUE  | TRUE  |
| X |    | 134944381 - 134975579 | T - 100.00% | FALSE | TRUE  |
| X |    | 134944381 - 134975579 |             | FALSE | TRUE  |
|   | 12 | 66582659 - 66648402   | T - 75.00%  | TRUE  | TRUE  |
|   | 12 | 66582659 - 66648402   | T - 100.00% | TRUE  | TRUE  |
|   | 12 | 66582659 - 66648402   |             | TRUE  | TRUE  |
|   | 12 | 66582659 - 66648402   |             | TRUE  | TRUE  |

|   |    |                       |             |       |      |
|---|----|-----------------------|-------------|-------|------|
|   | 12 | 66582659 - 66648402   | F - 25.00%  | FALSE | TRUE |
|   | 12 | 66582659 - 66648402   | F - 12.50%  | TRUE  | TRUE |
|   | 12 | 66582659 - 66648402   | T - 75.00%  | TRUE  | TRUE |
|   | 12 | 66582659 - 66648402   |             | TRUE  | TRUE |
|   | 14 | 59895740 - 59932059   |             | FALSE | TRUE |
|   | 14 | 59895740 - 59932059   | F - 33.33%  | TRUE  | TRUE |
|   | 14 | 59895740 - 59932059   | F - 33.33%  | TRUE  | TRUE |
|   | 14 | 59895740 - 59932059   |             | TRUE  | TRUE |
|   | 16 | 772582 - 776954       |             | TRUE  | TRUE |
|   | 16 | 772582 - 776954       | F - 5.00%   | FALSE | TRUE |
|   | 16 | 1560428 - 1662109     |             | TRUE  | TRUE |
|   | 16 | 1560428 - 1662109     | T - 71.43%  | TRUE  | TRUE |
|   | 16 | 1560428 - 1662109     |             | FALSE | TRUE |
|   | 1  | 28879529 - 28905057   |             | TRUE  | TRUE |
|   | 1  | 28879529 - 28905057   | T - 57.14%  | TRUE  | TRUE |
|   | 1  | 86786611 - 86862025   |             | TRUE  | TRUE |
|   | 1  | 86786611 - 86862025   | F - 16.67%  | FALSE | TRUE |
|   | 1  | 86786611 - 86862025   |             | TRUE  | TRUE |
|   | 1  | 86786611 - 86862025   | F - 5.56%   | TRUE  | TRUE |
|   | 1  | 86786611 - 86862025   |             | TRUE  | TRUE |
|   | 1  | 86786611 - 86862025   |             | TRUE  | TRUE |
|   | 1  | 86786611 - 86862025   |             | TRUE  | TRUE |
|   | 1  | 86786611 - 86862025   | F - 44.44%  | TRUE  | TRUE |
|   | 1  | 86786611 - 86862025   | F - 2.78%   | TRUE  | TRUE |
|   | 1  | 86786611 - 86862025   | F - 2.78%   | FALSE | TRUE |
|   | 1  | 86786611 - 86862025   |             | TRUE  | TRUE |
|   | 1  | 86786611 - 86862025   |             | TRUE  | TRUE |
|   | 1  | 86786611 - 86862025   | F - 2.78%   | TRUE  | TRUE |
|   | 1  | 175911248 - 176176629 | T - 72.22%  | TRUE  | TRUE |
|   | 1  | 175911248 - 176176629 |             | FALSE | TRUE |
|   | 2  | 3501690 - 3523507     | F - 33.33%  | TRUE  | TRUE |
|   | 2  | 3501690 - 3523507     |             | TRUE  | TRUE |
|   | 5  | 115163893 - 115177555 | F - 5.26%   | TRUE  | TRUE |
|   | 5  | 115163893 - 115177555 |             | FALSE | TRUE |
|   | 5  | 115163893 - 115177555 |             | FALSE | TRUE |
|   | 7  | 2552163 - 2568811     | F - 18.18%  | FALSE | TRUE |
|   | 7  | 2552163 - 2568811     |             | FALSE | TRUE |
|   | 7  | 65670186 - 65885530   | F - 11.11%  | TRUE  | TRUE |
|   | 7  | 65670186 - 65885530   |             | FALSE | TRUE |
|   | 7  | 65670186 - 65885530   | F - 11.11%  | TRUE  | TRUE |
|   | 8  | 22022249 - 22069840   |             | TRUE  | TRUE |
|   | 8  | 22022249 - 22069840   |             | TRUE  | TRUE |
|   | 8  | 22022249 - 22069840   | T - 72.73%  | TRUE  | TRUE |
|   | 8  | 22022249 - 22069840   | F - 15.15%  | TRUE  | TRUE |
|   | 8  | 22022249 - 22069840   |             | FALSE | TRUE |
|   | 8  | 22022249 - 22069840   |             | TRUE  | TRUE |
|   | 8  | 22022249 - 22069840   | F - 45.45%  | TRUE  | TRUE |
|   | 8  | 22022249 - 22069840   | F - 3.03%   | TRUE  | TRUE |
|   | 8  | 22022249 - 22069840   | F - 39.39%  | FALSE | TRUE |
| X |    | 16606122 - 16731059   | T - 70.00%  | TRUE  | TRUE |
| X |    | 16606122 - 16731059   |             | TRUE  | TRUE |
|   | 10 | 72972292 - 73062635   |             | TRUE  | TRUE |
|   | 10 | 72972292 - 73062635   | T - 60.00%  | TRUE  | TRUE |
|   | 10 | 72972292 - 73062635   | F - 40.00%  | TRUE  | TRUE |
|   | 10 | 72972292 - 73062635   |             | TRUE  | TRUE |
|   | 11 | 369795 - 382117       | T - 100.00% | TRUE  | TRUE |
|   | 11 | 369795 - 382117       | T - 100.00% | TRUE  | TRUE |
|   | 11 | 369795 - 382117       |             | FALSE | TRUE |

|    |                       |             |       |       |
|----|-----------------------|-------------|-------|-------|
| 16 | 50099881 - 50140298   | F - 20.00%  | FALSE | TRUE  |
| 16 | 50099881 - 50140298   | T - 80.00%  | TRUE  | TRUE  |
| 16 | 50099881 - 50140298   | F - 30.00%  | TRUE  | TRUE  |
| 16 | 50099881 - 50140298   |             | TRUE  | TRUE  |
| 20 | 40030741 - 40247133   |             | TRUE  | TRUE  |
| 20 | 40030741 - 40247133   | F - 20.00%  | TRUE  | TRUE  |
| 20 | 40030741 - 40247133   |             | TRUE  | TRUE  |
| 20 | 40030741 - 40247133   |             | TRUE  | TRUE  |
| 1  | 40915771 - 40929390   | T - 88.89%  | TRUE  | TRUE  |
| 1  | 40915771 - 40929390   |             | FALSE | TRUE  |
| 2  | 38893052 - 38968379   | T - 87.50%  | TRUE  | TRUE  |
| 2  | 38893052 - 38968379   |             | TRUE  | TRUE  |
| 2  | 38893052 - 38968379   |             | TRUE  | TRUE  |
| 2  | 38893052 - 38968379   | T - 50.00%  | TRUE  | TRUE  |
| 2  | 38893052 - 38968379   |             | TRUE  | TRUE  |
| 2  | 38893052 - 38968379   |             | TRUE  | TRUE  |
| 2  | 38893052 - 38968379   | F - 25.00%  | TRUE  | TRUE  |
| 2  | 38893052 - 38968379   | F - 12.50%  | FALSE | TRUE  |
| 2  | 38893052 - 38968379   | F - 12.50%  | TRUE  | TRUE  |
| 2  | 38893052 - 38968379   | F - 25.00%  | TRUE  | TRUE  |
| 2  | 38893052 - 38968379   | F - 12.50%  | TRUE  | TRUE  |
| 2  | 130887194 - 130896990 | T - 100.00% | TRUE  | TRUE  |
| 2  | 130887194 - 130896990 |             | FALSE | TRUE  |
| 4  | 26578059 - 26756973   |             | TRUE  | TRUE  |
| 4  | 26578059 - 26756973   | F - 15.38%  | FALSE | TRUE  |
| 4  | 26578059 - 26756973   | F - 7.69%   | FALSE | TRUE  |
| 5  | 69321072 - 69338940   | F - 19.05%  | TRUE  | TRUE  |
| 5  | 69321072 - 69338940   |             | FALSE | TRUE  |
| 5  | 149492804 - 149535435 | F - 5.88%   | FALSE | TRUE  |
| 5  | 149492804 - 149535435 | F - 5.88%   | TRUE  | FALSE |
| 5  | 149492804 - 149535435 |             | TRUE  | TRUE  |
| 5  | 149492804 - 149535435 | F - 35.29%  | TRUE  | TRUE  |
| 5  | 149492804 - 149535435 | F - 5.88%   | TRUE  | TRUE  |
| 5  | 149492804 - 149535435 | F - 5.88%   | TRUE  | TRUE  |
| 5  | 149492804 - 149535435 |             | TRUE  | TRUE  |
| 5  | 149492804 - 149535435 | F - 5.88%   | TRUE  | TRUE  |
| 6  | 18155560 - 18224084   |             | TRUE  | TRUE  |
| 6  | 18155560 - 18224084   | F - 20.00%  | TRUE  | TRUE  |
| 6  | 18155560 - 18224084   |             | TRUE  | TRUE  |
| 7  | 102067265 - 102075227 | T - 100.00% | TRUE  | TRUE  |
| 7  | 102067265 - 102075227 | T - 100.00% | FALSE | TRUE  |
| 7  | 102067265 - 102075227 |             | FALSE | TRUE  |
| 8  | 23127633 - 23153792   |             | FALSE | TRUE  |
| 8  | 23127633 - 23153792   | F - 7.14%   | TRUE  | TRUE  |
| 8  | 37278859 - 37411701   | T - 50.00%  | FALSE | TRUE  |
| 8  | 37278859 - 37411701   |             | FALSE | TRUE  |
| 9  | 100263462 - 100364025 |             | FALSE | TRUE  |
| 9  | 100263462 - 100364025 |             | FALSE | TRUE  |
| 9  | 100263462 - 100364025 | T - 83.33%  | FALSE | TRUE  |
| 9  | 100263462 - 100364025 |             | FALSE | TRUE  |
| 9  | 101493611 - 101559247 |             | TRUE  | TRUE  |
| 9  | 101493611 - 101559247 | F - 6.67%   | FALSE | TRUE  |
| X  | 106057101 - 106243474 | T - 70.00%  | TRUE  | TRUE  |
| X  | 106057101 - 106243474 |             | TRUE  | TRUE  |
| X  | 131503343 - 131623996 | T - 82.61%  | TRUE  | TRUE  |
| X  | 131503343 - 131623996 |             | TRUE  | TRUE  |
| X  | 131503343 - 131623996 | T - 78.26%  | TRUE  | TRUE  |
| X  | 131503343 - 131623996 |             | TRUE  | TRUE  |

|    |                       |             |       |      |
|----|-----------------------|-------------|-------|------|
| X  | 131503343 - 131623996 | T - 73.91%  | FALSE | TRUE |
| X  | 131503343 - 131623996 | F - 13.04%  | FALSE | TRUE |
| X  | 131503343 - 131623996 | F - 4.35%   | FALSE | TRUE |
| X  | 131503343 - 131623996 |             | FALSE | TRUE |
| X  | 131503343 - 131623996 | F - 17.39%  | FALSE | TRUE |
| X  | 131503343 - 131623996 |             | FALSE | TRUE |
| 11 | 117070037 - 117075523 | F - 20.00%  | TRUE  | TRUE |
| 11 | 117070037 - 117075523 | F - 20.00%  | TRUE  | TRUE |
| 11 | 117070037 - 117075523 | F - 33.33%  | TRUE  | TRUE |
| 11 | 117070037 - 117075523 |             | FALSE | TRUE |
| 11 | 73685712 - 73694352   | T - 100.00% | TRUE  | TRUE |
| 11 | 73685712 - 73694352   |             | FALSE | TRUE |
| 13 | 32420920 - 32533721   | T - 60.00%  | TRUE  | TRUE |
| 13 | 32420920 - 32533721   | F - 40.00%  | TRUE  | TRUE |
| 13 | 32420920 - 32533721   | F - 20.00%  | TRUE  | TRUE |
| 13 | 32420920 - 32533721   | T - 80.00%  | TRUE  | TRUE |
| 13 | 32420920 - 32533721   |             | TRUE  | TRUE |
| 15 | 58702768 - 58861151   | F - 45.45%  | TRUE  | TRUE |
| 15 | 58702768 - 58861151   |             | TRUE  | TRUE |
| 15 | 58702768 - 58861151   |             | FALSE | TRUE |
| 15 | 58702768 - 58861151   | F - 18.18%  | TRUE  | TRUE |
| 15 | 58702768 - 58861151   |             | TRUE  | TRUE |
| 15 | 58702768 - 58861151   | F - 18.18%  | TRUE  | TRUE |
| 15 | 58702768 - 58861151   |             | TRUE  | TRUE |
| 15 | 58702768 - 58861151   |             | FALSE | TRUE |
| 15 | 65550432 - 65592956   | T - 85.71%  | TRUE  | TRUE |
| 15 | 65550432 - 65592956   | F - 14.29%  | TRUE  | TRUE |
| 15 | 65550432 - 65592956   |             | TRUE  | TRUE |
| 15 | 65550432 - 65592956   |             | FALSE | TRUE |
| 16 | 2961980 - 3001209     | T - 100.00% | TRUE  | TRUE |
| 16 | 2961980 - 3001209     |             | TRUE  | TRUE |
| 16 | 2961980 - 3001209     |             | TRUE  | TRUE |
| 16 | 2961980 - 3001209     | F - 18.18%  | TRUE  | TRUE |
| 17 | 62461569 - 62464760   | F - 33.33%  | TRUE  | TRUE |
| 17 | 62461569 - 62464760   |             | TRUE  | TRUE |
| 19 | 21106059 - 21133503   |             | TRUE  | TRUE |
| 19 | 21106059 - 21133503   | F - 7.69%   | TRUE  | TRUE |
| 19 | 21106059 - 21133503   |             | TRUE  | TRUE |
| 19 | 21106059 - 21133503   | F - 7.69%   | TRUE  | TRUE |
| 19 | 48706403 - 48759203   | T - 69.57%  | TRUE  | TRUE |
| 19 | 48706403 - 48759203   |             | FALSE | TRUE |
| 19 | 48706403 - 48759203   | F - 2.17%   | FALSE | TRUE |
| 19 | 48706403 - 48759203   | F - 43.48%  | TRUE  | TRUE |
| 19 | 48706403 - 48759203   |             | FALSE | TRUE |
| 22 | 38597889 - 38612518   | T - 80.00%  | TRUE  | TRUE |
| 22 | 38597889 - 38612518   |             | TRUE  | TRUE |
| 22 | 38597889 - 38612518   | T - 73.33%  | TRUE  | TRUE |
| 3  | 179370543 - 179507189 | F - 42.86%  | TRUE  | TRUE |
| 3  | 179370543 - 179507189 |             | TRUE  | TRUE |
| 3  | 179370543 - 179507189 | T - 57.14%  | TRUE  | TRUE |
| 3  | 179370543 - 179507189 |             | TRUE  | TRUE |
| 5  | 79407050 - 79551898   | F - 17.65%  | FALSE | TRUE |
| 5  | 79407050 - 79551898   | T - 64.71%  | TRUE  | TRUE |
| 5  | 79407050 - 79551898   | F - 41.18%  | TRUE  | TRUE |
| 5  | 79407050 - 79551898   | T - 64.71%  | TRUE  | TRUE |
| 5  | 79407050 - 79551898   |             | TRUE  | TRUE |
| 5  | 79407050 - 79551898   | F - 5.88%   | FALSE | TRUE |
| 5  | 79407050 - 79551898   |             | FALSE | TRUE |



|    |                       |            |       |       |
|----|-----------------------|------------|-------|-------|
| 5  | 150560613 - 150603706 | T - 54.55% | TRUE  | TRUE  |
| 5  | 150560613 - 150603706 | F - 9.09%  | FALSE | TRUE  |
| 5  | 150560613 - 150603706 |            | FALSE | TRUE  |
| 5  | 150560613 - 150603706 | F - 36.36% | TRUE  | TRUE  |
| 6  | 53659295 - 53788919   |            | TRUE  | TRUE  |
| 6  | 53659295 - 53788919   | F - 16.67% | TRUE  | TRUE  |
| 6  | 53659295 - 53788919   | T - 66.67% | TRUE  | TRUE  |
| 6  | 53659295 - 53788919   |            | FALSE | TRUE  |
| 6  | 53659295 - 53788919   |            | TRUE  | TRUE  |
| 6  | 122793062 - 123047518 | F - 14.29% | FALSE | TRUE  |
| 6  | 122793062 - 123047518 | F - 14.29% | TRUE  | TRUE  |
| 6  | 122793062 - 123047518 |            | TRUE  | TRUE  |
| 6  | 16299343 - 16761722   | F - 16.67% | TRUE  | TRUE  |
| 6  | 16299343 - 16761722   | F - 5.56%  | TRUE  | TRUE  |
| 6  | 16299343 - 16761722   |            | FALSE | TRUE  |
| 7  | 79082198 - 79100524   | F - 37.50% | TRUE  | TRUE  |
| 7  | 79082198 - 79100524   | F - 6.25%  | TRUE  | TRUE  |
| 7  | 79082198 - 79100524   | F - 6.25%  | TRUE  | TRUE  |
| 7  | 79082198 - 79100524   | F - 12.50% | TRUE  | TRUE  |
| 7  | 79082198 - 79100524   | F - 6.25%  | TRUE  | TRUE  |
| 7  | 79082198 - 79100524   |            | TRUE  | FALSE |
| 7  | 79082198 - 79100524   | F - 6.25%  | FALSE | TRUE  |
| 7  | 79082198 - 79100524   | F - 6.25%  | TRUE  | TRUE  |
| 7  | 79082198 - 79100524   | F - 18.75% | TRUE  | TRUE  |
| 7  | 79082198 - 79100524   | F - 6.25%  | FALSE | TRUE  |
| 7  | 79082198 - 79100524   | F - 25.00% | TRUE  | TRUE  |
| 7  | 79082198 - 79100524   | F - 31.25% | FALSE | TRUE  |
| 7  | 79082198 - 79100524   | F - 12.50% | TRUE  | TRUE  |
| 7  | 79082198 - 79100524   | F - 6.25%  | TRUE  | TRUE  |
| 7  | 79082198 - 79100524   | F - 37.50% | FALSE | TRUE  |
| 7  | 79082198 - 79100524   |            | FALSE | TRUE  |
| 7  | 79082198 - 79100524   |            | FALSE | TRUE  |
| 7  | 156931607 - 157062066 |            | TRUE  | TRUE  |
| 7  | 156931607 - 157062066 |            | TRUE  | TRUE  |
| 7  | 156931607 - 157062066 | F - 7.69%  | TRUE  | TRUE  |
| 7  | 156931607 - 157062066 |            | TRUE  | TRUE  |
| Y  | 9225731 - 9235047     |            | TRUE  | TRUE  |
| Y  | 9225731 - 9235047     | T - 75.00% | TRUE  | TRUE  |
| Y  | 9225731 - 9235047     | T - 50.00% | TRUE  | TRUE  |
| Y  | 9225731 - 9235047     |            | TRUE  | TRUE  |
| 10 | 127700950 - 128077127 | F - 38.46% | TRUE  | TRUE  |
| 10 | 127700950 - 128077127 | F - 7.69%  | TRUE  | TRUE  |
| 10 | 127700950 - 128077127 |            | TRUE  | TRUE  |
| 10 | 127700950 - 128077127 |            | TRUE  | TRUE  |
| 10 | 127700950 - 128077127 | F - 7.69%  | FALSE | TRUE  |
| 10 | 127700950 - 128077127 |            | TRUE  | TRUE  |
| 11 | 58910221 - 58922512   | F - 23.08% | TRUE  | TRUE  |
| 11 | 58910221 - 58922512   |            | TRUE  | TRUE  |
| 14 | 39734476 - 39856156   | F - 3.85%  | TRUE  | TRUE  |
| 14 | 39734476 - 39856156   |            | FALSE | TRUE  |
| 15 | 48700503 - 48938046   | F - 12.50% | TRUE  | TRUE  |
| 15 | 48700503 - 48938046   |            | FALSE | TRUE  |
| 16 | 50352929 - 50402861   | F - 12.50% | TRUE  | TRUE  |
| 16 | 50352929 - 50402861   |            | FALSE | TRUE  |
| 17 | 15339332 - 15466945   | F - 7.41%  | TRUE  | TRUE  |
| 17 | 15339332 - 15466945   | F - 11.11% | TRUE  | TRUE  |
| 17 | 15339332 - 15466945   | T - 51.85% | TRUE  | TRUE  |
| 17 | 15339332 - 15466945   |            | TRUE  | TRUE  |

|            |                       |             |       |       |
|------------|-----------------------|-------------|-------|-------|
| 17         | 15339332 - 15466945   | T - 51.85%  | TRUE  | TRUE  |
| 17         | 15339332 - 15466945   | F - 3.70%   | TRUE  | TRUE  |
| 17         | 15339332 - 15466945   |             | TRUE  | TRUE  |
| 17         | 15339332 - 15466945   | F - 3.70%   | TRUE  | TRUE  |
| 17         | 76967335 - 76976061   |             | FALSE | TRUE  |
| 17         | 76967335 - 76976061   | T - 100.00% | TRUE  | TRUE  |
| 17         | 76967335 - 76976061   |             | FALSE | TRUE  |
| 19         | 5558178 - 5568045     |             | TRUE  | TRUE  |
| 19         | 5558178 - 5568045     | T - 50.00%  | TRUE  | TRUE  |
| 19         | 5558178 - 5568045     | T - 100.00% | FALSE | TRUE  |
| 19         | 46623328 - 46627931   | T - 100.00% | TRUE  | TRUE  |
| 19         | 46623328 - 46627931   | T - 100.00% | TRUE  | FALSE |
| 19         | 46623328 - 46627931   |             | TRUE  | TRUE  |
| 20         | 31030862 - 31172876   | F - 37.50%  | FALSE | TRUE  |
| 20         | 31030862 - 31172876   |             | TRUE  | TRUE  |
| 20         | 31030862 - 31172876   | F - 31.25%  | TRUE  | TRUE  |
| 6_apd_hap1 | 1062750 - 1069002     | T - 100.00% | TRUE  | TRUE  |
| 6_apd_hap1 | 1062750 - 1069002     |             | TRUE  | TRUE  |
| 6_cox_hap2 | 1275212 - 1281464     | T - 100.00% | TRUE  | TRUE  |
| 6_cox_hap2 | 1275212 - 1281464     |             | TRUE  | TRUE  |
| 1          | 104230037 - 104239302 |             | FALSE | TRUE  |
| 1          | 104230037 - 104239302 | T - 80.00%  | FALSE | TRUE  |
| 2          | 74710200 - 74722013   | T - 80.95%  | TRUE  | TRUE  |
| 2          | 74710200 - 74722013   |             | FALSE | TRUE  |
| 2          | 130680750 - 130704276 | T - 100.00% | FALSE | TRUE  |
| 2          | 130680750 - 130704276 |             | TRUE  | TRUE  |
| 3          | 93591881 - 93692934   |             | TRUE  | FALSE |
| 3          | 93591881 - 93692934   |             | TRUE  | FALSE |
| 3          | 93591881 - 93692934   |             | TRUE  | FALSE |
| 3          | 93591881 - 93692934   | F - 33.33%  | TRUE  | TRUE  |
| 3          | 93591881 - 93692934   | F - 22.22%  | TRUE  | TRUE  |
| 3          | 93591881 - 93692934   | F - 11.11%  | TRUE  | FALSE |
| 3          | 50330259 - 50336899   | T - 78.57%  | FALSE | TRUE  |
| 3          | 50330259 - 50336899   |             | FALSE | TRUE  |
| 4          | 159045626 - 159094470 | F - 16.67%  | TRUE  | TRUE  |
| 4          | 159045626 - 159094470 |             | FALSE | TRUE  |
| 4          | 159045626 - 159094470 | F - 8.33%   | TRUE  | TRUE  |
| 4          | 159045626 - 159094470 |             | FALSE | TRUE  |
| 4          | 159045626 - 159094470 | F - 16.67%  | TRUE  | TRUE  |
| 4          | 159045626 - 159094470 |             | TRUE  | TRUE  |
| 4          | 159045626 - 159094470 |             | TRUE  | TRUE  |
| 4          | 185548850 - 185570663 |             | TRUE  | TRUE  |
| 4          | 185548850 - 185570663 | F - 30.00%  | TRUE  | TRUE  |
| 7          | 5553485 - 5565173     | F - 33.33%  | TRUE  | TRUE  |
| 7          | 5553485 - 5565173     |             | TRUE  | TRUE  |
| 7          | 5553485 - 5565173     | T - 100.00% | TRUE  | TRUE  |
| 7          | 5553485 - 5565173     |             | TRUE  | TRUE  |
| 7          | 73213872 - 73247017   | F - 12.50%  | TRUE  | TRUE  |
| 7          | 73213872 - 73247017   |             | TRUE  | TRUE  |
| 11         | 799179 - 809523       | T - 90.91%  | TRUE  | TRUE  |
| 11         | 799179 - 809523       |             | FALSE | TRUE  |
| 12         | 57881077 - 57911334   | F - 46.15%  | FALSE | TRUE  |
| 12         | 57881077 - 57911334   | F - 23.08%  | TRUE  | TRUE  |
| 12         | 57881077 - 57911334   | F - 7.69%   | FALSE | TRUE  |
| 12         | 57881077 - 57911334   | F - 7.69%   | TRUE  | TRUE  |
| 12         | 57881077 - 57911334   |             | TRUE  | TRUE  |
| 12         | 57881077 - 57911334   |             | FALSE | TRUE  |
| 12         | 69004619 - 69054385   |             | TRUE  | TRUE  |

|             |                       |             |       |      |
|-------------|-----------------------|-------------|-------|------|
| 12          | 69004619 - 69054385   |             | TRUE  | TRUE |
| 12          | 69004619 - 69054385   | T - 96.43%  | TRUE  | TRUE |
| 14          | 74960423 - 74963809   | F - 33.33%  | TRUE  | TRUE |
| 14          | 74960423 - 74963809   | T - 50.00%  | TRUE  | TRUE |
| 14          | 74960423 - 74963809   |             | FALSE | TRUE |
| 14          | 100204069 - 100408397 | T - 58.33%  | TRUE  | TRUE |
| 14          | 100204069 - 100408397 |             | FALSE | TRUE |
| 15          | 79724858 - 79764644   | T - 100.00% | TRUE  | TRUE |
| 15          | 79724858 - 79764644   | T - 80.00%  | TRUE  | TRUE |
| 15          | 79724858 - 79764644   | T - 80.00%  | TRUE  | TRUE |
| 15          | 79724858 - 79764644   | F - 20.00%  | TRUE  | TRUE |
| 15          | 79724858 - 79764644   |             | TRUE  | TRUE |
| 15          | 79724858 - 79764644   |             | TRUE  | TRUE |
| 15          | 25922420 - 26110317   | F - 20.00%  | TRUE  | TRUE |
| 15          | 25922420 - 26110317   | F - 40.00%  | TRUE  | TRUE |
| 15          | 25922420 - 26110317   |             | TRUE  | TRUE |
| 16          | 29911700 - 29930953   |             | FALSE | TRUE |
| 16          | 29911700 - 29930953   | T - 62.50%  | TRUE  | TRUE |
| 17          | 62962668 - 62971703   |             | TRUE  | TRUE |
| 17          | 62962668 - 62971703   |             | TRUE  | TRUE |
| 17          | 62962668 - 62971703   | T - 100.00% | TRUE  | TRUE |
| 17          | 62962668 - 62971703   |             | FALSE | TRUE |
| 6_cox_hap2  | 3154081 - 3161436     | F - 10.00%  | TRUE  | TRUE |
| 6_cox_hap2  | 3154081 - 3161436     | T - 50.00%  | FALSE | TRUE |
| 6_cox_hap2  | 3154081 - 3161436     | F - 20.00%  | TRUE  | TRUE |
| 6_cox_hap2  | 3154081 - 3161436     | F - 20.00%  | FALSE | TRUE |
| 6_cox_hap2  | 3154081 - 3161436     |             | TRUE  | TRUE |
| 6_cox_hap2  | 3154081 - 3161436     | F - 20.00%  | TRUE  | TRUE |
| 6_cox_hap2  | 3154081 - 3161436     | F - 10.00%  | FALSE | TRUE |
| 6_dbb_hap3  | 2930041 - 2937398     | F - 10.00%  | TRUE  | TRUE |
| 6_dbb_hap3  | 2930041 - 2937398     | T - 50.00%  | FALSE | TRUE |
| 6_dbb_hap3  | 2930041 - 2937398     | F - 20.00%  | TRUE  | TRUE |
| 6_dbb_hap3  | 2930041 - 2937398     | F - 20.00%  | FALSE | TRUE |
| 6_dbb_hap3  | 2930041 - 2937398     |             | TRUE  | TRUE |
| 6_dbb_hap3  | 2930041 - 2937398     | F - 20.00%  | TRUE  | TRUE |
| 6_dbb_hap3  | 2930041 - 2937398     | F - 10.00%  | FALSE | TRUE |
| 6_mann_hap4 | 2987351 - 2994707     | F - 10.00%  | TRUE  | TRUE |
| 6_mann_hap4 | 2987351 - 2994707     | T - 50.00%  | FALSE | TRUE |
| 6_mann_hap4 | 2987351 - 2994707     | F - 20.00%  | TRUE  | TRUE |
| 6_mann_hap4 | 2987351 - 2994707     | F - 20.00%  | FALSE | TRUE |
| 6_mann_hap4 | 2987351 - 2994707     |             | TRUE  | TRUE |
| 6_mann_hap4 | 2987351 - 2994707     | F - 20.00%  | TRUE  | TRUE |
| 6_mann_hap4 | 2987351 - 2994707     | F - 10.00%  | FALSE | TRUE |
| 6_mcf_hap5  | 3024141 - 3031497     | F - 10.00%  | TRUE  | TRUE |
| 6_mcf_hap5  | 3024141 - 3031497     | T - 50.00%  | FALSE | TRUE |
| 6_mcf_hap5  | 3024141 - 3031497     | F - 20.00%  | TRUE  | TRUE |
| 6_mcf_hap5  | 3024141 - 3031497     | F - 20.00%  | FALSE | TRUE |
| 6_mcf_hap5  | 3024141 - 3031497     |             | TRUE  | TRUE |
| 6_mcf_hap5  | 3024141 - 3031497     | F - 20.00%  | TRUE  | TRUE |
| 6_mcf_hap5  | 3024141 - 3031497     | F - 10.00%  | FALSE | TRUE |
| 6_qbl_hap6  | 2938104 - 2945456     | F - 10.00%  | TRUE  | TRUE |
| 6_qbl_hap6  | 2938104 - 2945456     | T - 50.00%  | FALSE | TRUE |
| 6_qbl_hap6  | 2938104 - 2945456     | F - 20.00%  | TRUE  | TRUE |
| 6_qbl_hap6  | 2938104 - 2945456     | F - 20.00%  | FALSE | TRUE |
| 6_qbl_hap6  | 2938104 - 2945456     |             | TRUE  | TRUE |
| 6_qbl_hap6  | 2938104 - 2945456     | F - 20.00%  | TRUE  | TRUE |
| 6_qbl_hap6  | 2938104 - 2945456     | F - 10.00%  | FALSE | TRUE |
| 6_ssto_hap7 | 2975266 - 2982619     | F - 10.00%  | TRUE  | TRUE |

|             |                       |             |       |       |
|-------------|-----------------------|-------------|-------|-------|
| 6_ssto_hap7 | 2975266 - 2982619     | T - 50.00%  | FALSE | TRUE  |
| 6_ssto_hap7 | 2975266 - 2982619     | F - 20.00%  | TRUE  | TRUE  |
| 6_ssto_hap7 | 2975266 - 2982619     | F - 20.00%  | FALSE | TRUE  |
| 6_ssto_hap7 | 2975266 - 2982619     |             | TRUE  | TRUE  |
| 6_ssto_hap7 | 2975266 - 2982619     | F - 20.00%  | TRUE  | TRUE  |
| 6_ssto_hap7 | 2975266 - 2982619     | F - 10.00%  | FALSE | TRUE  |
| 1           | 43585819 - 43622067   | F - 11.11%  | FALSE | TRUE  |
| 1           | 43585819 - 43622067   |             | FALSE | TRUE  |
| 1           | 46859937 - 46879520   | T - 54.55%  | FALSE | TRUE  |
| 1           | 46859937 - 46879520   |             | FALSE | TRUE  |
| 2           | 18059114 - 18542882   | F - 11.11%  | TRUE  | TRUE  |
| 2           | 18059114 - 18542882   | F - 11.11%  | TRUE  | TRUE  |
| 2           | 18059114 - 18542882   |             | TRUE  | TRUE  |
| 3           | 148847371 - 148891519 | F - 9.09%   | TRUE  | TRUE  |
| 3           | 148847371 - 148891519 |             | TRUE  | TRUE  |
| 3           | 148847371 - 148891519 | T - 54.55%  | TRUE  | TRUE  |
| 3           | 148847371 - 148891519 |             | TRUE  | TRUE  |
| 3           | 148847371 - 148891519 | F - 36.36%  | TRUE  | TRUE  |
| 3           | 148847371 - 148891519 | F - 9.09%   | TRUE  | TRUE  |
| 3           | 156391024 - 156424559 | F - 18.18%  | FALSE | TRUE  |
| 3           | 156391024 - 156424559 |             | TRUE  | TRUE  |
| 4           | 24807739 - 24981826   |             | FALSE | TRUE  |
| 4           | 24807739 - 24981826   |             | FALSE | TRUE  |
| 4           | 24807739 - 24981826   | T - 66.67%  | TRUE  | TRUE  |
| 4           | 24807739 - 24981826   | T - 73.33%  | FALSE | TRUE  |
| 6           | 147525494 - 147711612 | F - 20.00%  | TRUE  | TRUE  |
| 6           | 147525494 - 147711612 |             | TRUE  | TRUE  |
| 6           | 147525494 - 147711612 |             | FALSE | TRUE  |
| 7           | 120590803 - 120617270 | T - 69.23%  | TRUE  | TRUE  |
| 7           | 120590803 - 120617270 | F - 7.69%   | TRUE  | TRUE  |
| 7           | 120590803 - 120617270 |             | TRUE  | TRUE  |
| 7           | 120590803 - 120617270 | F - 7.69%   | FALSE | TRUE  |
| 8           | 120428546 - 120436678 | T - 80.00%  | TRUE  | TRUE  |
| 8           | 120428546 - 120436678 |             | TRUE  | TRUE  |
| 8           | 120428546 - 120436678 |             | TRUE  | FALSE |
| 8           | 120428546 - 120436678 | T - 60.00%  | TRUE  | TRUE  |
| 8           | 67383676 - 67430759   | F - 15.79%  | TRUE  | TRUE  |
| 8           | 67383676 - 67430759   |             | FALSE | TRUE  |
| 9           | 136028340 - 136039332 |             | FALSE | TRUE  |
| 9           | 136028340 - 136039332 |             | TRUE  | TRUE  |
| 9           | 136028340 - 136039332 | F - 7.14%   | FALSE | TRUE  |
| 9           | 136028340 - 136039332 |             | TRUE  | TRUE  |
| 9           | 136028340 - 136039332 |             | FALSE | TRUE  |
| Y           | 2087555 - 2369019     | F - 21.43%  | TRUE  | TRUE  |
| Y           | 2087555 - 2369019     | F - 21.43%  | TRUE  | TRUE  |
| Y           | 2087555 - 2369019     |             | TRUE  | TRUE  |
| Y           | 2087555 - 2369019     |             | TRUE  | TRUE  |
| Y           | 2087555 - 2369019     |             | TRUE  | TRUE  |
| Y           | 2087555 - 2369019     | F - 21.43%  | TRUE  | TRUE  |
| Y           | 2087555 - 2369019     |             | TRUE  | TRUE  |
| 11          | 31391377 - 31454382   |             | TRUE  | TRUE  |
| 11          | 31391377 - 31454382   | F - 25.00%  | TRUE  | TRUE  |
| 11          | 65222728 - 65234028   | T - 100.00% | FALSE | TRUE  |
| 11          | 65222728 - 65234028   | T - 100.00% | TRUE  | TRUE  |
| 11          | 65222728 - 65234028   |             | FALSE | TRUE  |
| 12          | 77252495 - 77272840   | T - 50.00%  | TRUE  | TRUE  |
| 12          | 77252495 - 77272840   |             | TRUE  | FALSE |
| 12          | 77252495 - 77272840   | F - 16.67%  | TRUE  | FALSE |

|             |    |                       |             |       |       |
|-------------|----|-----------------------|-------------|-------|-------|
|             | 12 | 77252495 - 77272840   | T - 83.33%  | TRUE  | TRUE  |
|             | 17 | 56282797 - 56296966   |             | TRUE  | TRUE  |
|             | 17 | 56282797 - 56296966   | T - 100.00% | TRUE  | TRUE  |
|             | 17 | 56282797 - 56296966   |             | FALSE | TRUE  |
|             | 19 | 43084393 - 43099082   | T - 66.67%  | TRUE  | TRUE  |
|             | 19 | 43084393 - 43099082   |             | FALSE | TRUE  |
| 6_mann_hap4 |    | 2816314 - 2821820     |             | FALSE | TRUE  |
| 6_mann_hap4 |    | 2816314 - 2821820     | T - 100.00% | TRUE  | TRUE  |
| 6_mann_hap4 |    | 2816314 - 2821820     |             | TRUE  | TRUE  |
|             | 1  | 6296300 - 6299504     | T - 100.00% | TRUE  | TRUE  |
|             | 1  | 6296300 - 6299504     | F - 33.33%  | TRUE  | TRUE  |
|             | 1  | 6296300 - 6299504     | F - 33.33%  | FALSE | TRUE  |
|             | 1  | 6296300 - 6299504     | F - 33.33%  | TRUE  | TRUE  |
|             | 1  | 6296300 - 6299504     |             | TRUE  | TRUE  |
|             | 2  | 71336806 - 71357394   | F - 33.33%  | TRUE  | TRUE  |
|             | 2  | 71336806 - 71357394   | F - 22.22%  | TRUE  | TRUE  |
|             | 2  | 71336806 - 71357394   |             | TRUE  | TRUE  |
|             | 2  | 71336806 - 71357394   | F - 22.22%  | FALSE | TRUE  |
|             | 2  | 71336806 - 71357394   | F - 22.22%  | TRUE  | TRUE  |
|             | 2  | 152126979 - 152146571 |             | TRUE  | TRUE  |
|             | 2  | 152126979 - 152146571 | F - 44.44%  | TRUE  | TRUE  |
|             | 2  | 152126979 - 152146571 |             | FALSE | TRUE  |
|             | 3  | 151961617 - 152183569 |             | TRUE  | TRUE  |
|             | 3  | 151961617 - 152183569 |             | FALSE | TRUE  |
|             | 3  | 151961617 - 152183569 | F - 5.26%   | TRUE  | TRUE  |
|             | 3  | 151961617 - 152183569 |             | TRUE  | TRUE  |
|             | 3  | 151961617 - 152183569 |             | TRUE  | TRUE  |
|             | 6  | 106808784 - 107018335 | F - 22.22%  | FALSE | TRUE  |
|             | 6  | 106808784 - 107018335 |             | TRUE  | TRUE  |
|             | 7  | 137029676 - 137039229 |             | FALSE | TRUE  |
|             | 7  | 137029676 - 137039229 | T - 100.00% | FALSE | TRUE  |
| X           |    | 20142636 - 20159966   |             | TRUE  | TRUE  |
| X           |    | 20142636 - 20159966   | T - 80.00%  | FALSE | TRUE  |
|             | 11 | 120811 - 139612       | F - 16.67%  | TRUE  | TRUE  |
|             | 11 | 120811 - 139612       |             | TRUE  | TRUE  |
|             | 12 | 48877070 - 48894744   |             | FALSE | TRUE  |
|             | 12 | 48877070 - 48894744   | T - 100.00% | TRUE  | TRUE  |
|             | 12 | 48877070 - 48894744   | T - 100.00% | TRUE  | TRUE  |
|             | 14 | 80663868 - 80697397   | T - 100.00% | TRUE  | FALSE |
|             | 14 | 80663868 - 80697397   | T - 93.33%  | TRUE  | TRUE  |
|             | 14 | 80663868 - 80697397   | F - 33.33%  | TRUE  | FALSE |
|             | 14 | 80663868 - 80697397   | F - 26.67%  | TRUE  | TRUE  |
|             | 14 | 80663868 - 80697397   |             | TRUE  | TRUE  |
|             | 14 | 80663868 - 80697397   | T - 66.67%  | TRUE  | TRUE  |
|             | 14 | 80663868 - 80697397   |             | TRUE  | FALSE |
|             | 14 | 80663868 - 80697397   | F - 20.00%  | TRUE  | TRUE  |
|             | 14 | 80663868 - 80697397   |             | TRUE  | TRUE  |
|             | 14 | 80663868 - 80697397   | F - 13.33%  | TRUE  | TRUE  |
|             | 14 | 91737667 - 91884188   | F - 8.33%   | TRUE  | TRUE  |
|             | 14 | 91737667 - 91884188   |             | TRUE  | TRUE  |
|             | 14 | 91737667 - 91884188   |             | TRUE  | TRUE  |
|             | 14 | 24681945 - 24685276   | F - 23.08%  | FALSE | TRUE  |
|             | 14 | 24681945 - 24685276   |             | FALSE | TRUE  |
|             | 19 | 58360099 - 58400442   |             | TRUE  | TRUE  |
|             | 19 | 58360099 - 58400442   | F - 40.00%  | TRUE  | TRUE  |
|             | 19 | 58360099 - 58400442   | F - 20.00%  | FALSE | TRUE  |
|             | 19 | 58360099 - 58400442   | F - 40.00%  | TRUE  | TRUE  |
|             | 19 | 58360099 - 58400442   | F - 40.00%  | TRUE  | TRUE  |

|    |                       |            |       |       |
|----|-----------------------|------------|-------|-------|
| 19 | 58360099 - 58400442   | F - 20.00% | TRUE  | TRUE  |
| 19 | 58360099 - 58400442   | F - 20.00% | TRUE  | TRUE  |
| 22 | 39378458 - 39429256   |            | FALSE | TRUE  |
| 22 | 39378458 - 39429256   |            | FALSE | TRUE  |
| 22 | 39378458 - 39429256   |            | FALSE | TRUE  |
| 22 | 39378458 - 39429256   | T - 71.43% | TRUE  | TRUE  |
| 22 | 39378458 - 39429256   |            | TRUE  | TRUE  |
| 1  | 155099936 - 155107386 | T - 90.00% | TRUE  | TRUE  |
| 1  | 155099936 - 155107386 | T - 80.00% | TRUE  | TRUE  |
| 1  | 155099936 - 155107386 | T - 90.00% | TRUE  | TRUE  |
| 1  | 155099936 - 155107386 |            | TRUE  | TRUE  |
| 1  | 155099936 - 155107386 |            | TRUE  | TRUE  |
| 2  | 96991062 - 96994091   | F - 45.45% | TRUE  | FALSE |
| 2  | 96991062 - 96994091   | F - 36.36% | TRUE  | TRUE  |
| 2  | 96991062 - 96994091   | F - 18.18% | FALSE | TRUE  |
| 2  | 96991062 - 96994091   |            | FALSE | TRUE  |
| 2  | 96991062 - 96994091   | F - 36.36% | TRUE  | TRUE  |
| 2  | 113239731 - 113290227 | F - 16.67% | TRUE  | TRUE  |
| 2  | 113239731 - 113290227 |            | TRUE  | TRUE  |
| 3  | 136676707 - 136729927 | F - 33.33% | TRUE  | TRUE  |
| 3  | 136676707 - 136729927 | T - 88.89% | TRUE  | TRUE  |
| 3  | 136676707 - 136729927 |            | TRUE  | TRUE  |
| 3  | 136676707 - 136729927 | F - 44.44% | TRUE  | TRUE  |
| 3  | 136676707 - 136729927 |            | TRUE  | TRUE  |
| 3  | 136676707 - 136729927 |            | TRUE  | TRUE  |
| 3  | 136676707 - 136729927 |            | FALSE | TRUE  |
| 3  | 136676707 - 136729927 | F - 11.11% | TRUE  | TRUE  |
| 3  | 136676707 - 136729927 | F - 22.22% | TRUE  | TRUE  |
| 5  | 72251808 - 72386349   |            | TRUE  | TRUE  |
| 5  | 72251808 - 72386349   |            | TRUE  | TRUE  |
| 5  | 72251808 - 72386349   | F - 7.69%  | TRUE  | TRUE  |
| 11 | 131240371 - 132206716 | F - 13.33% | TRUE  | TRUE  |
| 11 | 131240371 - 132206716 | F - 3.33%  | TRUE  | FALSE |
| 11 | 131240371 - 132206716 | T - 60.00% | TRUE  | TRUE  |
| 11 | 131240371 - 132206716 | F - 40.00% | TRUE  | TRUE  |
| 11 | 131240371 - 132206716 | F - 3.33%  | TRUE  | TRUE  |
| 11 | 131240371 - 132206716 |            | TRUE  | TRUE  |
| 11 | 131240371 - 132206716 | F - 13.33% | TRUE  | TRUE  |
| 11 | 131240371 - 132206716 | F - 16.67% | TRUE  | TRUE  |
| 11 | 131240371 - 132206716 | F - 3.33%  | TRUE  | TRUE  |
| 11 | 131240371 - 132206716 |            | TRUE  | TRUE  |
| 11 | 131240371 - 132206716 | F - 26.67% | TRUE  | TRUE  |
| 11 | 131240371 - 132206716 | F - 3.33%  | TRUE  | TRUE  |
| 11 | 131240371 - 132206716 |            | TRUE  | TRUE  |
| 11 | 131240371 - 132206716 | F - 3.33%  | TRUE  | TRUE  |
| 11 | 131240371 - 132206716 | F - 6.67%  | TRUE  | TRUE  |
| 11 | 131240371 - 132206716 | F - 23.33% | TRUE  | TRUE  |
| 11 | 131240371 - 132206716 | F - 13.33% | TRUE  | TRUE  |
| 11 | 131240371 - 132206716 | F - 3.33%  | TRUE  | TRUE  |
| 11 | 131240371 - 132206716 | F - 3.33%  | FALSE | TRUE  |
| 11 | 131240371 - 132206716 | F - 20.00% | FALSE | TRUE  |
| 11 | 131240371 - 132206716 | F - 10.00% | FALSE | TRUE  |
| 11 | 131240371 - 132206716 |            | TRUE  | TRUE  |
| 11 | 131240371 - 132206716 | F - 16.67% | TRUE  | TRUE  |
| 20 | 4833002 - 4990939     |            | TRUE  | TRUE  |
| 20 | 4833002 - 4990939     |            | FALSE | TRUE  |
| 20 | 4833002 - 4990939     | F - 30.00% | FALSE | TRUE  |
| 20 | 50400581 - 50419048   |            | TRUE  | TRUE  |

|    |                       |             |       |      |
|----|-----------------------|-------------|-------|------|
| 20 | 50400581 - 50419048   | F - 11.11%  | TRUE  | TRUE |
| 20 | 50400581 - 50419048   | F - 11.11%  | TRUE  | TRUE |
| 20 | 50400581 - 50419048   |             | TRUE  | TRUE |
| 20 | 50400581 - 50419048   | T - 77.78%  | TRUE  | TRUE |
| 20 | 50400581 - 50419048   | T - 66.67%  | TRUE  | TRUE |
| 20 | 50400581 - 50419048   |             | FALSE | TRUE |
| 20 | 50400581 - 50419048   |             | FALSE | TRUE |
| 22 | 20103461 - 20114878   | T - 50.00%  | TRUE  | TRUE |
| 22 | 20103461 - 20114878   |             | TRUE  | TRUE |
| 22 | 20103461 - 20114878   |             | TRUE  | TRUE |
| 22 | 20103461 - 20114878   |             | FALSE | TRUE |
| 22 | 45898118 - 45997015   | F - 4.00%   | TRUE  | TRUE |
| 22 | 45898118 - 45997015   | F - 4.00%   | TRUE  | TRUE |
| 22 | 45898118 - 45997015   |             | TRUE  | TRUE |
| 22 | 45898118 - 45997015   | F - 44.00%  | TRUE  | TRUE |
| 22 | 45898118 - 45997015   | F - 8.00%   | FALSE | TRUE |
| 22 | 45898118 - 45997015   | F - 4.00%   | FALSE | TRUE |
| 22 | 45898118 - 45997015   | F - 8.00%   | TRUE  | TRUE |
| 22 | 45898118 - 45997015   |             | FALSE | TRUE |
| 22 | 45898118 - 45997015   |             | FALSE | TRUE |
| 22 | 45898118 - 45997015   |             | TRUE  | TRUE |
| 22 | 45898118 - 45997015   |             | FALSE | TRUE |
| 2  | 27873679 - 27887508   |             | FALSE | TRUE |
| 2  | 27873679 - 27887508   | F - 7.69%   | FALSE | TRUE |
| X  | 129473874 - 129507335 |             | FALSE | TRUE |
| X  | 129473874 - 129507335 | T - 50.00%  | FALSE | TRUE |
| X  | 129473874 - 129507335 | F - 36.36%  | FALSE | TRUE |
| 12 | 53662083 - 53778657   | T - 71.43%  | FALSE | TRUE |
| 12 | 53662083 - 53778657   |             | FALSE | TRUE |
| 12 | 53662083 - 53778657   |             | FALSE | TRUE |
| 12 | 53662083 - 53778657   | T - 85.71%  | TRUE  | TRUE |
| 12 | 6456009 - 6486525     | T - 63.64%  | TRUE  | TRUE |
| 12 | 6456009 - 6486525     | F - 9.09%   | FALSE | TRUE |
| 12 | 6456009 - 6486525     |             | FALSE | TRUE |
| 17 | 6007 - 31427          | T - 100.00% | TRUE  | TRUE |
| 17 | 6007 - 31427          |             | FALSE | TRUE |
| 2  | 186603355 - 186698017 | F - 36.36%  | TRUE  | TRUE |
| 2  | 186603355 - 186698017 | F - 45.45%  | FALSE | TRUE |
| 2  | 186603355 - 186698017 | F - 18.18%  | TRUE  | TRUE |
| 2  | 186603355 - 186698017 |             | FALSE | TRUE |
| 2  | 186603355 - 186698017 |             | FALSE | TRUE |
| 3  | 63819546 - 63849597   |             | TRUE  | TRUE |
| 3  | 63819546 - 63849597   | F - 10.00%  | FALSE | TRUE |
| 6  | 169615875 - 169654139 | F - 22.22%  | TRUE  | TRUE |
| 6  | 169615875 - 169654139 | F - 11.11%  | TRUE  | TRUE |
| 6  | 169615875 - 169654139 |             | TRUE  | TRUE |
| 6  | 169615875 - 169654139 | F - 22.22%  | TRUE  | TRUE |
| 10 | 695888 - 712562       | F - 20.00%  | FALSE | TRUE |
| 10 | 695888 - 712562       |             | FALSE | TRUE |
| 15 | 42841008 - 42862192   | F - 16.67%  | TRUE  | TRUE |
| 15 | 42841008 - 42862192   |             | TRUE  | TRUE |
| 15 | 42841008 - 42862192   |             | TRUE  | TRUE |
| 16 | 75572015 - 75590170   |             | FALSE | TRUE |
| 16 | 75572015 - 75590170   |             | TRUE  | TRUE |
| 16 | 75572015 - 75590170   | T - 75.00%  | TRUE  | TRUE |
| 16 | 75572015 - 75590170   |             | FALSE | TRUE |
| 18 | 45553639 - 45935663   |             | TRUE  | TRUE |
| 18 | 45553639 - 45935663   | F - 15.15%  | TRUE  | TRUE |

|    |                     |            |       |       |
|----|---------------------|------------|-------|-------|
| 18 | 45553639 - 45935663 |            | FALSE | TRUE  |
| 20 | 44002520 - 44036529 |            | FALSE | TRUE  |
| 20 | 44002520 - 44036529 | T - 71.43% | TRUE  | TRUE  |
| 22 | 21562261 - 21594223 | F - 40.00% | TRUE  | TRUE  |
| 22 | 21562261 - 21594223 | T - 70.00% | TRUE  | TRUE  |
| 22 | 21562261 - 21594223 |            | FALSE | TRUE  |
| 22 | 21562261 - 21594223 |            | FALSE | TRUE  |
| 22 | 21562261 - 21594223 |            | TRUE  | TRUE  |
| 22 | 21562261 - 21594223 |            | FALSE | TRUE  |
| 22 | 46756731 - 46933067 |            | TRUE  | FALSE |
| 22 | 46756731 - 46933067 | F - 28.57% | TRUE  | FALSE |
| 22 | 46756731 - 46933067 | F - 42.86% | TRUE  | TRUE  |
| 22 | 46756731 - 46933067 | F - 14.29% | TRUE  | TRUE  |
| 22 | 46756731 - 46933067 |            | TRUE  | FALSE |
| 22 | 46756731 - 46933067 |            | TRUE  | TRUE  |
| 22 | 46756731 - 46933067 | F - 28.57% | TRUE  | TRUE  |
| 22 | 46756731 - 46933067 | F - 42.86% | TRUE  | TRUE  |
| 22 | 46756731 - 46933067 |            | TRUE  | FALSE |
| 22 | 46756731 - 46933067 | F - 28.57% | TRUE  | TRUE  |
| 22 | 46756731 - 46933067 | F - 28.57% | TRUE  | TRUE  |
| 22 | 46756731 - 46933067 | F - 28.57% | TRUE  | FALSE |
| 22 | 46756731 - 46933067 | F - 14.29% | TRUE  | TRUE  |
| 22 | 46756731 - 46933067 |            | TRUE  | TRUE  |
| 22 | 46756731 - 46933067 |            | TRUE  | TRUE  |
| 22 | 46756731 - 46933067 |            | TRUE  | TRUE  |
| 22 | 46756731 - 46933067 | F - 42.86% | TRUE  | TRUE  |
| 22 | 46756731 - 46933067 |            | TRUE  | FALSE |
| 22 | 46756731 - 46933067 | F - 28.57% | TRUE  | TRUE  |
| 22 | 46756731 - 46933067 |            | TRUE  | TRUE  |
| 22 | 46756731 - 46933067 | F - 14.29% | TRUE  | TRUE  |
| 22 | 46756731 - 46933067 |            | TRUE  | FALSE |
| 22 | 46756731 - 46933067 | F - 14.29% | TRUE  | TRUE  |
| 22 | 46756731 - 46933067 | F - 28.57% | TRUE  | TRUE  |
| 22 | 46756731 - 46933067 | F - 28.57% | TRUE  | TRUE  |
| 22 | 46756731 - 46933067 | F - 28.57% | TRUE  | TRUE  |
| 22 | 46756731 - 46933067 | F - 28.57% | TRUE  | TRUE  |
| 22 | 46756731 - 46933067 | F - 14.29% | TRUE  | TRUE  |
| 22 | 46756731 - 46933067 | F - 14.29% | TRUE  | TRUE  |
| 22 | 46756731 - 46933067 | F - 28.57% | TRUE  | TRUE  |
| 22 | 46756731 - 46933067 | F - 14.29% | TRUE  | TRUE  |
| 22 | 46756731 - 46933067 | F - 14.29% | TRUE  | TRUE  |
| 22 | 46756731 - 46933067 | F - 28.57% | TRUE  | TRUE  |
| 22 | 46756731 - 46933067 | F - 14.29% | TRUE  | TRUE  |
| 22 | 46756731 - 46933067 | F - 14.29% | TRUE  | TRUE  |
| 22 | 46756731 - 46933067 |            | TRUE  | TRUE  |
| 22 | 46756731 - 46933067 | F - 14.29% | TRUE  | TRUE  |
| 22 | 46756731 - 46933067 | F - 28.57% | TRUE  | TRUE  |
| 22 | 46756731 - 46933067 |            | TRUE  | TRUE  |
| 22 | 46756731 - 46933067 | F - 28.57% | TRUE  | TRUE  |
| 22 | 46756731 - 46933067 | F - 28.57% | TRUE  | TRUE  |
| 22 | 46756731 - 46933067 | F - 14.29% | TRUE  | TRUE  |
| 22 | 46756731 - 46933067 | F - 14.29% | TRUE  | TRUE  |



|             |                       |            |       |       |
|-------------|-----------------------|------------|-------|-------|
| 22          | 46756731 - 46933067   | F - 28.57% | TRUE  | TRUE  |
| 22          | 46756731 - 46933067   | F - 14.29% | FALSE | TRUE  |
| 22          | 46756731 - 46933067   | F - 28.57% | TRUE  | TRUE  |
| 22          | 46756731 - 46933067   |            | TRUE  | TRUE  |
| 22          | 46756731 - 46933067   | F - 14.29% | FALSE | TRUE  |
| 22          | 46756731 - 46933067   | F - 28.57% | TRUE  | TRUE  |
| 22          | 46756731 - 46933067   |            | TRUE  | TRUE  |
| 22          | 46756731 - 46933067   | F - 14.29% | TRUE  | TRUE  |
| 6_mann_hap4 | 4537841 - 4554153     | T - 50.00% | TRUE  | TRUE  |
| 6_mann_hap4 | 4537841 - 4554153     | T - 50.00% | TRUE  | TRUE  |
| 6_mann_hap4 | 4537841 - 4554153     |            | TRUE  | TRUE  |
| 6_mann_hap4 | 4537841 - 4554153     |            | TRUE  | TRUE  |
| 6_mann_hap4 | 4537841 - 4554153     |            | TRUE  | TRUE  |
| 6_qbl_hap6  | 4312748 - 4329060     | T - 50.00% | TRUE  | TRUE  |
| 6_qbl_hap6  | 4312748 - 4329060     | T - 50.00% | TRUE  | TRUE  |
| 6_qbl_hap6  | 4312748 - 4329060     |            | TRUE  | TRUE  |
| 6_qbl_hap6  | 4312748 - 4329060     |            | TRUE  | TRUE  |
| 6_qbl_hap6  | 4312748 - 4329060     |            | TRUE  | TRUE  |
| 1           | 76190036 - 76229364   | F - 5.56%  | TRUE  | TRUE  |
| 1           | 76190036 - 76229364   | F - 22.22% | TRUE  | TRUE  |
| 1           | 76190036 - 76229364   |            | FALSE | TRUE  |
| 1           | 151023447 - 151042801 | T - 54.55% | TRUE  | TRUE  |
| 1           | 151023447 - 151042801 | F - 9.09%  | FALSE | TRUE  |
| 1           | 151023447 - 151042801 |            | TRUE  | TRUE  |
| 1           | 154916552 - 154928599 | F - 42.86% | TRUE  | TRUE  |
| 1           | 154916552 - 154928599 |            | TRUE  | TRUE  |
| 2           | 45878484 - 46415129   |            | TRUE  | TRUE  |
| 2           | 45878484 - 46415129   | F - 33.33% | TRUE  | TRUE  |
| 2           | 45878484 - 46415129   |            | FALSE | TRUE  |
| 4           | 99792835 - 99851788   | F - 20.00% | FALSE | TRUE  |
| 4           | 99792835 - 99851788   |            | FALSE | TRUE  |
| 5           | 36606457 - 36688436   |            | TRUE  | TRUE  |
| 5           | 36606457 - 36688436   | F - 5.26%  | TRUE  | FALSE |
| 5           | 36606457 - 36688436   | F - 10.53% | TRUE  | TRUE  |
| 5           | 36606457 - 36688436   | F - 5.26%  | TRUE  | TRUE  |
| 5           | 36606457 - 36688436   |            | TRUE  | FALSE |
| 5           | 36606457 - 36688436   | F - 5.26%  | TRUE  | FALSE |
| 5           | 36606457 - 36688436   |            | TRUE  | TRUE  |
| 5           | 36606457 - 36688436   | F - 26.32% | TRUE  | TRUE  |
| 5           | 36606457 - 36688436   | F - 15.79% | FALSE | TRUE  |
| 5           | 36606457 - 36688436   | F - 5.26%  | TRUE  | TRUE  |
| 5           | 36606457 - 36688436   | F - 10.53% | TRUE  | TRUE  |
| 5           | 36606457 - 36688436   | F - 5.26%  | FALSE | TRUE  |
| 5           | 36606457 - 36688436   | F - 5.26%  | TRUE  | TRUE  |
| 5           | 36606457 - 36688436   | F - 26.32% | TRUE  | TRUE  |
| 5           | 36606457 - 36688436   |            | TRUE  | TRUE  |
| 5           | 36606457 - 36688436   | F - 15.79% | FALSE | TRUE  |
| 5           | 36606457 - 36688436   | F - 5.26%  | TRUE  | TRUE  |
| 5           | 36606457 - 36688436   | F - 15.79% | FALSE | TRUE  |
| 5           | 139554227 - 139663119 | F - 44.44% | TRUE  | TRUE  |
| 5           | 139554227 - 139663119 |            | TRUE  | TRUE  |
| 5           | 173508509 - 173513562 | T - 66.67% | TRUE  | TRUE  |
| 5           | 173508509 - 173513562 |            | TRUE  | TRUE  |
| 6           | 74405508 - 74538041   |            | TRUE  | TRUE  |
| 6           | 74405508 - 74538041   | T - 88.89% | TRUE  | TRUE  |
| 7           | 93592074 - 93633694   |            | FALSE | TRUE  |
| 7           | 93592074 - 93633694   | F - 30.00% | TRUE  | TRUE  |
| 7           | 93592074 - 93633694   | F - 10.00% | TRUE  | TRUE  |

|    |                       |             |       |       |
|----|-----------------------|-------------|-------|-------|
| 7  | 93592074 - 93633694   | F - 10.00%  | FALSE | TRUE  |
| 7  | 93592074 - 93633694   | F - 30.00%  | TRUE  | TRUE  |
| 7  | 76673038 - 76958850   | F - 26.67%  | TRUE  | TRUE  |
| 7  | 76673038 - 76958850   | F - 26.67%  | TRUE  | TRUE  |
| 7  | 76673038 - 76958850   |             | TRUE  | TRUE  |
| 7  | 76673038 - 76958850   | F - 6.67%   | TRUE  | TRUE  |
| 9  | 95176527 - 95186836   | T - 100.00% | TRUE  | TRUE  |
| 9  | 95176527 - 95186836   |             | TRUE  | TRUE  |
| 9  | 95176527 - 95186836   |             | TRUE  | FALSE |
| 9  | 95176527 - 95186836   | F - 33.33%  | TRUE  | TRUE  |
| 9  | 123714614 - 123837452 |             | FALSE | TRUE  |
| 9  | 123714614 - 123837452 |             | FALSE | TRUE  |
| 9  | 123714614 - 123837452 |             | FALSE | TRUE  |
| 9  | 123714614 - 123837452 | F - 9.09%   | FALSE | TRUE  |
| 9  | 123714614 - 123837452 |             | FALSE | TRUE  |
| 9  | 136528682 - 136605077 | F - 44.44%  | FALSE | TRUE  |
| 9  | 136528682 - 136605077 | T - 61.11%  | FALSE | TRUE  |
| 9  | 136528682 - 136605077 |             | FALSE | TRUE  |
| 9  | 136528682 - 136605077 |             | FALSE | TRUE  |
| 9  | 88879461 - 88897676   | F - 14.29%  | TRUE  | TRUE  |
| 9  | 88879461 - 88897676   |             | FALSE | TRUE  |
| X  | 46357160 - 46404892   | F - 8.33%   | TRUE  | TRUE  |
| X  | 46357160 - 46404892   |             | TRUE  | TRUE  |
| X  | 46357160 - 46404892   |             | TRUE  | TRUE  |
| Y  | 9185120 - 9193010     | T - 100.00% | TRUE  | TRUE  |
| Y  | 9185120 - 9193010     | T - 100.00% | TRUE  | TRUE  |
| Y  | 9185120 - 9193010     | T - 100.00% | TRUE  | TRUE  |
| Y  | 9185120 - 9193010     |             | TRUE  | TRUE  |
| Y  | 9185120 - 9193010     | T - 66.67%  | TRUE  | TRUE  |
| Y  | 9185120 - 9193010     |             | TRUE  | TRUE  |
| 11 | 13299325 - 13408813   |             | FALSE | TRUE  |
| 11 | 13299325 - 13408813   |             | TRUE  | TRUE  |
| 11 | 13299325 - 13408813   |             | TRUE  | TRUE  |
| 11 | 13299325 - 13408813   | F - 39.29%  | FALSE | TRUE  |
| 12 | 16500076 - 16530126   |             | FALSE | TRUE  |
| 12 | 16500076 - 16530126   | F - 15.38%  | FALSE | TRUE  |
| 12 | 81664454 - 81706201   | F - 10.00%  | FALSE | TRUE  |
| 12 | 81664454 - 81706201   |             | FALSE | TRUE  |
| 14 | 51955855 - 52197445   | F - 15.38%  | FALSE | TRUE  |
| 14 | 51955855 - 52197445   |             | TRUE  | TRUE  |
| 16 | 56700647 - 56701977   | T - 100.00% | TRUE  | TRUE  |
| 16 | 56700647 - 56701977   |             | TRUE  | TRUE  |
| 19 | 676389 - 683392       | F - 33.33%  | TRUE  | TRUE  |
| 19 | 676389 - 683392       |             | TRUE  | TRUE  |
| 19 | 6531010 - 6535939     | F - 33.33%  | TRUE  | TRUE  |
| 19 | 6531010 - 6535939     |             | FALSE | TRUE  |
| 19 | 812488 - 821967       | T - 70.00%  | TRUE  | TRUE  |
| 19 | 812488 - 821967       |             | FALSE | TRUE  |
| 20 | 35624752 - 35724410   |             | FALSE | TRUE  |
| 20 | 35624752 - 35724410   | T - 100.00% | TRUE  | TRUE  |
| 2  | 111876955 - 111926022 | F - 5.71%   | TRUE  | TRUE  |
| 2  | 111876955 - 111926022 | F - 5.71%   | FALSE | TRUE  |
| 2  | 111876955 - 111926022 |             | TRUE  | TRUE  |
| 3  | 124480795 - 124606674 |             | FALSE | TRUE  |
| 3  | 124480795 - 124606674 | F - 8.33%   | TRUE  | TRUE  |
| 4  | 74124926 - 74183670   |             | FALSE | TRUE  |
| 4  | 74124926 - 74183670   | T - 100.00% | TRUE  | TRUE  |
| 4  | 74124926 - 74183670   | T - 100.00% | TRUE  | TRUE  |

|   |    |                       |             |       |      |
|---|----|-----------------------|-------------|-------|------|
|   | 6  | 29894106 - 29897504   | T - 100.00% | TRUE  | TRUE |
|   | 6  | 29894106 - 29897504   |             | TRUE  | TRUE |
|   | 6  | 29894106 - 29897504   |             | FALSE | TRUE |
|   | 6  | 37400907 - 37450603   | F - 35.71%  | TRUE  | TRUE |
|   | 6  | 37400907 - 37450603   |             | TRUE  | TRUE |
| X |    | 150148982 - 150159248 | F - 33.33%  | TRUE  | TRUE |
| X |    | 150148982 - 150159248 | F - 11.11%  | FALSE | TRUE |
| X |    | 150148982 - 150159248 |             | TRUE  | TRUE |
| X |    | 150148982 - 150159248 | F - 44.44%  | TRUE  | TRUE |
|   | 16 | 46918290 - 46965201   | T - 83.33%  | TRUE  | TRUE |
|   | 16 | 46918290 - 46965201   |             | TRUE  | TRUE |
|   | 16 | 46918290 - 46965201   |             | FALSE | TRUE |
|   | 22 | 43013846 - 43045574   | F - 12.50%  | FALSE | TRUE |
|   | 22 | 43013846 - 43045574   |             | FALSE | TRUE |
|   | 22 | 43013846 - 43045574   |             | FALSE | TRUE |
|   | 1  | 168664695 - 168698502 |             | TRUE  | TRUE |
|   | 1  | 168664695 - 168698502 | F - 33.33%  | TRUE  | TRUE |
|   | 1  | 173204199 - 173446294 | T - 100.00% | TRUE  | TRUE |
|   | 1  | 173204199 - 173446294 | T - 100.00% | TRUE  | TRUE |
|   | 1  | 173204199 - 173446294 |             | TRUE  | TRUE |
|   | 3  | 33839844 - 33911199   | F - 3.70%   | FALSE | TRUE |
|   | 3  | 33839844 - 33911199   |             | FALSE | TRUE |
|   | 4  | 25749049 - 25865382   | F - 37.50%  | TRUE  | TRUE |
|   | 4  | 25749049 - 25865382   | F - 6.25%   | FALSE | TRUE |
|   | 4  | 25749049 - 25865382   | F - 12.50%  | TRUE  | TRUE |
|   | 4  | 25749049 - 25865382   | F - 6.25%   | TRUE  | TRUE |
|   | 4  | 25749049 - 25865382   | F - 6.25%   | FALSE | TRUE |
|   | 4  | 25749049 - 25865382   | F - 12.50%  | TRUE  | TRUE |
|   | 4  | 25749049 - 25865382   | F - 6.25%   | FALSE | TRUE |
|   | 4  | 25749049 - 25865382   |             | TRUE  | TRUE |
|   | 4  | 25749049 - 25865382   | F - 6.25%   | TRUE  | TRUE |
|   | 4  | 25749049 - 25865382   |             | FALSE | TRUE |
|   | 5  | 133450402 - 133487556 | F - 7.50%   | FALSE | TRUE |
|   | 5  | 133450402 - 133487556 | F - 25.00%  | FALSE | TRUE |
|   | 5  | 133450402 - 133487556 |             | FALSE | TRUE |
|   | 5  | 133450402 - 133487556 |             | FALSE | TRUE |
|   | 7  | 76139745 - 76648340   | F - 16.67%  | TRUE  | TRUE |
|   | 7  | 76139745 - 76648340   |             | TRUE  | TRUE |
|   | 8  | 21964383 - 21967456   |             | FALSE | TRUE |
|   | 8  | 21964383 - 21967456   | T - 80.00%  | FALSE | TRUE |
|   | 8  | 42704780 - 42751866   | F - 7.69%   | FALSE | TRUE |
|   | 8  | 42704780 - 42751866   |             | TRUE  | TRUE |
|   | 10 | 99472930 - 99484694   | F - 16.67%  | TRUE  | TRUE |
|   | 10 | 99472930 - 99484694   |             | TRUE  | TRUE |
|   | 2  | 27579113 - 27590489   |             | TRUE  | TRUE |
|   | 2  | 27579113 - 27590489   | F - 33.33%  | TRUE  | TRUE |
|   | 2  | 27579113 - 27590489   | T - 66.67%  | TRUE  | TRUE |
|   | 2  | 69240276 - 69476459   | F - 8.33%   | TRUE  | TRUE |
|   | 2  | 69240276 - 69476459   | F - 16.67%  | FALSE | TRUE |
|   | 2  | 69240276 - 69476459   |             | TRUE  | TRUE |
|   | 2  | 69240276 - 69476459   | F - 25.00%  | TRUE  | TRUE |
|   | 2  | 69240276 - 69476459   | F - 8.33%   | TRUE  | TRUE |
|   | 2  | 228549926 - 228582745 | F - 21.43%  | FALSE | TRUE |
|   | 2  | 228549926 - 228582745 |             | FALSE | TRUE |
|   | 4  | 165875598 - 165898820 |             | TRUE  | TRUE |
|   | 4  | 165875598 - 165898820 | T - 100.00% | FALSE | TRUE |
|   | 4  | 165875598 - 165898820 | T - 100.00% | TRUE  | TRUE |
|   | 6  | 150285143 - 150294846 |             | TRUE  | TRUE |

|            |                       |             |       |       |
|------------|-----------------------|-------------|-------|-------|
| 6          | 150285143 - 150294846 | T - 100.00% | TRUE  | TRUE  |
| 10         | 69865874 - 69971774   |             | FALSE | TRUE  |
| 10         | 69865874 - 69971774   |             | TRUE  | TRUE  |
| 10         | 69865874 - 69971774   | T - 89.47%  | TRUE  | TRUE  |
| 10         | 69865874 - 69971774   |             | TRUE  | TRUE  |
| 10         | 69865874 - 69971774   |             | TRUE  | TRUE  |
| 12         | 100550175 - 100590222 | F - 10.00%  | TRUE  | TRUE  |
| 12         | 100550175 - 100590222 |             | FALSE | TRUE  |
| 12         | 100550175 - 100590222 |             | TRUE  | TRUE  |
| 12         | 100550175 - 100590222 |             | FALSE | TRUE  |
| 1          | 147400506 - 147465755 | F - 4.76%   | FALSE | TRUE  |
| 1          | 147400506 - 147465755 |             | FALSE | TRUE  |
| 1          | 229406822 - 229441641 |             | TRUE  | TRUE  |
| 1          | 229406822 - 229441641 | T - 50.00%  | FALSE | TRUE  |
| 3          | 58810163 - 59004819   |             | TRUE  | TRUE  |
| 3          | 58810163 - 59004819   | F - 25.00%  | FALSE | TRUE  |
| 3          | 101498029 - 101547075 |             | TRUE  | TRUE  |
| 3          | 101498029 - 101547075 | F - 20.00%  | TRUE  | TRUE  |
| 4          | 79892902 - 80229953   | T - 61.54%  | TRUE  | TRUE  |
| 4          | 79892902 - 80229953   | T - 53.85%  | TRUE  | TRUE  |
| 4          | 79892902 - 80229953   | F - 15.38%  | TRUE  | TRUE  |
| 4          | 79892902 - 80229953   |             | TRUE  | TRUE  |
| 4          | 79892902 - 80229953   | F - 7.69%   | TRUE  | FALSE |
| 4          | 79892902 - 80229953   | F - 7.69%   | TRUE  | TRUE  |
| 4          | 79892902 - 80229953   | F - 7.69%   | TRUE  | TRUE  |
| 4          | 79892902 - 80229953   | F - 7.69%   | FALSE | TRUE  |
| 4          | 79892902 - 80229953   | F - 7.69%   | FALSE | TRUE  |
| 4          | 79892902 - 80229953   |             | FALSE | TRUE  |
| 4          | 79892902 - 80229953   | F - 7.69%   | TRUE  | TRUE  |
| 4          | 79892902 - 80229953   | F - 46.15%  | TRUE  | TRUE  |
| 4          | 79892902 - 80229953   |             | TRUE  | TRUE  |
| 4          | 79892902 - 80229953   | F - 23.08%  | TRUE  | TRUE  |
| 4          | 79892902 - 80229953   | F - 7.69%   | FALSE | TRUE  |
| 6          | 30670844 - 30680961   |             | FALSE | TRUE  |
| 6          | 30670844 - 30680961   | T - 100.00% | FALSE | TRUE  |
| 9          | 21324051 - 21335429   | F - 12.50%  | TRUE  | TRUE  |
| 9          | 21324051 - 21335429   |             | FALSE | TRUE  |
| 9          | 21324051 - 21335429   |             | TRUE  | TRUE  |
| 14         | 58467479 - 58618931   | F - 16.67%  | TRUE  | TRUE  |
| 14         | 58467479 - 58618931   |             | FALSE | TRUE  |
| 15         | 57592563 - 57599967   | T - 100.00% | TRUE  | TRUE  |
| 15         | 57592563 - 57599967   |             | TRUE  | TRUE  |
| 16         | 72146056 - 72206349   |             | FALSE | TRUE  |
| 16         | 72146056 - 72206349   | F - 10.00%  | FALSE | TRUE  |
| 16         | 72146056 - 72206349   |             | TRUE  | TRUE  |
| 19         | 38397861 - 38699012   |             | TRUE  | TRUE  |
| 19         | 38397861 - 38699012   |             | TRUE  | TRUE  |
| 19         | 38397861 - 38699012   | T - 75.00%  | TRUE  | TRUE  |
| 20         | 50448336 - 50479451   | T - 100.00% | TRUE  | TRUE  |
| 20         | 50448336 - 50479451   | T - 100.00% | TRUE  | TRUE  |
| 20         | 50448336 - 50479451   |             | TRUE  | TRUE  |
| 20         | 60528525 - 60640866   |             | TRUE  | TRUE  |
| 20         | 60528525 - 60640866   |             | TRUE  | TRUE  |
| 20         | 60528525 - 60640866   | T - 55.56%  | TRUE  | TRUE  |
| 6_apd_hap1 | 1982488 - 1992604     |             | FALSE | TRUE  |
| 6_apd_hap1 | 1982488 - 1992604     | T - 100.00% | FALSE | TRUE  |
| 6_cox_hap2 | 2182914 - 2193030     |             | FALSE | TRUE  |
| 6_cox_hap2 | 2182914 - 2193030     | T - 100.00% | FALSE | TRUE  |

|             |                       |             |       |       |
|-------------|-----------------------|-------------|-------|-------|
| 6_dbb_hap3  | 1964504 - 1974620     |             | FALSE | TRUE  |
| 6_dbb_hap3  | 1964504 - 1974620     | T - 100.00% | FALSE | TRUE  |
| 6_mann_hap4 | 2018939 - 2029055     |             | FALSE | TRUE  |
| 6_mann_hap4 | 2018939 - 2029055     | T - 100.00% | FALSE | TRUE  |
| 6_mcf_hap5  | 2052728 - 2062844     |             | FALSE | TRUE  |
| 6_mcf_hap5  | 2052728 - 2062844     | T - 100.00% | FALSE | TRUE  |
| 6_ssto_hap7 | 2003151 - 2013267     |             | FALSE | TRUE  |
| 6_ssto_hap7 | 2003151 - 2013267     | T - 100.00% | FALSE | TRUE  |
| 3           | 148568720 - 148677899 | T - 100.00% | TRUE  | TRUE  |
| 3           | 148568720 - 148677899 |             | TRUE  | TRUE  |
| 3           | 148568720 - 148677899 |             | FALSE | TRUE  |
| 4           | 121606074 - 121844025 |             | FALSE | TRUE  |
| 4           | 121606074 - 121844025 | F - 10.53%  | TRUE  | TRUE  |
| 4           | 121606074 - 121844025 |             | TRUE  | TRUE  |
| 4           | 121606074 - 121844025 | F - 10.53%  | TRUE  | TRUE  |
| 5           | 34656342 - 34832732   |             | FALSE | TRUE  |
| 5           | 34656342 - 34832732   | F - 2.70%   | FALSE | TRUE  |
| 5           | 114546527 - 114598569 |             | TRUE  | TRUE  |
| 5           | 114546527 - 114598569 |             | FALSE | TRUE  |
| 5           | 114546527 - 114598569 | F - 16.67%  | FALSE | TRUE  |
| 7           | 90032648 - 90142716   |             | FALSE | TRUE  |
| 7           | 90032648 - 90142716   | F - 4.55%   | TRUE  | TRUE  |
| 8           | 90769975 - 90803292   |             | TRUE  | TRUE  |
| 8           | 90769975 - 90803292   | T - 50.00%  | TRUE  | TRUE  |
| 12          | 124773710 - 124800570 | T - 100.00% | FALSE | TRUE  |
| 12          | 124773710 - 124800570 |             | TRUE  | TRUE  |
| 14          | 70078310 - 70181861   | F - 20.00%  | TRUE  | TRUE  |
| 14          | 70078310 - 70181861   | F - 20.00%  | TRUE  | TRUE  |
| 14          | 70078310 - 70181861   |             | FALSE | TRUE  |
| 16          | 30772933 - 30787628   |             | FALSE | TRUE  |
| 16          | 30772933 - 30787628   | T - 73.33%  | TRUE  | TRUE  |
| 2           | 160092304 - 160143310 | T - 100.00% | TRUE  | TRUE  |
| 2           | 160092304 - 160143310 |             | TRUE  | TRUE  |
| 5           | 72921983 - 73237818   | F - 26.92%  | TRUE  | TRUE  |
| 5           | 72921983 - 73237818   |             | TRUE  | TRUE  |
| 6           | 76067008 - 76096096   | F - 33.33%  | TRUE  | TRUE  |
| 6           | 76067008 - 76096096   |             | TRUE  | TRUE  |
| 6           | 76067008 - 76096096   |             | FALSE | TRUE  |
| 12          | 83080659 - 83528649   | T - 80.00%  | FALSE | TRUE  |
| 12          | 83080659 - 83528649   |             | FALSE | TRUE  |
| 15          | 100913144 - 100978119 | T - 50.00%  | TRUE  | TRUE  |
| 15          | 100913144 - 100978119 |             | TRUE  | TRUE  |
| 22          | 26921458 - 26992681   | F - 6.67%   | FALSE | TRUE  |
| 22          | 26921458 - 26992681   |             | FALSE | TRUE  |
| 1           | 145376125 - 145382397 |             | TRUE  | FALSE |
| 1           | 145376125 - 145382397 | T - 50.00%  | TRUE  | TRUE  |
| 1           | 145376125 - 145382397 | F - 25.00%  | TRUE  | TRUE  |
| 1           | 145376125 - 145382397 |             | TRUE  | TRUE  |
| 1           | 145376125 - 145382397 | F - 25.00%  | TRUE  | TRUE  |
| 1           | 145376125 - 145382397 | T - 75.00%  | TRUE  | TRUE  |
| 1           | 145376125 - 145382397 | F - 25.00%  | TRUE  | TRUE  |
| 1           | 145376125 - 145382397 | T - 50.00%  | TRUE  | TRUE  |
| 1           | 145376125 - 145382397 | F - 25.00%  | TRUE  | TRUE  |
| 4           | 57514154 - 57548065   | F - 16.00%  | TRUE  | TRUE  |
| 4           | 57514154 - 57548065   | F - 32.00%  | TRUE  | TRUE  |
| 4           | 57514154 - 57548065   | F - 28.00%  | TRUE  | TRUE  |
| 4           | 57514154 - 57548065   | F - 44.00%  | TRUE  | TRUE  |
| 4           | 57514154 - 57548065   | T - 56.00%  | TRUE  | TRUE  |

|            |                       |             |       |       |
|------------|-----------------------|-------------|-------|-------|
| 4          | 57514154 - 57548065   | T - 96.00%  | TRUE  | FALSE |
| 4          | 57514154 - 57548065   | T - 100.00% | TRUE  | TRUE  |
| 4          | 57514154 - 57548065   | F - 24.00%  | TRUE  | TRUE  |
| 4          | 57514154 - 57548065   | F - 8.00%   | TRUE  | TRUE  |
| 4          | 57514154 - 57548065   |             | FALSE | TRUE  |
| 4          | 57514154 - 57548065   | F - 4.00%   | FALSE | TRUE  |
| 4          | 57514154 - 57548065   |             | FALSE | TRUE  |
| 4          | 57514154 - 57548065   |             | FALSE | TRUE  |
| 4          | 57514154 - 57548065   | F - 36.00%  | FALSE | TRUE  |
| 5          | 72416119 - 72427644   | F - 16.67%  | TRUE  | TRUE  |
| 5          | 72416119 - 72427644   | T - 100.00% | TRUE  | TRUE  |
| 5          | 72416119 - 72427644   | T - 83.33%  | TRUE  | TRUE  |
| 5          | 72416119 - 72427644   |             | TRUE  | TRUE  |
| 5          | 119799973 - 120023027 | F - 40.00%  | TRUE  | TRUE  |
| 5          | 119799973 - 120023027 |             | TRUE  | TRUE  |
| 9          | 79379352 - 79402485   |             | FALSE | TRUE  |
| 9          | 79379352 - 79402485   | T - 100.00% | TRUE  | TRUE  |
| 10         | 134020993 - 134146063 | F - 40.00%  | TRUE  | TRUE  |
| 10         | 134020993 - 134146063 | F - 6.67%   | TRUE  | TRUE  |
| 10         | 134020993 - 134146063 | F - 6.67%   | TRUE  | TRUE  |
| 10         | 134020993 - 134146063 |             | FALSE | TRUE  |
| 11         | 18287721 - 18291524   |             | TRUE  | FALSE |
| 11         | 18287721 - 18291524   |             | TRUE  | TRUE  |
| 11         | 18287721 - 18291524   |             | TRUE  | TRUE  |
| 11         | 18287721 - 18291524   | T - 91.67%  | TRUE  | TRUE  |
| 11         | 18287721 - 18291524   | T - 66.67%  | TRUE  | FALSE |
| 11         | 18287721 - 18291524   | F - 8.33%   | TRUE  | TRUE  |
| 11         | 18287721 - 18291524   | F - 8.33%   | TRUE  | TRUE  |
| 11         | 128761251 - 128790930 | T - 100.00% | FALSE | TRUE  |
| 11         | 128761251 - 128790930 |             | FALSE | TRUE  |
| 13         | 115000362 - 115038198 | F - 18.75%  | TRUE  | TRUE  |
| 13         | 115000362 - 115038198 |             | TRUE  | TRUE  |
| 6_qbl_hap6 | 1963777 - 1973892     |             | FALSE | TRUE  |
| 6_qbl_hap6 | 1963777 - 1973892     | T - 100.00% | FALSE | TRUE  |
| 1          | 43766566 - 43791552   | F - 4.17%   | FALSE | TRUE  |
| 1          | 43766566 - 43791552   |             | FALSE | TRUE  |
| 2          | 206546562 - 206662857 |             | TRUE  | TRUE  |
| 2          | 206546562 - 206662857 | F - 16.13%  | TRUE  | TRUE  |
| 2          | 206546562 - 206662857 | F - 35.48%  | TRUE  | TRUE  |
| 2          | 206546562 - 206662857 |             | TRUE  | TRUE  |
| 2          | 206546562 - 206662857 |             | FALSE | TRUE  |
| 2          | 202241930 - 202316334 | F - 11.11%  | FALSE | TRUE  |
| 2          | 202241930 - 202316334 |             | FALSE | TRUE  |
| 6          | 132129156 - 132216295 |             | FALSE | TRUE  |
| 6          | 132129156 - 132216295 | F - 33.33%  | FALSE | TRUE  |
| 2          | 17720393 - 17838285   |             | TRUE  | FALSE |
| 2          | 17720393 - 17838285   | T - 62.50%  | TRUE  | TRUE  |
| 2          | 17720393 - 17838285   |             | TRUE  | FALSE |
| 2          | 17720393 - 17838285   | T - 87.50%  | TRUE  | TRUE  |
| 2          | 17720393 - 17838285   | T - 62.50%  | TRUE  | TRUE  |
| 2          | 17720393 - 17838285   |             | TRUE  | TRUE  |
| 2          | 17720393 - 17838285   |             | TRUE  | TRUE  |
| 2          | 17720393 - 17838285   | F - 12.50%  | FALSE | TRUE  |
| 2          | 17720393 - 17838285   | F - 12.50%  | TRUE  | TRUE  |
| 2          | 17720393 - 17838285   |             | TRUE  | TRUE  |
| 2          | 17720393 - 17838285   | F - 12.50%  | TRUE  | TRUE  |
| 2          | 17720393 - 17838285   |             | TRUE  | TRUE  |
| 2          | 17720393 - 17838285   | F - 12.50%  | TRUE  | TRUE  |

|             |    |                       |             |       |      |
|-------------|----|-----------------------|-------------|-------|------|
|             | 2  | 17720393 - 17838285   | F - 12.50%  | FALSE | TRUE |
|             | 6  | 33217311 - 33222766   |             | FALSE | TRUE |
|             | 6  | 33217311 - 33222766   |             | FALSE | TRUE |
|             | 6  | 33217311 - 33222766   | T - 80.00%  | TRUE  | TRUE |
|             | 6  | 29393281 - 29424848   | T - 60.00%  | FALSE | TRUE |
|             | 6  | 29393281 - 29424848   |             | FALSE | TRUE |
|             | 7  | 30323923 - 30407308   | T - 50.00%  | TRUE  | TRUE |
|             | 7  | 30323923 - 30407308   |             | TRUE  | TRUE |
|             | 7  | 30323923 - 30407308   | T - 75.00%  | TRUE  | TRUE |
|             | 8  | 23286665 - 23315244   | F - 8.33%   | TRUE  | TRUE |
|             | 8  | 23286665 - 23315244   | F - 16.67%  | TRUE  | TRUE |
|             | 8  | 23286665 - 23315244   | F - 8.33%   | TRUE  | TRUE |
|             | 8  | 23286665 - 23315244   |             | TRUE  | TRUE |
|             | 17 | 29248698 - 29286340   | T - 75.00%  | FALSE | TRUE |
|             | 17 | 29248698 - 29286340   |             | FALSE | TRUE |
| 6_cox_hap2  |    | 4661137 - 4666592     |             | FALSE | TRUE |
| 6_cox_hap2  |    | 4661137 - 4666592     |             | FALSE | TRUE |
| 6_cox_hap2  |    | 4661137 - 4666592     | T - 80.00%  | TRUE  | TRUE |
| 6_cox_hap2  |    | 912059 - 943630       | T - 60.00%  | FALSE | TRUE |
| 6_cox_hap2  |    | 912059 - 943630       |             | FALSE | TRUE |
| 6_dbb_hap3  |    | 4498631 - 4504086     |             | FALSE | TRUE |
| 6_dbb_hap3  |    | 4498631 - 4504086     |             | FALSE | TRUE |
| 6_dbb_hap3  |    | 4498631 - 4504086     | T - 80.00%  | TRUE  | TRUE |
| 6_mann_hap4 |    | 4674615 - 4680070     |             | FALSE | TRUE |
| 6_mann_hap4 |    | 4674615 - 4680070     |             | FALSE | TRUE |
| 6_mann_hap4 |    | 4674615 - 4680070     | T - 80.00%  | TRUE  | TRUE |
| 6_mann_hap4 |    | 696260 - 727815       | T - 60.00%  | FALSE | TRUE |
| 6_mann_hap4 |    | 696260 - 727815       |             | FALSE | TRUE |
| 6_mcf_hap5  |    | 4691101 - 4696552     |             | FALSE | TRUE |
| 6_mcf_hap5  |    | 4691101 - 4696552     |             | FALSE | TRUE |
| 6_mcf_hap5  |    | 4691101 - 4696552     | T - 80.00%  | TRUE  | TRUE |
| 6_mcf_hap5  |    | 696457 - 728030       | T - 60.00%  | FALSE | TRUE |
| 6_mcf_hap5  |    | 696457 - 728030       |             | FALSE | TRUE |
| 6_qbl_hap6  |    | 4449530 - 4454982     |             | FALSE | TRUE |
| 6_qbl_hap6  |    | 4449530 - 4454982     |             | FALSE | TRUE |
| 6_qbl_hap6  |    | 4449530 - 4454982     | T - 80.00%  | TRUE  | TRUE |
| 6_ssto_hap7 |    | 4697536 - 4702988     |             | FALSE | TRUE |
| 6_ssto_hap7 |    | 4697536 - 4702988     |             | FALSE | TRUE |
| 6_ssto_hap7 |    | 4697536 - 4702988     | T - 80.00%  | TRUE  | TRUE |
|             | 1  | 212859759 - 212873327 | F - 20.00%  | TRUE  | TRUE |
|             | 1  | 212859759 - 212873327 | T - 60.00%  | TRUE  | TRUE |
|             | 1  | 212859759 - 212873327 | T - 80.00%  | TRUE  | TRUE |
|             | 1  | 212859759 - 212873327 |             | TRUE  | TRUE |
|             | 7  | 75162619 - 75368283   |             | FALSE | TRUE |
|             | 7  | 75162619 - 75368283   | F - 10.00%  | FALSE | TRUE |
|             | 7  | 66093868 - 66108216   | T - 83.33%  | TRUE  | TRUE |
|             | 7  | 66093868 - 66108216   |             | FALSE | TRUE |
|             | 9  | 66494269 - 66503030   | F - 33.33%  | TRUE  | TRUE |
|             | 9  | 66494269 - 66503030   |             | FALSE | TRUE |
|             | 10 | 121332978 - 121356541 | F - 20.00%  | TRUE  | TRUE |
|             | 10 | 121332978 - 121356541 |             | FALSE | TRUE |
|             | 15 | 66797431 - 66841823   |             | TRUE  | TRUE |
|             | 15 | 66797431 - 66841823   | T - 77.78%  | FALSE | TRUE |
|             | 16 | 1138226 - 1146244     | T - 100.00% | FALSE | TRUE |
|             | 16 | 1138226 - 1146244     |             | TRUE  | TRUE |
|             | 16 | 67471917 - 67515140   | F - 28.57%  | FALSE | TRUE |
|             | 16 | 67471917 - 67515140   |             | TRUE  | TRUE |
|             | 16 | 67471917 - 67515140   | F - 28.57%  | TRUE  | TRUE |

|             |                       |             |       |       |
|-------------|-----------------------|-------------|-------|-------|
| 17          | 56769934 - 56811703   |             | FALSE | TRUE  |
| 17          | 56769934 - 56811703   | F - 22.22%  | FALSE | TRUE  |
| 17          | 56769934 - 56811703   |             | TRUE  | TRUE  |
| 20          | 24449835 - 24647252   |             | TRUE  | TRUE  |
| 20          | 24449835 - 24647252   | F - 25.00%  | TRUE  | TRUE  |
| 20          | 24449835 - 24647252   | T - 50.00%  | TRUE  | TRUE  |
| 2           | 198115582 - 198167243 | T - 100.00% | TRUE  | TRUE  |
| 2           | 198115582 - 198167243 |             | TRUE  | TRUE  |
| 6           | 124125069 - 125146803 |             | TRUE  | TRUE  |
| 6           | 124125069 - 125146803 |             | TRUE  | TRUE  |
| 6           | 124125069 - 125146803 |             | TRUE  | TRUE  |
| 6           | 124125069 - 125146803 | T - 76.92%  | TRUE  | FALSE |
| 6           | 124125069 - 125146803 | T - 53.85%  | TRUE  | TRUE  |
| 6           | 124125069 - 125146803 | F - 38.46%  | TRUE  | TRUE  |
| 6           | 124125069 - 125146803 | F - 7.69%   | FALSE | TRUE  |
| 6           | 124125069 - 125146803 | T - 69.23%  | TRUE  | TRUE  |
| 11          | 64373646 - 64490660   | F - 42.86%  | FALSE | TRUE  |
| 11          | 64373646 - 64490660   |             | TRUE  | TRUE  |
| 11          | 64373646 - 64490660   | F - 47.62%  | FALSE | TRUE  |
| 11          | 64373646 - 64490660   |             | FALSE | TRUE  |
| 11          | 64373646 - 64490660   |             | FALSE | TRUE  |
| 11          | 64373646 - 64490660   |             | FALSE | TRUE  |
| 11          | 64373646 - 64490660   |             | FALSE | TRUE  |
| 20          | 37075221 - 37079564   |             | TRUE  | TRUE  |
| 20          | 37075221 - 37079564   | F - 21.74%  | TRUE  | TRUE  |
| 6_ssto_hap7 | 4560771 - 4577055     |             | TRUE  | TRUE  |
| 6_ssto_hap7 | 4560771 - 4577055     | T - 50.00%  | TRUE  | TRUE  |
| 6_ssto_hap7 | 4560771 - 4577055     |             | TRUE  | TRUE  |
| 6_ssto_hap7 | 4560771 - 4577055     |             | TRUE  | TRUE  |
| 1           | 179068462 - 179198819 | F - 4.76%   | TRUE  | TRUE  |
| 1           | 179068462 - 179198819 |             | FALSE | TRUE  |
| 2           | 54683422 - 54898583   |             | TRUE  | TRUE  |
| 2           | 54683422 - 54898583   | F - 10.00%  | FALSE | TRUE  |
| 2           | 54683422 - 54898583   | F - 10.00%  | FALSE | TRUE  |
| 6           | 127439749 - 127518910 | F - 33.33%  | TRUE  | TRUE  |
| 6           | 127439749 - 127518910 | F - 16.67%  | TRUE  | FALSE |
| 6           | 127439749 - 127518910 | F - 33.33%  | TRUE  | TRUE  |
| 6           | 127439749 - 127518910 | F - 16.67%  | TRUE  | TRUE  |
| 6           | 127439749 - 127518910 |             | TRUE  | TRUE  |
| 11          | 108535752 - 108811657 | T - 77.78%  | TRUE  | TRUE  |
| 11          | 108535752 - 108811657 |             | FALSE | TRUE  |
| 14          | 94547628 - 94570192   |             | FALSE | TRUE  |
| 14          | 94547628 - 94570192   | F - 9.09%   | TRUE  | TRUE  |
| 14          | 94547628 - 94570192   |             | TRUE  | TRUE  |
| 14          | 58875212 - 58894332   | T - 81.82%  | TRUE  | TRUE  |
| 14          | 58875212 - 58894332   |             | TRUE  | TRUE  |
| 14          | 58875212 - 58894332   | F - 18.18%  | TRUE  | TRUE  |
| 14          | 58875212 - 58894332   |             | FALSE | TRUE  |
| 15          | 23255242 - 23268823   | F - 20.00%  | FALSE | TRUE  |
| 15          | 23255242 - 23268823   |             | FALSE | TRUE  |
| 15          | 23255242 - 23268823   |             | TRUE  | TRUE  |
| 16          | 64977656 - 65156101   | F - 10.00%  | TRUE  | TRUE  |
| 16          | 64977656 - 65156101   | F - 20.00%  | TRUE  | TRUE  |
| 16          | 64977656 - 65156101   | T - 70.00%  | TRUE  | TRUE  |
| 16          | 64977656 - 65156101   |             | FALSE | TRUE  |
| 17          | 73870245 - 73874656   | T - 100.00% | TRUE  | TRUE  |
| 17          | 73870245 - 73874656   | T - 100.00% | TRUE  | TRUE  |
| 17          | 73870245 - 73874656   |             | TRUE  | TRUE  |



|             |                       |             |       |      |
|-------------|-----------------------|-------------|-------|------|
| 9           | 35658287 - 35661508   | F - 7.69%   | FALSE | TRUE |
| 9           | 35658287 - 35661508   |             | TRUE  | TRUE |
| 17          | 19286755 - 19290553   |             | TRUE  | TRUE |
| 17          | 19286755 - 19290553   | F - 16.67%  | TRUE  | TRUE |
| 17          | 19286755 - 19290553   | T - 50.00%  | TRUE  | TRUE |
| 20          | 33543704 - 33590240   | F - 27.27%  | TRUE  | TRUE |
| 20          | 33543704 - 33590240   |             | FALSE | TRUE |
| 3           | 3168600 - 3192563     |             | FALSE | TRUE |
| 3           | 3168600 - 3192563     | F - 5.56%   | TRUE  | TRUE |
| 12          | 70636774 - 70748773   | F - 10.00%  | TRUE  | TRUE |
| 12          | 70636774 - 70748773   |             | TRUE  | TRUE |
| 12          | 70636774 - 70748773   |             | FALSE | TRUE |
| 14          | 35514113 - 35552589   | F - 14.29%  | TRUE  | TRUE |
| 14          | 35514113 - 35552589   |             | TRUE  | TRUE |
| 15          | 28594197 - 28603226   | F - 33.33%  | TRUE  | TRUE |
| 15          | 28594197 - 28603226   |             | FALSE | TRUE |
| 17          | 1182957 - 1204281     | T - 100.00% | FALSE | TRUE |
| 17          | 1182957 - 1204281     |             | FALSE | TRUE |
| 19          | 43428284 - 43441330   |             | FALSE | TRUE |
| 19          | 43428284 - 43441330   | T - 80.00%  | TRUE  | TRUE |
| 19          | 43428284 - 43441330   |             | TRUE  | TRUE |
| 19          | 43428284 - 43441330   |             | TRUE  | TRUE |
| 20          | 2632791 - 2639039     |             | TRUE  | TRUE |
| 20          | 2632791 - 2639039     | F - 13.79%  | TRUE  | TRUE |
| 20          | 10015689 - 10037410   |             | FALSE | TRUE |
| 20          | 10015689 - 10037410   | F - 42.86%  | TRUE  | TRUE |
| 20          | 10015689 - 10037410   | F - 28.57%  | FALSE | TRUE |
| 21          | 42792231 - 42831141   |             | TRUE  | TRUE |
| 21          | 42792231 - 42831141   | F - 4.55%   | TRUE  | TRUE |
| 21          | 42792231 - 42831141   | F - 45.45%  | TRUE  | TRUE |
| 21          | 42792231 - 42831141   | F - 22.73%  | TRUE  | TRUE |
| 21          | 42792231 - 42831141   |             | TRUE  | TRUE |
| 22          | 50166931 - 50221334   |             | TRUE  | TRUE |
| 22          | 50166931 - 50221334   | T - 83.33%  | TRUE  | TRUE |
| 22          | 50166931 - 50221334   |             | FALSE | TRUE |
| 22          | 50166931 - 50221334   | F - 44.44%  | FALSE | TRUE |
| 2           | 190425305 - 190448484 | F - 5.88%   | TRUE  | TRUE |
| 2           | 190425305 - 190448484 |             | TRUE  | TRUE |
| 2           | 190425305 - 190448484 | F - 11.76%  | TRUE  | TRUE |
| 3           | 134318765 - 134370478 | T - 81.82%  | FALSE | TRUE |
| 3           | 134318765 - 134370478 |             | FALSE | TRUE |
| 5           | 175570088 - 175626298 |             | TRUE  | TRUE |
| 5           | 175570088 - 175626298 | F - 37.50%  | FALSE | TRUE |
| 6_mann_hap4 | 1188313 - 1191712     | T - 100.00% | TRUE  | TRUE |
| 6_mann_hap4 | 1188313 - 1191712     |             | TRUE  | TRUE |
| 4           | 40751914 - 40812002   | T - 60.00%  | FALSE | TRUE |
| 4           | 40751914 - 40812002   |             | TRUE  | TRUE |
| 12          | 27397078 - 27478892   | F - 28.57%  | FALSE | TRUE |
| 12          | 27397078 - 27478892   |             | TRUE  | TRUE |
| 15          | 58245622 - 58571520   |             | FALSE | TRUE |
| 15          | 58245622 - 58571520   | F - 23.08%  | FALSE | TRUE |
| 15          | 90328120 - 90358094   |             | TRUE  | TRUE |
| 15          | 90328120 - 90358094   | T - 50.00%  | TRUE  | TRUE |
| 15          | 90328120 - 90358094   |             | TRUE  | TRUE |
| 15          | 90328120 - 90358094   | F - 25.00%  | TRUE  | TRUE |
| 16          | 53468351 - 53525560   |             | FALSE | TRUE |
| 16          | 53468351 - 53525560   | T - 100.00% | TRUE  | TRUE |
| 17          | 77906143 - 78009647   | F - 12.50%  | FALSE | TRUE |

|             |                       |             |       |       |
|-------------|-----------------------|-------------|-------|-------|
| 17          | 77906143 - 78009647   |             | FALSE | TRUE  |
| 1           | 111822681 - 111828738 | T - 50.00%  | FALSE | TRUE  |
| 1           | 111822681 - 111828738 |             | FALSE | TRUE  |
| 1           | 150039342 - 150117505 |             | TRUE  | TRUE  |
| 1           | 150039342 - 150117505 | F - 4.76%   | TRUE  | TRUE  |
| 1           | 150768684 - 150780917 | F - 16.67%  | TRUE  | TRUE  |
| 1           | 150768684 - 150780917 | F - 33.33%  | TRUE  | TRUE  |
| 1           | 150768684 - 150780917 |             | TRUE  | TRUE  |
| 1           | 150768684 - 150780917 |             | TRUE  | FALSE |
| 1           | 150768684 - 150780917 | F - 16.67%  | TRUE  | TRUE  |
| 1           | 150768684 - 150780917 |             | TRUE  | TRUE  |
| 6           | 37137922 - 37143204   |             | TRUE  | TRUE  |
| 6           | 37137922 - 37143204   | F - 28.57%  | TRUE  | TRUE  |
| 12          | 56229214 - 56236735   |             | TRUE  | TRUE  |
| 12          | 56229214 - 56236735   |             | TRUE  | TRUE  |
| 12          | 56229214 - 56236735   | F - 11.11%  | TRUE  | TRUE  |
| 12          | 56229214 - 56236735   | T - 55.56%  | TRUE  | TRUE  |
| 12          | 56229214 - 56236735   |             | TRUE  | TRUE  |
| 12          | 56229214 - 56236735   | T - 55.56%  | TRUE  | TRUE  |
| 12          | 56229214 - 56236735   | T - 66.67%  | TRUE  | TRUE  |
| 12          | 56229214 - 56236735   | F - 11.11%  | TRUE  | TRUE  |
| 12          | 56229214 - 56236735   |             | TRUE  | TRUE  |
| 12          | 56229214 - 56236735   | F - 44.44%  | TRUE  | TRUE  |
| 12          | 56229214 - 56236735   |             | TRUE  | TRUE  |
| 15          | 77400471 - 77712464   |             | TRUE  | TRUE  |
| 15          | 77400471 - 77712464   | F - 12.50%  | TRUE  | TRUE  |
| 15          | 77400471 - 77712464   |             | FALSE | TRUE  |
| 16          | 56691855 - 56693215   |             | TRUE  | TRUE  |
| 16          | 56691855 - 56693215   | T - 100.00% | TRUE  | FALSE |
| 16          | 56691855 - 56693215   | T - 100.00% | TRUE  | TRUE  |
| 16          | 56691855 - 56693215   |             | TRUE  | TRUE  |
| 16          | 56691855 - 56693215   |             | TRUE  | TRUE  |
| 6_ssto_hap7 | 733813 - 765382       | T - 60.00%  | FALSE | TRUE  |
| 6_ssto_hap7 | 733813 - 765382       |             | FALSE | TRUE  |
| 3           | 11034410 - 11080935   |             | TRUE  | TRUE  |
| 3           | 11034410 - 11080935   |             | FALSE | TRUE  |
| 3           | 11034410 - 11080935   | T - 62.50%  | FALSE | TRUE  |
| 4           | 142240604 - 142253772 | F - 33.33%  | TRUE  | TRUE  |
| 4           | 142240604 - 142253772 |             | TRUE  | TRUE  |
| 10          | 125673090 - 125691113 | T - 100.00% | TRUE  | TRUE  |
| 10          | 125673090 - 125691113 | T - 100.00% | FALSE | TRUE  |
| 10          | 125673090 - 125691113 |             | TRUE  | TRUE  |
| 3           | 197615946 - 197687013 |             | FALSE | TRUE  |
| 3           | 197615946 - 197687013 | F - 11.11%  | TRUE  | TRUE  |
| 3           | 197615946 - 197687013 | F - 5.56%   | FALSE | TRUE  |
| 3           | 9834179 - 9848789     | F - 7.14%   | TRUE  | TRUE  |
| 3           | 9834179 - 9848789     |             | FALSE | TRUE  |
| 1           | 42921788 - 42926086   |             | FALSE | TRUE  |
| 1           | 42921788 - 42926086   | T - 75.00%  | TRUE  | TRUE  |
| 2           | 73481810 - 73511559   | T - 57.14%  | FALSE | TRUE  |
| 2           | 73481810 - 73511559   |             | FALSE | TRUE  |
| 2           | 73481810 - 73511559   | F - 14.29%  | FALSE | TRUE  |
| 2           | 73481810 - 73511559   | F - 14.29%  | TRUE  | TRUE  |
| 2           | 73481810 - 73511559   |             | TRUE  | TRUE  |
| 5           | 167718656 - 167899308 |             | TRUE  | TRUE  |
| 5           | 167718656 - 167899308 | F - 4.76%   | TRUE  | TRUE  |
| 8           | 18027971 - 18081198   | F - 9.09%   | TRUE  | TRUE  |
| 8           | 18027971 - 18081198   | F - 13.64%  | FALSE | TRUE  |

|   |    |                       |             |       |      |
|---|----|-----------------------|-------------|-------|------|
|   | 8  | 18027971 - 18081198   |             | TRUE  | TRUE |
|   | 9  | 22446840 - 22452472   | T - 100.00% | TRUE  | TRUE |
|   | 9  | 22446840 - 22452472   |             | TRUE  | TRUE |
|   | 1  | 10490159 - 10512210   | F - 25.00%  | FALSE | TRUE |
|   | 1  | 10490159 - 10512210   |             | FALSE | TRUE |
|   | 3  | 125822408 - 125916837 |             | FALSE | TRUE |
|   | 3  | 125822408 - 125916837 | T - 68.00%  | TRUE  | TRUE |
|   | 11 | 16634679 - 16779901   |             | FALSE | TRUE |
|   | 11 | 16634679 - 16779901   | F - 11.11%  | FALSE | TRUE |
|   | 14 | 52781016 - 52795324   |             | TRUE  | TRUE |
|   | 14 | 52781016 - 52795324   | T - 50.00%  | TRUE  | TRUE |
|   | 3  | 50595456 - 50608458   | F - 44.44%  | TRUE  | TRUE |
|   | 3  | 50595456 - 50608458   | T - 83.33%  | TRUE  | TRUE |
|   | 3  | 50595456 - 50608458   |             | FALSE | TRUE |
|   | 7  | 97481429 - 97501854   | F - 4.00%   | FALSE | TRUE |
|   | 7  | 97481429 - 97501854   | F - 4.00%   | FALSE | TRUE |
|   | 7  | 97481429 - 97501854   | F - 4.00%   | TRUE  | TRUE |
|   | 7  | 97481429 - 97501854   |             | TRUE  | TRUE |
|   | 7  | 97481429 - 97501854   | F - 8.00%   | TRUE  | TRUE |
|   | 7  | 97481429 - 97501854   | F - 4.00%   | TRUE  | TRUE |
|   | 7  | 97481429 - 97501854   | F - 4.00%   | FALSE | TRUE |
|   | 19 | 43568362 - 43586893   | T - 83.33%  | TRUE  | TRUE |
|   | 19 | 43568362 - 43586893   |             | FALSE | TRUE |
|   | 19 | 43568362 - 43586893   |             | FALSE | TRUE |
|   | 1  | 231154704 - 231175995 | F - 16.67%  | TRUE  | TRUE |
|   | 1  | 231154704 - 231175995 |             | FALSE | TRUE |
|   | 1  | 115590632 - 115632121 | F - 12.50%  | TRUE  | TRUE |
|   | 1  | 115590632 - 115632121 | T - 62.50%  | TRUE  | TRUE |
|   | 1  | 115590632 - 115632121 |             | TRUE  | TRUE |
|   | 1  | 175126123 - 175162229 | T - 50.00%  | TRUE  | TRUE |
|   | 1  | 175126123 - 175162229 | F - 33.33%  | TRUE  | TRUE |
|   | 1  | 175126123 - 175162229 |             | TRUE  | TRUE |
|   | 1  | 175126123 - 175162229 | T - 50.00%  | TRUE  | TRUE |
|   | 1  | 175126123 - 175162229 |             | FALSE | TRUE |
| X |    | 102470020 - 102472174 | T - 50.00%  | TRUE  | TRUE |
| X |    | 102470020 - 102472174 | T - 66.67%  | TRUE  | TRUE |
| X |    | 102470020 - 102472174 |             | FALSE | TRUE |
| X |    | 102470020 - 102472174 |             | FALSE | TRUE |
| X |    | 102470020 - 102472174 | F - 33.33%  | TRUE  | TRUE |
| X |    | 102470020 - 102472174 | T - 100.00% | TRUE  | TRUE |
| X |    | 102470020 - 102472174 |             | TRUE  | TRUE |
|   | 17 | 43299292 - 43324686   | F - 30.00%  | FALSE | TRUE |
|   | 17 | 43299292 - 43324686   |             | FALSE | TRUE |
|   | 3  | 58318607 - 58411748   |             | TRUE  | TRUE |
|   | 3  | 58318607 - 58411748   | F - 36.00%  | TRUE  | TRUE |
|   | 11 | 34127111 - 34168458   | T - 100.00% | TRUE  | TRUE |
|   | 11 | 34127111 - 34168458   |             | FALSE | TRUE |
|   | 12 | 6961285 - 6975795     | T - 100.00% | TRUE  | TRUE |
|   | 12 | 6961285 - 6975795     |             | FALSE | TRUE |
|   | 3  | 67705121 - 67998137   | T - 75.00%  | TRUE  | TRUE |
|   | 3  | 67705121 - 67998137   |             | FALSE | TRUE |
|   | 15 | 85144236 - 85171027   | F - 20.83%  | FALSE | TRUE |
|   | 15 | 85144236 - 85171027   |             | FALSE | TRUE |
|   | 15 | 85144236 - 85171027   |             | FALSE | TRUE |
|   | 22 | 19929130 - 19957498   |             | TRUE  | TRUE |
|   | 22 | 19929130 - 19957498   | F - 9.09%   | TRUE  | TRUE |
|   | 2  | 95752952 - 95787754   |             | TRUE  | TRUE |
|   | 2  | 95752952 - 95787754   | F - 10.00%  | TRUE  | TRUE |

|             |                       |             |       |       |
|-------------|-----------------------|-------------|-------|-------|
| 2           | 95752952 - 95787754   | F - 20.00%  | TRUE  | TRUE  |
| 5           | 172841038 - 172878168 |             | TRUE  | FALSE |
| 5           | 172841038 - 172878168 | T - 100.00% | FALSE | TRUE  |
| 5           | 93486556 - 93954309   | T - 60.00%  | TRUE  | TRUE  |
| 5           | 93486556 - 93954309   |             | TRUE  | TRUE  |
| 5           | 93486556 - 93954309   |             | TRUE  | TRUE  |
| 6           | 33080228 - 33096890   |             | TRUE  | TRUE  |
| 6           | 33080228 - 33096890   | F - 33.33%  | TRUE  | TRUE  |
| 6           | 33080228 - 33096890   |             | TRUE  | TRUE  |
| 10          | 70242090 - 70287280   | F - 33.33%  | TRUE  | TRUE  |
| 10          | 70242090 - 70287280   |             | FALSE | TRUE  |
| 10          | 70242090 - 70287280   |             | FALSE | TRUE  |
| 22          | 51017378 - 51039884   | T - 70.59%  | TRUE  | TRUE  |
| 22          | 51017378 - 51039884   |             | FALSE | TRUE  |
| 3           | 179065480 - 179112719 | F - 12.50%  | TRUE  | TRUE  |
| 3           | 179065480 - 179112719 |             | FALSE | TRUE  |
| 11          | 31806340 - 31839509   |             | FALSE | TRUE  |
| 11          | 31806340 - 31839509   | F - 2.78%   | FALSE | TRUE  |
| 9           | 108320411 - 108403399 | F - 6.67%   | TRUE  | TRUE  |
| 9           | 108320411 - 108403399 |             | FALSE | TRUE  |
| 9           | 108320411 - 108403399 |             | TRUE  | TRUE  |
| 1           | 151584514 - 151671567 |             | TRUE  | TRUE  |
| 1           | 151584514 - 151671567 | F - 23.08%  | TRUE  | TRUE  |
| 1           | 151584514 - 151671567 | T - 84.62%  | FALSE | TRUE  |
| Un_gl000219 | 51812 - 99642         |             | TRUE  | TRUE  |
| Un_gl000219 | 51812 - 99642         | T - 75.00%  | TRUE  | TRUE  |
| 6           | 168456425 - 168482237 |             | TRUE  | TRUE  |
| 6           | 168456425 - 168482237 | F - 6.25%   | FALSE | TRUE  |
| 6           | 168456425 - 168482237 |             | FALSE | TRUE  |
| 1           | 52254863 - 52344609   | F - 33.33%  | FALSE | TRUE  |
| 1           | 52254863 - 52344609   |             | TRUE  | TRUE  |
| 1           | 52254863 - 52344609   |             | FALSE | TRUE  |
| 20          | 35518632 - 35580246   | F - 16.67%  | TRUE  | TRUE  |
| 20          | 35518632 - 35580246   |             | TRUE  | TRUE  |
| 7           | 127881331 - 127897682 | T - 60.00%  | TRUE  | TRUE  |
| 7           | 127881331 - 127897682 |             | TRUE  | TRUE  |
| 7           | 108194987 - 108210194 |             | TRUE  | TRUE  |
| 7           | 108194987 - 108210194 | F - 16.67%  | FALSE | TRUE  |
| 1           | 186265405 - 186283694 |             | TRUE  | FALSE |
| 1           | 186265405 - 186283694 | T - 72.73%  | TRUE  | TRUE  |
| 4           | 79567057 - 79605655   | F - 8.33%   | FALSE | TRUE  |
| 4           | 79567057 - 79605655   |             | FALSE | TRUE  |
| 9           | 36136730 - 36163910   |             | FALSE | TRUE  |
| 9           | 36136730 - 36163910   | F - 9.09%   | TRUE  | TRUE  |
| 9           | 36136730 - 36163910   |             | FALSE | TRUE  |
| 9           | 36136730 - 36163910   | F - 18.18%  | TRUE  | TRUE  |
| 19          | 39514663 - 39523198   |             | TRUE  | TRUE  |
| 19          | 39514663 - 39523198   | T - 50.00%  | TRUE  | TRUE  |
| 6           | 143380500 - 143661441 |             | TRUE  | TRUE  |
| 6           | 143380500 - 143661441 | F - 5.88%   | TRUE  | TRUE  |
| 6           | 143380500 - 143661441 | F - 17.65%  | TRUE  | TRUE  |
| 6           | 143380500 - 143661441 | F - 29.41%  | TRUE  | TRUE  |
| 6           | 143380500 - 143661441 | F - 11.76%  | TRUE  | TRUE  |
| 6           | 143380500 - 143661441 | F - 5.88%   | TRUE  | TRUE  |
| 2           | 114341205 - 114356613 |             | TRUE  | TRUE  |
| 2           | 114341205 - 114356613 | F - 12.50%  | FALSE | TRUE  |
| 7           | 140218220 - 140373793 |             | FALSE | TRUE  |
| 7           | 140218220 - 140373793 | T - 73.33%  | FALSE | TRUE  |

|    |                       |             |       |       |
|----|-----------------------|-------------|-------|-------|
| 7  | 140218220 - 140373793 | T - 73.33%  | TRUE  | TRUE  |
| 7  | 140218220 - 140373793 |             | FALSE | TRUE  |
| 9  | 109040673 - 109367076 |             | TRUE  | TRUE  |
| 9  | 109040673 - 109367076 | T - 50.00%  | TRUE  | TRUE  |
| 9  | 109040673 - 109367076 | T - 50.00%  | TRUE  | TRUE  |
| 9  | 109040673 - 109367076 | T - 50.00%  | FALSE | TRUE  |
| 1  | 165600098 - 165631033 | F - 5.88%   | TRUE  | TRUE  |
| 1  | 165600098 - 165631033 |             | FALSE | TRUE  |
| 3  | 30647994 - 30735634   |             | TRUE  | TRUE  |
| 3  | 30647994 - 30735634   | F - 14.29%  | FALSE | TRUE  |
| 3  | 30647994 - 30735634   | F - 14.29%  | TRUE  | TRUE  |
| 8  | 99202061 - 99306621   | F - 35.71%  | FALSE | TRUE  |
| 8  | 99202061 - 99306621   |             | FALSE | TRUE  |
| 2  | 86066267 - 86116157   |             | TRUE  | FALSE |
| 2  | 86066267 - 86116157   | F - 4.55%   | TRUE  | TRUE  |
| 2  | 86066267 - 86116157   | F - 9.09%   | TRUE  | FALSE |
| 2  | 86066267 - 86116157   |             | TRUE  | FALSE |
| 2  | 86066267 - 86116157   | F - 27.27%  | TRUE  | TRUE  |
| 2  | 86066267 - 86116157   | F - 18.18%  | TRUE  | FALSE |
| 2  | 86066267 - 86116157   |             | TRUE  | FALSE |
| 2  | 86066267 - 86116157   | F - 4.55%   | TRUE  | TRUE  |
| 2  | 86066267 - 86116157   | F - 22.73%  | TRUE  | TRUE  |
| 2  | 86066267 - 86116157   | F - 31.82%  | TRUE  | TRUE  |
| 2  | 86066267 - 86116157   | T - 54.55%  | TRUE  | TRUE  |
| 2  | 86066267 - 86116157   |             | FALSE | TRUE  |
| 2  | 86066267 - 86116157   | F - 27.27%  | TRUE  | FALSE |
| 2  | 86066267 - 86116157   | F - 36.36%  | TRUE  | FALSE |
| 2  | 86066267 - 86116157   | F - 4.55%   | TRUE  | TRUE  |
| 2  | 86066267 - 86116157   | F - 22.73%  | TRUE  | TRUE  |
| 2  | 86066267 - 86116157   | F - 4.55%   | TRUE  | TRUE  |
| 2  | 86066267 - 86116157   | F - 4.55%   | TRUE  | TRUE  |
| 2  | 86066267 - 86116157   | T - 50.00%  | TRUE  | TRUE  |
| 2  | 86066267 - 86116157   | F - 13.64%  | TRUE  | TRUE  |
| 2  | 86066267 - 86116157   |             | TRUE  | TRUE  |
| 2  | 86066267 - 86116157   |             | TRUE  | TRUE  |
| 2  | 86066267 - 86116157   | F - 18.18%  | TRUE  | TRUE  |
| 2  | 86066267 - 86116157   | F - 4.55%   | TRUE  | TRUE  |
| 2  | 86066267 - 86116157   |             | FALSE | TRUE  |
| 5  | 1567597 - 1594735     |             | TRUE  | TRUE  |
| 5  | 1567597 - 1594735     | F - 40.00%  | TRUE  | TRUE  |
| 16 | 21845890 - 21890744   |             | TRUE  | TRUE  |
| 16 | 21845890 - 21890744   | F - 15.38%  | TRUE  | TRUE  |
| 17 | 4851387 - 4860426     | T - 56.52%  | TRUE  | TRUE  |
| 17 | 4851387 - 4860426     | F - 39.13%  | TRUE  | TRUE  |
| 17 | 4851387 - 4860426     |             | TRUE  | TRUE  |
| 22 | 43088127 - 43117304   | T - 64.29%  | TRUE  | TRUE  |
| 22 | 43088127 - 43117304   | F - 7.14%   | FALSE | TRUE  |
| 22 | 43088127 - 43117304   |             | TRUE  | TRUE  |
| 4  | 74718906 - 74720198   |             | TRUE  | TRUE  |
| 4  | 74718906 - 74720198   | T - 100.00% | FALSE | TRUE  |
| 4  | 47452811 - 47465736   | F - 25.00%  | FALSE | TRUE  |
| 4  | 47452811 - 47465736   |             | FALSE | TRUE  |
| 11 | 5617331 - 5634188     | T - 52.17%  | FALSE | TRUE  |
| 11 | 5617331 - 5634188     |             | FALSE | TRUE  |
| 16 | 89894907 - 89937727   | T - 57.14%  | FALSE | TRUE  |
| 16 | 89894907 - 89937727   |             | FALSE | TRUE  |
| 16 | 89894907 - 89937727   |             | FALSE | TRUE  |
| 22 | 20366206 - 20368028   |             | TRUE  | TRUE  |

|   |    |                       |             |       |       |
|---|----|-----------------------|-------------|-------|-------|
|   | 22 | 20366206 - 20368028   | T - 100.00% | TRUE  | TRUE  |
|   | 22 | 20366206 - 20368028   |             | FALSE | TRUE  |
|   | 22 | 37621301 - 37640488   | F - 25.00%  | TRUE  | TRUE  |
|   | 22 | 37621301 - 37640488   | F - 37.50%  | FALSE | TRUE  |
|   | 22 | 37621301 - 37640488   |             | FALSE | TRUE  |
|   | 22 | 37621301 - 37640488   |             | FALSE | TRUE  |
|   | 6  | 6144311 - 6321246     | F - 10.00%  | TRUE  | TRUE  |
|   | 6  | 6144311 - 6321246     | F - 30.00%  | TRUE  | TRUE  |
|   | 6  | 6144311 - 6321246     | F - 20.00%  | TRUE  | TRUE  |
|   | 6  | 6144311 - 6321246     | F - 10.00%  | TRUE  | TRUE  |
|   | 6  | 6144311 - 6321246     | T - 80.00%  | TRUE  | TRUE  |
|   | 6  | 6144311 - 6321246     | F - 10.00%  | TRUE  | TRUE  |
|   | 6  | 6144311 - 6321246     | T - 70.00%  | FALSE | TRUE  |
|   | 6  | 6144311 - 6321246     |             | FALSE | TRUE  |
|   | 11 | 114310108 - 114321001 |             | FALSE | TRUE  |
|   | 11 | 114310108 - 114321001 | F - 9.09%   | TRUE  | TRUE  |
|   | 4  | 110481355 - 110609874 | T - 75.00%  | TRUE  | TRUE  |
|   | 4  | 110481355 - 110609874 |             | TRUE  | TRUE  |
|   | 4  | 110481355 - 110609874 | F - 12.50%  | FALSE | TRUE  |
|   | 4  | 110481355 - 110609874 | F - 25.00%  | FALSE | TRUE  |
|   | 4  | 110481355 - 110609874 | T - 62.50%  | TRUE  | TRUE  |
|   | 4  | 110481355 - 110609874 | F - 12.50%  | TRUE  | TRUE  |
|   | 9  | 33617760 - 33618504   | T - 100.00% | TRUE  | TRUE  |
|   | 9  | 33617760 - 33618504   |             | TRUE  | TRUE  |
|   | 9  | 33617760 - 33618504   | T - 100.00% | FALSE | TRUE  |
|   | 10 | 44793038 - 44881941   | F - 21.43%  | TRUE  | FALSE |
|   | 10 | 44793038 - 44881941   | F - 28.57%  | TRUE  | TRUE  |
|   | 10 | 44793038 - 44881941   | F - 21.43%  | TRUE  | TRUE  |
|   | 10 | 44793038 - 44881941   | T - 85.71%  | TRUE  | TRUE  |
|   | 10 | 44793038 - 44881941   | F - 7.14%   | TRUE  | TRUE  |
|   | 10 | 44793038 - 44881941   | F - 14.29%  | TRUE  | TRUE  |
|   | 10 | 44793038 - 44881941   |             | TRUE  | TRUE  |
|   | 10 | 44793038 - 44881941   | F - 7.14%   | TRUE  | TRUE  |
|   | 10 | 44793038 - 44881941   |             | TRUE  | TRUE  |
|   | 10 | 44793038 - 44881941   |             | FALSE | TRUE  |
|   | 10 | 44793038 - 44881941   | F - 7.14%   | FALSE | TRUE  |
|   | 1  | 77333126 - 77531396   | T - 70.00%  | TRUE  | TRUE  |
|   | 1  | 77333126 - 77531396   |             | TRUE  | TRUE  |
|   | 22 | 45809572 - 45828376   |             | TRUE  | TRUE  |
|   | 22 | 45809572 - 45828376   | T - 85.71%  | TRUE  | TRUE  |
|   | 12 | 29653746 - 29937692   | F - 7.14%   | TRUE  | TRUE  |
|   | 12 | 29653746 - 29937692   |             | FALSE | TRUE  |
|   | 22 | 27672201 - 27682310   | T - 100.00% | TRUE  | TRUE  |
|   | 22 | 27672201 - 27682310   |             | FALSE | TRUE  |
| X |    | 2822011 - 2847416     | T - 50.00%  | FALSE | TRUE  |
| X |    | 2822011 - 2847416     |             | FALSE | TRUE  |
|   | 6  | 52804524 - 52810263   | T - 100.00% | TRUE  | TRUE  |
|   | 6  | 52804524 - 52810263   |             | TRUE  | TRUE  |
| X |    | 78003206 - 78012591   | F - 12.50%  | FALSE | TRUE  |
| X |    | 78003206 - 78012591   |             | FALSE | TRUE  |
|   | 12 | 123743581 - 123756881 | F - 12.50%  | TRUE  | TRUE  |
|   | 12 | 123743581 - 123756881 |             | FALSE | TRUE  |
|   | 4  | 148402069 - 148466106 |             | TRUE  | TRUE  |
|   | 4  | 148402069 - 148466106 |             | TRUE  | FALSE |
|   | 4  | 148402069 - 148466106 | T - 60.00%  | TRUE  | TRUE  |
|   | 4  | 148402069 - 148466106 | T - 53.33%  | TRUE  | TRUE  |
|   | 4  | 148402069 - 148466106 |             | TRUE  | TRUE  |
|   | 4  | 148402069 - 148466106 | F - 6.67%   | TRUE  | TRUE  |

|            |                       |             |       |       |
|------------|-----------------------|-------------|-------|-------|
| 6_apd_hap1 | 1135922 - 1139325     | T - 100.00% | TRUE  | TRUE  |
| 6_apd_hap1 | 1135922 - 1139325     |             | TRUE  | TRUE  |
| 6_cox_hap2 | 1407786 - 1411189     | T - 100.00% | TRUE  | TRUE  |
| 6_cox_hap2 | 1407786 - 1411189     |             | TRUE  | TRUE  |
| 19         | 53569867 - 53606687   |             | FALSE | TRUE  |
| 19         | 53569867 - 53606687   | T - 100.00% | TRUE  | TRUE  |
| 14         | 65472892 - 65569408   |             | TRUE  | TRUE  |
| 14         | 65472892 - 65569408   | F - 37.50%  | TRUE  | TRUE  |
| 14         | 65472892 - 65569408   | F - 41.67%  | TRUE  | TRUE  |
| 14         | 65472892 - 65569408   |             | FALSE | TRUE  |
| 2          | 120932461 - 120974120 |             | FALSE | TRUE  |
| 2          | 120932461 - 120974120 | T - 100.00% | FALSE | TRUE  |
| 9          | 95255829 - 95298937   |             | FALSE | TRUE  |
| 9          | 95255829 - 95298937   | F - 8.33%   | TRUE  | TRUE  |
| 6_apd_hap1 | 4367057 - 4383650     |             | TRUE  | TRUE  |
| 6_apd_hap1 | 4367057 - 4383650     | T - 50.00%  | TRUE  | TRUE  |
| 6_apd_hap1 | 4367057 - 4383650     |             | TRUE  | TRUE  |
| 1          | 203764751 - 203823256 | T - 65.22%  | TRUE  | TRUE  |
| 1          | 203764751 - 203823256 |             | FALSE | TRUE  |
| 4          | 121956768 - 121994176 | F - 16.67%  | TRUE  | TRUE  |
| 4          | 121956768 - 121994176 |             | TRUE  | FALSE |
| 4          | 121956768 - 121994176 | F - 33.33%  | TRUE  | TRUE  |
| 4          | 121956768 - 121994176 | F - 16.67%  | FALSE | TRUE  |
| 4          | 121956768 - 121994176 | F - 16.67%  | TRUE  | TRUE  |
| 4          | 121956768 - 121994176 |             | TRUE  | TRUE  |
| 4          | 121956768 - 121994176 |             | FALSE | TRUE  |
| 4          | 121956768 - 121994176 | F - 16.67%  | TRUE  | TRUE  |
| 3          | 189838753 - 189862635 |             | TRUE  | TRUE  |
| 3          | 189838753 - 189862635 | T - 100.00% | TRUE  | TRUE  |
| 3          | 189838753 - 189862635 |             | FALSE | TRUE  |
| 5          | 2752245 - 2755511     | T - 57.14%  | TRUE  | TRUE  |
| 5          | 2752245 - 2755511     |             | FALSE | TRUE  |
| 12         | 64078523 - 64109256   | T - 100.00% | TRUE  | TRUE  |
| 12         | 64078523 - 64109256   |             | FALSE | TRUE  |
| 12         | 64078523 - 64109256   |             | FALSE | TRUE  |
| 11         | 112097088 - 112140678 | F - 14.29%  | FALSE | TRUE  |
| 11         | 112097088 - 112140678 |             | FALSE | TRUE  |
| 1          | 209848670 - 209849735 |             | FALSE | TRUE  |
| 1          | 209848670 - 209849735 | T - 75.00%  | TRUE  | TRUE  |
| 22         | 38092995 - 38172563   |             | FALSE | TRUE  |
| 22         | 38092995 - 38172563   | F - 36.84%  | TRUE  | TRUE  |
| 22         | 38092995 - 38172563   | F - 36.84%  | FALSE | TRUE  |
| 22         | 38092995 - 38172563   | F - 36.84%  | FALSE | TRUE  |
| 22         | 38092995 - 38172563   |             | FALSE | TRUE  |
| 9          | 132094579 - 132121817 | F - 25.00%  | TRUE  | TRUE  |
| 9          | 132094579 - 132121817 | F - 25.00%  | TRUE  | TRUE  |
| 9          | 132094579 - 132121817 |             | TRUE  | TRUE  |
| 9          | 132094579 - 132121817 | F - 25.00%  | TRUE  | TRUE  |
| 9          | 132094579 - 132121817 | T - 50.00%  | TRUE  | TRUE  |
| 11         | 10578513 - 10633236   | F - 16.67%  | TRUE  | FALSE |
| 11         | 10578513 - 10633236   |             | TRUE  | TRUE  |
| 6_dbb_hap3 | 1189068 - 1192469     |             | TRUE  | TRUE  |
| 6_dbb_hap3 | 1189068 - 1192469     | T - 100.00% | TRUE  | TRUE  |
| 6_dbb_hap3 | 1189068 - 1192469     |             | FALSE | TRUE  |
| 19         | 18704035 - 18717660   |             | TRUE  | FALSE |
| 19         | 18704035 - 18717660   |             | TRUE  | TRUE  |
| 19         | 18704035 - 18717660   | T - 66.67%  | TRUE  | FALSE |
| 19         | 18704035 - 18717660   | T - 100.00% | TRUE  | TRUE  |

|             |                       |             |       |       |
|-------------|-----------------------|-------------|-------|-------|
| 19          | 18704035 - 18717660   | T - 100.00% | TRUE  | TRUE  |
| 21          | 38996786 - 39288749   | F - 20.00%  | TRUE  | TRUE  |
| 21          | 38996786 - 39288749   | T - 60.00%  | TRUE  | TRUE  |
| 21          | 38996786 - 39288749   |             | TRUE  | TRUE  |
| 4           | 170907748 - 170954182 | F - 13.33%  | TRUE  | TRUE  |
| 4           | 170907748 - 170954182 |             | TRUE  | FALSE |
| 4           | 170907748 - 170954182 |             | TRUE  | TRUE  |
| 4           | 170907748 - 170954182 | F - 6.67%   | TRUE  | TRUE  |
| 4           | 170907748 - 170954182 |             | TRUE  | TRUE  |
| 4           | 170907748 - 170954182 | F - 40.00%  | TRUE  | TRUE  |
| 4           | 170907748 - 170954182 | F - 6.67%   | FALSE | TRUE  |
| 4           | 170907748 - 170954182 | F - 13.33%  | FALSE | TRUE  |
| 4           | 170907748 - 170954182 |             | TRUE  | TRUE  |
| 4           | 170907748 - 170954182 |             | TRUE  | TRUE  |
| 4           | 170907748 - 170954182 |             | TRUE  | TRUE  |
| 4           | 170907748 - 170954182 | F - 6.67%   | TRUE  | TRUE  |
| 4           | 170907748 - 170954182 |             | FALSE | TRUE  |
| 4           | 170907748 - 170954182 |             | FALSE | TRUE  |
| 4           | 170907748 - 170954182 | F - 13.33%  | FALSE | TRUE  |
| 4           | 170907748 - 170954182 |             | TRUE  | TRUE  |
| 15          | 57669344 - 57699476   |             | FALSE | TRUE  |
| 15          | 57669344 - 57699476   | T - 100.00% | TRUE  | TRUE  |
| 14          | 90742580 - 90798481   |             | FALSE | TRUE  |
| 14          | 90742580 - 90798481   |             | FALSE | TRUE  |
| 14          | 90742580 - 90798481   | T - 75.00%  | FALSE | TRUE  |
| 3           | 45123769 - 45187914   | T - 83.33%  | FALSE | TRUE  |
| 3           | 45123769 - 45187914   | F - 33.33%  | FALSE | TRUE  |
| 3           | 45123769 - 45187914   | T - 100.00% | FALSE | TRUE  |
| 3           | 45123769 - 45187914   |             | FALSE | TRUE  |
| 16          | 86563782 - 86600008   | T - 60.00%  | TRUE  | TRUE  |
| 16          | 86563782 - 86600008   |             | FALSE | TRUE  |
| 6_ssto_hap7 | 1225317 - 1228720     |             | TRUE  | TRUE  |
| 6_ssto_hap7 | 1225317 - 1228720     | T - 100.00% | TRUE  | TRUE  |
| 6_ssto_hap7 | 1225317 - 1228720     |             | FALSE | TRUE  |
| 6_apd_hap1  | 4076763 - 4093559     | F - 12.50%  | FALSE | TRUE  |
| 6_apd_hap1  | 4076763 - 4093559     |             | FALSE | TRUE  |
| 6_dbb_hap3  | 4071136 - 4087933     | F - 12.50%  | FALSE | TRUE  |
| 6_dbb_hap3  | 4071136 - 4087933     |             | FALSE | TRUE  |
| 6_ssto_hap7 | 4220533 - 4237328     | F - 12.50%  | FALSE | TRUE  |
| 6_ssto_hap7 | 4220533 - 4237328     |             | FALSE | TRUE  |
| 6           | 32789610 - 32806557   | F - 12.50%  | FALSE | TRUE  |
| 6           | 32789610 - 32806557   |             | FALSE | TRUE  |
| 6_mann_hap4 | 4246806 - 4263754     | F - 12.50%  | FALSE | TRUE  |
| 6_mann_hap4 | 4246806 - 4263754     |             | FALSE | TRUE  |
| 6_mcf_hap5  | 4126506 - 4143432     | F - 12.50%  | FALSE | TRUE  |
| 6_mcf_hap5  | 4126506 - 4143432     |             | FALSE | TRUE  |
| 6_qbl_hap6  | 4021717 - 4038665     | F - 12.50%  | FALSE | TRUE  |
| 6_qbl_hap6  | 4021717 - 4038665     |             | FALSE | TRUE  |
| 6_cox_hap2  | 4234140 - 4251085     | F - 12.50%  | FALSE | TRUE  |
| 6_cox_hap2  | 4234140 - 4251085     |             | FALSE | TRUE  |
| 12          | 42850560 - 42984157   |             | TRUE  | TRUE  |
| 12          | 42850560 - 42984157   | F - 46.15%  | TRUE  | TRUE  |
| 12          | 42850560 - 42984157   | F - 23.08%  | TRUE  | TRUE  |
| 12          | 42850560 - 42984157   | F - 15.38%  | TRUE  | TRUE  |
| 12          | 42850560 - 42984157   | F - 7.69%   | TRUE  | TRUE  |
| 12          | 42850560 - 42984157   |             | TRUE  | TRUE  |
| 12          | 42850560 - 42984157   | F - 23.08%  | TRUE  | TRUE  |
| 12          | 42850560 - 42984157   |             | TRUE  | TRUE  |



|    |                       |             |       |       |
|----|-----------------------|-------------|-------|-------|
| 12 | 42850560 - 42984157   |             | TRUE  | TRUE  |
| 10 | 12938625 - 13141713   | F - 33.33%  | TRUE  | TRUE  |
| 10 | 12938625 - 13141713   |             | TRUE  | FALSE |
| 10 | 12938625 - 13141713   |             | TRUE  | TRUE  |
| 10 | 12938625 - 13141713   |             | TRUE  | TRUE  |
| 10 | 12938625 - 13141713   | F - 11.11%  | FALSE | TRUE  |
| 10 | 12938625 - 13141713   | F - 44.44%  | TRUE  | TRUE  |
| 10 | 12938625 - 13141713   | F - 44.44%  | TRUE  | TRUE  |
| 10 | 12938625 - 13141713   | F - 22.22%  | TRUE  | TRUE  |
| 10 | 12938625 - 13141713   | F - 11.11%  | TRUE  | TRUE  |
| 10 | 12938625 - 13141713   |             | TRUE  | TRUE  |
| 10 | 12938625 - 13141713   | F - 11.11%  | TRUE  | TRUE  |
| 10 | 12938625 - 13141713   | F - 11.11%  | TRUE  | TRUE  |
| 10 | 12938625 - 13141713   | F - 22.22%  | FALSE | TRUE  |
| 10 | 12938625 - 13141713   |             | TRUE  | TRUE  |
| 10 | 12938625 - 13141713   | F - 11.11%  | TRUE  | TRUE  |
| 1  | 109852188 - 109940573 | F - 7.69%   | TRUE  | TRUE  |
| 1  | 109852188 - 109940573 | F - 30.77%  | TRUE  | TRUE  |
| 1  | 109852188 - 109940573 | F - 7.69%   | TRUE  | TRUE  |
| 1  | 109852188 - 109940573 | F - 7.69%   | TRUE  | TRUE  |
| 1  | 109852188 - 109940573 | F - 23.08%  | TRUE  | TRUE  |
| 1  | 109852188 - 109940573 | F - 7.69%   | TRUE  | TRUE  |
| 1  | 109852188 - 109940573 |             | TRUE  | TRUE  |
| 1  | 109852188 - 109940573 |             | FALSE | TRUE  |
| 1  | 109852188 - 109940573 |             | FALSE | TRUE  |
| 1  | 109852188 - 109940573 | F - 7.69%   | FALSE | TRUE  |
| 3  | 195295573 - 195311076 |             | TRUE  | TRUE  |
| 3  | 195295573 - 195311076 | F - 14.29%  | TRUE  | FALSE |
| 3  | 195295573 - 195311076 | F - 14.29%  | TRUE  | TRUE  |
| 3  | 195295573 - 195311076 | F - 14.29%  | TRUE  | TRUE  |
| 3  | 195295573 - 195311076 |             | TRUE  | TRUE  |
| 12 | 54392806 - 54393794   |             | FALSE | TRUE  |
| 12 | 54392806 - 54393794   | T - 50.00%  | TRUE  | TRUE  |
| 1  | 114522030 - 114524876 |             | TRUE  | TRUE  |
| 1  | 114522030 - 114524876 | F - 37.50%  | TRUE  | TRUE  |
| 3  | 12194551 - 12200851   | T - 100.00% | TRUE  | TRUE  |
| 3  | 12194551 - 12200851   |             | TRUE  | TRUE  |

| 6 PSR/JUC Expressed (Detail) | 4 PSR/JUC Expressed | 6 Bi-weight Avg Signal | 4 Bi-weight Avg Signal |
|------------------------------|---------------------|------------------------|------------------------|
| 1/1                          | 0/1                 | 10.47                  | 2.41                   |
| 1/1                          | 1/1                 | 6.43                   | 8.78                   |
| 1/1                          | 0/1                 | 8.59                   | 1.8                    |
| 1/1                          | 1/1                 | 9.46                   | 6.38                   |
| 1/1                          | 0/1                 | 4.15                   | 2.36                   |
| 1/1                          | 1/1                 | 9.23                   | 7.7                    |
| 1/1                          | 1/1                 | 6.91                   | 9.51                   |
| 1/1                          | 1/1                 | 2.9                    | 5.65                   |
| 0/1                          | 1/1                 | 3.43                   | 6.81                   |
| 1/1                          | 1/1                 | 9.54                   | 3.71                   |
| 1/1                          | 0/1                 | 2.41                   | 1.86                   |
| 1/1                          | 1/1                 | 4.46                   | 6.31                   |
| 1/1                          | 0/1                 | 6.04                   | 3.66                   |
| 1/1                          | 1/1                 | 6.71                   | 5.78                   |
| 1/1                          | 1/1                 | 4.42                   | 4.21                   |
| 1/1                          | 1/1                 | 5.9                    | 5.81                   |
| 1/1                          | 1/1                 | 4.89                   | 4.88                   |
| 0/1                          | 1/1                 | 2.22                   | 2.24                   |
| 1/1                          | 1/1                 | 5.31                   | 5.56                   |
| 0/1                          | 1/1                 | 2.96                   | 3.4                    |
| 0/1                          | 1/1                 | 2.72                   | 3.46                   |
| 1/1                          | 1/1                 | 2.99                   | 3.96                   |
| 0/1                          | 1/1                 | 2.09                   | 3.54                   |
| 0/1                          | 1/1                 | 3.03                   | 4.74                   |
| 1/1                          | 1/1                 | 2.97                   | 4.8                    |
| 0/1                          | 1/1                 | 4.06                   | 6.07                   |
| 0/1                          | 1/1                 | 2.53                   | 4.6                    |
| 1/1                          | 1/1                 | 4.51                   | 7.16                   |
| 0/1                          | 1/1                 | 1.85                   | 6.94                   |
| 0/1                          | 1/1                 | 3.25                   | 8.35                   |
| 1/1                          | 0/1                 | 10.33                  | 2.86                   |
| 1/1                          | 1/1                 | 9.07                   | 5.44                   |
| 1/1                          | 0/1                 | 5.49                   | 2.05                   |
| 1/1                          | 1/1                 | 7.05                   | 3.79                   |
| 1/1                          | 1/1                 | 6.8                    | 3.54                   |
| 1/1                          | 1/1                 | 6.98                   | 3.74                   |
| 1/1                          | 1/1                 | 7.75                   | 4.74                   |
| 1/1                          | 0/1                 | 5.27                   | 2.41                   |
| 1/1                          | 0/1                 | 4.56                   | 1.87                   |
| 1/1                          | 1/1                 | 9.87                   | 7.21                   |
| 1/1                          | 1/1                 | 6.48                   | 3.83                   |
| 1/1                          | 1/1                 | 8.18                   | 5.59                   |
| 1/1                          | 1/1                 | 7.5                    | 7.48                   |
| 0/1                          | 1/1                 | 4.14                   | 4.22                   |
| 0/1                          | 1/1                 | 2.9                    | 3.04                   |
| 1/1                          | 1/1                 | 6.99                   | 7.25                   |
| 0/1                          | 1/1                 | 2.4                    | 2.72                   |
| 1/1                          | 0/1                 | 5.37                   | 4.56                   |
| 1/1                          | 1/1                 | 5.01                   | 4.91                   |
| 1/1                          | 1/1                 | 4.98                   | 5.08                   |
| 1/1                          | 1/1                 | 3.26                   | 3.51                   |
| 1/1                          | 1/1                 | 7.61                   | 8.27                   |
| 1/1                          | 1/1                 | 6.44                   | 7.78                   |
| 1/1                          | 1/1                 | 3.03                   | 4.8                    |
| 0/1                          | 1/1                 | 5.4                    | 8.16                   |
| 0/1                          | 1/1                 | 3.03                   | 6.04                   |
| 1/1                          | 1/1                 | 6.59                   | 9.65                   |

|     |     |      |       |
|-----|-----|------|-------|
| 1/1 | 1/1 | 5.88 | 9.64  |
| 1/1 | 1/1 | 3.8  | 7.75  |
| 0/1 | 1/1 | 1.88 | 5.92  |
| 0/1 | 1/1 | 3.06 | 9.18  |
| 0/1 | 1/1 | 5.07 | 11.34 |
| 1/1 | 1/1 | 3.56 | 10.05 |
| 0/1 | 1/1 | 4.41 | 10.96 |
| 1/1 | 1/1 | 4.2  | 11.03 |
| 0/1 | 1/1 | 3.98 | 11.16 |
| 0/1 | 1/1 | 2.73 | 10.99 |
| 1/1 | 0/1 | 5.84 | 3.93  |
| 1/1 | 1/1 | 5.7  | 5.02  |
| 0/1 | 1/1 | 3.01 | 2.96  |
| 1/1 | 1/1 | 2.64 | 2.7   |
| 1/1 | 1/1 | 5.23 | 5.6   |
| 0/1 | 1/1 | 4.07 | 4.63  |
| 1/1 | 1/1 | 8.52 | 9.3   |
| 1/1 | 1/1 | 6.85 | 9.03  |
| 1/1 | 1/1 | 6.52 | 9.07  |
| 1/1 | 1/1 | 6.86 | 9.63  |
| 1/1 | 1/1 | 5.24 | 8.03  |
| 0/1 | 1/1 | 5.64 | 10.62 |
| 1/1 | 1/1 | 5.48 | 10.92 |
| 0/1 | 1/1 | 4.2  | 10.05 |
| 0/1 | 1/1 | 4.18 | 10.18 |
| 0/1 | 1/1 | 4.55 | 10.55 |
| 0/1 | 1/1 | 4.02 | 10.05 |
| 0/1 | 1/1 | 2.29 | 8.33  |
| 0/1 | 1/1 | 4.52 | 10.84 |
| 0/1 | 1/1 | 3.07 | 9.77  |
| 0/1 | 1/1 | 2.99 | 10.32 |
| 1/1 | 0/1 | 6.82 | 6.22  |
| 1/1 | 1/1 | 5.95 | 5.45  |
| 1/1 | 1/1 | 6.25 | 5.98  |
| 1/1 | 1/1 | 5.93 | 5.84  |
| 1/1 | 1/1 | 5.34 | 5.25  |
| 0/1 | 1/1 | 3.09 | 3.06  |
| 1/1 | 1/1 | 6.92 | 6.93  |
| 0/1 | 1/1 | 3.48 | 3.63  |
| 1/1 | 1/1 | 8.45 | 8.64  |
| 1/1 | 1/1 | 7.36 | 7.6   |
| 1/1 | 1/1 | 9.05 | 9.41  |
| 1/1 | 1/1 | 4.86 | 5.25  |
| 0/1 | 1/1 | 4.21 | 4.62  |
| 0/1 | 1/1 | 3.68 | 4.17  |
| 0/1 | 1/1 | 3.05 | 3.64  |
| 1/1 | 1/1 | 7.85 | 8.49  |
| 0/1 | 1/1 | 2.24 | 3.02  |
| 0/1 | 1/1 | 4.87 | 5.79  |
| 0/1 | 1/1 | 5.06 | 6.08  |
| 0/1 | 1/1 | 2.32 | 3.69  |
| 0/1 | 1/1 | 1.85 | 3.28  |
| 0/1 | 1/1 | 1.7  | 3.49  |
| 1/1 | 1/1 | 6.26 | 8.44  |
| 0/1 | 1/1 | 3.63 | 5.86  |
| 1/1 | 1/1 | 6.99 | 9.79  |
| 0/1 | 1/1 | 1.7  | 4.75  |
| 0/1 | 1/1 | 4.15 | 7.55  |

|     |     |       |       |
|-----|-----|-------|-------|
| 0/1 | 1/1 | 3.4   | 7.19  |
| 1/1 | 1/1 | 4.47  | 10.57 |
| 0/1 | 1/1 | 4.83  | 10.95 |
| 0/1 | 1/1 | 2.9   | 9.08  |
| 0/1 | 1/1 | 2.64  | 9.82  |
| 0/1 | 1/1 | 3.13  | 10.32 |
| 1/1 | 1/1 | 3.21  | 10.64 |
| 0/1 | 1/1 | 2.81  | 10.82 |
| 0/1 | 1/1 | 2.09  | 10.36 |
| 1/1 | 1/1 | 12.23 | 6.57  |
| 1/1 | 1/1 | 12.85 | 7.56  |
| 1/1 | 0/1 | 4.98  | 1.95  |
| 1/1 | 1/1 | 8.21  | 5.21  |
| 1/1 | 1/1 | 8.97  | 6.05  |
| 1/1 | 1/1 | 6.99  | 5.53  |
| 1/1 | 1/1 | 4.47  | 5.3   |
| 1/1 | 1/1 | 4.16  | 3.85  |
| 0/1 | 1/1 | 3.19  | 3.22  |
| 0/1 | 1/1 | 5.84  | 5.93  |
| 0/1 | 1/1 | 6.02  | 6.4   |
| 0/1 | 1/1 | 2.76  | 3.41  |
| 0/1 | 1/1 | 2.49  | 3.52  |
| 0/1 | 1/1 | 3.32  | 4.62  |
| 0/1 | 1/1 | 2.39  | 5.26  |
| 0/1 | 1/1 | 5.69  | 9.47  |
| 0/1 | 1/1 | 1.69  | 7.81  |
| 1/1 | 1/1 | 3.79  | 10    |
| 1/1 | 1/1 | 4.81  | 3.62  |
| 1/1 | 1/1 | 6.1   | 5.07  |
| 1/1 | 1/1 | 8.2   | 7.88  |
| 0/1 | 1/1 | 3.34  | 3.05  |
| 0/1 | 1/1 | 4.68  | 4.43  |
| 1/1 | 1/1 | 5.26  | 5.03  |
| 1/1 | 1/1 | 9.41  | 9.35  |
| 1/1 | 1/1 | 7.08  | 7.03  |
| 1/1 | 1/1 | 3.43  | 3.43  |
| 0/1 | 1/1 | 3.59  | 3.77  |
| 0/1 | 1/1 | 3.35  | 3.58  |
| 0/1 | 1/1 | 3.32  | 3.57  |
| 1/1 | 1/1 | 4.1   | 4.46  |
| 0/1 | 1/1 | 2.4   | 2.76  |
| 0/1 | 1/1 | 3.41  | 3.88  |
| 0/1 | 1/1 | 3.92  | 4.44  |
| 0/1 | 1/1 | 1.91  | 2.44  |
| 0/1 | 1/1 | 1.7   | 2.32  |
| 0/1 | 1/1 | 3.27  | 3.9   |
| 1/1 | 1/1 | 8.27  | 9.08  |
| 0/1 | 1/1 | 3.31  | 4.38  |
| 0/1 | 1/1 | 2.33  | 3.55  |
| 0/1 | 1/1 | 2.42  | 4.07  |
| 0/1 | 1/1 | 6.09  | 7.89  |
| 0/1 | 1/1 | 2.42  | 4.27  |
| 1/1 | 1/1 | 6.07  | 8.09  |
| 1/1 | 1/1 | 3.86  | 6.26  |
| 1/1 | 1/1 | 4.3   | 6.73  |
| 0/1 | 1/1 | 5.23  | 7.78  |
| 0/1 | 1/1 | 2.85  | 5.73  |
| 0/1 | 1/1 | 2.41  | 5.35  |

|     |     |      |       |
|-----|-----|------|-------|
| 1/1 | 1/1 | 6.89 | 10.06 |
| 1/1 | 1/1 | 3.16 | 8.46  |
| 1/1 | 1/1 | 6.77 | 6.22  |
| 0/1 | 1/1 | 6.05 | 5.75  |
| 1/1 | 1/1 | 8.94 | 8.7   |
| 1/1 | 1/1 | 5.99 | 5.9   |
| 0/1 | 1/1 | 4.8  | 4.88  |
| 1/1 | 1/1 | 7.84 | 8.15  |
| 1/1 | 1/1 | 7.8  | 8.65  |
| 1/1 | 1/1 | 4.56 | 5.5   |
| 0/1 | 1/1 | 3.74 | 5.14  |
| 0/1 | 1/1 | 2.56 | 4.85  |
| 0/1 | 1/1 | 1.94 | 4.26  |
| 1/1 | 1/1 | 5.27 | 8.19  |
| 0/1 | 1/1 | 5    | 8.07  |
| 0/1 | 1/1 | 2.73 | 6.29  |
| 0/1 | 1/1 | 2.81 | 9.13  |
| 0/1 | 1/1 | 3.11 | 3.29  |
| 0/1 | 1/1 | 3.27 | 3.48  |
| 1/1 | 1/1 | 3.96 | 4.34  |
| 0/1 | 1/1 | 2.95 | 3.85  |
| 0/1 | 1/1 | 2.4  | 3.32  |
| 1/1 | 1/1 | 8.27 | 9.87  |
| 0/1 | 1/1 | 2.43 | 4.41  |
| 1/1 | 1/1 | 3.48 | 5.62  |
| 1/1 | 1/1 | 4.94 | 7.09  |
| 1/1 | 1/1 | 6.48 | 8.67  |
| 0/1 | 1/1 | 2.36 | 4.64  |
| 0/1 | 1/1 | 2.72 | 5.17  |
| 0/1 | 1/1 | 2.18 | 4.97  |
| 1/1 | 1/1 | 4.39 | 7.19  |
| 0/1 | 1/1 | 3.24 | 6.08  |
| 0/1 | 1/1 | 3.24 | 6.18  |
| 1/1 | 1/1 | 4.04 | 7.01  |
| 0/1 | 1/1 | 2.24 | 6.02  |
| 0/1 | 1/1 | 6.37 | 10.34 |
| 1/1 | 1/1 | 8.52 | 12.67 |
| 0/1 | 1/1 | 2.81 | 6.98  |
| 0/1 | 1/1 | 2.34 | 6.53  |
| 1/1 | 1/1 | 4.22 | 8.51  |
| 0/1 | 1/1 | 2.54 | 8.94  |
| 1/1 | 1/1 | 4.3  | 10.82 |
| 0/1 | 1/1 | 3.06 | 9.62  |
| 1/1 | 1/1 | 4.15 | 10.73 |
| 1/1 | 1/1 | 3.81 | 10.77 |
| 1/1 | 0/1 | 8.85 | 2.68  |
| 1/1 | 0/1 | 7.72 | 2.6   |
| 1/1 | 1/1 | 9.76 | 5.21  |
| 1/1 | 0/1 | 8.06 | 3.56  |
| 1/1 | 1/1 | 7.16 | 3.13  |
| 1/1 | 1/1 | 9.12 | 5.28  |
| 1/1 | 0/1 | 6.75 | 3.33  |
| 1/1 | 1/1 | 7.55 | 4.56  |
| 1/1 | 1/1 | 7.92 | 5.05  |
| 1/1 | 1/1 | 7.74 | 4.89  |
| 1/1 | 0/1 | 6.45 | 3.61  |
| 1/1 | 0/1 | 6.43 | 3.59  |
| 1/1 | 1/1 | 6.72 | 3.9   |

|     |     |       |       |
|-----|-----|-------|-------|
| 1/1 | 0/1 | 6.44  | 3.65  |
| 1/1 | 1/1 | 8.95  | 6.36  |
| 1/1 | 1/1 | 6.62  | 4.07  |
| 1/1 | 1/1 | 6.63  | 4.1   |
| 1/1 | 1/1 | 7.77  | 5.29  |
| 1/1 | 1/1 | 7.29  | 4.87  |
| 1/1 | 1/1 | 6.71  | 4.29  |
| 1/1 | 0/1 | 4.26  | 1.87  |
| 1/1 | 1/1 | 7.67  | 5.42  |
| 1/1 | 1/1 | 7.93  | 5.69  |
| 1/1 | 1/1 | 10.82 | 8.59  |
| 1/1 | 1/1 | 7.12  | 4.91  |
| 1/1 | 1/1 | 8.45  | 6.27  |
| 1/1 | 1/1 | 8.19  | 6.03  |
| 1/1 | 1/1 | 8.33  | 6.17  |
| 1/1 | 1/1 | 7.24  | 5.15  |
| 0/1 | 1/1 | 5.85  | 5.84  |
| 1/1 | 1/1 | 5.37  | 5.38  |
| 1/1 | 1/1 | 4.02  | 4.1   |
| 0/1 | 1/1 | 3.1   | 3.23  |
| 1/1 | 1/1 | 12.1  | 12.3  |
| 1/1 | 1/1 | 4.49  | 4.72  |
| 1/1 | 1/1 | 4.45  | 4.7   |
| 1/1 | 1/1 | 6.35  | 5.91  |
| 1/1 | 1/1 | 8.4   | 8.1   |
| 1/1 | 1/1 | 7.7   | 7.85  |
| 1/1 | 1/1 | 5.61  | 5.98  |
| 0/1 | 1/1 | 5.69  | 7.76  |
| 1/1 | 1/1 | 5.71  | 7.82  |
| 1/1 | 1/1 | 7.39  | 10.16 |
| 1/1 | 1/1 | 6.09  | 9.28  |
| 0/1 | 1/1 | 4.68  | 8.03  |
| 0/1 | 1/1 | 5.14  | 11.34 |
| 1/1 | 1/1 | 5.38  | 4.84  |
| 1/1 | 1/1 | 7.33  | 7.07  |
| 0/1 | 1/1 | 4.23  | 4.2   |
| 0/1 | 1/1 | 3.35  | 3.33  |
| 1/1 | 1/1 | 4.88  | 4.87  |
| 0/1 | 1/1 | 7.42  | 7.45  |
| 1/1 | 1/1 | 9.04  | 9.08  |
| 0/1 | 1/1 | 6.26  | 6.33  |
| 1/1 | 1/1 | 5.88  | 6.14  |
| 1/1 | 1/1 | 6.71  | 7.01  |
| 0/1 | 1/1 | 6.29  | 6.64  |
| 1/1 | 1/1 | 5.77  | 6.15  |
| 0/1 | 1/1 | 4.31  | 4.73  |
| 1/1 | 1/1 | 7.69  | 8.13  |
| 0/1 | 1/1 | 3.27  | 3.71  |
| 1/1 | 1/1 | 6.3   | 6.75  |
| 0/1 | 1/1 | 3.48  | 4.04  |
| 1/1 | 1/1 | 5.54  | 6.11  |
| 1/1 | 1/1 | 6.66  | 7.35  |
| 0/1 | 1/1 | 2.56  | 3.49  |
| 1/1 | 1/1 | 8.03  | 9.71  |
| 0/1 | 1/1 | 2.7   | 4.7   |
| 1/1 | 1/1 | 7.15  | 9.22  |
| 1/1 | 1/1 | 7.42  | 9.68  |
| 0/1 | 1/1 | 7.15  | 10.46 |

|     |     |       |       |
|-----|-----|-------|-------|
| 1/1 | 1/1 | 7.04  | 10.45 |
| 1/1 | 1/1 | 2.83  | 8.25  |
| 1/1 | 1/1 | 4.67  | 10.11 |
| 1/1 | 1/1 | 4.52  | 10.21 |
| 1/1 | 1/1 | 4.78  | 10.53 |
| 0/1 | 1/1 | 2.99  | 9.39  |
| 1/1 | 0/1 | 7.49  | 4.7   |
| 1/1 | 1/1 | 4.12  | 2.89  |
| 1/1 | 1/1 | 5.33  | 5.19  |
| 1/1 | 1/1 | 7.03  | 7.73  |
| 1/1 | 1/1 | 6.92  | 7.71  |
| 1/1 | 1/1 | 5.64  | 4.63  |
| 1/1 | 1/1 | 6.45  | 7.21  |
| 0/1 | 1/1 | 3.01  | 3.82  |
| 0/1 | 1/1 | 4.69  | 6.45  |
| 1/1 | 1/1 | 9.16  | 10.99 |
| 1/1 | 1/1 | 6.01  | 8.51  |
| 1/1 | 1/1 | 4.46  | 7.19  |
| 1/1 | 1/1 | 3.3   | 8.79  |
| 1/1 | 1/1 | 4.66  | 10.18 |
| 1/1 | 0/1 | 10.27 | 2.09  |
| 1/1 | 1/1 | 8.31  | 2.62  |
| 1/1 | 1/1 | 8.24  | 2.79  |
| 1/1 | 1/1 | 11.98 | 6.85  |
| 1/1 | 1/1 | 10.94 | 6.03  |
| 1/1 | 1/1 | 8.42  | 3.56  |
| 1/1 | 1/1 | 11.9  | 7.13  |
| 1/1 | 1/1 | 8.9   | 4.14  |
| 1/1 | 1/1 | 11.02 | 6.33  |
| 1/1 | 1/1 | 9.68  | 5.02  |
| 1/1 | 1/1 | 9.32  | 4.69  |
| 1/1 | 1/1 | 11.92 | 7.37  |
| 1/1 | 1/1 | 10.28 | 7.83  |
| 1/1 | 1/1 | 11.82 | 9.54  |
| 1/1 | 1/1 | 12.59 | 10.46 |
| 1/1 | 1/1 | 12.62 | 10.52 |
| 1/1 | 1/1 | 4.42  | 3.88  |
| 1/1 | 1/1 | 3.93  | 3.43  |
| 1/1 | 0/1 | 2.63  | 2.24  |
| 1/1 | 1/1 | 6.91  | 5.82  |
| 0/1 | 1/1 | 3.04  | 2.81  |
| 1/1 | 1/1 | 5.03  | 4.97  |
| 0/1 | 1/1 | 2.11  | 2.15  |
| 1/1 | 1/1 | 7.13  | 7.22  |
| 0/1 | 1/1 | 5.04  | 5.29  |
| 0/1 | 1/1 | 2.99  | 3.33  |
| 1/1 | 1/1 | 6.48  | 6.89  |
| 1/1 | 1/1 | 4.55  | 5.12  |
| 0/1 | 1/1 | 2.95  | 3.65  |
| 0/1 | 1/1 | 2.71  | 3.52  |
| 1/1 | 1/1 | 9.56  | 10.44 |
| 1/1 | 1/1 | 8.17  | 9.14  |
| 1/1 | 1/1 | 7.98  | 9.77  |
| 1/1 | 1/1 | 6.39  | 8.45  |
| 1/1 | 1/1 | 4.74  | 7     |
| 1/1 | 1/1 | 4.09  | 6.38  |
| 1/1 | 1/1 | 5.64  | 8     |
| 1/1 | 1/1 | 6.35  | 8.71  |

|     |     |       |       |
|-----|-----|-------|-------|
| 0/1 | 1/1 | 1.88  | 4.32  |
| 0/1 | 1/1 | 3.89  | 8.57  |
| 0/1 | 1/1 | 3.1   | 7.8   |
| 0/1 | 1/1 | 2.48  | 7.34  |
| 0/1 | 1/1 | 2.62  | 8.38  |
| 1/1 | 1/1 | 5.75  | 6.78  |
| 0/1 | 1/1 | 3.58  | 5.8   |
| 0/1 | 1/1 | 2.93  | 5.55  |
| 0/1 | 1/1 | 3.63  | 8.03  |
| 1/1 | 1/1 | 4.19  | 11.06 |
| 0/1 | 1/1 | 3.5   | 10.72 |
| 1/1 | 1/1 | 4.55  | 11.78 |
| 1/1 | 1/1 | 3.54  | 2.55  |
| 1/1 | 1/1 | 7.81  | 7.66  |
| 0/1 | 1/1 | 8.03  | 8.08  |
| 1/1 | 1/1 | 9.11  | 9.27  |
| 0/1 | 1/1 | 2.48  | 2.88  |
| 1/1 | 1/1 | 8.38  | 10.31 |
| 0/1 | 1/1 | 2.66  | 5.07  |
| 1/1 | 1/1 | 3.83  | 6.27  |
| 1/1 | 1/1 | 3.4   | 8.21  |
| 1/1 | 1/1 | 10.06 | 4.95  |
| 1/1 | 1/1 | 9.7   | 4.68  |
| 1/1 | 1/1 | 8.63  | 3.67  |
| 1/1 | 1/1 | 10    | 5.06  |
| 1/1 | 1/1 | 9.49  | 4.58  |
| 1/1 | 1/1 | 9.83  | 4.96  |
| 1/1 | 1/1 | 9.65  | 4.8   |
| 1/1 | 0/1 | 6.61  | 1.81  |
| 1/1 | 1/1 | 10.51 | 5.76  |
| 1/1 | 1/1 | 8.93  | 4.2   |
| 1/1 | 1/1 | 10.96 | 6.36  |
| 1/1 | 1/1 | 10.17 | 5.59  |
| 1/1 | 1/1 | 10.76 | 6.25  |
| 1/1 | 1/1 | 11.12 | 6.69  |
| 1/1 | 1/1 | 9.73  | 5.39  |
| 1/1 | 1/1 | 10.8  | 6.51  |
| 1/1 | 1/1 | 8.06  | 3.78  |
| 1/1 | 1/1 | 9.97  | 5.75  |
| 1/1 | 1/1 | 12.41 | 8.31  |
| 1/1 | 1/1 | 11.62 | 7.56  |
| 1/1 | 1/1 | 8     | 4.07  |
| 1/1 | 1/1 | 12.05 | 8.29  |
| 1/1 | 1/1 | 6.52  | 3.44  |
| 1/1 | 1/1 | 10.13 | 7.42  |
| 1/1 | 1/1 | 10.52 | 7.81  |
| 1/1 | 1/1 | 11.09 | 8.83  |
| 1/1 | 1/1 | 8.29  | 6.26  |
| 1/1 | 0/1 | 5.17  | 3.16  |
| 1/1 | 1/1 | 12.62 | 10.81 |
| 1/1 | 0/1 | 6     | 4.24  |
| 1/1 | 1/1 | 12.73 | 10.98 |
| 1/1 | 1/1 | 12.98 | 11.23 |
| 1/1 | 1/1 | 12.12 | 10.49 |
| 1/1 | 1/1 | 9.59  | 6.36  |
| 1/1 | 0/1 | 5.46  | 4.37  |
| 1/1 | 0/1 | 6.78  | 6.3   |
| 1/1 | 1/1 | 3.97  | 3.79  |



|     |     |       |       |
|-----|-----|-------|-------|
| 1/1 | 1/1 | 7.05  | 6.87  |
| 0/1 | 1/1 | 4.62  | 4.73  |
| 1/1 | 1/1 | 10.12 | 10.28 |
| 0/1 | 1/1 | 2.73  | 6.06  |
| 1/1 | 1/1 | 5.22  | 3.66  |
| 1/1 | 1/1 | 4.01  | 2.85  |
| 1/1 | 1/1 | 5.27  | 4.12  |
| 1/1 | 1/1 | 8.38  | 7.25  |
| 1/1 | 1/1 | 7.49  | 6.39  |
| 1/1 | 0/1 | 3.45  | 2.57  |
| 1/1 | 1/1 | 6.31  | 5.57  |
| 1/1 | 1/1 | 5.92  | 5.41  |
| 1/1 | 0/1 | 3.17  | 2.68  |
| 1/1 | 1/1 | 6.19  | 5.73  |
| 0/1 | 1/1 | 4.03  | 3.63  |
| 1/1 | 1/1 | 7.79  | 7.44  |
| 1/1 | 1/1 | 4.85  | 4.51  |
| 1/1 | 1/1 | 6.12  | 5.8   |
| 1/1 | 1/1 | 6.09  | 5.83  |
| 1/1 | 0/1 | 3.12  | 2.86  |
| 1/1 | 1/1 | 2.47  | 2.28  |
| 1/1 | 1/1 | 8.76  | 8.67  |
| 0/1 | 1/1 | 2.89  | 2.95  |
| 0/1 | 1/1 | 2.47  | 2.86  |
| 0/1 | 1/1 | 7.04  | 7.67  |
| 1/1 | 1/1 | 4.02  | 4.85  |
| 0/1 | 1/1 | 2.14  | 3.09  |
| 1/1 | 1/1 | 5.47  | 9.43  |
| 1/1 | 1/1 | 5.31  | 9.37  |
| 0/1 | 1/1 | 2.91  | 7.04  |
| 1/1 | 1/1 | 4.7   | 8.85  |
| 0/1 | 1/1 | 3.64  | 7.87  |
| 1/1 | 1/1 | 3.19  | 7.52  |
| 1/1 | 1/1 | 3.34  | 7.68  |
| 1/1 | 1/1 | 3.84  | 8.39  |
| 1/1 | 1/1 | 9.38  | 5.29  |
| 1/1 | 1/1 | 4.41  | 3.71  |
| 1/1 | 1/1 | 9.59  | 6.36  |
| 1/1 | 0/1 | 5.46  | 4.37  |
| 1/1 | 0/1 | 6.78  | 6.3   |
| 1/1 | 1/1 | 3.97  | 3.79  |
| 1/1 | 1/1 | 7.05  | 6.87  |
| 1/1 | 1/1 | 6.18  | 6.14  |
| 0/1 | 1/1 | 4.62  | 4.73  |
| 1/1 | 1/1 | 5.85  | 5.99  |
| 1/1 | 1/1 | 10.12 | 10.28 |
| 0/1 | 1/1 | 2.73  | 6.06  |
| 1/1 | 0/1 | 7.01  | 2.91  |
| 1/1 | 1/1 | 9.77  | 6.55  |
| 1/1 | 1/1 | 5.8   | 3.42  |
| 1/1 | 1/1 | 6.93  | 5.18  |
| 1/1 | 1/1 | 5.97  | 4.32  |
| 1/1 | 0/1 | 6.02  | 4.54  |
| 1/1 | 1/1 | 5.95  | 5.06  |
| 1/1 | 1/1 | 4.88  | 4.06  |
| 1/1 | 1/1 | 8     | 7.2   |
| 1/1 | 1/1 | 7.5   | 6.72  |
| 1/1 | 1/1 | 7.11  | 6.37  |

|     |     |      |      |
|-----|-----|------|------|
| 1/1 | 0/1 | 9.06 | 2.17 |
| 1/1 | 0/1 | 9.29 | 3.21 |
| 1/1 | 0/1 | 7.4  | 2.29 |
| 1/1 | 0/1 | 7.66 | 2.63 |
| 1/1 | 1/1 | 8.1  | 3.1  |
| 1/1 | 0/1 | 6.52 | 1.96 |
| 1/1 | 0/1 | 7.23 | 2.74 |
| 1/1 | 1/1 | 7.86 | 3.52 |
| 1/1 | 0/1 | 7.71 | 3.38 |
| 1/1 | 1/1 | 7.92 | 4.03 |
| 1/1 | 0/1 | 5.7  | 2.05 |
| 1/1 | 0/1 | 3.17 | 1.66 |
| 1/1 | 1/1 | 8.13 | 6.64 |
| 1/1 | 1/1 | 7.85 | 6.45 |
| 1/1 | 0/1 | 5.89 | 4.51 |
| 1/1 | 0/1 | 3.93 | 2.59 |
| 1/1 | 0/1 | 4.49 | 3.15 |
| 1/1 | 0/1 | 3.47 | 2.16 |
| 1/1 | 1/1 | 6.41 | 5.1  |
| 1/1 | 1/1 | 6.13 | 4.84 |
| 1/1 | 0/1 | 3.46 | 2.21 |
| 1/1 | 0/1 | 4.19 | 2.98 |
| 1/1 | 1/1 | 5.17 | 3.96 |
| 1/1 | 0/1 | 3.41 | 2.2  |
| 1/1 | 0/1 | 4.19 | 2.99 |
| 1/1 | 0/1 | 4.17 | 2.99 |
| 1/1 | 1/1 | 5.22 | 4.13 |
| 1/1 | 1/1 | 5.8  | 4.77 |
| 1/1 | 1/1 | 5.49 | 4.5  |
| 1/1 | 1/1 | 4.1  | 3.13 |
| 1/1 | 1/1 | 7.29 | 6.35 |
| 1/1 | 0/1 | 3.98 | 3.04 |
| 1/1 | 1/1 | 5.53 | 4.6  |
| 1/1 | 1/1 | 6.81 | 5.9  |
| 1/1 | 0/1 | 3.13 | 2.28 |
| 1/1 | 1/1 | 7.53 | 6.78 |
| 1/1 | 1/1 | 6.13 | 5.38 |
| 1/1 | 1/1 | 5.92 | 5.18 |
| 1/1 | 1/1 | 4.9  | 4.18 |
| 1/1 | 0/1 | 3.43 | 2.72 |
| 1/1 | 0/1 | 2.64 | 1.97 |
| 1/1 | 1/1 | 3.72 | 3.1  |
| 1/1 | 0/1 | 2.72 | 2.1  |
| 1/1 | 1/1 | 3.96 | 3.36 |
| 1/1 | 1/1 | 6.68 | 6.09 |
| 1/1 | 1/1 | 6.85 | 6.29 |
| 1/1 | 1/1 | 3.56 | 3.01 |
| 1/1 | 1/1 | 5.86 | 5.32 |
| 1/1 | 1/1 | 8.28 | 7.74 |
| 1/1 | 1/1 | 5.38 | 4.87 |
| 1/1 | 1/1 | 5.21 | 4.71 |
| 1/1 | 0/1 | 3.78 | 3.35 |
| 1/1 | 1/1 | 4.65 | 4.26 |
| 1/1 | 1/1 | 4.83 | 4.46 |
| 1/1 | 0/1 | 2.91 | 2.6  |
| 0/1 | 1/1 | 3.41 | 3.23 |
| 1/1 | 1/1 | 7.38 | 7.24 |
| 1/1 | 1/1 | 7.1  | 6.97 |

|     |     |       |       |
|-----|-----|-------|-------|
| 0/1 | 1/1 | 3.66  | 3.58  |
| 1/1 | 1/1 | 7.73  | 7.69  |
| 1/1 | 1/1 | 4.89  | 4.86  |
| 1/1 | 1/1 | 8.83  | 8.96  |
| 1/1 | 1/1 | 5.26  | 5.38  |
| 1/1 | 1/1 | 10.35 | 10.5  |
| 1/1 | 1/1 | 7.65  | 7.8   |
| 1/1 | 1/1 | 8.72  | 8.89  |
| 1/1 | 1/1 | 4.2   | 4.37  |
| 1/1 | 1/1 | 9.3   | 9.49  |
| 1/1 | 1/1 | 6.34  | 6.62  |
| 1/1 | 1/1 | 7.11  | 7.41  |
| 0/1 | 1/1 | 4.47  | 4.83  |
| 0/1 | 1/1 | 2.86  | 3.22  |
| 1/1 | 1/1 | 9.82  | 10.27 |
| 0/1 | 1/1 | 2.84  | 3.4   |
| 1/1 | 1/1 | 5.01  | 5.6   |
| 0/1 | 1/1 | 2.45  | 3.09  |
| 0/1 | 1/1 | 2.44  | 3.1   |
| 0/1 | 1/1 | 2.66  | 3.35  |
| 0/1 | 1/1 | 2.08  | 2.83  |
| 0/1 | 1/1 | 2.38  | 3.29  |
| 1/1 | 1/1 | 6.77  | 7.81  |
| 0/1 | 1/1 | 1.88  | 3.17  |
| 1/1 | 1/1 | 2.92  | 2.73  |
| 1/1 | 1/1 | 7.95  | 7.83  |
| 0/1 | 1/1 | 2.66  | 2.81  |
| 1/1 | 1/1 | 6.4   | 6.82  |
| 0/1 | 1/1 | 3.13  | 4.03  |
| 1/1 | 1/1 | 6.09  | 7.3   |
| 0/1 | 1/1 | 2.17  | 3.43  |
| 1/1 | 1/1 | 7.06  | 8.65  |
| 0/1 | 1/1 | 4.22  | 7.11  |
| 1/1 | 1/1 | 6.13  | 9.27  |
| 1/1 | 1/1 | 4.38  | 10.21 |
| 0/1 | 1/1 | 2.3   | 8.56  |
| 0/1 | 1/1 | 5.02  | 5.1   |
| 0/1 | 1/1 | 3.44  | 3.88  |
| 0/1 | 1/1 | 2.47  | 3.05  |
| 1/1 | 1/1 | 5.81  | 6.43  |
| 0/1 | 1/1 | 3.13  | 3.86  |
| 1/1 | 1/1 | 6.21  | 7.4   |
| 1/1 | 1/1 | 6.02  | 7.98  |
| 0/1 | 1/1 | 3.61  | 5.58  |
| 0/1 | 1/1 | 2.16  | 4.37  |
| 0/1 | 1/1 | 2.71  | 4.94  |
| 0/1 | 1/1 | 2.77  | 5.2   |
| 1/1 | 1/1 | 5.42  | 7.89  |
| 1/1 | 1/1 | 5.17  | 10.67 |
| 0/1 | 1/1 | 4.71  | 10.47 |
| 1/1 | 0/1 | 5.22  | 3.46  |
| 1/1 | 1/1 | 5.02  | 4.42  |
| 1/1 | 1/1 | 11.13 | 10.7  |
| 1/1 | 1/1 | 4.98  | 4.55  |
| 1/1 | 1/1 | 7.66  | 7.48  |
| 1/1 | 1/1 | 11.5  | 11.41 |
| 1/1 | 1/1 | 10.7  | 10.74 |
| 1/1 | 1/1 | 6.23  | 6.3   |

|     |     |       |       |
|-----|-----|-------|-------|
| 0/1 | 1/1 | 3.73  | 3.84  |
| 0/1 | 1/1 | 5.53  | 5.68  |
| 1/1 | 1/1 | 9.09  | 9.34  |
| 0/1 | 1/1 | 3.78  | 4.3   |
| 0/1 | 1/1 | 5.19  | 5.79  |
| 0/1 | 1/1 | 3.6   | 4.59  |
| 0/1 | 1/1 | 4.65  | 5.74  |
| 0/1 | 1/1 | 2.94  | 4.22  |
| 1/1 | 1/1 | 5.22  | 6.76  |
| 0/1 | 1/1 | 3.26  | 4.8   |
| 0/1 | 1/1 | 4.31  | 7.89  |
| 0/1 | 1/1 | 2.24  | 6.65  |
| 1/1 | 1/1 | 3.02  | 7.61  |
| 1/1 | 1/1 | 5.36  | 4.17  |
| 1/1 | 1/1 | 6.63  | 6     |
| 1/1 | 1/1 | 6.81  | 6.23  |
| 1/1 | 1/1 | 6.38  | 5.88  |
| 1/1 | 1/1 | 3.67  | 3.22  |
| 0/1 | 1/1 | 3.97  | 3.78  |
| 1/1 | 1/1 | 2.64  | 3.12  |
| 0/1 | 1/1 | 5.94  | 6.62  |
| 0/1 | 1/1 | 5.28  | 6.19  |
| 0/1 | 1/1 | 3.54  | 4.5   |
| 0/1 | 1/1 | 3.94  | 5.17  |
| 1/1 | 1/1 | 5.01  | 6.32  |
| 0/1 | 1/1 | 2.93  | 4.3   |
| 0/1 | 1/1 | 3.3   | 4.68  |
| 1/1 | 1/1 | 7.99  | 9.66  |
| 0/1 | 1/1 | 2.47  | 4.24  |
| 1/1 | 1/1 | 3.95  | 6     |
| 1/1 | 1/1 | 3.46  | 7.77  |
| 1/1 | 1/1 | 5.13  | 3.16  |
| 1/1 | 1/1 | 7.3   | 6.27  |
| 1/1 | 1/1 | 6.2   | 5.77  |
| 1/1 | 1/1 | 9.67  | 9.55  |
| 1/1 | 1/1 | 8.5   | 8.56  |
| 1/1 | 1/1 | 11.27 | 11.36 |
| 0/1 | 1/1 | 4.63  | 4.73  |
| 0/1 | 1/1 | 3.41  | 3.68  |
| 0/1 | 1/1 | 5.06  | 5.65  |
| 0/1 | 1/1 | 3.71  | 4.35  |
| 0/1 | 1/1 | 3.52  | 4.36  |
| 1/1 | 1/1 | 5.68  | 6.67  |
| 1/1 | 1/1 | 5.91  | 9.26  |
| 0/1 | 1/1 | 4.08  | 7.47  |
| 1/1 | 1/1 | 4.27  | 8.72  |
| 1/1 | 1/1 | 9.52  | 6.94  |
| 1/1 | 1/1 | 8.35  | 6.76  |
| 1/1 | 0/1 | 4.68  | 4.29  |
| 1/1 | 1/1 | 5.48  | 5.32  |
| 1/1 | 1/1 | 3.06  | 2.96  |
| 1/1 | 1/1 | 6.02  | 6.24  |
| 0/1 | 1/1 | 2.78  | 3.1   |
| 0/1 | 1/1 | 2.59  | 2.92  |
| 0/1 | 1/1 | 2.18  | 2.64  |
| 1/1 | 1/1 | 5     | 5.64  |
| 1/1 | 1/1 | 3.64  | 6.45  |
| 1/1 | 1/1 | 3.42  | 6.35  |

|     |     |       |       |
|-----|-----|-------|-------|
| 1/1 | 0/1 | 8.71  | 4.44  |
| 0/1 | 1/1 | 2.58  | 4.45  |
| 1/1 | 1/1 | 11.2  | 10.38 |
| 1/1 | 1/1 | 11.38 | 10.82 |
| 1/1 | 1/1 | 6.81  | 6.41  |
| 0/1 | 1/1 | 4.21  | 3.91  |
| 1/1 | 1/1 | 11.53 | 11.54 |
| 1/1 | 1/1 | 9.23  | 9.41  |
| 0/1 | 1/1 | 2.73  | 3.26  |
| 0/1 | 1/1 | 6.77  | 7.32  |
| 0/1 | 1/1 | 5.63  | 6.26  |
| 1/1 | 1/1 | 4.61  | 5.62  |
| 0/1 | 1/1 | 8.15  | 10.06 |
| 0/1 | 1/1 | 4.63  | 6.9   |
| 0/1 | 1/1 | 3.48  | 5.89  |
| 0/1 | 1/1 | 4.38  | 8.96  |
| 1/1 | 1/1 | 5.96  | 10.69 |
| 0/1 | 1/1 | 4.68  | 10.15 |
| 1/1 | 1/1 | 7.61  | 6.78  |
| 1/1 | 1/1 | 7.92  | 7.51  |
| 1/1 | 1/1 | 7.8   | 7.64  |
| 1/1 | 1/1 | 9.25  | 9.5   |
| 1/1 | 1/1 | 7.73  | 8.1   |
| 1/1 | 1/1 | 8.32  | 8.75  |
| 0/1 | 1/1 | 4.78  | 5.33  |
| 0/1 | 1/1 | 8.56  | 9.12  |
| 0/1 | 1/1 | 2.36  | 3.13  |
| 0/1 | 1/1 | 5.73  | 7.04  |
| 1/1 | 1/1 | 5.59  | 6.91  |
| 0/1 | 1/1 | 4.38  | 6.25  |
| 1/1 | 1/1 | 9.54  | 11.76 |
| 1/1 | 1/1 | 7.06  | 11.49 |
| 0/1 | 1/1 | 1.88  | 6.43  |
| 1/1 | 1/1 | 6.8   | 11.39 |
| 1/1 | 1/1 | 4.65  | 9.32  |
| 0/1 | 1/1 | 2.5   | 8     |
| 0/1 | 1/1 | 4.28  | 10.02 |
| 1/1 | 1/1 | 2.85  | 2.76  |
| 1/1 | 1/1 | 5.99  | 6.08  |
| 1/1 | 1/1 | 4.36  | 4.54  |
| 1/1 | 1/1 | 6.17  | 6.41  |
| 0/1 | 1/1 | 3.97  | 4.44  |
| 1/1 | 1/1 | 3.9   | 4.53  |
| 1/1 | 1/1 | 7.36  | 8.08  |
| 0/1 | 1/1 | 3.67  | 4.99  |
| 1/1 | 1/1 | 4.04  | 5.64  |
| 0/1 | 1/1 | 4.73  | 6.58  |
| 0/1 | 1/1 | 1.99  | 4.59  |
| 1/1 | 1/1 | 6.52  | 9.35  |
| 1/1 | 0/1 | 5.82  | 3.33  |
| 1/1 | 1/1 | 6.57  | 6.14  |
| 1/1 | 1/1 | 7.24  | 6.97  |
| 1/1 | 1/1 | 6.92  | 6.68  |
| 1/1 | 1/1 | 9.4   | 9.19  |
| 1/1 | 1/1 | 8.58  | 8.43  |
| 1/1 | 1/1 | 7.61  | 7.47  |
| 1/1 | 1/1 | 5.95  | 5.94  |
| 0/1 | 1/1 | 8.61  | 8.64  |

|     |     |       |       |
|-----|-----|-------|-------|
| 1/1 | 1/1 | 6.94  | 7.05  |
| 1/1 | 1/1 | 6.28  | 6.66  |
| 1/1 | 1/1 | 4.79  | 5.22  |
| 1/1 | 1/1 | 4.26  | 4.71  |
| 1/1 | 1/1 | 5.79  | 6.27  |
| 1/1 | 1/1 | 8.37  | 8.87  |
| 1/1 | 1/1 | 5     | 5.53  |
| 0/1 | 1/1 | 4.27  | 4.84  |
| 0/1 | 1/1 | 3.49  | 4.06  |
| 1/1 | 1/1 | 5.91  | 6.5   |
| 1/1 | 1/1 | 5.68  | 6.3   |
| 1/1 | 1/1 | 4.75  | 5.43  |
| 1/1 | 1/1 | 2.86  | 3.55  |
| 1/1 | 1/1 | 3.27  | 6.11  |
| 1/1 | 1/1 | 5.83  | 8.73  |
| 1/1 | 1/1 | 5.07  | 8.18  |
| 0/1 | 1/1 | 3.31  | 6.87  |
| 0/1 | 1/1 | 2.49  | 6.16  |
| 1/1 | 1/1 | 9.32  | 6.13  |
| 1/1 | 0/1 | 4.32  | 3.38  |
| 1/1 | 1/1 | 4.58  | 4.11  |
| 1/1 | 1/1 | 7.05  | 6.87  |
| 1/1 | 1/1 | 8.65  | 10.66 |
| 1/1 | 1/1 | 10.06 | 12.42 |
| 0/1 | 1/1 | 2.73  | 6.06  |
| 1/1 | 1/1 | 9.3   | 4.64  |
| 0/1 | 1/1 | 5.3   | 5.78  |
| 1/1 | 1/1 | 3.53  | 4.04  |
| 1/1 | 1/1 | 5.95  | 6.62  |
| 0/1 | 1/1 | 1.96  | 2.74  |
| 0/1 | 1/1 | 2.72  | 4.17  |
| 1/1 | 1/1 | 10.54 | 7.93  |
| 1/1 | 1/1 | 6.61  | 6.13  |
| 1/1 | 1/1 | 6.84  | 6.44  |
| 1/1 | 1/1 | 9.18  | 8.89  |
| 0/1 | 1/1 | 7.4   | 7.39  |
| 0/1 | 1/1 | 7.04  | 7.08  |
| 1/1 | 1/1 | 8.35  | 8.51  |
| 1/1 | 1/1 | 9.26  | 9.49  |
| 1/1 | 1/1 | 6.53  | 6.88  |
| 1/1 | 1/1 | 6.99  | 7.36  |
| 1/1 | 1/1 | 6.84  | 7.29  |
| 1/1 | 1/1 | 5.09  | 8.09  |
| 1/1 | 1/1 | 6.21  | 9.26  |
| 1/1 | 1/1 | 6.16  | 9.29  |
| 1/1 | 1/1 | 3.81  | 3.52  |
| 1/1 | 1/1 | 4.56  | 6.23  |
| 1/1 | 1/1 | 7.14  | 9.3   |
| 0/1 | 1/1 | 1.96  | 4.63  |
| 0/1 | 1/1 | 3.31  | 8.79  |
| 0/1 | 1/1 | 2.9   | 8.7   |
| 1/1 | 0/1 | 5.56  | 2.48  |
| 1/1 | 1/1 | 7.69  | 6.25  |
| 1/1 | 0/1 | 5.05  | 3.92  |
| 1/1 | 0/1 | 3.5   | 2.72  |
| 1/1 | 1/1 | 6.73  | 6.03  |
| 1/1 | 1/1 | 2.92  | 2.63  |
| 1/1 | 1/1 | 8.46  | 8.21  |

|     |     |       |       |
|-----|-----|-------|-------|
| 0/1 | 1/1 | 5.03  | 4.8   |
| 1/1 | 1/1 | 8.07  | 7.86  |
| 1/1 | 1/1 | 7.49  | 7.28  |
| 1/1 | 1/1 | 4.29  | 4.11  |
| 1/1 | 1/1 | 4.73  | 4.56  |
| 1/1 | 1/1 | 8.02  | 7.86  |
| 0/1 | 1/1 | 5.94  | 5.81  |
| 1/1 | 1/1 | 7.86  | 7.79  |
| 1/1 | 1/1 | 6.68  | 6.61  |
| 1/1 | 1/1 | 6.07  | 6.03  |
| 0/1 | 1/1 | 2.14  | 4.21  |
| 0/1 | 1/1 | 2.52  | 4.84  |
| 0/1 | 1/1 | 2.59  | 5.69  |
| 1/1 | 1/1 | 10.71 | 9.81  |
| 1/1 | 0/1 | 8.08  | 7.26  |
| 1/1 | 1/1 | 7.76  | 7.09  |
| 1/1 | 1/1 | 7.87  | 7.39  |
| 1/1 | 1/1 | 7.37  | 6.9   |
| 1/1 | 1/1 | 9.22  | 8.78  |
| 1/1 | 1/1 | 9.57  | 9.43  |
| 1/1 | 1/1 | 5.38  | 5.26  |
| 1/1 | 1/1 | 7.29  | 7.24  |
| 0/1 | 1/1 | 5.28  | 5.32  |
| 0/1 | 1/1 | 6.92  | 7.02  |
| 0/1 | 1/1 | 7.05  | 7.2   |
| 1/1 | 1/1 | 7.71  | 7.88  |
| 1/1 | 1/1 | 8.88  | 9.12  |
| 1/1 | 1/1 | 4.96  | 5.33  |
| 1/1 | 1/1 | 8.28  | 8.7   |
| 1/1 | 1/1 | 5.48  | 5.91  |
| 1/1 | 1/1 | 5.39  | 5.89  |
| 1/1 | 1/1 | 6.45  | 7     |
| 1/1 | 1/1 | 6.64  | 7.25  |
| 1/1 | 1/1 | 4.58  | 5.2   |
| 0/1 | 1/1 | 8.61  | 9.3   |
| 0/1 | 1/1 | 6.38  | 7.08  |
| 1/1 | 1/1 | 6.37  | 7.13  |
| 1/1 | 1/1 | 10.16 | 10.98 |
| 0/1 | 1/1 | 8.71  | 9.58  |
| 0/1 | 1/1 | 4.85  | 5.9   |
| 1/1 | 1/1 | 7.5   | 8.59  |
| 1/1 | 1/1 | 4.18  | 5.47  |
| 1/1 | 1/1 | 7.99  | 9.38  |
| 1/1 | 1/1 | 9.34  | 10.85 |
| 0/1 | 1/1 | 3.35  | 4.89  |
| 0/1 | 1/1 | 4.57  | 6.2   |
| 0/1 | 1/1 | 7.06  | 8.98  |
| 1/1 | 1/1 | 7.59  | 9.53  |
| 0/1 | 1/1 | 2.89  | 4.85  |
| 0/1 | 1/1 | 5.26  | 7.39  |
| 1/1 | 1/1 | 6.04  | 10.3  |
| 0/1 | 1/1 | 4.9   | 9.26  |
| 1/1 | 1/1 | 5.8   | 10.33 |
| 0/1 | 1/1 | 3.28  | 7.85  |
| 0/1 | 1/1 | 4.68  | 9.27  |
| 1/1 | 1/1 | 5.54  | 10.28 |
| 1/1 | 1/1 | 5.34  | 10.08 |
| 0/1 | 1/1 | 4.25  | 9.03  |

|     |     |      |       |
|-----|-----|------|-------|
| 1/1 | 1/1 | 4.35 | 9.39  |
| 0/1 | 1/1 | 3.7  | 8.86  |
| 1/1 | 1/1 | 4.34 | 10.41 |
| 0/1 | 1/1 | 2.59 | 8.81  |
| 1/1 | 1/1 | 9.08 | 8.6   |
| 0/1 | 1/1 | 6.37 | 7.01  |
| 0/1 | 1/1 | 5.98 | 6.88  |
| 0/1 | 1/1 | 3.85 | 5.04  |
| 1/1 | 1/1 | 8.17 | 9.48  |
| 1/1 | 1/1 | 7.65 | 9.13  |
| 1/1 | 1/1 | 6.58 | 8.35  |
| 1/1 | 1/1 | 6.26 | 8.07  |
| 1/1 | 1/1 | 5.43 | 7.77  |
| 1/1 | 1/1 | 6.69 | 9.25  |
| 0/1 | 1/1 | 3.95 | 8.51  |
| 1/1 | 1/1 | 6.46 | 11.07 |
| 1/1 | 1/1 | 5.74 | 10.39 |
| 1/1 | 1/1 | 6.36 | 11.05 |
| 1/1 | 1/1 | 5.28 | 10.1  |
| 1/1 | 1/1 | 3.48 | 8.38  |
| 0/1 | 1/1 | 3.24 | 8.16  |
| 1/1 | 1/1 | 5.05 | 10.01 |
| 1/1 | 1/1 | 4.35 | 9.36  |
| 1/1 | 1/1 | 4.62 | 9.69  |
| 1/1 | 1/1 | 4.12 | 9.21  |
| 1/1 | 1/1 | 4.2  | 9.35  |
| 0/1 | 1/1 | 5.29 | 10.45 |
| 1/1 | 1/1 | 4.02 | 9.4   |
| 1/1 | 1/1 | 3.49 | 8.88  |
| 1/1 | 1/1 | 5.09 | 10.56 |
| 0/1 | 1/1 | 3.71 | 9.22  |
| 0/1 | 1/1 | 3.21 | 8.89  |
| 1/1 | 0/1 | 6.76 | 3.51  |
| 1/1 | 1/1 | 5.49 | 5.01  |
| 1/1 | 1/1 | 6.44 | 6     |
| 1/1 | 1/1 | 6.76 | 6.39  |
| 0/1 | 1/1 | 2.58 | 4.59  |
| 1/1 | 1/1 | 6.01 | 5.72  |
| 1/1 | 1/1 | 4.98 | 4.86  |
| 1/1 | 1/1 | 6.21 | 6.19  |
| 1/1 | 1/1 | 7.69 | 7.72  |
| 1/1 | 1/1 | 5.5  | 5.61  |
| 0/1 | 1/1 | 3.41 | 3.58  |
| 0/1 | 1/1 | 2.93 | 3.23  |
| 1/1 | 1/1 | 5.83 | 6.64  |
| 1/1 | 1/1 | 4.4  | 5.37  |
| 1/1 | 1/1 | 3.67 | 4.9   |
| 1/1 | 1/1 | 4.43 | 5.66  |
| 1/1 | 1/1 | 8.91 | 10.22 |
| 0/1 | 1/1 | 3.49 | 5.19  |
| 1/1 | 1/1 | 6.83 | 8.59  |
| 1/1 | 1/1 | 7.02 | 8.99  |
| 1/1 | 1/1 | 7.12 | 9.13  |
| 1/1 | 1/1 | 5.48 | 7.63  |
| 1/1 | 1/1 | 7.15 | 9.35  |
| 1/1 | 1/1 | 6.25 | 8.49  |
| 1/1 | 1/1 | 5.39 | 7.71  |
| 1/1 | 1/1 | 5    | 7.4   |



|     |     |      |       |
|-----|-----|------|-------|
| 1/1 | 1/1 | 6.23 | 8.75  |
| 1/1 | 1/1 | 7.41 | 10.13 |
| 0/1 | 1/1 | 4.75 | 9.77  |
| 1/1 | 1/1 | 6.01 | 5.72  |
| 1/1 | 1/1 | 4.98 | 4.86  |
| 1/1 | 1/1 | 6.21 | 6.19  |
| 1/1 | 1/1 | 7.69 | 7.72  |
| 1/1 | 1/1 | 5.5  | 5.61  |
| 0/1 | 1/1 | 3.34 | 3.59  |
| 0/1 | 1/1 | 2.93 | 3.23  |
| 1/1 | 1/1 | 5.83 | 6.64  |
| 1/1 | 1/1 | 4.4  | 5.37  |
| 1/1 | 1/1 | 3.67 | 4.9   |
| 1/1 | 1/1 | 4.43 | 5.66  |
| 1/1 | 1/1 | 8.91 | 10.22 |
| 0/1 | 1/1 | 3.49 | 5.19  |
| 1/1 | 1/1 | 6.83 | 8.59  |
| 1/1 | 1/1 | 7.02 | 8.99  |
| 1/1 | 1/1 | 7.12 | 9.13  |
| 1/1 | 1/1 | 5.48 | 7.63  |
| 1/1 | 1/1 | 7.15 | 9.35  |
| 1/1 | 1/1 | 6.25 | 8.49  |
| 1/1 | 1/1 | 5.39 | 7.71  |
| 1/1 | 1/1 | 5    | 7.4   |
| 1/1 | 1/1 | 6.23 | 8.75  |
| 1/1 | 1/1 | 7.41 | 10.13 |
| 0/1 | 1/1 | 4.75 | 9.77  |
| 1/1 | 1/1 | 6.01 | 5.72  |
| 1/1 | 1/1 | 4.98 | 4.86  |
| 1/1 | 1/1 | 6.21 | 6.19  |
| 1/1 | 1/1 | 7.69 | 7.72  |
| 1/1 | 1/1 | 5.5  | 5.61  |
| 0/1 | 1/1 | 3.34 | 3.59  |
| 0/1 | 1/1 | 2.93 | 3.23  |
| 0/1 | 1/1 | 2.31 | 3.03  |
| 1/1 | 1/1 | 5.83 | 6.64  |
| 1/1 | 1/1 | 4.4  | 5.37  |
| 1/1 | 1/1 | 3.67 | 4.9   |
| 1/1 | 1/1 | 4.43 | 5.66  |
| 1/1 | 1/1 | 8.91 | 10.22 |
| 0/1 | 1/1 | 3.49 | 5.19  |
| 1/1 | 1/1 | 6.83 | 8.59  |
| 1/1 | 1/1 | 7.02 | 8.99  |
| 1/1 | 1/1 | 7.12 | 9.13  |
| 1/1 | 1/1 | 5.48 | 7.63  |
| 1/1 | 1/1 | 7.15 | 9.35  |
| 1/1 | 1/1 | 6.25 | 8.49  |
| 1/1 | 1/1 | 5.39 | 7.71  |
| 1/1 | 1/1 | 5    | 7.4   |
| 1/1 | 1/1 | 6.23 | 8.75  |
| 1/1 | 1/1 | 7.41 | 10.13 |
| 0/1 | 1/1 | 4.75 | 9.77  |
| 1/1 | 1/1 | 6.01 | 5.72  |
| 1/1 | 1/1 | 4.98 | 4.86  |
| 1/1 | 1/1 | 6.21 | 6.19  |
| 1/1 | 1/1 | 7.69 | 7.72  |
| 1/1 | 1/1 | 5.5  | 5.61  |
| 0/1 | 1/1 | 3.34 | 3.59  |

|     |     |       |       |
|-----|-----|-------|-------|
| 0/1 | 1/1 | 2.93  | 3.23  |
| 1/1 | 1/1 | 5.83  | 6.64  |
| 1/1 | 1/1 | 4.4   | 5.37  |
| 1/1 | 1/1 | 3.67  | 4.9   |
| 1/1 | 1/1 | 4.43  | 5.66  |
| 1/1 | 1/1 | 8.91  | 10.22 |
| 0/1 | 1/1 | 3.49  | 5.19  |
| 1/1 | 1/1 | 6.83  | 8.59  |
| 1/1 | 1/1 | 7.02  | 8.99  |
| 1/1 | 1/1 | 7.12  | 9.13  |
| 1/1 | 1/1 | 5.48  | 7.63  |
| 1/1 | 1/1 | 7.15  | 9.35  |
| 1/1 | 1/1 | 6.25  | 8.49  |
| 1/1 | 1/1 | 5.39  | 7.71  |
| 1/1 | 1/1 | 5     | 7.4   |
| 1/1 | 1/1 | 6.23  | 8.75  |
| 1/1 | 1/1 | 7.41  | 10.13 |
| 0/1 | 1/1 | 4.75  | 9.77  |
| 1/1 | 1/1 | 6.01  | 5.72  |
| 1/1 | 1/1 | 4.98  | 4.86  |
| 1/1 | 1/1 | 6.21  | 6.19  |
| 1/1 | 1/1 | 7.69  | 7.72  |
| 1/1 | 1/1 | 5.5   | 5.61  |
| 0/1 | 1/1 | 3.34  | 3.59  |
| 0/1 | 1/1 | 2.93  | 3.23  |
| 0/1 | 1/1 | 2.31  | 3.03  |
| 1/1 | 1/1 | 5.83  | 6.64  |
| 1/1 | 1/1 | 4.4   | 5.37  |
| 1/1 | 1/1 | 3.67  | 4.9   |
| 1/1 | 1/1 | 4.43  | 5.66  |
| 1/1 | 1/1 | 8.91  | 10.22 |
| 0/1 | 1/1 | 3.49  | 5.19  |
| 1/1 | 1/1 | 6.83  | 8.59  |
| 1/1 | 1/1 | 7.02  | 8.99  |
| 1/1 | 1/1 | 7.12  | 9.13  |
| 1/1 | 1/1 | 5.48  | 7.63  |
| 1/1 | 1/1 | 7.15  | 9.35  |
| 1/1 | 1/1 | 6.25  | 8.49  |
| 1/1 | 1/1 | 5.39  | 7.71  |
| 1/1 | 1/1 | 5     | 7.4   |
| 1/1 | 1/1 | 6.23  | 8.75  |
| 1/1 | 1/1 | 7.41  | 10.13 |
| 0/1 | 1/1 | 4.75  | 9.77  |
| 1/1 | 0/1 | 4.67  | 1.57  |
| 1/1 | 1/1 | 8.22  | 7.97  |
| 1/1 | 1/1 | 7.65  | 6.99  |
| 1/1 | 1/1 | 8.31  | 8.16  |
| 1/1 | 1/1 | 5.03  | 4.92  |
| 1/1 | 1/1 | 4.76  | 4.82  |
| 1/1 | 1/1 | 8.11  | 9.24  |
| 0/1 | 1/1 | 5.15  | 6.34  |
| 1/1 | 1/1 | 6.76  | 8.19  |
| 1/1 | 1/1 | 6.11  | 7.55  |
| 1/1 | 1/1 | 10.03 | 11.72 |
| 0/1 | 1/1 | 2.93  | 5.03  |
| 1/1 | 1/1 | 4.73  | 9.7   |
| 0/1 | 1/1 | 3.4   | 8.58  |
| 1/1 | 1/1 | 5.57  | 3.56  |

|     |     |       |       |
|-----|-----|-------|-------|
| 1/1 | 1/1 | 3.05  | 3.11  |
| 1/1 | 1/1 | 8.5   | 8.7   |
| 1/1 | 1/1 | 10.73 | 10.93 |
| 0/1 | 1/1 | 7.83  | 8.16  |
| 1/1 | 1/1 | 8.86  | 9.2   |
| 1/1 | 1/1 | 7.09  | 7.66  |
| 1/1 | 1/1 | 6.7   | 7.33  |
| 0/1 | 1/1 | 3.24  | 3.89  |
| 1/1 | 1/1 | 6.12  | 9.11  |
| 1/1 | 1/1 | 4.35  | 3.66  |
| 1/1 | 1/1 | 6.74  | 6.17  |
| 0/1 | 1/1 | 2     | 2.35  |
| 0/1 | 1/1 | 3.1   | 4.98  |
| 0/1 | 1/1 | 2.31  | 6.69  |
| 1/1 | 1/1 | 4.06  | 8.49  |
| 1/1 | 0/1 | 6.25  | 4.93  |
| 1/1 | 1/1 | 9.72  | 9.23  |
| 1/1 | 1/1 | 6.2   | 5.72  |
| 1/1 | 1/1 | 2.87  | 2.46  |
| 1/1 | 1/1 | 8.29  | 7.95  |
| 0/1 | 1/1 | 2.84  | 2.83  |
| 1/1 | 1/1 | 6.51  | 6.56  |
| 1/1 | 1/1 | 6.44  | 6.55  |
| 1/1 | 1/1 | 7.7   | 7.83  |
| 1/1 | 1/1 | 3.75  | 3.88  |
| 1/1 | 1/1 | 5.96  | 6.12  |
| 0/1 | 1/1 | 3.42  | 3.62  |
| 1/1 | 1/1 | 10.36 | 10.59 |
| 0/1 | 1/1 | 3.86  | 4.24  |
| 0/1 | 1/1 | 2.48  | 2.93  |
| 0/1 | 1/1 | 3.93  | 4.47  |
| 1/1 | 1/1 | 5.21  | 5.87  |
| 0/1 | 1/1 | 4     | 4.67  |
| 1/1 | 1/1 | 7.03  | 7.83  |
| 0/1 | 1/1 | 4.17  | 5.04  |
| 1/1 | 1/1 | 4.11  | 4.99  |
| 1/1 | 1/1 | 5.08  | 6.09  |
| 1/1 | 1/1 | 6.68  | 7.76  |
| 0/1 | 1/1 | 3.04  | 4.2   |
| 0/1 | 1/1 | 2.27  | 3.47  |
| 1/1 | 1/1 | 6.17  | 7.62  |
| 0/1 | 1/1 | 4.46  | 5.91  |
| 1/1 | 1/1 | 5.75  | 7.23  |
| 1/1 | 1/1 | 6.24  | 7.81  |
| 1/1 | 1/1 | 4.82  | 8.44  |
| 1/1 | 1/1 | 4.47  | 8.13  |
| 1/1 | 1/1 | 3.77  | 7.71  |
| 1/1 | 1/1 | 8.26  | 7.24  |
| 1/1 | 1/1 | 7.15  | 7.12  |
| 1/1 | 1/1 | 6.26  | 6.49  |
| 1/1 | 1/1 | 8.47  | 8.7   |
| 0/1 | 1/1 | 4.32  | 4.84  |
| 0/1 | 1/1 | 3.52  | 4.11  |
| 1/1 | 1/1 | 5.41  | 6.56  |
| 1/1 | 1/1 | 7.34  | 8.75  |
| 1/1 | 1/1 | 5.99  | 7.41  |
| 1/1 | 1/1 | 5.04  | 6.47  |
| 1/1 | 1/1 | 7.06  | 8.66  |

|     |     |       |      |
|-----|-----|-------|------|
| 1/1 | 1/1 | 3.65  | 7.61 |
| 1/1 | 1/1 | 4.3   | 8.52 |
| 0/1 | 1/1 | 2.76  | 7.1  |
| 1/1 | 1/1 | 4.53  | 8.88 |
| 0/1 | 1/1 | 2.63  | 7.35 |
| 1/1 | 1/1 | 6.22  | 3.41 |
| 1/1 | 1/1 | 6.22  | 3.41 |
| 1/1 | 1/1 | 6.93  | 6.34 |
| 1/1 | 1/1 | 6.88  | 6.42 |
| 1/1 | 1/1 | 8.31  | 8.19 |
| 1/1 | 1/1 | 6.71  | 6.68 |
| 1/1 | 1/1 | 9.05  | 3.43 |
| 1/1 | 1/1 | 9.55  | 5.95 |
| 1/1 | 0/1 | 5.3   | 2.03 |
| 1/1 | 0/1 | 5.14  | 1.91 |
| 1/1 | 1/1 | 7.53  | 4.5  |
| 1/1 | 0/1 | 7.08  | 4.08 |
| 1/1 | 1/1 | 7.49  | 4.54 |
| 1/1 | 1/1 | 7.33  | 4.4  |
| 1/1 | 1/1 | 6.05  | 3.22 |
| 1/1 | 0/1 | 5.88  | 3.09 |
| 1/1 | 1/1 | 6.52  | 3.75 |
| 1/1 | 0/1 | 2.97  | 2.28 |
| 1/1 | 1/1 | 4.87  | 4.24 |
| 1/1 | 1/1 | 8.57  | 7.98 |
| 1/1 | 1/1 | 4.86  | 4.29 |
| 1/1 | 1/1 | 4.69  | 4.14 |
| 1/1 | 1/1 | 3.21  | 2.68 |
| 1/1 | 1/1 | 4.39  | 3.87 |
| 1/1 | 1/1 | 6.07  | 5.61 |
| 1/1 | 0/1 | 3.55  | 3.1  |
| 1/1 | 1/1 | 4.11  | 3.7  |
| 1/1 | 1/1 | 3.14  | 2.82 |
| 1/1 | 1/1 | 9.06  | 8.76 |
| 1/1 | 1/1 | 3.25  | 3.01 |
| 1/1 | 1/1 | 4.82  | 4.57 |
| 1/1 | 1/1 | 4.84  | 4.66 |
| 1/1 | 1/1 | 6.18  | 6.08 |
| 0/1 | 1/1 | 2.63  | 2.55 |
| 0/1 | 1/1 | 9.47  | 9.39 |
| 1/1 | 1/1 | 7.22  | 7.14 |
| 0/1 | 1/1 | 7.39  | 7.39 |
| 1/1 | 1/1 | 3.78  | 3.91 |
| 0/1 | 1/1 | 2.34  | 2.56 |
| 1/1 | 1/1 | 5.29  | 5.6  |
| 0/1 | 1/1 | 2.67  | 3    |
| 1/1 | 1/1 | 5.27  | 5.88 |
| 0/1 | 1/1 | 2.23  | 3    |
| 0/1 | 1/1 | 2.62  | 3.61 |
| 0/1 | 1/1 | 5.28  | 6.42 |
| 0/1 | 1/1 | 3.76  | 5.12 |
| 1/1 | 0/1 | 7.23  | 3.19 |
| 1/1 | 0/1 | 6.15  | 3.84 |
| 1/1 | 0/1 | 4.31  | 2.44 |
| 1/1 | 0/1 | 4.02  | 2.63 |
| 1/1 | 1/1 | 10.54 | 9.36 |
| 1/1 | 1/1 | 8.09  | 9.95 |
| 1/1 | 0/1 | 5.99  | 2.01 |

|     |     |      |      |
|-----|-----|------|------|
| 1/1 | 0/1 | 6    | 2.23 |
| 1/1 | 1/1 | 6.96 | 3.42 |
| 1/1 | 0/1 | 7.17 | 3.74 |
| 1/1 | 1/1 | 5.67 | 4.86 |
| 1/1 | 1/1 | 4.63 | 3.95 |
| 1/1 | 1/1 | 5.76 | 5.11 |
| 0/1 | 1/1 | 2.2  | 3.84 |
| 1/1 | 0/1 | 5.82 | 3.33 |
| 1/1 | 1/1 | 6.73 | 6.69 |
| 1/1 | 1/1 | 5.99 | 6.26 |
| 1/1 | 1/1 | 3.86 | 6.66 |
| 1/1 | 1/1 | 5.83 | 8.73 |
| 0/1 | 1/1 | 3.31 | 6.87 |
| 0/1 | 1/1 | 2.49 | 6.16 |
| 1/1 | 1/1 | 8.15 | 5.98 |
| 1/1 | 0/1 | 3.46 | 2.55 |
| 1/1 | 1/1 | 3.5  | 2.98 |
| 1/1 | 1/1 | 8.77 | 8.54 |
| 1/1 | 1/1 | 8.63 | 8.42 |
| 0/1 | 1/1 | 3.47 | 3.3  |
| 1/1 | 1/1 | 8.17 | 8.04 |
| 1/1 | 1/1 | 9.25 | 9.16 |
| 1/1 | 1/1 | 4.65 | 4.66 |
| 0/1 | 1/1 | 6.43 | 6.45 |
| 1/1 | 1/1 | 5.91 | 5.96 |
| 1/1 | 1/1 | 5.94 | 6.08 |
| 0/1 | 1/1 | 3.81 | 4.05 |
| 0/1 | 1/1 | 3.52 | 3.78 |
| 1/1 | 1/1 | 6.18 | 6.44 |
| 1/1 | 1/1 | 7.69 | 8.05 |
| 0/1 | 1/1 | 6.07 | 6.54 |
| 1/1 | 1/1 | 5.1  | 5.63 |
| 0/1 | 1/1 | 6.35 | 6.9  |
| 0/1 | 1/1 | 5.61 | 6.23 |
| 1/1 | 1/1 | 6.79 | 7.41 |
| 1/1 | 1/1 | 5.81 | 6.46 |
| 1/1 | 1/1 | 5.29 | 5.98 |
| 1/1 | 1/1 | 5.22 | 7.92 |
| 0/1 | 1/1 | 4.4  | 7.23 |
| 0/1 | 1/1 | 2.72 | 5.58 |
| 1/1 | 1/1 | 4.73 | 7.66 |
| 1/1 | 1/1 | 5.2  | 8.42 |
| 0/1 | 1/1 | 5.09 | 8.33 |
| 1/1 | 1/1 | 5.58 | 8.96 |
| 0/1 | 1/1 | 2.71 | 6.16 |
| 0/1 | 1/1 | 2.8  | 6.34 |
| 1/1 | 1/1 | 5.01 | 8.57 |
| 1/1 | 1/1 | 5.56 | 9.18 |
| 0/1 | 1/1 | 2.59 | 6.42 |
| 1/1 | 1/1 | 4.32 | 8.28 |
| 1/1 | 1/1 | 3.35 | 7.35 |
| 0/1 | 1/1 | 2.82 | 6.88 |
| 1/1 | 1/1 | 4.22 | 8.32 |
| 1/1 | 1/1 | 4.03 | 8.29 |
| 1/1 | 1/1 | 3.99 | 8.64 |
| 1/1 | 1/1 | 4.38 | 9.15 |
| 0/1 | 1/1 | 2.19 | 7.12 |
| 0/1 | 1/1 | 2.95 | 7.99 |

|     |     |       |       |
|-----|-----|-------|-------|
| 1/1 | 0/1 | 6.96  | 4.17  |
| 0/1 | 1/1 | 3.87  | 3     |
| 1/1 | 1/1 | 5.49  | 4.67  |
| 1/1 | 0/1 | 2.78  | 2.23  |
| 1/1 | 1/1 | 4     | 3.49  |
| 1/1 | 1/1 | 3.3   | 2.83  |
| 1/1 | 1/1 | 5.52  | 5.16  |
| 1/1 | 0/1 | 2.52  | 2.25  |
| 1/1 | 1/1 | 4.68  | 4.43  |
| 1/1 | 1/1 | 4.88  | 4.71  |
| 0/1 | 1/1 | 5.29  | 5.18  |
| 1/1 | 1/1 | 4.28  | 4.18  |
| 1/1 | 1/1 | 4.1   | 4.01  |
| 0/1 | 1/1 | 2.61  | 2.52  |
| 1/1 | 1/1 | 7.52  | 7.43  |
| 0/1 | 1/1 | 3.86  | 3.78  |
| 1/1 | 1/1 | 5.47  | 5.44  |
| 1/1 | 1/1 | 2.67  | 2.71  |
| 1/1 | 1/1 | 3.57  | 5.64  |
| 1/1 | 1/1 | 6.63  | 5.41  |
| 1/1 | 1/1 | 5.24  | 4.65  |
| 1/1 | 1/1 | 7.23  | 7.1   |
| 1/1 | 1/1 | 2.36  | 2.39  |
| 0/1 | 1/1 | 3.61  | 3.85  |
| 0/1 | 1/1 | 2.34  | 2.67  |
| 1/1 | 1/1 | 7.08  | 7.89  |
| 0/1 | 1/1 | 2.98  | 3.86  |
| 1/1 | 1/1 | 5.73  | 7.07  |
| 1/1 | 1/1 | 6.84  | 8.32  |
| 1/1 | 1/1 | 6.4   | 7.91  |
| 0/1 | 1/1 | 2.01  | 3.56  |
| 1/1 | 1/1 | 3.15  | 6.81  |
| 0/1 | 1/1 | 2.18  | 6.07  |
| 0/1 | 1/1 | 2.55  | 6.51  |
| 1/1 | 0/1 | 6.51  | 5.67  |
| 1/1 | 1/1 | 2.74  | 2.51  |
| 0/1 | 1/1 | 2.69  | 2.59  |
| 1/1 | 1/1 | 13.22 | 13.13 |
| 1/1 | 1/1 | 8.17  | 9.08  |
| 0/1 | 1/1 | 6.05  | 7.49  |
| 0/1 | 1/1 | 2.35  | 3.99  |
| 1/1 | 1/1 | 6.44  | 8.16  |
| 1/1 | 1/1 | 6.48  | 8.43  |
| 1/1 | 1/1 | 4.28  | 6.26  |
| 1/1 | 1/1 | 4.54  | 8.57  |
| 1/1 | 1/1 | 8.74  | 7.32  |
| 1/1 | 1/1 | 7.39  | 6.72  |
| 1/1 | 1/1 | 6.33  | 5.87  |
| 1/1 | 1/1 | 7.06  | 6.8   |
| 0/1 | 1/1 | 5.4   | 5.17  |
| 1/1 | 1/1 | 6.76  | 6.55  |
| 1/1 | 1/1 | 8.77  | 8.67  |
| 1/1 | 1/1 | 5.61  | 5.77  |
| 0/1 | 1/1 | 4.54  | 4.8   |
| 1/1 | 1/1 | 3.19  | 3.48  |
| 1/1 | 1/1 | 3.26  | 3.72  |
| 0/1 | 1/1 | 3.27  | 3.75  |
| 1/1 | 1/1 | 6.1   | 6.59  |

|     |     |       |       |
|-----|-----|-------|-------|
| 0/1 | 1/1 | 3.04  | 4     |
| 0/1 | 1/1 | 3.08  | 6.62  |
| 1/1 | 1/1 | 8.07  | 4.71  |
| 1/1 | 1/1 | 8.1   | 7.34  |
| 1/1 | 1/1 | 3.42  | 2.85  |
| 1/1 | 1/1 | 4.24  | 6.5   |
| 1/1 | 1/1 | 8.03  | 7.46  |
| 1/1 | 1/1 | 5.89  | 6.03  |
| 1/1 | 1/1 | 9.56  | 9.71  |
| 1/1 | 1/1 | 11.74 | 11.9  |
| 0/1 | 1/1 | 7.62  | 7.92  |
| 0/1 | 1/1 | 4.75  | 5.14  |
| 0/1 | 1/1 | 4.43  | 4.94  |
| 1/1 | 1/1 | 5.73  | 4.93  |
| 1/1 | 1/1 | 6.05  | 5.71  |
| 1/1 | 1/1 | 5.3   | 5.33  |
| 1/1 | 1/1 | 2.7   | 2.95  |
| 1/1 | 1/1 | 6.42  | 6.81  |
| 1/1 | 1/1 | 6.86  | 7.49  |
| 0/1 | 1/1 | 2.81  | 3.87  |
| 1/1 | 1/1 | 4.7   | 6.38  |
| 1/1 | 1/1 | 5.65  | 7.6   |
| 1/1 | 1/1 | 4.77  | 8.82  |
| 1/1 | 1/1 | 6.75  | 6.41  |
| 1/1 | 1/1 | 6.47  | 6.88  |
| 1/1 | 1/1 | 3.19  | 3.68  |
| 0/1 | 1/1 | 5.41  | 6.08  |
| 0/1 | 1/1 | 4.53  | 5.63  |
| 1/1 | 1/1 | 7.89  | 9     |
| 0/1 | 1/1 | 5.03  | 6.27  |
| 1/1 | 1/1 | 4.79  | 6.3   |
| 1/1 | 1/1 | 5.09  | 9.89  |
| 1/1 | 1/1 | 5.45  | 10.35 |
| 1/1 | 1/1 | 5.57  | 4.64  |
| 1/1 | 1/1 | 5     | 4.3   |
| 1/1 | 1/1 | 7.85  | 7.16  |
| 1/1 | 1/1 | 4.98  | 4.45  |
| 1/1 | 1/1 | 5.58  | 5.18  |
| 1/1 | 1/1 | 4.19  | 3.89  |
| 1/1 | 1/1 | 7.5   | 7.21  |
| 1/1 | 1/1 | 6.29  | 6.02  |
| 1/1 | 1/1 | 7.84  | 7.61  |
| 1/1 | 1/1 | 4.06  | 3.84  |
| 1/1 | 1/1 | 6.1   | 5.89  |
| 1/1 | 1/1 | 9.3   | 9.1   |
| 1/1 | 1/1 | 7.54  | 7.33  |
| 0/1 | 1/1 | 3.08  | 2.91  |
| 1/1 | 1/1 | 9.42  | 9.29  |
| 1/1 | 1/1 | 7.27  | 7.13  |
| 1/1 | 1/1 | 5.65  | 5.56  |
| 1/1 | 1/1 | 5.21  | 5.16  |
| 1/1 | 1/1 | 5.6   | 5.57  |
| 1/1 | 1/1 | 6.92  | 6.98  |
| 1/1 | 1/1 | 5.15  | 5.21  |
| 1/1 | 1/1 | 9.91  | 10.03 |
| 1/1 | 1/1 | 10.25 | 10.41 |
| 1/1 | 1/1 | 6.07  | 6.29  |
| 1/1 | 1/1 | 5.83  | 6.15  |

|     |     |       |       |
|-----|-----|-------|-------|
| 0/1 | 1/1 | 2.49  | 2.95  |
| 1/1 | 1/1 | 5.12  | 5.61  |
| 0/1 | 1/1 | 4     | 4.49  |
| 1/1 | 1/1 | 5.83  | 6.43  |
| 1/1 | 1/1 | 7.09  | 7.71  |
| 0/1 | 1/1 | 3.73  | 4.52  |
| 0/1 | 1/1 | 2.88  | 3.74  |
| 0/1 | 1/1 | 5.15  | 6.17  |
| 0/1 | 1/1 | 1.99  | 3.06  |
| 0/1 | 1/1 | 4.37  | 5.45  |
| 0/1 | 1/1 | 3.62  | 4.73  |
| 0/1 | 1/1 | 2.39  | 3.51  |
| 0/1 | 1/1 | 4.69  | 6.02  |
| 1/1 | 1/1 | 4.26  | 5.69  |
| 1/1 | 1/1 | 5.05  | 6.57  |
| 1/1 | 1/1 | 4.06  | 8.56  |
| 1/1 | 1/1 | 11.89 | 10.68 |
| 0/1 | 1/1 | 6.65  | 6.86  |
| 0/1 | 1/1 | 3.75  | 3.97  |
| 1/1 | 1/1 | 3.88  | 4.13  |
| 1/1 | 1/1 | 4.99  | 5.3   |
| 1/1 | 1/1 | 4.69  | 5.03  |
| 0/1 | 1/1 | 3.26  | 3.74  |
| 0/1 | 1/1 | 4.18  | 4.78  |
| 1/1 | 1/1 | 3.12  | 3.74  |
| 0/1 | 1/1 | 4.11  | 5.31  |
| 1/1 | 1/1 | 8.01  | 9.38  |
| 1/1 | 0/1 | 4.72  | 2.98  |
| 1/1 | 0/1 | 5.98  | 4.32  |
| 1/1 | 1/1 | 4.49  | 2.93  |
| 1/1 | 1/1 | 5.32  | 3.83  |
| 1/1 | 1/1 | 5.54  | 4.09  |
| 1/1 | 1/1 | 5.66  | 5.36  |
| 1/1 | 1/1 | 9.56  | 9.58  |
| 1/1 | 1/1 | 3.51  | 3.56  |
| 1/1 | 1/1 | 12.05 | 12.11 |
| 0/1 | 1/1 | 2.79  | 2.87  |
| 1/1 | 1/1 | 4.61  | 4.72  |
| 1/1 | 1/1 | 9.04  | 9.27  |
| 1/1 | 1/1 | 10.23 | 10.56 |
| 1/1 | 1/1 | 3.7   | 4.13  |
| 1/1 | 1/1 | 4.67  | 5.39  |
| 0/1 | 1/1 | 2.4   | 3.4   |
| 0/1 | 1/1 | 2.87  | 6     |
| 1/1 | 1/1 | 5.72  | 2.38  |
| 1/1 | 1/1 | 6.27  | 5.51  |
| 0/1 | 1/1 | 2.64  | 5.39  |
| 1/1 | 1/1 | 6.58  | 6.58  |
| 0/1 | 1/1 | 2.75  | 3.54  |
| 0/1 | 1/1 | 1.75  | 3.62  |
| 0/1 | 1/1 | 3.02  | 7.86  |
| 0/1 | 1/1 | 2.79  | 8.18  |
| 1/1 | 0/1 | 7.82  | 2.08  |
| 1/1 | 1/1 | 7.98  | 3.82  |
| 1/1 | 1/1 | 8.41  | 4.9   |
| 1/1 | 1/1 | 7.39  | 3.89  |
| 1/1 | 1/1 | 7.31  | 6.6   |
| 1/1 | 0/1 | 4.47  | 3.26  |



|     |     |       |       |
|-----|-----|-------|-------|
| 0/1 | 1/1 | 3.22  | 3.05  |
| 1/1 | 1/1 | 11.18 | 11.04 |
| 1/1 | 1/1 | 7.58  | 7.52  |
| 1/1 | 1/1 | 8.75  | 8.69  |
| 1/1 | 1/1 | 9.06  | 9.08  |
| 1/1 | 1/1 | 7.23  | 7.38  |
| 0/1 | 1/1 | 3.16  | 3.42  |
| 1/1 | 1/1 | 10.97 | 11.35 |
| 0/1 | 1/1 | 6.41  | 7     |
| 0/1 | 1/1 | 4.26  | 4.95  |
| 1/1 | 1/1 | 5.06  | 5.78  |
| 1/1 | 1/1 | 4.49  | 5.24  |
| 1/1 | 1/1 | 3.56  | 4.33  |
| 1/1 | 1/1 | 7.49  | 8.38  |
| 1/1 | 1/1 | 7.99  | 9.22  |
| 0/1 | 1/1 | 3.5   | 4.79  |
| 1/1 | 1/1 | 7.72  | 9.17  |
| 1/1 | 1/1 | 7.5   | 11.07 |
| 1/1 | 1/1 | 6.01  | 5.72  |
| 1/1 | 1/1 | 4.98  | 4.86  |
| 1/1 | 1/1 | 6.4   | 6.31  |
| 1/1 | 1/1 | 6.11  | 6.05  |
| 1/1 | 1/1 | 4.9   | 4.91  |
| 1/1 | 1/1 | 5.5   | 5.61  |
| 0/1 | 1/1 | 3.41  | 3.58  |
| 0/1 | 1/1 | 2.93  | 3.23  |
| 0/1 | 1/1 | 5.02  | 5.61  |
| 1/1 | 1/1 | 5.13  | 5.83  |
| 1/1 | 1/1 | 5.83  | 6.64  |
| 1/1 | 1/1 | 4.47  | 5.43  |
| 1/1 | 1/1 | 8.91  | 10.22 |
| 0/1 | 1/1 | 4.99  | 6.6   |
| 0/1 | 1/1 | 3.49  | 5.19  |
| 1/1 | 1/1 | 6.83  | 8.59  |
| 1/1 | 1/1 | 7.02  | 8.99  |
| 1/1 | 1/1 | 6.91  | 8.91  |
| 1/1 | 1/1 | 7.15  | 9.35  |
| 1/1 | 1/1 | 5.84  | 8.08  |
| 1/1 | 1/1 | 6.25  | 8.49  |
| 1/1 | 1/1 | 5.39  | 7.71  |
| 1/1 | 1/1 | 5     | 7.4   |
| 0/1 | 1/1 | 2.44  | 6.85  |
| 0/1 | 1/1 | 3.07  | 7.49  |
| 1/1 | 1/1 | 5.17  | 9.62  |
| 1/1 | 1/1 | 5.87  | 10.42 |
| 0/1 | 1/1 | 4.75  | 9.77  |
| 1/1 | 0/1 | 6.85  | 4.29  |
| 1/1 | 1/1 | 8.28  | 8.15  |
| 1/1 | 1/1 | 7.85  | 7.74  |
| 1/1 | 1/1 | 4.73  | 4.67  |
| 1/1 | 1/1 | 5.76  | 5.76  |
| 1/1 | 1/1 | 8.59  | 8.65  |
| 1/1 | 1/1 | 5.92  | 5.99  |
| 1/1 | 1/1 | 6.8   | 6.87  |
| 0/1 | 1/1 | 2.57  | 4.82  |
| 1/1 | 0/1 | 7.85  | 2.11  |
| 1/1 | 0/1 | 8.62  | 3.56  |
| 1/1 | 0/1 | 8.36  | 4.06  |

|     |     |       |       |
|-----|-----|-------|-------|
| 1/1 | 0/1 | 7.62  | 3.52  |
| 1/1 | 1/1 | 7.68  | 4.57  |
| 1/1 | 1/1 | 7.53  | 6.66  |
| 1/1 | 1/1 | 8.63  | 7.93  |
| 1/1 | 1/1 | 10.43 | 9.96  |
| 1/1 | 1/1 | 9.29  | 8.84  |
| 1/1 | 1/1 | 8.16  | 7.8   |
| 0/1 | 1/1 | 3.75  | 4.1   |
| 1/1 | 1/1 | 3.78  | 4.36  |
| 1/1 | 0/1 | 4.74  | 2.4   |
| 1/1 | 0/1 | 4.79  | 2.97  |
| 1/1 | 1/1 | 7.42  | 6.32  |
| 1/1 | 1/1 | 6.19  | 5.31  |
| 1/1 | 0/1 | 3.24  | 2.45  |
| 1/1 | 1/1 | 10.64 | 9.89  |
| 1/1 | 1/1 | 3.41  | 2.78  |
| 1/1 | 1/1 | 6.4   | 5.79  |
| 1/1 | 1/1 | 5.39  | 4.82  |
| 1/1 | 1/1 | 5.97  | 5.5   |
| 0/1 | 1/1 | 7.07  | 6.63  |
| 1/1 | 1/1 | 4.48  | 4.14  |
| 1/1 | 1/1 | 6.23  | 5.95  |
| 0/1 | 1/1 | 4.64  | 4.39  |
| 1/1 | 1/1 | 3.68  | 3.45  |
| 1/1 | 1/1 | 3.97  | 3.74  |
| 1/1 | 1/1 | 2.73  | 2.53  |
| 1/1 | 1/1 | 10.89 | 10.73 |
| 0/1 | 1/1 | 3.35  | 3.2   |
| 1/1 | 1/1 | 5.78  | 5.65  |
| 1/1 | 1/1 | 5.53  | 5.41  |
| 1/1 | 1/1 | 4.84  | 4.72  |
| 1/1 | 1/1 | 7.8   | 7.7   |
| 1/1 | 1/1 | 2.94  | 2.9   |
| 0/1 | 1/1 | 2.48  | 2.44  |
| 1/1 | 1/1 | 12.23 | 12.2  |
| 0/1 | 1/1 | 4.58  | 4.63  |
| 0/1 | 1/1 | 2.75  | 2.84  |
| 0/1 | 1/1 | 2.11  | 2.2   |
| 1/1 | 1/1 | 3.34  | 3.45  |
| 0/1 | 1/1 | 2.34  | 2.49  |
| 1/1 | 1/1 | 5.61  | 5.76  |
| 0/1 | 1/1 | 3.49  | 3.66  |
| 0/1 | 1/1 | 1.86  | 2.11  |
| 0/1 | 1/1 | 3.19  | 3.45  |
| 1/1 | 1/1 | 8.68  | 8.97  |
| 1/1 | 0/1 | 7.89  | 2.98  |
| 1/1 | 0/1 | 7.34  | 4.52  |
| 1/1 | 1/1 | 4.55  | 4.3   |
| 1/1 | 1/1 | 5.46  | 5.88  |
| 1/1 | 1/1 | 10.59 | 12.52 |
| 0/1 | 1/1 | 5.03  | 7.03  |
| 1/1 | 1/1 | 5.76  | 7.86  |
| 0/1 | 1/1 | 3.64  | 8.36  |
| 1/1 | 1/1 | 6.46  | 11.24 |
| 1/1 | 1/1 | 6.46  | 11.29 |
| 0/1 | 1/1 | 3     | 7.98  |
| 0/1 | 1/1 | 5.45  | 10.81 |
| 1/1 | 1/1 | 8.24  | 8     |

|     |     |       |       |
|-----|-----|-------|-------|
| 0/1 | 1/1 | 4.17  | 4.23  |
| 1/1 | 1/1 | 4.16  | 4.31  |
| 1/1 | 1/1 | 4.19  | 4.37  |
| 1/1 | 1/1 | 6.97  | 7.43  |
| 1/1 | 1/1 | 7.53  | 8.73  |
| 0/1 | 1/1 | 2.17  | 3.83  |
| 0/1 | 1/1 | 3.08  | 8     |
| 1/1 | 1/1 | 4.46  | 3.86  |
| 1/1 | 1/1 | 10.17 | 10.13 |
| 1/1 | 1/1 | 6.58  | 6.65  |
| 1/1 | 1/1 | 3.81  | 3.91  |
| 1/1 | 1/1 | 4.19  | 4.34  |
| 1/1 | 1/1 | 2.67  | 2.85  |
| 1/1 | 1/1 | 10.91 | 11.12 |
| 0/1 | 1/1 | 6.3   | 6.57  |
| 0/1 | 1/1 | 4.96  | 5.35  |
| 0/1 | 1/1 | 4.91  | 5.31  |
| 0/1 | 1/1 | 2.1   | 2.51  |
| 1/1 | 1/1 | 4.97  | 5.4   |
| 0/1 | 1/1 | 4.06  | 4.59  |
| 1/1 | 1/1 | 6.5   | 7.05  |
| 1/1 | 1/1 | 4.83  | 5.44  |
| 1/1 | 1/1 | 6.02  | 6.67  |
| 1/1 | 1/1 | 5.27  | 5.93  |
| 1/1 | 1/1 | 5.25  | 5.91  |
| 1/1 | 1/1 | 7.82  | 8.54  |
| 1/1 | 1/1 | 6.54  | 7.38  |
| 1/1 | 1/1 | 5.46  | 6.35  |
| 1/1 | 1/1 | 6.02  | 6.96  |
| 1/1 | 1/1 | 5     | 5.96  |
| 1/1 | 1/1 | 5.89  | 6.87  |
| 1/1 | 1/1 | 5.13  | 6.23  |
| 1/1 | 1/1 | 6.49  | 7.59  |
| 1/1 | 1/1 | 4.53  | 5.63  |
| 1/1 | 1/1 | 3.73  | 4.84  |
| 1/1 | 1/1 | 3.02  | 4.14  |
| 1/1 | 1/1 | 7.27  | 8.41  |
| 0/1 | 1/1 | 2.93  | 4.1   |
| 1/1 | 1/1 | 6.19  | 7.39  |
| 0/1 | 1/1 | 3.3   | 4.58  |
| 1/1 | 1/1 | 6.37  | 7.66  |
| 1/1 | 1/1 | 4.52  | 5.89  |
| 1/1 | 1/1 | 6.27  | 7.75  |
| 0/1 | 1/1 | 3.57  | 5.11  |
| 1/1 | 1/1 | 6.16  | 7.72  |
| 1/1 | 1/1 | 8.27  | 9.89  |
| 1/1 | 1/1 | 7.78  | 9.7   |
| 1/1 | 1/1 | 4.76  | 8.81  |
| 1/1 | 0/1 | 6.43  | 3.2   |
| 1/1 | 1/1 | 5.74  | 3.48  |
| 1/1 | 1/1 | 3.29  | 4.72  |
| 1/1 | 0/1 | 8.06  | 2.89  |
| 1/1 | 0/1 | 7.88  | 4.3   |
| 1/1 | 1/1 | 8.71  | 5.24  |
| 1/1 | 0/1 | 5.96  | 2.78  |
| 1/1 | 0/1 | 5.64  | 2.57  |
| 1/1 | 1/1 | 6.36  | 5.93  |
| 1/1 | 1/1 | 6.08  | 5.93  |

|     |     |       |       |
|-----|-----|-------|-------|
| 1/1 | 0/1 | 8.29  | 2.51  |
| 1/1 | 1/1 | 9.1   | 4.26  |
| 1/1 | 1/1 | 8.4   | 3.65  |
| 1/1 | 1/1 | 8.15  | 4.23  |
| 1/1 | 1/1 | 8.64  | 4.95  |
| 1/1 | 1/1 | 8.44  | 4.83  |
| 1/1 | 0/1 | 4.88  | 3.83  |
| 1/1 | 1/1 | 5.65  | 4.8   |
| 1/1 | 1/1 | 3.72  | 3.1   |
| 1/1 | 1/1 | 4.73  | 4.74  |
| 0/1 | 1/1 | 3.1   | 4.68  |
| 1/1 | 1/1 | 9.87  | 5.92  |
| 1/1 | 0/1 | 5.57  | 2.6   |
| 1/1 | 1/1 | 6.45  | 4.01  |
| 1/1 | 1/1 | 4.59  | 2.67  |
| 1/1 | 1/1 | 9.02  | 7.1   |
| 1/1 | 1/1 | 4.72  | 3.25  |
| 0/1 | 1/1 | 2.57  | 3.6   |
| 1/1 | 0/1 | 7.7   | 3.32  |
| 1/1 | 1/1 | 7.73  | 4.49  |
| 1/1 | 1/1 | 11.15 | 8.25  |
| 1/1 | 0/1 | 7.5   | 4.76  |
| 1/1 | 0/1 | 6.91  | 4.41  |
| 1/1 | 0/1 | 7.1   | 4.64  |
| 1/1 | 0/1 | 5.36  | 2.97  |
| 1/1 | 1/1 | 7.88  | 5.78  |
| 1/1 | 0/1 | 4.63  | 2.73  |
| 1/1 | 1/1 | 7.72  | 7.98  |
| 1/1 | 1/1 | 7.32  | 4.25  |
| 1/1 | 0/1 | 4.17  | 3.36  |
| 1/1 | 0/1 | 4.47  | 3.26  |
| 0/1 | 1/1 | 3.22  | 3.05  |
| 1/1 | 1/1 | 11.18 | 11.04 |
| 1/1 | 1/1 | 7.58  | 7.52  |
| 1/1 | 1/1 | 9.06  | 9.08  |
| 1/1 | 1/1 | 7.23  | 7.38  |
| 1/1 | 1/1 | 6.53  | 6.75  |
| 1/1 | 1/1 | 6.15  | 6.57  |
| 0/1 | 1/1 | 4.26  | 4.95  |
| 1/1 | 1/1 | 7.49  | 8.38  |
| 1/1 | 0/1 | 4.47  | 3.26  |
| 0/1 | 1/1 | 3.22  | 3.05  |
| 1/1 | 1/1 | 11.18 | 11.04 |
| 1/1 | 1/1 | 7.58  | 7.52  |
| 1/1 | 1/1 | 8.75  | 8.69  |
| 1/1 | 1/1 | 9.06  | 9.08  |
| 1/1 | 1/1 | 7.23  | 7.38  |
| 0/1 | 1/1 | 3.15  | 3.38  |
| 0/1 | 1/1 | 6.41  | 7     |
| 0/1 | 1/1 | 4.26  | 4.95  |
| 1/1 | 1/1 | 5.06  | 5.78  |
| 1/1 | 1/1 | 4.49  | 5.24  |
| 1/1 | 1/1 | 3.56  | 4.33  |
| 1/1 | 1/1 | 7.49  | 8.38  |
| 0/1 | 1/1 | 3.5   | 4.79  |
| 1/1 | 1/1 | 7.97  | 9.27  |
| 1/1 | 1/1 | 7.5   | 11.07 |
| 1/1 | 0/1 | 4.1   | 2.76  |

|     |     |       |       |
|-----|-----|-------|-------|
| 1/1 | 1/1 | 9.34  | 8.59  |
| 1/1 | 1/1 | 10.94 | 10.36 |
| 1/1 | 1/1 | 7.48  | 7.2   |
| 1/1 | 1/1 | 6.13  | 5.95  |
| 0/1 | 1/1 | 5.97  | 5.84  |
| 1/1 | 1/1 | 9.32  | 9.2   |
| 1/1 | 1/1 | 6.51  | 6.56  |
| 1/1 | 1/1 | 5.27  | 5.35  |
| 0/1 | 1/1 | 5.9   | 5.99  |
| 1/1 | 1/1 | 7.97  | 8.17  |
| 1/1 | 1/1 | 6.68  | 6.94  |
| 1/1 | 1/1 | 6.12  | 6.39  |
| 1/1 | 1/1 | 6.9   | 7.18  |
| 1/1 | 1/1 | 9.07  | 9.42  |
| 1/1 | 1/1 | 5.53  | 5.89  |
| 1/1 | 1/1 | 5.56  | 5.94  |
| 0/1 | 1/1 | 3.84  | 4.53  |
| 1/1 | 1/1 | 6.57  | 7.3   |
| 0/1 | 1/1 | 5.69  | 6.52  |
| 0/1 | 1/1 | 4.41  | 5.35  |
| 1/1 | 1/1 | 4.77  | 5.93  |
| 1/1 | 0/1 | 8.17  | 2.56  |
| 1/1 | 0/1 | 8.04  | 2.49  |
| 1/1 | 1/1 | 8.99  | 3.65  |
| 1/1 | 0/1 | 8.09  | 2.77  |
| 1/1 | 0/1 | 6.76  | 1.91  |
| 1/1 | 1/1 | 9.01  | 4.38  |
| 1/1 | 1/1 | 8.3   | 3.82  |
| 1/1 | 1/1 | 7.16  | 3.26  |
| 1/1 | 1/1 | 8.11  | 4.26  |
| 1/1 | 0/1 | 6.6   | 2.87  |
| 1/1 | 0/1 | 5.62  | 2.51  |
| 1/1 | 0/1 | 5.73  | 2.64  |
| 1/1 | 1/1 | 7.39  | 4.31  |
| 1/1 | 1/1 | 5.97  | 4.95  |
| 1/1 | 1/1 | 5.17  | 4.19  |
| 1/1 | 1/1 | 5.11  | 4.27  |
| 1/1 | 1/1 | 6.32  | 5.48  |
| 1/1 | 1/1 | 4.39  | 3.6   |
| 1/1 | 1/1 | 6.39  | 5.69  |
| 1/1 | 1/1 | 6.6   | 5.98  |
| 1/1 | 1/1 | 5.92  | 5.41  |
| 1/1 | 1/1 | 7.17  | 6.68  |
| 1/1 | 1/1 | 5.34  | 4.86  |
| 1/1 | 1/1 | 7.26  | 6.85  |
| 1/1 | 1/1 | 7.17  | 6.87  |
| 1/1 | 1/1 | 5.59  | 5.3   |
| 1/1 | 1/1 | 4.55  | 4.28  |
| 1/1 | 1/1 | 7.59  | 7.36  |
| 1/1 | 1/1 | 7.63  | 7.4   |
| 1/1 | 1/1 | 6.31  | 6.12  |
| 1/1 | 1/1 | 3.82  | 3.7   |
| 0/1 | 1/1 | 2.45  | 2.37  |
| 1/1 | 1/1 | 10.02 | 9.95  |
| 1/1 | 1/1 | 8.38  | 8.36  |
| 1/1 | 1/1 | 6.7   | 6.8   |
| 0/1 | 1/1 | 5.8   | 5.93  |
| 1/1 | 1/1 | 6.72  | 6.91  |

|     |     |       |       |
|-----|-----|-------|-------|
| 1/1 | 1/1 | 7.37  | 7.63  |
| 1/1 | 1/1 | 9.15  | 9.71  |
| 1/1 | 1/1 | 5.45  | 6.16  |
| 1/1 | 1/1 | 8.98  | 9.84  |
| 0/1 | 1/1 | 4.54  | 5.42  |
| 1/1 | 0/1 | 4.47  | 3.26  |
| 0/1 | 1/1 | 3.22  | 3.05  |
| 1/1 | 1/1 | 11.18 | 11.04 |
| 1/1 | 1/1 | 7.58  | 7.52  |
| 1/1 | 1/1 | 8.75  | 8.69  |
| 1/1 | 1/1 | 9.06  | 9.08  |
| 1/1 | 1/1 | 7.23  | 7.38  |
| 0/1 | 1/1 | 3.16  | 3.42  |
| 0/1 | 1/1 | 6.41  | 7     |
| 0/1 | 1/1 | 4.26  | 4.95  |
| 1/1 | 1/1 | 5.06  | 5.78  |
| 1/1 | 1/1 | 4.49  | 5.24  |
| 1/1 | 1/1 | 3.56  | 4.33  |
| 1/1 | 1/1 | 7.49  | 8.38  |
| 1/1 | 1/1 | 7.99  | 9.22  |
| 0/1 | 1/1 | 3.5   | 4.79  |
| 1/1 | 1/1 | 7.5   | 11.07 |
| 1/1 | 0/1 | 4.47  | 3.26  |
| 0/1 | 1/1 | 3.22  | 3.05  |
| 1/1 | 1/1 | 11.18 | 11.04 |
| 1/1 | 1/1 | 7.58  | 7.52  |
| 1/1 | 1/1 | 8.75  | 8.69  |
| 1/1 | 1/1 | 9.06  | 9.08  |
| 1/1 | 1/1 | 7.23  | 7.38  |
| 0/1 | 1/1 | 3.16  | 3.42  |
| 0/1 | 1/1 | 6.41  | 7     |
| 0/1 | 1/1 | 4.26  | 4.95  |
| 1/1 | 1/1 | 5.06  | 5.78  |
| 1/1 | 1/1 | 4.49  | 5.24  |
| 1/1 | 1/1 | 3.56  | 4.33  |
| 1/1 | 1/1 | 7.49  | 8.38  |
| 1/1 | 1/1 | 7.99  | 9.22  |
| 0/1 | 1/1 | 3.5   | 4.79  |
| 1/1 | 1/1 | 7.5   | 11.07 |
| 1/1 | 1/1 | 6.42  | 3.43  |
| 1/1 | 1/1 | 7.62  | 4.87  |
| 1/1 | 0/1 | 5.37  | 3.01  |
| 1/1 | 1/1 | 7.85  | 5.55  |
| 1/1 | 1/1 | 8.17  | 6.05  |
| 1/1 | 1/1 | 7.44  | 5.36  |
| 1/1 | 1/1 | 6.47  | 4.47  |
| 1/1 | 1/1 | 7.85  | 5.96  |
| 1/1 | 1/1 | 8.3   | 6.45  |
| 1/1 | 1/1 | 5.62  | 3.79  |
| 1/1 | 1/1 | 6.79  | 4.97  |
| 1/1 | 1/1 | 8.05  | 6.26  |
| 1/1 | 1/1 | 7.07  | 5.31  |
| 1/1 | 1/1 | 7.67  | 5.93  |
| 1/1 | 1/1 | 7.08  | 5.37  |
| 1/1 | 1/1 | 5.98  | 4.27  |
| 1/1 | 1/1 | 7.87  | 6.2   |
| 1/1 | 1/1 | 5.02  | 3.43  |
| 1/1 | 1/1 | 6.72  | 5.2   |

|     |     |       |       |
|-----|-----|-------|-------|
| 1/1 | 1/1 | 7.47  | 6     |
| 1/1 | 1/1 | 7.71  | 6.3   |
| 1/1 | 0/1 | 5.05  | 3.65  |
| 1/1 | 1/1 | 7.87  | 6.48  |
| 1/1 | 1/1 | 8.53  | 7.17  |
| 1/1 | 1/1 | 7.31  | 5.97  |
| 1/1 | 1/1 | 7.33  | 6.01  |
| 1/1 | 1/1 | 7.17  | 5.86  |
| 1/1 | 1/1 | 6     | 4.72  |
| 1/1 | 1/1 | 6.2   | 4.97  |
| 1/1 | 1/1 | 10.01 | 8.79  |
| 1/1 | 1/1 | 7.39  | 6.2   |
| 1/1 | 1/1 | 7.42  | 6.34  |
| 1/1 | 1/1 | 4.16  | 3.09  |
| 1/1 | 1/1 | 7.26  | 6.22  |
| 1/1 | 1/1 | 6.99  | 6.01  |
| 1/1 | 1/1 | 7.44  | 6.51  |
| 1/1 | 1/1 | 6.82  | 5.9   |
| 1/1 | 1/1 | 6.1   | 5.24  |
| 1/1 | 1/1 | 6.03  | 5.28  |
| 1/1 | 1/1 | 4.93  | 4.21  |
| 1/1 | 1/1 | 4.13  | 5.72  |
| 1/1 | 1/1 | 4.25  | 5.92  |
| 1/1 | 1/1 | 4.97  | 7.03  |
| 1/1 | 0/1 | 4.47  | 3.26  |
| 0/1 | 1/1 | 3.22  | 3.05  |
| 1/1 | 1/1 | 11.18 | 11.04 |
| 1/1 | 1/1 | 7.58  | 7.52  |
| 1/1 | 1/1 | 8.75  | 8.69  |
| 1/1 | 1/1 | 9.06  | 9.08  |
| 1/1 | 1/1 | 7.23  | 7.38  |
| 0/1 | 1/1 | 3.15  | 3.38  |
| 0/1 | 1/1 | 6.41  | 7     |
| 0/1 | 1/1 | 4.26  | 4.95  |
| 1/1 | 1/1 | 5.06  | 5.78  |
| 1/1 | 1/1 | 4.49  | 5.24  |
| 1/1 | 1/1 | 3.56  | 4.33  |
| 1/1 | 1/1 | 7.49  | 8.38  |
| 1/1 | 1/1 | 7.3   | 8.35  |
| 0/1 | 1/1 | 3.5   | 4.79  |
| 1/1 | 1/1 | 7.5   | 11.07 |
| 1/1 | 0/1 | 4.47  | 3.26  |
| 0/1 | 1/1 | 3.22  | 3.05  |
| 1/1 | 1/1 | 11.18 | 11.04 |
| 1/1 | 1/1 | 7.58  | 7.52  |
| 1/1 | 1/1 | 8.75  | 8.69  |
| 1/1 | 1/1 | 9.06  | 9.08  |
| 1/1 | 1/1 | 7.23  | 7.38  |
| 0/1 | 1/1 | 3.15  | 3.38  |
| 0/1 | 1/1 | 6.41  | 7     |
| 0/1 | 1/1 | 4.26  | 4.95  |
| 1/1 | 1/1 | 5.06  | 5.78  |
| 1/1 | 1/1 | 4.49  | 5.24  |
| 1/1 | 1/1 | 3.56  | 4.33  |
| 1/1 | 1/1 | 7.49  | 8.38  |
| 1/1 | 1/1 | 7.84  | 8.8   |
| 0/1 | 1/1 | 3.5   | 4.79  |
| 1/1 | 1/1 | 7.5   | 11.07 |

|     |     |       |       |
|-----|-----|-------|-------|
| 1/1 | 0/1 | 4.47  | 3.26  |
| 0/1 | 1/1 | 3.22  | 3.05  |
| 1/1 | 1/1 | 11.18 | 11.04 |
| 1/1 | 1/1 | 7.58  | 7.52  |
| 1/1 | 1/1 | 8.75  | 8.69  |
| 1/1 | 1/1 | 9.06  | 9.08  |
| 1/1 | 1/1 | 7.23  | 7.38  |
| 0/1 | 1/1 | 3.15  | 3.38  |
| 0/1 | 1/1 | 6.41  | 7     |
| 0/1 | 1/1 | 4.26  | 4.95  |
| 1/1 | 1/1 | 5.06  | 5.78  |
| 1/1 | 1/1 | 4.49  | 5.24  |
| 1/1 | 1/1 | 3.56  | 4.33  |
| 1/1 | 1/1 | 7.49  | 8.38  |
| 1/1 | 1/1 | 7.84  | 8.8   |
| 0/1 | 1/1 | 3.5   | 4.79  |
| 1/1 | 1/1 | 7.5   | 11.07 |
| 1/1 | 1/1 | 10.5  | 7.9   |
| 1/1 | 1/1 | 6.74  | 6.35  |
| 1/1 | 1/1 | 5.89  | 4.98  |
| 1/1 | 0/1 | 4.82  | 3.96  |
| 1/1 | 1/1 | 5.65  | 5.73  |
| 0/1 | 1/1 | 4.01  | 4.19  |
| 0/1 | 1/1 | 2.85  | 3.5   |
| 1/1 | 1/1 | 6.62  | 7.62  |
| 0/1 | 1/1 | 5.42  | 6.45  |
| 0/1 | 1/1 | 2.77  | 4.18  |
| 1/1 | 1/1 | 4     | 7.72  |
| 1/1 | 0/1 | 7.89  | 6.86  |
| 1/1 | 1/1 | 8.52  | 8.01  |
| 1/1 | 1/1 | 6.72  | 6.61  |
| 1/1 | 1/1 | 8.25  | 8.21  |
| 1/1 | 1/1 | 5.88  | 6.02  |
| 1/1 | 1/1 | 6.27  | 6.48  |
| 1/1 | 1/1 | 6.67  | 6.9   |
| 1/1 | 1/1 | 7.84  | 8.09  |
| 1/1 | 1/1 | 6.45  | 6.73  |
| 1/1 | 1/1 | 5.7   | 6.04  |
| 1/1 | 1/1 | 6.27  | 6.63  |
| 1/1 | 1/1 | 4.7   | 5.15  |
| 1/1 | 1/1 | 6.75  | 7.25  |
| 0/1 | 1/1 | 5.05  | 5.82  |
| 1/1 | 1/1 | 4.83  | 5.63  |
| 0/1 | 1/1 | 3.67  | 4.5   |
| 1/1 | 1/1 | 6.98  | 7.82  |
| 1/1 | 1/1 | 6.95  | 7.81  |
| 1/1 | 1/1 | 6.09  | 7.2   |
| 0/1 | 1/1 | 5.29  | 6.54  |
| 1/1 | 1/1 | 7.41  | 8.77  |
| 1/1 | 1/1 | 5.65  | 5.15  |
| 1/1 | 1/1 | 7.17  | 6.72  |
| 1/1 | 1/1 | 5.38  | 5.22  |
| 0/1 | 1/1 | 2.96  | 2.9   |
| 0/1 | 1/1 | 2.66  | 2.98  |
| 0/1 | 1/1 | 7.02  | 7.65  |
| 0/1 | 1/1 | 2.5   | 3.45  |
| 0/1 | 1/1 | 3.96  | 5.06  |
| 1/1 | 1/1 | 5.96  | 7.31  |



|     |     |      |       |
|-----|-----|------|-------|
| 1/1 | 1/1 | 9.35 | 11.18 |
| 1/1 | 1/1 | 5.4  | 9.65  |
| 1/1 | 1/1 | 4.11 | 8.48  |
| 1/1 | 1/1 | 5.58 | 10.04 |
| 1/1 | 1/1 | 3.8  | 8.5   |
| 0/1 | 1/1 | 3.17 | 9.2   |
| 1/1 | 1/1 | 7.95 | 4.8   |
| 1/1 | 1/1 | 8.64 | 7.82  |
| 1/1 | 0/1 | 5.82 | 3.33  |
| 1/1 | 1/1 | 6.72 | 6.01  |
| 1/1 | 1/1 | 7.43 | 6.89  |
| 1/1 | 1/1 | 8.05 | 7.6   |
| 1/1 | 1/1 | 7.79 | 7.34  |
| 1/1 | 1/1 | 8.29 | 7.84  |
| 1/1 | 1/1 | 6.57 | 6.14  |
| 1/1 | 1/1 | 7.04 | 6.66  |
| 1/1 | 1/1 | 7.34 | 7.12  |
| 1/1 | 1/1 | 5.96 | 5.87  |
| 1/1 | 1/1 | 9.03 | 8.96  |
| 1/1 | 1/1 | 7.87 | 7.84  |
| 1/1 | 1/1 | 5.91 | 5.89  |
| 1/1 | 1/1 | 7.64 | 7.63  |
| 0/1 | 1/1 | 3.03 | 5.31  |
| 1/1 | 1/1 | 5.22 | 7.59  |
| 0/1 | 1/1 | 3.68 | 6.07  |
| 0/1 | 1/1 | 2.53 | 5.09  |
| 1/1 | 1/1 | 2.81 | 5.53  |
| 1/1 | 1/1 | 5.83 | 8.73  |
| 0/1 | 1/1 | 3.31 | 6.87  |
| 0/1 | 1/1 | 2.49 | 6.16  |
| 1/1 | 1/1 | 4.71 | 3.15  |
| 1/1 | 1/1 | 6.68 | 5.27  |
| 1/1 | 1/1 | 4.9  | 3.76  |
| 1/1 | 1/1 | 7.64 | 7     |
| 1/1 | 1/1 | 5.87 | 5.46  |
| 1/1 | 1/1 | 5.03 | 4.79  |
| 1/1 | 1/1 | 4.14 | 4.09  |
| 1/1 | 1/1 | 5.54 | 5.76  |
| 0/1 | 1/1 | 3.37 | 3.6   |
| 1/1 | 1/1 | 4.9  | 5.16  |
| 0/1 | 1/1 | 2.5  | 2.8   |
| 1/1 | 1/1 | 2.87 | 3.21  |
| 1/1 | 1/1 | 4.84 | 5.31  |
| 0/1 | 1/1 | 2.21 | 2.78  |
| 0/1 | 1/1 | 2.3  | 3.08  |
| 1/1 | 1/1 | 4.76 | 5.53  |
| 1/1 | 1/1 | 2.56 | 3.43  |
| 1/1 | 1/1 | 6.34 | 4.98  |
| 1/1 | 1/1 | 7.52 | 6.54  |
| 1/1 | 1/1 | 7.12 | 6.41  |
| 1/1 | 1/1 | 6.08 | 5.39  |
| 1/1 | 1/1 | 3.87 | 3.33  |
| 1/1 | 1/1 | 2.99 | 2.5   |
| 1/1 | 1/1 | 7.98 | 7.53  |
| 1/1 | 1/1 | 9.67 | 9.26  |
| 1/1 | 1/1 | 6.29 | 5.91  |
| 1/1 | 1/1 | 5.4  | 5.13  |
| 1/1 | 1/1 | 5.49 | 5.25  |

|     |     |      |       |
|-----|-----|------|-------|
| 1/1 | 1/1 | 6.42 | 6.18  |
| 0/1 | 1/1 | 3.28 | 3.06  |
| 1/1 | 1/1 | 4.47 | 4.28  |
| 0/1 | 1/1 | 3.26 | 3.13  |
| 1/1 | 1/1 | 4.01 | 3.94  |
| 1/1 | 1/1 | 6.47 | 6.46  |
| 1/1 | 1/1 | 5.6  | 5.61  |
| 1/1 | 1/1 | 6.48 | 6.54  |
| 1/1 | 1/1 | 7.09 | 7.42  |
| 0/1 | 1/1 | 2.63 | 3     |
| 1/1 | 1/1 | 9.38 | 9.79  |
| 1/1 | 1/1 | 7.34 | 7.86  |
| 1/1 | 1/1 | 4.57 | 5.2   |
| 1/1 | 1/1 | 9.51 | 10.15 |
| 1/1 | 1/1 | 9.12 | 9.76  |
| 0/1 | 1/1 | 5.41 | 6.06  |
| 1/1 | 1/1 | 3.39 | 4.07  |
| 1/1 | 1/1 | 7.3  | 8.07  |
| 1/1 | 1/1 | 7.91 | 8.68  |
| 1/1 | 1/1 | 6.14 | 6.97  |
| 0/1 | 1/1 | 2.62 | 3.5   |
| 0/1 | 1/1 | 3.62 | 4.53  |
| 0/1 | 1/1 | 2.45 | 3.39  |
| 0/1 | 1/1 | 4.05 | 5     |
| 0/1 | 1/1 | 1.74 | 2.74  |
| 1/1 | 1/1 | 5.85 | 6.86  |
| 1/1 | 1/1 | 4.59 | 5.61  |
| 1/1 | 1/1 | 3.66 | 6.79  |
| 1/1 | 1/1 | 3.44 | 6.67  |
| 0/1 | 1/1 | 1.9  | 5.27  |
| 0/1 | 1/1 | 3.27 | 6.87  |
| 0/1 | 1/1 | 2.17 | 5.85  |
| 1/1 | 1/1 | 7.2  | 5.05  |
| 1/1 | 1/1 | 3.85 | 3.25  |
| 1/1 | 1/1 | 7.35 | 6.8   |
| 1/1 | 0/1 | 5.28 | 4.75  |
| 1/1 | 1/1 | 6.41 | 5.88  |
| 1/1 | 1/1 | 6.92 | 6.39  |
| 1/1 | 0/1 | 3.16 | 2.64  |
| 0/1 | 1/1 | 6.24 | 5.74  |
| 1/1 | 1/1 | 6    | 5.51  |
| 1/1 | 1/1 | 8.09 | 7.62  |
| 1/1 | 0/1 | 4.12 | 3.69  |
| 1/1 | 1/1 | 4.78 | 4.37  |
| 1/1 | 1/1 | 6.73 | 6.36  |
| 1/1 | 1/1 | 5.72 | 5.39  |
| 1/1 | 1/1 | 7.29 | 6.98  |
| 1/1 | 1/1 | 5.47 | 5.21  |
| 1/1 | 1/1 | 5.42 | 5.19  |
| 1/1 | 1/1 | 6.31 | 6.1   |
| 1/1 | 1/1 | 5.5  | 5.39  |
| 1/1 | 1/1 | 6.2  | 6.1   |
| 1/1 | 1/1 | 6.54 | 6.48  |
| 0/1 | 1/1 | 5.31 | 5.26  |
| 0/1 | 1/1 | 5.05 | 5.04  |
| 1/1 | 1/1 | 6.7  | 6.7   |
| 0/1 | 1/1 | 5.39 | 5.43  |
| 1/1 | 1/1 | 5.21 | 5.25  |

|     |     |       |       |
|-----|-----|-------|-------|
| 1/1 | 1/1 | 7.32  | 7.4   |
| 0/1 | 1/1 | 3.92  | 4.04  |
| 1/1 | 1/1 | 6.85  | 6.99  |
| 1/1 | 1/1 | 11.4  | 11.54 |
| 1/1 | 1/1 | 6.1   | 6.27  |
| 0/1 | 1/1 | 5.29  | 5.46  |
| 1/1 | 1/1 | 6.35  | 6.53  |
| 1/1 | 1/1 | 5.22  | 5.41  |
| 0/1 | 1/1 | 6.84  | 7.04  |
| 0/1 | 1/1 | 4.34  | 4.55  |
| 1/1 | 1/1 | 5.01  | 5.26  |
| 0/1 | 1/1 | 5.86  | 6.14  |
| 1/1 | 1/1 | 6.01  | 5.72  |
| 1/1 | 1/1 | 4.98  | 4.86  |
| 1/1 | 1/1 | 6.21  | 6.19  |
| 1/1 | 1/1 | 7.69  | 7.72  |
| 1/1 | 1/1 | 5.5   | 5.61  |
| 0/1 | 1/1 | 2.93  | 3.23  |
| 1/1 | 1/1 | 5.83  | 6.64  |
| 1/1 | 1/1 | 4.42  | 5.4   |
| 1/1 | 1/1 | 3.67  | 4.9   |
| 1/1 | 1/1 | 4.43  | 5.66  |
| 1/1 | 1/1 | 8.91  | 10.22 |
| 1/1 | 1/1 | 6.83  | 8.59  |
| 0/1 | 1/1 | 3.43  | 5.22  |
| 1/1 | 1/1 | 7.02  | 8.99  |
| 1/1 | 1/1 | 7.12  | 9.13  |
| 0/1 | 1/1 | 2.44  | 6.85  |
| 0/1 | 1/1 | 3.07  | 7.49  |
| 1/1 | 1/1 | 5.87  | 10.42 |
| 1/1 | 1/1 | 8.79  | 2.73  |
| 1/1 | 0/1 | 8.56  | 3.43  |
| 1/1 | 1/1 | 9.35  | 4.36  |
| 1/1 | 1/1 | 8.62  | 4.2   |
| 1/1 | 1/1 | 8.68  | 4.31  |
| 1/1 | 1/1 | 7.91  | 3.75  |
| 1/1 | 1/1 | 7.26  | 3.24  |
| 1/1 | 1/1 | 10.47 | 6.57  |
| 1/1 | 1/1 | 10.19 | 6.31  |
| 1/1 | 1/1 | 10.44 | 6.66  |
| 1/1 | 1/1 | 11.85 | 8.17  |
| 1/1 | 1/1 | 11.02 | 9.88  |
| 1/1 | 1/1 | 5.45  | 4.32  |
| 1/1 | 1/1 | 3.22  | 2.17  |
| 1/1 | 1/1 | 4.12  | 3.41  |
| 1/1 | 1/1 | 6.08  | 5.41  |
| 1/1 | 1/1 | 8.04  | 7.45  |
| 1/1 | 1/1 | 4.7   | 4.12  |
| 1/1 | 1/1 | 6.96  | 6.42  |
| 1/1 | 1/1 | 7.26  | 6.82  |
| 1/1 | 1/1 | 8.51  | 8.13  |
| 1/1 | 1/1 | 7.72  | 7.34  |
| 1/1 | 1/1 | 7.57  | 7.27  |
| 1/1 | 1/1 | 6.19  | 5.91  |
| 1/1 | 1/1 | 7.04  | 6.78  |
| 1/1 | 0/1 | 2.27  | 2.07  |
| 0/1 | 1/1 | 7.42  | 7.3   |
| 1/1 | 1/1 | 6.83  | 6.81  |

|     |     |      |       |
|-----|-----|------|-------|
| 1/1 | 1/1 | 7.82 | 7.9   |
| 1/1 | 1/1 | 6.05 | 6.2   |
| 1/1 | 1/1 | 5.1  | 5.29  |
| 1/1 | 1/1 | 6.29 | 6.5   |
| 1/1 | 1/1 | 5.53 | 5.74  |
| 1/1 | 1/1 | 6.52 | 6.76  |
| 1/1 | 1/1 | 6.54 | 6.78  |
| 0/1 | 1/1 | 5.68 | 6.01  |
| 1/1 | 1/1 | 7.15 | 7.6   |
| 1/1 | 1/1 | 5.18 | 6.43  |
| 1/1 | 0/1 | 3.46 | 2.16  |
| 1/1 | 0/1 | 4.25 | 3.84  |
| 1/1 | 1/1 | 7.88 | 7.67  |
| 1/1 | 1/1 | 6.16 | 6.01  |
| 1/1 | 1/1 | 6.19 | 6.25  |
| 0/1 | 1/1 | 3.14 | 3.25  |
| 1/1 | 1/1 | 6.25 | 6.72  |
| 0/1 | 1/1 | 3.71 | 4.24  |
| 1/1 | 1/1 | 8.71 | 9.37  |
| 0/1 | 1/1 | 1.96 | 2.91  |
| 0/1 | 1/1 | 3.52 | 4.53  |
| 1/1 | 1/1 | 7.09 | 8.17  |
| 1/1 | 1/1 | 6.78 | 7.91  |
| 0/1 | 1/1 | 2.75 | 5.87  |
| 1/1 | 1/1 | 5    | 8.19  |
| 1/1 | 1/1 | 4.21 | 7.45  |
| 0/1 | 1/1 | 3.71 | 7.23  |
| 1/1 | 1/1 | 4.82 | 8.94  |
| 0/1 | 1/1 | 3.08 | 7.39  |
| 1/1 | 1/1 | 3.94 | 3.22  |
| 1/1 | 1/1 | 7.46 | 6.98  |
| 1/1 | 1/1 | 6.93 | 6.47  |
| 1/1 | 1/1 | 5.77 | 5.41  |
| 1/1 | 1/1 | 6.52 | 6.22  |
| 1/1 | 1/1 | 9.01 | 8.78  |
| 0/1 | 1/1 | 3.41 | 3.37  |
| 1/1 | 1/1 | 6.03 | 6.02  |
| 1/1 | 1/1 | 7.73 | 7.76  |
| 0/1 | 1/1 | 4.95 | 5.04  |
| 1/1 | 1/1 | 8.94 | 9.05  |
| 1/1 | 1/1 | 7.83 | 8.18  |
| 1/1 | 1/1 | 9.56 | 10.02 |
| 0/1 | 1/1 | 6.38 | 7.03  |
| 0/1 | 1/1 | 6.17 | 6.83  |
| 1/1 | 1/1 | 7.93 | 9.04  |
| 0/1 | 1/1 | 6.31 | 7.68  |
| 1/1 | 1/1 | 8.27 | 9.67  |
| 1/1 | 1/1 | 8.22 | 9.7   |
| 1/1 | 1/1 | 6.82 | 8.34  |
| 1/1 | 1/1 | 8.21 | 9.72  |
| 1/1 | 1/1 | 7.03 | 8.6   |
| 1/1 | 1/1 | 7.15 | 8.78  |
| 1/1 | 1/1 | 3.94 | 5.63  |
| 1/1 | 1/1 | 6.91 | 10.62 |
| 0/1 | 1/1 | 5.61 | 9.32  |
| 1/1 | 1/1 | 5.77 | 9.51  |
| 1/1 | 1/1 | 6.46 | 10.21 |
| 1/1 | 1/1 | 6.41 | 10.19 |

|     |     |       |       |
|-----|-----|-------|-------|
| 1/1 | 1/1 | 5.48  | 9.28  |
| 1/1 | 1/1 | 6.27  | 10.15 |
| 1/1 | 1/1 | 4.86  | 8.85  |
| 1/1 | 1/1 | 5.74  | 9.75  |
| 1/1 | 1/1 | 5.37  | 9.45  |
| 0/1 | 1/1 | 4.51  | 8.75  |
| 1/1 | 1/1 | 5.42  | 9.72  |
| 1/1 | 1/1 | 5.05  | 9.51  |
| 0/1 | 1/1 | 2.92  | 8.2   |
| 1/1 | 1/1 | 5.99  | 5.17  |
| 1/1 | 1/1 | 5.72  | 5.12  |
| 1/1 | 1/1 | 11.11 | 10.6  |
| 1/1 | 1/1 | 4.34  | 3.84  |
| 1/1 | 1/1 | 5.52  | 5.08  |
| 1/1 | 1/1 | 6.85  | 6.42  |
| 1/1 | 1/1 | 6.52  | 6.38  |
| 1/1 | 1/1 | 6.81  | 6.75  |
| 0/1 | 1/1 | 5.35  | 5.29  |
| 1/1 | 1/1 | 6.29  | 6.48  |
| 1/1 | 1/1 | 4.42  | 4.62  |
| 0/1 | 1/1 | 3.1   | 3.36  |
| 1/1 | 1/1 | 6.71  | 7.06  |
| 1/1 | 1/1 | 4.52  | 5.1   |
| 1/1 | 1/1 | 6.74  | 7.71  |
| 0/1 | 1/1 | 3.46  | 7.56  |
| 1/1 | 0/1 | 7.22  | 2.82  |
| 1/1 | 0/1 | 6.06  | 2.82  |
| 1/1 | 1/1 | 7.21  | 4.43  |
| 1/1 | 1/1 | 6.56  | 6.86  |
| 0/1 | 1/1 | 3.81  | 4.12  |
| 0/1 | 1/1 | 2.65  | 3.21  |
| 0/1 | 1/1 | 6.15  | 5.93  |
| 1/1 | 1/1 | 8.47  | 8.43  |
| 1/1 | 1/1 | 3.87  | 3.85  |
| 1/1 | 1/1 | 7.47  | 7.59  |
| 0/1 | 1/1 | 7.23  | 7.68  |
| 1/1 | 1/1 | 9.13  | 9.6   |
| 1/1 | 1/1 | 2.82  | 3.36  |
| 0/1 | 1/1 | 2.18  | 2.85  |
| 1/1 | 1/1 | 4.53  | 5.27  |
| 0/1 | 1/1 | 2.18  | 3.71  |
| 0/1 | 1/1 | 2.31  | 3.96  |
| 1/1 | 1/1 | 6.29  | 7.95  |
| 0/1 | 1/1 | 4.72  | 6.52  |
| 1/1 | 1/1 | 7.27  | 9.17  |
| 1/1 | 1/1 | 4.24  | 8.45  |
| 1/1 | 1/1 | 4.06  | 8.59  |
| 0/1 | 1/1 | 2.54  | 7.41  |
| 1/1 | 1/1 | 11.16 | 9.07  |
| 1/1 | 1/1 | 6.48  | 6.12  |
| 0/1 | 1/1 | 4.71  | 4.44  |
| 1/1 | 1/1 | 6.81  | 6.78  |
| 1/1 | 1/1 | 2.49  | 2.53  |
| 1/1 | 1/1 | 7.11  | 7.18  |
| 0/1 | 1/1 | 3.85  | 4.05  |
| 1/1 | 1/1 | 6.3   | 6.55  |
| 1/1 | 1/1 | 4.76  | 5.03  |
| 1/1 | 0/1 | 6.2   | 3.09  |

|     |     |       |       |
|-----|-----|-------|-------|
| 1/1 | 1/1 | 6.38  | 3.97  |
| 1/1 | 0/1 | 4.03  | 2.41  |
| 1/1 | 1/1 | 5.33  | 4.39  |
| 1/1 | 1/1 | 4.48  | 3.58  |
| 1/1 | 1/1 | 5.58  | 4.82  |
| 0/1 | 1/1 | 3.53  | 4.86  |
| 0/1 | 1/1 | 3.39  | 4.84  |
| 0/1 | 1/1 | 1.86  | 4.53  |
| 1/1 | 1/1 | 6.92  | 4.37  |
| 1/1 | 0/1 | 6.1   | 3.81  |
| 1/1 | 1/1 | 6.56  | 5.91  |
| 0/1 | 1/1 | 6.19  | 5.77  |
| 1/1 | 1/1 | 2.78  | 2.48  |
| 1/1 | 1/1 | 4.32  | 4.02  |
| 1/1 | 1/1 | 6.52  | 6.21  |
| 1/1 | 1/1 | 3.81  | 3.51  |
| 1/1 | 1/1 | 3.85  | 3.66  |
| 0/1 | 1/1 | 2.03  | 3.95  |
| 1/1 | 1/1 | 4.92  | 7.02  |
| 1/1 | 1/1 | 5.01  | 7.13  |
| 1/1 | 0/1 | 8.02  | 7.04  |
| 1/1 | 1/1 | 8.08  | 7.35  |
| 1/1 | 1/1 | 5.2   | 4.55  |
| 1/1 | 1/1 | 4.96  | 4.53  |
| 0/1 | 1/1 | 4.29  | 3.91  |
| 1/1 | 1/1 | 7.16  | 6.9   |
| 0/1 | 1/1 | 4.69  | 4.51  |
| 1/1 | 1/1 | 7.37  | 7.22  |
| 1/1 | 1/1 | 4.33  | 4.31  |
| 0/1 | 1/1 | 3.23  | 3.27  |
| 0/1 | 1/1 | 2.58  | 2.66  |
| 1/1 | 1/1 | 2.58  | 2.68  |
| 1/1 | 1/1 | 5.86  | 5.96  |
| 1/1 | 1/1 | 10.57 | 10.69 |
| 1/1 | 1/1 | 6.59  | 6.78  |
| 0/1 | 1/1 | 3.4   | 3.69  |
| 0/1 | 1/1 | 5.84  | 6.15  |
| 1/1 | 1/1 | 9.42  | 9.8   |
| 1/1 | 1/1 | 5.74  | 6.2   |
| 1/1 | 1/1 | 4.82  | 5.35  |
| 1/1 | 1/1 | 5.27  | 5.8   |
| 1/1 | 1/1 | 5.5   | 6.21  |
| 1/1 | 1/1 | 8.2   | 8.9   |
| 0/1 | 1/1 | 5.37  | 6.13  |
| 1/1 | 1/1 | 5.61  | 6.5   |
| 0/1 | 1/1 | 2.7   | 3.61  |
| 1/1 | 1/1 | 4.82  | 5.77  |
| 0/1 | 1/1 | 3.87  | 4.84  |
| 1/1 | 1/1 | 5.41  | 6.52  |
| 1/1 | 1/1 | 5.37  | 6.56  |
| 1/1 | 1/1 | 6.65  | 7.88  |
| 0/1 | 1/1 | 6.25  | 7.53  |
| 1/1 | 1/1 | 4.43  | 7.83  |
| 1/1 | 1/1 | 3.92  | 7.5   |
| 0/1 | 1/1 | 3.65  | 7.8   |
| 0/1 | 1/1 | 1.99  | 6.18  |
| 0/1 | 1/1 | 3.32  | 7.92  |
| 1/1 | 1/1 | 3.98  | 8.63  |

|     |     |       |      |
|-----|-----|-------|------|
| 1/1 | 1/1 | 5.3   | 2.84 |
| 1/1 | 0/1 | 3.84  | 2.56 |
| 1/1 | 1/1 | 7.06  | 6.18 |
| 1/1 | 1/1 | 3.63  | 3.11 |
| 1/1 | 1/1 | 5.26  | 4.79 |
| 1/1 | 1/1 | 5.21  | 4.76 |
| 1/1 | 1/1 | 6.68  | 6.27 |
| 1/1 | 1/1 | 6.3   | 5.9  |
| 1/1 | 1/1 | 4.7   | 4.31 |
| 1/1 | 1/1 | 6.72  | 6.4  |
| 1/1 | 1/1 | 6.59  | 6.35 |
| 1/1 | 1/1 | 8.38  | 8.17 |
| 1/1 | 1/1 | 5.64  | 5.49 |
| 1/1 | 0/1 | 8.39  | 2.46 |
| 1/1 | 0/1 | 7.19  | 2.69 |
| 1/1 | 0/1 | 7.38  | 3.2  |
| 1/1 | 0/1 | 7.15  | 3.13 |
| 1/1 | 1/1 | 8.23  | 4.23 |
| 1/1 | 1/1 | 7.58  | 3.81 |
| 1/1 | 1/1 | 8.54  | 4.9  |
| 1/1 | 1/1 | 5.41  | 4.03 |
| 1/1 | 1/1 | 6.99  | 5.63 |
| 1/1 | 1/1 | 4.81  | 3.46 |
| 1/1 | 1/1 | 8.08  | 6.83 |
| 1/1 | 0/1 | 7.34  | 6.14 |
| 1/1 | 1/1 | 6.77  | 5.78 |
| 1/1 | 1/1 | 7.15  | 6.46 |
| 1/1 | 1/1 | 8.9   | 8.45 |
| 0/1 | 1/1 | 6.95  | 6.53 |
| 1/1 | 0/1 | 8.26  | 3.77 |
| 1/1 | 0/1 | 6.67  | 2.74 |
| 1/1 | 1/1 | 7.55  | 4.76 |
| 1/1 | 1/1 | 8.65  | 5.9  |
| 1/1 | 0/1 | 6.02  | 3.47 |
| 1/1 | 1/1 | 7.78  | 5.45 |
| 1/1 | 1/1 | 3.28  | 3.17 |
| 1/1 | 0/1 | 3.03  | 2.94 |
| 1/1 | 1/1 | 5.46  | 5.45 |
| 1/1 | 1/1 | 3.78  | 3.86 |
| 0/1 | 1/1 | 6.02  | 6.33 |
| 0/1 | 1/1 | 3.42  | 3.84 |
| 1/1 | 1/1 | 9.2   | 5.3  |
| 1/1 | 0/1 | 10.21 | 6.32 |
| 1/1 | 1/1 | 11.12 | 7.31 |
| 1/1 | 1/1 | 8.94  | 5.46 |
| 1/1 | 1/1 | 9.6   | 6.4  |
| 1/1 | 0/1 | 8.83  | 5.64 |
| 1/1 | 1/1 | 7.69  | 4.74 |
| 1/1 | 1/1 | 9.49  | 6.55 |
| 1/1 | 0/1 | 7.34  | 4.41 |
| 1/1 | 0/1 | 8.44  | 5.54 |
| 1/1 | 1/1 | 9.58  | 6.82 |
| 1/1 | 1/1 | 8.09  | 5.36 |
| 1/1 | 1/1 | 8.28  | 5.56 |
| 1/1 | 1/1 | 9.02  | 6.34 |
| 1/1 | 0/1 | 7.94  | 5.41 |
| 1/1 | 0/1 | 5.52  | 3.08 |
| 1/1 | 1/1 | 8.2   | 5.77 |

|     |     |       |       |
|-----|-----|-------|-------|
| 1/1 | 1/1 | 8.22  | 5.85  |
| 1/1 | 1/1 | 8.18  | 5.93  |
| 1/1 | 1/1 | 10.88 | 8.65  |
| 1/1 | 1/1 | 7.56  | 5.37  |
| 1/1 | 1/1 | 8.65  | 6.48  |
| 1/1 | 1/1 | 6.98  | 4.84  |
| 1/1 | 1/1 | 7.5   | 5.47  |
| 1/1 | 1/1 | 8.58  | 6.67  |
| 1/1 | 1/1 | 8.3   | 6.41  |
| 1/1 | 1/1 | 6.07  | 4.24  |
| 1/1 | 1/1 | 8.37  | 6.57  |
| 1/1 | 0/1 | 7     | 5.27  |
| 1/1 | 1/1 | 8.6   | 6.99  |
| 1/1 | 1/1 | 11.01 | 9.41  |
| 1/1 | 1/1 | 5.29  | 5.72  |
| 1/1 | 1/1 | 8.64  | 9.11  |
| 0/1 | 1/1 | 5.34  | 5.82  |
| 0/1 | 1/1 | 5.73  | 6.22  |
| 1/1 | 1/1 | 6.39  | 7.03  |
| 0/1 | 1/1 | 6.03  | 6.82  |
| 1/1 | 1/1 | 6.32  | 6     |
| 1/1 | 1/1 | 4.95  | 4.68  |
| 0/1 | 1/1 | 6.13  | 5.88  |
| 1/1 | 1/1 | 6.72  | 6.68  |
| 1/1 | 1/1 | 5.97  | 5.95  |
| 0/1 | 1/1 | 4.81  | 4.8   |
| 1/1 | 1/1 | 5.96  | 5.95  |
| 1/1 | 1/1 | 6.54  | 6.53  |
| 1/1 | 1/1 | 7.15  | 7.21  |
| 0/1 | 1/1 | 7     | 7.06  |
| 1/1 | 1/1 | 8.07  | 8.18  |
| 1/1 | 1/1 | 5.75  | 5.89  |
| 1/1 | 1/1 | 6.55  | 6.77  |
| 0/1 | 1/1 | 4.76  | 5.05  |
| 1/1 | 1/1 | 5.81  | 6.15  |
| 0/1 | 1/1 | 3.9   | 4.26  |
| 1/1 | 1/1 | 5     | 5.55  |
| 0/1 | 1/1 | 5.5   | 6.18  |
| 1/1 | 1/1 | 8.94  | 9.74  |
| 0/1 | 1/1 | 6.4   | 7.27  |
| 0/1 | 1/1 | 7.51  | 8.39  |
| 1/1 | 1/1 | 8.79  | 9.76  |
| 1/1 | 1/1 | 10.58 | 11.75 |
| 1/1 | 1/1 | 6.19  | 7.57  |
| 1/1 | 1/1 | 8.3   | 9.72  |
| 0/1 | 1/1 | 5.65  | 7.21  |
| 0/1 | 1/1 | 2.35  | 3.92  |
| 1/1 | 1/1 | 6.25  | 7.91  |
| 1/1 | 1/1 | 5.42  | 9.48  |
| 0/1 | 1/1 | 2.31  | 6.85  |
| 0/1 | 1/1 | 5.04  | 10.08 |
| 0/1 | 1/1 | 3.63  | 8.87  |
| 0/1 | 1/1 | 2.77  | 8.67  |
| 0/1 | 1/1 | 2.63  | 8.83  |
| 0/1 | 1/1 | 2.11  | 9.43  |
| 0/1 | 1/1 | 2.54  | 10.11 |
| 1/1 | 0/1 | 6.08  | 4.85  |
| 1/1 | 0/1 | 5.78  | 5.16  |



|     |     |       |       |
|-----|-----|-------|-------|
| 1/1 | 1/1 | 10.04 | 9.64  |
| 1/1 | 1/1 | 7.42  | 7.09  |
| 1/1 | 1/1 | 7.65  | 7.43  |
| 1/1 | 1/1 | 4.93  | 4.75  |
| 1/1 | 1/1 | 8.1   | 8.02  |
| 0/1 | 1/1 | 6.53  | 6.51  |
| 0/1 | 1/1 | 6.92  | 6.95  |
| 1/1 | 1/1 | 6.13  | 6.2   |
| 1/1 | 1/1 | 6.9   | 7.12  |
| 0/1 | 1/1 | 5.06  | 5.29  |
| 1/1 | 1/1 | 5.4   | 5.69  |
| 1/1 | 1/1 | 8.98  | 9.3   |
| 1/1 | 1/1 | 6.07  | 6.4   |
| 1/1 | 1/1 | 9.87  | 10.22 |
| 1/1 | 1/1 | 4.14  | 4.5   |
| 1/1 | 1/1 | 6.56  | 6.98  |
| 0/1 | 1/1 | 6.72  | 7.14  |
| 0/1 | 1/1 | 6.17  | 6.6   |
| 1/1 | 1/1 | 4.93  | 5.4   |
| 0/1 | 1/1 | 7.23  | 7.69  |
| 1/1 | 1/1 | 5.14  | 5.63  |
| 0/1 | 1/1 | 5.02  | 5.53  |
| 0/1 | 1/1 | 7.25  | 7.8   |
| 0/1 | 1/1 | 4.45  | 5.03  |
| 1/1 | 1/1 | 4.7   | 5.35  |
| 1/1 | 1/1 | 9.59  | 10.26 |
| 0/1 | 1/1 | 5.27  | 6.05  |
| 1/1 | 1/1 | 10.55 | 11.37 |
| 1/1 | 1/1 | 6.9   | 7.8   |
| 1/1 | 1/1 | 8.68  | 9.6   |
| 1/1 | 1/1 | 5.88  | 6.86  |
| 1/1 | 1/1 | 5.35  | 6.37  |
| 1/1 | 1/1 | 7.18  | 8.26  |
| 0/1 | 1/1 | 5.8   | 8.95  |
| 1/1 | 1/1 | 5.34  | 8.64  |
| 1/1 | 1/1 | 3.77  | 7.09  |
| 1/1 | 1/1 | 5.81  | 9.26  |
| 1/1 | 1/1 | 5.39  | 8.94  |
| 0/1 | 1/1 | 6.77  | 6.73  |
| 1/1 | 1/1 | 9.06  | 9.11  |
| 0/1 | 1/1 | 6.88  | 7.33  |
| 1/1 | 1/1 | 5.23  | 6.16  |
| 1/1 | 1/1 | 6.09  | 8.1   |
| 1/1 | 1/1 | 5.43  | 4.38  |
| 1/1 | 1/1 | 7.04  | 6.5   |
| 1/1 | 1/1 | 7.57  | 7.09  |
| 1/1 | 1/1 | 5.06  | 4.68  |
| 1/1 | 1/1 | 7.48  | 7.1   |
| 1/1 | 1/1 | 7.48  | 7.12  |
| 0/1 | 1/1 | 4.54  | 4.33  |
| 1/1 | 1/1 | 9.69  | 9.54  |
| 1/1 | 1/1 | 9.05  | 8.91  |
| 1/1 | 1/1 | 7.24  | 7.15  |
| 1/1 | 1/1 | 7.21  | 7.22  |
| 0/1 | 1/1 | 6.59  | 6.64  |
| 1/1 | 1/1 | 9.56  | 9.7   |
| 1/1 | 1/1 | 5.77  | 5.96  |
| 0/1 | 1/1 | 6.53  | 6.98  |

|     |     |       |       |
|-----|-----|-------|-------|
| 1/1 | 1/1 | 5.62  | 6.15  |
| 1/1 | 1/1 | 5.92  | 9.35  |
| 0/1 | 1/1 | 2.06  | 5.63  |
| 1/1 | 1/1 | 8.58  | 7.37  |
| 1/1 | 1/1 | 8.81  | 7.95  |
| 1/1 | 1/1 | 5.73  | 5.48  |
| 1/1 | 1/1 | 8.74  | 8.53  |
| 1/1 | 1/1 | 4.68  | 4.5   |
| 1/1 | 1/1 | 7.02  | 6.86  |
| 1/1 | 1/1 | 6.3   | 6.3   |
| 1/1 | 1/1 | 11.62 | 11.68 |
| 1/1 | 1/1 | 6.51  | 6.59  |
| 1/1 | 1/1 | 6.62  | 6.89  |
| 1/1 | 1/1 | 9.6   | 10.02 |
| 1/1 | 1/1 | 9.26  | 9.74  |
| 1/1 | 1/1 | 8.58  | 9.12  |
| 1/1 | 1/1 | 8.74  | 9.35  |
| 0/1 | 1/1 | 3.5   | 4.15  |
| 1/1 | 1/1 | 5.35  | 6.04  |
| 0/1 | 1/1 | 3.89  | 7.12  |
| 0/1 | 1/1 | 5.42  | 8.82  |
| 0/1 | 1/1 | 5.3   | 8.9   |
| 1/1 | 1/1 | 6.66  | 2.83  |
| 1/1 | 0/1 | 7.1   | 3.49  |
| 1/1 | 0/1 | 5.91  | 3.07  |
| 1/1 | 0/1 | 5.43  | 3.49  |
| 1/1 | 0/1 | 7.56  | 5.87  |
| 1/1 | 0/1 | 4.41  | 2.66  |
| 1/1 | 1/1 | 7.14  | 6.05  |
| 1/1 | 1/1 | 8.96  | 8.65  |
| 1/1 | 1/1 | 5.38  | 5.15  |
| 1/1 | 1/1 | 3.9   | 3.71  |
| 1/1 | 1/1 | 6.94  | 6.83  |
| 1/1 | 1/1 | 5.74  | 5.7   |
| 1/1 | 1/1 | 4.13  | 4.48  |
| 1/1 | 0/1 | 3.99  | 2.47  |
| 1/1 | 1/1 | 3.55  | 3.12  |
| 1/1 | 1/1 | 3.09  | 3.08  |
| 1/1 | 1/1 | 4.42  | 4.54  |
| 1/1 | 1/1 | 8.37  | 8.5   |
| 1/1 | 1/1 | 2.6   | 2.73  |
| 1/1 | 1/1 | 3.25  | 3.4   |
| 1/1 | 1/1 | 5.76  | 5.9   |
| 1/1 | 1/1 | 6.26  | 6.66  |
| 1/1 | 1/1 | 3.52  | 3.93  |
| 0/1 | 1/1 | 4.87  | 5.31  |
| 1/1 | 1/1 | 4.49  | 7.42  |
| 1/1 | 1/1 | 3.96  | 6.93  |
| 1/1 | 1/1 | 4.87  | 7.86  |
| 0/1 | 1/1 | 2.7   | 6.1   |
| 1/1 | 0/1 | 6.46  | 3.2   |
| 1/1 | 1/1 | 5.79  | 3.46  |
| 1/1 | 0/1 | 5.63  | 3.45  |
| 1/1 | 0/1 | 3.46  | 1.94  |
| 0/1 | 1/1 | 3.59  | 5.02  |
| 1/1 | 1/1 | 8.16  | 7.1   |
| 1/1 | 1/1 | 7.32  | 6.85  |
| 1/1 | 1/1 | 4.99  | 5.1   |

|     |     |       |       |
|-----|-----|-------|-------|
| 1/1 | 1/1 | 12.89 | 13.11 |
| 0/1 | 1/1 | 2.66  | 3.28  |
| 1/1 | 1/1 | 5.48  | 6.19  |
| 1/1 | 1/1 | 7.61  | 11.03 |
| 1/1 | 1/1 | 7.17  | 10.66 |
| 1/1 | 1/1 | 6.7   | 10.32 |
| 1/1 | 1/1 | 6.05  | 9.87  |
| 1/1 | 1/1 | 5.44  | 9.3   |
| 1/1 | 1/1 | 5.88  | 10.02 |
| 1/1 | 1/1 | 5.03  | 9.62  |
| 1/1 | 1/1 | 7.32  | 6.94  |
| 1/1 | 1/1 | 9     | 8.97  |
| 1/1 | 1/1 | 5.38  | 5.4   |
| 0/1 | 1/1 | 4.06  | 4.47  |
| 1/1 | 1/1 | 10.28 | 10.77 |
| 1/1 | 1/1 | 8.28  | 9.09  |
| 0/1 | 1/1 | 2.61  | 3.43  |
| 1/1 | 1/1 | 7.55  | 8.59  |
| 0/1 | 1/1 | 3.17  | 4.27  |
| 1/1 | 1/1 | 8.27  | 9.4   |
| 0/1 | 1/1 | 6.4   | 7.82  |
| 1/1 | 1/1 | 5     | 6.42  |
| 1/1 | 1/1 | 9.35  | 10.88 |
| 0/1 | 1/1 | 5.6   | 7.14  |
| 1/1 | 1/1 | 6.41  | 8.29  |
| 1/1 | 0/1 | 6.2   | 3.08  |
| 1/1 | 1/1 | 11.17 | 9.68  |
| 1/1 | 1/1 | 12.08 | 10.9  |
| 1/1 | 1/1 | 4.99  | 4.11  |
| 0/1 | 1/1 | 2.43  | 3.6   |
| 1/1 | 0/1 | 8.68  | 6.05  |
| 1/1 | 0/1 | 3.33  | 2.11  |
| 1/1 | 1/1 | 6.32  | 5.1   |
| 1/1 | 1/1 | 6.37  | 5.94  |
| 1/1 | 1/1 | 8.4   | 8.01  |
| 1/1 | 1/1 | 5.34  | 7.48  |
| 1/1 | 0/1 | 9.61  | 7.22  |
| 1/1 | 1/1 | 7.27  | 7     |
| 1/1 | 0/1 | 6.83  | 2.87  |
| 1/1 | 1/1 | 7.29  | 3.4   |
| 1/1 | 1/1 | 5.09  | 2.53  |
| 1/1 | 1/1 | 9.58  | 7.09  |
| 1/1 | 1/1 | 5.2   | 2.86  |
| 1/1 | 1/1 | 7.71  | 5.42  |
| 1/1 | 1/1 | 9.64  | 7.63  |
| 1/1 | 1/1 | 10.23 | 8.23  |
| 1/1 | 1/1 | 6.28  | 4.33  |
| 1/1 | 1/1 | 10.25 | 8.3   |
| 1/1 | 1/1 | 5.42  | 3.5   |
| 1/1 | 1/1 | 9.91  | 8.05  |
| 1/1 | 1/1 | 4.86  | 3.08  |
| 1/1 | 1/1 | 5.74  | 6.04  |
| 1/1 | 1/1 | 6.35  | 6.69  |
| 1/1 | 1/1 | 6.4   | 6.74  |
| 0/1 | 1/1 | 2.17  | 2.52  |
| 0/1 | 1/1 | 3.75  | 4.15  |
| 0/1 | 1/1 | 3.16  | 3.6   |
| 0/1 | 1/1 | 2.59  | 3.11  |

|     |     |       |      |
|-----|-----|-------|------|
| 1/1 | 1/1 | 3.74  | 4.28 |
| 0/1 | 1/1 | 7.47  | 8.1  |
| 0/1 | 1/1 | 2.45  | 3.13 |
| 1/1 | 1/1 | 4.71  | 5.41 |
| 0/1 | 1/1 | 5.87  | 6.6  |
| 0/1 | 1/1 | 3.09  | 3.83 |
| 0/1 | 1/1 | 4.68  | 5.57 |
| 0/1 | 1/1 | 2.6   | 3.79 |
| 1/1 | 1/1 | 4.49  | 5.86 |
| 0/1 | 1/1 | 3.21  | 4.6  |
| 1/1 | 1/1 | 5.64  | 7.13 |
| 1/1 | 1/1 | 4.08  | 5.62 |
| 1/1 | 1/1 | 4.66  | 6.26 |
| 1/1 | 1/1 | 6.05  | 7.88 |
| 0/1 | 1/1 | 3.49  | 5.43 |
| 1/1 | 1/1 | 4.31  | 6.4  |
| 1/1 | 0/1 | 8.62  | 5.41 |
| 1/1 | 1/1 | 6.27  | 7.33 |
| 1/1 | 0/1 | 9.07  | 1.63 |
| 1/1 | 0/1 | 9.83  | 2.81 |
| 1/1 | 0/1 | 9.72  | 2.72 |
| 1/1 | 0/1 | 10.02 | 3.45 |
| 1/1 | 0/1 | 9.34  | 3.06 |
| 1/1 | 0/1 | 8.81  | 2.62 |
| 1/1 | 0/1 | 8.28  | 2.13 |
| 1/1 | 0/1 | 10.27 | 4.51 |
| 1/1 | 0/1 | 7.77  | 2.11 |
| 1/1 | 1/1 | 9.66  | 4.05 |
| 1/1 | 1/1 | 9.15  | 3.66 |
| 1/1 | 1/1 | 8.78  | 3.5  |
| 1/1 | 1/1 | 7.05  | 3.86 |
| 1/1 | 1/1 | 6.79  | 3.67 |
| 1/1 | 1/1 | 6.58  | 3.63 |
| 1/1 | 0/1 | 5.2   | 2.26 |
| 1/1 | 0/1 | 4.79  | 1.94 |
| 1/1 | 1/1 | 5.68  | 2.85 |
| 1/1 | 0/1 | 5.18  | 2.37 |
| 1/1 | 1/1 | 8.4   | 5.62 |
| 1/1 | 1/1 | 6.38  | 3.68 |
| 1/1 | 0/1 | 5.45  | 2.77 |
| 1/1 | 1/1 | 7.18  | 4.55 |
| 1/1 | 1/1 | 6.44  | 3.83 |
| 1/1 | 1/1 | 6.58  | 3.98 |
| 1/1 | 1/1 | 6.28  | 4.22 |
| 1/1 | 0/1 | 4.55  | 2.7  |
| 1/1 | 0/1 | 7.23  | 5.46 |
| 1/1 | 0/1 | 3.96  | 2.35 |
| 1/1 | 1/1 | 7.76  | 6.21 |
| 1/1 | 0/1 | 3.43  | 1.99 |
| 1/1 | 1/1 | 10.03 | 8.6  |
| 1/1 | 0/1 | 3.1   | 2.11 |
| 1/1 | 0/1 | 3.14  | 2.26 |
| 1/1 | 1/1 | 5.16  | 4.44 |
| 1/1 | 1/1 | 4.48  | 3.99 |
| 0/1 | 1/1 | 3.28  | 3.48 |
| 0/1 | 1/1 | 3.8   | 4.41 |
| 1/1 | 1/1 | 6.99  | 7.9  |
| 1/1 | 1/1 | 8.08  | 9.07 |

|     |     |       |      |
|-----|-----|-------|------|
| 0/1 | 1/1 | 3.1   | 4.24 |
| 1/1 | 1/1 | 7     | 8.79 |
| 0/1 | 1/1 | 2.58  | 4.51 |
| 1/1 | 1/1 | 9.86  | 6.87 |
| 1/1 | 1/1 | 6.27  | 4.8  |
| 1/1 | 1/1 | 5.54  | 4.22 |
| 1/1 | 1/1 | 9.04  | 7.77 |
| 1/1 | 1/1 | 4.47  | 3.21 |
| 1/1 | 1/1 | 5.28  | 4.28 |
| 1/1 | 0/1 | 3.26  | 2.33 |
| 1/1 | 1/1 | 6.58  | 5.77 |
| 1/1 | 1/1 | 6.71  | 5.9  |
| 1/1 | 1/1 | 2.95  | 4.82 |
| 1/1 | 0/1 | 4.52  | 2.72 |
| 1/1 | 0/1 | 3.58  | 2.87 |
| 1/1 | 1/1 | 6.41  | 5.95 |
| 0/1 | 1/1 | 3.68  | 3.68 |
| 1/1 | 1/1 | 4.4   | 4.45 |
| 1/1 | 1/1 | 7.99  | 8.15 |
| 1/1 | 1/1 | 6.43  | 6.62 |
| 1/1 | 1/1 | 5.12  | 7.66 |
| 1/1 | 1/1 | 3.42  | 7.1  |
| 1/1 | 1/1 | 8.62  | 7.85 |
| 0/1 | 1/1 | 2.86  | 2.5  |
| 1/1 | 1/1 | 4.09  | 4.15 |
| 0/1 | 1/1 | 3.38  | 3.68 |
| 1/1 | 1/1 | 6.76  | 7.26 |
| 1/1 | 0/1 | 9.82  | 2.2  |
| 1/1 | 0/1 | 9.59  | 3.17 |
| 1/1 | 0/1 | 8.81  | 2.56 |
| 1/1 | 1/1 | 10.37 | 4.17 |
| 1/1 | 1/1 | 10.85 | 4.75 |
| 1/1 | 1/1 | 10.08 | 4.2  |
| 1/1 | 1/1 | 10.09 | 4.27 |
| 1/1 | 1/1 | 9.84  | 4.02 |
| 1/1 | 1/1 | 8.69  | 2.87 |
| 1/1 | 1/1 | 9.21  | 3.52 |
| 1/1 | 1/1 | 10.05 | 4.42 |
| 1/1 | 1/1 | 10.17 | 4.55 |
| 1/1 | 0/1 | 9.41  | 6.17 |
| 1/1 | 1/1 | 11.24 | 8.04 |
| 1/1 | 1/1 | 8.96  | 5.84 |
| 1/1 | 0/1 | 8.42  | 5.37 |
| 1/1 | 1/1 | 9.24  | 6.28 |
| 1/1 | 1/1 | 8.96  | 6.01 |
| 1/1 | 1/1 | 10.45 | 7.51 |
| 1/1 | 1/1 | 9.05  | 6.16 |
| 1/1 | 1/1 | 8.17  | 5.3  |
| 1/1 | 1/1 | 9.27  | 6.43 |
| 1/1 | 1/1 | 7.75  | 4.97 |
| 1/1 | 1/1 | 8.67  | 6.03 |
| 1/1 | 1/1 | 6.55  | 4.09 |
| 1/1 | 1/1 | 5.79  | 3.45 |
| 1/1 | 1/1 | 9.03  | 6.92 |
| 1/1 | 1/1 | 7.91  | 6.17 |
| 1/1 | 0/1 | 3.56  | 1.93 |
| 1/1 | 1/1 | 6.47  | 5.17 |
| 1/1 | 0/1 | 5.24  | 4.05 |

|     |     |      |      |
|-----|-----|------|------|
| 1/1 | 0/1 | 2.96 | 2    |
| 1/1 | 1/1 | 3.05 | 2.94 |
| 0/1 | 1/1 | 7.8  | 7.94 |
| 1/1 | 1/1 | 4.9  | 4.44 |
| 1/1 | 1/1 | 6.7  | 6.45 |
| 1/1 | 1/1 | 7    | 6.91 |
| 1/1 | 1/1 | 7.45 | 7.52 |
| 0/1 | 1/1 | 5.26 | 5.39 |
| 1/1 | 1/1 | 8.73 | 8.95 |
| 0/1 | 1/1 | 3.29 | 3.96 |
| 1/1 | 0/1 | 3.22 | 2.15 |
| 1/1 | 1/1 | 4.75 | 7.9  |
| 1/1 | 1/1 | 5.15 | 9.71 |
| 0/1 | 1/1 | 7.25 | 6.76 |
| 1/1 | 1/1 | 4.22 | 3.81 |
| 1/1 | 1/1 | 6.25 | 5.9  |
| 1/1 | 1/1 | 8.21 | 7.9  |
| 1/1 | 1/1 | 3.6  | 3.3  |
| 1/1 | 1/1 | 9    | 9.02 |
| 1/1 | 1/1 | 4.33 | 4.49 |
| 0/1 | 1/1 | 3.62 | 3.91 |
| 0/1 | 1/1 | 2.7  | 3.2  |
| 1/1 | 1/1 | 5.81 | 6.72 |
| 1/1 | 1/1 | 5.49 | 6.51 |
| 1/1 | 1/1 | 6.05 | 7.39 |
| 0/1 | 1/1 | 2.79 | 4.21 |
| 1/1 | 1/1 | 7.13 | 5.32 |
| 1/1 | 0/1 | 3.26 | 2.65 |
| 1/1 | 1/1 | 8.76 | 8.78 |
| 0/1 | 1/1 | 5.03 | 5.05 |
| 0/1 | 1/1 | 3.34 | 3.45 |
| 1/1 | 1/1 | 8.56 | 8.75 |
| 1/1 | 1/1 | 7.09 | 7.36 |
| 0/1 | 1/1 | 2.03 | 2.41 |
| 1/1 | 1/1 | 6.47 | 3.28 |
| 1/1 | 0/1 | 6.21 | 3.24 |
| 1/1 | 1/1 | 5.76 | 3.74 |
| 1/1 | 1/1 | 7.96 | 4.89 |
| 1/1 | 1/1 | 4.96 | 3.7  |
| 1/1 | 1/1 | 4.99 | 3.95 |
| 1/1 | 0/1 | 5.43 | 4.48 |
| 1/1 | 0/1 | 3.12 | 2.23 |
| 1/1 | 1/1 | 3.1  | 4.25 |
| 1/1 | 1/1 | 3.28 | 4.54 |
| 1/1 | 0/1 | 4.86 | 2.87 |
| 1/1 | 1/1 | 5.6  | 4.5  |
| 1/1 | 1/1 | 6.24 | 5.47 |
| 1/1 | 1/1 | 6.06 | 5.87 |
| 0/1 | 1/1 | 4.52 | 4.43 |
| 1/1 | 1/1 | 5.99 | 5.93 |
| 0/1 | 1/1 | 5.88 | 5.86 |
| 1/1 | 1/1 | 7.83 | 7.82 |
| 1/1 | 1/1 | 7.87 | 7.87 |
| 1/1 | 1/1 | 6.73 | 6.78 |
| 1/1 | 1/1 | 6.52 | 6.59 |
| 1/1 | 1/1 | 8.35 | 8.46 |
| 1/1 | 1/1 | 5.47 | 5.59 |
| 0/1 | 1/1 | 4.28 | 4.43 |

|     |     |       |       |
|-----|-----|-------|-------|
| 0/1 | 1/1 | 2.07  | 4.39  |
| 1/1 | 1/1 | 5.21  | 7.54  |
| 1/1 | 1/1 | 6.81  | 4.7   |
| 1/1 | 1/1 | 5.59  | 5.25  |
| 1/1 | 1/1 | 5.01  | 4.72  |
| 1/1 | 1/1 | 5.91  | 5.86  |
| 1/1 | 1/1 | 10.27 | 2.93  |
| 1/1 | 0/1 | 9.37  | 2.3   |
| 1/1 | 0/1 | 9.37  | 2.45  |
| 1/1 | 1/1 | 9.49  | 3.23  |
| 1/1 | 1/1 | 8.95  | 3.04  |
| 1/1 | 0/1 | 8.76  | 3.3   |
| 1/1 | 1/1 | 6.7   | 4.08  |
| 1/1 | 0/1 | 4.37  | 2.21  |
| 1/1 | 1/1 | 7.51  | 5.49  |
| 1/1 | 1/1 | 6.77  | 5.44  |
| 1/1 | 0/1 | 4.57  | 3.58  |
| 1/1 | 0/1 | 4.8   | 4.07  |
| 1/1 | 1/1 | 6.45  | 5.8   |
| 1/1 | 1/1 | 7.93  | 7.46  |
| 1/1 | 1/1 | 7.09  | 6.81  |
| 1/1 | 1/1 | 8.37  | 8.3   |
| 1/1 | 1/1 | 9.65  | 9.62  |
| 1/1 | 1/1 | 9.54  | 9.72  |
| 1/1 | 0/1 | 4.52  | 2.76  |
| 1/1 | 1/1 | 5.75  | 5.19  |
| 1/1 | 1/1 | 7.45  | 7.01  |
| 1/1 | 1/1 | 8.96  | 8.78  |
| 1/1 | 1/1 | 5.38  | 5.23  |
| 0/1 | 1/1 | 6.26  | 6.12  |
| 1/1 | 1/1 | 9.03  | 9     |
| 0/1 | 1/1 | 5.7   | 5.75  |
| 0/1 | 1/1 | 4.2   | 4.28  |
| 1/1 | 1/1 | 5.08  | 5.25  |
| 1/1 | 1/1 | 5.23  | 5.4   |
| 1/1 | 1/1 | 8.87  | 9.06  |
| 1/1 | 1/1 | 10.72 | 11.11 |
| 1/1 | 1/1 | 5.55  | 3.88  |
| 1/1 | 0/1 | 3.17  | 2.47  |
| 1/1 | 1/1 | 3.72  | 3.05  |
| 1/1 | 1/1 | 3.01  | 2.5   |
| 1/1 | 1/1 | 8.02  | 7.76  |
| 0/1 | 1/1 | 3.85  | 3.59  |
| 1/1 | 1/1 | 7.59  | 7.41  |
| 0/1 | 1/1 | 9.01  | 8.83  |
| 1/1 | 1/1 | 7.08  | 6.92  |
| 0/1 | 1/1 | 3.01  | 2.88  |
| 1/1 | 1/1 | 5.85  | 5.75  |
| 1/1 | 1/1 | 3.11  | 3.02  |
| 1/1 | 1/1 | 3.24  | 3.17  |
| 0/1 | 1/1 | 2.38  | 2.39  |
| 1/1 | 1/1 | 5.88  | 5.93  |
| 0/1 | 1/1 | 2.95  | 3.01  |
| 1/1 | 1/1 | 5.37  | 5.49  |
| 0/1 | 1/1 | 3.31  | 3.44  |
| 1/1 | 1/1 | 4.9   | 5.04  |
| 0/1 | 1/1 | 2.39  | 2.62  |
| 0/1 | 1/1 | 3.07  | 3.31  |

|     |     |       |      |
|-----|-----|-------|------|
| 1/1 | 1/1 | 2.79  | 3.06 |
| 1/1 | 1/1 | 7.7   | 7.99 |
| 1/1 | 1/1 | 8.44  | 8.74 |
| 0/1 | 1/1 | 4.14  | 4.47 |
| 1/1 | 1/1 | 4.77  | 5.11 |
| 0/1 | 1/1 | 7.61  | 8.02 |
| 0/1 | 1/1 | 3.19  | 3.64 |
| 1/1 | 0/1 | 3.71  | 1.62 |
| 1/1 | 0/1 | 4.82  | 4.25 |
| 1/1 | 1/1 | 10.01 | 9.73 |
| 1/1 | 1/1 | 7.22  | 6.97 |
| 1/1 | 1/1 | 5.96  | 5.79 |
| 1/1 | 1/1 | 9.05  | 8.96 |
| 0/1 | 1/1 | 3.6   | 3.52 |
| 1/1 | 1/1 | 8.85  | 7.4  |
| 1/1 | 1/1 | 5.09  | 4.26 |
| 1/1 | 1/1 | 6.92  | 6.56 |
| 0/1 | 1/1 | 4.27  | 3.95 |
| 1/1 | 1/1 | 6.94  | 6.83 |
| 1/1 | 1/1 | 6.5   | 6.47 |
| 1/1 | 1/1 | 2.69  | 2.75 |
| 1/1 | 1/1 | 2.92  | 3.02 |
| 1/1 | 1/1 | 5.77  | 5.91 |
| 0/1 | 1/1 | 2.99  | 3.21 |
| 1/1 | 1/1 | 4.44  | 4.76 |
| 1/1 | 1/1 | 7.41  | 7.73 |
| 1/1 | 1/1 | 4.1   | 4.43 |
| 1/1 | 1/1 | 4.01  | 6.7  |
| 1/1 | 1/1 | 3.85  | 6.56 |
| 0/1 | 1/1 | 3.9   | 7.01 |
| 1/1 | 1/1 | 5.97  | 5.13 |
| 0/1 | 1/1 | 3.76  | 3.59 |
| 0/1 | 1/1 | 2.91  | 2.79 |
| 0/1 | 1/1 | 3.07  | 2.99 |
| 1/1 | 1/1 | 5.73  | 5.68 |
| 1/1 | 1/1 | 6.77  | 6.8  |
| 1/1 | 1/1 | 2.7   | 2.73 |
| 1/1 | 1/1 | 6.47  | 6.6  |
| 0/1 | 1/1 | 2.35  | 2.52 |
| 1/1 | 1/1 | 3.93  | 4.2  |
| 1/1 | 1/1 | 4.04  | 4.32 |
| 0/1 | 1/1 | 2.53  | 2.84 |
| 1/1 | 1/1 | 2.92  | 3.28 |
| 1/1 | 1/1 | 5.76  | 6.24 |
| 0/1 | 1/1 | 2.65  | 3.22 |
| 0/1 | 1/1 | 2.48  | 3.06 |
| 0/1 | 1/1 | 2.15  | 2.77 |
| 0/1 | 1/1 | 2.57  | 3.21 |
| 0/1 | 1/1 | 2.41  | 3.13 |
| 1/1 | 1/1 | 6.94  | 7.7  |
| 1/1 | 1/1 | 5.39  | 6.34 |
| 0/1 | 1/1 | 2.05  | 3.1  |
| 0/1 | 1/1 | 2.35  | 3.61 |
| 1/1 | 1/1 | 6.97  | 6.76 |
| 0/1 | 1/1 | 6.01  | 6.47 |
| 1/1 | 1/1 | 9.22  | 9.88 |
| 1/1 | 1/1 | 7.51  | 8.37 |
| 1/1 | 1/1 | 6.3   | 7.47 |



|     |     |      |       |
|-----|-----|------|-------|
| 1/1 | 1/1 | 7.41 | 11.59 |
| 1/1 | 1/1 | 7.79 | 7.48  |
| 1/1 | 1/1 | 8.46 | 8.23  |
| 1/1 | 1/1 | 7.49 | 7.38  |
| 1/1 | 1/1 | 3.22 | 3.18  |
| 1/1 | 1/1 | 6.26 | 6.24  |
| 1/1 | 1/1 | 2.62 | 2.75  |
| 1/1 | 1/1 | 5.72 | 5.87  |
| 1/1 | 1/1 | 9.79 | 10    |
| 0/1 | 1/1 | 3.71 | 4.14  |
| 0/1 | 1/1 | 2.62 | 3.08  |
| 0/1 | 1/1 | 2.66 | 3.56  |
| 1/1 | 1/1 | 4.82 | 6.09  |
| 1/1 | 1/1 | 3.74 | 5.28  |
| 1/1 | 1/1 | 3.98 | 5.62  |
| 1/1 | 1/1 | 5.28 | 7.02  |
| 1/1 | 1/1 | 3.97 | 7.86  |
| 0/1 | 1/1 | 3.08 | 6.99  |
| 1/1 | 1/1 | 3.66 | 7.9   |
| 0/1 | 1/1 | 1.94 | 7.44  |
| 1/1 | 1/1 | 6.12 | 4.41  |
| 1/1 | 1/1 | 6.17 | 4.95  |
| 1/1 | 1/1 | 4.12 | 3.17  |
| 1/1 | 1/1 | 7.32 | 6.82  |
| 1/1 | 1/1 | 5.96 | 5.51  |
| 1/1 | 1/1 | 5.77 | 5.35  |
| 1/1 | 1/1 | 7.88 | 7.46  |
| 1/1 | 1/1 | 5.91 | 5.55  |
| 0/1 | 1/1 | 2.83 | 2.66  |
| 1/1 | 1/1 | 4.51 | 4.36  |
| 1/1 | 1/1 | 4.47 | 4.33  |
| 1/1 | 1/1 | 5.4  | 5.26  |
| 1/1 | 1/1 | 5.72 | 5.6   |
| 1/1 | 1/1 | 5.11 | 5.01  |
| 1/1 | 1/1 | 5.93 | 5.83  |
| 1/1 | 1/1 | 6.38 | 6.29  |
| 0/1 | 1/1 | 4.23 | 4.14  |
| 1/1 | 1/1 | 7.03 | 6.97  |
| 0/1 | 1/1 | 4.34 | 4.3   |
| 1/1 | 1/1 | 2.54 | 2.55  |
| 1/1 | 1/1 | 6.14 | 6.19  |
| 1/1 | 1/1 | 6.27 | 6.35  |
| 1/1 | 1/1 | 8.63 | 8.77  |
| 1/1 | 1/1 | 6.48 | 6.62  |
| 0/1 | 1/1 | 4.28 | 4.43  |
| 1/1 | 1/1 | 5.17 | 5.36  |
| 0/1 | 1/1 | 2.45 | 2.67  |
| 0/1 | 1/1 | 4.03 | 4.29  |
| 0/1 | 1/1 | 6.49 | 6.75  |
| 1/1 | 1/1 | 4.86 | 5.23  |
| 1/1 | 1/1 | 4.83 | 5.23  |
| 1/1 | 1/1 | 3.98 | 6.82  |
| 0/1 | 1/1 | 4.07 | 7.26  |
| 1/1 | 1/1 | 9.85 | 9.63  |
| 1/1 | 1/1 | 3.78 | 3.79  |
| 1/1 | 1/1 | 7.53 | 7.72  |
| 1/1 | 1/1 | 5.36 | 5.59  |
| 0/1 | 1/1 | 5.48 | 5.76  |

|     |     |       |       |
|-----|-----|-------|-------|
| 1/1 | 1/1 | 7.44  | 7.8   |
| 0/1 | 1/1 | 2.47  | 2.83  |
| 0/1 | 1/1 | 2.21  | 2.62  |
| 0/1 | 1/1 | 2.69  | 3.14  |
| 1/1 | 1/1 | 8.78  | 9.24  |
| 0/1 | 1/1 | 2.07  | 2.53  |
| 0/1 | 1/1 | 4.04  | 4.54  |
| 1/1 | 1/1 | 5.55  | 6.3   |
| 1/1 | 1/1 | 6.18  | 7.08  |
| 0/1 | 1/1 | 1.97  | 3.44  |
| 0/1 | 1/1 | 4.3   | 6.07  |
| 0/1 | 1/1 | 2.79  | 4.65  |
| 0/1 | 1/1 | 1.83  | 3.71  |
| 1/1 | 1/1 | 3.08  | 7.27  |
| 1/1 | 1/1 | 3.56  | 7.88  |
| 0/1 | 1/1 | 2.61  | 7.24  |
| 1/1 | 1/1 | 6.53  | 5.77  |
| 1/1 | 1/1 | 3.31  | 2.82  |
| 1/1 | 1/1 | 8.85  | 9.07  |
| 1/1 | 1/1 | 6.93  | 7.53  |
| 1/1 | 1/1 | 6.3   | 7.01  |
| 0/1 | 1/1 | 2.69  | 3.79  |
| 1/1 | 1/1 | 4.81  | 8.6   |
| 1/1 | 1/1 | 4.41  | 8.45  |
| 1/1 | 1/1 | 6.28  | 5.77  |
| 1/1 | 1/1 | 6.83  | 6.42  |
| 0/1 | 1/1 | 6.23  | 5.87  |
| 1/1 | 1/1 | 4.86  | 5.28  |
| 1/1 | 1/1 | 6.69  | 7.24  |
| 0/1 | 1/1 | 7.43  | 7.98  |
| 1/1 | 1/1 | 7.53  | 8.22  |
| 1/1 | 1/1 | 5.11  | 5.89  |
| 0/1 | 1/1 | 2.4   | 3.38  |
| 0/1 | 1/1 | 7.71  | 8.71  |
| 1/1 | 1/1 | 4.14  | 5.33  |
| 0/1 | 1/1 | 5.37  | 6.6   |
| 1/1 | 1/1 | 5.23  | 6.49  |
| 0/1 | 1/1 | 5.8   | 7.33  |
| 1/1 | 1/1 | 10.41 | 7.12  |
| 1/1 | 1/1 | 6.56  | 4.79  |
| 1/1 | 0/1 | 5.06  | 3.33  |
| 1/1 | 1/1 | 5.73  | 4.17  |
| 0/1 | 1/1 | 2.72  | 4.24  |
| 1/1 | 1/1 | 5.7   | 5.42  |
| 1/1 | 1/1 | 10.72 | 10.47 |
| 0/1 | 1/1 | 2.64  | 2.56  |
| 0/1 | 1/1 | 4.78  | 4.72  |
| 1/1 | 1/1 | 3.2   | 3.28  |
| 0/1 | 1/1 | 3.78  | 3.9   |
| 0/1 | 1/1 | 2.11  | 2.3   |
| 0/1 | 1/1 | 3.53  | 3.74  |
| 1/1 | 1/1 | 4.79  | 5.33  |
| 0/1 | 1/1 | 2.68  | 3.33  |
| 1/1 | 1/1 | 6.41  | 7.3   |
| 0/1 | 1/1 | 4.24  | 5.69  |
| 1/1 | 1/1 | 7.55  | 9.12  |
| 1/1 | 1/1 | 6.71  | 8.3   |
| 1/1 | 1/1 | 3.4   | 5.03  |

|     |     |       |       |
|-----|-----|-------|-------|
| 0/1 | 1/1 | 3.49  | 7.45  |
| 0/1 | 1/1 | 3.49  | 7.45  |
| 0/1 | 1/1 | 3.01  | 6.99  |
| 1/1 | 1/1 | 8.15  | 5.11  |
| 1/1 | 1/1 | 8.72  | 7.41  |
| 1/1 | 1/1 | 10.56 | 9.48  |
| 1/1 | 1/1 | 4.84  | 3.8   |
| 1/1 | 1/1 | 5     | 6.2   |
| 1/1 | 1/1 | 4.91  | 6.29  |
| 1/1 | 0/1 | 5.52  | 2.92  |
| 1/1 | 1/1 | 7.06  | 4.84  |
| 1/1 | 1/1 | 6.38  | 5.26  |
| 1/1 | 1/1 | 7.46  | 6.88  |
| 1/1 | 1/1 | 9.73  | 7.44  |
| 1/1 | 1/1 | 5.7   | 5.45  |
| 0/1 | 1/1 | 2.87  | 4.88  |
| 1/1 | 1/1 | 3.52  | 5.75  |
| 0/1 | 1/1 | 3.96  | 6.82  |
| 0/1 | 1/1 | 3.04  | 6.03  |
| 1/1 | 0/1 | 3.1   | 2.46  |
| 1/1 | 1/1 | 7.38  | 7.28  |
| 1/1 | 1/1 | 9.64  | 10.08 |
| 0/1 | 1/1 | 1.88  | 2.51  |
| 1/1 | 0/1 | 4.52  | 2.76  |
| 1/1 | 1/1 | 9.37  | 8.38  |
| 1/1 | 1/1 | 5.75  | 5.19  |
| 1/1 | 1/1 | 7.45  | 7.01  |
| 1/1 | 1/1 | 8.96  | 8.78  |
| 1/1 | 1/1 | 5.38  | 5.23  |
| 0/1 | 1/1 | 6.26  | 6.12  |
| 1/1 | 1/1 | 9.03  | 9     |
| 1/1 | 1/1 | 6.47  | 6.44  |
| 0/1 | 1/1 | 5.7   | 5.75  |
| 0/1 | 1/1 | 4.2   | 4.28  |
| 1/1 | 1/1 | 5.08  | 5.25  |
| 1/1 | 1/1 | 5.23  | 5.4   |
| 1/1 | 0/1 | 4.52  | 2.76  |
| 1/1 | 0/1 | 5.76  | 4.59  |
| 1/1 | 1/1 | 5.75  | 5.19  |
| 1/1 | 1/1 | 9.41  | 9.05  |
| 1/1 | 1/1 | 5.38  | 5.23  |
| 0/1 | 1/1 | 4.12  | 4.23  |
| 0/1 | 1/1 | 6     | 6.26  |
| 0/1 | 1/1 | 5.82  | 6.13  |
| 1/1 | 1/1 | 7.27  | 5.25  |
| 1/1 | 0/1 | 3.92  | 3.18  |
| 1/1 | 1/1 | 2.87  | 2.68  |
| 1/1 | 1/1 | 2.56  | 2.45  |
| 1/1 | 1/1 | 5.23  | 5.12  |
| 0/1 | 1/1 | 2.68  | 2.59  |
| 0/1 | 1/1 | 3.12  | 3.14  |
| 1/1 | 1/1 | 10.69 | 9.91  |
| 0/1 | 1/1 | 3.89  | 3.89  |
| 0/1 | 1/1 | 5.62  | 5.75  |
| 1/1 | 0/1 | 3.57  | 2.35  |
| 1/1 | 1/1 | 5.54  | 4.61  |
| 1/1 | 1/1 | 6.17  | 5.93  |
| 0/1 | 1/1 | 4.8   | 4.72  |

|     |     |      |       |
|-----|-----|------|-------|
| 0/1 | 1/1 | 3.1  | 3.21  |
| 1/1 | 1/1 | 6.56 | 6.68  |
| 1/1 | 1/1 | 6.67 | 6.9   |
| 1/1 | 1/1 | 5.39 | 5.67  |
| 0/1 | 1/1 | 2.64 | 2.93  |
| 0/1 | 1/1 | 2.93 | 3.47  |
| 1/1 | 1/1 | 5.49 | 6.14  |
| 1/1 | 1/1 | 5.89 | 8.76  |
| 0/1 | 1/1 | 5.23 | 8.13  |
| 1/1 | 1/1 | 6.37 | 9.35  |
| 1/1 | 1/1 | 7.6  | 10.61 |
| 1/1 | 1/1 | 4.2  | 7.28  |
| 1/1 | 1/1 | 4.47 | 7.56  |
| 1/1 | 1/1 | 4.55 | 7.87  |
| 1/1 | 1/1 | 3.37 | 7.16  |
| 1/1 | 1/1 | 5.12 | 8.96  |
| 0/1 | 1/1 | 2.27 | 6.3   |
| 1/1 | 0/1 | 4.09 | 2.67  |
| 1/1 | 1/1 | 6.67 | 5.99  |
| 0/1 | 1/1 | 3.97 | 3.6   |
| 1/1 | 1/1 | 6.99 | 6.72  |
| 1/1 | 1/1 | 7.17 | 7.08  |
| 1/1 | 0/1 | 3.41 | 3.35  |
| 0/1 | 1/1 | 3.83 | 3.78  |
| 1/1 | 1/1 | 4.12 | 4.08  |
| 1/1 | 1/1 | 11.4 | 11.4  |
| 1/1 | 1/1 | 6.67 | 6.73  |
| 1/1 | 1/1 | 5.64 | 5.85  |
| 0/1 | 1/1 | 4.24 | 4.45  |
| 0/1 | 1/1 | 4.44 | 4.69  |
| 0/1 | 1/1 | 5.25 | 5.55  |
| 1/1 | 1/1 | 7.13 | 7.45  |
| 1/1 | 1/1 | 6.33 | 6.66  |
| 0/1 | 1/1 | 3.6  | 3.96  |
| 1/1 | 1/1 | 6.46 | 6.94  |
| 1/1 | 1/1 | 5.01 | 5.5   |
| 1/1 | 0/1 | 7.18 | 3.94  |
| 1/1 | 1/1 | 8.31 | 7.01  |
| 0/1 | 1/1 | 4.23 | 5.25  |
| 1/1 | 1/1 | 5.21 | 7.16  |
| 1/1 | 0/1 | 4.39 | 2.41  |
| 1/1 | 0/1 | 3.21 | 2.16  |
| 1/1 | 1/1 | 6.25 | 5.54  |
| 1/1 | 1/1 | 6.48 | 6.04  |
| 1/1 | 1/1 | 8.27 | 7.88  |
| 0/1 | 1/1 | 7.87 | 7.65  |
| 1/1 | 1/1 | 9.51 | 9.31  |
| 0/1 | 1/1 | 5.4  | 5.21  |
| 1/1 | 1/1 | 8.4  | 8.24  |
| 1/1 | 1/1 | 9.86 | 9.76  |
| 1/1 | 1/1 | 6.37 | 6.32  |
| 1/1 | 1/1 | 7.18 | 7.17  |
| 0/1 | 1/1 | 3.22 | 5.79  |
| 0/1 | 1/1 | 3.14 | 5.8   |
| 0/1 | 1/1 | 2.39 | 5.58  |
| 1/1 | 0/1 | 4.69 | 3.56  |
| 1/1 | 1/1 | 7.55 | 6.8   |
| 1/1 | 1/1 | 3.05 | 2.79  |

|     |     |       |       |
|-----|-----|-------|-------|
| 0/1 | 1/1 | 2.54  | 2.31  |
| 0/1 | 1/1 | 2.6   | 2.58  |
| 1/1 | 1/1 | 2.63  | 2.63  |
| 0/1 | 1/1 | 2.19  | 2.2   |
| 1/1 | 1/1 | 5.36  | 5.48  |
| 1/1 | 1/1 | 4.66  | 4.81  |
| 1/1 | 1/1 | 3.51  | 3.95  |
| 0/1 | 1/1 | 2.84  | 3.48  |
| 1/1 | 1/1 | 3.76  | 4.67  |
| 0/1 | 1/1 | 3.36  | 6.72  |
| 1/1 | 0/1 | 7.12  | 2.94  |
| 1/1 | 0/1 | 6.71  | 3.94  |
| 1/1 | 1/1 | 6.74  | 4.35  |
| 0/1 | 1/1 | 3.24  | 3.16  |
| 1/1 | 1/1 | 6.26  | 6.3   |
| 1/1 | 1/1 | 11.76 | 11.82 |
| 1/1 | 0/1 | 3.08  | 2.61  |
| 1/1 | 1/1 | 2.75  | 2.61  |
| 1/1 | 1/1 | 10.51 | 10.46 |
| 0/1 | 1/1 | 2.75  | 2.89  |
| 1/1 | 1/1 | 8.52  | 8.79  |
| 1/1 | 1/1 | 2.66  | 3.16  |
| 0/1 | 1/1 | 2.62  | 3.18  |
| 0/1 | 1/1 | 2.26  | 3     |
| 0/1 | 1/1 | 3.06  | 4.38  |
| 1/1 | 1/1 | 7.76  | 9.17  |
| 1/1 | 1/1 | 5.02  | 8.77  |
| 1/1 | 1/1 | 4.47  | 3.82  |
| 1/1 | 1/1 | 6.4   | 6.2   |
| 1/1 | 1/1 | 4.78  | 4.76  |
| 0/1 | 1/1 | 3.79  | 3.82  |
| 0/1 | 1/1 | 2     | 2.05  |
| 1/1 | 1/1 | 5.83  | 5.89  |
| 0/1 | 1/1 | 5.57  | 5.86  |
| 1/1 | 1/1 | 3.33  | 3.66  |
| 0/1 | 1/1 | 3.52  | 3.91  |
| 1/1 | 1/1 | 6.39  | 6.88  |
| 1/1 | 1/1 | 2.99  | 3.97  |
| 0/1 | 1/1 | 2.82  | 6.66  |
| 1/1 | 1/1 | 5.37  | 3.7   |
| 1/1 | 0/1 | 4.16  | 3.62  |
| 1/1 | 1/1 | 8.12  | 7.77  |
| 1/1 | 1/1 | 5.1   | 5.11  |
| 1/1 | 1/1 | 10.97 | 11.01 |
| 1/1 | 1/1 | 6.47  | 6.59  |
| 1/1 | 1/1 | 5.87  | 6.01  |
| 1/1 | 1/1 | 6.04  | 6.22  |
| 1/1 | 1/1 | 7.57  | 7.84  |
| 1/1 | 1/1 | 9.02  | 9.34  |
| 1/1 | 1/1 | 8.2   | 8.57  |
| 1/1 | 1/1 | 4.5   | 7.5   |
| 1/1 | 1/1 | 3.13  | 7.3   |
| 1/1 | 0/1 | 5.57  | 4.22  |
| 1/1 | 1/1 | 4.09  | 4.04  |
| 1/1 | 1/1 | 10.34 | 10.3  |
| 1/1 | 1/1 | 6.38  | 6.38  |
| 1/1 | 1/1 | 8.71  | 9.24  |
| 1/1 | 1/1 | 7.01  | 9.74  |

|     |     |       |       |
|-----|-----|-------|-------|
| 1/1 | 1/1 | 7.27  | 10.4  |
| 0/1 | 1/1 | 5.25  | 8.5   |
| 1/1 | 1/1 | 7.84  | 7.62  |
| 1/1 | 1/1 | 12.64 | 12.72 |
| 1/1 | 1/1 | 8.35  | 8.62  |
| 1/1 | 1/1 | 8.08  | 8.36  |
| 0/1 | 1/1 | 2     | 2.38  |
| 1/1 | 1/1 | 9.62  | 10    |
| 1/1 | 1/1 | 9.62  | 10    |
| 1/1 | 1/1 | 3.42  | 3.81  |
| 1/1 | 1/1 | 5.1   | 6.23  |
| 0/1 | 1/1 | 4.22  | 5.36  |
| 1/1 | 1/1 | 5.67  | 7.26  |
| 1/1 | 1/1 | 8.25  | 9.9   |
| 1/1 | 1/1 | 3.93  | 5.64  |
| 1/1 | 1/1 | 4.53  | 6.26  |
| 1/1 | 1/1 | 3.75  | 3.7   |
| 1/1 | 1/1 | 5.71  | 5.86  |
| 0/1 | 1/1 | 6.08  | 6.46  |
| 0/1 | 1/1 | 5.49  | 5.92  |
| 1/1 | 1/1 | 5.25  | 5.72  |
| 1/1 | 1/1 | 4.49  | 5.7   |
| 1/1 | 1/1 | 7.05  | 5.09  |
| 1/1 | 1/1 | 4.46  | 4.04  |
| 1/1 | 1/1 | 6.68  | 6.28  |
| 1/1 | 1/1 | 8.25  | 8     |
| 1/1 | 1/1 | 6.32  | 6.26  |
| 1/1 | 1/1 | 6.21  | 6.23  |
| 1/1 | 1/1 | 7.75  | 4.87  |
| 1/1 | 1/1 | 5.99  | 4.63  |
| 1/1 | 1/1 | 7.08  | 6.1   |
| 1/1 | 1/1 | 5.11  | 3.96  |
| 1/1 | 1/1 | 7.34  | 6.83  |
| 1/1 | 1/1 | 6.44  | 5.96  |
| 1/1 | 0/1 | 6.86  | 6.39  |
| 1/1 | 1/1 | 8.09  | 7.95  |
| 1/1 | 1/1 | 5.21  | 5.09  |
| 0/1 | 1/1 | 6.52  | 6.47  |
| 1/1 | 1/1 | 6.7   | 6.67  |
| 0/1 | 1/1 | 6.73  | 6.74  |
| 1/1 | 1/1 | 3.6   | 3.68  |
| 0/1 | 1/1 | 3.8   | 3.91  |
| 0/1 | 1/1 | 3.97  | 4.09  |
| 1/1 | 1/1 | 8.76  | 8.88  |
| 1/1 | 1/1 | 7.94  | 8.08  |
| 1/1 | 1/1 | 6.02  | 6.17  |
| 1/1 | 1/1 | 4.03  | 4.3   |
| 1/1 | 1/1 | 5.5   | 5.84  |
| 1/1 | 1/1 | 7.52  | 8.08  |
| 1/1 | 1/1 | 8.43  | 9.01  |
| 1/1 | 1/1 | 7.24  | 7.83  |
| 1/1 | 1/1 | 6.37  | 7.03  |
| 1/1 | 1/1 | 5.67  | 6.47  |
| 1/1 | 1/1 | 6.43  | 7.27  |
| 1/1 | 1/1 | 4.88  | 7.74  |
| 1/1 | 1/1 | 4.5   | 7.38  |
| 1/1 | 1/1 | 4.94  | 8.05  |
| 1/1 | 1/1 | 4.23  | 7.55  |

|     |     |      |      |
|-----|-----|------|------|
| 1/1 | 0/1 | 6.77 | 5.69 |
| 1/1 | 1/1 | 6.76 | 6.2  |
| 1/1 | 1/1 | 6.21 | 5.83 |
| 1/1 | 1/1 | 5.11 | 4.73 |
| 1/1 | 1/1 | 6.58 | 6.28 |
| 1/1 | 1/1 | 3.63 | 3.52 |
| 1/1 | 1/1 | 5.79 | 5.76 |
| 1/1 | 1/1 | 5.04 | 5.15 |
| 0/1 | 1/1 | 3.09 | 3.27 |
| 1/1 | 1/1 | 3.76 | 4    |
| 1/1 | 1/1 | 4.21 | 4.55 |
| 1/1 | 1/1 | 3.39 | 3.84 |
| 1/1 | 1/1 | 7.91 | 8.41 |
| 1/1 | 1/1 | 4.81 | 5.39 |
| 1/1 | 1/1 | 5.69 | 6.34 |
| 1/1 | 1/1 | 6.48 | 7.27 |
| 1/1 | 1/1 | 4.1  | 7.36 |
| 1/1 | 1/1 | 5.11 | 4.64 |
| 1/1 | 1/1 | 5.69 | 5.63 |
| 1/1 | 1/1 | 8.85 | 9.86 |
| 1/1 | 1/1 | 7.77 | 9.08 |
| 0/1 | 1/1 | 2.96 | 4.28 |
| 1/1 | 1/1 | 4.32 | 7.88 |
| 0/1 | 1/1 | 4.75 | 8.39 |
| 1/1 | 1/1 | 5.38 | 9.65 |
| 1/1 | 1/1 | 8.49 | 7.39 |
| 1/1 | 0/1 | 4.27 | 3.38 |
| 1/1 | 1/1 | 5.32 | 4.79 |
| 1/1 | 1/1 | 7.09 | 6.68 |
| 1/1 | 1/1 | 6.67 | 6.43 |
| 1/1 | 1/1 | 6.5  | 6.3  |
| 1/1 | 1/1 | 6.57 | 6.38 |
| 1/1 | 1/1 | 7.36 | 7.19 |
| 0/1 | 1/1 | 4.68 | 4.67 |
| 1/1 | 1/1 | 6.98 | 7.1  |
| 1/1 | 1/1 | 6.24 | 6.4  |
| 1/1 | 1/1 | 5.49 | 5.83 |
| 1/1 | 1/1 | 6.24 | 6.72 |
| 1/1 | 1/1 | 4.4  | 4.9  |
| 1/1 | 1/1 | 5.45 | 6.1  |
| 1/1 | 1/1 | 5.36 | 6.13 |
| 0/1 | 1/1 | 2.98 | 3.74 |
| 1/1 | 1/1 | 6.26 | 7.05 |
| 1/1 | 1/1 | 6.39 | 9.45 |
| 1/1 | 0/1 | 6.12 | 2.26 |
| 1/1 | 0/1 | 6.43 | 3.21 |
| 1/1 | 1/1 | 7.09 | 4.15 |
| 1/1 | 0/1 | 7.51 | 4.91 |
| 1/1 | 1/1 | 6.45 | 4.11 |
| 1/1 | 1/1 | 6.13 | 7.04 |
| 1/1 | 0/1 | 5.93 | 3.3  |
| 1/1 | 0/1 | 3.56 | 2.39 |
| 1/1 | 1/1 | 10.4 | 9.24 |
| 1/1 | 1/1 | 5.88 | 4.82 |
| 1/1 | 0/1 | 4.87 | 3.96 |
| 1/1 | 1/1 | 6.34 | 5.51 |
| 0/1 | 1/1 | 2.46 | 4.05 |
| 1/1 | 1/1 | 3    | 4.91 |

|     |     |       |       |
|-----|-----|-------|-------|
| 1/1 | 1/1 | 7.98  | 7.21  |
| 1/1 | 1/1 | 6.78  | 6.34  |
| 1/1 | 1/1 | 11.03 | 10.67 |
| 1/1 | 1/1 | 5.89  | 5.81  |
| 1/1 | 1/1 | 9.2   | 9.2   |
| 1/1 | 1/1 | 5.51  | 5.65  |
| 0/1 | 1/1 | 6.24  | 6.42  |
| 1/1 | 1/1 | 6.31  | 6.69  |
| 0/1 | 1/1 | 5.07  | 5.48  |
| 1/1 | 1/1 | 10.46 | 10.89 |
| 0/1 | 1/1 | 5.94  | 6.37  |
| 0/1 | 1/1 | 6.35  | 6.89  |
| 1/1 | 1/1 | 7.87  | 8.48  |
| 1/1 | 1/1 | 6.05  | 6.71  |
| 1/1 | 1/1 | 6.53  | 7.26  |
| 0/1 | 1/1 | 3.64  | 4.39  |
| 0/1 | 1/1 | 2.29  | 3.32  |
| 0/1 | 1/1 | 2.4   | 5.68  |
| 1/1 | 1/1 | 4.94  | 8.23  |
| 0/1 | 1/1 | 2.72  | 6.26  |
| 1/1 | 1/1 | 5.72  | 9.29  |
| 1/1 | 1/1 | 4.42  | 7.99  |
| 1/1 | 1/1 | 6.03  | 9.75  |
| 1/1 | 1/1 | 5.36  | 9.21  |
| 0/1 | 1/1 | 4.99  | 8.98  |
| 0/1 | 1/1 | 3.28  | 7.75  |
| 1/1 | 1/1 | 7.13  | 6.81  |
| 0/1 | 1/1 | 3.48  | 3.52  |
| 0/1 | 1/1 | 2.25  | 2.34  |
| 0/1 | 1/1 | 3.41  | 3.59  |
| 1/1 | 1/1 | 5.16  | 5.35  |
| 0/1 | 1/1 | 3.61  | 3.85  |
| 0/1 | 1/1 | 3.1   | 3.4   |
| 1/1 | 1/1 | 6.64  | 6.97  |
| 1/1 | 1/1 | 5.6   | 6.11  |
| 1/1 | 1/1 | 4.48  | 5.01  |
| 0/1 | 1/1 | 3.45  | 4.02  |
| 1/1 | 1/1 | 4.07  | 5.08  |
| 1/1 | 1/1 | 6.13  | 7.32  |
| 1/1 | 1/1 | 5.03  | 8.71  |
| 1/1 | 1/1 | 10.02 | 7.3   |
| 1/1 | 1/1 | 7.23  | 5.26  |
| 1/1 | 1/1 | 5.3   | 4.53  |
| 0/1 | 1/1 | 3.55  | 4.91  |
| 1/1 | 1/1 | 5.02  | 6.58  |
| 1/1 | 1/1 | 12.17 | 9.55  |
| 0/1 | 1/1 | 3.78  | 5.2   |
| 1/1 | 1/1 | 6.3   | 7.98  |
| 1/1 | 0/1 | 4.52  | 2.76  |
| 1/1 | 1/1 | 10.77 | 10.54 |
| 1/1 | 1/1 | 4.16  | 3.93  |
| 1/1 | 1/1 | 5.99  | 5.83  |
| 1/1 | 1/1 | 9.38  | 9.33  |
| 1/1 | 1/1 | 4.55  | 4.72  |
| 1/1 | 1/1 | 7.11  | 9.99  |
| 1/1 | 0/1 | 5.15  | 4.2   |
| 1/1 | 1/1 | 6.16  | 6.12  |
| 1/1 | 1/1 | 3.45  | 3.59  |



|     |     |       |       |
|-----|-----|-------|-------|
| 1/1 | 1/1 | 12.05 | 12.22 |
| 0/1 | 1/1 | 2.98  | 3.16  |
| 0/1 | 1/1 | 2.94  | 3.39  |
| 0/1 | 1/1 | 2.61  | 3.25  |
| 1/1 | 1/1 | 7.51  | 8.37  |
| 1/1 | 1/1 | 4.65  | 5.62  |
| 1/1 | 1/1 | 8.53  | 7.83  |
| 1/1 | 1/1 | 9.66  | 9.6   |
| 1/1 | 1/1 | 9.35  | 9.3   |
| 1/1 | 1/1 | 9.82  | 9.8   |
| 1/1 | 1/1 | 10.19 | 10.2  |
| 0/1 | 1/1 | 7.63  | 7.76  |
| 1/1 | 1/1 | 7.59  | 7.73  |
| 1/1 | 1/1 | 7.3   | 7.6   |
| 1/1 | 1/1 | 9.86  | 10.19 |
| 1/1 | 1/1 | 4.16  | 4.52  |
| 1/1 | 1/1 | 9.16  | 9.56  |
| 1/1 | 1/1 | 7.64  | 8.08  |
| 1/1 | 1/1 | 5.81  | 6.28  |
| 1/1 | 1/1 | 9.15  | 9.64  |
| 0/1 | 1/1 | 6.81  | 7.31  |
| 1/1 | 1/1 | 5.28  | 5.94  |
| 0/1 | 1/1 | 3.3   | 3.96  |
| 1/1 | 1/1 | 6.48  | 7.34  |
| 1/1 | 1/1 | 7.24  | 8.26  |
| 1/1 | 1/1 | 7.9   | 8.98  |
| 0/1 | 1/1 | 5.92  | 9.25  |
| 1/1 | 1/1 | 5.64  | 9     |
| 0/1 | 1/1 | 5.58  | 9.06  |
| 0/1 | 1/1 | 2.64  | 6.45  |
| 0/1 | 1/1 | 4.47  | 8.51  |
| 1/1 | 1/1 | 3.44  | 7.73  |
| 1/1 | 0/1 | 4.96  | 2.59  |
| 1/1 | 1/1 | 4.7   | 3.22  |
| 1/1 | 1/1 | 5.72  | 4.37  |
| 1/1 | 1/1 | 8.71  | 7.87  |
| 1/1 | 1/1 | 6.3   | 5.77  |
| 1/1 | 0/1 | 4.09  | 3.61  |
| 1/1 | 1/1 | 5.3   | 4.84  |
| 1/1 | 1/1 | 5.65  | 5.22  |
| 1/1 | 1/1 | 8.36  | 7.94  |
| 1/1 | 0/1 | 9.3   | 4     |
| 1/1 | 0/1 | 8.24  | 3.14  |
| 1/1 | 0/1 | 8.28  | 3.89  |
| 1/1 | 0/1 | 8.35  | 3.97  |
| 1/1 | 0/1 | 9.08  | 4.84  |
| 1/1 | 0/1 | 6.37  | 2.21  |
| 1/1 | 0/1 | 8.18  | 4.2   |
| 1/1 | 1/1 | 8.51  | 4.6   |
| 1/1 | 0/1 | 8.72  | 4.89  |
| 1/1 | 0/1 | 7.35  | 3.72  |
| 1/1 | 1/1 | 8.4   | 4.84  |
| 1/1 | 0/1 | 5.81  | 2.3   |
| 1/1 | 0/1 | 6.48  | 3.01  |
| 1/1 | 0/1 | 6.3   | 2.92  |
| 1/1 | 1/1 | 4.63  | 3.31  |
| 1/1 | 0/1 | 4.5   | 3.39  |
| 1/1 | 1/1 | 7.79  | 6.7   |

|     |     |       |       |
|-----|-----|-------|-------|
| 1/1 | 1/1 | 5.9   | 4.82  |
| 1/1 | 0/1 | 4.08  | 3.02  |
| 1/1 | 0/1 | 2.95  | 1.88  |
| 1/1 | 1/1 | 7.1   | 6.13  |
| 1/1 | 1/1 | 6.69  | 5.77  |
| 1/1 | 0/1 | 4.58  | 3.67  |
| 1/1 | 1/1 | 5.68  | 4.77  |
| 1/1 | 0/1 | 4.07  | 3.19  |
| 1/1 | 1/1 | 6.8   | 5.92  |
| 1/1 | 1/1 | 7.87  | 7.01  |
| 1/1 | 0/1 | 8.39  | 7.56  |
| 1/1 | 1/1 | 5.98  | 5.16  |
| 1/1 | 1/1 | 5.81  | 5.02  |
| 1/1 | 0/1 | 5.78  | 5.01  |
| 1/1 | 1/1 | 6.76  | 6     |
| 1/1 | 0/1 | 3.61  | 2.85  |
| 1/1 | 1/1 | 11.7  | 10.99 |
| 1/1 | 1/1 | 6.61  | 5.92  |
| 1/1 | 0/1 | 3.8   | 3.14  |
| 1/1 | 1/1 | 8.11  | 7.6   |
| 1/1 | 1/1 | 5.92  | 5.47  |
| 1/1 | 1/1 | 7.37  | 6.94  |
| 1/1 | 1/1 | 7.46  | 7.04  |
| 1/1 | 1/1 | 6.51  | 6.11  |
| 1/1 | 0/1 | 3.12  | 2.72  |
| 1/1 | 1/1 | 6.63  | 6.25  |
| 1/1 | 1/1 | 5.45  | 5.1   |
| 1/1 | 1/1 | 6.68  | 6.35  |
| 1/1 | 1/1 | 6.42  | 6.14  |
| 1/1 | 1/1 | 7.37  | 7.1   |
| 1/1 | 1/1 | 8.29  | 8.02  |
| 1/1 | 1/1 | 7.01  | 6.76  |
| 1/1 | 1/1 | 6.3   | 6.05  |
| 1/1 | 1/1 | 6.67  | 6.43  |
| 1/1 | 1/1 | 7.53  | 7.3   |
| 1/1 | 1/1 | 6.48  | 6.27  |
| 1/1 | 1/1 | 6.74  | 6.55  |
| 1/1 | 1/1 | 5.91  | 5.73  |
| 1/1 | 1/1 | 4.99  | 4.85  |
| 1/1 | 1/1 | 7.23  | 7.13  |
| 1/1 | 1/1 | 3.22  | 3.2   |
| 0/1 | 1/1 | 6.66  | 6.71  |
| 1/1 | 1/1 | 10.32 | 10.39 |
| 0/1 | 1/1 | 5.51  | 5.63  |
| 1/1 | 1/1 | 7.59  | 7.74  |
| 1/1 | 1/1 | 6.47  | 6.71  |
| 1/1 | 1/1 | 3.38  | 3.7   |
| 1/1 | 1/1 | 5.84  | 6.2   |
| 0/1 | 1/1 | 2.54  | 2.97  |
| 0/1 | 1/1 | 3.52  | 3.97  |
| 1/1 | 1/1 | 4.76  | 5.21  |
| 0/1 | 1/1 | 2.21  | 2.8   |
| 0/1 | 1/1 | 3.14  | 3.8   |
| 1/1 | 1/1 | 7.55  | 2.49  |
| 1/1 | 1/1 | 7.54  | 3.16  |
| 1/1 | 0/1 | 6.94  | 3     |
| 1/1 | 0/1 | 6.21  | 2.62  |
| 1/1 | 0/1 | 6.75  | 3.25  |

|     |     |       |       |
|-----|-----|-------|-------|
| 1/1 | 0/1 | 5.93  | 2.56  |
| 1/1 | 1/1 | 6.63  | 3.34  |
| 1/1 | 1/1 | 7.27  | 4.11  |
| 1/1 | 0/1 | 5.44  | 2.34  |
| 1/1 | 1/1 | 5.39  | 4.38  |
| 1/1 | 1/1 | 8.02  | 7.03  |
| 1/1 | 1/1 | 6.44  | 5.47  |
| 1/1 | 0/1 | 4.32  | 3.35  |
| 1/1 | 1/1 | 4.21  | 3.33  |
| 1/1 | 1/1 | 5.91  | 5.07  |
| 1/1 | 1/1 | 4.43  | 3.65  |
| 1/1 | 0/1 | 2.61  | 1.9   |
| 1/1 | 1/1 | 6.23  | 5.57  |
| 1/1 | 1/1 | 6.65  | 6.12  |
| 1/1 | 1/1 | 9     | 8.56  |
| 1/1 | 0/1 | 2.62  | 2.18  |
| 1/1 | 1/1 | 8.38  | 8.06  |
| 1/1 | 1/1 | 8.26  | 7.97  |
| 1/1 | 1/1 | 5.05  | 4.81  |
| 1/1 | 1/1 | 7.79  | 7.59  |
| 1/1 | 1/1 | 7.52  | 7.34  |
| 1/1 | 0/1 | 3.45  | 3.27  |
| 1/1 | 1/1 | 10.65 | 10.55 |
| 1/1 | 1/1 | 10.15 | 10.07 |
| 1/1 | 1/1 | 6.59  | 6.51  |
| 0/1 | 1/1 | 3.57  | 3.49  |
| 1/1 | 1/1 | 6.98  | 6.99  |
| 1/1 | 1/1 | 8.14  | 8.23  |
| 1/1 | 1/1 | 8.26  | 8.38  |
| 1/1 | 1/1 | 10.27 | 10.41 |
| 1/1 | 1/1 | 7.82  | 8.02  |
| 0/1 | 1/1 | 2.61  | 2.88  |
| 1/1 | 1/1 | 8.27  | 4.69  |
| 1/1 | 1/1 | 7.95  | 4.98  |
| 1/1 | 0/1 | 8.29  | 6.28  |
| 1/1 | 1/1 | 8.41  | 6.68  |
| 1/1 | 1/1 | 6.01  | 6.37  |
| 1/1 | 1/1 | 5.84  | 6.41  |
| 1/1 | 1/1 | 9.88  | 10.7  |
| 1/1 | 1/1 | 7.94  | 8.79  |
| 0/1 | 1/1 | 2.42  | 3.93  |
| 1/1 | 1/1 | 6.24  | 4.88  |
| 1/1 | 1/1 | 5.66  | 4.65  |
| 1/1 | 1/1 | 6.51  | 5.98  |
| 1/1 | 1/1 | 3.83  | 3.93  |
| 1/1 | 1/1 | 4.83  | 4.98  |
| 1/1 | 1/1 | 7.1   | 7.45  |
| 0/1 | 1/1 | 3.89  | 4.38  |
| 0/1 | 1/1 | 2.98  | 5.59  |
| 1/1 | 1/1 | 3.23  | 5.93  |
| 0/1 | 1/1 | 2.88  | 5.65  |
| 0/1 | 1/1 | 3.73  | 6.55  |
| 0/1 | 1/1 | 2.59  | 5.95  |
| 1/1 | 1/1 | 9.76  | 8.86  |
| 1/1 | 1/1 | 8.84  | 8.16  |
| 1/1 | 1/1 | 11.32 | 11.03 |
| 1/1 | 1/1 | 9.95  | 9.8   |
| 1/1 | 1/1 | 9.48  | 9.43  |

|     |     |       |       |
|-----|-----|-------|-------|
| 0/1 | 1/1 | 7.65  | 7.74  |
| 1/1 | 1/1 | 7.5   | 7.69  |
| 1/1 | 1/1 | 6.44  | 6.64  |
| 1/1 | 1/1 | 6.53  | 6.88  |
| 1/1 | 1/1 | 9.92  | 10.33 |
| 1/1 | 1/1 | 8.18  | 8.62  |
| 0/1 | 1/1 | 6.93  | 7.49  |
| 1/1 | 1/1 | 9.12  | 9.78  |
| 1/1 | 1/1 | 7.97  | 8.65  |
| 1/1 | 1/1 | 6.54  | 7.27  |
| 1/1 | 1/1 | 6.55  | 7.31  |
| 1/1 | 1/1 | 8.37  | 9.13  |
| 1/1 | 1/1 | 8.48  | 9.28  |
| 1/1 | 1/1 | 6.9   | 7.7   |
| 1/1 | 1/1 | 6.56  | 7.43  |
| 1/1 | 1/1 | 8.02  | 9.05  |
| 1/1 | 1/1 | 6.92  | 9.95  |
| 1/1 | 1/1 | 10.67 | 7.2   |
| 1/1 | 1/1 | 7.36  | 4.05  |
| 1/1 | 1/1 | 11.07 | 8.1   |
| 1/1 | 1/1 | 9.03  | 6.07  |
| 1/1 | 1/1 | 11.87 | 9.29  |
| 1/1 | 1/1 | 12.07 | 9.76  |
| 1/1 | 1/1 | 8.47  | 6.19  |
| 1/1 | 1/1 | 10.87 | 8.62  |
| 1/1 | 1/1 | 10.01 | 8.11  |
| 1/1 | 1/1 | 9.63  | 7.8   |
| 1/1 | 1/1 | 9.41  | 7.79  |
| 1/1 | 0/1 | 7.68  | 5.08  |
| 1/1 | 1/1 | 8.86  | 8.12  |
| 0/1 | 1/1 | 4.68  | 6.09  |
| 1/1 | 1/1 | 7.57  | 4.43  |
| 1/1 | 1/1 | 4.03  | 4.83  |
| 1/1 | 1/1 | 5.46  | 4.3   |
| 1/1 | 1/1 | 3.84  | 3.29  |
| 1/1 | 1/1 | 3.05  | 2.75  |
| 1/1 | 1/1 | 5.76  | 5.71  |
| 0/1 | 1/1 | 3.81  | 3.77  |
| 0/1 | 1/1 | 3.87  | 6.73  |
| 1/1 | 1/1 | 3.23  | 6.11  |
| 1/1 | 1/1 | 3.98  | 7.06  |
| 0/1 | 1/1 | 2.29  | 6.21  |
| 1/1 | 0/1 | 6.46  | 5.39  |
| 1/1 | 1/1 | 6.89  | 6.5   |
| 1/1 | 1/1 | 5.64  | 5.6   |
| 0/1 | 1/1 | 7.01  | 7.2   |
| 1/1 | 1/1 | 8.89  | 9.11  |
| 0/1 | 1/1 | 4.48  | 4.86  |
| 0/1 | 1/1 | 3.65  | 4.47  |
| 1/1 | 1/1 | 7.69  | 6.66  |
| 1/1 | 1/1 | 4.39  | 3.77  |
| 1/1 | 1/1 | 8.3   | 7.89  |
| 1/1 | 1/1 | 8.94  | 8.92  |
| 0/1 | 1/1 | 6.74  | 6.85  |
| 1/1 | 1/1 | 7.78  | 7.91  |
| 1/1 | 1/1 | 6.67  | 6.93  |
| 1/1 | 1/1 | 5.15  | 5.43  |
| 1/1 | 1/1 | 7.7   | 8.03  |

|     |     |       |       |
|-----|-----|-------|-------|
| 1/1 | 1/1 | 8.58  | 8.95  |
| 1/1 | 1/1 | 8.98  | 9.46  |
| 1/1 | 1/1 | 8.64  | 9.22  |
| 1/1 | 1/1 | 6.53  | 7.18  |
| 1/1 | 1/1 | 7.46  | 8.12  |
| 1/1 | 1/1 | 6.65  | 7.32  |
| 1/1 | 1/1 | 6.51  | 7.25  |
| 0/1 | 1/1 | 4.99  | 7.96  |
| 1/1 | 1/1 | 4.88  | 7.93  |
| 1/1 | 1/1 | 5.02  | 8.63  |
| 1/1 | 1/1 | 4.63  | 8.36  |
| 0/1 | 1/1 | 2.67  | 6.72  |
| 0/1 | 1/1 | 3.38  | 7.43  |
| 0/1 | 1/1 | 3.97  | 8.18  |
| 0/1 | 1/1 | 4.06  | 8.43  |
| 1/1 | 1/1 | 4.66  | 9.1   |
| 1/1 | 1/1 | 4.75  | 9.28  |
| 1/1 | 1/1 | 4.44  | 9.06  |
| 1/1 | 1/1 | 4.03  | 8.67  |
| 0/1 | 1/1 | 3.81  | 8.93  |
| 0/1 | 1/1 | 2.97  | 9.44  |
| 1/1 | 0/1 | 7.18  | 5.06  |
| 1/1 | 0/1 | 8.11  | 7.2   |
| 1/1 | 1/1 | 9.75  | 8.93  |
| 1/1 | 1/1 | 4.46  | 4     |
| 0/1 | 1/1 | 5.15  | 4.94  |
| 1/1 | 1/1 | 4.01  | 5.93  |
| 1/1 | 1/1 | 4.21  | 6.39  |
| 0/1 | 1/1 | 3.26  | 5.55  |
| 1/1 | 1/1 | 6.5   | 5.73  |
| 1/1 | 1/1 | 7.97  | 7.87  |
| 0/1 | 1/1 | 7.43  | 8.03  |
| 0/1 | 1/1 | 3.21  | 3.89  |
| 1/1 | 1/1 | 3.67  | 7.33  |
| 1/1 | 1/1 | 4.36  | 8.04  |
| 1/1 | 1/1 | 4.33  | 8.89  |
| 1/1 | 0/1 | 4.52  | 2.76  |
| 1/1 | 1/1 | 4.16  | 3.93  |
| 1/1 | 1/1 | 10.48 | 10.28 |
| 1/1 | 1/1 | 5.99  | 5.83  |
| 1/1 | 1/1 | 9.38  | 9.33  |
| 1/1 | 1/1 | 6.92  | 7.05  |
| 1/1 | 1/1 | 7.7   | 9.86  |
| 1/1 | 1/1 | 7.11  | 9.99  |
| 1/1 | 1/1 | 7.72  | 4.9   |
| 1/1 | 1/1 | 6.12  | 3.5   |
| 1/1 | 1/1 | 7.07  | 4.69  |
| 1/1 | 1/1 | 7.75  | 5.55  |
| 1/1 | 1/1 | 5.82  | 3.7   |
| 1/1 | 1/1 | 7.31  | 5.19  |
| 1/1 | 1/1 | 7.59  | 5.6   |
| 1/1 | 1/1 | 8.34  | 6.35  |
| 1/1 | 1/1 | 4.82  | 3.11  |
| 1/1 | 0/1 | 4.61  | 2.97  |
| 1/1 | 1/1 | 7.59  | 6.11  |
| 1/1 | 1/1 | 5.09  | 3.75  |
| 1/1 | 1/1 | 5.42  | 6.61  |
| 1/1 | 0/1 | 7.15  | 2.67  |

|     |     |       |       |
|-----|-----|-------|-------|
| 1/1 | 1/1 | 6.78  | 2.87  |
| 1/1 | 1/1 | 8.28  | 5.53  |
| 1/1 | 1/1 | 7.18  | 4.51  |
| 1/1 | 1/1 | 6.61  | 3.96  |
| 1/1 | 1/1 | 8.1   | 5.46  |
| 1/1 | 1/1 | 8.08  | 5.45  |
| 1/1 | 1/1 | 5.68  | 5.2   |
| 1/1 | 1/1 | 6.5   | 6.04  |
| 1/1 | 1/1 | 6.78  | 6.38  |
| 1/1 | 1/1 | 3.15  | 2.99  |
| 1/1 | 1/1 | 5.02  | 4.88  |
| 1/1 | 1/1 | 3.79  | 3.69  |
| 1/1 | 1/1 | 7.11  | 7.04  |
| 1/1 | 1/1 | 2.71  | 2.65  |
| 1/1 | 1/1 | 6.47  | 6.51  |
| 1/1 | 1/1 | 5.38  | 5.59  |
| 1/1 | 1/1 | 4.64  | 4.99  |
| 1/1 | 1/1 | 5.66  | 5.55  |
| 0/1 | 1/1 | 6.56  | 6.57  |
| 1/1 | 1/1 | 4.07  | 4.25  |
| 1/1 | 1/1 | 7.31  | 7.96  |
| 1/1 | 1/1 | 6.43  | 7.4   |
| 0/1 | 1/1 | 2.15  | 3.16  |
| 0/1 | 1/1 | 2.58  | 3.76  |
| 0/1 | 1/1 | 4.78  | 6.13  |
| 0/1 | 1/1 | 2.32  | 3.84  |
| 1/1 | 1/1 | 4.44  | 8.22  |
| 0/1 | 1/1 | 4.33  | 8.19  |
| 0/1 | 1/1 | 3.72  | 7.66  |
| 1/1 | 0/1 | 5.29  | 2.13  |
| 1/1 | 1/1 | 4.77  | 5.54  |
| 1/1 | 0/1 | 3.98  | 2.26  |
| 1/1 | 1/1 | 8.45  | 8.01  |
| 1/1 | 1/1 | 11.59 | 11.33 |
| 0/1 | 1/1 | 7.59  | 7.42  |
| 1/1 | 1/1 | 6.46  | 6.35  |
| 1/1 | 1/1 | 3.72  | 3.64  |
| 1/1 | 0/1 | 7.16  | 3.92  |
| 1/1 | 1/1 | 8.23  | 6.68  |
| 0/1 | 1/1 | 4.33  | 5.18  |
| 0/1 | 1/1 | 4.01  | 4.91  |
| 0/1 | 1/1 | 3.48  | 4.56  |
| 1/1 | 0/1 | 5.2   | 3.51  |
| 1/1 | 1/1 | 3.02  | 2.11  |
| 1/1 | 1/1 | 9.05  | 8.38  |
| 1/1 | 1/1 | 10.66 | 10.18 |
| 1/1 | 1/1 | 10.47 | 10    |
| 1/1 | 1/1 | 10.66 | 10.22 |
| 1/1 | 1/1 | 9.07  | 8.67  |
| 0/1 | 1/1 | 4.33  | 3.94  |
| 1/1 | 1/1 | 6.31  | 6.04  |
| 0/1 | 1/1 | 7.61  | 7.36  |
| 1/1 | 1/1 | 12.93 | 12.73 |
| 0/1 | 1/1 | 4.62  | 4.44  |
| 1/1 | 1/1 | 2.77  | 2.62  |
| 1/1 | 1/1 | 4.7   | 4.57  |
| 1/1 | 1/1 | 2.42  | 2.35  |
| 1/1 | 1/1 | 4.86  | 4.84  |

|     |     |       |       |
|-----|-----|-------|-------|
| 1/1 | 1/1 | 8.25  | 8.25  |
| 1/1 | 1/1 | 6.08  | 6.12  |
| 0/1 | 1/1 | 6.78  | 6.83  |
| 1/1 | 1/1 | 6.67  | 6.8   |
| 1/1 | 1/1 | 4.22  | 4.37  |
| 1/1 | 1/1 | 5.05  | 5.2   |
| 1/1 | 1/1 | 9.44  | 9.6   |
| 1/1 | 1/1 | 5.24  | 5.43  |
| 1/1 | 1/1 | 8.5   | 4.08  |
| 1/1 | 1/1 | 7.11  | 3.96  |
| 1/1 | 1/1 | 6.96  | 4.25  |
| 1/1 | 0/1 | 4.36  | 1.83  |
| 1/1 | 1/1 | 5.44  | 5.25  |
| 1/1 | 1/1 | 5.04  | 4.95  |
| 1/1 | 1/1 | 9.11  | 9.03  |
| 0/1 | 1/1 | 6.83  | 6.76  |
| 1/1 | 1/1 | 5.32  | 5.26  |
| 0/1 | 1/1 | 4     | 3.99  |
| 1/1 | 1/1 | 3.39  | 3.43  |
| 0/1 | 1/1 | 3.06  | 3.12  |
| 0/1 | 1/1 | 5.86  | 6     |
| 0/1 | 1/1 | 4.49  | 4.76  |
| 0/1 | 1/1 | 4.1   | 4.95  |
| 0/1 | 1/1 | 3.99  | 5.31  |
| 1/1 | 0/1 | 7.46  | 3.86  |
| 1/1 | 0/1 | 6.69  | 3.35  |
| 1/1 | 1/1 | 6.59  | 3.65  |
| 1/1 | 1/1 | 6.97  | 4.38  |
| 1/1 | 1/1 | 5.55  | 3.64  |
| 1/1 | 0/1 | 6.07  | 4.3   |
| 0/1 | 1/1 | 2.11  | 2.42  |
| 1/1 | 0/1 | 4.02  | 2.52  |
| 1/1 | 1/1 | 5     | 4.46  |
| 1/1 | 1/1 | 7.4   | 7.24  |
| 0/1 | 1/1 | 3.65  | 3.59  |
| 1/1 | 1/1 | 3.48  | 3.45  |
| 0/1 | 1/1 | 3.49  | 3.66  |
| 1/1 | 1/1 | 10.91 | 11.14 |
| 1/1 | 1/1 | 4.77  | 5.03  |
| 1/1 | 1/1 | 4.21  | 4.51  |
| 1/1 | 0/1 | 4.12  | 1.81  |
| 1/1 | 1/1 | 3.81  | 5.75  |
| 0/1 | 1/1 | 2.43  | 5.11  |
| 1/1 | 0/1 | 4.22  | 2     |
| 1/1 | 1/1 | 5.37  | 4.95  |
| 0/1 | 1/1 | 5.58  | 5.08  |
| 1/1 | 1/1 | 7.1   | 6.66  |
| 1/1 | 1/1 | 8.41  | 8.12  |
| 0/1 | 1/1 | 5.64  | 5.37  |
| 0/1 | 1/1 | 2.44  | 6.19  |
| 1/1 | 1/1 | 4.94  | 4.56  |
| 1/1 | 1/1 | 5.47  | 5.4   |
| 0/1 | 1/1 | 1.86  | 2.24  |
| 0/1 | 1/1 | 4.63  | 5.03  |
| 1/1 | 1/1 | 4.99  | 5.9   |
| 1/1 | 0/1 | 6.8   | 2.39  |
| 1/1 | 1/1 | 7.16  | 3.3   |
| 1/1 | 1/1 | 7.81  | 4.17  |

|     |     |       |       |
|-----|-----|-------|-------|
| 1/1 | 1/1 | 8.54  | 5.25  |
| 1/1 | 1/1 | 6.71  | 3.64  |
| 1/1 | 1/1 | 6.03  | 3.05  |
| 1/1 | 0/1 | 5.7   | 2.73  |
| 1/1 | 1/1 | 6.93  | 4.03  |
| 1/1 | 0/1 | 5.46  | 2.68  |
| 1/1 | 1/1 | 6.33  | 3.57  |
| 1/1 | 0/1 | 6.34  | 3.78  |
| 1/1 | 1/1 | 7.83  | 7.51  |
| 1/1 | 1/1 | 6.97  | 6.67  |
| 1/1 | 1/1 | 6.73  | 6.47  |
| 1/1 | 1/1 | 7.42  | 7.21  |
| 1/1 | 1/1 | 4.48  | 4.26  |
| 1/1 | 1/1 | 5.59  | 5.4   |
| 0/1 | 1/1 | 4.25  | 4.27  |
| 1/1 | 1/1 | 9.06  | 9.13  |
| 1/1 | 1/1 | 4.25  | 4.36  |
| 0/1 | 1/1 | 7.78  | 7.95  |
| 1/1 | 1/1 | 7.75  | 8     |
| 1/1 | 1/1 | 6.8   | 7.13  |
| 1/1 | 1/1 | 5.59  | 6.14  |
| 1/1 | 1/1 | 7.79  | 5.15  |
| 1/1 | 0/1 | 3.84  | 2.01  |
| 0/1 | 1/1 | 3.62  | 4.84  |
| 1/1 | 1/1 | 6.91  | 4.02  |
| 1/1 | 1/1 | 4.9   | 3.87  |
| 1/1 | 1/1 | 9.38  | 8.74  |
| 1/1 | 1/1 | 8.91  | 8.28  |
| 1/1 | 1/1 | 8.44  | 7.83  |
| 1/1 | 1/1 | 9.05  | 8.55  |
| 1/1 | 1/1 | 8.97  | 8.67  |
| 1/1 | 1/1 | 10.01 | 9.79  |
| 1/1 | 1/1 | 6.32  | 6.14  |
| 1/1 | 1/1 | 7.35  | 7.23  |
| 1/1 | 1/1 | 8.96  | 8.86  |
| 1/1 | 1/1 | 8.49  | 8.45  |
| 1/1 | 1/1 | 13.77 | 13.73 |
| 1/1 | 1/1 | 7.07  | 7.12  |
| 0/1 | 1/1 | 6.85  | 6.91  |
| 0/1 | 1/1 | 7.07  | 7.15  |
| 0/1 | 1/1 | 4.1   | 4.2   |
| 0/1 | 1/1 | 3.26  | 3.37  |
| 1/1 | 1/1 | 8.69  | 9     |
| 0/1 | 1/1 | 2.58  | 2.9   |
| 1/1 | 1/1 | 7.61  | 7.96  |
| 1/1 | 1/1 | 9.18  | 9.63  |
| 1/1 | 1/1 | 4.85  | 5.33  |
| 1/1 | 1/1 | 7.05  | 7.66  |
| 0/1 | 1/1 | 5.23  | 5.89  |
| 1/1 | 1/1 | 6.48  | 7.22  |
| 1/1 | 1/1 | 8.13  | 8.9   |
| 0/1 | 1/1 | 5.76  | 6.54  |
| 0/1 | 1/1 | 4.78  | 5.74  |
| 1/1 | 1/1 | 6.07  | 7.12  |
| 1/1 | 1/1 | 5.5   | 6.71  |
| 1/1 | 1/1 | 7.35  | 8.56  |
| 0/1 | 1/1 | 3.12  | 6.49  |
| 1/1 | 1/1 | 5.78  | 5.45  |



|     |     |       |       |
|-----|-----|-------|-------|
| 1/1 | 1/1 | 9.53  | 9.32  |
| 1/1 | 1/1 | 9.63  | 9.5   |
| 1/1 | 1/1 | 7.11  | 7.13  |
| 1/1 | 1/1 | 2.4   | 2.49  |
| 0/1 | 1/1 | 1.86  | 2.16  |
| 0/1 | 1/1 | 2.48  | 2.97  |
| 1/1 | 1/1 | 4.48  | 5.05  |
| 0/1 | 1/1 | 3.55  | 4.77  |
| 1/1 | 1/1 | 5.27  | 8.94  |
| 1/1 | 0/1 | 5.83  | 2.66  |
| 1/1 | 0/1 | 4.57  | 2.86  |
| 1/1 | 1/1 | 4.17  | 2.51  |
| 1/1 | 0/1 | 4.77  | 3.19  |
| 1/1 | 1/1 | 6.05  | 4.54  |
| 1/1 | 1/1 | 5.67  | 4.18  |
| 0/1 | 1/1 | 3.16  | 4.25  |
| 1/1 | 0/1 | 5.53  | 4.25  |
| 1/1 | 1/1 | 4.98  | 4.64  |
| 1/1 | 1/1 | 3.25  | 3.09  |
| 0/1 | 1/1 | 4.75  | 4.74  |
| 1/1 | 1/1 | 2.71  | 2.72  |
| 1/1 | 1/1 | 3.1   | 3.2   |
| 1/1 | 1/1 | 3.44  | 3.62  |
| 0/1 | 1/1 | 2.47  | 2.74  |
| 1/1 | 1/1 | 2.77  | 3.23  |
| 0/1 | 1/1 | 6.89  | 7.4   |
| 0/1 | 1/1 | 1.91  | 2.46  |
| 1/1 | 1/1 | 3.57  | 6.94  |
| 1/1 | 1/1 | 7.45  | 4.9   |
| 1/1 | 0/1 | 4.85  | 3.02  |
| 1/1 | 0/1 | 3.62  | 2.31  |
| 1/1 | 0/1 | 3.12  | 2.09  |
| 1/1 | 0/1 | 3.02  | 2.03  |
| 1/1 | 1/1 | 6.38  | 5.64  |
| 1/1 | 1/1 | 4.21  | 3.49  |
| 1/1 | 1/1 | 4.68  | 5.97  |
| 0/1 | 1/1 | 3     | 4.49  |
| 1/1 | 1/1 | 3.92  | 5.69  |
| 1/1 | 1/1 | 8.72  | 7.48  |
| 1/1 | 0/1 | 3.67  | 2.45  |
| 1/1 | 1/1 | 7.85  | 6.75  |
| 0/1 | 1/1 | 5.29  | 4.45  |
| 1/1 | 1/1 | 3.33  | 2.62  |
| 1/1 | 1/1 | 8.96  | 8.37  |
| 1/1 | 1/1 | 11.39 | 11.03 |
| 1/1 | 1/1 | 3.18  | 2.94  |
| 1/1 | 1/1 | 5.95  | 5.74  |
| 1/1 | 1/1 | 3.28  | 3.08  |
| 0/1 | 1/1 | 2.87  | 2.77  |
| 1/1 | 1/1 | 3.61  | 3.65  |
| 1/1 | 1/1 | 5.83  | 5.87  |
| 0/1 | 1/1 | 6.3   | 6.39  |
| 1/1 | 1/1 | 4.54  | 4.69  |
| 1/1 | 1/1 | 4.55  | 4.71  |
| 0/1 | 1/1 | 3.78  | 3.95  |
| 1/1 | 1/1 | 6.24  | 6.43  |
| 0/1 | 1/1 | 2.64  | 2.85  |
| 1/1 | 1/1 | 5.57  | 5.82  |

|     |     |       |       |
|-----|-----|-------|-------|
| 0/1 | 1/1 | 6.43  | 6.68  |
| 1/1 | 1/1 | 6.84  | 7.15  |
| 1/1 | 1/1 | 5.73  | 6.07  |
| 1/1 | 1/1 | 7.42  | 7.85  |
| 1/1 | 1/1 | 4.36  | 4.8   |
| 1/1 | 1/1 | 6.99  | 7.44  |
| 1/1 | 1/1 | 6     | 6.46  |
| 0/1 | 1/1 | 2.32  | 2.8   |
| 1/1 | 1/1 | 4.11  | 4.61  |
| 1/1 | 1/1 | 5.48  | 5.99  |
| 0/1 | 1/1 | 2.66  | 3.19  |
| 1/1 | 1/1 | 5.9   | 6.43  |
| 1/1 | 1/1 | 5.44  | 8.03  |
| 1/1 | 1/1 | 5.44  | 8.15  |
| 0/1 | 1/1 | 3.37  | 6.12  |
| 1/1 | 1/1 | 3.89  | 6.65  |
| 1/1 | 1/1 | 4.98  | 7.75  |
| 1/1 | 1/1 | 4.51  | 7.28  |
| 1/1 | 1/1 | 4.82  | 7.6   |
| 0/1 | 1/1 | 2.72  | 5.54  |
| 0/1 | 1/1 | 3.8   | 6.86  |
| 1/1 | 1/1 | 3.98  | 7.06  |
| 1/1 | 1/1 | 3.97  | 7.09  |
| 1/1 | 1/1 | 3.43  | 6.56  |
| 1/1 | 1/1 | 3.89  | 7.18  |
| 1/1 | 1/1 | 3.85  | 7.29  |
| 0/1 | 1/1 | 4.2   | 7.67  |
| 0/1 | 1/1 | 2.57  | 6.23  |
| 1/1 | 1/1 | 7.47  | 5.56  |
| 1/1 | 1/1 | 7.54  | 6.81  |
| 1/1 | 0/1 | 2.73  | 2.17  |
| 1/1 | 1/1 | 8.45  | 8.14  |
| 1/1 | 1/1 | 3.05  | 2.87  |
| 0/1 | 1/1 | 2.33  | 2.24  |
| 0/1 | 1/1 | 2.69  | 5.08  |
| 1/1 | 1/1 | 3.58  | 2.76  |
| 1/1 | 1/1 | 7.85  | 7.09  |
| 1/1 | 1/1 | 3.6   | 2.9   |
| 1/1 | 1/1 | 5.91  | 5.44  |
| 1/1 | 1/1 | 5.78  | 5.62  |
| 1/1 | 1/1 | 3.22  | 3.3   |
| 1/1 | 1/1 | 10.4  | 10.51 |
| 1/1 | 1/1 | 5.55  | 5.66  |
| 1/1 | 1/1 | 5.86  | 6.26  |
| 0/1 | 1/1 | 3.94  | 4.43  |
| 1/1 | 1/1 | 4.74  | 5.25  |
| 1/1 | 1/1 | 8.08  | 8.6   |
| 0/1 | 1/1 | 3.77  | 4.35  |
| 0/1 | 1/1 | 2.17  | 3.05  |
| 0/1 | 1/1 | 2.29  | 5.87  |
| 1/1 | 0/1 | 6.29  | 3.46  |
| 1/1 | 0/1 | 5.89  | 3.4   |
| 1/1 | 1/1 | 7.6   | 5.27  |
| 1/1 | 1/1 | 8.28  | 6.01  |
| 1/1 | 1/1 | 10.28 | 8.04  |
| 1/1 | 1/1 | 8.15  | 5.96  |
| 1/1 | 1/1 | 6.96  | 4.86  |
| 1/1 | 1/1 | 7.31  | 5.28  |

|     |     |      |       |
|-----|-----|------|-------|
| 1/1 | 1/1 | 8.25 | 6.23  |
| 1/1 | 0/1 | 5.24 | 3.26  |
| 1/1 | 1/1 | 8.02 | 6.08  |
| 1/1 | 1/1 | 7.33 | 5.5   |
| 1/1 | 0/1 | 7.76 | 5.97  |
| 1/1 | 1/1 | 7.35 | 5.6   |
| 1/1 | 1/1 | 8.47 | 6.81  |
| 1/1 | 1/1 | 7.13 | 5.52  |
| 1/1 | 1/1 | 8.51 | 6.91  |
| 1/1 | 1/1 | 9.07 | 7.54  |
| 1/1 | 1/1 | 8.44 | 6.93  |
| 1/1 | 1/1 | 7.78 | 6.27  |
| 1/1 | 1/1 | 7.87 | 6.42  |
| 1/1 | 1/1 | 7.63 | 6.2   |
| 1/1 | 1/1 | 8.3  | 6.89  |
| 1/1 | 1/1 | 7.85 | 6.45  |
| 1/1 | 1/1 | 8.77 | 7.4   |
| 1/1 | 1/1 | 8.29 | 6.92  |
| 1/1 | 1/1 | 8.28 | 6.93  |
| 1/1 | 1/1 | 7.22 | 5.86  |
| 1/1 | 1/1 | 8.78 | 7.44  |
| 1/1 | 1/1 | 7.12 | 5.79  |
| 1/1 | 1/1 | 6.73 | 5.43  |
| 1/1 | 1/1 | 7.22 | 5.93  |
| 1/1 | 1/1 | 8.98 | 7.7   |
| 1/1 | 1/1 | 8.16 | 6.91  |
| 1/1 | 1/1 | 7.98 | 6.77  |
| 1/1 | 1/1 | 6.99 | 5.79  |
| 1/1 | 1/1 | 7.78 | 6.59  |
| 1/1 | 1/1 | 8.4  | 7.22  |
| 1/1 | 1/1 | 6.66 | 5.52  |
| 1/1 | 1/1 | 9.71 | 8.58  |
| 1/1 | 1/1 | 6.68 | 5.58  |
| 1/1 | 1/1 | 8.02 | 6.97  |
| 1/1 | 1/1 | 6.96 | 8.07  |
| 1/1 | 1/1 | 5.86 | 6.08  |
| 1/1 | 1/1 | 5.65 | 6.25  |
| 0/1 | 1/1 | 3.83 | 4.48  |
| 1/1 | 1/1 | 5.91 | 6.6   |
| 0/1 | 1/1 | 3.26 | 4.79  |
| 0/1 | 1/1 | 2.24 | 3.76  |
| 0/1 | 1/1 | 2.98 | 4.74  |
| 1/1 | 1/1 | 6.63 | 3.93  |
| 1/1 | 1/1 | 6.14 | 5.05  |
| 0/1 | 1/1 | 2.97 | 4.38  |
| 1/1 | 1/1 | 8.64 | 10.07 |
| 1/1 | 1/1 | 6.41 | 8.72  |
| 1/1 | 1/1 | 8.07 | 7.69  |
| 1/1 | 1/1 | 8.65 | 8.49  |
| 1/1 | 1/1 | 7.47 | 7.53  |
| 1/1 | 1/1 | 8.1  | 8.74  |
| 1/1 | 1/1 | 7.77 | 9.15  |
| 1/1 | 1/1 | 4.82 | 8.26  |
| 1/1 | 1/1 | 4.57 | 8.04  |
| 1/1 | 1/1 | 4.03 | 7.61  |
| 1/1 | 0/1 | 3.69 | 2.18  |
| 1/1 | 1/1 | 6.14 | 5.77  |
| 0/1 | 1/1 | 3.47 | 3.54  |

|     |     |      |      |
|-----|-----|------|------|
| 0/1 | 1/1 | 3.24 | 3.36 |
| 1/1 | 1/1 | 8.83 | 6.61 |
| 1/1 | 1/1 | 8.65 | 6.48 |
| 1/1 | 0/1 | 4.66 | 3.31 |
| 1/1 | 1/1 | 9.5  | 8.33 |
| 0/1 | 1/1 | 4.43 | 3.74 |
| 1/1 | 1/1 | 5.34 | 4.69 |
| 1/1 | 1/1 | 5.73 | 5.21 |
| 1/1 | 1/1 | 4.99 | 6.6  |
| 0/1 | 1/1 | 2.61 | 4.67 |
| 1/1 | 1/1 | 6.49 | 3.12 |
| 1/1 | 0/1 | 4.71 | 2.21 |
| 1/1 | 1/1 | 8.53 | 6.13 |
| 1/1 | 0/1 | 4.91 | 2.6  |
| 1/1 | 0/1 | 5.08 | 2.77 |
| 1/1 | 1/1 | 4.99 | 2.76 |
| 1/1 | 1/1 | 7.2  | 5.13 |
| 1/1 | 0/1 | 4.14 | 2.37 |
| 1/1 | 0/1 | 5.01 | 3.26 |
| 1/1 | 1/1 | 4.82 | 3.22 |
| 0/1 | 1/1 | 3.76 | 4.75 |
| 1/1 | 0/1 | 6.51 | 3.97 |
| 1/1 | 1/1 | 6.07 | 5.08 |
| 1/1 | 1/1 | 5.49 | 4.7  |
| 1/1 | 1/1 | 8.83 | 8.08 |
| 1/1 | 1/1 | 8.35 | 4.88 |
| 1/1 | 1/1 | 4.18 | 4.52 |
| 1/1 | 1/1 | 4.56 | 5.05 |
| 1/1 | 0/1 | 7.45 | 3.99 |
| 1/1 | 1/1 | 5.93 | 4.19 |
| 1/1 | 1/1 | 4.32 | 5.18 |
| 1/1 | 1/1 | 7    | 4.65 |
| 1/1 | 1/1 | 4.78 | 3.41 |
| 0/1 | 1/1 | 5.54 | 4.86 |
| 1/1 | 0/1 | 2.66 | 2    |
| 1/1 | 1/1 | 8.61 | 8.01 |
| 1/1 | 1/1 | 6.22 | 7.67 |
| 1/1 | 1/1 | 4.28 | 6.12 |
| 0/1 | 1/1 | 1.77 | 3.86 |
| 1/1 | 1/1 | 8.64 | 6.62 |
| 1/1 | 1/1 | 8.24 | 7.56 |
| 1/1 | 1/1 | 4.82 | 4.24 |
| 0/1 | 1/1 | 4.87 | 4.44 |
| 1/1 | 1/1 | 4.22 | 3.82 |
| 1/1 | 0/1 | 4.94 | 2.78 |
| 1/1 | 1/1 | 5.01 | 4.16 |
| 1/1 | 1/1 | 5.93 | 5.22 |
| 1/1 | 1/1 | 3.6  | 3.09 |
| 1/1 | 1/1 | 8.84 | 8.37 |
| 1/1 | 0/1 | 5.16 | 4.27 |
| 1/1 | 1/1 | 9.56 | 8.97 |
| 0/1 | 1/1 | 5.96 | 5.82 |
| 1/1 | 1/1 | 8.6  | 8.54 |
| 0/1 | 1/1 | 3.73 | 3.73 |
| 0/1 | 1/1 | 5.12 | 5.29 |
| 1/1 | 1/1 | 8.92 | 9.18 |
| 0/1 | 1/1 | 4.33 | 4.67 |
| 0/1 | 1/1 | 7.08 | 7.52 |

|     |     |       |       |
|-----|-----|-------|-------|
| 0/1 | 1/1 | 5.47  | 6.12  |
| 1/1 | 1/1 | 8.88  | 9.71  |
| 1/1 | 1/1 | 6.97  | 6.45  |
| 1/1 | 1/1 | 4.14  | 3.7   |
| 1/1 | 1/1 | 6.67  | 6.24  |
| 1/1 | 1/1 | 7.62  | 7.34  |
| 1/1 | 1/1 | 6.5   | 6.3   |
| 0/1 | 1/1 | 3.99  | 3.85  |
| 1/1 | 1/1 | 6.89  | 6.78  |
| 0/1 | 1/1 | 3.35  | 3.32  |
| 1/1 | 1/1 | 6.18  | 6.2   |
| 1/1 | 1/1 | 7     | 7.09  |
| 1/1 | 1/1 | 6.25  | 6.35  |
| 1/1 | 1/1 | 12.72 | 12.85 |
| 1/1 | 1/1 | 5.75  | 5.88  |
| 1/1 | 1/1 | 5.79  | 5.93  |
| 1/1 | 1/1 | 6.24  | 6.4   |
| 1/1 | 1/1 | 9.23  | 9.42  |
| 1/1 | 1/1 | 5.07  | 5.86  |
| 1/1 | 1/1 | 8.93  | 9.86  |
| 1/1 | 1/1 | 8.93  | 9.86  |
| 1/1 | 1/1 | 8.86  | 9.9   |
| 1/1 | 1/1 | 6.24  | 7.34  |
| 1/1 | 1/1 | 5.36  | 8.83  |
| 1/1 | 1/1 | 5.99  | 9.45  |
| 1/1 | 1/1 | 11.21 | 11.59 |
| 1/1 | 1/1 | 7.43  | 8.87  |
| 1/1 | 1/1 | 4.61  | 6.67  |
| 1/1 | 0/1 | 8.41  | 6.32  |
| 1/1 | 1/1 | 3.5   | 2.79  |
| 1/1 | 1/1 | 8.51  | 7.87  |
| 1/1 | 1/1 | 7.31  | 6.87  |
| 0/1 | 1/1 | 2.3   | 4.68  |
| 1/1 | 1/1 | 8.67  | 6.82  |
| 1/1 | 1/1 | 3.97  | 3.15  |
| 1/1 | 1/1 | 5.46  | 4.94  |
| 1/1 | 1/1 | 5.43  | 5.05  |
| 1/1 | 1/1 | 3.93  | 3.6   |
| 1/1 | 1/1 | 7.18  | 6.9   |
| 1/1 | 1/1 | 6.81  | 6.66  |
| 0/1 | 1/1 | 4.96  | 4.82  |
| 1/1 | 1/1 | 10.05 | 9.92  |
| 1/1 | 0/1 | 3.95  | 2.85  |
| 1/1 | 0/1 | 3.76  | 2.68  |
| 1/1 | 0/1 | 3.26  | 2.27  |
| 1/1 | 1/1 | 9.74  | 9.37  |
| 1/1 | 1/1 | 5.25  | 4.91  |
| 1/1 | 1/1 | 2.15  | 2.1   |
| 1/1 | 1/1 | 8.64  | 8.6   |
| 0/1 | 1/1 | 4.18  | 4.18  |
| 1/1 | 1/1 | 2.5   | 2.58  |
| 1/1 | 1/1 | 7.93  | 8.14  |
| 0/1 | 1/1 | 5.72  | 5.95  |
| 0/1 | 1/1 | 3.21  | 3.45  |
| 1/1 | 1/1 | 7.2   | 7.46  |
| 0/1 | 1/1 | 3.04  | 3.3   |
| 0/1 | 1/1 | 3.23  | 3.58  |
| 0/1 | 1/1 | 2.92  | 3.3   |

|     |     |       |       |
|-----|-----|-------|-------|
| 0/1 | 1/1 | 2.65  | 3.07  |
| 1/1 | 1/1 | 6.05  | 6.47  |
| 1/1 | 1/1 | 6.55  | 6.99  |
| 1/1 | 0/1 | 6.29  | 4.35  |
| 1/1 | 1/1 | 6.75  | 6.14  |
| 0/1 | 1/1 | 5.76  | 7.65  |
| 1/1 | 1/1 | 8.61  | 4.69  |
| 1/1 | 0/1 | 5.29  | 2.47  |
| 1/1 | 1/1 | 8.92  | 6.31  |
| 1/1 | 1/1 | 10.24 | 7.89  |
| 1/1 | 1/1 | 4.74  | 4.6   |
| 0/1 | 1/1 | 3.93  | 4.12  |
| 1/1 | 1/1 | 5.53  | 5.8   |
| 1/1 | 1/1 | 6.94  | 4.43  |
| 1/1 | 1/1 | 6.06  | 4.61  |
| 1/1 | 0/1 | 4.07  | 2.71  |
| 1/1 | 1/1 | 4.15  | 3.12  |
| 1/1 | 1/1 | 5.99  | 5.07  |
| 1/1 | 1/1 | 3.96  | 5.38  |
| 0/1 | 1/1 | 2.2   | 3.65  |
| 1/1 | 0/1 | 5.5   | 2.07  |
| 1/1 | 0/1 | 4.47  | 2.1   |
| 1/1 | 1/1 | 4.44  | 4.83  |
| 0/1 | 1/1 | 3.21  | 3.4   |
| 0/1 | 1/1 | 2.17  | 2.92  |
| 1/1 | 1/1 | 6.88  | 8     |
| 0/1 | 1/1 | 2.52  | 4.26  |
| 1/1 | 1/1 | 3.3   | 5.06  |
| 0/1 | 1/1 | 3.06  | 4.9   |
| 1/1 | 1/1 | 5.43  | 9.73  |
| 0/1 | 1/1 | 3.34  | 7.7   |
| 1/1 | 1/1 | 4.27  | 9.01  |
| 0/1 | 1/1 | 3.7   | 8.98  |
| 0/1 | 1/1 | 3.01  | 8.42  |
| 1/1 | 1/1 | 8.8   | 7.04  |
| 1/1 | 1/1 | 6.93  | 6.21  |
| 1/1 | 1/1 | 7.95  | 7.33  |
| 1/1 | 0/1 | 3.05  | 2.5   |
| 1/1 | 0/1 | 2.68  | 2.14  |
| 1/1 | 1/1 | 5.64  | 5.12  |
| 1/1 | 1/1 | 3.61  | 3.31  |
| 0/1 | 1/1 | 4.79  | 4.51  |
| 1/1 | 1/1 | 3.58  | 3.39  |
| 1/1 | 1/1 | 8.95  | 8.82  |
| 1/1 | 1/1 | 6.09  | 6     |
| 1/1 | 1/1 | 8.97  | 8.9   |
| 0/1 | 1/1 | 4.09  | 4.05  |
| 1/1 | 1/1 | 6.21  | 6.18  |
| 1/1 | 1/1 | 3.41  | 5.54  |
| 0/1 | 1/1 | 2.32  | 4.87  |
| 1/1 | 1/1 | 10.54 | 7.54  |
| 1/1 | 1/1 | 8.76  | 7.1   |
| 1/1 | 1/1 | 6.6   | 5.28  |
| 1/1 | 1/1 | 7.91  | 6.61  |
| 1/1 | 1/1 | 8.82  | 9.63  |
| 0/1 | 1/1 | 4.67  | 5.53  |
| 1/1 | 1/1 | 3.85  | 4.9   |
| 1/1 | 1/1 | 10.35 | 11.56 |

|     |     |       |       |
|-----|-----|-------|-------|
| 1/1 | 0/1 | 4.87  | 1.93  |
| 1/1 | 1/1 | 7.12  | 5.03  |
| 1/1 | 0/1 | 5.08  | 3.25  |
| 1/1 | 1/1 | 3.9   | 5.01  |
| 1/1 | 1/1 | 3.28  | 4.43  |
| 1/1 | 1/1 | 6.21  | 7.38  |
| 1/1 | 1/1 | 4.43  | 5.9   |
| 1/1 | 0/1 | 5.27  | 3.68  |
| 1/1 | 1/1 | 6.13  | 4.99  |
| 1/1 | 1/1 | 7.74  | 6.99  |
| 1/1 | 1/1 | 7.49  | 6.91  |
| 1/1 | 1/1 | 6.07  | 5.51  |
| 1/1 | 1/1 | 6.94  | 6.41  |
| 1/1 | 1/1 | 7.8   | 7.29  |
| 1/1 | 1/1 | 6.84  | 6.37  |
| 1/1 | 1/1 | 7.28  | 6.82  |
| 1/1 | 1/1 | 6.82  | 6.38  |
| 1/1 | 1/1 | 5.72  | 5.29  |
| 1/1 | 1/1 | 6.57  | 6.14  |
| 1/1 | 1/1 | 6.01  | 5.59  |
| 1/1 | 1/1 | 6.85  | 6.44  |
| 1/1 | 1/1 | 6.66  | 6.28  |
| 1/1 | 1/1 | 7.91  | 7.55  |
| 1/1 | 1/1 | 7.45  | 7.12  |
| 1/1 | 1/1 | 7.68  | 7.37  |
| 0/1 | 1/1 | 7.28  | 6.99  |
| 1/1 | 1/1 | 5.88  | 5.6   |
| 1/1 | 1/1 | 8.69  | 8.4   |
| 1/1 | 0/1 | 4.72  | 4.45  |
| 1/1 | 1/1 | 7.36  | 7.1   |
| 1/1 | 1/1 | 4.82  | 4.58  |
| 0/1 | 1/1 | 4.41  | 4.17  |
| 1/1 | 1/1 | 7.27  | 7.03  |
| 1/1 | 1/1 | 7.13  | 6.89  |
| 1/1 | 1/1 | 4.57  | 4.34  |
| 1/1 | 1/1 | 4.42  | 4.2   |
| 1/1 | 1/1 | 7.08  | 6.86  |
| 1/1 | 1/1 | 8.03  | 7.84  |
| 0/1 | 1/1 | 7.28  | 7.11  |
| 0/1 | 1/1 | 4.88  | 4.71  |
| 0/1 | 1/1 | 6.02  | 5.88  |
| 1/1 | 1/1 | 6.98  | 6.85  |
| 0/1 | 1/1 | 6.85  | 6.71  |
| 1/1 | 1/1 | 6.36  | 6.25  |
| 1/1 | 1/1 | 5.97  | 5.87  |
| 1/1 | 1/1 | 8.36  | 8.25  |
| 1/1 | 1/1 | 10.76 | 10.66 |
| 1/1 | 1/1 | 9.14  | 9.05  |
| 1/1 | 1/1 | 5     | 4.91  |
| 1/1 | 1/1 | 7.52  | 7.44  |
| 1/1 | 1/1 | 9.48  | 9.4   |
| 1/1 | 1/1 | 7.43  | 7.35  |
| 1/1 | 1/1 | 7.91  | 7.85  |
| 1/1 | 1/1 | 9.46  | 9.41  |
| 1/1 | 1/1 | 6.18  | 6.15  |
| 1/1 | 1/1 | 7.04  | 7.01  |
| 1/1 | 1/1 | 5.5   | 5.48  |
| 0/1 | 1/1 | 7.01  | 7.09  |

|     |     |      |       |
|-----|-----|------|-------|
| 1/1 | 1/1 | 6.16 | 6.27  |
| 1/1 | 1/1 | 9.89 | 10.02 |
| 0/1 | 1/1 | 5.33 | 5.47  |
| 1/1 | 1/1 | 7.19 | 7.32  |
| 1/1 | 1/1 | 5.61 | 5.74  |
| 0/1 | 1/1 | 6.78 | 6.94  |
| 1/1 | 1/1 | 7.91 | 8.06  |
| 1/1 | 1/1 | 7.14 | 7.3   |
| 0/1 | 1/1 | 2.34 | 2.52  |
| 0/1 | 1/1 | 5.13 | 7.58  |
| 1/1 | 1/1 | 6.38 | 5.65  |
| 1/1 | 0/1 | 7.13 | 6.41  |
| 1/1 | 0/1 | 3.56 | 2.89  |
| 1/1 | 1/1 | 3.95 | 3.38  |
| 1/1 | 1/1 | 7.56 | 6.99  |
| 1/1 | 1/1 | 6.74 | 6.17  |
| 1/1 | 1/1 | 6.5  | 5.93  |
| 1/1 | 1/1 | 3.58 | 3.12  |
| 1/1 | 1/1 | 4.97 | 4.52  |
| 1/1 | 0/1 | 4.06 | 3.63  |
| 1/1 | 0/1 | 3.69 | 3.32  |
| 1/1 | 1/1 | 6.08 | 5.76  |
| 1/1 | 1/1 | 7.17 | 6.91  |
| 1/1 | 1/1 | 6.05 | 5.89  |
| 1/1 | 1/1 | 7.84 | 7.7   |
| 1/1 | 1/1 | 3.82 | 3.67  |
| 0/1 | 1/1 | 3.58 | 3.53  |
| 1/1 | 1/1 | 7.54 | 7.5   |
| 1/1 | 1/1 | 6.3  | 6.27  |
| 1/1 | 1/1 | 3.79 | 3.79  |
| 1/1 | 1/1 | 6.6  | 6.61  |
| 1/1 | 1/1 | 8.6  | 8.66  |
| 0/1 | 1/1 | 3.44 | 3.5   |
| 1/1 | 1/1 | 5.53 | 5.62  |
| 0/1 | 1/1 | 4.35 | 4.45  |
| 0/1 | 1/1 | 6.22 | 6.32  |
| 0/1 | 1/1 | 4.69 | 4.82  |
| 0/1 | 1/1 | 4.42 | 4.58  |
| 0/1 | 1/1 | 3.35 | 3.54  |
| 1/1 | 1/1 | 5.6  | 5.8   |
| 1/1 | 1/1 | 5.27 | 5.5   |
| 0/1 | 1/1 | 3.17 | 3.41  |
| 0/1 | 1/1 | 2.35 | 2.61  |
| 1/1 | 1/1 | 4.83 | 5.11  |
| 0/1 | 1/1 | 6.75 | 7.03  |
| 1/1 | 1/1 | 3.81 | 4.13  |
| 1/1 | 1/1 | 9.99 | 10.33 |
| 1/1 | 1/1 | 4.21 | 4.58  |
| 1/1 | 1/1 | 4.68 | 5.05  |
| 1/1 | 1/1 | 7.45 | 7.85  |
| 1/1 | 1/1 | 4.23 | 4.67  |
| 1/1 | 1/1 | 6.73 | 7.17  |
| 1/1 | 1/1 | 9.91 | 10.37 |
| 0/1 | 1/1 | 3.74 | 4.21  |
| 0/1 | 1/1 | 2.74 | 3.28  |
| 1/1 | 1/1 | 6.55 | 7.09  |
| 1/1 | 1/1 | 3.6  | 4.2   |
| 1/1 | 1/1 | 4.82 | 5.44  |



|     |     |       |      |
|-----|-----|-------|------|
| 1/1 | 1/1 | 4.85  | 5.48 |
| 1/1 | 1/1 | 6.39  | 7.03 |
| 1/1 | 1/1 | 3.99  | 4.68 |
| 1/1 | 1/1 | 6.49  | 7.2  |
| 1/1 | 1/1 | 4.75  | 5.46 |
| 1/1 | 1/1 | 5.92  | 6.64 |
| 1/1 | 1/1 | 6.34  | 7.11 |
| 1/1 | 1/1 | 5.04  | 5.83 |
| 1/1 | 1/1 | 6.34  | 7.13 |
| 0/1 | 1/1 | 4.99  | 5.81 |
| 1/1 | 1/1 | 5.59  | 6.43 |
| 1/1 | 1/1 | 4.97  | 5.82 |
| 1/1 | 1/1 | 4.25  | 5.23 |
| 1/1 | 1/1 | 5.27  | 6.28 |
| 1/1 | 1/1 | 4.97  | 5.99 |
| 1/1 | 0/1 | 5.37  | 2.48 |
| 1/1 | 1/1 | 5.62  | 3.49 |
| 1/1 | 0/1 | 4.26  | 2.14 |
| 1/1 | 0/1 | 3.9   | 2.12 |
| 1/1 | 0/1 | 6.35  | 4.67 |
| 1/1 | 0/1 | 3.57  | 2.03 |
| 1/1 | 1/1 | 4.03  | 2.57 |
| 1/1 | 0/1 | 3.78  | 2.35 |
| 1/1 | 0/1 | 3.67  | 2.27 |
| 1/1 | 1/1 | 6.27  | 4.91 |
| 1/1 | 0/1 | 4.35  | 3.01 |
| 1/1 | 1/1 | 5.39  | 4.06 |
| 1/1 | 0/1 | 3.69  | 2.38 |
| 1/1 | 0/1 | 4.17  | 2.91 |
| 1/1 | 0/1 | 3.64  | 2.46 |
| 1/1 | 1/1 | 6.75  | 5.6  |
| 1/1 | 0/1 | 7.34  | 2    |
| 1/1 | 0/1 | 7.26  | 2.34 |
| 1/1 | 1/1 | 8.39  | 3.68 |
| 1/1 | 1/1 | 9.42  | 5.58 |
| 1/1 | 1/1 | 9.12  | 5.52 |
| 1/1 | 1/1 | 8.37  | 4.77 |
| 1/1 | 1/1 | 8.16  | 6.89 |
| 1/1 | 1/1 | 7.96  | 6.76 |
| 1/1 | 1/1 | 7.32  | 6.14 |
| 1/1 | 1/1 | 9.29  | 8.23 |
| 1/1 | 1/1 | 10.54 | 9.5  |
| 1/1 | 0/1 | 5.07  | 4.09 |
| 1/1 | 1/1 | 6.85  | 5.94 |
| 1/1 | 0/1 | 3.78  | 3.05 |
| 1/1 | 1/1 | 8.81  | 8.16 |
| 1/1 | 1/1 | 9.66  | 9.1  |
| 1/1 | 1/1 | 3.35  | 2.89 |
| 1/1 | 1/1 | 7.38  | 6.96 |
| 1/1 | 1/1 | 8.55  | 8.28 |
| 1/1 | 1/1 | 5.29  | 5.04 |
| 1/1 | 1/1 | 6.13  | 5.9  |
| 1/1 | 1/1 | 10.04 | 9.92 |
| 1/1 | 1/1 | 6.93  | 6.85 |
| 1/1 | 1/1 | 6.97  | 7.15 |
| 0/1 | 1/1 | 3.03  | 3.23 |
| 1/1 | 1/1 | 5.69  | 5.9  |
| 0/1 | 1/1 | 2.49  | 2.7  |

|     |     |       |       |
|-----|-----|-------|-------|
| 0/1 | 1/1 | 5.65  | 6.04  |
| 0/1 | 1/1 | 2.62  | 3.36  |
| 1/1 | 1/1 | 6.26  | 6.37  |
| 1/1 | 1/1 | 8.66  | 8.85  |
| 1/1 | 1/1 | 7.95  | 8.14  |
| 1/1 | 1/1 | 5.21  | 5.49  |
| 0/1 | 1/1 | 1.91  | 3.24  |
| 1/1 | 1/1 | 7.01  | 8.4   |
| 1/1 | 1/1 | 4.65  | 8.87  |
| 1/1 | 1/1 | 4.17  | 8.55  |
| 1/1 | 1/1 | 5.71  | 10.24 |
| 1/1 | 0/1 | 4.52  | 2.76  |
| 1/1 | 1/1 | 6.08  | 5.28  |
| 1/1 | 1/1 | 5.75  | 5.19  |
| 1/1 | 1/1 | 4.71  | 4.16  |
| 1/1 | 1/1 | 9.16  | 9.03  |
| 1/1 | 1/1 | 8.14  | 8.01  |
| 1/1 | 1/1 | 8.47  | 10.71 |
| 1/1 | 0/1 | 4.52  | 2.76  |
| 1/1 | 1/1 | 6.08  | 5.28  |
| 1/1 | 1/1 | 4.71  | 4.16  |
| 1/1 | 1/1 | 9.16  | 9.03  |
| 1/1 | 1/1 | 8.14  | 8.01  |
| 1/1 | 1/1 | 8.47  | 10.71 |
| 1/1 | 1/1 | 9.99  | 8.53  |
| 1/1 | 1/1 | 8.8   | 8.98  |
| 1/1 | 1/1 | 3.02  | 3.27  |
| 1/1 | 0/1 | 5.57  | 2.37  |
| 1/1 | 0/1 | 8.12  | 5.06  |
| 1/1 | 0/1 | 5.95  | 3.65  |
| 1/1 | 0/1 | 5.02  | 2.88  |
| 1/1 | 0/1 | 4.7   | 2.7   |
| 1/1 | 1/1 | 6.58  | 4.77  |
| 1/1 | 0/1 | 5.89  | 4.16  |
| 1/1 | 0/1 | 4.68  | 3.07  |
| 1/1 | 0/1 | 4.64  | 3.03  |
| 1/1 | 0/1 | 6.2   | 4.6   |
| 1/1 | 1/1 | 5.67  | 4.15  |
| 0/1 | 1/1 | 6.12  | 6.84  |
| 0/1 | 1/1 | 2.46  | 3.55  |
| 0/1 | 1/1 | 3.91  | 5.07  |
| 1/1 | 1/1 | 8.06  | 8.43  |
| 1/1 | 1/1 | 6.88  | 7.73  |
| 1/1 | 1/1 | 6.73  | 7.91  |
| 1/1 | 1/1 | 3.49  | 4.75  |
| 0/1 | 1/1 | 2.9   | 4.81  |
| 0/1 | 1/1 | 3.8   | 8.13  |
| 0/1 | 1/1 | 2.87  | 7.82  |
| 1/1 | 0/1 | 6.95  | 3.2   |
| 1/1 | 1/1 | 3.89  | 3.93  |
| 1/1 | 1/1 | 5.37  | 5.48  |
| 1/1 | 1/1 | 10.19 | 10.31 |
| 0/1 | 1/1 | 3.56  | 3.83  |
| 1/1 | 0/1 | 5.04  | 2.63  |
| 1/1 | 1/1 | 6.51  | 5.72  |
| 1/1 | 0/1 | 3.16  | 2.41  |
| 1/1 | 1/1 | 4.13  | 3.41  |
| 1/1 | 0/1 | 4.86  | 3.3   |

|     |     |      |      |
|-----|-----|------|------|
| 1/1 | 1/1 | 3.44 | 2.94 |
| 1/1 | 1/1 | 7.75 | 7.42 |
| 1/1 | 1/1 | 3.02 | 3.14 |
| 1/1 | 1/1 | 6.01 | 5.64 |
| 1/1 | 1/1 | 5.47 | 5.13 |
| 1/1 | 1/1 | 6.09 | 5.81 |
| 1/1 | 1/1 | 8.09 | 7.82 |
| 0/1 | 1/1 | 4.26 | 4.09 |
| 0/1 | 1/1 | 5.11 | 5.15 |
| 0/1 | 1/1 | 5.31 | 5.43 |
| 0/1 | 1/1 | 5.43 | 5.64 |
| 0/1 | 1/1 | 3.28 | 3.67 |
| 0/1 | 1/1 | 2.45 | 2.98 |
| 0/1 | 1/1 | 4.67 | 5.34 |
| 1/1 | 1/1 | 6.03 | 6.83 |
| 1/1 | 1/1 | 4.78 | 5.79 |
| 1/1 | 1/1 | 6.78 | 8    |
| 1/1 | 1/1 | 6.92 | 8.26 |
| 1/1 | 1/1 | 3.39 | 6.8  |
| 1/1 | 1/1 | 3.39 | 7.04 |
| 1/1 | 1/1 | 5.21 | 4.1  |
| 0/1 | 1/1 | 4    | 3.55 |
| 1/1 | 1/1 | 4.79 | 4.39 |
| 1/1 | 1/1 | 5.37 | 5.19 |
| 1/1 | 1/1 | 8.03 | 8.24 |
| 1/1 | 1/1 | 8.07 | 8.32 |
| 1/1 | 1/1 | 4.08 | 4.36 |
| 0/1 | 1/1 | 4.47 | 4.95 |
| 1/1 | 1/1 | 4.53 | 7.31 |
| 1/1 | 1/1 | 6.66 | 4.11 |
| 1/1 | 1/1 | 6.42 | 4    |
| 1/1 | 1/1 | 6.53 | 4.74 |
| 1/1 | 1/1 | 6.86 | 5.15 |
| 1/1 | 1/1 | 8.95 | 7.7  |
| 1/1 | 1/1 | 7.08 | 5.91 |
| 1/1 | 1/1 | 6.47 | 5.48 |
| 1/1 | 1/1 | 6.15 | 5.19 |
| 1/1 | 0/1 | 4.36 | 3.41 |
| 1/1 | 1/1 | 6.41 | 8.01 |
| 1/1 | 1/1 | 8.94 | 8.87 |
| 0/1 | 1/1 | 6.81 | 7.37 |
| 1/1 | 1/1 | 6.62 | 7.34 |
| 1/1 | 1/1 | 6.85 | 8.28 |
| 1/1 | 1/1 | 6.68 | 8.17 |
| 1/1 | 0/1 | 6.16 | 4.46 |
| 1/1 | 1/1 | 6.15 | 5.97 |
| 0/1 | 1/1 | 6.75 | 6.67 |
| 1/1 | 0/1 | 6.91 | 3.77 |
| 1/1 | 1/1 | 6.32 | 4.06 |
| 1/1 | 0/1 | 6.08 | 3.95 |
| 1/1 | 0/1 | 5.65 | 3.66 |
| 1/1 | 1/1 | 7.7  | 5.93 |
| 1/1 | 1/1 | 5.97 | 4.53 |
| 1/1 | 0/1 | 5.95 | 4.51 |
| 1/1 | 0/1 | 5.11 | 3.67 |
| 1/1 | 1/1 | 6.56 | 5.13 |
| 0/1 | 1/1 | 6.4  | 7    |
| 1/1 | 1/1 | 4.55 | 5.18 |

|     |     |       |       |
|-----|-----|-------|-------|
| 0/1 | 1/1 | 3.25  | 3.97  |
| 1/1 | 1/1 | 4.14  | 4.92  |
| 0/1 | 1/1 | 2.72  | 3.93  |
| 1/1 | 0/1 | 4.67  | 3.07  |
| 1/1 | 1/1 | 3.75  | 2.85  |
| 1/1 | 0/1 | 5.61  | 4.92  |
| 1/1 | 1/1 | 3.8   | 3.25  |
| 0/1 | 1/1 | 3.3   | 2.97  |
| 1/1 | 1/1 | 3.45  | 3.17  |
| 1/1 | 1/1 | 4.13  | 3.98  |
| 0/1 | 1/1 | 5.47  | 5.34  |
| 1/1 | 1/1 | 6.2   | 6.24  |
| 1/1 | 1/1 | 4.52  | 4.57  |
| 1/1 | 1/1 | 8.86  | 8.94  |
| 0/1 | 1/1 | 2.29  | 5.07  |
| 1/1 | 0/1 | 5.07  | 3.61  |
| 0/1 | 1/1 | 2.69  | 2.55  |
| 1/1 | 1/1 | 5.24  | 5.14  |
| 1/1 | 1/1 | 8.78  | 8.72  |
| 1/1 | 1/1 | 4.08  | 4.31  |
| 1/1 | 1/1 | 10.17 | 10.42 |
| 1/1 | 1/1 | 2.51  | 2.75  |
| 0/1 | 1/1 | 4.38  | 6.67  |
| 1/1 | 1/1 | 4.01  | 6.83  |
| 1/1 | 0/1 | 11.16 | 1.76  |
| 1/1 | 0/1 | 5.99  | 1.97  |
| 1/1 | 0/1 | 5.82  | 1.96  |
| 1/1 | 1/1 | 8.46  | 5.14  |
| 1/1 | 0/1 | 5.42  | 2.24  |
| 1/1 | 1/1 | 7.82  | 5.18  |
| 1/1 | 0/1 | 3.82  | 1.96  |
| 1/1 | 0/1 | 6.05  | 4.51  |
| 0/1 | 1/1 | 5.26  | 4.52  |
| 1/1 | 1/1 | 4.16  | 3.47  |
| 1/1 | 1/1 | 8.1   | 7.59  |
| 1/1 | 1/1 | 3.82  | 3.37  |
| 1/1 | 1/1 | 6.15  | 5.99  |
| 0/1 | 1/1 | 7.61  | 7.45  |
| 0/1 | 1/1 | 2.48  | 2.36  |
| 1/1 | 1/1 | 6.16  | 6.07  |
| 1/1 | 1/1 | 4.02  | 6.48  |
| 1/1 | 0/1 | 3.05  | 2.59  |
| 0/1 | 1/1 | 3.34  | 3.52  |
| 0/1 | 1/1 | 2.28  | 2.56  |
| 0/1 | 1/1 | 3.1   | 3.5   |
| 1/1 | 1/1 | 6.65  | 7.1   |
| 1/1 | 1/1 | 5.45  | 6.04  |
| 0/1 | 1/1 | 2.67  | 3.42  |
| 0/1 | 1/1 | 3.27  | 4.06  |
| 0/1 | 1/1 | 3.18  | 4.05  |
| 0/1 | 1/1 | 5.18  | 6.14  |
| 1/1 | 1/1 | 5.62  | 8.92  |
| 0/1 | 1/1 | 4.1   | 7.95  |
| 1/1 | 1/1 | 9.18  | 7.17  |
| 1/1 | 0/1 | 3.78  | 2.7   |
| 1/1 | 1/1 | 11.59 | 10.94 |
| 0/1 | 1/1 | 3.73  | 5.59  |
| 1/1 | 0/1 | 5.56  | 1.75  |

|     |     |       |       |
|-----|-----|-------|-------|
| 1/1 | 0/1 | 6.39  | 2.92  |
| 1/1 | 0/1 | 5.46  | 2.41  |
| 1/1 | 0/1 | 4.88  | 1.91  |
| 1/1 | 0/1 | 5.45  | 2.91  |
| 1/1 | 0/1 | 4.48  | 2.21  |
| 1/1 | 0/1 | 4.66  | 2.41  |
| 1/1 | 0/1 | 6.2   | 4.08  |
| 1/1 | 1/1 | 3.37  | 3.42  |
| 1/1 | 1/1 | 5.49  | 5.89  |
| 0/1 | 1/1 | 3.29  | 4.36  |
| 0/1 | 1/1 | 2.88  | 4.25  |
| 1/1 | 1/1 | 10.56 | 4.85  |
| 1/1 | 0/1 | 8.86  | 3.44  |
| 1/1 | 1/1 | 9.58  | 4.21  |
| 1/1 | 0/1 | 7.53  | 2.25  |
| 1/1 | 1/1 | 8.35  | 3.31  |
| 1/1 | 1/1 | 8.59  | 3.74  |
| 1/1 | 0/1 | 7.25  | 2.42  |
| 1/1 | 1/1 | 8.99  | 4.52  |
| 1/1 | 1/1 | 8.21  | 3.84  |
| 1/1 | 1/1 | 8.38  | 4.08  |
| 1/1 | 1/1 | 9.28  | 7.41  |
| 1/1 | 1/1 | 9.07  | 7.29  |
| 1/1 | 1/1 | 6.86  | 5.21  |
| 1/1 | 1/1 | 6.31  | 5.13  |
| 1/1 | 0/1 | 6.26  | 5.13  |
| 1/1 | 1/1 | 7.37  | 6.24  |
| 1/1 | 1/1 | 6.67  | 5.62  |
| 1/1 | 1/1 | 5.92  | 4.88  |
| 1/1 | 1/1 | 7.68  | 7     |
| 1/1 | 1/1 | 5.2   | 4.71  |
| 1/1 | 1/1 | 7.55  | 7.1   |
| 1/1 | 1/1 | 6.27  | 5.94  |
| 1/1 | 1/1 | 3.52  | 3.28  |
| 1/1 | 1/1 | 6.18  | 5.94  |
| 1/1 | 1/1 | 8.65  | 8.47  |
| 0/1 | 1/1 | 6.57  | 6.57  |
| 1/1 | 0/1 | 4.52  | 2.76  |
| 1/1 | 1/1 | 6.08  | 5.28  |
| 1/1 | 1/1 | 5.75  | 5.19  |
| 1/1 | 1/1 | 4.71  | 4.16  |
| 1/1 | 1/1 | 10.48 | 10.28 |
| 1/1 | 1/1 | 9.18  | 9     |
| 1/1 | 1/1 | 8.51  | 8.36  |
| 1/1 | 1/1 | 9.65  | 11.7  |
| 1/1 | 1/1 | 8.47  | 10.71 |
| 1/1 | 1/1 | 8.25  | 6.32  |
| 1/1 | 0/1 | 4.29  | 2.83  |
| 1/1 | 1/1 | 2.99  | 2.45  |
| 1/1 | 1/1 | 5.23  | 4.72  |
| 1/1 | 1/1 | 6.02  | 5.53  |
| 1/1 | 1/1 | 4.81  | 4.39  |
| 0/1 | 1/1 | 2.86  | 2.6   |
| 1/1 | 0/1 | 5.64  | 3.57  |
| 1/1 | 0/1 | 4.17  | 2.81  |
| 1/1 | 1/1 | 4.18  | 3.41  |
| 1/1 | 1/1 | 4.73  | 4.27  |
| 0/1 | 1/1 | 1.98  | 3.94  |

|     |     |      |      |
|-----|-----|------|------|
| 1/1 | 1/1 | 3.16 | 5.57 |
| 1/1 | 0/1 | 4.53 | 2.2  |
| 1/1 | 0/1 | 4.54 | 3.44 |
| 1/1 | 1/1 | 5.35 | 4.28 |
| 1/1 | 1/1 | 3.2  | 4.56 |
| 1/1 | 1/1 | 5.4  | 3.6  |
| 1/1 | 1/1 | 4.86 | 4.19 |
| 1/1 | 1/1 | 5.04 | 4.76 |
| 0/1 | 1/1 | 2.49 | 4.39 |
| 1/1 | 1/1 | 4.62 | 6.55 |
| 0/1 | 1/1 | 5    | 6.97 |
| 0/1 | 1/1 | 3.56 | 5.82 |
| 0/1 | 1/1 | 3.58 | 5.89 |
| 1/1 | 1/1 | 3.61 | 5.95 |
| 0/1 | 1/1 | 3.64 | 6.24 |
| 0/1 | 1/1 | 2.56 | 6.42 |
| 1/1 | 1/1 | 7.16 | 4.9  |
| 1/1 | 1/1 | 7.07 | 6.23 |
| 1/1 | 1/1 | 4.07 | 3.24 |
| 1/1 | 1/1 | 6.29 | 7.72 |
| 1/1 | 1/1 | 5.6  | 7.08 |
| 1/1 | 1/1 | 5.21 | 6.69 |
| 0/1 | 1/1 | 3.8  | 5.32 |
| 1/1 | 1/1 | 5.35 | 3.54 |
| 1/1 | 1/1 | 9.15 | 8.27 |
| 1/1 | 0/1 | 4.44 | 3.74 |
| 1/1 | 1/1 | 4.44 | 3.79 |
| 1/1 | 1/1 | 3.77 | 3.33 |
| 1/1 | 1/1 | 7.13 | 6.83 |
| 1/1 | 1/1 | 7.18 | 6.9  |
| 0/1 | 1/1 | 2.87 | 2.61 |
| 1/1 | 1/1 | 6.22 | 6.08 |
| 0/1 | 1/1 | 2.45 | 4.42 |
| 1/1 | 0/1 | 8.57 | 6.85 |
| 1/1 | 1/1 | 5.5  | 4.73 |
| 1/1 | 0/1 | 6.31 | 3.29 |
| 1/1 | 1/1 | 4.12 | 4.82 |
| 1/1 | 1/1 | 6.75 | 7.65 |
| 0/1 | 1/1 | 2.92 | 3.83 |
| 1/1 | 1/1 | 8.82 | 9.75 |
| 1/1 | 1/1 | 7.36 | 8.36 |
| 1/1 | 0/1 | 5.34 | 2.81 |
| 1/1 | 1/1 | 5.34 | 4.23 |
| 0/1 | 1/1 | 4.75 | 5.89 |
| 0/1 | 1/1 | 5.24 | 6.55 |
| 1/1 | 0/1 | 5.04 | 2.56 |
| 0/1 | 1/1 | 2.78 | 4.57 |
| 1/1 | 0/1 | 4.17 | 3.11 |
| 0/1 | 1/1 | 5.4  | 4.61 |
| 0/1 | 1/1 | 5.55 | 5.6  |
| 0/1 | 1/1 | 5.74 | 5.8  |
| 1/1 | 1/1 | 5.35 | 5.57 |
| 1/1 | 1/1 | 6.42 | 6.93 |
| 1/1 | 1/1 | 5.46 | 6.07 |
| 1/1 | 1/1 | 8.88 | 7.54 |
| 1/1 | 1/1 | 7.33 | 6.92 |
| 1/1 | 1/1 | 8.82 | 8.46 |
| 1/1 | 1/1 | 4.32 | 4.29 |

|     |     |       |       |
|-----|-----|-------|-------|
| 1/1 | 1/1 | 4.84  | 4.83  |
| 1/1 | 1/1 | 3.52  | 3.52  |
| 1/1 | 1/1 | 10.28 | 10.42 |
| 1/1 | 1/1 | 3.53  | 3.8   |
| 1/1 | 1/1 | 4.37  | 6.76  |
| 1/1 | 1/1 | 4.14  | 6.67  |
| 1/1 | 1/1 | 3.64  | 7.03  |
| 1/1 | 0/1 | 6.59  | 2.67  |
| 1/1 | 0/1 | 5.27  | 1.84  |
| 1/1 | 0/1 | 5.47  | 2.17  |
| 1/1 | 0/1 | 5.53  | 2.34  |
| 1/1 | 0/1 | 5.6   | 2.66  |
| 1/1 | 0/1 | 4.99  | 2.47  |
| 1/1 | 1/1 | 6.1   | 3.67  |
| 1/1 | 1/1 | 5.77  | 5.66  |
| 1/1 | 1/1 | 5.64  | 5.56  |
| 0/1 | 1/1 | 6.41  | 6.34  |
| 1/1 | 1/1 | 3.4   | 3.36  |
| 1/1 | 1/1 | 6.84  | 6.86  |
| 1/1 | 1/1 | 3.99  | 4.01  |
| 0/1 | 1/1 | 5.79  | 5.92  |
| 1/1 | 1/1 | 5.58  | 5.79  |
| 1/1 | 1/1 | 9.65  | 9.96  |
| 1/1 | 1/1 | 5.91  | 6.64  |
| 1/1 | 1/1 | 10.17 | 7.22  |
| 1/1 | 0/1 | 8.84  | 6.06  |
| 1/1 | 0/1 | 5.48  | 2.95  |
| 1/1 | 0/1 | 8.34  | 6.31  |
| 1/1 | 0/1 | 7.23  | 5.25  |
| 1/1 | 0/1 | 5.69  | 3.92  |
| 1/1 | 1/1 | 5.77  | 4.25  |
| 1/1 | 1/1 | 9.83  | 8.32  |
| 1/1 | 1/1 | 6.34  | 4.92  |
| 1/1 | 1/1 | 8.07  | 6.72  |
| 1/1 | 1/1 | 7.33  | 5.98  |
| 1/1 | 1/1 | 5.89  | 7.06  |
| 1/1 | 0/1 | 3.72  | 2.13  |
| 1/1 | 1/1 | 7.31  | 7.39  |
| 1/1 | 0/1 | 4.78  | 2.47  |
| 1/1 | 1/1 | 6.13  | 4.63  |
| 1/1 | 0/1 | 4.62  | 3.23  |
| 1/1 | 1/1 | 7.15  | 5.89  |
| 1/1 | 1/1 | 5.97  | 4.85  |
| 1/1 | 0/1 | 3.65  | 2.69  |
| 1/1 | 1/1 | 4.08  | 3.37  |
| 1/1 | 1/1 | 6.34  | 5.69  |
| 1/1 | 1/1 | 6.17  | 5.53  |
| 0/1 | 1/1 | 2.41  | 3.82  |
| 1/1 | 1/1 | 4.48  | 6.13  |
| 0/1 | 1/1 | 2.54  | 4.8   |
| 1/1 | 0/1 | 6.4   | 3.67  |
| 1/1 | 0/1 | 4.88  | 3.33  |
| 1/1 | 1/1 | 7.2   | 6.13  |
| 1/1 | 1/1 | 7.2   | 6.13  |
| 1/1 | 1/1 | 3.17  | 4.28  |
| 0/1 | 1/1 | 2.07  | 3.42  |
| 1/1 | 0/1 | 6.36  | 4.32  |
| 1/1 | 1/1 | 6.95  | 6.14  |

|     |     |       |       |
|-----|-----|-------|-------|
| 1/1 | 1/1 | 3.51  | 3.01  |
| 1/1 | 1/1 | 7.49  | 7.02  |
| 1/1 | 1/1 | 5.84  | 7.54  |
| 0/1 | 1/1 | 2.86  | 4.85  |
| 0/1 | 1/1 | 2.97  | 5.11  |
| 1/1 | 1/1 | 3.5   | 5.73  |
| 1/1 | 1/1 | 11.16 | 11.16 |
| 1/1 | 1/1 | 10.8  | 10.93 |
| 1/1 | 1/1 | 7.41  | 7.68  |
| 1/1 | 1/1 | 7.76  | 8.49  |
| 0/1 | 1/1 | 5.13  | 6.07  |
| 1/1 | 1/1 | 10.08 | 11.06 |
| 1/1 | 1/1 | 8.27  | 9.34  |
| 0/1 | 1/1 | 1.7   | 2.87  |
| 1/1 | 1/1 | 4.18  | 8.91  |
| 1/1 | 1/1 | 9.56  | 9.08  |
| 1/1 | 1/1 | 5.93  | 5.68  |
| 1/1 | 1/1 | 2.67  | 2.55  |
| 1/1 | 1/1 | 6.05  | 5.94  |
| 1/1 | 1/1 | 5.7   | 5.59  |
| 1/1 | 1/1 | 3.59  | 3.49  |
| 1/1 | 1/1 | 9.54  | 9.61  |
| 1/1 | 1/1 | 5.86  | 6     |
| 1/1 | 1/1 | 4.62  | 4.86  |
| 1/1 | 1/1 | 5.79  | 6.07  |
| 1/1 | 1/1 | 5.3   | 5.61  |
| 1/1 | 1/1 | 6.16  | 6.47  |
| 1/1 | 1/1 | 7.58  | 8     |
| 1/1 | 1/1 | 7.67  | 8.24  |
| 0/1 | 1/1 | 2.6   | 3.18  |
| 0/1 | 1/1 | 3.56  | 4.17  |
| 0/1 | 1/1 | 4.4   | 5.12  |
| 0/1 | 1/1 | 2.03  | 2.8   |
| 0/1 | 1/1 | 3.28  | 4.16  |
| 0/1 | 1/1 | 2.71  | 3.64  |
| 1/1 | 1/1 | 3.95  | 5.09  |
| 0/1 | 1/1 | 2.2   | 3.35  |
| 1/1 | 1/1 | 6.27  | 7.44  |
| 1/1 | 1/1 | 4.85  | 8.12  |
| 1/1 | 1/1 | 4.24  | 7.57  |
| 1/1 | 1/1 | 4.68  | 8.11  |
| 0/1 | 1/1 | 4.46  | 7.93  |
| 1/1 | 1/1 | 4.75  | 8.37  |
| 1/1 | 1/1 | 4.4   | 8.04  |
| 1/1 | 1/1 | 5.11  | 8.8   |
| 1/1 | 1/1 | 5.98  | 9.69  |
| 1/1 | 1/1 | 6.38  | 10.11 |
| 0/1 | 1/1 | 2.33  | 6.19  |
| 1/1 | 1/1 | 3.77  | 7.9   |
| 1/1 | 1/1 | 9.47  | 5.38  |
| 1/1 | 1/1 | 9.76  | 5.93  |
| 1/1 | 0/1 | 7.06  | 3.52  |
| 1/1 | 1/1 | 10.21 | 6.76  |
| 1/1 | 0/1 | 7.32  | 3.94  |
| 1/1 | 1/1 | 10.31 | 7.21  |
| 1/1 | 1/1 | 9.32  | 6.58  |
| 1/1 | 1/1 | 8.39  | 5.92  |
| 1/1 | 1/1 | 8.1   | 7.71  |



|     |     |      |      |
|-----|-----|------|------|
| 1/1 | 1/1 | 8.07 | 7.69 |
| 1/1 | 1/1 | 7.26 | 6.89 |
| 1/1 | 1/1 | 6.21 | 5.85 |
| 1/1 | 1/1 | 5.44 | 5.08 |
| 1/1 | 1/1 | 7.49 | 7.14 |
| 1/1 | 1/1 | 7.76 | 7.42 |
| 1/1 | 1/1 | 6.77 | 6.43 |
| 1/1 | 1/1 | 6.57 | 6.29 |
| 1/1 | 1/1 | 6.08 | 5.82 |
| 1/1 | 1/1 | 6.94 | 6.7  |
| 0/1 | 1/1 | 6.56 | 6.34 |
| 1/1 | 1/1 | 7.91 | 7.7  |
| 0/1 | 1/1 | 4.96 | 4.79 |
| 1/1 | 1/1 | 8.02 | 7.86 |
| 1/1 | 1/1 | 8.28 | 8.17 |
| 1/1 | 1/1 | 5.76 | 5.67 |
| 1/1 | 1/1 | 8.46 | 8.38 |
| 1/1 | 1/1 | 7.1  | 7.03 |
| 1/1 | 1/1 | 5.12 | 5.09 |
| 1/1 | 1/1 | 6.84 | 6.86 |
| 1/1 | 1/1 | 7.2  | 7.24 |
| 1/1 | 1/1 | 4.53 | 4.6  |
| 1/1 | 1/1 | 7.14 | 7.21 |
| 1/1 | 1/1 | 6.58 | 6.71 |
| 1/1 | 1/1 | 6.38 | 6.55 |
| 1/1 | 1/1 | 7.45 | 7.76 |
| 1/1 | 1/1 | 7.43 | 7.75 |
| 1/1 | 1/1 | 5.13 | 5.46 |
| 1/1 | 1/1 | 7.74 | 8.08 |
| 1/1 | 1/1 | 6.42 | 6.77 |
| 1/1 | 1/1 | 8.47 | 8.84 |
| 0/1 | 1/1 | 3.98 | 4.37 |
| 1/1 | 1/1 | 5.61 | 6.05 |
| 1/1 | 1/1 | 8.07 | 8.59 |
| 1/1 | 1/1 | 6.88 | 7.41 |
| 1/1 | 1/1 | 3.48 | 4.12 |
| 1/1 | 1/1 | 8.79 | 9.45 |
| 1/1 | 1/1 | 5.33 | 6.11 |
| 0/1 | 1/1 | 3.18 | 4    |
| 0/1 | 1/1 | 6.19 | 7.1  |
| 0/1 | 1/1 | 3.62 | 4.6  |
| 1/1 | 1/1 | 7.05 | 4.01 |
| 1/1 | 1/1 | 7.76 | 5.76 |
| 1/1 | 1/1 | 6.73 | 4.93 |
| 1/1 | 1/1 | 7.22 | 5.72 |
| 1/1 | 1/1 | 6.23 | 5.16 |
| 1/1 | 1/1 | 7.62 | 7.05 |
| 1/1 | 1/1 | 6.25 | 5.74 |
| 1/1 | 1/1 | 4.68 | 4.26 |
| 1/1 | 1/1 | 8.4  | 8.05 |
| 1/1 | 1/1 | 7.79 | 7.85 |
| 1/1 | 1/1 | 5.82 | 8.22 |
| 1/1 | 1/1 | 5.78 | 8.27 |
| 1/1 | 1/1 | 3.71 | 6.29 |
| 0/1 | 1/1 | 2.78 | 5.35 |
| 0/1 | 1/1 | 2.72 | 5.57 |
| 1/1 | 1/1 | 3.72 | 6.7  |
| 0/1 | 1/1 | 2.29 | 6.42 |

|     |     |       |      |
|-----|-----|-------|------|
| 1/1 | 1/1 | 3.92  | 4.57 |
| 1/1 | 1/1 | 7.31  | 8.48 |
| 1/1 | 1/1 | 5.63  | 7.15 |
| 0/1 | 1/1 | 6.08  | 8.32 |
| 1/1 | 0/1 | 6.4   | 3.67 |
| 1/1 | 0/1 | 4.88  | 3.33 |
| 0/1 | 1/1 | 2.07  | 3.42 |
| 1/1 | 1/1 | 4.03  | 5.48 |
| 1/1 | 0/1 | 5.13  | 3.09 |
| 1/1 | 0/1 | 3.83  | 2.46 |
| 1/1 | 1/1 | 4.18  | 3.02 |
| 1/1 | 1/1 | 4.87  | 4.1  |
| 1/1 | 1/1 | 4.88  | 4.17 |
| 1/1 | 1/1 | 4.64  | 4.14 |
| 1/1 | 1/1 | 7.22  | 6.82 |
| 1/1 | 0/1 | 8.8   | 2.52 |
| 1/1 | 1/1 | 9.41  | 4.61 |
| 1/1 | 1/1 | 10.34 | 5.67 |
| 1/1 | 0/1 | 9.75  | 7.55 |
| 1/1 | 1/1 | 8.56  | 6.55 |
| 1/1 | 1/1 | 8.49  | 6.92 |
| 1/1 | 1/1 | 7.55  | 6.79 |
| 1/1 | 1/1 | 4.2   | 3.45 |
| 1/1 | 1/1 | 8.25  | 3.93 |
| 1/1 | 1/1 | 9.02  | 5.32 |
| 1/1 | 1/1 | 7.56  | 4.02 |
| 1/1 | 1/1 | 7.14  | 3.68 |
| 1/1 | 1/1 | 6.41  | 3.14 |
| 1/1 | 1/1 | 6.87  | 3.66 |
| 1/1 | 1/1 | 7.59  | 4.46 |
| 1/1 | 1/1 | 6.95  | 3.92 |
| 1/1 | 0/1 | 6.49  | 3.49 |
| 1/1 | 1/1 | 7.14  | 4.36 |
| 1/1 | 1/1 | 5.34  | 4.74 |
| 1/1 | 1/1 | 6.42  | 5.85 |
| 1/1 | 1/1 | 7.56  | 7.01 |
| 1/1 | 1/1 | 7.01  | 6.46 |
| 1/1 | 1/1 | 6.64  | 6.12 |
| 1/1 | 1/1 | 7.88  | 7.36 |
| 1/1 | 1/1 | 8.08  | 7.59 |
| 1/1 | 1/1 | 9.52  | 9.03 |
| 1/1 | 1/1 | 5.42  | 4.98 |
| 1/1 | 1/1 | 6     | 5.61 |
| 1/1 | 1/1 | 5.43  | 5.05 |
| 1/1 | 1/1 | 5.54  | 5.16 |
| 1/1 | 1/1 | 5.44  | 5.22 |
| 1/1 | 1/1 | 6.51  | 6.44 |
| 1/1 | 1/1 | 5.7   | 5.62 |
| 1/1 | 1/1 | 4.07  | 4.26 |
| 1/1 | 1/1 | 4.2   | 4.44 |
| 1/1 | 1/1 | 9.37  | 9.74 |
| 0/1 | 1/1 | 3.36  | 3.91 |
| 1/1 | 1/1 | 6.32  | 6.97 |
| 0/1 | 1/1 | 3.7   | 4.75 |
| 0/1 | 1/1 | 1.74  | 2.88 |
| 1/1 | 0/1 | 6.1   | 3.23 |
| 1/1 | 1/1 | 6.91  | 4.58 |
| 1/1 | 1/1 | 6.76  | 4.73 |

|     |     |       |       |
|-----|-----|-------|-------|
| 1/1 | 1/1 | 6.73  | 4.97  |
| 1/1 | 1/1 | 7.84  | 6.11  |
| 1/1 | 1/1 | 7.62  | 5.98  |
| 1/1 | 0/1 | 4.08  | 2.59  |
| 1/1 | 0/1 | 5.38  | 3.93  |
| 1/1 | 1/1 | 12.41 | 10.99 |
| 1/1 | 1/1 | 8.37  | 7.14  |
| 1/1 | 1/1 | 7.24  | 8.12  |
| 1/1 | 0/1 | 4.68  | 2.41  |
| 1/1 | 1/1 | 5.29  | 3.92  |
| 1/1 | 1/1 | 6.15  | 5.15  |
| 1/1 | 1/1 | 4.93  | 6.57  |
| 1/1 | 0/1 | 6.19  | 2.79  |
| 1/1 | 0/1 | 4.28  | 2.26  |
| 1/1 | 1/1 | 5.71  | 4.64  |
| 1/1 | 1/1 | 6.99  | 6.74  |
| 0/1 | 1/1 | 2.46  | 2.35  |
| 0/1 | 1/1 | 2.75  | 2.73  |
| 1/1 | 1/1 | 5.23  | 5.25  |
| 1/1 | 1/1 | 4.48  | 4.54  |
| 1/1 | 1/1 | 12.55 | 12.71 |
| 0/1 | 1/1 | 3.54  | 3.72  |
| 0/1 | 1/1 | 7.3   | 7.77  |
| 1/1 | 1/1 | 10.77 | 11.25 |
| 1/1 | 1/1 | 4.58  | 7.16  |
| 0/1 | 1/1 | 3.17  | 5.99  |
| 1/1 | 1/1 | 4.61  | 7.49  |
| 0/1 | 1/1 | 2.72  | 5.76  |
| 1/1 | 1/1 | 2.85  | 6.24  |
| 1/1 | 1/1 | 10.47 | 10.16 |
| 1/1 | 1/1 | 11.77 | 11.69 |
| 0/1 | 1/1 | 6.12  | 6.06  |
| 1/1 | 1/1 | 5.09  | 5.05  |
| 0/1 | 1/1 | 2.58  | 2.55  |
| 1/1 | 1/1 | 8.58  | 8.88  |
| 1/1 | 1/1 | 5.3   | 5.63  |
| 1/1 | 1/1 | 8.36  | 8.85  |
| 1/1 | 1/1 | 6.04  | 6.98  |
| 1/1 | 1/1 | 7.17  | 8.2   |
| 0/1 | 1/1 | 2.82  | 6.16  |
| 1/1 | 1/1 | 6.02  | 9.55  |
| 0/1 | 1/1 | 3.04  | 7.01  |
| 0/1 | 1/1 | 3.01  | 7.34  |
| 1/1 | 0/1 | 6.63  | 2.92  |
| 1/1 | 1/1 | 6.43  | 4.07  |
| 1/1 | 1/1 | 7.17  | 4.95  |
| 1/1 | 1/1 | 6.14  | 3.93  |
| 1/1 | 1/1 | 6.78  | 4.66  |
| 1/1 | 1/1 | 5.75  | 5.75  |
| 1/1 | 1/1 | 6.2   | 6.22  |
| 0/1 | 1/1 | 5.23  | 5.32  |
| 1/1 | 1/1 | 3.95  | 4.16  |
| 1/1 | 1/1 | 8.07  | 8.72  |
| 1/1 | 0/1 | 7.08  | 4.36  |
| 1/1 | 0/1 | 6.08  | 4.7   |
| 1/1 | 0/1 | 3.48  | 2.24  |
| 1/1 | 1/1 | 5.31  | 4.11  |
| 1/1 | 1/1 | 7.91  | 6.78  |

|     |     |       |       |
|-----|-----|-------|-------|
| 1/1 | 0/1 | 4.32  | 2.43  |
| 1/1 | 1/1 | 7.11  | 6.17  |
| 1/1 | 0/1 | 3.55  | 2.77  |
| 1/1 | 0/1 | 3.88  | 3.33  |
| 1/1 | 0/1 | 2.74  | 2.39  |
| 0/1 | 1/1 | 4.86  | 4.58  |
| 0/1 | 1/1 | 4.86  | 4.58  |
| 1/1 | 1/1 | 5.38  | 7.28  |
| 1/1 | 1/1 | 3.56  | 6.06  |
| 1/1 | 1/1 | 7.05  | 4.16  |
| 1/1 | 0/1 | 5.02  | 2.36  |
| 1/1 | 1/1 | 5.35  | 2.94  |
| 1/1 | 1/1 | 7.19  | 4.8   |
| 1/1 | 1/1 | 7.65  | 5.28  |
| 1/1 | 1/1 | 6.92  | 4.69  |
| 1/1 | 0/1 | 5.17  | 3     |
| 1/1 | 1/1 | 5.84  | 3.71  |
| 1/1 | 0/1 | 4.4   | 2.53  |
| 1/1 | 1/1 | 6.27  | 4.53  |
| 1/1 | 1/1 | 5.67  | 3.98  |
| 1/1 | 1/1 | 6.36  | 4.69  |
| 1/1 | 1/1 | 5.55  | 3.89  |
| 1/1 | 1/1 | 6.2   | 4.66  |
| 1/1 | 1/1 | 6.39  | 4.87  |
| 1/1 | 1/1 | 6.41  | 4.97  |
| 1/1 | 0/1 | 5.81  | 3.27  |
| 1/1 | 1/1 | 11.41 | 10.29 |
| 1/1 | 1/1 | 7.91  | 6.98  |
| 1/1 | 1/1 | 6.03  | 7.14  |
| 1/1 | 1/1 | 6.05  | 7.16  |
| 1/1 | 1/1 | 6.48  | 7.62  |
| 0/1 | 1/1 | 4.82  | 6.01  |
| 1/1 | 1/1 | 6.67  | 7.88  |
| 0/1 | 1/1 | 4.26  | 5.46  |
| 1/1 | 1/1 | 7.13  | 8.4   |
| 1/1 | 1/1 | 7.1   | 8.42  |
| 1/1 | 1/1 | 4.31  | 6.06  |
| 0/1 | 1/1 | 4.69  | 6.58  |
| 1/1 | 1/1 | 6.73  | 8.65  |
| 0/1 | 1/1 | 5.09  | 7.06  |
| 0/1 | 1/1 | 4.7   | 6.71  |
| 0/1 | 1/1 | 3.5   | 5.72  |
| 0/1 | 1/1 | 3.56  | 5.95  |
| 0/1 | 1/1 | 4.55  | 7.18  |
| 1/1 | 1/1 | 5.2   | 8.02  |
| 1/1 | 1/1 | 5.02  | 7.87  |
| 0/1 | 1/1 | 2.86  | 6.24  |
| 1/1 | 1/1 | 4.33  | 8.33  |
| 1/1 | 0/1 | 7.99  | 5.97  |
| 1/1 | 1/1 | 8.28  | 7.56  |
| 1/1 | 1/1 | 7.21  | 6.61  |
| 1/1 | 1/1 | 3.39  | 5.2   |
| 1/1 | 1/1 | 4.76  | 6.6   |
| 1/1 | 1/1 | 6.79  | 4.47  |
| 1/1 | 1/1 | 12.52 | 10.65 |
| 1/1 | 1/1 | 8.29  | 7.15  |
| 1/1 | 0/1 | 3.52  | 2.49  |
| 1/1 | 1/1 | 4.4   | 5.79  |

|     |     |       |      |
|-----|-----|-------|------|
| 1/1 | 1/1 | 4.12  | 6.31 |
| 1/1 | 0/1 | 3.33  | 2.32 |
| 1/1 | 1/1 | 4.43  | 4.1  |
| 0/1 | 1/1 | 2.38  | 2.66 |
| 1/1 | 1/1 | 6.74  | 7.08 |
| 0/1 | 1/1 | 3.34  | 3.73 |
| 1/1 | 1/1 | 4.59  | 7.25 |
| 1/1 | 1/1 | 7.38  | 5.47 |
| 1/1 | 1/1 | 5.62  | 4.1  |
| 1/1 | 1/1 | 8.52  | 7.91 |
| 1/1 | 1/1 | 10.2  | 9.83 |
| 1/1 | 1/1 | 6.44  | 6.09 |
| 1/1 | 1/1 | 7.01  | 6.69 |
| 1/1 | 1/1 | 7.25  | 6.93 |
| 1/1 | 1/1 | 5.31  | 8.01 |
| 1/1 | 1/1 | 6.67  | 5.4  |
| 1/1 | 1/1 | 5.87  | 5.32 |
| 1/1 | 1/1 | 3.3   | 2.89 |
| 1/1 | 1/1 | 3.09  | 2.8  |
| 1/1 | 1/1 | 5.8   | 5.53 |
| 0/1 | 1/1 | 6.52  | 6.46 |
| 0/1 | 1/1 | 3.74  | 3.7  |
| 1/1 | 1/1 | 4.44  | 4.4  |
| 1/1 | 1/1 | 7.01  | 7.1  |
| 0/1 | 1/1 | 6.97  | 7.26 |
| 0/1 | 1/1 | 3.08  | 5.47 |
| 1/1 | 1/1 | 4.83  | 7.55 |
| 1/1 | 0/1 | 6.83  | 5.09 |
| 1/1 | 1/1 | 4.1   | 2.81 |
| 1/1 | 1/1 | 2.74  | 2.08 |
| 1/1 | 1/1 | 5.14  | 4.48 |
| 1/1 | 1/1 | 7.22  | 6.9  |
| 1/1 | 1/1 | 4.41  | 4.19 |
| 1/1 | 1/1 | 9.73  | 9.52 |
| 1/1 | 1/1 | 5.85  | 5.65 |
| 1/1 | 1/1 | 7.95  | 7.8  |
| 1/1 | 1/1 | 6.09  | 5.94 |
| 0/1 | 1/1 | 2.81  | 5.28 |
| 1/1 | 1/1 | 9.18  | 4.4  |
| 1/1 | 0/1 | 8.41  | 3.93 |
| 1/1 | 1/1 | 9.55  | 5.47 |
| 1/1 | 1/1 | 8.66  | 4.6  |
| 1/1 | 1/1 | 11.05 | 7.08 |
| 1/1 | 1/1 | 10.89 | 7.21 |
| 1/1 | 1/1 | 9.3   | 5.64 |
| 1/1 | 1/1 | 10.42 | 6.88 |
| 1/1 | 1/1 | 10.22 | 6.85 |
| 1/1 | 1/1 | 9.35  | 5.99 |
| 1/1 | 0/1 | 6.53  | 3.21 |
| 1/1 | 0/1 | 5.59  | 2.31 |
| 1/1 | 1/1 | 7.18  | 6.1  |
| 1/1 | 1/1 | 7.61  | 6.54 |
| 1/1 | 1/1 | 6.52  | 5.52 |
| 1/1 | 1/1 | 6.17  | 5.26 |
| 1/1 | 1/1 | 8.77  | 7.88 |
| 1/1 | 1/1 | 6.78  | 6.11 |
| 1/1 | 1/1 | 8.39  | 7.84 |
| 1/1 | 1/1 | 6.66  | 6.13 |

|     |     |       |       |
|-----|-----|-------|-------|
| 1/1 | 1/1 | 4.33  | 3.91  |
| 1/1 | 1/1 | 9.96  | 9.95  |
| 0/1 | 1/1 | 3.76  | 3.75  |
| 1/1 | 1/1 | 8.02  | 8.06  |
| 1/1 | 1/1 | 5.39  | 5.85  |
| 1/1 | 1/1 | 6.42  | 5.59  |
| 1/1 | 1/1 | 8.41  | 7.83  |
| 1/1 | 1/1 | 6.04  | 5.84  |
| 1/1 | 1/1 | 7.76  | 7.69  |
| 1/1 | 1/1 | 5.15  | 5.17  |
| 0/1 | 1/1 | 1.91  | 2     |
| 0/1 | 1/1 | 5.97  | 6.17  |
| 1/1 | 1/1 | 10.69 | 10.89 |
| 1/1 | 1/1 | 7.76  | 8.35  |
| 1/1 | 1/1 | 3.68  | 6.76  |
| 1/1 | 1/1 | 7.99  | 5.78  |
| 1/1 | 1/1 | 5.3   | 4.39  |
| 1/1 | 1/1 | 8.67  | 7.85  |
| 0/1 | 1/1 | 2.91  | 4.59  |
| 1/1 | 0/1 | 5.57  | 3.09  |
| 1/1 | 0/1 | 4.25  | 3.05  |
| 1/1 | 1/1 | 4.65  | 3.52  |
| 1/1 | 1/1 | 5.99  | 5.07  |
| 0/1 | 1/1 | 2.56  | 4.82  |
| 0/1 | 1/1 | 3.4   | 5.82  |
| 1/1 | 1/1 | 5.06  | 4.38  |
| 1/1 | 1/1 | 8.04  | 7.47  |
| 0/1 | 1/1 | 3.41  | 3.08  |
| 0/1 | 1/1 | 3.23  | 3.07  |
| 1/1 | 1/1 | 6.74  | 6.62  |
| 1/1 | 1/1 | 4.52  | 4.6   |
| 1/1 | 1/1 | 5.97  | 6.19  |
| 1/1 | 1/1 | 7     | 7.24  |
| 1/1 | 1/1 | 4.21  | 4.6   |
| 1/1 | 1/1 | 8.41  | 8.86  |
| 1/1 | 1/1 | 6.6   | 7.11  |
| 1/1 | 1/1 | 6.78  | 7.35  |
| 0/1 | 1/1 | 2.95  | 3.6   |
| 1/1 | 1/1 | 8.23  | 8.91  |
| 1/1 | 1/1 | 6.29  | 7.05  |
| 1/1 | 1/1 | 6.2   | 7.01  |
| 1/1 | 1/1 | 6.95  | 7.76  |
| 0/1 | 1/1 | 2.18  | 5.55  |
| 1/1 | 1/1 | 8.32  | 8.37  |
| 1/1 | 1/1 | 11.25 | 11.49 |
| 0/1 | 1/1 | 2.69  | 3.1   |
| 1/1 | 1/1 | 4.23  | 4.91  |
| 0/1 | 1/1 | 2.84  | 3.58  |
| 0/1 | 1/1 | 2.34  | 3.21  |
| 0/1 | 1/1 | 3.48  | 4.58  |
| 1/1 | 1/1 | 7.68  | 8.98  |
| 1/1 | 1/1 | 6.62  | 8.1   |
| 1/1 | 1/1 | 3.61  | 7.93  |
| 1/1 | 0/1 | 5.04  | 2.89  |
| 1/1 | 1/1 | 6.32  | 5.7   |
| 1/1 | 1/1 | 5.65  | 4.47  |
| 1/1 | 1/1 | 6.52  | 5.35  |
| 1/1 | 1/1 | 6.67  | 6.17  |

|     |     |       |       |
|-----|-----|-------|-------|
| 1/1 | 1/1 | 6.17  | 5.92  |
| 1/1 | 1/1 | 7.99  | 7.76  |
| 1/1 | 1/1 | 5.64  | 5.49  |
| 1/1 | 1/1 | 4.18  | 4.06  |
| 1/1 | 1/1 | 3.17  | 3.09  |
| 1/1 | 1/1 | 9.33  | 9.38  |
| 1/1 | 1/1 | 4.13  | 4.19  |
| 1/1 | 1/1 | 5.26  | 5.39  |
| 0/1 | 1/1 | 2.5   | 2.75  |
| 0/1 | 1/1 | 3.77  | 4.11  |
| 1/1 | 1/1 | 4.61  | 7.18  |
| 1/1 | 1/1 | 11.07 | 8.48  |
| 1/1 | 1/1 | 5.76  | 4.77  |
| 1/1 | 1/1 | 5     | 4.01  |
| 0/1 | 1/1 | 4.24  | 5.32  |
| 0/1 | 1/1 | 5.17  | 6.37  |
| 1/1 | 1/1 | 4.27  | 3.29  |
| 1/1 | 1/1 | 3.22  | 2.47  |
| 1/1 | 1/1 | 7.39  | 6.92  |
| 1/1 | 1/1 | 7.7   | 7.28  |
| 1/1 | 1/1 | 9.95  | 9.66  |
| 0/1 | 1/1 | 4.42  | 4.23  |
| 1/1 | 1/1 | 6.12  | 6     |
| 1/1 | 1/1 | 5.13  | 5.03  |
| 1/1 | 1/1 | 7.42  | 7.34  |
| 1/1 | 1/1 | 4.79  | 4.72  |
| 1/1 | 1/1 | 6.49  | 6.44  |
| 1/1 | 1/1 | 6.41  | 6.38  |
| 1/1 | 1/1 | 7.04  | 7.02  |
| 0/1 | 1/1 | 2.68  | 2.75  |
| 1/1 | 1/1 | 5.52  | 5.7   |
| 1/1 | 1/1 | 4.39  | 4.65  |
| 0/1 | 1/1 | 2.54  | 2.8   |
| 1/1 | 1/1 | 5.82  | 6.09  |
| 0/1 | 1/1 | 3.95  | 4.24  |
| 1/1 | 1/1 | 6.5   | 6.81  |
| 0/1 | 1/1 | 3.58  | 3.93  |
| 1/1 | 1/1 | 8.68  | 9.09  |
| 0/1 | 1/1 | 5.64  | 6.08  |
| 0/1 | 1/1 | 4.83  | 5.44  |
| 1/1 | 1/1 | 3.61  | 4.24  |
| 1/1 | 1/1 | 3.6   | 6.51  |
| 0/1 | 1/1 | 3.25  | 6.29  |
| 0/1 | 1/1 | 2.87  | 6.66  |
| 1/1 | 0/1 | 4.17  | 3.37  |
| 1/1 | 0/1 | 2.72  | 2.21  |
| 1/1 | 1/1 | 7.08  | 6.87  |
| 1/1 | 1/1 | 4.22  | 4.04  |
| 0/1 | 1/1 | 6.88  | 6.73  |
| 1/1 | 1/1 | 4.5   | 4.39  |
| 0/1 | 1/1 | 4.79  | 4.73  |
| 1/1 | 1/1 | 5.8   | 5.78  |
| 1/1 | 1/1 | 12.14 | 12.16 |
| 0/1 | 1/1 | 2.87  | 2.99  |
| 1/1 | 1/1 | 6.75  | 6.89  |
| 1/1 | 1/1 | 9.87  | 10.17 |
| 1/1 | 1/1 | 5.44  | 5.78  |
| 1/1 | 1/1 | 8.78  | 9.18  |

|     |     |       |       |
|-----|-----|-------|-------|
| 0/1 | 1/1 | 1.94  | 2.37  |
| 1/1 | 1/1 | 3.06  | 3.62  |
| 1/1 | 1/1 | 6.79  | 7.38  |
| 1/1 | 1/1 | 6     | 6.59  |
| 0/1 | 1/1 | 2.35  | 3.09  |
| 1/1 | 1/1 | 6.41  | 7.16  |
| 1/1 | 1/1 | 7.72  | 5.5   |
| 1/1 | 1/1 | 6.69  | 6.03  |
| 1/1 | 1/1 | 3.56  | 5.01  |
| 1/1 | 1/1 | 5.52  | 7.08  |
| 1/1 | 0/1 | 3.51  | 2.35  |
| 1/1 | 1/1 | 12.85 | 12.76 |
| 1/1 | 1/1 | 5.83  | 5.79  |
| 1/1 | 1/1 | 5.77  | 5.79  |
| 1/1 | 1/1 | 6.93  | 6.97  |
| 0/1 | 1/1 | 2.31  | 2.52  |
| 1/1 | 1/1 | 7.04  | 7.28  |
| 0/1 | 1/1 | 7     | 7.3   |
| 0/1 | 1/1 | 4.66  | 4.99  |
| 0/1 | 1/1 | 3.16  | 5.61  |
| 0/1 | 1/1 | 3.66  | 6.15  |
| 0/1 | 1/1 | 2.44  | 5.09  |
| 0/1 | 1/1 | 3.01  | 6     |
| 1/1 | 1/1 | 4.24  | 7.29  |
| 0/1 | 1/1 | 3.64  | 6.71  |
| 1/1 | 1/1 | 2.91  | 5.98  |
| 0/1 | 1/1 | 2.85  | 5.94  |
| 1/1 | 1/1 | 3.35  | 6.74  |
| 1/1 | 1/1 | 5.79  | 9.23  |
| 0/1 | 1/1 | 2.53  | 6.28  |
| 1/1 | 1/1 | 4.95  | 9.24  |
| 0/1 | 1/1 | 2.97  | 7.49  |
| 0/1 | 1/1 | 3.43  | 8.33  |
| 1/1 | 0/1 | 5.66  | 3.55  |
| 1/1 | 1/1 | 5.16  | 3.63  |
| 1/1 | 1/1 | 5.66  | 4.69  |
| 1/1 | 1/1 | 3.78  | 2.98  |
| 1/1 | 1/1 | 4.38  | 3.62  |
| 1/1 | 0/1 | 2.89  | 2.2   |
| 1/1 | 1/1 | 4.7   | 4.15  |
| 0/1 | 1/1 | 2.49  | 4.11  |
| 0/1 | 1/1 | 2.76  | 4.39  |
| 1/1 | 0/1 | 5.1   | 3.58  |
| 1/1 | 1/1 | 6.26  | 5.11  |
| 1/1 | 0/1 | 5.21  | 4.16  |
| 1/1 | 1/1 | 5.55  | 4.64  |
| 1/1 | 1/1 | 9.44  | 8.86  |
| 1/1 | 1/1 | 6.74  | 6.18  |
| 1/1 | 1/1 | 5.99  | 5.47  |
| 1/1 | 1/1 | 4.01  | 3.64  |
| 1/1 | 1/1 | 10.76 | 10.45 |
| 1/1 | 1/1 | 9.08  | 8.78  |
| 1/1 | 1/1 | 6.04  | 5.78  |
| 0/1 | 1/1 | 2.97  | 2.76  |
| 1/1 | 1/1 | 5.23  | 5.02  |
| 1/1 | 1/1 | 8.68  | 8.49  |
| 0/1 | 1/1 | 5.95  | 5.8   |
| 1/1 | 1/1 | 9.38  | 9.24  |



|     |     |       |       |
|-----|-----|-------|-------|
| 1/1 | 1/1 | 9.53  | 9.4   |
| 1/1 | 1/1 | 5.68  | 5.57  |
| 0/1 | 1/1 | 9.4   | 9.29  |
| 1/1 | 1/1 | 5.95  | 5.87  |
| 1/1 | 1/1 | 7.36  | 7.29  |
| 1/1 | 1/1 | 9.78  | 9.76  |
| 1/1 | 1/1 | 4.96  | 4.98  |
| 1/1 | 1/1 | 5.6   | 5.64  |
| 0/1 | 1/1 | 2.55  | 2.59  |
| 1/1 | 1/1 | 3.38  | 3.43  |
| 1/1 | 1/1 | 7.32  | 7.38  |
| 0/1 | 1/1 | 2.58  | 4.87  |
| 0/1 | 1/1 | 3.45  | 6.48  |
| 0/1 | 1/1 | 2.71  | 6.01  |
| 1/1 | 0/1 | 5.63  | 3.21  |
| 1/1 | 1/1 | 5.27  | 4.14  |
| 1/1 | 0/1 | 3.57  | 2.45  |
| 1/1 | 1/1 | 7.3   | 6.17  |
| 1/1 | 1/1 | 6.73  | 5.72  |
| 0/1 | 1/1 | 3.74  | 5.19  |
| 1/1 | 1/1 | 3.53  | 4.99  |
| 1/1 | 1/1 | 8.27  | 7.32  |
| 1/1 | 1/1 | 9.93  | 9.24  |
| 1/1 | 1/1 | 6.47  | 5.95  |
| 1/1 | 1/1 | 8.58  | 8.08  |
| 1/1 | 1/1 | 6.62  | 6.23  |
| 1/1 | 1/1 | 7.76  | 7.51  |
| 0/1 | 1/1 | 6.15  | 5.93  |
| 1/1 | 1/1 | 8.18  | 7.96  |
| 1/1 | 1/1 | 9.27  | 9.09  |
| 1/1 | 1/1 | 10.7  | 10.55 |
| 1/1 | 1/1 | 8.59  | 8.44  |
| 1/1 | 1/1 | 5.59  | 5.46  |
| 1/1 | 1/1 | 8.6   | 8.49  |
| 1/1 | 1/1 | 8.8   | 8.7   |
| 1/1 | 1/1 | 5.62  | 5.56  |
| 1/1 | 1/1 | 13.28 | 13.24 |
| 0/1 | 1/1 | 6.02  | 6.1   |
| 1/1 | 1/1 | 6.57  | 6.68  |
| 1/1 | 1/1 | 8.24  | 8.37  |
| 1/1 | 1/1 | 7.11  | 7.24  |
| 1/1 | 1/1 | 7.68  | 7.82  |
| 0/1 | 1/1 | 5.41  | 5.57  |
| 1/1 | 1/1 | 8.08  | 8.27  |
| 1/1 | 1/1 | 9     | 9.22  |
| 1/1 | 1/1 | 6.29  | 6.53  |
| 0/1 | 1/1 | 5.01  | 5.3   |
| 0/1 | 1/1 | 5.83  | 6.14  |
| 0/1 | 1/1 | 4.76  | 5.1   |
| 1/1 | 1/1 | 7.34  | 7.7   |
| 1/1 | 1/1 | 6.84  | 7.2   |
| 1/1 | 1/1 | 7.28  | 7.65  |
| 1/1 | 1/1 | 7.49  | 7.86  |
| 0/1 | 1/1 | 5.58  | 5.96  |
| 1/1 | 1/1 | 6.03  | 6.45  |
| 0/1 | 1/1 | 5     | 5.44  |
| 1/1 | 1/1 | 6.04  | 6.53  |
| 1/1 | 1/1 | 3.57  | 4.11  |

|     |     |       |       |
|-----|-----|-------|-------|
| 1/1 | 1/1 | 7.27  | 7.85  |
| 1/1 | 1/1 | 7.47  | 8.09  |
| 0/1 | 1/1 | 6.72  | 7.36  |
| 0/1 | 1/1 | 3.97  | 6.83  |
| 1/1 | 1/1 | 6.7   | 5.74  |
| 1/1 | 1/1 | 5.91  | 5.29  |
| 1/1 | 1/1 | 8.03  | 7.65  |
| 1/1 | 1/1 | 13.58 | 13.38 |
| 0/1 | 1/1 | 3.62  | 3.44  |
| 1/1 | 1/1 | 9.1   | 9.1   |
| 1/1 | 1/1 | 9.45  | 9.48  |
| 1/1 | 1/1 | 6.05  | 6.22  |
| 0/1 | 1/1 | 7.23  | 7.44  |
| 1/1 | 1/1 | 8.63  | 8.88  |
| 1/1 | 1/1 | 8.22  | 8.52  |
| 0/1 | 1/1 | 3.62  | 4.02  |
| 1/1 | 1/1 | 6.45  | 6.96  |
| 1/1 | 1/1 | 6.33  | 6.85  |
| 0/1 | 1/1 | 4.16  | 6.79  |
| 1/1 | 1/1 | 5.65  | 8.39  |
| 1/1 | 1/1 | 5.39  | 3.43  |
| 1/1 | 1/1 | 5.29  | 7.01  |
| 1/1 | 1/1 | 4.14  | 5.89  |
| 1/1 | 1/1 | 7.44  | 4.91  |
| 1/1 | 0/1 | 4.26  | 2.58  |
| 1/1 | 1/1 | 4.67  | 3.13  |
| 1/1 | 1/1 | 4.8   | 3.4   |
| 1/1 | 0/1 | 2.99  | 2     |
| 1/1 | 1/1 | 5.51  | 4.53  |
| 1/1 | 0/1 | 4.58  | 3.51  |
| 0/1 | 1/1 | 4.13  | 3.79  |
| 0/1 | 1/1 | 4.04  | 3.81  |
| 1/1 | 1/1 | 7.48  | 7.26  |
| 0/1 | 1/1 | 3.84  | 3.67  |
| 1/1 | 1/1 | 4.55  | 4.49  |
| 1/1 | 1/1 | 9.03  | 9     |
| 1/1 | 1/1 | 7.67  | 7.75  |
| 1/1 | 1/1 | 7.61  | 7.72  |
| 0/1 | 1/1 | 3.11  | 3.22  |
| 0/1 | 1/1 | 3.22  | 3.5   |
| 0/1 | 1/1 | 2.48  | 2.77  |
| 1/1 | 1/1 | 7.2   | 7.53  |
| 1/1 | 1/1 | 4.75  | 5.09  |
| 1/1 | 1/1 | 10.39 | 10.74 |
| 1/1 | 1/1 | 4.21  | 6.76  |
| 0/1 | 1/1 | 3.07  | 6.81  |
| 1/1 | 0/1 | 5.4   | 2.9   |
| 1/1 | 1/1 | 3.14  | 4.41  |
| 0/1 | 1/1 | 2.9   | 4.23  |
| 1/1 | 1/1 | 5.77  | 7.28  |
| 1/1 | 1/1 | 5.61  | 5.1   |
| 1/1 | 1/1 | 7.37  | 6.95  |
| 1/1 | 0/1 | 3.74  | 3.4   |
| 1/1 | 1/1 | 6.26  | 5.92  |
| 0/1 | 1/1 | 5.27  | 5.19  |
| 1/1 | 1/1 | 6.96  | 7.01  |
| 1/1 | 1/1 | 6.99  | 7.26  |
| 1/1 | 1/1 | 4.91  | 5.25  |

|     |     |       |       |
|-----|-----|-------|-------|
| 0/1 | 1/1 | 3.93  | 4.43  |
| 1/1 | 1/1 | 6.33  | 6.94  |
| 1/1 | 1/1 | 10.8  | 9.43  |
| 1/1 | 1/1 | 11.2  | 10.02 |
| 1/1 | 1/1 | 5.87  | 5.27  |
| 1/1 | 1/1 | 6.46  | 6.15  |
| 1/1 | 1/1 | 6.76  | 6.52  |
| 0/1 | 1/1 | 5.76  | 5.54  |
| 1/1 | 1/1 | 6.92  | 6.81  |
| 1/1 | 1/1 | 7.42  | 7.39  |
| 1/1 | 1/1 | 5.49  | 5.49  |
| 0/1 | 1/1 | 5.04  | 5.04  |
| 0/1 | 1/1 | 5.99  | 6.02  |
| 0/1 | 1/1 | 8.54  | 8.58  |
| 0/1 | 1/1 | 6.78  | 6.84  |
| 1/1 | 1/1 | 5.59  | 5.73  |
| 1/1 | 1/1 | 7.28  | 7.47  |
| 1/1 | 1/1 | 7.05  | 7.25  |
| 1/1 | 1/1 | 7.34  | 10.39 |
| 1/1 | 1/1 | 7.33  | 5     |
| 0/1 | 1/1 | 5.29  | 4.23  |
| 1/1 | 0/1 | 7.07  | 6.14  |
| 1/1 | 1/1 | 5.44  | 6.86  |
| 1/1 | 1/1 | 11.24 | 10.09 |
| 1/1 | 1/1 | 7.46  | 6.43  |
| 1/1 | 1/1 | 8.82  | 8.55  |
| 1/1 | 1/1 | 5.51  | 5.28  |
| 0/1 | 1/1 | 7.28  | 7.06  |
| 1/1 | 1/1 | 6.46  | 6.29  |
| 1/1 | 1/1 | 6.65  | 6.49  |
| 1/1 | 1/1 | 7.79  | 7.73  |
| 1/1 | 1/1 | 7.14  | 7.12  |
| 1/1 | 1/1 | 7.61  | 7.59  |
| 1/1 | 1/1 | 6.03  | 6.06  |
| 1/1 | 1/1 | 11.72 | 11.82 |
| 1/1 | 1/1 | 6.02  | 6.25  |
| 0/1 | 1/1 | 3.75  | 4.04  |
| 1/1 | 1/1 | 6.28  | 6.58  |
| 1/1 | 1/1 | 6.77  | 7.1   |
| 1/1 | 1/1 | 5.73  | 6.14  |
| 1/1 | 1/1 | 4.56  | 7.09  |
| 1/1 | 1/1 | 3.91  | 6.6   |
| 0/1 | 1/1 | 3.54  | 6.63  |
| 0/1 | 1/1 | 3.22  | 6.64  |
| 0/1 | 1/1 | 2.93  | 6.84  |
| 0/1 | 1/1 | 2.85  | 7.29  |
| 1/1 | 0/1 | 7.32  | 4.26  |
| 0/1 | 1/1 | 2.48  | 3.03  |
| 1/1 | 1/1 | 5.84  | 4.67  |
| 1/1 | 1/1 | 9.41  | 9.42  |
| 1/1 | 0/1 | 7.02  | 2.75  |
| 1/1 | 0/1 | 5.79  | 2     |
| 1/1 | 0/1 | 7.25  | 3.99  |
| 1/1 | 0/1 | 6.43  | 3.26  |
| 1/1 | 1/1 | 7.11  | 6.7   |
| 1/1 | 1/1 | 7.64  | 7.27  |
| 1/1 | 1/1 | 7.76  | 7.4   |
| 0/1 | 1/1 | 5.6   | 5.32  |

|     |     |      |      |
|-----|-----|------|------|
| 1/1 | 1/1 | 5.73 | 5.5  |
| 1/1 | 1/1 | 5.01 | 4.96 |
| 1/1 | 1/1 | 4.87 | 5.07 |
| 0/1 | 1/1 | 4.17 | 4.41 |
| 1/1 | 1/1 | 7.98 | 8.24 |
| 1/1 | 1/1 | 4.46 | 4.74 |
| 1/1 | 1/1 | 4.08 | 4.57 |
| 1/1 | 1/1 | 7.93 | 6.71 |
| 1/1 | 1/1 | 5.45 | 4.4  |
| 1/1 | 1/1 | 4.36 | 3.61 |
| 1/1 | 1/1 | 3.79 | 3.06 |
| 1/1 | 1/1 | 6.54 | 5.98 |
| 0/1 | 1/1 | 3.65 | 3.14 |
| 1/1 | 1/1 | 4.69 | 4.22 |
| 1/1 | 0/1 | 2.95 | 2.53 |
| 0/1 | 1/1 | 3.25 | 2.85 |
| 1/1 | 1/1 | 3.3  | 2.95 |
| 1/1 | 1/1 | 3.32 | 2.99 |
| 1/1 | 1/1 | 3.92 | 3.62 |
| 1/1 | 1/1 | 4.81 | 4.53 |
| 1/1 | 1/1 | 2.99 | 2.73 |
| 0/1 | 1/1 | 2.6  | 2.37 |
| 1/1 | 1/1 | 3.58 | 3.36 |
| 0/1 | 1/1 | 3.69 | 3.49 |
| 1/1 | 1/1 | 4.29 | 4.1  |
| 1/1 | 1/1 | 3.68 | 3.53 |
| 1/1 | 1/1 | 4.73 | 4.6  |
| 1/1 | 1/1 | 6.92 | 6.81 |
| 1/1 | 1/1 | 4.38 | 4.27 |
| 1/1 | 1/1 | 3.58 | 3.53 |
| 1/1 | 1/1 | 7.4  | 7.38 |
| 1/1 | 1/1 | 3.78 | 3.82 |
| 1/1 | 1/1 | 6.51 | 6.58 |
| 1/1 | 1/1 | 6.31 | 6.4  |
| 1/1 | 1/1 | 3.03 | 3.13 |
| 0/1 | 1/1 | 3.23 | 3.36 |
| 0/1 | 1/1 | 2.86 | 3.03 |
| 1/1 | 1/1 | 4.98 | 5.18 |
| 1/1 | 1/1 | 3.44 | 3.65 |
| 1/1 | 1/1 | 3.26 | 3.48 |
| 1/1 | 1/1 | 4.92 | 5.15 |
| 0/1 | 1/1 | 2.61 | 2.86 |
| 1/1 | 1/1 | 3.19 | 3.51 |
| 1/1 | 1/1 | 7.06 | 7.41 |
| 1/1 | 1/1 | 3.68 | 6.11 |
| 1/1 | 1/1 | 9.3  | 6.79 |
| 1/1 | 1/1 | 5.27 | 4.32 |
| 1/1 | 1/1 | 3.74 | 5.38 |
| 1/1 | 1/1 | 8.71 | 6.11 |
| 1/1 | 0/1 | 5.21 | 3.24 |
| 1/1 | 1/1 | 5.9  | 6.99 |
| 1/1 | 1/1 | 5.59 | 6.85 |
| 1/1 | 1/1 | 6.59 | 8.02 |
| 1/1 | 0/1 | 6.03 | 3.99 |
| 1/1 | 1/1 | 6.09 | 5.6  |
| 1/1 | 1/1 | 5.46 | 3.12 |
| 1/1 | 1/1 | 7.3  | 6.19 |
| 1/1 | 1/1 | 7.75 | 6.86 |

|     |     |       |       |
|-----|-----|-------|-------|
| 1/1 | 1/1 | 4.38  | 3.58  |
| 1/1 | 1/1 | 8.31  | 7.51  |
| 0/1 | 1/1 | 3.28  | 4.51  |
| 0/1 | 1/1 | 3.98  | 5.41  |
| 1/1 | 1/1 | 3.93  | 5.38  |
| 0/1 | 1/1 | 4.16  | 5.78  |
| 0/1 | 1/1 | 2.49  | 4.13  |
| 0/1 | 1/1 | 2.35  | 4     |
| 0/1 | 1/1 | 3.65  | 6     |
| 1/1 | 1/1 | 10.75 | 10.85 |
| 1/1 | 1/1 | 6.25  | 10.07 |
| 1/1 | 1/1 | 5.48  | 3.76  |
| 1/1 | 1/1 | 10.26 | 9.65  |
| 1/1 | 1/1 | 5.56  | 5.09  |
| 1/1 | 1/1 | 10.58 | 10.15 |
| 1/1 | 1/1 | 10.14 | 9.71  |
| 0/1 | 1/1 | 4.22  | 3.86  |
| 1/1 | 1/1 | 6.69  | 6.4   |
| 1/1 | 1/1 | 8.7   | 8.43  |
| 0/1 | 1/1 | 6.45  | 6.25  |
| 1/1 | 1/1 | 3.82  | 5.85  |
| 1/1 | 1/1 | 6.73  | 4.61  |
| 1/1 | 1/1 | 5.97  | 4.61  |
| 0/1 | 1/1 | 2.89  | 4.53  |
| 0/1 | 1/1 | 2.87  | 6.03  |
| 1/1 | 1/1 | 5.47  | 4.25  |
| 1/1 | 1/1 | 7.03  | 6.94  |
| 0/1 | 1/1 | 3.75  | 3.76  |
| 0/1 | 1/1 | 3.38  | 3.42  |
| 0/1 | 1/1 | 4.21  | 4.26  |
| 1/1 | 1/1 | 7.03  | 7.23  |
| 1/1 | 1/1 | 4.67  | 4.96  |
| 0/1 | 1/1 | 4.45  | 7.47  |
| 1/1 | 1/1 | 10.2  | 8.49  |
| 1/1 | 0/1 | 4.31  | 3.04  |
| 1/1 | 0/1 | 3.54  | 2.48  |
| 1/1 | 1/1 | 6.31  | 5.34  |
| 1/1 | 1/1 | 6.17  | 5.36  |
| 1/1 | 0/1 | 3.39  | 2.61  |
| 1/1 | 1/1 | 3.23  | 2.51  |
| 1/1 | 1/1 | 5.58  | 4.87  |
| 1/1 | 1/1 | 4.44  | 3.79  |
| 1/1 | 1/1 | 5.39  | 4.82  |
| 1/1 | 1/1 | 4.17  | 3.71  |
| 1/1 | 1/1 | 6.75  | 6.38  |
| 1/1 | 1/1 | 3.72  | 3.35  |
| 1/1 | 0/1 | 3.17  | 2.84  |
| 1/1 | 1/1 | 3.71  | 3.45  |
| 1/1 | 1/1 | 3.27  | 3.03  |
| 1/1 | 1/1 | 2.85  | 2.64  |
| 1/1 | 1/1 | 4.21  | 4.01  |
| 1/1 | 1/1 | 3.23  | 3.06  |
| 1/1 | 1/1 | 5.7   | 5.54  |
| 1/1 | 1/1 | 8.29  | 6.43  |
| 0/1 | 1/1 | 5.22  | 4.74  |
| 1/1 | 1/1 | 7.23  | 6.86  |
| 1/1 | 1/1 | 8.08  | 7.76  |
| 1/1 | 1/1 | 4.74  | 6.47  |

|     |     |       |       |
|-----|-----|-------|-------|
| 0/1 | 1/1 | 3.06  | 5.07  |
| 0/1 | 1/1 | 2.21  | 4.48  |
| 0/1 | 1/1 | 2.95  | 5.51  |
| 0/1 | 1/1 | 3.81  | 6.39  |
| 0/1 | 1/1 | 2.76  | 5.38  |
| 0/1 | 1/1 | 2.4   | 5.05  |
| 0/1 | 1/1 | 2.31  | 5.45  |
| 1/1 | 1/1 | 5.34  | 2.82  |
| 1/1 | 1/1 | 6.55  | 7.6   |
| 0/1 | 1/1 | 2.79  | 3.91  |
| 1/1 | 1/1 | 4.14  | 5.45  |
| 1/1 | 1/1 | 4.83  | 3.14  |
| 1/1 | 0/1 | 3.7   | 3.06  |
| 1/1 | 0/1 | 9.36  | 8.88  |
| 1/1 | 1/1 | 7.69  | 7.32  |
| 1/1 | 1/1 | 6.99  | 6.83  |
| 1/1 | 1/1 | 5.14  | 4.61  |
| 1/1 | 1/1 | 4.88  | 4.49  |
| 0/1 | 1/1 | 4.56  | 4.17  |
| 1/1 | 1/1 | 6.46  | 6.09  |
| 1/1 | 1/1 | 7.05  | 6.7   |
| 0/1 | 1/1 | 8.12  | 7.98  |
| 1/1 | 1/1 | 5.31  | 5.21  |
| 1/1 | 1/1 | 11.17 | 11.17 |
| 0/1 | 1/1 | 7.42  | 7.47  |
| 1/1 | 1/1 | 7.96  | 8.05  |
| 1/1 | 1/1 | 5.02  | 5.14  |
| 1/1 | 1/1 | 7.52  | 7.68  |
| 1/1 | 1/1 | 8.12  | 8.45  |
| 1/1 | 1/1 | 4.91  | 5.26  |
| 1/1 | 1/1 | 2.67  | 3.39  |
| 0/1 | 1/1 | 4.03  | 5.03  |
| 1/1 | 0/1 | 7.02  | 3.47  |
| 1/1 | 1/1 | 8.07  | 5.14  |
| 1/1 | 0/1 | 5.65  | 2.84  |
| 1/1 | 1/1 | 6.56  | 4.2   |
| 1/1 | 1/1 | 4.57  | 4.56  |
| 1/1 | 1/1 | 5.78  | 5.83  |
| 1/1 | 1/1 | 7.22  | 7.34  |
| 1/1 | 1/1 | 4.71  | 4.94  |
| 1/1 | 1/1 | 4.82  | 3.7   |
| 1/1 | 1/1 | 4.54  | 3.94  |
| 1/1 | 1/1 | 7.4   | 6.95  |
| 1/1 | 1/1 | 3.49  | 3.14  |
| 1/1 | 1/1 | 7.37  | 7.16  |
| 1/1 | 1/1 | 4.63  | 4.43  |
| 1/1 | 1/1 | 13.03 | 12.87 |
| 1/1 | 1/1 | 9.41  | 9.47  |
| 1/1 | 1/1 | 8.47  | 8.8   |
| 0/1 | 1/1 | 4.58  | 4.97  |
| 1/1 | 1/1 | 2.38  | 2.77  |
| 0/1 | 1/1 | 3.94  | 6.46  |
| 1/1 | 0/1 | 5.29  | 2.89  |
| 1/1 | 1/1 | 4.06  | 5.61  |
| 1/1 | 1/1 | 3.78  | 5.34  |
| 1/1 | 1/1 | 7.98  | 6.16  |
| 1/1 | 0/1 | 2.96  | 1.69  |
| 1/1 | 1/1 | 2.73  | 2.22  |

|     |     |       |       |
|-----|-----|-------|-------|
| 1/1 | 1/1 | 3.4   | 2.91  |
| 1/1 | 1/1 | 9.46  | 9.15  |
| 1/1 | 0/1 | 7.83  | 3.23  |
| 1/1 | 0/1 | 7.61  | 3.01  |
| 1/1 | 1/1 | 7.11  | 3.14  |
| 1/1 | 0/1 | 7.03  | 3.24  |
| 1/1 | 0/1 | 8.41  | 4.76  |
| 1/1 | 0/1 | 6.25  | 2.65  |
| 1/1 | 1/1 | 7.12  | 3.54  |
| 1/1 | 0/1 | 6.35  | 2.8   |
| 1/1 | 0/1 | 7.47  | 3.95  |
| 1/1 | 0/1 | 6.21  | 2.94  |
| 1/1 | 0/1 | 5.98  | 2.76  |
| 1/1 | 0/1 | 7.25  | 4.06  |
| 1/1 | 0/1 | 4.81  | 1.63  |
| 1/1 | 1/1 | 8.19  | 5.02  |
| 1/1 | 1/1 | 7.51  | 6.48  |
| 1/1 | 1/1 | 6.9   | 5.87  |
| 1/1 | 1/1 | 6.26  | 5.28  |
| 1/1 | 0/1 | 2.79  | 1.94  |
| 1/1 | 1/1 | 5.83  | 5.05  |
| 1/1 | 0/1 | 3.58  | 2.81  |
| 1/1 | 1/1 | 3.8   | 3.1   |
| 1/1 | 0/1 | 4.94  | 4.3   |
| 1/1 | 1/1 | 7.79  | 7.21  |
| 1/1 | 1/1 | 6.15  | 5.68  |
| 1/1 | 1/1 | 6.66  | 6.33  |
| 1/1 | 1/1 | 4.4   | 4.15  |
| 1/1 | 1/1 | 10.41 | 10.3  |
| 1/1 | 0/1 | 3.53  | 3.55  |
| 1/1 | 0/1 | 5.6   | 2.73  |
| 1/1 | 0/1 | 5.64  | 3.77  |
| 0/1 | 1/1 | 4.62  | 5.59  |
| 1/1 | 0/1 | 6.29  | 3.48  |
| 1/1 | 0/1 | 5.79  | 3.24  |
| 1/1 | 0/1 | 7.86  | 6.13  |
| 1/1 | 1/1 | 7.73  | 6.35  |
| 1/1 | 1/1 | 5.08  | 3.74  |
| 1/1 | 1/1 | 5.05  | 3.7   |
| 1/1 | 1/1 | 4.35  | 3.06  |
| 0/1 | 1/1 | 5.5   | 6.26  |
| 1/1 | 1/1 | 2.96  | 3.96  |
| 1/1 | 1/1 | 4.2   | 5.21  |
| 1/1 | 1/1 | 3.31  | 4.34  |
| 0/1 | 1/1 | 2.84  | 4.77  |
| 1/1 | 0/1 | 7.16  | 5.45  |
| 1/1 | 0/1 | 6.77  | 5.77  |
| 1/1 | 1/1 | 5.2   | 4.22  |
| 1/1 | 1/1 | 11.44 | 10.74 |
| 1/1 | 1/1 | 9.81  | 9.17  |
| 1/1 | 1/1 | 6.49  | 6.04  |
| 1/1 | 1/1 | 7.55  | 7.19  |
| 1/1 | 1/1 | 6.89  | 6.66  |
| 1/1 | 0/1 | 4.77  | 3.58  |
| 1/1 | 1/1 | 3.21  | 2.68  |
| 1/1 | 1/1 | 7.97  | 7.59  |
| 0/1 | 1/1 | 5.62  | 5.35  |
| 1/1 | 1/1 | 6.14  | 6.15  |

|     |     |       |      |
|-----|-----|-------|------|
| 0/1 | 1/1 | 4.34  | 4.39 |
| 0/1 | 1/1 | 6.61  | 6.91 |
| 1/1 | 1/1 | 6.83  | 7.16 |
| 1/1 | 1/1 | 7.48  | 7.81 |
| 0/1 | 1/1 | 5.02  | 7.51 |
| 1/1 | 1/1 | 4.49  | 6.99 |
| 1/1 | 1/1 | 4.98  | 7.49 |
| 1/1 | 1/1 | 5.77  | 8.33 |
| 1/1 | 1/1 | 5.41  | 8.02 |
| 0/1 | 1/1 | 3.87  | 6.96 |
| 1/1 | 1/1 | 9.95  | 8.59 |
| 1/1 | 1/1 | 4.98  | 3.79 |
| 0/1 | 1/1 | 5     | 4.76 |
| 1/1 | 1/1 | 5.74  | 5.59 |
| 1/1 | 1/1 | 4.98  | 4.83 |
| 1/1 | 1/1 | 8.14  | 8.16 |
| 0/1 | 1/1 | 7.55  | 7.62 |
| 0/1 | 1/1 | 4.21  | 4.32 |
| 0/1 | 1/1 | 6.88  | 7.02 |
| 1/1 | 1/1 | 5.37  | 5.55 |
| 1/1 | 1/1 | 5.13  | 7.3  |
| 1/1 | 1/1 | 5.52  | 7.88 |
| 0/1 | 1/1 | 4.06  | 6.47 |
| 1/1 | 1/1 | 6.65  | 9.1  |
| 1/1 | 1/1 | 4.93  | 7.46 |
| 1/1 | 1/1 | 6.02  | 8.57 |
| 1/1 | 1/1 | 5.1   | 7.76 |
| 1/1 | 1/1 | 4.64  | 7.35 |
| 1/1 | 1/1 | 4.39  | 7.11 |
| 0/1 | 1/1 | 4.05  | 7.24 |
| 1/1 | 1/1 | 7.4   | 5.28 |
| 1/1 | 1/1 | 4.32  | 2.93 |
| 1/1 | 1/1 | 3.99  | 5.82 |
| 1/1 | 0/1 | 7.33  | 2.35 |
| 1/1 | 0/1 | 7.83  | 3.22 |
| 1/1 | 1/1 | 7.44  | 3.15 |
| 1/1 | 1/1 | 3.67  | 2.41 |
| 1/1 | 0/1 | 3.82  | 2.79 |
| 1/1 | 1/1 | 7.03  | 6.05 |
| 1/1 | 0/1 | 2.73  | 1.75 |
| 1/1 | 1/1 | 5.74  | 5.14 |
| 1/1 | 1/1 | 2.39  | 2.17 |
| 1/1 | 1/1 | 2.86  | 2.67 |
| 1/1 | 0/1 | 2.19  | 2.14 |
| 1/1 | 1/1 | 5.32  | 5.5  |
| 1/1 | 0/1 | 4.86  | 2.22 |
| 1/1 | 0/1 | 5.25  | 2.65 |
| 1/1 | 1/1 | 5.3   | 3.16 |
| 1/1 | 0/1 | 3.65  | 2.19 |
| 1/1 | 1/1 | 6.12  | 5.01 |
| 1/1 | 1/1 | 5.6   | 6.56 |
| 0/1 | 1/1 | 5.72  | 7.33 |
| 1/1 | 1/1 | 10.09 | 8.02 |
| 1/1 | 1/1 | 5.32  | 4.45 |
| 1/1 | 1/1 | 4.14  | 3.52 |
| 1/1 | 1/1 | 5.25  | 4.65 |
| 1/1 | 1/1 | 6.27  | 7.73 |
| 1/1 | 1/1 | 4.96  | 6.55 |



|     |     |       |       |
|-----|-----|-------|-------|
| 1/1 | 0/1 | 8.72  | 8.14  |
| 0/1 | 1/1 | 7     | 6.66  |
| 1/1 | 1/1 | 5.17  | 5.04  |
| 1/1 | 1/1 | 8.72  | 8.6   |
| 1/1 | 1/1 | 7.1   | 6.98  |
| 1/1 | 1/1 | 9     | 9.01  |
| 1/1 | 1/1 | 5.35  | 5.43  |
| 0/1 | 1/1 | 3.02  | 3.2   |
| 1/1 | 1/1 | 5.51  | 5.97  |
| 1/1 | 1/1 | 7.63  | 8.3   |
| 0/1 | 1/1 | 4.5   | 5.29  |
| 0/1 | 1/1 | 3.95  | 6.91  |
| 0/1 | 1/1 | 3.57  | 6.57  |
| 0/1 | 1/1 | 4.21  | 7.47  |
| 0/1 | 1/1 | 3.68  | 7.08  |
| 1/1 | 1/1 | 3.92  | 7.72  |
| 0/1 | 1/1 | 3.91  | 7.75  |
| 0/1 | 1/1 | 3.96  | 7.85  |
| 1/1 | 1/1 | 4.64  | 8.63  |
| 0/1 | 1/1 | 3.53  | 8.03  |
| 1/1 | 1/1 | 5.1   | 2.84  |
| 1/1 | 1/1 | 4.53  | 2.97  |
| 1/1 | 0/1 | 3.92  | 2.57  |
| 1/1 | 1/1 | 11.73 | 10.91 |
| 1/1 | 0/1 | 4.6   | 2.26  |
| 1/1 | 0/1 | 6.2   | 4.82  |
| 1/1 | 1/1 | 4.36  | 5.65  |
| 1/1 | 0/1 | 7.05  | 3.92  |
| 1/1 | 1/1 | 5.68  | 3.74  |
| 1/1 | 0/1 | 4.32  | 2.52  |
| 1/1 | 0/1 | 4.78  | 3     |
| 1/1 | 0/1 | 5.64  | 3.89  |
| 1/1 | 1/1 | 6.2   | 4.5   |
| 0/1 | 1/1 | 1.85  | 2.45  |
| 0/1 | 1/1 | 2.16  | 3.06  |
| 1/1 | 1/1 | 5.63  | 6.57  |
| 0/1 | 1/1 | 1.64  | 2.59  |
| 0/1 | 1/1 | 5.04  | 6     |
| 1/1 | 1/1 | 4.2   | 5.31  |
| 1/1 | 0/1 | 7.78  | 4.65  |
| 1/1 | 0/1 | 5.75  | 3.62  |
| 1/1 | 1/1 | 7.73  | 5.72  |
| 1/1 | 1/1 | 9.24  | 7.25  |
| 1/1 | 1/1 | 7.36  | 5.46  |
| 1/1 | 0/1 | 4.5   | 2.65  |
| 1/1 | 1/1 | 7.87  | 6.05  |
| 1/1 | 0/1 | 4.95  | 3.13  |
| 1/1 | 1/1 | 7.33  | 5.57  |
| 1/1 | 0/1 | 5.67  | 4     |
| 0/1 | 1/1 | 7.04  | 7.49  |
| 0/1 | 1/1 | 2.68  | 3.69  |
| 0/1 | 1/1 | 6.14  | 5.73  |
| 1/1 | 1/1 | 9.88  | 9.5   |
| 0/1 | 1/1 | 2.25  | 2.31  |
| 0/1 | 1/1 | 3.84  | 4     |
| 0/1 | 1/1 | 2.69  | 2.9   |
| 1/1 | 1/1 | 7.27  | 7.51  |
| 0/1 | 1/1 | 2.49  | 2.79  |

|     |     |       |       |
|-----|-----|-------|-------|
| 1/1 | 1/1 | 5.98  | 6.35  |
| 1/1 | 1/1 | 8.5   | 8.95  |
| 0/1 | 1/1 | 3.25  | 4.13  |
| 1/1 | 1/1 | 7.83  | 8.88  |
| 1/1 | 1/1 | 3.92  | 7.19  |
| 0/1 | 1/1 | 3.29  | 7.13  |
| 0/1 | 1/1 | 2.07  | 6.1   |
| 0/1 | 1/1 | 2.63  | 6.92  |
| 1/1 | 0/1 | 4.42  | 2.57  |
| 1/1 | 1/1 | 4.24  | 3.04  |
| 1/1 | 1/1 | 11.56 | 10.87 |
| 1/1 | 1/1 | 5.88  | 5.21  |
| 1/1 | 1/1 | 6.16  | 5.6   |
| 1/1 | 1/1 | 3.85  | 3.3   |
| 1/1 | 1/1 | 4.97  | 4.42  |
| 1/1 | 1/1 | 6.35  | 5.81  |
| 1/1 | 1/1 | 4.69  | 4.22  |
| 1/1 | 1/1 | 5.95  | 5.54  |
| 1/1 | 1/1 | 5.1   | 4.74  |
| 0/1 | 1/1 | 5.21  | 4.88  |
| 0/1 | 1/1 | 2.51  | 4.17  |
| 0/1 | 1/1 | 3.29  | 4.97  |
| 0/1 | 1/1 | 2     | 3.73  |
| 1/1 | 1/1 | 5.48  | 7.26  |
| 1/1 | 1/1 | 3.24  | 5.02  |
| 0/1 | 1/1 | 2.46  | 4.28  |
| 0/1 | 1/1 | 4.05  | 5.89  |
| 1/1 | 1/1 | 4.26  | 6.14  |
| 1/1 | 1/1 | 3.69  | 5.61  |
| 0/1 | 1/1 | 3.55  | 5.48  |
| 0/1 | 1/1 | 3.58  | 5.51  |
| 0/1 | 1/1 | 3.77  | 5.73  |
| 1/1 | 1/1 | 4.68  | 6.64  |
| 0/1 | 1/1 | 2.84  | 4.89  |
| 1/1 | 1/1 | 4.47  | 6.54  |
| 0/1 | 1/1 | 2.88  | 5.05  |
| 1/1 | 1/1 | 5.44  | 7.63  |
| 1/1 | 1/1 | 4.86  | 7.06  |
| 1/1 | 1/1 | 3.05  | 5.28  |
| 1/1 | 1/1 | 5.46  | 8     |
| 0/1 | 1/1 | 4.06  | 6.66  |
| 0/1 | 1/1 | 3.2   | 5.87  |
| 1/1 | 1/1 | 3.5   | 6.18  |
| 1/1 | 1/1 | 2.98  | 5.88  |
| 0/1 | 1/1 | 3.79  | 6.7   |
| 1/1 | 1/1 | 6.03  | 5.21  |
| 1/1 | 1/1 | 11.88 | 11.21 |
| 1/1 | 1/1 | 2.99  | 2.68  |
| 1/1 | 1/1 | 5.39  | 5.21  |
| 1/1 | 1/1 | 4.3   | 4.24  |
| 1/1 | 1/1 | 5.07  | 5.15  |
| 1/1 | 1/1 | 8.06  | 8.16  |
| 0/1 | 1/1 | 3.86  | 3.98  |
| 0/1 | 1/1 | 4.2   | 4.54  |
| 0/1 | 1/1 | 3.54  | 6.56  |
| 0/1 | 1/1 | 2.36  | 5.63  |
| 1/1 | 1/1 | 7.36  | 5.16  |
| 1/1 | 1/1 | 5.43  | 3.55  |

|     |     |       |       |
|-----|-----|-------|-------|
| 1/1 | 1/1 | 7.35  | 5.64  |
| 1/1 | 1/1 | 5.5   | 4.57  |
| 1/1 | 1/1 | 7.48  | 8.83  |
| 1/1 | 1/1 | 6.44  | 7.84  |
| 1/1 | 1/1 | 3.38  | 4.91  |
| 1/1 | 1/1 | 6.2   | 7.83  |
| 1/1 | 1/1 | 4.15  | 6.31  |
| 1/1 | 0/1 | 5.56  | 4.34  |
| 1/1 | 1/1 | 7.26  | 6.55  |
| 1/1 | 1/1 | 4.17  | 4.11  |
| 1/1 | 1/1 | 7.73  | 7.72  |
| 1/1 | 1/1 | 6.62  | 6.63  |
| 1/1 | 1/1 | 12.77 | 12.8  |
| 1/1 | 1/1 | 4.86  | 5.13  |
| 1/1 | 1/1 | 6.76  | 4.21  |
| 1/1 | 0/1 | 6.02  | 3.65  |
| 1/1 | 0/1 | 4.44  | 2.29  |
| 1/1 | 1/1 | 4.95  | 3.57  |
| 1/1 | 0/1 | 3.34  | 2.23  |
| 1/1 | 1/1 | 4.75  | 3.68  |
| 1/1 | 1/1 | 9.15  | 6.04  |
| 1/1 | 1/1 | 7.85  | 4.74  |
| 1/1 | 1/1 | 7.49  | 4.58  |
| 1/1 | 1/1 | 9.06  | 6.53  |
| 1/1 | 1/1 | 8.4   | 5.98  |
| 1/1 | 1/1 | 8.84  | 6.49  |
| 1/1 | 1/1 | 8.11  | 5.77  |
| 1/1 | 1/1 | 6.43  | 4.26  |
| 1/1 | 1/1 | 5.38  | 3.23  |
| 1/1 | 1/1 | 7.56  | 5.71  |
| 1/1 | 1/1 | 7.88  | 6.11  |
| 1/1 | 1/1 | 7.79  | 6.11  |
| 1/1 | 1/1 | 6.22  | 6.78  |
| 1/1 | 1/1 | 3.62  | 4.38  |
| 1/1 | 1/1 | 6.36  | 5.71  |
| 1/1 | 1/1 | 5.12  | 4.91  |
| 1/1 | 1/1 | 6.21  | 6.03  |
| 1/1 | 1/1 | 4.48  | 4.35  |
| 1/1 | 1/1 | 6.07  | 5.98  |
| 1/1 | 1/1 | 12.44 | 12.52 |
| 1/1 | 1/1 | 4.28  | 4.62  |
| 1/1 | 1/1 | 6.91  | 7.26  |
| 1/1 | 1/1 | 5.9   | 6.24  |
| 1/1 | 1/1 | 7.25  | 7.65  |
| 1/1 | 1/1 | 6.07  | 6.5   |
| 1/1 | 1/1 | 10.49 | 10.95 |
| 1/1 | 1/1 | 8.25  | 8.81  |
| 0/1 | 1/1 | 4.71  | 5.3   |
| 0/1 | 1/1 | 4.41  | 5.07  |
| 1/1 | 1/1 | 5.04  | 5.71  |
| 1/1 | 1/1 | 5.42  | 6.11  |
| 1/1 | 1/1 | 9.31  | 10.05 |
| 0/1 | 1/1 | 6.1   | 6.94  |
| 1/1 | 0/1 | 7.16  | 5.45  |
| 1/1 | 0/1 | 6.77  | 5.77  |
| 1/1 | 1/1 | 9.69  | 8.79  |
| 1/1 | 1/1 | 6.12  | 5.38  |
| 1/1 | 1/1 | 11.44 | 10.74 |

|     |     |       |       |
|-----|-----|-------|-------|
| 1/1 | 1/1 | 8.44  | 7.95  |
| 1/1 | 1/1 | 6.49  | 6.04  |
| 1/1 | 1/1 | 6.11  | 5.75  |
| 1/1 | 1/1 | 6.33  | 5.98  |
| 1/1 | 0/1 | 6.21  | 3.85  |
| 1/1 | 1/1 | 6.51  | 5.42  |
| 1/1 | 1/1 | 5.86  | 4.82  |
| 1/1 | 1/1 | 6.39  | 7.74  |
| 1/1 | 0/1 | 7.37  | 5.09  |
| 1/1 | 1/1 | 7.98  | 7.01  |
| 1/1 | 0/1 | 4.73  | 3.83  |
| 1/1 | 1/1 | 9.15  | 4.49  |
| 1/1 | 1/1 | 8.26  | 4.78  |
| 1/1 | 1/1 | 8.12  | 4.74  |
| 1/1 | 0/1 | 6.16  | 2.99  |
| 1/1 | 1/1 | 6.73  | 5.65  |
| 1/1 | 0/1 | 3.33  | 2.29  |
| 1/1 | 1/1 | 3.76  | 2.81  |
| 1/1 | 1/1 | 8.72  | 7.77  |
| 1/1 | 1/1 | 4.75  | 3.87  |
| 1/1 | 1/1 | 8.96  | 8.18  |
| 1/1 | 1/1 | 6.92  | 6.22  |
| 1/1 | 1/1 | 3.81  | 3.24  |
| 1/1 | 1/1 | 7.54  | 7.01  |
| 1/1 | 1/1 | 6.96  | 6.5   |
| 1/1 | 1/1 | 9.39  | 8.95  |
| 1/1 | 1/1 | 8.49  | 8.06  |
| 0/1 | 1/1 | 6.47  | 6.08  |
| 1/1 | 1/1 | 4.73  | 4.33  |
| 1/1 | 1/1 | 6.35  | 5.95  |
| 1/1 | 1/1 | 3.55  | 3.48  |
| 1/1 | 1/1 | 6.38  | 6.32  |
| 1/1 | 1/1 | 6.54  | 6.96  |
| 1/1 | 1/1 | 4.25  | 4.72  |
| 1/1 | 1/1 | 3.81  | 2.18  |
| 1/1 | 0/1 | 5.78  | 4.94  |
| 1/1 | 1/1 | 2.78  | 2.4   |
| 1/1 | 1/1 | 7.9   | 7.57  |
| 1/1 | 1/1 | 4.77  | 6.67  |
| 1/1 | 1/1 | 3.23  | 5.24  |
| 0/1 | 1/1 | 2.14  | 4.21  |
| 1/1 | 1/1 | 4.88  | 7.14  |
| 1/1 | 0/1 | 6.85  | 3.3   |
| 1/1 | 1/1 | 5.42  | 5.44  |
| 1/1 | 1/1 | 12.38 | 12.53 |
| 1/1 | 1/1 | 12.38 | 12.53 |
| 1/1 | 1/1 | 8.81  | 9.39  |
| 1/1 | 1/1 | 7.05  | 6.28  |
| 1/1 | 0/1 | 4.57  | 4.08  |
| 1/1 | 1/1 | 5.11  | 5     |
| 1/1 | 1/1 | 6.54  | 6.44  |
| 1/1 | 1/1 | 5.29  | 5.25  |
| 0/1 | 1/1 | 4.6   | 4.59  |
| 1/1 | 1/1 | 6.98  | 7.07  |
| 1/1 | 1/1 | 6.92  | 7.02  |
| 0/1 | 1/1 | 7.87  | 8.03  |
| 1/1 | 1/1 | 5.25  | 5.42  |
| 0/1 | 1/1 | 4.22  | 4.39  |

|     |     |       |       |
|-----|-----|-------|-------|
| 0/1 | 1/1 | 5.54  | 5.73  |
| 0/1 | 1/1 | 7.31  | 7.58  |
| 1/1 | 1/1 | 7.31  | 7.6   |
| 0/1 | 1/1 | 5.2   | 5.56  |
| 0/1 | 1/1 | 6.96  | 7.32  |
| 1/1 | 1/1 | 6.04  | 6.45  |
| 0/1 | 1/1 | 5.98  | 6.4   |
| 1/1 | 1/1 | 7.41  | 7.87  |
| 0/1 | 1/1 | 2.65  | 3.17  |
| 0/1 | 1/1 | 4.66  | 5.23  |
| 1/1 | 1/1 | 6.81  | 7.42  |
| 1/1 | 1/1 | 6.37  | 7.08  |
| 0/1 | 1/1 | 3.3   | 6.41  |
| 0/1 | 1/1 | 4.29  | 7.59  |
| 1/1 | 1/1 | 3.16  | 6.52  |
| 0/1 | 1/1 | 4.2   | 7.67  |
| 0/1 | 1/1 | 3.22  | 6.72  |
| 1/1 | 1/1 | 3.23  | 7.64  |
| 0/1 | 1/1 | 3.79  | 8.29  |
| 0/1 | 1/1 | 3.52  | 8.03  |
| 0/1 | 1/1 | 1.85  | 7.39  |
| 1/1 | 0/1 | 4.52  | 2.76  |
| 1/1 | 1/1 | 5.43  | 4.6   |
| 1/1 | 1/1 | 5.75  | 5.19  |
| 1/1 | 1/1 | 4.71  | 4.16  |
| 1/1 | 1/1 | 8.47  | 10.71 |
| 0/1 | 1/1 | 5.47  | 7.8   |
| 1/1 | 1/1 | 10.42 | 8.32  |
| 1/1 | 1/1 | 7.25  | 6.56  |
| 1/1 | 0/1 | 7.82  | 2.68  |
| 1/1 | 0/1 | 7.84  | 3.12  |
| 1/1 | 0/1 | 7.53  | 2.81  |
| 1/1 | 0/1 | 8.03  | 3.47  |
| 1/1 | 0/1 | 7.18  | 2.7   |
| 1/1 | 0/1 | 6.66  | 2.32  |
| 1/1 | 1/1 | 9.02  | 4.69  |
| 1/1 | 0/1 | 6.51  | 2.19  |
| 1/1 | 1/1 | 7.13  | 2.81  |
| 1/1 | 1/1 | 7.41  | 3.17  |
| 1/1 | 0/1 | 6.39  | 2.17  |
| 1/1 | 1/1 | 7.54  | 3.33  |
| 1/1 | 1/1 | 7.06  | 3.03  |
| 1/1 | 0/1 | 6.96  | 3.06  |
| 1/1 | 1/1 | 8.09  | 4.21  |
| 1/1 | 1/1 | 8.66  | 4.78  |
| 1/1 | 0/1 | 6.54  | 2.72  |
| 1/1 | 0/1 | 5.43  | 3.78  |
| 1/1 | 0/1 | 4.77  | 3.15  |
| 1/1 | 0/1 | 4.3   | 2.72  |
| 1/1 | 1/1 | 6.15  | 4.62  |
| 1/1 | 1/1 | 9.5   | 7.99  |
| 1/1 | 1/1 | 4.72  | 3.22  |
| 1/1 | 1/1 | 6.29  | 4.79  |
| 1/1 | 0/1 | 4.09  | 2.67  |
| 1/1 | 0/1 | 6.65  | 5.31  |
| 1/1 | 0/1 | 3.5   | 2.17  |
| 1/1 | 0/1 | 4.15  | 2.86  |
| 1/1 | 0/1 | 3.31  | 2.2   |

|     |     |       |       |
|-----|-----|-------|-------|
| 1/1 | 1/1 | 4.22  | 3.12  |
| 1/1 | 1/1 | 4.74  | 3.75  |
| 1/1 | 0/1 | 3.56  | 2.58  |
| 1/1 | 0/1 | 4.02  | 3.11  |
| 1/1 | 0/1 | 3.76  | 2.87  |
| 1/1 | 0/1 | 2.94  | 2.09  |
| 1/1 | 0/1 | 2.64  | 1.9   |
| 1/1 | 1/1 | 5.34  | 4.61  |
| 1/1 | 1/1 | 4.84  | 4.14  |
| 1/1 | 0/1 | 2.81  | 2.14  |
| 1/1 | 1/1 | 4.79  | 4.23  |
| 1/1 | 1/1 | 4.54  | 4.16  |
| 1/1 | 1/1 | 3.54  | 3.2   |
| 1/1 | 0/1 | 2.74  | 2.5   |
| 1/1 | 1/1 | 2.95  | 2.73  |
| 1/1 | 1/1 | 8.35  | 8.29  |
| 1/1 | 1/1 | 8.57  | 5.79  |
| 1/1 | 1/1 | 5.45  | 6.25  |
| 1/1 | 1/1 | 6.21  | 4.25  |
| 1/1 | 1/1 | 8.92  | 7.98  |
| 1/1 | 1/1 | 6.9   | 6.16  |
| 1/1 | 0/1 | 5.03  | 2.76  |
| 1/1 | 1/1 | 3.31  | 4.77  |
| 1/1 | 1/1 | 5.44  | 5.18  |
| 0/1 | 1/1 | 6.31  | 6.24  |
| 1/1 | 1/1 | 6.89  | 7.36  |
| 1/1 | 1/1 | 6.66  | 7.23  |
| 0/1 | 1/1 | 4.88  | 5.5   |
| 1/1 | 1/1 | 6.39  | 9.69  |
| 1/1 | 1/1 | 6.27  | 10.98 |
| 1/1 | 1/1 | 5.32  | 3.63  |
| 1/1 | 0/1 | 3.55  | 2.73  |
| 1/1 | 0/1 | 3.3   | 2.71  |
| 1/1 | 1/1 | 10.69 | 10.23 |
| 1/1 | 1/1 | 6.63  | 6.23  |
| 1/1 | 1/1 | 3.56  | 3.17  |
| 1/1 | 1/1 | 3.31  | 2.98  |
| 0/1 | 1/1 | 6.79  | 6.5   |
| 1/1 | 1/1 | 7.15  | 6.93  |
| 1/1 | 0/1 | 4.07  | 2.29  |
| 1/1 | 0/1 | 4.53  | 3.22  |
| 1/1 | 1/1 | 8.03  | 7.32  |
| 1/1 | 1/1 | 3.85  | 3.24  |
| 1/1 | 1/1 | 6.88  | 6.37  |
| 1/1 | 1/1 | 6.29  | 5.78  |
| 1/1 | 1/1 | 5.79  | 5.32  |
| 1/1 | 1/1 | 5.75  | 5.4   |
| 1/1 | 1/1 | 6.56  | 6.22  |
| 1/1 | 1/1 | 5.73  | 7.58  |
| 0/1 | 1/1 | 3.21  | 5.97  |
| 1/1 | 0/1 | 4.07  | 2.29  |
| 1/1 | 0/1 | 4.53  | 3.22  |
| 1/1 | 1/1 | 4.01  | 3.09  |
| 1/1 | 1/1 | 8.03  | 7.32  |
| 1/1 | 1/1 | 6.88  | 6.37  |
| 1/1 | 1/1 | 6.29  | 5.78  |
| 1/1 | 1/1 | 5.79  | 5.32  |
| 1/1 | 1/1 | 5.75  | 5.4   |

|     |     |      |       |
|-----|-----|------|-------|
| 1/1 | 1/1 | 6.56 | 6.22  |
| 1/1 | 1/1 | 5.73 | 7.58  |
| 0/1 | 1/1 | 3.21 | 5.97  |
| 1/1 | 0/1 | 4.07 | 2.29  |
| 1/1 | 0/1 | 4.53 | 3.22  |
| 1/1 | 1/1 | 5.77 | 4.74  |
| 1/1 | 1/1 | 4.01 | 3.09  |
| 1/1 | 1/1 | 8.03 | 7.32  |
| 1/1 | 1/1 | 6.88 | 6.37  |
| 1/1 | 1/1 | 6.29 | 5.78  |
| 1/1 | 1/1 | 5.75 | 5.4   |
| 1/1 | 1/1 | 6.56 | 6.22  |
| 1/1 | 1/1 | 5.73 | 7.58  |
| 0/1 | 1/1 | 3.21 | 5.97  |
| 1/1 | 0/1 | 4.07 | 2.29  |
| 1/1 | 0/1 | 4.53 | 3.22  |
| 1/1 | 1/1 | 8.03 | 7.32  |
| 1/1 | 1/1 | 3.85 | 3.24  |
| 1/1 | 1/1 | 6.88 | 6.37  |
| 1/1 | 1/1 | 6.29 | 5.78  |
| 1/1 | 1/1 | 5.79 | 5.32  |
| 1/1 | 1/1 | 5.75 | 5.4   |
| 1/1 | 1/1 | 6.56 | 6.22  |
| 1/1 | 1/1 | 5.73 | 7.58  |
| 0/1 | 1/1 | 3.21 | 5.97  |
| 1/1 | 0/1 | 4.52 | 2.76  |
| 1/1 | 1/1 | 5.75 | 5.19  |
| 1/1 | 1/1 | 4.71 | 4.16  |
| 1/1 | 1/1 | 4.92 | 4.53  |
| 1/1 | 1/1 | 8.47 | 10.71 |
| 1/1 | 0/1 | 4.07 | 2.29  |
| 1/1 | 0/1 | 4.53 | 3.22  |
| 1/1 | 1/1 | 5.77 | 4.74  |
| 1/1 | 1/1 | 4.01 | 3.09  |
| 1/1 | 1/1 | 8.03 | 7.32  |
| 1/1 | 1/1 | 6.88 | 6.37  |
| 1/1 | 1/1 | 6.29 | 5.78  |
| 1/1 | 1/1 | 5.75 | 5.4   |
| 1/1 | 1/1 | 6.56 | 6.22  |
| 1/1 | 1/1 | 5.73 | 7.58  |
| 0/1 | 1/1 | 3.21 | 5.97  |
| 1/1 | 0/1 | 4.07 | 2.29  |
| 1/1 | 0/1 | 4.53 | 3.22  |
| 1/1 | 1/1 | 4.01 | 3.09  |
| 1/1 | 1/1 | 8.03 | 7.32  |
| 1/1 | 1/1 | 6.88 | 6.37  |
| 1/1 | 1/1 | 6.29 | 5.78  |
| 1/1 | 1/1 | 5.79 | 5.32  |
| 1/1 | 1/1 | 5.75 | 5.4   |
| 1/1 | 1/1 | 6.56 | 6.22  |
| 1/1 | 1/1 | 5.73 | 7.58  |
| 0/1 | 1/1 | 3.21 | 5.97  |
| 1/1 | 1/1 | 8.88 | 7.01  |
| 1/1 | 1/1 | 5    | 4.31  |
| 1/1 | 1/1 | 6.68 | 6.14  |
| 0/1 | 1/1 | 3.28 | 2.86  |
| 1/1 | 0/1 | 3.21 | 1.69  |
| 1/1 | 1/1 | 5.31 | 4.85  |

|     |     |       |       |
|-----|-----|-------|-------|
| 1/1 | 1/1 | 8.59  | 8.32  |
| 1/1 | 1/1 | 3.58  | 5.64  |
| 0/1 | 1/1 | 2.49  | 4.58  |
| 1/1 | 1/1 | 3.3   | 5.83  |
| 1/1 | 0/1 | 3.99  | 2.19  |
| 1/1 | 1/1 | 4.72  | 2.94  |
| 1/1 | 1/1 | 3.5   | 2.78  |
| 1/1 | 1/1 | 6.06  | 5.38  |
| 1/1 | 1/1 | 6.96  | 6.36  |
| 1/1 | 0/1 | 3.07  | 2.53  |
| 1/1 | 1/1 | 5.48  | 5.09  |
| 1/1 | 1/1 | 3.88  | 3.5   |
| 0/1 | 1/1 | 4.59  | 6.32  |
| 1/1 | 1/1 | 7.15  | 8.89  |
| 0/1 | 1/1 | 2.99  | 4.8   |
| 1/1 | 1/1 | 5.62  | 7.5   |
| 1/1 | 1/1 | 5.2   | 7.25  |
| 1/1 | 1/1 | 5.49  | 7.57  |
| 0/1 | 1/1 | 3.14  | 5.26  |
| 1/1 | 1/1 | 5.44  | 7.6   |
| 1/1 | 1/1 | 6.75  | 8.94  |
| 0/1 | 1/1 | 4.49  | 7.16  |
| 0/1 | 1/1 | 3.4   | 6.09  |
| 1/1 | 1/1 | 4.73  | 7.46  |
| 0/1 | 1/1 | 2.83  | 6.21  |
| 1/1 | 0/1 | 4.99  | 3.39  |
| 1/1 | 1/1 | 4.68  | 3.81  |
| 1/1 | 1/1 | 6.64  | 5.9   |
| 1/1 | 0/1 | 2.89  | 2.18  |
| 1/1 | 1/1 | 5.69  | 5.48  |
| 1/1 | 0/1 | 7.56  | 3.52  |
| 1/1 | 1/1 | 9.02  | 5.57  |
| 1/1 | 1/1 | 7.26  | 4.02  |
| 1/1 | 1/1 | 10.18 | 6.96  |
| 1/1 | 1/1 | 8.63  | 5.58  |
| 1/1 | 1/1 | 8.51  | 5.53  |
| 1/1 | 1/1 | 10.53 | 7.59  |
| 1/1 | 1/1 | 10.9  | 7.97  |
| 1/1 | 1/1 | 10.43 | 7.54  |
| 1/1 | 1/1 | 7.58  | 4.76  |
| 1/1 | 1/1 | 9.41  | 9.02  |
| 1/1 | 1/1 | 8.32  | 8.3   |
| 0/1 | 1/1 | 3.69  | 3.06  |
| 1/1 | 1/1 | 7.68  | 7.75  |
| 1/1 | 1/1 | 10.2  | 10.34 |
| 0/1 | 1/1 | 7.48  | 7.67  |
| 1/1 | 1/1 | 7.83  | 8.27  |
| 1/1 | 1/1 | 5.88  | 6.42  |
| 0/1 | 1/1 | 2.79  | 3.37  |
| 1/1 | 1/1 | 10.02 | 10.69 |
| 1/1 | 1/1 | 6.88  | 7.62  |
| 0/1 | 1/1 | 3.57  | 6.6   |
| 1/1 | 1/1 | 4.69  | 7.89  |
| 1/1 | 0/1 | 5.93  | 2.52  |
| 1/1 | 1/1 | 5.38  | 3.34  |
| 1/1 | 1/1 | 8.07  | 8.3   |
| 1/1 | 0/1 | 3.01  | 2.51  |
| 0/1 | 1/1 | 2.57  | 2.47  |



|     |     |       |      |
|-----|-----|-------|------|
| 1/1 | 1/1 | 8.26  | 8.18 |
| 0/1 | 1/1 | 2.09  | 2.32 |
| 1/1 | 1/1 | 5.96  | 6.2  |
| 0/1 | 1/1 | 2.53  | 2.8  |
| 0/1 | 1/1 | 2.1   | 2.54 |
| 1/1 | 1/1 | 3.73  | 4.28 |
| 1/1 | 1/1 | 5.8   | 6.5  |
| 0/1 | 1/1 | 2.74  | 3.44 |
| 0/1 | 1/1 | 3.34  | 4.15 |
| 0/1 | 1/1 | 3.58  | 6.72 |
| 0/1 | 1/1 | 2.93  | 6.5  |
| 0/1 | 1/1 | 2.17  | 6.03 |
| 1/1 | 1/1 | 6.73  | 4.82 |
| 1/1 | 1/1 | 4.28  | 3.72 |
| 1/1 | 1/1 | 5.16  | 4.65 |
| 1/1 | 1/1 | 5.08  | 4.58 |
| 1/1 | 1/1 | 3.35  | 5.03 |
| 0/1 | 1/1 | 3.27  | 5.16 |
| 0/1 | 1/1 | 3.59  | 5.53 |
| 0/1 | 1/1 | 3.59  | 5.61 |
| 1/1 | 1/1 | 5.89  | 4.22 |
| 1/1 | 1/1 | 5.54  | 4.38 |
| 1/1 | 0/1 | 6.18  | 5.19 |
| 1/1 | 0/1 | 4.11  | 3.27 |
| 1/1 | 0/1 | 3.66  | 2.9  |
| 1/1 | 0/1 | 3.49  | 2.81 |
| 1/1 | 1/1 | 3.76  | 3.11 |
| 1/1 | 1/1 | 4.44  | 3.81 |
| 1/1 | 1/1 | 5.63  | 5.15 |
| 1/1 | 1/1 | 4.64  | 4.29 |
| 1/1 | 1/1 | 2.88  | 2.59 |
| 1/1 | 1/1 | 4.81  | 4.53 |
| 1/1 | 1/1 | 6.37  | 4.38 |
| 1/1 | 1/1 | 6.86  | 5.75 |
| 1/1 | 1/1 | 9.49  | 8.64 |
| 1/1 | 1/1 | 4.63  | 3.91 |
| 1/1 | 1/1 | 3.24  | 5.27 |
| 1/1 | 0/1 | 4.29  | 2.6  |
| 1/1 | 1/1 | 8.62  | 7.92 |
| 1/1 | 1/1 | 6.74  | 6.21 |
| 1/1 | 1/1 | 8.44  | 7.96 |
| 0/1 | 1/1 | 2.72  | 4.87 |
| 0/1 | 1/1 | 2.43  | 4.59 |
| 1/1 | 0/1 | 7.63  | 4.92 |
| 1/1 | 1/1 | 11.27 | 9.58 |
| 1/1 | 1/1 | 8.47  | 6.87 |
| 1/1 | 1/1 | 8.87  | 7.3  |
| 1/1 | 0/1 | 6.7   | 5.29 |
| 1/1 | 0/1 | 7.73  | 6.4  |
| 0/1 | 1/1 | 5.06  | 5.91 |
| 0/1 | 1/1 | 6.02  | 6.88 |
| 1/1 | 1/1 | 4     | 4.89 |
| 1/1 | 1/1 | 7.54  | 8.58 |
| 0/1 | 1/1 | 5.46  | 6.67 |
| 0/1 | 1/1 | 2.62  | 3.87 |
| 0/1 | 1/1 | 3     | 5.23 |
| 0/1 | 1/1 | 7.55  | 7.31 |
| 1/1 | 1/1 | 8.5   | 8.37 |

|     |     |       |       |
|-----|-----|-------|-------|
| 0/1 | 1/1 | 5.59  | 5.85  |
| 1/1 | 1/1 | 6.41  | 6.86  |
| 0/1 | 1/1 | 5.45  | 6.13  |
| 0/1 | 1/1 | 2.15  | 3.27  |
| 1/1 | 1/1 | 2.88  | 6.36  |
| 1/1 | 1/1 | 5.33  | 9.1   |
| 1/1 | 0/1 | 3.16  | 1.85  |
| 1/1 | 1/1 | 9.1   | 8.71  |
| 1/1 | 1/1 | 11.4  | 11.08 |
| 0/1 | 1/1 | 5.6   | 5.35  |
| 1/1 | 1/1 | 9.87  | 9.66  |
| 1/1 | 1/1 | 7.62  | 7.58  |
| 1/1 | 1/1 | 5.45  | 5.49  |
| 1/1 | 1/1 | 3.67  | 6.28  |
| 1/1 | 0/1 | 3.8   | 2.21  |
| 1/1 | 1/1 | 6.58  | 5.98  |
| 1/1 | 1/1 | 8.34  | 7.77  |
| 1/1 | 1/1 | 3.48  | 3.3   |
| 1/1 | 1/1 | 5.18  | 7.03  |
| 0/1 | 1/1 | 2.53  | 4.53  |
| 0/1 | 1/1 | 3.8   | 5.8   |
| 1/1 | 0/1 | 6.06  | 1.83  |
| 1/1 | 0/1 | 6.36  | 2.57  |
| 1/1 | 0/1 | 6.73  | 3.06  |
| 1/1 | 1/1 | 6.37  | 3.56  |
| 1/1 | 1/1 | 4.93  | 4.21  |
| 1/1 | 1/1 | 5.27  | 4.9   |
| 0/1 | 1/1 | 2.69  | 2.71  |
| 1/1 | 1/1 | 11.59 | 11.75 |
| 0/1 | 1/1 | 2.27  | 2.47  |
| 1/1 | 1/1 | 7.54  | 5.62  |
| 1/1 | 1/1 | 6     | 5.25  |
| 1/1 | 1/1 | 3.87  | 3.2   |
| 1/1 | 1/1 | 6.3   | 5.72  |
| 1/1 | 1/1 | 6.94  | 6.36  |
| 1/1 | 0/1 | 5.52  | 3.88  |
| 1/1 | 1/1 | 5.71  | 4.72  |
| 1/1 | 1/1 | 6.83  | 6.42  |
| 0/1 | 1/1 | 5.96  | 5.68  |
| 0/1 | 1/1 | 6.02  | 7.91  |
| 1/1 | 1/1 | 5.33  | 7.41  |
| 1/1 | 1/1 | 5.24  | 7.66  |
| 0/1 | 1/1 | 3.48  | 5.98  |
| 1/1 | 1/1 | 3.63  | 7.07  |
| 0/1 | 1/1 | 1.99  | 6.47  |
| 1/1 | 1/1 | 9.86  | 8.83  |
| 1/1 | 1/1 | 11.63 | 10.71 |
| 1/1 | 1/1 | 8.1   | 7.85  |
| 1/1 | 1/1 | 4.5   | 4.26  |
| 1/1 | 0/1 | 2.11  | 1.88  |
| 1/1 | 1/1 | 5.14  | 8.24  |
| 0/1 | 1/1 | 3.49  | 7.55  |
| 1/1 | 1/1 | 6.79  | 6.3   |
| 1/1 | 1/1 | 8.53  | 8.11  |
| 0/1 | 1/1 | 2.07  | 2.67  |
| 1/1 | 1/1 | 6.51  | 7.4   |
| 1/1 | 1/1 | 6.63  | 5.64  |
| 1/1 | 1/1 | 4.58  | 4.4   |

|     |     |       |       |
|-----|-----|-------|-------|
| 0/1 | 1/1 | 5.04  | 4.88  |
| 1/1 | 1/1 | 8.24  | 8.13  |
| 0/1 | 1/1 | 6.52  | 6.48  |
| 1/1 | 1/1 | 2.31  | 2.42  |
| 1/1 | 1/1 | 5.79  | 6.13  |
| 1/1 | 1/1 | 4.43  | 4.83  |
| 1/1 | 1/1 | 4.34  | 7.23  |
| 1/1 | 1/1 | 5.1   | 8.21  |
| 1/1 | 1/1 | 5.03  | 8.71  |
| 0/1 | 1/1 | 4.1   | 7.98  |
| 1/1 | 1/1 | 4     | 2.9   |
| 1/1 | 1/1 | 8.96  | 8.62  |
| 1/1 | 1/1 | 11.65 | 11.41 |
| 0/1 | 1/1 | 5.04  | 4.88  |
| 1/1 | 1/1 | 6.02  | 5.91  |
| 1/1 | 1/1 | 6.94  | 6.98  |
| 1/1 | 1/1 | 6.38  | 6.43  |
| 1/1 | 1/1 | 8.27  | 8.33  |
| 1/1 | 1/1 | 8.54  | 8.81  |
| 0/1 | 1/1 | 2.49  | 2.77  |
| 1/1 | 0/1 | 4.6   | 3.31  |
| 0/1 | 1/1 | 5.76  | 5.4   |
| 0/1 | 1/1 | 5.88  | 5.89  |
| 1/1 | 1/1 | 6.42  | 6.51  |
| 1/1 | 0/1 | 6.62  | 3.22  |
| 1/1 | 1/1 | 6.9   | 4.29  |
| 1/1 | 1/1 | 5.01  | 5.06  |
| 1/1 | 1/1 | 7.31  | 6.05  |
| 1/1 | 1/1 | 8.63  | 7.73  |
| 1/1 | 1/1 | 9.18  | 8.65  |
| 1/1 | 1/1 | 4.88  | 4.38  |
| 1/1 | 1/1 | 4.98  | 4.56  |
| 0/1 | 1/1 | 6.63  | 6.34  |
| 0/1 | 1/1 | 3.07  | 2.79  |
| 1/1 | 1/1 | 2.91  | 2.66  |
| 1/1 | 1/1 | 6.53  | 6.29  |
| 1/1 | 1/1 | 6.14  | 5.97  |
| 1/1 | 1/1 | 9.44  | 9.33  |
| 0/1 | 1/1 | 2.39  | 2.28  |
| 1/1 | 1/1 | 5.61  | 5.55  |
| 0/1 | 1/1 | 2.91  | 2.85  |
| 1/1 | 1/1 | 6.23  | 6.17  |
| 1/1 | 1/1 | 12.69 | 12.68 |
| 1/1 | 1/1 | 5.48  | 5.51  |
| 0/1 | 1/1 | 4.59  | 4.64  |
| 1/1 | 1/1 | 4.9   | 4.95  |
| 1/1 | 1/1 | 9.08  | 9.17  |
| 0/1 | 1/1 | 6.83  | 6.98  |
| 1/1 | 1/1 | 6.16  | 4.89  |
| 1/1 | 0/1 | 2.55  | 2.19  |
| 1/1 | 1/1 | 3.76  | 3.53  |
| 0/1 | 1/1 | 3.57  | 3.39  |
| 1/1 | 1/1 | 9.47  | 9.32  |
| 0/1 | 1/1 | 2.84  | 2.73  |
| 0/1 | 1/1 | 2.95  | 2.85  |
| 1/1 | 1/1 | 4.1   | 4.09  |
| 1/1 | 1/1 | 8.03  | 8.1   |
| 0/1 | 1/1 | 3.6   | 3.68  |

|     |     |       |      |
|-----|-----|-------|------|
| 0/1 | 1/1 | 2.39  | 2.52 |
| 1/1 | 1/1 | 3.83  | 3.97 |
| 1/1 | 1/1 | 3.73  | 5.97 |
| 0/1 | 1/1 | 2.67  | 4.96 |
| 1/1 | 0/1 | 5.62  | 2.46 |
| 1/1 | 1/1 | 4.31  | 4.6  |
| 0/1 | 1/1 | 3.51  | 3.8  |
| 1/1 | 1/1 | 6.58  | 6.9  |
| 1/1 | 1/1 | 5.35  | 5.82 |
| 1/1 | 1/1 | 3.65  | 4.17 |
| 1/1 | 1/1 | 4.41  | 5.02 |
| 1/1 | 1/1 | 4.64  | 5.36 |
| 1/1 | 1/1 | 4.65  | 5.51 |
| 1/1 | 1/1 | 5.89  | 6.86 |
| 0/1 | 1/1 | 3.83  | 5.06 |
| 1/1 | 1/1 | 11.79 | 9.6  |
| 1/1 | 1/1 | 5.74  | 4.78 |
| 1/1 | 1/1 | 6.28  | 5.35 |
| 1/1 | 0/1 | 4.08  | 2.31 |
| 1/1 | 1/1 | 4.21  | 6.04 |
| 1/1 | 1/1 | 8.52  | 3.3  |
| 1/1 | 0/1 | 8.04  | 2.83 |
| 1/1 | 0/1 | 7.53  | 2.41 |
| 1/1 | 0/1 | 8.47  | 3.7  |
| 1/1 | 1/1 | 8.56  | 4.02 |
| 1/1 | 0/1 | 7.45  | 2.95 |
| 1/1 | 1/1 | 7.92  | 3.82 |
| 1/1 | 0/1 | 7.02  | 3.01 |
| 1/1 | 1/1 | 8.35  | 4.39 |
| 1/1 | 0/1 | 6.42  | 2.51 |
| 1/1 | 0/1 | 6.21  | 2.39 |
| 1/1 | 1/1 | 7.28  | 5.63 |
| 1/1 | 0/1 | 3.5   | 1.99 |
| 1/1 | 0/1 | 4.2   | 2.72 |
| 1/1 | 1/1 | 7.61  | 6.23 |
| 1/1 | 0/1 | 4.41  | 3.07 |
| 1/1 | 0/1 | 3.39  | 2.21 |
| 1/1 | 1/1 | 4.37  | 3.33 |
| 1/1 | 0/1 | 4.18  | 3.27 |
| 1/1 | 0/1 | 2.81  | 1.94 |
| 1/1 | 1/1 | 7.3   | 6.47 |
| 1/1 | 0/1 | 3.63  | 2.85 |
| 1/1 | 1/1 | 4.4   | 3.69 |
| 1/1 | 1/1 | 7.54  | 6.84 |
| 1/1 | 0/1 | 2.61  | 1.92 |
| 1/1 | 0/1 | 6.94  | 6.31 |
| 1/1 | 0/1 | 3.04  | 2.56 |
| 1/1 | 1/1 | 4.56  | 4.48 |
| 1/1 | 1/1 | 4.92  | 4.9  |
| 1/1 | 1/1 | 6.33  | 6.45 |
| 1/1 | 0/1 | 7.63  | 4.92 |
| 1/1 | 1/1 | 11.27 | 9.58 |
| 1/1 | 1/1 | 8.47  | 6.87 |
| 1/1 | 1/1 | 8.87  | 7.3  |
| 1/1 | 0/1 | 6.7   | 5.29 |
| 1/1 | 0/1 | 7.73  | 6.4  |
| 1/1 | 1/1 | 7.78  | 8.5  |
| 0/1 | 1/1 | 5.75  | 6.52 |

|     |     |       |      |
|-----|-----|-------|------|
| 0/1 | 1/1 | 5.06  | 5.91 |
| 0/1 | 1/1 | 6.02  | 6.88 |
| 1/1 | 1/1 | 4     | 4.89 |
| 1/1 | 1/1 | 7.54  | 8.58 |
| 0/1 | 1/1 | 5.46  | 6.67 |
| 0/1 | 1/1 | 2.62  | 3.87 |
| 0/1 | 1/1 | 3     | 5.23 |
| 1/1 | 1/1 | 5.94  | 4.7  |
| 0/1 | 1/1 | 4.5   | 3.85 |
| 1/1 | 1/1 | 8.2   | 7.76 |
| 1/1 | 0/1 | 2.09  | 1.85 |
| 1/1 | 1/1 | 7.56  | 7.41 |
| 1/1 | 1/1 | 3.14  | 3.11 |
| 0/1 | 1/1 | 6.07  | 6.12 |
| 1/1 | 1/1 | 3.84  | 6.39 |
| 0/1 | 1/1 | 2.88  | 5.51 |
| 1/1 | 1/1 | 4.17  | 7.25 |
| 1/1 | 0/1 | 4.46  | 2.48 |
| 1/1 | 1/1 | 7.99  | 6.14 |
| 1/1 | 1/1 | 6     | 5.13 |
| 1/1 | 1/1 | 4.54  | 3.83 |
| 1/1 | 1/1 | 4.07  | 3.5  |
| 1/1 | 1/1 | 3.51  | 5.06 |
| 1/1 | 1/1 | 4.09  | 5.65 |
| 1/1 | 0/1 | 7.63  | 4.92 |
| 1/1 | 1/1 | 11.27 | 9.58 |
| 1/1 | 1/1 | 8.47  | 6.87 |
| 1/1 | 1/1 | 8.87  | 7.3  |
| 1/1 | 0/1 | 6.7   | 5.29 |
| 1/1 | 0/1 | 7.73  | 6.4  |
| 1/1 | 1/1 | 7.78  | 8.5  |
| 0/1 | 1/1 | 5.06  | 5.91 |
| 0/1 | 1/1 | 6.02  | 6.88 |
| 1/1 | 1/1 | 4     | 4.89 |
| 1/1 | 1/1 | 7.54  | 8.58 |
| 0/1 | 1/1 | 5.46  | 6.67 |
| 0/1 | 1/1 | 2.62  | 3.87 |
| 0/1 | 1/1 | 3     | 5.23 |
| 1/1 | 1/1 | 9.33  | 3.47 |
| 1/1 | 0/1 | 8.44  | 2.61 |
| 1/1 | 0/1 | 8.69  | 2.94 |
| 1/1 | 0/1 | 8.71  | 3.05 |
| 1/1 | 0/1 | 7.92  | 2.79 |
| 1/1 | 0/1 | 7.45  | 2.35 |
| 1/1 | 1/1 | 9.33  | 4.31 |
| 1/1 | 0/1 | 8.6   | 3.85 |
| 1/1 | 1/1 | 7.78  | 3.26 |
| 1/1 | 0/1 | 6.82  | 2.32 |
| 1/1 | 0/1 | 6.32  | 1.84 |
| 1/1 | 1/1 | 8.77  | 4.29 |
| 1/1 | 1/1 | 7.4   | 2.95 |
| 1/1 | 0/1 | 6.84  | 2.4  |
| 1/1 | 1/1 | 9.3   | 6.95 |
| 1/1 | 0/1 | 4.61  | 2.39 |
| 1/1 | 0/1 | 4.24  | 2.03 |
| 1/1 | 0/1 | 4.57  | 2.38 |
| 1/1 | 1/1 | 5.35  | 3.34 |
| 1/1 | 1/1 | 4.48  | 2.65 |

|     |     |       |       |
|-----|-----|-------|-------|
| 1/1 | 1/1 | 5.42  | 3.6   |
| 1/1 | 0/1 | 4.25  | 2.47  |
| 1/1 | 0/1 | 5.58  | 3.86  |
| 1/1 | 0/1 | 5.86  | 4.19  |
| 1/1 | 1/1 | 5.55  | 4.05  |
| 1/1 | 1/1 | 8.41  | 6.96  |
| 1/1 | 1/1 | 4.13  | 2.69  |
| 1/1 | 0/1 | 4.74  | 3.34  |
| 1/1 | 1/1 | 8.19  | 6.88  |
| 1/1 | 0/1 | 3.41  | 2.32  |
| 1/1 | 1/1 | 6.42  | 5.45  |
| 1/1 | 0/1 | 3.41  | 2.44  |
| 1/1 | 0/1 | 3.42  | 2.55  |
| 1/1 | 1/1 | 6.51  | 5.84  |
| 1/1 | 1/1 | 6.65  | 6     |
| 1/1 | 1/1 | 3.47  | 2.85  |
| 1/1 | 0/1 | 2.9   | 2.29  |
| 1/1 | 1/1 | 9.21  | 8.62  |
| 1/1 | 0/1 | 2.84  | 2.37  |
| 1/1 | 1/1 | 10.39 | 9.94  |
| 1/1 | 1/1 | 6.75  | 6.41  |
| 1/1 | 1/1 | 3.79  | 3.55  |
| 0/1 | 1/1 | 2.9   | 2.95  |
| 1/1 | 0/1 | 2.77  | 2.83  |
| 1/1 | 1/1 | 6.28  | 6.37  |
| 1/1 | 1/1 | 10.95 | 11.09 |
| 1/1 | 1/1 | 8.41  | 8.65  |
| 1/1 | 1/1 | 8.61  | 8.93  |
| 0/1 | 1/1 | 4.39  | 4.84  |
| 1/1 | 1/1 | 5.64  | 2.92  |
| 1/1 | 1/1 | 3.31  | 4.15  |
| 1/1 | 1/1 | 5.21  | 5.85  |
| 1/1 | 1/1 | 5.76  | 7.03  |
| 0/1 | 1/1 | 3.74  | 5.13  |
| 1/1 | 1/1 | 4.48  | 5.93  |
| 1/1 | 1/1 | 7.95  | 9.6   |
| 1/1 | 1/1 | 3.74  | 5.49  |
| 1/1 | 1/1 | 10.35 | 6.35  |
| 1/1 | 0/1 | 7.39  | 3.51  |
| 1/1 | 1/1 | 8.63  | 5.5   |
| 1/1 | 1/1 | 8.2   | 7.65  |
| 1/1 | 1/1 | 8.09  | 7.85  |
| 1/1 | 1/1 | 8.28  | 8.04  |
| 1/1 | 1/1 | 8.8   | 8.53  |
| 1/1 | 1/1 | 8.35  | 8.61  |
| 1/1 | 1/1 | 5.16  | 5.79  |
| 1/1 | 0/1 | 7.63  | 4.92  |
| 1/1 | 1/1 | 11.27 | 9.58  |
| 1/1 | 1/1 | 8.47  | 6.87  |
| 1/1 | 1/1 | 8.87  | 7.3   |
| 1/1 | 0/1 | 6.7   | 5.29  |
| 1/1 | 0/1 | 7.73  | 6.4   |
| 1/1 | 1/1 | 7.78  | 8.5   |
| 0/1 | 1/1 | 5.06  | 5.91  |
| 0/1 | 1/1 | 6.02  | 6.88  |
| 1/1 | 1/1 | 4     | 4.89  |
| 1/1 | 1/1 | 7.54  | 8.58  |
| 0/1 | 1/1 | 5.46  | 6.67  |

|     |     |       |       |
|-----|-----|-------|-------|
| 0/1 | 1/1 | 2.62  | 3.87  |
| 0/1 | 1/1 | 3     | 5.23  |
| 1/1 | 0/1 | 7.63  | 4.92  |
| 1/1 | 1/1 | 11.27 | 9.58  |
| 1/1 | 1/1 | 8.47  | 6.87  |
| 1/1 | 1/1 | 8.87  | 7.3   |
| 1/1 | 0/1 | 6.7   | 5.29  |
| 1/1 | 0/1 | 7.73  | 6.4   |
| 1/1 | 1/1 | 7.78  | 8.5   |
| 0/1 | 1/1 | 5.06  | 5.91  |
| 0/1 | 1/1 | 6.02  | 6.88  |
| 1/1 | 1/1 | 4     | 4.89  |
| 1/1 | 1/1 | 7.54  | 8.58  |
| 0/1 | 1/1 | 5.46  | 6.67  |
| 0/1 | 1/1 | 2.62  | 3.87  |
| 0/1 | 1/1 | 3     | 5.23  |
| 1/1 | 0/1 | 7.63  | 4.92  |
| 1/1 | 1/1 | 11.27 | 9.58  |
| 1/1 | 1/1 | 8.47  | 6.87  |
| 1/1 | 1/1 | 8.87  | 7.3   |
| 1/1 | 0/1 | 6.7   | 5.29  |
| 1/1 | 0/1 | 7.73  | 6.4   |
| 1/1 | 1/1 | 7.78  | 8.5   |
| 0/1 | 1/1 | 5.06  | 5.91  |
| 0/1 | 1/1 | 6.02  | 6.88  |
| 1/1 | 1/1 | 4     | 4.89  |
| 1/1 | 1/1 | 7.54  | 8.58  |
| 0/1 | 1/1 | 5.46  | 6.67  |
| 0/1 | 1/1 | 2.62  | 3.87  |
| 0/1 | 1/1 | 3     | 5.23  |
| 1/1 | 0/1 | 7.63  | 4.92  |
| 1/1 | 1/1 | 11.27 | 9.58  |
| 1/1 | 1/1 | 8.47  | 6.87  |
| 1/1 | 1/1 | 8.87  | 7.3   |
| 1/1 | 0/1 | 6.7   | 5.29  |
| 1/1 | 0/1 | 7.73  | 6.4   |
| 1/1 | 1/1 | 7.78  | 8.5   |
| 0/1 | 1/1 | 5.06  | 5.91  |
| 0/1 | 1/1 | 6.02  | 6.88  |
| 1/1 | 1/1 | 4     | 4.89  |
| 1/1 | 1/1 | 7.54  | 8.58  |
| 0/1 | 1/1 | 5.46  | 6.67  |
| 0/1 | 1/1 | 2.62  | 3.87  |
| 0/1 | 1/1 | 3     | 5.23  |
| 1/1 | 0/1 | 5.53  | 4.03  |
| 1/1 | 0/1 | 5.53  | 4.2   |
| 1/1 | 1/1 | 8.28  | 7.32  |
| 1/1 | 1/1 | 6.83  | 6.13  |
| 1/1 | 1/1 | 6.4   | 5.79  |
| 1/1 | 1/1 | 5.95  | 5.37  |
| 0/1 | 1/1 | 5.09  | 4.67  |
| 1/1 | 1/1 | 6.25  | 5.84  |
| 1/1 | 1/1 | 11.96 | 11.6  |
| 1/1 | 1/1 | 11.67 | 11.31 |
| 1/1 | 1/1 | 6.64  | 6.29  |
| 1/1 | 1/1 | 6.36  | 6.07  |
| 1/1 | 1/1 | 6.83  | 6.66  |
| 1/1 | 1/1 | 4.46  | 4.29  |

|     |     |       |       |
|-----|-----|-------|-------|
| 1/1 | 1/1 | 6.22  | 6.07  |
| 1/1 | 1/1 | 7.02  | 6.88  |
| 0/1 | 1/1 | 3.51  | 5.88  |
| 0/1 | 1/1 | 4.21  | 6.8   |
| 1/1 | 1/1 | 6.94  | 6.68  |
| 1/1 | 1/1 | 2.47  | 2.26  |
| 1/1 | 1/1 | 4.15  | 3.94  |
| 0/1 | 1/1 | 2.98  | 3.13  |
| 1/1 | 1/1 | 6.36  | 6.54  |
| 1/1 | 1/1 | 3.06  | 3.33  |
| 0/1 | 1/1 | 2.38  | 2.72  |
| 1/1 | 1/1 | 5.21  | 5.59  |
| 1/1 | 1/1 | 8.65  | 9.23  |
| 1/1 | 1/1 | 3.12  | 3.71  |
| 0/1 | 1/1 | 2.95  | 3.55  |
| 0/1 | 1/1 | 1.93  | 2.57  |
| 0/1 | 1/1 | 3.06  | 3.71  |
| 1/1 | 1/1 | 3.86  | 4.57  |
| 1/1 | 1/1 | 3.32  | 4.08  |
| 1/1 | 1/1 | 9.2   | 10.06 |
| 1/1 | 1/1 | 5.26  | 6.25  |
| 0/1 | 1/1 | 2.56  | 3.57  |
| 1/1 | 1/1 | 7.51  | 8.57  |
| 1/1 | 0/1 | 3.79  | 2.45  |
| 1/1 | 1/1 | 7.22  | 7.03  |
| 1/1 | 1/1 | 4.31  | 4.14  |
| 0/1 | 1/1 | 8.13  | 7.98  |
| 0/1 | 1/1 | 2.71  | 2.65  |
| 1/1 | 1/1 | 6.53  | 6.48  |
| 1/1 | 1/1 | 8.41  | 8.4   |
| 1/1 | 1/1 | 7.71  | 7.73  |
| 1/1 | 1/1 | 5.13  | 7.34  |
| 1/1 | 1/1 | 10.03 | 8.23  |
| 1/1 | 1/1 | 7.34  | 6.59  |
| 1/1 | 1/1 | 4.74  | 6.38  |
| 0/1 | 1/1 | 2.2   | 4.37  |
| 1/1 | 1/1 | 8.81  | 7.5   |
| 1/1 | 1/1 | 8.81  | 7.63  |
| 1/1 | 1/1 | 4.45  | 4.09  |
| 1/1 | 1/1 | 8.41  | 8.15  |
| 1/1 | 1/1 | 6.42  | 6.33  |
| 0/1 | 1/1 | 2.36  | 4.5   |
| 1/1 | 1/1 | 5.19  | 4.19  |
| 1/1 | 1/1 | 7.98  | 7.56  |
| 1/1 | 1/1 | 7.6   | 7.62  |
| 0/1 | 1/1 | 8.02  | 8.22  |
| 1/1 | 1/1 | 4.82  | 5.15  |
| 1/1 | 1/1 | 7.17  | 7.53  |
| 1/1 | 1/1 | 8.53  | 8.23  |
| 1/1 | 1/1 | 6.47  | 6.21  |
| 1/1 | 1/1 | 8.13  | 7.95  |
| 1/1 | 1/1 | 7.03  | 7.07  |
| 1/1 | 1/1 | 6.95  | 7.24  |
| 0/1 | 1/1 | 2.84  | 3.61  |
| 0/1 | 1/1 | 2.71  | 5.85  |
| 1/1 | 1/1 | 3.73  | 7.48  |
| 1/1 | 1/1 | 4.87  | 3.7   |
| 1/1 | 1/1 | 3.29  | 2.64  |



|     |     |       |       |
|-----|-----|-------|-------|
| 1/1 | 1/1 | 9.05  | 8.45  |
| 1/1 | 1/1 | 7.98  | 7.58  |
| 1/1 | 1/1 | 11.43 | 11.17 |
| 1/1 | 1/1 | 7.3   | 7.03  |
| 1/1 | 1/1 | 3.11  | 2.92  |
| 1/1 | 1/1 | 5.18  | 5     |
| 1/1 | 1/1 | 4.72  | 4.58  |
| 1/1 | 1/1 | 2.28  | 2.19  |
| 1/1 | 1/1 | 9.48  | 9.42  |
| 0/1 | 1/1 | 7.13  | 7.1   |
| 0/1 | 1/1 | 3.34  | 3.33  |
| 1/1 | 1/1 | 6.08  | 6.12  |
| 1/1 | 1/1 | 6.86  | 6.97  |
| 1/1 | 1/1 | 9.4   | 9.51  |
| 1/1 | 1/1 | 5.29  | 5.45  |
| 0/1 | 1/1 | 2.56  | 2.76  |
| 1/1 | 1/1 | 5.13  | 5.35  |
| 0/1 | 1/1 | 3.3   | 5.65  |
| 1/1 | 1/1 | 4.85  | 7.21  |
| 0/1 | 1/1 | 1.76  | 5.4   |
| 1/1 | 1/1 | 2.78  | 7.16  |
| 1/1 | 0/1 | 8.29  | 4.97  |
| 1/1 | 1/1 | 6.12  | 3.31  |
| 1/1 | 1/1 | 8.74  | 6.01  |
| 1/1 | 0/1 | 5.04  | 2.65  |
| 1/1 | 0/1 | 4.67  | 2.67  |
| 1/1 | 1/1 | 9.72  | 9.53  |
| 0/1 | 1/1 | 3.91  | 3.78  |
| 0/1 | 1/1 | 2.67  | 2.83  |
| 1/1 | 1/1 | 5.9   | 6.33  |
| 1/1 | 1/1 | 5.19  | 5.81  |
| 1/1 | 1/1 | 8.6   | 9.38  |
| 1/1 | 1/1 | 2.58  | 3.65  |
| 1/1 | 1/1 | 5.18  | 6.29  |
| 1/1 | 1/1 | 4.71  | 3.97  |
| 1/1 | 1/1 | 4.77  | 4.34  |
| 0/1 | 1/1 | 4.43  | 4.51  |
| 1/1 | 1/1 | 3.91  | 4.11  |
| 1/1 | 1/1 | 9.92  | 10.17 |
| 1/1 | 1/1 | 6.91  | 7.28  |
| 1/1 | 1/1 | 6.75  | 7.34  |
| 0/1 | 1/1 | 2.57  | 3.17  |
| 1/1 | 1/1 | 3.36  | 6.07  |
| 0/1 | 1/1 | 2.92  | 5.93  |
| 1/1 | 0/1 | 5.67  | 4.29  |
| 1/1 | 1/1 | 8.3   | 7.47  |
| 1/1 | 1/1 | 4.69  | 3.91  |
| 1/1 | 1/1 | 4.25  | 3.88  |
| 1/1 | 1/1 | 5.79  | 5.44  |
| 1/1 | 1/1 | 7.85  | 7.54  |
| 1/1 | 1/1 | 9.33  | 9.16  |
| 1/1 | 1/1 | 6.17  | 6.03  |
| 1/1 | 1/1 | 4.93  | 4.82  |
| 1/1 | 1/1 | 9.61  | 9.52  |
| 1/1 | 1/1 | 8.61  | 8.58  |
| 1/1 | 1/1 | 3.89  | 3.88  |
| 1/1 | 1/1 | 3     | 5.16  |
| 0/1 | 1/1 | 3.38  | 5.58  |

|     |     |       |      |
|-----|-----|-------|------|
| 1/1 | 1/1 | 4.37  | 6.6  |
| 0/1 | 1/1 | 2.04  | 4.97 |
| 1/1 | 1/1 | 8.92  | 5.65 |
| 1/1 | 1/1 | 10.76 | 8.2  |
| 1/1 | 1/1 | 6.61  | 4.35 |
| 1/1 | 1/1 | 6.47  | 4.26 |
| 1/1 | 1/1 | 10.19 | 8.06 |
| 1/1 | 1/1 | 8.71  | 6.83 |
| 1/1 | 1/1 | 6.11  | 4.4  |
| 1/1 | 0/1 | 4.92  | 3.5  |
| 1/1 | 0/1 | 6.6   | 5.3  |
| 1/1 | 1/1 | 5.58  | 4.98 |
| 1/1 | 1/1 | 8.68  | 8.12 |
| 1/1 | 1/1 | 5.15  | 4.68 |
| 1/1 | 1/1 | 8.71  | 8.34 |
| 1/1 | 1/1 | 9.15  | 8.81 |
| 1/1 | 1/1 | 7.14  | 5.51 |
| 1/1 | 1/1 | 7.78  | 7.26 |
| 1/1 | 1/1 | 6.6   | 6.19 |
| 1/1 | 1/1 | 5.95  | 5.59 |
| 1/1 | 1/1 | 6.41  | 6.09 |
| 1/1 | 1/1 | 6.31  | 6.07 |
| 1/1 | 0/1 | 7.64  | 2.82 |
| 1/1 | 1/1 | 7.97  | 3.66 |
| 1/1 | 1/1 | 7.16  | 5.83 |
| 1/1 | 0/1 | 4.64  | 3.54 |
| 1/1 | 1/1 | 6.16  | 5.48 |
| 1/1 | 1/1 | 6.58  | 6.41 |
| 1/1 | 1/1 | 9.74  | 9.78 |
| 1/1 | 1/1 | 6.61  | 6.85 |
| 1/1 | 1/1 | 4.56  | 4.99 |
| 1/1 | 0/1 | 10.69 | 2.86 |
| 1/1 | 0/1 | 9.84  | 2.9  |
| 1/1 | 0/1 | 10.64 | 3.71 |
| 1/1 | 1/1 | 9.65  | 2.94 |
| 1/1 | 0/1 | 9.09  | 2.37 |
| 1/1 | 0/1 | 10.85 | 4.31 |
| 1/1 | 0/1 | 7.98  | 3.82 |
| 1/1 | 0/1 | 6.34  | 2.2  |
| 1/1 | 1/1 | 9.84  | 5.86 |
| 1/1 | 1/1 | 9.25  | 5.31 |
| 1/1 | 1/1 | 8.23  | 4.29 |
| 1/1 | 0/1 | 6.75  | 3.21 |
| 1/1 | 1/1 | 7.34  | 3.82 |
| 1/1 | 1/1 | 7.9   | 4.38 |
| 1/1 | 0/1 | 5.96  | 2.44 |
| 1/1 | 0/1 | 7.36  | 4.24 |
| 1/1 | 0/1 | 7.44  | 4.51 |
| 1/1 | 1/1 | 5.87  | 3.09 |
| 1/1 | 1/1 | 8.79  | 6.03 |
| 1/1 | 0/1 | 5.94  | 3.23 |
| 1/1 | 0/1 | 4.79  | 2.24 |
| 1/1 | 1/1 | 10.19 | 8.47 |
| 1/1 | 1/1 | 9.16  | 7.75 |
| 1/1 | 1/1 | 7.88  | 6.76 |
| 1/1 | 1/1 | 7.6   | 6.63 |
| 1/1 | 1/1 | 6.16  | 5.3  |
| 1/1 | 0/1 | 2.84  | 2.17 |

|     |     |       |       |
|-----|-----|-------|-------|
| 1/1 | 1/1 | 6.41  | 5.16  |
| 1/1 | 1/1 | 7.08  | 6.41  |
| 1/1 | 1/1 | 8.02  | 7.5   |
| 1/1 | 1/1 | 5.76  | 5.48  |
| 1/1 | 0/1 | 3.58  | 3.31  |
| 1/1 | 1/1 | 4.55  | 4.31  |
| 0/1 | 1/1 | 5.45  | 5.24  |
| 1/1 | 1/1 | 3.94  | 3.8   |
| 1/1 | 1/1 | 6.29  | 6.15  |
| 0/1 | 1/1 | 3.64  | 3.59  |
| 1/1 | 1/1 | 6.54  | 6.57  |
| 1/1 | 1/1 | 5.22  | 7.7   |
| 1/1 | 1/1 | 4.51  | 7.87  |
| 0/1 | 1/1 | 4     | 7.54  |
| 1/1 | 1/1 | 3.59  | 8.09  |
| 0/1 | 1/1 | 1.69  | 6.25  |
| 1/1 | 0/1 | 4.64  | 2.39  |
| 1/1 | 0/1 | 3.67  | 2.36  |
| 1/1 | 1/1 | 7.98  | 6.88  |
| 1/1 | 1/1 | 8.69  | 7.8   |
| 1/1 | 1/1 | 4.95  | 4.05  |
| 1/1 | 1/1 | 8.46  | 4.59  |
| 1/1 | 1/1 | 9.05  | 5.78  |
| 1/1 | 1/1 | 7.82  | 4.7   |
| 1/1 | 1/1 | 9.2   | 6.2   |
| 1/1 | 1/1 | 9.85  | 6.87  |
| 1/1 | 1/1 | 9.11  | 6.2   |
| 1/1 | 1/1 | 8.86  | 5.96  |
| 1/1 | 1/1 | 10.33 | 7.47  |
| 1/1 | 1/1 | 10.22 | 7.64  |
| 1/1 | 1/1 | 9.09  | 6.55  |
| 1/1 | 1/1 | 8.52  | 5.99  |
| 1/1 | 1/1 | 9.61  | 7.1   |
| 1/1 | 1/1 | 13.19 | 12.7  |
| 1/1 | 1/1 | 13.59 | 13.11 |
| 1/1 | 1/1 | 13.41 | 12.94 |
| 1/1 | 1/1 | 12.94 | 12.53 |
| 1/1 | 1/1 | 13.54 | 13.16 |
| 1/1 | 1/1 | 12.75 | 12.4  |
| 1/1 | 1/1 | 13.3  | 12.99 |
| 1/1 | 1/1 | 13.36 | 13.06 |
| 1/1 | 1/1 | 13.42 | 13.18 |
| 1/1 | 1/1 | 13.03 | 12.8  |
| 1/1 | 1/1 | 13.37 | 13.15 |
| 1/1 | 1/1 | 12.97 | 12.92 |
| 1/1 | 1/1 | 6.88  | 6.85  |
| 1/1 | 0/1 | 4.14  | 3.02  |
| 1/1 | 1/1 | 4.1   | 3.49  |
| 1/1 | 1/1 | 2.77  | 2.41  |
| 0/1 | 1/1 | 4.12  | 3.98  |
| 1/1 | 1/1 | 4.81  | 4.76  |
| 1/1 | 1/1 | 9.66  | 9.64  |
| 1/1 | 1/1 | 6     | 6.2   |
| 1/1 | 0/1 | 6.72  | 5.38  |
| 1/1 | 1/1 | 8.97  | 8.57  |
| 1/1 | 1/1 | 5.18  | 4.84  |
| 1/1 | 1/1 | 5.78  | 5.47  |
| 0/1 | 1/1 | 7.78  | 7.6   |

|     |     |       |      |
|-----|-----|-------|------|
| 0/1 | 1/1 | 7.45  | 7.39 |
| 0/1 | 1/1 | 5.67  | 5.66 |
| 1/1 | 1/1 | 8.34  | 8.35 |
| 1/1 | 1/1 | 8.6   | 8.6  |
| 0/1 | 1/1 | 6.35  | 6.39 |
| 1/1 | 0/1 | 7.37  | 5.09 |
| 1/1 | 1/1 | 9.61  | 8.39 |
| 1/1 | 1/1 | 10.24 | 9.22 |
| 1/1 | 1/1 | 10.1  | 9.09 |
| 1/1 | 1/1 | 10.1  | 9.09 |
| 1/1 | 1/1 | 10.48 | 9.5  |
| 1/1 | 1/1 | 10.48 | 9.5  |
| 1/1 | 1/1 | 10.4  | 9.45 |
| 1/1 | 1/1 | 3.66  | 2.65 |
| 1/1 | 1/1 | 5.93  | 5.21 |
| 1/1 | 1/1 | 5.12  | 4.45 |
| 1/1 | 1/1 | 8.38  | 7.78 |
| 1/1 | 1/1 | 5.73  | 5.14 |
| 1/1 | 1/1 | 5.18  | 4.68 |
| 1/1 | 1/1 | 4.46  | 3.98 |
| 1/1 | 1/1 | 4.55  | 4.08 |
| 1/1 | 1/1 | 6.19  | 5.79 |
| 0/1 | 1/1 | 5.91  | 5.54 |
| 1/1 | 1/1 | 4.19  | 3.95 |
| 0/1 | 1/1 | 3.43  | 3.21 |
| 1/1 | 1/1 | 7.28  | 7.11 |
| 1/1 | 1/1 | 6.49  | 6.33 |
| 0/1 | 1/1 | 4.14  | 4.01 |
| 1/1 | 1/1 | 3.83  | 3.78 |
| 1/1 | 1/1 | 7.5   | 7.55 |
| 1/1 | 1/1 | 5.56  | 5.62 |
| 1/1 | 1/1 | 6.67  | 6.74 |
| 1/1 | 1/1 | 3.34  | 3.47 |
| 1/1 | 1/1 | 8.41  | 8.58 |
| 1/1 | 1/1 | 6.56  | 6.75 |
| 1/1 | 1/1 | 5.59  | 5.8  |
| 1/1 | 1/1 | 10.08 | 10.3 |
| 0/1 | 1/1 | 3.28  | 3.52 |
| 1/1 | 1/1 | 5.4   | 5.66 |
| 1/1 | 1/1 | 3.77  | 4.06 |
| 0/1 | 1/1 | 3.03  | 3.33 |
| 0/1 | 1/1 | 4.35  | 4.66 |
| 0/1 | 1/1 | 3.63  | 3.97 |
| 0/1 | 1/1 | 4.01  | 4.37 |
| 1/1 | 1/1 | 4.27  | 7.64 |
| 1/1 | 1/1 | 7.97  | 2.75 |
| 1/1 | 1/1 | 6.19  | 4.36 |
| 1/1 | 1/1 | 6.08  | 4.37 |
| 1/1 | 1/1 | 5.62  | 3.91 |
| 1/1 | 1/1 | 5.26  | 3.71 |
| 1/1 | 1/1 | 7.51  | 5.98 |
| 1/1 | 1/1 | 6.89  | 5.78 |
| 1/1 | 1/1 | 5.27  | 4.28 |
| 1/1 | 1/1 | 6.25  | 5.41 |
| 1/1 | 1/1 | 6.89  | 6.06 |
| 1/1 | 1/1 | 6.34  | 5.55 |
| 1/1 | 1/1 | 7.02  | 6.3  |
| 1/1 | 1/1 | 3.91  | 3.32 |

|     |     |      |      |
|-----|-----|------|------|
| 1/1 | 1/1 | 4.14 | 3.69 |
| 1/1 | 1/1 | 2.85 | 2.5  |
| 0/1 | 1/1 | 2.47 | 2.37 |
| 1/1 | 1/1 | 2.61 | 2.63 |
| 1/1 | 1/1 | 7.05 | 4.18 |
| 1/1 | 1/1 | 5.96 | 3.12 |
| 1/1 | 1/1 | 9.16 | 6.54 |
| 1/1 | 1/1 | 7.47 | 5.04 |
| 1/1 | 0/1 | 5.72 | 3.34 |
| 1/1 | 0/1 | 4.45 | 2.16 |
| 1/1 | 1/1 | 7.68 | 5.41 |
| 1/1 | 0/1 | 5.79 | 3.66 |
| 1/1 | 1/1 | 5.39 | 3.31 |
| 1/1 | 1/1 | 6.72 | 4.82 |
| 1/1 | 1/1 | 5.22 | 3.42 |
| 1/1 | 1/1 | 5.88 | 4.13 |
| 1/1 | 1/1 | 6.56 | 4.87 |
| 1/1 | 1/1 | 8.35 | 6.79 |
| 1/1 | 1/1 | 4.66 | 3.11 |
| 1/1 | 1/1 | 7.62 | 6.08 |
| 1/1 | 1/1 | 7.22 | 7.98 |
| 0/1 | 1/1 | 3.29 | 4.82 |
| 1/1 | 1/1 | 5.19 | 3.72 |
| 1/1 | 1/1 | 6.88 | 6.43 |
| 1/1 | 1/1 | 7.5  | 7.25 |
| 1/1 | 1/1 | 7.51 | 7.35 |
| 0/1 | 1/1 | 6.46 | 6.31 |
| 1/1 | 1/1 | 4.97 | 3.06 |
| 1/1 | 1/1 | 4.47 | 5.98 |
| 1/1 | 1/1 | 11.6 | 9.12 |
| 1/1 | 1/1 | 9.14 | 7.2  |
| 1/1 | 0/1 | 6.22 | 4.38 |
| 1/1 | 1/1 | 5.47 | 4.47 |
| 1/1 | 0/1 | 4.77 | 3.98 |
| 1/1 | 1/1 | 5.43 | 4.95 |
| 1/1 | 1/1 | 5.41 | 5.01 |
| 1/1 | 1/1 | 5.66 | 5.31 |
| 1/1 | 1/1 | 6.22 | 5.95 |
| 1/1 | 1/1 | 4.42 | 4.17 |
| 1/1 | 1/1 | 6.78 | 6.6  |
| 1/1 | 1/1 | 6.15 | 6.01 |
| 1/1 | 1/1 | 5.11 | 5.08 |
| 1/1 | 1/1 | 2.92 | 2.92 |
| 1/1 | 1/1 | 6.75 | 6.75 |
| 0/1 | 1/1 | 2.7  | 2.83 |
| 0/1 | 1/1 | 2.13 | 4.85 |
| 1/1 | 1/1 | 5.63 | 4.23 |
| 1/1 | 1/1 | 6.25 | 5.92 |
| 1/1 | 1/1 | 8.4  | 8.06 |
| 1/1 | 1/1 | 3.76 | 3.51 |
| 1/1 | 1/1 | 7.25 | 7    |
| 1/1 | 1/1 | 4.02 | 3.83 |
| 1/1 | 1/1 | 8.11 | 7.93 |
| 1/1 | 1/1 | 8.69 | 8.58 |
| 1/1 | 0/1 | 4.71 | 2.52 |
| 1/1 | 1/1 | 5.37 | 4.25 |
| 1/1 | 1/1 | 8.48 | 7.66 |
| 1/1 | 1/1 | 7.31 | 6.92 |

|     |     |       |       |
|-----|-----|-------|-------|
| 1/1 | 1/1 | 4.76  | 4.58  |
| 1/1 | 1/1 | 7.94  | 8.28  |
| 1/1 | 1/1 | 6.08  | 6.56  |
| 1/1 | 1/1 | 9.87  | 10.48 |
| 1/1 | 1/1 | 8.75  | 8.31  |
| 1/1 | 1/1 | 7.75  | 7.45  |
| 0/1 | 1/1 | 3.23  | 3.14  |
| 1/1 | 1/1 | 5.4   | 5.56  |
| 0/1 | 1/1 | 3.86  | 4.14  |
| 1/1 | 1/1 | 11.53 | 9.53  |
| 1/1 | 1/1 | 6.88  | 6.1   |
| 1/1 | 1/1 | 6.17  | 5.44  |
| 1/1 | 1/1 | 6.8   | 6.08  |
| 1/1 | 1/1 | 5.74  | 7.1   |
| 0/1 | 1/1 | 3.2   | 4.65  |
| 0/1 | 1/1 | 2.28  | 2.66  |
| 1/1 | 1/1 | 8.69  | 9.62  |
| 1/1 | 0/1 | 3.77  | 2.06  |
| 1/1 | 0/1 | 7.3   | 6.2   |
| 1/1 | 0/1 | 3.8   | 2.96  |
| 1/1 | 1/1 | 3.95  | 3.19  |
| 1/1 | 1/1 | 6.63  | 5.99  |
| 1/1 | 1/1 | 4.74  | 4.12  |
| 1/1 | 0/1 | 2.94  | 2.37  |
| 1/1 | 1/1 | 3.96  | 3.5   |
| 0/1 | 1/1 | 3.49  | 3.03  |
| 1/1 | 1/1 | 4.53  | 4.14  |
| 1/1 | 1/1 | 2.66  | 2.28  |
| 1/1 | 1/1 | 5.54  | 7.23  |
| 0/1 | 1/1 | 3.22  | 5.15  |
| 1/1 | 1/1 | 3.23  | 5.23  |
| 0/1 | 1/1 | 2.81  | 4.88  |
| 1/1 | 1/1 | 7.61  | 5.16  |
| 1/1 | 1/1 | 4.38  | 2.37  |
| 1/1 | 1/1 | 5.86  | 5.45  |
| 1/1 | 1/1 | 7.64  | 7.37  |
| 0/1 | 1/1 | 2.77  | 2.71  |
| 0/1 | 1/1 | 3.2   | 3.25  |
| 1/1 | 1/1 | 3.08  | 3.28  |
| 1/1 | 1/1 | 5.42  | 5.8   |
| 0/1 | 1/1 | 3.85  | 4.38  |
| 0/1 | 1/1 | 6.64  | 7.31  |
| 1/1 | 1/1 | 4.67  | 5.48  |
| 1/1 | 1/1 | 8.32  | 9.25  |
| 0/1 | 1/1 | 5.89  | 8.83  |
| 0/1 | 1/1 | 6.06  | 9.03  |
| 1/1 | 1/1 | 6.86  | 9.85  |
| 1/1 | 1/1 | 6.88  | 10.21 |
| 1/1 | 0/1 | 5.2   | 2.87  |
| 0/1 | 1/1 | 4.88  | 5.96  |
| 1/1 | 1/1 | 7.55  | 8.67  |
| 1/1 | 1/1 | 5.23  | 6.56  |
| 1/1 | 1/1 | 8.66  | 7.13  |
| 1/1 | 1/1 | 8.43  | 7.89  |
| 1/1 | 1/1 | 5.43  | 5.02  |
| 1/1 | 1/1 | 5.96  | 5.63  |
| 1/1 | 1/1 | 7.96  | 7.67  |
| 1/1 | 1/1 | 7.51  | 7.22  |

|     |     |      |      |
|-----|-----|------|------|
| 1/1 | 1/1 | 3.72 | 3.48 |
| 1/1 | 1/1 | 9.19 | 8.98 |
| 0/1 | 1/1 | 5.05 | 7.01 |
| 0/1 | 1/1 | 3.83 | 5.82 |
| 0/1 | 1/1 | 3.37 | 5.44 |
| 1/1 | 1/1 | 5.03 | 7.11 |
| 0/1 | 1/1 | 3.13 | 5.24 |
| 1/1 | 1/1 | 4.78 | 6.94 |
| 0/1 | 1/1 | 3.93 | 6.08 |
| 0/1 | 1/1 | 2.71 | 5.01 |
| 1/1 | 1/1 | 6.63 | 8.96 |
| 0/1 | 1/1 | 4.04 | 6.48 |
| 1/1 | 1/1 | 4.87 | 7.33 |
| 0/1 | 1/1 | 3.04 | 5.54 |
| 0/1 | 1/1 | 2.76 | 5.32 |
| 1/1 | 1/1 | 4.29 | 7.24 |
| 0/1 | 1/1 | 2.37 | 5.62 |
| 0/1 | 1/1 | 3.41 | 6.84 |
| 1/1 | 1/1 | 8.5  | 5.94 |
| 1/1 | 1/1 | 6.2  | 6.99 |
| 0/1 | 1/1 | 3.53 | 5.15 |
| 1/1 | 1/1 | 8.79 | 8.26 |
| 1/1 | 1/1 | 6.77 | 6.42 |
| 1/1 | 1/1 | 7.5  | 7.45 |
| 1/1 | 1/1 | 9.6  | 9.71 |
| 1/1 | 1/1 | 5.44 | 5.86 |
| 0/1 | 1/1 | 2.67 | 5.53 |
| 0/1 | 1/1 | 3.11 | 6.04 |
| 1/1 | 1/1 | 3.4  | 6.41 |
| 1/1 | 1/1 | 5.44 | 4.01 |
| 1/1 | 1/1 | 9.77 | 9.54 |
| 1/1 | 1/1 | 7.56 | 7.38 |
| 1/1 | 0/1 | 7.84 | 2.88 |
| 1/1 | 0/1 | 7.19 | 2.79 |
| 1/1 | 1/1 | 7.13 | 3.12 |
| 1/1 | 0/1 | 6.47 | 2.51 |
| 1/1 | 0/1 | 6.51 | 2.61 |
| 1/1 | 1/1 | 8.12 | 4.51 |
| 1/1 | 1/1 | 7.27 | 5.74 |
| 1/1 | 1/1 | 6.06 | 4.53 |
| 1/1 | 0/1 | 3.59 | 2.1  |
| 1/1 | 0/1 | 3.41 | 1.96 |
| 1/1 | 1/1 | 6.57 | 5.12 |
| 1/1 | 1/1 | 4.68 | 3.37 |
| 1/1 | 0/1 | 3.8  | 2.55 |
| 1/1 | 1/1 | 4.83 | 3.74 |
| 1/1 | 1/1 | 8.65 | 7.69 |
| 1/1 | 1/1 | 9.08 | 8.16 |
| 1/1 | 1/1 | 5.64 | 4.82 |
| 1/1 | 1/1 | 7.15 | 6.4  |
| 1/1 | 1/1 | 6.58 | 5.91 |
| 1/1 | 0/1 | 2.79 | 2.12 |
| 1/1 | 1/1 | 4.52 | 3.88 |
| 1/1 | 1/1 | 5.23 | 4.68 |
| 1/1 | 1/1 | 5.52 | 4.99 |
| 1/1 | 1/1 | 7.99 | 7.58 |
| 0/1 | 1/1 | 5.06 | 4.68 |
| 1/1 | 1/1 | 2.91 | 2.79 |

|     |     |       |       |
|-----|-----|-------|-------|
| 1/1 | 0/1 | 2.27  | 2.15  |
| 1/1 | 1/1 | 13.11 | 13.15 |
| 1/1 | 1/1 | 7.15  | 7.31  |
| 1/1 | 1/1 | 5.82  | 6.21  |
| 0/1 | 1/1 | 2.64  | 3.08  |
| 1/1 | 1/1 | 4.64  | 2.93  |
| 1/1 | 0/1 | 4.07  | 3.41  |
| 1/1 | 1/1 | 8.22  | 7.84  |
| 1/1 | 0/1 | 7.07  | 5.2   |
| 1/1 | 0/1 | 4.77  | 3.15  |
| 1/1 | 1/1 | 6.04  | 5.43  |
| 1/1 | 1/1 | 3.16  | 4.96  |
| 0/1 | 1/1 | 4.85  | 6.85  |
| 0/1 | 1/1 | 3.45  | 5.46  |
| 1/1 | 1/1 | 4.84  | 6.89  |
| 0/1 | 1/1 | 3.97  | 6.08  |
| 1/1 | 0/1 | 7.82  | 1.76  |
| 1/1 | 1/1 | 8.34  | 3.32  |
| 1/1 | 0/1 | 5.63  | 3.17  |
| 1/1 | 0/1 | 5.89  | 3.92  |
| 1/1 | 1/1 | 5.71  | 3.81  |
| 1/1 | 1/1 | 4.66  | 3.08  |
| 1/1 | 1/1 | 4.53  | 4.46  |
| 0/1 | 1/1 | 6.16  | 5.96  |
| 1/1 | 1/1 | 12.86 | 12.85 |
| 1/1 | 1/1 | 3.02  | 3.51  |
| 0/1 | 1/1 | 2.73  | 3.36  |
| 1/1 | 1/1 | 4.86  | 8.3   |
| 1/1 | 0/1 | 10.13 | 7.77  |
| 1/1 | 1/1 | 9.14  | 7.19  |
| 1/1 | 0/1 | 5.11  | 3.72  |
| 1/1 | 0/1 | 6.06  | 5.03  |
| 0/1 | 1/1 | 3.93  | 5.7   |
| 1/1 | 0/1 | 6.45  | 2.49  |
| 1/1 | 0/1 | 7.39  | 3.7   |
| 1/1 | 1/1 | 6.69  | 3.5   |
| 1/1 | 1/1 | 5.92  | 2.78  |
| 1/1 | 1/1 | 9.33  | 6.41  |
| 1/1 | 1/1 | 8.64  | 5.79  |
| 1/1 | 0/1 | 4.66  | 2     |
| 1/1 | 1/1 | 9.88  | 7.25  |
| 1/1 | 1/1 | 10.76 | 10.22 |
| 1/1 | 1/1 | 10.9  | 10.67 |
| 1/1 | 1/1 | 11.22 | 11.62 |
| 1/1 | 1/1 | 7.42  | 3.39  |
| 1/1 | 1/1 | 7.85  | 4.83  |
| 1/1 | 1/1 | 10.82 | 7.93  |
| 1/1 | 1/1 | 10.41 | 7.62  |
| 1/1 | 1/1 | 4.55  | 4.1   |
| 1/1 | 1/1 | 5.18  | 5.24  |
| 0/1 | 1/1 | 5.68  | 5.8   |
| 1/1 | 1/1 | 6.36  | 6.81  |
| 1/1 | 1/1 | 8.62  | 8.21  |
| 1/1 | 1/1 | 9.08  | 8.69  |
| 0/1 | 1/1 | 2.29  | 2.43  |
| 1/1 | 1/1 | 7.06  | 7.25  |
| 0/1 | 1/1 | 5.73  | 6.54  |
| 1/1 | 1/1 | 3.27  | 6.33  |



|     |     |      |      |
|-----|-----|------|------|
| 0/1 | 1/1 | 3.92 | 7.21 |
| 1/1 | 1/1 | 3.25 | 6.93 |
| 1/1 | 1/1 | 3.64 | 7.44 |
| 1/1 | 1/1 | 8.38 | 6.81 |
| 1/1 | 1/1 | 7.87 | 7.34 |
| 1/1 | 1/1 | 6.52 | 6.05 |
| 1/1 | 1/1 | 4.43 | 4.02 |
| 1/1 | 1/1 | 7.68 | 7.38 |
| 1/1 | 1/1 | 7.42 | 7.12 |
| 1/1 | 1/1 | 9.15 | 8.86 |
| 1/1 | 1/1 | 5.8  | 8.22 |
| 1/1 | 1/1 | 4.21 | 3.01 |
| 1/1 | 1/1 | 5.29 | 4.38 |
| 1/1 | 1/1 | 7.79 | 6.88 |
| 1/1 | 0/1 | 2.91 | 2.26 |
| 1/1 | 0/1 | 2.9  | 2.29 |
| 1/1 | 1/1 | 6.54 | 6.02 |
| 1/1 | 1/1 | 3.4  | 2.88 |
| 1/1 | 1/1 | 8.16 | 7.75 |
| 1/1 | 1/1 | 4.66 | 4.28 |
| 0/1 | 1/1 | 5.38 | 5.04 |
| 1/1 | 1/1 | 5.18 | 4.84 |
| 1/1 | 1/1 | 5.64 | 5.36 |
| 1/1 | 1/1 | 5.01 | 4.76 |
| 1/1 | 1/1 | 3.84 | 3.6  |
| 1/1 | 1/1 | 5.22 | 4.99 |
| 1/1 | 1/1 | 5.36 | 5.19 |
| 1/1 | 1/1 | 5.11 | 5.01 |
| 1/1 | 1/1 | 7.36 | 7.29 |
| 1/1 | 1/1 | 2.97 | 2.91 |
| 1/1 | 1/1 | 6.16 | 6.1  |
| 1/1 | 1/1 | 3.05 | 3.02 |
| 0/1 | 1/1 | 2.64 | 2.61 |
| 1/1 | 1/1 | 5.78 | 5.78 |
| 1/1 | 1/1 | 8.07 | 8.09 |
| 1/1 | 1/1 | 5.11 | 5.16 |
| 1/1 | 1/1 | 6.12 | 6.17 |
| 1/1 | 1/1 | 4.6  | 4.68 |
| 1/1 | 1/1 | 4.92 | 5.01 |
| 0/1 | 1/1 | 3.02 | 3.1  |
| 1/1 | 1/1 | 8.85 | 8.94 |
| 1/1 | 1/1 | 6.68 | 6.76 |
| 1/1 | 1/1 | 3.7  | 3.79 |
| 0/1 | 1/1 | 3.48 | 3.57 |
| 1/1 | 1/1 | 8.02 | 8.11 |
| 1/1 | 1/1 | 3.47 | 3.57 |
| 1/1 | 1/1 | 6.13 | 6.24 |
| 1/1 | 1/1 | 3    | 3.11 |
| 0/1 | 1/1 | 2.63 | 2.75 |
| 0/1 | 1/1 | 3.71 | 3.82 |
| 1/1 | 1/1 | 7.34 | 7.46 |
| 1/1 | 1/1 | 6.03 | 6.16 |
| 1/1 | 1/1 | 6.17 | 6.29 |
| 1/1 | 1/1 | 4.86 | 4.99 |
| 1/1 | 1/1 | 5.87 | 7.99 |
| 1/1 | 1/1 | 5.61 | 7.75 |
| 1/1 | 1/1 | 5.05 | 7.2  |
| 1/1 | 1/1 | 5.3  | 7.46 |

|     |     |      |      |
|-----|-----|------|------|
| 1/1 | 1/1 | 4.18 | 6.35 |
| 1/1 | 1/1 | 7.25 | 9.43 |
| 0/1 | 1/1 | 3.93 | 6.13 |
| 1/1 | 1/1 | 4.36 | 6.61 |
| 1/1 | 1/1 | 5.93 | 8.18 |
| 1/1 | 1/1 | 4.91 | 7.16 |
| 1/1 | 1/1 | 6.19 | 8.5  |
| 1/1 | 1/1 | 4.63 | 6.95 |
| 1/1 | 1/1 | 5.98 | 8.32 |
| 0/1 | 1/1 | 3.05 | 5.41 |
| 1/1 | 1/1 | 6.83 | 9.29 |
| 1/1 | 1/1 | 6.66 | 9.15 |
| 0/1 | 1/1 | 2.27 | 4.99 |
| 1/1 | 1/1 | 6.05 | 8.77 |
| 0/1 | 1/1 | 2.7  | 5.43 |
| 0/1 | 1/1 | 1.79 | 4.65 |
| 0/1 | 1/1 | 3.1  | 6.36 |
| 1/1 | 1/1 | 8.34 | 6.77 |
| 1/1 | 1/1 | 7.57 | 7.07 |
| 0/1 | 1/1 | 4.69 | 4.24 |
| 1/1 | 0/1 | 4.07 | 2.29 |
| 1/1 | 0/1 | 4.53 | 3.22 |
| 1/1 | 1/1 | 4.01 | 3.09 |
| 1/1 | 1/1 | 8.03 | 7.32 |
| 1/1 | 1/1 | 6.88 | 6.37 |
| 1/1 | 1/1 | 6.29 | 5.78 |
| 1/1 | 1/1 | 5.79 | 5.32 |
| 1/1 | 1/1 | 6.96 | 8.55 |
| 1/1 | 1/1 | 7.59 | 9.19 |
| 1/1 | 1/1 | 6.11 | 7.78 |
| 1/1 | 1/1 | 5.73 | 7.58 |
| 0/1 | 1/1 | 3.21 | 5.97 |
| 1/1 | 0/1 | 4.24 | 2.2  |
| 1/1 | 1/1 | 9.52 | 8.21 |
| 1/1 | 1/1 | 3.78 | 2.74 |
| 1/1 | 0/1 | 4.07 | 2.29 |
| 1/1 | 0/1 | 4.53 | 3.22 |
| 1/1 | 1/1 | 4.01 | 3.09 |
| 1/1 | 1/1 | 8.03 | 7.32 |
| 1/1 | 1/1 | 6.88 | 6.37 |
| 1/1 | 1/1 | 6.29 | 5.78 |
| 1/1 | 1/1 | 5.79 | 5.32 |
| 1/1 | 1/1 | 7.59 | 9.19 |
| 1/1 | 1/1 | 6.11 | 7.78 |
| 1/1 | 1/1 | 5.73 | 7.66 |
| 0/1 | 1/1 | 3.21 | 5.97 |
| 1/1 | 1/1 | 6.6  | 4.87 |
| 1/1 | 1/1 | 5.32 | 4.34 |
| 1/1 | 1/1 | 5.37 | 4.82 |
| 1/1 | 1/1 | 4.45 | 4.03 |
| 1/1 | 1/1 | 6.37 | 4.73 |
| 1/1 | 0/1 | 2.99 | 2.16 |
| 1/1 | 0/1 | 2.91 | 2.21 |
| 1/1 | 1/1 | 4.44 | 3.37 |
| 1/1 | 0/1 | 2.98 | 2.16 |
| 1/1 | 1/1 | 3.36 | 2.62 |
| 1/1 | 1/1 | 4.17 | 3.43 |
| 1/1 | 1/1 | 3.39 | 2.79 |

|     |     |      |      |
|-----|-----|------|------|
| 1/1 | 1/1 | 3.37 | 2.85 |
| 1/1 | 0/1 | 2.89 | 2.45 |
| 1/1 | 1/1 | 2.94 | 2.52 |
| 1/1 | 0/1 | 2.59 | 2.17 |
| 1/1 | 0/1 | 2.87 | 2.51 |
| 1/1 | 1/1 | 2.76 | 2.41 |
| 1/1 | 1/1 | 9.49 | 9.17 |
| 1/1 | 1/1 | 2.93 | 2.62 |
| 1/1 | 1/1 | 3.4  | 3.09 |
| 1/1 | 1/1 | 4.28 | 4    |
| 0/1 | 1/1 | 3.14 | 2.86 |
| 1/1 | 1/1 | 3.32 | 3.05 |
| 1/1 | 1/1 | 3.47 | 3.21 |
| 1/1 | 1/1 | 2.7  | 2.44 |
| 0/1 | 1/1 | 3.48 | 3.29 |
| 1/1 | 1/1 | 3.52 | 3.36 |
| 1/1 | 1/1 | 3.22 | 3.07 |
| 1/1 | 1/1 | 4.11 | 3.97 |
| 1/1 | 1/1 | 6.49 | 6.38 |
| 0/1 | 1/1 | 2.64 | 2.57 |
| 1/1 | 1/1 | 3.9  | 3.85 |
| 1/1 | 1/1 | 2.58 | 2.54 |
| 1/1 | 1/1 | 3.09 | 3.07 |
| 1/1 | 1/1 | 2.65 | 2.64 |
| 0/1 | 1/1 | 3.16 | 3.17 |
| 0/1 | 1/1 | 2.32 | 2.34 |
| 1/1 | 1/1 | 6.19 | 6.22 |
| 1/1 | 1/1 | 5.81 | 5.84 |
| 1/1 | 1/1 | 6.57 | 6.61 |
| 1/1 | 1/1 | 3.43 | 3.48 |
| 0/1 | 1/1 | 2.13 | 2.2  |
| 1/1 | 1/1 | 6.16 | 6.25 |
| 1/1 | 1/1 | 5.26 | 5.36 |
| 1/1 | 1/1 | 3.61 | 3.77 |
| 0/1 | 1/1 | 3.73 | 3.9  |
| 1/1 | 1/1 | 5.81 | 5.99 |
| 0/1 | 1/1 | 2.19 | 2.38 |
| 1/1 | 1/1 | 4.47 | 4.66 |
| 1/1 | 1/1 | 4.52 | 4.72 |
| 1/1 | 1/1 | 3.52 | 3.72 |
| 1/1 | 1/1 | 3.54 | 3.77 |
| 0/1 | 1/1 | 2.92 | 3.16 |
| 1/1 | 1/1 | 7.03 | 5.45 |
| 1/1 | 1/1 | 6.41 | 4.92 |
| 1/1 | 1/1 | 8.34 | 7.9  |
| 1/1 | 1/1 | 6.21 | 5.8  |
| 1/1 | 1/1 | 4.34 | 3.94 |
| 1/1 | 1/1 | 9.27 | 8.92 |
| 1/1 | 1/1 | 4.77 | 6.72 |
| 0/1 | 1/1 | 5.67 | 5.22 |
| 1/1 | 1/1 | 7.61 | 7.17 |
| 1/1 | 1/1 | 8.72 | 8.47 |
| 1/1 | 1/1 | 4.32 | 4.41 |
| 0/1 | 1/1 | 6.61 | 7.34 |
| 0/1 | 1/1 | 2.59 | 5.49 |
| 1/1 | 1/1 | 4.17 | 7.3  |
| 0/1 | 1/1 | 3.66 | 7.05 |
| 1/1 | 1/1 | 3.89 | 7.59 |

|     |     |       |      |
|-----|-----|-------|------|
| 1/1 | 1/1 | 3.47  | 7.81 |
| 1/1 | 1/1 | 9.1   | 7.92 |
| 1/1 | 1/1 | 8.61  | 7.83 |
| 1/1 | 1/1 | 6.87  | 6.14 |
| 0/1 | 1/1 | 5.59  | 5.09 |
| 1/1 | 1/1 | 8.12  | 7.67 |
| 1/1 | 1/1 | 10.12 | 9.71 |
| 1/1 | 1/1 | 7.88  | 7.51 |
| 0/1 | 1/1 | 7.46  | 7.16 |
| 1/1 | 1/1 | 9.4   | 9.1  |
| 1/1 | 1/1 | 7.29  | 7.02 |
| 0/1 | 1/1 | 5.22  | 5.02 |
| 0/1 | 1/1 | 7.17  | 6.98 |
| 1/1 | 1/1 | 9.74  | 9.69 |
| 1/1 | 1/1 | 6.9   | 6.87 |
| 1/1 | 1/1 | 8.25  | 8.26 |
| 0/1 | 1/1 | 5.61  | 5.71 |
| 1/1 | 1/1 | 5.57  | 5.39 |
| 0/1 | 1/1 | 6.94  | 6.87 |
| 1/1 | 1/1 | 7.02  | 7.02 |
| 0/1 | 1/1 | 7.05  | 7.11 |
| 1/1 | 1/1 | 6.56  | 6.64 |
| 0/1 | 1/1 | 2.7   | 2.96 |
| 1/1 | 1/1 | 7.03  | 7.39 |
| 1/1 | 1/1 | 2.74  | 3.16 |
| 1/1 | 1/1 | 8.53  | 8.99 |
| 1/1 | 1/1 | 3.05  | 3.54 |
| 1/1 | 1/1 | 6.42  | 7.1  |
| 0/1 | 1/1 | 3.3   | 4.15 |
| 1/1 | 1/1 | 6.07  | 7.01 |
| 0/1 | 1/1 | 4.52  | 5.57 |
| 0/1 | 1/1 | 2.11  | 5.28 |
| 0/1 | 1/1 | 2.93  | 6.12 |
| 1/1 | 1/1 | 4.28  | 7.63 |
| 1/1 | 1/1 | 4.52  | 7.86 |
| 0/1 | 1/1 | 4.35  | 7.8  |
| 0/1 | 1/1 | 2.12  | 5.72 |
| 0/1 | 1/1 | 1.74  | 5.77 |
| 1/1 | 1/1 | 6.15  | 4.44 |
| 1/1 | 1/1 | 8.8   | 8.1  |
| 1/1 | 1/1 | 6.82  | 6.28 |
| 1/1 | 1/1 | 7.43  | 6.92 |
| 1/1 | 0/1 | 4.55  | 4.15 |
| 0/1 | 1/1 | 2.2   | 4.71 |
| 1/1 | 1/1 | 7.11  | 5.71 |
| 1/1 | 1/1 | 7.76  | 6.53 |
| 1/1 | 1/1 | 8.82  | 7.83 |
| 1/1 | 1/1 | 8.06  | 7.19 |
| 1/1 | 1/1 | 3.91  | 3.47 |
| 1/1 | 1/1 | 6.95  | 6.53 |
| 1/1 | 1/1 | 8.11  | 7.78 |
| 1/1 | 1/1 | 6.94  | 6.61 |
| 1/1 | 1/1 | 9.74  | 9.47 |
| 1/1 | 1/1 | 4.65  | 4.41 |
| 1/1 | 1/1 | 5.26  | 5.08 |
| 0/1 | 1/1 | 5.65  | 5.49 |
| 1/1 | 1/1 | 6.66  | 6.51 |
| 1/1 | 1/1 | 6.78  | 6.64 |

|     |     |       |       |
|-----|-----|-------|-------|
| 1/1 | 1/1 | 8.34  | 8.24  |
| 1/1 | 1/1 | 8.02  | 7.92  |
| 0/1 | 1/1 | 5.6   | 5.5   |
| 1/1 | 1/1 | 7.41  | 5.35  |
| 1/1 | 1/1 | 6.32  | 5.09  |
| 1/1 | 1/1 | 5.81  | 4.81  |
| 1/1 | 1/1 | 5.67  | 4.83  |
| 1/1 | 1/1 | 6.77  | 5.94  |
| 1/1 | 1/1 | 4.91  | 4.15  |
| 1/1 | 0/1 | 7.76  | 3.46  |
| 1/1 | 0/1 | 6.58  | 2.68  |
| 1/1 | 1/1 | 8.37  | 4.52  |
| 1/1 | 1/1 | 4.72  | 3.78  |
| 1/1 | 1/1 | 8.93  | 8.55  |
| 1/1 | 1/1 | 7.29  | 6.99  |
| 1/1 | 1/1 | 5.36  | 4.98  |
| 0/1 | 1/1 | 7.16  | 7.18  |
| 1/1 | 1/1 | 5.11  | 5.13  |
| 1/1 | 1/1 | 6.76  | 7.02  |
| 1/1 | 1/1 | 5.26  | 5.65  |
| 0/1 | 1/1 | 6.25  | 6.64  |
| 0/1 | 1/1 | 2.72  | 3.29  |
| 1/1 | 1/1 | 3.85  | 4.76  |
| 1/1 | 1/1 | 5.85  | 4.88  |
| 1/1 | 1/1 | 4.42  | 4.01  |
| 0/1 | 1/1 | 3.16  | 2.79  |
| 1/1 | 1/1 | 9.04  | 8.89  |
| 1/1 | 1/1 | 7.26  | 7.15  |
| 1/1 | 1/1 | 5.8   | 5.84  |
| 1/1 | 1/1 | 6.52  | 6.63  |
| 0/1 | 1/1 | 8.11  | 8.28  |
| 1/1 | 1/1 | 7.06  | 7.24  |
| 1/1 | 1/1 | 6.31  | 6.55  |
| 1/1 | 1/1 | 4.97  | 5.27  |
| 0/1 | 1/1 | 5.84  | 8.77  |
| 1/1 | 0/1 | 5.01  | 3.29  |
| 1/1 | 1/1 | 8.92  | 7.61  |
| 1/1 | 1/1 | 5.28  | 4.13  |
| 1/1 | 1/1 | 5.39  | 4.73  |
| 1/1 | 1/1 | 8.78  | 8.19  |
| 1/1 | 1/1 | 6.67  | 6.09  |
| 1/1 | 1/1 | 11.66 | 11.09 |
| 1/1 | 1/1 | 6.19  | 5.68  |
| 1/1 | 1/1 | 6.85  | 6.39  |
| 1/1 | 1/1 | 9.44  | 9     |
| 1/1 | 1/1 | 3.19  | 4.84  |
| 0/1 | 1/1 | 4.63  | 6.3   |
| 1/1 | 1/1 | 6.9   | 5.23  |
| 1/1 | 1/1 | 7     | 5.94  |
| 1/1 | 1/1 | 6.46  | 5.42  |
| 1/1 | 1/1 | 4.36  | 3.84  |
| 1/1 | 1/1 | 6.01  | 5.51  |
| 1/1 | 1/1 | 3.62  | 3.17  |
| 1/1 | 1/1 | 5.12  | 6.82  |
| 1/1 | 0/1 | 3.66  | 2.86  |
| 1/1 | 1/1 | 5.27  | 4.86  |
| 1/1 | 1/1 | 3.64  | 3.36  |
| 1/1 | 1/1 | 3.98  | 3.84  |

|     |     |       |       |
|-----|-----|-------|-------|
| 1/1 | 1/1 | 6.11  | 5.98  |
| 1/1 | 1/1 | 3.44  | 3.34  |
| 1/1 | 1/1 | 5.99  | 5.9   |
| 1/1 | 1/1 | 3.92  | 3.91  |
| 1/1 | 1/1 | 6.73  | 6.77  |
| 1/1 | 1/1 | 10.1  | 10.16 |
| 1/1 | 1/1 | 3.66  | 3.77  |
| 0/1 | 1/1 | 2.43  | 2.59  |
| 0/1 | 1/1 | 2.34  | 2.52  |
| 0/1 | 1/1 | 3.19  | 3.41  |
| 1/1 | 1/1 | 4.09  | 4.4   |
| 0/1 | 1/1 | 2.68  | 3.03  |
| 1/1 | 1/1 | 2.9   | 5.58  |
| 0/1 | 1/1 | 3     | 6.67  |
| 1/1 | 1/1 | 6.44  | 6.15  |
| 0/1 | 1/1 | 4.89  | 4.66  |
| 1/1 | 1/1 | 4.43  | 4.24  |
| 0/1 | 1/1 | 6.96  | 6.87  |
| 1/1 | 1/1 | 4.72  | 7.95  |
| 1/1 | 1/1 | 5.29  | 9     |
| 1/1 | 1/1 | 4.72  | 8.68  |
| 1/1 | 0/1 | 5.59  | 3.62  |
| 1/1 | 1/1 | 6.73  | 5.96  |
| 1/1 | 1/1 | 5.53  | 6.97  |
| 1/1 | 1/1 | 4.44  | 6.24  |
| 0/1 | 1/1 | 3.37  | 5.69  |
| 1/1 | 1/1 | 4.28  | 3.52  |
| 1/1 | 1/1 | 3.92  | 3.41  |
| 1/1 | 1/1 | 2.66  | 2.49  |
| 1/1 | 1/1 | 6.24  | 6.48  |
| 1/1 | 1/1 | 2.84  | 3.13  |
| 1/1 | 1/1 | 3.96  | 6.84  |
| 1/1 | 1/1 | 8.36  | 7.46  |
| 1/1 | 1/1 | 10.26 | 9.91  |
| 1/1 | 1/1 | 7.25  | 7.01  |
| 1/1 | 1/1 | 10.88 | 10.83 |
| 1/1 | 1/1 | 8.61  | 8.7   |
| 1/1 | 1/1 | 6.63  | 6.75  |
| 1/1 | 1/1 | 8.1   | 8.35  |
| 1/1 | 1/1 | 7.22  | 7.47  |
| 1/1 | 1/1 | 10.57 | 10.93 |
| 1/1 | 1/1 | 5.88  | 8.7   |
| 1/1 | 1/1 | 5.43  | 8.55  |
| 1/1 | 0/1 | 5.42  | 3.04  |
| 1/1 | 1/1 | 7.04  | 8.46  |
| 0/1 | 1/1 | 3.3   | 4.78  |
| 0/1 | 1/1 | 2.26  | 4.03  |
| 1/1 | 1/1 | 11.53 | 10.13 |
| 0/1 | 1/1 | 4.31  | 4.15  |
| 1/1 | 1/1 | 9.4   | 9.24  |
| 1/1 | 1/1 | 5.15  | 7.07  |
| 1/1 | 1/1 | 6.58  | 8.61  |
| 1/1 | 1/1 | 7.42  | 9.48  |
| 1/1 | 1/1 | 5.32  | 7.49  |
| 1/1 | 1/1 | 4.51  | 6.68  |
| 1/1 | 1/1 | 3.29  | 5.57  |
| 0/1 | 1/1 | 4.5   | 7.16  |
| 1/1 | 1/1 | 3.67  | 7.25  |

|     |     |       |       |
|-----|-----|-------|-------|
| 1/1 | 1/1 | 6.95  | 6.85  |
| 1/1 | 1/1 | 6.02  | 6.31  |
| 0/1 | 1/1 | 4.19  | 4.64  |
| 0/1 | 1/1 | 7.58  | 8.17  |
| 0/1 | 1/1 | 2.31  | 5.58  |
| 1/1 | 1/1 | 5.54  | 8.91  |
| 1/1 | 0/1 | 3.62  | 2.71  |
| 1/1 | 1/1 | 6.47  | 5.61  |
| 1/1 | 1/1 | 6.98  | 6.97  |
| 1/1 | 1/1 | 4.11  | 4.11  |
| 1/1 | 1/1 | 8.58  | 8.78  |
| 1/1 | 1/1 | 6.73  | 6.94  |
| 1/1 | 1/1 | 8.99  | 9.28  |
| 0/1 | 1/1 | 2.74  | 5.42  |
| 1/1 | 1/1 | 3.41  | 6.14  |
| 1/1 | 1/1 | 7.82  | 7.66  |
| 1/1 | 1/1 | 6.35  | 6.83  |
| 1/1 | 1/1 | 5.38  | 6.21  |
| 0/1 | 1/1 | 3.09  | 4.05  |
| 1/1 | 0/1 | 4.55  | 2.61  |
| 1/1 | 1/1 | 7.02  | 5.13  |
| 1/1 | 0/1 | 4.26  | 2.73  |
| 1/1 | 1/1 | 2.88  | 2.11  |
| 1/1 | 1/1 | 4.92  | 4.19  |
| 1/1 | 1/1 | 4.66  | 3.95  |
| 1/1 | 1/1 | 4.74  | 6.94  |
| 1/1 | 1/1 | 5.32  | 5.22  |
| 0/1 | 1/1 | 6.43  | 6.36  |
| 1/1 | 1/1 | 5.64  | 5.62  |
| 1/1 | 1/1 | 4.7   | 4.8   |
| 1/1 | 1/1 | 7.25  | 7.41  |
| 1/1 | 1/1 | 5.36  | 5.69  |
| 1/1 | 1/1 | 4.12  | 4.57  |
| 1/1 | 1/1 | 10.9  | 11.39 |
| 0/1 | 1/1 | 2.61  | 3.18  |
| 1/1 | 1/1 | 5.62  | 6.27  |
| 1/1 | 1/1 | 4.32  | 5.15  |
| 1/1 | 1/1 | 11.96 | 12.98 |
| 1/1 | 1/1 | 12.86 | 13.9  |
| 1/1 | 1/1 | 6.35  | 7.47  |
| 1/1 | 1/1 | 11.31 | 12.48 |
| 1/1 | 1/1 | 3.8   | 7.47  |
| 1/1 | 1/1 | 4.28  | 3.78  |
| 0/1 | 1/1 | 3.92  | 4.12  |
| 1/1 | 1/1 | 6.52  | 7.22  |
| 1/1 | 1/1 | 6.25  | 9.34  |
| 1/1 | 1/1 | 5.31  | 8.47  |
| 1/1 | 1/1 | 5.63  | 9.12  |
| 1/1 | 1/1 | 4.87  | 8.42  |
| 1/1 | 1/1 | 5.85  | 4.22  |
| 1/1 | 1/1 | 7.48  | 6.7   |
| 0/1 | 1/1 | 5.38  | 4.73  |
| 1/1 | 1/1 | 5.04  | 4.46  |
| 0/1 | 1/1 | 2.21  | 3.87  |
| 0/1 | 1/1 | 2.92  | 4.79  |
| 1/1 | 0/1 | 5.35  | 3.68  |
| 1/1 | 1/1 | 6.61  | 6.01  |
| 1/1 | 0/1 | 4.9   | 2.18  |

|     |     |      |      |
|-----|-----|------|------|
| 1/1 | 0/1 | 4.18 | 2.09 |
| 1/1 | 0/1 | 4.18 | 2.09 |
| 1/1 | 0/1 | 4.92 | 2.84 |
| 1/1 | 0/1 | 4.66 | 2.63 |
| 1/1 | 0/1 | 4.66 | 2.63 |
| 1/1 | 0/1 | 4.66 | 2.63 |
| 1/1 | 0/1 | 4.66 | 2.78 |
| 1/1 | 0/1 | 3.46 | 1.71 |
| 1/1 | 1/1 | 5.97 | 4.42 |
| 1/1 | 0/1 | 4.96 | 3.44 |
| 1/1 | 0/1 | 5.15 | 3.66 |
| 1/1 | 0/1 | 3.7  | 2.22 |
| 1/1 | 0/1 | 3.7  | 2.22 |
| 1/1 | 0/1 | 3.7  | 2.22 |
| 1/1 | 1/1 | 5.14 | 5.71 |
| 0/1 | 1/1 | 3.18 | 4.03 |
| 1/1 | 1/1 | 9.49 | 7.14 |
| 1/1 | 0/1 | 3.4  | 2.1  |
| 1/1 | 1/1 | 4.79 | 5.82 |
| 1/1 | 0/1 | 4.84 | 2.9  |
| 1/1 | 0/1 | 3.84 | 3.07 |
| 1/1 | 1/1 | 3.73 | 2.97 |
| 1/1 | 0/1 | 2.84 | 2.1  |
| 1/1 | 1/1 | 6.88 | 6.17 |
| 1/1 | 0/1 | 3.74 | 3.05 |
| 1/1 | 1/1 | 3.4  | 4.82 |
| 0/1 | 1/1 | 1.77 | 3.21 |
| 1/1 | 1/1 | 6.79 | 6.06 |
| 1/1 | 1/1 | 9.21 | 8.53 |
| 0/1 | 1/1 | 3.36 | 2.83 |
| 1/1 | 1/1 | 6.41 | 6.03 |
| 1/1 | 1/1 | 4.61 | 4.48 |
| 1/1 | 1/1 | 4.93 | 4.89 |
| 0/1 | 1/1 | 4.25 | 4.22 |
| 0/1 | 1/1 | 3.96 | 4.31 |
| 0/1 | 1/1 | 3.07 | 3.49 |
| 1/1 | 1/1 | 5.45 | 5.92 |
| 1/1 | 1/1 | 3.49 | 3.98 |
| 1/1 | 1/1 | 4.22 | 4.72 |
| 1/1 | 1/1 | 5.83 | 8.4  |
| 1/1 | 1/1 | 5.41 | 8.15 |
| 1/1 | 1/1 | 3.65 | 6.59 |
| 0/1 | 1/1 | 2.46 | 5.65 |
| 0/1 | 1/1 | 2.89 | 6.35 |
| 1/1 | 1/1 | 4.79 | 8.3  |
| 1/1 | 1/1 | 7.66 | 7.58 |
| 1/1 | 1/1 | 4.6  | 4.58 |
| 1/1 | 1/1 | 5.44 | 5.93 |
| 0/1 | 1/1 | 3.8  | 4.32 |
| 1/1 | 1/1 | 7.09 | 7.69 |
| 1/1 | 1/1 | 5.2  | 5.96 |
| 0/1 | 1/1 | 5.29 | 6.11 |
| 1/1 | 1/1 | 4.98 | 4.1  |
| 1/1 | 1/1 | 3.17 | 2.44 |
| 1/1 | 1/1 | 6.43 | 5.79 |
| 1/1 | 1/1 | 7.02 | 6.79 |
| 1/1 | 1/1 | 5.79 | 5.75 |
| 0/1 | 1/1 | 6.22 | 6.31 |



|     |     |       |       |
|-----|-----|-------|-------|
| 1/1 | 1/1 | 9.93  | 10.11 |
| 1/1 | 1/1 | 7.37  | 7.54  |
| 1/1 | 1/1 | 5.73  | 6.07  |
| 1/1 | 1/1 | 8.74  | 7.45  |
| 1/1 | 1/1 | 7.63  | 6.81  |
| 1/1 | 1/1 | 8.66  | 7.95  |
| 1/1 | 1/1 | 5.65  | 5.52  |
| 1/1 | 1/1 | 7.89  | 10.02 |
| 1/1 | 1/1 | 4.26  | 3.07  |
| 1/1 | 1/1 | 5.55  | 4.49  |
| 1/1 | 0/1 | 3.95  | 3     |
| 1/1 | 0/1 | 3.85  | 2.96  |
| 1/1 | 1/1 | 6.61  | 5.98  |
| 1/1 | 1/1 | 4.93  | 4.32  |
| 1/1 | 1/1 | 5.32  | 4.98  |
| 1/1 | 1/1 | 6.84  | 6.59  |
| 0/1 | 1/1 | 3.05  | 2.85  |
| 0/1 | 1/1 | 2.48  | 2.37  |
| 0/1 | 1/1 | 3.44  | 3.43  |
| 1/1 | 1/1 | 7.12  | 7.13  |
| 1/1 | 1/1 | 3.41  | 3.45  |
| 1/1 | 1/1 | 3.64  | 3.68  |
| 1/1 | 1/1 | 7.16  | 9.71  |
| 1/1 | 1/1 | 7.43  | 5.11  |
| 0/1 | 1/1 | 2.59  | 3.76  |
| 0/1 | 1/1 | 3.67  | 4.99  |
| 1/1 | 1/1 | 8.5   | 7.06  |
| 1/1 | 1/1 | 7.06  | 6.05  |
| 1/1 | 1/1 | 6.81  | 6.29  |
| 1/1 | 1/1 | 5.84  | 5.55  |
| 0/1 | 1/1 | 7.22  | 6.95  |
| 1/1 | 1/1 | 10.99 | 10.76 |
| 1/1 | 1/1 | 8.09  | 7.86  |
| 1/1 | 0/1 | 3.89  | 2.72  |
| 1/1 | 0/1 | 3.39  | 2.65  |
| 1/1 | 1/1 | 2.81  | 2.28  |
| 1/1 | 1/1 | 2.51  | 2.27  |
| 1/1 | 1/1 | 4.72  | 6.93  |
| 1/1 | 0/1 | 3.74  | 2.56  |
| 1/1 | 0/1 | 2.9   | 2.21  |
| 1/1 | 1/1 | 4.3   | 3.82  |
| 1/1 | 1/1 | 2.56  | 2.18  |
| 1/1 | 1/1 | 3.2   | 2.89  |
| 1/1 | 0/1 | 2.54  | 2.26  |
| 1/1 | 1/1 | 4.05  | 3.83  |
| 1/1 | 1/1 | 6.53  | 6.34  |
| 1/1 | 1/1 | 8     | 7.91  |
| 1/1 | 1/1 | 9.42  | 9.34  |
| 1/1 | 1/1 | 2.55  | 2.5   |
| 1/1 | 1/1 | 7.43  | 7.39  |
| 0/1 | 1/1 | 4.1   | 4.06  |
| 1/1 | 1/1 | 5.49  | 5.5   |
| 1/1 | 1/1 | 3.3   | 3.31  |
| 0/1 | 1/1 | 3.2   | 5.33  |
| 0/1 | 1/1 | 2.13  | 4.3   |
| 0/1 | 1/1 | 3.01  | 5.57  |
| 1/1 | 1/1 | 8.87  | 6.7   |
| 1/1 | 1/1 | 5.47  | 3.57  |

|     |     |       |      |
|-----|-----|-------|------|
| 1/1 | 1/1 | 5.36  | 4.23 |
| 0/1 | 1/1 | 2.22  | 3.64 |
| 1/1 | 1/1 | 7.47  | 6.27 |
| 1/1 | 1/1 | 6.37  | 5.22 |
| 1/1 | 1/1 | 7.58  | 6.42 |
| 1/1 | 0/1 | 4.25  | 3.23 |
| 1/1 | 1/1 | 8.26  | 7.23 |
| 1/1 | 1/1 | 6.47  | 5.48 |
| 1/1 | 0/1 | 3.59  | 2.64 |
| 1/1 | 1/1 | 7.59  | 6.67 |
| 1/1 | 1/1 | 8.17  | 7.26 |
| 1/1 | 1/1 | 8.61  | 7.8  |
| 1/1 | 1/1 | 7.41  | 6.62 |
| 1/1 | 1/1 | 10.21 | 9.49 |
| 1/1 | 1/1 | 6.31  | 5.6  |
| 1/1 | 1/1 | 3.13  | 2.44 |
| 1/1 | 1/1 | 7.33  | 6.64 |
| 1/1 | 1/1 | 8.78  | 8.11 |
| 1/1 | 1/1 | 8.16  | 7.51 |
| 1/1 | 1/1 | 7.53  | 6.9  |
| 1/1 | 1/1 | 4.25  | 3.63 |
| 1/1 | 1/1 | 6.56  | 5.94 |
| 1/1 | 1/1 | 7.84  | 7.38 |
| 1/1 | 1/1 | 4.21  | 3.89 |
| 1/1 | 1/1 | 6.63  | 6.33 |
| 1/1 | 1/1 | 5.27  | 4.98 |
| 1/1 | 1/1 | 4.54  | 4.26 |
| 1/1 | 1/1 | 5.66  | 5.5  |
| 1/1 | 1/1 | 2.91  | 2.83 |
| 1/1 | 1/1 | 6.78  | 6.74 |
| 1/1 | 1/1 | 2.61  | 2.59 |
| 0/1 | 1/1 | 2.5   | 4.98 |
| 0/1 | 1/1 | 4.98  | 7.47 |
| 1/1 | 1/1 | 4.95  | 8.01 |
| 1/1 | 1/1 | 5     | 8.9  |
| 1/1 | 1/1 | 5.76  | 3.76 |
| 1/1 | 1/1 | 4.44  | 3.42 |
| 1/1 | 1/1 | 5.8   | 4.79 |
| 1/1 | 0/1 | 7.12  | 6.32 |
| 0/1 | 1/1 | 4.12  | 5.41 |
| 0/1 | 1/1 | 3.36  | 4.99 |
| 1/1 | 0/1 | 5.31  | 2.53 |
| 0/1 | 1/1 | 5.03  | 5.58 |
| 1/1 | 1/1 | 3.61  | 4.34 |
| 1/1 | 0/1 | 5.18  | 3.68 |
| 1/1 | 1/1 | 4.66  | 3.34 |
| 1/1 | 0/1 | 4.63  | 3.33 |
| 1/1 | 1/1 | 6.7   | 5.53 |
| 1/1 | 0/1 | 4.22  | 3.22 |
| 1/1 | 0/1 | 5.11  | 4.23 |
| 1/1 | 1/1 | 4.44  | 3.72 |
| 1/1 | 1/1 | 5.89  | 5.29 |
| 1/1 | 1/1 | 5.25  | 4.71 |
| 1/1 | 1/1 | 3.62  | 3.14 |
| 1/1 | 1/1 | 5.37  | 4.9  |
| 1/1 | 0/1 | 3.24  | 2.77 |
| 1/1 | 1/1 | 7.54  | 7.11 |
| 1/1 | 1/1 | 4.96  | 4.57 |

|     |     |       |       |
|-----|-----|-------|-------|
| 1/1 | 1/1 | 6.71  | 6.38  |
| 1/1 | 0/1 | 2.72  | 2.47  |
| 1/1 | 0/1 | 6.42  | 3.52  |
| 1/1 | 0/1 | 6.52  | 4.35  |
| 1/1 | 1/1 | 6.46  | 4.75  |
| 0/1 | 1/1 | 7.05  | 7.42  |
| 0/1 | 1/1 | 2.9   | 3.4   |
| 1/1 | 1/1 | 7.47  | 8.03  |
| 1/1 | 1/1 | 8.18  | 8.94  |
| 1/1 | 1/1 | 5.53  | 5.03  |
| 0/1 | 1/1 | 8.02  | 8.22  |
| 1/1 | 1/1 | 6.72  | 7.08  |
| 1/1 | 1/1 | 9.39  | 10.02 |
| 1/1 | 1/1 | 4.42  | 5.11  |
| 1/1 | 0/1 | 5.3   | 2.85  |
| 1/1 | 0/1 | 4.1   | 2.89  |
| 1/1 | 0/1 | 6.48  | 3.35  |
| 1/1 | 1/1 | 7.7   | 4.59  |
| 1/1 | 1/1 | 7.7   | 4.87  |
| 1/1 | 1/1 | 9.19  | 6.84  |
| 1/1 | 1/1 | 6.7   | 4.38  |
| 1/1 | 1/1 | 8.99  | 9.24  |
| 0/1 | 1/1 | 8.25  | 8.5   |
| 1/1 | 1/1 | 7.12  | 6.8   |
| 1/1 | 1/1 | 10.19 | 9.89  |
| 1/1 | 1/1 | 5.03  | 4.84  |
| 1/1 | 1/1 | 8.57  | 8.43  |
| 0/1 | 1/1 | 5.35  | 5.23  |
| 0/1 | 1/1 | 6.54  | 6.46  |
| 1/1 | 1/1 | 7.27  | 7.24  |
| 1/1 | 1/1 | 12.17 | 12.14 |
| 1/1 | 1/1 | 9.92  | 10.13 |
| 0/1 | 1/1 | 6.52  | 7.05  |
| 1/1 | 1/1 | 9.09  | 9.69  |
| 1/1 | 1/1 | 4.51  | 5.34  |
| 1/1 | 1/1 | 5.79  | 8.71  |
| 0/1 | 1/1 | 5.29  | 8.54  |
| 1/1 | 1/1 | 4.72  | 8.33  |
| 1/1 | 0/1 | 6.56  | 3.46  |
| 1/1 | 0/1 | 5.48  | 3.33  |
| 0/1 | 1/1 | 6.3   | 6.47  |
| 0/1 | 1/1 | 6.06  | 6.26  |
| 0/1 | 1/1 | 5.01  | 5.27  |
| 1/1 | 1/1 | 7.09  | 6.31  |
| 1/1 | 1/1 | 6.69  | 6.16  |
| 1/1 | 1/1 | 6.83  | 6.39  |
| 1/1 | 1/1 | 3.18  | 2.75  |
| 1/1 | 1/1 | 4.55  | 4.25  |
| 1/1 | 1/1 | 4.41  | 4.14  |
| 1/1 | 1/1 | 6.09  | 5.84  |
| 1/1 | 1/1 | 5.73  | 5.82  |
| 1/1 | 1/1 | 8.2   | 8.3   |
| 0/1 | 1/1 | 3.42  | 3.54  |
| 1/1 | 1/1 | 6.96  | 7.14  |
| 1/1 | 1/1 | 3.07  | 3.31  |
| 1/1 | 1/1 | 5.38  | 5.63  |
| 1/1 | 1/1 | 2.69  | 2.95  |
| 0/1 | 1/1 | 1.91  | 2.19  |

|     |     |      |      |
|-----|-----|------|------|
| 0/1 | 1/1 | 2.31 | 2.62 |
| 0/1 | 1/1 | 3.14 | 3.47 |
| 1/1 | 1/1 | 6.83 | 7.16 |
| 0/1 | 1/1 | 2.28 | 2.73 |
| 1/1 | 0/1 | 3.19 | 2.17 |
| 1/1 | 1/1 | 8.01 | 7.35 |
| 1/1 | 1/1 | 5.65 | 5.2  |
| 1/1 | 1/1 | 3.43 | 3.4  |
| 0/1 | 1/1 | 2.52 | 2.54 |
| 1/1 | 1/1 | 6.59 | 6.62 |
| 1/1 | 1/1 | 3.22 | 3.26 |
| 1/1 | 1/1 | 6.53 | 6.09 |
| 1/1 | 1/1 | 3.33 | 2.97 |
| 1/1 | 1/1 | 6.64 | 6.37 |
| 0/1 | 1/1 | 4.33 | 5.01 |
| 1/1 | 1/1 | 5.56 | 3.72 |
| 1/1 | 0/1 | 2.75 | 2.12 |
| 0/1 | 1/1 | 3.2  | 4.61 |
| 1/1 | 1/1 | 6.88 | 4.86 |
| 1/1 | 0/1 | 4.8  | 3.04 |
| 1/1 | 1/1 | 6.75 | 5.8  |
| 1/1 | 0/1 | 3.84 | 2.41 |
| 1/1 | 1/1 | 3.26 | 2.7  |
| 1/1 | 1/1 | 4.68 | 4.15 |
| 1/1 | 1/1 | 6.79 | 6.42 |
| 1/1 | 1/1 | 6.64 | 6.29 |
| 1/1 | 1/1 | 3.79 | 5.61 |
| 0/1 | 1/1 | 2.26 | 4.15 |
| 0/1 | 1/1 | 3.39 | 5.44 |
| 1/1 | 1/1 | 6.13 | 4.99 |
| 1/1 | 1/1 | 7.49 | 6.91 |
| 1/1 | 1/1 | 8.59 | 8.11 |
| 1/1 | 1/1 | 6.82 | 6.38 |
| 1/1 | 1/1 | 6.57 | 6.14 |
| 1/1 | 1/1 | 3.74 | 3.35 |
| 1/1 | 1/1 | 6.66 | 6.28 |
| 0/1 | 1/1 | 5.37 | 5.01 |
| 1/1 | 1/1 | 7.68 | 7.37 |
| 1/1 | 1/1 | 8.69 | 8.4  |
| 1/1 | 1/1 | 8.03 | 7.84 |
| 1/1 | 1/1 | 5.75 | 5.57 |
| 0/1 | 1/1 | 6.85 | 6.71 |
| 1/1 | 1/1 | 5    | 4.91 |
| 1/1 | 1/1 | 7.52 | 7.44 |
| 1/1 | 1/1 | 7.43 | 7.35 |
| 1/1 | 1/1 | 9.8  | 9.76 |
| 1/1 | 1/1 | 7.12 | 7.08 |
| 1/1 | 1/1 | 7.04 | 7.01 |
| 1/1 | 1/1 | 7.07 | 7.14 |
| 1/1 | 1/1 | 6.76 | 6.85 |
| 1/1 | 1/1 | 5.85 | 7.97 |
| 0/1 | 1/1 | 5.13 | 7.58 |
| 1/1 | 1/1 | 6.13 | 4.99 |
| 1/1 | 1/1 | 7.49 | 6.91 |
| 1/1 | 1/1 | 8.59 | 8.11 |
| 1/1 | 1/1 | 6.82 | 6.38 |
| 1/1 | 1/1 | 6.57 | 6.14 |
| 1/1 | 1/1 | 3.74 | 3.35 |

|     |     |       |       |
|-----|-----|-------|-------|
| 1/1 | 1/1 | 6.66  | 6.28  |
| 0/1 | 1/1 | 5.37  | 5.01  |
| 1/1 | 1/1 | 7.68  | 7.37  |
| 1/1 | 1/1 | 8.69  | 8.4   |
| 1/1 | 1/1 | 8.03  | 7.84  |
| 1/1 | 1/1 | 5.75  | 5.57  |
| 0/1 | 1/1 | 6.85  | 6.71  |
| 1/1 | 1/1 | 5     | 4.91  |
| 1/1 | 1/1 | 7.52  | 7.44  |
| 1/1 | 1/1 | 7.43  | 7.35  |
| 1/1 | 1/1 | 9.8   | 9.76  |
| 1/1 | 1/1 | 7.12  | 7.08  |
| 1/1 | 1/1 | 7.04  | 7.01  |
| 1/1 | 1/1 | 7.07  | 7.14  |
| 1/1 | 1/1 | 6.76  | 6.85  |
| 1/1 | 1/1 | 5.85  | 7.97  |
| 0/1 | 1/1 | 5.13  | 7.58  |
| 1/1 | 1/1 | 10.19 | 9.25  |
| 1/1 | 1/1 | 9.31  | 8.87  |
| 0/1 | 1/1 | 5.78  | 5.85  |
| 1/1 | 1/1 | 5.48  | 5.59  |
| 1/1 | 1/1 | 9.97  | 10.12 |
| 1/1 | 1/1 | 6.35  | 6.51  |
| 1/1 | 1/1 | 4.96  | 3.45  |
| 1/1 | 1/1 | 7.34  | 6.32  |
| 1/1 | 1/1 | 5.51  | 4.58  |
| 1/1 | 1/1 | 6.68  | 5.77  |
| 1/1 | 0/1 | 3.51  | 2.71  |
| 1/1 | 1/1 | 6.03  | 5.3   |
| 1/1 | 1/1 | 9.39  | 8.7   |
| 1/1 | 1/1 | 5.42  | 4.76  |
| 1/1 | 1/1 | 8.21  | 7.81  |
| 1/1 | 1/1 | 7.9   | 7.5   |
| 1/1 | 1/1 | 7.69  | 7.32  |
| 1/1 | 1/1 | 10.95 | 10.59 |
| 1/1 | 1/1 | 3.13  | 2.77  |
| 1/1 | 1/1 | 10.01 | 9.64  |
| 1/1 | 1/1 | 8.31  | 7.98  |
| 1/1 | 1/1 | 3.43  | 3.09  |
| 1/1 | 1/1 | 8.13  | 7.81  |
| 1/1 | 1/1 | 9.01  | 8.69  |
| 1/1 | 1/1 | 4.85  | 4.56  |
| 0/1 | 1/1 | 2.24  | 2.01  |
| 1/1 | 1/1 | 9.78  | 9.73  |
| 0/1 | 1/1 | 3.98  | 4.24  |
| 1/1 | 1/1 | 10.03 | 10.32 |
| 1/1 | 1/1 | 12.01 | 12.37 |
| 1/1 | 1/1 | 5.33  | 5.7   |
| 1/1 | 1/1 | 3.68  | 4.16  |
| 1/1 | 1/1 | 3.76  | 4.28  |
| 0/1 | 1/1 | 2.2   | 3.01  |
| 1/1 | 1/1 | 5.48  | 6.34  |
| 1/1 | 1/1 | 4.6   | 5.48  |
| 1/1 | 0/1 | 6.3   | 4.86  |
| 1/1 | 1/1 | 3.34  | 2.98  |
| 1/1 | 1/1 | 7.21  | 6.93  |
| 1/1 | 1/1 | 7.58  | 5.92  |
| 1/1 | 1/1 | 5.88  | 4.84  |

|     |     |       |       |
|-----|-----|-------|-------|
| 1/1 | 1/1 | 3.84  | 3.2   |
| 1/1 | 0/1 | 3.62  | 3.01  |
| 1/1 | 1/1 | 3.98  | 3.39  |
| 1/1 | 1/1 | 5.96  | 5.38  |
| 1/1 | 1/1 | 6.05  | 5.54  |
| 0/1 | 1/1 | 2.8   | 4.92  |
| 1/1 | 1/1 | 4.77  | 3.2   |
| 1/1 | 1/1 | 4.98  | 4.44  |
| 1/1 | 1/1 | 4.33  | 6.22  |
| 0/1 | 1/1 | 3.3   | 5.27  |
| 1/1 | 1/1 | 3.23  | 5.34  |
| 0/1 | 1/1 | 2.38  | 4.52  |
| 1/1 | 1/1 | 3.82  | 6.6   |
| 1/1 | 0/1 | 5.68  | 4.11  |
| 1/1 | 1/1 | 6.26  | 5.33  |
| 0/1 | 1/1 | 5.15  | 4.31  |
| 1/1 | 1/1 | 5.11  | 4.47  |
| 1/1 | 1/1 | 4.33  | 3.76  |
| 1/1 | 1/1 | 5.99  | 5.6   |
| 1/1 | 0/1 | 2.95  | 2.57  |
| 1/1 | 1/1 | 4.04  | 3.65  |
| 1/1 | 1/1 | 7.93  | 7.58  |
| 0/1 | 1/1 | 3.03  | 2.68  |
| 1/1 | 0/1 | 4.34  | 3.16  |
| 1/1 | 1/1 | 6.41  | 5.43  |
| 1/1 | 1/1 | 6.35  | 5.7   |
| 1/1 | 1/1 | 6.99  | 6.58  |
| 1/1 | 1/1 | 8.02  | 7.63  |
| 1/1 | 1/1 | 4.53  | 4.26  |
| 1/1 | 1/1 | 4.61  | 4.42  |
| 0/1 | 1/1 | 3.29  | 3.22  |
| 1/1 | 1/1 | 5.68  | 5.61  |
| 0/1 | 1/1 | 4.39  | 4.38  |
| 1/1 | 1/1 | 2.13  | 2.13  |
| 1/1 | 1/1 | 4.52  | 3.81  |
| 1/1 | 1/1 | 7.1   | 6.51  |
| 1/1 | 1/1 | 8.96  | 8.62  |
| 1/1 | 1/1 | 5.04  | 4.72  |
| 0/1 | 1/1 | 5.54  | 5.39  |
| 1/1 | 1/1 | 6.94  | 6.98  |
| 1/1 | 1/1 | 6.38  | 6.43  |
| 1/1 | 1/1 | 8.27  | 8.33  |
| 1/1 | 1/1 | 7.8   | 8.06  |
| 1/1 | 1/1 | 8.54  | 8.81  |
| 0/1 | 1/1 | 2.49  | 2.77  |
| 0/1 | 1/1 | 5.16  | 5.57  |
| 1/1 | 1/1 | 7.09  | 7.55  |
| 1/1 | 0/1 | 5.36  | 4.34  |
| 1/1 | 1/1 | 6.62  | 6.05  |
| 1/1 | 1/1 | 8.72  | 8.27  |
| 1/1 | 1/1 | 7.04  | 6.63  |
| 1/1 | 1/1 | 8.56  | 8.31  |
| 1/1 | 1/1 | 4.35  | 4.16  |
| 1/1 | 1/1 | 3.57  | 3.4   |
| 1/1 | 1/1 | 9.89  | 9.78  |
| 1/1 | 1/1 | 10.72 | 10.62 |
| 0/1 | 1/1 | 2.51  | 2.43  |
| 0/1 | 1/1 | 2.74  | 2.69  |

|     |     |       |       |
|-----|-----|-------|-------|
| 1/1 | 1/1 | 10.11 | 10.07 |
| 1/1 | 1/1 | 6.73  | 6.91  |
| 1/1 | 1/1 | 4.36  | 6.87  |
| 1/1 | 1/1 | 2.98  | 5.57  |
| 1/1 | 1/1 | 7.22  | 4.39  |
| 1/1 | 0/1 | 5.24  | 2.46  |
| 1/1 | 1/1 | 8.44  | 5.69  |
| 1/1 | 1/1 | 7.82  | 5.44  |
| 1/1 | 0/1 | 5     | 3.05  |
| 1/1 | 1/1 | 6.73  | 4.87  |
| 1/1 | 1/1 | 6.66  | 4.87  |
| 1/1 | 1/1 | 7.12  | 5.36  |
| 1/1 | 1/1 | 8.58  | 6.93  |
| 0/1 | 1/1 | 5.54  | 6.11  |
| 1/1 | 1/1 | 3.35  | 3.92  |
| 1/1 | 1/1 | 6.91  | 6.09  |
| 1/1 | 1/1 | 6.05  | 5.41  |
| 1/1 | 1/1 | 10.1  | 10    |
| 0/1 | 1/1 | 4.96  | 4.96  |
| 1/1 | 1/1 | 4.4   | 4.53  |
| 1/1 | 1/1 | 6.46  | 6.64  |
| 1/1 | 1/1 | 5.94  | 6.24  |
| 0/1 | 1/1 | 2.24  | 2.55  |
| 1/1 | 1/1 | 9.08  | 9.44  |
| 1/1 | 1/1 | 3.62  | 6.05  |
| 1/1 | 1/1 | 5.09  | 3.32  |
| 1/1 | 1/1 | 6.23  | 5.52  |
| 1/1 | 1/1 | 8.15  | 6.96  |
| 1/1 | 1/1 | 6.15  | 5.07  |
| 1/1 | 1/1 | 2.3   | 2.33  |
| 1/1 | 1/1 | 4.34  | 2.81  |
| 1/1 | 1/1 | 3.75  | 3.29  |
| 1/1 | 1/1 | 6.18  | 5.75  |
| 1/1 | 1/1 | 2.36  | 1.98  |
| 1/1 | 1/1 | 6.4   | 6.25  |
| 1/1 | 1/1 | 10.06 | 10.03 |
| 0/1 | 1/1 | 2.56  | 2.82  |
| 0/1 | 1/1 | 3.49  | 3.76  |
| 0/1 | 1/1 | 3.59  | 3.88  |
| 1/1 | 1/1 | 6.37  | 6.69  |
| 1/1 | 1/1 | 6.58  | 6.91  |
| 1/1 | 1/1 | 3.66  | 4.02  |
| 0/1 | 1/1 | 2.64  | 3.07  |
| 1/1 | 1/1 | 2.39  | 2.85  |
| 1/1 | 1/1 | 6.82  | 7.32  |
| 0/1 | 1/1 | 2.98  | 3.49  |
| 0/1 | 1/1 | 3     | 3.78  |
| 1/1 | 0/1 | 4.95  | 2.57  |
| 1/1 | 1/1 | 6.22  | 5.04  |
| 0/1 | 1/1 | 4.07  | 5     |
| 1/1 | 1/1 | 6.2   | 7.13  |
| 0/1 | 1/1 | 2.39  | 2.34  |
| 0/1 | 1/1 | 2.79  | 3.21  |
| 1/1 | 1/1 | 2.46  | 2.91  |
| 1/1 | 1/1 | 7.56  | 8.13  |
| 1/1 | 1/1 | 6.79  | 7.43  |
| 0/1 | 1/1 | 3.68  | 4.48  |
| 1/1 | 1/1 | 7.24  | 8.08  |

|     |     |       |       |
|-----|-----|-------|-------|
| 1/1 | 1/1 | 7.43  | 8.4   |
| 1/1 | 1/1 | 6.76  | 7.78  |
| 1/1 | 1/1 | 5.69  | 6.75  |
| 1/1 | 0/1 | 6.66  | 2.52  |
| 1/1 | 0/1 | 5.35  | 4.52  |
| 1/1 | 1/1 | 5.65  | 4.83  |
| 1/1 | 1/1 | 4.91  | 4.14  |
| 1/1 | 1/1 | 4.49  | 4.69  |
| 0/1 | 1/1 | 4.97  | 5.87  |
| 1/1 | 1/1 | 6     | 3.51  |
| 1/1 | 0/1 | 3.54  | 2.08  |
| 1/1 | 1/1 | 7.55  | 7.09  |
| 1/1 | 1/1 | 3.68  | 3.34  |
| 1/1 | 1/1 | 7.44  | 7.95  |
| 1/1 | 1/1 | 12.09 | 12.75 |
| 1/1 | 1/1 | 5.09  | 8.14  |
| 1/1 | 1/1 | 3.32  | 6.62  |
| 1/1 | 1/1 | 5.1   | 4.65  |
| 0/1 | 1/1 | 4.66  | 5.03  |
| 1/1 | 1/1 | 6.93  | 7.53  |
| 0/1 | 1/1 | 4.87  | 7.81  |
| 0/1 | 1/1 | 3.31  | 7.4   |
| 1/1 | 1/1 | 2.83  | 2.82  |
| 1/1 | 1/1 | 7.05  | 7.18  |
| 0/1 | 1/1 | 3.86  | 4     |
| 0/1 | 1/1 | 6.11  | 6.47  |
| 0/1 | 1/1 | 5.76  | 6.18  |
| 1/1 | 1/1 | 3.02  | 3.68  |
| 1/1 | 1/1 | 6.65  | 7.51  |
| 1/1 | 1/1 | 8.11  | 6     |
| 1/1 | 1/1 | 5.31  | 3.94  |
| 1/1 | 1/1 | 9.85  | 8.68  |
| 1/1 | 0/1 | 6.32  | 4.1   |
| 1/1 | 0/1 | 3.91  | 2.82  |
| 1/1 | 1/1 | 3.5   | 4.5   |
| 0/1 | 1/1 | 5.71  | 6.81  |
| 1/1 | 0/1 | 7.23  | 4.55  |
| 0/1 | 1/1 | 4.6   | 5.22  |
| 1/1 | 1/1 | 6.82  | 7.55  |
| 0/1 | 1/1 | 2.47  | 3.39  |
| 1/1 | 0/1 | 4.87  | 2.67  |
| 1/1 | 0/1 | 4.35  | 2.37  |
| 1/1 | 1/1 | 5.61  | 4.28  |
| 1/1 | 1/1 | 5.43  | 4.23  |
| 1/1 | 1/1 | 3.77  | 5.65  |
| 1/1 | 1/1 | 4.61  | 2.91  |
| 1/1 | 1/1 | 7.26  | 6.34  |
| 1/1 | 1/1 | 5.64  | 4.73  |
| 1/1 | 1/1 | 5.36  | 4.59  |
| 1/1 | 1/1 | 3.86  | 3.3   |
| 1/1 | 1/1 | 5.14  | 4.58  |
| 1/1 | 1/1 | 5.92  | 5.42  |
| 1/1 | 1/1 | 7.05  | 3.4   |
| 1/1 | 1/1 | 7.07  | 6.95  |
| 1/1 | 1/1 | 10.93 | 10.89 |
| 1/1 | 1/1 | 4.7   | 4.72  |
| 0/1 | 1/1 | 7.09  | 7.53  |
| 1/1 | 1/1 | 11.07 | 9.23  |



|     |     |      |      |
|-----|-----|------|------|
| 1/1 | 1/1 | 9.92 | 8.7  |
| 1/1 | 1/1 | 7.05 | 5.65 |
| 1/1 | 1/1 | 4.49 | 3.96 |
| 1/1 | 1/1 | 8.59 | 8.1  |
| 1/1 | 1/1 | 4.04 | 6.22 |
| 1/1 | 1/1 | 6.15 | 4.97 |
| 1/1 | 1/1 | 9.78 | 9.35 |
| 1/1 | 0/1 | 2.91 | 2.49 |
| 1/1 | 1/1 | 4.57 | 4.17 |
| 1/1 | 1/1 | 5.39 | 5    |
| 1/1 | 1/1 | 2.83 | 2.77 |
| 1/1 | 1/1 | 4.78 | 4.73 |
| 1/1 | 1/1 | 6.71 | 6.06 |
| 1/1 | 1/1 | 6.38 | 5.84 |
| 0/1 | 1/1 | 3.07 | 2.91 |
| 1/1 | 1/1 | 9.55 | 9.4  |
| 1/1 | 1/1 | 7.43 | 7.42 |
| 1/1 | 1/1 | 6.73 | 6.98 |
| 1/1 | 1/1 | 5.43 | 5.7  |
| 1/1 | 1/1 | 8.7  | 8.64 |
| 1/1 | 1/1 | 5.87 | 5.97 |
| 0/1 | 1/1 | 2.28 | 3.39 |
| 1/1 | 1/1 | 9.01 | 8.79 |
| 0/1 | 1/1 | 4.9  | 4.81 |
| 1/1 | 1/1 | 5.54 | 5.98 |
| 1/1 | 1/1 | 7.18 | 7.66 |
| 1/1 | 1/1 | 8.23 | 8.72 |
| 0/1 | 1/1 | 2.82 | 3.62 |
| 1/1 | 1/1 | 5.79 | 9.25 |
| 1/1 | 1/1 | 4.56 | 8.43 |
| 1/1 | 1/1 | 6.55 | 6.45 |
| 1/1 | 1/1 | 6.36 | 6.33 |
| 1/1 | 1/1 | 5.12 | 5.12 |
| 0/1 | 1/1 | 4.66 | 4.66 |
| 0/1 | 1/1 | 3.6  | 4.25 |
| 0/1 | 1/1 | 5.57 | 6.39 |
| 0/1 | 1/1 | 4.88 | 8    |
| 1/1 | 1/1 | 3.09 | 2.97 |
| 0/1 | 1/1 | 2.1  | 2.03 |
| 1/1 | 1/1 | 4.72 | 4.65 |
| 0/1 | 1/1 | 4.81 | 4.74 |
| 1/1 | 1/1 | 4.71 | 4.66 |
| 0/1 | 1/1 | 6.35 | 6.37 |
| 1/1 | 1/1 | 4.19 | 4.21 |
| 1/1 | 1/1 | 3.79 | 3.83 |
| 0/1 | 1/1 | 3.17 | 3.35 |
| 1/1 | 1/1 | 7.49 | 7.78 |
| 0/1 | 1/1 | 4.8  | 5.21 |
| 0/1 | 1/1 | 3.52 | 4.15 |
| 1/1 | 1/1 | 6.15 | 6.9  |
| 1/1 | 1/1 | 2.42 | 3.19 |
| 1/1 | 1/1 | 6.78 | 7.63 |
| 1/1 | 1/1 | 7.05 | 8.02 |
| 0/1 | 1/1 | 2.91 | 3.89 |
| 0/1 | 1/1 | 4.64 | 5.62 |
| 1/1 | 1/1 | 5.9  | 6.9  |
| 1/1 | 1/1 | 4.53 | 3.66 |
| 1/1 | 1/1 | 3.34 | 2.92 |

|     |     |       |       |
|-----|-----|-------|-------|
| 1/1 | 1/1 | 9.63  | 9.34  |
| 1/1 | 1/1 | 8.44  | 8.28  |
| 1/1 | 1/1 | 3.33  | 3.17  |
| 1/1 | 1/1 | 9.34  | 9.22  |
| 0/1 | 1/1 | 2.77  | 2.85  |
| 0/1 | 1/1 | 3.73  | 6.3   |
| 1/1 | 1/1 | 6.21  | 5.74  |
| 1/1 | 1/1 | 7.15  | 6.7   |
| 1/1 | 1/1 | 7.64  | 7.23  |
| 1/1 | 1/1 | 6.26  | 5.86  |
| 1/1 | 1/1 | 7.18  | 6.81  |
| 1/1 | 1/1 | 4.78  | 4.53  |
| 1/1 | 1/1 | 8.35  | 8.19  |
| 1/1 | 1/1 | 13.76 | 13.64 |
| 1/1 | 1/1 | 5.96  | 6.02  |
| 1/1 | 1/1 | 9.25  | 9.32  |
| 1/1 | 1/1 | 6.49  | 6.6   |
| 0/1 | 1/1 | 8.62  | 8.73  |
| 1/1 | 1/1 | 2.73  | 2.86  |
| 1/1 | 1/1 | 5.54  | 5.77  |
| 1/1 | 1/1 | 5.18  | 5.59  |
| 0/1 | 1/1 | 2.95  | 3.37  |
| 1/1 | 1/1 | 7.91  | 8.36  |
| 1/1 | 1/1 | 4.7   | 5.15  |
| 1/1 | 1/1 | 8.38  | 8.84  |
| 1/1 | 1/1 | 5.91  | 8.68  |
| 1/1 | 1/1 | 5.91  | 8.68  |
| 1/1 | 1/1 | 3.84  | 6.88  |
| 1/1 | 1/1 | 8.08  | 6.31  |
| 1/1 | 1/1 | 6.81  | 5.87  |
| 1/1 | 1/1 | 7.11  | 6.53  |
| 1/1 | 0/1 | 4.26  | 3.33  |
| 1/1 | 1/1 | 5.65  | 4.88  |
| 1/1 | 1/1 | 3.48  | 2.92  |
| 1/1 | 1/1 | 6.2   | 5.96  |
| 1/1 | 1/1 | 6.5   | 6.35  |
| 0/1 | 1/1 | 7.07  | 6.94  |
| 1/1 | 1/1 | 6.35  | 6.36  |
| 1/1 | 1/1 | 4.97  | 5.03  |
| 1/1 | 1/1 | 5.97  | 6.09  |
| 0/1 | 1/1 | 3.53  | 3.69  |
| 1/1 | 1/1 | 2.84  | 3.02  |
| 1/1 | 1/1 | 7.64  | 7.85  |
| 1/1 | 1/1 | 5.13  | 5.36  |
| 1/1 | 1/1 | 6.19  | 6.44  |
| 1/1 | 1/1 | 3.48  | 3.73  |
| 1/1 | 1/1 | 7.16  | 7.41  |
| 1/1 | 1/1 | 4.6   | 7.11  |
| 1/1 | 1/1 | 3.17  | 6.18  |
| 1/1 | 0/1 | 9.26  | 2.53  |
| 1/1 | 1/1 | 8.89  | 5.6   |
| 1/1 | 1/1 | 8.01  | 5.16  |
| 1/1 | 0/1 | 8.93  | 6.14  |
| 1/1 | 1/1 | 5.43  | 4.39  |
| 1/1 | 1/1 | 6.76  | 6.21  |
| 1/1 | 1/1 | 4.57  | 4.33  |
| 1/1 | 1/1 | 6.07  | 5.84  |
| 1/1 | 1/1 | 8.94  | 8.78  |

|     |     |       |       |
|-----|-----|-------|-------|
| 1/1 | 1/1 | 6.26  | 6.22  |
| 1/1 | 1/1 | 6.32  | 6.3   |
| 1/1 | 1/1 | 3.35  | 3.33  |
| 0/1 | 1/1 | 5.23  | 5.27  |
| 1/1 | 1/1 | 12.36 | 12.47 |
| 1/1 | 1/1 | 4.38  | 4.5   |
| 1/1 | 1/1 | 4.75  | 4.89  |
| 1/1 | 1/1 | 6.66  | 6.93  |
| 0/1 | 1/1 | 3.28  | 3.57  |
| 1/1 | 1/1 | 3.6   | 3.93  |
| 1/1 | 1/1 | 11.31 | 11.68 |
| 1/1 | 1/1 | 6.73  | 7.13  |
| 0/1 | 1/1 | 4.66  | 5.06  |
| 0/1 | 1/1 | 2.53  | 2.93  |
| 0/1 | 1/1 | 4.6   | 5.04  |
| 1/1 | 1/1 | 5.22  | 5.73  |
| 1/1 | 1/1 | 10.84 | 11.35 |
| 1/1 | 1/1 | 3.84  | 4.41  |
| 1/1 | 1/1 | 6.72  | 7.32  |
| 1/1 | 1/1 | 6.38  | 7.01  |
| 1/1 | 1/1 | 6.5   | 7.13  |
| 1/1 | 1/1 | 4.8   | 7.43  |
| 1/1 | 1/1 | 5.86  | 8.56  |
| 1/1 | 1/1 | 6.21  | 9.18  |
| 0/1 | 1/1 | 3.27  | 6.27  |
| 1/1 | 1/1 | 5.28  | 4.27  |
| 1/1 | 1/1 | 7.61  | 7.19  |
| 1/1 | 1/1 | 7.45  | 7.07  |
| 0/1 | 1/1 | 6.64  | 6.31  |
| 1/1 | 1/1 | 6.87  | 6.61  |
| 1/1 | 1/1 | 7.81  | 7.66  |
| 1/1 | 1/1 | 4.75  | 4.64  |
| 0/1 | 1/1 | 6.8   | 6.69  |
| 1/1 | 1/1 | 6.36  | 6.36  |
| 0/1 | 1/1 | 4.11  | 4.11  |
| 1/1 | 1/1 | 6.63  | 6.63  |
| 0/1 | 1/1 | 5.09  | 5.16  |
| 1/1 | 1/1 | 7.27  | 7.41  |
| 0/1 | 1/1 | 2.63  | 4.83  |
| 1/1 | 1/1 | 4.52  | 6.76  |
| 1/1 | 1/1 | 5.08  | 7.6   |
| 1/1 | 1/1 | 4.76  | 7.58  |
| 1/1 | 1/1 | 7.42  | 5.47  |
| 1/1 | 0/1 | 3.83  | 2.15  |
| 1/1 | 0/1 | 4.24  | 2.94  |
| 1/1 | 1/1 | 6.41  | 5.1   |
| 1/1 | 1/1 | 5.2   | 4.08  |
| 1/1 | 1/1 | 4.37  | 3.38  |
| 1/1 | 1/1 | 3.6   | 2.75  |
| 0/1 | 1/1 | 2.37  | 3.7   |
| 1/1 | 1/1 | 4.7   | 4.18  |
| 1/1 | 1/1 | 7.09  | 6.78  |
| 1/1 | 1/1 | 10.48 | 10.2  |
| 1/1 | 1/1 | 8.05  | 7.84  |
| 1/1 | 1/1 | 6.77  | 6.58  |
| 1/1 | 1/1 | 6.44  | 6.39  |
| 0/1 | 1/1 | 4.68  | 4.7   |
| 1/1 | 1/1 | 5.87  | 5.91  |

|     |     |      |      |
|-----|-----|------|------|
| 1/1 | 1/1 | 7.32 | 7.38 |
| 1/1 | 1/1 | 3.83 | 4.11 |
| 0/1 | 1/1 | 6.07 | 6.38 |
| 1/1 | 1/1 | 4.04 | 4.37 |
| 1/1 | 1/1 | 7.49 | 7.86 |
| 0/1 | 1/1 | 2.32 | 2.7  |
| 0/1 | 1/1 | 2.38 | 2.87 |
| 1/1 | 1/1 | 2.47 | 2.99 |
| 1/1 | 1/1 | 5.18 | 5.7  |
| 0/1 | 1/1 | 2.03 | 2.68 |
| 1/1 | 1/1 | 4.65 | 7.35 |
| 0/1 | 1/1 | 3.11 | 5.81 |
| 0/1 | 1/1 | 1.89 | 4.76 |
| 0/1 | 1/1 | 2.23 | 5.3  |
| 1/1 | 1/1 | 5.6  | 2.69 |
| 1/1 | 1/1 | 6.91 | 4.59 |
| 1/1 | 1/1 | 7.37 | 5.05 |
| 1/1 | 1/1 | 5.61 | 3.44 |
| 1/1 | 1/1 | 8.29 | 6.29 |
| 1/1 | 1/1 | 8.07 | 6.08 |
| 1/1 | 1/1 | 9.47 | 7.5  |
| 1/1 | 1/1 | 6.7  | 4.76 |
| 1/1 | 1/1 | 7.67 | 5.77 |
| 1/1 | 1/1 | 6.8  | 4.9  |
| 1/1 | 1/1 | 7.94 | 6.14 |
| 1/1 | 1/1 | 8.1  | 6.35 |
| 0/1 | 1/1 | 4.36 | 4.85 |
| 1/1 | 1/1 | 6.2  | 6.81 |
| 1/1 | 1/1 | 5.87 | 3.01 |
| 1/1 | 0/1 | 5.31 | 2.7  |
| 1/1 | 1/1 | 5.72 | 3.32 |
| 1/1 | 1/1 | 8.05 | 5.82 |
| 1/1 | 1/1 | 6.12 | 3.97 |
| 1/1 | 1/1 | 8.25 | 6.19 |
| 1/1 | 1/1 | 5.55 | 3.51 |
| 1/1 | 1/1 | 9.01 | 6.98 |
| 1/1 | 1/1 | 7.02 | 7.41 |
| 0/1 | 1/1 | 4.47 | 4.87 |
| 1/1 | 1/1 | 4.18 | 4.79 |
| 1/1 | 1/1 | 8.86 | 9.81 |
| 1/1 | 1/1 | 7.11 | 9.11 |
| 1/1 | 0/1 | 5.45 | 3.04 |
| 1/1 | 1/1 | 6.58 | 4.69 |
| 1/1 | 0/1 | 5.1  | 3.67 |
| 1/1 | 1/1 | 7.42 | 6.16 |
| 1/1 | 1/1 | 4.89 | 3.62 |
| 0/1 | 1/1 | 2.3  | 3.35 |
| 1/1 | 0/1 | 8.18 | 3.02 |
| 1/1 | 0/1 | 7.2  | 2.09 |
| 1/1 | 0/1 | 6.89 | 2.86 |
| 1/1 | 0/1 | 7.54 | 5.72 |
| 1/1 | 1/1 | 4.96 | 3.16 |
| 1/1 | 0/1 | 4.84 | 3.26 |
| 1/1 | 0/1 | 4.66 | 3.17 |
| 1/1 | 0/1 | 4.53 | 3.12 |
| 1/1 | 0/1 | 5.04 | 3.72 |
| 1/1 | 0/1 | 3.04 | 1.89 |
| 1/1 | 1/1 | 7.17 | 6.03 |

|     |     |       |       |
|-----|-----|-------|-------|
| 1/1 | 0/1 | 3.44  | 2.54  |
| 1/1 | 1/1 | 7.87  | 7.11  |
| 1/1 | 1/1 | 4.92  | 4.24  |
| 1/1 | 1/1 | 6.31  | 5.82  |
| 1/1 | 1/1 | 10.29 | 9.87  |
| 1/1 | 1/1 | 6.01  | 5.79  |
| 1/1 | 1/1 | 6.44  | 6.23  |
| 1/1 | 1/1 | 5.21  | 5.14  |
| 0/1 | 1/1 | 4.12  | 4.12  |
| 0/1 | 1/1 | 4.17  | 4.18  |
| 1/1 | 1/1 | 5.8   | 5.82  |
| 1/1 | 1/1 | 5.92  | 6.12  |
| 0/1 | 1/1 | 2.36  | 3.45  |
| 1/1 | 0/1 | 11.99 | 3.06  |
| 1/1 | 1/1 | 11.51 | 5.78  |
| 1/1 | 1/1 | 12.79 | 7.69  |
| 1/1 | 0/1 | 7.9   | 3     |
| 1/1 | 1/1 | 12.28 | 7.53  |
| 1/1 | 0/1 | 6.85  | 3.21  |
| 1/1 | 1/1 | 4.49  | 2.96  |
| 1/1 | 0/1 | 5.87  | 4.7   |
| 1/1 | 1/1 | 5.95  | 5.13  |
| 1/1 | 1/1 | 7.17  | 6.38  |
| 1/1 | 1/1 | 7.39  | 6.62  |
| 1/1 | 0/1 | 7.92  | 7.25  |
| 1/1 | 1/1 | 5.86  | 5.21  |
| 1/1 | 1/1 | 7.51  | 6.88  |
| 1/1 | 1/1 | 6.52  | 5.93  |
| 1/1 | 1/1 | 7.17  | 6.62  |
| 1/1 | 1/1 | 9.53  | 9.05  |
| 1/1 | 1/1 | 10.64 | 10.18 |
| 1/1 | 1/1 | 5.97  | 5.58  |
| 0/1 | 1/1 | 2.85  | 4.56  |
| 0/1 | 1/1 | 3.45  | 5.67  |
| 0/1 | 1/1 | 2.83  | 5.37  |
| 1/1 | 1/1 | 10.09 | 8.91  |
| 1/1 | 1/1 | 5.86  | 5.44  |
| 0/1 | 1/1 | 5.63  | 5.41  |
| 1/1 | 1/1 | 4.86  | 4.81  |
| 1/1 | 1/1 | 6.77  | 6.29  |
| 1/1 | 1/1 | 8.02  | 7.6   |
| 1/1 | 1/1 | 6.3   | 5.96  |
| 1/1 | 1/1 | 8.17  | 7.94  |
| 1/1 | 1/1 | 5.65  | 5.49  |
| 1/1 | 1/1 | 6.68  | 6.57  |
| 1/1 | 1/1 | 8.95  | 8.86  |
| 0/1 | 1/1 | 6.28  | 6.27  |
| 1/1 | 1/1 | 7.03  | 7.28  |
| 0/1 | 1/1 | 6.07  | 6.39  |
| 0/1 | 1/1 | 4.75  | 5.12  |
| 0/1 | 1/1 | 7.4   | 7.86  |
| 1/1 | 1/1 | 7.71  | 8.31  |
| 0/1 | 1/1 | 6.67  | 9.47  |
| 1/1 | 1/1 | 5.97  | 8.83  |
| 1/1 | 1/1 | 6.79  | 9.88  |
| 0/1 | 1/1 | 4.56  | 7.86  |
| 0/1 | 1/1 | 2.46  | 6.38  |
| 0/1 | 1/1 | 5.58  | 9.88  |

|     |     |       |       |
|-----|-----|-------|-------|
| 1/1 | 1/1 | 5.54  | 10.02 |
| 0/1 | 1/1 | 4.69  | 9.33  |
| 1/1 | 1/1 | 5.69  | 10.9  |
| 1/1 | 1/1 | 10.42 | 4.64  |
| 1/1 | 1/1 | 9.51  | 3.81  |
| 1/1 | 1/1 | 8.9   | 3.53  |
| 1/1 | 0/1 | 8.32  | 3.25  |
| 1/1 | 1/1 | 10.13 | 5.25  |
| 1/1 | 1/1 | 9.31  | 4.46  |
| 1/1 | 1/1 | 10.79 | 6.11  |
| 1/1 | 1/1 | 13.36 | 10.76 |
| 1/1 | 0/1 | 6.22  | 4.3   |
| 1/1 | 1/1 | 6.31  | 5.73  |
| 0/1 | 1/1 | 3.73  | 3.18  |
| 1/1 | 1/1 | 10.79 | 8.44  |
| 1/1 | 1/1 | 11.62 | 9.28  |
| 0/1 | 1/1 | 3.6   | 5.42  |
| 1/1 | 0/1 | 5.48  | 3.72  |
| 1/1 | 1/1 | 3.44  | 2.66  |
| 1/1 | 1/1 | 4.46  | 3.69  |
| 1/1 | 1/1 | 4.93  | 6.61  |
| 1/1 | 1/1 | 3.19  | 2.45  |
| 1/1 | 1/1 | 10.63 | 10.41 |
| 1/1 | 1/1 | 10.84 | 10.99 |
| 1/1 | 1/1 | 8.05  | 8.32  |
| 1/1 | 1/1 | 6.51  | 6.91  |
| 1/1 | 1/1 | 4.52  | 7.38  |
| 0/1 | 1/1 | 4.16  | 7.39  |
| 1/1 | 1/1 | 8.37  | 5.94  |
| 1/1 | 1/1 | 4.87  | 3.08  |
| 1/1 | 0/1 | 5.84  | 4.11  |
| 1/1 | 1/1 | 8.77  | 7.32  |
| 1/1 | 1/1 | 9.26  | 10.09 |
| 1/1 | 1/1 | 8.58  | 7.71  |
| 1/1 | 1/1 | 10.76 | 10.48 |
| 1/1 | 1/1 | 8.85  | 8.71  |
| 1/1 | 1/1 | 6.14  | 6.08  |
| 1/1 | 1/1 | 3.91  | 4.18  |
| 1/1 | 1/1 | 3.3   | 5.74  |
| 1/1 | 1/1 | 8.81  | 7.87  |
| 1/1 | 1/1 | 4.53  | 4.16  |
| 1/1 | 1/1 | 7.06  | 6.85  |
| 1/1 | 1/1 | 9.08  | 9.17  |
| 0/1 | 1/1 | 7.31  | 7.41  |
| 1/1 | 1/1 | 7.85  | 6.69  |
| 1/1 | 1/1 | 7.61  | 7.5   |
| 1/1 | 1/1 | 5.13  | 7.17  |
| 1/1 | 1/1 | 3.83  | 5.91  |
| 0/1 | 1/1 | 3.13  | 5.66  |
| 1/1 | 1/1 | 6.13  | 3.4   |
| 1/1 | 0/1 | 5.73  | 3.08  |
| 1/1 | 0/1 | 5.83  | 3.18  |
| 1/1 | 0/1 | 4.94  | 2.4   |
| 1/1 | 0/1 | 5.21  | 3.27  |
| 1/1 | 0/1 | 4.76  | 2.86  |
| 1/1 | 1/1 | 5.87  | 4.02  |
| 1/1 | 0/1 | 3.87  | 2.22  |
| 1/1 | 0/1 | 5.4   | 2.93  |

|     |     |       |       |
|-----|-----|-------|-------|
| 1/1 | 1/1 | 8.11  | 6.61  |
| 1/1 | 0/1 | 4.55  | 3.13  |
| 1/1 | 1/1 | 10.15 | 9.59  |
| 1/1 | 0/1 | 2.95  | 2.4   |
| 1/1 | 1/1 | 11.14 | 10.74 |
| 1/1 | 1/1 | 7.69  | 7.34  |
| 1/1 | 1/1 | 9.11  | 8.9   |
| 1/1 | 1/1 | 7.88  | 7.75  |
| 0/1 | 1/1 | 3.84  | 3.9   |
| 0/1 | 1/1 | 8.12  | 8.21  |
| 1/1 | 1/1 | 7.07  | 7.28  |
| 1/1 | 1/1 | 7.07  | 7.31  |
| 1/1 | 1/1 | 6.75  | 7.26  |
| 0/1 | 1/1 | 3.83  | 6.83  |
| 1/1 | 1/1 | 7.46  | 6.21  |
| 1/1 | 0/1 | 4.04  | 3.56  |
| 0/1 | 1/1 | 3.82  | 3.65  |
| 1/1 | 1/1 | 8.95  | 6.51  |
| 1/1 | 1/1 | 11.2  | 9.68  |
| 1/1 | 0/1 | 8.44  | 6.98  |
| 1/1 | 1/1 | 7.31  | 5.96  |
| 1/1 | 1/1 | 6.83  | 5.54  |
| 0/1 | 1/1 | 4.35  | 5.15  |
| 1/1 | 0/1 | 5.75  | 2.84  |
| 1/1 | 1/1 | 7.73  | 5.18  |
| 0/1 | 1/1 | 1.93  | 2.44  |
| 1/1 | 1/1 | 12.52 | 12.26 |
| 0/1 | 1/1 | 3.11  | 3.54  |
| 1/1 | 1/1 | 4.33  | 4.9   |
| 1/1 | 1/1 | 4.66  | 5.3   |
| 1/1 | 1/1 | 9.41  | 10.24 |
| 1/1 | 0/1 | 4.77  | 2.07  |
| 1/1 | 1/1 | 7.07  | 4.96  |
| 1/1 | 0/1 | 6.37  | 4.61  |
| 0/1 | 1/1 | 3.56  | 4.11  |
| 0/1 | 1/1 | 3.52  | 4.29  |
| 1/1 | 1/1 | 6.76  | 3.59  |
| 1/1 | 1/1 | 7.69  | 5.3   |
| 1/1 | 1/1 | 5.43  | 3.3   |
| 1/1 | 1/1 | 8.79  | 6.69  |
| 1/1 | 1/1 | 8.6   | 8.61  |
| 1/1 | 1/1 | 10.93 | 11.25 |
| 1/1 | 1/1 | 4.97  | 6.13  |
| 1/1 | 0/1 | 5.05  | 3.56  |
| 1/1 | 0/1 | 3.89  | 2.45  |
| 1/1 | 0/1 | 8.02  | 6.93  |
| 1/1 | 1/1 | 3.22  | 2.76  |
| 1/1 | 1/1 | 7.06  | 8.73  |
| 1/1 | 1/1 | 6.55  | 8.29  |
| 1/1 | 1/1 | 6.45  | 4.84  |
| 1/1 | 1/1 | 6.69  | 5.67  |
| 1/1 | 1/1 | 5.53  | 4.67  |
| 1/1 | 1/1 | 6.86  | 6.27  |
| 1/1 | 1/1 | 6.94  | 6.5   |
| 1/1 | 1/1 | 8.41  | 8.45  |
| 1/1 | 1/1 | 8.87  | 8.92  |
| 1/1 | 1/1 | 7.25  | 7.35  |
| 0/1 | 1/1 | 4.49  | 4.6   |

|     |     |       |       |
|-----|-----|-------|-------|
| 1/1 | 1/1 | 6.77  | 6.92  |
| 1/1 | 1/1 | 7.31  | 7.49  |
| 1/1 | 1/1 | 3.44  | 3.64  |
| 1/1 | 1/1 | 10.92 | 11.13 |
| 1/1 | 1/1 | 3.19  | 3.39  |
| 1/1 | 1/1 | 11.94 | 12.15 |
| 1/1 | 1/1 | 7.25  | 7.55  |
| 1/1 | 1/1 | 8.88  | 9.35  |
| 1/1 | 1/1 | 6.56  | 7.16  |
| 0/1 | 1/1 | 2.2   | 2.83  |
| 0/1 | 1/1 | 3.3   | 6.19  |
| 1/1 | 1/1 | 4.24  | 7.16  |
| 1/1 | 1/1 | 7.75  | 6.79  |
| 1/1 | 1/1 | 4.5   | 3.73  |
| 1/1 | 1/1 | 9.19  | 8.58  |
| 1/1 | 1/1 | 7.23  | 6.92  |
| 1/1 | 1/1 | 4.07  | 3.79  |
| 1/1 | 1/1 | 7.98  | 7.78  |
| 1/1 | 1/1 | 10.3  | 10.18 |
| 1/1 | 1/1 | 6.51  | 6.49  |
| 1/1 | 1/1 | 10.27 | 10.35 |
| 1/1 | 1/1 | 5.47  | 5.59  |
| 0/1 | 1/1 | 2.64  | 2.81  |
| 1/1 | 1/1 | 5.03  | 7.24  |
| 1/1 | 1/1 | 4.34  | 6.59  |
| 1/1 | 1/1 | 5.53  | 5.03  |
| 1/1 | 1/1 | 7.6   | 7.62  |
| 0/1 | 1/1 | 8.02  | 8.22  |
| 1/1 | 1/1 | 3.32  | 3.57  |
| 1/1 | 1/1 | 6.72  | 7.08  |
| 1/1 | 1/1 | 9.39  | 10.02 |
| 1/1 | 1/1 | 3.89  | 3.25  |
| 1/1 | 1/1 | 4.04  | 3.47  |
| 1/1 | 1/1 | 2.73  | 2.61  |
| 1/1 | 1/1 | 7.68  | 7.62  |
| 0/1 | 1/1 | 3.04  | 3.01  |
| 1/1 | 1/1 | 3.53  | 3.55  |
| 1/1 | 1/1 | 7.32  | 7.36  |
| 0/1 | 1/1 | 2.14  | 2.35  |
| 1/1 | 1/1 | 8.09  | 8.32  |
| 0/1 | 1/1 | 6.5   | 6.78  |
| 0/1 | 1/1 | 2.69  | 3.05  |
| 0/1 | 1/1 | 5.93  | 6.35  |
| 1/1 | 1/1 | 6.39  | 6.86  |
| 0/1 | 1/1 | 2.61  | 3.08  |
| 1/1 | 1/1 | 3.22  | 5.92  |
| 1/1 | 1/1 | 3.99  | 7.18  |
| 0/1 | 1/1 | 2.94  | 6.25  |
| 0/1 | 1/1 | 3.55  | 7.17  |
| 1/1 | 0/1 | 5.11  | 2.3   |
| 1/1 | 0/1 | 7.69  | 5.57  |
| 1/1 | 1/1 | 5.81  | 3.78  |
| 1/1 | 1/1 | 8.23  | 6.24  |
| 1/1 | 1/1 | 8.91  | 7.22  |
| 1/1 | 1/1 | 10.17 | 8.44  |
| 1/1 | 1/1 | 5.43  | 4.8   |
| 1/1 | 1/1 | 8.65  | 10.09 |
| 1/1 | 1/1 | 5.51  | 7.07  |



|     |     |       |       |
|-----|-----|-------|-------|
| 0/1 | 1/1 | 5.8   | 7.59  |
| 0/1 | 1/1 | 3.05  | 4.89  |
| 1/1 | 1/1 | 6.32  | 8.54  |
| 1/1 | 1/1 | 9.52  | 6.57  |
| 1/1 | 1/1 | 9.28  | 6.54  |
| 1/1 | 1/1 | 7.52  | 4.94  |
| 1/1 | 1/1 | 8.21  | 5.82  |
| 1/1 | 0/1 | 6.14  | 4.03  |
| 1/1 | 1/1 | 8.78  | 6.68  |
| 1/1 | 0/1 | 5.14  | 3.21  |
| 1/1 | 1/1 | 6.76  | 7.17  |
| 1/1 | 1/1 | 5.34  | 5.83  |
| 1/1 | 1/1 | 6.94  | 7.74  |
| 1/1 | 1/1 | 7.26  | 8.13  |
| 1/1 | 0/1 | 5.91  | 5.19  |
| 1/1 | 1/1 | 7.29  | 6.89  |
| 1/1 | 1/1 | 7.29  | 6.89  |
| 1/1 | 1/1 | 6.95  | 6.6   |
| 1/1 | 1/1 | 7.17  | 6.96  |
| 1/1 | 1/1 | 6.12  | 5.92  |
| 1/1 | 1/1 | 5.94  | 5.79  |
| 1/1 | 1/1 | 3.34  | 3.27  |
| 0/1 | 1/1 | 7.6   | 7.64  |
| 1/1 | 1/1 | 6.16  | 6.2   |
| 1/1 | 1/1 | 8.23  | 8.29  |
| 1/1 | 1/1 | 8.2   | 8.4   |
| 1/1 | 1/1 | 7.51  | 7.83  |
| 1/1 | 1/1 | 4.59  | 4.91  |
| 1/1 | 1/1 | 9.39  | 9.74  |
| 1/1 | 1/1 | 9.39  | 9.74  |
| 1/1 | 0/1 | 5.85  | 4.35  |
| 1/1 | 1/1 | 3.97  | 3.06  |
| 1/1 | 1/1 | 5.01  | 4.48  |
| 1/1 | 1/1 | 5.53  | 5.15  |
| 1/1 | 1/1 | 4.62  | 6.44  |
| 1/1 | 1/1 | 3.25  | 5.52  |
| 1/1 | 0/1 | 4.77  | 2.99  |
| 1/1 | 1/1 | 4.51  | 3.59  |
| 1/1 | 0/1 | 3.7   | 3.02  |
| 1/1 | 1/1 | 3.37  | 4.94  |
| 1/1 | 0/1 | 7.06  | 6.41  |
| 0/1 | 1/1 | 5.61  | 5.21  |
| 1/1 | 1/1 | 8.61  | 8.31  |
| 1/1 | 1/1 | 5.92  | 5.67  |
| 1/1 | 1/1 | 7.83  | 7.6   |
| 0/1 | 1/1 | 2.44  | 2.29  |
| 1/1 | 1/1 | 13.6  | 13.56 |
| 1/1 | 1/1 | 7.63  | 7.61  |
| 1/1 | 1/1 | 8.68  | 8.68  |
| 1/1 | 1/1 | 11.17 | 11.23 |
| 0/1 | 1/1 | 2.81  | 2.92  |
| 0/1 | 1/1 | 2.3   | 2.53  |
| 1/1 | 1/1 | 9.18  | 9.5   |
| 1/1 | 1/1 | 5.18  | 8.26  |
| 1/1 | 0/1 | 2.78  | 2.09  |
| 1/1 | 1/1 | 3.02  | 2.91  |
| 1/1 | 1/1 | 6.07  | 6.23  |
| 0/1 | 1/1 | 2.45  | 2.82  |

|     |     |       |       |
|-----|-----|-------|-------|
| 1/1 | 1/1 | 4.61  | 4.31  |
| 1/1 | 1/1 | 6.07  | 6.06  |
| 1/1 | 1/1 | 11.74 | 11.76 |
| 1/1 | 1/1 | 6.34  | 6.46  |
| 1/1 | 1/1 | 4.79  | 3.62  |
| 1/1 | 1/1 | 5.25  | 4.48  |
| 1/1 | 1/1 | 8.93  | 8.63  |
| 1/1 | 1/1 | 8.44  | 8.19  |
| 1/1 | 1/1 | 6.24  | 6.04  |
| 0/1 | 1/1 | 4.06  | 3.96  |
| 1/1 | 1/1 | 7.28  | 7.22  |
| 1/1 | 1/1 | 5.21  | 7.48  |
| 1/1 | 1/1 | 3.46  | 5.78  |
| 1/1 | 1/1 | 10.06 | 8.56  |
| 1/1 | 1/1 | 8.4   | 7.65  |
| 1/1 | 1/1 | 8.48  | 7.85  |
| 1/1 | 0/1 | 2.58  | 2.33  |
| 0/1 | 1/1 | 2.6   | 2.66  |
| 0/1 | 1/1 | 5.71  | 5.77  |
| 1/1 | 1/1 | 4.19  | 4.25  |
| 0/1 | 1/1 | 2.91  | 3     |
| 0/1 | 1/1 | 2.45  | 2.81  |
| 1/1 | 1/1 | 8.12  | 8.53  |
| 1/1 | 1/1 | 5.6   | 8.16  |
| 1/1 | 1/1 | 9.72  | 7.83  |
| 1/1 | 1/1 | 8.83  | 7.44  |
| 1/1 | 1/1 | 10.74 | 9.53  |
| 1/1 | 1/1 | 4.19  | 5.5   |
| 0/1 | 1/1 | 4.38  | 5.83  |
| 1/1 | 0/1 | 6.29  | 3.06  |
| 1/1 | 1/1 | 8.18  | 5.31  |
| 0/1 | 1/1 | 4.36  | 4.63  |
| 1/1 | 1/1 | 9.29  | 9.6   |
| 0/1 | 1/1 | 3.05  | 3.47  |
| 0/1 | 1/1 | 2.88  | 4.36  |
| 1/1 | 0/1 | 6.83  | 3.58  |
| 1/1 | 1/1 | 8.2   | 5.27  |
| 1/1 | 1/1 | 8.22  | 5.47  |
| 1/1 | 1/1 | 7.22  | 4.51  |
| 1/1 | 1/1 | 6.15  | 3.53  |
| 1/1 | 1/1 | 9.7   | 7.29  |
| 1/1 | 1/1 | 9.23  | 6.85  |
| 1/1 | 0/1 | 6.02  | 3.69  |
| 1/1 | 1/1 | 8.97  | 6.64  |
| 1/1 | 1/1 | 9.5   | 7.22  |
| 1/1 | 1/1 | 7.77  | 5.53  |
| 1/1 | 1/1 | 8.3   | 6.09  |
| 1/1 | 1/1 | 8.16  | 5.96  |
| 1/1 | 1/1 | 9.3   | 7.11  |
| 1/1 | 1/1 | 9.75  | 7.56  |
| 1/1 | 1/1 | 8.91  | 6.76  |
| 1/1 | 1/1 | 8.72  | 6.58  |
| 1/1 | 1/1 | 4.1   | 4     |
| 0/1 | 1/1 | 4.6   | 4.56  |
| 1/1 | 1/1 | 5.93  | 6.15  |
| 1/1 | 1/1 | 10.6  | 12    |
| 1/1 | 1/1 | 9.76  | 7.92  |
| 1/1 | 0/1 | 3.23  | 2.12  |

|     |     |       |      |
|-----|-----|-------|------|
| 1/1 | 1/1 | 4.21  | 3.21 |
| 1/1 | 0/1 | 4.51  | 3.51 |
| 1/1 | 0/1 | 3.2   | 2.41 |
| 1/1 | 0/1 | 2.94  | 2.23 |
| 1/1 | 1/1 | 8.11  | 4.3  |
| 1/1 | 1/1 | 7.48  | 3.73 |
| 1/1 | 0/1 | 5.92  | 2.71 |
| 1/1 | 1/1 | 7.63  | 4.53 |
| 1/1 | 1/1 | 8.29  | 5.37 |
| 1/1 | 1/1 | 6.88  | 3.96 |
| 1/1 | 1/1 | 8.24  | 5.33 |
| 1/1 | 0/1 | 5.32  | 2.47 |
| 1/1 | 0/1 | 5.3   | 2.46 |
| 1/1 | 1/1 | 6.43  | 3.6  |
| 1/1 | 1/1 | 7.3   | 4.54 |
| 1/1 | 1/1 | 7.82  | 5.09 |
| 1/1 | 0/1 | 5.3   | 2.6  |
| 1/1 | 1/1 | 3.74  | 3.07 |
| 1/1 | 1/1 | 6.44  | 5.78 |
| 1/1 | 1/1 | 8.19  | 7.56 |
| 1/1 | 1/1 | 4.87  | 4.33 |
| 1/1 | 1/1 | 7.97  | 7.46 |
| 1/1 | 0/1 | 2.72  | 2.22 |
| 1/1 | 1/1 | 4.3   | 3.8  |
| 1/1 | 1/1 | 8.59  | 8.12 |
| 1/1 | 1/1 | 9.4   | 8.93 |
| 1/1 | 0/1 | 2.36  | 1.97 |
| 1/1 | 1/1 | 13.46 | 13.1 |
| 1/1 | 1/1 | 5.1   | 4.77 |
| 1/1 | 1/1 | 4.69  | 4.42 |
| 1/1 | 1/1 | 4.23  | 3.96 |
| 1/1 | 1/1 | 2.6   | 2.35 |
| 1/1 | 1/1 | 7.5   | 7.26 |
| 1/1 | 1/1 | 6.08  | 5.86 |
| 0/1 | 1/1 | 3.06  | 2.91 |
| 0/1 | 1/1 | 3.77  | 3.62 |
| 1/1 | 1/1 | 4.45  | 4.31 |
| 0/1 | 1/1 | 3.19  | 3.16 |
| 1/1 | 1/1 | 3.21  | 3.35 |
| 1/1 | 1/1 | 8.06  | 8.3  |
| 0/1 | 1/1 | 4.53  | 4.89 |
| 0/1 | 1/1 | 2.44  | 3.08 |
| 0/1 | 1/1 | 3.46  | 5.22 |
| 1/1 | 1/1 | 8.43  | 7.09 |
| 0/1 | 1/1 | 4.73  | 4.29 |
| 1/1 | 1/1 | 5.82  | 5.38 |
| 1/1 | 1/1 | 6.69  | 6.38 |
| 1/1 | 1/1 | 4.91  | 2.69 |
| 1/1 | 0/1 | 3.77  | 2.51 |
| 1/1 | 1/1 | 4.24  | 5.19 |
| 1/1 | 1/1 | 6.09  | 4.21 |
| 1/1 | 1/1 | 4.3   | 3.35 |
| 1/1 | 1/1 | 6.86  | 6    |
| 1/1 | 0/1 | 3.17  | 2.36 |
| 1/1 | 1/1 | 7.58  | 6.9  |
| 0/1 | 1/1 | 6.8   | 6.49 |
| 0/1 | 1/1 | 4.42  | 4.26 |
| 1/1 | 1/1 | 9.45  | 9.36 |

|     |     |      |      |
|-----|-----|------|------|
| 1/1 | 1/1 | 6.86 | 6.8  |
| 1/1 | 1/1 | 5.14 | 5.15 |
| 0/1 | 1/1 | 6.36 | 6.47 |
| 1/1 | 1/1 | 8.99 | 9.27 |
| 1/1 | 1/1 | 9.16 | 9.51 |
| 1/1 | 1/1 | 9.51 | 9.9  |
| 1/1 | 0/1 | 4.69 | 3.04 |
| 1/1 | 1/1 | 5.54 | 4.61 |
| 1/1 | 1/1 | 6.64 | 6.07 |
| 0/1 | 1/1 | 4    | 3.44 |
| 0/1 | 1/1 | 3.98 | 3.44 |
| 1/1 | 1/1 | 3.38 | 4.98 |
| 0/1 | 1/1 | 2.31 | 4.11 |
| 0/1 | 1/1 | 2.26 | 4.07 |
| 1/1 | 1/1 | 4.03 | 5.91 |
| 0/1 | 1/1 | 2.94 | 4.88 |
| 0/1 | 1/1 | 2.78 | 4.75 |
| 0/1 | 1/1 | 3.54 | 5.54 |
| 1/1 | 1/1 | 6.98 | 6.42 |
| 1/1 | 1/1 | 3.59 | 7.81 |
| 1/1 | 1/1 | 5.44 | 5.12 |
| 1/1 | 1/1 | 5.16 | 5.01 |
| 0/1 | 1/1 | 4.95 | 4.86 |
| 0/1 | 1/1 | 4.9  | 5    |
| 0/1 | 1/1 | 5.62 | 5.74 |
| 1/1 | 1/1 | 9.05 | 9.27 |
| 1/1 | 1/1 | 5.29 | 5.74 |
| 1/1 | 1/1 | 6.7  | 7.17 |
| 0/1 | 1/1 | 6.44 | 6.95 |
| 1/1 | 1/1 | 4.75 | 5.28 |
| 1/1 | 1/1 | 7.8  | 8.35 |
| 1/1 | 1/1 | 7.65 | 8.24 |
| 1/1 | 1/1 | 7.34 | 7.95 |
| 0/1 | 1/1 | 6.15 | 6.94 |
| 1/1 | 1/1 | 5.8  | 8.86 |
| 1/1 | 1/1 | 6.06 | 4.19 |
| 1/1 | 1/1 | 4.55 | 6.28 |
| 1/1 | 1/1 | 6.09 | 3.85 |
| 0/1 | 1/1 | 3.95 | 4.84 |
| 1/1 | 0/1 | 4.86 | 3.56 |
| 1/1 | 1/1 | 7.65 | 6.91 |
| 1/1 | 1/1 | 4.64 | 4.06 |
| 1/1 | 1/1 | 6.16 | 5.66 |
| 0/1 | 1/1 | 2.81 | 2.53 |
| 1/1 | 1/1 | 4.28 | 4.03 |
| 1/1 | 1/1 | 7.98 | 7.79 |
| 0/1 | 1/1 | 4.08 | 6    |
| 1/1 | 1/1 | 8.47 | 7.27 |
| 1/1 | 1/1 | 3.89 | 3.05 |
| 1/1 | 0/1 | 3.33 | 2.59 |
| 1/1 | 1/1 | 5.29 | 4.69 |
| 1/1 | 1/1 | 8.27 | 7.82 |
| 1/1 | 1/1 | 4.75 | 4.3  |
| 1/1 | 1/1 | 8    | 7.81 |
| 1/1 | 1/1 | 6.37 | 6.2  |
| 1/1 | 1/1 | 4.17 | 4.06 |
| 0/1 | 1/1 | 2.49 | 4.62 |
| 0/1 | 1/1 | 3.77 | 6.39 |

|     |     |       |       |
|-----|-----|-------|-------|
| 0/1 | 1/1 | 2.71  | 5.84  |
| 1/1 | 0/1 | 6.7   | 3.45  |
| 1/1 | 0/1 | 6.24  | 3.69  |
| 1/1 | 0/1 | 4.97  | 2.68  |
| 0/1 | 1/1 | 4.85  | 4.84  |
| 1/1 | 0/1 | 5.6   | 2.62  |
| 1/1 | 1/1 | 4.37  | 4.76  |
| 1/1 | 1/1 | 4.12  | 5.13  |
| 1/1 | 1/1 | 4.29  | 5.39  |
| 1/1 | 0/1 | 4.15  | 3.32  |
| 1/1 | 1/1 | 3.08  | 2.64  |
| 1/1 | 1/1 | 4.08  | 3.74  |
| 0/1 | 1/1 | 4.4   | 4.31  |
| 1/1 | 1/1 | 6.27  | 6.41  |
| 1/1 | 1/1 | 6.47  | 6.63  |
| 1/1 | 1/1 | 7.09  | 7.29  |
| 0/1 | 1/1 | 2.31  | 4.81  |
| 1/1 | 1/1 | 5.75  | 8.3   |
| 1/1 | 1/1 | 6.35  | 4.83  |
| 1/1 | 0/1 | 3.54  | 2.52  |
| 1/1 | 1/1 | 5.04  | 4.38  |
| 1/1 | 1/1 | 8.25  | 7.83  |
| 1/1 | 1/1 | 6.28  | 5.86  |
| 1/1 | 1/1 | 6.9   | 4.32  |
| 1/1 | 0/1 | 4.21  | 2.34  |
| 1/1 | 1/1 | 5.77  | 4.12  |
| 1/1 | 1/1 | 5.69  | 6.23  |
| 1/1 | 1/1 | 4.51  | 5.1   |
| 0/1 | 1/1 | 4.07  | 4.67  |
| 0/1 | 1/1 | 3.23  | 3.87  |
| 0/1 | 1/1 | 2.03  | 2.68  |
| 1/1 | 1/1 | 6.87  | 7.67  |
| 1/1 | 1/1 | 5.84  | 6.74  |
| 0/1 | 1/1 | 3.84  | 5.03  |
| 1/1 | 1/1 | 4.12  | 5.45  |
| 0/1 | 1/1 | 3.15  | 4.5   |
| 1/1 | 0/1 | 4.87  | 3.25  |
| 0/1 | 1/1 | 2.74  | 4.42  |
| 0/1 | 1/1 | 3.06  | 5.16  |
| 1/1 | 1/1 | 11.75 | 10.16 |
| 1/1 | 1/1 | 10.68 | 9.65  |
| 1/1 | 1/1 | 5.63  | 5.06  |
| 1/1 | 1/1 | 4.37  | 4.25  |
| 1/1 | 1/1 | 7.92  | 7.86  |
| 0/1 | 1/1 | 3.66  | 3.81  |
| 1/1 | 1/1 | 3.95  | 4.18  |
| 1/1 | 1/1 | 4.89  | 5.71  |
| 0/1 | 1/1 | 2.5   | 3.38  |
| 0/1 | 1/1 | 5.08  | 5.97  |
| 1/1 | 1/1 | 3.74  | 6.81  |
| 1/1 | 1/1 | 3.37  | 6.46  |
| 1/1 | 1/1 | 4.68  | 7.81  |
| 0/1 | 1/1 | 4.12  | 7.4   |
| 0/1 | 1/1 | 4.17  | 8.26  |
| 1/1 | 1/1 | 5.55  | 4.74  |
| 1/1 | 1/1 | 3.17  | 2.78  |
| 0/1 | 1/1 | 4.22  | 3.95  |
| 1/1 | 1/1 | 3.27  | 3.06  |

|     |     |       |       |
|-----|-----|-------|-------|
| 0/1 | 1/1 | 2.5   | 2.29  |
| 1/1 | 1/1 | 3.71  | 3.66  |
| 1/1 | 1/1 | 4.95  | 4.97  |
| 1/1 | 1/1 | 10.85 | 10.93 |
| 1/1 | 1/1 | 8.74  | 8.83  |
| 1/1 | 1/1 | 2.6   | 2.76  |
| 1/1 | 1/1 | 8.67  | 8.88  |
| 1/1 | 1/1 | 3.98  | 4.2   |
| 0/1 | 1/1 | 7.09  | 7.35  |
| 0/1 | 1/1 | 1.84  | 2.15  |
| 1/1 | 1/1 | 10.55 | 7.15  |
| 1/1 | 1/1 | 5.12  | 4.88  |
| 1/1 | 1/1 | 8.35  | 8.1   |
| 1/1 | 1/1 | 5.94  | 5.7   |
| 1/1 | 1/1 | 9.02  | 8.8   |
| 1/1 | 1/1 | 6.32  | 6.19  |
| 1/1 | 1/1 | 9.01  | 8.88  |
| 1/1 | 1/1 | 7.45  | 7.4   |
| 1/1 | 1/1 | 6.56  | 6.53  |
| 1/1 | 1/1 | 8.44  | 8.43  |
| 1/1 | 1/1 | 7.9   | 7.89  |
| 1/1 | 1/1 | 9.03  | 9.04  |
| 1/1 | 1/1 | 8.41  | 8.43  |
| 1/1 | 1/1 | 5.58  | 5.63  |
| 0/1 | 1/1 | 5.56  | 5.84  |
| 1/1 | 1/1 | 3.88  | 4.21  |
| 1/1 | 1/1 | 7.38  | 7.75  |
| 0/1 | 1/1 | 5.66  | 6.1   |
| 0/1 | 1/1 | 4.06  | 4.61  |
| 1/1 | 1/1 | 11.41 | 11.95 |
| 1/1 | 1/1 | 5.71  | 6.5   |
| 1/1 | 0/1 | 10.06 | 2.75  |
| 1/1 | 0/1 | 10.48 | 3.28  |
| 1/1 | 1/1 | 11.8  | 5.34  |
| 1/1 | 0/1 | 10.15 | 3.77  |
| 1/1 | 0/1 | 10.9  | 4.53  |
| 1/1 | 1/1 | 7.9   | 4.68  |
| 1/1 | 1/1 | 9     | 7.41  |
| 1/1 | 1/1 | 5.59  | 5.13  |
| 1/1 | 1/1 | 5.76  | 5.61  |
| 1/1 | 1/1 | 5.53  | 4.42  |
| 1/1 | 1/1 | 5.42  | 4.32  |
| 1/1 | 1/1 | 9.11  | 8.12  |
| 1/1 | 1/1 | 5.07  | 4.18  |
| 1/1 | 1/1 | 5.81  | 4.95  |
| 1/1 | 0/1 | 5.73  | 4.87  |
| 1/1 | 1/1 | 7.59  | 6.8   |
| 1/1 | 1/1 | 11.23 | 10.48 |
| 1/1 | 1/1 | 8.15  | 7.41  |
| 1/1 | 0/1 | 7.27  | 6.57  |
| 1/1 | 1/1 | 6.42  | 5.79  |
| 1/1 | 1/1 | 6.34  | 5.83  |
| 1/1 | 1/1 | 8.94  | 8.5   |
| 1/1 | 1/1 | 4.96  | 4.58  |
| 1/1 | 1/1 | 6.25  | 5.99  |
| 0/1 | 1/1 | 5.27  | 5.02  |
| 1/1 | 1/1 | 7.06  | 6.85  |
| 1/1 | 1/1 | 5     | 4.78  |

|     |     |       |       |
|-----|-----|-------|-------|
| 1/1 | 1/1 | 6.75  | 6.55  |
| 1/1 | 1/1 | 6.04  | 5.87  |
| 1/1 | 1/1 | 8.35  | 8.19  |
| 1/1 | 1/1 | 3.53  | 3.37  |
| 1/1 | 1/1 | 7.61  | 7.47  |
| 1/1 | 1/1 | 6.67  | 6.54  |
| 1/1 | 1/1 | 7.6   | 7.48  |
| 0/1 | 1/1 | 4.14  | 4.04  |
| 0/1 | 1/1 | 4.23  | 4.14  |
| 1/1 | 1/1 | 5.88  | 5.79  |
| 0/1 | 1/1 | 7.53  | 7.46  |
| 1/1 | 1/1 | 10.31 | 10.25 |
| 1/1 | 1/1 | 3.42  | 3.37  |
| 1/1 | 1/1 | 6.5   | 6.45  |
| 1/1 | 1/1 | 6.19  | 6.17  |
| 1/1 | 1/1 | 5.79  | 5.78  |
| 0/1 | 1/1 | 5     | 4.99  |
| 0/1 | 1/1 | 3.66  | 5.99  |
| 0/1 | 1/1 | 4.11  | 7     |
| 1/1 | 1/1 | 4.99  | 5.06  |
| 1/1 | 1/1 | 10.49 | 10.72 |
| 1/1 | 1/1 | 5.43  | 5.73  |
| 0/1 | 1/1 | 3.66  | 4.15  |
| 0/1 | 1/1 | 2.69  | 3.28  |
| 1/1 | 1/1 | 6.9   | 7.62  |
| 0/1 | 1/1 | 3.55  | 4.52  |
| 1/1 | 1/1 | 5.51  | 6.58  |
| 1/1 | 1/1 | 5.68  | 9.14  |
| 1/1 | 1/1 | 5.41  | 9.28  |
| 1/1 | 1/1 | 11.06 | 10.36 |
| 1/1 | 1/1 | 3.87  | 3.55  |
| 1/1 | 1/1 | 11.68 | 11.43 |
| 0/1 | 1/1 | 4.09  | 3.96  |
| 1/1 | 1/1 | 8.79  | 8.72  |
| 1/1 | 1/1 | 6.84  | 6.83  |
| 0/1 | 1/1 | 7.49  | 7.51  |
| 1/1 | 1/1 | 2.22  | 2.38  |
| 1/1 | 1/1 | 6.39  | 6.62  |
| 0/1 | 1/1 | 4.84  | 5.08  |
| 1/1 | 1/1 | 5.72  | 6.03  |
| 1/1 | 1/1 | 7.44  | 7.79  |
| 0/1 | 1/1 | 2.31  | 2.68  |
| 1/1 | 1/1 | 6.6   | 7     |
| 0/1 | 1/1 | 2.86  | 3.28  |
| 0/1 | 1/1 | 3.29  | 5.71  |
| 1/1 | 1/1 | 9.08  | 5.1   |
| 1/1 | 1/1 | 8.25  | 4.34  |
| 1/1 | 1/1 | 9.24  | 5.49  |
| 1/1 | 0/1 | 7.74  | 4.76  |
| 1/1 | 1/1 | 13.19 | 13.55 |
| 1/1 | 0/1 | 5.03  | 3.09  |
| 1/1 | 1/1 | 4.85  | 6.11  |
| 1/1 | 0/1 | 5.1   | 4.14  |
| 1/1 | 1/1 | 6.03  | 5.43  |
| 1/1 | 1/1 | 6.84  | 6.5   |
| 1/1 | 1/1 | 5.19  | 5.16  |
| 1/1 | 1/1 | 7.13  | 7.23  |
| 1/1 | 0/1 | 5.79  | 3.16  |

|     |     |       |      |
|-----|-----|-------|------|
| 1/1 | 1/1 | 7.97  | 5.67 |
| 1/1 | 0/1 | 4.13  | 2.13 |
| 1/1 | 1/1 | 7.61  | 5.91 |
| 1/1 | 1/1 | 8.99  | 7.29 |
| 1/1 | 0/1 | 4.87  | 3.18 |
| 1/1 | 1/1 | 6.71  | 5.04 |
| 1/1 | 1/1 | 8.97  | 7.39 |
| 1/1 | 1/1 | 5.64  | 6.23 |
| 1/1 | 1/1 | 8.6   | 7.2  |
| 1/1 | 1/1 | 6.43  | 5.41 |
| 1/1 | 0/1 | 8.5   | 7.73 |
| 1/1 | 1/1 | 9     | 8.51 |
| 1/1 | 1/1 | 6.47  | 6    |
| 1/1 | 1/1 | 6.62  | 8.41 |
| 1/1 | 1/1 | 7.67  | 3.55 |
| 1/1 | 1/1 | 8.26  | 4.77 |
| 1/1 | 1/1 | 8.78  | 5.36 |
| 1/1 | 1/1 | 9.03  | 5.7  |
| 1/1 | 1/1 | 7.89  | 4.85 |
| 1/1 | 1/1 | 10.58 | 9.75 |
| 1/1 | 1/1 | 9.21  | 8.46 |
| 1/1 | 1/1 | 10.08 | 9.4  |
| 1/1 | 1/1 | 7.97  | 7.65 |
| 1/1 | 1/1 | 5.2   | 4.98 |
| 1/1 | 1/1 | 5.38  | 5.18 |
| 1/1 | 1/1 | 6.41  | 6.25 |
| 1/1 | 1/1 | 6.2   | 6.42 |
| 0/1 | 1/1 | 3.59  | 3.87 |
| 1/1 | 1/1 | 7.16  | 4.69 |
| 1/1 | 0/1 | 5.97  | 4.32 |
| 1/1 | 1/1 | 5.02  | 3.53 |
| 0/1 | 1/1 | 5.45  | 6.32 |
| 1/1 | 0/1 | 7.65  | 6.08 |
| 1/1 | 1/1 | 4.1   | 3.22 |
| 1/1 | 1/1 | 3.3   | 5.23 |
| 1/1 | 1/1 | 4.33  | 3.06 |
| 1/1 | 1/1 | 4.41  | 3.71 |
| 1/1 | 1/1 | 5.33  | 4.66 |
| 1/1 | 1/1 | 5.99  | 5.44 |
| 1/1 | 1/1 | 6.59  | 6.1  |
| 1/1 | 1/1 | 6.43  | 5.95 |
| 1/1 | 1/1 | 5.69  | 5.21 |
| 1/1 | 1/1 | 4.38  | 3.94 |
| 1/1 | 1/1 | 5.16  | 4.93 |
| 1/1 | 1/1 | 6.85  | 6.69 |
| 1/1 | 1/1 | 6.34  | 5.33 |
| 1/1 | 1/1 | 6.28  | 5.29 |
| 1/1 | 1/1 | 5.24  | 4.31 |
| 1/1 | 0/1 | 3.08  | 2.16 |
| 1/1 | 0/1 | 5.27  | 4.41 |
| 1/1 | 1/1 | 6.67  | 5.98 |
| 1/1 | 1/1 | 6.24  | 5.67 |
| 1/1 | 1/1 | 6.02  | 5.47 |
| 1/1 | 1/1 | 3.7   | 3.17 |
| 1/1 | 0/1 | 2.43  | 1.93 |
| 1/1 | 1/1 | 4.48  | 3.99 |
| 1/1 | 1/1 | 5.39  | 4.94 |
| 1/1 | 1/1 | 5.05  | 4.65 |



|     |     |       |       |
|-----|-----|-------|-------|
| 1/1 | 1/1 | 8.28  | 7.87  |
| 1/1 | 1/1 | 7.86  | 7.46  |
| 1/1 | 1/1 | 7.66  | 7.3   |
| 1/1 | 0/1 | 6.15  | 5.87  |
| 1/1 | 1/1 | 5.09  | 4.81  |
| 1/1 | 1/1 | 4.33  | 4.06  |
| 1/1 | 1/1 | 5.01  | 4.74  |
| 1/1 | 1/1 | 4.87  | 4.62  |
| 1/1 | 1/1 | 4.05  | 3.8   |
| 1/1 | 1/1 | 5.31  | 5.08  |
| 1/1 | 1/1 | 5.15  | 4.92  |
| 1/1 | 1/1 | 9.46  | 9.24  |
| 1/1 | 1/1 | 6.23  | 6.01  |
| 1/1 | 1/1 | 8.08  | 7.87  |
| 1/1 | 1/1 | 9.14  | 8.95  |
| 1/1 | 1/1 | 5.83  | 5.65  |
| 1/1 | 1/1 | 10.8  | 10.63 |
| 1/1 | 1/1 | 7.03  | 6.87  |
| 1/1 | 1/1 | 4.41  | 4.25  |
| 0/1 | 1/1 | 2.37  | 2.22  |
| 1/1 | 1/1 | 4.09  | 3.95  |
| 1/1 | 1/1 | 6.48  | 6.34  |
| 1/1 | 1/1 | 6.43  | 6.31  |
| 1/1 | 1/1 | 8.5   | 8.39  |
| 1/1 | 1/1 | 4.62  | 4.51  |
| 1/1 | 1/1 | 8.82  | 8.71  |
| 1/1 | 1/1 | 9.8   | 9.72  |
| 1/1 | 1/1 | 8.67  | 8.58  |
| 1/1 | 1/1 | 8.87  | 8.79  |
| 1/1 | 1/1 | 5.99  | 5.92  |
| 0/1 | 1/1 | 2.59  | 2.57  |
| 1/1 | 1/1 | 10.66 | 10.63 |
| 1/1 | 1/1 | 9.17  | 9.15  |
| 1/1 | 1/1 | 7.65  | 7.64  |
| 0/1 | 1/1 | 2.87  | 2.88  |
| 1/1 | 1/1 | 7.97  | 7.99  |
| 1/1 | 1/1 | 11.44 | 11.46 |
| 1/1 | 1/1 | 7.98  | 8.01  |
| 1/1 | 1/1 | 6.56  | 6.6   |
| 1/1 | 1/1 | 9.51  | 9.56  |
| 1/1 | 1/1 | 5.79  | 5.85  |
| 1/1 | 1/1 | 9.76  | 9.85  |
| 1/1 | 1/1 | 11.86 | 11.94 |
| 1/1 | 1/1 | 4.24  | 6.34  |
| 0/1 | 1/1 | 3     | 5.96  |
| 0/1 | 1/1 | 2.53  | 7.68  |
| 1/1 | 1/1 | 6.13  | 5.01  |
| 1/1 | 1/1 | 8.19  | 7.08  |
| 1/1 | 1/1 | 8.34  | 7.26  |
| 1/1 | 0/1 | 7.47  | 6.45  |
| 1/1 | 1/1 | 3.34  | 2.37  |
| 1/1 | 1/1 | 7.1   | 6.33  |
| 1/1 | 1/1 | 7.52  | 6.77  |
| 1/1 | 0/1 | 3.4   | 2.65  |
| 1/1 | 1/1 | 4.49  | 3.85  |
| 1/1 | 1/1 | 4.06  | 3.45  |
| 1/1 | 1/1 | 6.87  | 6.34  |
| 0/1 | 1/1 | 4.33  | 3.82  |

|     |     |       |       |
|-----|-----|-------|-------|
| 1/1 | 1/1 | 6.46  | 5.98  |
| 1/1 | 1/1 | 5.83  | 5.44  |
| 1/1 | 1/1 | 4.16  | 3.9   |
| 1/1 | 1/1 | 8.46  | 8.21  |
| 1/1 | 1/1 | 4.11  | 3.89  |
| 1/1 | 1/1 | 5.32  | 4.43  |
| 1/1 | 1/1 | 7.66  | 7.2   |
| 1/1 | 1/1 | 5.27  | 4.86  |
| 1/1 | 1/1 | 7.64  | 7.32  |
| 0/1 | 1/1 | 3.98  | 3.66  |
| 1/1 | 1/1 | 4.3   | 4.01  |
| 1/1 | 1/1 | 7.76  | 7.55  |
| 0/1 | 1/1 | 7.01  | 6.85  |
| 1/1 | 1/1 | 6.59  | 6.45  |
| 0/1 | 1/1 | 4.39  | 4.41  |
| 0/1 | 1/1 | 7.91  | 7.96  |
| 1/1 | 1/1 | 8.43  | 8.58  |
| 0/1 | 1/1 | 2.85  | 5.47  |
| 0/1 | 1/1 | 2.19  | 5.06  |
| 1/1 | 1/1 | 8.02  | 5.88  |
| 1/1 | 0/1 | 5.98  | 4.86  |
| 1/1 | 0/1 | 7.47  | 6.4   |
| 1/1 | 0/1 | 2.99  | 1.95  |
| 1/1 | 1/1 | 5.65  | 5.46  |
| 1/1 | 1/1 | 9.32  | 9.28  |
| 1/1 | 1/1 | 10.38 | 10.35 |
| 1/1 | 1/1 | 9.38  | 9.38  |
| 1/1 | 1/1 | 7.03  | 9.77  |
| 1/1 | 1/1 | 4.69  | 7.75  |
| 1/1 | 0/1 | 3.49  | 2.42  |
| 1/1 | 1/1 | 5.07  | 4.21  |
| 1/1 | 1/1 | 3.11  | 3.02  |
| 1/1 | 1/1 | 4.12  | 6.56  |
| 1/1 | 1/1 | 5.99  | 5.16  |
| 1/1 | 1/1 | 5.83  | 5     |
| 1/1 | 1/1 | 5.1   | 4.82  |
| 1/1 | 1/1 | 8.07  | 7.99  |
| 1/1 | 1/1 | 5.53  | 5.49  |
| 1/1 | 1/1 | 9.56  | 9.62  |
| 0/1 | 1/1 | 2.96  | 6.55  |
| 1/1 | 0/1 | 5.1   | 3.86  |
| 1/1 | 1/1 | 6.51  | 5.49  |
| 1/1 | 1/1 | 7.91  | 7.07  |
| 1/1 | 0/1 | 3.69  | 2.94  |
| 1/1 | 1/1 | 8.79  | 8.1   |
| 1/1 | 1/1 | 6.24  | 5.58  |
| 1/1 | 1/1 | 5.52  | 4.92  |
| 1/1 | 1/1 | 3.36  | 2.8   |
| 1/1 | 1/1 | 6.36  | 5.8   |
| 1/1 | 1/1 | 8.1   | 7.61  |
| 1/1 | 1/1 | 6.75  | 6.39  |
| 1/1 | 1/1 | 7.23  | 6.87  |
| 1/1 | 1/1 | 8.22  | 7.86  |
| 1/1 | 1/1 | 5.22  | 4.89  |
| 1/1 | 1/1 | 10.87 | 10.68 |
| 1/1 | 1/1 | 4.92  | 4.76  |
| 1/1 | 0/1 | 6.35  | 2.73  |
| 1/1 | 1/1 | 5.84  | 3     |

|     |     |       |       |
|-----|-----|-------|-------|
| 1/1 | 0/1 | 4.88  | 2.29  |
| 0/1 | 1/1 | 2.98  | 2.79  |
| 0/1 | 1/1 | 2.66  | 2.58  |
| 1/1 | 1/1 | 8.07  | 8.05  |
| 1/1 | 1/1 | 7.33  | 7.35  |
| 1/1 | 1/1 | 6.82  | 6.91  |
| 0/1 | 1/1 | 3.7   | 3.94  |
| 0/1 | 1/1 | 2.72  | 2.97  |
| 0/1 | 1/1 | 3.24  | 3.56  |
| 1/1 | 1/1 | 5.76  | 6.11  |
| 0/1 | 1/1 | 1.79  | 2.58  |
| 1/1 | 1/1 | 4.78  | 3.33  |
| 1/1 | 1/1 | 10.51 | 9.45  |
| 1/1 | 1/1 | 9.06  | 8.21  |
| 1/1 | 1/1 | 11.75 | 11.18 |
| 1/1 | 1/1 | 6.82  | 6.28  |
| 1/1 | 1/1 | 9.98  | 9.47  |
| 1/1 | 1/1 | 6.64  | 6.2   |
| 1/1 | 1/1 | 10.91 | 10.18 |
| 1/1 | 1/1 | 5.09  | 4.76  |
| 0/1 | 1/1 | 5.7   | 5.48  |
| 1/1 | 1/1 | 7.81  | 7.69  |
| 1/1 | 1/1 | 6.53  | 6.41  |
| 0/1 | 1/1 | 5.45  | 5.46  |
| 1/1 | 1/1 | 3.32  | 3.36  |
| 1/1 | 1/1 | 7.78  | 7.91  |
| 1/1 | 1/1 | 5.52  | 5.7   |
| 0/1 | 1/1 | 2.3   | 2.52  |
| 1/1 | 1/1 | 6.33  | 6.6   |
| 1/1 | 1/1 | 4.51  | 7.02  |
| 1/1 | 1/1 | 6.33  | 4.89  |
| 1/1 | 1/1 | 5.46  | 4.51  |
| 1/1 | 1/1 | 3.63  | 3.01  |
| 1/1 | 1/1 | 7.92  | 7.52  |
| 1/1 | 1/1 | 7.85  | 7.46  |
| 1/1 | 1/1 | 3.77  | 3.41  |
| 0/1 | 1/1 | 2.59  | 4.34  |
| 1/1 | 0/1 | 4.5   | 3.55  |
| 1/1 | 1/1 | 5.46  | 4.76  |
| 1/1 | 1/1 | 10.53 | 10.05 |
| 1/1 | 1/1 | 3.61  | 3.31  |
| 1/1 | 1/1 | 9.34  | 9.18  |
| 1/1 | 0/1 | 2.09  | 1.95  |
| 1/1 | 1/1 | 5.04  | 4.92  |
| 1/1 | 1/1 | 4.06  | 3.99  |
| 1/1 | 1/1 | 7.85  | 7.81  |
| 1/1 | 1/1 | 7.66  | 7.67  |
| 1/1 | 1/1 | 6.61  | 6.63  |
| 1/1 | 1/1 | 7.05  | 7.1   |
| 1/1 | 1/1 | 8.64  | 8.74  |
| 1/1 | 1/1 | 4.62  | 4.73  |
| 1/1 | 1/1 | 4.82  | 4.94  |
| 1/1 | 1/1 | 3.64  | 5.9   |
| 1/1 | 1/1 | 5.36  | 7.99  |
| 0/1 | 1/1 | 3.22  | 6.13  |
| 1/1 | 1/1 | 7.83  | 5.27  |
| 1/1 | 1/1 | 8.07  | 5.66  |
| 1/1 | 1/1 | 7.4   | 5.05  |

|     |     |       |       |
|-----|-----|-------|-------|
| 1/1 | 1/1 | 7.3   | 5.03  |
| 0/1 | 1/1 | 2.08  | 2.67  |
| 0/1 | 1/1 | 2.77  | 3.43  |
| 0/1 | 1/1 | 2     | 2.97  |
| 1/1 | 1/1 | 4.3   | 3.29  |
| 1/1 | 1/1 | 6.21  | 5.29  |
| 1/1 | 0/1 | 3.37  | 2.52  |
| 1/1 | 1/1 | 4.13  | 3.34  |
| 1/1 | 1/1 | 7     | 6.39  |
| 1/1 | 1/1 | 7.66  | 7.11  |
| 1/1 | 1/1 | 4.15  | 3.65  |
| 1/1 | 1/1 | 4.91  | 4.47  |
| 1/1 | 1/1 | 6.34  | 5.92  |
| 0/1 | 1/1 | 8.05  | 7.8   |
| 0/1 | 1/1 | 5.31  | 5.16  |
| 1/1 | 1/1 | 5.52  | 5.41  |
| 1/1 | 1/1 | 8.26  | 8.17  |
| 1/1 | 1/1 | 5.51  | 5.47  |
| 1/1 | 1/1 | 8.6   | 8.59  |
| 0/1 | 1/1 | 1.95  | 1.95  |
| 1/1 | 1/1 | 8.85  | 8.87  |
| 1/1 | 1/1 | 12.45 | 12.47 |
| 1/1 | 1/1 | 10.12 | 10.2  |
| 1/1 | 1/1 | 4.6   | 6.73  |
| 0/1 | 1/1 | 4.05  | 6.5   |
| 1/1 | 1/1 | 8.29  | 7.66  |
| 1/1 | 1/1 | 5.78  | 5.27  |
| 1/1 | 1/1 | 7.2   | 6.8   |
| 1/1 | 1/1 | 11.08 | 10.81 |
| 1/1 | 1/1 | 10    | 9.91  |
| 0/1 | 1/1 | 2.79  | 2.8   |
| 1/1 | 1/1 | 6.58  | 6.95  |
| 1/1 | 1/1 | 5.09  | 5.49  |
| 1/1 | 1/1 | 8.22  | 8.69  |
| 1/1 | 0/1 | 2.69  | 1.8   |
| 1/1 | 0/1 | 3.12  | 2.41  |
| 1/1 | 0/1 | 2.76  | 2.21  |
| 0/1 | 1/1 | 2.57  | 2.64  |
| 0/1 | 1/1 | 2.24  | 2.43  |
| 1/1 | 1/1 | 3.84  | 6.37  |
| 0/1 | 1/1 | 2.8   | 5.36  |
| 0/1 | 1/1 | 2.81  | 5.62  |
| 1/1 | 1/1 | 6.04  | 4.86  |
| 1/1 | 1/1 | 8.6   | 8.23  |
| 1/1 | 1/1 | 6.49  | 6.21  |
| 1/1 | 1/1 | 4.28  | 4.2   |
| 0/1 | 1/1 | 3.86  | 5.78  |
| 1/1 | 1/1 | 5.62  | 7.8   |
| 0/1 | 1/1 | 4.14  | 3.39  |
| 1/1 | 1/1 | 3     | 2.97  |
| 0/1 | 1/1 | 2.68  | 2.68  |
| 1/1 | 1/1 | 6.72  | 6.92  |
| 1/1 | 1/1 | 2.3   | 2.52  |
| 1/1 | 0/1 | 4.04  | 2.67  |
| 1/1 | 0/1 | 2.98  | 2.41  |
| 1/1 | 1/1 | 5.27  | 4.81  |
| 1/1 | 1/1 | 2.75  | 4.67  |
| 1/1 | 1/1 | 3.82  | 5.91  |

|     |     |       |       |
|-----|-----|-------|-------|
| 0/1 | 1/1 | 2.99  | 5.25  |
| 1/1 | 1/1 | 4.63  | 6.96  |
| 1/1 | 1/1 | 9.02  | 6.5   |
| 1/1 | 1/1 | 6.34  | 4.75  |
| 1/1 | 0/1 | 5.35  | 3.78  |
| 1/1 | 1/1 | 9.26  | 7.78  |
| 1/1 | 0/1 | 6.01  | 4.46  |
| 1/1 | 1/1 | 5.78  | 4.77  |
| 1/1 | 0/1 | 10.69 | 10.21 |
| 0/1 | 1/1 | 2.49  | 4.08  |
| 0/1 | 1/1 | 4.26  | 5.88  |
| 1/1 | 1/1 | 6.92  | 8.57  |
| 0/1 | 1/1 | 3.23  | 4.92  |
| 0/1 | 1/1 | 3.8   | 5.78  |
| 0/1 | 1/1 | 3.26  | 5.6   |
| 1/1 | 1/1 | 5.72  | 4.1   |
| 1/1 | 0/1 | 3.93  | 2.92  |
| 1/1 | 1/1 | 7.73  | 7.17  |
| 1/1 | 1/1 | 4.33  | 5.86  |
| 1/1 | 0/1 | 6.32  | 4.7   |
| 1/1 | 0/1 | 4.12  | 2.81  |
| 1/1 | 1/1 | 7.25  | 6.53  |
| 1/1 | 1/1 | 7.5   | 6.79  |
| 1/1 | 1/1 | 9.52  | 8.83  |
| 1/1 | 1/1 | 9.65  | 9.08  |
| 0/1 | 1/1 | 3.21  | 5.67  |
| 1/1 | 1/1 | 6.72  | 3.17  |
| 1/1 | 1/1 | 7     | 3.46  |
| 1/1 | 0/1 | 5.34  | 1.94  |
| 1/1 | 0/1 | 5.38  | 2.38  |
| 1/1 | 0/1 | 5.33  | 2.47  |
| 1/1 | 1/1 | 7.23  | 4.51  |
| 1/1 | 0/1 | 4.65  | 2.01  |
| 1/1 | 0/1 | 2.85  | 2.49  |
| 1/1 | 1/1 | 4.42  | 4.06  |
| 1/1 | 1/1 | 3.64  | 3.36  |
| 1/1 | 1/1 | 4.21  | 4.05  |
| 1/1 | 1/1 | 4.74  | 4.74  |
| 0/1 | 1/1 | 2.53  | 2.55  |
| 1/1 | 1/1 | 2.88  | 3.09  |
| 1/1 | 1/1 | 3.63  | 4.01  |
| 0/1 | 1/1 | 2.03  | 2.53  |
| 1/1 | 1/1 | 3.18  | 2.7   |
| 0/1 | 1/1 | 4.42  | 4.4   |
| 0/1 | 1/1 | 3.02  | 3.18  |
| 1/1 | 1/1 | 6.53  | 6.81  |
| 0/1 | 1/1 | 3.32  | 3.7   |
| 1/1 | 1/1 | 4.96  | 7.6   |
| 1/1 | 1/1 | 3.89  | 3.44  |
| 1/1 | 0/1 | 2.89  | 2.5   |
| 1/1 | 1/1 | 4.33  | 4.19  |
| 1/1 | 1/1 | 6.67  | 6.64  |
| 1/1 | 1/1 | 5.2   | 5.19  |
| 0/1 | 1/1 | 7.5   | 7.55  |
| 1/1 | 1/1 | 12.34 | 12.49 |
| 1/1 | 1/1 | 5.02  | 5.28  |
| 1/1 | 1/1 | 2.13  | 2.39  |
| 0/1 | 1/1 | 2.86  | 3.15  |

|     |     |      |       |
|-----|-----|------|-------|
| 1/1 | 1/1 | 3.73 | 4.09  |
| 1/1 | 1/1 | 6.42 | 6.79  |
| 1/1 | 1/1 | 5.27 | 5.64  |
| 1/1 | 1/1 | 3.5  | 3.9   |
| 1/1 | 1/1 | 8.44 | 9.02  |
| 0/1 | 1/1 | 3.15 | 3.78  |
| 1/1 | 1/1 | 6.17 | 5.43  |
| 1/1 | 1/1 | 8.49 | 8.63  |
| 1/1 | 1/1 | 5.07 | 7.46  |
| 1/1 | 1/1 | 6.08 | 8.59  |
| 1/1 | 1/1 | 4.84 | 7.54  |
| 1/1 | 1/1 | 4.82 | 7.6   |
| 0/1 | 1/1 | 1.99 | 5.59  |
| 1/1 | 1/1 | 3.94 | 7.64  |
| 0/1 | 1/1 | 2.48 | 6.39  |
| 1/1 | 0/1 | 3.51 | 2.19  |
| 1/1 | 1/1 | 6.22 | 5.37  |
| 1/1 | 1/1 | 4.26 | 4     |
| 1/1 | 1/1 | 3.57 | 2.89  |
| 1/1 | 1/1 | 7.86 | 7.44  |
| 1/1 | 1/1 | 5.53 | 5.17  |
| 1/1 | 1/1 | 8.35 | 8     |
| 0/1 | 1/1 | 5.04 | 4.88  |
| 1/1 | 1/1 | 8.35 | 8.22  |
| 1/1 | 1/1 | 7.39 | 7.32  |
| 1/1 | 1/1 | 7.04 | 7.03  |
| 1/1 | 1/1 | 7.16 | 7.26  |
| 1/1 | 1/1 | 7.39 | 7.59  |
| 0/1 | 1/1 | 2.78 | 3.11  |
| 0/1 | 1/1 | 4.37 | 4.72  |
| 1/1 | 1/1 | 3.65 | 6.05  |
| 1/1 | 1/1 | 3.43 | 6.23  |
| 1/1 | 0/1 | 4.32 | 2.62  |
| 1/1 | 1/1 | 8.42 | 7.47  |
| 1/1 | 1/1 | 7.06 | 6.13  |
| 1/1 | 1/1 | 4.11 | 3.45  |
| 1/1 | 1/1 | 7.56 | 6.93  |
| 1/1 | 1/1 | 6.4  | 7.81  |
| 1/1 | 1/1 | 5.03 | 6.6   |
| 1/1 | 1/1 | 7.49 | 7.1   |
| 1/1 | 1/1 | 8.66 | 8.49  |
| 1/1 | 1/1 | 11.4 | 11.54 |
| 0/1 | 1/1 | 4.92 | 5.11  |
| 1/1 | 1/1 | 6.36 | 6.58  |
| 1/1 | 1/1 | 6.16 | 6.42  |
| 1/1 | 1/1 | 8.38 | 8.81  |
| 1/1 | 1/1 | 4.29 | 4.9   |
| 1/1 | 1/1 | 6.19 | 8.89  |
| 0/1 | 1/1 | 2.23 | 4.97  |
| 1/1 | 0/1 | 4.89 | 3.3   |
| 1/1 | 1/1 | 3.59 | 2.71  |
| 1/1 | 1/1 | 7.37 | 6.5   |
| 1/1 | 1/1 | 7.47 | 6.66  |
| 1/1 | 1/1 | 5.7  | 5.09  |
| 1/1 | 1/1 | 3.82 | 5.97  |
| 1/1 | 0/1 | 7.11 | 6.82  |
| 1/1 | 1/1 | 9.93 | 9.88  |
| 0/1 | 1/1 | 4.9  | 8.15  |

|     |     |      |       |
|-----|-----|------|-------|
| 1/1 | 1/1 | 5.86 | 9.2   |
| 1/1 | 1/1 | 3.82 | 2.94  |
| 1/1 | 1/1 | 7.04 | 6.7   |
| 1/1 | 1/1 | 7.9  | 7.89  |
| 1/1 | 1/1 | 3.91 | 3.93  |
| 1/1 | 1/1 | 8.34 | 8.38  |
| 0/1 | 1/1 | 2.6  | 2.66  |
| 1/1 | 1/1 | 6.69 | 6.78  |
| 1/1 | 1/1 | 9.73 | 2.39  |
| 1/1 | 0/1 | 6.43 | 2.21  |
| 1/1 | 1/1 | 6.22 | 3.34  |
| 1/1 | 0/1 | 5.23 | 3.46  |
| 0/1 | 1/1 | 2.55 | 2.45  |
| 1/1 | 0/1 | 5.99 | 3.25  |
| 1/1 | 1/1 | 5.98 | 3.35  |
| 1/1 | 1/1 | 8.35 | 5.94  |
| 1/1 | 1/1 | 5.36 | 2.96  |
| 1/1 | 1/1 | 8.76 | 6.4   |
| 1/1 | 0/1 | 5.27 | 2.91  |
| 1/1 | 1/1 | 9.06 | 6.93  |
| 1/1 | 1/1 | 5.64 | 3.65  |
| 1/1 | 1/1 | 8.31 | 6.51  |
| 1/1 | 1/1 | 7.34 | 5.55  |
| 0/1 | 1/1 | 6.68 | 7.01  |
| 1/1 | 1/1 | 9.68 | 10.03 |
| 0/1 | 1/1 | 5.93 | 6.47  |
| 1/1 | 0/1 | 4.31 | 2.53  |
| 1/1 | 1/1 | 7.07 | 6.22  |
| 0/1 | 1/1 | 2.5  | 3.86  |
| 1/1 | 1/1 | 4.78 | 6.67  |
| 1/1 | 0/1 | 3.18 | 2.13  |
| 1/1 | 1/1 | 4.88 | 4.47  |
| 1/1 | 1/1 | 3.08 | 2.68  |
| 1/1 | 1/1 | 3.94 | 3.95  |
| 1/1 | 0/1 | 4.64 | 2.65  |
| 1/1 | 1/1 | 3.85 | 2.87  |
| 1/1 | 1/1 | 5.08 | 4.14  |
| 1/1 | 1/1 | 3.81 | 5.02  |
| 0/1 | 1/1 | 3.21 | 4.56  |
| 1/1 | 1/1 | 3.42 | 4.97  |
| 1/1 | 1/1 | 5.75 | 4.88  |
| 1/1 | 1/1 | 7.48 | 6.67  |
| 1/1 | 1/1 | 7.87 | 7.2   |
| 1/1 | 1/1 | 5.64 | 5.32  |
| 1/1 | 1/1 | 3.74 | 3.51  |
| 1/1 | 1/1 | 5.79 | 5.61  |
| 1/1 | 1/1 | 7.14 | 6.99  |
| 1/1 | 1/1 | 7.7  | 7.65  |
| 1/1 | 1/1 | 8.54 | 8.51  |
| 1/1 | 1/1 | 8.79 | 8.77  |
| 1/1 | 1/1 | 7.75 | 7.76  |
| 1/1 | 1/1 | 5.96 | 6     |
| 1/1 | 1/1 | 6.71 | 6.79  |
| 1/1 | 1/1 | 8.8  | 8.96  |
| 1/1 | 1/1 | 8.11 | 6.18  |
| 1/1 | 1/1 | 5.63 | 4.63  |
| 1/1 | 0/1 | 5.57 | 4.63  |
| 1/1 | 1/1 | 4.98 | 4.09  |

|     |     |       |       |
|-----|-----|-------|-------|
| 0/1 | 1/1 | 3.08  | 4.38  |
| 1/1 | 1/1 | 4.87  | 3.37  |
| 1/1 | 0/1 | 6.04  | 4.96  |
| 1/1 | 1/1 | 6.53  | 5.65  |
| 1/1 | 0/1 | 4.17  | 3.32  |
| 1/1 | 1/1 | 5.52  | 4.71  |
| 1/1 | 1/1 | 7.13  | 6.35  |
| 1/1 | 1/1 | 4.34  | 3.69  |
| 1/1 | 0/1 | 3.13  | 2.61  |
| 1/1 | 1/1 | 5.22  | 4.77  |
| 1/1 | 1/1 | 4.35  | 3.92  |
| 1/1 | 1/1 | 9.41  | 9.17  |
| 1/1 | 1/1 | 6     | 5.8   |
| 1/1 | 1/1 | 3.89  | 4.02  |
| 1/1 | 1/1 | 5.36  | 5.58  |
| 0/1 | 1/1 | 5.99  | 6.54  |
| 1/1 | 1/1 | 4.08  | 4.89  |
| 1/1 | 1/1 | 4.96  | 8.51  |
| 1/1 | 0/1 | 4.82  | 2.72  |
| 1/1 | 1/1 | 6.65  | 7.78  |
| 0/1 | 1/1 | 2.6   | 3.81  |
| 0/1 | 1/1 | 1.92  | 4.04  |
| 1/1 | 0/1 | 10.81 | 2.88  |
| 1/1 | 1/1 | 10.44 | 3.47  |
| 1/1 | 1/1 | 8.43  | 3.67  |
| 0/1 | 1/1 | 3.12  | 2.84  |
| 1/1 | 1/1 | 8.46  | 8.25  |
| 1/1 | 1/1 | 7.82  | 7.93  |
| 1/1 | 1/1 | 4.1   | 7.29  |
| 1/1 | 1/1 | 11.1  | 9.94  |
| 1/1 | 1/1 | 5.06  | 4.34  |
| 1/1 | 1/1 | 8.05  | 7.69  |
| 1/1 | 1/1 | 5.66  | 5.4   |
| 1/1 | 1/1 | 4.5   | 4.28  |
| 1/1 | 1/1 | 7.68  | 8.87  |
| 0/1 | 1/1 | 6.23  | 11.17 |
| 1/1 | 1/1 | 5.75  | 11.5  |
| 0/1 | 1/1 | 3.71  | 9.82  |
| 1/1 | 1/1 | 9.65  | 9.23  |
| 1/1 | 1/1 | 7.52  | 7.21  |
| 1/1 | 1/1 | 6.39  | 6.2   |
| 0/1 | 1/1 | 3.58  | 3.66  |
| 0/1 | 1/1 | 4.65  | 4.76  |
| 0/1 | 1/1 | 3.3   | 3.59  |
| 1/1 | 1/1 | 4.82  | 5.3   |
| 0/1 | 1/1 | 2.31  | 2.79  |
| 1/1 | 1/1 | 6.11  | 6.68  |
| 1/1 | 1/1 | 5.81  | 6.42  |
| 0/1 | 1/1 | 3.01  | 5.73  |
| 0/1 | 1/1 | 3.53  | 6.48  |
| 1/1 | 1/1 | 4.96  | 4.36  |
| 0/1 | 1/1 | 5.99  | 5.62  |
| 1/1 | 1/1 | 6.27  | 6.12  |
| 1/1 | 1/1 | 7.45  | 7.4   |
| 0/1 | 1/1 | 3.05  | 3.1   |
| 0/1 | 1/1 | 2.34  | 2.47  |
| 1/1 | 1/1 | 5.05  | 5.24  |
| 0/1 | 1/1 | 2.34  | 2.69  |



|     |     |       |       |
|-----|-----|-------|-------|
| 1/1 | 0/1 | 3.99  | 2.55  |
| 1/1 | 1/1 | 7.17  | 5.77  |
| 0/1 | 1/1 | 4.36  | 3.58  |
| 1/1 | 1/1 | 11.38 | 10.7  |
| 1/1 | 1/1 | 3.37  | 2.71  |
| 1/1 | 1/1 | 4.52  | 3.9   |
| 1/1 | 1/1 | 11.44 | 10.89 |
| 1/1 | 1/1 | 6.85  | 6.3   |
| 1/1 | 1/1 | 9.66  | 9.2   |
| 1/1 | 1/1 | 5.38  | 4.98  |
| 1/1 | 1/1 | 4.09  | 5.97  |
| 0/1 | 1/1 | 2.69  | 4.65  |
| 1/1 | 1/1 | 3.55  | 5.64  |
| 1/1 | 1/1 | 7.1   | 6.51  |
| 1/1 | 1/1 | 4.42  | 3.94  |
| 1/1 | 1/1 | 8.96  | 8.62  |
| 1/1 | 1/1 | 11.53 | 11.34 |
| 1/1 | 1/1 | 6.02  | 5.91  |
| 1/1 | 1/1 | 5.5   | 5.45  |
| 1/1 | 1/1 | 6.94  | 6.98  |
| 1/1 | 1/1 | 6.38  | 6.43  |
| 1/1 | 1/1 | 8     | 8.08  |
| 1/1 | 1/1 | 7.8   | 8.06  |
| 1/1 | 1/1 | 8.54  | 8.81  |
| 0/1 | 1/1 | 2.49  | 2.77  |
| 0/1 | 1/1 | 5.16  | 5.57  |
| 1/1 | 1/1 | 7.09  | 7.55  |
| 1/1 | 0/1 | 6.19  | 5.27  |
| 1/1 | 0/1 | 4.1   | 3.26  |
| 1/1 | 1/1 | 10.2  | 9.57  |
| 1/1 | 1/1 | 5.84  | 5.31  |
| 0/1 | 1/1 | 3.18  | 2.81  |
| 1/1 | 1/1 | 8.39  | 8.09  |
| 0/1 | 1/1 | 4.82  | 4.54  |
| 1/1 | 1/1 | 7.14  | 6.9   |
| 0/1 | 1/1 | 3.8   | 3.61  |
| 1/1 | 1/1 | 7.59  | 7.43  |
| 0/1 | 1/1 | 4.36  | 4.26  |
| 1/1 | 1/1 | 8.42  | 8.34  |
| 1/1 | 1/1 | 6.3   | 6.23  |
| 1/1 | 1/1 | 7.58  | 7.56  |
| 1/1 | 1/1 | 7.76  | 7.8   |
| 1/1 | 1/1 | 5.74  | 5.8   |
| 1/1 | 1/1 | 6.43  | 6.53  |
| 1/1 | 1/1 | 6.43  | 6.53  |
| 0/1 | 1/1 | 4.23  | 4.35  |
| 0/1 | 1/1 | 3.82  | 3.94  |
| 0/1 | 1/1 | 2.51  | 5.04  |
| 1/1 | 1/1 | 3.47  | 6.87  |
| 1/1 | 1/1 | 7.1   | 6.51  |
| 1/1 | 1/1 | 4.42  | 3.94  |
| 1/1 | 1/1 | 8.96  | 8.62  |
| 1/1 | 1/1 | 11.53 | 11.34 |
| 0/1 | 1/1 | 5.5   | 5.37  |
| 1/1 | 1/1 | 6.02  | 5.91  |
| 1/1 | 1/1 | 6.94  | 6.98  |
| 1/1 | 1/1 | 6.38  | 6.43  |
| 1/1 | 1/1 | 8.27  | 8.33  |

|     |     |       |       |
|-----|-----|-------|-------|
| 1/1 | 1/1 | 7.8   | 8.06  |
| 1/1 | 1/1 | 8.54  | 8.81  |
| 0/1 | 1/1 | 2.49  | 2.77  |
| 0/1 | 1/1 | 5.16  | 5.57  |
| 1/1 | 1/1 | 7.09  | 7.55  |
| 1/1 | 1/1 | 5.2   | 4.49  |
| 1/1 | 1/1 | 7.6   | 7.62  |
| 0/1 | 1/1 | 8.02  | 8.22  |
| 1/1 | 1/1 | 4.82  | 5.15  |
| 1/1 | 1/1 | 7.1   | 6.51  |
| 1/1 | 1/1 | 4.42  | 3.94  |
| 1/1 | 1/1 | 8.96  | 8.62  |
| 1/1 | 1/1 | 11.53 | 11.34 |
| 0/1 | 1/1 | 5.5   | 5.37  |
| 1/1 | 1/1 | 6.02  | 5.91  |
| 1/1 | 1/1 | 6.94  | 6.98  |
| 1/1 | 1/1 | 6.38  | 6.43  |
| 1/1 | 1/1 | 8.27  | 8.33  |
| 1/1 | 1/1 | 7.8   | 8.06  |
| 1/1 | 1/1 | 8.54  | 8.81  |
| 0/1 | 1/1 | 2.49  | 2.77  |
| 0/1 | 1/1 | 5.16  | 5.57  |
| 1/1 | 1/1 | 7.09  | 7.55  |
| 1/1 | 0/1 | 4.79  | 3.39  |
| 1/1 | 1/1 | 7.58  | 6.49  |
| 1/1 | 1/1 | 5.09  | 4.36  |
| 0/1 | 1/1 | 3.92  | 3.36  |
| 1/1 | 1/1 | 6.45  | 6.02  |
| 1/1 | 1/1 | 6.08  | 8.14  |
| 1/1 | 0/1 | 4.29  | 2.65  |
| 1/1 | 0/1 | 3.61  | 2.25  |
| 1/1 | 0/1 | 2.44  | 1.69  |
| 1/1 | 1/1 | 2.8   | 2.12  |
| 1/1 | 1/1 | 4.91  | 6.67  |
| 1/1 | 1/1 | 5.88  | 4.21  |
| 1/1 | 1/1 | 4.24  | 3.49  |
| 1/1 | 1/1 | 5.27  | 4.61  |
| 1/1 | 1/1 | 4.27  | 5.79  |
| 1/1 | 0/1 | 7.88  | 6.67  |
| 1/1 | 1/1 | 6.95  | 6.44  |
| 0/1 | 1/1 | 3.26  | 3.04  |
| 1/1 | 1/1 | 5.2   | 5.06  |
| 0/1 | 1/1 | 3.93  | 5.83  |
| 0/1 | 1/1 | 2.5   | 4.42  |
| 0/1 | 1/1 | 2.2   | 4.84  |
| 1/1 | 1/1 | 3.82  | 3.13  |
| 1/1 | 1/1 | 6.31  | 5.93  |
| 0/1 | 1/1 | 2.94  | 2.61  |
| 1/1 | 1/1 | 5.87  | 5.97  |
| 0/1 | 1/1 | 2.35  | 2.47  |
| 1/1 | 1/1 | 3.6   | 3.73  |
| 1/1 | 1/1 | 5.04  | 5.35  |
| 1/1 | 1/1 | 4.24  | 4.57  |
| 1/1 | 1/1 | 6.62  | 3.8   |
| 1/1 | 0/1 | 4.94  | 2.88  |
| 1/1 | 1/1 | 4.5   | 5.22  |
| 1/1 | 1/1 | 5.73  | 5.76  |
| 0/1 | 1/1 | 2.55  | 2.85  |

|     |     |       |       |
|-----|-----|-------|-------|
| 1/1 | 1/1 | 9.52  | 9.82  |
| 0/1 | 1/1 | 2.57  | 3     |
| 1/1 | 1/1 | 4.5   | 5.23  |
| 1/1 | 1/1 | 5.81  | 6.61  |
| 1/1 | 1/1 | 7.38  | 7.4   |
| 1/1 | 1/1 | 9.84  | 9.88  |
| 1/1 | 1/1 | 7.6   | 7.67  |
| 1/1 | 1/1 | 5.19  | 5.42  |
| 1/1 | 1/1 | 6.63  | 6.89  |
| 0/1 | 1/1 | 5.47  | 6.12  |
| 0/1 | 1/1 | 4.1   | 4.79  |
| 0/1 | 1/1 | 5.62  | 6.36  |
| 1/1 | 1/1 | 6.67  | 7.59  |
| 1/1 | 1/1 | 5.55  | 6.57  |
| 0/1 | 1/1 | 4.06  | 7.29  |
| 0/1 | 1/1 | 4.08  | 7.45  |
| 1/1 | 1/1 | 4.67  | 8.23  |
| 0/1 | 1/1 | 3.12  | 7.12  |
| 1/1 | 1/1 | 9.06  | 8.54  |
| 1/1 | 1/1 | 3.12  | 2.68  |
| 1/1 | 1/1 | 9.66  | 9.55  |
| 1/1 | 1/1 | 6.62  | 6.56  |
| 0/1 | 1/1 | 2.63  | 2.66  |
| 1/1 | 1/1 | 9.7   | 9.8   |
| 0/1 | 1/1 | 5.83  | 5.93  |
| 1/1 | 1/1 | 8.05  | 8.21  |
| 0/1 | 1/1 | 2.79  | 3.13  |
| 0/1 | 1/1 | 5.26  | 5.77  |
| 0/1 | 1/1 | 4.24  | 4.77  |
| 1/1 | 1/1 | 6.05  | 8.69  |
| 1/1 | 1/1 | 6.64  | 9.4   |
| 1/1 | 1/1 | 5.2   | 8.02  |
| 0/1 | 1/1 | 3.99  | 7.2   |
| 0/1 | 1/1 | 3.13  | 6.98  |
| 0/1 | 1/1 | 4.23  | 8.24  |
| 0/1 | 1/1 | 2.24  | 6.76  |
| 0/1 | 1/1 | 4.61  | 9.25  |
| 1/1 | 1/1 | 7.82  | 7.43  |
| 1/1 | 1/1 | 6.23  | 5.9   |
| 1/1 | 1/1 | 5.76  | 5.5   |
| 1/1 | 1/1 | 6.26  | 6.09  |
| 1/1 | 1/1 | 6.05  | 5.89  |
| 1/1 | 1/1 | 6.13  | 6     |
| 0/1 | 1/1 | 2.11  | 2.05  |
| 1/1 | 1/1 | 4.75  | 4.84  |
| 1/1 | 1/1 | 8.52  | 8.76  |
| 0/1 | 1/1 | 2.33  | 2.59  |
| 1/1 | 1/1 | 7.11  | 7.39  |
| 1/1 | 1/1 | 3.45  | 3.75  |
| 0/1 | 1/1 | 3.43  | 3.82  |
| 1/1 | 1/1 | 6.69  | 7.12  |
| 0/1 | 1/1 | 2.94  | 3.46  |
| 1/1 | 1/1 | 5.67  | 6.21  |
| 1/1 | 1/1 | 8.06  | 8.61  |
| 1/1 | 1/1 | 7.19  | 6.59  |
| 1/1 | 1/1 | 10.88 | 10.51 |
| 1/1 | 1/1 | 2.94  | 2.58  |
| 1/1 | 0/1 | 2.73  | 2.54  |

|     |     |       |       |
|-----|-----|-------|-------|
| 1/1 | 1/1 | 9.51  | 9.33  |
| 0/1 | 1/1 | 4.65  | 4.52  |
| 1/1 | 1/1 | 10.61 | 10.68 |
| 0/1 | 1/1 | 3.12  | 3.21  |
| 1/1 | 1/1 | 5.62  | 5.75  |
| 1/1 | 1/1 | 9.21  | 9.34  |
| 0/1 | 1/1 | 2.84  | 3     |
| 0/1 | 1/1 | 4.22  | 4.49  |
| 0/1 | 1/1 | 3.63  | 3.94  |
| 0/1 | 1/1 | 2.82  | 3.13  |
| 0/1 | 1/1 | 2.02  | 2.37  |
| 0/1 | 1/1 | 2.65  | 3.02  |
| 1/1 | 1/1 | 4.48  | 6.98  |
| 1/1 | 1/1 | 3.93  | 6.49  |
| 0/1 | 1/1 | 2.44  | 5.83  |
| 1/1 | 0/1 | 5.03  | 3.18  |
| 1/1 | 0/1 | 6.41  | 4.66  |
| 1/1 | 1/1 | 7.93  | 6.62  |
| 1/1 | 0/1 | 4.76  | 3.86  |
| 0/1 | 1/1 | 5.59  | 8.44  |
| 1/1 | 0/1 | 5.2   | 2.62  |
| 1/1 | 0/1 | 4.19  | 2.55  |
| 1/1 | 1/1 | 6.15  | 5.24  |
| 1/1 | 1/1 | 9.08  | 8.67  |
| 1/1 | 1/1 | 8.32  | 8.12  |
| 1/1 | 1/1 | 3.8   | 6.02  |
| 1/1 | 1/1 | 5.29  | 7.81  |
| 1/1 | 0/1 | 6.1   | 2.75  |
| 1/1 | 0/1 | 6.31  | 3.4   |
| 1/1 | 0/1 | 7.66  | 4.87  |
| 1/1 | 1/1 | 9.3   | 9.06  |
| 1/1 | 1/1 | 4.02  | 3.97  |
| 1/1 | 0/1 | 5.15  | 3.5   |
| 1/1 | 1/1 | 4.53  | 3.13  |
| 1/1 | 1/1 | 6.83  | 6.07  |
| 1/1 | 0/1 | 4.86  | 4.13  |
| 1/1 | 1/1 | 7.44  | 6.75  |
| 1/1 | 1/1 | 5.72  | 5.08  |
| 1/1 | 1/1 | 5.95  | 4.41  |
| 1/1 | 1/1 | 6.64  | 5.74  |
| 1/1 | 1/1 | 7.96  | 7.35  |
| 1/1 | 1/1 | 5.39  | 4.87  |
| 1/1 | 1/1 | 7.45  | 5.16  |
| 1/1 | 1/1 | 9.42  | 7.31  |
| 1/1 | 1/1 | 6.04  | 3.97  |
| 1/1 | 1/1 | 9.93  | 7.97  |
| 1/1 | 1/1 | 9.53  | 7.58  |
| 1/1 | 1/1 | 8.24  | 6.53  |
| 1/1 | 1/1 | 7.09  | 5.4   |
| 1/1 | 1/1 | 9.05  | 7.39  |
| 1/1 | 1/1 | 8.17  | 6.6   |
| 1/1 | 1/1 | 6.23  | 4.74  |
| 1/1 | 0/1 | 8.04  | 5.92  |
| 0/1 | 1/1 | 2.44  | 4.08  |
| 1/1 | 1/1 | 9.01  | 7.84  |
| 1/1 | 1/1 | 7.47  | 7.07  |
| 1/1 | 1/1 | 9.28  | 9.14  |
| 0/1 | 1/1 | 7.13  | 6.99  |

|     |     |       |       |
|-----|-----|-------|-------|
| 1/1 | 1/1 | 6.9   | 6.76  |
| 1/1 | 1/1 | 4.81  | 6.72  |
| 1/1 | 1/1 | 6.72  | 8.79  |
| 1/1 | 1/1 | 5.66  | 7.8   |
| 1/1 | 1/1 | 6.94  | 9.09  |
| 1/1 | 1/1 | 6.38  | 8.62  |
| 1/1 | 1/1 | 5.63  | 8.12  |
| 1/1 | 0/1 | 4.01  | 2.32  |
| 1/1 | 1/1 | 5.26  | 4.47  |
| 1/1 | 1/1 | 4.25  | 5.79  |
| 0/1 | 1/1 | 3.69  | 5.25  |
| 0/1 | 1/1 | 2.86  | 5     |
| 1/1 | 0/1 | 7.07  | 2.17  |
| 1/1 | 1/1 | 10.95 | 6.43  |
| 1/1 | 1/1 | 9.26  | 4.86  |
| 1/1 | 1/1 | 7.85  | 6.01  |
| 1/1 | 1/1 | 9.82  | 8.08  |
| 1/1 | 1/1 | 9.03  | 7.35  |
| 1/1 | 1/1 | 9.82  | 8.27  |
| 1/1 | 1/1 | 8.4   | 7.34  |
| 1/1 | 1/1 | 8.8   | 8.74  |
| 1/1 | 0/1 | 3.58  | 2.19  |
| 1/1 | 0/1 | 2.82  | 2.15  |
| 1/1 | 1/1 | 6.53  | 5.92  |
| 1/1 | 1/1 | 5.91  | 5.42  |
| 1/1 | 1/1 | 6.31  | 5.88  |
| 1/1 | 1/1 | 9.05  | 8.69  |
| 1/1 | 1/1 | 4.92  | 6.65  |
| 1/1 | 1/1 | 3.94  | 6.05  |
| 1/1 | 1/1 | 6.05  | 4.13  |
| 1/1 | 1/1 | 6.64  | 4.87  |
| 1/1 | 1/1 | 5.35  | 4.12  |
| 1/1 | 1/1 | 4.18  | 3.2   |
| 0/1 | 1/1 | 3.24  | 4.73  |
| 1/1 | 1/1 | 4.03  | 2.52  |
| 1/1 | 1/1 | 3.8   | 2.76  |
| 1/1 | 1/1 | 4.73  | 3.3   |
| 1/1 | 1/1 | 6.77  | 5.84  |
| 1/1 | 1/1 | 3.9   | 3.1   |
| 1/1 | 1/1 | 4.96  | 4.46  |
| 1/1 | 0/1 | 2.69  | 2.27  |
| 1/1 | 1/1 | 4.97  | 4.57  |
| 0/1 | 1/1 | 4.11  | 3.71  |
| 1/1 | 0/1 | 4.97  | 3.23  |
| 1/1 | 1/1 | 4.43  | 5.95  |
| 1/1 | 1/1 | 3.62  | 5.59  |
| 1/1 | 0/1 | 5.02  | 3.8   |
| 1/1 | 1/1 | 6.22  | 5.17  |
| 1/1 | 1/1 | 3.96  | 3.51  |
| 0/1 | 1/1 | 7.18  | 6.74  |
| 1/1 | 1/1 | 13.03 | 12.64 |
| 1/1 | 1/1 | 3.91  | 3.58  |
| 1/1 | 1/1 | 5.29  | 4.96  |
| 1/1 | 1/1 | 8.37  | 8.09  |
| 1/1 | 1/1 | 4.86  | 4.64  |
| 1/1 | 1/1 | 13.16 | 12.95 |
| 1/1 | 1/1 | 5.49  | 5.28  |
| 1/1 | 1/1 | 11.43 | 11.22 |

|     |     |       |       |
|-----|-----|-------|-------|
| 0/1 | 1/1 | 4.28  | 6.34  |
| 1/1 | 1/1 | 8.04  | 6.85  |
| 1/1 | 1/1 | 9.21  | 8.27  |
| 1/1 | 1/1 | 4.12  | 3.37  |
| 1/1 | 1/1 | 4.43  | 3.98  |
| 1/1 | 1/1 | 8.24  | 7.91  |
| 0/1 | 1/1 | 5.47  | 5.25  |
| 1/1 | 0/1 | 6.38  | 2.52  |
| 1/1 | 1/1 | 8.08  | 7.48  |
| 1/1 | 1/1 | 8.73  | 8.34  |
| 1/1 | 1/1 | 5.6   | 4.29  |
| 1/1 | 0/1 | 3.53  | 2.32  |
| 1/1 | 1/1 | 3.23  | 2.7   |
| 1/1 | 1/1 | 4.97  | 4.66  |
| 1/1 | 1/1 | 7.08  | 3.34  |
| 1/1 | 1/1 | 3.56  | 3.08  |
| 1/1 | 0/1 | 2.55  | 2.25  |
| 1/1 | 1/1 | 6.03  | 6.08  |
| 1/1 | 0/1 | 4.8   | 2.7   |
| 1/1 | 0/1 | 7.51  | 6.01  |
| 1/1 | 1/1 | 5.08  | 3.77  |
| 1/1 | 1/1 | 6.64  | 5.47  |
| 1/1 | 1/1 | 5.28  | 6.46  |
| 0/1 | 1/1 | 3.48  | 4.67  |
| 1/1 | 1/1 | 3     | 4.18  |
| 1/1 | 1/1 | 4.36  | 5.76  |
| 1/1 | 0/1 | 8.03  | 5.75  |
| 0/1 | 1/1 | 4.59  | 5.49  |
| 0/1 | 1/1 | 4.24  | 5.16  |
| 1/1 | 1/1 | 4.34  | 5.29  |
| 1/1 | 1/1 | 5.61  | 5.24  |
| 1/1 | 1/1 | 6.71  | 6.39  |
| 0/1 | 1/1 | 3.48  | 3.28  |
| 1/1 | 1/1 | 8.62  | 8.64  |
| 0/1 | 1/1 | 4.79  | 4.82  |
| 1/1 | 1/1 | 7.54  | 7.67  |
| 1/1 | 1/1 | 10.58 | 10.79 |
| 1/1 | 1/1 | 9.59  | 9.84  |
| 0/1 | 1/1 | 4.86  | 5.19  |
| 0/1 | 1/1 | 6.42  | 6.85  |
| 1/1 | 1/1 | 7.65  | 8.14  |
| 0/1 | 1/1 | 3.15  | 2.7   |
| 0/1 | 1/1 | 3.23  | 3.09  |
| 0/1 | 1/1 | 4.13  | 4.03  |
| 1/1 | 1/1 | 8.42  | 8.49  |
| 0/1 | 1/1 | 3.05  | 3.22  |
| 1/1 | 1/1 | 6.6   | 7.05  |
| 0/1 | 1/1 | 3.42  | 6.24  |
| 0/1 | 1/1 | 3.39  | 6.71  |
| 1/1 | 1/1 | 4.75  | 4.07  |
| 1/1 | 1/1 | 7.07  | 6.65  |
| 1/1 | 0/1 | 6.54  | 6.26  |
| 0/1 | 1/1 | 5.31  | 5.04  |
| 1/1 | 1/1 | 8.48  | 8.49  |
| 1/1 | 1/1 | 11.47 | 11.56 |
| 0/1 | 1/1 | 6.25  | 6.49  |
| 1/1 | 0/1 | 6.63  | 4.01  |
| 1/1 | 1/1 | 6.07  | 4.17  |

|     |     |      |       |
|-----|-----|------|-------|
| 1/1 | 1/1 | 8.42 | 6.61  |
| 1/1 | 1/1 | 6.5  | 4.74  |
| 1/1 | 1/1 | 6.96 | 5.2   |
| 1/1 | 1/1 | 7.45 | 5.76  |
| 1/1 | 1/1 | 6.85 | 7.34  |
| 1/1 | 1/1 | 9.65 | 7.8   |
| 1/1 | 1/1 | 6.77 | 5.73  |
| 0/1 | 1/1 | 5.1  | 6.49  |
| 1/1 | 1/1 | 5.55 | 6.95  |
| 1/1 | 1/1 | 5.21 | 3.42  |
| 1/1 | 0/1 | 3.92 | 2.47  |
| 1/1 | 1/1 | 8.12 | 6.78  |
| 1/1 | 0/1 | 2.59 | 1.72  |
| 1/1 | 1/1 | 8.88 | 8.12  |
| 1/1 | 1/1 | 4.04 | 5.42  |
| 1/1 | 0/1 | 3.58 | 2.26  |
| 1/1 | 1/1 | 5.18 | 4.64  |
| 1/1 | 0/1 | 4.03 | 2.33  |
| 1/1 | 1/1 | 4.84 | 3.38  |
| 1/1 | 1/1 | 8.97 | 7.72  |
| 1/1 | 0/1 | 4.06 | 3.07  |
| 1/1 | 1/1 | 5.82 | 4.97  |
| 1/1 | 1/1 | 6.5  | 7.97  |
| 1/1 | 1/1 | 3.52 | 5.02  |
| 1/1 | 1/1 | 7.9  | 7.3   |
| 1/1 | 1/1 | 5.7  | 5.23  |
| 1/1 | 1/1 | 5.7  | 5.3   |
| 1/1 | 1/1 | 9.45 | 9.3   |
| 1/1 | 1/1 | 9.67 | 9.72  |
| 1/1 | 1/1 | 7.37 | 7.49  |
| 1/1 | 1/1 | 8.52 | 8.71  |
| 1/1 | 1/1 | 6.35 | 6.7   |
| 1/1 | 1/1 | 7.76 | 8.15  |
| 1/1 | 1/1 | 7.67 | 10.22 |
| 1/1 | 0/1 | 5.4  | 2.51  |
| 1/1 | 0/1 | 7.41 | 4.77  |
| 1/1 | 1/1 | 7.22 | 4.95  |
| 1/1 | 0/1 | 7.55 | 5.58  |
| 1/1 | 1/1 | 6.72 | 4.81  |
| 1/1 | 1/1 | 6.09 | 6.62  |
| 1/1 | 0/1 | 8.13 | 6.25  |
| 1/1 | 1/1 | 7.45 | 8.71  |
| 1/1 | 1/1 | 6.65 | 7.9   |
| 1/1 | 1/1 | 6.8  | 8.09  |
| 1/1 | 1/1 | 6.6  | 7.97  |
| 0/1 | 1/1 | 4.3  | 5.81  |
| 1/1 | 1/1 | 5.82 | 7.34  |
| 1/1 | 1/1 | 6.92 | 8.52  |
| 1/1 | 1/1 | 4.53 | 6.28  |
| 0/1 | 1/1 | 3.82 | 5.87  |
| 1/1 | 1/1 | 4.25 | 3.78  |
| 1/1 | 0/1 | 3.25 | 2.8   |
| 1/1 | 1/1 | 9.18 | 8.81  |
| 1/1 | 1/1 | 6.22 | 6.1   |
| 1/1 | 1/1 | 8.35 | 8.26  |
| 1/1 | 1/1 | 7.75 | 7.93  |
| 1/1 | 1/1 | 7.18 | 7.37  |
| 1/1 | 1/1 | 6.85 | 9.72  |

|     |     |      |      |
|-----|-----|------|------|
| 0/1 | 1/1 | 2.6  | 5.77 |
| 0/1 | 1/1 | 3.1  | 6.45 |
| 1/1 | 1/1 | 5.51 | 8.87 |
| 1/1 | 1/1 | 5.97 | 9.67 |
| 0/1 | 1/1 | 3.15 | 8.62 |
| 1/1 | 1/1 | 4.99 | 2.96 |
| 1/1 | 0/1 | 5.53 | 3.69 |
| 1/1 | 0/1 | 3.4  | 2.01 |
| 1/1 | 0/1 | 3.2  | 1.91 |
| 1/1 | 1/1 | 6.9  | 5.66 |
| 1/1 | 1/1 | 5.41 | 4.2  |
| 1/1 | 0/1 | 5.17 | 4.07 |
| 1/1 | 1/1 | 9.66 | 8.12 |
| 1/1 | 0/1 | 7.19 | 6.17 |
| 1/1 | 1/1 | 5.28 | 4.28 |
| 1/1 | 1/1 | 4.88 | 4.19 |
| 1/1 | 1/1 | 3.7  | 5.18 |
| 1/1 | 0/1 | 2.68 | 1.73 |
| 1/1 | 1/1 | 7.63 | 7.33 |
| 1/1 | 1/1 | 5.48 | 5.23 |
| 1/1 | 1/1 | 5.61 | 5.39 |
| 1/1 | 1/1 | 3.09 | 2.9  |
| 1/1 | 1/1 | 5.15 | 5.07 |
| 0/1 | 1/1 | 2.12 | 4.45 |
| 1/1 | 1/1 | 3.68 | 6.02 |
| 1/1 | 1/1 | 3.77 | 6.22 |
| 1/1 | 0/1 | 7.24 | 2.42 |
| 1/1 | 1/1 | 7.67 | 6.55 |
| 1/1 | 1/1 | 7.39 | 6.9  |
| 0/1 | 1/1 | 6.39 | 6.15 |
| 0/1 | 1/1 | 7.92 | 7.68 |
| 1/1 | 1/1 | 8.91 | 8.78 |
| 0/1 | 1/1 | 4.85 | 4.78 |
| 1/1 | 1/1 | 7.07 | 7.04 |
| 1/1 | 1/1 | 6.29 | 6.25 |
| 0/1 | 1/1 | 2.94 | 2.94 |
| 1/1 | 1/1 | 6.61 | 6.66 |
| 1/1 | 1/1 | 6.04 | 6.22 |
| 1/1 | 1/1 | 8.43 | 8.65 |
| 0/1 | 1/1 | 5.73 | 5.99 |
| 0/1 | 1/1 | 6.18 | 6.56 |
| 0/1 | 1/1 | 2.39 | 2.91 |
| 1/1 | 1/1 | 4.27 | 6.81 |
| 1/1 | 1/1 | 6.66 | 6.09 |
| 1/1 | 1/1 | 7.09 | 6.87 |
| 1/1 | 1/1 | 5.74 | 5.71 |
| 0/1 | 1/1 | 5.18 | 5.16 |
| 1/1 | 1/1 | 5.54 | 5.88 |
| 0/1 | 1/1 | 4.83 | 7.38 |
| 0/1 | 1/1 | 2.61 | 5.19 |
| 0/1 | 1/1 | 3.03 | 6.5  |
| 1/1 | 0/1 | 3.95 | 1.71 |
| 1/1 | 1/1 | 5.59 | 4.25 |
| 1/1 | 0/1 | 4.92 | 3.63 |
| 0/1 | 1/1 | 3.33 | 4.13 |
| 1/1 | 1/1 | 5.72 | 3.89 |
| 1/1 | 1/1 | 3.8  | 2.89 |
| 1/1 | 0/1 | 4.03 | 2.31 |



|     |     |       |       |
|-----|-----|-------|-------|
| 1/1 | 0/1 | 3.45  | 2.26  |
| 1/1 | 1/1 | 2.58  | 5.29  |
| 1/1 | 0/1 | 5.43  | 3.2   |
| 1/1 | 1/1 | 5.95  | 8.39  |
| 1/1 | 1/1 | 8.52  | 11.05 |
| 1/1 | 0/1 | 4.12  | 2.48  |
| 1/1 | 0/1 | 5.84  | 4.8   |
| 1/1 | 1/1 | 4.18  | 3.31  |
| 1/1 | 0/1 | 3.16  | 2.49  |
| 1/1 | 0/1 | 4.1   | 3.15  |
| 1/1 | 1/1 | 6.23  | 6.01  |
| 1/1 | 1/1 | 5.32  | 5.14  |
| 1/1 | 1/1 | 2.69  | 2.53  |
| 0/1 | 1/1 | 2.3   | 2.19  |
| 1/1 | 1/1 | 4.88  | 4.84  |
| 1/1 | 1/1 | 3.51  | 3.53  |
| 1/1 | 0/1 | 5.01  | 4.22  |
| 1/1 | 1/1 | 8.93  | 8.46  |
| 1/1 | 0/1 | 2.91  | 2.48  |
| 1/1 | 1/1 | 8.38  | 8.15  |
| 1/1 | 1/1 | 2.73  | 2.8   |
| 1/1 | 1/1 | 7.49  | 7.47  |
| 1/1 | 1/1 | 3.02  | 3.24  |
| 1/1 | 1/1 | 8.99  | 9.43  |
| 0/1 | 1/1 | 2.2   | 2.85  |
| 0/1 | 1/1 | 3.08  | 3.83  |
| 1/1 | 1/1 | 4.72  | 5.55  |
| 1/1 | 1/1 | 3.62  | 4.47  |
| 1/1 | 1/1 | 6.53  | 7.42  |
| 0/1 | 1/1 | 3.69  | 6.67  |
| 1/1 | 1/1 | 3.21  | 6.27  |
| 1/1 | 1/1 | 3.16  | 6.39  |
| 0/1 | 1/1 | 3.43  | 6.74  |
| 1/1 | 1/1 | 7.92  | 7.42  |
| 1/1 | 1/1 | 4.88  | 4.43  |
| 1/1 | 1/1 | 5.76  | 5.36  |
| 1/1 | 1/1 | 12.58 | 12.23 |
| 1/1 | 1/1 | 6.08  | 6.2   |
| 1/1 | 1/1 | 4.13  | 4.3   |
| 1/1 | 1/1 | 3.73  | 4     |
| 1/1 | 1/1 | 5.49  | 4.98  |
| 1/1 | 1/1 | 7.26  | 6.78  |
| 1/1 | 1/1 | 6.46  | 6.16  |
| 0/1 | 1/1 | 6.81  | 6.6   |
| 0/1 | 1/1 | 6.55  | 6.35  |
| 1/1 | 1/1 | 7.08  | 7.23  |
| 1/1 | 1/1 | 7.65  | 7.87  |
| 0/1 | 1/1 | 2.07  | 2.49  |
| 0/1 | 1/1 | 3.36  | 6.91  |
| 1/1 | 0/1 | 5.47  | 3.71  |
| 1/1 | 1/1 | 5.2   | 4.12  |
| 0/1 | 1/1 | 3.65  | 5.73  |
| 1/1 | 1/1 | 7.39  | 6.36  |
| 1/1 | 1/1 | 7.61  | 6.76  |
| 1/1 | 1/1 | 7.8   | 7.22  |
| 1/1 | 1/1 | 6.41  | 5.87  |
| 1/1 | 1/1 | 6.23  | 5.74  |
| 0/1 | 1/1 | 6.45  | 6.12  |

|     |     |       |      |
|-----|-----|-------|------|
| 1/1 | 1/1 | 6.05  | 5.75 |
| 1/1 | 1/1 | 6.55  | 6.26 |
| 0/1 | 1/1 | 4.32  | 4.05 |
| 1/1 | 1/1 | 5.45  | 5.29 |
| 1/1 | 1/1 | 3.53  | 3.45 |
| 1/1 | 1/1 | 3.55  | 3.48 |
| 1/1 | 1/1 | 4.19  | 4.14 |
| 1/1 | 1/1 | 6.05  | 6.02 |
| 1/1 | 1/1 | 4.34  | 6.47 |
| 1/1 | 1/1 | 4.23  | 6.38 |
| 1/1 | 1/1 | 3.06  | 5.36 |
| 0/1 | 1/1 | 2.62  | 5.34 |
| 1/1 | 0/1 | 7.6   | 5.65 |
| 1/1 | 1/1 | 5.51  | 6.73 |
| 1/1 | 1/1 | 4.17  | 5.66 |
| 0/1 | 1/1 | 3.41  | 5.51 |
| 1/1 | 0/1 | 5.78  | 2.45 |
| 1/1 | 1/1 | 8.8   | 5.58 |
| 0/1 | 1/1 | 6.89  | 6.68 |
| 1/1 | 1/1 | 10.12 | 9.93 |
| 1/1 | 0/1 | 6.01  | 3.37 |
| 1/1 | 1/1 | 5.84  | 3.58 |
| 1/1 | 1/1 | 4.14  | 4.53 |
| 1/1 | 1/1 | 3.73  | 4.64 |
| 1/1 | 0/1 | 6.05  | 3.19 |
| 1/1 | 1/1 | 4.23  | 4.37 |
| 1/1 | 1/1 | 9.33  | 9.49 |
| 0/1 | 1/1 | 4.19  | 4.41 |
| 1/1 | 1/1 | 3.06  | 3.35 |
| 0/1 | 1/1 | 3.39  | 3.72 |
| 1/1 | 1/1 | 3.24  | 3.89 |
| 0/1 | 1/1 | 3.3   | 4.32 |
| 1/1 | 1/1 | 5.87  | 6.51 |
| 0/1 | 1/1 | 3.91  | 4.94 |
| 0/1 | 1/1 | 2.73  | 3.92 |
| 0/1 | 1/1 | 2.87  | 4.29 |
| 0/1 | 1/1 | 2.48  | 6.14 |
| 1/1 | 1/1 | 7.56  | 7.06 |
| 1/1 | 1/1 | 7.48  | 7.61 |
| 1/1 | 1/1 | 6.29  | 6.45 |
| 0/1 | 1/1 | 4.4   | 4.61 |
| 1/1 | 1/1 | 4.78  | 5.04 |
| 1/1 | 1/1 | 8.34  | 8.62 |
| 1/1 | 1/1 | 4.84  | 5.16 |
| 0/1 | 1/1 | 5.66  | 6.11 |
| 1/1 | 1/1 | 5.14  | 2.98 |
| 1/1 | 1/1 | 5.31  | 4    |
| 1/1 | 1/1 | 6.61  | 5.32 |
| 1/1 | 1/1 | 9.38  | 7.51 |
| 1/1 | 0/1 | 3.74  | 2.55 |
| 0/1 | 1/1 | 3.34  | 4.47 |
| 1/1 | 1/1 | 7.4   | 8.54 |
| 1/1 | 1/1 | 2.35  | 3.51 |
| 1/1 | 1/1 | 3.76  | 5.22 |
| 0/1 | 1/1 | 1.89  | 3.35 |
| 0/1 | 1/1 | 2.43  | 3.93 |
| 0/1 | 1/1 | 3.77  | 5.52 |
| 1/1 | 0/1 | 5.87  | 2.63 |

|     |     |       |       |
|-----|-----|-------|-------|
| 1/1 | 1/1 | 7.51  | 5.21  |
| 1/1 | 1/1 | 7.36  | 7.14  |
| 1/1 | 0/1 | 7.5   | 5.05  |
| 1/1 | 1/1 | 8.56  | 6.55  |
| 1/1 | 1/1 | 6.68  | 5.06  |
| 1/1 | 1/1 | 6.15  | 6.77  |
| 1/1 | 0/1 | 5.64  | 5.32  |
| 0/1 | 1/1 | 6.69  | 6.48  |
| 1/1 | 1/1 | 4.88  | 4.86  |
| 1/1 | 1/1 | 9.46  | 9.49  |
| 1/1 | 1/1 | 11.36 | 11.42 |
| 1/1 | 1/1 | 10.07 | 10.16 |
| 1/1 | 1/1 | 5.73  | 5.88  |
| 0/1 | 1/1 | 4.32  | 4.82  |
| 0/1 | 1/1 | 4.89  | 7.61  |
| 1/1 | 0/1 | 3.75  | 2.67  |
| 1/1 | 1/1 | 3.94  | 3.58  |
| 1/1 | 1/1 | 4.4   | 6.63  |
| 0/1 | 1/1 | 4.64  | 7.11  |
| 1/1 | 1/1 | 4.11  | 7.04  |
| 1/1 | 1/1 | 4.06  | 7.03  |
| 0/1 | 1/1 | 2.48  | 5.74  |
| 1/1 | 1/1 | 7.7   | 6.12  |
| 1/1 | 0/1 | 3.94  | 2.51  |
| 1/1 | 1/1 | 6.76  | 5.52  |
| 1/1 | 1/1 | 5.91  | 5.04  |
| 1/1 | 1/1 | 4.43  | 3.81  |
| 1/1 | 1/1 | 8.16  | 7.55  |
| 1/1 | 1/1 | 8.35  | 7.74  |
| 1/1 | 1/1 | 9.83  | 7.81  |
| 1/1 | 1/1 | 4.91  | 3.86  |
| 0/1 | 1/1 | 2.79  | 3.95  |
| 0/1 | 1/1 | 3.46  | 4.93  |
| 1/1 | 1/1 | 4.83  | 2.89  |
| 1/1 | 1/1 | 5.56  | 4.48  |
| 1/1 | 1/1 | 2.91  | 4     |
| 1/1 | 0/1 | 5.55  | 2.97  |
| 1/1 | 0/1 | 4.68  | 3.05  |
| 1/1 | 0/1 | 7.5   | 6.19  |
| 1/1 | 1/1 | 4.77  | 3.48  |
| 1/1 | 0/1 | 7.13  | 6.21  |
| 1/1 | 1/1 | 6.24  | 5.42  |
| 1/1 | 0/1 | 4.03  | 3.31  |
| 1/1 | 1/1 | 8.34  | 7.71  |
| 1/1 | 1/1 | 4.61  | 4.03  |
| 1/1 | 1/1 | 6.57  | 6.14  |
| 0/1 | 1/1 | 4.08  | 5.92  |
| 1/1 | 1/1 | 4.36  | 6.83  |
| 1/1 | 0/1 | 5.07  | 2.65  |
| 1/1 | 1/1 | 7.56  | 5.37  |
| 1/1 | 1/1 | 5.29  | 3.69  |
| 1/1 | 0/1 | 5.38  | 3.78  |
| 0/1 | 1/1 | 3.58  | 4.54  |
| 1/1 | 1/1 | 7.37  | 7.02  |
| 1/1 | 1/1 | 5.39  | 5.23  |
| 1/1 | 1/1 | 7     | 6.86  |
| 1/1 | 1/1 | 8.87  | 8.73  |
| 1/1 | 1/1 | 5.54  | 5.61  |

|     |     |       |       |
|-----|-----|-------|-------|
| 0/1 | 1/1 | 3.07  | 3.27  |
| 1/1 | 1/1 | 5.8   | 8.47  |
| 1/1 | 1/1 | 4.16  | 6.99  |
| 1/1 | 1/1 | 3     | 7.13  |
| 1/1 | 1/1 | 6.77  | 6.15  |
| 1/1 | 1/1 | 10.03 | 9.44  |
| 1/1 | 1/1 | 7.96  | 7.65  |
| 1/1 | 1/1 | 7.31  | 7.08  |
| 0/1 | 1/1 | 8.11  | 8.05  |
| 0/1 | 1/1 | 7.12  | 7.14  |
| 0/1 | 1/1 | 7.96  | 8     |
| 1/1 | 1/1 | 8.2   | 8.36  |
| 0/1 | 1/1 | 6.18  | 8.6   |
| 1/1 | 1/1 | 6.57  | 8.99  |
| 1/1 | 1/1 | 7.73  | 10.18 |
| 1/1 | 1/1 | 7.5   | 9.96  |
| 1/1 | 1/1 | 7.32  | 9.84  |
| 1/1 | 1/1 | 4.9   | 7.42  |
| 1/1 | 1/1 | 7.72  | 10.32 |
| 1/1 | 1/1 | 5.59  | 8.28  |
| 0/1 | 1/1 | 5.43  | 8.14  |
| 1/1 | 1/1 | 7.55  | 10.34 |
| 0/1 | 1/1 | 3.56  | 6.78  |
| 0/1 | 1/1 | 3.3   | 7.55  |
| 1/1 | 1/1 | 5.85  | 3.52  |
| 0/1 | 1/1 | 3.48  | 4.18  |
| 1/1 | 1/1 | 4.49  | 5.21  |
| 0/1 | 1/1 | 5     | 6.27  |
| 1/1 | 0/1 | 6.01  | 4.28  |
| 1/1 | 0/1 | 5.52  | 4.03  |
| 1/1 | 1/1 | 8.07  | 7.87  |
| 1/1 | 1/1 | 8.77  | 8.91  |
| 1/1 | 1/1 | 6.76  | 6.93  |
| 1/1 | 1/1 | 6.73  | 7.04  |
| 0/1 | 1/1 | 3.43  | 6.36  |
| 1/1 | 0/1 | 5.29  | 4.37  |
| 1/1 | 1/1 | 6.2   | 5.37  |
| 1/1 | 1/1 | 8.53  | 8.22  |
| 1/1 | 1/1 | 5.92  | 5.65  |
| 1/1 | 1/1 | 8.61  | 8.41  |
| 1/1 | 1/1 | 5.23  | 5.08  |
| 1/1 | 1/1 | 8.48  | 8.37  |
| 0/1 | 1/1 | 6.73  | 6.7   |
| 1/1 | 1/1 | 8.86  | 8.9   |
| 1/1 | 1/1 | 7.73  | 7.77  |
| 1/1 | 1/1 | 5.56  | 7.76  |
| 0/1 | 1/1 | 3.07  | 5.35  |
| 1/1 | 1/1 | 3.95  | 6.36  |
| 0/1 | 1/1 | 4.28  | 6.72  |
| 1/1 | 1/1 | 7.12  | 9.58  |
| 1/1 | 1/1 | 5.86  | 4.17  |
| 1/1 | 0/1 | 5.29  | 3.63  |
| 1/1 | 0/1 | 3.93  | 3     |
| 1/1 | 1/1 | 6.12  | 7.57  |
| 1/1 | 1/1 | 5.96  | 3.99  |
| 1/1 | 1/1 | 3.05  | 4.25  |
| 1/1 | 1/1 | 7.66  | 5.49  |
| 1/1 | 1/1 | 4.03  | 4.98  |

|     |     |       |       |
|-----|-----|-------|-------|
| 1/1 | 0/1 | 6.25  | 3.13  |
| 1/1 | 1/1 | 5.59  | 5.53  |
| 0/1 | 1/1 | 2.05  | 2.59  |
| 1/1 | 1/1 | 4.28  | 5.11  |
| 1/1 | 0/1 | 4.95  | 2.97  |
| 1/1 | 1/1 | 4.32  | 2.8   |
| 1/1 | 0/1 | 3.6   | 2.4   |
| 1/1 | 1/1 | 6.2   | 5.17  |
| 0/1 | 1/1 | 4.27  | 5.28  |
| 1/1 | 1/1 | 7.12  | 4.27  |
| 1/1 | 1/1 | 7.97  | 5.66  |
| 1/1 | 1/1 | 7.13  | 5.02  |
| 1/1 | 1/1 | 6.21  | 4.24  |
| 1/1 | 0/1 | 4.77  | 2.85  |
| 1/1 | 1/1 | 6.15  | 6.34  |
| 1/1 | 0/1 | 5.42  | 3.3   |
| 1/1 | 1/1 | 4.58  | 5.45  |
| 1/1 | 1/1 | 6.44  | 5.34  |
| 1/1 | 0/1 | 5.21  | 4.18  |
| 1/1 | 1/1 | 5.97  | 5.22  |
| 1/1 | 1/1 | 5.76  | 5.23  |
| 1/1 | 1/1 | 5.03  | 4.7   |
| 0/1 | 1/1 | 5.88  | 5.74  |
| 1/1 | 0/1 | 5.99  | 4.71  |
| 1/1 | 1/1 | 11.18 | 10.18 |
| 1/1 | 1/1 | 9.89  | 9.08  |
| 1/1 | 1/1 | 9.25  | 8.57  |
| 0/1 | 1/1 | 2.06  | 4.56  |
| 1/1 | 1/1 | 6.19  | 5.11  |
| 1/1 | 1/1 | 10.04 | 9.65  |
| 1/1 | 1/1 | 3.73  | 3.48  |
| 0/1 | 1/1 | 2.39  | 2.29  |
| 1/1 | 0/1 | 6.29  | 4.82  |
| 1/1 | 0/1 | 5.04  | 4.18  |
| 1/1 | 1/1 | 7.87  | 7.07  |
| 1/1 | 1/1 | 3.58  | 2.94  |
| 0/1 | 1/1 | 4.15  | 5.82  |
| 1/1 | 1/1 | 9.7   | 8.39  |
| 1/1 | 1/1 | 4.23  | 3.39  |
| 1/1 | 1/1 | 4.74  | 4.2   |
| 1/1 | 1/1 | 7.34  | 6.95  |
| 1/1 | 1/1 | 5.7   | 5.36  |
| 0/1 | 1/1 | 5.35  | 7.23  |
| 1/1 | 1/1 | 5.39  | 7.33  |
| 1/1 | 1/1 | 5.04  | 7.02  |
| 1/1 | 1/1 | 3.68  | 6.08  |
| 1/1 | 1/1 | 9.8   | 8.89  |
| 1/1 | 1/1 | 5.77  | 4.97  |
| 1/1 | 1/1 | 6.56  | 5.96  |
| 1/1 | 1/1 | 6.67  | 6.09  |
| 0/1 | 1/1 | 7.05  | 6.53  |
| 1/1 | 1/1 | 7.27  | 7.01  |
| 1/1 | 1/1 | 7.07  | 6.94  |
| 1/1 | 1/1 | 3.02  | 2.92  |
| 1/1 | 1/1 | 8.29  | 8.23  |
| 1/1 | 1/1 | 2.8   | 4.98  |
| 1/1 | 1/1 | 4.4   | 6.71  |
| 0/1 | 1/1 | 3.47  | 6.21  |

|     |     |       |       |
|-----|-----|-------|-------|
| 0/1 | 1/1 | 2.46  | 5.45  |
| 1/1 | 0/1 | 5.7   | 2.51  |
| 1/1 | 1/1 | 6.43  | 4.01  |
| 1/1 | 1/1 | 7.74  | 7.54  |
| 1/1 | 1/1 | 3.39  | 3.22  |
| 1/1 | 1/1 | 8.49  | 8.33  |
| 0/1 | 1/1 | 3.63  | 3.55  |
| 0/1 | 1/1 | 7.29  | 7.46  |
| 1/1 | 0/1 | 4.48  | 3.4   |
| 0/1 | 1/1 | 3.15  | 2.79  |
| 1/1 | 1/1 | 7.05  | 6.76  |
| 1/1 | 1/1 | 8.14  | 7.89  |
| 1/1 | 1/1 | 7.57  | 7.34  |
| 1/1 | 1/1 | 8.62  | 8.51  |
| 0/1 | 1/1 | 3.76  | 5.67  |
| 0/1 | 1/1 | 3.36  | 5.72  |
| 1/1 | 1/1 | 6.65  | 5.62  |
| 1/1 | 1/1 | 8.14  | 7.49  |
| 1/1 | 1/1 | 8.71  | 8.11  |
| 1/1 | 1/1 | 7.03  | 6.69  |
| 1/1 | 1/1 | 6.94  | 6.71  |
| 1/1 | 1/1 | 7.2   | 6.98  |
| 1/1 | 1/1 | 7.92  | 7.73  |
| 1/1 | 1/1 | 7.97  | 7.87  |
| 1/1 | 1/1 | 7.09  | 7     |
| 1/1 | 1/1 | 9.19  | 9.11  |
| 1/1 | 0/1 | 3.47  | 2.36  |
| 1/1 | 1/1 | 3.44  | 2.96  |
| 1/1 | 1/1 | 5.93  | 5.47  |
| 1/1 | 1/1 | 4.1   | 3.86  |
| 1/1 | 1/1 | 5.31  | 4.75  |
| 1/1 | 1/1 | 8.13  | 7.58  |
| 1/1 | 1/1 | 6.5   | 5.98  |
| 1/1 | 1/1 | 8.08  | 7.56  |
| 1/1 | 1/1 | 10.84 | 10.34 |
| 1/1 | 1/1 | 10.95 | 10.44 |
| 1/1 | 1/1 | 9.49  | 9     |
| 0/1 | 1/1 | 5.27  | 4.87  |
| 1/1 | 1/1 | 8.17  | 7.78  |
| 1/1 | 1/1 | 7.92  | 7.7   |
| 1/1 | 1/1 | 5.99  | 5.78  |
| 0/1 | 1/1 | 7.16  | 6.97  |
| 1/1 | 1/1 | 7.5   | 7.34  |
| 0/1 | 1/1 | 5.73  | 5.6   |
| 1/1 | 1/1 | 6.47  | 6.34  |
| 1/1 | 1/1 | 9.18  | 9.05  |
| 1/1 | 1/1 | 5.97  | 5.89  |
| 1/1 | 1/1 | 5.67  | 5.64  |
| 1/1 | 1/1 | 6.87  | 6.85  |
| 1/1 | 1/1 | 6.55  | 6.56  |
| 1/1 | 1/1 | 6.89  | 6.92  |
| 1/1 | 1/1 | 4.55  | 4.64  |
| 1/1 | 1/1 | 5.29  | 5.39  |
| 1/1 | 1/1 | 10.99 | 11.27 |
| 1/1 | 1/1 | 6.47  | 6.8   |
| 1/1 | 1/1 | 5.7   | 6.11  |
| 0/1 | 1/1 | 4.84  | 5.26  |
| 1/1 | 1/1 | 7.08  | 9.55  |

|     |     |       |       |
|-----|-----|-------|-------|
| 1/1 | 1/1 | 7.56  | 10.05 |
| 0/1 | 1/1 | 4.08  | 6.66  |
| 1/1 | 1/1 | 6.79  | 9.54  |
| 1/1 | 1/1 | 7.42  | 10.27 |
| 1/1 | 1/1 | 6.29  | 9.28  |
| 1/1 | 1/1 | 4.15  | 7.43  |
| 1/1 | 1/1 | 5.2   | 8.59  |
| 1/1 | 1/1 | 4.35  | 7.74  |
| 1/1 | 1/1 | 3.84  | 7.41  |
| 0/1 | 1/1 | 3.81  | 7.57  |
| 1/1 | 1/1 | 3.71  | 7.84  |
| 1/1 | 0/1 | 5.75  | 2.84  |
| 1/1 | 1/1 | 8.42  | 8.53  |
| 1/1 | 1/1 | 4.88  | 4.56  |
| 1/1 | 1/1 | 9.99  | 10.22 |
| 1/1 | 1/1 | 5.26  | 4.33  |
| 1/1 | 1/1 | 9.27  | 8.75  |
| 1/1 | 1/1 | 5.86  | 5.47  |
| 1/1 | 1/1 | 8.17  | 8.03  |
| 1/1 | 1/1 | 12.64 | 12.51 |
| 1/1 | 1/1 | 4.13  | 4.04  |
| 1/1 | 1/1 | 7.33  | 7.32  |
| 1/1 | 1/1 | 8.58  | 8.61  |
| 1/1 | 1/1 | 8.72  | 6.66  |
| 1/1 | 1/1 | 4.58  | 3.46  |
| 0/1 | 1/1 | 4.28  | 5.27  |
| 0/1 | 1/1 | 1.99  | 3.23  |
| 1/1 | 1/1 | 4.61  | 3.3   |
| 1/1 | 0/1 | 3.17  | 2.37  |
| 1/1 | 1/1 | 5.64  | 5.09  |
| 1/1 | 1/1 | 6.66  | 6.14  |
| 1/1 | 1/1 | 6.11  | 5.67  |
| 1/1 | 1/1 | 6.89  | 6.49  |
| 1/1 | 1/1 | 5.38  | 5.18  |
| 1/1 | 1/1 | 5.11  | 4.94  |
| 1/1 | 1/1 | 4.85  | 4.79  |
| 1/1 | 1/1 | 5.81  | 5.02  |
| 1/1 | 1/1 | 5.25  | 4.71  |
| 1/1 | 1/1 | 7.09  | 6.72  |
| 1/1 | 1/1 | 6.15  | 5.86  |
| 1/1 | 1/1 | 2.56  | 2.31  |
| 1/1 | 1/1 | 4.79  | 4.56  |
| 1/1 | 1/1 | 6.14  | 5.92  |
| 1/1 | 1/1 | 8.45  | 8.23  |
| 1/1 | 1/1 | 5.86  | 5.74  |
| 1/1 | 1/1 | 5.12  | 5.07  |
| 1/1 | 1/1 | 7.81  | 7.77  |
| 1/1 | 1/1 | 6.97  | 7     |
| 0/1 | 1/1 | 4.78  | 4.9   |
| 1/1 | 1/1 | 4.12  | 4.26  |
| 0/1 | 1/1 | 6.63  | 6.78  |
| 0/1 | 1/1 | 4.14  | 4.31  |
| 1/1 | 1/1 | 5.56  | 7.78  |
| 1/1 | 1/1 | 4.53  | 6.81  |
| 1/1 | 1/1 | 5.71  | 8.04  |
| 0/1 | 1/1 | 3.15  | 6.08  |
| 1/1 | 1/1 | 4.05  | 6.99  |
| 0/1 | 1/1 | 3.3   | 6.25  |

|     |     |       |       |
|-----|-----|-------|-------|
| 1/1 | 1/1 | 3.68  | 6.65  |
| 0/1 | 1/1 | 4.29  | 7.52  |
| 1/1 | 0/1 | 6.99  | 5.6   |
| 1/1 | 1/1 | 3.88  | 2.76  |
| 0/1 | 1/1 | 3.46  | 2.69  |
| 1/1 | 1/1 | 6.05  | 5.38  |
| 1/1 | 0/1 | 6.51  | 5.9   |
| 1/1 | 1/1 | 3.83  | 3.38  |
| 0/1 | 1/1 | 2.55  | 4.94  |
| 1/1 | 1/1 | 2.84  | 5.32  |
| 1/1 | 1/1 | 11.63 | 6.07  |
| 1/1 | 1/1 | 10.32 | 5.62  |
| 1/1 | 1/1 | 9.92  | 7.71  |
| 1/1 | 1/1 | 5.87  | 4.48  |
| 1/1 | 0/1 | 5.88  | 4.49  |
| 1/1 | 1/1 | 7.01  | 6.16  |
| 1/1 | 0/1 | 5.33  | 4.68  |
| 1/1 | 1/1 | 5.2   | 4.66  |
| 1/1 | 1/1 | 8.6   | 8.36  |
| 1/1 | 1/1 | 7.97  | 7.83  |
| 1/1 | 1/1 | 9.12  | 9.11  |
| 1/1 | 1/1 | 8.45  | 8.66  |
| 0/1 | 1/1 | 5.75  | 6.07  |
| 1/1 | 1/1 | 6.08  | 6.53  |
| 0/1 | 1/1 | 5.66  | 6.3   |
| 1/1 | 1/1 | 6.88  | 6.05  |
| 0/1 | 1/1 | 4.51  | 4.25  |
| 1/1 | 1/1 | 11.72 | 11.59 |
| 0/1 | 1/1 | 6.73  | 6.66  |
| 1/1 | 1/1 | 3.64  | 3.77  |
| 1/1 | 1/1 | 4.62  | 7.18  |
| 1/1 | 0/1 | 6.67  | 2.78  |
| 1/1 | 1/1 | 6.86  | 5.97  |
| 1/1 | 1/1 | 6.84  | 5.97  |
| 1/1 | 1/1 | 6.08  | 5.53  |
| 1/1 | 1/1 | 7.56  | 7.07  |
| 1/1 | 1/1 | 5.77  | 5.33  |
| 0/1 | 1/1 | 3.33  | 3.04  |
| 1/1 | 1/1 | 6.29  | 6.04  |
| 1/1 | 1/1 | 6.15  | 5.9   |
| 1/1 | 1/1 | 6     | 5.79  |
| 0/1 | 1/1 | 3.25  | 3.05  |
| 0/1 | 1/1 | 6.39  | 6.21  |
| 1/1 | 1/1 | 10.93 | 10.91 |
| 1/1 | 1/1 | 5.86  | 5.85  |
| 0/1 | 1/1 | 2.83  | 2.84  |
| 1/1 | 1/1 | 2.7   | 2.76  |
| 1/1 | 1/1 | 9.34  | 9.42  |
| 1/1 | 1/1 | 11.06 | 11.26 |
| 0/1 | 1/1 | 4.92  | 5.14  |
| 1/1 | 1/1 | 8.28  | 8.54  |
| 0/1 | 1/1 | 3.07  | 3.58  |
| 1/1 | 1/1 | 9.74  | 7.88  |
| 1/1 | 0/1 | 6.46  | 5.02  |
| 1/1 | 1/1 | 8.65  | 7.39  |
| 1/1 | 1/1 | 6.85  | 5.79  |
| 1/1 | 1/1 | 7.78  | 6.78  |
| 1/1 | 1/1 | 6.29  | 4.75  |



|     |     |       |      |
|-----|-----|-------|------|
| 1/1 | 1/1 | 9.48  | 8.64 |
| 1/1 | 1/1 | 8.97  | 8.17 |
| 1/1 | 1/1 | 7.08  | 8.66 |
| 0/1 | 1/1 | 4.4   | 6.29 |
| 0/1 | 1/1 | 2.3   | 4.27 |
| 0/1 | 1/1 | 5.24  | 7.29 |
| 0/1 | 1/1 | 4.5   | 6.93 |
| 1/1 | 1/1 | 3.53  | 2.74 |
| 1/1 | 1/1 | 5.44  | 5.02 |
| 1/1 | 1/1 | 5.54  | 5.28 |
| 1/1 | 1/1 | 8.05  | 7.83 |
| 1/1 | 1/1 | 2.24  | 2.04 |
| 1/1 | 1/1 | 7.22  | 7.11 |
| 1/1 | 1/1 | 5.7   | 5.62 |
| 1/1 | 1/1 | 3.8   | 3.74 |
| 1/1 | 1/1 | 3.84  | 3.79 |
| 1/1 | 1/1 | 2.38  | 2.35 |
| 1/1 | 1/1 | 8.96  | 8.95 |
| 0/1 | 1/1 | 2.24  | 2.23 |
| 1/1 | 1/1 | 4.76  | 4.83 |
| 1/1 | 1/1 | 4.14  | 4.26 |
| 1/1 | 1/1 | 6.04  | 6.16 |
| 1/1 | 1/1 | 6.08  | 6.25 |
| 0/1 | 1/1 | 6.03  | 8.3  |
| 1/1 | 1/1 | 4.69  | 6.98 |
| 1/1 | 1/1 | 4.54  | 7.09 |
| 0/1 | 1/1 | 2.93  | 6.05 |
| 1/1 | 1/1 | 4.18  | 7.85 |
| 1/1 | 1/1 | 5.8   | 3.97 |
| 1/1 | 1/1 | 2.6   | 4.17 |
| 1/1 | 0/1 | 4.48  | 2.32 |
| 1/1 | 1/1 | 9.37  | 7.31 |
| 1/1 | 1/1 | 6.51  | 4.55 |
| 1/1 | 1/1 | 5.6   | 3.92 |
| 1/1 | 1/1 | 5.04  | 3.46 |
| 1/1 | 1/1 | 2.85  | 3.78 |
| 0/1 | 1/1 | 3.8   | 4.91 |
| 0/1 | 1/1 | 2.69  | 3.83 |
| 0/1 | 1/1 | 3.18  | 4.37 |
| 0/1 | 1/1 | 2.18  | 3.5  |
| 0/1 | 1/1 | 2.54  | 3.94 |
| 1/1 | 0/1 | 5.46  | 3.21 |
| 1/1 | 0/1 | 4.15  | 2.19 |
| 1/1 | 1/1 | 4.62  | 2.7  |
| 1/1 | 1/1 | 4.15  | 4.9  |
| 1/1 | 1/1 | 10.09 | 9.04 |
| 1/1 | 0/1 | 3.1   | 2.26 |
| 1/1 | 1/1 | 7.96  | 7.22 |
| 0/1 | 1/1 | 4.25  | 3.62 |
| 1/1 | 1/1 | 7.19  | 6.66 |
| 1/1 | 1/1 | 4.57  | 4.17 |
| 1/1 | 1/1 | 7.81  | 7.42 |
| 1/1 | 1/1 | 3.81  | 3.61 |
| 1/1 | 1/1 | 6.02  | 5.83 |
| 1/1 | 1/1 | 4.12  | 3.96 |
| 1/1 | 1/1 | 6.63  | 6.49 |
| 1/1 | 1/1 | 9.52  | 8    |
| 1/1 | 1/1 | 5.78  | 4.93 |

|     |     |       |       |
|-----|-----|-------|-------|
| 1/1 | 1/1 | 10.18 | 7.94  |
| 1/1 | 1/1 | 10.57 | 8.74  |
| 1/1 | 1/1 | 8.74  | 7.13  |
| 1/1 | 0/1 | 5.54  | 4.23  |
| 1/1 | 0/1 | 7.5   | 5.05  |
| 1/1 | 1/1 | 8.56  | 6.55  |
| 1/1 | 1/1 | 6.42  | 7.22  |
| 1/1 | 1/1 | 4.65  | 5.71  |
| 1/1 | 1/1 | 7.26  | 6.12  |
| 1/1 | 1/1 | 7.71  | 6.73  |
| 1/1 | 1/1 | 7.33  | 6.43  |
| 1/1 | 1/1 | 6.87  | 6.01  |
| 1/1 | 1/1 | 4.74  | 4.24  |
| 1/1 | 1/1 | 10.83 | 10.37 |
| 1/1 | 1/1 | 5.06  | 4.63  |
| 1/1 | 1/1 | 7.84  | 7.48  |
| 0/1 | 1/1 | 3.39  | 3.19  |
| 1/1 | 1/1 | 7.91  | 7.74  |
| 1/1 | 1/1 | 7.77  | 7.6   |
| 1/1 | 1/1 | 4.96  | 7.66  |
| 1/1 | 1/1 | 7.12  | 5.67  |
| 1/1 | 1/1 | 3.66  | 2.89  |
| 1/1 | 1/1 | 6.33  | 5.61  |
| 1/1 | 1/1 | 6.15  | 5.53  |
| 1/1 | 1/1 | 4.03  | 3.47  |
| 1/1 | 1/1 | 7.66  | 7.13  |
| 0/1 | 1/1 | 3.86  | 5.79  |
| 1/1 | 1/1 | 9.94  | 8.22  |
| 1/1 | 1/1 | 5.18  | 3.86  |
| 1/1 | 1/1 | 6.75  | 5.5   |
| 1/1 | 1/1 | 6.89  | 6.09  |
| 1/1 | 1/1 | 7.61  | 6.46  |
| 1/1 | 1/1 | 4.9   | 6.72  |
| 0/1 | 1/1 | 5.3   | 7.26  |
| 1/1 | 1/1 | 6.47  | 5.7   |
| 1/1 | 1/1 | 4.57  | 3.88  |
| 1/1 | 1/1 | 5.68  | 5.15  |
| 1/1 | 1/1 | 7.27  | 6.96  |
| 1/1 | 1/1 | 6.23  | 6.05  |
| 1/1 | 1/1 | 7.58  | 7.46  |
| 1/1 | 1/1 | 7.92  | 7.82  |
| 1/1 | 1/1 | 6.54  | 6.45  |
| 1/1 | 1/1 | 6.22  | 6.22  |
| 1/1 | 1/1 | 5.39  | 5.43  |
| 1/1 | 1/1 | 8.08  | 8.15  |
| 0/1 | 1/1 | 5.14  | 5.23  |
| 1/1 | 1/1 | 8.15  | 8.26  |
| 1/1 | 1/1 | 6.62  | 6.73  |
| 1/1 | 1/1 | 8.43  | 8.56  |
| 0/1 | 1/1 | 6.9   | 7.03  |
| 0/1 | 1/1 | 6.61  | 6.76  |
| 1/1 | 1/1 | 10.33 | 10.49 |
| 0/1 | 1/1 | 6.77  | 6.94  |
| 1/1 | 1/1 | 4.73  | 6.96  |
| 1/1 | 1/1 | 6.46  | 8.9   |
| 1/1 | 1/1 | 7.9   | 5.82  |
| 1/1 | 1/1 | 7.07  | 5.91  |
| 1/1 | 1/1 | 4.86  | 6.12  |

|     |     |       |       |
|-----|-----|-------|-------|
| 1/1 | 1/1 | 6.02  | 4.39  |
| 1/1 | 0/1 | 3.07  | 2.09  |
| 1/1 | 0/1 | 6.69  | 5.96  |
| 0/1 | 1/1 | 3.89  | 5.22  |
| 1/1 | 0/1 | 5.37  | 3.62  |
| 1/1 | 1/1 | 8.91  | 7.38  |
| 1/1 | 1/1 | 5.15  | 4.25  |
| 1/1 | 1/1 | 4.09  | 5.41  |
| 1/1 | 1/1 | 8.67  | 6.94  |
| 1/1 | 1/1 | 6.3   | 5.19  |
| 1/1 | 1/1 | 3.56  | 2.52  |
| 1/1 | 1/1 | 5.78  | 4.97  |
| 1/1 | 1/1 | 4.62  | 3.27  |
| 1/1 | 1/1 | 6.27  | 4.93  |
| 1/1 | 1/1 | 6.01  | 5.12  |
| 1/1 | 0/1 | 3.12  | 2.3   |
| 1/1 | 1/1 | 5.39  | 7.01  |
| 1/1 | 0/1 | 5.08  | 3.15  |
| 1/1 | 0/1 | 3.81  | 2.82  |
| 1/1 | 0/1 | 4.45  | 3.03  |
| 1/1 | 1/1 | 8.48  | 7.69  |
| 1/1 | 1/1 | 6.68  | 6.11  |
| 1/1 | 1/1 | 3.2   | 5.39  |
| 1/1 | 1/1 | 10.13 | 6.87  |
| 1/1 | 1/1 | 9.95  | 7.56  |
| 1/1 | 1/1 | 5.93  | 3.57  |
| 1/1 | 1/1 | 8.13  | 7.83  |
| 1/1 | 1/1 | 11.64 | 11.6  |
| 1/1 | 1/1 | 8.15  | 8.22  |
| 1/1 | 1/1 | 6.51  | 6.59  |
| 1/1 | 1/1 | 5.03  | 3.1   |
| 1/1 | 1/1 | 6.06  | 4.49  |
| 1/1 | 1/1 | 3.89  | 5.04  |
| 1/1 | 0/1 | 5.79  | 3.38  |
| 1/1 | 1/1 | 5.28  | 3.07  |
| 1/1 | 1/1 | 8.11  | 6.17  |
| 1/1 | 1/1 | 6.66  | 4.75  |
| 1/1 | 1/1 | 4.91  | 3.08  |
| 1/1 | 0/1 | 5.48  | 3.7   |
| 1/1 | 1/1 | 7.69  | 6.68  |
| 1/1 | 1/1 | 5.57  | 4.63  |
| 1/1 | 1/1 | 7.16  | 6.3   |
| 1/1 | 1/1 | 7.11  | 8.3   |
| 1/1 | 0/1 | 6.33  | 2.94  |
| 1/1 | 1/1 | 7.56  | 4.62  |
| 1/1 | 1/1 | 7.39  | 4.76  |
| 1/1 | 1/1 | 7.24  | 4.64  |
| 1/1 | 1/1 | 7.17  | 4.68  |
| 1/1 | 1/1 | 3.52  | 3.44  |
| 1/1 | 1/1 | 5.96  | 5.9   |
| 1/1 | 1/1 | 5.16  | 5.17  |
| 1/1 | 1/1 | 11.73 | 11.86 |
| 1/1 | 0/1 | 3.41  | 1.5   |
| 1/1 | 1/1 | 5.86  | 4.85  |
| 1/1 | 1/1 | 10.31 | 9.31  |
| 0/1 | 1/1 | 6.16  | 7.45  |
| 0/1 | 1/1 | 4.54  | 6.03  |
| 1/1 | 0/1 | 4.17  | 2.8   |

|     |     |       |       |
|-----|-----|-------|-------|
| 1/1 | 1/1 | 8.85  | 8.15  |
| 1/1 | 1/1 | 7.24  | 6.76  |
| 1/1 | 1/1 | 6.85  | 6.39  |
| 0/1 | 1/1 | 3.93  | 5.56  |
| 1/1 | 1/1 | 4.66  | 6.69  |
| 1/1 | 1/1 | 2.7   | 2.18  |
| 1/1 | 1/1 | 7.68  | 7.36  |
| 0/1 | 1/1 | 6.04  | 5.77  |
| 1/1 | 1/1 | 4.99  | 4.76  |
| 0/1 | 1/1 | 6.47  | 6.3   |
| 1/1 | 1/1 | 7.61  | 7.82  |
| 1/1 | 1/1 | 4.07  | 3.45  |
| 1/1 | 1/1 | 4.66  | 4.3   |
| 1/1 | 1/1 | 3.26  | 2.91  |
| 0/1 | 1/1 | 6.32  | 6.24  |
| 1/1 | 1/1 | 2.23  | 2.27  |
| 1/1 | 1/1 | 6.16  | 6.26  |
| 1/1 | 1/1 | 10.41 | 10.73 |
| 0/1 | 1/1 | 3.11  | 5.66  |
| 1/1 | 1/1 | 4.68  | 7.28  |
| 1/1 | 1/1 | 6.06  | 4.19  |
| 1/1 | 1/1 | 5.4   | 4.11  |
| 1/1 | 1/1 | 7.14  | 6.79  |
| 1/1 | 1/1 | 4.49  | 4.16  |
| 1/1 | 1/1 | 4.76  | 4.44  |
| 1/1 | 1/1 | 7.09  | 6.91  |
| 1/1 | 1/1 | 8.15  | 7.99  |
| 1/1 | 1/1 | 9.58  | 9.49  |
| 1/1 | 1/1 | 7.22  | 7.15  |
| 1/1 | 1/1 | 7.58  | 7.59  |
| 0/1 | 1/1 | 3.58  | 3.7   |
| 1/1 | 1/1 | 9.3   | 9.45  |
| 1/1 | 1/1 | 5.67  | 6.01  |
| 1/1 | 1/1 | 7.29  | 7.69  |
| 1/1 | 1/1 | 6.36  | 6.77  |
| 1/1 | 1/1 | 10.56 | 10.99 |
| 1/1 | 1/1 | 6.53  | 7.02  |
| 0/1 | 1/1 | 4.74  | 7.49  |
| 1/1 | 1/1 | 4.04  | 6.91  |
| 0/1 | 1/1 | 2.57  | 6.37  |
| 1/1 | 0/1 | 6.29  | 4.82  |
| 1/1 | 0/1 | 5.04  | 4.18  |
| 1/1 | 1/1 | 7.87  | 7.07  |
| 1/1 | 1/1 | 3.58  | 2.94  |
| 1/1 | 1/1 | 8.49  | 4.35  |
| 1/1 | 1/1 | 9.97  | 10.41 |
| 1/1 | 1/1 | 8.8   | 6.39  |
| 1/1 | 1/1 | 9.52  | 7.19  |
| 1/1 | 1/1 | 8.01  | 6.14  |
| 1/1 | 0/1 | 3.42  | 2.11  |
| 1/1 | 1/1 | 4.86  | 6.01  |
| 0/1 | 1/1 | 4.69  | 6.16  |
| 0/1 | 1/1 | 4.32  | 5.81  |
| 1/1 | 1/1 | 5.43  | 7.14  |
| 1/1 | 0/1 | 6.99  | 5.75  |
| 1/1 | 1/1 | 5.66  | 4.68  |
| 1/1 | 1/1 | 5.69  | 4.85  |
| 1/1 | 1/1 | 6.02  | 5.33  |

|     |     |       |       |
|-----|-----|-------|-------|
| 1/1 | 1/1 | 8.07  | 7.47  |
| 1/1 | 1/1 | 5.76  | 5.23  |
| 1/1 | 1/1 | 8.43  | 7.92  |
| 1/1 | 1/1 | 7.15  | 6.73  |
| 1/1 | 1/1 | 6.74  | 6.39  |
| 1/1 | 1/1 | 6.3   | 5.96  |
| 1/1 | 1/1 | 6.91  | 6.58  |
| 1/1 | 1/1 | 7.65  | 7.33  |
| 1/1 | 1/1 | 4.97  | 3.22  |
| 1/1 | 1/1 | 3.53  | 2.63  |
| 1/1 | 1/1 | 5.18  | 6.66  |
| 0/1 | 1/1 | 4.38  | 5.93  |
| 1/1 | 0/1 | 6.55  | 2.67  |
| 1/1 | 0/1 | 6.17  | 2.7   |
| 1/1 | 0/1 | 6.26  | 2.84  |
| 1/1 | 1/1 | 3.3   | 2.68  |
| 1/1 | 0/1 | 3.14  | 2.54  |
| 1/1 | 1/1 | 6.46  | 5.91  |
| 1/1 | 1/1 | 3.79  | 3.31  |
| 1/1 | 0/1 | 2.95  | 2.47  |
| 1/1 | 1/1 | 2.55  | 2.41  |
| 1/1 | 1/1 | 4.06  | 3.6   |
| 1/1 | 1/1 | 8.18  | 8.59  |
| 0/1 | 1/1 | 2.8   | 3.26  |
| 1/1 | 1/1 | 5.74  | 8.62  |
| 1/1 | 1/1 | 4.09  | 7.01  |
| 1/1 | 1/1 | 8.9   | 6.16  |
| 1/1 | 1/1 | 2.45  | 2.79  |
| 1/1 | 1/1 | 10.89 | 7.5   |
| 1/1 | 1/1 | 8.41  | 5.92  |
| 1/1 | 1/1 | 7.78  | 7.46  |
| 1/1 | 1/1 | 10.71 | 10.41 |
| 1/1 | 1/1 | 10.02 | 10.01 |
| 1/1 | 1/1 | 6.35  | 3.16  |
| 1/1 | 1/1 | 7.4   | 5     |
| 1/1 | 1/1 | 8.89  | 8.69  |
| 0/1 | 1/1 | 2.92  | 3.32  |
| 1/1 | 1/1 | 4.47  | 3.77  |
| 1/1 | 1/1 | 3.11  | 2.47  |
| 1/1 | 1/1 | 10.62 | 10.25 |
| 1/1 | 1/1 | 6.66  | 6.71  |
| 1/1 | 1/1 | 6.68  | 6.76  |
| 1/1 | 1/1 | 11.07 | 11.19 |
| 1/1 | 1/1 | 5.35  | 5.54  |
| 0/1 | 1/1 | 3.18  | 5.52  |
| 0/1 | 1/1 | 3.03  | 5.38  |
| 1/1 | 1/1 | 8.18  | 5.92  |
| 0/1 | 1/1 | 3.33  | 4.1   |
| 1/1 | 1/1 | 9.35  | 7.75  |
| 1/1 | 1/1 | 6.56  | 5.75  |
| 1/1 | 1/1 | 5.78  | 7.38  |
| 1/1 | 0/1 | 4.01  | 2.53  |
| 1/1 | 1/1 | 5.27  | 4.53  |
| 1/1 | 1/1 | 4.57  | 6.23  |
| 1/1 | 1/1 | 5.75  | 7.42  |
| 0/1 | 1/1 | 2.47  | 4.42  |
| 1/1 | 0/1 | 5.96  | 3.26  |
| 1/1 | 1/1 | 8.75  | 9.33  |

|     |     |      |      |
|-----|-----|------|------|
| 1/1 | 1/1 | 6.03 | 4.3  |
| 1/1 | 1/1 | 8.88 | 7.72 |
| 1/1 | 1/1 | 4.59 | 3.58 |
| 1/1 | 1/1 | 7.91 | 7.03 |
| 1/1 | 1/1 | 6.31 | 5.44 |
| 1/1 | 1/1 | 7.56 | 5.58 |
| 1/1 | 1/1 | 4.24 | 5.24 |
| 0/1 | 1/1 | 3.3  | 4.75 |
| 1/1 | 0/1 | 6.45 | 4.47 |
| 1/1 | 0/1 | 4.88 | 3.04 |
| 1/1 | 1/1 | 5.61 | 4.48 |
| 1/1 | 1/1 | 7.69 | 6.88 |
| 1/1 | 1/1 | 8.02 | 7.45 |
| 1/1 | 1/1 | 6.12 | 5.65 |
| 1/1 | 1/1 | 6.11 | 5.76 |
| 0/1 | 1/1 | 3.9  | 3.83 |
| 1/1 | 1/1 | 7.22 | 7.22 |
| 1/1 | 1/1 | 3.05 | 3.09 |
| 0/1 | 1/1 | 2.48 | 2.53 |
| 1/1 | 1/1 | 4.26 | 4.31 |
| 0/1 | 1/1 | 2.27 | 2.38 |
| 0/1 | 1/1 | 1.91 | 4.17 |
| 1/1 | 1/1 | 4.04 | 6.61 |
| 1/1 | 0/1 | 4.76 | 2.09 |
| 1/1 | 1/1 | 3.72 | 4.27 |
| 1/1 | 1/1 | 6.43 | 4.44 |
| 1/1 | 1/1 | 4.94 | 6.01 |
| 0/1 | 1/1 | 2.78 | 3.93 |
| 1/1 | 1/1 | 3.83 | 5.49 |
| 1/1 | 0/1 | 6.8  | 4.94 |
| 1/1 | 0/1 | 5.21 | 3.66 |
| 1/1 | 1/1 | 5.54 | 4.41 |
| 1/1 | 0/1 | 6.29 | 4.82 |
| 1/1 | 0/1 | 5.04 | 4.18 |
| 1/1 | 1/1 | 7.87 | 7.07 |
| 1/1 | 1/1 | 3.58 | 2.94 |
| 1/1 | 0/1 | 4.86 | 2.84 |
| 1/1 | 1/1 | 6    | 7.97 |
| 1/1 | 1/1 | 6.33 | 4.29 |
| 1/1 | 1/1 | 5.84 | 4.22 |
| 1/1 | 1/1 | 6.82 | 5.7  |
| 1/1 | 1/1 | 6.16 | 7.19 |
| 1/1 | 1/1 | 4.99 | 6.1  |
| 1/1 | 0/1 | 6.29 | 4.82 |
| 1/1 | 0/1 | 5.04 | 4.18 |
| 1/1 | 1/1 | 7.87 | 7.07 |
| 1/1 | 1/1 | 3.58 | 2.94 |
| 1/1 | 1/1 | 7.72 | 5.07 |
| 1/1 | 1/1 | 8.75 | 6.32 |
| 1/1 | 1/1 | 7.3  | 5.37 |
| 1/1 | 1/1 | 9.08 | 7.26 |
| 1/1 | 0/1 | 4.91 | 2.79 |
| 1/1 | 0/1 | 5.93 | 4.43 |
| 1/1 | 1/1 | 9.16 | 7.67 |
| 1/1 | 1/1 | 6.52 | 5.26 |
| 0/1 | 1/1 | 2.07 | 3.12 |
| 1/1 | 0/1 | 5.48 | 2.39 |
| 1/1 | 1/1 | 6.5  | 6.43 |

|     |     |       |       |
|-----|-----|-------|-------|
| 0/1 | 1/1 | 2     | 2.41  |
| 1/1 | 0/1 | 4.56  | 3.6   |
| 1/1 | 0/1 | 8.57  | 7.75  |
| 1/1 | 1/1 | 8.48  | 8.38  |
| 1/1 | 1/1 | 7.25  | 7.14  |
| 1/1 | 1/1 | 5.75  | 5.67  |
| 1/1 | 1/1 | 5.69  | 7.93  |
| 1/1 | 1/1 | 9.91  | 4.3   |
| 1/1 | 0/1 | 8.85  | 3.52  |
| 1/1 | 1/1 | 10.05 | 5.01  |
| 1/1 | 1/1 | 9.01  | 4.02  |
| 1/1 | 1/1 | 8.56  | 6.18  |
| 1/1 | 1/1 | 9.29  | 7.49  |
| 1/1 | 1/1 | 3.88  | 2.89  |
| 1/1 | 1/1 | 4.44  | 3.46  |
| 1/1 | 0/1 | 2.95  | 2.09  |
| 1/1 | 1/1 | 5.42  | 4.7   |
| 1/1 | 0/1 | 5.92  | 5.22  |
| 1/1 | 1/1 | 3.56  | 3.21  |
| 0/1 | 1/1 | 2.44  | 2.38  |
| 0/1 | 1/1 | 3.68  | 3.7   |
| 1/1 | 1/1 | 11.1  | 11.15 |
| 1/1 | 1/1 | 10.62 | 9.72  |
| 1/1 | 1/1 | 5.06  | 7.08  |
| 1/1 | 1/1 | 10.04 | 9.19  |
| 1/1 | 1/1 | 8.97  | 8.65  |
| 1/1 | 1/1 | 6.99  | 6.78  |
| 1/1 | 1/1 | 3.07  | 5.46  |
| 1/1 | 1/1 | 2.73  | 5.16  |
| 1/1 | 0/1 | 4.99  | 3.97  |
| 1/1 | 1/1 | 11.1  | 10.29 |
| 1/1 | 1/1 | 7.62  | 7.33  |
| 1/1 | 0/1 | 6.33  | 6.06  |
| 1/1 | 1/1 | 3.57  | 3.29  |
| 1/1 | 1/1 | 7.01  | 6.74  |
| 1/1 | 1/1 | 6.57  | 6.33  |
| 1/1 | 1/1 | 6.81  | 6.64  |
| 1/1 | 1/1 | 6.52  | 6.4   |
| 1/1 | 1/1 | 9.08  | 7.06  |
| 1/1 | 1/1 | 4.14  | 2.59  |
| 1/1 | 1/1 | 4.9   | 3.39  |
| 1/1 | 1/1 | 4.38  | 5.66  |
| 1/1 | 0/1 | 4.04  | 2.91  |
| 1/1 | 1/1 | 7.8   | 6.79  |
| 1/1 | 1/1 | 5.37  | 4.86  |
| 1/1 | 1/1 | 6.89  | 6.42  |
| 1/1 | 1/1 | 3.99  | 3.59  |
| 1/1 | 1/1 | 4.9   | 4.5   |
| 1/1 | 1/1 | 4.24  | 2.91  |
| 1/1 | 1/1 | 6.9   | 5.92  |
| 1/1 | 1/1 | 5.48  | 4.78  |
| 1/1 | 1/1 | 5.54  | 4.92  |
| 1/1 | 1/1 | 4.4   | 4.1   |
| 1/1 | 1/1 | 8.14  | 8.3   |
| 1/1 | 1/1 | 5.51  | 5.78  |
| 1/1 | 1/1 | 5.37  | 5.94  |
| 1/1 | 1/1 | 6.16  | 6.74  |
| 1/1 | 1/1 | 5.19  | 7.89  |

|     |     |       |       |
|-----|-----|-------|-------|
| 1/1 | 1/1 | 4.28  | 7.26  |
| 1/1 | 1/1 | 5.46  | 8.6   |
| 1/1 | 1/1 | 7.73  | 10.91 |
| 0/1 | 1/1 | 3.18  | 6.45  |
| 1/1 | 1/1 | 6.21  | 9.6   |
| 1/1 | 1/1 | 5.56  | 9.28  |
| 1/1 | 1/1 | 5.98  | 9.93  |
| 1/1 | 1/1 | 11.32 | 9.55  |
| 1/1 | 1/1 | 5.71  | 6.94  |
| 0/1 | 1/1 | 2.47  | 3.82  |
| 1/1 | 1/1 | 8.27  | 6.66  |
| 1/1 | 1/1 | 7.13  | 5.88  |
| 1/1 | 0/1 | 3.91  | 2.83  |
| 1/1 | 1/1 | 4.38  | 3.32  |
| 1/1 | 0/1 | 3.19  | 2.23  |
| 1/1 | 1/1 | 3.67  | 3.21  |
| 1/1 | 1/1 | 4.98  | 4.58  |
| 0/1 | 1/1 | 4.49  | 4.15  |
| 1/1 | 0/1 | 3.78  | 3.54  |
| 1/1 | 1/1 | 4.03  | 6.07  |
| 1/1 | 1/1 | 4.19  | 6.41  |
| 1/1 | 1/1 | 3.19  | 5.91  |
| 0/1 | 1/1 | 1.93  | 4.8   |
| 1/1 | 0/1 | 5.22  | 3.87  |
| 1/1 | 1/1 | 6.71  | 6.19  |
| 1/1 | 1/1 | 4.21  | 5.87  |
| 0/1 | 1/1 | 4.63  | 6.61  |
| 1/1 | 1/1 | 7.27  | 5.26  |
| 1/1 | 1/1 | 7.54  | 5.78  |
| 1/1 | 0/1 | 4.58  | 2.84  |
| 1/1 | 1/1 | 6.7   | 4.98  |
| 1/1 | 1/1 | 6.31  | 5.02  |
| 0/1 | 1/1 | 4.69  | 6.17  |
| 1/1 | 1/1 | 6.2   | 5.08  |
| 1/1 | 0/1 | 4.97  | 4.27  |
| 1/1 | 1/1 | 6.87  | 6.24  |
| 1/1 | 1/1 | 5.1   | 4.59  |
| 1/1 | 1/1 | 9.21  | 8.76  |
| 1/1 | 1/1 | 10.95 | 10.57 |
| 0/1 | 1/1 | 7.35  | 7.06  |
| 0/1 | 1/1 | 3.86  | 3.6   |
| 0/1 | 1/1 | 4.95  | 4.75  |
| 0/1 | 1/1 | 3.66  | 5.51  |
| 1/1 | 0/1 | 5.64  | 3.84  |
| 1/1 | 1/1 | 9.49  | 7.84  |
| 1/1 | 1/1 | 4.13  | 2.85  |
| 1/1 | 1/1 | 6.79  | 5.67  |
| 1/1 | 1/1 | 4.12  | 6.25  |
| 1/1 | 0/1 | 8.23  | 6.33  |
| 1/1 | 1/1 | 8.35  | 6.96  |
| 1/1 | 1/1 | 2.8   | 3.88  |
| 1/1 | 1/1 | 4.52  | 6.17  |
| 1/1 | 1/1 | 4.84  | 3.85  |
| 0/1 | 1/1 | 3.95  | 3.02  |
| 1/1 | 1/1 | 4.33  | 3.86  |
| 1/1 | 1/1 | 3.92  | 3.64  |
| 1/1 | 1/1 | 4.92  | 4.65  |
| 1/1 | 1/1 | 7.21  | 6.99  |



|     |     |       |       |
|-----|-----|-------|-------|
| 1/1 | 1/1 | 7.18  | 7.05  |
| 1/1 | 1/1 | 7.06  | 6.93  |
| 1/1 | 1/1 | 8.08  | 8     |
| 0/1 | 1/1 | 3.69  | 5.62  |
| 0/1 | 1/1 | 3.44  | 5.41  |
| 1/1 | 1/1 | 4.39  | 6.41  |
| 1/1 | 1/1 | 3.58  | 5.73  |
| 0/1 | 1/1 | 3.37  | 6.28  |
| 1/1 | 1/1 | 5.27  | 3.92  |
| 1/1 | 1/1 | 5.15  | 4.27  |
| 1/1 | 1/1 | 3.86  | 3.11  |
| 1/1 | 1/1 | 5.43  | 4.95  |
| 1/1 | 0/1 | 4.28  | 3.15  |
| 1/1 | 1/1 | 5.75  | 5.21  |
| 1/1 | 1/1 | 4.12  | 3.82  |
| 1/1 | 1/1 | 6.18  | 5.06  |
| 1/1 | 1/1 | 3.57  | 3.19  |
| 1/1 | 1/1 | 4.97  | 4.73  |
| 1/1 | 0/1 | 6.64  | 5.87  |
| 1/1 | 1/1 | 5.3   | 4.71  |
| 1/1 | 1/1 | 9.38  | 8.79  |
| 1/1 | 1/1 | 8.92  | 8.38  |
| 1/1 | 1/1 | 10.22 | 9.8   |
| 1/1 | 1/1 | 8.65  | 8.24  |
| 1/1 | 1/1 | 8.36  | 7.98  |
| 1/1 | 1/1 | 9.53  | 9.29  |
| 1/1 | 1/1 | 6.48  | 6.27  |
| 1/1 | 1/1 | 8.96  | 8.8   |
| 0/1 | 1/1 | 7.01  | 6.88  |
| 1/1 | 1/1 | 8.32  | 8.24  |
| 1/1 | 1/1 | 6.81  | 6.74  |
| 1/1 | 1/1 | 9.16  | 9.11  |
| 1/1 | 1/1 | 9.15  | 9.1   |
| 1/1 | 1/1 | 7.41  | 7.38  |
| 1/1 | 1/1 | 10.27 | 10.27 |
| 1/1 | 1/1 | 7.1   | 7.12  |
| 1/1 | 1/1 | 8.73  | 8.76  |
| 1/1 | 1/1 | 8.72  | 8.75  |
| 1/1 | 1/1 | 9.74  | 9.78  |
| 1/1 | 1/1 | 9.38  | 9.45  |
| 1/1 | 1/1 | 8.27  | 8.34  |
| 1/1 | 1/1 | 9.33  | 9.41  |
| 1/1 | 1/1 | 7.88  | 7.98  |
| 1/1 | 1/1 | 11.44 | 11.54 |
| 0/1 | 1/1 | 7.21  | 7.31  |
| 1/1 | 1/1 | 8.39  | 8.5   |
| 1/1 | 1/1 | 5.34  | 5.46  |
| 1/1 | 1/1 | 8.75  | 8.87  |
| 0/1 | 1/1 | 8.03  | 8.16  |
| 1/1 | 1/1 | 9.96  | 10.09 |
| 1/1 | 1/1 | 8     | 8.13  |
| 1/1 | 1/1 | 9.07  | 9.2   |
| 1/1 | 1/1 | 7.24  | 7.38  |
| 1/1 | 0/1 | 5.2   | 2.5   |
| 1/1 | 0/1 | 5.19  | 2.93  |
| 1/1 | 0/1 | 6.14  | 3.95  |
| 1/1 | 1/1 | 6.72  | 4.84  |
| 1/1 | 1/1 | 4.87  | 3.02  |

|     |     |       |       |
|-----|-----|-------|-------|
| 1/1 | 1/1 | 6.55  | 6.82  |
| 0/1 | 1/1 | 5.96  | 6.41  |
| 0/1 | 1/1 | 3.57  | 4.11  |
| 1/1 | 1/1 | 6.65  | 7.3   |
| 1/1 | 1/1 | 6.83  | 7.49  |
| 0/1 | 1/1 | 2.84  | 4.99  |
| 1/1 | 1/1 | 4.05  | 3.1   |
| 1/1 | 1/1 | 3.44  | 5.48  |
| 1/1 | 0/1 | 4.22  | 2.82  |
| 1/1 | 0/1 | 4.46  | 3.4   |
| 1/1 | 1/1 | 6.74  | 6.2   |
| 0/1 | 1/1 | 2.78  | 4.86  |
| 1/1 | 1/1 | 5.93  | 5.14  |
| 1/1 | 1/1 | 8.29  | 8.14  |
| 0/1 | 1/1 | 3.2   | 3.29  |
| 0/1 | 1/1 | 1.98  | 4.71  |
| 1/1 | 0/1 | 9.49  | 8.51  |
| 1/1 | 1/1 | 9.65  | 8.7   |
| 1/1 | 1/1 | 7.39  | 6.62  |
| 1/1 | 1/1 | 7.23  | 6.51  |
| 1/1 | 1/1 | 7.82  | 7.38  |
| 1/1 | 1/1 | 8.72  | 8.4   |
| 1/1 | 1/1 | 6.12  | 5.86  |
| 1/1 | 1/1 | 7.3   | 7.07  |
| 1/1 | 1/1 | 6.46  | 6.25  |
| 1/1 | 1/1 | 7.11  | 6.99  |
| 1/1 | 1/1 | 10.9  | 10.82 |
| 1/1 | 1/1 | 7.67  | 6.94  |
| 1/1 | 1/1 | 9.37  | 8.82  |
| 1/1 | 1/1 | 4.06  | 3.78  |
| 1/1 | 1/1 | 6.35  | 6.53  |
| 0/1 | 1/1 | 5.59  | 7.86  |
| 0/1 | 1/1 | 5.55  | 7.85  |
| 1/1 | 1/1 | 6.32  | 4.85  |
| 1/1 | 1/1 | 6.32  | 5.22  |
| 1/1 | 1/1 | 3.32  | 4.84  |
| 1/1 | 1/1 | 4.89  | 6.59  |
| 0/1 | 1/1 | 2.07  | 4.12  |
| 1/1 | 1/1 | 8.92  | 6.91  |
| 1/1 | 1/1 | 8     | 6.42  |
| 1/1 | 1/1 | 8.14  | 7.02  |
| 1/1 | 1/1 | 7.41  | 6.95  |
| 1/1 | 1/1 | 4.39  | 7.49  |
| 1/1 | 1/1 | 5.8   | 4.58  |
| 1/1 | 1/1 | 8.49  | 8.17  |
| 1/1 | 1/1 | 3.59  | 5.64  |
| 1/1 | 1/1 | 10.49 | 8.39  |
| 0/1 | 1/1 | 2.42  | 3.34  |
| 0/1 | 1/1 | 7.68  | 8.85  |
| 1/1 | 0/1 | 6.97  | 5.28  |
| 1/1 | 1/1 | 5.11  | 6.44  |
| 1/1 | 1/1 | 3.66  | 5.56  |
| 1/1 | 1/1 | 6.12  | 3.55  |
| 1/1 | 1/1 | 6.28  | 4.25  |
| 1/1 | 0/1 | 3.83  | 2.05  |
| 1/1 | 1/1 | 7.09  | 7.47  |
| 1/1 | 1/1 | 3.45  | 3.84  |
| 1/1 | 0/1 | 6.83  | 4.98  |

|     |     |      |      |
|-----|-----|------|------|
| 1/1 | 1/1 | 6.52 | 7.69 |
| 1/1 | 0/1 | 6.29 | 4.82 |
| 1/1 | 0/1 | 5.04 | 4.18 |
| 1/1 | 1/1 | 7.87 | 7.07 |
| 1/1 | 1/1 | 3.58 | 2.94 |
| 1/1 | 0/1 | 6.29 | 4.82 |
| 1/1 | 0/1 | 5.04 | 4.18 |
| 1/1 | 1/1 | 7.87 | 7.07 |
| 1/1 | 1/1 | 3.58 | 2.94 |
| 1/1 | 0/1 | 3.51 | 2.17 |
| 1/1 | 1/1 | 4.56 | 3.3  |
| 1/1 | 0/1 | 3.3  | 2.75 |
| 1/1 | 1/1 | 6.38 | 5.87 |
| 1/1 | 1/1 | 4.57 | 4.14 |
| 1/1 | 1/1 | 4.39 | 3.78 |
| 1/1 | 1/1 | 3.04 | 2.73 |
| 1/1 | 1/1 | 8.15 | 8.08 |
| 0/1 | 1/1 | 6.92 | 7.03 |
| 0/1 | 1/1 | 5.29 | 5.43 |
| 1/1 | 1/1 | 4.94 | 4.36 |
| 1/1 | 1/1 | 5.66 | 5.31 |
| 1/1 | 1/1 | 3.24 | 2.93 |
| 1/1 | 1/1 | 2.84 | 2.58 |
| 1/1 | 1/1 | 6.78 | 6.6  |
| 1/1 | 1/1 | 6.15 | 6.01 |
| 1/1 | 1/1 | 5.16 | 5.04 |
| 1/1 | 1/1 | 5.11 | 5.08 |
| 0/1 | 1/1 | 5.29 | 5.26 |
| 1/1 | 1/1 | 6.75 | 6.75 |
| 1/1 | 1/1 | 3.97 | 3.98 |
| 0/1 | 1/1 | 2.41 | 2.41 |
| 1/1 | 1/1 | 4.14 | 4.22 |
| 0/1 | 1/1 | 2.7  | 2.83 |
| 0/1 | 1/1 | 3.59 | 3.86 |
| 0/1 | 1/1 | 2.13 | 4.85 |
| 1/1 | 1/1 | 7.1  | 5.92 |
| 1/1 | 0/1 | 4.2  | 3.16 |
| 1/1 | 1/1 | 5.68 | 4.69 |
| 1/1 | 1/1 | 6.83 | 6.2  |
| 1/1 | 1/1 | 9.84 | 9.34 |
| 0/1 | 1/1 | 4.09 | 3.7  |
| 1/1 | 1/1 | 7.95 | 7.67 |
| 1/1 | 1/1 | 4.43 | 4.15 |
| 1/1 | 1/1 | 3.62 | 5.95 |
| 1/1 | 0/1 | 6    | 4.71 |
| 1/1 | 0/1 | 5.02 | 3.86 |
| 1/1 | 1/1 | 8.93 | 8.14 |
| 1/1 | 1/1 | 5.8  | 3.53 |
| 1/1 | 1/1 | 5.96 | 4.51 |
| 1/1 | 1/1 | 8.03 | 8.07 |
| 0/1 | 1/1 | 6.54 | 6.69 |
| 1/1 | 1/1 | 5.98 | 6.33 |
| 1/1 | 1/1 | 4.84 | 5.38 |
| 1/1 | 1/1 | 5.43 | 6.16 |
| 1/1 | 1/1 | 5.84 | 4.1  |
| 1/1 | 1/1 | 4.4  | 6.15 |
| 1/1 | 1/1 | 4.99 | 4.42 |
| 1/1 | 1/1 | 6.33 | 6.32 |

|     |     |       |       |
|-----|-----|-------|-------|
| 1/1 | 1/1 | 6.6   | 6.7   |
| 1/1 | 1/1 | 7.92  | 5.56  |
| 1/1 | 1/1 | 8.28  | 6.26  |
| 1/1 | 1/1 | 10.02 | 8.01  |
| 1/1 | 1/1 | 8.77  | 6.82  |
| 1/1 | 1/1 | 8.78  | 7.17  |
| 1/1 | 1/1 | 6.57  | 7.19  |
| 1/1 | 1/1 | 7.69  | 8.61  |
| 0/1 | 1/1 | 4.36  | 5.33  |
| 0/1 | 1/1 | 7.33  | 8.5   |
| 0/1 | 1/1 | 2.87  | 4.62  |
| 1/1 | 1/1 | 8.39  | 7.48  |
| 1/1 | 0/1 | 5.17  | 4.49  |
| 1/1 | 1/1 | 6.34  | 5.9   |
| 1/1 | 1/1 | 9.02  | 8.75  |
| 1/1 | 1/1 | 11.58 | 11.32 |
| 1/1 | 1/1 | 2.89  | 4.89  |
| 1/1 | 0/1 | 5     | 3.54  |
| 1/1 | 1/1 | 3.93  | 5.74  |
| 0/1 | 1/1 | 3.29  | 5.44  |
| 1/1 | 0/1 | 4.68  | 3.1   |
| 1/1 | 1/1 | 9.89  | 8.7   |
| 1/1 | 1/1 | 7.6   | 6.73  |
| 1/1 | 1/1 | 6.94  | 6.22  |
| 1/1 | 1/1 | 4.84  | 6.2   |
| 1/1 | 1/1 | 6.5   | 7.93  |
| 0/1 | 1/1 | 3.74  | 6.19  |
| 1/1 | 1/1 | 9.76  | 9.06  |
| 1/1 | 1/1 | 8.41  | 7.88  |
| 1/1 | 1/1 | 10.58 | 10.27 |
| 1/1 | 1/1 | 5.41  | 5.25  |
| 1/1 | 1/1 | 7.79  | 7.84  |
| 1/1 | 1/1 | 6.2   | 6.35  |
| 1/1 | 0/1 | 8.06  | 6.48  |
| 0/1 | 1/1 | 2.79  | 4.55  |
| 1/1 | 1/1 | 8.93  | 7.85  |
| 1/1 | 1/1 | 8.57  | 7.73  |
| 1/1 | 1/1 | 7.67  | 6.92  |
| 1/1 | 1/1 | 7.66  | 6.97  |
| 1/1 | 1/1 | 7.56  | 7.01  |
| 1/1 | 1/1 | 7.8   | 7.27  |
| 1/1 | 0/1 | 7.05  | 6.55  |
| 1/1 | 1/1 | 6.92  | 6.45  |
| 1/1 | 1/1 | 8.8   | 8.39  |
| 1/1 | 1/1 | 7.77  | 7.38  |
| 1/1 | 1/1 | 7.71  | 7.33  |
| 1/1 | 1/1 | 2.73  | 2.36  |
| 1/1 | 1/1 | 8.07  | 7.75  |
| 1/1 | 1/1 | 5.99  | 5.69  |
| 1/1 | 1/1 | 7.07  | 6.81  |
| 1/1 | 1/1 | 8.35  | 8.09  |
| 1/1 | 1/1 | 7.42  | 7.19  |
| 1/1 | 0/1 | 4.28  | 2.61  |
| 1/1 | 1/1 | 5.9   | 4.93  |
| 1/1 | 0/1 | 4.61  | 3.45  |
| 1/1 | 1/1 | 4.88  | 4.2   |
| 1/1 | 0/1 | 4.59  | 3.68  |
| 1/1 | 1/1 | 8.48  | 7.74  |

|     |     |       |       |
|-----|-----|-------|-------|
| 1/1 | 1/1 | 11.47 | 10.95 |
| 1/1 | 0/1 | 8.13  | 7.67  |
| 1/1 | 1/1 | 5.54  | 5.1   |
| 1/1 | 1/1 | 8.49  | 8.06  |
| 1/1 | 1/1 | 9.67  | 9.4   |
| 1/1 | 1/1 | 6.1   | 5.86  |
| 0/1 | 1/1 | 6.41  | 6.2   |
| 1/1 | 1/1 | 7.44  | 7.3   |
| 1/1 | 1/1 | 7.65  | 7.54  |
| 0/1 | 1/1 | 4.97  | 4.88  |
| 1/1 | 1/1 | 8.4   | 8.32  |
| 1/1 | 1/1 | 8.2   | 8.12  |
| 1/1 | 1/1 | 5.36  | 7.37  |
| 0/1 | 1/1 | 4.15  | 6.31  |
| 1/1 | 1/1 | 4.62  | 2.93  |
| 1/1 | 1/1 | 5.19  | 4.07  |
| 1/1 | 1/1 | 6.37  | 5.12  |
| 1/1 | 1/1 | 6.73  | 6.33  |
| 0/1 | 1/1 | 5.75  | 7.42  |
| 0/1 | 1/1 | 4.19  | 6.57  |
| 1/1 | 0/1 | 3.84  | 2.57  |
| 1/1 | 1/1 | 5.49  | 4.98  |
| 1/1 | 1/1 | 5.89  | 5.41  |
| 1/1 | 1/1 | 3.54  | 6.12  |
| 0/1 | 1/1 | 2.56  | 5.26  |
| 0/1 | 1/1 | 3.03  | 6.07  |
| 1/1 | 1/1 | 9.76  | 8.53  |
| 1/1 | 1/1 | 6.69  | 5.87  |
| 1/1 | 1/1 | 5.87  | 5.47  |
| 1/1 | 1/1 | 4.93  | 3.31  |
| 1/1 | 0/1 | 4.37  | 2.96  |
| 1/1 | 1/1 | 4.85  | 3.81  |
| 1/1 | 1/1 | 5.57  | 4.59  |
| 1/1 | 1/1 | 3.98  | 3.07  |
| 1/1 | 0/1 | 2.81  | 2.03  |
| 1/1 | 1/1 | 5.46  | 6.76  |
| 1/1 | 1/1 | 3.57  | 4.88  |
| 1/1 | 1/1 | 3.75  | 5.17  |
| 0/1 | 1/1 | 2.03  | 3.82  |
| 0/1 | 1/1 | 2.18  | 4.01  |
| 1/1 | 1/1 | 4.32  | 2.98  |
| 1/1 | 1/1 | 3.73  | 3.02  |
| 1/1 | 1/1 | 6.12  | 5.58  |
| 0/1 | 1/1 | 3.85  | 5.49  |
| 1/1 | 1/1 | 4.84  | 3.28  |
| 1/1 | 1/1 | 3.23  | 4.97  |
| 0/1 | 1/1 | 3.12  | 5.03  |
| 1/1 | 0/1 | 4.06  | 2.55  |
| 1/1 | 1/1 | 7.25  | 6.27  |
| 1/1 | 1/1 | 9.3   | 8.36  |
| 1/1 | 1/1 | 5.4   | 3.29  |
| 1/1 | 1/1 | 6.01  | 4.52  |
| 1/1 | 1/1 | 4.64  | 3.26  |
| 1/1 | 0/1 | 5.8   | 4.43  |
| 1/1 | 0/1 | 4.45  | 3.16  |
| 0/1 | 1/1 | 1.91  | 3.8   |
| 1/1 | 1/1 | 5.84  | 4.18  |
| 1/1 | 1/1 | 5.87  | 5.02  |

|     |     |       |      |
|-----|-----|-------|------|
| 1/1 | 1/1 | 5.85  | 3.65 |
| 1/1 | 1/1 | 5.42  | 3.9  |
| 1/1 | 1/1 | 7.01  | 5.61 |
| 1/1 | 1/1 | 8.47  | 9.22 |
| 1/1 | 1/1 | 6.01  | 6.86 |
| 1/1 | 1/1 | 5.99  | 4.55 |
| 1/1 | 1/1 | 3.18  | 2.48 |
| 1/1 | 1/1 | 5.46  | 6.9  |
| 1/1 | 1/1 | 5.2   | 6.65 |
| 1/1 | 1/1 | 6.59  | 8.11 |
| 1/1 | 1/1 | 5.39  | 7.03 |
| 1/1 | 0/1 | 5.23  | 2.81 |
| 1/1 | 1/1 | 5.59  | 3.92 |
| 1/1 | 1/1 | 3.47  | 1.93 |
| 0/1 | 1/1 | 4.06  | 4.59 |
| 1/1 | 1/1 | 6.77  | 4.71 |
| 1/1 | 0/1 | 6.02  | 4.57 |
| 1/1 | 0/1 | 4.5   | 3.29 |
| 1/1 | 1/1 | 9.39  | 3.73 |
| 1/1 | 1/1 | 9.99  | 4.54 |
| 1/1 | 1/1 | 11.22 | 6.35 |
| 1/1 | 1/1 | 8.92  | 6.71 |
| 1/1 | 1/1 | 3.12  | 2.07 |
| 1/1 | 1/1 | 7.88  | 7.33 |
| 1/1 | 1/1 | 5.29  | 3.94 |
| 1/1 | 0/1 | 4.05  | 3.23 |
| 1/1 | 0/1 | 5.4   | 2.94 |
| 1/1 | 1/1 | 6.06  | 4.32 |
| 1/1 | 1/1 | 6.2   | 5.37 |
| 1/1 | 1/1 | 4.72  | 4.21 |
| 1/1 | 1/1 | 4.41  | 3.98 |
| 1/1 | 1/1 | 6.95  | 6.84 |
| 1/1 | 1/1 | 3.98  | 4.03 |
| 1/1 | 1/1 | 5.13  | 5.18 |
| 1/1 | 1/1 | 4.19  | 6.47 |
| 1/1 | 1/1 | 7.41  | 5.86 |
| 1/1 | 1/1 | 10.59 | 9.41 |
| 1/1 | 0/1 | 7.44  | 6.2  |
| 1/1 | 1/1 | 9.82  | 9.27 |
| 1/1 | 1/1 | 9.15  | 8.79 |
| 1/1 | 0/1 | 5.29  | 3.43 |
| 1/1 | 1/1 | 5.86  | 4.01 |
| 1/1 | 1/1 | 4.66  | 5.7  |
| 1/1 | 1/1 | 5.61  | 6.69 |
| 1/1 | 1/1 | 8.15  | 5.74 |
| 1/1 | 1/1 | 8.86  | 6.81 |
| 1/1 | 1/1 | 2.34  | 2.88 |
| 1/1 | 1/1 | 3.85  | 5.06 |
| 1/1 | 1/1 | 6.63  | 4.91 |
| 1/1 | 0/1 | 4.2   | 2.77 |
| 1/1 | 0/1 | 4.12  | 2.73 |
| 1/1 | 1/1 | 5.08  | 3.9  |
| 1/1 | 0/1 | 3.44  | 2.39 |
| 1/1 | 1/1 | 5.91  | 4.9  |
| 1/1 | 1/1 | 4.28  | 3.33 |
| 1/1 | 1/1 | 6.18  | 5.23 |
| 1/1 | 1/1 | 8.9   | 7.98 |
| 0/1 | 1/1 | 2.58  | 4.9  |

|     |     |       |       |
|-----|-----|-------|-------|
| 1/1 | 0/1 | 9.22  | 4.15  |
| 1/1 | 0/1 | 6.5   | 2.24  |
| 1/1 | 1/1 | 8.05  | 5.88  |
| 1/1 | 0/1 | 3.63  | 1.84  |
| 1/1 | 1/1 | 9.45  | 7.87  |
| 1/1 | 1/1 | 6.15  | 5.11  |
| 1/1 | 1/1 | 6.22  | 6.13  |
| 1/1 | 1/1 | 10.72 | 10.85 |
| 1/1 | 1/1 | 5.09  | 5.64  |
| 1/1 | 1/1 | 6.55  | 4.15  |
| 1/1 | 1/1 | 5.69  | 3.71  |
| 1/1 | 1/1 | 7.24  | 5.28  |
| 1/1 | 1/1 | 6.67  | 4.77  |
| 1/1 | 0/1 | 5.79  | 4.24  |
| 1/1 | 1/1 | 4.58  | 5.09  |
| 1/1 | 1/1 | 3.22  | 3.72  |
| 1/1 | 1/1 | 5.16  | 5.66  |
| 0/1 | 1/1 | 3.36  | 3.96  |
| 1/1 | 1/1 | 3.93  | 4.53  |
| 1/1 | 1/1 | 3.58  | 4.31  |
| 1/1 | 1/1 | 3.56  | 4.34  |
| 0/1 | 1/1 | 4.7   | 5.53  |
| 0/1 | 1/1 | 2.64  | 3.58  |
| 0/1 | 1/1 | 3.58  | 4.6   |
| 0/1 | 1/1 | 4.32  | 5.64  |
| 1/1 | 1/1 | 4.8   | 4.33  |
| 1/1 | 1/1 | 12.79 | 12.57 |
| 1/1 | 1/1 | 9.69  | 9.62  |
| 0/1 | 1/1 | 2.72  | 2.76  |
| 0/1 | 1/1 | 2.24  | 2.29  |
| 1/1 | 1/1 | 10.78 | 10.96 |
| 1/1 | 1/1 | 5.93  | 6.27  |
| 1/1 | 1/1 | 8.14  | 8.48  |
| 1/1 | 1/1 | 4.34  | 4.72  |
| 1/1 | 1/1 | 4.44  | 6.93  |
| 1/1 | 1/1 | 5.07  | 7.62  |
| 0/1 | 1/1 | 2.54  | 5.19  |
| 1/1 | 1/1 | 3.95  | 6.69  |
| 1/1 | 1/1 | 7.22  | 4.51  |
| 1/1 | 1/1 | 7.49  | 5.29  |
| 1/1 | 1/1 | 7.35  | 5.17  |
| 1/1 | 1/1 | 8.2   | 8.4   |
| 1/1 | 1/1 | 5.27  | 5.47  |
| 1/1 | 1/1 | 7.04  | 7.31  |
| 1/1 | 1/1 | 7.39  | 7.65  |
| 1/1 | 1/1 | 6.77  | 7.09  |
| 1/1 | 1/1 | 7.24  | 7.57  |
| 0/1 | 1/1 | 4.63  | 4.98  |
| 1/1 | 1/1 | 7.47  | 7.83  |
| 0/1 | 1/1 | 3.83  | 4.3   |
| 1/1 | 1/1 | 5.81  | 4.27  |
| 1/1 | 1/1 | 5.02  | 4.19  |
| 1/1 | 1/1 | 6.79  | 6.12  |
| 1/1 | 1/1 | 5.23  | 4.2   |
| 1/1 | 1/1 | 3.64  | 2.97  |
| 1/1 | 1/1 | 3.99  | 3.52  |
| 1/1 | 1/1 | 4.37  | 4.13  |
| 1/1 | 1/1 | 5.84  | 5.69  |

|     |     |       |      |
|-----|-----|-------|------|
| 1/1 | 0/1 | 4.89  | 3.66 |
| 1/1 | 1/1 | 4.39  | 3.17 |
| 1/1 | 1/1 | 4.22  | 3.45 |
| 1/1 | 1/1 | 5.5   | 4.99 |
| 1/1 | 1/1 | 6.42  | 6.01 |
| 0/1 | 1/1 | 3.29  | 5.21 |
| 1/1 | 1/1 | 6.09  | 5.18 |
| 1/1 | 1/1 | 3.78  | 3.64 |
| 1/1 | 1/1 | 11.32 | 9.71 |
| 0/1 | 1/1 | 3.63  | 5.27 |
| 0/1 | 1/1 | 4.01  | 5.85 |
| 1/1 | 1/1 | 6.59  | 5.06 |
| 1/1 | 1/1 | 4.93  | 6.37 |
| 1/1 | 1/1 | 2.55  | 4.28 |
| 1/1 | 1/1 | 5.1   | 3.01 |
| 1/1 | 1/1 | 4.1   | 4.88 |
| 1/1 | 1/1 | 6.8   | 5    |
| 1/1 | 1/1 | 5.78  | 4.12 |
| 1/1 | 0/1 | 5.44  | 4.19 |
| 1/1 | 1/1 | 7.71  | 6.57 |
| 1/1 | 1/1 | 6.94  | 5.86 |
| 0/1 | 1/1 | 3.25  | 4.77 |
| 1/1 | 1/1 | 6.57  | 4.37 |
| 1/1 | 1/1 | 6.11  | 6.82 |
| 1/1 | 1/1 | 5.4   | 6.25 |
| 1/1 | 1/1 | 4.92  | 6.07 |
| 1/1 | 1/1 | 3.43  | 4.91 |
| 1/1 | 1/1 | 7.95  | 7.33 |
| 1/1 | 1/1 | 6.22  | 5.62 |
| 1/1 | 1/1 | 5.5   | 5.09 |
| 1/1 | 1/1 | 7.58  | 7.23 |
| 1/1 | 1/1 | 6.3   | 6.08 |
| 0/1 | 1/1 | 6.23  | 6.13 |
| 1/1 | 1/1 | 6.78  | 6.7  |
| 1/1 | 1/1 | 2.65  | 2.59 |
| 1/1 | 1/1 | 5.6   | 5.55 |
| 1/1 | 1/1 | 9.02  | 9.04 |
| 0/1 | 1/1 | 5.02  | 5.07 |
| 1/1 | 1/1 | 10.83 | 10.9 |
| 0/1 | 1/1 | 5.66  | 5.86 |
| 1/1 | 1/1 | 5.48  | 5.68 |
| 1/1 | 1/1 | 7.1   | 7.33 |
| 0/1 | 1/1 | 3.84  | 6.09 |
| 1/1 | 1/1 | 5.22  | 7.63 |
| 0/1 | 1/1 | 3.85  | 6.52 |
| 0/1 | 1/1 | 2.43  | 5.23 |
| 0/1 | 1/1 | 3.48  | 6.36 |
| 0/1 | 1/1 | 4.7   | 7.59 |
| 1/1 | 1/1 | 4.88  | 7.84 |
| 0/1 | 1/1 | 4.37  | 7.37 |
| 0/1 | 1/1 | 3.57  | 6.87 |
| 0/1 | 1/1 | 4.4   | 7.74 |
| 0/1 | 1/1 | 2.96  | 6.62 |
| 0/1 | 1/1 | 4.23  | 8.89 |
| 0/1 | 1/1 | 1.81  | 6.61 |
| 1/1 | 1/1 | 5.12  | 4.29 |
| 1/1 | 1/1 | 5.33  | 5.19 |
| 1/1 | 1/1 | 6.54  | 6.49 |



|     |     |       |       |
|-----|-----|-------|-------|
| 1/1 | 1/1 | 7.67  | 7.63  |
| 0/1 | 1/1 | 6     | 8.32  |
| 1/1 | 1/1 | 5.44  | 7.79  |
| 1/1 | 1/1 | 4.55  | 7.8   |
| 1/1 | 0/1 | 6.97  | 5.47  |
| 1/1 | 0/1 | 6.34  | 5.38  |
| 1/1 | 1/1 | 7.11  | 6.17  |
| 1/1 | 1/1 | 7.68  | 6.97  |
| 1/1 | 1/1 | 6.06  | 5.35  |
| 1/1 | 1/1 | 7.08  | 8.46  |
| 1/1 | 1/1 | 6.7   | 8.08  |
| 1/1 | 1/1 | 6.86  | 8.27  |
| 0/1 | 1/1 | 5.77  | 7.39  |
| 1/1 | 1/1 | 6.45  | 8.1   |
| 1/1 | 0/1 | 4.43  | 3.25  |
| 1/1 | 1/1 | 6.27  | 5.94  |
| 1/1 | 1/1 | 6.76  | 5.27  |
| 1/1 | 0/1 | 3.15  | 2.26  |
| 1/1 | 1/1 | 4.25  | 3.52  |
| 1/1 | 1/1 | 6.76  | 6.04  |
| 1/1 | 1/1 | 4.22  | 5.63  |
| 1/1 | 1/1 | 3.39  | 5.48  |
| 1/1 | 1/1 | 6.15  | 4.76  |
| 1/1 | 1/1 | 6.61  | 5.33  |
| 1/1 | 1/1 | 11.84 | 10.98 |
| 1/1 | 1/1 | 4.95  | 4.12  |
| 1/1 | 0/1 | 4.22  | 3.4   |
| 1/1 | 1/1 | 4.96  | 4.19  |
| 1/1 | 0/1 | 3.35  | 2.62  |
| 1/1 | 1/1 | 6.12  | 5.53  |
| 1/1 | 1/1 | 3.14  | 2.59  |
| 1/1 | 0/1 | 4.96  | 2.69  |
| 1/1 | 1/1 | 5.98  | 6.74  |
| 0/1 | 1/1 | 5.87  | 7.58  |
| 1/1 | 1/1 | 6.61  | 4.64  |
| 1/1 | 1/1 | 3.74  | 4.67  |
| 1/1 | 1/1 | 4.14  | 5.28  |
| 0/1 | 1/1 | 2.64  | 4.11  |
| 1/1 | 0/1 | 9.49  | 2.92  |
| 1/1 | 1/1 | 9.99  | 3.45  |
| 1/1 | 0/1 | 8.76  | 2.28  |
| 1/1 | 1/1 | 10.15 | 3.77  |
| 1/1 | 0/1 | 8.94  | 2.57  |
| 1/1 | 0/1 | 10.11 | 3.78  |
| 1/1 | 1/1 | 9.54  | 3.27  |
| 1/1 | 1/1 | 10    | 3.77  |
| 1/1 | 1/1 | 10.19 | 3.99  |
| 1/1 | 0/1 | 9.04  | 2.88  |
| 1/1 | 1/1 | 9.62  | 3.48  |
| 1/1 | 0/1 | 8.84  | 2.72  |
| 1/1 | 0/1 | 8.64  | 2.6   |
| 1/1 | 0/1 | 7.85  | 1.83  |
| 1/1 | 0/1 | 8.29  | 2.29  |
| 1/1 | 0/1 | 8.51  | 2.51  |
| 1/1 | 0/1 | 8.37  | 2.39  |
| 1/1 | 0/1 | 9.02  | 3.05  |
| 1/1 | 1/1 | 9.9   | 4.03  |
| 1/1 | 1/1 | 11.43 | 5.56  |

|     |     |       |      |
|-----|-----|-------|------|
| 1/1 | 1/1 | 9.66  | 3.81 |
| 1/1 | 1/1 | 10.46 | 4.65 |
| 1/1 | 1/1 | 11.08 | 5.31 |
| 1/1 | 0/1 | 9.05  | 3.28 |
| 1/1 | 0/1 | 9.15  | 3.4  |
| 1/1 | 0/1 | 8.96  | 5.26 |
| 1/1 | 0/1 | 7.85  | 4.16 |
| 1/1 | 0/1 | 6.14  | 2.45 |
| 1/1 | 0/1 | 8.47  | 4.81 |
| 1/1 | 1/1 | 7.27  | 3.63 |
| 1/1 | 0/1 | 6.35  | 2.75 |
| 1/1 | 0/1 | 7.08  | 3.5  |
| 1/1 | 0/1 | 6.62  | 3.1  |
| 1/1 | 1/1 | 6.66  | 3.24 |
| 1/1 | 0/1 | 5.4   | 2.05 |
| 1/1 | 1/1 | 11.58 | 8.24 |
| 1/1 | 0/1 | 7.76  | 4.45 |
| 1/1 | 0/1 | 7.07  | 3.79 |
| 1/1 | 0/1 | 6.84  | 3.57 |
| 1/1 | 0/1 | 5.4   | 2.23 |
| 1/1 | 1/1 | 8.25  | 5.17 |
| 1/1 | 1/1 | 7.1   | 4.05 |
| 1/1 | 1/1 | 8.8   | 5.77 |
| 1/1 | 1/1 | 8.11  | 5.13 |
| 1/1 | 0/1 | 5.46  | 2.48 |
| 1/1 | 0/1 | 5.14  | 2.18 |
| 1/1 | 1/1 | 8.02  | 5.14 |
| 1/1 | 0/1 | 4.45  | 1.68 |
| 1/1 | 0/1 | 5.73  | 2.96 |
| 1/1 | 1/1 | 6.39  | 3.65 |
| 1/1 | 1/1 | 6.28  | 3.54 |
| 1/1 | 1/1 | 6.96  | 4.29 |
| 1/1 | 0/1 | 4.91  | 2.33 |
| 1/1 | 1/1 | 6.29  | 3.72 |
| 1/1 | 1/1 | 9.13  | 6.56 |
| 1/1 | 0/1 | 7.78  | 5.28 |
| 1/1 | 0/1 | 4.54  | 2.13 |
| 1/1 | 1/1 | 9.56  | 7.37 |
| 1/1 | 1/1 | 8.56  | 6.4  |
| 1/1 | 1/1 | 7.95  | 5.83 |
| 1/1 | 1/1 | 5.03  | 3.01 |
| 1/1 | 0/1 | 4.03  | 2.03 |
| 1/1 | 1/1 | 9.44  | 7.76 |
| 1/1 | 0/1 | 3.34  | 1.72 |
| 1/1 | 1/1 | 8.34  | 6.73 |
| 1/1 | 1/1 | 7.96  | 6.6  |
| 1/1 | 1/1 | 7.16  | 5.86 |
| 1/1 | 0/1 | 3.89  | 2.63 |
| 1/1 | 0/1 | 4.54  | 3.58 |
| 1/1 | 1/1 | 7.54  | 6.84 |
| 1/1 | 1/1 | 7.18  | 6.55 |
| 1/1 | 1/1 | 3.1   | 2.56 |
| 0/1 | 1/1 | 3.35  | 4.01 |
| 1/1 | 0/1 | 8.08  | 2.78 |
| 1/1 | 0/1 | 7.67  | 2.56 |
| 1/1 | 1/1 | 8.95  | 6.7  |
| 1/1 | 1/1 | 8.06  | 6.09 |
| 1/1 | 0/1 | 6.68  | 5    |

|     |     |       |      |
|-----|-----|-------|------|
| 1/1 | 0/1 | 3.55  | 2.18 |
| 1/1 | 1/1 | 8.52  | 7.72 |
| 1/1 | 1/1 | 5.41  | 4.77 |
| 1/1 | 0/1 | 3.19  | 2.67 |
| 1/1 | 1/1 | 6.15  | 5.65 |
| 1/1 | 1/1 | 3.48  | 3.3  |
| 1/1 | 1/1 | 4.03  | 4.1  |
| 1/1 | 1/1 | 3.85  | 4.18 |
| 1/1 | 0/1 | 4.64  | 3.44 |
| 1/1 | 0/1 | 2.87  | 2.28 |
| 1/1 | 1/1 | 5.56  | 4.97 |
| 1/1 | 1/1 | 6.78  | 6.2  |
| 1/1 | 0/1 | 3.2   | 2.68 |
| 1/1 | 1/1 | 5.77  | 5.26 |
| 1/1 | 1/1 | 11.18 | 10.7 |
| 1/1 | 1/1 | 7.06  | 6.72 |
| 1/1 | 1/1 | 9.33  | 8.28 |
| 1/1 | 1/1 | 6.56  | 5.73 |
| 0/1 | 1/1 | 5.13  | 4.76 |
| 0/1 | 1/1 | 5.42  | 5.12 |
| 1/1 | 1/1 | 4.5   | 4.23 |
| 1/1 | 1/1 | 7.17  | 6.93 |
| 1/1 | 1/1 | 5.36  | 5.14 |
| 0/1 | 1/1 | 2.65  | 2.43 |
| 1/1 | 1/1 | 5.47  | 4.14 |
| 1/1 | 1/1 | 7.45  | 6.76 |
| 1/1 | 1/1 | 6.79  | 6.18 |
| 1/1 | 1/1 | 8.63  | 8.02 |
| 1/1 | 1/1 | 7.15  | 4.42 |
| 1/1 | 1/1 | 7.3   | 4.82 |
| 1/1 | 1/1 | 6.71  | 4.77 |
| 0/1 | 1/1 | 2.78  | 3.04 |
| 1/1 | 1/1 | 4.04  | 4.52 |
| 1/1 | 1/1 | 6.86  | 7.39 |
| 1/1 | 1/1 | 5.74  | 6.55 |
| 1/1 | 1/1 | 8.51  | 8.71 |
| 1/1 | 1/1 | 8.98  | 9.34 |
| 1/1 | 1/1 | 5.55  | 8.82 |
| 1/1 | 1/1 | 7.14  | 6.36 |
| 1/1 | 1/1 | 4.52  | 3.91 |
| 1/1 | 1/1 | 5.14  | 4.63 |
| 0/1 | 1/1 | 4.94  | 4.44 |
| 1/1 | 1/1 | 7.42  | 7.37 |
| 1/1 | 1/1 | 3.45  | 3.45 |
| 1/1 | 1/1 | 5.98  | 8.07 |
| 1/1 | 1/1 | 3.02  | 5.35 |
| 1/1 | 1/1 | 9.54  | 7.85 |
| 1/1 | 1/1 | 8.92  | 7.95 |
| 1/1 | 1/1 | 7.23  | 4.02 |
| 1/1 | 0/1 | 5.98  | 3.26 |
| 1/1 | 0/1 | 5.18  | 2.49 |
| 1/1 | 1/1 | 6.83  | 4.24 |
| 1/1 | 1/1 | 7     | 4.48 |
| 1/1 | 1/1 | 5.77  | 3.26 |
| 1/1 | 0/1 | 5.38  | 2.88 |
| 1/1 | 1/1 | 6.75  | 4.38 |
| 1/1 | 1/1 | 7.62  | 7.31 |
| 1/1 | 1/1 | 7.07  | 6.77 |

|     |     |       |       |
|-----|-----|-------|-------|
| 1/1 | 1/1 | 3.29  | 3.09  |
| 1/1 | 1/1 | 7.58  | 7.5   |
| 0/1 | 1/1 | 5.41  | 5.51  |
| 1/1 | 1/1 | 3.15  | 3.31  |
| 0/1 | 1/1 | 2.23  | 2.74  |
| 1/1 | 1/1 | 6.43  | 5.7   |
| 1/1 | 0/1 | 2.48  | 1.95  |
| 1/1 | 1/1 | 5.48  | 5.09  |
| 0/1 | 1/1 | 3.19  | 2.91  |
| 1/1 | 1/1 | 8.05  | 7.79  |
| 1/1 | 1/1 | 7.29  | 7.19  |
| 1/1 | 1/1 | 8.31  | 8.22  |
| 1/1 | 1/1 | 3.46  | 3.46  |
| 1/1 | 1/1 | 7.26  | 7.38  |
| 0/1 | 1/1 | 4.22  | 4.34  |
| 1/1 | 0/1 | 3.2   | 2.44  |
| 1/1 | 0/1 | 2.64  | 2.17  |
| 1/1 | 1/1 | 4.69  | 4.51  |
| 1/1 | 1/1 | 7.6   | 7.58  |
| 1/1 | 1/1 | 6.91  | 6.91  |
| 1/1 | 1/1 | 3.95  | 6.25  |
| 1/1 | 0/1 | 5.01  | 3.47  |
| 1/1 | 1/1 | 5.84  | 4.67  |
| 1/1 | 1/1 | 4.55  | 3.5   |
| 1/1 | 1/1 | 4.67  | 3.85  |
| 1/1 | 1/1 | 4.46  | 3.71  |
| 0/1 | 1/1 | 3.01  | 4.6   |
| 1/1 | 1/1 | 3.65  | 5.43  |
| 1/1 | 1/1 | 4.05  | 2.97  |
| 1/1 | 1/1 | 7.71  | 7.14  |
| 1/1 | 1/1 | 7.03  | 6.56  |
| 0/1 | 1/1 | 6.83  | 6.44  |
| 1/1 | 1/1 | 7.61  | 7.31  |
| 1/1 | 0/1 | 2.54  | 2.27  |
| 1/1 | 1/1 | 4.28  | 4.02  |
| 0/1 | 1/1 | 2.64  | 4.52  |
| 0/1 | 1/1 | 2.29  | 4.21  |
| 1/1 | 1/1 | 6.88  | 5.28  |
| 1/1 | 1/1 | 4.53  | 3.61  |
| 1/1 | 1/1 | 8     | 5.2   |
| 1/1 | 1/1 | 6.09  | 3.47  |
| 1/1 | 0/1 | 6.72  | 4.14  |
| 1/1 | 1/1 | 12.2  | 12.27 |
| 1/1 | 1/1 | 11.43 | 11.54 |
| 0/1 | 1/1 | 2.74  | 2.86  |
| 1/1 | 1/1 | 9.02  | 9.18  |
| 1/1 | 1/1 | 4.68  | 4.86  |
| 1/1 | 1/1 | 4.23  | 4.55  |
| 0/1 | 1/1 | 2.59  | 3.12  |
| 1/1 | 1/1 | 5.19  | 3.77  |
| 1/1 | 1/1 | 3.9   | 2.64  |
| 1/1 | 1/1 | 5.52  | 4.81  |
| 1/1 | 1/1 | 7.47  | 6.81  |
| 1/1 | 1/1 | 4.2   | 3.61  |
| 1/1 | 0/1 | 3.5   | 2.03  |
| 1/1 | 1/1 | 3.24  | 4.9   |
| 1/1 | 1/1 | 6.09  | 4.98  |
| 1/1 | 1/1 | 6.51  | 5.64  |

|     |     |       |       |
|-----|-----|-------|-------|
| 1/1 | 1/1 | 10.42 | 9.6   |
| 1/1 | 1/1 | 6.78  | 6.05  |
| 1/1 | 1/1 | 9.28  | 8.58  |
| 1/1 | 0/1 | 5.52  | 4.9   |
| 1/1 | 1/1 | 5.74  | 5.2   |
| 1/1 | 1/1 | 6.97  | 6.44  |
| 1/1 | 1/1 | 7.28  | 6.77  |
| 1/1 | 1/1 | 5.6   | 5.18  |
| 1/1 | 1/1 | 9     | 8.6   |
| 1/1 | 1/1 | 9.07  | 8.72  |
| 1/1 | 1/1 | 7.27  | 6.93  |
| 1/1 | 1/1 | 7.63  | 7.32  |
| 1/1 | 1/1 | 6.46  | 6.15  |
| 1/1 | 1/1 | 9.2   | 8.9   |
| 1/1 | 1/1 | 6.67  | 6.37  |
| 1/1 | 1/1 | 5.22  | 4.95  |
| 1/1 | 1/1 | 6.99  | 6.72  |
| 1/1 | 1/1 | 5.9   | 5.65  |
| 1/1 | 0/1 | 3.73  | 2.14  |
| 1/1 | 0/1 | 4.82  | 3.24  |
| 1/1 | 1/1 | 7.76  | 6.83  |
| 1/1 | 1/1 | 8.6   | 7.86  |
| 1/1 | 1/1 | 3.88  | 5.29  |
| 0/1 | 1/1 | 3.51  | 5.01  |
| 1/1 | 0/1 | 4.68  | 3.19  |
| 1/1 | 1/1 | 6.6   | 5.25  |
| 1/1 | 0/1 | 5.46  | 4.32  |
| 1/1 | 1/1 | 7.02  | 6.06  |
| 1/1 | 1/1 | 7.61  | 6.97  |
| 1/1 | 1/1 | 6.64  | 8.05  |
| 0/1 | 1/1 | 2.51  | 4.01  |
| 1/1 | 1/1 | 3.6   | 5.7   |
| 1/1 | 1/1 | 4.37  | 6.64  |
| 1/1 | 1/1 | 3.16  | 5.73  |
| 1/1 | 1/1 | 9.65  | 8.1   |
| 1/1 | 1/1 | 10.54 | 9.56  |
| 1/1 | 1/1 | 8.72  | 7.81  |
| 1/1 | 1/1 | 7.75  | 6.99  |
| 1/1 | 1/1 | 5.46  | 4.2   |
| 1/1 | 0/1 | 3.43  | 2.44  |
| 1/1 | 0/1 | 7.5   | 5.05  |
| 1/1 | 1/1 | 8.56  | 6.55  |
| 1/1 | 1/1 | 5.85  | 6.36  |
| 1/1 | 1/1 | 6.64  | 7.47  |
| 1/1 | 1/1 | 9.09  | 7.18  |
| 1/1 | 1/1 | 7.3   | 5.84  |
| 1/1 | 1/1 | 8.69  | 7.62  |
| 1/1 | 1/1 | 5.19  | 4.19  |
| 1/1 | 1/1 | 8.41  | 7.76  |
| 1/1 | 1/1 | 7.43  | 7.19  |
| 1/1 | 1/1 | 9.77  | 11.96 |
| 1/1 | 1/1 | 6.89  | 5.49  |
| 1/1 | 0/1 | 5.96  | 5.11  |
| 1/1 | 0/1 | 5.03  | 4.35  |
| 1/1 | 1/1 | 4.86  | 3.82  |
| 1/1 | 1/1 | 6.47  | 6.06  |
| 1/1 | 1/1 | 3.93  | 3.62  |
| 1/1 | 1/1 | 6.3   | 4.09  |

|     |     |       |       |
|-----|-----|-------|-------|
| 1/1 | 0/1 | 5.86  | 4.1   |
| 0/1 | 1/1 | 3.54  | 4.59  |
| 1/1 | 1/1 | 3.51  | 3.11  |
| 1/1 | 1/1 | 4.06  | 3.69  |
| 1/1 | 1/1 | 7.08  | 6.96  |
| 0/1 | 1/1 | 3.39  | 3.37  |
| 1/1 | 1/1 | 5.45  | 5.47  |
| 1/1 | 1/1 | 3.33  | 3.39  |
| 0/1 | 1/1 | 3.56  | 3.61  |
| 0/1 | 1/1 | 3.35  | 3.4   |
| 1/1 | 1/1 | 3.77  | 3.83  |
| 1/1 | 1/1 | 8.01  | 8.07  |
| 0/1 | 1/1 | 5.24  | 5.34  |
| 1/1 | 1/1 | 4.87  | 5.02  |
| 1/1 | 1/1 | 5.38  | 5.56  |
| 0/1 | 1/1 | 2.17  | 2.36  |
| 1/1 | 1/1 | 11.54 | 11.75 |
| 1/1 | 1/1 | 8.23  | 8.45  |
| 1/1 | 1/1 | 4.66  | 5.01  |
| 0/1 | 1/1 | 4.27  | 4.65  |
| 1/1 | 1/1 | 6.31  | 6.71  |
| 1/1 | 1/1 | 7.57  | 8.01  |
| 0/1 | 1/1 | 3.23  | 3.67  |
| 1/1 | 1/1 | 4     | 6.5   |
| 0/1 | 1/1 | 3.33  | 6.03  |
| 1/1 | 1/1 | 3.22  | 6     |
| 0/1 | 1/1 | 2.14  | 7.14  |
| 1/1 | 0/1 | 5.85  | 3.79  |
| 1/1 | 1/1 | 4.73  | 5.6   |
| 1/1 | 1/1 | 8.19  | 4.14  |
| 1/1 | 1/1 | 7.49  | 3.85  |
| 1/1 | 1/1 | 9.27  | 5.82  |
| 1/1 | 1/1 | 8.75  | 7.86  |
| 1/1 | 1/1 | 4.74  | 3.9   |
| 1/1 | 1/1 | 9.05  | 8.21  |
| 1/1 | 1/1 | 4.69  | 4.18  |
| 1/1 | 1/1 | 6.59  | 6.28  |
| 1/1 | 1/1 | 5.15  | 5.01  |
| 1/1 | 1/1 | 9.93  | 10.07 |
| 1/1 | 1/1 | 12.52 | 12.26 |
| 1/1 | 1/1 | 4.91  | 4.73  |
| 0/1 | 1/1 | 3.11  | 3.54  |
| 1/1 | 1/1 | 5.68  | 4.73  |
| 1/1 | 1/1 | 4.47  | 3.85  |
| 1/1 | 1/1 | 2.08  | 1.6   |
| 1/1 | 1/1 | 4.92  | 4.48  |
| 1/1 | 1/1 | 6.28  | 5.84  |
| 1/1 | 1/1 | 3.81  | 3.39  |
| 1/1 | 1/1 | 6.99  | 6.61  |
| 1/1 | 1/1 | 7.1   | 6.74  |
| 1/1 | 1/1 | 5.14  | 4.79  |
| 1/1 | 1/1 | 7.61  | 7.26  |
| 1/1 | 1/1 | 11.87 | 11.58 |
| 1/1 | 1/1 | 6.28  | 6.03  |
| 1/1 | 1/1 | 7.24  | 7.04  |
| 0/1 | 1/1 | 3.84  | 3.64  |
| 1/1 | 1/1 | 5.2   | 5.02  |
| 0/1 | 1/1 | 3.57  | 3.39  |

|     |     |      |      |
|-----|-----|------|------|
| 1/1 | 1/1 | 5.97 | 5.79 |
| 1/1 | 1/1 | 8.14 | 7.97 |
| 1/1 | 1/1 | 7.98 | 7.84 |
| 1/1 | 1/1 | 5.79 | 5.03 |
| 1/1 | 1/1 | 3.11 | 2.8  |
| 1/1 | 0/1 | 5.52 | 3.89 |
| 1/1 | 0/1 | 3.91 | 3.12 |
| 0/1 | 1/1 | 2.26 | 3.53 |
| 1/1 | 0/1 | 4.31 | 2.56 |
| 1/1 | 1/1 | 5.22 | 3.93 |
| 1/1 | 1/1 | 6.36 | 5.4  |
| 1/1 | 1/1 | 6.93 | 5.51 |
| 1/1 | 1/1 | 8.86 | 7.79 |
| 1/1 | 1/1 | 6.29 | 7.74 |
| 1/1 | 1/1 | 5.97 | 7.54 |
| 1/1 | 1/1 | 6.48 | 5.27 |
| 1/1 | 1/1 | 6.05 | 5.34 |
| 1/1 | 0/1 | 2.95 | 2.37 |
| 1/1 | 1/1 | 4.66 | 4.19 |
| 1/1 | 1/1 | 2.95 | 2.56 |
| 1/1 | 1/1 | 6.84 | 3.74 |
| 1/1 | 1/1 | 7.29 | 4.6  |
| 1/1 | 1/1 | 2.37 | 2.27 |
| 1/1 | 1/1 | 4.7  | 4.63 |
| 1/1 | 1/1 | 6.67 | 6.71 |
| 0/1 | 1/1 | 5.1  | 5.17 |
| 0/1 | 1/1 | 3.17 | 3.26 |
| 1/1 | 1/1 | 9.56 | 9.67 |
| 0/1 | 1/1 | 3.93 | 4.38 |
| 0/1 | 1/1 | 5.64 | 6.18 |
| 0/1 | 1/1 | 2.75 | 3.31 |
| 1/1 | 0/1 | 6.87 | 4.91 |
| 0/1 | 1/1 | 4.37 | 6.45 |
| 1/1 | 1/1 | 6.98 | 5.43 |
| 1/1 | 1/1 | 8.15 | 6.85 |
| 1/1 | 1/1 | 5.59 | 4.55 |
| 1/1 | 1/1 | 5.59 | 4.79 |
| 1/1 | 1/1 | 3.61 | 2.83 |
| 1/1 | 1/1 | 4.36 | 5.84 |
| 0/1 | 1/1 | 3.28 | 4.82 |
| 1/1 | 1/1 | 7.27 | 5.86 |
| 1/1 | 1/1 | 4.23 | 3.43 |
| 1/1 | 0/1 | 3    | 2.28 |
| 1/1 | 1/1 | 5.72 | 5.06 |
| 1/1 | 1/1 | 9.15 | 9.05 |
| 0/1 | 1/1 | 2.56 | 2.76 |
| 0/1 | 1/1 | 5.07 | 5.33 |
| 1/1 | 1/1 | 4.34 | 4.6  |
| 0/1 | 1/1 | 6.39 | 6.7  |
| 1/1 | 1/1 | 6.87 | 7.25 |
| 1/1 | 1/1 | 4.26 | 7.23 |
| 1/1 | 1/1 | 5.12 | 3.03 |
| 1/1 | 1/1 | 5.51 | 4.21 |
| 1/1 | 1/1 | 5.99 | 7.06 |
| 1/1 | 1/1 | 3.48 | 4.56 |
| 1/1 | 1/1 | 4.23 | 5.52 |
| 1/1 | 1/1 | 4.87 | 6.5  |
| 1/1 | 1/1 | 3.7  | 5.73 |

|     |     |       |       |
|-----|-----|-------|-------|
| 1/1 | 1/1 | 5.82  | 4.66  |
| 1/1 | 0/1 | 3.09  | 2.34  |
| 1/1 | 1/1 | 9.92  | 9.47  |
| 1/1 | 1/1 | 6.8   | 6.4   |
| 0/1 | 1/1 | 4.71  | 6.74  |
| 1/1 | 1/1 | 3.77  | 6.05  |
| 1/1 | 1/1 | 6.25  | 5.4   |
| 1/1 | 1/1 | 7.56  | 6.82  |
| 1/1 | 1/1 | 5.12  | 4.4   |
| 1/1 | 1/1 | 5.33  | 4.62  |
| 1/1 | 1/1 | 8.26  | 7.69  |
| 0/1 | 1/1 | 4.02  | 3.53  |
| 1/1 | 1/1 | 3.87  | 3.44  |
| 1/1 | 1/1 | 6.16  | 5.77  |
| 0/1 | 1/1 | 3.66  | 3.29  |
| 1/1 | 1/1 | 5.73  | 5.36  |
| 1/1 | 1/1 | 6.65  | 6.27  |
| 1/1 | 1/1 | 5.91  | 5.55  |
| 1/1 | 1/1 | 10.01 | 9.71  |
| 1/1 | 1/1 | 3.92  | 3.62  |
| 1/1 | 1/1 | 5.73  | 5.44  |
| 0/1 | 1/1 | 7.08  | 6.8   |
| 1/1 | 1/1 | 5.94  | 5.73  |
| 1/1 | 1/1 | 3.17  | 3.05  |
| 1/1 | 1/1 | 5     | 4.89  |
| 1/1 | 1/1 | 4.78  | 4.69  |
| 1/1 | 1/1 | 5.99  | 5.9   |
| 1/1 | 1/1 | 6.8   | 6.73  |
| 0/1 | 1/1 | 3.08  | 3.01  |
| 1/1 | 1/1 | 4.38  | 6.41  |
| 0/1 | 1/1 | 2.56  | 4.61  |
| 0/1 | 1/1 | 4.24  | 6.3   |
| 0/1 | 1/1 | 3.95  | 6.11  |
| 0/1 | 1/1 | 1.83  | 4.06  |
| 1/1 | 1/1 | 3.82  | 6.16  |
| 0/1 | 1/1 | 4.17  | 6.6   |
| 0/1 | 1/1 | 2.89  | 5.45  |
| 0/1 | 1/1 | 2.17  | 4.85  |
| 0/1 | 1/1 | 2.63  | 5.44  |
| 0/1 | 1/1 | 3.97  | 6.91  |
| 1/1 | 1/1 | 4.47  | 7.49  |
| 0/1 | 1/1 | 2.35  | 5.91  |
| 0/1 | 1/1 | 3.22  | 6.89  |
| 0/1 | 1/1 | 3.85  | 7.63  |
| 0/1 | 1/1 | 2.98  | 6.86  |
| 0/1 | 1/1 | 2.12  | 6.7   |
| 1/1 | 1/1 | 10.13 | 9.18  |
| 1/1 | 1/1 | 5.84  | 4.97  |
| 1/1 | 1/1 | 11.38 | 10.95 |
| 1/1 | 1/1 | 8.54  | 8.14  |
| 0/1 | 1/1 | 4.11  | 6.38  |
| 1/1 | 1/1 | 8.71  | 7.31  |
| 1/1 | 1/1 | 6.83  | 5.95  |
| 1/1 | 1/1 | 9.22  | 8.42  |
| 1/1 | 1/1 | 5.25  | 4.58  |
| 0/1 | 1/1 | 4.19  | 6.13  |
| 1/1 | 0/1 | 2.99  | 2.08  |
| 1/1 | 1/1 | 3.34  | 3.11  |



|     |     |       |       |
|-----|-----|-------|-------|
| 1/1 | 1/1 | 6.62  | 6.44  |
| 1/1 | 1/1 | 8.52  | 7.92  |
| 1/1 | 1/1 | 4.73  | 4.29  |
| 1/1 | 1/1 | 11.71 | 11.3  |
| 1/1 | 1/1 | 9.65  | 9.39  |
| 1/1 | 1/1 | 8.2   | 8.14  |
| 1/1 | 1/1 | 4.97  | 5.1   |
| 1/1 | 1/1 | 7.73  | 6.61  |
| 1/1 | 1/1 | 6.38  | 8.1   |
| 1/1 | 0/1 | 3.56  | 2.45  |
| 1/1 | 1/1 | 6.66  | 6.36  |
| 1/1 | 1/1 | 7.19  | 6.92  |
| 1/1 | 0/1 | 4.82  | 2.81  |
| 1/1 | 1/1 | 4.11  | 4.97  |
| 1/1 | 1/1 | 3.14  | 4.03  |
| 1/1 | 1/1 | 6.5   | 7.43  |
| 1/1 | 1/1 | 3.68  | 4.69  |
| 1/1 | 1/1 | 6.95  | 8.03  |
| 1/1 | 0/1 | 4.34  | 3.01  |
| 1/1 | 1/1 | 5.51  | 4.74  |
| 1/1 | 1/1 | 10.29 | 9.58  |
| 1/1 | 1/1 | 4.3   | 3.77  |
| 1/1 | 0/1 | 4.74  | 3.15  |
| 1/1 | 1/1 | 5.36  | 4.24  |
| 1/1 | 1/1 | 5.17  | 6.42  |
| 0/1 | 1/1 | 1.8   | 3.07  |
| 0/1 | 1/1 | 3.61  | 5.09  |
| 0/1 | 1/1 | 1.98  | 3.52  |
| 0/1 | 1/1 | 3.12  | 4.7   |
| 0/1 | 1/1 | 2.7   | 4.53  |
| 1/1 | 0/1 | 4.96  | 3.18  |
| 1/1 | 1/1 | 8.65  | 7.55  |
| 1/1 | 1/1 | 6.21  | 7.33  |
| 1/1 | 1/1 | 5.42  | 6.6   |
| 1/1 | 1/1 | 6.08  | 4.39  |
| 1/1 | 0/1 | 4.25  | 2.76  |
| 1/1 | 1/1 | 5.96  | 5.21  |
| 0/1 | 1/1 | 4.59  | 4.1   |
| 1/1 | 1/1 | 7.83  | 7.36  |
| 1/1 | 1/1 | 10.52 | 10.06 |
| 1/1 | 1/1 | 8.23  | 7.81  |
| 1/1 | 1/1 | 8.43  | 8.01  |
| 0/1 | 1/1 | 4.37  | 3.99  |
| 1/1 | 1/1 | 9.31  | 9.01  |
| 0/1 | 1/1 | 5.72  | 5.58  |
| 1/1 | 1/1 | 9.18  | 9.11  |
| 1/1 | 1/1 | 5.48  | 5.46  |
| 1/1 | 1/1 | 10.29 | 10.28 |
| 1/1 | 1/1 | 6.86  | 6.86  |
| 1/1 | 1/1 | 7.16  | 7.19  |
| 1/1 | 1/1 | 5.42  | 7.62  |
| 1/1 | 1/1 | 6.58  | 5.78  |
| 1/1 | 1/1 | 4.61  | 4.12  |
| 1/1 | 1/1 | 9     | 8.52  |
| 1/1 | 1/1 | 3.99  | 3.55  |
| 1/1 | 1/1 | 3.18  | 2.93  |
| 1/1 | 1/1 | 6.01  | 5.86  |
| 1/1 | 1/1 | 8.49  | 8.41  |

|     |     |      |      |
|-----|-----|------|------|
| 1/1 | 1/1 | 6.55 | 8.59 |
| 1/1 | 1/1 | 6.64 | 8.69 |
| 0/1 | 1/1 | 4.16 | 6.24 |
| 1/1 | 1/1 | 4.94 | 7.05 |
| 1/1 | 1/1 | 6.45 | 8.55 |
| 1/1 | 1/1 | 6.66 | 8.76 |
| 1/1 | 1/1 | 5.22 | 7.34 |
| 1/1 | 1/1 | 4.92 | 7.04 |
| 1/1 | 1/1 | 5.94 | 8.1  |
| 1/1 | 1/1 | 6.54 | 8.71 |
| 1/1 | 1/1 | 7.14 | 9.34 |
| 1/1 | 1/1 | 6.27 | 8.47 |
| 1/1 | 1/1 | 5.68 | 7.91 |
| 1/1 | 1/1 | 6.58 | 8.83 |
| 1/1 | 1/1 | 6.42 | 8.71 |
| 1/1 | 1/1 | 5.92 | 8.27 |
| 1/1 | 1/1 | 6.3  | 8.73 |
| 1/1 | 1/1 | 6.04 | 8.65 |
| 0/1 | 1/1 | 3.43 | 6.1  |
| 0/1 | 1/1 | 2.96 | 5.74 |
| 1/1 | 1/1 | 3.94 | 6.87 |
| 0/1 | 1/1 | 2.77 | 5.76 |
| 1/1 | 1/1 | 7    | 6.28 |
| 1/1 | 1/1 | 3.97 | 3.29 |
| 1/1 | 1/1 | 6.41 | 6.23 |
| 1/1 | 1/1 | 4.55 | 3.22 |
| 1/1 | 1/1 | 5.33 | 4.09 |
| 1/1 | 1/1 | 6.02 | 5.33 |
| 1/1 | 1/1 | 7.77 | 7.13 |
| 1/1 | 1/1 | 3.74 | 3.11 |
| 1/1 | 1/1 | 4.46 | 3.88 |
| 1/1 | 1/1 | 8.32 | 7.77 |
| 1/1 | 1/1 | 6.06 | 5.55 |
| 1/1 | 0/1 | 3.57 | 3.09 |
| 1/1 | 1/1 | 6.63 | 5.21 |
| 1/1 | 0/1 | 3.69 | 2.97 |
| 0/1 | 1/1 | 3.11 | 5.65 |
| 1/1 | 1/1 | 5.97 | 4.13 |
| 1/1 | 1/1 | 6.78 | 5.62 |
| 1/1 | 1/1 | 4.02 | 5.01 |
| 1/1 | 1/1 | 5.85 | 6.94 |
| 0/1 | 1/1 | 2.58 | 3.7  |
| 1/1 | 1/1 | 5.15 | 6.37 |
| 0/1 | 1/1 | 2.51 | 3.97 |
| 1/1 | 0/1 | 7.61 | 6    |
| 1/1 | 1/1 | 9.66 | 8.22 |
| 0/1 | 1/1 | 5.71 | 7.05 |
| 1/1 | 1/1 | 6.27 | 7.64 |
| 0/1 | 1/1 | 5.2  | 6.71 |
| 1/1 | 1/1 | 5.71 | 7.27 |
| 1/1 | 1/1 | 7.01 | 8.81 |
| 0/1 | 1/1 | 4.61 | 6.65 |
| 0/1 | 1/1 | 6.34 | 8.58 |
| 0/1 | 1/1 | 4.4  | 6.71 |
| 0/1 | 1/1 | 6.17 | 8.65 |
| 0/1 | 1/1 | 2.45 | 5.61 |
| 1/1 | 1/1 | 5.97 | 3.65 |
| 1/1 | 1/1 | 6    | 4.11 |

|     |     |       |       |
|-----|-----|-------|-------|
| 0/1 | 1/1 | 2.5   | 3.03  |
| 1/1 | 1/1 | 4.05  | 3.76  |
| 1/1 | 1/1 | 8.82  | 8.54  |
| 1/1 | 1/1 | 9.17  | 8.9   |
| 1/1 | 1/1 | 4.78  | 4.52  |
| 1/1 | 1/1 | 3.12  | 2.9   |
| 1/1 | 1/1 | 4.51  | 4.3   |
| 1/1 | 1/1 | 6.99  | 6.86  |
| 1/1 | 1/1 | 8.09  | 7.98  |
| 1/1 | 1/1 | 6.34  | 6.34  |
| 0/1 | 1/1 | 2.89  | 2.95  |
| 1/1 | 1/1 | 4.41  | 4.51  |
| 1/1 | 1/1 | 6.73  | 6.86  |
| 1/1 | 1/1 | 2.99  | 3.15  |
| 1/1 | 1/1 | 6.19  | 6.41  |
| 0/1 | 1/1 | 2.5   | 2.75  |
| 1/1 | 1/1 | 6.82  | 7.16  |
| 1/1 | 1/1 | 6.14  | 6.5   |
| 1/1 | 1/1 | 5.52  | 5.91  |
| 1/1 | 1/1 | 3.82  | 4.33  |
| 1/1 | 1/1 | 6.58  | 7.13  |
| 0/1 | 1/1 | 3.64  | 6.39  |
| 0/1 | 1/1 | 2.45  | 5.72  |
| 1/1 | 1/1 | 4.31  | 7.61  |
| 1/1 | 1/1 | 3.97  | 7.68  |
| 1/1 | 1/1 | 7.37  | 5.49  |
| 1/1 | 0/1 | 3.64  | 2.14  |
| 1/1 | 0/1 | 5.39  | 3.95  |
| 1/1 | 0/1 | 5.87  | 4.51  |
| 0/1 | 1/1 | 3.84  | 4.82  |
| 1/1 | 0/1 | 4.38  | 3.36  |
| 1/1 | 0/1 | 6.52  | 5.88  |
| 1/1 | 1/1 | 7.66  | 7.26  |
| 1/1 | 1/1 | 6.81  | 6.44  |
| 1/1 | 1/1 | 8.52  | 8.19  |
| 1/1 | 1/1 | 11.11 | 10.79 |
| 0/1 | 1/1 | 3.19  | 5.61  |
| 1/1 | 1/1 | 11.52 | 10.33 |
| 1/1 | 0/1 | 3.06  | 2.08  |
| 1/1 | 1/1 | 5.99  | 4.91  |
| 1/1 | 1/1 | 3.58  | 2.92  |
| 1/1 | 1/1 | 6.32  | 5.72  |
| 1/1 | 1/1 | 4.95  | 4.69  |
| 1/1 | 1/1 | 4.95  | 6.75  |
| 1/1 | 1/1 | 5.64  | 7.49  |
| 0/1 | 1/1 | 3.71  | 5.88  |
| 1/1 | 1/1 | 3.54  | 5.88  |
| 0/1 | 1/1 | 5.57  | 5.1   |
| 1/1 | 1/1 | 4.84  | 4.47  |
| 1/1 | 1/1 | 7.08  | 6.9   |
| 1/1 | 1/1 | 2.38  | 2.38  |
| 1/1 | 1/1 | 3.93  | 4.2   |
| 1/1 | 1/1 | 4.8   | 5.08  |
| 0/1 | 1/1 | 2.21  | 2.52  |
| 1/1 | 1/1 | 6.73  | 9.13  |
| 1/1 | 1/1 | 6.92  | 9.47  |
| 1/1 | 1/1 | 6.86  | 9.46  |
| 1/1 | 1/1 | 6.39  | 9.01  |

|     |     |       |       |
|-----|-----|-------|-------|
| 0/1 | 1/1 | 3.44  | 6.73  |
| 1/1 | 1/1 | 5.73  | 9.25  |
| 1/1 | 1/1 | 6.76  | 5.54  |
| 1/1 | 1/1 | 9.98  | 9.58  |
| 1/1 | 0/1 | 5.21  | 3.18  |
| 0/1 | 1/1 | 2.55  | 3.67  |
| 1/1 | 1/1 | 5.51  | 6.74  |
| 1/1 | 0/1 | 3.43  | 2.3   |
| 1/1 | 1/1 | 9.79  | 9     |
| 1/1 | 1/1 | 3.02  | 2.33  |
| 1/1 | 1/1 | 3.69  | 3.12  |
| 1/1 | 1/1 | 7.86  | 7.4   |
| 1/1 | 1/1 | 7.31  | 6.87  |
| 1/1 | 1/1 | 2.84  | 2.52  |
| 1/1 | 1/1 | 3.46  | 3.47  |
| 1/1 | 1/1 | 10.49 | 10.51 |
| 0/1 | 1/1 | 3.79  | 4.03  |
| 0/1 | 1/1 | 5.55  | 5.99  |
| 1/1 | 1/1 | 7.66  | 8.16  |
| 1/1 | 1/1 | 3.62  | 4.44  |
| 1/1 | 1/1 | 7.2   | 6.7   |
| 1/1 | 1/1 | 3.69  | 3.31  |
| 0/1 | 1/1 | 2.81  | 2.45  |
| 1/1 | 1/1 | 6.86  | 6.56  |
| 1/1 | 1/1 | 6.89  | 6.68  |
| 0/1 | 1/1 | 4.46  | 4.26  |
| 1/1 | 1/1 | 7.12  | 6.98  |
| 1/1 | 1/1 | 7.98  | 7.85  |
| 0/1 | 1/1 | 6.19  | 6.39  |
| 1/1 | 0/1 | 3.45  | 2.6   |
| 1/1 | 1/1 | 6.21  | 6.12  |
| 1/1 | 1/1 | 6.48  | 8.55  |
| 0/1 | 1/1 | 3.67  | 5.81  |
| 1/1 | 1/1 | 4.57  | 6.99  |
| 1/1 | 1/1 | 3.75  | 3.23  |
| 1/1 | 1/1 | 4.4   | 4.02  |
| 1/1 | 1/1 | 8.61  | 8.32  |
| 1/1 | 1/1 | 8.33  | 8.09  |
| 1/1 | 1/1 | 9.6   | 9.66  |
| 1/1 | 1/1 | 3.64  | 3.73  |
| 1/1 | 1/1 | 3     | 3.12  |
| 1/1 | 1/1 | 8.38  | 8.52  |
| 1/1 | 1/1 | 7.01  | 7.16  |
| 1/1 | 1/1 | 6.8   | 7.09  |
| 0/1 | 1/1 | 6.55  | 6.85  |
| 1/1 | 1/1 | 9.17  | 8.19  |
| 1/1 | 1/1 | 7.5   | 7.1   |
| 1/1 | 1/1 | 3.23  | 3.02  |
| 1/1 | 1/1 | 7.18  | 6.97  |
| 1/1 | 1/1 | 5.52  | 4.54  |
| 1/1 | 1/1 | 9.09  | 8.42  |
| 0/1 | 1/1 | 4.19  | 3.69  |
| 1/1 | 1/1 | 8.62  | 8.17  |
| 1/1 | 1/1 | 10.56 | 10.22 |
| 1/1 | 1/1 | 6.62  | 6.28  |
| 1/1 | 1/1 | 5.32  | 5.08  |
| 1/1 | 1/1 | 6.6   | 6.36  |
| 1/1 | 1/1 | 10    | 9.81  |

|     |     |       |       |
|-----|-----|-------|-------|
| 0/1 | 1/1 | 3.53  | 5.45  |
| 1/1 | 1/1 | 4.04  | 2.5   |
| 1/1 | 1/1 | 5.56  | 4.7   |
| 1/1 | 1/1 | 4.19  | 3.37  |
| 1/1 | 0/1 | 5.1   | 4.14  |
| 1/1 | 1/1 | 5.51  | 4.87  |
| 1/1 | 1/1 | 4.85  | 4.34  |
| 1/1 | 1/1 | 5.9   | 5.5   |
| 1/1 | 1/1 | 6.98  | 6.59  |
| 1/1 | 1/1 | 3.71  | 5.68  |
| 1/1 | 1/1 | 4.3   | 6.41  |
| 1/1 | 1/1 | 6.25  | 5.07  |
| 1/1 | 1/1 | 7.06  | 6.66  |
| 1/1 | 0/1 | 5     | 3.53  |
| 1/1 | 0/1 | 6.36  | 5.64  |
| 0/1 | 1/1 | 1.77  | 3.53  |
| 1/1 | 0/1 | 5.56  | 4.35  |
| 1/1 | 1/1 | 7.44  | 6.64  |
| 1/1 | 1/1 | 5.81  | 5.04  |
| 1/1 | 1/1 | 5.02  | 4.54  |
| 1/1 | 1/1 | 5.84  | 5.43  |
| 1/1 | 1/1 | 7.32  | 3.22  |
| 1/1 | 1/1 | 11.51 | 7.76  |
| 1/1 | 1/1 | 6.27  | 2.73  |
| 1/1 | 1/1 | 7.07  | 3.55  |
| 1/1 | 1/1 | 10.79 | 10    |
| 1/1 | 1/1 | 12.95 | 12.17 |
| 1/1 | 1/1 | 7.35  | 6.59  |
| 1/1 | 1/1 | 8.19  | 8.02  |
| 1/1 | 1/1 | 8.39  | 8.24  |
| 1/1 | 1/1 | 7.88  | 7.92  |
| 1/1 | 1/1 | 6.55  | 5.77  |
| 1/1 | 1/1 | 5.65  | 5.07  |
| 1/1 | 0/1 | 7.91  | 7.43  |
| 1/1 | 1/1 | 7.62  | 7.24  |
| 0/1 | 1/1 | 5.44  | 5.17  |
| 1/1 | 1/1 | 3.57  | 3.32  |
| 1/1 | 1/1 | 6.31  | 6.11  |
| 1/1 | 1/1 | 10.9  | 10.7  |
| 1/1 | 1/1 | 8.34  | 8.18  |
| 0/1 | 1/1 | 6.12  | 6.04  |
| 0/1 | 1/1 | 5.21  | 5.14  |
| 0/1 | 1/1 | 4.23  | 4.19  |
| 0/1 | 1/1 | 6.57  | 6.54  |
| 1/1 | 1/1 | 9.77  | 9.79  |
| 1/1 | 1/1 | 6.15  | 4.5   |
| 1/1 | 1/1 | 3.5   | 4.82  |
| 1/1 | 1/1 | 7.02  | 6.23  |
| 1/1 | 1/1 | 6.71  | 6.16  |
| 1/1 | 1/1 | 5.35  | 4.83  |
| 1/1 | 1/1 | 5.42  | 5     |
| 1/1 | 1/1 | 5.05  | 4.72  |
| 0/1 | 1/1 | 3.52  | 3.41  |
| 1/1 | 0/1 | 4.7   | 2.78  |
| 1/1 | 1/1 | 5.46  | 6.75  |
| 1/1 | 1/1 | 6.83  | 5.53  |
| 1/1 | 1/1 | 7.75  | 7.12  |
| 1/1 | 1/1 | 6.89  | 6.41  |

|     |     |       |      |
|-----|-----|-------|------|
| 1/1 | 1/1 | 8.61  | 8.11 |
| 0/1 | 1/1 | 3.94  | 5.6  |
| 1/1 | 1/1 | 6.22  | 4.82 |
| 1/1 | 1/1 | 8.06  | 7.15 |
| 1/1 | 1/1 | 10.25 | 9.47 |
| 1/1 | 1/1 | 6.48  | 7.88 |
| 1/1 | 1/1 | 6.01  | 7.46 |
| 0/1 | 1/1 | 4.72  | 6.38 |
| 0/1 | 1/1 | 3.21  | 4.88 |
| 0/1 | 1/1 | 3.11  | 5.06 |
| 0/1 | 1/1 | 4.63  | 6.62 |
| 1/1 | 0/1 | 5.86  | 4.82 |
| 1/1 | 1/1 | 6.56  | 5.67 |
| 1/1 | 0/1 | 5.92  | 5.21 |
| 1/1 | 1/1 | 6.18  | 5.87 |
| 0/1 | 1/1 | 3.51  | 5.31 |
| 0/1 | 1/1 | 2.85  | 5.7  |
| 1/1 | 1/1 | 8.99  | 5.02 |
| 1/1 | 1/1 | 8.32  | 4.58 |
| 1/1 | 1/1 | 6.69  | 3.15 |
| 1/1 | 0/1 | 6.38  | 2.89 |
| 1/1 | 1/1 | 9.43  | 6.03 |
| 1/1 | 1/1 | 10.04 | 6.65 |
| 1/1 | 0/1 | 5.33  | 2.05 |
| 1/1 | 1/1 | 8.56  | 5.29 |
| 1/1 | 1/1 | 7.26  | 4.02 |
| 1/1 | 1/1 | 8.12  | 4.91 |
| 1/1 | 0/1 | 3.85  | 3.11 |
| 1/1 | 1/1 | 8.29  | 7.81 |
| 1/1 | 1/1 | 8.71  | 8.31 |
| 1/1 | 1/1 | 8.46  | 8.12 |
| 1/1 | 1/1 | 5.85  | 5.56 |
| 1/1 | 1/1 | 5.82  | 5.55 |
| 1/1 | 1/1 | 9.41  | 9.56 |
| 1/1 | 1/1 | 3.85  | 4.24 |
| 1/1 | 0/1 | 6.72  | 4.7  |
| 1/1 | 1/1 | 7.39  | 5.93 |
| 0/1 | 1/1 | 2.28  | 3.08 |
| 1/1 | 1/1 | 2.95  | 3.84 |
| 1/1 | 0/1 | 7.68  | 6.6  |
| 1/1 | 1/1 | 5.81  | 5.1  |
| 0/1 | 1/1 | 7.64  | 6.99 |
| 1/1 | 1/1 | 7.95  | 7.31 |
| 1/1 | 1/1 | 7.14  | 6.53 |
| 1/1 | 1/1 | 6.64  | 6.07 |
| 0/1 | 1/1 | 5.13  | 4.59 |
| 1/1 | 1/1 | 6.77  | 6.29 |
| 1/1 | 1/1 | 6.09  | 5.67 |
| 1/1 | 1/1 | 7.87  | 7.5  |
| 1/1 | 1/1 | 6.84  | 6.49 |
| 1/1 | 1/1 | 4.68  | 4.35 |
| 1/1 | 1/1 | 6.04  | 5.75 |
| 1/1 | 1/1 | 8.34  | 8.06 |
| 0/1 | 1/1 | 5.05  | 6.89 |
| 0/1 | 1/1 | 4.71  | 6.87 |
| 1/1 | 1/1 | 5.04  | 7.21 |
| 0/1 | 1/1 | 3.11  | 5.37 |
| 0/1 | 1/1 | 3.19  | 5.71 |

|     |     |       |      |
|-----|-----|-------|------|
| 1/1 | 0/1 | 4.45  | 2.05 |
| 1/1 | 0/1 | 4.95  | 3.3  |
| 0/1 | 1/1 | 2.82  | 4.34 |
| 1/1 | 1/1 | 8.91  | 7.45 |
| 1/1 | 1/1 | 4.56  | 3.42 |
| 1/1 | 1/1 | 5.25  | 4.23 |
| 1/1 | 1/1 | 5.02  | 4.01 |
| 1/1 | 1/1 | 5.17  | 4.23 |
| 1/1 | 0/1 | 3.47  | 2.62 |
| 1/1 | 1/1 | 4.02  | 3.18 |
| 1/1 | 1/1 | 4.99  | 6.35 |
| 1/1 | 1/1 | 5.24  | 6.69 |
| 1/1 | 1/1 | 3.76  | 5.34 |
| 1/1 | 0/1 | 6.18  | 4.61 |
| 1/1 | 1/1 | 6.04  | 7.54 |
| 0/1 | 1/1 | 2.34  | 3.92 |
| 1/1 | 1/1 | 4.41  | 6.07 |
| 0/1 | 1/1 | 4.11  | 6.08 |
| 1/1 | 1/1 | 6.48  | 4.18 |
| 1/1 | 1/1 | 5.32  | 3.08 |
| 1/1 | 1/1 | 4.64  | 5.25 |
| 1/1 | 1/1 | 3.51  | 4.84 |
| 1/1 | 0/1 | 7.24  | 6.14 |
| 1/1 | 0/1 | 5.59  | 4.71 |
| 1/1 | 1/1 | 7.73  | 7.08 |
| 1/1 | 1/1 | 6.93  | 6.39 |
| 0/1 | 1/1 | 7.82  | 7.41 |
| 1/1 | 1/1 | 6.68  | 6.29 |
| 1/1 | 1/1 | 7.39  | 7    |
| 0/1 | 1/1 | 4.33  | 6.32 |
| 1/1 | 0/1 | 4.01  | 2.3  |
| 0/1 | 1/1 | 2.49  | 3.91 |
| 0/1 | 1/1 | 2.46  | 4.59 |
| 1/1 | 0/1 | 4.02  | 2.74 |
| 1/1 | 0/1 | 6.68  | 5.64 |
| 1/1 | 1/1 | 5.21  | 4.58 |
| 1/1 | 1/1 | 3.62  | 3.01 |
| 1/1 | 1/1 | 4.5   | 6.38 |
| 1/1 | 1/1 | 10.83 | 8.47 |
| 1/1 | 1/1 | 6.99  | 4.82 |
| 1/1 | 1/1 | 7.08  | 5.03 |
| 1/1 | 1/1 | 5.96  | 3.96 |
| 1/1 | 1/1 | 9.35  | 7.35 |
| 1/1 | 0/1 | 5.75  | 3.94 |
| 1/1 | 1/1 | 7.1   | 5.39 |
| 0/1 | 1/1 | 2.8   | 3.97 |
| 1/1 | 1/1 | 3.88  | 5.13 |
| 0/1 | 1/1 | 4.59  | 6.04 |
| 1/1 | 0/1 | 3.98  | 2.48 |
| 1/1 | 1/1 | 5.08  | 4    |
| 1/1 | 1/1 | 5.28  | 4.38 |
| 1/1 | 1/1 | 3.07  | 4.46 |
| 1/1 | 1/1 | 3.19  | 4.7  |
| 1/1 | 1/1 | 4.62  | 6.39 |
| 1/1 | 0/1 | 5.25  | 2.31 |
| 1/1 | 0/1 | 7.48  | 4.73 |
| 1/1 | 1/1 | 6.19  | 3.46 |
| 1/1 | 0/1 | 5.14  | 2.53 |

|     |     |       |       |
|-----|-----|-------|-------|
| 1/1 | 0/1 | 4.6   | 2.38  |
| 1/1 | 1/1 | 5.85  | 5.73  |
| 1/1 | 1/1 | 7.04  | 6.93  |
| 1/1 | 1/1 | 8.34  | 8.31  |
| 1/1 | 1/1 | 9.58  | 9.69  |
| 1/1 | 1/1 | 5     | 3.52  |
| 1/1 | 1/1 | 2.9   | 4.36  |
| 1/1 | 1/1 | 11.81 | 11.48 |
| 0/1 | 1/1 | 6.93  | 6.93  |
| 1/1 | 1/1 | 9.36  | 9.42  |
| 0/1 | 1/1 | 5.7   | 5.76  |
| 1/1 | 1/1 | 5.62  | 5.71  |
| 1/1 | 1/1 | 8.36  | 8.48  |
| 1/1 | 1/1 | 7.12  | 7.37  |
| 1/1 | 1/1 | 6.93  | 7.18  |
| 0/1 | 1/1 | 3.62  | 4.04  |
| 1/1 | 1/1 | 7.63  | 8.07  |
| 1/1 | 1/1 | 7.45  | 7.89  |
| 1/1 | 1/1 | 4.09  | 6.57  |
| 0/1 | 1/1 | 5.18  | 7.66  |
| 1/1 | 1/1 | 4.43  | 6.95  |
| 1/1 | 1/1 | 6.44  | 8.95  |
| 1/1 | 1/1 | 5.17  | 7.76  |
| 1/1 | 1/1 | 4.97  | 7.66  |
| 1/1 | 1/1 | 5.05  | 7.84  |
| 1/1 | 1/1 | 4.43  | 7.31  |
| 1/1 | 1/1 | 4.8   | 7.69  |
| 0/1 | 1/1 | 2.86  | 6.05  |
| 0/1 | 1/1 | 2.87  | 6.17  |
| 1/1 | 1/1 | 4.42  | 7.83  |
| 0/1 | 1/1 | 3.39  | 6.84  |
| 1/1 | 1/1 | 5.65  | 5.49  |
| 0/1 | 1/1 | 8.71  | 8.78  |
| 1/1 | 1/1 | 10.47 | 10.54 |
| 0/1 | 1/1 | 7.92  | 8.13  |
| 1/1 | 1/1 | 5.59  | 6.07  |
| 1/1 | 1/1 | 8.53  | 7.17  |
| 1/1 | 1/1 | 8.99  | 8.15  |
| 1/1 | 1/1 | 7.54  | 6.58  |
| 1/1 | 1/1 | 7.85  | 7.3   |
| 1/1 | 1/1 | 7.97  | 7.8   |
| 1/1 | 1/1 | 4.21  | 4.14  |
| 1/1 | 1/1 | 3.61  | 4.06  |
| 1/1 | 1/1 | 5.89  | 6.51  |
| 1/1 | 1/1 | 5.51  | 3.02  |
| 1/1 | 1/1 | 6.75  | 4.33  |
| 1/1 | 0/1 | 4.17  | 1.97  |
| 1/1 | 0/1 | 5.56  | 3.37  |
| 1/1 | 0/1 | 5.79  | 3.97  |
| 1/1 | 1/1 | 6.23  | 4.44  |
| 0/1 | 1/1 | 3.72  | 4.07  |
| 0/1 | 1/1 | 3.02  | 3.42  |
| 1/1 | 1/1 | 6.52  | 7.21  |
| 1/1 | 1/1 | 7.32  | 8.14  |
| 1/1 | 1/1 | 4.85  | 4.72  |
| 1/1 | 1/1 | 2.86  | 2.87  |
| 1/1 | 1/1 | 3.61  | 3.63  |
| 1/1 | 1/1 | 7.27  | 7.41  |



|     |     |       |       |
|-----|-----|-------|-------|
| 1/1 | 1/1 | 8.17  | 8.4   |
| 1/1 | 1/1 | 8.83  | 9.07  |
| 1/1 | 1/1 | 7.22  | 7.52  |
| 1/1 | 1/1 | 7.34  | 7.79  |
| 1/1 | 1/1 | 5.31  | 5.91  |
| 1/1 | 1/1 | 6.73  | 7.4   |
| 0/1 | 1/1 | 2.37  | 5.05  |
| 1/1 | 1/1 | 5.1   | 8.21  |
| 0/1 | 1/1 | 2.65  | 6.56  |
| 1/1 | 1/1 | 3.48  | 7.75  |
| 1/1 | 1/1 | 7.79  | 6.6   |
| 1/1 | 1/1 | 8.02  | 7.05  |
| 1/1 | 0/1 | 3.85  | 3.08  |
| 1/1 | 1/1 | 6.64  | 5.93  |
| 1/1 | 1/1 | 5.74  | 5.13  |
| 1/1 | 1/1 | 2.63  | 2.13  |
| 1/1 | 1/1 | 7.59  | 7.12  |
| 1/1 | 1/1 | 4.52  | 6.13  |
| 1/1 | 1/1 | 5.66  | 7.39  |
| 1/1 | 1/1 | 6.65  | 2.98  |
| 1/1 | 1/1 | 6.5   | 6.42  |
| 1/1 | 1/1 | 7.29  | 7.91  |
| 1/1 | 1/1 | 10.63 | 10.04 |
| 1/1 | 1/1 | 7.3   | 7     |
| 1/1 | 1/1 | 6.32  | 6.15  |
| 1/1 | 1/1 | 7.27  | 7.37  |
| 1/1 | 1/1 | 10.11 | 10.32 |
| 1/1 | 0/1 | 5.28  | 3.15  |
| 0/1 | 1/1 | 2.55  | 3.21  |
| 0/1 | 1/1 | 5.25  | 6.52  |
| 1/1 | 1/1 | 8.58  | 7.69  |
| 1/1 | 0/1 | 7.35  | 6.68  |
| 1/1 | 1/1 | 6.08  | 5.61  |
| 1/1 | 1/1 | 5.35  | 4.92  |
| 1/1 | 1/1 | 6.26  | 6.04  |
| 0/1 | 1/1 | 2.85  | 5.7   |
| 1/1 | 0/1 | 5.41  | 4.19  |
| 1/1 | 1/1 | 4.99  | 3.97  |
| 1/1 | 1/1 | 3.67  | 3.1   |
| 1/1 | 0/1 | 2.63  | 2.19  |
| 1/1 | 1/1 | 4.73  | 3.64  |
| 1/1 | 0/1 | 3.96  | 3.21  |
| 1/1 | 1/1 | 4.58  | 4.01  |
| 0/1 | 1/1 | 3.46  | 2.91  |
| 1/1 | 1/1 | 5.32  | 4.83  |
| 1/1 | 1/1 | 8.13  | 7.83  |
| 1/1 | 1/1 | 4.36  | 4.06  |
| 0/1 | 1/1 | 2.45  | 4.16  |
| 1/1 | 1/1 | 7.8   | 7.2   |
| 1/1 | 1/1 | 6.87  | 7.05  |
| 1/1 | 0/1 | 7.68  | 6.6   |
| 1/1 | 1/1 | 5.81  | 5.1   |
| 0/1 | 1/1 | 7.64  | 6.99  |
| 1/1 | 1/1 | 7.95  | 7.31  |
| 1/1 | 1/1 | 7.14  | 6.53  |
| 1/1 | 1/1 | 6.64  | 6.07  |
| 0/1 | 1/1 | 5.13  | 4.59  |
| 1/1 | 1/1 | 6.77  | 6.29  |

|     |     |       |       |
|-----|-----|-------|-------|
| 1/1 | 1/1 | 6.09  | 5.67  |
| 1/1 | 1/1 | 9.01  | 8.63  |
| 1/1 | 1/1 | 7.87  | 7.5   |
| 1/1 | 1/1 | 6.84  | 6.49  |
| 1/1 | 1/1 | 4.68  | 4.35  |
| 1/1 | 1/1 | 5.6   | 5.27  |
| 1/1 | 1/1 | 6.04  | 5.75  |
| 0/1 | 1/1 | 5.05  | 6.89  |
| 0/1 | 1/1 | 4.71  | 6.87  |
| 1/1 | 1/1 | 5.04  | 7.21  |
| 0/1 | 1/1 | 3.11  | 5.37  |
| 0/1 | 1/1 | 3.19  | 5.71  |
| 1/1 | 1/1 | 10.82 | 9.19  |
| 1/1 | 1/1 | 5.36  | 4.3   |
| 0/1 | 1/1 | 4.68  | 6.13  |
| 1/1 | 1/1 | 5.19  | 3.54  |
| 1/1 | 1/1 | 3.31  | 4.77  |
| 1/1 | 1/1 | 8.69  | 7.48  |
| 1/1 | 1/1 | 6.97  | 6.08  |
| 1/1 | 1/1 | 8.94  | 8.11  |
| 1/1 | 1/1 | 6.26  | 5.46  |
| 1/1 | 1/1 | 9.59  | 8.8   |
| 1/1 | 1/1 | 6.93  | 6.28  |
| 1/1 | 1/1 | 7.58  | 6.98  |
| 1/1 | 1/1 | 8.03  | 7.53  |
| 1/1 | 1/1 | 12.63 | 12.15 |
| 1/1 | 1/1 | 7.44  | 6.29  |
| 1/1 | 1/1 | 4.61  | 3.89  |
| 1/1 | 1/1 | 6.79  | 6.08  |
| 1/1 | 1/1 | 4.17  | 3.68  |
| 1/1 | 1/1 | 4.42  | 6.13  |
| 1/1 | 1/1 | 5.26  | 6.97  |
| 0/1 | 1/1 | 2.88  | 4.74  |
| 0/1 | 1/1 | 2.69  | 4.7   |
| 1/1 | 1/1 | 10.51 | 9.04  |
| 1/1 | 1/1 | 9.39  | 8.26  |
| 0/1 | 1/1 | 3.56  | 5.34  |
| 1/1 | 0/1 | 3.79  | 2.49  |
| 1/1 | 1/1 | 5.46  | 4.52  |
| 1/1 | 1/1 | 6.81  | 6.18  |
| 1/1 | 1/1 | 8.56  | 7.99  |
| 0/1 | 1/1 | 3.95  | 5.55  |
| 1/1 | 0/1 | 3.89  | 2.5   |
| 1/1 | 1/1 | 8.75  | 7.78  |
| 1/1 | 1/1 | 4.06  | 5.46  |
| 1/1 | 1/1 | 4.61  | 6.13  |
| 1/1 | 1/1 | 7.21  | 6.46  |
| 1/1 | 1/1 | 7.74  | 7.21  |
| 1/1 | 1/1 | 5.4   | 5.16  |
| 1/1 | 1/1 | 7.61  | 7.38  |
| 1/1 | 1/1 | 5.71  | 5.52  |
| 1/1 | 1/1 | 6.49  | 6.35  |
| 1/1 | 1/1 | 6.09  | 5.96  |
| 1/1 | 1/1 | 7.92  | 7.86  |
| 0/1 | 1/1 | 5.5   | 5.46  |
| 0/1 | 1/1 | 5.63  | 5.58  |
| 1/1 | 1/1 | 5.87  | 5.87  |
| 0/1 | 1/1 | 8.07  | 8.07  |

|     |     |       |      |
|-----|-----|-------|------|
| 1/1 | 1/1 | 10.51 | 9.04 |
| 1/1 | 1/1 | 9.39  | 8.26 |
| 0/1 | 1/1 | 3.56  | 5.34 |
| 1/1 | 1/1 | 10.51 | 9.04 |
| 1/1 | 1/1 | 9.39  | 8.26 |
| 0/1 | 1/1 | 3.56  | 5.34 |
| 1/1 | 1/1 | 10.51 | 9.04 |
| 1/1 | 1/1 | 9.61  | 8.36 |
| 0/1 | 1/1 | 3.56  | 5.34 |
| 1/1 | 1/1 | 10.51 | 9.04 |
| 1/1 | 1/1 | 9.39  | 8.26 |
| 0/1 | 1/1 | 3.56  | 5.34 |
| 1/1 | 1/1 | 10.51 | 9.04 |
| 1/1 | 1/1 | 9.39  | 8.26 |
| 0/1 | 1/1 | 3.56  | 5.34 |
| 1/1 | 1/1 | 10.51 | 9.04 |
| 1/1 | 1/1 | 9.39  | 8.26 |
| 0/1 | 1/1 | 3.56  | 5.34 |
| 1/1 | 1/1 | 5.5   | 4.92 |
| 1/1 | 1/1 | 6.75  | 6.35 |
| 1/1 | 1/1 | 6.93  | 6.69 |
| 1/1 | 1/1 | 7.47  | 7.25 |
| 0/1 | 1/1 | 3.33  | 3.13 |
| 0/1 | 1/1 | 9.43  | 9.3  |
| 0/1 | 1/1 | 5.92  | 5.89 |
| 0/1 | 1/1 | 6.25  | 6.29 |
| 1/1 | 1/1 | 7     | 7.05 |
| 1/1 | 1/1 | 6.21  | 6.32 |
| 1/1 | 1/1 | 5.86  | 8.18 |
| 1/1 | 1/1 | 3.94  | 6.29 |
| 0/1 | 1/1 | 3.58  | 6.2  |
| 1/1 | 1/1 | 4.92  | 7.57 |
| 0/1 | 1/1 | 2.95  | 5.69 |
| 1/1 | 0/1 | 8.07  | 2.49 |
| 1/1 | 0/1 | 8.07  | 2.77 |
| 1/1 | 1/1 | 9.32  | 4.45 |
| 1/1 | 0/1 | 6.36  | 3.6  |
| 1/1 | 1/1 | 9.52  | 6.86 |
| 1/1 | 0/1 | 4.7   | 2.89 |
| 1/1 | 0/1 | 5.23  | 3.54 |
| 1/1 | 1/1 | 8.44  | 6.87 |
| 1/1 | 1/1 | 4.86  | 3.5  |
| 1/1 | 1/1 | 6.77  | 5.43 |
| 1/1 | 0/1 | 4.69  | 3.77 |
| 1/1 | 1/1 | 5.55  | 4.73 |
| 1/1 | 1/1 | 6.46  | 5.89 |
| 1/1 | 1/1 | 9.03  | 8.5  |
| 1/1 | 1/1 | 9.09  | 8.66 |
| 1/1 | 1/1 | 4.96  | 4.64 |
| 1/1 | 1/1 | 6.98  | 6.67 |
| 1/1 | 1/1 | 8.94  | 9.02 |
| 1/1 | 1/1 | 3.81  | 4.02 |
| 1/1 | 0/1 | 5.26  | 3.77 |
| 1/1 | 1/1 | 5.63  | 4.69 |
| 1/1 | 1/1 | 4.28  | 3.4  |
| 1/1 | 1/1 | 5.3   | 4.58 |
| 1/1 | 1/1 | 3.25  | 5.06 |
| 1/1 | 1/1 | 8.83  | 7.54 |

|     |     |       |       |
|-----|-----|-------|-------|
| 1/1 | 1/1 | 9.76  | 8.54  |
| 1/1 | 1/1 | 8.71  | 7.54  |
| 1/1 | 1/1 | 4.61  | 3.54  |
| 1/1 | 1/1 | 9.54  | 8.56  |
| 1/1 | 1/1 | 7.96  | 7.01  |
| 1/1 | 1/1 | 8.91  | 7.97  |
| 1/1 | 1/1 | 8.91  | 8.12  |
| 1/1 | 0/1 | 5.83  | 5.03  |
| 1/1 | 1/1 | 8.11  | 7.35  |
| 1/1 | 1/1 | 9.82  | 9.08  |
| 1/1 | 1/1 | 8.31  | 7.58  |
| 1/1 | 1/1 | 8.53  | 7.82  |
| 1/1 | 1/1 | 9.66  | 8.96  |
| 1/1 | 1/1 | 9.19  | 8.5   |
| 1/1 | 1/1 | 8.14  | 7.47  |
| 1/1 | 1/1 | 7.89  | 7.23  |
| 1/1 | 1/1 | 8.42  | 7.79  |
| 1/1 | 1/1 | 4.88  | 4.27  |
| 1/1 | 1/1 | 8.62  | 8.01  |
| 1/1 | 1/1 | 8.3   | 7.77  |
| 1/1 | 1/1 | 8.19  | 7.66  |
| 1/1 | 1/1 | 8.03  | 7.51  |
| 0/1 | 1/1 | 3.43  | 5.14  |
| 1/1 | 1/1 | 7.49  | 6.91  |
| 1/1 | 1/1 | 8.59  | 8.11  |
| 1/1 | 1/1 | 6.82  | 6.38  |
| 1/1 | 1/1 | 5.98  | 5.54  |
| 1/1 | 1/1 | 6.57  | 6.14  |
| 1/1 | 1/1 | 3.74  | 3.35  |
| 1/1 | 1/1 | 6.66  | 6.28  |
| 1/1 | 1/1 | 7.68  | 7.37  |
| 1/1 | 1/1 | 8.69  | 8.4   |
| 1/1 | 1/1 | 5.75  | 5.57  |
| 0/1 | 1/1 | 6.85  | 6.71  |
| 1/1 | 1/1 | 5     | 4.91  |
| 1/1 | 1/1 | 7.52  | 7.44  |
| 1/1 | 1/1 | 7.43  | 7.35  |
| 1/1 | 1/1 | 9.8   | 9.76  |
| 1/1 | 1/1 | 7.12  | 7.08  |
| 1/1 | 1/1 | 7.04  | 7.01  |
| 1/1 | 1/1 | 7.07  | 7.14  |
| 1/1 | 1/1 | 6.76  | 6.85  |
| 1/1 | 1/1 | 9.24  | 9.36  |
| 1/1 | 1/1 | 9.89  | 10.02 |
| 1/1 | 1/1 | 5.67  | 5.82  |
| 0/1 | 1/1 | 5.13  | 7.58  |
| 1/1 | 0/1 | 5.49  | 3.36  |
| 1/1 | 0/1 | 4.23  | 2.2   |
| 1/1 | 1/1 | 7.61  | 6.21  |
| 1/1 | 1/1 | 5.72  | 4.12  |
| 1/1 | 1/1 | 4.59  | 3.45  |
| 1/1 | 0/1 | 5.32  | 3.45  |
| 1/1 | 1/1 | 6.09  | 4.95  |
| 1/1 | 1/1 | 7.49  | 4.16  |
| 1/1 | 1/1 | 7.95  | 5.08  |
| 1/1 | 1/1 | 5.71  | 5.23  |
| 1/1 | 1/1 | 4.57  | 4.16  |
| 1/1 | 1/1 | 10.03 | 9.69  |

|     |     |       |       |
|-----|-----|-------|-------|
| 1/1 | 1/1 | 6.88  | 6.59  |
| 1/1 | 1/1 | 10.6  | 10.51 |
| 1/1 | 1/1 | 8.85  | 7.8   |
| 1/1 | 1/1 | 4.72  | 4.12  |
| 1/1 | 1/1 | 6.67  | 6.32  |
| 1/1 | 1/1 | 7.06  | 6.78  |
| 0/1 | 1/1 | 4.18  | 6.2   |
| 1/1 | 1/1 | 8.41  | 7.93  |
| 1/1 | 1/1 | 7.36  | 7.04  |
| 1/1 | 1/1 | 8.43  | 8.17  |
| 1/1 | 1/1 | 9.96  | 9.8   |
| 1/1 | 1/1 | 8.24  | 8.1   |
| 1/1 | 1/1 | 8.02  | 7.9   |
| 1/1 | 1/1 | 7.98  | 7.91  |
| 1/1 | 1/1 | 8.19  | 8.19  |
| 1/1 | 1/1 | 8.63  | 8.81  |
| 1/1 | 1/1 | 7.79  | 8.03  |
| 0/1 | 1/1 | 4.26  | 7.64  |
| 0/1 | 1/1 | 4.56  | 8.85  |
| 1/1 | 1/1 | 4.84  | 9.23  |
| 0/1 | 1/1 | 4.15  | 9.42  |
| 1/1 | 0/1 | 6.18  | 3.33  |
| 1/1 | 1/1 | 10.06 | 7.32  |
| 1/1 | 1/1 | 8.82  | 7.34  |
| 1/1 | 0/1 | 8.18  | 7.17  |
| 1/1 | 1/1 | 10.54 | 9.81  |
| 1/1 | 1/1 | 8.99  | 8.26  |
| 1/1 | 1/1 | 7.5   | 6.78  |
| 0/1 | 1/1 | 4.78  | 6.07  |
| 1/1 | 1/1 | 7.62  | 8.97  |
| 0/1 | 1/1 | 5.86  | 7.25  |
| 1/1 | 1/1 | 6.42  | 7.82  |
| 1/1 | 1/1 | 6.94  | 8.34  |
| 0/1 | 1/1 | 6.51  | 7.9   |
| 1/1 | 1/1 | 7.05  | 8.47  |
| 0/1 | 1/1 | 5.48  | 6.96  |
| 0/1 | 1/1 | 5.58  | 7.18  |
| 0/1 | 1/1 | 7.02  | 8.64  |
| 0/1 | 1/1 | 4.2   | 5.93  |
| 0/1 | 1/1 | 3.76  | 5.51  |
| 0/1 | 1/1 | 4.67  | 6.48  |
| 1/1 | 1/1 | 6.25  | 8.09  |
| 1/1 | 1/1 | 7.58  | 9.48  |
| 0/1 | 1/1 | 4.11  | 6.19  |
| 1/1 | 1/1 | 6.32  | 8.41  |
| 1/1 | 1/1 | 5.41  | 7.57  |
| 1/1 | 1/1 | 7.15  | 9.36  |
| 1/1 | 1/1 | 3.22  | 5.55  |
| 0/1 | 1/1 | 4.49  | 6.91  |
| 1/1 | 1/1 | 5.55  | 8.14  |
| 1/1 | 1/1 | 6.17  | 8.78  |
| 0/1 | 1/1 | 2.76  | 5.76  |
| 1/1 | 1/1 | 10.22 | 9.06  |
| 1/1 | 1/1 | 9.65  | 8.77  |
| 1/1 | 1/1 | 8.65  | 8.01  |
| 1/1 | 1/1 | 6.87  | 6.26  |
| 1/1 | 1/1 | 9.45  | 8.9   |
| 1/1 | 1/1 | 8.01  | 7.52  |

|     |     |      |      |
|-----|-----|------|------|
| 1/1 | 1/1 | 6.74 | 6.33 |
| 1/1 | 1/1 | 8.12 | 7.9  |
| 1/1 | 1/1 | 7.18 | 7.02 |
| 0/1 | 1/1 | 2.7  | 2.71 |
| 0/1 | 1/1 | 3.57 | 5.98 |
| 1/1 | 1/1 | 3.01 | 2.67 |
| 1/1 | 1/1 | 6.53 | 6.85 |
| 1/1 | 1/1 | 5.75 | 4.25 |
| 0/1 | 1/1 | 4.06 | 5.37 |
| 1/1 | 1/1 | 7.41 | 5.85 |
| 1/1 | 0/1 | 3.25 | 2.01 |
| 0/1 | 1/1 | 3.77 | 5.15 |
| 0/1 | 1/1 | 2.69 | 4.41 |
| 1/1 | 0/1 | 6.37 | 2.75 |
| 1/1 | 1/1 | 7.04 | 3.94 |
| 1/1 | 0/1 | 5.53 | 2.55 |
| 1/1 | 0/1 | 4.28 | 3.52 |
| 1/1 | 1/1 | 4.16 | 3.72 |
| 1/1 | 1/1 | 5.87 | 5.49 |
| 1/1 | 1/1 | 3.69 | 3.39 |
| 1/1 | 1/1 | 5.23 | 4.98 |
| 1/1 | 1/1 | 6.35 | 6.19 |
| 1/1 | 1/1 | 7.88 | 7.8  |
| 1/1 | 1/1 | 3.7  | 3.65 |
| 1/1 | 1/1 | 6.22 | 6.25 |
| 0/1 | 1/1 | 4.44 | 4.64 |
| 1/1 | 1/1 | 7.15 | 7.49 |
| 0/1 | 1/1 | 3.72 | 4.09 |
| 1/1 | 0/1 | 5.81 | 4.49 |
| 1/1 | 1/1 | 7    | 5.77 |
| 1/1 | 1/1 | 8.39 | 7.62 |
| 1/1 | 1/1 | 4.25 | 3.51 |
| 1/1 | 0/1 | 6.91 | 6.25 |
| 1/1 | 1/1 | 8.52 | 7.57 |
| 1/1 | 1/1 | 5.64 | 5.02 |
| 1/1 | 1/1 | 6.54 | 5.97 |
| 1/1 | 0/1 | 2.61 | 2.13 |
| 1/1 | 1/1 | 6.78 | 6.36 |
| 1/1 | 1/1 | 6.62 | 6.33 |
| 1/1 | 1/1 | 7.31 | 7.05 |
| 1/1 | 1/1 | 6.3  | 6.05 |
| 1/1 | 1/1 | 7.25 | 7.02 |
| 1/1 | 1/1 | 9.61 | 9.41 |
| 1/1 | 1/1 | 9.77 | 9.57 |
| 1/1 | 1/1 | 5.86 | 7.94 |
| 1/1 | 1/1 | 7.51 | 9.61 |
| 1/1 | 1/1 | 5.56 | 7.8  |
| 0/1 | 1/1 | 3.5  | 5.76 |
| 1/1 | 0/1 | 5.05 | 2.73 |
| 1/1 | 0/1 | 4.2  | 2.04 |
| 1/1 | 1/1 | 6.75 | 4.68 |
| 1/1 | 1/1 | 5.97 | 4.02 |
| 1/1 | 1/1 | 6.31 | 4.53 |
| 1/1 | 0/1 | 4.24 | 2.46 |
| 1/1 | 0/1 | 4.1  | 2.44 |
| 1/1 | 0/1 | 4.64 | 3.03 |
| 1/1 | 1/1 | 5.64 | 6.13 |
| 0/1 | 1/1 | 5.07 | 5.7  |

|     |     |       |       |
|-----|-----|-------|-------|
| 0/1 | 1/1 | 3.76  | 4.84  |
| 1/1 | 0/1 | 4.95  | 3.33  |
| 1/1 | 1/1 | 8.59  | 7.41  |
| 1/1 | 0/1 | 3.36  | 2.27  |
| 1/1 | 1/1 | 4.83  | 3.89  |
| 0/1 | 1/1 | 2.98  | 4.3   |
| 1/1 | 1/1 | 2.95  | 4.53  |
| 1/1 | 1/1 | 7.7   | 7.08  |
| 1/1 | 1/1 | 4.53  | 4.29  |
| 1/1 | 1/1 | 12.21 | 12.04 |
| 1/1 | 1/1 | 6.47  | 6.42  |
| 1/1 | 1/1 | 5.91  | 5.86  |
| 0/1 | 1/1 | 7.6   | 7.58  |
| 1/1 | 1/1 | 5.93  | 5.91  |
| 1/1 | 1/1 | 3.36  | 3.36  |
| 1/1 | 1/1 | 6.39  | 8.66  |
| 1/1 | 1/1 | 6.42  | 8.73  |
| 1/1 | 1/1 | 4.24  | 6.67  |
| 1/1 | 1/1 | 3.08  | 5.87  |
| 1/1 | 0/1 | 3.6   | 2.18  |
| 1/1 | 0/1 | 3.7   | 2.65  |
| 1/1 | 1/1 | 7.49  | 6.54  |
| 1/1 | 0/1 | 3.47  | 2.53  |
| 1/1 | 1/1 | 8.19  | 7.51  |
| 0/1 | 1/1 | 2.6   | 4.1   |
| 1/1 | 1/1 | 3.11  | 4.63  |
| 0/1 | 1/1 | 2.96  | 5.08  |
| 1/1 | 1/1 | 9.7   | 7.91  |
| 1/1 | 1/1 | 5.82  | 4.23  |
| 1/1 | 1/1 | 11.03 | 9.67  |
| 1/1 | 1/1 | 3.38  | 4.38  |
| 1/1 | 1/1 | 4.78  | 5.83  |
| 1/1 | 1/1 | 4.34  | 5.42  |
| 0/1 | 1/1 | 3.98  | 5.14  |
| 1/1 | 1/1 | 5.24  | 6.46  |
| 1/1 | 0/1 | 5.68  | 4.6   |
| 1/1 | 1/1 | 6.16  | 5.54  |
| 1/1 | 1/1 | 8.17  | 7.79  |
| 1/1 | 1/1 | 6.85  | 8.54  |
| 1/1 | 1/1 | 5.72  | 7.58  |
| 1/1 | 1/1 | 5.16  | 7.29  |
| 0/1 | 1/1 | 3.15  | 5.92  |
| 1/1 | 0/1 | 6.06  | 2.99  |
| 0/1 | 1/1 | 6.83  | 6.6   |
| 1/1 | 1/1 | 5.39  | 5.21  |
| 1/1 | 1/1 | 6.56  | 6.41  |
| 1/1 | 1/1 | 6.77  | 6.92  |
| 1/1 | 1/1 | 7.06  | 8.25  |
| 1/1 | 1/1 | 8.64  | 9.88  |
| 1/1 | 1/1 | 3.64  | 5.02  |
| 1/1 | 1/1 | 6.64  | 8.05  |
| 1/1 | 1/1 | 4.79  | 6.52  |
| 1/1 | 1/1 | 4.24  | 7.16  |
| 1/1 | 1/1 | 6.25  | 4.92  |
| 1/1 | 1/1 | 4.4   | 3.62  |
| 1/1 | 1/1 | 7.36  | 6.71  |
| 1/1 | 1/1 | 9.21  | 6.93  |
| 1/1 | 1/1 | 5.9   | 4.26  |

|     |     |       |       |
|-----|-----|-------|-------|
| 1/1 | 1/1 | 6.23  | 4.59  |
| 0/1 | 1/1 | 2.33  | 2.88  |
| 1/1 | 1/1 | 3.22  | 3.78  |
| 1/1 | 1/1 | 2.17  | 2.1   |
| 1/1 | 1/1 | 5.91  | 6.32  |
| 0/1 | 1/1 | 6.83  | 7.33  |
| 1/1 | 1/1 | 7.39  | 7.97  |
| 1/1 | 1/1 | 6.49  | 9.35  |
| 1/1 | 1/1 | 4.78  | 7.89  |
| 1/1 | 0/1 | 3.64  | 1.96  |
| 1/1 | 0/1 | 3.9   | 2.72  |
| 1/1 | 1/1 | 11.69 | 10.56 |
| 0/1 | 1/1 | 3.68  | 4.9   |
| 1/1 | 1/1 | 5.31  | 3.77  |
| 1/1 | 1/1 | 3.45  | 5.19  |
| 1/1 | 1/1 | 5.85  | 4.76  |
| 1/1 | 1/1 | 5.97  | 5.25  |
| 1/1 | 1/1 | 4.8   | 4.19  |
| 1/1 | 1/1 | 4.31  | 6.1   |
| 1/1 | 1/1 | 5.58  | 4.2   |
| 1/1 | 1/1 | 6.03  | 4.93  |
| 1/1 | 1/1 | 5.85  | 5.06  |
| 1/1 | 1/1 | 4.98  | 6.59  |
| 1/1 | 1/1 | 4.3   | 6.11  |
| 1/1 | 1/1 | 5.25  | 4.8   |
| 1/1 | 1/1 | 6.05  | 5.96  |
| 1/1 | 1/1 | 6.52  | 6.46  |
| 1/1 | 1/1 | 4.75  | 4.7   |
| 1/1 | 1/1 | 6.41  | 6.38  |
| 1/1 | 1/1 | 8.08  | 8.08  |
| 1/1 | 1/1 | 4.17  | 4.4   |
| 1/1 | 1/1 | 5.33  | 7.66  |
| 1/1 | 0/1 | 4.84  | 2.3   |
| 1/1 | 0/1 | 4.35  | 1.97  |
| 1/1 | 1/1 | 6.18  | 4.2   |
| 1/1 | 0/1 | 5.37  | 3.48  |
| 1/1 | 1/1 | 4.21  | 2.83  |
| 1/1 | 1/1 | 6.64  | 3.82  |
| 1/1 | 0/1 | 5.84  | 3.48  |
| 1/1 | 1/1 | 7.81  | 7.97  |
| 1/1 | 1/1 | 7.25  | 4.46  |
| 1/1 | 1/1 | 5.48  | 3.1   |
| 1/1 | 1/1 | 8.1   | 6.05  |
| 1/1 | 0/1 | 3.99  | 2.75  |
| 1/1 | 1/1 | 5.55  | 4.56  |
| 1/1 | 0/1 | 7.3   | 5.43  |
| 1/1 | 0/1 | 6.9   | 5.31  |
| 1/1 | 1/1 | 8.35  | 6.79  |
| 1/1 | 1/1 | 6.33  | 5.11  |
| 1/1 | 0/1 | 5.81  | 4.69  |
| 1/1 | 1/1 | 6.42  | 3.54  |
| 1/1 | 1/1 | 8.26  | 5.47  |
| 1/1 | 1/1 | 7.89  | 7.94  |
| 1/1 | 1/1 | 7.45  | 7.54  |
| 1/1 | 1/1 | 9.45  | 8.91  |
| 1/1 | 1/1 | 7.44  | 7.01  |
| 1/1 | 1/1 | 6.18  | 5.85  |
| 1/1 | 1/1 | 3.89  | 3.85  |



|     |     |       |       |
|-----|-----|-------|-------|
| 1/1 | 1/1 | 4.17  | 4.13  |
| 1/1 | 1/1 | 6.05  | 6.01  |
| 1/1 | 1/1 | 6.01  | 6.1   |
| 0/1 | 1/1 | 2.74  | 5.86  |
| 1/1 | 1/1 | 10.65 | 9.83  |
| 1/1 | 0/1 | 5.08  | 4.36  |
| 1/1 | 1/1 | 2.78  | 2.2   |
| 1/1 | 1/1 | 3.62  | 3.22  |
| 1/1 | 1/1 | 4.22  | 3.91  |
| 1/1 | 0/1 | 2.39  | 2.09  |
| 1/1 | 1/1 | 7.16  | 6.96  |
| 1/1 | 1/1 | 5.16  | 5.04  |
| 1/1 | 1/1 | 8.5   | 8.38  |
| 0/1 | 1/1 | 3.63  | 5.78  |
| 1/1 | 1/1 | 3.63  | 6.28  |
| 1/1 | 0/1 | 4.56  | 2.8   |
| 1/1 | 1/1 | 7.07  | 6     |
| 1/1 | 1/1 | 3.46  | 4.54  |
| 1/1 | 0/1 | 3.58  | 2.4   |
| 1/1 | 0/1 | 3.58  | 2.51  |
| 1/1 | 1/1 | 6.09  | 5.18  |
| 1/1 | 1/1 | 3.86  | 3.25  |
| 1/1 | 1/1 | 6.15  | 5.65  |
| 1/1 | 1/1 | 5.22  | 4.81  |
| 1/1 | 1/1 | 3.42  | 5.14  |
| 1/1 | 1/1 | 4.34  | 3.29  |
| 1/1 | 1/1 | 10.15 | 9.34  |
| 1/1 | 1/1 | 11.17 | 10.44 |
| 1/1 | 1/1 | 3.4   | 2.91  |
| 0/1 | 1/1 | 4.38  | 6.21  |
| 0/1 | 1/1 | 3.42  | 5.9   |
| 1/1 | 0/1 | 4.65  | 3.17  |
| 1/1 | 1/1 | 6.84  | 5.94  |
| 1/1 | 1/1 | 9.98  | 9.29  |
| 1/1 | 1/1 | 2.66  | 2.27  |
| 0/1 | 1/1 | 4.68  | 4.35  |
| 1/1 | 1/1 | 6.84  | 6.72  |
| 1/1 | 1/1 | 3.17  | 3.11  |
| 1/1 | 0/1 | 5.38  | 4.24  |
| 1/1 | 1/1 | 7.97  | 6.88  |
| 1/1 | 1/1 | 7.44  | 6.49  |
| 1/1 | 1/1 | 5.5   | 4.75  |
| 1/1 | 1/1 | 9.47  | 8.8   |
| 1/1 | 1/1 | 7.2   | 6.7   |
| 1/1 | 1/1 | 7.86  | 7.41  |
| 1/1 | 1/1 | 4.78  | 6.44  |
| 1/1 | 1/1 | 5.35  | 7.18  |
| 1/1 | 1/1 | 5.36  | 7.21  |
| 1/1 | 1/1 | 4.51  | 6.55  |
| 1/1 | 1/1 | 4.75  | 6.98  |
| 1/1 | 1/1 | 5.19  | 3.73  |
| 1/1 | 0/1 | 3.45  | 2.52  |
| 1/1 | 1/1 | 9.33  | 8.44  |
| 1/1 | 1/1 | 6     | 5.27  |
| 0/1 | 1/1 | 3.19  | 4.76  |
| 0/1 | 1/1 | 2.85  | 4.55  |
| 0/1 | 1/1 | 2.6   | 4.89  |
| 1/1 | 1/1 | 6.07  | 4.39  |

|     |     |       |      |
|-----|-----|-------|------|
| 1/1 | 1/1 | 4.7   | 3.77 |
| 1/1 | 1/1 | 4.16  | 3.61 |
| 1/1 | 1/1 | 5.53  | 5.21 |
| 1/1 | 1/1 | 5.98  | 5.72 |
| 1/1 | 1/1 | 3.68  | 3.71 |
| 1/1 | 1/1 | 4.63  | 4.78 |
| 1/1 | 1/1 | 4.25  | 3.44 |
| 1/1 | 1/1 | 6.47  | 5.74 |
| 1/1 | 1/1 | 3.33  | 2.68 |
| 1/1 | 1/1 | 3.98  | 3.45 |
| 0/1 | 1/1 | 6.89  | 6.53 |
| 1/1 | 1/1 | 3.01  | 2.66 |
| 1/1 | 1/1 | 8.37  | 8.07 |
| 1/1 | 1/1 | 5.75  | 5.46 |
| 1/1 | 1/1 | 9.3   | 9.02 |
| 1/1 | 1/1 | 4.26  | 4    |
| 1/1 | 1/1 | 10    | 9.76 |
| 1/1 | 1/1 | 4     | 3.79 |
| 1/1 | 1/1 | 3.97  | 3.78 |
| 1/1 | 1/1 | 6.36  | 6.21 |
| 1/1 | 1/1 | 6.51  | 6.37 |
| 1/1 | 1/1 | 7.03  | 6.55 |
| 1/1 | 1/1 | 8.31  | 8.21 |
| 0/1 | 1/1 | 6.63  | 6.59 |
| 0/1 | 1/1 | 4.86  | 4.89 |
| 1/1 | 1/1 | 4.77  | 4.88 |
| 1/1 | 1/1 | 7.16  | 7.32 |
| 1/1 | 1/1 | 6.14  | 6.32 |
| 1/1 | 1/1 | 7.64  | 7.87 |
| 1/1 | 1/1 | 7.9   | 8.13 |
| 1/1 | 1/1 | 5.86  | 8.25 |
| 1/1 | 1/1 | 5.98  | 8.45 |
| 1/1 | 1/1 | 6.97  | 4.41 |
| 1/1 | 1/1 | 7.32  | 5.5  |
| 1/1 | 1/1 | 4.22  | 4.5  |
| 0/1 | 1/1 | 2.77  | 3.16 |
| 1/1 | 1/1 | 8.13  | 4.63 |
| 1/1 | 0/1 | 5.65  | 2.45 |
| 1/1 | 1/1 | 9.57  | 6.47 |
| 1/1 | 1/1 | 7.77  | 4.76 |
| 1/1 | 0/1 | 5.44  | 2.5  |
| 1/1 | 1/1 | 8.03  | 5.09 |
| 1/1 | 0/1 | 5.09  | 2.21 |
| 1/1 | 1/1 | 10.2  | 7.33 |
| 1/1 | 1/1 | 8.45  | 5.61 |
| 1/1 | 1/1 | 9.25  | 6.42 |
| 1/1 | 1/1 | 7.72  | 4.95 |
| 1/1 | 1/1 | 9.21  | 6.46 |
| 1/1 | 0/1 | 4.09  | 3.44 |
| 1/1 | 1/1 | 10.84 | 10.2 |
| 1/1 | 1/1 | 6.65  | 6.05 |
| 1/1 | 1/1 | 7.5   | 6.93 |
| 1/1 | 1/1 | 10.85 | 10.3 |
| 1/1 | 1/1 | 8.1   | 7.56 |
| 1/1 | 1/1 | 7.39  | 6.9  |
| 1/1 | 1/1 | 6.29  | 5.82 |
| 1/1 | 1/1 | 5.52  | 5.06 |
| 1/1 | 1/1 | 7.11  | 6.67 |

|     |     |       |       |
|-----|-----|-------|-------|
| 1/1 | 1/1 | 6.11  | 5.67  |
| 1/1 | 1/1 | 6.22  | 5.82  |
| 1/1 | 1/1 | 7.27  | 6.88  |
| 0/1 | 1/1 | 4.32  | 3.98  |
| 1/1 | 1/1 | 7.35  | 7.03  |
| 1/1 | 1/1 | 6.74  | 6.42  |
| 1/1 | 1/1 | 7.04  | 6.72  |
| 1/1 | 1/1 | 5.86  | 5.56  |
| 1/1 | 1/1 | 6.69  | 6.39  |
| 1/1 | 1/1 | 9.5   | 9.21  |
| 1/1 | 1/1 | 8.29  | 8.02  |
| 1/1 | 1/1 | 6.53  | 6.3   |
| 1/1 | 1/1 | 10.92 | 10.78 |
| 1/1 | 1/1 | 7.82  | 7.85  |
| 1/1 | 1/1 | 6.14  | 6.23  |
| 1/1 | 1/1 | 6.36  | 6.5   |
| 1/1 | 1/1 | 7.09  | 7.55  |
| 1/1 | 1/1 | 4.78  | 5.34  |
| 0/1 | 1/1 | 3.6   | 4.23  |
| 0/1 | 1/1 | 3.67  | 4.74  |
| 1/1 | 1/1 | 5.43  | 4.69  |
| 1/1 | 1/1 | 10.6  | 10.06 |
| 1/1 | 0/1 | 3.38  | 3.03  |
| 0/1 | 1/1 | 6.19  | 6     |
| 1/1 | 1/1 | 5.99  | 5.97  |
| 1/1 | 1/1 | 4.53  | 6.61  |
| 1/1 | 1/1 | 4.74  | 7.13  |
| 1/1 | 1/1 | 6.67  | 6.47  |
| 1/1 | 1/1 | 8.55  | 8.34  |
| 0/1 | 1/1 | 6.18  | 6.05  |
| 1/1 | 1/1 | 11    | 11.16 |
| 1/1 | 1/1 | 8.85  | 9.17  |
| 0/1 | 1/1 | 7.18  | 7.53  |
| 0/1 | 1/1 | 8.17  | 8.65  |
| 1/1 | 1/1 | 4.92  | 4.74  |
| 1/1 | 1/1 | 6.67  | 6.74  |
| 1/1 | 1/1 | 8.29  | 8.86  |
| 1/1 | 1/1 | 8.07  | 7.16  |
| 0/1 | 1/1 | 6.02  | 5.43  |
| 1/1 | 1/1 | 7.44  | 7.24  |
| 1/1 | 1/1 | 7.04  | 3.72  |
| 1/1 | 1/1 | 8.34  | 5.34  |
| 1/1 | 1/1 | 6.83  | 4.2   |
| 1/1 | 1/1 | 8.44  | 7.87  |
| 1/1 | 0/1 | 3.8   | 3.32  |
| 1/1 | 1/1 | 8.37  | 8.05  |
| 1/1 | 1/1 | 9.49  | 9.18  |
| 1/1 | 1/1 | 6.84  | 6.63  |
| 1/1 | 1/1 | 3.35  | 3.35  |
| 0/1 | 1/1 | 1.9   | 2.26  |
| 1/1 | 1/1 | 6.93  | 5.84  |
| 1/1 | 1/1 | 6.71  | 6.26  |
| 1/1 | 1/1 | 4.22  | 3.87  |
| 1/1 | 1/1 | 3.96  | 5.71  |
| 1/1 | 1/1 | 4.14  | 3.15  |
| 1/1 | 1/1 | 4.91  | 4.2   |
| 1/1 | 1/1 | 7.47  | 7.15  |
| 1/1 | 1/1 | 7.5   | 7.23  |

|     |     |       |       |
|-----|-----|-------|-------|
| 1/1 | 1/1 | 6.87  | 4.63  |
| 0/1 | 1/1 | 2.98  | 3.91  |
| 1/1 | 1/1 | 5.73  | 4.03  |
| 1/1 | 1/1 | 6.14  | 5.11  |
| 1/1 | 0/1 | 4.44  | 2.08  |
| 0/1 | 1/1 | 2.06  | 2.65  |
| 1/1 | 1/1 | 5.75  | 4.55  |
| 1/1 | 1/1 | 5.88  | 5.13  |
| 1/1 | 0/1 | 4.25  | 3.06  |
| 1/1 | 1/1 | 7.35  | 6.85  |
| 0/1 | 1/1 | 2.69  | 4.89  |
| 0/1 | 1/1 | 3.57  | 5.78  |
| 1/1 | 0/1 | 5.83  | 3.07  |
| 1/1 | 1/1 | 2.92  | 2.95  |
| 0/1 | 1/1 | 2.56  | 2.68  |
| 0/1 | 1/1 | 3.97  | 4.16  |
| 1/1 | 0/1 | 7.02  | 5.8   |
| 1/1 | 0/1 | 3.05  | 2.28  |
| 1/1 | 1/1 | 6.04  | 5.5   |
| 1/1 | 1/1 | 6.48  | 6.16  |
| 1/1 | 1/1 | 9.32  | 9.15  |
| 1/1 | 1/1 | 6.97  | 6.87  |
| 1/1 | 1/1 | 6.38  | 6.48  |
| 0/1 | 1/1 | 5.4   | 5.57  |
| 1/1 | 0/1 | 2.93  | 1.9   |
| 1/1 | 1/1 | 8.79  | 8.45  |
| 0/1 | 1/1 | 3.38  | 3.03  |
| 1/1 | 1/1 | 8.88  | 6.96  |
| 1/1 | 0/1 | 3.97  | 2.73  |
| 1/1 | 1/1 | 7.79  | 8.77  |
| 0/1 | 1/1 | 2.2   | 3.73  |
| 1/1 | 1/1 | 6.8   | 4.42  |
| 1/1 | 0/1 | 5.86  | 3.95  |
| 0/1 | 1/1 | 3.08  | 3.53  |
| 0/1 | 1/1 | 3.01  | 3.6   |
| 1/1 | 1/1 | 5.86  | 4.54  |
| 1/1 | 1/1 | 4.55  | 3.67  |
| 1/1 | 1/1 | 4.67  | 3.28  |
| 1/1 | 1/1 | 6.23  | 4.97  |
| 1/1 | 0/1 | 3.95  | 2.38  |
| 1/1 | 1/1 | 5.95  | 4.74  |
| 1/1 | 1/1 | 3.99  | 2.9   |
| 1/1 | 1/1 | 4.83  | 3.78  |
| 1/1 | 1/1 | 3.49  | 4.75  |
| 0/1 | 1/1 | 2.95  | 4.32  |
| 0/1 | 1/1 | 3.14  | 4.58  |
| 1/1 | 1/1 | 8.67  | 6.27  |
| 1/1 | 1/1 | 6.61  | 6.95  |
| 1/1 | 1/1 | 6.84  | 7.28  |
| 1/1 | 1/1 | 7.32  | 6.94  |
| 1/1 | 1/1 | 7.77  | 7.53  |
| 1/1 | 1/1 | 5.72  | 5.54  |
| 1/1 | 1/1 | 4.49  | 4.39  |
| 1/1 | 1/1 | 5.93  | 5.83  |
| 0/1 | 1/1 | 4.28  | 4.24  |
| 0/1 | 1/1 | 4.37  | 4.37  |
| 1/1 | 1/1 | 5.44  | 5.45  |
| 1/1 | 1/1 | 10.77 | 10.91 |

|     |     |       |       |
|-----|-----|-------|-------|
| 0/1 | 1/1 | 9.56  | 9.73  |
| 1/1 | 1/1 | 10.1  | 10.28 |
| 1/1 | 1/1 | 9.56  | 9.75  |
| 0/1 | 1/1 | 3.92  | 6.53  |
| 1/1 | 0/1 | 7.86  | 6.26  |
| 1/1 | 0/1 | 3.7   | 2.32  |
| 1/1 | 1/1 | 5.81  | 4.94  |
| 1/1 | 1/1 | 4.99  | 6.32  |
| 0/1 | 1/1 | 4.07  | 5.4   |
| 1/1 | 1/1 | 9.84  | 9.5   |
| 1/1 | 1/1 | 7.87  | 7.94  |
| 0/1 | 1/1 | 9.94  | 10.22 |
| 1/1 | 1/1 | 7.87  | 6.09  |
| 1/1 | 1/1 | 6.09  | 4.48  |
| 1/1 | 1/1 | 8.82  | 7.58  |
| 1/1 | 1/1 | 7.01  | 8.21  |
| 0/1 | 1/1 | 3.34  | 4.55  |
| 1/1 | 1/1 | 5.78  | 4.17  |
| 1/1 | 0/1 | 3.87  | 2.46  |
| 1/1 | 1/1 | 5.38  | 4.14  |
| 1/1 | 0/1 | 5.01  | 3.88  |
| 1/1 | 1/1 | 5.47  | 4.54  |
| 0/1 | 1/1 | 2.13  | 3.37  |
| 1/1 | 1/1 | 4.05  | 6.09  |
| 1/1 | 0/1 | 3.95  | 2.52  |
| 1/1 | 1/1 | 6.2   | 5.44  |
| 1/1 | 1/1 | 5.42  | 4.68  |
| 0/1 | 1/1 | 2.19  | 3.91  |
| 1/1 | 1/1 | 11.32 | 10.01 |
| 1/1 | 1/1 | 8.38  | 7.17  |
| 1/1 | 1/1 | 6.77  | 5.82  |
| 1/1 | 0/1 | 2.9   | 2.08  |
| 1/1 | 1/1 | 8.27  | 7.45  |
| 1/1 | 0/1 | 4.34  | 3.55  |
| 1/1 | 1/1 | 7.17  | 6.38  |
| 1/1 | 1/1 | 5.45  | 4.79  |
| 1/1 | 1/1 | 6.47  | 5.89  |
| 1/1 | 1/1 | 9.89  | 9.31  |
| 1/1 | 1/1 | 6.22  | 5.66  |
| 1/1 | 1/1 | 7.81  | 7.32  |
| 0/1 | 1/1 | 5.64  | 5.38  |
| 0/1 | 1/1 | 6.05  | 5.83  |
| 1/1 | 1/1 | 5.48  | 5.33  |
| 1/1 | 1/1 | 6.7   | 6.71  |
| 1/1 | 0/1 | 5.04  | 3.51  |
| 1/1 | 1/1 | 5.47  | 4.32  |
| 1/1 | 1/1 | 5.98  | 3.59  |
| 1/1 | 1/1 | 8.15  | 5.85  |
| 1/1 | 1/1 | 4.74  | 5.67  |
| 1/1 | 1/1 | 6.48  | 3.89  |
| 1/1 | 1/1 | 4.41  | 4.56  |
| 1/1 | 1/1 | 3.49  | 3.81  |
| 0/1 | 1/1 | 1.93  | 2.45  |
| 1/1 | 1/1 | 9.92  | 10.52 |
| 0/1 | 1/1 | 2.6   | 3.82  |
| 1/1 | 1/1 | 6.45  | 3.6   |
| 1/1 | 1/1 | 5.48  | 2.7   |
| 1/1 | 1/1 | 6.32  | 4.12  |

|     |     |       |       |
|-----|-----|-------|-------|
| 1/1 | 1/1 | 9.52  | 9.45  |
| 1/1 | 1/1 | 12.25 | 12.22 |
| 1/1 | 1/1 | 2.83  | 2.83  |
| 1/1 | 1/1 | 5.87  | 5.88  |
| 1/1 | 1/1 | 4.9   | 3.63  |
| 1/1 | 1/1 | 8.61  | 7.42  |
| 1/1 | 1/1 | 6.34  | 5.51  |
| 1/1 | 1/1 | 5.14  | 4.31  |
| 1/1 | 1/1 | 3.96  | 3.16  |
| 1/1 | 1/1 | 3.9   | 3.16  |
| 1/1 | 1/1 | 11.39 | 10.66 |
| 1/1 | 1/1 | 5.02  | 4.36  |
| 1/1 | 1/1 | 4.12  | 3.51  |
| 1/1 | 1/1 | 6.17  | 5.6   |
| 0/1 | 1/1 | 4.21  | 5.8   |
| 1/1 | 1/1 | 5.65  | 7.35  |
| 1/1 | 1/1 | 4.36  | 6.06  |
| 1/1 | 1/1 | 8.37  | 6.64  |
| 1/1 | 0/1 | 4.3   | 2.67  |
| 1/1 | 1/1 | 8.53  | 6.94  |
| 1/1 | 1/1 | 9.02  | 7.5   |
| 1/1 | 1/1 | 7.83  | 6.32  |
| 1/1 | 1/1 | 8.4   | 7.26  |
| 1/1 | 1/1 | 11.03 | 9.9   |
| 1/1 | 1/1 | 5.13  | 6.14  |
| 1/1 | 1/1 | 6.68  | 7.69  |
| 1/1 | 1/1 | 6.17  | 7.23  |
| 1/1 | 1/1 | 5.13  | 6.2   |
| 0/1 | 1/1 | 3.19  | 4.29  |
| 1/1 | 1/1 | 6.17  | 7.31  |
| 1/1 | 1/1 | 4     | 5.27  |
| 1/1 | 1/1 | 4.95  | 6.4   |
| 1/1 | 0/1 | 4.69  | 2.41  |
| 1/1 | 0/1 | 5.82  | 3.8   |
| 1/1 | 0/1 | 4.83  | 3.19  |
| 1/1 | 1/1 | 8     | 8.65  |
| 1/1 | 1/1 | 2.94  | 3.67  |
| 1/1 | 1/1 | 8.6   | 9.55  |
| 1/1 | 0/1 | 5.4   | 2.93  |
| 1/1 | 1/1 | 5.95  | 7.04  |
| 1/1 | 0/1 | 6.29  | 5.4   |
| 1/1 | 1/1 | 9.13  | 8.57  |
| 1/1 | 1/1 | 5.72  | 5.24  |
| 1/1 | 1/1 | 5.89  | 5.43  |
| 1/1 | 0/1 | 4.94  | 4.48  |
| 1/1 | 1/1 | 6.78  | 6.38  |
| 1/1 | 1/1 | 6.38  | 6.01  |
| 1/1 | 1/1 | 4.43  | 4.18  |
| 1/1 | 1/1 | 9.83  | 9.63  |
| 0/1 | 1/1 | 8.31  | 8.13  |
| 1/1 | 1/1 | 9.85  | 8.89  |
| 1/1 | 1/1 | 6.74  | 5.96  |
| 1/1 | 1/1 | 6.31  | 6.02  |
| 0/1 | 1/1 | 2.36  | 2.1   |
| 1/1 | 1/1 | 4.4   | 4.15  |
| 1/1 | 1/1 | 2.97  | 4.85  |
| 1/1 | 1/1 | 4.55  | 4.6   |
| 1/1 | 1/1 | 3.32  | 3.57  |

|     |     |       |       |
|-----|-----|-------|-------|
| 1/1 | 1/1 | 5.05  | 5.66  |
| 1/1 | 1/1 | 9.39  | 10.02 |
| 1/1 | 1/1 | 9.62  | 7.11  |
| 0/1 | 1/1 | 2.75  | 3.22  |
| 1/1 | 1/1 | 4.97  | 5.51  |
| 0/1 | 1/1 | 1.96  | 2.75  |
| 1/1 | 1/1 | 5.34  | 4.46  |
| 1/1 | 1/1 | 5.5   | 4.8   |
| 1/1 | 1/1 | 4.1   | 3.77  |
| 1/1 | 1/1 | 5.98  | 5.79  |
| 1/1 | 1/1 | 5.53  | 5.33  |
| 1/1 | 1/1 | 4.29  | 6.23  |
| 0/1 | 1/1 | 2.86  | 4.84  |
| 1/1 | 1/1 | 8.62  | 8.31  |
| 1/1 | 1/1 | 4.17  | 4.08  |
| 1/1 | 1/1 | 8.8   | 8.81  |
| 1/1 | 1/1 | 8.1   | 8.39  |
| 1/1 | 1/1 | 6.12  | 8.56  |
| 1/1 | 1/1 | 6.28  | 8.79  |
| 1/1 | 1/1 | 5.28  | 8.26  |
| 1/1 | 0/1 | 6.63  | 5.09  |
| 1/1 | 1/1 | 4.5   | 5.75  |
| 1/1 | 1/1 | 5.47  | 6.74  |
| 0/1 | 1/1 | 4.71  | 5.98  |
| 0/1 | 1/1 | 4.02  | 5.35  |
| 1/1 | 1/1 | 4.67  | 6.13  |
| 1/1 | 1/1 | 4.65  | 6.57  |
| 1/1 | 1/1 | 5.51  | 4.81  |
| 1/1 | 1/1 | 6.12  | 5.87  |
| 1/1 | 1/1 | 9.84  | 9.72  |
| 1/1 | 1/1 | 6.72  | 6.63  |
| 1/1 | 1/1 | 7.79  | 7.81  |
| 1/1 | 0/1 | 4.8   | 2.51  |
| 1/1 | 1/1 | 5.76  | 4     |
| 1/1 | 1/1 | 5.12  | 3.51  |
| 0/1 | 1/1 | 2.11  | 2.61  |
| 0/1 | 1/1 | 2.2   | 2.72  |
| 0/1 | 1/1 | 3.95  | 4.67  |
| 1/1 | 1/1 | 4.82  | 4.58  |
| 1/1 | 1/1 | 10.85 | 10.82 |
| 1/1 | 1/1 | 7.27  | 7.52  |
| 1/1 | 1/1 | 5.44  | 5.88  |
| 1/1 | 1/1 | 8.86  | 7.24  |
| 1/1 | 1/1 | 10.72 | 9.81  |
| 1/1 | 1/1 | 5.98  | 7.32  |
| 1/1 | 1/1 | 7.45  | 9.04  |
| 0/1 | 1/1 | 3.16  | 5.23  |
| 1/1 | 1/1 | 9.24  | 7.74  |
| 0/1 | 1/1 | 2.66  | 3.98  |
| 1/1 | 1/1 | 3.61  | 5.15  |
| 1/1 | 0/1 | 4.76  | 3.16  |
| 1/1 | 1/1 | 3.3   | 4.64  |
| 0/1 | 1/1 | 4.9   | 6.26  |
| 0/1 | 1/1 | 2.56  | 4.62  |
| 1/1 | 0/1 | 3.47  | 2.09  |
| 1/1 | 1/1 | 7.11  | 5.98  |
| 1/1 | 0/1 | 3.38  | 2.64  |
| 1/1 | 1/1 | 10.03 | 9.33  |

|     |     |       |       |
|-----|-----|-------|-------|
| 1/1 | 1/1 | 10.9  | 10.24 |
| 1/1 | 1/1 | 5.55  | 4.91  |
| 1/1 | 1/1 | 5.99  | 5.73  |
| 0/1 | 1/1 | 5.1   | 4.84  |
| 0/1 | 1/1 | 8.14  | 7.91  |
| 1/1 | 1/1 | 8.48  | 8.52  |
| 0/1 | 1/1 | 5.13  | 7.41  |
| 1/1 | 1/1 | 4.97  | 7.5   |
| 1/1 | 1/1 | 5.2   | 7.79  |
| 1/1 | 1/1 | 5.12  | 7.84  |
| 1/1 | 0/1 | 6.29  | 4.56  |
| 1/1 | 1/1 | 2.96  | 4.69  |
| 0/1 | 1/1 | 2.46  | 4.53  |
| 1/1 | 1/1 | 6.07  | 3.58  |
| 1/1 | 1/1 | 3.14  | 3.42  |
| 0/1 | 1/1 | 4.35  | 5.6   |
| 1/1 | 0/1 | 5.99  | 3.63  |
| 1/1 | 0/1 | 5.92  | 4.22  |
| 1/1 | 0/1 | 4.37  | 2.12  |
| 1/1 | 0/1 | 6.71  | 4.66  |
| 1/1 | 1/1 | 5.85  | 4.29  |
| 1/1 | 1/1 | 3.87  | 3.55  |
| 1/1 | 1/1 | 11.68 | 11.43 |
| 0/1 | 1/1 | 4.09  | 3.96  |
| 1/1 | 1/1 | 8.79  | 8.72  |
| 1/1 | 1/1 | 6.84  | 6.83  |
| 1/1 | 1/1 | 7.48  | 7.67  |
| 1/1 | 1/1 | 6.39  | 6.62  |
| 0/1 | 1/1 | 4.84  | 5.08  |
| 1/1 | 1/1 | 5.72  | 6.03  |
| 1/1 | 1/1 | 7.44  | 7.79  |
| 1/1 | 1/1 | 6.6   | 7     |
| 1/1 | 1/1 | 6.36  | 4.88  |
| 0/1 | 1/1 | 4.31  | 5.67  |
| 1/1 | 1/1 | 3.74  | 5.29  |
| 1/1 | 1/1 | 4.85  | 3.54  |
| 1/1 | 1/1 | 3.42  | 2.84  |
| 1/1 | 1/1 | 6.81  | 6.23  |
| 1/1 | 1/1 | 7.91  | 7.36  |
| 1/1 | 1/1 | 9.52  | 9.22  |
| 1/1 | 1/1 | 3.9   | 3.67  |
| 1/1 | 1/1 | 6.39  | 6.31  |
| 1/1 | 1/1 | 7.61  | 7.6   |
| 1/1 | 1/1 | 5.01  | 5.1   |
| 1/1 | 1/1 | 6.4   | 6.51  |
| 1/1 | 1/1 | 7.19  | 4.46  |
| 1/1 | 1/1 | 6.6   | 4.13  |
| 1/1 | 0/1 | 5.41  | 2.97  |
| 1/1 | 1/1 | 8.07  | 6.04  |
| 1/1 | 1/1 | 6.09  | 6.1   |
| 1/1 | 1/1 | 3.67  | 3.7   |
| 1/1 | 1/1 | 2.19  | 2.24  |
| 0/1 | 1/1 | 3.23  | 3.28  |
| 1/1 | 1/1 | 4.52  | 4.61  |
| 1/1 | 1/1 | 5.4   | 5.5   |
| 1/1 | 1/1 | 3.62  | 3.79  |
| 1/1 | 1/1 | 7.91  | 7.24  |
| 1/1 | 1/1 | 6.54  | 6.38  |



|     |     |       |      |
|-----|-----|-------|------|
| 0/1 | 1/1 | 6.53  | 6.44 |
| 1/1 | 1/1 | 7.89  | 7.88 |
| 1/1 | 1/1 | 8.94  | 8.03 |
| 1/1 | 1/1 | 9.03  | 8.51 |
| 1/1 | 1/1 | 5.77  | 5.35 |
| 1/1 | 1/1 | 13.15 | 12.8 |
| 1/1 | 1/1 | 5.37  | 7.33 |
| 1/1 | 1/1 | 6.72  | 3.44 |
| 1/1 | 0/1 | 6.19  | 3.09 |
| 1/1 | 1/1 | 6.61  | 3.95 |
| 1/1 | 1/1 | 3.99  | 3.5  |
| 1/1 | 1/1 | 2.96  | 2.52 |
| 0/1 | 1/1 | 4.23  | 3.82 |
| 1/1 | 0/1 | 2.72  | 2.33 |
| 1/1 | 1/1 | 5.57  | 5.21 |
| 1/1 | 1/1 | 3.92  | 3.58 |
| 1/1 | 1/1 | 7.42  | 7.2  |
| 1/1 | 1/1 | 8.91  | 8.72 |
| 1/1 | 1/1 | 7.08  | 7.08 |
| 1/1 | 0/1 | 2.62  | 2.64 |
| 1/1 | 0/1 | 4.43  | 3.35 |
| 1/1 | 0/1 | 3.71  | 3.02 |
| 1/1 | 0/1 | 2.69  | 2.24 |
| 1/1 | 1/1 | 6.87  | 6.49 |
| 0/1 | 1/1 | 3.23  | 5.11 |
| 1/1 | 1/1 | 8.08  | 3.61 |
| 1/1 | 0/1 | 5.85  | 2.03 |
| 1/1 | 1/1 | 6.01  | 4.56 |
| 1/1 | 1/1 | 5.92  | 5.06 |
| 1/1 | 1/1 | 8.74  | 8.05 |
| 1/1 | 1/1 | 2.74  | 2.42 |
| 1/1 | 1/1 | 8.92  | 8.67 |
| 1/1 | 1/1 | 5.7   | 5.65 |
| 1/1 | 1/1 | 8.62  | 8.44 |
| 1/1 | 1/1 | 6.79  | 6.74 |
| 1/1 | 1/1 | 4.45  | 4.43 |
| 1/1 | 1/1 | 6.42  | 6.47 |
| 1/1 | 1/1 | 7.49  | 7.54 |
| 1/1 | 1/1 | 7.82  | 7.95 |
| 1/1 | 1/1 | 2.86  | 3.09 |
| 0/1 | 1/1 | 2.43  | 2.8  |
| 1/1 | 1/1 | 7.75  | 8.22 |
| 0/1 | 1/1 | 5.17  | 5.65 |
| 1/1 | 1/1 | 7.21  | 5.24 |
| 1/1 | 1/1 | 7.1   | 5.25 |
| 1/1 | 0/1 | 4.27  | 2.95 |
| 0/1 | 1/1 | 2.46  | 4.35 |
| 1/1 | 1/1 | 5.2   | 3.62 |
| 1/1 | 1/1 | 5.46  | 4.1  |
| 1/1 | 0/1 | 3.62  | 2.3  |
| 1/1 | 1/1 | 5.63  | 5.1  |
| 1/1 | 1/1 | 9.48  | 9    |
| 1/1 | 1/1 | 5.03  | 4.61 |
| 1/1 | 1/1 | 8.55  | 8.13 |
| 1/1 | 1/1 | 9.93  | 9.66 |
| 1/1 | 1/1 | 8.13  | 7.92 |
| 1/1 | 1/1 | 7.27  | 7.07 |
| 1/1 | 1/1 | 7.38  | 7.37 |

|     |     |       |      |
|-----|-----|-------|------|
| 1/1 | 1/1 | 6.17  | 6.25 |
| 1/1 | 0/1 | 5.44  | 3.67 |
| 1/1 | 0/1 | 3.92  | 2.61 |
| 1/1 | 1/1 | 6.42  | 5.2  |
| 1/1 | 1/1 | 4.24  | 3.12 |
| 1/1 | 1/1 | 4     | 3.13 |
| 1/1 | 1/1 | 4.39  | 3.93 |
| 1/1 | 1/1 | 5.2   | 7.1  |
| 1/1 | 1/1 | 7.83  | 5.71 |
| 1/1 | 1/1 | 8.62  | 7.21 |
| 1/1 | 1/1 | 8.84  | 7.3  |
| 1/1 | 0/1 | 6.18  | 5.11 |
| 1/1 | 1/1 | 9.07  | 8.03 |
| 0/1 | 1/1 | 3.4   | 5.65 |
| 1/1 | 1/1 | 9.2   | 7.56 |
| 1/1 | 1/1 | 4.46  | 5.79 |
| 1/1 | 0/1 | 6.17  | 4.16 |
| 1/1 | 1/1 | 4.8   | 2.97 |
| 1/1 | 1/1 | 4.75  | 3.03 |
| 1/1 | 1/1 | 7.05  | 5.56 |
| 1/1 | 1/1 | 6.14  | 6.88 |
| 1/1 | 1/1 | 5.69  | 3.32 |
| 1/1 | 1/1 | 5.18  | 3.19 |
| 1/1 | 0/1 | 5.01  | 3.07 |
| 1/1 | 0/1 | 4.01  | 2.14 |
| 1/1 | 1/1 | 5.18  | 3.49 |
| 1/1 | 1/1 | 5.7   | 3.44 |
| 1/1 | 1/1 | 7.28  | 7.75 |
| 0/1 | 1/1 | 3.95  | 4.44 |
| 1/1 | 1/1 | 8.21  | 8.82 |
| 1/1 | 1/1 | 7.78  | 8.53 |
| 0/1 | 1/1 | 3.52  | 4.3  |
| 1/1 | 1/1 | 6.6   | 7.42 |
| 1/1 | 1/1 | 6.55  | 7.39 |
| 1/1 | 1/1 | 7.53  | 8.45 |
| 1/1 | 1/1 | 8.23  | 9.2  |
| 0/1 | 1/1 | 4.3   | 5.38 |
| 1/1 | 1/1 | 6.93  | 8.32 |
| 1/1 | 1/1 | 6.15  | 4.69 |
| 1/1 | 1/1 | 6.2   | 5.14 |
| 1/1 | 0/1 | 5.77  | 4.86 |
| 1/1 | 1/1 | 6.8   | 5.96 |
| 1/1 | 1/1 | 3.69  | 4.95 |
| 0/1 | 1/1 | 3.28  | 5.27 |
| 1/1 | 1/1 | 5.4   | 4.29 |
| 1/1 | 0/1 | 3.54  | 2.55 |
| 1/1 | 1/1 | 3.66  | 2.77 |
| 1/1 | 1/1 | 3.71  | 2.91 |
| 1/1 | 1/1 | 5.11  | 4.56 |
| 1/1 | 1/1 | 4.33  | 3.83 |
| 1/1 | 1/1 | 3.85  | 3.36 |
| 1/1 | 1/1 | 10.05 | 9.57 |
| 1/1 | 1/1 | 4.72  | 4.3  |
| 1/1 | 1/1 | 4.33  | 6.41 |
| 1/1 | 1/1 | 7.04  | 5.31 |
| 1/1 | 1/1 | 5.13  | 6.13 |
| 1/1 | 1/1 | 3.04  | 4.27 |
| 1/1 | 1/1 | 3.85  | 5.24 |

|     |     |      |      |
|-----|-----|------|------|
| 1/1 | 1/1 | 2.83 | 4.71 |
| 1/1 | 0/1 | 6.63 | 4.73 |
| 1/1 | 1/1 | 4.9  | 3.52 |
| 1/1 | 1/1 | 5.25 | 3.73 |
| 1/1 | 1/1 | 6.15 | 5.28 |
| 1/1 | 1/1 | 3.4  | 2.5  |
| 1/1 | 1/1 | 5.89 | 5.26 |
| 1/1 | 1/1 | 8.65 | 8.04 |
| 1/1 | 1/1 | 6.1  | 5.52 |
| 1/1 | 1/1 | 9.46 | 9.22 |
| 1/1 | 1/1 | 6.17 | 5.96 |
| 1/1 | 0/1 | 5.21 | 3.22 |
| 1/1 | 1/1 | 7.77 | 6.38 |
| 1/1 | 1/1 | 5.99 | 6.78 |
| 1/1 | 1/1 | 5.23 | 6.09 |
| 0/1 | 1/1 | 3.47 | 4.45 |
| 1/1 | 1/1 | 4.02 | 5.75 |
| 1/1 | 0/1 | 5.12 | 4.42 |
| 1/1 | 1/1 | 8.14 | 7.47 |
| 1/1 | 1/1 | 5.59 | 5.02 |
| 0/1 | 1/1 | 5.43 | 5.42 |
| 0/1 | 1/1 | 4.63 | 4.64 |
| 1/1 | 0/1 | 7.05 | 5.54 |
| 1/1 | 0/1 | 6.41 | 5.5  |
| 1/1 | 1/1 | 5.87 | 5.17 |
| 0/1 | 1/1 | 3.11 | 2.95 |
| 1/1 | 1/1 | 9.11 | 9.02 |
| 1/1 | 1/1 | 5.42 | 4.03 |
| 1/1 | 1/1 | 6.73 | 8.14 |
| 1/1 | 1/1 | 4.13 | 6.01 |
| 1/1 | 0/1 | 4.79 | 3.46 |
| 1/1 | 1/1 | 7.38 | 6.41 |
| 1/1 | 1/1 | 5.16 | 4.3  |
| 1/1 | 0/1 | 6.82 | 6.11 |
| 0/1 | 1/1 | 5.73 | 5.05 |
| 0/1 | 1/1 | 2.84 | 4.57 |
| 1/1 | 1/1 | 5.33 | 3.74 |
| 1/1 | 1/1 | 6.25 | 4.79 |
| 1/1 | 1/1 | 6.83 | 5.5  |
| 1/1 | 1/1 | 7.43 | 6.17 |
| 1/1 | 0/1 | 3.96 | 2.73 |
| 1/1 | 1/1 | 7.46 | 6.45 |
| 1/1 | 1/1 | 3.21 | 2.84 |
| 1/1 | 1/1 | 9.86 | 9.54 |
| 0/1 | 1/1 | 2.87 | 2.76 |
| 0/1 | 1/1 | 3.44 | 3.37 |
| 1/1 | 1/1 | 5.14 | 5.2  |
| 1/1 | 1/1 | 5.38 | 5.53 |
| 1/1 | 1/1 | 5.96 | 6.25 |
| 1/1 | 1/1 | 3.74 | 6.2  |
| 0/1 | 1/1 | 3.82 | 6.35 |
| 1/1 | 1/1 | 4.79 | 7.37 |
| 1/1 | 1/1 | 3.64 | 6.36 |
| 1/1 | 1/1 | 4.03 | 3.03 |
| 1/1 | 1/1 | 4.93 | 4.29 |
| 1/1 | 1/1 | 6.3  | 8.06 |
| 1/1 | 1/1 | 6.33 | 8.26 |
| 1/1 | 1/1 | 6.79 | 8.88 |

|     |     |       |       |
|-----|-----|-------|-------|
| 1/1 | 1/1 | 8.38  | 6.96  |
| 1/1 | 1/1 | 6.53  | 5.42  |
| 1/1 | 1/1 | 6.14  | 5.09  |
| 1/1 | 1/1 | 6.89  | 5.96  |
| 1/1 | 1/1 | 5.21  | 4.48  |
| 1/1 | 0/1 | 3.69  | 2.92  |
| 1/1 | 1/1 | 5.69  | 5.43  |
| 1/1 | 1/1 | 4.67  | 4.18  |
| 1/1 | 1/1 | 6.79  | 6.5   |
| 1/1 | 1/1 | 10.16 | 10    |
| 1/1 | 1/1 | 7.72  | 7.79  |
| 1/1 | 1/1 | 7.61  | 7.72  |
| 1/1 | 1/1 | 8.34  | 8.48  |
| 1/1 | 1/1 | 6.23  | 6.42  |
| 1/1 | 1/1 | 5.2   | 7.51  |
| 0/1 | 1/1 | 3.38  | 5.91  |
| 1/1 | 1/1 | 4.43  | 6.98  |
| 0/1 | 1/1 | 3.56  | 6.96  |
| 0/1 | 1/1 | 3     | 6.73  |
| 1/1 | 1/1 | 11.33 | 10.39 |
| 1/1 | 1/1 | 5.32  | 4.99  |
| 1/1 | 1/1 | 5.37  | 4.64  |
| 0/1 | 1/1 | 2.7   | 2.46  |
| 1/1 | 1/1 | 6.69  | 6.45  |
| 1/1 | 1/1 | 6.72  | 6.65  |
| 1/1 | 1/1 | 8.34  | 7.27  |
| 1/1 | 1/1 | 5.41  | 4.53  |
| 1/1 | 1/1 | 3.91  | 5.56  |
| 1/1 | 1/1 | 3.01  | 4.73  |
| 0/1 | 1/1 | 3.86  | 5.61  |
| 1/1 | 1/1 | 4.25  | 6.14  |
| 0/1 | 1/1 | 3.47  | 5.58  |
| 1/1 | 0/1 | 3.17  | 2.12  |
| 1/1 | 1/1 | 6.28  | 5.69  |
| 1/1 | 1/1 | 5.17  | 4.61  |
| 1/1 | 1/1 | 8.07  | 6.64  |
| 1/1 | 0/1 | 4.4   | 3.55  |
| 1/1 | 1/1 | 7.73  | 6.9   |
| 0/1 | 1/1 | 2.71  | 4.23  |
| 1/1 | 1/1 | 5.96  | 4.48  |
| 1/1 | 0/1 | 3.41  | 2.6   |
| 0/1 | 1/1 | 2.89  | 4.56  |
| 1/1 | 1/1 | 9.75  | 9.49  |
| 1/1 | 1/1 | 7     | 6.78  |
| 1/1 | 1/1 | 9.41  | 9.2   |
| 1/1 | 1/1 | 6.73  | 6.61  |
| 1/1 | 1/1 | 8.4   | 8.41  |
| 1/1 | 1/1 | 9.46  | 9.62  |
| 0/1 | 1/1 | 2.68  | 5.37  |
| 1/1 | 0/1 | 5.43  | 3.29  |
| 1/1 | 1/1 | 5.85  | 3.76  |
| 1/1 | 0/1 | 4.21  | 2.46  |
| 1/1 | 0/1 | 3.91  | 2.23  |
| 1/1 | 1/1 | 4.71  | 3.22  |
| 1/1 | 1/1 | 7     | 7.6   |
| 1/1 | 1/1 | 5.89  | 3.65  |
| 0/1 | 1/1 | 3.11  | 3.72  |
| 1/1 | 0/1 | 5.41  | 4.04  |

|     |     |       |       |
|-----|-----|-------|-------|
| 1/1 | 1/1 | 9.43  | 8.46  |
| 1/1 | 1/1 | 3.43  | 2.59  |
| 1/1 | 1/1 | 6.07  | 5.25  |
| 1/1 | 0/1 | 6.02  | 4.4   |
| 1/1 | 1/1 | 4.95  | 6.1   |
| 0/1 | 1/1 | 2.93  | 4.19  |
| 1/1 | 0/1 | 4.76  | 3.01  |
| 1/1 | 1/1 | 3.48  | 4.56  |
| 1/1 | 0/1 | 4.45  | 2.84  |
| 1/1 | 1/1 | 4.85  | 3.8   |
| 1/1 | 1/1 | 4.93  | 4     |
| 0/1 | 1/1 | 1.71  | 3.25  |
| 0/1 | 1/1 | 5.47  | 5.74  |
| 0/1 | 1/1 | 5.68  | 5.96  |
| 1/1 | 1/1 | 6.19  | 6.58  |
| 1/1 | 1/1 | 8.81  | 9.2   |
| 0/1 | 1/1 | 1.97  | 2.52  |
| 1/1 | 1/1 | 4.62  | 5.28  |
| 1/1 | 1/1 | 11.16 | 11.94 |
| 1/1 | 1/1 | 10.87 | 11.85 |
| 1/1 | 1/1 | 5.46  | 3.49  |
| 1/1 | 1/1 | 7.03  | 5.71  |
| 1/1 | 1/1 | 8.76  | 9.79  |
| 1/1 | 1/1 | 4.4   | 5.65  |
| 1/1 | 0/1 | 4.99  | 3.73  |
| 1/1 | 0/1 | 6.44  | 5.57  |
| 1/1 | 1/1 | 11.71 | 11.09 |
| 1/1 | 1/1 | 4.65  | 6.87  |
| 1/1 | 1/1 | 3.49  | 5.92  |
| 1/1 | 1/1 | 3.16  | 5.6   |
| 1/1 | 1/1 | 6.68  | 9.15  |
| 1/1 | 1/1 | 4.42  | 3.43  |
| 1/1 | 1/1 | 3.71  | 2.99  |
| 1/1 | 1/1 | 5.76  | 5.2   |
| 1/1 | 1/1 | 4.48  | 4     |
| 1/1 | 1/1 | 6.1   | 5.67  |
| 1/1 | 1/1 | 6.73  | 6.21  |
| 1/1 | 1/1 | 3.25  | 2.78  |
| 1/1 | 1/1 | 2.97  | 2.65  |
| 1/1 | 1/1 | 7.3   | 7.14  |
| 1/1 | 1/1 | 12.85 | 12.75 |
| 1/1 | 1/1 | 8.52  | 8.53  |
| 0/1 | 1/1 | 1.96  | 4.37  |
| 1/1 | 1/1 | 5.73  | 8.41  |
| 1/1 | 0/1 | 3.84  | 2.65  |
| 0/1 | 1/1 | 3.73  | 5.49  |
| 1/1 | 1/1 | 7.31  | 5.5   |
| 1/1 | 1/1 | 7.61  | 6.34  |
| 1/1 | 0/1 | 7.68  | 6.6   |
| 1/1 | 1/1 | 5.47  | 4.7   |
| 0/1 | 1/1 | 7.64  | 6.99  |
| 1/1 | 1/1 | 7.95  | 7.31  |
| 1/1 | 1/1 | 6.64  | 6.07  |
| 0/1 | 1/1 | 5.13  | 4.59  |
| 1/1 | 1/1 | 5.99  | 5.45  |
| 1/1 | 1/1 | 6.77  | 6.29  |
| 1/1 | 1/1 | 6.09  | 5.67  |
| 1/1 | 1/1 | 5.74  | 7.41  |

|     |     |       |       |
|-----|-----|-------|-------|
| 0/1 | 1/1 | 5.05  | 6.89  |
| 0/1 | 1/1 | 4.71  | 6.87  |
| 1/1 | 1/1 | 5.04  | 7.21  |
| 0/1 | 1/1 | 3.11  | 5.37  |
| 0/1 | 1/1 | 3.19  | 5.71  |
| 1/1 | 1/1 | 11.68 | 11.43 |
| 1/1 | 1/1 | 7.69  | 7.6   |
| 1/1 | 1/1 | 6.84  | 6.83  |
| 1/1 | 1/1 | 7.48  | 7.67  |
| 1/1 | 1/1 | 6.39  | 6.62  |
| 1/1 | 1/1 | 6.02  | 4.26  |
| 0/1 | 1/1 | 2.04  | 3.26  |
| 0/1 | 1/1 | 2.32  | 3.55  |
| 1/1 | 1/1 | 7.82  | 7.24  |
| 1/1 | 1/1 | 5.4   | 4.82  |
| 1/1 | 0/1 | 2.97  | 2.5   |
| 0/1 | 1/1 | 7.59  | 7.37  |
| 1/1 | 1/1 | 8.74  | 8.56  |
| 0/1 | 1/1 | 6     | 5.88  |
| 1/1 | 1/1 | 8.48  | 8.48  |
| 1/1 | 0/1 | 5.51  | 3.83  |
| 1/1 | 0/1 | 3.53  | 2.27  |
| 1/1 | 1/1 | 7.27  | 8.28  |
| 1/1 | 1/1 | 5.75  | 6.84  |
| 1/1 | 1/1 | 5.32  | 6.52  |
| 1/1 | 1/1 | 3.97  | 5.18  |
| 1/1 | 1/1 | 8.69  | 9.92  |
| 1/1 | 1/1 | 3.19  | 4.82  |
| 1/1 | 1/1 | 5.76  | 7.73  |
| 1/1 | 1/1 | 5.44  | 3.39  |
| 1/1 | 1/1 | 5.72  | 6.49  |
| 0/1 | 1/1 | 2.19  | 2.97  |
| 0/1 | 1/1 | 4.39  | 5.25  |
| 1/1 | 0/1 | 3.74  | 1.97  |
| 1/1 | 1/1 | 2.92  | 4.13  |
| 1/1 | 1/1 | 7.78  | 3.24  |
| 1/1 | 0/1 | 6.53  | 2.52  |
| 1/1 | 0/1 | 6.79  | 2.79  |
| 1/1 | 1/1 | 9.65  | 7.81  |
| 1/1 | 0/1 | 4.2   | 2.57  |
| 1/1 | 1/1 | 5.6   | 4.05  |
| 1/1 | 1/1 | 7.17  | 5.71  |
| 1/1 | 1/1 | 8.18  | 6.72  |
| 1/1 | 1/1 | 7.46  | 6.15  |
| 1/1 | 1/1 | 4.25  | 2.99  |
| 1/1 | 0/1 | 7.26  | 6.19  |
| 1/1 | 1/1 | 4.57  | 3.73  |
| 1/1 | 1/1 | 6.51  | 5.7   |
| 1/1 | 1/1 | 6.58  | 5.81  |
| 1/1 | 1/1 | 7.11  | 6.56  |
| 0/1 | 1/1 | 4.02  | 3.51  |
| 1/1 | 0/1 | 3.19  | 2.78  |
| 0/1 | 1/1 | 5.95  | 5.77  |
| 0/1 | 1/1 | 2.59  | 2.41  |
| 1/1 | 1/1 | 8.8   | 8.65  |
| 0/1 | 1/1 | 3.02  | 2.91  |
| 0/1 | 1/1 | 4.07  | 4.13  |
| 0/1 | 1/1 | 2.9   | 3.54  |

|     |     |       |      |
|-----|-----|-------|------|
| 0/1 | 1/1 | 5.05  | 6.02 |
| 1/1 | 0/1 | 5.14  | 3.01 |
| 1/1 | 1/1 | 10.04 | 10.6 |
| 0/1 | 1/1 | 3.56  | 4.3  |
| 1/1 | 0/1 | 4.72  | 2.97 |
| 1/1 | 0/1 | 4.08  | 2.93 |
| 1/1 | 1/1 | 6.51  | 7.46 |
| 0/1 | 1/1 | 2.78  | 3.74 |
| 1/1 | 1/1 | 3.51  | 4.48 |
| 1/1 | 1/1 | 6.09  | 7.31 |
| 1/1 | 1/1 | 4.58  | 5.87 |
| 1/1 | 1/1 | 8.78  | 7.74 |
| 1/1 | 1/1 | 5.1   | 4.38 |
| 1/1 | 1/1 | 7.1   | 6.6  |
| 1/1 | 1/1 | 7.89  | 7.42 |
| 1/1 | 1/1 | 4.82  | 6.9  |
| 1/1 | 1/1 | 3.75  | 3.05 |
| 1/1 | 1/1 | 7.59  | 7.26 |
| 1/1 | 1/1 | 8.21  | 8.03 |
| 1/1 | 1/1 | 6.89  | 6.72 |
| 0/1 | 1/1 | 4.02  | 3.93 |
| 1/1 | 1/1 | 9.02  | 7.77 |
| 1/1 | 1/1 | 6.21  | 5.58 |
| 1/1 | 1/1 | 5.47  | 4.45 |
| 1/1 | 0/1 | 3.26  | 2.26 |
| 1/1 | 1/1 | 5.73  | 5.21 |
| 1/1 | 1/1 | 4.17  | 3.68 |
| 1/1 | 1/1 | 4.95  | 4.54 |
| 0/1 | 1/1 | 4.47  | 4.14 |
| 0/1 | 1/1 | 2.99  | 4.9  |
| 1/1 | 1/1 | 2.65  | 4.66 |
| 1/1 | 1/1 | 4.82  | 3.48 |
| 1/1 | 1/1 | 5.77  | 7.17 |
| 1/1 | 1/1 | 5.32  | 7.25 |
| 0/1 | 1/1 | 2.11  | 4.16 |
| 1/1 | 1/1 | 2.41  | 5.3  |
| 1/1 | 0/1 | 9.19  | 8.36 |
| 1/1 | 1/1 | 7.7   | 7.47 |
| 1/1 | 1/1 | 8.22  | 7.99 |
| 1/1 | 1/1 | 4.71  | 7.28 |
| 1/1 | 1/1 | 5.36  | 4    |
| 1/1 | 1/1 | 4.69  | 3.58 |
| 1/1 | 1/1 | 4.94  | 4.27 |
| 1/1 | 1/1 | 5.92  | 7.42 |
| 1/1 | 1/1 | 4.12  | 5.88 |
| 0/1 | 1/1 | 4.57  | 6.37 |
| 1/1 | 1/1 | 3.84  | 5.85 |
| 0/1 | 1/1 | 4.1   | 6.16 |
| 1/1 | 1/1 | 8.5   | 6.99 |
| 1/1 | 1/1 | 4.27  | 5.6  |
| 0/1 | 1/1 | 2.39  | 4.02 |
| 1/1 | 1/1 | 9.96  | 8.66 |
| 1/1 | 1/1 | 7.28  | 8.83 |
| 1/1 | 0/1 | 7.08  | 3.87 |
| 1/1 | 0/1 | 6.14  | 3.18 |
| 1/1 | 1/1 | 6.47  | 3.75 |
| 1/1 | 1/1 | 7.35  | 4.68 |
| 1/1 | 1/1 | 7.14  | 4.55 |

|     |     |       |      |
|-----|-----|-------|------|
| 1/1 | 1/1 | 6.36  | 3.82 |
| 1/1 | 1/1 | 7.14  | 6.67 |
| 1/1 | 1/1 | 6.39  | 5.96 |
| 1/1 | 1/1 | 5.15  | 4.73 |
| 1/1 | 1/1 | 8.32  | 7.91 |
| 1/1 | 1/1 | 7.75  | 7.43 |
| 1/1 | 1/1 | 6.4   | 6.13 |
| 1/1 | 1/1 | 7.08  | 6.87 |
| 1/1 | 1/1 | 7.81  | 7.6  |
| 1/1 | 1/1 | 5.48  | 5.31 |
| 0/1 | 1/1 | 7.14  | 7.13 |
| 1/1 | 1/1 | 6.69  | 7.06 |
| 1/1 | 1/1 | 7.96  | 6    |
| 1/1 | 0/1 | 5     | 3.68 |
| 0/1 | 1/1 | 3.69  | 4.51 |
| 0/1 | 1/1 | 2.51  | 3.63 |
| 1/1 | 1/1 | 6.13  | 5.3  |
| 1/1 | 1/1 | 6.83  | 6.15 |
| 1/1 | 1/1 | 5.94  | 5.39 |
| 1/1 | 1/1 | 7.21  | 6.8  |
| 1/1 | 1/1 | 6.52  | 6.14 |
| 1/1 | 1/1 | 9.06  | 8.68 |
| 1/1 | 1/1 | 5.57  | 5.3  |
| 1/1 | 1/1 | 5.01  | 4.82 |
| 1/1 | 1/1 | 6.52  | 6.35 |
| 1/1 | 1/1 | 3.67  | 3.51 |
| 1/1 | 1/1 | 6.3   | 3.81 |
| 1/1 | 1/1 | 7.47  | 5.5  |
| 1/1 | 1/1 | 7.97  | 8.21 |
| 0/1 | 1/1 | 4.14  | 4.43 |
| 0/1 | 1/1 | 4.86  | 5.41 |
| 1/1 | 1/1 | 4.21  | 4.84 |
| 1/1 | 1/1 | 5.75  | 6.43 |
| 1/1 | 1/1 | 5.65  | 6.37 |
| 0/1 | 1/1 | 3.15  | 3.89 |
| 1/1 | 1/1 | 5.38  | 6.31 |
| 1/1 | 1/1 | 6     | 6.94 |
| 1/1 | 1/1 | 6.51  | 7.61 |
| 1/1 | 1/1 | 5.3   | 7.41 |
| 1/1 | 0/1 | 2.81  | 1.74 |
| 1/1 | 1/1 | 5.58  | 4.56 |
| 1/1 | 1/1 | 10.27 | 9.34 |
| 1/1 | 1/1 | 9.66  | 9.04 |
| 1/1 | 1/1 | 8.77  | 8.24 |
| 1/1 | 1/1 | 3.48  | 5.25 |
| 1/1 | 1/1 | 8.31  | 6.95 |
| 1/1 | 1/1 | 5.2   | 4.21 |
| 1/1 | 1/1 | 5.69  | 4.93 |
| 1/1 | 1/1 | 4.89  | 6.31 |
| 0/1 | 1/1 | 4.07  | 5.51 |
| 1/1 | 1/1 | 5.53  | 7.12 |
| 1/1 | 1/1 | 7.57  | 6.87 |
| 1/1 | 1/1 | 6.35  | 5.86 |
| 1/1 | 1/1 | 8.77  | 8.43 |
| 1/1 | 1/1 | 3.84  | 3.66 |
| 1/1 | 0/1 | 4.67  | 2.89 |
| 1/1 | 1/1 | 6.77  | 5.45 |
| 1/1 | 1/1 | 6.98  | 5.84 |



|     |     |       |       |
|-----|-----|-------|-------|
| 1/1 | 1/1 | 5.41  | 4.13  |
| 1/1 | 0/1 | 4.79  | 3.76  |
| 1/1 | 1/1 | 6.15  | 5.32  |
| 1/1 | 1/1 | 8     | 7.36  |
| 1/1 | 1/1 | 5.14  | 6.59  |
| 1/1 | 1/1 | 3.71  | 5.37  |
| 1/1 | 1/1 | 4.55  | 6.22  |
| 1/1 | 1/1 | 7.67  | 4.21  |
| 1/1 | 1/1 | 7.06  | 4.25  |
| 1/1 | 1/1 | 5.53  | 4.77  |
| 1/1 | 1/1 | 6.15  | 5.61  |
| 1/1 | 1/1 | 9.56  | 9.19  |
| 1/1 | 1/1 | 9.58  | 9.23  |
| 1/1 | 1/1 | 8.15  | 8.07  |
| 1/1 | 0/1 | 2.96  | 2.29  |
| 1/1 | 1/1 | 8.86  | 8.83  |
| 1/1 | 0/1 | 6.04  | 3.74  |
| 1/1 | 0/1 | 4.16  | 2.52  |
| 1/1 | 1/1 | 2.46  | 2.86  |
| 1/1 | 1/1 | 3.14  | 3.73  |
| 1/1 | 0/1 | 4.65  | 3.75  |
| 1/1 | 1/1 | 9.81  | 8.92  |
| 1/1 | 1/1 | 6.06  | 5.2   |
| 1/1 | 1/1 | 9.33  | 8.81  |
| 1/1 | 1/1 | 7.96  | 7.71  |
| 1/1 | 1/1 | 7.08  | 6.86  |
| 0/1 | 1/1 | 6.95  | 6.73  |
| 1/1 | 1/1 | 4.03  | 3.11  |
| 1/1 | 1/1 | 8.32  | 7.89  |
| 1/1 | 1/1 | 6.46  | 6.15  |
| 1/1 | 1/1 | 9.44  | 11.91 |
| 1/1 | 1/1 | 5.35  | 8.45  |
| 1/1 | 1/1 | 10.04 | 9.5   |
| 0/1 | 1/1 | 4.86  | 4.48  |
| 0/1 | 1/1 | 5.32  | 5.24  |
| 1/1 | 1/1 | 6.15  | 6.15  |
| 1/1 | 1/1 | 8.65  | 7.28  |
| 1/1 | 1/1 | 9.67  | 8.95  |
| 1/1 | 1/1 | 7.02  | 6.23  |
| 1/1 | 1/1 | 3.52  | 2.82  |
| 1/1 | 1/1 | 7.68  | 7.5   |
| 1/1 | 0/1 | 2.94  | 2.77  |
| 1/1 | 0/1 | 6.59  | 4.56  |
| 1/1 | 1/1 | 6.09  | 4.52  |
| 1/1 | 0/1 | 4.84  | 3.27  |
| 1/1 | 1/1 | 8.73  | 7.37  |
| 0/1 | 1/1 | 3.38  | 4.37  |
| 1/1 | 0/1 | 4.67  | 3.22  |
| 1/1 | 1/1 | 4.87  | 3.62  |
| 1/1 | 1/1 | 4.69  | 3.67  |
| 1/1 | 1/1 | 7.36  | 6.34  |
| 1/1 | 1/1 | 5.82  | 5.18  |
| 1/1 | 0/1 | 4.68  | 2.96  |
| 1/1 | 1/1 | 4.92  | 3.52  |
| 1/1 | 0/1 | 5.72  | 4.36  |
| 1/1 | 0/1 | 3.4   | 1.81  |
| 1/1 | 1/1 | 7.19  | 5.73  |
| 1/1 | 1/1 | 6.72  | 5.29  |

|     |     |      |      |
|-----|-----|------|------|
| 1/1 | 1/1 | 4.29 | 5.44 |
| 0/1 | 1/1 | 3.51 | 4.84 |
| 0/1 | 1/1 | 3.74 | 5.47 |
| 1/1 | 0/1 | 7.68 | 6.6  |
| 1/1 | 1/1 | 5.47 | 4.7  |
| 0/1 | 1/1 | 7.64 | 6.99 |
| 1/1 | 1/1 | 7.95 | 7.31 |
| 1/1 | 1/1 | 7.14 | 6.53 |
| 1/1 | 1/1 | 6.64 | 6.07 |
| 0/1 | 1/1 | 5.13 | 4.59 |
| 1/1 | 1/1 | 6.77 | 6.29 |
| 1/1 | 1/1 | 6.09 | 5.67 |
| 1/1 | 1/1 | 5.74 | 7.41 |
| 0/1 | 1/1 | 5.05 | 6.89 |
| 1/1 | 1/1 | 5.04 | 7.21 |
| 0/1 | 1/1 | 4.71 | 6.87 |
| 0/1 | 1/1 | 3.11 | 5.37 |
| 0/1 | 1/1 | 3.19 | 5.71 |
| 1/1 | 0/1 | 7.68 | 6.6  |
| 1/1 | 1/1 | 5.47 | 4.7  |
| 0/1 | 1/1 | 7.64 | 6.99 |
| 1/1 | 1/1 | 7.95 | 7.31 |
| 1/1 | 1/1 | 7.14 | 6.53 |
| 1/1 | 1/1 | 6.64 | 6.07 |
| 0/1 | 1/1 | 5.13 | 4.59 |
| 1/1 | 1/1 | 6.77 | 6.29 |
| 1/1 | 1/1 | 6.09 | 5.67 |
| 1/1 | 1/1 | 5.74 | 7.41 |
| 0/1 | 1/1 | 5.05 | 6.89 |
| 1/1 | 1/1 | 5.04 | 7.21 |
| 0/1 | 1/1 | 4.71 | 6.87 |
| 0/1 | 1/1 | 3.11 | 5.37 |
| 0/1 | 1/1 | 3.19 | 5.71 |
| 1/1 | 0/1 | 7.68 | 6.6  |
| 1/1 | 1/1 | 5.47 | 4.7  |
| 0/1 | 1/1 | 7.64 | 6.99 |
| 1/1 | 1/1 | 7.95 | 7.31 |
| 1/1 | 1/1 | 7.14 | 6.53 |
| 1/1 | 1/1 | 6.64 | 6.07 |
| 0/1 | 1/1 | 5.13 | 4.59 |
| 1/1 | 1/1 | 6.77 | 6.29 |
| 1/1 | 1/1 | 6.09 | 5.67 |
| 1/1 | 1/1 | 5.74 | 7.41 |
| 0/1 | 1/1 | 5.05 | 6.89 |
| 1/1 | 1/1 | 5.04 | 7.21 |
| 0/1 | 1/1 | 4.71 | 6.87 |
| 0/1 | 1/1 | 3.11 | 5.37 |
| 0/1 | 1/1 | 3.19 | 5.71 |
| 1/1 | 1/1 | 5.34 | 4.44 |
| 1/1 | 1/1 | 5.01 | 4.13 |
| 1/1 | 0/1 | 6.49 | 5.68 |
| 1/1 | 1/1 | 6.51 | 6.09 |
| 0/1 | 1/1 | 2.94 | 2.71 |
| 0/1 | 1/1 | 2.6  | 4.51 |
| 1/1 | 1/1 | 3.48 | 5.42 |
| 1/1 | 1/1 | 8.37 | 6.88 |
| 1/1 | 1/1 | 8.11 | 7.27 |
| 1/1 | 1/1 | 3.34 | 4.79 |

|     |     |       |      |
|-----|-----|-------|------|
| 1/1 | 1/1 | 7.99  | 7.01 |
| 1/1 | 0/1 | 3.64  | 2.8  |
| 1/1 | 1/1 | 10.29 | 9.74 |
| 1/1 | 1/1 | 6.44  | 6.05 |
| 1/1 | 1/1 | 7.7   | 7.1  |
| 0/1 | 1/1 | 4.52  | 4.16 |
| 1/1 | 1/1 | 6.11  | 5.76 |
| 1/1 | 1/1 | 6.72  | 6.47 |
| 1/1 | 1/1 | 4.72  | 4.66 |
| 1/1 | 1/1 | 6.81  | 9.21 |
| 0/1 | 1/1 | 2.49  | 5.05 |
| 1/1 | 1/1 | 5.23  | 7.93 |
| 0/1 | 1/1 | 4.1   | 6.86 |
| 1/1 | 1/1 | 5.71  | 5.01 |
| 1/1 | 1/1 | 4.34  | 3.78 |
| 1/1 | 1/1 | 5.99  | 5.6  |
| 0/1 | 1/1 | 2.94  | 2.78 |
| 1/1 | 1/1 | 5.43  | 5.29 |
| 1/1 | 1/1 | 5.49  | 5.36 |
| 1/1 | 1/1 | 3.49  | 3.42 |
| 1/1 | 1/1 | 7.7   | 6.95 |
| 1/1 | 0/1 | 5.57  | 4.89 |
| 1/1 | 1/1 | 5.02  | 4.65 |
| 1/1 | 1/1 | 4.3   | 3.93 |
| 1/1 | 1/1 | 6.77  | 6.5  |
| 1/1 | 1/1 | 6.24  | 6.02 |
| 1/1 | 1/1 | 4.21  | 4.01 |
| 1/1 | 1/1 | 5.25  | 5.11 |
| 1/1 | 1/1 | 8.52  | 8.4  |
| 0/1 | 1/1 | 2.99  | 2.88 |
| 1/1 | 1/1 | 4.06  | 6.74 |
| 1/1 | 0/1 | 5.54  | 3.6  |
| 1/1 | 1/1 | 6.64  | 5.28 |
| 1/1 | 1/1 | 6.61  | 4.87 |
| 1/1 | 0/1 | 3.75  | 2.57 |
| 1/1 | 1/1 | 6.6   | 7.55 |
| 1/1 | 1/1 | 3.46  | 4.43 |
| 1/1 | 1/1 | 4.4   | 5.36 |
| 1/1 | 1/1 | 4.59  | 5.71 |
| 1/1 | 1/1 | 4.61  | 5.73 |
| 1/1 | 1/1 | 4.06  | 5.98 |
| 0/1 | 1/1 | 1.98  | 3.91 |
| 1/1 | 1/1 | 6.02  | 4.47 |
| 1/1 | 1/1 | 7.14  | 6.19 |
| 1/1 | 1/1 | 3.63  | 2.81 |
| 1/1 | 1/1 | 4.51  | 4.3  |
| 1/1 | 1/1 | 8.14  | 8.13 |
| 1/1 | 1/1 | 3.52  | 4.12 |
| 0/1 | 1/1 | 2.99  | 6.15 |
| 1/1 | 1/1 | 4.13  | 7.79 |
| 1/1 | 1/1 | 9.44  | 8.33 |
| 1/1 | 1/1 | 5.03  | 4.37 |
| 0/1 | 1/1 | 2.27  | 4.11 |
| 0/1 | 1/1 | 3.54  | 5.58 |
| 1/1 | 1/1 | 6.51  | 6.07 |
| 1/1 | 0/1 | 6.02  | 5.84 |
| 1/1 | 1/1 | 4.25  | 4.13 |
| 1/1 | 1/1 | 7.03  | 6.92 |

|     |     |       |       |
|-----|-----|-------|-------|
| 1/1 | 1/1 | 11.88 | 11.78 |
| 1/1 | 1/1 | 5.81  | 5.86  |
| 1/1 | 1/1 | 4.71  | 3.75  |
| 1/1 | 1/1 | 3.71  | 3.3   |
| 1/1 | 1/1 | 5.04  | 6.78  |
| 1/1 | 1/1 | 3.06  | 4.81  |
| 1/1 | 1/1 | 3.93  | 5.9   |
| 1/1 | 1/1 | 8.85  | 7.26  |
| 1/1 | 1/1 | 6.84  | 5.31  |
| 1/1 | 1/1 | 8.19  | 7.09  |
| 1/1 | 1/1 | 8.07  | 7.03  |
| 1/1 | 1/1 | 5.99  | 7.12  |
| 0/1 | 1/1 | 3.05  | 4.51  |
| 1/1 | 0/1 | 6.05  | 2.97  |
| 1/1 | 0/1 | 6.31  | 3.67  |
| 1/1 | 1/1 | 5.88  | 3.41  |
| 1/1 | 1/1 | 5.81  | 5.51  |
| 1/1 | 1/1 | 4.64  | 4.45  |
| 0/1 | 1/1 | 3.86  | 3.76  |
| 1/1 | 1/1 | 5.26  | 5.23  |
| 1/1 | 1/1 | 8.13  | 8.23  |
| 0/1 | 1/1 | 3.93  | 4.08  |
| 0/1 | 1/1 | 2.56  | 2.72  |
| 0/1 | 1/1 | 4.36  | 5.04  |
| 0/1 | 1/1 | 4.98  | 6.2   |
| 1/1 | 1/1 | 4.44  | 3.2   |
| 1/1 | 1/1 | 5.1   | 6.84  |
| 1/1 | 1/1 | 8.27  | 7.21  |
| 1/1 | 0/1 | 4.76  | 3.86  |
| 1/1 | 1/1 | 5.44  | 4.64  |
| 1/1 | 1/1 | 9.31  | 8.73  |
| 1/1 | 1/1 | 7.69  | 7.2   |
| 1/1 | 1/1 | 7.74  | 7.25  |
| 1/1 | 1/1 | 7.23  | 6.77  |
| 1/1 | 1/1 | 7.5   | 7.11  |
| 1/1 | 0/1 | 3.84  | 1.63  |
| 1/1 | 1/1 | 3.81  | 4.4   |
| 1/1 | 1/1 | 8.92  | 8.34  |
| 0/1 | 1/1 | 3.49  | 6.09  |
| 1/1 | 0/1 | 4.74  | 3.51  |
| 1/1 | 1/1 | 6.72  | 5.97  |
| 1/1 | 1/1 | 4.45  | 3.81  |
| 1/1 | 1/1 | 6.49  | 7.92  |
| 0/1 | 1/1 | 2.84  | 5.9   |
| 1/1 | 1/1 | 6.96  | 6.98  |
| 1/1 | 1/1 | 4.7   | 4.92  |
| 1/1 | 1/1 | 6.48  | 7.02  |
| 1/1 | 1/1 | 5.7   | 4.02  |
| 1/1 | 0/1 | 3.38  | 1.94  |
| 1/1 | 1/1 | 4.21  | 2.8   |
| 1/1 | 1/1 | 4.54  | 3.41  |
| 0/1 | 1/1 | 5.78  | 8.9   |
| 1/1 | 1/1 | 6.19  | 5.44  |
| 0/1 | 1/1 | 5.5   | 4.79  |
| 1/1 | 1/1 | 8.05  | 7.4   |
| 1/1 | 1/1 | 9.17  | 8.72  |
| 0/1 | 1/1 | 5.44  | 5.23  |
| 0/1 | 1/1 | 5.77  | 5.61  |

|     |     |      |      |
|-----|-----|------|------|
| 1/1 | 1/1 | 7.7  | 7.58 |
| 1/1 | 1/1 | 7.02 | 5.81 |
| 1/1 | 1/1 | 5    | 4.12 |
| 1/1 | 1/1 | 6.92 | 6.23 |
| 1/1 | 1/1 | 3.46 | 5.07 |
| 1/1 | 1/1 | 7.19 | 6.64 |
| 1/1 | 1/1 | 5.33 | 4.9  |
| 1/1 | 1/1 | 7.6  | 7.37 |
| 1/1 | 1/1 | 4.3  | 4.15 |
| 1/1 | 1/1 | 8.49 | 8.55 |
| 1/1 | 1/1 | 5.39 | 5.5  |
| 1/1 | 1/1 | 6.11 | 6.22 |
| 1/1 | 0/1 | 4.68 | 3.47 |
| 1/1 | 1/1 | 7.63 | 6.56 |
| 1/1 | 1/1 | 6.43 | 5.4  |
| 1/1 | 1/1 | 5.12 | 4.2  |
| 1/1 | 1/1 | 3.77 | 3.15 |
| 1/1 | 1/1 | 5.79 | 5.23 |
| 1/1 | 1/1 | 4.6  | 4.23 |
| 1/1 | 1/1 | 8.16 | 8.24 |
| 1/1 | 1/1 | 7.47 | 5.96 |
| 1/1 | 1/1 | 4.56 | 3.66 |
| 1/1 | 1/1 | 6.06 | 7.25 |
| 1/1 | 1/1 | 5.32 | 6.54 |
| 0/1 | 1/1 | 3.45 | 4.79 |
| 1/1 | 0/1 | 3.52 | 2.31 |
| 1/1 | 1/1 | 8.75 | 8.1  |
| 1/1 | 1/1 | 4.75 | 6.4  |
| 0/1 | 1/1 | 3.32 | 5.02 |
| 1/1 | 1/1 | 7.29 | 5.87 |
| 1/1 | 1/1 | 4.93 | 3.81 |
| 1/1 | 1/1 | 5.22 | 4.28 |
| 1/1 | 1/1 | 7.86 | 7.02 |
| 1/1 | 1/1 | 7.03 | 6.22 |
| 1/1 | 1/1 | 6.48 | 5.68 |
| 1/1 | 1/1 | 7.24 | 6.49 |
| 1/1 | 1/1 | 5.34 | 6.75 |
| 0/1 | 1/1 | 3.35 | 4.77 |
| 1/1 | 1/1 | 8.78 | 6.76 |
| 1/1 | 1/1 | 6.04 | 4.55 |
| 1/1 | 1/1 | 5.9  | 6.73 |
| 1/1 | 0/1 | 3.11 | 2.37 |
| 1/1 | 0/1 | 3.34 | 2.6  |
| 1/1 | 1/1 | 5.09 | 4.59 |
| 1/1 | 0/1 | 2.74 | 2.33 |
| 1/1 | 1/1 | 4.44 | 4.28 |
| 1/1 | 1/1 | 5.65 | 5.53 |
| 1/1 | 1/1 | 3.2  | 3.11 |
| 1/1 | 1/1 | 8.59 | 7.19 |
| 1/1 | 0/1 | 6.76 | 5.54 |
| 1/1 | 1/1 | 6.24 | 5.14 |
| 1/1 | 1/1 | 7.88 | 6.86 |
| 1/1 | 1/1 | 7.72 | 6.74 |
| 1/1 | 1/1 | 6.76 | 5.71 |
| 1/1 | 1/1 | 5.27 | 4.83 |
| 0/1 | 1/1 | 4.56 | 6.26 |
| 1/1 | 1/1 | 5.07 | 6.81 |
| 0/1 | 1/1 | 3.8  | 5.68 |

|     |     |       |       |
|-----|-----|-------|-------|
| 0/1 | 1/1 | 3.96  | 5.96  |
| 1/1 | 0/1 | 3.96  | 2.42  |
| 1/1 | 1/1 | 3.95  | 5.11  |
| 1/1 | 1/1 | 3.46  | 4.92  |
| 1/1 | 1/1 | 9.65  | 11.15 |
| 1/1 | 1/1 | 11.68 | 11.43 |
| 0/1 | 1/1 | 3.24  | 3.07  |
| 0/1 | 1/1 | 4.09  | 3.96  |
| 0/1 | 1/1 | 5.11  | 4.99  |
| 1/1 | 1/1 | 8.79  | 8.72  |
| 1/1 | 1/1 | 6.84  | 6.83  |
| 1/1 | 1/1 | 2.18  | 2.28  |
| 1/1 | 1/1 | 6.39  | 6.62  |
| 0/1 | 1/1 | 4.84  | 5.08  |
| 1/1 | 1/1 | 7.34  | 7.64  |
| 1/1 | 1/1 | 5.72  | 6.03  |
| 1/1 | 1/1 | 6.68  | 7.01  |
| 1/1 | 1/1 | 7.44  | 7.79  |
| 1/1 | 0/1 | 5.77  | 4.7   |
| 1/1 | 1/1 | 12.07 | 11.49 |
| 1/1 | 1/1 | 8.19  | 7.65  |
| 1/1 | 1/1 | 4.87  | 3.62  |
| 1/1 | 1/1 | 4.1   | 3.17  |
| 1/1 | 0/1 | 5.54  | 4.57  |
| 1/1 | 1/1 | 10.17 | 9.48  |
| 1/1 | 1/1 | 7.1   | 6.4   |
| 1/1 | 1/1 | 8.84  | 8.38  |
| 1/1 | 1/1 | 6.81  | 6.39  |
| 0/1 | 1/1 | 6.19  | 7.94  |
| 0/1 | 1/1 | 3.28  | 5.26  |
| 0/1 | 1/1 | 4     | 5.98  |
| 0/1 | 1/1 | 2.99  | 5.14  |
| 0/1 | 1/1 | 5.55  | 7.83  |
| 1/1 | 1/1 | 5.19  | 7.66  |
| 1/1 | 1/1 | 4.67  | 7.25  |
| 0/1 | 1/1 | 1.84  | 4.45  |
| 0/1 | 1/1 | 3.13  | 5.75  |
| 0/1 | 1/1 | 3.6   | 6.36  |
| 0/1 | 1/1 | 2.69  | 5.51  |
| 0/1 | 1/1 | 2.36  | 6.06  |
| 1/1 | 1/1 | 5.17  | 4.52  |
| 1/1 | 1/1 | 4.43  | 4.05  |
| 1/1 | 1/1 | 2.84  | 2.7   |
| 1/1 | 1/1 | 3.63  | 3.61  |
| 0/1 | 1/1 | 3.29  | 5.48  |
| 1/1 | 1/1 | 4.86  | 7.16  |
| 1/1 | 1/1 | 4.75  | 7.12  |
| 0/1 | 1/1 | 2.39  | 5.06  |
| 1/1 | 1/1 | 6.17  | 3.52  |
| 1/1 | 1/1 | 11.89 | 12.03 |
| 1/1 | 1/1 | 10.19 | 10.6  |
| 1/1 | 1/1 | 7.43  | 6.46  |
| 1/1 | 1/1 | 6.67  | 6.17  |
| 1/1 | 1/1 | 7.78  | 7.33  |
| 1/1 | 1/1 | 6.72  | 6.29  |
| 1/1 | 1/1 | 7.48  | 7.1   |
| 1/1 | 1/1 | 7.95  | 7.61  |
| 1/1 | 1/1 | 4.57  | 3.79  |

|     |     |       |       |
|-----|-----|-------|-------|
| 1/1 | 1/1 | 4.36  | 3.75  |
| 0/1 | 1/1 | 2.54  | 2.24  |
| 1/1 | 1/1 | 6.61  | 6.32  |
| 1/1 | 1/1 | 5.56  | 5.29  |
| 0/1 | 1/1 | 2.61  | 4.74  |
| 1/1 | 1/1 | 4.41  | 4.16  |
| 1/1 | 1/1 | 2.97  | 2.74  |
| 0/1 | 1/1 | 2.33  | 2.35  |
| 0/1 | 1/1 | 7.46  | 7.52  |
| 0/1 | 1/1 | 6.46  | 6.54  |
| 1/1 | 1/1 | 8.1   | 8.18  |
| 0/1 | 1/1 | 6.4   | 6.62  |
| 1/1 | 1/1 | 6.82  | 9.31  |
| 1/1 | 1/1 | 4.2   | 6.82  |
| 0/1 | 1/1 | 3.24  | 6.05  |
| 1/1 | 1/1 | 6.08  | 8.92  |
| 1/1 | 1/1 | 4.28  | 7.37  |
| 1/1 | 0/1 | 6.51  | 5.75  |
| 1/1 | 0/1 | 6.71  | 6.06  |
| 1/1 | 1/1 | 6.3   | 6.16  |
| 1/1 | 1/1 | 5.19  | 5.08  |
| 1/1 | 1/1 | 4.69  | 7.08  |
| 1/1 | 1/1 | 7.55  | 7.19  |
| 1/1 | 1/1 | 10.73 | 10.42 |
| 1/1 | 1/1 | 9.63  | 9.37  |
| 0/1 | 1/1 | 6.53  | 6.43  |
| 1/1 | 1/1 | 11.24 | 11.3  |
| 1/1 | 1/1 | 9.26  | 9.35  |
| 1/1 | 1/1 | 9.4   | 9.58  |
| 1/1 | 1/1 | 13.43 | 13.63 |
| 1/1 | 1/1 | 6.39  | 6.61  |
| 1/1 | 1/1 | 8.57  | 8.86  |
| 1/1 | 1/1 | 7.57  | 10.06 |
| 0/1 | 1/1 | 5.26  | 7.77  |
| 1/1 | 0/1 | 7.24  | 3.06  |
| 1/1 | 1/1 | 8.06  | 4.23  |
| 1/1 | 0/1 | 7.46  | 3.88  |
| 1/1 | 0/1 | 6.96  | 3.43  |
| 1/1 | 1/1 | 7.82  | 6.55  |
| 1/1 | 1/1 | 8.64  | 7.95  |
| 1/1 | 1/1 | 7.39  | 6.75  |
| 1/1 | 1/1 | 3.26  | 2.63  |
| 1/1 | 1/1 | 6.87  | 6.25  |
| 1/1 | 1/1 | 6.87  | 6.3   |
| 1/1 | 1/1 | 8.64  | 8.17  |
| 1/1 | 1/1 | 7.74  | 7.36  |
| 1/1 | 1/1 | 9.47  | 9.24  |
| 0/1 | 1/1 | 6     | 5.87  |
| 0/1 | 1/1 | 8.18  | 8.19  |
| 1/1 | 1/1 | 7.89  | 8.08  |
| 1/1 | 0/1 | 6.28  | 3.77  |
| 1/1 | 1/1 | 5.59  | 5.75  |
| 1/1 | 1/1 | 7.33  | 7.62  |
| 1/1 | 0/1 | 5.48  | 3.05  |
| 1/1 | 1/1 | 7.72  | 5.45  |
| 1/1 | 1/1 | 6.74  | 4.51  |
| 1/1 | 1/1 | 6.77  | 4.69  |
| 1/1 | 0/1 | 5.27  | 3.22  |

|     |     |       |       |
|-----|-----|-------|-------|
| 1/1 | 1/1 | 7.17  | 5.17  |
| 1/1 | 0/1 | 5.38  | 3.45  |
| 1/1 | 1/1 | 6.24  | 6.48  |
| 1/1 | 1/1 | 6.48  | 7.11  |
| 1/1 | 1/1 | 7.18  | 7.95  |
| 1/1 | 1/1 | 4.69  | 5.47  |
| 1/1 | 1/1 | 8.8   | 9.76  |
| 1/1 | 1/1 | 9.97  | 7.03  |
| 1/1 | 0/1 | 4.68  | 2.13  |
| 1/1 | 1/1 | 8.92  | 6.48  |
| 1/1 | 1/1 | 6.87  | 6.63  |
| 1/1 | 1/1 | 10.36 | 10.28 |
| 1/1 | 1/1 | 12    | 12.05 |
| 1/1 | 0/1 | 6.5   | 4.16  |
| 1/1 | 1/1 | 5.55  | 6.02  |
| 1/1 | 1/1 | 5.92  | 5.13  |
| 1/1 | 1/1 | 5.94  | 7.87  |
| 1/1 | 1/1 | 5.99  | 8.65  |
| 1/1 | 1/1 | 4.87  | 7.69  |
| 1/1 | 1/1 | 9.6   | 9.25  |
| 1/1 | 1/1 | 6.72  | 6.43  |
| 1/1 | 1/1 | 10.15 | 9.92  |
| 0/1 | 1/1 | 3.51  | 3.58  |
| 1/1 | 1/1 | 4.4   | 4.54  |
| 1/1 | 1/1 | 9.4   | 9.57  |
| 1/1 | 1/1 | 6.41  | 6.59  |
| 1/1 | 1/1 | 7.53  | 3.89  |
| 1/1 | 1/1 | 9.46  | 5.85  |
| 1/1 | 1/1 | 12.16 | 11.19 |
| 1/1 | 1/1 | 11.8  | 10.82 |
| 1/1 | 1/1 | 12.29 | 11.34 |
| 1/1 | 1/1 | 12.01 | 11.06 |
| 1/1 | 1/1 | 12.03 | 11.13 |
| 1/1 | 1/1 | 12.8  | 11.9  |
| 1/1 | 1/1 | 7.21  | 6.34  |
| 1/1 | 1/1 | 13.33 | 12.48 |
| 1/1 | 1/1 | 12.38 | 11.54 |
| 1/1 | 1/1 | 7.88  | 7.06  |
| 1/1 | 1/1 | 13.12 | 12.3  |
| 1/1 | 1/1 | 13.14 | 12.4  |
| 1/1 | 1/1 | 12.97 | 12.27 |
| 1/1 | 1/1 | 7.77  | 7.07  |
| 1/1 | 1/1 | 12.53 | 11.85 |
| 1/1 | 1/1 | 12.59 | 11.94 |
| 1/1 | 1/1 | 12.73 | 12.19 |
| 1/1 | 1/1 | 13.38 | 12.89 |
| 1/1 | 1/1 | 3.11  | 2.98  |
| 1/1 | 1/1 | 3.76  | 3.87  |
| 0/1 | 1/1 | 2.95  | 4.13  |
| 1/1 | 1/1 | 5.64  | 3.74  |
| 1/1 | 1/1 | 5.09  | 3.59  |
| 1/1 | 0/1 | 3.93  | 2.59  |
| 1/1 | 1/1 | 9.48  | 10.4  |
| 0/1 | 1/1 | 2.1   | 3.29  |
| 1/1 | 0/1 | 3.51  | 2.06  |
| 1/1 | 1/1 | 3.91  | 2.6   |
| 1/1 | 1/1 | 4.18  | 5.57  |
| 0/1 | 1/1 | 2.14  | 3.71  |



|     |     |       |       |
|-----|-----|-------|-------|
| 1/1 | 1/1 | 4.96  | 3.36  |
| 1/1 | 1/1 | 8.68  | 7.29  |
| 1/1 | 1/1 | 5.92  | 4.84  |
| 0/1 | 1/1 | 5.76  | 4.73  |
| 0/1 | 1/1 | 3.77  | 4.96  |
| 0/1 | 1/1 | 2.76  | 4.05  |
| 0/1 | 1/1 | 2.23  | 3.53  |
| 0/1 | 1/1 | 2.82  | 4.31  |
| 0/1 | 1/1 | 3.56  | 5.06  |
| 1/1 | 1/1 | 4.14  | 5.68  |
| 0/1 | 1/1 | 2.98  | 4.69  |
| 1/1 | 1/1 | 3.64  | 2.84  |
| 1/1 | 1/1 | 3.13  | 2.68  |
| 0/1 | 1/1 | 4.43  | 6.28  |
| 0/1 | 1/1 | 2.24  | 4.94  |
| 1/1 | 0/1 | 5.27  | 3.96  |
| 1/1 | 1/1 | 5.93  | 4.68  |
| 1/1 | 0/1 | 2.78  | 1.92  |
| 1/1 | 0/1 | 7.75  | 6.92  |
| 1/1 | 1/1 | 7.18  | 6.45  |
| 0/1 | 1/1 | 2.96  | 4.29  |
| 0/1 | 1/1 | 3.25  | 4.62  |
| 0/1 | 1/1 | 3.18  | 4.92  |
| 0/1 | 1/1 | 3.13  | 5.27  |
| 1/1 | 1/1 | 7.94  | 7.79  |
| 1/1 | 1/1 | 6.47  | 6.67  |
| 1/1 | 1/1 | 9.98  | 9.42  |
| 1/1 | 1/1 | 7.24  | 7.02  |
| 1/1 | 1/1 | 7.37  | 7.22  |
| 1/1 | 1/1 | 5.82  | 5.67  |
| 1/1 | 1/1 | 10.6  | 10.52 |
| 1/1 | 1/1 | 7.49  | 6.91  |
| 1/1 | 1/1 | 8.59  | 8.11  |
| 1/1 | 1/1 | 6.82  | 6.38  |
| 1/1 | 1/1 | 5.98  | 5.54  |
| 1/1 | 1/1 | 6.57  | 6.14  |
| 1/1 | 1/1 | 3.74  | 3.35  |
| 1/1 | 1/1 | 6.66  | 6.28  |
| 0/1 | 1/1 | 5.37  | 5.01  |
| 1/1 | 1/1 | 7.68  | 7.37  |
| 1/1 | 1/1 | 8.69  | 8.4   |
| 1/1 | 1/1 | 8.03  | 7.84  |
| 1/1 | 1/1 | 5.75  | 5.57  |
| 0/1 | 1/1 | 6.85  | 6.71  |
| 1/1 | 1/1 | 5     | 4.91  |
| 1/1 | 1/1 | 7.52  | 7.44  |
| 1/1 | 1/1 | 7.43  | 7.35  |
| 1/1 | 1/1 | 9.8   | 9.76  |
| 1/1 | 1/1 | 7.12  | 7.08  |
| 1/1 | 1/1 | 7.04  | 7.01  |
| 1/1 | 1/1 | 7.07  | 7.14  |
| 1/1 | 1/1 | 5.85  | 7.97  |
| 0/1 | 1/1 | 5.13  | 7.58  |
| 1/1 | 1/1 | 11.68 | 11.43 |
| 0/1 | 1/1 | 4.09  | 3.96  |
| 1/1 | 1/1 | 8.79  | 8.72  |
| 1/1 | 1/1 | 6.84  | 6.83  |
| 0/1 | 1/1 | 2.21  | 2.21  |

|     |     |       |       |
|-----|-----|-------|-------|
| 1/1 | 1/1 | 7.48  | 7.67  |
| 1/1 | 1/1 | 6.39  | 6.62  |
| 0/1 | 1/1 | 4.84  | 5.08  |
| 1/1 | 1/1 | 5.82  | 6.14  |
| 1/1 | 1/1 | 7.44  | 7.79  |
| 1/1 | 1/1 | 6.6   | 7     |
| 0/1 | 1/1 | 3.01  | 3.41  |
| 1/1 | 1/1 | 11.68 | 11.43 |
| 0/1 | 1/1 | 4.09  | 3.96  |
| 1/1 | 1/1 | 8.79  | 8.72  |
| 1/1 | 1/1 | 6.84  | 6.83  |
| 0/1 | 1/1 | 2.21  | 2.21  |
| 1/1 | 1/1 | 7.48  | 7.67  |
| 1/1 | 1/1 | 6.39  | 6.62  |
| 0/1 | 1/1 | 4.84  | 5.08  |
| 1/1 | 1/1 | 5.82  | 6.14  |
| 1/1 | 1/1 | 7.44  | 7.79  |
| 1/1 | 1/1 | 6.6   | 7     |
| 0/1 | 1/1 | 3.01  | 3.41  |
| 1/1 | 1/1 | 11.68 | 11.43 |
| 0/1 | 1/1 | 4.09  | 3.96  |
| 1/1 | 1/1 | 8.79  | 8.72  |
| 1/1 | 1/1 | 6.84  | 6.83  |
| 0/1 | 1/1 | 2.21  | 2.21  |
| 1/1 | 1/1 | 7.48  | 7.67  |
| 1/1 | 1/1 | 6.39  | 6.62  |
| 0/1 | 1/1 | 4.84  | 5.08  |
| 1/1 | 1/1 | 5.82  | 6.14  |
| 1/1 | 1/1 | 7.44  | 7.79  |
| 1/1 | 1/1 | 6.6   | 7     |
| 0/1 | 1/1 | 3.01  | 3.41  |
| 1/1 | 1/1 | 8.8   | 7.58  |
| 1/1 | 0/1 | 6.23  | 5.52  |
| 1/1 | 1/1 | 6.78  | 6.19  |
| 1/1 | 1/1 | 5.95  | 4.68  |
| 1/1 | 1/1 | 3.98  | 5.5   |
| 0/1 | 1/1 | 2.63  | 4.16  |
| 0/1 | 1/1 | 3.39  | 5.12  |
| 0/1 | 1/1 | 3.33  | 5.98  |
| 1/1 | 0/1 | 8.38  | 3.57  |
| 1/1 | 1/1 | 9.2   | 4.75  |
| 1/1 | 1/1 | 9.79  | 5.62  |
| 1/1 | 1/1 | 10.02 | 8.18  |
| 1/1 | 0/1 | 5.02  | 3.19  |
| 1/1 | 1/1 | 4.29  | 5.14  |
| 1/1 | 1/1 | 4.28  | 5.23  |
| 0/1 | 1/1 | 4.46  | 5.74  |
| 1/1 | 1/1 | 7.99  | 7.01  |
| 1/1 | 0/1 | 3.64  | 2.8   |
| 1/1 | 1/1 | 10.29 | 9.74  |
| 1/1 | 1/1 | 6.44  | 6.05  |
| 1/1 | 1/1 | 10.28 | 9.35  |
| 1/1 | 1/1 | 5.37  | 4.6   |
| 1/1 | 1/1 | 3.75  | 3.32  |
| 0/1 | 1/1 | 4.38  | 4.02  |
| 1/1 | 1/1 | 8.54  | 8.37  |
| 1/1 | 1/1 | 3.85  | 3.7   |
| 0/1 | 1/1 | 2.58  | 5.89  |

|     |     |       |       |
|-----|-----|-------|-------|
| 0/1 | 1/1 | 6.09  | 5.86  |
| 0/1 | 1/1 | 5.05  | 5.13  |
| 0/1 | 1/1 | 5.05  | 5.13  |
| 0/1 | 1/1 | 5.05  | 5.13  |
| 1/1 | 1/1 | 9.23  | 9.36  |
| 1/1 | 1/1 | 8.81  | 9.05  |
| 1/1 | 1/1 | 6.42  | 8.88  |
| 0/1 | 1/1 | 3.88  | 6.51  |
| 0/1 | 1/1 | 3.56  | 6.22  |
| 0/1 | 1/1 | 3.56  | 6.22  |
| 0/1 | 1/1 | 3.3   | 6.1   |
| 0/1 | 1/1 | 3.3   | 6.1   |
| 0/1 | 1/1 | 3.53  | 6.47  |
| 1/1 | 1/1 | 6.01  | 9.25  |
| 1/1 | 1/1 | 6.01  | 9.25  |
| 1/1 | 1/1 | 4.27  | 7.97  |
| 1/1 | 1/1 | 4.27  | 7.97  |
| 0/1 | 1/1 | 3.36  | 8.17  |
| 1/1 | 1/1 | 5.24  | 4.29  |
| 1/1 | 0/1 | 2.99  | 2.55  |
| 1/1 | 1/1 | 7.52  | 7.17  |
| 1/1 | 1/1 | 4.77  | 6.67  |
| 1/1 | 1/1 | 3.61  | 5.82  |
| 1/1 | 0/1 | 4.8   | 2.96  |
| 1/1 | 1/1 | 5.13  | 5.95  |
| 1/1 | 1/1 | 5.69  | 3.3   |
| 1/1 | 1/1 | 4.86  | 5.17  |
| 0/1 | 1/1 | 2.16  | 2.48  |
| 0/1 | 1/1 | 3.58  | 4.08  |
| 0/1 | 1/1 | 2.73  | 3.8   |
| 0/1 | 1/1 | 3.77  | 6.29  |
| 1/1 | 1/1 | 6.93  | 6.51  |
| 1/1 | 1/1 | 6.93  | 6.8   |
| 1/1 | 0/1 | 3.07  | 3.03  |
| 1/1 | 1/1 | 6.47  | 6.48  |
| 1/1 | 1/1 | 9.46  | 9.53  |
| 1/1 | 1/1 | 5.45  | 5.58  |
| 1/1 | 0/1 | 3.23  | 1.46  |
| 1/1 | 0/1 | 4.16  | 2.56  |
| 1/1 | 0/1 | 3.09  | 1.81  |
| 1/1 | 1/1 | 5.53  | 6.5   |
| 1/1 | 1/1 | 3.45  | 4.89  |
| 1/1 | 1/1 | 8.3   | 7.32  |
| 0/1 | 1/1 | 3.26  | 5.29  |
| 1/1 | 1/1 | 5.77  | 4.9   |
| 1/1 | 1/1 | 9     | 8.14  |
| 0/1 | 1/1 | 5.31  | 4.93  |
| 1/1 | 1/1 | 5.14  | 4.84  |
| 1/1 | 1/1 | 4.79  | 4.56  |
| 1/1 | 1/1 | 5.69  | 4.68  |
| 1/1 | 1/1 | 3.39  | 2.66  |
| 1/1 | 1/1 | 10.95 | 10.59 |
| 1/1 | 1/1 | 4.5   | 6.59  |
| 1/1 | 1/1 | 4.89  | 3.89  |
| 1/1 | 1/1 | 7.59  | 6.93  |
| 1/1 | 0/1 | 7.62  | 5.39  |
| 1/1 | 1/1 | 6.18  | 4.54  |
| 1/1 | 1/1 | 4.88  | 5.56  |

|     |     |      |      |
|-----|-----|------|------|
| 1/1 | 0/1 | 7.68 | 6.6  |
| 1/1 | 1/1 | 5.47 | 4.7  |
| 0/1 | 1/1 | 7.64 | 6.99 |
| 1/1 | 1/1 | 7.95 | 7.31 |
| 1/1 | 1/1 | 6.64 | 6.07 |
| 0/1 | 1/1 | 5.13 | 4.59 |
| 1/1 | 1/1 | 6.77 | 6.29 |
| 1/1 | 1/1 | 6.02 | 7.6  |
| 1/1 | 1/1 | 5.74 | 7.41 |
| 0/1 | 1/1 | 5.05 | 6.89 |
| 0/1 | 1/1 | 4.71 | 6.87 |
| 1/1 | 1/1 | 5.04 | 7.21 |
| 0/1 | 1/1 | 3.11 | 5.37 |
| 0/1 | 1/1 | 3.19 | 5.71 |
| 1/1 | 0/1 | 7.68 | 6.6  |
| 1/1 | 1/1 | 5.47 | 4.7  |
| 0/1 | 1/1 | 7.64 | 6.99 |
| 1/1 | 1/1 | 7.95 | 7.31 |
| 1/1 | 1/1 | 6.64 | 6.07 |
| 0/1 | 1/1 | 5.13 | 4.59 |
| 1/1 | 1/1 | 6.77 | 6.29 |
| 1/1 | 1/1 | 6.02 | 7.6  |
| 1/1 | 1/1 | 5.74 | 7.41 |
| 0/1 | 1/1 | 5.05 | 6.89 |
| 0/1 | 1/1 | 4.71 | 6.87 |
| 1/1 | 1/1 | 5.04 | 7.21 |
| 0/1 | 1/1 | 3.11 | 5.37 |
| 0/1 | 1/1 | 3.19 | 5.71 |
| 1/1 | 0/1 | 7.68 | 6.6  |
| 1/1 | 1/1 | 5.47 | 4.7  |
| 0/1 | 1/1 | 7.64 | 6.99 |
| 1/1 | 1/1 | 7.95 | 7.31 |
| 1/1 | 1/1 | 6.64 | 6.07 |
| 0/1 | 1/1 | 5.13 | 4.59 |
| 1/1 | 1/1 | 6.77 | 6.29 |
| 1/1 | 1/1 | 6.02 | 7.6  |
| 1/1 | 1/1 | 5.74 | 7.41 |
| 0/1 | 1/1 | 5.05 | 6.89 |
| 0/1 | 1/1 | 4.71 | 6.87 |
| 1/1 | 1/1 | 5.04 | 7.21 |
| 0/1 | 1/1 | 3.11 | 5.37 |
| 0/1 | 1/1 | 3.19 | 5.71 |
| 1/1 | 1/1 | 5.08 | 4.08 |
| 1/1 | 1/1 | 9.52 | 8.6  |
| 1/1 | 1/1 | 6.7  | 5.8  |
| 1/1 | 1/1 | 5.07 | 4.72 |
| 1/1 | 1/1 | 9.2  | 8.35 |
| 1/1 | 1/1 | 7.71 | 7.3  |
| 1/1 | 1/1 | 5.91 | 5.52 |
| 1/1 | 1/1 | 6.11 | 5.79 |
| 1/1 | 1/1 | 6.85 | 6.6  |
| 1/1 | 1/1 | 8.98 | 8.75 |
| 1/1 | 1/1 | 5.28 | 7.12 |
| 1/1 | 1/1 | 3.44 | 5.33 |
| 1/1 | 1/1 | 5.99 | 8.02 |
| 1/1 | 1/1 | 7.74 | 9.77 |
| 1/1 | 1/1 | 5.13 | 7.26 |
| 1/1 | 1/1 | 6.1  | 8.3  |

|     |     |       |       |
|-----|-----|-------|-------|
| 1/1 | 1/1 | 5.4   | 7.65  |
| 0/1 | 1/1 | 4.16  | 6.5   |
| 1/1 | 1/1 | 5.66  | 8.31  |
| 0/1 | 1/1 | 4.32  | 7.25  |
| 0/1 | 1/1 | 2.45  | 5.64  |
| 0/1 | 1/1 | 3.14  | 7.33  |
| 1/1 | 0/1 | 5.77  | 4.22  |
| 1/1 | 1/1 | 6.12  | 5.13  |
| 1/1 | 0/1 | 4.91  | 2.97  |
| 1/1 | 0/1 | 5.05  | 3.64  |
| 1/1 | 1/1 | 5.17  | 5.97  |
| 0/1 | 1/1 | 3.58  | 4.49  |
| 0/1 | 1/1 | 3.41  | 4.43  |
| 1/1 | 1/1 | 4.54  | 4.24  |
| 0/1 | 1/1 | 2.86  | 2.72  |
| 0/1 | 1/1 | 2.08  | 2.25  |
| 1/1 | 1/1 | 6.29  | 6.56  |
| 0/1 | 1/1 | 3.62  | 6.84  |
| 0/1 | 1/1 | 3.27  | 6.52  |
| 1/1 | 0/1 | 6.53  | 3.25  |
| 1/1 | 1/1 | 6.99  | 6.38  |
| 1/1 | 1/1 | 3.49  | 2.93  |
| 1/1 | 1/1 | 7.44  | 7.08  |
| 1/1 | 1/1 | 4.78  | 4.64  |
| 1/1 | 1/1 | 8.03  | 8.17  |
| 1/1 | 1/1 | 8.71  | 8.87  |
| 0/1 | 1/1 | 5.24  | 5.57  |
| 1/1 | 1/1 | 8.56  | 8.15  |
| 1/1 | 1/1 | 2.67  | 2.38  |
| 1/1 | 1/1 | 5.52  | 5.26  |
| 1/1 | 1/1 | 11.76 | 11.62 |
| 1/1 | 1/1 | 13.52 | 13.49 |
| 1/1 | 1/1 | 12.61 | 12.66 |
| 1/1 | 1/1 | 3.81  | 4.01  |
| 1/1 | 0/1 | 6.71  | 5.77  |
| 1/1 | 1/1 | 3.29  | 2.71  |
| 1/1 | 1/1 | 9.13  | 8.84  |
| 1/1 | 1/1 | 4.42  | 6.29  |
| 1/1 | 1/1 | 7.14  | 6.26  |
| 1/1 | 1/1 | 8.61  | 8.12  |
| 1/1 | 1/1 | 7.84  | 7.54  |
| 1/1 | 1/1 | 6.52  | 6.23  |
| 0/1 | 1/1 | 5.18  | 6.94  |
| 1/1 | 1/1 | 5.33  | 7.12  |
| 1/1 | 1/1 | 6.61  | 8.49  |
| 1/1 | 1/1 | 6.45  | 8.48  |
| 1/1 | 1/1 | 5.66  | 4.92  |
| 1/1 | 1/1 | 4.8   | 4.16  |
| 1/1 | 1/1 | 6.02  | 5.46  |
| 1/1 | 1/1 | 8.66  | 8.48  |
| 1/1 | 1/1 | 7.13  | 6.98  |
| 1/1 | 1/1 | 8.45  | 8.34  |
| 1/1 | 0/1 | 4.17  | 3.29  |
| 1/1 | 1/1 | 8.26  | 7.94  |
| 1/1 | 1/1 | 6.33  | 4.93  |
| 1/1 | 0/1 | 6.4   | 5.57  |
| 1/1 | 1/1 | 7.51  | 5.48  |
| 1/1 | 1/1 | 8.01  | 8.63  |

|     |     |       |       |
|-----|-----|-------|-------|
| 1/1 | 1/1 | 6.3   | 6.94  |
| 1/1 | 1/1 | 7.32  | 7.96  |
| 1/1 | 1/1 | 7.16  | 7.85  |
| 1/1 | 1/1 | 6.02  | 6.81  |
| 1/1 | 1/1 | 4.69  | 5.5   |
| 1/1 | 0/1 | 4.63  | 2.65  |
| 1/1 | 1/1 | 4.56  | 2.93  |
| 1/1 | 1/1 | 4.63  | 3.29  |
| 0/1 | 1/1 | 2.5   | 3.35  |
| 0/1 | 1/1 | 2.76  | 3.62  |
| 1/1 | 1/1 | 9.37  | 8.17  |
| 1/1 | 1/1 | 7.53  | 6.96  |
| 1/1 | 0/1 | 3.51  | 2.1   |
| 1/1 | 1/1 | 6.52  | 5.72  |
| 0/1 | 1/1 | 3.17  | 4.61  |
| 1/1 | 1/1 | 6.37  | 6.25  |
| 0/1 | 1/1 | 4.82  | 4.82  |
| 1/1 | 1/1 | 12.98 | 13.3  |
| 1/1 | 1/1 | 10.64 | 11.09 |
| 1/1 | 1/1 | 8.06  | 7.94  |
| 1/1 | 1/1 | 6.98  | 7.09  |
| 1/1 | 1/1 | 4.96  | 5.18  |
| 1/1 | 1/1 | 4.93  | 4.27  |
| 1/1 | 1/1 | 4     | 3.65  |
| 1/1 | 1/1 | 3.55  | 3.27  |
| 1/1 | 1/1 | 7.37  | 7.13  |
| 1/1 | 1/1 | 4.63  | 4.54  |
| 1/1 | 1/1 | 3.36  | 3.34  |
| 1/1 | 1/1 | 4.75  | 3.52  |
| 1/1 | 1/1 | 7.2   | 6.29  |
| 1/1 | 1/1 | 7.58  | 6.86  |
| 0/1 | 1/1 | 4.19  | 5.95  |
| 0/1 | 1/1 | 2.39  | 4.31  |
| 1/1 | 1/1 | 8.36  | 7.64  |
| 1/1 | 1/1 | 7.48  | 7.02  |
| 1/1 | 1/1 | 9     | 8.73  |
| 1/1 | 1/1 | 6.56  | 8.54  |
| 0/1 | 1/1 | 2.51  | 4.5   |
| 1/1 | 1/1 | 4.56  | 6.62  |
| 1/1 | 1/1 | 6.61  | 9.17  |
| 1/1 | 1/1 | 5.73  | 8.29  |
| 1/1 | 1/1 | 4.24  | 6.86  |
| 1/1 | 1/1 | 5.63  | 8.28  |
| 1/1 | 1/1 | 3.81  | 6.55  |
| 0/1 | 1/1 | 3.42  | 6.52  |
| 1/1 | 0/1 | 9.62  | 8.25  |
| 0/1 | 1/1 | 3.5   | 6.02  |
| 1/1 | 1/1 | 6.11  | 5.33  |
| 1/1 | 1/1 | 7.34  | 6.66  |
| 1/1 | 1/1 | 11.5  | 10.99 |
| 1/1 | 1/1 | 6.27  | 5.91  |
| 1/1 | 1/1 | 5.4   | 4.23  |
| 1/1 | 1/1 | 6.88  | 6.05  |
| 1/1 | 0/1 | 6.22  | 5.52  |
| 1/1 | 1/1 | 6.07  | 7.58  |
| 0/1 | 1/1 | 4.03  | 5.79  |
| 1/1 | 0/1 | 7.35  | 6.58  |
| 1/1 | 1/1 | 7.31  | 6.66  |

|     |     |      |       |
|-----|-----|------|-------|
| 1/1 | 1/1 | 4.03 | 3.75  |
| 1/1 | 1/1 | 3.92 | 3.07  |
| 1/1 | 1/1 | 8.05 | 7.77  |
| 1/1 | 1/1 | 5.6  | 5.34  |
| 1/1 | 1/1 | 7.34 | 5.18  |
| 1/1 | 1/1 | 6.16 | 6.65  |
| 1/1 | 1/1 | 4.32 | 5.06  |
| 1/1 | 1/1 | 5.04 | 5.97  |
| 1/1 | 1/1 | 8.14 | 3.38  |
| 1/1 | 1/1 | 7.73 | 3.59  |
| 1/1 | 0/1 | 4.52 | 2.43  |
| 1/1 | 0/1 | 5.12 | 3.04  |
| 1/1 | 0/1 | 4.83 | 2.95  |
| 1/1 | 0/1 | 4.09 | 2.46  |
| 1/1 | 1/1 | 4.71 | 3.16  |
| 1/1 | 1/1 | 9.07 | 8.24  |
| 0/1 | 1/1 | 4.76 | 4.85  |
| 1/1 | 1/1 | 7.01 | 7.38  |
| 1/1 | 1/1 | 4.91 | 4     |
| 1/1 | 1/1 | 6.47 | 5.91  |
| 1/1 | 1/1 | 7.11 | 6.82  |
| 1/1 | 1/1 | 4.87 | 6.78  |
| 1/1 | 1/1 | 5.4  | 7.32  |
| 0/1 | 1/1 | 4.47 | 6.83  |
| 1/1 | 0/1 | 3.91 | 3.08  |
| 1/1 | 1/1 | 8.82 | 8.35  |
| 1/1 | 1/1 | 4.74 | 4.34  |
| 1/1 | 1/1 | 2.9  | 2.54  |
| 1/1 | 1/1 | 4.03 | 3.73  |
| 1/1 | 1/1 | 9.2  | 8.97  |
| 1/1 | 1/1 | 4.11 | 5.94  |
| 1/1 | 1/1 | 3.96 | 6.18  |
| 1/1 | 1/1 | 4.15 | 6.5   |
| 1/1 | 0/1 | 5.29 | 3.84  |
| 1/1 | 1/1 | 6.29 | 5.05  |
| 1/1 | 0/1 | 7.29 | 4.21  |
| 1/1 | 1/1 | 9.83 | 9.51  |
| 1/1 | 1/1 | 7.95 | 7.79  |
| 1/1 | 1/1 | 8.07 | 7.95  |
| 1/1 | 1/1 | 6.56 | 6.88  |
| 0/1 | 1/1 | 3.7  | 4.37  |
| 1/1 | 1/1 | 6.86 | 6.51  |
| 0/1 | 1/1 | 6.94 | 6.76  |
| 1/1 | 1/1 | 7.2  | 7.18  |
| 1/1 | 1/1 | 8.48 | 8.55  |
| 0/1 | 1/1 | 6.75 | 6.88  |
| 1/1 | 1/1 | 8.01 | 8.15  |
| 1/1 | 1/1 | 4.83 | 7.12  |
| 1/1 | 1/1 | 4.96 | 3.22  |
| 1/1 | 0/1 | 3.82 | 2.31  |
| 0/1 | 1/1 | 2.94 | 3.84  |
| 1/1 | 1/1 | 9.86 | 10.77 |
| 1/1 | 1/1 | 8.77 | 9.73  |
| 1/1 | 1/1 | 7.2  | 8.18  |
| 1/1 | 1/1 | 9.12 | 10.1  |
| 1/1 | 1/1 | 6.2  | 7.21  |
| 1/1 | 1/1 | 8.73 | 9.73  |
| 1/1 | 1/1 | 7.16 | 8.16  |

|     |     |       |       |
|-----|-----|-------|-------|
| 1/1 | 1/1 | 8.26  | 9.3   |
| 1/1 | 1/1 | 9.02  | 10.06 |
| 1/1 | 1/1 | 3.29  | 4.45  |
| 1/1 | 1/1 | 6.96  | 8.29  |
| 1/1 | 1/1 | 7.9   | 9.35  |
| 1/1 | 1/1 | 5.11  | 6.58  |
| 1/1 | 1/1 | 5.16  | 6.9   |
| 1/1 | 1/1 | 10.81 | 6.37  |
| 1/1 | 1/1 | 11.72 | 7.44  |
| 1/1 | 1/1 | 11.95 | 7.87  |
| 1/1 | 1/1 | 12.11 | 8.1   |
| 1/1 | 0/1 | 7.42  | 5.64  |
| 1/1 | 0/1 | 6.45  | 5.8   |
| 1/1 | 0/1 | 5.47  | 4.88  |
| 1/1 | 0/1 | 7.13  | 6.56  |
| 1/1 | 0/1 | 10.32 | 9.88  |
| 1/1 | 1/1 | 7.2   | 6.81  |
| 1/1 | 1/1 | 8.76  | 8.37  |
| 1/1 | 1/1 | 6.59  | 6.21  |
| 1/1 | 1/1 | 10.83 | 10.55 |
| 1/1 | 1/1 | 6.36  | 6.15  |
| 1/1 | 1/1 | 9.46  | 9.28  |
| 0/1 | 1/1 | 6.15  | 6     |
| 0/1 | 1/1 | 6.16  | 6.03  |
| 0/1 | 1/1 | 6.19  | 6.72  |
| 1/1 | 0/1 | 4.02  | 2.84  |
| 1/1 | 1/1 | 6.84  | 6.2   |
| 1/1 | 0/1 | 2.94  | 2.36  |
| 0/1 | 1/1 | 2.16  | 3.66  |
| 1/1 | 1/1 | 4.55  | 6.39  |
| 0/1 | 1/1 | 2.26  | 4.35  |
| 1/1 | 0/1 | 5.18  | 3.34  |
| 0/1 | 1/1 | 2.31  | 3.4   |
| 1/1 | 1/1 | 5.11  | 3.12  |
| 1/1 | 1/1 | 7.86  | 6.47  |
| 0/1 | 1/1 | 2.46  | 4.05  |
| 1/1 | 1/1 | 8.91  | 7.56  |
| 1/1 | 0/1 | 3.35  | 2.39  |
| 0/1 | 1/1 | 3.06  | 2.34  |
| 0/1 | 1/1 | 4.36  | 5.7   |
| 1/1 | 1/1 | 8.1   | 7.06  |
| 1/1 | 1/1 | 9.11  | 8.24  |
| 1/1 | 1/1 | 8.47  | 7.75  |
| 1/1 | 1/1 | 5.6   | 4.91  |
| 1/1 | 1/1 | 5.32  | 4.64  |
| 1/1 | 1/1 | 7.66  | 7.06  |
| 1/1 | 1/1 | 4.94  | 4.34  |
| 1/1 | 1/1 | 6.66  | 6.06  |
| 1/1 | 1/1 | 5.24  | 4.7   |
| 0/1 | 1/1 | 4.85  | 4.35  |
| 1/1 | 1/1 | 8.38  | 7.9   |
| 1/1 | 1/1 | 5.51  | 5.03  |
| 1/1 | 1/1 | 7.87  | 7.41  |
| 1/1 | 1/1 | 6.15  | 5.73  |
| 1/1 | 1/1 | 7.13  | 6.72  |
| 0/1 | 1/1 | 3.51  | 5.29  |
| 0/1 | 1/1 | 4.16  | 6.01  |
| 1/1 | 1/1 | 5.13  | 4.47  |



|     |     |       |       |
|-----|-----|-------|-------|
| 1/1 | 1/1 | 10.42 | 10.15 |
| 1/1 | 1/1 | 5.23  | 3.77  |
| 1/1 | 1/1 | 4.94  | 6.13  |
| 1/1 | 1/1 | 4.26  | 5.45  |
| 1/1 | 1/1 | 6.18  | 7.41  |
| 1/1 | 1/1 | 4.44  | 5.68  |
| 1/1 | 1/1 | 8.86  | 10.1  |
| 1/1 | 1/1 | 6.85  | 8.28  |
| 0/1 | 1/1 | 3.13  | 4.78  |
| 1/1 | 1/1 | 5.99  | 7.73  |
| 1/1 | 1/1 | 5.02  | 4.19  |
| 1/1 | 1/1 | 7.22  | 6.75  |
| 1/1 | 1/1 | 4.78  | 4.34  |
| 0/1 | 1/1 | 6.9   | 6.45  |
| 1/1 | 1/1 | 3.97  | 3.67  |
| 1/1 | 1/1 | 7.79  | 7.54  |
| 1/1 | 1/1 | 6.34  | 6.12  |
| 0/1 | 1/1 | 3.89  | 3.68  |
| 1/1 | 0/1 | 5.51  | 4.08  |
| 1/1 | 1/1 | 4.36  | 5.91  |
| 1/1 | 1/1 | 4.58  | 3.58  |
| 1/1 | 0/1 | 2.97  | 2.58  |
| 1/1 | 1/1 | 3.47  | 5.17  |
| 1/1 | 1/1 | 6.27  | 5.01  |
| 1/1 | 1/1 | 4.94  | 4.12  |
| 0/1 | 1/1 | 3.68  | 5.6   |
| 0/1 | 1/1 | 3.68  | 5.6   |
| 1/1 | 1/1 | 6.41  | 6.16  |
| 1/1 | 1/1 | 7.8   | 7.7   |
| 1/1 | 1/1 | 3.5   | 3.76  |
| 0/1 | 1/1 | 4.27  | 4.62  |
| 1/1 | 1/1 | 4.15  | 6.69  |
| 0/1 | 1/1 | 4.13  | 6.68  |
| 1/1 | 1/1 | 2.97  | 5.56  |
| 1/1 | 1/1 | 9.43  | 7.8   |
| 1/1 | 1/1 | 9.61  | 8.1   |
| 1/1 | 1/1 | 6.46  | 5.03  |
| 1/1 | 1/1 | 10.99 | 9.65  |
| 1/1 | 1/1 | 8.85  | 7.53  |
| 1/1 | 1/1 | 7.98  | 6.77  |
| 1/1 | 1/1 | 8.05  | 6.87  |
| 1/1 | 1/1 | 9.04  | 7.88  |
| 1/1 | 1/1 | 8.75  | 7.62  |
| 1/1 | 1/1 | 5.44  | 4.31  |
| 1/1 | 1/1 | 8.94  | 7.82  |
| 1/1 | 1/1 | 9.14  | 8.11  |
| 1/1 | 1/1 | 11.95 | 10.93 |
| 1/1 | 1/1 | 5.48  | 6.51  |
| 1/1 | 1/1 | 7.25  | 8.38  |
| 0/1 | 1/1 | 4.46  | 5.59  |
| 1/1 | 1/1 | 5.32  | 6.56  |
| 0/1 | 1/1 | 7.2   | 8.48  |
| 0/1 | 1/1 | 2.94  | 4.23  |
| 0/1 | 1/1 | 4.91  | 6.23  |
| 0/1 | 1/1 | 5.59  | 7.15  |
| 1/1 | 1/1 | 5.87  | 7.55  |
| 0/1 | 1/1 | 2.34  | 4.07  |
| 0/1 | 1/1 | 4.49  | 6.61  |

|     |     |       |       |
|-----|-----|-------|-------|
| 1/1 | 1/1 | 7.11  | 9.33  |
| 1/1 | 1/1 | 8.83  | 11.5  |
| 1/1 | 1/1 | 6.89  | 9.77  |
| 1/1 | 1/1 | 7.25  | 11.75 |
| 1/1 | 1/1 | 5.55  | 10.16 |
| 1/1 | 1/1 | 4.45  | 9.64  |
| 1/1 | 1/1 | 5.03  | 11.37 |
| 0/1 | 1/1 | 2.21  | 10.29 |
| 1/1 | 0/1 | 6     | 4.47  |
| 1/1 | 1/1 | 7.26  | 8.4   |
| 0/1 | 1/1 | 3.36  | 5.08  |
| 1/1 | 1/1 | 5.36  | 4.35  |
| 1/1 | 0/1 | 3.7   | 3.12  |
| 1/1 | 1/1 | 3.76  | 5.83  |
| 1/1 | 1/1 | 6.27  | 5.01  |
| 1/1 | 1/1 | 4.94  | 4.12  |
| 0/1 | 1/1 | 3.68  | 5.6   |
| 0/1 | 1/1 | 3.68  | 5.6   |
| 1/1 | 1/1 | 6.27  | 5.01  |
| 1/1 | 1/1 | 4.94  | 4.12  |
| 0/1 | 1/1 | 3.68  | 5.6   |
| 0/1 | 1/1 | 3.68  | 5.6   |
| 1/1 | 1/1 | 6.27  | 5.01  |
| 1/1 | 1/1 | 4.94  | 4.12  |
| 0/1 | 1/1 | 3.68  | 5.6   |
| 0/1 | 1/1 | 3.68  | 5.6   |
| 1/1 | 1/1 | 6.27  | 5.01  |
| 1/1 | 1/1 | 4.94  | 4.12  |
| 0/1 | 1/1 | 3.68  | 5.6   |
| 0/1 | 1/1 | 3.68  | 5.6   |
| 1/1 | 1/1 | 6.27  | 5.01  |
| 1/1 | 1/1 | 4.94  | 4.12  |
| 0/1 | 1/1 | 3.68  | 5.6   |
| 0/1 | 1/1 | 3.68  | 5.6   |
| 1/1 | 1/1 | 9.44  | 9.14  |
| 1/1 | 1/1 | 9.2   | 9.18  |
| 1/1 | 1/1 | 5.66  | 5.65  |
| 0/1 | 1/1 | 3.41  | 3.49  |
| 1/1 | 1/1 | 8.54  | 8.83  |
| 1/1 | 1/1 | 7.99  | 8.32  |
| 1/1 | 1/1 | 4.28  | 6.9   |
| 1/1 | 1/1 | 6.51  | 4.95  |
| 0/1 | 1/1 | 3.62  | 4.84  |
| 1/1 | 1/1 | 6.21  | 4.97  |
| 1/1 | 1/1 | 6.35  | 5.65  |
| 1/1 | 0/1 | 6.54  | 5.87  |
| 1/1 | 1/1 | 9.28  | 8.62  |
| 1/1 | 0/1 | 3.31  | 1.87  |
| 1/1 | 0/1 | 5.67  | 4.5   |
| 1/1 | 1/1 | 9.81  | 8.96  |
| 1/1 | 1/1 | 3.21  | 2.6   |
| 1/1 | 1/1 | 10.34 | 9.85  |
| 1/1 | 1/1 | 7.75  | 7.27  |
| 1/1 | 1/1 | 8.45  | 7.97  |

|     |     |       |       |
|-----|-----|-------|-------|
| 1/1 | 1/1 | 8.2   | 7.75  |
| 1/1 | 1/1 | 6.49  | 6.06  |
| 1/1 | 1/1 | 9.04  | 8.69  |
| 1/1 | 1/1 | 5.19  | 4.88  |
| 1/1 | 1/1 | 10.06 | 9.77  |
| 1/1 | 1/1 | 6.72  | 6.44  |
| 1/1 | 1/1 | 5.88  | 4.86  |
| 1/1 | 1/1 | 5.18  | 4.71  |
| 1/1 | 1/1 | 8.88  | 8.41  |
| 1/1 | 1/1 | 2.76  | 2.32  |
| 1/1 | 1/1 | 7.77  | 7.36  |
| 1/1 | 1/1 | 6.72  | 6.01  |
| 1/1 | 1/1 | 8.03  | 7.59  |
| 1/1 | 1/1 | 6.57  | 6.14  |
| 1/1 | 1/1 | 7.99  | 7.87  |
| 0/1 | 1/1 | 2.53  | 5.09  |
| 1/1 | 0/1 | 3.35  | 2.42  |
| 1/1 | 1/1 | 5.31  | 4.52  |
| 1/1 | 1/1 | 3.17  | 2.6   |
| 1/1 | 1/1 | 6.95  | 5.54  |
| 1/1 | 1/1 | 6.56  | 5.66  |
| 1/1 | 1/1 | 7.93  | 7.06  |
| 0/1 | 1/1 | 5.15  | 4.64  |
| 1/1 | 1/1 | 6.55  | 6.04  |
| 1/1 | 1/1 | 8.43  | 8.11  |
| 1/1 | 1/1 | 5.21  | 4.93  |
| 1/1 | 1/1 | 5.26  | 7.09  |
| 1/1 | 1/1 | 4.23  | 6.1   |
| 1/1 | 1/1 | 8.44  | 7.5   |
| 1/1 | 1/1 | 7.32  | 6.71  |
| 1/1 | 1/1 | 3.82  | 3.32  |
| 1/1 | 0/1 | 7.32  | 6.84  |
| 1/1 | 1/1 | 5.78  | 5.33  |
| 1/1 | 1/1 | 6.73  | 6.36  |
| 1/1 | 1/1 | 3.47  | 3.13  |
| 1/1 | 1/1 | 5.76  | 7.6   |
| 1/1 | 1/1 | 5.23  | 7.17  |
| 1/1 | 1/1 | 5.01  | 7.05  |
| 1/1 | 1/1 | 4.33  | 6.55  |
| 1/1 | 1/1 | 3.89  | 6.77  |
| 1/1 | 1/1 | 9.44  | 9.14  |
| 1/1 | 1/1 | 10.05 | 10.02 |
| 1/1 | 1/1 | 4.93  | 5.01  |
| 0/1 | 1/1 | 3.41  | 3.49  |
| 1/1 | 1/1 | 8.54  | 8.83  |
| 1/1 | 1/1 | 7.99  | 8.32  |
| 1/1 | 1/1 | 4.28  | 6.9   |
| 1/1 | 1/1 | 9.81  | 8.96  |
| 1/1 | 1/1 | 3.21  | 2.6   |
| 1/1 | 1/1 | 10.34 | 9.85  |
| 1/1 | 1/1 | 7.75  | 7.27  |
| 1/1 | 1/1 | 8.45  | 7.97  |
| 1/1 | 1/1 | 8.2   | 7.75  |
| 1/1 | 1/1 | 6.49  | 6.06  |
| 1/1 | 1/1 | 9.04  | 8.69  |
| 1/1 | 1/1 | 10.06 | 9.77  |
| 1/1 | 1/1 | 6.72  | 6.44  |
| 1/1 | 1/1 | 9.81  | 8.96  |

|     |     |       |       |
|-----|-----|-------|-------|
| 1/1 | 1/1 | 3.21  | 2.6   |
| 1/1 | 1/1 | 10.34 | 9.85  |
| 1/1 | 1/1 | 7.75  | 7.27  |
| 1/1 | 1/1 | 8.45  | 7.97  |
| 1/1 | 1/1 | 8.2   | 7.75  |
| 1/1 | 1/1 | 6.49  | 6.06  |
| 1/1 | 1/1 | 4.28  | 3.93  |
| 1/1 | 1/1 | 9.04  | 8.69  |
| 1/1 | 1/1 | 10.06 | 9.77  |
| 1/1 | 1/1 | 6.72  | 6.44  |
| 1/1 | 1/1 | 11.38 | 10.6  |
| 1/1 | 1/1 | 5.34  | 4.86  |
| 1/1 | 1/1 | 8.81  | 8.43  |
| 1/1 | 1/1 | 6.1   | 5.83  |
| 1/1 | 1/1 | 6.16  | 5.92  |
| 1/1 | 1/1 | 7.94  | 7.74  |
| 1/1 | 1/1 | 7     | 6.81  |
| 1/1 | 1/1 | 6.25  | 8.1   |
| 1/1 | 1/1 | 6.71  | 8.71  |
| 1/1 | 1/1 | 5.6   | 4.69  |
| 1/1 | 1/1 | 10.08 | 9.6   |
| 1/1 | 1/1 | 5.23  | 4.82  |
| 1/1 | 1/1 | 7.06  | 8.95  |
| 1/1 | 1/1 | 5.87  | 4.57  |
| 1/1 | 1/1 | 6.62  | 5.36  |
| 1/1 | 1/1 | 6.04  | 5.33  |
| 0/1 | 1/1 | 1.77  | 3.2   |
| 1/1 | 1/1 | 8.93  | 8.39  |
| 1/1 | 1/1 | 3.89  | 3.54  |
| 0/1 | 1/1 | 1.88  | 1.82  |
| 0/1 | 1/1 | 5.61  | 6.44  |
| 1/1 | 1/1 | 6.49  | 7.92  |
| 1/1 | 1/1 | 5.88  | 4.86  |
| 1/1 | 1/1 | 8.88  | 8.41  |
| 1/1 | 1/1 | 2.76  | 2.32  |
| 1/1 | 1/1 | 7.77  | 7.36  |
| 1/1 | 1/1 | 6.28  | 3.94  |
| 1/1 | 1/1 | 6.74  | 7.04  |
| 1/1 | 1/1 | 5.2   | 5.73  |
| 1/1 | 0/1 | 4.59  | 3.49  |
| 1/1 | 1/1 | 6.41  | 5.78  |
| 1/1 | 1/1 | 3.98  | 3.44  |
| 1/1 | 0/1 | 5.66  | 3.57  |
| 0/1 | 1/1 | 2.64  | 3.19  |
| 1/1 | 1/1 | 7.1   | 3.7   |
| 1/1 | 1/1 | 4.72  | 4.46  |
| 1/1 | 1/1 | 5.86  | 5.7   |
| 1/1 | 1/1 | 6.4   | 4.95  |
| 1/1 | 0/1 | 5.5   | 4.32  |
| 1/1 | 1/1 | 9.1   | 7.97  |
| 1/1 | 0/1 | 6.13  | 5.22  |
| 1/1 | 1/1 | 6.65  | 5.74  |
| 1/1 | 1/1 | 9.71  | 11.27 |
| 1/1 | 0/1 | 4.69  | 3.33  |
| 1/1 | 0/1 | 4.85  | 3.56  |
| 1/1 | 0/1 | 5.24  | 4.27  |
| 0/1 | 1/1 | 3.94  | 5.32  |
| 0/1 | 1/1 | 2.96  | 4.53  |

|     |     |       |       |
|-----|-----|-------|-------|
| 0/1 | 1/1 | 2.93  | 4.54  |
| 0/1 | 1/1 | 3.33  | 4.96  |
| 0/1 | 1/1 | 3.55  | 5.56  |
| 1/1 | 0/1 | 5.7   | 4.74  |
| 1/1 | 1/1 | 4.09  | 3.16  |
| 1/1 | 1/1 | 6.76  | 6.38  |
| 0/1 | 1/1 | 4.53  | 6.73  |
| 1/1 | 1/1 | 5.13  | 4.47  |
| 1/1 | 1/1 | 10.42 | 10.15 |
| 1/1 | 0/1 | 3.8   | 2.58  |
| 1/1 | 1/1 | 5.38  | 4.76  |
| 1/1 | 0/1 | 3.43  | 2.83  |
| 1/1 | 1/1 | 4.22  | 5.7   |
| 1/1 | 1/1 | 7.31  | 6.38  |
| 1/1 | 1/1 | 6.88  | 6.49  |
| 1/1 | 1/1 | 4.48  | 6.26  |
| 1/1 | 1/1 | 11.35 | 9.95  |
| 1/1 | 1/1 | 11.14 | 10.02 |
| 1/1 | 0/1 | 8.08  | 7.05  |
| 1/1 | 1/1 | 7.22  | 6.39  |
| 1/1 | 1/1 | 4.71  | 4.28  |
| 1/1 | 1/1 | 5.22  | 6.82  |
| 1/1 | 1/1 | 7.22  | 8.92  |
| 0/1 | 1/1 | 5.04  | 6.83  |
| 1/1 | 1/1 | 6.27  | 4.08  |
| 1/1 | 1/1 | 6.13  | 4.45  |
| 1/1 | 1/1 | 7.28  | 7.78  |
| 1/1 | 1/1 | 2.92  | 3.64  |
| 1/1 | 1/1 | 5.99  | 4.95  |
| 1/1 | 1/1 | 4.51  | 4.08  |
| 1/1 | 1/1 | 6.54  | 6.37  |
| 0/1 | 1/1 | 2.48  | 2.5   |
| 1/1 | 1/1 | 7.45  | 7.51  |
| 1/1 | 1/1 | 2.92  | 3.21  |
| 1/1 | 1/1 | 9.11  | 9.48  |
| 1/1 | 1/1 | 5.13  | 5.54  |
| 1/1 | 1/1 | 6.31  | 8.79  |
| 1/1 | 1/1 | 4.39  | 7.21  |
| 1/1 | 0/1 | 6.53  | 2.57  |
| 1/1 | 1/1 | 8.92  | 5.47  |
| 1/1 | 1/1 | 9.68  | 8.47  |
| 1/1 | 1/1 | 3.5   | 3.41  |
| 1/1 | 1/1 | 6.71  | 6.92  |
| 1/1 | 1/1 | 5.13  | 4.47  |
| 1/1 | 1/1 | 10.42 | 10.15 |
| 1/1 | 1/1 | 5.13  | 4.47  |
| 1/1 | 1/1 | 10.42 | 10.15 |
| 1/1 | 1/1 | 5.13  | 4.47  |
| 1/1 | 1/1 | 10.42 | 10.15 |
| 1/1 | 1/1 | 5.13  | 4.47  |
| 1/1 | 1/1 | 10.42 | 10.15 |
| 1/1 | 1/1 | 5.13  | 4.47  |
| 1/1 | 1/1 | 10.42 | 10.15 |
| 1/1 | 0/1 | 4.74  | 3.1   |
| 1/1 | 1/1 | 6.26  | 4.96  |
| 1/1 | 0/1 | 3.75  | 2.57  |
| 1/1 | 0/1 | 4.24  | 3.12  |
| 1/1 | 1/1 | 4.97  | 6     |

|     |     |       |       |
|-----|-----|-------|-------|
| 1/1 | 1/1 | 3.51  | 4.54  |
| 1/1 | 1/1 | 4.61  | 5.73  |
| 1/1 | 1/1 | 3.74  | 4.9   |
| 1/1 | 1/1 | 4.68  | 5.86  |
| 1/1 | 0/1 | 4.07  | 1.85  |
| 1/1 | 1/1 | 7.15  | 5.13  |
| 1/1 | 1/1 | 5.74  | 3.82  |
| 0/1 | 1/1 | 3.01  | 3.5   |
| 0/1 | 1/1 | 3.93  | 4.6   |
| 1/1 | 1/1 | 8.46  | 6.98  |
| 1/1 | 0/1 | 3.48  | 2.19  |
| 1/1 | 1/1 | 7.51  | 6.35  |
| 1/1 | 1/1 | 8.51  | 7.39  |
| 1/1 | 1/1 | 11.28 | 10.18 |
| 1/1 | 1/1 | 4.41  | 5.59  |
| 1/1 | 0/1 | 4.43  | 3.35  |
| 1/1 | 1/1 | 4.55  | 6.08  |
| 0/1 | 1/1 | 3.02  | 4.76  |
| 1/1 | 1/1 | 4.44  | 6.25  |
| 1/1 | 1/1 | 5.38  | 4.57  |
| 1/1 | 1/1 | 5.8   | 5.24  |
| 1/1 | 1/1 | 7.56  | 7.35  |
| 1/1 | 0/1 | 6.92  | 5.8   |
| 1/1 | 1/1 | 8.16  | 7.41  |
| 1/1 | 0/1 | 5.01  | 4.4   |
| 1/1 | 1/1 | 9.34  | 8.83  |
| 1/1 | 0/1 | 3.36  | 2.33  |
| 1/1 | 1/1 | 3.79  | 3.04  |
| 1/1 | 1/1 | 4.01  | 3.53  |
| 1/1 | 1/1 | 5.3   | 4.85  |
| 0/1 | 1/1 | 2.05  | 4.35  |
| 1/1 | 0/1 | 3.44  | 2.56  |
| 1/1 | 0/1 | 3.31  | 2.49  |
| 1/1 | 1/1 | 3.32  | 2.51  |
| 1/1 | 1/1 | 4.72  | 4.02  |
| 1/1 | 1/1 | 5.01  | 4.43  |
| 1/1 | 1/1 | 8.78  | 8.39  |
| 1/1 | 1/1 | 5.48  | 5.12  |
| 1/1 | 1/1 | 9.45  | 9.19  |
| 1/1 | 0/1 | 4.49  | 2.48  |
| 1/1 | 0/1 | 5.97  | 4.01  |
| 1/1 | 0/1 | 4.83  | 3.01  |
| 0/1 | 1/1 | 2.57  | 3.21  |
| 0/1 | 1/1 | 2.67  | 3.59  |
| 0/1 | 1/1 | 2.22  | 3.18  |
| 0/1 | 1/1 | 3.51  | 4.65  |
| 1/1 | 1/1 | 4.02  | 3.67  |
| 1/1 | 1/1 | 4.67  | 4.35  |
| 1/1 | 1/1 | 6.52  | 6.37  |
| 1/1 | 1/1 | 8.21  | 8.19  |
| 1/1 | 1/1 | 6.63  | 6.66  |
| 1/1 | 1/1 | 4.56  | 4.74  |
| 1/1 | 1/1 | 4.09  | 6.61  |
| 1/1 | 1/1 | 6.15  | 3.75  |
| 1/1 | 1/1 | 4.88  | 3.09  |
| 1/1 | 1/1 | 8.2   | 8.42  |
| 1/1 | 1/1 | 9.18  | 9.53  |
| 0/1 | 1/1 | 3.25  | 3.82  |

|     |     |       |       |
|-----|-----|-------|-------|
| 0/1 | 1/1 | 2.22  | 3.64  |
| 1/1 | 1/1 | 5.85  | 7.32  |
| 1/1 | 1/1 | 4.91  | 3.3   |
| 1/1 | 1/1 | 9.42  | 8.03  |
| 1/1 | 1/1 | 10.48 | 9.36  |
| 1/1 | 1/1 | 6.49  | 5.33  |
| 1/1 | 1/1 | 5.74  | 4.69  |
| 1/1 | 1/1 | 7.11  | 6.23  |
| 1/1 | 1/1 | 7.3   | 6.65  |
| 0/1 | 1/1 | 3.04  | 4.93  |
| 1/1 | 1/1 | 6.49  | 5.33  |
| 1/1 | 1/1 | 5.74  | 4.69  |
| 1/1 | 1/1 | 7.11  | 6.23  |
| 1/1 | 1/1 | 7.3   | 6.65  |
| 0/1 | 1/1 | 3.04  | 4.93  |
| 1/1 | 1/1 | 6.49  | 5.33  |
| 1/1 | 1/1 | 5.74  | 4.69  |
| 1/1 | 1/1 | 7.11  | 6.23  |
| 1/1 | 1/1 | 7.1   | 6.44  |
| 0/1 | 1/1 | 3.04  | 4.93  |
| 1/1 | 1/1 | 6.49  | 5.33  |
| 1/1 | 1/1 | 5.74  | 4.69  |
| 1/1 | 1/1 | 7.11  | 6.23  |
| 1/1 | 1/1 | 7.3   | 6.65  |
| 0/1 | 1/1 | 3.04  | 4.93  |
| 1/1 | 1/1 | 6.49  | 5.33  |
| 1/1 | 1/1 | 5.74  | 4.69  |
| 1/1 | 1/1 | 7.11  | 6.23  |
| 1/1 | 1/1 | 7.3   | 6.65  |
| 0/1 | 1/1 | 3.04  | 4.93  |
| 1/1 | 1/1 | 4.13  | 3.34  |
| 1/1 | 1/1 | 3.17  | 2.58  |
| 1/1 | 1/1 | 3.71  | 3.52  |
| 1/1 | 1/1 | 8.61  | 8.43  |
| 1/1 | 0/1 | 6.23  | 2.45  |
| 1/1 | 1/1 | 7.83  | 4.17  |
| 1/1 | 1/1 | 7.68  | 4.28  |
| 1/1 | 0/1 | 5.93  | 2.74  |
| 1/1 | 0/1 | 3.72  | 2.57  |
| 1/1 | 1/1 | 5.51  | 4.38  |
| 1/1 | 1/1 | 5.8   | 4.69  |
| 1/1 | 0/1 | 2.85  | 1.89  |
| 1/1 | 0/1 | 4.41  | 3.52  |
| 1/1 | 1/1 | 5.86  | 5.03  |
| 1/1 | 0/1 | 3.46  | 2.75  |
| 1/1 | 0/1 | 3.01  | 2.42  |
| 1/1 | 0/1 | 2.7   | 2.21  |
| 1/1 | 1/1 | 5.02  | 4.6   |
| 1/1 | 1/1 | 4.66  | 4.3   |
| 1/1 | 1/1 | 7.21  | 6.93  |
| 1/1 | 1/1 | 13.32 | 13.21 |
| 1/1 | 1/1 | 2.82  | 2.74  |
| 1/1 | 1/1 | 3.34  | 3.67  |
| 1/1 | 1/1 | 6.01  | 5.08  |
| 1/1 | 0/1 | 8.98  | 8.13  |
| 1/1 | 0/1 | 6.32  | 5.71  |
| 1/1 | 1/1 | 6.1   | 5.52  |
| 1/1 | 1/1 | 7.23  | 6.7   |

|     |     |       |       |
|-----|-----|-------|-------|
| 1/1 | 1/1 | 3.8   | 3.3   |
| 1/1 | 1/1 | 5.89  | 5.4   |
| 1/1 | 1/1 | 9.4   | 8.95  |
| 1/1 | 1/1 | 11.52 | 11.08 |
| 1/1 | 1/1 | 3.67  | 3.27  |
| 1/1 | 1/1 | 4.45  | 4.1   |
| 1/1 | 1/1 | 8.12  | 9.81  |
| 1/1 | 1/1 | 5.54  | 7.33  |
| 1/1 | 1/1 | 7.83  | 9.64  |
| 1/1 | 1/1 | 6.1   | 8.09  |
| 1/1 | 1/1 | 6.65  | 8.78  |
| 1/1 | 1/1 | 4.75  | 7     |
| 1/1 | 1/1 | 5.04  | 7.3   |
| 1/1 | 1/1 | 6.44  | 8.96  |
| 1/1 | 1/1 | 4.8   | 7.9   |
| 1/1 | 1/1 | 11.31 | 10.48 |
| 1/1 | 1/1 | 9.97  | 9.63  |
| 1/1 | 1/1 | 6.04  | 5.72  |
| 1/1 | 1/1 | 6.04  | 5.79  |
| 1/1 | 1/1 | 6.01  | 5.61  |
| 1/1 | 1/1 | 3.82  | 3.61  |
| 1/1 | 1/1 | 9.02  | 8.99  |
| 1/1 | 1/1 | 3.66  | 3.86  |
| 1/1 | 1/1 | 5.66  | 7.96  |
| 1/1 | 1/1 | 3.77  | 6.08  |
| 1/1 | 1/1 | 3.57  | 6.13  |
| 1/1 | 0/1 | 6.46  | 5.31  |
| 1/1 | 1/1 | 4.98  | 4.26  |
| 1/1 | 1/1 | 7.81  | 7.18  |
| 1/1 | 1/1 | 6.72  | 5.32  |
| 1/1 | 1/1 | 6.02  | 4.69  |
| 0/1 | 1/1 | 3.37  | 4.91  |
| 1/1 | 0/1 | 2.39  | 1.95  |
| 1/1 | 1/1 | 4.47  | 4.04  |
| 1/1 | 1/1 | 3.21  | 2.98  |
| 1/1 | 1/1 | 7.42  | 7.22  |
| 1/1 | 1/1 | 7.12  | 6.94  |
| 0/1 | 1/1 | 6.82  | 6.87  |
| 1/1 | 1/1 | 4.8   | 4.89  |
| 1/1 | 1/1 | 5.94  | 3.32  |
| 1/1 | 0/1 | 5.56  | 3.13  |
| 1/1 | 1/1 | 12.17 | 12.29 |
| 1/1 | 1/1 | 8.22  | 8.45  |
| 1/1 | 0/1 | 8.15  | 7.17  |
| 1/1 | 0/1 | 6.92  | 6.03  |
| 1/1 | 1/1 | 7.62  | 7.09  |
| 1/1 | 1/1 | 5.02  | 4.53  |
| 1/1 | 1/1 | 8.72  | 8.3   |
| 1/1 | 1/1 | 3.62  | 3.22  |
| 1/1 | 1/1 | 3.9   | 5.82  |
| 1/1 | 0/1 | 5.32  | 2.03  |
| 1/1 | 0/1 | 5.46  | 2.53  |
| 1/1 | 0/1 | 5.66  | 2.88  |
| 1/1 | 1/1 | 5.02  | 4.37  |
| 1/1 | 0/1 | 3     | 2.44  |
| 1/1 | 1/1 | 6     | 5.56  |
| 1/1 | 1/1 | 6.66  | 6.25  |
| 1/1 | 1/1 | 9.37  | 8.97  |



|     |     |       |       |
|-----|-----|-------|-------|
| 0/1 | 1/1 | 4.38  | 4.33  |
| 0/1 | 1/1 | 3.42  | 3.37  |
| 1/1 | 1/1 | 11.21 | 11.17 |
| 0/1 | 1/1 | 2.35  | 2.58  |
| 1/1 | 1/1 | 4.81  | 3.42  |
| 1/1 | 1/1 | 5.26  | 4.27  |
| 1/1 | 1/1 | 4.05  | 3.22  |
| 1/1 | 0/1 | 2.86  | 1.9   |
| 1/1 | 1/1 | 5.4   | 4.65  |
| 1/1 | 1/1 | 5.5   | 4.82  |
| 1/1 | 1/1 | 11.46 | 10.89 |
| 1/1 | 0/1 | 3.64  | 3.24  |
| 0/1 | 1/1 | 2.46  | 4.46  |
| 0/1 | 1/1 | 2.62  | 4.76  |
| 1/1 | 1/1 | 6.49  | 5.33  |
| 0/1 | 1/1 | 3.04  | 4.93  |
| 0/1 | 1/1 | 4.29  | 6.59  |
| 1/1 | 0/1 | 5.94  | 3.66  |
| 0/1 | 1/1 | 8.83  | 9.42  |
| 1/1 | 1/1 | 5.19  | 4.13  |
| 1/1 | 1/1 | 7.33  | 6.68  |
| 1/1 | 1/1 | 7.26  | 5.89  |
| 1/1 | 0/1 | 5.02  | 4.17  |
| 1/1 | 1/1 | 7.27  | 6.49  |
| 1/1 | 1/1 | 6.17  | 3.33  |
| 1/1 | 1/1 | 9.25  | 9.25  |
| 1/1 | 1/1 | 5.82  | 5.83  |
| 1/1 | 1/1 | 8.55  | 8.92  |
| 1/1 | 1/1 | 9.72  | 10.22 |
| 1/1 | 0/1 | 6.19  | 3.37  |
| 1/1 | 0/1 | 5.4   | 2.75  |
| 1/1 | 0/1 | 5.93  | 3.52  |
| 1/1 | 1/1 | 5.54  | 3.2   |
| 1/1 | 0/1 | 6.07  | 3.8   |
| 1/1 | 0/1 | 5.21  | 2.96  |
| 1/1 | 1/1 | 5.03  | 4.83  |
| 1/1 | 1/1 | 4.69  | 4.5   |
| 1/1 | 1/1 | 7.78  | 7.61  |
| 0/1 | 1/1 | 8.75  | 8.6   |
| 1/1 | 1/1 | 3.57  | 3.43  |
| 0/1 | 1/1 | 2.34  | 2.23  |
| 1/1 | 1/1 | 4.43  | 4.36  |
| 0/1 | 1/1 | 2.44  | 2.47  |
| 0/1 | 1/1 | 2.17  | 2.21  |
| 1/1 | 1/1 | 5.97  | 6.02  |
| 0/1 | 1/1 | 3.15  | 3.25  |
| 0/1 | 1/1 | 2.55  | 2.65  |
| 0/1 | 1/1 | 3.51  | 3.66  |
| 0/1 | 1/1 | 3.17  | 3.44  |
| 0/1 | 1/1 | 2.34  | 2.66  |
| 0/1 | 1/1 | 2.82  | 3.89  |
| 0/1 | 1/1 | 2.91  | 5.05  |
| 1/1 | 1/1 | 6.15  | 4.23  |
| 1/1 | 1/1 | 7.45  | 6.04  |
| 0/1 | 1/1 | 2.38  | 3.21  |
| 0/1 | 1/1 | 3.31  | 4.46  |
| 1/1 | 1/1 | 8.4   | 7.45  |
| 1/1 | 1/1 | 8.46  | 7.52  |

|     |     |       |       |
|-----|-----|-------|-------|
| 1/1 | 1/1 | 8.24  | 7.45  |
| 1/1 | 1/1 | 7.82  | 7.05  |
| 1/1 | 1/1 | 6.53  | 6.17  |
| 0/1 | 1/1 | 3.18  | 4.91  |
| 0/1 | 1/1 | 3.12  | 5.81  |
| 0/1 | 1/1 | 3.43  | 8.37  |
| 1/1 | 1/1 | 5.31  | 4.39  |
| 1/1 | 1/1 | 5.79  | 4.95  |
| 1/1 | 1/1 | 5.35  | 4.72  |
| 1/1 | 1/1 | 7.88  | 7.29  |
| 1/1 | 0/1 | 4.04  | 3.45  |
| 1/1 | 1/1 | 4.05  | 3.71  |
| 1/1 | 1/1 | 3.74  | 3.28  |
| 1/1 | 1/1 | 8.36  | 7.97  |
| 0/1 | 1/1 | 3.51  | 3.13  |
| 1/1 | 1/1 | 12.29 | 12.31 |
| 1/1 | 1/1 | 3.25  | 3.33  |
| 1/1 | 1/1 | 7.13  | 7.24  |
| 1/1 | 1/1 | 2.96  | 2.64  |
| 1/1 | 1/1 | 6.74  | 6.57  |
| 1/1 | 1/1 | 4.89  | 5.06  |
| 0/1 | 1/1 | 3.2   | 5.62  |
| 0/1 | 1/1 | 2.4   | 4.85  |
| 1/1 | 1/1 | 3.47  | 6.19  |
| 1/1 | 1/1 | 5.9   | 5.14  |
| 1/1 | 1/1 | 5.89  | 7.83  |
| 1/1 | 0/1 | 4.35  | 3.18  |
| 1/1 | 1/1 | 6.11  | 5.47  |
| 1/1 | 1/1 | 8.52  | 7.93  |
| 1/1 | 1/1 | 5.44  | 4.64  |
| 1/1 | 1/1 | 4.44  | 3.73  |
| 1/1 | 1/1 | 6.88  | 6.29  |
| 1/1 | 1/1 | 4.25  | 3.8   |
| 1/1 | 1/1 | 4.7   | 4.31  |
| 1/1 | 1/1 | 3.58  | 3.25  |
| 1/1 | 1/1 | 6.53  | 9.07  |
| 1/1 | 1/1 | 3.59  | 7.6   |
| 1/1 | 1/1 | 5.25  | 3.63  |
| 1/1 | 1/1 | 7.9   | 6.7   |
| 1/1 | 1/1 | 6.95  | 5.9   |
| 1/1 | 1/1 | 6.94  | 7.96  |
| 0/1 | 1/1 | 2.25  | 3.42  |
| 1/1 | 1/1 | 7.05  | 6.57  |
| 1/1 | 1/1 | 8.42  | 7.99  |
| 1/1 | 1/1 | 7.9   | 7.61  |
| 1/1 | 1/1 | 10.6  | 10.32 |
| 1/1 | 1/1 | 7.98  | 7.88  |
| 0/1 | 1/1 | 3.22  | 3.17  |
| 0/1 | 1/1 | 3.77  | 8.17  |
| 1/1 | 1/1 | 6.69  | 6.13  |
| 1/1 | 1/1 | 4.7   | 4.38  |
| 0/1 | 1/1 | 5.12  | 4.88  |
| 1/1 | 1/1 | 6.35  | 6.19  |
| 1/1 | 1/1 | 6.76  | 6.67  |
| 0/1 | 1/1 | 6.4   | 6.32  |
| 1/1 | 1/1 | 4.95  | 7.01  |
| 1/1 | 1/1 | 5.87  | 8.11  |
| 1/1 | 1/1 | 9.72  | 4.79  |

|     |     |       |       |
|-----|-----|-------|-------|
| 1/1 | 1/1 | 9.27  | 4.57  |
| 1/1 | 1/1 | 7.75  | 3.14  |
| 1/1 | 1/1 | 7.4   | 2.83  |
| 1/1 | 1/1 | 8.31  | 3.93  |
| 1/1 | 0/1 | 7.48  | 5.44  |
| 1/1 | 1/1 | 10.8  | 8.93  |
| 1/1 | 1/1 | 10.87 | 9.15  |
| 1/1 | 1/1 | 10.1  | 8.41  |
| 1/1 | 1/1 | 11.48 | 10.19 |
| 1/1 | 0/1 | 8.1   | 6.94  |
| 1/1 | 1/1 | 7.75  | 6.61  |
| 1/1 | 0/1 | 7.37  | 6.94  |
| 1/1 | 1/1 | 3.95  | 3.65  |
| 1/1 | 1/1 | 6.16  | 6.15  |
| 1/1 | 1/1 | 10.75 | 10.9  |
| 1/1 | 1/1 | 8.94  | 8.12  |
| 1/1 | 1/1 | 3.38  | 2.76  |
| 1/1 | 1/1 | 6.86  | 6.41  |
| 1/1 | 1/1 | 7.77  | 7.34  |
| 1/1 | 1/1 | 8.08  | 7.67  |
| 0/1 | 1/1 | 7     | 6.65  |
| 1/1 | 1/1 | 7.41  | 7.09  |
| 1/1 | 1/1 | 10.53 | 10.23 |
| 1/1 | 1/1 | 7.19  | 9.81  |
| 1/1 | 1/1 | 3.18  | 6.1   |
| 1/1 | 1/1 | 6.18  | 9.15  |
| 1/1 | 1/1 | 5.75  | 5.19  |
| 1/1 | 1/1 | 8.84  | 8.53  |
| 1/1 | 1/1 | 5.38  | 5.23  |
| 1/1 | 1/1 | 5.01  | 5     |
| 1/1 | 1/1 | 7.31  | 9.59  |
| 1/1 | 1/1 | 8.8   | 11.24 |
| 1/1 | 1/1 | 7.68  | 10.28 |
| 1/1 | 0/1 | 4.67  | 3.38  |
| 1/1 | 1/1 | 6.78  | 5.92  |
| 0/1 | 1/1 | 3.15  | 4.51  |
| 1/1 | 1/1 | 4.03  | 5.45  |
| 0/1 | 1/1 | 3.7   | 5.24  |
| 0/1 | 1/1 | 4.09  | 5.74  |
| 1/1 | 0/1 | 4.64  | 2.44  |
| 1/1 | 1/1 | 5.67  | 6.09  |
| 1/1 | 1/1 | 6.53  | 7.02  |
| 0/1 | 1/1 | 3.5   | 4.24  |
| 1/1 | 1/1 | 4.5   | 3.27  |
| 1/1 | 1/1 | 4.56  | 3.8   |
| 1/1 | 1/1 | 8.45  | 5.65  |
| 1/1 | 1/1 | 8.69  | 8.7   |
| 1/1 | 1/1 | 7.12  | 7.15  |
| 1/1 | 1/1 | 11.61 | 11.71 |
| 0/1 | 1/1 | 6.7   | 6.98  |
| 1/1 | 1/1 | 4.12  | 4.51  |
| 1/1 | 1/1 | 5.41  | 6.39  |
| 1/1 | 0/1 | 4.52  | 2.7   |
| 1/1 | 1/1 | 2.49  | 3.46  |
| 0/1 | 1/1 | 2.59  | 3.91  |
| 1/1 | 1/1 | 4.02  | 5.47  |
| 1/1 | 0/1 | 5.21  | 3.46  |
| 1/1 | 1/1 | 4.9   | 5.92  |

|     |     |       |      |
|-----|-----|-------|------|
| 0/1 | 1/1 | 2.5   | 3.56 |
| 1/1 | 1/1 | 4.3   | 5.52 |
| 1/1 | 1/1 | 4.23  | 5.57 |
| 0/1 | 1/1 | 2.69  | 4.39 |
| 1/1 | 1/1 | 10.68 | 6.28 |
| 1/1 | 1/1 | 11.26 | 7.11 |
| 1/1 | 1/1 | 7.5   | 6.14 |
| 1/1 | 1/1 | 6.45  | 5.25 |
| 1/1 | 0/1 | 3.53  | 2.41 |
| 1/1 | 1/1 | 8.5   | 7.69 |
| 1/1 | 1/1 | 4.41  | 3.86 |
| 1/1 | 1/1 | 9.57  | 9.45 |
| 1/1 | 0/1 | 3.13  | 3.21 |
| 1/1 | 1/1 | 3.14  | 3.26 |
| 1/1 | 1/1 | 2.83  | 3.21 |
| 0/1 | 1/1 | 3.58  | 4.23 |
| 1/1 | 1/1 | 5.3   | 3.93 |
| 1/1 | 1/1 | 9.48  | 8.32 |
| 1/1 | 1/1 | 5.99  | 4.9  |
| 1/1 | 1/1 | 4.99  | 4.17 |
| 1/1 | 0/1 | 3.78  | 2.05 |
| 1/1 | 1/1 | 6.46  | 4.96 |
| 1/1 | 1/1 | 5.78  | 4.5  |
| 1/1 | 1/1 | 7.42  | 8.35 |
| 1/1 | 1/1 | 3.93  | 5.26 |
| 1/1 | 1/1 | 7.59  | 7.19 |
| 0/1 | 1/1 | 5     | 4.7  |
| 1/1 | 1/1 | 8.76  | 8.49 |
| 0/1 | 1/1 | 4.61  | 4.45 |
| 1/1 | 1/1 | 4.53  | 4.39 |
| 1/1 | 1/1 | 7.65  | 7.51 |
| 1/1 | 1/1 | 6.91  | 6.82 |
| 1/1 | 1/1 | 3.76  | 3.67 |
| 1/1 | 1/1 | 5.88  | 5.88 |
| 1/1 | 1/1 | 9.48  | 9.58 |
| 1/1 | 1/1 | 9.17  | 9.27 |
| 1/1 | 1/1 | 7.17  | 7.28 |
| 1/1 | 1/1 | 4.03  | 4.15 |
| 1/1 | 1/1 | 6.95  | 7.12 |
| 0/1 | 1/1 | 2.7   | 2.87 |
| 1/1 | 1/1 | 3.46  | 5.83 |
| 1/1 | 1/1 | 3.31  | 6.31 |
| 1/1 | 1/1 | 5.32  | 3.73 |
| 1/1 | 1/1 | 7.29  | 6.15 |
| 1/1 | 1/1 | 5.06  | 6.31 |
| 0/1 | 1/1 | 2.01  | 3.42 |
| 1/1 | 1/1 | 8.35  | 7.63 |
| 1/1 | 1/1 | 9.13  | 8.66 |
| 1/1 | 1/1 | 8.46  | 8.17 |
| 0/1 | 1/1 | 4.2   | 3.98 |
| 1/1 | 0/1 | 3.12  | 2    |
| 1/1 | 0/1 | 3.38  | 2.36 |
| 1/1 | 1/1 | 4.58  | 4.04 |
| 1/1 | 0/1 | 5.14  | 3.42 |
| 1/1 | 1/1 | 4.22  | 5.23 |
| 1/1 | 1/1 | 4.49  | 4.22 |
| 0/1 | 1/1 | 6.93  | 6.78 |
| 1/1 | 1/1 | 5.11  | 5.26 |

|     |     |      |       |
|-----|-----|------|-------|
| 1/1 | 1/1 | 8.92 | 9.08  |
| 1/1 | 1/1 | 6.45 | 6.65  |
| 0/1 | 1/1 | 3.35 | 3.58  |
| 1/1 | 1/1 | 4.08 | 4.07  |
| 1/1 | 1/1 | 5.31 | 5.42  |
| 1/1 | 1/1 | 4.84 | 5     |
| 1/1 | 1/1 | 5.47 | 5.99  |
| 1/1 | 1/1 | 4.48 | 7.5   |
| 1/1 | 0/1 | 5.73 | 4.4   |
| 1/1 | 1/1 | 8.52 | 7.73  |
| 1/1 | 1/1 | 5.79 | 7.11  |
| 1/1 | 0/1 | 9.58 | 5.78  |
| 1/1 | 1/1 | 7.08 | 6     |
| 1/1 | 0/1 | 6.46 | 5.43  |
| 1/1 | 0/1 | 3.38 | 2.41  |
| 1/1 | 1/1 | 6.35 | 5.51  |
| 1/1 | 1/1 | 3.35 | 2.55  |
| 1/1 | 1/1 | 4.66 | 3.95  |
| 1/1 | 1/1 | 4.36 | 3.67  |
| 1/1 | 1/1 | 5.96 | 5.34  |
| 1/1 | 1/1 | 7.93 | 7.35  |
| 1/1 | 1/1 | 5.49 | 4.98  |
| 1/1 | 1/1 | 6.15 | 5.7   |
| 1/1 | 1/1 | 6.11 | 5.69  |
| 1/1 | 1/1 | 3.42 | 3.1   |
| 1/1 | 1/1 | 4.28 | 4.04  |
| 1/1 | 1/1 | 2.97 | 2.74  |
| 0/1 | 1/1 | 3.7  | 3.51  |
| 1/1 | 1/1 | 7.2  | 7.16  |
| 1/1 | 1/1 | 3.47 | 3.74  |
| 0/1 | 1/1 | 2.56 | 3.08  |
| 0/1 | 1/1 | 3.65 | 4.17  |
| 1/1 | 1/1 | 4.58 | 4.39  |
| 0/1 | 1/1 | 5.2  | 5.06  |
| 1/1 | 1/1 | 7.7  | 7.7   |
| 1/1 | 1/1 | 5.57 | 5.65  |
| 0/1 | 1/1 | 4.37 | 4.54  |
| 1/1 | 1/1 | 6.35 | 6.54  |
| 0/1 | 1/1 | 6.44 | 6.69  |
| 0/1 | 1/1 | 5.3  | 5.56  |
| 0/1 | 1/1 | 5.36 | 5.68  |
| 0/1 | 1/1 | 4.65 | 5.02  |
| 0/1 | 1/1 | 4.48 | 7.07  |
| 0/1 | 1/1 | 2.73 | 6.06  |
| 1/1 | 1/1 | 6.61 | 10.13 |
| 1/1 | 1/1 | 4.53 | 3.22  |
| 1/1 | 1/1 | 4.55 | 3.78  |
| 0/1 | 1/1 | 2.24 | 4.02  |
| 1/1 | 1/1 | 7.66 | 6.53  |
| 1/1 | 1/1 | 7.9  | 6.86  |
| 0/1 | 1/1 | 4.35 | 5.99  |
| 0/1 | 1/1 | 4.19 | 6.41  |
| 1/1 | 1/1 | 5.39 | 5.26  |
| 1/1 | 1/1 | 6.12 | 6     |
| 1/1 | 1/1 | 5.86 | 5.74  |
| 0/1 | 1/1 | 3.96 | 3.87  |
| 0/1 | 1/1 | 4.67 | 4.65  |
| 1/1 | 1/1 | 3.95 | 3.97  |

|     |     |       |       |
|-----|-----|-------|-------|
| 0/1 | 1/1 | 7.63  | 7.74  |
| 1/1 | 1/1 | 9.5   | 9.79  |
| 1/1 | 1/1 | 6.84  | 7.16  |
| 0/1 | 1/1 | 3.57  | 3.89  |
| 0/1 | 1/1 | 3.12  | 3.47  |
| 0/1 | 1/1 | 4.97  | 7.47  |
| 1/1 | 1/1 | 4.65  | 7.31  |
| 1/1 | 1/1 | 8.27  | 8     |
| 1/1 | 1/1 | 7.55  | 7.31  |
| 1/1 | 1/1 | 5.23  | 5     |
| 1/1 | 1/1 | 10.33 | 10.18 |
| 1/1 | 1/1 | 6.79  | 6.88  |
| 1/1 | 1/1 | 8.22  | 8.45  |
| 1/1 | 1/1 | 6.34  | 6.6   |
| 1/1 | 1/1 | 6.99  | 7.25  |
| 1/1 | 1/1 | 4.64  | 3.71  |
| 1/1 | 1/1 | 8.61  | 8     |
| 1/1 | 1/1 | 7.69  | 7.11  |
| 1/1 | 1/1 | 7.98  | 7.4   |
| 1/1 | 1/1 | 10.36 | 9.87  |
| 0/1 | 1/1 | 2.52  | 4.21  |
| 1/1 | 0/1 | 2.91  | 1.82  |
| 1/1 | 0/1 | 2.61  | 1.72  |
| 1/1 | 1/1 | 4.03  | 3.43  |
| 1/1 | 1/1 | 5.23  | 6.73  |
| 0/1 | 1/1 | 1.82  | 3.77  |
| 0/1 | 1/1 | 1.97  | 3.94  |
| 0/1 | 1/1 | 3.04  | 5.53  |
| 1/1 | 1/1 | 5.76  | 4.32  |
| 1/1 | 1/1 | 5.42  | 4.32  |
| 0/1 | 1/1 | 4.57  | 5.83  |
| 1/1 | 1/1 | 9.31  | 8.97  |
| 1/1 | 1/1 | 9.07  | 8.98  |
| 1/1 | 1/1 | 4.13  | 4.35  |
| 1/1 | 1/1 | 2.6   | 5.16  |
| 1/1 | 1/1 | 5.75  | 5.19  |
| 1/1 | 1/1 | 8.96  | 8.78  |
| 1/1 | 1/1 | 9.16  | 9.01  |
| 1/1 | 1/1 | 5.38  | 5.23  |
| 1/1 | 1/1 | 8.36  | 8.28  |
| 1/1 | 1/1 | 6.47  | 6.44  |
| 1/1 | 1/1 | 10.51 | 9.04  |
| 1/1 | 1/1 | 9.39  | 8.26  |
| 0/1 | 1/1 | 3.56  | 5.34  |
| 1/1 | 1/1 | 6.49  | 5.33  |
| 1/1 | 1/1 | 5.74  | 4.69  |
| 1/1 | 1/1 | 7.3   | 6.65  |
| 0/1 | 1/1 | 3.04  | 4.93  |
| 0/1 | 1/1 | 4.29  | 6.59  |
| 1/1 | 1/1 | 4.92  | 4.04  |
| 1/1 | 1/1 | 3.16  | 2.51  |
| 1/1 | 0/1 | 3.94  | 2.41  |
| 1/1 | 1/1 | 4.61  | 5.71  |
| 1/1 | 1/1 | 5.15  | 6.36  |
| 1/1 | 1/1 | 4.57  | 3.9   |
| 1/1 | 1/1 | 4.65  | 3.99  |
| 1/1 | 1/1 | 7.61  | 7.13  |
| 1/1 | 1/1 | 6.88  | 6.49  |

|     |     |       |       |
|-----|-----|-------|-------|
| 0/1 | 1/1 | 4.88  | 4.54  |
| 1/1 | 1/1 | 6.19  | 5.98  |
| 0/1 | 1/1 | 2.72  | 2.59  |
| 1/1 | 1/1 | 6.44  | 6.34  |
| 1/1 | 1/1 | 6.16  | 4.91  |
| 1/1 | 1/1 | 4.29  | 5.64  |
| 0/1 | 1/1 | 3.76  | 5.62  |
| 1/1 | 1/1 | 3.16  | 5.06  |
| 1/1 | 1/1 | 5.4   | 3.63  |
| 1/1 | 1/1 | 4.43  | 5.59  |
| 0/1 | 1/1 | 2.61  | 3.98  |
| 0/1 | 1/1 | 4.12  | 5.84  |
| 1/1 | 1/1 | 7.97  | 7.3   |
| 1/1 | 1/1 | 6.36  | 6.11  |
| 1/1 | 0/1 | 3.63  | 2.57  |
| 1/1 | 1/1 | 4.63  | 4.07  |
| 1/1 | 1/1 | 6.43  | 3.51  |
| 1/1 | 1/1 | 7.23  | 4.7   |
| 1/1 | 1/1 | 6.82  | 4.47  |
| 1/1 | 1/1 | 7.3   | 7.06  |
| 1/1 | 1/1 | 8.98  | 9.59  |
| 1/1 | 1/1 | 4.04  | 3.13  |
| 1/1 | 1/1 | 7.7   | 6.9   |
| 1/1 | 1/1 | 7.95  | 7.37  |
| 1/1 | 1/1 | 5.27  | 4.8   |
| 0/1 | 1/1 | 4.88  | 7.03  |
| 1/1 | 1/1 | 5.95  | 3.53  |
| 1/1 | 1/1 | 6.64  | 4.3   |
| 1/1 | 1/1 | 5.94  | 3.73  |
| 1/1 | 1/1 | 5.92  | 4     |
| 1/1 | 1/1 | 4.97  | 3.47  |
| 1/1 | 1/1 | 9.25  | 8.04  |
| 1/1 | 1/1 | 4.82  | 5.97  |
| 1/1 | 1/1 | 4.58  | 5.9   |
| 1/1 | 1/1 | 4.13  | 5.92  |
| 1/1 | 1/1 | 9.24  | 5.89  |
| 1/1 | 1/1 | 7.43  | 4.31  |
| 1/1 | 1/1 | 9.55  | 6.72  |
| 1/1 | 1/1 | 9.38  | 9.03  |
| 1/1 | 1/1 | 12.32 | 12.36 |
| 1/1 | 1/1 | 9.25  | 8.18  |
| 1/1 | 1/1 | 9.61  | 8.58  |
| 1/1 | 1/1 | 8.09  | 7.06  |
| 1/1 | 1/1 | 8.69  | 7.71  |
| 1/1 | 1/1 | 9     | 8.04  |
| 1/1 | 1/1 | 7.7   | 6.77  |
| 1/1 | 1/1 | 7.9   | 6.99  |
| 1/1 | 1/1 | 7.51  | 6.67  |
| 1/1 | 1/1 | 7.56  | 6.72  |
| 1/1 | 1/1 | 7.47  | 6.66  |
| 1/1 | 1/1 | 10.41 | 9.6   |
| 1/1 | 1/1 | 10.72 | 9.93  |
| 1/1 | 1/1 | 9.86  | 9.07  |
| 1/1 | 1/1 | 3.76  | 3.04  |
| 1/1 | 1/1 | 10.12 | 9.43  |
| 1/1 | 1/1 | 9.11  | 8.47  |
| 1/1 | 1/1 | 7.92  | 7.32  |
| 1/1 | 1/1 | 8.33  | 7.73  |

|     |     |      |      |
|-----|-----|------|------|
| 1/1 | 1/1 | 3.87 | 5.39 |
| 0/1 | 1/1 | 3.92 | 5.83 |
| 1/1 | 1/1 | 5.37 | 4.63 |
| 1/1 | 1/1 | 5.74 | 5.14 |
| 1/1 | 1/1 | 6.77 | 6.5  |
| 0/1 | 1/1 | 2.45 | 4.4  |
| 0/1 | 1/1 | 2.98 | 5.22 |
| 1/1 | 1/1 | 5.89 | 8.16 |
| 1/1 | 0/1 | 3.21 | 2.03 |
| 1/1 | 1/1 | 5.97 | 5.05 |
| 1/1 | 1/1 | 6.56 | 5.72 |
| 1/1 | 0/1 | 2.9  | 2.11 |
| 1/1 | 1/1 | 3.72 | 3    |
| 1/1 | 1/1 | 4.16 | 3.55 |
| 1/1 | 0/1 | 4.4  | 3.14 |
| 1/1 | 1/1 | 4.97 | 3.94 |
| 1/1 | 1/1 | 7.98 | 7.27 |
| 1/1 | 1/1 | 3.89 | 5.47 |
| 0/1 | 1/1 | 3.08 | 4.87 |
| 0/1 | 1/1 | 3.22 | 5.11 |
| 1/1 | 1/1 | 4.01 | 6.19 |
| 1/1 | 1/1 | 5.87 | 4.92 |
| 1/1 | 1/1 | 5.98 | 5.21 |
| 1/1 | 1/1 | 5.67 | 5.14 |
| 1/1 | 0/1 | 2.48 | 2.05 |
| 1/1 | 1/1 | 2.97 | 2.57 |
| 1/1 | 1/1 | 5.33 | 4.95 |
| 1/1 | 1/1 | 4.95 | 3.39 |
| 1/1 | 1/1 | 4.02 | 6.3  |
| 1/1 | 0/1 | 5.42 | 3.01 |
| 1/1 | 0/1 | 5.3  | 3.37 |
| 1/1 | 0/1 | 7.43 | 5.58 |
| 1/1 | 1/1 | 6.31 | 6.5  |
| 1/1 | 1/1 | 5.18 | 5.52 |
| 0/1 | 1/1 | 3.02 | 3.61 |
| 0/1 | 1/1 | 2.39 | 3.28 |
| 1/1 | 0/1 | 3.93 | 3.2  |
| 1/1 | 0/1 | 4.43 | 3.88 |
| 1/1 | 1/1 | 2.34 | 2.05 |
| 1/1 | 1/1 | 6.54 | 6.29 |
| 1/1 | 1/1 | 4.05 | 3.82 |
| 1/1 | 1/1 | 3.68 | 5.59 |
| 0/1 | 1/1 | 2.56 | 4.53 |
| 1/1 | 1/1 | 6.1  | 4.54 |
| 1/1 | 1/1 | 4.2  | 2.77 |
| 1/1 | 1/1 | 3.4  | 2.37 |
| 1/1 | 0/1 | 2.8  | 1.97 |
| 1/1 | 1/1 | 5.1  | 4.41 |
| 1/1 | 0/1 | 5.41 | 4.79 |
| 1/1 | 1/1 | 3.95 | 5.52 |
| 0/1 | 1/1 | 3.2  | 4.79 |
| 1/1 | 1/1 | 9.09 | 7.88 |
| 1/1 | 1/1 | 5.07 | 4.29 |
| 1/1 | 0/1 | 3.52 | 2.39 |
| 1/1 | 1/1 | 3.45 | 2.45 |
| 1/1 | 1/1 | 5.26 | 4.27 |
| 1/1 | 1/1 | 4.05 | 3.22 |
| 1/1 | 1/1 | 6.37 | 5.64 |



|     |     |       |       |
|-----|-----|-------|-------|
| 1/1 | 1/1 | 4.34  | 3.68  |
| 1/1 | 1/1 | 8.4   | 7.83  |
| 1/1 | 1/1 | 4.41  | 6.21  |
| 1/1 | 1/1 | 11.14 | 10.42 |
| 1/1 | 1/1 | 5.73  | 5.14  |
| 1/1 | 0/1 | 5.91  | 5.36  |
| 0/1 | 1/1 | 5.39  | 4.87  |
| 1/1 | 1/1 | 7.77  | 7.37  |
| 1/1 | 1/1 | 7.93  | 7.55  |
| 1/1 | 1/1 | 8.68  | 8.41  |
| 1/1 | 1/1 | 7.88  | 7.7   |
| 1/1 | 1/1 | 9.67  | 11.7  |
| 1/1 | 1/1 | 9.81  | 8.96  |
| 1/1 | 1/1 | 3.21  | 2.6   |
| 1/1 | 1/1 | 10.32 | 9.84  |
| 1/1 | 1/1 | 7.75  | 7.27  |
| 1/1 | 1/1 | 8.45  | 7.97  |
| 1/1 | 1/1 | 8.2   | 7.75  |
| 1/1 | 1/1 | 6.49  | 6.06  |
| 1/1 | 1/1 | 4.28  | 3.93  |
| 1/1 | 1/1 | 9.04  | 8.69  |
| 1/1 | 1/1 | 10.06 | 9.77  |
| 1/1 | 1/1 | 6.72  | 6.44  |
| 1/1 | 1/1 | 9.81  | 8.96  |
| 1/1 | 1/1 | 3.21  | 2.6   |
| 1/1 | 1/1 | 10.34 | 9.85  |
| 1/1 | 1/1 | 7.75  | 7.27  |
| 1/1 | 1/1 | 8.45  | 7.97  |
| 1/1 | 1/1 | 8.2   | 7.75  |
| 1/1 | 1/1 | 6.49  | 6.06  |
| 1/1 | 1/1 | 9.04  | 8.69  |
| 1/1 | 1/1 | 10.06 | 9.77  |
| 1/1 | 1/1 | 6.72  | 6.44  |
| 1/1 | 1/1 | 9.81  | 8.96  |
| 1/1 | 1/1 | 3.21  | 2.6   |
| 1/1 | 1/1 | 10.34 | 9.85  |
| 1/1 | 1/1 | 7.75  | 7.27  |
| 1/1 | 1/1 | 8.45  | 7.97  |
| 1/1 | 1/1 | 8.2   | 7.75  |
| 1/1 | 1/1 | 6.49  | 6.06  |
| 1/1 | 1/1 | 9.04  | 8.69  |
| 1/1 | 1/1 | 10.06 | 9.77  |
| 1/1 | 1/1 | 6.72  | 6.44  |
| 1/1 | 1/1 | 9.81  | 8.96  |
| 1/1 | 1/1 | 3.21  | 2.6   |
| 1/1 | 1/1 | 10.32 | 9.84  |
| 1/1 | 1/1 | 7.75  | 7.27  |
| 1/1 | 1/1 | 8.45  | 7.97  |
| 1/1 | 1/1 | 8.2   | 7.75  |
| 1/1 | 1/1 | 6.49  | 6.06  |
| 1/1 | 1/1 | 4.28  | 3.93  |
| 1/1 | 1/1 | 9.04  | 8.69  |
| 1/1 | 1/1 | 10.06 | 9.77  |
| 1/1 | 1/1 | 6.72  | 6.44  |
| 1/1 | 0/1 | 4.17  | 2.34  |
| 1/1 | 1/1 | 4.29  | 2.52  |
| 1/1 | 1/1 | 6.04  | 4.57  |
| 1/1 | 1/1 | 11.75 | 10.29 |

|     |     |       |       |
|-----|-----|-------|-------|
| 1/1 | 1/1 | 3.47  | 4.34  |
| 0/1 | 1/1 | 3.08  | 4.03  |
| 1/1 | 1/1 | 3.84  | 2.64  |
| 1/1 | 1/1 | 4.91  | 4.16  |
| 1/1 | 1/1 | 7.58  | 5.69  |
| 1/1 | 1/1 | 6.87  | 5.38  |
| 1/1 | 1/1 | 7.65  | 6.22  |
| 1/1 | 1/1 | 5.51  | 4.1   |
| 1/1 | 0/1 | 4.39  | 3.05  |
| 0/1 | 1/1 | 3.7   | 4.4   |
| 0/1 | 1/1 | 3.46  | 4.17  |
| 1/1 | 1/1 | 3.63  | 4.43  |
| 1/1 | 1/1 | 4.33  | 5.38  |
| 0/1 | 1/1 | 3.98  | 5.45  |
| 1/1 | 1/1 | 8.51  | 7.13  |
| 1/1 | 1/1 | 4.37  | 3.15  |
| 1/1 | 1/1 | 2.91  | 4.23  |
| 0/1 | 1/1 | 2.5   | 3.94  |
| 1/1 | 1/1 | 5.02  | 3.61  |
| 1/1 | 0/1 | 4.61  | 3.23  |
| 1/1 | 0/1 | 3.89  | 2.51  |
| 1/1 | 1/1 | 8.54  | 7.25  |
| 1/1 | 1/1 | 5.74  | 4.59  |
| 1/1 | 1/1 | 4.81  | 3.8   |
| 1/1 | 1/1 | 5.22  | 6.4   |
| 1/1 | 1/1 | 8.74  | 8.16  |
| 0/1 | 1/1 | 7.42  | 7.34  |
| 0/1 | 1/1 | 2.12  | 4.8   |
| 1/1 | 1/1 | 6.49  | 5.33  |
| 1/1 | 1/1 | 5.74  | 4.69  |
| 1/1 | 1/1 | 4.7   | 3.83  |
| 1/1 | 1/1 | 7.3   | 6.65  |
| 1/1 | 1/1 | 7.55  | 6.93  |
| 0/1 | 1/1 | 2.92  | 4.35  |
| 0/1 | 1/1 | 4.29  | 6.59  |
| 0/1 | 1/1 | 2.67  | 5.11  |
| 1/1 | 1/1 | 9.43  | 8.15  |
| 1/1 | 1/1 | 10.98 | 10.05 |
| 1/1 | 1/1 | 5.17  | 4.26  |
| 1/1 | 1/1 | 4.72  | 6.27  |
| 1/1 | 1/1 | 7.07  | 5.98  |
| 1/1 | 1/1 | 7.14  | 6.54  |
| 1/1 | 1/1 | 9.65  | 9.11  |
| 0/1 | 1/1 | 2.85  | 4.9   |
| 1/1 | 1/1 | 6.92  | 6.55  |
| 1/1 | 1/1 | 9.33  | 9     |
| 1/1 | 1/1 | 6.35  | 6.24  |
| 1/1 | 1/1 | 13.11 | 13.07 |
| 1/1 | 1/1 | 12.9  | 13.03 |
| 1/1 | 1/1 | 6.82  | 9.2   |
| 1/1 | 1/1 | 5.67  | 9.22  |
| 1/1 | 1/1 | 6.47  | 5.26  |
| 1/1 | 0/1 | 5.21  | 4.29  |
| 1/1 | 1/1 | 7.09  | 6.44  |
| 1/1 | 1/1 | 4.21  | 3.57  |
| 0/1 | 1/1 | 3.74  | 5.12  |
| 1/1 | 1/1 | 5.65  | 7.09  |
| 1/1 | 0/1 | 4.87  | 3.22  |

|     |     |       |       |
|-----|-----|-------|-------|
| 1/1 | 1/1 | 9.09  | 7.56  |
| 1/1 | 0/1 | 4.46  | 2.96  |
| 1/1 | 1/1 | 6.12  | 4.89  |
| 1/1 | 1/1 | 5.94  | 5.52  |
| 1/1 | 1/1 | 6.63  | 6.32  |
| 1/1 | 1/1 | 9.86  | 9.62  |
| 1/1 | 1/1 | 8.41  | 8.29  |
| 1/1 | 1/1 | 8.85  | 8.8   |
| 1/1 | 1/1 | 7.56  | 7.58  |
| 1/1 | 1/1 | 7.64  | 7.69  |
| 1/1 | 1/1 | 8.63  | 8.74  |
| 1/1 | 1/1 | 6.68  | 6.82  |
| 1/1 | 1/1 | 6.49  | 6.63  |
| 1/1 | 1/1 | 7.94  | 5.46  |
| 1/1 | 1/1 | 11.29 | 11.44 |
| 1/1 | 1/1 | 4.29  | 3.05  |
| 1/1 | 0/1 | 4.78  | 3.93  |
| 1/1 | 1/1 | 6.8   | 6.06  |
| 0/1 | 1/1 | 3.13  | 4.69  |
| 0/1 | 1/1 | 2.96  | 4.62  |
| 1/1 | 0/1 | 9.97  | 9.33  |
| 1/1 | 1/1 | 5.52  | 4.89  |
| 0/1 | 1/1 | 3     | 5.85  |
| 1/1 | 1/1 | 9.2   | 8.66  |
| 1/1 | 1/1 | 5.58  | 5.41  |
| 0/1 | 1/1 | 5.21  | 5.07  |
| 0/1 | 1/1 | 2.74  | 2.6   |
| 0/1 | 1/1 | 2.28  | 2.29  |
| 1/1 | 1/1 | 4.02  | 6.42  |
| 1/1 | 1/1 | 5.6   | 4.84  |
| 1/1 | 1/1 | 3.43  | 2.82  |
| 1/1 | 1/1 | 3.54  | 3.3   |
| 0/1 | 1/1 | 3.39  | 5.41  |
| 1/1 | 1/1 | 5.82  | 4.68  |
| 1/1 | 1/1 | 6.68  | 6.09  |
| 0/1 | 1/1 | 2.77  | 4.2   |
| 0/1 | 1/1 | 4.17  | 6.07  |
| 0/1 | 1/1 | 4.47  | 6.39  |
| 0/1 | 1/1 | 3.76  | 5.76  |
| 1/1 | 1/1 | 6.67  | 2.94  |
| 1/1 | 1/1 | 9.04  | 5.4   |
| 1/1 | 1/1 | 7.61  | 4.28  |
| 1/1 | 1/1 | 7.21  | 6.05  |
| 1/1 | 1/1 | 4.17  | 3.08  |
| 1/1 | 1/1 | 8.37  | 7.3   |
| 1/1 | 1/1 | 6.93  | 5.88  |
| 1/1 | 1/1 | 6.03  | 5.02  |
| 1/1 | 0/1 | 3.35  | 2.38  |
| 1/1 | 1/1 | 8.35  | 7.4   |
| 1/1 | 1/1 | 4.2   | 3.38  |
| 1/1 | 1/1 | 7.7   | 6.99  |
| 1/1 | 1/1 | 6.54  | 5.86  |
| 1/1 | 1/1 | 3.82  | 3.18  |
| 1/1 | 1/1 | 6.84  | 6.2   |
| 1/1 | 1/1 | 3.66  | 3.09  |
| 1/1 | 1/1 | 4.93  | 4.39  |
| 1/1 | 1/1 | 7.67  | 7.15  |
| 1/1 | 0/1 | 2.59  | 2.25  |

|     |     |      |      |
|-----|-----|------|------|
| 1/1 | 1/1 | 3.02 | 2.7  |
| 1/1 | 1/1 | 4.46 | 4.79 |
| 0/1 | 1/1 | 2.14 | 2.74 |
| 1/1 | 0/1 | 4.86 | 2.38 |
| 1/1 | 0/1 | 4.48 | 2.48 |
| 0/1 | 1/1 | 5.52 | 5.71 |
| 1/1 | 1/1 | 3.37 | 3.65 |
| 0/1 | 1/1 | 3.34 | 3.77 |
| 1/1 | 1/1 | 8.66 | 9.44 |
| 1/1 | 1/1 | 3.87 | 2.44 |
| 1/1 | 1/1 | 6.8  | 5.37 |
| 1/1 | 0/1 | 3.98 | 2.61 |
| 1/1 | 1/1 | 6.51 | 5.54 |
| 1/1 | 1/1 | 4.38 | 5.66 |
| 1/1 | 1/1 | 4.7  | 4.29 |
| 1/1 | 1/1 | 5.35 | 5.08 |
| 1/1 | 1/1 | 3.94 | 3.71 |
| 1/1 | 1/1 | 7.37 | 7.24 |
| 0/1 | 1/1 | 5.96 | 5.84 |
| 0/1 | 1/1 | 5.76 | 5.69 |
| 1/1 | 1/1 | 4.22 | 4.25 |
| 0/1 | 1/1 | 4.91 | 5.01 |
| 0/1 | 1/1 | 3.69 | 6.3  |
| 1/1 | 1/1 | 4.53 | 7.57 |
| 0/1 | 1/1 | 2.87 | 6.06 |
| 1/1 | 1/1 | 8.97 | 8.36 |
| 1/1 | 1/1 | 6.26 | 5.93 |
| 1/1 | 1/1 | 5.41 | 5.2  |
| 0/1 | 1/1 | 2.88 | 4.97 |
| 0/1 | 1/1 | 4.78 | 4.3  |
| 0/1 | 1/1 | 3.84 | 3.88 |
| 1/1 | 1/1 | 6.26 | 8.41 |
| 1/1 | 1/1 | 6.24 | 8.44 |
| 0/1 | 1/1 | 2.27 | 4.55 |
| 1/1 | 1/1 | 5.14 | 8.31 |
| 1/1 | 1/1 | 4.02 | 3.17 |
| 1/1 | 1/1 | 8.07 | 7.45 |
| 1/1 | 1/1 | 3.92 | 3.53 |
| 1/1 | 1/1 | 7.32 | 6.96 |
| 0/1 | 1/1 | 1.91 | 3.64 |
| 1/1 | 1/1 | 4.42 | 6.24 |
| 1/1 | 0/1 | 3.39 | 2.38 |
| 1/1 | 1/1 | 6.28 | 5.66 |
| 1/1 | 1/1 | 6.18 | 5.59 |
| 1/1 | 1/1 | 3.74 | 3.18 |
| 1/1 | 1/1 | 7.28 | 6.77 |
| 1/1 | 1/1 | 4.64 | 4.17 |
| 1/1 | 1/1 | 5.45 | 7.17 |
| 1/1 | 1/1 | 7.39 | 6.89 |
| 0/1 | 1/1 | 3.68 | 3.67 |
| 1/1 | 1/1 | 6    | 6.02 |
| 1/1 | 1/1 | 4.22 | 6.82 |
| 1/1 | 0/1 | 2.97 | 2.37 |
| 1/1 | 1/1 | 5.97 | 5.57 |
| 1/1 | 1/1 | 4.36 | 6.41 |
| 1/1 | 1/1 | 4.9  | 7.26 |
| 1/1 | 1/1 | 5.42 | 4.03 |
| 1/1 | 1/1 | 5.83 | 7.04 |

|     |     |      |      |
|-----|-----|------|------|
| 1/1 | 1/1 | 6.73 | 8.14 |
| 1/1 | 1/1 | 4.13 | 6.01 |
| 1/1 | 1/1 | 6.08 | 4.26 |
| 1/1 | 0/1 | 4.54 | 2.87 |
| 1/1 | 1/1 | 4.51 | 5.27 |
| 1/1 | 1/1 | 4.5  | 5.79 |
| 1/1 | 0/1 | 7.51 | 6.36 |
| 1/1 | 1/1 | 6.78 | 5.88 |
| 1/1 | 0/1 | 6.89 | 6.17 |
| 1/1 | 0/1 | 7.67 | 7    |
| 1/1 | 1/1 | 3.82 | 3.17 |
| 1/1 | 1/1 | 6.79 | 6.19 |
| 1/1 | 1/1 | 7.4  | 6.8  |
| 0/1 | 1/1 | 3.94 | 5.55 |
| 0/1 | 1/1 | 3.75 | 5.69 |
| 1/1 | 1/1 | 3.86 | 3.16 |
| 1/1 | 1/1 | 3.98 | 3.54 |
| 1/1 | 1/1 | 5.25 | 4.98 |
| 1/1 | 0/1 | 4.02 | 2.97 |
| 1/1 | 1/1 | 4.21 | 3.44 |
| 1/1 | 1/1 | 3.66 | 3.08 |
| 1/1 | 1/1 | 3.4  | 2.87 |
| 1/1 | 1/1 | 3.94 | 6.25 |
| 1/1 | 1/1 | 4.84 | 4.16 |
| 1/1 | 1/1 | 7.53 | 6.92 |
| 1/1 | 1/1 | 4.64 | 4.28 |
| 1/1 | 1/1 | 5.92 | 5.65 |
| 1/1 | 1/1 | 9.72 | 9.56 |
| 1/1 | 1/1 | 6.37 | 6.15 |
| 1/1 | 1/1 | 7.78 | 7.87 |
| 1/1 | 1/1 | 5.11 | 5.23 |
| 0/1 | 1/1 | 3.8  | 4.05 |
| 0/1 | 1/1 | 3.83 | 6.46 |
| 1/1 | 1/1 | 4.89 | 7.57 |
| 0/1 | 1/1 | 3.71 | 6.45 |
| 1/1 | 1/1 | 4.15 | 6.93 |
| 1/1 | 1/1 | 4.76 | 4.07 |
| 1/1 | 1/1 | 8.12 | 7.57 |
| 1/1 | 1/1 | 6.06 | 5.73 |
| 1/1 | 1/1 | 4.97 | 4.84 |
| 1/1 | 1/1 | 4.22 | 6.62 |
| 1/1 | 1/1 | 6.16 | 4.6  |
| 1/1 | 1/1 | 6.02 | 4.84 |
| 1/1 | 1/1 | 4.97 | 3.82 |
| 1/1 | 1/1 | 4.61 | 5.7  |
| 0/1 | 1/1 | 2.18 | 3.32 |
| 1/1 | 1/1 | 5.77 | 4.55 |
| 1/1 | 1/1 | 6.14 | 5.12 |
| 1/1 | 1/1 | 7.81 | 5.76 |
| 1/1 | 1/1 | 7.87 | 6.2  |
| 1/1 | 0/1 | 5.15 | 3.62 |
| 1/1 | 0/1 | 6.31 | 4.76 |
| 1/1 | 1/1 | 5.48 | 6.57 |
| 1/1 | 1/1 | 8.16 | 3.33 |
| 1/1 | 1/1 | 8.36 | 6.24 |
| 1/1 | 0/1 | 4.67 | 3.18 |
| 1/1 | 0/1 | 4.12 | 2.79 |
| 1/1 | 1/1 | 3.77 | 2.69 |

|     |     |       |       |
|-----|-----|-------|-------|
| 1/1 | 0/1 | 2.36  | 1.64  |
| 1/1 | 0/1 | 3.04  | 2.39  |
| 1/1 | 0/1 | 3.07  | 2.83  |
| 1/1 | 0/1 | 5.53  | 4.07  |
| 0/1 | 1/1 | 2.46  | 3.76  |
| 1/1 | 1/1 | 5.3   | 4.31  |
| 1/1 | 1/1 | 9.87  | 9.01  |
| 1/1 | 1/1 | 6.32  | 5.46  |
| 1/1 | 1/1 | 10.36 | 9.52  |
| 1/1 | 0/1 | 3.17  | 2.63  |
| 1/1 | 1/1 | 6.37  | 5.85  |
| 1/1 | 1/1 | 5.34  | 4.89  |
| 1/1 | 1/1 | 7.8   | 7.37  |
| 0/1 | 1/1 | 1.94  | 3.54  |
| 1/1 | 0/1 | 3.87  | 2.52  |
| 1/1 | 1/1 | 7.78  | 6.49  |
| 1/1 | 0/1 | 3.08  | 1.8   |
| 1/1 | 1/1 | 6.56  | 7.82  |
| 1/1 | 1/1 | 4.18  | 3.49  |
| 1/1 | 1/1 | 5.49  | 4.89  |
| 1/1 | 1/1 | 6.86  | 6.6   |
| 1/1 | 1/1 | 10.23 | 9.98  |
| 1/1 | 1/1 | 4.8   | 6.8   |
| 1/1 | 1/1 | 5.34  | 7.72  |
| 1/1 | 1/1 | 3.22  | 5.61  |
| 1/1 | 1/1 | 6.7   | 5.02  |
| 1/1 | 1/1 | 4.02  | 5.01  |
| 0/1 | 1/1 | 2.73  | 3.73  |
| 0/1 | 1/1 | 2.92  | 4.04  |
| 1/1 | 1/1 | 3.05  | 4.25  |
| 0/1 | 1/1 | 2.62  | 4.51  |
| 1/1 | 1/1 | 6.75  | 5.29  |
| 1/1 | 1/1 | 6.47  | 7.58  |
| 1/1 | 1/1 | 4.84  | 5.97  |
| 0/1 | 1/1 | 4.47  | 5.62  |
| 1/1 | 1/1 | 3.13  | 4.36  |
| 1/1 | 1/1 | 5     | 6.27  |
| 1/1 | 1/1 | 5.42  | 6.73  |
| 1/1 | 1/1 | 4.18  | 5.64  |
| 1/1 | 1/1 | 4.02  | 5.62  |
| 1/1 | 1/1 | 5.12  | 6.88  |
| 0/1 | 1/1 | 2.9   | 5.17  |
| 1/1 | 1/1 | 11.39 | 11.31 |
| 1/1 | 1/1 | 5.27  | 5.37  |
| 1/1 | 1/1 | 8.26  | 8.37  |
| 1/1 | 1/1 | 7.43  | 7.76  |
| 1/1 | 1/1 | 6.37  | 6.72  |
| 1/1 | 1/1 | 8.65  | 5.8   |
| 1/1 | 1/1 | 8.76  | 5.98  |
| 1/1 | 1/1 | 8.23  | 5.74  |
| 1/1 | 1/1 | 7.74  | 5.29  |
| 1/1 | 1/1 | 6.86  | 4.46  |
| 1/1 | 1/1 | 9.1   | 8.82  |
| 1/1 | 1/1 | 13.8  | 13.54 |
| 1/1 | 1/1 | 13.36 | 13.11 |
| 1/1 | 1/1 | 13.47 | 13.22 |
| 1/1 | 1/1 | 13.3  | 13.08 |
| 1/1 | 1/1 | 13.67 | 13.46 |

|     |     |       |       |
|-----|-----|-------|-------|
| 1/1 | 1/1 | 13.39 | 13.18 |
| 1/1 | 1/1 | 13.84 | 13.67 |
| 1/1 | 1/1 | 13.35 | 13.19 |
| 1/1 | 1/1 | 13.17 | 13.17 |
| 1/1 | 1/1 | 10.56 | 10.63 |
| 1/1 | 1/1 | 5.42  | 4.64  |
| 1/1 | 1/1 | 8.01  | 7.27  |
| 1/1 | 1/1 | 9.79  | 9.48  |
| 1/1 | 1/1 | 3.85  | 5.82  |
| 1/1 | 0/1 | 5.22  | 3.63  |
| 1/1 | 1/1 | 6.93  | 5.82  |
| 1/1 | 1/1 | 3.12  | 4.19  |
| 1/1 | 1/1 | 9.44  | 9.14  |
| 1/1 | 1/1 | 9.2   | 9.19  |
| 1/1 | 1/1 | 4.93  | 5.01  |
| 0/1 | 1/1 | 3.41  | 3.49  |
| 1/1 | 1/1 | 4.28  | 6.9   |
| 1/1 | 1/1 | 9.44  | 9.14  |
| 1/1 | 1/1 | 9.2   | 9.19  |
| 1/1 | 1/1 | 4.93  | 5.01  |
| 0/1 | 1/1 | 3.41  | 3.49  |
| 1/1 | 1/1 | 4.28  | 6.9   |
| 1/1 | 1/1 | 8.83  | 7.79  |
| 1/1 | 0/1 | 4.84  | 3.9   |
| 1/1 | 0/1 | 4.3   | 3.47  |
| 1/1 | 1/1 | 4.76  | 6.93  |
| 1/1 | 1/1 | 9.44  | 9.14  |
| 1/1 | 1/1 | 9.2   | 9.19  |
| 1/1 | 1/1 | 4.93  | 5.01  |
| 0/1 | 1/1 | 3.41  | 3.49  |
| 1/1 | 1/1 | 4.28  | 6.9   |
| 1/1 | 1/1 | 6.35  | 4.15  |
| 1/1 | 1/1 | 6.48  | 6.89  |
| 1/1 | 1/1 | 5.37  | 6.15  |
| 1/1 | 1/1 | 2.78  | 3.67  |
| 1/1 | 0/1 | 5.54  | 4.53  |
| 1/1 | 0/1 | 6.58  | 5.71  |
| 1/1 | 1/1 | 6.34  | 5.52  |
| 1/1 | 1/1 | 2.91  | 2.15  |
| 1/1 | 1/1 | 5.35  | 4.86  |
| 1/1 | 1/1 | 3.95  | 3.47  |
| 1/1 | 0/1 | 4.54  | 3.56  |
| 1/1 | 1/1 | 5.08  | 4.45  |
| 1/1 | 1/1 | 8.94  | 8.36  |
| 1/1 | 0/1 | 4.92  | 4.4   |
| 1/1 | 1/1 | 7.02  | 6.53  |
| 1/1 | 1/1 | 3.96  | 3.15  |
| 1/1 | 1/1 | 9.47  | 8.99  |
| 1/1 | 1/1 | 6.28  | 6.01  |
| 1/1 | 1/1 | 6.02  | 4.92  |
| 1/1 | 1/1 | 5.47  | 4.37  |
| 1/1 | 1/1 | 4.41  | 5.91  |
| 1/1 | 0/1 | 3.15  | 2.73  |
| 1/1 | 1/1 | 5.01  | 4.81  |
| 1/1 | 1/1 | 4.92  | 4.75  |
| 0/1 | 1/1 | 3.03  | 2.91  |
| 1/1 | 1/1 | 2.95  | 2.95  |
| 0/1 | 1/1 | 3.57  | 3.6   |

|     |     |       |       |
|-----|-----|-------|-------|
| 1/1 | 1/1 | 5.62  | 5.01  |
| 1/1 | 1/1 | 9.12  | 8.57  |
| 1/1 | 1/1 | 5.17  | 4.7   |
| 1/1 | 1/1 | 7.09  | 6.9   |
| 1/1 | 1/1 | 7.65  | 7.46  |
| 0/1 | 1/1 | 6.41  | 6.29  |
| 1/1 | 1/1 | 10.45 | 10.14 |
| 1/1 | 1/1 | 8.45  | 8.25  |
| 1/1 | 1/1 | 8.22  | 8.16  |
| 1/1 | 1/1 | 8.52  | 8.48  |
| 0/1 | 1/1 | 7.2   | 7.43  |
| 1/1 | 1/1 | 6.11  | 8.55  |
| 0/1 | 1/1 | 3.16  | 6.27  |
| 0/1 | 1/1 | 2.8   | 6.65  |
| 1/1 | 1/1 | 7.72  | 3.91  |
| 1/1 | 1/1 | 9.31  | 6.05  |
| 1/1 | 0/1 | 6.91  | 5.74  |
| 1/1 | 1/1 | 6.73  | 5.62  |
| 1/1 | 1/1 | 6.58  | 5.51  |
| 1/1 | 1/1 | 9.32  | 8.35  |
| 1/1 | 1/1 | 8.84  | 7.9   |
| 1/1 | 1/1 | 8.59  | 7.94  |
| 1/1 | 0/1 | 4.03  | 3.42  |
| 0/1 | 1/1 | 7.48  | 7.73  |
| 1/1 | 1/1 | 5.84  | 4.68  |
| 1/1 | 0/1 | 3.02  | 2.3   |
| 1/1 | 1/1 | 10.98 | 10.38 |
| 1/1 | 1/1 | 5.85  | 4.91  |
| 0/1 | 1/1 | 2.84  | 4.74  |
| 1/1 | 1/1 | 10.03 | 9.25  |
| 1/1 | 1/1 | 6.19  | 5.61  |
| 1/1 | 0/1 | 4.17  | 3.67  |
| 1/1 | 1/1 | 6.81  | 6.34  |
| 1/1 | 0/1 | 3.38  | 2.95  |
| 1/1 | 1/1 | 6.69  | 6.36  |
| 0/1 | 1/1 | 3.63  | 3.35  |
| 1/1 | 0/1 | 5.32  | 3.93  |
| 1/1 | 0/1 | 5.23  | 4.35  |
| 1/1 | 1/1 | 4.75  | 6.01  |
| 1/1 | 1/1 | 5.43  | 4.35  |
| 1/1 | 1/1 | 4.49  | 3.87  |
| 1/1 | 1/1 | 3.07  | 2.45  |
| 1/1 | 1/1 | 5.07  | 4.53  |
| 1/1 | 1/1 | 4.88  | 6.71  |
| 0/1 | 1/1 | 2.39  | 4.31  |
| 1/1 | 1/1 | 3.37  | 5.29  |
| 1/1 | 1/1 | 7.69  | 6.99  |
| 1/1 | 1/1 | 6.45  | 6.09  |
| 0/1 | 1/1 | 4.67  | 6.76  |
| 1/1 | 1/1 | 4.69  | 2.52  |
| 1/1 | 1/1 | 4.94  | 5.41  |
| 1/1 | 1/1 | 7.66  | 7.47  |
| 1/1 | 1/1 | 4.32  | 4.17  |
| 0/1 | 1/1 | 6.54  | 6.67  |
| 1/1 | 1/1 | 4.21  | 6.78  |
| 0/1 | 1/1 | 2.69  | 5.51  |
| 1/1 | 0/1 | 10.59 | 2.48  |
| 1/1 | 0/1 | 10.32 | 2.72  |



|     |     |       |       |
|-----|-----|-------|-------|
| 1/1 | 1/1 | 10.4  | 4.97  |
| 1/1 | 1/1 | 9.5   | 4.34  |
| 1/1 | 0/1 | 8.46  | 3.31  |
| 1/1 | 0/1 | 6.98  | 2.18  |
| 1/1 | 1/1 | 7.73  | 3.04  |
| 1/1 | 0/1 | 6.96  | 2.38  |
| 1/1 | 0/1 | 6.61  | 2.26  |
| 1/1 | 0/1 | 4.77  | 1.92  |
| 1/1 | 1/1 | 1.79  | 2.34  |
| 1/1 | 1/1 | 11.3  | 11.37 |
| 0/1 | 1/1 | 5.05  | 5.13  |
| 1/1 | 1/1 | 8.8   | 9.04  |
| 1/1 | 1/1 | 6.35  | 6.77  |
| 0/1 | 1/1 | 5.82  | 6.35  |
| 0/1 | 1/1 | 3.88  | 6.51  |
| 0/1 | 1/1 | 3.56  | 6.22  |
| 0/1 | 1/1 | 3.3   | 6.1   |
| 1/1 | 1/1 | 6.01  | 9.25  |
| 1/1 | 1/1 | 4.27  | 7.97  |
| 1/1 | 1/1 | 4.81  | 4.07  |
| 1/1 | 1/1 | 5.46  | 4.86  |
| 1/1 | 1/1 | 7.12  | 6.64  |
| 1/1 | 1/1 | 7.26  | 6.9   |
| 1/1 | 1/1 | 6.37  | 6.02  |
| 1/1 | 1/1 | 4.34  | 4.01  |
| 1/1 | 1/1 | 6.74  | 6.5   |
| 0/1 | 1/1 | 3.05  | 5.88  |
| 1/1 | 1/1 | 6.5   | 4.27  |
| 1/1 | 1/1 | 5.63  | 3.83  |
| 1/1 | 1/1 | 6.38  | 6.73  |
| 1/1 | 1/1 | 4.69  | 5.22  |
| 1/1 | 1/1 | 3.44  | 3.99  |
| 0/1 | 1/1 | 3.6   | 4.27  |
| 1/1 | 1/1 | 4.74  | 5.55  |
| 0/1 | 1/1 | 3.68  | 4.89  |
| 1/1 | 1/1 | 6.86  | 4.49  |
| 1/1 | 1/1 | 7.53  | 5.28  |
| 1/1 | 1/1 | 5.42  | 5.66  |
| 1/1 | 1/1 | 5.3   | 6.04  |
| 1/1 | 0/1 | 5.85  | 4.14  |
| 0/1 | 1/1 | 4.44  | 5.29  |
| 1/1 | 1/1 | 8.35  | 6.94  |
| 1/1 | 0/1 | 6.82  | 5.61  |
| 1/1 | 0/1 | 3.98  | 2.86  |
| 1/1 | 1/1 | 10.27 | 9.37  |
| 1/1 | 1/1 | 4.99  | 6.16  |
| 1/1 | 1/1 | 5.22  | 6.4   |
| 1/1 | 1/1 | 3.84  | 5.06  |
| 0/1 | 1/1 | 2.35  | 3.68  |
| 1/1 | 1/1 | 5.71  | 4.25  |
| 1/1 | 1/1 | 9.46  | 8.47  |
| 1/1 | 1/1 | 4.97  | 6.08  |
| 1/1 | 0/1 | 5.1   | 3.25  |
| 1/1 | 0/1 | 6.27  | 4.69  |
| 0/1 | 1/1 | 4.55  | 5.44  |
| 0/1 | 1/1 | 3.61  | 4.79  |
| 1/1 | 1/1 | 7.45  | 5.6   |
| 1/1 | 1/1 | 7.9   | 6.35  |

|     |     |       |       |
|-----|-----|-------|-------|
| 0/1 | 1/1 | 2.8   | 4.66  |
| 1/1 | 1/1 | 5.82  | 4.34  |
| 1/1 | 1/1 | 5.55  | 4.3   |
| 1/1 | 0/1 | 4.16  | 2.95  |
| 1/1 | 1/1 | 10.28 | 9.11  |
| 1/1 | 1/1 | 3.48  | 4.54  |
| 0/1 | 1/1 | 2.4   | 3.48  |
| 0/1 | 1/1 | 3.45  | 4.61  |
| 1/1 | 1/1 | 5.24  | 6.44  |
| 0/1 | 1/1 | 3.38  | 5.2   |
| 1/1 | 1/1 | 9.63  | 9.09  |
| 1/1 | 1/1 | 5.78  | 5.41  |
| 0/1 | 1/1 | 3.16  | 2.84  |
| 1/1 | 1/1 | 3.05  | 2.93  |
| 1/1 | 1/1 | 8.14  | 8.06  |
| 1/1 | 1/1 | 13.68 | 13.66 |
| 1/1 | 1/1 | 8.53  | 6.79  |
| 0/1 | 1/1 | 4.23  | 5.5   |
| 1/1 | 1/1 | 6.72  | 4.41  |
| 1/1 | 1/1 | 6.26  | 3.95  |
| 1/1 | 0/1 | 5.47  | 3.42  |
| 1/1 | 0/1 | 4.57  | 2.75  |
| 1/1 | 1/1 | 5.88  | 6.15  |
| 0/1 | 1/1 | 2.12  | 2.44  |
| 0/1 | 1/1 | 2.65  | 3.02  |
| 0/1 | 1/1 | 2.24  | 2.69  |
| 1/1 | 1/1 | 3.83  | 4.34  |
| 1/1 | 1/1 | 3.62  | 4.41  |
| 1/1 | 1/1 | 5.25  | 3.48  |
| 1/1 | 1/1 | 6.24  | 4.82  |
| 1/1 | 1/1 | 5.03  | 3.77  |
| 1/1 | 0/1 | 3.81  | 2.57  |
| 1/1 | 1/1 | 3.32  | 4.19  |
| 1/1 | 1/1 | 6.16  | 4.6   |
| 1/1 | 1/1 | 5.95  | 7.02  |
| 1/1 | 0/1 | 6.34  | 5.21  |
| 1/1 | 1/1 | 8.34  | 7.54  |
| 1/1 | 1/1 | 9.11  | 8.53  |
| 1/1 | 0/1 | 4.92  | 3.13  |
| 1/1 | 1/1 | 6.05  | 4.39  |
| 0/1 | 1/1 | 3.98  | 4.78  |
| 1/1 | 1/1 | 5.75  | 5.19  |
| 1/1 | 1/1 | 4.12  | 3.72  |
| 1/1 | 1/1 | 9.36  | 9.17  |
| 1/1 | 1/1 | 8.96  | 8.78  |
| 1/1 | 1/1 | 8.36  | 8.28  |
| 1/1 | 1/1 | 8.21  | 10.42 |
| 1/1 | 1/1 | 4.61  | 3.54  |
| 1/1 | 1/1 | 5.37  | 4.47  |
| 1/1 | 1/1 | 4.56  | 3.92  |
| 1/1 | 1/1 | 6.33  | 4.96  |
| 1/1 | 1/1 | 4     | 2.93  |
| 1/1 | 1/1 | 5.3   | 4.26  |
| 1/1 | 1/1 | 8.61  | 7.7   |
| 1/1 | 1/1 | 8.59  | 7.76  |
| 1/1 | 0/1 | 6.56  | 4.96  |
| 1/1 | 1/1 | 8.06  | 6.68  |
| 1/1 | 1/1 | 4.66  | 3.46  |

|     |     |      |      |
|-----|-----|------|------|
| 1/1 | 0/1 | 3.3  | 2.33 |
| 1/1 | 0/1 | 4.35 | 3.67 |
| 1/1 | 1/1 | 5.11 | 6.85 |
| 1/1 | 1/1 | 9.21 | 7.69 |
| 1/1 | 0/1 | 6.87 | 5.64 |
| 1/1 | 1/1 | 8.01 | 6.81 |
| 1/1 | 1/1 | 6.99 | 5.87 |
| 0/1 | 1/1 | 4.09 | 5.38 |
| 1/1 | 0/1 | 2.85 | 2.15 |
| 1/1 | 1/1 | 3.22 | 2.85 |
| 1/1 | 1/1 | 3.52 | 3.27 |
| 1/1 | 1/1 | 4.36 | 6.22 |
| 1/1 | 1/1 | 5.69 | 7.56 |
| 1/1 | 1/1 | 3.62 | 5.48 |
| 1/1 | 1/1 | 3.92 | 5.83 |
| 1/1 | 1/1 | 4.71 | 6.71 |
| 1/1 | 1/1 | 3.53 | 5.54 |
| 1/1 | 1/1 | 4.42 | 6.57 |
| 1/1 | 1/1 | 4.34 | 6.88 |
| 1/1 | 0/1 | 6.54 | 4.11 |
| 1/1 | 1/1 | 5.99 | 3.9  |
| 1/1 | 0/1 | 4.19 | 2.16 |
| 1/1 | 1/1 | 5.66 | 3.64 |
| 1/1 | 1/1 | 6.56 | 4.61 |
| 1/1 | 1/1 | 7    | 7.11 |
| 1/1 | 1/1 | 6.53 | 6.75 |
| 1/1 | 1/1 | 5.19 | 5.53 |
| 1/1 | 1/1 | 4.11 | 3.24 |
| 1/1 | 1/1 | 4.3  | 3.44 |
| 1/1 | 1/1 | 6.49 | 5.78 |
| 1/1 | 1/1 | 3.65 | 2.98 |
| 1/1 | 0/1 | 3.83 | 3.2  |
| 0/1 | 1/1 | 3.9  | 3.29 |
| 1/1 | 1/1 | 5.36 | 4.81 |
| 1/1 | 0/1 | 4.83 | 4.32 |
| 0/1 | 1/1 | 4.55 | 4.14 |
| 0/1 | 1/1 | 3.71 | 5.55 |
| 0/1 | 1/1 | 3.18 | 5.03 |
| 0/1 | 1/1 | 3.18 | 5.11 |
| 0/1 | 1/1 | 3.97 | 6.07 |
| 0/1 | 1/1 | 2.91 | 5.58 |
| 1/1 | 0/1 | 2.99 | 1.78 |
| 1/1 | 1/1 | 5.11 | 4.34 |
| 1/1 | 0/1 | 3.5  | 1.96 |
| 1/1 | 1/1 | 4.39 | 2.94 |
| 0/1 | 1/1 | 3.04 | 4.44 |
| 1/1 | 0/1 | 4.21 | 3.16 |
| 1/1 | 1/1 | 5.29 | 4.41 |
| 1/1 | 1/1 | 3.76 | 5.72 |
| 1/1 | 1/1 | 4.25 | 3.27 |
| 1/1 | 1/1 | 6.78 | 6.01 |
| 1/1 | 1/1 | 3.59 | 3.03 |
| 1/1 | 1/1 | 6.25 | 5.66 |
| 1/1 | 1/1 | 8.93 | 8.87 |
| 0/1 | 1/1 | 2.46 | 4.72 |
| 1/1 | 1/1 | 6.88 | 6.14 |
| 1/1 | 1/1 | 7.95 | 7.74 |
| 1/1 | 1/1 | 4.02 | 3.04 |

|     |     |       |       |
|-----|-----|-------|-------|
| 1/1 | 1/1 | 4.25  | 3.79  |
| 1/1 | 1/1 | 5.74  | 5.29  |
| 1/1 | 1/1 | 4.98  | 6.54  |
| 1/1 | 1/1 | 3.85  | 5.48  |
| 1/1 | 1/1 | 7.7   | 6.94  |
| 1/1 | 1/1 | 6.27  | 5.92  |
| 1/1 | 1/1 | 5.78  | 5.47  |
| 0/1 | 1/1 | 5.38  | 5.14  |
| 1/1 | 1/1 | 5.68  | 7.93  |
| 0/1 | 1/1 | 3.38  | 5.84  |
| 1/1 | 1/1 | 7.03  | 6.4   |
| 1/1 | 0/1 | 2.92  | 2.3   |
| 1/1 | 1/1 | 4.84  | 4.39  |
| 1/1 | 1/1 | 5.93  | 5.53  |
| 1/1 | 1/1 | 8.4   | 8.02  |
| 1/1 | 1/1 | 4.79  | 4.47  |
| 1/1 | 1/1 | 4.49  | 4.21  |
| 1/1 | 1/1 | 5.7   | 5.47  |
| 1/1 | 1/1 | 5.84  | 5.61  |
| 1/1 | 1/1 | 3.8   | 3.6   |
| 1/1 | 1/1 | 5.84  | 5.65  |
| 1/1 | 1/1 | 6.75  | 6.58  |
| 1/1 | 1/1 | 4.01  | 3.84  |
| 0/1 | 1/1 | 2.62  | 2.49  |
| 0/1 | 1/1 | 1.91  | 4.02  |
| 0/1 | 1/1 | 2.64  | 4.77  |
| 0/1 | 1/1 | 4.3   | 6.63  |
| 0/1 | 1/1 | 3.16  | 5.67  |
| 0/1 | 1/1 | 3.01  | 5.52  |
| 0/1 | 1/1 | 2.64  | 5.95  |
| 1/1 | 0/1 | 5.54  | 4.89  |
| 1/1 | 1/1 | 5.25  | 4.82  |
| 1/1 | 1/1 | 5.17  | 4.99  |
| 1/1 | 1/1 | 6.58  | 6.41  |
| 0/1 | 1/1 | 6.95  | 6.78  |
| 1/1 | 1/1 | 6.92  | 6.76  |
| 1/1 | 1/1 | 6.08  | 5.93  |
| 1/1 | 1/1 | 6.95  | 6.81  |
| 1/1 | 1/1 | 4.49  | 4.36  |
| 1/1 | 0/1 | 4.07  | 2.95  |
| 1/1 | 1/1 | 3.75  | 5.18  |
| 1/1 | 0/1 | 5.95  | 3.65  |
| 1/1 | 0/1 | 5.02  | 2.88  |
| 1/1 | 1/1 | 6.58  | 4.77  |
| 1/1 | 1/1 | 5.8   | 6.73  |
| 0/1 | 1/1 | 3.91  | 5.07  |
| 0/1 | 1/1 | 4.69  | 4.27  |
| 1/1 | 1/1 | 7.29  | 6.99  |
| 1/1 | 1/1 | 10.62 | 10.48 |
| 1/1 | 1/1 | 12.12 | 12.15 |
| 1/1 | 0/1 | 4.31  | 2.38  |
| 1/1 | 1/1 | 7.19  | 7.86  |
| 1/1 | 1/1 | 9.13  | 7.69  |
| 1/1 | 1/1 | 5.77  | 4.77  |
| 1/1 | 1/1 | 4.18  | 5.32  |
| 1/1 | 1/1 | 6.71  | 7.96  |
| 0/1 | 1/1 | 1.46  | 3.05  |
| 1/1 | 1/1 | 5.69  | 4.45  |

|     |     |       |      |
|-----|-----|-------|------|
| 1/1 | 1/1 | 3.89  | 3.18 |
| 1/1 | 0/1 | 6.09  | 4.72 |
| 1/1 | 1/1 | 4.47  | 3.59 |
| 1/1 | 1/1 | 4.85  | 6.07 |
| 1/1 | 1/1 | 4     | 3.52 |
| 1/1 | 1/1 | 7.19  | 7.03 |
| 1/1 | 1/1 | 9.93  | 9.78 |
| 0/1 | 1/1 | 3.68  | 3.55 |
| 1/1 | 1/1 | 5.25  | 5.18 |
| 1/1 | 1/1 | 4.36  | 4.32 |
| 0/1 | 1/1 | 4.71  | 4.68 |
| 0/1 | 1/1 | 6.94  | 6.95 |
| 0/1 | 1/1 | 6.89  | 6.92 |
| 0/1 | 1/1 | 5.19  | 5.23 |
| 1/1 | 1/1 | 4.51  | 6.58 |
| 1/1 | 0/1 | 3.54  | 2.43 |
| 1/1 | 1/1 | 6.47  | 5.72 |
| 1/1 | 1/1 | 7.36  | 6.62 |
| 1/1 | 1/1 | 4.37  | 3.23 |
| 1/1 | 0/1 | 3.44  | 2.32 |
| 0/1 | 1/1 | 2.9   | 4.32 |
| 1/1 | 1/1 | 3.96  | 5.45 |
| 0/1 | 1/1 | 2.6   | 4.18 |
| 1/1 | 0/1 | 9.88  | 3.35 |
| 1/1 | 1/1 | 9.51  | 3.23 |
| 1/1 | 1/1 | 10.57 | 4.44 |
| 1/1 | 0/1 | 8.25  | 2.16 |
| 1/1 | 1/1 | 9.65  | 5.75 |
| 1/1 | 0/1 | 6.05  | 3.03 |
| 1/1 | 0/1 | 4.77  | 2.56 |
| 1/1 | 0/1 | 5.49  | 3.81 |
| 1/1 | 1/1 | 10.08 | 8.55 |
| 1/1 | 1/1 | 5.81  | 4.57 |
| 1/1 | 1/1 | 9.07  | 8    |
| 1/1 | 0/1 | 2.33  | 1.81 |
| 1/1 | 1/1 | 10.15 | 9.95 |
| 1/1 | 1/1 | 5.69  | 5.71 |
| 1/1 | 1/1 | 6.68  | 6.89 |
| 1/1 | 1/1 | 4.67  | 4.91 |
| 1/1 | 1/1 | 9.08  | 9.42 |
| 1/1 | 1/1 | 9     | 8.1  |
| 1/1 | 1/1 | 4.32  | 6.32 |
| 1/1 | 1/1 | 8.31  | 7.74 |
| 1/1 | 1/1 | 5.83  | 5.75 |
| 1/1 | 0/1 | 4.2   | 2.42 |
| 1/1 | 1/1 | 9.08  | 7.66 |
| 1/1 | 1/1 | 6.58  | 5.23 |
| 0/1 | 1/1 | 6.52  | 7.56 |
| 0/1 | 1/1 | 3.6   | 5.59 |
| 1/1 | 0/1 | 5.94  | 4.4  |
| 1/1 | 1/1 | 5.91  | 7.25 |
| 1/1 | 1/1 | 6.81  | 8.21 |
| 1/1 | 1/1 | 4.44  | 5.86 |
| 1/1 | 1/1 | 3.82  | 5.63 |
| 1/1 | 1/1 | 2.88  | 4.88 |
| 1/1 | 0/1 | 3.31  | 2.12 |
| 1/1 | 1/1 | 4.39  | 3.58 |
| 1/1 | 1/1 | 5.06  | 4.27 |

|     |     |      |      |
|-----|-----|------|------|
| 1/1 | 1/1 | 2.95 | 4.37 |
| 1/1 | 1/1 | 8.39 | 7.84 |
| 1/1 | 1/1 | 5.21 | 4.89 |
| 1/1 | 1/1 | 7.39 | 7.21 |
| 1/1 | 1/1 | 7.55 | 7.46 |
| 1/1 | 1/1 | 6.01 | 8.25 |
| 0/1 | 1/1 | 2.51 | 4.76 |
| 1/1 | 1/1 | 5.5  | 4.95 |
| 1/1 | 1/1 | 9.07 | 8.66 |
| 1/1 | 1/1 | 8.58 | 8.37 |
| 1/1 | 1/1 | 6.01 | 5.96 |
| 1/1 | 1/1 | 3.68 | 3.13 |
| 1/1 | 1/1 | 6.55 | 6.08 |
| 1/1 | 1/1 | 5.48 | 5.35 |
| 0/1 | 1/1 | 7.4  | 7.27 |
| 1/1 | 1/1 | 4.42 | 4.33 |
| 1/1 | 1/1 | 6.79 | 6.71 |
| 1/1 | 1/1 | 4.17 | 4.14 |
| 1/1 | 1/1 | 6.4  | 3.76 |
| 1/1 | 1/1 | 5.75 | 3.51 |
| 1/1 | 0/1 | 5.95 | 3.74 |
| 1/1 | 1/1 | 9.46 | 9.6  |
| 1/1 | 1/1 | 7.22 | 5.92 |
| 1/1 | 1/1 | 3.82 | 5.17 |
| 1/1 | 0/1 | 5.95 | 3.12 |
| 1/1 | 0/1 | 5.26 | 2.46 |
| 1/1 | 1/1 | 4.89 | 2.56 |
| 1/1 | 1/1 | 3.13 | 3.06 |
| 0/1 | 1/1 | 2.9  | 2.84 |
| 0/1 | 1/1 | 2.64 | 2.62 |
| 1/1 | 1/1 | 5.13 | 5.19 |
| 0/1 | 1/1 | 2.75 | 2.84 |
| 0/1 | 1/1 | 2.53 | 3.69 |
| 1/1 | 1/1 | 4.53 | 3.7  |
| 1/1 | 1/1 | 4.73 | 3.94 |
| 1/1 | 1/1 | 8.29 | 7.78 |
| 1/1 | 1/1 | 7.12 | 6.65 |
| 1/1 | 1/1 | 6.53 | 6.12 |
| 1/1 | 1/1 | 8.21 | 7.82 |
| 0/1 | 1/1 | 3.37 | 2.99 |
| 1/1 | 1/1 | 5.81 | 5.42 |
| 1/1 | 1/1 | 5.56 | 5.17 |
| 1/1 | 1/1 | 9.7  | 9.35 |
| 1/1 | 1/1 | 5.97 | 5.63 |
| 1/1 | 1/1 | 6.03 | 7.73 |
| 1/1 | 1/1 | 5.46 | 7.21 |
| 1/1 | 1/1 | 3.68 | 5.56 |
| 1/1 | 1/1 | 6.15 | 8.06 |
| 1/1 | 1/1 | 3.76 | 6.18 |
| 1/1 | 1/1 | 3.17 | 5.79 |
| 0/1 | 1/1 | 3.56 | 6.19 |
| 0/1 | 1/1 | 3.16 | 6.21 |
| 0/1 | 1/1 | 2.26 | 5.66 |
| 1/1 | 1/1 | 6.65 | 5.69 |
| 0/1 | 1/1 | 4.99 | 6.67 |
| 1/1 | 1/1 | 6.26 | 3.59 |
| 1/1 | 1/1 | 7.86 | 5.55 |
| 1/1 | 1/1 | 7.92 | 8.14 |

|     |     |       |       |
|-----|-----|-------|-------|
| 1/1 | 1/1 | 8.42  | 7.57  |
| 1/1 | 1/1 | 7.24  | 6.82  |
| 1/1 | 1/1 | 6.33  | 5.92  |
| 1/1 | 1/1 | 7.29  | 6.9   |
| 1/1 | 1/1 | 10.25 | 9.87  |
| 1/1 | 1/1 | 5.34  | 3.87  |
| 1/1 | 1/1 | 3.01  | 4.81  |
| 1/1 | 0/1 | 3.42  | 2.28  |
| 1/1 | 1/1 | 9.23  | 8.39  |
| 1/1 | 1/1 | 8.24  | 7.45  |
| 1/1 | 1/1 | 5.71  | 5.09  |
| 0/1 | 1/1 | 2.65  | 4.23  |
| 0/1 | 1/1 | 2.52  | 4.14  |
| 1/1 | 1/1 | 8.79  | 4.57  |
| 1/1 | 1/1 | 6.83  | 3.03  |
| 1/1 | 1/1 | 7.28  | 3.54  |
| 1/1 | 1/1 | 4.11  | 2.42  |
| 1/1 | 0/1 | 4.33  | 2.77  |
| 1/1 | 1/1 | 8.4   | 6.97  |
| 1/1 | 0/1 | 3.66  | 2.29  |
| 1/1 | 0/1 | 3.66  | 2.29  |
| 1/1 | 0/1 | 3.5   | 2.49  |
| 1/1 | 1/1 | 3.3   | 2.39  |
| 1/1 | 1/1 | 8.24  | 7.33  |
| 1/1 | 1/1 | 9.34  | 8.63  |
| 1/1 | 0/1 | 3.15  | 2.58  |
| 1/1 | 1/1 | 6.68  | 6.19  |
| 1/1 | 0/1 | 2.86  | 2.39  |
| 1/1 | 1/1 | 2.36  | 2.39  |
| 1/1 | 1/1 | 6.99  | 7.34  |
| 1/1 | 1/1 | 5.54  | 4.46  |
| 1/1 | 1/1 | 5.46  | 4.8   |
| 1/1 | 1/1 | 6.49  | 5.9   |
| 1/1 | 1/1 | 4     | 6.51  |
| 1/1 | 1/1 | 4.52  | 3.48  |
| 1/1 | 1/1 | 6.74  | 8.32  |
| 1/1 | 1/1 | 4.85  | 6.59  |
| 0/1 | 1/1 | 3.14  | 6.53  |
| 1/1 | 1/1 | 10.75 | 5.48  |
| 1/1 | 1/1 | 10.81 | 6     |
| 1/1 | 1/1 | 11.16 | 6.39  |
| 1/1 | 1/1 | 10.81 | 8.47  |
| 1/1 | 1/1 | 7.22  | 5     |
| 1/1 | 1/1 | 6.82  | 5.79  |
| 1/1 | 1/1 | 6.57  | 6.12  |
| 1/1 | 1/1 | 3.61  | 2.88  |
| 0/1 | 1/1 | 5.1   | 4.55  |
| 1/1 | 1/1 | 10.89 | 10.41 |
| 1/1 | 1/1 | 6.55  | 6.14  |
| 1/1 | 1/1 | 9.36  | 9.11  |
| 1/1 | 1/1 | 3.5   | 5.62  |
| 1/1 | 0/1 | 4.11  | 3.44  |
| 1/1 | 1/1 | 10.53 | 10.28 |
| 1/1 | 1/1 | 6.48  | 8.36  |
| 1/1 | 1/1 | 6.85  | 8.74  |
| 0/1 | 1/1 | 3.72  | 5.74  |
| 1/1 | 1/1 | 4.69  | 7.26  |
| 0/1 | 1/1 | 2.24  | 5.52  |

|     |     |       |       |
|-----|-----|-------|-------|
| 1/1 | 1/1 | 4.84  | 4.52  |
| 0/1 | 1/1 | 5.08  | 4.87  |
| 1/1 | 1/1 | 7.43  | 7.23  |
| 1/1 | 1/1 | 7.38  | 7.38  |
| 1/1 | 1/1 | 5.85  | 5.9   |
| 1/1 | 1/1 | 11.44 | 11.51 |
| 1/1 | 1/1 | 5.99  | 8.22  |
| 1/1 | 1/1 | 5.73  | 8.16  |
| 1/1 | 1/1 | 6.16  | 8.69  |
| 1/1 | 1/1 | 4.44  | 7.15  |
| 1/1 | 0/1 | 4.74  | 2.09  |
| 1/1 | 1/1 | 5.73  | 3.41  |
| 1/1 | 1/1 | 8.08  | 7.99  |
| 1/1 | 1/1 | 5.99  | 5.94  |
| 0/1 | 1/1 | 3.6   | 3.57  |
| 0/1 | 1/1 | 3.45  | 3.44  |
| 1/1 | 1/1 | 11.05 | 11.07 |
| 1/1 | 1/1 | 8.45  | 8.47  |
| 1/1 | 1/1 | 6.15  | 6.2   |
| 1/1 | 1/1 | 12.25 | 12.32 |
| 0/1 | 1/1 | 2.4   | 2.47  |
| 1/1 | 1/1 | 5.31  | 5.43  |
| 1/1 | 1/1 | 3.96  | 4.12  |
| 1/1 | 1/1 | 6.16  | 6.34  |
| 1/1 | 1/1 | 2.94  | 3.18  |
| 1/1 | 1/1 | 6.09  | 6.55  |
| 1/1 | 1/1 | 5.09  | 5.85  |
| 0/1 | 1/1 | 3.94  | 4.82  |
| 1/1 | 1/1 | 8.4   | 7.52  |
| 1/1 | 1/1 | 3.59  | 2.75  |
| 1/1 | 1/1 | 4.59  | 3.79  |
| 1/1 | 1/1 | 5.04  | 4.33  |
| 1/1 | 1/1 | 5.49  | 4.8   |
| 1/1 | 1/1 | 5.3   | 4.76  |
| 1/1 | 1/1 | 10.05 | 9.55  |
| 1/1 | 1/1 | 3.49  | 5.2   |
| 0/1 | 1/1 | 2.53  | 4.45  |
| 0/1 | 1/1 | 2.46  | 4.61  |
| 1/1 | 1/1 | 3.8   | 3.09  |
| 1/1 | 0/1 | 3.02  | 2.35  |
| 1/1 | 1/1 | 3.74  | 5.73  |
| 1/1 | 1/1 | 6.2   | 6.14  |
| 1/1 | 1/1 | 3.27  | 3.24  |
| 1/1 | 1/1 | 8.45  | 8.51  |
| 1/1 | 1/1 | 5.78  | 5.85  |
| 1/1 | 1/1 | 3.41  | 6.35  |
| 1/1 | 1/1 | 8.07  | 6.86  |
| 1/1 | 1/1 | 6.87  | 6.01  |
| 0/1 | 1/1 | 2.54  | 4.24  |
| 1/1 | 0/1 | 8.86  | 4.82  |
| 1/1 | 1/1 | 9.9   | 5.88  |
| 1/1 | 0/1 | 10.35 | 6.45  |
| 1/1 | 1/1 | 10.78 | 6.92  |
| 1/1 | 0/1 | 8.62  | 4.82  |
| 1/1 | 1/1 | 9.27  | 5.56  |
| 1/1 | 1/1 | 10.45 | 6.77  |
| 1/1 | 0/1 | 7.48  | 3.83  |
| 1/1 | 1/1 | 9.03  | 5.41  |



|     |     |       |       |
|-----|-----|-------|-------|
| 1/1 | 1/1 | 10.87 | 7.25  |
| 1/1 | 1/1 | 10.5  | 6.93  |
| 1/1 | 1/1 | 8.1   | 4.55  |
| 1/1 | 0/1 | 7.31  | 3.79  |
| 1/1 | 0/1 | 4.66  | 3.14  |
| 1/1 | 0/1 | 8.23  | 6.78  |
| 1/1 | 1/1 | 9.27  | 7.83  |
| 1/1 | 0/1 | 9.26  | 7.84  |
| 1/1 | 1/1 | 10.79 | 9.47  |
| 1/1 | 1/1 | 8.63  | 7.31  |
| 1/1 | 1/1 | 9.27  | 8.02  |
| 1/1 | 0/1 | 5.06  | 3.83  |
| 1/1 | 1/1 | 5.87  | 4.7   |
| 1/1 | 1/1 | 11.39 | 10.22 |
| 1/1 | 1/1 | 7.62  | 6.59  |
| 1/1 | 1/1 | 11.05 | 10.03 |
| 1/1 | 1/1 | 8.79  | 7.76  |
| 1/1 | 1/1 | 5.81  | 4.79  |
| 1/1 | 1/1 | 6.72  | 5.72  |
| 1/1 | 1/1 | 6.74  | 5.75  |
| 1/1 | 1/1 | 9.38  | 8.38  |
| 1/1 | 1/1 | 10.98 | 10    |
| 1/1 | 1/1 | 6.23  | 5.26  |
| 1/1 | 0/1 | 7.35  | 6.43  |
| 1/1 | 1/1 | 8.86  | 8     |
| 1/1 | 1/1 | 4.68  | 3.84  |
| 1/1 | 1/1 | 7.71  | 6.94  |
| 1/1 | 0/1 | 7.37  | 6.62  |
| 1/1 | 1/1 | 10.35 | 9.65  |
| 1/1 | 1/1 | 8.62  | 8.01  |
| 1/1 | 1/1 | 10.63 | 10.08 |
| 1/1 | 1/1 | 5.63  | 5.09  |
| 1/1 | 1/1 | 4.04  | 3.52  |
| 1/1 | 0/1 | 6.58  | 6.11  |
| 1/1 | 1/1 | 4.98  | 4.54  |
| 1/1 | 1/1 | 10.44 | 10.06 |
| 1/1 | 1/1 | 9.74  | 9.37  |
| 1/1 | 1/1 | 10.05 | 9.76  |
| 1/1 | 1/1 | 9.09  | 8.81  |
| 1/1 | 1/1 | 6.17  | 5.94  |
| 1/1 | 1/1 | 10.21 | 10.04 |
| 1/1 | 1/1 | 7     | 6.85  |
| 1/1 | 1/1 | 8.73  | 8.59  |
| 0/1 | 1/1 | 6.24  | 6.22  |
| 1/1 | 1/1 | 3.97  | 3.96  |
| 1/1 | 1/1 | 12.4  | 12.41 |
| 0/1 | 1/1 | 6.52  | 6.6   |
| 1/1 | 1/1 | 7.82  | 7.93  |
| 1/1 | 1/1 | 9.95  | 10.1  |
| 1/1 | 1/1 | 6.21  | 6.36  |
| 1/1 | 1/1 | 7.03  | 7.52  |
| 1/1 | 0/1 | 2.57  | 1.94  |
| 1/1 | 1/1 | 2.91  | 2.75  |
| 1/1 | 1/1 | 2.99  | 2.86  |
| 1/1 | 1/1 | 4.33  | 6.22  |
| 1/1 | 1/1 | 4.49  | 6.42  |
| 0/1 | 1/1 | 2.97  | 5.06  |
| 0/1 | 1/1 | 3.17  | 6.14  |

|     |     |       |       |
|-----|-----|-------|-------|
| 1/1 | 0/1 | 4.81  | 3.91  |
| 1/1 | 0/1 | 4.19  | 3.65  |
| 1/1 | 1/1 | 3.91  | 3.46  |
| 1/1 | 1/1 | 5.89  | 5.45  |
| 1/1 | 1/1 | 7.3   | 6.52  |
| 1/1 | 1/1 | 5.95  | 5.23  |
| 1/1 | 1/1 | 5.21  | 4.69  |
| 1/1 | 0/1 | 3.65  | 3.19  |
| 1/1 | 1/1 | 8.98  | 8.68  |
| 1/1 | 1/1 | 6.32  | 6.04  |
| 1/1 | 1/1 | 4.17  | 3.92  |
| 1/1 | 1/1 | 5.78  | 4.91  |
| 1/1 | 1/1 | 10.97 | 10.23 |
| 1/1 | 1/1 | 6.66  | 8.31  |
| 1/1 | 1/1 | 4.56  | 6.71  |
| 1/1 | 1/1 | 7.06  | 5.76  |
| 1/1 | 1/1 | 5.35  | 6.65  |
| 1/1 | 1/1 | 7.23  | 6.17  |
| 1/1 | 1/1 | 4.96  | 4.31  |
| 1/1 | 0/1 | 5.45  | 3.66  |
| 0/1 | 1/1 | 3.04  | 4.03  |
| 0/1 | 1/1 | 3.54  | 4.73  |
| 1/1 | 1/1 | 6.23  | 5.57  |
| 1/1 | 1/1 | 8.98  | 8.4   |
| 0/1 | 1/1 | 6.82  | 6.58  |
| 1/1 | 1/1 | 6.67  | 5.62  |
| 1/1 | 1/1 | 6.62  | 5.95  |
| 1/1 | 1/1 | 7.68  | 7.03  |
| 1/1 | 1/1 | 5.69  | 7.47  |
| 1/1 | 1/1 | 6.21  | 8.02  |
| 1/1 | 1/1 | 5.87  | 7.79  |
| 0/1 | 1/1 | 3.53  | 5.69  |
| 1/1 | 1/1 | 6.33  | 8.58  |
| 0/1 | 1/1 | 3.66  | 6.34  |
| 0/1 | 1/1 | 2.29  | 6.94  |
| 1/1 | 1/1 | 7.49  | 6.91  |
| 1/1 | 1/1 | 6.82  | 6.38  |
| 1/1 | 1/1 | 6.57  | 6.14  |
| 1/1 | 1/1 | 3.74  | 3.35  |
| 1/1 | 1/1 | 6.66  | 6.28  |
| 0/1 | 1/1 | 5.37  | 5.01  |
| 1/1 | 1/1 | 7.68  | 7.37  |
| 1/1 | 1/1 | 8.69  | 8.4   |
| 1/1 | 1/1 | 9.25  | 8.99  |
| 1/1 | 1/1 | 8.03  | 7.84  |
| 1/1 | 1/1 | 5.75  | 5.57  |
| 0/1 | 1/1 | 6.85  | 6.71  |
| 1/1 | 1/1 | 7.52  | 7.44  |
| 1/1 | 1/1 | 7.43  | 7.35  |
| 0/1 | 1/1 | 5.13  | 7.58  |
| 1/1 | 1/1 | 6.54  | 5.77  |
| 1/1 | 1/1 | 4.65  | 3.99  |
| 1/1 | 1/1 | 4.37  | 4     |
| 1/1 | 1/1 | 5.5   | 5.19  |
| 1/1 | 1/1 | 7.86  | 7.6   |
| 1/1 | 1/1 | 6.63  | 5.01  |
| 1/1 | 1/1 | 9.88  | 8.64  |
| 1/1 | 1/1 | 10.4  | 9.19  |

|     |     |       |       |
|-----|-----|-------|-------|
| 1/1 | 1/1 | 7.01  | 2.88  |
| 1/1 | 1/1 | 7.43  | 3.31  |
| 1/1 | 1/1 | 6.91  | 3.07  |
| 1/1 | 1/1 | 7.35  | 3.56  |
| 1/1 | 0/1 | 4.38  | 2.81  |
| 1/1 | 0/1 | 8.98  | 7.71  |
| 1/1 | 1/1 | 5.24  | 4.08  |
| 1/1 | 1/1 | 4.65  | 3.9   |
| 1/1 | 1/1 | 4.13  | 3.42  |
| 1/1 | 1/1 | 3.76  | 3.2   |
| 0/1 | 1/1 | 3.27  | 2.94  |
| 1/1 | 1/1 | 9.3   | 9.24  |
| 0/1 | 1/1 | 3.69  | 3.96  |
| 1/1 | 0/1 | 5.79  | 2.23  |
| 1/1 | 0/1 | 6.39  | 2.95  |
| 1/1 | 1/1 | 7.72  | 4.57  |
| 1/1 | 0/1 | 6.82  | 3.71  |
| 1/1 | 1/1 | 7.01  | 6.04  |
| 1/1 | 1/1 | 8.3   | 7.39  |
| 1/1 | 1/1 | 9.01  | 8.11  |
| 1/1 | 1/1 | 5.81  | 5.07  |
| 1/1 | 1/1 | 8.77  | 8.05  |
| 1/1 | 1/1 | 8.17  | 7.46  |
| 1/1 | 1/1 | 5.1   | 4.41  |
| 1/1 | 1/1 | 5.42  | 4.79  |
| 1/1 | 1/1 | 7.36  | 6.8   |
| 1/1 | 1/1 | 7.55  | 7     |
| 1/1 | 1/1 | 7.57  | 7.06  |
| 1/1 | 1/1 | 7.77  | 7.35  |
| 1/1 | 1/1 | 6.6   | 6.19  |
| 1/1 | 1/1 | 5.29  | 4.91  |
| 1/1 | 1/1 | 4.18  | 3.83  |
| 1/1 | 1/1 | 5.08  | 4.74  |
| 1/1 | 1/1 | 4.66  | 4.36  |
| 1/1 | 1/1 | 8.08  | 7.79  |
| 1/1 | 1/1 | 4.69  | 4.45  |
| 0/1 | 1/1 | 6.67  | 6.44  |
| 1/1 | 1/1 | 7.03  | 6.8   |
| 1/1 | 1/1 | 8.36  | 8.18  |
| 1/1 | 1/1 | 5.78  | 5.7   |
| 1/1 | 1/1 | 6.13  | 6.07  |
| 1/1 | 1/1 | 4.63  | 4.6   |
| 1/1 | 1/1 | 6.52  | 6.5   |
| 1/1 | 1/1 | 7.91  | 7.89  |
| 1/1 | 1/1 | 8.75  | 8.77  |
| 1/1 | 1/1 | 6.02  | 6.1   |
| 1/1 | 1/1 | 4.41  | 4.5   |
| 1/1 | 1/1 | 7.13  | 7.25  |
| 1/1 | 1/1 | 10.16 | 10.34 |
| 1/1 | 1/1 | 10.87 | 11.06 |
| 1/1 | 1/1 | 6.91  | 7.13  |
| 1/1 | 1/1 | 10.71 | 10.95 |
| 0/1 | 1/1 | 4.16  | 4.41  |
| 0/1 | 1/1 | 4.4   | 4.75  |
| 1/1 | 1/1 | 5.34  | 5.7   |
| 1/1 | 1/1 | 5.42  | 5.8   |
| 0/1 | 1/1 | 5.53  | 6.14  |
| 0/1 | 1/1 | 2.53  | 3.24  |

|     |     |       |       |
|-----|-----|-------|-------|
| 0/1 | 1/1 | 2.08  | 2.89  |
| 1/1 | 1/1 | 4.33  | 5.52  |
| 1/1 | 1/1 | 4.64  | 6.17  |
| 0/1 | 1/1 | 3.02  | 4.57  |
| 1/1 | 1/1 | 6.13  | 4.78  |
| 1/1 | 1/1 | 3.75  | 5.01  |
| 1/1 | 1/1 | 6.86  | 6.07  |
| 1/1 | 1/1 | 5.92  | 7.65  |
| 0/1 | 1/1 | 4.83  | 7.01  |
| 0/1 | 1/1 | 3.29  | 5.56  |
| 0/1 | 1/1 | 4.28  | 6.6   |
| 1/1 | 1/1 | 5.26  | 7.73  |
| 0/1 | 1/1 | 2.59  | 5.73  |
| 1/1 | 1/1 | 5.41  | 8.65  |
| 0/1 | 1/1 | 1.91  | 7.23  |
| 1/1 | 1/1 | 9.37  | 8.41  |
| 1/1 | 1/1 | 7.93  | 7.33  |
| 1/1 | 1/1 | 2.84  | 2.3   |
| 1/1 | 1/1 | 6.89  | 6.11  |
| 1/1 | 1/1 | 5.82  | 5.52  |
| 1/1 | 0/1 | 6.21  | 4.53  |
| 1/1 | 1/1 | 5.84  | 6.71  |
| 1/1 | 1/1 | 5.73  | 6.7   |
| 1/1 | 1/1 | 4.93  | 3.23  |
| 0/1 | 1/1 | 2.28  | 3.32  |
| 1/1 | 1/1 | 8.66  | 6.93  |
| 1/1 | 1/1 | 11.84 | 10.34 |
| 1/1 | 0/1 | 7.42  | 5.95  |
| 1/1 | 0/1 | 7.42  | 5.95  |
| 1/1 | 0/1 | 7.42  | 5.95  |
| 1/1 | 1/1 | 4.74  | 3.4   |
| 0/1 | 1/1 | 3.14  | 4.13  |
| 0/1 | 1/1 | 4.97  | 6.13  |
| 1/1 | 1/1 | 7.08  | 6.88  |
| 0/1 | 1/1 | 4.21  | 4.04  |
| 0/1 | 1/1 | 3.42  | 6.63  |
| 1/1 | 1/1 | 2.32  | 2.13  |
| 0/1 | 1/1 | 2.96  | 2.95  |
| 0/1 | 1/1 | 2.29  | 2.34  |
| 1/1 | 1/1 | 4.59  | 6.95  |
| 1/1 | 1/1 | 5.17  | 2.83  |
| 1/1 | 1/1 | 9.23  | 9.48  |
| 1/1 | 1/1 | 6.21  | 6.48  |
| 1/1 | 1/1 | 6.31  | 5.81  |
| 1/1 | 1/1 | 4.58  | 4.11  |
| 1/1 | 1/1 | 7.05  | 6.87  |
| 1/1 | 1/1 | 4.63  | 4.65  |
| 0/1 | 1/1 | 2.73  | 6.06  |
| 1/1 | 1/1 | 7.07  | 5.24  |
| 1/1 | 1/1 | 7.36  | 8.13  |
| 1/1 | 1/1 | 4.68  | 6.09  |
| 1/1 | 1/1 | 7.75  | 5.38  |
| 0/1 | 1/1 | 2.29  | 2.72  |
| 0/1 | 1/1 | 2.81  | 3.32  |
| 1/1 | 1/1 | 5.97  | 5     |
| 1/1 | 1/1 | 5.24  | 4.35  |
| 1/1 | 1/1 | 5.06  | 4.42  |
| 1/1 | 1/1 | 8.48  | 7.97  |

|     |     |       |       |
|-----|-----|-------|-------|
| 1/1 | 1/1 | 5.93  | 5.44  |
| 0/1 | 1/1 | 4.79  | 4.52  |
| 1/1 | 1/1 | 2.59  | 2.56  |
| 1/1 | 1/1 | 6.55  | 6.54  |
| 1/1 | 1/1 | 6.7   | 6.7   |
| 1/1 | 1/1 | 8.57  | 8.57  |
| 1/1 | 1/1 | 9.16  | 9.2   |
| 1/1 | 1/1 | 11.23 | 11.3  |
| 1/1 | 1/1 | 3.24  | 3.35  |
| 1/1 | 1/1 | 9.12  | 9.25  |
| 0/1 | 1/1 | 2.37  | 2.52  |
| 0/1 | 1/1 | 3.54  | 3.71  |
| 1/1 | 1/1 | 5.2   | 7.92  |
| 1/1 | 0/1 | 5.48  | 2.88  |
| 1/1 | 1/1 | 5.36  | 5.29  |
| 0/1 | 1/1 | 4.48  | 4.45  |
| 1/1 | 1/1 | 5.51  | 5.56  |
| 0/1 | 1/1 | 2.87  | 3.02  |
| 0/1 | 1/1 | 2.51  | 2.89  |
| 1/1 | 0/1 | 4.08  | 3.08  |
| 1/1 | 1/1 | 2.83  | 4.74  |
| 0/1 | 1/1 | 3.15  | 7.08  |
| 1/1 | 0/1 | 4.49  | 3.13  |
| 0/1 | 1/1 | 3.2   | 5     |
| 1/1 | 1/1 | 9.36  | 7.87  |
| 1/1 | 1/1 | 9.91  | 8.78  |
| 1/1 | 0/1 | 7.77  | 6.69  |
| 0/1 | 1/1 | 3.76  | 5.21  |
| 1/1 | 1/1 | 10.48 | 8.54  |
| 1/1 | 0/1 | 8.89  | 7.34  |
| 1/1 | 1/1 | 9.99  | 8.54  |
| 1/1 | 1/1 | 11.32 | 10.95 |
| 1/1 | 1/1 | 8.11  | 7.84  |
| 1/1 | 1/1 | 8.18  | 8.03  |
| 1/1 | 1/1 | 9.39  | 9.28  |
| 1/1 | 1/1 | 7.1   | 7.14  |
| 1/1 | 1/1 | 8.98  | 9.12  |
| 1/1 | 1/1 | 6.93  | 6.18  |
| 0/1 | 1/1 | 4.73  | 4.19  |
| 1/1 | 1/1 | 6.46  | 6.19  |
| 1/1 | 1/1 | 5.94  | 5.67  |
| 1/1 | 1/1 | 8.53  | 8.37  |
| 1/1 | 1/1 | 10.8  | 10.91 |
| 1/1 | 1/1 | 9.67  | 9.93  |
| 1/1 | 1/1 | 5.2   | 5.5   |
| 1/1 | 1/1 | 4.11  | 6.62  |
| 1/1 | 1/1 | 5.03  | 7.62  |
| 1/1 | 1/1 | 3.61  | 6.64  |
| 1/1 | 1/1 | 9.66  | 8.27  |
| 1/1 | 1/1 | 6.48  | 5.22  |
| 1/1 | 1/1 | 5.52  | 6.76  |
| 1/1 | 0/1 | 4.28  | 2.54  |
| 1/1 | 1/1 | 3.62  | 4.41  |
| 1/1 | 1/1 | 3.79  | 4.66  |
| 1/1 | 1/1 | 4.21  | 5.15  |
| 1/1 | 1/1 | 3.03  | 4.97  |
| 0/1 | 1/1 | 4.58  | 4.24  |
| 1/1 | 1/1 | 2.78  | 2.73  |

|     |     |       |       |
|-----|-----|-------|-------|
| 1/1 | 1/1 | 7.04  | 7.15  |
| 1/1 | 1/1 | 5.53  | 5.65  |
| 1/1 | 0/1 | 3.58  | 2.34  |
| 1/1 | 0/1 | 2.95  | 2.19  |
| 1/1 | 1/1 | 6.01  | 7.36  |
| 1/1 | 1/1 | 3.02  | 4.54  |
| 1/1 | 0/1 | 4.34  | 2.95  |
| 0/1 | 1/1 | 3.04  | 4.31  |
| 0/1 | 1/1 | 3.78  | 5.39  |
| 1/1 | 1/1 | 6.82  | 5.97  |
| 1/1 | 1/1 | 3.51  | 2.96  |
| 1/1 | 0/1 | 4.62  | 4.13  |
| 1/1 | 1/1 | 4.48  | 4.05  |
| 0/1 | 1/1 | 8.68  | 8.25  |
| 1/1 | 1/1 | 5.92  | 5.5   |
| 1/1 | 1/1 | 9.12  | 8.72  |
| 1/1 | 1/1 | 6.85  | 6.48  |
| 0/1 | 1/1 | 4.45  | 6.23  |
| 1/1 | 1/1 | 5.1   | 6.94  |
| 0/1 | 1/1 | 4.41  | 6.3   |
| 1/1 | 1/1 | 4.62  | 6.56  |
| 0/1 | 1/1 | 3.46  | 6.07  |
| 1/1 | 1/1 | 6.76  | 5.85  |
| 1/1 | 1/1 | 9.85  | 9.41  |
| 1/1 | 1/1 | 9.9   | 9.47  |
| 1/1 | 1/1 | 4.93  | 6.62  |
| 1/1 | 1/1 | 5.3   | 7.04  |
| 0/1 | 1/1 | 4.73  | 6.71  |
| 0/1 | 1/1 | 4.49  | 6.54  |
| 1/1 | 1/1 | 3.9   | 6.08  |
| 1/1 | 0/1 | 3.99  | 2.85  |
| 1/1 | 0/1 | 4.02  | 2.94  |
| 1/1 | 1/1 | 4.15  | 3.22  |
| 1/1 | 1/1 | 4.61  | 3.78  |
| 1/1 | 1/1 | 4.72  | 6.13  |
| 0/1 | 1/1 | 2.83  | 4.54  |
| 1/1 | 1/1 | 4.21  | 5.93  |
| 0/1 | 1/1 | 3.15  | 5.1   |
| 1/1 | 0/1 | 4.12  | 1.86  |
| 1/1 | 1/1 | 6.88  | 4.67  |
| 1/1 | 1/1 | 6.5   | 4.55  |
| 1/1 | 1/1 | 5.38  | 3.53  |
| 1/1 | 0/1 | 4.91  | 3.12  |
| 0/1 | 1/1 | 9.74  | 9.99  |
| 0/1 | 1/1 | 2.71  | 2.96  |
| 1/1 | 1/1 | 8.48  | 8.8   |
| 1/1 | 1/1 | 4.03  | 4.34  |
| 1/1 | 1/1 | 5.51  | 5.93  |
| 1/1 | 1/1 | 9.51  | 9.96  |
| 0/1 | 1/1 | 2.96  | 3.54  |
| 1/1 | 1/1 | 4.88  | 5.47  |
| 0/1 | 1/1 | 5.8   | 6.62  |
| 1/1 | 1/1 | 6.48  | 7.32  |
| 1/1 | 1/1 | 10.84 | 10.57 |
| 0/1 | 1/1 | 2.98  | 2.97  |
| 0/1 | 1/1 | 7.99  | 7.72  |
| 1/1 | 1/1 | 7.88  | 7.65  |
| 1/1 | 1/1 | 6.53  | 6.63  |

|     |     |       |       |
|-----|-----|-------|-------|
| 1/1 | 1/1 | 8.39  | 7.47  |
| 1/1 | 1/1 | 8.21  | 7.78  |
| 1/1 | 1/1 | 5.73  | 7.37  |
| 0/1 | 1/1 | 4.28  | 6.14  |
| 1/1 | 1/1 | 5.61  | 7.51  |
| 1/1 | 1/1 | 6.89  | 8.79  |
| 0/1 | 1/1 | 4.95  | 6.91  |
| 1/1 | 1/1 | 3.88  | 5.9   |
| 1/1 | 1/1 | 6.92  | 9     |
| 0/1 | 1/1 | 2.54  | 5.56  |
| 1/1 | 0/1 | 6.45  | 5.49  |
| 1/1 | 1/1 | 8.19  | 7.49  |
| 1/1 | 1/1 | 8.23  | 7.13  |
| 1/1 | 1/1 | 6.6   | 5.79  |
| 1/1 | 1/1 | 6.93  | 6.15  |
| 1/1 | 1/1 | 10.63 | 9.95  |
| 1/1 | 1/1 | 6.08  | 5.41  |
| 1/1 | 1/1 | 8.08  | 7.15  |
| 1/1 | 1/1 | 9.69  | 9.17  |
| 1/1 | 1/1 | 11.03 | 10.52 |
| 1/1 | 1/1 | 9.14  | 8.65  |
| 1/1 | 1/1 | 8.67  | 8.23  |
| 0/1 | 1/1 | 5.8   | 4.74  |
| 1/1 | 1/1 | 4.33  | 3.68  |
| 1/1 | 1/1 | 7.76  | 7.14  |
| 1/1 | 1/1 | 7.89  | 5.32  |
| 1/1 | 1/1 | 5.9   | 3.64  |
| 1/1 | 1/1 | 5.16  | 5.29  |
| 0/1 | 1/1 | 6.37  | 6.51  |
| 0/1 | 1/1 | 2.95  | 3.3   |
| 1/1 | 1/1 | 6.9   | 7.62  |
| 1/1 | 1/1 | 5.39  | 6.36  |
| 1/1 | 1/1 | 5.65  | 4.58  |
| 1/1 | 1/1 | 4.01  | 3.18  |
| 1/1 | 1/1 | 8.19  | 7.4   |
| 1/1 | 1/1 | 6.01  | 5.44  |
| 1/1 | 1/1 | 9.47  | 6.07  |
| 1/1 | 1/1 | 8.88  | 5.94  |
| 1/1 | 1/1 | 4.94  | 4.17  |
| 1/1 | 1/1 | 5.74  | 5.01  |
| 1/1 | 1/1 | 9.37  | 8.66  |
| 1/1 | 0/1 | 7.81  | 7.12  |
| 1/1 | 1/1 | 7.31  | 6.65  |
| 1/1 | 1/1 | 8.3   | 7.78  |
| 1/1 | 1/1 | 7.12  | 6.6   |
| 1/1 | 1/1 | 5.12  | 4.69  |
| 1/1 | 1/1 | 5.16  | 4.84  |
| 1/1 | 1/1 | 7.24  | 6.93  |
| 1/1 | 1/1 | 9.2   | 8.91  |
| 1/1 | 1/1 | 8.52  | 8.25  |
| 1/1 | 1/1 | 4.61  | 4.37  |
| 1/1 | 1/1 | 4.07  | 3.94  |
| 1/1 | 1/1 | 7.07  | 6.98  |
| 1/1 | 1/1 | 6.88  | 6.83  |
| 0/1 | 1/1 | 7.06  | 7.09  |
| 0/1 | 1/1 | 5.24  | 5.32  |
| 1/1 | 1/1 | 4.09  | 4.2   |
| 0/1 | 1/1 | 5.6   | 5.76  |

|     |     |       |       |
|-----|-----|-------|-------|
| 1/1 | 1/1 | 4.62  | 4.79  |
| 1/1 | 1/1 | 5.52  | 5.94  |
| 1/1 | 1/1 | 5.45  | 4.44  |
| 1/1 | 1/1 | 10.91 | 9.97  |
| 1/1 | 0/1 | 3.09  | 2.28  |
| 1/1 | 0/1 | 2.96  | 2.17  |
| 1/1 | 1/1 | 5.73  | 5.02  |
| 1/1 | 1/1 | 3.2   | 2.69  |
| 1/1 | 1/1 | 4.33  | 5.84  |
| 1/1 | 1/1 | 8.83  | 7.79  |
| 1/1 | 0/1 | 4.84  | 3.9   |
| 1/1 | 0/1 | 4.3   | 3.47  |
| 1/1 | 1/1 | 4.76  | 6.93  |
| 1/1 | 1/1 | 8.83  | 7.79  |
| 1/1 | 0/1 | 4.84  | 3.9   |
| 1/1 | 0/1 | 4.3   | 3.47  |
| 1/1 | 1/1 | 4.76  | 6.93  |
| 1/1 | 1/1 | 8.83  | 7.79  |
| 1/1 | 0/1 | 4.84  | 3.9   |
| 1/1 | 0/1 | 4.3   | 3.47  |
| 1/1 | 1/1 | 4.76  | 6.93  |
| 1/1 | 1/1 | 10.39 | 5.67  |
| 1/1 | 1/1 | 6     | 4.07  |
| 1/1 | 1/1 | 11.16 | 9.38  |
| 1/1 | 1/1 | 8.3   | 6.79  |
| 1/1 | 1/1 | 7.84  | 6.82  |
| 1/1 | 1/1 | 6.98  | 6.31  |
| 1/1 | 0/1 | 4.52  | 4     |
| 1/1 | 1/1 | 7.99  | 7.69  |
| 1/1 | 1/1 | 12.8  | 12.61 |
| 1/1 | 1/1 | 10.91 | 10.77 |
| 1/1 | 1/1 | 6.71  | 6.69  |
| 1/1 | 1/1 | 6.48  | 5.7   |
| 1/1 | 1/1 | 6.95  | 6.25  |
| 1/1 | 1/1 | 3.41  | 3.04  |
| 1/1 | 1/1 | 6.31  | 5.94  |
| 1/1 | 1/1 | 7.59  | 7.25  |
| 1/1 | 1/1 | 6.3   | 5.98  |
| 1/1 | 1/1 | 9.7   | 9.41  |
| 1/1 | 1/1 | 4.71  | 4.43  |
| 1/1 | 1/1 | 3.6   | 5.48  |
| 1/1 | 1/1 | 8.52  | 7.6   |
| 1/1 | 1/1 | 10.06 | 9.33  |
| 1/1 | 1/1 | 9.27  | 8.54  |
| 1/1 | 1/1 | 4.56  | 3.92  |
| 1/1 | 1/1 | 5.33  | 4.71  |
| 0/1 | 1/1 | 4.38  | 3.93  |
| 1/1 | 1/1 | 7.5   | 9.1   |
| 1/1 | 1/1 | 7.48  | 9.1   |
| 1/1 | 1/1 | 7.05  | 8.72  |
| 1/1 | 1/1 | 5.48  | 7.53  |
| 0/1 | 1/1 | 4.1   | 7.13  |
| 1/1 | 0/1 | 3.18  | 2.32  |
| 1/1 | 0/1 | 6.36  | 5.52  |
| 1/1 | 1/1 | 5.66  | 4.97  |
| 1/1 | 1/1 | 6.56  | 6.08  |
| 1/1 | 1/1 | 6.7   | 6.24  |
| 1/1 | 1/1 | 8.61  | 8.05  |



|     |     |       |       |
|-----|-----|-------|-------|
| 0/1 | 1/1 | 3.57  | 3.35  |
| 1/1 | 1/1 | 8.51  | 8.38  |
| 1/1 | 1/1 | 7.51  | 7.42  |
| 1/1 | 1/1 | 3.63  | 5.68  |
| 1/1 | 1/1 | 4.79  | 3.89  |
| 1/1 | 1/1 | 4.17  | 3.58  |
| 1/1 | 1/1 | 6.65  | 6.09  |
| 1/1 | 1/1 | 3.49  | 2.98  |
| 1/1 | 1/1 | 5     | 4.54  |
| 1/1 | 0/1 | 4.33  | 2.51  |
| 1/1 | 1/1 | 12.06 | 10.32 |
| 1/1 | 1/1 | 5.8   | 4.44  |
| 1/1 | 1/1 | 4.43  | 5.67  |
| 1/1 | 1/1 | 5.43  | 6.68  |
| 1/1 | 1/1 | 6.33  | 7.69  |
| 1/1 | 1/1 | 5.22  | 6.68  |
| 1/1 | 1/1 | 12.1  | 10.71 |
| 1/1 | 1/1 | 4.42  | 6.07  |
| 1/1 | 1/1 | 4.32  | 6.15  |
| 1/1 | 1/1 | 5.33  | 4.21  |
| 1/1 | 1/1 | 5.2   | 4.29  |
| 1/1 | 1/1 | 8.36  | 7.58  |
| 1/1 | 1/1 | 8.55  | 7.87  |
| 1/1 | 1/1 | 7.31  | 6.74  |
| 0/1 | 1/1 | 6.43  | 5.87  |
| 0/1 | 1/1 | 6.7   | 6.3   |
| 1/1 | 1/1 | 6.83  | 6.56  |
| 1/1 | 1/1 | 7     | 6.77  |
| 1/1 | 1/1 | 5.97  | 5.79  |
| 1/1 | 0/1 | 3.15  | 2.28  |
| 1/1 | 0/1 | 3.83  | 3.34  |
| 1/1 | 1/1 | 7.6   | 7.18  |
| 1/1 | 1/1 | 7.03  | 6.62  |
| 1/1 | 1/1 | 5.61  | 5     |
| 1/1 | 1/1 | 7.03  | 6.51  |
| 1/1 | 1/1 | 5.92  | 5.47  |
| 1/1 | 1/1 | 7.42  | 7.05  |
| 1/1 | 1/1 | 10.78 | 10.47 |
| 1/1 | 1/1 | 8.39  | 8.11  |
| 1/1 | 1/1 | 4.86  | 4.61  |
| 0/1 | 1/1 | 3.8   | 3.57  |
| 1/1 | 1/1 | 6.7   | 6.47  |
| 1/1 | 1/1 | 6.59  | 6.45  |
| 0/1 | 1/1 | 3.99  | 5.89  |
| 0/1 | 1/1 | 3.25  | 5.22  |
| 1/1 | 1/1 | 4.51  | 6.6   |
| 0/1 | 1/1 | 3.8   | 5.94  |
| 0/1 | 1/1 | 3.13  | 5.32  |
| 1/1 | 1/1 | 3.96  | 6.16  |
| 1/1 | 1/1 | 4.42  | 6.63  |
| 0/1 | 1/1 | 3.68  | 5.92  |
| 0/1 | 1/1 | 3.22  | 5.59  |
| 0/1 | 1/1 | 2.94  | 5.38  |
| 1/1 | 1/1 | 4.55  | 7.03  |
| 1/1 | 1/1 | 4.41  | 6.89  |
| 1/1 | 1/1 | 4.79  | 7.49  |
| 0/1 | 1/1 | 2.81  | 5.53  |
| 1/1 | 1/1 | 5.32  | 4.74  |

|     |     |      |      |
|-----|-----|------|------|
| 1/1 | 1/1 | 4.22 | 3.75 |
| 1/1 | 1/1 | 4.63 | 4.19 |
| 1/1 | 1/1 | 6.41 | 6.01 |
| 1/1 | 1/1 | 5.3  | 4.92 |
| 1/1 | 1/1 | 6.68 | 6.38 |
| 1/1 | 1/1 | 6.16 | 5.95 |
| 1/1 | 1/1 | 5.36 | 5.19 |
| 1/1 | 1/1 | 9.62 | 9.46 |
| 1/1 | 1/1 | 3.37 | 3.24 |
| 1/1 | 1/1 | 4.41 | 4.3  |
| 1/1 | 1/1 | 9.14 | 9.03 |
| 1/1 | 1/1 | 4.83 | 6.78 |
| 1/1 | 1/1 | 4.85 | 6.81 |
| 1/1 | 1/1 | 4.96 | 7    |
| 0/1 | 1/1 | 3.57 | 6.28 |
| 1/1 | 1/1 | 6.77 | 6.02 |
| 1/1 | 1/1 | 5.88 | 5.43 |
| 1/1 | 1/1 | 4.84 | 7.04 |
| 0/1 | 1/1 | 3.64 | 6.11 |
| 0/1 | 1/1 | 3.59 | 6.28 |
| 1/1 | 1/1 | 7.96 | 7.45 |
| 1/1 | 1/1 | 6.9  | 6.49 |
| 1/1 | 1/1 | 5.98 | 5.59 |
| 1/1 | 1/1 | 8.18 | 7.81 |
| 1/1 | 1/1 | 7.57 | 7.27 |
| 1/1 | 1/1 | 8.77 | 8.48 |
| 1/1 | 1/1 | 6.89 | 6.67 |
| 1/1 | 1/1 | 6.35 | 6.2  |
| 1/1 | 1/1 | 9.98 | 9.85 |
| 1/1 | 1/1 | 8.43 | 8.3  |
| 1/1 | 1/1 | 7.94 | 7.82 |
| 1/1 | 1/1 | 9.58 | 9.48 |
| 1/1 | 1/1 | 9.03 | 8.98 |
| 1/1 | 1/1 | 5.87 | 5.82 |
| 0/1 | 1/1 | 4.43 | 6.47 |
| 1/1 | 1/1 | 5.66 | 7.77 |
| 0/1 | 1/1 | 3.5  | 5.78 |
| 0/1 | 1/1 | 4.24 | 6.74 |
| 0/1 | 1/1 | 2.73 | 5.24 |
| 0/1 | 1/1 | 3.72 | 6.59 |
| 0/1 | 1/1 | 2.49 | 5.49 |
| 1/1 | 1/1 | 3.89 | 7.01 |
| 0/1 | 1/1 | 2.85 | 6.14 |
| 0/1 | 1/1 | 3.02 | 6.72 |
| 1/1 | 1/1 | 4.24 | 7.95 |
| 1/1 | 0/1 | 3.8  | 2.9  |
| 0/1 | 1/1 | 3.28 | 4.88 |
| 1/1 | 1/1 | 3.83 | 2.99 |
| 1/1 | 0/1 | 2.72 | 2.06 |
| 1/1 | 1/1 | 3.99 | 5.88 |
| 1/1 | 1/1 | 2.61 | 5.11 |
| 1/1 | 1/1 | 4.75 | 3.82 |
| 1/1 | 1/1 | 4.53 | 3.96 |
| 1/1 | 0/1 | 5.01 | 3.11 |
| 1/1 | 0/1 | 5.34 | 3.51 |
| 1/1 | 0/1 | 4.09 | 2.58 |
| 1/1 | 0/1 | 3.89 | 2.41 |
| 0/1 | 1/1 | 6.24 | 6.88 |

|     |     |       |       |
|-----|-----|-------|-------|
| 1/1 | 1/1 | 4.02  | 4.7   |
| 1/1 | 0/1 | 4.21  | 3.27  |
| 1/1 | 1/1 | 5.08  | 6.81  |
| 1/1 | 1/1 | 4.81  | 6.99  |
| 1/1 | 1/1 | 6.92  | 9.18  |
| 1/1 | 1/1 | 10.28 | 8.79  |
| 1/1 | 0/1 | 5.24  | 3.76  |
| 1/1 | 0/1 | 6.48  | 5.05  |
| 1/1 | 1/1 | 11.01 | 9.7   |
| 1/1 | 1/1 | 10.8  | 9.64  |
| 1/1 | 1/1 | 8.04  | 7.41  |
| 1/1 | 1/1 | 6.16  | 8.12  |
| 1/1 | 1/1 | 5.38  | 8.26  |
| 1/1 | 1/1 | 11.31 | 10.83 |
| 1/1 | 1/1 | 10.7  | 10.38 |
| 1/1 | 1/1 | 8.95  | 8.76  |
| 1/1 | 1/1 | 8.09  | 8.08  |
| 1/1 | 1/1 | 7.27  | 6.61  |
| 1/1 | 1/1 | 6.02  | 5.46  |
| 1/1 | 1/1 | 5.01  | 4.49  |
| 1/1 | 1/1 | 6.33  | 5.99  |
| 1/1 | 1/1 | 4.04  | 3.76  |
| 1/1 | 1/1 | 8.1   | 7.86  |
| 1/1 | 1/1 | 4.91  | 4.71  |
| 1/1 | 1/1 | 4.33  | 6.25  |
| 0/1 | 1/1 | 1.99  | 4.58  |
| 1/1 | 0/1 | 4.03  | 3.52  |
| 1/1 | 1/1 | 6.35  | 6.03  |
| 1/1 | 1/1 | 10.21 | 9.94  |
| 1/1 | 1/1 | 9.44  | 9.27  |
| 1/1 | 1/1 | 8.09  | 7.97  |
| 1/1 | 1/1 | 11.12 | 11.01 |
| 1/1 | 1/1 | 11.07 | 11.04 |
| 0/1 | 1/1 | 3.78  | 5.96  |
| 0/1 | 1/1 | 3.93  | 6.58  |
| 1/1 | 1/1 | 8.43  | 7.02  |
| 1/1 | 1/1 | 6.23  | 5.18  |
| 1/1 | 1/1 | 8.69  | 7     |
| 1/1 | 1/1 | 2.78  | 3.68  |
| 0/1 | 1/1 | 3.83  | 4.82  |
| 1/1 | 1/1 | 3.88  | 5.01  |
| 0/1 | 1/1 | 2.62  | 3.87  |
| 0/1 | 1/1 | 3.36  | 4.64  |
| 1/1 | 1/1 | 5.89  | 5.22  |
| 1/1 | 1/1 | 10.96 | 10.34 |
| 1/1 | 1/1 | 5.96  | 5.46  |
| 1/1 | 1/1 | 6.79  | 6.59  |
| 1/1 | 1/1 | 6.14  | 5.74  |
| 1/1 | 1/1 | 8.01  | 7.9   |
| 1/1 | 1/1 | 7.01  | 6.92  |
| 0/1 | 1/1 | 2.19  | 2.24  |
| 1/1 | 1/1 | 4.82  | 6.93  |
| 0/1 | 1/1 | 2.38  | 5.04  |
| 1/1 | 0/1 | 7.72  | 6.95  |
| 1/1 | 1/1 | 5.59  | 5.04  |
| 1/1 | 1/1 | 7.69  | 7.21  |
| 1/1 | 1/1 | 5.51  | 5.17  |
| 1/1 | 1/1 | 6.68  | 6.35  |

|     |     |       |       |
|-----|-----|-------|-------|
| 1/1 | 1/1 | 5.89  | 5.58  |
| 1/1 | 1/1 | 5.71  | 5.42  |
| 0/1 | 1/1 | 2.83  | 4.68  |
| 1/1 | 1/1 | 5.83  | 5.25  |
| 0/1 | 1/1 | 5.21  | 4.88  |
| 0/1 | 1/1 | 4.12  | 3.92  |
| 0/1 | 1/1 | 2.67  | 2.51  |
| 1/1 | 1/1 | 5.96  | 7.93  |
| 1/1 | 1/1 | 4.16  | 6.17  |
| 1/1 | 0/1 | 4.58  | 2.57  |
| 1/1 | 0/1 | 4.18  | 2.61  |
| 1/1 | 1/1 | 4.69  | 5.17  |
| 1/1 | 1/1 | 6.19  | 5.45  |
| 1/1 | 1/1 | 7.36  | 6.71  |
| 1/1 | 1/1 | 5.74  | 5.41  |
| 1/1 | 1/1 | 4.76  | 6.5   |
| 1/1 | 1/1 | 2.22  | 4.03  |
| 1/1 | 1/1 | 4.61  | 6.49  |
| 1/1 | 1/1 | 3.79  | 5.85  |
| 1/1 | 1/1 | 5.9   | 3.42  |
| 1/1 | 1/1 | 11.48 | 11.52 |
| 1/1 | 1/1 | 11.57 | 11.64 |
| 1/1 | 1/1 | 8.08  | 8.15  |
| 1/1 | 1/1 | 11.4  | 11.49 |
| 1/1 | 1/1 | 11.63 | 11.77 |
| 1/1 | 1/1 | 10.76 | 10.92 |
| 1/1 | 0/1 | 4.35  | 2.26  |
| 1/1 | 1/1 | 4.38  | 4.83  |
| 1/1 | 1/1 | 4.74  | 5.28  |
| 0/1 | 1/1 | 2.89  | 3.74  |
| 1/1 | 1/1 | 6.7   | 7.67  |
| 1/1 | 1/1 | 3.25  | 2.64  |
| 1/1 | 1/1 | 9.76  | 9.19  |
| 1/1 | 1/1 | 9.02  | 8.59  |
| 1/1 | 1/1 | 9.33  | 8.94  |
| 1/1 | 1/1 | 9.91  | 9.52  |
| 1/1 | 1/1 | 2.79  | 2.66  |
| 1/1 | 1/1 | 8.19  | 4.72  |
| 1/1 | 1/1 | 7.02  | 3.88  |
| 1/1 | 1/1 | 8.97  | 5.97  |
| 1/1 | 1/1 | 5.8   | 5.02  |
| 1/1 | 1/1 | 7.52  | 6.82  |
| 1/1 | 1/1 | 5.39  | 4.69  |
| 1/1 | 0/1 | 3.82  | 3.15  |
| 1/1 | 1/1 | 5.67  | 5.09  |
| 1/1 | 1/1 | 2.93  | 2.48  |
| 0/1 | 1/1 | 4.53  | 4.11  |
| 1/1 | 1/1 | 9.04  | 8.77  |
| 1/1 | 1/1 | 3.88  | 3.65  |
| 1/1 | 1/1 | 3.94  | 3.71  |
| 1/1 | 1/1 | 7.86  | 7.83  |
| 0/1 | 1/1 | 5.23  | 5.26  |
| 1/1 | 1/1 | 3.76  | 4.21  |
| 0/1 | 1/1 | 4.36  | 4.81  |
| 0/1 | 1/1 | 4.63  | 5.79  |
| 1/1 | 0/1 | 3.98  | 2.57  |
| 1/1 | 1/1 | 4.2   | 5.51  |
| 0/1 | 1/1 | 2.58  | 4.53  |

|     |     |      |      |
|-----|-----|------|------|
| 1/1 | 0/1 | 4.02 | 2.23 |
| 1/1 | 1/1 | 8.81 | 7.44 |
| 1/1 | 1/1 | 5.77 | 4.46 |
| 1/1 | 1/1 | 4.1  | 4.79 |
| 1/1 | 1/1 | 3.35 | 4.08 |
| 0/1 | 1/1 | 2.11 | 3.11 |
| 0/1 | 1/1 | 3.23 | 4.24 |
| 1/1 | 1/1 | 8.08 | 6.4  |
| 1/1 | 1/1 | 5.53 | 6.53 |
| 0/1 | 1/1 | 2.69 | 4.67 |
| 1/1 | 1/1 | 7.36 | 6.74 |
| 1/1 | 1/1 | 3.23 | 2.82 |
| 1/1 | 1/1 | 6.93 | 4.96 |
| 1/1 | 1/1 | 9.83 | 8.3  |
| 1/1 | 1/1 | 3.13 | 3.67 |
| 1/1 | 1/1 | 4.89 | 5.44 |
| 0/1 | 1/1 | 2.44 | 3.04 |
| 0/1 | 1/1 | 2.69 | 3.8  |
| 1/1 | 1/1 | 5.54 | 4.48 |
| 1/1 | 1/1 | 5.92 | 5.16 |
| 1/1 | 1/1 | 7.01 | 8.45 |
| 1/1 | 0/1 | 4.16 | 3.01 |
| 1/1 | 1/1 | 5.32 | 4.63 |
| 1/1 | 1/1 | 6.09 | 4.55 |
| 1/1 | 1/1 | 6.31 | 5.12 |
| 1/1 | 1/1 | 5.05 | 3.65 |
| 1/1 | 1/1 | 4.42 | 5.99 |
| 1/1 | 1/1 | 5.73 | 7.49 |
| 1/1 | 0/1 | 4.25 | 3.12 |
| 1/1 | 1/1 | 9.01 | 8.14 |
| 0/1 | 1/1 | 5.14 | 6.51 |
| 0/1 | 1/1 | 3.63 | 5.04 |
| 0/1 | 1/1 | 4.49 | 6.11 |
| 0/1 | 1/1 | 2.38 | 4.2  |
| 0/1 | 1/1 | 5.51 | 7.51 |
| 1/1 | 1/1 | 3.96 | 5.98 |
| 1/1 | 1/1 | 3.48 | 5.57 |
| 0/1 | 1/1 | 3.67 | 6.33 |
| 1/1 | 1/1 | 9.03 | 7.63 |
| 1/1 | 1/1 | 6.77 | 5.62 |
| 1/1 | 1/1 | 6.67 | 5.75 |
| 1/1 | 1/1 | 6.29 | 5.59 |
| 1/1 | 0/1 | 4.45 | 3.77 |
| 1/1 | 1/1 | 5.94 | 5.29 |
| 1/1 | 1/1 | 5.32 | 4.74 |
| 1/1 | 1/1 | 6.17 | 5.69 |
| 1/1 | 1/1 | 5.54 | 5.06 |
| 1/1 | 1/1 | 6.47 | 6.4  |
| 1/1 | 1/1 | 9.18 | 9.1  |
| 1/1 | 1/1 | 8.92 | 8.88 |
| 1/1 | 1/1 | 7.01 | 7.02 |
| 1/1 | 1/1 | 7.35 | 7.42 |
| 1/1 | 1/1 | 5.71 | 5.93 |
| 1/1 | 1/1 | 7.66 | 7.96 |
| 1/1 | 0/1 | 6.43 | 5.24 |
| 1/1 | 1/1 | 8.8  | 8.1  |
| 1/1 | 1/1 | 6.49 | 5.97 |
| 1/1 | 1/1 | 6.39 | 5.95 |

|     |     |       |       |
|-----|-----|-------|-------|
| 1/1 | 1/1 | 9.02  | 8.69  |
| 1/1 | 1/1 | 8.08  | 7.76  |
| 1/1 | 1/1 | 9.49  | 9.2   |
| 1/1 | 1/1 | 10.98 | 10.71 |
| 1/1 | 1/1 | 5.74  | 5.48  |
| 1/1 | 1/1 | 5.39  | 5.2   |
| 1/1 | 1/1 | 8.15  | 8.01  |
| 1/1 | 1/1 | 4.16  | 4.06  |
| 0/1 | 1/1 | 3.25  | 5.24  |
| 1/1 | 1/1 | 5.14  | 7.41  |
| 1/1 | 1/1 | 5.28  | 7.76  |
| 1/1 | 1/1 | 10.51 | 9.44  |
| 1/1 | 1/1 | 7.99  | 7.4   |
| 1/1 | 1/1 | 3.33  | 2.69  |
| 1/1 | 1/1 | 8.64  | 8.45  |
| 1/1 | 1/1 | 5.27  | 4.61  |
| 1/1 | 1/1 | 2.43  | 2.04  |
| 0/1 | 1/1 | 3.3   | 3.12  |
| 1/1 | 0/1 | 4.54  | 3.62  |
| 0/1 | 1/1 | 2.64  | 5.01  |
| 1/1 | 1/1 | 8.23  | 7.64  |
| 1/1 | 1/1 | 9.82  | 9.31  |
| 1/1 | 1/1 | 6.97  | 6.8   |
| 1/1 | 1/1 | 9.91  | 9.75  |
| 1/1 | 1/1 | 5.76  | 7.64  |
| 1/1 | 1/1 | 5.6   | 7.68  |
| 1/1 | 1/1 | 4.72  | 3.93  |
| 1/1 | 1/1 | 5.39  | 4.8   |
| 1/1 | 1/1 | 9.13  | 8.59  |
| 1/1 | 1/1 | 4.21  | 3.8   |
| 0/1 | 1/1 | 4.53  | 4.18  |
| 1/1 | 1/1 | 6.17  | 5.86  |
| 1/1 | 1/1 | 6.96  | 5.74  |
| 1/1 | 0/1 | 5.88  | 5.09  |
| 1/1 | 1/1 | 4.65  | 2.65  |
| 1/1 | 0/1 | 5.01  | 3.06  |
| 1/1 | 1/1 | 4.25  | 2.63  |
| 1/1 | 1/1 | 4.15  | 4.69  |
| 0/1 | 1/1 | 2.2   | 2.92  |
| 1/1 | 1/1 | 5.28  | 4.7   |
| 1/1 | 1/1 | 5.25  | 7.37  |
| 1/1 | 1/1 | 5.45  | 7.83  |
| 1/1 | 1/1 | 4.79  | 3.76  |
| 1/1 | 1/1 | 4.94  | 4.1   |
| 1/1 | 1/1 | 4.45  | 3.85  |
| 0/1 | 1/1 | 2.89  | 5.45  |
| 1/1 | 1/1 | 6.91  | 6.21  |
| 1/1 | 1/1 | 5.12  | 4.55  |
| 1/1 | 1/1 | 6.11  | 5.56  |
| 1/1 | 1/1 | 5.78  | 5.28  |
| 1/1 | 1/1 | 6.95  | 6.49  |
| 1/1 | 1/1 | 7.96  | 7.5   |
| 1/1 | 1/1 | 8.56  | 8.17  |
| 1/1 | 1/1 | 6.06  | 5.69  |
| 0/1 | 1/1 | 6.04  | 5.69  |
| 1/1 | 1/1 | 8.54  | 8.2   |
| 0/1 | 1/1 | 4.62  | 6.63  |
| 1/1 | 1/1 | 4.45  | 6.83  |

|     |     |       |      |
|-----|-----|-------|------|
| 1/1 | 1/1 | 8.83  | 7.79 |
| 1/1 | 0/1 | 4.84  | 3.9  |
| 1/1 | 0/1 | 4.3   | 3.47 |
| 1/1 | 1/1 | 4.76  | 6.93 |
| 1/1 | 1/1 | 8.88  | 7.64 |
| 1/1 | 1/1 | 5.75  | 7.04 |
| 0/1 | 1/1 | 3.84  | 5.32 |
| 1/1 | 1/1 | 8.88  | 7.64 |
| 1/1 | 1/1 | 5.75  | 7.04 |
| 0/1 | 1/1 | 4.85  | 6.26 |
| 0/1 | 1/1 | 3.84  | 5.32 |
| 1/1 | 1/1 | 8.83  | 7.79 |
| 1/1 | 0/1 | 4.84  | 3.9  |
| 1/1 | 0/1 | 4.3   | 3.47 |
| 1/1 | 1/1 | 4.76  | 6.93 |
| 1/1 | 1/1 | 4.62  | 3.87 |
| 1/1 | 1/1 | 3.58  | 3.22 |
| 1/1 | 1/1 | 6.2   | 5.65 |
| 1/1 | 1/1 | 2.89  | 4.86 |
| 1/1 | 1/1 | 4.04  | 6.06 |
| 1/1 | 1/1 | 3.94  | 6.22 |
| 1/1 | 1/1 | 5.81  | 3.1  |
| 1/1 | 1/1 | 6.77  | 4.53 |
| 1/1 | 1/1 | 7.9   | 7.19 |
| 0/1 | 1/1 | 2.52  | 4.74 |
| 1/1 | 1/1 | 6.48  | 5.7  |
| 1/1 | 1/1 | 3.99  | 3.33 |
| 1/1 | 1/1 | 6.26  | 5.94 |
| 1/1 | 1/1 | 3.29  | 5.12 |
| 1/1 | 1/1 | 6.86  | 5.62 |
| 1/1 | 1/1 | 10.51 | 9.49 |
| 1/1 | 1/1 | 3.97  | 3.1  |
| 1/1 | 1/1 | 9.25  | 8.4  |
| 1/1 | 1/1 | 4.43  | 3.4  |
| 1/1 | 1/1 | 6.05  | 5.04 |
| 1/1 | 1/1 | 3.6   | 2.71 |
| 1/1 | 0/1 | 3.14  | 2.3  |
| 1/1 | 0/1 | 7.42  | 6.79 |
| 1/1 | 1/1 | 3.34  | 4.89 |
| 1/1 | 1/1 | 5.98  | 4.13 |
| 1/1 | 1/1 | 5.86  | 4.39 |
| 0/1 | 1/1 | 2.05  | 2.74 |
| 0/1 | 1/1 | 2.91  | 3.63 |
| 1/1 | 0/1 | 5.41  | 3.31 |
| 1/1 | 0/1 | 5.1   | 3.01 |
| 1/1 | 1/1 | 3.34  | 3.74 |
| 1/1 | 1/1 | 4.96  | 5.38 |
| 0/1 | 1/1 | 1.95  | 2.42 |
| 1/1 | 1/1 | 4.99  | 5.61 |
| 0/1 | 1/1 | 4.73  | 5.72 |
| 1/1 | 1/1 | 4.42  | 3.61 |
| 1/1 | 1/1 | 8.76  | 8.14 |
| 1/1 | 1/1 | 4.66  | 4.17 |
| 0/1 | 1/1 | 2.42  | 4.49 |
| 1/1 | 1/1 | 9.87  | 7.96 |
| 0/1 | 1/1 | 3.71  | 4.28 |
| 1/1 | 1/1 | 6.13  | 3.49 |
| 1/1 | 1/1 | 4.53  | 4.42 |

|     |     |       |       |
|-----|-----|-------|-------|
| 1/1 | 1/1 | 4.94  | 4.46  |
| 1/1 | 1/1 | 6.14  | 5.66  |
| 1/1 | 1/1 | 7.21  | 6.75  |
| 1/1 | 1/1 | 8.6   | 8.25  |
| 1/1 | 1/1 | 7.64  | 7.31  |
| 1/1 | 1/1 | 7.73  | 7.48  |
| 1/1 | 1/1 | 8.87  | 8.63  |
| 1/1 | 1/1 | 10.23 | 10.06 |
| 0/1 | 1/1 | 4.57  | 4.52  |
| 1/1 | 1/1 | 5.68  | 5.65  |
| 0/1 | 1/1 | 4.18  | 6.23  |
| 1/1 | 1/1 | 5.49  | 8.22  |
| 1/1 | 0/1 | 5.75  | 3.24  |
| 1/1 | 1/1 | 6.03  | 3.73  |
| 1/1 | 1/1 | 7.2   | 7.21  |
| 1/1 | 1/1 | 6.49  | 6.54  |
| 1/1 | 1/1 | 5.67  | 5.74  |
| 1/1 | 1/1 | 6.45  | 6.67  |
| 1/1 | 1/1 | 6.94  | 6.67  |
| 1/1 | 1/1 | 12.34 | 12.21 |
| 1/1 | 1/1 | 5.58  | 5.54  |
| 1/1 | 1/1 | 8.4   | 8.39  |
| 0/1 | 1/1 | 6.65  | 6.72  |
| 1/1 | 1/1 | 6.23  | 6.41  |
| 1/1 | 1/1 | 4.52  | 6.79  |
| 1/1 | 1/1 | 5.16  | 7.69  |
| 1/1 | 1/1 | 7.33  | 6.81  |
| 1/1 | 1/1 | 7.07  | 6.78  |
| 1/1 | 1/1 | 7.08  | 6.88  |
| 1/1 | 1/1 | 6.15  | 6.07  |
| 0/1 | 1/1 | 3.73  | 6.01  |
| 0/1 | 1/1 | 3.42  | 6.42  |
| 1/1 | 1/1 | 3.8   | 6.87  |
| 1/1 | 1/1 | 2.79  | 6.35  |
| 1/1 | 0/1 | 3.11  | 2.62  |
| 1/1 | 1/1 | 3     | 2.84  |
| 1/1 | 1/1 | 7.62  | 7.52  |
| 1/1 | 1/1 | 7.08  | 6.99  |
| 1/1 | 1/1 | 9.67  | 8.36  |
| 0/1 | 1/1 | 2.61  | 4.27  |
| 1/1 | 1/1 | 7.49  | 6.56  |
| 1/1 | 1/1 | 4.8   | 4.16  |
| 1/1 | 0/1 | 2.54  | 1.96  |
| 1/1 | 1/1 | 4.15  | 3.62  |
| 1/1 | 1/1 | 4.95  | 4.15  |
| 1/1 | 1/1 | 7.01  | 6.45  |
| 1/1 | 1/1 | 7.22  | 6.69  |
| 1/1 | 1/1 | 4.62  | 4.12  |
| 1/1 | 1/1 | 6.17  | 5.67  |
| 1/1 | 1/1 | 6.47  | 6.07  |
| 1/1 | 1/1 | 5.6   | 5.24  |
| 1/1 | 1/1 | 5.5   | 5.15  |
| 1/1 | 1/1 | 5.45  | 4.64  |
| 1/1 | 1/1 | 6.78  | 6.34  |
| 1/1 | 1/1 | 6.88  | 6.55  |
| 1/1 | 1/1 | 7     | 6.54  |
| 1/1 | 1/1 | 7.38  | 6.97  |
| 1/1 | 1/1 | 5.89  | 5.51  |



|     |     |       |       |
|-----|-----|-------|-------|
| 1/1 | 1/1 | 7.6   | 7.29  |
| 1/1 | 1/1 | 10.13 | 10.12 |
| 1/1 | 1/1 | 3.55  | 5.63  |
| 0/1 | 1/1 | 3.93  | 6.07  |
| 1/1 | 1/1 | 4.28  | 6.44  |
| 1/1 | 1/1 | 5.48  | 3.17  |
| 1/1 | 1/1 | 6.7   | 4.46  |
| 1/1 | 1/1 | 4.97  | 5.42  |
| 1/1 | 1/1 | 4.02  | 5.36  |
| 1/1 | 0/1 | 5.9   | 5.02  |
| 1/1 | 0/1 | 7.43  | 6.61  |
| 1/1 | 1/1 | 4.87  | 6.5   |
| 1/1 | 1/1 | 9.24  | 10.9  |
| 0/1 | 1/1 | 4.43  | 6.19  |
| 0/1 | 1/1 | 3.37  | 5.5   |
| 1/1 | 1/1 | 7.89  | 7.05  |
| 1/1 | 1/1 | 6.85  | 6.36  |
| 1/1 | 1/1 | 8.26  | 7.61  |
| 0/1 | 1/1 | 4.55  | 4.13  |
| 0/1 | 1/1 | 5.59  | 5.33  |
| 1/1 | 0/1 | 3.44  | 3.19  |
| 1/1 | 1/1 | 6.75  | 6.08  |
| 1/1 | 1/1 | 4.89  | 4.46  |
| 1/1 | 1/1 | 6.84  | 6.47  |
| 1/1 | 1/1 | 6.47  | 5.59  |
| 1/1 | 1/1 | 10.22 | 9.57  |
| 1/1 | 1/1 | 4.53  | 6.15  |
| 0/1 | 1/1 | 5.35  | 6.99  |
| 1/1 | 1/1 | 5.59  | 7.53  |
| 0/1 | 1/1 | 4.96  | 6.94  |
| 0/1 | 1/1 | 3.42  | 5.54  |
| 0/1 | 1/1 | 3.05  | 5.33  |
| 0/1 | 1/1 | 3.18  | 6.84  |
| 1/1 | 1/1 | 7.18  | 5.8   |
| 0/1 | 1/1 | 2.16  | 3.46  |
| 1/1 | 1/1 | 6.49  | 5.11  |
| 1/1 | 1/1 | 8.85  | 7.8   |
| 1/1 | 1/1 | 6.54  | 5.51  |
| 1/1 | 1/1 | 4.55  | 3.68  |
| 1/1 | 1/1 | 5.68  | 4.98  |
| 1/1 | 1/1 | 7.02  | 6.33  |
| 1/1 | 1/1 | 7.48  | 6.95  |
| 1/1 | 1/1 | 7.22  | 6.7   |
| 1/1 | 1/1 | 6.75  | 6.27  |
| 1/1 | 1/1 | 8.34  | 7.88  |
| 1/1 | 1/1 | 7.37  | 6.94  |
| 1/1 | 1/1 | 6.12  | 5.91  |
| 0/1 | 1/1 | 5.49  | 5.31  |
| 1/1 | 1/1 | 3.53  | 3.38  |
| 1/1 | 1/1 | 8.2   | 8.29  |
| 1/1 | 1/1 | 5.95  | 6.07  |
| 0/1 | 1/1 | 3.73  | 6.03  |
| 0/1 | 1/1 | 2.57  | 4.92  |
| 1/1 | 1/1 | 3     | 5.4   |
| 1/1 | 1/1 | 7.52  | 6.38  |
| 1/1 | 1/1 | 10.24 | 9.22  |
| 1/1 | 1/1 | 6.4   | 6.11  |
| 1/1 | 1/1 | 6.81  | 6.93  |

|     |     |       |       |
|-----|-----|-------|-------|
| 1/1 | 1/1 | 4.35  | 6.9   |
| 0/1 | 1/1 | 2.74  | 6.22  |
| 1/1 | 1/1 | 9.62  | 10    |
| 1/1 | 1/1 | 5.2   | 5.77  |
| 0/1 | 1/1 | 2.44  | 3.16  |
| 1/1 | 1/1 | 7.56  | 6.33  |
| 1/1 | 1/1 | 4.78  | 3.92  |
| 1/1 | 0/1 | 5.79  | 3.48  |
| 1/1 | 1/1 | 6.22  | 4.02  |
| 1/1 | 0/1 | 4.66  | 2.75  |
| 1/1 | 1/1 | 6.65  | 6.86  |
| 1/1 | 1/1 | 5.24  | 3.23  |
| 1/1 | 0/1 | 3.91  | 2.26  |
| 1/1 | 1/1 | 7.25  | 7.71  |
| 1/1 | 1/1 | 5.78  | 6.25  |
| 1/1 | 1/1 | 7.86  | 8.34  |
| 1/1 | 1/1 | 4.64  | 5.16  |
| 1/1 | 1/1 | 6.39  | 6.93  |
| 0/1 | 1/1 | 4.97  | 5.57  |
| 1/1 | 1/1 | 4.75  | 5.36  |
| 0/1 | 1/1 | 2.24  | 2.89  |
| 1/1 | 1/1 | 4.34  | 5.05  |
| 0/1 | 1/1 | 9.81  | 10.56 |
| 1/1 | 1/1 | 6.06  | 6.92  |
| 1/1 | 1/1 | 5.35  | 6.36  |
| 1/1 | 1/1 | 5.75  | 6.81  |
| 0/1 | 1/1 | 4.53  | 5.77  |
| 1/1 | 1/1 | 5.41  | 6.75  |
| 1/1 | 0/1 | 7.5   | 5.84  |
| 0/1 | 1/1 | 6.03  | 6.87  |
| 1/1 | 1/1 | 5.38  | 6.29  |
| 0/1 | 1/1 | 3.19  | 4.2   |
| 1/1 | 1/1 | 5.53  | 6.83  |
| 1/1 | 0/1 | 5.73  | 3.51  |
| 1/1 | 1/1 | 5.28  | 5.7   |
| 1/1 | 1/1 | 10.52 | 11.04 |
| 1/1 | 1/1 | 10.52 | 11.04 |
| 1/1 | 1/1 | 5.85  | 6.39  |
| 0/1 | 1/1 | 4.89  | 5.48  |
| 0/1 | 1/1 | 3.04  | 3.85  |
| 1/1 | 1/1 | 6.69  | 3.3   |
| 1/1 | 1/1 | 10.28 | 7.12  |
| 1/1 | 1/1 | 8.16  | 7.58  |
| 1/1 | 1/1 | 8.79  | 8.39  |
| 1/1 | 1/1 | 8.12  | 8.03  |
| 0/1 | 1/1 | 6.95  | 6.89  |
| 0/1 | 1/1 | 7.98  | 8.02  |
| 1/1 | 0/1 | 4.76  | 3.67  |
| 1/1 | 1/1 | 5.11  | 6.55  |
| 1/1 | 1/1 | 4.09  | 5.68  |
| 1/1 | 1/1 | 3.89  | 5.51  |
| 1/1 | 1/1 | 4.59  | 6.66  |
| 1/1 | 1/1 | 9     | 8.58  |
| 1/1 | 1/1 | 8.31  | 8.19  |
| 1/1 | 1/1 | 5.53  | 7.93  |
| 1/1 | 0/1 | 5.66  | 4.24  |
| 0/1 | 1/1 | 4.1   | 5.36  |
| 0/1 | 1/1 | 2.95  | 4.48  |

|     |     |       |       |
|-----|-----|-------|-------|
| 1/1 | 1/1 | 5.62  | 5.09  |
| 1/1 | 1/1 | 8.66  | 8.28  |
| 1/1 | 1/1 | 6.6   | 6.3   |
| 1/1 | 1/1 | 3.04  | 2.97  |
| 1/1 | 1/1 | 5.93  | 7.96  |
| 1/1 | 1/1 | 4.81  | 6.91  |
| 1/1 | 0/1 | 7.06  | 5.99  |
| 1/1 | 1/1 | 6.88  | 6.07  |
| 1/1 | 1/1 | 5.38  | 4.61  |
| 1/1 | 1/1 | 9.03  | 8.33  |
| 1/1 | 1/1 | 7.06  | 6.42  |
| 1/1 | 1/1 | 4.9   | 4.28  |
| 1/1 | 1/1 | 4.37  | 6     |
| 0/1 | 1/1 | 4.63  | 3.8   |
| 1/1 | 1/1 | 5.18  | 4.74  |
| 1/1 | 1/1 | 5.47  | 5.09  |
| 0/1 | 1/1 | 2.59  | 4.22  |
| 1/1 | 1/1 | 3.39  | 5.03  |
| 0/1 | 1/1 | 2.8   | 4.61  |
| 1/1 | 1/1 | 8.78  | 8.55  |
| 1/1 | 1/1 | 6.41  | 6.38  |
| 1/1 | 1/1 | 9.23  | 9.22  |
| 1/1 | 1/1 | 10.97 | 11.01 |
| 0/1 | 1/1 | 2.67  | 2.73  |
| 1/1 | 1/1 | 6.98  | 7.14  |
| 1/1 | 1/1 | 5.94  | 6.12  |
| 1/1 | 1/1 | 4.5   | 6.83  |
| 0/1 | 1/1 | 2.93  | 5.79  |
| 1/1 | 1/1 | 7.18  | 2.46  |
| 1/1 | 1/1 | 6.48  | 5.57  |
| 1/1 | 0/1 | 3.97  | 3.14  |
| 1/1 | 0/1 | 2.72  | 1.92  |
| 1/1 | 1/1 | 7.44  | 6.67  |
| 1/1 | 1/1 | 7.23  | 6.58  |
| 1/1 | 1/1 | 7.89  | 7.28  |
| 1/1 | 1/1 | 8     | 7.72  |
| 0/1 | 1/1 | 4.02  | 3.82  |
| 1/1 | 1/1 | 9.59  | 9.67  |
| 0/1 | 1/1 | 5.8   | 5.93  |
| 0/1 | 1/1 | 6.63  | 6.89  |
| 1/1 | 1/1 | 5.72  | 6.22  |
| 0/1 | 1/1 | 3.56  | 4.11  |
| 1/1 | 0/1 | 4.8   | 3.4   |
| 1/1 | 1/1 | 4.52  | 3.48  |
| 1/1 | 1/1 | 7.97  | 6.97  |
| 1/1 | 1/1 | 5.39  | 4.42  |
| 1/1 | 1/1 | 4.06  | 3.1   |
| 1/1 | 1/1 | 4.07  | 5.23  |
| 1/1 | 1/1 | 4.88  | 6.12  |
| 0/1 | 1/1 | 2.92  | 4.7   |
| 0/1 | 1/1 | 2.7   | 4.74  |
| 0/1 | 1/1 | 3.74  | 3.26  |
| 1/1 | 1/1 | 10.57 | 10.16 |
| 1/1 | 1/1 | 8.32  | 8.16  |
| 1/1 | 1/1 | 4.69  | 4.6   |
| 0/1 | 1/1 | 7.74  | 7.67  |
| 1/1 | 1/1 | 5.34  | 7.35  |
| 1/1 | 1/1 | 3.65  | 6     |

|     |     |       |      |
|-----|-----|-------|------|
| 0/1 | 1/1 | 2.72  | 5.84 |
| 1/1 | 1/1 | 6.24  | 4.72 |
| 1/1 | 1/1 | 5.29  | 4.17 |
| 1/1 | 1/1 | 3.85  | 4.86 |
| 1/1 | 1/1 | 5.26  | 3.97 |
| 1/1 | 1/1 | 5.11  | 3.86 |
| 1/1 | 1/1 | 6.1   | 4.96 |
| 1/1 | 0/1 | 4.17  | 3.07 |
| 1/1 | 1/1 | 3.44  | 2.49 |
| 1/1 | 1/1 | 4.12  | 3.24 |
| 1/1 | 0/1 | 3.04  | 2.16 |
| 1/1 | 1/1 | 5.36  | 4.49 |
| 1/1 | 1/1 | 5.84  | 5    |
| 1/1 | 1/1 | 9.59  | 8.61 |
| 1/1 | 1/1 | 4.33  | 3.51 |
| 1/1 | 1/1 | 5.92  | 5.3  |
| 1/1 | 0/1 | 4.78  | 3.2  |
| 1/1 | 0/1 | 3.5   | 2.35 |
| 0/1 | 1/1 | 3.97  | 4.9  |
| 0/1 | 1/1 | 3.63  | 4.66 |
| 1/1 | 1/1 | 7.28  | 6.86 |
| 0/1 | 1/1 | 4.33  | 3.91 |
| 1/1 | 1/1 | 9.89  | 9.63 |
| 0/1 | 1/1 | 5.99  | 6.01 |
| 1/1 | 1/1 | 8.77  | 6.97 |
| 1/1 | 1/1 | 8.11  | 6.33 |
| 1/1 | 0/1 | 5.54  | 3.8  |
| 1/1 | 1/1 | 4.47  | 2.78 |
| 1/1 | 1/1 | 5.03  | 3.51 |
| 1/1 | 1/1 | 5.48  | 3.98 |
| 1/1 | 1/1 | 4.72  | 3.22 |
| 1/1 | 0/1 | 6.03  | 4.55 |
| 1/1 | 0/1 | 7.62  | 6.21 |
| 1/1 | 1/1 | 6.36  | 4.97 |
| 1/1 | 1/1 | 8.13  | 6.76 |
| 1/1 | 1/1 | 4.12  | 4.84 |
| 1/1 | 0/1 | 4.11  | 3.09 |
| 1/1 | 1/1 | 4.42  | 3.56 |
| 1/1 | 1/1 | 10.17 | 9.55 |
| 1/1 | 1/1 | 5.81  | 5.24 |
| 1/1 | 1/1 | 5.84  | 4.69 |
| 1/1 | 1/1 | 4.88  | 6.21 |
| 1/1 | 1/1 | 4.42  | 5.84 |
| 0/1 | 1/1 | 3.29  | 4.73 |
| 1/1 | 1/1 | 3.99  | 5.43 |
| 1/1 | 1/1 | 4.59  | 6.05 |
| 1/1 | 1/1 | 5.15  | 6.74 |
| 1/1 | 1/1 | 4.5   | 6.14 |
| 1/1 | 1/1 | 3.99  | 5.72 |
| 1/1 | 1/1 | 3.25  | 5.11 |
| 1/1 | 1/1 | 3.32  | 5.22 |
| 1/1 | 1/1 | 3.68  | 5.68 |
| 0/1 | 1/1 | 1.91  | 4.39 |
| 1/1 | 1/1 | 7.76  | 6.77 |
| 1/1 | 1/1 | 6.33  | 5.43 |
| 1/1 | 1/1 | 4.47  | 3.9  |
| 1/1 | 1/1 | 3.38  | 5.29 |
| 0/1 | 1/1 | 3.11  | 5.09 |

|     |     |       |       |
|-----|-----|-------|-------|
| 1/1 | 1/1 | 10.09 | 10.26 |
| 1/1 | 1/1 | 9.22  | 9.83  |
| 1/1 | 0/1 | 5.14  | 2.89  |
| 1/1 | 1/1 | 4.05  | 4.42  |
| 0/1 | 1/1 | 2.52  | 3     |
| 0/1 | 1/1 | 2.99  | 4.05  |
| 1/1 | 1/1 | 7.06  | 5.93  |
| 1/1 | 1/1 | 7.07  | 6.03  |
| 1/1 | 0/1 | 5.9   | 4.9   |
| 1/1 | 1/1 | 6.44  | 5.68  |
| 1/1 | 1/1 | 7.39  | 6.69  |
| 0/1 | 1/1 | 4     | 5.64  |
| 1/1 | 0/1 | 5.09  | 3.36  |
| 1/1 | 0/1 | 4.07  | 2.36  |
| 1/1 | 1/1 | 7.15  | 5.6   |
| 1/1 | 1/1 | 5.74  | 4.36  |
| 1/1 | 1/1 | 5.4   | 4.11  |
| 1/1 | 0/1 | 6     | 2.78  |
| 1/1 | 1/1 | 6     | 5.25  |
| 1/1 | 1/1 | 7.44  | 6.87  |
| 1/1 | 1/1 | 7.95  | 7.69  |
| 1/1 | 1/1 | 7.38  | 7.23  |
| 1/1 | 1/1 | 5.5   | 5.91  |
| 1/1 | 1/1 | 6.12  | 4.79  |
| 1/1 | 1/1 | 10.49 | 9.42  |
| 1/1 | 1/1 | 5.13  | 6.34  |
| 1/1 | 1/1 | 5.14  | 6.4   |
| 0/1 | 1/1 | 4.42  | 5.74  |
| 1/1 | 1/1 | 5.3   | 4.05  |
| 1/1 | 1/1 | 6.55  | 5.41  |
| 1/1 | 0/1 | 3.42  | 2.55  |
| 1/1 | 1/1 | 4.82  | 6.22  |
| 1/1 | 0/1 | 6.08  | 4.8   |
| 1/1 | 1/1 | 6.74  | 5.65  |
| 1/1 | 0/1 | 3.84  | 2.86  |
| 0/1 | 1/1 | 3.57  | 4.96  |
| 1/1 | 1/1 | 8.68  | 7.6   |
| 1/1 | 1/1 | 7.97  | 7.09  |
| 1/1 | 0/1 | 7.11  | 6.3   |
| 1/1 | 1/1 | 4.68  | 3.98  |
| 1/1 | 0/1 | 3.08  | 2.57  |
| 0/1 | 1/1 | 5.73  | 5.58  |
| 1/1 | 1/1 | 5.92  | 5.45  |
| 1/1 | 1/1 | 8.09  | 7.77  |
| 0/1 | 1/1 | 5.09  | 4.96  |
| 1/1 | 1/1 | 7.9   | 7.81  |
| 1/1 | 1/1 | 4.47  | 4.4   |
| 1/1 | 1/1 | 4.15  | 6.45  |
| 0/1 | 1/1 | 4.16  | 6.49  |
| 1/1 | 1/1 | 6.77  | 6.2   |
| 1/1 | 1/1 | 8.86  | 8.59  |
| 0/1 | 1/1 | 2.75  | 2.57  |
| 1/1 | 1/1 | 4.64  | 6.99  |
| 0/1 | 1/1 | 2.61  | 5.04  |
| 1/1 | 0/1 | 4.46  | 3.63  |
| 1/1 | 1/1 | 7.54  | 7.08  |
| 0/1 | 1/1 | 6.29  | 8.3   |
| 1/1 | 1/1 | 4.15  | 6.65  |

|     |     |       |       |
|-----|-----|-------|-------|
| 1/1 | 1/1 | 11.17 | 11.08 |
| 1/1 | 1/1 | 4.22  | 4.28  |
| 0/1 | 1/1 | 2.85  | 2.98  |
| 0/1 | 1/1 | 7.26  | 7.48  |
| 1/1 | 1/1 | 8.28  | 8.61  |
| 1/1 | 1/1 | 6.27  | 8.64  |
| 1/1 | 1/1 | 7.04  | 9.49  |
| 1/1 | 1/1 | 9.88  | 8.94  |
| 1/1 | 1/1 | 6.9   | 6.16  |
| 1/1 | 1/1 | 5.59  | 4.98  |
| 0/1 | 1/1 | 4.81  | 4.24  |
| 1/1 | 1/1 | 3.56  | 5.2   |
| 0/1 | 1/1 | 3.94  | 5.89  |
| 1/1 | 0/1 | 4.78  | 2.88  |
| 1/1 | 1/1 | 5.82  | 4.26  |
| 0/1 | 1/1 | 2.87  | 3.49  |
| 0/1 | 1/1 | 2.95  | 3.77  |
| 0/1 | 1/1 | 2.26  | 3.82  |
| 1/1 | 1/1 | 6.42  | 5.46  |
| 1/1 | 0/1 | 7.72  | 7.05  |
| 1/1 | 1/1 | 9.27  | 8.68  |
| 1/1 | 1/1 | 8.06  | 6.95  |
| 1/1 | 1/1 | 8.36  | 7.28  |
| 1/1 | 0/1 | 5.32  | 4.27  |
| 1/1 | 1/1 | 4.68  | 3.76  |
| 1/1 | 1/1 | 5.45  | 4.62  |
| 0/1 | 1/1 | 2.81  | 4.27  |
| 0/1 | 1/1 | 3.51  | 5.25  |
| 1/1 | 1/1 | 7.6   | 7.62  |
| 1/1 | 1/1 | 4.46  | 4.64  |
| 0/1 | 1/1 | 8.02  | 8.22  |
| 1/1 | 1/1 | 4.82  | 5.15  |
| 1/1 | 1/1 | 6.72  | 7.08  |
| 1/1 | 0/1 | 3.62  | 2.99  |
| 1/1 | 1/1 | 6.22  | 8.04  |
| 1/1 | 1/1 | 3.93  | 6.08  |
| 1/1 | 0/1 | 3.22  | 1.81  |
| 1/1 | 1/1 | 5.95  | 4.87  |
| 1/1 | 1/1 | 3.34  | 4.78  |
| 1/1 | 0/1 | 6.87  | 5.95  |
| 1/1 | 1/1 | 6.77  | 6.06  |
| 1/1 | 1/1 | 4.39  | 3.77  |
| 1/1 | 1/1 | 4.87  | 3.97  |
| 1/1 | 1/1 | 6.83  | 6.26  |
| 1/1 | 1/1 | 4.76  | 6.3   |
| 0/1 | 1/1 | 3.06  | 4.62  |
| 1/1 | 1/1 | 3.73  | 5.51  |
| 1/1 | 1/1 | 5.22  | 7.05  |
| 0/1 | 1/1 | 2.99  | 5.08  |
| 0/1 | 1/1 | 2.39  | 4.56  |
| 0/1 | 1/1 | 2.26  | 4.44  |
| 0/1 | 1/1 | 3.29  | 5.49  |
| 0/1 | 1/1 | 2.34  | 4.72  |
| 0/1 | 1/1 | 3.11  | 5.73  |
| 1/1 | 0/1 | 2.26  | 1.95  |
| 1/1 | 1/1 | 5.94  | 5.8   |
| 0/1 | 1/1 | 2.27  | 2.22  |
| 1/1 | 1/1 | 5.38  | 5.51  |

|     |     |      |      |
|-----|-----|------|------|
| 1/1 | 1/1 | 6.04 | 8.27 |
| 0/1 | 1/1 | 2.7  | 5.1  |
| 1/1 | 1/1 | 7.61 | 4.14 |
| 1/1 | 1/1 | 8.6  | 7.58 |
| 1/1 | 1/1 | 3.71 | 2.97 |
| 1/1 | 1/1 | 5.76 | 5.13 |
| 1/1 | 1/1 | 3.54 | 3.18 |
| 1/1 | 1/1 | 7.59 | 7.28 |
| 1/1 | 1/1 | 5.84 | 5.56 |
| 1/1 | 0/1 | 2.33 | 2.09 |
| 0/1 | 1/1 | 6.75 | 6.53 |
| 1/1 | 1/1 | 9.17 | 9    |
| 1/1 | 1/1 | 8.97 | 8.81 |
| 1/1 | 1/1 | 6.93 | 6.78 |
| 1/1 | 1/1 | 4.84 | 4.84 |
| 1/1 | 1/1 | 3.47 | 3.48 |
| 0/1 | 1/1 | 5.48 | 5.65 |
| 0/1 | 1/1 | 2.71 | 3.16 |
| 0/1 | 1/1 | 3.66 | 4.13 |
| 1/1 | 1/1 | 5.82 | 4.84 |
| 1/1 | 0/1 | 2.43 | 1.83 |
| 1/1 | 1/1 | 4.85 | 6.32 |
| 1/1 | 1/1 | 4.6  | 7.07 |
| 1/1 | 1/1 | 8.84 | 7.84 |
| 1/1 | 0/1 | 6.39 | 5.53 |
| 0/1 | 1/1 | 2.65 | 4.88 |
| 1/1 | 1/1 | 6.45 | 4.51 |
| 1/1 | 0/1 | 6.28 | 4.44 |
| 0/1 | 1/1 | 3.83 | 4.48 |
| 1/1 | 1/1 | 8.2  | 6.78 |
| 1/1 | 1/1 | 4.34 | 3.2  |
| 1/1 | 1/1 | 7.08 | 4.87 |
| 1/1 | 1/1 | 4.7  | 4.98 |
| 0/1 | 1/1 | 3.39 | 3.89 |
| 1/1 | 1/1 | 4.7  | 5.31 |
| 1/1 | 0/1 | 7.02 | 5.4  |
| 1/1 | 1/1 | 8.11 | 6.77 |
| 0/1 | 1/1 | 3.39 | 4.31 |
| 1/1 | 0/1 | 3.09 | 2.02 |
| 1/1 | 1/1 | 5.79 | 5.15 |
| 1/1 | 1/1 | 5.14 | 3.46 |
| 0/1 | 1/1 | 2.54 | 3.35 |
| 1/1 | 1/1 | 4.85 | 5.86 |
| 1/1 | 1/1 | 8.4  | 6.97 |
| 1/1 | 1/1 | 8.02 | 6.96 |
| 1/1 | 1/1 | 6.12 | 7.24 |
| 1/1 | 1/1 | 4.66 | 5.84 |
| 1/1 | 1/1 | 6.95 | 8.14 |
| 1/1 | 1/1 | 4.14 | 5.37 |
| 1/1 | 0/1 | 3.24 | 2.56 |
| 1/1 | 1/1 | 7.39 | 6.93 |
| 1/1 | 1/1 | 7.27 | 6.83 |
| 1/1 | 1/1 | 2.54 | 2.14 |
| 1/1 | 1/1 | 4.38 | 4.01 |
| 1/1 | 1/1 | 4.85 | 3.91 |
| 1/1 | 0/1 | 7.34 | 6.69 |
| 0/1 | 1/1 | 2.71 | 4.36 |
| 1/1 | 1/1 | 4.41 | 6.1  |

|     |     |       |      |
|-----|-----|-------|------|
| 1/1 | 0/1 | 5.39  | 4.21 |
| 1/1 | 0/1 | 6.23  | 5.24 |
| 1/1 | 0/1 | 6.97  | 6.1  |
| 1/1 | 0/1 | 6.64  | 5.91 |
| 0/1 | 1/1 | 3.86  | 5.17 |
| 1/1 | 1/1 | 4.29  | 5.66 |
| 1/1 | 1/1 | 8.3   | 6.9  |
| 0/1 | 1/1 | 5.05  | 6.28 |
| 1/1 | 1/1 | 4.47  | 5.78 |
| 1/1 | 1/1 | 5.4   | 7.07 |
| 1/1 | 1/1 | 6     | 7.9  |
| 1/1 | 1/1 | 11.35 | 9.76 |
| 1/1 | 1/1 | 7.72  | 6.51 |
| 0/1 | 1/1 | 4.48  | 5.37 |
| 1/1 | 1/1 | 7.81  | 8.77 |
| 1/1 | 1/1 | 7.79  | 8.89 |
| 1/1 | 0/1 | 3.57  | 1.96 |
| 1/1 | 1/1 | 7.17  | 5.89 |
| 1/1 | 1/1 | 4.49  | 5.46 |
| 1/1 | 0/1 | 4.99  | 4.01 |
| 1/1 | 1/1 | 7.47  | 6.92 |
| 1/1 | 1/1 | 7.32  | 8.86 |
| 0/1 | 1/1 | 4.72  | 6.27 |
| 0/1 | 1/1 | 3.02  | 5.75 |
| 0/1 | 1/1 | 3.68  | 7.25 |
| 1/1 | 1/1 | 7.82  | 6.98 |
| 1/1 | 1/1 | 4.72  | 3.92 |
| 1/1 | 1/1 | 3.73  | 3    |
| 1/1 | 1/1 | 5.23  | 4.62 |
| 1/1 | 1/1 | 6.97  | 6.58 |
| 1/1 | 1/1 | 5.43  | 5.09 |
| 1/1 | 1/1 | 7.07  | 7.03 |
| 1/1 | 1/1 | 9.83  | 9.81 |
| 1/1 | 1/1 | 9.27  | 9.32 |
| 1/1 | 1/1 | 10.46 | 9.76 |
| 1/1 | 1/1 | 9.39  | 9.07 |
| 1/1 | 1/1 | 5.66  | 7.53 |
| 1/1 | 0/1 | 3.18  | 2.46 |
| 0/1 | 1/1 | 3.47  | 5.34 |
| 1/1 | 1/1 | 7.04  | 5.87 |
| 1/1 | 1/1 | 7.97  | 6.9  |
| 1/1 | 1/1 | 7.97  | 6.96 |
| 1/1 | 1/1 | 7.97  | 7    |
| 1/1 | 1/1 | 6.48  | 5.58 |
| 1/1 | 1/1 | 6.99  | 6.12 |
| 1/1 | 1/1 | 6.3   | 5.51 |
| 0/1 | 1/1 | 2.75  | 5.14 |
| 1/1 | 1/1 | 5.06  | 4.42 |
| 1/1 | 1/1 | 5.12  | 4.68 |
| 1/1 | 1/1 | 3.81  | 3.41 |
| 1/1 | 1/1 | 4.82  | 4.54 |
| 1/1 | 1/1 | 8.4   | 8.2  |
| 1/1 | 1/1 | 5.64  | 7.59 |
| 1/1 | 1/1 | 5.36  | 3.65 |
| 0/1 | 1/1 | 2.5   | 3.51 |
| 1/1 | 1/1 | 4.21  | 5.67 |
| 1/1 | 1/1 | 7.4   | 6.5  |
| 1/1 | 1/1 | 5.55  | 5    |



|     |     |       |       |
|-----|-----|-------|-------|
| 1/1 | 1/1 | 6.15  | 6.06  |
| 1/1 | 1/1 | 5.45  | 5.43  |
| 1/1 | 1/1 | 4.13  | 6.58  |
| 1/1 | 1/1 | 6.87  | 6.76  |
| 1/1 | 1/1 | 13.08 | 13.3  |
| 1/1 | 1/1 | 9.58  | 9.88  |
| 1/1 | 0/1 | 6.48  | 3.13  |
| 1/1 | 1/1 | 5.85  | 4.95  |
| 1/1 | 1/1 | 6.45  | 5.58  |
| 1/1 | 0/1 | 3.94  | 3.08  |
| 1/1 | 0/1 | 3.64  | 2.88  |
| 1/1 | 1/1 | 5.87  | 5.25  |
| 1/1 | 1/1 | 4.04  | 3.44  |
| 1/1 | 1/1 | 2.93  | 2.36  |
| 1/1 | 1/1 | 4.31  | 3.76  |
| 0/1 | 1/1 | 6.01  | 5.63  |
| 0/1 | 1/1 | 7.84  | 7.62  |
| 1/1 | 1/1 | 6.22  | 6.09  |
| 1/1 | 1/1 | 7.03  | 6.91  |
| 1/1 | 1/1 | 10.45 | 10.39 |
| 1/1 | 0/1 | 6.97  | 4     |
| 1/1 | 1/1 | 8.76  | 6.19  |
| 1/1 | 1/1 | 6.3   | 5.78  |
| 1/1 | 1/1 | 8.43  | 8.03  |
| 1/1 | 1/1 | 6.38  | 5.98  |
| 1/1 | 1/1 | 7.99  | 7.63  |
| 1/1 | 1/1 | 8.6   | 8.33  |
| 1/1 | 1/1 | 7.29  | 7.19  |
| 0/1 | 1/1 | 5.88  | 5.81  |
| 0/1 | 1/1 | 6.47  | 6.6   |
| 1/1 | 1/1 | 5.67  | 4.67  |
| 1/1 | 0/1 | 4.48  | 3.55  |
| 1/1 | 1/1 | 5.76  | 5.02  |
| 1/1 | 0/1 | 7.86  | 6.94  |
| 1/1 | 1/1 | 7.9   | 7.1   |
| 1/1 | 1/1 | 6.37  | 5.84  |
| 1/1 | 1/1 | 8.72  | 8.22  |
| 1/1 | 1/1 | 5.6   | 7.32  |
| 1/1 | 1/1 | 6.38  | 5.79  |
| 1/1 | 1/1 | 6.05  | 5.51  |
| 1/1 | 1/1 | 7.24  | 6.8   |
| 1/1 | 1/1 | 7.17  | 6.94  |
| 1/1 | 1/1 | 5.41  | 5.22  |
| 1/1 | 1/1 | 6.67  | 6.52  |
| 1/1 | 1/1 | 5.27  | 7.18  |
| 1/1 | 1/1 | 8.18  | 4.73  |
| 1/1 | 1/1 | 8.74  | 5.6   |
| 1/1 | 1/1 | 5.92  | 4.97  |
| 1/1 | 1/1 | 6.45  | 5.64  |
| 1/1 | 1/1 | 4.18  | 3.39  |
| 1/1 | 1/1 | 5.72  | 4.95  |
| 1/1 | 1/1 | 6.12  | 5.45  |
| 1/1 | 1/1 | 6.41  | 5.77  |
| 1/1 | 1/1 | 6.15  | 5.5   |
| 1/1 | 1/1 | 7.13  | 6.49  |
| 1/1 | 1/1 | 7.56  | 7.12  |
| 1/1 | 1/1 | 6.08  | 5.69  |
| 1/1 | 1/1 | 3.12  | 3.11  |

|     |     |       |       |
|-----|-----|-------|-------|
| 0/1 | 1/1 | 4.15  | 4.27  |
| 0/1 | 1/1 | 5     | 5.16  |
| 0/1 | 1/1 | 3.14  | 3.47  |
| 1/1 | 1/1 | 6.42  | 6.78  |
| 0/1 | 1/1 | 3.29  | 4.22  |
| 1/1 | 1/1 | 4.09  | 2.99  |
| 0/1 | 1/1 | 4.11  | 5.46  |
| 0/1 | 1/1 | 3.56  | 5.03  |
| 1/1 | 1/1 | 2.76  | 4.59  |
| 1/1 | 1/1 | 6.26  | 5.41  |
| 1/1 | 1/1 | 3.49  | 6.48  |
| 1/1 | 1/1 | 10.71 | 10.03 |
| 0/1 | 1/1 | 7.67  | 7.1   |
| 1/1 | 1/1 | 3.77  | 3.2   |
| 1/1 | 1/1 | 10.7  | 10.2  |
| 0/1 | 1/1 | 4.19  | 6.1   |
| 1/1 | 1/1 | 8.29  | 7.58  |
| 1/1 | 1/1 | 7.72  | 7.18  |
| 1/1 | 1/1 | 10.97 | 9.99  |
| 1/1 | 1/1 | 3.72  | 3.05  |
| 1/1 | 1/1 | 4.53  | 6     |
| 1/1 | 1/1 | 4.26  | 6.19  |
| 0/1 | 1/1 | 2.41  | 4.69  |
| 1/1 | 1/1 | 5.89  | 4.96  |
| 1/1 | 0/1 | 2.78  | 2.11  |
| 1/1 | 1/1 | 3.46  | 5.79  |
| 1/1 | 1/1 | 5.66  | 5.28  |
| 0/1 | 1/1 | 7.95  | 7.7   |
| 1/1 | 1/1 | 8.84  | 8.72  |
| 1/1 | 1/1 | 7.92  | 7.92  |
| 1/1 | 0/1 | 4.47  | 2.85  |
| 1/1 | 1/1 | 8.43  | 9.35  |
| 0/1 | 1/1 | 3.43  | 4.44  |
| 1/1 | 1/1 | 6.55  | 5.35  |
| 1/1 | 1/1 | 7.56  | 6.53  |
| 0/1 | 1/1 | 5.4   | 6.68  |
| 1/1 | 1/1 | 6.11  | 7.58  |
| 1/1 | 0/1 | 8.43  | 7.21  |
| 1/1 | 1/1 | 5.58  | 6.8   |
| 1/1 | 0/1 | 6.67  | 4.59  |
| 1/1 | 1/1 | 8.48  | 6.63  |
| 1/1 | 0/1 | 7.37  | 5.58  |
| 1/1 | 1/1 | 6.4   | 4.73  |
| 1/1 | 1/1 | 6.15  | 4.49  |
| 0/1 | 1/1 | 4.46  | 5.27  |
| 0/1 | 1/1 | 4.54  | 5.46  |
| 0/1 | 1/1 | 3.87  | 5.06  |
| 1/1 | 1/1 | 7.92  | 7.56  |
| 1/1 | 1/1 | 11.71 | 11.37 |
| 1/1 | 1/1 | 6.86  | 6.64  |
| 1/1 | 1/1 | 4.77  | 4.74  |
| 0/1 | 1/1 | 4.71  | 4.73  |
| 1/1 | 0/1 | 4.56  | 3.35  |
| 1/1 | 1/1 | 8.31  | 7.45  |
| 0/1 | 1/1 | 3     | 4.31  |
| 0/1 | 1/1 | 2.35  | 3.91  |
| 1/1 | 1/1 | 10.2  | 9.06  |
| 0/1 | 1/1 | 3.51  | 5.31  |

|     |     |       |       |
|-----|-----|-------|-------|
| 1/1 | 1/1 | 5.68  | 4.59  |
| 1/1 | 1/1 | 4.98  | 6.95  |
| 1/1 | 1/1 | 5.85  | 7.82  |
| 1/1 | 1/1 | 5.85  | 7.82  |
| 1/1 | 1/1 | 5.07  | 7.07  |
| 1/1 | 1/1 | 5.07  | 4.05  |
| 1/1 | 1/1 | 8.17  | 7.38  |
| 1/1 | 1/1 | 7.06  | 6.43  |
| 0/1 | 1/1 | 1.63  | 3.13  |
| 1/1 | 1/1 | 3.9   | 5.42  |
| 0/1 | 1/1 | 3.07  | 6.36  |
| 1/1 | 1/1 | 5.05  | 3.86  |
| 1/1 | 1/1 | 7.4   | 6.48  |
| 1/1 | 1/1 | 7.01  | 6.15  |
| 1/1 | 1/1 | 6.1   | 5.24  |
| 0/1 | 1/1 | 3.34  | 5.44  |
| 1/1 | 1/1 | 6.76  | 6.12  |
| 1/1 | 1/1 | 5.06  | 4.71  |
| 1/1 | 1/1 | 6.9   | 6.63  |
| 1/1 | 1/1 | 6.01  | 5.78  |
| 1/1 | 1/1 | 8.77  | 8.47  |
| 1/1 | 1/1 | 7.95  | 7.76  |
| 0/1 | 1/1 | 4.34  | 7.29  |
| 1/1 | 1/1 | 4.67  | 7.64  |
| 1/1 | 1/1 | 4.56  | 3.29  |
| 1/1 | 0/1 | 3.61  | 2.35  |
| 1/1 | 1/1 | 6.3   | 5.14  |
| 1/1 | 1/1 | 6.2   | 5.27  |
| 1/1 | 1/1 | 5.06  | 4.19  |
| 1/1 | 1/1 | 4.42  | 3.57  |
| 1/1 | 1/1 | 7.04  | 6.69  |
| 1/1 | 1/1 | 7.12  | 6.84  |
| 1/1 | 1/1 | 4     | 3.81  |
| 1/1 | 1/1 | 7.39  | 7.34  |
| 1/1 | 1/1 | 6.55  | 6.57  |
| 1/1 | 1/1 | 6.1   | 4.99  |
| 0/1 | 1/1 | 4.89  | 6.23  |
| 1/1 | 1/1 | 5.5   | 5.06  |
| 1/1 | 1/1 | 7.65  | 7.24  |
| 1/1 | 1/1 | 10.62 | 10.34 |
| 1/1 | 1/1 | 7.31  | 7.06  |
| 1/1 | 1/1 | 9.78  | 9.64  |
| 0/1 | 1/1 | 3.61  | 6.06  |
| 0/1 | 1/1 | 2.94  | 5.41  |
| 1/1 | 1/1 | 3.61  | 6.38  |
| 1/1 | 1/1 | 5.49  | 8.3   |
| 0/1 | 1/1 | 2.78  | 6.27  |
| 1/1 | 1/1 | 6.61  | 4.87  |
| 1/1 | 1/1 | 6.44  | 4.93  |
| 0/1 | 1/1 | 2.77  | 3.46  |
| 1/1 | 1/1 | 3.01  | 3.72  |
| 1/1 | 1/1 | 3.27  | 3.98  |
| 1/1 | 1/1 | 2.53  | 3.3   |
| 1/1 | 1/1 | 6.31  | 7.11  |
| 1/1 | 1/1 | 5.11  | 5.91  |
| 1/1 | 1/1 | 5.68  | 6.54  |
| 1/1 | 1/1 | 4.61  | 5.73  |
| 1/1 | 1/1 | 3.94  | 5.07  |

|     |     |       |       |
|-----|-----|-------|-------|
| 1/1 | 1/1 | 4.13  | 5.31  |
| 0/1 | 1/1 | 1.98  | 3.91  |
| 1/1 | 1/1 | 4.9   | 3.78  |
| 1/1 | 1/1 | 5.5   | 4.41  |
| 1/1 | 1/1 | 6.52  | 5.56  |
| 1/1 | 0/1 | 5.76  | 2.54  |
| 1/1 | 1/1 | 3.3   | 2.55  |
| 1/1 | 1/1 | 5.24  | 4.61  |
| 1/1 | 1/1 | 6.24  | 5.62  |
| 1/1 | 1/1 | 5.14  | 4.55  |
| 1/1 | 1/1 | 6.53  | 6     |
| 1/1 | 0/1 | 4.8   | 4.27  |
| 1/1 | 1/1 | 5.6   | 5.15  |
| 0/1 | 1/1 | 6.66  | 6.28  |
| 1/1 | 0/1 | 2.49  | 2.18  |
| 0/1 | 1/1 | 3.77  | 3.58  |
| 1/1 | 1/1 | 10.16 | 10.06 |
| 0/1 | 1/1 | 5.48  | 5.46  |
| 1/1 | 0/1 | 3.4   | 3.41  |
| 1/1 | 1/1 | 11.11 | 11.2  |
| 1/1 | 1/1 | 7.05  | 7.38  |
| 0/1 | 1/1 | 3.84  | 4.32  |
| 1/1 | 1/1 | 6.32  | 6.9   |
| 0/1 | 1/1 | 4.08  | 5.09  |
| 1/1 | 1/1 | 5.02  | 4     |
| 1/1 | 0/1 | 3.2   | 2.6   |
| 1/1 | 1/1 | 3.9   | 5.39  |
| 0/1 | 1/1 | 2.09  | 4.29  |
| 1/1 | 1/1 | 6.55  | 5.95  |
| 1/1 | 1/1 | 6.59  | 6.18  |
| 1/1 | 1/1 | 4.96  | 4.63  |
| 1/1 | 1/1 | 7.57  | 7.31  |
| 1/1 | 1/1 | 2.6   | 4.47  |
| 0/1 | 1/1 | 5.68  | 7.67  |
| 1/1 | 1/1 | 9.62  | 8.61  |
| 1/1 | 1/1 | 5.45  | 4.72  |
| 1/1 | 1/1 | 6.92  | 6.3   |
| 1/1 | 1/1 | 6.15  | 7.62  |
| 1/1 | 1/1 | 3.3   | 4.97  |
| 1/1 | 0/1 | 6.11  | 5.85  |
| 1/1 | 1/1 | 6.57  | 6.52  |
| 1/1 | 1/1 | 6.34  | 6.43  |
| 0/1 | 1/1 | 1.88  | 4.66  |
| 1/1 | 1/1 | 6.4   | 4.51  |
| 1/1 | 1/1 | 6.46  | 7.21  |
| 1/1 | 1/1 | 8.79  | 10.64 |
| 1/1 | 1/1 | 5.55  | 4.41  |
| 1/1 | 1/1 | 3.09  | 2.28  |
| 1/1 | 1/1 | 9.81  | 9.06  |
| 0/1 | 1/1 | 3.7   | 5.09  |
| 0/1 | 1/1 | 4.49  | 6.06  |
| 1/1 | 1/1 | 4.64  | 6.41  |
| 0/1 | 1/1 | 3.31  | 5.22  |
| 1/1 | 1/1 | 8.88  | 7.07  |
| 1/1 | 1/1 | 5.88  | 6.51  |
| 1/1 | 0/1 | 4.56  | 3     |
| 1/1 | 1/1 | 7.5   | 5.97  |
| 1/1 | 1/1 | 9.87  | 8.51  |

|     |     |       |       |
|-----|-----|-------|-------|
| 1/1 | 1/1 | 9.81  | 10.68 |
| 1/1 | 1/1 | 7.86  | 7.47  |
| 1/1 | 1/1 | 6.8   | 6.43  |
| 1/1 | 1/1 | 7.34  | 7.1   |
| 1/1 | 1/1 | 6.23  | 6.07  |
| 1/1 | 1/1 | 6.74  | 6.68  |
| 0/1 | 1/1 | 7.62  | 7.59  |
| 1/1 | 1/1 | 5.51  | 7.6   |
| 0/1 | 1/1 | 3.19  | 5.34  |
| 1/1 | 1/1 | 5.6   | 7.81  |
| 1/1 | 1/1 | 6.07  | 8.41  |
| 1/1 | 1/1 | 4.21  | 6.62  |
| 1/1 | 1/1 | 3.77  | 6.19  |
| 1/1 | 1/1 | 5.03  | 7.64  |
| 1/1 | 1/1 | 5.13  | 8.13  |
| 1/1 | 0/1 | 3.54  | 2.45  |
| 1/1 | 0/1 | 3.91  | 3.17  |
| 1/1 | 1/1 | 3.13  | 4.65  |
| 1/1 | 1/1 | 6.5   | 5.67  |
| 1/1 | 1/1 | 6.27  | 5.64  |
| 1/1 | 1/1 | 4.77  | 4.15  |
| 1/1 | 1/1 | 5.09  | 7.74  |
| 1/1 | 0/1 | 4.4   | 2.7   |
| 1/1 | 1/1 | 3.96  | 4.89  |
| 1/1 | 1/1 | 9.77  | 8.79  |
| 1/1 | 1/1 | 6.61  | 5.84  |
| 1/1 | 1/1 | 7.8   | 7.1   |
| 1/1 | 1/1 | 7.07  | 6.47  |
| 1/1 | 1/1 | 6.41  | 7.87  |
| 0/1 | 1/1 | 5.08  | 6.85  |
| 1/1 | 1/1 | 6.44  | 8.23  |
| 1/1 | 1/1 | 4.27  | 6.09  |
| 1/1 | 1/1 | 5.53  | 7.35  |
| 1/1 | 1/1 | 5.63  | 7.45  |
| 1/1 | 1/1 | 5.99  | 7.97  |
| 0/1 | 1/1 | 3.75  | 5.8   |
| 0/1 | 1/1 | 3.62  | 5.79  |
| 1/1 | 1/1 | 5.15  | 7.43  |
| 1/1 | 1/1 | 5.37  | 7.71  |
| 0/1 | 1/1 | 2.67  | 5.68  |
| 1/1 | 1/1 | 7.22  | 7.01  |
| 0/1 | 1/1 | 3.17  | 2.97  |
| 0/1 | 1/1 | 3.98  | 3.83  |
| 1/1 | 1/1 | 5.1   | 5.01  |
| 1/1 | 1/1 | 6.6   | 6.55  |
| 1/1 | 1/1 | 11.67 | 11.66 |
| 1/1 | 1/1 | 8.5   | 8.51  |
| 1/1 | 1/1 | 9.77  | 9.8   |
| 1/1 | 1/1 | 8.2   | 8.38  |
| 1/1 | 1/1 | 4.86  | 4.09  |
| 1/1 | 1/1 | 6.01  | 5.56  |
| 1/1 | 1/1 | 6.18  | 5.76  |
| 1/1 | 1/1 | 5.46  | 3.73  |
| 1/1 | 1/1 | 4.27  | 5.14  |
| 0/1 | 1/1 | 3.39  | 4.54  |
| 0/1 | 1/1 | 3.73  | 5.14  |
| 0/1 | 1/1 | 4.45  | 6.05  |
| 1/1 | 0/1 | 3.4   | 2.2   |

|     |     |       |      |
|-----|-----|-------|------|
| 1/1 | 1/1 | 3.95  | 5.28 |
| 1/1 | 1/1 | 5.87  | 4.3  |
| 1/1 | 1/1 | 5.98  | 4.47 |
| 1/1 | 1/1 | 8.65  | 9.87 |
| 1/1 | 1/1 | 7.45  | 8.96 |
| 1/1 | 1/1 | 7.74  | 9.78 |
| 1/1 | 0/1 | 8.01  | 6.32 |
| 1/1 | 0/1 | 6.05  | 4.53 |
| 1/1 | 0/1 | 10.45 | 9.13 |
| 0/1 | 1/1 | 4.37  | 5.34 |
| 0/1 | 1/1 | 5.13  | 6.12 |
| 1/1 | 1/1 | 5.13  | 3.31 |
| 1/1 | 1/1 | 4.24  | 4.91 |
| 0/1 | 1/1 | 3.45  | 4.35 |
| 1/1 | 1/1 | 10.17 | 8.63 |
| 1/1 | 1/1 | 10.47 | 9.02 |
| 1/1 | 1/1 | 5.1   | 3.86 |
| 1/1 | 1/1 | 8.93  | 8.06 |
| 1/1 | 1/1 | 8.64  | 8.05 |
| 1/1 | 1/1 | 3.9   | 5.48 |
| 1/1 | 1/1 | 6.56  | 5.66 |
| 1/1 | 1/1 | 9.54  | 8.84 |
| 1/1 | 0/1 | 4.38  | 3.72 |
| 1/1 | 1/1 | 4.7   | 4.1  |
| 0/1 | 1/1 | 3.22  | 4.78 |
| 1/1 | 1/1 | 4.47  | 6.35 |
| 0/1 | 1/1 | 2.38  | 4.55 |
| 1/1 | 1/1 | 8.43  | 7.55 |
| 1/1 | 0/1 | 5.66  | 5.17 |
| 1/1 | 1/1 | 6.19  | 7.76 |
| 0/1 | 1/1 | 3.65  | 5.52 |
| 1/1 | 1/1 | 7.39  | 6.39 |
| 1/1 | 1/1 | 5.04  | 6.57 |
| 0/1 | 1/1 | 3.88  | 5.74 |
| 0/1 | 1/1 | 5.43  | 7.47 |
| 1/1 | 1/1 | 5.79  | 4.23 |
| 1/1 | 1/1 | 5.22  | 3.96 |
| 1/1 | 1/1 | 8.09  | 6.92 |
| 1/1 | 1/1 | 3.72  | 5.04 |
| 1/1 | 1/1 | 8.49  | 8.08 |
| 1/1 | 1/1 | 8.03  | 7.71 |
| 1/1 | 1/1 | 3.36  | 3.04 |
| 1/1 | 1/1 | 5.31  | 5.09 |
| 1/1 | 1/1 | 7.62  | 7.41 |
| 1/1 | 1/1 | 7.7   | 7.51 |
| 1/1 | 1/1 | 6.07  | 5.91 |
| 1/1 | 1/1 | 4.86  | 4.79 |
| 1/1 | 1/1 | 4.7   | 6.78 |
| 1/1 | 1/1 | 3.65  | 6.02 |
| 1/1 | 1/1 | 5     | 3.66 |
| 1/1 | 1/1 | 5.71  | 4.52 |
| 1/1 | 1/1 | 5.89  | 4.78 |
| 1/1 | 1/1 | 8.88  | 7.64 |
| 1/1 | 1/1 | 10.32 | 9.18 |
| 1/1 | 1/1 | 5.75  | 7.04 |
| 0/1 | 1/1 | 3.84  | 5.32 |
| 1/1 | 1/1 | 6.35  | 4.47 |
| 0/1 | 1/1 | 3.84  | 4.45 |

|     |     |       |       |
|-----|-----|-------|-------|
| 0/1 | 1/1 | 2.4   | 3.62  |
| 1/1 | 1/1 | 9.67  | 8.57  |
| 1/1 | 1/1 | 7.83  | 7.11  |
| 1/1 | 1/1 | 6.42  | 5.92  |
| 1/1 | 1/1 | 9.55  | 9.08  |
| 0/1 | 1/1 | 4.06  | 3.64  |
| 1/1 | 1/1 | 7.2   | 7.07  |
| 1/1 | 1/1 | 5.35  | 5.27  |
| 0/1 | 1/1 | 5.9   | 8.2   |
| 1/1 | 1/1 | 6.28  | 8.64  |
| 1/1 | 1/1 | 3.12  | 6.08  |
| 1/1 | 1/1 | 5.62  | 3.89  |
| 1/1 | 1/1 | 7.25  | 5.55  |
| 0/1 | 1/1 | 3.97  | 4.87  |
| 1/1 | 0/1 | 3.62  | 2.42  |
| 1/1 | 0/1 | 3.3   | 2.4   |
| 1/1 | 1/1 | 5.17  | 4.29  |
| 1/1 | 1/1 | 5.26  | 4.44  |
| 1/1 | 1/1 | 6.59  | 5.8   |
| 1/1 | 1/1 | 5.47  | 6.79  |
| 1/1 | 1/1 | 4.34  | 5.72  |
| 1/1 | 0/1 | 5.62  | 4.14  |
| 0/1 | 1/1 | 2.32  | 3.31  |
| 1/1 | 0/1 | 5.43  | 3.95  |
| 1/1 | 1/1 | 3.82  | 4.8   |
| 0/1 | 1/1 | 4.01  | 5.23  |
| 1/1 | 0/1 | 4     | 2.24  |
| 1/1 | 1/1 | 5.23  | 6     |
| 1/1 | 1/1 | 2.1   | 2.95  |
| 0/1 | 1/1 | 3.12  | 4     |
| 0/1 | 1/1 | 2.9   | 4.06  |
| 1/1 | 1/1 | 5.13  | 4.52  |
| 1/1 | 1/1 | 3.47  | 3.24  |
| 0/1 | 1/1 | 2.23  | 4.12  |
| 1/1 | 1/1 | 4.1   | 6.08  |
| 0/1 | 1/1 | 3.54  | 5.56  |
| 1/1 | 1/1 | 3.64  | 5.68  |
| 1/1 | 1/1 | 5.04  | 7.15  |
| 1/1 | 1/1 | 4.05  | 3.22  |
| 1/1 | 0/1 | 5.02  | 4.25  |
| 1/1 | 1/1 | 6.37  | 5.64  |
| 1/1 | 1/1 | 5.07  | 4.39  |
| 1/1 | 1/1 | 6.06  | 5.46  |
| 1/1 | 1/1 | 4.38  | 3.84  |
| 1/1 | 1/1 | 6.06  | 5.52  |
| 1/1 | 1/1 | 8.43  | 7.93  |
| 1/1 | 1/1 | 4.41  | 6.21  |
| 1/1 | 1/1 | 11.39 | 10.86 |
| 1/1 | 1/1 | 6.58  | 6.15  |
| 0/1 | 1/1 | 6.53  | 6.34  |
| 1/1 | 1/1 | 8.84  | 7.89  |
| 1/1 | 1/1 | 7.61  | 7.03  |
| 1/1 | 1/1 | 8.22  | 7.56  |
| 1/1 | 1/1 | 10.45 | 10.11 |
| 1/1 | 1/1 | 10.94 | 10.62 |
| 1/1 | 1/1 | 7.63  | 7.39  |
| 1/1 | 1/1 | 6.21  | 4.83  |
| 1/1 | 1/1 | 3.47  | 4.54  |

|     |     |       |      |
|-----|-----|-------|------|
| 0/1 | 1/1 | 2.87  | 4.14 |
| 0/1 | 1/1 | 2.27  | 4.14 |
| 1/1 | 0/1 | 3.69  | 2.44 |
| 1/1 | 0/1 | 3.72  | 2.56 |
| 1/1 | 1/1 | 4.01  | 2.95 |
| 0/1 | 1/1 | 4.56  | 4.27 |
| 1/1 | 1/1 | 5.84  | 5.66 |
| 0/1 | 1/1 | 5.07  | 5.13 |
| 1/1 | 1/1 | 3.44  | 5.6  |
| 1/1 | 1/1 | 7.86  | 7.17 |
| 0/1 | 1/1 | 4.61  | 6.85 |
| 1/1 | 1/1 | 8.33  | 7.17 |
| 1/1 | 1/1 | 4.08  | 5.58 |
| 1/1 | 1/1 | 9.38  | 9.12 |
| 0/1 | 1/1 | 2.93  | 2.68 |
| 1/1 | 1/1 | 3.38  | 3.35 |
| 0/1 | 1/1 | 2.74  | 2.72 |
| 1/1 | 1/1 | 7.06  | 7.09 |
| 1/1 | 1/1 | 3.45  | 3.52 |
| 1/1 | 1/1 | 6.65  | 5.95 |
| 1/1 | 1/1 | 8.03  | 7.66 |
| 1/1 | 1/1 | 4.12  | 3.46 |
| 1/1 | 1/1 | 4.28  | 3.64 |
| 1/1 | 1/1 | 3.85  | 3.46 |
| 1/1 | 1/1 | 4.2   | 3.85 |
| 0/1 | 1/1 | 3.94  | 6.51 |
| 0/1 | 1/1 | 5.54  | 4.99 |
| 1/1 | 1/1 | 6.25  | 5.93 |
| 1/1 | 1/1 | 4.65  | 4.39 |
| 1/1 | 1/1 | 10.02 | 9.78 |
| 1/1 | 1/1 | 7.94  | 7.71 |
| 1/1 | 1/1 | 5.22  | 4.99 |
| 1/1 | 1/1 | 6.33  | 6.11 |
| 1/1 | 1/1 | 5.69  | 5.53 |
| 1/1 | 1/1 | 5.1   | 4.96 |
| 0/1 | 1/1 | 2.99  | 5.04 |
| 0/1 | 1/1 | 2.35  | 5.63 |
| 1/1 | 1/1 | 7.31  | 5.41 |
| 1/1 | 1/1 | 4.77  | 5.36 |
| 1/1 | 1/1 | 5.35  | 6.46 |
| 1/1 | 0/1 | 4.31  | 2.27 |
| 1/1 | 1/1 | 5.22  | 3.38 |
| 1/1 | 1/1 | 4.39  | 5.24 |
| 1/1 | 1/1 | 2.96  | 3.83 |
| 1/1 | 1/1 | 9.97  | 9.03 |
| 0/1 | 1/1 | 4.96  | 4.22 |
| 1/1 | 1/1 | 5.08  | 4.46 |
| 1/1 | 1/1 | 6.24  | 5.7  |
| 1/1 | 0/1 | 6.16  | 2.39 |
| 1/1 | 0/1 | 6.19  | 2.81 |
| 1/1 | 1/1 | 4.75  | 3.81 |
| 1/1 | 0/1 | 3.96  | 3.25 |
| 1/1 | 1/1 | 4.29  | 3.83 |
| 1/1 | 1/1 | 8.33  | 7.95 |
| 1/1 | 1/1 | 3.46  | 3.18 |
| 1/1 | 1/1 | 7.17  | 6.95 |
| 0/1 | 1/1 | 5.26  | 5.04 |
| 1/1 | 1/1 | 4.01  | 3.88 |



|     |     |       |       |
|-----|-----|-------|-------|
| 0/1 | 1/1 | 2.77  | 2.75  |
| 1/1 | 1/1 | 4.95  | 4.95  |
| 1/1 | 1/1 | 4.45  | 3.92  |
| 1/1 | 1/1 | 5.27  | 4.82  |
| 1/1 | 0/1 | 3.96  | 3.56  |
| 1/1 | 1/1 | 6.45  | 6.21  |
| 1/1 | 1/1 | 5.81  | 5.6   |
| 1/1 | 1/1 | 12.11 | 11.93 |
| 1/1 | 1/1 | 5.05  | 6.93  |
| 1/1 | 1/1 | 5.5   | 7.52  |
| 0/1 | 1/1 | 2.4   | 4.71  |
| 0/1 | 1/1 | 2.58  | 4.95  |
| 1/1 | 0/1 | 6.25  | 3.26  |
| 1/1 | 0/1 | 5.1   | 2.3   |
| 1/1 | 1/1 | 6.24  | 3.61  |
| 1/1 | 1/1 | 9.06  | 8.53  |
| 1/1 | 0/1 | 3.39  | 2.9   |
| 1/1 | 1/1 | 7.31  | 6.92  |
| 0/1 | 1/1 | 3.22  | 3.2   |
| 0/1 | 1/1 | 2.96  | 2.97  |
| 1/1 | 1/1 | 8.64  | 8.67  |
| 1/1 | 1/1 | 3.23  | 3.4   |
| 1/1 | 1/1 | 10.19 | 10.39 |
| 1/1 | 1/1 | 6.6   | 5.4   |
| 1/1 | 1/1 | 5.03  | 3.84  |
| 1/1 | 1/1 | 6.8   | 5.88  |
| 1/1 | 1/1 | 5.95  | 5.05  |
| 1/1 | 1/1 | 4.07  | 3.24  |
| 1/1 | 1/1 | 6.64  | 5.57  |
| 1/1 | 1/1 | 5.57  | 4.76  |
| 1/1 | 1/1 | 2.51  | 4.37  |
| 1/1 | 1/1 | 7.3   | 6.22  |
| 1/1 | 1/1 | 5.55  | 4.77  |
| 1/1 | 1/1 | 5.88  | 5.15  |
| 1/1 | 0/1 | 5.03  | 3.41  |
| 1/1 | 1/1 | 6.58  | 7.4   |
| 1/1 | 1/1 | 3.54  | 2.67  |
| 1/1 | 0/1 | 4.04  | 3.43  |
| 1/1 | 1/1 | 3.91  | 6.09  |
| 1/1 | 1/1 | 6.06  | 5.25  |
| 1/1 | 1/1 | 11.28 | 10.77 |
| 0/1 | 1/1 | 2.64  | 2.3   |
| 1/1 | 1/1 | 10.77 | 10.55 |
| 1/1 | 1/1 | 9.38  | 9.19  |
| 1/1 | 1/1 | 6.94  | 6.75  |
| 1/1 | 1/1 | 3.89  | 3.74  |
| 1/1 | 1/1 | 2.74  | 4.79  |
| 0/1 | 1/1 | 5.22  | 5.12  |
| 1/1 | 1/1 | 8.9   | 8.82  |
| 1/1 | 1/1 | 12.1  | 12.15 |
| 1/1 | 1/1 | 12.09 | 12.16 |
| 1/1 | 1/1 | 11.16 | 11.27 |
| 1/1 | 1/1 | 6.47  | 6.59  |
| 1/1 | 1/1 | 11.15 | 11.36 |
| 1/1 | 1/1 | 8.09  | 8.34  |
| 1/1 | 1/1 | 7.46  | 9.77  |
| 1/1 | 1/1 | 10.41 | 10.31 |
| 1/1 | 1/1 | 3.04  | 3.05  |

|     |     |       |       |
|-----|-----|-------|-------|
| 1/1 | 1/1 | 3.62  | 3.79  |
| 1/1 | 1/1 | 6.28  | 6.5   |
| 0/1 | 1/1 | 2.31  | 4.97  |
| 1/1 | 0/1 | 6.02  | 4.71  |
| 1/1 | 1/1 | 7.94  | 6.94  |
| 0/1 | 1/1 | 2.52  | 4.05  |
| 1/1 | 1/1 | 4.27  | 4.05  |
| 1/1 | 1/1 | 6.25  | 6.08  |
| 1/1 | 1/1 | 7.69  | 7.7   |
| 0/1 | 1/1 | 4.62  | 4.73  |
| 1/1 | 1/1 | 6.56  | 6.71  |
| 1/1 | 1/1 | 5.58  | 5.75  |
| 1/1 | 1/1 | 10.06 | 12.42 |
| 0/1 | 1/1 | 4.48  | 7.07  |
| 0/1 | 1/1 | 2.73  | 6.06  |
| 1/1 | 1/1 | 6.61  | 10.13 |
| 1/1 | 1/1 | 4.94  | 4.36  |
| 1/1 | 1/1 | 5.41  | 5.01  |
| 1/1 | 1/1 | 5.66  | 5.31  |
| 1/1 | 1/1 | 3.15  | 2.81  |
| 1/1 | 1/1 | 6.78  | 6.6   |
| 0/1 | 1/1 | 3.54  | 5.44  |
| 0/1 | 1/1 | 2.96  | 4.95  |
| 1/1 | 1/1 | 3.2   | 5.25  |
| 0/1 | 1/1 | 2.13  | 4.85  |
| 1/1 | 1/1 | 4.27  | 4.05  |
| 1/1 | 1/1 | 6.25  | 6.08  |
| 1/1 | 1/1 | 7.69  | 7.7   |
| 0/1 | 1/1 | 4.62  | 4.73  |
| 1/1 | 1/1 | 6.56  | 6.71  |
| 1/1 | 1/1 | 5.58  | 5.75  |
| 1/1 | 1/1 | 10.06 | 12.42 |
| 0/1 | 1/1 | 4.48  | 7.07  |
| 0/1 | 1/1 | 2.73  | 6.06  |
| 1/1 | 1/1 | 6.61  | 10.13 |
| 1/1 | 1/1 | 4.94  | 4.36  |
| 1/1 | 1/1 | 5.41  | 5.01  |
| 1/1 | 1/1 | 5.66  | 5.31  |
| 1/1 | 1/1 | 3.15  | 2.81  |
| 1/1 | 1/1 | 6.78  | 6.6   |
| 0/1 | 1/1 | 3.54  | 5.44  |
| 0/1 | 1/1 | 2.96  | 4.95  |
| 1/1 | 1/1 | 3.2   | 5.25  |
| 0/1 | 1/1 | 2.13  | 4.85  |
| 1/1 | 1/1 | 4.94  | 4.36  |
| 1/1 | 1/1 | 5.41  | 5.01  |
| 1/1 | 1/1 | 5.66  | 5.31  |
| 1/1 | 1/1 | 3.15  | 2.81  |
| 1/1 | 1/1 | 6.78  | 6.6   |
| 0/1 | 1/1 | 3.54  | 5.44  |
| 0/1 | 1/1 | 2.96  | 4.95  |
| 1/1 | 1/1 | 3.2   | 5.25  |
| 0/1 | 1/1 | 2.13  | 4.85  |
| 1/1 | 1/1 | 4.94  | 4.36  |
| 1/1 | 1/1 | 6.1   | 5.62  |
| 1/1 | 1/1 | 5.66  | 5.31  |
| 1/1 | 1/1 | 3.42  | 3.06  |
| 1/1 | 1/1 | 6.78  | 6.6   |

|     |     |      |      |
|-----|-----|------|------|
| 0/1 | 1/1 | 3.54 | 5.44 |
| 1/1 | 1/1 | 3.2  | 5.25 |
| 0/1 | 1/1 | 2.13 | 4.85 |
| 1/1 | 1/1 | 4.94 | 4.36 |
| 1/1 | 1/1 | 5.66 | 5.31 |
| 1/1 | 1/1 | 3.15 | 2.81 |
| 1/1 | 1/1 | 3.29 | 3.04 |
| 1/1 | 1/1 | 4.42 | 4.17 |
| 1/1 | 1/1 | 6.78 | 6.6  |
| 0/1 | 1/1 | 3.54 | 5.44 |
| 1/1 | 1/1 | 3.2  | 5.25 |
| 0/1 | 1/1 | 2.13 | 4.85 |
| 1/1 | 1/1 | 8.68 | 7.63 |
| 1/1 | 1/1 | 7.23 | 6.5  |
| 1/1 | 1/1 | 6.42 | 5.78 |
| 1/1 | 1/1 | 5.96 | 7.47 |
| 0/1 | 1/1 | 5.6  | 7.13 |
| 1/1 | 1/1 | 4.78 | 6.58 |
| 1/1 | 1/1 | 5.19 | 4.84 |
| 1/1 | 1/1 | 5.6  | 5.58 |
| 1/1 | 1/1 | 5.41 | 5.46 |
| 0/1 | 1/1 | 3.86 | 5.95 |
| 1/1 | 1/1 | 4.48 | 3.89 |
| 1/1 | 1/1 | 5.7  | 5.33 |
| 1/1 | 1/1 | 4.99 | 4.67 |
| 1/1 | 1/1 | 3.41 | 3.12 |
| 1/1 | 1/1 | 4.68 | 4.44 |
| 1/1 | 0/1 | 4.46 | 2.2  |
| 1/1 | 1/1 | 3.1  | 3.38 |
| 1/1 | 1/1 | 7.54 | 6.73 |
| 1/1 | 0/1 | 3.37 | 2.7  |
| 1/1 | 1/1 | 5.18 | 4.7  |
| 1/1 | 1/1 | 6.34 | 5.88 |
| 0/1 | 1/1 | 3.16 | 5.4  |
| 1/1 | 0/1 | 4.58 | 1.99 |
| 1/1 | 1/1 | 4.86 | 4.73 |
| 1/1 | 1/1 | 3.89 | 3.81 |
| 1/1 | 1/1 | 9.1  | 9.12 |
| 0/1 | 1/1 | 4.33 | 4.46 |
| 1/1 | 1/1 | 3.76 | 3.97 |
| 0/1 | 1/1 | 2.16 | 2.44 |
| 1/1 | 1/1 | 5.38 | 5.68 |
| 1/1 | 1/1 | 4.48 | 5.22 |
| 0/1 | 1/1 | 4.51 | 5.37 |
| 0/1 | 1/1 | 2.35 | 2.43 |
| 0/1 | 1/1 | 2.89 | 6.51 |
| 1/1 | 1/1 | 8.43 | 7.91 |
| 0/1 | 1/1 | 4.1  | 6.52 |
| 0/1 | 1/1 | 5.74 | 5.18 |
| 1/1 | 1/1 | 6.92 | 6.73 |
| 1/1 | 1/1 | 8.22 | 6.89 |
| 0/1 | 1/1 | 4.4  | 5.69 |
| 0/1 | 1/1 | 3.6  | 4.91 |
| 0/1 | 1/1 | 4.14 | 5.46 |
| 0/1 | 1/1 | 4.49 | 5.86 |
| 0/1 | 1/1 | 4.2  | 5.75 |
| 0/1 | 1/1 | 3.81 | 5.54 |
| 1/1 | 1/1 | 4.17 | 3.73 |

|     |     |       |       |
|-----|-----|-------|-------|
| 1/1 | 1/1 | 5.77  | 5.45  |
| 1/1 | 1/1 | 6.05  | 5.89  |
| 1/1 | 1/1 | 6.97  | 6.91  |
| 1/1 | 1/1 | 3.61  | 5.68  |
| 1/1 | 1/1 | 5.18  | 4.35  |
| 1/1 | 0/1 | 6.83  | 6.11  |
| 1/1 | 1/1 | 4.22  | 3.74  |
| 0/1 | 1/1 | 2.4   | 4.07  |
| 1/1 | 1/1 | 6.49  | 5.53  |
| 1/1 | 1/1 | 5.22  | 4.45  |
| 1/1 | 0/1 | 5.18  | 4.48  |
| 1/1 | 0/1 | 6.06  | 5.45  |
| 1/1 | 1/1 | 3.1   | 3.22  |
| 0/1 | 1/1 | 5.83  | 6.24  |
| 1/1 | 1/1 | 9.25  | 7.84  |
| 1/1 | 1/1 | 4.31  | 5.31  |
| 1/1 | 1/1 | 4.95  | 6.19  |
| 1/1 | 1/1 | 9.45  | 8.83  |
| 1/1 | 1/1 | 4.66  | 4.03  |
| 1/1 | 1/1 | 4.42  | 3.92  |
| 1/1 | 1/1 | 4.56  | 4.08  |
| 1/1 | 1/1 | 8.41  | 8.07  |
| 1/1 | 1/1 | 3.28  | 3     |
| 1/1 | 1/1 | 5.88  | 5.6   |
| 1/1 | 1/1 | 11.1  | 10.88 |
| 1/1 | 1/1 | 3.66  | 6.03  |
| 1/1 | 1/1 | 4.56  | 3.88  |
| 1/1 | 1/1 | 8.62  | 8.02  |
| 1/1 | 1/1 | 10.07 | 9.51  |
| 1/1 | 0/1 | 3.76  | 3.21  |
| 1/1 | 1/1 | 5.59  | 5.27  |
| 1/1 | 1/1 | 6.04  | 5.75  |
| 1/1 | 1/1 | 6.09  | 5.79  |
| 1/1 | 1/1 | 5.46  | 5.18  |
| 0/1 | 1/1 | 4.03  | 5.87  |
| 1/1 | 1/1 | 4.74  | 6.75  |
| 0/1 | 1/1 | 3.08  | 5.24  |
| 1/1 | 1/1 | 4.94  | 4.36  |
| 1/1 | 1/1 | 5.41  | 5.01  |
| 1/1 | 1/1 | 5.66  | 5.31  |
| 1/1 | 1/1 | 3.15  | 2.81  |
| 1/1 | 1/1 | 6.78  | 6.6   |
| 0/1 | 1/1 | 3.54  | 5.44  |
| 0/1 | 1/1 | 2.96  | 4.95  |
| 1/1 | 1/1 | 3.2   | 5.25  |
| 0/1 | 1/1 | 2.13  | 4.85  |
| 1/1 | 1/1 | 8.38  | 7.34  |
| 1/1 | 1/1 | 6.69  | 5.72  |
| 1/1 | 1/1 | 7.16  | 6.53  |
| 1/1 | 1/1 | 10.01 | 6.12  |
| 1/1 | 1/1 | 8.37  | 4.83  |
| 1/1 | 1/1 | 8.46  | 6.98  |
| 1/1 | 1/1 | 7.11  | 5.76  |
| 1/1 | 1/1 | 9.12  | 7.89  |
| 1/1 | 1/1 | 4.98  | 3.91  |
| 1/1 | 1/1 | 8.73  | 7.67  |
| 1/1 | 1/1 | 9.64  | 8.85  |
| 1/1 | 1/1 | 6.73  | 6.11  |

|     |     |       |       |
|-----|-----|-------|-------|
| 1/1 | 1/1 | 6.15  | 5.89  |
| 0/1 | 1/1 | 3.26  | 3.42  |
| 1/1 | 1/1 | 6.14  | 6.32  |
| 1/1 | 0/1 | 4.07  | 2.7   |
| 1/1 | 0/1 | 4.3   | 3.04  |
| 1/1 | 1/1 | 10.02 | 8.57  |
| 1/1 | 1/1 | 5.13  | 6.09  |
| 1/1 | 1/1 | 3.38  | 4.94  |
| 0/1 | 1/1 | 2.73  | 4.65  |
| 1/1 | 1/1 | 5.59  | 4.96  |
| 1/1 | 1/1 | 2.83  | 2.45  |
| 0/1 | 1/1 | 3.86  | 3.55  |
| 1/1 | 1/1 | 5.18  | 4.93  |
| 0/1 | 1/1 | 2.77  | 4.55  |
| 1/1 | 1/1 | 6.44  | 5.8   |
| 1/1 | 1/1 | 5.11  | 6.93  |
| 1/1 | 1/1 | 2.9   | 4.91  |
| 1/1 | 1/1 | 6.76  | 5.8   |
| 1/1 | 1/1 | 9.27  | 8.6   |
| 1/1 | 0/1 | 3.66  | 2.6   |
| 1/1 | 1/1 | 5.7   | 4.82  |
| 1/1 | 0/1 | 6.15  | 3.75  |
| 1/1 | 0/1 | 4.48  | 2.17  |
| 1/1 | 0/1 | 5.26  | 3.21  |
| 1/1 | 0/1 | 4.72  | 2.66  |
| 1/1 | 1/1 | 5.31  | 5.37  |
| 1/1 | 1/1 | 5.07  | 5.15  |
| 1/1 | 1/1 | 5.63  | 5.71  |
| 1/1 | 1/1 | 6.53  | 6.7   |
| 0/1 | 1/1 | 2.87  | 3.13  |
| 1/1 | 1/1 | 5.44  | 6.18  |
| 1/1 | 1/1 | 5.72  | 3.56  |
| 1/1 | 1/1 | 6.81  | 4.89  |
| 1/1 | 1/1 | 5.99  | 4.07  |
| 1/1 | 1/1 | 8.61  | 6.78  |
| 1/1 | 1/1 | 6.91  | 5.13  |
| 0/1 | 1/1 | 2.49  | 2.72  |
| 0/1 | 1/1 | 3.41  | 3.65  |
| 1/1 | 1/1 | 3.58  | 4.3   |
| 1/1 | 1/1 | 3.47  | 2.88  |
| 1/1 | 1/1 | 6.07  | 5.53  |
| 1/1 | 1/1 | 5.25  | 4.77  |
| 1/1 | 1/1 | 7.19  | 6.8   |
| 1/1 | 1/1 | 2.99  | 2.63  |
| 1/1 | 1/1 | 4.64  | 4.38  |
| 1/1 | 1/1 | 9.04  | 8.82  |
| 1/1 | 1/1 | 4.75  | 6.74  |
| 1/1 | 1/1 | 4.55  | 4.57  |
| 1/1 | 1/1 | 8.41  | 8.62  |
| 0/1 | 1/1 | 6.25  | 6.46  |
| 0/1 | 1/1 | 3.75  | 6.17  |
| 1/1 | 1/1 | 7.64  | 6.65  |
| 1/1 | 1/1 | 9.93  | 11.48 |
| 1/1 | 1/1 | 7.66  | 9.35  |
| 1/1 | 1/1 | 8.83  | 10.57 |
| 1/1 | 1/1 | 9.81  | 11.61 |
| 1/1 | 1/1 | 10.82 | 12.62 |
| 1/1 | 1/1 | 9.46  | 11.47 |

|     |     |       |       |
|-----|-----|-------|-------|
| 1/1 | 1/1 | 9.48  | 11.55 |
| 1/1 | 1/1 | 5.52  | 7.59  |
| 1/1 | 1/1 | 5.9   | 7.99  |
| 1/1 | 1/1 | 9.12  | 11.22 |
| 1/1 | 1/1 | 9.79  | 11.91 |
| 1/1 | 1/1 | 8.2   | 10.31 |
| 1/1 | 1/1 | 8.61  | 10.88 |
| 1/1 | 1/1 | 8.57  | 10.93 |
| 1/1 | 1/1 | 7.56  | 10.26 |
| 1/1 | 1/1 | 6.17  | 8.96  |
| 1/1 | 1/1 | 5.78  | 4.81  |
| 1/1 | 1/1 | 5.37  | 4.49  |
| 0/1 | 1/1 | 2.55  | 4.09  |
| 1/1 | 1/1 | 6.64  | 5.84  |
| 1/1 | 1/1 | 6.46  | 5.94  |
| 1/1 | 0/1 | 4.34  | 3.55  |
| 1/1 | 1/1 | 6.2   | 7.82  |
| 1/1 | 0/1 | 3.44  | 1.9   |
| 1/1 | 0/1 | 7.17  | 5.69  |
| 1/1 | 1/1 | 6.08  | 7.36  |
| 1/1 | 1/1 | 3.08  | 2.54  |
| 1/1 | 1/1 | 7.76  | 7.34  |
| 1/1 | 1/1 | 5.41  | 5.09  |
| 1/1 | 1/1 | 6.74  | 8.73  |
| 0/1 | 1/1 | 5.48  | 7.9   |
| 0/1 | 1/1 | 5.55  | 8.26  |
| 0/1 | 1/1 | 4.7   | 7.54  |
| 0/1 | 1/1 | 3.89  | 6.92  |
| 0/1 | 1/1 | 3.59  | 8.2   |
| 1/1 | 1/1 | 5.74  | 4.7   |
| 1/1 | 0/1 | 3.29  | 2.44  |
| 1/1 | 1/1 | 7.06  | 6.33  |
| 1/1 | 1/1 | 7.26  | 5.27  |
| 1/1 | 1/1 | 6.12  | 4.48  |
| 1/1 | 1/1 | 4.16  | 4.67  |
| 0/1 | 1/1 | 2.59  | 3.72  |
| 1/1 | 1/1 | 8.54  | 7.91  |
| 1/1 | 1/1 | 8.29  | 7.67  |
| 1/1 | 0/1 | 3.96  | 3.41  |
| 0/1 | 1/1 | 4.84  | 4.45  |
| 1/1 | 1/1 | 7.43  | 7.05  |
| 1/1 | 1/1 | 8.29  | 7.95  |
| 1/1 | 1/1 | 7.27  | 6.96  |
| 1/1 | 1/1 | 6.96  | 6.65  |
| 1/1 | 1/1 | 7.29  | 7     |
| 1/1 | 1/1 | 4.66  | 4.38  |
| 1/1 | 1/1 | 8.44  | 8.18  |
| 1/1 | 1/1 | 13.54 | 13.76 |
| 1/1 | 1/1 | 7.85  | 8.46  |
| 1/1 | 1/1 | 6.98  | 10.4  |
| 1/1 | 1/1 | 9.18  | 7.86  |
| 0/1 | 1/1 | 2.77  | 3.97  |
| 0/1 | 1/1 | 5.06  | 6.27  |
| 0/1 | 1/1 | 2.74  | 4.13  |
| 0/1 | 1/1 | 3.03  | 4.73  |
| 0/1 | 1/1 | 3.8   | 5.99  |
| 1/1 | 0/1 | 5     | 3.43  |
| 1/1 | 0/1 | 4.3   | 2.88  |

|     |     |      |      |
|-----|-----|------|------|
| 1/1 | 1/1 | 5.92 | 4.69 |
| 0/1 | 1/1 | 2.13 | 3.18 |
| 0/1 | 1/1 | 3.07 | 4.11 |
| 0/1 | 1/1 | 2.72 | 4.33 |
| 1/1 | 1/1 | 5.4  | 7.39 |
| 1/1 | 1/1 | 6.45 | 5.67 |
| 1/1 | 1/1 | 6.11 | 5.51 |
| 1/1 | 1/1 | 7.45 | 6.98 |
| 1/1 | 1/1 | 6.55 | 6.14 |
| 1/1 | 0/1 | 4.4  | 3.64 |
| 1/1 | 1/1 | 3.97 | 3.33 |
| 1/1 | 1/1 | 6.32 | 5.75 |
| 0/1 | 1/1 | 3.5  | 3.13 |
| 1/1 | 1/1 | 8.44 | 6.75 |
| 0/1 | 1/1 | 3.92 | 4.62 |
| 1/1 | 1/1 | 4.36 | 3.65 |
| 1/1 | 0/1 | 2.58 | 1.96 |
| 1/1 | 1/1 | 7.54 | 6.94 |
| 0/1 | 1/1 | 2.69 | 2.23 |
| 1/1 | 1/1 | 6.6  | 6.24 |
| 1/1 | 1/1 | 7.63 | 7.27 |
| 1/1 | 1/1 | 4.62 | 6.49 |
| 1/1 | 1/1 | 5.08 | 3.8  |
| 1/1 | 0/1 | 4.12 | 3.14 |
| 1/1 | 1/1 | 4.08 | 5.33 |
| 1/1 | 1/1 | 5.4  | 6.76 |
| 1/1 | 1/1 | 4.76 | 4.12 |
| 1/1 | 1/1 | 4.19 | 3.83 |
| 1/1 | 1/1 | 4.68 | 4.41 |
| 1/1 | 1/1 | 5.3  | 5.05 |
| 1/1 | 1/1 | 3.49 | 2.64 |
| 1/1 | 1/1 | 6.58 | 6    |
| 1/1 | 1/1 | 5.07 | 4.56 |
| 1/1 | 1/1 | 5.05 | 6.59 |
| 0/1 | 1/1 | 1.82 | 3.6  |
| 1/1 | 1/1 | 9.13 | 8.34 |
| 1/1 | 1/1 | 5.7  | 4.92 |
| 1/1 | 0/1 | 7.48 | 6.91 |
| 1/1 | 1/1 | 8.8  | 8.25 |
| 1/1 | 0/1 | 4.31 | 2.27 |
| 1/1 | 1/1 | 5.22 | 3.38 |
| 1/1 | 1/1 | 4.39 | 5.24 |
| 1/1 | 1/1 | 2.96 | 3.83 |
| 1/1 | 1/1 | 5.58 | 4.81 |
| 1/1 | 1/1 | 6.78 | 6.09 |
| 1/1 | 1/1 | 6.62 | 6.09 |
| 1/1 | 1/1 | 9.57 | 8.65 |
| 1/1 | 1/1 | 9.88 | 9.13 |
| 1/1 | 1/1 | 6.37 | 8.05 |
| 1/1 | 1/1 | 7.08 | 3.96 |
| 1/1 | 1/1 | 6.72 | 6.07 |
| 1/1 | 1/1 | 5.36 | 4.93 |
| 1/1 | 1/1 | 8.57 | 8.55 |
| 1/1 | 1/1 | 5.85 | 5.93 |
| 1/1 | 1/1 | 5.76 | 5.47 |
| 0/1 | 1/1 | 2.07 | 4.34 |
| 1/1 | 1/1 | 4.95 | 3.8  |
| 1/1 | 1/1 | 6.91 | 6.06 |

|     |     |       |       |
|-----|-----|-------|-------|
| 1/1 | 1/1 | 3.84  | 3.04  |
| 1/1 | 1/1 | 9.66  | 9.03  |
| 1/1 | 1/1 | 8.71  | 8.22  |
| 0/1 | 1/1 | 4.38  | 3.94  |
| 0/1 | 1/1 | 3.01  | 4.88  |
| 0/1 | 1/1 | 2.63  | 5.02  |
| 1/1 | 0/1 | 5.74  | 4.3   |
| 1/1 | 1/1 | 5.3   | 4.21  |
| 1/1 | 1/1 | 6.35  | 7.29  |
| 1/1 | 1/1 | 10.84 | 10.36 |
| 1/1 | 0/1 | 3.19  | 2.7   |
| 1/1 | 1/1 | 10.08 | 9.8   |
| 1/1 | 1/1 | 5.08  | 3.69  |
| 1/1 | 1/1 | 6.76  | 5.4   |
| 1/1 | 1/1 | 4.32  | 3.07  |
| 1/1 | 1/1 | 5.8   | 4.59  |
| 1/1 | 1/1 | 4.55  | 3.4   |
| 0/1 | 1/1 | 2.43  | 4.03  |
| 1/1 | 1/1 | 9.44  | 9.14  |
| 1/1 | 1/1 | 9.13  | 9.12  |
| 0/1 | 1/1 | 3.41  | 3.49  |
| 1/1 | 1/1 | 4.28  | 6.9   |
| 1/1 | 1/1 | 6.93  | 6.2   |
| 1/1 | 1/1 | 6.29  | 5.92  |
| 1/1 | 1/1 | 3.67  | 5.73  |
| 1/1 | 1/1 | 10    | 7.7   |
| 1/1 | 1/1 | 7.89  | 5.82  |
| 1/1 | 1/1 | 8.25  | 6.22  |
| 1/1 | 1/1 | 6.2   | 6.5   |
| 1/1 | 0/1 | 4.51  | 3.59  |
| 1/1 | 1/1 | 5.03  | 4.27  |
| 1/1 | 1/1 | 4.98  | 4.33  |
| 1/1 | 1/1 | 4.08  | 5.58  |
| 1/1 | 1/1 | 6.69  | 8.21  |
| 1/1 | 1/1 | 5.97  | 7.52  |
| 1/1 | 1/1 | 7.82  | 9.38  |
| 0/1 | 1/1 | 4.47  | 6.04  |
| 1/1 | 1/1 | 7.85  | 9.42  |
| 1/1 | 1/1 | 7.65  | 9.22  |
| 1/1 | 1/1 | 9.12  | 10.71 |
| 1/1 | 1/1 | 5.75  | 7.35  |
| 1/1 | 1/1 | 5.85  | 7.48  |
| 1/1 | 1/1 | 7.34  | 9.21  |
| 1/1 | 1/1 | 9.05  | 10.95 |
| 1/1 | 1/1 | 7.23  | 9.26  |
| 0/1 | 1/1 | 2.34  | 4.39  |
| 0/1 | 1/1 | 5.88  | 7.98  |
| 1/1 | 1/1 | 7.01  | 9.16  |
| 1/1 | 1/1 | 4.66  | 7.36  |
| 1/1 | 0/1 | 4.3   | 2.7   |
| 1/1 | 1/1 | 4.86  | 5.71  |
| 1/1 | 0/1 | 3.22  | 2.69  |
| 1/1 | 1/1 | 6.33  | 5.84  |
| 1/1 | 1/1 | 3.12  | 2.79  |
| 1/1 | 1/1 | 4.75  | 4.53  |
| 1/1 | 1/1 | 3.65  | 3.12  |
| 1/1 | 1/1 | 2.96  | 2.69  |
| 1/1 | 1/1 | 8.89  | 8.67  |



|     |     |       |       |
|-----|-----|-------|-------|
| 1/1 | 1/1 | 6.23  | 6     |
| 1/1 | 1/1 | 5.77  | 5.6   |
| 1/1 | 1/1 | 3.25  | 5.25  |
| 1/1 | 0/1 | 10.01 | 3.27  |
| 1/1 | 0/1 | 8.9   | 2.18  |
| 1/1 | 1/1 | 10.84 | 4.16  |
| 1/1 | 0/1 | 8.67  | 2.22  |
| 1/1 | 1/1 | 10.03 | 3.65  |
| 1/1 | 1/1 | 8.47  | 4.11  |
| 1/1 | 1/1 | 8.12  | 4.02  |
| 1/1 | 1/1 | 7.75  | 3.76  |
| 1/1 | 1/1 | 5.91  | 2.01  |
| 1/1 | 1/1 | 8.26  | 4.58  |
| 1/1 | 0/1 | 6.07  | 2.51  |
| 1/1 | 1/1 | 6.7   | 3.19  |
| 1/1 | 0/1 | 5.58  | 2.06  |
| 1/1 | 1/1 | 9.47  | 5.98  |
| 1/1 | 0/1 | 5.79  | 2.44  |
| 1/1 | 0/1 | 5.25  | 1.99  |
| 1/1 | 1/1 | 6.2   | 2.98  |
| 1/1 | 0/1 | 5.09  | 1.92  |
| 1/1 | 0/1 | 4.86  | 2.21  |
| 1/1 | 0/1 | 4.75  | 2.18  |
| 1/1 | 1/1 | 5.16  | 2.76  |
| 1/1 | 0/1 | 8.22  | 6.32  |
| 1/1 | 0/1 | 4.4   | 2.64  |
| 1/1 | 1/1 | 5.01  | 3.58  |
| 1/1 | 1/1 | 4.5   | 3.45  |
| 1/1 | 0/1 | 3.54  | 2.62  |
| 1/1 | 1/1 | 4.16  | 3.25  |
| 1/1 | 0/1 | 3.03  | 2.13  |
| 1/1 | 0/1 | 2.67  | 1.99  |
| 1/1 | 1/1 | 7.2   | 6.95  |
| 1/1 | 1/1 | 10.82 | 10.62 |
| 1/1 | 1/1 | 8.23  | 8.08  |
| 1/1 | 1/1 | 3.95  | 4.26  |
| 1/1 | 1/1 | 5.09  | 5.57  |
| 0/1 | 1/1 | 6.46  | 5.93  |
| 1/1 | 1/1 | 6.08  | 5.57  |
| 1/1 | 1/1 | 5.18  | 4.84  |
| 1/1 | 1/1 | 4.75  | 4.44  |
| 1/1 | 1/1 | 3.55  | 3.38  |
| 1/1 | 1/1 | 3.87  | 6.07  |
| 0/1 | 1/1 | 3.53  | 6.27  |
| 1/1 | 1/1 | 5.91  | 5.2   |
| 1/1 | 1/1 | 5.35  | 4.94  |
| 1/1 | 1/1 | 3.38  | 5.58  |
| 1/1 | 1/1 | 4.33  | 6.56  |
| 0/1 | 1/1 | 2.69  | 5.83  |
| 1/1 | 1/1 | 4.78  | 4.1   |
| 0/1 | 1/1 | 6.19  | 5.85  |
| 1/1 | 1/1 | 6.42  | 6.12  |
| 0/1 | 1/1 | 2.24  | 4.33  |
| 1/1 | 0/1 | 4.34  | 2.52  |
| 0/1 | 1/1 | 4.89  | 5.53  |
| 1/1 | 1/1 | 10.15 | 10.81 |
| 0/1 | 1/1 | 3.41  | 4.27  |
| 0/1 | 1/1 | 4.92  | 6.1   |

|     |     |       |       |
|-----|-----|-------|-------|
| 0/1 | 1/1 | 5.89  | 5.5   |
| 0/1 | 1/1 | 6.71  | 6.43  |
| 1/1 | 1/1 | 6.37  | 6.14  |
| 1/1 | 0/1 | 4.02  | 3.13  |
| 1/1 | 1/1 | 7.14  | 6.33  |
| 1/1 | 1/1 | 8.23  | 7.45  |
| 1/1 | 1/1 | 5.94  | 5.27  |
| 1/1 | 1/1 | 9.38  | 8.28  |
| 1/1 | 0/1 | 3.07  | 2.03  |
| 1/1 | 1/1 | 8.65  | 7.64  |
| 1/1 | 1/1 | 6.52  | 5.62  |
| 1/1 | 1/1 | 7.71  | 6.92  |
| 1/1 | 1/1 | 4.19  | 5.48  |
| 1/1 | 1/1 | 5.73  | 7.02  |
| 0/1 | 1/1 | 3.03  | 4.4   |
| 0/1 | 1/1 | 2.64  | 4.94  |
| 1/1 | 1/1 | 4.97  | 7.27  |
| 1/1 | 1/1 | 6.91  | 6.92  |
| 0/1 | 1/1 | 1.8   | 4.25  |
| 1/1 | 1/1 | 3.97  | 6.47  |
| 1/1 | 1/1 | 7.44  | 9.99  |
| 1/1 | 1/1 | 5.68  | 8.44  |
| 0/1 | 1/1 | 4.01  | 6.77  |
| 1/1 | 1/1 | 7.39  | 10.23 |
| 1/1 | 1/1 | 6.11  | 9.03  |
| 1/1 | 1/1 | 6.31  | 5.22  |
| 1/1 | 1/1 | 5.09  | 6.39  |
| 1/1 | 1/1 | 4.14  | 5.47  |
| 0/1 | 1/1 | 4.16  | 5.54  |
| 0/1 | 1/1 | 3.13  | 4.59  |
| 1/1 | 1/1 | 6.37  | 4.53  |
| 0/1 | 1/1 | 3.49  | 4.04  |
| 1/1 | 1/1 | 3.13  | 4.22  |
| 1/1 | 0/1 | 3.07  | 2.6   |
| 1/1 | 1/1 | 7.35  | 7.06  |
| 1/1 | 1/1 | 7.52  | 7.4   |
| 1/1 | 1/1 | 7.86  | 6.26  |
| 1/1 | 1/1 | 2.33  | 3.81  |
| 1/1 | 1/1 | 8.83  | 7.79  |
| 1/1 | 0/1 | 4.84  | 3.9   |
| 1/1 | 0/1 | 4.3   | 3.47  |
| 0/1 | 1/1 | 3.77  | 5.15  |
| 1/1 | 1/1 | 4.76  | 6.93  |
| 1/1 | 1/1 | 12.44 | 12.08 |
| 1/1 | 1/1 | 6.97  | 6.62  |
| 1/1 | 1/1 | 8.23  | 8.07  |
| 1/1 | 1/1 | 4.29  | 4.14  |
| 1/1 | 1/1 | 7.97  | 7.86  |
| 1/1 | 1/1 | 5.49  | 4     |
| 1/1 | 0/1 | 3.62  | 2.41  |
| 1/1 | 1/1 | 4.7   | 3.57  |
| 1/1 | 1/1 | 7.02  | 6.62  |
| 1/1 | 1/1 | 4.1   | 4     |
| 0/1 | 1/1 | 4.52  | 4.44  |
| 0/1 | 1/1 | 2.71  | 5.18  |
| 1/1 | 1/1 | 4.05  | 3.09  |
| 1/1 | 1/1 | 6.11  | 5.47  |
| 0/1 | 1/1 | 2.21  | 4.59  |

|     |     |       |      |
|-----|-----|-------|------|
| 1/1 | 1/1 | 6.32  | 5.03 |
| 1/1 | 0/1 | 5.57  | 4.61 |
| 1/1 | 0/1 | 4.97  | 3.75 |
| 1/1 | 1/1 | 6.52  | 7.81 |
| 1/1 | 1/1 | 5.38  | 6.82 |
| 1/1 | 1/1 | 4.64  | 6.18 |
| 1/1 | 0/1 | 6.61  | 3.53 |
| 1/1 | 0/1 | 3.68  | 3.26 |
| 0/1 | 1/1 | 7.4   | 7.34 |
| 1/1 | 1/1 | 8.42  | 8.52 |
| 1/1 | 1/1 | 4.88  | 5.03 |
| 1/1 | 0/1 | 5.28  | 4.11 |
| 1/1 | 1/1 | 7.81  | 6.9  |
| 1/1 | 1/1 | 4.04  | 5.4  |
| 1/1 | 1/1 | 3.54  | 5    |
| 0/1 | 1/1 | 2.41  | 4.09 |
| 1/1 | 1/1 | 6.03  | 4.99 |
| 1/1 | 1/1 | 6.63  | 5.88 |
| 1/1 | 1/1 | 6.76  | 8.11 |
| 0/1 | 1/1 | 4     | 5.44 |
| 1/1 | 1/1 | 4.91  | 6.55 |
| 0/1 | 1/1 | 2.53  | 5.43 |
| 1/1 | 1/1 | 4.95  | 4.03 |
| 1/1 | 1/1 | 6.2   | 5.4  |
| 1/1 | 0/1 | 6.78  | 6.03 |
| 1/1 | 1/1 | 7.12  | 6.42 |
| 1/1 | 1/1 | 5.79  | 5.1  |
| 1/1 | 1/1 | 3.89  | 3.25 |
| 1/1 | 0/1 | 8.11  | 6.51 |
| 0/1 | 1/1 | 3.43  | 4.24 |
| 1/1 | 1/1 | 8.43  | 9.62 |
| 1/1 | 1/1 | 9.1   | 8.71 |
| 1/1 | 1/1 | 10.13 | 9.91 |
| 0/1 | 1/1 | 4.82  | 4.71 |
| 1/1 | 1/1 | 7.09  | 6.52 |
| 1/1 | 1/1 | 6.78  | 6.44 |
| 1/1 | 1/1 | 8.79  | 8.47 |
| 1/1 | 1/1 | 7.89  | 7.6  |
| 1/1 | 1/1 | 7.08  | 6.81 |
| 1/1 | 1/1 | 4.82  | 4.56 |
| 1/1 | 1/1 | 6.47  | 8.41 |
| 0/1 | 1/1 | 5.18  | 7.48 |
| 1/1 | 0/1 | 3.33  | 2.25 |
| 1/1 | 0/1 | 3.19  | 2.2  |
| 1/1 | 1/1 | 4.94  | 6.25 |
| 1/1 | 1/1 | 5.29  | 3.5  |
| 1/1 | 1/1 | 4.95  | 5.65 |
| 1/1 | 1/1 | 7.83  | 7.18 |
| 1/1 | 1/1 | 6.8   | 6.31 |
| 1/1 | 1/1 | 8.01  | 7.57 |
| 1/1 | 1/1 | 6.05  | 5.63 |
| 1/1 | 1/1 | 5.8   | 5.45 |
| 1/1 | 1/1 | 8.63  | 8.3  |
| 1/1 | 1/1 | 4.58  | 4.27 |
| 0/1 | 1/1 | 6.66  | 6.38 |
| 0/1 | 1/1 | 4.41  | 6.27 |
| 0/1 | 1/1 | 3.17  | 5.71 |
| 1/1 | 1/1 | 7.75  | 4.45 |

|     |     |       |       |
|-----|-----|-------|-------|
| 1/1 | 1/1 | 6.66  | 3.56  |
| 1/1 | 1/1 | 7.06  | 4.03  |
| 1/1 | 0/1 | 3.17  | 2.27  |
| 1/1 | 1/1 | 3.33  | 2.46  |
| 1/1 | 1/1 | 6.95  | 6.56  |
| 1/1 | 1/1 | 6.39  | 6.07  |
| 1/1 | 1/1 | 10.95 | 10.73 |
| 1/1 | 1/1 | 4.91  | 4.72  |
| 1/1 | 1/1 | 2.9   | 2.8   |
| 0/1 | 1/1 | 2.94  | 2.96  |
| 0/1 | 1/1 | 3.57  | 3.61  |
| 1/1 | 1/1 | 7.62  | 7.87  |
| 1/1 | 1/1 | 2.54  | 2.81  |
| 1/1 | 1/1 | 5.04  | 5.32  |
| 1/1 | 1/1 | 3.69  | 3.99  |
| 1/1 | 1/1 | 4.5   | 5.24  |
| 1/1 | 0/1 | 3.1   | 2.1   |
| 1/1 | 0/1 | 2.9   | 2.04  |
| 1/1 | 1/1 | 3.45  | 2.65  |
| 1/1 | 1/1 | 4.77  | 4.08  |
| 1/1 | 1/1 | 5.42  | 4.78  |
| 1/1 | 1/1 | 4.69  | 6.24  |
| 1/1 | 1/1 | 6.74  | 5.86  |
| 1/1 | 1/1 | 7.14  | 6.3   |
| 1/1 | 1/1 | 6.81  | 5.98  |
| 1/1 | 1/1 | 4.96  | 4.43  |
| 1/1 | 0/1 | 6.48  | 3.01  |
| 1/1 | 1/1 | 5.51  | 4.43  |
| 1/1 | 0/1 | 2.9   | 1.96  |
| 1/1 | 1/1 | 4.04  | 3.24  |
| 1/1 | 1/1 | 7.63  | 6.93  |
| 1/1 | 1/1 | 6.33  | 5.81  |
| 1/1 | 1/1 | 3.68  | 3.21  |
| 0/1 | 1/1 | 5.51  | 5.27  |
| 1/1 | 1/1 | 5.51  | 5.33  |
| 0/1 | 1/1 | 3.34  | 3.24  |
| 1/1 | 1/1 | 5.94  | 5.86  |
| 1/1 | 1/1 | 8.03  | 8.08  |
| 1/1 | 1/1 | 4.07  | 4.17  |
| 0/1 | 1/1 | 5.08  | 5.19  |
| 0/1 | 1/1 | 5.56  | 5.82  |
| 1/1 | 1/1 | 9.4   | 5.75  |
| 1/1 | 1/1 | 8.96  | 5.32  |
| 1/1 | 1/1 | 9.69  | 6.42  |
| 1/1 | 1/1 | 7.59  | 6.31  |
| 1/1 | 1/1 | 7.85  | 6.57  |
| 1/1 | 1/1 | 9.22  | 7.99  |
| 1/1 | 1/1 | 7.84  | 6.91  |
| 1/1 | 1/1 | 7.4   | 6.61  |
| 1/1 | 1/1 | 5.12  | 4.35  |
| 1/1 | 1/1 | 6.84  | 6.19  |
| 1/1 | 1/1 | 8.27  | 7.89  |
| 1/1 | 1/1 | 8.05  | 7.75  |
| 1/1 | 1/1 | 8.69  | 8.5   |
| 1/1 | 1/1 | 8.47  | 8.33  |
| 1/1 | 1/1 | 9.04  | 9.02  |
| 0/1 | 1/1 | 5.56  | 5.64  |
| 0/1 | 1/1 | 6.26  | 6.86  |

|     |     |       |       |
|-----|-----|-------|-------|
| 0/1 | 1/1 | 5.89  | 6.49  |
| 1/1 | 1/1 | 8.25  | 6.99  |
| 1/1 | 1/1 | 3     | 4.12  |
| 0/1 | 1/1 | 2.51  | 3.88  |
| 1/1 | 1/1 | 3.45  | 4.89  |
| 0/1 | 1/1 | 2.4   | 4.08  |
| 1/1 | 1/1 | 3.39  | 5.94  |
| 0/1 | 1/1 | 2.85  | 5.57  |
| 1/1 | 1/1 | 7.61  | 6.96  |
| 1/1 | 1/1 | 6.33  | 5.88  |
| 1/1 | 1/1 | 5.87  | 5.46  |
| 1/1 | 1/1 | 3.37  | 3.01  |
| 1/1 | 1/1 | 7.35  | 6.98  |
| 1/1 | 1/1 | 8.73  | 8.38  |
| 0/1 | 1/1 | 2.97  | 5.4   |
| 1/1 | 0/1 | 8.56  | 5.27  |
| 1/1 | 1/1 | 8.53  | 7.79  |
| 1/1 | 0/1 | 2.43  | 1.72  |
| 1/1 | 1/1 | 6.03  | 5.37  |
| 1/1 | 1/1 | 4.6   | 3.98  |
| 1/1 | 1/1 | 5.43  | 4.85  |
| 1/1 | 1/1 | 6.04  | 5.47  |
| 1/1 | 1/1 | 6.78  | 6.26  |
| 1/1 | 1/1 | 6.63  | 6.13  |
| 1/1 | 1/1 | 6.09  | 5.73  |
| 1/1 | 1/1 | 4.94  | 4.6   |
| 1/1 | 1/1 | 4.97  | 4.77  |
| 1/1 | 1/1 | 5.89  | 5.74  |
| 1/1 | 1/1 | 5.86  | 5.74  |
| 1/1 | 1/1 | 8.14  | 8.1   |
| 1/1 | 1/1 | 8.38  | 8.4   |
| 1/1 | 1/1 | 5.67  | 5.75  |
| 1/1 | 1/1 | 6.28  | 6.42  |
| 1/1 | 1/1 | 10.13 | 10.41 |
| 0/1 | 1/1 | 6.32  | 6.82  |
| 1/1 | 1/1 | 7.53  | 7.15  |
| 1/1 | 1/1 | 3.61  | 3.31  |
| 1/1 | 1/1 | 5.01  | 7.2   |
| 1/1 | 1/1 | 5.75  | 7.98  |
| 1/1 | 0/1 | 7.74  | 6.56  |
| 1/1 | 1/1 | 10.01 | 8.99  |
| 1/1 | 1/1 | 6.07  | 5.17  |
| 1/1 | 0/1 | 4.11  | 3.01  |
| 1/1 | 0/1 | 3.32  | 2.33  |
| 1/1 | 1/1 | 5.68  | 4.45  |
| 1/1 | 1/1 | 4.07  | 5.34  |
| 1/1 | 1/1 | 5.93  | 4.87  |
| 1/1 | 0/1 | 7.6   | 6.87  |
| 1/1 | 1/1 | 4.27  | 3.56  |
| 1/1 | 0/1 | 5.89  | 5.27  |
| 1/1 | 1/1 | 5.94  | 7.87  |
| 1/1 | 1/1 | 5.33  | 7.33  |
| 0/1 | 1/1 | 3.49  | 5.52  |
| 0/1 | 1/1 | 5.59  | 7.65  |
| 0/1 | 1/1 | 4.14  | 6.86  |
| 1/1 | 1/1 | 4.83  | 7.63  |
| 1/1 | 1/1 | 5.52  | 5.18  |
| 1/1 | 1/1 | 7.49  | 7.43  |

|     |     |       |       |
|-----|-----|-------|-------|
| 0/1 | 1/1 | 9.48  | 9.43  |
| 1/1 | 1/1 | 7.68  | 6.87  |
| 1/1 | 1/1 | 6.48  | 5.83  |
| 1/1 | 1/1 | 4.46  | 6.31  |
| 0/1 | 1/1 | 7.05  | 6.89  |
| 1/1 | 1/1 | 7.39  | 7.26  |
| 1/1 | 1/1 | 8.49  | 8.36  |
| 1/1 | 1/1 | 7.24  | 7.26  |
| 1/1 | 1/1 | 7.49  | 7.62  |
| 0/1 | 1/1 | 4.58  | 7.31  |
| 1/1 | 1/1 | 5.09  | 3.9   |
| 1/1 | 1/1 | 4.31  | 3.42  |
| 1/1 | 1/1 | 5.04  | 2.77  |
| 0/1 | 1/1 | 3.18  | 3.49  |
| 1/1 | 1/1 | 10.02 | 8.62  |
| 1/1 | 1/1 | 4.83  | 3.57  |
| 1/1 | 1/1 | 6.89  | 5.87  |
| 1/1 | 1/1 | 5.97  | 4.05  |
| 1/1 | 1/1 | 2.61  | 3.07  |
| 0/1 | 1/1 | 1.96  | 2.94  |
| 1/1 | 1/1 | 4.61  | 5.7   |
| 1/1 | 1/1 | 7.91  | 9.05  |
| 1/1 | 1/1 | 5.2   | 6.45  |
| 1/1 | 1/1 | 2.99  | 7.4   |
| 1/1 | 1/1 | 8.41  | 6.28  |
| 1/1 | 1/1 | 7.18  | 5.3   |
| 0/1 | 1/1 | 5.12  | 5.37  |
| 1/1 | 1/1 | 9.99  | 10.36 |
| 1/1 | 1/1 | 5.56  | 5.16  |
| 0/1 | 1/1 | 6.74  | 6.4   |
| 1/1 | 1/1 | 8.58  | 8.35  |
| 0/1 | 1/1 | 6.58  | 6.39  |
| 1/1 | 1/1 | 7.6   | 9.63  |
| 1/1 | 1/1 | 7.39  | 9.51  |
| 1/1 | 1/1 | 6.46  | 8.63  |
| 1/1 | 1/1 | 5.59  | 7.86  |
| 1/1 | 1/1 | 4.39  | 3.39  |
| 0/1 | 1/1 | 4.21  | 3.51  |
| 1/1 | 1/1 | 4.67  | 6.17  |
| 1/1 | 1/1 | 5.55  | 4.39  |
| 1/1 | 1/1 | 4.4   | 3.53  |
| 1/1 | 1/1 | 7.83  | 5.96  |
| 1/1 | 1/1 | 6.85  | 5.15  |
| 1/1 | 1/1 | 3.14  | 3.76  |
| 1/1 | 1/1 | 4.95  | 5.61  |
| 0/1 | 1/1 | 2.23  | 3.21  |
| 0/1 | 1/1 | 2.81  | 3.79  |
| 1/1 | 1/1 | 8.33  | 7.61  |
| 1/1 | 1/1 | 5.99  | 5.52  |
| 1/1 | 0/1 | 3.4   | 2.03  |
| 1/1 | 1/1 | 11.9  | 10.62 |
| 1/1 | 1/1 | 4.39  | 3.27  |
| 0/1 | 1/1 | 2.12  | 4.14  |
| 1/1 | 0/1 | 3.82  | 2.62  |
| 0/1 | 1/1 | 2.96  | 4.15  |
| 0/1 | 1/1 | 2.89  | 4.9   |
| 1/1 | 1/1 | 10.48 | 9.74  |
| 1/1 | 1/1 | 5.32  | 4.59  |

|     |     |       |      |
|-----|-----|-------|------|
| 1/1 | 1/1 | 8.66  | 8.37 |
| 1/1 | 1/1 | 6.39  | 6.24 |
| 1/1 | 1/1 | 6.3   | 6.25 |
| 0/1 | 1/1 | 2.49  | 5.91 |
| 1/1 | 0/1 | 5.79  | 3.95 |
| 0/1 | 1/1 | 2.54  | 3.08 |
| 1/1 | 1/1 | 3.88  | 4.43 |
| 0/1 | 1/1 | 2.01  | 2.58 |
| 1/1 | 1/1 | 3.56  | 4.15 |
| 0/1 | 1/1 | 3.21  | 3.82 |
| 0/1 | 1/1 | 4.21  | 4.82 |
| 0/1 | 1/1 | 3.42  | 4.04 |
| 1/1 | 1/1 | 3.45  | 4.11 |
| 0/1 | 1/1 | 1.94  | 2.72 |
| 0/1 | 1/1 | 2.86  | 3.82 |
| 0/1 | 1/1 | 2.33  | 3.34 |
| 1/1 | 1/1 | 5.88  | 7.01 |
| 1/1 | 1/1 | 8.5   | 5.81 |
| 1/1 | 1/1 | 7.2   | 4.61 |
| 1/1 | 1/1 | 7.55  | 5.02 |
| 1/1 | 1/1 | 6.6   | 4.23 |
| 1/1 | 1/1 | 9.64  | 9.34 |
| 1/1 | 1/1 | 8.87  | 8.63 |
| 1/1 | 1/1 | 8.29  | 8.15 |
| 1/1 | 1/1 | 9.33  | 9.22 |
| 1/1 | 1/1 | 3.51  | 3.45 |
| 1/1 | 1/1 | 3.63  | 4.59 |
| 1/1 | 1/1 | 10.83 | 9.87 |
| 1/1 | 1/1 | 7.76  | 7.03 |
| 1/1 | 1/1 | 6.06  | 5.12 |
| 1/1 | 0/1 | 3.45  | 2.56 |
| 1/1 | 1/1 | 5.43  | 4.84 |
| 1/1 | 0/1 | 3.79  | 2.59 |
| 1/1 | 0/1 | 3.16  | 2.03 |
| 1/1 | 1/1 | 4.74  | 3.91 |
| 1/1 | 0/1 | 5.91  | 5.11 |
| 1/1 | 1/1 | 6.3   | 7.88 |
| 0/1 | 1/1 | 4.16  | 5.78 |
| 1/1 | 1/1 | 7.79  | 7.49 |
| 0/1 | 1/1 | 4.52  | 6.66 |
| 1/1 | 1/1 | 6.77  | 6.01 |
| 1/1 | 0/1 | 2.89  | 2.19 |
| 1/1 | 1/1 | 7.04  | 6.45 |
| 1/1 | 1/1 | 5.02  | 4.51 |
| 1/1 | 1/1 | 4.6   | 6.5  |
| 1/1 | 0/1 | 3.95  | 3    |
| 1/1 | 0/1 | 3.64  | 2.77 |
| 1/1 | 1/1 | 3.72  | 3.06 |
| 1/1 | 1/1 | 8.33  | 7.26 |
| 1/1 | 0/1 | 7.46  | 6.62 |
| 1/1 | 1/1 | 7.9   | 7.15 |
| 0/1 | 1/1 | 4.53  | 5.89 |
| 1/1 | 1/1 | 3.6   | 5.01 |
| 1/1 | 1/1 | 4.88  | 6.42 |
| 1/1 | 1/1 | 8.71  | 8.12 |
| 0/1 | 1/1 | 3.97  | 3.43 |
| 1/1 | 1/1 | 9.69  | 9.3  |
| 1/1 | 1/1 | 9.31  | 8.93 |

|     |     |       |       |
|-----|-----|-------|-------|
| 1/1 | 1/1 | 9.81  | 9.44  |
| 1/1 | 1/1 | 10.63 | 10.32 |
| 1/1 | 1/1 | 4.84  | 6.76  |
| 1/1 | 1/1 | 7.49  | 6.26  |
| 0/1 | 1/1 | 2.91  | 4.4   |
| 1/1 | 1/1 | 4.27  | 5.83  |
| 1/1 | 1/1 | 4.93  | 3.66  |
| 1/1 | 1/1 | 5.08  | 4.18  |
| 0/1 | 1/1 | 3.31  | 4.61  |
| 1/1 | 1/1 | 6.85  | 6.59  |
| 1/1 | 1/1 | 8.39  | 8.34  |
| 1/1 | 1/1 | 3.91  | 3.88  |
| 0/1 | 1/1 | 3.06  | 3.06  |
| 0/1 | 1/1 | 2.76  | 2.77  |
| 0/1 | 1/1 | 2.05  | 2.11  |
| 1/1 | 1/1 | 3.58  | 5.81  |
| 0/1 | 1/1 | 2.89  | 5.75  |
| 1/1 | 1/1 | 7.09  | 4.82  |
| 1/1 | 1/1 | 7.86  | 8.07  |
| 1/1 | 1/1 | 4.27  | 4.51  |
| 0/1 | 1/1 | 2.95  | 3.2   |
| 0/1 | 1/1 | 2.93  | 3.2   |
| 0/1 | 1/1 | 5.28  | 5.6   |
| 1/1 | 1/1 | 9.24  | 9.74  |
| 0/1 | 1/1 | 2.3   | 2.87  |
| 1/1 | 1/1 | 4.06  | 4.69  |
| 1/1 | 0/1 | 4.81  | 3.39  |
| 1/1 | 1/1 | 5.26  | 4.12  |
| 1/1 | 0/1 | 4.3   | 3.18  |
| 0/1 | 1/1 | 2.9   | 3.87  |
| 1/1 | 1/1 | 6.12  | 7.13  |
| 1/1 | 1/1 | 5.5   | 6.54  |
| 0/1 | 1/1 | 3.87  | 4.93  |
| 1/1 | 1/1 | 6.52  | 7.69  |
| 1/1 | 1/1 | 4.71  | 6.46  |
| 1/1 | 1/1 | 3.23  | 5.22  |
| 1/1 | 1/1 | 3.32  | 5.57  |
| 0/1 | 1/1 | 2.68  | 5.23  |
| 0/1 | 1/1 | 3.55  | 6.13  |
| 1/1 | 0/1 | 2.83  | 2.02  |
| 1/1 | 1/1 | 5.09  | 6.86  |
| 1/1 | 1/1 | 8.26  | 7.43  |
| 1/1 | 1/1 | 7.95  | 7.24  |
| 0/1 | 1/1 | 4.71  | 4.18  |
| 1/1 | 1/1 | 2.92  | 2.4   |
| 1/1 | 1/1 | 3.36  | 4.92  |
| 1/1 | 1/1 | 4.61  | 6.33  |
| 1/1 | 1/1 | 3.71  | 5.72  |
| 1/1 | 1/1 | 5.3   | 4.38  |
| 1/1 | 1/1 | 8.78  | 8.12  |
| 0/1 | 1/1 | 3.37  | 5.09  |
| 1/1 | 0/1 | 5.04  | 3.54  |
| 0/1 | 1/1 | 4.68  | 5.82  |
| 1/1 | 1/1 | 6.38  | 5.07  |
| 1/1 | 1/1 | 4.22  | 3.19  |
| 0/1 | 1/1 | 3.6   | 4.86  |
| 1/1 | 1/1 | 5.53  | 3.25  |
| 1/1 | 1/1 | 6.05  | 3.79  |



|     |     |      |      |
|-----|-----|------|------|
| 1/1 | 0/1 | 4.9  | 2.67 |
| 1/1 | 1/1 | 6.4  | 6.76 |
| 1/1 | 1/1 | 5.79 | 5.11 |
| 1/1 | 1/1 | 6.25 | 5.87 |
| 1/1 | 1/1 | 7.93 | 8.02 |
| 0/1 | 1/1 | 3.14 | 5.91 |
| 1/1 | 0/1 | 3.25 | 2.45 |
| 1/1 | 1/1 | 3.92 | 3.15 |
| 1/1 | 1/1 | 3.64 | 2.88 |
| 0/1 | 1/1 | 3.58 | 5.18 |
| 1/1 | 1/1 | 4.66 | 6.64 |
| 0/1 | 1/1 | 2.33 | 4.99 |
| 1/1 | 0/1 | 6.5  | 4.65 |
| 0/1 | 1/1 | 3.33 | 3.96 |
| 0/1 | 1/1 | 5.05 | 6.08 |
| 1/1 | 0/1 | 8.28 | 6.73 |
| 0/1 | 1/1 | 2.74 | 3.73 |
| 1/1 | 1/1 | 4.29 | 5.88 |
| 1/1 | 1/1 | 5.6  | 4.87 |
| 1/1 | 1/1 | 7.94 | 7.33 |
| 1/1 | 1/1 | 9.97 | 9.53 |
| 1/1 | 1/1 | 5.17 | 4.77 |
| 1/1 | 1/1 | 9.43 | 9.05 |
| 1/1 | 1/1 | 7.63 | 6.67 |
| 1/1 | 1/1 | 5.86 | 4.98 |
| 1/1 | 1/1 | 7.14 | 6.39 |
| 1/1 | 1/1 | 5.71 | 5.03 |
| 0/1 | 1/1 | 2.79 | 4.26 |
| 0/1 | 1/1 | 2.58 | 4.36 |
| 1/1 | 1/1 | 6.43 | 4.79 |
| 1/1 | 1/1 | 9    | 7.64 |
| 1/1 | 0/1 | 4.12 | 2.87 |
| 1/1 | 1/1 | 5.27 | 4.11 |
| 1/1 | 1/1 | 7.67 | 6.62 |
| 1/1 | 1/1 | 4.05 | 5.87 |
| 1/1 | 1/1 | 4.7  | 4.23 |
| 1/1 | 1/1 | 9.42 | 9.02 |
| 1/1 | 1/1 | 5.97 | 4.88 |
| 1/1 | 1/1 | 5.94 | 7.23 |
| 1/1 | 1/1 | 4.74 | 6.25 |
| 1/1 | 1/1 | 5.19 | 7.09 |
| 1/1 | 1/1 | 3.69 | 3.01 |
| 1/1 | 1/1 | 8.57 | 7.96 |
| 1/1 | 1/1 | 6.28 | 5.79 |
| 1/1 | 1/1 | 3.2  | 2.86 |
| 1/1 | 1/1 | 5.28 | 6.96 |
| 1/1 | 1/1 | 4.54 | 6.21 |
| 1/1 | 1/1 | 5.64 | 7.37 |
| 1/1 | 1/1 | 5.06 | 6.83 |
| 0/1 | 1/1 | 3.49 | 5.61 |
| 0/1 | 1/1 | 3.03 | 5.29 |
| 1/1 | 1/1 | 3.64 | 6.75 |
| 1/1 | 0/1 | 3.66 | 2.62 |
| 1/1 | 1/1 | 4.45 | 3.58 |
| 1/1 | 0/1 | 3.86 | 2.72 |
| 1/1 | 1/1 | 4.11 | 3.02 |
| 1/1 | 1/1 | 4.72 | 3.9  |
| 1/1 | 0/1 | 6.31 | 3.46 |

|     |     |       |       |
|-----|-----|-------|-------|
| 1/1 | 1/1 | 7.45  | 7.06  |
| 1/1 | 1/1 | 8.73  | 8.45  |
| 1/1 | 1/1 | 8.6   | 8.42  |
| 1/1 | 1/1 | 8.69  | 8.52  |
| 1/1 | 1/1 | 5.51  | 5.38  |
| 1/1 | 1/1 | 9.43  | 9.41  |
| 1/1 | 1/1 | 8.09  | 7.21  |
| 1/1 | 1/1 | 5.82  | 5.23  |
| 1/1 | 1/1 | 3.34  | 5.18  |
| 1/1 | 1/1 | 3.6   | 5.49  |
| 1/1 | 1/1 | 4.53  | 3.06  |
| 0/1 | 1/1 | 2.12  | 3.01  |
| 1/1 | 1/1 | 3.44  | 4.81  |
| 1/1 | 0/1 | 4.22  | 2.81  |
| 1/1 | 0/1 | 6.25  | 4.84  |
| 1/1 | 0/1 | 4.65  | 3.5   |
| 0/1 | 1/1 | 4.16  | 5.16  |
| 0/1 | 1/1 | 3.1   | 4.17  |
| 1/1 | 0/1 | 4.44  | 2.54  |
| 1/1 | 1/1 | 5.07  | 3.37  |
| 0/1 | 1/1 | 3.63  | 4.13  |
| 0/1 | 1/1 | 3.39  | 4.08  |
| 1/1 | 0/1 | 4.79  | 3.51  |
| 1/1 | 0/1 | 7.58  | 6.46  |
| 1/1 | 1/1 | 8.72  | 7.77  |
| 1/1 | 1/1 | 9.7   | 2.78  |
| 1/1 | 1/1 | 11.82 | 5.22  |
| 1/1 | 1/1 | 11.37 | 7.24  |
| 1/1 | 0/1 | 5.87  | 2.02  |
| 1/1 | 0/1 | 4.28  | 2.67  |
| 1/1 | 1/1 | 4.75  | 3.79  |
| 1/1 | 1/1 | 3.55  | 2.92  |
| 1/1 | 1/1 | 2.98  | 4.4   |
| 1/1 | 1/1 | 8.64  | 8.32  |
| 1/1 | 1/1 | 3.35  | 5.44  |
| 1/1 | 0/1 | 7.71  | 6.86  |
| 1/1 | 1/1 | 6     | 5.43  |
| 1/1 | 1/1 | 5.89  | 7.48  |
| 0/1 | 1/1 | 4.19  | 5.95  |
| 0/1 | 1/1 | 2.39  | 4.31  |
| 1/1 | 1/1 | 12.41 | 12.09 |
| 1/1 | 1/1 | 6.44  | 8.53  |
| 1/1 | 0/1 | 3.46  | 2.34  |
| 1/1 | 1/1 | 4.17  | 3.35  |
| 1/1 | 1/1 | 6.05  | 5.77  |
| 1/1 | 1/1 | 5.57  | 5.38  |
| 1/1 | 1/1 | 7.69  | 7.75  |
| 1/1 | 1/1 | 5     | 7.69  |
| 1/1 | 1/1 | 5.49  | 4.76  |
| 1/1 | 1/1 | 4     | 5.76  |
| 0/1 | 1/1 | 3.2   | 5.04  |
| 1/1 | 1/1 | 5.4   | 7.27  |
| 1/1 | 1/1 | 3.25  | 5.16  |
| 1/1 | 1/1 | 4.72  | 6.64  |
| 1/1 | 1/1 | 3.81  | 5.92  |
| 0/1 | 1/1 | 2.96  | 5.09  |
| 1/1 | 1/1 | 11.09 | 10.4  |
| 1/1 | 0/1 | 6.68  | 6.06  |

|     |     |       |      |
|-----|-----|-------|------|
| 1/1 | 0/1 | 2.93  | 2.37 |
| 1/1 | 1/1 | 7.71  | 7.18 |
| 1/1 | 1/1 | 7.11  | 6.7  |
| 1/1 | 1/1 | 6.5   | 6.13 |
| 1/1 | 1/1 | 7.55  | 7.18 |
| 1/1 | 1/1 | 5.48  | 7.29 |
| 0/1 | 1/1 | 2.57  | 4.94 |
| 1/1 | 1/1 | 5.14  | 3.89 |
| 1/1 | 1/1 | 7.3   | 6.24 |
| 1/1 | 1/1 | 5.5   | 6.81 |
| 0/1 | 1/1 | 2.91  | 4.53 |
| 0/1 | 1/1 | 2.64  | 4.96 |
| 1/1 | 1/1 | 4.8   | 3.46 |
| 1/1 | 0/1 | 4.09  | 3.03 |
| 1/1 | 0/1 | 4.58  | 3.54 |
| 1/1 | 1/1 | 3.57  | 4.79 |
| 1/1 | 1/1 | 3.88  | 5.31 |
| 1/1 | 1/1 | 7.03  | 6.16 |
| 1/1 | 1/1 | 4.9   | 4.17 |
| 1/1 | 1/1 | 9.67  | 8.95 |
| 1/1 | 1/1 | 8.17  | 7.59 |
| 1/1 | 1/1 | 7.64  | 6.25 |
| 1/1 | 0/1 | 6.2   | 4.86 |
| 1/1 | 1/1 | 10.42 | 7.97 |
| 1/1 | 1/1 | 8.99  | 6.87 |
| 0/1 | 1/1 | 5.38  | 5.36 |
| 1/1 | 1/1 | 7.42  | 7.44 |
| 0/1 | 1/1 | 5.48  | 5.67 |
| 0/1 | 1/1 | 4.7   | 4.97 |
| 1/1 | 1/1 | 9.94  | 8.26 |
| 0/1 | 1/1 | 3.09  | 4.06 |
| 0/1 | 1/1 | 4.06  | 5.25 |
| 0/1 | 1/1 | 2.03  | 3.3  |
| 1/1 | 1/1 | 6.93  | 5.94 |
| 1/1 | 0/1 | 6.32  | 5.46 |
| 1/1 | 1/1 | 6.67  | 5.93 |
| 0/1 | 1/1 | 3.15  | 3.21 |
| 1/1 | 1/1 | 7.8   | 8.19 |
| 1/1 | 0/1 | 3.97  | 2.72 |
| 1/1 | 1/1 | 4.8   | 3.64 |
| 1/1 | 0/1 | 3.18  | 2.06 |
| 1/1 | 1/1 | 7.61  | 6.66 |
| 1/1 | 0/1 | 3.38  | 2.46 |
| 1/1 | 1/1 | 7.49  | 6.01 |
| 1/1 | 1/1 | 6.3   | 4.97 |
| 1/1 | 1/1 | 7.44  | 5.76 |
| 1/1 | 1/1 | 7.06  | 7.75 |
| 1/1 | 1/1 | 6.31  | 7.23 |
| 1/1 | 1/1 | 6.49  | 7.59 |
| 0/1 | 1/1 | 2.16  | 3.65 |
| 0/1 | 1/1 | 2.84  | 4.61 |
| 1/1 | 0/1 | 3.54  | 2.07 |
| 1/1 | 1/1 | 5.74  | 6.64 |
| 1/1 | 1/1 | 5.76  | 4.7  |
| 1/1 | 1/1 | 5.27  | 4.55 |
| 1/1 | 1/1 | 3.91  | 5.7  |
| 1/1 | 1/1 | 8.09  | 6.36 |
| 1/1 | 1/1 | 11.41 | 9.86 |

|     |     |       |       |
|-----|-----|-------|-------|
| 1/1 | 1/1 | 5.32  | 6.09  |
| 1/1 | 1/1 | 4.62  | 2.97  |
| 1/1 | 0/1 | 3.97  | 2.57  |
| 0/1 | 1/1 | 3.12  | 3.83  |
| 1/1 | 0/1 | 3.79  | 2.97  |
| 0/1 | 1/1 | 4.56  | 6.22  |
| 1/1 | 1/1 | 4.33  | 6.15  |
| 1/1 | 1/1 | 13.66 | 13.67 |
| 1/1 | 1/1 | 11.92 | 12.02 |
| 0/1 | 1/1 | 8.88  | 9.1   |
| 1/1 | 1/1 | 9.51  | 9.87  |
| 0/1 | 1/1 | 4.96  | 7.89  |
| 1/1 | 1/1 | 5.16  | 8.17  |
| 1/1 | 0/1 | 5.1   | 2.8   |
| 1/1 | 1/1 | 4.85  | 2.81  |
| 1/1 | 1/1 | 5.99  | 6.1   |
| 1/1 | 1/1 | 6.69  | 6.82  |
| 1/1 | 1/1 | 10.29 | 10.46 |
| 1/1 | 1/1 | 9.53  | 9.83  |
| 1/1 | 1/1 | 6.24  | 6.54  |
| 0/1 | 1/1 | 4.71  | 5.02  |
| 0/1 | 1/1 | 3.3   | 4.52  |
| 1/1 | 1/1 | 8.65  | 7.93  |
| 0/1 | 1/1 | 6.13  | 5.66  |
| 0/1 | 1/1 | 6.44  | 6.05  |
| 1/1 | 1/1 | 8.67  | 7.26  |
| 1/1 | 1/1 | 6.17  | 5.11  |
| 1/1 | 0/1 | 3.73  | 2.78  |
| 1/1 | 1/1 | 3.95  | 3.35  |
| 1/1 | 1/1 | 5.86  | 5.26  |
| 1/1 | 1/1 | 9.57  | 8.42  |
| 1/1 | 0/1 | 4.15  | 3.13  |
| 1/1 | 1/1 | 6.57  | 5.56  |
| 0/1 | 1/1 | 3.29  | 4.68  |
| 1/1 | 1/1 | 8.61  | 8.14  |
| 1/1 | 1/1 | 6.94  | 6.62  |
| 1/1 | 1/1 | 6.85  | 6.63  |
| 1/1 | 1/1 | 6.45  | 6.26  |
| 1/1 | 1/1 | 5.26  | 5.08  |
| 0/1 | 1/1 | 5.02  | 6.9   |
| 1/1 | 1/1 | 6.69  | 8.6   |
| 1/1 | 1/1 | 5.82  | 7.74  |
| 1/1 | 1/1 | 5.77  | 7.71  |
| 0/1 | 1/1 | 5.39  | 7.4   |
| 0/1 | 1/1 | 5.15  | 7.21  |
| 0/1 | 1/1 | 6.34  | 8.66  |
| 1/1 | 1/1 | 6.47  | 4.27  |
| 1/1 | 0/1 | 5.59  | 3.47  |
| 1/1 | 1/1 | 5.5   | 3.39  |
| 1/1 | 1/1 | 5.66  | 3.6   |
| 1/1 | 1/1 | 7.42  | 5.38  |
| 1/1 | 1/1 | 7.1   | 5.11  |
| 0/1 | 1/1 | 2.56  | 2.78  |
| 1/1 | 1/1 | 3.03  | 3.32  |
| 0/1 | 1/1 | 2.61  | 2.96  |
| 0/1 | 1/1 | 5.21  | 5.66  |
| 0/1 | 1/1 | 2.72  | 3.21  |
| 1/1 | 1/1 | 5.45  | 4.77  |

|     |     |      |      |
|-----|-----|------|------|
| 1/1 | 0/1 | 2.91 | 2.43 |
| 1/1 | 1/1 | 6.04 | 5.56 |
| 0/1 | 1/1 | 3.07 | 4.9  |
| 1/1 | 1/1 | 8.49 | 8.05 |
| 0/1 | 1/1 | 2.27 | 1.95 |
| 0/1 | 1/1 | 5.44 | 5.29 |
| 1/1 | 1/1 | 8.29 | 7.58 |
| 1/1 | 1/1 | 6.03 | 7.94 |
| 1/1 | 1/1 | 6.8  | 8.78 |
| 1/1 | 1/1 | 5.43 | 2.97 |
| 1/1 | 1/1 | 6.41 | 6.33 |
| 1/1 | 1/1 | 7.15 | 7.08 |
| 1/1 | 1/1 | 2.68 | 2.61 |
| 1/1 | 1/1 | 5.95 | 5.89 |
| 1/1 | 1/1 | 9.08 | 9.02 |
| 1/1 | 1/1 | 6.42 | 6.41 |
| 1/1 | 1/1 | 4.7  | 4.7  |
| 1/1 | 1/1 | 4.62 | 4.62 |
| 1/1 | 1/1 | 2.74 | 2.78 |
| 1/1 | 1/1 | 5.91 | 5.95 |
| 1/1 | 1/1 | 4.61 | 4.66 |
| 1/1 | 1/1 | 5.69 | 5.8  |
| 1/1 | 1/1 | 3.05 | 3.18 |
| 1/1 | 1/1 | 7.53 | 7.66 |
| 1/1 | 1/1 | 2.37 | 2.51 |
| 0/1 | 1/1 | 3.05 | 3.26 |
| 1/1 | 1/1 | 3.19 | 3.48 |
| 1/1 | 1/1 | 5.98 | 6.28 |
| 0/1 | 1/1 | 2.54 | 2.89 |
| 1/1 | 1/1 | 5.57 | 6.03 |
| 1/1 | 1/1 | 7.27 | 7.78 |
| 1/1 | 1/1 | 5.7  | 6.23 |
| 1/1 | 1/1 | 4.96 | 5.51 |
| 0/1 | 1/1 | 2.52 | 3.12 |
| 1/1 | 1/1 | 5.88 | 6.7  |
| 0/1 | 1/1 | 3.04 | 4.17 |
| 0/1 | 1/1 | 4.02 | 5.2  |
| 1/1 | 1/1 | 5.14 | 3.92 |
| 0/1 | 1/1 | 2.36 | 3.51 |
| 1/1 | 1/1 | 3.55 | 4.76 |
| 1/1 | 1/1 | 2.63 | 4.01 |
| 0/1 | 1/1 | 2.95 | 4.92 |
| 1/1 | 1/1 | 5.49 | 4.53 |
| 1/1 | 1/1 | 4.5  | 3.63 |
| 1/1 | 1/1 | 7.68 | 7.06 |
| 1/1 | 1/1 | 4.62 | 6.11 |
| 1/1 | 1/1 | 8    | 7.72 |
| 1/1 | 1/1 | 6.65 | 6.56 |
| 1/1 | 1/1 | 5.82 | 5.79 |
| 1/1 | 1/1 | 7.43 | 7.49 |
| 1/1 | 1/1 | 4.95 | 7.15 |
| 0/1 | 1/1 | 3.51 | 6.13 |
| 1/1 | 1/1 | 9.32 | 7.52 |
| 1/1 | 0/1 | 3.78 | 2.23 |
| 1/1 | 1/1 | 7.62 | 6.15 |
| 0/1 | 1/1 | 3.49 | 4.16 |
| 1/1 | 1/1 | 4.6  | 5.32 |
| 0/1 | 1/1 | 3.86 | 5.29 |

|     |     |       |       |
|-----|-----|-------|-------|
| 1/1 | 1/1 | 3.9   | 5.51  |
| 1/1 | 1/1 | 6.6   | 5.23  |
| 1/1 | 0/1 | 5.16  | 4.07  |
| 0/1 | 1/1 | 2.69  | 4.53  |
| 1/1 | 1/1 | 8.28  | 7.08  |
| 1/1 | 1/1 | 5.77  | 4.84  |
| 1/1 | 1/1 | 4.39  | 3.5   |
| 1/1 | 1/1 | 6.92  | 8.09  |
| 1/1 | 1/1 | 3.83  | 5.52  |
| 0/1 | 1/1 | 4.6   | 6.6   |
| 1/1 | 1/1 | 5.4   | 4.57  |
| 1/1 | 1/1 | 8.93  | 8.25  |
| 1/1 | 1/1 | 10.98 | 10.45 |
| 0/1 | 1/1 | 6.62  | 6.08  |
| 1/1 | 1/1 | 6.72  | 6.23  |
| 1/1 | 1/1 | 7.44  | 6.57  |
| 1/1 | 1/1 | 5.34  | 6.88  |
| 0/1 | 1/1 | 3.57  | 5.38  |
| 1/1 | 1/1 | 5.42  | 4.78  |
| 1/1 | 1/1 | 3.77  | 3.22  |
| 1/1 | 1/1 | 7.8   | 7.34  |
| 1/1 | 1/1 | 4.67  | 4.29  |
| 1/1 | 1/1 | 3.74  | 3.38  |
| 1/1 | 1/1 | 8.51  | 7.38  |
| 1/1 | 1/1 | 6.95  | 5.97  |
| 1/1 | 1/1 | 6.57  | 5.61  |
| 1/1 | 1/1 | 7.39  | 8.8   |
| 1/1 | 1/1 | 8.04  | 5.79  |
| 1/1 | 1/1 | 9.8   | 7.6   |
| 1/1 | 1/1 | 10.2  | 8.09  |
| 1/1 | 1/1 | 10.18 | 8.09  |
| 1/1 | 1/1 | 9.79  | 7.77  |
| 1/1 | 1/1 | 8.47  | 8.72  |
| 1/1 | 1/1 | 6.07  | 6.51  |
| 1/1 | 1/1 | 5.63  | 6.1   |
| 0/1 | 1/1 | 4.26  | 5.24  |
| 0/1 | 1/1 | 3.62  | 4.65  |
| 1/1 | 1/1 | 6.98  | 8.38  |
| 1/1 | 1/1 | 4.94  | 7.46  |
| 1/1 | 1/1 | 8.98  | 7.8   |
| 1/1 | 1/1 | 10.68 | 9.67  |
| 1/1 | 1/1 | 9.74  | 8.74  |
| 1/1 | 1/1 | 10.52 | 9.62  |
| 1/1 | 1/1 | 9.31  | 8.42  |
| 1/1 | 0/1 | 4.71  | 3.53  |
| 1/1 | 0/1 | 6.03  | 4.86  |
| 1/1 | 1/1 | 6.25  | 4.45  |
| 1/1 | 1/1 | 5.58  | 6.12  |
| 1/1 | 1/1 | 8.25  | 8.82  |
| 0/1 | 1/1 | 3.66  | 4.25  |
| 1/1 | 1/1 | 4.59  | 3.96  |
| 1/1 | 1/1 | 4     | 3.57  |
| 1/1 | 1/1 | 6.86  | 6.51  |
| 0/1 | 1/1 | 3.03  | 4.88  |
| 0/1 | 1/1 | 2.4   | 4.36  |
| 1/1 | 1/1 | 2.88  | 4.83  |
| 1/1 | 0/1 | 4.72  | 3.12  |
| 0/1 | 1/1 | 3.22  | 4.14  |

|     |     |       |       |
|-----|-----|-------|-------|
| 1/1 | 1/1 | 2.95  | 4     |
| 1/1 | 1/1 | 12.12 | 10.85 |
| 1/1 | 1/1 | 3.92  | 5.09  |
| 1/1 | 1/1 | 6.52  | 4.24  |
| 1/1 | 1/1 | 12.83 | 12.91 |
| 0/1 | 1/1 | 3.59  | 4.11  |
| 0/1 | 1/1 | 3.19  | 3.78  |
| 1/1 | 1/1 | 6.86  | 7.64  |
| 1/1 | 0/1 | 5.45  | 4.46  |
| 1/1 | 1/1 | 8.09  | 7.32  |
| 1/1 | 1/1 | 7.51  | 6.81  |
| 1/1 | 1/1 | 9.9   | 9.22  |
| 1/1 | 0/1 | 5.66  | 4.47  |
| 1/1 | 1/1 | 7.1   | 6.25  |
| 1/1 | 1/1 | 4.17  | 5.88  |
| 1/1 | 1/1 | 3.98  | 3.12  |
| 0/1 | 1/1 | 2.39  | 3.89  |
| 1/1 | 1/1 | 3.74  | 5.44  |
| 1/1 | 1/1 | 6.42  | 4.7   |
| 1/1 | 1/1 | 5.07  | 3.43  |
| 1/1 | 0/1 | 4.46  | 2.89  |
| 1/1 | 1/1 | 6.92  | 5.57  |
| 1/1 | 1/1 | 7.34  | 6.25  |
| 0/1 | 1/1 | 3.43  | 4.6   |
| 1/1 | 1/1 | 5.33  | 3.62  |
| 1/1 | 0/1 | 4.28  | 2.79  |
| 1/1 | 1/1 | 7.68  | 6.21  |
| 1/1 | 1/1 | 2.98  | 3.6   |
| 1/1 | 1/1 | 3.1   | 3.94  |
| 1/1 | 0/1 | 4.3   | 2.79  |
| 1/1 | 1/1 | 6.53  | 5.33  |
| 1/1 | 1/1 | 3.96  | 2.78  |
| 0/1 | 1/1 | 3     | 4.03  |
| 1/1 | 1/1 | 10.76 | 9.27  |
| 1/1 | 1/1 | 6     | 6.92  |
| 1/1 | 1/1 | 5.04  | 4.1   |
| 1/1 | 1/1 | 3.52  | 4.94  |
| 1/1 | 1/1 | 4.17  | 3.59  |
| 1/1 | 1/1 | 6.04  | 5.72  |
| 1/1 | 1/1 | 7.22  | 6.97  |
| 1/1 | 1/1 | 7.23  | 6.97  |
| 1/1 | 1/1 | 8.21  | 7.92  |
| 1/1 | 1/1 | 10.66 | 10.4  |
| 1/1 | 1/1 | 2.48  | 2.23  |
| 1/1 | 1/1 | 6.58  | 6.45  |
| 1/1 | 1/1 | 7.7   | 7.69  |
| 1/1 | 0/1 | 5.28  | 2.44  |
| 1/1 | 0/1 | 2.74  | 2.27  |
| 1/1 | 1/1 | 5.37  | 4.94  |
| 1/1 | 1/1 | 3.83  | 3.57  |
| 1/1 | 1/1 | 7.17  | 7.02  |
| 0/1 | 1/1 | 4.34  | 4.6   |
| 1/1 | 1/1 | 5.57  | 5.85  |
| 0/1 | 1/1 | 2.79  | 3.16  |
| 1/1 | 1/1 | 6.05  | 4.56  |
| 1/1 | 1/1 | 4.53  | 3.18  |
| 1/1 | 1/1 | 5.64  | 6.5   |
| 0/1 | 1/1 | 2.23  | 3.33  |

|     |     |       |       |
|-----|-----|-------|-------|
| 1/1 | 1/1 | 5.76  | 4.32  |
| 1/1 | 1/1 | 5.31  | 6.27  |
| 1/1 | 1/1 | 4.94  | 4.5   |
| 1/1 | 1/1 | 3.12  | 3     |
| 0/1 | 1/1 | 2.18  | 4.9   |
| 1/1 | 1/1 | 8.11  | 6.63  |
| 1/1 | 1/1 | 10.13 | 8.74  |
| 1/1 | 1/1 | 9.81  | 10.68 |
| 1/1 | 1/1 | 6.59  | 4.86  |
| 1/1 | 0/1 | 4.01  | 2.42  |
| 1/1 | 0/1 | 4.56  | 2.31  |
| 1/1 | 1/1 | 6.17  | 3.94  |
| 1/1 | 1/1 | 5.94  | 3.95  |
| 1/1 | 1/1 | 6.98  | 5.05  |
| 1/1 | 1/1 | 4.34  | 4.41  |
| 1/1 | 1/1 | 8.3   | 8.38  |
| 0/1 | 1/1 | 4.84  | 5.09  |
| 0/1 | 1/1 | 4.35  | 4.67  |
| 0/1 | 1/1 | 2.78  | 3.29  |
| 1/1 | 1/1 | 3.39  | 3.92  |
| 0/1 | 1/1 | 4.96  | 5.5   |
| 1/1 | 1/1 | 4.69  | 3.8   |
| 1/1 | 1/1 | 3.99  | 3.18  |
| 0/1 | 1/1 | 5.1   | 6.59  |
| 0/1 | 1/1 | 1.9   | 4.35  |
| 1/1 | 1/1 | 4.94  | 4.01  |
| 1/1 | 1/1 | 6.06  | 7.56  |
| 1/1 | 1/1 | 3.33  | 5.15  |
| 1/1 | 1/1 | 2.93  | 5.24  |
| 1/1 | 1/1 | 4.7   | 7.54  |
| 1/1 | 0/1 | 4.26  | 2.99  |
| 0/1 | 1/1 | 3.15  | 4.92  |
| 1/1 | 1/1 | 5.16  | 4.64  |
| 0/1 | 1/1 | 7.47  | 7.15  |
| 1/1 | 0/1 | 5.14  | 2.66  |
| 1/1 | 1/1 | 3.34  | 3.21  |
| 1/1 | 1/1 | 3.6   | 3.53  |
| 1/1 | 1/1 | 6.03  | 5.98  |
| 0/1 | 1/1 | 3.33  | 3.72  |
| 0/1 | 1/1 | 3.07  | 3.59  |
| 1/1 | 0/1 | 3.04  | 2.4   |
| 1/1 | 1/1 | 3.94  | 5.77  |
| 1/1 | 1/1 | 4.54  | 6.56  |
| 1/1 | 1/1 | 4.93  | 3.79  |
| 1/1 | 0/1 | 3.74  | 2.88  |
| 1/1 | 1/1 | 4.02  | 5.48  |
| 1/1 | 1/1 | 8.74  | 6.41  |
| 1/1 | 1/1 | 4.96  | 4.96  |
| 1/1 | 1/1 | 5.06  | 5.15  |
| 0/1 | 1/1 | 2.62  | 3.7   |
| 1/1 | 1/1 | 6.62  | 5.3   |
| 1/1 | 1/1 | 6.03  | 4.76  |
| 1/1 | 1/1 | 5.17  | 4.18  |
| 0/1 | 1/1 | 3.56  | 4.63  |
| 1/1 | 1/1 | 5.55  | 6.7   |
| 1/1 | 1/1 | 5.36  | 6.58  |
| 0/1 | 1/1 | 2.34  | 3.61  |
| 1/1 | 1/1 | 4.16  | 5.48  |



|     |     |       |       |
|-----|-----|-------|-------|
| 1/1 | 1/1 | 3.16  | 4.49  |
| 1/1 | 1/1 | 10.01 | 9.22  |
| 1/1 | 1/1 | 10.09 | 9.57  |
| 1/1 | 0/1 | 2.53  | 2.05  |
| 1/1 | 1/1 | 7.76  | 5.31  |
| 1/1 | 1/1 | 7.14  | 7.1   |
| 1/1 | 1/1 | 4.6   | 4.65  |
| 1/1 | 1/1 | 6.65  | 6.83  |
| 1/1 | 1/1 | 7.37  | 8.45  |
| 1/1 | 1/1 | 9.64  | 8.74  |
| 1/1 | 1/1 | 6.28  | 5.65  |
| 0/1 | 1/1 | 3.11  | 5.07  |
| 1/1 | 1/1 | 7.88  | 7.42  |
| 1/1 | 1/1 | 6.05  | 5.85  |
| 1/1 | 1/1 | 5.97  | 7.87  |
| 0/1 | 1/1 | 2.36  | 4.95  |
| 1/1 | 1/1 | 4.44  | 3.36  |
| 1/1 | 1/1 | 7.71  | 6.83  |
| 1/1 | 1/1 | 3.86  | 5.16  |
| 1/1 | 1/1 | 3.56  | 4.87  |
| 1/1 | 1/1 | 4.25  | 5.65  |
| 1/1 | 0/1 | 3.93  | 2.69  |
| 0/1 | 1/1 | 3.12  | 4.33  |
| 1/1 | 1/1 | 7.2   | 6.38  |
| 0/1 | 1/1 | 3.53  | 5.05  |
| 1/1 | 1/1 | 3.96  | 5.5   |
| 1/1 | 1/1 | 7.42  | 4.45  |
| 1/1 | 1/1 | 7.15  | 4.29  |
| 1/1 | 0/1 | 5.22  | 2.5   |
| 1/1 | 1/1 | 5.42  | 4.89  |
| 1/1 | 1/1 | 10.71 | 10.23 |
| 0/1 | 1/1 | 4.12  | 3.7   |
| 1/1 | 1/1 | 3.84  | 3.5   |
| 1/1 | 1/1 | 3.91  | 3.6   |
| 0/1 | 1/1 | 6.09  | 5.88  |
| 1/1 | 1/1 | 5.43  | 5.28  |
| 1/1 | 1/1 | 7.92  | 7.95  |
| 0/1 | 1/1 | 4.46  | 4.69  |
| 1/1 | 1/1 | 4.82  | 5.15  |
| 1/1 | 1/1 | 4.63  | 6.09  |
| 1/1 | 1/1 | 8.96  | 8.9   |
| 0/1 | 1/1 | 3.54  | 3.57  |
| 1/1 | 1/1 | 5.19  | 7.5   |
| 1/1 | 0/1 | 3.07  | 2.31  |
| 1/1 | 1/1 | 6.33  | 5.62  |
| 1/1 | 1/1 | 3.96  | 3.36  |
| 1/1 | 0/1 | 3.43  | 2.86  |
| 1/1 | 1/1 | 3.87  | 3.35  |
| 1/1 | 1/1 | 4.53  | 3.85  |
| 1/1 | 1/1 | 5.01  | 4.54  |
| 1/1 | 1/1 | 6.4   | 6.02  |
| 1/1 | 1/1 | 8.9   | 7.95  |
| 1/1 | 0/1 | 10.46 | 9.69  |
| 0/1 | 1/1 | 4.89  | 6.6   |
| 1/1 | 1/1 | 4.09  | 6.05  |
| 1/1 | 1/1 | 8.59  | 7.61  |
| 1/1 | 1/1 | 9.96  | 9.02  |
| 1/1 | 0/1 | 4.35  | 3.44  |

|     |     |       |       |
|-----|-----|-------|-------|
| 1/1 | 0/1 | 6.79  | 5.88  |
| 1/1 | 1/1 | 10.05 | 9.39  |
| 0/1 | 1/1 | 5.18  | 6.6   |
| 0/1 | 1/1 | 3.35  | 5.39  |
| 0/1 | 1/1 | 2.02  | 7.13  |
| 1/1 | 1/1 | 7.66  | 6.23  |
| 1/1 | 1/1 | 7.21  | 8.12  |
| 1/1 | 1/1 | 7.68  | 7.22  |
| 1/1 | 1/1 | 4.73  | 4.36  |
| 1/1 | 1/1 | 4.51  | 4.29  |
| 0/1 | 1/1 | 3.57  | 3.4   |
| 1/1 | 1/1 | 3.75  | 6     |
| 1/1 | 1/1 | 5.85  | 4.77  |
| 1/1 | 1/1 | 5.1   | 6.9   |
| 1/1 | 0/1 | 5.17  | 4.08  |
| 1/1 | 1/1 | 5.25  | 4.3   |
| 1/1 | 1/1 | 6.04  | 5.12  |
| 1/1 | 1/1 | 8.03  | 7.38  |
| 1/1 | 1/1 | 9.78  | 9.4   |
| 1/1 | 1/1 | 5.34  | 7.02  |
| 1/1 | 1/1 | 8.29  | 7.79  |
| 1/1 | 1/1 | 4.18  | 3.8   |
| 1/1 | 1/1 | 12.69 | 12.33 |
| 1/1 | 1/1 | 2.5   | 2.29  |
| 1/1 | 1/1 | 7.83  | 7.64  |
| 0/1 | 1/1 | 2.2   | 4.09  |
| 0/1 | 1/1 | 3.62  | 5.57  |
| 0/1 | 1/1 | 2.95  | 4.97  |
| 1/1 | 1/1 | 3.79  | 5.9   |
| 0/1 | 1/1 | 3.05  | 5.26  |
| 0/1 | 1/1 | 3.05  | 5.8   |
| 0/1 | 1/1 | 3.61  | 6.92  |
| 0/1 | 1/1 | 3.3   | 6.69  |
| 1/1 | 0/1 | 7.08  | 3.16  |
| 1/1 | 1/1 | 8.9   | 5.15  |
| 1/1 | 1/1 | 9.4   | 7.84  |
| 1/1 | 0/1 | 4.31  | 2.92  |
| 1/1 | 1/1 | 9.58  | 8.25  |
| 1/1 | 1/1 | 5.13  | 3.96  |
| 1/1 | 1/1 | 7.35  | 6.2   |
| 1/1 | 0/1 | 5.54  | 4.48  |
| 1/1 | 1/1 | 6.92  | 5.93  |
| 1/1 | 1/1 | 4.23  | 3.31  |
| 1/1 | 1/1 | 7.62  | 6.79  |
| 1/1 | 1/1 | 7.83  | 7.39  |
| 0/1 | 1/1 | 6.45  | 6.35  |
| 1/1 | 1/1 | 9.81  | 9.72  |
| 1/1 | 1/1 | 7.32  | 7.44  |
| 0/1 | 1/1 | 4     | 4.51  |
| 1/1 | 1/1 | 7.11  | 7.62  |
| 1/1 | 1/1 | 4.62  | 3.32  |
| 1/1 | 1/1 | 10.14 | 9.14  |
| 1/1 | 1/1 | 5.43  | 7.03  |
| 1/1 | 1/1 | 6.39  | 5.54  |
| 1/1 | 1/1 | 9.79  | 9.16  |
| 1/1 | 1/1 | 5.07  | 4.54  |
| 1/1 | 1/1 | 3.95  | 5.59  |
| 1/1 | 0/1 | 8.77  | 7.46  |

|     |     |       |       |
|-----|-----|-------|-------|
| 1/1 | 1/1 | 6.52  | 7.57  |
| 1/1 | 1/1 | 4.31  | 5.58  |
| 1/1 | 0/1 | 5.78  | 3.03  |
| 1/1 | 1/1 | 7.9   | 5.36  |
| 1/1 | 1/1 | 11.12 | 10.85 |
| 1/1 | 1/1 | 10.65 | 10.55 |
| 0/1 | 1/1 | 3.21  | 3.12  |
| 0/1 | 1/1 | 3.16  | 3.17  |
| 1/1 | 1/1 | 6.48  | 6.51  |
| 0/1 | 1/1 | 2.17  | 2.41  |
| 1/1 | 1/1 | 12.39 | 13.11 |
| 1/1 | 0/1 | 4.46  | 2.94  |
| 1/1 | 1/1 | 5.85  | 4.54  |
| 1/1 | 1/1 | 4.22  | 5.03  |
| 1/1 | 1/1 | 6.67  | 5.82  |
| 1/1 | 1/1 | 3.59  | 5.32  |
| 1/1 | 1/1 | 7.32  | 6.48  |
| 1/1 | 1/1 | 4.95  | 4.2   |
| 1/1 | 1/1 | 4.03  | 5.63  |
| 1/1 | 1/1 | 4.45  | 3.37  |
| 1/1 | 1/1 | 4.91  | 4.05  |
| 1/1 | 1/1 | 5.71  | 5.18  |
| 1/1 | 1/1 | 10.97 | 10.74 |
| 1/1 | 1/1 | 6.03  | 5.81  |
| 0/1 | 1/1 | 3.89  | 5.82  |
| 1/1 | 1/1 | 9.33  | 5.35  |
| 1/1 | 1/1 | 7.56  | 3.62  |
| 1/1 | 0/1 | 6.6   | 2.93  |
| 1/1 | 0/1 | 3.47  | 2.1   |
| 1/1 | 1/1 | 4.86  | 3.62  |
| 1/1 | 1/1 | 7.74  | 6.59  |
| 1/1 | 1/1 | 8.18  | 7.36  |
| 1/1 | 1/1 | 3.72  | 2.91  |
| 1/1 | 1/1 | 8.09  | 7.35  |
| 1/1 | 1/1 | 7.4   | 6.88  |
| 1/1 | 1/1 | 8.84  | 8.35  |
| 1/1 | 1/1 | 2.56  | 2.44  |
| 1/1 | 1/1 | 6.56  | 6.72  |
| 0/1 | 1/1 | 2.78  | 3.2   |
| 1/1 | 1/1 | 3.41  | 3.89  |
| 1/1 | 1/1 | 4.66  | 5.59  |
| 0/1 | 1/1 | 1.84  | 3.23  |
| 1/1 | 1/1 | 5.42  | 3.63  |
| 1/1 | 1/1 | 5.1   | 5.64  |
| 1/1 | 1/1 | 4.73  | 5.47  |
| 0/1 | 1/1 | 2.44  | 3.51  |
| 1/1 | 1/1 | 11.32 | 10.11 |
| 1/1 | 1/1 | 11.23 | 10.07 |
| 1/1 | 1/1 | 3.28  | 5.09  |
| 1/1 | 1/1 | 5.37  | 3.29  |
| 1/1 | 1/1 | 7.63  | 5.7   |
| 1/1 | 1/1 | 7.24  | 3.57  |
| 1/1 | 1/1 | 4.66  | 4.02  |
| 1/1 | 1/1 | 11.15 | 10.63 |
| 0/1 | 1/1 | 2.82  | 3.67  |
| 1/1 | 0/1 | 6.52  | 5.56  |
| 1/1 | 1/1 | 4.53  | 3.86  |
| 0/1 | 1/1 | 2.95  | 4.5   |

|     |     |      |       |
|-----|-----|------|-------|
| 1/1 | 1/1 | 4.58 | 3.31  |
| 1/1 | 1/1 | 3.56 | 5.6   |
| 1/1 | 1/1 | 5.61 | 4.17  |
| 0/1 | 1/1 | 2.08 | 3.05  |
| 0/1 | 1/1 | 3.02 | 4.08  |
| 0/1 | 1/1 | 3.22 | 4.39  |
| 0/1 | 1/1 | 1.69 | 3.04  |
| 0/1 | 1/1 | 3.19 | 4.65  |
| 1/1 | 1/1 | 5.56 | 3.94  |
| 1/1 | 0/1 | 4.66 | 3.17  |
| 0/1 | 1/1 | 3.32 | 4.24  |
| 1/1 | 0/1 | 4.77 | 2.13  |
| 1/1 | 1/1 | 3.28 | 2.97  |
| 1/1 | 1/1 | 3.1  | 2.84  |
| 1/1 | 1/1 | 8.84 | 8.69  |
| 1/1 | 1/1 | 2.41 | 2.28  |
| 1/1 | 1/1 | 2.38 | 2.29  |
| 1/1 | 1/1 | 4.12 | 4.04  |
| 1/1 | 1/1 | 9.75 | 8.2   |
| 1/1 | 1/1 | 8.56 | 7.17  |
| 1/1 | 1/1 | 6.77 | 7.55  |
| 1/1 | 1/1 | 6.98 | 6.61  |
| 1/1 | 1/1 | 5.92 | 8.03  |
| 1/1 | 1/1 | 4.71 | 2.45  |
| 1/1 | 0/1 | 5.09 | 2.99  |
| 1/1 | 1/1 | 6.43 | 4.33  |
| 0/1 | 1/1 | 2.74 | 2.86  |
| 1/1 | 1/1 | 7.9  | 8.08  |
| 1/1 | 1/1 | 4.62 | 4.87  |
| 1/1 | 1/1 | 9.9  | 10.21 |
| 1/1 | 1/1 | 4.2  | 4.64  |
| 1/1 | 0/1 | 3.53 | 2.38  |
| 1/1 | 0/1 | 5.23 | 4.18  |
| 1/1 | 1/1 | 5.99 | 5.12  |
| 1/1 | 1/1 | 7.3  | 8.45  |
| 1/1 | 1/1 | 5.32 | 6.67  |
| 1/1 | 0/1 | 2.8  | 2.09  |
| 0/1 | 1/1 | 2.84 | 2.18  |
| 1/1 | 1/1 | 3.27 | 2.77  |
| 1/1 | 1/1 | 9.99 | 9.52  |
| 1/1 | 0/1 | 3.49 | 3.04  |
| 1/1 | 1/1 | 4.91 | 4.49  |
| 0/1 | 1/1 | 2.07 | 3.71  |
| 1/1 | 1/1 | 9.52 | 9.16  |
| 1/1 | 1/1 | 8.13 | 7.83  |
| 1/1 | 1/1 | 4.27 | 4.03  |
| 1/1 | 1/1 | 7.55 | 6.76  |
| 1/1 | 1/1 | 7.85 | 7.19  |
| 1/1 | 1/1 | 6.88 | 6.27  |
| 1/1 | 1/1 | 8.66 | 8.17  |
| 1/1 | 1/1 | 9.47 | 8.54  |
| 1/1 | 1/1 | 6.69 | 8.09  |
| 1/1 | 1/1 | 5.46 | 4.7   |
| 1/1 | 1/1 | 4.93 | 4.46  |
| 1/1 | 0/1 | 6.02 | 4.14  |
| 0/1 | 1/1 | 2.99 | 3.45  |
| 1/1 | 1/1 | 5.28 | 5.77  |
| 1/1 | 1/1 | 4.4  | 3.41  |

|     |     |       |       |
|-----|-----|-------|-------|
| 1/1 | 1/1 | 6.09  | 5.33  |
| 1/1 | 1/1 | 6.33  | 5.6   |
| 1/1 | 0/1 | 3.04  | 2.36  |
| 1/1 | 1/1 | 4.81  | 4.11  |
| 1/1 | 1/1 | 4.75  | 6.23  |
| 1/1 | 1/1 | 5.51  | 7.11  |
| 0/1 | 1/1 | 2.83  | 4.52  |
| 1/1 | 1/1 | 5.94  | 3.31  |
| 1/1 | 1/1 | 5.82  | 5.52  |
| 0/1 | 1/1 | 6.7   | 6.4   |
| 1/1 | 1/1 | 7.52  | 7.26  |
| 0/1 | 1/1 | 4.01  | 3.87  |
| 1/1 | 1/1 | 8.05  | 8.02  |
| 1/1 | 1/1 | 5.91  | 5.99  |
| 1/1 | 1/1 | 11.3  | 11.4  |
| 0/1 | 1/1 | 2.34  | 2.46  |
| 0/1 | 1/1 | 3.11  | 3.28  |
| 1/1 | 1/1 | 7.58  | 7.82  |
| 0/1 | 1/1 | 6.02  | 6.27  |
| 1/1 | 1/1 | 7.35  | 7.69  |
| 1/1 | 1/1 | 7.83  | 8.18  |
| 1/1 | 1/1 | 8.41  | 8.82  |
| 1/1 | 1/1 | 8.13  | 8.69  |
| 0/1 | 1/1 | 6.58  | 7.3   |
| 1/1 | 1/1 | 7.48  | 6.9   |
| 0/1 | 1/1 | 3.99  | 5.85  |
| 0/1 | 1/1 | 2.69  | 5.36  |
| 1/1 | 1/1 | 4.98  | 3.07  |
| 1/1 | 1/1 | 9.11  | 9.6   |
| 1/1 | 1/1 | 4.59  | 3.02  |
| 0/1 | 1/1 | 2.23  | 3.09  |
| 1/1 | 1/1 | 3.77  | 4.68  |
| 1/1 | 1/1 | 3.27  | 4.19  |
| 1/1 | 1/1 | 6.89  | 5.88  |
| 1/1 | 1/1 | 4.95  | 3.99  |
| 1/1 | 1/1 | 6.08  | 7.43  |
| 1/1 | 1/1 | 4.29  | 5.74  |
| 1/1 | 1/1 | 4.68  | 6.73  |
| 1/1 | 1/1 | 6.09  | 4.81  |
| 1/1 | 1/1 | 10.01 | 11.47 |
| 1/1 | 1/1 | 6.5   | 5.61  |
| 1/1 | 1/1 | 6.43  | 5.83  |
| 0/1 | 1/1 | 2.05  | 3.52  |
| 1/1 | 1/1 | 4.58  | 6.14  |
| 1/1 | 1/1 | 4.32  | 3.84  |
| 1/1 | 1/1 | 8.92  | 8.6   |
| 1/1 | 1/1 | 6.56  | 6.24  |
| 1/1 | 1/1 | 6.2   | 6.01  |
| 1/1 | 1/1 | 5.27  | 5.1   |
| 1/1 | 1/1 | 5.61  | 5.39  |
| 1/1 | 1/1 | 5.53  | 5.44  |
| 1/1 | 1/1 | 5.84  | 5.77  |
| 1/1 | 1/1 | 10.3  | 10.24 |
| 1/1 | 1/1 | 7.32  | 7.28  |
| 1/1 | 1/1 | 6.1   | 6.09  |
| 1/1 | 1/1 | 6.55  | 6.55  |
| 0/1 | 1/1 | 4.62  | 4.62  |
| 1/1 | 1/1 | 6.82  | 6.85  |

|     |     |      |      |
|-----|-----|------|------|
| 1/1 | 1/1 | 9.47 | 9.5  |
| 1/1 | 1/1 | 7.77 | 7.2  |
| 1/1 | 1/1 | 7.32 | 6.85 |
| 1/1 | 1/1 | 8.19 | 7.77 |
| 1/1 | 1/1 | 6.46 | 5.77 |
| 1/1 | 1/1 | 4.21 | 3.76 |
| 1/1 | 0/1 | 3.29 | 2.41 |
| 1/1 | 1/1 | 6.97 | 6.18 |
| 1/1 | 1/1 | 2.85 | 2.18 |
| 1/1 | 1/1 | 3.27 | 2.66 |
| 0/1 | 1/1 | 4.17 | 5.63 |
| 1/1 | 1/1 | 7.77 | 7.38 |
| 1/1 | 1/1 | 3.03 | 2.76 |
| 1/1 | 1/1 | 7.8  | 7.59 |
| 1/1 | 1/1 | 8.83 | 8.63 |
| 1/1 | 0/1 | 5.03 | 2.46 |
| 1/1 | 1/1 | 6.6  | 4.23 |
| 1/1 | 0/1 | 5.39 | 3.03 |
| 1/1 | 0/1 | 4.76 | 2.45 |
| 1/1 | 1/1 | 3    | 2.77 |
| 0/1 | 1/1 | 3.06 | 2.84 |
| 1/1 | 1/1 | 4.56 | 4.42 |
| 1/1 | 1/1 | 4.3  | 4.29 |
| 1/1 | 1/1 | 4.11 | 4.11 |
| 0/1 | 1/1 | 2.11 | 2.24 |
| 1/1 | 1/1 | 5.96 | 6.11 |
| 0/1 | 1/1 | 2.5  | 2.66 |
| 1/1 | 1/1 | 3.7  | 3.88 |
| 0/1 | 1/1 | 2.81 | 2.99 |
| 1/1 | 1/1 | 4.98 | 5.21 |
| 1/1 | 1/1 | 7.56 | 7.81 |
| 0/1 | 1/1 | 3.41 | 4.02 |
| 0/1 | 1/1 | 3.57 | 4.66 |
| 1/1 | 1/1 | 5.64 | 4.07 |
| 1/1 | 0/1 | 4.08 | 2.72 |
| 1/1 | 1/1 | 3.14 | 3.89 |
| 1/1 | 1/1 | 2.97 | 4.16 |
| 0/1 | 1/1 | 2.35 | 3.85 |
| 1/1 | 1/1 | 4.41 | 3.86 |
| 1/1 | 1/1 | 3.06 | 2.56 |
| 1/1 | 1/1 | 8.86 | 8.44 |
| 1/1 | 1/1 | 6.05 | 5.7  |
| 1/1 | 1/1 | 3.25 | 5.03 |
| 1/1 | 1/1 | 4.13 | 5.93 |
| 0/1 | 1/1 | 2.31 | 4.17 |
| 1/1 | 1/1 | 6.85 | 8.74 |
| 1/1 | 0/1 | 3.97 | 3.23 |
| 1/1 | 1/1 | 9.94 | 9.46 |
| 1/1 | 1/1 | 5.43 | 5.01 |
| 0/1 | 1/1 | 2.51 | 4.53 |
| 1/1 | 1/1 | 4    | 6.22 |
| 1/1 | 1/1 | 7.4  | 7.1  |
| 0/1 | 1/1 | 3.31 | 5.88 |
| 1/1 | 1/1 | 4.43 | 3.88 |
| 1/1 | 1/1 | 5.92 | 5.59 |
| 1/1 | 0/1 | 3.34 | 2.22 |
| 1/1 | 1/1 | 4.07 | 2.97 |
| 1/1 | 1/1 | 6.19 | 5.22 |

|     |     |       |       |
|-----|-----|-------|-------|
| 1/1 | 1/1 | 5.44  | 4.59  |
| 1/1 | 1/1 | 3.13  | 2.49  |
| 1/1 | 1/1 | 5.82  | 5.25  |
| 1/1 | 1/1 | 5.26  | 7.01  |
| 0/1 | 1/1 | 3.29  | 5.26  |
| 1/1 | 1/1 | 3.11  | 5.34  |
| 1/1 | 1/1 | 3.9   | 3.4   |
| 1/1 | 0/1 | 2.48  | 2.05  |
| 1/1 | 1/1 | 6.17  | 5.78  |
| 1/1 | 1/1 | 5.39  | 7.32  |
| 1/1 | 1/1 | 5.76  | 4.23  |
| 1/1 | 1/1 | 5.21  | 3.73  |
| 1/1 | 0/1 | 5.4   | 3.95  |
| 1/1 | 1/1 | 8.06  | 6.95  |
| 1/1 | 1/1 | 8.36  | 7.28  |
| 1/1 | 0/1 | 5.32  | 4.27  |
| 1/1 | 1/1 | 4.68  | 3.76  |
| 1/1 | 1/1 | 5.45  | 4.62  |
| 0/1 | 1/1 | 4.37  | 5.56  |
| 0/1 | 1/1 | 4.52  | 5.78  |
| 0/1 | 1/1 | 2.81  | 4.27  |
| 0/1 | 1/1 | 3.51  | 5.25  |
| 1/1 | 1/1 | 6.15  | 5.38  |
| 1/1 | 1/1 | 6.4   | 5.69  |
| 1/1 | 1/1 | 7.81  | 7.16  |
| 1/1 | 1/1 | 5.45  | 4.96  |
| 1/1 | 1/1 | 8.06  | 6.95  |
| 1/1 | 1/1 | 8.36  | 7.28  |
| 1/1 | 0/1 | 5.32  | 4.27  |
| 1/1 | 1/1 | 4.68  | 3.76  |
| 1/1 | 1/1 | 5.45  | 4.62  |
| 0/1 | 1/1 | 4.37  | 5.56  |
| 0/1 | 1/1 | 4.52  | 5.78  |
| 0/1 | 1/1 | 2.81  | 4.27  |
| 0/1 | 1/1 | 3.51  | 5.25  |
| 1/1 | 1/1 | 7.9   | 7.12  |
| 1/1 | 1/1 | 5.17  | 4.41  |
| 1/1 | 1/1 | 8.46  | 7.81  |
| 1/1 | 1/1 | 3.39  | 2.54  |
| 1/1 | 0/1 | 3.49  | 2.73  |
| 0/1 | 1/1 | 2.35  | 3.91  |
| 1/1 | 0/1 | 3.87  | 2.85  |
| 1/1 | 1/1 | 7.01  | 6.14  |
| 1/1 | 1/1 | 5.04  | 3.85  |
| 1/1 | 1/1 | 6.76  | 5.66  |
| 0/1 | 1/1 | 3.61  | 5.84  |
| 0/1 | 1/1 | 3.71  | 3.37  |
| 1/1 | 1/1 | 3.69  | 3.37  |
| 1/1 | 1/1 | 7.12  | 6.86  |
| 1/1 | 1/1 | 5.2   | 5.07  |
| 1/1 | 0/1 | 5.92  | 3.17  |
| 1/1 | 1/1 | 6.72  | 6.5   |
| 1/1 | 1/1 | 10.75 | 10.62 |
| 1/1 | 1/1 | 5.72  | 5.78  |
| 0/1 | 1/1 | 5.98  | 6.26  |
| 1/1 | 1/1 | 9.07  | 8.2   |
| 1/1 | 1/1 | 6.71  | 5.96  |
| 1/1 | 1/1 | 4.7   | 6.32  |

|     |     |       |       |
|-----|-----|-------|-------|
| 1/1 | 1/1 | 4.99  | 6.66  |
| 0/1 | 1/1 | 2.51  | 4.4   |
| 1/1 | 1/1 | 4.18  | 2.75  |
| 0/1 | 1/1 | 3.01  | 3.89  |
| 1/1 | 1/1 | 9.34  | 8.58  |
| 1/1 | 1/1 | 4.07  | 3.51  |
| 1/1 | 1/1 | 6.33  | 5.84  |
| 1/1 | 1/1 | 5.38  | 3.43  |
| 1/1 | 1/1 | 6.38  | 7.2   |
| 1/1 | 0/1 | 5.41  | 4.06  |
| 1/1 | 1/1 | 4.98  | 6.52  |
| 1/1 | 1/1 | 4.59  | 4.21  |
| 1/1 | 1/1 | 6.41  | 6.32  |
| 1/1 | 0/1 | 4.49  | 3.56  |
| 1/1 | 1/1 | 12.97 | 12.18 |
| 1/1 | 1/1 | 8.18  | 7.48  |
| 1/1 | 1/1 | 8.66  | 8.55  |
| 1/1 | 1/1 | 3.94  | 3.89  |
| 0/1 | 1/1 | 4.01  | 4     |
| 1/1 | 1/1 | 3.3   | 3.43  |
| 1/1 | 1/1 | 6.5   | 8.76  |
| 1/1 | 1/1 | 3.45  | 3.36  |
| 1/1 | 1/1 | 4.98  | 4.97  |
| 1/1 | 1/1 | 4.45  | 4.6   |
| 1/1 | 1/1 | 5.48  | 7.93  |
| 0/1 | 1/1 | 4.24  | 7.8   |
| 1/1 | 1/1 | 3.46  | 7.54  |
| 1/1 | 0/1 | 3.06  | 2.01  |
| 1/1 | 1/1 | 3.31  | 5.01  |
| 1/1 | 1/1 | 3.09  | 5.37  |
| 1/1 | 0/1 | 4.5   | 3.8   |
| 1/1 | 0/1 | 2.48  | 1.94  |
| 1/1 | 1/1 | 6.24  | 5.8   |
| 1/1 | 0/1 | 7.23  | 6.53  |
| 1/1 | 1/1 | 4.63  | 4.04  |
| 0/1 | 1/1 | 6.2   | 5.76  |
| 1/1 | 1/1 | 7.29  | 6.85  |
| 1/1 | 1/1 | 3.81  | 5.43  |
| 1/1 | 1/1 | 4.8   | 6.59  |
| 1/1 | 1/1 | 4.35  | 7.03  |
| 1/1 | 1/1 | 7.25  | 6.25  |
| 1/1 | 1/1 | 5.61  | 4.63  |
| 1/1 | 1/1 | 10.7  | 9.74  |
| 1/1 | 1/1 | 7.28  | 5.98  |
| 0/1 | 1/1 | 2.69  | 3.78  |
| 0/1 | 1/1 | 4.5   | 5.66  |
| 0/1 | 1/1 | 2.66  | 4.13  |
| 1/1 | 0/1 | 10.13 | 9.42  |
| 1/1 | 0/1 | 3.45  | 2.77  |
| 1/1 | 1/1 | 5.67  | 5.12  |
| 0/1 | 1/1 | 2.91  | 5.41  |
| 1/1 | 0/1 | 3.99  | 2.78  |
| 1/1 | 1/1 | 5.23  | 6.51  |
| 1/1 | 1/1 | 3.57  | 2.63  |
| 1/1 | 1/1 | 4.9   | 6.28  |
| 0/1 | 1/1 | 2.53  | 4.49  |
| 1/1 | 0/1 | 4.69  | 2.53  |
| 0/1 | 1/1 | 2.19  | 2.34  |



|     |     |       |       |
|-----|-----|-------|-------|
| 1/1 | 1/1 | 4.17  | 4.34  |
| 1/1 | 1/1 | 3.93  | 4.2   |
| 1/1 | 1/1 | 5.48  | 5.92  |
| 1/1 | 1/1 | 4.27  | 4.87  |
| 1/1 | 1/1 | 6.52  | 3.41  |
| 1/1 | 1/1 | 8.37  | 7.61  |
| 0/1 | 1/1 | 6.86  | 6.85  |
| 1/1 | 1/1 | 8.38  | 7.9   |
| 1/1 | 1/1 | 6.76  | 6.33  |
| 1/1 | 1/1 | 6.26  | 8.16  |
| 0/1 | 1/1 | 3.08  | 5.12  |
| 1/1 | 1/1 | 4.28  | 6.84  |
| 0/1 | 1/1 | 3.74  | 6.64  |
| 1/1 | 1/1 | 2.74  | 6.36  |
| 1/1 | 1/1 | 9.12  | 7.9   |
| 1/1 | 1/1 | 7.28  | 6.09  |
| 1/1 | 0/1 | 5.29  | 4.19  |
| 1/1 | 0/1 | 3.66  | 2.94  |
| 1/1 | 1/1 | 3.81  | 5.74  |
| 1/1 | 1/1 | 5.15  | 3.95  |
| 1/1 | 1/1 | 6.65  | 5.45  |
| 1/1 | 0/1 | 7.52  | 6.57  |
| 1/1 | 1/1 | 5.15  | 3.95  |
| 1/1 | 1/1 | 6.65  | 5.45  |
| 1/1 | 0/1 | 7.52  | 6.57  |
| 1/1 | 1/1 | 7.02  | 6.87  |
| 1/1 | 1/1 | 8.09  | 8.08  |
| 1/1 | 1/1 | 3.35  | 3.34  |
| 1/1 | 1/1 | 8.98  | 9.01  |
| 0/1 | 1/1 | 5.89  | 5.96  |
| 1/1 | 1/1 | 4.29  | 3.63  |
| 1/1 | 1/1 | 3.69  | 3.15  |
| 1/1 | 0/1 | 6.59  | 5.8   |
| 1/1 | 1/1 | 11.75 | 11.17 |
| 1/1 | 1/1 | 6.1   | 5.57  |
| 1/1 | 1/1 | 4.75  | 6.31  |
| 1/1 | 1/1 | 3.75  | 5.34  |
| 1/1 | 1/1 | 4.26  | 5.91  |
| 1/1 | 0/1 | 5.47  | 4.66  |
| 1/1 | 1/1 | 7.96  | 7.17  |
| 1/1 | 1/1 | 7.37  | 6.51  |
| 1/1 | 0/1 | 7.48  | 6.84  |
| 1/1 | 1/1 | 5.49  | 7.15  |
| 1/1 | 1/1 | 7.82  | 6.81  |
| 1/1 | 1/1 | 3.4   | 5.2   |
| 1/1 | 1/1 | 7.45  | 6.56  |
| 1/1 | 1/1 | 7.42  | 6.79  |
| 0/1 | 1/1 | 3.72  | 5.39  |
| 0/1 | 1/1 | 3.52  | 5.19  |
| 1/1 | 1/1 | 4.98  | 7.58  |
| 1/1 | 0/1 | 4.95  | 3.7   |
| 1/1 | 1/1 | 9.06  | 7.92  |
| 1/1 | 1/1 | 5.61  | 6.74  |
| 1/1 | 1/1 | 5.1   | 6.52  |
| 1/1 | 1/1 | 9.32  | 5.61  |
| 1/1 | 1/1 | 8.77  | 5.19  |
| 1/1 | 1/1 | 8.61  | 7.42  |
| 1/1 | 1/1 | 7.66  | 6.7   |

|     |     |       |       |
|-----|-----|-------|-------|
| 1/1 | 1/1 | 4.36  | 3.41  |
| 1/1 | 1/1 | 6.12  | 5.43  |
| 0/1 | 1/1 | 6.71  | 6.49  |
| 1/1 | 1/1 | 5.81  | 5.61  |
| 0/1 | 1/1 | 2.11  | 2.12  |
| 1/1 | 1/1 | 5.78  | 5.1   |
| 1/1 | 1/1 | 4.05  | 5.67  |
| 1/1 | 1/1 | 5.18  | 7.16  |
| 1/1 | 1/1 | 5.49  | 7.5   |
| 0/1 | 1/1 | 1.97  | 4.66  |
| 0/1 | 1/1 | 2.25  | 5.62  |
| 1/1 | 1/1 | 9.23  | 8.45  |
| 1/1 | 1/1 | 9.23  | 8.66  |
| 1/1 | 1/1 | 3.74  | 5.71  |
| 1/1 | 1/1 | 6.7   | 6.32  |
| 0/1 | 1/1 | 3.48  | 5.41  |
| 1/1 | 1/1 | 3.4   | 5.4   |
| 1/1 | 1/1 | 8.92  | 5.65  |
| 1/1 | 1/1 | 7.72  | 6.87  |
| 1/1 | 1/1 | 9.33  | 8.51  |
| 1/1 | 1/1 | 9.51  | 8.77  |
| 1/1 | 1/1 | 9.99  | 9.49  |
| 0/1 | 1/1 | 5.18  | 4.85  |
| 1/1 | 1/1 | 12.19 | 11.88 |
| 1/1 | 1/1 | 7.11  | 6.89  |
| 1/1 | 1/1 | 4.06  | 6.41  |
| 1/1 | 1/1 | 6.34  | 6.2   |
| 1/1 | 1/1 | 5.42  | 8.09  |
| 1/1 | 1/1 | 5.44  | 8.76  |
| 1/1 | 1/1 | 5.03  | 8.71  |
| 0/1 | 1/1 | 4.25  | 8.66  |
| 1/1 | 1/1 | 10.27 | 9.52  |
| 1/1 | 1/1 | 3.06  | 5.29  |
| 1/1 | 1/1 | 7.43  | 7.34  |
| 0/1 | 1/1 | 2.58  | 5.16  |
| 1/1 | 0/1 | 2.67  | 2.12  |
| 1/1 | 1/1 | 3.54  | 3.19  |
| 1/1 | 0/1 | 6.67  | 2.66  |
| 1/1 | 0/1 | 5.45  | 3.8   |
| 1/1 | 1/1 | 4.57  | 3.16  |
| 1/1 | 0/1 | 3.85  | 2.46  |
| 1/1 | 1/1 | 6.3   | 5.13  |
| 1/1 | 0/1 | 4.35  | 3.26  |
| 1/1 | 1/1 | 4.63  | 3.6   |
| 1/1 | 0/1 | 5.12  | 4.19  |
| 1/1 | 0/1 | 4.49  | 3.59  |
| 1/1 | 0/1 | 3.66  | 2.81  |
| 1/1 | 1/1 | 5.42  | 4.66  |
| 1/1 | 1/1 | 4.22  | 3.48  |
| 0/1 | 1/1 | 5.54  | 4.84  |
| 1/1 | 1/1 | 6.15  | 5.54  |
| 1/1 | 1/1 | 6.53  | 5.95  |
| 1/1 | 1/1 | 7.32  | 6.75  |
| 0/1 | 1/1 | 2.99  | 2.63  |
| 1/1 | 1/1 | 3.84  | 3.55  |
| 1/1 | 1/1 | 5.91  | 5.85  |
| 1/1 | 1/1 | 7.13  | 7.24  |
| 1/1 | 1/1 | 12.54 | 12.67 |

|     |     |      |      |
|-----|-----|------|------|
| 1/1 | 1/1 | 6.8  | 6.99 |
| 0/1 | 1/1 | 3.09 | 3.32 |
| 1/1 | 1/1 | 8.61 | 8.92 |
| 1/1 | 0/1 | 4.39 | 2.8  |
| 1/1 | 1/1 | 5.52 | 6.26 |
| 1/1 | 1/1 | 6.17 | 6.98 |
| 1/1 | 1/1 | 7.84 | 4.41 |
| 1/1 | 1/1 | 7.07 | 3.73 |
| 1/1 | 1/1 | 6.71 | 3.38 |
| 1/1 | 1/1 | 5.58 | 4.43 |
| 1/1 | 1/1 | 7.37 | 6.3  |
| 1/1 | 0/1 | 3.56 | 2.6  |
| 1/1 | 1/1 | 5.07 | 4.2  |
| 1/1 | 1/1 | 7.45 | 6.65 |
| 1/1 | 1/1 | 3.58 | 2.83 |
| 1/1 | 1/1 | 8.25 | 7.52 |
| 1/1 | 0/1 | 2.96 | 2.45 |
| 1/1 | 1/1 | 9.14 | 8.67 |
| 1/1 | 1/1 | 3.73 | 3.41 |
| 1/1 | 1/1 | 6.16 | 5.93 |
| 0/1 | 1/1 | 2.82 | 2.79 |
| 1/1 | 1/1 | 3.02 | 3.21 |
| 1/1 | 1/1 | 3.16 | 3.64 |
| 1/1 | 1/1 | 4.27 | 3.31 |
| 1/1 | 1/1 | 5.45 | 4.73 |
| 1/1 | 1/1 | 5.2  | 6.68 |
| 1/1 | 0/1 | 5.48 | 3.58 |
| 1/1 | 0/1 | 6.19 | 4.45 |
| 1/1 | 1/1 | 6.1  | 4.46 |
| 0/1 | 1/1 | 4.37 | 5    |
| 1/1 | 1/1 | 6.45 | 7.41 |
| 1/1 | 0/1 | 4.86 | 3.12 |
| 1/1 | 1/1 | 5.31 | 3.68 |
| 1/1 | 1/1 | 4.88 | 3.31 |
| 0/1 | 1/1 | 3.14 | 3.8  |
| 1/1 | 1/1 | 6.05 | 5.24 |
| 1/1 | 0/1 | 3.02 | 2.23 |
| 1/1 | 1/1 | 4.61 | 4.09 |
| 1/1 | 1/1 | 6.77 | 5.89 |
| 1/1 | 1/1 | 6.81 | 5.97 |
| 1/1 | 1/1 | 6.23 | 5.45 |
| 1/1 | 0/1 | 4.92 | 3.72 |
| 1/1 | 1/1 | 5.68 | 4.59 |
| 1/1 | 1/1 | 3.2  | 4.34 |
| 1/1 | 1/1 | 4.83 | 6.74 |
| 1/1 | 1/1 | 4.01 | 2.64 |
| 1/1 | 1/1 | 5.84 | 4.66 |
| 1/1 | 1/1 | 2.26 | 3.39 |
| 1/1 | 1/1 | 6.02 | 7.16 |
| 0/1 | 1/1 | 2.94 | 4.35 |
| 1/1 | 1/1 | 8.17 | 6.45 |
| 1/1 | 1/1 | 7.89 | 6.31 |
| 1/1 | 1/1 | 7.01 | 5.48 |
| 1/1 | 1/1 | 9.4  | 7.91 |
| 1/1 | 1/1 | 7.62 | 6.13 |
| 1/1 | 1/1 | 6.44 | 4.93 |
| 1/1 | 1/1 | 6.26 | 4.96 |
| 1/1 | 1/1 | 3.71 | 2.48 |

|     |     |      |       |
|-----|-----|------|-------|
| 1/1 | 1/1 | 5.11 | 5.91  |
| 0/1 | 1/1 | 2.24 | 3.05  |
| 1/1 | 1/1 | 6.99 | 7.8   |
| 1/1 | 1/1 | 5.11 | 6.09  |
| 1/1 | 1/1 | 5.19 | 6.3   |
| 1/1 | 1/1 | 4.59 | 5.71  |
| 0/1 | 1/1 | 2.66 | 3.8   |
| 1/1 | 1/1 | 4.93 | 4.55  |
| 1/1 | 1/1 | 3.85 | 6.85  |
| 1/1 | 1/1 | 6.51 | 5.62  |
| 1/1 | 1/1 | 5.2  | 4.51  |
| 0/1 | 1/1 | 3.27 | 5.43  |
| 1/1 | 0/1 | 4.06 | 3.13  |
| 1/1 | 1/1 | 7.56 | 6.83  |
| 1/1 | 1/1 | 4.77 | 4.11  |
| 0/1 | 1/1 | 4.06 | 5.58  |
| 0/1 | 1/1 | 2.85 | 4.51  |
| 1/1 | 1/1 | 6.21 | 6.14  |
| 1/1 | 1/1 | 6.86 | 9.24  |
| 0/1 | 1/1 | 3.4  | 5.8   |
| 1/1 | 1/1 | 6.3  | 5.04  |
| 1/1 | 1/1 | 6.14 | 5.1   |
| 1/1 | 1/1 | 7.5  | 5.97  |
| 1/1 | 1/1 | 9.81 | 10.68 |
| 1/1 | 1/1 | 8.47 | 9.62  |
| 0/1 | 1/1 | 5.72 | 5.24  |
| 1/1 | 1/1 | 8.26 | 7.87  |
| 0/1 | 1/1 | 5.83 | 5.58  |
| 1/1 | 1/1 | 9.38 | 9.18  |
| 1/1 | 1/1 | 6.46 | 5.65  |
| 1/1 | 1/1 | 4.75 | 6.32  |
| 0/1 | 1/1 | 3.48 | 5.53  |
| 1/1 | 0/1 | 4.86 | 3.76  |
| 1/1 | 0/1 | 4.78 | 3.79  |
| 1/1 | 1/1 | 6.15 | 5.02  |
| 1/1 | 1/1 | 3.35 | 2.41  |
| 1/1 | 1/1 | 5.61 | 6.83  |
| 1/1 | 1/1 | 6.52 | 8.07  |
| 1/1 | 1/1 | 2.85 | 4.44  |
| 1/1 | 1/1 | 8.06 | 6.95  |
| 1/1 | 1/1 | 4.68 | 3.76  |
| 1/1 | 1/1 | 5.45 | 4.62  |
| 0/1 | 1/1 | 4.37 | 5.56  |
| 0/1 | 1/1 | 4.52 | 5.78  |
| 0/1 | 1/1 | 2.81 | 4.27  |
| 0/1 | 1/1 | 3.51 | 5.25  |
| 1/1 | 1/1 | 8.06 | 6.95  |
| 1/1 | 1/1 | 8.36 | 7.28  |
| 1/1 | 0/1 | 5.32 | 4.27  |
| 1/1 | 1/1 | 4.68 | 3.76  |
| 1/1 | 1/1 | 5.45 | 4.62  |
| 0/1 | 1/1 | 4.37 | 5.56  |
| 0/1 | 1/1 | 4.52 | 5.78  |
| 0/1 | 1/1 | 2.81 | 4.27  |
| 0/1 | 1/1 | 3.51 | 5.25  |
| 1/1 | 1/1 | 6.15 | 5.38  |
| 1/1 | 1/1 | 6.4  | 5.69  |
| 1/1 | 1/1 | 7.81 | 7.16  |

|     |     |       |       |
|-----|-----|-------|-------|
| 1/1 | 1/1 | 5.45  | 4.96  |
| 1/1 | 1/1 | 2.92  | 2.66  |
| 1/1 | 1/1 | 5.52  | 5.33  |
| 0/1 | 1/1 | 2.58  | 4.69  |
| 1/1 | 1/1 | 3.91  | 6.1   |
| 1/1 | 1/1 | 5.1   | 7.32  |
| 1/1 | 1/1 | 6.15  | 5.41  |
| 1/1 | 1/1 | 5.91  | 5.21  |
| 0/1 | 1/1 | 3.44  | 5     |
| 0/1 | 1/1 | 2.28  | 3.86  |
| 0/1 | 1/1 | 3.42  | 5.15  |
| 1/1 | 1/1 | 7.26  | 4.76  |
| 1/1 | 1/1 | 3.64  | 3.46  |
| 1/1 | 1/1 | 4.97  | 4.79  |
| 1/1 | 1/1 | 4.93  | 4.84  |
| 1/1 | 1/1 | 7.69  | 7.64  |
| 1/1 | 1/1 | 4.97  | 5     |
| 0/1 | 1/1 | 3.34  | 3.72  |
| 1/1 | 0/1 | 3.99  | 3.08  |
| 1/1 | 1/1 | 8.47  | 7.8   |
| 0/1 | 1/1 | 2.76  | 4.3   |
| 1/1 | 1/1 | 5.71  | 7.27  |
| 0/1 | 1/1 | 2.63  | 4.6   |
| 1/1 | 1/1 | 10.06 | 9.82  |
| 1/1 | 1/1 | 6.86  | 6.66  |
| 0/1 | 1/1 | 5.61  | 5.51  |
| 1/1 | 1/1 | 4.71  | 4.7   |
| 1/1 | 1/1 | 7.8   | 6.14  |
| 1/1 | 1/1 | 7.9   | 6.32  |
| 1/1 | 1/1 | 9.1   | 7.53  |
| 1/1 | 1/1 | 6.48  | 4.92  |
| 1/1 | 1/1 | 10.57 | 9.05  |
| 1/1 | 1/1 | 9.18  | 7.7   |
| 1/1 | 1/1 | 10.8  | 9.35  |
| 1/1 | 1/1 | 8.1   | 6.69  |
| 1/1 | 0/1 | 6.65  | 5.25  |
| 1/1 | 1/1 | 9.99  | 8.61  |
| 1/1 | 1/1 | 11.04 | 9.66  |
| 1/1 | 1/1 | 5.86  | 6.55  |
| 1/1 | 1/1 | 3.55  | 2.95  |
| 1/1 | 1/1 | 5.33  | 4.72  |
| 1/1 | 0/1 | 3.7   | 3.17  |
| 1/1 | 1/1 | 3.64  | 3.21  |
| 1/1 | 1/1 | 5.76  | 5.34  |
| 1/1 | 1/1 | 5.36  | 4.96  |
| 1/1 | 1/1 | 5.67  | 5.32  |
| 0/1 | 1/1 | 3.08  | 5     |
| 1/1 | 1/1 | 2.95  | 5.11  |
| 1/1 | 1/1 | 8.32  | 8.02  |
| 1/1 | 1/1 | 4.19  | 4.12  |
| 1/1 | 1/1 | 3.56  | 3.5   |
| 1/1 | 1/1 | 6.67  | 6.35  |
| 1/1 | 1/1 | 6.6   | 6.3   |
| 0/1 | 1/1 | 5.91  | 5.62  |
| 0/1 | 1/1 | 6.59  | 6.33  |
| 1/1 | 1/1 | 11.53 | 11.45 |
| 1/1 | 1/1 | 7.91  | 7.87  |
| 0/1 | 1/1 | 4.8   | 7.02  |

|     |     |       |      |
|-----|-----|-------|------|
| 0/1 | 1/1 | 3.86  | 6.3  |
| 1/1 | 1/1 | 4.88  | 4.59 |
| 1/1 | 1/1 | 5.56  | 5.46 |
| 1/1 | 1/1 | 3.04  | 5.22 |
| 1/1 | 1/1 | 3.58  | 2.95 |
| 1/1 | 1/1 | 9.44  | 9.04 |
| 1/1 | 1/1 | 3.77  | 5.44 |
| 0/1 | 1/1 | 4.15  | 6.59 |
| 1/1 | 1/1 | 6.02  | 5.44 |
| 1/1 | 1/1 | 5.93  | 5.46 |
| 0/1 | 1/1 | 4.3   | 3.97 |
| 0/1 | 1/1 | 3.39  | 5.09 |
| 1/1 | 1/1 | 6.19  | 7.98 |
| 1/1 | 1/1 | 5.23  | 7.02 |
| 0/1 | 1/1 | 2.11  | 3.97 |
| 0/1 | 1/1 | 2.4   | 5.13 |
| 1/1 | 1/1 | 7.37  | 6.74 |
| 1/1 | 0/1 | 3.23  | 2.67 |
| 1/1 | 1/1 | 6.95  | 6.6  |
| 1/1 | 1/1 | 8.06  | 6.95 |
| 1/1 | 1/1 | 8.36  | 7.28 |
| 1/1 | 0/1 | 5.32  | 4.27 |
| 1/1 | 1/1 | 4.68  | 3.76 |
| 1/1 | 1/1 | 5.45  | 4.62 |
| 0/1 | 1/1 | 4.37  | 5.56 |
| 0/1 | 1/1 | 4.52  | 5.78 |
| 0/1 | 1/1 | 2.81  | 4.27 |
| 0/1 | 1/1 | 3.51  | 5.25 |
| 1/1 | 1/1 | 6.61  | 5.27 |
| 1/1 | 1/1 | 4.89  | 6.05 |
| 1/1 | 1/1 | 5.14  | 6.49 |
| 1/1 | 1/1 | 6.22  | 4.69 |
| 0/1 | 1/1 | 4.4   | 5.54 |
| 0/1 | 1/1 | 2.49  | 3.64 |
| 1/1 | 0/1 | 4.57  | 2.84 |
| 1/1 | 1/1 | 4.65  | 5.55 |
| 1/1 | 0/1 | 3.87  | 2.42 |
| 1/1 | 1/1 | 3.59  | 4.44 |
| 1/1 | 1/1 | 4.52  | 3.61 |
| 1/1 | 1/1 | 5.69  | 4.84 |
| 1/1 | 1/1 | 4.11  | 3.36 |
| 1/1 | 1/1 | 4.31  | 6.13 |
| 1/1 | 1/1 | 7.7   | 5.65 |
| 1/1 | 1/1 | 8.34  | 6.32 |
| 0/1 | 1/1 | 3.47  | 5.04 |
| 1/1 | 1/1 | 6.75  | 6.06 |
| 1/1 | 1/1 | 5.66  | 5.09 |
| 1/1 | 1/1 | 10.85 | 10.4 |
| 1/1 | 0/1 | 4.02  | 2.94 |
| 1/1 | 1/1 | 5.69  | 6.93 |
| 0/1 | 1/1 | 3.06  | 5.23 |
| 1/1 | 1/1 | 8.64  | 7.66 |
| 1/1 | 1/1 | 9.58  | 8.61 |
| 1/1 | 1/1 | 6.05  | 5.23 |
| 1/1 | 1/1 | 10.28 | 9.52 |
| 1/1 | 1/1 | 4.92  | 6.27 |
| 1/1 | 1/1 | 4.95  | 6.41 |
| 1/1 | 1/1 | 3.04  | 4.53 |

|     |     |       |       |
|-----|-----|-------|-------|
| 1/1 | 0/1 | 5.25  | 3.99  |
| 1/1 | 0/1 | 4.9   | 3.66  |
| 1/1 | 0/1 | 3.9   | 2.72  |
| 1/1 | 0/1 | 4.81  | 3.71  |
| 0/1 | 1/1 | 2.57  | 3.69  |
| 1/1 | 1/1 | 2.94  | 4.58  |
| 1/1 | 1/1 | 3.88  | 5.79  |
| 1/1 | 0/1 | 3.42  | 2.42  |
| 1/1 | 0/1 | 3.36  | 2.43  |
| 1/1 | 1/1 | 4.53  | 6.26  |
| 1/1 | 0/1 | 7.68  | 6.52  |
| 1/1 | 0/1 | 4.49  | 3.4   |
| 1/1 | 0/1 | 3.53  | 2.49  |
| 0/1 | 1/1 | 3.04  | 4.35  |
| 1/1 | 1/1 | 5.08  | 6.68  |
| 1/1 | 1/1 | 9.1   | 8.32  |
| 1/1 | 1/1 | 7.23  | 6.48  |
| 1/1 | 0/1 | 4.16  | 2.68  |
| 1/1 | 1/1 | 9.13  | 7.87  |
| 0/1 | 1/1 | 2.43  | 3.23  |
| 0/1 | 1/1 | 2.13  | 2.96  |
| 1/1 | 1/1 | 3.51  | 4.39  |
| 1/1 | 1/1 | 3.02  | 3.9   |
| 0/1 | 1/1 | 2.43  | 3.78  |
| 1/1 | 1/1 | 7.46  | 3.39  |
| 1/1 | 1/1 | 10.16 | 6.34  |
| 1/1 | 1/1 | 7.2   | 5.48  |
| 1/1 | 1/1 | 10.01 | 9.3   |
| 1/1 | 0/1 | 2.71  | 2.01  |
| 1/1 | 1/1 | 8.46  | 8.03  |
| 0/1 | 1/1 | 3.59  | 3.35  |
| 1/1 | 1/1 | 10.19 | 10.22 |
| 1/1 | 1/1 | 9.58  | 9.67  |
| 1/1 | 1/1 | 12.7  | 12.8  |
| 1/1 | 1/1 | 8.79  | 8.22  |
| 1/1 | 1/1 | 7.82  | 7.45  |
| 1/1 | 1/1 | 10.12 | 9.81  |
| 1/1 | 1/1 | 11.58 | 7.48  |
| 1/1 | 1/1 | 10.81 | 6.84  |
| 1/1 | 1/1 | 13.01 | 11.61 |
| 1/1 | 1/1 | 6.77  | 5.85  |
| 0/1 | 1/1 | 5.74  | 5.14  |
| 1/1 | 1/1 | 5.85  | 5.25  |
| 1/1 | 1/1 | 6.29  | 5.76  |
| 1/1 | 1/1 | 8.35  | 7.9   |
| 1/1 | 1/1 | 6.78  | 6.36  |
| 0/1 | 1/1 | 6.14  | 5.74  |
| 1/1 | 1/1 | 7.22  | 6.85  |
| 1/1 | 1/1 | 6.8   | 6.45  |
| 1/1 | 1/1 | 10.4  | 10.12 |
| 1/1 | 1/1 | 8.34  | 8.19  |
| 1/1 | 1/1 | 7.11  | 6.97  |
| 0/1 | 1/1 | 6.16  | 6.03  |
| 0/1 | 1/1 | 4.85  | 4.73  |
| 1/1 | 1/1 | 6.24  | 6.14  |
| 1/1 | 1/1 | 10.6  | 10.5  |
| 0/1 | 1/1 | 6.71  | 6.64  |
| 1/1 | 1/1 | 5.72  | 5.81  |

|     |     |       |       |
|-----|-----|-------|-------|
| 1/1 | 1/1 | 6.92  | 7.03  |
| 0/1 | 1/1 | 3.68  | 3.93  |
| 0/1 | 1/1 | 7.43  | 7.76  |
| 1/1 | 1/1 | 4.9   | 4.35  |
| 1/1 | 1/1 | 4.41  | 3.96  |
| 1/1 | 1/1 | 4.31  | 6.47  |
| 1/1 | 1/1 | 3.31  | 5.54  |
| 1/1 | 1/1 | 5.97  | 4.73  |
| 1/1 | 1/1 | 6.69  | 8.05  |
| 1/1 | 1/1 | 9.7   | 8.45  |
| 1/1 | 1/1 | 3.6   | 4.66  |
| 1/1 | 1/1 | 4.24  | 5.32  |
| 1/1 | 1/1 | 4.89  | 6.04  |
| 0/1 | 1/1 | 4.82  | 6.1   |
| 1/1 | 1/1 | 8.66  | 10.09 |
| 1/1 | 1/1 | 9.08  | 7.58  |
| 1/1 | 0/1 | 4.4   | 3.13  |
| 1/1 | 1/1 | 9.28  | 8.25  |
| 1/1 | 1/1 | 5.57  | 6.97  |
| 1/1 | 1/1 | 5.15  | 3.95  |
| 1/1 | 1/1 | 6.65  | 5.45  |
| 1/1 | 0/1 | 7.52  | 6.57  |
| 1/1 | 1/1 | 5.15  | 3.95  |
| 1/1 | 1/1 | 6.65  | 5.45  |
| 1/1 | 0/1 | 7.52  | 6.57  |
| 1/1 | 1/1 | 5.15  | 3.95  |
| 1/1 | 1/1 | 6.65  | 5.45  |
| 1/1 | 0/1 | 7.52  | 6.57  |
| 1/1 | 0/1 | 5.37  | 4.79  |
| 1/1 | 1/1 | 3.26  | 2.76  |
| 1/1 | 1/1 | 7.02  | 6.72  |
| 1/1 | 1/1 | 4.06  | 3.22  |
| 1/1 | 0/1 | 3.54  | 2.73  |
| 1/1 | 1/1 | 5.3   | 6.74  |
| 0/1 | 1/1 | 2.96  | 4.63  |
| 0/1 | 1/1 | 2.48  | 4.24  |
| 1/1 | 1/1 | 7.9   | 6.62  |
| 0/1 | 1/1 | 3.84  | 5.17  |
| 0/1 | 1/1 | 3.42  | 4.94  |
| 0/1 | 1/1 | 3.13  | 4.76  |
| 0/1 | 1/1 | 2.97  | 5.22  |
| 1/1 | 1/1 | 6.79  | 5.67  |
| 1/1 | 1/1 | 5     | 3.96  |
| 1/1 | 1/1 | 6.01  | 3.12  |
| 1/1 | 0/1 | 4.59  | 1.89  |
| 1/1 | 1/1 | 7.78  | 7.15  |
| 1/1 | 1/1 | 7.4   | 7.16  |
| 1/1 | 1/1 | 3.24  | 3.02  |
| 1/1 | 1/1 | 4.37  | 4.29  |
| 1/1 | 1/1 | 3.15  | 3.12  |
| 1/1 | 1/1 | 11.72 | 11.84 |
| 1/1 | 1/1 | 2.54  | 2.68  |
| 0/1 | 1/1 | 4.99  | 5.54  |
| 1/1 | 1/1 | 4.02  | 3.06  |
| 0/1 | 1/1 | 3.39  | 4.92  |



|     |     |       |       |
|-----|-----|-------|-------|
| 1/1 | 1/1 | 9.71  | 7.02  |
| 1/1 | 1/1 | 6.08  | 3.53  |
| 1/1 | 1/1 | 5.32  | 2.77  |
| 1/1 | 1/1 | 9.79  | 7.25  |
| 1/1 | 0/1 | 6.15  | 3.7   |
| 1/1 | 1/1 | 6.15  | 5.73  |
| 1/1 | 1/1 | 9.41  | 9.09  |
| 1/1 | 1/1 | 5.27  | 4.95  |
| 1/1 | 1/1 | 6.43  | 6.15  |
| 1/1 | 1/1 | 7.26  | 6.98  |
| 1/1 | 1/1 | 10.4  | 10.18 |
| 1/1 | 1/1 | 4.47  | 4.25  |
| 1/1 | 1/1 | 8.78  | 8.58  |
| 1/1 | 1/1 | 6.97  | 6.84  |
| 1/1 | 1/1 | 9.09  | 8.97  |
| 1/1 | 1/1 | 5.98  | 5.92  |
| 1/1 | 1/1 | 7.08  | 7.04  |
| 1/1 | 1/1 | 6.63  | 6.62  |
| 1/1 | 1/1 | 5.59  | 5.58  |
| 1/1 | 1/1 | 8.02  | 8.03  |
| 1/1 | 1/1 | 5.61  | 5.72  |
| 1/1 | 1/1 | 5.94  | 6.16  |
| 0/1 | 1/1 | 3.5   | 3.76  |
| 0/1 | 1/1 | 3.81  | 3.4   |
| 1/1 | 1/1 | 7.18  | 6.83  |
| 1/1 | 1/1 | 6     | 5.71  |
| 1/1 | 1/1 | 10.42 | 10.19 |
| 1/1 | 1/1 | 4.43  | 6.37  |
| 1/1 | 1/1 | 7.02  | 5.16  |
| 0/1 | 1/1 | 3.06  | 3.63  |
| 0/1 | 1/1 | 3.29  | 3.94  |
| 0/1 | 1/1 | 7.53  | 7.28  |
| 1/1 | 1/1 | 5.3   | 5.2   |
| 1/1 | 1/1 | 2.92  | 2.9   |
| 1/1 | 1/1 | 8.11  | 6.63  |
| 1/1 | 1/1 | 7.71  | 6.29  |
| 1/1 | 1/1 | 9.81  | 10.68 |
| 1/1 | 1/1 | 10.13 | 8.74  |
| 1/1 | 1/1 | 9.81  | 10.68 |
| 1/1 | 1/1 | 8.47  | 9.62  |
| 1/1 | 1/1 | 8.9   | 7.88  |
| 1/1 | 1/1 | 6.57  | 5.65  |
| 1/1 | 0/1 | 7.78  | 6.95  |
| 1/1 | 1/1 | 5.27  | 4.52  |
| 1/1 | 1/1 | 7.85  | 7.23  |
| 1/1 | 1/1 | 7.44  | 6.9   |
| 1/1 | 1/1 | 7.18  | 6.62  |
| 1/1 | 1/1 | 5.16  | 4.62  |
| 1/1 | 1/1 | 9.34  | 8.85  |
| 0/1 | 1/1 | 4.52  | 4.03  |
| 0/1 | 1/1 | 6.49  | 6.09  |
| 0/1 | 1/1 | 6.23  | 5.91  |
| 1/1 | 1/1 | 7.15  | 6.84  |
| 1/1 | 1/1 | 7.62  | 6.95  |
| 1/1 | 1/1 | 8.8   | 8.27  |
| 1/1 | 1/1 | 7.3   | 6.87  |
| 0/1 | 1/1 | 4.2   | 5.81  |
| 0/1 | 1/1 | 1.97  | 3.59  |

|     |     |       |       |
|-----|-----|-------|-------|
| 0/1 | 1/1 | 2.9   | 5.13  |
| 1/1 | 0/1 | 4.21  | 2.87  |
| 1/1 | 1/1 | 5.25  | 4.12  |
| 1/1 | 1/1 | 4.63  | 5.76  |
| 1/1 | 1/1 | 4.02  | 3.52  |
| 1/1 | 1/1 | 9.12  | 8.7   |
| 1/1 | 1/1 | 6.79  | 6.43  |
| 1/1 | 1/1 | 3.07  | 2.78  |
| 0/1 | 1/1 | 3.28  | 5.52  |
| 1/1 | 1/1 | 5.83  | 4.39  |
| 0/1 | 1/1 | 2.96  | 3.81  |
| 1/1 | 1/1 | 4.62  | 5.72  |
| 0/1 | 1/1 | 2.7   | 4.4   |
| 1/1 | 0/1 | 3.48  | 2.18  |
| 1/1 | 1/1 | 9.85  | 8.75  |
| 1/1 | 1/1 | 6.87  | 7.86  |
| 1/1 | 1/1 | 5.43  | 6.44  |
| 0/1 | 1/1 | 2.82  | 3.85  |
| 1/1 | 1/1 | 6.43  | 7.49  |
| 1/1 | 1/1 | 5.38  | 6.46  |
| 1/1 | 1/1 | 4.85  | 6.03  |
| 1/1 | 1/1 | 5.4   | 6.65  |
| 1/1 | 1/1 | 5.45  | 6.78  |
| 1/1 | 1/1 | 5.26  | 6.66  |
| 1/1 | 1/1 | 5.89  | 7.3   |
| 1/1 | 1/1 | 4.22  | 5.77  |
| 1/1 | 1/1 | 6.9   | 5.41  |
| 0/1 | 1/1 | 5.21  | 6.61  |
| 1/1 | 1/1 | 10.72 | 10.58 |
| 1/1 | 1/1 | 5.09  | 5.01  |
| 1/1 | 1/1 | 2.56  | 2.58  |
| 1/1 | 1/1 | 8.33  | 8.44  |
| 1/1 | 1/1 | 6.25  | 4.97  |
| 1/1 | 1/1 | 7.39  | 8.36  |
| 0/1 | 1/1 | 3.18  | 4.29  |
| 1/1 | 1/1 | 5.85  | 4.49  |
| 1/1 | 1/1 | 3.52  | 4.48  |
| 0/1 | 1/1 | 3.25  | 4.27  |
| 0/1 | 1/1 | 2.88  | 4.13  |
| 0/1 | 1/1 | 2.41  | 3.72  |
| 0/1 | 1/1 | 3.27  | 4.69  |
| 1/1 | 1/1 | 6.04  | 4.77  |
| 0/1 | 1/1 | 2.05  | 3.12  |
| 1/1 | 0/1 | 4.11  | 3.47  |
| 1/1 | 0/1 | 2.76  | 2.17  |
| 1/1 | 1/1 | 4.32  | 3.77  |
| 1/1 | 0/1 | 3.28  | 2.39  |
| 1/1 | 1/1 | 5.69  | 4.93  |
| 1/1 | 1/1 | 7.9   | 7.17  |
| 0/1 | 1/1 | 2.15  | 3.57  |
| 1/1 | 1/1 | 6.81  | 6.51  |
| 0/1 | 1/1 | 6.09  | 5.92  |
| 1/1 | 1/1 | 11.59 | 11.43 |
| 1/1 | 1/1 | 9.44  | 9.33  |
| 1/1 | 1/1 | 3.25  | 5.25  |
| 1/1 | 1/1 | 3.92  | 6     |
| 1/1 | 1/1 | 5.82  | 7.94  |
| 0/1 | 1/1 | 6.21  | 5.59  |

|     |     |       |      |
|-----|-----|-------|------|
| 1/1 | 1/1 | 6.5   | 5.97 |
| 1/1 | 1/1 | 8.24  | 7.74 |
| 1/1 | 1/1 | 6.22  | 5.72 |
| 1/1 | 1/1 | 5.56  | 4.37 |
| 1/1 | 1/1 | 10.82 | 9.78 |
| 1/1 | 1/1 | 5.88  | 4.93 |
| 0/1 | 1/1 | 3.79  | 5.3  |
| 1/1 | 1/1 | 7.1   | 7    |
| 1/1 | 1/1 | 3.24  | 3.18 |
| 1/1 | 1/1 | 6.72  | 6.69 |
| 1/1 | 1/1 | 4.28  | 4.24 |
| 1/1 | 1/1 | 7.34  | 7.33 |
| 0/1 | 1/1 | 2.11  | 4.39 |
| 0/1 | 1/1 | 2.31  | 4.82 |
| 0/1 | 1/1 | 2.25  | 4.8  |
| 0/1 | 1/1 | 4.21  | 7.09 |
| 0/1 | 1/1 | 3.39  | 6.46 |
| 1/1 | 0/1 | 5.25  | 3.66 |
| 1/1 | 1/1 | 4.46  | 3.1  |
| 1/1 | 0/1 | 3.45  | 2.08 |
| 1/1 | 0/1 | 4.29  | 3.13 |
| 1/1 | 1/1 | 6.31  | 4.64 |
| 1/1 | 0/1 | 4.1   | 2.55 |
| 1/1 | 0/1 | 3.87  | 2.32 |
| 0/1 | 1/1 | 3.81  | 4.41 |
| 1/1 | 1/1 | 5.19  | 5.79 |
| 1/1 | 1/1 | 3.4   | 4.14 |
| 0/1 | 1/1 | 2.27  | 3.21 |
| 1/1 | 0/1 | 5.46  | 3.8  |
| 0/1 | 1/1 | 3.94  | 5    |
| 0/1 | 1/1 | 4.72  | 5.82 |
| 0/1 | 1/1 | 3.01  | 4.18 |
| 0/1 | 1/1 | 4.22  | 5.52 |
| 0/1 | 1/1 | 4.33  | 5.84 |
| 1/1 | 0/1 | 6.07  | 4.26 |
| 0/1 | 1/1 | 3.82  | 4.35 |
| 1/1 | 0/1 | 4.53  | 3.43 |
| 1/1 | 1/1 | 4.92  | 6.41 |
| 1/1 | 1/1 | 9.14  | 8.2  |
| 1/1 | 1/1 | 5.1   | 4.34 |
| 1/1 | 1/1 | 7.69  | 6.96 |
| 1/1 | 1/1 | 5.66  | 3.94 |
| 1/1 | 1/1 | 6.52  | 4.91 |
| 1/1 | 0/1 | 5.61  | 4.06 |
| 1/1 | 1/1 | 10.62 | 9.58 |
| 1/1 | 1/1 | 5.4   | 7.38 |
| 1/1 | 1/1 | 6.66  | 5    |
| 1/1 | 1/1 | 6.44  | 7.25 |
| 1/1 | 1/1 | 6.77  | 7.61 |
| 1/1 | 1/1 | 5.15  | 3.95 |
| 1/1 | 1/1 | 6.65  | 5.45 |
| 1/1 | 0/1 | 7.52  | 6.57 |
| 1/1 | 1/1 | 9.13  | 8.79 |
| 1/1 | 1/1 | 8.17  | 7.83 |
| 1/1 | 1/1 | 7.58  | 7.25 |
| 0/1 | 1/1 | 3.11  | 5.17 |
| 1/1 | 1/1 | 3.94  | 6.08 |
| 1/1 | 1/1 | 6.46  | 8.8  |

|     |     |      |      |
|-----|-----|------|------|
| 0/1 | 1/1 | 4.74 | 7.16 |
| 1/1 | 1/1 | 6.47 | 4.92 |
| 1/1 | 1/1 | 3.97 | 4.71 |
| 1/1 | 1/1 | 6.27 | 5.04 |
| 0/1 | 1/1 | 4.53 | 6.24 |
| 1/1 | 1/1 | 5.21 | 4.29 |
| 1/1 | 1/1 | 6.31 | 7.74 |
| 0/1 | 1/1 | 2.27 | 3.73 |
| 1/1 | 1/1 | 5.8  | 7.46 |
| 1/1 | 1/1 | 6.34 | 8.03 |
| 1/1 | 0/1 | 6.91 | 5.95 |
| 1/1 | 0/1 | 3.25 | 2.46 |
| 1/1 | 0/1 | 3.86 | 3.09 |
| 1/1 | 1/1 | 5.16 | 6.78 |
| 1/1 | 1/1 | 3.43 | 5.2  |
| 0/1 | 1/1 | 6.38 | 6.07 |
| 1/1 | 1/1 | 5.54 | 7.65 |
| 1/1 | 1/1 | 4.99 | 3.72 |
| 1/1 | 0/1 | 4.26 | 3.06 |
| 1/1 | 1/1 | 3.39 | 4.52 |
| 1/1 | 1/1 | 8.83 | 8.15 |
| 1/1 | 1/1 | 4.38 | 6.24 |
| 1/1 | 1/1 | 7.03 | 6.53 |
| 1/1 | 1/1 | 9.49 | 9.14 |
| 1/1 | 0/1 | 2.6  | 1.93 |
| 0/1 | 1/1 | 2.52 | 4.14 |
| 1/1 | 1/1 | 6.15 | 5.38 |
| 1/1 | 1/1 | 6.4  | 5.69 |
| 1/1 | 1/1 | 7.81 | 7.16 |
| 0/1 | 1/1 | 3.38 | 2.91 |
| 1/1 | 1/1 | 5.93 | 5.69 |
| 1/1 | 1/1 | 4.74 | 6.66 |
| 1/1 | 1/1 | 5.65 | 7.86 |
| 1/1 | 0/1 | 9.13 | 8.43 |
| 1/1 | 1/1 | 4.3  | 3.85 |
| 1/1 | 1/1 | 5.82 | 7.78 |
| 1/1 | 1/1 | 5.24 | 7.25 |
| 1/1 | 1/1 | 8.94 | 7.19 |
| 1/1 | 1/1 | 8.8  | 9.31 |
| 0/1 | 1/1 | 3.54 | 4.57 |
| 1/1 | 0/1 | 6.28 | 4.87 |
| 1/1 | 1/1 | 4.06 | 5.05 |
| 0/1 | 1/1 | 5.27 | 6.41 |
| 1/1 | 1/1 | 5.52 | 3.91 |
| 1/1 | 1/1 | 5.23 | 5.93 |
| 0/1 | 1/1 | 2.53 | 3.3  |
| 1/1 | 0/1 | 5.6  | 4.12 |
| 1/1 | 0/1 | 4.94 | 3.56 |
| 1/1 | 1/1 | 4.09 | 4.96 |
| 1/1 | 1/1 | 6.62 | 7.51 |
| 1/1 | 1/1 | 3.6  | 3.41 |
| 1/1 | 1/1 | 8.13 | 7.95 |
| 1/1 | 1/1 | 6.88 | 5.76 |
| 1/1 | 1/1 | 4.17 | 5.41 |
| 1/1 | 1/1 | 3.77 | 5.6  |
| 0/1 | 1/1 | 5.22 | 4.3  |
| 1/1 | 1/1 | 5.93 | 7.82 |
| 1/1 | 1/1 | 8.15 | 7.42 |

|     |     |       |       |
|-----|-----|-------|-------|
| 1/1 | 0/1 | 6.43  | 5.72  |
| 0/1 | 1/1 | 3.25  | 4.9   |
| 0/1 | 1/1 | 2.05  | 3.85  |
| 0/1 | 1/1 | 2.54  | 4.78  |
| 1/1 | 1/1 | 7.01  | 6.74  |
| 1/1 | 1/1 | 9.59  | 9.47  |
| 1/1 | 1/1 | 2.44  | 2.39  |
| 0/1 | 1/1 | 2.87  | 3.13  |
| 1/1 | 1/1 | 5.79  | 6.07  |
| 0/1 | 1/1 | 2.56  | 2.86  |
| 0/1 | 1/1 | 2.48  | 2.84  |
| 1/1 | 1/1 | 6.85  | 7.33  |
| 1/1 | 1/1 | 6.58  | 5.38  |
| 1/1 | 1/1 | 6.9   | 5.71  |
| 1/1 | 0/1 | 6.8   | 6.03  |
| 1/1 | 1/1 | 6.57  | 5.86  |
| 1/1 | 0/1 | 5.08  | 4.5   |
| 1/1 | 1/1 | 4.13  | 5.85  |
| 0/1 | 1/1 | 2.82  | 5.47  |
| 1/1 | 0/1 | 5.76  | 2.84  |
| 1/1 | 1/1 | 9.68  | 9.1   |
| 1/1 | 1/1 | 10.01 | 9.62  |
| 0/1 | 1/1 | 5.22  | 5.74  |
| 1/1 | 1/1 | 3.51  | 3.04  |
| 1/1 | 1/1 | 8.16  | 7.81  |
| 1/1 | 1/1 | 6.64  | 5.7   |
| 1/1 | 1/1 | 7.83  | 7.11  |
| 0/1 | 1/1 | 3.5   | 4.82  |
| 1/1 | 1/1 | 3.75  | 5.23  |
| 0/1 | 1/1 | 3.87  | 5.64  |
| 1/1 | 1/1 | 5.11  | 3.43  |
| 1/1 | 1/1 | 5.07  | 5.68  |
| 0/1 | 1/1 | 5.06  | 5.73  |
| 0/1 | 1/1 | 4.96  | 6.28  |
| 1/1 | 1/1 | 8.2   | 6.67  |
| 1/1 | 0/1 | 5.05  | 3.58  |
| 1/1 | 1/1 | 6.21  | 4.86  |
| 0/1 | 1/1 | 3.83  | 4.62  |
| 1/1 | 1/1 | 7.19  | 8.05  |
| 1/1 | 1/1 | 4.59  | 5.6   |
| 1/1 | 1/1 | 7.09  | 6.89  |
| 1/1 | 1/1 | 10.15 | 9.98  |
| 1/1 | 1/1 | 5.52  | 5.51  |
| 1/1 | 1/1 | 9.04  | 9.05  |
| 1/1 | 1/1 | 11.1  | 11.14 |
| 1/1 | 1/1 | 6.7   | 6.75  |
| 0/1 | 1/1 | 5.03  | 7.12  |
| 1/1 | 0/1 | 4.83  | 3.1   |
| 1/1 | 0/1 | 4.02  | 2.52  |
| 0/1 | 1/1 | 2.45  | 3.06  |
| 0/1 | 1/1 | 1.96  | 2.77  |
| 1/1 | 1/1 | 9.53  | 8.63  |
| 0/1 | 1/1 | 3.12  | 4.51  |
| 1/1 | 1/1 | 4.89  | 6.33  |
| 0/1 | 1/1 | 3.55  | 5.24  |
| 1/1 | 1/1 | 5     | 4.53  |
| 1/1 | 1/1 | 4.7   | 4.38  |
| 1/1 | 1/1 | 6.51  | 6.22  |

|     |     |       |       |
|-----|-----|-------|-------|
| 1/1 | 1/1 | 6.13  | 5.9   |
| 0/1 | 1/1 | 3.43  | 6.47  |
| 1/1 | 1/1 | 5.98  | 4.57  |
| 1/1 | 1/1 | 5.75  | 4.46  |
| 1/1 | 1/1 | 7.81  | 9.05  |
| 1/1 | 1/1 | 5.98  | 4.57  |
| 1/1 | 1/1 | 5.75  | 4.46  |
| 1/1 | 1/1 | 7.81  | 9.05  |
| 1/1 | 1/1 | 8.64  | 6.92  |
| 0/1 | 1/1 | 3.08  | 3.83  |
| 1/1 | 1/1 | 12.53 | 12.24 |
| 0/1 | 1/1 | 7.06  | 6.92  |
| 1/1 | 1/1 | 7.06  | 7.01  |
| 1/1 | 1/1 | 5.54  | 7.51  |
| 1/1 | 1/1 | 3.8   | 6.5   |
| 1/1 | 1/1 | 5.14  | 7.87  |
| 1/1 | 1/1 | 6.15  | 5.38  |
| 1/1 | 1/1 | 6.4   | 5.69  |
| 1/1 | 1/1 | 7.81  | 7.16  |
| 1/1 | 1/1 | 6.15  | 5.38  |
| 1/1 | 1/1 | 6.4   | 5.69  |
| 1/1 | 1/1 | 7.81  | 7.16  |
| 1/1 | 1/1 | 6.15  | 5.38  |
| 1/1 | 1/1 | 6.4   | 5.69  |
| 1/1 | 1/1 | 7.81  | 7.16  |
| 1/1 | 1/1 | 4.9   | 4.03  |
| 0/1 | 1/1 | 4.72  | 4.11  |
| 1/1 | 1/1 | 6.35  | 5.5   |
| 1/1 | 1/1 | 5.36  | 4.57  |
| 1/1 | 1/1 | 4.42  | 5.81  |
| 0/1 | 1/1 | 7.49  | 7.19  |
| 1/1 | 1/1 | 3.7   | 3.46  |
| 1/1 | 1/1 | 12.93 | 12.74 |
| 1/1 | 1/1 | 10.76 | 10.7  |
| 1/1 | 1/1 | 6.86  | 6.21  |
| 1/1 | 0/1 | 3.32  | 2.82  |
| 1/1 | 1/1 | 7.03  | 6.56  |
| 1/1 | 1/1 | 4.85  | 6.49  |
| 1/1 | 1/1 | 3.16  | 5.46  |
| 1/1 | 1/1 | 8.83  | 7.69  |
| 0/1 | 1/1 | 4.26  | 5.4   |
| 1/1 | 1/1 | 5.94  | 5.26  |
| 1/1 | 0/1 | 5.77  | 5.26  |
| 1/1 | 1/1 | 6.04  | 5.56  |
| 0/1 | 1/1 | 3.38  | 5.52  |
| 1/1 | 0/1 | 3.36  | 2.84  |
| 1/1 | 1/1 | 4.89  | 4.5   |
| 1/1 | 1/1 | 3.81  | 5.73  |
| 1/1 | 1/1 | 4.28  | 3.37  |
| 1/1 | 1/1 | 5.57  | 4.83  |
| 0/1 | 1/1 | 4.85  | 6.28  |
| 1/1 | 1/1 | 6.17  | 7.81  |
| 0/1 | 1/1 | 3.17  | 4.9   |
| 1/1 | 1/1 | 5.79  | 7.76  |
| 1/1 | 1/1 | 5.74  | 7.82  |
| 1/1 | 1/1 | 5.29  | 8.16  |
| 1/1 | 1/1 | 10.4  | 9.12  |
| 1/1 | 1/1 | 7.74  | 6.53  |

|     |     |       |      |
|-----|-----|-------|------|
| 1/1 | 1/1 | 8.8   | 7.61 |
| 1/1 | 1/1 | 10.33 | 9.28 |
| 1/1 | 1/1 | 5.53  | 4.48 |
| 1/1 | 1/1 | 7.03  | 6.06 |
| 1/1 | 1/1 | 7.64  | 6.78 |
| 1/1 | 1/1 | 5.94  | 5.18 |
| 1/1 | 1/1 | 5.92  | 7.42 |
| 1/1 | 1/1 | 5.79  | 3.89 |
| 1/1 | 1/1 | 4.73  | 2.89 |
| 0/1 | 1/1 | 2.64  | 3.06 |
| 1/1 | 1/1 | 5.39  | 4.22 |
| 1/1 | 1/1 | 5.48  | 6.68 |
| 0/1 | 1/1 | 2.35  | 3.62 |
| 1/1 | 1/1 | 4.79  | 6.19 |
| 1/1 | 1/1 | 4.78  | 6.4  |
| 1/1 | 1/1 | 6.54  | 5.83 |
| 1/1 | 1/1 | 4.6   | 6.66 |
| 1/1 | 0/1 | 5.07  | 1.97 |
| 1/1 | 1/1 | 7.2   | 4.33 |
| 1/1 | 0/1 | 3.24  | 2.75 |
| 1/1 | 1/1 | 4.07  | 3.82 |
| 1/1 | 1/1 | 3.69  | 4.03 |
| 1/1 | 1/1 | 4.54  | 4.2  |
| 1/1 | 1/1 | 4.88  | 4.7  |
| 1/1 | 1/1 | 3.75  | 2.99 |
| 0/1 | 1/1 | 4.05  | 5.62 |
| 1/1 | 1/1 | 5.47  | 4.96 |
| 1/1 | 1/1 | 5.69  | 5.18 |
| 1/1 | 1/1 | 5     | 3.49 |
| 0/1 | 1/1 | 3.34  | 4.26 |
| 1/1 | 1/1 | 7.16  | 6.46 |
| 1/1 | 1/1 | 6.42  | 5.87 |
| 1/1 | 1/1 | 5.59  | 5.06 |
| 1/1 | 1/1 | 7.24  | 8.8  |
| 1/1 | 1/1 | 6.87  | 5.73 |
| 0/1 | 1/1 | 3.46  | 4.75 |
| 1/1 | 1/1 | 4.49  | 4.19 |
| 1/1 | 1/1 | 6.23  | 6.15 |
| 1/1 | 1/1 | 3.8   | 5.9  |
| 1/1 | 0/1 | 2.91  | 2.24 |
| 1/1 | 1/1 | 4.44  | 6.09 |
| 1/1 | 1/1 | 9.78  | 8.9  |
| 1/1 | 1/1 | 7.28  | 6.42 |
| 0/1 | 1/1 | 3.89  | 5.27 |
| 1/1 | 1/1 | 4.94  | 6.69 |
| 1/1 | 1/1 | 5.51  | 4.59 |
| 1/1 | 1/1 | 2.99  | 2.11 |
| 1/1 | 0/1 | 3.4   | 2.51 |
| 1/1 | 1/1 | 4.76  | 6.07 |
| 0/1 | 1/1 | 2.08  | 3.39 |
| 1/1 | 1/1 | 4.18  | 5.8  |
| 1/1 | 1/1 | 6.52  | 6.45 |
| 0/1 | 1/1 | 4.63  | 7.05 |
| 1/1 | 1/1 | 6.27  | 8.7  |
| 1/1 | 1/1 | 5     | 7.54 |
| 0/1 | 1/1 | 5.39  | 7.99 |
| 1/1 | 1/1 | 5.55  | 8.41 |
| 1/1 | 0/1 | 6.41  | 3.1  |

|     |     |       |      |
|-----|-----|-------|------|
| 1/1 | 1/1 | 6.94  | 5.91 |
| 1/1 | 1/1 | 7.58  | 6.6  |
| 1/1 | 1/1 | 5.92  | 5.01 |
| 1/1 | 1/1 | 3.3   | 2.74 |
| 1/1 | 1/1 | 4.68  | 4.52 |
| 0/1 | 1/1 | 3.21  | 3.11 |
| 1/1 | 1/1 | 5.35  | 4.39 |
| 1/1 | 1/1 | 4.2   | 5.73 |
| 1/1 | 0/1 | 5.69  | 4.48 |
| 1/1 | 1/1 | 5.64  | 6.9  |
| 1/1 | 1/1 | 5.26  | 3.93 |
| 1/1 | 1/1 | 4.61  | 5.57 |
| 0/1 | 1/1 | 2.2   | 3.18 |
| 1/1 | 1/1 | 3.78  | 4.86 |
| 1/1 | 1/1 | 2.96  | 4.05 |
| 1/1 | 1/1 | 3.18  | 4.93 |
| 1/1 | 1/1 | 6.35  | 4.92 |
| 1/1 | 0/1 | 6.41  | 4.98 |
| 1/1 | 1/1 | 6.09  | 5.63 |
| 1/1 | 1/1 | 3.45  | 3.12 |
| 1/1 | 1/1 | 5.01  | 6.81 |
| 1/1 | 1/1 | 3.31  | 5.16 |
| 0/1 | 1/1 | 2.02  | 3.96 |
| 1/1 | 1/1 | 10.86 | 10   |
| 1/1 | 1/1 | 4.7   | 3.95 |
| 1/1 | 1/1 | 7.19  | 6.51 |
| 1/1 | 1/1 | 8.61  | 7.93 |
| 1/1 | 1/1 | 5.89  | 5.21 |
| 1/1 | 1/1 | 6.37  | 5.09 |
| 1/1 | 1/1 | 5.65  | 4.48 |
| 1/1 | 1/1 | 6.34  | 5.51 |
| 1/1 | 1/1 | 6.27  | 7.81 |
| 1/1 | 0/1 | 9.28  | 8.39 |
| 1/1 | 0/1 | 7.95  | 7.28 |
| 1/1 | 1/1 | 5.05  | 4.05 |
| 1/1 | 0/1 | 5.52  | 4.58 |
| 1/1 | 1/1 | 9.55  | 8.38 |
| 1/1 | 1/1 | 4.65  | 3.62 |
| 1/1 | 1/1 | 6.66  | 5.9  |
| 1/1 | 1/1 | 6.69  | 6.14 |
| 0/1 | 1/1 | 3.22  | 4.85 |
| 1/1 | 1/1 | 8.07  | 6.4  |
| 1/1 | 1/1 | 6.87  | 7.43 |
| 1/1 | 1/1 | 8.78  | 8.47 |
| 1/1 | 1/1 | 8.15  | 7.98 |
| 1/1 | 1/1 | 7.48  | 6.57 |
| 1/1 | 1/1 | 5.3   | 4.59 |
| 1/1 | 1/1 | 9.04  | 8.84 |
| 1/1 | 1/1 | 2.54  | 2.35 |
| 1/1 | 1/1 | 5.93  | 5.79 |
| 0/1 | 1/1 | 7.71  | 7.64 |
| 1/1 | 1/1 | 9.18  | 8.09 |
| 1/1 | 0/1 | 9.12  | 8.13 |
| 0/1 | 1/1 | 5.02  | 6.2  |
| 1/1 | 1/1 | 4.66  | 5.89 |
| 1/1 | 1/1 | 5.67  | 7.3  |
| 0/1 | 1/1 | 2.45  | 4.35 |
| 0/1 | 1/1 | 3.08  | 5.41 |



|     |     |       |       |
|-----|-----|-------|-------|
| 1/1 | 1/1 | 4.45  | 3.13  |
| 1/1 | 1/1 | 6.85  | 5.59  |
| 1/1 | 1/1 | 4.45  | 3.2   |
| 1/1 | 0/1 | 3.99  | 2.9   |
| 1/1 | 1/1 | 5.02  | 3.94  |
| 1/1 | 1/1 | 3.8   | 3.07  |
| 1/1 | 1/1 | 4.43  | 3.83  |
| 1/1 | 1/1 | 6.08  | 5.51  |
| 1/1 | 1/1 | 3.22  | 4.99  |
| 1/1 | 1/1 | 3.94  | 2.92  |
| 1/1 | 1/1 | 5.36  | 4.49  |
| 1/1 | 1/1 | 2.91  | 4.15  |
| 0/1 | 1/1 | 3.34  | 4.73  |
| 1/1 | 1/1 | 5.29  | 6.73  |
| 1/1 | 1/1 | 5.39  | 6.92  |
| 0/1 | 1/1 | 2.64  | 4.23  |
| 1/1 | 1/1 | 3.87  | 5.91  |
| 1/1 | 1/1 | 4.94  | 3.54  |
| 1/1 | 1/1 | 4.19  | 5.01  |
| 1/1 | 0/1 | 5.38  | 4.5   |
| 1/1 | 1/1 | 7.39  | 6.52  |
| 1/1 | 1/1 | 5.95  | 5.21  |
| 1/1 | 1/1 | 4.71  | 6.12  |
| 0/1 | 1/1 | 3.47  | 5.1   |
| 1/1 | 0/1 | 7.23  | 2.03  |
| 1/1 | 1/1 | 5.87  | 3.01  |
| 1/1 | 0/1 | 5.47  | 2.65  |
| 1/1 | 1/1 | 7.36  | 4.57  |
| 1/1 | 0/1 | 5.83  | 3.05  |
| 1/1 | 0/1 | 4.85  | 2.22  |
| 1/1 | 1/1 | 6.11  | 3.55  |
| 1/1 | 0/1 | 5.11  | 2.7   |
| 1/1 | 1/1 | 5.28  | 2.91  |
| 1/1 | 0/1 | 4.99  | 2.67  |
| 1/1 | 0/1 | 5.92  | 3.62  |
| 1/1 | 1/1 | 5.74  | 3.59  |
| 1/1 | 1/1 | 4.78  | 2.92  |
| 1/1 | 0/1 | 3.99  | 2.19  |
| 1/1 | 0/1 | 5.36  | 3.7   |
| 1/1 | 0/1 | 4.05  | 2.42  |
| 1/1 | 0/1 | 3.5   | 2.04  |
| 1/1 | 1/1 | 5.73  | 4.36  |
| 1/1 | 0/1 | 4.15  | 2.91  |
| 1/1 | 0/1 | 3.49  | 2.27  |
| 1/1 | 0/1 | 3.41  | 2.23  |
| 1/1 | 0/1 | 3.38  | 2.41  |
| 1/1 | 1/1 | 3.53  | 2.65  |
| 1/1 | 1/1 | 7.92  | 7.14  |
| 1/1 | 0/1 | 3     | 2.27  |
| 1/1 | 0/1 | 2.74  | 2.13  |
| 1/1 | 1/1 | 3.39  | 2.91  |
| 1/1 | 1/1 | 7.18  | 6.79  |
| 1/1 | 1/1 | 7.21  | 6.95  |
| 1/1 | 1/1 | 11.39 | 11.18 |
| 1/1 | 1/1 | 5.02  | 4.9   |
| 1/1 | 1/1 | 4.13  | 4.18  |
| 1/1 | 1/1 | 2.24  | 2.45  |
| 1/1 | 1/1 | 6.58  | 5.31  |

|     |     |       |       |
|-----|-----|-------|-------|
| 1/1 | 1/1 | 6.29  | 7.34  |
| 0/1 | 1/1 | 4.99  | 6.14  |
| 1/1 | 1/1 | 4.63  | 5.79  |
| 0/1 | 1/1 | 2.81  | 4.44  |
| 1/1 | 1/1 | 5.5   | 4.52  |
| 0/1 | 1/1 | 4.8   | 4.02  |
| 1/1 | 1/1 | 6.72  | 5.94  |
| 1/1 | 0/1 | 5.27  | 4.51  |
| 1/1 | 1/1 | 3.63  | 2.98  |
| 0/1 | 1/1 | 2.51  | 4.12  |
| 0/1 | 1/1 | 3.35  | 5.15  |
| 1/1 | 1/1 | 10.08 | 9.89  |
| 1/1 | 1/1 | 2.67  | 2.63  |
| 1/1 | 1/1 | 3.78  | 5.84  |
| 1/1 | 1/1 | 4.33  | 6.41  |
| 1/1 | 1/1 | 4.54  | 6.63  |
| 1/1 | 1/1 | 5.2   | 7.39  |
| 0/1 | 1/1 | 2.97  | 5.5   |
| 1/1 | 1/1 | 6.99  | 6.31  |
| 1/1 | 1/1 | 6.59  | 6.1   |
| 1/1 | 1/1 | 4.35  | 3.81  |
| 1/1 | 1/1 | 8.12  | 7.74  |
| 1/1 | 1/1 | 4.07  | 3.69  |
| 1/1 | 1/1 | 7.23  | 6.91  |
| 1/1 | 1/1 | 6.48  | 6.17  |
| 0/1 | 1/1 | 2.16  | 5.01  |
| 1/1 | 1/1 | 5.5   | 4.29  |
| 1/1 | 1/1 | 4.26  | 5.4   |
| 1/1 | 0/1 | 3.37  | 2.33  |
| 1/1 | 1/1 | 8.18  | 7.26  |
| 1/1 | 1/1 | 3.59  | 2.7   |
| 1/1 | 1/1 | 6.41  | 7.77  |
| 1/1 | 0/1 | 5.78  | 4.68  |
| 1/1 | 1/1 | 6.41  | 7.55  |
| 1/1 | 1/1 | 2.96  | 4.25  |
| 1/1 | 1/1 | 5.03  | 6.36  |
| 1/1 | 1/1 | 8.74  | 7.23  |
| 1/1 | 1/1 | 6.74  | 5.31  |
| 1/1 | 1/1 | 8.17  | 6.76  |
| 1/1 | 1/1 | 7.22  | 5.81  |
| 1/1 | 0/1 | 4.71  | 3.57  |
| 1/1 | 1/1 | 3.55  | 5.01  |
| 1/1 | 1/1 | 2.96  | 4.42  |
| 1/1 | 1/1 | 8.4   | 7.22  |
| 1/1 | 1/1 | 5.86  | 7.04  |
| 0/1 | 1/1 | 4.73  | 6     |
| 1/1 | 1/1 | 8.92  | 8.41  |
| 1/1 | 1/1 | 5.18  | 4.82  |
| 1/1 | 1/1 | 4.58  | 4.11  |
| 0/1 | 1/1 | 4.32  | 6.32  |
| 0/1 | 1/1 | 2.73  | 6.06  |
| 1/1 | 1/1 | 6.73  | 6.11  |
| 1/1 | 1/1 | 5.77  | 5.26  |
| 1/1 | 1/1 | 3.89  | 3.4   |
| 1/1 | 0/1 | 2.48  | 2.06  |
| 1/1 | 1/1 | 4.95  | 6.63  |
| 1/1 | 1/1 | 8.29  | 7.25  |
| 1/1 | 1/1 | 10.99 | 10.02 |

|     |     |       |       |
|-----|-----|-------|-------|
| 1/1 | 1/1 | 5.96  | 5.01  |
| 1/1 | 1/1 | 4.96  | 4.13  |
| 1/1 | 1/1 | 8.32  | 5.64  |
| 1/1 | 1/1 | 8.77  | 6.18  |
| 1/1 | 1/1 | 4.56  | 4.1   |
| 1/1 | 1/1 | 7.83  | 7.43  |
| 1/1 | 1/1 | 10.25 | 9.85  |
| 1/1 | 1/1 | 7.72  | 7.37  |
| 0/1 | 1/1 | 5.02  | 4.79  |
| 1/1 | 1/1 | 5.19  | 5.03  |
| 1/1 | 1/1 | 10.61 | 10.46 |
| 1/1 | 1/1 | 9.69  | 9.75  |
| 1/1 | 1/1 | 4.4   | 4.48  |
| 1/1 | 1/1 | 5.27  | 5.53  |
| 1/1 | 1/1 | 6.55  | 5.22  |
| 1/1 | 1/1 | 4.38  | 3.13  |
| 1/1 | 1/1 | 7.58  | 6.92  |
| 1/1 | 1/1 | 5.84  | 5.31  |
| 1/1 | 1/1 | 7.13  | 6.64  |
| 1/1 | 1/1 | 5.09  | 2.86  |
| 1/1 | 1/1 | 3.16  | 3.15  |
| 0/1 | 1/1 | 2.15  | 2.2   |
| 1/1 | 1/1 | 2.81  | 2.88  |
| 0/1 | 1/1 | 2.26  | 2.4   |
| 0/1 | 1/1 | 3.16  | 3.36  |
| 1/1 | 1/1 | 4.93  | 5.15  |
| 1/1 | 1/1 | 9.33  | 9.62  |
| 1/1 | 1/1 | 3.83  | 4.22  |
| 0/1 | 1/1 | 2.84  | 3.31  |
| 1/1 | 1/1 | 2.85  | 3.35  |
| 0/1 | 1/1 | 3.46  | 4.05  |
| 0/1 | 1/1 | 2.3   | 3.13  |
| 1/1 | 1/1 | 6.95  | 6.26  |
| 1/1 | 1/1 | 5.04  | 4.41  |
| 1/1 | 1/1 | 5.16  | 4.62  |
| 0/1 | 1/1 | 3.94  | 5.6   |
| 0/1 | 1/1 | 3.36  | 5.65  |
| 1/1 | 1/1 | 8.5   | 6.91  |
| 1/1 | 1/1 | 4.92  | 5.57  |
| 1/1 | 1/1 | 6.48  | 7.14  |
| 1/1 | 1/1 | 5.82  | 6.52  |
| 0/1 | 1/1 | 3.62  | 4.36  |
| 1/1 | 1/1 | 4.95  | 5.78  |
| 1/1 | 1/1 | 5.38  | 6.23  |
| 1/1 | 1/1 | 6.34  | 7.43  |
| 1/1 | 1/1 | 4.23  | 5.65  |
| 1/1 | 1/1 | 5.1   | 4.66  |
| 1/1 | 1/1 | 5.4   | 5.09  |
| 0/1 | 1/1 | 2.43  | 4.22  |
| 0/1 | 1/1 | 2.46  | 4.42  |
| 1/1 | 1/1 | 5.02  | 7.13  |
| 1/1 | 1/1 | 5.89  | 8.05  |
| 1/1 | 1/1 | 4.48  | 6.66  |
| 1/1 | 1/1 | 4.02  | 6.28  |
| 0/1 | 1/1 | 2.92  | 5.61  |
| 0/1 | 1/1 | 2.41  | 5.34  |
| 1/1 | 1/1 | 7.94  | 5.04  |
| 1/1 | 1/1 | 6.76  | 4.08  |

|     |     |       |       |
|-----|-----|-------|-------|
| 1/1 | 1/1 | 4.29  | 3.63  |
| 1/1 | 0/1 | 2.88  | 2.29  |
| 1/1 | 1/1 | 5.8   | 5.27  |
| 1/1 | 1/1 | 4.88  | 4.39  |
| 1/1 | 1/1 | 4.93  | 4.46  |
| 1/1 | 1/1 | 6.52  | 6.06  |
| 1/1 | 1/1 | 3.5   | 3.12  |
| 1/1 | 1/1 | 5.02  | 4.65  |
| 1/1 | 1/1 | 6.07  | 5.82  |
| 0/1 | 1/1 | 2.99  | 2.9   |
| 0/1 | 1/1 | 2.08  | 2.99  |
| 1/1 | 1/1 | 3.41  | 2.16  |
| 0/1 | 1/1 | 2.01  | 3.69  |
| 1/1 | 1/1 | 7.25  | 4.78  |
| 1/1 | 1/1 | 6.53  | 4.2   |
| 1/1 | 1/1 | 5.05  | 5.07  |
| 0/1 | 1/1 | 2.87  | 2.88  |
| 0/1 | 1/1 | 4.43  | 4.44  |
| 1/1 | 1/1 | 3.38  | 3.44  |
| 1/1 | 1/1 | 10.37 | 10.57 |
| 1/1 | 1/1 | 5.77  | 4.21  |
| 1/1 | 1/1 | 5.36  | 6.04  |
| 1/1 | 1/1 | 4.87  | 5.66  |
| 1/1 | 1/1 | 3.93  | 4.87  |
| 0/1 | 1/1 | 3.2   | 4.28  |
| 0/1 | 1/1 | 2.84  | 4.77  |
| 1/1 | 1/1 | 4.35  | 3.41  |
| 1/1 | 1/1 | 4.86  | 6.33  |
| 1/1 | 1/1 | 9.64  | 9.02  |
| 1/1 | 1/1 | 6.95  | 6.35  |
| 0/1 | 1/1 | 3.78  | 5.75  |
| 0/1 | 1/1 | 3.24  | 5.69  |
| 1/1 | 1/1 | 8.22  | 8.04  |
| 1/1 | 1/1 | 8.25  | 8.21  |
| 1/1 | 0/1 | 8.75  | 7.4   |
| 0/1 | 1/1 | 3.93  | 4.87  |
| 1/1 | 1/1 | 6.17  | 7.44  |
| 0/1 | 1/1 | 4.82  | 4.04  |
| 1/1 | 1/1 | 6.35  | 5.69  |
| 1/1 | 0/1 | 5.11  | 4.42  |
| 1/1 | 1/1 | 4.33  | 6.2   |
| 1/1 | 1/1 | 4.51  | 4.14  |
| 1/1 | 1/1 | 4.47  | 4.14  |
| 1/1 | 1/1 | 3.59  | 3.41  |
| 1/1 | 1/1 | 5.25  | 7.15  |
| 1/1 | 1/1 | 6.06  | 4.91  |
| 0/1 | 1/1 | 2.18  | 3.27  |
| 1/1 | 1/1 | 5.04  | 6.18  |
| 1/1 | 1/1 | 3.4   | 4.67  |
| 1/1 | 0/1 | 7.39  | 4.12  |
| 1/1 | 1/1 | 8.61  | 5.5   |
| 1/1 | 1/1 | 5.39  | 4.36  |
| 1/1 | 0/1 | 8.23  | 7.38  |
| 1/1 | 1/1 | 7.39  | 6.56  |
| 1/1 | 1/1 | 7.75  | 6.93  |
| 1/1 | 1/1 | 8.79  | 7.99  |
| 1/1 | 1/1 | 7.64  | 7.02  |
| 1/1 | 1/1 | 8.88  | 8.35  |

|     |     |      |      |
|-----|-----|------|------|
| 1/1 | 1/1 | 6.45 | 5.93 |
| 1/1 | 1/1 | 4.01 | 3.76 |
| 1/1 | 1/1 | 7.06 | 6.88 |
| 1/1 | 1/1 | 8.26 | 8.1  |
| 1/1 | 1/1 | 6.18 | 6.1  |
| 1/1 | 1/1 | 8.36 | 8.31 |
| 1/1 | 1/1 | 9.52 | 9.5  |
| 1/1 | 1/1 | 6.28 | 6.3  |
| 1/1 | 1/1 | 5.87 | 5.99 |
| 1/1 | 0/1 | 3.55 | 2.22 |
| 1/1 | 1/1 | 5.04 | 3.85 |
| 1/1 | 0/1 | 6    | 2.34 |
| 1/1 | 0/1 | 3.75 | 2.3  |
| 1/1 | 0/1 | 3.95 | 2.99 |
| 1/1 | 0/1 | 3.22 | 2.4  |
| 1/1 | 1/1 | 7.4  | 6.61 |
| 0/1 | 1/1 | 3.73 | 3.23 |
| 1/1 | 1/1 | 7.21 | 7.15 |
| 1/1 | 1/1 | 2.86 | 2.9  |
| 1/1 | 1/1 | 3.07 | 3.81 |
| 1/1 | 0/1 | 6.65 | 4.15 |
| 1/1 | 1/1 | 7.4  | 5.02 |
| 1/1 | 1/1 | 8.92 | 8.65 |
| 1/1 | 1/1 | 7.82 | 7.6  |
| 1/1 | 1/1 | 8.97 | 8.8  |
| 1/1 | 1/1 | 5.05 | 5.25 |
| 1/1 | 1/1 | 7    | 7.26 |
| 1/1 | 1/1 | 6.53 | 7.28 |
| 1/1 | 1/1 | 4.09 | 4.85 |
| 1/1 | 1/1 | 6.2  | 7.53 |
| 1/1 | 0/1 | 6.65 | 4.15 |
| 1/1 | 1/1 | 7.4  | 5.02 |
| 1/1 | 1/1 | 8.92 | 8.65 |
| 1/1 | 1/1 | 7.82 | 7.6  |
| 1/1 | 1/1 | 8.69 | 8.5  |
| 1/1 | 1/1 | 8.97 | 8.8  |
| 1/1 | 1/1 | 7.46 | 7.6  |
| 1/1 | 1/1 | 5.55 | 6.8  |
| 1/1 | 1/1 | 5.64 | 5.02 |
| 1/1 | 1/1 | 6.63 | 6.03 |
| 1/1 | 1/1 | 7.3  | 6.8  |
| 1/1 | 1/1 | 7.5  | 6.14 |
| 0/1 | 1/1 | 2.76 | 3.62 |
| 0/1 | 1/1 | 3.06 | 5.97 |
| 1/1 | 1/1 | 8.93 | 7.56 |
| 0/1 | 1/1 | 4.19 | 5.05 |
| 0/1 | 1/1 | 2.95 | 3.93 |
| 0/1 | 1/1 | 2.91 | 3.93 |
| 0/1 | 1/1 | 2.96 | 4.28 |
| 1/1 | 1/1 | 3.42 | 4.99 |
| 1/1 | 1/1 | 4.06 | 3.56 |
| 1/1 | 1/1 | 4.43 | 6.6  |
| 1/1 | 1/1 | 5.23 | 7.46 |
| 1/1 | 0/1 | 2.48 | 2.05 |
| 1/1 | 1/1 | 6.17 | 5.78 |
| 1/1 | 1/1 | 6.54 | 8.35 |
| 1/1 | 1/1 | 6.67 | 5.98 |
| 1/1 | 1/1 | 7.05 | 6.57 |

|     |     |       |       |
|-----|-----|-------|-------|
| 1/1 | 1/1 | 9.47  | 9.41  |
| 1/1 | 1/1 | 3.76  | 6.09  |
| 1/1 | 1/1 | 5.61  | 8.04  |
| 1/1 | 1/1 | 5.53  | 8.18  |
| 0/1 | 1/1 | 1.88  | 5.26  |
| 1/1 | 0/1 | 6.85  | 4.95  |
| 1/1 | 1/1 | 6.63  | 6.95  |
| 1/1 | 0/1 | 5.44  | 4.35  |
| 1/1 | 1/1 | 7.35  | 6.34  |
| 1/1 | 1/1 | 8.3   | 7.43  |
| 1/1 | 1/1 | 9.3   | 7.85  |
| 1/1 | 1/1 | 11.43 | 10.03 |
| 1/1 | 1/1 | 11.19 | 9.93  |
| 1/1 | 1/1 | 8.05  | 8.81  |
| 1/1 | 1/1 | 4.9   | 6.25  |
| 1/1 | 0/1 | 3.69  | 2.45  |
| 1/1 | 1/1 | 6.13  | 4.99  |
| 1/1 | 1/1 | 3.94  | 4.99  |
| 1/1 | 1/1 | 4.22  | 5.31  |
| 0/1 | 1/1 | 2.9   | 4.41  |
| 0/1 | 1/1 | 2.17  | 4.64  |
| 0/1 | 1/1 | 6.6   | 6.3   |
| 1/1 | 1/1 | 9.71  | 9.45  |
| 1/1 | 1/1 | 7.05  | 6.82  |
| 1/1 | 1/1 | 7.49  | 7.32  |
| 1/1 | 1/1 | 6.42  | 6.28  |
| 1/1 | 1/1 | 5.86  | 5.77  |
| 1/1 | 1/1 | 12.78 | 10.53 |
| 1/1 | 1/1 | 5.14  | 5.09  |
| 1/1 | 1/1 | 5.43  | 5.39  |
| 1/1 | 1/1 | 7.88  | 7.88  |
| 0/1 | 1/1 | 2.57  | 2.93  |
| 1/1 | 1/1 | 5.8   | 6.62  |
| 1/1 | 1/1 | 6.19  | 5.62  |
| 1/1 | 1/1 | 4.06  | 3.67  |
| 1/1 | 1/1 | 5.24  | 6.89  |
| 0/1 | 1/1 | 2.97  | 5.12  |
| 1/1 | 1/1 | 5.53  | 3.62  |
| 1/1 | 1/1 | 2.86  | 3.27  |
| 1/1 | 1/1 | 6.36  | 6.86  |
| 1/1 | 1/1 | 3.8   | 4.42  |
| 1/1 | 1/1 | 6.64  | 7.54  |
| 0/1 | 1/1 | 4.47  | 5.82  |
| 1/1 | 1/1 | 8.28  | 9.7   |
| 1/1 | 1/1 | 7.04  | 5.36  |
| 1/1 | 1/1 | 6.59  | 4.99  |
| 0/1 | 1/1 | 3.27  | 4.04  |
| 1/1 | 0/1 | 6.26  | 5.44  |
| 1/1 | 1/1 | 5.67  | 4.85  |
| 1/1 | 1/1 | 3.72  | 5.18  |
| 1/1 | 1/1 | 4.43  | 5.96  |
| 1/1 | 1/1 | 5.57  | 7.12  |
| 0/1 | 1/1 | 5.13  | 6.93  |
| 0/1 | 1/1 | 4.78  | 6.65  |
| 1/1 | 0/1 | 5.4   | 2.93  |
| 1/1 | 1/1 | 5.85  | 5.62  |
| 1/1 | 1/1 | 7.63  | 7.53  |
| 1/1 | 1/1 | 10.91 | 10.91 |

|     |     |       |       |
|-----|-----|-------|-------|
| 1/1 | 1/1 | 9.67  | 9.77  |
| 0/1 | 1/1 | 2.74  | 3.36  |
| 1/1 | 1/1 | 9.1   | 9.85  |
| 1/1 | 0/1 | 4.98  | 2.97  |
| 1/1 | 1/1 | 2.89  | 3.54  |
| 0/1 | 1/1 | 2.7   | 3.51  |
| 1/1 | 1/1 | 10.17 | 8.72  |
| 1/1 | 1/1 | 6.25  | 7.02  |
| 1/1 | 1/1 | 4.09  | 4.86  |
| 1/1 | 1/1 | 4.31  | 5.38  |
| 1/1 | 1/1 | 5.47  | 6.66  |
| 1/1 | 1/1 | 6.51  | 5.73  |
| 1/1 | 0/1 | 3.66  | 3.01  |
| 0/1 | 1/1 | 2.4   | 4.03  |
| 1/1 | 1/1 | 8.59  | 8.57  |
| 1/1 | 1/1 | 6.63  | 6.66  |
| 1/1 | 1/1 | 8.24  | 8.28  |
| 1/1 | 1/1 | 4.16  | 6.46  |
| 1/1 | 1/1 | 5.43  | 7.85  |
| 0/1 | 1/1 | 3.76  | 6.85  |
| 1/1 | 1/1 | 6.68  | 3.38  |
| 1/1 | 1/1 | 5.66  | 4.7   |
| 1/1 | 1/1 | 12.21 | 11.34 |
| 1/1 | 1/1 | 12.68 | 12.75 |
| 0/1 | 1/1 | 3.58  | 4.01  |
| 1/1 | 1/1 | 6.55  | 3.94  |
| 0/1 | 1/1 | 5.91  | 5.66  |
| 1/1 | 1/1 | 7.2   | 6.97  |
| 0/1 | 1/1 | 5.68  | 5.54  |
| 1/1 | 1/1 | 8     | 7.93  |
| 1/1 | 1/1 | 7.3   | 7.36  |
| 1/1 | 1/1 | 8.14  | 8.21  |
| 1/1 | 1/1 | 3.98  | 4.71  |
| 1/1 | 0/1 | 5.2   | 4.52  |
| 1/1 | 1/1 | 5.69  | 5.14  |
| 1/1 | 1/1 | 4.22  | 3.47  |
| 1/1 | 1/1 | 7.96  | 7.24  |
| 1/1 | 1/1 | 7.46  | 8.97  |
| 0/1 | 1/1 | 4.17  | 5.75  |
| 1/1 | 1/1 | 2.69  | 5.11  |
| 1/1 | 0/1 | 5.78  | 4.68  |
| 1/1 | 1/1 | 6.41  | 7.55  |
| 1/1 | 1/1 | 4.67  | 5.86  |
| 1/1 | 1/1 | 6.34  | 8.24  |
| 1/1 | 1/1 | 6.1   | 3.49  |
| 1/1 | 1/1 | 8.84  | 8.58  |
| 0/1 | 1/1 | 3.59  | 3.62  |
| 0/1 | 1/1 | 9.27  | 9.53  |
| 0/1 | 1/1 | 4.22  | 6     |
| 1/1 | 1/1 | 9.02  | 8.12  |
| 1/1 | 1/1 | 3.41  | 2.67  |
| 0/1 | 1/1 | 3.89  | 5.22  |
| 1/1 | 1/1 | 4.2   | 5.56  |
| 0/1 | 1/1 | 3.37  | 4.77  |
| 0/1 | 1/1 | 2.9   | 4.36  |
| 1/1 | 1/1 | 5.08  | 6.95  |
| 1/1 | 1/1 | 9.19  | 8.09  |
| 1/1 | 1/1 | 5.08  | 4.01  |

|     |     |       |       |
|-----|-----|-------|-------|
| 1/1 | 1/1 | 6.05  | 4.98  |
| 0/1 | 1/1 | 2.74  | 4.18  |
| 1/1 | 1/1 | 11.08 | 10.93 |
| 1/1 | 1/1 | 5.17  | 5.06  |
| 0/1 | 1/1 | 3.56  | 3.47  |
| 0/1 | 1/1 | 4.05  | 3.87  |
| 0/1 | 1/1 | 2.43  | 4.97  |
| 1/1 | 0/1 | 5.05  | 3.54  |
| 1/1 | 1/1 | 6.45  | 5.15  |
| 0/1 | 1/1 | 1.82  | 3.16  |
| 1/1 | 1/1 | 7.54  | 7.34  |
| 1/1 | 1/1 | 5.76  | 5.6   |
| 1/1 | 1/1 | 10.9  | 10.9  |
| 0/1 | 1/1 | 3.1   | 5.63  |
| 1/1 | 0/1 | 4.92  | 3.96  |
| 1/1 | 1/1 | 6.28  | 7.57  |
| 1/1 | 1/1 | 10.23 | 9.87  |
| 1/1 | 1/1 | 3.76  | 5.73  |
| 0/1 | 1/1 | 3.2   | 5.51  |
| 1/1 | 1/1 | 5.42  | 3.64  |
| 1/1 | 1/1 | 10.61 | 11.14 |
| 1/1 | 0/1 | 4.6   | 3.59  |
| 1/1 | 1/1 | 6.95  | 6.08  |
| 1/1 | 1/1 | 5.14  | 3.56  |
| 1/1 | 0/1 | 4.37  | 2.91  |
| 1/1 | 1/1 | 8.5   | 9.13  |
| 1/1 | 1/1 | 4.44  | 5.08  |
| 0/1 | 1/1 | 1.95  | 2.59  |
| 0/1 | 1/1 | 3.95  | 4.62  |
| 1/1 | 1/1 | 5.84  | 6.51  |
| 1/1 | 1/1 | 6.43  | 7.12  |
| 0/1 | 1/1 | 3.51  | 4.38  |
| 1/1 | 0/1 | 3.92  | 2.62  |
| 1/1 | 1/1 | 5     | 3.84  |
| 1/1 | 1/1 | 4.01  | 4.94  |
| 1/1 | 1/1 | 5.27  | 6.26  |
| 0/1 | 1/1 | 2.79  | 3.78  |
| 1/1 | 1/1 | 4.48  | 5.66  |
| 0/1 | 1/1 | 3.83  | 5.73  |
| 1/1 | 1/1 | 7.34  | 6.43  |
| 1/1 | 1/1 | 5.89  | 5.18  |
| 0/1 | 1/1 | 4.24  | 5.89  |
| 1/1 | 1/1 | 7.33  | 5.63  |
| 1/1 | 1/1 | 6.37  | 4.73  |
| 0/1 | 1/1 | 2.38  | 3.83  |
| 1/1 | 1/1 | 4.34  | 3.74  |
| 1/1 | 1/1 | 5.24  | 4.65  |
| 1/1 | 1/1 | 3.61  | 3.04  |
| 1/1 | 1/1 | 9.29  | 8.92  |
| 1/1 | 1/1 | 4.92  | 4.55  |
| 1/1 | 1/1 | 8.13  | 7.79  |
| 0/1 | 1/1 | 5.2   | 4.93  |
| 1/1 | 1/1 | 6.71  | 5.64  |
| 0/1 | 1/1 | 2.71  | 4.22  |
| 1/1 | 0/1 | 5.76  | 4.93  |
| 1/1 | 1/1 | 6.04  | 5.23  |
| 0/1 | 1/1 | 4.22  | 5.68  |
| 1/1 | 1/1 | 6.51  | 5.73  |



|     |     |       |       |
|-----|-----|-------|-------|
| 1/1 | 0/1 | 3.66  | 3.01  |
| 0/1 | 1/1 | 2.4   | 4.03  |
| 1/1 | 1/1 | 6.4   | 3.67  |
| 1/1 | 1/1 | 8.06  | 5.52  |
| 1/1 | 1/1 | 5.11  | 4.61  |
| 0/1 | 1/1 | 3.31  | 2.86  |
| 1/1 | 1/1 | 3.43  | 3     |
| 1/1 | 1/1 | 4.28  | 3.85  |
| 1/1 | 0/1 | 3.04  | 2.7   |
| 1/1 | 1/1 | 8.14  | 7.8   |
| 1/1 | 1/1 | 3.39  | 3.06  |
| 1/1 | 0/1 | 2.78  | 2.45  |
| 0/1 | 1/1 | 2.92  | 2.61  |
| 1/1 | 1/1 | 8.31  | 8.05  |
| 1/1 | 1/1 | 6.86  | 6.63  |
| 0/1 | 1/1 | 4.47  | 4.27  |
| 1/1 | 1/1 | 4.5   | 4.31  |
| 0/1 | 1/1 | 3.1   | 2.93  |
| 1/1 | 1/1 | 10.63 | 10.53 |
| 0/1 | 1/1 | 2.66  | 2.59  |
| 1/1 | 1/1 | 4.43  | 4.37  |
| 1/1 | 1/1 | 3.77  | 3.72  |
| 1/1 | 1/1 | 10.59 | 10.58 |
| 1/1 | 1/1 | 9.81  | 9.87  |
| 1/1 | 1/1 | 5.52  | 5.62  |
| 1/1 | 1/1 | 8.35  | 8.47  |
| 1/1 | 1/1 | 6.05  | 6.25  |
| 0/1 | 1/1 | 2.59  | 2.81  |
| 0/1 | 1/1 | 2.79  | 3.12  |
| 0/1 | 1/1 | 4.56  | 4.98  |
| 0/1 | 1/1 | 3.86  | 4.29  |
| 0/1 | 1/1 | 2.44  | 2.88  |
| 0/1 | 1/1 | 2.18  | 2.62  |
| 1/1 | 1/1 | 5.35  | 5.94  |
| 0/1 | 1/1 | 2.13  | 2.82  |
| 0/1 | 1/1 | 3.78  | 4.54  |
| 1/1 | 1/1 | 6.62  | 6.2   |
| 1/1 | 1/1 | 4.24  | 6.8   |
| 1/1 | 1/1 | 3.18  | 2.47  |
| 1/1 | 1/1 | 8.35  | 7.75  |
| 1/1 | 1/1 | 7.71  | 6.56  |
| 1/1 | 0/1 | 3.72  | 2.65  |
| 0/1 | 1/1 | 3.12  | 4.18  |
| 0/1 | 1/1 | 2.67  | 4.3   |
| 1/1 | 1/1 | 6.29  | 5.91  |
| 1/1 | 1/1 | 4.05  | 3.68  |
| 1/1 | 1/1 | 7.33  | 7.08  |
| 1/1 | 0/1 | 2.48  | 2.05  |
| 1/1 | 1/1 | 6.17  | 5.78  |
| 1/1 | 1/1 | 6.85  | 6.61  |
| 1/1 | 1/1 | 4.43  | 3.38  |
| 1/1 | 1/1 | 5.25  | 4.39  |
| 1/1 | 1/1 | 5.79  | 7.23  |
| 1/1 | 0/1 | 8.75  | 6.04  |
| 1/1 | 1/1 | 7.82  | 5.25  |
| 1/1 | 1/1 | 7.66  | 7.24  |
| 1/1 | 1/1 | 7.34  | 6.59  |
| 1/1 | 1/1 | 7.86  | 7.14  |

|     |     |      |      |
|-----|-----|------|------|
| 1/1 | 1/1 | 8.98 | 8.31 |
| 1/1 | 1/1 | 5.2  | 4.54 |
| 1/1 | 1/1 | 5.85 | 5.21 |
| 1/1 | 1/1 | 7.42 | 6.77 |
| 1/1 | 1/1 | 4.6  | 6.13 |
| 1/1 | 1/1 | 5.26 | 7.1  |
| 1/1 | 1/1 | 6.81 | 6.1  |
| 0/1 | 1/1 | 6.26 | 5.73 |
| 1/1 | 0/1 | 7.33 | 6.28 |
| 0/1 | 1/1 | 4.8  | 6    |
| 1/1 | 0/1 | 7.33 | 6.28 |
| 0/1 | 1/1 | 4.8  | 6    |
| 1/1 | 1/1 | 6.5  | 5.92 |
| 1/1 | 1/1 | 5.43 | 5.03 |
| 1/1 | 1/1 | 4.28 | 3.89 |
| 1/1 | 1/1 | 6.5  | 5.92 |
| 1/1 | 1/1 | 5.43 | 5.03 |
| 1/1 | 1/1 | 4.28 | 3.89 |
| 1/1 | 1/1 | 8.39 | 7.15 |
| 1/1 | 1/1 | 6.83 | 5.76 |
| 1/1 | 1/1 | 6.37 | 4.01 |
| 0/1 | 1/1 | 3.29 | 3.42 |
| 1/1 | 1/1 | 8.01 | 6.83 |
| 1/1 | 0/1 | 6.13 | 4.97 |
| 1/1 | 1/1 | 6.41 | 5.43 |
| 0/1 | 1/1 | 3.88 | 5.49 |
| 0/1 | 1/1 | 4.11 | 5.72 |
| 1/1 | 1/1 | 6.88 | 6.85 |
| 0/1 | 1/1 | 4.14 | 4.11 |
| 1/1 | 1/1 | 6.83 | 6.85 |
| 1/1 | 1/1 | 6.48 | 6.58 |
| 0/1 | 1/1 | 6.63 | 6.75 |
| 1/1 | 1/1 | 5.12 | 3.99 |
| 1/1 | 1/1 | 4.28 | 5.46 |
| 1/1 | 1/1 | 6.5  | 7.81 |
| 1/1 | 1/1 | 7.95 | 6.72 |
| 1/1 | 0/1 | 4.9  | 3.79 |
| 0/1 | 1/1 | 2.84 | 3.92 |
| 1/1 | 1/1 | 4.4  | 5.48 |
| 1/1 | 1/1 | 4.51 | 5.62 |
| 1/1 | 1/1 | 4.19 | 5.72 |
| 1/1 | 0/1 | 3.38 | 2.2  |
| 1/1 | 0/1 | 2.84 | 1.77 |
| 1/1 | 1/1 | 7.69 | 9.04 |
| 0/1 | 1/1 | 3.85 | 5.38 |
| 1/1 | 1/1 | 3.95 | 2.88 |
| 1/1 | 1/1 | 6.05 | 5.1  |
| 1/1 | 1/1 | 4.43 | 3.49 |
| 1/1 | 1/1 | 3.53 | 2.65 |
| 1/1 | 1/1 | 4.42 | 5.66 |
| 1/1 | 1/1 | 4.38 | 5.98 |
| 1/1 | 1/1 | 4.13 | 6    |
| 1/1 | 1/1 | 5.53 | 4.45 |
| 1/1 | 1/1 | 6.38 | 5.38 |
| 1/1 | 1/1 | 6.21 | 5.22 |
| 1/1 | 1/1 | 5.22 | 4.28 |
| 0/1 | 1/1 | 2.64 | 3.8  |
| 0/1 | 1/1 | 4.46 | 5.65 |

|     |     |       |       |
|-----|-----|-------|-------|
| 0/1 | 1/1 | 2.31  | 3.67  |
| 0/1 | 1/1 | 2.15  | 3.59  |
| 0/1 | 1/1 | 4.08  | 5.58  |
| 1/1 | 1/1 | 5.4   | 7     |
| 0/1 | 1/1 | 2.83  | 5.18  |
| 0/1 | 1/1 | 3.61  | 6.15  |
| 0/1 | 1/1 | 2.22  | 4.83  |
| 0/1 | 1/1 | 2.57  | 5.37  |
| 1/1 | 0/1 | 4.3   | 3.4   |
| 0/1 | 1/1 | 2.96  | 4.31  |
| 1/1 | 1/1 | 6.8   | 8.23  |
| 1/1 | 1/1 | 4.11  | 5.74  |
| 1/1 | 1/1 | 4.38  | 6.02  |
| 1/1 | 1/1 | 4.06  | 5.79  |
| 1/1 | 1/1 | 4.33  | 6.39  |
| 1/1 | 1/1 | 4.09  | 3     |
| 1/1 | 1/1 | 6.28  | 5.25  |
| 0/1 | 1/1 | 3.53  | 5.05  |
| 0/1 | 1/1 | 3.49  | 5.48  |
| 1/1 | 1/1 | 6.5   | 5.92  |
| 1/1 | 1/1 | 5.43  | 5.03  |
| 1/1 | 1/1 | 4.28  | 3.89  |
| 1/1 | 0/1 | 4.52  | 2.83  |
| 1/1 | 0/1 | 5.05  | 3.54  |
| 0/1 | 1/1 | 2.52  | 3.22  |
| 1/1 | 1/1 | 4.55  | 5.26  |
| 0/1 | 1/1 | 2.8   | 3.68  |
| 1/1 | 1/1 | 7.17  | 7.03  |
| 0/1 | 1/1 | 5.23  | 7.46  |
| 0/1 | 1/1 | 2.52  | 4.77  |
| 0/1 | 1/1 | 2.76  | 5.21  |
| 1/1 | 1/1 | 5.04  | 7.88  |
| 0/1 | 1/1 | 5.5   | 8.78  |
| 0/1 | 1/1 | 4.3   | 8.68  |
| 0/1 | 1/1 | 3.98  | 8.52  |
| 0/1 | 1/1 | 3.24  | 9.05  |
| 1/1 | 1/1 | 10.85 | 8.99  |
| 0/1 | 1/1 | 3.88  | 4.38  |
| 0/1 | 1/1 | 3.71  | 4.42  |
| 1/1 | 1/1 | 5.63  | 6.34  |
| 1/1 | 1/1 | 8.6   | 7.15  |
| 0/1 | 1/1 | 2.88  | 3.79  |
| 1/1 | 1/1 | 4.27  | 5.37  |
| 1/1 | 1/1 | 6.59  | 5.64  |
| 1/1 | 1/1 | 7.82  | 9.1   |
| 1/1 | 1/1 | 3.89  | 5.23  |
| 1/1 | 1/1 | 7     | 8.35  |
| 1/1 | 1/1 | 7.69  | 9.19  |
| 1/1 | 1/1 | 5.36  | 6.94  |
| 0/1 | 1/1 | 3.32  | 5.02  |
| 0/1 | 1/1 | 3.84  | 6.33  |
| 1/1 | 1/1 | 6.13  | 5.31  |
| 1/1 | 0/1 | 5.38  | 4.66  |
| 1/1 | 1/1 | 8.14  | 7.52  |
| 1/1 | 1/1 | 9.8   | 11.44 |
| 1/1 | 1/1 | 5.42  | 4.67  |
| 1/1 | 1/1 | 6.02  | 5.34  |
| 1/1 | 1/1 | 4.62  | 3.08  |

|     |     |      |      |
|-----|-----|------|------|
| 0/1 | 1/1 | 2.24 | 2.97 |
| 1/1 | 0/1 | 7.33 | 6.28 |
| 0/1 | 1/1 | 4.8  | 6    |
| 1/1 | 1/1 | 6.5  | 5.92 |
| 1/1 | 1/1 | 6.51 | 5.98 |
| 1/1 | 1/1 | 5.43 | 5.03 |
| 1/1 | 1/1 | 4.28 | 3.89 |
| 1/1 | 1/1 | 6.5  | 5.92 |
| 1/1 | 1/1 | 5.43 | 5.03 |
| 1/1 | 1/1 | 4.28 | 3.89 |
| 1/1 | 1/1 | 6.5  | 5.92 |
| 1/1 | 1/1 | 5.43 | 5.03 |
| 1/1 | 1/1 | 4.28 | 3.89 |
| 1/1 | 0/1 | 7.33 | 6.28 |
| 0/1 | 1/1 | 4.8  | 6    |
| 1/1 | 0/1 | 7.33 | 6.28 |
| 0/1 | 1/1 | 4.8  | 6    |
| 1/1 | 1/1 | 6.04 | 4.82 |
| 1/1 | 0/1 | 5.55 | 4.53 |
| 0/1 | 1/1 | 4.78 | 4.2  |
| 1/1 | 1/1 | 6.34 | 5.81 |
| 1/1 | 1/1 | 6.71 | 6.24 |
| 1/1 | 1/1 | 6.42 | 4.27 |
| 1/1 | 1/1 | 8.21 | 6.12 |
| 1/1 | 1/1 | 7.32 | 7.52 |
| 0/1 | 1/1 | 6.28 | 6.65 |
| 1/1 | 1/1 | 4.75 | 2.91 |
| 1/1 | 0/1 | 5.02 | 3.38 |
| 0/1 | 1/1 | 3.06 | 3.82 |
| 1/1 | 1/1 | 5.66 | 4.66 |
| 1/1 | 1/1 | 5.63 | 4.69 |
| 1/1 | 1/1 | 8.13 | 7.19 |
| 1/1 | 1/1 | 5.19 | 3.25 |
| 0/1 | 1/1 | 3.91 | 4.19 |
| 1/1 | 1/1 | 5.89 | 6.81 |
| 1/1 | 1/1 | 6.7  | 5.38 |
| 1/1 | 1/1 | 4.51 | 3.35 |
| 1/1 | 1/1 | 7.59 | 6.68 |
| 1/1 | 1/1 | 4.21 | 5.57 |
| 0/1 | 1/1 | 2.52 | 3.88 |
| 1/1 | 1/1 | 4.56 | 6.11 |
| 1/1 | 1/1 | 3.39 | 4.95 |
| 0/1 | 1/1 | 3.02 | 5.01 |
| 1/1 | 1/1 | 3.03 | 5.53 |
| 1/1 | 1/1 | 8.25 | 7.43 |
| 1/1 | 0/1 | 8.19 | 7.49 |
| 1/1 | 0/1 | 2.81 | 1.77 |
| 1/1 | 1/1 | 6.39 | 7.71 |
| 1/1 | 1/1 | 5.77 | 7.83 |
| 1/1 | 1/1 | 6.66 | 5.47 |
| 1/1 | 1/1 | 5.66 | 6.75 |
| 1/1 | 0/1 | 3.54 | 3.1  |
| 1/1 | 1/1 | 9.91 | 9.57 |
| 1/1 | 1/1 | 3.22 | 5.29 |
| 1/1 | 1/1 | 4.28 | 6.72 |
| 1/1 | 1/1 | 5.37 | 4.82 |
| 1/1 | 1/1 | 6.63 | 6.25 |
| 1/1 | 1/1 | 7.63 | 7.21 |

|     |     |       |       |
|-----|-----|-------|-------|
| 1/1 | 1/1 | 5.58  | 5.24  |
| 1/1 | 1/1 | 9.65  | 9.39  |
| 0/1 | 1/1 | 4.71  | 6.55  |
| 0/1 | 1/1 | 4.71  | 6.58  |
| 1/1 | 1/1 | 7.1   | 4.86  |
| 1/1 | 1/1 | 3.42  | 3.41  |
| 1/1 | 1/1 | 10.22 | 10.47 |
| 1/1 | 1/1 | 10.6  | 10.99 |
| 1/1 | 1/1 | 7.17  | 6.92  |
| 1/1 | 1/1 | 2.52  | 2.33  |
| 1/1 | 1/1 | 8.16  | 7.71  |
| 1/1 | 1/1 | 5.06  | 4.79  |
| 1/1 | 1/1 | 3.56  | 5.4   |
| 1/1 | 1/1 | 4.72  | 6.61  |
| 1/1 | 1/1 | 4.17  | 6.66  |
| 1/1 | 1/1 | 5.44  | 4.12  |
| 1/1 | 1/1 | 5.71  | 6.8   |
| 1/1 | 1/1 | 3.77  | 3.46  |
| 1/1 | 1/1 | 4.36  | 6.42  |
| 1/1 | 1/1 | 5.4   | 7.48  |
| 1/1 | 1/1 | 4.95  | 7.12  |
| 0/1 | 1/1 | 4.35  | 6.86  |
| 1/1 | 1/1 | 9.87  | 9.22  |
| 1/1 | 1/1 | 7.96  | 7.41  |
| 1/1 | 1/1 | 4.62  | 6.31  |
| 1/1 | 1/1 | 11.03 | 10.87 |
| 1/1 | 1/1 | 5     | 7.09  |
| 1/1 | 1/1 | 3.77  | 5.96  |
| 0/1 | 1/1 | 3.36  | 5.88  |
| 1/1 | 1/1 | 4.85  | 3.07  |
| 1/1 | 0/1 | 3.67  | 2.02  |
| 0/1 | 1/1 | 2.44  | 3.13  |
| 0/1 | 1/1 | 5.88  | 6.65  |
| 1/1 | 1/1 | 3.17  | 4.34  |
| 0/1 | 1/1 | 2.32  | 4.09  |
| 1/1 | 1/1 | 6.74  | 4.32  |
| 0/1 | 1/1 | 3.09  | 2.93  |
| 0/1 | 1/1 | 3.26  | 3.43  |
| 1/1 | 1/1 | 10.17 | 9.87  |
| 1/1 | 1/1 | 5.59  | 5.36  |
| 1/1 | 0/1 | 5.16  | 4.04  |
| 1/1 | 1/1 | 4.83  | 3.9   |
| 1/1 | 1/1 | 7.92  | 5.18  |
| 1/1 | 0/1 | 5.48  | 2.8   |
| 1/1 | 1/1 | 6.67  | 6.59  |
| 0/1 | 1/1 | 7.26  | 7.26  |
| 1/1 | 1/1 | 4.1   | 4.11  |
| 0/1 | 1/1 | 6.93  | 7.1   |
| 0/1 | 1/1 | 2.96  | 3.87  |
| 1/1 | 1/1 | 6.06  | 3.83  |
| 1/1 | 1/1 | 7.31  | 5.1   |
| 1/1 | 1/1 | 5.36  | 3.18  |
| 1/1 | 1/1 | 5.07  | 2.95  |
| 1/1 | 1/1 | 6.85  | 4.77  |
| 1/1 | 1/1 | 5.22  | 3.15  |
| 1/1 | 1/1 | 6.32  | 6.3   |
| 1/1 | 1/1 | 7.66  | 7.79  |
| 1/1 | 1/1 | 2.44  | 2.6   |

|     |     |       |      |
|-----|-----|-------|------|
| 0/1 | 1/1 | 5.45  | 5.63 |
| 0/1 | 1/1 | 4.2   | 4.4  |
| 0/1 | 1/1 | 3.42  | 3.63 |
| 1/1 | 1/1 | 5.63  | 4.04 |
| 0/1 | 1/1 | 3.93  | 4.83 |
| 1/1 | 1/1 | 5.81  | 4.67 |
| 1/1 | 1/1 | 2.6   | 3.8  |
| 1/1 | 1/1 | 5.13  | 4.58 |
| 1/1 | 1/1 | 3.24  | 2.77 |
| 1/1 | 1/1 | 2.75  | 2.3  |
| 1/1 | 1/1 | 5.77  | 7.41 |
| 0/1 | 1/1 | 2.29  | 4.31 |
| 1/1 | 0/1 | 3.15  | 1.85 |
| 1/1 | 1/1 | 9.65  | 8.45 |
| 1/1 | 0/1 | 4.38  | 3.21 |
| 1/1 | 1/1 | 7.97  | 6.82 |
| 1/1 | 0/1 | 4.59  | 3.48 |
| 1/1 | 1/1 | 10.47 | 8.37 |
| 1/1 | 1/1 | 8.31  | 6.25 |
| 1/1 | 1/1 | 5.9   | 6.24 |
| 1/1 | 1/1 | 8.3   | 8.66 |
| 1/1 | 1/1 | 4.35  | 4.86 |
| 1/1 | 1/1 | 6.82  | 5.23 |
| 1/1 | 1/1 | 6.51  | 5.08 |
| 1/1 | 0/1 | 11.7  | 10.6 |
| 1/1 | 0/1 | 5.62  | 4.68 |
| 1/1 | 1/1 | 8.76  | 8.33 |
| 1/1 | 1/1 | 5.74  | 7.57 |
| 0/1 | 1/1 | 2.9   | 4.8  |
| 1/1 | 1/1 | 7.94  | 6.52 |
| 0/1 | 1/1 | 5.28  | 6.23 |
| 0/1 | 1/1 | 4.42  | 5.74 |
| 0/1 | 1/1 | 2.91  | 4.29 |
| 0/1 | 1/1 | 4.51  | 6.63 |
| 1/1 | 1/1 | 9.93  | 8.91 |
| 1/1 | 1/1 | 7.22  | 6.33 |
| 1/1 | 1/1 | 8.29  | 7.86 |
| 1/1 | 1/1 | 4.97  | 4.55 |
| 1/1 | 1/1 | 5.1   | 4.38 |
| 1/1 | 1/1 | 4.82  | 6.9  |
| 1/1 | 1/1 | 7.85  | 6.72 |
| 0/1 | 1/1 | 2.28  | 3.51 |
| 1/1 | 1/1 | 8.65  | 7.77 |
| 0/1 | 1/1 | 4.12  | 5.53 |
| 0/1 | 1/1 | 3.54  | 3.05 |
| 1/1 | 1/1 | 4.84  | 4.36 |
| 1/1 | 0/1 | 7.48  | 6.84 |
| 1/1 | 1/1 | 5.99  | 5.52 |
| 1/1 | 1/1 | 5.49  | 7.15 |
| 1/1 | 1/1 | 6.5   | 5.92 |
| 1/1 | 1/1 | 5.43  | 5.03 |
| 1/1 | 0/1 | 3.87  | 3.01 |
| 1/1 | 0/1 | 4.42  | 3.63 |
| 1/1 | 1/1 | 3.95  | 3.27 |
| 1/1 | 1/1 | 7.38  | 6.96 |
| 0/1 | 1/1 | 6.82  | 6.44 |
| 1/1 | 1/1 | 5.18  | 7.25 |
| 0/1 | 1/1 | 3.05  | 7.54 |

|     |     |       |       |
|-----|-----|-------|-------|
| 1/1 | 1/1 | 7.02  | 7.02  |
| 1/1 | 1/1 | 2.63  | 2.65  |
| 1/1 | 1/1 | 4.71  | 4.78  |
| 1/1 | 1/1 | 8.2   | 8.3   |
| 0/1 | 1/1 | 2.39  | 2.5   |
| 1/1 | 1/1 | 7.48  | 7.6   |
| 1/1 | 1/1 | 7.25  | 9.43  |
| 1/1 | 1/1 | 6.67  | 9.06  |
| 1/1 | 1/1 | 8.02  | 10.58 |
| 1/1 | 1/1 | 5.4   | 7.96  |
| 1/1 | 1/1 | 7.16  | 10.05 |
| 1/1 | 1/1 | 7.02  | 5.64  |
| 1/1 | 1/1 | 5.69  | 4.46  |
| 1/1 | 1/1 | 5.43  | 6.59  |
| 1/1 | 1/1 | 5.21  | 3.4   |
| 1/1 | 1/1 | 8.38  | 6.65  |
| 1/1 | 1/1 | 8.52  | 8.99  |
| 1/1 | 1/1 | 4.47  | 4.95  |
| 0/1 | 1/1 | 7.73  | 8.22  |
| 0/1 | 1/1 | 5.08  | 5.58  |
| 1/1 | 1/1 | 7.22  | 7.76  |
| 1/1 | 1/1 | 8.39  | 7.56  |
| 1/1 | 1/1 | 6.28  | 7.65  |
| 1/1 | 1/1 | 5.07  | 3.92  |
| 0/1 | 1/1 | 3.12  | 4.25  |
| 0/1 | 1/1 | 3.5   | 4.68  |
| 1/1 | 1/1 | 9.21  | 8.56  |
| 1/1 | 1/1 | 5.69  | 5.05  |
| 1/1 | 1/1 | 4.41  | 5.94  |
| 1/1 | 1/1 | 2.9   | 2.6   |
| 1/1 | 1/1 | 9.19  | 8.88  |
| 1/1 | 1/1 | 6.38  | 6.12  |
| 1/1 | 1/1 | 3.72  | 5.75  |
| 1/1 | 0/1 | 4.19  | 2.48  |
| 1/1 | 1/1 | 2.95  | 3.41  |
| 0/1 | 1/1 | 2.26  | 2.72  |
| 1/1 | 1/1 | 2.92  | 3.4   |
| 1/1 | 1/1 | 3.23  | 3.75  |
| 1/1 | 1/1 | 4.73  | 5.28  |
| 1/1 | 1/1 | 4.06  | 4.72  |
| 1/1 | 1/1 | 4.61  | 5.45  |
| 1/1 | 1/1 | 4.53  | 3.86  |
| 1/1 | 1/1 | 8.23  | 7.69  |
| 1/1 | 0/1 | 4.94  | 3.62  |
| 0/1 | 1/1 | 2.27  | 3.22  |
| 1/1 | 1/1 | 7.26  | 6.05  |
| 1/1 | 1/1 | 4.05  | 2.91  |
| 0/1 | 1/1 | 2.8   | 4.03  |
| 1/1 | 1/1 | 11.59 | 10.76 |
| 1/1 | 1/1 | 3.57  | 5.19  |
| 1/1 | 1/1 | 5.95  | 4.97  |
| 0/1 | 1/1 | 4.49  | 5.82  |
| 1/1 | 0/1 | 5.09  | 3.1   |
| 1/1 | 1/1 | 4.36  | 4.85  |
| 0/1 | 1/1 | 2.29  | 2.99  |
| 0/1 | 1/1 | 2.2   | 3.18  |
| 1/1 | 0/1 | 6.78  | 4.54  |
| 1/1 | 1/1 | 9.19  | 9.16  |

|     |     |       |       |
|-----|-----|-------|-------|
| 1/1 | 1/1 | 8.67  | 8.78  |
| 0/1 | 1/1 | 4.23  | 4.84  |
| 1/1 | 1/1 | 4.42  | 4.18  |
| 0/1 | 1/1 | 4.44  | 4.37  |
| 1/1 | 1/1 | 5.77  | 5.47  |
| 1/1 | 1/1 | 8.12  | 7.83  |
| 1/1 | 1/1 | 10.09 | 9.81  |
| 1/1 | 1/1 | 5.87  | 4.29  |
| 0/1 | 1/1 | 2.94  | 4.3   |
| 0/1 | 1/1 | 3.35  | 3.01  |
| 1/1 | 1/1 | 9.21  | 8.88  |
| 1/1 | 1/1 | 5.25  | 7.32  |
| 1/1 | 1/1 | 9.76  | 4.92  |
| 1/1 | 1/1 | 12.94 | 11.74 |
| 1/1 | 1/1 | 12.95 | 12.15 |
| 1/1 | 1/1 | 7.24  | 6.99  |
| 1/1 | 1/1 | 7.24  | 7.02  |
| 1/1 | 1/1 | 7.37  | 7.22  |
| 1/1 | 1/1 | 10.6  | 10.52 |
| 1/1 | 1/1 | 7.39  | 6.7   |
| 0/1 | 1/1 | 5.24  | 4.66  |
| 1/1 | 1/1 | 4.72  | 6.35  |
| 0/1 | 1/1 | 3.31  | 5.38  |
| 1/1 | 1/1 | 8.76  | 7.98  |
| 0/1 | 1/1 | 3.29  | 5.39  |
| 1/1 | 1/1 | 6.68  | 5.87  |
| 1/1 | 0/1 | 3.78  | 3.01  |
| 1/1 | 1/1 | 6.67  | 6.01  |
| 1/1 | 1/1 | 7.73  | 9.13  |
| 1/1 | 1/1 | 7.63  | 6.35  |
| 1/1 | 1/1 | 2.71  | 3.64  |
| 1/1 | 1/1 | 5.44  | 6.68  |
| 1/1 | 1/1 | 4.19  | 5.5   |
| 1/1 | 1/1 | 4.53  | 3.86  |
| 1/1 | 1/1 | 8.23  | 7.69  |
| 1/1 | 1/1 | 4.53  | 3.86  |
| 1/1 | 1/1 | 8.23  | 7.69  |
| 1/1 | 0/1 | 7.48  | 6.84  |
| 1/1 | 1/1 | 5.49  | 7.15  |
| 1/1 | 0/1 | 7.48  | 6.84  |
| 1/1 | 1/1 | 5.49  | 7.15  |
| 1/1 | 0/1 | 7.48  | 6.84  |
| 1/1 | 1/1 | 5.49  | 7.15  |
| 1/1 | 1/1 | 4.53  | 3.86  |
| 1/1 | 1/1 | 8.23  | 7.69  |
| 0/1 | 1/1 | 3.4   | 4.92  |
| 1/1 | 1/1 | 5.64  | 4.25  |
| 0/1 | 1/1 | 2.71  | 3.53  |
| 1/1 | 1/1 | 7.93  | 6.9   |
| 0/1 | 1/1 | 3.13  | 4.34  |
| 1/1 | 1/1 | 5.93  | 4.55  |
| 1/1 | 1/1 | 6.73  | 5.45  |
| 1/1 | 1/1 | 5.5   | 6.37  |
| 1/1 | 1/1 | 3.81  | 4.71  |
| 0/1 | 1/1 | 3.54  | 4.46  |
| 1/1 | 1/1 | 4.11  | 5.74  |
| 1/1 | 1/1 | 5.93  | 4.55  |
| 1/1 | 1/1 | 6.73  | 5.45  |



|     |     |       |      |
|-----|-----|-------|------|
| 1/1 | 1/1 | 5.5   | 6.37 |
| 1/1 | 1/1 | 3.81  | 4.71 |
| 0/1 | 1/1 | 3.54  | 4.46 |
| 0/1 | 1/1 | 2.31  | 3.61 |
| 1/1 | 0/1 | 3.42  | 2.09 |
| 1/1 | 1/1 | 5.56  | 4.39 |
| 1/1 | 1/1 | 2.88  | 3.91 |
| 1/1 | 1/1 | 6.05  | 4.68 |
| 0/1 | 1/1 | 2.84  | 3.81 |
| 1/1 | 0/1 | 4.92  | 2.37 |
| 1/1 | 1/1 | 10.41 | 7.98 |
| 1/1 | 1/1 | 6.78  | 6.41 |
| 1/1 | 1/1 | 8.15  | 7.82 |
| 0/1 | 1/1 | 5.72  | 5.43 |
| 1/1 | 1/1 | 3.05  | 2.78 |
| 1/1 | 1/1 | 5.29  | 5.09 |
| 1/1 | 1/1 | 6.26  | 6.06 |
| 0/1 | 1/1 | 4.66  | 4.48 |
| 0/1 | 1/1 | 3.22  | 3.44 |
| 1/1 | 0/1 | 4.96  | 3.85 |
| 1/1 | 1/1 | 3.65  | 2.63 |
| 1/1 | 1/1 | 6.22  | 5.53 |
| 0/1 | 1/1 | 2.7   | 4.74 |
| 1/1 | 1/1 | 5.35  | 4.46 |
| 1/1 | 0/1 | 3.56  | 2.71 |
| 1/1 | 1/1 | 5.61  | 6.97 |
| 0/1 | 1/1 | 2.72  | 4.69 |
| 0/1 | 1/1 | 3.83  | 3.55 |
| 0/1 | 1/1 | 4.36  | 4.13 |
| 1/1 | 1/1 | 6.51  | 6.3  |
| 0/1 | 1/1 | 3.4   | 3.24 |
| 1/1 | 1/1 | 5.45  | 5.33 |
| 0/1 | 1/1 | 4.61  | 6.8  |
| 1/1 | 0/1 | 4.79  | 3.73 |
| 1/1 | 1/1 | 8.42  | 7.4  |
| 1/1 | 1/1 | 4.25  | 5.78 |
| 1/1 | 1/1 | 10    | 9.47 |
| 0/1 | 1/1 | 4.85  | 6.75 |
| 1/1 | 0/1 | 6.65  | 4.15 |
| 1/1 | 1/1 | 7.4   | 5.02 |
| 1/1 | 1/1 | 8.92  | 8.65 |
| 1/1 | 1/1 | 7.82  | 7.6  |
| 1/1 | 1/1 | 8.97  | 8.8  |
| 1/1 | 1/1 | 7.46  | 7.6  |
| 1/1 | 1/1 | 4.09  | 4.85 |
| 1/1 | 1/1 | 5.55  | 6.8  |
| 1/1 | 1/1 | 4.45  | 3.56 |
| 1/1 | 1/1 | 5.37  | 6.91 |
| 1/1 | 1/1 | 6.74  | 6.24 |
| 1/1 | 1/1 | 8.72  | 8.38 |
| 1/1 | 1/1 | 7.69  | 7.19 |
| 1/1 | 1/1 | 9.88  | 9.43 |
| 1/1 | 1/1 | 8.29  | 6.16 |
| 1/1 | 1/1 | 10.16 | 8.04 |
| 1/1 | 1/1 | 9.98  | 7.89 |
| 1/1 | 1/1 | 6.84  | 6.91 |
| 1/1 | 1/1 | 9.1   | 9.2  |
| 1/1 | 1/1 | 9.23  | 8.15 |

|     |     |       |      |
|-----|-----|-------|------|
| 1/1 | 1/1 | 6.67  | 5.64 |
| 1/1 | 0/1 | 7.48  | 6.84 |
| 1/1 | 1/1 | 5.49  | 7.15 |
| 1/1 | 1/1 | 4.5   | 3.74 |
| 1/1 | 1/1 | 6.02  | 5.4  |
| 1/1 | 1/1 | 6.74  | 5.57 |
| 1/1 | 1/1 | 3.83  | 4.87 |
| 0/1 | 1/1 | 5.34  | 6.7  |
| 1/1 | 0/1 | 4.33  | 2.7  |
| 1/1 | 1/1 | 8.85  | 9.43 |
| 1/1 | 1/1 | 6.97  | 7.56 |
| 1/1 | 1/1 | 6.11  | 6.71 |
| 1/1 | 1/1 | 3     | 3.92 |
| 0/1 | 1/1 | 3.02  | 4.14 |
| 1/1 | 1/1 | 9.59  | 5.97 |
| 1/1 | 1/1 | 10.23 | 6.65 |
| 1/1 | 1/1 | 9.09  | 5.56 |
| 1/1 | 0/1 | 3.97  | 3.31 |
| 1/1 | 0/1 | 3.17  | 2.57 |
| 1/1 | 1/1 | 6.18  | 6.13 |
| 0/1 | 1/1 | 3.69  | 4.13 |
| 1/1 | 1/1 | 6.39  | 5.32 |
| 1/1 | 1/1 | 4.21  | 5.31 |
| 0/1 | 1/1 | 3.3   | 4.53 |
| 1/1 | 1/1 | 7.34  | 4.98 |
| 1/1 | 1/1 | 8.99  | 8.82 |
| 1/1 | 1/1 | 5.47  | 5.33 |
| 1/1 | 1/1 | 5.57  | 5.45 |
| 1/1 | 1/1 | 7.26  | 7.28 |
| 1/1 | 1/1 | 4.57  | 4.63 |
| 0/1 | 1/1 | 2.2   | 3.06 |
| 1/1 | 1/1 | 4.7   | 3.66 |
| 1/1 | 1/1 | 4.96  | 6.09 |
| 1/1 | 1/1 | 4.05  | 6.25 |
| 1/1 | 1/1 | 6.83  | 5.46 |
| 1/1 | 1/1 | 7.93  | 8.72 |
| 0/1 | 1/1 | 3.05  | 3.96 |
| 1/1 | 1/1 | 4.56  | 5.57 |
| 1/1 | 1/1 | 10.53 | 6.79 |
| 1/1 | 1/1 | 9     | 7.87 |
| 1/1 | 1/1 | 9.89  | 8.88 |
| 0/1 | 1/1 | 6.14  | 5.73 |
| 1/1 | 1/1 | 8.26  | 7.17 |
| 1/1 | 1/1 | 10.07 | 8.98 |
| 0/1 | 1/1 | 3.46  | 4.6  |
| 1/1 | 1/1 | 6.54  | 5.56 |
| 1/1 | 1/1 | 6.45  | 5.52 |
| 0/1 | 1/1 | 3.39  | 4.59 |
| 1/1 | 1/1 | 5.66  | 5.01 |
| 0/1 | 1/1 | 3.29  | 5.73 |
| 1/1 | 1/1 | 7.28  | 6.05 |
| 1/1 | 1/1 | 6.97  | 5.88 |
| 1/1 | 1/1 | 5.29  | 6.29 |
| 1/1 | 1/1 | 7.8   | 7.17 |
| 1/1 | 1/1 | 7.69  | 7.09 |
| 1/1 | 1/1 | 5.88  | 4.87 |
| 1/1 | 0/1 | 6.3   | 5.46 |
| 1/1 | 1/1 | 3.52  | 4.8  |

|     |     |       |      |
|-----|-----|-------|------|
| 1/1 | 0/1 | 3.72  | 2.05 |
| 1/1 | 1/1 | 5.7   | 6.22 |
| 0/1 | 1/1 | 7     | 7.56 |
| 1/1 | 1/1 | 8.24  | 7.68 |
| 1/1 | 0/1 | 2.98  | 2.5  |
| 1/1 | 1/1 | 7.8   | 6.68 |
| 1/1 | 1/1 | 5.04  | 4.07 |
| 0/1 | 1/1 | 2.53  | 4.09 |
| 1/1 | 1/1 | 8.26  | 7.25 |
| 1/1 | 1/1 | 8     | 7.11 |
| 1/1 | 0/1 | 5.27  | 3.85 |
| 0/1 | 1/1 | 4.25  | 4.99 |
| 1/1 | 1/1 | 7.9   | 6.71 |
| 0/1 | 1/1 | 2.59  | 4.29 |
| 1/1 | 1/1 | 3.47  | 2.43 |
| 1/1 | 1/1 | 4.69  | 6.05 |
| 1/1 | 1/1 | 5.91  | 4.64 |
| 0/1 | 1/1 | 3.34  | 4.41 |
| 1/1 | 1/1 | 3.98  | 3.53 |
| 1/1 | 1/1 | 5.44  | 5.07 |
| 0/1 | 1/1 | 2.15  | 3.89 |
| 0/1 | 1/1 | 4.08  | 6.12 |
| 0/1 | 1/1 | 4.48  | 6.59 |
| 1/1 | 1/1 | 7.6   | 5.68 |
| 0/1 | 1/1 | 1.89  | 2.32 |
| 1/1 | 1/1 | 3.64  | 3.04 |
| 1/1 | 1/1 | 8.12  | 7.62 |
| 1/1 | 1/1 | 7.89  | 7.43 |
| 1/1 | 1/1 | 5.09  | 6.8  |
| 1/1 | 1/1 | 4.53  | 6.36 |
| 1/1 | 1/1 | 5.46  | 4.09 |
| 1/1 | 1/1 | 8.46  | 7.19 |
| 1/1 | 1/1 | 5.89  | 6.72 |
| 0/1 | 1/1 | 4.56  | 5.42 |
| 0/1 | 1/1 | 4.24  | 5.87 |
| 1/1 | 0/1 | 8.9   | 8.19 |
| 1/1 | 1/1 | 8.98  | 8.37 |
| 1/1 | 1/1 | 6.24  | 5.64 |
| 1/1 | 1/1 | 5.08  | 6.62 |
| 1/1 | 1/1 | 6.54  | 5.11 |
| 1/1 | 1/1 | 3.64  | 4.72 |
| 0/1 | 1/1 | 3.56  | 4.74 |
| 0/1 | 1/1 | 3.56  | 4.74 |
| 1/1 | 1/1 | 7.25  | 4.28 |
| 1/1 | 0/1 | 2.73  | 1.93 |
| 1/1 | 1/1 | 4.75  | 4.23 |
| 1/1 | 1/1 | 6.6   | 6.25 |
| 1/1 | 1/1 | 7.81  | 7.57 |
| 1/1 | 1/1 | 3.77  | 3.56 |
| 1/1 | 1/1 | 5.95  | 5.37 |
| 1/1 | 1/1 | 5.46  | 7.68 |
| 1/1 | 0/1 | 4.98  | 3.57 |
| 1/1 | 0/1 | 4.66  | 3.29 |
| 1/1 | 1/1 | 5.19  | 3.91 |
| 1/1 | 1/1 | 2.56  | 3.46 |
| 1/1 | 1/1 | 4.61  | 5.66 |
| 1/1 | 1/1 | 4.32  | 5.86 |
| 1/1 | 1/1 | 10.29 | 9.51 |

|     |     |       |      |
|-----|-----|-------|------|
| 1/1 | 1/1 | 4.32  | 3.69 |
| 1/1 | 0/1 | 4.86  | 2.87 |
| 1/1 | 1/1 | 3.94  | 4.16 |
| 0/1 | 1/1 | 2.55  | 3.37 |
| 0/1 | 1/1 | 3.17  | 4    |
| 1/1 | 1/1 | 6.62  | 6.09 |
| 1/1 | 1/1 | 7.82  | 7.3  |
| 1/1 | 1/1 | 5.84  | 5.37 |
| 1/1 | 1/1 | 5.04  | 6.68 |
| 0/1 | 1/1 | 3.28  | 5.45 |
| 1/1 | 1/1 | 4.6   | 7.28 |
| 1/1 | 1/1 | 8.05  | 7.79 |
| 1/1 | 1/1 | 6.63  | 6.42 |
| 1/1 | 1/1 | 8.62  | 7.29 |
| 0/1 | 1/1 | 5.36  | 6.4  |
| 1/1 | 1/1 | 4.53  | 3.86 |
| 1/1 | 1/1 | 8.23  | 7.69 |
| 1/1 | 1/1 | 9.85  | 9.06 |
| 1/1 | 1/1 | 6.23  | 5.6  |
| 0/1 | 1/1 | 4.46  | 6.36 |
| 1/1 | 1/1 | 8.7   | 6.9  |
| 1/1 | 1/1 | 9.64  | 7.9  |
| 1/1 | 1/1 | 10.57 | 8.87 |
| 1/1 | 1/1 | 6.12  | 3.21 |
| 1/1 | 1/1 | 5.09  | 4.35 |
| 1/1 | 1/1 | 3.87  | 3.17 |
| 1/1 | 0/1 | 2.96  | 2.36 |
| 1/1 | 1/1 | 6.86  | 6.33 |
| 1/1 | 1/1 | 8.12  | 7.67 |
| 1/1 | 1/1 | 6.61  | 6.27 |
| 1/1 | 1/1 | 9.56  | 9.23 |
| 0/1 | 1/1 | 3.57  | 3.34 |
| 1/1 | 1/1 | 3.55  | 3.47 |
| 1/1 | 1/1 | 5.65  | 5.61 |
| 1/1 | 1/1 | 2.14  | 2.12 |
| 1/1 | 1/1 | 4.93  | 5.02 |
| 1/1 | 1/1 | 5.86  | 6.02 |
| 0/1 | 1/1 | 3.31  | 3.52 |
| 0/1 | 1/1 | 5.32  | 5.53 |
| 1/1 | 1/1 | 6.1   | 6.38 |
| 1/1 | 1/1 | 9.62  | 8.76 |
| 1/1 | 1/1 | 7.98  | 7.25 |
| 1/1 | 1/1 | 8.89  | 8.18 |
| 1/1 | 1/1 | 6.31  | 5.92 |
| 0/1 | 1/1 | 3.11  | 2.82 |
| 1/1 | 1/1 | 3.81  | 3.56 |
| 1/1 | 1/1 | 2.98  | 5.24 |
| 1/1 | 0/1 | 5.35  | 2.57 |
| 1/1 | 1/1 | 7.19  | 6.58 |
| 1/1 | 1/1 | 6.29  | 5.69 |
| 1/1 | 1/1 | 5.67  | 5.4  |
| 1/1 | 1/1 | 13.03 | 12.6 |
| 1/1 | 1/1 | 4.58  | 6.7  |
| 1/1 | 1/1 | 9.08  | 7.93 |
| 0/1 | 1/1 | 2.53  | 4.37 |
| 1/1 | 1/1 | 3.68  | 2.9  |
| 1/1 | 1/1 | 6.8   | 8.73 |
| 1/1 | 1/1 | 6.14  | 5.6  |

|     |     |       |       |
|-----|-----|-------|-------|
| 1/1 | 1/1 | 6.71  | 6.2   |
| 1/1 | 1/1 | 6.32  | 5.9   |
| 1/1 | 1/1 | 4.71  | 3.81  |
| 0/1 | 1/1 | 2.34  | 3.77  |
| 1/1 | 1/1 | 4.02  | 5.87  |
| 1/1 | 1/1 | 6.07  | 5.3   |
| 0/1 | 1/1 | 3.47  | 4.85  |
| 0/1 | 1/1 | 3.72  | 5.83  |
| 0/1 | 1/1 | 5.08  | 7.67  |
| 1/1 | 1/1 | 6.03  | 5.52  |
| 1/1 | 1/1 | 6.77  | 6.39  |
| 1/1 | 1/1 | 4.76  | 6.56  |
| 1/1 | 1/1 | 5     | 6.92  |
| 1/1 | 1/1 | 6.7   | 5.65  |
| 1/1 | 1/1 | 5.82  | 6.97  |
| 1/1 | 1/1 | 9.62  | 8.24  |
| 1/1 | 1/1 | 11.08 | 9.83  |
| 1/1 | 1/1 | 6.12  | 6.95  |
| 1/1 | 1/1 | 7.06  | 8.07  |
| 1/1 | 0/1 | 5.61  | 3.67  |
| 1/1 | 1/1 | 4.61  | 4.89  |
| 1/1 | 1/1 | 6.27  | 4.93  |
| 0/1 | 1/1 | 4.13  | 5.02  |
| 1/1 | 0/1 | 2.89  | 2.35  |
| 1/1 | 0/1 | 2.54  | 2.04  |
| 1/1 | 1/1 | 7.46  | 6.97  |
| 1/1 | 1/1 | 6.88  | 8.74  |
| 1/1 | 0/1 | 7.48  | 6.84  |
| 1/1 | 1/1 | 5.49  | 7.15  |
| 1/1 | 1/1 | 8.74  | 8.04  |
| 1/1 | 1/1 | 7.12  | 6.57  |
| 1/1 | 1/1 | 3.75  | 5.55  |
| 1/1 | 1/1 | 10.25 | 9.21  |
| 1/1 | 1/1 | 8.11  | 7.17  |
| 1/1 | 1/1 | 8.05  | 7.13  |
| 1/1 | 1/1 | 7.2   | 8.3   |
| 1/1 | 0/1 | 2.75  | 1.86  |
| 1/1 | 1/1 | 6.16  | 7.51  |
| 1/1 | 1/1 | 6.99  | 6.09  |
| 1/1 | 1/1 | 3.31  | 2.48  |
| 1/1 | 1/1 | 6.65  | 6.5   |
| 1/1 | 1/1 | 10.79 | 10.69 |
| 1/1 | 1/1 | 5.5   | 5.43  |
| 1/1 | 1/1 | 5.21  | 7.37  |
| 1/1 | 1/1 | 8.27  | 7.76  |
| 1/1 | 1/1 | 8.43  | 7.93  |
| 1/1 | 1/1 | 8.35  | 7.74  |
| 1/1 | 1/1 | 3.51  | 3.02  |
| 1/1 | 1/1 | 3.42  | 5.08  |
| 1/1 | 1/1 | 7.96  | 7.74  |
| 1/1 | 1/1 | 6.63  | 6.54  |
| 0/1 | 1/1 | 6.58  | 8.67  |
| 1/1 | 1/1 | 7.05  | 9.16  |
| 1/1 | 1/1 | 5.33  | 7.46  |
| 1/1 | 1/1 | 4.68  | 6.9   |
| 1/1 | 1/1 | 8.04  | 10.34 |
| 0/1 | 1/1 | 2.68  | 5.06  |
| 1/1 | 1/1 | 3.7   | 9.21  |

|     |     |       |       |
|-----|-----|-------|-------|
| 1/1 | 0/1 | 4.01  | 2.89  |
| 1/1 | 1/1 | 7.3   | 6.2   |
| 1/1 | 0/1 | 5.48  | 4.4   |
| 1/1 | 1/1 | 6.66  | 5.66  |
| 1/1 | 1/1 | 3.69  | 4.82  |
| 0/1 | 1/1 | 3.02  | 5.19  |
| 1/1 | 0/1 | 3.9   | 2.33  |
| 1/1 | 1/1 | 4.75  | 5.56  |
| 0/1 | 1/1 | 3.93  | 4.76  |
| 1/1 | 1/1 | 7.16  | 6.38  |
| 1/1 | 1/1 | 4.04  | 3.36  |
| 1/1 | 1/1 | 3.57  | 2.91  |
| 1/1 | 1/1 | 5.93  | 3.5   |
| 1/1 | 1/1 | 2.71  | 2.6   |
| 1/1 | 1/1 | 12.06 | 12.22 |
| 1/1 | 1/1 | 12.95 | 13.13 |
| 1/1 | 1/1 | 5.78  | 6.06  |
| 1/1 | 1/1 | 10.23 | 10.87 |
| 1/1 | 1/1 | 7.71  | 3.58  |
| 1/1 | 0/1 | 4.69  | 3.5   |
| 1/1 | 1/1 | 8.23  | 7.23  |
| 1/1 | 1/1 | 8.08  | 7.14  |
| 1/1 | 1/1 | 5.13  | 4.31  |
| 1/1 | 1/1 | 8.19  | 7.7   |
| 0/1 | 1/1 | 3.28  | 3.39  |
| 1/1 | 0/1 | 5.53  | 2.37  |
| 1/1 | 0/1 | 3.68  | 2.77  |
| 1/1 | 1/1 | 3.83  | 3.08  |
| 1/1 | 1/1 | 4.6   | 3.89  |
| 1/1 | 1/1 | 4.82  | 4.17  |
| 1/1 | 1/1 | 3.79  | 3.47  |
| 1/1 | 1/1 | 7.82  | 7.52  |
| 1/1 | 1/1 | 4.02  | 3.94  |
| 1/1 | 1/1 | 3.01  | 3.01  |
| 1/1 | 1/1 | 7.99  | 8.22  |
| 0/1 | 1/1 | 3.46  | 4.07  |
| 0/1 | 1/1 | 6.55  | 6.31  |
| 1/1 | 1/1 | 8.28  | 8.09  |
| 1/1 | 1/1 | 5.51  | 5.37  |
| 1/1 | 1/1 | 10.7  | 10.55 |
| 1/1 | 1/1 | 5.56  | 7.54  |
| 0/1 | 1/1 | 5.44  | 4.8   |
| 0/1 | 1/1 | 2.62  | 4.17  |
| 1/1 | 1/1 | 9.67  | 9.05  |
| 1/1 | 1/1 | 3.83  | 5.4   |
| 0/1 | 1/1 | 4.35  | 6.1   |
| 1/1 | 1/1 | 6.17  | 7.93  |
| 1/1 | 1/1 | 5.87  | 7.66  |
| 1/1 | 1/1 | 4.87  | 6.73  |
| 0/1 | 1/1 | 3.09  | 5.7   |
| 1/1 | 1/1 | 4.07  | 7.1   |
| 1/1 | 0/1 | 4.97  | 3.93  |
| 0/1 | 1/1 | 4.81  | 6.49  |
| 1/1 | 1/1 | 4.87  | 7.31  |
| 0/1 | 1/1 | 3.57  | 6.86  |
| 1/1 | 1/1 | 4.17  | 3.27  |
| 1/1 | 1/1 | 5.95  | 7.21  |
| 1/1 | 1/1 | 4.26  | 3.76  |

|     |     |       |       |
|-----|-----|-------|-------|
| 1/1 | 1/1 | 4.49  | 4.09  |
| 1/1 | 1/1 | 5.67  | 7.33  |
| 1/1 | 1/1 | 4.25  | 6.16  |
| 1/1 | 0/1 | 5.59  | 3.83  |
| 1/1 | 1/1 | 5.16  | 5.56  |
| 1/1 | 1/1 | 5.6   | 6.01  |
| 0/1 | 1/1 | 3.78  | 4.2   |
| 0/1 | 1/1 | 2.58  | 3.05  |
| 1/1 | 1/1 | 4.43  | 4.91  |
| 0/1 | 1/1 | 3.51  | 4.07  |
| 1/1 | 1/1 | 4.82  | 5.4   |
| 0/1 | 1/1 | 2.43  | 3.06  |
| 0/1 | 1/1 | 2.35  | 3.14  |
| 1/1 | 1/1 | 6.79  | 8.37  |
| 1/1 | 1/1 | 6.16  | 5.35  |
| 1/1 | 0/1 | 6.96  | 6.19  |
| 1/1 | 1/1 | 4.25  | 5.98  |
| 1/1 | 1/1 | 6.67  | 5.62  |
| 0/1 | 1/1 | 3.53  | 5.69  |
| 1/1 | 1/1 | 5.41  | 4.22  |
| 0/1 | 1/1 | 3.11  | 4.08  |
| 1/1 | 1/1 | 3.22  | 4.34  |
| 1/1 | 1/1 | 8.17  | 7.33  |
| 1/1 | 1/1 | 7.42  | 6.62  |
| 1/1 | 1/1 | 4.42  | 4.03  |
| 1/1 | 1/1 | 6.06  | 5.76  |
| 1/1 | 1/1 | 7.4   | 7.1   |
| 0/1 | 1/1 | 3.66  | 3.4   |
| 1/1 | 1/1 | 10.76 | 10.08 |
| 1/1 | 1/1 | 5.4   | 7.38  |
| 1/1 | 0/1 | 3.06  | 2.24  |
| 1/1 | 1/1 | 4.24  | 3.56  |
| 1/1 | 1/1 | 4.61  | 3.93  |
| 0/1 | 1/1 | 2.55  | 4.28  |
| 1/1 | 1/1 | 4.97  | 4.2   |
| 0/1 | 1/1 | 3.06  | 4.59  |
| 1/1 | 1/1 | 7.16  | 6.23  |
| 1/1 | 1/1 | 8.74  | 7.87  |
| 1/1 | 1/1 | 8.02  | 7.2   |
| 1/1 | 1/1 | 4.16  | 5.41  |
| 1/1 | 1/1 | 7.08  | 5.93  |
| 1/1 | 1/1 | 8.46  | 7.38  |
| 1/1 | 1/1 | 7.33  | 6.61  |
| 1/1 | 1/1 | 5.92  | 5.29  |
| 1/1 | 1/1 | 4.52  | 5.95  |
| 1/1 | 1/1 | 4.28  | 6.05  |
| 1/1 | 0/1 | 5.36  | 2.97  |
| 0/1 | 1/1 | 6.96  | 6.73  |
| 1/1 | 1/1 | 6.96  | 6.82  |
| 1/1 | 1/1 | 5.26  | 5.18  |
| 1/1 | 1/1 | 4.7   | 4.82  |
| 1/1 | 1/1 | 5.47  | 5.7   |
| 0/1 | 1/1 | 8.04  | 8.44  |
| 0/1 | 1/1 | 9.09  | 9.57  |
| 1/1 | 1/1 | 5.05  | 5.59  |
| 1/1 | 1/1 | 3.29  | 4.14  |
| 0/1 | 1/1 | 2.34  | 3.39  |
| 1/1 | 1/1 | 9.56  | 9.11  |

|     |     |       |       |
|-----|-----|-------|-------|
| 1/1 | 1/1 | 2.53  | 2.21  |
| 1/1 | 1/1 | 3.8   | 5.73  |
| 1/1 | 1/1 | 6.45  | 6.13  |
| 1/1 | 1/1 | 13.04 | 12.79 |
| 1/1 | 1/1 | 3.52  | 3.29  |
| 0/1 | 1/1 | 2.47  | 4.46  |
| 1/1 | 1/1 | 6.64  | 5.16  |
| 1/1 | 1/1 | 3.69  | 4.37  |
| 1/1 | 1/1 | 6.05  | 5.29  |
| 0/1 | 1/1 | 3.04  | 4.88  |
| 1/1 | 1/1 | 8.92  | 5.65  |
| 1/1 | 1/1 | 9.46  | 8.58  |
| 1/1 | 1/1 | 7.72  | 6.87  |
| 1/1 | 1/1 | 9.33  | 8.76  |
| 1/1 | 1/1 | 7.15  | 6.03  |
| 0/1 | 1/1 | 3.97  | 5.05  |
| 1/1 | 1/1 | 7.48  | 7.01  |
| 1/1 | 1/1 | 7.16  | 6.79  |
| 1/1 | 1/1 | 10.1  | 9.74  |
| 1/1 | 1/1 | 6.67  | 6.33  |
| 1/1 | 1/1 | 7.23  | 6.21  |
| 1/1 | 1/1 | 4.62  | 5.78  |
| 0/1 | 1/1 | 3.41  | 5.78  |
| 1/1 | 1/1 | 10.77 | 9.79  |
| 1/1 | 1/1 | 7.35  | 8.67  |
| 0/1 | 1/1 | 3.4   | 5.08  |
| 1/1 | 1/1 | 7.26  | 6.54  |
| 1/1 | 1/1 | 4.6   | 6.11  |
| 1/1 | 1/1 | 5     | 6.6   |
| 1/1 | 1/1 | 6.89  | 6.1   |
| 1/1 | 1/1 | 5.25  | 4.59  |
| 0/1 | 1/1 | 3.07  | 4.94  |
| 1/1 | 1/1 | 6.89  | 6.1   |
| 1/1 | 1/1 | 5.25  | 4.59  |
| 0/1 | 1/1 | 3.07  | 4.94  |
| 1/1 | 1/1 | 6.89  | 6.1   |
| 1/1 | 1/1 | 5.25  | 4.59  |
| 0/1 | 1/1 | 3.07  | 4.94  |
| 1/1 | 1/1 | 6.89  | 6.1   |
| 1/1 | 1/1 | 5.25  | 4.59  |
| 0/1 | 1/1 | 3.07  | 4.94  |
| 1/1 | 1/1 | 6.89  | 6.1   |
| 1/1 | 1/1 | 5.25  | 4.59  |
| 0/1 | 1/1 | 3.07  | 4.94  |
| 1/1 | 1/1 | 6.4   | 6.32  |
| 1/1 | 1/1 | 6.99  | 7.04  |
| 1/1 | 1/1 | 10.08 | 8.96  |
| 1/1 | 1/1 | 10.46 | 9.38  |
| 1/1 | 1/1 | 11.32 | 10.26 |
| 1/1 | 1/1 | 3.35  | 4.47  |
| 0/1 | 1/1 | 4.2   | 5.73  |
| 0/1 | 1/1 | 6.33  | 5.81  |
| 1/1 | 1/1 | 6.98  | 6.55  |
| 1/1 | 1/1 | 4.25  | 5.87  |
| 1/1 | 1/1 | 7.5   | 4.71  |



|     |     |       |       |
|-----|-----|-------|-------|
| 1/1 | 1/1 | 4.73  | 4.22  |
| 1/1 | 1/1 | 3.2   | 2.86  |
| 1/1 | 1/1 | 6.33  | 6.69  |
| 1/1 | 1/1 | 12.34 | 12.19 |
| 1/1 | 1/1 | 3.55  | 3.46  |
| 1/1 | 1/1 | 7.2   | 6.17  |
| 1/1 | 1/1 | 6.54  | 7.74  |
| 1/1 | 1/1 | 2.85  | 4.37  |
| 1/1 | 1/1 | 3.53  | 5.86  |
| 0/1 | 1/1 | 2.64  | 5.64  |
| 1/1 | 0/1 | 3.04  | 2.29  |
| 1/1 | 0/1 | 3.17  | 2.49  |
| 1/1 | 1/1 | 8.07  | 7.05  |
| 1/1 | 1/1 | 6.39  | 5.43  |
| 1/1 | 1/1 | 3.83  | 4.95  |
| 1/1 | 1/1 | 9.18  | 6.25  |
| 1/1 | 1/1 | 9.73  | 6.82  |
| 1/1 | 1/1 | 9.21  | 8.59  |
| 1/1 | 1/1 | 9.18  | 8.62  |
| 1/1 | 1/1 | 5.57  | 5.02  |
| 1/1 | 1/1 | 4.96  | 4.47  |
| 1/1 | 1/1 | 8.14  | 7.7   |
| 1/1 | 1/1 | 7.3   | 6.87  |
| 0/1 | 1/1 | 5.21  | 4.81  |
| 1/1 | 1/1 | 7.33  | 6.93  |
| 0/1 | 1/1 | 6.35  | 5.97  |
| 1/1 | 1/1 | 7.82  | 7.49  |
| 1/1 | 1/1 | 8.1   | 7.85  |
| 1/1 | 1/1 | 7.78  | 7.56  |
| 1/1 | 1/1 | 6.25  | 6.04  |
| 1/1 | 1/1 | 10.17 | 9.97  |
| 1/1 | 1/1 | 6.39  | 6.24  |
| 1/1 | 1/1 | 8.27  | 8.15  |
| 1/1 | 1/1 | 7.74  | 7.62  |
| 0/1 | 1/1 | 7.64  | 7.55  |
| 1/1 | 1/1 | 6.95  | 6.9   |
| 0/1 | 1/1 | 7.46  | 7.47  |
| 1/1 | 1/1 | 5.39  | 5.43  |
| 1/1 | 1/1 | 6.81  | 6.86  |
| 1/1 | 1/1 | 6.12  | 6.19  |
| 1/1 | 1/1 | 7.66  | 7.87  |
| 0/1 | 1/1 | 5.35  | 5.9   |
| 1/1 | 1/1 | 4.43  | 3.48  |
| 1/1 | 1/1 | 4.3   | 3.45  |
| 1/1 | 1/1 | 3.13  | 4.67  |
| 1/1 | 1/1 | 3.56  | 5.37  |
| 1/1 | 1/1 | 5.53  | 4.44  |
| 1/1 | 1/1 | 3.9   | 4.99  |
| 1/1 | 1/1 | 3.62  | 5     |
| 0/1 | 1/1 | 2.76  | 4.33  |
| 1/1 | 1/1 | 3.96  | 3.3   |
| 1/1 | 1/1 | 6.78  | 8.5   |
| 1/1 | 1/1 | 4.84  | 4.1   |
| 1/1 | 1/1 | 6.61  | 5.96  |
| 1/1 | 1/1 | 3.38  | 2.82  |
| 1/1 | 1/1 | 4.74  | 4.21  |
| 1/1 | 1/1 | 3.24  | 2.79  |
| 1/1 | 1/1 | 9.8   | 8.55  |

|     |     |       |       |
|-----|-----|-------|-------|
| 1/1 | 1/1 | 6.31  | 5.14  |
| 0/1 | 1/1 | 2.36  | 3.27  |
| 1/1 | 1/1 | 5.26  | 6.38  |
| 1/1 | 0/1 | 3.75  | 2.57  |
| 1/1 | 0/1 | 4.24  | 3.12  |
| 1/1 | 1/1 | 4.39  | 5.38  |
| 1/1 | 1/1 | 4.61  | 5.73  |
| 1/1 | 1/1 | 3.94  | 5.07  |
| 1/1 | 1/1 | 2.28  | 3.78  |
| 1/1 | 1/1 | 4.58  | 3.66  |
| 1/1 | 1/1 | 7.46  | 9.01  |
| 1/1 | 1/1 | 7.39  | 6.9   |
| 1/1 | 1/1 | 8.87  | 8.4   |
| 1/1 | 1/1 | 6.67  | 6.26  |
| 1/1 | 0/1 | 6.08  | 5.37  |
| 1/1 | 1/1 | 3.25  | 5.09  |
| 1/1 | 0/1 | 4.19  | 3.08  |
| 1/1 | 0/1 | 5.66  | 4.68  |
| 1/1 | 1/1 | 5.02  | 4.12  |
| 1/1 | 1/1 | 6.02  | 5.21  |
| 1/1 | 1/1 | 5.63  | 4.86  |
| 1/1 | 1/1 | 9.01  | 10.37 |
| 1/1 | 1/1 | 6.86  | 6.16  |
| 1/1 | 1/1 | 6.41  | 5.83  |
| 1/1 | 1/1 | 4.9   | 6.35  |
| 1/1 | 1/1 | 6.72  | 6.46  |
| 0/1 | 1/1 | 4.25  | 6.97  |
| 1/1 | 1/1 | 9.51  | 8.29  |
| 1/1 | 1/1 | 7.15  | 8.1   |
| 1/1 | 1/1 | 5.08  | 3.35  |
| 1/1 | 1/1 | 7.81  | 8.22  |
| 0/1 | 1/1 | 3.33  | 4.19  |
| 0/1 | 1/1 | 2.93  | 3.98  |
| 1/1 | 1/1 | 7.34  | 6.82  |
| 1/1 | 1/1 | 5.74  | 7.44  |
| 1/1 | 1/1 | 4.3   | 6.04  |
| 1/1 | 1/1 | 5.92  | 7.78  |
| 1/1 | 1/1 | 5.12  | 6.99  |
| 0/1 | 1/1 | 3.19  | 5.22  |
| 1/1 | 1/1 | 8.02  | 7.18  |
| 1/1 | 1/1 | 3.93  | 5.51  |
| 1/1 | 1/1 | 3.62  | 5.29  |
| 1/1 | 1/1 | 9.31  | 8.97  |
| 1/1 | 1/1 | 5.2   | 7.39  |
| 1/1 | 1/1 | 3.96  | 3.3   |
| 1/1 | 1/1 | 6.78  | 8.5   |
| 1/1 | 1/1 | 5.93  | 4.55  |
| 1/1 | 1/1 | 6.73  | 5.45  |
| 1/1 | 1/1 | 4.68  | 5.78  |
| 1/1 | 1/1 | 10.42 | 9.21  |
| 0/1 | 1/1 | 5.01  | 6     |
| 0/1 | 1/1 | 2.73  | 3.92  |
| 0/1 | 1/1 | 3.22  | 4.49  |
| 1/1 | 1/1 | 5.08  | 3.92  |
| 1/1 | 1/1 | 6.09  | 5.02  |
| 0/1 | 1/1 | 3.14  | 4.19  |
| 1/1 | 1/1 | 3.58  | 2.96  |
| 1/1 | 1/1 | 6.54  | 5.92  |

|     |     |       |       |
|-----|-----|-------|-------|
| 0/1 | 1/1 | 2.16  | 4.65  |
| 1/1 | 1/1 | 3.65  | 2.81  |
| 0/1 | 1/1 | 4.07  | 5.48  |
| 1/1 | 1/1 | 5.8   | 7.29  |
| 0/1 | 1/1 | 3.68  | 5.56  |
| 1/1 | 1/1 | 4.88  | 3.2   |
| 0/1 | 1/1 | 3.39  | 3.89  |
| 0/1 | 1/1 | 6.12  | 6.62  |
| 0/1 | 1/1 | 2.78  | 3.49  |
| 1/1 | 1/1 | 9.36  | 9.05  |
| 0/1 | 1/1 | 2.74  | 5.1   |
| 1/1 | 1/1 | 5.41  | 4.29  |
| 1/1 | 1/1 | 4.13  | 3.1   |
| 1/1 | 1/1 | 9.94  | 10.97 |
| 1/1 | 1/1 | 8.6   | 9.65  |
| 1/1 | 1/1 | 6.77  | 7.84  |
| 1/1 | 1/1 | 8.6   | 9.66  |
| 1/1 | 1/1 | 6.01  | 7.08  |
| 1/1 | 1/1 | 8.73  | 9.82  |
| 1/1 | 1/1 | 8.4   | 9.5   |
| 1/1 | 1/1 | 7.68  | 8.79  |
| 1/1 | 1/1 | 8.18  | 9.43  |
| 1/1 | 1/1 | 6.82  | 8.24  |
| 1/1 | 1/1 | 7.26  | 8.77  |
| 1/1 | 1/1 | 5.76  | 7.65  |
| 1/1 | 0/1 | 8.19  | 2.78  |
| 1/1 | 0/1 | 5.18  | 1.92  |
| 1/1 | 0/1 | 6.89  | 4.13  |
| 1/1 | 1/1 | 9.11  | 6.46  |
| 1/1 | 0/1 | 7.83  | 5.39  |
| 1/1 | 1/1 | 9.74  | 7.53  |
| 1/1 | 1/1 | 8.66  | 6.85  |
| 1/1 | 1/1 | 10.56 | 9.54  |
| 1/1 | 1/1 | 6.01  | 5.03  |
| 1/1 | 1/1 | 4.97  | 4.29  |
| 1/1 | 1/1 | 8.06  | 7.39  |
| 1/1 | 1/1 | 4.82  | 4.39  |
| 1/1 | 1/1 | 6.8   | 6.39  |
| 1/1 | 1/1 | 5.22  | 4.88  |
| 1/1 | 1/1 | 4.3   | 4     |
| 1/1 | 1/1 | 3.32  | 3.04  |
| 0/1 | 1/1 | 2.27  | 2.65  |
| 1/1 | 1/1 | 5.01  | 3.82  |
| 1/1 | 1/1 | 4.41  | 5.68  |
| 1/1 | 1/1 | 7.24  | 6.45  |
| 1/1 | 1/1 | 8.43  | 7.76  |
| 1/1 | 1/1 | 8.38  | 7.34  |
| 1/1 | 1/1 | 7.07  | 6.09  |
| 1/1 | 1/1 | 6.29  | 5.36  |
| 0/1 | 1/1 | 4.44  | 5.64  |
| 1/1 | 1/1 | 4.41  | 5.63  |
| 1/1 | 1/1 | 6.54  | 6.13  |
| 1/1 | 1/1 | 8.48  | 8.1   |
| 1/1 | 1/1 | 6.68  | 8.39  |
| 0/1 | 1/1 | 2.3   | 4.1   |
| 1/1 | 1/1 | 4.07  | 6.22  |
| 0/1 | 1/1 | 4.48  | 6.89  |
| 1/1 | 0/1 | 5.66  | 4.62  |

|     |     |       |       |
|-----|-----|-------|-------|
| 1/1 | 1/1 | 4.9   | 6.14  |
| 0/1 | 1/1 | 4.15  | 5.63  |
| 1/1 | 1/1 | 12.16 | 11.63 |
| 0/1 | 1/1 | 1.7   | 3.42  |
| 1/1 | 1/1 | 4.24  | 6.49  |
| 1/1 | 1/1 | 4.49  | 3.81  |
| 1/1 | 1/1 | 7.5   | 6.89  |
| 1/1 | 1/1 | 5.25  | 6.76  |
| 0/1 | 1/1 | 3.88  | 5.42  |
| 0/1 | 1/1 | 4.2   | 5.76  |
| 0/1 | 1/1 | 3.35  | 4.94  |
| 1/1 | 1/1 | 3.9   | 5.72  |
| 0/1 | 1/1 | 3.85  | 6.12  |
| 1/1 | 1/1 | 9.97  | 8.74  |
| 1/1 | 1/1 | 8.47  | 9.62  |
| 1/1 | 1/1 | 7.07  | 5.71  |
| 1/1 | 1/1 | 4.09  | 5.09  |
| 1/1 | 1/1 | 3.36  | 4.62  |
| 0/1 | 1/1 | 7.28  | 6.56  |
| 1/1 | 1/1 | 4.34  | 3.7   |
| 1/1 | 1/1 | 5.59  | 4.98  |
| 1/1 | 0/1 | 5.99  | 5.05  |
| 1/1 | 1/1 | 6.51  | 5.68  |
| 1/1 | 1/1 | 3.41  | 4.65  |
| 0/1 | 1/1 | 2.06  | 3.31  |
| 0/1 | 1/1 | 3.41  | 4.7   |
| 0/1 | 1/1 | 4.45  | 5.85  |
| 0/1 | 1/1 | 3.26  | 4.83  |
| 0/1 | 1/1 | 4.8   | 6.51  |
| 0/1 | 1/1 | 2.88  | 5.18  |
| 0/1 | 1/1 | 2.09  | 5.32  |
| 1/1 | 1/1 | 9.08  | 9.11  |
| 1/1 | 1/1 | 4.58  | 4.63  |
| 1/1 | 1/1 | 6.43  | 8.67  |
| 1/1 | 1/1 | 12.35 | 5.95  |
| 1/1 | 0/1 | 12.66 | 6.26  |
| 1/1 | 1/1 | 13.56 | 9.29  |
| 1/1 | 1/1 | 13.44 | 9.58  |
| 1/1 | 0/1 | 9.87  | 6.5   |
| 1/1 | 0/1 | 8.1   | 4.81  |
| 1/1 | 1/1 | 12.36 | 9.19  |
| 1/1 | 1/1 | 9.19  | 7.71  |
| 1/1 | 1/1 | 7.2   | 6.17  |
| 1/1 | 1/1 | 7.87  | 6.95  |
| 1/1 | 1/1 | 7.02  | 6.51  |
| 1/1 | 1/1 | 7.08  | 6.58  |
| 1/1 | 1/1 | 7.03  | 6.61  |
| 1/1 | 1/1 | 8.26  | 7.86  |
| 1/1 | 1/1 | 6.25  | 5.62  |
| 1/1 | 1/1 | 8.24  | 7.65  |
| 0/1 | 1/1 | 4.51  | 6.02  |
| 1/1 | 0/1 | 6.11  | 5.26  |
| 1/1 | 1/1 | 4     | 5.35  |
| 1/1 | 1/1 | 6.13  | 5.3   |
| 1/1 | 1/1 | 9.29  | 8.51  |
| 1/1 | 1/1 | 4.79  | 6.11  |
| 0/1 | 1/1 | 3.33  | 5.34  |
| 1/1 | 1/1 | 9.5   | 5.78  |

|     |     |      |       |
|-----|-----|------|-------|
| 1/1 | 0/1 | 6.56 | 5.65  |
| 1/1 | 1/1 | 5.46 | 5.31  |
| 1/1 | 1/1 | 7.39 | 7.25  |
| 1/1 | 1/1 | 7.06 | 6.95  |
| 1/1 | 1/1 | 6.13 | 6.08  |
| 0/1 | 1/1 | 6.68 | 6.69  |
| 1/1 | 1/1 | 5.62 | 4.99  |
| 1/1 | 1/1 | 5.94 | 5.33  |
| 1/1 | 1/1 | 3.96 | 5.48  |
| 1/1 | 1/1 | 4.41 | 6.14  |
| 1/1 | 1/1 | 6    | 7.98  |
| 1/1 | 1/1 | 4.41 | 6.54  |
| 1/1 | 1/1 | 3.04 | 5.18  |
| 1/1 | 1/1 | 4.94 | 4.21  |
| 1/1 | 1/1 | 4.85 | 4.15  |
| 1/1 | 1/1 | 5.03 | 4.37  |
| 1/1 | 1/1 | 3.66 | 3.02  |
| 1/1 | 0/1 | 4.45 | 3.82  |
| 1/1 | 0/1 | 2.98 | 2.01  |
| 1/1 | 1/1 | 5.68 | 4.76  |
| 1/1 | 1/1 | 7.09 | 6.17  |
| 1/1 | 1/1 | 3.79 | 5.24  |
| 1/1 | 1/1 | 6.1  | 5.43  |
| 1/1 | 1/1 | 2.47 | 4.33  |
| 1/1 | 0/1 | 7.17 | 6.24  |
| 1/1 | 1/1 | 4.95 | 6.44  |
| 1/1 | 1/1 | 3.97 | 5.48  |
| 1/1 | 1/1 | 5.16 | 6.72  |
| 1/1 | 1/1 | 8.51 | 10.48 |
| 1/1 | 1/1 | 8.53 | 10.69 |
| 1/1 | 1/1 | 8.43 | 10.71 |
| 0/1 | 1/1 | 4.19 | 6.51  |
| 1/1 | 1/1 | 7.07 | 9.54  |
| 1/1 | 1/1 | 7.21 | 9.68  |
| 1/1 | 1/1 | 7.09 | 9.59  |
| 1/1 | 1/1 | 7.07 | 9.74  |
| 1/1 | 1/1 | 6.47 | 9.24  |
| 1/1 | 1/1 | 6.29 | 9.11  |
| 1/1 | 1/1 | 8.09 | 10.93 |
| 1/1 | 1/1 | 6.16 | 9.11  |
| 1/1 | 1/1 | 5.28 | 8.37  |
| 1/1 | 1/1 | 7.13 | 10.36 |
| 1/1 | 1/1 | 5.52 | 5.11  |
| 1/1 | 1/1 | 7.46 | 7.17  |
| 1/1 | 1/1 | 6.42 | 6.13  |
| 0/1 | 1/1 | 2.88 | 5.32  |
| 1/1 | 0/1 | 3.91 | 2.33  |
| 0/1 | 1/1 | 5.35 | 6.2   |
| 1/1 | 1/1 | 8.29 | 7.76  |
| 1/1 | 1/1 | 4.58 | 6.24  |
| 0/1 | 1/1 | 3.74 | 3.23  |
| 1/1 | 1/1 | 2.73 | 2.24  |
| 1/1 | 0/1 | 2.95 | 2.5   |
| 0/1 | 1/1 | 2.83 | 4.56  |
| 1/1 | 0/1 | 4.55 | 3.41  |
| 1/1 | 1/1 | 7.81 | 6.79  |
| 1/1 | 1/1 | 5.58 | 4.3   |
| 1/1 | 1/1 | 3.51 | 4.35  |

|     |     |      |      |
|-----|-----|------|------|
| 1/1 | 1/1 | 3.43 | 4.31 |
| 1/1 | 1/1 | 6.45 | 5.83 |
| 1/1 | 1/1 | 8.38 | 7.81 |
| 1/1 | 1/1 | 5.08 | 4.55 |
| 1/1 | 1/1 | 6.09 | 5.46 |
| 1/1 | 1/1 | 6.31 | 5.77 |
| 1/1 | 1/1 | 4.72 | 4.2  |
| 1/1 | 0/1 | 4.76 | 2.52 |
| 1/1 | 1/1 | 8.13 | 5.96 |
| 1/1 | 1/1 | 5.64 | 3.47 |
| 1/1 | 1/1 | 8.35 | 6.41 |
| 1/1 | 1/1 | 4.53 | 5.39 |
| 1/1 | 0/1 | 3.77 | 2.46 |
| 0/1 | 1/1 | 2.58 | 3.58 |
| 1/1 | 1/1 | 4.19 | 5.25 |
| 1/1 | 1/1 | 3.82 | 4.96 |
| 1/1 | 1/1 | 3.52 | 5.31 |
| 0/1 | 1/1 | 2.43 | 4.36 |
| 1/1 | 1/1 | 5.37 | 7.33 |
| 1/1 | 1/1 | 3.47 | 2.13 |
| 1/1 | 1/1 | 5.54 | 6.76 |
| 1/1 | 0/1 | 4.73 | 3.03 |
| 1/1 | 0/1 | 5.09 | 3.44 |
| 1/1 | 1/1 | 4.86 | 4.24 |
| 1/1 | 1/1 | 3.29 | 4.92 |
| 1/1 | 0/1 | 3.75 | 2.57 |
| 0/1 | 1/1 | 2.79 | 3.85 |
| 1/1 | 1/1 | 4.61 | 5.73 |
| 1/1 | 1/1 | 3.69 | 4.87 |
| 1/1 | 1/1 | 3.43 | 4.68 |
| 0/1 | 1/1 | 1.98 | 3.91 |
| 1/1 | 0/1 | 6.65 | 3.62 |
| 1/1 | 1/1 | 5.97 | 3.01 |
| 1/1 | 1/1 | 5.34 | 4.54 |
| 1/1 | 0/1 | 2.31 | 1.87 |
| 1/1 | 0/1 | 2.81 | 2.64 |
| 1/1 | 1/1 | 5.85 | 5.75 |
| 1/1 | 1/1 | 6.82 | 5.92 |
| 1/1 | 1/1 | 5.08 | 4.17 |
| 0/1 | 1/1 | 2.45 | 3.7  |
| 1/1 | 1/1 | 5.62 | 4.54 |
| 1/1 | 1/1 | 9.49 | 8.46 |
| 1/1 | 1/1 | 3.65 | 2.63 |
| 0/1 | 1/1 | 2.23 | 3.73 |
| 1/1 | 0/1 | 3.19 | 1.89 |
| 1/1 | 1/1 | 4.85 | 5.69 |
| 0/1 | 1/1 | 4.3  | 5.57 |
| 1/1 | 0/1 | 3.52 | 2.39 |
| 0/1 | 1/1 | 3.54 | 4.87 |
| 1/1 | 1/1 | 7.41 | 4.02 |
| 1/1 | 1/1 | 9.04 | 7.8  |
| 1/1 | 1/1 | 9.78 | 8.56 |
| 1/1 | 0/1 | 6.44 | 5.27 |
| 1/1 | 1/1 | 9.28 | 8.43 |
| 1/1 | 1/1 | 5.11 | 4.73 |
| 1/1 | 1/1 | 7.14 | 6.8  |
| 1/1 | 1/1 | 6.44 | 6.16 |
| 1/1 | 1/1 | 7.21 | 7.06 |

|     |     |       |       |
|-----|-----|-------|-------|
| 1/1 | 1/1 | 11.37 | 11.28 |
| 1/1 | 1/1 | 9.35  | 9.28  |
| 1/1 | 1/1 | 4.04  | 4.06  |
| 0/1 | 1/1 | 4.9   | 3.91  |
| 0/1 | 1/1 | 3.42  | 4.81  |
| 1/1 | 1/1 | 8.47  | 7.93  |
| 1/1 | 1/1 | 3.27  | 2.79  |
| 1/1 | 1/1 | 4.84  | 4.08  |
| 1/1 | 1/1 | 3.19  | 5.67  |
| 1/1 | 1/1 | 10.32 | 9.94  |
| 0/1 | 1/1 | 2.71  | 4.46  |
| 1/1 | 1/1 | 4.59  | 6.44  |
| 0/1 | 1/1 | 4.16  | 6.17  |
| 1/1 | 1/1 | 6.1   | 4.05  |
| 1/1 | 1/1 | 3.33  | 3.57  |
| 1/1 | 1/1 | 6.84  | 7.21  |
| 1/1 | 1/1 | 6.07  | 4.2   |
| 1/1 | 0/1 | 4.61  | 2.83  |
| 0/1 | 1/1 | 2.75  | 3     |
| 1/1 | 1/1 | 4.26  | 4.56  |
| 1/1 | 1/1 | 4.65  | 4.96  |
| 1/1 | 1/1 | 6.23  | 6.65  |
| 1/1 | 1/1 | 5.28  | 5.94  |
| 1/1 | 1/1 | 4.51  | 3.76  |
| 1/1 | 1/1 | 4.8   | 6.22  |
| 1/1 | 1/1 | 4.67  | 6.14  |
| 1/1 | 1/1 | 6.01  | 7.48  |
| 1/1 | 1/1 | 6.76  | 5.74  |
| 1/1 | 1/1 | 6.39  | 5.42  |
| 1/1 | 0/1 | 3.23  | 2.59  |
| 1/1 | 1/1 | 6.15  | 5.55  |
| 1/1 | 1/1 | 3.79  | 3.2   |
| 1/1 | 1/1 | 5.55  | 7.25  |
| 1/1 | 1/1 | 3.19  | 5.01  |
| 1/1 | 0/1 | 7.47  | 5.98  |
| 0/1 | 1/1 | 3.85  | 4.77  |
| 0/1 | 1/1 | 4.93  | 5.88  |
| 1/1 | 1/1 | 4.82  | 5.84  |
| 0/1 | 1/1 | 2.67  | 3.85  |
| 1/1 | 1/1 | 5.59  | 6.84  |
| 1/1 | 0/1 | 8.53  | 7.94  |
| 1/1 | 1/1 | 7.58  | 7.07  |
| 1/1 | 1/1 | 7.6   | 6.98  |
| 1/1 | 1/1 | 9.81  | 9.19  |
| 1/1 | 1/1 | 7.7   | 4.98  |
| 1/1 | 1/1 | 6.71  | 6.12  |
| 1/1 | 1/1 | 4.58  | 4.11  |
| 1/1 | 1/1 | 5.37  | 4.91  |
| 1/1 | 1/1 | 11.73 | 11.36 |
| 1/1 | 1/1 | 12.06 | 11.88 |
| 1/1 | 1/1 | 11.73 | 11.57 |
| 0/1 | 1/1 | 6.64  | 8.67  |
| 1/1 | 1/1 | 9.79  | 8.87  |
| 1/1 | 1/1 | 6.29  | 7.49  |
| 1/1 | 1/1 | 5.13  | 6.44  |
| 1/1 | 1/1 | 7.23  | 4.97  |
| 1/1 | 1/1 | 7.67  | 5.49  |
| 1/1 | 1/1 | 6.4   | 5.64  |

|     |     |      |      |
|-----|-----|------|------|
| 1/1 | 1/1 | 3.86 | 3.12 |
| 1/1 | 0/1 | 3.12 | 2.43 |
| 0/1 | 1/1 | 3.27 | 4.87 |
| 1/1 | 1/1 | 5.77 | 4.23 |
| 1/1 | 1/1 | 6.08 | 4.6  |
| 1/1 | 1/1 | 3.42 | 3.98 |
| 1/1 | 1/1 | 5.46 | 6.13 |
| 0/1 | 1/1 | 2.28 | 3.1  |
| 1/1 | 1/1 | 8.15 | 8.99 |
| 1/1 | 1/1 | 7.16 | 8.01 |
| 0/1 | 1/1 | 4.75 | 5.95 |
| 0/1 | 1/1 | 3.08 | 3.17 |
| 1/1 | 1/1 | 8.03 | 8.13 |
| 1/1 | 1/1 | 4.25 | 6.45 |
| 1/1 | 1/1 | 3.88 | 6.09 |
| 1/1 | 1/1 | 7.68 | 6.86 |
| 1/1 | 1/1 | 3.64 | 4.98 |
| 1/1 | 1/1 | 4.53 | 5.94 |
| 1/1 | 1/1 | 8.65 | 8.27 |
| 1/1 | 1/1 | 5.12 | 4.82 |
| 1/1 | 0/1 | 6.91 | 6.09 |
| 1/1 | 1/1 | 5.68 | 6.97 |
| 1/1 | 1/1 | 5.59 | 7.19 |
| 1/1 | 1/1 | 4.67 | 6.31 |
| 1/1 | 1/1 | 5.99 | 5.13 |
| 0/1 | 1/1 | 3.45 | 6.3  |
| 1/1 | 1/1 | 3.84 | 2.69 |
| 1/1 | 1/1 | 6.19 | 5.13 |
| 1/1 | 1/1 | 7.16 | 8.73 |
| 1/1 | 1/1 | 5.27 | 4.47 |
| 0/1 | 1/1 | 4.83 | 6.92 |
| 1/1 | 1/1 | 6.17 | 5.47 |
| 1/1 | 0/1 | 2.77 | 2.08 |
| 1/1 | 1/1 | 5.03 | 4.43 |
| 1/1 | 1/1 | 3.84 | 2.79 |
| 0/1 | 1/1 | 4.4  | 5.5  |
| 0/1 | 1/1 | 2.68 | 3.84 |
| 1/1 | 1/1 | 3.33 | 5.51 |
| 1/1 | 1/1 | 7.01 | 6.11 |
| 1/1 | 1/1 | 2.85 | 4.26 |
| 1/1 | 1/1 | 4.3  | 5.78 |
| 1/1 | 1/1 | 3.05 | 4.6  |
| 0/1 | 1/1 | 3.06 | 5.09 |
| 1/1 | 1/1 | 4.67 | 3.45 |
| 1/1 | 1/1 | 3.43 | 4.42 |
| 1/1 | 1/1 | 3.09 | 4.64 |
| 1/1 | 1/1 | 9.57 | 8.59 |
| 1/1 | 1/1 | 8.81 | 7.86 |
| 1/1 | 1/1 | 2.72 | 5.19 |
| 1/1 | 1/1 | 4.71 | 3.55 |
| 1/1 | 1/1 | 5.32 | 4.19 |
| 1/1 | 1/1 | 7.56 | 8.53 |
| 1/1 | 1/1 | 6.86 | 7.86 |
| 1/1 | 1/1 | 6.44 | 7.46 |
| 0/1 | 1/1 | 2.89 | 3.92 |
| 1/1 | 1/1 | 3.45 | 4.6  |
| 1/1 | 1/1 | 4.08 | 5.25 |
| 1/1 | 1/1 | 4.68 | 5.89 |



|     |     |       |       |
|-----|-----|-------|-------|
| 0/1 | 1/1 | 2.79  | 4.12  |
| 0/1 | 1/1 | 2.4   | 3.85  |
| 1/1 | 1/1 | 3.34  | 4.8   |
| 1/1 | 1/1 | 3.67  | 5.21  |
| 1/1 | 1/1 | 4.99  | 4.19  |
| 1/1 | 1/1 | 5.38  | 4.67  |
| 1/1 | 1/1 | 7.17  | 6.38  |
| 1/1 | 1/1 | 5.02  | 4.32  |
| 1/1 | 1/1 | 9.03  | 7.3   |
| 1/1 | 1/1 | 7.64  | 8.16  |
| 1/1 | 1/1 | 5.46  | 4.15  |
| 1/1 | 1/1 | 6.29  | 5     |
| 0/1 | 1/1 | 3.97  | 5.5   |
| 1/1 | 1/1 | 7.47  | 7.02  |
| 1/1 | 1/1 | 9.19  | 8.8   |
| 1/1 | 1/1 | 3.46  | 3.1   |
| 1/1 | 0/1 | 3.18  | 2.46  |
| 1/1 | 1/1 | 6.4   | 5.69  |
| 1/1 | 1/1 | 5.25  | 4.58  |
| 1/1 | 1/1 | 5.61  | 7.01  |
| 0/1 | 1/1 | 2.22  | 3.8   |
| 1/1 | 1/1 | 6.97  | 6.38  |
| 1/1 | 1/1 | 7.4   | 6.88  |
| 1/1 | 1/1 | 5.6   | 5.09  |
| 1/1 | 1/1 | 2.73  | 5.1   |
| 1/1 | 1/1 | 7.18  | 4.79  |
| 1/1 | 1/1 | 5.79  | 5.6   |
| 1/1 | 1/1 | 7.24  | 6.32  |
| 1/1 | 1/1 | 3.92  | 5.77  |
| 1/1 | 1/1 | 5.61  | 4.49  |
| 0/1 | 1/1 | 3.57  | 4.57  |
| 1/1 | 1/1 | 3.67  | 4.8   |
| 1/1 | 1/1 | 5.81  | 6.99  |
| 1/1 | 1/1 | 4.01  | 5.29  |
| 1/1 | 1/1 | 5.78  | 7.26  |
| 1/1 | 1/1 | 11.52 | 10.35 |
| 1/1 | 0/1 | 10.66 | 9.57  |
| 1/1 | 1/1 | 7.93  | 8.92  |
| 1/1 | 1/1 | 7.93  | 8.92  |
| 1/1 | 1/1 | 7.07  | 6.37  |
| 0/1 | 1/1 | 3.85  | 5.4   |
| 1/1 | 0/1 | 5.32  | 4.51  |
| 1/1 | 1/1 | 4.94  | 4.13  |
| 1/1 | 1/1 | 4.49  | 6.11  |
| 1/1 | 1/1 | 4.02  | 3.45  |
| 1/1 | 1/1 | 3.49  | 5.16  |
| 1/1 | 1/1 | 6.46  | 6.13  |
| 1/1 | 1/1 | 3.4   | 5.54  |
| 1/1 | 1/1 | 7.2   | 6.07  |
| 1/1 | 1/1 | 5.47  | 4.38  |
| 0/1 | 1/1 | 2.12  | 3.3   |
| 0/1 | 1/1 | 2.48  | 3.92  |
| 0/1 | 1/1 | 2.48  | 4.08  |
| 1/1 | 1/1 | 8.3   | 6.21  |
| 0/1 | 1/1 | 6.01  | 6.09  |
| 0/1 | 1/1 | 6.87  | 6.95  |
| 1/1 | 1/1 | 7.56  | 7.73  |
| 0/1 | 1/1 | 4.31  | 4.62  |

|     |     |       |       |
|-----|-----|-------|-------|
| 0/1 | 1/1 | 2.38  | 2.75  |
| 1/1 | 1/1 | 3.24  | 2.76  |
| 1/1 | 1/1 | 9.7   | 9.3   |
| 1/1 | 1/1 | 3.91  | 5.56  |
| 1/1 | 1/1 | 4.57  | 3.33  |
| 0/1 | 1/1 | 2.65  | 3.7   |
| 1/1 | 1/1 | 6.36  | 5.35  |
| 0/1 | 1/1 | 2.61  | 3.85  |
| 1/1 | 1/1 | 5.65  | 7.02  |
| 0/1 | 1/1 | 2.87  | 5.43  |
| 1/1 | 0/1 | 7.99  | 6.87  |
| 0/1 | 1/1 | 2.2   | 3.18  |
| 0/1 | 1/1 | 3.38  | 4.64  |
| 0/1 | 1/1 | 3.49  | 4.75  |
| 1/1 | 1/1 | 6.07  | 7.54  |
| 0/1 | 1/1 | 4.09  | 5.67  |
| 1/1 | 1/1 | 5.53  | 7.12  |
| 1/1 | 1/1 | 5.39  | 4.39  |
| 1/1 | 1/1 | 4.57  | 3.58  |
| 0/1 | 1/1 | 2.43  | 4.09  |
| 1/1 | 0/1 | 3.71  | 2.87  |
| 1/1 | 0/1 | 4.26  | 3.5   |
| 0/1 | 1/1 | 3.07  | 5.69  |
| 1/1 | 1/1 | 4.87  | 3.61  |
| 0/1 | 1/1 | 3.22  | 4.05  |
| 1/1 | 1/1 | 6.77  | 6.12  |
| 1/1 | 1/1 | 3.94  | 5.59  |
| 1/1 | 1/1 | 5.79  | 7.59  |
| 0/1 | 1/1 | 2.49  | 4.77  |
| 1/1 | 1/1 | 4.34  | 2.5   |
| 1/1 | 1/1 | 3.1   | 3.53  |
| 1/1 | 1/1 | 4     | 3.13  |
| 0/1 | 1/1 | 3.63  | 5.09  |
| 0/1 | 1/1 | 4.6   | 6.06  |
| 1/1 | 1/1 | 4.57  | 6.28  |
| 1/1 | 0/1 | 5.76  | 2.55  |
| 1/1 | 1/1 | 6.49  | 3.29  |
| 1/1 | 0/1 | 3.51  | 2.58  |
| 1/1 | 1/1 | 7.39  | 6.49  |
| 1/1 | 1/1 | 3.84  | 2.95  |
| 1/1 | 1/1 | 4.75  | 3.89  |
| 1/1 | 1/1 | 5.74  | 4.91  |
| 1/1 | 0/1 | 2.72  | 1.96  |
| 1/1 | 0/1 | 4.43  | 3.77  |
| 1/1 | 0/1 | 3.13  | 2.81  |
| 0/1 | 1/1 | 2.9   | 2.76  |
| 1/1 | 1/1 | 8.58  | 8.52  |
| 1/1 | 1/1 | 10.19 | 10.19 |
| 1/1 | 1/1 | 4.27  | 4.46  |
| 1/1 | 1/1 | 6.67  | 7.31  |
| 1/1 | 1/1 | 5.6   | 5.16  |
| 1/1 | 1/1 | 5.15  | 4.73  |
| 0/1 | 1/1 | 4.07  | 3.69  |
| 1/1 | 1/1 | 4.5   | 6.28  |
| 0/1 | 1/1 | 3.01  | 5.99  |
| 1/1 | 1/1 | 6.28  | 5.46  |
| 1/1 | 1/1 | 5.43  | 4.63  |
| 1/1 | 1/1 | 7.66  | 7.03  |

|     |     |      |      |
|-----|-----|------|------|
| 1/1 | 1/1 | 6.07 | 7.87 |
| 1/1 | 1/1 | 4.16 | 5.99 |
| 1/1 | 1/1 | 4.63 | 6.76 |
| 0/1 | 1/1 | 2.97 | 5.69 |
| 1/1 | 1/1 | 7.1  | 6.51 |
| 1/1 | 1/1 | 5.49 | 4.93 |
| 1/1 | 1/1 | 7.65 | 7.08 |
| 0/1 | 1/1 | 3.5  | 5.19 |
| 1/1 | 1/1 | 5.65 | 7.37 |
| 0/1 | 1/1 | 4.17 | 6.27 |
| 1/1 | 1/1 | 8.43 | 7.16 |
| 0/1 | 1/1 | 3.46 | 4.3  |
| 1/1 | 1/1 | 3.6  | 4.44 |
| 1/1 | 1/1 | 4.84 | 5.77 |
| 0/1 | 1/1 | 3.33 | 4.3  |
| 1/1 | 0/1 | 4.41 | 3.7  |
| 1/1 | 1/1 | 3.64 | 2.97 |
| 0/1 | 1/1 | 3.21 | 4.82 |
| 1/1 | 1/1 | 7.09 | 5.95 |
| 1/1 | 1/1 | 6.48 | 7.91 |
| 1/1 | 1/1 | 7.22 | 8.84 |
| 1/1 | 1/1 | 5.6  | 7.75 |
| 0/1 | 1/1 | 4.46 | 6.84 |
| 0/1 | 1/1 | 3.05 | 6.12 |
| 1/1 | 1/1 | 4.92 | 2.92 |
| 1/1 | 1/1 | 5.36 | 5.65 |
| 1/1 | 1/1 | 4.83 | 5.12 |
| 0/1 | 1/1 | 6.27 | 6.68 |
| 1/1 | 1/1 | 4.86 | 3.79 |
| 1/1 | 1/1 | 6.14 | 7.16 |
| 1/1 | 1/1 | 5.52 | 4.7  |
| 0/1 | 1/1 | 3.29 | 4.55 |
| 1/1 | 1/1 | 5.26 | 7.19 |
| 1/1 | 1/1 | 5.38 | 4.98 |
| 1/1 | 1/1 | 3.96 | 3.6  |
| 1/1 | 1/1 | 4.45 | 6.15 |
| 1/1 | 1/1 | 4.58 | 6.39 |
| 1/1 | 0/1 | 3.58 | 2.23 |
| 1/1 | 1/1 | 5.74 | 6.94 |
| 1/1 | 1/1 | 7.74 | 5.31 |
| 1/1 | 1/1 | 5.47 | 5.24 |
| 0/1 | 1/1 | 2.97 | 2.9  |
| 1/1 | 1/1 | 5.12 | 5.23 |
| 0/1 | 1/1 | 4.48 | 5.13 |
| 1/1 | 1/1 | 8.22 | 4.82 |
| 1/1 | 0/1 | 3.57 | 2.28 |
| 1/1 | 1/1 | 6.4  | 5.23 |
| 1/1 | 1/1 | 4.27 | 3.4  |
| 1/1 | 1/1 | 5.72 | 4.86 |
| 1/1 | 1/1 | 3.4  | 2.8  |
| 1/1 | 1/1 | 6.43 | 5.89 |
| 1/1 | 1/1 | 4.98 | 4.5  |
| 1/1 | 0/1 | 2.54 | 2.14 |
| 1/1 | 1/1 | 2.98 | 2.67 |
| 1/1 | 1/1 | 8.52 | 8.29 |
| 1/1 | 0/1 | 2.36 | 2.21 |
| 1/1 | 1/1 | 7.21 | 7.11 |
| 0/1 | 1/1 | 2.5  | 2.41 |

|     |     |       |       |
|-----|-----|-------|-------|
| 1/1 | 1/1 | 9.76  | 9.7   |
| 0/1 | 1/1 | 2.53  | 2.87  |
| 0/1 | 1/1 | 3.72  | 4.44  |
| 1/1 | 1/1 | 5.09  | 4.69  |
| 0/1 | 1/1 | 1.77  | 4.86  |
| 0/1 | 1/1 | 3.55  | 3.14  |
| 1/1 | 0/1 | 2.68  | 2.28  |
| 1/1 | 1/1 | 5.42  | 7.11  |
| 1/1 | 1/1 | 5.31  | 7.08  |
| 1/1 | 1/1 | 3.55  | 2.72  |
| 1/1 | 1/1 | 4.23  | 3.41  |
| 0/1 | 1/1 | 3.18  | 5.15  |
| 1/1 | 1/1 | 6.13  | 5.18  |
| 1/1 | 0/1 | 5.1   | 4.2   |
| 1/1 | 1/1 | 3.95  | 5.4   |
| 1/1 | 1/1 | 6.66  | 5.53  |
| 1/1 | 1/1 | 4.11  | 3.01  |
| 0/1 | 1/1 | 3.89  | 5.31  |
| 1/1 | 1/1 | 6.59  | 4.43  |
| 1/1 | 0/1 | 5.06  | 2.96  |
| 1/1 | 1/1 | 3.86  | 3.86  |
| 1/1 | 1/1 | 6.11  | 6.14  |
| 1/1 | 1/1 | 3.32  | 3.41  |
| 1/1 | 0/1 | 5.93  | 4.2   |
| 1/1 | 1/1 | 5.9   | 4.23  |
| 1/1 | 1/1 | 6.86  | 7.52  |
| 0/1 | 1/1 | 2.44  | 3.52  |
| 1/1 | 1/1 | 3.49  | 2.98  |
| 0/1 | 1/1 | 3.56  | 5.27  |
| 1/1 | 1/1 | 4.51  | 6.37  |
| 0/1 | 1/1 | 2.43  | 4.77  |
| 1/1 | 1/1 | 11.02 | 8.59  |
| 1/1 | 1/1 | 10.94 | 11.21 |
| 1/1 | 1/1 | 7.75  | 6.68  |
| 1/1 | 1/1 | 4.57  | 5.93  |
| 1/1 | 1/1 | 3.35  | 2.45  |
| 1/1 | 1/1 | 4.18  | 5.75  |
| 1/1 | 1/1 | 6.98  | 6.83  |
| 1/1 | 1/1 | 5.34  | 7.43  |
| 0/1 | 1/1 | 2.45  | 4.98  |
| 1/1 | 1/1 | 5.49  | 4.55  |
| 1/1 | 1/1 | 4.25  | 5.56  |
| 1/1 | 1/1 | 4.82  | 6.15  |
| 1/1 | 1/1 | 4.09  | 3.45  |
| 0/1 | 1/1 | 3.55  | 5.08  |
| 1/1 | 1/1 | 7.38  | 7.07  |
| 0/1 | 1/1 | 4.58  | 4.36  |
| 1/1 | 1/1 | 7.26  | 6.12  |
| 0/1 | 1/1 | 1.73  | 2.89  |
| 1/1 | 1/1 | 6.83  | 5.13  |
| 1/1 | 1/1 | 3.38  | 3.91  |
| 1/1 | 1/1 | 7.26  | 6.39  |
| 1/1 | 1/1 | 7.01  | 6.15  |
| 1/1 | 1/1 | 3.82  | 5.09  |
| 0/1 | 1/1 | 3.44  | 5.18  |
| 1/1 | 1/1 | 5.46  | 4.28  |
| 1/1 | 0/1 | 3.35  | 2.2   |
| 1/1 | 1/1 | 7.65  | 8.55  |

|     |     |       |       |
|-----|-----|-------|-------|
| 1/1 | 1/1 | 3     | 3.93  |
| 1/1 | 1/1 | 3.54  | 4.49  |
| 1/1 | 1/1 | 4.38  | 5.41  |
| 1/1 | 0/1 | 4.08  | 2.72  |
| 0/1 | 1/1 | 2.75  | 3.5   |
| 1/1 | 1/1 | 3.38  | 4.29  |
| 0/1 | 1/1 | 2.35  | 3.85  |
| 1/1 | 1/1 | 4.36  | 3.27  |
| 1/1 | 0/1 | 8.46  | 7.39  |
| 1/1 | 1/1 | 7.07  | 5.29  |
| 1/1 | 1/1 | 7.73  | 8.04  |
| 0/1 | 1/1 | 2.98  | 3.38  |
| 1/1 | 1/1 | 6.77  | 7.2   |
| 0/1 | 1/1 | 3.68  | 4.72  |
| 1/1 | 1/1 | 4.26  | 5.75  |
| 1/1 | 0/1 | 4.19  | 3.39  |
| 1/1 | 1/1 | 5.78  | 4.98  |
| 0/1 | 1/1 | 3.07  | 4.34  |
| 1/1 | 1/1 | 4.31  | 5.64  |
| 0/1 | 1/1 | 3.38  | 4.89  |
| 1/1 | 1/1 | 5.36  | 7.25  |
| 1/1 | 1/1 | 7.72  | 5.21  |
| 1/1 | 1/1 | 4.94  | 4.57  |
| 1/1 | 1/1 | 5.16  | 4.85  |
| 1/1 | 1/1 | 6.58  | 6.38  |
| 0/1 | 1/1 | 6.68  | 6.63  |
| 1/1 | 1/1 | 4.48  | 4.45  |
| 1/1 | 1/1 | 9.49  | 9.49  |
| 1/1 | 0/1 | 4.3   | 2.98  |
| 1/1 | 1/1 | 7.24  | 5.99  |
| 1/1 | 0/1 | 5.52  | 3.89  |
| 1/1 | 1/1 | 3.99  | 2.41  |
| 1/1 | 0/1 | 3.28  | 2.58  |
| 0/1 | 1/1 | 3.29  | 4.8   |
| 0/1 | 1/1 | 2.46  | 4.08  |
| 0/1 | 1/1 | 3     | 4.94  |
| 0/1 | 1/1 | 2.61  | 4.55  |
| 0/1 | 1/1 | 2.35  | 4.41  |
| 0/1 | 1/1 | 2.51  | 4.63  |
| 0/1 | 1/1 | 2.48  | 4.79  |
| 1/1 | 1/1 | 11.53 | 10.34 |
| 0/1 | 1/1 | 5.47  | 6.83  |
| 1/1 | 1/1 | 6.97  | 5.8   |
| 1/1 | 1/1 | 4.34  | 5.35  |
| 1/1 | 1/1 | 5.54  | 4.67  |
| 1/1 | 1/1 | 5.18  | 6.81  |
| 1/1 | 1/1 | 6.89  | 6.1   |
| 0/1 | 1/1 | 3.07  | 4.94  |
| 1/1 | 1/1 | 7.36  | 4.82  |
| 1/1 | 1/1 | 10.55 | 8.06  |
| 1/1 | 1/1 | 4.61  | 4.18  |
| 1/1 | 1/1 | 5.29  | 4.89  |
| 1/1 | 1/1 | 5.55  | 5.28  |
| 0/1 | 1/1 | 7.27  | 7.01  |
| 1/1 | 1/1 | 5.42  | 5.22  |
| 1/1 | 1/1 | 5.76  | 5.8   |
| 1/1 | 1/1 | 10.75 | 10.84 |
| 1/1 | 1/1 | 4.49  | 4.71  |

|     |     |       |      |
|-----|-----|-------|------|
| 1/1 | 1/1 | 7.34  | 7.71 |
| 1/1 | 1/1 | 4.1   | 3.01 |
| 1/1 | 1/1 | 4.16  | 5.22 |
| 1/1 | 1/1 | 10.13 | 8.48 |
| 1/1 | 0/1 | 3.86  | 2.23 |
| 1/1 | 1/1 | 8.32  | 6.7  |
| 1/1 | 1/1 | 4.24  | 4.69 |
| 0/1 | 1/1 | 2.48  | 3.12 |
| 0/1 | 1/1 | 1.99  | 2.93 |
| 0/1 | 1/1 | 3.3   | 4.35 |
| 1/1 | 1/1 | 5.87  | 2.57 |
| 1/1 | 0/1 | 6.22  | 5    |
| 1/1 | 1/1 | 6.98  | 6.04 |
| 1/1 | 1/1 | 6.77  | 6.23 |
| 1/1 | 1/1 | 4.82  | 4.46 |
| 1/1 | 1/1 | 4.76  | 4.47 |
| 1/1 | 1/1 | 4.15  | 3.95 |
| 1/1 | 1/1 | 3.55  | 3.72 |
| 1/1 | 0/1 | 5.31  | 4.35 |
| 1/1 | 1/1 | 3.73  | 4.83 |
| 0/1 | 1/1 | 2.79  | 4.09 |
| 1/1 | 1/1 | 4.32  | 5.73 |
| 0/1 | 1/1 | 3     | 4.67 |
| 1/1 | 1/1 | 6.11  | 7.84 |
| 1/1 | 1/1 | 3.8   | 5.57 |
| 1/1 | 0/1 | 6.76  | 5.45 |
| 0/1 | 1/1 | 2.13  | 3.02 |
| 1/1 | 1/1 | 9.37  | 8.34 |
| 0/1 | 1/1 | 5.54  | 6.77 |
| 1/1 | 1/1 | 5.62  | 7.03 |
| 1/1 | 1/1 | 5.55  | 7.08 |
| 1/1 | 1/1 | 5.25  | 7.4  |
| 1/1 | 0/1 | 5.54  | 4.16 |
| 1/1 | 0/1 | 9.77  | 8.4  |
| 1/1 | 0/1 | 3.67  | 2.32 |
| 1/1 | 0/1 | 3.25  | 2.47 |
| 1/1 | 1/1 | 3.97  | 5.43 |
| 1/1 | 1/1 | 5.7   | 5.53 |
| 0/1 | 1/1 | 5.61  | 7.53 |
| 0/1 | 1/1 | 6.02  | 8.49 |
| 0/1 | 1/1 | 3.1   | 7.03 |
| 1/1 | 1/1 | 7.87  | 7.01 |
| 0/1 | 1/1 | 2.04  | 3.78 |
| 1/1 | 1/1 | 4.22  | 3.85 |
| 0/1 | 1/1 | 1.99  | 3.91 |
| 0/1 | 1/1 | 3.65  | 5.67 |
| 1/1 | 1/1 | 5.06  | 7.23 |
| 1/1 | 1/1 | 8.49  | 7.59 |
| 1/1 | 1/1 | 4.91  | 6.3  |
| 1/1 | 1/1 | 4.11  | 3.2  |
| 0/1 | 1/1 | 3.53  | 4.72 |
| 0/1 | 1/1 | 4.05  | 6.27 |
| 0/1 | 1/1 | 5.55  | 4.84 |
| 1/1 | 1/1 | 5.79  | 7.19 |
| 1/1 | 1/1 | 10.42 | 7.79 |
| 1/1 | 1/1 | 5.73  | 5.21 |
| 1/1 | 1/1 | 10.32 | 9.97 |
| 1/1 | 1/1 | 5.25  | 4.93 |

|     |     |      |      |
|-----|-----|------|------|
| 1/1 | 1/1 | 9.15 | 8.87 |
| 1/1 | 1/1 | 4.37 | 4.13 |
| 1/1 | 1/1 | 4.07 | 3.86 |
| 1/1 | 1/1 | 6.88 | 6.74 |
| 1/1 | 1/1 | 6    | 5.88 |
| 1/1 | 1/1 | 7.39 | 8.01 |
| 1/1 | 1/1 | 7.2  | 6.85 |
| 1/1 | 1/1 | 7.49 | 9.52 |
| 1/1 | 1/1 | 7.2  | 6.85 |
| 1/1 | 1/1 | 7.49 | 9.52 |
| 1/1 | 1/1 | 7.94 | 7.07 |
| 0/1 | 1/1 | 3.52 | 4.72 |
| 1/1 | 1/1 | 6.88 | 6.2  |
| 1/1 | 1/1 | 3.34 | 2.72 |
| 0/1 | 1/1 | 3.96 | 3.35 |
| 0/1 | 1/1 | 4.85 | 6.25 |
| 0/1 | 1/1 | 4.46 | 6.03 |
| 1/1 | 1/1 | 4.84 | 6.47 |
| 0/1 | 1/1 | 4.03 | 5.75 |
| 1/1 | 0/1 | 4.77 | 3.74 |
| 1/1 | 1/1 | 5.95 | 4.99 |
| 1/1 | 1/1 | 6.89 | 5.58 |
| 1/1 | 1/1 | 5.07 | 5.91 |
| 1/1 | 0/1 | 3.97 | 2.55 |
| 0/1 | 1/1 | 4.59 | 5.27 |
| 1/1 | 1/1 | 7.28 | 8.17 |
| 1/1 | 1/1 | 8.08 | 6.91 |
| 1/1 | 1/1 | 5.12 | 6.26 |
| 0/1 | 1/1 | 3.9  | 5.11 |
| 1/1 | 1/1 | 5.08 | 6.47 |
| 1/1 | 1/1 | 4.48 | 6.16 |
| 1/1 | 0/1 | 4.35 | 2.81 |
| 0/1 | 1/1 | 2.52 | 3.04 |
| 1/1 | 1/1 | 5.59 | 6.1  |
| 1/1 | 1/1 | 6.68 | 7.23 |
| 1/1 | 1/1 | 5.9  | 6.53 |
| 1/1 | 1/1 | 6.2  | 6.85 |
| 1/1 | 1/1 | 5.78 | 6.44 |
| 1/1 | 1/1 | 6.75 | 7.52 |
| 1/1 | 1/1 | 6.24 | 7.07 |
| 1/1 | 1/1 | 5    | 5.89 |
| 1/1 | 1/1 | 4.68 | 5.76 |
| 1/1 | 1/1 | 3.96 | 5.23 |
| 1/1 | 1/1 | 4.07 | 5.48 |
| 1/1 | 1/1 | 4.7  | 3.99 |
| 1/1 | 1/1 | 3.43 | 5.23 |
| 1/1 | 1/1 | 5.45 | 4.26 |
| 1/1 | 1/1 | 6.26 | 5.1  |
| 1/1 | 1/1 | 4.04 | 4.95 |
| 1/1 | 1/1 | 3.81 | 4.77 |
| 0/1 | 1/1 | 7.33 | 6.89 |
| 0/1 | 1/1 | 2.14 | 4.46 |
| 1/1 | 1/1 | 8.28 | 7.6  |
| 1/1 | 1/1 | 5.05 | 4.39 |
| 0/1 | 1/1 | 1.77 | 4.27 |
| 1/1 | 1/1 | 5.37 | 4.25 |
| 0/1 | 1/1 | 2.89 | 3.86 |
| 0/1 | 1/1 | 8.24 | 9.67 |

|     |     |       |       |
|-----|-----|-------|-------|
| 1/1 | 1/1 | 9.06  | 8.62  |
| 1/1 | 1/1 | 5.59  | 5.19  |
| 1/1 | 1/1 | 9.31  | 8.45  |
| 1/1 | 0/1 | 7.26  | 6.46  |
| 1/1 | 1/1 | 7.51  | 6.84  |
| 0/1 | 1/1 | 3.47  | 5.54  |
| 1/1 | 1/1 | 4.48  | 7.1   |
| 1/1 | 1/1 | 6.66  | 5.28  |
| 0/1 | 1/1 | 3.65  | 4.54  |
| 1/1 | 1/1 | 12.37 | 12.26 |
| 1/1 | 1/1 | 5.18  | 5.07  |
| 0/1 | 1/1 | 3.09  | 5.73  |
| 1/1 | 1/1 | 7.68  | 6.94  |
| 0/1 | 1/1 | 2.56  | 4.31  |
| 1/1 | 1/1 | 4.52  | 3.7   |
| 0/1 | 1/1 | 3.2   | 4.47  |
| 1/1 | 1/1 | 5.33  | 6.72  |
| 0/1 | 1/1 | 2.29  | 3.79  |
| 1/1 | 1/1 | 4.36  | 5.87  |
| 1/1 | 1/1 | 4.18  | 5.7   |
| 0/1 | 1/1 | 4.04  | 5.6   |
| 0/1 | 1/1 | 3.17  | 4.88  |
| 1/1 | 1/1 | 4.87  | 6.72  |
| 0/1 | 1/1 | 2.97  | 4.95  |
| 0/1 | 1/1 | 3.55  | 5.64  |
| 0/1 | 1/1 | 3.67  | 6.18  |
| 1/1 | 1/1 | 5.94  | 5.02  |
| 1/1 | 0/1 | 4.07  | 3.17  |
| 1/1 | 1/1 | 5.01  | 4.16  |
| 1/1 | 1/1 | 5.35  | 6.54  |
| 0/1 | 1/1 | 4.27  | 6.43  |
| 1/1 | 1/1 | 7.64  | 7.19  |
| 1/1 | 1/1 | 8.53  | 8.08  |
| 1/1 | 1/1 | 3.86  | 3.47  |
| 1/1 | 1/1 | 6.5   | 5.61  |
| 1/1 | 1/1 | 4.76  | 6.19  |
| 1/1 | 1/1 | 8.56  | 7.48  |
| 1/1 | 1/1 | 6.03  | 7.43  |
| 0/1 | 1/1 | 4.74  | 6.55  |
| 1/1 | 1/1 | 3.69  | 5.62  |
| 1/1 | 1/1 | 5.9   | 5.11  |
| 1/1 | 1/1 | 6.84  | 6.09  |
| 0/1 | 1/1 | 6.73  | 8.04  |
| 0/1 | 1/1 | 3.49  | 4.94  |
| 1/1 | 1/1 | 4.02  | 5.6   |
| 1/1 | 1/1 | 4.2   | 5.78  |
| 1/1 | 1/1 | 8.32  | 7.82  |
| 0/1 | 1/1 | 2.05  | 3.79  |
| 0/1 | 1/1 | 3.24  | 5.32  |
| 0/1 | 1/1 | 3.06  | 5.44  |
| 1/1 | 1/1 | 4.75  | 3.87  |
| 1/1 | 1/1 | 6.36  | 7.58  |
| 1/1 | 1/1 | 6.07  | 7.31  |
| 1/1 | 1/1 | 10.11 | 11.34 |
| 1/1 | 1/1 | 4.94  | 4.48  |
| 0/1 | 1/1 | 2.35  | 3.98  |
| 1/1 | 1/1 | 5.92  | 4.99  |
| 1/1 | 1/1 | 5.25  | 6.51  |



|     |     |       |       |
|-----|-----|-------|-------|
| 0/1 | 1/1 | 2.72  | 4.72  |
| 1/1 | 1/1 | 9.83  | 9.44  |
| 1/1 | 1/1 | 5.65  | 5.29  |
| 1/1 | 1/1 | 7.18  | 4.12  |
| 1/1 | 0/1 | 3.92  | 3.11  |
| 1/1 | 1/1 | 7.29  | 6.67  |
| 1/1 | 1/1 | 4.14  | 3.59  |
| 1/1 | 1/1 | 5.71  | 5.26  |
| 0/1 | 1/1 | 3.05  | 2.61  |
| 1/1 | 1/1 | 6.79  | 6.35  |
| 1/1 | 1/1 | 4.83  | 4.49  |
| 0/1 | 1/1 | 4.09  | 3.79  |
| 1/1 | 1/1 | 6.2   | 5.92  |
| 1/1 | 1/1 | 6.67  | 6.42  |
| 1/1 | 1/1 | 6.98  | 6.79  |
| 1/1 | 1/1 | 10.71 | 10.53 |
| 1/1 | 1/1 | 2.62  | 2.58  |
| 1/1 | 1/1 | 7.71  | 7.69  |
| 1/1 | 1/1 | 3.15  | 3.16  |
| 0/1 | 1/1 | 2.91  | 2.92  |
| 1/1 | 1/1 | 6.07  | 6.11  |
| 1/1 | 1/1 | 10.38 | 10.55 |
| 1/1 | 1/1 | 4.13  | 4.41  |
| 1/1 | 1/1 | 5.15  | 5.44  |
| 1/1 | 1/1 | 6.29  | 6.59  |
| 1/1 | 1/1 | 5.57  | 5.94  |
| 1/1 | 0/1 | 3.84  | 2.64  |
| 0/1 | 1/1 | 4.06  | 4.94  |
| 1/1 | 1/1 | 3.15  | 4.47  |
| 1/1 | 1/1 | 4.79  | 3.33  |
| 1/1 | 1/1 | 5.91  | 4.46  |
| 0/1 | 1/1 | 3.09  | 4.66  |
| 1/1 | 1/1 | 5.52  | 4.57  |
| 1/1 | 1/1 | 4.72  | 3.79  |
| 1/1 | 1/1 | 4.56  | 5.74  |
| 0/1 | 1/1 | 3.49  | 4.96  |
| 1/1 | 1/1 | 6.95  | 6.51  |
| 1/1 | 1/1 | 9     | 8.58  |
| 1/1 | 1/1 | 4.05  | 5.69  |
| 1/1 | 1/1 | 7.24  | 5.57  |
| 1/1 | 1/1 | 6.45  | 4.83  |
| 0/1 | 1/1 | 4.64  | 5.08  |
| 1/1 | 1/1 | 6.27  | 6.73  |
| 0/1 | 1/1 | 5.39  | 6.28  |
| 1/1 | 1/1 | 5.52  | 3.9   |
| 1/1 | 1/1 | 3.8   | 4.46  |
| 0/1 | 1/1 | 3.65  | 4.45  |
| 1/1 | 1/1 | 3.5   | 4.58  |
| 1/1 | 1/1 | 5.35  | 6.61  |
| 1/1 | 1/1 | 7.68  | 7.19  |
| 0/1 | 1/1 | 3.58  | 5.55  |
| 1/1 | 1/1 | 3.52  | 5.82  |
| 0/1 | 1/1 | 2.72  | 5.54  |
| 1/1 | 1/1 | 8.03  | 7.06  |
| 0/1 | 1/1 | 2.26  | 3.38  |
| 1/1 | 1/1 | 5.71  | 4.69  |
| 1/1 | 0/1 | 3.55  | 2.56  |
| 1/1 | 1/1 | 5.96  | 7.44  |

|     |     |       |       |
|-----|-----|-------|-------|
| 1/1 | 0/1 | 3.25  | 2.21  |
| 1/1 | 1/1 | 2.63  | 3.75  |
| 0/1 | 1/1 | 2.51  | 3.63  |
| 1/1 | 1/1 | 5.77  | 7.27  |
| 1/1 | 0/1 | 9.04  | 8.02  |
| 1/1 | 1/1 | 3.66  | 4.87  |
| 1/1 | 1/1 | 6.89  | 5.47  |
| 1/1 | 1/1 | 5.91  | 6.56  |
| 0/1 | 1/1 | 1.9   | 3.08  |
| 1/1 | 1/1 | 9.42  | 4.5   |
| 1/1 | 1/1 | 5.27  | 3.07  |
| 1/1 | 1/1 | 9.71  | 7.62  |
| 1/1 | 1/1 | 9.31  | 7.97  |
| 1/1 | 1/1 | 10.17 | 9.19  |
| 1/1 | 1/1 | 11.44 | 8.1   |
| 1/1 | 1/1 | 11.86 | 10.9  |
| 1/1 | 1/1 | 12.6  | 11.94 |
| 1/1 | 1/1 | 8.88  | 8.23  |
| 1/1 | 1/1 | 10.17 | 9.52  |
| 1/1 | 1/1 | 6.92  | 6.36  |
| 1/1 | 1/1 | 12.49 | 12.03 |
| 1/1 | 1/1 | 8.54  | 8.19  |
| 1/1 | 1/1 | 10.32 | 9.99  |
| 1/1 | 1/1 | 8.56  | 8.27  |
| 1/1 | 1/1 | 8.51  | 8.3   |
| 1/1 | 1/1 | 3.25  | 3.19  |
| 1/1 | 1/1 | 9.67  | 9.64  |
| 1/1 | 1/1 | 6.25  | 6.25  |
| 1/1 | 1/1 | 6.21  | 6.53  |
| 1/1 | 1/1 | 3.9   | 4.4   |
| 1/1 | 1/1 | 2.96  | 3.55  |
| 1/1 | 1/1 | 8.54  | 7.92  |
| 1/1 | 1/1 | 5.82  | 7.44  |
| 0/1 | 1/1 | 3.64  | 5.32  |
| 1/1 | 1/1 | 3.66  | 3.21  |
| 1/1 | 1/1 | 9.07  | 8.67  |
| 1/1 | 1/1 | 5.82  | 7.5   |
| 1/1 | 1/1 | 3.78  | 5.5   |
| 1/1 | 1/1 | 4.41  | 6.23  |
| 1/1 | 1/1 | 4.01  | 5.9   |
| 1/1 | 1/1 | 5.71  | 3.99  |
| 0/1 | 1/1 | 3.24  | 3.67  |
| 0/1 | 1/1 | 3.41  | 4.14  |
| 1/1 | 0/1 | 5.35  | 3.63  |
| 1/1 | 1/1 | 10.96 | 11.35 |
| 1/1 | 1/1 | 5.65  | 6.1   |
| 1/1 | 1/1 | 7.5   | 6.43  |
| 1/1 | 1/1 | 7.74  | 6.69  |
| 1/1 | 1/1 | 6.38  | 5.22  |
| 0/1 | 1/1 | 2.15  | 3.69  |
| 1/1 | 0/1 | 2.72  | 1.63  |
| 1/1 | 1/1 | 3.05  | 4.22  |
| 1/1 | 1/1 | 4.73  | 5.93  |
| 1/1 | 1/1 | 6.53  | 6.08  |
| 1/1 | 1/1 | 7.51  | 9.12  |
| 1/1 | 1/1 | 5.31  | 7.11  |
| 1/1 | 1/1 | 5.67  | 7.51  |
| 1/1 | 1/1 | 4.1   | 6.72  |

|     |     |      |      |
|-----|-----|------|------|
| 1/1 | 1/1 | 6.85 | 4.81 |
| 0/1 | 1/1 | 3.88 | 4.1  |
| 0/1 | 1/1 | 3.31 | 3.6  |
| 1/1 | 1/1 | 3.44 | 3.79 |
| 0/1 | 1/1 | 3.09 | 3.68 |
| 1/1 | 1/1 | 8.46 | 6.97 |
| 0/1 | 1/1 | 3.93 | 4.55 |
| 1/1 | 1/1 | 8.45 | 9.14 |
| 1/1 | 1/1 | 6.59 | 5.88 |
| 1/1 | 1/1 | 7.02 | 6.32 |
| 0/1 | 1/1 | 3.12 | 5.77 |
| 1/1 | 1/1 | 4.5  | 3.94 |
| 0/1 | 1/1 | 3.69 | 5.59 |
| 1/1 | 1/1 | 5.8  | 7.71 |
| 1/1 | 1/1 | 4.38 | 6.7  |
| 1/1 | 0/1 | 6.57 | 5.9  |
| 1/1 | 1/1 | 4.39 | 5.87 |
| 1/1 | 1/1 | 6.94 | 6.22 |
| 1/1 | 1/1 | 5.43 | 4.72 |
| 1/1 | 1/1 | 7.78 | 9.3  |
| 1/1 | 1/1 | 3.56 | 2.64 |
| 0/1 | 1/1 | 2.44 | 3.79 |
| 1/1 | 1/1 | 8.44 | 6.84 |
| 0/1 | 1/1 | 2.54 | 3.62 |
| 1/1 | 1/1 | 5.68 | 6.79 |
| 1/1 | 1/1 | 6.04 | 5.26 |
| 1/1 | 1/1 | 2.85 | 4.26 |
| 1/1 | 1/1 | 5.99 | 5.27 |
| 1/1 | 1/1 | 4.42 | 5.75 |
| 1/1 | 1/1 | 5.77 | 4.16 |
| 1/1 | 1/1 | 2.96 | 3.8  |
| 1/1 | 0/1 | 4.81 | 1.77 |
| 1/1 | 1/1 | 8.54 | 5.51 |
| 1/1 | 0/1 | 2.68 | 1.75 |
| 1/1 | 0/1 | 3.92 | 3.22 |
| 1/1 | 1/1 | 7.39 | 6.76 |
| 1/1 | 1/1 | 8.1  | 7.47 |
| 1/1 | 1/1 | 5.96 | 5.41 |
| 1/1 | 1/1 | 7.1  | 6.71 |
| 1/1 | 1/1 | 3.91 | 3.52 |
| 1/1 | 1/1 | 4.55 | 4.23 |
| 1/1 | 1/1 | 3.6  | 3.47 |
| 1/1 | 1/1 | 6.23 | 3.62 |
| 1/1 | 1/1 | 4.21 | 3.78 |
| 1/1 | 0/1 | 2.59 | 2.23 |
| 1/1 | 1/1 | 3.53 | 3.21 |
| 1/1 | 1/1 | 3.46 | 3.2  |
| 1/1 | 1/1 | 7.44 | 7.26 |
| 1/1 | 1/1 | 3.54 | 3.37 |
| 0/1 | 1/1 | 3.95 | 3.8  |
| 1/1 | 1/1 | 2.89 | 2.84 |
| 1/1 | 1/1 | 6.66 | 6.61 |
| 1/1 | 1/1 | 8.52 | 8.53 |
| 0/1 | 1/1 | 3.18 | 3.21 |
| 1/1 | 1/1 | 5.88 | 6.66 |
| 0/1 | 1/1 | 2.3  | 3.37 |
| 1/1 | 1/1 | 4.86 | 4.41 |
| 1/1 | 1/1 | 4.61 | 6.29 |

|     |     |       |       |
|-----|-----|-------|-------|
| 1/1 | 1/1 | 3.76  | 5.92  |
| 0/1 | 1/1 | 3.07  | 3.02  |
| 1/1 | 1/1 | 6.54  | 8.57  |
| 1/1 | 1/1 | 4.93  | 7.32  |
| 1/1 | 1/1 | 3.31  | 2.47  |
| 0/1 | 1/1 | 2.43  | 3.75  |
| 1/1 | 1/1 | 3.31  | 5.11  |
| 1/1 | 1/1 | 4.51  | 4.32  |
| 1/1 | 1/1 | 3.52  | 5.91  |
| 0/1 | 1/1 | 4.22  | 6.66  |
| 1/1 | 1/1 | 7.44  | 6.39  |
| 0/1 | 1/1 | 4.05  | 5.23  |
| 1/1 | 1/1 | 4.66  | 6.4   |
| 1/1 | 1/1 | 5.43  | 4.62  |
| 1/1 | 1/1 | 4.96  | 6.29  |
| 1/1 | 1/1 | 4.96  | 6.29  |
| 0/1 | 1/1 | 2.83  | 4.16  |
| 1/1 | 1/1 | 4.66  | 6.06  |
| 0/1 | 1/1 | 3.82  | 5.3   |
| 1/1 | 1/1 | 3.11  | 4.65  |
| 1/1 | 1/1 | 3.11  | 4.65  |
| 1/1 | 1/1 | 5.26  | 4.39  |
| 0/1 | 1/1 | 4.08  | 5.58  |
| 1/1 | 1/1 | 3.66  | 5.38  |
| 1/1 | 1/1 | 8.03  | 7.06  |
| 1/1 | 1/1 | 4.42  | 3.49  |
| 0/1 | 1/1 | 2.26  | 3.38  |
| 1/1 | 1/1 | 9.6   | 9.15  |
| 1/1 | 1/1 | 6.65  | 8.46  |
| 1/1 | 1/1 | 6.64  | 5.56  |
| 1/1 | 1/1 | 2.8   | 4.11  |
| 1/1 | 1/1 | 7.85  | 7.39  |
| 1/1 | 1/1 | 2.48  | 4.15  |
| 0/1 | 1/1 | 3.27  | 5.46  |
| 1/1 | 0/1 | 3.17  | 2     |
| 1/1 | 1/1 | 8.36  | 7.2   |
| 1/1 | 1/1 | 5.08  | 6     |
| 1/1 | 1/1 | 2.83  | 3.94  |
| 1/1 | 1/1 | 4.5   | 5.85  |
| 1/1 | 1/1 | 5.19  | 4.68  |
| 1/1 | 1/1 | 5.79  | 5.32  |
| 1/1 | 1/1 | 3.94  | 5.81  |
| 1/1 | 1/1 | 6.8   | 3.96  |
| 1/1 | 1/1 | 5.37  | 4.87  |
| 1/1 | 1/1 | 6.2   | 5.76  |
| 1/1 | 1/1 | 8.6   | 8.19  |
| 1/1 | 1/1 | 9.27  | 8.86  |
| 0/1 | 1/1 | 5.99  | 5.59  |
| 1/1 | 1/1 | 4.62  | 4.27  |
| 1/1 | 1/1 | 5.55  | 5.28  |
| 1/1 | 1/1 | 8.3   | 8.05  |
| 1/1 | 1/1 | 7.14  | 6.98  |
| 1/1 | 1/1 | 3.6   | 3.48  |
| 1/1 | 1/1 | 5.58  | 5.6   |
| 1/1 | 1/1 | 4.77  | 4.81  |
| 1/1 | 1/1 | 12.51 | 12.62 |
| 1/1 | 1/1 | 12.87 | 13.01 |
| 1/1 | 1/1 | 9.91  | 10.09 |

|     |     |      |      |
|-----|-----|------|------|
| 1/1 | 1/1 | 3.86 | 4.09 |
| 0/1 | 1/1 | 6.03 | 6.28 |
| 1/1 | 1/1 | 6.66 | 7.01 |
| 0/1 | 1/1 | 4.32 | 5.64 |
| 1/1 | 1/1 | 5.81 | 5.08 |
| 1/1 | 0/1 | 6.53 | 5.81 |
| 0/1 | 1/1 | 5.49 | 5.06 |
| 1/1 | 1/1 | 6.5  | 6.09 |
| 1/1 | 1/1 | 7.31 | 8.97 |
| 0/1 | 1/1 | 5.58 | 7.28 |
| 1/1 | 1/1 | 5.6  | 7.65 |
| 1/1 | 1/1 | 5.45 | 7.54 |
| 0/1 | 1/1 | 3.54 | 7.05 |
| 1/1 | 0/1 | 4.48 | 2.91 |
| 1/1 | 1/1 | 6.35 | 7.54 |
| 1/1 | 0/1 | 5.92 | 5.17 |
| 0/1 | 1/1 | 5.73 | 7.23 |
| 1/1 | 1/1 | 6.42 | 7.95 |
| 0/1 | 1/1 | 4.45 | 6.12 |
| 0/1 | 1/1 | 4.89 | 7.06 |
| 0/1 | 1/1 | 5.3  | 7.5  |
| 1/1 | 1/1 | 6.19 | 5.37 |
| 1/1 | 1/1 | 3.82 | 5.06 |
| 0/1 | 1/1 | 4.64 | 5.93 |
| 0/1 | 1/1 | 2.4  | 4.1  |
| 1/1 | 1/1 | 3.63 | 5.84 |
| 1/1 | 0/1 | 6.19 | 5.61 |
| 1/1 | 1/1 | 5.97 | 5.41 |
| 0/1 | 1/1 | 6.56 | 6.02 |
| 1/1 | 1/1 | 7.78 | 6.83 |
| 1/1 | 1/1 | 7.1  | 8.2  |
| 1/1 | 1/1 | 4.04 | 5.45 |
| 1/1 | 1/1 | 7.98 | 6.97 |
| 1/1 | 1/1 | 5.45 | 6.52 |
| 1/1 | 1/1 | 6.89 | 4.41 |
| 1/1 | 1/1 | 5.61 | 5.37 |
| 1/1 | 1/1 | 8.81 | 8.59 |
| 1/1 | 0/1 | 7.14 | 5.74 |
| 0/1 | 1/1 | 3.1  | 3.79 |
| 0/1 | 1/1 | 2.72 | 3.46 |
| 0/1 | 1/1 | 4.05 | 5.06 |
| 1/1 | 0/1 | 3.69 | 2.68 |
| 1/1 | 1/1 | 8.3  | 7.32 |
| 1/1 | 1/1 | 3.51 | 4.7  |
| 0/1 | 1/1 | 2.53 | 4.1  |
| 1/1 | 0/1 | 3.96 | 2.46 |
| 0/1 | 1/1 | 2.51 | 3.46 |
| 0/1 | 1/1 | 4.4  | 5.41 |
| 1/1 | 1/1 | 6.76 | 4.4  |
| 1/1 | 1/1 | 6.69 | 4.34 |
| 1/1 | 0/1 | 4.41 | 4.11 |
| 1/1 | 1/1 | 5.45 | 5.2  |
| 1/1 | 1/1 | 3.94 | 4.07 |
| 1/1 | 1/1 | 5.23 | 5.69 |
| 1/1 | 1/1 | 2.98 | 3.45 |
| 1/1 | 1/1 | 4.42 | 3.74 |
| 1/1 | 1/1 | 4.29 | 6.25 |
| 1/1 | 1/1 | 3.91 | 3.11 |

|     |     |       |       |
|-----|-----|-------|-------|
| 0/1 | 1/1 | 2.96  | 4.28  |
| 1/1 | 1/1 | 5.91  | 7.3   |
| 1/1 | 1/1 | 3.19  | 5.15  |
| 1/1 | 1/1 | 10.15 | 9.82  |
| 1/1 | 1/1 | 3.43  | 5.69  |
| 1/1 | 1/1 | 3.27  | 5.94  |
| 1/1 | 1/1 | 5.45  | 4.61  |
| 1/1 | 1/1 | 5.06  | 6.31  |
| 1/1 | 1/1 | 4.99  | 6.3   |
| 1/1 | 1/1 | 6.07  | 4.17  |
| 0/1 | 1/1 | 4.48  | 4.76  |
| 0/1 | 1/1 | 2.51  | 2.95  |
| 0/1 | 1/1 | 2.01  | 2.55  |
| 0/1 | 1/1 | 4.31  | 5.35  |
| 1/1 | 1/1 | 6.95  | 4.62  |
| 1/1 | 1/1 | 10.22 | 10.2  |
| 1/1 | 1/1 | 7.46  | 7.53  |
| 1/1 | 1/1 | 10.87 | 10.95 |
| 1/1 | 1/1 | 3.13  | 3.98  |
| 0/1 | 1/1 | 7.77  | 7.33  |
| 0/1 | 1/1 | 1.79  | 4.32  |
| 1/1 | 1/1 | 4.69  | 3.67  |
| 1/1 | 1/1 | 6.36  | 7.46  |
| 0/1 | 1/1 | 3.13  | 4.46  |
| 0/1 | 1/1 | 3.27  | 4.64  |
| 0/1 | 1/1 | 4.5   | 6.13  |
| 1/1 | 1/1 | 7.53  | 6.59  |
| 1/1 | 1/1 | 5.8   | 6.98  |
| 0/1 | 1/1 | 4.7   | 6.1   |
| 1/1 | 1/1 | 5.76  | 3.62  |
| 0/1 | 1/1 | 5.72  | 5.86  |
| 0/1 | 1/1 | 2.86  | 3.66  |
| 1/1 | 1/1 | 5.33  | 4.81  |
| 0/1 | 1/1 | 3.01  | 5.09  |
| 1/1 | 1/1 | 6.36  | 5.69  |
| 0/1 | 1/1 | 4.86  | 6.38  |
| 1/1 | 0/1 | 8.77  | 8.34  |
| 1/1 | 1/1 | 5.68  | 7.44  |
| 1/1 | 1/1 | 6.24  | 4.83  |
| 0/1 | 1/1 | 2.88  | 3.54  |
| 1/1 | 1/1 | 4.76  | 5.51  |
| 1/1 | 1/1 | 5.16  | 5.92  |
| 0/1 | 1/1 | 4.66  | 5.59  |
| 1/1 | 1/1 | 5.53  | 5.12  |
| 1/1 | 1/1 | 8.5   | 8.12  |
| 1/1 | 1/1 | 5.29  | 7.23  |
| 1/1 | 1/1 | 4.45  | 6.43  |
| 1/1 | 1/1 | 5.97  | 5.56  |
| 1/1 | 1/1 | 5.65  | 7.29  |
| 0/1 | 1/1 | 4.22  | 5.9   |
| 1/1 | 1/1 | 6.73  | 8.5   |
| 1/1 | 1/1 | 4.17  | 6.18  |
| 1/1 | 1/1 | 4.34  | 3.74  |
| 0/1 | 1/1 | 4.2   | 5.68  |
| 1/1 | 1/1 | 4.36  | 5.93  |
| 0/1 | 1/1 | 3.39  | 5.06  |
| 1/1 | 1/1 | 4.88  | 3.62  |
| 1/1 | 1/1 | 4.38  | 5.48  |

|     |     |       |      |
|-----|-----|-------|------|
| 1/1 | 1/1 | 7.83  | 6.84 |
| 0/1 | 1/1 | 2.54  | 3.59 |
| 1/1 | 1/1 | 6.86  | 6.09 |
| 1/1 | 1/1 | 4.53  | 5.99 |
| 1/1 | 1/1 | 8.45  | 7.76 |
| 0/1 | 1/1 | 3.96  | 5.46 |
| 1/1 | 1/1 | 8.66  | 7.06 |
| 0/1 | 1/1 | 3.8   | 5.57 |
| 1/1 | 1/1 | 6.68  | 5.17 |
| 1/1 | 1/1 | 7.33  | 5.83 |
| 0/1 | 1/1 | 2.66  | 3.41 |
| 0/1 | 1/1 | 2.92  | 4.02 |
| 1/1 | 1/1 | 7.3   | 6.66 |
| 1/1 | 1/1 | 6.94  | 6.32 |
| 0/1 | 1/1 | 4.14  | 3.39 |
| 1/1 | 1/1 | 3.59  | 5.64 |
| 1/1 | 1/1 | 7.3   | 6.24 |
| 1/1 | 1/1 | 4.42  | 3.36 |
| 1/1 | 1/1 | 5.64  | 6.66 |
| 1/1 | 1/1 | 6.12  | 7.62 |
| 1/1 | 1/1 | 5     | 6.86 |
| 1/1 | 1/1 | 5.52  | 5.01 |
| 0/1 | 1/1 | 3.03  | 5.35 |
| 1/1 | 1/1 | 7.46  | 6.29 |
| 0/1 | 1/1 | 3.1   | 4.19 |
| 0/1 | 1/1 | 2.48  | 3.75 |
| 0/1 | 1/1 | 2.91  | 4.28 |
| 1/1 | 0/1 | 2.69  | 1.69 |
| 1/1 | 1/1 | 7.33  | 6.36 |
| 0/1 | 1/1 | 3     | 4.07 |
| 1/1 | 1/1 | 4.17  | 5.28 |
| 1/1 | 1/1 | 2.57  | 4.5  |
| 1/1 | 1/1 | 4.87  | 3.77 |
| 0/1 | 1/1 | 3.24  | 4.23 |
| 1/1 | 1/1 | 5.62  | 6.66 |
| 0/1 | 1/1 | 2.84  | 4.12 |
| 1/1 | 1/1 | 3.95  | 3.1  |
| 0/1 | 1/1 | 3.1   | 4.76 |
| 1/1 | 1/1 | 4.29  | 5.96 |
| 1/1 | 0/1 | 5.69  | 4.39 |
| 1/1 | 1/1 | 4.57  | 5.34 |
| 0/1 | 1/1 | 1.91  | 3.17 |
| 1/1 | 1/1 | 8.72  | 6.3  |
| 1/1 | 1/1 | 10.32 | 9.95 |
| 1/1 | 1/1 | 9.75  | 9.43 |
| 1/1 | 1/1 | 4.4   | 4.18 |
| 1/1 | 1/1 | 5.22  | 5.07 |
| 0/1 | 1/1 | 8.56  | 8.42 |
| 1/1 | 1/1 | 8.12  | 8.01 |
| 1/1 | 1/1 | 7.78  | 7.75 |
| 0/1 | 1/1 | 7.24  | 7.36 |
| 0/1 | 1/1 | 7.09  | 7.24 |
| 1/1 | 1/1 | 8.49  | 8.65 |
| 0/1 | 1/1 | 3.23  | 5.01 |
| 1/1 | 1/1 | 5.94  | 4.79 |
| 1/1 | 1/1 | 4.89  | 5.96 |
| 1/1 | 0/1 | 5.21  | 3.96 |
| 1/1 | 1/1 | 6.5   | 7.61 |

|     |     |       |       |
|-----|-----|-------|-------|
| 1/1 | 1/1 | 9.86  | 9.4   |
| 1/1 | 1/1 | 3.92  | 5.55  |
| 1/1 | 0/1 | 5.05  | 3.81  |
| 1/1 | 1/1 | 8.9   | 7.68  |
| 0/1 | 1/1 | 4.23  | 5.03  |
| 1/1 | 1/1 | 6.61  | 4.64  |
| 1/1 | 1/1 | 13.09 | 13.15 |
| 0/1 | 1/1 | 4.91  | 5.49  |
| 1/1 | 1/1 | 5.81  | 4.41  |
| 1/1 | 1/1 | 3.43  | 4.29  |
| 0/1 | 1/1 | 3.21  | 5.12  |
| 1/1 | 0/1 | 6.26  | 5.28  |
| 1/1 | 1/1 | 7.51  | 6.52  |
| 0/1 | 1/1 | 5.75  | 5.16  |
| 1/1 | 1/1 | 3.7   | 5.39  |
| 1/1 | 1/1 | 5.44  | 3.16  |
| 1/1 | 1/1 | 3.64  | 3.39  |
| 1/1 | 1/1 | 4.19  | 3.98  |
| 1/1 | 1/1 | 5.46  | 5.33  |
| 0/1 | 1/1 | 2.63  | 2.52  |
| 1/1 | 1/1 | 7.39  | 7.28  |
| 1/1 | 1/1 | 3.58  | 3.49  |
| 1/1 | 1/1 | 11.22 | 11.17 |
| 0/1 | 1/1 | 2.59  | 2.56  |
| 0/1 | 1/1 | 3     | 2.97  |
| 1/1 | 1/1 | 4.47  | 4.55  |
| 0/1 | 1/1 | 4.84  | 5.07  |
| 0/1 | 1/1 | 2.68  | 2.93  |
| 0/1 | 1/1 | 2.17  | 2.45  |
| 0/1 | 1/1 | 3.89  | 4.23  |
| 1/1 | 1/1 | 2.98  | 3.4   |
| 0/1 | 1/1 | 2.51  | 2.94  |
| 0/1 | 1/1 | 4.15  | 4.72  |
| 0/1 | 1/1 | 3.67  | 4.29  |
| 0/1 | 1/1 | 5.12  | 5.78  |
| 0/1 | 1/1 | 2.69  | 3.4   |
| 0/1 | 1/1 | 2.49  | 3.29  |
| 0/1 | 1/1 | 3.37  | 4.55  |
| 1/1 | 1/1 | 3.72  | 2.9   |
| 0/1 | 1/1 | 2.66  | 4.28  |
| 1/1 | 1/1 | 4.91  | 4.53  |
| 0/1 | 1/1 | 2.84  | 4.91  |
| 1/1 | 1/1 | 5.63  | 4.04  |
| 0/1 | 1/1 | 3.12  | 3.56  |
| 1/1 | 1/1 | 6.74  | 7.32  |
| 0/1 | 1/1 | 5.61  | 6.23  |
| 0/1 | 1/1 | 3.15  | 4.07  |
| 1/1 | 1/1 | 5.4   | 4.58  |
| 1/1 | 1/1 | 6.25  | 5.44  |
| 1/1 | 0/1 | 3.83  | 2.58  |
| 0/1 | 1/1 | 3.27  | 4.05  |
| 1/1 | 1/1 | 4.94  | 4.05  |
| 0/1 | 1/1 | 3.46  | 4.64  |
| 0/1 | 1/1 | 2.99  | 4.37  |
| 0/1 | 1/1 | 3.7   | 5.09  |
| 1/1 | 1/1 | 7.52  | 5.63  |
| 0/1 | 1/1 | 2.35  | 2.61  |
| 0/1 | 1/1 | 2.79  | 3.06  |



|     |     |       |       |
|-----|-----|-------|-------|
| 1/1 | 1/1 | 5.25  | 4.59  |
| 1/1 | 1/1 | 10.47 | 9.83  |
| 0/1 | 1/1 | 3.07  | 4.94  |
| 1/1 | 1/1 | 3.95  | 3.42  |
| 1/1 | 1/1 | 3.52  | 5.01  |
| 1/1 | 1/1 | 4.91  | 3.75  |
| 0/1 | 1/1 | 3.38  | 4.25  |
| 1/1 | 1/1 | 10.73 | 10.09 |
| 0/1 | 1/1 | 4.55  | 6.26  |
| 1/1 | 0/1 | 3.58  | 2.64  |
| 1/1 | 1/1 | 6.56  | 7.87  |
| 1/1 | 1/1 | 5.81  | 7.27  |
| 0/1 | 1/1 | 3.38  | 5.23  |
| 0/1 | 1/1 | 3.94  | 5.83  |
| 0/1 | 1/1 | 3.75  | 5.71  |
| 1/1 | 1/1 | 6.23  | 5.36  |
| 0/1 | 1/1 | 2.78  | 4.22  |
| 1/1 | 1/1 | 11.33 | 10.38 |
| 1/1 | 1/1 | 11.33 | 10.38 |
| 1/1 | 1/1 | 5.48  | 6.74  |
| 1/1 | 1/1 | 6.58  | 7.88  |
| 0/1 | 1/1 | 3.32  | 4.62  |
| 1/1 | 1/1 | 6.62  | 8.14  |
| 0/1 | 1/1 | 3.2   | 4.79  |
| 1/1 | 1/1 | 4.57  | 3.64  |
| 1/1 | 1/1 | 3.45  | 4.55  |
| 1/1 | 1/1 | 6.15  | 7.25  |
| 1/1 | 1/1 | 4.51  | 5.64  |
| 0/1 | 1/1 | 2.64  | 4.21  |
| 0/1 | 1/1 | 3.36  | 5.09  |
| 1/1 | 1/1 | 5.5   | 3.31  |
| 0/1 | 1/1 | 8.01  | 8.07  |
| 1/1 | 1/1 | 6.12  | 5.73  |
| 1/1 | 1/1 | 3.7   | 5.34  |
| 1/1 | 1/1 | 4.11  | 5.79  |
| 0/1 | 1/1 | 3.42  | 5.35  |
| 1/1 | 1/1 | 3.55  | 5.62  |
| 1/1 | 1/1 | 4.89  | 7     |
| 1/1 | 1/1 | 3.46  | 5.62  |
| 1/1 | 1/1 | 3.59  | 5.78  |
| 0/1 | 1/1 | 2.03  | 4.28  |
| 1/1 | 0/1 | 4.36  | 3.48  |
| 1/1 | 1/1 | 5.38  | 6.55  |
| 1/1 | 1/1 | 6.1   | 5.2   |
| 0/1 | 1/1 | 5.36  | 6.7   |
| 1/1 | 1/1 | 5.52  | 4.85  |
| 1/1 | 0/1 | 5.8   | 5.14  |
| 0/1 | 1/1 | 4.13  | 5.74  |
| 0/1 | 1/1 | 3.12  | 4.96  |
| 1/1 | 1/1 | 3.46  | 3.44  |
| 1/1 | 1/1 | 4.23  | 7.01  |
| 1/1 | 1/1 | 4.94  | 4.05  |
| 0/1 | 1/1 | 3.46  | 4.64  |
| 0/1 | 1/1 | 2.99  | 4.37  |
| 0/1 | 1/1 | 3.7   | 5.09  |
| 1/1 | 1/1 | 4.13  | 3.34  |
| 1/1 | 1/1 | 7.72  | 9.08  |
| 1/1 | 1/1 | 7.14  | 8.58  |

|     |     |      |      |
|-----|-----|------|------|
| 1/1 | 1/1 | 4.89 | 4.07 |
| 1/1 | 1/1 | 4.04 | 3.24 |
| 1/1 | 1/1 | 4.94 | 6.2  |
| 1/1 | 1/1 | 7.56 | 7.16 |
| 1/1 | 1/1 | 8.33 | 7.93 |
| 1/1 | 1/1 | 6.89 | 6.5  |
| 1/1 | 1/1 | 6.12 | 5.17 |
| 1/1 | 1/1 | 3.67 | 4.8  |
| 0/1 | 1/1 | 1.94 | 3.48 |
| 1/1 | 1/1 | 5.02 | 3.93 |
| 0/1 | 1/1 | 2.36 | 3.29 |
| 1/1 | 1/1 | 3.69 | 4.64 |
| 1/1 | 1/1 | 8.25 | 9.2  |
| 1/1 | 1/1 | 7.79 | 8.74 |
| 0/1 | 1/1 | 3.28 | 4.26 |
| 1/1 | 1/1 | 4.79 | 5.82 |
| 1/1 | 1/1 | 5.14 | 6.9  |
| 1/1 | 1/1 | 9.7  | 9.03 |
| 1/1 | 1/1 | 4.48 | 5.87 |
| 0/1 | 1/1 | 4.07 | 5.5  |
| 1/1 | 0/1 | 4.65 | 3.58 |
| 1/1 | 1/1 | 5.14 | 6.17 |
| 1/1 | 1/1 | 5.08 | 7.11 |
| 1/1 | 1/1 | 6.18 | 4.72 |
| 1/1 | 1/1 | 3.17 | 3.9  |
| 1/1 | 0/1 | 4.73 | 2.17 |
| 1/1 | 1/1 | 3.13 | 2.59 |
| 1/1 | 0/1 | 2.84 | 2.34 |
| 1/1 | 1/1 | 7.32 | 7    |
| 1/1 | 1/1 | 2.66 | 2.82 |
| 0/1 | 1/1 | 3.1  | 3.32 |
| 1/1 | 1/1 | 8.37 | 5.95 |
| 1/1 | 1/1 | 9.05 | 8.67 |
| 1/1 | 1/1 | 7.28 | 6.93 |
| 1/1 | 1/1 | 8.77 | 8.49 |
| 1/1 | 1/1 | 6.36 | 6.12 |
| 1/1 | 1/1 | 6.39 | 6.17 |
| 1/1 | 1/1 | 7.57 | 7.45 |
| 1/1 | 1/1 | 6.55 | 6.47 |
| 1/1 | 1/1 | 9.81 | 9.77 |
| 0/1 | 1/1 | 7.24 | 7.23 |
| 1/1 | 1/1 | 7    | 7.06 |
| 1/1 | 1/1 | 5.25 | 5.41 |
| 1/1 | 0/1 | 4.16 | 2.4  |
| 1/1 | 1/1 | 2.86 | 3.18 |
| 0/1 | 1/1 | 2.25 | 2.59 |
| 0/1 | 1/1 | 2    | 2.57 |
| 1/1 | 1/1 | 8.06 | 7.41 |
| 1/1 | 1/1 | 6.63 | 8.23 |
| 1/1 | 1/1 | 6.16 | 7.91 |
| 1/1 | 1/1 | 3.79 | 5.79 |
| 1/1 | 1/1 | 9.44 | 8.31 |
| 1/1 | 1/1 | 4.52 | 5.83 |
| 1/1 | 1/1 | 6.52 | 4.98 |
| 0/1 | 1/1 | 3.09 | 3.67 |
| 1/1 | 0/1 | 5.51 | 4.32 |
| 1/1 | 1/1 | 5.83 | 6.65 |
| 1/1 | 1/1 | 7.09 | 8.04 |

|     |     |      |       |
|-----|-----|------|-------|
| 0/1 | 1/1 | 3.47 | 4.57  |
| 0/1 | 1/1 | 3.45 | 4.65  |
| 1/1 | 1/1 | 9.82 | 9.11  |
| 0/1 | 1/1 | 2.33 | 3.65  |
| 0/1 | 1/1 | 4.82 | 6.29  |
| 1/1 | 1/1 | 4.47 | 3.7   |
| 1/1 | 1/1 | 3.04 | 4.68  |
| 0/1 | 1/1 | 2.73 | 4.85  |
| 1/1 | 1/1 | 6.69 | 5.77  |
| 0/1 | 1/1 | 3.43 | 4.72  |
| 1/1 | 1/1 | 9.85 | 7.71  |
| 1/1 | 1/1 | 2.58 | 2.6   |
| 0/1 | 1/1 | 4.47 | 5.1   |
| 1/1 | 1/1 | 6.97 | 6.11  |
| 1/1 | 1/1 | 5.02 | 6.68  |
| 1/1 | 1/1 | 8.19 | 7.94  |
| 1/1 | 1/1 | 4.34 | 6.2   |
| 1/1 | 1/1 | 6.53 | 5.89  |
| 0/1 | 1/1 | 3.48 | 5.02  |
| 0/1 | 1/1 | 2.78 | 5.32  |
| 1/1 | 1/1 | 8.24 | 6.91  |
| 1/1 | 1/1 | 4.8  | 5.54  |
| 1/1 | 1/1 | 3.02 | 3.96  |
| 0/1 | 1/1 | 2.09 | 3.22  |
| 0/1 | 1/1 | 3.2  | 5.21  |
| 1/1 | 1/1 | 7.6  | 7.62  |
| 1/1 | 1/1 | 8.17 | 10.37 |
| 1/1 | 0/1 | 3.53 | 2.38  |
| 0/1 | 1/1 | 2.87 | 3.74  |
| 0/1 | 1/1 | 2.03 | 2.98  |
| 1/1 | 0/1 | 3.23 | 2     |
| 1/1 | 1/1 | 4.34 | 5.18  |
| 1/1 | 1/1 | 3.37 | 4.38  |
| 1/1 | 1/1 | 4.3  | 5.67  |
| 1/1 | 1/1 | 7.9  | 6.94  |
| 1/1 | 1/1 | 7.05 | 8.34  |
| 1/1 | 1/1 | 3.66 | 5.49  |
| 1/1 | 1/1 | 3.22 | 2.79  |
| 0/1 | 1/1 | 3.78 | 6.05  |
| 1/1 | 0/1 | 4.07 | 2.93  |
| 0/1 | 1/1 | 2.58 | 3.83  |
| 1/1 | 0/1 | 4.67 | 3.37  |
| 1/1 | 1/1 | 4.58 | 5.3   |
| 1/1 | 1/1 | 3.1  | 3.9   |
| 1/1 | 1/1 | 3.62 | 4.6   |
| 1/1 | 0/1 | 3.72 | 2     |
| 0/1 | 1/1 | 3.45 | 3.75  |
| 1/1 | 1/1 | 7.9  | 8.2   |
| 1/1 | 1/1 | 3.12 | 3.5   |
| 1/1 | 1/1 | 7.17 | 7.61  |
| 0/1 | 1/1 | 1.94 | 2.43  |
| 0/1 | 1/1 | 3.47 | 4.05  |
| 1/1 | 1/1 | 5.28 | 6.04  |
| 1/1 | 1/1 | 5.78 | 4.67  |
| 1/1 | 1/1 | 3.59 | 4.48  |
| 1/1 | 1/1 | 5.18 | 6.11  |
| 1/1 | 1/1 | 5.33 | 6.44  |
| 1/1 | 1/1 | 3.36 | 5.37  |

|     |     |      |      |
|-----|-----|------|------|
| 1/1 | 1/1 | 7.08 | 4.45 |
| 1/1 | 1/1 | 6.16 | 5.62 |
| 1/1 | 1/1 | 6.61 | 6.13 |
| 1/1 | 1/1 | 5.99 | 5.56 |
| 1/1 | 1/1 | 4.8  | 4.48 |
| 1/1 | 1/1 | 7.61 | 7.38 |
| 0/1 | 1/1 | 3.61 | 3.56 |
| 1/1 | 1/1 | 5.64 | 5.66 |
| 0/1 | 1/1 | 6.49 | 7.1  |
| 0/1 | 1/1 | 3.43 | 4.42 |
| 1/1 | 0/1 | 4.68 | 2.77 |
| 1/1 | 1/1 | 6.41 | 6.53 |
| 1/1 | 1/1 | 3.42 | 3.64 |
| 1/1 | 1/1 | 6.06 | 6.33 |
| 1/1 | 1/1 | 4.04 | 3.01 |
| 1/1 | 1/1 | 3.79 | 4.81 |
| 0/1 | 1/1 | 2.36 | 3.57 |
| 1/1 | 1/1 | 3.86 | 5.34 |
| 1/1 | 1/1 | 3.52 | 5.24 |
| 1/1 | 0/1 | 3.09 | 2.35 |
| 0/1 | 1/1 | 2.11 | 3.4  |
| 1/1 | 1/1 | 5.09 | 3.81 |
| 0/1 | 1/1 | 2.98 | 4.66 |
| 1/1 | 1/1 | 6.35 | 4.65 |
| 1/1 | 1/1 | 3.39 | 4.04 |
| 1/1 | 1/1 | 4.37 | 3.52 |
| 1/1 | 1/1 | 6.87 | 8.36 |
| 0/1 | 1/1 | 7.12 | 8.94 |
| 0/1 | 1/1 | 4.53 | 6.66 |
| 1/1 | 1/1 | 6.06 | 8.33 |
| 1/1 | 1/1 | 7.43 | 7.02 |
| 1/1 | 1/1 | 6.62 | 8.43 |
| 1/1 | 1/1 | 3.27 | 2.71 |
| 0/1 | 1/1 | 3.98 | 5.44 |
| 1/1 | 1/1 | 6.32 | 7.91 |
| 0/1 | 1/1 | 2.56 | 4.45 |
| 1/1 | 1/1 | 4.85 | 6.89 |
| 1/1 | 1/1 | 6.7  | 5.49 |
| 1/1 | 1/1 | 4.6  | 5.52 |
| 1/1 | 1/1 | 5.61 | 4.62 |
| 1/1 | 1/1 | 3.59 | 5.84 |
| 1/1 | 1/1 | 7.35 | 6.04 |
| 1/1 | 1/1 | 5.32 | 6.25 |
| 1/1 | 1/1 | 9.67 | 9.43 |
| 1/1 | 1/1 | 5.67 | 7.45 |
| 1/1 | 1/1 | 5.39 | 7.47 |
| 1/1 | 1/1 | 5.15 | 7.36 |
| 1/1 | 1/1 | 3.89 | 2.84 |
| 1/1 | 1/1 | 6.39 | 7.36 |
| 1/1 | 1/1 | 3.72 | 4.79 |
| 1/1 | 1/1 | 2.81 | 3.9  |
| 1/1 | 1/1 | 5.28 | 3.77 |
| 1/1 | 1/1 | 3.65 | 4.17 |
| 1/1 | 1/1 | 6.6  | 4.89 |
| 1/1 | 1/1 | 7.1  | 7.43 |
| 0/1 | 1/1 | 4.4  | 4.75 |
| 1/1 | 1/1 | 6.73 | 7.08 |
| 0/1 | 1/1 | 1.89 | 2.28 |

|     |     |       |      |
|-----|-----|-------|------|
| 1/1 | 1/1 | 3.29  | 3.95 |
| 1/1 | 1/1 | 6.44  | 7.16 |
| 0/1 | 1/1 | 4.84  | 5.66 |
| 1/1 | 1/1 | 3.22  | 4.22 |
| 1/1 | 1/1 | 4.36  | 5.68 |
| 1/1 | 1/1 | 5.83  | 4.29 |
| 1/1 | 1/1 | 3.01  | 3.52 |
| 1/1 | 1/1 | 5.52  | 6.22 |
| 1/1 | 1/1 | 10.25 | 9.38 |
| 1/1 | 1/1 | 6.04  | 7.22 |
| 0/1 | 1/1 | 3.81  | 5.18 |
| 1/1 | 1/1 | 6.98  | 8.42 |
| 0/1 | 1/1 | 4.12  | 5.99 |
| 0/1 | 1/1 | 2.85  | 4.74 |
| 1/1 | 0/1 | 4.08  | 2.51 |
| 1/1 | 1/1 | 4.28  | 4.76 |
| 0/1 | 1/1 | 2.33  | 2.81 |
| 1/1 | 1/1 | 7.61  | 6.89 |
| 1/1 | 1/1 | 4.91  | 6.24 |
| 0/1 | 1/1 | 4.91  | 6.53 |
| 1/1 | 1/1 | 5.6   | 5.22 |
| 1/1 | 1/1 | 5.21  | 6.89 |
| 1/1 | 1/1 | 10.67 | 6.16 |
| 1/1 | 1/1 | 9.17  | 6.76 |
| 1/1 | 1/1 | 8.3   | 6.27 |
| 1/1 | 1/1 | 4.6   | 2.66 |
| 1/1 | 0/1 | 3.29  | 2.57 |
| 1/1 | 1/1 | 5.94  | 5.31 |
| 0/1 | 1/1 | 3.27  | 3.02 |
| 1/1 | 1/1 | 2.44  | 2.65 |
| 1/1 | 1/1 | 6.55  | 5.75 |
| 1/1 | 1/1 | 6.17  | 7.48 |
| 1/1 | 1/1 | 3.63  | 5.43 |
| 1/1 | 1/1 | 7.33  | 6.06 |
| 1/1 | 0/1 | 3.86  | 2.58 |
| 1/1 | 1/1 | 3.48  | 4.33 |
| 1/1 | 1/1 | 4.34  | 5.2  |
| 1/1 | 1/1 | 4.02  | 4.93 |
| 1/1 | 0/1 | 4.12  | 2.44 |
| 0/1 | 1/1 | 3.15  | 3.71 |
| 1/1 | 1/1 | 4.95  | 6.04 |
| 1/1 | 1/1 | 8.17  | 6.41 |
| 1/1 | 1/1 | 4.67  | 5.17 |
| 1/1 | 1/1 | 8     | 7.4  |
| 1/1 | 1/1 | 2.95  | 5.3  |
| 1/1 | 0/1 | 7.6   | 3.4  |
| 1/1 | 1/1 | 5.83  | 5.43 |
| 1/1 | 1/1 | 6.62  | 5.87 |
| 1/1 | 1/1 | 3.36  | 5.38 |
| 1/1 | 1/1 | 7.31  | 6.55 |
| 1/1 | 1/1 | 3.34  | 4.85 |
| 1/1 | 1/1 | 4.93  | 6.65 |
| 1/1 | 1/1 | 4.98  | 4.39 |
| 0/1 | 1/1 | 3.23  | 4.92 |
| 0/1 | 1/1 | 1.98  | 5.62 |
| 1/1 | 1/1 | 4.68  | 3.92 |
| 0/1 | 1/1 | 2.65  | 4.58 |
| 1/1 | 1/1 | 9.12  | 8.24 |

|     |     |       |       |
|-----|-----|-------|-------|
| 0/1 | 1/1 | 4.12  | 5.57  |
| 1/1 | 1/1 | 3.46  | 3.44  |
| 1/1 | 1/1 | 4.23  | 7.01  |
| 1/1 | 1/1 | 3.46  | 3.44  |
| 1/1 | 1/1 | 4.23  | 7.01  |
| 1/1 | 1/1 | 7.99  | 8.26  |
| 1/1 | 1/1 | 7.42  | 7.69  |
| 1/1 | 1/1 | 6.77  | 7.09  |
| 1/1 | 1/1 | 6.93  | 7.26  |
| 1/1 | 1/1 | 5.6   | 5.96  |
| 1/1 | 1/1 | 6.48  | 6.87  |
| 0/1 | 1/1 | 3.84  | 4.3   |
| 1/1 | 1/1 | 7.03  | 7.51  |
| 1/1 | 1/1 | 7.78  | 8.36  |
| 1/1 | 1/1 | 4.35  | 5     |
| 1/1 | 1/1 | 5.66  | 6.35  |
| 0/1 | 1/1 | 4.7   | 5.46  |
| 1/1 | 1/1 | 6.18  | 6.45  |
| 1/1 | 1/1 | 4.08  | 4.35  |
| 0/1 | 1/1 | 2.96  | 3.33  |
| 1/1 | 1/1 | 2.62  | 3     |
| 1/1 | 1/1 | 8.36  | 8.76  |
| 1/1 | 1/1 | 6.97  | 7.56  |
| 0/1 | 1/1 | 2.69  | 3.34  |
| 1/1 | 1/1 | 7.03  | 7.7   |
| 1/1 | 1/1 | 5.19  | 6.01  |
| 1/1 | 1/1 | 4.47  | 5.61  |
| 1/1 | 1/1 | 4.22  | 5.67  |
| 1/1 | 1/1 | 6.82  | 6.85  |
| 1/1 | 1/1 | 5.36  | 5.41  |
| 1/1 | 1/1 | 6.06  | 6.17  |
| 0/1 | 1/1 | 3.08  | 3.2   |
| 1/1 | 1/1 | 5.86  | 6.08  |
| 1/1 | 1/1 | 7.19  | 7.56  |
| 1/1 | 1/1 | 8.78  | 10.27 |
| 0/1 | 1/1 | 2.99  | 4.49  |
| 1/1 | 1/1 | 8.36  | 10.1  |
| 1/1 | 1/1 | 4.79  | 6.6   |
| 1/1 | 1/1 | 6.18  | 8.06  |
| 1/1 | 1/1 | 6.75  | 9.06  |
| 1/1 | 1/1 | 6.74  | 9.25  |
| 1/1 | 1/1 | 7.78  | 7.59  |
| 1/1 | 1/1 | 8.93  | 8.75  |
| 1/1 | 1/1 | 7.28  | 7.14  |
| 1/1 | 1/1 | 12.02 | 11.9  |
| 1/1 | 1/1 | 6.14  | 6.02  |
| 1/1 | 1/1 | 6.53  | 6.43  |
| 1/1 | 1/1 | 2.33  | 2.25  |
| 1/1 | 1/1 | 6.89  | 6.83  |
| 0/1 | 1/1 | 5.52  | 5.48  |
| 0/1 | 1/1 | 6.83  | 6.91  |
| 1/1 | 1/1 | 6.39  | 6.52  |
| 0/1 | 1/1 | 3.7   | 3.86  |
| 0/1 | 1/1 | 2.35  | 2.57  |
| 1/1 | 1/1 | 6.34  | 6.75  |
| 0/1 | 1/1 | 2.96  | 3.42  |
| 1/1 | 1/1 | 6.03  | 7.04  |
| 1/1 | 1/1 | 3.95  | 4.97  |

|     |     |       |       |
|-----|-----|-------|-------|
| 1/1 | 1/1 | 7.49  | 8.58  |
| 1/1 | 1/1 | 4.14  | 5.27  |
| 1/1 | 1/1 | 6.43  | 7.63  |
| 1/1 | 1/1 | 5.25  | 6.57  |
| 1/1 | 1/1 | 9.95  | 10    |
| 1/1 | 1/1 | 5.31  | 5.38  |
| 1/1 | 1/1 | 4.1   | 4.37  |
| 1/1 | 1/1 | 13.09 | 13.1  |
| 1/1 | 1/1 | 3.39  | 3.41  |
| 1/1 | 1/1 | 12.34 | 12.37 |
| 1/1 | 1/1 | 10.1  | 10.17 |
| 1/1 | 1/1 | 12.1  | 12.19 |
| 0/1 | 1/1 | 2.44  | 2.56  |
| 1/1 | 1/1 | 11.22 | 11.35 |
| 1/1 | 1/1 | 6.59  | 6.73  |
| 0/1 | 1/1 | 3.38  | 3.57  |
| 1/1 | 1/1 | 5.47  | 5.69  |
| 0/1 | 1/1 | 2.75  | 3.03  |
| 1/1 | 1/1 | 3.01  | 3.36  |
| 1/1 | 1/1 | 3.9   | 4.4   |
| 1/1 | 1/1 | 6.78  | 7.29  |
| 0/1 | 1/1 | 3.41  | 4.22  |
| 1/1 | 1/1 | 3     | 3.86  |
| 1/1 | 1/1 | 10.52 | 10.55 |
| 1/1 | 1/1 | 9.94  | 9.99  |
| 1/1 | 1/1 | 9.59  | 9.68  |
| 1/1 | 1/1 | 6.88  | 7.86  |
| 1/1 | 1/1 | 6.15  | 7.14  |
| 0/1 | 1/1 | 3.57  | 4.85  |
| 1/1 | 1/1 | 5.37  | 7.12  |
| 1/1 | 1/1 | 5.37  | 8.6   |
| 1/1 | 1/1 | 3.96  | 5.14  |
| 1/1 | 1/1 | 4.69  | 5.89  |
| 1/1 | 1/1 | 5.99  | 7.21  |
| 1/1 | 1/1 | 4.91  | 6.23  |
| 1/1 | 1/1 | 5.5   | 6.88  |
| 1/1 | 1/1 | 2.35  | 4     |
| 0/1 | 1/1 | 2.52  | 4.78  |
| 0/1 | 1/1 | 3.41  | 3.57  |
| 1/1 | 1/1 | 8.04  | 8.22  |
| 1/1 | 1/1 | 11.27 | 11.46 |
| 1/1 | 1/1 | 2.37  | 2.64  |
| 0/1 | 1/1 | 3.79  | 4.22  |
| 1/1 | 1/1 | 7.35  | 7.88  |
| 0/1 | 1/1 | 5.23  | 5.97  |
| 1/1 | 1/1 | 6.89  | 7.89  |
| 1/1 | 1/1 | 5.97  | 6.16  |
| 1/1 | 1/1 | 4.08  | 4.29  |
| 0/1 | 1/1 | 2.96  | 3.18  |
| 1/1 | 1/1 | 4.88  | 5.32  |
| 0/1 | 1/1 | 3.62  | 4.27  |
| 0/1 | 1/1 | 4.15  | 5.04  |
| 0/1 | 1/1 | 6.35  | 6.84  |
| 0/1 | 1/1 | 6.26  | 6.78  |
| 0/1 | 1/1 | 2.83  | 3.81  |
| 1/1 | 1/1 | 5.34  | 6.35  |
| 1/1 | 1/1 | 7.53  | 7.52  |
| 0/1 | 1/1 | 4.26  | 4.28  |

|     |     |      |      |
|-----|-----|------|------|
| 0/1 | 1/1 | 6.91 | 7.16 |
| 1/1 | 1/1 | 4.86 | 5.8  |
| 1/1 | 1/1 | 4.53 | 5.51 |
| 1/1 | 1/1 | 4.47 | 5.78 |
| 1/1 | 1/1 | 2.86 | 4.45 |
| 0/1 | 1/1 | 3.47 | 5.07 |
| 0/1 | 1/1 | 4.35 | 6.2  |
| 1/1 | 1/1 | 4.88 | 6.04 |
| 1/1 | 1/1 | 3.24 | 4.43 |
| 0/1 | 1/1 | 2.93 | 4.15 |
| 1/1 | 1/1 | 5.47 | 6.73 |
| 1/1 | 1/1 | 3.72 | 5    |
| 1/1 | 1/1 | 5.71 | 4.87 |
| 1/1 | 1/1 | 5.65 | 4.86 |
| 1/1 | 1/1 | 5.88 | 5.22 |
| 1/1 | 1/1 | 7.94 | 7.31 |
| 1/1 | 1/1 | 5.48 | 4.91 |
| 1/1 | 1/1 | 9.11 | 8.6  |
| 1/1 | 1/1 | 6.12 | 5.61 |
| 1/1 | 1/1 | 3.81 | 3.38 |
| 1/1 | 1/1 | 8.84 | 8.51 |
| 1/1 | 1/1 | 5.13 | 4.9  |
| 1/1 | 1/1 | 4.81 | 4.62 |
| 1/1 | 1/1 | 6.77 | 6.62 |
| 1/1 | 1/1 | 5.07 | 4.97 |
| 0/1 | 1/1 | 6.94 | 6.9  |
| 1/1 | 1/1 | 5.56 | 5.65 |
| 1/1 | 1/1 | 4.38 | 4.86 |
| 0/1 | 1/1 | 3.53 | 3.93 |
| 0/1 | 1/1 | 1.94 | 2.39 |
| 1/1 | 1/1 | 8.78 | 9.41 |
| 0/1 | 1/1 | 4.57 | 5.22 |
| 1/1 | 1/1 | 8.43 | 9.32 |
| 0/1 | 1/1 | 2.15 | 2.39 |
| 1/1 | 1/1 | 6.11 | 6.41 |
| 0/1 | 1/1 | 3.14 | 3.45 |
| 1/1 | 1/1 | 3.72 | 4.15 |
| 0/1 | 1/1 | 4.29 | 5.03 |
| 0/1 | 1/1 | 4.12 | 3.51 |
| 1/1 | 1/1 | 7.3  | 6.74 |
| 1/1 | 1/1 | 5.51 | 4.96 |
| 1/1 | 1/1 | 3.96 | 3.59 |
| 1/1 | 1/1 | 6.53 | 6.16 |
| 1/1 | 1/1 | 5.62 | 5.32 |
| 1/1 | 1/1 | 8.16 | 7.92 |
| 0/1 | 1/1 | 6.03 | 5.92 |
| 1/1 | 1/1 | 7.22 | 7.13 |
| 0/1 | 1/1 | 5.34 | 5.51 |
| 1/1 | 1/1 | 5.09 | 5.42 |
| 1/1 | 1/1 | 5.71 | 5.46 |
| 0/1 | 1/1 | 5.31 | 5.13 |
| 1/1 | 1/1 | 7.38 | 7.22 |
| 1/1 | 1/1 | 2.26 | 2.53 |
| 1/1 | 1/1 | 3.06 | 3.54 |
| 1/1 | 1/1 | 5.51 | 6.23 |
| 1/1 | 1/1 | 4.92 | 5.71 |
| 0/1 | 1/1 | 3.15 | 3.95 |
| 0/1 | 1/1 | 3.11 | 3.92 |



|     |     |       |       |
|-----|-----|-------|-------|
| 1/1 | 1/1 | 6.9   | 7.7   |
| 1/1 | 1/1 | 5.35  | 6.23  |
| 1/1 | 1/1 | 8.09  | 9     |
| 1/1 | 1/1 | 6.49  | 7.41  |
| 1/1 | 1/1 | 9.43  | 10.39 |
| 1/1 | 1/1 | 5.18  | 6.29  |
| 1/1 | 1/1 | 3.6   | 4.77  |
| 0/1 | 1/1 | 2.92  | 4.41  |
| 1/1 | 1/1 | 5.12  | 6.65  |
| 1/1 | 1/1 | 4.09  | 5.74  |
| 1/1 | 1/1 | 5.78  | 7.53  |
| 1/1 | 1/1 | 5.12  | 6.88  |
| 1/1 | 1/1 | 4.52  | 6.35  |
| 0/1 | 1/1 | 4.22  | 5.15  |
| 1/1 | 1/1 | 4.43  | 5.45  |
| 1/1 | 1/1 | 6.43  | 7.46  |
| 0/1 | 1/1 | 3.76  | 4.88  |
| 0/1 | 1/1 | 3.16  | 4.63  |
| 1/1 | 1/1 | 3.7   | 4.69  |
| 1/1 | 1/1 | 5.62  | 6.71  |
| 1/1 | 1/1 | 3.86  | 5.06  |
| 1/1 | 1/1 | 3.15  | 4.41  |
| 0/1 | 1/1 | 3.48  | 3.75  |
| 1/1 | 1/1 | 5.62  | 5.99  |
| 1/1 | 0/1 | 9.36  | 8.61  |
| 1/1 | 1/1 | 6.03  | 5.4   |
| 1/1 | 1/1 | 5.55  | 4.96  |
| 1/1 | 1/1 | 7.28  | 6.7   |
| 1/1 | 0/1 | 6.48  | 5.97  |
| 1/1 | 1/1 | 4.9   | 4.4   |
| 1/1 | 1/1 | 4.27  | 3.84  |
| 1/1 | 1/1 | 6.21  | 5.85  |
| 1/1 | 1/1 | 7.77  | 7.51  |
| 1/1 | 1/1 | 8.74  | 8.5   |
| 1/1 | 1/1 | 7.72  | 7.54  |
| 0/1 | 1/1 | 5.98  | 5.99  |
| 1/1 | 1/1 | 6.61  | 6.64  |
| 1/1 | 1/1 | 12.68 | 13.09 |
| 0/1 | 1/1 | 4.44  | 5.21  |
| 1/1 | 1/1 | 6.44  | 6.88  |
| 1/1 | 1/1 | 4.08  | 4.63  |
| 1/1 | 1/1 | 4.4   | 5.2   |
| 1/1 | 1/1 | 8.69  | 7.89  |
| 1/1 | 1/1 | 3.98  | 3.3   |
| 1/1 | 0/1 | 5.11  | 4.45  |
| 1/1 | 1/1 | 7.98  | 7.45  |
| 1/1 | 1/1 | 4.02  | 3.77  |
| 1/1 | 1/1 | 4.27  | 4.06  |
| 1/1 | 1/1 | 7.35  | 7.21  |
| 1/1 | 1/1 | 4.85  | 4.78  |
| 0/1 | 1/1 | 7.11  | 7.07  |
| 0/1 | 1/1 | 5.36  | 5.36  |
| 0/1 | 1/1 | 6.38  | 6.48  |
| 1/1 | 1/1 | 5.06  | 5.19  |
| 1/1 | 1/1 | 8.99  | 9.14  |
| 1/1 | 1/1 | 7.86  | 8.23  |
| 1/1 | 1/1 | 2.65  | 3     |
| 0/1 | 1/1 | 5.32  | 5.79  |

|     |     |       |       |
|-----|-----|-------|-------|
| 1/1 | 1/1 | 3.18  | 3.88  |
| 0/1 | 1/1 | 4.04  | 4.78  |
| 0/1 | 1/1 | 3.16  | 3.92  |
| 1/1 | 1/1 | 6.79  | 8.07  |
| 1/1 | 1/1 | 10.93 | 11.43 |
| 0/1 | 1/1 | 2.86  | 3.48  |
| 1/1 | 1/1 | 3.67  | 4.77  |
| 1/1 | 1/1 | 6.85  | 8.08  |
| 1/1 | 1/1 | 7.45  | 8.95  |
| 1/1 | 1/1 | 5.67  | 7.37  |
| 1/1 | 1/1 | 4.05  | 4.36  |
| 1/1 | 1/1 | 3.37  | 3.86  |
| 1/1 | 1/1 | 5.61  | 6.14  |
| 1/1 | 1/1 | 2.88  | 2.89  |
| 1/1 | 1/1 | 4.7   | 4.88  |
| 0/1 | 1/1 | 6.83  | 7.29  |
| 1/1 | 1/1 | 6.05  | 8.27  |
| 1/1 | 1/1 | 4.94  | 7.34  |
| 1/1 | 1/1 | 4.78  | 8.05  |
| 0/1 | 1/1 | 2.85  | 6.59  |
| 0/1 | 1/1 | 2.69  | 3.65  |
| 1/1 | 1/1 | 6.07  | 7.22  |
| 1/1 | 1/1 | 4.55  | 5.92  |
| 1/1 | 1/1 | 4.63  | 6.18  |
| 0/1 | 1/1 | 3.8   | 6.44  |
| 1/1 | 1/1 | 7.27  | 6.81  |
| 1/1 | 1/1 | 6.12  | 5.84  |
| 1/1 | 1/1 | 8.84  | 8.7   |
| 1/1 | 1/1 | 6.39  | 6.26  |
| 1/1 | 1/1 | 5.99  | 5.92  |
| 1/1 | 1/1 | 8.98  | 9.05  |
| 1/1 | 1/1 | 10.24 | 10.42 |
| 1/1 | 1/1 | 6.07  | 6.5   |
| 1/1 | 1/1 | 3.57  | 4.76  |
| 0/1 | 1/1 | 3.12  | 4.5   |
| 0/1 | 1/1 | 2.07  | 3.54  |
| 1/1 | 1/1 | 5.7   | 7.2   |
| 1/1 | 1/1 | 5.49  | 5.65  |
| 1/1 | 1/1 | 3.7   | 4.08  |
| 1/1 | 1/1 | 8.1   | 7.98  |
| 1/1 | 1/1 | 12.12 | 12.24 |
| 0/1 | 1/1 | 3.1   | 3.57  |
| 1/1 | 1/1 | 4.44  | 4.95  |
| 1/1 | 1/1 | 2.83  | 3.5   |
| 1/1 | 1/1 | 5.71  | 5.89  |
| 1/1 | 1/1 | 3.8   | 4.21  |
| 0/1 | 1/1 | 2.84  | 3.3   |
| 1/1 | 1/1 | 3.32  | 3.81  |
| 1/1 | 1/1 | 6.65  | 4.85  |
| 1/1 | 1/1 | 5.86  | 4.33  |
| 1/1 | 1/1 | 7.06  | 5.57  |
| 1/1 | 1/1 | 3.71  | 2.58  |
| 1/1 | 0/1 | 3.36  | 2.26  |
| 1/1 | 0/1 | 3.67  | 2.62  |
| 1/1 | 0/1 | 3.75  | 2.8   |
| 1/1 | 1/1 | 3.7   | 2.81  |
| 1/1 | 1/1 | 3.78  | 3.16  |
| 1/1 | 1/1 | 6.89  | 6.39  |

|     |     |       |       |
|-----|-----|-------|-------|
| 1/1 | 1/1 | 6.75  | 6.25  |
| 1/1 | 1/1 | 4.79  | 4.63  |
| 1/1 | 1/1 | 2.99  | 2.92  |
| 1/1 | 1/1 | 3.41  | 3.36  |
| 1/1 | 1/1 | 12.76 | 12.83 |
| 1/1 | 1/1 | 8.59  | 6.85  |
| 1/1 | 1/1 | 7.46  | 6     |
| 1/1 | 1/1 | 9.12  | 8.13  |
| 1/1 | 1/1 | 5.92  | 5.51  |
| 1/1 | 1/1 | 7.21  | 7.23  |
| 1/1 | 1/1 | 4.55  | 5.36  |
| 0/1 | 1/1 | 2.22  | 3.32  |
| 0/1 | 1/1 | 2.86  | 4.11  |
| 1/1 | 1/1 | 3.16  | 4.45  |
| 1/1 | 1/1 | 5.36  | 5.5   |
| 1/1 | 1/1 | 9.2   | 9.65  |
| 0/1 | 1/1 | 3.73  | 4.66  |
| 0/1 | 1/1 | 2.63  | 3.65  |
| 1/1 | 1/1 | 5.51  | 6.91  |
| 1/1 | 1/1 | 8.13  | 9.37  |
| 1/1 | 1/1 | 5.33  | 6.97  |
| 0/1 | 1/1 | 3.89  | 5     |
| 0/1 | 1/1 | 4.03  | 5.55  |
| 0/1 | 1/1 | 4     | 5.6   |
| 1/1 | 1/1 | 5.09  | 6.72  |
| 0/1 | 1/1 | 5.19  | 7.01  |
| 0/1 | 1/1 | 3.13  | 5.64  |
| 0/1 | 1/1 | 3.46  | 6.51  |
| 0/1 | 1/1 | 2.79  | 6.65  |
| 0/1 | 1/1 | 4.27  | 4.8   |
| 0/1 | 1/1 | 3.89  | 4.94  |
| 1/1 | 1/1 | 7.81  | 9.05  |
| 0/1 | 1/1 | 3.86  | 6.71  |
| 0/1 | 1/1 | 3.89  | 6.92  |
| 1/1 | 1/1 | 9.2   | 5.54  |
| 1/1 | 1/1 | 6.17  | 5.27  |
| 0/1 | 1/1 | 2.32  | 3.16  |
| 0/1 | 1/1 | 3.76  | 5.12  |
| 1/1 | 1/1 | 8.34  | 8.49  |
| 1/1 | 1/1 | 6.17  | 6.39  |
| 1/1 | 1/1 | 5.36  | 6.46  |
| 1/1 | 1/1 | 6.13  | 7.38  |
| 1/1 | 1/1 | 6.19  | 6.66  |
| 1/1 | 1/1 | 6.41  | 6.87  |
| 1/1 | 1/1 | 3.96  | 4.71  |
| 0/1 | 1/1 | 4.33  | 5.34  |
| 0/1 | 1/1 | 3.04  | 4.2   |
| 1/1 | 1/1 | 4.8   | 6.14  |
| 1/1 | 1/1 | 6.44  | 6.63  |
| 0/1 | 1/1 | 3.45  | 4.78  |
| 0/1 | 1/1 | 3.76  | 3.74  |
| 0/1 | 1/1 | 4.69  | 6.15  |
| 0/1 | 1/1 | 2.78  | 3.71  |
| 0/1 | 1/1 | 2.85  | 3.94  |
| 0/1 | 1/1 | 3.89  | 5.06  |
| 0/1 | 1/1 | 3.28  | 5.23  |
| 0/1 | 1/1 | 3.41  | 4.51  |
| 0/1 | 1/1 | 1.64  | 3.04  |

|     |     |       |       |
|-----|-----|-------|-------|
| 1/1 | 1/1 | 13.03 | 13.11 |
| 0/1 | 1/1 | 6.33  | 6.62  |
| 1/1 | 1/1 | 5.85  | 6.35  |
| 1/1 | 1/1 | 5.85  | 6.82  |
| 0/1 | 1/1 | 2.59  | 3.7   |
| 0/1 | 1/1 | 4.27  | 5.91  |
| 1/1 | 1/1 | 5.48  | 6.49  |
| 1/1 | 1/1 | 5     | 6.91  |
| 0/1 | 1/1 | 2.59  | 3.7   |
| 0/1 | 1/1 | 4.27  | 5.91  |
| 1/1 | 1/1 | 5.48  | 6.49  |
| 1/1 | 1/1 | 5     | 6.91  |
| 1/1 | 1/1 | 8.61  | 9.53  |
| 1/1 | 1/1 | 7.58  | 9.7   |
| 1/1 | 1/1 | 7.72  | 7.68  |
| 0/1 | 1/1 | 3.45  | 3.49  |
| 1/1 | 1/1 | 2.73  | 2.99  |
| 1/1 | 1/1 | 3.43  | 3.74  |
| 0/1 | 1/1 | 6.26  | 6.75  |
| 0/1 | 1/1 | 4.77  | 5.27  |
| 1/1 | 1/1 | 9.01  | 9.52  |
| 1/1 | 1/1 | 5.99  | 6.5   |
| 1/1 | 1/1 | 7.89  | 8.44  |
| 1/1 | 1/1 | 4.49  | 5.05  |
| 1/1 | 1/1 | 7.4   | 7.96  |
| 1/1 | 1/1 | 6.08  | 6.67  |
| 1/1 | 1/1 | 4.97  | 5.63  |
| 1/1 | 1/1 | 7.38  | 8.06  |
| 1/1 | 1/1 | 5.95  | 6.69  |
| 1/1 | 1/1 | 5.74  | 6.54  |
| 1/1 | 1/1 | 6.76  | 7.57  |
| 0/1 | 1/1 | 2.26  | 3.11  |
| 1/1 | 1/1 | 4.35  | 5.31  |
| 1/1 | 1/1 | 8.53  | 9.49  |
| 1/1 | 1/1 | 5.18  | 6.27  |
| 1/1 | 1/1 | 6.01  | 7.13  |
| 1/1 | 1/1 | 4.87  | 6.05  |
| 0/1 | 1/1 | 3.14  | 4.36  |
| 1/1 | 1/1 | 4.41  | 5.65  |
| 1/1 | 1/1 | 4.64  | 5.96  |
| 0/1 | 1/1 | 5.05  | 6.38  |
| 1/1 | 1/1 | 7.4   | 8.88  |
| 1/1 | 1/1 | 3.68  | 5.46  |
| 0/1 | 1/1 | 4.34  | 6.42  |
| 1/1 | 1/1 | 6.3   | 7.53  |
| 1/1 | 1/1 | 6.86  | 8.11  |
| 1/1 | 1/1 | 4.47  | 5.74  |
| 1/1 | 1/1 | 6.91  | 8.2   |
| 1/1 | 1/1 | 5.91  | 7.21  |
| 0/1 | 1/1 | 5.55  | 6.91  |
| 1/1 | 1/1 | 7.17  | 8.58  |
| 1/1 | 1/1 | 5.03  | 6.46  |
| 1/1 | 1/1 | 4.98  | 6.49  |
| 1/1 | 1/1 | 5.01  | 7.07  |
| 1/1 | 1/1 | 3.8   | 5.98  |
| 0/1 | 1/1 | 4.2   | 6.38  |
| 1/1 | 1/1 | 4.59  | 6.8   |
| 1/1 | 1/1 | 8.72  | 9.77  |

|     |     |       |       |
|-----|-----|-------|-------|
| 1/1 | 1/1 | 6.91  | 8.02  |
| 1/1 | 1/1 | 5.93  | 7.24  |
| 1/1 | 1/1 | 8.42  | 9.72  |
| 0/1 | 1/1 | 4.63  | 6.21  |
| 1/1 | 1/1 | 5.46  | 5.68  |
| 1/1 | 1/1 | 5.71  | 5.93  |
| 1/1 | 1/1 | 5.51  | 5.83  |
| 1/1 | 1/1 | 4.79  | 5.13  |
| 0/1 | 1/1 | 3.24  | 3.81  |
| 0/1 | 1/1 | 5.61  | 6.21  |
| 0/1 | 1/1 | 4.82  | 4.67  |
| 1/1 | 1/1 | 9.45  | 9.34  |
| 1/1 | 1/1 | 6.38  | 6.3   |
| 0/1 | 1/1 | 3.73  | 3.69  |
| 1/1 | 1/1 | 7.74  | 7.72  |
| 1/1 | 1/1 | 5.95  | 6     |
| 1/1 | 1/1 | 5.49  | 5.55  |
| 1/1 | 1/1 | 4.46  | 4.57  |
| 1/1 | 1/1 | 7.37  | 7.5   |
| 1/1 | 1/1 | 5.47  | 5.62  |
| 0/1 | 1/1 | 5.93  | 6.2   |
| 0/1 | 1/1 | 5.12  | 5.79  |
| 1/1 | 1/1 | 4.81  | 4.94  |
| 1/1 | 1/1 | 5.49  | 5.62  |
| 1/1 | 1/1 | 5.73  | 5.89  |
| 1/1 | 1/1 | 7.91  | 8.24  |
| 1/1 | 1/1 | 3.97  | 4.56  |
| 0/1 | 1/1 | 3.27  | 3.88  |
| 0/1 | 1/1 | 2.9   | 3.54  |
| 1/1 | 1/1 | 5.01  | 5.68  |
| 1/1 | 1/1 | 5.5   | 6.28  |
| 0/1 | 1/1 | 3.33  | 4.1   |
| 1/1 | 1/1 | 4.82  | 5.88  |
| 0/1 | 1/1 | 6.24  | 6.65  |
| 1/1 | 1/1 | 6.65  | 7.09  |
| 0/1 | 1/1 | 4.74  | 5.87  |
| 1/1 | 1/1 | 4.69  | 4.53  |
| 1/1 | 1/1 | 7.1   | 6.96  |
| 1/1 | 1/1 | 6.94  | 6.91  |
| 0/1 | 1/1 | 4.11  | 4.32  |
| 1/1 | 1/1 | 11.09 | 11.99 |
| 1/1 | 1/1 | 3.11  | 4.15  |
| 0/1 | 1/1 | 1.57  | 2.65  |
| 0/1 | 1/1 | 2.26  | 3.35  |
| 1/1 | 1/1 | 4.49  | 5.59  |
| 0/1 | 1/1 | 3.15  | 4.25  |
| 0/1 | 1/1 | 2.55  | 3.65  |
| 1/1 | 1/1 | 4.45  | 5.57  |
| 1/1 | 1/1 | 3.47  | 4.68  |
| 1/1 | 1/1 | 6.42  | 7.66  |
| 1/1 | 1/1 | 3.06  | 4.51  |
| 0/1 | 1/1 | 3.08  | 4.54  |
| 1/1 | 1/1 | 3.46  | 4.93  |
| 1/1 | 1/1 | 5.25  | 6.8   |
| 0/1 | 1/1 | 2.55  | 4.12  |
| 0/1 | 1/1 | 4.19  | 6.84  |
| 1/1 | 1/1 | 5.23  | 5.03  |
| 0/1 | 1/1 | 5.33  | 5.37  |

|     |     |       |       |
|-----|-----|-------|-------|
| 0/1 | 1/1 | 3.62  | 3.67  |
| 1/1 | 1/1 | 3.14  | 3.28  |
| 1/1 | 1/1 | 6.64  | 6.35  |
| 1/1 | 1/1 | 7.65  | 7.39  |
| 1/1 | 1/1 | 4.83  | 4.57  |
| 1/1 | 1/1 | 3.53  | 3.31  |
| 1/1 | 1/1 | 6.23  | 6.03  |
| 1/1 | 1/1 | 6.51  | 6.33  |
| 1/1 | 1/1 | 4.63  | 4.46  |
| 1/1 | 1/1 | 4.68  | 4.55  |
| 1/1 | 1/1 | 7.47  | 7.37  |
| 1/1 | 1/1 | 8.5   | 8.44  |
| 1/1 | 1/1 | 2.82  | 2.83  |
| 1/1 | 1/1 | 4.68  | 4.7   |
| 1/1 | 1/1 | 8.81  | 9.13  |
| 1/1 | 1/1 | 11.14 | 11.49 |
| 1/1 | 1/1 | 3.77  | 4.12  |
| 0/1 | 1/1 | 2.62  | 3.96  |
| 1/1 | 1/1 | 7.46  | 7.54  |
| 1/1 | 1/1 | 3.58  | 3.7   |
| 1/1 | 1/1 | 5.62  | 5.75  |
| 1/1 | 1/1 | 5.04  | 5.17  |
| 1/1 | 1/1 | 4.19  | 4.39  |
| 0/1 | 1/1 | 3.05  | 3.26  |
| 1/1 | 1/1 | 2.92  | 3.27  |
| 1/1 | 1/1 | 3.67  | 4.35  |
| 1/1 | 1/1 | 3.45  | 6.01  |
| 0/1 | 1/1 | 5.24  | 8.83  |
| 1/1 | 1/1 | 6.59  | 10.23 |
| 1/1 | 1/1 | 4.85  | 5.87  |
| 0/1 | 1/1 | 2.35  | 3.5   |
| 1/1 | 1/1 | 5.25  | 6.57  |
| 1/1 | 1/1 | 7.65  | 9.01  |
| 1/1 | 1/1 | 6.46  | 7.82  |
| 1/1 | 1/1 | 6.91  | 8.33  |
| 1/1 | 1/1 | 6.06  | 7.59  |
| 1/1 | 1/1 | 5.7   | 7.64  |
| 0/1 | 1/1 | 5.49  | 6.24  |
| 1/1 | 1/1 | 4.75  | 5.54  |
| 1/1 | 1/1 | 3.19  | 4.05  |
| 1/1 | 1/1 | 2.97  | 4.02  |
| 1/1 | 1/1 | 9.14  | 9.52  |
| 1/1 | 1/1 | 5.15  | 5.76  |
| 0/1 | 1/1 | 2.47  | 3.2   |
| 1/1 | 1/1 | 5.57  | 7.07  |
| 1/1 | 1/1 | 5.38  | 7.13  |
| 1/1 | 1/1 | 3.81  | 5.64  |
| 1/1 | 1/1 | 11.93 | 12.53 |
| 0/1 | 1/1 | 4.91  | 6.02  |
| 1/1 | 1/1 | 10.9  | 10.8  |
| 1/1 | 1/1 | 4.58  | 4.84  |
| 1/1 | 1/1 | 5.59  | 6.55  |
| 1/1 | 1/1 | 3.23  | 4.28  |
| 1/1 | 1/1 | 3.64  | 4.75  |
| 1/1 | 1/1 | 5.23  | 6.62  |
| 1/1 | 1/1 | 6.75  | 7.21  |
| 0/1 | 1/1 | 3.26  | 3.77  |
| 0/1 | 1/1 | 2.79  | 3.31  |

|     |     |       |       |
|-----|-----|-------|-------|
| 0/1 | 1/1 | 3.21  | 3.82  |
| 0/1 | 1/1 | 4.37  | 4.98  |
| 0/1 | 1/1 | 2.99  | 4.07  |
| 1/1 | 1/1 | 10.58 | 10.94 |
| 0/1 | 1/1 | 6.51  | 6.94  |
| 1/1 | 1/1 | 6.47  | 7.03  |
| 1/1 | 1/1 | 6.16  | 6.74  |
| 1/1 | 1/1 | 6.84  | 7.43  |
| 1/1 | 1/1 | 4.28  | 4.89  |
| 1/1 | 1/1 | 6.01  | 6.65  |
| 1/1 | 1/1 | 4.27  | 4.91  |
| 1/1 | 1/1 | 5.63  | 6.28  |
| 1/1 | 1/1 | 4.91  | 5.57  |
| 1/1 | 1/1 | 4.46  | 5.15  |
| 1/1 | 1/1 | 2.33  | 3.07  |
| 1/1 | 1/1 | 5.26  | 6.06  |
| 1/1 | 1/1 | 7.59  | 8.45  |
| 1/1 | 1/1 | 4.42  | 5.34  |
| 1/1 | 1/1 | 4.82  | 5.8   |
| 0/1 | 1/1 | 2.39  | 3.48  |
| 1/1 | 1/1 | 5.31  | 6.44  |
| 0/1 | 1/1 | 2.77  | 4     |
| 0/1 | 1/1 | 4.93  | 5.71  |
| 0/1 | 1/1 | 2.07  | 3.78  |
| 1/1 | 1/1 | 7.31  | 8.08  |
| 0/1 | 1/1 | 3.97  | 4.94  |
| 0/1 | 1/1 | 2.86  | 4.18  |
| 1/1 | 1/1 | 5.56  | 6.03  |
| 1/1 | 1/1 | 5.8   | 6.3   |
| 1/1 | 1/1 | 7.97  | 8.14  |
| 1/1 | 1/1 | 6.11  | 6.29  |
| 0/1 | 1/1 | 4.18  | 4.41  |
| 1/1 | 1/1 | 5.92  | 6.19  |
| 0/1 | 1/1 | 2.59  | 3     |
| 0/1 | 1/1 | 4.55  | 4.98  |
| 1/1 | 1/1 | 3.54  | 4.64  |
| 1/1 | 1/1 | 6.47  | 7.53  |
| 0/1 | 1/1 | 3.38  | 4.6   |
| 0/1 | 1/1 | 4.12  | 5.56  |
| 1/1 | 1/1 | 7.85  | 7.46  |
| 1/1 | 1/1 | 8.53  | 8.17  |
| 1/1 | 1/1 | 4.39  | 4.28  |
| 1/1 | 1/1 | 4.82  | 4.89  |
| 0/1 | 1/1 | 4.27  | 4.64  |
| 0/1 | 1/1 | 3.69  | 4.74  |
| 1/1 | 1/1 | 7.37  | 8.55  |
| 0/1 | 1/1 | 3.61  | 4.94  |
| 1/1 | 1/1 | 8.78  | 10.27 |
| 1/1 | 1/1 | 6.37  | 6.52  |
| 1/1 | 1/1 | 7.43  | 7.62  |
| 1/1 | 1/1 | 7.33  | 7.55  |
| 0/1 | 1/1 | 2.68  | 2.93  |
| 0/1 | 1/1 | 3.35  | 3.72  |
| 0/1 | 1/1 | 3.67  | 4.22  |
| 0/1 | 1/1 | 3.25  | 3.96  |
| 0/1 | 1/1 | 3.97  | 4.9   |
| 0/1 | 1/1 | 5.21  | 6.61  |
| 1/1 | 1/1 | 3.91  | 4.4   |

|     |     |       |       |
|-----|-----|-------|-------|
| 0/1 | 1/1 | 3.86  | 4.36  |
| 1/1 | 1/1 | 2.54  | 3.1   |
| 1/1 | 1/1 | 9.01  | 9.67  |
| 1/1 | 1/1 | 6.44  | 6.21  |
| 1/1 | 1/1 | 9.33  | 9.16  |
| 1/1 | 1/1 | 4.34  | 4.22  |
| 1/1 | 1/1 | 6.97  | 6.87  |
| 1/1 | 1/1 | 4.73  | 4.66  |
| 1/1 | 1/1 | 6.59  | 6.56  |
| 1/1 | 1/1 | 5.68  | 6.3   |
| 1/1 | 1/1 | 3.33  | 4.71  |
| 1/1 | 1/1 | 3.87  | 5.35  |
| 1/1 | 1/1 | 5.31  | 6.93  |
| 1/1 | 1/1 | 7.04  | 7.48  |
| 1/1 | 1/1 | 11.92 | 12.39 |
| 1/1 | 1/1 | 4.98  | 5.63  |
| 0/1 | 1/1 | 6.41  | 7.1   |
| 1/1 | 1/1 | 3.24  | 4.52  |
| 1/1 | 1/1 | 7.72  | 8.49  |
| 1/1 | 1/1 | 6.94  | 7.8   |
| 1/1 | 1/1 | 6.59  | 7.48  |
| 1/1 | 1/1 | 6.73  | 7.89  |
| 1/1 | 1/1 | 5.94  | 7.32  |
| 0/1 | 1/1 | 3.59  | 4.18  |
| 0/1 | 1/1 | 5.4   | 6.1   |
| 1/1 | 1/1 | 7.18  | 8.05  |
| 0/1 | 1/1 | 3.3   | 3.71  |
| 0/1 | 1/1 | 5.36  | 5.79  |
| 0/1 | 1/1 | 3.77  | 4.21  |
| 1/1 | 1/1 | 8.2   | 9.45  |
| 0/1 | 1/1 | 4.33  | 5.7   |
| 1/1 | 1/1 | 2.65  | 2.92  |
| 1/1 | 1/1 | 6.8   | 7.33  |
| 1/1 | 1/1 | 4.84  | 5.66  |
| 0/1 | 1/1 | 5.44  | 6.36  |
| 1/1 | 1/1 | 4.94  | 5.94  |
| 1/1 | 1/1 | 6.6   | 6.4   |
| 1/1 | 1/1 | 3.18  | 3.14  |
| 1/1 | 1/1 | 3.93  | 4.1   |
| 0/1 | 1/1 | 3.12  | 3.31  |
| 1/1 | 1/1 | 9.6   | 9.79  |
| 1/1 | 1/1 | 7.42  | 7.62  |
| 1/1 | 1/1 | 6.04  | 7.91  |
| 1/1 | 1/1 | 5.45  | 7.63  |
| 1/1 | 1/1 | 6.12  | 8.33  |
| 1/1 | 1/1 | 7.42  | 5.46  |
| 1/1 | 1/1 | 5.98  | 4.11  |
| 1/1 | 1/1 | 6.82  | 5     |
| 1/1 | 0/1 | 4.6   | 2.79  |
| 1/1 | 1/1 | 5.85  | 4.08  |
| 1/1 | 0/1 | 4.2   | 2.45  |
| 1/1 | 0/1 | 4.07  | 3.04  |
| 1/1 | 1/1 | 5.83  | 4.81  |
| 1/1 | 0/1 | 5.22  | 4.27  |
| 1/1 | 1/1 | 4.56  | 3.82  |
| 0/1 | 1/1 | 3.77  | 3.15  |
| 1/1 | 1/1 | 7.88  | 7.37  |
| 1/1 | 1/1 | 8.24  | 7.82  |



|     |     |       |       |
|-----|-----|-------|-------|
| 1/1 | 1/1 | 8.73  | 8.44  |
| 1/1 | 1/1 | 7.67  | 7.4   |
| 1/1 | 1/1 | 7.99  | 7.77  |
| 1/1 | 1/1 | 3.63  | 3.54  |
| 1/1 | 1/1 | 11.36 | 11.29 |
| 1/1 | 1/1 | 8.33  | 8.29  |
| 1/1 | 1/1 | 8.68  | 8.88  |
| 1/1 | 1/1 | 4.52  | 5.29  |
| 1/1 | 1/1 | 3.27  | 4.05  |
| 0/1 | 1/1 | 2.26  | 3.5   |
| 1/1 | 1/1 | 6.76  | 6.63  |
| 1/1 | 1/1 | 9.3   | 9.25  |
| 1/1 | 1/1 | 6.98  | 6.95  |
| 1/1 | 1/1 | 8.04  | 8.04  |
| 1/1 | 1/1 | 11.34 | 11.47 |
| 1/1 | 1/1 | 3.98  | 4.14  |
| 1/1 | 1/1 | 6.23  | 7.18  |
| 1/1 | 1/1 | 10.68 | 7.48  |
| 1/1 | 1/1 | 10.4  | 7.38  |
| 1/1 | 1/1 | 9.75  | 6.98  |
| 1/1 | 0/1 | 4.79  | 2.35  |
| 1/1 | 0/1 | 8.93  | 6.81  |
| 1/1 | 1/1 | 8.4   | 6.54  |
| 1/1 | 0/1 | 7.08  | 5.26  |
| 1/1 | 0/1 | 4.65  | 2.85  |
| 1/1 | 1/1 | 4.56  | 3.12  |
| 1/1 | 0/1 | 3.97  | 2.61  |
| 1/1 | 1/1 | 5.51  | 4.27  |
| 1/1 | 1/1 | 6.33  | 5.12  |
| 1/1 | 1/1 | 10.28 | 9.58  |
| 1/1 | 1/1 | 4.08  | 3.5   |
| 1/1 | 1/1 | 6.78  | 6.61  |
| 1/1 | 1/1 | 12.89 | 12.74 |
| 0/1 | 1/1 | 5.59  | 5.46  |
| 0/1 | 1/1 | 4.88  | 4.85  |
| 1/1 | 1/1 | 5.55  | 6.65  |
| 1/1 | 1/1 | 7.73  | 8.85  |
| 1/1 | 1/1 | 6.18  | 7.41  |
| 1/1 | 1/1 | 4.44  | 5.68  |
| 1/1 | 1/1 | 8.86  | 10.1  |
| 1/1 | 1/1 | 4.11  | 5.54  |
| 1/1 | 1/1 | 6.85  | 8.28  |
| 1/1 | 1/1 | 5.54  | 7.08  |
| 1/1 | 1/1 | 7.07  | 8.63  |
| 1/1 | 1/1 | 4.49  | 6.05  |
| 1/1 | 1/1 | 6.61  | 8.26  |
| 0/1 | 1/1 | 3.13  | 4.78  |
| 1/1 | 1/1 | 5.99  | 7.73  |
| 1/1 | 1/1 | 5.99  | 7.73  |
| 1/1 | 1/1 | 7.23  | 9.03  |
| 1/1 | 1/1 | 3.98  | 5.77  |
| 1/1 | 1/1 | 7.35  | 9.31  |
| 1/1 | 1/1 | 7.28  | 9.29  |
| 1/1 | 1/1 | 6.42  | 8.56  |
| 1/1 | 1/1 | 4.5   | 4.85  |
| 0/1 | 1/1 | 7.64  | 8.09  |
| 0/1 | 1/1 | 6.42  | 6.93  |
| 0/1 | 1/1 | 6.06  | 6.59  |

|     |     |       |       |
|-----|-----|-------|-------|
| 0/1 | 1/1 | 2.22  | 2.77  |
| 0/1 | 1/1 | 5.54  | 6.54  |
| 1/1 | 1/1 | 5.35  | 6.81  |
| 1/1 | 1/1 | 6.18  | 7.95  |
| 1/1 | 1/1 | 4.29  | 3.4   |
| 1/1 | 1/1 | 10.28 | 10.02 |
| 1/1 | 1/1 | 10.25 | 10.11 |
| 1/1 | 0/1 | 2.65  | 2.56  |
| 1/1 | 1/1 | 13.75 | 13.68 |
| 1/1 | 1/1 | 2.16  | 2.3   |
| 0/1 | 1/1 | 3.26  | 3.54  |
| 0/1 | 1/1 | 3.81  | 4.87  |
| 1/1 | 1/1 | 4.71  | 5.78  |
| 1/1 | 1/1 | 6.84  | 7.98  |
| 1/1 | 1/1 | 4.96  | 5.65  |
| 0/1 | 1/1 | 3.23  | 3.98  |
| 1/1 | 1/1 | 2.83  | 4.22  |
| 1/1 | 1/1 | 5     | 3.81  |
| 1/1 | 0/1 | 8.25  | 7.44  |
| 1/1 | 1/1 | 8.99  | 8.2   |
| 1/1 | 1/1 | 7.56  | 6.85  |
| 1/1 | 1/1 | 9.73  | 9.26  |
| 1/1 | 1/1 | 7.58  | 7.38  |
| 0/1 | 1/1 | 3.54  | 4.33  |
| 1/1 | 1/1 | 4.4   | 5.46  |
| 0/1 | 1/1 | 2.34  | 3.47  |
| 0/1 | 1/1 | 2.86  | 4.62  |
| 1/1 | 1/1 | 5.31  | 5.52  |
| 1/1 | 1/1 | 8.96  | 9.24  |
| 1/1 | 1/1 | 5.34  | 6.24  |
| 1/1 | 1/1 | 4.36  | 5.31  |
| 1/1 | 1/1 | 5.76  | 6.54  |
| 0/1 | 1/1 | 2.32  | 3.11  |
| 1/1 | 1/1 | 7.33  | 8.12  |
| 1/1 | 1/1 | 3.94  | 4.74  |
| 1/1 | 1/1 | 6.32  | 7.12  |
| 1/1 | 1/1 | 6.81  | 7.63  |
| 1/1 | 1/1 | 5.41  | 6.52  |
| 0/1 | 1/1 | 4.41  | 5.57  |
| 0/1 | 1/1 | 4.07  | 5.4   |
| 0/1 | 1/1 | 4.61  | 6.34  |
| 1/1 | 1/1 | 3.72  | 4.86  |
| 1/1 | 1/1 | 4.21  | 5.87  |
| 0/1 | 1/1 | 2.92  | 3.38  |
| 1/1 | 1/1 | 6.76  | 8.89  |
| 0/1 | 1/1 | 4.39  | 4.89  |
| 0/1 | 1/1 | 4.44  | 5.03  |
| 0/1 | 1/1 | 3.17  | 3.87  |
| 1/1 | 1/1 | 8.51  | 9.53  |
| 1/1 | 1/1 | 2.75  | 3.6   |
| 1/1 | 1/1 | 5.95  | 6.94  |
| 1/1 | 1/1 | 9.7   | 9.15  |
| 1/1 | 1/1 | 7.19  | 6.71  |
| 1/1 | 1/1 | 6.09  | 6.17  |
| 0/1 | 1/1 | 2.32  | 2.47  |
| 1/1 | 1/1 | 4.97  | 5.21  |
| 1/1 | 1/1 | 4.32  | 4.64  |
| 1/1 | 1/1 | 5.17  | 5.63  |

|     |     |       |       |
|-----|-----|-------|-------|
| 1/1 | 1/1 | 8.49  | 9.04  |
| 1/1 | 1/1 | 4.57  | 5.73  |
| 1/1 | 1/1 | 5.29  | 5.62  |
| 1/1 | 1/1 | 2.98  | 3.34  |
| 1/1 | 1/1 | 5.3   | 6.31  |
| 1/1 | 1/1 | 5.82  | 5.4   |
| 1/1 | 1/1 | 5.85  | 5.45  |
| 1/1 | 1/1 | 2.59  | 2.5   |
| 1/1 | 0/1 | 2.7   | 2.63  |
| 1/1 | 1/1 | 5.53  | 5.5   |
| 0/1 | 1/1 | 3.75  | 3.75  |
| 1/1 | 1/1 | 3.11  | 3.18  |
| 1/1 | 1/1 | 8.09  | 8.21  |
| 1/1 | 1/1 | 9.87  | 10.01 |
| 1/1 | 1/1 | 6.53  | 6.83  |
| 1/1 | 1/1 | 5.66  | 6.25  |
| 0/1 | 1/1 | 3.31  | 4.37  |
| 1/1 | 1/1 | 5.32  | 6.49  |
| 0/1 | 1/1 | 5.14  | 6.57  |
| 1/1 | 1/1 | 6.12  | 6.85  |
| 1/1 | 1/1 | 5.89  | 6.62  |
| 1/1 | 1/1 | 3.2   | 3.49  |
| 1/1 | 1/1 | 7.06  | 7.55  |
| 1/1 | 1/1 | 3.96  | 4.26  |
| 1/1 | 1/1 | 6.31  | 6.66  |
| 1/1 | 1/1 | 4.16  | 4.95  |
| 1/1 | 1/1 | 5.54  | 5.97  |
| 1/1 | 1/1 | 4.93  | 5.37  |
| 0/1 | 1/1 | 2.49  | 3.99  |
| 0/1 | 1/1 | 3.92  | 4.99  |
| 1/1 | 1/1 | 4.22  | 5.34  |
| 1/1 | 1/1 | 3.89  | 5.53  |
| 1/1 | 1/1 | 7.05  | 7.68  |
| 0/1 | 1/1 | 5.19  | 5.87  |
| 0/1 | 1/1 | 3.55  | 3.92  |
| 0/1 | 1/1 | 2.44  | 2.92  |
| 1/1 | 1/1 | 3.49  | 4.03  |
| 0/1 | 1/1 | 2.06  | 2.22  |
| 0/1 | 1/1 | 7.01  | 7.21  |
| 0/1 | 1/1 | 2.89  | 3.19  |
| 1/1 | 1/1 | 5.58  | 4.69  |
| 1/1 | 1/1 | 8.91  | 8.14  |
| 1/1 | 1/1 | 8.21  | 7.75  |
| 1/1 | 1/1 | 7.83  | 7.68  |
| 1/1 | 1/1 | 10.92 | 10.97 |
| 0/1 | 1/1 | 3.53  | 3.97  |
| 1/1 | 1/1 | 5.73  | 6.69  |
| 1/1 | 1/1 | 5.33  | 6.62  |
| 0/1 | 1/1 | 3.94  | 5.5   |
| 1/1 | 1/1 | 6.14  | 8.04  |
| 1/1 | 1/1 | 7.33  | 8.03  |
| 0/1 | 1/1 | 4.12  | 4.92  |
| 0/1 | 1/1 | 2.67  | 3.49  |
| 1/1 | 1/1 | 5.64  | 6.49  |
| 1/1 | 1/1 | 5.46  | 6.32  |
| 1/1 | 1/1 | 6.33  | 7.54  |
| 0/1 | 1/1 | 3.6   | 5.41  |
| 1/1 | 1/1 | 3.26  | 5.48  |

|     |     |       |       |
|-----|-----|-------|-------|
| 1/1 | 1/1 | 5.91  | 5.35  |
| 1/1 | 1/1 | 7.44  | 6.88  |
| 1/1 | 1/1 | 6.3   | 5.83  |
| 1/1 | 1/1 | 4.71  | 4.26  |
| 1/1 | 1/1 | 4.93  | 4.51  |
| 1/1 | 1/1 | 9.61  | 9.28  |
| 1/1 | 1/1 | 9.19  | 8.87  |
| 1/1 | 1/1 | 2.53  | 2.27  |
| 1/1 | 1/1 | 11.15 | 11.06 |
| 1/1 | 1/1 | 4.54  | 4.46  |
| 1/1 | 1/1 | 3.99  | 4.01  |
| 1/1 | 1/1 | 6.3   | 6.41  |
| 1/1 | 1/1 | 9.75  | 9.35  |
| 1/1 | 1/1 | 3.4   | 3.01  |
| 1/1 | 1/1 | 8.63  | 8.25  |
| 0/1 | 1/1 | 4.81  | 4.48  |
| 1/1 | 1/1 | 9.55  | 9.22  |
| 1/1 | 1/1 | 5.5   | 6.46  |
| 1/1 | 1/1 | 4.89  | 6.97  |
| 1/1 | 1/1 | 5.77  | 6.54  |
| 1/1 | 1/1 | 5.21  | 6.74  |
| 1/1 | 1/1 | 5.05  | 5.61  |
| 1/1 | 1/1 | 8.03  | 8.62  |
| 1/1 | 1/1 | 4.97  | 5.68  |
| 0/1 | 1/1 | 4.69  | 5.51  |
| 1/1 | 1/1 | 3.77  | 4.88  |
| 0/1 | 1/1 | 3.7   | 4.58  |
| 0/1 | 1/1 | 4.49  | 5.45  |
| 1/1 | 1/1 | 4.49  | 4.92  |
| 1/1 | 1/1 | 5.07  | 5.74  |
| 0/1 | 1/1 | 3.82  | 4.52  |
| 1/1 | 1/1 | 4.2   | 4.91  |
| 0/1 | 1/1 | 2.26  | 3.16  |
| 0/1 | 1/1 | 4.26  | 5.36  |
| 0/1 | 1/1 | 3.02  | 4.28  |
| 1/1 | 1/1 | 8.13  | 9.56  |
| 1/1 | 1/1 | 5.86  | 7.48  |
| 1/1 | 1/1 | 7.06  | 6.96  |
| 1/1 | 1/1 | 6.88  | 7.46  |
| 0/1 | 1/1 | 2.55  | 3.04  |
| 0/1 | 1/1 | 3.78  | 4.45  |
| 1/1 | 1/1 | 3.63  | 4.38  |
| 1/1 | 1/1 | 4.81  | 5.67  |
| 0/1 | 1/1 | 2.56  | 3.44  |
| 1/1 | 1/1 | 5.48  | 6.49  |
| 1/1 | 1/1 | 5     | 6.91  |
| 1/1 | 1/1 | 5.48  | 6.49  |
| 1/1 | 1/1 | 5     | 6.91  |
| 1/1 | 1/1 | 6.9   | 7.68  |
| 1/1 | 1/1 | 8.83  | 9.84  |
| 0/1 | 1/1 | 5.34  | 6.52  |
| 1/1 | 1/1 | 10.19 | 11.46 |
| 1/1 | 1/1 | 9.77  | 11.06 |
| 1/1 | 1/1 | 9.02  | 10.77 |
| 0/1 | 1/1 | 4.55  | 5.4   |
| 0/1 | 1/1 | 1.89  | 3.17  |
| 0/1 | 1/1 | 7.66  | 7.57  |
| 1/1 | 1/1 | 7.07  | 6.99  |

|     |     |       |       |
|-----|-----|-------|-------|
| 1/1 | 1/1 | 7.63  | 7.62  |
| 0/1 | 1/1 | 7.64  | 7.66  |
| 1/1 | 1/1 | 6.27  | 6.47  |
| 0/1 | 1/1 | 5.35  | 5.65  |
| 1/1 | 1/1 | 6.4   | 6.71  |
| 0/1 | 1/1 | 4.8   | 5.46  |
| 1/1 | 1/1 | 11.62 | 11.78 |
| 1/1 | 1/1 | 7.75  | 7.93  |
| 1/1 | 1/1 | 3.3   | 2.73  |
| 1/1 | 1/1 | 3.98  | 3.46  |
| 1/1 | 1/1 | 4.87  | 4.5   |
| 1/1 | 1/1 | 6.66  | 6.3   |
| 1/1 | 1/1 | 4.8   | 4.56  |
| 1/1 | 1/1 | 5.43  | 5.19  |
| 1/1 | 1/1 | 4.35  | 4.13  |
| 0/1 | 1/1 | 2.43  | 2.25  |
| 1/1 | 1/1 | 3.8   | 3.73  |
| 1/1 | 1/1 | 6.84  | 6.89  |
| 1/1 | 1/1 | 3.51  | 3.71  |
| 1/1 | 1/1 | 6.79  | 7.3   |
| 0/1 | 1/1 | 2.21  | 2.95  |
| 1/1 | 1/1 | 5.1   | 6.47  |
| 1/1 | 1/1 | 3     | 3.86  |
| 1/1 | 1/1 | 3.27  | 4.21  |
| 1/1 | 1/1 | 7.24  | 7.26  |
| 0/1 | 1/1 | 5.5   | 5.62  |
| 1/1 | 1/1 | 4.92  | 5.08  |
| 1/1 | 1/1 | 2.87  | 2.88  |
| 1/1 | 1/1 | 5.73  | 5.75  |
| 1/1 | 1/1 | 6.47  | 6.51  |
| 0/1 | 1/1 | 3.2   | 3.25  |
| 1/1 | 1/1 | 5.08  | 5.13  |
| 1/1 | 1/1 | 5.18  | 5.28  |
| 0/1 | 1/1 | 2.83  | 2.97  |
| 1/1 | 1/1 | 11.57 | 11.77 |
| 1/1 | 1/1 | 3.58  | 3.79  |
| 0/1 | 1/1 | 5.12  | 5.34  |
| 0/1 | 1/1 | 3.8   | 4.1   |
| 1/1 | 1/1 | 7.09  | 7.48  |
| 1/1 | 1/1 | 5.7   | 6.88  |
| 1/1 | 1/1 | 4.51  | 5.72  |
| 0/1 | 1/1 | 3.21  | 4.47  |
| 1/1 | 1/1 | 5.17  | 6.44  |
| 1/1 | 1/1 | 3.86  | 5.17  |
| 1/1 | 1/1 | 4.51  | 5.96  |
| 0/1 | 1/1 | 2.48  | 4.03  |
| 0/1 | 1/1 | 3.46  | 5.03  |
| 1/1 | 1/1 | 4.13  | 6.11  |
| 0/1 | 1/1 | 1.78  | 2.86  |
| 0/1 | 1/1 | 2.48  | 3.58  |
| 1/1 | 1/1 | 3.04  | 4.28  |
| 1/1 | 1/1 | 2.39  | 3.12  |
| 1/1 | 1/1 | 7.26  | 8.01  |
| 1/1 | 1/1 | 3.02  | 3.8   |
| 0/1 | 1/1 | 3.15  | 4.07  |
| 1/1 | 1/1 | 9.93  | 10.08 |
| 0/1 | 1/1 | 2.29  | 2.65  |
| 0/1 | 1/1 | 3.11  | 4.39  |

|     |     |       |       |
|-----|-----|-------|-------|
| 1/1 | 1/1 | 9.34  | 9.3   |
| 1/1 | 1/1 | 6.05  | 6.05  |
| 1/1 | 1/1 | 4.05  | 4.08  |
| 0/1 | 1/1 | 6.29  | 7.08  |
| 0/1 | 1/1 | 3.65  | 4.56  |
| 0/1 | 1/1 | 6.5   | 6.65  |
| 0/1 | 1/1 | 3.76  | 3.93  |
| 1/1 | 1/1 | 5.15  | 5.34  |
| 1/1 | 1/1 | 6.31  | 6.61  |
| 1/1 | 1/1 | 5.94  | 6.29  |
| 0/1 | 1/1 | 2     | 2.67  |
| 1/1 | 1/1 | 5.03  | 5.75  |
| 0/1 | 1/1 | 2.63  | 3.66  |
| 1/1 | 1/1 | 6.08  | 6.11  |
| 1/1 | 1/1 | 6.67  | 6.72  |
| 1/1 | 1/1 | 8.37  | 8.43  |
| 1/1 | 1/1 | 7.21  | 7.29  |
| 1/1 | 1/1 | 6.53  | 6.61  |
| 1/1 | 1/1 | 7.48  | 7.57  |
| 1/1 | 1/1 | 5.4   | 5.54  |
| 1/1 | 1/1 | 10.69 | 10.83 |
| 1/1 | 1/1 | 9.11  | 9.31  |
| 1/1 | 1/1 | 5.23  | 5.57  |
| 1/1 | 1/1 | 2.94  | 3.34  |
| 0/1 | 1/1 | 2.29  | 2.71  |
| 1/1 | 1/1 | 4.02  | 4.79  |
| 1/1 | 1/1 | 4.57  | 4.52  |
| 0/1 | 1/1 | 5.37  | 5.33  |
| 0/1 | 1/1 | 9.24  | 9.22  |
| 1/1 | 0/1 | 3.99  | 4.07  |
| 1/1 | 1/1 | 10.2  | 10.35 |
| 0/1 | 1/1 | 6.89  | 7.48  |
| 1/1 | 1/1 | 5.62  | 6.61  |
| 0/1 | 1/1 | 1.91  | 3.2   |
| 0/1 | 1/1 | 2.11  | 3.73  |
| 1/1 | 1/1 | 7.99  | 7.87  |
| 1/1 | 1/1 | 4.42  | 4.32  |
| 0/1 | 1/1 | 5.56  | 6.28  |
| 1/1 | 1/1 | 3.62  | 4.74  |
| 0/1 | 1/1 | 4.35  | 3.74  |
| 1/1 | 1/1 | 6.38  | 5.78  |
| 1/1 | 1/1 | 7.37  | 7.03  |
| 1/1 | 1/1 | 7.64  | 7.39  |
| 1/1 | 1/1 | 9.76  | 9.17  |
| 1/1 | 1/1 | 5.41  | 4.89  |
| 1/1 | 1/1 | 8.8   | 8.28  |
| 1/1 | 1/1 | 8.11  | 7.68  |
| 1/1 | 1/1 | 5.42  | 4.99  |
| 1/1 | 1/1 | 6.2   | 5.79  |
| 1/1 | 1/1 | 7.04  | 6.64  |
| 1/1 | 1/1 | 3.55  | 3.16  |
| 1/1 | 1/1 | 8.5   | 8.15  |
| 1/1 | 1/1 | 4.61  | 4.28  |
| 1/1 | 1/1 | 7.39  | 7.06  |
| 1/1 | 1/1 | 3.15  | 2.84  |
| 1/1 | 1/1 | 6.91  | 6.61  |
| 1/1 | 1/1 | 6.14  | 5.84  |
| 1/1 | 1/1 | 7.53  | 7.26  |

|     |     |      |       |
|-----|-----|------|-------|
| 1/1 | 1/1 | 7.87 | 7.62  |
| 1/1 | 1/1 | 3.51 | 3.33  |
| 1/1 | 1/1 | 4.94 | 4.9   |
| 0/1 | 1/1 | 3.4  | 3.36  |
| 1/1 | 1/1 | 7.05 | 7.14  |
| 1/1 | 1/1 | 5.73 | 5.83  |
| 1/1 | 1/1 | 9.25 | 9.44  |
| 0/1 | 1/1 | 6.51 | 6.72  |
| 0/1 | 1/1 | 3.74 | 3.99  |
| 0/1 | 1/1 | 5.13 | 5.55  |
| 1/1 | 1/1 | 5.62 | 6.2   |
| 1/1 | 1/1 | 7.43 | 8.33  |
| 1/1 | 1/1 | 7.98 | 8.99  |
| 1/1 | 1/1 | 6.31 | 7.39  |
| 1/1 | 1/1 | 6.17 | 7.27  |
| 0/1 | 1/1 | 4.13 | 5.52  |
| 0/1 | 1/1 | 4.24 | 5.7   |
| 0/1 | 1/1 | 4.26 | 5.74  |
| 1/1 | 1/1 | 7.51 | 7.26  |
| 1/1 | 1/1 | 7.89 | 7.74  |
| 1/1 | 1/1 | 3.04 | 2.92  |
| 1/1 | 1/1 | 7.77 | 7.69  |
| 1/1 | 1/1 | 7.74 | 7.7   |
| 1/1 | 1/1 | 4.58 | 4.56  |
| 1/1 | 1/1 | 4.22 | 4.26  |
| 1/1 | 1/1 | 3.16 | 3.24  |
| 1/1 | 1/1 | 7.37 | 7.47  |
| 0/1 | 1/1 | 3.17 | 3.34  |
| 1/1 | 1/1 | 3.2  | 3.38  |
| 1/1 | 1/1 | 5.97 | 6.31  |
| 1/1 | 1/1 | 7.69 | 8.14  |
| 1/1 | 1/1 | 2.97 | 3.82  |
| 0/1 | 1/1 | 2.64 | 3.51  |
| 0/1 | 1/1 | 4.72 | 5.5   |
| 0/1 | 1/1 | 2.79 | 3.59  |
| 0/1 | 1/1 | 1.6  | 2.45  |
| 0/1 | 1/1 | 4.24 | 5.13  |
| 1/1 | 1/1 | 4.13 | 5.39  |
| 0/1 | 1/1 | 3.59 | 5.09  |
| 1/1 | 1/1 | 7.22 | 6.66  |
| 1/1 | 1/1 | 5.28 | 4.87  |
| 1/1 | 0/1 | 5.66 | 5.27  |
| 1/1 | 1/1 | 4.29 | 3.95  |
| 0/1 | 1/1 | 5.68 | 5.4   |
| 1/1 | 1/1 | 4.34 | 4.07  |
| 1/1 | 1/1 | 5.41 | 5.21  |
| 1/1 | 1/1 | 9.08 | 10.36 |
| 1/1 | 1/1 | 4.59 | 5.87  |
| 1/1 | 1/1 | 6.89 | 8.26  |
| 1/1 | 1/1 | 6.41 | 7.81  |
| 1/1 | 1/1 | 6.95 | 8.56  |
| 1/1 | 1/1 | 4.05 | 5.81  |
| 1/1 | 1/1 | 3.16 | 5.1   |
| 1/1 | 1/1 | 3.23 | 3.86  |
| 0/1 | 1/1 | 2.53 | 4.17  |
| 0/1 | 1/1 | 3.04 | 3.81  |
| 0/1 | 1/1 | 6.39 | 7.63  |
| 0/1 | 1/1 | 5.37 | 5.43  |

|     |     |       |       |
|-----|-----|-------|-------|
| 1/1 | 1/1 | 2.4   | 2.56  |
| 1/1 | 1/1 | 2.76  | 2.38  |
| 1/1 | 1/1 | 8.35  | 8.04  |
| 1/1 | 1/1 | 4.41  | 4.62  |
| 0/1 | 1/1 | 2.81  | 3.71  |
| 0/1 | 1/1 | 2.74  | 4.07  |
| 1/1 | 1/1 | 5.76  | 5.31  |
| 1/1 | 1/1 | 7.33  | 6.91  |
| 1/1 | 1/1 | 5.18  | 4.82  |
| 1/1 | 1/1 | 6.07  | 5.72  |
| 1/1 | 1/1 | 5.49  | 5.15  |
| 1/1 | 1/1 | 8.18  | 8.12  |
| 1/1 | 1/1 | 3.97  | 4.11  |
| 0/1 | 1/1 | 2.46  | 2.98  |
| 1/1 | 1/1 | 3.41  | 4.75  |
| 1/1 | 1/1 | 6.76  | 8.21  |
| 0/1 | 1/1 | 4.21  | 5.87  |
| 0/1 | 1/1 | 2.12  | 2.74  |
| 0/1 | 1/1 | 3.86  | 5.09  |
| 0/1 | 1/1 | 4.31  | 4.6   |
| 0/1 | 1/1 | 4.11  | 4.6   |
| 0/1 | 1/1 | 3.44  | 3.95  |
| 1/1 | 1/1 | 11.8  | 11.58 |
| 1/1 | 1/1 | 5.08  | 5.11  |
| 0/1 | 1/1 | 5.74  | 6.04  |
| 1/1 | 1/1 | 5.12  | 5.09  |
| 0/1 | 1/1 | 1.93  | 2.44  |
| 1/1 | 1/1 | 4.46  | 5.05  |
| 1/1 | 1/1 | 3.05  | 3.87  |
| 0/1 | 1/1 | 3.09  | 3.91  |
| 1/1 | 1/1 | 5.95  | 6.83  |
| 1/1 | 1/1 | 5.15  | 6.27  |
| 1/1 | 1/1 | 4.51  | 5.75  |
| 0/1 | 1/1 | 4.19  | 4.42  |
| 0/1 | 1/1 | 4.54  | 5.06  |
| 0/1 | 1/1 | 3.78  | 4.13  |
| 0/1 | 1/1 | 2.49  | 2.87  |
| 0/1 | 1/1 | 2.78  | 3.31  |
| 0/1 | 1/1 | 3.33  | 4.18  |
| 1/1 | 1/1 | 5.35  | 5.12  |
| 0/1 | 1/1 | 2.85  | 2.74  |
| 1/1 | 1/1 | 11.13 | 11.41 |
| 1/1 | 1/1 | 3.27  | 4.81  |
| 0/1 | 1/1 | 3.59  | 5.24  |
| 1/1 | 1/1 | 7.93  | 7.57  |
| 1/1 | 1/1 | 7.42  | 7.11  |
| 1/1 | 1/1 | 6.74  | 6.47  |
| 1/1 | 1/1 | 5.4   | 5.17  |
| 1/1 | 1/1 | 7.11  | 6.92  |
| 1/1 | 1/1 | 5.55  | 5.39  |
| 1/1 | 1/1 | 7.63  | 7.65  |
| 1/1 | 1/1 | 2.93  | 3.11  |
| 1/1 | 1/1 | 5.49  | 6.32  |
| 0/1 | 1/1 | 5.19  | 6.04  |
| 1/1 | 1/1 | 7.94  | 7.31  |
| 1/1 | 1/1 | 7.99  | 7.44  |
| 1/1 | 1/1 | 8.29  | 7.75  |
| 1/1 | 0/1 | 3.34  | 2.97  |



|     |     |       |       |
|-----|-----|-------|-------|
| 1/1 | 1/1 | 7.47  | 7.35  |
| 1/1 | 1/1 | 12.62 | 12.52 |
| 1/1 | 1/1 | 7.08  | 7     |
| 0/1 | 1/1 | 7.14  | 7.21  |
| 1/1 | 1/1 | 9.35  | 9.45  |
| 1/1 | 1/1 | 8.33  | 9.71  |
| 1/1 | 1/1 | 4.48  | 6.52  |
| 1/1 | 1/1 | 4.87  | 7.29  |
| 1/1 | 1/1 | 5.43  | 6.73  |
| 1/1 | 1/1 | 7.24  | 8.53  |
| 1/1 | 1/1 | 5.45  | 7.1   |
| 1/1 | 1/1 | 4.74  | 6.75  |
| 1/1 | 1/1 | 5.62  | 6.21  |
| 0/1 | 1/1 | 6.21  | 7.08  |
| 1/1 | 1/1 | 5.45  | 6.63  |
| 1/1 | 1/1 | 5.25  | 6.5   |
| 0/1 | 1/1 | 3.46  | 5.52  |
| 1/1 | 1/1 | 5.23  | 5.61  |
| 0/1 | 1/1 | 5.35  | 5.8   |
| 1/1 | 1/1 | 6.98  | 7.47  |
| 1/1 | 1/1 | 5.45  | 5.99  |
| 1/1 | 1/1 | 6.97  | 8.13  |
| 1/1 | 1/1 | 3.72  | 3.74  |
| 1/1 | 1/1 | 4.41  | 4.49  |
| 1/1 | 1/1 | 9.46  | 9.76  |
| 1/1 | 1/1 | 3.19  | 3.83  |
| 1/1 | 1/1 | 3.49  | 4.48  |
| 1/1 | 1/1 | 2.88  | 3.89  |
| 1/1 | 1/1 | 5.95  | 7.08  |
| 1/1 | 1/1 | 4.91  | 6.09  |
| 1/1 | 1/1 | 6.11  | 7.36  |
| 0/1 | 1/1 | 3.48  | 3.82  |
| 1/1 | 1/1 | 4.08  | 4.47  |
| 1/1 | 1/1 | 6.49  | 6.95  |
| 1/1 | 1/1 | 6.21  | 6.76  |
| 0/1 | 1/1 | 3.53  | 4.09  |
| 1/1 | 1/1 | 5.27  | 6.37  |
| 0/1 | 1/1 | 2.48  | 3.82  |
| 1/1 | 1/1 | 5.15  | 6.21  |
| 1/1 | 1/1 | 3.07  | 4.15  |
| 1/1 | 1/1 | 4.35  | 5.58  |
| 1/1 | 1/1 | 5.4   | 6.79  |
| 0/1 | 1/1 | 2.86  | 4.59  |
| 1/1 | 1/1 | 2.89  | 4.59  |
| 1/1 | 1/1 | 3.61  | 5.44  |
| 1/1 | 1/1 | 8.65  | 10.63 |
| 1/1 | 1/1 | 7.74  | 9.82  |
| 1/1 | 1/1 | 8.69  | 10.87 |
| 0/1 | 1/1 | 4.09  | 7.24  |
| 1/1 | 1/1 | 4.13  | 4.19  |
| 1/1 | 1/1 | 6.16  | 6.29  |
| 1/1 | 1/1 | 12.34 | 12.48 |
| 1/1 | 1/1 | 6.58  | 7.24  |
| 1/1 | 1/1 | 5.43  | 5.34  |
| 1/1 | 1/1 | 4.29  | 4.21  |
| 1/1 | 1/1 | 7.43  | 7.56  |
| 1/1 | 1/1 | 4.4   | 4.65  |
| 1/1 | 1/1 | 7.29  | 6.56  |

|     |     |       |       |
|-----|-----|-------|-------|
| 1/1 | 1/1 | 6.04  | 5.35  |
| 1/1 | 1/1 | 11.56 | 10.9  |
| 1/1 | 1/1 | 5.45  | 4.81  |
| 1/1 | 1/1 | 5.57  | 4.97  |
| 1/1 | 1/1 | 8.76  | 8.21  |
| 1/1 | 1/1 | 5.51  | 5.01  |
| 1/1 | 1/1 | 6.19  | 5.69  |
| 1/1 | 0/1 | 6.71  | 6.27  |
| 1/1 | 1/1 | 3.58  | 3.38  |
| 1/1 | 1/1 | 7.63  | 7.46  |
| 1/1 | 1/1 | 7.02  | 6.86  |
| 0/1 | 1/1 | 6.12  | 6.19  |
| 1/1 | 1/1 | 3.12  | 3.33  |
| 0/1 | 1/1 | 2.39  | 3.19  |
| 0/1 | 1/1 | 2.59  | 3.48  |
| 1/1 | 1/1 | 6.05  | 6.01  |
| 1/1 | 1/1 | 7.51  | 7.53  |
| 1/1 | 1/1 | 6.54  | 6.57  |
| 0/1 | 1/1 | 4.58  | 4.64  |
| 1/1 | 1/1 | 5.73  | 5.8   |
| 1/1 | 1/1 | 5.47  | 5.72  |
| 0/1 | 1/1 | 6.56  | 6.85  |
| 0/1 | 1/1 | 3.88  | 4.25  |
| 1/1 | 1/1 | 3.46  | 3.75  |
| 1/1 | 1/1 | 4.3   | 4.83  |
| 0/1 | 1/1 | 1.99  | 3.07  |
| 1/1 | 1/1 | 4.04  | 5.17  |
| 0/1 | 1/1 | 2.72  | 3.89  |
| 0/1 | 1/1 | 4.88  | 6.08  |
| 0/1 | 1/1 | 3.5   | 4.79  |
| 0/1 | 1/1 | 3.97  | 5.45  |
| 0/1 | 1/1 | 2.45  | 4.08  |
| 0/1 | 1/1 | 3.59  | 5.69  |
| 1/1 | 1/1 | 4.69  | 5.28  |
| 1/1 | 1/1 | 5.42  | 6.13  |
| 0/1 | 1/1 | 8.81  | 9.71  |
| 1/1 | 1/1 | 6.04  | 6.95  |
| 1/1 | 1/1 | 3.7   | 3.71  |
| 1/1 | 1/1 | 11.58 | 11.62 |
| 0/1 | 1/1 | 3.16  | 3.23  |
| 0/1 | 1/1 | 3.27  | 3.44  |
| 0/1 | 1/1 | 3.66  | 4.25  |
| 0/1 | 1/1 | 4.29  | 5.49  |
| 1/1 | 1/1 | 7.43  | 7.57  |
| 1/1 | 1/1 | 11.1  | 11.32 |
| 0/1 | 1/1 | 4.64  | 5.41  |
| 1/1 | 1/1 | 3.49  | 4.32  |
| 1/1 | 1/1 | 3.95  | 4.87  |
| 1/1 | 1/1 | 3.86  | 4.9   |
| 0/1 | 1/1 | 3.31  | 4.45  |
| 1/1 | 1/1 | 5.32  | 5.3   |
| 1/1 | 1/1 | 8.15  | 8.16  |
| 1/1 | 1/1 | 8.54  | 8.57  |
| 0/1 | 1/1 | 4.93  | 4.99  |
| 0/1 | 1/1 | 3.9   | 4.05  |
| 1/1 | 1/1 | 3.89  | 4.05  |
| 1/1 | 1/1 | 5.46  | 6.75  |
| 0/1 | 1/1 | 4.42  | 6.67  |

|     |     |       |       |
|-----|-----|-------|-------|
| 1/1 | 1/1 | 6.8   | 6.7   |
| 0/1 | 1/1 | 3.07  | 3.43  |
| 1/1 | 1/1 | 4.28  | 4.89  |
| 1/1 | 1/1 | 4.07  | 5.04  |
| 1/1 | 1/1 | 4.55  | 5.59  |
| 0/1 | 1/1 | 3.14  | 4.4   |
| 1/1 | 1/1 | 6.77  | 8.2   |
| 0/1 | 1/1 | 3.29  | 4.78  |
| 1/1 | 1/1 | 5.78  | 7.71  |
| 0/1 | 1/1 | 2.99  | 5.41  |
| 1/1 | 1/1 | 4.24  | 5.27  |
| 1/1 | 1/1 | 6.28  | 7.47  |
| 0/1 | 1/1 | 3.16  | 4.45  |
| 1/1 | 1/1 | 12.17 | 12.27 |
| 0/1 | 1/1 | 3.88  | 3.98  |
| 1/1 | 1/1 | 7.04  | 7.15  |
| 1/1 | 1/1 | 10.54 | 10.68 |
| 1/1 | 1/1 | 9.14  | 9.3   |
| 1/1 | 1/1 | 6.29  | 6.49  |
| 1/1 | 1/1 | 6.5   | 6.71  |
| 1/1 | 1/1 | 10.67 | 11    |
| 1/1 | 1/1 | 7.31  | 7.65  |
| 0/1 | 1/1 | 2.68  | 2.87  |
| 1/1 | 1/1 | 6.21  | 6.49  |
| 1/1 | 1/1 | 4.47  | 4.97  |
| 1/1 | 1/1 | 5.4   | 4.76  |
| 1/1 | 1/1 | 8.67  | 8.57  |
| 1/1 | 1/1 | 8.51  | 8.42  |
| 1/1 | 1/1 | 5.17  | 6.67  |
| 1/1 | 1/1 | 3.79  | 5.36  |
| 1/1 | 1/1 | 3.95  | 5.76  |
| 1/1 | 1/1 | 3     | 4.4   |
| 0/1 | 1/1 | 2.4   | 3.92  |
| 0/1 | 1/1 | 2.86  | 3.79  |
| 1/1 | 1/1 | 4.81  | 6.23  |
| 1/1 | 1/1 | 5.58  | 7.29  |
| 1/1 | 1/1 | 6.95  | 8.37  |
| 1/1 | 1/1 | 5.98  | 7.55  |
| 1/1 | 1/1 | 5.49  | 7.12  |
| 1/1 | 1/1 | 3.68  | 5.6   |
| 0/1 | 1/1 | 6.06  | 6.33  |
| 0/1 | 1/1 | 4.17  | 4.47  |
| 0/1 | 1/1 | 4.24  | 5.05  |
| 1/1 | 1/1 | 7.3   | 8.38  |
| 0/1 | 1/1 | 2.99  | 4.07  |
| 0/1 | 1/1 | 5.13  | 6.27  |
| 1/1 | 1/1 | 5.35  | 6.5   |
| 0/1 | 1/1 | 4.05  | 5.37  |
| 1/1 | 1/1 | 3.68  | 5.09  |
| 1/1 | 1/1 | 4.58  | 6.12  |
| 1/1 | 1/1 | 5.02  | 5.78  |
| 1/1 | 1/1 | 3.03  | 3.96  |
| 1/1 | 0/1 | 3.55  | 2.58  |
| 1/1 | 1/1 | 7     | 6.09  |
| 1/1 | 1/1 | 5.06  | 4.25  |
| 1/1 | 1/1 | 6.49  | 5.72  |
| 1/1 | 1/1 | 8.72  | 8.38  |
| 1/1 | 1/1 | 9.79  | 9.47  |

|     |     |       |       |
|-----|-----|-------|-------|
| 1/1 | 1/1 | 7.17  | 7     |
| 1/1 | 1/1 | 5.63  | 5.55  |
| 1/1 | 1/1 | 4.67  | 4.82  |
| 1/1 | 1/1 | 5.34  | 5.56  |
| 1/1 | 1/1 | 11.24 | 11.55 |
| 1/1 | 0/1 | 2.54  | 2.22  |
| 1/1 | 1/1 | 6.95  | 6.84  |
| 1/1 | 1/1 | 7.91  | 7.97  |
| 1/1 | 1/1 | 6.37  | 6.58  |
| 1/1 | 1/1 | 7.55  | 8.21  |
| 1/1 | 1/1 | 6.55  | 7.22  |
| 1/1 | 1/1 | 7.35  | 8.07  |
| 1/1 | 1/1 | 6.74  | 7.49  |
| 1/1 | 1/1 | 7.19  | 7.95  |
| 1/1 | 1/1 | 7.02  | 8.04  |
| 0/1 | 1/1 | 6.44  | 7.61  |
| 1/1 | 1/1 | 6.06  | 7.26  |
| 1/1 | 1/1 | 6.06  | 6.88  |
| 1/1 | 1/1 | 5.2   | 6.33  |
| 1/1 | 1/1 | 5.79  | 7.58  |
| 1/1 | 1/1 | 4.85  | 5.83  |
| 1/1 | 1/1 | 4.17  | 5.29  |
| 1/1 | 1/1 | 3.5   | 5.72  |
| 1/1 | 1/1 | 10.51 | 10.26 |
| 1/1 | 1/1 | 9.77  | 9.66  |
| 1/1 | 1/1 | 10.53 | 10.44 |
| 0/1 | 1/1 | 3.61  | 3.58  |
| 0/1 | 1/1 | 2.14  | 2.31  |
| 1/1 | 1/1 | 10.44 | 10.66 |
| 1/1 | 1/1 | 8.47  | 8.71  |
| 1/1 | 1/1 | 7.74  | 8     |
| 0/1 | 1/1 | 3.05  | 3.44  |
| 1/1 | 1/1 | 7.2   | 7.66  |
| 0/1 | 1/1 | 3.72  | 4.23  |
| 0/1 | 1/1 | 3.51  | 4.07  |
| 1/1 | 1/1 | 5.33  | 6.02  |
| 1/1 | 1/1 | 7.84  | 8.56  |
| 1/1 | 1/1 | 5.87  | 6.61  |
| 1/1 | 1/1 | 4.41  | 5.4   |
| 0/1 | 1/1 | 5.5   | 6.08  |
| 1/1 | 1/1 | 5.9   | 6.51  |
| 1/1 | 1/1 | 4.66  | 5.4   |
| 0/1 | 1/1 | 2.8   | 3.64  |
| 1/1 | 1/1 | 6.72  | 7.8   |
| 0/1 | 1/1 | 3.76  | 5.04  |
| 0/1 | 1/1 | 3.21  | 4.34  |
| 0/1 | 1/1 | 2.96  | 4.77  |
| 1/1 | 1/1 | 5.52  | 5.59  |
| 1/1 | 1/1 | 6.63  | 6.75  |
| 0/1 | 1/1 | 7.82  | 7.97  |
| 1/1 | 1/1 | 7.97  | 8.21  |
| 0/1 | 1/1 | 3.1   | 4.21  |
| 0/1 | 1/1 | 2.68  | 4.68  |
| 0/1 | 1/1 | 6.97  | 7.11  |
| 1/1 | 1/1 | 6.24  | 6.45  |
| 1/1 | 1/1 | 5.22  | 5.51  |
| 0/1 | 1/1 | 8.81  | 9.71  |
| 1/1 | 1/1 | 4.08  | 4.98  |

|     |     |       |      |
|-----|-----|-------|------|
| 1/1 | 1/1 | 4.61  | 5.86 |
| 1/1 | 1/1 | 4.47  | 5.72 |
| 1/1 | 1/1 | 4.52  | 5.82 |
| 1/1 | 1/1 | 4.3   | 5.6  |
| 0/1 | 1/1 | 3.41  | 3.7  |
| 1/1 | 1/1 | 3.01  | 3.32 |
| 0/1 | 1/1 | 2.99  | 3.33 |
| 1/1 | 1/1 | 7.24  | 7.63 |
| 1/1 | 1/1 | 2.86  | 3.26 |
| 1/1 | 1/1 | 2.32  | 2.93 |
| 0/1 | 1/1 | 4.88  | 5.52 |
| 1/1 | 1/1 | 7.49  | 8.29 |
| 1/1 | 1/1 | 3.82  | 4.69 |
| 0/1 | 1/1 | 2.68  | 3.97 |
| 1/1 | 1/1 | 3.75  | 5.85 |
| 1/1 | 1/1 | 7.2   | 7.92 |
| 1/1 | 1/1 | 3.55  | 4.28 |
| 1/1 | 1/1 | 6.71  | 7.53 |
| 1/1 | 1/1 | 3.46  | 4.55 |
| 0/1 | 1/1 | 4.69  | 5.84 |
| 0/1 | 1/1 | 3.96  | 4.6  |
| 0/1 | 1/1 | 3.41  | 4.29 |
| 0/1 | 1/1 | 2.94  | 4.28 |
| 0/1 | 1/1 | 2.56  | 4.15 |
| 0/1 | 1/1 | 3.11  | 5    |
| 1/1 | 1/1 | 5.39  | 5.89 |
| 1/1 | 1/1 | 5.13  | 5.63 |
| 1/1 | 1/1 | 5.75  | 6.74 |
| 0/1 | 1/1 | 2.15  | 3.41 |
| 0/1 | 1/1 | 2.63  | 4.13 |
| 1/1 | 1/1 | 4.94  | 6.51 |
| 1/1 | 1/1 | 8.78  | 8.48 |
| 1/1 | 1/1 | 7.54  | 7.28 |
| 1/1 | 1/1 | 10.33 | 10.1 |
| 1/1 | 1/1 | 6.52  | 6.63 |
| 1/1 | 1/1 | 9.46  | 8.79 |
| 1/1 | 1/1 | 7.65  | 7.15 |
| 1/1 | 1/1 | 2.73  | 2.45 |
| 1/1 | 1/1 | 4.82  | 6.14 |
| 0/1 | 1/1 | 4.27  | 5.6  |
| 1/1 | 1/1 | 3.72  | 5.31 |
| 1/1 | 1/1 | 4.28  | 4.47 |
| 1/1 | 1/1 | 5.58  | 5.84 |
| 1/1 | 1/1 | 4.68  | 5.49 |
| 1/1 | 1/1 | 6.17  | 7.12 |
| 1/1 | 1/1 | 3.16  | 4.65 |
| 0/1 | 1/1 | 5.14  | 6.29 |
| 0/1 | 1/1 | 4.3   | 6.28 |
| 0/1 | 1/1 | 3.43  | 4.51 |
| 0/1 | 1/1 | 4.23  | 5.99 |
| 1/1 | 1/1 | 8.14  | 7.69 |
| 1/1 | 1/1 | 5.28  | 4.93 |
| 1/1 | 1/1 | 7.15  | 6.85 |
| 1/1 | 1/1 | 4.51  | 4.23 |
| 1/1 | 1/1 | 4.63  | 4.48 |
| 1/1 | 1/1 | 6.2   | 6.05 |
| 1/1 | 1/1 | 6.5   | 6.55 |
| 1/1 | 1/1 | 6.69  | 6.91 |

|     |     |       |       |
|-----|-----|-------|-------|
| 0/1 | 1/1 | 3.69  | 3.98  |
| 0/1 | 1/1 | 5.53  | 6.05  |
| 1/1 | 1/1 | 4     | 5.32  |
| 0/1 | 1/1 | 3.83  | 5.16  |
| 1/1 | 1/1 | 4.82  | 6.9   |
| 1/1 | 1/1 | 6.11  | 6.51  |
| 1/1 | 1/1 | 6.26  | 6.77  |
| 1/1 | 1/1 | 3.12  | 3.69  |
| 1/1 | 1/1 | 6.57  | 7.18  |
| 1/1 | 1/1 | 6.48  | 7.11  |
| 1/1 | 1/1 | 5.81  | 6.48  |
| 1/1 | 1/1 | 4.25  | 5.01  |
| 0/1 | 1/1 | 2.96  | 3.75  |
| 1/1 | 1/1 | 3.85  | 4.66  |
| 1/1 | 1/1 | 3.78  | 4.62  |
| 1/1 | 1/1 | 4.42  | 5.38  |
| 0/1 | 1/1 | 4.23  | 4.74  |
| 0/1 | 1/1 | 4.85  | 5.39  |
| 1/1 | 1/1 | 3.56  | 4.11  |
| 0/1 | 1/1 | 6.42  | 6.97  |
| 0/1 | 1/1 | 6.4   | 6.97  |
| 0/1 | 1/1 | 4.98  | 6.11  |
| 1/1 | 1/1 | 5.81  | 6.97  |
| 1/1 | 1/1 | 4.61  | 5.93  |
| 0/1 | 1/1 | 3.78  | 5.2   |
| 0/1 | 1/1 | 3.51  | 3.8   |
| 0/1 | 1/1 | 3.47  | 3.78  |
| 0/1 | 1/1 | 1.95  | 2.27  |
| 1/1 | 1/1 | 6.06  | 6.4   |
| 1/1 | 1/1 | 3.79  | 4.55  |
| 1/1 | 1/1 | 6.22  | 8.04  |
| 1/1 | 1/1 | 3.93  | 6.08  |
| 1/1 | 1/1 | 6.22  | 8.04  |
| 1/1 | 1/1 | 3.93  | 6.08  |
| 1/1 | 1/1 | 4.18  | 3     |
| 1/1 | 1/1 | 7.68  | 6.52  |
| 1/1 | 0/1 | 2.79  | 2     |
| 1/1 | 1/1 | 7.2   | 6.6   |
| 1/1 | 0/1 | 3.06  | 2.67  |
| 1/1 | 1/1 | 6.62  | 6.32  |
| 1/1 | 1/1 | 3.28  | 3.02  |
| 1/1 | 1/1 | 6.44  | 6.69  |
| 1/1 | 1/1 | 6.49  | 4.95  |
| 1/1 | 1/1 | 8.08  | 6.61  |
| 1/1 | 1/1 | 2.96  | 2.34  |
| 1/1 | 1/1 | 8.26  | 7.71  |
| 1/1 | 1/1 | 7.53  | 7.03  |
| 1/1 | 1/1 | 10.48 | 10.24 |
| 1/1 | 1/1 | 6.65  | 6.63  |
| 0/1 | 1/1 | 2.41  | 2.59  |
| 1/1 | 1/1 | 5.2   | 7.03  |
| 0/1 | 1/1 | 5.29  | 7.51  |
| 0/1 | 1/1 | 3.82  | 6.91  |
| 1/1 | 1/1 | 4.2   | 5.4   |
| 1/1 | 1/1 | 6.23  | 7.57  |
| 1/1 | 1/1 | 3.33  | 4.94  |
| 1/1 | 1/1 | 4.13  | 6.37  |
| 0/1 | 1/1 | 3.66  | 6.1   |

|     |     |      |       |
|-----|-----|------|-------|
| 1/1 | 1/1 | 3.59 | 3.86  |
| 0/1 | 1/1 | 2.47 | 2.87  |
| 1/1 | 1/1 | 2.75 | 3.59  |
| 1/1 | 1/1 | 4.45 | 4.78  |
| 1/1 | 1/1 | 3.25 | 3.89  |
| 0/1 | 1/1 | 2.37 | 3.34  |
| 1/1 | 1/1 | 4.38 | 5.5   |
| 1/1 | 1/1 | 6.49 | 7.44  |
| 1/1 | 1/1 | 5.3  | 6.32  |
| 1/1 | 1/1 | 4.44 | 5.64  |
| 1/1 | 1/1 | 4.69 | 6.15  |
| 1/1 | 1/1 | 4.65 | 6.22  |
| 1/1 | 0/1 | 2.34 | 2.06  |
| 0/1 | 1/1 | 2.66 | 2.55  |
| 1/1 | 0/1 | 2.76 | 2.7   |
| 0/1 | 1/1 | 2.69 | 2.7   |
| 0/1 | 1/1 | 2.98 | 3     |
| 0/1 | 1/1 | 3.26 | 3.3   |
| 0/1 | 1/1 | 2.89 | 2.99  |
| 0/1 | 1/1 | 2.96 | 3.14  |
| 1/1 | 1/1 | 2.95 | 3.29  |
| 0/1 | 1/1 | 5.32 | 5.69  |
| 1/1 | 0/1 | 2.44 | 2.64  |
| 0/1 | 1/1 | 3.66 | 3.92  |
| 0/1 | 1/1 | 2.61 | 3.08  |
| 1/1 | 1/1 | 5.84 | 6.33  |
| 0/1 | 1/1 | 2.29 | 2.98  |
| 0/1 | 1/1 | 2.72 | 3.42  |
| 0/1 | 1/1 | 2.59 | 3.31  |
| 1/1 | 1/1 | 5.61 | 5.65  |
| 1/1 | 1/1 | 9.94 | 10.29 |
| 1/1 | 1/1 | 8.51 | 8.93  |
| 1/1 | 1/1 | 7.88 | 9.05  |
| 1/1 | 1/1 | 4.87 | 6.1   |
| 1/1 | 1/1 | 3.26 | 3.75  |
| 1/1 | 1/1 | 4.42 | 4.92  |
| 1/1 | 1/1 | 5.02 | 5.79  |
| 1/1 | 1/1 | 3.69 | 4.48  |
| 0/1 | 1/1 | 2.47 | 3.86  |
| 0/1 | 1/1 | 2.48 | 3.85  |
| 0/1 | 1/1 | 2.67 | 4.23  |
| 1/1 | 1/1 | 3.62 | 4.31  |
| 0/1 | 1/1 | 2.79 | 3.66  |
| 1/1 | 1/1 | 5.05 | 5.93  |
| 1/1 | 1/1 | 5.89 | 6.8   |
| 0/1 | 1/1 | 2.94 | 3.95  |
| 1/1 | 1/1 | 8.65 | 10.47 |
| 1/1 | 1/1 | 4.35 | 6.17  |
| 1/1 | 1/1 | 7.9  | 9.74  |
| 1/1 | 1/1 | 7.81 | 9.8   |
| 0/1 | 1/1 | 2.77 | 4.77  |
| 1/1 | 1/1 | 5.88 | 7.9   |
| 0/1 | 1/1 | 4.53 | 6.9   |
| 1/1 | 1/1 | 5.34 | 7.84  |
| 0/1 | 1/1 | 3.23 | 6.76  |
| 0/1 | 1/1 | 5.4  | 6.4   |
| 0/1 | 1/1 | 4.03 | 5.22  |
| 1/1 | 1/1 | 6.21 | 6.53  |

|     |     |       |       |
|-----|-----|-------|-------|
| 1/1 | 1/1 | 5.26  | 5.58  |
| 0/1 | 1/1 | 3.57  | 3.95  |
| 1/1 | 1/1 | 7.35  | 7.74  |
| 1/1 | 1/1 | 6.11  | 6.56  |
| 0/1 | 1/1 | 5.76  | 6.75  |
| 0/1 | 1/1 | 2.82  | 5.09  |
| 1/1 | 1/1 | 6.48  | 7.03  |
| 1/1 | 1/1 | 6.01  | 6.65  |
| 1/1 | 1/1 | 4.06  | 4.78  |
| 1/1 | 1/1 | 4.83  | 6     |
| 1/1 | 1/1 | 5.96  | 7.46  |
| 1/1 | 1/1 | 3.49  | 5.57  |
| 1/1 | 1/1 | 4.6   | 5.19  |
| 1/1 | 1/1 | 7.11  | 7.74  |
| 0/1 | 1/1 | 4.77  | 4.73  |
| 1/1 | 1/1 | 12.34 | 12.41 |
| 1/1 | 1/1 | 6.66  | 6.72  |
| 1/1 | 1/1 | 6.78  | 6.96  |
| 0/1 | 1/1 | 2.54  | 2.83  |
| 1/1 | 1/1 | 8.89  | 9.17  |
| 1/1 | 1/1 | 3.91  | 4.23  |
| 1/1 | 1/1 | 7.74  | 8.1   |
| 0/1 | 1/1 | 4.53  | 4.95  |
| 1/1 | 1/1 | 5.52  | 6.28  |
| 1/1 | 1/1 | 5.35  | 4.89  |
| 1/1 | 1/1 | 7.36  | 6.94  |
| 1/1 | 1/1 | 5.13  | 4.81  |
| 1/1 | 1/1 | 12.53 | 12.33 |
| 0/1 | 1/1 | 5.56  | 5.7   |
| 1/1 | 1/1 | 9.11  | 9.3   |
| 1/1 | 1/1 | 5.28  | 5.92  |
| 0/1 | 1/1 | 3.34  | 3.91  |
| 0/1 | 1/1 | 2.34  | 3.31  |
| 0/1 | 1/1 | 6.44  | 7.45  |
| 0/1 | 1/1 | 5.82  | 7.04  |
| 1/1 | 1/1 | 7.91  | 9.15  |
| 1/1 | 1/1 | 7.66  | 9.16  |
| 0/1 | 1/1 | 5.87  | 7.84  |
| 1/1 | 1/1 | 3.64  | 4.52  |
| 1/1 | 1/1 | 6.53  | 7.5   |
| 1/1 | 1/1 | 7.39  | 8.44  |
| 1/1 | 1/1 | 3.97  | 5.19  |
| 0/1 | 1/1 | 3.96  | 5.5   |
| 0/1 | 1/1 | 4.49  | 5.1   |
| 1/1 | 1/1 | 4.56  | 5.17  |
| 0/1 | 1/1 | 5.41  | 6.04  |
| 1/1 | 1/1 | 6.85  | 6.82  |
| 1/1 | 1/1 | 4.23  | 4.31  |
| 1/1 | 1/1 | 11.44 | 11.53 |
| 0/1 | 1/1 | 2.44  | 3.19  |
| 1/1 | 1/1 | 3.83  | 4.71  |
| 1/1 | 1/1 | 3.71  | 4.62  |
| 1/1 | 1/1 | 10.35 | 11.56 |
| 0/1 | 1/1 | 4.08  | 5.37  |
| 1/1 | 1/1 | 4.31  | 5.81  |
| 1/1 | 1/1 | 5.56  | 5.56  |
| 1/1 | 1/1 | 6.87  | 6.88  |
| 1/1 | 1/1 | 4.77  | 4.82  |



|     |     |       |       |
|-----|-----|-------|-------|
| 1/1 | 1/1 | 5.54  | 5.61  |
| 1/1 | 1/1 | 4.62  | 4.86  |
| 0/1 | 1/1 | 3.73  | 4.11  |
| 0/1 | 1/1 | 2.2   | 2.62  |
| 1/1 | 1/1 | 10.92 | 11.52 |
| 1/1 | 1/1 | 5.35  | 4.79  |
| 1/1 | 1/1 | 3.73  | 3.17  |
| 1/1 | 1/1 | 6.15  | 5.68  |
| 1/1 | 1/1 | 7.42  | 7.11  |
| 1/1 | 1/1 | 3.86  | 3.62  |
| 1/1 | 1/1 | 4.46  | 4.32  |
| 1/1 | 1/1 | 6.78  | 6.69  |
| 0/1 | 1/1 | 5.73  | 5.75  |
| 0/1 | 1/1 | 2.94  | 3.24  |
| 1/1 | 1/1 | 4.08  | 4.56  |
| 1/1 | 1/1 | 3.27  | 3.47  |
| 1/1 | 1/1 | 5.36  | 5.59  |
| 1/1 | 1/1 | 3.43  | 3.68  |
| 1/1 | 1/1 | 6.82  | 7.09  |
| 1/1 | 1/1 | 4.13  | 4.41  |
| 1/1 | 1/1 | 5.01  | 5.56  |
| 1/1 | 1/1 | 3.29  | 4.07  |
| 0/1 | 1/1 | 4.16  | 5.13  |
| 1/1 | 1/1 | 3.22  | 4.66  |
| 1/1 | 1/1 | 4.54  | 4.49  |
| 1/1 | 1/1 | 4.12  | 4.09  |
| 1/1 | 1/1 | 3.33  | 3.39  |
| 0/1 | 1/1 | 4.46  | 4.55  |
| 1/1 | 1/1 | 5.92  | 6.11  |
| 1/1 | 1/1 | 4.34  | 4.57  |
| 1/1 | 1/1 | 3.01  | 3.28  |
| 1/1 | 1/1 | 3.53  | 4.47  |
| 0/1 | 1/1 | 3.03  | 4.16  |
| 1/1 | 1/1 | 4.52  | 5.84  |
| 1/1 | 1/1 | 6.11  | 6.31  |
| 1/1 | 1/1 | 7.87  | 8.1   |
| 1/1 | 1/1 | 2.64  | 2.9   |
| 1/1 | 1/1 | 3.92  | 4.19  |
| 0/1 | 1/1 | 3.44  | 4.46  |
| 1/1 | 1/1 | 7.06  | 8.83  |
| 1/1 | 1/1 | 9.6   | 11.56 |
| 1/1 | 1/1 | 3.12  | 4.41  |
| 0/1 | 1/1 | 4.19  | 6.02  |
| 0/1 | 1/1 | 2.76  | 4.94  |
| 1/1 | 1/1 | 4.47  | 6.73  |
| 0/1 | 1/1 | 2.86  | 5.21  |
| 1/1 | 1/1 | 3.47  | 3.54  |
| 1/1 | 1/1 | 12.37 | 12.73 |
| 1/1 | 1/1 | 9.84  | 9.56  |
| 1/1 | 1/1 | 7.44  | 7.61  |
| 0/1 | 1/1 | 2.86  | 3.47  |
| 1/1 | 1/1 | 4     | 5.27  |
| 1/1 | 1/1 | 3.87  | 4.12  |
| 1/1 | 1/1 | 5.83  | 6.22  |
| 0/1 | 1/1 | 2.01  | 2.55  |
| 1/1 | 1/1 | 2.2   | 2.89  |
| 1/1 | 1/1 | 2.11  | 2.71  |
| 1/1 | 1/1 | 5.41  | 6.02  |

|     |     |       |       |
|-----|-----|-------|-------|
| 1/1 | 1/1 | 4     | 4.79  |
| 0/1 | 1/1 | 3.97  | 4.83  |
| 1/1 | 1/1 | 4.91  | 5.82  |
| 1/1 | 1/1 | 4.57  | 5.65  |
| 1/1 | 1/1 | 6.96  | 6.54  |
| 1/1 | 1/1 | 8.96  | 8.7   |
| 1/1 | 1/1 | 6.23  | 6.17  |
| 1/1 | 1/1 | 8.15  | 8.1   |
| 0/1 | 1/1 | 9.44  | 9.41  |
| 1/1 | 1/1 | 6.66  | 6.71  |
| 0/1 | 1/1 | 4.49  | 4.6   |
| 1/1 | 1/1 | 10.93 | 11.13 |
| 1/1 | 1/1 | 6.17  | 6.37  |
| 1/1 | 1/1 | 5.41  | 5.64  |
| 0/1 | 1/1 | 4.71  | 5     |
| 1/1 | 1/1 | 6.55  | 6.98  |
| 1/1 | 1/1 | 3.38  | 3.84  |
| 1/1 | 1/1 | 7.89  | 8.42  |
| 0/1 | 1/1 | 5.16  | 5.69  |
| 0/1 | 1/1 | 4.31  | 4.91  |
| 1/1 | 1/1 | 3.37  | 4.37  |
| 1/1 | 1/1 | 2.28  | 2.22  |
| 1/1 | 1/1 | 7.72  | 7.91  |
| 0/1 | 1/1 | 2.85  | 3.06  |
| 1/1 | 1/1 | 6.82  | 7.48  |
| 1/1 | 1/1 | 5.98  | 7.43  |
| 1/1 | 1/1 | 5     | 6.71  |
| 1/1 | 1/1 | 8.21  | 10.33 |
| 1/1 | 1/1 | 3.27  | 4.04  |
| 1/1 | 1/1 | 4.32  | 5.43  |
| 0/1 | 1/1 | 2.62  | 3.84  |
| 0/1 | 1/1 | 3.73  | 4.31  |
| 0/1 | 1/1 | 7.83  | 8.41  |
| 0/1 | 1/1 | 4.68  | 5.81  |
| 1/1 | 1/1 | 6.3   | 6.9   |
| 0/1 | 1/1 | 4.99  | 5.59  |
| 0/1 | 1/1 | 4.07  | 5.04  |
| 0/1 | 1/1 | 4.91  | 5.93  |
| 1/1 | 1/1 | 8.02  | 7.51  |
| 1/1 | 1/1 | 3.24  | 3     |
| 1/1 | 1/1 | 4.84  | 5.01  |
| 1/1 | 1/1 | 5.24  | 6.08  |
| 0/1 | 1/1 | 2.6   | 3.56  |
| 1/1 | 1/1 | 4.7   | 6.06  |
| 1/1 | 1/1 | 8.81  | 8.71  |
| 1/1 | 1/1 | 10.35 | 10.35 |
| 1/1 | 1/1 | 9.52  | 9.57  |
| 1/1 | 1/1 | 7.59  | 7.73  |
| 1/1 | 1/1 | 4.12  | 4.57  |
| 1/1 | 1/1 | 12.92 | 12.77 |
| 1/1 | 1/1 | 7.25  | 7.57  |
| 1/1 | 1/1 | 8.49  | 8.57  |
| 0/1 | 1/1 | 3.06  | 3.27  |
| 1/1 | 1/1 | 3.79  | 4.28  |
| 1/1 | 1/1 | 4.85  | 3.77  |
| 1/1 | 1/1 | 6.51  | 5.59  |
| 1/1 | 1/1 | 6.46  | 5.64  |
| 1/1 | 1/1 | 4.41  | 3.63  |

|     |     |       |       |
|-----|-----|-------|-------|
| 1/1 | 0/1 | 4.72  | 3.94  |
| 1/1 | 1/1 | 6.06  | 5.32  |
| 1/1 | 1/1 | 6.72  | 6.24  |
| 0/1 | 1/1 | 5.76  | 5.29  |
| 1/1 | 1/1 | 5.71  | 5.3   |
| 1/1 | 1/1 | 5.44  | 5.04  |
| 1/1 | 1/1 | 3.11  | 2.87  |
| 1/1 | 1/1 | 4.03  | 3.8   |
| 1/1 | 1/1 | 3.15  | 3     |
| 1/1 | 1/1 | 5.64  | 5.77  |
| 0/1 | 1/1 | 4.19  | 4.39  |
| 1/1 | 1/1 | 10.44 | 11.3  |
| 0/1 | 1/1 | 2.95  | 4.15  |
| 1/1 | 1/1 | 10.94 | 11.01 |
| 0/1 | 1/1 | 5.05  | 5.21  |
| 0/1 | 1/1 | 5.49  | 5.67  |
| 1/1 | 1/1 | 12.22 | 12.42 |
| 1/1 | 1/1 | 5.83  | 6.18  |
| 1/1 | 1/1 | 5.69  | 6.08  |
| 1/1 | 1/1 | 4.31  | 4.85  |
| 0/1 | 1/1 | 5.95  | 6.7   |
| 1/1 | 1/1 | 5.53  | 5.7   |
| 1/1 | 1/1 | 3.98  | 4.17  |
| 1/1 | 1/1 | 8.64  | 8.91  |
| 1/1 | 1/1 | 6.01  | 6.45  |
| 0/1 | 1/1 | 4.46  | 4.92  |
| 0/1 | 1/1 | 5.68  | 6.44  |
| 1/1 | 1/1 | 13.46 | 12.87 |
| 1/1 | 1/1 | 13.07 | 12.62 |
| 1/1 | 1/1 | 12.91 | 12.63 |
| 1/1 | 1/1 | 4.99  | 6.31  |
| 1/1 | 1/1 | 4.02  | 5.41  |
| 0/1 | 1/1 | 4.51  | 5.43  |
| 0/1 | 1/1 | 5.25  | 6.19  |
| 1/1 | 1/1 | 3.79  | 4.83  |
| 1/1 | 1/1 | 3.67  | 4.85  |
| 1/1 | 1/1 | 6.64  | 7.35  |
| 0/1 | 1/1 | 3.84  | 4.63  |
| 1/1 | 1/1 | 4.57  | 5.22  |
| 1/1 | 1/1 | 2.73  | 3.55  |
| 1/1 | 1/1 | 5.17  | 6.26  |
| 0/1 | 1/1 | 1.63  | 2.95  |
| 1/1 | 0/1 | 2.55  | 2.27  |
| 1/1 | 1/1 | 5.29  | 5.03  |
| 1/1 | 1/1 | 4.15  | 3.97  |
| 1/1 | 1/1 | 5.16  | 5.05  |
| 1/1 | 1/1 | 8.37  | 8.32  |
| 1/1 | 1/1 | 2.92  | 3.01  |
| 0/1 | 1/1 | 2.64  | 2.76  |
| 1/1 | 1/1 | 9.36  | 9.55  |
| 1/1 | 1/1 | 3.86  | 4.14  |
| 1/1 | 1/1 | 3.26  | 3.64  |
| 0/1 | 1/1 | 4.36  | 4.75  |
| 1/1 | 1/1 | 5.02  | 5.41  |
| 1/1 | 1/1 | 4.36  | 5.41  |
| 1/1 | 1/1 | 3.99  | 5.69  |
| 1/1 | 1/1 | 5.87  | 5.62  |
| 1/1 | 1/1 | 3.86  | 3.6   |

|     |     |      |      |
|-----|-----|------|------|
| 1/1 | 1/1 | 6.31 | 6.06 |
| 1/1 | 1/1 | 8.29 | 8.11 |
| 1/1 | 1/1 | 7.73 | 7.72 |
| 1/1 | 1/1 | 6.44 | 6.52 |
| 0/1 | 1/1 | 6.8  | 7.09 |
| 1/1 | 1/1 | 4.37 | 4.95 |
| 0/1 | 1/1 | 5.38 | 6    |
| 1/1 | 1/1 | 4.19 | 4.91 |
| 1/1 | 1/1 | 4.67 | 5.98 |
| 1/1 | 1/1 | 4.22 | 5.54 |
| 1/1 | 1/1 | 2.88 | 4.57 |
| 0/1 | 1/1 | 2.89 | 4.58 |
| 1/1 | 1/1 | 4.63 | 6.41 |
| 1/1 | 1/1 | 4.09 | 6.47 |
| 1/1 | 1/1 | 9    | 8.51 |
| 1/1 | 1/1 | 7.51 | 7.03 |
| 1/1 | 1/1 | 5.77 | 5.34 |
| 1/1 | 1/1 | 6.87 | 6.54 |
| 1/1 | 1/1 | 7.35 | 7.04 |
| 1/1 | 1/1 | 7.7  | 7.63 |
| 1/1 | 1/1 | 9.1  | 9.13 |
| 0/1 | 1/1 | 3.61 | 3.66 |
| 1/1 | 1/1 | 8.88 | 9.03 |
| 0/1 | 1/1 | 6    | 6.24 |
| 1/1 | 1/1 | 6.33 | 7.12 |
| 0/1 | 1/1 | 3.61 | 5.22 |
| 1/1 | 1/1 | 4.86 | 5.11 |
| 1/1 | 1/1 | 3.01 | 3.28 |
| 1/1 | 1/1 | 3.66 | 3.96 |
| 0/1 | 1/1 | 2.53 | 2.83 |
| 0/1 | 1/1 | 2.2  | 2.83 |
| 1/1 | 1/1 | 3.15 | 2.91 |
| 1/1 | 1/1 | 5.73 | 5.54 |
| 1/1 | 1/1 | 4.7  | 4.63 |
| 1/1 | 1/1 | 7.04 | 6.97 |
| 1/1 | 1/1 | 4.18 | 4.25 |
| 1/1 | 1/1 | 7.84 | 8.08 |
| 0/1 | 1/1 | 4.7  | 5.06 |
| 1/1 | 1/1 | 7.81 | 8.22 |
| 0/1 | 1/1 | 2.69 | 3.63 |
| 0/1 | 1/1 | 3.42 | 3.99 |
| 0/1 | 1/1 | 2.26 | 2.94 |
| 1/1 | 1/1 | 4.07 | 5.03 |
| 1/1 | 1/1 | 7.61 | 8.63 |
| 1/1 | 1/1 | 4.54 | 5.73 |
| 1/1 | 1/1 | 5.01 | 6.65 |
| 1/1 | 1/1 | 6.95 | 7.18 |
| 1/1 | 1/1 | 3.54 | 3.82 |
| 1/1 | 1/1 | 3.9  | 4.2  |
| 1/1 | 1/1 | 5.14 | 5.47 |
| 0/1 | 1/1 | 4.33 | 4.71 |
| 1/1 | 1/1 | 6.91 | 7.31 |
| 0/1 | 1/1 | 2.22 | 2.73 |
| 0/1 | 1/1 | 5.76 | 6.29 |
| 1/1 | 1/1 | 6.87 | 7.5  |
| 1/1 | 1/1 | 5.7  | 6.37 |
| 1/1 | 1/1 | 3.35 | 4.08 |
| 0/1 | 1/1 | 3.55 | 4.41 |

|     |     |       |      |
|-----|-----|-------|------|
| 0/1 | 1/1 | 5.24  | 6.11 |
| 0/1 | 1/1 | 4.76  | 5.65 |
| 1/1 | 0/1 | 8.36  | 7.36 |
| 1/1 | 1/1 | 4.22  | 3.46 |
| 1/1 | 1/1 | 5.73  | 5.15 |
| 1/1 | 1/1 | 9.05  | 8.51 |
| 1/1 | 1/1 | 6.42  | 6.02 |
| 1/1 | 1/1 | 4.51  | 4.41 |
| 0/1 | 1/1 | 6.61  | 6.54 |
| 0/1 | 1/1 | 6.74  | 6.85 |
| 1/1 | 1/1 | 6.2   | 7.65 |
| 0/1 | 1/1 | 5.11  | 6.6  |
| 0/1 | 1/1 | 3.11  | 5.12 |
| 1/1 | 1/1 | 5.66  | 6.83 |
| 1/1 | 1/1 | 5.2   | 6.64 |
| 1/1 | 1/1 | 4.49  | 6.06 |
| 0/1 | 1/1 | 4.42  | 6.45 |
| 0/1 | 1/1 | 3.14  | 5.34 |
| 0/1 | 1/1 | 4.78  | 7.11 |
| 1/1 | 1/1 | 6.14  | 7.51 |
| 1/1 | 1/1 | 4.41  | 5.83 |
| 0/1 | 1/1 | 3.25  | 4.71 |
| 0/1 | 1/1 | 2.58  | 4.04 |
| 1/1 | 1/1 | 3.3   | 4.9  |
| 1/1 | 1/1 | 3.91  | 5.95 |
| 1/1 | 1/1 | 5.14  | 5.34 |
| 1/1 | 1/1 | 7.12  | 7.71 |
| 0/1 | 1/1 | 2.59  | 3.73 |
| 1/1 | 1/1 | 4.36  | 5.66 |
| 0/1 | 1/1 | 2.67  | 4.06 |
| 1/1 | 1/1 | 5.05  | 5.17 |
| 1/1 | 1/1 | 3.9   | 4.03 |
| 1/1 | 1/1 | 7.8   | 7.95 |
| 1/1 | 1/1 | 8.06  | 8.22 |
| 1/1 | 1/1 | 6.81  | 7.05 |
| 1/1 | 1/1 | 6.65  | 7.11 |
| 1/1 | 1/1 | 5.44  | 5.94 |
| 0/1 | 1/1 | 3.67  | 4.7  |
| 1/1 | 1/1 | 4     | 4.88 |
| 1/1 | 1/1 | 5.32  | 6.62 |
| 0/1 | 1/1 | 3.23  | 3.93 |
| 1/1 | 1/1 | 4.57  | 5.28 |
| 0/1 | 1/1 | 2.75  | 3.61 |
| 0/1 | 1/1 | 4.15  | 5.31 |
| 1/1 | 1/1 | 6.46  | 6.59 |
| 0/1 | 1/1 | 2.84  | 3.13 |
| 0/1 | 1/1 | 5.52  | 5.85 |
| 1/1 | 1/1 | 5.02  | 5.55 |
| 1/1 | 1/1 | 8.3   | 8.35 |
| 1/1 | 1/1 | 3.45  | 3.6  |
| 0/1 | 1/1 | 3.29  | 4.25 |
| 1/1 | 1/1 | 10.49 | 11.5 |
| 0/1 | 1/1 | 3.3   | 4.35 |
| 1/1 | 1/1 | 5.33  | 6.23 |
| 0/1 | 1/1 | 3.05  | 4    |
| 1/1 | 1/1 | 5.85  | 6.49 |
| 0/1 | 1/1 | 5.94  | 6.65 |
| 1/1 | 1/1 | 3.53  | 4.43 |

|     |     |       |       |
|-----|-----|-------|-------|
| 0/1 | 1/1 | 3.42  | 4.4   |
| 1/1 | 1/1 | 4.89  | 6.34  |
| 1/1 | 1/1 | 3.83  | 4.9   |
| 1/1 | 1/1 | 6.7   | 7.84  |
| 1/1 | 1/1 | 5.3   | 6.28  |
| 1/1 | 1/1 | 5.89  | 7.04  |
| 0/1 | 1/1 | 4.23  | 4.8   |
| 0/1 | 1/1 | 3.38  | 4.01  |
| 1/1 | 1/1 | 8.36  | 9.17  |
| 1/1 | 1/1 | 4.98  | 5.84  |
| 1/1 | 1/1 | 5.64  | 6.64  |
| 1/1 | 1/1 | 5.68  | 6.77  |
| 0/1 | 1/1 | 3.58  | 4.95  |
| 0/1 | 1/1 | 2.92  | 4.35  |
| 1/1 | 1/1 | 12.77 | 12.82 |
| 1/1 | 1/1 | 3     | 3.08  |
| 1/1 | 1/1 | 5.27  | 5.43  |
| 0/1 | 1/1 | 2.42  | 3.05  |
| 1/1 | 1/1 | 4.65  | 5.93  |
| 0/1 | 1/1 | 3.97  | 5.34  |
| 1/1 | 1/1 | 4.39  | 4.88  |
| 1/1 | 1/1 | 4.67  | 5.25  |
| 1/1 | 1/1 | 7.14  | 7.96  |
| 0/1 | 1/1 | 2.32  | 2.16  |
| 1/1 | 1/1 | 7.06  | 7.21  |
| 1/1 | 1/1 | 4.99  | 5.34  |
| 1/1 | 1/1 | 3.53  | 5.19  |
| 1/1 | 1/1 | 4.02  | 5.91  |
| 0/1 | 1/1 | 3.63  | 4.29  |
| 1/1 | 1/1 | 5.81  | 6.48  |
| 0/1 | 1/1 | 1.77  | 2.54  |
| 0/1 | 1/1 | 3.22  | 4.13  |
| 1/1 | 1/1 | 5.47  | 6.52  |
| 1/1 | 1/1 | 6.59  | 6.95  |
| 0/1 | 1/1 | 2.3   | 2.79  |
| 0/1 | 1/1 | 3.05  | 3.99  |
| 1/1 | 1/1 | 10.38 | 12.03 |
| 1/1 | 1/1 | 3.92  | 5.62  |
| 1/1 | 1/1 | 5.46  | 7.22  |
| 0/1 | 1/1 | 4.15  | 5.94  |
| 1/1 | 1/1 | 4     | 5.82  |
| 1/1 | 1/1 | 6.46  | 8.32  |
| 1/1 | 1/1 | 9.66  | 11.74 |
| 1/1 | 1/1 | 3.76  | 3.93  |
| 1/1 | 1/1 | 5.05  | 5.7   |
| 1/1 | 1/1 | 8.72  | 9.37  |
| 1/1 | 1/1 | 7.94  | 8.61  |
| 1/1 | 1/1 | 6.26  | 7.01  |
| 1/1 | 1/1 | 7.3   | 7.18  |
| 1/1 | 1/1 | 6.53  | 6.58  |
| 1/1 | 1/1 | 10.45 | 9.3   |
| 1/1 | 1/1 | 5.63  | 4.57  |
| 1/1 | 1/1 | 10.03 | 9.15  |
| 1/1 | 0/1 | 4.26  | 3.38  |
| 1/1 | 1/1 | 4.63  | 4.09  |
| 1/1 | 1/1 | 5.5   | 5.03  |
| 1/1 | 1/1 | 8.99  | 8.59  |
| 1/1 | 1/1 | 6.36  | 5.98  |

|     |     |       |       |
|-----|-----|-------|-------|
| 0/1 | 1/1 | 4.03  | 3.82  |
| 1/1 | 1/1 | 7.22  | 7.03  |
| 1/1 | 1/1 | 3.52  | 3.35  |
| 1/1 | 1/1 | 4.82  | 4.65  |
| 1/1 | 1/1 | 4.9   | 4.78  |
| 0/1 | 1/1 | 3.75  | 3.83  |
| 1/1 | 1/1 | 3.54  | 3.72  |
| 0/1 | 1/1 | 4.87  | 5.07  |
| 0/1 | 1/1 | 3.13  | 3.4   |
| 0/1 | 1/1 | 4.11  | 4.41  |
| 1/1 | 1/1 | 4.04  | 4.47  |
| 1/1 | 1/1 | 4.61  | 5.72  |
| 1/1 | 1/1 | 9.63  | 10.78 |
| 0/1 | 1/1 | 2.27  | 3.27  |
| 0/1 | 1/1 | 2.72  | 4.02  |
| 0/1 | 1/1 | 2.38  | 3.77  |
| 1/1 | 1/1 | 4.81  | 6.25  |
| 0/1 | 1/1 | 2.29  | 3.81  |
| 1/1 | 1/1 | 8.21  | 9.17  |
| 1/1 | 1/1 | 4.96  | 5.96  |
| 1/1 | 1/1 | 5.78  | 6.82  |
| 1/1 | 1/1 | 7.34  | 8.42  |
| 1/1 | 1/1 | 7.21  | 8.44  |
| 1/1 | 1/1 | 5.99  | 7.49  |
| 1/1 | 1/1 | 3.99  | 5.63  |
| 1/1 | 1/1 | 6.56  | 8.39  |
| 1/1 | 1/1 | 8.62  | 9.01  |
| 0/1 | 1/1 | 2.65  | 3.14  |
| 0/1 | 1/1 | 2.58  | 4.22  |
| 0/1 | 1/1 | 2.63  | 5.28  |
| 1/1 | 1/1 | 6.07  | 7.76  |
| 1/1 | 1/1 | 4.93  | 6.63  |
| 1/1 | 1/1 | 4.03  | 5.76  |
| 1/1 | 1/1 | 3.95  | 5.74  |
| 1/1 | 1/1 | 6.78  | 7.11  |
| 0/1 | 1/1 | 5.66  | 6.48  |
| 0/1 | 1/1 | 2.51  | 3.61  |
| 1/1 | 1/1 | 3.4   | 4.58  |
| 1/1 | 1/1 | 4.3   | 5.6   |
| 1/1 | 1/1 | 7.57  | 8.85  |
| 1/1 | 1/1 | 6.91  | 8.23  |
| 1/1 | 1/1 | 5.43  | 6.92  |
| 0/1 | 1/1 | 4.13  | 7.07  |
| 1/1 | 1/1 | 6.54  | 7.29  |
| 1/1 | 1/1 | 3.38  | 4.72  |
| 1/1 | 1/1 | 6.96  | 7.36  |
| 1/1 | 1/1 | 10.56 | 10.97 |
| 1/1 | 1/1 | 3.91  | 5.12  |
| 1/1 | 1/1 | 3.75  | 5.12  |
| 1/1 | 1/1 | 4.33  | 5.83  |
| 0/1 | 1/1 | 4.11  | 5.93  |
| 0/1 | 1/1 | 3.52  | 5.64  |
| 1/1 | 1/1 | 7.1   | 8.29  |
| 1/1 | 1/1 | 5.92  | 7.18  |
| 0/1 | 1/1 | 3.78  | 3.75  |
| 0/1 | 1/1 | 6.16  | 6.48  |
| 0/1 | 1/1 | 4.05  | 4.96  |
| 0/1 | 1/1 | 2.34  | 3.2   |

|     |     |      |       |
|-----|-----|------|-------|
| 0/1 | 1/1 | 2.54 | 3.46  |
| 1/1 | 1/1 | 6.72 | 6.84  |
| 0/1 | 1/1 | 2.05 | 2.2   |
| 0/1 | 1/1 | 2.29 | 2.5   |
| 1/1 | 1/1 | 7.18 | 7.45  |
| 1/1 | 1/1 | 3.2  | 3.53  |
| 1/1 | 1/1 | 4.23 | 5.51  |
| 1/1 | 1/1 | 4.93 | 5.05  |
| 1/1 | 1/1 | 2.61 | 2.8   |
| 1/1 | 1/1 | 4.39 | 4.59  |
| 0/1 | 1/1 | 2.58 | 3.1   |
| 0/1 | 1/1 | 3.97 | 4.62  |
| 1/1 | 1/1 | 7.17 | 7.95  |
| 0/1 | 1/1 | 2.53 | 4.85  |
| 1/1 | 1/1 | 8.02 | 8.49  |
| 1/1 | 1/1 | 9.68 | 10.19 |
| 1/1 | 1/1 | 9.33 | 10.05 |
| 1/1 | 1/1 | 3.1  | 3.67  |
| 1/1 | 1/1 | 4.6  | 5.25  |
| 1/1 | 1/1 | 4.7  | 5.63  |
| 0/1 | 1/1 | 4.03 | 4.94  |
| 0/1 | 1/1 | 2.77 | 3.73  |
| 0/1 | 1/1 | 2.57 | 3.59  |
| 1/1 | 1/1 | 9.22 | 8.18  |
| 1/1 | 1/1 | 5.64 | 4.89  |
| 1/1 | 0/1 | 2.81 | 2.11  |
| 1/1 | 1/1 | 6.08 | 5.82  |
| 1/1 | 1/1 | 3.1  | 3.24  |
| 0/1 | 1/1 | 2.38 | 3.39  |
| 0/1 | 1/1 | 3.32 | 5.19  |
| 1/1 | 1/1 | 4.54 | 5.15  |
| 0/1 | 1/1 | 4.06 | 4.66  |
| 1/1 | 1/1 | 5.73 | 7.3   |
| 1/1 | 1/1 | 8.17 | 9.5   |
| 1/1 | 1/1 | 8.79 | 10.22 |
| 1/1 | 1/1 | 7.15 | 8.73  |
| 1/1 | 1/1 | 6.07 | 7.94  |
| 1/1 | 1/1 | 7.09 | 8.96  |
| 1/1 | 1/1 | 2.82 | 4.85  |
| 1/1 | 1/1 | 6.83 | 8.85  |
| 0/1 | 1/1 | 3.94 | 7.35  |
| 1/1 | 1/1 | 5.8  | 4.99  |
| 1/1 | 1/1 | 6.01 | 5.46  |
| 1/1 | 1/1 | 8.8  | 8.28  |
| 1/1 | 1/1 | 7.44 | 6.94  |
| 1/1 | 1/1 | 7.95 | 7.45  |
| 0/1 | 1/1 | 4.88 | 4.55  |
| 1/1 | 1/1 | 9    | 8.79  |
| 1/1 | 1/1 | 6.43 | 6.37  |
| 1/1 | 1/1 | 8.82 | 8.78  |
| 1/1 | 1/1 | 6.53 | 6.69  |
| 1/1 | 1/1 | 4.94 | 5.19  |
| 0/1 | 1/1 | 2.56 | 3.27  |
| 0/1 | 1/1 | 1.85 | 2.68  |
| 1/1 | 1/1 | 3.15 | 2.72  |
| 1/1 | 1/1 | 7.4  | 7.12  |
| 1/1 | 1/1 | 7.45 | 7.18  |
| 1/1 | 1/1 | 7.99 | 7.79  |



|     |     |       |       |
|-----|-----|-------|-------|
| 0/1 | 1/1 | 3.12  | 2.94  |
| 1/1 | 1/1 | 6.27  | 6.21  |
| 1/1 | 1/1 | 6.59  | 6.6   |
| 1/1 | 1/1 | 4.83  | 4.94  |
| 0/1 | 1/1 | 2.99  | 4.38  |
| 1/1 | 1/1 | 6.09  | 7.5   |
| 1/1 | 1/1 | 5.53  | 7.24  |
| 1/1 | 1/1 | 2.99  | 5.8   |
| 1/1 | 1/1 | 7.86  | 8.71  |
| 0/1 | 1/1 | 4.78  | 5.64  |
| 1/1 | 1/1 | 4.38  | 5.61  |
| 1/1 | 1/1 | 4.74  | 6.14  |
| 0/1 | 1/1 | 4.42  | 5.85  |
| 1/1 | 1/1 | 4.55  | 6.09  |
| 1/1 | 1/1 | 3.49  | 5.23  |
| 1/1 | 1/1 | 4.26  | 4.26  |
| 0/1 | 1/1 | 2.51  | 2.53  |
| 1/1 | 1/1 | 5.41  | 5.51  |
| 1/1 | 1/1 | 3.21  | 3.37  |
| 1/1 | 1/1 | 5.59  | 5.74  |
| 1/1 | 1/1 | 8.06  | 8.25  |
| 1/1 | 1/1 | 5.63  | 5.83  |
| 1/1 | 1/1 | 5.06  | 5.37  |
| 1/1 | 1/1 | 4.25  | 4.57  |
| 0/1 | 1/1 | 2.95  | 3.29  |
| 1/1 | 1/1 | 7.86  | 8.22  |
| 1/1 | 1/1 | 10.5  | 10.9  |
| 1/1 | 1/1 | 2.96  | 3.61  |
| 1/1 | 1/1 | 2.5   | 3.35  |
| 0/1 | 1/1 | 2.68  | 3.66  |
| 1/1 | 1/1 | 4.81  | 5.87  |
| 1/1 | 1/1 | 3.07  | 4.67  |
| 1/1 | 1/1 | 4.41  | 5.47  |
| 0/1 | 1/1 | 2.67  | 3.84  |
| 0/1 | 1/1 | 2.25  | 3.8   |
| 0/1 | 1/1 | 4.69  | 5.26  |
| 0/1 | 1/1 | 7     | 7.6   |
| 1/1 | 1/1 | 5.88  | 5.83  |
| 0/1 | 1/1 | 7.09  | 7.22  |
| 1/1 | 1/1 | 6.62  | 6.78  |
| 1/1 | 1/1 | 10.94 | 10.93 |
| 1/1 | 1/1 | 5.99  | 6.06  |
| 1/1 | 1/1 | 8.15  | 8.25  |
| 1/1 | 1/1 | 5.47  | 5.57  |
| 0/1 | 1/1 | 4     | 4.12  |
| 1/1 | 1/1 | 6.34  | 6.5   |
| 1/1 | 1/1 | 9.13  | 9.38  |
| 1/1 | 1/1 | 6.46  | 6.78  |
| 0/1 | 1/1 | 4.29  | 5.08  |
| 1/1 | 1/1 | 6.79  | 8.31  |
| 1/1 | 1/1 | 4.22  | 5.87  |
| 1/1 | 1/1 | 8.25  | 7.86  |
| 1/1 | 1/1 | 7.38  | 7     |
| 1/1 | 1/1 | 12.53 | 12.32 |
| 1/1 | 1/1 | 11.5  | 11.31 |
| 1/1 | 1/1 | 5.95  | 7.43  |
| 1/1 | 1/1 | 5.19  | 7.31  |
| 0/1 | 1/1 | 2.83  | 5.37  |

|     |     |       |      |
|-----|-----|-------|------|
| 0/1 | 1/1 | 2.84  | 2.92 |
| 1/1 | 1/1 | 3.09  | 3.19 |
| 1/1 | 1/1 | 6.78  | 7.03 |
| 1/1 | 1/1 | 2.97  | 3.33 |
| 1/1 | 1/1 | 4.45  | 5.79 |
| 1/1 | 1/1 | 5.53  | 6.89 |
| 1/1 | 1/1 | 6.24  | 7.63 |
| 1/1 | 1/1 | 6.59  | 8.1  |
| 1/1 | 1/1 | 3.17  | 3.62 |
| 0/1 | 1/1 | 3.42  | 5.08 |
| 1/1 | 1/1 | 7.89  | 7.21 |
| 1/1 | 1/1 | 5.5   | 4.82 |
| 1/1 | 1/1 | 3.99  | 3.51 |
| 1/1 | 1/1 | 4.14  | 3.74 |
| 1/1 | 1/1 | 7     | 6.66 |
| 1/1 | 1/1 | 5.86  | 5.74 |
| 1/1 | 1/1 | 5.03  | 4.96 |
| 0/1 | 1/1 | 3.22  | 3.18 |
| 1/1 | 1/1 | 2.79  | 2.77 |
| 1/1 | 1/1 | 4.26  | 4.35 |
| 1/1 | 1/1 | 11.75 | 11.9 |
| 1/1 | 1/1 | 3.53  | 4.04 |
| 0/1 | 1/1 | 5.01  | 5.65 |
| 1/1 | 1/1 | 7.7   | 7.68 |
| 0/1 | 1/1 | 2.75  | 2.98 |
| 0/1 | 1/1 | 2.58  | 3.33 |
| 1/1 | 1/1 | 2.59  | 3.42 |
| 0/1 | 1/1 | 2.5   | 3.61 |
| 0/1 | 1/1 | 6.7   | 6.34 |
| 1/1 | 0/1 | 3.31  | 2.95 |
| 1/1 | 1/1 | 4.81  | 4.49 |
| 1/1 | 1/1 | 5.93  | 5.72 |
| 1/1 | 1/1 | 5.71  | 5.62 |
| 1/1 | 1/1 | 7.32  | 7.3  |
| 1/1 | 1/1 | 8.57  | 8.66 |
| 1/1 | 1/1 | 5.19  | 5.47 |
| 1/1 | 1/1 | 3.76  | 4.12 |
| 1/1 | 1/1 | 3.57  | 3.95 |
| 1/1 | 1/1 | 4.05  | 4.59 |
| 1/1 | 1/1 | 7.26  | 7.13 |
| 0/1 | 1/1 | 4.5   | 4.38 |
| 0/1 | 1/1 | 3.74  | 5.29 |
| 0/1 | 1/1 | 5.49  | 6.11 |
| 1/1 | 1/1 | 4.99  | 5.69 |
| 0/1 | 1/1 | 3.34  | 3.99 |
| 0/1 | 1/1 | 2.98  | 4.23 |
| 0/1 | 1/1 | 4.12  | 5.62 |
| 0/1 | 1/1 | 3.11  | 4.66 |
| 0/1 | 1/1 | 3.57  | 5.18 |
| 0/1 | 1/1 | 4.12  | 6.18 |
| 1/1 | 1/1 | 4.54  | 5.85 |
| 0/1 | 1/1 | 3.9   | 6.23 |
| 1/1 | 1/1 | 4.27  | 5.8  |
| 1/1 | 1/1 | 4.52  | 6.06 |
| 1/1 | 1/1 | 2.42  | 2.31 |
| 1/1 | 1/1 | 8.39  | 8.3  |
| 1/1 | 1/1 | 3.31  | 3.22 |
| 1/1 | 1/1 | 4.64  | 4.6  |

|     |     |       |       |
|-----|-----|-------|-------|
| 0/1 | 1/1 | 2.4   | 2.37  |
| 0/1 | 1/1 | 5.39  | 5.44  |
| 0/1 | 1/1 | 3.15  | 3.28  |
| 0/1 | 1/1 | 4.69  | 4.84  |
| 0/1 | 1/1 | 3.33  | 3.52  |
| 0/1 | 1/1 | 3.67  | 4.31  |
| 1/1 | 1/1 | 7.3   | 7     |
| 1/1 | 1/1 | 6.82  | 6.52  |
| 1/1 | 1/1 | 4.69  | 4.41  |
| 0/1 | 1/1 | 5.28  | 5.21  |
| 1/1 | 1/1 | 9.46  | 9.1   |
| 0/1 | 1/1 | 4.94  | 4.85  |
| 1/1 | 1/1 | 8.57  | 8.18  |
| 1/1 | 1/1 | 10.59 | 10.3  |
| 1/1 | 1/1 | 10.41 | 10.36 |
| 1/1 | 1/1 | 5.45  | 5.49  |
| 1/1 | 1/1 | 4.93  | 5.05  |
| 1/1 | 1/1 | 4.02  | 3.78  |
| 1/1 | 1/1 | 10.85 | 10.65 |
| 0/1 | 1/1 | 6.11  | 6.07  |
| 1/1 | 1/1 | 3.24  | 3.27  |
| 1/1 | 1/1 | 3.99  | 4.03  |
| 1/1 | 1/1 | 3.46  | 3.55  |
| 1/1 | 1/1 | 8.1   | 8.27  |
| 0/1 | 1/1 | 2.93  | 4.04  |
| 1/1 | 1/1 | 5.44  | 6.46  |
| 1/1 | 1/1 | 4.76  | 5.8   |
| 1/1 | 1/1 | 5.63  | 7.21  |
| 0/1 | 1/1 | 3.82  | 5.47  |
| 1/1 | 1/1 | 5.75  | 6.94  |
| 1/1 | 1/1 | 4.96  | 6.2   |
| 1/1 | 1/1 | 5.08  | 6.34  |
| 1/1 | 1/1 | 7.29  | 8.85  |
| 1/1 | 1/1 | 3.1   | 3.29  |
| 1/1 | 1/1 | 5.09  | 6.1   |
| 1/1 | 1/1 | 5.63  | 5.76  |
| 1/1 | 1/1 | 7.42  | 7.69  |
| 1/1 | 1/1 | 3.8   | 4.16  |
| 1/1 | 1/1 | 5.59  | 6.46  |
| 1/1 | 1/1 | 4.16  | 5.22  |
| 0/1 | 1/1 | 4.23  | 5.35  |
| 0/1 | 1/1 | 2.57  | 3.78  |
| 1/1 | 1/1 | 3.82  | 5.07  |
| 0/1 | 1/1 | 2.9   | 5.44  |
| 1/1 | 1/1 | 5.04  | 6.43  |
| 1/1 | 1/1 | 4.61  | 6.28  |
| 1/1 | 1/1 | 4.9   | 6.93  |
| 1/1 | 1/1 | 10.38 | 10.47 |
| 1/1 | 1/1 | 9.2   | 9.33  |
| 1/1 | 1/1 | 9.02  | 9.16  |
| 1/1 | 1/1 | 4.59  | 4.73  |
| 0/1 | 1/1 | 2.69  | 3     |
| 1/1 | 1/1 | 4.32  | 4.62  |
| 1/1 | 1/1 | 4.39  | 4.76  |
| 1/1 | 1/1 | 9.25  | 9.66  |
| 1/1 | 1/1 | 4.94  | 5.36  |
| 0/1 | 1/1 | 3.61  | 4.44  |
| 0/1 | 1/1 | 2.88  | 3.78  |

|     |     |       |       |
|-----|-----|-------|-------|
| 1/1 | 1/1 | 11.69 | 11.68 |
| 0/1 | 1/1 | 5.16  | 5.21  |
| 0/1 | 1/1 | 3.78  | 4.08  |
| 1/1 | 1/1 | 7.25  | 7.64  |
| 1/1 | 1/1 | 3.28  | 3.01  |
| 1/1 | 1/1 | 8.95  | 8.7   |
| 1/1 | 1/1 | 10.94 | 10.84 |
| 0/1 | 1/1 | 2.03  | 2.44  |
| 1/1 | 1/1 | 3.67  | 4.45  |
| 0/1 | 1/1 | 3.63  | 4.2   |
| 1/1 | 1/1 | 2.71  | 3.53  |
| 1/1 | 1/1 | 4.36  | 6.72  |
| 1/1 | 1/1 | 6.1   | 7.01  |
| 1/1 | 1/1 | 6.48  | 7.56  |
| 0/1 | 1/1 | 2.09  | 3.55  |
| 1/1 | 1/1 | 7.54  | 6.69  |
| 1/1 | 1/1 | 5.01  | 4.16  |
| 1/1 | 1/1 | 4.82  | 4.13  |
| 1/1 | 1/1 | 9.03  | 8.46  |
| 1/1 | 1/1 | 7.23  | 6.67  |
| 1/1 | 0/1 | 3.57  | 3.04  |
| 0/1 | 1/1 | 6.25  | 5.83  |
| 1/1 | 1/1 | 4.46  | 4.09  |
| 1/1 | 1/1 | 6.74  | 6.39  |
| 0/1 | 1/1 | 5.95  | 5.73  |
| 1/1 | 1/1 | 6.45  | 6.39  |
| 0/1 | 1/1 | 6.89  | 6.84  |
| 1/1 | 1/1 | 11.02 | 11.08 |
| 1/1 | 1/1 | 12.71 | 12.86 |
| 0/1 | 1/1 | 2.5   | 2.8   |
| 0/1 | 1/1 | 3.33  | 3.94  |
| 0/1 | 1/1 | 2.88  | 3.67  |
| 1/1 | 1/1 | 6.69  | 7.5   |
| 1/1 | 1/1 | 5.89  | 6.91  |
| 1/1 | 1/1 | 4.85  | 5.98  |
| 1/1 | 1/1 | 3.54  | 5.76  |
| 1/1 | 1/1 | 7.85  | 7.97  |
| 1/1 | 1/1 | 8.11  | 8.31  |
| 1/1 | 1/1 | 7.83  | 8.12  |
| 1/1 | 1/1 | 5.28  | 5.7   |
| 1/1 | 1/1 | 5.89  | 5.62  |
| 1/1 | 1/1 | 7.41  | 7.2   |
| 1/1 | 1/1 | 5.96  | 5.79  |
| 1/1 | 1/1 | 5.82  | 6.09  |
| 0/1 | 1/1 | 2.6   | 3.17  |
| 1/1 | 1/1 | 6.48  | 7.27  |
| 1/1 | 1/1 | 4.72  | 5.6   |
| 1/1 | 1/1 | 3.67  | 5.45  |
| 1/1 | 1/1 | 3.3   | 3.92  |
| 0/1 | 1/1 | 3.23  | 4.03  |
| 1/1 | 1/1 | 3.17  | 3.44  |
| 0/1 | 1/1 | 3.09  | 4.13  |
| 1/1 | 1/1 | 4.73  | 6.17  |
| 0/1 | 1/1 | 2.43  | 4.15  |
| 1/1 | 1/1 | 3.9   | 4.93  |
| 1/1 | 1/1 | 4.18  | 5.31  |
| 1/1 | 1/1 | 4.54  | 5.68  |
| 1/1 | 1/1 | 7.04  | 8.21  |

|     |     |       |       |
|-----|-----|-------|-------|
| 1/1 | 1/1 | 3.49  | 4.66  |
| 1/1 | 1/1 | 4.98  | 6.19  |
| 1/1 | 1/1 | 6.54  | 7.75  |
| 1/1 | 1/1 | 5.29  | 6.55  |
| 0/1 | 1/1 | 5.52  | 7.35  |
| 1/1 | 1/1 | 6.04  | 8.08  |
| 0/1 | 1/1 | 3.24  | 5.49  |
| 1/1 | 1/1 | 7.04  | 7     |
| 1/1 | 1/1 | 13.3  | 13.3  |
| 0/1 | 1/1 | 3.44  | 3.94  |
| 1/1 | 1/1 | 6.96  | 3.86  |
| 1/1 | 0/1 | 6.97  | 4.03  |
| 1/1 | 1/1 | 7.75  | 6.19  |
| 0/1 | 1/1 | 2.51  | 3.19  |
| 1/1 | 1/1 | 5.97  | 6.87  |
| 1/1 | 1/1 | 3.48  | 4.78  |
| 1/1 | 1/1 | 8.61  | 9.53  |
| 1/1 | 1/1 | 7.58  | 9.7   |
| 1/1 | 1/1 | 8.61  | 9.53  |
| 1/1 | 1/1 | 7.58  | 9.7   |
| 0/1 | 1/1 | 3.76  | 5.12  |
| 0/1 | 1/1 | 3.65  | 5.08  |
| 1/1 | 1/1 | 5.21  | 6.43  |
| 0/1 | 1/1 | 4.97  | 6.54  |
| 0/1 | 1/1 | 3.28  | 3.82  |
| 1/1 | 1/1 | 6.99  | 8.07  |
| 1/1 | 0/1 | 3.71  | 2.03  |
| 1/1 | 0/1 | 3.47  | 1.93  |
| 1/1 | 0/1 | 3.63  | 2.68  |
| 1/1 | 1/1 | 5.21  | 4.29  |
| 1/1 | 1/1 | 5.39  | 4.87  |
| 1/1 | 0/1 | 2.65  | 2.17  |
| 0/1 | 1/1 | 4.09  | 5.08  |
| 0/1 | 1/1 | 4.57  | 5.7   |
| 1/1 | 1/1 | 4.14  | 3.83  |
| 0/1 | 1/1 | 6.23  | 6.05  |
| 1/1 | 1/1 | 3.19  | 3.1   |
| 0/1 | 1/1 | 6.14  | 6.06  |
| 1/1 | 1/1 | 3.38  | 3.31  |
| 1/1 | 1/1 | 12.48 | 12.49 |
| 1/1 | 1/1 | 5.73  | 5.9   |
| 1/1 | 1/1 | 4.36  | 4.97  |
| 1/1 | 1/1 | 5.53  | 6.61  |
| 1/1 | 1/1 | 4.48  | 4.14  |
| 1/1 | 1/1 | 9.44  | 9.4   |
| 1/1 | 1/1 | 6.2   | 6.35  |
| 1/1 | 1/1 | 7.82  | 8.31  |
| 1/1 | 1/1 | 4.83  | 5.53  |
| 1/1 | 1/1 | 6.53  | 7.34  |
| 1/1 | 1/1 | 5.04  | 5.94  |
| 0/1 | 1/1 | 5.27  | 6.72  |
| 0/1 | 1/1 | 5.64  | 5.53  |
| 1/1 | 1/1 | 4.54  | 4.45  |
| 0/1 | 1/1 | 3.45  | 3.54  |
| 1/1 | 1/1 | 3.7   | 3.92  |
| 1/1 | 1/1 | 8.12  | 8.44  |
| 0/1 | 1/1 | 6.17  | 6.78  |
| 1/1 | 1/1 | 3.82  | 3.65  |

|     |     |       |       |
|-----|-----|-------|-------|
| 1/1 | 1/1 | 8.63  | 8.55  |
| 1/1 | 1/1 | 11.38 | 11.34 |
| 1/1 | 1/1 | 3.82  | 4.9   |
| 1/1 | 1/1 | 6.88  | 8.12  |
| 0/1 | 1/1 | 4.87  | 6.44  |
| 1/1 | 1/1 | 4.54  | 5.73  |
| 0/1 | 1/1 | 3.64  | 5.16  |
| 1/1 | 1/1 | 7.07  | 6.67  |
| 1/1 | 1/1 | 3.62  | 3.28  |
| 1/1 | 1/1 | 2.63  | 2.4   |
| 1/1 | 1/1 | 4.29  | 4.11  |
| 1/1 | 1/1 | 7.21  | 7.39  |
| 1/1 | 1/1 | 6.67  | 6.88  |
| 1/1 | 1/1 | 5.04  | 5.11  |
| 1/1 | 1/1 | 5.62  | 5.72  |
| 1/1 | 1/1 | 10.16 | 10.99 |
| 0/1 | 1/1 | 2.97  | 4.04  |
| 1/1 | 1/1 | 3.45  | 4.64  |
| 1/1 | 1/1 | 9.11  | 9.95  |
| 1/1 | 1/1 | 5.84  | 6.76  |
| 1/1 | 1/1 | 7.07  | 8.22  |
| 0/1 | 1/1 | 2.34  | 4.62  |
| 1/1 | 1/1 | 6.05  | 6.01  |
| 0/1 | 1/1 | 3.42  | 3.39  |
| 1/1 | 1/1 | 6.54  | 6.57  |
| 0/1 | 1/1 | 4.58  | 4.64  |
| 1/1 | 1/1 | 5.73  | 5.8   |
| 1/1 | 1/1 | 5.47  | 5.72  |
| 0/1 | 1/1 | 3.88  | 4.25  |
| 1/1 | 1/1 | 6.05  | 6.01  |
| 0/1 | 1/1 | 3.42  | 3.39  |
| 1/1 | 1/1 | 6.54  | 6.57  |
| 0/1 | 1/1 | 4.58  | 4.64  |
| 1/1 | 1/1 | 5.73  | 5.8   |
| 1/1 | 1/1 | 5.47  | 5.72  |
| 0/1 | 1/1 | 3.88  | 4.25  |
| 1/1 | 1/1 | 6.05  | 6.01  |
| 0/1 | 1/1 | 3.42  | 3.39  |
| 1/1 | 1/1 | 6.54  | 6.57  |
| 0/1 | 1/1 | 4.58  | 4.64  |
| 1/1 | 1/1 | 5.73  | 5.8   |
| 1/1 | 1/1 | 5.47  | 5.72  |
| 0/1 | 1/1 | 3.88  | 4.25  |
| 1/1 | 1/1 | 6.05  | 6.01  |
| 0/1 | 1/1 | 3.42  | 3.39  |
| 1/1 | 1/1 | 6.54  | 6.57  |
| 0/1 | 1/1 | 4.58  | 4.64  |
| 1/1 | 1/1 | 5.73  | 5.8   |
| 1/1 | 1/1 | 5.47  | 5.72  |
| 0/1 | 1/1 | 3.88  | 4.25  |
| 1/1 | 1/1 | 6.05  | 6.01  |
| 0/1 | 1/1 | 3.42  | 3.39  |
| 1/1 | 1/1 | 6.54  | 6.57  |
| 0/1 | 1/1 | 4.58  | 4.64  |
| 1/1 | 1/1 | 5.73  | 5.8   |
| 1/1 | 1/1 | 5.47  | 5.72  |
| 0/1 | 1/1 | 3.88  | 4.25  |
| 1/1 | 1/1 | 6.05  | 6.01  |
| 0/1 | 1/1 | 3.42  | 3.39  |
| 1/1 | 1/1 | 6.54  | 6.57  |
| 0/1 | 1/1 | 4.58  | 4.64  |
| 1/1 | 1/1 | 5.73  | 5.8   |
| 1/1 | 1/1 | 5.47  | 5.72  |
| 0/1 | 1/1 | 3.88  | 4.25  |
| 1/1 | 1/1 | 6.05  | 6.01  |
| 0/1 | 1/1 | 3.42  | 3.39  |
| 1/1 | 1/1 | 6.54  | 6.57  |
| 0/1 | 1/1 | 4.58  | 4.64  |
| 1/1 | 1/1 | 5.73  | 5.8   |
| 1/1 | 1/1 | 5.47  | 5.72  |
| 0/1 | 1/1 | 3.88  | 4.25  |
| 1/1 | 1/1 | 6.05  | 6.01  |
| 0/1 | 1/1 | 3.42  | 3.39  |
| 1/1 | 1/1 | 6.54  | 6.57  |
| 0/1 | 1/1 | 4.58  | 4.64  |
| 1/1 | 1/1 | 5.73  | 5.8   |
| 1/1 | 1/1 | 5.47  | 5.72  |
| 0/1 | 1/1 | 3.88  | 4.25  |
| 1/1 | 1/1 | 6.05  | 6.01  |
| 0/1 | 1/1 | 3.42  | 3.39  |
| 1/1 | 1/1 | 6.54  | 6.57  |
| 0/1 | 1/1 | 4.58  | 4.64  |
| 1/1 | 1/1 | 5.73  | 5.8   |
| 1/1 | 1/1 | 5.47  | 5.72  |
| 0/1 | 1/1 | 3.88  | 4.25  |
| 1/1 | 1/1 | 6.05  | 6.01  |
| 0/1 | 1/1 | 3.42  | 3.39  |
| 1/1 | 1/1 | 6.54  | 6.57  |
| 0/1 | 1/1 | 4.58  | 4.64  |
| 1/1 | 1/1 | 5.73  | 5.8   |
| 1/1 | 1/1 | 5.47  | 5.72  |
| 0/1 | 1/1 | 3.88  | 4.25  |
| 1/1 | 1/1 | 6.05  | 6.01  |
| 0/1 | 1/1 | 3.42  | 3.39  |
| 1/1 | 1/1 | 6.54  | 6.57  |
| 0/1 | 1/1 | 4.58  | 4.64  |
| 1/1 | 1/1 | 5.73  | 5.8   |
| 1/1 | 1/1 | 5.47  | 5.72  |
| 0/1 | 1/1 | 3.88  | 4.25  |
| 1/1 | 1/1 | 6.05  | 6.01  |
| 0/1 | 1/1 | 3.42  | 3.39  |
| 1/1 | 1/1 | 6.54  | 6.57  |
| 0/1 | 1/1 | 4.58  | 4.64  |
| 1/1 | 1/1 | 5.73  | 5.8   |
| 1/1 | 1/1 | 5.47  | 5.72  |
| 0/1 | 1/1 | 3.88  | 4.25  |
| 1/1 | 1/1 | 6.05  | 6.01  |

|     |     |       |       |
|-----|-----|-------|-------|
| 0/1 | 1/1 | 3.42  | 3.39  |
| 1/1 | 1/1 | 6.54  | 6.57  |
| 0/1 | 1/1 | 4.58  | 4.64  |
| 1/1 | 1/1 | 5.73  | 5.8   |
| 1/1 | 1/1 | 5.47  | 5.72  |
| 0/1 | 1/1 | 3.88  | 4.25  |
| 0/1 | 1/1 | 3.63  | 4.3   |
| 0/1 | 1/1 | 3.43  | 4.36  |
| 0/1 | 1/1 | 3.6   | 4.36  |
| 0/1 | 1/1 | 3.74  | 5.22  |
| 1/1 | 1/1 | 3.54  | 3.29  |
| 1/1 | 1/1 | 5.96  | 6.06  |
| 1/1 | 1/1 | 5.99  | 6.21  |
| 1/1 | 1/1 | 3.24  | 4.54  |
| 1/1 | 1/1 | 4.82  | 6.38  |
| 1/1 | 1/1 | 4.7   | 6.27  |
| 1/1 | 1/1 | 5.64  | 7.49  |
| 1/1 | 1/1 | 3.83  | 8.1   |
| 1/1 | 1/1 | 2.6   | 7.22  |
| 0/1 | 1/1 | 4.52  | 4.67  |
| 1/1 | 1/1 | 5.1   | 5.51  |
| 0/1 | 1/1 | 5.06  | 6.27  |
| 0/1 | 1/1 | 3.37  | 4.73  |
| 1/1 | 1/1 | 2.91  | 4.27  |
| 0/1 | 1/1 | 4.37  | 5.78  |
| 1/1 | 1/1 | 4.44  | 5.14  |
| 1/1 | 1/1 | 7.26  | 8.01  |
| 0/1 | 1/1 | 3.29  | 4.14  |
| 1/1 | 1/1 | 3.44  | 4.5   |
| 1/1 | 1/1 | 3.02  | 4.13  |
| 1/1 | 1/1 | 5.88  | 7.06  |
| 0/1 | 1/1 | 2.72  | 4.19  |
| 1/1 | 1/1 | 13.24 | 10.54 |
| 1/1 | 1/1 | 13.56 | 10.96 |
| 1/1 | 0/1 | 7.61  | 6.52  |
| 1/1 | 1/1 | 5.54  | 4.75  |
| 1/1 | 1/1 | 3.89  | 4.59  |
| 0/1 | 1/1 | 3.17  | 4.24  |
| 0/1 | 1/1 | 5.75  | 7.64  |
| 1/1 | 1/1 | 7.54  | 9.48  |
| 0/1 | 1/1 | 4.44  | 6.42  |
| 1/1 | 1/1 | 5.52  | 7.73  |
| 0/1 | 1/1 | 4.16  | 6.53  |
| 1/1 | 1/1 | 8.17  | 9.43  |
| 1/1 | 1/1 | 9.08  | 10.36 |
| 1/1 | 1/1 | 4.59  | 5.87  |
| 1/1 | 1/1 | 6.89  | 8.26  |
| 1/1 | 1/1 | 6.41  | 7.81  |
| 1/1 | 1/1 | 6.95  | 8.56  |
| 1/1 | 1/1 | 3.16  | 5.1   |
| 1/1 | 1/1 | 6.48  | 6.46  |
| 1/1 | 1/1 | 3.43  | 3.45  |
| 0/1 | 1/1 | 3.88  | 4.99  |
| 1/1 | 1/1 | 6.89  | 8.29  |
| 0/1 | 1/1 | 6.24  | 7.83  |
| 1/1 | 1/1 | 8.67  | 7.39  |
| 1/1 | 0/1 | 4.19  | 3.3   |
| 1/1 | 0/1 | 5.17  | 4.4   |

|     |     |      |      |
|-----|-----|------|------|
| 1/1 | 1/1 | 8.62 | 8.77 |
| 1/1 | 1/1 | 6.16 | 7.28 |
| 1/1 | 1/1 | 3.72 | 4.96 |
| 0/1 | 1/1 | 3.52 | 4.76 |
| 1/1 | 1/1 | 5.38 | 6.44 |
| 0/1 | 1/1 | 2.65 | 3.83 |
| 0/1 | 1/1 | 6.52 | 7.35 |
| 1/1 | 1/1 | 8.04 | 9.03 |
| 1/1 | 1/1 | 7.52 | 9.65 |
| 1/1 | 1/1 | 7.81 | 7.81 |
| 1/1 | 1/1 | 7.25 | 7.37 |
| 0/1 | 1/1 | 3.18 | 3.37 |
| 1/1 | 1/1 | 6.84 | 7.08 |
| 1/1 | 1/1 | 7.78 | 8.1  |
| 1/1 | 1/1 | 7.67 | 8.58 |
| 1/1 | 1/1 | 6.78 | 7.69 |
| 1/1 | 1/1 | 4.66 | 5.8  |
| 0/1 | 1/1 | 3.4  | 4.61 |
| 1/1 | 1/1 | 3.52 | 4.81 |
| 1/1 | 1/1 | 2.87 | 4.16 |
| 1/1 | 1/1 | 4.85 | 6.49 |
| 0/1 | 1/1 | 2.45 | 4.32 |
| 1/1 | 1/1 | 6.24 | 7    |
| 0/1 | 1/1 | 2.05 | 2.92 |
| 1/1 | 1/1 | 8.08 | 8.96 |
| 1/1 | 1/1 | 7.36 | 8.27 |
| 1/1 | 1/1 | 7.39 | 9.11 |
| 0/1 | 1/1 | 3.72 | 3.69 |
| 1/1 | 1/1 | 4.62 | 4.74 |
| 0/1 | 1/1 | 4.46 | 4.71 |
| 0/1 | 1/1 | 2.89 | 3.58 |
| 1/1 | 1/1 | 3.94 | 5.31 |
| 0/1 | 1/1 | 1.73 | 3.35 |
| 1/1 | 1/1 | 6.08 | 7.85 |
| 1/1 | 1/1 | 6.07 | 7.87 |
| 0/1 | 1/1 | 4.34 | 4.47 |
| 1/1 | 1/1 | 2.98 | 3.16 |
| 1/1 | 1/1 | 7.61 | 7.92 |
| 1/1 | 0/1 | 5.12 | 3.66 |
| 1/1 | 1/1 | 7.47 | 6.14 |
| 1/1 | 0/1 | 3.27 | 2.1  |
| 1/1 | 1/1 | 3.44 | 2.4  |
| 1/1 | 1/1 | 4.58 | 3.63 |
| 1/1 | 1/1 | 3.96 | 3.04 |
| 1/1 | 0/1 | 5.61 | 4.86 |
| 1/1 | 1/1 | 4.66 | 4.5  |
| 1/1 | 1/1 | 6.58 | 6.68 |
| 1/1 | 1/1 | 5.68 | 6.24 |
| 1/1 | 1/1 | 5.45 | 6.12 |
| 1/1 | 1/1 | 5.19 | 6.22 |
| 1/1 | 1/1 | 6.96 | 8.03 |
| 0/1 | 1/1 | 4.66 | 5.43 |
| 0/1 | 1/1 | 2.21 | 3.11 |
| 1/1 | 1/1 | 2.4  | 3.05 |
| 1/1 | 1/1 | 3.5  | 4.18 |
| 0/1 | 1/1 | 2.23 | 2.92 |
| 1/1 | 1/1 | 4.71 | 5.43 |
| 1/1 | 1/1 | 5.12 | 5.84 |



|     |     |       |       |
|-----|-----|-------|-------|
| 1/1 | 1/1 | 4.4   | 5.24  |
| 1/1 | 1/1 | 3.11  | 4     |
| 0/1 | 1/1 | 3.38  | 5.13  |
| 0/1 | 1/1 | 3.38  | 5.13  |
| 0/1 | 1/1 | 3.38  | 5.13  |
| 1/1 | 1/1 | 6.11  | 7.88  |
| 1/1 | 1/1 | 6.12  | 7.96  |
| 1/1 | 1/1 | 7.04  | 8.83  |
| 1/1 | 1/1 | 7.14  | 8.94  |
| 1/1 | 1/1 | 6.96  | 8.85  |
| 1/1 | 1/1 | 7.02  | 8.96  |
| 1/1 | 1/1 | 4.84  | 8.21  |
| 1/1 | 0/1 | 4.08  | 3.35  |
| 1/1 | 1/1 | 8.84  | 8.63  |
| 0/1 | 1/1 | 5.04  | 4.96  |
| 0/1 | 1/1 | 6.8   | 6.76  |
| 1/1 | 1/1 | 5.33  | 5.33  |
| 1/1 | 1/1 | 6.37  | 7.01  |
| 1/1 | 1/1 | 7.23  | 8.19  |
| 1/1 | 1/1 | 5.74  | 5.53  |
| 1/1 | 1/1 | 3.99  | 3.8   |
| 1/1 | 1/1 | 12.69 | 12.58 |
| 1/1 | 1/1 | 4.36  | 4.28  |
| 1/1 | 1/1 | 11.77 | 11.71 |
| 1/1 | 1/1 | 8.63  | 8.85  |
| 0/1 | 1/1 | 7.26  | 7.49  |
| 1/1 | 1/1 | 9.85  | 10.18 |
| 1/1 | 1/1 | 8.33  | 8.82  |
| 1/1 | 1/1 | 6.75  | 7.84  |
| 1/1 | 1/1 | 4.26  | 5.67  |
| 1/1 | 1/1 | 3.3   | 5.07  |
| 1/1 | 1/1 | 6.35  | 5.68  |
| 1/1 | 0/1 | 3.35  | 2.69  |
| 1/1 | 1/1 | 9.33  | 8.9   |
| 1/1 | 1/1 | 6.68  | 6.27  |
| 1/1 | 1/1 | 6.12  | 5.72  |
| 1/1 | 1/1 | 7.04  | 6.65  |
| 1/1 | 1/1 | 7.69  | 7.31  |
| 1/1 | 1/1 | 7.13  | 6.79  |
| 1/1 | 1/1 | 5.38  | 5.11  |
| 1/1 | 1/1 | 7.6   | 7.35  |
| 1/1 | 1/1 | 6.37  | 6.12  |
| 1/1 | 1/1 | 4.75  | 4.57  |
| 1/1 | 1/1 | 7.4   | 7.28  |
| 1/1 | 1/1 | 3.67  | 3.58  |
| 1/1 | 1/1 | 4.11  | 4.27  |
| 1/1 | 1/1 | 7.42  | 7.59  |
| 1/1 | 1/1 | 3.6   | 3.78  |
| 1/1 | 1/1 | 3.1   | 3.3   |
| 0/1 | 1/1 | 5.04  | 5.25  |
| 0/1 | 1/1 | 2.65  | 2.87  |
| 0/1 | 1/1 | 2.97  | 3.54  |
| 1/1 | 1/1 | 2.79  | 3.42  |
| 1/1 | 1/1 | 5.59  | 6.28  |
| 1/1 | 1/1 | 5.09  | 6.54  |
| 0/1 | 1/1 | 2.15  | 4.06  |
| 0/1 | 1/1 | 3.49  | 5.5   |
| 1/1 | 1/1 | 7.88  | 7.3   |

|     |     |       |       |
|-----|-----|-------|-------|
| 1/1 | 1/1 | 4.09  | 3.62  |
| 1/1 | 1/1 | 3.72  | 3.58  |
| 1/1 | 1/1 | 9.79  | 9.81  |
| 1/1 | 1/1 | 6.64  | 6.69  |
| 1/1 | 1/1 | 8.52  | 8.59  |
| 0/1 | 1/1 | 7.67  | 7.86  |
| 0/1 | 1/1 | 3.59  | 3.99  |
| 1/1 | 1/1 | 4.09  | 5.13  |
| 1/1 | 1/1 | 3.43  | 4.48  |
| 1/1 | 1/1 | 5.8   | 6.9   |
| 0/1 | 1/1 | 4.73  | 6.36  |
| 1/1 | 1/1 | 5.91  | 5.81  |
| 1/1 | 1/1 | 5.14  | 5.04  |
| 1/1 | 1/1 | 9.76  | 9.74  |
| 1/1 | 1/1 | 11.38 | 11.39 |
| 0/1 | 1/1 | 4.29  | 4.32  |
| 0/1 | 1/1 | 6.14  | 6.19  |
| 1/1 | 1/1 | 7.17  | 7.26  |
| 0/1 | 1/1 | 6.86  | 6.98  |
| 0/1 | 1/1 | 6.91  | 7.3   |
| 1/1 | 1/1 | 8.11  | 8.71  |
| 0/1 | 1/1 | 4.97  | 5.83  |
| 0/1 | 1/1 | 4.46  | 5.07  |
| 0/1 | 1/1 | 2.64  | 3.29  |
| 0/1 | 1/1 | 2.12  | 3.09  |
| 0/1 | 1/1 | 2.5   | 3.77  |
| 0/1 | 1/1 | 2.92  | 4.21  |
| 0/1 | 1/1 | 2.92  | 4.3   |
| 0/1 | 1/1 | 3.21  | 4.6   |
| 0/1 | 1/1 | 4.1   | 5.85  |
| 1/1 | 1/1 | 4.27  | 6.14  |
| 1/1 | 1/1 | 10.62 | 10.94 |
| 0/1 | 1/1 | 2.68  | 3.29  |
| 0/1 | 1/1 | 3.08  | 4.15  |
| 1/1 | 1/1 | 5.21  | 6.53  |
| 0/1 | 1/1 | 3.82  | 5.64  |
| 1/1 | 1/1 | 4.25  | 4.53  |
| 0/1 | 1/1 | 2.5   | 2.91  |
| 1/1 | 1/1 | 4.95  | 5.44  |
| 0/1 | 1/1 | 2.13  | 2.65  |
| 0/1 | 1/1 | 3.49  | 4.23  |
| 1/1 | 1/1 | 3.77  | 5.2   |
| 0/1 | 1/1 | 2.6   | 4.21  |
| 1/1 | 1/1 | 7.5   | 7.49  |
| 1/1 | 1/1 | 5.81  | 5.82  |
| 1/1 | 1/1 | 7.57  | 7.61  |
| 1/1 | 1/1 | 7.78  | 7.86  |
| 0/1 | 1/1 | 2.85  | 3.58  |
| 0/1 | 1/1 | 2.33  | 3.17  |
| 1/1 | 1/1 | 7.44  | 8.09  |
| 1/1 | 1/1 | 3.32  | 4.52  |
| 1/1 | 1/1 | 6.39  | 7.65  |
| 0/1 | 1/1 | 6     | 7.1   |
| 1/1 | 1/1 | 5.13  | 6.35  |
| 1/1 | 1/1 | 5.24  | 6.56  |
| 0/1 | 1/1 | 3.36  | 4.93  |
| 1/1 | 1/1 | 6.23  | 6.93  |
| 1/1 | 1/1 | 3.01  | 3.82  |

|     |     |      |      |
|-----|-----|------|------|
| 0/1 | 1/1 | 3.5  | 4.8  |
| 0/1 | 1/1 | 4.5  | 4.97 |
| 1/1 | 1/1 | 3.01 | 3.57 |
| 1/1 | 1/1 | 5.72 | 7.37 |
| 1/1 | 1/1 | 6.21 | 8.01 |
| 0/1 | 1/1 | 3.53 | 5.69 |
| 0/1 | 1/1 | 4.18 | 6.4  |
| 1/1 | 1/1 | 6.33 | 8.58 |
| 0/1 | 1/1 | 2.29 | 6.94 |
| 1/1 | 0/1 | 6.03 | 3.9  |
| 1/1 | 0/1 | 5.98 | 3.88 |
| 1/1 | 1/1 | 8.15 | 6.09 |
| 1/1 | 1/1 | 5.77 | 3.94 |
| 1/1 | 0/1 | 7.99 | 6.23 |
| 1/1 | 1/1 | 7.93 | 6.19 |
| 1/1 | 1/1 | 7.3  | 5.69 |
| 1/1 | 1/1 | 6.85 | 5.28 |
| 1/1 | 0/1 | 4.69 | 3.17 |
| 1/1 | 1/1 | 7.3  | 5.79 |
| 1/1 | 1/1 | 6.83 | 5.37 |
| 1/1 | 0/1 | 6.28 | 4.83 |
| 1/1 | 1/1 | 7.85 | 6.48 |
| 1/1 | 1/1 | 9.16 | 7.81 |
| 1/1 | 1/1 | 7.63 | 6.31 |
| 1/1 | 1/1 | 4.51 | 3.2  |
| 1/1 | 1/1 | 7.68 | 6.39 |
| 1/1 | 0/1 | 5.68 | 4.4  |
| 1/1 | 1/1 | 7.21 | 6.01 |
| 1/1 | 1/1 | 8.45 | 7.3  |
| 1/1 | 1/1 | 6.29 | 5.15 |
| 1/1 | 0/1 | 7.04 | 5.91 |
| 1/1 | 1/1 | 6.28 | 5.22 |
| 1/1 | 1/1 | 7.68 | 6.68 |
| 1/1 | 1/1 | 8.07 | 7.07 |
| 1/1 | 1/1 | 7.55 | 6.56 |
| 1/1 | 1/1 | 8.12 | 7.15 |
| 1/1 | 1/1 | 7.25 | 6.39 |
| 1/1 | 1/1 | 6.73 | 5.9  |
| 1/1 | 0/1 | 8.28 | 7.51 |
| 1/1 | 0/1 | 6.28 | 5.53 |
| 1/1 | 1/1 | 6.24 | 5.5  |
| 1/1 | 1/1 | 5.64 | 4.92 |
| 1/1 | 1/1 | 7.25 | 6.56 |
| 1/1 | 1/1 | 5.19 | 4.52 |
| 1/1 | 1/1 | 5.57 | 4.93 |
| 1/1 | 1/1 | 6.57 | 5.94 |
| 1/1 | 1/1 | 6.12 | 5.51 |
| 1/1 | 1/1 | 7.3  | 6.71 |
| 1/1 | 1/1 | 4.59 | 4.03 |
| 1/1 | 1/1 | 4.74 | 4.17 |
| 1/1 | 1/1 | 6.65 | 6.11 |
| 1/1 | 1/1 | 7.62 | 7.13 |
| 1/1 | 1/1 | 7.11 | 6.68 |
| 1/1 | 1/1 | 6.84 | 6.46 |
| 1/1 | 1/1 | 8.33 | 8.01 |
| 1/1 | 1/1 | 6.78 | 6.51 |
| 1/1 | 1/1 | 7.24 | 6.97 |
| 1/1 | 1/1 | 5.5  | 5.34 |

|     |     |       |       |
|-----|-----|-------|-------|
| 1/1 | 1/1 | 7.53  | 7.38  |
| 0/1 | 1/1 | 5.42  | 5.31  |
| 1/1 | 1/1 | 5.78  | 5.69  |
| 1/1 | 1/1 | 7.36  | 7.4   |
| 0/1 | 1/1 | 6.08  | 6.17  |
| 1/1 | 1/1 | 7.04  | 7.23  |
| 1/1 | 1/1 | 6.36  | 6.67  |
| 1/1 | 1/1 | 5.87  | 6.2   |
| 1/1 | 1/1 | 4.93  | 5.77  |
| 1/1 | 1/1 | 6.06  | 7.28  |
| 1/1 | 1/1 | 9.33  | 10.83 |
| 1/1 | 1/1 | 9.39  | 11.54 |
| 1/1 | 1/1 | 4.25  | 8.82  |
| 1/1 | 1/1 | 4.93  | 5.77  |
| 1/1 | 1/1 | 6.06  | 7.28  |
| 1/1 | 1/1 | 9.33  | 10.83 |
| 1/1 | 1/1 | 9.39  | 11.54 |
| 1/1 | 1/1 | 4.25  | 8.82  |
| 1/1 | 1/1 | 3.29  | 4.11  |
| 1/1 | 1/1 | 3.45  | 4.32  |
| 0/1 | 1/1 | 2.64  | 3.91  |
| 1/1 | 1/1 | 12.35 | 12.82 |
| 0/1 | 1/1 | 3.12  | 3.74  |
| 1/1 | 1/1 | 5.43  | 6.18  |
| 1/1 | 1/1 | 6.25  | 7.59  |
| 1/1 | 1/1 | 5.2   | 6.74  |
| 1/1 | 1/1 | 2.95  | 4.32  |
| 1/1 | 1/1 | 4.69  | 6.16  |
| 0/1 | 1/1 | 3.44  | 5.45  |
| 0/1 | 1/1 | 2.13  | 2.85  |
| 0/1 | 1/1 | 3.98  | 5.24  |
| 1/1 | 1/1 | 5.45  | 4.24  |
| 1/1 | 0/1 | 4.23  | 3.03  |
| 1/1 | 1/1 | 4.08  | 3.08  |
| 1/1 | 1/1 | 4.38  | 3.5   |
| 1/1 | 0/1 | 3.34  | 2.53  |
| 1/1 | 0/1 | 4.19  | 3.5   |
| 1/1 | 1/1 | 7.34  | 6.71  |
| 1/1 | 1/1 | 4.16  | 3.56  |
| 0/1 | 1/1 | 3.29  | 3     |
| 1/1 | 1/1 | 4.62  | 4.34  |
| 1/1 | 1/1 | 6.13  | 5.92  |
| 0/1 | 1/1 | 3.74  | 3.61  |
| 1/1 | 1/1 | 5.88  | 5.78  |
| 1/1 | 1/1 | 4.73  | 4.67  |
| 1/1 | 1/1 | 9.56  | 9.51  |
| 0/1 | 1/1 | 3.65  | 3.74  |
| 1/1 | 1/1 | 4.39  | 4.57  |
| 0/1 | 1/1 | 3.04  | 3.27  |
| 1/1 | 1/1 | 7.3   | 8.38  |
| 1/1 | 1/1 | 9.05  | 10.27 |
| 1/1 | 1/1 | 5.37  | 5.89  |
| 1/1 | 1/1 | 5.57  | 6.32  |
| 1/1 | 1/1 | 7.65  | 9     |
| 1/1 | 1/1 | 3.65  | 5.49  |
| 0/1 | 1/1 | 2.65  | 3.77  |
| 1/1 | 1/1 | 3.97  | 5.11  |
| 1/1 | 1/1 | 4.31  | 5.58  |

|     |     |       |       |
|-----|-----|-------|-------|
| 0/1 | 1/1 | 3.58  | 4.87  |
| 1/1 | 1/1 | 5.03  | 6.39  |
| 1/1 | 1/1 | 2.93  | 3.53  |
| 1/1 | 1/1 | 4.69  | 5.36  |
| 1/1 | 1/1 | 6.85  | 7.52  |
| 1/1 | 1/1 | 4.67  | 5.59  |
| 1/1 | 1/1 | 8.58  | 5.73  |
| 1/1 | 1/1 | 5.37  | 2.91  |
| 1/1 | 0/1 | 2.26  | 2.28  |
| 1/1 | 1/1 | 3.4   | 3.69  |
| 0/1 | 1/1 | 3.48  | 4.83  |
| 0/1 | 1/1 | 3.15  | 4.52  |
| 0/1 | 1/1 | 2.28  | 3.64  |
| 0/1 | 1/1 | 3.16  | 4.75  |
| 0/1 | 1/1 | 2.12  | 3.73  |
| 0/1 | 1/1 | 3.94  | 5.12  |
| 0/1 | 1/1 | 4.33  | 5.58  |
| 0/1 | 1/1 | 4.5   | 5.82  |
| 0/1 | 1/1 | 2.45  | 4.05  |
| 1/1 | 1/1 | 2.7   | 3.67  |
| 0/1 | 1/1 | 3.33  | 4.72  |
| 1/1 | 1/1 | 4.91  | 5.24  |
| 1/1 | 1/1 | 6.73  | 7.26  |
| 1/1 | 1/1 | 5.72  | 6.39  |
| 1/1 | 1/1 | 4.3   | 4.14  |
| 1/1 | 1/1 | 3.43  | 3.4   |
| 1/1 | 1/1 | 9.74  | 9.82  |
| 1/1 | 1/1 | 7.85  | 7.97  |
| 1/1 | 1/1 | 7.83  | 8.12  |
| 1/1 | 1/1 | 5.28  | 5.7   |
| 0/1 | 1/1 | 2.57  | 3.3   |
| 1/1 | 1/1 | 3.92  | 4.9   |
| 1/1 | 1/1 | 4.01  | 5.16  |
| 0/1 | 1/1 | 3.54  | 6.26  |
| 0/1 | 1/1 | 2.46  | 3.46  |
| 0/1 | 1/1 | 2.33  | 3.88  |
| 0/1 | 1/1 | 1.92  | 2.65  |
| 0/1 | 1/1 | 3.52  | 4.31  |
| 0/1 | 1/1 | 3.67  | 4.92  |
| 1/1 | 1/1 | 2.56  | 4.99  |
| 1/1 | 1/1 | 12.96 | 12.36 |
| 1/1 | 1/1 | 7.94  | 7.72  |
| 1/1 | 1/1 | 4.47  | 4.16  |
| 1/1 | 1/1 | 7.93  | 7.83  |
| 1/1 | 1/1 | 5.01  | 6.32  |
| 0/1 | 1/1 | 4.21  | 5.96  |
| 1/1 | 1/1 | 4.71  | 6.15  |
| 0/1 | 1/1 | 2.64  | 4.8   |
| 0/1 | 1/1 | 3.2   | 5.26  |
| 1/1 | 1/1 | 4.19  | 6.32  |
| 1/1 | 1/1 | 2.87  | 4.01  |
| 0/1 | 1/1 | 2.99  | 4.24  |
| 1/1 | 1/1 | 6     | 7.24  |
| 0/1 | 1/1 | 3.94  | 4.61  |
| 1/1 | 1/1 | 4.8   | 5.51  |
| 0/1 | 1/1 | 2.26  | 2.89  |
| 1/1 | 1/1 | 4.19  | 4.85  |
| 1/1 | 1/1 | 6.14  | 7.37  |

|     |     |       |       |
|-----|-----|-------|-------|
| 1/1 | 1/1 | 6.81  | 7.48  |
| 1/1 | 1/1 | 9.77  | 11.06 |
| 0/1 | 1/1 | 4.57  | 6.05  |
| 1/1 | 1/1 | 4.09  | 5.5   |
| 1/1 | 1/1 | 6.68  | 8.1   |
| 1/1 | 1/1 | 7.8   | 7.64  |
| 0/1 | 1/1 | 2.09  | 2.28  |
| 1/1 | 1/1 | 13.3  | 13.5  |
| 1/1 | 1/1 | 7.29  | 7.57  |
| 1/1 | 1/1 | 5.36  | 6.43  |
| 1/1 | 1/1 | 5.74  | 6.86  |
| 0/1 | 1/1 | 3.02  | 4.16  |
| 0/1 | 1/1 | 4.27  | 5.58  |
| 0/1 | 1/1 | 3.9   | 6.36  |
| 0/1 | 1/1 | 4.96  | 7.85  |
| 1/1 | 1/1 | 13.5  | 8.31  |
| 1/1 | 1/1 | 6.65  | 4.23  |
| 1/1 | 1/1 | 3.68  | 3.47  |
| 1/1 | 1/1 | 11.12 | 11.17 |
| 1/1 | 1/1 | 5.72  | 5.81  |
| 0/1 | 1/1 | 2.12  | 3.43  |
| 0/1 | 1/1 | 5.13  | 6.52  |
| 1/1 | 1/1 | 4.43  | 4.29  |
| 0/1 | 1/1 | 4.77  | 4.71  |
| 1/1 | 1/1 | 6.31  | 6.28  |
| 1/1 | 1/1 | 3.57  | 3.57  |
| 0/1 | 1/1 | 6.55  | 6.57  |
| 1/1 | 1/1 | 13.46 | 13.58 |
| 0/1 | 1/1 | 4.61  | 4.76  |
| 1/1 | 1/1 | 6.38  | 6.84  |
| 1/1 | 1/1 | 4.16  | 4.73  |
| 0/1 | 1/1 | 4.34  | 5.07  |
| 0/1 | 1/1 | 3.21  | 3.87  |
| 0/1 | 1/1 | 3.97  | 4.71  |
| 0/1 | 1/1 | 3.59  | 4.38  |
| 0/1 | 1/1 | 3.22  | 4.15  |
| 1/1 | 1/1 | 7.46  | 8.59  |
| 1/1 | 1/1 | 5.13  | 6.36  |
| 0/1 | 1/1 | 5.47  | 6.33  |
| 0/1 | 1/1 | 3.98  | 5.19  |
| 0/1 | 1/1 | 3.29  | 4.5   |
| 1/1 | 1/1 | 5.01  | 6.38  |
| 1/1 | 1/1 | 4.48  | 4.72  |
| 1/1 | 1/1 | 5.75  | 6.48  |
| 1/1 | 1/1 | 5.82  | 6.62  |
| 1/1 | 1/1 | 5.34  | 6.37  |
| 1/1 | 1/1 | 4.36  | 5.82  |
| 1/1 | 1/1 | 4.63  | 5.9   |
| 0/1 | 1/1 | 3.81  | 5.29  |
| 1/1 | 1/1 | 8.05  | 9.9   |
| 1/1 | 1/1 | 6.97  | 8.9   |
| 1/1 | 1/1 | 5.17  | 7.4   |
| 0/1 | 1/1 | 3.4   | 4.73  |
| 0/1 | 1/1 | 2.38  | 4.24  |
| 1/1 | 1/1 | 4.2   | 3.87  |
| 0/1 | 1/1 | 2.23  | 2.28  |
| 1/1 | 1/1 | 9.89  | 10.05 |
| 1/1 | 1/1 | 6.4   | 5.68  |

|     |     |      |      |
|-----|-----|------|------|
| 1/1 | 1/1 | 8.46 | 7.88 |
| 0/1 | 1/1 | 2.4  | 3.83 |
| 1/1 | 1/1 | 5.96 | 7.66 |
| 1/1 | 1/1 | 4.94 | 6.68 |
| 1/1 | 1/1 | 5.3  | 7.08 |
| 1/1 | 1/1 | 3.27 | 5.99 |
| 1/1 | 1/1 | 6.3  | 7.21 |
| 0/1 | 1/1 | 4.65 | 5.65 |
| 1/1 | 1/1 | 7.46 | 9.01 |
| 0/1 | 1/1 | 1.9  | 3.63 |
| 0/1 | 1/1 | 2.49 | 3.04 |
| 0/1 | 1/1 | 2.7  | 3.62 |
| 1/1 | 1/1 | 5.53 | 6.71 |
| 0/1 | 1/1 | 2.46 | 3.78 |
| 1/1 | 1/1 | 5.42 | 6.08 |
| 0/1 | 1/1 | 2.71 | 3.43 |
| 1/1 | 1/1 | 3.48 | 4.75 |
| 1/1 | 1/1 | 4.12 | 5.45 |
| 1/1 | 1/1 | 4.93 | 4.23 |
| 1/1 | 1/1 | 3.24 | 2.64 |
| 1/1 | 1/1 | 3.47 | 2.88 |
| 1/1 | 1/1 | 7.3  | 6.76 |
| 1/1 | 0/1 | 2.33 | 1.94 |
| 1/1 | 1/1 | 3.03 | 2.73 |
| 1/1 | 1/1 | 4.07 | 3.87 |
| 0/1 | 1/1 | 2.67 | 2.77 |
| 0/1 | 1/1 | 2.37 | 2.54 |
| 0/1 | 1/1 | 3.92 | 4.09 |
| 1/1 | 1/1 | 6.96 | 7.22 |
| 1/1 | 1/1 | 7.8  | 8.09 |
| 1/1 | 1/1 | 5.14 | 5.47 |
| 1/1 | 1/1 | 3.39 | 3.82 |
| 0/1 | 1/1 | 3.04 | 3.7  |
| 0/1 | 1/1 | 4.48 | 5.67 |
| 0/1 | 1/1 | 3.06 | 4.51 |
| 1/1 | 1/1 | 4.6  | 5.83 |
| 0/1 | 1/1 | 4.12 | 5.76 |
| 1/1 | 1/1 | 4.87 | 6.54 |
| 1/1 | 1/1 | 3.89 | 5.75 |
| 0/1 | 1/1 | 3.52 | 5.77 |
| 1/1 | 1/1 | 6.7  | 7.03 |
| 1/1 | 1/1 | 7.31 | 7.79 |
| 0/1 | 1/1 | 2.55 | 3.12 |
| 0/1 | 1/1 | 2.36 | 3.06 |
| 1/1 | 1/1 | 8.1  | 9.69 |
| 1/1 | 1/1 | 6.54 | 7.69 |
| 1/1 | 1/1 | 5.53 | 6.76 |
| 1/1 | 1/1 | 5.79 | 7.08 |
| 1/1 | 1/1 | 3.2  | 3.04 |
| 1/1 | 1/1 | 5.94 | 5.84 |
| 1/1 | 1/1 | 5.21 | 5.11 |
| 1/1 | 1/1 | 4.85 | 6.22 |
| 1/1 | 1/1 | 5.84 | 7.25 |
| 1/1 | 1/1 | 4.49 | 6.63 |
| 0/1 | 1/1 | 4.48 | 5.67 |
| 0/1 | 1/1 | 3.06 | 4.51 |
| 0/1 | 1/1 | 4.48 | 5.67 |
| 0/1 | 1/1 | 3.06 | 4.51 |

|     |     |      |      |
|-----|-----|------|------|
| 0/1 | 1/1 | 4.48 | 5.67 |
| 0/1 | 1/1 | 3.06 | 4.51 |
| 0/1 | 1/1 | 4.48 | 5.67 |
| 0/1 | 1/1 | 3.06 | 4.51 |
| 0/1 | 1/1 | 4.48 | 5.67 |
| 0/1 | 1/1 | 3.06 | 4.51 |
| 0/1 | 1/1 | 4.48 | 5.67 |
| 0/1 | 1/1 | 3.06 | 4.51 |
| 1/1 | 1/1 | 7.99 | 8.49 |
| 1/1 | 1/1 | 5.34 | 5.97 |
| 0/1 | 1/1 | 3.25 | 4.04 |
| 0/1 | 1/1 | 3.34 | 4.07 |
| 1/1 | 1/1 | 3.86 | 4.63 |
| 1/1 | 1/1 | 6.58 | 7.44 |
| 1/1 | 1/1 | 3.01 | 3.91 |
| 0/1 | 1/1 | 2.58 | 3.52 |
| 0/1 | 1/1 | 2.58 | 3.67 |
| 1/1 | 1/1 | 2.8  | 3.72 |
| 0/1 | 1/1 | 2.46 | 3.47 |
| 0/1 | 1/1 | 2.88 | 3.91 |
| 0/1 | 1/1 | 3.53 | 4.51 |
| 1/1 | 1/1 | 5.2  | 6.42 |
| 1/1 | 1/1 | 3.34 | 4.48 |
| 1/1 | 1/1 | 4.69 | 5.88 |
| 0/1 | 1/1 | 6.56 | 7.11 |
| 1/1 | 1/1 | 8.3  | 9.07 |
| 1/1 | 1/1 | 4.7  | 5.43 |
| 1/1 | 1/1 | 4.1  | 4.95 |
| 0/1 | 1/1 | 3.57 | 5.06 |
| 0/1 | 1/1 | 4.02 | 5.26 |
| 1/1 | 1/1 | 4.33 | 5.71 |
| 1/1 | 1/1 | 4.88 | 6.52 |
| 1/1 | 1/1 | 4.96 | 7.12 |
| 1/1 | 1/1 | 3.95 | 5.41 |
| 1/1 | 1/1 | 4.52 | 6.18 |
| 1/1 | 1/1 | 3.49 | 4.03 |
| 1/1 | 1/1 | 6.3  | 6.88 |
| 0/1 | 1/1 | 5.38 | 6.24 |
| 0/1 | 1/1 | 2.98 | 3.72 |
| 0/1 | 1/1 | 2.96 | 4.33 |
| 1/1 | 1/1 | 4.01 | 5.16 |
| 1/1 | 1/1 | 4.9  | 6.21 |
| 0/1 | 1/1 | 3.35 | 3.75 |
| 0/1 | 1/1 | 6.07 | 6.76 |
| 1/1 | 0/1 | 5.76 | 4.16 |
| 1/1 | 1/1 | 8.02 | 6.59 |
| 1/1 | 1/1 | 6.05 | 4.63 |
| 1/1 | 1/1 | 5.64 | 4.68 |
| 1/1 | 1/1 | 7.81 | 6.86 |
| 1/1 | 1/1 | 3.19 | 2.42 |
| 1/1 | 1/1 | 6.91 | 6.37 |
| 1/1 | 1/1 | 3.86 | 3.51 |
| 1/1 | 1/1 | 4.07 | 4.01 |
| 1/1 | 1/1 | 4.23 | 3.67 |
| 1/1 | 1/1 | 8.13 | 7.58 |
| 1/1 | 1/1 | 6.76 | 6.29 |
| 1/1 | 1/1 | 4.74 | 4.35 |
| 1/1 | 1/1 | 6.26 | 5.88 |



|     |     |       |      |
|-----|-----|-------|------|
| 1/1 | 0/1 | 2.37  | 2.02 |
| 1/1 | 1/1 | 6.23  | 5.9  |
| 1/1 | 1/1 | 4.75  | 4.52 |
| 1/1 | 1/1 | 7.3   | 7.15 |
| 0/1 | 1/1 | 6.79  | 6.9  |
| 0/1 | 1/1 | 2.27  | 2.47 |
| 0/1 | 1/1 | 2.74  | 2.99 |
| 0/1 | 1/1 | 7.76  | 8.02 |
| 0/1 | 1/1 | 2.59  | 3.02 |
| 1/1 | 1/1 | 7.39  | 6.73 |
| 1/1 | 1/1 | 4.92  | 4.32 |
| 1/1 | 1/1 | 9.01  | 9.03 |
| 1/1 | 1/1 | 5.12  | 5.15 |
| 1/1 | 1/1 | 6.55  | 8.13 |
| 1/1 | 1/1 | 5.65  | 7.37 |
| 0/1 | 1/1 | 3.16  | 3.56 |
| 1/1 | 1/1 | 4.98  | 5.42 |
| 1/1 | 1/1 | 5.62  | 6.5  |
| 1/1 | 1/1 | 4.92  | 6.3  |
| 1/1 | 1/1 | 5.63  | 7.05 |
| 0/1 | 1/1 | 3.87  | 5.58 |
| 1/1 | 0/1 | 6.34  | 3.08 |
| 1/1 | 1/1 | 11.57 | 8.42 |
| 1/1 | 1/1 | 8.47  | 5.66 |
| 1/1 | 1/1 | 7.41  | 5.95 |
| 1/1 | 0/1 | 3.77  | 2.46 |
| 1/1 | 1/1 | 8.5   | 7.68 |
| 1/1 | 1/1 | 5.63  | 5.71 |
| 0/1 | 1/1 | 4.53  | 5.18 |
| 0/1 | 1/1 | 5.14  | 5.82 |
| 1/1 | 1/1 | 5.17  | 6.11 |
| 1/1 | 1/1 | 5.18  | 6.34 |
| 0/1 | 1/1 | 4.48  | 5.67 |
| 0/1 | 1/1 | 2.94  | 4.51 |
| 0/1 | 1/1 | 3.87  | 4.62 |
| 0/1 | 1/1 | 4.27  | 6.24 |
| 1/1 | 1/1 | 6.8   | 6.58 |
| 1/1 | 1/1 | 3.85  | 3.7  |
| 1/1 | 1/1 | 8.99  | 8.9  |
| 1/1 | 1/1 | 5.01  | 5.38 |
| 0/1 | 1/1 | 2.74  | 3.4  |
| 0/1 | 1/1 | 2.68  | 3.81 |
| 0/1 | 1/1 | 4.83  | 6.18 |
| 0/1 | 1/1 | 2.05  | 3.01 |
| 0/1 | 1/1 | 3.05  | 4.83 |
| 1/1 | 0/1 | 5.43  | 2.1  |
| 1/1 | 1/1 | 7.1   | 3.86 |
| 1/1 | 0/1 | 8.25  | 5.09 |
| 1/1 | 1/1 | 8.9   | 6.2  |
| 1/1 | 1/1 | 5.79  | 3.28 |
| 1/1 | 1/1 | 10.68 | 8.32 |
| 1/1 | 1/1 | 6.94  | 6.49 |
| 0/1 | 1/1 | 3.6   | 3.29 |
| 1/1 | 1/1 | 5.19  | 4.94 |
| 1/1 | 1/1 | 4.88  | 4.7  |
| 1/1 | 1/1 | 8.19  | 8.24 |
| 1/1 | 1/1 | 5.36  | 5.46 |
| 1/1 | 1/1 | 6.35  | 6.6  |

|     |     |      |      |
|-----|-----|------|------|
| 0/1 | 1/1 | 2.96 | 3.68 |
| 0/1 | 1/1 | 3.01 | 4.93 |
| 0/1 | 1/1 | 4.79 | 6.73 |
| 1/1 | 1/1 | 4.26 | 6.79 |
| 0/1 | 1/1 | 2.39 | 2.71 |
| 0/1 | 1/1 | 2.69 | 3.17 |
| 1/1 | 1/1 | 4.8  | 6.77 |
| 1/1 | 1/1 | 4.12 | 6.21 |
| 1/1 | 1/1 | 4.27 | 6.67 |
| 1/1 | 1/1 | 4.03 | 5.11 |
| 1/1 | 1/1 | 6.17 | 7.42 |
| 1/1 | 1/1 | 5.08 | 6.4  |
| 1/1 | 1/1 | 6.1  | 7.67 |
| 0/1 | 1/1 | 3.33 | 4.62 |
| 0/1 | 1/1 | 2.87 | 4.3  |
| 0/1 | 1/1 | 3.01 | 4.93 |
| 0/1 | 1/1 | 4.79 | 6.73 |
| 1/1 | 1/1 | 4.26 | 6.79 |
| 0/1 | 1/1 | 2.39 | 2.71 |
| 0/1 | 1/1 | 2.69 | 3.17 |
| 0/1 | 1/1 | 3.01 | 4.93 |
| 0/1 | 1/1 | 4.79 | 6.73 |
| 1/1 | 1/1 | 4.26 | 6.79 |
| 0/1 | 1/1 | 3.01 | 4.93 |
| 0/1 | 1/1 | 4.79 | 6.73 |
| 1/1 | 1/1 | 4.26 | 6.79 |
| 0/1 | 1/1 | 4.79 | 6.73 |
| 1/1 | 1/1 | 4.26 | 6.79 |
| 0/1 | 1/1 | 2.39 | 2.71 |
| 0/1 | 1/1 | 2.69 | 3.17 |
| 0/1 | 1/1 | 3.01 | 4.93 |
| 0/1 | 1/1 | 4.79 | 6.73 |
| 1/1 | 1/1 | 4.26 | 6.79 |
| 0/1 | 1/1 | 2.39 | 2.71 |
| 0/1 | 1/1 | 2.69 | 3.17 |
| 0/1 | 1/1 | 3.01 | 4.93 |
| 0/1 | 1/1 | 4.79 | 6.73 |
| 1/1 | 1/1 | 4.26 | 6.79 |
| 0/1 | 1/1 | 3.01 | 4.93 |
| 0/1 | 1/1 | 4.79 | 6.73 |
| 1/1 | 1/1 | 4.26 | 6.79 |
| 0/1 | 1/1 | 4.79 | 6.73 |
| 1/1 | 1/1 | 4.26 | 6.79 |
| 1/1 | 1/1 | 3.79 | 3.68 |
| 1/1 | 1/1 | 8.25 | 8.35 |
| 1/1 | 1/1 | 3.14 | 3.5  |
| 1/1 | 1/1 | 8.9  | 9.71 |
| 0/1 | 1/1 | 4.28 | 4.27 |
| 0/1 | 1/1 | 5.03 | 5.28 |
| 1/1 | 1/1 | 5.1  | 6.28 |
| 0/1 | 1/1 | 3.67 | 4.91 |
| 1/1 | 1/1 | 5.64 | 6.5  |
| 0/1 | 1/1 | 5.68 | 6.58 |
| 1/1 | 1/1 | 2.98 | 3.92 |
| 0/1 | 1/1 | 2.29 | 3.44 |
| 1/1 | 1/1 | 4.57 | 5.39 |
| 0/1 | 1/1 | 2.56 | 3.9  |
| 0/1 | 1/1 | 4.35 | 4.6  |
| 1/1 | 1/1 | 8.19 | 9.58 |
| 0/1 | 1/1 | 3.31 | 4.55 |
| 1/1 | 1/1 | 4.4  | 5.88 |
| 1/1 | 1/1 | 4.54 | 6.05 |

|     |     |       |       |
|-----|-----|-------|-------|
| 0/1 | 1/1 | 4.19  | 5.17  |
| 0/1 | 1/1 | 9.85  | 10.97 |
| 1/1 | 1/1 | 2.9   | 4.15  |
| 1/1 | 1/1 | 7.07  | 5.7   |
| 1/1 | 1/1 | 5.82  | 5.46  |
| 1/1 | 1/1 | 6.76  | 6.82  |
| 1/1 | 1/1 | 9.34  | 9.35  |
| 1/1 | 1/1 | 3.85  | 3.93  |
| 1/1 | 1/1 | 5.06  | 3.22  |
| 1/1 | 1/1 | 8.18  | 6.53  |
| 1/1 | 1/1 | 5.86  | 4.59  |
| 1/1 | 0/1 | 3.28  | 2.23  |
| 1/1 | 1/1 | 4.46  | 3.55  |
| 1/1 | 1/1 | 6.22  | 5.69  |
| 0/1 | 1/1 | 4.21  | 3.88  |
| 1/1 | 1/1 | 7.22  | 6.97  |
| 0/1 | 1/1 | 4.69  | 5.64  |
| 1/1 | 1/1 | 7.77  | 8.78  |
| 0/1 | 1/1 | 3.37  | 4.46  |
| 0/1 | 1/1 | 4.72  | 5.97  |
| 0/1 | 1/1 | 2.54  | 4.29  |
| 0/1 | 1/1 | 3.5   | 5.84  |
| 0/1 | 1/1 | 2.79  | 6.25  |
| 1/1 | 1/1 | 4.45  | 5.33  |
| 1/1 | 1/1 | 3.62  | 5.02  |
| 1/1 | 1/1 | 9.33  | 10.83 |
| 1/1 | 1/1 | 6.1   | 8.08  |
| 1/1 | 1/1 | 8.76  | 10.97 |
| 1/1 | 1/1 | 4.25  | 8.82  |
| 1/1 | 1/1 | 4.87  | 6     |
| 0/1 | 1/1 | 3.31  | 5.12  |
| 1/1 | 1/1 | 7.53  | 9.29  |
| 0/1 | 1/1 | 2.95  | 4.84  |
| 0/1 | 1/1 | 3.83  | 7     |
| 1/1 | 1/1 | 8.71  | 8.02  |
| 1/1 | 0/1 | 7.92  | 7.38  |
| 1/1 | 1/1 | 9.09  | 8.59  |
| 1/1 | 1/1 | 9.41  | 9.32  |
| 1/1 | 1/1 | 13.31 | 13.46 |
| 1/1 | 1/1 | 5.05  | 6.28  |
| 0/1 | 1/1 | 3.09  | 5.04  |
| 0/1 | 1/1 | 5.17  | 5.7   |
| 1/1 | 1/1 | 5.05  | 5.67  |
| 1/1 | 1/1 | 4.98  | 5.97  |
| 1/1 | 1/1 | 4.59  | 5.34  |
| 1/1 | 1/1 | 4.55  | 5.32  |
| 1/1 | 1/1 | 3.56  | 4.34  |
| 0/1 | 1/1 | 3.12  | 4.49  |
| 0/1 | 1/1 | 1.96  | 2.35  |
| 0/1 | 1/1 | 1.93  | 2.44  |
| 1/1 | 1/1 | 4.46  | 5.05  |
| 1/1 | 1/1 | 7.61  | 7.45  |
| 1/1 | 1/1 | 8.17  | 8.08  |
| 1/1 | 1/1 | 10.92 | 11.18 |
| 0/1 | 1/1 | 2.56  | 3.2   |
| 1/1 | 1/1 | 7.4   | 8.71  |
| 1/1 | 1/1 | 4.99  | 6.76  |
| 1/1 | 1/1 | 3.23  | 5.11  |

|     |     |       |       |
|-----|-----|-------|-------|
| 0/1 | 1/1 | 3.68  | 4.49  |
| 1/1 | 1/1 | 5.29  | 6.19  |
| 1/1 | 1/1 | 8.85  | 8.36  |
| 1/1 | 1/1 | 7.75  | 7.46  |
| 1/1 | 1/1 | 8.25  | 8.06  |
| 1/1 | 1/1 | 4.52  | 5.49  |
| 0/1 | 1/1 | 3.14  | 4.73  |
| 0/1 | 1/1 | 2.82  | 3.83  |
| 1/1 | 1/1 | 2.62  | 3.69  |
| 1/1 | 1/1 | 5.15  | 6.2   |
| 1/1 | 1/1 | 3.99  | 5.43  |
| 0/1 | 1/1 | 3.65  | 5.37  |
| 1/1 | 1/1 | 4.44  | 5.24  |
| 1/1 | 1/1 | 5.15  | 6.29  |
| 1/1 | 1/1 | 3.97  | 5.06  |
| 0/1 | 1/1 | 4.38  | 5.82  |
| 0/1 | 1/1 | 4.14  | 4.7   |
| 0/1 | 1/1 | 2.82  | 4.14  |
| 0/1 | 1/1 | 3     | 4.91  |
| 1/1 | 1/1 | 3.46  | 5.92  |
| 1/1 | 1/1 | 5.44  | 8.76  |
| 1/1 | 1/1 | 5.03  | 8.71  |
| 1/1 | 1/1 | 6.29  | 7.32  |
| 1/1 | 1/1 | 7.21  | 8.41  |
| 0/1 | 1/1 | 3.76  | 4.69  |
| 1/1 | 1/1 | 3.86  | 4.84  |
| 0/1 | 1/1 | 3.44  | 5.05  |
| 1/1 | 1/1 | 4.77  | 5.66  |
| 1/1 | 1/1 | 6.14  | 7.06  |
| 1/1 | 1/1 | 3.48  | 4.4   |
| 1/1 | 1/1 | 4.43  | 5.51  |
| 1/1 | 1/1 | 3.89  | 5.05  |
| 1/1 | 1/1 | 4.37  | 5.71  |
| 1/1 | 1/1 | 4.51  | 6.01  |
| 0/1 | 1/1 | 3.99  | 5.61  |
| 0/1 | 1/1 | 2.14  | 4.82  |
| 1/1 | 1/1 | 4.69  | 5.83  |
| 1/1 | 1/1 | 5.45  | 7.16  |
| 1/1 | 1/1 | 3.25  | 5.56  |
| 0/1 | 1/1 | 3.92  | 5.47  |
| 0/1 | 1/1 | 2.06  | 3.68  |
| 1/1 | 1/1 | 3.76  | 4.38  |
| 0/1 | 1/1 | 2.79  | 3.51  |
| 1/1 | 1/1 | 6.82  | 7.61  |
| 1/1 | 1/1 | 9.77  | 11.06 |
| 0/1 | 1/1 | 3.54  | 4.32  |
| 1/1 | 1/1 | 6.83  | 7.76  |
| 0/1 | 1/1 | 7.02  | 6.98  |
| 1/1 | 1/1 | 6.17  | 6.61  |
| 0/1 | 1/1 | 3.95  | 4.72  |
| 0/1 | 1/1 | 4.07  | 5.06  |
| 1/1 | 1/1 | 7.65  | 6.4   |
| 1/1 | 1/1 | 9.37  | 8.29  |
| 1/1 | 1/1 | 10.67 | 9.89  |
| 1/1 | 1/1 | 5.55  | 4.88  |
| 0/1 | 1/1 | 2     | 3.46  |
| 1/1 | 1/1 | 3.99  | 5.58  |
| 0/1 | 1/1 | 5.56  | 6.77  |

|     |     |       |       |
|-----|-----|-------|-------|
| 0/1 | 1/1 | 4.38  | 5.64  |
| 0/1 | 1/1 | 4.23  | 5.27  |
| 0/1 | 1/1 | 2.34  | 6.05  |
| 1/1 | 1/1 | 7.99  | 8.82  |
| 1/1 | 1/1 | 5.66  | 6.64  |
| 1/1 | 1/1 | 4.83  | 3.76  |
| 1/1 | 1/1 | 6.99  | 5.93  |
| 1/1 | 1/1 | 4.06  | 3.03  |
| 1/1 | 0/1 | 2.92  | 2.01  |
| 1/1 | 1/1 | 3.73  | 3.02  |
| 1/1 | 1/1 | 2.47  | 2.51  |
| 1/1 | 1/1 | 12.67 | 12.84 |
| 1/1 | 1/1 | 7.37  | 7.85  |
| 1/1 | 1/1 | 8.19  | 7.13  |
| 1/1 | 1/1 | 10.06 | 9.07  |
| 1/1 | 1/1 | 4.51  | 3.66  |
| 1/1 | 1/1 | 4.82  | 4.02  |
| 1/1 | 1/1 | 7.72  | 6.94  |
| 1/1 | 1/1 | 3.23  | 2.49  |
| 1/1 | 1/1 | 3.71  | 3.05  |
| 1/1 | 1/1 | 4.44  | 3.98  |
| 1/1 | 1/1 | 7.27  | 6.85  |
| 1/1 | 1/1 | 7.65  | 7.39  |
| 1/1 | 1/1 | 6.86  | 6.77  |
| 1/1 | 1/1 | 4.71  | 5.18  |
| 1/1 | 1/1 | 3.14  | 3.65  |
| 0/1 | 1/1 | 2.24  | 2.77  |
| 1/1 | 1/1 | 9.37  | 7.73  |
| 1/1 | 0/1 | 3.4   | 2.02  |
| 1/1 | 1/1 | 12.27 | 11    |
| 1/1 | 1/1 | 12.94 | 11.74 |
| 1/1 | 1/1 | 13.03 | 12.13 |
| 0/1 | 1/1 | 2.39  | 2.71  |
| 0/1 | 1/1 | 2.69  | 3.17  |
| 1/1 | 1/1 | 6.83  | 7.87  |
| 0/1 | 1/1 | 2.02  | 3.27  |
| 0/1 | 1/1 | 3.07  | 4.37  |
| 1/1 | 1/1 | 2.74  | 4.87  |
| 1/1 | 1/1 | 5.02  | 7.72  |
| 1/1 | 1/1 | 5.75  | 5.09  |
| 0/1 | 1/1 | 2.61  | 2.62  |
| 1/1 | 1/1 | 8.63  | 8.77  |
| 0/1 | 1/1 | 2.73  | 3.96  |
| 1/1 | 1/1 | 3.26  | 4.57  |
| 0/1 | 1/1 | 3.1   | 5.14  |
| 1/1 | 1/1 | 4.92  | 5.79  |
| 0/1 | 1/1 | 2.84  | 4.39  |
| 0/1 | 1/1 | 4.75  | 5.84  |
| 1/1 | 1/1 | 2.97  | 4.41  |
| 0/1 | 1/1 | 3.82  | 4.84  |
| 0/1 | 1/1 | 4.75  | 6.17  |
| 0/1 | 1/1 | 4.38  | 5.84  |
| 1/1 | 1/1 | 5.14  | 7.08  |
| 1/1 | 1/1 | 5.76  | 8.34  |
| 1/1 | 1/1 | 3.91  | 4.7   |
| 1/1 | 1/1 | 3.81  | 4.89  |
| 1/1 | 1/1 | 4.24  | 4.57  |
| 0/1 | 1/1 | 3.84  | 4.38  |

|     |     |       |       |
|-----|-----|-------|-------|
| 1/1 | 1/1 | 3.91  | 4.71  |
| 1/1 | 1/1 | 6.29  | 8.2   |
| 1/1 | 1/1 | 3.92  | 7.01  |
| 0/1 | 1/1 | 2.05  | 3.16  |
| 0/1 | 1/1 | 2.63  | 4.06  |
| 0/1 | 1/1 | 4.88  | 5.96  |
| 1/1 | 1/1 | 4.62  | 6.41  |
| 0/1 | 1/1 | 5.04  | 6.09  |
| 0/1 | 1/1 | 3.45  | 4.57  |
| 1/1 | 1/1 | 7.96  | 7.23  |
| 1/1 | 1/1 | 10.01 | 9.58  |
| 1/1 | 1/1 | 5.3   | 6.45  |
| 1/1 | 1/1 | 4.11  | 5.38  |
| 0/1 | 1/1 | 3.58  | 4.86  |
| 0/1 | 1/1 | 2.78  | 2.68  |
| 0/1 | 1/1 | 2.77  | 2.79  |
| 1/1 | 1/1 | 3.28  | 3.32  |
| 1/1 | 1/1 | 5.31  | 5.36  |
| 1/1 | 1/1 | 3.28  | 3.36  |
| 1/1 | 1/1 | 5.08  | 5.19  |
| 0/1 | 1/1 | 2.12  | 2.9   |
| 1/1 | 1/1 | 4.52  | 6.16  |
| 0/1 | 1/1 | 4.73  | 6.58  |
| 0/1 | 1/1 | 3.38  | 5.66  |
| 1/1 | 1/1 | 5.99  | 5.85  |
| 0/1 | 1/1 | 2.58  | 3.84  |
| 1/1 | 1/1 | 5.16  | 4.57  |
| 1/1 | 1/1 | 11.8  | 11.76 |
| 1/1 | 1/1 | 10.34 | 10.33 |
| 1/1 | 1/1 | 9.44  | 7.25  |
| 1/1 | 1/1 | 8.33  | 7.01  |
| 1/1 | 1/1 | 8.88  | 8.55  |
| 1/1 | 1/1 | 7.55  | 7.41  |
| 0/1 | 1/1 | 10.54 | 10.8  |
| 1/1 | 1/1 | 3.63  | 3.98  |
| 1/1 | 1/1 | 7.68  | 8.03  |
| 0/1 | 1/1 | 5.7   | 6.29  |
| 0/1 | 1/1 | 6.72  | 7.37  |
| 1/1 | 1/1 | 8.08  | 8.85  |
| 1/1 | 1/1 | 8.02  | 8.81  |
| 1/1 | 1/1 | 7.59  | 8.5   |
| 0/1 | 1/1 | 3.32  | 4.65  |
| 0/1 | 1/1 | 3.93  | 5.48  |
| 1/1 | 1/1 | 3.94  | 5.39  |
| 1/1 | 1/1 | 4.76  | 6.64  |
| 1/1 | 1/1 | 3.88  | 5.37  |
| 0/1 | 1/1 | 3.02  | 4.99  |
| 1/1 | 1/1 | 4.59  | 5.86  |
| 0/1 | 1/1 | 4.32  | 5.76  |
| 1/1 | 1/1 | 3.97  | 5.97  |
| 0/1 | 1/1 | 2.74  | 5.24  |
| 0/1 | 1/1 | 3.82  | 5.09  |
| 0/1 | 1/1 | 2.44  | 4.06  |
| 0/1 | 1/1 | 4.38  | 6.01  |
| 1/1 | 1/1 | 6.13  | 7.65  |
| 1/1 | 1/1 | 5.33  | 7.4   |
| 1/1 | 1/1 | 5.03  | 6.79  |
| 1/1 | 1/1 | 4.18  | 5.95  |

|     |     |      |       |
|-----|-----|------|-------|
| 1/1 | 1/1 | 2.89 | 4.85  |
| 1/1 | 0/1 | 5.01 | 3.77  |
| 0/1 | 1/1 | 2.97 | 3.26  |
| 1/1 | 1/1 | 3.77 | 4.53  |
| 1/1 | 1/1 | 2.84 | 3.68  |
| 1/1 | 1/1 | 4.46 | 5.38  |
| 1/1 | 1/1 | 9.33 | 10.83 |
| 1/1 | 1/1 | 6.27 | 8.02  |
| 1/1 | 1/1 | 9.39 | 11.54 |
| 1/1 | 1/1 | 3.41 | 4.15  |
| 0/1 | 1/1 | 4.34 | 5.17  |
| 0/1 | 1/1 | 4.65 | 6.04  |
| 1/1 | 1/1 | 5.39 | 7.28  |
| 0/1 | 1/1 | 3.71 | 5.61  |
| 1/1 | 1/1 | 3.08 | 3.66  |
| 0/1 | 1/1 | 2.11 | 2.85  |
| 0/1 | 1/1 | 2.2  | 2.85  |
| 0/1 | 1/1 | 4.45 | 5.16  |
| 1/1 | 1/1 | 4.85 | 6.51  |
| 0/1 | 1/1 | 2.78 | 4.52  |
| 1/1 | 1/1 | 4.65 | 6.49  |
| 1/1 | 1/1 | 4.34 | 5.87  |
| 1/1 | 1/1 | 6.23 | 8.17  |
| 0/1 | 1/1 | 2.92 | 5.69  |
| 1/1 | 1/1 | 4.23 | 5.23  |
| 1/1 | 1/1 | 4.65 | 6.2   |
| 1/1 | 1/1 | 7.07 | 8.13  |
| 0/1 | 1/1 | 1.74 | 2.84  |
| 0/1 | 1/1 | 2.66 | 4.79  |
| 0/1 | 1/1 | 4.74 | 6.27  |
| 1/1 | 1/1 | 4.1  | 5.79  |
| 0/1 | 1/1 | 3.82 | 5.58  |
| 1/1 | 1/1 | 4.07 | 4.66  |
| 1/1 | 1/1 | 2.84 | 3.77  |
| 1/1 | 1/1 | 6.32 | 5.91  |
| 1/1 | 1/1 | 8.63 | 8.57  |
| 1/1 | 1/1 | 4.07 | 5.7   |
| 0/1 | 1/1 | 2.24 | 4.45  |
| 1/1 | 0/1 | 2.8  | 2.28  |
| 1/1 | 1/1 | 7.13 | 6.86  |
| 0/1 | 1/1 | 2.78 | 3.53  |
| 0/1 | 1/1 | 2.99 | 4.42  |
| 0/1 | 1/1 | 7.1  | 7.16  |
| 1/1 | 1/1 | 6.48 | 6.82  |
| 0/1 | 1/1 | 3.7  | 4.07  |
| 1/1 | 1/1 | 4.93 | 5.47  |
| 1/1 | 1/1 | 7.58 | 7.84  |
| 1/1 | 1/1 | 7.61 | 7.97  |
| 1/1 | 1/1 | 4.79 | 5.43  |
| 1/1 | 1/1 | 4.59 | 5.27  |
| 1/1 | 1/1 | 6.79 | 7.54  |
| 1/1 | 1/1 | 5.15 | 5.9   |
| 1/1 | 1/1 | 2.81 | 3.74  |
| 1/1 | 1/1 | 5.45 | 6.49  |
| 1/1 | 1/1 | 4.33 | 6.09  |
| 0/1 | 1/1 | 3.96 | 6.32  |
| 0/1 | 1/1 | 3.14 | 4.77  |
| 0/1 | 1/1 | 4.49 | 6.19  |

|     |     |       |       |
|-----|-----|-------|-------|
| 1/1 | 1/1 | 4.44  | 6.32  |
| 0/1 | 1/1 | 3.26  | 5.72  |
| 1/1 | 1/1 | 4.2   | 3.79  |
| 1/1 | 1/1 | 3.23  | 2.84  |
| 1/1 | 1/1 | 9.53  | 9.6   |
| 0/1 | 1/1 | 3.16  | 3.36  |
| 1/1 | 1/1 | 3.71  | 4.98  |
| 0/1 | 1/1 | 2.91  | 5.14  |
| 1/1 | 1/1 | 5.08  | 5.4   |
| 0/1 | 1/1 | 3.05  | 3.39  |
| 1/1 | 1/1 | 3.73  | 4.18  |
| 0/1 | 1/1 | 2.31  | 3.45  |
| 0/1 | 1/1 | 2.54  | 3.91  |
| 1/1 | 0/1 | 7.37  | 5.35  |
| 1/1 | 1/1 | 5.35  | 3.34  |
| 1/1 | 0/1 | 4.42  | 2.71  |
| 1/1 | 0/1 | 4.15  | 2.49  |
| 1/1 | 1/1 | 6.56  | 4.93  |
| 1/1 | 0/1 | 4.54  | 2.95  |
| 1/1 | 0/1 | 5.24  | 3.77  |
| 1/1 | 1/1 | 6.03  | 4.64  |
| 1/1 | 1/1 | 5.18  | 4.19  |
| 1/1 | 1/1 | 5.7   | 4.96  |
| 1/1 | 1/1 | 8.32  | 7.77  |
| 0/1 | 1/1 | 3.93  | 3.42  |
| 1/1 | 0/1 | 4.19  | 3.78  |
| 1/1 | 0/1 | 3.31  | 2.94  |
| 1/1 | 1/1 | 5.14  | 4.79  |
| 1/1 | 1/1 | 11.71 | 11.42 |
| 1/1 | 1/1 | 5.06  | 4.83  |
| 1/1 | 1/1 | 4.41  | 4.18  |
| 1/1 | 1/1 | 12.9  | 12.74 |
| 1/1 | 1/1 | 11.59 | 11.47 |
| 1/1 | 1/1 | 3.51  | 3.39  |
| 1/1 | 1/1 | 8.41  | 8.39  |
| 1/1 | 1/1 | 11.43 | 11.43 |
| 1/1 | 1/1 | 3.24  | 3.27  |
| 0/1 | 1/1 | 4.33  | 4.71  |
| 1/1 | 1/1 | 5.01  | 6.69  |
| 1/1 | 1/1 | 5.21  | 6.92  |
| 1/1 | 1/1 | 4.42  | 5.99  |
| 1/1 | 1/1 | 5.73  | 7.49  |
| 1/1 | 1/1 | 6.61  | 7.78  |
| 1/1 | 1/1 | 6.95  | 8.32  |
| 1/1 | 1/1 | 7.37  | 8.78  |
| 1/1 | 1/1 | 8.66  | 9.9   |
| 0/1 | 1/1 | 3.47  | 4.75  |
| 1/1 | 1/1 | 6.75  | 8.19  |
| 1/1 | 1/1 | 5.82  | 7.34  |
| 0/1 | 1/1 | 2.5   | 5.02  |
| 0/1 | 1/1 | 2.78  | 3.08  |
| 0/1 | 1/1 | 5.68  | 6.41  |
| 0/1 | 1/1 | 2.91  | 4.14  |
| 0/1 | 1/1 | 3.81  | 5.88  |
| 0/1 | 1/1 | 3.61  | 5     |
| 0/1 | 1/1 | 2.09  | 3.77  |
| 0/1 | 1/1 | 2.76  | 5.33  |
| 1/1 | 1/1 | 5.67  | 6.65  |



|     |     |       |       |
|-----|-----|-------|-------|
| 1/1 | 1/1 | 6.35  | 7.55  |
| 0/1 | 1/1 | 3.53  | 5.69  |
| 1/1 | 1/1 | 4.66  | 6.08  |
| 0/1 | 1/1 | 4.12  | 5.77  |
| 0/1 | 1/1 | 2.57  | 4.4   |
| 0/1 | 1/1 | 2.45  | 4.52  |
| 1/1 | 1/1 | 4.82  | 3.77  |
| 1/1 | 1/1 | 8.02  | 6.98  |
| 1/1 | 1/1 | 6.87  | 6.07  |
| 1/1 | 1/1 | 5.94  | 5.86  |
| 1/1 | 1/1 | 5.94  | 5.93  |
| 1/1 | 1/1 | 6.55  | 6.65  |
| 0/1 | 1/1 | 7.36  | 7.65  |
| 0/1 | 1/1 | 3.53  | 3.85  |
| 0/1 | 1/1 | 2.64  | 4.35  |
| 1/1 | 1/1 | 3.6   | 5.4   |
| 1/1 | 1/1 | 7.96  | 7.88  |
| 1/1 | 1/1 | 5.52  | 5.43  |
| 0/1 | 1/1 | 2.35  | 2.54  |
| 0/1 | 1/1 | 3.31  | 3.51  |
| 1/1 | 1/1 | 8.01  | 8.29  |
| 1/1 | 1/1 | 7.08  | 7.47  |
| 1/1 | 1/1 | 6.62  | 6.47  |
| 1/1 | 1/1 | 8.81  | 8.99  |
| 0/1 | 1/1 | 3.9   | 4.3   |
| 1/1 | 0/1 | 5.45  | 3.62  |
| 1/1 | 1/1 | 6.65  | 5.32  |
| 1/1 | 1/1 | 6.44  | 5.23  |
| 1/1 | 1/1 | 9.6   | 8.7   |
| 1/1 | 1/1 | 6.43  | 5.79  |
| 1/1 | 1/1 | 4.09  | 3.7   |
| 1/1 | 1/1 | 6.78  | 6.51  |
| 1/1 | 1/1 | 5.46  | 5.21  |
| 1/1 | 1/1 | 5.11  | 5.08  |
| 0/1 | 1/1 | 2.78  | 3.04  |
| 0/1 | 1/1 | 3.82  | 4.21  |
| 1/1 | 1/1 | 11.91 | 11.98 |
| 1/1 | 1/1 | 4.55  | 4.88  |
| 1/1 | 1/1 | 4.09  | 5.37  |
| 1/1 | 1/1 | 3.17  | 4.95  |
| 1/1 | 1/1 | 7.54  | 8.12  |
| 0/1 | 1/1 | 4.82  | 5.9   |
| 1/1 | 1/1 | 6.55  | 7.08  |
| 0/1 | 1/1 | 3.64  | 4.35  |
| 0/1 | 1/1 | 3.56  | 4.88  |
| 0/1 | 1/1 | 5.3   | 6.69  |
| 1/1 | 1/1 | 9.02  | 9.3   |
| 1/1 | 1/1 | 6.16  | 7.16  |
| 0/1 | 1/1 | 2     | 2.32  |
| 0/1 | 1/1 | 2.26  | 2.84  |
| 1/1 | 1/1 | 5.17  | 7.03  |
| 0/1 | 1/1 | 3.58  | 5.77  |
| 1/1 | 1/1 | 9.27  | 7.31  |
| 1/1 | 0/1 | 4.12  | 2.81  |
| 1/1 | 1/1 | 8.14  | 6.96  |
| 1/1 | 1/1 | 5.94  | 5.51  |
| 1/1 | 1/1 | 8.76  | 8.38  |
| 1/1 | 1/1 | 4.61  | 4.47  |

|     |     |       |       |
|-----|-----|-------|-------|
| 1/1 | 1/1 | 6.81  | 7.48  |
| 1/1 | 1/1 | 9.61  | 10.84 |
| 1/1 | 1/1 | 6.81  | 7.48  |
| 1/1 | 1/1 | 9.61  | 10.84 |
| 0/1 | 1/1 | 3.61  | 5.67  |
| 1/1 | 1/1 | 4.2   | 6.29  |
| 1/1 | 1/1 | 8.81  | 10.34 |
| 1/1 | 1/1 | 7.05  | 9.01  |
| 1/1 | 1/1 | 4.76  | 7.29  |
| 0/1 | 1/1 | 2.84  | 6.16  |
| 0/1 | 1/1 | 3.31  | 4.97  |
| 0/1 | 1/1 | 3.27  | 4.99  |
| 0/1 | 1/1 | 2.74  | 4.04  |
| 1/1 | 1/1 | 6.09  | 7.52  |
| 1/1 | 1/1 | 9.33  | 10.83 |
| 1/1 | 1/1 | 6.27  | 8.02  |
| 1/1 | 1/1 | 9.39  | 11.54 |
| 1/1 | 1/1 | 4.62  | 6.3   |
| 0/1 | 1/1 | 1.85  | 4.13  |
| 1/1 | 1/1 | 6.54  | 5.77  |
| 1/1 | 0/1 | 2.45  | 2.13  |
| 1/1 | 1/1 | 9.06  | 8.95  |
| 0/1 | 1/1 | 4.13  | 4.13  |
| 1/1 | 1/1 | 10.18 | 10.34 |
| 1/1 | 1/1 | 6.11  | 6.39  |
| 0/1 | 1/1 | 7.51  | 7.79  |
| 1/1 | 1/1 | 2.59  | 2.89  |
| 1/1 | 1/1 | 5.84  | 8.11  |
| 1/1 | 1/1 | 5.22  | 8.46  |
| 0/1 | 1/1 | 2.82  | 8.13  |
| 1/1 | 1/1 | 5.08  | 6.54  |
| 0/1 | 1/1 | 4.51  | 6.26  |
| 1/1 | 1/1 | 4.84  | 6.07  |
| 0/1 | 1/1 | 4.13  | 6.13  |
| 0/1 | 1/1 | 3.96  | 6.82  |
| 0/1 | 1/1 | 3.39  | 4.09  |
| 0/1 | 1/1 | 2.56  | 3.4   |
| 0/1 | 1/1 | 2.18  | 4     |
| 1/1 | 1/1 | 4.17  | 7.29  |
| 0/1 | 1/1 | 3.35  | 4.94  |
| 1/1 | 1/1 | 5.86  | 7.76  |
| 0/1 | 1/1 | 4.9   | 6.92  |
| 0/1 | 1/1 | 3.84  | 5.95  |
| 0/1 | 1/1 | 4.83  | 7.12  |
| 1/1 | 1/1 | 7.32  | 6.62  |
| 1/1 | 1/1 | 6.83  | 6.52  |
| 1/1 | 1/1 | 8.85  | 8.78  |
| 1/1 | 1/1 | 5.31  | 5.62  |
| 1/1 | 1/1 | 6.09  | 6.48  |
| 1/1 | 0/1 | 4.23  | 3.32  |
| 1/1 | 1/1 | 7.85  | 7.2   |
| 1/1 | 1/1 | 9.77  | 11.06 |
| 1/1 | 1/1 | 7.57  | 8.98  |
| 0/1 | 1/1 | 4.57  | 6.05  |
| 1/1 | 0/1 | 8.77  | 6.99  |
| 1/1 | 1/1 | 8.6   | 7.99  |
| 1/1 | 0/1 | 5.58  | 5.01  |
| 1/1 | 1/1 | 6.89  | 6.53  |

|     |     |       |       |
|-----|-----|-------|-------|
| 1/1 | 1/1 | 10.67 | 10.4  |
| 1/1 | 1/1 | 8.39  | 7.88  |
| 1/1 | 1/1 | 10.82 | 10.66 |
| 1/1 | 1/1 | 3.31  | 3.36  |
| 1/1 | 1/1 | 5.17  | 4.12  |
| 1/1 | 0/1 | 2.99  | 2     |
| 1/1 | 1/1 | 7.45  | 6.5   |
| 1/1 | 1/1 | 4.65  | 3.77  |
| 1/1 | 1/1 | 6.45  | 5.74  |
| 1/1 | 1/1 | 9.87  | 9.18  |
| 0/1 | 1/1 | 3.29  | 2.92  |
| 0/1 | 1/1 | 3.94  | 3.81  |
| 1/1 | 1/1 | 6.8   | 6.79  |
| 1/1 | 1/1 | 7.48  | 7.5   |
| 1/1 | 1/1 | 6.31  | 6.45  |
| 1/1 | 1/1 | 2.56  | 2.72  |
| 0/1 | 1/1 | 7.19  | 7.38  |
| 0/1 | 1/1 | 2.43  | 2.66  |
| 0/1 | 1/1 | 2.51  | 2.85  |
| 1/1 | 1/1 | 6.37  | 6.73  |
| 0/1 | 1/1 | 4.4   | 5.41  |
| 1/1 | 1/1 | 5.42  | 6.85  |
| 0/1 | 1/1 | 1.99  | 3.66  |
| 0/1 | 1/1 | 3.24  | 4.95  |
| 0/1 | 1/1 | 1.65  | 3.57  |
| 0/1 | 1/1 | 4.44  | 6.84  |
| 0/1 | 1/1 | 3.96  | 6.48  |
| 0/1 | 1/1 | 3.86  | 6.7   |
| 0/1 | 1/1 | 2.12  | 6.22  |
| 1/1 | 1/1 | 6.24  | 8.25  |
| 0/1 | 1/1 | 2.59  | 5.05  |
| 1/1 | 1/1 | 9.77  | 11.06 |
| 1/1 | 1/1 | 7.57  | 8.98  |
| 0/1 | 1/1 | 4.57  | 6.05  |
| 0/1 | 1/1 | 2.39  | 3.95  |
| 0/1 | 1/1 | 3.82  | 5.69  |
| 0/1 | 1/1 | 2.39  | 3.95  |
| 0/1 | 1/1 | 3.82  | 5.69  |
| 0/1 | 1/1 | 2.39  | 3.95  |
| 0/1 | 1/1 | 3.82  | 5.69  |
| 0/1 | 1/1 | 2.39  | 3.95  |
| 0/1 | 1/1 | 3.82  | 5.69  |
| 0/1 | 1/1 | 2.39  | 3.95  |
| 0/1 | 1/1 | 3.82  | 5.69  |
| 0/1 | 1/1 | 2.39  | 3.95  |
| 0/1 | 1/1 | 3.82  | 5.69  |
| 0/1 | 1/1 | 2.39  | 3.95  |
| 0/1 | 1/1 | 3.82  | 5.69  |
| 0/1 | 1/1 | 2.39  | 3.95  |
| 0/1 | 1/1 | 3.82  | 5.69  |
| 1/1 | 1/1 | 7.34  | 6.62  |
| 1/1 | 1/1 | 7.69  | 7.22  |
| 1/1 | 1/1 | 6.89  | 6.55  |
| 1/1 | 1/1 | 5.79  | 5.52  |
| 1/1 | 1/1 | 11.66 | 11.77 |
| 1/1 | 1/1 | 8.85  | 9.12  |
| 1/1 | 1/1 | 10.5  | 10.78 |
| 1/1 | 1/1 | 9.04  | 9.5   |

|     |     |       |       |
|-----|-----|-------|-------|
| 1/1 | 1/1 | 7.57  | 8.13  |
| 1/1 | 1/1 | 7.58  | 6.18  |
| 1/1 | 0/1 | 4.45  | 3.38  |
| 1/1 | 1/1 | 6     | 5.21  |
| 1/1 | 1/1 | 4.08  | 3.39  |
| 0/1 | 1/1 | 2.93  | 2.65  |
| 1/1 | 1/1 | 5.02  | 4.78  |
| 1/1 | 1/1 | 5.05  | 4.84  |
| 1/1 | 1/1 | 5.5   | 5.38  |
| 1/1 | 1/1 | 3.69  | 3.6   |
| 1/1 | 1/1 | 5.77  | 5.71  |
| 1/1 | 1/1 | 5.57  | 5.56  |
| 1/1 | 1/1 | 4.76  | 4.87  |
| 0/1 | 1/1 | 5.55  | 5.7   |
| 1/1 | 1/1 | 7.4   | 7.57  |
| 1/1 | 1/1 | 3.75  | 4.13  |
| 1/1 | 1/1 | 5.34  | 4.68  |
| 1/1 | 1/1 | 5.69  | 5.1   |
| 1/1 | 1/1 | 3.56  | 3.35  |
| 1/1 | 1/1 | 3.88  | 3.73  |
| 1/1 | 1/1 | 12.04 | 11.91 |
| 1/1 | 1/1 | 3.71  | 3.61  |
| 1/1 | 1/1 | 3.71  | 3.72  |
| 0/1 | 1/1 | 5.39  | 5.59  |
| 0/1 | 1/1 | 2.58  | 2.77  |
| 0/1 | 1/1 | 2.09  | 2.47  |
| 1/1 | 1/1 | 5.16  | 4.55  |
| 1/1 | 0/1 | 5.79  | 5.27  |
| 1/1 | 1/1 | 12.29 | 12.4  |
| 1/1 | 1/1 | 10.22 | 10.43 |
| 1/1 | 1/1 | 8.74  | 9.02  |
| 0/1 | 1/1 | 5.04  | 7.13  |
| 1/1 | 1/1 | 3.72  | 6.36  |
| 1/1 | 1/1 | 9.32  | 9.21  |
| 1/1 | 1/1 | 6.27  | 6.25  |
| 1/1 | 1/1 | 7.09  | 6.08  |
| 1/1 | 1/1 | 8.53  | 7.54  |

| Fold Change | 6 Normalized Avg Signal | 4 Normalized Avg Signal (log2) |  |  |
|-------------|-------------------------|--------------------------------|--|--|
| 266.49      | -1.52                   | -9.98                          |  |  |
| -5.08       | -5.56                   | -3.62                          |  |  |
| 110.12      | -1.36                   | -8.68                          |  |  |
| 8.43        | -0.49                   | -4.1                           |  |  |
| 3.47        | -5.8                    | -8.12                          |  |  |
| 2.88        | -0.72                   | -2.78                          |  |  |
| -6.09       | -3.04                   | -0.97                          |  |  |
| -6.73       | -7.05                   | -4.83                          |  |  |
| -10.35      | -6.52                   | -3.67                          |  |  |
| 56.79       | 4.15                    | -2.41                          |  |  |
| 1.46        | -2.98                   | -4.25                          |  |  |
| -3.59       | -0.92                   | 0.19                           |  |  |
| 5.18        | 2.47                    | -3.76                          |  |  |
| 1.9         | 3.14                    | -1.64                          |  |  |
| 1.16        | 0.86                    | -3.21                          |  |  |
| 1.06        | 2.34                    | -1.61                          |  |  |
| 1.01        | 1.33                    | -2.54                          |  |  |
| -1.02       | -1.35                   | -5.18                          |  |  |
| -1.19       | 1.75                    | -1.87                          |  |  |
| -1.36       | -0.6                    | -4.02                          |  |  |
| -1.67       | -0.84                   | -3.97                          |  |  |
| -1.96       | -0.57                   | -3.46                          |  |  |
| -2.73       | -1.47                   | -3.89                          |  |  |
| -3.28       | -0.53                   | -2.68                          |  |  |
| -3.55       | -0.59                   | -2.63                          |  |  |
| -4.03       | 0.5                     | -1.35                          |  |  |
| -4.21       | -1.04                   | -2.82                          |  |  |
| -6.28       | 0.95                    | -0.26                          |  |  |
| -34.19      | -1.72                   | -0.48                          |  |  |
| -34.29      | -0.31                   | 0.93                           |  |  |
| 177.35      | -1.8                    | -7.72                          |  |  |
| 12.36       | -3.06                   | -5.13                          |  |  |
| 10.87       | -6.64                   | -8.53                          |  |  |
| 9.59        | -5.08                   | -6.79                          |  |  |
| 9.6         | -5.33                   | -7.04                          |  |  |
| 9.46        | -5.14                   | -6.83                          |  |  |
| 8.08        | -4.38                   | -5.84                          |  |  |
| 7.29        | -6.85                   | -8.17                          |  |  |
| 6.41        | -7.57                   | -8.7                           |  |  |
| 6.32        | -2.25                   | -3.36                          |  |  |
| 6.28        | -5.64                   | -6.74                          |  |  |
| 6.04        | -3.94                   | -4.99                          |  |  |
| 1.01        | -4.63                   | -3.09                          |  |  |
| -1.06       | -7.99                   | -6.35                          |  |  |
| -1.1        | -9.22                   | -7.53                          |  |  |
| -1.19       | -5.13                   | -3.32                          |  |  |
| -1.26       | -9.73                   | -7.85                          |  |  |
| 1.75        | 0.42                    | -5.46                          |  |  |
| 1.07        | 0.06                    | -5.11                          |  |  |
| -1.07       | 0.04                    | -4.94                          |  |  |
| -1.19       | -1.69                   | -6.51                          |  |  |
| -1.58       | 2.66                    | -1.75                          |  |  |
| -2.53       | 1.49                    | -2.25                          |  |  |
| -3.42       | -1.92                   | -5.22                          |  |  |
| -6.78       | 0.46                    | -1.86                          |  |  |
| -8.1        | -1.92                   | -3.98                          |  |  |
| -8.36       | 1.64                    | -0.37                          |  |  |

|         |       |       |  |  |
|---------|-------|-------|--|--|
| -13.6   | 0.93  | -0.38 |  |  |
| -15.39  | -1.14 | -2.27 |  |  |
| -16.41  | -3.06 | -4.1  |  |  |
| -69.45  | -1.88 | -0.84 |  |  |
| -77.53  | 0.12  | 1.32  |  |  |
| -89.66  | -1.39 | 0.03  |  |  |
| -93.97  | -0.54 | 0.94  |  |  |
| -114.11 | -0.75 | 1.01  |  |  |
| -144.39 | -0.96 | 1.14  |  |  |
| -306.43 | -2.22 | 0.97  |  |  |
| 3.78    | -0.23 | -5.99 |  |  |
| 1.59    | -0.38 | -4.89 |  |  |
| 1.03    | -3.07 | -6.95 |  |  |
| -1.04   | -3.43 | -7.21 |  |  |
| -1.29   | -0.84 | -4.31 |  |  |
| -1.47   | -2    | -5.28 |  |  |
| -1.71   | 2.45  | -0.62 |  |  |
| -4.55   | 0.77  | -0.88 |  |  |
| -5.86   | 0.44  | -0.84 |  |  |
| -6.82   | 0.79  | -0.28 |  |  |
| -6.91   | -0.83 | -1.88 |  |  |
| -31.52  | -0.43 | 0.71  |  |  |
| -43.38  | -0.59 | 1.01  |  |  |
| -57.79  | -1.87 | 0.14  |  |  |
| -63.7   | -1.89 | 0.27  |  |  |
| -64.16  | -1.53 | 0.64  |  |  |
| -65.32  | -2.05 | 0.14  |  |  |
| -65.88  | -3.79 | -1.58 |  |  |
| -79.62  | -1.55 | 0.93  |  |  |
| -103.94 | -3.01 | -0.14 |  |  |
| -161.05 | -3.08 | 0.41  |  |  |
| 1.52    | 2.97  | -2.68 |  |  |
| 1.41    | 2.09  | -3.45 |  |  |
| 1.2     | 2.39  | -2.92 |  |  |
| 1.07    | 2.08  | -3.07 |  |  |
| 1.06    | 1.49  | -3.65 |  |  |
| 1.03    | -0.76 | -5.85 |  |  |
| -1.01   | 3.06  | -1.97 |  |  |
| -1.11   | -0.37 | -5.27 |  |  |
| -1.14   | 4.6   | -0.26 |  |  |
| -1.18   | 3.51  | -1.3  |  |  |
| -1.28   | 5.2   | 0.51  |  |  |
| -1.31   | 1.01  | -3.65 |  |  |
| -1.32   | 0.36  | -4.28 |  |  |
| -1.41   | -0.18 | -4.73 |  |  |
| -1.51   | -0.81 | -5.26 |  |  |
| -1.55   | 4     | -0.42 |  |  |
| -1.72   | -1.62 | -5.88 |  |  |
| -1.9    | 1.01  | -3.11 |  |  |
| -2.04   | 1.2   | -2.82 |  |  |
| -2.59   | -1.53 | -5.21 |  |  |
| -2.69   | -2    | -5.63 |  |  |
| -3.44   | -2.15 | -5.42 |  |  |
| -4.53   | 2.4   | -0.47 |  |  |
| -4.68   | -0.22 | -3.05 |  |  |
| -6.98   | 3.14  | 0.89  |  |  |
| -8.3    | -2.15 | -4.15 |  |  |
| -10.57  | 0.3   | -1.35 |  |  |

|         |       |       |  |  |
|---------|-------|-------|--|--|
| -13.86  | -0.45 | -1.71 |  |  |
| -68.66  | 0.62  | 1.67  |  |  |
| -69.63  | 0.98  | 2.05  |  |  |
| -72.25  | -0.95 | 0.18  |  |  |
| -145.68 | -1.22 | 0.92  |  |  |
| -145.87 | -0.73 | 1.41  |  |  |
| -172.74 | -0.64 | 1.74  |  |  |
| -257.97 | -1.04 | 1.92  |  |  |
| -308.57 | -1.76 | 1.46  |  |  |
| 50.68   | 6.8   | 1.37  |  |  |
| 39.12   | 7.42  | 2.36  |  |  |
| 8.19    | -0.45 | -3.25 |  |  |
| 7.98    | 2.77  | 0.01  |  |  |
| 7.55    | 3.54  | 0.85  |  |  |
| 2.75    | 1.56  | 0.33  |  |  |
| -1.77   | -0.96 | 0.1   |  |  |
| 1.24    | -0.88 | -6.24 |  |  |
| -1.02   | -1.84 | -6.87 |  |  |
| -1.07   | 0.8   | -4.16 |  |  |
| -1.3    | 0.98  | -3.7  |  |  |
| -1.57   | -2.28 | -6.68 |  |  |
| -2.05   | -2.55 | -6.57 |  |  |
| -2.46   | -1.72 | -5.47 |  |  |
| -7.34   | -2.65 | -4.83 |  |  |
| -13.73  | 0.66  | -0.62 |  |  |
| -69.52  | -3.35 | -2.29 |  |  |
| -74.39  | -1.25 | -0.09 |  |  |
| 2.28    | -1.26 | -6.62 |  |  |
| 2.04    | 0.02  | -5.17 |  |  |
| 1.24    | 2.12  | -2.36 |  |  |
| 1.22    | -2.73 | -7.19 |  |  |
| 1.19    | -1.39 | -5.81 |  |  |
| 1.18    | -0.81 | -5.21 |  |  |
| 1.05    | 3.34  | -0.89 |  |  |
| 1.04    | 1.01  | -3.22 |  |  |
| 1       | -2.64 | -6.81 |  |  |
| -1.13   | -2.49 | -6.47 |  |  |
| -1.17   | -2.72 | -6.66 |  |  |
| -1.19   | -2.76 | -6.67 |  |  |
| -1.27   | -1.97 | -5.79 |  |  |
| -1.28   | -3.68 | -7.48 |  |  |
| -1.39   | -2.67 | -6.36 |  |  |
| -1.43   | -2.15 | -5.8  |  |  |
| -1.44   | -4.16 | -7.8  |  |  |
| -1.53   | -4.37 | -7.92 |  |  |
| -1.55   | -2.81 | -6.34 |  |  |
| -1.75   | 2.2   | -1.16 |  |  |
| -2.1    | -2.76 | -5.86 |  |  |
| -2.34   | -3.74 | -6.69 |  |  |
| -3.14   | -3.65 | -6.17 |  |  |
| -3.49   | 0.01  | -2.35 |  |  |
| -3.6    | -3.65 | -5.97 |  |  |
| -4.04   | 0     | -2.15 |  |  |
| -5.28   | -2.21 | -3.98 |  |  |
| -5.4    | -1.78 | -3.51 |  |  |
| -5.85   | -0.85 | -2.46 |  |  |
| -7.35   | -3.23 | -4.52 |  |  |
| -7.67   | -3.67 | -4.89 |  |  |

|         |       |       |  |  |
|---------|-------|-------|--|--|
| -8.99   | 0.82  | -0.18 |  |  |
| -39.49  | -2.92 | -1.78 |  |  |
| 1.46    | 2.69  | -2.64 |  |  |
| 1.23    | 1.98  | -3.12 |  |  |
| 1.18    | 4.87  | -0.16 |  |  |
| 1.07    | 1.92  | -2.97 |  |  |
| -1.06   | 0.73  | -3.99 |  |  |
| -1.24   | 3.77  | -0.71 |  |  |
| -1.81   | 3.72  | -0.21 |  |  |
| -1.91   | 0.49  | -3.37 |  |  |
| -2.65   | -0.34 | -3.72 |  |  |
| -4.89   | -1.51 | -4.01 |  |  |
| -4.99   | -2.13 | -4.6  |  |  |
| -7.56   | 1.2   | -0.67 |  |  |
| -8.36   | 0.93  | -0.8  |  |  |
| -11.84  | -1.35 | -2.57 |  |  |
| -79.84  | -1.27 | 0.26  |  |  |
| -1.14   | -2.63 | -7.73 |  |  |
| -1.16   | -2.47 | -7.54 |  |  |
| -1.3    | -1.78 | -6.68 |  |  |
| -1.87   | -2.79 | -7.17 |  |  |
| -1.9    | -3.34 | -7.7  |  |  |
| -3.03   | 2.53  | -1.16 |  |  |
| -3.95   | -3.31 | -6.61 |  |  |
| -4.41   | -2.27 | -5.41 |  |  |
| -4.44   | -0.8  | -3.93 |  |  |
| -4.55   | 0.74  | -2.35 |  |  |
| -4.86   | -3.38 | -6.39 |  |  |
| -5.48   | -3.02 | -5.85 |  |  |
| -6.95   | -3.57 | -6.05 |  |  |
| -7.01   | -1.35 | -3.83 |  |  |
| -7.13   | -2.5  | -4.95 |  |  |
| -7.64   | -2.5  | -4.85 |  |  |
| -7.83   | -1.7  | -4.01 |  |  |
| -13.76  | -3.51 | -5.01 |  |  |
| -15.67  | 0.63  | -0.68 |  |  |
| -17.7   | 2.78  | 1.64  |  |  |
| -18.03  | -2.93 | -4.04 |  |  |
| -18.2   | -3.4  | -4.5  |  |  |
| -19.45  | -1.52 | -2.52 |  |  |
| -83.93  | -3.2  | -2.09 |  |  |
| -91.59  | -1.44 | -0.21 |  |  |
| -94.11  | -2.68 | -1.4  |  |  |
| -95.29  | -1.59 | -0.3  |  |  |
| -125.29 | -1.94 | -0.25 |  |  |
| 72.03   | 2.23  | -2.85 |  |  |
| 34.56   | 1.1   | -2.92 |  |  |
| 23.53   | 3.15  | -0.32 |  |  |
| 22.61   | 1.45  | -1.97 |  |  |
| 16.28   | 0.54  | -2.4  |  |  |
| 14.29   | 2.5   | -0.25 |  |  |
| 10.71   | 0.14  | -2.19 |  |  |
| 7.96    | 0.94  | -0.97 |  |  |
| 7.34    | 1.31  | -0.48 |  |  |
| 7.23    | 1.13  | -0.64 |  |  |
| 7.2     | -0.16 | -1.92 |  |  |
| 7.17    | -0.18 | -1.94 |  |  |
| 7.09    | 0.11  | -1.63 |  |  |



|        |       |       |  |  |
|--------|-------|-------|--|--|
| 6.91   | -0.17 | -1.88 |  |  |
| 6.02   | 2.34  | 0.83  |  |  |
| 5.87   | 0.01  | -1.46 |  |  |
| 5.79   | 0.02  | -1.43 |  |  |
| 5.6    | 1.16  | -0.24 |  |  |
| 5.34   | 0.68  | -0.65 |  |  |
| 5.34   | 0.1   | -1.23 |  |  |
| 5.22   | -2.36 | -3.65 |  |  |
| 4.76   | 1.05  | -0.11 |  |  |
| 4.72   | 1.32  | 0.16  |  |  |
| 4.7    | 4.21  | 3.06  |  |  |
| 4.62   | 0.51  | -0.62 |  |  |
| 4.52   | 1.83  | 0.75  |  |  |
| 4.48   | 1.58  | 0.5   |  |  |
| 4.44   | 1.71  | 0.65  |  |  |
| 4.27   | 0.63  | -0.38 |  |  |
| 1.01   | -0.76 | 0.32  |  |  |
| -1     | -1.24 | -0.15 |  |  |
| -1.06  | -2.59 | -1.42 |  |  |
| -1.1   | -3.52 | -2.29 |  |  |
| -1.14  | 5.49  | 6.77  |  |  |
| -1.17  | -2.12 | -0.81 |  |  |
| -1.19  | -2.16 | -0.82 |  |  |
| 1.36   | -1    | -6.04 |  |  |
| 1.23   | 1.04  | -3.86 |  |  |
| -1.11  | 0.34  | -4.11 |  |  |
| -1.3   | -1.75 | -5.97 |  |  |
| -4.22  | -1.67 | -4.19 |  |  |
| -4.29  | -1.64 | -4.14 |  |  |
| -6.82  | 0.04  | -1.79 |  |  |
| -9.11  | -1.26 | -2.67 |  |  |
| -10.24 | -2.68 | -3.92 |  |  |
| -73.87 | -2.22 | -0.61 |  |  |
| 1.46   | -0.47 | -5.44 |  |  |
| 1.19   | 1.47  | -3.2  |  |  |
| 1.02   | -1.63 | -6.07 |  |  |
| 1.01   | -2.51 | -6.94 |  |  |
| 1      | -0.98 | -5.4  |  |  |
| -1.03  | 1.56  | -2.82 |  |  |
| -1.03  | 3.18  | -1.2  |  |  |
| -1.05  | 0.4   | -3.94 |  |  |
| -1.2   | 0.02  | -4.13 |  |  |
| -1.24  | 0.85  | -3.26 |  |  |
| -1.27  | 0.43  | -3.64 |  |  |
| -1.3   | -0.08 | -4.12 |  |  |
| -1.34  | -1.55 | -5.54 |  |  |
| -1.36  | 1.83  | -2.15 |  |  |
| -1.36  | -2.59 | -6.56 |  |  |
| -1.37  | 0.44  | -3.52 |  |  |
| -1.48  | -2.37 | -6.23 |  |  |
| -1.48  | -0.31 | -4.17 |  |  |
| -1.62  | 0.8   | -2.92 |  |  |
| -1.91  | -3.29 | -6.78 |  |  |
| -3.2   | 2.18  | -0.57 |  |  |
| -3.99  | -3.16 | -5.58 |  |  |
| -4.2   | 1.29  | -1.06 |  |  |
| -4.77  | 1.57  | -0.6  |  |  |
| -9.87  | 1.3   | 0.18  |  |  |

|        |       |       |  |  |
|--------|-------|-------|--|--|
| -10.6  | 1.19  | 0.18  |  |  |
| -43    | -3.03 | -2.02 |  |  |
| -43.49 | -1.19 | -0.16 |  |  |
| -51.88 | -1.34 | -0.06 |  |  |
| -53.89 | -1.08 | 0.25  |  |  |
| -84.29 | -2.86 | -0.88 |  |  |
| 6.94   | 0.48  | -4.45 |  |  |
| 2.35   | -2.89 | -6.26 |  |  |
| 1.1    | -1.69 | -3.96 |  |  |
| -1.62  | 0.02  | -1.42 |  |  |
| -1.73  | -0.1  | -1.44 |  |  |
| 2.01   | -0.2  | -4.98 |  |  |
| -1.7   | 0.61  | -2.4  |  |  |
| -1.75  | -2.83 | -5.79 |  |  |
| -3.39  | -1.15 | -3.16 |  |  |
| -3.56  | 3.32  | 1.38  |  |  |
| -5.66  | 0.17  | -1.1  |  |  |
| -6.62  | -1.38 | -2.42 |  |  |
| -44.81 | -2.54 | -0.82 |  |  |
| -45.92 | -1.18 | 0.57  |  |  |
| 289.53 | -2.03 | -6.74 |  |  |
| 51.39  | -3.99 | -6.21 |  |  |
| 43.64  | -4.06 | -6.04 |  |  |
| 35.1   | -0.31 | -1.98 |  |  |
| 30.03  | -1.35 | -2.79 |  |  |
| 29.07  | -3.88 | -5.27 |  |  |
| 27.41  | -0.39 | -1.7  |  |  |
| 27.09  | -3.4  | -4.69 |  |  |
| 25.87  | -1.27 | -2.5  |  |  |
| 25.29  | -2.62 | -3.81 |  |  |
| 24.8   | -2.97 | -4.14 |  |  |
| 23.41  | -0.38 | -1.46 |  |  |
| 5.47   | -2.01 | -1    |  |  |
| 4.84   | -0.47 | 0.72  |  |  |
| 4.37   | 0.29  | 1.64  |  |  |
| 4.27   | 0.32  | 1.7   |  |  |
| 1.44   | -7.88 | -4.94 |  |  |
| 1.42   | -8.36 | -5.4  |  |  |
| 1.31   | -9.66 | -6.59 |  |  |
| 2.13   | 3.19  | -1.5  |  |  |
| 1.17   | -0.68 | -4.51 |  |  |
| 1.04   | 1.3   | -2.36 |  |  |
| -1.03  | -1.62 | -5.17 |  |  |
| -1.06  | 3.41  | -0.1  |  |  |
| -1.19  | 1.31  | -2.03 |  |  |
| -1.26  | -0.73 | -4    |  |  |
| -1.33  | 2.75  | -0.43 |  |  |
| -1.48  | 0.82  | -2.21 |  |  |
| -1.63  | -0.78 | -3.67 |  |  |
| -1.75  | -1.01 | -3.8  |  |  |
| -1.84  | 5.84  | 3.12  |  |  |
| -1.96  | 4.45  | 1.82  |  |  |
| -3.46  | 4.25  | 2.45  |  |  |
| -4.15  | 2.67  | 1.13  |  |  |
| -4.78  | 1.02  | -0.32 |  |  |
| -4.89  | 0.36  | -0.95 |  |  |
| -5.15  | 1.92  | 0.68  |  |  |
| -5.15  | 2.62  | 1.39  |  |  |

|         |       |        |  |  |
|---------|-------|--------|--|--|
| -5.4    | -1.84 | -3.01  |  |  |
| -25.63  | 0.17  | 1.25   |  |  |
| -26.08  | -0.63 | 0.48   |  |  |
| -29.04  | -1.24 | 0.02   |  |  |
| -54.23  | -1.11 | 1.05   |  |  |
| -2.04   | 1.16  | -3.45  |  |  |
| -4.68   | -1.01 | -4.43  |  |  |
| -6.17   | -1.66 | -4.68  |  |  |
| -21.03  | -0.95 | -2.2   |  |  |
| -116.71 | -0.4  | 0.83   |  |  |
| -149.61 | -1.09 | 0.49   |  |  |
| -149.93 | -0.04 | 1.55   |  |  |
| 1.99    | -2.33 | -6.91  |  |  |
| 1.11    | 1.95  | -1.8   |  |  |
| -1.04   | 2.16  | -1.38  |  |  |
| -1.12   | 3.24  | -0.19  |  |  |
| -1.32   | -3.39 | -6.58  |  |  |
| -3.81   | 2.51  | 0.85   |  |  |
| -5.3    | -3.2  | -4.39  |  |  |
| -5.43   | -2.04 | -3.19  |  |  |
| -27.97  | -2.47 | -1.25  |  |  |
| 34.67   | -3.2  | -7.71  |  |  |
| 32.46   | -3.57 | -7.98  |  |  |
| 31.06   | -4.64 | -8.99  |  |  |
| 30.84   | -3.26 | -7.6   |  |  |
| 30.21   | -3.77 | -8.09  |  |  |
| 29.23   | -3.44 | -7.7   |  |  |
| 28.7    | -3.62 | -7.86  |  |  |
| 27.92   | -6.65 | -10.85 |  |  |
| 26.93   | -2.75 | -6.9   |  |  |
| 26.68   | -4.33 | -8.47  |  |  |
| 24.2    | -2.3  | -6.3   |  |  |
| 23.99   | -3.1  | -7.08  |  |  |
| 22.65   | -2.51 | -6.41  |  |  |
| 21.54   | -2.15 | -5.97  |  |  |
| 20.19   | -3.54 | -7.27  |  |  |
| 19.53   | -2.46 | -6.15  |  |  |
| 19.45   | -5.2  | -8.88  |  |  |
| 18.59   | -3.3  | -6.91  |  |  |
| 17.12   | -0.86 | -4.35  |  |  |
| 16.72   | -1.65 | -5.11  |  |  |
| 15.21   | -5.27 | -8.59  |  |  |
| 13.54   | -1.22 | -4.38  |  |  |
| 8.49    | -6.74 | -9.23  |  |  |
| 6.57    | -3.13 | -5.25  |  |  |
| 6.54    | -2.75 | -4.86  |  |  |
| 4.79    | -2.17 | -3.83  |  |  |
| 4.08    | -4.98 | -6.41  |  |  |
| 4.02    | -8.1  | -9.5   |  |  |
| 3.51    | -0.64 | -1.85  |  |  |
| 3.36    | -7.27 | -8.42  |  |  |
| 3.35    | -0.54 | -1.68  |  |  |
| 3.35    | -0.29 | -1.43  |  |  |
| 3.1     | -1.14 | -2.17  |  |  |
| 9.33    | -0.48 | -4.96  |  |  |
| 2.13    | -4.61 | -6.95  |  |  |
| 1.39    | -3.29 | -5.03  |  |  |
| 1.14    | -6.09 | -7.54  |  |  |

|        |       |       |  |  |
|--------|-------|-------|--|--|
| 1.13   | -3.01 | -4.45 |  |  |
| -1.08  | -5.45 | -6.59 |  |  |
| -1.12  | 0.05  | -1.05 |  |  |
| -10.06 | -7.34 | -5.27 |  |  |
| 2.95   | -0.12 | -4.56 |  |  |
| 2.24   | -1.33 | -5.37 |  |  |
| 2.22   | -0.07 | -4.1  |  |  |
| 2.19   | 3.04  | -0.97 |  |  |
| 2.15   | 2.15  | -1.83 |  |  |
| 1.84   | -1.89 | -5.65 |  |  |
| 1.67   | 0.96  | -2.65 |  |  |
| 1.43   | 0.58  | -2.82 |  |  |
| 1.4    | -2.18 | -5.54 |  |  |
| 1.38   | 0.84  | -2.49 |  |  |
| 1.31   | -1.32 | -4.59 |  |  |
| 1.27   | 2.44  | -0.79 |  |  |
| 1.26   | -0.5  | -3.71 |  |  |
| 1.25   | 0.78  | -2.43 |  |  |
| 1.2    | 0.75  | -2.39 |  |  |
| 1.2    | -2.23 | -5.37 |  |  |
| 1.14   | -2.87 | -5.94 |  |  |
| 1.07   | 3.42  | 0.45  |  |  |
| -1.04  | -2.45 | -5.27 |  |  |
| -1.32  | -2.88 | -5.36 |  |  |
| -1.55  | 1.7   | -0.55 |  |  |
| -1.77  | -1.32 | -3.37 |  |  |
| -1.93  | -3.21 | -5.13 |  |  |
| -15.64 | 0.12  | 1.21  |  |  |
| -16.68 | -0.03 | 1.15  |  |  |
| -17.53 | -2.44 | -1.18 |  |  |
| -17.7  | -0.64 | 0.63  |  |  |
| -18.81 | -1.71 | -0.35 |  |  |
| -20.12 | -2.16 | -0.71 |  |  |
| -20.19 | -2    | -0.54 |  |  |
| -23.44 | -1.51 | 0.17  |  |  |
| 16.99  | 0.63  | -3.79 |  |  |
| 1.62   | -4.34 | -5.38 |  |  |
| 9.33   | -0.5  | -4.91 |  |  |
| 2.13   | -4.62 | -6.9  |  |  |
| 1.39   | -3.3  | -4.97 |  |  |
| 1.14   | -6.11 | -7.48 |  |  |
| 1.13   | -3.03 | -4.4  |  |  |
| 1.02   | -3.91 | -5.13 |  |  |
| -1.08  | -5.46 | -6.53 |  |  |
| -1.1   | -4.23 | -5.28 |  |  |
| -1.12  | 0.04  | -0.99 |  |  |
| -10.06 | -7.36 | -5.21 |  |  |
| 17.2   | -3.35 | -7.73 |  |  |
| 9.37   | -0.59 | -4.09 |  |  |
| 5.2    | -4.57 | -7.22 |  |  |
| 3.37   | -3.44 | -5.46 |  |  |
| 3.13   | -4.4  | -6.32 |  |  |
| 2.8    | -4.34 | -6.1  |  |  |
| 1.86   | -4.41 | -5.58 |  |  |
| 1.77   | -5.49 | -6.58 |  |  |
| 1.75   | -2.36 | -3.44 |  |  |
| 1.72   | -2.87 | -3.93 |  |  |
| 1.67   | -3.25 | -4.27 |  |  |

|        |       |       |  |  |
|--------|-------|-------|--|--|
| 118.18 | 2.84  | -1.53 |  |  |
| 67.62  | 3.07  | -0.49 |  |  |
| 34.68  | 1.19  | -1.41 |  |  |
| 32.53  | 1.44  | -1.07 |  |  |
| 32.05  | 1.89  | -0.6  |  |  |
| 23.6   | 0.31  | -1.74 |  |  |
| 22.51  | 1.02  | -0.96 |  |  |
| 20.21  | 1.65  | -0.18 |  |  |
| 20.14  | 1.5   | -0.32 |  |  |
| 14.81  | 1.71  | 0.33  |  |  |
| 12.57  | -0.51 | -1.65 |  |  |
| 2.84   | -3.05 | -2.04 |  |  |
| 2.8    | 1.92  | 2.94  |  |  |
| 2.64   | 1.64  | 2.75  |  |  |
| 2.6    | -0.33 | 0.81  |  |  |
| 2.53   | -2.28 | -1.11 |  |  |
| 2.53   | -1.72 | -0.55 |  |  |
| 2.49   | -2.74 | -1.54 |  |  |
| 2.46   | 0.19  | 1.4   |  |  |
| 2.43   | -0.09 | 1.14  |  |  |
| 2.37   | -2.76 | -1.49 |  |  |
| 2.32   | -2.02 | -0.72 |  |  |
| 2.32   | -1.04 | 0.26  |  |  |
| 2.31   | -2.8  | -1.5  |  |  |
| 2.3    | -2.02 | -0.71 |  |  |
| 2.27   | -2.04 | -0.72 |  |  |
| 2.13   | -0.99 | 0.43  |  |  |
| 2.05   | -0.41 | 1.07  |  |  |
| 1.99   | -0.72 | 0.8   |  |  |
| 1.97   | -2.11 | -0.58 |  |  |
| 1.93   | 1.08  | 2.65  |  |  |
| 1.92   | -2.24 | -0.67 |  |  |
| 1.9    | -0.68 | 0.9   |  |  |
| 1.87   | 0.59  | 2.2   |  |  |
| 1.81   | -3.08 | -1.42 |  |  |
| 1.69   | 1.32  | 3.08  |  |  |
| 1.68   | -0.08 | 1.68  |  |  |
| 1.67   | -0.29 | 1.48  |  |  |
| 1.65   | -1.31 | 0.48  |  |  |
| 1.64   | -2.78 | -0.98 |  |  |
| 1.59   | -3.57 | -1.73 |  |  |
| 1.54   | -2.49 | -0.6  |  |  |
| 1.54   | -3.49 | -1.6  |  |  |
| 1.52   | -2.25 | -0.35 |  |  |
| 1.51   | 0.47  | 2.38  |  |  |
| 1.47   | 0.64  | 2.59  |  |  |
| 1.47   | -2.65 | -0.69 |  |  |
| 1.45   | -0.35 | 1.62  |  |  |
| 1.45   | 2.06  | 4.04  |  |  |
| 1.42   | -0.84 | 1.17  |  |  |
| 1.41   | -1    | 1.01  |  |  |
| 1.34   | -2.44 | -0.35 |  |  |
| 1.31   | -1.57 | 0.56  |  |  |
| 1.29   | -1.38 | 0.76  |  |  |
| 1.24   | -3.3  | -1.1  |  |  |
| 1.13   | -2.81 | -0.47 |  |  |
| 1.1    | 1.16  | 3.54  |  |  |
| 1.09   | 0.89  | 3.27  |  |  |

|        |       |       |  |  |
|--------|-------|-------|--|--|
| 1.05   | -2.55 | -0.12 |  |  |
| 1.03   | 1.52  | 3.99  |  |  |
| 1.02   | -1.32 | 1.16  |  |  |
| -1.09  | 2.62  | 5.26  |  |  |
| -1.09  | -0.95 | 1.68  |  |  |
| -1.11  | 4.14  | 6.8   |  |  |
| -1.11  | 1.44  | 4.1   |  |  |
| -1.13  | 2.51  | 5.19  |  |  |
| -1.13  | -2.01 | 0.67  |  |  |
| -1.14  | 3.09  | 5.79  |  |  |
| -1.21  | 0.13  | 2.92  |  |  |
| -1.24  | 0.89  | 3.71  |  |  |
| -1.28  | -1.74 | 1.13  |  |  |
| -1.29  | -3.36 | -0.48 |  |  |
| -1.37  | 3.61  | 6.57  |  |  |
| -1.47  | -3.37 | -0.3  |  |  |
| -1.5   | -1.2  | 1.9   |  |  |
| -1.55  | -3.76 | -0.61 |  |  |
| -1.58  | -3.78 | -0.6  |  |  |
| -1.61  | -3.55 | -0.35 |  |  |
| -1.67  | -4.13 | -0.88 |  |  |
| -1.89  | -3.84 | -0.41 |  |  |
| -2.05  | 0.56  | 4.11  |  |  |
| -2.44  | -4.33 | -0.53 |  |  |
| 1.14   | -1.14 | -5.5  |  |  |
| 1.09   | 3.9   | -0.4  |  |  |
| -1.11  | -1.39 | -5.41 |  |  |
| -1.34  | 2.35  | -1.4  |  |  |
| -1.88  | -0.93 | -4.19 |  |  |
| -2.31  | 2.04  | -0.92 |  |  |
| -2.39  | -1.88 | -4.79 |  |  |
| -3.01  | 3     | 0.42  |  |  |
| -7.41  | 0.17  | -1.11 |  |  |
| -8.81  | 2.07  | 1.04  |  |  |
| -56.6  | 0.33  | 1.98  |  |  |
| -76.54 | -1.75 | 0.34  |  |  |
| -1.06  | -1.63 | -5.97 |  |  |
| -1.36  | -3.21 | -7.19 |  |  |
| -1.49  | -4.18 | -8.02 |  |  |
| -1.54  | -0.84 | -4.64 |  |  |
| -1.66  | -3.52 | -7.21 |  |  |
| -2.29  | -0.44 | -3.66 |  |  |
| -3.88  | -0.63 | -3.09 |  |  |
| -3.91  | -3.04 | -5.49 |  |  |
| -4.64  | -4.49 | -6.7  |  |  |
| -4.69  | -3.94 | -6.12 |  |  |
| -5.39  | -3.88 | -5.87 |  |  |
| -5.57  | -1.23 | -3.17 |  |  |
| -45.37 | -1.48 | -0.4  |  |  |
| -54.13 | -1.94 | -0.6  |  |  |
| 3.4    | -2.12 | -6.44 |  |  |
| 1.51   | -2.32 | -5.48 |  |  |
| 1.35   | 3.79  | 0.8   |  |  |
| 1.35   | -2.36 | -5.35 |  |  |
| 1.13   | 0.32  | -2.42 |  |  |
| 1.07   | 4.16  | 1.51  |  |  |
| -1.02  | 3.36  | 0.84  |  |  |
| -1.05  | -1.11 | -3.6  |  |  |

|        |       |       |  |  |
|--------|-------|-------|--|--|
| -1.08  | -3.61 | -6.06 |  |  |
| -1.11  | -1.81 | -4.22 |  |  |
| -1.19  | 1.75  | -0.56 |  |  |
| -1.43  | -3.56 | -5.6  |  |  |
| -1.51  | -2.15 | -4.11 |  |  |
| -1.98  | -3.74 | -5.32 |  |  |
| -2.13  | -2.69 | -4.16 |  |  |
| -2.42  | -4.4  | -5.68 |  |  |
| -2.91  | -2.12 | -3.14 |  |  |
| -2.92  | -4.09 | -5.1  |  |  |
| -11.96 | -3.03 | -2.01 |  |  |
| -21.22 | -5.1  | -3.25 |  |  |
| -24.1  | -4.32 | -2.29 |  |  |
| 2.28   | -0.19 | -4.5  |  |  |
| 1.55   | 1.08  | -2.68 |  |  |
| 1.5    | 1.26  | -2.45 |  |  |
| 1.41   | 0.83  | -2.79 |  |  |
| 1.37   | -1.88 | -5.45 |  |  |
| 1.14   | -1.58 | -4.9  |  |  |
| -1.4   | -2.91 | -5.55 |  |  |
| -1.6   | 0.39  | -2.05 |  |  |
| -1.88  | -0.27 | -2.48 |  |  |
| -1.95  | -2.01 | -4.17 |  |  |
| -2.35  | -1.61 | -3.5  |  |  |
| -2.49  | -0.54 | -2.35 |  |  |
| -2.58  | -2.62 | -4.37 |  |  |
| -2.6   | -2.25 | -4    |  |  |
| -3.17  | 2.44  | 0.99  |  |  |
| -3.43  | -3.08 | -4.43 |  |  |
| -4.14  | -1.59 | -2.67 |  |  |
| -19.88 | -2.09 | -0.9  |  |  |
| 3.92   | -4.47 | -8.78 |  |  |
| 2.05   | -2.3  | -5.68 |  |  |
| 1.35   | -3.4  | -6.17 |  |  |
| 1.09   | 0.07  | -2.39 |  |  |
| -1.04  | -1.1  | -3.38 |  |  |
| -1.07  | 1.66  | -0.58 |  |  |
| -1.07  | -4.97 | -7.21 |  |  |
| -1.2   | -6.2  | -8.27 |  |  |
| -1.51  | -4.54 | -6.29 |  |  |
| -1.56  | -5.9  | -7.59 |  |  |
| -1.78  | -6.08 | -7.58 |  |  |
| -1.99  | -3.93 | -5.28 |  |  |
| -10.17 | -3.7  | -2.69 |  |  |
| -10.48 | -5.52 | -4.47 |  |  |
| -21.85 | -5.34 | -3.22 |  |  |
| 5.97   | 5.6   | 1.31  |  |  |
| 3.01   | 4.42  | 1.12  |  |  |
| 1.31   | 0.75  | -1.34 |  |  |
| 1.12   | 1.55  | -0.31 |  |  |
| 1.07   | -0.86 | -2.67 |  |  |
| -1.16  | 2.1   | 0.61  |  |  |
| -1.25  | -1.15 | -2.54 |  |  |
| -1.26  | -1.34 | -2.71 |  |  |
| -1.37  | -1.74 | -3    |  |  |
| -1.56  | 1.08  | 0.01  |  |  |
| -6.98  | -0.28 | 0.81  |  |  |
| -7.63  | -0.51 | 0.71  |  |  |

|        |       |       |  |  |
|--------|-------|-------|--|--|
| 19.3   | 0.76  | -3.5  |  |  |
| -3.66  | -5.38 | -3.5  |  |  |
| 1.76   | 3.59  | -0.64 |  |  |
| 1.47   | 3.77  | -0.2  |  |  |
| 1.32   | -0.8  | -4.61 |  |  |
| 1.23   | -3.4  | -7.11 |  |  |
| -1.01  | 3.92  | 0.52  |  |  |
| -1.13  | 1.62  | -1.61 |  |  |
| -1.44  | -4.88 | -7.77 |  |  |
| -1.46  | -0.84 | -3.71 |  |  |
| -1.55  | -1.98 | -4.76 |  |  |
| -2.02  | -3    | -5.4  |  |  |
| -3.75  | 0.55  | -0.96 |  |  |
| -4.81  | -2.97 | -4.12 |  |  |
| -5.33  | -4.13 | -5.13 |  |  |
| -23.99 | -3.23 | -2.06 |  |  |
| -26.63 | -1.65 | -0.33 |  |  |
| -44.41 | -2.93 | -0.87 |  |  |
| 1.78   | -0.7  | -4.93 |  |  |
| 1.33   | -0.4  | -4.2  |  |  |
| 1.12   | -0.51 | -4.07 |  |  |
| -1.19  | 0.94  | -2.2  |  |  |
| -1.3   | -0.59 | -3.61 |  |  |
| -1.35  | 0.01  | -2.95 |  |  |
| -1.46  | -3.53 | -6.38 |  |  |
| -1.48  | 0.24  | -2.58 |  |  |
| -1.7   | -5.96 | -8.58 |  |  |
| -2.47  | -2.59 | -4.67 |  |  |
| -2.49  | -2.72 | -4.79 |  |  |
| -3.65  | -3.93 | -5.46 |  |  |
| -4.67  | 1.22  | 0.05  |  |  |
| -21.48 | -1.25 | -0.22 |  |  |
| -23.42 | -6.44 | -5.28 |  |  |
| -23.97 | -1.51 | -0.32 |  |  |
| -25.39 | -3.67 | -2.39 |  |  |
| -45.27 | -5.82 | -3.71 |  |  |
| -53.42 | -4.04 | -1.69 |  |  |
| 1.06   | -1.44 | -5.63 |  |  |
| -1.06  | 1.7   | -2.32 |  |  |
| -1.14  | 0.06  | -3.85 |  |  |
| -1.18  | 1.88  | -1.98 |  |  |
| -1.38  | -0.32 | -3.95 |  |  |
| -1.54  | -0.39 | -3.87 |  |  |
| -1.65  | 3.07  | -0.31 |  |  |
| -2.5   | -0.62 | -3.4  |  |  |
| -3.03  | -0.25 | -2.75 |  |  |
| -3.6   | 0.43  | -1.82 |  |  |
| -6.08  | -2.3  | -3.8  |  |  |
| -7.08  | 2.23  | 0.95  |  |  |
| 5.61   | 0.1   | -4.08 |  |  |
| 1.34   | 0.85  | -1.26 |  |  |
| 1.21   | 1.53  | -0.43 |  |  |
| 1.18   | 1.21  | -0.72 |  |  |
| 1.16   | 3.69  | 1.79  |  |  |
| 1.11   | 2.87  | 1.02  |  |  |
| 1.1    | 1.9   | 0.06  |  |  |
| 1      | 0.23  | -1.46 |  |  |
| -1.02  | 2.89  | 1.23  |  |  |



|        |       |       |  |  |
|--------|-------|-------|--|--|
| -1.08  | 1.23  | -0.35 |  |  |
| -1.29  | 0.57  | -0.75 |  |  |
| -1.35  | -0.93 | -2.19 |  |  |
| -1.37  | -1.46 | -2.7  |  |  |
| -1.4   | 0.08  | -1.13 |  |  |
| -1.42  | 2.65  | 1.47  |  |  |
| -1.44  | -0.72 | -1.88 |  |  |
| -1.48  | -1.44 | -2.57 |  |  |
| -1.49  | -2.23 | -3.35 |  |  |
| -1.51  | 0.19  | -0.9  |  |  |
| -1.54  | -0.03 | -1.1  |  |  |
| -1.6   | -0.97 | -1.98 |  |  |
| -1.62  | -2.86 | -3.86 |  |  |
| -7.15  | -2.44 | -1.29 |  |  |
| -7.48  | 0.12  | 1.33  |  |  |
| -8.65  | -0.65 | 0.78  |  |  |
| -11.79 | -2.4  | -0.53 |  |  |
| -12.75 | -3.23 | -1.25 |  |  |
| 9.12   | -0.95 | -5.11 |  |  |
| 1.91   | -5.95 | -7.86 |  |  |
| 1.38   | -5.69 | -7.13 |  |  |
| 1.13   | -3.22 | -4.37 |  |  |
| -4.03  | -1.62 | -0.58 |  |  |
| -5.12  | -0.21 | 1.17  |  |  |
| -10.06 | -7.54 | -5.19 |  |  |
| 25.22  | 1.63  | -2.51 |  |  |
| -1.4   | -2.37 | -1.36 |  |  |
| -1.42  | -4.14 | -3.11 |  |  |
| -1.6   | -1.72 | -0.52 |  |  |
| -1.72  | -5.7  | -4.4  |  |  |
| -2.72  | -4.94 | -2.98 |  |  |
| 6.12   | 3.79  | -0.34 |  |  |
| 1.39   | -0.15 | -2.14 |  |  |
| 1.32   | 0.09  | -1.83 |  |  |
| 1.22   | 2.42  | 0.62  |  |  |
| 1.01   | 0.64  | -0.88 |  |  |
| -1.03  | 0.29  | -1.19 |  |  |
| -1.12  | 1.59  | 0.24  |  |  |
| -1.17  | 2.5   | 1.22  |  |  |
| -1.28  | -0.23 | -1.39 |  |  |
| -1.29  | 0.24  | -0.91 |  |  |
| -1.37  | 0.09  | -0.98 |  |  |
| -8     | -1.67 | -0.18 |  |  |
| -8.28  | -0.55 | 0.99  |  |  |
| -8.76  | -0.6  | 1.02  |  |  |
| 1.22   | -0.25 | -4.37 |  |  |
| -3.16  | 0.5   | -1.66 |  |  |
| -4.46  | 3.08  | 1.41  |  |  |
| -6.36  | -2.11 | -3.26 |  |  |
| -44.78 | -0.76 | 0.91  |  |  |
| -55.84 | -1.17 | 0.81  |  |  |
| 8.46   | 1.48  | -2.63 |  |  |
| 2.71   | 3.6   | 1.14  |  |  |
| 2.19   | 0.96  | -1.19 |  |  |
| 1.72   | -0.59 | -2.39 |  |  |
| 1.62   | 2.64  | 0.92  |  |  |
| 1.22   | -1.17 | -2.48 |  |  |
| 1.19   | 4.37  | 3.1   |  |  |

|        |       |       |  |  |
|--------|-------|-------|--|--|
| 1.17   | 0.94  | -0.31 |  |  |
| 1.16   | 3.99  | 2.75  |  |  |
| 1.15   | 3.4   | 2.17  |  |  |
| 1.14   | 0.21  | -1    |  |  |
| 1.13   | 0.65  | -0.55 |  |  |
| 1.11   | 3.93  | 2.75  |  |  |
| 1.1    | 1.85  | 0.7   |  |  |
| 1.05   | 3.78  | 2.69  |  |  |
| 1.05   | 2.6   | 1.5   |  |  |
| 1.03   | 1.99  | 0.92  |  |  |
| -4.18  | -1.94 | -0.9  |  |  |
| -4.99  | -1.57 | -0.27 |  |  |
| -8.63  | -1.5  | 0.58  |  |  |
| 1.87   | 4.25  | 0.21  |  |  |
| 1.77   | 1.61  | -2.34 |  |  |
| 1.59   | 1.29  | -2.51 |  |  |
| 1.39   | 1.4   | -2.21 |  |  |
| 1.38   | 0.9   | -2.71 |  |  |
| 1.36   | 2.76  | -0.82 |  |  |
| 1.1    | 3.11  | -0.17 |  |  |
| 1.09   | -1.08 | -4.34 |  |  |
| 1.03   | 0.82  | -2.36 |  |  |
| -1.03  | -1.18 | -4.28 |  |  |
| -1.07  | 0.45  | -2.58 |  |  |
| -1.11  | 0.58  | -2.4  |  |  |
| -1.12  | 1.25  | -1.72 |  |  |
| -1.18  | 2.42  | -0.48 |  |  |
| -1.29  | -1.51 | -4.28 |  |  |
| -1.33  | 1.82  | -0.91 |  |  |
| -1.35  | -0.98 | -3.69 |  |  |
| -1.41  | -1.08 | -3.71 |  |  |
| -1.46  | -0.01 | -2.6  |  |  |
| -1.54  | 0.17  | -2.35 |  |  |
| -1.55  | -1.89 | -4.4  |  |  |
| -1.61  | 2.14  | -0.31 |  |  |
| -1.63  | -0.09 | -2.52 |  |  |
| -1.7   | -0.1  | -2.47 |  |  |
| -1.76  | 3.69  | 1.37  |  |  |
| -1.82  | 2.24  | -0.03 |  |  |
| -2.07  | -1.62 | -3.7  |  |  |
| -2.12  | 1.03  | -1.02 |  |  |
| -2.44  | -2.28 | -4.13 |  |  |
| -2.63  | 1.52  | -0.22 |  |  |
| -2.85  | 2.87  | 1.25  |  |  |
| -2.91  | -3.12 | -4.71 |  |  |
| -3.1   | -1.9  | -3.4  |  |  |
| -3.78  | 0.59  | -0.62 |  |  |
| -3.85  | 1.12  | -0.07 |  |  |
| -3.91  | -3.58 | -4.75 |  |  |
| -4.38  | -1.21 | -2.22 |  |  |
| -19.2  | -0.43 | 0.7   |  |  |
| -20.5  | -1.56 | -0.34 |  |  |
| -23.06 | -0.66 | 0.73  |  |  |
| -23.79 | -3.19 | -1.75 |  |  |
| -24.14 | -1.79 | -0.33 |  |  |
| -26.72 | -0.93 | 0.68  |  |  |
| -26.78 | -1.13 | 0.48  |  |  |
| -27.42 | -2.22 | -0.58 |  |  |

|        |       |       |  |  |
|--------|-------|-------|--|--|
| -32.82 | -2.11 | -0.21 |  |  |
| -35.7  | -2.77 | -0.74 |  |  |
| -67.12 | -2.12 | 0.81  |  |  |
| -74.76 | -3.88 | -0.79 |  |  |
| 1.39   | 2.83  | -1.2  |  |  |
| -1.56  | 0.12  | -2.79 |  |  |
| -1.86  | -0.26 | -2.92 |  |  |
| -2.28  | -2.4  | -4.76 |  |  |
| -2.48  | 1.93  | -0.32 |  |  |
| -2.79  | 1.4   | -0.67 |  |  |
| -3.41  | 0.33  | -1.46 |  |  |
| -3.52  | 0.01  | -1.73 |  |  |
| -5.06  | -0.82 | -2.04 |  |  |
| -5.88  | 0.45  | -0.56 |  |  |
| -23.67 | -2.3  | -1.29 |  |  |
| -24.42 | 0.22  | 1.27  |  |  |
| -24.98 | -0.5  | 0.58  |  |  |
| -25.66 | 0.12  | 1.24  |  |  |
| -28.36 | -0.97 | 0.3   |  |  |
| -29.85 | -2.77 | -1.42 |  |  |
| -30.32 | -3.01 | -1.64 |  |  |
| -31.17 | -1.2  | 0.2   |  |  |
| -32.25 | -1.9  | -0.44 |  |  |
| -33.53 | -1.63 | -0.12 |  |  |
| -33.94 | -2.13 | -0.6  |  |  |
| -35.44 | -2.05 | -0.46 |  |  |
| -35.86 | -0.96 | 0.65  |  |  |
| -41.8  | -2.23 | -0.4  |  |  |
| -42.11 | -2.76 | -0.92 |  |  |
| -44.21 | -1.15 | 0.75  |  |  |
| -45.49 | -2.54 | -0.59 |  |  |
| -51.3  | -3.04 | -0.92 |  |  |
| 9.54   | 3.63  | -0.39 |  |  |
| 1.39   | 2.36  | 1.12  |  |  |
| 1.35   | 3.31  | 2.11  |  |  |
| 1.29   | 3.63  | 2.5   |  |  |
| -4.03  | -0.56 | 0.69  |  |  |
| 1.22   | 0.52  | -3.49 |  |  |
| 1.09   | -0.5  | -4.36 |  |  |
| 1.01   | 0.72  | -3.02 |  |  |
| -1.02  | 2.21  | -1.49 |  |  |
| -1.08  | 0.01  | -3.6  |  |  |
| -1.13  | -2.08 | -5.63 |  |  |
| -1.23  | -2.56 | -5.98 |  |  |
| -1.75  | 0.34  | -2.58 |  |  |
| -1.95  | -1.08 | -3.85 |  |  |
| -2.34  | -1.82 | -4.32 |  |  |
| -2.35  | -1.05 | -3.55 |  |  |
| -2.48  | 3.42  | 1     |  |  |
| -3.26  | -2    | -4.02 |  |  |
| -3.37  | 1.35  | -0.63 |  |  |
| -3.92  | 1.53  | -0.23 |  |  |
| -4.01  | 1.64  | -0.09 |  |  |
| -4.44  | -0.01 | -1.59 |  |  |
| -4.61  | 1.66  | 0.14  |  |  |
| -4.73  | 0.76  | -0.72 |  |  |
| -5     | -0.09 | -1.5  |  |  |
| -5.26  | -0.48 | -1.82 |  |  |

|        |       |       |  |  |
|--------|-------|-------|--|--|
| -5.7   | 0.75  | -0.47 |  |  |
| -6.58  | 1.92  | 0.91  |  |  |
| -32.57 | -0.74 | 0.56  |  |  |
| 1.22   | 0.52  | -3.49 |  |  |
| 1.09   | -0.5  | -4.36 |  |  |
| 1.01   | 0.72  | -3.02 |  |  |
| -1.02  | 2.21  | -1.49 |  |  |
| -1.08  | 0.01  | -3.6  |  |  |
| -1.19  | -2.14 | -5.62 |  |  |
| -1.23  | -2.56 | -5.98 |  |  |
| -1.75  | 0.34  | -2.58 |  |  |
| -1.95  | -1.08 | -3.85 |  |  |
| -2.34  | -1.82 | -4.32 |  |  |
| -2.35  | -1.05 | -3.55 |  |  |
| -2.48  | 3.42  | 1     |  |  |
| -3.26  | -2    | -4.02 |  |  |
| -3.37  | 1.35  | -0.63 |  |  |
| -3.92  | 1.53  | -0.23 |  |  |
| -4.01  | 1.64  | -0.09 |  |  |
| -4.44  | -0.01 | -1.59 |  |  |
| -4.61  | 1.66  | 0.14  |  |  |
| -4.73  | 0.76  | -0.72 |  |  |
| -5     | -0.09 | -1.5  |  |  |
| -5.26  | -0.48 | -1.82 |  |  |
| -5.7   | 0.75  | -0.47 |  |  |
| -6.58  | 1.92  | 0.91  |  |  |
| -32.57 | -0.74 | 0.56  |  |  |
| 1.22   | 0.52  | -3.49 |  |  |
| 1.09   | -0.5  | -4.36 |  |  |
| 1.01   | 0.72  | -3.02 |  |  |
| -1.02  | 2.21  | -1.49 |  |  |
| -1.08  | 0.01  | -3.6  |  |  |
| -1.19  | -2.14 | -5.62 |  |  |
| -1.23  | -2.56 | -5.98 |  |  |
| -1.65  | -3.17 | -6.18 |  |  |
| -1.75  | 0.34  | -2.58 |  |  |
| -1.95  | -1.08 | -3.85 |  |  |
| -2.34  | -1.82 | -4.32 |  |  |
| -2.35  | -1.05 | -3.55 |  |  |
| -2.48  | 3.42  | 1     |  |  |
| -3.26  | -2    | -4.02 |  |  |
| -3.37  | 1.35  | -0.63 |  |  |
| -3.92  | 1.53  | -0.23 |  |  |
| -4.01  | 1.64  | -0.09 |  |  |
| -4.44  | -0.01 | -1.59 |  |  |
| -4.61  | 1.66  | 0.14  |  |  |
| -4.73  | 0.76  | -0.72 |  |  |
| -5     | -0.09 | -1.5  |  |  |
| -5.26  | -0.48 | -1.82 |  |  |
| -5.7   | 0.75  | -0.47 |  |  |
| -6.58  | 1.92  | 0.91  |  |  |
| -32.57 | -0.74 | 0.56  |  |  |
| 1.22   | 0.52  | -3.49 |  |  |
| 1.09   | -0.5  | -4.36 |  |  |
| 1.01   | 0.72  | -3.02 |  |  |
| -1.02  | 2.21  | -1.49 |  |  |
| -1.08  | 0.01  | -3.6  |  |  |
| -1.19  | -2.14 | -5.62 |  |  |

|        |       |       |  |  |
|--------|-------|-------|--|--|
| -1.23  | -2.56 | -5.98 |  |  |
| -1.75  | 0.34  | -2.58 |  |  |
| -1.95  | -1.08 | -3.85 |  |  |
| -2.34  | -1.82 | -4.32 |  |  |
| -2.35  | -1.05 | -3.55 |  |  |
| -2.48  | 3.42  | 1     |  |  |
| -3.26  | -2    | -4.02 |  |  |
| -3.37  | 1.35  | -0.63 |  |  |
| -3.92  | 1.53  | -0.23 |  |  |
| -4.01  | 1.64  | -0.09 |  |  |
| -4.44  | -0.01 | -1.59 |  |  |
| -4.61  | 1.66  | 0.14  |  |  |
| -4.73  | 0.76  | -0.72 |  |  |
| -5     | -0.09 | -1.5  |  |  |
| -5.26  | -0.48 | -1.82 |  |  |
| -5.7   | 0.75  | -0.47 |  |  |
| -6.58  | 1.92  | 0.91  |  |  |
| -32.57 | -0.74 | 0.56  |  |  |
| 1.22   | 0.52  | -3.49 |  |  |
| 1.09   | -0.5  | -4.36 |  |  |
| 1.01   | 0.72  | -3.02 |  |  |
| -1.02  | 2.21  | -1.49 |  |  |
| -1.08  | 0.01  | -3.6  |  |  |
| -1.19  | -2.14 | -5.62 |  |  |
| -1.23  | -2.56 | -5.98 |  |  |
| -1.65  | -3.17 | -6.18 |  |  |
| -1.75  | 0.34  | -2.58 |  |  |
| -1.95  | -1.08 | -3.85 |  |  |
| -2.34  | -1.82 | -4.32 |  |  |
| -2.35  | -1.05 | -3.55 |  |  |
| -2.48  | 3.42  | 1     |  |  |
| -3.26  | -2    | -4.02 |  |  |
| -3.37  | 1.35  | -0.63 |  |  |
| -3.92  | 1.53  | -0.23 |  |  |
| -4.01  | 1.64  | -0.09 |  |  |
| -4.44  | -0.01 | -1.59 |  |  |
| -4.61  | 1.66  | 0.14  |  |  |
| -4.73  | 0.76  | -0.72 |  |  |
| -5     | -0.09 | -1.5  |  |  |
| -5.26  | -0.48 | -1.82 |  |  |
| -5.7   | 0.75  | -0.47 |  |  |
| -6.58  | 1.92  | 0.91  |  |  |
| -32.57 | -0.74 | 0.56  |  |  |
| 8.58   | -1.72 | -5.7  |  |  |
| 1.19   | 1.83  | 0.7   |  |  |
| 1.59   | 0.94  | -3.04 |  |  |
| 1.11   | 1.6   | -1.86 |  |  |
| 1.08   | -1.69 | -5.1  |  |  |
| -1.04  | -1.95 | -5.21 |  |  |
| -2.18  | 1.4   | -0.79 |  |  |
| -2.27  | -1.56 | -3.69 |  |  |
| -2.7   | 0.05  | -1.83 |  |  |
| -2.72  | -0.6  | -2.47 |  |  |
| -3.23  | 3.31  | 1.69  |  |  |
| -4.27  | -3.78 | -4.99 |  |  |
| -31.44 | -1.99 | -0.32 |  |  |
| -36.18 | -3.31 | -1.44 |  |  |
| 4.04   | -1.19 | -5.15 |  |  |

|        |       |       |  |  |
|--------|-------|-------|--|--|
| -1.05  | -3.71 | -5.59 |  |  |
| -1.15  | 1.74  | -0.01 |  |  |
| -1.15  | 3.96  | 2.22  |  |  |
| -1.25  | 1.07  | -0.55 |  |  |
| -1.27  | 2.09  | 0.49  |  |  |
| -1.49  | 0.32  | -1.05 |  |  |
| -1.54  | -0.06 | -1.38 |  |  |
| -1.57  | -3.52 | -4.82 |  |  |
| -7.92  | -0.64 | 0.4   |  |  |
| 1.61   | 0.78  | -3.16 |  |  |
| 1.48   | 3.17  | -0.65 |  |  |
| -1.28  | -1.57 | -4.47 |  |  |
| -3.68  | -0.47 | -1.84 |  |  |
| -20.71 | -1.25 | -0.13 |  |  |
| -21.51 | 0.49  | 1.67  |  |  |
| 2.49   | 0.15  | -3.79 |  |  |
| 1.41   | 3.62  | 0.51  |  |  |
| 1.4    | 0.09  | -3    |  |  |
| 1.32   | -3.24 | -6.26 |  |  |
| 1.27   | 2.19  | -0.77 |  |  |
| 1.01   | -3.26 | -5.89 |  |  |
| -1.03  | 0.41  | -2.16 |  |  |
| -1.08  | 0.34  | -2.17 |  |  |
| -1.09  | 1.6   | -0.89 |  |  |
| -1.1   | -2.36 | -4.84 |  |  |
| -1.12  | -0.15 | -2.6  |  |  |
| -1.15  | -2.68 | -5.1  |  |  |
| -1.17  | 4.25  | 1.87  |  |  |
| -1.3   | -2.24 | -4.48 |  |  |
| -1.36  | -3.63 | -5.79 |  |  |
| -1.45  | -2.17 | -4.25 |  |  |
| -1.58  | -0.9  | -2.85 |  |  |
| -1.59  | -2.11 | -4.05 |  |  |
| -1.74  | 0.93  | -0.89 |  |  |
| -1.83  | -1.94 | -3.68 |  |  |
| -1.84  | -1.99 | -3.73 |  |  |
| -2.02  | -1.03 | -2.63 |  |  |
| -2.1   | 0.58  | -0.96 |  |  |
| -2.24  | -3.07 | -4.52 |  |  |
| -2.29  | -3.84 | -5.25 |  |  |
| -2.72  | 0.07  | -1.1  |  |  |
| -2.73  | -1.65 | -2.81 |  |  |
| -2.79  | -0.35 | -1.49 |  |  |
| -2.98  | 0.13  | -0.91 |  |  |
| -12.3  | -1.29 | -0.28 |  |  |
| -12.55 | -1.63 | -0.59 |  |  |
| -15.4  | -2.33 | -1.01 |  |  |
| 2.02   | 2.58  | -1.33 |  |  |
| 1.02   | 1.47  | -1.45 |  |  |
| -1.17  | 0.58  | -2.08 |  |  |
| -1.18  | 2.79  | 0.13  |  |  |
| -1.44  | -1.36 | -3.73 |  |  |
| -1.51  | -2.16 | -4.46 |  |  |
| -2.21  | -0.27 | -2.01 |  |  |
| -2.66  | 1.66  | 0.18  |  |  |
| -2.67  | 0.32  | -1.16 |  |  |
| -2.69  | -0.64 | -2.1  |  |  |
| -3.03  | 1.39  | 0.09  |  |  |

|        |       |       |  |  |
|--------|-------|-------|--|--|
| -15.54 | -2.02 | -0.96 |  |  |
| -18.58 | -1.37 | -0.05 |  |  |
| -20.26 | -2.91 | -1.47 |  |  |
| -20.5  | -1.15 | 0.31  |  |  |
| -26.36 | -3.04 | -1.22 |  |  |
| 7.01   | 2.13  | -1.77 |  |  |
| 7.01   | 2.13  | -1.77 |  |  |
| 1.51   | 2.84  | 1.16  |  |  |
| 1.37   | 2.78  | 1.25  |  |  |
| 1.08   | 4.21  | 3.02  |  |  |
| 1.02   | 2.62  | 1.51  |  |  |
| 49.25  | 3.45  | -0.43 |  |  |
| 12.13  | 3.95  | 2.08  |  |  |
| 9.63   | -0.3  | -1.83 |  |  |
| 9.41   | -0.46 | -1.96 |  |  |
| 8.17   | 1.93  | 0.64  |  |  |
| 8.02   | 1.48  | 0.21  |  |  |
| 7.71   | 1.89  | 0.68  |  |  |
| 7.62   | 1.73  | 0.54  |  |  |
| 7.15   | 0.45  | -0.65 |  |  |
| 6.88   | 0.27  | -0.77 |  |  |
| 6.83   | 0.92  | -0.11 |  |  |
| 1.62   | -2.63 | -1.59 |  |  |
| 1.54   | -0.73 | 0.38  |  |  |
| 1.5    | 2.97  | 4.11  |  |  |
| 1.49   | -0.74 | 0.43  |  |  |
| 1.46   | -0.91 | 0.28  |  |  |
| 1.45   | -2.39 | -1.18 |  |  |
| 1.43   | -1.22 | 0     |  |  |
| 1.38   | 0.47  | 1.74  |  |  |
| 1.36   | -2.05 | -0.76 |  |  |
| 1.32   | -1.5  | -0.16 |  |  |
| 1.25   | -2.46 | -1.04 |  |  |
| 1.22   | 3.46  | 4.9   |  |  |
| 1.18   | -2.35 | -0.85 |  |  |
| 1.18   | -0.78 | 0.71  |  |  |
| 1.14   | -0.76 | 0.8   |  |  |
| 1.08   | 0.58  | 2.21  |  |  |
| 1.06   | -2.97 | -1.31 |  |  |
| 1.06   | 3.87  | 5.53  |  |  |
| 1.06   | 1.62  | 3.28  |  |  |
| -1     | 1.79  | 3.53  |  |  |
| -1.09  | -1.82 | 0.04  |  |  |
| -1.16  | -3.26 | -1.31 |  |  |
| -1.24  | -0.32 | 1.74  |  |  |
| -1.26  | -2.93 | -0.86 |  |  |
| -1.53  | -0.33 | 2.02  |  |  |
| -1.7   | -3.37 | -0.86 |  |  |
| -1.99  | -2.98 | -0.25 |  |  |
| -2.22  | -0.32 | 2.56  |  |  |
| -2.57  | -1.84 | 1.26  |  |  |
| 16.37  | -4.46 | -8.34 |  |  |
| 4.96   | -5.54 | -7.69 |  |  |
| 3.68   | -7.37 | -9.1  |  |  |
| 2.61   | -7.67 | -8.9  |  |  |
| 2.26   | -1.15 | -2.17 |  |  |
| -3.64  | -3.6  | -1.58 |  |  |
| 15.72  | -2.26 | -6.14 |  |  |

|        |       |       |  |  |
|--------|-------|-------|--|--|
| 13.66  | -2.24 | -5.92 |  |  |
| 11.63  | -1.29 | -4.73 |  |  |
| 10.76  | 2.79  | -1.09 |  |  |
| 1.75   | 1.29  | 0.03  |  |  |
| 1.59   | 0.25  | -0.88 |  |  |
| 1.56   | 1.38  | 0.28  |  |  |
| -3.12  | -2.18 | -0.99 |  |  |
| 5.61   | 0.39  | -3.48 |  |  |
| 1.03   | 1.31  | -0.12 |  |  |
| -1.21  | 0.56  | -0.55 |  |  |
| -6.94  | -1.56 | -0.15 |  |  |
| -7.48  | 0.41  | 1.92  |  |  |
| -11.79 | -2.11 | 0.06  |  |  |
| -12.75 | -2.94 | -0.65 |  |  |
| 4.5    | 3.58  | -0.28 |  |  |
| 1.87   | -1.11 | -3.71 |  |  |
| 1.43   | -1.08 | -3.29 |  |  |
| 1.17   | 4.19  | 2.27  |  |  |
| 1.15   | 4.05  | 2.16  |  |  |
| 1.12   | -1.1  | -2.96 |  |  |
| 1.1    | 3.6   | 1.77  |  |  |
| 1.06   | 4.68  | 2.9   |  |  |
| -1     | 0.08  | -1.61 |  |  |
| -1.02  | 1.86  | 0.19  |  |  |
| -1.04  | 1.34  | -0.31 |  |  |
| -1.1   | 1.37  | -0.18 |  |  |
| -1.18  | -0.77 | -2.22 |  |  |
| -1.2   | -1.05 | -2.48 |  |  |
| -1.19  | 1.61  | 0.17  |  |  |
| -1.28  | 3.12  | 1.78  |  |  |
| -1.39  | 1.5   | 0.27  |  |  |
| -1.44  | 0.53  | -0.64 |  |  |
| -1.46  | 1.78  | 0.64  |  |  |
| -1.53  | 1.04  | -0.04 |  |  |
| -1.54  | 2.21  | 1.15  |  |  |
| -1.57  | 1.24  | 0.19  |  |  |
| -1.61  | 0.72  | -0.29 |  |  |
| -6.49  | 0.65  | 1.65  |  |  |
| -7.09  | -0.17 | 0.96  |  |  |
| -7.25  | -1.85 | -0.69 |  |  |
| -7.6   | 0.16  | 1.39  |  |  |
| -9.34  | 0.63  | 2.16  |  |  |
| -9.47  | 0.51  | 2.06  |  |  |
| -10.43 | 1.01  | 2.7   |  |  |
| -10.93 | -1.87 | -0.11 |  |  |
| -11.63 | -1.77 | 0.07  |  |  |
| -11.81 | 0.44  | 2.31  |  |  |
| -12.37 | 0.98  | 2.92  |  |  |
| -14.2  | -1.98 | 0.15  |  |  |
| -15.63 | -0.25 | 2.02  |  |  |
| -16.08 | -1.22 | 1.09  |  |  |
| -16.75 | -1.75 | 0.62  |  |  |
| -17.06 | -0.35 | 2.05  |  |  |
| -19.23 | -0.54 | 2.03  |  |  |
| -24.98 | -0.58 | 2.37  |  |  |
| -27.36 | -0.2  | 2.88  |  |  |
| -30.35 | -2.38 | 0.85  |  |  |
| -32.78 | -1.62 | 1.72  |  |  |



|        |       |       |  |  |
|--------|-------|-------|--|--|
| 6.94   | 2.43  | -1.41 |  |  |
| 1.83   | -0.65 | -2.58 |  |  |
| 1.76   | 0.96  | -0.91 |  |  |
| 1.47   | -1.75 | -3.35 |  |  |
| 1.42   | -0.53 | -2.09 |  |  |
| 1.39   | -1.23 | -2.75 |  |  |
| 1.29   | 1     | -0.42 |  |  |
| 1.21   | -2    | -3.33 |  |  |
| 1.18   | 0.15  | -1.14 |  |  |
| 1.12   | 0.35  | -0.87 |  |  |
| 1.08   | 0.77  | -0.4  |  |  |
| 1.08   | -0.24 | -1.4  |  |  |
| 1.06   | -0.42 | -1.56 |  |  |
| 1.06   | -1.92 | -3.06 |  |  |
| 1.06   | 2.99  | 1.85  |  |  |
| 1.05   | -0.67 | -1.8  |  |  |
| 1.02   | 0.94  | -0.14 |  |  |
| -1.02  | -1.85 | -2.87 |  |  |
| -4.19  | -0.95 | 0.06  |  |  |
| 2.34   | 2.12  | -1.73 |  |  |
| 1.5    | 0.72  | -2.48 |  |  |
| 1.1    | 2.72  | -0.04 |  |  |
| -1.02  | -2.16 | -4.75 |  |  |
| -1.18  | -0.91 | -3.29 |  |  |
| -1.26  | -2.18 | -4.47 |  |  |
| -1.74  | 2.57  | 0.75  |  |  |
| -1.84  | -1.53 | -3.27 |  |  |
| -2.53  | 1.21  | -0.07 |  |  |
| -2.79  | 2.33  | 1.19  |  |  |
| -2.84  | 1.89  | 0.78  |  |  |
| -2.93  | -2.51 | -3.57 |  |  |
| -12.62 | -1.37 | -0.33 |  |  |
| -14.87 | -2.34 | -1.06 |  |  |
| -15.59 | -1.97 | -0.62 |  |  |
| 1.79   | 1.42  | -2.41 |  |  |
| 1.18   | -2.34 | -5.57 |  |  |
| 1.07   | -2.39 | -5.49 |  |  |
| 1.06   | 8.13  | 5.05  |  |  |
| -1.89  | 3.08  | 1.01  |  |  |
| -2.72  | 0.96  | -0.59 |  |  |
| -3.12  | -2.73 | -4.08 |  |  |
| -3.3   | 1.35  | 0.08  |  |  |
| -3.86  | 1.39  | 0.35  |  |  |
| -3.94  | -0.81 | -1.82 |  |  |
| -16.23 | -0.54 | 0.49  |  |  |
| 2.67   | 4.2   | 0.39  |  |  |
| 1.59   | 2.85  | -0.21 |  |  |
| 1.38   | 1.79  | -1.07 |  |  |
| 1.2    | 2.52  | -0.13 |  |  |
| 1.18   | 0.86  | -1.77 |  |  |
| 1.16   | 2.21  | -0.39 |  |  |
| 1.08   | 4.23  | 1.73  |  |  |
| -1.12  | 1.06  | -1.17 |  |  |
| -1.19  | 0     | -2.14 |  |  |
| -1.22  | -1.35 | -3.45 |  |  |
| -1.37  | -1.28 | -3.21 |  |  |
| -1.39  | -1.27 | -3.19 |  |  |
| -1.4   | 1.56  | -0.34 |  |  |

|        |       |       |  |  |
|--------|-------|-------|--|--|
| -1.95  | -1.5  | -2.93 |  |  |
| -11.7  | -1.47 | -0.31 |  |  |
| 10.31  | 1.4   | -2.4  |  |  |
| 1.68   | 1.42  | 0.23  |  |  |
| 1.49   | -3.25 | -4.26 |  |  |
| -4.8   | -2.43 | -0.61 |  |  |
| 1.48   | 1.85  | -1.95 |  |  |
| -1.11  | -0.29 | -3.38 |  |  |
| -1.11  | 3.39  | 0.3   |  |  |
| -1.12  | 5.56  | 2.49  |  |  |
| -1.23  | 1.44  | -1.49 |  |  |
| -1.31  | -1.43 | -4.27 |  |  |
| -1.42  | -1.74 | -4.47 |  |  |
| 1.73   | -1.1  | -4.9  |  |  |
| 1.27   | -0.78 | -4.12 |  |  |
| -1.02  | -1.53 | -4.5  |  |  |
| -1.19  | -4.13 | -6.88 |  |  |
| -1.31  | -0.41 | -3.02 |  |  |
| -1.55  | 0.03  | -2.34 |  |  |
| -2.09  | -4.02 | -5.96 |  |  |
| -3.21  | -2.13 | -3.45 |  |  |
| -3.85  | -1.18 | -2.23 |  |  |
| -16.58 | -2.06 | -1.01 |  |  |
| 1.27   | 0.21  | -3.58 |  |  |
| -1.33  | -0.07 | -3.1  |  |  |
| -1.41  | -3.35 | -6.3  |  |  |
| -1.59  | -1.13 | -3.91 |  |  |
| -2.13  | -2.01 | -4.36 |  |  |
| -2.15  | 1.35  | -0.99 |  |  |
| -2.37  | -1.51 | -3.71 |  |  |
| -2.85  | -1.75 | -3.69 |  |  |
| -27.81 | -1.45 | -0.09 |  |  |
| -29.86 | -1.09 | 0.36  |  |  |
| 1.9    | 0.15  | -3.62 |  |  |
| 1.62   | -0.42 | -3.96 |  |  |
| 1.62   | 2.44  | -1.1  |  |  |
| 1.44   | -0.44 | -3.82 |  |  |
| 1.31   | 0.16  | -3.08 |  |  |
| 1.23   | -1.22 | -4.37 |  |  |
| 1.22   | 2.08  | -1.05 |  |  |
| 1.2    | 0.87  | -2.24 |  |  |
| 1.17   | 2.43  | -0.65 |  |  |
| 1.16   | -1.36 | -4.42 |  |  |
| 1.15   | 0.69  | -2.37 |  |  |
| 1.15   | 3.89  | 0.83  |  |  |
| 1.15   | 2.12  | -0.93 |  |  |
| 1.12   | -2.33 | -5.35 |  |  |
| 1.1    | 4.01  | 1.02  |  |  |
| 1.1    | 1.85  | -1.13 |  |  |
| 1.07   | 0.24  | -2.71 |  |  |
| 1.04   | -0.2  | -3.11 |  |  |
| 1.02   | 0.18  | -2.69 |  |  |
| -1.04  | 1.5   | -1.29 |  |  |
| -1.05  | -0.27 | -3.05 |  |  |
| -1.08  | 4.5   | 1.77  |  |  |
| -1.12  | 4.84  | 2.15  |  |  |
| -1.17  | 0.65  | -1.97 |  |  |
| -1.25  | 0.41  | -2.11 |  |  |

|        |       |       |  |  |
|--------|-------|-------|--|--|
| -1.38  | -2.93 | -5.31 |  |  |
| -1.4   | -0.29 | -2.65 |  |  |
| -1.41  | -1.42 | -3.77 |  |  |
| -1.52  | 0.41  | -1.83 |  |  |
| -1.54  | 1.67  | -0.55 |  |  |
| -1.73  | -1.69 | -3.74 |  |  |
| -1.82  | -2.54 | -4.52 |  |  |
| -2.03  | -0.27 | -2.1  |  |  |
| -2.1   | -3.43 | -5.21 |  |  |
| -2.12  | -1.04 | -2.81 |  |  |
| -2.15  | -1.79 | -3.54 |  |  |
| -2.17  | -3.02 | -4.75 |  |  |
| -2.51  | -0.72 | -2.24 |  |  |
| -2.69  | -1.15 | -2.57 |  |  |
| -2.87  | -0.36 | -1.69 |  |  |
| -22.55 | -1.35 | 0.29  |  |  |
| 2.32   | 4.6   | 0.84  |  |  |
| -1.16  | -0.64 | -2.98 |  |  |
| -1.16  | -3.54 | -5.87 |  |  |
| -1.19  | -3.41 | -5.71 |  |  |
| -1.23  | -2.3  | -4.54 |  |  |
| -1.26  | -2.6  | -4.81 |  |  |
| -1.39  | -4.03 | -6.1  |  |  |
| -1.52  | -3.12 | -5.06 |  |  |
| -1.54  | -4.17 | -6.09 |  |  |
| -2.3   | -3.19 | -4.53 |  |  |
| -2.59  | 0.72  | -0.46 |  |  |
| 3.34   | 1.83  | -1.92 |  |  |
| 3.16   | 3.09  | -0.58 |  |  |
| 2.95   | 1.6   | -1.96 |  |  |
| 2.8    | 2.42  | -1.07 |  |  |
| 2.73   | 2.65  | -0.8  |  |  |
| 1.24   | 2.77  | 0.46  |  |  |
| -1.01  | 6.67  | 4.68  |  |  |
| -1.03  | 0.62  | -1.33 |  |  |
| -1.04  | 9.16  | 7.21  |  |  |
| -1.06  | -0.1  | -2.02 |  |  |
| -1.08  | 1.72  | -0.18 |  |  |
| -1.17  | 6.14  | 4.37  |  |  |
| -1.26  | 7.34  | 5.67  |  |  |
| -1.35  | 0.81  | -0.76 |  |  |
| -1.66  | 1.77  | 0.5   |  |  |
| -1.99  | -0.49 | -1.5  |  |  |
| -8.76  | -0.02 | 1.11  |  |  |
| 10.11  | -0.03 | -3.77 |  |  |
| 1.69   | 0.52  | -0.64 |  |  |
| -6.75  | -3.12 | -0.76 |  |  |
| -1     | 3.29  | -0.42 |  |  |
| -1.73  | -0.53 | -3.46 |  |  |
| -3.65  | -1.54 | -3.38 |  |  |
| -28.63 | -0.26 | 0.86  |  |  |
| -41.77 | -0.49 | 1.18  |  |  |
| 53.66  | -0.1  | -3.81 |  |  |
| 17.95  | 0.06  | -2.07 |  |  |
| 11.43  | 0.49  | -0.99 |  |  |
| 11.37  | -0.53 | -2    |  |  |
| 1.64   | -0.62 | 0.71  |  |  |
| 2.32   | -3.16 | -6.86 |  |  |

|        |       |       |  |  |
|--------|-------|-------|--|--|
| 1.12   | -4.42 | -7.07 |  |  |
| 1.1    | 3.55  | 0.92  |  |  |
| 1.04   | -0.06 | -2.6  |  |  |
| 1.04   | 1.11  | -1.43 |  |  |
| -1.02  | 1.42  | -1.04 |  |  |
| -1.11  | -0.41 | -2.74 |  |  |
| -1.2   | -4.48 | -6.7  |  |  |
| -1.31  | 3.33  | 1.23  |  |  |
| -1.51  | -1.23 | -3.12 |  |  |
| -1.62  | -3.38 | -5.17 |  |  |
| -1.64  | -2.58 | -4.34 |  |  |
| -1.68  | -3.15 | -4.88 |  |  |
| -1.7   | -4.08 | -5.79 |  |  |
| -1.86  | -0.15 | -1.74 |  |  |
| -2.35  | 0.35  | -0.9  |  |  |
| -2.44  | -4.14 | -5.33 |  |  |
| -2.73  | 0.08  | -0.95 |  |  |
| -11.83 | -0.13 | 0.95  |  |  |
| 1.22   | 0.4   | -3.28 |  |  |
| 1.09   | -0.63 | -4.15 |  |  |
| 1.06   | 0.79  | -2.69 |  |  |
| 1.04   | 0.5   | -2.95 |  |  |
| -1.01  | -0.71 | -4.09 |  |  |
| -1.08  | -0.11 | -3.39 |  |  |
| -1.13  | -2.2  | -5.42 |  |  |
| -1.23  | -2.68 | -5.77 |  |  |
| -1.5   | -0.59 | -3.4  |  |  |
| -1.63  | -0.48 | -3.17 |  |  |
| -1.75  | 0.22  | -2.37 |  |  |
| -1.95  | -1.14 | -3.58 |  |  |
| -2.48  | 3.3   | 1.21  |  |  |
| -3.05  | -0.62 | -2.41 |  |  |
| -3.26  | -2.12 | -3.81 |  |  |
| -3.37  | 1.22  | -0.42 |  |  |
| -3.92  | 1.41  | -0.02 |  |  |
| -4     | 1.3   | -0.1  |  |  |
| -4.61  | 1.54  | 0.35  |  |  |
| -4.72  | 0.23  | -0.92 |  |  |
| -4.73  | 0.64  | -0.51 |  |  |
| -5     | -0.22 | -1.29 |  |  |
| -5.26  | -0.61 | -1.61 |  |  |
| -21.2  | -3.17 | -2.16 |  |  |
| -21.34 | -2.53 | -1.51 |  |  |
| -21.8  | -0.43 | 0.62  |  |  |
| -23.49 | 0.26  | 1.42  |  |  |
| -32.57 | -0.86 | 0.77  |  |  |
| 5.93   | 0.71  | -2.97 |  |  |
| 1.1    | 2.14  | 0.9   |  |  |
| 1.08   | 1.71  | 0.49  |  |  |
| 1.05   | -1.41 | -2.59 |  |  |
| 1      | -0.38 | -1.49 |  |  |
| -1.04  | 2.45  | 1.4   |  |  |
| -1.05  | -0.22 | -1.26 |  |  |
| -1.06  | 0.65  | -0.38 |  |  |
| -4.75  | -3.57 | -2.43 |  |  |
| 53.48  | 0.08  | -3.58 |  |  |
| 33.27  | 0.85  | -2.13 |  |  |
| 19.66  | 0.59  | -1.63 |  |  |

|        |       |       |  |  |
|--------|-------|-------|--|--|
| 17.15  | -0.15 | -2.17 |  |  |
| 8.65   | -0.09 | -1.13 |  |  |
| 1.83   | -0.24 | 0.96  |  |  |
| 1.62   | 0.86  | 2.24  |  |  |
| 1.38   | 2.66  | 4.27  |  |  |
| 1.36   | 1.52  | 3.15  |  |  |
| 1.28   | 0.39  | 2.11  |  |  |
| -1.28  | -4.02 | -1.59 |  |  |
| -1.49  | -3.99 | -1.34 |  |  |
| 5.09   | -0.79 | -4.46 |  |  |
| 3.54   | -0.74 | -3.89 |  |  |
| 2.13   | 1.88  | -0.53 |  |  |
| 1.84   | 0.66  | -1.55 |  |  |
| 1.72   | -2.3  | -4.4  |  |  |
| 1.68   | 5.11  | 3.04  |  |  |
| 1.55   | -2.12 | -4.08 |  |  |
| 1.53   | 0.87  | -1.06 |  |  |
| 1.48   | -0.15 | -2.03 |  |  |
| 1.39   | 0.44  | -1.36 |  |  |
| 1.36   | 1.54  | -0.23 |  |  |
| 1.27   | -1.05 | -2.71 |  |  |
| 1.22   | 0.7   | -0.9  |  |  |
| 1.2    | -0.89 | -2.47 |  |  |
| 1.18   | -1.85 | -3.4  |  |  |
| 1.17   | -1.57 | -3.11 |  |  |
| 1.15   | -2.8  | -4.33 |  |  |
| 1.12   | 5.36  | 3.88  |  |  |
| 1.11   | -2.19 | -3.65 |  |  |
| 1.09   | 0.25  | -1.2  |  |  |
| 1.09   | 0     | -1.45 |  |  |
| 1.09   | -0.69 | -2.14 |  |  |
| 1.07   | 2.27  | 0.85  |  |  |
| 1.03   | -2.6  | -3.96 |  |  |
| 1.02   | -3.06 | -4.41 |  |  |
| 1.02   | 6.7   | 5.35  |  |  |
| -1.04  | -0.96 | -2.23 |  |  |
| -1.06  | -2.78 | -4.01 |  |  |
| -1.06  | -3.42 | -4.66 |  |  |
| -1.08  | -2.2  | -3.4  |  |  |
| -1.11  | -3.19 | -4.36 |  |  |
| -1.11  | 0.08  | -1.09 |  |  |
| -1.12  | -2.04 | -3.19 |  |  |
| -1.19  | -3.68 | -4.74 |  |  |
| -1.2   | -2.35 | -3.4  |  |  |
| -1.22  | 3.14  | 2.11  |  |  |
| 30.12  | 0.67  | -2.97 |  |  |
| 7.05   | 0.12  | -1.43 |  |  |
| 1.18   | -4.45 | -8.06 |  |  |
| -1.34  | -3.54 | -6.48 |  |  |
| -3.81  | 1.59  | 0.15  |  |  |
| -4.02  | -3.97 | -5.33 |  |  |
| -4.27  | -3.23 | -4.51 |  |  |
| -26.39 | -5.36 | -4    |  |  |
| -27.59 | -2.54 | -1.12 |  |  |
| -28.51 | -2.53 | -1.07 |  |  |
| -31.61 | -6    | -4.38 |  |  |
| -41.32 | -3.55 | -1.55 |  |  |
| 1.18   | 3.79  | 0.19  |  |  |

|        |       |       |  |  |
|--------|-------|-------|--|--|
| -1.04  | -0.28 | -3.59 |  |  |
| -1.11  | -0.3  | -3.5  |  |  |
| -1.13  | -0.26 | -3.44 |  |  |
| -1.38  | 2.52  | -0.38 |  |  |
| -2.3   | 3.07  | 0.92  |  |  |
| -3.16  | -2.29 | -3.99 |  |  |
| -30.27 | -1.37 | 0.19  |  |  |
| 1.52   | -1.16 | -4.75 |  |  |
| 1.03   | 4.55  | 1.52  |  |  |
| -1.05  | 0.96  | -1.96 |  |  |
| -1.07  | -1.81 | -4.7  |  |  |
| -1.1   | -1.42 | -4.27 |  |  |
| -1.13  | -2.94 | -5.76 |  |  |
| -1.16  | 5.29  | 2.51  |  |  |
| -1.2   | 0.68  | -2.04 |  |  |
| -1.31  | -0.66 | -3.26 |  |  |
| -1.32  | -0.7  | -3.3  |  |  |
| -1.33  | -3.52 | -6.1  |  |  |
| -1.36  | -0.65 | -3.21 |  |  |
| -1.44  | -1.55 | -4.02 |  |  |
| -1.46  | 0.89  | -1.55 |  |  |
| -1.52  | -0.79 | -3.17 |  |  |
| -1.56  | 0.4   | -1.94 |  |  |
| -1.58  | -0.35 | -2.68 |  |  |
| -1.58  | -0.37 | -2.7  |  |  |
| -1.65  | 2.2   | -0.07 |  |  |
| -1.79  | 0.92  | -1.23 |  |  |
| -1.85  | -0.16 | -2.26 |  |  |
| -1.91  | 0.4   | -1.65 |  |  |
| -1.93  | -0.61 | -2.65 |  |  |
| -1.97  | 0.27  | -1.74 |  |  |
| -2.14  | -0.49 | -2.38 |  |  |
| -2.15  | 0.87  | -1.02 |  |  |
| -2.15  | -1.09 | -2.98 |  |  |
| -2.17  | -1.89 | -3.76 |  |  |
| -2.19  | -2.6  | -4.46 |  |  |
| -2.2   | 1.65  | -0.2  |  |  |
| -2.26  | -2.69 | -4.51 |  |  |
| -2.29  | 0.57  | -1.22 |  |  |
| -2.43  | -2.32 | -4.03 |  |  |
| -2.44  | 0.75  | -0.95 |  |  |
| -2.59  | -1.1  | -2.72 |  |  |
| -2.8   | 0.65  | -0.86 |  |  |
| -2.91  | -2.05 | -3.5  |  |  |
| -2.96  | 0.54  | -0.88 |  |  |
| -3.07  | 2.65  | 1.28  |  |  |
| -3.79  | 2.16  | 1.09  |  |  |
| -16.56 | -0.86 | 0.2   |  |  |
| 9.36   | 1.6   | -1.99 |  |  |
| 4.78   | 0.91  | -1.71 |  |  |
| -2.69  | -1.53 | -0.47 |  |  |
| 36.03  | 1.29  | -2.29 |  |  |
| 11.99  | 1.1   | -0.89 |  |  |
| 11.11  | 1.94  | 0.05  |  |  |
| 9.06   | -0.82 | -2.4  |  |  |
| 8.41   | -1.14 | -2.62 |  |  |
| 1.34   | -0.42 | 0.75  |  |  |
| 1.11   | -0.7  | 0.75  |  |  |

|        |       |       |  |  |
|--------|-------|-------|--|--|
| 54.95  | 1.56  | -2.02 |  |  |
| 28.66  | 2.37  | -0.27 |  |  |
| 26.92  | 1.67  | -0.88 |  |  |
| 15.1   | 1.42  | -0.3  |  |  |
| 12.92  | 1.91  | 0.41  |  |  |
| 12.27  | 1.71  | 0.3   |  |  |
| 2.07   | -1.86 | -0.71 |  |  |
| 1.81   | -1.08 | 0.27  |  |  |
| 1.54   | -3.01 | -1.43 |  |  |
| -1.01  | -2.01 | 0.21  |  |  |
| -2.98  | -3.63 | 0.15  |  |  |
| 15.45  | -0.98 | -4.55 |  |  |
| 7.83   | -5.28 | -7.87 |  |  |
| 5.41   | -4.4  | -6.46 |  |  |
| 3.8    | -6.26 | -7.81 |  |  |
| 3.76   | -1.83 | -3.37 |  |  |
| 2.78   | -6.13 | -7.23 |  |  |
| -2.05  | -8.28 | -6.87 |  |  |
| 20.77  | 1.09  | -2.48 |  |  |
| 9.42   | 1.13  | -1.31 |  |  |
| 7.47   | 4.55  | 2.45  |  |  |
| 6.66   | 0.89  | -1.04 |  |  |
| 5.64   | 0.3   | -1.39 |  |  |
| 5.51   | 0.5   | -1.16 |  |  |
| 5.21   | -1.25 | -2.83 |  |  |
| 4.3    | 1.28  | -0.02 |  |  |
| 3.72   | -1.98 | -3.07 |  |  |
| -1.2   | 1.12  | 2.18  |  |  |
| 8.4    | 1.57  | -1.99 |  |  |
| 1.75   | -1.58 | -2.87 |  |  |
| 2.32   | -3.24 | -6.8  |  |  |
| 1.12   | -4.5  | -7.01 |  |  |
| 1.1    | 3.47  | 0.99  |  |  |
| 1.04   | -0.14 | -2.53 |  |  |
| -1.02  | 1.34  | -0.97 |  |  |
| -1.11  | -0.49 | -2.67 |  |  |
| -1.16  | -1.19 | -3.31 |  |  |
| -1.34  | -1.57 | -3.48 |  |  |
| -1.62  | -3.46 | -5.1  |  |  |
| -1.86  | -0.23 | -1.67 |  |  |
| 2.32   | -3.22 | -6.77 |  |  |
| 1.12   | -4.48 | -6.98 |  |  |
| 1.1    | 3.49  | 1.02  |  |  |
| 1.04   | -0.12 | -2.51 |  |  |
| 1.04   | 1.05  | -1.34 |  |  |
| -1.02  | 1.36  | -0.95 |  |  |
| -1.11  | -0.47 | -2.64 |  |  |
| -1.17  | -4.55 | -6.65 |  |  |
| -1.51  | -1.29 | -3.03 |  |  |
| -1.62  | -3.44 | -5.07 |  |  |
| -1.64  | -2.64 | -4.25 |  |  |
| -1.68  | -3.21 | -4.79 |  |  |
| -1.7   | -4.13 | -5.7  |  |  |
| -1.86  | -0.2  | -1.64 |  |  |
| -2.44  | -4.2  | -5.24 |  |  |
| -2.47  | 0.27  | -0.76 |  |  |
| -11.83 | -0.19 | 1.04  |  |  |
| 2.52   | -4.16 | -7.71 |  |  |

|       |       |       |  |  |
|-------|-------|-------|--|--|
| 1.68  | 1.08  | -1.88 |  |  |
| 1.5   | 2.68  | -0.11 |  |  |
| 1.22  | -0.78 | -3.27 |  |  |
| 1.13  | -2.13 | -4.52 |  |  |
| 1.09  | -2.29 | -4.63 |  |  |
| 1.08  | 1.06  | -1.26 |  |  |
| -1.03 | -1.75 | -3.91 |  |  |
| -1.06 | -2.99 | -5.12 |  |  |
| -1.07 | -2.36 | -4.48 |  |  |
| -1.15 | -0.29 | -2.3  |  |  |
| -1.19 | -1.58 | -3.53 |  |  |
| -1.21 | -2.14 | -4.08 |  |  |
| -1.21 | -1.36 | -3.29 |  |  |
| -1.28 | 0.81  | -1.05 |  |  |
| -1.28 | -2.73 | -4.58 |  |  |
| -1.3  | -2.7  | -4.53 |  |  |
| -1.62 | -4.42 | -5.94 |  |  |
| -1.67 | -1.69 | -3.17 |  |  |
| -1.77 | -2.57 | -3.95 |  |  |
| -1.92 | -3.86 | -5.12 |  |  |
| -2.23 | -3.49 | -4.54 |  |  |
| 48.83 | 1.72  | -1.82 |  |  |
| 46.62 | 1.58  | -1.89 |  |  |
| 40.5  | 2.54  | -0.73 |  |  |
| 39.73 | 1.63  | -1.61 |  |  |
| 28.85 | 0.31  | -2.48 |  |  |
| 24.86 | 2.56  | -0.01 |  |  |
| 22.36 | 1.85  | -0.56 |  |  |
| 14.93 | 0.71  | -1.13 |  |  |
| 14.41 | 1.66  | -0.12 |  |  |
| 13.33 | 0.15  | -1.52 |  |  |
| 8.66  | -0.83 | -1.88 |  |  |
| 8.53  | -0.72 | -1.74 |  |  |
| 8.42  | 0.93  | -0.07 |  |  |
| 2.03  | -0.48 | 0.56  |  |  |
| 1.98  | -1.28 | -0.19 |  |  |
| 1.79  | -1.34 | -0.11 |  |  |
| 1.79  | -0.13 | 1.1   |  |  |
| 1.74  | -2.06 | -0.79 |  |  |
| 1.62  | -0.06 | 1.31  |  |  |
| 1.55  | 0.15  | 1.59  |  |  |
| 1.43  | -0.53 | 1.02  |  |  |
| 1.41  | 0.72  | 2.29  |  |  |
| 1.39  | -1.11 | 0.47  |  |  |
| 1.33  | 0.81  | 2.47  |  |  |
| 1.23  | 0.72  | 2.48  |  |  |
| 1.22  | -0.87 | 0.91  |  |  |
| 1.2   | -1.9  | -0.1  |  |  |
| 1.18  | 1.14  | 2.97  |  |  |
| 1.17  | 1.18  | 3.02  |  |  |
| 1.14  | -0.15 | 1.74  |  |  |
| 1.09  | -2.63 | -0.69 |  |  |
| 1.06  | -4    | -2.01 |  |  |
| 1.05  | 3.57  | 5.57  |  |  |
| 1.01  | 1.93  | 3.98  |  |  |
| -1.07 | 0.25  | 2.41  |  |  |
| -1.1  | -0.65 | 1.55  |  |  |
| -1.14 | 0.27  | 2.53  |  |  |



|        |       |       |  |  |
|--------|-------|-------|--|--|
| -1.19  | 0.92  | 3.25  |  |  |
| -1.47  | 2.7   | 5.32  |  |  |
| -1.64  | -1    | 1.78  |  |  |
| -1.81  | 2.53  | 5.45  |  |  |
| -1.83  | -1.91 | 1.03  |  |  |
| 2.32   | -3.23 | -6.77 |  |  |
| 1.12   | -4.48 | -6.98 |  |  |
| 1.1    | 3.49  | 1.02  |  |  |
| 1.04   | -0.12 | -2.5  |  |  |
| 1.04   | 1.05  | -1.33 |  |  |
| -1.02  | 1.36  | -0.94 |  |  |
| -1.11  | -0.47 | -2.64 |  |  |
| -1.2   | -4.54 | -6.6  |  |  |
| -1.51  | -1.29 | -3.02 |  |  |
| -1.62  | -3.44 | -5.07 |  |  |
| -1.64  | -2.64 | -4.25 |  |  |
| -1.68  | -3.21 | -4.79 |  |  |
| -1.7   | -4.14 | -5.7  |  |  |
| -1.86  | -0.21 | -1.64 |  |  |
| -2.35  | 0.29  | -0.8  |  |  |
| -2.44  | -4.2  | -5.24 |  |  |
| -11.83 | -0.19 | 1.04  |  |  |
| 2.32   | -3.23 | -6.77 |  |  |
| 1.12   | -4.48 | -6.98 |  |  |
| 1.1    | 3.49  | 1.02  |  |  |
| 1.04   | -0.12 | -2.5  |  |  |
| 1.04   | 1.05  | -1.33 |  |  |
| -1.02  | 1.36  | -0.94 |  |  |
| -1.11  | -0.47 | -2.64 |  |  |
| -1.2   | -4.54 | -6.6  |  |  |
| -1.51  | -1.29 | -3.02 |  |  |
| -1.62  | -3.44 | -5.07 |  |  |
| -1.64  | -2.64 | -4.25 |  |  |
| -1.68  | -3.21 | -4.79 |  |  |
| -1.7   | -4.14 | -5.7  |  |  |
| -1.86  | -0.21 | -1.64 |  |  |
| -2.35  | 0.29  | -0.8  |  |  |
| -2.44  | -4.2  | -5.24 |  |  |
| -11.83 | -0.19 | 1.04  |  |  |
| 7.94   | -0.55 | -4.09 |  |  |
| 6.7    | 0.64  | -2.65 |  |  |
| 5.13   | -1.6  | -4.51 |  |  |
| 4.95   | 0.88  | -1.97 |  |  |
| 4.36   | 1.2   | -1.47 |  |  |
| 4.22   | 0.47  | -2.16 |  |  |
| 4      | -0.5  | -3.05 |  |  |
| 3.69   | 0.87  | -1.55 |  |  |
| 3.6    | 1.33  | -1.06 |  |  |
| 3.55   | -1.36 | -3.73 |  |  |
| 3.51   | -0.19 | -2.54 |  |  |
| 3.47   | 1.08  | -1.26 |  |  |
| 3.39   | 0.1   | -2.21 |  |  |
| 3.35   | 0.7   | -1.59 |  |  |
| 3.27   | 0.11  | -2.14 |  |  |
| 3.26   | -0.99 | -3.24 |  |  |
| 3.18   | 0.89  | -1.32 |  |  |
| 3.01   | -1.96 | -4.09 |  |  |
| 2.86   | -0.25 | -2.31 |  |  |

|        |       |       |  |  |
|--------|-------|-------|--|--|
| 2.78   | 0.5   | -1.52 |  |  |
| 2.66   | 0.74  | -1.22 |  |  |
| 2.65   | -1.92 | -3.87 |  |  |
| 2.62   | 0.9   | -1.04 |  |  |
| 2.58   | 1.56  | -0.35 |  |  |
| 2.53   | 0.34  | -1.55 |  |  |
| 2.5    | 0.36  | -1.51 |  |  |
| 2.48   | 0.2   | -1.66 |  |  |
| 2.42   | -0.97 | -2.79 |  |  |
| 2.35   | -0.77 | -2.55 |  |  |
| 2.32   | 3.03  | 1.28  |  |  |
| 2.28   | 0.41  | -1.32 |  |  |
| 2.12   | 0.45  | -1.18 |  |  |
| 2.09   | -2.81 | -4.42 |  |  |
| 2.06   | 0.29  | -1.3  |  |  |
| 1.97   | 0.02  | -1.51 |  |  |
| 1.9    | 0.47  | -1.01 |  |  |
| 1.89   | -0.15 | -1.62 |  |  |
| 1.82   | -0.87 | -2.28 |  |  |
| 1.68   | -0.94 | -2.24 |  |  |
| 1.64   | -2.04 | -3.3  |  |  |
| -3.02  | -2.85 | -1.8  |  |  |
| -3.18  | -2.72 | -1.6  |  |  |
| -4.19  | -2.01 | -0.49 |  |  |
| 2.32   | -3.03 | -6.56 |  |  |
| 1.12   | -4.29 | -6.77 |  |  |
| 1.1    | 3.68  | 1.23  |  |  |
| 1.04   | 0.08  | -2.29 |  |  |
| 1.04   | 1.25  | -1.12 |  |  |
| -1.02  | 1.55  | -0.73 |  |  |
| -1.11  | -0.27 | -2.43 |  |  |
| -1.17  | -4.35 | -6.44 |  |  |
| -1.51  | -1.09 | -2.81 |  |  |
| -1.62  | -3.24 | -4.86 |  |  |
| -1.64  | -2.44 | -4.04 |  |  |
| -1.68  | -3.01 | -4.58 |  |  |
| -1.7   | -3.94 | -5.49 |  |  |
| -1.86  | -0.01 | -1.43 |  |  |
| -2.08  | -0.21 | -1.46 |  |  |
| -2.44  | -4    | -5.03 |  |  |
| -11.83 | 0     | 1.25  |  |  |
| 2.32   | -3.2  | -6.73 |  |  |
| 1.12   | -4.46 | -6.94 |  |  |
| 1.1    | 3.51  | 1.06  |  |  |
| 1.04   | -0.1  | -2.46 |  |  |
| 1.04   | 1.07  | -1.29 |  |  |
| -1.02  | 1.38  | -0.9  |  |  |
| -1.11  | -0.45 | -2.6  |  |  |
| -1.17  | -4.53 | -6.61 |  |  |
| -1.51  | -1.27 | -2.98 |  |  |
| -1.62  | -3.42 | -5.03 |  |  |
| -1.64  | -2.62 | -4.21 |  |  |
| -1.68  | -3.18 | -4.75 |  |  |
| -1.7   | -4.11 | -5.66 |  |  |
| -1.86  | -0.18 | -1.6  |  |  |
| -1.94  | 0.17  | -1.19 |  |  |
| -2.44  | -4.18 | -5.2  |  |  |
| -11.83 | -0.17 | 1.08  |  |  |

|        |       |       |  |  |
|--------|-------|-------|--|--|
| 2.32   | -3.2  | -6.73 |  |  |
| 1.12   | -4.46 | -6.94 |  |  |
| 1.1    | 3.51  | 1.06  |  |  |
| 1.04   | -0.1  | -2.46 |  |  |
| 1.04   | 1.07  | -1.29 |  |  |
| -1.02  | 1.38  | -0.9  |  |  |
| -1.11  | -0.45 | -2.6  |  |  |
| -1.17  | -4.53 | -6.61 |  |  |
| -1.51  | -1.27 | -2.98 |  |  |
| -1.62  | -3.42 | -5.03 |  |  |
| -1.64  | -2.62 | -4.21 |  |  |
| -1.68  | -3.18 | -4.75 |  |  |
| -1.7   | -4.11 | -5.66 |  |  |
| -1.86  | -0.18 | -1.6  |  |  |
| -1.94  | 0.17  | -1.19 |  |  |
| -2.44  | -4.18 | -5.2  |  |  |
| -11.83 | -0.17 | 1.08  |  |  |
| 6.09   | 4.26  | 0.75  |  |  |
| 1.31   | 0.5   | -0.79 |  |  |
| 1.88   | 1.76  | -1.74 |  |  |
| 1.81   | 0.69  | -2.77 |  |  |
| -1.06  | 1.51  | -1    |  |  |
| -1.14  | -0.13 | -2.54 |  |  |
| -1.57  | -1.29 | -3.23 |  |  |
| -2.01  | 2.48  | 0.89  |  |  |
| -2.04  | 1.29  | -0.28 |  |  |
| -2.65  | -1.36 | -2.55 |  |  |
| -13.22 | -0.13 | 1     |  |  |
| 2.04   | -0.49 | -3.99 |  |  |
| 1.42   | 0.14  | -2.83 |  |  |
| 1.08   | -1.65 | -4.24 |  |  |
| 1.03   | -0.12 | -2.64 |  |  |
| -1.11  | -2.5  | -4.82 |  |  |
| -1.16  | -2.11 | -4.37 |  |  |
| -1.17  | -1.71 | -3.95 |  |  |
| -1.19  | -0.54 | -2.76 |  |  |
| -1.22  | -1.93 | -4.12 |  |  |
| -1.27  | -2.67 | -4.8  |  |  |
| -1.28  | -2.11 | -4.22 |  |  |
| -1.36  | -3.68 | -5.7  |  |  |
| -1.41  | -1.62 | -3.6  |  |  |
| -1.71  | -3.33 | -5.03 |  |  |
| -1.74  | -3.55 | -5.22 |  |  |
| -1.78  | -4.71 | -6.35 |  |  |
| -1.79  | -1.4  | -3.03 |  |  |
| -1.82  | -1.43 | -3.04 |  |  |
| -2.17  | -2.29 | -3.64 |  |  |
| -2.37  | -3.09 | -4.31 |  |  |
| -2.57  | -0.97 | -2.08 |  |  |
| 1.42   | -2.85 | -6.34 |  |  |
| 1.37   | -1.33 | -4.77 |  |  |
| 1.12   | -3.12 | -6.27 |  |  |
| 1.04   | -5.54 | -8.58 |  |  |
| -1.25  | -5.84 | -8.5  |  |  |
| -1.54  | -1.47 | -3.84 |  |  |
| -1.94  | -6    | -8.03 |  |  |
| -2.14  | -4.53 | -6.42 |  |  |
| -2.55  | -2.54 | -4.18 |  |  |

|        |       |       |  |  |
|--------|-------|-------|--|--|
| -3.56  | 0.85  | -0.3  |  |  |
| -18.96 | -3.09 | -1.84 |  |  |
| -20.75 | -4.39 | -3    |  |  |
| -22.04 | -2.92 | -1.44 |  |  |
| -25.89 | -4.7  | -2.99 |  |  |
| -65.41 | -5.33 | -2.29 |  |  |
| 8.89   | -0.37 | -3.86 |  |  |
| 1.77   | 0.32  | -0.84 |  |  |
| 5.61   | -0.24 | -3.72 |  |  |
| 1.63   | 0.66  | -1.03 |  |  |
| 1.46   | 1.38  | -0.16 |  |  |
| 1.37   | 1.99  | 0.55  |  |  |
| 1.37   | 1.73  | 0.29  |  |  |
| 1.36   | 2.23  | 0.79  |  |  |
| 1.34   | 0.51  | -0.9  |  |  |
| 1.31   | 0.99  | -0.39 |  |  |
| 1.16   | 1.28  | 0.07  |  |  |
| 1.06   | -0.1  | -1.18 |  |  |
| 1.05   | 2.97  | 1.91  |  |  |
| 1.02   | 1.81  | 0.79  |  |  |
| 1.01   | -0.15 | -1.16 |  |  |
| 1      | 1.58  | 0.58  |  |  |
| -4.84  | -3.03 | -1.74 |  |  |
| -5.17  | -0.83 | 0.54  |  |  |
| -5.24  | -2.37 | -0.98 |  |  |
| -5.92  | -3.53 | -1.96 |  |  |
| -6.56  | -3.24 | -1.52 |  |  |
| -7.48  | -0.22 | 1.69  |  |  |
| -11.79 | -2.74 | -0.18 |  |  |
| -12.75 | -3.57 | -0.89 |  |  |
| 2.94   | 1.58  | -1.9  |  |  |
| 2.66   | 3.55  | 0.22  |  |  |
| 2.2    | 1.77  | -1.29 |  |  |
| 1.55   | 4.51  | 1.96  |  |  |
| 1.33   | 2.74  | 0.41  |  |  |
| 1.19   | 1.9   | -0.26 |  |  |
| 1.04   | 1.01  | -0.96 |  |  |
| -1.17  | 2.41  | 0.71  |  |  |
| -1.18  | 0.23  | -1.45 |  |  |
| -1.2   | 1.76  | 0.12  |  |  |
| -1.23  | -0.63 | -2.25 |  |  |
| -1.26  | -0.26 | -1.84 |  |  |
| -1.38  | 1.71  | 0.26  |  |  |
| -1.49  | -0.92 | -2.26 |  |  |
| -1.71  | -0.83 | -1.97 |  |  |
| -1.71  | 1.63  | 0.48  |  |  |
| -1.83  | -0.57 | -1.61 |  |  |
| 2.57   | 1.19  | -2.28 |  |  |
| 1.97   | 2.37  | -0.72 |  |  |
| 1.63   | 1.96  | -0.85 |  |  |
| 1.61   | 0.92  | -1.87 |  |  |
| 1.45   | -1.28 | -3.93 |  |  |
| 1.41   | -2.16 | -4.76 |  |  |
| 1.36   | 2.82  | 0.27  |  |  |
| 1.33   | 4.52  | 2     |  |  |
| 1.3    | 1.13  | -1.35 |  |  |
| 1.21   | 0.25  | -2.13 |  |  |
| 1.18   | 0.33  | -2.02 |  |  |

|        |       |       |  |  |
|--------|-------|-------|--|--|
| 1.18   | 1.27  | -1.08 |  |  |
| 1.16   | -1.88 | -4.2  |  |  |
| 1.14   | -0.68 | -2.98 |  |  |
| 1.09   | -1.9  | -4.13 |  |  |
| 1.06   | -1.14 | -3.33 |  |  |
| 1.01   | 1.32  | -0.8  |  |  |
| -1     | 0.45  | -1.65 |  |  |
| -1.04  | 1.33  | -0.72 |  |  |
| -1.26  | 1.94  | 0.16  |  |  |
| -1.3   | -2.52 | -4.26 |  |  |
| -1.33  | 4.22  | 2.53  |  |  |
| -1.43  | 2.19  | 0.6   |  |  |
| -1.55  | -0.59 | -2.06 |  |  |
| -1.56  | 4.36  | 2.89  |  |  |
| -1.57  | 3.96  | 2.5   |  |  |
| -1.57  | 0.26  | -1.2  |  |  |
| -1.6   | -1.76 | -3.19 |  |  |
| -1.7   | 2.15  | 0.81  |  |  |
| -1.71  | 2.76  | 1.42  |  |  |
| -1.77  | 0.98  | -0.29 |  |  |
| -1.83  | -2.53 | -3.76 |  |  |
| -1.88  | -1.53 | -2.73 |  |  |
| -1.91  | -2.7  | -3.87 |  |  |
| -1.94  | -1.11 | -2.26 |  |  |
| -2.01  | -3.42 | -4.52 |  |  |
| -2.02  | 0.7   | -0.4  |  |  |
| -2.02  | -0.57 | -1.65 |  |  |
| -8.81  | -1.5  | -0.47 |  |  |
| -9.39  | -1.71 | -0.59 |  |  |
| -10.35 | -3.25 | -1.99 |  |  |
| -12.17 | -1.88 | -0.39 |  |  |
| -12.86 | -2.99 | -1.41 |  |  |
| 4.45   | -0.13 | -3.56 |  |  |
| 1.52   | -3.48 | -5.36 |  |  |
| 1.47   | 0.02  | -1.81 |  |  |
| 1.45   | -2.05 | -3.86 |  |  |
| 1.45   | -0.92 | -2.73 |  |  |
| 1.45   | -0.41 | -2.22 |  |  |
| 1.43   | -4.18 | -5.97 |  |  |
| 1.41   | -1.1  | -2.87 |  |  |
| 1.4    | -1.33 | -3.09 |  |  |
| 1.38   | 0.75  | -0.98 |  |  |
| 1.34   | -3.22 | -4.92 |  |  |
| 1.33   | -2.56 | -4.24 |  |  |
| 1.29   | -0.6  | -2.25 |  |  |
| 1.26   | -1.62 | -3.22 |  |  |
| 1.25   | -0.04 | -1.63 |  |  |
| 1.2    | -1.86 | -3.4  |  |  |
| 1.18   | -1.91 | -3.42 |  |  |
| 1.15   | -1.02 | -2.5  |  |  |
| 1.08   | -1.84 | -3.22 |  |  |
| 1.07   | -1.14 | -2.51 |  |  |
| 1.04   | -0.79 | -2.13 |  |  |
| 1.03   | -2.03 | -3.34 |  |  |
| 1.01   | -2.29 | -3.57 |  |  |
| 1      | -0.63 | -1.91 |  |  |
| -1.03  | -1.95 | -3.18 |  |  |
| -1.03  | -2.13 | -3.36 |  |  |

|        |       |       |  |  |
|--------|-------|-------|--|--|
| -1.05  | -0.01 | -1.21 |  |  |
| -1.08  | -3.41 | -4.57 |  |  |
| -1.1   | -0.48 | -1.62 |  |  |
| -1.1   | 4.07  | 2.93  |  |  |
| -1.13  | -1.24 | -2.34 |  |  |
| -1.12  | -2.04 | -3.15 |  |  |
| -1.13  | -0.98 | -2.07 |  |  |
| -1.14  | -2.11 | -3.2  |  |  |
| -1.15  | -0.5  | -1.56 |  |  |
| -1.16  | -3    | -4.06 |  |  |
| -1.19  | -2.33 | -3.35 |  |  |
| -1.21  | -1.47 | -2.47 |  |  |
| 1.22   | 0.47  | -2.96 |  |  |
| 1.09   | -0.56 | -3.83 |  |  |
| 1.01   | 0.67  | -2.49 |  |  |
| -1.02  | 2.15  | -0.96 |  |  |
| -1.08  | -0.05 | -3.07 |  |  |
| -1.23  | -2.62 | -5.45 |  |  |
| -1.75  | 0.29  | -2.05 |  |  |
| -1.97  | -1.13 | -3.29 |  |  |
| -2.34  | -1.88 | -3.79 |  |  |
| -2.35  | -1.11 | -3.02 |  |  |
| -2.48  | 3.37  | 1.53  |  |  |
| -3.37  | 1.29  | -0.1  |  |  |
| -3.46  | -2.12 | -3.47 |  |  |
| -3.92  | 1.47  | 0.3   |  |  |
| -4.01  | 1.58  | 0.44  |  |  |
| -21.2  | -3.1  | -1.84 |  |  |
| -21.34 | -2.47 | -1.19 |  |  |
| -23.49 | 0.33  | 1.74  |  |  |
| 66.77  | -1.28 | -4.71 |  |  |
| 34.99  | -1.52 | -4.01 |  |  |
| 31.73  | -0.73 | -3.08 |  |  |
| 21.41  | -1.45 | -3.24 |  |  |
| 20.69  | -1.4  | -3.13 |  |  |
| 17.83  | -2.17 | -3.69 |  |  |
| 16.25  | -2.81 | -4.2  |  |  |
| 14.9   | 0.39  | -0.87 |  |  |
| 14.72  | 0.12  | -1.13 |  |  |
| 13.82  | 0.37  | -0.79 |  |  |
| 12.82  | 1.77  | 0.72  |  |  |
| 2.2    | 0.95  | 2.44  |  |  |
| 2.19   | -4.62 | -3.12 |  |  |
| 2.08   | -6.86 | -5.27 |  |  |
| 1.63   | -5.96 | -4.03 |  |  |
| 1.59   | -4    | -2.03 |  |  |
| 1.5    | -2.04 | 0.01  |  |  |
| 1.5    | -5.37 | -3.32 |  |  |
| 1.45   | -3.12 | -1.02 |  |  |
| 1.36   | -2.81 | -0.62 |  |  |
| 1.31   | -1.56 | 0.69  |  |  |
| 1.3    | -2.36 | -0.1  |  |  |
| 1.23   | -2.51 | -0.18 |  |  |
| 1.22   | -3.88 | -1.53 |  |  |
| 1.2    | -3.03 | -0.66 |  |  |
| 1.15   | -7.8  | -5.37 |  |  |
| 1.09   | -2.66 | -0.14 |  |  |
| 1.01   | -3.25 | -0.63 |  |  |

|        |       |       |  |  |
|--------|-------|-------|--|--|
| -1.06  | -2.26 | 0.46  |  |  |
| -1.11  | -4.02 | -1.24 |  |  |
| -1.14  | -4.98 | -2.15 |  |  |
| -1.15  | -3.79 | -0.94 |  |  |
| -1.16  | -4.55 | -1.7  |  |  |
| -1.18  | -3.55 | -0.68 |  |  |
| -1.18  | -3.54 | -0.66 |  |  |
| -1.26  | -4.4  | -1.43 |  |  |
| -1.37  | -2.93 | 0.16  |  |  |
| -2.38  | -4.9  | -1.01 |  |  |
| 2.45   | -1.4  | -4.82 |  |  |
| 1.33   | -0.61 | -3.14 |  |  |
| 1.16   | 3.03  | 0.68  |  |  |
| 1.11   | 1.31  | -0.98 |  |  |
| -1.04  | 1.33  | -0.74 |  |  |
| -1.08  | -1.71 | -3.73 |  |  |
| -1.38  | 1.39  | -0.27 |  |  |
| -1.45  | -1.15 | -2.74 |  |  |
| -1.58  | 3.85  | 2.38  |  |  |
| -1.93  | -2.9  | -4.07 |  |  |
| -2.01  | -1.34 | -2.46 |  |  |
| -2.12  | 2.23  | 1.19  |  |  |
| -2.18  | 1.92  | 0.92  |  |  |
| -8.71  | -2.11 | -1.11 |  |  |
| -9.11  | 0.14  | 1.2   |  |  |
| -9.44  | -0.65 | 0.47  |  |  |
| -11.47 | -1.15 | 0.24  |  |  |
| -17.31 | -0.03 | 1.95  |  |  |
| -19.81 | -1.78 | 0.41  |  |  |
| 1.65   | -2.69 | -6.11 |  |  |
| 1.4    | 0.83  | -2.35 |  |  |
| 1.37   | 0.29  | -2.86 |  |  |
| 1.28   | -0.87 | -3.92 |  |  |
| 1.23   | -0.12 | -3.11 |  |  |
| 1.17   | 2.37  | -0.56 |  |  |
| 1.03   | -3.23 | -5.96 |  |  |
| 1.01   | -0.6  | -3.31 |  |  |
| -1.02  | 1.09  | -1.57 |  |  |
| -1.06  | -1.68 | -4.3  |  |  |
| -1.08  | 2.31  | -0.28 |  |  |
| -1.27  | 1.2   | -1.15 |  |  |
| -1.38  | 2.92  | 0.69  |  |  |
| -1.57  | -0.25 | -2.3  |  |  |
| -1.59  | -0.47 | -2.5  |  |  |
| -2.15  | 1.3   | -0.29 |  |  |
| -2.58  | -0.32 | -1.65 |  |  |
| -2.63  | 1.64  | 0.34  |  |  |
| -2.79  | 1.58  | 0.37  |  |  |
| -2.86  | 0.19  | -1    |  |  |
| -2.86  | 1.57  | 0.39  |  |  |
| -2.97  | 0.39  | -0.73 |  |  |
| -3.09  | 0.51  | -0.55 |  |  |
| -3.23  | -2.69 | -3.7  |  |  |
| -13.06 | 0.28  | 1.29  |  |  |
| -13.09 | -1.02 | -0.01 |  |  |
| -13.34 | -0.86 | 0.18  |  |  |
| -13.47 | -0.17 | 0.88  |  |  |
| -13.71 | -0.22 | 0.86  |  |  |

|        |       |       |  |  |
|--------|-------|-------|--|--|
| -14.01 | -1.16 | -0.05 |  |  |
| -14.65 | -0.36 | 0.81  |  |  |
| -15.9  | -1.77 | -0.48 |  |  |
| -16.1  | -0.9  | 0.41  |  |  |
| -16.93 | -1.27 | 0.12  |  |  |
| -18.88 | -2.12 | -0.58 |  |  |
| -19.64 | -1.21 | 0.39  |  |  |
| -22.1  | -1.59 | 0.18  |  |  |
| -38.83 | -3.72 | -1.14 |  |  |
| 1.77   | -0.78 | -4.19 |  |  |
| 1.52   | -1.05 | -4.25 |  |  |
| 1.43   | 4.34  | 1.23  |  |  |
| 1.41   | -2.43 | -5.52 |  |  |
| 1.36   | -1.25 | -4.29 |  |  |
| 1.34   | 0.08  | -2.94 |  |  |
| 1.1    | -0.25 | -2.99 |  |  |
| 1.05   | 0.04  | -2.62 |  |  |
| 1.04   | -1.42 | -4.08 |  |  |
| -1.14  | -0.48 | -2.88 |  |  |
| -1.15  | -2.35 | -4.75 |  |  |
| -1.2   | -3.67 | -6    |  |  |
| -1.28  | -0.06 | -2.3  |  |  |
| -1.49  | -2.25 | -4.27 |  |  |
| -1.96  | -0.03 | -1.66 |  |  |
| -17.24 | -3.31 | -1.8  |  |  |
| 21.16  | 2.85  | -0.56 |  |  |
| 9.45   | 1.69  | -0.56 |  |  |
| 6.87   | 2.84  | 1.05  |  |  |
| -1.23  | 2.19  | 3.48  |  |  |
| -1.24  | -0.56 | 0.74  |  |  |
| -1.48  | -1.73 | -0.17 |  |  |
| 1.17   | 0.89  | -2.52 |  |  |
| 1.03   | 3.21  | -0.02 |  |  |
| 1.02   | -1.39 | -4.59 |  |  |
| -1.09  | 2.21  | -0.85 |  |  |
| -1.37  | 1.97  | -0.76 |  |  |
| -1.38  | 3.87  | 1.16  |  |  |
| -1.45  | -2.44 | -5.08 |  |  |
| -1.59  | -3.08 | -5.59 |  |  |
| -1.68  | -0.73 | -3.17 |  |  |
| -2.9   | -3.08 | -4.73 |  |  |
| -3.13  | -2.95 | -4.48 |  |  |
| -3.16  | 1.03  | -0.5  |  |  |
| -3.48  | -0.54 | -1.93 |  |  |
| -3.72  | 2.01  | 0.72  |  |  |
| -18.52 | -1.02 | 0.01  |  |  |
| -23.22 | -1.2  | 0.15  |  |  |
| -29.26 | -2.72 | -1.03 |  |  |
| 4.25   | 3.25  | -0.14 |  |  |
| 1.29   | -1.42 | -3.1  |  |  |
| 1.2    | -3.2  | -4.77 |  |  |
| 1.02   | -1.09 | -2.43 |  |  |
| -1.03  | -5.41 | -6.68 |  |  |
| -1.05  | -0.79 | -2.03 |  |  |
| -1.15  | -4.05 | -5.16 |  |  |
| -1.19  | -1.6  | -2.66 |  |  |
| -1.21  | -3.14 | -4.18 |  |  |
| 8.65   | 1.81  | -1.57 |  |  |



|        |       |       |  |  |
|--------|-------|-------|--|--|
| 5.3    | 1.99  | -0.69 |  |  |
| 3.06   | -0.37 | -2.25 |  |  |
| 1.92   | 0.94  | -0.27 |  |  |
| 1.87   | 0.09  | -1.09 |  |  |
| 1.69   | 1.18  | 0.15  |  |  |
| -2.5   | -0.86 | 0.19  |  |  |
| -2.72  | -1    | 0.18  |  |  |
| -6.36  | -2.53 | -0.13 |  |  |
| 5.86   | 1.38  | -2    |  |  |
| 4.89   | 0.56  | -2.56 |  |  |
| 1.57   | 1.02  | -0.45 |  |  |
| 1.33   | 0.65  | -0.59 |  |  |
| 1.23   | -2.75 | -3.88 |  |  |
| 1.23   | -1.22 | -2.34 |  |  |
| 1.24   | 0.98  | -0.15 |  |  |
| 1.23   | -1.73 | -2.85 |  |  |
| 1.15   | -1.68 | -2.71 |  |  |
| -3.78  | -3.51 | -2.42 |  |  |
| -4.29  | -0.61 | 0.66  |  |  |
| -4.36  | -0.53 | 0.77  |  |  |
| 1.97   | 2.13  | -1.22 |  |  |
| 1.66   | 2.2   | -0.92 |  |  |
| 1.57   | -0.68 | -3.72 |  |  |
| 1.35   | -0.92 | -3.73 |  |  |
| 1.3    | -1.6  | -4.36 |  |  |
| 1.19   | 1.27  | -1.36 |  |  |
| 1.14   | -1.19 | -3.76 |  |  |
| 1.11   | 1.48  | -1.05 |  |  |
| 1.01   | -1.55 | -3.96 |  |  |
| -1.03  | -2.66 | -5    |  |  |
| -1.06  | -3.3  | -5.61 |  |  |
| -1.07  | -3.3  | -5.59 |  |  |
| -1.07  | -0.02 | -2.3  |  |  |
| -1.08  | 4.69  | 2.42  |  |  |
| -1.14  | 0.71  | -1.49 |  |  |
| -1.22  | -2.48 | -4.58 |  |  |
| -1.25  | -0.05 | -2.11 |  |  |
| -1.3   | 3.54  | 1.53  |  |  |
| -1.38  | -0.15 | -2.07 |  |  |
| -1.44  | -1.06 | -2.92 |  |  |
| -1.45  | -0.61 | -2.46 |  |  |
| -1.63  | -0.38 | -2.06 |  |  |
| -1.63  | 2.31  | 0.64  |  |  |
| -1.69  | -0.51 | -2.14 |  |  |
| -1.86  | -0.27 | -1.76 |  |  |
| -1.87  | -3.18 | -4.66 |  |  |
| -1.93  | -1.06 | -2.5  |  |  |
| -1.96  | -2.02 | -3.43 |  |  |
| -2.16  | -0.47 | -1.74 |  |  |
| -2.28  | -0.51 | -1.71 |  |  |
| -2.35  | 0.77  | -0.38 |  |  |
| -2.43  | 0.36  | -0.74 |  |  |
| -10.51 | -1.45 | -0.44 |  |  |
| -11.94 | -1.96 | -0.77 |  |  |
| -17.74 | -2.24 | -0.47 |  |  |
| -18.29 | -3.89 | -2.08 |  |  |
| -24.17 | -2.56 | -0.35 |  |  |
| -25.12 | -1.9  | 0.36  |  |  |

|       |       |       |  |  |
|-------|-------|-------|--|--|
| 5.5   | -4.76 | -8.1  |  |  |
| 2.43  | -6.23 | -8.38 |  |  |
| 1.84  | -3    | -4.76 |  |  |
| 1.44  | -6.43 | -7.83 |  |  |
| 1.39  | -4.8  | -6.15 |  |  |
| 1.37  | -4.85 | -6.18 |  |  |
| 1.33  | -3.38 | -4.67 |  |  |
| 1.33  | -3.76 | -5.04 |  |  |
| 1.31  | -5.36 | -6.63 |  |  |
| 1.24  | -3.34 | -4.54 |  |  |
| 1.19  | -3.47 | -4.59 |  |  |
| 1.16  | -1.68 | -2.77 |  |  |
| 1.11  | -4.42 | -5.45 |  |  |
| 60.91 | 1.19  | -2.15 |  |  |
| 22.67 | -0.01 | -1.93 |  |  |
| 18.12 | 0.18  | -1.41 |  |  |
| 16.28 | -0.05 | -1.49 |  |  |
| 15.92 | 1.02  | -0.38 |  |  |
| 13.64 | 0.38  | -0.8  |  |  |
| 12.5  | 1.34  | 0.29  |  |  |
| 2.59  | -1.8  | -0.58 |  |  |
| 2.57  | -0.21 | 1.02  |  |  |
| 2.55  | -2.39 | -1.15 |  |  |
| 2.37  | 0.87  | 2.22  |  |  |
| 2.29  | 0.13  | 1.53  |  |  |
| 1.98  | -0.43 | 1.17  |  |  |
| 1.61  | -0.06 | 1.85  |  |  |
| 1.37  | 1.7   | 3.84  |  |  |
| 1.34  | -0.25 | 1.91  |  |  |
| 22.52 | 2.3   | -1.04 |  |  |
| 15.21 | 0.71  | -2.06 |  |  |
| 6.94  | 1.59  | -0.05 |  |  |
| 6.7   | 2.69  | 1.1   |  |  |
| 5.87  | 0.06  | -1.34 |  |  |
| 5.05  | 1.82  | 0.64  |  |  |
| 1.08  | -2.68 | -1.63 |  |  |
| 1.07  | -2.93 | -1.87 |  |  |
| 1.01  | -0.49 | 0.64  |  |  |
| -1.06 | -2.18 | -0.94 |  |  |
| -1.24 | 0.06  | 1.53  |  |  |
| -1.34 | -2.54 | -0.96 |  |  |
| 14.99 | 2.2   | -1.13 |  |  |
| 14.88 | 3.21  | -0.11 |  |  |
| 13.97 | 4.11  | 0.88  |  |  |
| 11.15 | 1.93  | -0.97 |  |  |
| 9.2   | 2.6   | -0.03 |  |  |
| 9.15  | 1.83  | -0.79 |  |  |
| 7.76  | 0.69  | -1.69 |  |  |
| 7.63  | 2.48  | 0.12  |  |  |
| 7.59  | 0.33  | -2.02 |  |  |
| 7.45  | 1.44  | -0.89 |  |  |
| 6.79  | 2.58  | 0.39  |  |  |
| 6.61  | 1.08  | -1.07 |  |  |
| 6.59  | 1.27  | -0.87 |  |  |
| 6.42  | 2.02  | -0.09 |  |  |
| 5.81  | 0.94  | -1.02 |  |  |
| 5.44  | -1.48 | -3.35 |  |  |
| 5.37  | 1.19  | -0.66 |  |  |

|         |       |       |  |  |
|---------|-------|-------|--|--|
| 5.15    | 1.21  | -0.58 |  |  |
| 4.75    | 1.18  | -0.5  |  |  |
| 4.7     | 3.88  | 2.22  |  |  |
| 4.55    | 0.55  | -1.06 |  |  |
| 4.52    | 1.65  | 0.05  |  |  |
| 4.4     | -0.02 | -1.59 |  |  |
| 4.07    | 0.49  | -0.96 |  |  |
| 3.76    | 1.58  | 0.24  |  |  |
| 3.71    | 1.3   | -0.02 |  |  |
| 3.56    | -0.94 | -2.19 |  |  |
| 3.49    | 1.36  | 0.14  |  |  |
| 3.32    | 0     | -1.16 |  |  |
| 3.04    | 1.6   | 0.56  |  |  |
| 3.02    | 4     | 2.98  |  |  |
| -1.35   | -1.71 | -0.71 |  |  |
| -1.39   | 1.64  | 2.68  |  |  |
| -1.39   | -1.66 | -0.61 |  |  |
| -1.41   | -1.28 | -0.21 |  |  |
| -1.56   | -0.62 | 0.6   |  |  |
| -1.74   | -0.98 | 0.39  |  |  |
| 1.25    | 0.38  | -2.95 |  |  |
| 1.21    | -0.99 | -4.27 |  |  |
| 1.2     | 0.19  | -3.07 |  |  |
| 1.03    | 0.78  | -2.27 |  |  |
| 1.01    | 0.03  | -2.99 |  |  |
| 1.01    | -1.13 | -4.15 |  |  |
| 1.01    | 0.02  | -3    |  |  |
| 1.01    | 0.6   | -2.41 |  |  |
| -1.04   | 1.21  | -1.73 |  |  |
| -1.04   | 1.06  | -1.88 |  |  |
| -1.09   | 2.12  | -0.76 |  |  |
| -1.1    | -0.19 | -3.05 |  |  |
| -1.16   | 0.61  | -2.18 |  |  |
| -1.23   | -1.18 | -3.89 |  |  |
| -1.27   | -0.13 | -2.79 |  |  |
| -1.29   | -2.04 | -4.68 |  |  |
| -1.46   | -0.94 | -3.4  |  |  |
| -1.6    | -0.44 | -2.76 |  |  |
| -1.74   | 3     | 0.8   |  |  |
| -1.83   | 0.45  | -1.68 |  |  |
| -1.85   | 1.57  | -0.55 |  |  |
| -1.97   | 2.85  | 0.82  |  |  |
| -2.25   | 4.64  | 2.8   |  |  |
| -2.61   | 0.25  | -1.37 |  |  |
| -2.68   | 2.35  | 0.77  |  |  |
| -2.95   | -0.29 | -1.74 |  |  |
| -2.97   | -3.59 | -5.03 |  |  |
| -3.17   | 0.31  | -1.03 |  |  |
| -16.66  | -0.52 | 0.53  |  |  |
| -23.26  | -3.63 | -2.1  |  |  |
| -32.85  | -0.9  | 1.13  |  |  |
| -37.85  | -2.31 | -0.07 |  |  |
| -59.72  | -3.17 | -0.28 |  |  |
| -73.39  | -3.31 | -0.12 |  |  |
| -159.88 | -3.83 | 0.49  |  |  |
| -190.47 | -3.4  | 1.17  |  |  |
| 2.36    | -1.95 | -5.27 |  |  |
| 1.54    | -2.25 | -4.96 |  |  |

|        |       |       |  |  |
|--------|-------|-------|--|--|
| 1.33   | 2.01  | -0.48 |  |  |
| 1.27   | -0.61 | -3.03 |  |  |
| 1.16   | -0.38 | -2.68 |  |  |
| 1.14   | -3.11 | -5.37 |  |  |
| 1.06   | 0.06  | -2.1  |  |  |
| 1.02   | -1.5  | -3.61 |  |  |
| -1.02  | -1.11 | -3.16 |  |  |
| -1.05  | -1.91 | -3.91 |  |  |
| -1.17  | -1.14 | -2.99 |  |  |
| -1.17  | -2.98 | -4.83 |  |  |
| -1.22  | -2.64 | -4.43 |  |  |
| -1.25  | 0.94  | -0.82 |  |  |
| -1.26  | -1.97 | -3.71 |  |  |
| -1.27  | 1.83  | 0.1   |  |  |
| -1.28  | -3.89 | -5.62 |  |  |
| -1.34  | -1.47 | -3.13 |  |  |
| -1.34  | -1.31 | -2.97 |  |  |
| -1.35  | -1.87 | -3.52 |  |  |
| -1.38  | -3.1  | -4.71 |  |  |
| -1.38  | -0.81 | -2.42 |  |  |
| -1.4   | -2.89 | -4.49 |  |  |
| -1.42  | -3.01 | -4.59 |  |  |
| -1.46  | -0.79 | -2.32 |  |  |
| -1.49  | -3.59 | -5.09 |  |  |
| -1.56  | -3.34 | -4.77 |  |  |
| -1.59  | 1.56  | 0.14  |  |  |
| -1.71  | -2.76 | -4.07 |  |  |
| -1.77  | 2.51  | 1.26  |  |  |
| -1.87  | -1.14 | -2.31 |  |  |
| -1.89  | 0.64  | -0.52 |  |  |
| -1.98  | -2.16 | -3.25 |  |  |
| -2.02  | -2.69 | -3.75 |  |  |
| -2.11  | -0.85 | -1.85 |  |  |
| -8.87  | -2.23 | -1.16 |  |  |
| -9.89  | -2.7  | -1.47 |  |  |
| -9.96  | -4.27 | -3.03 |  |  |
| -10.9  | -2.23 | -0.86 |  |  |
| -11.69 | -2.65 | -1.18 |  |  |
| 1.03   | -0.72 | -4.04 |  |  |
| -1.03  | 1.57  | -1.66 |  |  |
| -1.36  | -0.61 | -3.44 |  |  |
| -1.91  | -2.27 | -4.6  |  |  |
| -4.04  | -1.41 | -2.66 |  |  |
| 2.08   | -1.39 | -4.7  |  |  |
| 1.46   | 0.22  | -2.58 |  |  |
| 1.39   | 0.75  | -1.99 |  |  |
| 1.3    | -1.76 | -4.4  |  |  |
| 1.3    | 0.66  | -1.98 |  |  |
| 1.28   | 0.65  | -1.96 |  |  |
| 1.16   | -2.28 | -4.75 |  |  |
| 1.11   | 2.87  | 0.46  |  |  |
| 1.1    | 2.23  | -0.17 |  |  |
| 1.06   | 0.41  | -1.93 |  |  |
| -1.01  | 0.39  | -1.86 |  |  |
| -1.03  | -0.23 | -2.44 |  |  |
| -1.1   | 2.74  | 0.62  |  |  |
| -1.14  | -1.05 | -3.12 |  |  |
| -1.37  | -0.29 | -2.1  |  |  |

|        |       |       |  |  |
|--------|-------|-------|--|--|
| -1.44  | -1.2  | -2.93 |  |  |
| -10.84 | -0.91 | 0.28  |  |  |
| -11.87 | -4.76 | -3.45 |  |  |
| 2.32   | 0.78  | -2.53 |  |  |
| 1.82   | 1.01  | -1.95 |  |  |
| 1.19   | -2.07 | -4.42 |  |  |
| 1.16   | 0.94  | -1.37 |  |  |
| 1.14   | -3.12 | -5.4  |  |  |
| 1.12   | -0.78 | -3.03 |  |  |
| -1     | -1.5  | -3.59 |  |  |
| -1.04  | 3.83  | 1.79  |  |  |
| -1.06  | -1.29 | -3.3  |  |  |
| -1.2   | -1.18 | -3.01 |  |  |
| -1.34  | 1.8   | 0.13  |  |  |
| -1.4   | 1.46  | -0.15 |  |  |
| -1.46  | 0.78  | -0.77 |  |  |
| -1.54  | 0.94  | -0.54 |  |  |
| -1.56  | -4.3  | -5.75 |  |  |
| -1.61  | -2.45 | -3.86 |  |  |
| -9.39  | -3.91 | -2.78 |  |  |
| -10.5  | -2.37 | -1.08 |  |  |
| -12.1  | -2.5  | -1    |  |  |
| 14.29  | -2.47 | -5.78 |  |  |
| 12.24  | -2.03 | -5.12 |  |  |
| 7.16   | -3.22 | -5.54 |  |  |
| 3.85   | -3.7  | -5.12 |  |  |
| 3.22   | -1.57 | -2.74 |  |  |
| 3.36   | -1.25 | -4.56 |  |  |
| 2.13   | 1.48  | -1.17 |  |  |
| 1.24   | 3.3   | 1.43  |  |  |
| 1.17   | -0.28 | -2.07 |  |  |
| 1.13   | -1.76 | -3.5  |  |  |
| 1.08   | 1.28  | -0.38 |  |  |
| 1.03   | 0.08  | -1.52 |  |  |
| -1.27  | -1.53 | -2.74 |  |  |
| 2.87   | -2.46 | -5.76 |  |  |
| 1.35   | -2.9  | -5.11 |  |  |
| 1.01   | -3.35 | -5.15 |  |  |
| -1.09  | -2.03 | -3.69 |  |  |
| -1.09  | 1.93  | 0.27  |  |  |
| -1.1   | -3.85 | -5.5  |  |  |
| -1.11  | -3.19 | -4.83 |  |  |
| -1.11  | -0.69 | -2.32 |  |  |
| -1.32  | -0.19 | -1.57 |  |  |
| -1.33  | -2.93 | -4.29 |  |  |
| -1.36  | -1.58 | -2.92 |  |  |
| -7.61  | -1.95 | -0.81 |  |  |
| -7.88  | -2.49 | -1.29 |  |  |
| -7.95  | -1.57 | -0.37 |  |  |
| -10.55 | -3.75 | -2.13 |  |  |
| 9.53   | -2.25 | -5.54 |  |  |
| 5.02   | -2.92 | -5.29 |  |  |
| 4.52   | -3.08 | -5.3  |  |  |
| 2.85   | -5.25 | -6.8  |  |  |
| -2.69  | -5.12 | -3.73 |  |  |
| 2.09   | -1.02 | -4.31 |  |  |
| 1.39   | -1.86 | -4.56 |  |  |
| -1.08  | -4.19 | -6.31 |  |  |

|        |       |       |  |  |
|--------|-------|-------|--|--|
| -1.16  | 3.71  | 1.7   |  |  |
| -1.54  | -6.52 | -8.13 |  |  |
| -1.64  | -3.7  | -5.21 |  |  |
| -10.72 | -1.57 | -0.38 |  |  |
| -11.18 | -2.01 | -0.75 |  |  |
| -12.26 | -2.48 | -1.09 |  |  |
| -14.15 | -3.13 | -1.54 |  |  |
| -14.45 | -3.74 | -2.11 |  |  |
| -17.72 | -3.3  | -1.38 |  |  |
| -24.09 | -4.15 | -1.79 |  |  |
| 1.29   | 0.82  | -2.47 |  |  |
| 1.02   | 2.5   | -0.44 |  |  |
| -1.01  | -1.12 | -4.01 |  |  |
| -1.32  | -2.44 | -4.95 |  |  |
| -1.41  | 3.78  | 1.36  |  |  |
| -1.75  | 1.78  | -0.32 |  |  |
| -1.76  | -3.89 | -5.98 |  |  |
| -2.05  | 1.05  | -0.83 |  |  |
| -2.15  | -3.33 | -5.14 |  |  |
| -2.19  | 1.77  | -0.01 |  |  |
| -2.66  | -0.09 | -1.6  |  |  |
| -2.67  | -1.5  | -3    |  |  |
| -2.88  | 2.85  | 1.47  |  |  |
| -2.9   | -0.9  | -2.27 |  |  |
| -3.67  | -0.09 | -1.13 |  |  |
| 8.73   | 0.16  | -3.12 |  |  |
| 2.8    | 5.12  | 3.49  |  |  |
| 2.27   | 6.04  | 4.7   |  |  |
| 1.83   | -1.05 | -2.08 |  |  |
| -2.25  | -3.61 | -2.59 |  |  |
| 6.16   | -1.09 | -4.35 |  |  |
| 2.33   | -6.44 | -8.3  |  |  |
| 2.33   | -3.45 | -5.3  |  |  |
| 1.35   | -3.4  | -4.47 |  |  |
| 1.31   | -1.37 | -2.4  |  |  |
| -4.41  | -4.43 | -2.93 |  |  |
| 5.24   | -1.13 | -4.39 |  |  |
| 1.21   | -3.47 | -4.61 |  |  |
| 15.59  | -1.32 | -4.58 |  |  |
| 14.81  | -0.87 | -4.05 |  |  |
| 5.89   | -3.07 | -4.92 |  |  |
| 5.59   | 1.42  | -0.36 |  |  |
| 5.07   | -2.95 | -4.59 |  |  |
| 4.89   | -0.45 | -2.03 |  |  |
| 4.03   | 1.48  | 0.18  |  |  |
| 4      | 2.08  | 0.78  |  |  |
| 3.87   | -1.87 | -3.12 |  |  |
| 3.85   | 2.09  | 0.85  |  |  |
| 3.77   | -2.74 | -3.95 |  |  |
| 3.64   | 1.76  | 0.6   |  |  |
| 3.46   | -3.29 | -4.37 |  |  |
| -1.24  | -2.42 | -1.41 |  |  |
| -1.27  | -1.81 | -0.76 |  |  |
| -1.27  | -1.76 | -0.71 |  |  |
| -1.27  | -5.99 | -4.93 |  |  |
| -1.32  | -4.4  | -3.3  |  |  |
| -1.36  | -4.99 | -3.85 |  |  |
| -1.43  | -5.56 | -4.34 |  |  |

|        |       |       |  |  |
|--------|-------|-------|--|--|
| -1.46  | -4.42 | -3.17 |  |  |
| -1.54  | -0.69 | 0.65  |  |  |
| -1.6   | -5.71 | -4.32 |  |  |
| -1.63  | -3.45 | -2.04 |  |  |
| -1.65  | -2.28 | -0.85 |  |  |
| -1.68  | -5.07 | -3.62 |  |  |
| -1.85  | -3.48 | -1.89 |  |  |
| -2.28  | -5.56 | -3.66 |  |  |
| -2.59  | -3.67 | -1.59 |  |  |
| -2.62  | -4.95 | -2.85 |  |  |
| -2.82  | -2.52 | -0.32 |  |  |
| -2.91  | -4.07 | -1.83 |  |  |
| -3.03  | -3.5  | -1.19 |  |  |
| -3.55  | -2.11 | 0.42  |  |  |
| -3.85  | -4.67 | -2.02 |  |  |
| -4.27  | -3.85 | -1.05 |  |  |
| 9.27   | 2.33  | -0.93 |  |  |
| -2.09  | -0.02 | 1     |  |  |
| 173.23 | 1.33  | -1.92 |  |  |
| 129.69 | 2.09  | -0.74 |  |  |
| 127.93 | 1.99  | -0.82 |  |  |
| 95.09  | 2.29  | -0.09 |  |  |
| 77.68  | 1.61  | -0.48 |  |  |
| 72.81  | 1.07  | -0.92 |  |  |
| 71.11  | 0.55  | -1.42 |  |  |
| 54.23  | 2.54  | 0.97  |  |  |
| 50.46  | 0.03  | -1.43 |  |  |
| 48.95  | 1.92  | 0.5   |  |  |
| 44.84  | 1.41  | 0.12  |  |  |
| 38.73  | 1.04  | -0.04 |  |  |
| 9.13   | -0.68 | 0.32  |  |  |
| 8.69   | -0.94 | 0.13  |  |  |
| 7.71   | -1.16 | 0.09  |  |  |
| 7.68   | -2.54 | -1.29 |  |  |
| 7.23   | -2.94 | -1.61 |  |  |
| 7.15   | -2.05 | -0.7  |  |  |
| 6.98   | -2.56 | -1.17 |  |  |
| 6.87   | 0.66  | 2.07  |  |  |
| 6.5    | -1.35 | 0.13  |  |  |
| 6.38   | -2.29 | -0.77 |  |  |
| 6.17   | -0.56 | 1.01  |  |  |
| 6.1    | -1.3  | 0.28  |  |  |
| 6.08   | -1.15 | 0.43  |  |  |
| 4.18   | -1.45 | 0.67  |  |  |
| 3.61   | -3.18 | -0.84 |  |  |
| 3.43   | -0.5  | 1.91  |  |  |
| 3.04   | -3.78 | -1.19 |  |  |
| 2.94   | 0.03  | 2.66  |  |  |
| 2.72   | -4.3  | -1.56 |  |  |
| 2.68   | 2.29  | 5.06  |  |  |
| 1.98   | -4.64 | -1.43 |  |  |
| 1.84   | -4.6  | -1.29 |  |  |
| 1.65   | -2.57 | 0.9   |  |  |
| 1.4    | -3.25 | 0.45  |  |  |
| -1.15  | -1.75 | -5    |  |  |
| -1.53  | -1.23 | -4.07 |  |  |
| -1.88  | 1.96  | -0.58 |  |  |
| -1.99  | 3.05  | 0.6   |  |  |

|        |       |       |  |  |
|--------|-------|-------|--|--|
| -2.2   | -1.93 | -4.24 |  |  |
| -3.46  | 1.97  | 0.32  |  |  |
| -3.8   | -2.45 | -3.97 |  |  |
| 7.98   | 1.88  | -1.35 |  |  |
| 2.76   | -1.72 | -3.41 |  |  |
| 2.49   | -2.44 | -3.99 |  |  |
| 2.4    | 1.05  | -0.45 |  |  |
| 2.4    | -3.51 | -5.01 |  |  |
| 2      | -2.71 | -3.94 |  |  |
| 1.9    | -4.73 | -5.88 |  |  |
| 1.75   | -1.4  | -2.45 |  |  |
| 1.76   | -1.27 | -2.32 |  |  |
| -3.64  | -5.03 | -3.4  |  |  |
| 3.47   | -4.19 | -7.42 |  |  |
| 1.63   | -5.13 | -7.27 |  |  |
| 1.37   | -2.3  | -4.19 |  |  |
| -1     | -5.03 | -6.46 |  |  |
| -1.04  | -4.31 | -5.69 |  |  |
| -1.12  | -0.72 | -1.99 |  |  |
| -1.14  | -2.28 | -3.52 |  |  |
| -5.82  | -3.59 | -2.48 |  |  |
| -12.8  | -5.29 | -3.05 |  |  |
| 1.7    | 4.48  | 1.27  |  |  |
| 1.29   | -1.27 | -4.09 |  |  |
| -1.04  | -0.04 | -2.43 |  |  |
| -1.23  | -0.75 | -2.9  |  |  |
| -1.41  | 2.63  | 0.67  |  |  |
| 197.72 | 0.54  | -2.67 |  |  |
| 85.64  | 0.3   | -1.7  |  |  |
| 76.47  | -0.47 | -2.31 |  |  |
| 73.49  | 1.08  | -0.7  |  |  |
| 68.85  | 1.57  | -0.12 |  |  |
| 58.79  | 0.79  | -0.67 |  |  |
| 56.81  | 0.81  | -0.6  |  |  |
| 56.49  | 0.55  | -0.85 |  |  |
| 56.44  | -0.6  | -2    |  |  |
| 51.6   | -0.08 | -1.35 |  |  |
| 49.54  | 0.76  | -0.45 |  |  |
| 49.32  | 0.88  | -0.32 |  |  |
| 9.5    | 0.13  | 1.29  |  |  |
| 9.19   | 1.95  | 3.17  |  |  |
| 8.72   | -0.32 | 0.97  |  |  |
| 8.26   | -0.87 | 0.5   |  |  |
| 7.8    | -0.04 | 1.41  |  |  |
| 7.71   | -0.33 | 1.14  |  |  |
| 7.67   | 1.16  | 2.64  |  |  |
| 7.41   | -0.24 | 1.29  |  |  |
| 7.33   | -1.12 | 0.43  |  |  |
| 7.17   | -0.02 | 1.56  |  |  |
| 6.87   | -1.54 | 0.1   |  |  |
| 6.22   | -0.62 | 1.16  |  |  |
| 5.51   | -2.73 | -0.78 |  |  |
| 5.06   | -3.5  | -1.42 |  |  |
| 4.33   | -0.26 | 2.05  |  |  |
| 3.34   | -1.38 | 1.3   |  |  |
| 3.11   | -5.73 | -2.94 |  |  |
| 2.47   | -2.81 | 0.3   |  |  |
| 2.28   | -4.05 | -0.82 |  |  |



|        |       |       |  |  |
|--------|-------|-------|--|--|
| 1.94   | -6.33 | -2.87 |  |  |
| 1.08   | -6.24 | -1.93 |  |  |
| -1.1   | -1.49 | 3.07  |  |  |
| 1.38   | 0.17  | -3.04 |  |  |
| 1.2    | 1.97  | -1.03 |  |  |
| 1.06   | 2.26  | -0.57 |  |  |
| -1.05  | 2.71  | 0.04  |  |  |
| -1.09  | 0.53  | -2.09 |  |  |
| -1.17  | 3.99  | 1.47  |  |  |
| -1.58  | -1.44 | -3.52 |  |  |
| 2.1    | -3.68 | -6.88 |  |  |
| -8.85  | -2.15 | -1.13 |  |  |
| -23.57 | -1.75 | 0.68  |  |  |
| 1.4    | -0.07 | -3.27 |  |  |
| 1.33   | -3.1  | -6.23 |  |  |
| 1.27   | -1.07 | -4.13 |  |  |
| 1.24   | 0.89  | -2.13 |  |  |
| 1.23   | -3.72 | -6.74 |  |  |
| -1.01  | 1.68  | -1.02 |  |  |
| -1.12  | -2.99 | -5.54 |  |  |
| -1.22  | -3.7  | -6.13 |  |  |
| -1.42  | -4.63 | -6.84 |  |  |
| -1.89  | -1.51 | -3.31 |  |  |
| -2.02  | -1.83 | -3.52 |  |  |
| -2.53  | -1.27 | -2.64 |  |  |
| -2.67  | -4.53 | -5.82 |  |  |
| 3.51   | -0.68 | -3.87 |  |  |
| 1.53   | -4.55 | -6.55 |  |  |
| -1.01  | 0.95  | -0.42 |  |  |
| -1.01  | -2.78 | -4.15 |  |  |
| -1.08  | -4.47 | -5.74 |  |  |
| -1.14  | 0.75  | -0.45 |  |  |
| -1.2   | -0.72 | -1.84 |  |  |
| -1.3   | -5.78 | -6.79 |  |  |
| 9.12   | -2.52 | -5.71 |  |  |
| 7.86   | -2.78 | -5.75 |  |  |
| 4.04   | -3.23 | -5.24 |  |  |
| 8.38   | 1.44  | -1.74 |  |  |
| 2.4    | -1.56 | -2.94 |  |  |
| 2.05   | -1.53 | -2.69 |  |  |
| 1.93   | -1.09 | -2.16 |  |  |
| 1.86   | -3.4  | -4.41 |  |  |
| -2.22  | -3.42 | -2.39 |  |  |
| -2.4   | -3.24 | -2.09 |  |  |
| 3.97   | -2.91 | -6.09 |  |  |
| 2.13   | -2.17 | -4.46 |  |  |
| 1.71   | -1.52 | -3.49 |  |  |
| 1.14   | -1.71 | -3.1  |  |  |
| 1.07   | -3.24 | -4.54 |  |  |
| 1.05   | -1.77 | -3.03 |  |  |
| 1.02   | -1.88 | -3.1  |  |  |
| 1.01   | 0.07  | -1.14 |  |  |
| 1      | 0.11  | -1.09 |  |  |
| -1.03  | -1.04 | -2.18 |  |  |
| -1.05  | -1.24 | -2.37 |  |  |
| -1.08  | 0.58  | -0.5  |  |  |
| -1.08  | -2.3  | -3.38 |  |  |
| -1.11  | -3.49 | -4.53 |  |  |

|        |       |       |  |  |
|--------|-------|-------|--|--|
| -4.99  | -5.7  | -4.57 |  |  |
| -5.06  | -2.56 | -1.42 |  |  |
| 4.31   | -2.86 | -6.04 |  |  |
| 1.26   | -4.08 | -5.48 |  |  |
| 1.23   | -4.66 | -6.02 |  |  |
| 1.03   | -3.76 | -4.87 |  |  |
| 161.11 | 1.96  | -1.21 |  |  |
| 133.85 | 1.07  | -1.84 |  |  |
| 121.16 | 1.07  | -1.69 |  |  |
| 77.12  | 1.19  | -0.91 |  |  |
| 60.23  | 0.65  | -1.1  |  |  |
| 44.07  | 0.45  | -0.84 |  |  |
| 6.13   | -1.61 | -0.06 |  |  |
| 4.46   | -3.93 | -1.93 |  |  |
| 4.06   | -0.79 | 1.35  |  |  |
| 2.53   | -1.53 | 1.3   |  |  |
| 1.99   | -3.74 | -0.56 |  |  |
| 1.66   | -3.5  | -0.07 |  |  |
| 1.56   | -1.86 | 1.67  |  |  |
| 1.39   | -0.37 | 3.32  |  |  |
| 1.21   | -1.21 | 2.67  |  |  |
| 1.05   | 0.07  | 4.16  |  |  |
| 1.03   | 1.35  | 5.48  |  |  |
| -1.13  | 1.24  | 5.59  |  |  |
| 3.4    | -5.1  | -8.27 |  |  |
| 1.47   | -3.88 | -5.84 |  |  |
| 1.36   | -2.17 | -4.01 |  |  |
| 1.14   | -0.66 | -2.25 |  |  |
| 1.11   | -4.25 | -5.79 |  |  |
| 1.1    | -3.36 | -4.9  |  |  |
| 1.02   | -0.6  | -2.02 |  |  |
| -1.03  | -3.92 | -5.28 |  |  |
| -1.06  | -5.42 | -6.74 |  |  |
| -1.13  | -4.55 | -5.78 |  |  |
| -1.13  | -4.4  | -5.62 |  |  |
| -1.14  | -0.75 | -1.97 |  |  |
| -1.31  | 1.09  | 0.09  |  |  |
| 3.18   | 1.34  | -1.8  |  |  |
| 1.62   | -1.04 | -3.22 |  |  |
| 1.59   | -0.49 | -2.63 |  |  |
| 1.42   | -1.2  | -3.18 |  |  |
| 1.2    | 3.81  | 2.08  |  |  |
| 1.2    | -0.36 | -2.09 |  |  |
| 1.14   | 3.38  | 1.72  |  |  |
| 1.13   | 4.8   | 3.14  |  |  |
| 1.12   | 2.87  | 1.23  |  |  |
| 1.1    | -1.19 | -2.8  |  |  |
| 1.07   | 1.65  | 0.07  |  |  |
| 1.07   | -1.09 | -2.66 |  |  |
| 1.04   | -0.97 | -2.51 |  |  |
| -1.01  | -1.82 | -3.29 |  |  |
| -1.04  | 1.67  | 0.24  |  |  |
| -1.04  | -1.26 | -2.67 |  |  |
| -1.09  | 1.16  | -0.19 |  |  |
| -1.09  | -0.89 | -2.24 |  |  |
| -1.1   | 0.69  | -0.65 |  |  |
| -1.18  | -1.82 | -3.06 |  |  |
| -1.18  | -1.13 | -2.37 |  |  |

|       |       |       |  |  |
|-------|-------|-------|--|--|
| -1.21 | -1.41 | -2.62 |  |  |
| -1.22 | 3.5   | 2.31  |  |  |
| -1.24 | 4.23  | 3.06  |  |  |
| -1.25 | -0.06 | -1.21 |  |  |
| -1.27 | 0.56  | -0.57 |  |  |
| -1.32 | 3.4   | 2.33  |  |  |
| -1.37 | -1.02 | -2.04 |  |  |
| 4.27  | -4.29 | -7.43 |  |  |
| 1.49  | -3.18 | -4.8  |  |  |
| 1.21  | 2     | 0.68  |  |  |
| 1.19  | -0.79 | -2.08 |  |  |
| 1.13  | -2.05 | -3.26 |  |  |
| 1.07  | 1.05  | -0.09 |  |  |
| 1.05  | -4.41 | -5.53 |  |  |
| 2.72  | 4.7   | 1.57  |  |  |
| 1.78  | 0.95  | -1.57 |  |  |
| 1.28  | 2.77  | 0.73  |  |  |
| 1.25  | 0.13  | -1.88 |  |  |
| 1.08  | 2.8   | 1     |  |  |
| 1.02  | 2.35  | 0.64  |  |  |
| -1.04 | -1.45 | -3.08 |  |  |
| -1.07 | -1.22 | -2.81 |  |  |
| -1.11 | 1.63  | 0.08  |  |  |
| -1.16 | -1.15 | -2.62 |  |  |
| -1.25 | 0.3   | -1.07 |  |  |
| -1.25 | 3.27  | 1.9   |  |  |
| -1.25 | -0.04 | -1.4  |  |  |
| -6.48 | -0.13 | 0.87  |  |  |
| -6.54 | -0.29 | 0.73  |  |  |
| -8.63 | -0.25 | 1.18  |  |  |
| 1.79  | 1.97  | -1.15 |  |  |
| 1.13  | -0.23 | -2.7  |  |  |
| 1.09  | -1.08 | -3.5  |  |  |
| 1.06  | -0.92 | -3.3  |  |  |
| 1.03  | 1.74  | -0.6  |  |  |
| -1.02 | 2.78  | 0.51  |  |  |
| -1.01 | -1.29 | -3.56 |  |  |
| -1.09 | 2.48  | 0.32  |  |  |
| -1.12 | -1.64 | -3.76 |  |  |
| -1.21 | -0.07 | -2.08 |  |  |
| -1.21 | 0.04  | -1.96 |  |  |
| -1.24 | -1.47 | -3.45 |  |  |
| -1.28 | -1.07 | -3    |  |  |
| -1.4  | 1.77  | -0.04 |  |  |
| -1.48 | -1.35 | -3.07 |  |  |
| -1.5  | -1.51 | -3.22 |  |  |
| -1.53 | -1.85 | -3.52 |  |  |
| -1.56 | -1.42 | -3.07 |  |  |
| -1.65 | -1.58 | -3.15 |  |  |
| -1.7  | 2.94  | 1.42  |  |  |
| -1.94 | 1.39  | 0.06  |  |  |
| -2.07 | -1.94 | -3.18 |  |  |
| -2.4  | -1.64 | -2.67 |  |  |
| 1.15  | -0.45 | -3.57 |  |  |
| -1.37 | -1.41 | -3.87 |  |  |
| -1.59 | 1.8   | -0.45 |  |  |
| -1.82 | 0.09  | -1.96 |  |  |
| -2.24 | -1.12 | -2.87 |  |  |

|        |       |       |  |  |
|--------|-------|-------|--|--|
| -18.12 | -0.01 | 1.25  |  |  |
| 1.24   | 2.77  | -0.36 |  |  |
| 1.18   | 3.44  | 0.39  |  |  |
| 1.08   | 2.47  | -0.46 |  |  |
| 1.03   | -1.81 | -4.66 |  |  |
| 1.02   | 1.23  | -1.6  |  |  |
| -1.09  | -2.41 | -5.09 |  |  |
| -1.11  | 0.69  | -1.97 |  |  |
| -1.16  | 4.76  | 2.16  |  |  |
| -1.34  | -1.31 | -3.7  |  |  |
| -1.38  | -2.41 | -4.76 |  |  |
| -1.86  | -2.37 | -4.28 |  |  |
| -2.41  | -0.21 | -1.75 |  |  |
| -2.92  | -1.29 | -2.56 |  |  |
| -3.11  | -1.05 | -2.22 |  |  |
| -3.35  | 0.25  | -0.82 |  |  |
| -14.78 | -1.05 | 0.02  |  |  |
| -15.05 | -1.95 | -0.85 |  |  |
| -18.9  | -1.37 | 0.06  |  |  |
| -45.12 | -3.08 | -0.4  |  |  |
| 3.27   | 0.36  | -2.76 |  |  |
| 2.33   | 0.41  | -2.22 |  |  |
| 1.93   | -1.64 | -4    |  |  |
| 1.41   | 1.57  | -0.34 |  |  |
| 1.37   | 0.2   | -1.66 |  |  |
| 1.34   | 0.01  | -1.82 |  |  |
| 1.34   | 2.12  | 0.29  |  |  |
| 1.28   | 0.15  | -1.62 |  |  |
| 1.12   | -2.93 | -4.5  |  |  |
| 1.11   | -1.25 | -2.81 |  |  |
| 1.1    | -1.29 | -2.84 |  |  |
| 1.1    | -0.36 | -1.9  |  |  |
| 1.08   | -0.04 | -1.57 |  |  |
| 1.07   | -0.64 | -2.15 |  |  |
| 1.07   | 0.17  | -1.34 |  |  |
| 1.07   | 0.62  | -0.88 |  |  |
| 1.06   | -1.53 | -3.03 |  |  |
| 1.05   | 1.28  | -0.2  |  |  |
| 1.03   | -1.42 | -2.87 |  |  |
| -1.01  | -3.22 | -4.62 |  |  |
| -1.04  | 0.38  | -0.98 |  |  |
| -1.05  | 0.51  | -0.82 |  |  |
| -1.1   | 2.88  | 1.6   |  |  |
| -1.1   | 0.72  | -0.55 |  |  |
| -1.11  | -1.47 | -2.74 |  |  |
| -1.14  | -0.59 | -1.81 |  |  |
| -1.17  | -3.31 | -4.5  |  |  |
| -1.2   | -1.73 | -2.88 |  |  |
| -1.2   | 0.73  | -0.42 |  |  |
| -1.29  | -0.9  | -1.94 |  |  |
| -1.32  | -0.92 | -1.94 |  |  |
| -7.18  | -1.78 | -0.35 |  |  |
| -9.11  | -1.69 | 0.09  |  |  |
| 1.16   | 5.23  | 2.11  |  |  |
| -1.01  | -0.84 | -3.73 |  |  |
| -1.14  | 2.91  | 0.2   |  |  |
| -1.17  | 0.74  | -1.93 |  |  |
| -1.22  | 0.86  | -1.76 |  |  |

|        |       |       |  |  |
|--------|-------|-------|--|--|
| -1.28  | 2.83  | 0.28  |  |  |
| -1.29  | -2.15 | -4.69 |  |  |
| -1.34  | -2.41 | -4.9  |  |  |
| -1.36  | -1.93 | -4.38 |  |  |
| -1.37  | 4.16  | 1.72  |  |  |
| -1.38  | -2.55 | -4.99 |  |  |
| -1.41  | -0.58 | -2.98 |  |  |
| -1.68  | 0.93  | -1.22 |  |  |
| -1.87  | 1.56  | -0.44 |  |  |
| -2.78  | -2.65 | -4.08 |  |  |
| -3.43  | -0.32 | -1.45 |  |  |
| -3.61  | -1.82 | -2.87 |  |  |
| -3.68  | -2.79 | -3.81 |  |  |
| -18.33 | -1.54 | -0.25 |  |  |
| -19.87 | -1.05 | 0.36  |  |  |
| -24.88 | -2.01 | -0.28 |  |  |
| 1.69   | 0.28  | -2.83 |  |  |
| 1.41   | -2.93 | -5.78 |  |  |
| -1.16  | 2.61  | 0.47  |  |  |
| -1.53  | 0.68  | -1.07 |  |  |
| -1.64  | 0.06  | -1.59 |  |  |
| -2.15  | -3.56 | -4.81 |  |  |
| -13.83 | -1.43 | 0     |  |  |
| -16.42 | -1.83 | -0.15 |  |  |
| 1.42   | -1.15 | -4.26 |  |  |
| 1.33   | -0.6  | -3.62 |  |  |
| 1.28   | -1.2  | -4.16 |  |  |
| -1.33  | -2.56 | -4.76 |  |  |
| -1.47  | -0.74 | -2.79 |  |  |
| -1.46  | 0     | -2.06 |  |  |
| -1.61  | 0.1   | -1.81 |  |  |
| -1.71  | -2.32 | -4.15 |  |  |
| -1.97  | -5.03 | -6.65 |  |  |
| -2     | 0.28  | -1.32 |  |  |
| -2.28  | -3.29 | -4.71 |  |  |
| -2.35  | -2.06 | -3.44 |  |  |
| -2.41  | -2.2  | -3.54 |  |  |
| -2.89  | -1.62 | -2.7  |  |  |
| 9.79   | 3.89  | 0.79  |  |  |
| 3.41   | 0.04  | -1.54 |  |  |
| 3.32   | -1.46 | -3    |  |  |
| 2.96   | -0.78 | -2.16 |  |  |
| -2.88  | -3.8  | -2.08 |  |  |
| 1.21   | 1.6   | -1.51 |  |  |
| 1.19   | 6.61  | 3.53  |  |  |
| 1.06   | -1.47 | -4.37 |  |  |
| 1.04   | 0.67  | -2.22 |  |  |
| -1.06  | -0.91 | -3.65 |  |  |
| -1.09  | -0.33 | -3.03 |  |  |
| -1.14  | -2    | -4.64 |  |  |
| -1.16  | -0.58 | -3.19 |  |  |
| -1.45  | 0.69  | -1.6  |  |  |
| -1.56  | -1.43 | -3.61 |  |  |
| -1.85  | 2.3   | 0.37  |  |  |
| -2.74  | 0.13  | -1.24 |  |  |
| -2.96  | 3.44  | 2.18  |  |  |
| -3.03  | 2.6   | 1.37  |  |  |
| -3.09  | -0.71 | -1.9  |  |  |

|        |       |       |  |  |
|--------|-------|-------|--|--|
| -15.65 | -0.62 | 0.52  |  |  |
| -15.65 | -0.62 | 0.52  |  |  |
| -15.81 | -1.1  | 0.06  |  |  |
| 8.21   | -1.34 | -4.44 |  |  |
| 2.48   | -0.77 | -2.15 |  |  |
| 2.11   | 1.07  | -0.07 |  |  |
| 2.05   | -4.65 | -5.75 |  |  |
| -2.28  | -4.48 | -3.36 |  |  |
| -2.61  | -4.58 | -3.26 |  |  |
| 6.08   | -1.36 | -4.44 |  |  |
| 4.66   | 0.18  | -2.53 |  |  |
| 2.17   | -0.51 | -2.11 |  |  |
| 1.49   | 0.57  | -0.49 |  |  |
| 4.89   | 5.05  | 1.97  |  |  |
| 1.19   | 1.02  | -0.02 |  |  |
| -4.03  | -1.8  | -0.59 |  |  |
| -4.69  | -1.16 | 0.28  |  |  |
| -7.27  | -0.72 | 1.35  |  |  |
| -7.97  | -1.64 | 0.56  |  |  |
| 1.56   | -1.35 | -4.43 |  |  |
| 1.08   | 2.94  | 0.39  |  |  |
| -1.36  | 5.19  | 3.2   |  |  |
| -1.55  | -2.57 | -4.37 |  |  |
| 3.4    | -5.13 | -8.21 |  |  |
| 1.99   | -0.28 | -2.59 |  |  |
| 1.47   | -3.9  | -5.78 |  |  |
| 1.36   | -2.2  | -3.96 |  |  |
| 1.14   | -0.69 | -2.19 |  |  |
| 1.11   | -4.27 | -5.73 |  |  |
| 1.1    | -3.39 | -4.84 |  |  |
| 1.02   | -0.62 | -1.96 |  |  |
| 1.02   | -3.19 | -4.52 |  |  |
| -1.03  | -3.95 | -5.22 |  |  |
| -1.06  | -5.45 | -6.68 |  |  |
| -1.13  | -4.58 | -5.72 |  |  |
| -1.13  | -4.42 | -5.56 |  |  |
| 3.4    | -5.36 | -8.44 |  |  |
| 2.24   | -4.12 | -6.6  |  |  |
| 1.47   | -4.14 | -6.01 |  |  |
| 1.28   | -0.48 | -2.14 |  |  |
| 1.11   | -4.5  | -5.96 |  |  |
| -1.08  | -5.76 | -6.97 |  |  |
| -1.2   | -3.89 | -4.94 |  |  |
| -1.24  | -4.06 | -5.06 |  |  |
| 4.07   | 4.88  | 1.81  |  |  |
| 1.68   | 1.53  | -0.26 |  |  |
| 1.15   | 0.47  | -0.77 |  |  |
| 1.08   | 0.16  | -0.99 |  |  |
| 1.08   | 2.83  | 1.68  |  |  |
| 1.07   | 0.29  | -0.85 |  |  |
| -1.02  | 0.72  | -0.3  |  |  |
| 1.73   | 1.73  | -1.35 |  |  |
| 1      | -5.08 | -7.36 |  |  |
| -1.09  | -3.35 | -5.5  |  |  |
| 2.33   | -0.15 | -3.22 |  |  |
| 1.9    | 1.82  | -0.95 |  |  |
| 1.18   | 2.46  | 0.37  |  |  |
| 1.06   | 1.09  | -0.85 |  |  |

|        |       |       |  |  |
|--------|-------|-------|--|--|
| -1.08  | -0.62 | -2.36 |  |  |
| -1.08  | 2.85  | 1.11  |  |  |
| -1.17  | 2.96  | 1.33  |  |  |
| -1.21  | 1.68  | 0.1   |  |  |
| -1.22  | -1.07 | -2.64 |  |  |
| -1.45  | -0.78 | -2.09 |  |  |
| -1.56  | 1.78  | 0.57  |  |  |
| -7.31  | 2.18  | 3.2   |  |  |
| -7.46  | 1.51  | 2.56  |  |  |
| -7.89  | 2.65  | 3.78  |  |  |
| -8.08  | 3.89  | 5.05  |  |  |
| -8.48  | 0.48  | 1.71  |  |  |
| -8.52  | 0.76  | 2     |  |  |
| -9.97  | 0.83  | 2.3   |  |  |
| -13.86 | -0.34 | 1.6   |  |  |
| -14.27 | 1.41  | 3.39  |  |  |
| -16.23 | -1.44 | 0.73  |  |  |
| 2.67   | -0.51 | -3.58 |  |  |
| 1.6    | 2.07  | -0.26 |  |  |
| 1.29   | -0.63 | -2.65 |  |  |
| 1.21   | 2.4   | 0.47  |  |  |
| 1.06   | 2.57  | 0.83  |  |  |
| 1.05   | -1.18 | -2.9  |  |  |
| 1.04   | -0.77 | -2.47 |  |  |
| 1.03   | -0.48 | -2.18 |  |  |
| -1     | 6.8   | 5.15  |  |  |
| -1.04  | 2.07  | 0.48  |  |  |
| -1.15  | 1.05  | -0.4  |  |  |
| -1.16  | -0.36 | -1.8  |  |  |
| -1.19  | -0.16 | -1.56 |  |  |
| -1.24  | 0.65  | -0.7  |  |  |
| -1.25  | 2.53  | 1.2   |  |  |
| -1.26  | 1.73  | 0.41  |  |  |
| -1.28  | -0.99 | -2.29 |  |  |
| -1.4   | 1.86  | 0.69  |  |  |
| -1.4   | 0.41  | -0.76 |  |  |
| 9.47   | 2.49  | -0.57 |  |  |
| 2.46   | 3.62  | 2.5   |  |  |
| -2.03  | -0.47 | 0.73  |  |  |
| -3.85  | 0.52  | 2.65  |  |  |
| 3.93   | -1.4  | -4.45 |  |  |
| 2.07   | -2.58 | -4.71 |  |  |
| 1.63   | 0.46  | -1.33 |  |  |
| 1.36   | 0.7   | -0.83 |  |  |
| 1.31   | 2.49  | 1.02  |  |  |
| 1.17   | 2.09  | 0.78  |  |  |
| 1.15   | 3.73  | 2.45  |  |  |
| 1.14   | -0.38 | -1.65 |  |  |
| 1.12   | 2.62  | 1.37  |  |  |
| 1.07   | 4.07  | 2.89  |  |  |
| 1.03   | 0.59  | -0.54 |  |  |
| 1.01   | 1.4   | 0.3   |  |  |
| -5.94  | -2.56 | -1.07 |  |  |
| -6.32  | -2.64 | -1.06 |  |  |
| -9.13  | -3.39 | -1.28 |  |  |
| 2.2    | 0.83  | -2.23 |  |  |
| 1.68   | 3.69  | 1.01  |  |  |
| 1.19   | -0.82 | -2.99 |  |  |

|        |       |       |  |  |
|--------|-------|-------|--|--|
| 1.18   | -1.32 | -3.48 |  |  |
| 1.01   | -1.26 | -3.21 |  |  |
| 1      | -1.23 | -3.16 |  |  |
| -1.01  | -1.68 | -3.59 |  |  |
| -1.09  | 1.49  | -0.31 |  |  |
| -1.11  | 0.79  | -0.98 |  |  |
| -1.36  | -0.36 | -1.84 |  |  |
| -1.56  | -1.02 | -2.3  |  |  |
| -1.88  | -0.11 | -1.12 |  |  |
| -10.27 | -0.51 | 0.93  |  |  |
| 18.04  | 0.81  | -2.24 |  |  |
| 6.84   | 0.4   | -1.25 |  |  |
| 5.24   | 0.43  | -0.83 |  |  |
| 1.06   | -3.07 | -2.03 |  |  |
| -1.03  | -0.05 | 1.11  |  |  |
| -1.04  | 5.45  | 6.63  |  |  |
| 1.38   | -3.66 | -6.7  |  |  |
| 1.11   | -3.98 | -6.71 |  |  |
| 1.04   | 3.78  | 1.14  |  |  |
| -1.11  | -3.99 | -6.42 |  |  |
| -1.2   | 1.79  | -0.53 |  |  |
| -1.42  | -4.08 | -6.15 |  |  |
| -1.47  | -4.12 | -6.14 |  |  |
| -1.68  | -4.48 | -6.31 |  |  |
| -2.49  | -3.68 | -4.94 |  |  |
| -2.65  | 1.03  | -0.15 |  |  |
| -13.46 | -1.72 | -0.55 |  |  |
| 1.58   | -2.3  | -5.34 |  |  |
| 1.15   | -0.37 | -2.96 |  |  |
| 1.01   | -1.99 | -4.4  |  |  |
| -1.02  | -2.98 | -5.33 |  |  |
| -1.04  | -4.77 | -7.1  |  |  |
| -1.04  | -0.94 | -3.26 |  |  |
| -1.22  | -1.2  | -3.29 |  |  |
| -1.26  | -3.44 | -5.5  |  |  |
| -1.31  | -3.25 | -5.25 |  |  |
| -1.41  | -0.38 | -2.28 |  |  |
| -1.97  | -3.78 | -5.19 |  |  |
| -14.32 | -3.95 | -2.5  |  |  |
| 3.18   | -0.82 | -3.86 |  |  |
| 1.45   | -2.03 | -3.93 |  |  |
| 1.27   | 1.93  | 0.22  |  |  |
| -1.01  | -1.08 | -2.45 |  |  |
| -1.02  | 4.79  | 3.45  |  |  |
| -1.08  | 0.29  | -0.97 |  |  |
| -1.11  | -0.32 | -1.54 |  |  |
| -1.13  | -0.14 | -1.34 |  |  |
| -1.21  | 1.38  | 0.29  |  |  |
| -1.24  | 2.84  | 1.79  |  |  |
| -1.29  | 2.02  | 1.01  |  |  |
| -8     | -1.68 | -0.05 |  |  |
| -18.04 | -3.05 | -0.25 |  |  |
| 2.56   | -3.59 | -6.64 |  |  |
| 1.04   | -5.08 | -6.82 |  |  |
| 1.03   | 1.18  | -0.56 |  |  |
| -1     | -2.79 | -4.47 |  |  |
| -1.45  | -0.46 | -1.61 |  |  |
| -6.63  | -2.16 | -1.12 |  |  |



|       |       |       |  |  |
|-------|-------|-------|--|--|
| -8.73 | -1.9  | -0.46 |  |  |
| -9.53 | -3.92 | -2.35 |  |  |
| 1.17  | 3.02  | -0.01 |  |  |
| -1.06 | 7.82  | 5.09  |  |  |
| -1.2  | 3.53  | 0.98  |  |  |
| -1.22 | 3.26  | 0.73  |  |  |
| -1.3  | -2.81 | -5.25 |  |  |
| -1.31 | 4.8   | 2.37  |  |  |
| -1.31 | 4.8   | 2.37  |  |  |
| -1.32 | -1.4  | -3.82 |  |  |
| -2.18 | 0.29  | -1.4  |  |  |
| -2.2  | -0.59 | -2.27 |  |  |
| -3.02 | 0.85  | -0.37 |  |  |
| -3.13 | 3.43  | 2.27  |  |  |
| -3.26 | -0.89 | -1.99 |  |  |
| -3.32 | -0.29 | -1.37 |  |  |
| 1.04  | -2    | -5.04 |  |  |
| -1.12 | -0.05 | -2.88 |  |  |
| -1.3  | 0.32  | -2.28 |  |  |
| -1.35 | -0.27 | -2.82 |  |  |
| -1.39 | -0.51 | -3.02 |  |  |
| -2.31 | -1.27 | -3.04 |  |  |
| 3.9   | -1.21 | -4.23 |  |  |
| 1.34  | -3.81 | -5.29 |  |  |
| 1.32  | -1.58 | -3.04 |  |  |
| 1.19  | -0.01 | -1.32 |  |  |
| 1.05  | -1.94 | -3.06 |  |  |
| -1.02 | -2.06 | -3.09 |  |  |
| 7.34  | -0.49 | -3.51 |  |  |
| 2.55  | -2.25 | -3.75 |  |  |
| 1.98  | -1.16 | -2.28 |  |  |
| 2.21  | -4.77 | -7.78 |  |  |
| 1.42  | -2.54 | -4.91 |  |  |
| 1.4   | -3.44 | -5.79 |  |  |
| 1.39  | -3.02 | -5.35 |  |  |
| 1.1   | -1.79 | -3.79 |  |  |
| 1.08  | -4.67 | -6.65 |  |  |
| 1.03  | -3.36 | -5.27 |  |  |
| 1.03  | -3.17 | -5.07 |  |  |
| -1    | -3.14 | -5    |  |  |
| -1.06 | -6.27 | -8.06 |  |  |
| -1.08 | -6.08 | -7.83 |  |  |
| -1.09 | -5.9  | -7.65 |  |  |
| -1.09 | -1.12 | -2.86 |  |  |
| -1.1  | -1.94 | -3.66 |  |  |
| -1.11 | -3.85 | -5.57 |  |  |
| -1.21 | -5.85 | -7.44 |  |  |
| -1.27 | -4.38 | -5.9  |  |  |
| -1.47 | -2.36 | -3.66 |  |  |
| -1.49 | -1.45 | -2.73 |  |  |
| -1.5  | -2.64 | -3.91 |  |  |
| -1.59 | -3.51 | -4.71 |  |  |
| -1.74 | -4.21 | -5.27 |  |  |
| -1.79 | -3.45 | -4.47 |  |  |
| -7.27 | -5    | -4    |  |  |
| -7.36 | -5.38 | -4.36 |  |  |
| -8.67 | -4.94 | -3.69 |  |  |
| -10   | -5.65 | -4.19 |  |  |

|        |       |       |  |  |
|--------|-------|-------|--|--|
| 2.12   | -0.14 | -3.13 |  |  |
| 1.48   | -0.15 | -2.63 |  |  |
| 1.31   | -0.7  | -3    |  |  |
| 1.3    | -1.81 | -4.09 |  |  |
| 1.23   | -0.34 | -2.55 |  |  |
| 1.08   | -3.29 | -5.31 |  |  |
| 1.02   | -1.12 | -3.06 |  |  |
| -1.08  | -1.88 | -3.68 |  |  |
| -1.13  | -3.82 | -5.56 |  |  |
| -1.18  | -3.15 | -4.83 |  |  |
| -1.26  | -2.7  | -4.28 |  |  |
| -1.36  | -3.52 | -4.99 |  |  |
| -1.42  | 0.99  | -0.41 |  |  |
| -1.5   | -2.11 | -3.43 |  |  |
| -1.57  | -1.22 | -2.48 |  |  |
| -1.74  | -0.44 | -1.55 |  |  |
| -9.56  | -2.81 | -1.47 |  |  |
| 1.38   | -1.8  | -4.79 |  |  |
| 1.04   | -1.22 | -3.8  |  |  |
| -2.02  | 1.94  | 0.43  |  |  |
| -2.47  | 0.87  | -0.35 |  |  |
| -2.5   | -3.95 | -5.15 |  |  |
| -11.72 | -2.58 | -1.55 |  |  |
| -12.42 | -2.15 | -1.04 |  |  |
| -19.37 | -1.53 | 0.23  |  |  |
| 2.14   | 1.2   | -1.79 |  |  |
| 1.85   | -3.01 | -5.8  |  |  |
| 1.44   | -1.96 | -4.38 |  |  |
| 1.33   | -0.19 | -2.49 |  |  |
| 1.19   | -0.61 | -2.75 |  |  |
| 1.15   | -0.78 | -2.88 |  |  |
| 1.14   | -0.71 | -2.8  |  |  |
| 1.12   | 0.07  | -1.99 |  |  |
| 1.01   | -2.61 | -4.51 |  |  |
| -1.09  | -0.31 | -2.08 |  |  |
| -1.12  | -1.04 | -2.78 |  |  |
| -1.27  | -1.8  | -3.35 |  |  |
| -1.4   | -1.05 | -2.46 |  |  |
| -1.42  | -2.89 | -4.28 |  |  |
| -1.58  | -1.84 | -3.07 |  |  |
| -1.7   | -1.92 | -3.05 |  |  |
| -1.69  | -4.31 | -5.44 |  |  |
| -1.73  | -1.02 | -2.13 |  |  |
| -8.33  | -0.89 | 0.27  |  |  |
| 14.56  | 1.13  | -1.86 |  |  |
| 9.34   | 1.44  | -0.91 |  |  |
| 7.66   | 2.1   | 0.04  |  |  |
| 6.05   | 2.52  | 0.8   |  |  |
| 5.08   | 1.46  | -0.01 |  |  |
| -1.88  | 1.14  | 2.92  |  |  |
| 6.2    | -3.57 | -6.55 |  |  |
| 2.25   | -5.94 | -7.46 |  |  |
| 2.23   | 0.9   | -0.61 |  |  |
| 2.08   | -3.62 | -5.03 |  |  |
| 1.89   | -4.63 | -5.9  |  |  |
| 1.78   | -3.17 | -4.35 |  |  |
| -3.03  | -7.05 | -5.8  |  |  |
| -3.78  | -6.51 | -4.94 |  |  |

|        |       |       |  |  |
|--------|-------|-------|--|--|
| 1.72   | 2.96  | -0.02 |  |  |
| 1.35   | 1.76  | -0.89 |  |  |
| 1.28   | 6.01  | 3.44  |  |  |
| 1.06   | 0.87  | -1.41 |  |  |
| 1      | 4.18  | 1.97  |  |  |
| -1.11  | 0.49  | -1.57 |  |  |
| -1.13  | 1.22  | -0.81 |  |  |
| -1.3   | 1.29  | -0.54 |  |  |
| -1.33  | 0.04  | -1.75 |  |  |
| -1.34  | 5.44  | 3.66  |  |  |
| -1.34  | 0.92  | -0.86 |  |  |
| -1.45  | 1.33  | -0.34 |  |  |
| -1.52  | 2.85  | 1.25  |  |  |
| -1.58  | 1.03  | -0.51 |  |  |
| -1.65  | 1.51  | 0.03  |  |  |
| -1.68  | -1.38 | -2.84 |  |  |
| -2.04  | -2.73 | -3.91 |  |  |
| -9.73  | -2.63 | -1.55 |  |  |
| -9.78  | -0.08 | 1.01  |  |  |
| -11.63 | -2.3  | -0.97 |  |  |
| -11.86 | 0.7   | 2.06  |  |  |
| -11.93 | -0.6  | 0.77  |  |  |
| -13.21 | 1.01  | 2.53  |  |  |
| -14.38 | 0.34  | 1.98  |  |  |
| -15.89 | -0.03 | 1.75  |  |  |
| -22.07 | -1.74 | 0.52  |  |  |
| 1.25   | 1.7   | -1.28 |  |  |
| -1.03  | -1.96 | -4.58 |  |  |
| -1.07  | -3.19 | -5.75 |  |  |
| -1.14  | -2.03 | -4.5  |  |  |
| -1.14  | -0.28 | -2.75 |  |  |
| -1.18  | -1.82 | -4.24 |  |  |
| -1.24  | -2.34 | -4.69 |  |  |
| -1.26  | 1.21  | -1.12 |  |  |
| -1.42  | 0.17  | -1.98 |  |  |
| -1.44  | -0.96 | -3.08 |  |  |
| -1.49  | -1.98 | -4.07 |  |  |
| -2.02  | -1.37 | -3.02 |  |  |
| -2.27  | 0.69  | -0.78 |  |  |
| -12.82 | -0.41 | 0.62  |  |  |
| 6.58   | 1.11  | -1.86 |  |  |
| 3.92   | -1.68 | -3.9  |  |  |
| 1.7    | -3.61 | -4.62 |  |  |
| -2.57  | -5.37 | -4.25 |  |  |
| -2.94  | -3.89 | -2.58 |  |  |
| 6.12   | 3.9   | 0.94  |  |  |
| -2.68  | -4.49 | -3.41 |  |  |
| -3.2   | -1.96 | -0.63 |  |  |
| 3.4    | -5.27 | -8.23 |  |  |
| 1.18   | 0.98  | -0.45 |  |  |
| 1.17   | -5.63 | -7.05 |  |  |
| 1.11   | -3.8  | -5.15 |  |  |
| 1.04   | -0.41 | -1.66 |  |  |
| -1.13  | -5.24 | -6.26 |  |  |
| -7.32  | -2.68 | -1    |  |  |
| 1.93   | -1.21 | -4.17 |  |  |
| 1.03   | -0.2  | -2.25 |  |  |
| -1.1   | -2.91 | -4.78 |  |  |

|        |       |       |  |  |
|--------|-------|-------|--|--|
| -1.13  | 5.69  | 3.85  |  |  |
| -1.13  | -3.38 | -5.21 |  |  |
| -1.36  | -3.42 | -4.98 |  |  |
| -1.56  | -3.75 | -5.12 |  |  |
| -1.82  | 1.15  | 0     |  |  |
| -1.96  | -1.71 | -2.75 |  |  |
| 1.63   | 1.23  | -1.72 |  |  |
| 1.04   | 2.36  | 0.05  |  |  |
| 1.03   | 2.05  | -0.25 |  |  |
| 1.02   | 2.52  | 0.25  |  |  |
| -1.01  | 2.89  | 0.65  |  |  |
| -1.09  | 0.33  | -1.78 |  |  |
| -1.1   | 0.29  | -1.82 |  |  |
| -1.24  | 0     | -1.95 |  |  |
| -1.25  | 2.56  | 0.64  |  |  |
| -1.28  | -3.14 | -5.03 |  |  |
| -1.32  | 1.86  | 0.01  |  |  |
| -1.35  | 0.34  | -1.47 |  |  |
| -1.39  | -1.49 | -3.27 |  |  |
| -1.4   | 1.85  | 0.09  |  |  |
| -1.42  | -0.49 | -2.24 |  |  |
| -1.57  | -2.02 | -3.61 |  |  |
| -1.58  | -4    | -5.59 |  |  |
| -1.81  | -0.82 | -2.21 |  |  |
| -2.02  | -0.06 | -1.29 |  |  |
| -2.12  | 0.6   | -0.57 |  |  |
| -10.05 | -1.38 | -0.3  |  |  |
| -10.28 | -1.66 | -0.55 |  |  |
| -11.18 | -1.72 | -0.49 |  |  |
| -14    | -4.66 | -3.1  |  |  |
| -16.36 | -2.83 | -1.04 |  |  |
| -19.57 | -3.87 | -1.82 |  |  |
| 5.15   | 0.06  | -2.89 |  |  |
| 2.8    | -0.2  | -2.27 |  |  |
| 2.55   | 0.82  | -1.12 |  |  |
| 1.79   | 3.81  | 2.38  |  |  |
| 1.45   | 1.4   | 0.28  |  |  |
| 1.39   | -0.81 | -1.87 |  |  |
| 1.38   | 0.41  | -0.65 |  |  |
| 1.34   | 0.75  | -0.26 |  |  |
| 1.34   | 3.46  | 2.45  |  |  |
| 39.48  | 2.4   | -0.55 |  |  |
| 34.1   | 1.33  | -1.41 |  |  |
| 21     | 1.38  | -0.67 |  |  |
| 20.74  | 1.44  | -0.58 |  |  |
| 18.91  | 2.17  | 0.28  |  |  |
| 17.86  | -0.54 | -2.34 |  |  |
| 15.72  | 1.27  | -0.35 |  |  |
| 15.01  | 1.6   | 0.05  |  |  |
| 14.22  | 1.82  | 0.34  |  |  |
| 12.32  | 0.44  | -0.83 |  |  |
| 11.77  | 1.49  | 0.28  |  |  |
| 11.4   | -1.09 | -2.25 |  |  |
| 11.06  | -0.43 | -1.55 |  |  |
| 10.4   | -0.61 | -1.63 |  |  |
| 2.49   | -2.28 | -1.24 |  |  |
| 2.16   | -2.41 | -1.16 |  |  |
| 2.14   | 0.89  | 2.14  |  |  |

|       |       |       |  |  |
|-------|-------|-------|--|--|
| 2.1   | -1.01 | 0.27  |  |  |
| 2.09  | -2.83 | -1.54 |  |  |
| 2.09  | -3.96 | -2.67 |  |  |
| 1.96  | 0.2   | 1.58  |  |  |
| 1.9   | -0.21 | 1.21  |  |  |
| 1.88  | -2.32 | -0.89 |  |  |
| 1.88  | -1.22 | 0.21  |  |  |
| 1.84  | -2.84 | -1.37 |  |  |
| 1.84  | -0.1  | 1.37  |  |  |
| 1.81  | 0.96  | 2.46  |  |  |
| 1.78  | 1.49  | 3     |  |  |
| 1.77  | -0.92 | 0.6   |  |  |
| 1.73  | -1.09 | 0.47  |  |  |
| 1.7   | -1.12 | 0.46  |  |  |
| 1.7   | -0.14 | 1.44  |  |  |
| 1.7   | -3.29 | -1.7  |  |  |
| 1.64  | 4.8   | 6.44  |  |  |
| 1.62  | -0.29 | 1.37  |  |  |
| 1.58  | -3.11 | -1.42 |  |  |
| 1.42  | 1.2   | 3.05  |  |  |
| 1.36  | -0.99 | 0.92  |  |  |
| 1.34  | 0.46  | 2.39  |  |  |
| 1.34  | 0.55  | 2.48  |  |  |
| 1.32  | -0.39 | 1.55  |  |  |
| 1.32  | -3.78 | -1.83 |  |  |
| 1.3   | -0.27 | 1.7   |  |  |
| 1.27  | -1.46 | 0.55  |  |  |
| 1.25  | -0.23 | 1.8   |  |  |
| 1.22  | -0.48 | 1.58  |  |  |
| 1.21  | 0.46  | 2.54  |  |  |
| 1.21  | 1.39  | 3.47  |  |  |
| 1.19  | 0.11  | 2.21  |  |  |
| 1.19  | -0.6  | 1.49  |  |  |
| 1.18  | -0.24 | 1.88  |  |  |
| 1.17  | 0.62  | 2.75  |  |  |
| 1.16  | -0.42 | 1.71  |  |  |
| 1.14  | -0.16 | 2     |  |  |
| 1.14  | -1    | 1.17  |  |  |
| 1.1   | -1.92 | 0.29  |  |  |
| 1.07  | 0.33  | 2.58  |  |  |
| 1.02  | -3.68 | -1.35 |  |  |
| -1.04 | -0.24 | 2.16  |  |  |
| -1.05 | 3.41  | 5.84  |  |  |
| -1.08 | -1.39 | 1.07  |  |  |
| -1.11 | 0.68  | 3.19  |  |  |
| -1.18 | -0.43 | 2.16  |  |  |
| -1.25 | -3.53 | -0.85 |  |  |
| -1.28 | -1.07 | 1.64  |  |  |
| -1.35 | -4.36 | -1.58 |  |  |
| -1.36 | -3.38 | -0.58 |  |  |
| -1.37 | -2.14 | 0.66  |  |  |
| -1.5  | -4.69 | -1.76 |  |  |
| -1.59 | -3.77 | -0.75 |  |  |
| 33.25 | 1.82  | -1.13 |  |  |
| 20.8  | 1.81  | -0.46 |  |  |
| 15.28 | 1.21  | -0.62 |  |  |
| 12.08 | 0.49  | -1    |  |  |
| 11.32 | 1.03  | -0.37 |  |  |

|        |       |       |  |  |
|--------|-------|-------|--|--|
| 10.29  | 0.2   | -1.06 |  |  |
| 9.82   | 0.91  | -0.28 |  |  |
| 8.92   | 1.55  | 0.49  |  |  |
| 8.6    | -0.28 | -1.28 |  |  |
| 2.01   | -0.34 | 0.76  |  |  |
| 1.99   | 2.3   | 3.41  |  |  |
| 1.97   | 0.72  | 1.85  |  |  |
| 1.95   | -1.4  | -0.27 |  |  |
| 1.84   | -1.51 | -0.29 |  |  |
| 1.79   | 0.19  | 1.45  |  |  |
| 1.72   | -1.29 | 0.03  |  |  |
| 1.64   | -3.11 | -1.72 |  |  |
| 1.58   | 0.51  | 1.95  |  |  |
| 1.44   | 0.93  | 2.5   |  |  |
| 1.36   | 3.28  | 4.94  |  |  |
| 1.36   | -3.1  | -1.44 |  |  |
| 1.25   | 2.66  | 4.44  |  |  |
| 1.22   | 2.54  | 4.35  |  |  |
| 1.18   | -0.67 | 1.19  |  |  |
| 1.15   | 2.06  | 3.97  |  |  |
| 1.13   | 1.79  | 3.72  |  |  |
| 1.13   | -2.27 | -0.35 |  |  |
| 1.07   | 4.92  | 6.94  |  |  |
| 1.06   | 4.42  | 6.45  |  |  |
| 1.06   | 0.87  | 2.89  |  |  |
| 1.05   | -2.16 | -0.13 |  |  |
| -1.01  | 1.26  | 3.37  |  |  |
| -1.06  | 2.42  | 4.61  |  |  |
| -1.09  | 2.54  | 4.76  |  |  |
| -1.1   | 4.55  | 6.79  |  |  |
| -1.14  | 2.1   | 4.4   |  |  |
| -1.21  | -3.12 | -0.74 |  |  |
| 12.03  | 1.59  | -1.36 |  |  |
| 7.8    | 1.26  | -1.06 |  |  |
| 4.03   | 1.61  | 0.24  |  |  |
| 3.32   | 1.72  | 0.63  |  |  |
| -1.29  | -0.68 | 0.33  |  |  |
| -1.48  | -0.84 | 0.37  |  |  |
| -1.77  | 3.19  | 4.66  |  |  |
| -1.81  | 1.25  | 2.75  |  |  |
| -2.85  | -4.27 | -2.12 |  |  |
| 2.58   | 0.93  | -2.01 |  |  |
| 2      | 0.34  | -2.23 |  |  |
| 1.44   | 1.2   | -0.9  |  |  |
| -1.07  | -1.48 | -2.95 |  |  |
| -1.11  | -0.49 | -1.9  |  |  |
| -1.27  | 1.79  | 0.56  |  |  |
| -1.4   | -1.42 | -2.5  |  |  |
| -6.13  | -2.34 | -1.29 |  |  |
| -6.49  | -2.08 | -0.95 |  |  |
| -6.84  | -2.44 | -1.23 |  |  |
| -7.05  | -1.58 | -0.34 |  |  |
| -10.28 | -2.72 | -0.93 |  |  |
| 1.87   | 2.46  | -0.48 |  |  |
| 1.61   | 1.54  | -1.18 |  |  |
| 1.23   | 4.02  | 1.69  |  |  |
| 1.11   | 2.66  | 0.47  |  |  |
| 1.04   | 2.18  | 0.09  |  |  |

|        |       |       |  |  |
|--------|-------|-------|--|--|
| -1.06  | 0.35  | -1.6  |  |  |
| -1.14  | 0.2   | -1.64 |  |  |
| -1.15  | -0.86 | -2.7  |  |  |
| -1.28  | -0.77 | -2.45 |  |  |
| -1.33  | 2.62  | 1     |  |  |
| -1.35  | 0.89  | -0.71 |  |  |
| -1.48  | -0.37 | -1.84 |  |  |
| -1.58  | 1.83  | 0.45  |  |  |
| -1.61  | 0.67  | -0.68 |  |  |
| -1.66  | -0.76 | -2.06 |  |  |
| -1.69  | -0.75 | -2.02 |  |  |
| -1.7   | 1.07  | -0.2  |  |  |
| -1.73  | 1.18  | -0.06 |  |  |
| -1.75  | -0.4  | -1.63 |  |  |
| -1.84  | -0.74 | -1.9  |  |  |
| -2.03  | 0.72  | -0.29 |  |  |
| -8.17  | -0.38 | 0.62  |  |  |
| 11.1   | -2.47 | -5.4  |  |  |
| 9.92   | -5.78 | -8.55 |  |  |
| 7.84   | -2.07 | -4.5  |  |  |
| 7.78   | -4.11 | -6.53 |  |  |
| 5.97   | -1.27 | -3.31 |  |  |
| 4.95   | -1.08 | -2.84 |  |  |
| 4.83   | -4.68 | -6.41 |  |  |
| 4.76   | -2.27 | -3.98 |  |  |
| 3.73   | -3.13 | -4.49 |  |  |
| 3.54   | -3.51 | -4.79 |  |  |
| 3.09   | -3.73 | -4.81 |  |  |
| 6.07   | 0.09  | -2.84 |  |  |
| 1.67   | 1.27  | 0.2   |  |  |
| -2.66  | -2.91 | -1.83 |  |  |
| 8.77   | -1.25 | -4.17 |  |  |
| -1.74  | -4.78 | -3.77 |  |  |
| 2.23   | 1.49  | -1.43 |  |  |
| 1.47   | -0.13 | -2.45 |  |  |
| 1.23   | -0.92 | -2.99 |  |  |
| 1.04   | 1.79  | -0.03 |  |  |
| 1.03   | -0.16 | -1.97 |  |  |
| -7.24  | -0.09 | 0.99  |  |  |
| -7.38  | -0.74 | 0.37  |  |  |
| -8.5   | 0.01  | 1.33  |  |  |
| -15.11 | -1.68 | 0.47  |  |  |
| 2.1    | -2.35 | -5.28 |  |  |
| 1.31   | -1.93 | -4.16 |  |  |
| 1.03   | -3.17 | -5.07 |  |  |
| -1.14  | -1.8  | -3.46 |  |  |
| -1.16  | 0.08  | -1.56 |  |  |
| -1.3   | -4.33 | -5.8  |  |  |
| -1.77  | -5.16 | -6.19 |  |  |
| 2.04   | 1.8   | -1.12 |  |  |
| 1.54   | -1.5  | -4.01 |  |  |
| 1.34   | 2.41  | 0.11  |  |  |
| 1.01   | 3.05  | 1.14  |  |  |
| -1.08  | 0.85  | -0.93 |  |  |
| -1.1   | 1.89  | 0.13  |  |  |
| -1.2   | 0.78  | -0.85 |  |  |
| -1.21  | -0.74 | -2.35 |  |  |
| -1.26  | 1.81  | 0.25  |  |  |

|        |       |       |  |  |
|--------|-------|-------|--|--|
| -1.29  | 2.69  | 1.17  |  |  |
| -1.39  | 3.09  | 1.68  |  |  |
| -1.49  | 2.75  | 1.43  |  |  |
| -1.57  | 0.64  | -0.6  |  |  |
| -1.59  | 1.57  | 0.34  |  |  |
| -1.59  | 0.76  | -0.46 |  |  |
| -1.68  | 0.62  | -0.53 |  |  |
| -7.86  | -0.9  | 0.18  |  |  |
| -8.26  | -1.01 | 0.15  |  |  |
| -12.19 | -0.87 | 0.85  |  |  |
| -13.23 | -1.26 | 0.58  |  |  |
| -16.54 | -3.22 | -1.06 |  |  |
| -16.58 | -2.51 | -0.35 |  |  |
| -18.55 | -1.92 | 0.4   |  |  |
| -20.69 | -1.83 | 0.65  |  |  |
| -21.82 | -1.23 | 1.32  |  |  |
| -23.04 | -1.14 | 1.5   |  |  |
| -24.61 | -1.45 | 1.28  |  |  |
| -24.93 | -1.86 | 0.89  |  |  |
| -34.95 | -2.08 | 1.15  |  |  |
| -88.81 | -2.92 | 1.66  |  |  |
| 4.33   | 2.28  | -0.63 |  |  |
| 1.88   | 3.22  | 1.51  |  |  |
| 1.76   | 4.85  | 3.24  |  |  |
| 1.38   | -0.43 | -1.7  |  |  |
| 1.16   | 0.25  | -0.75 |  |  |
| -3.77  | -0.88 | 0.24  |  |  |
| -4.55  | -0.69 | 0.7   |  |  |
| -4.89  | -1.64 | -0.15 |  |  |
| 1.7    | 1.31  | -1.6  |  |  |
| 1.07   | 2.78  | 0.54  |  |  |
| -1.52  | 2.24  | 0.7   |  |  |
| -1.6   | -1.97 | -3.44 |  |  |
| -12.64 | -1.51 | 0     |  |  |
| -12.88 | -0.83 | 0.71  |  |  |
| -23.66 | -0.86 | 1.56  |  |  |
| 3.4    | -5.29 | -8.2  |  |  |
| 1.17   | -5.65 | -7.03 |  |  |
| 1.15   | 0.67  | -0.68 |  |  |
| 1.11   | -3.82 | -5.12 |  |  |
| 1.04   | -0.44 | -1.63 |  |  |
| -1.09  | -2.89 | -3.91 |  |  |
| -4.47  | -2.12 | -1.1  |  |  |
| -7.32  | -2.7  | -0.97 |  |  |
| 7.1    | -3.52 | -6.42 |  |  |
| 6.12   | -5.12 | -7.82 |  |  |
| 5.22   | -4.17 | -6.63 |  |  |
| 4.6    | -3.49 | -5.77 |  |  |
| 4.35   | -5.42 | -7.62 |  |  |
| 4.32   | -3.93 | -6.13 |  |  |
| 3.97   | -3.65 | -5.72 |  |  |
| 3.96   | -2.9  | -4.97 |  |  |
| 3.27   | -6.42 | -8.21 |  |  |
| 3.13   | -6.63 | -8.35 |  |  |
| 2.79   | -3.65 | -5.21 |  |  |
| 2.53   | -6.15 | -7.57 |  |  |
| -2.29  | -5.82 | -4.71 |  |  |
| 22.35  | -0.15 | -3.05 |  |  |



|        |       |       |  |  |
|--------|-------|-------|--|--|
| 15.04  | -0.52 | -2.85 |  |  |
| 6.69   | 0.98  | -0.18 |  |  |
| 6.34   | -0.12 | -1.2  |  |  |
| 6.26   | -0.69 | -1.75 |  |  |
| 6.25   | 0.8   | -0.26 |  |  |
| 6.18   | 0.78  | -0.27 |  |  |
| 1.4    | -1.62 | -0.52 |  |  |
| 1.38   | -0.8  | 0.32  |  |  |
| 1.32   | -0.51 | 0.66  |  |  |
| 1.12   | -4.15 | -2.73 |  |  |
| 1.1    | -2.28 | -0.84 |  |  |
| 1.07   | -3.5  | -2.02 |  |  |
| 1.05   | -0.19 | 1.32  |  |  |
| 1.04   | -4.59 | -3.06 |  |  |
| -1.03  | -0.82 | 0.79  |  |  |
| -1.16  | -1.92 | -0.12 |  |  |
| -1.27  | -2.65 | -0.73 |  |  |
| 1.08   | 0.17  | -2.73 |  |  |
| -1.01  | 1.07  | -1.71 |  |  |
| -1.14  | -1.43 | -4.03 |  |  |
| -1.57  | 1.82  | -0.32 |  |  |
| -1.96  | 0.93  | -0.88 |  |  |
| -2.01  | -3.35 | -5.12 |  |  |
| -2.27  | -2.92 | -4.52 |  |  |
| -2.56  | -0.72 | -2.15 |  |  |
| -2.86  | -3.17 | -4.44 |  |  |
| -13.77 | -1.05 | -0.06 |  |  |
| -14.55 | -1.17 | -0.09 |  |  |
| -15.33 | -1.77 | -0.62 |  |  |
| 8.93   | -5.54 | -8.43 |  |  |
| -1.7   | -6.05 | -5.03 |  |  |
| 3.3    | -0.77 | -3.67 |  |  |
| 1.36   | 3.69  | 2.08  |  |  |
| 1.2    | 6.83  | 5.4   |  |  |
| 1.12   | 2.83  | 1.49  |  |  |
| 1.08   | 1.7   | 0.42  |  |  |
| 1.06   | -1.03 | -2.29 |  |  |
| 9.41   | -0.16 | -3.05 |  |  |
| 2.95   | 0.92  | -0.3  |  |  |
| -1.8   | -2.98 | -1.79 |  |  |
| -1.87  | -3.31 | -2.06 |  |  |
| -2.11  | -3.83 | -2.41 |  |  |
| 3.23   | -1.9  | -4.79 |  |  |
| 1.89   | -4.07 | -6.19 |  |  |
| 1.59   | 1.95  | 0.09  |  |  |
| 1.39   | 3.57  | 1.89  |  |  |
| 1.39   | 3.37  | 1.7   |  |  |
| 1.35   | 3.56  | 1.92  |  |  |
| 1.33   | 1.98  | 0.37  |  |  |
| 1.31   | -2.76 | -4.36 |  |  |
| 1.21   | -0.78 | -2.26 |  |  |
| 1.2    | 0.52  | -0.94 |  |  |
| 1.15   | 5.84  | 4.43  |  |  |
| 1.13   | -2.47 | -3.86 |  |  |
| 1.11   | -4.32 | -5.68 |  |  |
| 1.09   | -2.4  | -3.73 |  |  |
| 1.05   | -4.68 | -5.95 |  |  |
| 1.01   | -2.24 | -3.46 |  |  |

|        |       |       |  |  |
|--------|-------|-------|--|--|
| 1.01   | 1.16  | -0.05 |  |  |
| -1.03  | -1.02 | -2.18 |  |  |
| -1.04  | -0.32 | -1.47 |  |  |
| -1.09  | -0.43 | -1.5  |  |  |
| -1.1   | -2.87 | -3.93 |  |  |
| -1.11  | -2.05 | -3.1  |  |  |
| -1.12  | 2.34  | 1.3   |  |  |
| -1.15  | -1.86 | -2.87 |  |  |
| 21.43  | 1.91  | -0.98 |  |  |
| 8.85   | 0.52  | -1.09 |  |  |
| 6.54   | 0.37  | -0.81 |  |  |
| 5.78   | -2.23 | -3.22 |  |  |
| 1.14   | -1.15 | 0.2   |  |  |
| 1.06   | -1.55 | -0.1  |  |  |
| 1.06   | 2.52  | 3.98  |  |  |
| 1.05   | 0.24  | 1.7   |  |  |
| 1.04   | -1.27 | 0.21  |  |  |
| 1.01   | -2.59 | -1.06 |  |  |
| -1.03  | -3.19 | -1.62 |  |  |
| -1.04  | -3.53 | -1.94 |  |  |
| -1.1   | -0.72 | 0.95  |  |  |
| -1.2   | -2.09 | -0.29 |  |  |
| -1.8   | -2.49 | -0.11 |  |  |
| -2.51  | -2.6  | 0.26  |  |  |
| 12.12  | 3.07  | 0.18  |  |  |
| 10.13  | 2.3   | -0.33 |  |  |
| 7.69   | 2.2   | -0.03 |  |  |
| 6.02   | 2.58  | 0.71  |  |  |
| 3.74   | 1.16  | -0.03 |  |  |
| 3.43   | 1.68  | 0.62  |  |  |
| -1.24  | -2.28 | -1.25 |  |  |
| 2.83   | -1.5  | -4.38 |  |  |
| 1.45   | -0.52 | -2.43 |  |  |
| 1.11   | 1.88  | 0.35  |  |  |
| 1.04   | -1.87 | -3.3  |  |  |
| 1.02   | -2.04 | -3.45 |  |  |
| -1.12  | -2.03 | -3.24 |  |  |
| -1.18  | 5.39  | 4.25  |  |  |
| -1.2   | -0.75 | -1.87 |  |  |
| -1.23  | -1.31 | -2.39 |  |  |
| 4.96   | -5.71 | -8.59 |  |  |
| -3.85  | -6.03 | -4.65 |  |  |
| -6.41  | -7.4  | -5.3  |  |  |
| 4.64   | -2.39 | -5.27 |  |  |
| 1.34   | -1.24 | -2.32 |  |  |
| 1.4    | -3.28 | -6.15 |  |  |
| 1.36   | -1.75 | -4.58 |  |  |
| 1.22   | -0.45 | -3.12 |  |  |
| 1.21   | -3.21 | -5.87 |  |  |
| -13.43 | -6.41 | -5.05 |  |  |
| 1.3    | -0.19 | -3.06 |  |  |
| 1.05   | 0.34  | -2.22 |  |  |
| -1.3   | -3.27 | -5.38 |  |  |
| -1.32  | -0.5  | -2.59 |  |  |
| -1.88  | -0.14 | -1.71 |  |  |
| 21.15  | 0.18  | -2.68 |  |  |
| 14.46  | 0.54  | -1.78 |  |  |
| 12.41  | 1.19  | -0.91 |  |  |

|        |       |       |  |  |
|--------|-------|-------|--|--|
| 9.79   | 1.93  | 0.17  |  |  |
| 8.39   | 0.09  | -1.44 |  |  |
| 7.87   | -0.58 | -2.02 |  |  |
| 7.86   | -0.91 | -2.35 |  |  |
| 7.45   | 0.32  | -1.05 |  |  |
| 6.87   | -1.15 | -2.4  |  |  |
| 6.81   | -0.28 | -1.51 |  |  |
| 5.91   | -0.27 | -1.3  |  |  |
| 1.24   | 1.21  | 2.43  |  |  |
| 1.23   | 0.36  | 1.6   |  |  |
| 1.19   | 0.11  | 1.39  |  |  |
| 1.16   | 0.81  | 2.13  |  |  |
| 1.16   | -2.13 | -0.81 |  |  |
| 1.14   | -1.02 | 0.32  |  |  |
| -1.01  | -2.36 | -0.81 |  |  |
| -1.05  | 2.44  | 4.05  |  |  |
| -1.08  | -2.37 | -0.72 |  |  |
| -1.13  | 1.16  | 2.87  |  |  |
| -1.19  | 1.14  | 2.92  |  |  |
| -1.26  | 0.18  | 2.05  |  |  |
| -1.46  | -1.02 | 1.06  |  |  |
| 6.24   | -3.03 | -5.89 |  |  |
| 3.54   | -6.98 | -9.03 |  |  |
| -2.34  | -7.2  | -6.2  |  |  |
| 7.39   | -2.79 | -5.65 |  |  |
| 2.04   | -4.8  | -5.8  |  |  |
| 1.57   | 3.28  | 0.43  |  |  |
| 1.54   | 2.8   | -0.03 |  |  |
| 1.53   | 2.33  | -0.48 |  |  |
| 1.41   | 2.95  | 0.24  |  |  |
| 1.23   | 2.86  | 0.36  |  |  |
| 1.17   | 3.91  | 1.47  |  |  |
| 1.14   | 0.21  | -2.18 |  |  |
| 1.09   | 1.25  | -1.08 |  |  |
| 1.07   | 2.86  | 0.55  |  |  |
| 1.03   | 2.39  | 0.14  |  |  |
| 1.03   | 7.67  | 5.42  |  |  |
| -1.04  | 0.96  | -1.19 |  |  |
| -1.04  | 0.74  | -1.4  |  |  |
| -1.05  | 0.97  | -1.16 |  |  |
| -1.08  | -2.01 | -4.11 |  |  |
| -1.08  | -2.84 | -4.94 |  |  |
| -1.24  | 2.58  | 0.69  |  |  |
| -1.25  | -3.52 | -5.41 |  |  |
| -1.28  | 1.51  | -0.35 |  |  |
| -1.36  | 3.08  | 1.32  |  |  |
| -1.4   | -1.25 | -2.98 |  |  |
| -1.52  | 0.95  | -0.65 |  |  |
| -1.59  | -0.88 | -2.42 |  |  |
| -1.68  | 0.37  | -1.09 |  |  |
| -1.71  | 2.02  | 0.59  |  |  |
| -1.72  | -0.34 | -1.77 |  |  |
| -1.94  | -1.32 | -2.57 |  |  |
| -2.07  | -0.03 | -1.19 |  |  |
| -2.31  | -0.6  | -1.6  |  |  |
| -2.31  | 1.25  | 0.25  |  |  |
| -10.33 | -2.98 | -1.82 |  |  |
| 1.25   | 1.61  | -1.25 |  |  |

|        |       |       |  |  |
|--------|-------|-------|--|--|
| 1.16   | 5.36  | 2.62  |  |  |
| 1.09   | 5.46  | 2.8   |  |  |
| -1.01  | 2.94  | 0.43  |  |  |
| -1.06  | -1.77 | -4.21 |  |  |
| -1.23  | -2.31 | -4.54 |  |  |
| -1.4   | -1.69 | -3.74 |  |  |
| -1.49  | 0.3   | -1.65 |  |  |
| -2.33  | -0.62 | -1.93 |  |  |
| -12.66 | 1.1   | 2.23  |  |  |
| 9.02   | 1.7   | -1.13 |  |  |
| 3.29   | 0.44  | -0.94 |  |  |
| 3.17   | 0.04  | -1.29 |  |  |
| 2.98   | 0.64  | -0.61 |  |  |
| 2.83   | 1.91  | 0.75  |  |  |
| 2.82   | 1.54  | 0.39  |  |  |
| -2.13  | -0.97 | 0.46  |  |  |
| 2.44   | 0.34  | -2.49 |  |  |
| 1.26   | -0.21 | -2.1  |  |  |
| 1.12   | -1.94 | -3.65 |  |  |
| 1.01   | -0.44 | -2    |  |  |
| -1.01  | -2.48 | -4.02 |  |  |
| -1.07  | -2.09 | -3.54 |  |  |
| -1.13  | -1.75 | -3.12 |  |  |
| -1.2   | -2.72 | -4.01 |  |  |
| -1.38  | -2.42 | -3.51 |  |  |
| -1.42  | 1.7   | 0.66  |  |  |
| -1.46  | -3.28 | -4.29 |  |  |
| -10.28 | -1.62 | 0.19  |  |  |
| 5.84   | 2.94  | 0.12  |  |  |
| 3.56   | 0.35  | -1.77 |  |  |
| 2.48   | -0.88 | -2.47 |  |  |
| 2.05   | -1.38 | -2.7  |  |  |
| 1.99   | -1.48 | -2.76 |  |  |
| 1.67   | 1.87  | 0.85  |  |  |
| 1.64   | -0.3  | -1.3  |  |  |
| -2.45  | 0.17  | 1.18  |  |  |
| -2.81  | -1.51 | -0.3  |  |  |
| -3.4   | -0.59 | 0.9   |  |  |
| 2.37   | 3.85  | 1.04  |  |  |
| 2.34   | -1.2  | -4    |  |  |
| 2.14   | 2.98  | 0.31  |  |  |
| 1.79   | 0.43  | -1.99 |  |  |
| 1.64   | -1.53 | -3.82 |  |  |
| 1.51   | 4.09  | 1.93  |  |  |
| 1.28   | 6.52  | 4.59  |  |  |
| 1.18   | -1.68 | -3.5  |  |  |
| 1.15   | 1.08  | -0.7  |  |  |
| 1.15   | -1.59 | -3.36 |  |  |
| 1.07   | -2    | -3.67 |  |  |
| -1.03  | -1.26 | -2.79 |  |  |
| -1.03  | 0.96  | -0.57 |  |  |
| -1.06  | 1.44  | -0.05 |  |  |
| -1.11  | -0.32 | -1.75 |  |  |
| -1.12  | -0.32 | -1.74 |  |  |
| -1.13  | -1.09 | -2.49 |  |  |
| -1.14  | 1.37  | -0.01 |  |  |
| -1.16  | -2.23 | -3.59 |  |  |
| -1.19  | 0.71  | -0.62 |  |  |

|        |       |       |  |  |
|--------|-------|-------|--|--|
| -1.19  | 1.56  | 0.24  |  |  |
| -1.24  | 1.97  | 0.71  |  |  |
| -1.26  | 0.87  | -0.37 |  |  |
| -1.35  | 2.55  | 1.41  |  |  |
| -1.35  | -0.51 | -1.64 |  |  |
| -1.37  | 2.12  | 1     |  |  |
| -1.37  | 1.13  | 0.01  |  |  |
| -1.39  | -2.55 | -3.65 |  |  |
| -1.42  | -0.76 | -1.83 |  |  |
| -1.42  | 0.62  | -0.45 |  |  |
| -1.44  | -2.2  | -3.25 |  |  |
| -1.44  | 1.03  | -0.01 |  |  |
| -6.03  | 0.57  | 1.59  |  |  |
| -6.53  | 0.57  | 1.71  |  |  |
| -6.75  | -1.5  | -0.32 |  |  |
| -6.79  | -0.97 | 0.21  |  |  |
| -6.82  | 0.11  | 1.31  |  |  |
| -6.85  | -0.36 | 0.84  |  |  |
| -6.9   | -0.05 | 1.16  |  |  |
| -7.08  | -2.15 | -0.9  |  |  |
| -8.34  | -1.07 | 0.42  |  |  |
| -8.46  | -0.88 | 0.62  |  |  |
| -8.67  | -0.89 | 0.65  |  |  |
| -8.75  | -1.43 | 0.12  |  |  |
| -9.82  | -0.98 | 0.74  |  |  |
| -10.87 | -1.02 | 0.85  |  |  |
| -11.05 | -0.67 | 1.22  |  |  |
| -12.58 | -2.29 | -0.21 |  |  |
| 3.77   | 3.77  | 0.95  |  |  |
| 1.66   | 3.84  | 2.21  |  |  |
| 1.48   | -0.97 | -2.44 |  |  |
| 1.24   | 4.75  | 3.53  |  |  |
| 1.13   | -0.65 | -1.73 |  |  |
| 1.07   | -1.37 | -2.37 |  |  |
| -5.23  | -1.01 | 0.47  |  |  |
| 1.76   | -0.7  | -3.51 |  |  |
| 1.69   | 3.58  | 0.82  |  |  |
| 1.63   | -0.67 | -3.38 |  |  |
| 1.39   | 1.64  | -0.84 |  |  |
| 1.12   | 1.51  | -0.66 |  |  |
| -1.05  | -1.05 | -2.98 |  |  |
| -1.08  | 6.13  | 4.23  |  |  |
| -1.08  | 1.28  | -0.62 |  |  |
| -1.32  | 1.59  | -0.02 |  |  |
| -1.4   | -0.33 | -1.85 |  |  |
| -1.42  | 0.47  | -1.03 |  |  |
| -1.44  | 3.81  | 2.33  |  |  |
| -1.5   | -0.5  | -1.92 |  |  |
| -1.84  | -2.11 | -3.23 |  |  |
| -11.97 | -1.99 | -0.41 |  |  |
| 7.11   | -1.22 | -4.03 |  |  |
| 5.64   | -1.62 | -4.09 |  |  |
| 5.03   | 0.09  | -2.23 |  |  |
| 4.84   | 0.77  | -1.49 |  |  |
| 4.73   | 2.77  | 0.54  |  |  |
| 4.55   | 0.64  | -1.53 |  |  |
| 4.28   | -0.55 | -2.63 |  |  |
| 4.09   | -0.2  | -2.21 |  |  |

|        |       |       |  |  |
|--------|-------|-------|--|--|
| 4.05   | 0.74  | -1.26 |  |  |
| 3.94   | -2.27 | -4.24 |  |  |
| 3.83   | 0.51  | -1.42 |  |  |
| 3.58   | -0.18 | -2    |  |  |
| 3.46   | 0.25  | -1.52 |  |  |
| 3.36   | -0.16 | -1.89 |  |  |
| 3.17   | 0.96  | -0.69 |  |  |
| 3.06   | -0.38 | -1.98 |  |  |
| 3.02   | 1     | -0.58 |  |  |
| 2.89   | 1.56  | 0.04  |  |  |
| 2.84   | 0.93  | -0.57 |  |  |
| 2.85   | 0.27  | -1.23 |  |  |
| 2.71   | 0.36  | -1.07 |  |  |
| 2.69   | 0.12  | -1.3  |  |  |
| 2.66   | 0.79  | -0.6  |  |  |
| 2.65   | 0.34  | -1.05 |  |  |
| 2.59   | 1.26  | -0.09 |  |  |
| 2.58   | 0.78  | -0.57 |  |  |
| 2.57   | 0.77  | -0.57 |  |  |
| 2.56   | -0.29 | -1.64 |  |  |
| 2.54   | 1.27  | -0.06 |  |  |
| 2.53   | -0.39 | -1.71 |  |  |
| 2.47   | -0.78 | -2.06 |  |  |
| 2.45   | -0.29 | -1.56 |  |  |
| 2.44   | 1.47  | 0.2   |  |  |
| 2.38   | 0.65  | -0.59 |  |  |
| 2.3    | 0.47  | -0.72 |  |  |
| 2.29   | -0.52 | -1.7  |  |  |
| 2.28   | 0.27  | -0.91 |  |  |
| 2.26   | 0.89  | -0.27 |  |  |
| 2.21   | -0.85 | -1.98 |  |  |
| 2.19   | 2.2   | 1.09  |  |  |
| 2.14   | -0.83 | -1.91 |  |  |
| 2.07   | 0.51  | -0.52 |  |  |
| -2.15  | -0.55 | 0.58  |  |  |
| -1.16  | 1.3   | -1.52 |  |  |
| -1.52  | 1.08  | -1.35 |  |  |
| -1.57  | -0.74 | -3.12 |  |  |
| -1.61  | 1.34  | -1    |  |  |
| -2.88  | -1.31 | -2.81 |  |  |
| -2.88  | -2.33 | -3.84 |  |  |
| -3.4   | -1.59 | -2.86 |  |  |
| 6.51   | -2.58 | -5.39 |  |  |
| 2.13   | -3.07 | -4.27 |  |  |
| -2.65  | -6.24 | -4.94 |  |  |
| -2.7   | -0.57 | 0.76  |  |  |
| -4.98  | -2.8  | -0.59 |  |  |
| 1.31   | 0.7   | -2.11 |  |  |
| 1.12   | 1.27  | -1.31 |  |  |
| -1.04  | 0.1   | -2.27 |  |  |
| -1.55  | 0.73  | -1.06 |  |  |
| -2.6   | 0.4   | -0.65 |  |  |
| -10.87 | -2.56 | -1.54 |  |  |
| -11.07 | -2.81 | -1.76 |  |  |
| -11.97 | -3.34 | -2.19 |  |  |
| 2.84   | 0.32  | -2.49 |  |  |
| 1.29   | 2.77  | 1.1   |  |  |
| -1.05  | 0.1   | -1.13 |  |  |

|       |       |       |  |  |
|-------|-------|-------|--|--|
| -1.08 | -0.12 | -1.31 |  |  |
| 4.68  | 1.14  | -1.67 |  |  |
| 4.52  | 0.96  | -1.8  |  |  |
| 2.55  | -3.03 | -4.96 |  |  |
| 2.25  | 1.81  | 0.06  |  |  |
| 1.62  | -3.26 | -4.53 |  |  |
| 1.58  | -2.35 | -3.59 |  |  |
| 1.43  | -1.97 | -3.06 |  |  |
| -3.06 | -2.71 | -1.68 |  |  |
| -4.17 | -5.08 | -3.6  |  |  |
| 10.3  | 2.06  | -0.75 |  |  |
| 5.65  | 0.28  | -1.66 |  |  |
| 5.26  | 4.1   | 2.26  |  |  |
| 4.97  | 0.48  | -1.27 |  |  |
| 4.96  | 0.66  | -1.1  |  |  |
| 4.71  | 0.57  | -1.11 |  |  |
| 4.19  | 2.77  | 1.27  |  |  |
| 3.41  | -0.29 | -1.5  |  |  |
| 3.38  | 0.59  | -0.61 |  |  |
| 3.04  | 0.4   | -0.65 |  |  |
| -1.98 | -0.66 | 0.88  |  |  |
| 5.8   | -0.18 | -2.99 |  |  |
| 1.98  | -0.62 | -1.88 |  |  |
| 1.73  | -1.19 | -2.26 |  |  |
| 1.69  | 2.14  | 1.12  |  |  |
| 11.07 | 0.81  | -1.99 |  |  |
| -1.26 | -3.35 | -2.35 |  |  |
| -1.41 | -2.97 | -1.81 |  |  |
| 10.97 | 1.16  | -1.65 |  |  |
| 3.34  | -0.37 | -1.45 |  |  |
| -1.82 | -1.97 | -0.46 |  |  |
| 5.12  | 0.37  | -2.43 |  |  |
| 2.58  | -1.86 | -3.67 |  |  |
| 1.6   | -1.1  | -2.22 |  |  |
| 1.58  | -3.97 | -5.07 |  |  |
| 1.52  | 1.98  | 0.93  |  |  |
| -2.75 | -0.42 | 0.6   |  |  |
| -3.59 | -2.36 | -0.96 |  |  |
| -4.26 | -4.87 | -3.22 |  |  |
| 4.05  | 5.31  | 2.51  |  |  |
| 1.6   | 4.92  | 3.45  |  |  |
| 1.49  | 1.49  | 0.12  |  |  |
| 1.35  | 1.54  | 0.32  |  |  |
| 1.32  | 0.89  | -0.3  |  |  |
| 4.47  | -0.71 | -3.51 |  |  |
| 1.81  | -0.64 | -2.14 |  |  |
| 1.64  | 0.28  | -1.07 |  |  |
| 1.42  | -2.05 | -3.2  |  |  |
| 1.38  | 3.18  | 2.08  |  |  |
| 1.85  | -2.74 | -5.54 |  |  |
| 1.51  | 1.66  | -0.84 |  |  |
| 1.1   | -1.94 | -3.98 |  |  |
| 1.04  | 0.7   | -1.26 |  |  |
| -1.01 | -4.17 | -6.07 |  |  |
| -1.13 | -2.78 | -4.52 |  |  |
| -1.2  | 1.02  | -0.63 |  |  |
| -1.26 | -3.57 | -5.14 |  |  |
| -1.36 | -0.82 | -2.29 |  |  |

|        |       |       |  |  |
|--------|-------|-------|--|--|
| -1.57  | -2.43 | -3.69 |  |  |
| -1.78  | 0.98  | -0.1  |  |  |
| 1.43   | -0.52 | -3.31 |  |  |
| 1.36   | -3.34 | -6.06 |  |  |
| 1.35   | -0.81 | -3.52 |  |  |
| 1.22   | 0.14  | -2.42 |  |  |
| 1.15   | -0.98 | -3.46 |  |  |
| 1.1    | -3.5  | -5.91 |  |  |
| 1.08   | -0.6  | -2.98 |  |  |
| 1.02   | -4.13 | -6.44 |  |  |
| -1.01  | -1.31 | -3.56 |  |  |
| -1.07  | -0.48 | -2.67 |  |  |
| -1.07  | -1.24 | -3.41 |  |  |
| -1.09  | 5.24  | 3.08  |  |  |
| -1.1   | -1.73 | -3.88 |  |  |
| -1.1   | -1.69 | -3.83 |  |  |
| -1.12  | -1.25 | -3.36 |  |  |
| -1.14  | 1.74  | -0.34 |  |  |
| -1.72  | -2.41 | -3.9  |  |  |
| -1.9   | 1.44  | 0.1   |  |  |
| -1.9   | 1.44  | 0.1   |  |  |
| -2.06  | 1.37  | 0.14  |  |  |
| -2.15  | -1.25 | -2.42 |  |  |
| -11.04 | -2.12 | -0.93 |  |  |
| -11.05 | -1.5  | -0.31 |  |  |
| -1.3   | 4.79  | 2     |  |  |
| -2.71  | 1.01  | -0.72 |  |  |
| -4.2   | -1.81 | -2.91 |  |  |
| 4.25   | 4.46  | 1.67  |  |  |
| 1.63   | -0.45 | -1.86 |  |  |
| 1.56   | 4.56  | 3.22  |  |  |
| 1.36   | 3.36  | 2.22  |  |  |
| -5.19  | -1.65 | 0.03  |  |  |
| 3.59   | 0.53  | -2.25 |  |  |
| 1.76   | -4.17 | -5.93 |  |  |
| 1.43   | -2.67 | -4.14 |  |  |
| 1.3    | -2.7  | -4.02 |  |  |
| 1.26   | -4.2  | -5.48 |  |  |
| 1.21   | -0.96 | -2.17 |  |  |
| 1.11   | -1.32 | -2.42 |  |  |
| 1.1    | -3.17 | -4.26 |  |  |
| 1.09   | 1.91  | 0.85  |  |  |
| 2.15   | -3.15 | -5.93 |  |  |
| 2.13   | -3.33 | -6.1  |  |  |
| 1.98   | -3.84 | -6.51 |  |  |
| 1.29   | 2.65  | 0.6   |  |  |
| 1.26   | -1.85 | -3.87 |  |  |
| 1.03   | -4.95 | -6.68 |  |  |
| 1.03   | 1.55  | -0.18 |  |  |
| -1     | -2.91 | -4.6  |  |  |
| -1.06  | -4.6  | -6.2  |  |  |
| -1.16  | 0.84  | -0.63 |  |  |
| -1.17  | -1.37 | -2.83 |  |  |
| -1.18  | -3.88 | -5.33 |  |  |
| -1.19  | 0.11  | -1.32 |  |  |
| -1.2   | -4.05 | -5.48 |  |  |
| -1.27  | -3.86 | -5.2  |  |  |
| -1.3   | -4.17 | -5.48 |  |  |



|        |       |       |  |  |
|--------|-------|-------|--|--|
| -1.34  | -4.44 | -5.71 |  |  |
| -1.35  | -1.05 | -2.31 |  |  |
| -1.35  | -0.54 | -1.79 |  |  |
| 3.83   | -1.38 | -4.16 |  |  |
| 1.52   | -0.92 | -2.37 |  |  |
| -3.71  | -1.9  | -0.86 |  |  |
| 15.12  | 3.47  | 0.69  |  |  |
| 7.07   | 0.16  | -1.53 |  |  |
| 6.08   | 3.78  | 2.31  |  |  |
| 5.1    | 5.11  | 3.9   |  |  |
| 1.1    | -0.4  | 0.6   |  |  |
| -1.14  | -1.21 | 0.12  |  |  |
| -1.21  | 0.39  | 1.8   |  |  |
| 5.7    | -3.28 | -6.05 |  |  |
| 2.74   | -4.16 | -5.87 |  |  |
| 2.57   | -6.15 | -7.77 |  |  |
| 2.05   | -6.07 | -7.36 |  |  |
| 1.89   | -4.23 | -5.41 |  |  |
| -2.68  | -6.26 | -5.1  |  |  |
| -2.73  | -8.01 | -6.82 |  |  |
| 10.79  | 0.38  | -2.39 |  |  |
| 5.16   | -0.65 | -2.36 |  |  |
| -1.31  | -0.68 | 0.37  |  |  |
| -1.14  | -0.64 | -3.42 |  |  |
| -1.68  | -1.68 | -3.9  |  |  |
| -2.17  | 3.02  | 1.18  |  |  |
| -3.32  | -1.34 | -2.56 |  |  |
| -3.41  | -0.56 | -1.75 |  |  |
| -3.58  | -0.8  | -1.91 |  |  |
| -19.7  | 1.58  | 2.92  |  |  |
| -20.56 | -0.52 | 0.88  |  |  |
| -26.66 | 0.41  | 2.19  |  |  |
| -38.96 | -0.16 | 2.16  |  |  |
| -42.74 | -0.85 | 1.61  |  |  |
| 3.39   | 2.45  | -0.32 |  |  |
| 1.64   | 0.57  | -1.15 |  |  |
| 1.54   | 1.6   | -0.03 |  |  |
| 1.46   | -3.3  | -4.86 |  |  |
| 1.45   | -3.67 | -5.22 |  |  |
| 1.43   | -0.72 | -2.25 |  |  |
| 1.23   | -2.75 | -4.05 |  |  |
| 1.21   | -1.56 | -2.85 |  |  |
| 1.14   | -2.77 | -3.98 |  |  |
| 1.09   | 2.6   | 1.46  |  |  |
| 1.07   | -0.26 | -1.36 |  |  |
| 1.05   | 2.62  | 1.54  |  |  |
| 1.03   | -2.27 | -3.32 |  |  |
| 1.02   | -0.14 | -1.18 |  |  |
| -4.37  | -2.94 | -1.83 |  |  |
| -5.86  | -4.03 | -2.49 |  |  |
| 8.04   | 3.39  | 0.62  |  |  |
| 3.15   | 1.61  | 0.19  |  |  |
| 2.49   | -0.55 | -1.63 |  |  |
| 2.46   | 0.76  | -0.3  |  |  |
| -1.75  | 1.67  | 2.72  |  |  |
| -1.82  | -2.48 | -1.38 |  |  |
| -2.06  | -3.3  | -2.02 |  |  |
| -2.32  | 3.2   | 4.65  |  |  |

|       |       |       |  |  |
|-------|-------|-------|--|--|
| 7.69  | -3.75 | -6.52 |  |  |
| 4.23  | -1.51 | -3.41 |  |  |
| 3.56  | -3.54 | -5.19 |  |  |
| -2.16 | -4.72 | -3.43 |  |  |
| -2.23 | -5.34 | -4.01 |  |  |
| -2.25 | -2.41 | -1.06 |  |  |
| -2.77 | -4.19 | -2.54 |  |  |
| 3     | -1.65 | -4.41 |  |  |
| 2.2   | -0.79 | -3.1  |  |  |
| 1.68  | 0.82  | -1.1  |  |  |
| 1.5   | 0.58  | -1.18 |  |  |
| 1.47  | -0.85 | -2.58 |  |  |
| 1.44  | 0.02  | -1.68 |  |  |
| 1.43  | 0.88  | -0.8  |  |  |
| 1.39  | -0.07 | -1.72 |  |  |
| 1.38  | 0.37  | -1.27 |  |  |
| 1.36  | -0.09 | -1.71 |  |  |
| 1.35  | -1.19 | -2.8  |  |  |
| 1.34  | -0.35 | -1.95 |  |  |
| 1.34  | -0.91 | -2.5  |  |  |
| 1.33  | -0.06 | -1.65 |  |  |
| 1.3   | -0.25 | -1.81 |  |  |
| 1.28  | 0.99  | -0.54 |  |  |
| 1.26  | 0.54  | -0.97 |  |  |
| 1.24  | 0.77  | -0.72 |  |  |
| 1.23  | 0.37  | -1.11 |  |  |
| 1.21  | -1.04 | -2.49 |  |  |
| 1.22  | 1.77  | 0.31  |  |  |
| 1.21  | -2.19 | -3.64 |  |  |
| 1.2   | 0.45  | -0.99 |  |  |
| 1.18  | -2.1  | -3.51 |  |  |
| 1.18  | -2.51 | -3.93 |  |  |
| 1.18  | 0.35  | -1.06 |  |  |
| 1.18  | 0.21  | -1.2  |  |  |
| 1.17  | -2.34 | -3.75 |  |  |
| 1.17  | -2.49 | -3.89 |  |  |
| 1.17  | 0.16  | -1.24 |  |  |
| 1.14  | 1.11  | -0.25 |  |  |
| 1.13  | 0.37  | -0.98 |  |  |
| 1.12  | -2.04 | -3.38 |  |  |
| 1.1   | -0.89 | -2.21 |  |  |
| 1.1   | 0.07  | -1.24 |  |  |
| 1.1   | -0.07 | -1.38 |  |  |
| 1.08  | -0.56 | -1.84 |  |  |
| 1.08  | -0.94 | -2.23 |  |  |
| 1.08  | 1.44  | 0.16  |  |  |
| 1.08  | 3.85  | 2.56  |  |  |
| 1.07  | 2.23  | 0.96  |  |  |
| 1.07  | -1.92 | -3.18 |  |  |
| 1.06  | 0.6   | -0.66 |  |  |
| 1.06  | 2.57  | 1.31  |  |  |
| 1.06  | 0.51  | -0.75 |  |  |
| 1.05  | 1     | -0.24 |  |  |
| 1.03  | 2.54  | 1.32  |  |  |
| 1.02  | -0.74 | -1.94 |  |  |
| 1.02  | 0.12  | -1.08 |  |  |
| 1.01  | -1.42 | -2.62 |  |  |
| -1.06 | 0.09  | -1    |  |  |

|       |       |       |  |  |
|-------|-------|-------|--|--|
| -1.08 | -0.75 | -1.82 |  |  |
| -1.09 | 2.98  | 1.93  |  |  |
| -1.1  | -1.58 | -2.62 |  |  |
| -1.1  | 0.28  | -0.77 |  |  |
| -1.1  | -1.31 | -2.35 |  |  |
| -1.11 | -0.13 | -1.16 |  |  |
| -1.11 | 0.99  | -0.03 |  |  |
| -1.11 | 0.23  | -0.79 |  |  |
| -1.13 | -4.57 | -5.57 |  |  |
| -5.46 | -1.79 | -0.51 |  |  |
| 1.65  | 0.91  | -1.84 |  |  |
| 1.65  | 1.66  | -1.09 |  |  |
| 1.59  | -1.9  | -4.6  |  |  |
| 1.48  | -1.52 | -4.12 |  |  |
| 1.48  | 2.09  | -0.5  |  |  |
| 1.48  | 1.27  | -1.32 |  |  |
| 1.48  | 1.03  | -1.56 |  |  |
| 1.37  | -1.89 | -4.37 |  |  |
| 1.36  | -0.5  | -2.97 |  |  |
| 1.35  | -1.4  | -3.87 |  |  |
| 1.29  | -1.77 | -4.17 |  |  |
| 1.25  | 0.61  | -1.74 |  |  |
| 1.2   | 1.7   | -0.59 |  |  |
| 1.12  | 0.58  | -1.61 |  |  |
| 1.1   | 2.37  | 0.2   |  |  |
| 1.1   | -1.65 | -3.82 |  |  |
| 1.04  | -1.89 | -3.97 |  |  |
| 1.03  | 2.07  | 0     |  |  |
| 1.02  | 0.84  | -1.22 |  |  |
| 1     | -1.68 | -3.71 |  |  |
| -1    | 1.13  | -0.89 |  |  |
| -1.04 | 3.13  | 1.16  |  |  |
| -1.04 | -2.02 | -3.99 |  |  |
| -1.06 | 0.06  | -1.88 |  |  |
| -1.07 | -1.11 | -3.05 |  |  |
| -1.07 | 0.76  | -1.18 |  |  |
| -1.1  | -0.78 | -2.67 |  |  |
| -1.11 | -1.04 | -2.92 |  |  |
| -1.14 | -2.12 | -3.96 |  |  |
| -1.15 | 0.14  | -1.69 |  |  |
| -1.17 | -0.2  | -2    |  |  |
| -1.19 | -2.3  | -4.08 |  |  |
| -1.19 | -3.12 | -4.89 |  |  |
| -1.21 | -0.64 | -2.39 |  |  |
| -1.22 | 1.28  | -0.46 |  |  |
| -1.24 | -1.65 | -3.37 |  |  |
| -1.26 | 4.53  | 2.84  |  |  |
| -1.29 | -1.25 | -2.92 |  |  |
| -1.29 | -0.78 | -2.44 |  |  |
| -1.32 | 1.98  | 0.35  |  |  |
| -1.36 | -1.24 | -2.83 |  |  |
| -1.36 | 1.26  | -0.32 |  |  |
| -1.38 | 4.44  | 2.88  |  |  |
| -1.38 | -1.73 | -3.29 |  |  |
| -1.45 | -2.73 | -4.22 |  |  |
| -1.45 | 1.09  | -0.41 |  |  |
| -1.52 | -1.87 | -3.29 |  |  |
| -1.54 | -0.65 | -2.06 |  |  |

|       |       |       |  |  |
|-------|-------|-------|--|--|
| -1.54 | -0.61 | -2.02 |  |  |
| -1.55 | 0.92  | -0.47 |  |  |
| -1.62 | -1.48 | -2.81 |  |  |
| -1.63 | 1.02  | -0.3  |  |  |
| -1.64 | -0.71 | -2.03 |  |  |
| -1.64 | 0.45  | -0.86 |  |  |
| -1.71 | 0.87  | -0.39 |  |  |
| -1.73 | -0.43 | -1.67 |  |  |
| -1.73 | 0.87  | -0.36 |  |  |
| -1.77 | -0.48 | -1.68 |  |  |
| -1.79 | 0.13  | -1.06 |  |  |
| -1.8  | -0.5  | -1.68 |  |  |
| -1.97 | -1.21 | -2.26 |  |  |
| -2.02 | -0.2  | -1.21 |  |  |
| -2.03 | -0.5  | -1.51 |  |  |
| 7.43  | 0.75  | -2    |  |  |
| 4.37  | 0.99  | -0.99 |  |  |
| 4.34  | -0.36 | -2.34 |  |  |
| 3.43  | -0.72 | -2.36 |  |  |
| 3.2   | 1.73  | 0.19  |  |  |
| 2.92  | -1.05 | -2.45 |  |  |
| 2.76  | -0.59 | -1.91 |  |  |
| 2.69  | -0.84 | -2.13 |  |  |
| 2.64  | -0.95 | -2.21 |  |  |
| 2.57  | 1.65  | 0.43  |  |  |
| 2.53  | -0.27 | -1.47 |  |  |
| 2.51  | 0.77  | -0.42 |  |  |
| 2.48  | -0.93 | -2.1  |  |  |
| 2.4   | -0.45 | -1.57 |  |  |
| 2.26  | -0.98 | -2.02 |  |  |
| 2.23  | 2.13  | 1.12  |  |  |
| 40.33 | -1.04 | -3.79 |  |  |
| 30.16 | -1.12 | -3.45 |  |  |
| 26.19 | 0.01  | -2.12 |  |  |
| 14.35 | 1.04  | -0.22 |  |  |
| 12.13 | 0.74  | -0.28 |  |  |
| 12.1  | -0.01 | -1.03 |  |  |
| 2.41  | -0.22 | 1.09  |  |  |
| 2.3   | -0.42 | 0.96  |  |  |
| 2.26  | -1.06 | 0.35  |  |  |
| 2.09  | 0.91  | 2.44  |  |  |
| 2.06  | 2.16  | 3.7   |  |  |
| 1.97  | -3.31 | -1.71 |  |  |
| 1.87  | -1.53 | 0.15  |  |  |
| 1.65  | -4.6  | -2.74 |  |  |
| 1.57  | 0.43  | 2.36  |  |  |
| 1.48  | 1.28  | 3.3   |  |  |
| 1.38  | -5.03 | -2.91 |  |  |
| 1.33  | -1    | 1.17  |  |  |
| 1.2   | 0.17  | 2.49  |  |  |
| 1.19  | -3.09 | -0.76 |  |  |
| 1.17  | -2.25 | 0.11  |  |  |
| 1.09  | 1.66  | 4.12  |  |  |
| 1.06  | -1.45 | 1.05  |  |  |
| -1.13 | -1.41 | 1.35  |  |  |
| -1.15 | -5.35 | -2.56 |  |  |
| -1.15 | -2.69 | 0.1   |  |  |
| -1.16 | -5.89 | -3.09 |  |  |

|        |       |       |  |  |
|--------|-------|-------|--|--|
| -1.31  | -2.73 | 0.24  |  |  |
| -1.66  | -5.76 | -2.44 |  |  |
| -1.08  | -1.2  | -3.95 |  |  |
| -1.14  | 1.19  | -1.47 |  |  |
| -1.14  | 0.49  | -2.18 |  |  |
| -1.21  | -2.26 | -4.83 |  |  |
| -2.52  | -5.56 | -7.08 |  |  |
| -2.63  | -0.46 | -1.92 |  |  |
| -18.59 | -2.82 | -1.45 |  |  |
| -20.8  | -3.3  | -1.77 |  |  |
| -22.98 | -1.75 | -0.09 |  |  |
| 3.4    | -5.49 | -8.24 |  |  |
| 1.75   | -3.94 | -5.73 |  |  |
| 1.47   | -4.27 | -5.81 |  |  |
| 1.46   | -5.31 | -6.84 |  |  |
| 1.1    | -0.85 | -1.97 |  |  |
| 1.1    | -1.88 | -2.99 |  |  |
| -4.73  | -1.55 | -0.29 |  |  |
| 3.4    | -5.49 | -8.24 |  |  |
| 1.75   | -3.94 | -5.73 |  |  |
| 1.46   | -5.31 | -6.84 |  |  |
| 1.1    | -0.85 | -1.97 |  |  |
| 1.1    | -1.88 | -2.99 |  |  |
| -4.73  | -1.55 | -0.29 |  |  |
| 2.75   | 3.32  | 0.58  |  |  |
| -1.13  | 2.13  | 1.03  |  |  |
| -1.19  | -3.65 | -4.68 |  |  |
| 9.17   | 0.89  | -1.85 |  |  |
| 8.33   | 3.44  | 0.84  |  |  |
| 4.94   | 1.27  | -0.57 |  |  |
| 4.4    | 0.33  | -1.35 |  |  |
| 4.02   | 0.02  | -1.53 |  |  |
| 3.5    | 1.89  | 0.54  |  |  |
| 3.32   | 1.21  | -0.07 |  |  |
| 3.06   | 0     | -1.15 |  |  |
| 3.05   | -0.04 | -1.19 |  |  |
| 3.04   | 1.52  | 0.37  |  |  |
| 2.87   | 0.98  | -0.08 |  |  |
| -1.64  | 1.44  | 2.61  |  |  |
| -2.13  | -2.22 | -0.67 |  |  |
| -2.23  | -0.77 | 0.85  |  |  |
| -1.3   | 3.36  | 0.62  |  |  |
| -1.8   | 2.19  | -0.07 |  |  |
| -2.27  | 2.03  | 0.1   |  |  |
| -2.39  | -1.2  | -3.06 |  |  |
| -3.75  | -1.79 | -3    |  |  |
| -20.03 | -0.89 | 0.32  |  |  |
| -30.98 | -1.82 | 0.02  |  |  |
| 13.46  | 0.56  | -2.18 |  |  |
| -1.03  | -2.5  | -1.45 |  |  |
| -1.08  | -1.02 | 0.1   |  |  |
| -1.09  | 3.79  | 4.93  |  |  |
| -1.21  | -2.83 | -1.55 |  |  |
| 5.34   | 0.47  | -2.27 |  |  |
| 1.73   | 1.93  | 0.82  |  |  |
| 1.68   | -1.42 | -2.49 |  |  |
| 1.65   | -0.45 | -1.49 |  |  |
| 2.95   | 1.58  | -1.15 |  |  |

|        |       |       |  |  |
|--------|-------|-------|--|--|
| 1.42   | 0.16  | -1.51 |  |  |
| 1.26   | 4.47  | 2.97  |  |  |
| -1.09  | -0.26 | -1.31 |  |  |
| 1.29   | 0.81  | -1.92 |  |  |
| 1.26   | 0.28  | -2.43 |  |  |
| 1.22   | 0.9   | -1.75 |  |  |
| 1.21   | 2.9   | 0.26  |  |  |
| 1.12   | -0.93 | -3.47 |  |  |
| -1.02  | -0.08 | -2.41 |  |  |
| -1.09  | 0.12  | -2.13 |  |  |
| -1.16  | 0.24  | -1.92 |  |  |
| -1.31  | -1.91 | -3.89 |  |  |
| -1.44  | -2.74 | -4.58 |  |  |
| -1.59  | -0.52 | -2.22 |  |  |
| -1.74  | 0.84  | -0.73 |  |  |
| -2.01  | -0.41 | -1.77 |  |  |
| -2.32  | 1.59  | 0.44  |  |  |
| -2.53  | 1.73  | 0.7   |  |  |
| -10.6  | -1.8  | -0.76 |  |  |
| -12.51 | -1.8  | -0.53 |  |  |
| 2.15   | -1.64 | -4.37 |  |  |
| 1.37   | -2.85 | -4.93 |  |  |
| 1.32   | -2.06 | -4.08 |  |  |
| 1.13   | -1.49 | -3.29 |  |  |
| -1.16  | 1.18  | -0.23 |  |  |
| -1.19  | 1.22  | -0.15 |  |  |
| -1.21  | -2.77 | -4.12 |  |  |
| -1.39  | -2.38 | -3.53 |  |  |
| -6.87  | -2.32 | -1.16 |  |  |
| 5.88   | -4.68 | -7.41 |  |  |
| 5.34   | -4.92 | -7.51 |  |  |
| 3.45   | -4.81 | -6.77 |  |  |
| 3.27   | -4.48 | -6.36 |  |  |
| 2.37   | -2.39 | -3.81 |  |  |
| 2.24   | -4.26 | -5.6  |  |  |
| 1.98   | -4.87 | -6.03 |  |  |
| 1.95   | -5.19 | -6.33 |  |  |
| 1.93   | -6.98 | -8.11 |  |  |
| -3.03  | -4.93 | -3.51 |  |  |
| 1.05   | 2.29  | -0.43 |  |  |
| -1.48  | 0.17  | -1.93 |  |  |
| -1.64  | -0.02 | -1.97 |  |  |
| -2.69  | 0.21  | -1.02 |  |  |
| -2.81  | 0.04  | -1.13 |  |  |
| 3.25   | 0.42  | -2.31 |  |  |
| 1.13   | 0.41  | -0.79 |  |  |
| 1.06   | 1.01  | -0.1  |  |  |
| 8.81   | 2.37  | -0.35 |  |  |
| 4.79   | 1.78  | -0.06 |  |  |
| 4.39   | 1.54  | -0.18 |  |  |
| 3.97   | 1.11  | -0.47 |  |  |
| 3.43   | 3.16  | 1.8   |  |  |
| 2.7    | 1.43  | 0.41  |  |  |
| 2.71   | 1.41  | 0.39  |  |  |
| 2.71   | 0.57  | -0.45 |  |  |
| 2.69   | 2.02  | 1.01  |  |  |
| -1.51  | 1.86  | 2.87  |  |  |
| -1.54  | 0.01  | 1.05  |  |  |

|        |       |       |  |  |
|--------|-------|-------|--|--|
| -1.64  | -1.29 | -0.16 |  |  |
| -1.71  | -0.4  | 0.79  |  |  |
| -2.31  | -1.82 | -0.19 |  |  |
| 3.03   | -0.52 | -3.24 |  |  |
| 1.87   | -1.45 | -3.47 |  |  |
| 1.61   | 0.41  | -1.4  |  |  |
| 1.47   | -1.39 | -3.07 |  |  |
| 1.26   | -1.89 | -3.35 |  |  |
| 1.21   | -1.75 | -3.14 |  |  |
| 1.11   | -1.06 | -2.34 |  |  |
| 1.09   | 0.27  | -0.97 |  |  |
| -1.03  | 1.01  | -0.08 |  |  |
| -1.03  | -0.68 | -1.75 |  |  |
| -1.06  | 3.66  | 2.63  |  |  |
| -6.87  | -2.91 | -1.25 |  |  |
| 2.76   | -1.16 | -3.87 |  |  |
| 1.1    | -3.54 | -4.93 |  |  |
| 1.07   | -0.99 | -2.34 |  |  |
| 1.04   | 2.55  | 1.24  |  |  |
| -1.17  | -2.15 | -3.18 |  |  |
| -1.18  | 3.94  | 2.93  |  |  |
| -1.18  | -3.72 | -4.74 |  |  |
| -4.88  | -1.85 | -0.81 |  |  |
| -7.07  | -2.22 | -0.66 |  |  |
| 674.53 | -0.29 | -3.01 |  |  |
| 16.17  | -5.46 | -2.79 |  |  |
| 14.44  | -5.63 | -2.8  |  |  |
| 9.97   | -2.99 | 0.37  |  |  |
| 9.06   | -6.03 | -2.52 |  |  |
| 6.22   | -3.64 | 0.41  |  |  |
| 3.64   | -7.63 | -2.81 |  |  |
| 2.91   | -1.03 | -3.75 |  |  |
| 1.66   | -1.83 | -3.73 |  |  |
| 1.61   | -2.93 | -4.78 |  |  |
| 1.43   | 1.01  | -0.67 |  |  |
| 1.36   | -3.27 | -4.88 |  |  |
| 1.12   | -0.93 | -2.27 |  |  |
| 1.11   | 0.52  | -0.8  |  |  |
| 1.08   | -4.61 | -5.9  |  |  |
| 1.07   | -0.93 | -2.19 |  |  |
| -5.53  | -3.07 | -1.78 |  |  |
| 1.37   | -2.26 | -4.97 |  |  |
| -1.13  | -1.96 | -4.04 |  |  |
| -1.21  | -3.03 | -5    |  |  |
| -1.32  | -2.2  | -4.06 |  |  |
| -1.36  | 1.35  | -0.46 |  |  |
| -1.51  | 0.15  | -1.51 |  |  |
| -1.68  | -2.63 | -4.13 |  |  |
| -1.74  | -2.04 | -3.49 |  |  |
| -1.82  | -2.12 | -3.51 |  |  |
| -1.95  | -0.13 | -1.42 |  |  |
| -9.85  | 0.32  | 1.37  |  |  |
| -14.36 | -1.2  | 0.39  |  |  |
| 4.02   | 5.3   | 2.59  |  |  |
| 2.11   | -0.1  | -1.87 |  |  |
| 1.57   | 7.71  | 6.36  |  |  |
| -3.62  | -0.15 | 1.01  |  |  |
| 14.04  | 0.04  | -2.66 |  |  |

|       |       |       |  |  |
|-------|-------|-------|--|--|
| 11.12 | 0.87  | -1.5  |  |  |
| 8.28  | -0.06 | -2.01 |  |  |
| 7.84  | -0.64 | -2.5  |  |  |
| 5.84  | -0.07 | -1.51 |  |  |
| 4.83  | -1.04 | -2.2  |  |  |
| 4.76  | -0.86 | -2.01 |  |  |
| 4.35  | 0.68  | -0.34 |  |  |
| -1.03 | -2.15 | -0.99 |  |  |
| -1.31 | -0.03 | 1.47  |  |  |
| -2.11 | -2.23 | -0.05 |  |  |
| -2.59 | -2.64 | -0.16 |  |  |
| 52.55 | 2.9   | 0.2   |  |  |
| 42.93 | 1.2   | -1.21 |  |  |
| 41.38 | 1.91  | -0.45 |  |  |
| 38.73 | -0.14 | -2.4  |  |  |
| 32.81 | 0.68  | -1.34 |  |  |
| 28.93 | 0.93  | -0.91 |  |  |
| 28.58 | -0.41 | -2.23 |  |  |
| 22.2  | 1.33  | -0.13 |  |  |
| 20.73 | 0.55  | -0.81 |  |  |
| 19.7  | 0.72  | -0.57 |  |  |
| 3.64  | 1.61  | 2.76  |  |  |
| 3.43  | 1.41  | 2.64  |  |  |
| 3.15  | -0.8  | 0.56  |  |  |
| 2.27  | -1.36 | 0.48  |  |  |
| 2.2   | -1.4  | 0.47  |  |  |
| 2.19  | -0.3  | 1.59  |  |  |
| 2.07  | -1    | 0.97  |  |  |
| 2.06  | -1.74 | 0.23  |  |  |
| 1.6   | 0.01  | 2.35  |  |  |
| 1.4   | -2.47 | 0.06  |  |  |
| 1.37  | -0.11 | 2.45  |  |  |
| 1.26  | -1.39 | 1.29  |  |  |
| 1.18  | -4.15 | -1.38 |  |  |
| 1.18  | -1.49 | 1.29  |  |  |
| 1.13  | 0.98  | 3.82  |  |  |
| 1     | -1.09 | 1.92  |  |  |
| 3.4   | -5.9  | -8.6  |  |  |
| 1.75  | -4.34 | -6.09 |  |  |
| 1.47  | -4.68 | -6.18 |  |  |
| 1.46  | -5.72 | -7.2  |  |  |
| 1.15  | 0.06  | -1.09 |  |  |
| 1.13  | -1.24 | -2.36 |  |  |
| 1.12  | -1.91 | -3.01 |  |  |
| -4.15 | -0.78 | 0.34  |  |  |
| -4.73 | -1.95 | -0.65 |  |  |
| 3.8   | 4.47  | 1.77  |  |  |
| 2.75  | 0.5   | -1.73 |  |  |
| 1.45  | -0.8  | -2.11 |  |  |
| 1.42  | 1.44  | 0.17  |  |  |
| 1.41  | 2.24  | 0.97  |  |  |
| 1.33  | 1.02  | -0.16 |  |  |
| 1.2   | -0.92 | -1.96 |  |  |
| 4.2   | -0.01 | -2.7  |  |  |
| 2.58  | -1.47 | -3.46 |  |  |
| 1.71  | -1.46 | -2.86 |  |  |
| 1.37  | -0.92 | -2    |  |  |
| -3.9  | -3.67 | -2.33 |  |  |



|        |       |       |  |  |
|--------|-------|-------|--|--|
| -5.3   | -2.48 | -0.7  |  |  |
| 5.05   | -2.22 | -4.91 |  |  |
| 2.14   | -2.21 | -3.66 |  |  |
| 2.11   | -1.4  | -2.83 |  |  |
| -2.56  | -3.55 | -2.55 |  |  |
| 3.47   | 1.58  | -1.12 |  |  |
| 1.59   | 1.04  | -0.53 |  |  |
| 1.21   | 1.22  | 0.04  |  |  |
| -3.72  | -1.33 | -0.33 |  |  |
| -3.81  | 0.8   | 1.83  |  |  |
| -3.92  | 1.18  | 2.25  |  |  |
| -4.79  | -0.26 | 1.1   |  |  |
| -4.96  | -0.24 | 1.17  |  |  |
| -5.04  | -0.21 | 1.23  |  |  |
| -6.09  | -0.18 | 1.53  |  |  |
| -14.57 | -1.26 | 1.7   |  |  |
| 4.79   | 1.03  | -1.66 |  |  |
| 1.8    | 0.95  | -0.33 |  |  |
| 1.78   | -2.05 | -3.31 |  |  |
| -2.7   | 0.17  | 1.17  |  |  |
| -2.79  | -0.52 | 0.53  |  |  |
| -2.8   | -0.92 | 0.14  |  |  |
| -2.87  | -2.33 | -1.24 |  |  |
| 3.49   | 0.89  | -1.79 |  |  |
| 1.83   | 4.7   | 2.94  |  |  |
| 1.61   | -0.02 | -1.59 |  |  |
| 1.57   | -0.01 | -1.54 |  |  |
| 1.36   | -0.68 | -2.01 |  |  |
| 1.23   | 2.68  | 1.5   |  |  |
| 1.21   | 2.73  | 1.56  |  |  |
| 1.2    | -1.59 | -2.73 |  |  |
| 1.11   | 1.77  | 0.74  |  |  |
| -3.93  | -2    | -0.91 |  |  |
| 3.31   | 2.2   | -0.48 |  |  |
| 1.7    | -0.87 | -2.6  |  |  |
| 8.1    | -1.51 | -4.19 |  |  |
| -1.63  | -3.7  | -2.66 |  |  |
| -1.87  | -1.07 | 0.17  |  |  |
| -1.88  | -4.9  | -3.65 |  |  |
| -1.91  | 1     | 2.27  |  |  |
| -2.01  | -0.46 | 0.88  |  |  |
| 5.78   | -0.6  | -3.28 |  |  |
| 2.17   | -0.6  | -1.86 |  |  |
| -2.22  | -1.19 | -0.2  |  |  |
| -2.48  | -0.7  | 0.46  |  |  |
| 5.62   | -5.17 | -7.85 |  |  |
| -3.45  | -7.43 | -5.83 |  |  |
| 2.09   | -4.28 | -6.96 |  |  |
| 1.73   | -3.06 | -5.46 |  |  |
| -1.03  | -2.9  | -4.47 |  |  |
| -1.04  | -2.71 | -4.27 |  |  |
| -1.16  | -3.1  | -4.5  |  |  |
| -1.43  | -2.03 | -3.14 |  |  |
| -1.53  | -3    | -3.99 |  |  |
| 2.54   | 3.56  | 0.89  |  |  |
| 1.32   | 2     | 0.28  |  |  |
| 1.28   | 3.5   | 1.81  |  |  |
| 1.02   | -1    | -2.35 |  |  |

|       |       |       |  |  |
|-------|-------|-------|--|--|
| 1.01  | -0.48 | -1.82 |  |  |
| -1    | -1.8  | -3.12 |  |  |
| -1.1  | 4.95  | 3.77  |  |  |
| -1.21 | -1.8  | -2.85 |  |  |
| -5.22 | -0.95 | 0.11  |  |  |
| -5.78 | -1.19 | 0.02  |  |  |
| -10.5 | -1.68 | 0.39  |  |  |
| 15.09 | 1.43  | -1.24 |  |  |
| 10.73 | 0.11  | -2.06 |  |  |
| 9.8   | 0.31  | -1.74 |  |  |
| 9.15  | 0.37  | -1.57 |  |  |
| 7.66  | 0.44  | -1.25 |  |  |
| 5.73  | -0.16 | -1.44 |  |  |
| 5.37  | 0.94  | -0.24 |  |  |
| 1.08  | 0.62  | 1.75  |  |  |
| 1.06  | 0.49  | 1.65  |  |  |
| 1.05  | 1.25  | 2.43  |  |  |
| 1.02  | -1.76 | -0.55 |  |  |
| -1.01 | 1.68  | 2.95  |  |  |
| -1.01 | -1.17 | 0.1   |  |  |
| -1.09 | 0.64  | 2.01  |  |  |
| -1.15 | 0.43  | 1.88  |  |  |
| -1.24 | 4.49  | 6.05  |  |  |
| -1.66 | 0.75  | 2.73  |  |  |
| 7.75  | 4.09  | 1.42  |  |  |
| 6.87  | 2.75  | 0.26  |  |  |
| 5.79  | -0.6  | -2.85 |  |  |
| 4.11  | 2.26  | 0.5   |  |  |
| 3.95  | 1.14  | -0.55 |  |  |
| 3.4   | -0.4  | -1.88 |  |  |
| 2.86  | -0.32 | -1.55 |  |  |
| 2.85  | 3.74  | 2.51  |  |  |
| 2.68  | 0.25  | -0.89 |  |  |
| 2.55  | 1.98  | 0.92  |  |  |
| 2.53  | 1.24  | 0.18  |  |  |
| -2.26 | -0.2  | 1.26  |  |  |
| 3.01  | -1.76 | -4.42 |  |  |
| -1.06 | 1.84  | 0.84  |  |  |
| 4.93  | -3.37 | -6.04 |  |  |
| 2.82  | -2.02 | -3.88 |  |  |
| 2.63  | -3.53 | -5.28 |  |  |
| 2.4   | -1    | -2.62 |  |  |
| 2.16  | -2.18 | -3.66 |  |  |
| 1.94  | -4.5  | -5.82 |  |  |
| 1.63  | -4.07 | -5.14 |  |  |
| 1.58  | -1.81 | -2.82 |  |  |
| 1.56  | -1.98 | -2.98 |  |  |
| -2.66 | -5.74 | -4.69 |  |  |
| -3.14 | -3.67 | -2.38 |  |  |
| -4.8  | -5.61 | -3.71 |  |  |
| 6.65  | 1     | -1.66 |  |  |
| 2.94  | -0.52 | -2    |  |  |
| 2.1   | 1.8   | 0.8   |  |  |
| 2.1   | 1.8   | 0.8   |  |  |
| -2.14 | -2.22 | -1.05 |  |  |
| -2.55 | -3.33 | -1.91 |  |  |
| 4.11  | 1.52  | -1.14 |  |  |
| 1.75  | 2.11  | 0.68  |  |  |

|        |       |       |  |  |
|--------|-------|-------|--|--|
| 1.42   | -1.33 | -2.46 |  |  |
| 1.38   | 2.65  | 1.56  |  |  |
| -3.25  | 1     | 2.07  |  |  |
| -3.96  | -1.98 | -0.61 |  |  |
| -4.38  | -1.87 | -0.36 |  |  |
| -4.71  | -1.34 | 0.27  |  |  |
| -1     | 3.75  | 1.09  |  |  |
| -1.09  | 3.4   | 0.86  |  |  |
| -1.2   | 0.01  | -2.39 |  |  |
| -1.67  | 0.35  | -1.57 |  |  |
| -1.92  | -2.28 | -4    |  |  |
| -1.98  | 2.67  | 0.99  |  |  |
| -2.1   | 0.86  | -0.73 |  |  |
| -2.24  | -5.7  | -7.2  |  |  |
| -26.54 | -3.23 | -1.16 |  |  |
| 1.39   | 4.43  | 1.77  |  |  |
| 1.2    | 0.8   | -1.64 |  |  |
| 1.08   | -2.46 | -4.76 |  |  |
| 1.08   | 0.92  | -1.37 |  |  |
| 1.08   | 0.57  | -1.72 |  |  |
| 1.07   | -1.54 | -3.82 |  |  |
| -1.05  | 4.41  | 2.3   |  |  |
| -1.1   | 0.73  | -1.31 |  |  |
| -1.18  | -0.51 | -2.45 |  |  |
| -1.21  | 0.66  | -1.24 |  |  |
| -1.24  | 0.16  | -1.71 |  |  |
| -1.24  | 1.02  | -0.85 |  |  |
| -1.34  | 2.45  | 0.69  |  |  |
| -1.48  | 2.54  | 0.92  |  |  |
| -1.5   | -2.53 | -4.13 |  |  |
| -1.53  | -1.58 | -3.15 |  |  |
| -1.64  | -0.73 | -2.2  |  |  |
| -1.71  | -3.11 | -4.51 |  |  |
| -1.84  | -1.85 | -3.15 |  |  |
| -1.91  | -2.43 | -3.67 |  |  |
| -2.21  | -1.18 | -2.22 |  |  |
| -2.22  | -2.93 | -3.96 |  |  |
| -2.24  | 1.14  | 0.13  |  |  |
| -9.66  | -0.28 | 0.81  |  |  |
| -10.04 | -0.89 | 0.26  |  |  |
| -10.75 | -0.45 | 0.79  |  |  |
| -11.06 | -0.67 | 0.61  |  |  |
| -12.25 | -0.38 | 1.05  |  |  |
| -12.4  | -0.73 | 0.72  |  |  |
| -12.96 | -0.03 | 1.49  |  |  |
| -13.08 | 0.85  | 2.38  |  |  |
| -13.32 | 1.24  | 2.8   |  |  |
| -14.48 | -2.8  | -1.12 |  |  |
| -17.52 | -1.37 | 0.58  |  |  |
| 16.99  | 2.28  | -0.38 |  |  |
| 14.17  | 2.57  | 0.17  |  |  |
| 11.63  | -0.13 | -2.25 |  |  |
| 10.92  | 3.02  | 0.99  |  |  |
| 10.44  | 0.13  | -1.82 |  |  |
| 8.6    | 3.12  | 1.45  |  |  |
| 6.7    | 2.13  | 0.81  |  |  |
| 5.53   | 1.2   | 0.16  |  |  |
| 1.31   | 0.91  | 1.95  |  |  |

|        |       |       |  |  |
|--------|-------|-------|--|--|
| 1.3    | 0.88  | 1.93  |  |  |
| 1.29   | 0.07  | 1.13  |  |  |
| 1.29   | -0.98 | 0.09  |  |  |
| 1.29   | -1.75 | -0.68 |  |  |
| 1.28   | 0.31  | 1.38  |  |  |
| 1.26   | 0.57  | 1.66  |  |  |
| 1.26   | -0.42 | 0.66  |  |  |
| 1.21   | -0.62 | 0.52  |  |  |
| 1.2    | -1.1  | 0.06  |  |  |
| 1.19   | -0.25 | 0.93  |  |  |
| 1.17   | -0.63 | 0.58  |  |  |
| 1.16   | 0.72  | 1.94  |  |  |
| 1.13   | -2.23 | -0.97 |  |  |
| 1.11   | 0.83  | 2.1   |  |  |
| 1.08   | 1.09  | 2.41  |  |  |
| 1.06   | -1.43 | -0.09 |  |  |
| 1.06   | 1.27  | 2.61  |  |  |
| 1.05   | -0.09 | 1.27  |  |  |
| 1.02   | -2.07 | -0.68 |  |  |
| -1.01  | -0.35 | 1.09  |  |  |
| -1.03  | 0.01  | 1.48  |  |  |
| -1.05  | -2.66 | -1.16 |  |  |
| -1.05  | -0.05 | 1.45  |  |  |
| -1.09  | -0.61 | 0.94  |  |  |
| -1.13  | -0.81 | 0.79  |  |  |
| -1.24  | 0.26  | 1.99  |  |  |
| -1.24  | 0.25  | 1.98  |  |  |
| -1.26  | -2.06 | -0.3  |  |  |
| -1.27  | 0.56  | 2.32  |  |  |
| -1.28  | -0.77 | 1.01  |  |  |
| -1.3   | 1.28  | 3.08  |  |  |
| -1.31  | -3.21 | -1.4  |  |  |
| -1.35  | -1.58 | 0.28  |  |  |
| -1.44  | 0.88  | 2.83  |  |  |
| -1.44  | -0.3  | 1.65  |  |  |
| -1.56  | -3.71 | -1.64 |  |  |
| -1.58  | 1.6   | 3.69  |  |  |
| -1.72  | -1.86 | 0.35  |  |  |
| -1.76  | -4    | -1.77 |  |  |
| -1.88  | -1    | 1.34  |  |  |
| -1.96  | -3.57 | -1.16 |  |  |
| 8.18   | 2.72  | 0.06  |  |  |
| 4      | 3.43  | 1.81  |  |  |
| 3.46   | 2.4   | 0.98  |  |  |
| 2.84   | -3.91 | -6.57 |  |  |
| 2.1    | -4.91 | -7.13 |  |  |
| 1.49   | -3.51 | -5.24 |  |  |
| 1.43   | -4.88 | -6.55 |  |  |
| 1.34   | -6.46 | -8.03 |  |  |
| 1.27   | -2.73 | -4.24 |  |  |
| -1.04  | -3.34 | -4.44 |  |  |
| -5.28  | -5.31 | -4.07 |  |  |
| -5.62  | -5.35 | -4.02 |  |  |
| -5.96  | -7.42 | -6    |  |  |
| -5.95  | -8.35 | -6.93 |  |  |
| -7.2   | -8.41 | -6.72 |  |  |
| -7.92  | -7.41 | -5.58 |  |  |
| -17.49 | -8.84 | -5.87 |  |  |

|       |       |       |  |  |
|-------|-------|-------|--|--|
| -1.56 | -2.3  | -4.95 |  |  |
| -2.25 | 1.09  | -1.04 |  |  |
| -2.87 | -0.59 | -2.37 |  |  |
| -4.71 | -0.14 | -1.2  |  |  |
| 6.65  | 0.66  | -1.99 |  |  |
| 2.94  | -0.85 | -2.32 |  |  |
| -2.55 | -3.66 | -2.23 |  |  |
| -2.73 | -1.7  | -0.18 |  |  |
| 4.11  | -1.61 | -4.27 |  |  |
| 2.59  | -2.91 | -4.9  |  |  |
| 2.23  | -2.57 | -4.33 |  |  |
| 1.71  | -1.88 | -3.26 |  |  |
| 1.63  | -1.87 | -3.18 |  |  |
| 1.42  | -2.1  | -3.22 |  |  |
| 1.32  | 0.48  | -0.54 |  |  |
| 77.87 | -1.05 | -3.7  |  |  |
| 27.78 | -0.44 | -1.6  |  |  |
| 25.51 | 0.49  | -0.55 |  |  |
| 4.59  | -0.1  | 1.34  |  |  |
| 4.03  | -1.29 | 0.33  |  |  |
| 2.97  | -1.36 | 0.7   |  |  |
| 1.69  | -2.3  | 0.57  |  |  |
| 1.68  | -5.65 | -2.77 |  |  |
| 19.95 | 1.3   | -1.35 |  |  |
| 12.94 | 2.07  | 0.04  |  |  |
| 11.57 | 0.61  | -1.26 |  |  |
| 11.05 | 0.19  | -1.6  |  |  |
| 9.64  | -0.54 | -2.14 |  |  |
| 9.23  | -0.08 | -1.62 |  |  |
| 8.72  | 0.64  | -0.82 |  |  |
| 8.14  | 0     | -1.36 |  |  |
| 7.99  | -0.46 | -1.79 |  |  |
| 6.85  | 0.19  | -0.92 |  |  |
| 1.52  | -1.61 | -0.54 |  |  |
| 1.49  | -0.53 | 0.57  |  |  |
| 1.46  | 0.61  | 1.73  |  |  |
| 1.46  | 0.06  | 1.18  |  |  |
| 1.44  | -0.3  | 0.84  |  |  |
| 1.43  | 0.93  | 2.08  |  |  |
| 1.41  | 1.13  | 2.31  |  |  |
| 1.4   | 2.57  | 3.75  |  |  |
| 1.37  | -1.53 | -0.3  |  |  |
| 1.31  | -0.95 | 0.33  |  |  |
| 1.31  | -1.52 | -0.23 |  |  |
| 1.3   | -1.41 | -0.12 |  |  |
| 1.16  | -1.51 | -0.06 |  |  |
| 1.05  | -0.44 | 1.16  |  |  |
| 1.05  | -1.25 | 0.34  |  |  |
| -1.13 | -2.88 | -1.02 |  |  |
| -1.18 | -2.75 | -0.84 |  |  |
| -1.29 | 2.42  | 4.46  |  |  |
| -1.46 | -3.59 | -1.37 |  |  |
| -1.56 | -0.62 | 1.69  |  |  |
| -2.07 | -3.25 | -0.53 |  |  |
| -2.21 | -5.21 | -2.4  |  |  |
| 7.3   | -1.73 | -4.37 |  |  |
| 5.04  | -0.92 | -3.03 |  |  |
| 4.08  | -1.07 | -2.87 |  |  |

|        |       |       |  |  |
|--------|-------|-------|--|--|
| 3.38   | -1.1  | -2.64 |  |  |
| 3.33   | 0.01  | -1.5  |  |  |
| 3.12   | -0.21 | -1.62 |  |  |
| 2.81   | -3.75 | -5.01 |  |  |
| 2.72   | -2.45 | -3.67 |  |  |
| 2.67   | 4.58  | 3.39  |  |  |
| 2.36   | 0.55  | -0.47 |  |  |
| -1.84  | -0.59 | 0.51  |  |  |
| 4.79   | -3.19 | -5.83 |  |  |
| 2.59   | -2.58 | -4.33 |  |  |
| 2      | -1.72 | -3.1  |  |  |
| -3.12  | -2.94 | -1.68 |  |  |
| 10.49  | 1.84  | -0.8  |  |  |
| 4.06   | -0.07 | -1.34 |  |  |
| 2.1    | -1.22 | -3.86 |  |  |
| 1.19   | 0.06  | -1.76 |  |  |
| 1.08   | -4.48 | -6.15 |  |  |
| 1.01   | -4.19 | -5.77 |  |  |
| -1.01  | -1.7  | -3.25 |  |  |
| -1.04  | -2.45 | -3.96 |  |  |
| -1.11  | 5.62  | 4.21  |  |  |
| -1.13  | -3.39 | -4.78 |  |  |
| -1.39  | 0.36  | -0.73 |  |  |
| -1.4   | 3.83  | 2.75  |  |  |
| -6.01  | -2.36 | -1.34 |  |  |
| -7.05  | -3.76 | -2.51 |  |  |
| -7.36  | -2.32 | -1.01 |  |  |
| -8.26  | -4.22 | -2.74 |  |  |
| -10.52 | -4.09 | -2.25 |  |  |
| 1.24   | 4.54  | 1.91  |  |  |
| 1.06   | 5.85  | 3.43  |  |  |
| 1.05   | 0.2   | -2.2  |  |  |
| 1.03   | -0.83 | -3.2  |  |  |
| 1.03   | -3.34 | -5.71 |  |  |
| -1.23  | 2.65  | 0.63  |  |  |
| -1.25  | -0.63 | -2.62 |  |  |
| -1.4   | 2.43  | 0.59  |  |  |
| -1.92  | 0.11  | -1.28 |  |  |
| -2.05  | 1.24  | -0.05 |  |  |
| -10.15 | -3.11 | -2.09 |  |  |
| -11.57 | 0.09  | 1.3   |  |  |
| -15.69 | -2.89 | -1.24 |  |  |
| -20.12 | -2.92 | -0.91 |  |  |
| 13.12  | 0.6   | -2.04 |  |  |
| 5.14   | 0.39  | -0.89 |  |  |
| 4.65   | 1.13  | -0.01 |  |  |
| 4.62   | 0.1   | -1.03 |  |  |
| 4.33   | 0.74  | -0.3  |  |  |
| 1      | -0.29 | 0.79  |  |  |
| -1.01  | 0.17  | 1.26  |  |  |
| -1.07  | -0.81 | 0.37  |  |  |
| -1.15  | -2.08 | -0.8  |  |  |
| -1.56  | 2.04  | 3.76  |  |  |
| 6.56   | 1.71  | -0.92 |  |  |
| 2.61   | 0.72  | -0.59 |  |  |
| 2.37   | -1.89 | -3.05 |  |  |
| 2.3    | -0.05 | -1.18 |  |  |
| 2.2    | 2.54  | 1.49  |  |  |

|        |       |       |  |  |
|--------|-------|-------|--|--|
| 3.71   | -1.21 | -3.84 |  |  |
| 1.91   | 1.57  | -0.1  |  |  |
| 1.72   | -1.98 | -3.5  |  |  |
| 1.46   | -1.65 | -2.94 |  |  |
| 1.27   | -2.79 | -3.88 |  |  |
| 1.21   | -0.67 | -1.69 |  |  |
| 1.21   | -0.67 | -1.69 |  |  |
| -3.73  | -0.15 | 1.01  |  |  |
| -5.64  | -1.97 | -0.21 |  |  |
| 7.43   | 1.61  | -1.02 |  |  |
| 6.32   | -0.42 | -2.82 |  |  |
| 5.33   | -0.09 | -2.24 |  |  |
| 5.25   | 1.75  | -0.38 |  |  |
| 5.14   | 2.2   | 0.11  |  |  |
| 4.71   | 1.48  | -0.49 |  |  |
| 4.51   | -0.27 | -2.18 |  |  |
| 4.39   | 0.4   | -1.47 |  |  |
| 3.67   | -1.04 | -2.65 |  |  |
| 3.35   | 0.83  | -0.65 |  |  |
| 3.22   | 0.23  | -1.2  |  |  |
| 3.17   | 0.91  | -0.49 |  |  |
| 3.18   | 0.11  | -1.29 |  |  |
| 2.91   | 0.76  | -0.52 |  |  |
| 2.87   | 0.95  | -0.31 |  |  |
| 2.71   | 0.97  | -0.21 |  |  |
| 5.83   | -0.64 | -3.27 |  |  |
| 2.17   | 4.95  | 3.75  |  |  |
| 1.9    | 1.46  | 0.44  |  |  |
| -2.14  | -0.42 | 0.6   |  |  |
| -2.16  | -0.41 | 0.62  |  |  |
| -2.21  | 0.03  | 1.08  |  |  |
| -2.29  | -1.63 | -0.53 |  |  |
| -2.31  | 0.22  | 1.34  |  |  |
| -2.31  | -2.2  | -1.08 |  |  |
| -2.41  | 0.68  | 1.86  |  |  |
| -2.5   | 0.65  | 1.88  |  |  |
| -3.36  | -2.14 | -0.48 |  |  |
| -3.7   | -1.76 | 0.04  |  |  |
| -3.79  | 0.28  | 2.11  |  |  |
| -3.93  | -1.37 | 0.52  |  |  |
| -4.01  | -1.75 | 0.17  |  |  |
| -4.65  | -2.95 | -0.82 |  |  |
| -5.23  | -2.89 | -0.59 |  |  |
| -6.18  | -1.9  | 0.64  |  |  |
| -7.1   | -1.26 | 1.49  |  |  |
| -7.21  | -1.43 | 1.33  |  |  |
| -10.4  | -3.59 | -0.3  |  |  |
| -15.96 | -2.12 | 1.79  |  |  |
| 4.06   | 1.26  | -1.37 |  |  |
| 1.65   | 1.54  | 0.22  |  |  |
| 1.52   | 0.48  | -0.73 |  |  |
| -3.51  | -3.34 | -2.14 |  |  |
| -3.58  | -1.98 | -0.74 |  |  |
| 5      | -2.38 | -5    |  |  |
| 3.64   | 3.35  | 1.18  |  |  |
| 2.2    | -0.87 | -2.31 |  |  |
| 2.05   | -5.64 | -6.98 |  |  |
| -2.62  | -4.76 | -3.68 |  |  |

|       |       |       |  |  |
|-------|-------|-------|--|--|
| -4.58 | -5.05 | -3.16 |  |  |
| 2     | -3.88 | -6.51 |  |  |
| 1.26  | -2.79 | -4.74 |  |  |
| -1.21 | -4.83 | -6.17 |  |  |
| -1.26 | -0.47 | -1.76 |  |  |
| -1.3  | -3.87 | -5.11 |  |  |
| -6.34 | -2.62 | -1.58 |  |  |
| 3.77  | -0.99 | -3.62 |  |  |
| 2.88  | -2.75 | -4.99 |  |  |
| 1.53  | 0.14  | -1.18 |  |  |
| 1.29  | 1.82  | 0.74  |  |  |
| 1.28  | -1.94 | -3    |  |  |
| 1.25  | -1.37 | -2.4  |  |  |
| 1.24  | -1.13 | -2.15 |  |  |
| -6.51 | -3.07 | -1.08 |  |  |
| 2.42  | 2.15  | -0.47 |  |  |
| 1.46  | 1.35  | -0.54 |  |  |
| 1.33  | -1.22 | -2.98 |  |  |
| 1.22  | -1.43 | -3.07 |  |  |
| 1.21  | 1.28  | -0.34 |  |  |
| 1.04  | 2     | 0.59  |  |  |
| 1.03  | -0.78 | -2.17 |  |  |
| 1.03  | -0.08 | -1.47 |  |  |
| -1.06 | 2.49  | 1.23  |  |  |
| -1.22 | 2.45  | 1.39  |  |  |
| -5.24 | -1.44 | -0.4  |  |  |
| -6.58 | 0.31  | 1.68  |  |  |
| 3.35  | 0.45  | -2.17 |  |  |
| 2.45  | -2.28 | -4.45 |  |  |
| 1.58  | -3.64 | -5.18 |  |  |
| 1.58  | -1.24 | -2.78 |  |  |
| 1.24  | 0.83  | -0.36 |  |  |
| 1.17  | -1.97 | -3.07 |  |  |
| 1.16  | 3.35  | 2.26  |  |  |
| 1.15  | -0.53 | -1.61 |  |  |
| 1.11  | 1.57  | 0.54  |  |  |
| 1.11  | -0.29 | -1.32 |  |  |
| -5.52 | -3.57 | -1.98 |  |  |
| 27.54 | 0.83  | -1.79 |  |  |
| 22.4  | 0.06  | -2.26 |  |  |
| 16.91 | 1.2   | -0.72 |  |  |
| 16.78 | 0.31  | -1.6  |  |  |
| 15.63 | 2.69  | 0.89  |  |  |
| 12.87 | 2.54  | 1.02  |  |  |
| 12.62 | 0.95  | -0.55 |  |  |
| 11.63 | 2.07  | 0.69  |  |  |
| 10.31 | 1.86  | 0.66  |  |  |
| 10.27 | 1     | -0.2  |  |  |
| 9.95  | -1.82 | -2.98 |  |  |
| 9.73  | -2.76 | -3.88 |  |  |
| 2.12  | -1.17 | -0.09 |  |  |
| 2.1   | -0.75 | 0.35  |  |  |
| 2     | -1.83 | -0.67 |  |  |
| 1.87  | -2.19 | -0.93 |  |  |
| 1.85  | 0.42  | 1.69  |  |  |
| 1.6   | -1.57 | -0.08 |  |  |
| 1.46  | 0.03  | 1.65  |  |  |
| 1.45  | -1.69 | -0.06 |  |  |



|        |       |       |  |  |
|--------|-------|-------|--|--|
| 1.34   | -4.03 | -2.28 |  |  |
| 1.01   | 1.6   | 3.76  |  |  |
| 1      | -4.59 | -2.44 |  |  |
| -1.02  | -0.33 | 1.86  |  |  |
| -1.38  | -2.97 | -0.34 |  |  |
| 1.78   | -2.15 | -4.77 |  |  |
| 1.49   | -0.16 | -2.53 |  |  |
| 1.15   | -2.53 | -4.52 |  |  |
| 1.05   | -0.81 | -2.67 |  |  |
| -1.01  | -3.42 | -5.19 |  |  |
| -1.06  | -6.66 | -8.36 |  |  |
| -1.15  | -2.6  | -4.19 |  |  |
| -1.15  | 2.12  | 0.53  |  |  |
| -1.51  | -0.81 | -2.01 |  |  |
| -8.43  | -4.89 | -3.6  |  |  |
| 4.62   | 3.78  | 1.17  |  |  |
| 1.88   | 1.1   | -0.22 |  |  |
| 1.77   | 4.47  | 3.23  |  |  |
| -3.21  | -1.29 | -0.02 |  |  |
| 5.59   | -4.2  | -6.81 |  |  |
| 2.29   | -5.53 | -6.85 |  |  |
| 2.18   | -5.13 | -6.38 |  |  |
| 1.89   | -3.78 | -4.83 |  |  |
| -4.78  | -7.22 | -5.09 |  |  |
| -5.35  | -6.38 | -4.08 |  |  |
| 1.6    | -1.44 | -4.05 |  |  |
| 1.49   | 1.54  | -0.97 |  |  |
| 1.26   | -3.1  | -5.36 |  |  |
| 1.11   | -3.28 | -5.36 |  |  |
| 1.09   | 0.23  | -1.82 |  |  |
| -1.06  | -1.99 | -3.84 |  |  |
| -1.17  | -0.54 | -2.24 |  |  |
| -1.18  | 0.5   | -1.2  |  |  |
| -1.31  | -2.3  | -3.84 |  |  |
| -1.37  | 1.9   | 0.43  |  |  |
| -1.43  | 0.09  | -1.33 |  |  |
| -1.48  | 0.28  | -1.09 |  |  |
| -1.57  | -3.56 | -4.83 |  |  |
| -1.6   | 1.72  | 0.47  |  |  |
| -1.69  | -0.21 | -1.38 |  |  |
| -1.75  | -0.31 | -1.43 |  |  |
| -1.75  | 0.44  | -0.68 |  |  |
| -10.3  | -4.33 | -2.89 |  |  |
| -1.03  | 0.31  | -2.3  |  |  |
| -1.18  | 3.24  | 0.82  |  |  |
| -1.33  | -5.32 | -7.57 |  |  |
| -1.6   | -3.78 | -5.76 |  |  |
| -1.67  | -5.18 | -7.09 |  |  |
| -1.83  | -5.68 | -7.46 |  |  |
| -2.14  | -4.54 | -6.1  |  |  |
| -2.46  | -0.33 | -1.69 |  |  |
| -2.77  | -1.39 | -2.58 |  |  |
| -19.98 | -4.4  | -2.74 |  |  |
| 4.45   | -2.19 | -4.8  |  |  |
| 1.54   | -0.91 | -1.99 |  |  |
| 2.26   | 0.74  | -1.87 |  |  |
| 2.26   | 1.61  | -0.99 |  |  |
| 1.42   | 1.76  | -0.18 |  |  |

|        |       |       |  |  |
|--------|-------|-------|--|--|
| 1.19   | 1.26  | -0.42 |  |  |
| 1.18   | 3.08  | 1.41  |  |  |
| 1.11   | 0.73  | -0.85 |  |  |
| 1.09   | -0.73 | -2.28 |  |  |
| 1.05   | -1.75 | -3.25 |  |  |
| -1.04  | 4.41  | 3.04  |  |  |
| -1.04  | -0.78 | -2.15 |  |  |
| -1.1   | 0.35  | -0.95 |  |  |
| -1.19  | -2.41 | -3.59 |  |  |
| -1.27  | -1.14 | -2.23 |  |  |
| -5.95  | -0.3  | 0.84  |  |  |
| 6.02   | 5.12  | 2.52  |  |  |
| 1.99   | -0.19 | -1.19 |  |  |
| 1.98   | -0.95 | -1.95 |  |  |
| -2.11  | -1.71 | -0.64 |  |  |
| -2.3   | -0.78 | 0.41  |  |  |
| 1.97   | -1.05 | -3.66 |  |  |
| 1.68   | -2.11 | -4.48 |  |  |
| 1.38   | 2.07  | -0.02 |  |  |
| 1.34   | 2.38  | 0.33  |  |  |
| 1.22   | 4.62  | 2.71  |  |  |
| 1.14   | -0.9  | -2.72 |  |  |
| 1.09   | 0.8   | -0.95 |  |  |
| 1.07   | -0.19 | -1.91 |  |  |
| 1.06   | 2.1   | 0.39  |  |  |
| 1.05   | -0.53 | -2.22 |  |  |
| 1.04   | 1.17  | -0.5  |  |  |
| 1.02   | 1.09  | -0.57 |  |  |
| 1.01   | 1.72  | 0.08  |  |  |
| -1.05  | -2.65 | -4.2  |  |  |
| -1.14  | 0.2   | -1.24 |  |  |
| -1.2   | -0.93 | -2.3  |  |  |
| -1.19  | -2.78 | -4.15 |  |  |
| -1.2   | 0.5   | -0.86 |  |  |
| -1.22  | -1.37 | -2.71 |  |  |
| -1.24  | 1.18  | -0.14 |  |  |
| -1.27  | -1.74 | -3.02 |  |  |
| -1.33  | 3.36  | 2.14  |  |  |
| -1.36  | 0.32  | -0.86 |  |  |
| -1.53  | -0.49 | -1.5  |  |  |
| -1.54  | -1.71 | -2.71 |  |  |
| -7.49  | -1.72 | -0.44 |  |  |
| -8.19  | -2.07 | -0.66 |  |  |
| -13.82 | -2.45 | -0.29 |  |  |
| 1.74   | -3.85 | -6.45 |  |  |
| 1.43   | -5.29 | -7.61 |  |  |
| 1.16   | -0.93 | -2.95 |  |  |
| 1.13   | -3.8  | -5.78 |  |  |
| 1.11   | -1.14 | -3.09 |  |  |
| 1.08   | -3.52 | -5.43 |  |  |
| 1.04   | -3.23 | -5.09 |  |  |
| 1.02   | -2.22 | -4.04 |  |  |
| -1.02  | 4.12  | 2.34  |  |  |
| -1.09  | -5.14 | -6.83 |  |  |
| -1.1   | -1.27 | -2.93 |  |  |
| -1.23  | 1.85  | 0.35  |  |  |
| -1.26  | -2.58 | -4.04 |  |  |
| -1.33  | 0.76  | -0.64 |  |  |

|        |       |       |  |  |
|--------|-------|-------|--|--|
| -1.35  | -6.08 | -7.45 |  |  |
| -1.48  | -4.96 | -6.19 |  |  |
| -1.5   | -1.23 | -2.44 |  |  |
| -1.51  | -2.02 | -3.23 |  |  |
| -1.67  | -5.67 | -6.73 |  |  |
| -1.69  | -1.61 | -2.66 |  |  |
| 4.64   | -0.73 | -3.32 |  |  |
| 1.58   | -1.75 | -2.79 |  |  |
| -2.73  | -4.88 | -3.82 |  |  |
| -2.96  | -2.93 | -1.74 |  |  |
| 2.23   | -2.01 | -4.61 |  |  |
| 1.06   | 7.33  | 5.81  |  |  |
| 1.02   | 0.3   | -1.17 |  |  |
| -1.01  | 0.25  | -1.17 |  |  |
| -1.03  | 1.4   | 0.01  |  |  |
| -1.16  | -3.21 | -4.43 |  |  |
| -1.18  | 1.52  | 0.32  |  |  |
| -1.23  | 1.48  | 0.34  |  |  |
| -1.26  | -0.86 | -1.96 |  |  |
| -5.46  | -2.36 | -1.35 |  |  |
| -5.62  | -1.86 | -0.81 |  |  |
| -6.29  | -3.09 | -1.87 |  |  |
| -7.91  | -2.51 | -0.96 |  |  |
| -8.27  | -1.29 | 0.33  |  |  |
| -8.42  | -1.89 | -0.25 |  |  |
| -8.41  | -2.62 | -0.98 |  |  |
| -8.53  | -2.68 | -1.02 |  |  |
| -10.48 | -2.17 | -0.22 |  |  |
| -10.88 | 0.26  | 2.27  |  |  |
| -13.47 | -3    | -0.68 |  |  |
| -19.53 | -0.57 | 2.28  |  |  |
| -23.04 | -2.56 | 0.53  |  |  |
| -29.8  | -2.1  | 1.37  |  |  |
| 4.32   | 0.41  | -2.18 |  |  |
| 2.89   | -0.09 | -2.11 |  |  |
| 1.96   | 0.41  | -1.04 |  |  |
| 1.74   | -1.48 | -2.76 |  |  |
| 1.68   | -0.88 | -2.11 |  |  |
| 1.62   | -2.36 | -3.54 |  |  |
| 1.46   | -0.56 | -1.58 |  |  |
| -3.08  | -2.77 | -1.63 |  |  |
| -3.1   | -2.49 | -1.34 |  |  |
| 2.86   | 0.48  | -2.11 |  |  |
| 2.21   | 1.64  | -0.58 |  |  |
| 2.06   | 0.59  | -1.53 |  |  |
| 1.87   | 0.93  | -1.05 |  |  |
| 1.5    | 4.82  | 3.16  |  |  |
| 1.47   | 2.12  | 0.49  |  |  |
| 1.43   | 1.37  | -0.22 |  |  |
| 1.3    | -0.6  | -2.05 |  |  |
| 1.24   | 6.15  | 4.76  |  |  |
| 1.23   | 4.47  | 3.09  |  |  |
| 1.2    | 1.42  | 0.08  |  |  |
| 1.16   | -1.65 | -2.93 |  |  |
| 1.15   | 0.61  | -0.67 |  |  |
| 1.14   | 4.06  | 2.8   |  |  |
| 1.11   | 1.34  | 0.11  |  |  |
| 1.1    | 4.76  | 3.54  |  |  |

|       |       |       |  |  |
|-------|-------|-------|--|--|
| 1.09  | 4.91  | 3.71  |  |  |
| 1.08  | 1.06  | -0.12 |  |  |
| 1.08  | 4.78  | 3.6   |  |  |
| 1.05  | 1.33  | 0.18  |  |  |
| 1.05  | 2.74  | 1.6   |  |  |
| 1.02  | 5.17  | 4.07  |  |  |
| -1.01 | 0.35  | -0.71 |  |  |
| -1.03 | 0.99  | -0.05 |  |  |
| -1.03 | -2.06 | -3.1  |  |  |
| -1.04 | -1.23 | -2.26 |  |  |
| -1.04 | 2.71  | 1.69  |  |  |
| -4.92 | -2.04 | -0.82 |  |  |
| -8.18 | -1.16 | 0.79  |  |  |
| -9.87 | -1.91 | 0.32  |  |  |
| 5.38  | 0.74  | -1.85 |  |  |
| 2.19  | 0.38  | -0.92 |  |  |
| 2.18  | -1.32 | -2.6  |  |  |
| 2.18  | 2.4   | 1.12  |  |  |
| 2.01  | 1.84  | 0.66  |  |  |
| -2.73 | -1.15 | 0.13  |  |  |
| -2.75 | -1.36 | -0.07 |  |  |
| 1.92  | 0.84  | -1.75 |  |  |
| 1.61  | 2.5   | 0.17  |  |  |
| 1.43  | -0.95 | -3.12 |  |  |
| 1.42  | 1.16  | -1    |  |  |
| 1.32  | -0.8  | -2.84 |  |  |
| 1.19  | 0.33  | -1.56 |  |  |
| 1.17  | -1.28 | -3.15 |  |  |
| 1.16  | 0.75  | -1.11 |  |  |
| 1.14  | 1.85  | 0.02  |  |  |
| 1.11  | 3.28  | 1.48  |  |  |
| 1.11  | 1.16  | -0.63 |  |  |
| 1.09  | -1.84 | -3.61 |  |  |
| 1.08  | 1.17  | -0.59 |  |  |
| 1.07  | 1.38  | -0.37 |  |  |
| 1.04  | -1.81 | -3.51 |  |  |
| 1.03  | 5.85  | 4.16  |  |  |
| -1.05 | -1.41 | -2.97 |  |  |
| -1.08 | -0.86 | -2.39 |  |  |
| -1.09 | 0.82  | -0.7  |  |  |
| -1.09 | -0.32 | -1.84 |  |  |
| -1.1  | 0.25  | -1.25 |  |  |
| -1.12 | -2.02 | -3.5  |  |  |
| -1.14 | 0.65  | -0.8  |  |  |
| -1.16 | 1.57  | 0.15  |  |  |
| -1.18 | -1.14 | -2.55 |  |  |
| -1.22 | -2.42 | -3.77 |  |  |
| -1.24 | -1.6  | -2.93 |  |  |
| -1.26 | -2.67 | -3.97 |  |  |
| -1.28 | -0.08 | -1.37 |  |  |
| -1.28 | -0.59 | -1.87 |  |  |
| -1.29 | -0.14 | -1.42 |  |  |
| -1.29 | 0.07  | -1.21 |  |  |
| -1.3  | -1.85 | -3.11 |  |  |
| -1.33 | -1.4  | -2.63 |  |  |
| -1.36 | -2.43 | -3.63 |  |  |
| -1.4  | -1.38 | -2.55 |  |  |
| -1.45 | -3.86 | -4.96 |  |  |

|       |       |       |  |  |
|-------|-------|-------|--|--|
| -1.49 | -0.15 | -1.22 |  |  |
| -1.54 | 0.05  | -0.98 |  |  |
| -1.55 | -0.7  | -1.71 |  |  |
| -7.23 | -3.45 | -2.24 |  |  |
| 1.94  | 1.5   | -1.08 |  |  |
| 1.54  | 0.72  | -1.53 |  |  |
| 1.3   | 2.83  | 0.82  |  |  |
| 1.14  | 8.38  | 6.56  |  |  |
| 1.13  | -1.58 | -3.38 |  |  |
| -1    | 3.9   | 2.27  |  |  |
| -1.02 | 4.25  | 2.66  |  |  |
| -1.12 | 0.86  | -0.61 |  |  |
| -1.16 | 2.03  | 0.62  |  |  |
| -1.19 | 3.43  | 2.05  |  |  |
| -1.23 | 3.02  | 1.69  |  |  |
| -1.32 | -1.58 | -2.81 |  |  |
| -1.43 | 1.25  | 0.14  |  |  |
| -1.43 | 1.13  | 0.02  |  |  |
| -6.2  | -1.04 | -0.04 |  |  |
| -6.69 | 0.45  | 1.56  |  |  |
| 3.9   | -4.4  | -6.99 |  |  |
| -3.31 | -4.51 | -3.41 |  |  |
| -3.37 | -5.66 | -4.53 |  |  |
| 5.8   | -2.58 | -5.16 |  |  |
| 3.19  | -5.76 | -7.49 |  |  |
| 2.9   | -5.35 | -6.94 |  |  |
| 2.63  | -5.22 | -6.67 |  |  |
| 1.99  | -7.03 | -8.07 |  |  |
| 1.97  | -4.51 | -5.54 |  |  |
| 2.1   | -0.11 | -2.7  |  |  |
| 1.26  | -0.57 | -2.42 |  |  |
| 1.17  | -0.65 | -2.4  |  |  |
| 1.16  | 2.78  | 1.05  |  |  |
| 1.13  | -0.85 | -2.54 |  |  |
| 1.04  | -0.14 | -1.72 |  |  |
| 1.03  | 4.34  | 2.79  |  |  |
| -1.06 | 2.98  | 1.54  |  |  |
| -1.08 | 2.92  | 1.51  |  |  |
| -1.08 | -1.58 | -2.99 |  |  |
| -1.21 | -1.47 | -2.71 |  |  |
| -1.22 | -2.21 | -3.44 |  |  |
| -1.26 | 2.51  | 1.32  |  |  |
| -1.27 | 0.05  | -1.12 |  |  |
| -1.27 | 5.7   | 4.53  |  |  |
| -5.89 | -0.49 | 0.55  |  |  |
| -13.4 | -1.63 | 0.6   |  |  |
| 5.67  | -1.06 | -3.65 |  |  |
| -2.42 | -3.32 | -2.13 |  |  |
| -2.51 | -3.56 | -2.31 |  |  |
| -2.85 | -0.69 | 0.74  |  |  |
| 1.42  | -2.71 | -5.29 |  |  |
| 1.34  | -0.95 | -3.44 |  |  |
| 1.27  | -4.58 | -7    |  |  |
| 1.26  | -2.06 | -4.48 |  |  |
| 1.06  | -3.05 | -5.21 |  |  |
| -1.04 | -1.36 | -3.39 |  |  |
| -1.2  | -1.32 | -3.14 |  |  |
| -1.27 | -3.41 | -5.15 |  |  |

|        |       |       |  |  |
|--------|-------|-------|--|--|
| -1.42  | -4.39 | -5.96 |  |  |
| -1.52  | -1.99 | -3.46 |  |  |
| 2.59   | 1.93  | -0.65 |  |  |
| 2.26   | 2.32  | -0.06 |  |  |
| 1.51   | -3.01 | -4.81 |  |  |
| 1.24   | -2.41 | -3.93 |  |  |
| 1.18   | -2.11 | -3.56 |  |  |
| 1.17   | -3.11 | -4.55 |  |  |
| 1.07   | -1.96 | -3.27 |  |  |
| 1.02   | -1.45 | -2.69 |  |  |
| -1     | -3.39 | -4.6  |  |  |
| -1     | -3.84 | -5.04 |  |  |
| -1.02  | -2.88 | -4.07 |  |  |
| -1.02  | -0.33 | -1.51 |  |  |
| -1.04  | -2.1  | -3.25 |  |  |
| -1.11  | -3.29 | -4.35 |  |  |
| -1.15  | -1.6  | -2.61 |  |  |
| -1.15  | -1.82 | -2.83 |  |  |
| -8.27  | -1.53 | 0.31  |  |  |
| 5.02   | -0.34 | -2.93 |  |  |
| 2.08   | -2.38 | -3.69 |  |  |
| 1.9    | -0.6  | -1.78 |  |  |
| -2.67  | -2.23 | -1.07 |  |  |
| 2.21   | 6.1   | 3.52  |  |  |
| 2.04   | 2.32  | -0.14 |  |  |
| 1.21   | 3.68  | 1.97  |  |  |
| 1.18   | 0.37  | -1.3  |  |  |
| 1.16   | 2.14  | 0.49  |  |  |
| 1.13   | 1.32  | -0.29 |  |  |
| 1.12   | 1.51  | -0.09 |  |  |
| 1.04   | 2.65  | 1.16  |  |  |
| 1.01   | 2     | 0.55  |  |  |
| 1.01   | 2.46  | 1.02  |  |  |
| -1.02  | 0.89  | -0.52 |  |  |
| -1.07  | 6.58  | 5.25  |  |  |
| -1.17  | 0.88  | -0.33 |  |  |
| -1.22  | -1.39 | -2.54 |  |  |
| -1.23  | 1.14  | 0     |  |  |
| -1.26  | 1.63  | 0.53  |  |  |
| -1.33  | 0.59  | -0.44 |  |  |
| -5.75  | -0.58 | 0.51  |  |  |
| -6.47  | -1.23 | 0.03  |  |  |
| -8.54  | -1.6  | 0.05  |  |  |
| -10.72 | -1.92 | 0.06  |  |  |
| -15.02 | -2.21 | 0.27  |  |  |
| -21.74 | -2.29 | 0.72  |  |  |
| 8.35   | 0.99  | -1.59 |  |  |
| -1.46  | -3.85 | -2.82 |  |  |
| 2.25   | 1.56  | -1.01 |  |  |
| -1.01  | 5.13  | 3.74  |  |  |
| 19.29  | -0.28 | -2.85 |  |  |
| 13.82  | -1.51 | -3.59 |  |  |
| 9.58   | -0.04 | -1.6  |  |  |
| 8.99   | -0.87 | -2.34 |  |  |
| 1.32   | -0.19 | 1.1   |  |  |
| 1.29   | 0.34  | 1.68  |  |  |
| 1.28   | 0.46  | 1.81  |  |  |
| 1.22   | -1.7  | -0.28 |  |  |

|       |       |       |  |  |
|-------|-------|-------|--|--|
| 1.18  | -1.57 | -0.1  |  |  |
| 1.03  | -2.29 | -0.63 |  |  |
| -1.15 | -2.43 | -0.52 |  |  |
| -1.18 | -3.13 | -1.19 |  |  |
| -1.2  | 0.68  | 2.64  |  |  |
| -1.22 | -2.84 | -0.85 |  |  |
| -1.4  | -3.21 | -1.02 |  |  |
| 2.34  | 2.55  | -0.02 |  |  |
| 2.07  | 0.06  | -2.33 |  |  |
| 1.68  | -1.02 | -3.11 |  |  |
| 1.66  | -1.59 | -3.67 |  |  |
| 1.48  | 1.16  | -0.75 |  |  |
| 1.42  | -1.74 | -3.59 |  |  |
| 1.39  | -0.69 | -2.51 |  |  |
| 1.34  | -2.43 | -4.2  |  |  |
| 1.32  | -2.13 | -3.88 |  |  |
| 1.27  | -2.08 | -3.78 |  |  |
| 1.27  | -2.06 | -3.74 |  |  |
| 1.23  | -1.46 | -3.11 |  |  |
| 1.21  | -0.58 | -2.2  |  |  |
| 1.2   | -2.39 | -4    |  |  |
| 1.17  | -2.78 | -4.35 |  |  |
| 1.17  | -1.81 | -3.37 |  |  |
| 1.15  | -1.69 | -3.24 |  |  |
| 1.14  | -1.1  | -2.63 |  |  |
| 1.11  | -1.7  | -3.2  |  |  |
| 1.1   | -0.65 | -2.13 |  |  |
| 1.08  | 1.54  | 0.09  |  |  |
| 1.08  | -1.01 | -2.46 |  |  |
| 1.04  | -1.8  | -3.2  |  |  |
| 1.01  | 2.02  | 0.65  |  |  |
| -1.03 | -1.6  | -2.91 |  |  |
| -1.05 | 1.12  | -0.15 |  |  |
| -1.06 | 0.92  | -0.33 |  |  |
| -1.07 | -2.35 | -3.59 |  |  |
| -1.09 | -2.16 | -3.37 |  |  |
| -1.12 | -2.52 | -3.7  |  |  |
| -1.15 | -0.4  | -1.55 |  |  |
| -1.15 | -1.94 | -3.08 |  |  |
| -1.16 | -2.12 | -3.24 |  |  |
| -1.17 | -0.47 | -1.58 |  |  |
| -1.19 | -2.78 | -3.87 |  |  |
| -1.25 | -2.2  | -3.22 |  |  |
| -1.27 | 1.68  | 0.68  |  |  |
| -5.37 | -1.7  | -0.62 |  |  |
| 5.73  | -2.32 | -4.88 |  |  |
| 1.93  | -6.35 | -7.35 |  |  |
| -3.12 | -7.89 | -6.29 |  |  |
| 6.08  | -1.62 | -4.18 |  |  |
| 3.91  | -5.13 | -7.05 |  |  |
| -2.13 | -4.44 | -3.3  |  |  |
| -2.4  | -4.75 | -3.44 |  |  |
| -2.7  | -3.74 | -2.27 |  |  |
| 4.1   | -0.55 | -3.1  |  |  |
| 1.4   | -0.49 | -1.5  |  |  |
| 5.03  | -0.77 | -3.33 |  |  |
| 2.16  | 1.07  | -0.26 |  |  |
| 1.85  | 1.53  | 0.41  |  |  |

|        |       |       |  |  |
|--------|-------|-------|--|--|
| 1.74   | -1.84 | -2.87 |  |  |
| 1.74   | 2.08  | 1.05  |  |  |
| -2.36  | -2.95 | -1.94 |  |  |
| -2.69  | -2.24 | -1.04 |  |  |
| -2.73  | -2.29 | -1.07 |  |  |
| -3.08  | -2.07 | -0.67 |  |  |
| -3.11  | -3.73 | -2.32 |  |  |
| -3.14  | -3.88 | -2.45 |  |  |
| -5.11  | -2.58 | -0.45 |  |  |
| -1.07  | 3.08  | 0.52  |  |  |
| -14.12 | -1.42 | -0.25 |  |  |
| 3.31   | -3.41 | -5.96 |  |  |
| 1.52   | 1.37  | -0.06 |  |  |
| 1.38   | -3.33 | -4.63 |  |  |
| 1.35   | 1.69  | 0.43  |  |  |
| 1.34   | 1.25  | -0.01 |  |  |
| 1.28   | -4.67 | -5.85 |  |  |
| 1.22   | -2.2  | -3.32 |  |  |
| 1.2    | -0.19 | -1.28 |  |  |
| 1.15   | -2.44 | -3.46 |  |  |
| -4.09  | -5.07 | -3.87 |  |  |
| 4.34   | 1.83  | -0.72 |  |  |
| 2.56   | 1.07  | -0.72 |  |  |
| -3.12  | -2.01 | -0.8  |  |  |
| -8.95  | -2.03 | 0.7   |  |  |
| 2.33   | -0.25 | -2.8  |  |  |
| 1.06   | 1.3   | -0.12 |  |  |
| -1     | -1.97 | -3.29 |  |  |
| -1.03  | -2.35 | -3.63 |  |  |
| -1.04  | -1.52 | -2.79 |  |  |
| -1.15  | 1.3   | 0.17  |  |  |
| -1.22  | -1.05 | -2.1  |  |  |
| -8.13  | -1.28 | 0.42  |  |  |
| 3.28   | 5.7   | 3.15  |  |  |
| 2.41   | -0.18 | -2.29 |  |  |
| 2.08   | -0.96 | -2.86 |  |  |
| 1.96   | 1.81  | 0.01  |  |  |
| 1.75   | 1.67  | 0.03  |  |  |
| 1.71   | -1.11 | -2.72 |  |  |
| 1.64   | -1.27 | -2.82 |  |  |
| 1.63   | 1.08  | -0.46 |  |  |
| 1.57   | -0.05 | -1.54 |  |  |
| 1.48   | 0.9   | -0.51 |  |  |
| 1.38   | -0.32 | -1.62 |  |  |
| 1.29   | 2.26  | 1.05  |  |  |
| 1.29   | -0.78 | -1.98 |  |  |
| 1.26   | -1.32 | -2.49 |  |  |
| 1.2    | -0.78 | -1.89 |  |  |
| 1.19   | -1.22 | -2.31 |  |  |
| 1.16   | -1.65 | -2.69 |  |  |
| 1.15   | -0.29 | -1.32 |  |  |
| 1.13   | -1.27 | -2.27 |  |  |
| 1.12   | 1.2   | 0.21  |  |  |
| 3.65   | 2.82  | 0.27  |  |  |
| 1.4    | -0.25 | -1.42 |  |  |
| 1.29   | 1.76  | 0.71  |  |  |
| 1.25   | 2.61  | 1.61  |  |  |
| -3.33  | -0.73 | 0.32  |  |  |



|       |       |       |  |  |
|-------|-------|-------|--|--|
| -4.05 | -2.41 | -1.08 |  |  |
| -4.81 | -3.26 | -1.68 |  |  |
| -5.88 | -2.52 | -0.64 |  |  |
| -5.97 | -1.66 | 0.23  |  |  |
| -6.15 | -2.71 | -0.77 |  |  |
| -6.26 | -3.07 | -1.1  |  |  |
| -8.8  | -3.16 | -0.71 |  |  |
| 5.73  | -4.73 | -7.28 |  |  |
| -2.08 | -3.53 | -2.5  |  |  |
| -2.17 | -7.28 | -6.19 |  |  |
| -2.47 | -5.93 | -4.65 |  |  |
| 3.24  | -1.63 | -4.18 |  |  |
| 1.55  | -2.77 | -4.25 |  |  |
| 1.39  | 2.89  | 1.56  |  |  |
| 1.29  | 1.22  | 0.01  |  |  |
| 1.12  | 0.52  | -0.48 |  |  |
| 1.44  | -1.23 | -3.78 |  |  |
| 1.31  | -1.5  | -3.91 |  |  |
| 1.31  | -1.82 | -4.22 |  |  |
| 1.29  | 0.08  | -2.31 |  |  |
| 1.28  | 0.68  | -1.69 |  |  |
| 1.1   | 1.75  | -0.41 |  |  |
| 1.07  | -1.07 | -3.19 |  |  |
| -1    | 4.79  | 2.78  |  |  |
| -1.03 | 1.04  | -0.92 |  |  |
| -1.07 | 1.59  | -0.34 |  |  |
| -1.09 | -1.35 | -3.25 |  |  |
| -1.12 | 1.14  | -0.71 |  |  |
| -1.25 | 1.75  | 0.06  |  |  |
| -1.27 | -1.46 | -3.13 |  |  |
| -1.64 | -3.7  | -5    |  |  |
| -2    | -2.35 | -3.36 |  |  |
| 11.75 | -0.28 | -2.82 |  |  |
| 7.63  | 0.78  | -1.14 |  |  |
| 7.02  | -1.65 | -3.45 |  |  |
| 5.12  | -0.74 | -2.09 |  |  |
| 1.01  | -2.73 | -1.72 |  |  |
| -1.03 | -1.51 | -0.46 |  |  |
| -1.09 | -0.07 | 1.06  |  |  |
| -1.17 | -2.58 | -1.34 |  |  |
| 2.17  | -0.19 | -2.73 |  |  |
| 1.52  | -0.47 | -2.49 |  |  |
| 1.37  | 2.39  | 0.52  |  |  |
| 1.27  | -1.52 | -3.28 |  |  |
| 1.15  | 2.36  | 0.74  |  |  |
| 1.14  | -0.38 | -1.99 |  |  |
| 1.12  | 8.02  | 6.45  |  |  |
| -1.04 | 4.4   | 3.05  |  |  |
| -1.26 | 3.47  | 2.38  |  |  |
| -1.31 | -0.43 | -1.46 |  |  |
| -1.31 | -2.62 | -3.65 |  |  |
| -5.72 | -1.06 | 0.03  |  |  |
| 5.28  | 0.1   | -2.44 |  |  |
| -2.94 | -1.13 | 0.28  |  |  |
| -2.94 | -1.41 | 0.01  |  |  |
| 3.51  | 0.6   | -1.94 |  |  |
| 2.42  | -4.41 | -6.42 |  |  |
| 1.42  | -4.65 | -5.88 |  |  |

|       |       |       |  |  |
|-------|-------|-------|--|--|
| 1.41  | -3.98 | -5.19 |  |  |
| 1.23  | 2.08  | 1.05  |  |  |
| 24.34 | 1.58  | -0.96 |  |  |
| 24.25 | 1.35  | -1.18 |  |  |
| 15.71 | 0.86  | -1.05 |  |  |
| 13.75 | 0.77  | -0.95 |  |  |
| 12.58 | 2.15  | 0.57  |  |  |
| 12.11 | -0.01 | -1.54 |  |  |
| 11.92 | 0.86  | -0.65 |  |  |
| 11.7  | 0.09  | -1.39 |  |  |
| 11.46 | 1.21  | -0.24 |  |  |
| 9.63  | -0.05 | -1.25 |  |  |
| 9.31  | -0.28 | -1.43 |  |  |
| 9.14  | 1     | -0.13 |  |  |
| 9.03  | -1.45 | -2.56 |  |  |
| 9.01  | 1.94  | 0.83  |  |  |
| 2.04  | 1.25  | 2.29  |  |  |
| 2.04  | 0.64  | 1.68  |  |  |
| 1.96  | 0     | 1.09  |  |  |
| 1.8   | -3.47 | -2.25 |  |  |
| 1.72  | -0.42 | 0.86  |  |  |
| 1.7   | -2.68 | -1.38 |  |  |
| 1.63  | -2.46 | -1.1  |  |  |
| 1.57  | -1.31 | 0.11  |  |  |
| 1.5   | 1.53  | 3.01  |  |  |
| 1.39  | -0.11 | 1.48  |  |  |
| 1.26  | 0.4   | 2.14  |  |  |
| 1.18  | -1.86 | -0.04 |  |  |
| 1.08  | 4.16  | 6.11  |  |  |
| -1.01 | -2.73 | -0.65 |  |  |
| 7.32  | -0.75 | -3.29 |  |  |
| 3.66  | -0.71 | -2.25 |  |  |
| -1.96 | -1.73 | -0.42 |  |  |
| 7.02  | 1.82  | -0.71 |  |  |
| 5.85  | 1.32  | -0.95 |  |  |
| 3.33  | 3.4   | 1.93  |  |  |
| 2.61  | 3.26  | 2.15  |  |  |
| 2.54  | 0.61  | -0.46 |  |  |
| 2.55  | 0.58  | -0.5  |  |  |
| 2.44  | -0.12 | -1.13 |  |  |
| -1.69 | 1.03  | 2.06  |  |  |
| -2    | -1.51 | -0.23 |  |  |
| -2.02 | -0.27 | 1.02  |  |  |
| -2.05 | -1.16 | 0.15  |  |  |
| -3.81 | -1.63 | 0.57  |  |  |
| 3.28  | -1.12 | -3.65 |  |  |
| 2.01  | -1.51 | -3.33 |  |  |
| 1.97  | -3.08 | -4.87 |  |  |
| 1.63  | 3.16  | 1.64  |  |  |
| 1.56  | 1.53  | 0.07  |  |  |
| 1.36  | -1.79 | -3.06 |  |  |
| 1.28  | -0.73 | -1.91 |  |  |
| 1.18  | -1.39 | -2.44 |  |  |
| 2.27  | -1.12 | -3.65 |  |  |
| 1.44  | -2.67 | -4.55 |  |  |
| 1.3   | 2.08  | 0.36  |  |  |
| 1.2   | -0.27 | -1.88 |  |  |
| -1.01 | 0.26  | -1.08 |  |  |

|       |       |       |  |  |
|-------|-------|-------|--|--|
| -1.03 | -1.54 | -2.84 |  |  |
| -1.23 | 0.73  | -0.32 |  |  |
| -1.26 | 0.94  | -0.08 |  |  |
| -1.26 | 1.59  | 0.58  |  |  |
| -5.6  | -0.86 | 0.28  |  |  |
| -5.67 | -1.4  | -0.24 |  |  |
| -5.71 | -0.91 | 0.26  |  |  |
| -5.92 | -0.12 | 1.1   |  |  |
| -6.1  | -0.48 | 0.78  |  |  |
| -8.55 | -2.02 | -0.27 |  |  |
| 2.56  | 3.67  | 1.14  |  |  |
| 2.29  | -1.29 | -3.66 |  |  |
| 1.18  | -1.28 | -2.69 |  |  |
| 1.11  | -0.53 | -1.86 |  |  |
| 1.11  | -1.3  | -2.62 |  |  |
| -1.01 | 1.87  | 0.7   |  |  |
| -1.05 | 1.27  | 0.17  |  |  |
| -1.08 | -2.07 | -3.13 |  |  |
| -1.11 | 0.6   | -0.43 |  |  |
| -1.13 | -0.9  | -1.9  |  |  |
| -4.51 | -1.15 | -0.15 |  |  |
| -5.11 | -0.76 | 0.42  |  |  |
| -5.32 | -2.22 | -0.98 |  |  |
| -5.48 | 0.37  | 1.65  |  |  |
| -5.81 | -1.35 | 0.01  |  |  |
| -5.85 | -0.26 | 1.11  |  |  |
| -6.32 | -1.17 | 0.31  |  |  |
| -6.54 | -1.64 | -0.1  |  |  |
| -6.58 | -1.88 | -0.34 |  |  |
| -9.17 | -2.23 | -0.21 |  |  |
| 4.33  | 0.31  | -2.22 |  |  |
| 2.62  | -2.76 | -4.57 |  |  |
| -3.57 | -3.09 | -1.68 |  |  |
| 31.63 | 2.06  | -0.47 |  |  |
| 24.37 | 2.56  | 0.41  |  |  |
| 19.53 | 2.17  | 0.34  |  |  |
| 2.39  | -1.61 | -0.41 |  |  |
| 2.03  | -1.45 | -0.02 |  |  |
| 1.97  | 1.76  | 3.23  |  |  |
| 1.97  | -2.54 | -1.07 |  |  |
| 1.51  | 0.47  | 2.33  |  |  |
| 1.17  | -2.88 | -0.65 |  |  |
| 1.14  | -2.41 | -0.15 |  |  |
| 1.03  | -3.08 | -0.68 |  |  |
| -1.13 | 0.05  | 2.68  |  |  |
| 6.23  | -1.14 | -3.67 |  |  |
| 6.07  | -0.75 | -3.24 |  |  |
| 4.41  | -0.71 | -2.74 |  |  |
| 2.74  | -2.35 | -3.7  |  |  |
| 2.16  | 0.12  | -0.88 |  |  |
| -1.95 | -0.4  | 0.67  |  |  |
| -3.06 | -0.28 | 1.44  |  |  |
| 4.22  | 3.8   | 1.28  |  |  |
| 1.83  | -0.97 | -2.29 |  |  |
| 1.53  | -2.15 | -3.22 |  |  |
| 1.52  | -1.04 | -2.09 |  |  |
| -2.74 | -0.02 | 0.99  |  |  |
| -3.02 | -1.33 | -0.19 |  |  |

|        |       |       |  |  |
|--------|-------|-------|--|--|
| 1.5    | 2.86  | 0.34  |  |  |
| 1.27   | 1.14  | -1.13 |  |  |
| 1.1    | -0.69 | -2.76 |  |  |
| 1.09   | 2.86  | 0.8   |  |  |
| 1.08   | 1.24  | -0.81 |  |  |
| -1.01  | 3.14  | 1.22  |  |  |
| -1.06  | -0.51 | -2.36 |  |  |
| -1.13  | -2.83 | -4.6  |  |  |
| -1.38  | -0.35 | -1.82 |  |  |
| -1.59  | 1.77  | 0.51  |  |  |
| -1.72  | -1.35 | -2.51 |  |  |
| -7.8   | -1.91 | -0.88 |  |  |
| -8     | -2.29 | -1.22 |  |  |
| -9.55  | -1.65 | -0.33 |  |  |
| -10.55 | -2.18 | -0.72 |  |  |
| -13.89 | -1.94 | -0.07 |  |  |
| -14.3  | -1.95 | -0.05 |  |  |
| -14.83 | -1.9  | 0.06  |  |  |
| -15.93 | -1.22 | 0.84  |  |  |
| -22.56 | -2.33 | 0.24  |  |  |
| 4.78   | -3.98 | -6.5  |  |  |
| 2.93   | -4.55 | -6.37 |  |  |
| 2.54   | -5.16 | -6.77 |  |  |
| 1.76   | 2.65  | 1.57  |  |  |
| 5.08   | 0.88  | -1.64 |  |  |
| 2.6    | 2.48  | 0.92  |  |  |
| -2.44  | 0.64  | 1.76  |  |  |
| 8.76   | 3.08  | 0.56  |  |  |
| 3.86   | 1.7   | 0.37  |  |  |
| 3.47   | 0.34  | -0.84 |  |  |
| 3.44   | 0.8   | -0.37 |  |  |
| 3.37   | 1.66  | 0.52  |  |  |
| 3.25   | 2.22  | 1.14  |  |  |
| -1.52  | -2.13 | -0.91 |  |  |
| -1.87  | -1.82 | -0.31 |  |  |
| -1.91  | 1.65  | 3.2   |  |  |
| -1.93  | -2.34 | -0.77 |  |  |
| -1.93  | 1.07  | 2.63  |  |  |
| -2.16  | 0.22  | 1.94  |  |  |
| 8.77   | 1.23  | -1.29 |  |  |
| 4.38   | -0.81 | -2.32 |  |  |
| 4.04   | 1.18  | -0.22 |  |  |
| 3.97   | 2.69  | 1.31  |  |  |
| 3.75   | 0.81  | -0.48 |  |  |
| 3.61   | -2.06 | -3.29 |  |  |
| 3.55   | 1.32  | 0.11  |  |  |
| 3.54   | -1.61 | -2.81 |  |  |
| 3.37   | 0.77  | -0.36 |  |  |
| 3.18   | -0.88 | -1.94 |  |  |
| -1.37  | 0.49  | 1.55  |  |  |
| -2.02  | -3.88 | -2.25 |  |  |
| 1.33   | -0.9  | -3.42 |  |  |
| 1.29   | 2.83  | 0.35  |  |  |
| -1.05  | -4.79 | -6.84 |  |  |
| -1.12  | -3.2  | -5.15 |  |  |
| -1.16  | -4.35 | -6.25 |  |  |
| -1.19  | 0.22  | -1.64 |  |  |
| -1.23  | -4.55 | -6.36 |  |  |

|        |       |       |  |  |
|--------|-------|-------|--|--|
| -1.29  | -1.06 | -2.8  |  |  |
| -1.36  | 1.46  | -0.2  |  |  |
| -1.84  | -3.79 | -5.02 |  |  |
| -2.07  | 0.79  | -0.27 |  |  |
| -9.67  | -3.12 | -1.96 |  |  |
| -14.31 | -3.75 | -2.02 |  |  |
| -16.41 | -4.97 | -3.05 |  |  |
| -19.46 | -4.41 | -2.23 |  |  |
| 3.6    | -1.47 | -3.99 |  |  |
| 2.3    | -1.65 | -3.52 |  |  |
| 1.61   | 5.66  | 4.31  |  |  |
| 1.6    | -0.01 | -1.35 |  |  |
| 1.48   | 0.26  | -0.96 |  |  |
| 1.47   | -2.04 | -3.26 |  |  |
| 1.46   | -0.92 | -2.13 |  |  |
| 1.45   | 0.45  | -0.75 |  |  |
| 1.39   | -1.2  | -2.34 |  |  |
| 1.32   | 0.05  | -1.02 |  |  |
| 1.28   | -0.8  | -1.81 |  |  |
| 1.26   | -0.68 | -1.68 |  |  |
| -3.16  | -3.38 | -2.39 |  |  |
| -3.2   | -2.6  | -1.58 |  |  |
| -3.31  | -3.89 | -2.83 |  |  |
| -3.43  | -0.41 | 0.7   |  |  |
| -3.44  | -2.66 | -1.54 |  |  |
| -3.54  | -3.44 | -2.28 |  |  |
| -3.6   | -1.85 | -0.66 |  |  |
| -3.69  | -1.63 | -0.41 |  |  |
| -3.78  | -2.2  | -0.95 |  |  |
| -3.8   | -2.34 | -1.08 |  |  |
| -3.8   | -2.31 | -1.05 |  |  |
| -3.89  | -2.12 | -0.83 |  |  |
| -3.89  | -1.21 | 0.08  |  |  |
| -4.15  | -3.05 | -1.66 |  |  |
| -4.2   | -1.43 | -0.02 |  |  |
| -4.5   | -3.01 | -1.51 |  |  |
| -4.58  | -0.46 | 1.07  |  |  |
| -4.6   | -1.03 | 0.51  |  |  |
| -4.72  | -2.85 | -1.27 |  |  |
| -5.81  | -0.43 | 1.44  |  |  |
| -6.06  | -1.84 | 0.1   |  |  |
| -6.38  | -2.7  | -0.69 |  |  |
| -6.43  | -2.39 | -0.37 |  |  |
| -7.43  | -2.91 | -0.68 |  |  |
| -7.5   | -2.1  | 0.14  |  |  |
| 1.77   | 0.61  | -1.9  |  |  |
| 1.59   | 6.46  | 4.1   |  |  |
| 1.24   | -2.44 | -4.42 |  |  |
| 1.13   | -0.04 | -1.9  |  |  |
| 1.04   | -1.12 | -2.86 |  |  |
| -1.06  | -0.36 | -1.96 |  |  |
| -1.07  | 2.64  | 1.06  |  |  |
| -1.08  | -1.56 | -3.13 |  |  |
| -1.26  | -1.22 | -2.56 |  |  |
| -8.07  | -1.88 | -0.55 |  |  |
| -9.62  | -3.06 | -1.48 |  |  |
| 4.61   | -0.21 | -2.72 |  |  |
| 3.67   | -2.14 | -4.32 |  |  |

|       |       |       |  |  |
|-------|-------|-------|--|--|
| 3.27  | -0.22 | -2.23 |  |  |
| 1.91  | -2.07 | -3.3  |  |  |
| -2.54 | -0.09 | 0.96  |  |  |
| -2.65 | -1.13 | -0.03 |  |  |
| -2.89 | -4.19 | -2.96 |  |  |
| -3.1  | -1.37 | -0.04 |  |  |
| -4.47 | -3.42 | -1.56 |  |  |
| 2.33  | -4.52 | -7.02 |  |  |
| 1.64  | -2.81 | -4.81 |  |  |
| 1.04  | -5.91 | -7.26 |  |  |
| 1.01  | -2.35 | -3.65 |  |  |
| -1    | -3.46 | -4.74 |  |  |
| -1.02 | 2.69  | 1.44  |  |  |
| -1.2  | -5.21 | -6.24 |  |  |
| 5.88  | -1.82 | -4.32 |  |  |
| 5.16  | -2.57 | -4.88 |  |  |
| 4.44  | -4.14 | -6.24 |  |  |
| 2.61  | -3.63 | -4.96 |  |  |
| 2.16  | -5.24 | -6.31 |  |  |
| 2.09  | -3.83 | -4.85 |  |  |
| 8.65  | 2.7   | 0.2   |  |  |
| 8.64  | 1.4   | -1.1  |  |  |
| 7.48  | 1.04  | -1.26 |  |  |
| 5.78  | 2.61  | 0.69  |  |  |
| 5.33  | 1.95  | 0.14  |  |  |
| 5.12  | 2.4   | 0.65  |  |  |
| 5.08  | 1.67  | -0.07 |  |  |
| 4.49  | -0.01 | -1.57 |  |  |
| 4.46  | -1.06 | -2.61 |  |  |
| 3.61  | 1.12  | -0.13 |  |  |
| 3.41  | 1.43  | 0.27  |  |  |
| 3.2   | 1.35  | 0.27  |  |  |
| -1.48 | -0.23 | 0.94  |  |  |
| -1.69 | -2.83 | -1.46 |  |  |
| 1.57  | -2.12 | -4.62 |  |  |
| 1.16  | -3.36 | -5.43 |  |  |
| 1.13  | -2.28 | -4.3  |  |  |
| 1.09  | -4    | -5.99 |  |  |
| 1.07  | -2.41 | -4.36 |  |  |
| -1.06 | 3.96  | 2.18  |  |  |
| -1.27 | -4.2  | -5.72 |  |  |
| -1.27 | -1.57 | -3.08 |  |  |
| -1.27 | -2.59 | -4.09 |  |  |
| -1.32 | -1.24 | -2.69 |  |  |
| -1.35 | -2.42 | -3.84 |  |  |
| -1.38 | 2.01  | 0.61  |  |  |
| -1.47 | -0.23 | -1.53 |  |  |
| -1.51 | -3.78 | -5.04 |  |  |
| -1.58 | -4.07 | -5.27 |  |  |
| -1.59 | -3.44 | -4.63 |  |  |
| -1.61 | -3.06 | -4.23 |  |  |
| -1.67 | 0.83  | -0.29 |  |  |
| -1.8  | -2.39 | -3.4  |  |  |
| 3.28  | -1.09 | -3.6  |  |  |
| 2.01  | -1.48 | -3.28 |  |  |
| 1.86  | 1.43  | -0.26 |  |  |
| 1.67  | -2.13 | -3.66 |  |  |
| 1.63  | 3.18  | 1.69  |  |  |

|       |       |       |  |  |
|-------|-------|-------|--|--|
| 1.4   | 0.18  | -1.1  |  |  |
| 1.36  | -1.77 | -3.01 |  |  |
| 1.29  | -2.14 | -3.3  |  |  |
| 1.27  | -1.93 | -3.06 |  |  |
| 5.14  | -2.37 | -4.88 |  |  |
| 2.12  | -2.08 | -3.3  |  |  |
| 2.06  | -2.73 | -3.91 |  |  |
| -2.55 | -2.2  | -0.99 |  |  |
| 4.88  | -0.42 | -2.91 |  |  |
| 1.95  | 0.19  | -0.99 |  |  |
| 1.87  | -3.06 | -4.17 |  |  |
| 25.14 | -0.19 | -2.68 |  |  |
| 11.17 | -1.08 | -2.4  |  |  |
| 10.39 | -1.22 | -2.44 |  |  |
| 9.01  | -3.17 | -4.19 |  |  |
| 2.1   | -2.61 | -1.53 |  |  |
| 2.05  | -6.01 | -4.89 |  |  |
| 1.93  | -5.58 | -4.37 |  |  |
| 1.93  | -0.62 | 0.59  |  |  |
| 1.84  | -4.58 | -3.31 |  |  |
| 1.71  | -0.38 | 1     |  |  |
| 1.63  | -2.42 | -0.96 |  |  |
| 1.48  | -5.53 | -3.94 |  |  |
| 1.45  | -1.8  | -0.17 |  |  |
| 1.38  | -2.37 | -0.68 |  |  |
| 1.35  | 0.05  | 1.77  |  |  |
| 1.35  | -0.84 | 0.88  |  |  |
| 1.32  | -2.86 | -1.1  |  |  |
| 1.32  | -4.61 | -2.85 |  |  |
| 1.31  | -2.99 | -1.23 |  |  |
| 1.05  | -5.79 | -3.7  |  |  |
| 1.04  | -2.95 | -0.85 |  |  |
| -1.34 | -2.79 | -0.22 |  |  |
| -1.38 | -5.08 | -2.46 |  |  |
| 3.1   | -2.31 | -4.8  |  |  |
| 1.8   | -0.34 | -2.05 |  |  |
| 1.3   | -3.35 | -4.59 |  |  |
| 1.26  | 1.78  | 0.59  |  |  |
| -3.73 | -1.36 | -0.31 |  |  |
| -4.03 | -2.9  | -1.74 |  |  |
| -4.2  | -3.98 | -2.77 |  |  |
| -4.78 | -1.24 | 0.16  |  |  |
| 11.74 | -0.75 | -3.24 |  |  |
| -1.02 | -2.18 | -1.1  |  |  |
| -1.11 | 4.78  | 6     |  |  |
| -1.11 | 4.78  | 6     |  |  |
| -1.49 | 1.21  | 2.85  |  |  |
| 1.71  | 1.45  | -1.04 |  |  |
| 1.4   | -1.04 | -3.24 |  |  |
| 1.08  | -0.5  | -2.32 |  |  |
| 1.07  | 0.94  | -0.88 |  |  |
| 1.03  | -0.31 | -2.07 |  |  |
| 1.01  | -1    | -2.73 |  |  |
| -1.06 | 1.38  | -0.25 |  |  |
| -1.07 | 1.32  | -0.3  |  |  |
| -1.12 | 2.27  | 0.71  |  |  |
| -1.12 | -0.35 | -1.9  |  |  |
| -1.12 | -1.38 | -2.93 |  |  |

|        |       |       |  |  |
|--------|-------|-------|--|--|
| -1.14  | -0.06 | -1.59 |  |  |
| -1.21  | 1.7   | 0.26  |  |  |
| -1.22  | 1.71  | 0.28  |  |  |
| -1.28  | -0.4  | -1.76 |  |  |
| -1.28  | 1.36  | 0     |  |  |
| -1.33  | 0.44  | -0.87 |  |  |
| -1.34  | 0.37  | -0.92 |  |  |
| -1.37  | 1.81  | 0.55  |  |  |
| -1.43  | -2.96 | -4.15 |  |  |
| -1.49  | -0.94 | -2.09 |  |  |
| -1.53  | 1.21  | 0.1   |  |  |
| -1.63  | 0.77  | -0.24 |  |  |
| -8.64  | -2.3  | -0.91 |  |  |
| -9.81  | -1.31 | 0.27  |  |  |
| -10.28 | -2.44 | -0.8  |  |  |
| -11.06 | -1.4  | 0.35  |  |  |
| -11.27 | -2.38 | -0.6  |  |  |
| -21.32 | -2.38 | 0.32  |  |  |
| -22.6  | -1.81 | 0.97  |  |  |
| -22.83 | -2.08 | 0.71  |  |  |
| -46.77 | -3.76 | 0.07  |  |  |
| 3.4    | -6.05 | -8.54 |  |  |
| 1.78   | -5.14 | -6.7  |  |  |
| 1.47   | -4.83 | -6.11 |  |  |
| 1.46   | -5.87 | -7.14 |  |  |
| -4.73  | -2.11 | -0.59 |  |  |
| -5.03  | -5.11 | -3.5  |  |  |
| 4.29   | 4.33  | 1.84  |  |  |
| 1.61   | 1.15  | 0.08  |  |  |
| 35.33  | 1.44  | -1.05 |  |  |
| 26.48  | 1.46  | -0.61 |  |  |
| 26.46  | 1.15  | -0.92 |  |  |
| 23.57  | 1.64  | -0.26 |  |  |
| 22.26  | 0.79  | -1.02 |  |  |
| 20.26  | 0.27  | -1.41 |  |  |
| 20.14  | 2.63  | 0.96  |  |  |
| 19.99  | 0.12  | -1.54 |  |  |
| 19.95  | 0.75  | -0.91 |  |  |
| 18.84  | 1.02  | -0.56 |  |  |
| 18.67  | 0     | -1.56 |  |  |
| 18.57  | 1.16  | -0.4  |  |  |
| 16.29  | 0.67  | -0.69 |  |  |
| 14.96  | 0.58  | -0.67 |  |  |
| 14.71  | 1.71  | 0.49  |  |  |
| 14.64  | 2.27  | 1.06  |  |  |
| 14.09  | 0.15  | -1.01 |  |  |
| 3.14   | -0.95 | 0.05  |  |  |
| 3.08   | -1.61 | -0.58 |  |  |
| 2.99   | -2.08 | -1    |  |  |
| 2.88   | -0.24 | 0.89  |  |  |
| 2.84   | 3.11  | 4.26  |  |  |
| 2.83   | -1.67 | -0.51 |  |  |
| 2.81   | -0.1  | 1.07  |  |  |
| 2.68   | -2.3  | -1.06 |  |  |
| 2.53   | 0.26  | 1.58  |  |  |
| 2.51   | -2.88 | -1.55 |  |  |
| 2.45   | -2.23 | -0.86 |  |  |
| 2.17   | -3.07 | -1.53 |  |  |



|        |       |       |  |  |
|--------|-------|-------|--|--|
| 2.14   | -2.17 | -0.61 |  |  |
| 1.98   | -1.65 | 0.02  |  |  |
| 1.97   | -2.83 | -1.15 |  |  |
| 1.88   | -2.36 | -0.62 |  |  |
| 1.84   | -2.63 | -0.85 |  |  |
| 1.81   | -3.45 | -1.64 |  |  |
| 1.66   | -3.75 | -1.82 |  |  |
| 1.66   | -1.05 | 0.89  |  |  |
| 1.63   | -1.55 | 0.41  |  |  |
| 1.59   | -3.58 | -1.58 |  |  |
| 1.48   | -1.6  | 0.5   |  |  |
| 1.3    | -1.85 | 0.44  |  |  |
| 1.26   | -2.85 | -0.53 |  |  |
| 1.18   | -3.65 | -1.23 |  |  |
| 1.16   | -3.44 | -1    |  |  |
| 1.04   | 1.96  | 4.57  |  |  |
| 6.87   | -2.68 | -5.17 |  |  |
| -1.74  | -5.8  | -4.71 |  |  |
| 3.9    | -1.9  | -4.38 |  |  |
| 1.92   | 0.81  | -0.66 |  |  |
| 1.67   | -1.21 | -2.47 |  |  |
| 4.83   | -1.33 | -3.81 |  |  |
| -2.75  | -3.05 | -1.8  |  |  |
| 1.2    | -2.35 | -4.82 |  |  |
| 1.05   | -1.48 | -3.76 |  |  |
| -1.39  | -0.9  | -2.64 |  |  |
| -1.49  | -1.13 | -2.77 |  |  |
| -1.54  | -2.91 | -4.5  |  |  |
| -9.84  | -1.4  | -0.32 |  |  |
| -26.19 | -1.51 | 0.98  |  |  |
| 3.23   | -2.13 | -4.61 |  |  |
| 1.77   | -3.9  | -5.5  |  |  |
| 1.5    | -4.15 | -5.52 |  |  |
| 1.38   | 3.24  | 2     |  |  |
| 1.32   | -0.82 | -2.01 |  |  |
| 1.31   | -3.89 | -5.06 |  |  |
| 1.26   | -4.14 | -5.26 |  |  |
| 1.22   | -0.66 | -1.74 |  |  |
| 1.17   | -0.29 | -1.31 |  |  |
| 3.42   | -3.12 | -5.6  |  |  |
| 2.48   | -2.66 | -4.67 |  |  |
| 1.64   | 0.84  | -0.57 |  |  |
| 1.53   | -3.34 | -4.65 |  |  |
| 1.43   | -0.31 | -1.52 |  |  |
| 1.42   | -0.9  | -2.11 |  |  |
| 1.39   | -1.4  | -2.57 |  |  |
| 1.28   | -1.44 | -2.49 |  |  |
| 1.27   | -0.63 | -1.67 |  |  |
| -3.62  | -1.46 | -0.31 |  |  |
| -6.79  | -3.98 | -1.92 |  |  |
| 3.42   | -3.12 | -5.6  |  |  |
| 2.48   | -2.66 | -4.67 |  |  |
| 1.9    | -3.17 | -4.8  |  |  |
| 1.64   | 0.84  | -0.57 |  |  |
| 1.43   | -0.31 | -1.52 |  |  |
| 1.42   | -0.9  | -2.11 |  |  |
| 1.39   | -1.4  | -2.57 |  |  |
| 1.28   | -1.44 | -2.49 |  |  |

|       |       |       |  |  |
|-------|-------|-------|--|--|
| 1.27  | -0.63 | -1.67 |  |  |
| -3.62 | -1.46 | -0.31 |  |  |
| -6.79 | -3.98 | -1.92 |  |  |
| 3.42  | -3.12 | -5.6  |  |  |
| 2.48  | -2.66 | -4.67 |  |  |
| 2.05  | -1.42 | -3.15 |  |  |
| 1.9   | -3.17 | -4.8  |  |  |
| 1.64  | 0.84  | -0.57 |  |  |
| 1.43  | -0.31 | -1.52 |  |  |
| 1.42  | -0.9  | -2.11 |  |  |
| 1.28  | -1.44 | -2.49 |  |  |
| 1.27  | -0.63 | -1.67 |  |  |
| -3.62 | -1.46 | -0.31 |  |  |
| -6.79 | -3.98 | -1.92 |  |  |
| 3.42  | -3.12 | -5.6  |  |  |
| 2.48  | -2.66 | -4.67 |  |  |
| 1.64  | 0.84  | -0.57 |  |  |
| 1.53  | -3.34 | -4.65 |  |  |
| 1.43  | -0.31 | -1.52 |  |  |
| 1.42  | -0.9  | -2.11 |  |  |
| 1.39  | -1.4  | -2.57 |  |  |
| 1.28  | -1.44 | -2.49 |  |  |
| 1.27  | -0.63 | -1.67 |  |  |
| -3.62 | -1.46 | -0.31 |  |  |
| -6.79 | -3.98 | -1.92 |  |  |
| 3.4   | -6.25 | -8.72 |  |  |
| 1.47  | -5.03 | -6.3  |  |  |
| 1.46  | -6.07 | -7.32 |  |  |
| 1.32  | -5.85 | -6.96 |  |  |
| -4.73 | -2.3  | -0.77 |  |  |
| 3.42  | -3.12 | -5.6  |  |  |
| 2.48  | -2.66 | -4.67 |  |  |
| 2.05  | -1.42 | -3.15 |  |  |
| 1.9   | -3.17 | -4.8  |  |  |
| 1.64  | 0.84  | -0.57 |  |  |
| 1.43  | -0.31 | -1.52 |  |  |
| 1.42  | -0.9  | -2.11 |  |  |
| 1.28  | -1.44 | -2.49 |  |  |
| 1.27  | -0.63 | -1.67 |  |  |
| -3.62 | -1.46 | -0.31 |  |  |
| -6.79 | -3.98 | -1.92 |  |  |
| 3.42  | -3.12 | -5.6  |  |  |
| 2.48  | -2.66 | -4.67 |  |  |
| 1.9   | -3.17 | -4.8  |  |  |
| 1.64  | 0.84  | -0.57 |  |  |
| 1.43  | -0.31 | -1.52 |  |  |
| 1.42  | -0.9  | -2.11 |  |  |
| 1.39  | -1.4  | -2.57 |  |  |
| 1.28  | -1.44 | -2.49 |  |  |
| 1.27  | -0.63 | -1.67 |  |  |
| -3.62 | -1.46 | -0.31 |  |  |
| -6.79 | -3.98 | -1.92 |  |  |
| 3.64  | 4.92  | 2.44  |  |  |
| 1.61  | 1.04  | -0.26 |  |  |
| 1.46  | 2.72  | 1.57  |  |  |
| 1.34  | -0.68 | -1.71 |  |  |
| 2.88  | -0.34 | -2.81 |  |  |
| 1.38  | 1.76  | 0.35  |  |  |

|        |       |       |  |  |
|--------|-------|-------|--|--|
| 1.2    | 5.03  | 3.82  |  |  |
| -4.17  | 0.03  | 1.14  |  |  |
| -4.25  | -1.06 | 0.08  |  |  |
| -5.77  | -0.26 | 1.32  |  |  |
| 3.47   | -0.51 | -2.98 |  |  |
| 3.44   | 0.21  | -2.24 |  |  |
| 1.65   | -1    | -2.4  |  |  |
| 1.6    | 1.56  | 0.2   |  |  |
| 1.51   | 2.46  | 1.19  |  |  |
| 1.46   | -1.43 | -2.65 |  |  |
| 1.3    | 0.97  | -0.08 |  |  |
| 1.3    | -0.62 | -1.67 |  |  |
| -3.32  | 0.08  | 1.14  |  |  |
| -3.35  | 2.64  | 3.72  |  |  |
| -3.52  | -1.52 | -0.37 |  |  |
| -3.68  | 1.12  | 2.33  |  |  |
| -4.13  | 0.7   | 2.07  |  |  |
| -4.23  | 0.98  | 2.39  |  |  |
| -4.33  | -1.36 | 0.08  |  |  |
| -4.45  | 0.94  | 2.42  |  |  |
| -4.56  | 2.25  | 3.76  |  |  |
| -6.38  | -0.01 | 1.99  |  |  |
| -6.47  | -1.1  | 0.92  |  |  |
| -6.63  | 0.23  | 2.28  |  |  |
| -10.38 | -1.67 | 1.03  |  |  |
| 3.03   | 0.5   | -1.97 |  |  |
| 1.82   | 0.19  | -1.54 |  |  |
| 1.66   | 2.15  | 0.55  |  |  |
| 1.63   | -1.6  | -3.18 |  |  |
| 1.16   | 1.2   | 0.12  |  |  |
| 16.46  | -0.96 | -3.43 |  |  |
| 10.92  | 0.5   | -1.38 |  |  |
| 9.43   | -1.26 | -2.92 |  |  |
| 9.33   | 1.66  | 0.02  |  |  |
| 8.28   | 0.11  | -1.36 |  |  |
| 7.87   | -0.01 | -1.41 |  |  |
| 7.69   | 2.01  | 0.64  |  |  |
| 7.57   | 2.38  | 1.03  |  |  |
| 7.42   | 1.91  | 0.6   |  |  |
| 7.08   | -0.94 | -2.19 |  |  |
| 1.31   | 0.89  | 2.08  |  |  |
| 1.02   | -0.2  | 1.35  |  |  |
| 1.56   | -3.03 | -5.49 |  |  |
| -1.05  | 0.95  | -0.8  |  |  |
| -1.1   | 3.48  | 1.79  |  |  |
| -1.14  | 0.76  | -0.88 |  |  |
| -1.35  | 1.11  | -0.28 |  |  |
| -1.45  | -0.84 | -2.13 |  |  |
| -1.49  | -3.93 | -5.18 |  |  |
| -1.59  | 3.3   | 2.14  |  |  |
| -1.67  | 0.16  | -0.93 |  |  |
| -8.21  | -3.16 | -1.95 |  |  |
| -9.18  | -2.03 | -0.66 |  |  |
| 10.6   | 0.17  | -2.29 |  |  |
| 4.11   | -0.38 | -1.48 |  |  |
| -1.17  | 2.32  | 3.49  |  |  |
| 1.41   | -1.52 | -3.99 |  |  |
| 1.07   | -1.96 | -4.02 |  |  |

|        |       |       |  |  |
|--------|-------|-------|--|--|
| 1.06   | 3.73  | 1.69  |  |  |
| -1.17  | -2.44 | -4.17 |  |  |
| -1.18  | 1.43  | -0.29 |  |  |
| -1.21  | -2    | -3.69 |  |  |
| -1.36  | -2.43 | -3.95 |  |  |
| -1.47  | -0.8  | -2.21 |  |  |
| -1.62  | 1.27  | 0     |  |  |
| -1.62  | -1.79 | -3.05 |  |  |
| -1.76  | -1.19 | -2.34 |  |  |
| -8.83  | -0.95 | 0.23  |  |  |
| -11.88 | -1.59 | 0.01  |  |  |
| -14.55 | -2.36 | -0.46 |  |  |
| 3.76   | 2.9   | 0.45  |  |  |
| 1.48   | 0.45  | -0.66 |  |  |
| 1.43   | 1.33  | 0.27  |  |  |
| 1.42   | 1.25  | 0.2   |  |  |
| -3.19  | -0.48 | 0.65  |  |  |
| -3.71  | -0.56 | 0.78  |  |  |
| -3.83  | -0.24 | 1.15  |  |  |
| -4.04  | -0.23 | 1.23  |  |  |
| 3.19   | 2.46  | 0     |  |  |
| 2.24   | 2.11  | 0.16  |  |  |
| 1.99   | 2.75  | 0.97  |  |  |
| 1.79   | 0.68  | -0.95 |  |  |
| 1.7    | 0.23  | -1.32 |  |  |
| 1.61   | 0.06  | -1.41 |  |  |
| 1.57   | 0.33  | -1.11 |  |  |
| 1.54   | 1.01  | -0.41 |  |  |
| 1.4    | 2.2   | 0.93  |  |  |
| 1.28   | 1.21  | 0.07  |  |  |
| 1.22   | -0.55 | -1.62 |  |  |
| 1.22   | 1.38  | 0.31  |  |  |
| 3.98   | -0.16 | -2.62 |  |  |
| 2.16   | 0.33  | -1.25 |  |  |
| 1.8    | 2.96  | 1.65  |  |  |
| 1.65   | -1.9  | -3.09 |  |  |
| -4.08  | -3.3  | -1.73 |  |  |
| 3.25   | -4.79 | -7.24 |  |  |
| 1.62   | -0.46 | -1.91 |  |  |
| 1.44   | -2.34 | -3.62 |  |  |
| 1.4    | -0.64 | -1.88 |  |  |
| -4.42  | -6.36 | -4.97 |  |  |
| -4.46  | -6.65 | -5.25 |  |  |
| 6.54   | 1.09  | -1.36 |  |  |
| 3.22   | 4.73  | 3.3   |  |  |
| 3.04   | 1.93  | 0.59  |  |  |
| 2.97   | 2.34  | 1.02  |  |  |
| 2.65   | 0.16  | -0.99 |  |  |
| 2.51   | 1.2   | 0.12  |  |  |
| -1.79  | -1.47 | -0.37 |  |  |
| -1.82  | -0.52 | 0.6   |  |  |
| -1.85  | -2.54 | -1.39 |  |  |
| -2.06  | 1     | 2.3   |  |  |
| -2.32  | -1.08 | 0.39  |  |  |
| -2.38  | -3.92 | -2.41 |  |  |
| -4.69  | -3.53 | -1.05 |  |  |
| 1.18   | 1.85  | -0.6  |  |  |
| 1.09   | 2.8   | 0.46  |  |  |

|        |       |       |  |  |
|--------|-------|-------|--|--|
| -1.19  | -0.1  | -2.07 |  |  |
| -1.37  | 0.71  | -1.05 |  |  |
| -1.59  | -0.25 | -1.79 |  |  |
| -2.18  | -3.55 | -4.64 |  |  |
| -11.18 | -2.82 | -1.55 |  |  |
| -13.59 | -0.37 | 1.18  |  |  |
| 2.47   | -2.86 | -5.31 |  |  |
| 1.31   | 3.08  | 1.55  |  |  |
| 1.24   | 5.37  | 3.92  |  |  |
| 1.19   | -0.42 | -1.82 |  |  |
| 1.16   | 3.85  | 2.5   |  |  |
| 1.03   | 1.6   | 0.42  |  |  |
| -1.03  | -0.57 | -1.67 |  |  |
| -6.09  | -2.35 | -0.88 |  |  |
| 3.03   | -3.11 | -5.56 |  |  |
| 1.52   | -0.33 | -1.79 |  |  |
| 1.48   | 1.42  | 0.01  |  |  |
| 1.14   | -3.43 | -4.46 |  |  |
| -3.61  | -1.73 | -0.73 |  |  |
| -4     | -4.38 | -3.23 |  |  |
| -4.02  | -3.12 | -1.96 |  |  |
| 18.82  | 0.24  | -2.21 |  |  |
| 13.81  | 0.53  | -1.47 |  |  |
| 12.73  | 0.9   | -0.98 |  |  |
| 7.02   | 0.54  | -0.48 |  |  |
| 1.65   | -0.89 | 0.17  |  |  |
| 1.3    | -0.55 | 0.86  |  |  |
| -1.02  | -3.13 | -1.32 |  |  |
| -1.12  | 5.77  | 7.71  |  |  |
| -1.15  | -3.55 | -1.56 |  |  |
| 3.76   | -4.63 | -7.08 |  |  |
| 1.68   | -6.17 | -7.45 |  |  |
| 1.59   | -8.3  | -9.5  |  |  |
| 1.5    | -5.86 | -6.98 |  |  |
| 1.49   | -5.23 | -6.34 |  |  |
| 3.12   | -1.06 | -3.5  |  |  |
| 1.99   | -0.87 | -2.67 |  |  |
| 1.33   | 0.25  | -0.97 |  |  |
| 1.22   | -0.62 | -1.71 |  |  |
| -3.71  | -0.56 | 0.53  |  |  |
| -4.22  | -1.25 | 0.03  |  |  |
| -5.37  | -1.34 | 0.28  |  |  |
| -5.67  | -3.1  | -1.4  |  |  |
| -10.83 | -2.95 | -0.32 |  |  |
| -22.34 | -4.59 | -0.91 |  |  |
| 2.05   | 3.73  | 1.29  |  |  |
| 1.89   | 5.5   | 3.17  |  |  |
| 1.19   | 1.97  | 0.31  |  |  |
| 1.18   | -1.64 | -3.28 |  |  |
| 1.17   | -4.03 | -5.66 |  |  |
| -8.59  | -1    | 0.7   |  |  |
| -16.67 | -2.65 | 0.01  |  |  |
| 1.4    | 1.35  | -1.08 |  |  |
| 1.34   | 3.09  | 0.73  |  |  |
| -1.52  | -3.37 | -4.72 |  |  |
| -1.85  | 1.07  | 0.02  |  |  |
| 1.99   | 2.13  | -0.31 |  |  |
| 1.14   | 0.08  | -1.55 |  |  |

|        |       |       |  |  |
|--------|-------|-------|--|--|
| 1.12   | 0.54  | -1.07 |  |  |
| 1.08   | 3.74  | 2.18  |  |  |
| 1.03   | 2.02  | 0.54  |  |  |
| -1.08  | -2.19 | -3.53 |  |  |
| -1.27  | 1.28  | 0.18  |  |  |
| -1.32  | -0.07 | -1.11 |  |  |
| -7.39  | -0.16 | 1.28  |  |  |
| -8.67  | 0.59  | 2.27  |  |  |
| -12.82 | 0.53  | 2.77  |  |  |
| -14.69 | -0.4  | 2.03  |  |  |
| 2.13   | -4.51 | -6.94 |  |  |
| 1.26   | 0.46  | -1.23 |  |  |
| 1.18   | 3.15  | 1.56  |  |  |
| 1.11   | -3.47 | -4.96 |  |  |
| 1.08   | -2.49 | -3.94 |  |  |
| -1.03  | -1.56 | -2.87 |  |  |
| -1.03  | -2.12 | -3.42 |  |  |
| -1.04  | -0.23 | -1.52 |  |  |
| -1.21  | 0.04  | -1.04 |  |  |
| -1.21  | -6.01 | -7.08 |  |  |
| 2.45   | -0.18 | -2.61 |  |  |
| 1.28   | 0.98  | -0.51 |  |  |
| -1.01  | 1.11  | -0.02 |  |  |
| -1.06  | 1.65  | 0.59  |  |  |
| 10.55  | 2.36  | -0.07 |  |  |
| 6.09   | 2.64  | 1     |  |  |
| -1.03  | 0.75  | 1.77  |  |  |
| 2.39   | 0.55  | -1.88 |  |  |
| 1.86   | 1.86  | -0.2  |  |  |
| 1.45   | 2.42  | 0.71  |  |  |
| 1.42   | -1.88 | -3.56 |  |  |
| 1.34   | -1.79 | -3.38 |  |  |
| 1.22   | -0.14 | -1.6  |  |  |
| 1.21   | -3.69 | -5.15 |  |  |
| 1.18   | -3.85 | -5.27 |  |  |
| 1.18   | -0.23 | -1.64 |  |  |
| 1.13   | -0.62 | -1.97 |  |  |
| 1.08   | 2.68  | 1.4   |  |  |
| 1.07   | -4.38 | -5.65 |  |  |
| 1.05   | -1.15 | -2.39 |  |  |
| 1.04   | -3.85 | -5.09 |  |  |
| 1.04   | -0.53 | -1.76 |  |  |
| 1      | 5.92  | 4.75  |  |  |
| -1.02  | -1.29 | -2.43 |  |  |
| -1.03  | -2.17 | -3.3  |  |  |
| -1.03  | -1.86 | -2.99 |  |  |
| -1.06  | 2.32  | 1.23  |  |  |
| -1.11  | 0.07  | -0.96 |  |  |
| 2.42   | 0.32  | -2.11 |  |  |
| 1.28   | -3.3  | -4.81 |  |  |
| 1.17   | -2.08 | -3.46 |  |  |
| 1.14   | -2.27 | -3.61 |  |  |
| 1.11   | 3.62  | 2.33  |  |  |
| 1.08   | -3.01 | -4.27 |  |  |
| 1.07   | -2.89 | -4.15 |  |  |
| 1.01   | -1.74 | -2.91 |  |  |
| -1.05  | 2.19  | 1.1   |  |  |
| -1.06  | -2.24 | -3.32 |  |  |

|       |       |       |  |  |
|-------|-------|-------|--|--|
| -1.09 | -3.45 | -4.48 |  |  |
| -1.11 | -2.02 | -3.03 |  |  |
| -4.72 | -2.12 | -1.03 |  |  |
| -4.86 | -3.17 | -2.04 |  |  |
| 8.9   | -2.47 | -4.9  |  |  |
| -1.22 | -3.77 | -2.77 |  |  |
| -1.22 | -4.58 | -3.56 |  |  |
| -1.25 | -1.51 | -0.46 |  |  |
| -1.38 | -2.73 | -1.54 |  |  |
| -1.44 | -4.43 | -3.19 |  |  |
| -1.53 | -3.68 | -2.34 |  |  |
| -1.64 | -3.45 | -2    |  |  |
| -1.8  | -3.43 | -1.85 |  |  |
| -1.96 | -2.2  | -0.5  |  |  |
| -2.35 | -4.26 | -2.3  |  |  |
| 4.55  | 6.43  | 4     |  |  |
| 1.94  | 0.38  | -0.82 |  |  |
| 1.91  | 0.93  | -0.24 |  |  |
| 3.42  | -1.84 | -4.26 |  |  |
| -3.56 | -1.71 | -0.53 |  |  |
| 37.31 | 2.18  | -0.24 |  |  |
| 36.92 | 1.7   | -0.71 |  |  |
| 34.58 | 1.19  | -1.12 |  |  |
| 27.29 | 2.13  | 0.17  |  |  |
| 23.23 | 2.22  | 0.48  |  |  |
| 22.69 | 1.11  | -0.59 |  |  |
| 17.16 | 1.58  | 0.29  |  |  |
| 16.07 | 0.68  | -0.52 |  |  |
| 15.55 | 2.01  | 0.85  |  |  |
| 15.01 | 0.08  | -1.03 |  |  |
| 14.1  | -0.13 | -1.15 |  |  |
| 3.14  | 0.94  | 2.09  |  |  |
| 2.84  | -2.84 | -1.54 |  |  |
| 2.8   | -2.14 | -0.82 |  |  |
| 2.6   | 1.27  | 2.69  |  |  |
| 2.54  | -1.93 | -0.47 |  |  |
| 2.26  | -2.96 | -1.33 |  |  |
| 2.06  | -1.97 | -0.21 |  |  |
| 1.88  | -2.16 | -0.27 |  |  |
| 1.82  | -3.53 | -1.59 |  |  |
| 1.78  | 0.96  | 2.93  |  |  |
| 1.72  | -2.71 | -0.69 |  |  |
| 1.63  | -1.94 | 0.15  |  |  |
| 1.62  | 1.2   | 3.3   |  |  |
| 1.61  | -3.73 | -1.62 |  |  |
| 1.54  | 0.59  | 2.77  |  |  |
| 1.4   | -3.3  | -0.98 |  |  |
| 1.05  | -1.78 | 0.94  |  |  |
| 1.01  | -1.43 | 1.37  |  |  |
| -1.09 | -0.01 | 2.91  |  |  |
| 6.54  | 1.17  | -1.25 |  |  |
| 3.22  | 4.81  | 3.41  |  |  |
| 3.04  | 2.01  | 0.69  |  |  |
| 2.97  | 2.41  | 1.13  |  |  |
| 2.65  | 0.24  | -0.88 |  |  |
| 2.51  | 1.27  | 0.23  |  |  |
| -1.65 | 1.32  | 2.33  |  |  |
| -1.71 | -0.71 | 0.35  |  |  |

|       |       |       |  |  |
|-------|-------|-------|--|--|
| -1.79 | -1.4  | -0.27 |  |  |
| -1.82 | -0.44 | 0.71  |  |  |
| -1.85 | -2.46 | -1.29 |  |  |
| -2.06 | 1.08  | 2.41  |  |  |
| -2.32 | -1    | 0.5   |  |  |
| -2.38 | -3.84 | -2.3  |  |  |
| -4.69 | -3.46 | -0.94 |  |  |
| 2.36  | 0.25  | -2.17 |  |  |
| 1.57  | -1.19 | -3.02 |  |  |
| 1.36  | 2.5   | 0.89  |  |  |
| 1.18  | -3.61 | -5.02 |  |  |
| 1.11  | 1.87  | 0.54  |  |  |
| 1.02  | -2.55 | -3.75 |  |  |
| -1.04 | 0.37  | -0.75 |  |  |
| -5.85 | -1.85 | -0.48 |  |  |
| -6.2  | -2.81 | -1.35 |  |  |
| -8.46 | -1.52 | 0.39  |  |  |
| 3.94  | -3.91 | -6.33 |  |  |
| 3.61  | -0.38 | -2.67 |  |  |
| 1.84  | -2.37 | -3.69 |  |  |
| 1.64  | -3.83 | -4.98 |  |  |
| 1.49  | -4.3  | -5.31 |  |  |
| -2.92 | -4.86 | -3.75 |  |  |
| -2.94 | -4.28 | -3.17 |  |  |
| 6.54  | 1.11  | -1.31 |  |  |
| 3.22  | 4.75  | 3.36  |  |  |
| 3.04  | 1.95  | 0.64  |  |  |
| 2.97  | 2.35  | 1.08  |  |  |
| 2.65  | 0.18  | -0.94 |  |  |
| 2.51  | 1.21  | 0.18  |  |  |
| -1.65 | 1.26  | 2.28  |  |  |
| -1.79 | -1.45 | -0.32 |  |  |
| -1.82 | -0.5  | 0.66  |  |  |
| -1.85 | -2.52 | -1.34 |  |  |
| -2.06 | 1.02  | 2.35  |  |  |
| -2.32 | -1.06 | 0.45  |  |  |
| -2.38 | -3.9  | -2.35 |  |  |
| -4.69 | -3.52 | -0.99 |  |  |
| 57.83 | 2.9   | 0.49  |  |  |
| 56.96 | 2.02  | -0.37 |  |  |
| 53.9  | 2.26  | -0.05 |  |  |
| 50.47 | 2.28  | 0.07  |  |  |
| 35.11 | 1.49  | -0.2  |  |  |
| 34.2  | 1.02  | -0.63 |  |  |
| 32.38 | 2.91  | 1.33  |  |  |
| 26.82 | 2.17  | 0.87  |  |  |
| 22.89 | 1.35  | 0.28  |  |  |
| 22.66 | 0.4   | -0.66 |  |  |
| 22.35 | -0.1  | -1.15 |  |  |
| 22.29 | 2.35  | 1.31  |  |  |
| 21.86 | 0.97  | -0.03 |  |  |
| 21.71 | 0.42  | -0.58 |  |  |
| 5.12  | 2.88  | 3.96  |  |  |
| 4.68  | -1.81 | -0.6  |  |  |
| 4.63  | -2.18 | -0.95 |  |  |
| 4.57  | -1.86 | -0.61 |  |  |
| 4.03  | -1.07 | 0.36  |  |  |
| 3.57  | -1.94 | -0.33 |  |  |



|       |       |       |  |  |
|-------|-------|-------|--|--|
| 3.55  | -1    | 0.61  |  |  |
| 3.44  | -2.17 | -0.51 |  |  |
| 3.29  | -0.85 | 0.87  |  |  |
| 3.19  | -0.56 | 1.21  |  |  |
| 2.82  | -0.87 | 1.07  |  |  |
| 2.73  | 1.99  | 3.98  |  |  |
| 2.72  | -2.29 | -0.29 |  |  |
| 2.64  | -1.69 | 0.36  |  |  |
| 2.48  | 1.77  | 3.9   |  |  |
| 2.13  | -3.01 | -0.66 |  |  |
| 1.96  | 0     | 2.47  |  |  |
| 1.96  | -3.01 | -0.54 |  |  |
| 1.83  | -3.01 | -0.44 |  |  |
| 1.58  | 0.08  | 2.86  |  |  |
| 1.57  | 0.23  | 3.02  |  |  |
| 1.53  | -2.96 | -0.13 |  |  |
| 1.52  | -3.52 | -0.69 |  |  |
| 1.5   | 2.78  | 5.64  |  |  |
| 1.38  | -3.58 | -0.61 |  |  |
| 1.37  | 3.97  | 6.95  |  |  |
| 1.26  | 0.32  | 3.42  |  |  |
| 1.18  | -2.64 | 0.57  |  |  |
| -1.04 | -3.52 | -0.03 |  |  |
| -1.04 | -3.66 | -0.15 |  |  |
| -1.06 | -0.14 | 3.39  |  |  |
| -1.1  | 4.53  | 8.11  |  |  |
| -1.18 | 1.99  | 5.67  |  |  |
| -1.25 | 2.18  | 5.94  |  |  |
| -1.37 | -2.04 | 1.86  |  |  |
| 6.61  | -3.04 | -5.45 |  |  |
| -1.8  | -5.37 | -4.22 |  |  |
| -1.57 | -0.37 | -2.78 |  |  |
| -2.41 | 0.18  | -1.6  |  |  |
| -2.61 | -1.83 | -3.5  |  |  |
| -2.74 | -1.1  | -2.71 |  |  |
| -3.13 | 2.37  | 0.97  |  |  |
| -3.36 | -1.84 | -3.15 |  |  |
| 15.91 | 2.33  | -0.08 |  |  |
| 14.69 | -0.63 | -2.91 |  |  |
| 8.72  | 0.61  | -0.92 |  |  |
| 1.46  | 0.18  | 1.22  |  |  |
| 1.18  | 0.07  | 1.42  |  |  |
| 1.18  | 0.26  | 1.61  |  |  |
| 1.21  | 1.76  | -0.64 |  |  |
| -1.2  | 1.32  | -0.56 |  |  |
| -1.55 | -1.88 | -3.38 |  |  |
| 6.54  | 1.15  | -1.25 |  |  |
| 3.22  | 4.79  | 3.41  |  |  |
| 3.04  | 1.99  | 0.69  |  |  |
| 2.97  | 2.39  | 1.13  |  |  |
| 2.65  | 0.22  | -0.88 |  |  |
| 2.51  | 1.26  | 0.23  |  |  |
| -1.65 | 1.3   | 2.33  |  |  |
| -1.79 | -1.41 | -0.27 |  |  |
| -1.82 | -0.46 | 0.71  |  |  |
| -1.85 | -2.48 | -1.29 |  |  |
| -2.06 | 1.06  | 2.41  |  |  |
| -2.32 | -1.02 | 0.5   |  |  |

|       |       |       |  |  |
|-------|-------|-------|--|--|
| -2.38 | -3.86 | -2.3  |  |  |
| -4.69 | -3.47 | -0.94 |  |  |
| 6.54  | 1.15  | -1.25 |  |  |
| 3.22  | 4.79  | 3.41  |  |  |
| 3.04  | 1.99  | 0.69  |  |  |
| 2.97  | 2.39  | 1.13  |  |  |
| 2.65  | 0.22  | -0.88 |  |  |
| 2.51  | 1.26  | 0.23  |  |  |
| -1.65 | 1.3   | 2.33  |  |  |
| -1.79 | -1.41 | -0.27 |  |  |
| -1.82 | -0.46 | 0.71  |  |  |
| -1.85 | -2.48 | -1.29 |  |  |
| -2.06 | 1.06  | 2.41  |  |  |
| -2.32 | -1.02 | 0.5   |  |  |
| -2.38 | -3.86 | -2.3  |  |  |
| -4.69 | -3.47 | -0.94 |  |  |
| 6.54  | 1.15  | -1.25 |  |  |
| 3.22  | 4.79  | 3.41  |  |  |
| 3.04  | 1.99  | 0.69  |  |  |
| 2.97  | 2.39  | 1.13  |  |  |
| 2.65  | 0.22  | -0.88 |  |  |
| 2.51  | 1.26  | 0.23  |  |  |
| -1.65 | 1.3   | 2.33  |  |  |
| -1.79 | -1.41 | -0.27 |  |  |
| -1.82 | -0.46 | 0.71  |  |  |
| -1.85 | -2.48 | -1.29 |  |  |
| -2.06 | 1.06  | 2.41  |  |  |
| -2.32 | -1.02 | 0.5   |  |  |
| -2.38 | -3.86 | -2.3  |  |  |
| -4.69 | -3.47 | -0.94 |  |  |
| 6.54  | 1.15  | -1.25 |  |  |
| 3.22  | 4.79  | 3.41  |  |  |
| 3.04  | 1.99  | 0.69  |  |  |
| 2.97  | 2.39  | 1.13  |  |  |
| 2.65  | 0.22  | -0.88 |  |  |
| 2.51  | 1.26  | 0.23  |  |  |
| -1.65 | 1.3   | 2.33  |  |  |
| -1.79 | -1.41 | -0.27 |  |  |
| -1.82 | -0.46 | 0.71  |  |  |
| -1.85 | -2.48 | -1.29 |  |  |
| -2.06 | 1.06  | 2.41  |  |  |
| -2.32 | -1.02 | 0.5   |  |  |
| -2.38 | -3.86 | -2.3  |  |  |
| -4.69 | -3.47 | -0.94 |  |  |
| 2.83  | -1.31 | -3.71 |  |  |
| 2.52  | -1.31 | -3.54 |  |  |
| 1.95  | 1.44  | -0.42 |  |  |
| 1.63  | -0.01 | -1.61 |  |  |
| 1.52  | -0.45 | -1.95 |  |  |
| 1.5   | -0.89 | -2.37 |  |  |
| 1.34  | -1.75 | -3.07 |  |  |
| 1.33  | -0.59 | -1.9  |  |  |
| 1.28  | 5.11  | 3.86  |  |  |
| 1.28  | 4.83  | 3.57  |  |  |
| 1.27  | -0.21 | -1.45 |  |  |
| 1.23  | -0.48 | -1.67 |  |  |
| 1.13  | -0.01 | -1.08 |  |  |
| 1.12  | -2.38 | -3.44 |  |  |

|        |       |       |  |  |
|--------|-------|-------|--|--|
| 1.11   | -0.62 | -1.67 |  |  |
| 1.1    | 0.18  | -0.86 |  |  |
| -5.18  | -3.33 | -1.86 |  |  |
| -6.03  | -2.63 | -0.94 |  |  |
| 1.19   | 1.69  | -0.71 |  |  |
| 1.16   | -2.77 | -5.13 |  |  |
| 1.16   | -1.1  | -3.45 |  |  |
| -1.12  | -2.27 | -4.26 |  |  |
| -1.13  | 1.11  | -0.85 |  |  |
| -1.2   | -2.18 | -4.06 |  |  |
| -1.27  | -2.87 | -4.67 |  |  |
| -1.3   | -0.03 | -1.8  |  |  |
| -1.49  | 3.41  | 1.84  |  |  |
| -1.51  | -2.13 | -3.68 |  |  |
| -1.52  | -2.3  | -3.84 |  |  |
| -1.56  | -3.32 | -4.82 |  |  |
| -1.56  | -2.18 | -3.68 |  |  |
| -1.64  | -1.39 | -2.82 |  |  |
| -1.69  | -1.92 | -3.31 |  |  |
| -1.82  | 3.95  | 2.67  |  |  |
| -1.99  | 0.01  | -1.14 |  |  |
| -2.02  | -2.69 | -3.82 |  |  |
| -2.09  | 2.27  | 1.19  |  |  |
| 2.53   | -4.7  | -7.1  |  |  |
| 1.14   | -1.27 | -2.52 |  |  |
| 1.12   | -4.19 | -5.42 |  |  |
| 1.11   | -0.36 | -1.57 |  |  |
| 1.04   | -5.79 | -6.9  |  |  |
| 1.04   | -1.96 | -3.07 |  |  |
| 1.01   | -0.08 | -1.16 |  |  |
| -1.01  | -0.78 | -1.83 |  |  |
| -4.63  | -3.36 | -2.21 |  |  |
| 3.48   | 2.52  | 0.12  |  |  |
| 1.68   | -0.18 | -1.52 |  |  |
| -3.11  | -2.77 | -1.74 |  |  |
| -4.49  | -5.31 | -3.74 |  |  |
| 2.48   | 3.15  | 0.75  |  |  |
| 2.27   | 3.15  | 0.88  |  |  |
| 1.29   | -1.21 | -2.66 |  |  |
| 1.2    | 2.74  | 1.39  |  |  |
| 1.07   | 0.76  | -0.42 |  |  |
| -4.42  | -3.3  | -2.25 |  |  |
| 2      | -2.93 | -5.33 |  |  |
| 1.34   | -0.14 | -1.96 |  |  |
| -1.02  | -0.52 | -1.9  |  |  |
| -1.15  | -0.1  | -1.3  |  |  |
| -1.26  | -3.3  | -4.37 |  |  |
| -1.28  | -0.95 | -1.99 |  |  |
| 1.23   | 3.96  | 1.56  |  |  |
| 1.2    | 1.89  | -0.47 |  |  |
| 1.13   | 3.56  | 1.27  |  |  |
| -1.03  | 2.46  | 0.4   |  |  |
| -1.22  | 2.38  | 0.56  |  |  |
| -1.7   | -1.73 | -3.07 |  |  |
| -8.8   | -1.86 | -0.82 |  |  |
| -13.48 | -0.84 | 0.81  |  |  |
| 2.25   | -1.25 | -3.65 |  |  |
| 1.57   | -2.83 | -4.71 |  |  |

|        |       |       |  |  |
|--------|-------|-------|--|--|
| 1.51   | 2.92  | 1.1   |  |  |
| 1.33   | 1.86  | 0.23  |  |  |
| 1.2    | 5.31  | 3.82  |  |  |
| 1.2    | 1.18  | -0.31 |  |  |
| 1.14   | -3.01 | -4.42 |  |  |
| 1.13   | -0.94 | -2.34 |  |  |
| 1.1    | -1.41 | -2.76 |  |  |
| 1.07   | -3.84 | -5.16 |  |  |
| 1.04   | 3.35  | 2.07  |  |  |
| 1.02   | 1.01  | -0.25 |  |  |
| 1      | -2.78 | -4.01 |  |  |
| -1.03  | -0.04 | -1.23 |  |  |
| -1.08  | 0.74  | -0.38 |  |  |
| -1.08  | 3.28  | 2.16  |  |  |
| -1.12  | -0.83 | -1.9  |  |  |
| -1.15  | -3.56 | -4.59 |  |  |
| -1.16  | -0.99 | -2    |  |  |
| -5.13  | -2.83 | -1.69 |  |  |
| -5.14  | -1.27 | -0.13 |  |  |
| -12.5  | -4.37 | -1.95 |  |  |
| -20.94 | -3.35 | -0.18 |  |  |
| 9.96   | 1.23  | -1.17 |  |  |
| 7      | -0.94 | -2.83 |  |  |
| 6.64   | 1.68  | -0.13 |  |  |
| 5.24   | -2.02 | -3.49 |  |  |
| 3.99   | -2.4  | -3.47 |  |  |
| 1.13   | 2.61  | 0.22  |  |  |
| 1.1    | -3.19 | -5.54 |  |  |
| -1.12  | -4.44 | -6.49 |  |  |
| -1.35  | -1.21 | -2.98 |  |  |
| -1.54  | -1.91 | -3.5  |  |  |
| -1.73  | 1.49  | 0.07  |  |  |
| -2.1   | -4.52 | -5.66 |  |  |
| -2.16  | -1.92 | -3.02 |  |  |
| 1.68   | -0.34 | -2.74 |  |  |
| 1.35   | -0.29 | -2.37 |  |  |
| -1.06  | -0.63 | -2.19 |  |  |
| -1.15  | -1.15 | -2.6  |  |  |
| -1.19  | 4.86  | 3.46  |  |  |
| -1.3   | 1.85  | 0.58  |  |  |
| -1.5   | 1.69  | 0.63  |  |  |
| -1.51  | -2.48 | -3.53 |  |  |
| -6.53  | -1.69 | -0.63 |  |  |
| -8.07  | -2.14 | -0.78 |  |  |
| 2.6    | 1.38  | -1.01 |  |  |
| 1.78   | 4.01  | 2.17  |  |  |
| 1.71   | 0.4   | -1.39 |  |  |
| 1.3    | -0.04 | -1.42 |  |  |
| 1.27   | 1.5   | 0.15  |  |  |
| 1.24   | 3.56  | 2.24  |  |  |
| 1.12   | 5.04  | 3.86  |  |  |
| 1.11   | 1.89  | 0.73  |  |  |
| 1.08   | 0.65  | -0.47 |  |  |
| 1.06   | 5.33  | 4.22  |  |  |
| 1.02   | 4.32  | 3.28  |  |  |
| 1.01   | -0.39 | -1.42 |  |  |
| -4.48  | -1.29 | -0.14 |  |  |
| -4.61  | -0.91 | 0.28  |  |  |

|        |       |       |  |  |
|--------|-------|-------|--|--|
| -4.69  | 0.08  | 1.3   |  |  |
| -7.62  | -2.25 | -0.33 |  |  |
| 9.68   | 1.34  | -1.05 |  |  |
| 5.89   | 3.18  | 1.51  |  |  |
| 4.81   | -0.97 | -2.35 |  |  |
| 4.65   | -1.11 | -2.44 |  |  |
| 4.38   | 2.61  | 1.36  |  |  |
| 3.69   | 1.13  | 0.13  |  |  |
| 3.28   | 0.43  | -1.95 |  |  |
| 2.68   | -0.76 | -2.85 |  |  |
| 2.47   | 0.92  | -1.05 |  |  |
| 1.51   | -0.1  | -1.37 |  |  |
| 1.48   | 3     | 1.77  |  |  |
| 1.38   | -0.53 | -1.67 |  |  |
| 1.29   | 3.03  | 1.99  |  |  |
| 1.27   | 3.47  | 2.46  |  |  |
| 3.09   | -0.52 | -2.91 |  |  |
| 1.44   | 0.12  | -1.16 |  |  |
| 1.32   | -1.07 | -2.22 |  |  |
| 1.28   | -1.72 | -2.83 |  |  |
| 1.24   | -1.26 | -2.33 |  |  |
| 1.18   | -1.35 | -2.35 |  |  |
| 28.3   | 1.11  | -1.27 |  |  |
| 19.77  | 1.44  | -0.43 |  |  |
| 2.52   | 0.63  | 1.74  |  |  |
| 2.14   | -1.9  | -0.55 |  |  |
| 1.61   | -0.37 | 1.38  |  |  |
| 1.12   | 0.05  | 2.32  |  |  |
| -1.03  | 3.21  | 5.69  |  |  |
| -1.18  | 0.07  | 2.76  |  |  |
| -1.34  | -1.97 | 0.9   |  |  |
| 228.19 | 0.89  | -1.49 |  |  |
| 122.64 | 0.04  | -1.45 |  |  |
| 121.35 | 0.84  | -0.64 |  |  |
| 105.2  | -0.15 | -1.42 |  |  |
| 105.51 | -0.71 | -1.98 |  |  |
| 92.94  | 1.05  | -0.04 |  |  |
| 17.85  | -1.82 | -0.53 |  |  |
| 17.64  | -3.47 | -2.16 |  |  |
| 15.74  | 0.04  | 1.51  |  |  |
| 15.33  | -0.55 | 0.96  |  |  |
| 15.29  | -1.57 | -0.06 |  |  |
| 11.65  | -3.05 | -1.15 |  |  |
| 11.48  | -2.46 | -0.53 |  |  |
| 11.45  | -1.91 | 0.03  |  |  |
| 11.4   | -3.85 | -1.91 |  |  |
| 8.74   | -2.44 | -0.12 |  |  |
| 7.61   | -2.36 | 0.16  |  |  |
| 6.86   | -3.93 | -1.26 |  |  |
| 6.77   | -1.01 | 1.68  |  |  |
| 6.53   | -3.86 | -1.12 |  |  |
| 5.85   | -5.01 | -2.11 |  |  |
| 3.29   | 0.39  | 4.12  |  |  |
| 2.65   | -0.65 | 3.4   |  |  |
| 2.17   | -1.92 | 2.41  |  |  |
| 1.95   | -2.2  | 2.28  |  |  |
| 1.81   | -3.65 | 0.95  |  |  |
| 1.59   | -6.96 | -2.18 |  |  |

|        |       |       |  |  |
|--------|-------|-------|--|--|
| 2.37   | 2.03  | -0.35 |  |  |
| 1.59   | 2.7   | 0.9   |  |  |
| 1.44   | 3.64  | 1.99  |  |  |
| 1.21   | 1.38  | -0.02 |  |  |
| 1.21   | -0.79 | -2.2  |  |  |
| 1.18   | 0.17  | -1.2  |  |  |
| 1.16   | 1.08  | -0.27 |  |  |
| 1.11   | -0.43 | -1.71 |  |  |
| 1.1    | 1.92  | 0.64  |  |  |
| 1.03   | -0.74 | -1.92 |  |  |
| -1.03  | 2.16  | 1.07  |  |  |
| -5.56  | 0.85  | 2.19  |  |  |
| -10.22 | 0.14  | 2.36  |  |  |
| -11.58 | -0.37 | 2.03  |  |  |
| -22.66 | -0.78 | 2.58  |  |  |
| -23.46 | -2.68 | 0.74  |  |  |
| 4.76   | -1.02 | -3.4  |  |  |
| 2.49   | -1.99 | -3.43 |  |  |
| 2.14   | 2.32  | 1.09  |  |  |
| 1.86   | 3.03  | 2.01  |  |  |
| 1.86   | -0.71 | -1.74 |  |  |
| 14.61  | -3.55 | -5.94 |  |  |
| 9.63   | -2.97 | -4.75 |  |  |
| 8.69   | -4.19 | -5.82 |  |  |
| 8.01   | -2.81 | -4.33 |  |  |
| 7.87   | -2.17 | -3.66 |  |  |
| 7.53   | -2.91 | -4.33 |  |  |
| 7.46   | -3.15 | -4.56 |  |  |
| 7.26   | -1.69 | -3.06 |  |  |
| 5.99   | -1.79 | -2.89 |  |  |
| 5.8    | -2.93 | -3.98 |  |  |
| 5.78   | -3.5  | -4.54 |  |  |
| 5.68   | -2.41 | -3.43 |  |  |
| 1.4    | 1.18  | 2.18  |  |  |
| 1.39   | 1.57  | 2.58  |  |  |
| 1.38   | 1.39  | 2.42  |  |  |
| 1.33   | 0.93  | 2     |  |  |
| 1.3    | 1.53  | 2.64  |  |  |
| 1.27   | 0.73  | 1.87  |  |  |
| 1.24   | 1.29  | 2.46  |  |  |
| 1.23   | 1.34  | 2.53  |  |  |
| 1.18   | 1.41  | 2.66  |  |  |
| 1.17   | 1.02  | 2.27  |  |  |
| 1.17   | 1.35  | 2.62  |  |  |
| 1.03   | 0.95  | 2.39  |  |  |
| 1.02   | -5.13 | -3.67 |  |  |
| 2.17   | -1.52 | -3.9  |  |  |
| 1.53   | -1.56 | -3.44 |  |  |
| 1.29   | -2.89 | -4.51 |  |  |
| 1.1    | -1.54 | -2.95 |  |  |
| 1.03   | -0.85 | -2.16 |  |  |
| 1.02   | 4     | 2.72  |  |  |
| -1.15  | 0.34  | -0.72 |  |  |
| 2.53   | -1.08 | -3.45 |  |  |
| 1.32   | 1.17  | -0.27 |  |  |
| 1.27   | -2.61 | -3.99 |  |  |
| 1.25   | -2.01 | -3.37 |  |  |
| 1.13   | -0.02 | -1.23 |  |  |

|        |       |       |  |  |
|--------|-------|-------|--|--|
| 1.05   | -0.34 | -1.45 |  |  |
| 1      | -2.13 | -3.17 |  |  |
| -1     | 0.54  | -0.49 |  |  |
| -1     | 0.8   | -0.23 |  |  |
| -1.03  | -1.45 | -2.45 |  |  |
| 4.88   | -3.08 | -5.46 |  |  |
| 2.32   | -0.85 | -2.16 |  |  |
| 2.02   | -0.22 | -1.33 |  |  |
| 2.02   | -0.36 | -1.46 |  |  |
| 2.02   | -0.36 | -1.46 |  |  |
| 1.97   | 0.02  | -1.05 |  |  |
| 1.97   | 0.02  | -1.05 |  |  |
| 1.93   | -0.06 | -1.1  |  |  |
| 2.02   | -4.93 | -7.31 |  |  |
| 1.66   | -2.66 | -4.75 |  |  |
| 1.59   | -3.47 | -5.51 |  |  |
| 1.51   | -0.22 | -2.18 |  |  |
| 1.51   | -2.87 | -4.82 |  |  |
| 1.42   | -3.42 | -5.28 |  |  |
| 1.39   | -4.14 | -5.98 |  |  |
| 1.39   | -4.04 | -5.88 |  |  |
| 1.33   | -2.4  | -4.17 |  |  |
| 1.3    | -2.68 | -4.42 |  |  |
| 1.18   | -4.41 | -6.01 |  |  |
| 1.17   | -5.17 | -6.75 |  |  |
| 1.13   | -1.31 | -2.85 |  |  |
| 1.12   | -2.1  | -3.63 |  |  |
| 1.09   | -4.46 | -5.95 |  |  |
| 1.04   | -4.76 | -6.18 |  |  |
| -1.03  | -1.1  | -2.41 |  |  |
| -1.04  | -3.03 | -4.33 |  |  |
| -1.05  | -1.93 | -3.22 |  |  |
| -1.09  | -5.25 | -6.49 |  |  |
| -1.13  | -0.18 | -1.38 |  |  |
| -1.14  | -2.04 | -3.21 |  |  |
| -1.15  | -3    | -4.16 |  |  |
| -1.17  | 1.48  | 0.34  |  |  |
| -1.18  | -5.31 | -6.43 |  |  |
| -1.2   | -3.19 | -4.29 |  |  |
| -1.23  | -4.83 | -5.9  |  |  |
| -1.23  | -5.56 | -6.63 |  |  |
| -1.24  | -4.25 | -5.3  |  |  |
| -1.27  | -4.96 | -5.98 |  |  |
| -1.28  | -4.59 | -5.59 |  |  |
| -10.33 | -4.33 | -2.32 |  |  |
| 37.33  | -1.98 | -4.36 |  |  |
| 3.56   | -3.77 | -2.75 |  |  |
| 3.28   | -3.87 | -2.73 |  |  |
| 3.28   | -4.33 | -3.2  |  |  |
| 2.93   | -4.7  | -3.4  |  |  |
| 2.87   | -2.45 | -1.12 |  |  |
| 2.16   | -3.06 | -1.33 |  |  |
| 1.98   | -4.68 | -2.82 |  |  |
| 1.79   | -3.71 | -1.7  |  |  |
| 1.78   | -3.06 | -1.04 |  |  |
| 1.73   | -3.61 | -1.56 |  |  |
| 1.65   | -2.94 | -0.81 |  |  |
| 1.51   | -6.04 | -3.79 |  |  |

|       |       |       |  |  |
|-------|-------|-------|--|--|
| 1.37  | -5.81 | -3.42 |  |  |
| 1.27  | -7.1  | -4.61 |  |  |
| 1.07  | -7.49 | -4.74 |  |  |
| -1.02 | -7.35 | -4.47 |  |  |
| 7.33  | 3.54  | 1.17  |  |  |
| 7.16  | 2.45  | 0.11  |  |  |
| 6.12  | 5.65  | 3.54  |  |  |
| 5.37  | 3.96  | 2.03  |  |  |
| 5.23  | 2.21  | 0.33  |  |  |
| 4.89  | 0.94  | -0.84 |  |  |
| 4.84  | 4.17  | 2.4   |  |  |
| 4.37  | 2.28  | 0.65  |  |  |
| 4.23  | 1.88  | 0.3   |  |  |
| 3.75  | 3.21  | 1.81  |  |  |
| 3.48  | 1.71  | 0.41  |  |  |
| 3.35  | 2.37  | 1.13  |  |  |
| 3.23  | 3.05  | 1.86  |  |  |
| 2.94  | 4.84  | 3.78  |  |  |
| 2.94  | 1.15  | 0.1   |  |  |
| 2.92  | 4.11  | 3.07  |  |  |
| -1.69 | 3.71  | 4.98  |  |  |
| -2.89 | -0.22 | 1.81  |  |  |
| 2.78  | -2    | -4.37 |  |  |
| 1.36  | -0.32 | -1.66 |  |  |
| 1.19  | 0.3   | -0.84 |  |  |
| 1.12  | 0.31  | -0.74 |  |  |
| 1.11  | -0.74 | -1.78 |  |  |
| 3.74  | -3.42 | -5.79 |  |  |
| -2.85 | -3.91 | -2.87 |  |  |
| 5.56  | 5.86  | 3.5   |  |  |
| 3.83  | 3.4   | 1.57  |  |  |
| 3.58  | 0.49  | -1.24 |  |  |
| 2     | 0.89  | -1.48 |  |  |
| 1.73  | 0.18  | -1.97 |  |  |
| 1.39  | 0.84  | -0.99 |  |  |
| 1.32  | 0.82  | -0.94 |  |  |
| 1.28  | 1.08  | -0.64 |  |  |
| 1.21  | 1.64  | 0     |  |  |
| 1.19  | -0.16 | -1.78 |  |  |
| 1.13  | 2.2   | 0.65  |  |  |
| 1.1   | 1.57  | 0.07  |  |  |
| 1.03  | 0.53  | -0.87 |  |  |
| 1     | -1.66 | -3.03 |  |  |
| 1     | 2.17  | 0.8   |  |  |
| -1.09 | -1.88 | -3.12 |  |  |
| -6.56 | -2.45 | -1.1  |  |  |
| 2.64  | -0.31 | -2.68 |  |  |
| 1.26  | 0.31  | -1    |  |  |
| 1.26  | 2.45  | 1.15  |  |  |
| 1.19  | -2.19 | -3.41 |  |  |
| 1.19  | 1.31  | 0.08  |  |  |
| 1.14  | -1.93 | -3.08 |  |  |
| 1.14  | 2.17  | 1.02  |  |  |
| 1.08  | 2.74  | 1.66  |  |  |
| 4.54  | -4.35 | -6.71 |  |  |
| 2.16  | -3.69 | -4.98 |  |  |
| 1.77  | -0.57 | -1.58 |  |  |
| 1.31  | -0.6  | -2.96 |  |  |



|        |       |       |  |  |
|--------|-------|-------|--|--|
| 1.14   | -3.15 | -5.3  |  |  |
| -1.27  | 0.03  | -1.6  |  |  |
| -1.39  | -1.83 | -3.32 |  |  |
| -1.53  | 1.96  | 0.6   |  |  |
| 1.36   | 1.79  | -0.57 |  |  |
| 1.23   | 0.78  | -1.43 |  |  |
| 1.07   | -3.73 | -5.74 |  |  |
| -1.12  | -1.56 | -3.32 |  |  |
| -1.21  | -3.1  | -4.74 |  |  |
| 4.02   | 3.97  | 1.61  |  |  |
| 1.72   | -0.68 | -1.82 |  |  |
| 1.67   | -1.39 | -2.48 |  |  |
| 1.64   | -0.77 | -1.83 |  |  |
| -2.57  | -1.82 | -0.81 |  |  |
| -2.74  | -4.37 | -3.26 |  |  |
| -1.3   | -3.55 | -5.91 |  |  |
| -1.9   | 2.86  | 1.04  |  |  |
| 3.27   | -0.74 | -3.09 |  |  |
| 2.15   | 2.79  | 1.05  |  |  |
| 1.79   | -0.71 | -2.19 |  |  |
| 1.69   | -0.56 | -1.96 |  |  |
| 1.55   | 2.12  | 0.84  |  |  |
| 1.54   | 0.23  | -1.04 |  |  |
| 1.49   | -1.57 | -2.78 |  |  |
| 1.38   | -0.55 | -1.66 |  |  |
| 1.38   | -1.01 | -2.12 |  |  |
| 1.31   | 0.02  | -1.01 |  |  |
| 1.3    | -1.85 | -2.87 |  |  |
| -3.25  | 1.03  | 2.08  |  |  |
| -3.82  | -1.29 | 0     |  |  |
| -4.01  | -1.28 | 0.08  |  |  |
| -4.19  | -1.7  | -0.28 |  |  |
| 5.46   | 4.19  | 1.83  |  |  |
| 4.01   | 0.95  | -0.95 |  |  |
| 1.33   | -1.02 | -3.37 |  |  |
| 1.21   | 0.75  | -1.45 |  |  |
| 1.05   | -4.11 | -6.11 |  |  |
| -1.04  | -3.68 | -5.57 |  |  |
| -1.15  | -3.8  | -5.54 |  |  |
| -1.3   | -1.46 | -3.02 |  |  |
| -1.45  | -3.03 | -4.44 |  |  |
| -1.6   | -0.25 | -1.51 |  |  |
| -1.76  | -2.22 | -3.34 |  |  |
| -1.92  | 1.43  | 0.43  |  |  |
| -7.64  | -0.99 | 0     |  |  |
| -7.82  | -0.82 | 0.21  |  |  |
| -7.95  | -0.03 | 1.03  |  |  |
| -10.09 | -0.01 | 1.39  |  |  |
| 5.02   | -2.65 | -5    |  |  |
| -2.11  | -2.98 | -1.92 |  |  |
| -2.17  | -0.3  | 0.8   |  |  |
| -2.51  | -2.62 | -1.32 |  |  |
| 2.88   | 3.26  | 0.91  |  |  |
| 1.46   | 3.03  | 1.66  |  |  |
| 1.32   | 0.03  | -1.2  |  |  |
| 1.26   | 0.56  | -0.59 |  |  |
| 1.23   | 2.57  | 1.44  |  |  |
| 1.22   | 2.12  | 1     |  |  |

|        |       |       |  |  |
|--------|-------|-------|--|--|
| 1.18   | -1.68 | -2.75 |  |  |
| 1.15   | 3.79  | 2.76  |  |  |
| -3.89  | -0.35 | 0.78  |  |  |
| -3.99  | -1.57 | -0.4  |  |  |
| -4.2   | -2.03 | -0.78 |  |  |
| -4.22  | -0.36 | 0.89  |  |  |
| -4.32  | -2.27 | -0.98 |  |  |
| -4.45  | -0.61 | 0.71  |  |  |
| -4.44  | -1.47 | -0.14 |  |  |
| -4.91  | -2.69 | -1.22 |  |  |
| -5.04  | 1.23  | 2.74  |  |  |
| -5.46  | -1.36 | 0.26  |  |  |
| -5.49  | -0.53 | 1.1   |  |  |
| -5.68  | -2.36 | -0.68 |  |  |
| -5.91  | -2.64 | -0.9  |  |  |
| -7.73  | -1.11 | 1.02  |  |  |
| -9.48  | -3.03 | -0.61 |  |  |
| -10.77 | -1.99 | 0.62  |  |  |
| 5.9    | 0.98  | -1.37 |  |  |
| -1.73  | -1.33 | -0.32 |  |  |
| -3.07  | -3.99 | -2.16 |  |  |
| 1.44   | 4.8   | 2.46  |  |  |
| 1.28   | 2.79  | 0.61  |  |  |
| 1.04   | 3.52  | 1.64  |  |  |
| -1.08  | 5.61  | 3.9   |  |  |
| -1.34  | 1.45  | 0.05  |  |  |
| -7.28  | -1.32 | -0.28 |  |  |
| -7.64  | -0.88 | 0.23  |  |  |
| -8.02  | -0.58 | 0.6   |  |  |
| 2.69   | -0.37 | -2.72 |  |  |
| 1.17   | 3.96  | 2.81  |  |  |
| 1.14   | 1.75  | 0.65  |  |  |
| 31.14  | 0.37  | -1.98 |  |  |
| 21.1   | -0.28 | -2.07 |  |  |
| 16.13  | -0.35 | -1.75 |  |  |
| 15.62  | -1    | -2.35 |  |  |
| 14.95  | -0.97 | -2.26 |  |  |
| 12.25  | 0.65  | -0.36 |  |  |
| 2.9    | -0.2  | 0.88  |  |  |
| 2.88   | -1.42 | -0.33 |  |  |
| 2.81   | -3.88 | -2.76 |  |  |
| 2.73   | -4.07 | -2.9  |  |  |
| 2.72   | -0.91 | 0.26  |  |  |
| 2.49   | -2.79 | -1.5  |  |  |
| 2.38   | -3.67 | -2.31 |  |  |
| 2.13   | -2.64 | -1.12 |  |  |
| 1.95   | 1.18  | 2.83  |  |  |
| 1.89   | 1.61  | 3.3   |  |  |
| 1.76   | -1.84 | -0.04 |  |  |
| 1.69   | -0.32 | 1.54  |  |  |
| 1.6    | -0.89 | 1.05  |  |  |
| 1.59   | -4.68 | -2.74 |  |  |
| 1.55   | -2.96 | -0.98 |  |  |
| 1.46   | -2.24 | -0.18 |  |  |
| 1.45   | -1.95 | 0.13  |  |  |
| 1.33   | 0.52  | 2.72  |  |  |
| 1.3    | -2.41 | -0.18 |  |  |
| 1.09   | -4.56 | -2.07 |  |  |

|        |       |       |  |  |
|--------|-------|-------|--|--|
| 1.09   | -5.2  | -2.71 |  |  |
| -1.03  | 5.64  | 8.29  |  |  |
| -1.12  | -0.33 | 2.44  |  |  |
| -1.31  | -1.65 | 1.35  |  |  |
| -1.36  | -4.83 | -1.78 |  |  |
| 3.26   | -2.92 | -5.27 |  |  |
| 1.58   | -3.49 | -4.78 |  |  |
| 1.3    | 0.66  | -0.36 |  |  |
| 3.66   | 0.65  | -1.69 |  |  |
| 3.08   | -1.65 | -3.74 |  |  |
| 1.53   | -0.37 | -1.46 |  |  |
| -3.5   | -3.26 | -1.92 |  |  |
| -4.01  | -1.57 | -0.03 |  |  |
| -4.01  | -2.96 | -1.43 |  |  |
| -4.13  | -1.57 | 0.01  |  |  |
| -4.32  | -2.44 | -0.8  |  |  |
| 66.72  | -0.15 | -2.48 |  |  |
| 32.57  | 0.37  | -0.93 |  |  |
| 5.5    | -2.34 | -1.08 |  |  |
| 3.93   | -2.07 | -0.32 |  |  |
| 3.72   | -2.26 | -0.43 |  |  |
| 2.98   | -3.31 | -1.16 |  |  |
| 1.05   | -3.43 | 0.22  |  |  |
| 1.14   | -1.02 | -3.36 |  |  |
| 1      | 5.67  | 3.53  |  |  |
| -1.41  | -4.16 | -5.81 |  |  |
| -1.54  | -4.45 | -5.96 |  |  |
| -10.83 | -2.32 | -1.02 |  |  |
| 5.12   | 4.26  | 1.92  |  |  |
| 3.87   | 3.27  | 1.34  |  |  |
| 2.62   | -0.76 | -2.13 |  |  |
| 2.03   | 0.19  | -0.82 |  |  |
| -3.42  | -1.94 | -0.15 |  |  |
| 15.53  | -1.86 | -4.19 |  |  |
| 12.91  | -0.92 | -2.98 |  |  |
| 9.1    | -1.62 | -3.18 |  |  |
| 8.85   | -2.39 | -3.91 |  |  |
| 7.57   | 1.02  | -0.28 |  |  |
| 7.22   | 0.34  | -0.89 |  |  |
| 6.32   | -3.64 | -4.68 |  |  |
| 6.2    | 1.58  | 0.57  |  |  |
| 1.45   | 2.45  | 3.54  |  |  |
| 1.17   | 2.59  | 3.99  |  |  |
| -1.32  | 2.91  | 4.94  |  |  |
| 16.37  | -0.98 | -3.31 |  |  |
| 8.13   | -0.54 | -1.87 |  |  |
| 7.43   | 2.43  | 1.24  |  |  |
| 6.92   | 2.02  | 0.93  |  |  |
| 1.37   | -3.84 | -2.6  |  |  |
| -1.04  | -3.21 | -1.46 |  |  |
| -1.09  | -2.72 | -0.9  |  |  |
| -1.37  | -2.04 | 0.12  |  |  |
| 1.33   | -1.22 | -3.55 |  |  |
| 1.31   | -0.76 | -3.07 |  |  |
| -1.1   | -7.55 | -9.33 |  |  |
| -1.14  | -2.78 | -4.51 |  |  |
| -1.75  | -4.11 | -5.22 |  |  |
| -8.35  | -6.58 | -5.43 |  |  |

|        |       |       |  |  |
|--------|-------|-------|--|--|
| -9.76  | -5.92 | -4.54 |  |  |
| -12.83 | -6.59 | -4.82 |  |  |
| -13.88 | -6.2  | -4.32 |  |  |
| 2.97   | 0.01  | -2.32 |  |  |
| 1.44   | -0.5  | -1.78 |  |  |
| 1.39   | -1.85 | -3.08 |  |  |
| 1.33   | -3.94 | -5.1  |  |  |
| 1.24   | -0.69 | -1.75 |  |  |
| 1.24   | -0.95 | -2.01 |  |  |
| 1.22   | 0.78  | -0.26 |  |  |
| -5.35  | -2.57 | -0.91 |  |  |
| 2.29   | -2.45 | -4.78 |  |  |
| 1.88   | -1.37 | -3.42 |  |  |
| 1.88   | 1.13  | -0.91 |  |  |
| 1.58   | -3.75 | -5.53 |  |  |
| 1.53   | -3.76 | -5.5  |  |  |
| 1.43   | -0.12 | -1.77 |  |  |
| 1.43   | -3.26 | -4.91 |  |  |
| 1.33   | 1.5   | -0.04 |  |  |
| 1.3    | -2    | -3.51 |  |  |
| 1.27   | -1.28 | -2.75 |  |  |
| 1.27   | -1.48 | -2.95 |  |  |
| 1.21   | -1.02 | -2.43 |  |  |
| 1.19   | -1.65 | -3.03 |  |  |
| 1.18   | -2.82 | -4.2  |  |  |
| 1.18   | -1.44 | -2.81 |  |  |
| 1.13   | -1.3  | -2.61 |  |  |
| 1.07   | -1.55 | -2.78 |  |  |
| 1.05   | 0.7   | -0.5  |  |  |
| 1.04   | -3.69 | -4.89 |  |  |
| 1.04   | -0.5  | -1.69 |  |  |
| 1.02   | -3.61 | -4.77 |  |  |
| 1.02   | -4.03 | -5.19 |  |  |
| -1     | -0.88 | -2.01 |  |  |
| -1.01  | 1.41  | 0.3   |  |  |
| -1.04  | -1.55 | -2.63 |  |  |
| -1.04  | -0.55 | -1.62 |  |  |
| -1.05  | -2.06 | -3.11 |  |  |
| -1.06  | -1.74 | -2.78 |  |  |
| -1.06  | -3.64 | -4.69 |  |  |
| -1.06  | 2.19  | 1.14  |  |  |
| -1.06  | 0.02  | -1.03 |  |  |
| -1.06  | -2.96 | -4    |  |  |
| -1.06  | -3.18 | -4.22 |  |  |
| -1.06  | 1.36  | 0.31  |  |  |
| -1.07  | -3.19 | -4.22 |  |  |
| -1.08  | -0.53 | -1.55 |  |  |
| -1.08  | -3.67 | -4.68 |  |  |
| -1.08  | -4.03 | -5.05 |  |  |
| -1.08  | -2.95 | -3.97 |  |  |
| -1.08  | 0.68  | -0.34 |  |  |
| -1.09  | -0.63 | -1.64 |  |  |
| -1.09  | -0.49 | -1.5  |  |  |
| -1.09  | -1.8  | -2.8  |  |  |
| -4.37  | -0.79 | 0.2   |  |  |
| -4.4   | -1.05 | -0.04 |  |  |
| -4.42  | -1.61 | -0.6  |  |  |
| -4.47  | -1.37 | -0.34 |  |  |

|       |       |       |  |  |
|-------|-------|-------|--|--|
| -4.49 | -2.48 | -1.44 |  |  |
| -4.54 | 0.59  | 1.64  |  |  |
| -4.6  | -2.73 | -1.66 |  |  |
| -4.75 | -2.3  | -1.18 |  |  |
| -4.76 | -0.73 | 0.39  |  |  |
| -4.74 | -1.75 | -0.63 |  |  |
| -4.97 | -0.47 | 0.71  |  |  |
| -5.01 | -2.04 | -0.84 |  |  |
| -5.06 | -0.68 | 0.52  |  |  |
| -5.13 | -3.61 | -2.38 |  |  |
| -5.52 | 0.17  | 1.5   |  |  |
| -5.62 | 0     | 1.36  |  |  |
| -6.58 | -4.39 | -2.8  |  |  |
| -6.61 | -0.62 | 0.98  |  |  |
| -6.65 | -3.96 | -2.36 |  |  |
| -7.3  | -4.88 | -3.14 |  |  |
| -9.54 | -3.56 | -1.44 |  |  |
| 2.97  | 0.25  | -2.06 |  |  |
| 1.42  | -0.51 | -1.77 |  |  |
| 1.36  | -3.4  | -4.59 |  |  |
| 3.42  | -2.92 | -5.23 |  |  |
| 2.48  | -2.46 | -4.31 |  |  |
| 1.9   | -2.97 | -4.44 |  |  |
| 1.64  | 1.05  | -0.21 |  |  |
| 1.43  | -0.11 | -1.16 |  |  |
| 1.42  | -0.7  | -1.75 |  |  |
| 1.39  | -1.2  | -2.21 |  |  |
| -3.02 | -0.03 | 1.02  |  |  |
| -3.03 | 0.6   | 1.66  |  |  |
| -3.18 | -0.87 | 0.25  |  |  |
| -3.62 | -1.26 | 0.06  |  |  |
| -6.79 | -3.78 | -1.55 |  |  |
| 4.12  | -2.32 | -4.64 |  |  |
| 2.47  | 2.96  | 1.38  |  |  |
| 2.05  | -2.78 | -4.09 |  |  |
| 3.42  | -2.92 | -5.23 |  |  |
| 2.48  | -2.46 | -4.31 |  |  |
| 1.9   | -2.97 | -4.44 |  |  |
| 1.64  | 1.05  | -0.21 |  |  |
| 1.43  | -0.11 | -1.16 |  |  |
| 1.42  | -0.7  | -1.75 |  |  |
| 1.39  | -1.2  | -2.21 |  |  |
| -3.03 | 0.6   | 1.66  |  |  |
| -3.18 | -0.87 | 0.25  |  |  |
| -3.81 | -1.25 | 0.13  |  |  |
| -6.79 | -3.78 | -1.55 |  |  |
| 3.32  | 1.42  | -0.9  |  |  |
| 1.97  | 0.14  | -1.43 |  |  |
| 1.46  | 0.19  | -0.95 |  |  |
| 1.33  | -0.74 | -1.74 |  |  |
| 3.11  | -0.79 | -3.11 |  |  |
| 1.77  | -4.18 | -5.68 |  |  |
| 1.63  | -4.25 | -5.64 |  |  |
| 2.1   | 0.04  | -2.27 |  |  |
| 1.77  | -1.41 | -3.48 |  |  |
| 1.68  | -1.03 | -3.02 |  |  |
| 1.67  | -0.23 | -2.21 |  |  |
| 1.52  | -1    | -2.85 |  |  |

|        |       |       |  |  |
|--------|-------|-------|--|--|
| 1.44   | -1.02 | -2.79 |  |  |
| 1.35   | -1.51 | -3.19 |  |  |
| 1.34   | -1.46 | -3.12 |  |  |
| 1.34   | -1.8  | -3.47 |  |  |
| 1.29   | -1.52 | -3.13 |  |  |
| 1.27   | -1.64 | -3.23 |  |  |
| 1.25   | 5.09  | 3.53  |  |  |
| 1.24   | -1.47 | -3.02 |  |  |
| 1.24   | -1    | -2.55 |  |  |
| 1.21   | -0.12 | -1.64 |  |  |
| 1.21   | -1.26 | -2.78 |  |  |
| 1.2    | -1.08 | -2.59 |  |  |
| 1.19   | -0.93 | -2.43 |  |  |
| 1.19   | -1.7  | -3.2  |  |  |
| 1.14   | -0.92 | -2.35 |  |  |
| 1.12   | -0.87 | -2.28 |  |  |
| 1.11   | -1.17 | -2.57 |  |  |
| 1.1    | -0.29 | -1.67 |  |  |
| 1.08   | 2.1   | 0.74  |  |  |
| 1.06   | -1.75 | -3.07 |  |  |
| 1.04   | -0.5  | -1.79 |  |  |
| 1.03   | -1.81 | -3.1  |  |  |
| 1.02   | -1.3  | -2.57 |  |  |
| 1.01   | -1.75 | -3    |  |  |
| -1.01  | -1.24 | -2.47 |  |  |
| -1.02  | -2.08 | -3.3  |  |  |
| -1.02  | 1.8   | 0.58  |  |  |
| -1.02  | 1.41  | 0.2   |  |  |
| -1.03  | 2.18  | 0.97  |  |  |
| -1.04  | -0.97 | -2.16 |  |  |
| -1.05  | -2.27 | -3.44 |  |  |
| -1.06  | 1.77  | 0.61  |  |  |
| -1.07  | 0.86  | -0.28 |  |  |
| -1.11  | -0.78 | -1.87 |  |  |
| -1.13  | -0.67 | -1.74 |  |  |
| -1.13  | 1.41  | 0.35  |  |  |
| -1.14  | -2.2  | -3.26 |  |  |
| -1.14  | 0.08  | -0.98 |  |  |
| -1.15  | 0.12  | -0.92 |  |  |
| -1.15  | -0.88 | -1.92 |  |  |
| -1.17  | -0.86 | -1.87 |  |  |
| -1.18  | -1.48 | -2.48 |  |  |
| 2.99   | 0.39  | -1.92 |  |  |
| 2.81   | -0.23 | -2.45 |  |  |
| 1.36   | 1.7   | 0.53  |  |  |
| 1.33   | -0.43 | -1.57 |  |  |
| 1.32   | -2.29 | -3.43 |  |  |
| 1.27   | 2.63  | 1.55  |  |  |
| -3.86  | -1.87 | -0.65 |  |  |
| 1.37   | -1.47 | -3.78 |  |  |
| 1.36   | 0.48  | -1.82 |  |  |
| 1.18   | 1.58  | -0.52 |  |  |
| -1.06  | -2.81 | -4.58 |  |  |
| -1.65  | -0.52 | -1.66 |  |  |
| -7.45  | -4.54 | -3.5  |  |  |
| -8.77  | -2.96 | -1.69 |  |  |
| -10.54 | -3.48 | -1.94 |  |  |
| -13.03 | -3.24 | -1.4  |  |  |

|        |       |       |  |  |
|--------|-------|-------|--|--|
| -20.23 | -3.66 | -1.18 |  |  |
| 2.28   | 1.25  | -1.06 |  |  |
| 1.72   | 0.76  | -1.14 |  |  |
| 1.66   | -0.98 | -2.83 |  |  |
| 1.41   | -2.27 | -3.89 |  |  |
| 1.36   | 0.26  | -1.31 |  |  |
| 1.33   | 2.27  | 0.73  |  |  |
| 1.29   | 0.03  | -1.46 |  |  |
| 1.23   | -0.39 | -1.82 |  |  |
| 1.23   | 1.54  | 0.12  |  |  |
| 1.2    | -0.56 | -1.95 |  |  |
| 1.15   | -2.63 | -3.96 |  |  |
| 1.14   | -0.68 | -2    |  |  |
| 1.04   | 1.89  | 0.71  |  |  |
| 1.02   | -0.95 | -2.11 |  |  |
| -1.01  | 0.4   | -0.71 |  |  |
| -1.07  | -2.24 | -3.27 |  |  |
| 1.13   | 0.72  | -1.59 |  |  |
| 1.05   | 2.1   | -0.1  |  |  |
| 1      | 2.18  | 0.04  |  |  |
| -1.04  | 2.21  | 0.13  |  |  |
| -1.05  | 1.72  | -0.34 |  |  |
| -1.2   | -2.14 | -4.01 |  |  |
| -1.28  | 2.19  | 0.41  |  |  |
| -1.34  | -2.1  | -3.81 |  |  |
| -1.37  | 3.69  | 2.02  |  |  |
| -1.4   | -1.79 | -3.44 |  |  |
| -1.6   | 1.57  | 0.12  |  |  |
| -1.81  | -1.54 | -2.82 |  |  |
| -1.92  | 1.23  | 0.04  |  |  |
| -2.08  | -0.32 | -1.4  |  |  |
| -8.97  | -2.73 | -1.7  |  |  |
| -9.13  | -1.91 | -0.85 |  |  |
| -10.18 | -0.56 | 0.65  |  |  |
| -10.17 | -0.32 | 0.89  |  |  |
| -10.95 | -0.49 | 0.83  |  |  |
| -12.07 | -2.72 | -1.26 |  |  |
| -16.41 | -3.1  | -1.2  |  |  |
| 3.27   | -0.1  | -2.41 |  |  |
| 1.63   | 2.55  | 1.24  |  |  |
| 1.45   | 0.57  | -0.57 |  |  |
| 1.43   | 1.17  | 0.06  |  |  |
| 1.33   | -1.7  | -2.71 |  |  |
| -5.73  | -4.06 | -2.14 |  |  |
| 2.64   | 0.22  | -2.09 |  |  |
| 2.35   | 0.88  | -1.26 |  |  |
| 1.98   | 1.93  | 0.04  |  |  |
| 1.82   | 1.17  | -0.6  |  |  |
| 1.36   | -2.97 | -4.33 |  |  |
| 1.33   | 0.06  | -1.26 |  |  |
| 1.26   | 1.23  | -0.01 |  |  |
| 1.26   | 0.06  | -1.18 |  |  |
| 1.2    | 2.85  | 1.68  |  |  |
| 1.18   | -2.23 | -3.38 |  |  |
| 1.13   | -1.63 | -2.71 |  |  |
| 1.12   | -1.23 | -2.3  |  |  |
| 1.11   | -0.22 | -1.28 |  |  |
| 1.1    | -0.11 | -1.15 |  |  |

|       |       |       |  |  |
|-------|-------|-------|--|--|
| 1.07  | 1.46  | 0.45  |  |  |
| 1.07  | 1.13  | 0.13  |  |  |
| 1.07  | -1.29 | -2.29 |  |  |
| 4.17  | 0.89  | -1.41 |  |  |
| 2.35  | -0.2  | -1.67 |  |  |
| 2     | -0.71 | -1.95 |  |  |
| 1.79  | -0.85 | -1.93 |  |  |
| 1.77  | 0.25  | -0.82 |  |  |
| 1.69  | -1.62 | -2.61 |  |  |
| 19.74 | 1.38  | -0.92 |  |  |
| 14.93 | 0.19  | -1.7  |  |  |
| 14.39 | 1.99  | 0.15  |  |  |
| 1.91  | -1.67 | -0.59 |  |  |
| 1.3   | 2.54  | 4.17  |  |  |
| 1.23  | 0.91  | 2.61  |  |  |
| 1.3   | -1.31 | -3.61 |  |  |
| -1.01 | 0.49  | -1.41 |  |  |
| -1.01 | -1.56 | -3.46 |  |  |
| -1.2  | 0.08  | -1.57 |  |  |
| -1.31 | -1.41 | -2.94 |  |  |
| -1.31 | -0.43 | -1.95 |  |  |
| -1.47 | -3.95 | -5.3  |  |  |
| -1.87 | -2.82 | -3.83 |  |  |
| 1.97  | -0.14 | -2.43 |  |  |
| 1.33  | -1.57 | -3.3  |  |  |
| 1.29  | -2.83 | -4.52 |  |  |
| 1.11  | 3.05  | 1.58  |  |  |
| 1.08  | 1.27  | -0.16 |  |  |
| -1.03 | -0.19 | -1.47 |  |  |
| -1.08 | 0.53  | -0.68 |  |  |
| -1.12 | 2.12  | 0.97  |  |  |
| -1.14 | 1.07  | -0.07 |  |  |
| -1.18 | 0.32  | -0.76 |  |  |
| -1.23 | -1.02 | -2.04 |  |  |
| -7.62 | -0.15 | 1.46  |  |  |
| 3.31  | -1.35 | -3.64 |  |  |
| 2.47  | 2.56  | 0.68  |  |  |
| 2.22  | -1.07 | -2.8  |  |  |
| 1.58  | -0.97 | -2.19 |  |  |
| 1.5   | 2.42  | 1.27  |  |  |
| 1.5   | 0.31  | -0.84 |  |  |
| 1.48  | 5.3   | 4.16  |  |  |
| 1.42  | -0.17 | -1.25 |  |  |
| 1.38  | 0.49  | -0.54 |  |  |
| 1.35  | 3.08  | 2.07  |  |  |
| -3.14 | -3.17 | -2.08 |  |  |
| -3.18 | -1.73 | -0.63 |  |  |
| 3.2   | 1.39  | -0.9  |  |  |
| 2.08  | 1.49  | -0.19 |  |  |
| 2.05  | 0.95  | -0.7  |  |  |
| 1.43  | -1.15 | -2.29 |  |  |
| 1.41  | 0.5   | -0.61 |  |  |
| 1.37  | -1.89 | -2.95 |  |  |
| -3.25 | -0.39 | 0.69  |  |  |
| 1.74  | -0.36 | -2.65 |  |  |
| 1.34  | 1.26  | -0.65 |  |  |
| 1.21  | -0.37 | -2.14 |  |  |
| 1.1   | -0.03 | -1.67 |  |  |



|        |       |       |  |  |
|--------|-------|-------|--|--|
| 1.09   | 2.09  | 0.47  |  |  |
| 1.07   | -0.58 | -2.17 |  |  |
| 1.06   | 1.98  | 0.4   |  |  |
| 1      | -0.1  | -1.6  |  |  |
| -1.03  | 2.71  | 1.26  |  |  |
| -1.04  | 6.09  | 4.66  |  |  |
| -1.07  | -0.35 | -1.74 |  |  |
| -1.12  | -1.58 | -2.92 |  |  |
| -1.13  | -1.67 | -2.99 |  |  |
| -1.17  | -0.83 | -2.1  |  |  |
| -1.24  | 0.07  | -1.11 |  |  |
| -1.27  | -1.33 | -2.48 |  |  |
| -6.44  | -1.12 | 0.07  |  |  |
| -12.78 | -1.02 | 1.17  |  |  |
| 1.23   | 1.11  | -1.19 |  |  |
| 1.17   | -0.44 | -2.67 |  |  |
| 1.14   | -0.9  | -3.09 |  |  |
| 1.06   | 1.62  | -0.46 |  |  |
| -9.37  | -0.61 | 0.62  |  |  |
| -13.08 | -0.04 | 1.67  |  |  |
| -15.49 | -0.61 | 1.35  |  |  |
| 3.91   | -5.48 | -7.77 |  |  |
| 1.7    | -4.34 | -5.44 |  |  |
| -2.72  | -5.54 | -4.43 |  |  |
| -3.47  | -6.63 | -5.16 |  |  |
| -4.98  | -7.69 | -5.7  |  |  |
| 1.69   | -4.83 | -7.12 |  |  |
| 1.42   | -5.19 | -7.23 |  |  |
| 1.12   | -6.45 | -8.15 |  |  |
| -1.18  | -2.86 | -4.16 |  |  |
| -1.22  | -6.26 | -7.51 |  |  |
| -7.37  | -5.15 | -3.8  |  |  |
| 1.86   | -0.24 | -2.53 |  |  |
| 1.27   | 1.67  | -0.08 |  |  |
| 1.18   | -1.35 | -2.98 |  |  |
| 1.03   | 2.28  | 0.84  |  |  |
| -1.07  | 0.01  | -1.29 |  |  |
| -1.08  | -1.97 | -3.25 |  |  |
| -1.19  | -0.5  | -1.65 |  |  |
| -1.19  | -1.38 | -2.53 |  |  |
| -1.28  | 1.97  | 0.94  |  |  |
| -7.07  | -2.72 | -1.29 |  |  |
| -8.65  | -3.17 | -1.45 |  |  |
| 5.23   | -3.41 | -5.7  |  |  |
| -2.68  | -1.8  | -0.28 |  |  |
| -2.78  | -5.53 | -3.96 |  |  |
| -3.42  | -6.58 | -4.71 |  |  |
| 2.62   | 3.56  | 1.28  |  |  |
| 1.12   | -3.65 | -4.7  |  |  |
| 1.11   | 1.43  | 0.39  |  |  |
| -3.78  | -2.81 | -1.79 |  |  |
| -4.09  | -1.38 | -0.24 |  |  |
| -4.15  | -0.54 | 0.62  |  |  |
| -4.5   | -2.65 | -1.37 |  |  |
| -4.5   | -3.45 | -2.17 |  |  |
| -4.88  | -4.68 | -3.28 |  |  |
| -6.35  | -3.47 | -1.69 |  |  |
| -11.94 | -4.29 | -1.6  |  |  |

|        |       |       |  |  |
|--------|-------|-------|--|--|
| 1.07   | -0.23 | -2.51 |  |  |
| -1.22  | -1.16 | -3.05 |  |  |
| -1.37  | -2.99 | -4.72 |  |  |
| -1.51  | 0.4   | -1.19 |  |  |
| -9.67  | -4.87 | -3.78 |  |  |
| -10.32 | -1.64 | -0.45 |  |  |
| 1.88   | -1.95 | -4.23 |  |  |
| 1.81   | 0.9   | -1.33 |  |  |
| 1.01   | 1.41  | 0.03  |  |  |
| 1      | -1.46 | -2.84 |  |  |
| -1.15  | 3.01  | 1.84  |  |  |
| -1.16  | 1.16  | 0     |  |  |
| -1.22  | 3.42  | 2.34  |  |  |
| -6.37  | -2.83 | -1.53 |  |  |
| -6.67  | -2.16 | -0.8  |  |  |
| 1.12   | 2     | -0.28 |  |  |
| -1.39  | 0.53  | -1.1  |  |  |
| -1.78  | -0.43 | -1.72 |  |  |
| -1.95  | -2.73 | -3.88 |  |  |
| 3.85   | -5.27 | -7.55 |  |  |
| 3.71   | -2.81 | -5.03 |  |  |
| 2.89   | -5.56 | -7.43 |  |  |
| 1.71   | -6.94 | -8.05 |  |  |
| 1.67   | -4.9  | -5.97 |  |  |
| 1.63   | -5.17 | -6.2  |  |  |
| -4.61  | -5.09 | -3.22 |  |  |
| 1.07   | -4.68 | -6.96 |  |  |
| 1.05   | -3.58 | -5.82 |  |  |
| 1.01   | -4.37 | -6.56 |  |  |
| -1.07  | -5.3  | -7.38 |  |  |
| -1.11  | -2.75 | -4.77 |  |  |
| -1.26  | -4.65 | -6.48 |  |  |
| -1.37  | -5.89 | -7.61 |  |  |
| -1.4   | 0.9   | -0.79 |  |  |
| -1.48  | -7.39 | -9    |  |  |
| -1.56  | -4.38 | -5.91 |  |  |
| -1.78  | -5.69 | -7.03 |  |  |
| -2.04  | 1.95  | 0.8   |  |  |
| -2.05  | 2.86  | 1.72  |  |  |
| -2.19  | -3.66 | -4.7  |  |  |
| -2.25  | 1.31  | 0.3   |  |  |
| -12.76 | -6.21 | -4.71 |  |  |
| 1.42   | -1.73 | -4.01 |  |  |
| -1.14  | -2.09 | -3.67 |  |  |
| -1.62  | 0.51  | -0.57 |  |  |
| -8.54  | 0.23  | 1.55  |  |  |
| -8.98  | -0.71 | 0.68  |  |  |
| -11.23 | -0.38 | 1.33  |  |  |
| -11.68 | -1.14 | 0.63  |  |  |
| 3.1    | -0.51 | -2.78 |  |  |
| 1.72   | 1.12  | -0.3  |  |  |
| 1.57   | -0.98 | -2.27 |  |  |
| 1.5    | -1.31 | -2.54 |  |  |
| -3.16  | -4.15 | -3.13 |  |  |
| -3.65  | -3.44 | -2.21 |  |  |
| 3.19   | -6.38 | -8.65 |  |  |
| 1.52   | -5.11 | -6.32 |  |  |
| 6.6    | 0.76  | -1.51 |  |  |

|        |       |       |  |  |
|--------|-------|-------|--|--|
| 4.24   | 0.03  | -1.6  |  |  |
| 4.24   | 0.03  | -1.6  |  |  |
| 4.24   | 0.77  | -0.86 |  |  |
| 4.1    | 0.51  | -1.07 |  |  |
| 4.1    | 0.51  | -1.07 |  |  |
| 4.1    | 0.51  | -1.07 |  |  |
| 3.68   | 0.52  | -0.91 |  |  |
| 3.36   | -0.69 | -1.98 |  |  |
| 2.94   | 1.82  | 0.72  |  |  |
| 2.86   | 0.81  | -0.25 |  |  |
| 2.81   | 1     | -0.04 |  |  |
| 2.78   | -0.45 | -1.47 |  |  |
| 2.78   | -0.45 | -1.47 |  |  |
| 2.78   | -0.45 | -1.47 |  |  |
| -1.49  | 0.99  | 2.02  |  |  |
| -1.8   | -0.97 | 0.33  |  |  |
| 5.09   | 2.4   | 0.13  |  |  |
| 2.47   | -3.68 | -4.91 |  |  |
| -2.04  | -2.29 | -1.18 |  |  |
| 3.83   | 1.12  | -1.14 |  |  |
| 1.71   | 0.12  | -0.98 |  |  |
| 1.69   | 0.01  | -1.08 |  |  |
| 1.67   | -0.87 | -1.94 |  |  |
| 1.64   | 3.16  | 2.12  |  |  |
| 1.62   | 0.03  | -1    |  |  |
| -2.68  | -0.32 | 0.78  |  |  |
| -2.71  | -1.95 | -0.84 |  |  |
| 1.66   | 1.72  | -0.54 |  |  |
| 1.59   | 4.13  | 1.93  |  |  |
| 1.44   | -1.71 | -3.77 |  |  |
| 1.3    | 1.33  | -0.57 |  |  |
| 1.09   | -0.47 | -2.13 |  |  |
| 1.02   | -0.15 | -1.71 |  |  |
| 1.02   | -0.82 | -2.38 |  |  |
| -1.28  | -1.12 | -2.29 |  |  |
| -1.34  | -2    | -3.11 |  |  |
| -1.39  | 0.38  | -0.68 |  |  |
| -1.4   | -1.58 | -2.63 |  |  |
| -1.41  | -0.85 | -1.89 |  |  |
| -5.95  | 0.76  | 1.8   |  |  |
| -6.68  | 0.34  | 1.55  |  |  |
| -7.71  | -1.43 | -0.01 |  |  |
| -9.1   | -2.61 | -0.96 |  |  |
| -11    | -2.18 | -0.25 |  |  |
| -11.39 | -0.28 | 1.7   |  |  |
| 1.06   | 3.2   | 0.94  |  |  |
| 1.02   | 0.14  | -2.07 |  |  |
| -1.4   | 0.97  | -0.72 |  |  |
| -1.44  | -0.66 | -2.32 |  |  |
| -1.51  | 2.63  | 1.05  |  |  |
| -1.69  | 0.74  | -0.68 |  |  |
| -1.77  | 0.83  | -0.53 |  |  |
| 1.84   | -0.85 | -3.11 |  |  |
| 1.66   | -2.66 | -4.77 |  |  |
| 1.55   | 0.6   | -1.42 |  |  |
| 1.18   | 1.2   | -0.42 |  |  |
| 1.03   | -0.03 | -1.46 |  |  |
| -1.07  | 0.39  | -0.9  |  |  |

|       |       |       |  |  |
|-------|-------|-------|--|--|
| -1.13 | 4.1   | 2.9   |  |  |
| -1.13 | 1.54  | 0.33  |  |  |
| -1.27 | -0.1  | -1.14 |  |  |
| 2.46  | -0.22 | -2.48 |  |  |
| 1.77  | -1.33 | -3.12 |  |  |
| 1.64  | -0.3  | -1.98 |  |  |
| 1.09  | -3.32 | -4.41 |  |  |
| -4.39 | -1.08 | 0.09  |  |  |
| 2.29  | -4.79 | -7.05 |  |  |
| 2.09  | -3.5  | -5.63 |  |  |
| 1.94  | -5.1  | -7.12 |  |  |
| 1.85  | -5.21 | -7.16 |  |  |
| 1.54  | -2.44 | -4.13 |  |  |
| 1.53  | -4.12 | -5.79 |  |  |
| 1.27  | -3.73 | -5.14 |  |  |
| 1.19  | -2.21 | -3.53 |  |  |
| 1.15  | -6    | -7.27 |  |  |
| 1.07  | -6.58 | -7.74 |  |  |
| 1.01  | -5.61 | -6.68 |  |  |
| -1.01 | -1.93 | -2.99 |  |  |
| -1.02 | -5.64 | -6.67 |  |  |
| -1.03 | -5.41 | -6.44 |  |  |
| -5.84 | -1.89 | -0.41 |  |  |
| 4.98  | -0.49 | -2.75 |  |  |
| -2.26 | -5.33 | -4.09 |  |  |
| -2.51 | -4.25 | -2.86 |  |  |
| 2.7   | 1.54  | -0.71 |  |  |
| 2.02  | 0.11  | -1.72 |  |  |
| 1.43  | -0.15 | -1.49 |  |  |
| 1.22  | -1.12 | -2.22 |  |  |
| 1.21  | 0.27  | -0.82 |  |  |
| 1.18  | 4.04  | 2.98  |  |  |
| 1.17  | 1.14  | 0.09  |  |  |
| 2.24  | -2.67 | -4.92 |  |  |
| 1.67  | -3.16 | -4.99 |  |  |
| 1.45  | -3.74 | -5.37 |  |  |
| 1.18  | -4.05 | -5.38 |  |  |
| -4.63 | -1.84 | -0.72 |  |  |
| 2.28  | 0.52  | -1.74 |  |  |
| 1.61  | -0.32 | -2.08 |  |  |
| 1.39  | 1.07  | -0.47 |  |  |
| 1.3   | -0.66 | -2.11 |  |  |
| 1.24  | -0.02 | -1.4  |  |  |
| 1.21  | -0.69 | -2.03 |  |  |
| 1.17  | 0.83  | -0.47 |  |  |
| 1.15  | 3.31  | 2.04  |  |  |
| 1.06  | 4.77  | 3.61  |  |  |
| 1.05  | 6.19  | 5.05  |  |  |
| 1.03  | -0.68 | -1.79 |  |  |
| 1.03  | 4.2   | 3.09  |  |  |
| 1.03  | 0.87  | -0.23 |  |  |
| -1    | 2.26  | 1.2   |  |  |
| -1.01 | 0.08  | -0.98 |  |  |
| -4.37 | -0.03 | 1.03  |  |  |
| -4.52 | -1.1  | 0.01  |  |  |
| -5.9  | -0.21 | 1.28  |  |  |
| 4.53  | 0.82  | -1.43 |  |  |
| 3.75  | -2.58 | -4.56 |  |  |

|        |       |       |  |  |
|--------|-------|-------|--|--|
| 2.19   | -2.69 | -3.9  |  |  |
| -2.67  | -5.83 | -4.49 |  |  |
| 2.3    | 1.05  | -1.2  |  |  |
| 2.23   | -0.05 | -2.25 |  |  |
| 2.23   | 1.15  | -1.05 |  |  |
| 2.04   | -2.17 | -4.24 |  |  |
| 2.03   | 1.83  | -0.24 |  |  |
| 1.98   | 0.05  | -1.99 |  |  |
| 1.93   | -2.83 | -4.83 |  |  |
| 1.89   | 1.17  | -0.8  |  |  |
| 1.87   | 1.75  | -0.21 |  |  |
| 1.75   | 2.19  | 0.33  |  |  |
| 1.73   | 0.99  | -0.85 |  |  |
| 1.65   | 3.79  | 2.02  |  |  |
| 1.64   | -0.11 | -1.87 |  |  |
| 1.62   | -3.29 | -5.03 |  |  |
| 1.61   | 0.91  | -0.83 |  |  |
| 1.6    | 2.36  | 0.63  |  |  |
| 1.57   | 1.74  | 0.04  |  |  |
| 1.54   | 1.11  | -0.57 |  |  |
| 1.54   | -2.17 | -3.85 |  |  |
| 1.54   | 0.14  | -1.53 |  |  |
| 1.37   | 1.41  | -0.09 |  |  |
| 1.25   | -2.21 | -3.58 |  |  |
| 1.22   | 0.2   | -1.14 |  |  |
| 1.22   | -1.15 | -2.49 |  |  |
| 1.21   | -1.88 | -3.21 |  |  |
| 1.12   | -0.76 | -1.97 |  |  |
| 1.06   | -3.51 | -4.64 |  |  |
| 1.03   | 0.36  | -0.73 |  |  |
| 1.01   | -3.81 | -4.88 |  |  |
| -5.58  | -3.92 | -2.49 |  |  |
| -5.61  | -1.44 | -0.01 |  |  |
| -8.38  | -1.48 | 0.54  |  |  |
| -14.89 | -1.42 | 1.43  |  |  |
| 3.99   | 0.98  | -1.27 |  |  |
| 2.04   | -0.33 | -1.61 |  |  |
| 2.01   | 1.02  | -0.24 |  |  |
| 1.74   | 2.34  | 1.29  |  |  |
| -2.44  | -0.65 | 0.38  |  |  |
| -3.09  | -1.42 | -0.05 |  |  |
| 6.87   | -3.47 | -5.72 |  |  |
| -1.46  | -3.76 | -2.67 |  |  |
| -1.66  | -5.18 | -3.91 |  |  |
| 2.81   | -0.89 | -3.13 |  |  |
| 2.5    | -1.4  | -3.48 |  |  |
| 2.48   | -1.43 | -3.49 |  |  |
| 2.26   | 0.64  | -1.29 |  |  |
| 2.01   | -1.84 | -3.6  |  |  |
| 1.83   | -0.95 | -2.58 |  |  |
| 1.65   | -1.62 | -3.1  |  |  |
| 1.52   | -0.17 | -1.53 |  |  |
| 1.46   | -0.81 | -2.11 |  |  |
| 1.39   | -2.44 | -3.67 |  |  |
| 1.38   | -0.7  | -1.91 |  |  |
| 1.38   | -2.82 | -4.04 |  |  |
| 1.35   | 1.48  | 0.29  |  |  |
| 1.31   | -1.1  | -2.25 |  |  |

|       |       |       |  |  |
|-------|-------|-------|--|--|
| 1.26  | 0.65  | -0.43 |  |  |
| 1.19  | -3.35 | -4.34 |  |  |
| 7.49  | -4.37 | -6.62 |  |  |
| 4.51  | -4.28 | -5.79 |  |  |
| 3.28  | -4.33 | -5.39 |  |  |
| -1.3  | -3.75 | -2.71 |  |  |
| -1.42 | -7.9  | -6.73 |  |  |
| -1.48 | -3.33 | -2.11 |  |  |
| -1.69 | -2.61 | -1.19 |  |  |
| 1.41  | -2.9  | -5.14 |  |  |
| -1.15 | -0.4  | -1.96 |  |  |
| -1.28 | -1.7  | -3.1  |  |  |
| -1.55 | 0.97  | -0.15 |  |  |
| -1.62 | -4.01 | -5.06 |  |  |
| 5.47  | 1.7   | -0.55 |  |  |
| 2.31  | 0.49  | -0.51 |  |  |
| 8.76  | -0.85 | -3.09 |  |  |
| 8.65  | 0.37  | -1.85 |  |  |
| 7.07  | 0.37  | -1.57 |  |  |
| 5.13  | 1.86  | 0.39  |  |  |
| 5     | -0.63 | -2.06 |  |  |
| -1.19 | 1.66  | 2.8   |  |  |
| -1.2  | 0.92  | 2.06  |  |  |
| 1.25  | -1.43 | -3.66 |  |  |
| 1.23  | 1.64  | -0.57 |  |  |
| 1.14  | -3.52 | -5.62 |  |  |
| 1.1   | 0.03  | -2.03 |  |  |
| 1.09  | -3.19 | -5.23 |  |  |
| 1.05  | -2.01 | -4    |  |  |
| 1.02  | -1.27 | -3.22 |  |  |
| 1.02  | 3.62  | 1.68  |  |  |
| -1.16 | 1.37  | -0.33 |  |  |
| -1.44 | -2.03 | -3.41 |  |  |
| -1.51 | 0.55  | -0.77 |  |  |
| -1.78 | -4.03 | -5.11 |  |  |
| -7.55 | -2.75 | -1.75 |  |  |
| -9.53 | -3.25 | -1.91 |  |  |
| -12.2 | -3.82 | -2.13 |  |  |
| 8.6   | 0.13  | -2.11 |  |  |
| 4.45  | -0.95 | -2.24 |  |  |
| -1.12 | -0.12 | 0.9   |  |  |
| -1.15 | -0.37 | 0.7   |  |  |
| -1.19 | -1.42 | -0.3  |  |  |
| 1.71  | 3.72  | 1.48  |  |  |
| 1.44  | 3.31  | 1.33  |  |  |
| 1.35  | 3.45  | 1.56  |  |  |
| 1.35  | -0.2  | -2.08 |  |  |
| 1.23  | 1.17  | -0.58 |  |  |
| 1.2   | 1.03  | -0.69 |  |  |
| 1.19  | 2.72  | 1     |  |  |
| -1.07 | 2.35  | 0.99  |  |  |
| -1.07 | 4.82  | 3.47  |  |  |
| -1.08 | 0.05  | -1.3  |  |  |
| -1.14 | 3.58  | 2.31  |  |  |
| -1.18 | -0.3  | -1.52 |  |  |
| -1.19 | 2.01  | 0.8   |  |  |
| -1.2  | -0.68 | -1.88 |  |  |
| -1.21 | -1.46 | -2.64 |  |  |

|       |       |       |  |  |
|-------|-------|-------|--|--|
| -1.24 | -1.06 | -2.21 |  |  |
| -1.25 | -0.23 | -1.37 |  |  |
| -1.26 | 3.45  | 2.33  |  |  |
| -1.37 | -1.1  | -2.11 |  |  |
| 2.03  | -2.64 | -4.87 |  |  |
| 1.58  | 2.18  | 0.3   |  |  |
| 1.37  | -0.18 | -1.84 |  |  |
| 1.02  | -2.4  | -3.64 |  |  |
| -1.01 | -3.31 | -4.5  |  |  |
| -1.02 | 0.76  | -0.43 |  |  |
| -1.02 | -2.6  | -3.79 |  |  |
| 1.36  | -2.18 | -4.42 |  |  |
| 1.28  | -5.39 | -7.54 |  |  |
| 1.21  | -2.07 | -4.14 |  |  |
| -1.6  | -4.38 | -5.5  |  |  |
| 3.56  | -1.13 | -3.37 |  |  |
| 1.55  | -3.93 | -4.97 |  |  |
| -2.66 | -3.48 | -2.48 |  |  |
| 4.07  | 1.24  | -1    |  |  |
| 3.39  | -0.85 | -2.82 |  |  |
| 1.94  | 1.11  | -0.06 |  |  |
| 2.68  | -0.76 | -2.99 |  |  |
| 1.48  | -1.33 | -2.7  |  |  |
| 1.45  | 0.09  | -1.25 |  |  |
| 1.29  | 2.2   | 1.02  |  |  |
| 1.28  | 2.05  | 0.89  |  |  |
| -3.53 | -0.81 | 0.21  |  |  |
| -3.71 | -2.33 | -1.25 |  |  |
| -4.16 | -1.2  | 0.04  |  |  |
| 2.2   | -0.71 | -2.94 |  |  |
| 1.5   | 0.66  | -1.02 |  |  |
| 1.4   | 1.75  | 0.17  |  |  |
| 1.36  | -0.01 | -1.55 |  |  |
| 1.34  | -0.27 | -1.79 |  |  |
| 1.31  | -3.1  | -4.58 |  |  |
| 1.3   | -0.17 | -1.65 |  |  |
| 1.28  | -1.47 | -2.92 |  |  |
| 1.24  | 0.85  | -0.56 |  |  |
| 1.22  | 1.85  | 0.47  |  |  |
| 1.14  | 1.19  | -0.09 |  |  |
| 1.13  | -1.09 | -2.36 |  |  |
| 1.1   | 0.01  | -1.22 |  |  |
| 1.07  | -1.84 | -3.02 |  |  |
| 1.06  | 0.68  | -0.5  |  |  |
| 1.06  | 0.59  | -0.59 |  |  |
| 1.03  | 2.96  | 1.82  |  |  |
| 1.03  | 0.28  | -0.85 |  |  |
| 1.02  | 0.2   | -0.92 |  |  |
| -1.05 | 0.23  | -0.8  |  |  |
| -1.07 | -0.08 | -1.08 |  |  |
| -4.35 | -0.99 | 0.03  |  |  |
| -5.46 | -1.71 | -0.35 |  |  |
| 2.2   | -0.71 | -2.94 |  |  |
| 1.5   | 0.66  | -1.02 |  |  |
| 1.4   | 1.75  | 0.17  |  |  |
| 1.36  | -0.01 | -1.55 |  |  |
| 1.34  | -0.27 | -1.79 |  |  |
| 1.31  | -3.1  | -4.58 |  |  |

|       |       |       |  |  |
|-------|-------|-------|--|--|
| 1.3   | -0.17 | -1.65 |  |  |
| 1.28  | -1.47 | -2.92 |  |  |
| 1.24  | 0.85  | -0.56 |  |  |
| 1.22  | 1.85  | 0.47  |  |  |
| 1.14  | 1.19  | -0.09 |  |  |
| 1.13  | -1.09 | -2.36 |  |  |
| 1.1   | 0.01  | -1.22 |  |  |
| 1.07  | -1.84 | -3.02 |  |  |
| 1.06  | 0.68  | -0.5  |  |  |
| 1.06  | 0.59  | -0.59 |  |  |
| 1.03  | 2.96  | 1.82  |  |  |
| 1.03  | 0.28  | -0.85 |  |  |
| 1.02  | 0.2   | -0.92 |  |  |
| -1.05 | 0.23  | -0.8  |  |  |
| -1.07 | -0.08 | -1.08 |  |  |
| -4.35 | -0.99 | 0.03  |  |  |
| -5.46 | -1.71 | -0.35 |  |  |
| 1.92  | 5.32  | 3.09  |  |  |
| 1.36  | 4.44  | 2.71  |  |  |
| -1.06 | 0.9   | -0.31 |  |  |
| -1.08 | 0.61  | -0.58 |  |  |
| -1.11 | 5.1   | 3.95  |  |  |
| -1.12 | 1.47  | 0.35  |  |  |
| 2.85  | 0.96  | -1.27 |  |  |
| 2.02  | 3.33  | 1.6   |  |  |
| 1.91  | 1.51  | -0.14 |  |  |
| 1.88  | 2.68  | 1.05  |  |  |
| 1.75  | -0.49 | -2.01 |  |  |
| 1.66  | 2.02  | 0.58  |  |  |
| 1.61  | 5.39  | 3.99  |  |  |
| 1.58  | 1.42  | 0.05  |  |  |
| 1.32  | 4.21  | 3.1   |  |  |
| 1.31  | 3.89  | 2.79  |  |  |
| 1.3   | 3.69  | 2.6   |  |  |
| 1.29  | 6.95  | 5.87  |  |  |
| 1.28  | -0.88 | -1.95 |  |  |
| 1.29  | 6     | 4.93  |  |  |
| 1.26  | 4.3   | 3.26  |  |  |
| 1.26  | -0.58 | -1.62 |  |  |
| 1.25  | 4.13  | 3.09  |  |  |
| 1.25  | 5     | 3.97  |  |  |
| 1.22  | 0.85  | -0.15 |  |  |
| 1.17  | -1.91 | -4.13 |  |  |
| 1.03  | 5.63  | 3.59  |  |  |
| -1.2  | -0.17 | -1.91 |  |  |
| -1.22 | 5.88  | 4.18  |  |  |
| -1.29 | 7.86  | 6.23  |  |  |
| -1.29 | 1.19  | -0.44 |  |  |
| -1.39 | -0.47 | -1.99 |  |  |
| -1.44 | -0.39 | -1.86 |  |  |
| -1.74 | -1.94 | -3.14 |  |  |
| -1.82 | 1.33  | 0.19  |  |  |
| -1.84 | 0.45  | -0.66 |  |  |
| 2.72  | 0.85  | -1.37 |  |  |
| 1.29  | -2.11 | -3.26 |  |  |
| 1.21  | 1.75  | 0.7   |  |  |
| 3.15  | -0.45 | -2.67 |  |  |
| 2.06  | -2.14 | -3.75 |  |  |



|       |       |       |  |  |
|-------|-------|-------|--|--|
| 1.55  | -4.19 | -5.39 |  |  |
| 1.53  | -4.4  | -5.58 |  |  |
| 1.51  | -4.04 | -5.2  |  |  |
| 1.5   | -2.06 | -3.21 |  |  |
| 1.43  | -1.97 | -3.06 |  |  |
| -4.35 | -5.23 | -3.68 |  |  |
| 2.95  | 0.42  | -1.8  |  |  |
| 1.45  | 0.64  | -0.56 |  |  |
| -3.7  | -0.01 | 1.21  |  |  |
| -3.91 | -1.04 | 0.27  |  |  |
| -4.3  | -1.11 | 0.34  |  |  |
| -4.4  | -1.96 | -0.48 |  |  |
| -6.84 | -0.52 | 1.59  |  |  |
| 2.97  | 0.29  | -1.93 |  |  |
| 1.89  | 0.87  | -0.7  |  |  |
| 1.79  | -0.24 | -1.72 |  |  |
| 1.56  | -0.27 | -1.57 |  |  |
| 1.48  | -1.06 | -2.27 |  |  |
| 1.31  | 0.6   | -0.44 |  |  |
| 1.31  | -2.43 | -3.47 |  |  |
| 1.31  | -1.34 | -2.39 |  |  |
| 1.28  | 2.55  | 1.54  |  |  |
| 1.28  | -2.35 | -3.36 |  |  |
| 2.27  | -1.71 | -3.93 |  |  |
| 1.97  | 0.37  | -1.65 |  |  |
| 1.56  | 0.3   | -1.38 |  |  |
| 1.33  | 0.94  | -0.51 |  |  |
| 1.31  | 1.97  | 0.54  |  |  |
| 1.21  | -1.51 | -2.82 |  |  |
| 1.14  | -1.44 | -2.66 |  |  |
| 1.05  | -2.75 | -3.86 |  |  |
| 1.05  | -0.37 | -1.48 |  |  |
| 1     | -1.66 | -2.7  |  |  |
| -1    | -3.92 | -4.95 |  |  |
| 1.64  | -3.66 | -5.88 |  |  |
| 1.51  | -1.09 | -3.18 |  |  |
| 1.26  | 0.78  | -1.07 |  |  |
| 1.25  | -3.14 | -4.97 |  |  |
| 1.11  | -2.64 | -4.3  |  |  |
| -1.03 | -1.25 | -2.71 |  |  |
| -1.03 | -1.8  | -3.26 |  |  |
| -1.04 | 0.09  | -1.36 |  |  |
| -1.2  | -0.39 | -1.63 |  |  |
| -1.21 | 0.36  | -0.88 |  |  |
| -1.21 | -5.69 | -6.92 |  |  |
| -1.32 | -3.02 | -4.12 |  |  |
| -1.37 | -1.09 | -2.14 |  |  |
| 2.04  | 1.25  | -0.97 |  |  |
| 1.48  | 2.51  | 0.75  |  |  |
| 1.36  | 4.61  | 2.97  |  |  |
| 1.33  | 2.93  | 1.32  |  |  |
| 1.19  | 4.45  | 3.01  |  |  |
| 1.14  | 0.24  | -1.15 |  |  |
| 1.12  | -0.54 | -1.9  |  |  |
| 1.08  | 5.78  | 4.48  |  |  |
| 1.07  | 6.61  | 5.32  |  |  |
| 1.06  | -1.6  | -2.87 |  |  |
| 1.04  | -1.37 | -2.61 |  |  |

|       |       |       |  |  |
|-------|-------|-------|--|--|
| 1.02  | 6     | 4.77  |  |  |
| -1.13 | 2.62  | 1.61  |  |  |
| -5.73 | 0.25  | 1.57  |  |  |
| -6.05 | -1.13 | 0.27  |  |  |
| 7.1   | -2.91 | -5.13 |  |  |
| 6.85  | -4.89 | -7.06 |  |  |
| 6.73  | -1.69 | -3.83 |  |  |
| 5.2   | -2.31 | -4.08 |  |  |
| 3.86  | -5.13 | -6.47 |  |  |
| 3.65  | -3.4  | -4.66 |  |  |
| 3.45  | -3.48 | -4.65 |  |  |
| 3.38  | -3.01 | -4.16 |  |  |
| 3.13  | -1.55 | -2.59 |  |  |
| -1.48 | -4.59 | -3.41 |  |  |
| -1.48 | -6.78 | -5.6  |  |  |
| 1.76  | -0.79 | -3.01 |  |  |
| 1.56  | -1.65 | -3.69 |  |  |
| 1.07  | 2.4   | 0.9   |  |  |
| 1     | -2.73 | -4.14 |  |  |
| -1.1  | -3.3  | -4.56 |  |  |
| -1.13 | -1.24 | -2.46 |  |  |
| -1.23 | -1.76 | -2.86 |  |  |
| -1.24 | -5.45 | -6.55 |  |  |
| -1.28 | 1.38  | 0.34  |  |  |
| -5.38 | -4.07 | -3.05 |  |  |
| 3.4   | -3.35 | -5.56 |  |  |
| 1.64  | -2.21 | -3.37 |  |  |
| 2.28  | 0.92  | -1.3  |  |  |
| 2.11  | -1.08 | -3.18 |  |  |
| -1.02 | -4.92 | -5.93 |  |  |
| 2.89  | -1.61 | -3.82 |  |  |
| 1.37  | -2.2  | -3.34 |  |  |
| 1.34  | 0.99  | -1.22 |  |  |
| 1.3   | -2.83 | -5    |  |  |
| 1.12  | 1.21  | -0.73 |  |  |
| 1.02  | 4.87  | 3.05  |  |  |
| -1.2  | -2.63 | -4.16 |  |  |
| -1.21 | -1.7  | -3.22 |  |  |
| -1.22 | -1.6  | -3.1  |  |  |
| -1.25 | 1.18  | -0.29 |  |  |
| -1.26 | 1.39  | -0.07 |  |  |
| -1.28 | -1.52 | -2.96 |  |  |
| -1.34 | -2.55 | -3.91 |  |  |
| -1.37 | -2.8  | -4.13 |  |  |
| -1.41 | 1.63  | 0.34  |  |  |
| -1.42 | -2.21 | -3.49 |  |  |
| -1.72 | -2.19 | -3.2  |  |  |
| 5.21  | -1.43 | -3.65 |  |  |
| 2.28  | -0.16 | -1.18 |  |  |
| -1.9  | -2.32 | -1.22 |  |  |
| -1.92 | -0.19 | 0.92  |  |  |
| 1.03  | -4.27 | -6.47 |  |  |
| -1.34 | -3.86 | -5.61 |  |  |
| -1.36 | -4.19 | -5.9  |  |  |
| -1.48 | 0.91  | -0.69 |  |  |
| -1.55 | 0.14  | -1.39 |  |  |
| -1.74 | -2.97 | -4.33 |  |  |
| -1.79 | 0.59  | -0.73 |  |  |

|        |       |       |  |  |
|--------|-------|-------|--|--|
| -1.97  | 0.78  | -0.41 |  |  |
| -2.03  | 0.11  | -1.03 |  |  |
| -2.1   | -0.97 | -2.06 |  |  |
| 17.65  | 1.07  | -1.14 |  |  |
| 1.78   | -0.24 | 0.86  |  |  |
| 1.76   | 0.06  | 1.17  |  |  |
| 1.71   | -0.68 | 0.48  |  |  |
| -1.15  | -1.1  | 1.03  |  |  |
| -1.86  | -0.62 | 2.21  |  |  |
| 5.63   | 1.27  | -0.94 |  |  |
| 2.77   | -1.18 | -2.37 |  |  |
| 1.38   | -0.54 | -2.75 |  |  |
| 1.27   | -4.42 | -6.5  |  |  |
| -1.42  | -0.65 | -1.89 |  |  |
| -1.58  | 3.99  | 2.91  |  |  |
| -8.3   | -3.01 | -1.7  |  |  |
| -9.81  | -4.77 | -3.22 |  |  |
| 1.37   | -0.75 | -2.96 |  |  |
| -1.29  | -1.19 | -2.58 |  |  |
| -1.51  | 1.08  | -0.08 |  |  |
| -7.64  | -0.98 | 0.2   |  |  |
| -17.13 | -2.54 | -0.21 |  |  |
| 1.01   | -1.9  | -4.11 |  |  |
| -1.09  | 2.32  | 0.25  |  |  |
| -1.1   | -0.88 | -2.93 |  |  |
| -1.28  | 1.37  | -0.46 |  |  |
| -1.34  | 1.03  | -0.74 |  |  |
| -1.58  | -1.71 | -3.25 |  |  |
| -1.82  | 1.91  | 0.58  |  |  |
| 4.31   | -1.15 | -3.36 |  |  |
| 2.6    | -3.95 | -5.42 |  |  |
| 2.24   | 0.59  | -0.67 |  |  |
| 4.65   | -1.28 | -3.49 |  |  |
| 2.14   | -3.69 | -4.77 |  |  |
| -2.01  | -4.11 | -3.09 |  |  |
| -2.15  | -1.9  | -0.78 |  |  |
| 6.4    | 3.17  | 0.96  |  |  |
| -1.53  | 0.54  | 1.63  |  |  |
| -1.65  | 2.76  | 3.96  |  |  |
| -1.88  | -1.59 | -0.2  |  |  |
| 4.58   | -1.01 | -3.21 |  |  |
| 3.95   | -1.52 | -3.51 |  |  |
| 2.51   | -0.27 | -1.6  |  |  |
| 2.3    | -0.44 | -1.65 |  |  |
| -3.67  | -2.1  | -0.23 |  |  |
| 3.26   | -0.08 | -2.28 |  |  |
| 1.9    | 2.57  | 1.15  |  |  |
| 1.88   | 0.95  | -0.46 |  |  |
| 1.71   | 0.68  | -0.6  |  |  |
| 1.48   | -0.83 | -1.89 |  |  |
| 1.47   | 0.45  | -0.6  |  |  |
| 1.42   | 1.23  | 0.23  |  |  |
| 12.52  | 1.2   | -1    |  |  |
| 1.08   | 1.21  | 2.55  |  |  |
| 1.03   | 5.07  | 6.48  |  |  |
| -1.01  | -1.16 | 0.31  |  |  |
| -1.36  | 1.24  | 3.13  |  |  |
| 3.57   | 1.41  | -0.79 |  |  |

|        |       |       |  |  |
|--------|-------|-------|--|--|
| 2.33   | 0.26  | -1.32 |  |  |
| 2.63   | 0.1   | -2.1  |  |  |
| 1.45   | -2.45 | -3.79 |  |  |
| 1.4    | 1.65  | 0.36  |  |  |
| -4.53  | -2.9  | -1.53 |  |  |
| 2.26   | -2.15 | -4.34 |  |  |
| 1.35   | 1.49  | 0.03  |  |  |
| 1.34   | -5.38 | -6.83 |  |  |
| 1.33   | -3.72 | -5.15 |  |  |
| 1.31   | -2.9  | -4.32 |  |  |
| 1.04   | -5.47 | -6.55 |  |  |
| 1.04   | -3.51 | -4.58 |  |  |
| 1.57   | -1.09 | -3.29 |  |  |
| 1.46   | -1.42 | -3.51 |  |  |
| 1.12   | -4.73 | -6.43 |  |  |
| 1.11   | 1.74  | 0.05  |  |  |
| 1.01   | -0.37 | -1.92 |  |  |
| -1.19  | -1.08 | -2.37 |  |  |
| -1.21  | -2.37 | -3.64 |  |  |
| 1.04   | 4.22  | 2.02  |  |  |
| -1.07  | 1.39  | -0.64 |  |  |
| -2.16  | -2.2  | -3.22 |  |  |
| 1.16   | 3.65  | 1.46  |  |  |
| 1.06   | -0.46 | -2.53 |  |  |
| -1.36  | 0.18  | -1.35 |  |  |
| -1.4   | 1.82  | 0.33  |  |  |
| -1.4   | 2.87  | 1.38  |  |  |
| -1.74  | -2.54 | -3.72 |  |  |
| -11.06 | 0.43  | 1.92  |  |  |
| -14.66 | -0.8  | 1.1   |  |  |
| 1.07   | 0.36  | -1.83 |  |  |
| 1.02   | 0.17  | -1.95 |  |  |
| 1      | -1.07 | -3.16 |  |  |
| -1     | -1.54 | -3.62 |  |  |
| -1.57  | -2.6  | -4.03 |  |  |
| -1.76  | -0.62 | -1.89 |  |  |
| -8.7   | -1.31 | -0.28 |  |  |
| 1.09   | -3.7  | -5.89 |  |  |
| 1.05   | -4.69 | -6.83 |  |  |
| 1.05   | -2.07 | -4.21 |  |  |
| 1.05   | -1.98 | -4.12 |  |  |
| 1.04   | -2.08 | -4.21 |  |  |
| -1.01  | -0.44 | -2.49 |  |  |
| -1.01  | -2.6  | -4.65 |  |  |
| -1.03  | -3    | -5.03 |  |  |
| -1.13  | -3.62 | -5.51 |  |  |
| -1.22  | 0.7   | -1.08 |  |  |
| -1.33  | -1.99 | -3.65 |  |  |
| -1.54  | -3.26 | -4.71 |  |  |
| -1.69  | -0.64 | -1.96 |  |  |
| -1.71  | -4.37 | -5.67 |  |  |
| -1.8   | -0.01 | -1.24 |  |  |
| -1.96  | 0.26  | -0.84 |  |  |
| -1.97  | -3.88 | -4.97 |  |  |
| -1.98  | -2.15 | -3.24 |  |  |
| -2.01  | -0.89 | -1.96 |  |  |
| 1.83   | -0.25 | -2.44 |  |  |
| 1.34   | -1.44 | -3.19 |  |  |

|        |       |       |  |  |
|--------|-------|-------|--|--|
| 1.22   | 4.85  | 3.23  |  |  |
| 1.12   | 3.66  | 2.17  |  |  |
| 1.12   | -1.45 | -2.94 |  |  |
| 1.08   | 4.56  | 3.12  |  |  |
| -1.06  | -2.01 | -3.26 |  |  |
| -5.93  | -1.05 | 0.19  |  |  |
| 1.38   | -1.13 | -3.32 |  |  |
| 1.37   | -0.18 | -2.36 |  |  |
| 1.33   | 0.3   | -1.83 |  |  |
| 1.32   | -1.08 | -3.2  |  |  |
| 1.29   | -0.16 | -2.25 |  |  |
| 1.19   | -2.55 | -4.53 |  |  |
| 1.12   | 1.02  | -0.87 |  |  |
| 1.09   | 6.42  | 4.58  |  |  |
| -1.04  | -1.38 | -3.05 |  |  |
| -1.05  | 1.91  | 0.26  |  |  |
| -1.07  | -0.84 | -2.46 |  |  |
| -1.08  | 1.29  | -0.33 |  |  |
| -1.09  | -4.61 | -6.2  |  |  |
| -1.17  | -1.79 | -3.29 |  |  |
| -1.33  | -2.16 | -3.47 |  |  |
| -1.33  | -4.38 | -5.69 |  |  |
| -1.36  | 0.57  | -0.7  |  |  |
| -1.37  | -2.64 | -3.91 |  |  |
| -1.37  | 1.05  | -0.22 |  |  |
| -6.8   | -1.42 | -0.38 |  |  |
| -6.8   | -1.42 | -0.38 |  |  |
| -8.21  | -3.5  | -2.18 |  |  |
| 3.42   | -1.05 | -3.25 |  |  |
| 1.92   | -2.32 | -3.68 |  |  |
| 1.49   | -2.02 | -3.02 |  |  |
| 1.9    | -1.85 | -4.04 |  |  |
| 1.7    | -0.45 | -2.48 |  |  |
| 1.47   | -2.62 | -4.44 |  |  |
| 1.18   | 0.1   | -1.4  |  |  |
| 1.11   | 0.4   | -1.01 |  |  |
| 1.09   | 0.96  | -0.42 |  |  |
| -1     | 0.25  | -1.01 |  |  |
| -1.04  | -1.13 | -2.33 |  |  |
| -1.09  | -0.14 | -1.27 |  |  |
| -1.12  | -2.58 | -3.67 |  |  |
| -1.13  | -3.27 | -4.34 |  |  |
| -1.16  | 1.54  | 0.49  |  |  |
| -1.17  | -0.97 | -2.01 |  |  |
| -1.19  | 0.09  | -0.92 |  |  |
| -1.19  | -2.62 | -3.63 |  |  |
| -1.19  | 1.05  | 0.05  |  |  |
| -5.67  | -1.5  | -0.26 |  |  |
| -8.04  | -2.93 | -1.19 |  |  |
| 106.45 | 0.93  | -1.26 |  |  |
| 9.82   | 0.57  | 1.81  |  |  |
| 7.23   | -0.32 | 1.37  |  |  |
| 6.93   | 0.61  | 2.36  |  |  |
| 2.05   | -2.9  | 0.61  |  |  |
| 1.47   | 1.19  | -1    |  |  |
| 1.18   | -1.01 | -2.88 |  |  |
| 1.17   | 0.49  | -1.36 |  |  |
| 1.12   | 3.36  | 1.57  |  |  |

|       |       |       |  |  |
|-------|-------|-------|--|--|
| 1.03  | 0.69  | -0.98 |  |  |
| 1.02  | 0.75  | -0.91 |  |  |
| 1.01  | -2.23 | -3.88 |  |  |
| -1.03 | -0.35 | -1.93 |  |  |
| -1.08 | 6.78  | 5.26  |  |  |
| -1.09 | -1.2  | -2.7  |  |  |
| -1.1  | -0.82 | -2.31 |  |  |
| -1.2  | 1.09  | -0.28 |  |  |
| -1.23 | -2.3  | -3.63 |  |  |
| -1.26 | -1.98 | -3.27 |  |  |
| -1.29 | 5.74  | 4.47  |  |  |
| -1.31 | 1.16  | -0.08 |  |  |
| -1.31 | -0.91 | -2.15 |  |  |
| -1.32 | -3.04 | -4.27 |  |  |
| -1.36 | -0.98 | -2.16 |  |  |
| -1.42 | -0.35 | -1.48 |  |  |
| -1.42 | 5.27  | 4.14  |  |  |
| -1.49 | -1.73 | -2.79 |  |  |
| -1.52 | 1.15  | 0.12  |  |  |
| -1.55 | 0.81  | -0.19 |  |  |
| -1.55 | 0.93  | -0.07 |  |  |
| -6.22 | -0.78 | 0.23  |  |  |
| -6.47 | 0.29  | 1.35  |  |  |
| -7.86 | 0.63  | 1.98  |  |  |
| -8.01 | -2.3  | -0.93 |  |  |
| 2.01  | -0.77 | -2.96 |  |  |
| 1.34  | 1.56  | -0.04 |  |  |
| 1.3   | 1.4   | -0.16 |  |  |
| 1.26  | 0.59  | -0.92 |  |  |
| 1.2   | 0.82  | -0.62 |  |  |
| 1.11  | 1.76  | 0.43  |  |  |
| 1.08  | -1.3  | -2.59 |  |  |
| 1.08  | 0.75  | -0.54 |  |  |
| 1     | 0.31  | -0.87 |  |  |
| 1     | -1.94 | -3.12 |  |  |
| -1    | 0.58  | -0.6  |  |  |
| -1.04 | -0.96 | -2.07 |  |  |
| -1.1  | 1.22  | 0.18  |  |  |
| -4.6  | -3.42 | -2.4  |  |  |
| -4.71 | -1.53 | -0.47 |  |  |
| -5.75 | -0.97 | 0.37  |  |  |
| -7.05 | -1.29 | 0.35  |  |  |
| 3.87  | 2.76  | 0.57  |  |  |
| 3.22  | -0.83 | -2.75 |  |  |
| 2.47  | -0.42 | -1.96 |  |  |
| 2.47  | 1.75  | 0.21  |  |  |
| 2.17  | 0.54  | -0.81 |  |  |
| 1.98  | -0.29 | -1.51 |  |  |
| 1.8   | -1.06 | -2.15 |  |  |
| -2.52 | -2.29 | -1.19 |  |  |
| 1.43  | -0.97 | -3.16 |  |  |
| 1.24  | 1.42  | -0.56 |  |  |
| 1.22  | 4.81  | 2.86  |  |  |
| 1.16  | 2.38  | 0.5   |  |  |
| 1.14  | 1.1   | -0.76 |  |  |
| 1.04  | 0.77  | -0.95 |  |  |
| -1.01 | -0.99 | -2.64 |  |  |
| -1.03 | 0.2   | -1.43 |  |  |

|       |       |       |  |  |
|-------|-------|-------|--|--|
| -1.04 | 1.65  | 0.05  |  |  |
| -1.21 | -1.84 | -3.23 |  |  |
| -1.24 | 0.4   | -0.96 |  |  |
| -1.26 | -1.63 | -2.97 |  |  |
| -1.3  | 1.82  | 0.53  |  |  |
| -1.3  | -3.35 | -4.64 |  |  |
| -1.4  | -3.29 | -4.47 |  |  |
| -1.43 | -3.2  | -4.35 |  |  |
| -1.44 | -0.49 | -1.63 |  |  |
| -1.57 | -3.64 | -4.66 |  |  |
| -6.48 | -1.02 | 0.01  |  |  |
| -6.51 | -2.56 | -1.53 |  |  |
| -7.28 | -3.78 | -2.58 |  |  |
| -8.43 | -3.44 | -2.04 |  |  |
| 7.54  | -5.49 | -7.67 |  |  |
| 4.98  | -4.19 | -5.77 |  |  |
| 4.99  | -3.72 | -5.31 |  |  |
| 4.5   | -5.49 | -6.92 |  |  |
| 3.99  | -2.81 | -4.07 |  |  |
| 3.96  | -3.03 | -4.28 |  |  |
| 3.92  | -1.63 | -2.86 |  |  |
| 3.85  | -4.39 | -5.6  |  |  |
| 3.74  | -3.43 | -4.6  |  |  |
| 3.71  | -4.3  | -5.46 |  |  |
| 3.47  | -3.16 | -4.22 |  |  |
| 3.35  | -3    | -4.01 |  |  |
| -1.4  | -6.73 | -5.52 |  |  |
| -1.53 | -4.9  | -3.55 |  |  |
| 7.24  | -5.46 | -7.64 |  |  |
| 6.1   | -6.02 | -7.95 |  |  |
| 5.3   | -5.6  | -7.33 |  |  |
| 4.68  | -3.27 | -4.83 |  |  |
| 4.45  | -5.2  | -6.68 |  |  |
| 4.15  | -3.08 | -4.46 |  |  |
| 4.1   | -5.78 | -7.14 |  |  |
| 4.08  | -2.32 | -3.67 |  |  |
| -1.32 | -4.31 | -3.24 |  |  |
| -1.32 | -6.85 | -5.78 |  |  |
| -1.53 | -7.15 | -5.86 |  |  |
| -1.94 | -2.47 | -0.84 |  |  |
| -4.01 | -4.22 | -1.54 |  |  |
| 5.32  | 0.47  | -1.71 |  |  |
| 3.71  | 1.6   | -0.06 |  |  |
| 2.69  | 0.12  | -1.08 |  |  |
| 2.4   | 2.44  | 1.41  |  |  |
| 2.4   | -0.1  | -1.13 |  |  |
| -2.07 | -2.69 | -1.4  |  |  |
| 35.83 | 0.74  | -1.44 |  |  |
| 34.52 | -0.24 | -2.37 |  |  |
| 16.33 | -0.56 | -1.61 |  |  |
| 3.53  | 0.09  | 1.26  |  |  |
| 3.47  | -2.49 | -1.3  |  |  |
| 2.99  | -2.61 | -1.21 |  |  |
| 2.82  | -2.78 | -1.3  |  |  |
| 2.66  | -2.91 | -1.34 |  |  |
| 2.5   | -2.4  | -0.75 |  |  |
| 2.22  | -4.4  | -2.57 |  |  |
| 2.21  | -0.27 | 1.57  |  |  |

|        |       |       |  |  |
|--------|-------|-------|--|--|
| 1.86   | -4    | -1.92 |  |  |
| 1.69   | 0.42  | 2.65  |  |  |
| 1.61   | -2.52 | -0.23 |  |  |
| 1.41   | -1.13 | 1.35  |  |  |
| 1.33   | 2.84  | 5.41  |  |  |
| 1.17   | -1.43 | 1.32  |  |  |
| 1.16   | -1    | 1.77  |  |  |
| 1.05   | -2.23 | 0.68  |  |  |
| -1.01  | -3.33 | -0.34 |  |  |
| -1.01  | -3.28 | -0.28 |  |  |
| -1.02  | -1.64 | 1.36  |  |  |
| -1.15  | -1.52 | 1.66  |  |  |
| -2.13  | -5.08 | -1.01 |  |  |
| 490.97 | 0.28  | -1.89 |  |  |
| 53.11  | -0.2  | 0.83  |  |  |
| 34.28  | 1.08  | 2.74  |  |  |
| 29.92  | -3.81 | -1.95 |  |  |
| 27.01  | 0.57  | 2.58  |  |  |
| 12.41  | -4.86 | -1.73 |  |  |
| 2.88   | -2.63 | -4.81 |  |  |
| 2.25   | -1.25 | -3.07 |  |  |
| 1.77   | -1.17 | -2.64 |  |  |
| 1.73   | 0.05  | -1.39 |  |  |
| 1.7    | 0.27  | -1.15 |  |  |
| 1.58   | 0.8   | -0.52 |  |  |
| 1.57   | -1.26 | -2.56 |  |  |
| 1.55   | 0.39  | -0.89 |  |  |
| 1.51   | -0.6  | -1.84 |  |  |
| 1.46   | 0.05  | -1.15 |  |  |
| 1.4    | 2.41  | 1.28  |  |  |
| 1.38   | 3.52  | 2.41  |  |  |
| 1.31   | -1.15 | -2.19 |  |  |
| -3.26  | -4.27 | -3.21 |  |  |
| -4.69  | -3.67 | -2.1  |  |  |
| -5.83  | -4.29 | -2.4  |  |  |
| 2.26   | 5.79  | 3.62  |  |  |
| 1.34   | 1.56  | 0.14  |  |  |
| 1.17   | 1.33  | 0.11  |  |  |
| 1.04   | 0.57  | -0.48 |  |  |
| 1.4    | 0.69  | -1.48 |  |  |
| 1.34   | 1.94  | -0.17 |  |  |
| 1.27   | 0.21  | -1.81 |  |  |
| 1.17   | 2.08  | 0.17  |  |  |
| 1.11   | -0.44 | -2.28 |  |  |
| 1.08   | 0.6   | -1.2  |  |  |
| 1.06   | 2.86  | 1.09  |  |  |
| 1.01   | 0.2   | -1.5  |  |  |
| -1.19  | 0.95  | -0.49 |  |  |
| -1.25  | -0.02 | -1.38 |  |  |
| -1.29  | -1.33 | -2.65 |  |  |
| -1.37  | 1.32  | 0.09  |  |  |
| -1.52  | 1.63  | 0.55  |  |  |
| -6.96  | 0.58  | 1.7   |  |  |
| -7.29  | -0.12 | 1.06  |  |  |
| -8.48  | 0.71  | 2.11  |  |  |
| -9.85  | -1.52 | 0.09  |  |  |
| -15.19 | -3.63 | -1.39 |  |  |
| -19.67 | -0.51 | 2.11  |  |  |



|        |       |       |  |  |
|--------|-------|-------|--|--|
| -22.42 | -0.55 | 2.25  |  |  |
| -24.98 | -1.4  | 1.56  |  |  |
| -37.03 | -0.39 | 3.14  |  |  |
| 54.83  | -2.07 | -4.24 |  |  |
| 52.06  | -2.98 | -5.07 |  |  |
| 41.42  | -3.59 | -5.36 |  |  |
| 33.6   | -4.17 | -5.64 |  |  |
| 29.54  | -2.36 | -3.64 |  |  |
| 28.88  | -3.18 | -4.43 |  |  |
| 25.53  | -1.71 | -2.78 |  |  |
| 6.1    | 0.87  | 1.87  |  |  |
| 3.78   | -6.28 | -4.59 |  |  |
| 1.5    | -6.18 | -3.15 |  |  |
| 1.46   | -8.76 | -5.7  |  |  |
| 5.11   | -0.6  | -2.77 |  |  |
| 5.04   | 0.23  | -1.93 |  |  |
| -3.53  | -7.8  | -5.79 |  |  |
| 3.39   | -1.54 | -3.7  |  |  |
| 1.71   | -3.59 | -4.76 |  |  |
| 1.7    | -2.57 | -3.73 |  |  |
| -3.2   | -2.09 | -0.81 |  |  |
| 1.66   | -0.84 | -3    |  |  |
| 1.16   | 6.61  | 4.97  |  |  |
| -1.11  | 6.81  | 5.54  |  |  |
| -1.21  | 4.03  | 2.87  |  |  |
| -1.32  | 2.49  | 1.46  |  |  |
| -7.3   | 0.49  | 1.93  |  |  |
| -9.39  | 0.14  | 1.94  |  |  |
| 5.39   | 3.17  | 1.01  |  |  |
| 3.45   | -0.33 | -1.85 |  |  |
| 3.32   | 0.63  | -0.83 |  |  |
| 2.72   | 3.57  | 2.39  |  |  |
| -1.79  | 4.06  | 5.16  |  |  |
| 1.83   | 1.91  | -0.25 |  |  |
| 1.22   | 4.09  | 2.52  |  |  |
| 1.1    | 2.18  | 0.75  |  |  |
| 1.04   | -0.53 | -1.87 |  |  |
| -1.21  | -2.76 | -3.77 |  |  |
| -5.42  | -3.36 | -2.21 |  |  |
| 1.92   | 3     | 0.84  |  |  |
| 1.29   | -1.28 | -2.86 |  |  |
| 1.16   | 1.25  | -0.18 |  |  |
| -1.07  | 3.27  | 2.14  |  |  |
| -1.07  | 1.5   | 0.38  |  |  |
| 2.23   | 3.04  | 0.88  |  |  |
| 1.08   | 2.81  | 1.69  |  |  |
| -4.1   | 0.32  | 1.36  |  |  |
| -4.23  | -0.98 | 0.1   |  |  |
| -5.74  | -1.67 | -0.15 |  |  |
| 6.63   | -0.45 | -2.6  |  |  |
| 6.29   | -0.84 | -2.92 |  |  |
| 6.27   | -0.75 | -2.82 |  |  |
| 5.82   | -1.63 | -3.6  |  |  |
| 3.83   | -1.37 | -2.73 |  |  |
| 3.71   | -1.82 | -3.14 |  |  |
| 3.58   | -0.71 | -1.98 |  |  |
| 3.15   | -2.7  | -3.79 |  |  |
| 5.53   | 0.21  | -1.95 |  |  |

|       |       |       |  |  |
|-------|-------|-------|--|--|
| 2.84  | 2.92  | 1.73  |  |  |
| 2.68  | -0.64 | -1.75 |  |  |
| 1.47  | 2.09  | -0.07 |  |  |
| 1.47  | -5.12 | -7.26 |  |  |
| 1.32  | 3.07  | 1.08  |  |  |
| 1.28  | -0.37 | -2.32 |  |  |
| 1.16  | 1.05  | -0.76 |  |  |
| 1.1   | -0.18 | -1.91 |  |  |
| -1.05 | -4.23 | -5.76 |  |  |
| -1.06 | 0.06  | -1.45 |  |  |
| -1.16 | -0.99 | -2.38 |  |  |
| -1.18 | -0.99 | -2.35 |  |  |
| -1.43 | -1.32 | -2.4  |  |  |
| -8    | -4.23 | -2.83 |  |  |
| 2.37  | 2.39  | 0.24  |  |  |
| 1.39  | -1.03 | -2.41 |  |  |
| 1.13  | -1.25 | -2.33 |  |  |
| 5.43  | 2.88  | 0.72  |  |  |
| 2.86  | 5.12  | 3.89  |  |  |
| 2.75  | 2.36  | 1.19  |  |  |
| 2.56  | 1.24  | 0.17  |  |  |
| 2.44  | 0.75  | -0.25 |  |  |
| -1.74 | -1.73 | -0.64 |  |  |
| 7.53  | -2.69 | -4.84 |  |  |
| 5.85  | -0.71 | -2.5  |  |  |
| -1.42 | -6.51 | -5.24 |  |  |
| 1.19  | 7.9   | 5.75  |  |  |
| -1.34 | -1.5  | -2.97 |  |  |
| -1.48 | -0.29 | -1.61 |  |  |
| -1.56 | 0.04  | -1.21 |  |  |
| -1.77 | 4.8   | 3.73  |  |  |
| 6.5   | -0.2  | -2.35 |  |  |
| 4.32  | 2.1   | 0.54  |  |  |
| 3.4   | 1.4   | 0.18  |  |  |
| -1.47 | -1.42 | -0.32 |  |  |
| -1.71 | -1.46 | -0.13 |  |  |
| 9.02  | -4.56 | -6.71 |  |  |
| 5.26  | -3.63 | -5    |  |  |
| 4.38  | -5.89 | -7    |  |  |
| 4.27  | -2.53 | -3.61 |  |  |
| -1.01 | -2.72 | -1.69 |  |  |
| -1.25 | -0.39 | 0.95  |  |  |
| -2.24 | -6.35 | -4.17 |  |  |
| 2.81  | -3.44 | -5.59 |  |  |
| 2.71  | -4.6  | -6.7  |  |  |
| 2.13  | -0.47 | -2.22 |  |  |
| 1.38  | -5.27 | -6.39 |  |  |
| -3.2  | -1.43 | -0.42 |  |  |
| -3.34 | -1.94 | -0.86 |  |  |
| 3.06  | 0.71  | -1.44 |  |  |
| 2.04  | 0.95  | -0.62 |  |  |
| 1.82  | -0.22 | -1.62 |  |  |
| 1.51  | 1.12  | -0.01 |  |  |
| 1.35  | 0.49  | -1.66 |  |  |
| -1.03 | 1.96  | 0.28  |  |  |
| -1.04 | 2.41  | 0.75  |  |  |
| -1.07 | 0.8   | -0.82 |  |  |
| -1.07 | -1.96 | -3.57 |  |  |

|        |       |       |  |  |
|--------|-------|-------|--|--|
| -1.11  | 0.32  | -1.25 |  |  |
| -1.13  | 0.86  | -0.68 |  |  |
| -1.15  | -3.01 | -4.52 |  |  |
| -1.15  | 4.47  | 2.96  |  |  |
| -1.15  | -3.26 | -4.77 |  |  |
| -1.16  | 5.48  | 3.99  |  |  |
| -1.23  | 0.79  | -0.62 |  |  |
| -1.38  | 2.43  | 1.18  |  |  |
| -1.51  | 0.1   | -1.01 |  |  |
| -1.55  | -4.25 | -5.33 |  |  |
| -7.46  | -3.16 | -1.97 |  |  |
| -7.55  | -2.21 | -1.01 |  |  |
| 1.95   | 1.74  | -0.41 |  |  |
| 1.7    | -1.52 | -3.47 |  |  |
| 1.53   | 3.18  | 1.38  |  |  |
| 1.24   | 1.22  | -0.28 |  |  |
| 1.21   | -1.94 | -3.41 |  |  |
| 1.15   | 1.97  | 0.58  |  |  |
| 1.09   | 4.29  | 2.98  |  |  |
| 1.02   | 0.5   | -0.71 |  |  |
| -1.06  | 4.26  | 3.15  |  |  |
| -1.09  | -0.55 | -1.61 |  |  |
| -1.12  | -3.37 | -4.39 |  |  |
| -4.61  | -0.98 | 0.04  |  |  |
| -4.77  | -1.67 | -0.61 |  |  |
| 1.41   | -3.13 | -5.29 |  |  |
| -1.02  | -1.06 | -2.7  |  |  |
| -1.15  | -0.64 | -2.1  |  |  |
| -1.19  | -5.34 | -6.75 |  |  |
| -1.28  | -1.94 | -3.24 |  |  |
| -1.55  | 0.73  | -0.3  |  |  |
| 1.55   | -0.54 | -2.68 |  |  |
| 1.48   | -0.39 | -2.47 |  |  |
| 1.09   | -1.69 | -3.33 |  |  |
| 1.04   | 3.25  | 1.68  |  |  |
| 1.02   | -1.39 | -2.93 |  |  |
| -1.01  | -0.89 | -2.39 |  |  |
| -1.02  | 2.9   | 1.42  |  |  |
| -1.16  | -2.29 | -3.59 |  |  |
| -1.18  | 3.66  | 2.39  |  |  |
| -1.21  | 2.08  | 0.85  |  |  |
| -1.28  | -1.74 | -2.89 |  |  |
| -1.33  | 1.5   | 0.41  |  |  |
| -1.38  | 1.97  | 0.92  |  |  |
| -1.38  | -1.82 | -2.86 |  |  |
| -6.52  | -1.21 | -0.01 |  |  |
| -9.12  | -0.44 | 1.24  |  |  |
| -9.94  | -1.49 | 0.32  |  |  |
| -12.32 | -0.88 | 1.23  |  |  |
| 7.02   | -7.57 | -9.72 |  |  |
| 4.35   | -4.99 | -6.45 |  |  |
| 4.07   | -6.88 | -8.24 |  |  |
| 3.98   | -4.46 | -5.79 |  |  |
| 3.23   | -3.77 | -4.8  |  |  |
| 3.31   | 2.79  | 0.64  |  |  |
| 1.55   | -1.95 | -3    |  |  |
| -2.72  | 1.27  | 2.29  |  |  |
| -2.95  | -1.86 | -0.73 |  |  |

|       |       |       |  |  |
|-------|-------|-------|--|--|
| -3.46 | -1.58 | -0.21 |  |  |
| -3.58 | -4.33 | -2.91 |  |  |
| -4.66 | -1.06 | 0.74  |  |  |
| 7.74  | 2.4   | 0.26  |  |  |
| 6.69  | 2.16  | 0.22  |  |  |
| 6     | 0.4   | -1.38 |  |  |
| 5.24  | 1.09  | -0.5  |  |  |
| 4.33  | -0.98 | -2.29 |  |  |
| 4.28  | 1.66  | 0.37  |  |  |
| 3.82  | -1.98 | -3.1  |  |  |
| -1.32 | -0.36 | 0.85  |  |  |
| -1.41 | -1.79 | -0.49 |  |  |
| -1.74 | -0.18 | 1.42  |  |  |
| -1.84 | 0.14  | 1.82  |  |  |
| 1.66  | -0.9  | -3.04 |  |  |
| 1.32  | 0.48  | -1.34 |  |  |
| 1.32  | 0.48  | -1.34 |  |  |
| 1.27  | 0.13  | -1.63 |  |  |
| 1.15  | 0.36  | -1.26 |  |  |
| 1.14  | -0.69 | -2.31 |  |  |
| 1.11  | -0.87 | -2.43 |  |  |
| 1.05  | -3.47 | -4.96 |  |  |
| -1.03 | 0.79  | -0.59 |  |  |
| -1.03 | -0.66 | -2.03 |  |  |
| -1.04 | 1.42  | 0.06  |  |  |
| -1.15 | 1.39  | 0.17  |  |  |
| -1.25 | 0.7   | -0.39 |  |  |
| -1.25 | -2.23 | -3.32 |  |  |
| -1.27 | 2.58  | 1.51  |  |  |
| -1.27 | 2.58  | 1.51  |  |  |
| 2.82  | 1.22  | -0.92 |  |  |
| 1.87  | -0.67 | -2.22 |  |  |
| 1.45  | 0.38  | -0.8  |  |  |
| 1.3   | 0.9   | -0.13 |  |  |
| -3.53 | -0.01 | 1.16  |  |  |
| -4.82 | -1.38 | 0.24  |  |  |
| 3.43  | -3.24 | -5.38 |  |  |
| 1.89  | -3.5  | -4.78 |  |  |
| 1.6   | -4.31 | -5.35 |  |  |
| -2.97 | -4.64 | -3.43 |  |  |
| 1.57  | -0.24 | -2.38 |  |  |
| 1.32  | -1.69 | -3.58 |  |  |
| 1.24  | 1.32  | -0.48 |  |  |
| 1.19  | -1.37 | -3.12 |  |  |
| 1.18  | 0.53  | -1.19 |  |  |
| 1.1   | -4.86 | -6.5  |  |  |
| 1.03  | 6.3   | 4.76  |  |  |
| 1.01  | 0.33  | -1.18 |  |  |
| 1.01  | 1.39  | -0.11 |  |  |
| -1.04 | 3.87  | 2.44  |  |  |
| -1.08 | -4.49 | -5.87 |  |  |
| -1.17 | -4.99 | -6.26 |  |  |
| -1.25 | 1.88  | 0.71  |  |  |
| -8.48 | -2.12 | -0.53 |  |  |
| 1.61  | -0.21 | -2.35 |  |  |
| 1.08  | 0.03  | -1.52 |  |  |
| -1.12 | 3.08  | 1.8   |  |  |
| -1.29 | -0.54 | -1.62 |  |  |

|       |       |       |  |  |
|-------|-------|-------|--|--|
| 1.24  | -3.56 | -5.7  |  |  |
| 1.01  | -2.1  | -3.95 |  |  |
| -1.02 | 3.56  | 1.75  |  |  |
| -1.08 | -1.83 | -3.55 |  |  |
| 2.24  | -4.34 | -6.48 |  |  |
| 1.71  | -3.88 | -5.63 |  |  |
| 1.23  | -0.2  | -1.48 |  |  |
| 1.19  | -0.69 | -1.91 |  |  |
| 1.15  | -2.89 | -4.06 |  |  |
| 1.07  | -5.07 | -6.14 |  |  |
| 1.04  | -1.85 | -2.88 |  |  |
| -4.81 | -3.91 | -2.62 |  |  |
| -4.97 | -5.67 | -4.33 |  |  |
| 2.82  | 4.66  | 2.52  |  |  |
| 1.68  | 3     | 1.61  |  |  |
| 1.55  | 2.05  | -0.09 |  |  |
| 1.19  | -3.85 | -5.6  |  |  |
| -1.04 | -3.83 | -5.28 |  |  |
| -1.04 | -0.72 | -2.17 |  |  |
| -1.05 | -2.24 | -3.68 |  |  |
| -1.06 | -3.52 | -4.93 |  |  |
| -1.28 | -3.97 | -5.12 |  |  |
| -1.33 | 1.69  | 0.59  |  |  |
| -5.88 | -0.83 | 0.22  |  |  |
| 3.7   | 4.09  | 1.95  |  |  |
| 2.61  | 3.19  | 1.56  |  |  |
| 2.32  | 5.11  | 3.65  |  |  |
| -2.49 | -1.44 | -0.38 |  |  |
| -2.73 | -1.25 | -0.05 |  |  |
| 9.41  | 0.35  | -1.78 |  |  |
| 7.31  | 2.24  | 0.47  |  |  |
| -1.21 | -1.59 | -0.21 |  |  |
| -1.24 | 3.35  | 4.76  |  |  |
| -1.34 | -2.9  | -1.37 |  |  |
| -2.79 | -3.06 | -0.48 |  |  |
| 9.45  | -0.51 | -2.64 |  |  |
| 7.61  | 0.87  | -0.96 |  |  |
| 6.73  | 0.89  | -0.75 |  |  |
| 6.54  | -0.12 | -1.72 |  |  |
| 6.12  | -1.19 | -2.69 |  |  |
| 5.31  | 2.37  | 1.06  |  |  |
| 5.17  | 1.89  | 0.63  |  |  |
| 5.03  | -1.31 | -2.53 |  |  |
| 5.03  | 1.64  | 0.41  |  |  |
| 4.88  | 2.17  | 0.99  |  |  |
| 4.73  | 0.44  | -0.7  |  |  |
| 4.64  | 0.97  | -0.14 |  |  |
| 4.58  | 0.83  | -0.26 |  |  |
| 4.56  | 1.96  | 0.88  |  |  |
| 4.56  | 2.41  | 1.33  |  |  |
| 4.43  | 1.57  | 0.53  |  |  |
| 4.4   | 1.39  | 0.36  |  |  |
| 1.08  | -3.23 | -2.23 |  |  |
| 1.03  | -2.73 | -1.67 |  |  |
| -1.16 | -1.41 | -0.08 |  |  |
| -2.64 | 3.27  | 5.77  |  |  |
| 3.58  | 4.01  | 1.88  |  |  |
| 2.16  | -2.52 | -3.93 |  |  |

|       |       |       |  |  |
|-------|-------|-------|--|--|
| 2.01  | -1.54 | -2.84 |  |  |
| 2     | -1.24 | -2.53 |  |  |
| 1.73  | -2.55 | -3.63 |  |  |
| 1.64  | -2.81 | -3.81 |  |  |
| 14.09 | 0.71  | -1.43 |  |  |
| 13.49 | 0.08  | -1.99 |  |  |
| 9.26  | -1.49 | -3.01 |  |  |
| 8.59  | 0.23  | -1.19 |  |  |
| 7.59  | 0.89  | -0.36 |  |  |
| 7.6   | -0.52 | -1.77 |  |  |
| 7.52  | 0.83  | -0.39 |  |  |
| 7.22  | -2.08 | -3.25 |  |  |
| 7.19  | -2.1  | -3.27 |  |  |
| 7.11  | -0.98 | -2.12 |  |  |
| 6.78  | -0.1  | -1.18 |  |  |
| 6.65  | 0.42  | -0.63 |  |  |
| 6.51  | -2.1  | -3.12 |  |  |
| 1.59  | -3.67 | -2.65 |  |  |
| 1.58  | -0.97 | 0.06  |  |  |
| 1.55  | 0.78  | 1.83  |  |  |
| 1.46  | -2.53 | -1.4  |  |  |
| 1.42  | 0.57  | 1.74  |  |  |
| 1.41  | -4.68 | -3.5  |  |  |
| 1.41  | -3.11 | -1.92 |  |  |
| 1.39  | 1.19  | 2.39  |  |  |
| 1.38  | 1.99  | 3.21  |  |  |
| 1.32  | -5.04 | -3.76 |  |  |
| 1.29  | 6.05  | 7.38  |  |  |
| 1.26  | -2.31 | -0.95 |  |  |
| 1.2   | -2.72 | -1.3  |  |  |
| 1.2   | -3.18 | -1.76 |  |  |
| 1.19  | -4.8  | -3.37 |  |  |
| 1.18  | 0.09  | 1.53  |  |  |
| 1.17  | -1.32 | 0.14  |  |  |
| 1.12  | -4.34 | -2.82 |  |  |
| 1.11  | -3.64 | -2.1  |  |  |
| 1.1   | -2.96 | -1.41 |  |  |
| 1.02  | -4.22 | -2.56 |  |  |
| -1.1  | -4.2  | -2.37 |  |  |
| -1.18 | 0.65  | 2.57  |  |  |
| -1.28 | -2.88 | -0.83 |  |  |
| -1.57 | -4.97 | -2.64 |  |  |
| -3.4  | -3.95 | -0.5  |  |  |
| 2.53  | 3.03  | 0.9   |  |  |
| 1.36  | -0.66 | -1.9  |  |  |
| 1.35  | 0.43  | -0.81 |  |  |
| 1.24  | 1.3   | 0.2   |  |  |
| 4.68  | -3.62 | -5.75 |  |  |
| 2.41  | -4.75 | -5.93 |  |  |
| -1.93 | -4.29 | -3.24 |  |  |
| 3.68  | -2.34 | -4.47 |  |  |
| 1.93  | -4.13 | -5.34 |  |  |
| 1.82  | -1.57 | -2.69 |  |  |
| 1.76  | -5.26 | -6.32 |  |  |
| 1.61  | -0.77 | -2.91 |  |  |
| 1.24  | -1.55 | -3.31 |  |  |
| 1.11  | -3.94 | -5.54 |  |  |
| 1.06  | 1.09  | -0.44 |  |  |

|        |       |       |  |  |
|--------|-------|-------|--|--|
| 1.04   | -1.49 | -3    |  |  |
| -1.01  | -3.21 | -4.65 |  |  |
| -1.08  | -1.99 | -3.33 |  |  |
| -1.21  | 0.63  | -0.53 |  |  |
| -1.28  | 0.8   | -0.29 |  |  |
| -1.31  | 1.16  | 0.1   |  |  |
| 3.14   | 0.39  | -1.74 |  |  |
| 1.9    | 1.25  | -0.16 |  |  |
| 1.48   | 2.34  | 1.29  |  |  |
| 1.47   | -0.3  | -1.34 |  |  |
| 1.45   | -0.32 | -1.34 |  |  |
| -3.03  | -0.91 | 0.2   |  |  |
| -3.47  | -1.98 | -0.67 |  |  |
| -3.5   | -2.03 | -0.71 |  |  |
| -3.68  | -0.26 | 1.13  |  |  |
| -3.83  | -1.35 | 0.1   |  |  |
| -3.92  | -1.52 | -0.03 |  |  |
| -3.98  | -0.75 | 0.76  |  |  |
| 1.47   | -2.32 | -4.45 |  |  |
| -18.57 | -5.71 | -3.06 |  |  |
| 1.25   | -2.71 | -4.84 |  |  |
| 1.11   | -3    | -4.95 |  |  |
| 1.06   | -3.2  | -5.1  |  |  |
| -1.07  | -3.25 | -4.96 |  |  |
| -1.09  | -2.53 | -4.22 |  |  |
| -1.17  | 0.9   | -0.69 |  |  |
| -1.37  | -2.87 | -4.22 |  |  |
| -1.38  | -1.45 | -2.79 |  |  |
| -1.42  | -1.71 | -3.01 |  |  |
| -1.45  | -3.4  | -4.68 |  |  |
| -1.46  | -0.35 | -1.61 |  |  |
| -1.5   | -0.5  | -1.72 |  |  |
| -1.53  | -0.81 | -2.01 |  |  |
| -1.73  | -2    | -3.02 |  |  |
| -8.34  | -2.36 | -1.1  |  |  |
| 3.63   | -2.91 | -5.04 |  |  |
| -3.32  | -4.42 | -2.95 |  |  |
| 4.71   | -0.94 | -3.07 |  |  |
| -1.86  | -3.09 | -2.08 |  |  |
| 2.48   | -1.68 | -3.8  |  |  |
| 1.67   | 1.11  | -0.45 |  |  |
| 1.5    | -1.9  | -3.3  |  |  |
| 1.42   | -0.38 | -1.7  |  |  |
| 1.21   | -3.74 | -4.83 |  |  |
| 1.19   | -2.26 | -3.33 |  |  |
| 1.14   | 1.44  | 0.44  |  |  |
| -3.77  | -2.46 | -1.36 |  |  |
| 2.29   | 2.46  | 0.33  |  |  |
| 1.8    | -2.12 | -3.89 |  |  |
| 1.67   | -2.68 | -4.34 |  |  |
| 1.52   | -0.72 | -2.25 |  |  |
| 1.37   | 2.26  | 0.88  |  |  |
| 1.37   | -1.26 | -2.64 |  |  |
| 1.14   | 1.99  | 0.87  |  |  |
| 1.13   | 0.36  | -0.73 |  |  |
| 1.08   | -1.84 | -2.88 |  |  |
| -4.36  | -3.52 | -2.32 |  |  |
| -6.18  | -2.24 | -0.54 |  |  |

|        |       |       |  |  |
|--------|-------|-------|--|--|
| -8.77  | -3.3  | -1.1  |  |  |
| 9.51   | 0.48  | -1.64 |  |  |
| 5.86   | 0.03  | -1.4  |  |  |
| 4.91   | -1.25 | -2.41 |  |  |
| 1.01   | -1.36 | -0.25 |  |  |
| 7.88   | -1    | -3.13 |  |  |
| -1.31  | -2.24 | -0.99 |  |  |
| -2.01  | -2.48 | -0.62 |  |  |
| -2.15  | -2.32 | -0.36 |  |  |
| 1.77   | -0.88 | -3    |  |  |
| 1.36   | -1.94 | -3.69 |  |  |
| 1.27   | -0.94 | -2.59 |  |  |
| 1.07   | -0.62 | -2.01 |  |  |
| -1.1   | 1.24  | 0.09  |  |  |
| -1.12  | 1.44  | 0.31  |  |  |
| -1.14  | 2.07  | 0.96  |  |  |
| -5.65  | -2.72 | -1.52 |  |  |
| -5.88  | 0.73  | 1.98  |  |  |
| 2.86   | -3.82 | -5.95 |  |  |
| 2.03   | -6.63 | -8.26 |  |  |
| 1.59   | -5.13 | -6.4  |  |  |
| 1.34   | -1.92 | -2.95 |  |  |
| 1.34   | -3.89 | -4.92 |  |  |
| 5.98   | 2.1   | -0.02 |  |  |
| 3.64   | -0.6  | -2.01 |  |  |
| 3.12   | 0.96  | -0.22 |  |  |
| -1.45  | 0.88  | 1.88  |  |  |
| -1.5   | -0.29 | 0.76  |  |  |
| -1.52  | -0.73 | 0.33  |  |  |
| -1.56  | -1.57 | -0.47 |  |  |
| -1.56  | -2.77 | -1.67 |  |  |
| -1.74  | 2.07  | 3.33  |  |  |
| -1.87  | 1.04  | 2.4   |  |  |
| -2.28  | -0.96 | 0.69  |  |  |
| -2.52  | -0.68 | 1.11  |  |  |
| -2.54  | -1.65 | 0.15  |  |  |
| 3.07   | -2.74 | -4.86 |  |  |
| -3.21  | -4.87 | -3.69 |  |  |
| -4.31  | -4.55 | -2.95 |  |  |
| 3.03   | 5.88  | 3.76  |  |  |
| 2.04   | 4.8   | 3.25  |  |  |
| 1.49   | -0.24 | -1.34 |  |  |
| 1.09   | -0.27 | -2.38 |  |  |
| 1.04   | 3.28  | 1.23  |  |  |
| -1.11  | -0.98 | -2.82 |  |  |
| -1.17  | -0.69 | -2.46 |  |  |
| -1.77  | 0.25  | -0.92 |  |  |
| -1.84  | -2.14 | -3.25 |  |  |
| -1.85  | 0.44  | -0.66 |  |  |
| -8.38  | -0.9  | 0.18  |  |  |
| -8.53  | -1.27 | -0.17 |  |  |
| -8.73  | 0.04  | 1.17  |  |  |
| -9.75  | -0.52 | 0.77  |  |  |
| -17.04 | -0.47 | 1.63  |  |  |
| 1.75   | -3.43 | -5.55 |  |  |
| 1.31   | -5.81 | -7.51 |  |  |
| 1.2    | -4.77 | -6.34 |  |  |
| 1.16   | -5.72 | -7.24 |  |  |



|        |       |       |  |  |
|--------|-------|-------|--|--|
| 1.16   | -6.48 | -8    |  |  |
| 1.03   | -5.28 | -6.63 |  |  |
| -1.01  | -4.03 | -5.32 |  |  |
| -1.05  | 1.87  | 0.63  |  |  |
| -1.07  | -0.25 | -1.47 |  |  |
| -1.12  | -6.38 | -7.53 |  |  |
| -1.16  | -0.32 | -1.41 |  |  |
| -1.17  | -5.01 | -6.09 |  |  |
| -1.2   | -1.9  | -2.94 |  |  |
| -1.24  | -7.14 | -8.14 |  |  |
| 10.58  | 0.14  | -1.97 |  |  |
| 1.18   | -5.29 | -4.24 |  |  |
| 1.19   | -2.06 | -1.02 |  |  |
| 1.18   | -4.47 | -3.42 |  |  |
| 1.16   | -1.39 | -0.32 |  |  |
| 1.1    | -4.08 | -2.93 |  |  |
| 1.09   | -1.4  | -0.24 |  |  |
| 1.04   | -2.96 | -1.72 |  |  |
| 1.02   | -3.85 | -2.59 |  |  |
| 1.01   | -1.96 | -0.69 |  |  |
| 1.01   | -2.51 | -1.23 |  |  |
| -1.01  | -1.38 | -0.08 |  |  |
| -1.02  | -2    | -0.69 |  |  |
| -1.04  | -4.83 | -3.49 |  |  |
| -1.22  | -4.85 | -3.28 |  |  |
| -1.25  | -6.53 | -4.91 |  |  |
| -1.29  | -3.03 | -1.37 |  |  |
| -1.36  | -4.75 | -3.02 |  |  |
| -1.46  | -6.34 | -4.51 |  |  |
| -1.46  | 1     | 2.83  |  |  |
| -1.74  | -4.7  | -2.62 |  |  |
| 158.5  | 0.12  | -1.99 |  |  |
| 147.14 | 0.53  | -1.47 |  |  |
| 87.53  | 1.85  | 0.6   |  |  |
| 83.28  | 0.2   | -0.98 |  |  |
| 82.8   | 0.96  | -0.22 |  |  |
| 9.35   | -2.04 | -0.07 |  |  |
| 3      | -0.94 | 2.67  |  |  |
| 1.37   | -4.35 | 0.38  |  |  |
| 1.11   | -4.19 | 0.86  |  |  |
| 2.16   | -2.05 | -4.17 |  |  |
| 2.15   | -2.16 | -4.27 |  |  |
| 1.98   | 1.53  | -0.46 |  |  |
| 1.86   | -2.51 | -4.4  |  |  |
| 1.81   | -1.77 | -3.63 |  |  |
| 1.81   | -1.85 | -3.71 |  |  |
| 1.73   | 0.01  | -1.78 |  |  |
| 1.68   | 3.65  | 1.9   |  |  |
| 1.67   | 0.57  | -1.18 |  |  |
| 1.63   | -0.31 | -2.02 |  |  |
| 1.55   | -1.16 | -2.8  |  |  |
| 1.42   | -1.24 | -2.75 |  |  |
| 1.35   | 1.36  | -0.08 |  |  |
| 1.3    | -2.62 | -4    |  |  |
| 1.19   | -1.33 | -2.59 |  |  |
| 1.19   | -2.31 | -3.57 |  |  |
| 1.16   | -0.52 | -1.74 |  |  |
| 1.16   | -2.58 | -3.8  |  |  |

|        |       |       |  |  |
|--------|-------|-------|--|--|
| 1.15   | -0.83 | -2.03 |  |  |
| 1.12   | -1.54 | -2.71 |  |  |
| 1.11   | 0.77  | -0.39 |  |  |
| 1.12   | -4.05 | -5.22 |  |  |
| 1.1    | 0.03  | -1.11 |  |  |
| 1.09   | -0.91 | -2.04 |  |  |
| 1.09   | 0.02  | -1.11 |  |  |
| 1.07   | -3.44 | -4.55 |  |  |
| 1.07   | -3.35 | -4.44 |  |  |
| 1.06   | -1.7  | -2.79 |  |  |
| 1.05   | -0.05 | -1.13 |  |  |
| 1.05   | 2.73  | 1.66  |  |  |
| 1.03   | -4.16 | -5.22 |  |  |
| 1.04   | -1.08 | -2.13 |  |  |
| 1.01   | -1.39 | -2.41 |  |  |
| 1.01   | -1.79 | -2.8  |  |  |
| 1.01   | -2.58 | -3.59 |  |  |
| -5.04  | -3.92 | -2.6  |  |  |
| -7.41  | -3.47 | -1.58 |  |  |
| -1.05  | -2.92 | -5.04 |  |  |
| -1.17  | 2.58  | 0.61  |  |  |
| -1.23  | -2.49 | -4.38 |  |  |
| -1.41  | -4.26 | -5.95 |  |  |
| -1.5   | -5.23 | -6.83 |  |  |
| -1.65  | -1.02 | -2.48 |  |  |
| -1.95  | -4.37 | -5.58 |  |  |
| -2.1   | -2.41 | -3.52 |  |  |
| -10.97 | -2.24 | -0.97 |  |  |
| -14.59 | -2.51 | -0.82 |  |  |
| 1.62   | 2.1   | -0.01 |  |  |
| 1.25   | -5.09 | -6.82 |  |  |
| 1.19   | 2.72  | 1.06  |  |  |
| 1.1    | -4.87 | -6.41 |  |  |
| 1.05   | -0.17 | -1.65 |  |  |
| 1.01   | -2.12 | -3.55 |  |  |
| -1.01  | -1.47 | -2.86 |  |  |
| -1.12  | -6.74 | -7.99 |  |  |
| -1.18  | -2.57 | -3.75 |  |  |
| -1.18  | -4.12 | -5.3  |  |  |
| -1.24  | -3.24 | -4.34 |  |  |
| -1.27  | -1.52 | -2.59 |  |  |
| -1.29  | -6.64 | -7.69 |  |  |
| -1.32  | -2.36 | -3.37 |  |  |
| -1.34  | -6.1  | -7.09 |  |  |
| -5.34  | -5.66 | -4.66 |  |  |
| 15.75  | -3.18 | -5.3  |  |  |
| 15.02  | -4.01 | -6.06 |  |  |
| 13.45  | -3.03 | -4.91 |  |  |
| 7.88   | -4.53 | -5.64 |  |  |
| -1.29  | 0.93  | 3.16  |  |  |
| 3.84   | -4.17 | -6.28 |  |  |
| -2.4   | -4.34 | -3.25 |  |  |
| 1.94   | -1.58 | -3.69 |  |  |
| 1.52   | -0.65 | -2.41 |  |  |
| 1.27   | 0.16  | -1.33 |  |  |
| 1.02   | -1.49 | -2.68 |  |  |
| -1.07  | 0.45  | -0.6  |  |  |
| 6.17   | -3.23 | -5.34 |  |  |

|       |       |       |  |  |
|-------|-------|-------|--|--|
| 4.94  | -1.05 | -2.84 |  |  |
| 3.99  | -4.89 | -6.37 |  |  |
| 3.24  | -1.41 | -2.59 |  |  |
| 3.25  | -0.03 | -1.21 |  |  |
| 3.22  | -4.15 | -5.32 |  |  |
| 3.2   | -2.31 | -3.47 |  |  |
| 2.98  | -0.05 | -1.11 |  |  |
| -1.51 | -3.38 | -2.27 |  |  |
| 2.65  | 1.24  | -0.87 |  |  |
| 2.03  | -0.93 | -2.66 |  |  |
| 1.71  | 1.14  | -0.34 |  |  |
| 1.41  | 1.64  | 0.44  |  |  |
| 1.38  | -0.89 | -2.07 |  |  |
| -3.45 | -0.74 | 0.34  |  |  |
| 17.35 | -0.3  | -2.4  |  |  |
| 11.21 | 0.29  | -1.19 |  |  |
| 10.68 | 0.81  | -0.59 |  |  |
| 10.12 | 1.07  | -0.26 |  |  |
| 8.2   | -0.08 | -1.11 |  |  |
| 1.77  | 2.61  | 3.8   |  |  |
| 1.68  | 1.24  | 2.5   |  |  |
| 1.61  | 2.11  | 3.44  |  |  |
| 1.25  | 0.01  | 1.69  |  |  |
| 1.16  | -2.77 | -0.98 |  |  |
| 1.15  | -2.58 | -0.78 |  |  |
| 1.12  | -1.55 | 0.29  |  |  |
| -1.16 | -1.77 | 0.46  |  |  |
| -1.22 | -4.38 | -2.08 |  |  |
| 5.54  | 1.11  | -0.99 |  |  |
| 3.14  | -0.08 | -1.37 |  |  |
| 2.79  | -1.03 | -2.15 |  |  |
| -1.83 | -0.59 | 0.64  |  |  |
| 2.97  | 3.83  | 1.73  |  |  |
| 1.84  | 0.28  | -1.14 |  |  |
| -3.83 | -0.53 | 0.87  |  |  |
| 2.41  | -2.6  | -4.7  |  |  |
| 1.63  | -2.52 | -4.06 |  |  |
| 1.59  | -1.6  | -3.11 |  |  |
| 1.46  | -0.94 | -2.33 |  |  |
| 1.41  | -0.34 | -1.67 |  |  |
| 1.4   | -0.5  | -1.82 |  |  |
| 1.4   | -1.24 | -2.56 |  |  |
| 1.36  | -2.55 | -3.82 |  |  |
| 1.18  | -1.77 | -2.84 |  |  |
| 1.12  | -0.08 | -1.08 |  |  |
| 2.02  | 1.65  | -0.46 |  |  |
| 1.99  | 1.59  | -0.49 |  |  |
| 1.9   | 0.55  | -1.47 |  |  |
| 1.89  | -1.61 | -3.62 |  |  |
| 1.81  | 0.58  | -1.37 |  |  |
| 1.61  | 1.98  | 0.2   |  |  |
| 1.48  | 1.55  | -0.11 |  |  |
| 1.46  | 1.33  | -0.31 |  |  |
| 1.44  | -0.99 | -2.61 |  |  |
| 1.41  | -2.26 | -3.85 |  |  |
| 1.4   | -0.21 | -1.79 |  |  |
| 1.37  | 0.7   | -0.84 |  |  |
| 1.32  | 0.36  | -1.14 |  |  |

|        |       |       |  |  |
|--------|-------|-------|--|--|
| 1.32   | 3.59  | 2.09  |  |  |
| 1.32   | 3.17  | 1.68  |  |  |
| 1.28   | 2.97  | 1.52  |  |  |
| 1.22   | 1.46  | 0.08  |  |  |
| 1.21   | 0.4   | -0.97 |  |  |
| 1.21   | -0.36 | -1.72 |  |  |
| 1.2    | 0.32  | -1.04 |  |  |
| 1.19   | 0.18  | -1.17 |  |  |
| 1.19   | -0.64 | -1.98 |  |  |
| 1.18   | 0.62  | -0.71 |  |  |
| 1.17   | 0.46  | -0.86 |  |  |
| 1.17   | 4.77  | 3.45  |  |  |
| 1.16   | 1.54  | 0.23  |  |  |
| 1.16   | 3.39  | 2.08  |  |  |
| 1.14   | 4.45  | 3.17  |  |  |
| 1.13   | 1.14  | -0.13 |  |  |
| 1.12   | 6.11  | 4.85  |  |  |
| 1.12   | 2.34  | 1.09  |  |  |
| 1.12   | -0.28 | -1.53 |  |  |
| 1.11   | -2.32 | -3.56 |  |  |
| 1.1    | -0.6  | -1.84 |  |  |
| 1.1    | 1.79  | 0.56  |  |  |
| 1.08   | 1.74  | 0.53  |  |  |
| 1.08   | 3.81  | 2.61  |  |  |
| 1.08   | -0.07 | -1.27 |  |  |
| 1.07   | 4.13  | 2.93  |  |  |
| 1.06   | 5.11  | 3.93  |  |  |
| 1.06   | 3.98  | 2.8   |  |  |
| 1.05   | 4.18  | 3.01  |  |  |
| 1.05   | 1.3   | 0.14  |  |  |
| 1.02   | -2.1  | -3.21 |  |  |
| 1.02   | 5.97  | 4.85  |  |  |
| 1.01   | 4.47  | 3.36  |  |  |
| 1.01   | 2.96  | 1.85  |  |  |
| -1.01  | -1.82 | -2.9  |  |  |
| -1.01  | 3.28  | 2.21  |  |  |
| -1.01  | 6.75  | 5.68  |  |  |
| -1.03  | 3.28  | 2.23  |  |  |
| -1.03  | 1.87  | 0.82  |  |  |
| -1.04  | 4.82  | 3.78  |  |  |
| -1.05  | 1.1   | 0.07  |  |  |
| -1.06  | 5.07  | 4.06  |  |  |
| -1.06  | 7.17  | 6.16  |  |  |
| -4.28  | -0.45 | 0.56  |  |  |
| -7.8   | -1.69 | 0.18  |  |  |
| -35.58 | -2.16 | 1.9   |  |  |
| 2.18   | -2.21 | -4.31 |  |  |
| 2.16   | -0.15 | -2.24 |  |  |
| 2.11   | 0     | -2.06 |  |  |
| 2.04   | -0.87 | -2.87 |  |  |
| 1.95   | -5    | -6.95 |  |  |
| 1.72   | -1.24 | -2.99 |  |  |
| 1.68   | -0.82 | -2.55 |  |  |
| 1.67   | -4.95 | -6.67 |  |  |
| 1.57   | -3.85 | -5.47 |  |  |
| 1.52   | -4.28 | -5.86 |  |  |
| 1.44   | -1.47 | -2.98 |  |  |
| 1.43   | -4.01 | -5.5  |  |  |

|        |       |       |  |  |
|--------|-------|-------|--|--|
| 1.39   | -1.88 | -3.34 |  |  |
| 1.31   | -2.51 | -3.88 |  |  |
| 1.2    | -4.18 | -5.42 |  |  |
| 1.19   | 0.12  | -1.11 |  |  |
| 1.16   | -4.23 | -5.43 |  |  |
| 1.85   | -1.8  | -3.9  |  |  |
| 1.37   | 0.54  | -1.13 |  |  |
| 1.33   | -1.84 | -3.47 |  |  |
| 1.25   | 0.53  | -1.01 |  |  |
| 1.25   | -3.13 | -4.67 |  |  |
| 1.22   | -2.82 | -4.32 |  |  |
| 1.15   | 0.65  | -0.78 |  |  |
| 1.12   | -0.1  | -1.48 |  |  |
| 1.1    | -0.53 | -1.88 |  |  |
| -1.01  | -2.72 | -3.92 |  |  |
| -1.04  | 0.79  | -0.37 |  |  |
| -1.11  | 1.32  | 0.25  |  |  |
| -6.17  | -4.27 | -2.86 |  |  |
| -7.33  | -4.93 | -3.27 |  |  |
| 4.39   | 1.3   | -0.81 |  |  |
| 2.18   | -0.74 | -1.83 |  |  |
| 2.09   | 0.76  | -0.28 |  |  |
| 2.07   | -3.96 | -6.07 |  |  |
| 1.14   | -1.31 | -2.56 |  |  |
| 1.03   | 2.36  | 1.26  |  |  |
| 1.02   | 3.42  | 2.34  |  |  |
| -1     | 2.42  | 1.37  |  |  |
| -6.67  | 0.07  | 1.75  |  |  |
| -8.34  | -2.27 | -0.26 |  |  |
| 2.1    | -2.61 | -4.71 |  |  |
| 1.83   | -1.02 | -2.92 |  |  |
| 1.06   | -2.99 | -4.1  |  |  |
| -5.44  | -1.98 | -0.56 |  |  |
| 1.78   | -2.57 | -4.67 |  |  |
| 1.78   | -2.74 | -4.83 |  |  |
| 1.21   | -3.47 | -5.01 |  |  |
| 1.05   | -0.49 | -1.83 |  |  |
| 1.03   | -3.03 | -4.34 |  |  |
| -1.04  | 1     | -0.21 |  |  |
| -12.05 | -5.61 | -3.28 |  |  |
| 2.36   | -3.11 | -5.21 |  |  |
| 2.02   | -1.7  | -3.58 |  |  |
| 1.79   | -0.3  | -2    |  |  |
| 1.68   | -4.52 | -6.13 |  |  |
| 1.62   | 0.59  | -0.98 |  |  |
| 1.59   | -1.96 | -3.49 |  |  |
| 1.52   | -2.68 | -4.15 |  |  |
| 1.48   | -4.84 | -6.27 |  |  |
| 1.47   | -1.84 | -3.27 |  |  |
| 1.4    | -0.11 | -1.46 |  |  |
| 1.29   | -1.46 | -2.69 |  |  |
| 1.28   | -0.98 | -2.2  |  |  |
| 1.28   | 0.01  | -1.21 |  |  |
| 1.26   | -2.98 | -4.18 |  |  |
| 1.15   | 2.67  | 1.61  |  |  |
| 1.12   | -3.28 | -4.31 |  |  |
| 12.29  | 1.29  | -0.81 |  |  |
| 7.17   | 0.78  | -0.54 |  |  |

|       |       |       |  |  |
|-------|-------|-------|--|--|
| 5.99  | -0.18 | -1.24 |  |  |
| 1.14  | -2.08 | -0.75 |  |  |
| 1.06  | -2.4  | -0.96 |  |  |
| 1.01  | 3.02  | 4.51  |  |  |
| -1.01 | 2.27  | 3.81  |  |  |
| -1.07 | 1.76  | 3.37  |  |  |
| -1.18 | -1.36 | 0.4   |  |  |
| -1.19 | -2.34 | -0.57 |  |  |
| -1.25 | -1.82 | 0.02  |  |  |
| -1.27 | 0.7   | 2.57  |  |  |
| -1.73 | -3.26 | -0.96 |  |  |
| 2.73  | -2.99 | -5.09 |  |  |
| 2.09  | 2.74  | 1.03  |  |  |
| 1.81  | 1.29  | -0.22 |  |  |
| 1.48  | 3.98  | 2.76  |  |  |
| 1.45  | -0.95 | -2.14 |  |  |
| 1.42  | 2.21  | 1.05  |  |  |
| 1.36  | -1.12 | -2.22 |  |  |
| 1.65  | 3.06  | 0.96  |  |  |
| 1.26  | -2.75 | -4.46 |  |  |
| 1.17  | -2.14 | -3.74 |  |  |
| 1.09  | -0.04 | -1.54 |  |  |
| 1.08  | -1.32 | -2.81 |  |  |
| -1.01 | -2.4  | -3.77 |  |  |
| -1.03 | -4.53 | -5.86 |  |  |
| -1.1  | -0.07 | -1.31 |  |  |
| -1.13 | -2.33 | -3.53 |  |  |
| -1.17 | -5.55 | -6.7  |  |  |
| -1.21 | -1.52 | -2.63 |  |  |
| -5.69 | -3.33 | -2.2  |  |  |
| 2.72  | 0.47  | -1.63 |  |  |
| 1.93  | -0.41 | -2.01 |  |  |
| 1.53  | -2.24 | -3.51 |  |  |
| 1.31  | 2.05  | 1     |  |  |
| 1.31  | 1.99  | 0.94  |  |  |
| 1.29  | -2.09 | -3.11 |  |  |
| -3.36 | -3.27 | -2.18 |  |  |
| 1.93  | -1.37 | -3.47 |  |  |
| 1.63  | -0.41 | -2.27 |  |  |
| 1.39  | 4.66  | 3.03  |  |  |
| 1.23  | -2.26 | -3.71 |  |  |
| 1.12  | 3.48  | 2.16  |  |  |
| 1.1   | -3.78 | -5.07 |  |  |
| 1.09  | -0.83 | -2.1  |  |  |
| 1.05  | -1.81 | -3.03 |  |  |
| 1.03  | 1.98  | 0.79  |  |  |
| -1    | 1.79  | 0.64  |  |  |
| -1.01 | 0.74  | -0.4  |  |  |
| -1.03 | 1.18  | 0.08  |  |  |
| -1.07 | 2.77  | 1.71  |  |  |
| -1.08 | -1.24 | -2.29 |  |  |
| -1.09 | -1.05 | -2.09 |  |  |
| -4.77 | -2.23 | -1.13 |  |  |
| -6.16 | -0.51 | 0.96  |  |  |
| -7.55 | -2.65 | -0.89 |  |  |
| 5.88  | 2.26  | 0.17  |  |  |
| 5.31  | 2.5   | 0.55  |  |  |
| 5.09  | 1.83  | -0.05 |  |  |

|       |       |       |  |  |
|-------|-------|-------|--|--|
| 4.79  | 1.73  | -0.07 |  |  |
| -1.5  | -3.48 | -2.44 |  |  |
| -1.58 | -2.8  | -1.67 |  |  |
| -1.96 | -3.57 | -2.14 |  |  |
| 2.02  | -3.99 | -6.09 |  |  |
| 1.9   | -2.08 | -4.09 |  |  |
| 1.81  | -4.92 | -6.86 |  |  |
| 1.74  | -4.16 | -6.04 |  |  |
| 1.53  | -1.29 | -2.99 |  |  |
| 1.46  | -0.63 | -2.26 |  |  |
| 1.41  | -4.14 | -5.72 |  |  |
| 1.35  | -3.38 | -4.9  |  |  |
| 1.34  | -1.95 | -3.46 |  |  |
| 1.19  | -0.25 | -1.58 |  |  |
| 1.11  | -2.98 | -4.21 |  |  |
| 1.08  | -2.78 | -3.97 |  |  |
| 1.06  | -0.04 | -1.21 |  |  |
| 1.03  | -2.78 | -3.91 |  |  |
| 1.01  | 0.31  | -0.79 |  |  |
| 1     | -6.35 | -7.43 |  |  |
| -1.01 | 0.56  | -0.51 |  |  |
| -1.02 | 4.15  | 3.09  |  |  |
| -1.06 | 1.82  | 0.82  |  |  |
| -4.37 | -3.69 | -2.65 |  |  |
| -5.44 | -4.24 | -2.88 |  |  |
| 1.55  | 2.49  | 0.39  |  |  |
| 1.42  | -0.02 | -1.99 |  |  |
| 1.32  | 1.4   | -0.46 |  |  |
| 1.2   | 5.28  | 3.55  |  |  |
| 1.06  | 4.2   | 2.64  |  |  |
| -1.01 | -3.01 | -4.47 |  |  |
| -1.29 | 0.78  | -0.32 |  |  |
| -1.32 | -0.71 | -1.77 |  |  |
| -1.38 | 2.42  | 1.42  |  |  |
| 1.85  | -1.13 | -3.23 |  |  |
| 1.63  | -0.7  | -2.61 |  |  |
| 1.47  | -1.05 | -2.81 |  |  |
| -1.05 | -1.25 | -2.38 |  |  |
| -1.14 | -1.58 | -2.59 |  |  |
| -5.77 | 0.02  | 1.35  |  |  |
| -5.9  | -1.01 | 0.34  |  |  |
| -7.02 | -1    | 0.6   |  |  |
| 2.26  | 0.04  | -2.06 |  |  |
| 1.29  | 2.61  | 1.32  |  |  |
| 1.21  | 0.49  | -0.71 |  |  |
| 1.06  | -1.72 | -2.72 |  |  |
| -3.77 | -2.14 | -1.14 |  |  |
| -4.55 | -0.38 | 0.89  |  |  |
| 1.68  | 0.69  | -1.4  |  |  |
| 1.02  | -0.45 | -1.83 |  |  |
| -1    | -0.77 | -2.11 |  |  |
| -1.15 | 3.27  | 2.12  |  |  |
| -1.16 | -1.14 | -2.28 |  |  |
| 2.59  | 0.04  | -2.05 |  |  |
| 1.48  | -1.02 | -2.31 |  |  |
| 1.38  | 1.27  | 0.09  |  |  |
| -3.79 | -1.26 | -0.05 |  |  |
| -4.25 | -0.18 | 1.19  |  |  |

|       |       |       |  |  |
|-------|-------|-------|--|--|
| -4.81 | -1.02 | 0.53  |  |  |
| -5.04 | 0.63  | 2.24  |  |  |
| 5.76  | -2.85 | -4.94 |  |  |
| 3.02  | -5.53 | -6.69 |  |  |
| 2.97  | -6.52 | -7.65 |  |  |
| 2.79  | -2.61 | -3.66 |  |  |
| 2.93  | -1.19 | -3.28 |  |  |
| 2.01  | -1.42 | -2.97 |  |  |
| 1.39  | 3.49  | 2.47  |  |  |
| -3.03 | -4.72 | -3.66 |  |  |
| -3.08 | -2.95 | -1.86 |  |  |
| -3.14 | -0.28 | 0.83  |  |  |
| -3.21 | -3.97 | -2.82 |  |  |
| -3.95 | -3.41 | -1.96 |  |  |
| -5.07 | -3.95 | -2.14 |  |  |
| 3.07  | -0.54 | -2.62 |  |  |
| 2     | -2.33 | -3.8  |  |  |
| 1.47  | 1.47  | 0.45  |  |  |
| -2.9  | -1.93 | -0.86 |  |  |
| 3.07  | -2.14 | -4.22 |  |  |
| 2.48  | -4.34 | -6.12 |  |  |
| 1.64  | -1.21 | -2.39 |  |  |
| 1.64  | -0.96 | -2.13 |  |  |
| 1.61  | 1.06  | -0.09 |  |  |
| 1.48  | 1.2   | 0.16  |  |  |
| -5.5  | -5.25 | -3.25 |  |  |
| 11.74 | 1.68  | -0.4  |  |  |
| 11.62 | 1.95  | -0.11 |  |  |
| 10.59 | 0.3   | -1.63 |  |  |
| 8.01  | 0.33  | -1.2  |  |  |
| 7.29  | 0.29  | -1.1  |  |  |
| 6.58  | 2.18  | 0.94  |  |  |
| 6.23  | -0.4  | -1.56 |  |  |
| 1.28  | -2.19 | -1.08 |  |  |
| 1.28  | -0.62 | 0.49  |  |  |
| 1.21  | -1.41 | -0.21 |  |  |
| 1.11  | -0.84 | 0.48  |  |  |
| 1     | -0.3  | 1.17  |  |  |
| -1.02 | -2.52 | -1.02 |  |  |
| -1.16 | -2.17 | -0.48 |  |  |
| -1.3  | -1.42 | 0.44  |  |  |
| -1.41 | -3.01 | -1.04 |  |  |
| 1.39  | -1.99 | -4.07 |  |  |
| 1.01  | -0.75 | -2.37 |  |  |
| -1.12 | -2.14 | -3.59 |  |  |
| -1.21 | 1.37  | 0.04  |  |  |
| -1.3  | -1.85 | -3.07 |  |  |
| -6.2  | -0.2  | 0.83  |  |  |
| 1.36  | -3.85 | -5.93 |  |  |
| 1.31  | -4.85 | -6.87 |  |  |
| 1.1   | -3.41 | -5.19 |  |  |
| 1.02  | -1.06 | -2.74 |  |  |
| 1.01  | -2.54 | -4.19 |  |  |
| -1.03 | -0.24 | -1.83 |  |  |
| -1.11 | 4.61  | 3.12  |  |  |
| -1.2  | -2.72 | -4.1  |  |  |
| -1.2  | -5.6  | -6.98 |  |  |
| -1.23 | -4.88 | -6.22 |  |  |



|        |       |       |  |  |
|--------|-------|-------|--|--|
| -1.29  | -4.01 | -5.28 |  |  |
| -1.29  | -1.32 | -2.59 |  |  |
| -1.29  | -2.47 | -3.73 |  |  |
| -1.32  | -4.24 | -5.48 |  |  |
| -1.49  | 0.7   | -0.36 |  |  |
| -1.55  | -4.59 | -5.6  |  |  |
| 1.68   | -2.13 | -4.21 |  |  |
| -1.1   | 0.19  | -1.01 |  |  |
| -5.22  | -3.23 | -2.18 |  |  |
| -5.71  | -2.22 | -1.04 |  |  |
| -6.52  | -3.46 | -2.09 |  |  |
| -6.87  | -3.48 | -2.04 |  |  |
| -12.15 | -6.31 | -4.04 |  |  |
| -13.04 | -4.37 | -1.99 |  |  |
| -15.02 | -5.82 | -3.24 |  |  |
| 2.49   | -0.91 | -2.99 |  |  |
| 1.79   | 1.79  | 0.19  |  |  |
| 1.2    | -0.16 | -1.19 |  |  |
| 1.61   | -1.72 | -3.8  |  |  |
| 1.34   | 2.57  | 0.75  |  |  |
| 1.29   | 0.24  | -1.51 |  |  |
| 1.28   | 3.06  | 1.32  |  |  |
| 1.11   | -0.25 | -1.8  |  |  |
| 1.09   | 3.06  | 1.54  |  |  |
| 1.05   | 2.1   | 0.63  |  |  |
| 1      | 1.75  | 0.35  |  |  |
| -1.07  | 1.87  | 0.58  |  |  |
| -1.15  | 2.1   | 0.91  |  |  |
| -1.25  | -2.51 | -3.58 |  |  |
| -1.27  | -0.92 | -1.97 |  |  |
| -5.28  | -1.64 | -0.63 |  |  |
| -7     | -1.86 | -0.45 |  |  |
| 3.26   | -3.33 | -5.41 |  |  |
| 1.93   | 0.76  | -0.56 |  |  |
| 1.91   | -0.6  | -1.9  |  |  |
| 1.58   | -3.54 | -4.58 |  |  |
| 1.55   | -0.09 | -1.09 |  |  |
| -2.66  | -1.26 | -0.22 |  |  |
| -2.96  | -2.63 | -1.43 |  |  |
| 1.31   | 0.54  | -1.54 |  |  |
| 1.13   | 1.71  | -0.15 |  |  |
| -1.1   | 4.45  | 2.9   |  |  |
| -1.14  | -2.03 | -3.53 |  |  |
| -1.17  | -0.6  | -2.06 |  |  |
| -1.2   | -0.8  | -2.22 |  |  |
| -1.35  | 1.42  | 0.17  |  |  |
| -1.53  | -2.66 | -3.74 |  |  |
| -6.51  | -0.77 | 0.25  |  |  |
| -6.66  | -4.72 | -3.67 |  |  |
| 3.01   | -4.16 | -6.24 |  |  |
| 1.84   | -5.46 | -6.82 |  |  |
| 1.83   | -1.68 | -3.04 |  |  |
| 1.75   | -1.58 | -2.87 |  |  |
| 1.53   | -3.35 | -4.45 |  |  |
| -4.45  | -5.23 | -3.56 |  |  |
| 1.22   | 0.7   | -1.38 |  |  |
| 1.04   | 3.52  | 1.68  |  |  |
| -9.55  | -1.51 | -0.04 |  |  |

|        |       |       |  |  |
|--------|-------|-------|--|--|
| -10.15 | -0.55 | 1.01  |  |  |
| 1.84   | 0     | -2.08 |  |  |
| 1.27   | 3.22  | 1.68  |  |  |
| 1.01   | 4.08  | 2.87  |  |  |
| -1.02  | 0.09  | -1.09 |  |  |
| -1.03  | 4.52  | 3.36  |  |  |
| -1.04  | -1.22 | -2.36 |  |  |
| -1.06  | 2.87  | 1.76  |  |  |
| 161.78 | 1.45  | -0.62 |  |  |
| 18.61  | -1.85 | -0.81 |  |  |
| 7.36   | -2.06 | 0.32  |  |  |
| 3.4    | -3.05 | 0.44  |  |  |
| 1.07   | -5.72 | -0.57 |  |  |
| 6.7    | -1.1  | -3.18 |  |  |
| 6.2    | -1.11 | -3.08 |  |  |
| 5.32   | 1.26  | -0.48 |  |  |
| 5.25   | -1.74 | -3.46 |  |  |
| 5.13   | 1.66  | -0.03 |  |  |
| 5.12   | -1.83 | -3.51 |  |  |
| 4.38   | 1.97  | 0.51  |  |  |
| 3.97   | -1.45 | -2.78 |  |  |
| 3.47   | 1.21  | 0.09  |  |  |
| 3.46   | 0.25  | -0.88 |  |  |
| -1.26  | -0.42 | 0.58  |  |  |
| -1.28  | 2.59  | 3.61  |  |  |
| -1.45  | -1.16 | 0.04  |  |  |
| 3.44   | -5.04 | -7.12 |  |  |
| 1.8    | -2.28 | -3.42 |  |  |
| -2.58  | -6.85 | -5.78 |  |  |
| -3.72  | -4.57 | -2.97 |  |  |
| 2.06   | -4.99 | -7.07 |  |  |
| 1.33   | -3.29 | -4.74 |  |  |
| 1.32   | -5.09 | -6.53 |  |  |
| -1.01  | -4.23 | -5.25 |  |  |
| 3.97   | -3.51 | -5.58 |  |  |
| 1.98   | -4.29 | -5.36 |  |  |
| 1.92   | -3.06 | -4.09 |  |  |
| -2.32  | -4.34 | -3.21 |  |  |
| -2.56  | -4.94 | -3.67 |  |  |
| -2.92  | -4.72 | -3.26 |  |  |
| 1.83   | -2.07 | -4.15 |  |  |
| 1.75   | -0.34 | -2.35 |  |  |
| 1.59   | 0.05  | -1.82 |  |  |
| 1.25   | -2.18 | -3.7  |  |  |
| 1.18   | -4.08 | -5.51 |  |  |
| 1.13   | -2.03 | -3.41 |  |  |
| 1.11   | -0.68 | -2.03 |  |  |
| 1.03   | -0.12 | -1.37 |  |  |
| 1.02   | 0.72  | -0.52 |  |  |
| 1.01   | 0.97  | -0.25 |  |  |
| -1.01  | -0.07 | -1.26 |  |  |
| -1.03  | -1.86 | -3.02 |  |  |
| -1.05  | -1.11 | -2.23 |  |  |
| -1.12  | 0.98  | -0.06 |  |  |
| 3.8    | 3.59  | 1.52  |  |  |
| 2      | 1.11  | -0.03 |  |  |
| 1.92   | 1.05  | -0.04 |  |  |
| 1.85   | 0.47  | -0.57 |  |  |

|        |       |       |  |  |
|--------|-------|-------|--|--|
| -2.47  | -1.44 | -0.28 |  |  |
| 2.83   | 0.73  | -1.34 |  |  |
| 2.11   | 1.89  | 0.25  |  |  |
| 1.84   | 2.38  | 0.93  |  |  |
| 1.8    | 0.03  | -1.39 |  |  |
| 1.76   | 1.38  | -0.01 |  |  |
| 1.72   | 2.98  | 1.63  |  |  |
| 1.57   | 0.19  | -1.03 |  |  |
| 1.44   | -1.01 | -2.1  |  |  |
| 1.36   | 1.07  | 0.05  |  |  |
| 1.35   | 0.21  | -0.79 |  |  |
| 1.18   | 2.67  | 0.59  |  |  |
| 1.15   | -0.74 | -2.77 |  |  |
| -1.09  | -2.85 | -4.56 |  |  |
| -1.17  | -1.39 | -2.99 |  |  |
| -1.46  | -0.75 | -2.03 |  |  |
| -1.76  | -2.67 | -3.68 |  |  |
| -11.71 | -1.78 | -0.06 |  |  |
| 4.28   | -0.87 | -2.94 |  |  |
| -2.19  | 0.97  | 2.12  |  |  |
| -2.32  | -3.09 | -1.85 |  |  |
| -4.37  | -3.77 | -1.62 |  |  |
| 244.48 | 1.38  | -0.69 |  |  |
| 124.54 | 1     | -0.1  |  |  |
| 27.25  | -1    | 0.1   |  |  |
| 1.22   | -0.27 | -2.34 |  |  |
| 1.15   | 5.07  | 3.08  |  |  |
| -1.08  | 4.44  | 2.76  |  |  |
| -9.14  | 0.71  | 2.11  |  |  |
| 2.25   | 6.26  | 4.19  |  |  |
| 1.65   | 0.21  | -1.41 |  |  |
| 1.29   | 3.2   | 1.94  |  |  |
| 1.2    | 0.81  | -0.35 |  |  |
| 1.16   | -0.34 | -1.47 |  |  |
| -2.28  | 1.22  | -0.85 |  |  |
| -30.63 | -0.24 | 1.44  |  |  |
| -53.84 | -0.72 | 1.77  |  |  |
| -68.93 | -2.76 | 0.1   |  |  |
| 1.33   | 4.71  | 2.64  |  |  |
| 1.24   | 2.59  | 0.61  |  |  |
| 1.14   | 1.46  | -0.39 |  |  |
| -1.06  | -1.35 | -2.93 |  |  |
| -1.08  | -0.28 | -1.83 |  |  |
| -1.23  | -1.64 | -3    |  |  |
| -1.39  | -0.11 | -1.29 |  |  |
| -1.4   | -2.62 | -3.8  |  |  |
| -1.49  | 1.18  | 0.09  |  |  |
| -1.53  | 0.88  | -0.17 |  |  |
| -6.58  | -1.93 | -0.87 |  |  |
| -7.73  | -1.41 | -0.11 |  |  |
| 1.51   | -1.24 | -3.31 |  |  |
| 1.29   | -0.21 | -2.05 |  |  |
| 1.11   | 0.07  | -1.55 |  |  |
| 1.03   | 1.25  | -0.27 |  |  |
| -1.03  | -3.15 | -4.58 |  |  |
| -1.09  | -3.86 | -5.21 |  |  |
| -1.14  | -1.15 | -2.43 |  |  |
| -1.28  | -3.86 | -4.98 |  |  |

|        |       |       |  |  |
|--------|-------|-------|--|--|
| 2.7    | -0.01 | -2.08 |  |  |
| 2.65   | 3.18  | 1.14  |  |  |
| 1.71   | 0.36  | -1.05 |  |  |
| 1.59   | 7.38  | 6.08  |  |  |
| 1.58   | -0.63 | -1.92 |  |  |
| 1.53   | 0.52  | -0.73 |  |  |
| 1.46   | 7.44  | 6.26  |  |  |
| 1.46   | 2.85  | 1.67  |  |  |
| 1.38   | 5.67  | 4.57  |  |  |
| 1.33   | 1.39  | 0.35  |  |  |
| -3.69  | 0.09  | 1.34  |  |  |
| -3.88  | -1.3  | 0.02  |  |  |
| -4.26  | -0.44 | 1.01  |  |  |
| 1.51   | -1.38 | -3.44 |  |  |
| 1.4    | -4.05 | -6.01 |  |  |
| 1.26   | 0.48  | -1.33 |  |  |
| 1.14   | 3.05  | 1.39  |  |  |
| 1.08   | -2.46 | -4.04 |  |  |
| 1.04   | -2.98 | -4.5  |  |  |
| -1.03  | -1.54 | -2.97 |  |  |
| -1.03  | -2.1  | -3.52 |  |  |
| -1.05  | -0.48 | -1.87 |  |  |
| -1.2   | -0.68 | -1.89 |  |  |
| -1.21  | 0.06  | -1.14 |  |  |
| -1.21  | -5.99 | -7.18 |  |  |
| -1.32  | -3.32 | -4.38 |  |  |
| -1.37  | -1.39 | -2.4  |  |  |
| 1.89   | 1.64  | -0.42 |  |  |
| 1.78   | -0.45 | -2.42 |  |  |
| 1.54   | 5.65  | 3.88  |  |  |
| 1.44   | 1.29  | -0.38 |  |  |
| 1.29   | -1.37 | -2.88 |  |  |
| 1.23   | 3.84  | 2.4   |  |  |
| 1.21   | 0.27  | -1.15 |  |  |
| 1.18   | 2.6   | 1.21  |  |  |
| 1.14   | -0.75 | -2.08 |  |  |
| 1.12   | 3.04  | 1.74  |  |  |
| 1.07   | -0.19 | -1.43 |  |  |
| 1.06   | 3.87  | 2.65  |  |  |
| 1.05   | 1.75  | 0.54  |  |  |
| 1.01   | 3.03  | 1.87  |  |  |
| -1.03  | 3.21  | 2.12  |  |  |
| -1.04  | 1.19  | 0.11  |  |  |
| -1.07  | 1.88  | 0.84  |  |  |
| -1.07  | 1.88  | 0.84  |  |  |
| -1.09  | -0.32 | -1.34 |  |  |
| -1.09  | -0.73 | -1.74 |  |  |
| -5.77  | -2.04 | -0.65 |  |  |
| -10.58 | -1.08 | 1.19  |  |  |
| 1.51   | -1.38 | -3.44 |  |  |
| 1.4    | -4.05 | -6.01 |  |  |
| 1.26   | 0.48  | -1.33 |  |  |
| 1.14   | 3.05  | 1.39  |  |  |
| 1.09   | -2.98 | -4.58 |  |  |
| 1.08   | -2.46 | -4.04 |  |  |
| -1.03  | -1.54 | -2.97 |  |  |
| -1.03  | -2.1  | -3.52 |  |  |
| -1.04  | -0.2  | -1.62 |  |  |

|       |       |       |  |  |
|-------|-------|-------|--|--|
| -1.2  | -0.68 | -1.89 |  |  |
| -1.21 | 0.06  | -1.14 |  |  |
| -1.21 | -5.99 | -7.18 |  |  |
| -1.32 | -3.32 | -4.38 |  |  |
| -1.37 | -1.39 | -2.4  |  |  |
| 1.64  | -2.93 | -4.99 |  |  |
| -1.02 | -0.53 | -1.86 |  |  |
| -1.15 | -0.11 | -1.26 |  |  |
| -1.26 | -3.31 | -4.33 |  |  |
| 1.51  | -1.38 | -3.44 |  |  |
| 1.4   | -4.05 | -6.01 |  |  |
| 1.26  | 0.48  | -1.33 |  |  |
| 1.14  | 3.05  | 1.39  |  |  |
| 1.09  | -2.98 | -4.58 |  |  |
| 1.08  | -2.46 | -4.04 |  |  |
| -1.03 | -1.54 | -2.97 |  |  |
| -1.03 | -2.1  | -3.52 |  |  |
| -1.04 | -0.2  | -1.62 |  |  |
| -1.2  | -0.68 | -1.89 |  |  |
| -1.21 | 0.06  | -1.14 |  |  |
| -1.21 | -5.99 | -7.18 |  |  |
| -1.32 | -3.32 | -4.38 |  |  |
| -1.37 | -1.39 | -2.4  |  |  |
| 2.63  | -6.6  | -8.66 |  |  |
| 2.14  | -3.81 | -5.57 |  |  |
| 1.66  | -6.3  | -7.69 |  |  |
| 1.48  | -7.47 | -8.69 |  |  |
| 1.35  | -4.93 | -6.03 |  |  |
| -4.18 | -5.31 | -3.91 |  |  |
| 3.13  | -3.97 | -6.03 |  |  |
| 2.58  | -4.65 | -6.43 |  |  |
| 1.69  | -5.81 | -6.99 |  |  |
| 1.6   | -5.46 | -6.56 |  |  |
| -3.39 | -3.35 | -2    |  |  |
| 3.18  | 1.38  | -0.68 |  |  |
| 1.68  | -0.26 | -1.4  |  |  |
| 1.57  | 0.77  | -0.27 |  |  |
| -2.88 | -0.23 | 0.91  |  |  |
| 2.3   | -0.8  | -2.86 |  |  |
| 1.42  | -1.73 | -3.09 |  |  |
| 1.16  | -5.42 | -6.49 |  |  |
| 1.11  | -3.48 | -4.48 |  |  |
| -3.73 | -4.75 | -3.71 |  |  |
| -3.79 | -6.18 | -5.11 |  |  |
| -6.27 | -6.48 | -4.69 |  |  |
| 1.62  | -2.36 | -4.42 |  |  |
| 1.3   | 0.13  | -1.62 |  |  |
| 1.25  | -3.24 | -4.93 |  |  |
| -1.07 | -0.31 | -1.57 |  |  |
| -1.08 | -3.83 | -5.07 |  |  |
| -1.1  | -2.58 | -3.81 |  |  |
| -1.24 | -1.14 | -2.19 |  |  |
| -1.25 | -1.94 | -2.98 |  |  |
| 7.04  | -0.64 | -2.69 |  |  |
| 4.18  | -2.31 | -3.61 |  |  |
| -1.64 | -2.75 | -1.27 |  |  |
| -1.02 | -1.01 | -3.07 |  |  |
| -1.23 | -4.19 | -5.98 |  |  |

|        |       |       |  |  |
|--------|-------|-------|--|--|
| -1.23  | 2.78  | 0.99  |  |  |
| -1.35  | -4.17 | -5.83 |  |  |
| -1.66  | -2.24 | -3.59 |  |  |
| -1.74  | -0.93 | -2.22 |  |  |
| -1.02  | 1.72  | -0.33 |  |  |
| -1.03  | 4.18  | 2.15  |  |  |
| -1.05  | 1.95  | -0.06 |  |  |
| -1.17  | -0.47 | -2.32 |  |  |
| -1.2   | 0.97  | -0.84 |  |  |
| -1.57  | -0.19 | -1.61 |  |  |
| -1.61  | -1.55 | -2.95 |  |  |
| -1.67  | -0.03 | -1.37 |  |  |
| -1.9   | 1.01  | -0.14 |  |  |
| -2.02  | -0.1  | -1.17 |  |  |
| -9.38  | -1.59 | -0.44 |  |  |
| -10.35 | -1.58 | -0.28 |  |  |
| -11.79 | -0.99 | 0.5   |  |  |
| -16.02 | -2.53 | -0.61 |  |  |
| 1.43   | 2.67  | 0.62  |  |  |
| 1.36   | -3.27 | -5.25 |  |  |
| 1.08   | 3.27  | 1.62  |  |  |
| 1.04   | 0.23  | -1.37 |  |  |
| -1.02  | -3.76 | -5.27 |  |  |
| -1.07  | 3.31  | 1.87  |  |  |
| -1.08  | -0.56 | -2    |  |  |
| -1.11  | 1.66  | 0.28  |  |  |
| -1.26  | -3.6  | -4.8  |  |  |
| -1.42  | -1.13 | -2.16 |  |  |
| -1.45  | -2.15 | -3.16 |  |  |
| -6.2   | -0.33 | 0.76  |  |  |
| -6.77  | 0.25  | 1.48  |  |  |
| -7.07  | -1.19 | 0.09  |  |  |
| -9.27  | -2.4  | -0.73 |  |  |
| -14.4  | -3.26 | -0.95 |  |  |
| -16.11 | -2.16 | 0.32  |  |  |
| -22.99 | -4.15 | -1.17 |  |  |
| -24.81 | -1.78 | 1.32  |  |  |
| 1.3    | 2.44  | 0.38  |  |  |
| 1.26   | 0.85  | -1.15 |  |  |
| 1.2    | 0.38  | -1.55 |  |  |
| 1.13   | 0.88  | -0.97 |  |  |
| 1.12   | 0.67  | -1.17 |  |  |
| 1.1    | 0.75  | -1.05 |  |  |
| 1.04   | -3.26 | -5    |  |  |
| -1.07  | -0.63 | -2.21 |  |  |
| -1.17  | 3.15  | 1.7   |  |  |
| -1.2   | -3.05 | -4.47 |  |  |
| -1.21  | 1.73  | 0.34  |  |  |
| -1.23  | -1.93 | -3.3  |  |  |
| -1.31  | -1.95 | -3.24 |  |  |
| -1.35  | 1.31  | 0.07  |  |  |
| -1.43  | -2.44 | -3.59 |  |  |
| -1.46  | 0.29  | -0.84 |  |  |
| -1.46  | 2.68  | 1.56  |  |  |
| 1.51   | 2.69  | 0.64  |  |  |
| 1.29   | 6.39  | 4.56  |  |  |
| 1.29   | -1.55 | -3.38 |  |  |
| 1.14   | -1.76 | -3.41 |  |  |

|        |       |       |  |  |
|--------|-------|-------|--|--|
| 1.14   | 5.02  | 3.38  |  |  |
| 1.09   | 0.15  | -1.43 |  |  |
| -1.05  | 6.12  | 4.73  |  |  |
| -1.06  | -1.37 | -2.74 |  |  |
| -1.09  | 1.13  | -0.2  |  |  |
| -1.1   | 4.72  | 3.39  |  |  |
| -1.12  | -1.65 | -2.95 |  |  |
| -1.21  | -0.27 | -1.46 |  |  |
| -1.24  | -0.86 | -2.02 |  |  |
| -1.24  | -1.67 | -2.82 |  |  |
| -1.28  | -2.48 | -3.58 |  |  |
| -1.29  | -1.84 | -2.94 |  |  |
| -5.65  | -0.01 | 1.03  |  |  |
| -5.91  | -0.57 | 0.54  |  |  |
| -10.48 | -2.06 | -0.13 |  |  |
| 3.61   | -0.87 | -2.93 |  |  |
| 3.37   | 0.51  | -1.44 |  |  |
| 2.48   | 2.03  | 0.52  |  |  |
| 1.87   | -1.14 | -2.24 |  |  |
| -7.2   | -0.31 | 2.34  |  |  |
| 6      | 0.71  | -1.34 |  |  |
| 3.12   | -0.29 | -1.4  |  |  |
| 1.88   | -0.55 | -2.6  |  |  |
| 1.32   | 2.38  | 0.84  |  |  |
| 1.14   | 1.62  | 0.29  |  |  |
| -4.68  | -2.9  | -1.81 |  |  |
| -5.73  | -1.41 | -0.02 |  |  |
| 10.15  | -0.34 | -2.39 |  |  |
| 7.51   | -0.12 | -1.74 |  |  |
| 6.91   | 1.22  | -0.27 |  |  |
| 1.18   | 2.86  | 3.92  |  |  |
| 1.04   | -2.41 | -1.17 |  |  |
| 3.13   | -1.61 | -3.66 |  |  |
| 2.63   | -2.23 | -4.03 |  |  |
| 1.7    | 0.07  | -1.09 |  |  |
| 1.65   | -1.9  | -3.03 |  |  |
| 1.61   | 0.68  | -0.41 |  |  |
| 1.56   | -1.05 | -2.09 |  |  |
| 2.9    | -1.61 | -3.66 |  |  |
| 1.87   | -0.92 | -2.34 |  |  |
| 1.53   | 0.4   | -0.72 |  |  |
| 1.44   | -2.17 | -3.21 |  |  |
| 4.88   | -1.9  | -3.95 |  |  |
| 4.31   | 0.07  | -1.8  |  |  |
| 4.21   | -3.31 | -5.14 |  |  |
| 3.91   | 0.58  | -1.15 |  |  |
| 3.86   | 0.18  | -1.53 |  |  |
| 3.27   | -1.12 | -2.59 |  |  |
| 3.23   | -2.27 | -3.72 |  |  |
| 3.15   | -0.31 | -1.72 |  |  |
| 2.97   | -1.19 | -2.52 |  |  |
| 2.8    | -3.12 | -4.37 |  |  |
| 4.35   | 2.18  | 0.13  |  |  |
| -3.12  | -3.41 | -1.7  |  |  |
| 2.24   | 3.78  | 1.73  |  |  |
| 1.32   | 2.24  | 0.96  |  |  |
| 1.11   | 4.05  | 3.03  |  |  |
| 1.1    | 1.9   | 0.88  |  |  |

|       |       |       |  |  |
|-------|-------|-------|--|--|
| 1.1   | 1.67  | 0.65  |  |  |
| -3.76 | -0.42 | 0.61  |  |  |
| -4.2  | 1.49  | 2.68  |  |  |
| -4.41 | 0.43  | 1.69  |  |  |
| -4.44 | 1.71  | 2.98  |  |  |
| -4.74 | 1.15  | 2.51  |  |  |
| -5.62 | 0.4   | 2.01  |  |  |
| 3.22  | -2.24 | -4.28 |  |  |
| 1.73  | -0.99 | -2.13 |  |  |
| -2.91 | -1.99 | -0.81 |  |  |
| -2.94 | -2.55 | -1.35 |  |  |
| -4.42 | -3.38 | -1.59 |  |  |
| 29.86 | -2.42 | -4.46 |  |  |
| 23.03 | 1.47  | -0.2  |  |  |
| 21.07 | -0.23 | -1.77 |  |  |
| 3.6   | -1.63 | -0.62 |  |  |
| 3.35  | 0.34  | 1.45  |  |  |
| 3.19  | -0.46 | 0.73  |  |  |
| 2.93  | 0.34  | 1.64  |  |  |
| 2.09  | -1.08 | 0.71  |  |  |
| 1.04  | -0.68 | 2.11  |  |  |
| 2.63  | -3.5  | -5.54 |  |  |
| 1.59  | -4.26 | -5.57 |  |  |
| 1.53  | -0.55 | -1.81 |  |  |
| 1.4   | -1.17 | -2.3  |  |  |
| 1.35  | -0.77 | -1.85 |  |  |
| 1.29  | 1.98  | 0.96  |  |  |
| -3.32 | -2.16 | -1.08 |  |  |
| -4.29 | -3.13 | -1.68 |  |  |
| 3.77  | -4.15 | -6.18 |  |  |
| 3.43  | -3.56 | -5.45 |  |  |
| 2.35  | -4.85 | -6.2  |  |  |
| 1.96  | -6.02 | -7.11 |  |  |
| -2.8  | -6.96 | -5.59 |  |  |
| 2.85  | -3.55 | -5.59 |  |  |
| 2.05  | -3.78 | -5.34 |  |  |
| 2.69  | 1.77  | -0.26 |  |  |
| 1.9   | 3.81  | 2.28  |  |  |
| 1.75  | 0.94  | -0.47 |  |  |
| 1.41  | 1.99  | 0.89  |  |  |
| 1.33  | -0.28 | -1.29 |  |  |
| 1.32  | 2     | 1     |  |  |
| 1.32  | 1.15  | 0.14  |  |  |
| 3.34  | -0.95 | -2.98 |  |  |
| -2.87 | -1.49 | -0.27 |  |  |
| -3.91 | -2.3  | -0.63 |  |  |
| 2.34  | -0.09 | -2.13 |  |  |
| 2.07  | 1.1   | -0.76 |  |  |
| 1.37  | -1.15 | -2.42 |  |  |
| 1.36  | 2.06  | 0.81  |  |  |
| 1.31  | 7.91  | 6.71  |  |  |
| 1.25  | -1.21 | -2.35 |  |  |
| 1.25  | 0.17  | -0.97 |  |  |
| 1.21  | 3.25  | 2.16  |  |  |
| 1.17  | -0.26 | -1.29 |  |  |
| 1.16  | 8.04  | 7.02  |  |  |
| 1.16  | 0.37  | -0.65 |  |  |
| 1.16  | 6.31  | 5.3   |  |  |



|       |       |       |  |  |
|-------|-------|-------|--|--|
| -4.15 | -0.83 | 0.41  |  |  |
| 2.29  | 4.03  | 2     |  |  |
| 1.92  | 5.2   | 3.42  |  |  |
| 1.68  | 0.11  | -1.47 |  |  |
| 1.37  | 0.42  | -0.87 |  |  |
| 1.26  | 4.23  | 3.07  |  |  |
| 1.16  | 1.46  | 0.41  |  |  |
| 14.47 | -0.79 | -2.82 |  |  |
| 1.52  | 0.92  | 2.14  |  |  |
| 1.32  | 1.57  | 2.99  |  |  |
| 2.48  | 0.4   | -1.63 |  |  |
| 2.31  | -1.67 | -3.61 |  |  |
| 1.45  | -1.97 | -3.23 |  |  |
| 1.25  | -0.23 | -1.27 |  |  |
| 13.33 | 2.22  | 0.19  |  |  |
| 1.39  | -1.3  | -0.06 |  |  |
| 1.23  | -2.3  | -0.89 |  |  |
| -1.03 | 1.17  | 2.93  |  |  |
| 4.28  | -3.71 | -5.74 |  |  |
| 2.83  | -1    | -2.43 |  |  |
| 2.48  | -3.43 | -4.67 |  |  |
| 2.25  | -1.87 | -2.97 |  |  |
| -2.26 | -3.23 | -1.98 |  |  |
| -2.27 | -5.02 | -3.77 |  |  |
| -2.28 | -5.51 | -4.26 |  |  |
| -2.65 | -4.15 | -2.68 |  |  |
| 4.87  | 0.63  | -1.4  |  |  |
| -1.86 | -2.81 | -1.65 |  |  |
| -1.9  | -3.16 | -1.98 |  |  |
| -1.93 | -3.06 | -1.85 |  |  |
| 1.3   | -0.99 | -3.01 |  |  |
| 1.25  | 0.11  | -1.86 |  |  |
| 1.15  | -3.12 | -4.97 |  |  |
| -1.01 | 2.02  | 0.39  |  |  |
| -1.02 | -1.81 | -3.43 |  |  |
| -1.09 | 0.94  | -0.59 |  |  |
| -1.15 | 3.98  | 2.53  |  |  |
| -1.18 | 2.99  | 1.58  |  |  |
| -1.26 | -1.75 | -3.07 |  |  |
| -1.35 | -0.19 | -1.4  |  |  |
| -1.4  | 1.05  | -0.11 |  |  |
| 1.37  | -0.81 | -2.83 |  |  |
| 1.1   | -0.73 | -2.44 |  |  |
| 1.07  | 0.18  | -1.5  |  |  |
| -1.05 | 4.47  | 2.96  |  |  |
| -1.12 | -0.9  | -2.31 |  |  |
| -1.37 | 2.64  | 1.52  |  |  |
| -7.09 | -0.54 | 0.71  |  |  |
| -9.99 | -0.57 | 1.18  |  |  |
| 1.61  | -2.8  | -4.82 |  |  |
| 1.34  | -0.48 | -2.24 |  |  |
| 1.22  | -1.01 | -2.63 |  |  |
| 1.21  | -2.24 | -3.85 |  |  |
| -1.01 | 0.93  | -0.4  |  |  |
| -1.07 | 3.92  | 2.67  |  |  |
| -1.17 | -1.3  | -2.4  |  |  |
| 6.15  | -0.73 | -2.75 |  |  |
| 3.72  | -1.28 | -2.59 |  |  |

|       |       |       |  |  |
|-------|-------|-------|--|--|
| 3.5   | 1.06  | -0.15 |  |  |
| 3.4   | -0.85 | -2.02 |  |  |
| 3.38  | -0.39 | -1.55 |  |  |
| 3.23  | 0.09  | -1    |  |  |
| -1.4  | -0.5  | 0.58  |  |  |
| 3.59  | 3.26  | 1.23  |  |  |
| 2.05  | 0.38  | -0.84 |  |  |
| -2.61 | -1.29 | -0.08 |  |  |
| -2.64 | -0.84 | 0.38  |  |  |
| 3.46  | -1.43 | -3.46 |  |  |
| 2.73  | -2.72 | -4.41 |  |  |
| 2.53  | 1.49  | -0.09 |  |  |
| 1.83  | -4.05 | -5.15 |  |  |
| 1.7   | 2.24  | 1.24  |  |  |
| -2.61 | -2.59 | -1.45 |  |  |
| 2.49  | -3.13 | -5.15 |  |  |
| 1.45  | -1.52 | -2.76 |  |  |
| 3.23  | -4.55 | -6.57 |  |  |
| 2.75  | -3.74 | -5.52 |  |  |
| 2.39  | 0.4   | -1.19 |  |  |
| 1.98  | -4.52 | -5.83 |  |  |
| 1.81  | -2.76 | -3.94 |  |  |
| -2.76 | -2.08 | -0.94 |  |  |
| -2.83 | -5.06 | -3.88 |  |  |
| 1.51  | -0.55 | -2.57 |  |  |
| 1.39  | -2.75 | -4.65 |  |  |
| 1.32  | -2.75 | -4.58 |  |  |
| 1.11  | 1     | -0.58 |  |  |
| -1.03 | 1.22  | -0.16 |  |  |
| -1.08 | -1.08 | -2.39 |  |  |
| -1.14 | 0.07  | -1.16 |  |  |
| -1.27 | -2.1  | -3.17 |  |  |
| -1.31 | -0.69 | -1.72 |  |  |
| -5.86 | -0.78 | 0.35  |  |  |
| 7.45  | -2.27 | -4.29 |  |  |
| 6.23  | -0.27 | -2.03 |  |  |
| 4.85  | -0.45 | -1.85 |  |  |
| 3.94  | -0.12 | -1.22 |  |  |
| 3.76  | -0.95 | -1.99 |  |  |
| -1.44 | -1.58 | -0.18 |  |  |
| 3.67  | 2.07  | 0.05  |  |  |
| -2.38 | 1.39  | 2.5   |  |  |
| -2.38 | 0.59  | 1.7   |  |  |
| -2.45 | 0.73  | 1.88  |  |  |
| -2.59 | 0.53  | 1.76  |  |  |
| -2.84 | -1.76 | -0.4  |  |  |
| -2.86 | -0.24 | 1.13  |  |  |
| -3.04 | 0.86  | 2.32  |  |  |
| -3.38 | -1.54 | 0.08  |  |  |
| -4.13 | -2.24 | -0.34 |  |  |
| 1.38  | -1.63 | -3.64 |  |  |
| 1.36  | -2.63 | -4.62 |  |  |
| 1.29  | 3.3   | 1.39  |  |  |
| 1.09  | 0.34  | -1.32 |  |  |
| 1.06  | 2.47  | 0.84  |  |  |
| -1.13 | 1.88  | 0.5   |  |  |
| -1.14 | 1.31  | -0.05 |  |  |
| -7.3  | 0.98  | 2.3   |  |  |

|        |       |       |  |  |
|--------|-------|-------|--|--|
| -9.03  | -3.27 | -1.65 |  |  |
| -10.14 | -2.77 | -0.98 |  |  |
| -10.26 | -0.36 | 1.45  |  |  |
| -13.04 | 0.09  | 2.25  |  |  |
| -44.26 | -2.72 | 1.2   |  |  |
| 4.08   | -0.56 | -2.58 |  |  |
| 3.58   | -0.03 | -1.86 |  |  |
| 2.63   | -2.15 | -3.54 |  |  |
| 2.45   | -2.35 | -3.63 |  |  |
| 2.36   | 1.34  | 0.11  |  |  |
| 2.32   | -0.14 | -1.35 |  |  |
| 2.14   | -0.38 | -1.47 |  |  |
| 2.91   | 4.69  | 2.67  |  |  |
| 2.03   | 2.22  | 0.72  |  |  |
| 1.99   | 0.31  | -1.16 |  |  |
| 1.61   | -0.09 | -1.25 |  |  |
| -2.79  | -1.27 | -0.26 |  |  |
| 1.93   | -3.98 | -5.99 |  |  |
| 1.23   | 0.97  | -0.4  |  |  |
| 1.19   | -1.18 | -2.49 |  |  |
| 1.17   | -1.04 | -2.33 |  |  |
| 1.14   | -3.57 | -4.82 |  |  |
| 1.06   | -1.51 | -2.65 |  |  |
| -5.03  | -4.54 | -3.27 |  |  |
| -5.06  | -2.98 | -1.7  |  |  |
| -5.48  | -2.89 | -1.5  |  |  |
| 28.13  | -0.41 | -2.43 |  |  |
| 2.17   | 0.02  | 1.7   |  |  |
| 1.4    | 2.58  | 0.56  |  |  |
| 1.18   | 1.58  | -0.2  |  |  |
| 1.18   | 3.11  | 1.34  |  |  |
| 1.09   | 4.1   | 2.44  |  |  |
| 1.04   | 0.04  | -1.56 |  |  |
| 1.02   | 2.26  | 0.7   |  |  |
| 1.03   | 1.47  | -0.09 |  |  |
| -1     | -1.87 | -3.4  |  |  |
| -1.03  | 1.8   | 0.32  |  |  |
| -1.13  | 1.22  | -0.13 |  |  |
| -1.17  | 3.61  | 2.31  |  |  |
| -1.19  | 0.92  | -0.36 |  |  |
| -1.31  | 1.36  | 0.22  |  |  |
| -1.43  | -2.42 | -3.43 |  |  |
| -5.83  | -0.54 | 0.47  |  |  |
| 1.48   | 2.45  | 0.43  |  |  |
| 1.16   | 2.88  | 1.21  |  |  |
| 1.03   | 1.53  | 0.05  |  |  |
| 1.01   | 0.97  | -0.5  |  |  |
| -1.27  | 1.33  | 0.22  |  |  |
| -5.89  | 0.61  | 1.72  |  |  |
| -5.95  | -1.6  | -0.48 |  |  |
| -11.1  | -1.18 | 0.84  |  |  |
| 4.72   | -0.49 | -2.51 |  |  |
| 2.52   | 1.15  | 0.04  |  |  |
| 2.45   | 0.48  | -0.59 |  |  |
| -1.74  | -1.11 | -0.08 |  |  |
| 3.54   | -2.69 | -4.7  |  |  |
| 1.87   | -4.61 | -5.71 |  |  |
| 3.29   | 0.77  | -1.24 |  |  |

|        |       |       |  |  |
|--------|-------|-------|--|--|
| 2.28   | 0.2   | -1.29 |  |  |
| -6.53  | -0.67 | 1.74  |  |  |
| 4.67   | -5.61 | -7.62 |  |  |
| -5.42  | -5.09 | -2.44 |  |  |
| -5.74  | -2.52 | 0.22  |  |  |
| 3.13   | -4.48 | -6.49 |  |  |
| 2.06   | -2.76 | -4.17 |  |  |
| 1.83   | -4.42 | -5.66 |  |  |
| 1.6    | -5.44 | -6.48 |  |  |
| 1.93   | -0.62 | -2.64 |  |  |
| 1.17   | 1.51  | 0.23  |  |  |
| 1.14   | 0.6   | -0.65 |  |  |
| 1.12   | -2.03 | -3.25 |  |  |
| 1.08   | -2.42 | -3.59 |  |  |
| 1.02   | 0.16  | -0.94 |  |  |
| -1.02  | -1.21 | -2.25 |  |  |
| 1.73   | -2.21 | -4.22 |  |  |
| 1.39   | 1.71  | 0.02  |  |  |
| 1.34   | -4.31 | -5.96 |  |  |
| 1.17   | 1.16  | -0.29 |  |  |
| -1.05  | -4.5  | -5.64 |  |  |
| 1.02   | 2.56  | 0.56  |  |  |
| -1.17  | -1.91 | -3.67 |  |  |
| -1.36  | 4.05  | 2.52  |  |  |
| -1.56  | -2.73 | -4.06 |  |  |
| -1.68  | -1.85 | -3.08 |  |  |
| -1.78  | -0.21 | -1.36 |  |  |
| -1.81  | -1.31 | -2.44 |  |  |
| -1.85  | 1.6   | 0.51  |  |  |
| -7.88  | -1.24 | -0.24 |  |  |
| -8.36  | -1.73 | -0.64 |  |  |
| -9.36  | -1.77 | -0.52 |  |  |
| -9.92  | -1.5  | -0.17 |  |  |
| 1.42   | -0.04 | -2.05 |  |  |
| 1.37   | -3.08 | -5.04 |  |  |
| 1.32   | -2.2  | -4.1  |  |  |
| 1.27   | 4.62  | 2.77  |  |  |
| -1.09  | -1.88 | -3.26 |  |  |
| -1.12  | -3.83 | -5.17 |  |  |
| -1.21  | -4.23 | -5.46 |  |  |
| 1.42   | -1.24 | -3.24 |  |  |
| 1.39   | 0.53  | -1.44 |  |  |
| 1.22   | -0.27 | -2.06 |  |  |
| 1.16   | 0.09  | -1.62 |  |  |
| 1.14   | -0.18 | -1.87 |  |  |
| -1.11  | 0.36  | -0.99 |  |  |
| -1.16  | 0.93  | -0.35 |  |  |
| -1.34  | -4.65 | -5.73 |  |  |
| -11.75 | -3.37 | -1.31 |  |  |
| 3.39   | -4.79 | -6.8  |  |  |
| 2.11   | -5.07 | -6.39 |  |  |
| -4.2   | -6.61 | -4.78 |  |  |
| 2.04   | 3     | 0.99  |  |  |
| 1.81   | 3.23  | 1.39  |  |  |
| 1.5    | 3.41  | 1.85  |  |  |
| 1.45   | 2.02  | 0.5   |  |  |
| 1.4    | 1.84  | 0.37  |  |  |
| 1.26   | 2.06  | 0.75  |  |  |

|        |       |       |  |  |
|--------|-------|-------|--|--|
| 1.23   | 1.66  | 0.39  |  |  |
| 1.22   | 2.16  | 0.9   |  |  |
| 1.21   | -0.07 | -1.32 |  |  |
| 1.12   | 1.07  | -0.07 |  |  |
| 1.06   | -0.86 | -1.91 |  |  |
| 1.05   | -0.84 | -1.88 |  |  |
| 1.03   | -0.2  | -1.22 |  |  |
| 1.02   | 1.66  | 0.66  |  |  |
| -4.39  | -0.05 | 1.11  |  |  |
| -4.46  | -0.16 | 1.02  |  |  |
| -4.93  | -1.33 | 0     |  |  |
| -6.56  | -1.76 | -0.02 |  |  |
| 3.88   | 1.77  | -0.23 |  |  |
| -2.34  | -0.32 | 0.85  |  |  |
| -2.8   | -1.66 | -0.22 |  |  |
| -4.29  | -2.43 | -0.37 |  |  |
| 10.09  | -4.76 | -6.77 |  |  |
| 9.26   | -1.75 | -3.63 |  |  |
| 1.16   | -3.65 | -2.53 |  |  |
| 1.14   | -0.43 | 0.71  |  |  |
| 6.22   | -0.33 | -2.33 |  |  |
| 4.77   | -0.5  | -2.12 |  |  |
| -1.31  | -2.2  | -1.17 |  |  |
| -1.87  | -2.61 | -1.07 |  |  |
| 7.29   | 0.11  | -1.9  |  |  |
| -1.1   | -1.72 | -0.71 |  |  |
| -1.11  | 3.38  | 4.4   |  |  |
| -1.17  | -1.76 | -0.67 |  |  |
| -1.22  | -2.89 | -1.74 |  |  |
| -1.26  | -2.56 | -1.36 |  |  |
| -1.57  | -2.71 | -1.2  |  |  |
| -2.03  | -2.64 | -0.76 |  |  |
| -1.55  | -1.35 | -3.35 |  |  |
| -2.04  | -3.31 | -4.92 |  |  |
| -2.29  | -4.5  | -5.94 |  |  |
| -2.68  | -4.35 | -5.57 |  |  |
| -12.65 | -4.74 | -3.72 |  |  |
| 1.41   | 0.46  | -1.54 |  |  |
| -1.1   | 0.38  | -0.98 |  |  |
| -1.12  | -0.8  | -2.14 |  |  |
| -1.16  | -2.7  | -3.98 |  |  |
| -1.2   | -2.31 | -3.55 |  |  |
| -1.21  | 1.25  | 0.02  |  |  |
| -1.25  | -2.25 | -3.43 |  |  |
| -1.36  | -1.43 | -2.49 |  |  |
| 4.48   | -0.09 | -2.09 |  |  |
| 2.47   | 0.08  | -1.06 |  |  |
| 2.46   | 1.39  | 0.25  |  |  |
| 3.65   | 2.49  | 0.49  |  |  |
| 2.27   | -3.14 | -4.46 |  |  |
| -2.19  | -3.54 | -2.54 |  |  |
| -2.21  | 0.52  | 1.53  |  |  |
| -2.24  | -4.53 | -3.5  |  |  |
| -2.75  | -3.12 | -1.8  |  |  |
| -2.76  | -4.99 | -3.66 |  |  |
| -2.85  | -4.45 | -3.08 |  |  |
| -3.36  | -3.11 | -1.5  |  |  |
| 9.49   | -0.51 | -2.51 |  |  |

|       |       |       |  |  |
|-------|-------|-------|--|--|
| 4.93  | 1.13  | 0.07  |  |  |
| 1.17  | 0.98  | 2     |  |  |
| 5.47  | 0.15  | -1.85 |  |  |
| 4.05  | 1.21  | -0.35 |  |  |
| 3.09  | -0.66 | -1.84 |  |  |
| -1.55 | -1.2  | -0.12 |  |  |
| 1.25  | -0.68 | -2.67 |  |  |
| 1.16  | 0.37  | -1.52 |  |  |
| 1.01  | -1.44 | -3.13 |  |  |
| -1.02 | 3.14  | 1.5   |  |  |
| -1.04 | 5.04  | 3.43  |  |  |
| -1.06 | 3.76  | 2.17  |  |  |
| -1.11 | -0.59 | -2.11 |  |  |
| -1.41 | -2    | -3.18 |  |  |
| -6.59 | -1.43 | -0.39 |  |  |
| 2.11  | -0.21 | -2.21 |  |  |
| 1.29  | -0.02 | -1.3  |  |  |
| -4.69 | 0.43  | 1.75  |  |  |
| -5.56 | 0.67  | 2.23  |  |  |
| -7.63 | 0.15  | 2.17  |  |  |
| -7.83 | 0.1   | 2.15  |  |  |
| -9.6  | -1.48 | 0.86  |  |  |
| 2.99  | -0.72 | -2.72 |  |  |
| 2.7   | -4.47 | -6.32 |  |  |
| 2.37  | -1.65 | -3.31 |  |  |
| 1.83  | -2.51 | -3.79 |  |  |
| 1.54  | -3.99 | -5.03 |  |  |
| 1.52  | -0.26 | -1.28 |  |  |
| 1.53  | -0.07 | -1.09 |  |  |
| 4.05  | 4.77  | 2.77  |  |  |
| 2.08  | -0.15 | -1.18 |  |  |
| -2.23 | -2.28 | -1.09 |  |  |
| -2.76 | -1.6  | -0.12 |  |  |
| 3.84  | -0.91 | -2.91 |  |  |
| 2.13  | -0.18 | -1.32 |  |  |
| -2.14 | -2.83 | -1.79 |  |  |
| 5.95  | 1.77  | -0.23 |  |  |
| 3.1   | 0.91  | -0.14 |  |  |
| 2.49  | 2.9   | 0.9   |  |  |
| 2.44  | 0.16  | -1.81 |  |  |
| 1.89  | 2.52  | 0.92  |  |  |
| 1.77  | 1.63  | 0.13  |  |  |
| 1.65  | -0.58 | -1.98 |  |  |
| 1.55  | 3.73  | 2.42  |  |  |
| 1.5   | 0     | -1.26 |  |  |
| 1.35  | 1.97  | 0.85  |  |  |
| -3.58 | -0.53 | 0.63  |  |  |
| -5.54 | -0.25 | 1.54  |  |  |
| 5.38  | -0.35 | -2.34 |  |  |
| 4.58  | 2.13  | 0.37  |  |  |
| 3.02  | -0.14 | -1.3  |  |  |
| 3.03  | -0.05 | -1.21 |  |  |
| -1.94 | -1.85 | -0.46 |  |  |
| 1.28  | -1.89 | -3.88 |  |  |
| 1.11  | -3.87 | -5.67 |  |  |
| 1.11  | -2.26 | -4.05 |  |  |
| 1.1   | -0.39 | -2.17 |  |  |
| -1.05 | -3.72 | -5.29 |  |  |

|        |       |       |  |  |
|--------|-------|-------|--|--|
| -1.15  | -6.19 | -7.63 |  |  |
| -6.4   | -3.47 | -2.43 |  |  |
| -7.09  | -5.1  | -3.92 |  |  |
| -17.56 | -6.26 | -3.77 |  |  |
| 1.54   | 0.09  | -1.91 |  |  |
| 1.51   | 3.35  | 1.39  |  |  |
| 1.24   | 1.27  | -0.4  |  |  |
| 1.17   | 0.62  | -0.97 |  |  |
| 1.04   | 1.42  | -0.01 |  |  |
| -1.01  | 0.44  | -0.92 |  |  |
| -1.03  | 1.27  | -0.05 |  |  |
| -1.11  | 1.52  | 0.3   |  |  |
| -5.35  | -0.51 | 0.55  |  |  |
| -5.36  | -0.12 | 0.94  |  |  |
| -5.46  | 1.04  | 2.12  |  |  |
| -5.48  | 0.82  | 1.9   |  |  |
| -5.7   | 0.64  | 1.78  |  |  |
| -5.73  | -1.79 | -0.64 |  |  |
| -6.07  | 1.03  | 2.26  |  |  |
| -6.43  | -1.1  | 0.22  |  |  |
| -6.56  | -1.26 | 0.09  |  |  |
| -6.92  | 0.86  | 2.29  |  |  |
| -9.28  | -3.13 | -1.28 |  |  |
| -19.01 | -3.39 | -0.5  |  |  |
| 5.02   | -1.29 | -3.28 |  |  |
| -1.63  | -3.66 | -2.62 |  |  |
| -1.65  | -2.66 | -1.6  |  |  |
| -2.4   | -2.14 | -0.54 |  |  |
| 3.32   | 0.47  | -1.52 |  |  |
| 2.81   | -0.02 | -1.77 |  |  |
| 1.15   | 1.04  | -0.95 |  |  |
| -1.1   | 1.73  | 0.08  |  |  |
| -1.12  | -0.27 | -1.89 |  |  |
| -1.23  | -0.3  | -1.79 |  |  |
| -7.61  | -3.61 | -2.47 |  |  |
| 1.89   | -0.98 | -2.97 |  |  |
| 1.78   | -0.07 | -1.97 |  |  |
| 1.24   | 2.26  | 0.88  |  |  |
| 1.21   | -0.35 | -1.69 |  |  |
| 1.15   | 2.34  | 1.07  |  |  |
| 1.11   | -1.04 | -2.26 |  |  |
| 1.08   | 2.21  | 1.03  |  |  |
| 1.02   | 0.46  | -0.64 |  |  |
| -1.03  | 2.59  | 1.56  |  |  |
| -1.03  | 1.45  | 0.43  |  |  |
| -4.57  | -0.71 | 0.42  |  |  |
| -4.84  | -3.2  | -1.99 |  |  |
| -5.33  | -2.33 | -0.98 |  |  |
| -5.42  | -2    | -0.62 |  |  |
| -5.5   | 0.85  | 2.24  |  |  |
| 3.23   | 0.45  | -1.53 |  |  |
| 3.16   | -0.12 | -2.08 |  |  |
| 1.91   | -1.48 | -2.71 |  |  |
| -2.72  | 0.71  | 1.86  |  |  |
| 3.91   | -1.59 | -3.58 |  |  |
| -2.3   | -4.5  | -3.31 |  |  |
| 4.5    | 3.36  | 1.38  |  |  |
| -1.94  | -0.27 | 0.87  |  |  |

|       |       |       |  |  |
|-------|-------|-------|--|--|
| 8.69  | -2.53 | -4.52 |  |  |
| 1.04  | -3.2  | -2.12 |  |  |
| -1.45 | -6.73 | -5.06 |  |  |
| -1.78 | -4.51 | -2.54 |  |  |
| 3.95  | 1.25  | -0.73 |  |  |
| 2.85  | 0.62  | -0.9  |  |  |
| 2.3   | -0.1  | -1.3  |  |  |
| 2.03  | 2.5   | 1.48  |  |  |
| -2.02 | 0.57  | 1.58  |  |  |
| 7.18  | -2.98 | -4.96 |  |  |
| 4.94  | -2.13 | -3.57 |  |  |
| 4.33  | -2.97 | -4.22 |  |  |
| 3.92  | -3.88 | -4.99 |  |  |
| 3.79  | -5.32 | -6.38 |  |  |
| -1.14 | -3.94 | -2.89 |  |  |
| 4.33  | -0.8  | -2.78 |  |  |
| -1.83 | -1.64 | -0.63 |  |  |
| 2.15  | 0.33  | -1.65 |  |  |
| 2.04  | -0.9  | -2.81 |  |  |
| 1.68  | -0.15 | -1.77 |  |  |
| 1.44  | -0.35 | -1.75 |  |  |
| 1.25  | -1.08 | -2.29 |  |  |
| 1.1   | -0.23 | -1.25 |  |  |
| 2.43  | -3.19 | -5.18 |  |  |
| 2     | 2     | 0.29  |  |  |
| 1.75  | 0.71  | -0.8  |  |  |
| 1.59  | 0.07  | -1.31 |  |  |
| -5.67 | -7.12 | -5.32 |  |  |
| 2.12  | -0.91 | -2.9  |  |  |
| 1.31  | 2.94  | 1.64  |  |  |
| 1.19  | -3.37 | -4.53 |  |  |
| 1.07  | -4.72 | -5.72 |  |  |
| 2.77  | 2.94  | 0.96  |  |  |
| 1.81  | 1.69  | 0.32  |  |  |
| 1.74  | 4.52  | 3.21  |  |  |
| 1.56  | 0.23  | -0.92 |  |  |
| -3.18 | 0.81  | 1.96  |  |  |
| 2.49  | 1.24  | -0.74 |  |  |
| 1.79  | -4.24 | -5.74 |  |  |
| 1.45  | -3.73 | -4.93 |  |  |
| 1.31  | -1.13 | -2.18 |  |  |
| 1.26  | -2.77 | -3.77 |  |  |
| -3.67 | -3.12 | -1.9  |  |  |
| -3.84 | -3.08 | -1.8  |  |  |
| -3.94 | -3.43 | -2.11 |  |  |
| -5.31 | -4.79 | -3.05 |  |  |
| 1.87  | 5.72  | 3.75  |  |  |
| 1.74  | 1.7   | -0.17 |  |  |
| 1.51  | 2.48  | 0.81  |  |  |
| 1.49  | 2.6   | 0.95  |  |  |
| 1.44  | 2.98  | 1.38  |  |  |
| 1.2   | 3.19  | 1.86  |  |  |
| 1.09  | 2.99  | 1.79  |  |  |
| 1.07  | -1.05 | -2.23 |  |  |
| 1.04  | 4.21  | 3.09  |  |  |
| -4.54 | -1.28 | -0.17 |  |  |
| -4.95 | 0.33  | 1.56  |  |  |
| -6.71 | -0.61 | 1.07  |  |  |



|       |       |       |  |  |
|-------|-------|-------|--|--|
| -7.91 | -1.61 | 0.3   |  |  |
| 9.13  | -1.02 | -2.99 |  |  |
| 5.36  | -0.29 | -1.5  |  |  |
| 1.15  | 1.02  | 2.03  |  |  |
| 1.13  | -3.33 | -2.29 |  |  |
| 1.12  | 1.77  | 2.83  |  |  |
| 1.06  | -3.09 | -1.96 |  |  |
| -1.12 | 0.57  | 1.96  |  |  |
| 2.11  | -1.65 | -3.63 |  |  |
| 1.28  | -2.98 | -4.24 |  |  |
| 1.22  | 0.92  | -0.26 |  |  |
| 1.19  | 2.01  | 0.87  |  |  |
| 1.17  | 1.44  | 0.31  |  |  |
| 1.08  | 2.5   | 1.49  |  |  |
| -3.77 | -2.37 | -1.35 |  |  |
| -5.14 | -2.76 | -1.3  |  |  |
| 2.04  | -0.53 | -2.51 |  |  |
| 1.56  | 0.96  | -0.63 |  |  |
| 1.52  | 1.53  | -0.01 |  |  |
| 1.27  | -0.15 | -1.43 |  |  |
| 1.17  | -0.24 | -1.41 |  |  |
| 1.17  | 0.03  | -1.15 |  |  |
| 1.14  | 0.75  | -0.39 |  |  |
| 1.07  | 0.79  | -0.25 |  |  |
| 1.06  | -0.09 | -1.12 |  |  |
| 1.06  | 2.02  | 0.99  |  |  |
| 2.15  | -2.83 | -4.81 |  |  |
| 1.4   | -2.85 | -4.21 |  |  |
| 1.38  | -0.37 | -1.7  |  |  |
| 1.18  | -2.2  | -3.31 |  |  |
| 1.47  | -0.71 | -2.69 |  |  |
| 1.46  | 2.11  | 0.14  |  |  |
| 1.44  | 0.48  | -1.46 |  |  |
| 1.43  | 2.06  | 0.12  |  |  |
| 1.42  | 4.82  | 2.89  |  |  |
| 1.42  | 4.92  | 3     |  |  |
| 1.41  | 3.47  | 1.55  |  |  |
| 1.32  | -0.75 | -2.57 |  |  |
| 1.31  | 2.15  | 0.34  |  |  |
| 1.17  | 1.9   | 0.25  |  |  |
| 1.15  | -0.04 | -1.66 |  |  |
| 1.14  | 1.14  | -0.47 |  |  |
| 1.12  | 1.48  | -0.1  |  |  |
| 1.09  | -0.29 | -1.84 |  |  |
| 1.09  | 0.45  | -1.11 |  |  |
| 1.09  | 3.16  | 1.61  |  |  |
| 1.06  | -0.05 | -1.55 |  |  |
| 1.03  | -0.35 | -1.81 |  |  |
| 1.01  | 0.85  | -0.59 |  |  |
| -1.01 | 0.53  | -0.88 |  |  |
| -1.02 | 0.87  | -0.53 |  |  |
| -1.06 | -1.47 | -2.81 |  |  |
| -1.07 | -0.73 | -2.05 |  |  |
| -1.21 | 4.97  | 3.83  |  |  |
| -1.26 | 0.45  | -0.64 |  |  |
| -1.33 | -0.32 | -1.33 |  |  |
| -1.34 | -1.18 | -2.18 |  |  |
| -5.53 | 1.06  | 2.11  |  |  |

|        |       |       |  |  |
|--------|-------|-------|--|--|
| -5.64  | 1.54  | 2.61  |  |  |
| -5.94  | -1.94 | -0.79 |  |  |
| -6.76  | 0.77  | 2.1   |  |  |
| -7.17  | 1.4   | 2.82  |  |  |
| -7.96  | 0.27  | 1.84  |  |  |
| -9.66  | -1.87 | -0.02 |  |  |
| -10.49 | -0.82 | 1.15  |  |  |
| -10.52 | -1.67 | 0.3   |  |  |
| -11.9  | -2.18 | -0.03 |  |  |
| -13.55 | -2.21 | 0.13  |  |  |
| -17.51 | -2.31 | 0.39  |  |  |
| 7.53   | -1.33 | -3.31 |  |  |
| -1.08  | 1.34  | 2.38  |  |  |
| 1.24   | -4.65 | -6.63 |  |  |
| -1.18  | 0.46  | -0.97 |  |  |
| 1.91   | -2.26 | -4.24 |  |  |
| 1.44   | 1.75  | 0.18  |  |  |
| 1.31   | -1.66 | -3.1  |  |  |
| 1.1    | 0.65  | -0.54 |  |  |
| 1.09   | 5.12  | 3.94  |  |  |
| 1.07   | -3.39 | -4.53 |  |  |
| 1.01   | -0.19 | -1.25 |  |  |
| -1.02  | 1.06  | 0.04  |  |  |
| 4.18   | 3.78  | 1.81  |  |  |
| 2.18   | -0.35 | -1.39 |  |  |
| -1.98  | -0.66 | 0.42  |  |  |
| -2.36  | -2.95 | -1.62 |  |  |
| 2.46   | 0.08  | -1.89 |  |  |
| 1.74   | -1.35 | -2.82 |  |  |
| 1.46   | 1.12  | -0.11 |  |  |
| 1.43   | 2.13  | 0.94  |  |  |
| 1.35   | 1.58  | 0.47  |  |  |
| 1.32   | -3.47 | -5.44 |  |  |
| 1.15   | -4.97 | -6.74 |  |  |
| 1.13   | -5.24 | -6.98 |  |  |
| 1.04   | -5.5  | -7.13 |  |  |
| 1.73   | 1.08  | -0.89 |  |  |
| 1.46   | 0.52  | -1.2  |  |  |
| 1.29   | 2.37  | 0.81  |  |  |
| 1.22   | 1.42  | -0.05 |  |  |
| 1.19   | -2.17 | -3.59 |  |  |
| 1.17   | 0.06  | -1.34 |  |  |
| 1.17   | 1.41  | 0.01  |  |  |
| 1.16   | 3.72  | 2.32  |  |  |
| 1.09   | 1.13  | -0.17 |  |  |
| 1.04   | 0.39  | -0.84 |  |  |
| 1.03   | 3.08  | 1.86  |  |  |
| -1.02  | 2.24  | 1.09  |  |  |
| -1.09  | 0.05  | -1.01 |  |  |
| -1.1   | -0.61 | -1.65 |  |  |
| -1.11  | 1.9   | 0.87  |  |  |
| -1.12  | -0.59 | -1.6  |  |  |
| -4.64  | 0.83  | 1.87  |  |  |
| -4.83  | -0.2  | 0.9   |  |  |
| -5     | 0.98  | 2.13  |  |  |
| -7.62  | -1.58 | 0.17  |  |  |
| -7.65  | -0.68 | 1.08  |  |  |
| -7.72  | -1.43 | 0.34  |  |  |

|       |       |       |  |  |
|-------|-------|-------|--|--|
| -7.81 | -1.04 | 0.74  |  |  |
| -9.35 | -0.44 | 1.61  |  |  |
| 2.62  | 1.79  | -0.19 |  |  |
| 2.17  | -1.32 | -3.02 |  |  |
| 1.7   | -1.74 | -3.1  |  |  |
| 1.59  | 0.85  | -0.4  |  |  |
| 1.52  | 1.3   | 0.12  |  |  |
| 1.37  | -1.37 | -2.41 |  |  |
| -5.24 | -2.65 | -0.85 |  |  |
| -5.58 | -2.36 | -0.46 |  |  |
| 47.05 | 1.3   | -0.67 |  |  |
| 25.94 | -0.01 | -1.12 |  |  |
| 4.61  | -0.41 | 0.97  |  |  |
| 2.63  | -4.45 | -2.26 |  |  |
| 2.61  | -4.45 | -2.25 |  |  |
| 1.8   | -3.31 | -0.58 |  |  |
| 1.56  | -5    | -2.06 |  |  |
| 1.45  | -5.13 | -2.08 |  |  |
| 1.19  | -1.72 | 1.61  |  |  |
| 1.1   | -2.36 | 1.09  |  |  |
| 1.01  | -1.2  | 2.37  |  |  |
| -1.16 | -1.88 | 1.92  |  |  |
| -1.25 | -4.57 | -0.67 |  |  |
| -1.37 | -4.24 | -0.21 |  |  |
| -1.55 | -4.66 | -0.45 |  |  |
| 1.78  | -0.48 | -2.44 |  |  |
| 1.2   | -2.84 | -4.24 |  |  |
| 1.1   | 4.37  | 3.1   |  |  |
| 1.05  | -0.62 | -1.83 |  |  |
| -1.09 | -3.71 | -4.72 |  |  |
| -5.88 | -2.74 | -1.31 |  |  |
| 14.87 | -0.01 | -1.98 |  |  |
| 1.86  | 0.18  | 1.21  |  |  |
| 1.83  | 0.16  | 1.21  |  |  |
| 1.46  | -0.61 | 0.77  |  |  |
| 1.41  | 0.88  | 2.31  |  |  |
| 1.36  | -0.91 | 0.57  |  |  |
| 1.23  | -3.35 | -1.72 |  |  |
| 1.19  | -0.39 | 1.28  |  |  |
| 1.18  | -0.54 | 1.15  |  |  |
| 1.16  | -0.68 | 1.03  |  |  |
| 1.15  | -3.43 | -1.71 |  |  |
| 1.13  | -0.29 | 1.45  |  |  |
| 1.02  | 4.25  | 6.15  |  |  |
| 1     | -0.83 | 1.09  |  |  |
| -1.01 | -3.86 | -1.92 |  |  |
| -1.05 | -3.99 | -2    |  |  |
| -1.05 | 2.66  | 4.66  |  |  |
| -1.15 | 4.37  | 6.5   |  |  |
| -1.17 | -1.77 | 0.38  |  |  |
| -1.19 | 1.6   | 3.78  |  |  |
| -1.43 | -3.62 | -1.18 |  |  |
| 3.65  | 3.45  | 1.48  |  |  |
| 2.71  | 0.17  | -1.37 |  |  |
| 2.39  | 2.36  | 1     |  |  |
| 2.08  | 0.56  | -0.6  |  |  |
| 1.99  | 1.49  | 0.39  |  |  |
| 2.9   | -0.1  | -2.07 |  |  |

|        |       |       |  |  |
|--------|-------|-------|--|--|
| 1.8    | 3.09  | 1.81  |  |  |
| 1.75   | 2.58  | 1.34  |  |  |
| -3     | 0.68  | 1.84  |  |  |
| -3.72  | -2    | -0.53 |  |  |
| -3.9   | -4.09 | -2.56 |  |  |
| -4.15  | -1.16 | 0.47  |  |  |
| -5.39  | -1.89 | 0.11  |  |  |
| 1.72   | -2.04 | -4.01 |  |  |
| 1.34   | -0.12 | -1.73 |  |  |
| 1.19   | -0.03 | -1.47 |  |  |
| 1.17   | 2.49  | 1.08  |  |  |
| 1.14   | -3.33 | -4.71 |  |  |
| 1.08   | 1.65  | 0.36  |  |  |
| 1.05   | 0.13  | -1.13 |  |  |
| 1.04   | -1.77 | -3.01 |  |  |
| 1.03   | -1.73 | -2.96 |  |  |
| 1.02   | -3.19 | -4.4  |  |  |
| 1      | 3.39  | 2.2   |  |  |
| 1.01   | -3.33 | -4.53 |  |  |
| -1.05  | -0.81 | -1.92 |  |  |
| -1.08  | -1.42 | -2.49 |  |  |
| -1.09  | 0.47  | -0.59 |  |  |
| -1.13  | 0.51  | -0.5  |  |  |
| -4.82  | 0.47  | 1.55  |  |  |
| -4.86  | -0.87 | 0.22  |  |  |
| -5.87  | -1.03 | 0.34  |  |  |
| -8.72  | -2.64 | -0.7  |  |  |
| -12.75 | -1.39 | 1.1   |  |  |
| 3.54   | -3.04 | -5    |  |  |
| -2.96  | -6.23 | -4.8  |  |  |
| 4.47   | 0.69  | -1.28 |  |  |
| 4.17   | 5.58  | 3.72  |  |  |
| 3.87   | 2.72  | 0.96  |  |  |
| 3.2    | 1.81  | 0.33  |  |  |
| 2.99   | 1.25  | -0.13 |  |  |
| -1.9   | -0.94 | 0.19  |  |  |
| -2.16  | 0.01  | 1.32  |  |  |
| -2.21  | -1.1  | 0.24  |  |  |
| -2.28  | -0.61 | 0.78  |  |  |
| -2.5   | -1.61 | -0.09 |  |  |
| -2.64  | -1.25 | 0.35  |  |  |
| 4.76   | -0.08 | -2.04 |  |  |
| 3.88   | -1.39 | -3.06 |  |  |
| 3.8    | -0.91 | -2.55 |  |  |
| -1.69  | -1.39 | -0.35 |  |  |
| 2.07   | 3.18  | 1.22  |  |  |
| 1.78   | -3.81 | -5.56 |  |  |
| 1.67   | 1.05  | -0.6  |  |  |
| 1.55   | -2.66 | -4.2  |  |  |
| 1.45   | 0.29  | -1.16 |  |  |
| 1.32   | -2.33 | -3.65 |  |  |
| 1.32   | 0.91  | -0.41 |  |  |
| 1.15   | -3.1  | -4.21 |  |  |
| 1.14   | -0.89 | -1.99 |  |  |
| 1.12   | -2.79 | -3.86 |  |  |
| 1.1    | -0.28 | -1.33 |  |  |
| 2.88   | 0.08  | -1.88 |  |  |
| 1.79   | -3.67 | -4.94 |  |  |

|       |       |       |  |  |
|-------|-------|-------|--|--|
| 4.72  | 4.01  | 2.04  |  |  |
| 3.55  | 4.4   | 2.85  |  |  |
| 3.04  | 2.57  | 1.24  |  |  |
| 2.46  | -0.63 | -1.66 |  |  |
| 5.47  | 0.37  | -1.59 |  |  |
| 4.05  | 1.44  | -0.09 |  |  |
| -1.73 | -0.71 | 0.58  |  |  |
| -2.09 | -2.48 | -0.93 |  |  |
| 2.2   | 0.04  | -1.93 |  |  |
| 1.97  | 0.49  | -1.31 |  |  |
| 1.86  | 0.11  | -1.61 |  |  |
| 1.81  | -0.35 | -2.03 |  |  |
| 1.41  | -2.49 | -3.81 |  |  |
| 1.37  | 3.6   | 2.32  |  |  |
| 1.35  | -2.16 | -3.41 |  |  |
| 1.28  | 0.62  | -0.57 |  |  |
| 1.15  | -3.83 | -4.86 |  |  |
| 1.13  | 0.69  | -0.31 |  |  |
| 1.13  | 0.55  | -0.45 |  |  |
| -6.51 | -2.26 | -0.38 |  |  |
| 2.73  | 0.02  | -1.94 |  |  |
| 1.71  | -3.44 | -4.72 |  |  |
| 1.65  | -0.76 | -2    |  |  |
| 1.54  | -0.95 | -2.08 |  |  |
| 1.47  | -3.07 | -4.14 |  |  |
| 1.44  | 0.56  | -0.48 |  |  |
| -3.82 | -3.24 | -1.81 |  |  |
| 3.3   | 2.59  | 0.63  |  |  |
| 2.49  | -2.18 | -3.73 |  |  |
| 2.37  | -0.6  | -2.09 |  |  |
| 1.74  | -0.46 | -1.5  |  |  |
| 2.21  | 1.72  | -0.24 |  |  |
| -3.53 | -0.99 | 0.02  |  |  |
| -3.89 | -0.58 | 0.56  |  |  |
| 1.7   | -1.57 | -3.52 |  |  |
| 1.61  | -3.46 | -5.34 |  |  |
| 1.44  | -2.36 | -4.07 |  |  |
| 1.24  | -0.76 | -2.26 |  |  |
| 1.13  | -1.8  | -3.17 |  |  |
| 1.09  | -0.46 | -1.76 |  |  |
| 1.07  | -0.11 | -1.4  |  |  |
| 1.06  | -1.49 | -2.77 |  |  |
| 1     | -1.81 | -3    |  |  |
| -1.03 | -2.64 | -3.79 |  |  |
| -1.05 | 0.05  | -1.07 |  |  |
| -1.06 | -2.89 | -3.99 |  |  |
| -1.08 | 0.12  | -0.96 |  |  |
| -1.08 | -1.41 | -2.49 |  |  |
| -1.09 | 0.4   | -0.66 |  |  |
| -1.1  | -1.14 | -2.19 |  |  |
| -1.12 | -1.43 | -2.46 |  |  |
| -1.12 | 2.3   | 1.27  |  |  |
| -1.13 | -1.26 | -2.28 |  |  |
| -4.67 | -3.3  | -2.26 |  |  |
| -5.46 | -1.58 | -0.32 |  |  |
| 4.21  | 0.99  | -0.97 |  |  |
| 2.23  | 0.17  | -0.88 |  |  |
| -2.39 | -2.04 | -0.67 |  |  |

|       |       |       |  |  |
|-------|-------|-------|--|--|
| 3.1   | -1.75 | -3.71 |  |  |
| 1.97  | -4.71 | -6.01 |  |  |
| 1.66  | -1.08 | -2.14 |  |  |
| -2.5  | -3.88 | -2.88 |  |  |
| 3.37  | -1.67 | -3.62 |  |  |
| 2.89  | 1.87  | 0.14  |  |  |
| 1.87  | -1.89 | -2.99 |  |  |
| -2.49 | -2.95 | -1.83 |  |  |
| 3.31  | 0.45  | -1.51 |  |  |
| 2.16  | -1.92 | -3.26 |  |  |
| 2.05  | -4.66 | -5.93 |  |  |
| 1.75  | -2.44 | -3.48 |  |  |
| 2.55  | -3.61 | -5.56 |  |  |
| 2.54  | -1.96 | -3.91 |  |  |
| 1.85  | -2.22 | -3.71 |  |  |
| 1.77  | -5.11 | -6.54 |  |  |
| -3.07 | -2.84 | -1.83 |  |  |
| 3.81  | -0.26 | -2.21 |  |  |
| 2     | -1.52 | -2.54 |  |  |
| 2.67  | -1.95 | -3.9  |  |  |
| 1.73  | 2.08  | 0.76  |  |  |
| 1.48  | 0.28  | -0.83 |  |  |
| -4.58 | -3.2  | -1.54 |  |  |
| 9.63  | 1.13  | -0.82 |  |  |
| 5.23  | 0.95  | -0.12 |  |  |
| 5.16  | -3.07 | -4.12 |  |  |
| 1.23  | -0.87 | 0.15  |  |  |
| 1.03  | 2.64  | 3.91  |  |  |
| -1.05 | -0.85 | 0.53  |  |  |
| -1.06 | -2.49 | -1.09 |  |  |
| 3.8   | -2.57 | -4.53 |  |  |
| 2.95  | -1.55 | -3.14 |  |  |
| -2.23 | -3.71 | -2.59 |  |  |
| 5.31  | -0.98 | -2.93 |  |  |
| 4.64  | -1.49 | -3.25 |  |  |
| 3.83  | 1.34  | -0.14 |  |  |
| 3.77  | -0.11 | -1.57 |  |  |
| 3.56  | -1.86 | -3.23 |  |  |
| 3.44  | -2.64 | -4.6  |  |  |
| 2     | -0.44 | -1.62 |  |  |
| 1.92  | -2.56 | -3.67 |  |  |
| 1.82  | -0.96 | -2    |  |  |
| -2.28 | -1.01 | 0     |  |  |
| 10.53 | -0.92 | -2.87 |  |  |
| 7.69  | 0.31  | -1.19 |  |  |
| 6.22  | 0.14  | -1.05 |  |  |
| 6.1   | 0     | -1.17 |  |  |
| 5.65  | -0.07 | -1.13 |  |  |
| 1.06  | -3.73 | -2.37 |  |  |
| 1.04  | -1.29 | 0.09  |  |  |
| -1.01 | -2.09 | -0.63 |  |  |
| -1.09 | 4.48  | 6.05  |  |  |
| 3.77  | -3.96 | -5.92 |  |  |
| 2.01  | -1.52 | -2.56 |  |  |
| 2.01  | 2.93  | 1.89  |  |  |
| -2.43 | -1.21 | 0.04  |  |  |
| -2.81 | -2.84 | -1.38 |  |  |
| 2.57  | -2.13 | -4.08 |  |  |

|        |       |       |  |  |
|--------|-------|-------|--|--|
| 1.63   | 2.56  | 1.27  |  |  |
| 1.4    | 0.94  | -0.13 |  |  |
| 1.37   | 0.55  | -0.49 |  |  |
| -3.09  | -2.37 | -1.33 |  |  |
| -4.08  | -1.63 | -0.19 |  |  |
| 1.44   | -6.18 | -8.13 |  |  |
| 1.25   | -1.2  | -2.95 |  |  |
| 1.21   | -2.84 | -4.53 |  |  |
| 1.18   | -3.89 | -5.55 |  |  |
| 1.13   | -2.41 | -4.01 |  |  |
| -1.16  | -1.28 | -2.49 |  |  |
| 1.54   | -2.47 | -4.42 |  |  |
| 1.28   | -1.89 | -3.58 |  |  |
| 1.27   | -3.29 | -4.96 |  |  |
| 1.06   | -0.23 | -1.63 |  |  |
| -1.03  | -4.32 | -5.6  |  |  |
| -1.08  | -0.39 | -1.61 |  |  |
| -1.25  | 3.86  | 2.86  |  |  |
| -5.85  | -3.44 | -2.21 |  |  |
| -6.07  | -1.87 | -0.59 |  |  |
| 3.63   | -0.27 | -2.22 |  |  |
| 2.46   | -0.92 | -2.31 |  |  |
| 1.28   | 1.69  | -0.26 |  |  |
| 1.26   | -0.97 | -2.89 |  |  |
| 1.25   | -0.7  | -2.62 |  |  |
| 1.13   | 1.63  | -0.14 |  |  |
| 1.11   | 2.69  | 0.94  |  |  |
| 1.07   | 4.12  | 2.43  |  |  |
| 1.04   | 1.76  | 0.1   |  |  |
| -1     | 2.13  | 0.53  |  |  |
| -1.09  | -1.88 | -3.36 |  |  |
| -1.11  | 3.84  | 2.39  |  |  |
| -1.27  | 0.21  | -1.04 |  |  |
| -1.32  | 1.83  | 0.64  |  |  |
| -1.33  | 0.9   | -0.29 |  |  |
| -1.35  | 5.1   | 3.94  |  |  |
| -1.41  | 1.07  | -0.04 |  |  |
| -6.74  | -0.72 | 0.44  |  |  |
| -7.35  | -1.42 | -0.14 |  |  |
| -13.92 | -2.88 | -0.68 |  |  |
| 2.77   | 2.39  | 0.44  |  |  |
| 1.81   | 1.14  | -0.2  |  |  |
| 1.74   | 3.97  | 2.69  |  |  |
| 1.56   | -0.33 | -1.44 |  |  |
| 17.63  | 0.84  | -1.11 |  |  |
| -1.36  | 2.32  | 4.96  |  |  |
| 5.33   | -0.35 | -2.3  |  |  |
| 5.02   | 0.37  | -1.49 |  |  |
| 3.68   | -0.16 | -2.1  |  |  |
| 2.47   | -4.75 | -6.12 |  |  |
| -2.22  | -3.31 | -2.22 |  |  |
| -2.78  | -3.48 | -2.07 |  |  |
| -2.82  | -3.85 | -2.42 |  |  |
| -3.27  | -2.74 | -1.09 |  |  |
| 2.37   | -0.9  | -2.84 |  |  |
| 1.97   | -2.22 | -3.9  |  |  |
| 1.79   | -2.19 | -3.73 |  |  |
| 1.62   | -1.86 | -3.26 |  |  |

|       |       |       |  |  |
|-------|-------|-------|--|--|
| 1.52  | 0.19  | -1.11 |  |  |
| 1.44  | -2.13 | -3.35 |  |  |
| 1.42  | 0.55  | -0.66 |  |  |
| 1.33  | -0.74 | -1.85 |  |  |
| 1.28  | -1.14 | -2.2  |  |  |
| 1.26  | -1.59 | -2.62 |  |  |
| 1.26  | -0.98 | -2.01 |  |  |
| 1.25  | -0.24 | -1.26 |  |  |
| 3.36  | -2.67 | -4.61 |  |  |
| 1.86  | -4.11 | -5.19 |  |  |
| -2.79 | -2.45 | -1.17 |  |  |
| -2.94 | -3.26 | -1.9  |  |  |
| 14.75 | 1.62  | -0.32 |  |  |
| 11.11 | 1.24  | -0.29 |  |  |
| 10.7  | 1.33  | -0.15 |  |  |
| 1.54  | -1.62 | -0.3  |  |  |
| 1.52  | -1.79 | -0.45 |  |  |
| 1.47  | 1.54  | 2.92  |  |  |
| 1.4   | -1.13 | 0.32  |  |  |
| 1.39  | -1.98 | -0.52 |  |  |
| 1.1   | -2.38 | -0.57 |  |  |
| 1.38  | -1.76 | -3.7  |  |  |
| -1.33 | 2.36  | 1.29  |  |  |
| -1.38 | -3.03 | -4.04 |  |  |
| -7.37 | -0.09 | 1.32  |  |  |
| -7.56 | -1.73 | -0.29 |  |  |
| 6.68  | 3.48  | 1.54  |  |  |
| -1.27 | -2.97 | -1.84 |  |  |
| 10.47 | 2.57  | 0.62  |  |  |
| 5.61  | 0.08  | -0.96 |  |  |
| 1.25  | -0.55 | 0.58  |  |  |
| 1.24  | 2.39  | 3.53  |  |  |
| 1.01  | 1.69  | 3.12  |  |  |
| 9.09  | -0.25 | -2.2  |  |  |
| 5.27  | 0.8   | -0.36 |  |  |
| 1.15  | 2.29  | 3.33  |  |  |
| -1.32 | -3.69 | -2.04 |  |  |
| 1.62  | -0.87 | -2.81 |  |  |
| 1.56  | -2.23 | -4.11 |  |  |
| 1.29  | 5.28  | 3.66  |  |  |
| -1.04 | 1.32  | 0.13  |  |  |
| -1.06 | 1.34  | 0.17  |  |  |
| -1.09 | 5.73  | 4.61  |  |  |
| -1.14 | 0.01  | -1.04 |  |  |
| -5.06 | -2.16 | -1.07 |  |  |
| -5.1  | -2.31 | -1.21 |  |  |
| 4.81  | 2.33  | 0.39  |  |  |
| -1.71 | -2.52 | -1.42 |  |  |
| 3.04  | 1.25  | -0.69 |  |  |
| 1.75  | -1.55 | -2.69 |  |  |
| -3.02 | -2.32 | -1.06 |  |  |
| 2.79  | -5.35 | -7.29 |  |  |
| 1.67  | -4.09 | -5.28 |  |  |
| -3.16 | -4.79 | -3.58 |  |  |
| -3.19 | -3.61 | -2.39 |  |  |
| -3.86 | -6.89 | -5.4  |  |  |
| 6.48  | -0.95 | -2.89 |  |  |
| -1.5  | 1.83  | 3.18  |  |  |



|       |       |       |  |  |
|-------|-------|-------|--|--|
| 3.32  | -1.27 | -3.21 |  |  |
| 2.22  | 1.57  | 0.21  |  |  |
| 2.02  | -2.71 | -3.93 |  |  |
| 1.84  | 0.61  | -0.48 |  |  |
| 1.83  | -0.99 | -2.07 |  |  |
| 3.96  | 2.3   | 0.37  |  |  |
| -2    | -1.01 | 0.03  |  |  |
| -2.73 | -1.96 | -0.46 |  |  |
| 3.93  | 0.39  | -1.55 |  |  |
| 3.58  | -1.18 | -2.98 |  |  |
| 2.19  | -0.45 | -1.54 |  |  |
| 1.76  | 2.32  | 0.38  |  |  |
| 1.48  | 2.64  | 0.96  |  |  |
| 1.38  | 0.74  | -0.84 |  |  |
| 1.27  | 0.73  | -0.73 |  |  |
| 1.05  | -1.47 | -2.66 |  |  |
| 1     | 1.85  | 0.72  |  |  |
| -1.03 | -2.32 | -3.41 |  |  |
| -1.03 | -2.89 | -3.97 |  |  |
| -1.03 | -1.11 | -2.18 |  |  |
| -1.08 | -3.11 | -4.11 |  |  |
| -4.78 | -3.46 | -2.32 |  |  |
| -5.93 | -1.33 | 0.12  |  |  |
| 6.34  | -3.13 | -5.07 |  |  |
| -1.46 | -4.17 | -2.9  |  |  |
| 3.97  | -3.25 | -5.19 |  |  |
| -2.1  | -4.75 | -3.62 |  |  |
| -2.22 | -6.9  | -5.7  |  |  |
| -3.14 | -5.85 | -4.14 |  |  |
| 3.64  | -1.04 | -2.98 |  |  |
| 2.93  | -2.63 | -4.25 |  |  |
| 2.2   | -2.3  | -3.51 |  |  |
| 2.77  | 2.89  | 0.96  |  |  |
| 1.81  | 1.64  | 0.32  |  |  |
| 1.74  | 4.47  | 3.21  |  |  |
| 1.56  | 0.18  | -0.92 |  |  |
| 4.05  | -0.65 | -2.58 |  |  |
| -3.93 | 0.49  | 2.55  |  |  |
| 4.11  | -2.33 | -4.26 |  |  |
| 3.07  | -2.82 | -4.33 |  |  |
| 2.17  | -1.84 | -2.85 |  |  |
| -2.05 | -2.5  | -1.36 |  |  |
| -2.16 | -3.66 | -2.45 |  |  |
| 2.77  | 2.89  | 0.96  |  |  |
| 1.81  | 1.64  | 0.32  |  |  |
| 1.74  | 4.47  | 3.21  |  |  |
| 1.56  | 0.18  | -0.92 |  |  |
| 6.28  | -0.6  | -2.53 |  |  |
| 5.39  | 0.43  | -1.28 |  |  |
| 3.81  | -1.02 | -2.23 |  |  |
| 3.53  | 0.75  | -0.35 |  |  |
| 4.37  | -0.01 | -1.94 |  |  |
| 2.82  | 1.01  | -0.29 |  |  |
| 2.82  | 4.24  | 2.94  |  |  |
| 2.39  | 1.59  | 0.53  |  |  |
| -2.07 | -2.85 | -1.6  |  |  |
| 8.49  | 0.44  | -1.49 |  |  |
| 1.05  | 1.46  | 2.55  |  |  |

|       |       |       |  |  |
|-------|-------|-------|--|--|
| -1.32 | -3.04 | -1.48 |  |  |
| 1.94  | -7.21 | -9.14 |  |  |
| 1.76  | -3.21 | -4.99 |  |  |
| 1.08  | -3.29 | -4.36 |  |  |
| 1.08  | -4.53 | -5.6  |  |  |
| 1.06  | -6.03 | -7.07 |  |  |
| -4.74 | -6.08 | -4.81 |  |  |
| 48.99 | -0.32 | -2.24 |  |  |
| 40.04 | -1.38 | -3.02 |  |  |
| 32.85 | -0.18 | -1.53 |  |  |
| 31.82 | -1.22 | -2.52 |  |  |
| 5.19  | -1.67 | -0.36 |  |  |
| 3.48  | -0.93 | 0.95  |  |  |
| 1.98  | -6.35 | -3.65 |  |  |
| 1.97  | -5.79 | -3.08 |  |  |
| 1.81  | -7.28 | -4.45 |  |  |
| 1.65  | -4.81 | -1.84 |  |  |
| 1.63  | -4.31 | -1.32 |  |  |
| 1.28  | -6.67 | -3.33 |  |  |
| 1.04  | -7.79 | -4.16 |  |  |
| -1.01 | -6.55 | -2.84 |  |  |
| -1.04 | 0.87  | 4.61  |  |  |
| 1.87  | 2.17  | 0.24  |  |  |
| -4.07 | -3.4  | -2.4  |  |  |
| 1.81  | 4.39  | 2.47  |  |  |
| 1.25  | 3.33  | 1.93  |  |  |
| 1.16  | 1.35  | 0.06  |  |  |
| -5.22 | -2.57 | -1.26 |  |  |
| -5.37 | -2.92 | -1.57 |  |  |
| 2.03  | -2.47 | -4.4  |  |  |
| 1.75  | 3.65  | 1.93  |  |  |
| 1.22  | 0.16  | -1.03 |  |  |
| 1.21  | -1.13 | -2.31 |  |  |
| 1.21  | -3.89 | -5.07 |  |  |
| 1.2   | -0.45 | -1.62 |  |  |
| 1.18  | -0.89 | -2.03 |  |  |
| 1.12  | -0.65 | -1.72 |  |  |
| 1.09  | -0.94 | -1.96 |  |  |
| 4.05  | 4.13  | 2.21  |  |  |
| 2.92  | -0.81 | -2.26 |  |  |
| 2.86  | -0.04 | -1.47 |  |  |
| -2.42 | -0.56 | 0.81  |  |  |
| 2.19  | -2.69 | -4.62 |  |  |
| 2.01  | 1.07  | -0.73 |  |  |
| 1.43  | -1.36 | -2.67 |  |  |
| 1.38  | 0.16  | -1.1  |  |  |
| 1.32  | -2.74 | -3.93 |  |  |
| 1.31  | -1.84 | -3.02 |  |  |
| 2.5   | -0.81 | -2.73 |  |  |
| 1.96  | 1.85  | 0.28  |  |  |
| 1.61  | 0.43  | -0.86 |  |  |
| 1.54  | 0.5   | -0.72 |  |  |
| 1.23  | -4.58 | -6.5  |  |  |
| -1.12 | -0.83 | -2.3  |  |  |
| -1.21 | -3.47 | -4.81 |  |  |
| -1.48 | -3.6  | -4.66 |  |  |
| -1.49 | -2.81 | -3.85 |  |  |
| -6.51 | -3.78 | -2.7  |  |  |

|        |       |       |  |  |
|--------|-------|-------|--|--|
| -7.91  | -4.69 | -3.33 |  |  |
| -8.84  | -3.51 | -1.99 |  |  |
| -9.07  | -1.24 | 0.32  |  |  |
| -9.69  | -5.79 | -4.14 |  |  |
| -10.47 | -2.76 | -1    |  |  |
| -13.23 | -3.42 | -1.31 |  |  |
| -15.46 | -2.99 | -0.67 |  |  |
| 3.4    | 3.5   | 1.58  |  |  |
| -2.34  | -2.11 | -1.03 |  |  |
| -2.55  | -5.35 | -4.16 |  |  |
| 3.05   | 3.32  | 1.39  |  |  |
| 2.38   | 2.17  | 0.61  |  |  |
| 2.12   | -1.05 | -2.44 |  |  |
| 2.08   | -0.58 | -1.95 |  |  |
| 1.95   | -2.44 | -4.37 |  |  |
| 1.38   | -1.97 | -3.39 |  |  |
| 1.32   | -0.65 | -2.01 |  |  |
| 1.27   | -1.14 | -2.44 |  |  |
| 1.18   | -1.85 | -3.05 |  |  |
| -4.12  | -1.6  | -0.52 |  |  |
| -4.66  | -1.44 | -0.18 |  |  |
| -6.61  | -2.44 | -0.68 |  |  |
| -7.33  | -3.7  | -1.79 |  |  |
| 2.55   | -0.95 | -2.87 |  |  |
| 1.44   | 0.54  | -0.55 |  |  |
| -3.15  | -1.96 | -0.87 |  |  |
| -3.96  | -1.54 | -0.13 |  |  |
| 4.02   | -2.54 | -4.46 |  |  |
| 3.37   | -2.27 | -3.94 |  |  |
| 3.35   | -5.23 | -6.88 |  |  |
| 3.3    | -3.11 | -4.75 |  |  |
| 2.45   | -3.5  | -4.71 |  |  |
| -2.79  | -5.12 | -3.56 |  |  |
| 2.17   | 1.48  | -0.44 |  |  |
| 1.62   | 0.25  | -1.25 |  |  |
| 1.55   | 2.15  | 0.72  |  |  |
| 1.42   | 0.38  | -0.92 |  |  |
| 1.36   | 4.49  | 3.25  |  |  |
| 1.31   | 6.24  | 5.05  |  |  |
| 1.23   | 2.63  | 1.54  |  |  |
| 1.2    | -0.86 | -1.92 |  |  |
| 1.15   | 0.24  | -0.77 |  |  |
| -3.61  | -1.06 | -0.01 |  |  |
| 3.48   | -2.91 | -4.83 |  |  |
| 3.14   | 0.95  | -0.83 |  |  |
| 2.42   | -4.42 | -5.82 |  |  |
| 2.17   | -1.75 | -2.99 |  |  |
| -4.37  | -4.43 | -2.42 |  |  |
| 3.74   | -0.15 | -2.07 |  |  |
| 2.62   | -0.03 | -1.43 |  |  |
| -2.11  | -5.58 | -4.52 |  |  |
| -3.12  | -3.86 | -2.23 |  |  |
| 1.99   | -0.83 | -2.74 |  |  |
| 1.91   | -1.71 | -3.57 |  |  |
| 1.39   | -1.34 | -2.73 |  |  |
| 1.21   | -1.74 | -2.95 |  |  |
| 1.21   | -0.75 | -1.94 |  |  |
| 1.17   | 1.55  | 0.4   |  |  |

|       |       |       |  |  |
|-------|-------|-------|--|--|
| 1.09  | 1.52  | 0.46  |  |  |
| 1.09  | 1.39  | 0.34  |  |  |
| 1.06  | 2.41  | 1.41  |  |  |
| -3.82 | -1.98 | -0.97 |  |  |
| -3.92 | -2.23 | -1.18 |  |  |
| -4.05 | -1.27 | -0.18 |  |  |
| -4.43 | -2.08 | -0.86 |  |  |
| -7.48 | -2.29 | -0.32 |  |  |
| 2.56  | -2.45 | -4.37 |  |  |
| 1.84  | -2.58 | -4.02 |  |  |
| 1.68  | -3.87 | -5.18 |  |  |
| 1.4   | -2.3  | -3.34 |  |  |
| 2.19  | -3.66 | -5.58 |  |  |
| 1.45  | -2.19 | -3.52 |  |  |
| 1.23  | -3.82 | -4.91 |  |  |
| 2.17  | -1.52 | -3.44 |  |  |
| 1.31  | -4.13 | -5.31 |  |  |
| 1.18  | -2.73 | -3.77 |  |  |
| 1.69  | -0.22 | -2.14 |  |  |
| 1.51  | -1.56 | -3.3  |  |  |
| 1.5   | 2.52  | 0.77  |  |  |
| 1.45  | 2.06  | 0.36  |  |  |
| 1.34  | 3.36  | 1.79  |  |  |
| 1.33  | 1.79  | 0.22  |  |  |
| 1.3   | 1.5   | -0.04 |  |  |
| 1.18  | 2.67  | 1.28  |  |  |
| 1.16  | -0.38 | -1.74 |  |  |
| 1.12  | 2.1   | 0.78  |  |  |
| 1.1   | 0.15  | -1.14 |  |  |
| 1.06  | 1.46  | 0.23  |  |  |
| 1.05  | -0.05 | -1.28 |  |  |
| 1.04  | 2.3   | 1.09  |  |  |
| 1.04  | 2.29  | 1.08  |  |  |
| 1.02  | 0.55  | -0.63 |  |  |
| 1     | 3.41  | 2.25  |  |  |
| -1.02 | 0.24  | -0.89 |  |  |
| -1.02 | 1.87  | 0.75  |  |  |
| -1.02 | 1.86  | 0.73  |  |  |
| -1.02 | 2.88  | 1.76  |  |  |
| -1.05 | 2.52  | 1.43  |  |  |
| -1.05 | 1.41  | 0.32  |  |  |
| -1.06 | 2.47  | 1.39  |  |  |
| -1.07 | 1.02  | -0.04 |  |  |
| -1.07 | 4.58  | 3.53  |  |  |
| -1.08 | 0.35  | -0.7  |  |  |
| -1.08 | 1.53  | 0.49  |  |  |
| -1.09 | -1.52 | -2.55 |  |  |
| -1.09 | 1.89  | 0.86  |  |  |
| -1.09 | 1.18  | 0.14  |  |  |
| -1.09 | 3.1   | 2.07  |  |  |
| -1.09 | 1.14  | 0.11  |  |  |
| -1.09 | 2.21  | 1.18  |  |  |
| -1.11 | 0.38  | -0.63 |  |  |
| 6.47  | -0.45 | -2.37 |  |  |
| 4.8   | -0.46 | -1.94 |  |  |
| 4.56  | 0.49  | -0.92 |  |  |
| 3.66  | 1.07  | -0.03 |  |  |
| 3.62  | -0.78 | -1.85 |  |  |

|       |       |       |  |  |
|-------|-------|-------|--|--|
| -1.2  | 0.9   | 1.95  |  |  |
| -1.36 | 0.31  | 1.54  |  |  |
| -1.46 | -2.08 | -0.76 |  |  |
| -1.57 | 1     | 2.43  |  |  |
| -1.58 | 1.18  | 2.62  |  |  |
| -4.42 | -2.81 | 0.12  |  |  |
| 1.93  | -0.46 | -2.37 |  |  |
| -4.1  | -1.07 | 0     |  |  |
| 2.63  | -0.94 | -2.86 |  |  |
| 2.09  | -0.7  | -2.28 |  |  |
| 1.45  | 1.58  | 0.52  |  |  |
| -4.25 | -2.38 | -0.81 |  |  |
| 1.73  | 0.4   | -1.51 |  |  |
| 1.11  | 2.76  | 1.49  |  |  |
| -1.06 | -2.33 | -3.36 |  |  |
| -6.63 | -3.55 | -1.94 |  |  |
| 1.97  | -1.68 | -3.59 |  |  |
| 1.94  | -1.51 | -3.4  |  |  |
| 1.7   | -3.77 | -5.47 |  |  |
| 1.65  | -3.94 | -5.59 |  |  |
| 1.36  | -3.34 | -4.72 |  |  |
| 1.24  | -2.45 | -3.69 |  |  |
| 1.2   | -5.04 | -6.24 |  |  |
| 1.17  | -3.86 | -5.02 |  |  |
| 1.16  | -4.71 | -5.85 |  |  |
| 1.09  | -4.05 | -5.11 |  |  |
| 1.06  | -0.26 | -1.27 |  |  |
| 1.66  | 2.66  | 0.75  |  |  |
| 1.46  | 4.36  | 2.63  |  |  |
| 1.21  | -0.95 | -2.41 |  |  |
| -1.14 | 1.34  | 0.34  |  |  |
| -4.83 | 0.58  | 1.67  |  |  |
| -4.94 | 0.54  | 1.66  |  |  |
| 2.78  | -0.18 | -2.09 |  |  |
| 2.14  | -0.18 | -1.71 |  |  |
| -2.87 | -3.18 | -2.09 |  |  |
| -3.24 | -1.61 | -0.34 |  |  |
| -4.15 | -4.43 | -2.81 |  |  |
| 4.04  | 3.7   | 1.79  |  |  |
| 3     | 2.78  | 1.3   |  |  |
| 2.17  | 2.92  | 1.91  |  |  |
| 1.38  | 3.25  | 1.34  |  |  |
| -8.57 | 0.23  | 1.88  |  |  |
| 2.34  | 0.7   | -1.21 |  |  |
| 1.25  | 3.39  | 2.38  |  |  |
| -4.14 | -1.51 | -0.15 |  |  |
| 4.3   | 3.33  | 1.42  |  |  |
| -1.88 | -4.74 | -3.63 |  |  |
| -2.25 | 0.52  | 1.88  |  |  |
| 3.23  | -1.23 | -3.14 |  |  |
| -2.52 | -3.09 | -1.98 |  |  |
| -3.74 | -4.54 | -2.86 |  |  |
| 5.96  | -0.24 | -2.15 |  |  |
| 4.08  | -0.09 | -1.45 |  |  |
| 3.42  | -2.54 | -3.65 |  |  |
| -1.3  | 0.73  | 1.77  |  |  |
| -1.31 | -2.91 | -1.86 |  |  |
| 3.59  | 0.39  | -1.53 |  |  |

|       |       |       |  |  |
|-------|-------|-------|--|--|
| -2.25 | 0.08  | 1.18  |  |  |
| 2.77  | 2.87  | 0.96  |  |  |
| 1.81  | 1.62  | 0.32  |  |  |
| 1.74  | 4.45  | 3.21  |  |  |
| 1.56  | 0.16  | -0.92 |  |  |
| 2.77  | 2.87  | 0.96  |  |  |
| 1.81  | 1.62  | 0.32  |  |  |
| 1.74  | 4.45  | 3.21  |  |  |
| 1.56  | 0.16  | -0.92 |  |  |
| 2.53  | -1.69 | -3.59 |  |  |
| 2.4   | -0.64 | -2.47 |  |  |
| 1.47  | -1.9  | -3.02 |  |  |
| 1.42  | 1.18  | 0.1   |  |  |
| 1.35  | -0.63 | -1.63 |  |  |
| 1.52  | -2.24 | -4.15 |  |  |
| 1.24  | -3.59 | -5.2  |  |  |
| 1.05  | 1.51  | 0.15  |  |  |
| -1.08 | 0.29  | -0.9  |  |  |
| -1.1  | -1.34 | -2.5  |  |  |
| 1.5   | 0.31  | -1.59 |  |  |
| 1.28  | 1.04  | -0.64 |  |  |
| 1.24  | -1.39 | -3.02 |  |  |
| 1.19  | -1.79 | -3.37 |  |  |
| 1.13  | 2.16  | 0.65  |  |  |
| 1.1   | 1.53  | 0.07  |  |  |
| 1.08  | 0.53  | -0.9  |  |  |
| 1.03  | 0.49  | -0.87 |  |  |
| 1.02  | 0.67  | -0.69 |  |  |
| 1     | 2.13  | 0.8   |  |  |
| -1    | -0.65 | -1.97 |  |  |
| -1    | -2.22 | -3.54 |  |  |
| -1.06 | -0.49 | -1.73 |  |  |
| -1.09 | -1.92 | -3.12 |  |  |
| -1.21 | -1.04 | -2.09 |  |  |
| -6.56 | -2.49 | -1.1  |  |  |
| 2.26  | 0.12  | -1.79 |  |  |
| 2.06  | -2.77 | -4.54 |  |  |
| 1.98  | -1.3  | -3.01 |  |  |
| 1.55  | -0.15 | -1.51 |  |  |
| 1.41  | 2.86  | 1.64  |  |  |
| 1.32  | -2.88 | -4.01 |  |  |
| 1.22  | 0.98  | -0.04 |  |  |
| 1.21  | -2.55 | -3.56 |  |  |
| -5.04 | -3.36 | -1.75 |  |  |
| 2.44  | 0.25  | -1.65 |  |  |
| 2.23  | -0.73 | -2.5  |  |  |
| 1.73  | 3.18  | 1.78  |  |  |
| 4.83  | 1.4   | -0.5  |  |  |
| 2.73  | 1.56  | 0.48  |  |  |
| -1.03 | 3.42  | 1.52  |  |  |
| -1.11 | 1.93  | 0.13  |  |  |
| -1.28 | 1.37  | -0.23 |  |  |
| -1.45 | 0.24  | -1.18 |  |  |
| -1.66 | 0.83  | -0.4  |  |  |
| 3.35  | -0.2  | -2.11 |  |  |
| -3.37 | -1.64 | -0.05 |  |  |
| 1.49  | 0.73  | -1.18 |  |  |
| 1.01  | 2.06  | 0.73  |  |  |

|       |       |       |  |  |
|-------|-------|-------|--|--|
| -1.07 | 2.34  | 1.11  |  |  |
| 5.11  | -0.12 | -2.02 |  |  |
| 4.03  | 0.24  | -1.32 |  |  |
| 4.02  | 1.98  | 0.42  |  |  |
| 3.87  | 0.74  | -0.76 |  |  |
| 3.07  | 0.75  | -0.42 |  |  |
| -1.54 | -1.46 | -0.39 |  |  |
| -1.9  | -0.35 | 1.03  |  |  |
| -1.96 | -3.67 | -2.25 |  |  |
| -2.25 | -0.7  | 0.92  |  |  |
| -3.37 | -5.16 | -2.96 |  |  |
| 1.89  | 3.94  | 2.03  |  |  |
| 1.6   | 0.72  | -0.95 |  |  |
| 1.35  | 1.88  | 0.45  |  |  |
| 1.21  | 4.57  | 3.31  |  |  |
| 1.2   | 7.13  | 5.88  |  |  |
| -4    | -1.56 | -0.55 |  |  |
| 2.76  | 1.38  | -0.53 |  |  |
| -3.49 | 0.31  | 1.67  |  |  |
| -4.45 | -0.33 | 1.38  |  |  |
| 2.99  | -2.67 | -4.57 |  |  |
| 2.28  | 2.54  | 1.02  |  |  |
| 1.82  | 0.25  | -0.94 |  |  |
| 1.65  | -0.41 | -1.46 |  |  |
| -2.58 | -2.52 | -1.47 |  |  |
| -2.7  | -0.85 | 0.25  |  |  |
| -5.45 | -3.61 | -1.48 |  |  |
| 1.63  | 0.54  | -1.36 |  |  |
| 1.44  | -0.81 | -2.54 |  |  |
| 1.24  | 1.36  | -0.15 |  |  |
| 1.12  | -3.81 | -5.17 |  |  |
| -1.04 | -1.44 | -2.58 |  |  |
| -1.11 | -3.02 | -4.07 |  |  |
| 3     | -0.15 | -2.05 |  |  |
| -3.39 | -5.42 | -3.97 |  |  |
| 2.11  | -0.72 | -2.62 |  |  |
| 1.79  | -1.08 | -2.74 |  |  |
| 1.68  | -1.98 | -3.55 |  |  |
| 1.61  | -1.98 | -3.5  |  |  |
| 1.46  | -2.09 | -3.46 |  |  |
| 1.44  | -1.85 | -3.2  |  |  |
| 1.42  | -2.59 | -3.92 |  |  |
| 1.39  | -2.73 | -4.03 |  |  |
| 1.33  | -0.85 | -2.08 |  |  |
| 1.31  | -1.88 | -3.09 |  |  |
| 1.31  | -1.94 | -3.15 |  |  |
| 1.29  | -6.92 | -8.12 |  |  |
| 1.25  | -1.58 | -2.72 |  |  |
| 1.23  | -3.66 | -4.78 |  |  |
| 1.2   | -2.58 | -3.67 |  |  |
| 1.2   | -1.29 | -2.38 |  |  |
| 1.18  | -2.22 | -3.28 |  |  |
| 3.17  | -3.87 | -5.77 |  |  |
| 1.97  | -2.24 | -3.45 |  |  |
| 2.24  | -0.38 | -2.28 |  |  |
| 1.6   | -0.11 | -1.52 |  |  |
| 1.88  | -1.79 | -3.69 |  |  |
| 1.68  | 2.1   | 0.36  |  |  |

|       |       |       |  |  |
|-------|-------|-------|--|--|
| 1.43  | 5.08  | 3.57  |  |  |
| 1.38  | 1.75  | 0.29  |  |  |
| 1.36  | -0.85 | -2.28 |  |  |
| 1.35  | 2.11  | 0.68  |  |  |
| 1.21  | 3.29  | 2.02  |  |  |
| 1.18  | -0.29 | -1.51 |  |  |
| 1.15  | 0.02  | -1.17 |  |  |
| 1.1   | 1.05  | -0.07 |  |  |
| 1.07  | 1.26  | 0.17  |  |  |
| 1.06  | -1.42 | -2.49 |  |  |
| 1.06  | 2.02  | 0.95  |  |  |
| 1.06  | 1.82  | 0.75  |  |  |
| -4.04 | -1.03 | 0     |  |  |
| -4.49 | -2.24 | -1.06 |  |  |
| 3.24  | -0.75 | -2.65 |  |  |
| 2.18  | -0.18 | -1.5  |  |  |
| 2.38  | -0.46 | -2.36 |  |  |
| 1.32  | -0.1  | -1.14 |  |  |
| -3.18 | -1.07 | -0.05 |  |  |
| -5.19 | -2.63 | -0.9  |  |  |
| 2.4   | -1.91 | -3.8  |  |  |
| 1.42  | -0.26 | -1.4  |  |  |
| 1.4   | 0.14  | -0.97 |  |  |
| -5.98 | -2.21 | -0.26 |  |  |
| -6.53 | -3.19 | -1.11 |  |  |
| -8.19 | -2.72 | -0.31 |  |  |
| 2.36  | 0.46  | -1.43 |  |  |
| 1.77  | -2.61 | -4.09 |  |  |
| 1.32  | -3.43 | -4.5  |  |  |
| 3.08  | 0.25  | -1.65 |  |  |
| 2.65  | -0.31 | -1.99 |  |  |
| 2.06  | 0.17  | -1.15 |  |  |
| 1.97  | 0.89  | -0.36 |  |  |
| 1.88  | -0.7  | -1.88 |  |  |
| 1.72  | -1.87 | -2.92 |  |  |
| -2.45 | 0.78  | 1.8   |  |  |
| -2.49 | -1.11 | -0.07 |  |  |
| -2.68 | -0.93 | 0.22  |  |  |
| -3.46 | -2.65 | -1.13 |  |  |
| -3.56 | -2.5  | -0.94 |  |  |
| 2.53  | -3.43 | -5.32 |  |  |
| 1.64  | -4.01 | -5.28 |  |  |
| 1.45  | -1.62 | -2.72 |  |  |
| -3.11 | -3.89 | -2.81 |  |  |
| 2.95  | 1.88  | -0.02 |  |  |
| -3.32 | 0.27  | 1.67  |  |  |
| -3.76 | 0.16  | 1.74  |  |  |
| 2.84  | 0.98  | -0.92 |  |  |
| 1.97  | 4.17  | 2.8   |  |  |
| 1.92  | 6.23  | 4.9   |  |  |
| 4.32  | -0.28 | -2.17 |  |  |
| 2.81  | 0.33  | -0.94 |  |  |
| 2.61  | -1.04 | -2.2  |  |  |
| 2.58  | 0.12  | -1.03 |  |  |
| 2.44  | -1    | -2.89 |  |  |
| -3.71 | -3.54 | -2.25 |  |  |
| 3.15  | 2.59  | 0.7   |  |  |
| 1.81  | 2.62  | 1.53  |  |  |



|       |       |       |  |  |
|-------|-------|-------|--|--|
| 4.59  | -1.85 | -3.74 |  |  |
| 2.87  | -2.28 | -3.49 |  |  |
| 2.64  | -0.69 | -1.78 |  |  |
| -1.67 | 0.77  | 1.82  |  |  |
| -1.8  | -1.69 | -0.53 |  |  |
| 2.73  | -3.63 | -5.51 |  |  |
| 1.63  | -6.44 | -7.58 |  |  |
| -2.71 | -4.16 | -3.15 |  |  |
| -2.73 | -4.42 | -3.41 |  |  |
| -2.87 | -3.03 | -1.95 |  |  |
| -3.12 | -4.23 | -3.03 |  |  |
| 5.35  | 0.49  | -1.4  |  |  |
| 3.19  | 0.85  | -0.29 |  |  |
| 2.9   | -1.27 | -2.27 |  |  |
| -1.44 | -0.68 | 0.38  |  |  |
| 4.17  | -2.13 | -4.02 |  |  |
| 2.74  | -2.88 | -4.16 |  |  |
| 2.31  | -4.4  | -5.44 |  |  |
| 50.62 | -1.37 | -3.25 |  |  |
| 43.56 | -0.77 | -2.44 |  |  |
| 29.21 | 0.46  | -0.63 |  |  |
| 4.64  | -1.83 | -0.27 |  |  |
| 2.06  | -7.64 | -4.9  |  |  |
| 1.47  | -2.87 | 0.35  |  |  |
| 2.56  | -0.24 | -2.13 |  |  |
| 1.76  | -1.49 | -2.83 |  |  |
| 5.52  | 0.8   | -1.09 |  |  |
| 3.33  | 1.45  | 0.3   |  |  |
| 1.77  | -1.77 | -3.66 |  |  |
| 1.43  | -3.24 | -4.82 |  |  |
| 1.34  | -3.56 | -5.05 |  |  |
| 1.08  | -1.02 | -2.19 |  |  |
| -1.04 | -3.99 | -5    |  |  |
| -1.04 | -2.84 | -3.85 |  |  |
| -4.86 | -3.78 | -2.56 |  |  |
| 2.92  | 1.21  | -0.68 |  |  |
| 2.27  | 4.39  | 2.86  |  |  |
| 2.36  | 2.88  | 0.99  |  |  |
| 1.46  | 5.25  | 4.06  |  |  |
| 1.28  | 4.59  | 3.58  |  |  |
| 3.63  | -1.16 | -3.04 |  |  |
| 3.62  | -0.59 | -2.47 |  |  |
| -2.05 | -1.79 | -0.78 |  |  |
| -2.11 | -0.84 | 0.22  |  |  |
| 5.29  | 1.44  | -0.43 |  |  |
| 4.12  | 2.15  | 0.63  |  |  |
| -1.45 | -4.37 | -3.3  |  |  |
| -2.31 | -2.86 | -1.12 |  |  |
| 3.3   | 3.08  | 1.2   |  |  |
| 2.69  | 0.65  | -0.94 |  |  |
| 2.62  | 0.56  | -0.98 |  |  |
| 2.26  | 1.52  | 0.19  |  |  |
| 2.06  | -0.12 | -1.32 |  |  |
| 2.02  | 2.36  | 1.19  |  |  |
| 1.94  | 0.73  | -0.39 |  |  |
| 1.93  | 2.63  | 1.52  |  |  |
| 1.89  | 5.35  | 4.27  |  |  |
| -4.97 | -0.97 | 1.19  |  |  |

|       |       |       |  |  |
|-------|-------|-------|--|--|
| 33.6  | 1.48  | -0.4  |  |  |
| 19.09 | -1.24 | -2.3  |  |  |
| 4.51  | 0.31  | 1.34  |  |  |
| 3.46  | -4.11 | -2.71 |  |  |
| 2.98  | 1.71  | 3.32  |  |  |
| 2.06  | -1.59 | 0.56  |  |  |
| 1.07  | -1.51 | 1.58  |  |  |
| -1.1  | 2.98  | 6.31  |  |  |
| -1.45 | -2.64 | 1.09  |  |  |
| 5.27  | 1.51  | -0.37 |  |  |
| 3.97  | 0.65  | -0.82 |  |  |
| 3.88  | 2.19  | 0.76  |  |  |
| 3.74  | 1.63  | 0.24  |  |  |
| 2.92  | 0.75  | -0.28 |  |  |
| -1.42 | -0.46 | 0.56  |  |  |
| -1.41 | -1.82 | -0.8  |  |  |
| -1.42 | 0.12  | 1.14  |  |  |
| -1.52 | -1.68 | -0.56 |  |  |
| -1.52 | -1.11 | 0.01  |  |  |
| -1.66 | -1.47 | -0.22 |  |  |
| -1.72 | -1.49 | -0.18 |  |  |
| -1.78 | -0.35 | 1.01  |  |  |
| -1.93 | -2.41 | -0.94 |  |  |
| -2.02 | -1.47 | 0.07  |  |  |
| -2.5  | -0.73 | 1.11  |  |  |
| 1.39  | -2.25 | -4.13 |  |  |
| 1.17  | 5.74  | 4.11  |  |  |
| 1.05  | 2.64  | 1.16  |  |  |
| -1.03 | -4.33 | -5.69 |  |  |
| -1.04 | -4.81 | -6.16 |  |  |
| -1.13 | 3.73  | 2.51  |  |  |
| -1.26 | -1.12 | -2.18 |  |  |
| -1.27 | 1.09  | 0.03  |  |  |
| -1.31 | -2.71 | -3.73 |  |  |
| -5.63 | -2.61 | -1.52 |  |  |
| -5.87 | -1.98 | -0.83 |  |  |
| -6.26 | -4.51 | -3.26 |  |  |
| -6.71 | -3.1  | -1.76 |  |  |
| 6.53  | 1.59  | -0.29 |  |  |
| 4.59  | 1.86  | 0.49  |  |  |
| 4.56  | 1.73  | 0.37  |  |  |
| -1.15 | 2.57  | 3.6   |  |  |
| -1.15 | -0.36 | 0.67  |  |  |
| -1.2  | 1.42  | 2.51  |  |  |
| -1.2  | 1.76  | 2.86  |  |  |
| -1.24 | 1.15  | 2.29  |  |  |
| -1.26 | 1.61  | 2.77  |  |  |
| -1.27 | -0.99 | 0.18  |  |  |
| -1.29 | 1.84  | 3.03  |  |  |
| -1.38 | -1.8  | -0.5  |  |  |
| 2.9   | -3.85 | -5.73 |  |  |
| 1.77  | -4.64 | -5.8  |  |  |
| 1.59  | -2.87 | -3.88 |  |  |
| 2.04  | -2.61 | -4.49 |  |  |
| 1.59  | -4.2  | -5.71 |  |  |
| 1.38  | -3.85 | -5.16 |  |  |
| 1.18  | -3.47 | -4.56 |  |  |
| 1.11  | -2    | -3    |  |  |

|        |       |       |  |  |
|--------|-------|-------|--|--|
| 2.34   | -0.87 | -2.74 |  |  |
| 2.31   | -1.37 | -3.23 |  |  |
| 1.71   | -1.53 | -2.95 |  |  |
| 1.43   | -0.26 | -1.42 |  |  |
| 1.32   | 0.66  | -0.39 |  |  |
| -3.78  | -2.46 | -1.2  |  |  |
| 1.88   | 2.23  | 0.36  |  |  |
| 1.1    | -0.07 | -1.18 |  |  |
| 3.04   | 4.41  | 2.54  |  |  |
| -3.13  | -3.27 | -1.9  |  |  |
| -3.58  | -2.89 | -1.33 |  |  |
| 2.89   | 0.64  | -1.24 |  |  |
| -2.71  | -1.02 | 0.07  |  |  |
| -3.32  | -3.41 | -2.02 |  |  |
| 4.28   | 0.9   | -0.98 |  |  |
| -1.72  | -0.11 | 0.89  |  |  |
| 3.47   | 0.76  | -1.11 |  |  |
| 3.17   | -0.25 | -1.99 |  |  |
| 2.38   | -0.6  | -1.92 |  |  |
| 2.2    | 1.67  | 0.46  |  |  |
| 2.12   | 0.91  | -0.25 |  |  |
| -2.88  | -2.79 | -1.34 |  |  |
| 4.59   | -3.77 | -5.64 |  |  |
| -1.63  | -4.23 | -3.19 |  |  |
| -1.8   | -4.94 | -3.77 |  |  |
| -2.21  | -5.42 | -3.95 |  |  |
| -2.8   | -6.91 | -5.1  |  |  |
| 1.54   | 2.77  | 0.89  |  |  |
| 1.52   | 1.03  | -0.82 |  |  |
| 1.33   | 0.31  | -1.34 |  |  |
| 1.27   | 2.39  | 0.8   |  |  |
| 1.16   | 1.11  | -0.35 |  |  |
| 1.07   | 1.04  | -0.3  |  |  |
| 1.06   | 1.59  | 0.27  |  |  |
| 1.04   | -2.54 | -3.84 |  |  |
| 1.04   | 0.42  | -0.88 |  |  |
| -1.02  | 3.83  | 2.61  |  |  |
| -1.04  | -0.17 | -1.36 |  |  |
| -1.05  | 5.64  | 4.47  |  |  |
| -1.15  | 0.48  | -0.57 |  |  |
| -1.14  | 0.3   | -0.76 |  |  |
| -1.18  | 1.91  | 0.9   |  |  |
| -4.77  | -1.35 | -0.34 |  |  |
| -5.33  | 0.03  | 1.2   |  |  |
| -6.36  | -1.34 | 0.09  |  |  |
| -6.95  | -2.76 | -1.21 |  |  |
| -7.37  | -1.7  | -0.07 |  |  |
| -7.4   | -0.48 | 1.16  |  |  |
| -7.77  | -0.31 | 1.4   |  |  |
| -8.02  | -0.82 | 0.94  |  |  |
| -9.84  | -1.62 | 0.43  |  |  |
| -10.09 | -0.79 | 1.3   |  |  |
| -12.63 | -2.22 | 0.19  |  |  |
| -25.24 | -0.95 | 2.46  |  |  |
| -27.99 | -3.38 | 0.18  |  |  |
| 1.78   | -0.5  | -2.37 |  |  |
| 1.1    | -0.28 | -1.47 |  |  |
| 1.03   | 0.92  | -0.16 |  |  |

|       |       |       |  |  |
|-------|-------|-------|--|--|
| 1.03  | 2.06  | 0.97  |  |  |
| -5    | 0.38  | 1.66  |  |  |
| -5.12 | -0.18 | 1.14  |  |  |
| -9.51 | -1.07 | 1.14  |  |  |
| 2.82  | -0.28 | -2.15 |  |  |
| 1.95  | -0.91 | -2.25 |  |  |
| 1.92  | -0.14 | -1.46 |  |  |
| 1.64  | 0.43  | -0.65 |  |  |
| 1.64  | -1.19 | -2.28 |  |  |
| -2.61 | -0.17 | 0.84  |  |  |
| -2.61 | -0.56 | 0.46  |  |  |
| -2.65 | -0.39 | 0.64  |  |  |
| -3.07 | -1.48 | -0.24 |  |  |
| -3.15 | -0.8  | 0.48  |  |  |
| 2.26  | -5.95 | -7.81 |  |  |
| 1.26  | -4.1  | -5.12 |  |  |
| 2.8   | 0.92  | -0.95 |  |  |
| 1.85  | -2.69 | -3.96 |  |  |
| 1.66  | -1.59 | -2.7  |  |  |
| 1.65  | 0.93  | -0.18 |  |  |
| -2.65 | -1.62 | -0.59 |  |  |
| -4.27 | -2.45 | -0.74 |  |  |
| 2.63  | -1.1  | -2.97 |  |  |
| 2.41  | -0.65 | -2.39 |  |  |
| 1.81  | 4.58  | 3.25  |  |  |
| 1.78  | -2.31 | -3.61 |  |  |
| 1.76  | -3.04 | -4.32 |  |  |
| 1.7   | -2.3  | -3.54 |  |  |
| 1.66  | -3.91 | -5.11 |  |  |
| 1.5   | -1.14 | -2.19 |  |  |
| 1.47  | -4.11 | -5.14 |  |  |
| 4.83  | -1.79 | -3.66 |  |  |
| -1.69 | -0.77 | 0.39  |  |  |
| -3.29 | -0.89 | 1.24  |  |  |
| 3.9   | -3.72 | -5.59 |  |  |
| -1.9  | -6.59 | -5.56 |  |  |
| -2.21 | -6.19 | -4.95 |  |  |
| -2.78 | -7.69 | -6.12 |  |  |
| 95.14 | 0.94  | -0.93 |  |  |
| 92.84 | 1.43  | -0.4  |  |  |
| 89.39 | 0.21  | -1.57 |  |  |
| 83.26 | 1.6   | -0.08 |  |  |
| 82.85 | 0.39  | -1.28 |  |  |
| 80.36 | 1.55  | -0.07 |  |  |
| 76.9  | 0.98  | -0.58 |  |  |
| 74.99 | 1.44  | -0.08 |  |  |
| 73.19 | 1.63  | 0.14  |  |  |
| 71.38 | 0.48  | -0.97 |  |  |
| 70.54 | 1.06  | -0.37 |  |  |
| 69.7  | 0.29  | -1.13 |  |  |
| 65.63 | 0.08  | -1.25 |  |  |
| 64.63 | -0.71 | -2.02 |  |  |
| 63.8  | -0.27 | -1.56 |  |  |
| 63.95 | -0.04 | -1.34 |  |  |
| 63.28 | -0.19 | -1.47 |  |  |
| 62.74 | 0.46  | -0.8  |  |  |
| 58.41 | 1.34  | 0.18  |  |  |
| 58.17 | 2.87  | 1.71  |  |  |

|       |       |       |  |  |
|-------|-------|-------|--|--|
| 57.43 | 1.1   | -0.04 |  |  |
| 56.19 | 1.9   | 0.8   |  |  |
| 54.68 | 2.53  | 1.46  |  |  |
| 54.6  | 0.5   | -0.57 |  |  |
| 53.75 | 0.59  | -0.45 |  |  |
| 13.04 | 0.41  | 1.41  |  |  |
| 12.95 | -0.7  | 0.31  |  |  |
| 12.91 | -2.42 | -1.4  |  |  |
| 12.6  | -0.09 | 0.96  |  |  |
| 12.44 | -1.29 | -0.22 |  |  |
| 12.16 | -2.2  | -1.1  |  |  |
| 12.01 | -1.47 | -0.35 |  |  |
| 11.43 | -1.94 | -0.75 |  |  |
| 10.72 | -1.89 | -0.61 |  |  |
| 10.24 | -3.15 | -1.8  |  |  |
| 10.12 | 3.02  | 4.39  |  |  |
| 9.88  | -0.8  | 0.6   |  |  |
| 9.69  | -1.48 | -0.06 |  |  |
| 9.67  | -1.71 | -0.28 |  |  |
| 9     | -3.15 | -1.62 |  |  |
| 8.47  | -0.31 | 1.31  |  |  |
| 8.31  | -1.45 | 0.2   |  |  |
| 8.15  | 0.24  | 1.92  |  |  |
| 7.91  | -0.44 | 1.28  |  |  |
| 7.88  | -3.1  | -1.37 |  |  |
| 7.8   | -3.42 | -1.67 |  |  |
| 7.37  | -0.53 | 1.29  |  |  |
| 6.84  | -4.11 | -2.17 |  |  |
| 6.79  | -2.83 | -0.89 |  |  |
| 6.68  | -2.17 | -0.2  |  |  |
| 6.65  | -2.28 | -0.31 |  |  |
| 6.33  | -1.6  | 0.44  |  |  |
| 5.98  | -3.65 | -1.52 |  |  |
| 5.95  | -2.26 | -0.13 |  |  |
| 5.91  | 0.57  | 2.71  |  |  |
| 5.64  | -0.78 | 1.43  |  |  |
| 5.34  | -4.01 | -1.72 |  |  |
| 4.56  | 1     | 3.52  |  |  |
| 4.48  | 0.01  | 2.55  |  |  |
| 4.35  | -0.6  | 1.98  |  |  |
| 4.07  | -3.53 | -0.85 |  |  |
| 4     | -4.52 | -1.82 |  |  |
| 3.21  | 0.88  | 3.91  |  |  |
| 3.07  | -5.22 | -2.13 |  |  |
| 3.04  | -0.22 | 2.88  |  |  |
| 2.56  | -0.6  | 2.75  |  |  |
| 2.45  | -1.4  | 2.01  |  |  |
| 2.4   | -4.66 | -1.22 |  |  |
| 1.94  | -4.01 | -0.27 |  |  |
| 1.62  | -1.02 | 2.99  |  |  |
| 1.55  | -1.37 | 2.7   |  |  |
| 1.46  | -5.45 | -1.3  |  |  |
| -1.58 | -5.21 | 0.16  |  |  |
| 39.26 | -0.49 | -2.36 |  |  |
| 34.55 | -0.91 | -2.59 |  |  |
| 4.76  | 0.38  | 1.55  |  |  |
| 3.92  | -0.51 | 0.94  |  |  |
| 3.2   | -1.89 | -0.14 |  |  |

|       |       |       |  |  |
|-------|-------|-------|--|--|
| 2.59  | -5.02 | -2.96 |  |  |
| 1.74  | -0.05 | 2.58  |  |  |
| 1.56  | -3.16 | -0.38 |  |  |
| 1.43  | -5.38 | -2.47 |  |  |
| 1.42  | -2.42 | 0.5   |  |  |
| 1.13  | -5.09 | -1.84 |  |  |
| -1.04 | -4.54 | -1.05 |  |  |
| -1.26 | -4.72 | -0.96 |  |  |
| 2.29  | -1.04 | -2.91 |  |  |
| 1.51  | -2.81 | -4.07 |  |  |
| 1.5   | -0.12 | -1.39 |  |  |
| 1.5   | 1.1   | -0.16 |  |  |
| 1.43  | -2.48 | -3.67 |  |  |
| 1.42  | 0.1   | -1.09 |  |  |
| 1.39  | 5.5   | 4.35  |  |  |
| 1.26  | 1.38  | 0.37  |  |  |
| 2.08  | -0.17 | -2.04 |  |  |
| 1.78  | -2.94 | -4.59 |  |  |
| 1.3   | -4.37 | -5.56 |  |  |
| 1.23  | -4.08 | -5.2  |  |  |
| 1.21  | -5    | -6.09 |  |  |
| 1.18  | -2.34 | -3.39 |  |  |
| 1.17  | -4.14 | -5.18 |  |  |
| 1.16  | -6.86 | -7.89 |  |  |
| 2.51  | -1.91 | -3.78 |  |  |
| 1.61  | 0.07  | -1.16 |  |  |
| 1.53  | -0.59 | -1.74 |  |  |
| 1.52  | 1.25  | 0.1   |  |  |
| 6.63  | 1.83  | -0.04 |  |  |
| 5.57  | 1.98  | 0.36  |  |  |
| 3.82  | 1.39  | 0.32  |  |  |
| -1.2  | -2.54 | -1.41 |  |  |
| -1.4  | -1.28 | 0.07  |  |  |
| -1.45 | 1.54  | 2.93  |  |  |
| -1.75 | 0.42  | 2.09  |  |  |
| -1.14 | 1.98  | 0.11  |  |  |
| -1.28 | 2.44  | 0.74  |  |  |
| -9.64 | -0.98 | 0.22  |  |  |
| 1.72  | 1.37  | -0.5  |  |  |
| 1.53  | -1.25 | -2.95 |  |  |
| 1.42  | -0.63 | -2.23 |  |  |
| 1.42  | -0.83 | -2.42 |  |  |
| 1.03  | 1.65  | 0.51  |  |  |
| -1    | -2.32 | -3.4  |  |  |
| -4.25 | 0.21  | 1.21  |  |  |
| -5.03 | -2.76 | -1.51 |  |  |
| 3.23  | 2.07  | 0.2   |  |  |
| 1.95  | 1.44  | 0.3   |  |  |
| 9.23  | 2.87  | 1.01  |  |  |
| 6.59  | 1.62  | 0.25  |  |  |
| 6.42  | 0.82  | -0.52 |  |  |
| 6.03  | 2.48  | 1.23  |  |  |
| 5.73  | 2.65  | 1.47  |  |  |
| 5.73  | 1.42  | 0.25  |  |  |
| 5.67  | 1.03  | -0.13 |  |  |
| 5.16  | 2.4   | 1.37  |  |  |
| 1.24  | 3.27  | 4.29  |  |  |
| 1.23  | 2.72  | 3.76  |  |  |

|       |       |       |  |  |
|-------|-------|-------|--|--|
| 1.15  | -1.07 | 0.08  |  |  |
| 1.06  | 3.23  | 4.49  |  |  |
| -1.07 | 1.06  | 2.5   |  |  |
| -1.12 | -1.2  | 0.3   |  |  |
| -1.42 | -2.12 | -0.28 |  |  |
| 1.65  | 1.07  | -0.79 |  |  |
| 1.45  | -2.87 | -4.55 |  |  |
| 1.31  | 0.12  | -1.41 |  |  |
| 1.21  | -2.16 | -3.58 |  |  |
| 1.19  | 2.69  | 1.3   |  |  |
| 1.07  | 1.93  | 0.7   |  |  |
| 1.06  | 2.96  | 1.73  |  |  |
| -1    | -1.9  | -3.03 |  |  |
| -1.08 | 1.91  | 0.88  |  |  |
| -1.08 | -1.13 | -2.16 |  |  |
| 1.7   | -1.47 | -3.34 |  |  |
| 1.39  | -2.04 | -3.61 |  |  |
| 1.13  | 0.01  | -1.27 |  |  |
| 1.01  | 2.92  | 1.8   |  |  |
| 1     | 2.23  | 1.13  |  |  |
| -4.91 | -0.73 | 0.47  |  |  |
| 2.9   | -1.94 | -3.81 |  |  |
| 2.25  | -1.11 | -2.61 |  |  |
| 2.06  | -2.4  | -3.77 |  |  |
| 1.76  | -2.28 | -3.43 |  |  |
| 1.69  | -2.49 | -3.57 |  |  |
| -3.02 | -3.94 | -2.67 |  |  |
| -3.43 | -3.3  | -1.85 |  |  |
| 2.12  | -1.69 | -3.55 |  |  |
| 1.49  | 1.98  | 0.62  |  |  |
| 1.38  | 1.29  | 0.04  |  |  |
| 1.32  | 1.09  | -0.08 |  |  |
| 1.23  | 1.87  | 0.79  |  |  |
| 1.21  | -3.2  | -4.25 |  |  |
| 1.2   | -1.46 | -2.5  |  |  |
| -3.69 | -3.1  | -2    |  |  |
| -3.78 | -3.45 | -2.31 |  |  |
| 3.04  | 1.53  | -0.34 |  |  |
| 1.89  | -0.83 | -2.01 |  |  |
| 6.99  | 3.41  | 1.54  |  |  |
| 6.15  | 1.49  | -0.19 |  |  |
| 5.96  | 2.12  | 0.49  |  |  |
| -1.05 | 7.6   | 8.62  |  |  |
| -1.08 | 6.83  | 7.89  |  |  |
| -1.09 | -1.86 | -0.79 |  |  |
| -1.12 | 4.42  | 5.52  |  |  |
| -1.13 | 0.08  | 1.2   |  |  |
| -1.25 | -0.37 | 0.9   |  |  |
| -1.44 | -2.01 | -0.54 |  |  |
| 2.68  | -4.1  | -5.96 |  |  |
| 2.39  | -5.39 | -7.08 |  |  |
| 1.64  | -3.76 | -4.92 |  |  |
| 1.58  | -1.82 | -2.91 |  |  |
| 1.51  | -5.08 | -6.11 |  |  |
| 2.76  | -5.73 | -7.59 |  |  |
| -3.17 | -5.99 | -4.73 |  |  |
| 2.16  | 0.6   | -1.26 |  |  |
| 1.83  | 1.02  | -0.59 |  |  |

|       |       |       |  |  |
|-------|-------|-------|--|--|
| 1.76  | 4.93  | 3.37  |  |  |
| 1.65  | 1.29  | -0.18 |  |  |
| 1.62  | 3.79  | 2.35  |  |  |
| 1.53  | 0.03  | -1.33 |  |  |
| 1.45  | 0.25  | -1.03 |  |  |
| 1.44  | 1.48  | 0.21  |  |  |
| 1.42  | 1.79  | 0.54  |  |  |
| 1.34  | 0.11  | -1.05 |  |  |
| 1.32  | 3.51  | 2.36  |  |  |
| 1.28  | 3.58  | 2.48  |  |  |
| 1.26  | 1.78  | 0.7   |  |  |
| 1.24  | 2.14  | 1.08  |  |  |
| 1.24  | 0.97  | -0.08 |  |  |
| 1.23  | 3.71  | 2.66  |  |  |
| 1.23  | 1.18  | 0.14  |  |  |
| 1.21  | -0.27 | -1.29 |  |  |
| 1.2   | 1.5   | 0.49  |  |  |
| 1.19  | 0.41  | -0.59 |  |  |
| 3.01  | -3.67 | -5.53 |  |  |
| 3     | -2.57 | -4.43 |  |  |
| 1.91  | 0.36  | -0.84 |  |  |
| 1.67  | 1.2   | 0.19  |  |  |
| -2.66 | -3.52 | -2.38 |  |  |
| -2.83 | -3.89 | -2.66 |  |  |
| 2.81  | -2.79 | -4.65 |  |  |
| 2.55  | -0.87 | -2.59 |  |  |
| 2.2   | -2.01 | -3.52 |  |  |
| 1.95  | -0.45 | -1.78 |  |  |
| 1.56  | 0.14  | -0.87 |  |  |
| -2.65 | -0.83 | 0.21  |  |  |
| -2.83 | -4.95 | -3.82 |  |  |
| -4.3  | -3.87 | -2.14 |  |  |
| -4.85 | -3.1  | -1.19 |  |  |
| -5.92 | -4.3  | -2.11 |  |  |
| 2.92  | 0.79  | -1.07 |  |  |
| 1.97  | 1.68  | 0.39  |  |  |
| 1.87  | -0.14 | -1.36 |  |  |
| 1.69  | -1.11 | -2.18 |  |  |
| 2.39  | -1.71 | -3.57 |  |  |
| 1.97  | -3.75 | -5.33 |  |  |
| 5.47  | -0.09 | -1.95 |  |  |
| 4.05  | 0.97  | -0.45 |  |  |
| -1.43 | -1.74 | -0.64 |  |  |
| -1.77 | -0.95 | 0.47  |  |  |
| 3.77  | 1.46  | -0.4  |  |  |
| 2.76  | -0.33 | -1.75 |  |  |
| 2.09  | 1.05  | 0.04  |  |  |
| 2     | -3.28 | -5.14 |  |  |
| 1.57  | -0.06 | -1.57 |  |  |
| 1.18  | -1.04 | -2.14 |  |  |
| -4.56 | 1.3   | 2.63  |  |  |
| 2.65  | -1.87 | -3.73 |  |  |
| 1.8   | -2.8  | -4.1  |  |  |
| 1.61  | -3.73 | -4.87 |  |  |
| 2.05  | -0.43 | -2.29 |  |  |
| 1.33  | 1.18  | -0.04 |  |  |
| 1.24  | -1.36 | -2.49 |  |  |
| 4.63  | 0.35  | -1.5  |  |  |



|       |       |       |  |  |
|-------|-------|-------|--|--|
| 3.38  | -0.08 | -1.49 |  |  |
| -2.06 | -2.4  | -1    |  |  |
| 1.33  | -2.69 | -4.55 |  |  |
| 1.29  | -2.14 | -3.96 |  |  |
| 1.09  | 0.88  | -0.7  |  |  |
| 1.02  | -2.81 | -4.29 |  |  |
| -1.02 | -0.76 | -2.18 |  |  |
| -1.04 | -2.87 | -4.27 |  |  |
| -1.03 | -2.64 | -4.05 |  |  |
| -1.04 | -2.85 | -4.25 |  |  |
| -1.04 | -2.43 | -3.82 |  |  |
| -1.05 | 1.8   | 0.42  |  |  |
| -1.08 | -0.96 | -2.31 |  |  |
| -1.11 | -1.33 | -2.63 |  |  |
| -1.13 | -0.82 | -2.09 |  |  |
| -1.14 | -4.04 | -5.29 |  |  |
| -1.15 | 5.34  | 4.09  |  |  |
| -1.17 | 2.03  | 0.8   |  |  |
| -1.27 | -1.54 | -2.65 |  |  |
| -1.31 | -1.93 | -3    |  |  |
| -1.32 | 0.11  | -0.94 |  |  |
| -1.35 | 1.37  | 0.36  |  |  |
| -1.35 | -2.97 | -3.99 |  |  |
| -5.66 | -2.2  | -1.15 |  |  |
| -6.49 | -2.87 | -1.62 |  |  |
| -6.87 | -2.98 | -1.65 |  |  |
| -31.9 | -4.06 | -0.51 |  |  |
| 4.16  | 1.25  | -0.61 |  |  |
| -1.83 | 0.13  | 1.2   |  |  |
| 16.64 | 0.54  | -1.32 |  |  |
| 12.5  | -0.16 | -1.6  |  |  |
| 10.93 | 1.62  | 0.37  |  |  |
| 1.86  | 1.1   | 2.41  |  |  |
| 1.79  | -2.91 | -1.55 |  |  |
| 1.79  | 1.4   | 2.76  |  |  |
| 1.43  | -2.96 | -1.27 |  |  |
| 1.23  | -1.07 | 0.83  |  |  |
| 1.11  | -2.5  | -0.44 |  |  |
| -1.1  | 2.28  | 4.62  |  |  |
| 1.19  | 8.26  | 6.41  |  |  |
| 1.13  | 0.65  | -1.12 |  |  |
| -1.34 | -1.14 | -2.31 |  |  |
| 1.93  | -2.31 | -4.17 |  |  |
| 1.53  | -3.53 | -5.05 |  |  |
| 1.4   | -5.92 | -7.3  |  |  |
| 1.36  | -3.07 | -4.42 |  |  |
| 1.36  | -1.72 | -3.06 |  |  |
| 1.34  | -4.19 | -5.52 |  |  |
| 1.3   | -1.01 | -2.29 |  |  |
| 1.29  | -0.89 | -2.16 |  |  |
| 1.28  | -2.86 | -4.11 |  |  |
| 1.27  | -0.39 | -1.64 |  |  |
| 1.22  | 3.88  | 2.68  |  |  |
| 1.19  | -1.71 | -2.87 |  |  |
| 1.15  | -0.76 | -1.87 |  |  |
| 1.15  | -4.16 | -5.26 |  |  |
| 1.14  | -2.79 | -3.88 |  |  |
| 1.14  | -4.42 | -5.51 |  |  |

|       |       |       |  |  |
|-------|-------|-------|--|--|
| 1.13  | -2.03 | -3.11 |  |  |
| 1.12  | 0.14  | -0.93 |  |  |
| 1.1   | -0.02 | -1.06 |  |  |
| 1.7   | 1.7   | -0.15 |  |  |
| 1.24  | -0.98 | -2.38 |  |  |
| 3.08  | -0.07 | -1.92 |  |  |
| 1.74  | -1.67 | -2.7  |  |  |
| -2.4  | -3.32 | -2.29 |  |  |
| 3.38  | -4.81 | -6.66 |  |  |
| 2.46  | -3.9  | -5.29 |  |  |
| 1.95  | -2.77 | -3.82 |  |  |
| 2.68  | -3.64 | -5.49 |  |  |
| 2.11  | -1.71 | -3.21 |  |  |
| -2.74 | -4.28 | -3.26 |  |  |
| -2.98 | -4.61 | -3.46 |  |  |
| 2.3   | -0.16 | -2.02 |  |  |
| 1.64  | -0.59 | -1.95 |  |  |
| 1.49  | -3.7  | -4.92 |  |  |
| 1.38  | -1.99 | -3.1  |  |  |
| 1.31  | -3.69 | -4.73 |  |  |
| 8.56  | -0.49 | -2.34 |  |  |
| 6.47  | -0.03 | -1.48 |  |  |
| 1.07  | -4.96 | -3.81 |  |  |
| 1.05  | -2.63 | -1.45 |  |  |
| -1.03 | -0.66 | 0.63  |  |  |
| -1.05 | -2.22 | -0.91 |  |  |
| -1.07 | -4.16 | -2.82 |  |  |
| -1.07 | 2.24  | 3.59  |  |  |
| -1.36 | -3.4  | -1.7  |  |  |
| -1.45 | -1.68 | 0.1   |  |  |
| -1.48 | -4.58 | -2.77 |  |  |
| 3.88  | -0.2  | -2.05 |  |  |
| -4.22 | -2.7  | -0.51 |  |  |
| 2.92  | 2.36  | 0.51  |  |  |
| 2.47  | 3.54  | 1.93  |  |  |
| 2.06  | 0.97  | -0.37 |  |  |
| 1.74  | 0.97  | -0.13 |  |  |
| 1.71  | -1.01 | -2.09 |  |  |
| -2.79 | -0.26 | 0.92  |  |  |
| -2.91 | -1.34 | -0.1  |  |  |
| 2.65  | 0.46  | -1.39 |  |  |
| 1.74  | -2.58 | -3.82 |  |  |
| 1.64  | -3.82 | -4.97 |  |  |
| 1.58  | -1.09 | -2.2  |  |  |
| 1.07  | 2.43  | 0.58  |  |  |
| -1.15 | -4.16 | -5.71 |  |  |
| -1.19 | -1.65 | -3.14 |  |  |
| -1.2  | -2.38 | -3.87 |  |  |
| -1.24 | -0.33 | -1.77 |  |  |
| -1.3  | 0.16  | -1.21 |  |  |
| -7.84 | -2.46 | -1.23 |  |  |
| 4.26  | -2.83 | -4.68 |  |  |
| 2.47  | -2.44 | -3.5  |  |  |
| -2.1  | -1.96 | -0.65 |  |  |
| -2.12 | -4.47 | -3.14 |  |  |
| -2.45 | -3.72 | -2.19 |  |  |
| -3.09 | -3.08 | -1.21 |  |  |
| -4.09 | -4.25 | -1.97 |  |  |

|        |       |       |  |  |
|--------|-------|-------|--|--|
| 2.24   | 0.17  | -1.68 |  |  |
| 1.68   | -2.57 | -4    |  |  |
| 1.36   | 4.26  | 3.13  |  |  |
| 1.32   | 1.14  | 0.06  |  |  |
| -4.09  | -0.94 | 0.4   |  |  |
| -4.84  | -1.89 | -0.29 |  |  |
| 1.8    | 0.92  | -0.93 |  |  |
| 1.67   | 2.23  | 0.49  |  |  |
| 1.65   | -0.21 | -1.93 |  |  |
| 1.63   | 0     | -1.7  |  |  |
| 1.48   | 2.92  | 1.36  |  |  |
| 1.4    | -1.31 | -2.8  |  |  |
| 1.35   | -1.46 | -2.88 |  |  |
| 1.31   | 0.83  | -0.56 |  |  |
| 1.29   | -1.67 | -3.03 |  |  |
| 1.29   | 0.4   | -0.97 |  |  |
| 1.3    | 1.32  | -0.05 |  |  |
| 1.28   | 0.57  | -0.78 |  |  |
| 1.24   | 4.68  | 3.38  |  |  |
| 1.23   | -1.41 | -2.71 |  |  |
| 1.22   | 0.4   | -0.88 |  |  |
| 1.22   | 1.75  | 0.47  |  |  |
| 1.16   | 0.61  | -0.59 |  |  |
| 1.08   | -2.16 | -3.27 |  |  |
| 1.07   | -0.34 | -1.43 |  |  |
| 1.06   | -0.55 | -1.64 |  |  |
| 1.06   | 0.66  | -0.42 |  |  |
| 1.05   | 1.47  | 0.41  |  |  |
| 1.05   | -2.26 | -3.32 |  |  |
| -4.07  | -0.95 | 0.08  |  |  |
| -4.14  | -2.77 | -1.71 |  |  |
| -4.14  | -1.09 | -0.03 |  |  |
| -4.45  | -1.38 | -0.22 |  |  |
| -4.7   | -3.5  | -2.26 |  |  |
| -5.04  | -1.51 | -0.17 |  |  |
| -5.42  | -1.17 | 0.28  |  |  |
| -5.91  | -2.45 | -0.88 |  |  |
| -6.38  | -3.16 | -1.48 |  |  |
| -7.02  | -2.7  | -0.89 |  |  |
| -7.64  | -1.36 | 0.58  |  |  |
| -8.09  | -0.86 | 1.16  |  |  |
| -11.72 | -2.98 | -0.42 |  |  |
| -12.77 | -2.12 | 0.56  |  |  |
| -13.76 | -1.49 | 1.3   |  |  |
| -14.75 | -2.36 | 0.53  |  |  |
| -23.86 | -3.21 | 0.37  |  |  |
| 1.93   | 0.95  | -0.9  |  |  |
| 1.83   | -3.34 | -5.11 |  |  |
| 1.35   | 2.2   | 0.88  |  |  |
| 1.32   | -0.63 | -1.93 |  |  |
| -4.83  | -5.07 | -3.69 |  |  |
| 2.63   | 3.27  | 1.42  |  |  |
| 1.84   | 1.38  | 0.06  |  |  |
| 1.74   | 3.78  | 2.53  |  |  |
| 1.59   | -0.19 | -1.31 |  |  |
| -3.84  | -1.25 | 0.24  |  |  |
| 1.88   | -1.26 | -3.11 |  |  |
| 1.17   | -0.91 | -2.07 |  |  |

|       |       |       |  |  |
|-------|-------|-------|--|--|
| 1.13  | 2.37  | 1.26  |  |  |
| 1.52  | 2.12  | 0.28  |  |  |
| 1.35  | -1.67 | -3.34 |  |  |
| 1.33  | 5.31  | 3.66  |  |  |
| 1.2   | 3.25  | 1.76  |  |  |
| 1.04  | 1.8   | 0.5   |  |  |
| -1.1  | -1.43 | -2.53 |  |  |
| 2.18  | -1.32 | -3.16 |  |  |
| -3.3  | -2.67 | -1.67 |  |  |
| 2.15  | -0.59 | -2.43 |  |  |
| 1.23  | 2.51  | 1.48  |  |  |
| 1.21  | 3.05  | 2.03  |  |  |
| 4.03  | -2.99 | -4.83 |  |  |
| -1.81 | -3.7  | -2.67 |  |  |
| -1.86 | -4.66 | -3.6  |  |  |
| -1.91 | -1.31 | -0.21 |  |  |
| -2    | -4.12 | -2.95 |  |  |
| -2.11 | -0.86 | 0.39  |  |  |
| 2.51  | -3.78 | -5.63 |  |  |
| 1.71  | -2.62 | -3.9  |  |  |
| 1.64  | 2.17  | 0.94  |  |  |
| 1.44  | -3.83 | -4.87 |  |  |
| 3     | -2.37 | -4.21 |  |  |
| 2.18  | -1.75 | -3.12 |  |  |
| -2.38 | -1.94 | -0.94 |  |  |
| -2.42 | -5.31 | -4.29 |  |  |
| -2.79 | -3.5  | -2.27 |  |  |
| -2.91 | -5.13 | -3.84 |  |  |
| -2.99 | -3.98 | -2.66 |  |  |
| -3.56 | -4.41 | -2.83 |  |  |
| 3.44  | -1.12 | -2.96 |  |  |
| 2.14  | 2.57  | 1.41  |  |  |
| -2.18 | 0.13  | 1.19  |  |  |
| -2.26 | -0.66 | 0.46  |  |  |
| 3.22  | 0.94  | -0.9  |  |  |
| 2.81  | -0.89 | -2.54 |  |  |
| 1.69  | -1.77 | -3.6  |  |  |
| 1.4   | -3.14 | -4.71 |  |  |
| 1.39  | 0.1   | -1.45 |  |  |
| 1.37  | 2.78  | 1.25  |  |  |
| 1.34  | 0.5   | -1    |  |  |
| 1.34  | 0.7   | -0.8  |  |  |
| 1.3   | -3.36 | -4.82 |  |  |
| 1.23  | 1.58  | 0.2   |  |  |
| 1.1   | -2.01 | -3.23 |  |  |
| 1.05  | 1.44  | 0.3   |  |  |
| 1.01  | -2.25 | -3.35 |  |  |
| 1.01  | 2.56  | 1.47  |  |  |
| 1     | -0.87 | -1.96 |  |  |
| -1.02 | -0.58 | -1.62 |  |  |
| -4.6  | -2.31 | -1.19 |  |  |
| 1.75  | -1.71 | -3.54 |  |  |
| 1.41  | -3.68 | -5.2  |  |  |
| 1.4   | 0.71  | -0.8  |  |  |
| 1.35  | -4.3  | -5.77 |  |  |
| 1.19  | -5.11 | -6.39 |  |  |
| 1.12  | -2.28 | -3.46 |  |  |
| 1.06  | 0.2   | -0.91 |  |  |

|       |       |       |  |  |
|-------|-------|-------|--|--|
| -4.11 | -1.74 | -0.73 |  |  |
| -4.14 | -1.65 | -0.63 |  |  |
| -4.2  | -4.13 | -3.08 |  |  |
| -4.3  | -3.35 | -2.27 |  |  |
| -4.29 | -1.84 | -0.77 |  |  |
| -4.3  | -1.63 | -0.56 |  |  |
| -4.36 | -3.07 | -1.98 |  |  |
| -4.37 | -3.37 | -2.28 |  |  |
| -4.48 | -2.35 | -1.22 |  |  |
| -4.49 | -1.75 | -0.61 |  |  |
| -4.6  | -1.15 | 0.02  |  |  |
| -4.63 | -2.02 | -0.84 |  |  |
| -4.69 | -2.61 | -1.41 |  |  |
| -4.76 | -1.71 | -0.49 |  |  |
| -4.91 | -1.87 | -0.61 |  |  |
| -5.07 | -2.37 | -1.05 |  |  |
| -5.39 | -1.99 | -0.59 |  |  |
| -6.11 | -2.25 | -0.67 |  |  |
| -6.39 | -4.86 | -3.22 |  |  |
| -6.9  | -5.33 | -3.58 |  |  |
| -7.64 | -4.35 | -2.45 |  |  |
| -7.95 | -5.52 | -3.56 |  |  |
| 1.65  | 2.03  | 0.19  |  |  |
| 1.6   | -1    | -2.8  |  |  |
| 1.13  | 1.43  | 0.14  |  |  |
| 2.5   | -1.39 | -3.23 |  |  |
| 2.35  | -0.61 | -2.36 |  |  |
| 1.62  | 0.09  | -1.12 |  |  |
| 1.56  | 1.84  | 0.68  |  |  |
| 1.55  | -2.2  | -3.34 |  |  |
| 1.5   | -1.48 | -2.57 |  |  |
| 1.47  | 2.39  | 1.32  |  |  |
| 1.43  | 0.13  | -0.9  |  |  |
| 1.4   | -2.36 | -3.36 |  |  |
| 2.69  | -3.3  | -5.13 |  |  |
| 1.64  | -6.24 | -7.37 |  |  |
| -5.81 | -6.82 | -4.69 |  |  |
| 3.58  | -1    | -2.83 |  |  |
| 2.23  | -0.19 | -1.34 |  |  |
| -2    | -2.95 | -1.95 |  |  |
| -2.13 | -1.12 | -0.02 |  |  |
| -2.18 | -4.39 | -3.26 |  |  |
| -2.33 | -1.82 | -0.59 |  |  |
| -2.74 | -4.46 | -3    |  |  |
| 3.04  | 1.01  | -0.82 |  |  |
| 2.71  | 3.07  | 1.4   |  |  |
| -2.53 | -0.89 | 0.22  |  |  |
| -2.58 | -0.33 | 0.81  |  |  |
| -2.85 | -1.39 | -0.11 |  |  |
| -2.95 | -0.88 | 0.45  |  |  |
| -3.5  | 0.41  | 1.99  |  |  |
| -4.11 | -1.98 | -0.17 |  |  |
| -4.71 | -0.25 | 1.76  |  |  |
| -4.97 | -2.2  | -0.12 |  |  |
| -5.57 | -0.43 | 1.82  |  |  |
| -8.98 | -4.15 | -1.21 |  |  |
| 4.98  | 0.97  | -0.86 |  |  |
| 3.7   | 1     | -0.4  |  |  |

|        |       |       |  |  |
|--------|-------|-------|--|--|
| -1.45  | -2.5  | -1.48 |  |  |
| 1.22   | -0.12 | -1.95 |  |  |
| 1.21   | 4.65  | 2.82  |  |  |
| 1.21   | 5     | 3.18  |  |  |
| 1.2    | 0.61  | -1.2  |  |  |
| 1.17   | -1.05 | -2.82 |  |  |
| 1.15   | 0.34  | -1.41 |  |  |
| 1.09   | 2.82  | 1.15  |  |  |
| 1.08   | 3.92  | 2.27  |  |  |
| 1      | 2.17  | 0.62  |  |  |
| -1.05  | -1.28 | -2.76 |  |  |
| -1.07  | 0.24  | -1.21 |  |  |
| -1.09  | 2.56  | 1.14  |  |  |
| -1.11  | -1.18 | -2.57 |  |  |
| -1.16  | 2.02  | 0.69  |  |  |
| -1.18  | -1.67 | -2.97 |  |  |
| -1.27  | 2.65  | 1.44  |  |  |
| -1.28  | 1.97  | 0.78  |  |  |
| -1.31  | 1.35  | 0.19  |  |  |
| -1.42  | -0.35 | -1.39 |  |  |
| -1.46  | 2.41  | 1.41  |  |  |
| -6.73  | -0.53 | 0.68  |  |  |
| -9.66  | -1.72 | 0.01  |  |  |
| -9.87  | 0.14  | 1.9   |  |  |
| -13.15 | -0.2  | 1.97  |  |  |
| 3.67   | -0.59 | -2.42 |  |  |
| 2.83   | -4.32 | -5.78 |  |  |
| 2.72   | -2.57 | -3.97 |  |  |
| 2.57   | -2.09 | -3.4  |  |  |
| -1.97  | -4.12 | -3.09 |  |  |
| 2.03   | -2    | -3.83 |  |  |
| 1.56   | 0.14  | -1.31 |  |  |
| 1.32   | 1.28  | 0.06  |  |  |
| 1.29   | 0.43  | -0.75 |  |  |
| 1.26   | 2.14  | 0.99  |  |  |
| 1.25   | 4.74  | 3.6   |  |  |
| -5.36  | -3.19 | -1.58 |  |  |
| 2.29   | 5.29  | 3.46  |  |  |
| 1.97   | -3.18 | -4.79 |  |  |
| 2.11   | 0.96  | -0.86 |  |  |
| 1.58   | -1.46 | -2.86 |  |  |
| 1.51   | 1.28  | -0.06 |  |  |
| 1.2    | -0.08 | -1.09 |  |  |
| -3.47  | -0.08 | 0.97  |  |  |
| -3.6   | 0.61  | 1.71  |  |  |
| -4.52  | -1.33 | 0.1   |  |  |
| -5.05  | -1.5  | 0.1   |  |  |
| 1.39   | -3.05 | -4.87 |  |  |
| 1.29   | -3.78 | -5.5  |  |  |
| 1.13   | -1.54 | -3.07 |  |  |
| -1     | -6.24 | -7.59 |  |  |
| -1.2   | -4.68 | -5.77 |  |  |
| -1.21  | -3.81 | -4.89 |  |  |
| -1.23  | -6.41 | -7.45 |  |  |
| -5.28  | -1.89 | -0.84 |  |  |
| -5.86  | -1.7  | -0.5  |  |  |
| -6.07  | -1.76 | -0.51 |  |  |
| -6.16  | -2.23 | -0.96 |  |  |

|       |       |       |  |  |
|-------|-------|-------|--|--|
| -9.78 | -5.18 | -3.25 |  |  |
| -11.4 | -2.88 | -0.73 |  |  |
| 2.33  | 0.3   | -1.52 |  |  |
| 1.33  | 3.52  | 2.51  |  |  |
| 4.08  | -0.54 | -2.37 |  |  |
| -2.17 | -3.2  | -1.87 |  |  |
| -2.35 | -0.24 | 1.2   |  |  |
| 2.19  | -1.01 | -2.83 |  |  |
| 1.73  | 5.34  | 3.86  |  |  |
| 1.61  | -1.43 | -2.8  |  |  |
| 1.48  | -0.76 | -2.02 |  |  |
| 1.37  | 3.41  | 2.27  |  |  |
| 1.36  | 2.86  | 1.73  |  |  |
| 1.24  | -1.61 | -2.61 |  |  |
| -1    | -2.96 | -4.78 |  |  |
| -1.01 | 4.07  | 2.26  |  |  |
| -1.18 | -2.63 | -4.22 |  |  |
| -1.36 | -0.87 | -2.26 |  |  |
| -1.41 | 1.24  | -0.09 |  |  |
| -1.76 | -2.79 | -3.8  |  |  |
| 1.42  | 0.26  | -1.55 |  |  |
| 1.3   | -3.26 | -4.94 |  |  |
| 1.29  | -4.13 | -5.8  |  |  |
| 1.24  | -0.08 | -1.69 |  |  |
| 1.16  | -0.05 | -1.57 |  |  |
| 1.15  | -2.48 | -4    |  |  |
| 1.1   | 0.18  | -1.27 |  |  |
| 1.09  | 1.03  | -0.41 |  |  |
| -1.15 | -0.75 | -1.86 |  |  |
| 1.8   | -2.88 | -4.7  |  |  |
| 1.07  | -0.11 | -1.18 |  |  |
| -4.21 | 0.15  | 1.25  |  |  |
| -4.41 | -2.66 | -1.49 |  |  |
| -5.35 | -1.76 | -0.31 |  |  |
| 1.44  | -2.12 | -3.94 |  |  |
| 1.3   | -1.48 | -3.14 |  |  |
| 1.22  | 2.74  | 1.15  |  |  |
| 1.18  | 2.46  | 0.93  |  |  |
| -1.05 | 3.73  | 2.5   |  |  |
| -1.06 | -2.23 | -3.44 |  |  |
| -1.08 | -2.87 | -4.05 |  |  |
| -1.1  | 2.51  | 1.36  |  |  |
| -1.11 | 1.14  | -0.01 |  |  |
| -1.22 | 0.93  | -0.07 |  |  |
| -1.23 | 0.68  | -0.32 |  |  |
| 1.97  | 2.62  | 0.81  |  |  |
| 1.31  | 0.95  | -0.28 |  |  |
| 1.16  | -3.31 | -4.36 |  |  |
| 1.15  | 0.63  | -0.41 |  |  |
| 1.98  | -2.08 | -3.89 |  |  |
| 1.59  | 1.48  | -0.01 |  |  |
| 1.41  | -3.42 | -4.74 |  |  |
| 1.37  | 1.01  | -0.26 |  |  |
| 1.27  | 2.96  | 1.79  |  |  |
| 1.27  | -0.99 | -2.15 |  |  |
| 1.18  | -2.28 | -3.34 |  |  |
| 1.17  | -1.01 | -2.06 |  |  |
| 1.14  | 2.39  | 1.38  |  |  |

|       |       |       |  |  |
|-------|-------|-------|--|--|
| -3.77 | -4.07 | -2.98 |  |  |
| 2.91  | -4.33 | -6.14 |  |  |
| 1.81  | -2.82 | -3.94 |  |  |
| 1.76  | -4.19 | -5.27 |  |  |
| 1.94  | -2.96 | -4.77 |  |  |
| 1.56  | -2.54 | -4.04 |  |  |
| 1.42  | -3.2  | -4.57 |  |  |
| 1.32  | -2.16 | -3.41 |  |  |
| 1.32  | -1.07 | -2.32 |  |  |
| -3.92 | -4.35 | -3.23 |  |  |
| -4.33 | -3.76 | -2.5  |  |  |
| 2.26  | -1.84 | -3.65 |  |  |
| 1.32  | -1.03 | -2.06 |  |  |
| 2.78  | -3.66 | -5.47 |  |  |
| 1.65  | -2.3  | -3.35 |  |  |
| -3.38 | -6.89 | -5.46 |  |  |
| 2.31  | -0.5  | -2.31 |  |  |
| 1.74  | 1.38  | -0.02 |  |  |
| 1.71  | -0.24 | -1.62 |  |  |
| 1.4   | -1.04 | -2.13 |  |  |
| 1.33  | -0.22 | -1.24 |  |  |
| 17.12 | -5.08 | -6.89 |  |  |
| 13.46 | -0.89 | -2.35 |  |  |
| 11.69 | -6.12 | -7.39 |  |  |
| 11.46 | -5.33 | -6.56 |  |  |
| 1.73  | -1.6  | -0.11 |  |  |
| 1.71  | 0.55  | 2.06  |  |  |
| 1.7   | -5.05 | -3.52 |  |  |
| 1.13  | -4.21 | -2.09 |  |  |
| 1.11  | -4.01 | -1.87 |  |  |
| -1.03 | -4.52 | -2.19 |  |  |
| 1.71  | -1    | -2.81 |  |  |
| 1.5   | -1.89 | -3.51 |  |  |
| 1.39  | 0.37  | -1.15 |  |  |
| 1.3   | 0.07  | -1.34 |  |  |
| 1.21  | -2.1  | -3.41 |  |  |
| 1.19  | -3.98 | -5.26 |  |  |
| 1.15  | -1.24 | -2.47 |  |  |
| 1.15  | 3.36  | 2.12  |  |  |
| 1.12  | 0.8   | -0.4  |  |  |
| 1.06  | -1.42 | -2.54 |  |  |
| 1.05  | -2.34 | -3.44 |  |  |
| 1.03  | -3.31 | -4.39 |  |  |
| 1.02  | -0.98 | -2.04 |  |  |
| -1.01 | 2.22  | 1.21  |  |  |
| 3.13  | 0.09  | -1.72 |  |  |
| -2.49 | -2.56 | -1.41 |  |  |
| 1.72  | 3.3   | 1.49  |  |  |
| 1.47  | 2.99  | 1.41  |  |  |
| 1.43  | 1.63  | 0.09  |  |  |
| 1.34  | 1.7   | 0.25  |  |  |
| 1.26  | 1.34  | -0.02 |  |  |
| 1.08  | -0.2  | -1.34 |  |  |
| 3.79  | -2.23 | -4.04 |  |  |
| -2.44 | -1.47 | -0.07 |  |  |
| 2.46  | -3.33 | -5.14 |  |  |
| 1.54  | -2.41 | -3.54 |  |  |
| 1.4   | -3.26 | -4.26 |  |  |



|       |       |       |  |  |
|-------|-------|-------|--|--|
| 1.41  | -1.55 | -2.55 |  |  |
| -3.16 | -6.22 | -5.07 |  |  |
| 2.64  | -0.03 | -1.84 |  |  |
| 1.89  | 1.81  | 0.49  |  |  |
| 1.71  | 3.99  | 2.81  |  |  |
| -2.65 | 0.22  | 1.22  |  |  |
| -2.72 | -0.24 | 0.8   |  |  |
| -3.16 | -1.53 | -0.28 |  |  |
| -3.17 | -3.04 | -1.78 |  |  |
| -3.88 | -3.15 | -1.6  |  |  |
| -3.97 | -1.63 | -0.04 |  |  |
| 2.06  | -2.13 | -3.94 |  |  |
| 1.85  | -1.43 | -3.08 |  |  |
| 1.63  | -2.06 | -3.54 |  |  |
| 1.24  | -1.8  | -2.88 |  |  |
| -3.47 | -4.47 | -3.44 |  |  |
| -7.23 | -5.14 | -3.05 |  |  |
| 15.65 | 1.45  | -0.36 |  |  |
| 13.37 | 0.78  | -0.8  |  |  |
| 11.6  | -0.85 | -2.23 |  |  |
| 11.2  | -1.16 | -2.49 |  |  |
| 10.55 | 1.89  | 0.65  |  |  |
| 10.51 | 2.5   | 1.27  |  |  |
| 9.7   | -2.21 | -3.33 |  |  |
| 9.65  | 1.02  | -0.09 |  |  |
| 9.44  | -0.28 | -1.36 |  |  |
| 9.23  | 0.58  | -0.47 |  |  |
| 1.67  | -3.69 | -2.27 |  |  |
| 1.4   | 0.75  | 2.43  |  |  |
| 1.32  | 1.17  | 2.93  |  |  |
| 1.27  | 0.92  | 2.74  |  |  |
| 1.22  | -1.69 | 0.18  |  |  |
| 1.2   | -1.72 | 0.17  |  |  |
| -1.11 | 1.87  | 4.18  |  |  |
| -1.31 | -3.69 | -1.14 |  |  |
| 4.06  | 1.71  | -0.1  |  |  |
| 2.76  | 2.38  | 1.13  |  |  |
| -1.74 | -2.73 | -1.72 |  |  |
| -1.85 | -2.06 | -0.96 |  |  |
| 2.12  | 2.42  | 0.62  |  |  |
| 1.64  | 0.56  | -0.88 |  |  |
| 1.57  | 2.38  | 1.01  |  |  |
| 1.56  | 2.69  | 1.33  |  |  |
| 1.53  | 1.88  | 0.55  |  |  |
| 1.49  | 1.39  | 0.09  |  |  |
| 1.46  | -0.12 | -1.39 |  |  |
| 1.4   | 1.52  | 0.31  |  |  |
| 1.34  | 0.84  | -0.3  |  |  |
| 1.3   | 2.62  | 1.52  |  |  |
| 1.28  | 1.59  | 0.51  |  |  |
| 1.26  | -0.57 | -1.63 |  |  |
| 1.22  | 0.79  | -0.23 |  |  |
| 1.21  | 3.08  | 2.08  |  |  |
| -3.58 | -0.21 | 0.91  |  |  |
| -4.49 | -0.55 | 0.9   |  |  |
| -4.49 | -0.22 | 1.23  |  |  |
| -4.8  | -2.15 | -0.61 |  |  |
| -5.73 | -2.06 | -0.26 |  |  |

|       |       |       |  |  |
|-------|-------|-------|--|--|
| 5.29  | -0.65 | -2.45 |  |  |
| 3.15  | -0.15 | -1.2  |  |  |
| -2.86 | -2.27 | -0.16 |  |  |
| 2.75  | 0.83  | -0.98 |  |  |
| 2.21  | -3.52 | -5.01 |  |  |
| 2.02  | -2.84 | -4.2  |  |  |
| 2.01  | -3.06 | -4.41 |  |  |
| 1.92  | -2.91 | -4.2  |  |  |
| 1.8   | -4.61 | -5.8  |  |  |
| 1.79  | -4.06 | -5.24 |  |  |
| -2.57 | -3.09 | -2.07 |  |  |
| -2.73 | -2.84 | -1.73 |  |  |
| -2.99 | -4.33 | -3.09 |  |  |
| 2.96  | -2.06 | -3.86 |  |  |
| -2.83 | -2.19 | -0.93 |  |  |
| -3    | -5.89 | -4.54 |  |  |
| -3.16 | -3.82 | -2.4  |  |  |
| -3.92 | -4.12 | -2.39 |  |  |
| 4.94  | 0.59  | -1.21 |  |  |
| 4.75  | -0.57 | -2.32 |  |  |
| -1.52 | -1.25 | -0.15 |  |  |
| -2.52 | -2.39 | -0.55 |  |  |
| 2.13  | 1.78  | -0.02 |  |  |
| 1.84  | 0.13  | -1.45 |  |  |
| 1.57  | 2.27  | 0.91  |  |  |
| 1.45  | 1.47  | 0.23  |  |  |
| 1.33  | 2.36  | 1.25  |  |  |
| 1.32  | 1.22  | 0.12  |  |  |
| 1.31  | 1.93  | 0.84  |  |  |
| -3.96 | -1.13 | 0.15  |  |  |
| 3.26  | -1.83 | -3.63 |  |  |
| -2.69 | -3.35 | -2.02 |  |  |
| -4.38 | -3.38 | -1.34 |  |  |
| 2.42  | -3.24 | -5.04 |  |  |
| 2.06  | -0.58 | -2.14 |  |  |
| 1.55  | -2.05 | -3.2  |  |  |
| 1.53  | -3.64 | -4.77 |  |  |
| -3.7  | -2.76 | -1.4  |  |  |
| 5.12  | -1.63 | -3.43 |  |  |
| 4.48  | -5.47 | -7.07 |  |  |
| 4.14  | -5.37 | -6.86 |  |  |
| 4     | -6.49 | -7.94 |  |  |
| 3.99  | -3.11 | -4.55 |  |  |
| 3.52  | 1.87  | 0.07  |  |  |
| 3.28  | 3.22  | 1.53  |  |  |
| -2.25 | -1.08 | 0.11  |  |  |
| -2.37 | 0     | 1.26  |  |  |
| -2.73 | 0.71  | 2.17  |  |  |
| 2.82  | -3.49 | -5.29 |  |  |
| 2.12  | -2.39 | -3.78 |  |  |
| 1.86  | -2.19 | -3.39 |  |  |
| -2.63 | -4.4  | -3.31 |  |  |
| -2.84 | -4.28 | -3.07 |  |  |
| -3.39 | -2.85 | -1.39 |  |  |
| 7.65  | 1.04  | -0.76 |  |  |
| 6.71  | 3.27  | 1.66  |  |  |
| 6.65  | 1.98  | 0.39  |  |  |
| 6.1   | 0.93  | -0.54 |  |  |

|        |       |       |  |  |
|--------|-------|-------|--|--|
| 4.65   | 0.39  | -0.69 |  |  |
| 1.09   | 1.64  | 2.65  |  |  |
| 1.07   | 2.83  | 3.86  |  |  |
| 1.02   | 4.13  | 5.23  |  |  |
| -1.08  | 5.37  | 6.61  |  |  |
| 2.79   | 0.98  | -0.82 |  |  |
| -2.76  | -1.12 | 0.02  |  |  |
| 1.25   | 5.67  | 3.87  |  |  |
| -1     | 0.8   | -0.68 |  |  |
| -1.04  | 3.23  | 1.81  |  |  |
| -1.04  | -0.43 | -1.85 |  |  |
| -1.06  | -0.51 | -1.89 |  |  |
| -1.08  | 2.23  | 0.87  |  |  |
| -1.19  | 0.99  | -0.23 |  |  |
| -1.19  | 0.8   | -0.42 |  |  |
| -1.34  | -2.51 | -3.56 |  |  |
| -1.36  | 1.5   | 0.46  |  |  |
| -1.36  | 1.31  | 0.29  |  |  |
| -5.58  | -2.05 | -1.04 |  |  |
| -5.59  | -0.96 | 0.05  |  |  |
| -5.72  | -1.7  | -0.66 |  |  |
| -5.72  | 0.3   | 1.35  |  |  |
| -6.02  | -0.96 | 0.16  |  |  |
| -6.45  | -1.16 | 0.05  |  |  |
| -6.9   | -1.08 | 0.23  |  |  |
| -7.36  | -1.7  | -0.29 |  |  |
| -7.38  | -1.33 | 0.08  |  |  |
| -9.1   | -3.27 | -1.56 |  |  |
| -9.87  | -3.26 | -1.43 |  |  |
| -10.59 | -1.71 | 0.22  |  |  |
| -10.97 | -2.74 | -0.76 |  |  |
| 1.12   | -1.43 | -3.23 |  |  |
| -1.05  | 1.63  | 0.06  |  |  |
| -1.05  | 3.39  | 1.82  |  |  |
| -1.16  | 0.83  | -0.59 |  |  |
| -1.39  | -1.49 | -2.65 |  |  |
| 2.55   | 2.75  | 0.95  |  |  |
| 1.79   | 3.21  | 1.93  |  |  |
| 1.95   | 1.85  | 0.05  |  |  |
| 1.46   | 2.15  | 0.77  |  |  |
| 1.12   | 2.27  | 1.27  |  |  |
| 1.05   | 0.65  | -1.15 |  |  |
| -1.36  | 0.05  | -1.24 |  |  |
| -1.53  | 2.33  | 1.21  |  |  |
| 5.61   | 1.39  | -0.4  |  |  |
| 5.36   | 2.63  | 0.91  |  |  |
| 4.6    | 0.05  | -1.45 |  |  |
| 4.58   | 1.45  | -0.06 |  |  |
| 3.54   | 1.67  | 0.55  |  |  |
| 3.45   | 2.11  | 1.02  |  |  |
| -1.28  | -0.4  | 0.65  |  |  |
| -1.32  | -1.1  | 0     |  |  |
| -1.61  | 2.4   | 3.79  |  |  |
| -1.77  | 3.2   | 4.72  |  |  |
| 1.09   | 0.6   | -1.19 |  |  |
| -1.01  | -1.39 | -3.05 |  |  |
| -1.01  | -0.64 | -2.29 |  |  |
| -1.1   | 3.02  | 1.49  |  |  |

|        |       |       |  |  |
|--------|-------|-------|--|--|
| -1.18  | 3.92  | 2.48  |  |  |
| -1.18  | 4.58  | 3.15  |  |  |
| -1.24  | 2.97  | 1.6   |  |  |
| -1.37  | 3.09  | 1.87  |  |  |
| -1.51  | 1.06  | -0.01 |  |  |
| -1.59  | 2.48  | 1.48  |  |  |
| -6.39  | -1.88 | -0.87 |  |  |
| -8.62  | 0.85  | 2.3   |  |  |
| -15.1  | -1.6  | 0.65  |  |  |
| -19.26 | -0.77 | 1.83  |  |  |
| 2.28   | 0.64  | -1.16 |  |  |
| 1.96   | 0.87  | -0.71 |  |  |
| 1.7    | -3.3  | -4.67 |  |  |
| 1.64   | -0.51 | -1.83 |  |  |
| 1.53   | -1.41 | -2.62 |  |  |
| 1.41   | -4.52 | -5.62 |  |  |
| 1.38   | 0.44  | -0.63 |  |  |
| -3.04  | -2.63 | -1.63 |  |  |
| -3.3   | -1.49 | -0.37 |  |  |
| 12.79  | 0.08  | -1.72 |  |  |
| 1.06   | -0.08 | 1.72  |  |  |
| -1.54  | 0.71  | 3.21  |  |  |
| 1.5    | 5.72  | 3.92  |  |  |
| 1.23   | 2.39  | 0.88  |  |  |
| 1.13   | 1.41  | 0.03  |  |  |
| -1.07  | 2.36  | 1.25  |  |  |
| -1.16  | 5.2   | 4.2   |  |  |
| 4.38   | -1.01 | -2.81 |  |  |
| -1.58  | -3.75 | -2.75 |  |  |
| -2.42  | -1.04 | 0.57  |  |  |
| 1.85   | -0.28 | -2.07 |  |  |
| 1.59   | -1.5  | -3.08 |  |  |
| 1.39   | -2.77 | -4.14 |  |  |
| 1.35   | -3.5  | -4.83 |  |  |
| 1.17   | -2.59 | -3.72 |  |  |
| -7.23  | -6    | -4.05 |  |  |
| 2.33   | -2.66 | -4.45 |  |  |
| 2.03   | -3.08 | -4.67 |  |  |
| 1.48   | -4.4  | -5.54 |  |  |
| 1.35   | -5.44 | -6.45 |  |  |
| 2.13   | -2.3  | -4.09 |  |  |
| 1.68   | -3.08 | -4.52 |  |  |
| 1.48   | -2.45 | -3.72 |  |  |
| 1.46   | -3.58 | -4.83 |  |  |
| 1.41   | -1.71 | -2.9  |  |  |
| 1.23   | 1.1   | 0.09  |  |  |
| 1.23   | -2.67 | -3.68 |  |  |
| -3.28  | -4.58 | -3.57 |  |  |
| 1.51   | 3.45  | 1.66  |  |  |
| -1.14  | 2.52  | 1.51  |  |  |
| 2.12   | 2.44  | 0.65  |  |  |
| 1.64   | 0.58  | -0.85 |  |  |
| 1.57   | 2.4   | 1.04  |  |  |
| 1.56   | 2.71  | 1.36  |  |  |
| 1.53   | 1.9   | 0.58  |  |  |
| 1.49   | 1.4   | 0.12  |  |  |
| 1.46   | -0.1  | -1.36 |  |  |
| 1.4    | 1.53  | 0.34  |  |  |

|       |       |       |  |  |
|-------|-------|-------|--|--|
| 1.34  | 0.85  | -0.27 |  |  |
| 1.3   | 3.77  | 2.69  |  |  |
| 1.3   | 2.63  | 1.55  |  |  |
| 1.28  | 1.61  | 0.54  |  |  |
| 1.26  | -0.55 | -1.6  |  |  |
| 1.25  | 0.36  | -0.68 |  |  |
| 1.22  | 0.8   | -0.2  |  |  |
| -3.58 | -0.19 | 0.94  |  |  |
| -4.49 | -0.53 | 0.93  |  |  |
| -4.49 | -0.2  | 1.26  |  |  |
| -4.8  | -2.13 | -0.58 |  |  |
| -5.73 | -2.04 | -0.23 |  |  |
| 3.1   | 2.63  | 0.84  |  |  |
| 2.08  | -2.83 | -4.05 |  |  |
| -2.74 | -3.51 | -2.21 |  |  |
| 3.13  | -3.82 | -5.61 |  |  |
| -2.76 | -5.7  | -4.38 |  |  |
| 2.31  | -0.91 | -2.7  |  |  |
| 1.85  | -2.63 | -4.1  |  |  |
| 1.78  | -0.66 | -2.07 |  |  |
| 1.75  | -3.34 | -4.73 |  |  |
| 1.73  | -0.01 | -1.38 |  |  |
| 1.57  | -2.67 | -3.9  |  |  |
| 1.51  | -2.02 | -3.2  |  |  |
| 1.42  | -1.57 | -2.66 |  |  |
| 1.4   | 3.03  | 1.97  |  |  |
| 2.22  | 2.15  | 0.36  |  |  |
| 1.65  | -0.67 | -2.03 |  |  |
| 1.64  | 1.5   | 0.15  |  |  |
| 1.4   | -1.12 | -2.24 |  |  |
| -3.27 | -0.87 | 0.2   |  |  |
| -3.29 | -0.03 | 1.05  |  |  |
| -3.65 | -2.41 | -1.18 |  |  |
| -4.01 | -2.59 | -1.23 |  |  |
| 2.77  | 4.5   | 2.71  |  |  |
| 2.19  | 3.38  | 1.93  |  |  |
| -3.42 | -2.45 | -0.99 |  |  |
| 2.45  | -2.67 | -4.46 |  |  |
| 1.92  | -1    | -2.43 |  |  |
| 1.55  | 0.35  | -0.77 |  |  |
| 1.48  | 2.1   | 1.04  |  |  |
| -3.03 | -2.51 | -1.4  |  |  |
| 2.62  | -2.64 | -4.42 |  |  |
| 1.96  | 2.23  | 0.86  |  |  |
| -2.63 | -2.46 | -1.46 |  |  |
| -2.86 | -1.91 | -0.8  |  |  |
| 1.69  | -0.71 | -2.5  |  |  |
| 1.44  | -0.19 | -1.74 |  |  |
| 1.18  | -2.53 | -3.8  |  |  |
| 1.18  | -0.31 | -1.58 |  |  |
| 1.14  | -2.22 | -3.43 |  |  |
| 1.1   | -1.43 | -2.6  |  |  |
| 1.1   | -1.83 | -2.99 |  |  |
| 1.05  | -0.01 | -1.1  |  |  |
| 1.03  | -2.43 | -3.49 |  |  |
| 1.03  | -2.3  | -3.37 |  |  |
| -1    | -2.06 | -3.08 |  |  |
| -1    | 0.14  | -0.88 |  |  |

|       |       |       |  |  |
|-------|-------|-------|--|--|
| 2.77  | 4.5   | 2.71  |  |  |
| 2.19  | 3.38  | 1.93  |  |  |
| -3.42 | -2.45 | -0.99 |  |  |
| 2.77  | 4.5   | 2.71  |  |  |
| 2.19  | 3.38  | 1.93  |  |  |
| -3.42 | -2.45 | -0.99 |  |  |
| 2.77  | 4.5   | 2.71  |  |  |
| 2.37  | 3.6   | 2.04  |  |  |
| -3.42 | -2.45 | -0.99 |  |  |
| 2.77  | 4.5   | 2.71  |  |  |
| 2.19  | 3.38  | 1.93  |  |  |
| -3.42 | -2.45 | -0.99 |  |  |
| 2.77  | 4.5   | 2.71  |  |  |
| 2.19  | 3.38  | 1.93  |  |  |
| -3.42 | -2.45 | -0.99 |  |  |
| 2.77  | 4.5   | 2.71  |  |  |
| 2.19  | 3.38  | 1.93  |  |  |
| -3.42 | -2.45 | -0.99 |  |  |
| 1.5   | 0.54  | -1.25 |  |  |
| 1.31  | 1.78  | 0.19  |  |  |
| 1.19  | 1.97  | 0.52  |  |  |
| 1.16  | 2.5   | 1.08  |  |  |
| 1.15  | -1.64 | -3.03 |  |  |
| 1.1   | 4.46  | 3.13  |  |  |
| 1.02  | 0.95  | -0.28 |  |  |
| -1.03 | 1.28  | 0.13  |  |  |
| -1.04 | 2.03  | 0.88  |  |  |
| -1.08 | 1.24  | 0.15  |  |  |
| -5.01 | 0.89  | 2.02  |  |  |
| -5.1  | -1.03 | 0.12  |  |  |
| -6.14 | -1.39 | 0.03  |  |  |
| -6.25 | -0.04 | 1.4   |  |  |
| -6.68 | -2.02 | -0.48 |  |  |
| 47.97 | -0.92 | -2.7  |  |  |
| 39.19 | -0.92 | -2.42 |  |  |
| 29.18 | 0.33  | -0.74 |  |  |
| 6.79  | -2.62 | -1.59 |  |  |
| 6.33  | 0.53  | 1.67  |  |  |
| 3.51  | -4.29 | -2.3  |  |  |
| 3.22  | -3.76 | -1.65 |  |  |
| 2.98  | -0.55 | 1.68  |  |  |
| 2.56  | -4.13 | -1.69 |  |  |
| 2.53  | -2.22 | 0.24  |  |  |
| 1.88  | -4.3  | -1.42 |  |  |
| 1.77  | -3.44 | -0.46 |  |  |
| 1.49  | -2.52 | 0.7   |  |  |
| 1.45  | 0.04  | 3.31  |  |  |
| 1.35  | 0.1   | 3.47  |  |  |
| 1.24  | -4.03 | -0.55 |  |  |
| 1.24  | -2.01 | 1.48  |  |  |
| -1.06 | -0.05 | 3.83  |  |  |
| -1.16 | -5.18 | -1.17 |  |  |
| 2.81  | 0.33  | -1.45 |  |  |
| 1.91  | 0.7   | -0.53 |  |  |
| 1.84  | -0.65 | -1.82 |  |  |
| 1.65  | 0.38  | -0.64 |  |  |
| -3.49 | -1.67 | -0.16 |  |  |
| 2.45  | -0.14 | -1.93 |  |  |

|       |       |       |  |  |
|-------|-------|-------|--|--|
| 2.32  | 0.78  | -0.92 |  |  |
| 2.25  | -0.27 | -1.93 |  |  |
| 2.11  | -4.37 | -5.93 |  |  |
| 1.97  | 0.56  | -0.9  |  |  |
| 1.93  | -1.01 | -2.45 |  |  |
| 1.91  | -0.07 | -1.49 |  |  |
| 1.74  | -0.06 | -1.35 |  |  |
| 1.74  | -3.15 | -4.44 |  |  |
| 1.69  | -0.87 | -2.12 |  |  |
| 1.67  | 0.85  | -0.38 |  |  |
| 1.66  | -0.67 | -1.89 |  |  |
| 1.64  | -0.45 | -1.65 |  |  |
| 1.63  | 0.68  | -0.51 |  |  |
| 1.62  | 0.22  | -0.96 |  |  |
| 1.6   | -0.83 | -2    |  |  |
| 1.59  | -1.08 | -2.24 |  |  |
| 1.56  | -0.55 | -1.68 |  |  |
| 1.53  | -4.09 | -5.2  |  |  |
| 1.53  | -0.35 | -1.46 |  |  |
| 1.44  | -0.68 | -1.7  |  |  |
| 1.45  | -0.78 | -1.8  |  |  |
| 1.44  | -0.95 | -1.96 |  |  |
| -3.27 | -5.55 | -4.33 |  |  |
| 1.5   | 0.73  | -1.05 |  |  |
| 1.4   | 1.83  | 0.15  |  |  |
| 1.36  | 0.06  | -1.58 |  |  |
| 1.35  | -0.78 | -2.41 |  |  |
| 1.34  | -0.2  | -1.82 |  |  |
| 1.31  | -3.03 | -4.61 |  |  |
| 1.3   | -0.1  | -1.67 |  |  |
| 1.24  | 0.92  | -0.59 |  |  |
| 1.22  | 1.93  | 0.45  |  |  |
| 1.13  | -1.01 | -2.39 |  |  |
| 1.1   | 0.08  | -1.24 |  |  |
| 1.07  | -1.76 | -3.05 |  |  |
| 1.06  | 0.76  | -0.52 |  |  |
| 1.06  | 0.66  | -0.61 |  |  |
| 1.03  | 3.03  | 1.8   |  |  |
| 1.03  | 0.36  | -0.88 |  |  |
| 1.02  | 0.27  | -0.94 |  |  |
| -1.05 | 0.31  | -0.82 |  |  |
| -1.07 | -0.01 | -1.11 |  |  |
| -1.09 | 2.48  | 1.4   |  |  |
| -1.09 | 3.13  | 2.06  |  |  |
| -1.11 | -1.09 | -2.14 |  |  |
| -5.46 | -1.63 | -0.38 |  |  |
| 4.38  | 0.22  | -1.56 |  |  |
| 4.1   | -1.04 | -2.73 |  |  |
| 2.65  | 2.34  | 1.28  |  |  |
| 3.04  | -1.06 | -2.83 |  |  |
| 2.21  | -2.19 | -3.51 |  |  |
| 3.68  | -3.01 | -4.79 |  |  |
| 2.21  | -2.25 | -3.29 |  |  |
| 10.07 | 0.3   | -1.47 |  |  |
| 7.31  | 0.77  | -0.55 |  |  |
| 1.4   | -1.47 | -0.4  |  |  |
| 1.32  | -2.62 | -1.47 |  |  |
| 1.26  | 2.85  | 4.06  |  |  |

|        |       |       |  |  |
|--------|-------|-------|--|--|
| 1.22   | -0.31 | 0.96  |  |  |
| 1.07   | 3.42  | 4.88  |  |  |
| 2.08   | 2.21  | 0.43  |  |  |
| 1.52   | -1.92 | -3.25 |  |  |
| 1.27   | 0.03  | -1.04 |  |  |
| 1.22   | 0.41  | -0.59 |  |  |
| -4.04  | -2.46 | -1.17 |  |  |
| 1.4    | 2.19  | 0.42  |  |  |
| 1.24   | 1.14  | -0.47 |  |  |
| 1.19   | 2.21  | 0.66  |  |  |
| 1.11   | 3.74  | 2.29  |  |  |
| 1.1    | 2.02  | 0.59  |  |  |
| 1.09   | 1.8   | 0.39  |  |  |
| 1.05   | 1.77  | 0.4   |  |  |
| -1.01  | 1.97  | 0.68  |  |  |
| -1.13  | 2.42  | 1.3   |  |  |
| -1.18  | 1.58  | 0.52  |  |  |
| -10.35 | -1.95 | 0.13  |  |  |
| -19.49 | -1.65 | 1.34  |  |  |
| -21.03 | -1.38 | 1.72  |  |  |
| -38.83 | -2.07 | 1.91  |  |  |
| 7.24   | -1.33 | -3.11 |  |  |
| 6.69   | 2.54  | 0.88  |  |  |
| 2.79   | 1.84  | 0.06  |  |  |
| 2.02   | 1.21  | -0.1  |  |  |
| 1.66   | 3.57  | 2.54  |  |  |
| 1.66   | 2.01  | 0.99  |  |  |
| 1.65   | 0.53  | -0.49 |  |  |
| -2.45  | -2.2  | -1.2  |  |  |
| -2.56  | 0.64  | 1.7   |  |  |
| -2.62  | -1.11 | -0.02 |  |  |
| -2.62  | -0.55 | 0.55  |  |  |
| -2.63  | -0.03 | 1.07  |  |  |
| -2.62  | -0.46 | 0.63  |  |  |
| -2.68  | 0.07  | 1.2   |  |  |
| -2.79  | -1.5  | -0.31 |  |  |
| -3.02  | -1.39 | -0.09 |  |  |
| -3.07  | 0.04  | 1.37  |  |  |
| -3.33  | -2.78 | -1.34 |  |  |
| -3.35  | -3.21 | -1.76 |  |  |
| -3.52  | -2.31 | -0.79 |  |  |
| -3.57  | -0.73 | 0.82  |  |  |
| -3.72  | 0.61  | 2.21  |  |  |
| -4.23  | -2.86 | -1.08 |  |  |
| -4.26  | -0.65 | 1.14  |  |  |
| -4.47  | -1.57 | 0.3   |  |  |
| -4.62  | 0.18  | 2.09  |  |  |
| -5.01  | -3.75 | -1.73 |  |  |
| -5.34  | -2.49 | -0.36 |  |  |
| -6.03  | -1.43 | 0.87  |  |  |
| -6.1   | -0.8  | 1.51  |  |  |
| -8     | -4.21 | -1.51 |  |  |
| 2.23   | 0.38  | -1.4  |  |  |
| 1.85   | -0.19 | -1.69 |  |  |
| 1.56   | -1.19 | -2.45 |  |  |
| 1.53   | -2.97 | -4.2  |  |  |
| 1.47   | -0.38 | -1.56 |  |  |
| 1.41   | -1.83 | -2.94 |  |  |



|       |       |       |  |  |
|-------|-------|-------|--|--|
| 1.33  | 2.63  | 0.85  |  |  |
| 1.17  | 4.01  | 2.43  |  |  |
| 1.12  | 3.06  | 1.55  |  |  |
| -1.01 | -1.41 | -2.76 |  |  |
| -5.33 | -0.54 | 0.51  |  |  |
| 1.26  | -6.3  | -8.07 |  |  |
| -1.25 | -2.78 | -3.89 |  |  |
| 2.83  | -0.61 | -2.39 |  |  |
| -2.47 | -2.3  | -1.27 |  |  |
| 2.95  | 0.68  | -1.1  |  |  |
| 2.36  | -3.49 | -4.93 |  |  |
| -2.61 | -2.97 | -1.8  |  |  |
| -3.3  | -4.05 | -2.53 |  |  |
| 12.28 | -0.64 | -2.41 |  |  |
| 8.57  | 0.03  | -1.23 |  |  |
| 7.91  | -1.48 | -2.62 |  |  |
| 1.7   | -2.73 | -1.65 |  |  |
| 1.36  | -2.86 | -1.45 |  |  |
| 1.3   | -1.14 | 0.33  |  |  |
| 1.23  | -3.32 | -1.78 |  |  |
| 1.19  | -1.78 | -0.19 |  |  |
| 1.12  | -0.66 | 1.02  |  |  |
| 1.05  | 0.87  | 2.64  |  |  |
| 1.04  | -3.31 | -1.52 |  |  |
| -1.02 | -0.79 | 1.08  |  |  |
| -1.15 | -2.58 | -0.53 |  |  |
| -1.27 | 0.13  | 2.32  |  |  |
| -1.3  | -3.3  | -1.08 |  |  |
| 2.5   | -1.8  | -3.57 |  |  |
| 2.35  | -0.6  | -2.29 |  |  |
| 1.7   | 0.78  | -0.44 |  |  |
| 1.67  | -3.36 | -4.55 |  |  |
| 1.57  | -0.7  | -1.81 |  |  |
| 1.93  | 2.21  | 0.44  |  |  |
| 1.53  | -0.67 | -2.11 |  |  |
| 1.49  | 0.23  | -1.16 |  |  |
| 1.39  | -3.7  | -5    |  |  |
| 1.33  | 0.47  | -0.77 |  |  |
| 1.23  | 0.31  | -0.8  |  |  |
| 1.2   | 1     | -0.08 |  |  |
| 1.19  | -0.01 | -1.08 |  |  |
| 1.18  | 0.95  | -0.11 |  |  |
| 1.15  | 3.3   | 2.28  |  |  |
| 1.15  | 3.46  | 2.44  |  |  |
| -4.24 | -0.45 | 0.82  |  |  |
| -4.27 | 1.2   | 2.48  |  |  |
| -4.71 | -0.75 | 0.67  |  |  |
| -4.81 | -2.81 | -1.37 |  |  |
| 5.02  | 0.9   | -0.87 |  |  |
| 4.46  | 0.05  | -1.56 |  |  |
| 4.2   | 2.6   | 1.08  |  |  |
| 3.88  | 1.82  | 0.42  |  |  |
| 3.44  | 2.16  | 0.93  |  |  |
| 3.42  | 0.08  | -1.13 |  |  |
| 3.17  | -0.05 | -1.16 |  |  |
| 3.05  | 0.49  | -0.57 |  |  |
| -1.4  | 1.49  | 2.53  |  |  |
| -1.55 | 0.92  | 2.11  |  |  |

|       |       |       |  |  |
|-------|-------|-------|--|--|
| -2.12 | -0.39 | 1.24  |  |  |
| 3.07  | -1.48 | -3.25 |  |  |
| 2.26  | 2.16  | 0.83  |  |  |
| 2.12  | -3.07 | -4.31 |  |  |
| 1.93  | -1.59 | -2.7  |  |  |
| -2.5  | -3.45 | -2.28 |  |  |
| -2.98 | -3.47 | -2.05 |  |  |
| 1.54  | -0.08 | -1.85 |  |  |
| 1.18  | -3.25 | -4.63 |  |  |
| 1.12  | 4.43  | 3.11  |  |  |
| 1.03  | -1.31 | -2.51 |  |  |
| 1.03  | -1.87 | -3.07 |  |  |
| 1.02  | -0.17 | -1.35 |  |  |
| 1.01  | -1.85 | -3.02 |  |  |
| -1    | -4.42 | -5.57 |  |  |
| -4.82 | -1.39 | -0.27 |  |  |
| -4.98 | -1.36 | -0.2  |  |  |
| -5.4  | -3.54 | -2.26 |  |  |
| -6.92 | -4.7  | -3.06 |  |  |
| 2.69  | -0.78 | -2.56 |  |  |
| 2.06  | -0.69 | -2.08 |  |  |
| 1.94  | 3.11  | 1.81  |  |  |
| 1.91  | -0.92 | -2.2  |  |  |
| 1.6   | 3.8   | 2.77  |  |  |
| -2.83 | -1.78 | -0.63 |  |  |
| -2.88 | -1.28 | -0.1  |  |  |
| -4.34 | -1.43 | 0.35  |  |  |
| 3.45  | 4.64  | 2.87  |  |  |
| 3     | 0.76  | -0.81 |  |  |
| 2.57  | 5.98  | 4.63  |  |  |
| -2    | -1.68 | -0.66 |  |  |
| -2.07 | -0.28 | 0.79  |  |  |
| -2.12 | -0.72 | 0.38  |  |  |
| -2.23 | -1.07 | 0.1   |  |  |
| -2.33 | 0.18  | 1.41  |  |  |
| 2.12  | -1.11 | -2.88 |  |  |
| 1.54  | -0.63 | -1.94 |  |  |
| 1.31  | 1.38  | 0.31  |  |  |
| -3.24 | 0.06  | 1.07  |  |  |
| -3.63 | -1.07 | 0.1   |  |  |
| -4.38 | -1.63 | -0.18 |  |  |
| -6.81 | -3.64 | -1.55 |  |  |
| 8.4   | 0.99  | -0.78 |  |  |
| 1.18  | 1.76  | 2.83  |  |  |
| 1.13  | 0.32  | 1.44  |  |  |
| 1.11  | 1.49  | 2.64  |  |  |
| -1.11 | 1.7   | 3.15  |  |  |
| -2.28 | 1.99  | 4.48  |  |  |
| -2.38 | 3.57  | 6.11  |  |  |
| -2.6  | -1.43 | 1.25  |  |  |
| -2.66 | 1.57  | 4.28  |  |  |
| -3.33 | -0.28 | 2.75  |  |  |
| -7.55 | -0.83 | 3.39  |  |  |
| 2.52  | 0.19  | -1.58 |  |  |
| 1.72  | -1.66 | -2.88 |  |  |
| 1.57  | 1.3   | 0.21  |  |  |
| 4.85  | 2.96  | 1.19  |  |  |
| 3.13  | -0.34 | -1.48 |  |  |

|       |       |       |  |  |
|-------|-------|-------|--|--|
| 3.1   | -0.02 | -1.15 |  |  |
| -1.46 | -3.92 | -2.86 |  |  |
| -1.47 | -3.03 | -1.96 |  |  |
| 1.05  | -4.14 | -5.91 |  |  |
| -1.33 | -0.39 | -1.69 |  |  |
| -1.41 | 0.53  | -0.68 |  |  |
| -1.49 | 1.08  | -0.04 |  |  |
| -7.26 | 0.19  | 1.34  |  |  |
| -8.61 | -1.52 | -0.12 |  |  |
| 3.2   | -3.49 | -5.26 |  |  |
| 2.26  | -3.23 | -4.49 |  |  |
| 2.19  | 4.56  | 3.34  |  |  |
| -2.33 | -3.45 | -2.32 |  |  |
| 2.91  | -1.54 | -3.31 |  |  |
| -3.33 | -3.4  | -1.89 |  |  |
| 2.13  | 0.75  | -1.01 |  |  |
| 1.65  | 0.87  | -0.53 |  |  |
| 1.52  | -0.3  | -1.58 |  |  |
| -3.46 | -0.79 | 0.33  |  |  |
| 2.6   | -1.18 | -2.95 |  |  |
| 2.15  | -0.73 | -2.22 |  |  |
| 1.72  | -0.91 | -2.08 |  |  |
| -3.05 | -1.78 | -0.56 |  |  |
| -3.49 | -2.46 | -1.04 |  |  |
| 1.36  | -4.11 | -5.87 |  |  |
| 1.07  | -3.31 | -4.72 |  |  |
| 1.04  | -2.84 | -4.22 |  |  |
| 1.04  | -4.61 | -5.98 |  |  |
| 1.02  | -2.95 | -4.29 |  |  |
| 1     | -1.28 | -2.6  |  |  |
| -1.18 | -5.19 | -6.27 |  |  |
| -5.03 | -4.03 | -3.02 |  |  |
| 5.83  | -0.98 | -2.75 |  |  |
| 5.23  | -1.47 | -3.08 |  |  |
| 3.95  | 0.36  | -0.85 |  |  |
| 3.69  | -0.84 | -2.6  |  |  |
| 2.59  | -2    | -3.25 |  |  |
| 7.05  | 1.15  | -0.61 |  |  |
| 5.12  | 0.35  | -0.95 |  |  |
| -1.12 | 2.32  | 3.53  |  |  |
| 6.92  | 1.92  | 0.16  |  |  |
| 5.23  | 0.16  | -1.2  |  |  |
| 4.13  | 2.77  | 1.75  |  |  |
| 2.36  | 1.05  | -0.71 |  |  |
| 1.99  | 2.61  | 1.1   |  |  |
| 3.65  | 0.71  | -1.05 |  |  |
| 3     | 0.31  | -1.16 |  |  |
| 2.96  | 1.76  | 0.31  |  |  |
| 2.34  | -0.26 | -1.37 |  |  |
| 2.17  | -0.78 | -1.79 |  |  |
| 7.34  | -1.01 | -2.76 |  |  |
| 6.93  | 0.84  | -0.83 |  |  |
| -1.04 | 0.47  | 1.64  |  |  |
| -1.06 | 0.03  | 1.24  |  |  |
| 1.46  | 3.35  | 1.6   |  |  |
| 1.35  | 1.34  | -0.3  |  |  |
| 1.26  | 0.08  | -1.46 |  |  |
| 1.03  | -2.21 | -3.47 |  |  |

|       |       |       |  |  |
|-------|-------|-------|--|--|
| 1.02  | -1.94 | -3.18 |  |  |
| 1.02  | -0.06 | -1.3  |  |  |
| -1.07 | -0.09 | -1.21 |  |  |
| -8.69 | -3.36 | -1.45 |  |  |
| 1.76  | 4.19  | 2.43  |  |  |
| 1.65  | -1.38 | -3.04 |  |  |
| 1.49  | -3.68 | -5.2  |  |  |
| 1.32  | -2.84 | -4.18 |  |  |
| 1.24  | -2.24 | -3.49 |  |  |
| 1.23  | -4.07 | -5.31 |  |  |
| 1.14  | 0.7   | -0.44 |  |  |
| 1.09  | -1.3  | -2.36 |  |  |
| 1.09  | 2.04  | 0.98  |  |  |
| -4.43 | -2.83 | -1.62 |  |  |
| -6.27 | -2.83 | -1.12 |  |  |
| 3.38  | -5.84 | -7.6  |  |  |
| 2.09  | -3.34 | -4.4  |  |  |
| -2.12 | -6.94 | -5.86 |  |  |
| 2.26  | -2.66 | -4.42 |  |  |
| 2.09  | -2.67 | -4.31 |  |  |
| 1.88  | -0.15 | -1.64 |  |  |
| 1.53  | -2.38 | -3.57 |  |  |
| 1.42  | -0.09 | -1.17 |  |  |
| 1.33  | -1.02 | -2.01 |  |  |
| -3.29 | -2.82 | -1.68 |  |  |
| 2.08  | -1.54 | -3.29 |  |  |
| 1.76  | 4.27  | 2.76  |  |  |
| 1.66  | 5.29  | 3.86  |  |  |
| 1.4   | -2.48 | -3.67 |  |  |
| -3.55 | -1.5  | -0.37 |  |  |
| -5.6  | -2.46 | -0.67 |  |  |
| 2.8   | -3.71 | -5.46 |  |  |
| 1.87  | -1.53 | -2.69 |  |  |
| 1.61  | 1.41  | -0.34 |  |  |
| 1.31  | -5.91 | -7.37 |  |  |
| 1.26  | -3.89 | -5.28 |  |  |
| 1.09  | -1.73 | -2.92 |  |  |
| 1.04  | -5.4  | -6.52 |  |  |
| 2.2   | -1.54 | -3.3  |  |  |
| 2.13  | 1.05  | -0.66 |  |  |
| 1.93  | 0.52  | -1.04 |  |  |
| 1.68  | -1.42 | -2.79 |  |  |
| 1.59  | 2.55  | 1.26  |  |  |
| 1.41  | 0.28  | -0.84 |  |  |
| 1.37  | 0.94  | -0.13 |  |  |
| -3.15 | -2.13 | -1.1  |  |  |
| -3.56 | -1.57 | -0.36 |  |  |
| -3.61 | -1.56 | -0.32 |  |  |
| -4.1  | -2.41 | -0.99 |  |  |
| -4.69 | -2.17 | -0.56 |  |  |
| 2.74  | 0.55  | -1.2  |  |  |
| 1.89  | -1.19 | -2.41 |  |  |
| 1.85  | 4.69  | 3.5   |  |  |
| 1.65  | 1.36  | 0.34  |  |  |
| -2.96 | -1.44 | -0.17 |  |  |
| -3.24 | -1.78 | -0.39 |  |  |
| -4.89 | -2.04 | -0.05 |  |  |
| 3.2   | -0.93 | -2.68 |  |  |

|       |       |       |  |  |
|-------|-------|-------|--|--|
| 1.92  | -2.29 | -3.31 |  |  |
| 1.46  | -1.42 | -3.17 |  |  |
| 1.25  | -0.05 | -1.57 |  |  |
| 1.2   | 0.4   | -1.07 |  |  |
| -1.02 | -1.9  | -3.07 |  |  |
| -1.11 | -0.95 | -2.01 |  |  |
| 1.76  | -1.2  | -2.95 |  |  |
| 1.65  | 1.01  | -0.65 |  |  |
| 1.57  | -2.12 | -3.71 |  |  |
| 1.44  | -1.47 | -2.93 |  |  |
| 1.28  | 1.43  | 0.15  |  |  |
| 1.27  | -2.44 | -3.72 |  |  |
| 1.23  | 2.91  | 1.68  |  |  |
| 1.22  | 0.3   | -0.93 |  |  |
| 1.22  | 3.85  | 2.63  |  |  |
| 1.19  | -1.2  | -2.38 |  |  |
| 1.18  | 4.55  | 3.37  |  |  |
| 1.15  | -1.46 | -2.6  |  |  |
| 1.14  | -1.49 | -2.61 |  |  |
| 1.11  | 0.91  | -0.18 |  |  |
| 1.1   | 1.05  | -0.02 |  |  |
| 1.39  | 0.36  | -1.39 |  |  |
| 1.07  | 1.63  | 0.26  |  |  |
| 1.02  | -0.05 | -1.35 |  |  |
| -1.03 | -1.82 | -3.05 |  |  |
| -1.08 | -1.91 | -3.07 |  |  |
| -1.12 | 0.48  | -0.63 |  |  |
| -1.13 | -0.53 | -1.63 |  |  |
| -1.17 | 0.97  | -0.08 |  |  |
| -1.17 | 1.23  | 0.18  |  |  |
| -5.21 | -0.81 | 0.3   |  |  |
| -5.56 | -0.7  | 0.51  |  |  |
| 5.91  | 0.85  | -0.9  |  |  |
| 3.53  | 1.2   | 0.19  |  |  |
| -1.22 | -1.91 | -0.81 |  |  |
| -1.31 | -3.35 | -2.15 |  |  |
| 11.3  | 0.4   | -1.34 |  |  |
| 9.19  | -2.08 | -3.53 |  |  |
| 8.59  | 1.84  | 0.49  |  |  |
| 8.05  | 0.04  | -1.22 |  |  |
| 7.71  | -2.29 | -3.48 |  |  |
| 7.67  | 0.3   | -0.89 |  |  |
| 7.38  | -2.63 | -3.77 |  |  |
| 7.31  | 2.47  | 1.35  |  |  |
| 7.19  | 0.72  | -0.37 |  |  |
| 7.08  | 1.52  | 0.45  |  |  |
| 6.81  | -0.01 | -1.02 |  |  |
| 6.74  | 1.49  | 0.48  |  |  |
| 1.57  | -3.64 | -2.54 |  |  |
| 1.56  | 3.11  | 4.23  |  |  |
| 1.52  | -1.08 | 0.07  |  |  |
| 1.49  | -0.23 | 0.95  |  |  |
| 1.47  | 3.12  | 4.32  |  |  |
| 1.46  | 0.38  | 1.58  |  |  |
| 1.4   | -0.34 | 0.93  |  |  |
| 1.38  | -1.44 | -0.16 |  |  |
| 1.38  | -2.21 | -0.92 |  |  |
| 1.35  | -0.62 | 0.7   |  |  |

|       |       |       |  |  |
|-------|-------|-------|--|--|
| 1.35  | -1.62 | -0.31 |  |  |
| 1.32  | -1.51 | -0.15 |  |  |
| 1.31  | -0.46 | 0.9   |  |  |
| 1.26  | -3.41 | -1.99 |  |  |
| 1.25  | -0.37 | 1.05  |  |  |
| 1.25  | -0.99 | 0.44  |  |  |
| 1.24  | -0.69 | 0.75  |  |  |
| 1.23  | -1.87 | -0.42 |  |  |
| 1.23  | -1.04 | 0.41  |  |  |
| 1.22  | 1.77  | 3.23  |  |  |
| 1.21  | 0.56  | 2.04  |  |  |
| 1.17  | -1.2  | 0.32  |  |  |
| 1.1   | 3.19  | 4.81  |  |  |
| -1.02 | 0.09  | 1.87  |  |  |
| -1.06 | -1.58 | 0.25  |  |  |
| -1.11 | -1.37 | 0.53  |  |  |
| -1.37 | -0.63 | 1.57  |  |  |
| -1.48 | -2.95 | -0.63 |  |  |
| -1.54 | -4.12 | -1.75 |  |  |
| -2.09 | -4.05 | -1.24 |  |  |
| 1.67  | -2.7  | -4.45 |  |  |
| 1.46  | 2.47  | 0.92  |  |  |
| 1.28  | -4.75 | -6.11 |  |  |
| 1.14  | -1.94 | -3.14 |  |  |
| 1.01  | -2.14 | -3.17 |  |  |
| -4.23 | -3.6  | -2.53 |  |  |
| -5.24 | -3.39 | -2.01 |  |  |
| 1.15  | -1.9  | -3.65 |  |  |
| 1.15  | -0.03 | -1.78 |  |  |
| 1.09  | -2.4  | -4.07 |  |  |
| -1.11 | 2.43  | 1.04  |  |  |
| -1.25 | 0.28  | -0.95 |  |  |
| -1.28 | -1.4  | -2.59 |  |  |
| -1.4  | -0.4  | -1.47 |  |  |
| 1.13  | -0.24 | -1.98 |  |  |
| -1.04 | 1.52  | 0.01  |  |  |
| -1.48 | 3.14  | 2.14  |  |  |
| 1.87  | 1.27  | -0.48 |  |  |
| 1.5   | -0.78 | -2.21 |  |  |
| 1.15  | 0.64  | -0.39 |  |  |
| 9.97  | 0     | -1.74 |  |  |
| 8.02  | 1.31  | -0.12 |  |  |
| 6.22  | -0.2  | -1.26 |  |  |
| 1.48  | 1.41  | 2.41  |  |  |
| 1.4   | -3.23 | -2.14 |  |  |
| 1.25  | 1.34  | 2.59  |  |  |
| 1.24  | 2.46  | 3.72  |  |  |
| 1.15  | -0.2  | 1.17  |  |  |
| 1     | -3.68 | -2.11 |  |  |
| -1.28 | -5.13 | -3.2  |  |  |
| 2.13  | 1.58  | -0.17 |  |  |
| 1.37  | 1.37  | 0.26  |  |  |
| 1.27  | -1.13 | -2.13 |  |  |
| -3.37 | -1.39 | -0.29 |  |  |
| 1.98  | -0.13 | -1.87 |  |  |
| 1.63  | 0.63  | -0.82 |  |  |
| 1.25  | 3.2   | 2.12  |  |  |
| 1.21  | 3.23  | 2.2   |  |  |

|       |       |       |  |  |
|-------|-------|-------|--|--|
| 4.71  | -0.62 | -2.37 |  |  |
| -1.9  | -4.51 | -3.09 |  |  |
| 3.26  | -1.61 | -3.35 |  |  |
| 2.04  | -1.2  | -2.27 |  |  |
| 5.13  | -2.77 | -4.52 |  |  |
| -1.51 | -5.15 | -3.95 |  |  |
| 2.31  | -1.61 | -3.36 |  |  |
| 1.68  | -1.48 | -2.77 |  |  |
| 2.28  | -1.32 | -3.06 |  |  |
| 1.41  | 1.79  | 0.73  |  |  |
| -4.59 | -2.88 | -1.24 |  |  |
| -4.62 | -1.99 | -0.34 |  |  |
| 6.81  | -0.99 | -2.73 |  |  |
| -1.02 | -3.91 | -2.85 |  |  |
| -1.09 | -4.27 | -3.12 |  |  |
| -1.14 | -2.86 | -1.64 |  |  |
| 2.34  | -1.66 | -3.39 |  |  |
| 1.71  | -5.63 | -6.91 |  |  |
| 1.46  | -2.63 | -3.69 |  |  |
| 1.25  | -1.9  | -3.64 |  |  |
| 1.12  | 0.94  | -0.65 |  |  |
| 1.07  | -1.41 | -2.93 |  |  |
| -1.07 | -2    | -3.32 |  |  |
| -1.13 | -2.98 | -4.23 |  |  |
| 2.05  | -0.77 | -2.51 |  |  |
| 1.27  | 5.08  | 4.04  |  |  |
| 1.27  | -0.33 | -1.38 |  |  |
| 3.78  | 3.37  | 1.63  |  |  |
| 2.37  | -1.53 | -2.59 |  |  |
| -1.97 | 2.29  | 3.44  |  |  |
| -2.9  | -3.31 | -1.59 |  |  |
| 5.2   | 2.35  | 0.61  |  |  |
| 3.75  | 1.41  | 0.14  |  |  |
| -1.37 | -1.37 | -0.28 |  |  |
| -1.5  | -1.44 | -0.21 |  |  |
| 2.49  | 0.12  | -1.62 |  |  |
| 1.85  | -1.19 | -2.5  |  |  |
| 2.62  | -0.9  | -2.64 |  |  |
| 2.41  | 0.66  | -0.95 |  |  |
| 2.97  | 0.18  | -1.56 |  |  |
| 2.31  | 2.18  | 0.8   |  |  |
| 2.14  | 0.22  | -1.04 |  |  |
| 2.08  | 1.06  | -0.16 |  |  |
| -2.39 | -0.28 | 0.81  |  |  |
| -2.59 | -0.82 | 0.38  |  |  |
| -2.71 | -0.63 | 0.64  |  |  |
| 5.28  | 2.06  | 0.32  |  |  |
| -1.27 | 0     | 1     |  |  |
| -1.35 | 0.23  | 1.33  |  |  |
| 1.3   | 0.43  | -1.31 |  |  |
| 1.18  | 0.87  | -0.73 |  |  |
| 1.13  | -1.18 | -2.71 |  |  |
| 1.07  | -2.41 | -3.87 |  |  |
| 1.07  | -0.97 | -2.43 |  |  |
| 1.03  | -2.62 | -4.01 |  |  |
| -1    | -2.53 | -3.88 |  |  |
| -1    | -1.46 | -2.81 |  |  |
| -1.1  | 3.87  | 2.66  |  |  |

|       |       |       |  |  |
|-------|-------|-------|--|--|
| -1.12 | 2.66  | 1.47  |  |  |
| -1.13 | 3.2   | 2.02  |  |  |
| -1.15 | 2.66  | 1.5   |  |  |
| -6.11 | -2.98 | -1.72 |  |  |
| 3.03  | 2.31  | 0.56  |  |  |
| 2.61  | -1.85 | -3.37 |  |  |
| 1.83  | 0.26  | -0.76 |  |  |
| -2.52 | -0.56 | 0.63  |  |  |
| -2.51 | -1.48 | -0.29 |  |  |
| 1.27  | 2.63  | 0.89  |  |  |
| -1.05 | 0.65  | -0.68 |  |  |
| -1.21 | 2.72  | 1.6   |  |  |
| 3.44  | -0.31 | -2.04 |  |  |
| 3.07  | -2.08 | -3.65 |  |  |
| 2.35  | 0.64  | -0.55 |  |  |
| -2.29 | -1.16 | 0.08  |  |  |
| -2.32 | -4.84 | -3.58 |  |  |
| 3.03  | 0.08  | -1.66 |  |  |
| 2.66  | -1.83 | -3.38 |  |  |
| 2.37  | -0.31 | -1.69 |  |  |
| 2.2   | -0.68 | -1.96 |  |  |
| 1.9   | -0.23 | -1.29 |  |  |
| -2.36 | -3.57 | -2.47 |  |  |
| -4.13 | -1.65 | 0.26  |  |  |
| 2.7   | -5.86 | -7.59 |  |  |
| 1.7   | -3.61 | -4.68 |  |  |
| 1.66  | -4.39 | -5.43 |  |  |
| -3.29 | -7.62 | -6.2  |  |  |
| 2.49  | 6.05  | 4.31  |  |  |
| 2.33  | 3.11  | 1.47  |  |  |
| 1.94  | 1.5   | 0.12  |  |  |
| 1.77  | -2.37 | -3.61 |  |  |
| 1.76  | 3     | 1.75  |  |  |
| 1.74  | -0.93 | -2.15 |  |  |
| 1.73  | 1.9   | 0.69  |  |  |
| 1.58  | 0.18  | -0.9  |  |  |
| 1.5   | 1.2   | 0.19  |  |  |
| 1.5   | 4.4   | 2.66  |  |  |
| 1.47  | 0.72  | -0.98 |  |  |
| 1.4   | 2.31  | 0.67  |  |  |
| 1.19  | 0.14  | -1.26 |  |  |
| 1.17  | 0.56  | -0.82 |  |  |
| 1.11  | -0.02 | -1.31 |  |  |
| -1.01 | 1.2   | 0.07  |  |  |
| 2.88  | 0.25  | -1.49 |  |  |
| 2.22  | 0.68  | -0.68 |  |  |
| 5.26  | -0.95 | -2.69 |  |  |
| 4.93  | 1.22  | -0.43 |  |  |
| -1.9  | -2.19 | -0.61 |  |  |
| 6.03  | -0.39 | -2.13 |  |  |
| -1.11 | -2.47 | -1.46 |  |  |
| -1.25 | -3.39 | -2.21 |  |  |
| -1.44 | -4.95 | -3.57 |  |  |
| -1.52 | 3.04  | 4.5   |  |  |
| -2.32 | -4.28 | -2.2  |  |  |
| 7.2   | 0.83  | -0.9  |  |  |
| 6.88  | -0.14 | -1.81 |  |  |
| 4.62  | 0.71  | -0.39 |  |  |



|       |       |       |  |  |
|-------|-------|-------|--|--|
| 1.05  | 3.9   | 4.94  |  |  |
| 1.02  | 6.64  | 7.71  |  |  |
| 1.01  | -2.78 | -1.68 |  |  |
| -1.01 | 0.25  | 1.38  |  |  |
| 2.41  | -0.25 | -1.98 |  |  |
| 2.27  | 3.46  | 1.81  |  |  |
| 1.78  | 1.19  | -0.11 |  |  |
| 1.78  | -0.01 | -1.31 |  |  |
| 1.74  | -1.19 | -2.46 |  |  |
| 1.67  | -1.25 | -2.45 |  |  |
| 1.66  | 6.24  | 5.04  |  |  |
| 1.58  | -0.13 | -1.26 |  |  |
| 1.53  | -1.03 | -2.11 |  |  |
| 1.48  | 1.02  | -0.01 |  |  |
| -3    | -0.94 | 0.18  |  |  |
| -3.23 | 0.5   | 1.73  |  |  |
| -3.24 | -0.79 | 0.44  |  |  |
| 3.32  | 4.24  | 2.5   |  |  |
| 3.1   | 0.17  | -1.47 |  |  |
| 3.01  | 4.39  | 2.8   |  |  |
| 2.88  | 4.89  | 3.36  |  |  |
| 2.85  | 3.69  | 2.18  |  |  |
| 2.2   | 4.26  | 3.12  |  |  |
| 2.19  | 6.9   | 5.76  |  |  |
| -2.02 | 0.99  | 2     |  |  |
| -2.02 | 2.54  | 3.55  |  |  |
| -2.08 | 2.04  | 3.09  |  |  |
| -2.1  | 0.99  | 2.06  |  |  |
| -2.15 | -0.95 | 0.16  |  |  |
| -2.21 | 2.03  | 3.17  |  |  |
| -2.41 | -0.14 | 1.13  |  |  |
| -2.72 | 0.81  | 2.26  |  |  |
| 4.86  | -1.88 | -3.62 |  |  |
| 4.05  | -0.76 | -2.23 |  |  |
| 3.13  | -1.74 | -2.84 |  |  |
| -1.57 | 1.42  | 2.62  |  |  |
| -1.66 | -3.63 | -2.36 |  |  |
| -1.93 | 2.02  | 3.52  |  |  |
| 5.53  | -0.04 | -1.78 |  |  |
| -2.13 | 0.51  | 2.33  |  |  |
| 1.85  | -1.23 | -2.96 |  |  |
| 1.48  | 1.62  | 0.2   |  |  |
| 1.39  | -1.79 | -3.12 |  |  |
| 1.38  | -1.63 | -2.94 |  |  |
| 1.38  | -2.58 | -3.88 |  |  |
| 1.31  | -0.74 | -1.98 |  |  |
| 1.29  | -1.14 | -2.35 |  |  |
| 1.19  | -3.09 | -4.19 |  |  |
| 1.15  | 2.31  | 1.27  |  |  |
| 1.13  | 0.79  | -0.23 |  |  |
| 1.93  | 4.29  | 2.55  |  |  |
| 1.72  | 1.18  | -0.38 |  |  |
| 1.22  | 0.75  | -0.32 |  |  |
| 1.2   | -3.2  | -4.24 |  |  |
| 1.19  | -1.16 | -2.19 |  |  |
| -3.67 | -2.59 | -1.49 |  |  |
| -1.03 | -3.99 | -5.72 |  |  |
| -1.19 | -5.22 | -6.75 |  |  |

|       |       |       |  |  |
|-------|-------|-------|--|--|
| -1.53 | -3.5  | -4.66 |  |  |
| -1.55 | 0.85  | -0.3  |  |  |
| 5.71  | 1.53  | -0.2  |  |  |
| -1.38 | -5.34 | -4.09 |  |  |
| -1.45 | -3.12 | -1.8  |  |  |
| -1.73 | -6.13 | -4.56 |  |  |
| 1.85  | -1.09 | -2.82 |  |  |
| 1.62  | -0.93 | -2.48 |  |  |
| 1.26  | -2.33 | -3.51 |  |  |
| 1.14  | -0.46 | -1.49 |  |  |
| 1.14  | -0.91 | -1.94 |  |  |
| -3.82 | -2.14 | -1.05 |  |  |
| -3.93 | -3.57 | -2.44 |  |  |
| 1.23  | -1.65 | -3.38 |  |  |
| 1.06  | -6.09 | -7.61 |  |  |
| -1    | -1.46 | -2.88 |  |  |
| -1.22 | -2.16 | -3.3  |  |  |
| -5.44 | -4.15 | -3.13 |  |  |
| -5.71 | -3.99 | -2.9  |  |  |
| -7.9  | -4.99 | -3.43 |  |  |
| 2.91  | 0.72  | -1.01 |  |  |
| -2.38 | -1.41 | -0.36 |  |  |
| -2.41 | -0.44 | 0.64  |  |  |
| -2.42 | -1.2  | -0.12 |  |  |
| -2.51 | -1.89 | -0.75 |  |  |
| -2.74 | -1.24 | 0.02  |  |  |
| -3.77 | -1.26 | 0.47  |  |  |
| 1.63  | 0.69  | -1.04 |  |  |
| 1.2   | 1.31  | 0.02  |  |  |
| 1.08  | 5.02  | 3.87  |  |  |
| 1.07  | 1.91  | 0.78  |  |  |
| -1.02 | 2.97  | 1.97  |  |  |
| 4.91  | 0.4   | -1.33 |  |  |
| 3.38  | 1.36  | 0.16  |  |  |
| 3.06  | 0.72  | -0.33 |  |  |
| -1.41 | -2.29 | -1.23 |  |  |
| -1.43 | -2.2  | -1.12 |  |  |
| -1.65 | -0.45 | 0.83  |  |  |
| 1.18  | 1.69  | -0.04 |  |  |
| 1.03  | 7.72  | 6.2   |  |  |
| -1.19 | 4.14  | 2.9   |  |  |
| -1.36 | 2.31  | 1.26  |  |  |
| 3.09  | -3.93 | -5.66 |  |  |
| 1.88  | -2.08 | -3.09 |  |  |
| -2.53 | -6.82 | -5.58 |  |  |
| -3.01 | -5.35 | -3.86 |  |  |
| -4.2  | -9.64 | -7.67 |  |  |
| 2.84  | 3.36  | 1.63  |  |  |
| -2.5  | -3.22 | -2.13 |  |  |
| -2.92 | -2.28 | -0.96 |  |  |
| 3.03  | -0.87 | -2.6  |  |  |
| -2.54 | -2.33 | -1.11 |  |  |
| -2.57 | -0.73 | 0.51  |  |  |
| -4.16 | -3.07 | -1.14 |  |  |
| 2.6   | -1.44 | -3.17 |  |  |
| 2.19  | 2.2   | 0.72  |  |  |
| 1.67  | -1.53 | -2.62 |  |  |
| 1.62  | 5.11  | 4.07  |  |  |

|       |       |       |  |  |
|-------|-------|-------|--|--|
| 1.58  | 4.3   | 2.57  |  |  |
| 1.57  | -1.05 | -2.76 |  |  |
| 1.2   | -0.61 | -1.94 |  |  |
| 1.2   | -1.5  | -2.83 |  |  |
| 1.17  | 1.54  | 0.25  |  |  |
| -1.03 | 1.87  | 0.85  |  |  |
| -4.85 | -1.47 | -0.26 |  |  |
| -5.76 | -1.63 | -0.17 |  |  |
| -6.03 | -1.4  | 0.13  |  |  |
| -6.58 | -1.48 | 0.18  |  |  |
| 3.32  | 0.76  | -0.96 |  |  |
| -3.31 | -2.57 | -0.83 |  |  |
| -4.18 | -3.07 | -1    |  |  |
| 5.61  | -1.91 | -3.64 |  |  |
| -1.21 | -4.84 | -3.81 |  |  |
| -2.38 | -3.63 | -1.62 |  |  |
| 5.11  | -0.45 | -2.18 |  |  |
| 3.24  | -0.52 | -1.59 |  |  |
| 4.74  | -0.76 | -2.48 |  |  |
| 4.14  | 1.59  | 0.06  |  |  |
| 2.95  | 0.72  | -0.31 |  |  |
| 1.25  | -5.07 | -6.8  |  |  |
| 1.19  | 2.74  | 1.08  |  |  |
| 1.1   | -4.85 | -6.39 |  |  |
| 1.05  | -0.15 | -1.62 |  |  |
| 1.01  | -2.1  | -3.52 |  |  |
| -1.14 | -1.46 | -2.68 |  |  |
| -1.18 | -2.55 | -3.73 |  |  |
| -1.18 | -4.1  | -5.27 |  |  |
| -1.24 | -3.22 | -4.32 |  |  |
| -1.27 | -1.5  | -2.56 |  |  |
| -1.32 | -2.34 | -3.35 |  |  |
| 2.79  | -0.71 | -2.43 |  |  |
| -2.56 | -2.76 | -1.64 |  |  |
| -2.94 | -3.33 | -2.02 |  |  |
| 2.47  | 0.06  | -1.67 |  |  |
| 1.5   | -1.37 | -2.37 |  |  |
| 1.5   | -1.12 | -2.84 |  |  |
| 1.46  | -0.03 | -1.71 |  |  |
| 1.23  | 1.59  | 0.15  |  |  |
| 1.18  | -4.03 | -5.41 |  |  |
| 1.06  | -1.54 | -2.76 |  |  |
| 1.01  | -0.32 | -1.47 |  |  |
| -1.06 | -2.92 | -3.97 |  |  |
| -1.08 | -1.53 | -2.57 |  |  |
| 6.66  | -2.55 | -4.27 |  |  |
| 5.55  | -3.15 | -4.61 |  |  |
| 5.42  | -4.33 | -5.76 |  |  |
| 4.07  | -1.68 | -2.69 |  |  |
| -1.01 | -3.66 | -2.64 |  |  |
| -1.02 | -6.08 | -5.03 |  |  |
| -1.03 | -7.55 | -6.5  |  |  |
| -1.03 | -6.52 | -5.45 |  |  |
| -1.07 | -5.23 | -4.12 |  |  |
| -1.07 | -4.34 | -3.23 |  |  |
| -1.12 | -6.13 | -4.95 |  |  |
| 1.6   | 2.64  | 0.92  |  |  |
| 1.12  | 1.27  | 0.07  |  |  |

|       |       |       |  |  |
|-------|-------|-------|--|--|
| 1.06  | 1.26  | 0.13  |  |  |
| 1.01  | 2.62  | 1.57  |  |  |
| 1.88  | 1.3   | -0.42 |  |  |
| 1.43  | 1.39  | 0.06  |  |  |
| 1.34  | -1.87 | -3.1  |  |  |
| 1.27  | 5.51  | 4.35  |  |  |
| -3.88 | -2.26 | -1.12 |  |  |
| 9.73  | -1.19 | -2.92 |  |  |
| 8.56  | -1.73 | -3.26 |  |  |
| 6.32  | -1.31 | -2.41 |  |  |
| 1.4   | -3.93 | -2.85 |  |  |
| 1.35  | -4.96 | -3.83 |  |  |
| 1.33  | -3.68 | -2.53 |  |  |
| 1.31  | -5.19 | -4.02 |  |  |
| 1.29  | -2.34 | -1.14 |  |  |
| 1.26  | -3.99 | -2.77 |  |  |
| 1.16  | -0.5  | 0.85  |  |  |
| 1.14  | 0.99  | 2.37  |  |  |
| -1    | -0.84 | 0.73  |  |  |
| -1.02 | -5.3  | -3.71 |  |  |
| 2.12  | 0.37  | -1.35 |  |  |
| 1.61  | -0.36 | -1.69 |  |  |
| 1.37  | -1.37 | -2.47 |  |  |
| 1.3   | 2.81  | 1.78  |  |  |
| -3.69 | -0.84 | 0.4   |  |  |
| 22.21 | 0.8   | -0.92 |  |  |
| 14.11 | -1.43 | -2.49 |  |  |
| 2.73  | -1.27 | 0.04  |  |  |
| 1.81  | -1.36 | 0.54  |  |  |
| 1.62  | 1.46  | 3.52  |  |  |
| 1.24  | -4.55 | -2.1  |  |  |
| 1.2   | 1.64  | 4.14  |  |  |
| 1.04  | -1.58 | 1.12  |  |  |
| 1.14  | 2.26  | 0.54  |  |  |
| 1.04  | 0.43  | -1.16 |  |  |
| 1.02  | -1.91 | -3.47 |  |  |
| -1.03 | 0.06  | -1.43 |  |  |
| -1.03 | 1.12  | -0.36 |  |  |
| -1.1  | 1.45  | 0.05  |  |  |
| -1.17 | -3.51 | -4.81 |  |  |
| -1.29 | -3.94 | -5.1  |  |  |
| -1.38 | 1.38  | 0.32  |  |  |
| -1.39 | -1.2  | -2.25 |  |  |
| 3.9   | 3.7   | 1.98  |  |  |
| 3.61  | 3.59  | 1.98  |  |  |
| 2.49  | 0.76  | -0.32 |  |  |
| -3.7  | -1.05 | 1.08  |  |  |
| 3     | -2.26 | -3.98 |  |  |
| 2.57  | -2    | -3.5  |  |  |
| 2.51  | -3.84 | -5.3  |  |  |
| 1.44  | -1.88 | -3.6  |  |  |
| 1.39  | 1.97  | 0.31  |  |  |
| 1.34  | -2.48 | -4.08 |  |  |
| 1.33  | 1.04  | -0.57 |  |  |
| 1.2   | 2.42  | 0.97  |  |  |
| 1.16  | 0.62  | -0.78 |  |  |
| 1.15  | -0.24 | -1.63 |  |  |
| 1.01  | -0.13 | -1.33 |  |  |

|       |       |       |  |  |
|-------|-------|-------|--|--|
| -1.06 | -1.34 | -2.45 |  |  |
| 3.43  | 0.13  | -1.58 |  |  |
| 2.48  | -1.39 | -2.64 |  |  |
| 2.33  | 1.11  | -0.05 |  |  |
| 2.17  | -1.07 | -2.12 |  |  |
| 1.84  | -3.9  | -5.62 |  |  |
| 1.37  | -3.52 | -4.82 |  |  |
| -3.74 | -2.71 | -1.65 |  |  |
| 4.36  | 1.82  | 0.1   |  |  |
| 2.67  | 2.61  | 1.6   |  |  |
| 2.9   | 1.78  | 0.06  |  |  |
| 2.1   | -0.88 | -2.14 |  |  |
| 2.06  | 2.01  | 0.78  |  |  |
| -4.77 | -3.66 | -1.59 |  |  |
| 3.1   | 1.29  | -0.42 |  |  |
| -2.51 | -3.44 | -2.2  |  |  |
| 4.03  | -0.68 | -2.4  |  |  |
| 3.56  | -2.06 | -3.6  |  |  |
| 3.31  | -2.1  | -3.53 |  |  |
| 2.8   | 0.19  | -1    |  |  |
| -1.66 | -0.71 | 0.31  |  |  |
| 5.17  | 1.81  | 0.09  |  |  |
| 3.97  | 1.29  | -0.04 |  |  |
| 3.83  | 1.12  | -0.16 |  |  |
| 3.64  | 0.12  | -1.09 |  |  |
| 3.22  | 1.29  | 0.26  |  |  |
| 4.76  | -0.62 | -2.34 |  |  |
| -1.38 | 0.96  | 1.96  |  |  |
| -1.4  | -2.37 | -1.35 |  |  |
| -1.52 | 1.89  | 3.03  |  |  |
| -1.68 | 1.46  | 2.74  |  |  |
| -1.71 | -2.8  | -1.49 |  |  |
| -1.76 | 0.28  | 1.63  |  |  |
| -1.79 | 0.23  | 1.6   |  |  |
| -1.88 | 1.21  | 2.66  |  |  |
| -1.95 | 1.91  | 3.41  |  |  |
| -2.11 | -2.02 | -0.41 |  |  |
| -2.63 | 0.61  | 2.54  |  |  |
| 2.76  | 0.04  | -1.68 |  |  |
| 2.08  | 0.08  | -1.23 |  |  |
| 1.88  | -0.35 | -1.51 |  |  |
| 1.79  | 0.69  | -0.4  |  |  |
| -2.39 | -2.42 | -1.42 |  |  |
| -3.96 | -2.83 | -1.1  |  |  |
| 2.15  | 2.12  | 0.41  |  |  |
| 1.99  | 0.26  | -1.34 |  |  |
| 1.85  | 0.38  | -1.12 |  |  |
| 1.74  | 0.43  | -0.98 |  |  |
| 1.46  | 1.83  | 0.68  |  |  |
| 1.42  | 1.05  | -0.06 |  |  |
| 1.4   | 0.57  | -0.52 |  |  |
| 1.4   | 6.77  | 5.68  |  |  |
| 1.34  | 1.44  | 0.41  |  |  |
| -4.23 | 1.05  | 2.52  |  |  |
| 3.3   | -0.42 | -2.13 |  |  |
| -2    | -2.33 | -1.31 |  |  |
| -2.36 | -4.42 | -3.17 |  |  |
| -2.62 | -3.6  | -2.2  |  |  |

|       |       |       |  |  |
|-------|-------|-------|--|--|
| -3.69 | -4.63 | -2.73 |  |  |
| 3.74  | 2.08  | 0.37  |  |  |
| 2.6   | 0.34  | -0.84 |  |  |
| 2.86  | -0.99 | -2.7  |  |  |
| 1.83  | -0.08 | -1.15 |  |  |
| 1.88  | -2.48 | -4.19 |  |  |
| 1.55  | 0.01  | -1.43 |  |  |
| 1.52  | 2.77  | 1.36  |  |  |
| 1.49  | 0.22  | -1.16 |  |  |
| 1.18  | 3.57  | 2.54  |  |  |
| 1.16  | 0.29  | -0.72 |  |  |
| 3.97  | -2.35 | -4.05 |  |  |
| 2.63  | 0.22  | -0.89 |  |  |
| -1.73 | -1.56 | -0.49 |  |  |
| -1.81 | -2.33 | -1.18 |  |  |
| -1.96 | -4.08 | -2.82 |  |  |
| -3.32 | -3.54 | -1.52 |  |  |
| 1.63  | -1.37 | -3.08 |  |  |
| 1.59  | 1.65  | -0.02 |  |  |
| 1.48  | -0.9  | -2.48 |  |  |
| 1.01  | -1.06 | -2.08 |  |  |
| -1.01 | -1.85 | -2.85 |  |  |
| 2.85  | -0.6  | -2.3  |  |  |
| 1.88  | -1.24 | -2.34 |  |  |
| 1.62  | -2.79 | -4.5  |  |  |
| 1.11  | -5.55 | -6.72 |  |  |
| 1.06  | 0.45  | -0.65 |  |  |
| 2.63  | -2.34 | -4.05 |  |  |
| -2.65 | -1.03 | 0.06  |  |  |
| -3.69 | -3.64 | -2.07 |  |  |
| 2.52  | -1.56 | -3.27 |  |  |
| 1.97  | 1.03  | -0.31 |  |  |
| 1.81  | -1.19 | -2.42 |  |  |
| 1.64  | 0.47  | -0.61 |  |  |
| 1.6   | -0.62 | -1.67 |  |  |
| -3.32 | -3.51 | -2.15 |  |  |
| 3.01  | -2.07 | -3.77 |  |  |
| 2.76  | -1.15 | -2.72 |  |  |
| 2.52  | -0.56 | -2.01 |  |  |
| 2.41  | 0.04  | -1.35 |  |  |
| 2.35  | -3.44 | -4.78 |  |  |
| 2.02  | 0.06  | -1.06 |  |  |
| 1.3   | -3.98 | -5.68 |  |  |
| 1.25  | 2.67  | 1.03  |  |  |
| 1.08  | -4.32 | -5.76 |  |  |
| 1.04  | -3.75 | -5.14 |  |  |
| -1.05 | -2.05 | -3.31 |  |  |
| -1.11 | -1.81 | -2.98 |  |  |
| -1.22 | -1.23 | -2.27 |  |  |
| -5.53 | -3.45 | -2.31 |  |  |
| -5.77 | -3.37 | -2.17 |  |  |
| -5.98 | -2.4  | -1.15 |  |  |
| -6.62 | -3.55 | -2.15 |  |  |
| 2.01  | -2.58 | -4.29 |  |  |
| 1.56  | -1.69 | -3.03 |  |  |
| -3.39 | -0.32 | 0.74  |  |  |
| -3.8  | -0.29 | 0.94  |  |  |
| -4.24 | 0.17  | 1.56  |  |  |

|        |       |       |  |  |
|--------|-------|-------|--|--|
| 2.67   | -2.39 | -4.1  |  |  |
| 2.16   | -4.24 | -5.65 |  |  |
| 2.07   | -4.63 | -5.97 |  |  |
| 1.92   | -3.88 | -5.11 |  |  |
| 1.66   | -5.56 | -6.58 |  |  |
| 1.7    | -0.3  | -2    |  |  |
| 1.19   | 1.7   | 0.51  |  |  |
| 1.41   | -0.61 | -2.32 |  |  |
| 1.22   | 1.51  | 0.01  |  |  |
| 1.12   | 4.88  | 3.5   |  |  |
| -1.05  | 2.43  | 1.29  |  |  |
| -1.08  | 2.32  | 1.23  |  |  |
| -1.1   | 3.06  | 1.99  |  |  |
| -1.14  | 0.95  | -0.07 |  |  |
| -4.97  | -0.09 | 1.02  |  |  |
| -5.75  | -1.9  | -0.59 |  |  |
| -5.88  | -0.86 | 0.49  |  |  |
| -10.54 | -1.73 | 0.46  |  |  |
| -13.28 | -2.28 | 0.24  |  |  |
| 1.92   | 2.53  | 0.82  |  |  |
| 1.26   | -3.48 | -4.58 |  |  |
| 1.65   | 2.33  | 0.62  |  |  |
| 1.18   | -0.34 | -1.56 |  |  |
| 1.18   | 3.66  | 2.43  |  |  |
| 1.05   | 3.69  | 2.63  |  |  |
| 2.1    | 2.11  | 0.4   |  |  |
| 1.84   | -0.82 | -2.34 |  |  |
| -3.14  | -2.32 | -1.3  |  |  |
| -3.3   | -3.22 | -2.14 |  |  |
| -3.35  | -2.37 | -1.26 |  |  |
| -3.7   | -1.98 | -0.73 |  |  |
| -4.34  | -2.77 | -1.28 |  |  |
| 2.07   | -3.41 | -5.12 |  |  |
| 1.51   | -0.31 | -1.55 |  |  |
| 1.48   | -1.42 | -2.63 |  |  |
| 2.7    | 1.78  | 0.07  |  |  |
| 1.81   | -1.89 | -3.02 |  |  |
| 1.78   | 1.44  | 0.33  |  |  |
| -2.86  | -3.58 | -2.34 |  |  |
| 2.8    | 1.64  | -0.06 |  |  |
| 1.75   | -0.91 | -1.93 |  |  |
| -3.19  | -1.43 | 0.03  |  |  |
| 1.21   | 4.51  | 2.81  |  |  |
| 1.17   | 1.76  | 0.11  |  |  |
| 1.16   | 4.17  | 2.53  |  |  |
| 1.09   | 1.49  | -0.07 |  |  |
| -1.01  | 3.16  | 1.74  |  |  |
| -1.12  | 4.22  | 2.95  |  |  |
| -6.48  | -2.56 | -1.3  |  |  |
| 4.41   | 1.92  | 0.22  |  |  |
| 4.25   | 2.33  | 0.69  |  |  |
| 3.37   | 0.69  | -0.62 |  |  |
| 3.21   | 0.4   | -0.85 |  |  |
| 2.8    | 1.19  | 0.14  |  |  |
| -1.52  | 3.48  | 4.52  |  |  |
| 4.74   | 0.05  | -1.66 |  |  |
| -1.52  | -2.73 | -1.58 |  |  |
| 2.58   | -2.19 | -3.89 |  |  |

|       |       |       |  |  |
|-------|-------|-------|--|--|
| 1.97  | 1.84  | 0.52  |  |  |
| 1.79  | -4.16 | -5.34 |  |  |
| 1.76  | -1.53 | -2.68 |  |  |
| 3.06  | 2.56  | 0.86  |  |  |
| -2.21 | 1.49  | 2.55  |  |  |
| -2.4  | -0.53 | 0.65  |  |  |
| 3.37  | -2.58 | -4.28 |  |  |
| -2.1  | -3.85 | -2.73 |  |  |
| 3.05  | -2.52 | -4.22 |  |  |
| 2.07  | -2.11 | -3.25 |  |  |
| 1.92  | -2.03 | -3.06 |  |  |
| -2.92 | -5.25 | -3.8  |  |  |
| -1.21 | -1.52 | -3.22 |  |  |
| -1.21 | -1.3  | -3.01 |  |  |
| -1.31 | -0.8  | -2.39 |  |  |
| -1.31 | 1.82  | 0.24  |  |  |
| -1.47 | -5.02 | -6.44 |  |  |
| -1.57 | -2.37 | -3.69 |  |  |
| -1.71 | 4.17  | 2.97  |  |  |
| -1.97 | 3.88  | 2.89  |  |  |
| 3.94  | -1.29 | -2.99 |  |  |
| 2.49  | 0.27  | -0.77 |  |  |
| -2.05 | 2     | 3.31  |  |  |
| -2.38 | -2.36 | -0.83 |  |  |
| 2.4   | -2.99 | -4.68 |  |  |
| 1.82  | -1.54 | -2.84 |  |  |
| 1.54  | 3.74  | 2.68  |  |  |
| -4.65 | -3.32 | -1.54 |  |  |
| -5.38 | -4.48 | -2.49 |  |  |
| -5.43 | -4.82 | -2.81 |  |  |
| -5.55 | -1.29 | 0.74  |  |  |
| 1.99  | -0.4  | -2.09 |  |  |
| 1.64  | -1.11 | -2.52 |  |  |
| 1.47  | 0.94  | -0.32 |  |  |
| 1.39  | -0.34 | -1.52 |  |  |
| 1.35  | 1.29  | 0.15  |  |  |
| 1.44  | -0.97 | -2.67 |  |  |
| 1.39  | -4.45 | -6.1  |  |  |
| 1.25  | -4.73 | -6.23 |  |  |
| 1.12  | -0.41 | -1.74 |  |  |
| 1.07  | 5.14  | 3.87  |  |  |
| -1    | 0.82  | -0.35 |  |  |
| -5.32 | -5.75 | -4.51 |  |  |
| -6.4  | -1.98 | -0.47 |  |  |
| 2.28  | -1.22 | -2.92 |  |  |
| -3.4  | -1.34 | -0.08 |  |  |
| 3.5   | -4.74 | -6.43 |  |  |
| 2.42  | -4.44 | -5.6  |  |  |
| 2.12  | 2.45  | 0.76  |  |  |
| 1.7   | 0.24  | -1.14 |  |  |
| 1.57  | 2.41  | 1.14  |  |  |
| 1.56  | 2.72  | 1.46  |  |  |
| 1.49  | 1.42  | 0.22  |  |  |
| 1.46  | -0.09 | -1.25 |  |  |
| 1.45  | 0.76  | -0.39 |  |  |
| 1.4   | 1.55  | 0.45  |  |  |
| 1.34  | 0.87  | -0.17 |  |  |
| -3.18 | 0.51  | 1.56  |  |  |



|       |       |       |  |  |
|-------|-------|-------|--|--|
| -3.58 | -0.18 | 1.04  |  |  |
| -4.49 | -0.52 | 1.03  |  |  |
| -4.49 | -0.19 | 1.36  |  |  |
| -4.8  | -2.12 | -0.47 |  |  |
| -5.73 | -2.03 | -0.13 |  |  |
| 1.19  | 2.73  | 1.03  |  |  |
| 1.06  | -1.26 | -2.8  |  |  |
| 1.01  | -2.11 | -3.57 |  |  |
| -1.14 | -1.47 | -2.73 |  |  |
| -1.18 | -2.56 | -3.78 |  |  |
| 3.38  | 2.3   | 0.6   |  |  |
| -2.33 | -1.68 | -0.4  |  |  |
| -2.33 | -1.4  | -0.11 |  |  |
| 1.49  | 2.06  | 0.37  |  |  |
| 1.49  | -0.36 | -2.05 |  |  |
| 1.39  | -2.79 | -4.38 |  |  |
| 1.17  | 1.83  | 0.49  |  |  |
| 1.13  | 2.98  | 1.69  |  |  |
| 1.09  | 0.24  | -0.99 |  |  |
| 1     | 2.72  | 1.6   |  |  |
| 3.21  | -2.3  | -3.99 |  |  |
| 2.39  | -4.28 | -5.54 |  |  |
| -2    | -0.53 | 0.46  |  |  |
| -2.13 | -2.06 | -0.97 |  |  |
| -2.29 | -2.48 | -1.3  |  |  |
| -2.32 | -3.84 | -2.63 |  |  |
| -2.33 | 0.89  | 2.1   |  |  |
| -3.09 | -4.62 | -3    |  |  |
| -3.9  | -2.05 | -0.09 |  |  |
| 4.13  | 1.31  | -0.38 |  |  |
| -1.7  | 1.59  | 2.72  |  |  |
| -1.72 | -1.94 | -0.81 |  |  |
| -1.81 | 0.26  | 1.48  |  |  |
| 3.42  | -5.04 | -6.73 |  |  |
| -2.31 | -5.86 | -4.57 |  |  |
| 23.19 | -0.25 | -1.95 |  |  |
| 16.08 | -1.5  | -2.67 |  |  |
| 16.03 | -1.24 | -2.4  |  |  |
| 3.57  | 1.62  | 2.62  |  |  |
| 3.1   | -3.83 | -2.62 |  |  |
| 2.94  | -2.43 | -1.14 |  |  |
| 2.76  | -0.86 | 0.52  |  |  |
| 2.75  | 0.15  | 1.54  |  |  |
| 2.48  | -0.57 | 0.96  |  |  |
| 2.4   | -3.78 | -2.2  |  |  |
| 2.1   | -0.77 | 1     |  |  |
| 1.79  | -3.46 | -1.46 |  |  |
| 1.75  | -1.52 | 0.52  |  |  |
| 1.71  | -1.45 | 0.62  |  |  |
| 1.46  | -0.92 | 1.37  |  |  |
| 1.42  | -4.01 | -1.67 |  |  |
| 1.33  | -4.84 | -2.4  |  |  |
| 1.13  | -2.08 | 0.58  |  |  |
| 1.13  | -5.44 | -2.78 |  |  |
| 1.11  | 0.77  | 3.46  |  |  |
| 1.08  | -5.01 | -2.28 |  |  |
| -1.05 | -3.96 | -1.06 |  |  |
| -1.55 | -5.13 | -1.65 |  |  |

|       |       |       |  |  |
|-------|-------|-------|--|--|
| -1.96 | -2.99 | 0.83  |  |  |
| 4.38  | -0.78 | -2.47 |  |  |
| -1.47 | 4.12  | 5.11  |  |  |
| -1.66 | -2.36 | -1.19 |  |  |
| 3.36  | -3.04 | -4.73 |  |  |
| 2.23  | -3.67 | -4.77 |  |  |
| -1.94 | -1.25 | -0.24 |  |  |
| -1.94 | -4.97 | -3.96 |  |  |
| -1.96 | -4.25 | -3.22 |  |  |
| -2.33 | -1.66 | -0.39 |  |  |
| -2.45 | -3.17 | -1.83 |  |  |
| 2.05  | 2.64  | 0.94  |  |  |
| 1.64  | -1.04 | -2.41 |  |  |
| 1.42  | 0.96  | -0.2  |  |  |
| 1.39  | 1.75  | 0.62  |  |  |
| -4.23 | -1.32 | 0.11  |  |  |
| 1.62  | -2.66 | -4.35 |  |  |
| 1.25  | 1.18  | -0.14 |  |  |
| 1.13  | 1.8   | 0.62  |  |  |
| 1.12  | 0.47  | -0.69 |  |  |
| 1.07  | -2.39 | -3.47 |  |  |
| 2.39  | 1.14  | -0.54 |  |  |
| 1.55  | -1.67 | -2.73 |  |  |
| 2.02  | 0.63  | -1.06 |  |  |
| 2     | -1.58 | -3.25 |  |  |
| 1.44  | 0.9   | -0.3  |  |  |
| 1.41  | -0.66 | -1.83 |  |  |
| 1.33  | 0.12  | -0.97 |  |  |
| 1.26  | -0.36 | -1.37 |  |  |
| -3.76 | -1.84 | -0.6  |  |  |
| -4.02 | -2.18 | -0.84 |  |  |
| 2.53  | -3.64 | -5.33 |  |  |
| -2.63 | -2.69 | -1.64 |  |  |
| -3.82 | -3.14 | -1.55 |  |  |
| -4.14 | -6.35 | -4.65 |  |  |
| -7.41 | -6.05 | -3.51 |  |  |
| 1.78  | 2.36  | 0.68  |  |  |
| 1.18  | 0.87  | -0.22 |  |  |
| 1.17  | 1.39  | 0.31  |  |  |
| -5.96 | -2.12 | -0.4  |  |  |
| 2.56  | -1.35 | -3.04 |  |  |
| 2.15  | -2.02 | -3.46 |  |  |
| 1.59  | -1.77 | -2.77 |  |  |
| -2.83 | -0.78 | 0.38  |  |  |
| -3.38 | -2.58 | -1.16 |  |  |
| -3.48 | -2.14 | -0.67 |  |  |
| -4.04 | -2.87 | -1.19 |  |  |
| -4.16 | -2.6  | -0.88 |  |  |
| 2.85  | 1.84  | 0.15  |  |  |
| -2.51 | -2.38 | -1.24 |  |  |
| -3.09 | -4.27 | -2.82 |  |  |
| 2.46  | 2.52  | 0.83  |  |  |
| -2.92 | -0.16 | 1     |  |  |
| 9.28  | -0.15 | -1.84 |  |  |
| 7.76  | -1.09 | -2.52 |  |  |
| 6.61  | -0.76 | -1.95 |  |  |
| 6.35  | 0.12  | -1.02 |  |  |
| 6.02  | -0.09 | -1.15 |  |  |

|       |       |       |  |  |
|-------|-------|-------|--|--|
| 5.84  | -0.87 | -1.89 |  |  |
| 1.38  | -0.09 | 0.97  |  |  |
| 1.34  | -0.84 | 0.26  |  |  |
| 1.34  | -2.07 | -0.97 |  |  |
| 1.32  | 1.09  | 2.21  |  |  |
| 1.24  | 0.52  | 1.73  |  |  |
| 1.2   | -0.83 | 0.43  |  |  |
| 1.16  | -0.15 | 1.17  |  |  |
| 1.15  | 0.58  | 1.9   |  |  |
| 1.12  | -1.75 | -0.39 |  |  |
| 1.01  | -0.09 | 1.43  |  |  |
| -1.3  | -0.54 | 1.36  |  |  |
| 3.88  | -0.99 | -2.67 |  |  |
| 2.49  | -3.95 | -5    |  |  |
| -1.76 | -5.26 | -4.17 |  |  |
| -2.18 | -6.44 | -5.04 |  |  |
| 1.78  | 0.97  | -0.71 |  |  |
| 1.61  | 1.67  | 0.13  |  |  |
| 1.46  | 0.78  | -0.63 |  |  |
| 1.33  | 2.05  | 0.78  |  |  |
| 1.3   | 1.36  | 0.12  |  |  |
| 1.3   | 3.9   | 2.67  |  |  |
| 1.2   | 0.41  | -0.71 |  |  |
| 1.14  | -0.15 | -1.19 |  |  |
| 1.13  | 1.36  | 0.33  |  |  |
| 1.11  | -1.5  | -2.5  |  |  |
| 5.62  | -0.91 | -2.59 |  |  |
| 3.91  | 0.26  | -0.9  |  |  |
| -1.18 | 0.76  | 1.8   |  |  |
| -1.22 | -3.07 | -1.97 |  |  |
| -1.46 | -2.35 | -1    |  |  |
| -1.54 | -3    | -1.57 |  |  |
| -1.6  | -1.46 | 0.02  |  |  |
| -1.64 | -1.56 | -0.04 |  |  |
| -1.68 | -4.06 | -2.51 |  |  |
| -1.9  | -1.83 | -0.1  |  |  |
| -1.92 | -1.22 | 0.53  |  |  |
| -2.14 | -0.7  | 1.2   |  |  |
| -4.33 | -1.92 | 1     |  |  |
| 2.1   | -3.21 | -4.9  |  |  |
| 2.03  | -0.45 | -2.09 |  |  |
| 1.89  | 4.24  | 2.7   |  |  |
| 1.54  | 3.64  | 2.39  |  |  |
| 1.45  | 2.75  | 1.59  |  |  |
| -3.41 | -2.54 | -1.39 |  |  |
| 2.58  | -0.38 | -2.07 |  |  |
| 1.99  | -3.5  | -4.81 |  |  |
| 1.69  | -3.01 | -4.08 |  |  |
| -2.67 | -3.81 | -2.71 |  |  |
| -2.71 | -4.62 | -3.51 |  |  |
| -3.01 | -3.17 | -1.9  |  |  |
| 1.62  | 1.03  | -0.66 |  |  |
| 1.4   | -0.19 | -1.66 |  |  |
| 1.26  | 2.23  | 0.9   |  |  |
| 1.13  | -2.69 | -3.87 |  |  |
| 3.45  | -4.76 | -6.45 |  |  |
| 2.49  | -2.66 | -3.88 |  |  |
| 2.21  | -2.45 | -3.49 |  |  |

|       |       |       |  |  |
|-------|-------|-------|--|--|
| 2.43  | -2.39 | -4.07 |  |  |
| 2.04  | -3.01 | -4.44 |  |  |
| 1.78  | -1.65 | -2.89 |  |  |
| 1.56  | 0.2   | -0.85 |  |  |
| -2.72 | -2.65 | -1.62 |  |  |
| -3.16 | -4.09 | -2.84 |  |  |
| -3.19 | -3.25 | -1.98 |  |  |
| 11.03 | 0.9   | -0.78 |  |  |
| 7.04  | 0.29  | -0.74 |  |  |
| 1.7   | -1.24 | -0.22 |  |  |
| 1.45  | -0.62 | 0.63  |  |  |
| 1.3   | 2.8   | 4.2   |  |  |
| 1.27  | 2.81  | 4.24  |  |  |
| 1.06  | 1.38  | 3.08  |  |  |
| 1.6   | -7.19 | -8.87 |  |  |
| 1.03  | -1.29 | -2.33 |  |  |
| 4.9   | -0.93 | -2.61 |  |  |
| 3.12  | -2.8  | -3.83 |  |  |
| -1.32 | -4.5  | -3.49 |  |  |
| -1.5  | -3.82 | -2.63 |  |  |
| 1.86  | -1.79 | -3.47 |  |  |
| 1.85  | 3.36  | 1.69  |  |  |
| 1.82  | -0.38 | -2.03 |  |  |
| 1.44  | 2.89  | 1.58  |  |  |
| 1.19  | 1.51  | 0.48  |  |  |
| 1.17  | 0.64  | -0.37 |  |  |
| 1.16  | 0.51  | -0.49 |  |  |
| 1.9   | -8.31 | -10   |  |  |
| 1.35  | -4.02 | -5.22 |  |  |
| 1.24  | -5.88 | -6.95 |  |  |
| -5.56 | -2.91 | -1.19 |  |  |
| -8.61 | -7    | -4.65 |  |  |
| 1.46  | 2.61  | 0.93  |  |  |
| 1.3   | -2.57 | -4.09 |  |  |
| 1.06  | -2.1  | -3.33 |  |  |
| -1    | -1.27 | -2.41 |  |  |
| 2.59  | 0.39  | -1.29 |  |  |
| 1.65  | 1.41  | 0.37  |  |  |
| 1.73  | 2.75  | 1.07  |  |  |
| 1.62  | -0.76 | -2.34 |  |  |
| 1.13  | 3.41  | 2.34  |  |  |
| 1.12  | -1.34 | -2.39 |  |  |
| 4.1   | 1.51  | -0.17 |  |  |
| 2.97  | 1.01  | -0.2  |  |  |
| 2.97  | -0.24 | -1.45 |  |  |
| 2.57  | 3.65  | 2.64  |  |  |
| -1.98 | -1.7  | -0.36 |  |  |
| 2.73  | -2.97 | -4.65 |  |  |
| 2.38  | -2.76 | -4.25 |  |  |
| 2.03  | -2.94 | -4.19 |  |  |
| 2.03  | 0.86  | -0.82 |  |  |
| 1.55  | -0.69 | -1.97 |  |  |
| 3.29  | -0.77 | -2.45 |  |  |
| 2.63  | -0.53 | -1.89 |  |  |
| 2.58  | 0.27  | -1.05 |  |  |
| 3.01  | -2.69 | -4.37 |  |  |
| 2.76  | 1.1   | -0.45 |  |  |
| 2.68  | 0.62  | -0.89 |  |  |

|       |       |       |  |  |
|-------|-------|-------|--|--|
| -2.23 | -1.8  | -0.74 |  |  |
| -2.5  | -2.58 | -1.34 |  |  |
| -3.3  | -2.35 | -0.72 |  |  |
| 2.12  | 2.44  | 0.76  |  |  |
| 1.7   | 0.22  | -1.14 |  |  |
| 1.57  | 2.39  | 1.15  |  |  |
| 1.56  | 2.7   | 1.47  |  |  |
| 1.53  | 1.89  | 0.68  |  |  |
| 1.49  | 1.4   | 0.22  |  |  |
| 1.46  | -0.11 | -1.25 |  |  |
| 1.4   | 1.53  | 0.45  |  |  |
| 1.34  | 0.85  | -0.17 |  |  |
| -3.18 | 0.49  | 1.57  |  |  |
| -3.58 | -0.2  | 1.04  |  |  |
| -4.49 | -0.21 | 1.36  |  |  |
| -4.49 | -0.54 | 1.03  |  |  |
| -4.8  | -2.14 | -0.47 |  |  |
| -5.73 | -2.05 | -0.13 |  |  |
| 2.12  | 2.44  | 0.76  |  |  |
| 1.7   | 0.22  | -1.14 |  |  |
| 1.57  | 2.39  | 1.15  |  |  |
| 1.56  | 2.7   | 1.47  |  |  |
| 1.53  | 1.89  | 0.68  |  |  |
| 1.49  | 1.4   | 0.22  |  |  |
| 1.46  | -0.11 | -1.25 |  |  |
| 1.4   | 1.53  | 0.45  |  |  |
| 1.34  | 0.85  | -0.17 |  |  |
| -3.18 | 0.49  | 1.57  |  |  |
| -3.58 | -0.2  | 1.04  |  |  |
| -4.49 | -0.21 | 1.36  |  |  |
| -4.49 | -0.54 | 1.03  |  |  |
| -4.8  | -2.14 | -0.47 |  |  |
| -5.73 | -2.05 | -0.13 |  |  |
| 2.12  | 2.44  | 0.76  |  |  |
| 1.7   | 0.22  | -1.14 |  |  |
| 1.57  | 2.39  | 1.15  |  |  |
| 1.56  | 2.7   | 1.47  |  |  |
| 1.53  | 1.89  | 0.68  |  |  |
| 1.49  | 1.4   | 0.22  |  |  |
| 1.46  | -0.11 | -1.25 |  |  |
| 1.4   | 1.53  | 0.45  |  |  |
| 1.34  | 0.85  | -0.17 |  |  |
| -3.18 | 0.49  | 1.57  |  |  |
| -3.58 | -0.2  | 1.04  |  |  |
| -4.49 | -0.21 | 1.36  |  |  |
| -4.49 | -0.54 | 1.03  |  |  |
| -4.8  | -2.14 | -0.47 |  |  |
| -5.73 | -2.05 | -0.13 |  |  |
| 1.87  | 2.04  | 0.37  |  |  |
| 1.84  | 1.71  | 0.07  |  |  |
| 1.75  | 3.2   | 1.62  |  |  |
| 1.34  | 3.21  | 2.02  |  |  |
| 1.18  | -0.35 | -1.36 |  |  |
| -3.76 | -0.7  | 0.44  |  |  |
| -3.83 | 0.19  | 1.36  |  |  |
| 2.8   | 2.27  | 0.6   |  |  |
| 1.79  | 2.01  | 0.98  |  |  |
| -2.73 | -2.76 | -1.5  |  |  |

|        |       |       |  |  |
|--------|-------|-------|--|--|
| 1.97   | 0.75  | -0.92 |  |  |
| 1.79   | -3.6  | -5.13 |  |  |
| 1.46   | 3.04  | 1.8   |  |  |
| 1.31   | -0.8  | -1.88 |  |  |
| 1.52   | 0.36  | -1.31 |  |  |
| 1.29   | -2.82 | -4.25 |  |  |
| 1.28   | -1.23 | -2.65 |  |  |
| 1.19   | -0.61 | -1.94 |  |  |
| 1.04   | -2.61 | -3.74 |  |  |
| -5.29  | -0.53 | 0.8   |  |  |
| -5.89  | -4.85 | -3.36 |  |  |
| -6.48  | -2.11 | -0.48 |  |  |
| -6.8   | -3.24 | -1.55 |  |  |
| 1.62   | -2.5  | -4.17 |  |  |
| 1.47   | -3.87 | -5.4  |  |  |
| 1.31   | -2.22 | -3.58 |  |  |
| 1.12   | -5.26 | -6.4  |  |  |
| 1.1    | -2.77 | -3.89 |  |  |
| 1.09   | -2.72 | -3.82 |  |  |
| 1.05   | -4.72 | -5.76 |  |  |
| 1.67   | 0.4   | -1.28 |  |  |
| 1.6    | -1.73 | -3.34 |  |  |
| 1.29   | -2.28 | -3.58 |  |  |
| 1.29   | -3    | -4.3  |  |  |
| 1.21   | -0.53 | -1.73 |  |  |
| 1.16   | -1.06 | -2.21 |  |  |
| 1.15   | -3.09 | -4.22 |  |  |
| 1.1    | -2.05 | -3.12 |  |  |
| 1.09   | 1.22  | 0.17  |  |  |
| 1.08   | -4.31 | -5.35 |  |  |
| -6.39  | -3.24 | -1.5  |  |  |
| 3.85   | -2.67 | -4.34 |  |  |
| 2.56   | -1.57 | -2.66 |  |  |
| 3.34   | -0.9  | -2.57 |  |  |
| 2.26   | -3.76 | -4.87 |  |  |
| -1.93  | -0.9  | 0.11  |  |  |
| -1.95  | -4.04 | -3.01 |  |  |
| -1.95  | -3.1  | -2.08 |  |  |
| -2.16  | -2.91 | -1.73 |  |  |
| -2.17  | -2.9  | -1.71 |  |  |
| -3.78  | -3.44 | -1.46 |  |  |
| -3.8   | -5.53 | -3.53 |  |  |
| 2.93   | -4.72 | -6.39 |  |  |
| 1.93   | -3.6  | -4.67 |  |  |
| 1.77   | -3.45 | -5.12 |  |  |
| 1.16   | -2.57 | -3.64 |  |  |
| 1      | 1.68  | 0     |  |  |
| -1.52  | -2.94 | -4    |  |  |
| -8.94  | -3.47 | -1.98 |  |  |
| -12.58 | -2.33 | -0.34 |  |  |
| 2.16   | 4.84  | 3.16  |  |  |
| 1.58   | 0.42  | -0.8  |  |  |
| -3.57  | -2.34 | -1.06 |  |  |
| -4.13  | -1.07 | 0.41  |  |  |
| 1.36   | 0.26  | -1.41 |  |  |
| 1.14   | -0.23 | -1.64 |  |  |
| 1.09   | -2    | -3.35 |  |  |
| 1.08   | 0.78  | -0.55 |  |  |

|       |       |       |  |  |
|-------|-------|-------|--|--|
| 1.07  | 5.63  | 4.31  |  |  |
| -1.04 | -0.44 | -1.61 |  |  |
| 1.96  | -2.33 | -4    |  |  |
| 1.33  | -3.34 | -4.45 |  |  |
| -3.33 | -2.01 | -0.97 |  |  |
| -3.36 | -3.99 | -2.94 |  |  |
| -3.91 | -3.12 | -1.86 |  |  |
| 3.01  | 2.73  | 1.06  |  |  |
| 2.89  | 0.73  | -0.89 |  |  |
| 2.15  | 2.08  | 0.89  |  |  |
| 2.06  | 1.96  | 0.83  |  |  |
| -2.19 | -0.13 | 0.92  |  |  |
| -2.76 | -3.07 | -1.69 |  |  |
| 8.49  | 0.76  | -0.91 |  |  |
| 6.22  | 1.02  | -0.2  |  |  |
| 5.54  | 0.59  | -0.46 |  |  |
| 1.24  | 0.52  | 1.63  |  |  |
| 1.14  | -0.65 | 0.57  |  |  |
| 1.08  | -1.43 | -0.12 |  |  |
| 1.03  | -0.03 | 1.35  |  |  |
| -1.07 | 2.84  | 4.35  |  |  |
| -1.11 | -1.36 | 0.2   |  |  |
| -1.12 | -2.73 | -1.15 |  |  |
| -1.6  | -0.94 | 1.17  |  |  |
| -2.33 | -0.31 | 2.33  |  |  |
| 2.35  | -2.67 | -4.34 |  |  |
| -3.34 | -2.01 | -0.71 |  |  |
| 2.09  | 1.68  | 0.01  |  |  |
| 1.87  | -1.83 | -3.34 |  |  |
| 1.74  | -1.15 | -2.56 |  |  |
| 1.5   | 2.72  | 1.53  |  |  |
| 1.4   | 1.1   | 0     |  |  |
| 1.4   | 1.15  | 0.05  |  |  |
| 1.37  | 0.64  | -0.43 |  |  |
| 1.31  | 0.91  | -0.09 |  |  |
| 4.62  | -3.13 | -4.8  |  |  |
| -1.51 | -3.16 | -2.02 |  |  |
| 1.5   | 4.41  | 2.74  |  |  |
| -6.07 | -1.02 | 0.5   |  |  |
| 2.36  | -3.54 | -5.21 |  |  |
| 1.68  | -1.56 | -2.74 |  |  |
| 1.56  | -3.83 | -4.9  |  |  |
| -2.69 | -1.79 | -0.79 |  |  |
| -8.3  | -5.44 | -2.82 |  |  |
| -1.01 | 1.8   | 0.13  |  |  |
| -1.16 | -0.46 | -1.93 |  |  |
| -1.45 | 1.31  | 0.17  |  |  |
| 3.21  | 1.82  | 0.15  |  |  |
| 2.72  | -0.5  | -1.93 |  |  |
| 2.67  | 0.33  | -1.07 |  |  |
| 2.19  | 0.66  | -0.46 |  |  |
| -8.7  | 1.89  | 5.03  |  |  |
| 1.68  | -1.32 | -2.99 |  |  |
| 1.64  | -2    | -3.63 |  |  |
| 1.56  | 0.54  | -1.02 |  |  |
| 1.36  | 1.66  | 0.3   |  |  |
| 1.16  | -2.07 | -3.19 |  |  |
| 1.11  | -1.74 | -2.81 |  |  |

|       |       |       |  |  |
|-------|-------|-------|--|--|
| 1.09  | 0.19  | -0.85 |  |  |
| 2.33  | 1.16  | -0.51 |  |  |
| 1.84  | -0.87 | -2.19 |  |  |
| 1.62  | 1.05  | -0.09 |  |  |
| -3.05 | -2.41 | -1.25 |  |  |
| 1.46  | -2.43 | -4.09 |  |  |
| 1.34  | -4.29 | -5.84 |  |  |
| 1.17  | -2.02 | -3.37 |  |  |
| 1.11  | -5.31 | -6.59 |  |  |
| -1.04 | -1.12 | -2.19 |  |  |
| -1.08 | -4.23 | -5.24 |  |  |
| -1.08 | -3.51 | -4.51 |  |  |
| 2.31  | -2.32 | -3.99 |  |  |
| 2.09  | 0.62  | -0.9  |  |  |
| 2.04  | -0.57 | -2.06 |  |  |
| 1.89  | -1.89 | -3.26 |  |  |
| 1.54  | -3.23 | -4.31 |  |  |
| 1.47  | -1.21 | -2.23 |  |  |
| 1.29  | -2.61 | -4.27 |  |  |
| -1.06 | 0.95  | -0.26 |  |  |
| 2.85  | 1.16  | -0.51 |  |  |
| 1.87  | -1.75 | -2.81 |  |  |
| -2.29 | -0.26 | 0.78  |  |  |
| -2.32 | -0.99 | 0.07  |  |  |
| -2.53 | -2.86 | -1.68 |  |  |
| 2.31  | -0.78 | -2.45 |  |  |
| 1.57  | 4.45  | 3.34  |  |  |
| -3.12 | 0.45  | 1.64  |  |  |
| -3.26 | -0.99 | 0.26  |  |  |
| 2.68  | -1.64 | -3.31 |  |  |
| 2.17  | -4    | -5.36 |  |  |
| 1.93  | -3.71 | -4.9  |  |  |
| 1.79  | -1.07 | -2.15 |  |  |
| 1.76  | -1.9  | -2.96 |  |  |
| 1.74  | -2.45 | -3.49 |  |  |
| 1.69  | -1.69 | -2.68 |  |  |
| -2.65 | -3.59 | -2.42 |  |  |
| -2.69 | -5.58 | -4.4  |  |  |
| 4.07  | 0.49  | -1.17 |  |  |
| 2.81  | -2.25 | -3.38 |  |  |
| -1.78 | -2.39 | -1.2  |  |  |
| 1.68  | -3.16 | -4.83 |  |  |
| 1.67  | -2.94 | -4.59 |  |  |
| 1.41  | -1.18 | -2.6  |  |  |
| 1.33  | -3.53 | -4.87 |  |  |
| 1.11  | -1.84 | -2.91 |  |  |
| 1.08  | -0.63 | -1.66 |  |  |
| 1.06  | -3.08 | -4.08 |  |  |
| 2.64  | 2.27  | 0.61  |  |  |
| 2.32  | 0.44  | -1.04 |  |  |
| 2.15  | -0.08 | -1.45 |  |  |
| 2.03  | 1.56  | 0.28  |  |  |
| 1.97  | 1.4   | 0.16  |  |  |
| 2.08  | 0.99  | -0.68 |  |  |
| 1.36  | -0.5  | -1.56 |  |  |
| -3.24 | -1.21 | -0.13 |  |  |
| -3.35 | -0.7  | 0.43  |  |  |
| -3.69 | -1.97 | -0.7  |  |  |



|        |       |       |  |  |
|--------|-------|-------|--|--|
| -3.99  | -1.81 | -0.42 |  |  |
| 2.9    | -2.5  | -4.17 |  |  |
| -2.23  | -2.51 | -1.48 |  |  |
| -2.75  | -3.01 | -1.67 |  |  |
| -2.84  | 3.18  | 4.56  |  |  |
| 1.19   | 2.81  | 1.15  |  |  |
| 1.12   | -5.62 | -7.21 |  |  |
| 1.1    | -4.78 | -6.33 |  |  |
| 1.09   | -3.75 | -5.3  |  |  |
| 1.05   | -0.07 | -1.56 |  |  |
| 1.01   | -2.03 | -3.46 |  |  |
| -1.07  | -6.68 | -8.01 |  |  |
| -1.18  | -2.48 | -3.66 |  |  |
| -1.18  | -4.03 | -5.21 |  |  |
| -1.22  | -1.52 | -2.65 |  |  |
| -1.24  | -3.15 | -4.25 |  |  |
| -1.25  | -2.18 | -3.27 |  |  |
| -1.27  | -1.42 | -2.5  |  |  |
| 2.09   | -1.09 | -2.75 |  |  |
| 1.49   | 5.21  | 4.04  |  |  |
| 1.45   | 1.33  | 0.2   |  |  |
| 2.37   | -0.35 | -2.01 |  |  |
| 1.91   | -1.12 | -2.46 |  |  |
| 1.96   | -0.08 | -1.74 |  |  |
| 1.62   | 4.56  | 3.17  |  |  |
| 1.62   | 1.48  | 0.09  |  |  |
| 1.37   | 3.22  | 2.07  |  |  |
| 1.34   | 1.2   | 0.08  |  |  |
| -3.37  | 0.57  | 1.63  |  |  |
| -3.96  | -2.34 | -1.05 |  |  |
| -3.97  | -1.62 | -0.33 |  |  |
| -4.46  | -2.63 | -1.17 |  |  |
| -4.84  | -0.06 | 1.52  |  |  |
| -5.54  | -0.42 | 1.35  |  |  |
| -5.97  | -0.94 | 0.94  |  |  |
| -6.08  | -3.77 | -1.87 |  |  |
| -6.17  | -2.49 | -0.56 |  |  |
| -6.8   | -2.02 | 0.05  |  |  |
| -7.02  | -2.92 | -0.8  |  |  |
| -13.06 | -3.26 | -0.25 |  |  |
| 1.57   | 0.53  | -1.13 |  |  |
| 1.31   | -0.2  | -1.6  |  |  |
| 1.1    | -1.8  | -2.95 |  |  |
| 1.01   | -1.01 | -2.04 |  |  |
| -4.55  | -1.35 | -0.17 |  |  |
| -4.93  | 0.22  | 1.51  |  |  |
| -5.2   | 0.11  | 1.47  |  |  |
| -6.38  | -2.25 | -0.59 |  |  |
| 6.28   | -2.16 | -3.82 |  |  |
| -1.1   | 3.56  | 4.68  |  |  |
| -1.32  | 1.86  | 3.25  |  |  |
| 1.96   | -0.31 | -1.97 |  |  |
| 1.41   | -1.07 | -2.26 |  |  |
| 1.37   | 0.05  | -1.1  |  |  |
| 1.35   | -1.02 | -2.14 |  |  |
| 1.3    | -0.26 | -1.33 |  |  |
| 1.26   | 0.21  | -0.82 |  |  |
| 1.71   | -1.37 | -3.03 |  |  |

|       |       |       |  |  |
|-------|-------|-------|--|--|
| 1.52  | -1.58 | -3.07 |  |  |
| 1.23  | -3.4  | -4.58 |  |  |
| 1.22  | 0.67  | -0.5  |  |  |
| 1.2   | -0.38 | -1.53 |  |  |
| -4.37 | -3.33 | -2.08 |  |  |
| 1.19  | -1.83 | -3.49 |  |  |
| 1.17  | -3.27 | -4.9  |  |  |
| -1.01 | -3.9  | -5.3  |  |  |
| -1.04 | 1.23  | -0.13 |  |  |
| -1.06 | 0.22  | -1.11 |  |  |
| -1.06 | 1.86  | 0.54  |  |  |
| -1.16 | 0.16  | -1.03 |  |  |
| -5.61 | 0.59  | 1.66  |  |  |
| -6.13 | -2.03 | -0.83 |  |  |
| -6.99 | -2.99 | -1.59 |  |  |
| -7.17 | -0.16 | 1.27  |  |  |
| -8.53 | -1.96 | -0.27 |  |  |
| 1.68  | -2.07 | -3.73 |  |  |
| 1.57  | -1.86 | -3.42 |  |  |
| 1.1   | -2.28 | -3.32 |  |  |
| 1.08  | -3.38 | -4.4  |  |  |
| -5.24 | -3.89 | -2.41 |  |  |
| 1.28  | -0.47 | -2.13 |  |  |
| 1.23  | 2.7   | 1.1   |  |  |
| 1.19  | 1.6   | 0.05  |  |  |
| 1.07  | -1.49 | -2.89 |  |  |
| -1.05 | 3.21  | 1.98  |  |  |
| -1.07 | 1.23  | 0.03  |  |  |
| -1.13 | 1.38  | 0.26  |  |  |
| -1.15 | 5.4   | 4.3   |  |  |
| -1.17 | -1.64 | -2.71 |  |  |
| -1.22 | 0.55  | -0.47 |  |  |
| -5.64 | -0.46 | 0.74  |  |  |
| -5.71 | -2.77 | -1.56 |  |  |
| 18.14 | -0.65 | -2.31 |  |  |
| 14.24 | 0.17  | -1.14 |  |  |
| 11.98 | -0.42 | -1.49 |  |  |
| 11.5  | -0.93 | -1.93 |  |  |
| 2.42  | -0.06 | 1.18  |  |  |
| 1.61  | 0.75  | 2.58  |  |  |
| 1.56  | -0.49 | 1.39  |  |  |
| 1.55  | -4.63 | -2.74 |  |  |
| 1.54  | -1.02 | 0.88  |  |  |
| 1.49  | -1.01 | 0.93  |  |  |
| 1.38  | 0.75  | 2.81  |  |  |
| 1.3   | -0.14 | 1.99  |  |  |
| 1.17  | 1.58  | 3.87  |  |  |
| 1.09  | -1.89 | 0.5   |  |  |
| -1.01 | 0.29  | 2.83  |  |  |
| -1.14 | 0.01  | 2.71  |  |  |
| 5.67  | 0.58  | -1.08 |  |  |
| -1.12 | -0.11 | 0.89  |  |  |
| -1.22 | 1.63  | 2.76  |  |  |
| 5.38  | -0.94 | -2.6  |  |  |
| 4.83  | 1.3   | -0.2  |  |  |
| 4.69  | 0.32  | -1.13 |  |  |
| 4.24  | 0.35  | -0.96 |  |  |
| 4.12  | -1.15 | -2.42 |  |  |

|       |       |       |  |  |
|-------|-------|-------|--|--|
| 4.02  | 0.75  | -0.48 |  |  |
| 3.81  | -1.04 | -2.2  |  |  |
| -1.18 | -0.18 | 0.83  |  |  |
| -1.55 | 0.06  | 1.46  |  |  |
| -1.7  | 0.76  | 2.3   |  |  |
| -1.71 | -1.73 | -0.18 |  |  |
| -1.95 | 2.38  | 4.11  |  |  |
| 7.71  | 2.1   | 0.43  |  |  |
| 5.87  | -3.2  | -4.46 |  |  |
| 5.43  | 1.04  | -0.12 |  |  |
| 1.18  | -1.01 | 0.04  |  |  |
| 1.06  | 2.48  | 3.69  |  |  |
| -1.04 | 4.12  | 5.46  |  |  |
| 5.05  | 1.77  | 0.11  |  |  |
| -1.38 | 0.82  | 1.96  |  |  |
| 1.73  | 2.2   | 0.54  |  |  |
| -3.8  | 2.22  | 3.27  |  |  |
| -6.3  | 2.27  | 4.05  |  |  |
| -7.05 | 1.15  | 3.1   |  |  |
| 1.27  | 2.99  | 1.34  |  |  |
| 1.21  | 0.11  | -1.47 |  |  |
| 1.17  | 3.55  | 2.01  |  |  |
| -1.05 | -3.09 | -4.32 |  |  |
| -1.11 | -2.2  | -3.36 |  |  |
| -1.13 | 2.8   | 1.66  |  |  |
| -1.14 | -0.2  | -1.32 |  |  |
| 12.45 | -3.13 | -4.78 |  |  |
| 12.21 | -1.19 | -2.82 |  |  |
| 1.97  | 1.51  | 2.51  |  |  |
| 1.97  | 1.14  | 2.15  |  |  |
| 1.94  | 1.63  | 2.66  |  |  |
| 1.92  | 1.35  | 2.39  |  |  |
| 1.86  | 1.37  | 2.46  |  |  |
| 1.86  | 2.14  | 3.23  |  |  |
| 1.83  | -3.44 | -2.33 |  |  |
| 1.8   | 2.67  | 3.81  |  |  |
| 1.79  | 1.73  | 2.87  |  |  |
| 1.77  | -2.78 | -1.62 |  |  |
| 1.78  | 2.47  | 3.62  |  |  |
| 1.68  | 2.48  | 3.72  |  |  |
| 1.62  | 2.31  | 3.6   |  |  |
| 1.62  | -2.89 | -1.6  |  |  |
| 1.6   | 1.87  | 3.17  |  |  |
| 1.57  | 1.93  | 3.27  |  |  |
| 1.46  | 2.07  | 3.51  |  |  |
| 1.41  | 2.72  | 4.21  |  |  |
| 1.1   | -7.54 | -5.69 |  |  |
| -1.08 | -6.9  | -4.8  |  |  |
| -2.27 | -7.71 | -4.54 |  |  |
| 3.71  | 0.84  | -0.81 |  |  |
| 2.84  | 0.3   | -0.97 |  |  |
| 2.52  | -0.87 | -1.96 |  |  |
| -1.89 | 4.69  | 5.85  |  |  |
| -2.29 | -2.7  | -1.26 |  |  |
| 2.73  | -3.07 | -4.72 |  |  |
| 2.49  | -2.67 | -4.19 |  |  |
| -2.62 | -2.4  | -1.21 |  |  |
| -2.96 | -4.43 | -3.08 |  |  |

|       |       |       |  |  |
|-------|-------|-------|--|--|
| 3.03  | -0.02 | -1.67 |  |  |
| 2.61  | 3.7   | 2.26  |  |  |
| 2.12  | 0.95  | -0.2  |  |  |
| 2.03  | 0.78  | -0.3  |  |  |
| -2.28 | -1.21 | -0.07 |  |  |
| -2.43 | -2.21 | -0.99 |  |  |
| -2.46 | -2.74 | -1.5  |  |  |
| -2.81 | -2.16 | -0.72 |  |  |
| -2.83 | -1.42 | 0.03  |  |  |
| -2.92 | -0.84 | 0.65  |  |  |
| -3.26 | -1.99 | -0.34 |  |  |
| 1.75  | -0.5  | -2.15 |  |  |
| 1.36  | -1.01 | -2.3  |  |  |
| -3.6  | 0.3   | 1.3   |  |  |
| -6.5  | -1.9  | -0.05 |  |  |
| 2.49  | 2.04  | 0.39  |  |  |
| 2.39  | 2.7   | 1.11  |  |  |
| 1.81  | -0.45 | -1.64 |  |  |
| 1.78  | 4.52  | 3.35  |  |  |
| 1.66  | 3.95  | 2.88  |  |  |
| -2.52 | -0.27 | 0.72  |  |  |
| -2.58 | 0.02  | 1.05  |  |  |
| -3.33 | -0.05 | 1.35  |  |  |
| -4.41 | -0.1  | 1.7   |  |  |
| 1.1   | 3.08  | 1.43  |  |  |
| -1.15 | 1.61  | 0.31  |  |  |
| 1.47  | 2.08  | 0.43  |  |  |
| 1.16  | -0.66 | -1.97 |  |  |
| 1.11  | -0.52 | -1.77 |  |  |
| 1.11  | -2.08 | -3.32 |  |  |
| 1.06  | 2.7   | 1.53  |  |  |
| 1.5   | 0.65  | -1    |  |  |
| 1.4   | 1.75  | 0.19  |  |  |
| 1.36  | -0.02 | -1.53 |  |  |
| 1.35  | -0.86 | -2.37 |  |  |
| 1.34  | -0.27 | -1.77 |  |  |
| 1.31  | -3.1  | -4.56 |  |  |
| 1.3   | -0.18 | -1.63 |  |  |
| 1.28  | -1.47 | -2.9  |  |  |
| 1.24  | 0.84  | -0.54 |  |  |
| 1.22  | 1.85  | 0.49  |  |  |
| 1.14  | 1.19  | -0.07 |  |  |
| 1.13  | -1.09 | -2.34 |  |  |
| 1.1   | 0.01  | -1.2  |  |  |
| 1.07  | -1.84 | -3    |  |  |
| 1.06  | 0.68  | -0.48 |  |  |
| 1.06  | 0.59  | -0.57 |  |  |
| 1.03  | 2.96  | 1.84  |  |  |
| 1.03  | 0.28  | -0.83 |  |  |
| 1.02  | 0.2   | -0.9  |  |  |
| -1.05 | 0.23  | -0.78 |  |  |
| -4.35 | -0.99 | 0.06  |  |  |
| -5.46 | -1.71 | -0.33 |  |  |
| 1.19  | 2.74  | 1.08  |  |  |
| 1.1   | -4.85 | -6.39 |  |  |
| 1.05  | -0.15 | -1.62 |  |  |
| 1.01  | -2.1  | -3.52 |  |  |
| -1    | -6.73 | -8.14 |  |  |

|       |       |       |  |  |
|-------|-------|-------|--|--|
| -1.14 | -1.46 | -2.68 |  |  |
| -1.18 | -2.55 | -3.73 |  |  |
| -1.18 | -4.1  | -5.27 |  |  |
| -1.25 | -3.12 | -4.21 |  |  |
| -1.27 | -1.5  | -2.56 |  |  |
| -1.32 | -2.34 | -3.35 |  |  |
| -1.32 | -5.93 | -6.94 |  |  |
| 1.19  | 2.74  | 1.08  |  |  |
| 1.1   | -4.85 | -6.39 |  |  |
| 1.05  | -0.15 | -1.62 |  |  |
| 1.01  | -2.1  | -3.52 |  |  |
| -1    | -6.73 | -8.14 |  |  |
| -1.14 | -1.46 | -2.68 |  |  |
| -1.18 | -2.55 | -3.73 |  |  |
| -1.18 | -4.1  | -5.27 |  |  |
| -1.25 | -3.12 | -4.21 |  |  |
| -1.27 | -1.5  | -2.56 |  |  |
| -1.32 | -2.34 | -3.35 |  |  |
| -1.32 | -5.93 | -6.94 |  |  |
| 1.19  | 2.74  | 1.08  |  |  |
| 1.1   | -4.85 | -6.39 |  |  |
| 1.05  | -0.15 | -1.62 |  |  |
| 1.01  | -2.1  | -3.52 |  |  |
| -1    | -6.73 | -8.14 |  |  |
| -1.14 | -1.46 | -2.68 |  |  |
| -1.18 | -2.55 | -3.73 |  |  |
| -1.18 | -4.1  | -5.27 |  |  |
| -1.25 | -3.12 | -4.21 |  |  |
| -1.27 | -1.5  | -2.56 |  |  |
| -1.32 | -2.34 | -3.35 |  |  |
| -1.32 | -5.93 | -6.94 |  |  |
| 2.32  | 2.54  | 0.89  |  |  |
| 1.63  | -0.03 | -1.17 |  |  |
| 1.5   | 0.52  | -0.5  |  |  |
| 2.42  | -1.24 | -2.89 |  |  |
| -2.87 | -3.21 | -2.07 |  |  |
| -2.88 | -4.56 | -3.41 |  |  |
| -3.32 | -3.8  | -2.44 |  |  |
| -6.28 | -3.86 | -1.59 |  |  |
| 28.06 | -1.37 | -3.02 |  |  |
| 21.74 | -0.55 | -1.83 |  |  |
| 17.93 | 0.04  | -0.96 |  |  |
| 3.57  | 0.27  | 1.6   |  |  |
| 3.55  | 0.24  | -1.41 |  |  |
| -1.8  | -0.48 | 0.55  |  |  |
| -1.93 | -0.49 | 0.63  |  |  |
| -2.43 | -0.31 | 1.15  |  |  |
| 1.97  | 0.4   | -1.25 |  |  |
| 1.79  | -3.95 | -5.46 |  |  |
| 1.46  | 2.69  | 1.47  |  |  |
| 1.31  | -1.15 | -2.21 |  |  |
| 1.9   | 1.38  | -0.27 |  |  |
| 1.7   | -3.53 | -5.03 |  |  |
| 1.35  | -3.69 | -5.34 |  |  |
| 1.28  | -3.07 | -4.65 |  |  |
| 1.12  | 1.1   | -0.29 |  |  |
| 1.11  | -3.6  | -4.96 |  |  |
| -9.86 | -4.86 | -2.78 |  |  |

|        |       |       |  |  |
|--------|-------|-------|--|--|
| 1.17   | -0.12 | -1.78 |  |  |
| -1.05  | -1.17 | -2.51 |  |  |
| -1.05  | -1.17 | -2.51 |  |  |
| -1.05  | -1.17 | -2.51 |  |  |
| -1.1   | 3.01  | 1.72  |  |  |
| -1.18  | 2.59  | 1.41  |  |  |
| -5.51  | 0.21  | 1.24  |  |  |
| -6.18  | -2.34 | -1.13 |  |  |
| -6.35  | -2.66 | -1.42 |  |  |
| -6.35  | -2.66 | -1.42 |  |  |
| -6.96  | -2.91 | -1.54 |  |  |
| -6.96  | -2.91 | -1.54 |  |  |
| -7.65  | -2.69 | -1.17 |  |  |
| -9.46  | -0.21 | 1.61  |  |  |
| -9.46  | -0.21 | 1.61  |  |  |
| -12.96 | -1.95 | 0.33  |  |  |
| -12.96 | -1.95 | 0.33  |  |  |
| -28.09 | -2.86 | 0.53  |  |  |
| 1.93   | -2.18 | -3.83 |  |  |
| 1.35   | -4.43 | -5.57 |  |  |
| 1.28   | 0.1   | -0.95 |  |  |
| -3.71  | -2.65 | -1.45 |  |  |
| -4.64  | -3.81 | -2.3  |  |  |
| 3.59   | -2.07 | -3.72 |  |  |
| -1.76  | -1.73 | -0.73 |  |  |
| 5.24   | -2.98 | -4.63 |  |  |
| -1.24  | -3.81 | -2.76 |  |  |
| -1.25  | -6.51 | -5.45 |  |  |
| -1.42  | -5.09 | -3.85 |  |  |
| -2.1   | -5.94 | -4.13 |  |  |
| -5.74  | -4.9  | -1.64 |  |  |
| 1.33   | 1.38  | -0.27 |  |  |
| 1.1    | 1.38  | 0.01  |  |  |
| 1.02   | -2.48 | -3.75 |  |  |
| -1.01  | 0.92  | -0.3  |  |  |
| -1.05  | 3.91  | 2.75  |  |  |
| -1.09  | -0.1  | -1.21 |  |  |
| 3.4    | -4.59 | -6.24 |  |  |
| 3.04   | -3.66 | -5.15 |  |  |
| 2.43   | -4.73 | -5.9  |  |  |
| -1.95  | -2.29 | -1.21 |  |  |
| -2.7   | -4.37 | -2.82 |  |  |
| 1.97   | 3.25  | 1.6   |  |  |
| -4.09  | -1.79 | -0.43 |  |  |
| 1.82   | 0.06  | -1.59 |  |  |
| 1.81   | 3.3   | 1.65  |  |  |
| 1.31   | -0.39 | -1.56 |  |  |
| 1.24   | -0.56 | -1.65 |  |  |
| 1.18   | -0.91 | -1.93 |  |  |
| 2.02   | -1.42 | -3.07 |  |  |
| 1.66   | -3.72 | -5.08 |  |  |
| 1.29   | 3.84  | 2.84  |  |  |
| -4.27  | -2.61 | -1.15 |  |  |
| 1.99   | -1.24 | -2.89 |  |  |
| 1.58   | 1.47  | 0.15  |  |  |
| 4.68   | 1.4   | -0.25 |  |  |
| 3.13   | -0.03 | -1.1  |  |  |
| -1.6   | -1.33 | -0.08 |  |  |

|       |       |       |  |  |
|-------|-------|-------|--|--|
| 2.12  | 2.4   | 0.75  |  |  |
| 1.7   | 0.18  | -1.15 |  |  |
| 1.57  | 2.36  | 1.14  |  |  |
| 1.56  | 2.67  | 1.46  |  |  |
| 1.49  | 1.36  | 0.22  |  |  |
| 1.46  | -0.15 | -1.26 |  |  |
| 1.4   | 1.49  | 0.44  |  |  |
| -2.98 | 0.74  | 1.75  |  |  |
| -3.18 | 0.46  | 1.56  |  |  |
| -3.58 | -0.24 | 1.04  |  |  |
| -4.49 | -0.57 | 1.03  |  |  |
| -4.49 | -0.24 | 1.36  |  |  |
| -4.8  | -2.17 | -0.48 |  |  |
| -5.73 | -2.09 | -0.13 |  |  |
| 2.12  | 2.4   | 0.75  |  |  |
| 1.7   | 0.18  | -1.15 |  |  |
| 1.57  | 2.36  | 1.14  |  |  |
| 1.56  | 2.67  | 1.46  |  |  |
| 1.49  | 1.36  | 0.22  |  |  |
| 1.46  | -0.15 | -1.26 |  |  |
| 1.4   | 1.49  | 0.44  |  |  |
| -2.98 | 0.74  | 1.75  |  |  |
| -3.18 | 0.46  | 1.56  |  |  |
| -3.58 | -0.24 | 1.04  |  |  |
| -4.49 | -0.57 | 1.03  |  |  |
| -4.49 | -0.24 | 1.36  |  |  |
| -4.8  | -2.17 | -0.48 |  |  |
| -5.73 | -2.09 | -0.13 |  |  |
| 2.12  | 2.4   | 0.75  |  |  |
| 1.7   | 0.18  | -1.15 |  |  |
| 1.57  | 2.36  | 1.14  |  |  |
| 1.56  | 2.67  | 1.46  |  |  |
| 1.49  | 1.36  | 0.22  |  |  |
| 1.46  | -0.15 | -1.26 |  |  |
| 1.4   | 1.49  | 0.44  |  |  |
| -2.98 | 0.74  | 1.75  |  |  |
| -3.18 | 0.46  | 1.56  |  |  |
| -3.58 | -0.24 | 1.04  |  |  |
| -4.49 | -0.57 | 1.03  |  |  |
| -4.49 | -0.24 | 1.36  |  |  |
| -4.8  | -2.17 | -0.48 |  |  |
| -5.73 | -2.09 | -0.13 |  |  |
| 2     | 0.1   | -1.55 |  |  |
| 1.89  | 4.53  | 2.97  |  |  |
| 1.88  | 1.72  | 0.16  |  |  |
| 1.28  | 0.08  | -0.92 |  |  |
| 1.8   | 3.13  | 1.49  |  |  |
| 1.33  | 1.64  | 0.43  |  |  |
| 1.31  | -0.16 | -1.34 |  |  |
| 1.25  | 0.04  | -1.07 |  |  |
| 1.19  | 0.78  | -0.26 |  |  |
| 1.17  | 2.91  | 1.89  |  |  |
| -3.57 | -0.78 | 0.26  |  |  |
| -3.68 | -2.62 | -1.54 |  |  |
| -4.08 | -0.07 | 1.16  |  |  |
| -4.09 | 1.67  | 2.91  |  |  |
| -4.37 | -0.93 | 0.4   |  |  |
| -4.61 | 0.03  | 1.44  |  |  |

|        |       |       |  |  |
|--------|-------|-------|--|--|
| -4.76  | -0.67 | 0.79  |  |  |
| -5.05  | -1.91 | -0.37 |  |  |
| -6.29  | -0.41 | 1.45  |  |  |
| -7.62  | -1.74 | 0.39  |  |  |
| -9.1   | -3.61 | -1.22 |  |  |
| -18.21 | -2.92 | 0.47  |  |  |
| 2.94   | -0.05 | -1.7  |  |  |
| 1.99   | 0.29  | -0.79 |  |  |
| 3.84   | -4.42 | -6.07 |  |  |
| 2.66   | -4.28 | -5.4  |  |  |
| -1.75  | -4.16 | -3.06 |  |  |
| -1.87  | -5.74 | -4.55 |  |  |
| -2.02  | -5.92 | -4.61 |  |  |
| 1.24   | -2.99 | -4.64 |  |  |
| 1.1    | -4.67 | -6.15 |  |  |
| -1.12  | -5.46 | -6.63 |  |  |
| -1.21  | -1.24 | -2.31 |  |  |
| -9.26  | -3.91 | -2.04 |  |  |
| -9.49  | -4.26 | -2.35 |  |  |
| 9.76   | 1.37  | -0.28 |  |  |
| 1.53   | 1.82  | 2.85  |  |  |
| 1.47   | -1.68 | -0.59 |  |  |
| 1.29   | 2.28  | 3.55  |  |  |
| 1.1    | -0.39 | 1.12  |  |  |
| -1.1   | 2.87  | 4.65  |  |  |
| -1.11  | 3.55  | 5.34  |  |  |
| -1.26  | 0.07  | 2.04  |  |  |
| 1.32   | -0.67 | -2.32 |  |  |
| 1.22   | -6.56 | -8.1  |  |  |
| 1.2    | -3.71 | -5.21 |  |  |
| 1.1    | 2.53  | 1.15  |  |  |
| 1.02   | 4.29  | 3.01  |  |  |
| -1.04  | 3.38  | 2.19  |  |  |
| -1.15  | -5.42 | -6.46 |  |  |
| 1.92   | -2.45 | -4.1  |  |  |
| 1.49   | -5.88 | -7.16 |  |  |
| 1.23   | -0.03 | -1.04 |  |  |
| -3.68  | -4.75 | -3.58 |  |  |
| 1.85   | -0.58 | -2.23 |  |  |
| 1.4    | 0.88  | -0.36 |  |  |
| 1.23   | 0.11  | -0.94 |  |  |
| 1.22   | -1.21 | -2.25 |  |  |
| -3.39  | -2.55 | -1.54 |  |  |
| -3.47  | -2.4  | -1.37 |  |  |
| -3.69  | -1.12 | 0     |  |  |
| -4.07  | -1.28 | -0.01 |  |  |
| 1.67   | -1.57 | -3.21 |  |  |
| 1.56   | -2.42 | -3.97 |  |  |
| 1.48   | -1.21 | -2.68 |  |  |
| 1.13   | 1.43  | 0.34  |  |  |
| 1.11   | -0.1  | -1.16 |  |  |
| 1.08   | 1.22  | 0.2   |  |  |
| 1.84   | -0.19 | -1.83 |  |  |
| 1.25   | 3.91  | 2.82  |  |  |
| 2.65   | 0.58  | -1.06 |  |  |
| 1.78   | 0.65  | -0.42 |  |  |
| 4.08   | 2.09  | 0.45  |  |  |
| -1.54  | 2.59  | 3.59  |  |  |



|       |       |       |  |  |
|-------|-------|-------|--|--|
| -1.55 | 0.88  | 1.9   |  |  |
| -1.56 | 1.9   | 2.93  |  |  |
| -1.61 | 1.74  | 2.81  |  |  |
| -1.74 | 0.59  | 1.78  |  |  |
| -1.76 | -0.73 | 0.47  |  |  |
| 3.96  | -0.66 | -2.3  |  |  |
| 3.11  | -0.73 | -2.02 |  |  |
| 2.53  | -0.66 | -1.66 |  |  |
| -1.8  | -2.79 | -1.61 |  |  |
| -1.8  | -2.52 | -1.34 |  |  |
| 2.3   | -0.58 | -2.22 |  |  |
| 1.49  | -2.42 | -3.44 |  |  |
| 2.66  | -3.9  | -5.54 |  |  |
| 1.74  | -0.89 | -1.92 |  |  |
| -2.7  | -4.23 | -3.03 |  |  |
| 1.08  | -1.04 | -2.68 |  |  |
| 1     | -2.58 | -4.12 |  |  |
| -1.24 | 5.58  | 4.36  |  |  |
| -1.36 | 3.23  | 2.15  |  |  |
| 1.09  | -0.21 | -1.85 |  |  |
| -1.08 | -1.29 | -2.7  |  |  |
| -1.17 | -3.31 | -4.6  |  |  |
| 1.58  | 1.5   | -0.15 |  |  |
| 1.27  | 0.57  | -0.76 |  |  |
| 1.21  | 0.12  | -1.15 |  |  |
| 1.18  | 3.94  | 2.71  |  |  |
| 1.06  | 1.2   | 0.12  |  |  |
| 1.01  | -0.07 | -1.08 |  |  |
| 2.35  | -2.35 | -4    |  |  |
| 1.87  | 0.09  | -1.23 |  |  |
| 1.65  | 0.48  | -0.66 |  |  |
| -3.4  | -2.92 | -1.57 |  |  |
| -3.77 | -4.71 | -3.22 |  |  |
| 1.65  | 1.53  | -0.12 |  |  |
| 1.37  | 0.64  | -0.73 |  |  |
| 1.21  | 2.17  | 0.97  |  |  |
| -3.93 | -0.27 | 0.78  |  |  |
| -3.97 | -4.32 | -3.26 |  |  |
| -4.18 | -2.27 | -1.14 |  |  |
| -5.88 | -0.22 | 1.41  |  |  |
| -5.89 | -1.1  | 0.54  |  |  |
| -6.12 | -2.59 | -0.9  |  |  |
| -6.25 | -1.2  | 0.52  |  |  |
| -6.7  | -3.02 | -1.2  |  |  |
| -8.58 | -3.41 | -1.24 |  |  |
| 2.58  | 1.73  | 0.08  |  |  |
| -5.71 | -4.39 | -2.15 |  |  |
| 1.71  | -1.65 | -3.3  |  |  |
| 1.6   | -0.42 | -1.97 |  |  |
| 1.42  | 3.74  | 2.36  |  |  |
| 1.29  | -1.49 | -2.73 |  |  |
| 2.25  | -0.81 | -2.45 |  |  |
| 1.78  | 0.68  | -0.63 |  |  |
| 1.62  | 0.01  | -1.16 |  |  |
| -2.85 | -0.14 | 0.9   |  |  |
| -3.39 | -2.17 | -0.89 |  |  |
| 1.7   | -1.75 | -3.39 |  |  |
| 1.57  | -1.78 | -3.3  |  |  |

|       |       |       |  |  |
|-------|-------|-------|--|--|
| 1.21  | -5.06 | -6.21 |  |  |
| 1.8   | -2.72 | -4.36 |  |  |
| 1.22  | 1.41  | 0.34  |  |  |
| 1.2   | -1.04 | -2.09 |  |  |
| 4.47  | 0.77  | -0.87 |  |  |
| -1.4  | -0.4  | 0.6   |  |  |
| -1.67 | -2.24 | -0.98 |  |  |
| -1.9  | -1.52 | -0.08 |  |  |
| 27.07 | 1.37  | -0.27 |  |  |
| 17.65 | 0.96  | -0.07 |  |  |
| 4.25  | -2.26 | -1.23 |  |  |
| 4.23  | -1.66 | -0.62 |  |  |
| 3.68  | -1.94 | -0.71 |  |  |
| 3.1   | -2.68 | -1.19 |  |  |
| 2.94  | -2.06 | -0.5  |  |  |
| 1.78  | 2.3   | 4.59  |  |  |
| -1.07 | -2.01 | 1.2   |  |  |
| -1.29 | 0.24  | 3.72  |  |  |
| 1.88  | -1.04 | -2.68 |  |  |
| 1.48  | 0.52  | -0.78 |  |  |
| 1.22  | 1.16  | 0.13  |  |  |
| -3.76 | -1.08 | 0.1   |  |  |
| -3.81 | -0.56 | 0.64  |  |  |
| -5.12 | -1.48 | 0.14  |  |  |
| 1.78  | -2.65 | -4.29 |  |  |
| 1.39  | 2.26  | 0.98  |  |  |
| 1.32  | -1.82 | -3.03 |  |  |
| 1.28  | -3.67 | -4.83 |  |  |
| 1.23  | -2.53 | -3.64 |  |  |
| 1.17  | 2.63  | 1.6   |  |  |
| -3.57 | -2.46 | -1.43 |  |  |
| -4.65 | -2.6  | -1.19 |  |  |
| -5.11 | -2.41 | -0.87 |  |  |
| 2.73  | -2.64 | -4.28 |  |  |
| 2.36  | -1.64 | -3.07 |  |  |
| 8.43  | -0.06 | -1.7  |  |  |
| 1.25  | 2.48  | 3.6   |  |  |
| 1.12  | 0.6   | 1.88  |  |  |
| 1.09  | 0.73  | 2.04  |  |  |
| -1.26 | -0.79 | 0.98  |  |  |
| -1.59 | -3.64 | -1.54 |  |  |
| 1.28  | 0.99  | -0.65 |  |  |
| 1.13  | 1.07  | -0.39 |  |  |
| 1.02  | 1.33  | 0.02  |  |  |
| -1.04 | 2.61  | 1.39  |  |  |
| -1.09 | 0.88  | -0.28 |  |  |
| -1.1  | 2.14  | 0.99  |  |  |
| -4.9  | -1.04 | -0.03 |  |  |
| 3.33  | -0.96 | -2.6  |  |  |
| 2.85  | -2.09 | -3.5  |  |  |
| -1.87 | -2.97 | -1.98 |  |  |
| -1.87 | 3.95  | 4.95  |  |  |
| -1.95 | 2.86  | 3.92  |  |  |
| -1.97 | 1.29  | 2.36  |  |  |
| -1.97 | 3.21  | 4.28  |  |  |
| -2.01 | 0.29  | 1.39  |  |  |
| -2.01 | 2.81  | 3.92  |  |  |
| -2.01 | 1.25  | 2.35  |  |  |

|       |       |       |  |  |
|-------|-------|-------|--|--|
| -2.06 | 2.35  | 3.48  |  |  |
| -2.06 | 3.11  | 4.24  |  |  |
| -2.23 | -2.62 | -1.36 |  |  |
| -2.5  | 1.05  | 2.47  |  |  |
| -2.74 | 1.99  | 3.53  |  |  |
| -2.78 | -0.81 | 0.76  |  |  |
| -3.34 | -0.76 | 1.08  |  |  |
| 21.71 | 1.66  | 0.02  |  |  |
| 19.5  | 2.57  | 1.09  |  |  |
| 16.93 | 2.8   | 1.52  |  |  |
| 16.14 | 2.96  | 1.75  |  |  |
| 3.43  | -1.74 | -0.71 |  |  |
| 1.58  | -2.7  | -0.55 |  |  |
| 1.5   | -3.69 | -1.47 |  |  |
| 1.49  | -2.02 | 0.21  |  |  |
| 1.36  | 1.16  | 3.53  |  |  |
| 1.32  | -1.95 | 0.46  |  |  |
| 1.31  | -0.4  | 2.02  |  |  |
| 1.31  | -2.56 | -0.14 |  |  |
| 1.21  | 1.67  | 4.2   |  |  |
| 1.15  | -2.79 | -0.2  |  |  |
| 1.13  | 0.31  | 2.93  |  |  |
| 1.1   | -3.01 | -0.35 |  |  |
| 1.09  | -2.99 | -0.32 |  |  |
| -1.45 | -2.96 | 0.37  |  |  |
| 2.25  | -5.38 | -7.02 |  |  |
| 1.56  | -2.55 | -3.66 |  |  |
| 1.49  | -6.46 | -7.5  |  |  |
| -2.81 | -7.23 | -6.2  |  |  |
| -3.58 | -4.84 | -3.47 |  |  |
| -4.26 | -7.13 | -5.51 |  |  |
| 3.57  | -2.61 | -4.25 |  |  |
| -2.12 | -5.48 | -4.19 |  |  |
| 3.96  | -5.15 | -6.79 |  |  |
| 2.63  | -2.4  | -3.44 |  |  |
| -3.01 | -7.8  | -5.86 |  |  |
| 2.56  | 2.65  | 1.02  |  |  |
| 1.95  | -2.91 | -4.16 |  |  |
| 1.65  | -3.2  | -4.2  |  |  |
| -2.52 | -1.9  | -0.84 |  |  |
| 2.06  | 2.23  | 0.59  |  |  |
| 1.82  | 3.23  | 1.77  |  |  |
| 1.64  | 2.59  | 1.28  |  |  |
| 1.61  | -0.28 | -1.56 |  |  |
| 1.6   | -0.56 | -1.83 |  |  |
| 1.51  | 1.78  | 0.59  |  |  |
| 1.51  | -0.94 | -2.13 |  |  |
| 1.51  | 0.78  | -0.42 |  |  |
| 1.45  | -0.63 | -1.77 |  |  |
| 1.42  | -1.03 | -2.13 |  |  |
| 1.4   | 2.5   | 1.43  |  |  |
| 1.39  | -0.37 | -1.44 |  |  |
| 1.38  | 1.99  | 0.94  |  |  |
| 1.33  | 0.27  | -0.74 |  |  |
| 1.32  | 1.25  | 0.25  |  |  |
| -3.44 | -2.37 | -1.18 |  |  |
| -3.59 | -1.72 | -0.47 |  |  |
| 1.59  | -0.05 | -1.69 |  |  |

|       |       |       |  |  |
|-------|-------|-------|--|--|
| 1.21  | 5.24  | 3.99  |  |  |
| 2.75  | -1.5  | -3.13 |  |  |
| -2.28 | -1.79 | -0.77 |  |  |
| -2.28 | -2.46 | -1.45 |  |  |
| -2.34 | -0.54 | 0.51  |  |  |
| -2.36 | -2.29 | -1.22 |  |  |
| -2.37 | 2.13  | 3.21  |  |  |
| -2.7  | 0.13  | 1.38  |  |  |
| -3.14 | -3.59 | -2.12 |  |  |
| -3.32 | -0.73 | 0.83  |  |  |
| 1.78  | -3.05 | -4.68 |  |  |
| 1.38  | -0.85 | -2.12 |  |  |
| 1.36  | -3.29 | -4.54 |  |  |
| 1.36  | -1.17 | -2.42 |  |  |
| 1.23  | -4.1  | -5.2  |  |  |
| 1.2   | -0.28 | -1.34 |  |  |
| 1.16  | -1.74 | -2.75 |  |  |
| 1.16  | -4.18 | -5.19 |  |  |
| 2.7   | -1.97 | -3.6  |  |  |
| -2.93 | -3.11 | -1.76 |  |  |
| 2     | -0.3  | -1.93 |  |  |
| 1.31  | -1.91 | -2.93 |  |  |
| -3.26 | -1.41 | -0.34 |  |  |
| 2.4   | -2.47 | -4.11 |  |  |
| 1.77  | -3.8  | -4.99 |  |  |
| -3.8  | -5.06 | -3.51 |  |  |
| -3.8  | -5.06 | -3.51 |  |  |
| 1.2   | 0.91  | -0.72 |  |  |
| 1.08  | 2.3   | 0.82  |  |  |
| -1.2  | -2.01 | -3.12 |  |  |
| -1.27 | -1.24 | -2.26 |  |  |
| -5.82 | -1.35 | -0.19 |  |  |
| -5.85 | -1.38 | -0.2  |  |  |
| -5.98 | -2.53 | -1.32 |  |  |
| 3.1   | 2.05  | 0.42  |  |  |
| 2.86  | 2.23  | 0.72  |  |  |
| 2.69  | -0.92 | -2.35 |  |  |
| 2.54  | 3.61  | 2.27  |  |  |
| 2.49  | 1.47  | 0.15  |  |  |
| 2.31  | 0.6   | -0.61 |  |  |
| 2.27  | 0.67  | -0.51 |  |  |
| 2.23  | 1.66  | 0.5   |  |  |
| 2.19  | 1.37  | 0.23  |  |  |
| 2.19  | -1.94 | -3.08 |  |  |
| 2.18  | 1.56  | 0.43  |  |  |
| 2.04  | 1.76  | 0.73  |  |  |
| 2.03  | 4.57  | 3.55  |  |  |
| -2.03 | -1.9  | -0.87 |  |  |
| -2.18 | -0.13 | 1     |  |  |
| -2.18 | -2.92 | -1.79 |  |  |
| -2.36 | -2.06 | -0.82 |  |  |
| -2.42 | -0.18 | 1.1   |  |  |
| -2.45 | -4.44 | -3.16 |  |  |
| -2.51 | -2.47 | -1.15 |  |  |
| -2.94 | -1.79 | -0.23 |  |  |
| -3.2  | -1.51 | 0.17  |  |  |
| -3.34 | -5.04 | -3.31 |  |  |
| -4.32 | -2.89 | -0.78 |  |  |

|        |       |       |  |  |
|--------|-------|-------|--|--|
| -4.64  | -0.27 | 1.95  |  |  |
| -6.36  | 1.45  | 4.12  |  |  |
| -7.38  | -0.49 | 2.39  |  |  |
| -22.64 | -0.13 | 4.37  |  |  |
| -24.52 | -1.83 | 2.78  |  |  |
| -36.64 | -2.93 | 2.26  |  |  |
| -80.94 | -2.35 | 3.98  |  |  |
| -269.6 | -5.17 | 2.91  |  |  |
| 2.89   | -2.58 | -4.21 |  |  |
| -2.2   | -1.31 | -0.27 |  |  |
| -3.29  | -5.22 | -3.6  |  |  |
| 2.01   | -0.05 | -1.68 |  |  |
| 1.49   | -1.71 | -2.91 |  |  |
| -4.21  | -1.64 | -0.2  |  |  |
| 2.4    | -2.47 | -4.11 |  |  |
| 1.77   | -3.8  | -4.99 |  |  |
| -3.8   | -5.06 | -3.51 |  |  |
| -3.8   | -5.06 | -3.51 |  |  |
| 2.4    | -2.47 | -4.11 |  |  |
| 1.77   | -3.8  | -4.99 |  |  |
| -3.8   | -5.06 | -3.51 |  |  |
| -3.8   | -5.06 | -3.51 |  |  |
| 2.4    | -2.47 | -4.11 |  |  |
| 1.77   | -3.8  | -4.99 |  |  |
| -3.8   | -5.06 | -3.51 |  |  |
| -3.8   | -5.06 | -3.51 |  |  |
| 2.4    | -2.47 | -4.11 |  |  |
| 1.77   | -3.8  | -4.99 |  |  |
| -3.8   | -5.06 | -3.51 |  |  |
| -3.8   | -5.06 | -3.51 |  |  |
| 2.4    | -2.47 | -4.11 |  |  |
| 1.77   | -3.8  | -4.99 |  |  |
| -3.8   | -5.06 | -3.51 |  |  |
| -3.8   | -5.06 | -3.51 |  |  |
| 1.23   | 3.04  | 1.41  |  |  |
| 1.01   | 2.8   | 1.44  |  |  |
| 1.01   | -0.74 | -2.09 |  |  |
| -1.06  | -3    | -4.25 |  |  |
| -1.22  | 2.14  | 1.09  |  |  |
| -1.25  | 1.59  | 0.58  |  |  |
| -6.12  | -2.12 | -0.84 |  |  |
| 2.93   | 1     | -0.62 |  |  |
| -2.32  | -1.88 | -0.74 |  |  |
| 2.36   | -0.69 | -2.31 |  |  |
| 1.63   | -0.54 | -1.64 |  |  |
| 1.59   | -0.35 | -1.41 |  |  |
| 1.58   | 2.39  | 1.34  |  |  |
| 2.73   | -3.86 | -5.49 |  |  |
| 2.26   | -1.51 | -2.86 |  |  |
| 1.81   | 0.99  | -0.64 |  |  |
| 1.52   | -5.62 | -6.99 |  |  |
| 1.4    | 1.52  | 0.25  |  |  |
| 1.4    | -1.07 | -2.33 |  |  |
| 1.4    | -0.37 | -1.62 |  |  |

|       |       |       |  |  |
|-------|-------|-------|--|--|
| 1.36  | -0.62 | -1.85 |  |  |
| 1.34  | -2.33 | -3.54 |  |  |
| 1.27  | 0.22  | -0.9  |  |  |
| 1.24  | -3.63 | -4.72 |  |  |
| 1.22  | 1.24  | 0.17  |  |  |
| 1.21  | -2.11 | -3.16 |  |  |
| 2.02  | -1.95 | -3.58 |  |  |
| 1.39  | -2.64 | -3.73 |  |  |
| 1.38  | 1.05  | -0.03 |  |  |
| 1.36  | -5.07 | -6.12 |  |  |
| 1.33  | -0.06 | -1.08 |  |  |
| 1.63  | 2.77  | 1.15  |  |  |
| 1.36  | 4.08  | 2.72  |  |  |
| 1.34  | 2.62  | 1.27  |  |  |
| 1.09  | 4.04  | 3     |  |  |
| -5.92 | -1.42 | 0.22  |  |  |
| 1.91  | -3.34 | -4.97 |  |  |
| 1.73  | -1.37 | -2.86 |  |  |
| 1.49  | -3.52 | -4.79 |  |  |
| 2.66  | -3.15 | -4.77 |  |  |
| 1.87  | -3.53 | -4.66 |  |  |
| 1.82  | -0.03 | -1.65 |  |  |
| 1.43  | -2.8  | -4.08 |  |  |
| 1.42  | -1.4  | -2.67 |  |  |
| 1.26  | 0.48  | -0.61 |  |  |
| 1.21  | -2.75 | -3.78 |  |  |
| -3.55 | -2.69 | -1.62 |  |  |
| -3.65 | -3.72 | -2.61 |  |  |
| 1.91  | 3.25  | 1.62  |  |  |
| 1.53  | 2.13  | 0.83  |  |  |
| 1.41  | -1.38 | -2.57 |  |  |
| 1.39  | 2.13  | 0.96  |  |  |
| 1.37  | 0.59  | -0.56 |  |  |
| 1.29  | 1.53  | 0.47  |  |  |
| 1.26  | -1.73 | -2.75 |  |  |
| -3.56 | 0.57  | 1.71  |  |  |
| -3.83 | 0.04  | 1.28  |  |  |
| -4.1  | -0.18 | 1.17  |  |  |
| -4.65 | -0.86 | 0.67  |  |  |
| -7.4  | -1.3  | 0.89  |  |  |
| 1.23  | 2.92  | 1.29  |  |  |
| 1.02  | 3.52  | 2.16  |  |  |
| -1.06 | -1.59 | -2.84 |  |  |
| -1.06 | -3.12 | -4.36 |  |  |
| -1.22 | 2.02  | 0.97  |  |  |
| -1.25 | 1.47  | 0.46  |  |  |
| -6.12 | -2.24 | -0.96 |  |  |
| 1.81  | 0.99  | -0.64 |  |  |
| 1.52  | -5.62 | -6.99 |  |  |
| 1.4   | 1.52  | 0.25  |  |  |
| 1.4   | -1.07 | -2.33 |  |  |
| 1.4   | -0.37 | -1.62 |  |  |
| 1.36  | -0.62 | -1.85 |  |  |
| 1.34  | -2.33 | -3.54 |  |  |
| 1.27  | 0.22  | -0.9  |  |  |
| 1.22  | 1.24  | 0.17  |  |  |
| 1.21  | -2.11 | -3.16 |  |  |
| 1.81  | 0.99  | -0.64 |  |  |

|       |       |       |  |  |
|-------|-------|-------|--|--|
| 1.52  | -5.62 | -6.99 |  |  |
| 1.4   | 1.52  | 0.25  |  |  |
| 1.4   | -1.07 | -2.33 |  |  |
| 1.4   | -0.37 | -1.62 |  |  |
| 1.36  | -0.62 | -1.85 |  |  |
| 1.34  | -2.33 | -3.54 |  |  |
| 1.28  | -4.54 | -5.67 |  |  |
| 1.27  | 0.22  | -0.9  |  |  |
| 1.22  | 1.24  | 0.17  |  |  |
| 1.21  | -2.11 | -3.16 |  |  |
| 1.72  | 3.78  | 2.15  |  |  |
| 1.39  | -2.27 | -3.59 |  |  |
| 1.31  | 1.21  | -0.02 |  |  |
| 1.21  | -1.51 | -2.62 |  |  |
| 1.18  | -1.44 | -2.53 |  |  |
| 1.15  | 0.33  | -0.71 |  |  |
| 1.14  | -0.6  | -1.63 |  |  |
| -3.59 | -1.35 | -0.35 |  |  |
| -4.01 | -0.89 | 0.26  |  |  |
| 1.88  | -4.73 | -6.35 |  |  |
| 1.4   | -0.24 | -1.44 |  |  |
| 1.34  | -5.09 | -6.22 |  |  |
| -3.72 | -3.27 | -2.08 |  |  |
| 2.46  | -1.32 | -2.95 |  |  |
| 2.4   | -0.57 | -2.16 |  |  |
| 1.63  | -1.16 | -2.19 |  |  |
| -2.7  | -5.43 | -4.32 |  |  |
| 1.45  | 5.1   | 3.48  |  |  |
| 1.27  | 0.06  | -1.38 |  |  |
| 1.04  | -1.95 | -3.09 |  |  |
| -1.79 | -2.42 | -4.04 |  |  |
| -2.71 | -1.54 | -2.56 |  |  |
| 2.02  | -2.31 | -3.93 |  |  |
| 1.38  | 0.69  | -0.38 |  |  |
| 1.36  | -5.42 | -6.47 |  |  |
| 1.33  | -0.41 | -1.43 |  |  |
| 5.07  | -0.73 | -2.36 |  |  |
| -1.23 | -0.27 | 0.75  |  |  |
| -1.44 | -1.81 | -0.56 |  |  |
| 2.13  | -0.69 | -2.31 |  |  |
| 1.55  | 1.13  | -0.03 |  |  |
| 1.46  | -1.29 | -2.36 |  |  |
| 4.26  | 1.22  | -0.41 |  |  |
| -1.46 | -1.8  | -0.79 |  |  |
| 10.56 | 1.24  | -0.38 |  |  |
| 1.2   | -1.13 | 0.38  |  |  |
| 1.12  | 0.01  | 1.62  |  |  |
| 2.73  | -0.03 | -1.66 |  |  |
| 2.26  | -0.94 | -2.29 |  |  |
| 2.19  | 2.67  | 1.36  |  |  |
| 1.88  | -0.3  | -1.39 |  |  |
| 1.88  | 0.22  | -0.87 |  |  |
| -2.97 | 3.27  | 4.66  |  |  |
| 2.58  | 0.14  | -1.47 |  |  |
| 2.45  | 0.3   | -1.24 |  |  |
| 1.95  | 0.69  | -0.53 |  |  |
| -2.61 | -0.61 | 0.52  |  |  |
| -2.96 | -1.58 | -0.27 |  |  |

|       |       |       |  |  |
|-------|-------|-------|--|--|
| -3.05 | -1.62 | -0.26 |  |  |
| -3.1  | -1.22 | 0.16  |  |  |
| -4.03 | -1    | 0.76  |  |  |
| 1.95  | -0.87 | -2.49 |  |  |
| 1.9   | -2.49 | -4.07 |  |  |
| 1.3   | 0.18  | -0.85 |  |  |
| -4.59 | -2.04 | -0.5  |  |  |
| 1.59  | -0.06 | -1.68 |  |  |
| 1.21  | 5.22  | 4     |  |  |
| 2.32  | -2.35 | -3.97 |  |  |
| 1.54  | -0.77 | -1.79 |  |  |
| 1.52  | -2.72 | -3.73 |  |  |
| -2.79 | -1.93 | -0.86 |  |  |
| 1.9   | 2.4   | 0.78  |  |  |
| 1.31  | 1.97  | 0.89  |  |  |
| -3.42 | -0.43 | 0.65  |  |  |
| 2.65  | 4.83  | 3.22  |  |  |
| 2.16  | 4.62  | 3.29  |  |  |
| 2.04  | 2.07  | 0.46  |  |  |
| 1.77  | 1.21  | -0.2  |  |  |
| 1.35  | -1.29 | -2.31 |  |  |
| -3.02 | -0.78 | 0.23  |  |  |
| -3.24 | 1.22  | 2.33  |  |  |
| -3.45 | -0.97 | 0.23  |  |  |
| 4.57  | -0.01 | -1.62 |  |  |
| 3.21  | -0.15 | -1.25 |  |  |
| -1.42 | 1     | 2.08  |  |  |
| -1.64 | -3.36 | -2.07 |  |  |
| 2.06  | 1.07  | -0.55 |  |  |
| 1.35  | -0.41 | -1.42 |  |  |
| 1.13  | -0.08 | -1.69 |  |  |
| -1.01 | -4.14 | -5.56 |  |  |
| -1.04 | 0.83  | -0.55 |  |  |
| -1.23 | -3.7  | -4.85 |  |  |
| -1.29 | 2.49  | 1.42  |  |  |
| -1.33 | -1.49 | -2.53 |  |  |
| -5.59 | -0.31 | 0.73  |  |  |
| -7.08 | -2.23 | -0.85 |  |  |
| 15.6  | -1    | -2.61 |  |  |
| 10.9  | 1.39  | 0.29  |  |  |
| 2.31  | 2.14  | 3.28  |  |  |
| 1.06  | -4.04 | -1.77 |  |  |
| -1.16 | -0.82 | 1.73  |  |  |
| 1.59  | -0.06 | -1.68 |  |  |
| 1.21  | 5.22  | 4     |  |  |
| 1.59  | -0.06 | -1.68 |  |  |
| 1.21  | 5.22  | 4     |  |  |
| 1.59  | -0.06 | -1.68 |  |  |
| 1.21  | 5.22  | 4     |  |  |
| 1.59  | -0.06 | -1.68 |  |  |
| 1.21  | 5.22  | 4     |  |  |
| 1.59  | -0.06 | -1.68 |  |  |
| 1.21  | 5.22  | 4     |  |  |
| 3.13  | -2.42 | -4.04 |  |  |
| 2.47  | -0.9  | -2.17 |  |  |
| 2.26  | -3.42 | -4.56 |  |  |
| 2.17  | -2.93 | -4.01 |  |  |
| -2.04 | -2.19 | -1.13 |  |  |



|       |       |       |  |  |
|-------|-------|-------|--|--|
| -2.03 | -3.65 | -2.59 |  |  |
| -2.17 | -2.55 | -1.41 |  |  |
| -2.23 | -3.42 | -2.23 |  |  |
| -2.28 | -2.49 | -1.27 |  |  |
| 4.65  | -2.17 | -3.78 |  |  |
| 4.06  | 0.91  | -0.51 |  |  |
| 3.78  | -0.5  | -1.82 |  |  |
| -1.41 | -3.23 | -2.14 |  |  |
| -1.59 | -2.31 | -1.04 |  |  |
| 2.79  | 1.89  | 0.27  |  |  |
| 2.45  | -3.09 | -4.52 |  |  |
| 2.24  | 0.94  | -0.36 |  |  |
| 2.17  | 1.93  | 0.68  |  |  |
| 2.15  | 4.71  | 3.47  |  |  |
| -2.27 | -2.16 | -1.12 |  |  |
| 2.12  | -1.13 | -2.74 |  |  |
| -2.9  | -1.02 | -0.01 |  |  |
| -3.34 | -2.55 | -1.34 |  |  |
| -3.51 | -1.12 | 0.16  |  |  |
| 1.75  | -5.32 | -6.94 |  |  |
| 1.48  | -4.9  | -6.27 |  |  |
| 1.16  | -3.15 | -4.16 |  |  |
| 2.18  | -0.56 | -2.17 |  |  |
| 1.68  | 0.68  | -0.56 |  |  |
| 1.53  | -2.47 | -3.57 |  |  |
| 1.43  | 1.86  | 0.86  |  |  |
| 2.04  | -2.28 | -3.9  |  |  |
| 1.69  | -1.85 | -3.19 |  |  |
| 1.39  | -1.63 | -2.69 |  |  |
| 1.36  | -0.34 | -1.37 |  |  |
| -4.92 | -3.59 | -1.88 |  |  |
| 1.84  | -4.1  | -5.71 |  |  |
| 1.77  | -4.22 | -5.78 |  |  |
| 1.76  | -4.21 | -5.76 |  |  |
| 1.63  | -2.81 | -4.25 |  |  |
| 1.5   | -2.52 | -3.84 |  |  |
| 1.32  | 1.25  | 0.12  |  |  |
| 1.28  | -2.05 | -3.14 |  |  |
| 1.2   | 1.92  | 0.92  |  |  |
| 4.03  | 0.57  | -1.05 |  |  |
| 3.89  | 2.05  | 0.48  |  |  |
| 3.52  | 0.9   | -0.52 |  |  |
| -1.56 | -1.36 | -0.32 |  |  |
| -1.9  | -1.26 | 0.06  |  |  |
| -1.95 | -1.71 | -0.35 |  |  |
| -2.21 | -0.42 | 1.12  |  |  |
| 1.27  | -2.99 | -4.6  |  |  |
| 1.25  | -2.34 | -3.92 |  |  |
| 1.12  | -0.48 | -1.91 |  |  |
| 1.01  | 1.2   | -0.08 |  |  |
| -1.03 | -0.38 | -1.61 |  |  |
| -1.13 | -2.45 | -3.53 |  |  |
| -5.76 | -2.92 | -1.66 |  |  |
| 5.29  | 0.25  | -1.36 |  |  |
| 3.46  | -1.02 | -2.02 |  |  |
| -1.16 | 2.31  | 3.31  |  |  |
| -1.27 | 3.28  | 4.42  |  |  |
| -1.49 | -2.65 | -1.29 |  |  |

|       |       |       |  |  |
|-------|-------|-------|--|--|
| -2.67 | -3.67 | -1.47 |  |  |
| -2.77 | -0.05 | 2.21  |  |  |
| 3.06  | -4.98 | -6.59 |  |  |
| 2.63  | -0.48 | -1.87 |  |  |
| 2.18  | 0.58  | -0.54 |  |  |
| 2.24  | -3.82 | -5.43 |  |  |
| 2.07  | -4.57 | -6.07 |  |  |
| 1.85  | -3.19 | -4.54 |  |  |
| 1.58  | -3    | -4.12 |  |  |
| -3.72 | -7.27 | -5.83 |  |  |
| 2.24  | -3.82 | -5.43 |  |  |
| 2.07  | -4.57 | -6.07 |  |  |
| 1.85  | -3.19 | -4.54 |  |  |
| 1.58  | -3    | -4.12 |  |  |
| -3.72 | -7.27 | -5.83 |  |  |
| 2.24  | -3.82 | -5.43 |  |  |
| 2.07  | -4.57 | -6.07 |  |  |
| 1.85  | -3.19 | -4.54 |  |  |
| 1.58  | -3.21 | -4.32 |  |  |
| -3.72 | -7.27 | -5.83 |  |  |
| 2.24  | -3.82 | -5.43 |  |  |
| 2.07  | -4.57 | -6.07 |  |  |
| 1.85  | -3.19 | -4.54 |  |  |
| 1.58  | -3    | -4.12 |  |  |
| -3.72 | -7.27 | -5.83 |  |  |
| 2.24  | -3.82 | -5.43 |  |  |
| 2.07  | -4.57 | -6.07 |  |  |
| 1.85  | -3.19 | -4.54 |  |  |
| 1.58  | -3    | -4.12 |  |  |
| -3.72 | -7.27 | -5.83 |  |  |
| 1.73  | 0.12  | -1.49 |  |  |
| 1.51  | -0.84 | -2.25 |  |  |
| 1.14  | -0.3  | -1.3  |  |  |
| 1.14  | 4.6   | 3.6   |  |  |
| 13.68 | 0.2   | -1.41 |  |  |
| 12.63 | 1.8   | 0.3   |  |  |
| 10.54 | 1.65  | 0.42  |  |  |
| 9.12  | -0.1  | -1.13 |  |  |
| 2.22  | -2.31 | -1.3  |  |  |
| 2.2   | -0.51 | 0.52  |  |  |
| 2.15  | -0.23 | 0.83  |  |  |
| 1.96  | -3.17 | -1.98 |  |  |
| 1.85  | -1.62 | -0.34 |  |  |
| 1.78  | -0.17 | 1.16  |  |  |
| 1.63  | -2.57 | -1.11 |  |  |
| 1.5   | -3.02 | -1.44 |  |  |
| 1.41  | -3.33 | -1.65 |  |  |
| 1.33  | -1.01 | 0.74  |  |  |
| 1.29  | -1.36 | 0.43  |  |  |
| 1.22  | 1.18  | 3.07  |  |  |
| 1.08  | 7.29  | 9.35  |  |  |
| 1.06  | -3.21 | -1.12 |  |  |
| -1.26 | -2.69 | -0.19 |  |  |
| 1.91  | -0.6  | -2.21 |  |  |
| 1.79  | 2.37  | 0.85  |  |  |
| 1.52  | -0.29 | -1.57 |  |  |
| 1.49  | -0.51 | -1.76 |  |  |
| 1.45  | 0.62  | -0.59 |  |  |

|       |       |       |  |  |
|-------|-------|-------|--|--|
| 1.42  | -2.81 | -3.99 |  |  |
| 1.4   | -0.72 | -1.89 |  |  |
| 1.36  | 2.79  | 1.66  |  |  |
| 1.35  | 4.91  | 3.79  |  |  |
| 1.32  | -2.94 | -4.02 |  |  |
| 1.28  | -2.16 | -3.19 |  |  |
| -3.22 | 1.51  | 2.52  |  |  |
| -3.46 | -1.07 | 0.05  |  |  |
| -3.51 | 1.22  | 2.35  |  |  |
| -3.97 | -0.51 | 0.8   |  |  |
| -4.39 | 0.04  | 1.5   |  |  |
| -4.77 | -1.86 | -0.28 |  |  |
| -4.78 | -1.57 | 0.01  |  |  |
| -5.72 | -0.17 | 1.67  |  |  |
| -8.56 | -1.81 | 0.61  |  |  |
| 1.78  | 3.23  | 1.62  |  |  |
| 1.27  | 1.89  | 0.77  |  |  |
| 1.25  | -2.04 | -3.14 |  |  |
| 1.19  | -2.04 | -3.07 |  |  |
| 1.32  | 0.02  | -1.59 |  |  |
| 1.16  | -2.17 | -3.59 |  |  |
| 1.01  | 3.03  | 1.8   |  |  |
| -1.14 | -2.33 | -3.34 |  |  |
| -4.94 | -0.33 | 0.77  |  |  |
| -4.97 | -2.22 | -1.11 |  |  |
| -5.9  | -2.42 | -1.07 |  |  |
| 2.21  | -1.3  | -2.91 |  |  |
| 1.65  | -2.78 | -3.97 |  |  |
| 1.55  | 0.05  | -1.04 |  |  |
| 2.64  | -1.04 | -2.65 |  |  |
| 2.52  | -1.74 | -3.28 |  |  |
| -2.91 | -4.39 | -3.06 |  |  |
| 1.36  | -2.71 | -4.32 |  |  |
| 1.35  | -0.63 | -2.23 |  |  |
| 1.17  | -1.89 | -3.29 |  |  |
| 1.14  | 2.32  | 0.96  |  |  |
| 1.13  | 2.02  | 0.67  |  |  |
| -1.03 | 1.72  | 0.6   |  |  |
| -1.07 | -0.3  | -1.37 |  |  |
| 6.18  | 0.19  | -1.42 |  |  |
| 5.37  | -0.19 | -1.6  |  |  |
| -1.09 | 6.42  | 7.56  |  |  |
| -1.17 | 2.47  | 3.72  |  |  |
| 1.97  | 2.75  | 1.15  |  |  |
| 1.85  | 1.53  | 0.01  |  |  |
| 1.44  | 2.23  | 1.07  |  |  |
| 1.41  | -0.37 | -1.49 |  |  |
| 1.33  | 3.32  | 2.28  |  |  |
| 1.33  | -1.77 | -2.8  |  |  |
| -3.78 | -1.49 | -0.2  |  |  |
| 9.75  | -0.29 | -1.89 |  |  |
| 7.64  | -0.14 | -1.4  |  |  |
| 6.87  | 0.05  | -1.05 |  |  |
| 1.57  | -0.58 | 0.44  |  |  |
| 1.48  | -2.61 | -1.49 |  |  |
| 1.36  | 0.4   | 1.64  |  |  |
| 1.33  | 1.06  | 2.32  |  |  |
| 1.32  | 3.77  | 5.04  |  |  |

|       |       |       |  |  |
|-------|-------|-------|--|--|
| 1.03  | -1.23 | 0.41  |  |  |
| 1.03  | -2.19 | -0.55 |  |  |
| 1.03  | 5.6   | 7.24  |  |  |
| -1.17 | -3.25 | -1.34 |  |  |
| 2.62  | -0.92 | -2.53 |  |  |
| 1.99  | -0.47 | -1.68 |  |  |
| 1.78  | -1.68 | -2.74 |  |  |
| 1.95  | -1.32 | -2.93 |  |  |
| 1.67  | 1.21  | -0.18 |  |  |
| 1.6   | 1.31  | -0.01 |  |  |
| 1.49  | 7.27  | 6.05  |  |  |
| 1.31  | -0.55 | -1.59 |  |  |
| -4    | -1.72 | -0.37 |  |  |
| -4.41 | -1.57 | -0.07 |  |  |
| 2.24  | -3.69 | -5.3  |  |  |
| -3.72 | -7.15 | -5.7  |  |  |
| -4.93 | -5.89 | -4.04 |  |  |
| 4.85  | -2.75 | -4.35 |  |  |
| -1.51 | 0.14  | 1.41  |  |  |
| 2.09  | -1.45 | -3.05 |  |  |
| 1.57  | 0.69  | -0.5  |  |  |
| 2.58  | -0.8  | -2.41 |  |  |
| 1.8   | -3.04 | -4.13 |  |  |
| 1.71  | -0.79 | -1.8  |  |  |
| 7.17  | -4.26 | -5.86 |  |  |
| 1     | -1.18 | 0.06  |  |  |
| -1.01 | -4.62 | -3.37 |  |  |
| -1.3  | -1.89 | -0.27 |  |  |
| -1.42 | -0.71 | 1.03  |  |  |
| 7.09  | 1.82  | 0.22  |  |  |
| 6.27  | 1.03  | -0.4  |  |  |
| 5.31  | 1.55  | 0.37  |  |  |
| 5.06  | 1.17  | 0.05  |  |  |
| 4.83  | 1.7   | 0.65  |  |  |
| 4.75  | 0.84  | -0.19 |  |  |
| 1.15  | 0.66  | 1.68  |  |  |
| 1.14  | 0.32  | 1.35  |  |  |
| 1.12  | 3.41  | 4.46  |  |  |
| 1.11  | 4.38  | 5.44  |  |  |
| 1.1   | -0.8  | 0.28  |  |  |
| 1.08  | -2.03 | -0.92 |  |  |
| 1.05  | 0.06  | 1.21  |  |  |
| -1.02 | -1.93 | -0.68 |  |  |
| -1.02 | -2.2  | -0.94 |  |  |
| -1.03 | 1.6   | 2.87  |  |  |
| -1.07 | -1.22 | 0.1   |  |  |
| -1.07 | -1.82 | -0.5  |  |  |
| -1.12 | -0.87 | 0.51  |  |  |
| -1.21 | -1.2  | 0.29  |  |  |
| -1.24 | -2.03 | -0.5  |  |  |
| -2.09 | -1.55 | 0.74  |  |  |
| -4.42 | -1.47 | 1.9   |  |  |
| 3.8   | -1.04 | -2.65 |  |  |
| 2.65  | 0.25  | -0.84 |  |  |
| -1.78 | -4.82 | -3.67 |  |  |
| -2.21 | -3.88 | -2.42 |  |  |
| 1.93  | -2.82 | -4.42 |  |  |
| 1.92  | -2.75 | -4.34 |  |  |

|        |       |       |  |  |
|--------|-------|-------|--|--|
| 1.72   | -2.98 | -4.42 |  |  |
| 1.7    | -3.4  | -4.82 |  |  |
| 1.29   | -4.68 | -5.7  |  |  |
| -3.31  | -8.03 | -6.96 |  |  |
| -6.46  | -8.09 | -6.06 |  |  |
| -30.79 | -7.79 | -3.5  |  |  |
| 1.89   | 0.76  | -0.84 |  |  |
| 1.79   | 1.25  | -0.27 |  |  |
| 1.55   | 0.81  | -0.5  |  |  |
| 1.5    | 3.34  | 2.07  |  |  |
| 1.5    | -0.51 | -1.77 |  |  |
| 1.27   | -0.49 | -1.51 |  |  |
| 1.37   | -0.13 | -1.73 |  |  |
| 1.31   | 4.49  | 2.96  |  |  |
| 1.3    | -0.36 | -1.88 |  |  |
| -1.02  | 8.42  | 7.3   |  |  |
| -1.06  | -0.62 | -1.68 |  |  |
| -1.08  | 3.26  | 2.23  |  |  |
| 1.25   | -0.87 | -2.47 |  |  |
| 1.13   | 2.91  | 1.46  |  |  |
| -1.12  | 1.06  | -0.05 |  |  |
| -5.34  | -0.63 | 0.51  |  |  |
| -5.49  | -1.43 | -0.25 |  |  |
| -6.58  | -0.36 | 1.08  |  |  |
| 1.69   | -1.38 | -2.98 |  |  |
| -3.84  | -1.38 | -0.29 |  |  |
| 2.25   | -4.03 | -5.63 |  |  |
| 1.56   | -2.27 | -3.34 |  |  |
| 1.51   | 0.14  | -0.88 |  |  |
| 1.75   | -1.85 | -3.45 |  |  |
| 1.63   | -2.86 | -4.36 |  |  |
| 1.5    | -0.42 | -1.8  |  |  |
| 1.36   | -3.05 | -4.28 |  |  |
| 1.31   | -2.6  | -3.78 |  |  |
| 1.26   | -3.71 | -4.84 |  |  |
| -5.8   | -0.76 | 0.98  |  |  |
| -16.09 | -3.7  | -0.49 |  |  |
| 3.06   | -1.61 | -3.21 |  |  |
| 2.29   | 1.04  | -0.14 |  |  |
| 2.07   | 0.09  | -0.94 |  |  |
| -2.03  | 0.09  | 1.12  |  |  |
| -2.25  | -4.6  | -3.42 |  |  |
| 1.39   | -0.12 | -1.72 |  |  |
| 1.34   | 1.25  | -0.3  |  |  |
| 1.22   | 0.72  | -0.68 |  |  |
| 1.21   | 3.42  | 2.03  |  |  |
| 1.07   | 0.8   | -0.41 |  |  |
| 1.03   | -3.95 | -5.12 |  |  |
| -21.11 | -3.4  | -0.12 |  |  |
| 1.47   | 1.13  | -0.47 |  |  |
| 1.25   | -0.85 | -2.21 |  |  |
| 1.18   | -0.44 | -1.72 |  |  |
| 1.11   | 0.79  | -0.41 |  |  |
| 1.07   | 1.21  | 0.08  |  |  |
| 1.06   | 0.85  | -0.28 |  |  |
| -4.2   | -0.61 | 0.42  |  |  |
| -4.74  | 0.31  | 1.52  |  |  |
| 30.41  | 0.03  | -1.57 |  |  |

|       |       |       |  |  |
|-------|-------|-------|--|--|
| 26.07 | -0.42 | -1.79 |  |  |
| 24.38 | -1.94 | -3.22 |  |  |
| 23.75 | -2.29 | -3.53 |  |  |
| 20.78 | -1.38 | -2.43 |  |  |
| 4.12  | -2.21 | -0.92 |  |  |
| 3.65  | 1.11  | 2.56  |  |  |
| 3.31  | 1.18  | 2.79  |  |  |
| 3.22  | 0.41  | 2.05  |  |  |
| 2.45  | 1.79  | 3.83  |  |  |
| 2.23  | -1.59 | 0.58  |  |  |
| 2.2   | -1.94 | 0.25  |  |  |
| 1.34  | -2.32 | 0.58  |  |  |
| 1.23  | -5.74 | -2.71 |  |  |
| 1.01  | -3.53 | -0.21 |  |  |
| -1.11 | 1.06  | 4.53  |  |  |
| 1.76  | -1.54 | -3.14 |  |  |
| 1.54  | -7.1  | -8.5  |  |  |
| 1.36  | -3.62 | -4.85 |  |  |
| 1.34  | -2.71 | -3.93 |  |  |
| 1.33  | -2.39 | -3.6  |  |  |
| 1.27  | -3.48 | -4.61 |  |  |
| 1.25  | -3.07 | -4.17 |  |  |
| 1.23  | 0.05  | -1.03 |  |  |
| -6.16 | -3.29 | -1.45 |  |  |
| -7.54 | -7.29 | -5.17 |  |  |
| -7.85 | -4.3  | -2.11 |  |  |
| 1.47  | -4.38 | -5.98 |  |  |
| 1.24  | -1.28 | -2.63 |  |  |
| 1.11  | -4.74 | -5.93 |  |  |
| 1.01  | -5.11 | -6.16 |  |  |
| -4.87 | -2.82 | -1.57 |  |  |
| -5.42 | -1.32 | 0.08  |  |  |
| -6.03 | -2.44 | -0.89 |  |  |
| 2.46  | 0.39  | -1.2  |  |  |
| 1.81  | 2.5   | 1.34  |  |  |
| -2.58 | -1.13 | -0.06 |  |  |
| -2.68 | -0.25 | 0.87  |  |  |
| -2.91 | -0.58 | 0.66  |  |  |
| -3.13 | -0.19 | 1.16  |  |  |
| 4.58  | -4.47 | -6.07 |  |  |
| -1.34 | -3.44 | -2.42 |  |  |
| -1.41 | -2.58 | -1.49 |  |  |
| -1.68 | -5.61 | -4.27 |  |  |
| 2.35  | -4.2  | -5.8  |  |  |
| 1.7   | -4.14 | -5.28 |  |  |
| 6.96  | -0.68 | -2.28 |  |  |
| -1.01 | -0.45 | 0.77  |  |  |
| -1.02 | -2.02 | -0.78 |  |  |
| -1.07 | 2.48  | 3.78  |  |  |
| -1.21 | -2.43 | -0.96 |  |  |
| -1.31 | -5.01 | -3.42 |  |  |
| -1.97 | -3.72 | -1.54 |  |  |
| 3.55  | -1.44 | -3.04 |  |  |
| -1.95 | -3.47 | -2.28 |  |  |
| -2.5  | -3.37 | -1.82 |  |  |
| -2.74 | -1.94 | -0.26 |  |  |
| 3.38  | -0.97 | -2.57 |  |  |
| -2.02 | -1.28 | -0.11 |  |  |

|       |       |       |  |  |
|-------|-------|-------|--|--|
| -2.09 | -3.68 | -2.47 |  |  |
| -2.33 | -1.89 | -0.51 |  |  |
| -2.53 | -1.96 | -0.46 |  |  |
| -3.26 | -3.5  | -1.64 |  |  |
| 21.22 | 1.67  | 0.07  |  |  |
| 17.78 | 2.25  | 0.91  |  |  |
| 2.57  | -1.51 | -0.06 |  |  |
| 2.31  | -2.56 | -0.96 |  |  |
| 2.16  | -5.49 | -3.79 |  |  |
| 1.76  | -0.51 | 1.48  |  |  |
| 1.47  | -4.6  | -2.35 |  |  |
| 1.09  | 0.56  | 3.24  |  |  |
| -1.06 | -5.88 | -2.99 |  |  |
| -1.08 | -5.87 | -2.95 |  |  |
| -1.31 | -6.18 | -2.99 |  |  |
| -1.57 | -5.43 | -1.98 |  |  |
| 2.59  | 1.96  | 0.36  |  |  |
| 2.23  | 6.14  | 4.75  |  |  |
| 2.12  | 2.65  | 1.33  |  |  |
| 1.77  | 1.65  | 0.6   |  |  |
| 3.32  | -5.53 | -7.12 |  |  |
| 2.83  | -2.85 | -4.21 |  |  |
| 2.44  | -3.52 | -4.67 |  |  |
| -1.91 | -1.89 | -0.82 |  |  |
| -2.52 | -5.38 | -3.91 |  |  |
| 1.32  | 3.07  | 1.48  |  |  |
| 1.23  | 0.48  | -1.01 |  |  |
| 1.2   | 4.25  | 2.79  |  |  |
| 1.12  | 0.1   | -1.26 |  |  |
| 1.11  | 0.02  | -1.32 |  |  |
| 1.1   | 3.14  | 1.81  |  |  |
| 1.06  | 2.4   | 1.12  |  |  |
| 1.06  | -0.75 | -2.04 |  |  |
| -1    | 1.36  | 0.18  |  |  |
| -1.07 | 4.97  | 3.87  |  |  |
| -1.07 | 4.66  | 3.57  |  |  |
| -1.08 | 2.66  | 1.58  |  |  |
| -1.09 | -0.48 | -1.55 |  |  |
| -1.12 | 2.44  | 1.41  |  |  |
| -1.13 | -1.82 | -2.84 |  |  |
| -5.17 | -1.05 | 0.13  |  |  |
| -7.98 | -1.2  | 0.6   |  |  |
| 2.99  | -2.2  | -3.8  |  |  |
| 2.21  | -0.23 | -1.38 |  |  |
| -2.38 | -2.46 | -1.23 |  |  |
| -2.65 | -5.51 | -4.11 |  |  |
| 1.65  | -2.18 | -3.78 |  |  |
| 1.38  | -1.41 | -2.74 |  |  |
| 1.22  | -2.07 | -3.23 |  |  |
| 1.16  | -6.33 | -7.42 |  |  |
| 2.17  | -4.68 | -6.28 |  |  |
| 2.03  | -4.42 | -5.92 |  |  |
| 1.46  | -3.22 | -4.24 |  |  |
| 3.28  | -1.92 | -3.51 |  |  |
| -2.01 | -2.83 | -1.7  |  |  |
| 1.2   | -3.09 | -4.68 |  |  |
| 1.11  | -0.65 | -2.13 |  |  |
| -1.1  | -2.47 | -3.65 |  |  |

|        |       |       |  |  |
|--------|-------|-------|--|--|
| -1.11  | 1.34  | 0.17  |  |  |
| -1.15  | -1.13 | -2.26 |  |  |
| -1.18  | -4.23 | -5.33 |  |  |
| 1      | -0.71 | -2.3  |  |  |
| -1.08  | 0.52  | -0.96 |  |  |
| -1.11  | 0.06  | -1.38 |  |  |
| -1.44  | 0.68  | -0.38 |  |  |
| -8.14  | -0.31 | 1.13  |  |  |
| 2.52   | -3.31 | -4.9  |  |  |
| 1.72   | -0.52 | -1.56 |  |  |
| -2.5   | -3.25 | -2.19 |  |  |
| 13.94  | 1.12  | -0.47 |  |  |
| 2.12   | -1.38 | -0.25 |  |  |
| 2.04   | -2    | -0.82 |  |  |
| 1.96   | -5.08 | -3.84 |  |  |
| 1.8    | -2.11 | -0.74 |  |  |
| 1.74   | -5.11 | -3.7  |  |  |
| 1.64   | -3.8  | -2.3  |  |  |
| 1.62   | -4.1  | -2.58 |  |  |
| 1.54   | -2.5  | -0.91 |  |  |
| 1.49   | -0.53 | 1.1   |  |  |
| 1.43   | -2.97 | -1.27 |  |  |
| 1.37   | -2.31 | -0.55 |  |  |
| 1.34   | -2.35 | -0.56 |  |  |
| 1.25   | -5.04 | -3.15 |  |  |
| 1.18   | -4.18 | -2.21 |  |  |
| 1.17   | -5.49 | -3.5  |  |  |
| 1.14   | -4.76 | -2.74 |  |  |
| 1.03   | -1.26 | 0.92  |  |  |
| -1.2   | -4.98 | -2.51 |  |  |
| -1.43  | -5.9  | -3.17 |  |  |
| -1.44  | -4.81 | -2.07 |  |  |
| 1.14   | -5.27 | -6.86 |  |  |
| 1.1    | -4.65 | -6.18 |  |  |
| -1     | -2.15 | -3.54 |  |  |
| -1.05  | -4.28 | -5.6  |  |  |
| -1.13  | -5.48 | -6.7  |  |  |
| -1.14  | -3.5  | -4.71 |  |  |
| -1.2   | -3.41 | -4.55 |  |  |
| -1.2   | -4.55 | -5.68 |  |  |
| -1.24  | -4.48 | -5.57 |  |  |
| -1.29  | -5.2  | -6.23 |  |  |
| -6.02  | -5.37 | -4.18 |  |  |
| -10.06 | -7.12 | -5.19 |  |  |
| -11.46 | -3.24 | -1.11 |  |  |
| 2.49   | -0.56 | -2.15 |  |  |
| 1.71   | -0.54 | -1.59 |  |  |
| -3.43  | -2.85 | -1.35 |  |  |
| 2.19   | 2.74  | 1.15  |  |  |
| 2.05   | 2.98  | 1.48  |  |  |
| -3.12  | -0.57 | 0.61  |  |  |
| -4.66  | -0.73 | 1.03  |  |  |
| 1.09   | -4.4  | -5.99 |  |  |
| 1.09   | -3.66 | -5.24 |  |  |
| 1.08   | -3.93 | -5.51 |  |  |
| 1.06   | -5.83 | -7.37 |  |  |
| 1.02   | -5.11 | -6.6  |  |  |
| -1.02  | -5.84 | -7.27 |  |  |



|       |       |       |  |  |
|-------|-------|-------|--|--|
| -1.07 | -2.15 | -3.51 |  |  |
| -1.22 | -0.28 | -1.46 |  |  |
| -1.25 | -2.94 | -4.09 |  |  |
| -1.25 | -6.21 | -7.35 |  |  |
| -1.27 | -6.67 | -7.78 |  |  |
| -5.65 | -4.82 | -3.78 |  |  |
| -6.33 | -5.13 | -3.93 |  |  |
| 1.21  | -0.45 | -2.04 |  |  |
| 1.18  | -1.18 | -2.73 |  |  |
| 1.17  | -3.5  | -5.04 |  |  |
| 1.11  | 1.6   | 0.14  |  |  |
| -1.07 | -1.93 | -3.16 |  |  |
| -1.18 | -0.51 | -1.59 |  |  |
| -1.19 | -2.38 | -3.44 |  |  |
| -1.19 | -1.73 | -2.79 |  |  |
| 1.91  | -1.32 | -2.92 |  |  |
| 1.53  | 2.65  | 1.37  |  |  |
| 1.49  | 1.73  | 0.49  |  |  |
| 1.49  | 2.02  | 0.78  |  |  |
| 1.4   | 4.4   | 3.25  |  |  |
| -3.22 | -3.44 | -2.41 |  |  |
| 2.14  | -1.12 | -2.71 |  |  |
| 1.85  | -1.43 | -2.81 |  |  |
| 1.51  | -0.01 | -1.1  |  |  |
| -2.82 | 1.19  | 2.2   |  |  |
| -3.87 | -2.22 | -0.76 |  |  |
| -3.92 | -2.06 | -0.58 |  |  |
| -5.6  | -0.99 | 1     |  |  |
| 2.71  | 0.39  | -1.2  |  |  |
| 2.15  | 0.06  | -1.2  |  |  |
| -2.38 | -0.79 | 0.31  |  |  |
| 1.27  | 0.46  | -1.13 |  |  |
| 1.06  | 0.22  | -1.11 |  |  |
| -1.16 | -4.72 | -5.75 |  |  |
| -5.89 | -6.25 | -4.94 |  |  |
| 1.47  | -4.04 | -5.62 |  |  |
| 1.14  | -0.82 | -2.03 |  |  |
| 1.11  | -0.62 | -1.8  |  |  |
| 1.11  | -4.4  | -5.58 |  |  |
| 1.06  | -1.42 | -2.53 |  |  |
| 1.02  | -3.32 | -4.37 |  |  |
| 2.77  | 4.58  | 2.99  |  |  |
| 2.19  | 3.46  | 2.21  |  |  |
| -3.42 | -2.37 | -0.71 |  |  |
| 2.24  | -3.85 | -5.44 |  |  |
| 2.07  | -4.6  | -6.08 |  |  |
| 1.58  | -3.04 | -4.13 |  |  |
| -3.72 | -7.31 | -5.84 |  |  |
| -4.93 | -6.05 | -4.18 |  |  |
| 1.84  | -2.87 | -4.45 |  |  |
| 1.57  | -4.63 | -5.98 |  |  |
| 2.9   | -2.1  | -3.68 |  |  |
| -2.13 | -1.43 | -0.38 |  |  |
| -2.3  | -0.89 | 0.27  |  |  |
| 1.6   | -1.7  | -3.28 |  |  |
| 1.57  | -1.62 | -3.19 |  |  |
| 1.4   | 1.34  | -0.05 |  |  |
| 1.32  | 0.61  | -0.7  |  |  |

|       |       |       |  |  |
|-------|-------|-------|--|--|
| 1.27  | -1.39 | -2.64 |  |  |
| 1.15  | -0.08 | -1.2  |  |  |
| 1.09  | -3.55 | -4.59 |  |  |
| 1.07  | 0.17  | -0.84 |  |  |
| 2.39  | 0.11  | -1.47 |  |  |
| -2.55 | -1.75 | -0.73 |  |  |
| -3.63 | -2.28 | -0.75 |  |  |
| -3.75 | -2.89 | -1.31 |  |  |
| 3.41  | -2.46 | -4.05 |  |  |
| -2.23 | -3.44 | -2.09 |  |  |
| -2.59 | -5.25 | -3.69 |  |  |
| -3.29 | -3.74 | -1.84 |  |  |
| 1.6   | 3.07  | 1.48  |  |  |
| 1.19  | 1.46  | 0.3   |  |  |
| 2.08  | -1.2  | -2.78 |  |  |
| 1.47  | -0.2  | -1.28 |  |  |
| 7.6   | -0.81 | -2.4  |  |  |
| 5.75  | -0.02 | -1.2  |  |  |
| 5.12  | -0.42 | -1.44 |  |  |
| 1.19  | 0.06  | 1.15  |  |  |
| -1.53 | 1.74  | 3.69  |  |  |
| 1.88  | -2.84 | -4.42 |  |  |
| 1.74  | 0.82  | -0.65 |  |  |
| 1.5   | 1.07  | -0.18 |  |  |
| 1.38  | -1.6  | -2.75 |  |  |
| -4.45 | -2    | -0.52 |  |  |
| 5.33  | -0.04 | -1.63 |  |  |
| 5.05  | 0.65  | -0.86 |  |  |
| 4.62  | -0.04 | -1.42 |  |  |
| 3.77  | -0.07 | -1.16 |  |  |
| 2.85  | -0.1  | -1.69 |  |  |
| 2.31  | 4.17  | 2.89  |  |  |
| -2.22 | -0.25 | 0.82  |  |  |
| -2.49 | -0.5  | 0.74  |  |  |
| -3.46 | -0.94 | 0.77  |  |  |
| 10.19 | 0.22  | -1.36 |  |  |
| 8.69  | -1.59 | -2.95 |  |  |
| 7.07  | 0.53  | -0.53 |  |  |
| 1.27  | 0.36  | 1.78  |  |  |
| -1.03 | 3.3   | 5.1   |  |  |
| 2.1   | 3.57  | 1.99  |  |  |
| 2.04  | 3.93  | 2.39  |  |  |
| 2.03  | 2.4   | 0.87  |  |  |
| 1.97  | 3.01  | 1.52  |  |  |
| 1.94  | 3.32  | 1.85  |  |  |
| 1.91  | 2.02  | 0.58  |  |  |
| 1.87  | 2.22  | 0.8   |  |  |
| 1.8   | 1.83  | 0.48  |  |  |
| 1.78  | 1.88  | 0.53  |  |  |
| 1.75  | 1.79  | 0.47  |  |  |
| 1.75  | 4.73  | 3.41  |  |  |
| 1.73  | 5.04  | 3.74  |  |  |
| 1.73  | 4.18  | 2.88  |  |  |
| 1.64  | -1.92 | -3.15 |  |  |
| 1.61  | 4.44  | 3.24  |  |  |
| 1.56  | 3.43  | 2.28  |  |  |
| 1.52  | 2.24  | 1.13  |  |  |
| 1.52  | 2.65  | 1.54  |  |  |

|       |       |       |  |  |
|-------|-------|-------|--|--|
| -2.86 | -1.81 | -0.8  |  |  |
| -3.76 | -1.76 | -0.35 |  |  |
| 1.66  | -0.7  | -2.28 |  |  |
| 1.51  | -0.33 | -1.77 |  |  |
| 1.2   | 0.7   | -0.41 |  |  |
| -3.87 | -3.62 | -2.51 |  |  |
| -4.73 | -3.09 | -1.69 |  |  |
| -4.81 | -0.17 | 1.25  |  |  |
| 2.26  | -2.39 | -3.97 |  |  |
| 1.89  | 0.37  | -0.95 |  |  |
| 1.78  | 0.96  | -0.29 |  |  |
| 1.72  | -2.7  | -3.89 |  |  |
| 1.65  | -1.88 | -3.01 |  |  |
| 1.52  | -1.44 | -2.45 |  |  |
| 2.39  | -0.69 | -2.27 |  |  |
| 2.03  | -0.12 | -1.47 |  |  |
| 1.64  | 2.89  | 1.85  |  |  |
| -2.97 | -1.19 | 0.06  |  |  |
| -3.46 | -2.01 | -0.54 |  |  |
| -3.71 | -1.87 | -0.3  |  |  |
| -4.53 | -1.07 | 0.78  |  |  |
| 1.94  | 1.44  | -0.13 |  |  |
| 1.71  | 1.56  | 0.16  |  |  |
| 1.45  | 1.25  | 0.09  |  |  |
| 1.35  | -1.95 | -3    |  |  |
| 1.32  | -1.46 | -2.48 |  |  |
| 1.31  | 0.91  | -0.1  |  |  |
| 2.96  | -6.34 | -7.92 |  |  |
| -4.83 | -7.27 | -5.01 |  |  |
| 5.33  | -0.08 | -1.66 |  |  |
| 3.8   | -0.21 | -1.3  |  |  |
| 3.6   | 1.93  | 0.91  |  |  |
| -1.14 | 0.81  | 1.83  |  |  |
| -1.27 | -0.32 | 0.86  |  |  |
| -1.51 | -2.48 | -1.05 |  |  |
| -1.85 | -3.11 | -1.39 |  |  |
| 1.65  | 0.46  | -1.11 |  |  |
| 1.46  | 0.97  | -0.44 |  |  |
| 1.22  | -1.12 | -2.27 |  |  |
| 1.19  | 3.08  | 1.97  |  |  |
| 1.18  | 0.59  | -0.5  |  |  |
| -3.76 | 0.22  | 1.27  |  |  |
| -3.94 | -0.91 | 0.22  |  |  |
| 2.95  | -3.19 | -4.77 |  |  |
| 2.69  | -5.09 | -6.54 |  |  |
| 2.03  | -2.93 | -4.51 |  |  |
| 1.77  | -3.52 | -4.9  |  |  |
| 1.61  | -1.22 | -2.47 |  |  |
| 1.53  | -0.91 | -2.09 |  |  |
| -2.98 | -2.37 | -1.35 |  |  |
| -3.02 | -3.12 | -2.09 |  |  |
| 2.3   | -0.64 | -2.21 |  |  |
| 1.72  | -4.65 | -5.81 |  |  |
| 2.2   | -2.56 | -4.14 |  |  |
| 2     | -2.63 | -4.08 |  |  |
| 1.99  | -0.82 | -2.26 |  |  |
| 1.78  | -2.03 | -3.31 |  |  |
| 1.65  | 0.29  | -0.88 |  |  |

|       |       |       |  |  |
|-------|-------|-------|--|--|
| 1.58  | -1.74 | -2.85 |  |  |
| 1.48  | 2.32  | 1.31  |  |  |
| -3.49 | -1.67 | -0.31 |  |  |
| 1.64  | 4.55  | 2.98  |  |  |
| 1.51  | -0.85 | -2.31 |  |  |
| 1.46  | -0.67 | -2.08 |  |  |
| 1.44  | -1.19 | -2.58 |  |  |
| 1.32  | 1.19  | -0.08 |  |  |
| 1.31  | 1.35  | 0.1   |  |  |
| 1.2   | 2.1   | 0.97  |  |  |
| 1.14  | 1.3   | 0.25  |  |  |
| -4.1  | 3.09  | 4.26  |  |  |
| 1.81  | 0.94  | -0.64 |  |  |
| 1.52  | -5.66 | -6.99 |  |  |
| 1.4   | 1.45  | 0.24  |  |  |
| 1.4   | -1.12 | -2.33 |  |  |
| 1.4   | -0.42 | -1.62 |  |  |
| 1.36  | -0.67 | -1.85 |  |  |
| 1.34  | -2.38 | -3.54 |  |  |
| 1.28  | -4.59 | -5.66 |  |  |
| 1.27  | 0.17  | -0.9  |  |  |
| 1.22  | 1.19  | 0.18  |  |  |
| 1.21  | -2.15 | -3.16 |  |  |
| 1.81  | 0.94  | -0.64 |  |  |
| 1.52  | -5.66 | -6.99 |  |  |
| 1.4   | 1.47  | 0.26  |  |  |
| 1.4   | -1.12 | -2.33 |  |  |
| 1.4   | -0.42 | -1.62 |  |  |
| 1.36  | -0.67 | -1.85 |  |  |
| 1.34  | -2.38 | -3.54 |  |  |
| 1.27  | 0.17  | -0.9  |  |  |
| 1.22  | 1.19  | 0.18  |  |  |
| 1.21  | -2.15 | -3.16 |  |  |
| 1.81  | 0.94  | -0.64 |  |  |
| 1.52  | -5.66 | -6.99 |  |  |
| 1.4   | 1.47  | 0.26  |  |  |
| 1.4   | -1.12 | -2.33 |  |  |
| 1.4   | -0.42 | -1.62 |  |  |
| 1.36  | -0.67 | -1.85 |  |  |
| 1.34  | -2.38 | -3.54 |  |  |
| 1.27  | 0.17  | -0.9  |  |  |
| 1.22  | 1.19  | 0.18  |  |  |
| 1.21  | -2.15 | -3.16 |  |  |
| 1.81  | 0.94  | -0.64 |  |  |
| 1.52  | -5.66 | -6.99 |  |  |
| 1.4   | 1.45  | 0.24  |  |  |
| 1.4   | -1.12 | -2.33 |  |  |
| 1.4   | -0.42 | -1.62 |  |  |
| 1.36  | -0.67 | -1.85 |  |  |
| 1.34  | -2.38 | -3.54 |  |  |
| 1.28  | -4.59 | -5.66 |  |  |
| 1.27  | 0.17  | -0.9  |  |  |
| 1.22  | 1.19  | 0.18  |  |  |
| 1.21  | -2.15 | -3.16 |  |  |
| 3.55  | -1.5  | -3.08 |  |  |
| 3.4   | -1.38 | -2.9  |  |  |
| 2.77  | 0.37  | -0.85 |  |  |
| 2.75  | 6.07  | 4.87  |  |  |

|        |       |       |  |  |
|--------|-------|-------|--|--|
| -1.83  | -2.2  | -1.08 |  |  |
| -1.93  | -2.59 | -1.39 |  |  |
| 2.29   | -4.94 | -6.51 |  |  |
| 1.68   | -3.86 | -4.99 |  |  |
| 3.7    | -0.54 | -2.12 |  |  |
| 2.81   | -1.25 | -2.43 |  |  |
| 2.7    | -0.48 | -1.6  |  |  |
| 2.65   | -2.61 | -3.71 |  |  |
| 2.54   | -3.74 | -4.76 |  |  |
| -1.62  | -4.42 | -3.41 |  |  |
| -1.64  | -4.67 | -3.64 |  |  |
| -1.74  | -4.5  | -3.38 |  |  |
| -2.07  | -3.79 | -2.43 |  |  |
| -2.77  | -4.15 | -2.37 |  |  |
| 2.6    | 2.89  | 1.32  |  |  |
| 2.33   | -1.25 | -2.67 |  |  |
| -2.5   | -2.71 | -1.59 |  |  |
| -2.72  | -3.12 | -1.88 |  |  |
| 2.66   | -3.86 | -5.43 |  |  |
| 2.61   | -4.27 | -5.82 |  |  |
| 2.61   | -4.99 | -6.54 |  |  |
| 2.44   | -0.34 | -1.79 |  |  |
| 2.23   | -3.14 | -4.46 |  |  |
| 2.01   | -4.07 | -5.24 |  |  |
| -2.26  | -3.65 | -2.65 |  |  |
| 1.5    | 1.25  | -0.33 |  |  |
| 1.06   | -0.07 | -1.15 |  |  |
| -6.41  | -5.38 | -3.69 |  |  |
| 2.24   | -3.7  | -5.28 |  |  |
| 2.07   | -4.45 | -5.92 |  |  |
| 1.84   | -5.49 | -6.78 |  |  |
| 1.58   | -2.89 | -3.96 |  |  |
| 1.54   | -2.64 | -3.68 |  |  |
| -2.71  | -7.28 | -6.25 |  |  |
| -4.93  | -5.9  | -4.02 |  |  |
| -5.44  | -7.52 | -5.5  |  |  |
| 2.43   | 2.42  | 0.85  |  |  |
| 1.91   | 3.97  | 2.75  |  |  |
| 1.88   | -1.84 | -3.05 |  |  |
| -2.92  | -2.29 | -1.03 |  |  |
| 2.14   | 0.11  | -1.46 |  |  |
| 1.51   | 0.18  | -0.89 |  |  |
| 1.45   | 2.69  | 1.68  |  |  |
| -4.15  | -4.11 | -2.54 |  |  |
| 1.29   | 0.19  | -1.39 |  |  |
| 1.26   | 2.59  | 1.06  |  |  |
| 1.08   | -0.38 | -1.7  |  |  |
| 1.03   | 6.38  | 5.13  |  |  |
| -1.1   | 6.17  | 5.09  |  |  |
| -5.24  | 0.08  | 1.26  |  |  |
| -11.72 | -1.07 | 1.28  |  |  |
| 2.3    | -2.7  | -4.28 |  |  |
| 1.89   | -3.96 | -5.25 |  |  |
| 1.57   | -2.08 | -3.1  |  |  |
| 1.55   | -4.96 | -5.97 |  |  |
| -2.61  | -5.43 | -4.42 |  |  |
| -2.73  | -3.52 | -2.45 |  |  |
| 3.14   | 1.05  | -0.53 |  |  |

|       |       |       |  |  |
|-------|-------|-------|--|--|
| 2.9   | 5.27  | 3.81  |  |  |
| 2.82  | 0.63  | -0.79 |  |  |
| 2.34  | 2.3   | 1.14  |  |  |
| 1.33  | -3.96 | -5.54 |  |  |
| 1.24  | -3.26 | -4.74 |  |  |
| 1.18  | -0.04 | -1.44 |  |  |
| 1.08  | -1.49 | -2.77 |  |  |
| 1.03  | -1.05 | -2.26 |  |  |
| -1.01 | -2.34 | -3.48 |  |  |
| -1.03 | -2.26 | -3.38 |  |  |
| -1.08 | -1.27 | -2.32 |  |  |
| -1.1  | -3.22 | -4.24 |  |  |
| -1.11 | -3.41 | -4.43 |  |  |
| 5.56  | 0.14  | -1.43 |  |  |
| -1.11 | 3.5   | 4.55  |  |  |
| 2.37  | -6.19 | -7.76 |  |  |
| 1.8   | -5.71 | -6.88 |  |  |
| 1.68  | -3.68 | -4.75 |  |  |
| -2.95 | -7.36 | -6.12 |  |  |
| -3.16 | -7.52 | -6.19 |  |  |
| 1.56  | -0.19 | -1.76 |  |  |
| 1.55  | -4.64 | -6.2  |  |  |
| -7.19 | -7.15 | -5.24 |  |  |
| 1.46  | 4.05  | 2.48  |  |  |
| 1.13  | 0.43  | -0.77 |  |  |
| 1.1   | 0.06  | -1.1  |  |  |
| 1.11  | -2.41 | -3.58 |  |  |
| -1.01 | -2.87 | -3.88 |  |  |
| -5.27 | -1.13 | 0.25  |  |  |
| 1.7   | -0.67 | -2.24 |  |  |
| 1.53  | -2.84 | -4.26 |  |  |
| 1.18  | -2.74 | -3.78 |  |  |
| -4.06 | -2.89 | -1.67 |  |  |
| 2.2   | 0.32  | -1.25 |  |  |
| 1.5   | 1.19  | 0.17  |  |  |
| -2.7  | -2.72 | -1.72 |  |  |
| -3.73 | -1.33 | 0.14  |  |  |
| -3.78 | -1.02 | 0.46  |  |  |
| -3.98 | -1.73 | -0.17 |  |  |
| 13.25 | -0.57 | -2.14 |  |  |
| 12.49 | 1.8   | 0.32  |  |  |
| 10.04 | 0.37  | -0.8  |  |  |
| 2.23  | -0.04 | 0.96  |  |  |
| 2.14  | -3.07 | -2.01 |  |  |
| 2.1   | 1.12  | 2.21  |  |  |
| 2.07  | -0.31 | 0.8   |  |  |
| 2     | -1.22 | -0.06 |  |  |
| 1.96  | -3.9  | -2.71 |  |  |
| 1.93  | 1.1   | 2.31  |  |  |
| 1.76  | -3.04 | -1.7  |  |  |
| 1.63  | 0.45  | 1.91  |  |  |
| 1.6   | -0.71 | 0.77  |  |  |
| 1.56  | -3.43 | -1.91 |  |  |
| 1.56  | -0.4  | 1.12  |  |  |
| 1.49  | -3.58 | -2    |  |  |
| 1.46  | -2.31 | -0.7  |  |  |
| 1.44  | 0.43  | 2.06  |  |  |
| 1.27  | -4.65 | -2.84 |  |  |

|       |       |       |  |  |
|-------|-------|-------|--|--|
| 1.25  | -4.22 | -2.39 |  |  |
| -1.25 | -2.78 | -0.29 |  |  |
| -1.52 | -5.1  | -2.34 |  |  |
| 5.61  | 0.02  | -1.55 |  |  |
| 3.99  | -0.37 | -1.45 |  |  |
| -1.14 | 0.67  | 1.78  |  |  |
| -1.21 | -1.48 | -0.28 |  |  |
| -1.35 | -1.5  | -0.16 |  |  |
| -1.72 | 3.81  | 5.51  |  |  |
| 2.71  | -3.62 | -5.19 |  |  |
| 2.68  | -0.69 | -2.25 |  |  |
| 2.58  | -3.51 | -5.01 |  |  |
| 1.96  | -0.98 | -2.08 |  |  |
| -2.43 | -3.11 | -1.96 |  |  |
| 1.33  | -0.61 | -2.18 |  |  |
| 1.21  | 0.04  | -1.39 |  |  |
| 1.18  | -1.37 | -2.76 |  |  |
| 1.09  | 2.06  | 0.78  |  |  |
| 1.08  | 0.64  | -0.63 |  |  |
| 1.05  | 0.45  | -0.78 |  |  |
| -1.02 | -1.09 | -2.22 |  |  |
| -1.07 | -0.4  | -1.45 |  |  |
| -6.09 | -1.62 | -0.16 |  |  |
| -8.23 | -0.78 | 1.11  |  |  |
| -9.1  | -2.44 | -0.41 |  |  |
| 1.53  | 3.32  | 1.75  |  |  |
| 1.25  | 0.6   | -0.67 |  |  |
| 1.16  | -0.25 | -1.41 |  |  |
| -4.25 | -2.78 | -1.64 |  |  |
| 1.39  | -4.98 | -6.55 |  |  |
| -1.03 | -5.92 | -6.97 |  |  |
| -4.43 | -3.49 | -2.44 |  |  |
| -4.6  | -3.52 | -2.41 |  |  |
| -4.84 | -7.49 | -6.3  |  |  |
| -9.02 | -4.62 | -2.54 |  |  |
| 1.81  | -1.89 | -3.46 |  |  |
| 1.54  | 2.16  | 0.82  |  |  |
| 1.31  | -1.99 | -3.1  |  |  |
| 1.28  | 1.41  | 0.34  |  |  |
| -3.33 | -4.01 | -2.99 |  |  |
| -3.52 | -1.49 | -0.39 |  |  |
| 2.02  | -5.28 | -6.86 |  |  |
| 1.54  | -2.4  | -3.58 |  |  |
| 1.51  | -2.49 | -3.64 |  |  |
| 1.48  | -4.93 | -6.05 |  |  |
| 1.43  | -1.39 | -2.46 |  |  |
| 1.38  | -4.04 | -5.07 |  |  |
| -3.3  | -3.23 | -2.06 |  |  |
| 1.41  | -2.53 | -4.1  |  |  |
| 1     | -6.24 | -7.32 |  |  |
| -1.02 | -3.92 | -4.97 |  |  |
| -6.09 | -5.7  | -4.17 |  |  |
| 1.51  | -2.32 | -3.88 |  |  |
| 1.32  | 0.68  | -0.69 |  |  |
| -4.15 | -0.93 | 0.16  |  |  |
| -5.12 | -0.38 | 1     |  |  |
| 2.63  | -2.58 | -4.16 |  |  |
| -2.31 | -2.17 | -1.14 |  |  |

|       |       |       |  |  |
|-------|-------|-------|--|--|
| -2.65 | -1.27 | -0.04 |  |  |
| -3.69 | -3.88 | -2.17 |  |  |
| 3.53  | -2.78 | -4.35 |  |  |
| 3.17  | -4.32 | -5.74 |  |  |
| -1.69 | -4.35 | -3.34 |  |  |
| -2.44 | -4.36 | -2.82 |  |  |
| 2.23  | 0.73  | -0.84 |  |  |
| 1.87  | 0     | -1.32 |  |  |
| 1.64  | 0.1   | -1.02 |  |  |
| 1.59  | 0.89  | -0.19 |  |  |
| 1.57  | -2.96 | -4.03 |  |  |
| 1.52  | 0.01  | -1.01 |  |  |
| 1.51  | 0.61  | -0.39 |  |  |
| -3.06 | -2.85 | -1.64 |  |  |
| -3.83 | -3.03 | -1.5  |  |  |
| 1.63  | -7.06 | -8.62 |  |  |
| 1.36  | -6.94 | -8.24 |  |  |
| 1.2   | -5.67 | -6.8  |  |  |
| 2.07  | 0.7   | -0.87 |  |  |
| 1.7   | 0.88  | -0.4  |  |  |
| 1.5   | 0.34  | -0.77 |  |  |
| 1.45  | 0.08  | -0.97 |  |  |
| -4.93 | 0.62  | 2.4   |  |  |
| 1.59  | -4.25 | -5.81 |  |  |
| 1.52  | -1.56 | -3.06 |  |  |
| 1.28  | -4.45 | -5.69 |  |  |
| 1.2   | -3.17 | -4.33 |  |  |
| 1.11  | 0.63  | -0.41 |  |  |
| 1.17  | 1.43  | -0.13 |  |  |
| -1.07 | 2.84  | 1.59  |  |  |
| -1.09 | 0.17  | -1.05 |  |  |
| -1.19 | -1.14 | -2.23 |  |  |
| -6.2  | -1.11 | 0.18  |  |  |
| -6.41 | -0.05 | 1.29  |  |  |
| -6.69 | -1.23 | 0.17  |  |  |
| -6.91 | -0.79 | 0.65  |  |  |
| 1.62  | -0.69 | -2.25 |  |  |
| 1.47  | 2.68  | 1.25  |  |  |
| 1.26  | 0.61  | -0.59 |  |  |
| 1.1   | -0.47 | -1.48 |  |  |
| -5.3  | -1.23 | 0.31  |  |  |
| 2.95  | -0.11 | -1.68 |  |  |
| 2.26  | -0.25 | -1.43 |  |  |
| 2.22  | -1.3  | -2.45 |  |  |
| -2.14 | -1.66 | -0.57 |  |  |
| -2.2  | -4.08 | -2.95 |  |  |
| 2.32  | -1.19 | -2.75 |  |  |
| 2.03  | -0.82 | -2.19 |  |  |
| 4.12  | 0.79  | -0.77 |  |  |
| 3.19  | 0.85  | -0.34 |  |  |
| 2.88  | -1.87 | -2.92 |  |  |
| 2.93  | -1.15 | -2.71 |  |  |
| -2.14 | -1.98 | -0.89 |  |  |
| 28.46 | 0.38  | -1.18 |  |  |
| 4.35  | 0.58  | 1.72  |  |  |
| 2.8   | -3.12 | -1.33 |  |  |
| 2.5   | -3.66 | -1.72 |  |  |
| 2.13  | -4.01 | -1.83 |  |  |



|       |       |       |  |  |
|-------|-------|-------|--|--|
| 1.64  | -5.43 | -2.87 |  |  |
| 1.57  | -4.74 | -2.13 |  |  |
| 1.18  | -4.71 | -1.68 |  |  |
| 2.74  | -0.86 | -2.42 |  |  |
| -2.46 | -3.92 | -2.73 |  |  |
| 1.98  | -2.16 | -3.72 |  |  |
| 1.82  | 2.42  | 0.98  |  |  |
| 1.81  | -1.13 | -2.57 |  |  |
| 1.78  | 2.9   | 1.49  |  |  |
| 1.45  | -4.29 | -5.4  |  |  |
| 1.43  | -1.08 | -2.18 |  |  |
| 1.37  | -2.12 | -3.14 |  |  |
| 1.35  | 0.34  | -0.66 |  |  |
| -3.02 | -5.51 | -4.49 |  |  |
| 2.55  | -4.47 | -6.03 |  |  |
| 2.43  | -0.57 | -2.06 |  |  |
| 2.41  | -5.27 | -6.75 |  |  |
| -2.39 | -1.78 | -0.74 |  |  |
| 1.61  | -2.14 | -3.7  |  |  |
| 1.52  | -0.83 | -2.3  |  |  |
| 1.2   | 0.54  | -0.59 |  |  |
| 1.19  | 3.91  | 2.79  |  |  |
| -3.98 | -1.51 | -0.39 |  |  |
| -5.21 | -0.98 | 0.53  |  |  |
| -5.26 | -3.1  | -1.57 |  |  |
| 3.21  | -0.74 | -2.3  |  |  |
| -2    | -3.43 | -2.31 |  |  |
| -2.01 | -4.71 | -3.59 |  |  |
| -2.19 | -4.53 | -3.28 |  |  |
| -2.3  | -4.39 | -3.07 |  |  |
| -3.7  | -4.82 | -2.81 |  |  |
| 2.75  | 0.91  | -0.64 |  |  |
| -2.16 | 0.64  | 1.65  |  |  |
| -2.2  | -1    | 0.04  |  |  |
| -2.22 | -1.37 | -0.31 |  |  |
| -2.35 | -2.7  | -1.57 |  |  |
| -2.4  | -0.83 | 0.34  |  |  |
| -2.47 | -0.41 | 0.8   |  |  |
| -2.76 | -1.65 | -0.29 |  |  |
| -3.02 | -1.81 | -0.31 |  |  |
| -3.4  | -0.71 | 0.95  |  |  |
| -4.8  | -2.93 | -0.76 |  |  |
| 1.06  | 3.87  | 2.31  |  |  |
| -1.07 | -2.25 | -3.63 |  |  |
| -1.08 | 0.73  | -0.63 |  |  |
| -1.26 | -0.1  | -1.24 |  |  |
| -1.28 | -1.16 | -2.28 |  |  |
| 7.21  | -3.85 | -5.41 |  |  |
| 6.86  | -3.74 | -5.23 |  |  |
| 5.62  | -4.27 | -5.47 |  |  |
| 5.46  | -4.76 | -5.92 |  |  |
| 5.28  | -5.64 | -6.75 |  |  |
| 1.21  | -3.4  | -2.39 |  |  |
| 1.2   | 1.3   | 2.33  |  |  |
| 1.19  | 0.86  | 1.9   |  |  |
| 1.19  | 0.97  | 2.01  |  |  |
| 1.16  | 0.8   | 1.87  |  |  |
| 1.16  | 1.17  | 2.25  |  |  |

|       |       |       |  |  |
|-------|-------|-------|--|--|
| 1.16  | 0.89  | 1.97  |  |  |
| 1.12  | 1.34  | 2.46  |  |  |
| 1.12  | 0.85  | 1.98  |  |  |
| -1    | 0.67  | 1.96  |  |  |
| -1.05 | -1.94 | -0.58 |  |  |
| 1.72  | -0.6  | -2.16 |  |  |
| 1.68  | 1.99  | 0.46  |  |  |
| 1.23  | 3.76  | 2.68  |  |  |
| -3.92 | -2.18 | -0.99 |  |  |
| 3.03  | -6.45 | -8.01 |  |  |
| 2.16  | -4.74 | -5.82 |  |  |
| -2.1  | -8.56 | -7.44 |  |  |
| 1.23  | 2.88  | 1.32  |  |  |
| 1.01  | 2.64  | 1.37  |  |  |
| -1.06 | -1.63 | -2.82 |  |  |
| -1.06 | -3.15 | -4.33 |  |  |
| -6.12 | -2.28 | -0.93 |  |  |
| 1.23  | 2.88  | 1.32  |  |  |
| 1.01  | 2.64  | 1.37  |  |  |
| -1.06 | -1.63 | -2.82 |  |  |
| -1.06 | -3.15 | -4.33 |  |  |
| -6.12 | -2.28 | -0.93 |  |  |
| 2.06  | -0.25 | -1.81 |  |  |
| 1.91  | -4.24 | -5.7  |  |  |
| 1.78  | -4.78 | -6.13 |  |  |
| -4.51 | -4.32 | -2.67 |  |  |
| 1.23  | 2.88  | 1.32  |  |  |
| 1.01  | 2.64  | 1.37  |  |  |
| -1.06 | -1.63 | -2.82 |  |  |
| -1.06 | -3.15 | -4.33 |  |  |
| -6.12 | -2.28 | -0.93 |  |  |
| 4.62  | 0.86  | -0.69 |  |  |
| -1.33 | 0.99  | 2.05  |  |  |
| -1.71 | -0.12 | 1.31  |  |  |
| -1.86 | -2.71 | -1.17 |  |  |
| 2.01  | -2.28 | -3.83 |  |  |
| 1.83  | -1.24 | -2.65 |  |  |
| 1.77  | -1.47 | -2.84 |  |  |
| 1.69  | -4.91 | -6.21 |  |  |
| 1.4   | -2.47 | -3.5  |  |  |
| 1.39  | -3.86 | -4.89 |  |  |
| 1.97  | -2.24 | -3.79 |  |  |
| 1.55  | -1.7  | -2.9  |  |  |
| 1.49  | 2.16  | 1.01  |  |  |
| 1.43  | -1.86 | -2.95 |  |  |
| 1.41  | 0.24  | -0.83 |  |  |
| 1.75  | -2.95 | -4.51 |  |  |
| 1.39  | 2.57  | 1.34  |  |  |
| 1.2   | -0.62 | -1.64 |  |  |
| 2.15  | -1.55 | -3.11 |  |  |
| 2.15  | -2.1  | -3.66 |  |  |
| -2.83 | -3.17 | -2.11 |  |  |
| 1.34  | -0.32 | -1.88 |  |  |
| 1.15  | 1.54  | 0.21  |  |  |
| 1.13  | 1.45  | 0.14  |  |  |
| 1.08  | -0.44 | -1.69 |  |  |
| -1    | -0.53 | -1.65 |  |  |
| -1.03 | 0.09  | -1    |  |  |

|        |       |       |  |  |
|--------|-------|-------|--|--|
| 1.53   | -0.64 | -2.19 |  |  |
| 1.47   | 2.87  | 1.37  |  |  |
| 1.38   | -1.09 | -2.5  |  |  |
| 1.14   | 0.84  | -0.3  |  |  |
| 1.14   | 1.39  | 0.26  |  |  |
| 1.09   | 0.15  | -0.91 |  |  |
| 1.24   | 4.29  | 2.73  |  |  |
| 1.15   | 2.29  | 0.84  |  |  |
| 1.04   | 2.06  | 0.75  |  |  |
| 1.03   | 2.36  | 1.07  |  |  |
| -1.18  | 1.04  | 0.02  |  |  |
| -5.45  | -0.05 | 1.14  |  |  |
| -8.65  | -3    | -1.14 |  |  |
| -14.41 | -3.35 | -0.76 |  |  |
| 14.06  | 0.02  | -1.54 |  |  |
| 9.58   | 1.6   | 0.6   |  |  |
| 2.24   | -0.8  | 0.3   |  |  |
| 2.15   | -0.98 | 0.17  |  |  |
| 2.1    | -1.13 | 0.06  |  |  |
| 1.95   | 1.61  | 2.9   |  |  |
| 1.91   | 1.13  | 2.46  |  |  |
| 1.57   | 0.89  | 2.5   |  |  |
| 1.52   | -3.68 | -2.02 |  |  |
| -1.19  | -0.23 | 2.28  |  |  |
| 2.23   | -1.81 | -3.36 |  |  |
| 1.65   | -4.63 | -5.75 |  |  |
| 1.52   | 3.34  | 2.34  |  |  |
| 1.91   | 0.57  | -0.98 |  |  |
| -3.73  | -2.44 | -1.15 |  |  |
| 1.72   | 4.3   | 2.75  |  |  |
| 1.5    | 0.46  | -0.89 |  |  |
| 1.41   | -1.56 | -2.83 |  |  |
| 1.39   | 1.08  | -0.16 |  |  |
| 1.35   | -2.35 | -3.56 |  |  |
| 1.25   | 0.96  | -0.14 |  |  |
| 1.21   | -2.1  | -3.15 |  |  |
| 2.61   | -4    | -5.55 |  |  |
| 1.85   | -4.09 | -5.14 |  |  |
| -2.39  | -4.57 | -3.48 |  |  |
| 2.11   | -0.73 | -2.28 |  |  |
| 1.55   | -1.67 | -2.76 |  |  |
| 1.54   | -3.09 | -4.18 |  |  |
| 1.46   | -1.09 | -2.1  |  |  |
| -3.56  | -1.28 | 0.08  |  |  |
| -3.78  | -3.77 | -2.32 |  |  |
| -3.78  | -2.79 | -1.34 |  |  |
| 1.62   | 2.5   | 0.95  |  |  |
| 1.28   | 1.27  | 0.05  |  |  |
| -4.26  | -0.51 | 0.72  |  |  |
| 4.49   | -1.82 | -3.37 |  |  |
| -1.38  | -1.57 | -0.49 |  |  |
| 1.14   | -0.22 | -1.77 |  |  |
| 1.11   | -3.56 | -5.07 |  |  |
| -1.1   | -1.34 | -2.57 |  |  |
| -5.93  | -3.67 | -2.46 |  |  |
| -7.08  | -5.19 | -3.73 |  |  |
| 277.41 | 0.81  | -0.74 |  |  |
| 193.04 | 0.54  | -0.49 |  |  |

|        |       |       |  |  |
|--------|-------|-------|--|--|
| 43.1   | 0.62  | 1.76  |  |  |
| 35.8   | -0.27 | 1.13  |  |  |
| 35.47  | -1.32 | 0.09  |  |  |
| 28.03  | -2.8  | -1.04 |  |  |
| 25.74  | -2.05 | -0.17 |  |  |
| 23.95  | -2.82 | -0.84 |  |  |
| 20.39  | -3.17 | -0.96 |  |  |
| 7.21   | -5.01 | -1.3  |  |  |
| -1.47  | -7.99 | -0.88 |  |  |
| -1.05  | 4.71  | 3.16  |  |  |
| -1.05  | -1.53 | -3.08 |  |  |
| -1.18  | 2.22  | 0.83  |  |  |
| -1.34  | -0.24 | -1.43 |  |  |
| -1.44  | -0.77 | -1.86 |  |  |
| -6.18  | -2.7  | -1.7  |  |  |
| -6.35  | -3.03 | -1.98 |  |  |
| -6.96  | -3.28 | -2.1  |  |  |
| -9.46  | -0.57 | 1.05  |  |  |
| -12.96 | -2.31 | -0.24 |  |  |
| 1.67   | -0.97 | -2.53 |  |  |
| 1.52   | -0.32 | -1.74 |  |  |
| 1.39   | 1.34  | 0.05  |  |  |
| 1.28   | 1.48  | 0.3   |  |  |
| 1.28   | 0.59  | -0.58 |  |  |
| 1.26   | -1.44 | -2.59 |  |  |
| 1.18   | 0.96  | -0.1  |  |  |
| -7.12  | -2.73 | -0.72 |  |  |
| 4.69   | 0.27  | -1.29 |  |  |
| 3.49   | -0.6  | -1.73 |  |  |
| -1.27  | 0.15  | 1.18  |  |  |
| -1.45  | -1.54 | -0.33 |  |  |
| -1.46  | -2.79 | -1.57 |  |  |
| -1.59  | -2.63 | -1.28 |  |  |
| -1.75  | -1.49 | 0     |  |  |
| -2.31  | -2.55 | -0.67 |  |  |
| 5.14   | -3.54 | -5.09 |  |  |
| 4.76   | -2.87 | -4.31 |  |  |
| -1.18  | -4.98 | -3.92 |  |  |
| -1.67  | -5.1  | -3.55 |  |  |
| 3.28   | 0.3   | -1.25 |  |  |
| -1.8   | -1.11 | -0.1  |  |  |
| 2.66   | 2.01  | 0.46  |  |  |
| 2.31   | 0.48  | -0.87 |  |  |
| 2.16   | -2.37 | -3.62 |  |  |
| 1.87   | 3.93  | 2.88  |  |  |
| -2.25  | -1.36 | -0.32 |  |  |
| -2.27  | -1.13 | -0.08 |  |  |
| -2.34  | -2.51 | -1.42 |  |  |
| -2.51  | -3.99 | -2.8  |  |  |
| 2.75   | -1.4  | -2.95 |  |  |
| 1.99   | 2.36  | 1.27  |  |  |
| -2.16  | -2.14 | -1.12 |  |  |
| 3.6    | -0.92 | -2.47 |  |  |
| 2.99   | 0.25  | -1.03 |  |  |
| -1.86  | -1.47 | -0.27 |  |  |
| -2.27  | -2.41 | -0.93 |  |  |
| 3.61   | 2.37  | 0.82  |  |  |
| 2.92   | 2.82  | 1.58  |  |  |

|       |       |       |  |  |
|-------|-------|-------|--|--|
| -3.65 | -2.29 | -0.11 |  |  |
| 2.78  | -0.29 | -1.84 |  |  |
| 2.38  | -0.56 | -1.88 |  |  |
| 2.31  | -1.95 | -3.23 |  |  |
| 2.25  | 4.17  | 2.93  |  |  |
| -2.09 | -2.63 | -1.64 |  |  |
| -2.11 | -3.71 | -2.7  |  |  |
| -2.23 | -2.66 | -1.57 |  |  |
| -2.3  | -0.87 | 0.26  |  |  |
| -3.54 | -2.73 | -0.97 |  |  |
| 1.46  | 6.32  | 4.77  |  |  |
| 1.3   | 2.47  | 1.08  |  |  |
| 1.24  | -0.16 | -1.48 |  |  |
| 1.09  | -0.27 | -1.4  |  |  |
| 1.06  | 4.82  | 3.73  |  |  |
| 1.02  | 10.37 | 9.34  |  |  |
| 3.34  | 3.3   | 1.75  |  |  |
| -2.42 | -1.01 | 0.46  |  |  |
| 4.96  | -0.54 | -2.09 |  |  |
| 4.93  | -1.01 | -2.54 |  |  |
| 4.13  | -1.79 | -3.07 |  |  |
| 3.53  | -2.69 | -3.75 |  |  |
| -1.21 | -1.38 | -0.35 |  |  |
| -1.24 | -5.14 | -4.06 |  |  |
| -1.29 | -4.61 | -3.48 |  |  |
| -1.36 | -5.02 | -3.81 |  |  |
| -1.42 | -3.43 | -2.16 |  |  |
| -1.73 | -3.64 | -2.09 |  |  |
| 3.4   | 0.76  | -0.79 |  |  |
| 2.67  | 1.74  | 0.55  |  |  |
| 2.39  | 0.54  | -0.5  |  |  |
| 2.36  | -0.68 | -1.7  |  |  |
| -1.83 | -1.18 | -0.08 |  |  |
| 2.94  | -1.89 | -3.43 |  |  |
| -2.09 | -2.09 | -1.01 |  |  |
| 2.19  | 0.08  | -1.47 |  |  |
| 1.74  | 2.08  | 0.86  |  |  |
| 1.5   | 2.85  | 1.85  |  |  |
| 3.44  | -0.58 | -2.13 |  |  |
| 3.16  | 0.56  | -0.87 |  |  |
| -1.74 | -1.52 | -0.48 |  |  |
| 1.47  | -3.96 | -5.5  |  |  |
| 1.32  | -5.59 | -6.97 |  |  |
| 1.13  | -0.35 | -1.51 |  |  |
| 1.14  | -0.74 | -1.91 |  |  |
| 1.06  | -1.35 | -2.41 |  |  |
| -4.63 | -1.49 | -0.27 |  |  |
| 2.09  | -1.12 | -2.66 |  |  |
| 1.88  | -0.36 | -1.74 |  |  |
| 1.56  | -1.17 | -2.29 |  |  |
| 2.58  | -1.49 | -3.03 |  |  |
| 2.1   | -3.82 | -5.06 |  |  |
| 2.06  | -2.52 | -3.74 |  |  |
| 1.88  | 0.79  | -0.3  |  |  |
| 1.79  | 0.77  | -0.24 |  |  |
| 3.05  | 2.16  | 0.62  |  |  |
| 2.59  | 3.66  | 2.35  |  |  |
| 2.3   | 0.26  | -0.87 |  |  |

|       |       |       |  |  |
|-------|-------|-------|--|--|
| 1.96  | -3.47 | -5.01 |  |  |
| 1.6   | -2.42 | -3.67 |  |  |
| -3.32 | -1.66 | -0.49 |  |  |
| 2.87  | 2.75  | 1.21  |  |  |
| 2.33  | 0.4   | -0.84 |  |  |
| 2.31  | 1.55  | 0.32  |  |  |
| 2.17  | 0.53  | -0.61 |  |  |
| -2.44 | -2.37 | -1.1  |  |  |
| 1.62  | -0.42 | -1.97 |  |  |
| 1.29  | -0.06 | -1.27 |  |  |
| 1.18  | 0.24  | -0.85 |  |  |
| -3.64 | 1.08  | 2.1   |  |  |
| -3.64 | 2.42  | 3.44  |  |  |
| -3.63 | 0.35  | 1.36  |  |  |
| -3.76 | 0.65  | 1.71  |  |  |
| -3.99 | 1.44  | 2.59  |  |  |
| -4.01 | 0.26  | 1.42  |  |  |
| -4.44 | 1.15  | 2.45  |  |  |
| -5.8  | 1.07  | 2.76  |  |  |
| 5.39  | 0.51  | -1.03 |  |  |
| 4.28  | -0.03 | -1.24 |  |  |
| 4.07  | -1.84 | -2.98 |  |  |
| 4.05  | -0.37 | -1.5  |  |  |
| 3.85  | 0.53  | -0.53 |  |  |
| -1.08 | 0.97  | 1.97  |  |  |
| -1.16 | 0.5   | 1.61  |  |  |
| -1.26 | -0.84 | 0.39  |  |  |
| 1.82  | -0.47 | -2    |  |  |
| 1.81  | -0.28 | -1.81 |  |  |
| 1.64  | 1.92  | 0.53  |  |  |
| 1.58  | -0.93 | -2.26 |  |  |
| 1.55  | -0.74 | -2.04 |  |  |
| 1.53  | -0.68 | -1.96 |  |  |
| 1.47  | 0.79  | -0.44 |  |  |
| 1.42  | 0.25  | -0.93 |  |  |
| 1.32  | -0.03 | -1.11 |  |  |
| -3.57 | -0.86 | 0.3   |  |  |
| -3.61 | -1.4  | -0.22 |  |  |
| -3.81 | -1.4  | -0.14 |  |  |
| -4.3  | -0.61 | 0.83  |  |  |
| -6.37 | -1.67 | 0.33  |  |  |
| 2.3   | -4.56 | -6.1  |  |  |
| 1.7   | -2.43 | -3.54 |  |  |
| 2.9   | -2.2  | -3.74 |  |  |
| 2.73  | -1.31 | -2.76 |  |  |
| -2.64 | -2.66 | -1.26 |  |  |
| 2.07  | -4.08 | -5.62 |  |  |
| 1.85  | -3    | -4.38 |  |  |
| -3.89 | -4.53 | -3.06 |  |  |
| 1.97  | -0.86 | -2.4  |  |  |
| 1.7   | 1.68  | 0.35  |  |  |
| 1.48  | -1.51 | -2.64 |  |  |
| 1.51  | -0.64 | -2.18 |  |  |
| 1.04  | 2.04  | 1.03  |  |  |
| -4.78 | -4.43 | -3.12 |  |  |
| 1.67  | 0.41  | -1.13 |  |  |
| 1.16  | 1.48  | 0.46  |  |  |
| 1.97  | -4.39 | -5.93 |  |  |

|       |       |       |  |  |
|-------|-------|-------|--|--|
| 1.38  | -4.16 | -5.18 |  |  |
| 1.36  | -2.68 | -3.68 |  |  |
| -2.96 | -3.44 | -2.43 |  |  |
| -3.09 | -4.57 | -3.5  |  |  |
| 1.7   | 1.41  | -0.12 |  |  |
| 1.27  | -0.02 | -1.14 |  |  |
| 1.24  | -0.51 | -1.59 |  |  |
| 1.18  | -0.91 | -1.92 |  |  |
| -4.78 | -0.61 | 0.88  |  |  |
| -5.5  | -2.91 | -1.22 |  |  |
| 1.55  | 2.78  | 1.25  |  |  |
| 1.54  | -1.33 | -2.86 |  |  |
| 1.36  | 0.59  | -0.76 |  |  |
| 1.32  | 1.67  | 0.37  |  |  |
| 1.3   | 4.15  | 2.86  |  |  |
| 1.25  | 0.54  | -0.69 |  |  |
| 1.21  | 0.24  | -0.94 |  |  |
| 1.18  | 1.45  | 0.31  |  |  |
| 1.17  | 1.59  | 0.45  |  |  |
| 1.15  | -0.45 | -1.56 |  |  |
| 1.14  | 1.59  | 0.49  |  |  |
| 1.12  | 2.49  | 1.42  |  |  |
| 1.13  | -0.24 | -1.31 |  |  |
| 1.1   | -1.63 | -2.67 |  |  |
| -4.3  | -2.34 | -1.14 |  |  |
| -4.4  | -1.62 | -0.38 |  |  |
| -5.03 | 0.05  | 1.47  |  |  |
| -5.7  | -1.09 | 0.51  |  |  |
| -5.7  | -1.24 | 0.37  |  |  |
| -9.94 | -1.62 | 0.79  |  |  |
| 1.57  | -0.21 | -1.74 |  |  |
| 1.35  | -0.5  | -1.81 |  |  |
| 1.13  | -0.58 | -1.64 |  |  |
| 1.13  | 0.84  | -0.22 |  |  |
| 1.12  | 1.2   | 0.14  |  |  |
| 1.12  | 1.18  | 0.12  |  |  |
| 1.11  | 0.34  | -0.71 |  |  |
| 1.1   | 1.21  | 0.18  |  |  |
| 1.09  | -1.26 | -2.27 |  |  |
| 2.18  | 1.02  | -0.51 |  |  |
| -2.69 | 0.7   | 1.72  |  |  |
| 4.94  | 0.97  | -0.57 |  |  |
| 4.4   | 0.03  | -1.34 |  |  |
| 3.5   | 1.59  | 0.55  |  |  |
| -1.92 | 0.81  | 2.52  |  |  |
| -2.23 | -1.07 | 0.86  |  |  |
| 1.34  | -3.52 | -5.05 |  |  |
| 1.23  | -0.92 | -2.34 |  |  |
| 1.11  | 2.42  | 1.15  |  |  |
| -1.02 | 3.91  | 2.82  |  |  |
| 3.82  | -1.33 | -2.87 |  |  |
| -1.59 | 1.54  | 2.61  |  |  |
| 2.71  | -1.97 | -3.5  |  |  |
| 2.01  | -5.32 | -6.42 |  |  |
| -2.2  | -6.91 | -5.86 |  |  |
| -2.37 | -4.38 | -3.23 |  |  |
| -3    | -9.63 | -8.14 |  |  |
| 2.36  | 1.32  | -0.21 |  |  |

|       |       |       |  |  |
|-------|-------|-------|--|--|
| 1.63  | -0.48 | -1.48 |  |  |
| 2.58  | -0.38 | -1.91 |  |  |
| 1.84  | -1.99 | -3.04 |  |  |
| -2.33 | -1.61 | -0.56 |  |  |
| 1.4   | -2.42 | -3.95 |  |  |
| 1.12  | 0.77  | -0.43 |  |  |
| 1.12  | 3.52  | 2.31  |  |  |
| 1.1   | -2.74 | -3.92 |  |  |
| 1.05  | -1.17 | -2.29 |  |  |
| 1.03  | -2.06 | -3.14 |  |  |
| 1.02  | -1.71 | -2.79 |  |  |
| -1    | 0.53  | -0.51 |  |  |
| -1.02 | 0.47  | -0.54 |  |  |
| -1.03 | -1.23 | -2.23 |  |  |
| -4.18 | -1.91 | -0.89 |  |  |
| 2.17  | -4.72 | -6.25 |  |  |
| 1.68  | -1.79 | -2.96 |  |  |
| 1.67  | -0.9  | -2.05 |  |  |
| 2.2   | 0.65  | -0.88 |  |  |
| 2.18  | -0.28 | -1.8  |  |  |
| -2.67 | -0.82 | 0.2   |  |  |
| -2.81 | 0.24  | 1.34  |  |  |
| -2.99 | -1.12 | 0.07  |  |  |
| 91.96 | -0.3  | -1.83 |  |  |
| 77.91 | -0.66 | -1.96 |  |  |
| 69.66 | 0.39  | -0.74 |  |  |
| 68.1  | -1.93 | -3.03 |  |  |
| 14.86 | -0.53 | 0.57  |  |  |
| 8.08  | -4.13 | -2.15 |  |  |
| 4.64  | -5.41 | -2.63 |  |  |
| 3.2   | -4.69 | -1.38 |  |  |
| 2.88  | -0.1  | 3.36  |  |  |
| 2.37  | -4.36 | -0.62 |  |  |
| 2.1   | -1.11 | 2.81  |  |  |
| 1.44  | -7.84 | -3.38 |  |  |
| 1.14  | -0.03 | 4.76  |  |  |
| -1.01 | -4.49 | 0.52  |  |  |
| -1.16 | -3.5  | 1.7   |  |  |
| -1.18 | -5.51 | -0.27 |  |  |
| -1.27 | -1.1  | 4.23  |  |  |
| 1.86  | 0.05  | -1.48 |  |  |
| -4.01 | -4.63 | -3.27 |  |  |
| 1.49  | 1.43  | -0.1  |  |  |
| 1.06  | -1.05 | -2.08 |  |  |
| 3.42  | -1.99 | -3.52 |  |  |
| 2.69  | 2.89  | 1.71  |  |  |
| 2.55  | 0.39  | -0.72 |  |  |
| -2.06 | 0.33  | 1.62  |  |  |
| -3.98 | -2.59 | -0.36 |  |  |
| 2.9   | -2.11 | -3.64 |  |  |
| -2.54 | -2.14 | -0.78 |  |  |
| -2.62 | -1.23 | 0.17  |  |  |
| -2.67 | -3.61 | -2.18 |  |  |
| -3.49 | -4.22 | -2.41 |  |  |
| -4    | -5.17 | -3.16 |  |  |
| 2.27  | -1.35 | -2.88 |  |  |
| 1.75  | -0.27 | -1.42 |  |  |
| 1.72  | 0.4   | -0.74 |  |  |



|        |       |       |  |  |
|--------|-------|-------|--|--|
| -2.68  | -1.71 | -0.63 |  |  |
| 1.47   | 1.12  | -0.41 |  |  |
| 1.25   | -2.06 | -3.36 |  |  |
| 1.13   | 0.12  | -1.04 |  |  |
| 1.06   | 0.28  | -0.79 |  |  |
| -4.74  | -1.27 | 0     |  |  |
| -4.76  | -4.76 | -3.49 |  |  |
| 1.46   | -1.37 | -2.91 |  |  |
| 1.33   | 2.19  | 0.8   |  |  |
| 1.16   | 1.71  | 0.5   |  |  |
| 1.04   | -0.86 | -1.9  |  |  |
| 1.46   | -1.63 | -3.17 |  |  |
| 1.38   | 1.24  | -0.21 |  |  |
| 1.09   | 0.18  | -0.94 |  |  |
| 1.09   | 2.09  | 0.98  |  |  |
| 1.07   | -0.89 | -1.97 |  |  |
| 1.06   | 1.48  | 0.41  |  |  |
| 1.03   | -1.13 | -2.16 |  |  |
| 6.25   | 2.15  | 0.62  |  |  |
| 4.74   | 1.5   | 0.37  |  |  |
| 4.62   | 1.7   | 0.61  |  |  |
| -1.11  | 5.2   | 6.46  |  |  |
| 2.47   | 0.09  | -1.44 |  |  |
| -2.54  | -3.31 | -2.19 |  |  |
| 7.11   | 1.61  | 0.09  |  |  |
| 6.97   | 0.93  | -0.57 |  |  |
| 5.03   | 0.55  | -0.47 |  |  |
| 1.05   | -1.2  | 0.03  |  |  |
| 1.04   | -1.44 | -0.19 |  |  |
| 1.02   | -1.7  | -0.41 |  |  |
| -1.04  | 0.79  | 2.15  |  |  |
| -1.06  | -1.59 | -0.2  |  |  |
| -2.23  | -1.8  | 0.66  |  |  |
| 1.77   | -0.94 | -2.46 |  |  |
| 1.73   | -0.73 | -2.23 |  |  |
| 1.43   | 2.83  | 1.62  |  |  |
| 1.38   | 1.66  | 0.49  |  |  |
| 1.33   | 1.07  | -0.05 |  |  |
| 1.31   | 2.75  | 1.65  |  |  |
| 1.3    | -2.09 | -3.18 |  |  |
| 1.31   | 0.35  | -0.74 |  |  |
| 1.3    | 0.1   | -0.99 |  |  |
| 1.27   | 4.24  | 3.18  |  |  |
| 1.27   | 0.51  | -0.54 |  |  |
| -3.26  | 0.57  | 1.56  |  |  |
| -3.36  | 0     | 1.04  |  |  |
| -3.67  | -1.78 | -0.61 |  |  |
| -3.75  | 0.69  | 1.89  |  |  |
| -5.34  | -1.7  | 0.01  |  |  |
| -6.13  | -2.29 | -0.38 |  |  |
| -6.2   | -1.9  | 0.02  |  |  |
| -8.3   | -2.3  | 0.04  |  |  |
| -10.51 | -3.2  | -0.51 |  |  |
| 1.94   | -0.68 | -2.21 |  |  |
| -3.2   | -2.34 | -1.23 |  |  |
| 6.33   | -5.58 | -7.1  |  |  |
| 4.96   | -3.98 | -5.15 |  |  |
| -1.17  | -3.92 | -2.55 |  |  |

|       |       |       |  |  |
|-------|-------|-------|--|--|
| 1.81  | 3.35  | 1.82  |  |  |
| 1.33  | 2.16  | 1.08  |  |  |
| 1.33  | 1.26  | 0.18  |  |  |
| 1.32  | 2.22  | 1.15  |  |  |
| 1.31  | 5.18  | 4.12  |  |  |
| 2.77  | -2.12 | -3.64 |  |  |
| -3.49 | -4.45 | -2.7  |  |  |
| 2.21  | -0.78 | -2.3  |  |  |
| 1.79  | 5.03  | 3.81  |  |  |
| 1.72  | 4.04  | 2.87  |  |  |
| 1.54  | 1.51  | 0.51  |  |  |
| -2.99 | -1.55 | -0.35 |  |  |
| -3.08 | -1.68 | -0.44 |  |  |
| 18.6  | 2.4   | 0.87  |  |  |
| 13.94 | 0.44  | -0.67 |  |  |
| 13.41 | 0.89  | -0.16 |  |  |
| 3.23  | -2.28 | -1.28 |  |  |
| 2.94  | -2.06 | -0.93 |  |  |
| 2.7   | 2.02  | 3.28  |  |  |
| 2.57  | -2.73 | -1.4  |  |  |
| 2.57  | -2.73 | -1.4  |  |  |
| 2.02  | -2.89 | -1.21 |  |  |
| 1.88  | -3.09 | -1.31 |  |  |
| 1.88  | 1.85  | 3.63  |  |  |
| 1.63  | 2.95  | 4.94  |  |  |
| 1.48  | -3.24 | -1.12 |  |  |
| 1.4   | 0.29  | 2.5   |  |  |
| 1.39  | -3.52 | -1.31 |  |  |
| -1.01 | -4.02 | -1.31 |  |  |
| -1.28 | 0.6   | 3.65  |  |  |
| 2.12  | -1.78 | -3.3  |  |  |
| 1.58  | -1.86 | -2.95 |  |  |
| 1.51  | -0.82 | -1.86 |  |  |
| -5.72 | -3.32 | -1.24 |  |  |
| 2.07  | -2.33 | -3.86 |  |  |
| -2.98 | -0.12 | 0.98  |  |  |
| -3.34 | -2.01 | -0.75 |  |  |
| -10.5 | -3.72 | -0.81 |  |  |
| 38.58 | -0.68 | -2.21 |  |  |
| 27.98 | -0.63 | -1.69 |  |  |
| 27.4  | -0.27 | -1.3  |  |  |
| 5.05  | -0.62 | 0.78  |  |  |
| 4.67  | -4.21 | -2.69 |  |  |
| 2.04  | -4.61 | -1.9  |  |  |
| 1.37  | -4.86 | -1.57 |  |  |
| 1.66  | -3.45 | -4.98 |  |  |
| 1.46  | -1.97 | -3.31 |  |  |
| 1.4   | 3.82  | 2.55  |  |  |
| 1.33  | -0.52 | -1.72 |  |  |
| 1.19  | 2.29  | 1.25  |  |  |
| -4.33 | -3.56 | -2.24 |  |  |
| 1.59  | -2.46 | -3.99 |  |  |
| 1.19  | 3.96  | 2.85  |  |  |
| -3.68 | -0.09 | 0.93  |  |  |
| -3.71 | 0.27  | 1.31  |  |  |
| -4.05 | -2.85 | -1.69 |  |  |
| -5.95 | -1.89 | -0.17 |  |  |
| -9.71 | -4.33 | -1.91 |  |  |

|       |       |       |  |  |
|-------|-------|-------|--|--|
| 1.24  | -1.25 | -2.78 |  |  |
| 1.16  | -1.01 | -2.43 |  |  |
| 1.15  | 1.34  | -0.07 |  |  |
| 1     | 1.3   | 0.08  |  |  |
| -1.04 | -0.24 | -1.4  |  |  |
| -1.04 | 5.36  | 4.21  |  |  |
| -4.67 | -0.09 | 0.92  |  |  |
| -5.38 | -0.36 | 0.86  |  |  |
| -5.74 | 0.08  | 1.39  |  |  |
| -6.52 | -1.65 | -0.15 |  |  |
| 6.31  | -0.35 | -1.87 |  |  |
| 4.98  | 0.64  | -0.54 |  |  |
| 1.06  | 2.99  | 4.03  |  |  |
| 1.04  | 0.9   | 1.98  |  |  |
| 1.02  | -1.49 | -0.39 |  |  |
| 1     | -1.65 | -0.51 |  |  |
| -1.01 | 5.96  | 7.11  |  |  |
| -1.02 | 3.36  | 4.51  |  |  |
| -1.04 | 1.06  | 2.24  |  |  |
| -1.05 | 7.16  | 8.36  |  |  |
| -1.06 | -2.7  | -1.48 |  |  |
| -1.09 | 0.22  | 1.48  |  |  |
| -1.12 | -1.13 | 0.16  |  |  |
| -1.13 | 1.07  | 2.39  |  |  |
| -1.18 | -2.16 | -0.78 |  |  |
| -1.38 | 1     | 2.59  |  |  |
| -1.69 | 0     | 1.89  |  |  |
| -1.84 | -1.15 | 0.87  |  |  |
| 1.84  | 2.1   | 0.58  |  |  |
| 1.79  | -2.7  | -4.19 |  |  |
| 1.74  | -1.7  | -3.14 |  |  |
| 1.64  | -1.25 | -2.6  |  |  |
| 1.61  | -0.81 | -2.13 |  |  |
| 1.45  | -1    | -2.18 |  |  |
| 1.41  | 3.76  | 2.62  |  |  |
| -3.26 | -2.8  | -1.74 |  |  |
| -3.79 | -3.76 | -2.48 |  |  |
| -4.45 | -3.83 | -2.32 |  |  |
| 1.64  | 0.05  | -1.47 |  |  |
| 1.59  | -0.73 | -2.21 |  |  |
| -3.99 | -0.01 | 1.17  |  |  |
| 1.04  | -1.58 | -3.1  |  |  |
| 1.02  | -4.52 | -6    |  |  |
| -1.05 | 0.66  | -0.73 |  |  |
| -1.05 | -2    | -3.4  |  |  |
| -7.71 | -4.38 | -2.89 |  |  |
| 2.31  | -0.46 | -1.98 |  |  |
| 1.82  | -1.66 | -2.84 |  |  |
| -3.25 | -5.99 | -4.61 |  |  |
| 16.43 | -1.47 | -2.99 |  |  |
| 16.22 | -0.42 | -1.93 |  |  |
| 14.92 | 0.03  | -1.36 |  |  |
| 14.48 | 0.45  | -0.89 |  |  |
| 13.95 | -1.71 | -2.99 |  |  |
| 13.08 | -1.06 | -2.25 |  |  |
| 12.79 | 0.12  | -1.04 |  |  |
| 12.57 | -2.84 | -3.98 |  |  |
| 12.3  | -1.29 | -2.4  |  |  |

|       |       |       |  |  |
|-------|-------|-------|--|--|
| 12.27 | 0.54  | -0.56 |  |  |
| 11.93 | 0.18  | -0.88 |  |  |
| 11.72 | -2.23 | -3.26 |  |  |
| 11.5  | -3.01 | -4.02 |  |  |
| 2.86  | -5.67 | -4.67 |  |  |
| 2.74  | -2.09 | -1.03 |  |  |
| 2.71  | -1.06 | 0.02  |  |  |
| 2.69  | -1.06 | 0.03  |  |  |
| 2.5   | 0.46  | 1.66  |  |  |
| 2.49  | -1.7  | -0.5  |  |  |
| 2.38  | -1.05 | 0.21  |  |  |
| 2.34  | -5.27 | -3.98 |  |  |
| 2.24  | -4.46 | -3.11 |  |  |
| 2.24  | 1.06  | 2.41  |  |  |
| 2.05  | -2.71 | -1.22 |  |  |
| 2.04  | 0.73  | 2.21  |  |  |
| 2.03  | -1.54 | -0.05 |  |  |
| 2.02  | -4.52 | -3.02 |  |  |
| 2     | -3.61 | -2.09 |  |  |
| 1.99  | -3.58 | -2.06 |  |  |
| 1.99  | -0.95 | 0.57  |  |  |
| 1.97  | 0.65  | 2.19  |  |  |
| 1.95  | -4.1  | -2.55 |  |  |
| 1.89  | -2.98 | -1.38 |  |  |
| 1.82  | -1.47 | 0.19  |  |  |
| 1.79  | -5.65 | -3.97 |  |  |
| 1.71  | -2.62 | -0.87 |  |  |
| 1.68  | -2.96 | -1.19 |  |  |
| 1.63  | 0.02  | 1.84  |  |  |
| 1.53  | -1.7  | 0.2   |  |  |
| 1.47  | 0.3   | 2.27  |  |  |
| 1.46  | -4.69 | -2.72 |  |  |
| 1.43  | -6.29 | -4.29 |  |  |
| 1.39  | -3.75 | -1.7  |  |  |
| 1.36  | -5.35 | -3.27 |  |  |
| 1.3   | 0.11  | 2.25  |  |  |
| 1.29  | -0.59 | 1.56  |  |  |
| 1.23  | -0.28 | 1.95  |  |  |
| 1.22  | -1.23 | 1     |  |  |
| 1.17  | -4.16 | -1.88 |  |  |
| 1.12  | -0.12 | 2.23  |  |  |
| 1.11  | -3.33 | -0.96 |  |  |
| 1.1   | -1.6  | 0.78  |  |  |
| 1.01  | -4.09 | -1.59 |  |  |
| 1.01  | -6.36 | -3.85 |  |  |
| -1    | 2.07  | 4.6   |  |  |
| -1.06 | -3.81 | -1.21 |  |  |
| -1.07 | -2.5  | 0.12  |  |  |
| -1.11 | -0.37 | 2.29  |  |  |
| -1.11 | -4.11 | -1.45 |  |  |
| -1.41 | -3.3  | -0.29 |  |  |
| 1.55  | -3.39 | -4.91 |  |  |
| 1.12  | -3.05 | -4.1  |  |  |
| 1.1   | -2.97 | -3.99 |  |  |
| -3.71 | -1.63 | -0.63 |  |  |
| -3.8  | -1.47 | -0.43 |  |  |
| -4.24 | -2.99 | -1.79 |  |  |
| -7.85 | -2.79 | -0.71 |  |  |

|        |       |       |  |  |
|--------|-------|-------|--|--|
| 1.86   | -1.27 | -2.79 |  |  |
| 1.45   | -1.88 | -3.05 |  |  |
| 1.37   | -2.16 | -3.24 |  |  |
| 1.36   | -0.18 | -1.25 |  |  |
| 1.71   | -1.64 | -3.16 |  |  |
| 1.65   | -2.99 | -4.46 |  |  |
| 1.44   | -3.73 | -5    |  |  |
| 1.37   | -5.29 | -6.5  |  |  |
| 1.24   | 0.04  | -1.01 |  |  |
| 1.22   | -2.62 | -3.65 |  |  |
| 1.19   | -4.77 | -5.77 |  |  |
| 1.82   | -1.53 | -3.06 |  |  |
| 1.68   | 3.66  | 2.26  |  |  |
| -3.14  | -0.65 | 0.35  |  |  |
| -4.45  | -2.76 | -1.26 |  |  |
| 2.47   | -1.72 | -3.24 |  |  |
| -2.47  | -3.43 | -2.35 |  |  |
| 2.08   | 0.62  | -0.9  |  |  |
| 1.57   | -1.65 | -2.76 |  |  |
| 3.46   | 0.08  | -1.44 |  |  |
| -1.99  | -2.33 | -1.07 |  |  |
| -2.28  | -1.83 | -0.37 |  |  |
| 1.58   | -2.11 | -3.63 |  |  |
| 1.5    | 0.64  | -0.8  |  |  |
| 1.18   | -1.52 | -2.62 |  |  |
| 2.08   | -0.2  | -1.72 |  |  |
| 1.59   | -0.25 | -1.38 |  |  |
| 1.57   | 0.81  | -0.31 |  |  |
| -3.42  | -1.18 | 0.13  |  |  |
| -3.5   | -0.67 | 0.68  |  |  |
| -3.77  | -1    | 0.45  |  |  |
| -4.47  | -3.34 | -1.65 |  |  |
| -4.78  | -0.55 | 1.25  |  |  |
| -6.42  | -3.21 | -0.99 |  |  |
| -25.02 | -4.58 | -0.4  |  |  |
| 1.5    | 0.63  | -0.89 |  |  |
| 1.36   | -0.04 | -1.42 |  |  |
| 1.34   | -0.3  | -1.66 |  |  |
| 1.31   | -3.13 | -4.45 |  |  |
| 1.3    | -0.2  | -1.52 |  |  |
| 1.28   | -1.5  | -2.79 |  |  |
| 1.24   | 0.81  | -0.43 |  |  |
| 1.22   | 1.82  | 0.6   |  |  |
| 1.2    | 2.39  | 1.19  |  |  |
| 1.14   | 1.16  | 0.04  |  |  |
| 1.13   | -1.12 | -2.23 |  |  |
| 1.1    | -0.02 | -1.09 |  |  |
| 1.06   | 0.65  | -0.37 |  |  |
| 1.06   | 0.56  | -0.46 |  |  |
| -5.46  | -1.74 | -0.22 |  |  |
| 1.71   | -1.84 | -3.36 |  |  |
| 1.58   | -3.73 | -5.13 |  |  |
| 1.29   | -4.02 | -5.13 |  |  |
| 1.24   | -2.88 | -3.93 |  |  |
| 1.2    | -0.52 | -1.53 |  |  |
| 3.07   | -5.9  | -7.42 |  |  |
| 2.35   | -2.65 | -3.78 |  |  |
| 2.31   | -2.13 | -3.24 |  |  |

|       |       |       |  |  |
|-------|-------|-------|--|--|
| 17.6  | 1.09  | -0.42 |  |  |
| 17.39 | 1.51  | 0.02  |  |  |
| 14.33 | 0.99  | -0.23 |  |  |
| 13.85 | 1.43  | 0.26  |  |  |
| 2.97  | -1.54 | -0.48 |  |  |
| 2.42  | 3.06  | 4.41  |  |  |
| 2.23  | -0.68 | 0.79  |  |  |
| 1.69  | -1.27 | 0.6   |  |  |
| 1.63  | -1.79 | 0.13  |  |  |
| 1.48  | -2.16 | -0.1  |  |  |
| 1.25  | -2.65 | -0.36 |  |  |
| 1.04  | 3.38  | 5.94  |  |  |
| -1.21 | -2.23 | 0.66  |  |  |
| 11.81 | -1.99 | -3.5  |  |  |
| 10.86 | -1.39 | -2.79 |  |  |
| 8.87  | -0.06 | -1.17 |  |  |
| 8.67  | -0.96 | -2.03 |  |  |
| 1.96  | -0.77 | 0.31  |  |  |
| 1.88  | 0.52  | 1.66  |  |  |
| 1.86  | 1.23  | 2.38  |  |  |
| 1.66  | -1.97 | -0.66 |  |  |
| 1.64  | 0.99  | 2.32  |  |  |
| 1.64  | 0.39  | 1.72  |  |  |
| 1.62  | -2.67 | -1.32 |  |  |
| 1.55  | -2.36 | -0.95 |  |  |
| 1.48  | -0.42 | 1.06  |  |  |
| 1.46  | -0.23 | 1.27  |  |  |
| 1.43  | -0.21 | 1.33  |  |  |
| 1.33  | -0.01 | 1.62  |  |  |
| 1.33  | -1.18 | 0.45  |  |  |
| 1.3   | -2.49 | -0.82 |  |  |
| 1.28  | -3.6  | -1.91 |  |  |
| 1.27  | -2.7  | -1    |  |  |
| 1.23  | -3.12 | -1.37 |  |  |
| 1.23  | 0.3   | 2.05  |  |  |
| 1.18  | -3.09 | -1.29 |  |  |
| 1.18  | -1.11 | 0.7   |  |  |
| 1.17  | -0.75 | 1.07  |  |  |
| 1.14  | 0.58  | 2.44  |  |  |
| 1.05  | -2    | -0.03 |  |  |
| 1.04  | -1.65 | 0.34  |  |  |
| 1.02  | -3.15 | -1.14 |  |  |
| 1.01  | -1.26 | 0.76  |  |  |
| 1.01  | 0.13  | 2.15  |  |  |
| -1.02 | 0.97  | 3.04  |  |  |
| -1.05 | -1.76 | 0.36  |  |  |
| -1.06 | -3.37 | -1.24 |  |  |
| -1.09 | -0.65 | 1.52  |  |  |
| -1.13 | 2.38  | 4.6   |  |  |
| -1.14 | 3.09  | 5.33  |  |  |
| -1.17 | -0.87 | 1.4   |  |  |
| -1.18 | 2.93  | 5.22  |  |  |
| -1.19 | -3.62 | -1.32 |  |  |
| -1.28 | -3.38 | -0.98 |  |  |
| -1.28 | -2.44 | -0.04 |  |  |
| -1.31 | -2.36 | 0.07  |  |  |
| -1.53 | -2.25 | 0.41  |  |  |
| -1.63 | -5.25 | -2.49 |  |  |

|        |       |       |  |  |
|--------|-------|-------|--|--|
| -1.76  | -5.7  | -2.84 |  |  |
| -2.28  | -3.45 | -0.21 |  |  |
| -2.87  | -3.13 | 0.43  |  |  |
| -2.93  | -4.76 | -1.16 |  |  |
| 2.55   | -5.07 | -6.58 |  |  |
| -2.4   | -7.45 | -6.35 |  |  |
| 1.74   | 0.39  | -1.12 |  |  |
| -3.3   | -0.55 | 0.46  |  |  |
| -4.52  | -1.64 | -0.18 |  |  |
| -4.82  | -3.18 | -1.63 |  |  |
| -4.97  | -2.19 | -0.59 |  |  |
| -5.52  | -1.21 | 0.54  |  |  |
| -8.84  | -3.88 | -1.46 |  |  |
| -9.46  | -1.06 | 1.46  |  |  |
| -39.7  | -4.56 | 0.04  |  |  |
| 1.95   | 0.55  | -0.96 |  |  |
| 1.51   | -0.9  | -2.04 |  |  |
| 1.46   | -5.98 | -7.07 |  |  |
| 1.72   | -1.85 | -3.37 |  |  |
| 1.23   | -2.92 | -3.96 |  |  |
| 3.21   | -0.75 | -2.26 |  |  |
| -1.82  | -1.11 | -0.08 |  |  |
| -1.96  | -1.22 | -0.09 |  |  |
| 3.26   | 1.65  | 0.13  |  |  |
| -2.06  | -1.01 | 0.22  |  |  |
| 3.32   | 2.65  | 1.14  |  |  |
| 2.82   | 5.83  | 4.55  |  |  |
| 2.78   | 1.42  | 0.16  |  |  |
| 2.78   | 1.42  | 0.16  |  |  |
| 2.78   | 1.42  | 0.16  |  |  |
| 2.53   | -1.26 | -2.39 |  |  |
| -1.99  | -2.87 | -1.66 |  |  |
| -2.23  | -1.03 | 0.34  |  |  |
| 1.15   | -0.18 | -1.7  |  |  |
| 1.13   | -3.06 | -4.55 |  |  |
| -9.26  | -3.84 | -1.95 |  |  |
| 1.14   | -3.68 | -5.19 |  |  |
| 1.01   | -3.04 | -4.38 |  |  |
| -1.03  | -3.71 | -4.99 |  |  |
| -5.13  | -1.4  | -0.38 |  |  |
| 5.09   | -2.91 | -4.43 |  |  |
| -1.19  | 1.14  | 2.22  |  |  |
| -1.21  | -1.88 | -0.77 |  |  |
| 1.41   | -3.88 | -5.4  |  |  |
| 1.38   | -5.61 | -7.1  |  |  |
| 1.13   | -3.13 | -4.33 |  |  |
| -1.01  | -5.55 | -6.56 |  |  |
| -10.06 | -7.46 | -5.15 |  |  |
| 3.55   | -0.66 | -2.17 |  |  |
| -1.69  | -0.37 | 0.71  |  |  |
| -2.65  | -3.05 | -1.32 |  |  |
| 5.17   | 1.13  | -0.38 |  |  |
| -1.34  | -4.33 | -3.04 |  |  |
| -1.43  | -3.81 | -2.44 |  |  |
| 1.96   | 0.75  | -0.76 |  |  |
| 1.85   | 0.01  | -1.42 |  |  |
| 1.56   | -0.16 | -1.34 |  |  |
| 1.42   | 3.26  | 2.21  |  |  |

|        |       |       |  |  |
|--------|-------|-------|--|--|
| 1.4    | 0.7   | -0.32 |  |  |
| 1.21   | -3.91 | -5.42 |  |  |
| 1.02   | -6.11 | -7.38 |  |  |
| 1.01   | -2.14 | -3.39 |  |  |
| -1     | -1.99 | -3.23 |  |  |
| -1     | -0.13 | -1.36 |  |  |
| -1.03  | 0.46  | -0.74 |  |  |
| -1.05  | 2.54  | 1.36  |  |  |
| -1.08  | -5.46 | -6.59 |  |  |
| -1.09  | 0.42  | -0.69 |  |  |
| -1.11  | -6.32 | -7.41 |  |  |
| -1.13  | -5.16 | -6.23 |  |  |
| -6.59  | -3.49 | -2.01 |  |  |
| 6.05   | -1.59 | -3.1  |  |  |
| 1.05   | -1.7  | -0.69 |  |  |
| 1.02   | -2.59 | -1.53 |  |  |
| -1.04  | -1.56 | -0.42 |  |  |
| -1.11  | -4.19 | -2.96 |  |  |
| -1.3   | -4.55 | -3.09 |  |  |
| 2      | -0.32 | -1.83 |  |  |
| -3.75  | -1.56 | -0.16 |  |  |
| -15.24 | -1.25 | 2.17  |  |  |
| 2.58   | -0.32 | -1.83 |  |  |
| -3.48  | -1.61 | 0.05  |  |  |
| 2.81   | 2.8   | 1.28  |  |  |
| 2.19   | 3.35  | 2.19  |  |  |
| 2.11   | 1.21  | 0.11  |  |  |
| -2.74  | -2.8  | -1.37 |  |  |
| 3.82   | 4.4   | 2.89  |  |  |
| 2.93   | 2.81  | 1.68  |  |  |
| 2.75   | 3.92  | 2.88  |  |  |
| 1.29   | 2.93  | 1.42  |  |  |
| 1.21   | -0.28 | -1.69 |  |  |
| 1.11   | -0.21 | -1.5  |  |  |
| 1.09   | 1     | -0.25 |  |  |
| -1.03  | -1.3  | -2.39 |  |  |
| -1.1   | 0.59  | -0.41 |  |  |
| 1.67   | -0.06 | -1.57 |  |  |
| 1.45   | -2.25 | -3.56 |  |  |
| 1.21   | -0.52 | -1.56 |  |  |
| 1.2    | -1.05 | -2.08 |  |  |
| 1.12   | 1.56  | 0.05  |  |  |
| -1.08  | 3.83  | 2.59  |  |  |
| -1.2   | 2.7   | 1.62  |  |  |
| -1.23  | -1.77 | -2.81 |  |  |
| -5.72  | -2.86 | -1.7  |  |  |
| -6.03  | -1.94 | -0.7  |  |  |
| -8.17  | -3.36 | -1.67 |  |  |
| 2.62   | 1.19  | -0.32 |  |  |
| 2.39   | -1.99 | -3.36 |  |  |
| -2.36  | -2.95 | -1.83 |  |  |
| 3.35   | -3.36 | -4.87 |  |  |
| -1.72  | -4.02 | -3    |  |  |
| -1.83  | -3.85 | -2.74 |  |  |
| -1.92  | -3.43 | -2.25 |  |  |
| -3.83  | -4.61 | -2.44 |  |  |
| 1.26   | 0.48  | -1.02 |  |  |
| 1.04   | -1.31 | -2.53 |  |  |



|       |       |       |  |  |
|-------|-------|-------|--|--|
| -1.08 | 2.95  | 1.89  |  |  |
| -1.08 | 1.44  | 0.39  |  |  |
| 2.37  | -3.33 | -4.84 |  |  |
| 1.7   | -3.96 | -4.99 |  |  |
| -2.56 | -0.91 | 0.18  |  |  |
| -2.88 | -3.9  | -2.63 |  |  |
| 2.63  | -2.8  | -4.31 |  |  |
| -2.42 | -4.11 | -2.94 |  |  |
| -3.06 | -3.36 | -1.86 |  |  |
| 1.81  | -1.5  | -3.01 |  |  |
| 1.46  | -4.81 | -6.01 |  |  |
| 1.41  | -3.71 | -4.85 |  |  |
| 1.35  | -3.84 | -4.93 |  |  |
| 1.35  | 0.36  | -0.73 |  |  |
| 1.34  | -2.4  | -3.48 |  |  |
| 1.32  | 0.8   | -0.26 |  |  |
| 1.29  | -1.48 | -2.5  |  |  |
| -3.45 | -3.88 | -2.74 |  |  |
| -3.59 | -3.23 | -2.03 |  |  |
| -3.71 | -3.92 | -2.68 |  |  |
| -3.84 | -3.71 | -2.42 |  |  |
| -6.09 | -4.86 | -2.91 |  |  |
| 1.87  | -0.51 | -2.01 |  |  |
| 1.36  | 2.58  | 1.54  |  |  |
| 1.35  | 2.64  | 1.6   |  |  |
| -3.24 | -2.34 | -1.24 |  |  |
| -3.33 | -1.96 | -0.83 |  |  |
| -3.96 | -2.54 | -1.15 |  |  |
| -4.16 | -2.78 | -1.32 |  |  |
| -4.51 | -3.36 | -1.79 |  |  |
| 2.21  | 0.01  | -1.5  |  |  |
| 2.11  | 0.03  | -1.4  |  |  |
| 1.91  | 0.16  | -1.13 |  |  |
| 1.78  | 0.62  | -0.57 |  |  |
| -2.66 | 0.73  | 1.78  |  |  |
| -3.27 | -1.16 | 0.19  |  |  |
| -3.3  | 0.22  | 1.58  |  |  |
| -3.85 | -0.84 | 0.75  |  |  |
| 4.81  | -1.78 | -3.29 |  |  |
| 4.61  | 0.98  | -0.47 |  |  |
| 3.87  | 0.6   | -0.6  |  |  |
| 3.6   | -0.53 | -1.62 |  |  |
| 3.46  | -0.99 | -2.02 |  |  |
| -1.19 | 3.84  | 4.85  |  |  |
| -1.19 | -3.19 | -2.18 |  |  |
| -1.25 | 2.58  | 3.66  |  |  |
| -1.25 | -1.88 | -0.8  |  |  |
| -1.33 | -0.39 | 0.79  |  |  |
| -1.36 | 3.61  | 4.81  |  |  |
| -1.49 | -2.94 | -1.6  |  |  |
| -1.51 | -1.02 | 0.33  |  |  |
| -1.77 | -0.1  | 1.47  |  |  |
| -1.79 | 0.58  | 2.18  |  |  |
| 1.21  | 4.82  | 3.32  |  |  |
| 1.01  | -3.03 | -4.27 |  |  |
| 1.21  | 0.74  | -0.77 |  |  |
| 1.17  | 0.63  | -0.83 |  |  |
| -1.07 | -0.72 | -1.86 |  |  |

|       |       |       |  |  |
|-------|-------|-------|--|--|
| 1.9   | 1.5   | 0     |  |  |
| 1.34  | 1.32  | 0.31  |  |  |
| -3.12 | -1.16 | -0.1  |  |  |
| -3.63 | -2.61 | -1.33 |  |  |
| -3.74 | -1.28 | 0.04  |  |  |
| -3.74 | 0     | 1.32  |  |  |
| -3.91 | -1.94 | -0.56 |  |  |
| -4.07 | -3.01 | -1.57 |  |  |
| -4.23 | 0.03  | 1.53  |  |  |
| -8.09 | -4.35 | -1.91 |  |  |
| 1.95  | 0.47  | -1.04 |  |  |
| 1.63  | 2.21  | 0.96  |  |  |
| 2.15  | -2.34 | -3.84 |  |  |
| 1.75  | -3.98 | -5.19 |  |  |
| 1.71  | -3.65 | -4.82 |  |  |
| 1.59  | 0.05  | -1.02 |  |  |
| 1.59  | -4.5  | -5.56 |  |  |
| 1.91  | 0.92  | -0.59 |  |  |
| 1.43  | 2.52  | 1.44  |  |  |
| 1.42  | 3.86  | 2.78  |  |  |
| 1.41  | 1.97  | 0.91  |  |  |
| 1.35  | 1.5   | 0.49  |  |  |
| 2.08  | -4.32 | -5.82 |  |  |
| 1.57  | -5.79 | -6.88 |  |  |
| 1.53  | -2.36 | -3.42 |  |  |
| 5.94  | 1.25  | -0.25 |  |  |
| 4.79  | -0.74 | -1.93 |  |  |
| -1.1  | -1.48 | -0.28 |  |  |
| -1.1  | -0.27 | 0.94  |  |  |
| -1.27 | -3.69 | -2.28 |  |  |
| -1.65 | 0.26  | 2.05  |  |  |
| -1.96 | -1.25 | 0.79  |  |  |
| 2.1   | -0.76 | -2.26 |  |  |
| 1.79  | -2.4  | -3.66 |  |  |
| 1.73  | 1.78  | 0.56  |  |  |
| 1.49  | -0.4  | -1.4  |  |  |
| 10.56 | 1.79  | 0.29  |  |  |
| 7.68  | 1.21  | 0.16  |  |  |
| 1.7   | -2.74 | -1.61 |  |  |
| 1.66  | -1.93 | -0.77 |  |  |
| 1.63  | 1.7   | 2.89  |  |  |
| 1.61  | 0.13  | 1.34  |  |  |
| 1.58  | -0.36 | 0.87  |  |  |
| 1.44  | 0.62  | 2     |  |  |
| 1.43  | -0.55 | 0.83  |  |  |
| 1.34  | -2.56 | -1.08 |  |  |
| 1.25  | -2.52 | -0.94 |  |  |
| 1.24  | -0.43 | 1.15  |  |  |
| 1.22  | 1.53  | 3.14  |  |  |
| 1.21  | 0.85  | 2.47  |  |  |
| 1.18  | -3.07 | -1.41 |  |  |
| 1.09  | -3.6  | -1.84 |  |  |
| 1.06  | -0.6  | 1.21  |  |  |
| 1.04  | -0.79 | 1.05  |  |  |
| -1.02 | -0.62 | 1.31  |  |  |
| -1.05 | -2.43 | -0.46 |  |  |
| -1.08 | -3.58 | -1.57 |  |  |
| -1.11 | -2.07 | -0.02 |  |  |

|       |       |       |  |  |
|-------|-------|-------|--|--|
| -1.13 | -3.06 | -0.99 |  |  |
| -1.34 | -2.15 | 0.16  |  |  |
| 2.01  | 1.97  | 0.47  |  |  |
| 1.92  | 7.43  | 5.99  |  |  |
| 1.76  | -0.39 | -1.7  |  |  |
| 1.73  | -0.53 | -1.81 |  |  |
| 1.63  | 2.24  | 1.05  |  |  |
| 1.42  | -0.29 | -1.29 |  |  |
| -2.87 | 0.84  | 1.87  |  |  |
| 2.06  | -0.3  | -1.81 |  |  |
| 1.91  | -4.3  | -5.69 |  |  |
| 1.78  | -4.84 | -6.13 |  |  |
| -4.51 | -4.37 | -2.66 |  |  |
| 2.06  | -0.3  | -1.81 |  |  |
| 1.91  | -4.3  | -5.69 |  |  |
| 1.78  | -4.84 | -6.13 |  |  |
| -4.51 | -4.37 | -2.66 |  |  |
| 2.06  | -0.3  | -1.81 |  |  |
| 1.91  | -4.3  | -5.69 |  |  |
| 1.78  | -4.84 | -6.13 |  |  |
| -4.51 | -4.37 | -2.66 |  |  |
| 26.37 | -1.26 | -2.76 |  |  |
| 3.8   | -5.65 | -4.36 |  |  |
| 3.43  | -0.49 | 0.95  |  |  |
| 2.84  | -3.35 | -1.63 |  |  |
| 2.02  | -3.81 | -1.6  |  |  |
| 1.59  | -4.67 | -2.11 |  |  |
| 1.43  | -7.14 | -4.43 |  |  |
| 1.23  | -3.67 | -0.74 |  |  |
| 1.14  | 1.15  | 4.18  |  |  |
| 1.1   | -0.74 | 2.34  |  |  |
| 1.01  | -4.94 | -1.73 |  |  |
| 1.71  | 0.14  | -1.36 |  |  |
| 1.62  | 0.61  | -0.81 |  |  |
| 1.29  | -2.93 | -4.02 |  |  |
| 1.3   | -0.03 | -1.12 |  |  |
| 1.26  | 1.25  | 0.19  |  |  |
| 1.25  | -0.04 | -1.08 |  |  |
| 1.22  | 3.36  | 2.35  |  |  |
| 1.22  | -1.63 | -2.63 |  |  |
| -3.66 | -2.74 | -1.58 |  |  |
| 1.88  | 1.35  | -0.14 |  |  |
| 1.66  | 2.89  | 1.58  |  |  |
| 1.65  | 2.1   | 0.79  |  |  |
| 1.56  | -2.61 | -3.83 |  |  |
| 1.54  | -1.84 | -3.04 |  |  |
| 1.36  | -2.78 | -3.81 |  |  |
| -3.03 | 0.34  | 1.36  |  |  |
| -3.06 | 0.32  | 1.35  |  |  |
| -3.18 | -0.12 | 0.97  |  |  |
| -4.13 | -1.68 | -0.22 |  |  |
| -8.14 | -3.06 | -0.62 |  |  |
| 1.81  | -2.4  | -3.9  |  |  |
| 1.79  | 0.78  | -0.7  |  |  |
| 1.61  | 0.08  | -1.25 |  |  |
| 1.39  | 0.98  | -0.14 |  |  |
| 1.37  | 1.11  | 0.01  |  |  |
| 1.48  | 2.32  | 0.82  |  |  |

|       |       |       |  |  |
|-------|-------|-------|--|--|
| 1.17  | -2.72 | -3.88 |  |  |
| 1.09  | 2.22  | 1.16  |  |  |
| 1.06  | 1.22  | 0.2   |  |  |
| -4.16 | -2.67 | -1.54 |  |  |
| 1.86  | -1.24 | -2.74 |  |  |
| 1.5   | -1.87 | -3.05 |  |  |
| 1.48  | 0.62  | -0.54 |  |  |
| 1.42  | -2.54 | -3.65 |  |  |
| 1.37  | -1.03 | -2.09 |  |  |
| 3.53  | -4.46 | -5.95 |  |  |
| 3.32  | 3.27  | 1.86  |  |  |
| 2.57  | -0.56 | -2.05 |  |  |
| -2.35 | -1.93 | -0.83 |  |  |
| -2.37 | -0.93 | 0.18  |  |  |
| -2.56 | -0.03 | 1.19  |  |  |
| -2.74 | -1.14 | 0.18  |  |  |
| 2.62  | 4.33  | 2.83  |  |  |
| -3.15 | -3.35 | -1.81 |  |  |
| -3.56 | -3.45 | -1.73 |  |  |
| 2.18  | 1.2   | -0.3  |  |  |
| 1.88  | 1.07  | -0.22 |  |  |
| 1.72  | 4.23  | 3.07  |  |  |
| 1.6   | -1.29 | -2.79 |  |  |
| 1.49  | -2.53 | -3.92 |  |  |
| 1.47  | -3.41 | -4.79 |  |  |
| 1.31  | -3.14 | -4.35 |  |  |
| 1.2   | -3.01 | -4.09 |  |  |
| 1.17  | -2.84 | -3.88 |  |  |
| 1.14  | -3.87 | -4.87 |  |  |
| 1.83  | -2.97 | -4.46 |  |  |
| 1.41  | -2.28 | -3.4  |  |  |
| 1.34  | 1.49  | 0.43  |  |  |
| 1.33  | 0.91  | -0.12 |  |  |
| 1.53  | 0.68  | -0.81 |  |  |
| 1.44  | 2.1   | 0.69  |  |  |
| 1.37  | 0.99  | -0.35 |  |  |
| 1.3   | 2.49  | 1.23  |  |  |
| 1.24  | 5.85  | 4.66  |  |  |
| 1.22  | 3.46  | 2.29  |  |  |
| 1.19  | -0.07 | -1.21 |  |  |
| 1.18  | -1.13 | -2.25 |  |  |
| 1.17  | 1.77  | 0.65  |  |  |
| 1.11  | 1.66  | 0.63  |  |  |
| -3.74 | -0.94 | 0.08  |  |  |
| -3.89 | -1.68 | -0.6  |  |  |
| -4.24 | -0.42 | 0.78  |  |  |
| -4.43 | -1.14 | 0.13  |  |  |
| -4.57 | -1.8  | -0.49 |  |  |
| -4.59 | -0.97 | 0.35  |  |  |
| -4.64 | -0.52 | 0.81  |  |  |
| -4.71 | -1.25 | 0.11  |  |  |
| -5.17 | -1.71 | -0.22 |  |  |
| -5.44 | -1.99 | -0.43 |  |  |
| -5.58 | -0.39 | 1.21  |  |  |
| -5.57 | -0.52 | 1.07  |  |  |
| -6.49 | -0.14 | 1.68  |  |  |
| -6.61 | -2.12 | -0.28 |  |  |
| 1.5   | 0.17  | -1.32 |  |  |

|        |       |       |  |  |
|--------|-------|-------|--|--|
| 1.38   | -0.93 | -2.31 |  |  |
| 1.36   | -0.51 | -1.87 |  |  |
| 1.32   | 1.27  | -0.05 |  |  |
| 1.3    | 0.16  | -1.14 |  |  |
| 1.23   | 1.54  | 0.32  |  |  |
| 1.16   | 1.02  | -0.11 |  |  |
| 1.12   | 0.21  | -0.87 |  |  |
| 1.12   | 4.48  | 3.4   |  |  |
| 1.09   | -1.77 | -2.82 |  |  |
| 1.08   | -0.73 | -1.76 |  |  |
| 1.08   | 3.99  | 2.97  |  |  |
| -3.87  | -0.32 | 0.72  |  |  |
| -3.91  | -0.3  | 0.76  |  |  |
| -4.1   | -0.18 | 0.94  |  |  |
| -6.53  | -1.57 | 0.22  |  |  |
| 1.69   | 0.21  | -1.28 |  |  |
| 1.36   | -0.68 | -1.87 |  |  |
| -4.62  | -1.72 | -0.25 |  |  |
| -5.53  | -2.91 | -1.19 |  |  |
| -6.47  | -2.97 | -1.02 |  |  |
| 1.42   | 2.13  | 0.64  |  |  |
| 1.33   | 1.07  | -0.32 |  |  |
| 1.31   | 0.16  | -1.22 |  |  |
| 1.29   | 2.35  | 1     |  |  |
| 1.23   | 1.74  | 0.45  |  |  |
| 1.22   | 2.95  | 1.67  |  |  |
| 1.17   | 1.07  | -0.15 |  |  |
| 1.11   | 0.53  | -0.61 |  |  |
| 1.1    | 4.16  | 3.04  |  |  |
| 1.09   | 2.61  | 1.49  |  |  |
| 1.09   | 2.12  | 1     |  |  |
| 1.07   | 3.76  | 2.67  |  |  |
| 1.04   | 3.2   | 2.16  |  |  |
| 1.04   | 0.05  | -0.99 |  |  |
| -4.1   | -1.39 | -0.34 |  |  |
| -4.33  | -0.17 | 0.96  |  |  |
| -4.85  | -2.32 | -1.03 |  |  |
| -5.66  | -1.58 | -0.07 |  |  |
| -5.7   | -3.09 | -1.57 |  |  |
| -7.3   | -2.1  | -0.22 |  |  |
| -7.98  | -3.33 | -1.32 |  |  |
| -8.68  | -1.93 | 0.2   |  |  |
| -9.79  | -2.97 | -0.67 |  |  |
| -13.03 | -2.81 | -0.09 |  |  |
| -13.11 | -1.58 | 1.14  |  |  |
| 1.87   | -3    | -4.49 |  |  |
| -3.03  | -3.52 | -2.51 |  |  |
| 1.8    | -3.4  | -4.89 |  |  |
| 1.58   | -4.51 | -5.82 |  |  |
| -3.73  | -3.25 | -2    |  |  |
| -5.65  | -4.63 | -2.77 |  |  |
| 1.91   | -0.69 | -2.18 |  |  |
| 1.48   | -0.91 | -2.04 |  |  |
| 3.73   | -0.43 | -1.92 |  |  |
| 3.55   | -0.11 | -1.52 |  |  |
| 2.86   | -1.35 | -2.46 |  |  |
| 2.79   | -1.55 | -2.62 |  |  |
| -1.56  | 0.8   | 1.85  |  |  |

|       |       |       |  |  |
|-------|-------|-------|--|--|
| -1.6  | -1.42 | -0.33 |  |  |
| 1.92  | -3.6  | -5.1  |  |  |
| -3.3  | -2.73 | -1.56 |  |  |
| -4.55 | -3.01 | -1.38 |  |  |
| -4.8  | -0.9  | 0.81  |  |  |
| 2.81  | 5.1   | 3.61  |  |  |
| 2.78  | 0.06  | -1.42 |  |  |
| 2.7   | 1.3   | -0.13 |  |  |
| 2.47  | 5.83  | 4.52  |  |  |
| 2.23  | 5.62  | 4.46  |  |  |
| 1.55  | 3.95  | 2.46  |  |  |
| -3.87 | 2.07  | 3.17  |  |  |
| -7.34 | 1.29  | 3.31  |  |  |
| 1.39  | 4.46  | 2.97  |  |  |
| 1.25  | 3.85  | 2.52  |  |  |
| 1.14  | 2.1   | 0.9   |  |  |
| 1.01  | 1.24  | 0.21  |  |  |
| 1.58  | 2.38  | 0.89  |  |  |
| 1.47  | 1.13  | -0.26 |  |  |
| 1.43  | 0.12  | -1.23 |  |  |
| 1.27  | 1.44  | 0.27  |  |  |
| 1.21  | -0.85 | -1.96 |  |  |
| 1.18  | 3.21  | 2.14  |  |  |
| 1.15  | 0.03  | -1.01 |  |  |
| -3.77 | -0.55 | 0.53  |  |  |
| -6.02 | -2.89 | -1.13 |  |  |
| 1.42  | -3.71 | -5.2  |  |  |
| 1.25  | -1.38 | -2.69 |  |  |
| 1.2   | 2.47  | 1.22  |  |  |
| 1.13  | 1.71  | 0.55  |  |  |
| 1.09  | 0.35  | -0.75 |  |  |
| 1.08  | 3.39  | 2.29  |  |  |
| 1.03  | 3.34  | 2.32  |  |  |
| -4.51 | -3.95 | -2.76 |  |  |
| -6.3  | -3.81 | -2.14 |  |  |
| 2.66  | 3.08  | 1.59  |  |  |
| 2.07  | 0.88  | -0.25 |  |  |
| 3.24  | 1.14  | -0.35 |  |  |
| -1.88 | -4.78 | -3.67 |  |  |
| -1.98 | -3.72 | -2.54 |  |  |
| -2.19 | -3.68 | -2.34 |  |  |
| -2.37 | -4.94 | -3.49 |  |  |
| -2.42 | -4.19 | -2.72 |  |  |
| 1.59  | 1.25  | -0.24 |  |  |
| 1.54  | 6.32  | 4.88  |  |  |
| 1.42  | 1.33  | 0     |  |  |
| 1.15  | 2.15  | 1.13  |  |  |
| 1.33  | 0.85  | -0.64 |  |  |
| 1.07  | 2.71  | 1.53  |  |  |
| 1.07  | 1.72  | 0.54  |  |  |
| -1.04 | -3.11 | -4.13 |  |  |
| -4.32 | -0.47 | 0.56  |  |  |
| -6.33 | -2.91 | -1.33 |  |  |
| 1.7   | -1.76 | -3.25 |  |  |
| 1.46  | -3.89 | -5.16 |  |  |
| 1.39  | -1.79 | -2.99 |  |  |
| 1.27  | -3.97 | -5.04 |  |  |
| 1.26  | -2.79 | -3.86 |  |  |

|       |       |       |  |  |
|-------|-------|-------|--|--|
| 1.23  | -3.59 | -4.62 |  |  |
| 1.23  | -3.77 | -4.79 |  |  |
| -3.59 | -6.65 | -5.53 |  |  |
| 1.49  | 2.54  | 1.05  |  |  |
| 1.25  | 1.92  | 0.69  |  |  |
| 1.15  | 0.84  | -0.28 |  |  |
| 1.12  | -0.62 | -1.68 |  |  |
| -3.89 | 2.68  | 3.73  |  |  |
| -4.03 | 0.87  | 1.97  |  |  |
| 4.02  | 0.36  | -1.12 |  |  |
| 2.98  | -0.03 | -1.09 |  |  |
| -1.39 | 0.48  | 1.47  |  |  |
| 1.68  | 0.69  | -0.79 |  |  |
| 1.57  | 1.86  | 0.47  |  |  |
| 1.26  | 0.24  | -0.83 |  |  |
| -3.33 | -0.74 | 0.26  |  |  |
| -3.51 | -3.28 | -2.21 |  |  |
| -3.68 | -0.89 | 0.25  |  |  |
| -4.16 | -1.71 | -0.39 |  |  |
| 5.58  | -2.24 | -3.73 |  |  |
| -1.03 | 3.34  | 4.38  |  |  |
| -1.05 | 3.43  | 4.49  |  |  |
| -1.05 | -0.06 | 1     |  |  |
| -1.06 | 3.26  | 4.35  |  |  |
| -1.1  | 3.49  | 4.62  |  |  |
| -1.12 | 2.62  | 3.78  |  |  |
| 4.27  | -3.26 | -4.74 |  |  |
| -1.37 | -3.23 | -2.17 |  |  |
| -1.45 | -2.87 | -1.72 |  |  |
| -1.81 | -4.72 | -3.26 |  |  |
| -1.96 | -0.91 | 0.67  |  |  |
| 1.53  | -2.26 | -3.74 |  |  |
| 1.48  | 4.25  | 2.81  |  |  |
| 1.34  | 3.51  | 2.21  |  |  |
| 1.31  | 3.83  | 2.56  |  |  |
| 1.32  | 4.41  | 3.14  |  |  |
| 1.1   | -2.71 | -3.72 |  |  |
| 11.06 | 0.84  | -0.64 |  |  |
| 8.81  | -0.33 | -1.48 |  |  |
| 8.01  | 1.63  | 0.61  |  |  |
| 1.72  | -1.54 | -0.34 |  |  |
| 1.62  | 0.17  | 1.46  |  |  |
| 1.62  | -1.96 | -0.67 |  |  |
| 1.58  | -3.53 | -2.21 |  |  |
| 1.5   | -1.67 | -0.28 |  |  |
| 1.37  | -4.41 | -2.88 |  |  |
| 1.34  | -2.81 | -1.25 |  |  |
| 1.21  | 1.7   | 3.41  |  |  |
| 1.17  | -3.46 | -1.71 |  |  |
| 1.17  | -3.41 | -1.65 |  |  |
| 1.02  | 0.52  | 2.47  |  |  |
| -1.02 | -2.12 | -0.1  |  |  |
| -1.37 | -3.58 | -1.15 |  |  |
| -1.37 | -2.99 | -0.55 |  |  |
| -2.24 | -2.72 | 0.43  |  |  |
| 2.65  | -5.28 | -6.76 |  |  |
| -2.48 | -5.06 | -3.82 |  |  |
| -3.87 | -6.67 | -4.8  |  |  |

|       |       |       |  |  |
|-------|-------|-------|--|--|
| 3.46  | -1.91 | -3.4  |  |  |
| 2.6   | 2.89  | 1.81  |  |  |
| 2.47  | -0.16 | -1.16 |  |  |
| -1.62 | -1.83 | -0.83 |  |  |
| -1.66 | -2.58 | -1.55 |  |  |
| -2    | -3.82 | -2.52 |  |  |
| -2    | -2.7  | -1.39 |  |  |
| 3.21  | 3.41  | 1.93  |  |  |
| -1.99 | 0.86  | 2.05  |  |  |
| -3.93 | -1.98 | 0.19  |  |  |
| 1.54  | 4.01  | 2.52  |  |  |
| 1.32  | -0.13 | -1.4  |  |  |
| 3.9   | -0.64 | -2.13 |  |  |
| 2.88  | 2.26  | 1.21  |  |  |
| -1.46 | -4.44 | -3.41 |  |  |
| -1.46 | -2.67 | -1.65 |  |  |
| -1.52 | -5.13 | -4.05 |  |  |
| -2.16 | -4.88 | -3.28 |  |  |
| 2.09  | -1.38 | -2.87 |  |  |
| 1.7   | -1    | -2.19 |  |  |
| -2.71 | 0.08  | 1.1   |  |  |
| 2.22  | -2.5  | -3.99 |  |  |
| 1.61  | -1.34 | -2.37 |  |  |
| 2.89  | -1.97 | -3.45 |  |  |
| 2.28  | -1.74 | -2.88 |  |  |
| 2.65  | -6.11 | -7.59 |  |  |
| -2.97 | -6.74 | -5.25 |  |  |
| -3.39 | -5.43 | -3.75 |  |  |
| 2.2   | -2.13 | -3.61 |  |  |
| 1.82  | 2.63  | 1.41  |  |  |
| -2.6  | -1.24 | -0.22 |  |  |
| -2.66 | -2.75 | -1.69 |  |  |
| -3.07 | -1.89 | -0.62 |  |  |
| -3.52 | -4    | -2.53 |  |  |
| -4    | -0.87 | 0.78  |  |  |
| -4.03 | -2.41 | -0.75 |  |  |
| -4.24 | -2.9  | -1.16 |  |  |
| -6.31 | -2.71 | -0.4  |  |  |
| 2.63  | -0.14 | -1.62 |  |  |
| 2.22  | -2.39 | -3.63 |  |  |
| 1.9   | 0.73  | -0.76 |  |  |
| 1.62  | 0.34  | -0.92 |  |  |
| 1.6   | -1.5  | -2.74 |  |  |
| 1.56  | -0.01 | -1.22 |  |  |
| 1.5   | -0.63 | -1.77 |  |  |
| 1.4   | 0.23  | -0.82 |  |  |
| 1.39  | -0.41 | -1.45 |  |  |
| 1.05  | -1.38 | -2.86 |  |  |
| 1.05  | 1.32  | -0.16 |  |  |
| 1.03  | 1.07  | -0.38 |  |  |
| -1.01 | -0.84 | -2.24 |  |  |
| -1.05 | -0.5  | -1.84 |  |  |
| -1.17 | -2.14 | -3.33 |  |  |
| -1.23 | -0.19 | -1.3  |  |  |
| 2.28  | -1.81 | -3.3  |  |  |
| 1.63  | 0.55  | -0.45 |  |  |
| 1.43  | -1.66 | -3.14 |  |  |
| 1.35  | -1.76 | -3.16 |  |  |



|       |       |       |  |  |
|-------|-------|-------|--|--|
| 1.26  | 0.87  | -0.42 |  |  |
| 1.25  | -0.07 | -1.35 |  |  |
| 1.22  | 1.33  | 0.08  |  |  |
| 1.21  | 2.82  | 1.59  |  |  |
| 1.2   | -2.41 | -3.64 |  |  |
| 1.14  | -2.76 | -3.91 |  |  |
| 1.1   | -0.01 | -1.1  |  |  |
| 1.07  | -3.99 | -5.05 |  |  |
| -3.96 | -4.9  | -3.87 |  |  |
| -4.83 | -3.02 | -1.71 |  |  |
| -5.59 | -2.87 | -1.35 |  |  |
| 2.1   | 2.77  | 1.29  |  |  |
| 1.5   | 0.25  | -0.74 |  |  |
| 1.56  | -3.14 | -4.62 |  |  |
| 1.14  | 2.16  | 1.14  |  |  |
| 1.58  | 0.18  | -1.3  |  |  |
| 1.31  | -2.66 | -3.87 |  |  |
| 1.13  | -1.79 | -2.79 |  |  |
| 1.88  | -3.37 | -4.85 |  |  |
| -5.17 | -5.26 | -3.46 |  |  |
| 1.51  | -2.34 | -3.82 |  |  |
| 1.43  | -0.76 | -2.15 |  |  |
| 1.12  | -3.6  | -4.66 |  |  |
| 1.11  | -0.67 | -1.7  |  |  |
| -3.7  | -4.82 | -3.82 |  |  |
| -4.22 | -4.97 | -3.78 |  |  |
| 1.72  | -2.27 | -3.75 |  |  |
| 1.5   | -1.6  | -2.88 |  |  |
| 1.45  | 2.14  | 0.9   |  |  |
| 1.32  | -2.78 | -3.88 |  |  |
| 1.27  | -2.45 | -3.5  |  |  |
| 1.23  | -0.82 | -1.82 |  |  |
| 2.32  | 2.14  | 0.66  |  |  |
| 1.72  | 1.06  | 0.01  |  |  |
| 4.01  | -0.55 | -2.03 |  |  |
| 3.87  | -0.19 | -1.62 |  |  |
| 3.08  | -0.95 | -2.05 |  |  |
| -1.45 | -1.05 | 0.01  |  |  |
| -1.64 | -3    | -1.76 |  |  |
| 1.49  | -2.37 | -3.85 |  |  |
| -4.33 | -2.4  | -1.19 |  |  |
| -5.18 | -2.2  | -0.72 |  |  |
| 2.04  | 0.56  | -0.92 |  |  |
| 1.79  | 0.7   | -0.59 |  |  |
| 1.51  | 0.22  | -0.83 |  |  |
| -5.9  | -1.35 | 0.76  |  |  |
| 1.63  | -0.68 | -2.16 |  |  |
| 1.48  | -2.48 | -3.82 |  |  |
| 1.46  | -1.49 | -2.81 |  |  |
| 1.42  | -1.81 | -3.09 |  |  |
| 1.38  | -0.64 | -1.88 |  |  |
| 1.37  | 0.36  | -0.86 |  |  |
| 1.31  | 0.96  | -0.2  |  |  |
| 1.3   | -1.53 | -2.68 |  |  |
| 1.27  | -1.56 | -2.67 |  |  |
| 1.27  | 0.95  | -0.16 |  |  |
| -4.03 | -2.98 | -1.74 |  |  |
| -5.19 | -3.14 | -1.54 |  |  |

|       |       |       |  |  |
|-------|-------|-------|--|--|
| 2.06  | -0.33 | -1.8  |  |  |
| 1.91  | -4.32 | -5.69 |  |  |
| 1.78  | -4.86 | -6.13 |  |  |
| -4.51 | -4.39 | -2.66 |  |  |
| 2.37  | 2.83  | 1.36  |  |  |
| -2.44 | -0.29 | 0.76  |  |  |
| -2.79 | -2.21 | -0.96 |  |  |
| 2.37  | 3.09  | 1.61  |  |  |
| -2.44 | -0.04 | 1.01  |  |  |
| -2.65 | -0.94 | 0.23  |  |  |
| -2.79 | -1.95 | -0.7  |  |  |
| 2.06  | -0.33 | -1.8  |  |  |
| 1.91  | -4.32 | -5.69 |  |  |
| 1.78  | -4.86 | -6.13 |  |  |
| -4.51 | -4.39 | -2.66 |  |  |
| 1.68  | 0.51  | -0.97 |  |  |
| 1.29  | -0.52 | -1.62 |  |  |
| 1.46  | 0.55  | -0.93 |  |  |
| -3.91 | -2.75 | -1.71 |  |  |
| -4.07 | -1.61 | -0.52 |  |  |
| -4.84 | -1.7  | -0.36 |  |  |
| 6.53  | -4.78 | -6.26 |  |  |
| 4.74  | -3.82 | -4.84 |  |  |
| 1.64  | 1.77  | 0.29  |  |  |
| -4.64 | -3.61 | -2.17 |  |  |
| 1.72  | -0.22 | -1.69 |  |  |
| 1.58  | -2.71 | -4.06 |  |  |
| 1.25  | -0.44 | -1.45 |  |  |
| -3.55 | -3.4  | -2.27 |  |  |
| 2.36  | -0.22 | -1.7  |  |  |
| 2.03  | 3.43  | 2.17  |  |  |
| 1.83  | -3.11 | -4.22 |  |  |
| 1.8   | 2.17  | 1.08  |  |  |
| 2.04  | -2.61 | -4.09 |  |  |
| 2.02  | -0.99 | -2.45 |  |  |
| 1.84  | -3.45 | -4.77 |  |  |
| 1.8   | -3.9  | -5.19 |  |  |
| 1.54  | 0.38  | -0.69 |  |  |
| -2.92 | -3.7  | -2.6  |  |  |
| 3.61  | 1.42  | -0.05 |  |  |
| 2.76  | 1.3   | 0.21  |  |  |
| -1.61 | -2.5  | -1.44 |  |  |
| -1.66 | -1.65 | -0.54 |  |  |
| 4.27  | -1.35 | -2.83 |  |  |
| 4.26  | -1.65 | -3.13 |  |  |
| -1.32 | -3.41 | -2.4  |  |  |
| -1.33 | -1.8  | -0.76 |  |  |
| -1.39 | -4.81 | -3.72 |  |  |
| -1.53 | -1.77 | -0.53 |  |  |
| -1.98 | -2.02 | -0.42 |  |  |
| 1.76  | 0.45  | -1.02 |  |  |
| 1.54  | 4.79  | 3.51  |  |  |
| 1.4   | 0.69  | -0.46 |  |  |
| -4.2  | -1.55 | -0.14 |  |  |
| 3.77  | 3.64  | 2.17  |  |  |
| -1.48 | -2.51 | -1.51 |  |  |
| 6.26  | -2.19 | -3.67 |  |  |
| 1.08  | -3.79 | -2.73 |  |  |

|        |       |       |  |  |
|--------|-------|-------|--|--|
| 1.4    | -1.31 | -2.78 |  |  |
| 1.39   | -0.11 | -1.58 |  |  |
| 1.37   | 0.96  | -0.49 |  |  |
| 1.27   | 2.35  | 1.01  |  |  |
| 1.26   | 1.39  | 0.07  |  |  |
| 1.19   | 1.48  | 0.24  |  |  |
| 1.18   | 2.62  | 1.39  |  |  |
| 1.12   | 3.98  | 2.82  |  |  |
| 1.04   | -1.68 | -2.72 |  |  |
| 1.02   | -0.57 | -1.59 |  |  |
| -4.14  | -2.07 | -1.01 |  |  |
| -6.63  | -0.76 | 0.98  |  |  |
| 5.71   | -0.62 | -2.09 |  |  |
| 4.94   | -0.33 | -1.6  |  |  |
| -1.01  | 0.84  | 1.88  |  |  |
| -1.03  | 0.13  | 1.21  |  |  |
| -1.05  | -0.7  | 0.41  |  |  |
| -1.16  | 0.09  | 1.34  |  |  |
| 1.21   | 0.47  | -1.01 |  |  |
| 1.1    | 5.86  | 4.53  |  |  |
| 1.02   | -0.9  | -2.13 |  |  |
| 1.01   | 1.92  | 0.71  |  |  |
| -1.06  | 0.17  | -0.95 |  |  |
| -1.13  | -0.24 | -1.27 |  |  |
| -4.82  | -1.96 | -0.89 |  |  |
| -5.79  | -1.32 | 0.01  |  |  |
| 1.44   | 1.51  | 0.03  |  |  |
| 1.23   | 1.25  | 0     |  |  |
| 1.15   | 1.26  | 0.1   |  |  |
| 1.06   | 0.33  | -0.7  |  |  |
| -4.84  | -2.09 | -0.77 |  |  |
| -8.01  | -2.4  | -0.35 |  |  |
| -8.41  | -2.02 | 0.1   |  |  |
| -11.84 | -3.03 | -0.42 |  |  |
| 1.41   | -0.49 | -1.96 |  |  |
| 1.12   | -0.6  | -1.74 |  |  |
| 1.07   | 4.02  | 2.94  |  |  |
| 1.06   | 3.47  | 2.41  |  |  |
| 2.47   | 3.53  | 2.07  |  |  |
| -3.15  | -3.52 | -2.03 |  |  |
| 1.91   | -2    | -3.47 |  |  |
| 1.55   | -4.69 | -5.86 |  |  |
| 1.49   | -6.95 | -8.06 |  |  |
| 1.44   | -5.34 | -6.4  |  |  |
| 1.74   | -3.11 | -4.58 |  |  |
| 1.47   | -1.05 | -2.27 |  |  |
| 1.44   | -0.84 | -2.03 |  |  |
| 1.42   | -3.44 | -4.61 |  |  |
| 1.41   | -1.89 | -3.06 |  |  |
| 1.31   | -1.59 | -2.65 |  |  |
| 1.28   | -2.46 | -3.48 |  |  |
| 1.27   | -2.56 | -3.57 |  |  |
| 1.75   | -1.94 | -3.4  |  |  |
| 1.36   | -0.6  | -1.71 |  |  |
| 1.26   | -0.5  | -1.5  |  |  |
| 1.37   | 2.03  | 0.56  |  |  |
| 1.33   | 2.41  | 0.98  |  |  |
| 1.3    | 0.92  | -0.47 |  |  |

|        |       |       |  |  |
|--------|-------|-------|--|--|
| 1.24   | 2.63  | 1.31  |  |  |
| 1.01   | 5.16  | 4.14  |  |  |
| -4.23  | -1.42 | -0.35 |  |  |
| -4.4   | -1.04 | 0.08  |  |  |
| -4.46  | -0.68 | 0.46  |  |  |
| 4.97   | -2.52 | -3.99 |  |  |
| 4.73   | -1.3  | -2.7  |  |  |
| -1.37  | -3.03 | -1.74 |  |  |
| -2.52  | -3.98 | -1.8  |  |  |
| 1.84   | -4.16 | -5.63 |  |  |
| 1.76   | -2.64 | -4.04 |  |  |
| -3.1   | -5.19 | -4.15 |  |  |
| -3.16  | -0.82 | 0.25  |  |  |
| -3.37  | -5.63 | -4.46 |  |  |
| -4.4   | -6.7  | -5.15 |  |  |
| 1.79   | 2.19  | 0.72  |  |  |
| 1.4    | 1.14  | 0.03  |  |  |
| 1.56   | 2.47  | 1     |  |  |
| 1.34   | -1.24 | -2.48 |  |  |
| 1.2    | -0.19 | -1.28 |  |  |
| 1.18   | -2.35 | -3.42 |  |  |
| 1.59   | 1.97  | 0.51  |  |  |
| 1.35   | 0.12  | -1.11 |  |  |
| 1.29   | 2.06  | 0.9   |  |  |
| 1.84   | 1.1   | -0.36 |  |  |
| 1.57   | 4.85  | 3.62  |  |  |
| -3.07  | -0.84 | 0.2   |  |  |
| -3.11  | -0.02 | 1.04  |  |  |
| -3.83  | 0.22  | 1.58  |  |  |
| -3.96  | -0.41 | 0.99  |  |  |
| -4.35  | -1.95 | -0.41 |  |  |
| -4.85  | -2.32 | -0.62 |  |  |
| -12.65 | -2.19 | 0.89  |  |  |
| 2.6    | -0.6  | -2.07 |  |  |
| -2.46  | -5.62 | -4.41 |  |  |
| 2.59   | -1    | -2.46 |  |  |
| 2.07   | 1.36  | 0.22  |  |  |
| 2.04   | -0.94 | -2.07 |  |  |
| 1.82   | -0.29 | -1.76 |  |  |
| 1.63   | 0.84  | -0.46 |  |  |
| 1.62   | 2.18  | 0.89  |  |  |
| 1.45   | 2.65  | 1.51  |  |  |
| 1.43   | 2.38  | 1.26  |  |  |
| 1.39   | 1.91  | 0.83  |  |  |
| 1.37   | 3.5   | 2.44  |  |  |
| 1.35   | 2.53  | 1.5   |  |  |
| 1.16   | 1.24  | -0.22 |  |  |
| 1.13   | 0.61  | -0.82 |  |  |
| 1.11   | -1.35 | -2.75 |  |  |
| -1.06  | 3.32  | 2.16  |  |  |
| -1.09  | 1.07  | -0.06 |  |  |
| -4.95  | -1.15 | -0.1  |  |  |
| -5.12  | -2.31 | -1.21 |  |  |
| -5.29  | -1.88 | -0.73 |  |  |
| 2.2    | 2.4   | 0.93  |  |  |
| 2.02   | 5.11  | 3.77  |  |  |
| 1.22   | 0.21  | -1.26 |  |  |
| -1.09  | 0.62  | -0.44 |  |  |

|        |       |       |  |  |
|--------|-------|-------|--|--|
| -5.87  | -1.85 | -0.47 |  |  |
| -11.11 | -3.45 | -1.15 |  |  |
| -1.31  | 5.45  | 3.99  |  |  |
| -1.49  | 1.03  | -0.24 |  |  |
| -1.64  | -1.72 | -2.86 |  |  |
| 2.34   | 0.08  | -1.39 |  |  |
| 1.81   | -2.71 | -3.8  |  |  |
| 4.95   | 1.1   | -0.37 |  |  |
| 4.59   | 1.52  | 0.17  |  |  |
| 3.76   | -0.03 | -1.1  |  |  |
| -1.16  | 1.96  | 3.02  |  |  |
| 4.03   | -4.02 | -5.48 |  |  |
| 3.12   | -5.35 | -6.45 |  |  |
| -1.37  | -2    | -1    |  |  |
| -1.38  | -3.48 | -2.46 |  |  |
| -1.4   | -1.4  | -0.38 |  |  |
| -1.43  | -4.62 | -3.55 |  |  |
| -1.45  | -2.86 | -1.78 |  |  |
| -1.52  | -4.29 | -3.14 |  |  |
| -1.53  | -4.51 | -3.35 |  |  |
| -1.57  | -7.02 | -5.82 |  |  |
| -1.64  | -4.92 | -3.66 |  |  |
| -1.68  | 0.55  | 1.85  |  |  |
| -1.82  | -3.2  | -1.79 |  |  |
| -2.01  | -3.91 | -2.35 |  |  |
| -2.08  | -3.51 | -1.9  |  |  |
| -2.37  | -4.73 | -2.94 |  |  |
| -2.54  | -3.85 | -1.96 |  |  |
| 3.15   | 2.3   | 0.84  |  |  |
| -1.79  | 0.83  | 1.87  |  |  |
| -1.88  | 0.19  | 1.29  |  |  |
| -2.02  | -2.01 | -0.81 |  |  |
| -2.45  | 0.33  | 1.82  |  |  |
| 4.64   | 1.29  | -0.17 |  |  |
| -1.34  | 0.84  | 2.02  |  |  |
| -1.44  | 6.08  | 7.35  |  |  |
| -1.44  | 6.08  | 7.35  |  |  |
| -1.46  | 1.41  | 2.71  |  |  |
| -1.51  | 0.45  | 1.8   |  |  |
| -1.75  | -1.4  | 0.16  |  |  |
| 10.47  | -2.19 | -3.65 |  |  |
| 8.95   | 1.4   | 0.17  |  |  |
| 1.49   | -0.72 | 0.62  |  |  |
| 1.32   | -0.09 | 1.44  |  |  |
| 1.07   | -0.76 | 1.08  |  |  |
| 1.04   | -1.93 | -0.06 |  |  |
| -1.03  | -0.9  | 1.07  |  |  |
| 2.13   | -2.23 | -3.69 |  |  |
| -2.71  | -1.88 | -0.81 |  |  |
| -2.99  | -2.89 | -1.68 |  |  |
| -3.07  | -3.1  | -1.85 |  |  |
| -4.19  | -2.4  | -0.7  |  |  |
| 1.34   | 2.36  | 0.9   |  |  |
| 1.09   | 1.67  | 0.5   |  |  |
| -5.29  | -1.11 | 0.25  |  |  |
| 2.69   | 1.14  | -0.32 |  |  |
| -2.4   | -0.42 | 0.8   |  |  |
| -2.89  | -1.57 | -0.08 |  |  |

|       |       |       |  |  |
|-------|-------|-------|--|--|
| 1.45  | -1.17 | -2.64 |  |  |
| 1.3   | 1.87  | 0.56  |  |  |
| 1.24  | -0.19 | -1.43 |  |  |
| 1.05  | -3.75 | -4.76 |  |  |
| -4.08 | -0.86 | 0.24  |  |  |
| -4.29 | -1.98 | -0.81 |  |  |
| 2.1   | -0.15 | -1.6  |  |  |
| 1.76  | -0.32 | -1.53 |  |  |
| 1.7   | -1.83 | -2.98 |  |  |
| 1.62  | 1.82  | 0.74  |  |  |
| 1.57  | -0.14 | -1.18 |  |  |
| 1.53  | -2.3  | -3.31 |  |  |
| -3.09 | -2.84 | -1.6  |  |  |
| 1.78  | 0.98  | -0.47 |  |  |
| 1.35  | 1.53  | 0.47  |  |  |
| 1.31  | 1.82  | 0.81  |  |  |
| -3.1  | -1.06 | -0.05 |  |  |
| -3.12 | -0.26 | 0.76  |  |  |
| -3.51 | -0.84 | 0.34  |  |  |
| 1.18  | 3.99  | 2.53  |  |  |
| 1.02  | 1.61  | 0.37  |  |  |
| 1     | 4.43  | 3.21  |  |  |
| -1.02 | 6.18  | 4.99  |  |  |
| -1.04 | -2.12 | -3.28 |  |  |
| -1.12 | 2.18  | 1.13  |  |  |
| -1.13 | 1.15  | 0.1   |  |  |
| -5.01 | -0.29 | 0.81  |  |  |
| -7.28 | -1.86 | -0.22 |  |  |
| 26.34 | -0.7  | -2.17 |  |  |
| 1.87  | -1.41 | 0.95  |  |  |
| 1.79  | -3.91 | -1.49 |  |  |
| 1.74  | -5.17 | -2.71 |  |  |
| 1.71  | -0.44 | 2.04  |  |  |
| 1.57  | -0.66 | 1.95  |  |  |
| 1.53  | 0.01  | 2.65  |  |  |
| 1.22  | 0.12  | 3.1   |  |  |
| 1.14  | -3.87 | -0.8  |  |  |
| -1.06 | 1.71  | 5.05  |  |  |
| -1.09 | -2.08 | 1.3   |  |  |
| -1.2  | -1.25 | 2.27  |  |  |
| -1.41 | -2.16 | 1.59  |  |  |
| -1.46 | -4.33 | -0.52 |  |  |
| 2.64  | -3.08 | -4.54 |  |  |
| 2.06  | -3.37 | -4.46 |  |  |
| 2     | 0.08  | -0.98 |  |  |
| 1.95  | -2.5  | -3.52 |  |  |
| 1.94  | -3.83 | -4.84 |  |  |
| -2.22 | -3.81 | -2.72 |  |  |
| -2.37 | -3.01 | -1.82 |  |  |
| -3.45 | -4.97 | -3.24 |  |  |
| -4.11 | -5.19 | -3.2  |  |  |
| 1.4   | -0.57 | -2.03 |  |  |
| 1.33  | 6.26  | 4.87  |  |  |
| 1.12  | 4.01  | 2.88  |  |  |
| 1.06  | 0.37  | -0.68 |  |  |
| 1.05  | 3.43  | 2.38  |  |  |
| -4.03 | 1.02  | 2.07  |  |  |
| -5.09 | -0.66 | 0.72  |  |  |

|       |       |       |  |  |
|-------|-------|-------|--|--|
| -8.69 | -1.59 | 0.56  |  |  |
| 2.87  | 1.33  | -0.13 |  |  |
| 2.17  | 0.38  | -0.67 |  |  |
| -2.01 | -1.06 | 0.01  |  |  |
| 2.44  | 0.9   | -0.57 |  |  |
| 2.39  | 0.75  | -0.68 |  |  |
| 2.21  | 1.74  | 0.42  |  |  |
| 2.14  | -0.2  | -1.47 |  |  |
| 1.94  | -0.92 | -2.05 |  |  |
| 1.84  | -0.24 | -1.3  |  |  |
| 1.83  | -1.33 | -2.38 |  |  |
| 1.83  | 1     | -0.05 |  |  |
| 1.79  | 1.48  | 0.47  |  |  |
| 1.97  | 3.92  | 2.46  |  |  |
| 1.77  | -1.33 | -2.64 |  |  |
| 1.54  | 0.26  | -0.85 |  |  |
| 2.98  | -0.75 | -2.21 |  |  |
| 2.22  | -2.03 | -3.07 |  |  |
| -1.9  | -1.55 | -0.51 |  |  |
| -2.05 | -1.9  | -0.75 |  |  |
| 1.34  | -1.13 | -2.6  |  |  |
| 1.34  | -4.09 | -5.55 |  |  |
| 1.19  | 1.47  | 0.18  |  |  |
| -1.02 | -2.43 | -3.44 |  |  |
| 3.48  | 2.55  | 1.09  |  |  |
| 3.42  | 1.88  | 0.45  |  |  |
| 3.33  | -0.69 | -2.08 |  |  |
| 3.23  | -1.75 | -3.1  |  |  |
| 2.87  | -1.2  | -2.37 |  |  |
| 2.83  | -0.74 | -1.9  |  |  |
| 2.83  | -1.51 | -2.66 |  |  |
| 2.77  | -0.2  | -1.33 |  |  |
| 2.66  | 1.39  | 0.33  |  |  |
| 2.62  | 0.13  | -0.91 |  |  |
| 2.58  | 1.9   | 0.88  |  |  |
| -1.64 | -2.1  | -1.04 |  |  |
| 2.03  | -2.58 | -4.03 |  |  |
| 1.82  | -2.26 | -3.56 |  |  |
| 1.54  | 3.49  | 2.43  |  |  |
| 1.49  | -0.87 | -1.88 |  |  |
| 2.22  | -1.34 | -2.8  |  |  |
| -2.5  | -2.29 | -1.28 |  |  |
| -2.66 | -2.75 | -1.65 |  |  |
| -2.72 | -3.89 | -2.75 |  |  |
| -2.73 | -3.19 | -2.05 |  |  |
| -2.74 | -2.58 | -1.44 |  |  |
| -3    | -2.02 | -0.74 |  |  |
| -3.13 | -2.68 | -1.34 |  |  |
| -3.31 | -3.18 | -1.77 |  |  |
| -3.63 | -3.93 | -2.38 |  |  |
| -3.73 | -3.85 | -2.26 |  |  |
| -4    | -3.49 | -1.8  |  |  |
| -5.57 | -5.26 | -3.1  |  |  |
| 1.99  | 2.06  | 0.6   |  |  |
| 1.86  | 0.62  | -0.74 |  |  |
| 1.49  | -1.24 | -2.28 |  |  |
| -3.77 | -2.33 | -0.88 |  |  |
| -3.93 | -2.59 | -1.09 |  |  |

|       |       |       |  |  |
|-------|-------|-------|--|--|
| -1.13 | 2.24  | 0.78  |  |  |
| -1.53 | 1.37  | 0.35  |  |  |
| 4.74  | -0.29 | -1.75 |  |  |
| -1.29 | -1.38 | -0.22 |  |  |
| -1.39 | -2.91 | -1.65 |  |  |
| -2.09 | -2.44 | -0.6  |  |  |
| 2.19  | 2.62  | 1.16  |  |  |
| 2.05  | 2.63  | 1.26  |  |  |
| 1.99  | 1.46  | 0.13  |  |  |
| 1.69  | 2     | 0.91  |  |  |
| 1.62  | 2.95  | 1.92  |  |  |
| -3.11 | -0.44 | 0.87  |  |  |
| 3.31  | -3.39 | -4.85 |  |  |
| 3.27  | -4.41 | -5.86 |  |  |
| 2.92  | -1.34 | -2.62 |  |  |
| 2.61  | -2.74 | -3.86 |  |  |
| 2.45  | -3.08 | -4.1  |  |  |
| 9.35  | -0.78 | -2.24 |  |  |
| 1.68  | -0.78 | 0.23  |  |  |
| 1.48  | 0.66  | 1.86  |  |  |
| 1.19  | 1.17  | 2.68  |  |  |
| 1.11  | 0.6   | 2.22  |  |  |
| -1.33 | -1.28 | 0.9   |  |  |
| 2.51  | -1.08 | -2.54 |  |  |
| 2.09  | 3.29  | 2.09  |  |  |
| -2.31 | -2.06 | -0.99 |  |  |
| -2.4  | -2.06 | -0.94 |  |  |
| -2.51 | -2.78 | -1.59 |  |  |
| 2.37  | -1.2  | -2.66 |  |  |
| 2.2   | 0.05  | -1.3  |  |  |
| 1.83  | -3.09 | -4.17 |  |  |
| -2.64 | -1.68 | -0.49 |  |  |
| 2.42  | -0.66 | -2.12 |  |  |
| 2.13  | 0.01  | -1.26 |  |  |
| 1.98  | -2.89 | -4.06 |  |  |
| -2.62 | -3.17 | -1.96 |  |  |
| 2.11  | 1.12  | -0.33 |  |  |
| 1.84  | 0.41  | -0.84 |  |  |
| 1.75  | -0.45 | -1.63 |  |  |
| 1.62  | -2.88 | -3.95 |  |  |
| 1.43  | -0.85 | -2.3  |  |  |
| 1.11  | 1.8   | 0.71  |  |  |
| 1.39  | 0.47  | -0.98 |  |  |
| 1.25  | 2.64  | 1.33  |  |  |
| 1.09  | -0.36 | -1.48 |  |  |
| 1.07  | 2.45  | 1.37  |  |  |
| 1.05  | -0.98 | -2.03 |  |  |
| -4.92 | -1.3  | 0.02  |  |  |
| -5.04 | -1.29 | 0.06  |  |  |
| 1.49  | -1.04 | -2.5  |  |  |
| 1.21  | 1.05  | -0.11 |  |  |
| 1.13  | -5.06 | -6.13 |  |  |
| -5.09 | -3.17 | -1.71 |  |  |
| -5.36 | -5.2  | -3.66 |  |  |
| 1.77  | -1.7  | -3.15 |  |  |
| 1.38  | 1.39  | 0.29  |  |  |
| -4.05 | 0.14  | 1.52  |  |  |
| -5.68 | -2    | -0.13 |  |  |



|       |       |       |  |  |
|-------|-------|-------|--|--|
| 1.07  | 2.73  | 1.28  |  |  |
| -1.05 | -4.22 | -5.52 |  |  |
| -1.09 | -5.58 | -6.82 |  |  |
| -1.17 | -1.17 | -2.32 |  |  |
| -1.26 | -0.16 | -1.19 |  |  |
| -5.19 | -2.17 | -1.16 |  |  |
| -5.48 | -1.4  | -0.31 |  |  |
| 1.92  | 3.59  | 2.14  |  |  |
| 1.67  | 0.61  | -0.64 |  |  |
| 1.52  | -0.69 | -1.81 |  |  |
| 1.49  | -1.48 | -2.56 |  |  |
| -3.12 | -2.73 | -1.59 |  |  |
| -3.85 | -2.35 | -0.91 |  |  |
| 3.72  | 0.78  | -0.67 |  |  |
| 2.95  | 1.82  | 0.71  |  |  |
| -1.54 | -1.13 | -0.07 |  |  |
| -1.76 | -1.05 | 0.21  |  |  |
| -2.95 | -1.74 | 0.26  |  |  |
| 1.93  | 0.74  | -0.71 |  |  |
| 1.58  | 2.04  | 0.87  |  |  |
| 1.5   | 3.59  | 2.51  |  |  |
| 2.16  | 2.47  | 1.01  |  |  |
| 2.11  | 2.77  | 1.35  |  |  |
| 2.07  | -0.27 | -1.67 |  |  |
| 1.89  | -0.91 | -2.18 |  |  |
| 1.78  | -0.14 | -1.32 |  |  |
| -2.76 | -2.78 | -1.67 |  |  |
| -3.36 | -2.09 | -0.68 |  |  |
| -1.02 | -0.35 | -1.8  |  |  |
| -1.13 | -3.49 | -4.79 |  |  |
| -1.15 | 0.08  | -1.21 |  |  |
| -1.26 | -3.13 | -4.27 |  |  |
| -1.28 | -1.23 | -2.35 |  |  |
| 1.56  | -3.76 | -5.22 |  |  |
| -3.53 | -1.17 | -0.17 |  |  |
| -4.45 | -3.46 | -2.12 |  |  |
| 2.67  | -4.6  | -6.04 |  |  |
| 2.1   | -1.87 | -2.98 |  |  |
| -2.72 | -4.48 | -3.07 |  |  |
| 1.9   | 2.79  | 1.35  |  |  |
| 1.63  | 2.69  | 1.46  |  |  |
| 1.54  | 0.31  | -0.84 |  |  |
| 1.87  | -0.48 | -1.93 |  |  |
| 1.48  | 1.48  | 0.36  |  |  |
| -2.92 | -0.59 | 0.4   |  |  |
| -2.96 | -2.29 | -1.27 |  |  |
| -3.44 | -1.62 | -0.39 |  |  |
| -3.55 | -0.13 | 1.16  |  |  |
| -4.27 | -2.36 | -0.82 |  |  |
| -4.5  | -2.96 | -1.34 |  |  |
| -4.51 | -3.09 | -1.46 |  |  |
| -4.6  | -2.06 | -0.41 |  |  |
| -5.2  | -3.01 | -1.18 |  |  |
| -6.14 | -2.24 | -0.17 |  |  |
| 1.24  | -5.46 | -6.9  |  |  |
| 1.1   | -1.78 | -3.06 |  |  |
| 1.04  | -5.45 | -6.64 |  |  |
| -1.09 | -2.34 | -3.35 |  |  |

|       |       |       |  |  |
|-------|-------|-------|--|--|
| -4.71 | -1.68 | -0.58 |  |  |
| -5.27 | -5.02 | -3.76 |  |  |
| 11.09 | 0.01  | -1.44 |  |  |
| 2.02  | 1     | 2.01  |  |  |
| 1.68  | -3.89 | -2.61 |  |  |
| 1.55  | -1.84 | -0.45 |  |  |
| 1.28  | -4.06 | -2.4  |  |  |
| 1.24  | -0.01 | 1.71  |  |  |
| 1.22  | -1.76 | -0.02 |  |  |
| 1.18  | -5.27 | -3.49 |  |  |
| 1.16  | -0.85 | 0.96  |  |  |
| 1.13  | 1.58  | 3.42  |  |  |
| 1.12  | 1.37  | 3.23  |  |  |
| 1.11  | -0.67 | 1.2   |  |  |
| 1     | -2.75 | -0.74 |  |  |
| -1    | -4.13 | -2.1  |  |  |
| -1.12 | -2.11 | 0.07  |  |  |
| -1.37 | -4.89 | -2.41 |  |  |
| -1.39 | -3.94 | -1.44 |  |  |
| 1.98  | -0.5  | -1.94 |  |  |
| 1.51  | -3.89 | -4.95 |  |  |
| -2.78 | -1.47 | -0.46 |  |  |
| -5.57 | -1.72 | 0.29  |  |  |
| 2     | 4.09  | 2.64  |  |  |
| 1.82  | 1.65  | 0.34  |  |  |
| -4.69 | -2.09 | -0.31 |  |  |
| 3.82  | -0.48 | -1.92 |  |  |
| 3.58  | -0.64 | -2    |  |  |
| -1.57 | -3.1  | -1.96 |  |  |
| 2.68  | 1.11  | -0.33 |  |  |
| 2.22  | -2.74 | -3.92 |  |  |
| 4.65  | -2.83 | -4.28 |  |  |
| -1.21 | -5.22 | -4.17 |  |  |
| -1.42 | -6.53 | -5.25 |  |  |
| -1.52 | -5.21 | -3.83 |  |  |
| 3.07  | 2.68  | 1.23  |  |  |
| 2.53  | 3.77  | 2.6   |  |  |
| -1.89 | -0.95 | 0.14  |  |  |
| 2.09  | -0.95 | -2.39 |  |  |
| 1.56  | 1.76  | 0.73  |  |  |
| 3.19  | -4.47 | -5.91 |  |  |
| -1.75 | -7.06 | -6.03 |  |  |
| -2.02 | -4.75 | -3.51 |  |  |
| 2.69  | -0.08 | -1.53 |  |  |
| 2.08  | -0.47 | -1.54 |  |  |
| -2.17 | -2.37 | -1.26 |  |  |
| -2.26 | -3.82 | -2.66 |  |  |
| -2.29 | -1.54 | -0.36 |  |  |
| -2.34 | -4.35 | -3.13 |  |  |
| 1.61  | -2.89 | -4.33 |  |  |
| 1.38  | 1.26  | 0.04  |  |  |
| 1.36  | 1.15  | -0.06 |  |  |
| 1.32  | -3.58 | -4.74 |  |  |
| 1.29  | -1.75 | -2.87 |  |  |
| 1.92  | -0.69 | -2.14 |  |  |
| 1.57  | 1.8   | 0.64  |  |  |
| -3.12 | -2.83 | -1.69 |  |  |
| -3.24 | -1.14 | 0.05  |  |  |

|        |       |       |  |  |
|--------|-------|-------|--|--|
| 2.26   | 0.61  | -0.84 |  |  |
| 1.98   | 1.45  | 0.19  |  |  |
| 1.83   | 2.19  | 1.05  |  |  |
| 1.67   | 1.86  | 0.86  |  |  |
| -2.49  | -0.92 | 0.13  |  |  |
| -2.59  | -0.49 | 0.61  |  |  |
| 2.64   | 0.97  | -0.47 |  |  |
| -2.35  | -2.28 | -1.09 |  |  |
| -2.49  | -2.86 | -1.59 |  |  |
| -3.17  | -1.93 | -0.3  |  |  |
| -3.73  | -1.33 | 0.53  |  |  |
| 3.01   | 5.45  | 4     |  |  |
| 2.32   | 1.82  | 0.75  |  |  |
| -1.85  | -1.43 | -0.39 |  |  |
| -1.94  | 1.91  | 3.01  |  |  |
| -2.14  | 1.89  | 3.13  |  |  |
| 3.05   | -1.41 | -2.85 |  |  |
| 2.42   | 2.18  | 1.08  |  |  |
| -1.95  | -0.49 | 0.64  |  |  |
| 1.97   | -1.99 | -3.44 |  |  |
| 1.46   | 0.49  | -0.52 |  |  |
| -2.91  | 0.34  | 1.42  |  |  |
| -2.92  | -2.26 | -1.18 |  |  |
| -6.63  | -3.96 | -1.69 |  |  |
| -11.86 | -3.29 | -0.19 |  |  |
| 1.79   | -0.46 | -1.9  |  |  |
| 1.75   | -3.56 | -4.97 |  |  |
| 1.65   | -4.56 | -5.88 |  |  |
| 1.52   | -3.05 | -4.26 |  |  |
| 1.31   | -0.6  | -2.04 |  |  |
| 1.26   | -2.14 | -3.52 |  |  |
| 1.03   | -0.49 | -1.59 |  |  |
| 1.01   | 2.26  | 1.19  |  |  |
| -1.04  | 1.7   | 0.7   |  |  |
| 1.62   | 2.74  | 1.3   |  |  |
| 1.25   | 1.67  | 0.61  |  |  |
| -3.64  | -2.06 | -0.94 |  |  |
| 1.64   | -2.18 | -3.61 |  |  |
| -3.66  | -1.89 | -0.73 |  |  |
| 2.26   | -0.04 | -1.48 |  |  |
| 2.1    | 0.88  | -0.44 |  |  |
| 2.03   | 0.89  | -0.39 |  |  |
| 1.97   | 0.89  | -0.35 |  |  |
| 1.87   | -0.6  | -1.76 |  |  |
| 1.83   | -0.1  | -1.23 |  |  |
| 1.72   | -0.79 | -1.83 |  |  |
| -5.24  | -4.34 | -2.21 |  |  |
| 1.56   | -1.9  | -3.34 |  |  |
| 1.36   | -1.84 | -3.08 |  |  |
| 1.32   | -3.15 | -4.35 |  |  |
| 1.22   | -2.14 | -3.22 |  |  |
| 1.15   | 1.45  | 0.45  |  |  |
| -3.85  | -1.32 | -0.17 |  |  |
| 3.26   | -1.82 | -3.26 |  |  |
| -2.01  | -4.67 | -3.4  |  |  |
| -2.75  | -2.97 | -1.24 |  |  |
| 1.86   | -1.93 | -3.37 |  |  |
| 1.46   | -3.77 | -4.86 |  |  |

|       |       |       |  |  |
|-------|-------|-------|--|--|
| 1.06  | -1.72 | -3.16 |  |  |
| 1.02  | -2.42 | -3.79 |  |  |
| -5.46 | -3.74 | -2.64 |  |  |
| 1.08  | 0.78  | -0.66 |  |  |
| -1.16 | 6.99  | 5.88  |  |  |
| -1.23 | 3.49  | 2.46  |  |  |
| 10.18 | 0.58  | -0.86 |  |  |
| 1.87  | -0.04 | 0.96  |  |  |
| 1.83  | 0.56  | 1.59  |  |  |
| 1.81  | -1.95 | -0.9  |  |  |
| 1.69  | -2.26 | -1.11 |  |  |
| 1.54  | -0.03 | 1.26  |  |  |
| 1.52  | -1.85 | -0.55 |  |  |
| 1.48  | -2.97 | -1.62 |  |  |
| 1.47  | -1.58 | -0.23 |  |  |
| 1.31  | 0.12  | 1.64  |  |  |
| 1.16  | 1.94  | 3.63  |  |  |
| 1.09  | 0.32  | 2.1   |  |  |
| 1.09  | 1.13  | 2.92  |  |  |
| 1.05  | 4.56  | 6.4   |  |  |
| 7.88  | -0.15 | -1.59 |  |  |
| 5.94  | 1.64  | 0.6   |  |  |
| 1.43  | -0.82 | 0.2   |  |  |
| 1.33  | 1.31  | 2.44  |  |  |
| 1.32  | -0.74 | 0.4   |  |  |
| 1.29  | 0.87  | 2.05  |  |  |
| 1.21  | 1.48  | 2.75  |  |  |
| 1.07  | 0.17  | 1.61  |  |  |
| 1.05  | -1.24 | 0.23  |  |  |
| -1.09 | -0.65 | 1.02  |  |  |
| 2     | 2.95  | 1.51  |  |  |
| 1.9   | 1.76  | 0.39  |  |  |
| 1.68  | 3.04  | 1.86  |  |  |
| 1.89  | -0.53 | -1.97 |  |  |
| 1.74  | -0.48 | -1.8  |  |  |
| 1.45  | -2.01 | -3.07 |  |  |
| 1.42  | 0.34  | -0.68 |  |  |
| -3.29 | -2.78 | -1.58 |  |  |
| 1.5   | -1.35 | -2.78 |  |  |
| 1.45  | -1.68 | -3.06 |  |  |
| 1.36  | -0.48 | -1.77 |  |  |
| 1.17  | -0.55 | -1.63 |  |  |
| 1.14  | -2.31 | -3.35 |  |  |
| 1.11  | -1.05 | -2.05 |  |  |
| -3.75 | -2.45 | -1.4  |  |  |
| 10.92 | 0.28  | -1.16 |  |  |
| 8.8   | 0.84  | -0.29 |  |  |
| 1.93  | -1.98 | -0.91 |  |  |
| 1.76  | -1.44 | -0.25 |  |  |
| 1.74  | -3.71 | -2.5  |  |  |
| 1.7   | -2.17 | -0.93 |  |  |
| 1.59  | -1.78 | -0.44 |  |  |
| 1.57  | -1.48 | -0.12 |  |  |
| 1.57  | -1.75 | -0.38 |  |  |
| 1.55  | -0.77 | 0.6   |  |  |
| 1.35  | -0.34 | 1.24  |  |  |
| 1.3   | -1.82 | -0.19 |  |  |
| 1     | -4.78 | -2.77 |  |  |

|       |       |       |  |  |
|-------|-------|-------|--|--|
| -1.09 | -3.75 | -1.61 |  |  |
| -1.12 | -2.9  | -0.72 |  |  |
| -1.26 | -4.75 | -2.42 |  |  |
| -1.29 | -1.48 | 0.9   |  |  |
| -1.9  | -4.6  | -1.67 |  |  |
| 2.15  | -1.68 | -3.12 |  |  |
| -2.55 | -1.66 | -0.65 |  |  |
| -2.77 | -2.22 | -1.08 |  |  |
| -3.55 | -3.01 | -1.52 |  |  |
| 1.8   | 0.72  | -0.72 |  |  |
| -7.92 | -2.05 | 0.35  |  |  |
| 1.6   | 3.8   | 2.36  |  |  |
| 1.49  | 0.76  | -0.57 |  |  |
| 1.48  | -3.13 | -4.46 |  |  |
| 1.41  | 3.8   | 2.54  |  |  |
| -3.76 | -2.71 | -1.56 |  |  |
| 1.64  | -0.44 | -1.88 |  |  |
| 1.46  | -1.02 | -2.27 |  |  |
| 1.97  | 4.59  | 3.16  |  |  |
| 1.59  | -2.66 | -3.78 |  |  |
| -2.76 | -1.84 | -0.83 |  |  |
| -3.81 | -2.11 | -0.64 |  |  |
| -4.84 | -3.96 | -2.14 |  |  |
| 1.92  | -1.34 | -2.77 |  |  |
| 1.6   | -4.45 | -5.62 |  |  |
| -5.01 | -3.77 | -1.94 |  |  |
| 1.31  | -0.69 | -2.12 |  |  |
| 1.2   | 1.6   | 0.3   |  |  |
| 1.09  | 2.49  | 1.32  |  |  |
| -1    | 1.57  | 0.52  |  |  |
| 3.08  | -1.48 | -2.91 |  |  |
| -1.88 | 2.49  | 3.59  |  |  |
| -2.01 | -2.51 | -1.32 |  |  |
| 2.3   | -1.08 | -2.51 |  |  |
| 2.04  | -0.07 | -1.33 |  |  |
| -2.44 | -2.23 | -1.17 |  |  |
| -2.77 | -1.52 | -0.28 |  |  |
| 2.33  | 0.6   | -0.83 |  |  |
| -2.33 | -2.25 | -1.24 |  |  |
| 4.22  | 0.45  | -0.98 |  |  |
| 3.6   | 2.26  | 1.06  |  |  |
| 3.46  | 1.15  | 0.01  |  |  |
| 3.19  | 0.18  | -0.85 |  |  |
| 3.16  | -0.07 | -1.09 |  |  |
| -1.75 | -1.76 | -0.31 |  |  |
| -1.89 | -1.67 | -0.11 |  |  |
| -2.28 | -2.35 | -0.51 |  |  |
| 1.29  | -0.42 | -1.85 |  |  |
| 1.26  | 3.36  | 1.96  |  |  |
| 1.17  | -1.48 | -2.77 |  |  |
| 1.03  | -3.57 | -4.68 |  |  |
| -1.02 | -3.64 | -4.68 |  |  |
| 2.31  | -1.58 | -3.02 |  |  |
| 1.82  | 2.17  | 1.08  |  |  |
| -2.48 | -3.14 | -2.06 |  |  |
| -2.93 | -3.79 | -2.46 |  |  |
| 2.21  | -0.57 | -2    |  |  |
| -3.48 | -7.26 | -5.75 |  |  |

|        |       |       |  |  |
|--------|-------|-------|--|--|
| 2.13   | -0.34 | -1.77 |  |  |
| -3.91  | -1.04 | 0.6   |  |  |
| -3.92  | -0.17 | 1.47  |  |  |
| -3.92  | -0.17 | 1.47  |  |  |
| -3.99  | -0.95 | 0.71  |  |  |
| 2.03   | -2.54 | -3.96 |  |  |
| 1.73   | 0.56  | -0.63 |  |  |
| 1.55   | -0.55 | -1.58 |  |  |
| -2.82  | -5.98 | -4.89 |  |  |
| -2.87  | -3.71 | -2.59 |  |  |
| -9.79  | -4.54 | -1.65 |  |  |
| 2.28   | -2.24 | -3.67 |  |  |
| 1.9    | 0.12  | -1.04 |  |  |
| 1.82   | -0.27 | -1.38 |  |  |
| 1.82   | -1.18 | -2.29 |  |  |
| -4.29  | -3.95 | -2.09 |  |  |
| 1.56   | 0.15  | -1.27 |  |  |
| 1.28   | -1.54 | -2.68 |  |  |
| 1.21   | 0.3   | -0.76 |  |  |
| 1.17   | -0.59 | -1.61 |  |  |
| 1.24   | 3.11  | 1.69  |  |  |
| 1.14   | 2.29  | 0.98  |  |  |
| -7.74  | -1.32 | 0.51  |  |  |
| -7.83  | -0.99 | 0.86  |  |  |
| 2.41   | 0.09  | -1.33 |  |  |
| 2.41   | -0.85 | -2.28 |  |  |
| 2.24   | 1.84  | 0.52  |  |  |
| 1.91   | 1.73  | 0.65  |  |  |
| 1.82   | 0.59  | -0.43 |  |  |
| 1.81   | -0.05 | -1.06 |  |  |
| 1.28   | 1.7   | 0.27  |  |  |
| 1.22   | 1.78  | 0.42  |  |  |
| 1.14   | -1.34 | -2.6  |  |  |
| 1.03   | 2.05  | 0.93  |  |  |
| -1.02  | 1.21  | 0.16  |  |  |
| 2.15   | -1.42 | -2.85 |  |  |
| -2.52  | -2.62 | -1.61 |  |  |
| 1.36   | -0.72 | -2.15 |  |  |
| 1.33   | 1.43  | 0.04  |  |  |
| 1.22   | 4.4   | 3.13  |  |  |
| 1.19   | 1.08  | -0.15 |  |  |
| 1.1    | 3.56  | 2.43  |  |  |
| -5.47  | -2.61 | -1.14 |  |  |
| -5.52  | -3.28 | -1.8  |  |  |
| -6.82  | -2.61 | -0.83 |  |  |
| -7.01  | -0.73 | 1.09  |  |  |
| -11.28 | -3.44 | -0.93 |  |  |
| 3.34   | -0.53 | -1.95 |  |  |
| 2.84   | -0.7  | -1.89 |  |  |
| -1.61  | -4.37 | -3.37 |  |  |
| -1.63  | -4.12 | -3.1  |  |  |
| -1.64  | -3.87 | -2.84 |  |  |
| -1.7   | -4.6  | -3.53 |  |  |
| -1.74  | -0.83 | 0.29  |  |  |
| -1.74  | -2.02 | -0.91 |  |  |
| -1.8   | -1.45 | -0.29 |  |  |
| -2.17  | -2.53 | -1.1  |  |  |
| -2.18  | -3.2  | -1.76 |  |  |

|       |       |       |  |  |
|-------|-------|-------|--|--|
| -2.27 | -3.01 | -1.51 |  |  |
| -3.8  | -5.16 | -2.92 |  |  |
| 2.18  | -3.35 | -4.78 |  |  |
| 2.14  | -2.75 | -4.15 |  |  |
| 1.95  | -1.73 | -3    |  |  |
| 9.33  | 0.13  | -1.3  |  |  |
| 1.68  | -2.34 | -1.29 |  |  |
| 1.54  | -0.4  | 0.77  |  |  |
| 1.53  | 0.61  | 1.78  |  |  |
| 1.51  | -0.49 | 0.71  |  |  |
| 1.44  | 0.89  | 2.16  |  |  |
| 1.44  | -0.83 | 0.43  |  |  |
| 1.37  | -0.03 | 1.31  |  |  |
| 1.31  | 1.03  | 2.43  |  |  |
| 1.24  | -3.15 | -1.66 |  |  |
| 1.14  | -1.87 | -0.26 |  |  |
| 1.07  | 4.52  | 6.22  |  |  |
| 1.02  | -0.15 | 1.61  |  |  |
| -1.01 | -2.23 | -0.43 |  |  |
| -1.06 | 5.48  | 7.36  |  |  |
| -1.26 | 1.41  | 3.54  |  |  |
| -1.4  | -1.8  | 0.48  |  |  |
| -1.5  | 0.68  | 3.06  |  |  |
| -2.02 | -1.56 | 1.25  |  |  |
| 2.02  | -0.15 | -1.58 |  |  |
| 1.52  | -1.96 | -2.98 |  |  |
| -2.81 | -1.27 | -0.19 |  |  |
| -4.59 | -3.07 | -1.29 |  |  |
| 1.52  | 1.61  | 0.18  |  |  |
| 1.33  | 1.64  | 0.41  |  |  |
| 1.26  | 0.01  | -1.15 |  |  |
| 1.2   | 2.63  | 1.54  |  |  |
| -3.66 | -2.35 | -1.3  |  |  |
| -3.99 | 0.73  | 1.9   |  |  |
| 2.02  | 1.24  | -0.18 |  |  |
| 1.66  | -2.93 | -4.07 |  |  |
| 1.54  | -1.46 | -2.49 |  |  |
| -2.78 | -2.23 | -1.17 |  |  |
| -3.17 | -5.07 | -3.82 |  |  |
| 1.19  | 1.67  | 0.25  |  |  |
| 1.03  | 2.13  | 0.91  |  |  |
| -1.06 | 1.9   | 0.82  |  |  |
| -6.86 | -2.56 | -0.95 |  |  |
| 3.71  | 0.86  | -0.56 |  |  |
| -1.68 | 0.92  | 2.13  |  |  |
| -3.62 | 3.25  | 5.57  |  |  |
| 2.21  | -0.59 | -2.02 |  |  |
| 1.76  | -3.06 | -4.15 |  |  |
| 1.68  | 3.66  | 2.63  |  |  |
| -2.61 | -2.45 | -1.34 |  |  |
| -2.96 | -1.65 | -0.37 |  |  |
| -3.41 | -1.5  | -0.01 |  |  |
| -3.77 | -2.84 | -1.2  |  |  |
| 3.52  | 0.38  | -1.05 |  |  |
| -1.55 | -2.63 | -1.61 |  |  |
| 2.95  | -1.06 | -2.49 |  |  |
| 2.89  | 1.88  | 0.49  |  |  |
| 2.56  | 4.25  | 3.02  |  |  |

|       |       |       |  |  |
|-------|-------|-------|--|--|
| -1.83 | 4.19  | 5.19  |  |  |
| 1.32  | 1.94  | 0.52  |  |  |
| 1.29  | 0.88  | -0.52 |  |  |
| 1.18  | 1.42  | 0.16  |  |  |
| 1.11  | 0.31  | -0.88 |  |  |
| 1.04  | 0.82  | -0.27 |  |  |
| 1.02  | 1.7   | 0.64  |  |  |
| -4.25 | -0.41 | 0.65  |  |  |
| -4.46 | -2.73 | -1.61 |  |  |
| -4.61 | -0.32 | 0.86  |  |  |
| -5.05 | 0.15  | 1.46  |  |  |
| -5.3  | -1.71 | -0.33 |  |  |
| -5.35 | -2.15 | -0.76 |  |  |
| -6.1  | -0.89 | 0.69  |  |  |
| -7.99 | -0.79 | 1.18  |  |  |
| 2.13  | -3.36 | -4.79 |  |  |
| 1.67  | -2.99 | -4.07 |  |  |
| -2.87 | -3.77 | -2.59 |  |  |
| 1.79  | 0.21  | -1.22 |  |  |
| 1.55  | -0.02 | -1.24 |  |  |
| 1.53  | -1.53 | -2.73 |  |  |
| -6.28 | -1.2  | 0.86  |  |  |
| 3.24  | -1    | -2.43 |  |  |
| -1.91 | -1.44 | -0.24 |  |  |
| 1.97  | 3.95  | 2.52  |  |  |
| 1.7   | 0.78  | -0.44 |  |  |
| 1.63  | 1.98  | 0.82  |  |  |
| 1.51  | 1.25  | 0.2   |  |  |
| -2.74 | 0.59  | 1.6   |  |  |
| -3.41 | -0.74 | 0.58  |  |  |
| -3.45 | 0.62  | 1.96  |  |  |
| -3.52 | -1.55 | -0.18 |  |  |
| -3.53 | -0.29 | 1.08  |  |  |
| -3.53 | -0.19 | 1.18  |  |  |
| -3.93 | 0.17  | 1.69  |  |  |
| -4.16 | -2.08 | -0.47 |  |  |
| -4.5  | -2.2  | -0.48 |  |  |
| -4.85 | -0.67 | 1.16  |  |  |
| -5.06 | -0.45 | 1.44  |  |  |
| -8.07 | -3.16 | -0.59 |  |  |
| 1.15  | -0.67 | -2.1  |  |  |
| 1.15  | -4.72 | -6.15 |  |  |
| 1.11  | -3.91 | -5.29 |  |  |
| 1.07  | -2.79 | -4.11 |  |  |
| 1.04  | -1.29 | -2.57 |  |  |
| 1     | 3.78  | 2.55  |  |  |
| -1.01 | 0.61  | -0.6  |  |  |
| -1.02 | 1.88  | 0.69  |  |  |
| -1.13 | 0.31  | -0.73 |  |  |
| 1.71  | -4.01 | -5.43 |  |  |
| 1.36  | -2.86 | -3.96 |  |  |
| 1.34  | -2.7  | -3.77 |  |  |
| 3.31  | 0.48  | -0.94 |  |  |
| -1.82 | -0.71 | 0.47  |  |  |
| -2.21 | -1.59 | -0.13 |  |  |
| -2.65 | -1.25 | 0.47  |  |  |
| -3.02 | -0.52 | 1.38  |  |  |
| 2.3   | -2.53 | -3.96 |  |  |



|       |       |       |  |  |
|-------|-------|-------|--|--|
| -2.51 | -1.98 | -0.87 |  |  |
| 2.97  | -4.46 | -5.88 |  |  |
| 2.85  | -4.35 | -5.71 |  |  |
| -2.33 | -1.68 | -0.31 |  |  |
| -2.85 | -2.88 | -1.22 |  |  |
| -4.1  | -2.58 | -0.4  |  |  |
| 3.21  | 0.95  | -0.47 |  |  |
| 2.86  | -1.01 | -2.27 |  |  |
| 2.48  | 3.39  | 2.34  |  |  |
| -1.96 | -2.69 | -1.46 |  |  |
| -1.98 | -1.93 | -0.68 |  |  |
| 3.53  | -4.44 | -5.86 |  |  |
| -1.59 | -5.33 | -4.26 |  |  |
| -1.87 | -6.13 | -4.83 |  |  |
| 2.91  | 4.21  | 2.79  |  |  |
| 2.73  | 4.51  | 3.17  |  |  |
| 2.37  | -0.86 | -1.98 |  |  |
| 1.83  | 3.24  | 1.82  |  |  |
| 1.51  | 2.95  | 1.81  |  |  |
| -2.99 | -1.79 | -0.76 |  |  |
| 1.86  | 1     | -0.42 |  |  |
| 1.63  | 3.99  | 2.75  |  |  |
| 1.57  | -1.18 | -2.36 |  |  |
| 1.52  | -0.85 | -1.99 |  |  |
| -2.96 | -2.34 | -1.3  |  |  |
| -3.7  | -1.08 | 0.27  |  |  |
| -4.48 | -3.17 | -1.54 |  |  |
| 1.84  | -0.07 | -1.49 |  |  |
| 1.4   | -2.84 | -3.87 |  |  |
| -2.98 | -2.31 | -1.28 |  |  |
| -3.66 | -4.85 | -3.52 |  |  |
| 2     | 0.82  | -0.6  |  |  |
| -2.9  | -1.54 | -0.42 |  |  |
| -3.64 | -2.7  | -1.25 |  |  |
| -4.12 | -1.15 | 0.48  |  |  |
| 2.95  | -0.75 | -2.17 |  |  |
| 2.4   | -1.31 | -2.43 |  |  |
| 2.26  | 1.56  | 0.52  |  |  |
| -2.49 | -2.81 | -1.35 |  |  |
| 1.33  | 2.99  | 1.57  |  |  |
| 1.25  | 2.53  | 1.21  |  |  |
| 1.25  | -2.14 | -3.46 |  |  |
| 1.16  | -0.19 | -1.41 |  |  |
| 1.16  | 2.12  | 0.91  |  |  |
| 1.14  | 2.2   | 1     |  |  |
| 1.12  | 0.57  | -0.6  |  |  |
| 1.05  | -0.64 | -1.71 |  |  |
| -4.25 | -0.8  | 0.28  |  |  |
| -5.14 | -1.85 | -0.49 |  |  |
| 2.53  | -3.14 | -4.56 |  |  |
| 2.29  | -2.43 | -3.7  |  |  |
| 2.16  | -2.25 | -3.44 |  |  |
| 2.37  | 3.02  | 1.6   |  |  |
| 2.2   | 4.46  | 3.15  |  |  |
| -2.44 | -0.11 | 1     |  |  |
| -2.79 | -2.02 | -0.72 |  |  |
| 3.69  | -1.17 | -2.59 |  |  |
| -1.53 | -3.68 | -2.6  |  |  |

|       |       |       |  |  |
|-------|-------|-------|--|--|
| -2.32 | -5.12 | -3.44 |  |  |
| 2.15  | 3.38  | 1.96  |  |  |
| 1.65  | 1.54  | 0.5   |  |  |
| 1.41  | 0.32  | -1.1  |  |  |
| 1.38  | 3.44  | 2.06  |  |  |
| 1.34  | -2.05 | -3.39 |  |  |
| 1.09  | 1.09  | 0.04  |  |  |
| 1.06  | -0.76 | -1.76 |  |  |
| -4.93 | -0.21 | 1.18  |  |  |
| -5.13 | 0.17  | 1.61  |  |  |
| -7.77 | -2.99 | -0.95 |  |  |
| 3.33  | -2.51 | -3.93 |  |  |
| 3.25  | -0.88 | -2.26 |  |  |
| -1.87 | -4.17 | -2.95 |  |  |
| 2.31  | -2.8  | -4.21 |  |  |
| 1.86  | -3.12 | -4.23 |  |  |
| 1.84  | -1.25 | -2.34 |  |  |
| 1.76  | -1.17 | -2.19 |  |  |
| 1.73  | 0.17  | -0.83 |  |  |
| -2.5  | -0.95 | 0.16  |  |  |
| -2.61 | -2.08 | -0.91 |  |  |
| 2.78  | -0.69 | -2.1  |  |  |
| -2    | -3.99 | -2.93 |  |  |
| 2.79  | -0.54 | -1.96 |  |  |
| -1.97 | -2.15 | -1.11 |  |  |
| -2.32 | -1.96 | -0.69 |  |  |
| 3.38  | -4.38 | -5.79 |  |  |
| -1.71 | -3.15 | -2.03 |  |  |
| -1.8  | -6.27 | -5.08 |  |  |
| -1.84 | -5.25 | -4.03 |  |  |
| -2.24 | -5.48 | -3.97 |  |  |
| 1.53  | 1.63  | 0.21  |  |  |
| 1.17  | -0.02 | -1.06 |  |  |
| -3.71 | -1.27 | -0.19 |  |  |
| -3.96 | 0.6   | 1.78  |  |  |
| -4.04 | 0.05  | 1.25  |  |  |
| -4.11 | 0.14  | 1.37  |  |  |
| -4.31 | 1.54  | 2.84  |  |  |
| 1.78  | -1.16 | -2.58 |  |  |
| 1.71  | -0.19 | -1.55 |  |  |
| 1.65  | 1.16  | -0.15 |  |  |
| 1.6   | -0.14 | -1.4  |  |  |
| 1.51  | 0.85  | -0.34 |  |  |
| 1.45  | -0.83 | -1.96 |  |  |
| 1.45  | 0.84  | -0.27 |  |  |
| 1.41  | 3.21  | 2.13  |  |  |
| -3.49 | -0.8  | 0.42  |  |  |
| 1.44  | 1.28  | -0.13 |  |  |
| 1.35  | -3.52 | -4.84 |  |  |
| 1.14  | -3.58 | -4.65 |  |  |
| 1.93  | 1.27  | -0.14 |  |  |
| 1.5   | 0.04  | -1.01 |  |  |
| 1.57  | 1.17  | -0.24 |  |  |
| 1.26  | 3.41  | 2.31  |  |  |
| 1.25  | 3.89  | 2.82  |  |  |
| 1.18  | 0.58  | -0.42 |  |  |
| 2.61  | -0.92 | -2.33 |  |  |
| -2.09 | -3.66 | -2.63 |  |  |

|       |       |       |  |  |
|-------|-------|-------|--|--|
| -2.42 | -4.27 | -3.02 |  |  |
| -3.66 | -4.86 | -3.02 |  |  |
| 2.38  | -4.96 | -6.37 |  |  |
| 2.25  | -4.92 | -6.25 |  |  |
| 2.08  | -4.63 | -5.85 |  |  |
| 1.22  | -1.08 | -2.5  |  |  |
| 1.13  | 0.2   | -1.11 |  |  |
| -1.05 | -0.58 | -1.64 |  |  |
| -4.47 | -2.2  | -1.17 |  |  |
| 1.61  | -1.2  | -2.61 |  |  |
| -4.75 | -4.46 | -2.93 |  |  |
| 2.23  | 1.82  | 0.41  |  |  |
| -2.83 | -2.43 | -1.18 |  |  |
| 1.2   | 5.29  | 3.88  |  |  |
| 1.19  | -1.16 | -2.56 |  |  |
| 1.02  | -0.71 | -1.89 |  |  |
| 1.01  | -1.35 | -2.52 |  |  |
| -1.02 | 2.97  | 1.85  |  |  |
| -1.05 | -0.64 | -1.72 |  |  |
| 1.62  | -3.17 | -4.58 |  |  |
| 1.29  | -1.78 | -2.87 |  |  |
| 1.58  | -1.38 | -2.79 |  |  |
| 1.56  | -1.22 | -2.61 |  |  |
| 1.31  | -1.65 | -2.79 |  |  |
| 1.27  | -1.3  | -2.4  |  |  |
| -5.92 | -1.56 | 0.26  |  |  |
| 1.46  | -0.7  | -2.11 |  |  |
| 1.25  | 0.02  | -1.16 |  |  |
| 1.2   | -1.58 | -2.7  |  |  |
| 1.18  | 3.79  | 2.68  |  |  |
| 1.18  | 1.71  | 0.62  |  |  |
| 1.18  | -1.01 | -2.1  |  |  |
| 1.17  | 0.1   | -0.99 |  |  |
| 1.12  | -0.54 | -1.56 |  |  |
| 1.1   | -1.13 | -2.13 |  |  |
| -4.14 | -3.25 | -2.06 |  |  |
| -9.69 | -3.88 | -1.46 |  |  |
| 3.74  | -0.36 | -1.77 |  |  |
| -1.5  | -2.9  | -1.82 |  |  |
| -2.15 | -2.32 | -0.72 |  |  |
| 4.09  | -1.34 | -2.75 |  |  |
| 3.57  | -0.43 | -1.64 |  |  |
| -1.79 | -1.25 | 0.21  |  |  |
| -1.82 | -2.68 | -1.2  |  |  |
| 1.92  | 5.12  | 3.71  |  |  |
| 1.68  | 0.11  | -1.1  |  |  |
| 1.54  | 0.23  | -0.86 |  |  |
| 1.45  | 1.39  | 0.39  |  |  |
| 13.65 | 0.69  | -0.71 |  |  |
| 10.46 | 0.72  | -0.3  |  |  |
| 1.91  | -0.72 | 0.71  |  |  |
| 1.64  | -1.51 | 0.14  |  |  |
| 1.37  | -1.18 | 0.73  |  |  |
| 1.31  | 2.86  | 4.84  |  |  |
| 1.21  | -2.01 | 0.08  |  |  |
| 1.17  | 1.7   | 3.84  |  |  |
| 1.17  | -0.21 | 1.93  |  |  |
| 1.09  | -1.46 | 0.78  |  |  |

|       |       |       |  |  |
|-------|-------|-------|--|--|
| 1.01  | -2.71 | -0.36 |  |  |
| -1    | -0.53 | 1.84  |  |  |
| 1.45  | -2.31 | -3.72 |  |  |
| 1.36  | -1.5  | -2.81 |  |  |
| 1.32  | -2.8  | -4.08 |  |  |
| 1.18  | -0.31 | -1.43 |  |  |
| 1.16  | -0.95 | -2.04 |  |  |
| 1.13  | 5.34  | 4.3   |  |  |
| -3.68 | -1.71 | -0.71 |  |  |
| -4.06 | -1.27 | -0.12 |  |  |
| -4.96 | -4.37 | -2.93 |  |  |
| -5.17 | -4.19 | -2.69 |  |  |
| 7.95  | -1.25 | -2.66 |  |  |
| 6.93  | -2.4  | -3.61 |  |  |
| 6.22  | -1.26 | -2.31 |  |  |
| 1.44  | 1.56  | 2.61  |  |  |
| 1.41  | -4.11 | -3.02 |  |  |
| 1.32  | -0.19 | 1     |  |  |
| 1.01  | -4.28 | -2.71 |  |  |
| -1.01 | -4.54 | -2.94 |  |  |
| -1.02 | 1.14  | 2.76  |  |  |
| -1.12 | -4.27 | -2.52 |  |  |
| -1.15 | 2.69  | 4.47  |  |  |
| 2.3   | -1.54 | -2.95 |  |  |
| 2.28  | -3.12 | -4.51 |  |  |
| 1.88  | -1.35 | -2.46 |  |  |
| 1.86  | -2.2  | -3.3  |  |  |
| 1.77  | -4.08 | -5.11 |  |  |
| 2.09  | 1.41  | 0     |  |  |
| 1.75  | 0.34  | -0.81 |  |  |
| -3.62 | -2.71 | -1.2  |  |  |
| 2.12  | 1.09  | -0.32 |  |  |
| 1.72  | -0.66 | -1.76 |  |  |
| 1.66  | -0.33 | -1.38 |  |  |
| 3.07  | 1.73  | 0.32  |  |  |
| -1.77 | 3.28  | 4.31  |  |  |
| 1.83  | -3.22 | -4.63 |  |  |
| 1.52  | -2.73 | -3.87 |  |  |
| -4.53 | -2.86 | -1.21 |  |  |
| 1.75  | -0.99 | -2.39 |  |  |
| 1.42  | 4.23  | 3.13  |  |  |
| 1.27  | -4.1  | -5.5  |  |  |
| 1.17  | 4.03  | 2.75  |  |  |
| 1.14  | 2.64  | 1.39  |  |  |
| 1.14  | 0.2   | -1.05 |  |  |
| 1.11  | -2.86 | -4.06 |  |  |
| -4.16 | -4    | -3.01 |  |  |
| 1.08  | -1.93 | -3.34 |  |  |
| 1.06  | 1.74  | 0.36  |  |  |
| -1.04 | 4.94  | 3.69  |  |  |
| -1.05 | 4.93  | 3.71  |  |  |
| -1.08 | 4     | 2.82  |  |  |
| -1.09 | -0.69 | -1.86 |  |  |
| -1.16 | 3.99  | 2.9   |  |  |
| -1.19 | 0.94  | -0.12 |  |  |
| -4.96 | 0.3   | 1.31  |  |  |
| 1.07  | 5.2   | 3.8   |  |  |
| -1.01 | -2.16 | -3.47 |  |  |

|        |       |       |  |  |
|--------|-------|-------|--|--|
| -1.13  | -1.59 | -2.73 |  |  |
| -1.17  | 1.07  | -0.02 |  |  |
| -6.31  | -2.9  | -1.55 |  |  |
| 2.49   | 1.12  | -0.28 |  |  |
| 2.01   | 3.05  | 1.95  |  |  |
| -2.89  | -2.38 | -0.94 |  |  |
| 1.16   | -5.74 | -7.15 |  |  |
| 1.13   | -3.76 | -5.12 |  |  |
| -1.01  | -2.32 | -3.5  |  |  |
| -1.08  | -5.39 | -6.46 |  |  |
| -1.11  | -3.46 | -4.49 |  |  |
| -1.13  | -4.44 | -5.45 |  |  |
| -5.12  | 0.05  | 1.22  |  |  |
| -6.02  | -5.53 | -4.13 |  |  |
| -10.06 | -7.29 | -5.14 |  |  |
| -11.46 | -3.4  | -1.07 |  |  |
| 1.5    | 0.49  | -0.91 |  |  |
| 1.32   | 0.96  | -0.27 |  |  |
| 1.28   | 1.21  | 0.03  |  |  |
| 1.26   | -1.3  | -2.46 |  |  |
| 1.13   | 2.33  | 1.33  |  |  |
| -3.74  | -0.91 | 0.17  |  |  |
| -3.97  | -1.49 | -0.32 |  |  |
| -4.13  | -1.25 | -0.03 |  |  |
| -6.56  | -2.31 | -0.42 |  |  |
| 1.16   | -5.74 | -7.15 |  |  |
| 1.13   | -3.76 | -5.12 |  |  |
| -1.01  | -2.32 | -3.5  |  |  |
| -1.08  | -5.39 | -6.46 |  |  |
| -1.11  | -3.46 | -4.49 |  |  |
| -1.13  | -4.44 | -5.45 |  |  |
| -5.12  | 0.05  | 1.22  |  |  |
| -6.02  | -5.53 | -4.13 |  |  |
| -10.06 | -7.29 | -5.14 |  |  |
| -11.46 | -3.4  | -1.07 |  |  |
| 1.5    | 0.49  | -0.91 |  |  |
| 1.32   | 0.96  | -0.27 |  |  |
| 1.28   | 1.21  | 0.03  |  |  |
| 1.26   | -1.3  | -2.46 |  |  |
| 1.13   | 2.33  | 1.33  |  |  |
| -3.74  | -0.91 | 0.17  |  |  |
| -3.97  | -1.49 | -0.32 |  |  |
| -4.13  | -1.25 | -0.03 |  |  |
| -6.56  | -2.31 | -0.42 |  |  |
| 1.5    | 0.49  | -0.91 |  |  |
| 1.32   | 0.96  | -0.27 |  |  |
| 1.28   | 1.21  | 0.03  |  |  |
| 1.26   | -1.3  | -2.46 |  |  |
| 1.13   | 2.33  | 1.33  |  |  |
| -3.74  | -0.91 | 0.17  |  |  |
| -3.97  | -1.49 | -0.32 |  |  |
| -4.13  | -1.25 | -0.03 |  |  |
| -6.56  | -2.31 | -0.42 |  |  |
| 1.5    | 0.49  | -0.91 |  |  |
| 1.4    | 1.65  | 0.35  |  |  |
| 1.28   | 1.21  | 0.03  |  |  |
| 1.28   | -1.03 | -2.21 |  |  |
| 1.13   | 2.33  | 1.33  |  |  |

|       |       |       |  |  |
|-------|-------|-------|--|--|
| -3.74 | -0.91 | 0.17  |  |  |
| -4.13 | -1.25 | -0.03 |  |  |
| -6.56 | -2.31 | -0.42 |  |  |
| 1.5   | 0.49  | -0.91 |  |  |
| 1.28  | 1.21  | 0.03  |  |  |
| 1.26  | -1.3  | -2.46 |  |  |
| 1.19  | -1.15 | -2.23 |  |  |
| 1.19  | -0.03 | -1.1  |  |  |
| 1.13  | 2.33  | 1.33  |  |  |
| -3.74 | -0.91 | 0.17  |  |  |
| -4.13 | -1.25 | -0.03 |  |  |
| -6.56 | -2.31 | -0.42 |  |  |
| 2.07  | 1.98  | 0.57  |  |  |
| 1.66  | 0.53  | -0.56 |  |  |
| 1.56  | -0.28 | -1.28 |  |  |
| -2.84 | -0.74 | 0.41  |  |  |
| -2.88 | -1.1  | 0.07  |  |  |
| -3.48 | -1.92 | -0.48 |  |  |
| 1.27  | -3.41 | -4.81 |  |  |
| 1.01  | -3    | -4.07 |  |  |
| -1.03 | -3.19 | -4.19 |  |  |
| -4.27 | -4.74 | -3.7  |  |  |
| 1.5   | -0.41 | -1.81 |  |  |
| 1.29  | 0.81  | -0.37 |  |  |
| 1.25  | 0.1   | -1.03 |  |  |
| 1.22  | -1.48 | -2.58 |  |  |
| 1.18  | -0.21 | -1.26 |  |  |
| 4.81  | -0.92 | -2.32 |  |  |
| -1.21 | -2.27 | -1.13 |  |  |
| 1.76  | 1.61  | 0.21  |  |  |
| 1.6   | -2.56 | -3.82 |  |  |
| 1.39  | -0.76 | -1.82 |  |  |
| 1.38  | 0.4   | -0.64 |  |  |
| -4.74 | -2.78 | -1.12 |  |  |
| 6     | -0.54 | -1.94 |  |  |
| 1.1   | -0.25 | 0.8   |  |  |
| 1.06  | -1.22 | -0.12 |  |  |
| -1.01 | 3.98  | 5.19  |  |  |
| -1.1  | -0.78 | 0.53  |  |  |
| -1.16 | -1.36 | 0.04  |  |  |
| -1.22 | -2.96 | -1.49 |  |  |
| -1.23 | 0.26  | 1.75  |  |  |
| -1.67 | -0.63 | 1.29  |  |  |
| -1.81 | -0.6  | 1.44  |  |  |
| -1.06 | -5.66 | -7.07 |  |  |
| -12.3 | -5.12 | -2.98 |  |  |
| 1.43  | 2.71  | 1.31  |  |  |
| -5.34 | -1.62 | -0.08 |  |  |
| 1.47  | 1.39  | -0.01 |  |  |
| 1.13  | 2.57  | 1.54  |  |  |
| 2.51  | 2.11  | 0.71  |  |  |
| -2.43 | -1.7  | -0.49 |  |  |
| -2.49 | -2.51 | -1.26 |  |  |
| -2.5  | -1.97 | -0.72 |  |  |
| -2.6  | -1.62 | -0.31 |  |  |
| -2.93 | -1.9  | -0.43 |  |  |
| -3.32 | -2.3  | -0.64 |  |  |
| 1.36  | -2.83 | -4.23 |  |  |

|       |       |       |  |  |
|-------|-------|-------|--|--|
| 1.25  | -1.23 | -2.52 |  |  |
| 1.12  | -0.96 | -2.08 |  |  |
| 1.04  | -0.04 | -1.06 |  |  |
| -4.2  | -3.39 | -2.29 |  |  |
| 1.78  | -3.22 | -4.62 |  |  |
| 1.65  | -1.57 | -2.86 |  |  |
| 1.39  | -4.18 | -5.23 |  |  |
| -3.19 | -6    | -4.9  |  |  |
| 1.94  | 0.19  | -1.21 |  |  |
| 1.71  | -1.08 | -2.29 |  |  |
| 1.63  | -1.11 | -2.27 |  |  |
| 1.53  | -0.23 | -1.29 |  |  |
| -1.08 | -3.02 | -4.42 |  |  |
| -1.32 | -0.29 | -1.4  |  |  |
| 2.65  | 2.94  | 1.54  |  |  |
| -2    | -2    | -0.99 |  |  |
| -2.37 | -1.36 | -0.11 |  |  |
| 1.54  | 1.87  | 0.47  |  |  |
| 1.55  | -2.92 | -4.32 |  |  |
| 1.41  | -3.16 | -4.43 |  |  |
| 1.39  | -3.03 | -4.28 |  |  |
| 1.27  | 0.83  | -0.29 |  |  |
| 1.21  | -4.3  | -5.35 |  |  |
| 1.21  | -1.71 | -2.75 |  |  |
| 1.17  | 3.52  | 2.52  |  |  |
| -5.18 | -3.93 | -2.33 |  |  |
| 1.6   | -1.15 | -2.54 |  |  |
| 1.51  | 2.91  | 1.6   |  |  |
| 1.48  | 4.37  | 3.09  |  |  |
| 1.47  | -1.94 | -3.21 |  |  |
| 1.24  | -0.12 | -1.15 |  |  |
| 1.23  | 0.34  | -0.68 |  |  |
| 1.23  | 0.38  | -0.63 |  |  |
| 1.22  | -0.24 | -1.24 |  |  |
| -3.6  | -1.68 | -0.55 |  |  |
| -4.03 | -0.97 | 0.33  |  |  |
| -4.46 | -2.62 | -1.18 |  |  |
| 1.5   | 0.03  | -1.37 |  |  |
| 1.32  | 0.5   | -0.72 |  |  |
| 1.28  | 0.75  | -0.42 |  |  |
| 1.26  | -1.76 | -2.91 |  |  |
| 1.13  | 1.88  | 0.87  |  |  |
| -3.74 | -1.37 | -0.29 |  |  |
| -3.97 | -1.95 | -0.78 |  |  |
| -4.13 | -1.71 | -0.48 |  |  |
| -6.56 | -2.77 | -0.88 |  |  |
| 2.05  | -0.41 | -1.81 |  |  |
| 1.96  | -2.09 | -3.43 |  |  |
| 1.55  | -1.62 | -2.62 |  |  |
| 14.8  | 1.37  | -0.03 |  |  |
| 11.66 | -0.27 | -1.32 |  |  |
| 2.79  | -0.19 | 0.83  |  |  |
| 2.55  | -1.53 | -0.39 |  |  |
| 2.35  | 0.47  | 1.74  |  |  |
| 2.1   | -3.66 | -2.24 |  |  |
| 2.09  | 0.09  | 1.52  |  |  |
| 1.73  | 1     | 2.7   |  |  |
| 1.54  | -1.91 | -0.04 |  |  |

|       |       |       |  |  |
|-------|-------|-------|--|--|
| 1.2   | -2.49 | -0.26 |  |  |
| -1.12 | -5.38 | -2.73 |  |  |
| -1.13 | -2.51 | 0.17  |  |  |
| 2.58  | 1.18  | -0.21 |  |  |
| 2.4   | 1.41  | 0.12  |  |  |
| 2.75  | 3.17  | 1.77  |  |  |
| -1.95 | -1.73 | -0.7  |  |  |
| -2.95 | -3.48 | -1.85 |  |  |
| -3.78 | -4.13 | -2.15 |  |  |
| 1.55  | 1.65  | 0.25  |  |  |
| 1.3   | -1.11 | -2.26 |  |  |
| 1.24  | -0.08 | -1.16 |  |  |
| 1.19  | 1.24  | 0.22  |  |  |
| -3.44 | -1.17 | -0.15 |  |  |
| 1.57  | 1.08  | -0.31 |  |  |
| -3.53 | -0.25 | 0.82  |  |  |
| -4    | -2.46 | -1.2  |  |  |
| 1.94  | -0.18 | -1.57 |  |  |
| 1.59  | 2.33  | 1.22  |  |  |
| 2.09  | 0.88  | -0.51 |  |  |
| 1.83  | 2.92  | 1.71  |  |  |
| 5.31  | 1.65  | 0.26  |  |  |
| 4.96  | -0.03 | -1.32 |  |  |
| 4.16  | 0.76  | -0.28 |  |  |
| 4.15  | 0.21  | -0.83 |  |  |
| -1.04 | 0.8   | 1.88  |  |  |
| -1.05 | 0.56  | 1.66  |  |  |
| -1.06 | 1.12  | 2.22  |  |  |
| -1.13 | 2.02  | 3.21  |  |  |
| -1.2  | -1.64 | -0.36 |  |  |
| -1.67 | 0.94  | 2.69  |  |  |
| 4.46  | 1.38  | -0.02 |  |  |
| 3.79  | 2.47  | 1.31  |  |  |
| 3.78  | 1.64  | 0.49  |  |  |
| 3.57  | 4.27  | 3.2   |  |  |
| 3.44  | 2.56  | 1.55  |  |  |
| -1.18 | -1.86 | -0.86 |  |  |
| -1.19 | -0.94 | 0.07  |  |  |
| -1.66 | -0.77 | 0.72  |  |  |
| 1.5   | -5.59 | -6.99 |  |  |
| 1.46  | -2.99 | -4.33 |  |  |
| 1.39  | -3.81 | -5.1  |  |  |
| 1.32  | -1.87 | -3.07 |  |  |
| 1.28  | -6.07 | -7.23 |  |  |
| 1.19  | -4.42 | -5.48 |  |  |
| 1.16  | -0.02 | -1.04 |  |  |
| -3.98 | -4.31 | -3.12 |  |  |
| -1.01 | -2.12 | -3.51 |  |  |
| -1.16 | 1.73  | 0.54  |  |  |
| -1.16 | -0.42 | -1.62 |  |  |
| -5.34 | -2.92 | -1.91 |  |  |
| 1.99  | -4.4  | -5.79 |  |  |
| -2.92 | -2.11 | -0.97 |  |  |
| -3.24 | -4.38 | -3.09 |  |  |
| -3.34 | -3.21 | -1.88 |  |  |
| -3.5  | -2.24 | -0.84 |  |  |
| -3.49 | -1.23 | 0.18  |  |  |
| -4.02 | -2.59 | -0.98 |  |  |



|        |       |       |  |  |
|--------|-------|-------|--|--|
| -4.17  | -2.56 | -0.9  |  |  |
| -4.2   | -6.52 | -4.86 |  |  |
| -4.24  | -6.14 | -4.46 |  |  |
| -4.28  | -2.93 | -1.23 |  |  |
| -4.33  | -2.25 | -0.54 |  |  |
| -4.33  | -3.85 | -2.13 |  |  |
| -4.82  | -3.44 | -1.57 |  |  |
| -5.11  | -3.47 | -1.52 |  |  |
| -6.47  | -4.48 | -2.19 |  |  |
| -6.93  | -5.87 | -3.49 |  |  |
| 1.97   | -0.54 | -1.94 |  |  |
| 1.83   | -0.96 | -2.25 |  |  |
| -2.91  | -3.78 | -2.65 |  |  |
| 1.75   | -3.21 | -4.6  |  |  |
| 1.43   | -3.39 | -4.5  |  |  |
| 1.73   | -1.97 | -3.36 |  |  |
| -3.07  | -0.1  | 0.91  |  |  |
| 2.89   | -1.19 | -2.59 |  |  |
| 2.79   | 2.55  | 1.2   |  |  |
| -2.42  | 1.45  | 2.87  |  |  |
| 1.46   | -3.59 | -4.99 |  |  |
| 1.34   | 1.09  | -0.18 |  |  |
| 1.24   | -1.27 | -2.43 |  |  |
| -3.97  | 0.07  | 1.21  |  |  |
| -5.36  | -1.2  | 0.38  |  |  |
| -6.57  | -1.12 | 0.74  |  |  |
| -7.15  | -1.97 | 0.02  |  |  |
| -8.13  | -2.78 | -0.61 |  |  |
| -24.33 | -3.08 | 0.68  |  |  |
| 2.06   | 1.39  | 0     |  |  |
| 1.8    | -1.05 | -2.25 |  |  |
| 1.66   | 2.72  | 1.64  |  |  |
| 3.97   | 1.88  | 0.49  |  |  |
| 3.12   | 0.74  | -0.31 |  |  |
| -1.42  | -1.22 | -0.11 |  |  |
| -2.19  | -2.79 | -1.07 |  |  |
| 1.55   | 0.29  | -1.11 |  |  |
| 1.53   | 0.03  | -1.35 |  |  |
| 1.47   | -4.3  | -5.61 |  |  |
| 1.31   | -3.41 | -4.57 |  |  |
| 1.3    | -0.83 | -1.97 |  |  |
| 1.27   | 0.04  | -1.07 |  |  |
| 1.24   | -0.99 | -2.06 |  |  |
| 1.24   | -1.29 | -2.37 |  |  |
| 1.23   | -0.96 | -2.03 |  |  |
| 1.22   | -3.59 | -4.64 |  |  |
| 1.19   | 0.18  | -0.84 |  |  |
| -1.17  | 5.5   | 4.1   |  |  |
| -1.53  | -0.19 | -1.19 |  |  |
| -10.71 | -1.06 | 0.74  |  |  |
| 2.49   | 3.08  | 1.69  |  |  |
| -2.3   | -3.32 | -2.2  |  |  |
| -2.32  | -1.04 | 0.1   |  |  |
| -2.62  | -3.35 | -2.04 |  |  |
| -3.23  | -3.06 | -1.44 |  |  |
| -4.55  | -2.29 | -0.18 |  |  |
| 2.97   | 0.9   | -0.49 |  |  |
| 2.68   | 0.19  | -1.05 |  |  |

|       |       |       |  |  |
|-------|-------|-------|--|--|
| 2.34  | 1.82  | 0.77  |  |  |
| -2.06 | -1.97 | -0.75 |  |  |
| -2.05 | -1.03 | 0.19  |  |  |
| -3.06 | -1.39 | 0.41  |  |  |
| -3.97 | 1.3   | 3.47  |  |  |
| 1.72  | -1.07 | -2.45 |  |  |
| 1.51  | -1.41 | -2.62 |  |  |
| 1.39  | -0.07 | -1.15 |  |  |
| 1.33  | -0.97 | -1.99 |  |  |
| 1.7   | 0.27  | -1.12 |  |  |
| 1.56  | -0.16 | -1.43 |  |  |
| 1.48  | 2.19  | 1     |  |  |
| 1.3   | -0.63 | -1.63 |  |  |
| 3.23  | 2.93  | 1.54  |  |  |
| -1.63 | -1.6  | -0.59 |  |  |
| 1.64  | -2.45 | -3.84 |  |  |
| 1.54  | -4.23 | -5.53 |  |  |
| 1.52  | 0.74  | -0.55 |  |  |
| 1.38  | -4.12 | -5.26 |  |  |
| 1.29  | -0.2  | -1.25 |  |  |
| 1.28  | 0.82  | -0.22 |  |  |
| -3.66 | -2.19 | -1    |  |  |
| 2.41  | -2.19 | -3.58 |  |  |
| 1.97  | -3.15 | -4.24 |  |  |
| -2.37 | -3.18 | -2.05 |  |  |
| -2.58 | -1.87 | -0.62 |  |  |
| 1.56  | -3.01 | -4.4  |  |  |
| 1.29  | -3.58 | -4.69 |  |  |
| 1.21  | -3.09 | -4.11 |  |  |
| 1.19  | -2.48 | -3.48 |  |  |
| 1.81  | -4.16 | -5.55 |  |  |
| 1.49  | -1.07 | -2.18 |  |  |
| 1.43  | -2.58 | -3.63 |  |  |
| -2.93 | -2.61 | -1.59 |  |  |
| -3.43 | -5.83 | -4.59 |  |  |
| 1.72  | 2.72  | 1.33  |  |  |
| 1.72  | -0.71 | -2.09 |  |  |
| 1.49  | 1.08  | -0.1  |  |  |
| 1.47  | 2.4   | 1.24  |  |  |
| 4.09  | -1.39 | -2.77 |  |  |
| 3.57  | -0.47 | -1.66 |  |  |
| -1.79 | -1.3  | 0.19  |  |  |
| -1.82 | -2.73 | -1.22 |  |  |
| 1.7   | -1.8  | -3.19 |  |  |
| 1.62  | -0.6  | -1.91 |  |  |
| 1.44  | -0.76 | -1.91 |  |  |
| 1.89  | 1.66  | 0.27  |  |  |
| 1.68  | 1.98  | 0.75  |  |  |
| -3.22 | -1.54 | -0.33 |  |  |
| 8.72  | 0.16  | -1.22 |  |  |
| 1.57  | -0.19 | 0.9   |  |  |
| 1.35  | -1.56 | -0.25 |  |  |
| 1.01  | 1.66  | 3.38  |  |  |
| -1.05 | -1.06 | 0.75  |  |  |
| 1.22  | -2.64 | -4.03 |  |  |
| -4.81 | -6.32 | -5.16 |  |  |
| 2.22  | -0.84 | -2.23 |  |  |
| 1.81  | 1.12  | 0.03  |  |  |

|       |       |       |  |  |
|-------|-------|-------|--|--|
| 1.74  | -1.95 | -2.99 |  |  |
| 1.55  | 4.03  | 2.65  |  |  |
| 1.41  | 3.09  | 1.83  |  |  |
| 1.35  | -1.25 | -2.44 |  |  |
| -3.67 | -2.62 | -1.5  |  |  |
| -5.21 | -2.99 | -1.37 |  |  |
| 2.72  | -2.42 | -3.8  |  |  |
| 2.12  | -2.86 | -3.89 |  |  |
| -1.92 | -1.81 | -0.81 |  |  |
| 1.4   | 3.84  | 2.46  |  |  |
| 1.4   | -3.82 | -5.2  |  |  |
| 1.21  | 3.07  | 1.9   |  |  |
| 2.61  | -0.96 | -2.34 |  |  |
| 2.57  | 0.72  | -0.64 |  |  |
| 2.38  | -1.72 | -2.97 |  |  |
| 2.32  | -0.23 | -1.44 |  |  |
| 2.22  | -1.49 | -2.64 |  |  |
| -3.04 | -3.61 | -2.01 |  |  |
| 1.23  | 2.94  | 1.55  |  |  |
| 1.01  | 2.63  | 1.53  |  |  |
| -1.06 | -3.1  | -4.1  |  |  |
| -6.12 | -2.22 | -0.69 |  |  |
| 1.66  | -2.24 | -3.62 |  |  |
| 1.29  | -2.88 | -3.91 |  |  |
| -4.17 | -5.51 | -4.1  |  |  |
| 4.92  | -1.37 | -2.75 |  |  |
| 4.22  | -3.47 | -4.63 |  |  |
| 4.09  | -3.11 | -4.23 |  |  |
| -1.23 | -5.17 | -3.95 |  |  |
| 1.9   | -2.13 | -3.51 |  |  |
| 1.69  | -1.61 | -2.83 |  |  |
| 1.57  | -1.66 | -2.77 |  |  |
| -2.83 | -2.56 | -1.52 |  |  |
| -2.87 | 0.05  | 1.11  |  |  |
| -2.93 | -0.67 | 0.42  |  |  |
| -2.94 | 1.18  | 2.28  |  |  |
| -2.98 | -2.17 | -1.06 |  |  |
| -2.97 | 1.21  | 2.32  |  |  |
| -2.98 | 1.01  | 2.12  |  |  |
| -3.01 | 2.48  | 3.61  |  |  |
| -3.03 | -0.89 | 0.25  |  |  |
| -3.09 | -0.79 | 0.38  |  |  |
| -3.64 | 0.7   | 2.11  |  |  |
| -3.74 | 2.41  | 3.85  |  |  |
| -4.08 | 0.59  | 2.16  |  |  |
| -4.15 | -4.3  | -2.71 |  |  |
| -4.29 | -0.76 | 0.88  |  |  |
| -4.44 | 0.37  | 2.06  |  |  |
| -6.49 | -1.98 | 0.25  |  |  |
| 3.05  | -2.03 | -3.42 |  |  |
| -1.8  | -1.48 | -0.4  |  |  |
| 1.44  | -0.76 | -2.14 |  |  |
| 1.4   | 2.35  | 1.01  |  |  |
| 1.26  | -0.85 | -2.05 |  |  |
| 1.16  | 0.77  | -0.3  |  |  |
| 1.45  | -1.44 | -2.82 |  |  |
| 1.21  | -2.13 | -3.25 |  |  |
| 1.17  | 3.8   | 2.72  |  |  |

|        |       |       |  |  |
|--------|-------|-------|--|--|
| 1.17   | 1.13  | 0.06  |  |  |
| 1.13   | 0.68  | -0.34 |  |  |
| -4     | -1.84 | -0.69 |  |  |
| 107.37 | 1.58  | 0.2   |  |  |
| 105.19 | 0.47  | -0.89 |  |  |
| 102.61 | 2.41  | 1.09  |  |  |
| 87.66  | 0.24  | -0.85 |  |  |
| 83.43  | 1.6   | 0.58  |  |  |
| 20.49  | 0.03  | 1.04  |  |  |
| 17.12  | -0.32 | 0.95  |  |  |
| 15.92  | -0.68 | 0.69  |  |  |
| 14.99  | -2.52 | -1.06 |  |  |
| 12.8   | -0.17 | 1.51  |  |  |
| 11.84  | -2.36 | -0.56 |  |  |
| 11.44  | -1.73 | 0.12  |  |  |
| 11.43  | -2.86 | -1.01 |  |  |
| 11.29  | 1.04  | 2.91  |  |  |
| 10.24  | -2.64 | -0.63 |  |  |
| 9.57   | -3.19 | -1.08 |  |  |
| 9.29   | -2.24 | -0.09 |  |  |
| 8.99   | -3.35 | -1.15 |  |  |
| 6.28   | -3.58 | -0.86 |  |  |
| 5.95   | -3.68 | -0.89 |  |  |
| 5.25   | -3.28 | -0.31 |  |  |
| 3.73   | -0.22 | 3.25  |  |  |
| 3.4    | -4.03 | -0.43 |  |  |
| 2.69   | -3.43 | 0.51  |  |  |
| 2.08   | -3.93 | 0.38  |  |  |
| 1.9    | -4.89 | -0.45 |  |  |
| 1.89   | -4.27 | 0.18  |  |  |
| 1.87   | -5.4  | -0.94 |  |  |
| 1.61   | -5.76 | -1.08 |  |  |
| 1.19   | -1.24 | 3.88  |  |  |
| 1.15   | 2.39  | 7.55  |  |  |
| 1.11   | -0.21 | 5.01  |  |  |
| -1.24  | -4.48 | 1.19  |  |  |
| -1.4   | -3.34 | 2.5   |  |  |
| 1.44   | 1.95  | 0.56  |  |  |
| 1.42   | 1.57  | 0.21  |  |  |
| 1.26   | 0.67  | -0.52 |  |  |
| 1.23   | 0.24  | -0.92 |  |  |
| 1.12   | -0.96 | -1.98 |  |  |
| -4.59  | -0.64 | 0.7   |  |  |
| -6.68  | -0.98 | 0.91  |  |  |
| 1.64   | -0.3  | -1.68 |  |  |
| 1.32   | -0.86 | -1.93 |  |  |
| -4.59  | -2.83 | -1.3  |  |  |
| -4.68  | -1.88 | -0.32 |  |  |
| -8.84  | -3.52 | -1.04 |  |  |
| 1.6    | 0.36  | -1.02 |  |  |
| 1.26   | 1.78  | 0.73  |  |  |
| 1.23   | 2.01  | 1     |  |  |
| -4.26  | -2.17 | -0.79 |  |  |
| 3.53   | -1.71 | -3.09 |  |  |
| -1.56  | -1.15 | -0.07 |  |  |
| -1.59  | 4.1   | 5.21  |  |  |
| -1.82  | -2.64 | -1.33 |  |  |
| -2.27  | -1.13 | 0.5   |  |  |

|       |       |       |  |  |
|-------|-------|-------|--|--|
| 1.31  | -0.38 | -1.75 |  |  |
| 1.22  | 0.44  | -0.82 |  |  |
| 1.17  | 0.1   | -1.11 |  |  |
| 1.86  | -6.55 | -7.93 |  |  |
| 1.75  | -3.44 | -4.73 |  |  |
| 1.71  | -2.35 | -3.61 |  |  |
| 1.59  | -4.64 | -5.79 |  |  |
| 2.14  | 4.21  | 2.83  |  |  |
| 2.06  | -2.09 | -3.41 |  |  |
| 2.02  | 3.49  | 2.19  |  |  |
| 1.88  | 1.36  | 0.17  |  |  |
| 1.73  | 2.54  | 1.47  |  |  |
| -2.45 | -0.97 | 0.04  |  |  |
| -2.45 | 0.57  | 1.58  |  |  |
| -2.58 | -2.13 | -1.05 |  |  |
| -4.93 | -2.53 | -0.51 |  |  |
| -4.95 | -0.19 | 1.83  |  |  |
| -1.01 | -4.34 | -5.72 |  |  |
| -5.45 | -9.45 | -8.4  |  |  |
| -5.66 | -7.27 | -6.17 |  |  |
| -5.86 | -3.81 | -2.65 |  |  |
| -6.77 | -5.56 | -4.2  |  |  |
| -6.77 | -7.24 | -5.88 |  |  |
| -7.17 | -3.85 | -2.41 |  |  |
| -7.56 | -5.13 | -3.61 |  |  |
| 2.13  | 1.9   | 0.51  |  |  |
| -2.46 | 0.67  | 1.68  |  |  |
| -2.52 | -0.28 | 0.76  |  |  |
| -2.61 | -0.26 | 0.83  |  |  |
| -2.75 | -1.28 | -0.12 |  |  |
| 3.58  | 0.59  | -0.79 |  |  |
| -1.47 | -2.3  | -1.28 |  |  |
| -2.12 | -2.65 | -1.1  |  |  |
| 1.38  | -1.2  | -2.58 |  |  |
| 1.22  | 3.08  | 1.89  |  |  |
| 1.09  | 3.26  | 2.22  |  |  |
| 3.03  | 1.3   | -0.08 |  |  |
| -2.8  | -4.23 | -2.53 |  |  |
| 2.06  | -0.57 | -1.95 |  |  |
| 1.91  | -4.56 | -5.83 |  |  |
| 1.78  | -5.1  | -6.27 |  |  |
| -2.6  | -5.63 | -4.59 |  |  |
| -4.51 | -4.64 | -2.8  |  |  |
| 1.28  | 6     | 4.62  |  |  |
| 1.27  | 0.53  | -0.84 |  |  |
| 1.12  | 1.8   | 0.61  |  |  |
| 1.11  | -2.14 | -3.32 |  |  |
| 1.08  | 1.54  | 0.4   |  |  |
| 2.81  | -0.81 | -2.19 |  |  |
| 2.32  | -2.69 | -3.79 |  |  |
| 2.19  | -1.6  | -2.62 |  |  |
| 1.32  | -1.58 | -2.96 |  |  |
| 1.07  | -4.5  | -5.58 |  |  |
| 1.05  | -4.09 | -5.14 |  |  |
| -5.54 | -5.89 | -4.4  |  |  |
| 1.94  | -6.01 | -7.39 |  |  |
| 1.56  | -3.95 | -5.01 |  |  |
| -5.2  | -7.85 | -5.89 |  |  |

|       |       |       |  |  |
|-------|-------|-------|--|--|
| 2.44  | 1.15  | -0.23 |  |  |
| 1.94  | 0.4   | -0.65 |  |  |
| 2.32  | -6.18 | -7.56 |  |  |
| -2.45 | -4.63 | -3.5  |  |  |
| -2.72 | -5.77 | -4.49 |  |  |
| -2.9  | -6.51 | -5.13 |  |  |
| 8.42  | 1.11  | -0.26 |  |  |
| 1.34  | -1.81 | -0.53 |  |  |
| 1.04  | 1.9   | 3.54  |  |  |
| -1.07 | 2.93  | 4.72  |  |  |
| -1.11 | -0.61 | 1.24  |  |  |
| 2.26  | -1.23 | -2.61 |  |  |
| 1.88  | 1.3   | 0.19  |  |  |
| -2.57 | -2.47 | -1.31 |  |  |
| -2.75 | -2.97 | -1.72 |  |  |
| -3.21 | -4.1  | -2.62 |  |  |
| 2.06  | -0.64 | -2.02 |  |  |
| 1.69  | -0.04 | -1.13 |  |  |
| -2.55 | 0.08  | 1.1   |  |  |
| -2.71 | -2.67 | -1.57 |  |  |
| -3.14 | -1.77 | -0.46 |  |  |
| -7.47 | -4.15 | -1.58 |  |  |
| 1.88  | -0.84 | -2.22 |  |  |
| 1.74  | 0.41  | -0.85 |  |  |
| 1.68  | 0.98  | -0.22 |  |  |
| 1.63  | 1.33  | 0.16  |  |  |
| 1.61  | 0     | -1.16 |  |  |
| 1.56  | -1.91 | -3.01 |  |  |
| 3.02  | 2.2   | 0.82  |  |  |
| -1.76 | -2.48 | -1.45 |  |  |
| -2.28 | 2.52  | 3.93  |  |  |
| 1.31  | 1.77  | 0.39  |  |  |
| 1.16  | 2.79  | 1.59  |  |  |
| 1.09  | -2.51 | -3.61 |  |  |
| 1.49  | -2.62 | -3.99 |  |  |
| 1.27  | -2.93 | -4.07 |  |  |
| 1.24  | -0.92 | -2.04 |  |  |
| 1.22  | -1.83 | -2.91 |  |  |
| 1.21  | -2.64 | -3.71 |  |  |
| 1.19  | -4.89 | -5.95 |  |  |
| -3.85 | -3.25 | -2.1  |  |  |
| -4.91 | -4.53 | -3.03 |  |  |
| 2.11  | -3.16 | -4.54 |  |  |
| 1.98  | -3.3  | -4.58 |  |  |
| -2.49 | -1.55 | -0.54 |  |  |
| 3.45  | -3.62 | -4.99 |  |  |
| -1.62 | -3.96 | -2.84 |  |  |
| 1.57  | -0.7  | -2.08 |  |  |
| 1.41  | -1.73 | -2.95 |  |  |
| 1.36  | -0.53 | -1.69 |  |  |
| 1.34  | -2.48 | -3.63 |  |  |
| 1.27  | -2.74 | -3.8  |  |  |
| 1.26  | 0.09  | -0.96 |  |  |
| 1.24  | -3.95 | -4.99 |  |  |
| 1.22  | -1.87 | -2.88 |  |  |
| -3.61 | -4.12 | -2.99 |  |  |
| -5.8  | -5.36 | -3.55 |  |  |
| 9.89  | -0.2  | -1.58 |  |  |

|       |       |       |  |  |
|-------|-------|-------|--|--|
| 8.57  | -1.3  | -2.47 |  |  |
| 8.21  | -0.89 | -2    |  |  |
| 1.86  | -4.78 | -3.75 |  |  |
| 1.82  | -4.63 | -3.56 |  |  |
| 1.32  | -1    | 0.53  |  |  |
| 1.25  | -1.57 | 0.05  |  |  |
| 1.16  | 3     | 4.71  |  |  |
| 1.14  | -3.05 | -1.31 |  |  |
| 1.07  | -5.05 | -3.22 |  |  |
| -1.02 | -5.02 | -3.06 |  |  |
| -1.03 | -4.38 | -2.41 |  |  |
| -1.19 | -0.33 | 1.84  |  |  |
| -1.21 | -5.42 | -3.22 |  |  |
| -1.21 | -2.91 | -0.71 |  |  |
| -1.23 | -4.27 | -2.04 |  |  |
| -1.68 | -3.46 | -0.78 |  |  |
| 2     | -0.51 | -1.88 |  |  |
| 1.81  | -0.71 | -1.94 |  |  |
| 1.75  | -0.15 | -1.33 |  |  |
| 1.61  | 1.17  | 0.1   |  |  |
| 1.56  | 1.81  | 0.8   |  |  |
| -2.94 | 1.08  | 2.27  |  |  |
| 1.84  | -1.53 | -2.91 |  |  |
| 1.79  | -1.13 | -2.47 |  |  |
| 1.77  | -1.47 | -2.79 |  |  |
| 1.44  | -3.32 | -4.33 |  |  |
| 11.04 | -4.14 | -5.51 |  |  |
| 2.12  | -5.1  | -4.09 |  |  |
| 1.92  | -7.71 | -6.56 |  |  |
| 1.74  | -6.58 | -5.28 |  |  |
| 1.62  | -2.98 | -1.59 |  |  |
| 1.43  | -4.28 | -2.71 |  |  |
| 1.38  | -6.93 | -5.31 |  |  |
| 1.18  | -5.1  | -3.25 |  |  |
| 1.13  | -5.1  | -3.19 |  |  |
| 1.07  | -7.27 | -5.28 |  |  |
| 1.06  | -4.67 | -2.66 |  |  |
| -1.04 | -2.58 | -0.44 |  |  |
| -1.08 | -6.55 | -4.35 |  |  |
| -1.08 | -5.53 | -3.33 |  |  |
| -1.2  | -5.05 | -2.7  |  |  |
| 12.55 | 0.72  | -0.65 |  |  |
| 12.49 | 0.28  | -1.08 |  |  |
| 9.69  | 1.02  | 0.02  |  |  |
| 2.43  | -1.09 | -0.09 |  |  |
| 2.43  | -0.83 | 0.17  |  |  |
| 2.34  | 0.54  | 1.59  |  |  |
| 1.92  | -0.83 | 0.51  |  |  |
| 1.74  | -1.27 | 0.21  |  |  |
| 1.71  | -3.55 | -2.05 |  |  |
| 1.57  | -1.84 | -0.21 |  |  |
| 1.3   | -0.4  | 1.49  |  |  |
| 1.23  | -0.62 | 1.36  |  |  |
| 1.14  | 0.01  | 2.1   |  |  |
| 1.1   | -0.21 | 1.93  |  |  |
| 1.02  | 0.37  | 2.62  |  |  |
| -1.06 | -3.12 | -0.76 |  |  |
| -1.52 | -2.41 | 0.46  |  |  |

|       |       |       |  |  |
|-------|-------|-------|--|--|
| -1.53 | -2.79 | 0.1   |  |  |
| 2.39  | 0.47  | -0.9  |  |  |
| -2.18 | -4.78 | -3.77 |  |  |
| -2.58 | -5.27 | -4.01 |  |  |
| -2.73 | -4.33 | -3    |  |  |
| -3.21 | -5.38 | -3.81 |  |  |
| -5.88 | -4.39 | -1.95 |  |  |
| -6.59 | -4.92 | -2.32 |  |  |
| 1.58  | 0.72  | -0.65 |  |  |
| 1.37  | -0.56 | -1.73 |  |  |
| 1.33  | -1.02 | -2.15 |  |  |
| 1.29  | -3.52 | -4.61 |  |  |
| 1.29  | 0.46  | -0.63 |  |  |
| 1.27  | 1.83  | 0.77  |  |  |
| -5.38 | -3.92 | -2.21 |  |  |
| 9.72  | -2.13 | -3.5  |  |  |
| 1.67  | -2.16 | -0.99 |  |  |
| 1.64  | -8.25 | -7.06 |  |  |
| 1.58  | -4.66 | -3.4  |  |  |
| 1.54  | -6.09 | -4.8  |  |  |
| 1.49  | -5.26 | -3.92 |  |  |
| 1.49  | -4.64 | -3.31 |  |  |
| 1.43  | -3.91 | -2.51 |  |  |
| 1.42  | -4.06 | -2.65 |  |  |
| 1.28  | -4.6  | -3.05 |  |  |
| 1.26  | -5.75 | -4.18 |  |  |
| 1.15  | -5.71 | -4    |  |  |
| 1.11  | -4.8  | -3.04 |  |  |
| 1.09  | -4.83 | -3.04 |  |  |
| 1.02  | -2.55 | -0.67 |  |  |
| -1.01 | -2.3  | -0.38 |  |  |
| -1.06 | -5.01 | -3.03 |  |  |
| -1.1  | -4.41 | -2.35 |  |  |
| -1.22 | -0.56 | 1.63  |  |  |
| -1.42 | -4.37 | -1.96 |  |  |
| 1.31  | 0.14  | -1.23 |  |  |
| 1.22  | -3.79 | -5.07 |  |  |
| -4.55 | -2.38 | -1.18 |  |  |
| -4.68 | -1.64 | -0.4  |  |  |
| 2.26  | -0.8  | -2.18 |  |  |
| 2.03  | 1.47  | 0.25  |  |  |
| 1.87  | -2.47 | -3.57 |  |  |
| 2.14  | -1.82 | -3.19 |  |  |
| 1.99  | -2.6  | -3.87 |  |  |
| 2.34  | -1.71 | -3.09 |  |  |
| -2.42 | -3.33 | -2.2  |  |  |
| 2.08  | -1.03 | -2.4  |  |  |
| 1.65  | 0.64  | -0.4  |  |  |
| 1.63  | -2.69 | -3.71 |  |  |
| 1.54  | -1.21 | -2.59 |  |  |
| -3.83 | -1.16 | 0.02  |  |  |
| -4.01 | -1.77 | -0.52 |  |  |
| -4.1  | -3.61 | -2.33 |  |  |
| -4.18 | -1.51 | -0.2  |  |  |
| -6.59 | -2.96 | -1    |  |  |
| -6.94 | -2.27 | -0.23 |  |  |
| 1.26  | -1.77 | -3.14 |  |  |
| 1.04  | 0.2   | -0.89 |  |  |



|        |       |       |  |  |
|--------|-------|-------|--|--|
| 1.04   | 2.19  | 1.1   |  |  |
| 1.75   | 0.24  | -1.13 |  |  |
| 1.57   | -0.96 | -2.17 |  |  |
| -3.59  | -2.98 | -1.7  |  |  |
| 1.12   | 1.4   | 0.02  |  |  |
| 1.09   | 1.73  | 0.4   |  |  |
| 1.09   | 2.83  | 1.49  |  |  |
| -1.02  | 1.58  | 0.39  |  |  |
| -1.09  | 1.84  | 0.75  |  |  |
| -6.65  | -1.07 | 0.45  |  |  |
| 2.27   | -1.03 | -2.4  |  |  |
| 1.86   | -1.8  | -2.89 |  |  |
| 4.84   | -2.71 | -4.08 |  |  |
| -1.24  | -4.57 | -3.36 |  |  |
| 2.64   | 5.77  | 4.39  |  |  |
| 2.4    | 0.58  | -0.66 |  |  |
| 2.03   | 2.64  | 1.64  |  |  |
| 3.78   | 1.7   | 0.33  |  |  |
| -1.37  | -1.66 | -0.65 |  |  |
| -1.97  | -2.32 | -0.78 |  |  |
| -2.12  | -4.5  | -5.87 |  |  |
| -2.19  | -1.2  | -2.52 |  |  |
| -2.38  | -3.91 | -5.11 |  |  |
| -21.21 | -6.12 | -4.17 |  |  |
| 4.39   | 1.64  | 0.28  |  |  |
| 3.7    | 0.42  | -0.7  |  |  |
| -1.19  | -1.65 | -0.63 |  |  |
| -1.29  | 3.22  | 4.36  |  |  |
| 1.32   | -1.22 | -2.59 |  |  |
| 1.27   | -0.04 | -1.35 |  |  |
| 1.17   | 1.8   | 0.6   |  |  |
| 1.14   | -0.2  | -1.36 |  |  |
| -4.1   | 0.81  | 1.88  |  |  |
| -4.36  | 0.61  | 1.76  |  |  |
| -4.52  | -0.33 | 0.88  |  |  |
| -4.8   | -1.19 | 0.11  |  |  |
| 2      | -1.03 | -2.39 |  |  |
| 1.62   | -1.21 | -2.27 |  |  |
| -2.83  | -0.74 | 0.39  |  |  |
| 2.23   | -2.22 | -3.59 |  |  |
| 1.83   | -3.36 | -4.44 |  |  |
| 3.66   | 0.9   | -0.47 |  |  |
| 3.25   | -0.09 | -1.28 |  |  |
| -1.53  | -3.79 | -2.67 |  |  |
| -1.58  | -1.98 | -0.82 |  |  |
| -1.97  | -4.7  | -3.22 |  |  |
| -1.97  | -4.13 | -2.64 |  |  |
| 1.64   | 0.12  | -1.25 |  |  |
| 1.39   | -2.22 | -3.34 |  |  |
| 2.58   | -4.64 | -6.01 |  |  |
| 2.43   | 3.86  | 2.58  |  |  |
| 2.17   | -3.65 | -4.77 |  |  |
| -4.06  | -5.92 | -3.9  |  |  |
| 2.29   | -5.96 | -7.32 |  |  |
| -2.27  | -6.81 | -5.8  |  |  |
| -4.03  | -6.89 | -5.05 |  |  |
| 1.67   | 4.05  | 2.68  |  |  |
| 1.66   | -1.11 | -2.47 |  |  |

|       |       |       |  |  |
|-------|-------|-------|--|--|
| 1.22  | 1.43  | 0.06  |  |  |
| 1.11  | -0.84 | -2.08 |  |  |
| 1.04  | -0.93 | -2.07 |  |  |
| -10.7 | -4.75 | -2.41 |  |  |
| 3.56  | -0.58 | -1.94 |  |  |
| -1.45 | -3.82 | -2.82 |  |  |
| -1.46 | -2.48 | -1.47 |  |  |
| -1.49 | -4.35 | -3.32 |  |  |
| -1.51 | -2.8  | -1.75 |  |  |
| -1.53 | -3.16 | -2.08 |  |  |
| -1.53 | -2.15 | -1.08 |  |  |
| -1.54 | -2.95 | -1.86 |  |  |
| -1.58 | -2.91 | -1.79 |  |  |
| -1.72 | -4.42 | -3.18 |  |  |
| -1.94 | -3.5  | -2.08 |  |  |
| -2.02 | -4.04 | -2.56 |  |  |
| -2.19 | -0.48 | 1.11  |  |  |
| 6.43  | 0.67  | -0.7  |  |  |
| 6.02  | -0.63 | -1.9  |  |  |
| 5.79  | -0.28 | -1.5  |  |  |
| 5.16  | -1.23 | -2.28 |  |  |
| 1.23  | 1.81  | 2.82  |  |  |
| 1.18  | 1.04  | 2.12  |  |  |
| 1.11  | 0.47  | 1.64  |  |  |
| 1.08  | 1.5   | 2.71  |  |  |
| 1.04  | -4.32 | -3.07 |  |  |
| -1.95 | -4.2  | -1.92 |  |  |
| 1.94  | 3.16  | 1.79  |  |  |
| 1.66  | 0.09  | -1.05 |  |  |
| 1.91  | -4.16 | -5.53 |  |  |
| 1.85  | -6.77 | -8.09 |  |  |
| 1.5   | -4.79 | -5.81 |  |  |
| 2.29  | 0.34  | -1.02 |  |  |
| 2.18  | -0.29 | -1.58 |  |  |
| 1.77  | 1.3   | 0.3   |  |  |
| 1.74  | -2.4  | -3.77 |  |  |
| -2.98 | -2.02 | -1    |  |  |
| -3.08 | -4.16 | -3.1  |  |  |
| 1.24  | 2.7   | 1.34  |  |  |
| -4.42 | -0.58 | 0.51  |  |  |
| 1.69  | 0.37  | -0.99 |  |  |
| 1.63  | -3.51 | -4.82 |  |  |
| 1.51  | 0.64  | -0.56 |  |  |
| 1.42  | -1.39 | -2.5  |  |  |
| -3.74 | -1.8  | -0.5  |  |  |
| 1.94  | -4    | -5.37 |  |  |
| 1.82  | -4.32 | -5.59 |  |  |
| 1.58  | -4.24 | -5.3  |  |  |
| 2.1   | 0.54  | -0.82 |  |  |
| 1.79  | -0.33 | -1.46 |  |  |
| 1.68  | 0.11  | -0.93 |  |  |
| -2.56 | -3.26 | -2.19 |  |  |
| -2.66 | -4.19 | -3.07 |  |  |
| -2.92 | -2.91 | -1.66 |  |  |
| 1.51  | 3.57  | 2.21  |  |  |
| 1.46  | -1.17 | -2.48 |  |  |
| 1.31  | 4.54  | 3.39  |  |  |
| 1.3   | 4.17  | 3.03  |  |  |

|       |       |       |  |  |
|-------|-------|-------|--|--|
| 1.29  | 4.67  | 3.53  |  |  |
| 1.23  | 5.48  | 4.42  |  |  |
| -3.77 | -0.3  | 0.85  |  |  |
| 2.34  | 1.17  | -0.19 |  |  |
| -2.8  | -3.41 | -2.06 |  |  |
| -2.95 | -2.05 | -0.62 |  |  |
| 2.42  | -1.26 | -2.62 |  |  |
| 1.88  | -1.1  | -2.1  |  |  |
| -2.46 | -2.88 | -1.67 |  |  |
| 1.2   | 0.66  | -0.7  |  |  |
| 1.04  | 2.2   | 1.05  |  |  |
| 1.02  | -2.27 | -3.41 |  |  |
| -1    | -3.13 | -4.22 |  |  |
| -1.01 | -3.43 | -4.51 |  |  |
| -1.05 | -4.14 | -5.17 |  |  |
| -4.69 | -2.6  | -1.47 |  |  |
| -7.23 | -3.29 | -1.54 |  |  |
| 4.81  | 0.92  | -0.45 |  |  |
| -1.16 | 1.69  | 2.8   |  |  |
| -1.18 | -1.9  | -0.76 |  |  |
| -1.19 | -3.22 | -2.06 |  |  |
| -1.21 | -3.24 | -2.07 |  |  |
| -1.25 | -0.89 | 0.33  |  |  |
| -1.42 | 3.07  | 4.48  |  |  |
| -1.48 | -3.87 | -2.4  |  |  |
| -1.55 | -2.11 | -0.57 |  |  |
| 2.69  | 1.05  | -0.32 |  |  |
| 2.21  | 1.5   | 0.42  |  |  |
| 2.18  | 0.53  | -0.53 |  |  |
| -1.96 | -0.87 | 0.17  |  |  |
| -2.02 | 2.35  | 3.43  |  |  |
| -2.05 | 1.73  | 2.83  |  |  |
| -2.09 | 0.1   | 1.22  |  |  |
| -2.25 | 2.76  | 3.99  |  |  |
| -3.36 | 0.94  | 2.76  |  |  |
| -3.98 | -0.54 | 1.52  |  |  |
| -4.74 | -0.44 | 1.86  |  |  |
| -5.89 | -1.09 | 1.53  |  |  |
| -5.99 | -0.22 | 2.43  |  |  |
| 1.75  | -4.11 | -5.47 |  |  |
| -3.39 | -1.85 | -0.63 |  |  |
| 1.77  | 3.73  | 2.36  |  |  |
| 1.63  | 3.42  | 2.17  |  |  |
| 1.45  | 0.19  | -0.89 |  |  |
| 1.43  | -1.61 | -2.66 |  |  |
| -2.95 | -1.17 | -0.15 |  |  |
| -3.3  | 0.08  | 1.26  |  |  |
| -4.03 | -0.82 | 0.65  |  |  |
| 1.9   | -0.83 | -2.19 |  |  |
| 1.58  | 2.64  | 1.55  |  |  |
| -3.28 | -2.76 | -1.48 |  |  |
| 2.83  | 0.61  | -0.75 |  |  |
| -2.2  | 0.25  | 1.52  |  |  |
| 2.49  | 0.18  | -1.18 |  |  |
| 2.03  | -1.99 | -3.06 |  |  |
| -2.39 | -2.61 | -1.4  |  |  |
| 4.85  | -0.26 | -1.62 |  |  |
| 4.79  | 0.26  | -1.08 |  |  |

|       |       |       |  |  |
|-------|-------|-------|--|--|
| 4.69  | -0.89 | -2.2  |  |  |
| -1.28 | 0.62  | 1.89  |  |  |
| 1.61  | 1.26  | -0.11 |  |  |
| 1.31  | 1.71  | 0.65  |  |  |
| -1.07 | 1.19  | -0.17 |  |  |
| -6.86 | -3.6  | -2.28 |  |  |
| 1.74  | -1.17 | -2.53 |  |  |
| 1.71  | -0.5  | -1.84 |  |  |
| 1.69  | -0.78 | -2.11 |  |  |
| -3.02 | -0.84 | 0.19  |  |  |
| -3.94 | 0.24  | 1.65  |  |  |
| -6.29 | -2.09 | 0     |  |  |
| 3.59  | 1.11  | -0.25 |  |  |
| -1.54 | -2.06 | -0.95 |  |  |
| -2.04 | -0.34 | 1.17  |  |  |
| 2.92  | 1.27  | -0.09 |  |  |
| -1.98 | -4.27 | -3.09 |  |  |
| -3    | -2.72 | -0.94 |  |  |
| 1.66  | -1.98 | -3.34 |  |  |
| 1.52  | 0.36  | -0.88 |  |  |
| 1.35  | 2.39  | 1.32  |  |  |
| 1.32  | -2.41 | -3.44 |  |  |
| 1.3   | 1.85  | 0.84  |  |  |
| 1.95  | 1.26  | -0.11 |  |  |
| 1.84  | -0.51 | -1.79 |  |  |
| 1.68  | 0.76  | -0.38 |  |  |
| 1.6   | -0.67 | -1.74 |  |  |
| -2.76 | -3.58 | -2.52 |  |  |
| -3.43 | -3.79 | -2.41 |  |  |
| 3.1   | -0.37 | -1.73 |  |  |
| 2.57  | 2.21  | 1.12  |  |  |
| 2.38  | -4.19 | -5.55 |  |  |
| 2.23  | -3.04 | -4.3  |  |  |
| 2.08  | -0.63 | -1.8  |  |  |
| -3.54 | -4.26 | -2.54 |  |  |
| 1.38  | -1.27 | -2.63 |  |  |
| 1.31  | 3.45  | 2.16  |  |  |
| 2.13  | -2.17 | -3.52 |  |  |
| -2.44 | -2.2  | -1.18 |  |  |
| -2.85 | -3.39 | -2.15 |  |  |
| -3.72 | -2.94 | -1.31 |  |  |
| 1.61  | -3.48 | -4.84 |  |  |
| 1.53  | 1.4   | 0.11  |  |  |
| 1.41  | -0.89 | -2.06 |  |  |
| 1.27  | -3.97 | -4.99 |  |  |
| -3.19 | -1.89 | -0.89 |  |  |
| -3.2  | -2.64 | -1.63 |  |  |
| -3.32 | -1.53 | -0.47 |  |  |
| -3.4  | -2.11 | -1.02 |  |  |
| -4.34 | -3.68 | -2.23 |  |  |
| -4.79 | -4.14 | -2.56 |  |  |
| -8.67 | -3.54 | -1.1  |  |  |
| 2.05  | -2.21 | -3.56 |  |  |
| 1.84  | -1.41 | -2.61 |  |  |
| 2.2   | -2.2  | -3.56 |  |  |
| 2.12  | -1.95 | -3.25 |  |  |
| 1.76  | -1.34 | -2.37 |  |  |
| 7.19  | -2.46 | -3.82 |  |  |

|        |       |       |  |  |
|--------|-------|-------|--|--|
| 1.31   | -1.32 | -0.22 |  |  |
| 1.21   | -0.04 | 1.17  |  |  |
| 1.13   | -0.17 | 1.14  |  |  |
| 1.13   | -0.09 | 1.24  |  |  |
| 1.09   | -3.27 | -1.9  |  |  |
| 1.01   | 0.65  | 2.13  |  |  |
| 1.84   | 2.17  | 0.81  |  |  |
| 1.5    | -0.1  | -1.17 |  |  |
| -3.59  | -2.59 | -1.22 |  |  |
| -3.7   | -2.32 | -0.91 |  |  |
| 2.78   | -0.91 | -2.26 |  |  |
| -1.85  | -3.32 | -2.31 |  |  |
| -2.58  | -2    | -0.51 |  |  |
| 2.67   | 0.26  | -1.1  |  |  |
| 2.66   | 2.29  | 0.94  |  |  |
| 2.23   | 0.69  | -0.41 |  |  |
| -2     | 0.2   | 1.25  |  |  |
| -2.09  | -0.86 | 0.26  |  |  |
| 3.73   | 1.19  | -0.16 |  |  |
| 3.23   | 1.82  | 0.68  |  |  |
| -1.41  | 0.39  | 1.43  |  |  |
| -1.61  | 0.15  | 1.38  |  |  |
| 2.43   | -4.09 | -5.45 |  |  |
| 2.18   | -1.3  | -2.51 |  |  |
| 1.92   | -0.17 | -1.19 |  |  |
| 121.07 | -2.12 | -3.48 |  |  |
| 96.8   | -0.01 | -1.04 |  |  |
| 17.54  | -0.45 | 0.97  |  |  |
| 14.48  | -5.95 | -4.25 |  |  |
| 3.06   | -7.54 | -3.59 |  |  |
| 1.94   | 0.14  | -1.21 |  |  |
| 1.54   | -1.05 | -2.08 |  |  |
| -2.69  | -1.63 | -0.6  |  |  |
| 1.25   | 2.7   | 1.34  |  |  |
| -4.24  | -2.59 | -1.54 |  |  |
| 1.81   | 0.68  | -0.68 |  |  |
| 1.48   | -1.04 | -2.1  |  |  |
| -3.01  | -1.14 | -0.06 |  |  |
| -3.4   | -2.85 | -1.59 |  |  |
| -3.77  | -4.65 | -3.23 |  |  |
| 1.25   | 4.69  | 3.33  |  |  |
| -4.25  | -1.28 | -0.23 |  |  |
| 2.17   | -5.9  | -7.26 |  |  |
| 1.76   | -5.19 | -6.25 |  |  |
| 1.21   | -2.26 | -3.61 |  |  |
| 1.14   | -2.74 | -4.01 |  |  |
| -1.05  | -0.62 | -1.63 |  |  |
| -6.42  | -3.31 | -1.7  |  |  |
| 1.65   | 1.2   | -0.15 |  |  |
| -3.39  | -0.29 | 0.85  |  |  |
| -3.58  | -1.08 | 0.13  |  |  |
| -3.67  | 1.11  | 2.36  |  |  |
| -3.76  | -1.04 | 0.25  |  |  |
| -3.78  | 0.43  | 1.72  |  |  |
| -4.3   | -0.48 | 1     |  |  |
| -4.38  | -1.33 | 0.17  |  |  |
| 1.61   | 3.64  | 2.29  |  |  |
| 1.55   | -0.76 | -2.06 |  |  |

|       |       |       |  |  |
|-------|-------|-------|--|--|
| 1.47  | -4.52 | -5.74 |  |  |
| 1.45  | 0.27  | -0.94 |  |  |
| 1.33  | -0.34 | -1.41 |  |  |
| 1.3   | -0.94 | -1.98 |  |  |
| 1.3   | 0.11  | -0.93 |  |  |
| -3.5  | -1.96 | -0.82 |  |  |
| -5.15 | -4.87 | -3.18 |  |  |
| 2.37  | -3.02 | -4.37 |  |  |
| 2.08  | -0.85 | -2.01 |  |  |
| -2.47 | -2.65 | -1.45 |  |  |
| -3.07 | -5.25 | -3.73 |  |  |
| -4.99 | -5.51 | -3.3  |  |  |
| 2.53  | -2.9  | -4.25 |  |  |
| 2.07  | -3.61 | -4.68 |  |  |
| 2.06  | -3.12 | -4.18 |  |  |
| -2.32 | -4.13 | -2.93 |  |  |
| -2.69 | -3.82 | -2.41 |  |  |
| 1.83  | -0.87 | -2.22 |  |  |
| 1.66  | -3    | -4.21 |  |  |
| 1.64  | 1.77  | 0.57  |  |  |
| 1.49  | 0.27  | -0.79 |  |  |
| 2.62  | 0.77  | -0.59 |  |  |
| 2.54  | -0.67 | -1.97 |  |  |
| 5.46  | -0.45 | -1.8  |  |  |
| 4.34  | -1.87 | -2.89 |  |  |
| 1.01  | -5.49 | -4.41 |  |  |
| -1.02 | -3.45 | -2.32 |  |  |
| -1.14 | -5.38 | -4.1  |  |  |
| -1.21 | -6.17 | -4.8  |  |  |
| 3.19  | 3.76  | 2.41  |  |  |
| -1.96 | -3.08 | -1.79 |  |  |
| -2.27 | -2.11 | -0.6  |  |  |
| -2.41 | -4.14 | -2.55 |  |  |
| 1.98  | 1.35  | 0     |  |  |
| 1.81  | 0.74  | -0.48 |  |  |
| 1.67  | 1.09  | -0.01 |  |  |
| -1.04 | -2.39 | -3.75 |  |  |
| -1.31 | 2.26  | 1.23  |  |  |
| 2.38  | -0.15 | -1.5  |  |  |
| 2.23  | 0.68  | -0.58 |  |  |
| 2.16  | -0.95 | -2.16 |  |  |
| 1.93  | 3.48  | 2.43  |  |  |
| 1.89  | -0.74 | -1.76 |  |  |
| 2.8   | 1.67  | 0.32  |  |  |
| 2.53  | 0.48  | -0.72 |  |  |
| 3.21  | -0.56 | -1.91 |  |  |
| -1.62 | -0.94 | 0.08  |  |  |
| -1.89 | -1.7  | -0.44 |  |  |
| -2.15 | -1.52 | -0.08 |  |  |
| -2.79 | -5.84 | -4.02 |  |  |
| -3.41 | -5.17 | -3.06 |  |  |
| 2.77  | -6.45 | -7.8  |  |  |
| -1.87 | -4.25 | -3.23 |  |  |
| 2.08  | 0.67  | -0.68 |  |  |
| 1.65  | 0.18  | -0.83 |  |  |
| -3.46 | -1.18 | 0.31  |  |  |
| 3.3   | -0.8  | -2.15 |  |  |
| 2.92  | 2.52  | 1.35  |  |  |

|       |       |       |  |  |
|-------|-------|-------|--|--|
| -1.7  | -3.57 | -2.43 |  |  |
| 3.14  | -0.63 | -1.98 |  |  |
| 2.64  | -1.28 | -2.37 |  |  |
| -1.63 | -2.13 | -1.12 |  |  |
| 1.77  | -5.73 | -7.08 |  |  |
| -3.16 | -4.95 | -3.82 |  |  |
| -3.54 | -5.19 | -3.89 |  |  |
| -1.01 | 5.2   | 3.85  |  |  |
| -1.07 | 3.46  | 2.2   |  |  |
| -1.17 | 0.43  | -0.71 |  |  |
| -1.28 | 1.05  | 0.05  |  |  |
| -7.67 | -3.5  | -1.92 |  |  |
| -8.07 | -3.3  | -1.65 |  |  |
| 4.95  | -2.38 | -3.73 |  |  |
| 4.13  | -2.63 | -3.72 |  |  |
| -1.08 | -1.49 | -0.43 |  |  |
| -1.09 | -0.79 | 0.29  |  |  |
| -1.13 | 2.8   | 3.93  |  |  |
| -1.23 | 2.05  | 3.3   |  |  |
| -1.23 | -1.24 | 0.01  |  |  |
| -1.25 | -2.78 | -1.51 |  |  |
| -2.33 | -4.18 | -2    |  |  |
| 1.65  | 1.75  | 0.4   |  |  |
| 1.39  | -0.77 | -1.88 |  |  |
| 1.31  | -0.46 | -1.48 |  |  |
| 2.66  | 1.81  | 0.46  |  |  |
| 2.08  | -0.69 | -1.69 |  |  |
| 1.93  | -4.54 | -5.89 |  |  |
| 1.51  | -4.32 | -5.32 |  |  |
| 1.51  | -2.41 | -3.41 |  |  |
| 2.23  | 6.55  | 5.2   |  |  |
| 2.02  | 1.12  | -0.08 |  |  |
| 2.01  | 3.54  | 2.35  |  |  |
| -2.63 | 0.26  | 1.47  |  |  |
| 1.39  | 1.06  | -0.28 |  |  |
| 1.25  | -0.61 | -1.8  |  |  |
| 1.17  | -0.7  | -1.79 |  |  |
| 1.14  | -1.1  | -2.17 |  |  |
| 1.13  | -2.29 | -3.34 |  |  |
| -3.7  | -2.54 | -1.52 |  |  |
| -3.76 | -0.86 | 0.18  |  |  |
| -3.79 | -1.74 | -0.68 |  |  |
| -3.82 | -1.78 | -0.72 |  |  |
| -4.02 | -2.16 | -1.03 |  |  |
| -4.17 | -2.41 | -1.21 |  |  |
| -5.01 | -1.22 | 0.24  |  |  |
| 4.59  | 0.94  | -0.4  |  |  |
| 4.36  | 0.06  | -1.21 |  |  |
| 4.34  | -0.03 | -1.29 |  |  |
| 4.17  | 0.13  | -1.08 |  |  |
| 4.11  | 1.89  | 0.7   |  |  |
| 3.97  | 1.57  | 0.43  |  |  |
| -1.17 | -2.98 | -1.89 |  |  |
| -1.22 | -2.5  | -1.36 |  |  |
| -1.27 | -2.92 | -1.72 |  |  |
| -1.36 | -0.32 | 0.98  |  |  |
| -1.41 | -2.81 | -1.47 |  |  |
| 1.61  | 1.57  | 0.23  |  |  |

|       |       |       |  |  |
|-------|-------|-------|--|--|
| 1.4   | -0.96 | -2.11 |  |  |
| 1.4   | 2.16  | 1.02  |  |  |
| -3.56 | -0.81 | 0.36  |  |  |
| 1.36  | 0.54  | -0.81 |  |  |
| 1.25  | -5.68 | -6.91 |  |  |
| 1.11  | -2.51 | -3.57 |  |  |
| 1.64  | -0.06 | -1.4  |  |  |
| -3.76 | -2.32 | -1.04 |  |  |
| -3.94 | -1.56 | -0.2  |  |  |
| 5.49  | -0.88 | -2.23 |  |  |
| 1.06  | 0.1   | 1.13  |  |  |
| 1.05  | 0.84  | 1.87  |  |  |
| 1.05  | -3.63 | -2.59 |  |  |
| 1.04  | -0.36 | 0.69  |  |  |
| 1.04  | 2.77  | 3.82  |  |  |
| 1     | 0.11  | 1.21  |  |  |
| -1    | -1.61 | -0.5  |  |  |
| -1    | -1.69 | -0.58 |  |  |
| -1.02 | -3.57 | -2.43 |  |  |
| -1.03 | -0.41 | 0.75  |  |  |
| -1.04 | -1.7  | -0.54 |  |  |
| -1.08 | -0.62 | 0.6   |  |  |
| -1.09 | -3.26 | -2.02 |  |  |
| -1.1  | 1.22  | 2.46  |  |  |
| -1.1  | -3.94 | -2.69 |  |  |
| -1.16 | -3.26 | -1.94 |  |  |
| -1.22 | -3.12 | -1.72 |  |  |
| -1.23 | -0.33 | 1.08  |  |  |
| -1.27 | -3.77 | -2.31 |  |  |
| -1.38 | -0.75 | 0.83  |  |  |
| -1.43 | 0.96  | 2.58  |  |  |
| -1.44 | -0.61 | 1.03  |  |  |
| -1.47 | -1.35 | 0.31  |  |  |
| -1.52 | -3.8  | -2.08 |  |  |
| -1.76 | -0.43 | 1.5   |  |  |
| -2.18 | -3.27 | -1.03 |  |  |
| -2.26 | -2.29 | 0     |  |  |
| 2.32  | -3.01 | -4.35 |  |  |
| -2.22 | -5.79 | -4.77 |  |  |
| -2.32 | -4.59 | -3.51 |  |  |
| -2.6  | -5.52 | -4.27 |  |  |
| -3.91 | -5.2  | -3.36 |  |  |
| 1.94  | 1.01  | -0.34 |  |  |
| 1.82  | 0.02  | -1.23 |  |  |
| 1.54  | 3.2   | 2.2   |  |  |
| -2.82 | 0.14  | 1.24  |  |  |
| 1.22  | 1.91  | 0.56  |  |  |
| 1.07  | 0.56  | -0.59 |  |  |
| 1.02  | -0.28 | -1.36 |  |  |
| -1.04 | 1.33  | 0.34  |  |  |
| -4.61 | -1.15 | 0     |  |  |
| -6.15 | -2.58 | -1.02 |  |  |
| 3.47  | 1.8   | 0.46  |  |  |
| 2.94  | -3.73 | -4.84 |  |  |
| 2.78  | 0.1   | -0.92 |  |  |
| -1.58 | -4.03 | -2.91 |  |  |
| -1.65 | -2.92 | -1.75 |  |  |
| -2.7  | -3.66 | -1.78 |  |  |



|       |       |       |  |  |
|-------|-------|-------|--|--|
| -3.05 | -3.62 | -1.56 |  |  |
| 2.58  | -0.37 | -1.72 |  |  |
| 2.12  | -1.81 | -2.88 |  |  |
| -3.58 | -4.28 | -2.41 |  |  |
| 2.3   | 2.93  | 1.59  |  |  |
| 1.91  | 0.42  | -0.65 |  |  |
| 1.85  | -0.96 | -1.99 |  |  |
| -2.24 | 1.58  | 2.59  |  |  |
| -3.23 | -1.52 | 0.03  |  |  |
| -4    | -0.75 | 1.11  |  |  |
| 1.77  | -2.08 | -3.43 |  |  |
| 1.6   | 1.45  | 0.25  |  |  |
| 1.45  | 3.5   | 2.45  |  |  |
| 1.45  | -0.86 | -1.92 |  |  |
| 1.4   | -0.76 | -1.77 |  |  |
| 1.83  | -0.5  | -1.84 |  |  |
| -2.9  | -2.6  | -1.53 |  |  |
| -3.5  | -4.37 | -3.03 |  |  |
| 1.56  | -1.35 | -2.69 |  |  |
| 1.46  | -3    | -4.24 |  |  |
| 1.38  | 1.03  | -0.13 |  |  |
| 1.3   | -2.1  | -3.17 |  |  |
| 1.28  | -3.04 | -4.09 |  |  |
| 2.18  | 1.72  | 0.38  |  |  |
| 1.97  | 0.17  | -1.02 |  |  |
| 1.95  | -0.21 | -1.39 |  |  |
| -2.64 | 0.61  | 1.8   |  |  |
| 4.75  | -2.08 | -3.42 |  |  |
| 4.59  | -0.32 | -1.61 |  |  |
| 4.34  | 0.08  | -1.13 |  |  |
| 4.27  | 0.06  | -1.12 |  |  |
| 4.06  | -0.33 | -1.44 |  |  |
| -1.2  | -1.65 | -0.49 |  |  |
| -1.35 | -4.05 | -2.71 |  |  |
| -1.39 | -4.49 | -3.11 |  |  |
| -1.98 | -5.86 | -3.97 |  |  |
| -2.03 | -6.5  | -4.57 |  |  |
| -2.63 | -3.14 | -0.83 |  |  |
| -5.74 | -5.18 | -1.75 |  |  |
| 2.27  | 0.39  | -0.95 |  |  |
| 2.01  | 2.09  | 0.93  |  |  |
| 1.99  | 1.15  | 0     |  |  |
| 1.87  | 1.93  | 0.88  |  |  |
| 1.86  | 0.72  | -0.33 |  |  |
| 2.27  | 0.1   | -1.24 |  |  |
| 2.25  | 1.43  | 0.1   |  |  |
| 3.49  | -2.38 | -3.72 |  |  |
| -1.46 | -3.05 | -2.04 |  |  |
| -1.49 | -0.38 | 0.66  |  |  |
| -1.51 | -4.97 | -3.91 |  |  |
| 1.55  | -1.22 | -2.56 |  |  |
| 1.35  | -1.81 | -2.95 |  |  |
| 1.28  | 1.06  | -0.01 |  |  |
| -3.62 | -2.77 | -1.63 |  |  |
| -3.87 | -3.4  | -2.15 |  |  |
| -3.87 | -2.92 | -1.68 |  |  |
| 3.03  | -2.76 | -4.1  |  |  |
| -1.89 | -4.26 | -3.08 |  |  |

|       |       |       |  |  |
|-------|-------|-------|--|--|
| -2.07 | -4.53 | -3.22 |  |  |
| 2.42  | 5.29  | 3.95  |  |  |
| -2.25 | -2.91 | -1.8  |  |  |
| 4.89  | -2.13 | -3.47 |  |  |
| -1.06 | 4.18  | 5.21  |  |  |
| -1.44 | -5.07 | -3.6  |  |  |
| -1.51 | -5.46 | -3.92 |  |  |
| -1.72 | -1.8  | -0.07 |  |  |
| 1.99  | -0.83 | -2.16 |  |  |
| 1.71  | 1.81  | 0.7   |  |  |
| 1.62  | 1.23  | 0.19  |  |  |
| 1.61  | 3.62  | 2.6   |  |  |
| 2.28  | -0.66 | -2    |  |  |
| 1.8   | 0.78  | -0.22 |  |  |
| -3.28 | -2.16 | -0.59 |  |  |
| 1.82  | -0.95 | -2.29 |  |  |
| -2.84 | -2.55 | -1.51 |  |  |
| -3.24 | -1.2  | 0.03  |  |  |
| 3.3   | 0.64  | -0.69 |  |  |
| 3.11  | -0.71 | -1.96 |  |  |
| 2.97  | -1.32 | -2.5  |  |  |
| 2.54  | 2.83  | 1.49  |  |  |
| 2.13  | 3.25  | 2.17  |  |  |
| -2.24 | -0.66 | 0.52  |  |  |
| 3.28  | -0.18 | -1.52 |  |  |
| 2.82  | -1.23 | -2.35 |  |  |
| 2.76  | 2.16  | 1.08  |  |  |
| -1.53 | -2.53 | -1.53 |  |  |
| -1.79 | -2.41 | -1.19 |  |  |
| 2.85  | 0.13  | -1.2  |  |  |
| 2.3   | 2.36  | 1.34  |  |  |
| 2.26  | -0.21 | -1.21 |  |  |
| -2.04 | -1.16 | 0.04  |  |  |
| 2.81  | 1.76  | 0.43  |  |  |
| -1.9  | -3    | -1.92 |  |  |
| 1.93  | -0.3  | -1.63 |  |  |
| -2.67 | -1.82 | -0.79 |  |  |
| 1.5   | -1.95 | -3.29 |  |  |
| 1.25  | -0.09 | -1.15 |  |  |
| 1.19  | 1.09  | 0.1   |  |  |
| 1.19  | 1.1   | 0.1   |  |  |
| 1.22  | 3.69  | 2.36  |  |  |
| 1.2   | 6.15  | 4.84  |  |  |
| 1.19  | -2.03 | -3.33 |  |  |
| 1.1   | 2.07  | 0.89  |  |  |
| 1.01  | 3.19  | 2.13  |  |  |
| 7.13  | 0.96  | -0.37 |  |  |
| 1.39  | -1.57 | -0.54 |  |  |
| 1.35  | 1.06  | 2.12  |  |  |
| 1.2   | -0.49 | 0.75  |  |  |
| 1.11  | 2.86  | 4.2   |  |  |
| -1.2  | 0.03  | 1.78  |  |  |
| -1.21 | 1.25  | 3.03  |  |  |
| -1.29 | -1.52 | 0.35  |  |  |
| 2.81  | -3.88 | -5.21 |  |  |
| 2.56  | -5.4  | -6.6  |  |  |
| -1.82 | -4.29 | -3.27 |  |  |
| -2.14 | -7.7  | -6.44 |  |  |

|       |       |       |  |  |
|-------|-------|-------|--|--|
| 2.72  | -4.28 | -5.61 |  |  |
| -1.96 | -4.74 | -3.66 |  |  |
| 1.35  | -2.77 | -4.11 |  |  |
| 1.09  | -4.59 | -5.62 |  |  |
| -6.59 | -5.53 | -3.71 |  |  |
| 2.8   | 2.1   | 0.77  |  |  |
| 2.63  | 4.12  | 2.88  |  |  |
| -1.83 | 3.8   | 4.82  |  |  |
| 3.32  | -1.8  | -3.13 |  |  |
| 2.99  | -4.39 | -5.57 |  |  |
| 4.77  | -0.9  | -2.23 |  |  |
| 4.69  | 0.71  | -0.6  |  |  |
| 3.96  | 0.48  | -0.58 |  |  |
| 3.81  | 1.52  | 0.51  |  |  |
| -1.05 | -1.13 | -0.13 |  |  |
| -1.05 | 2.84  | 3.84  |  |  |
| -1.19 | -0.62 | 0.55  |  |  |
| -1.25 | -1.12 | 0.13  |  |  |
| -1.42 | -2.68 | -1.25 |  |  |
| -1.45 | -2.08 | -0.62 |  |  |
| -1.46 | -0.5  | 0.96  |  |  |
| 1.85  | -1.17 | -2.49 |  |  |
| 1.76  | -1.86 | -3.12 |  |  |
| -2.81 | -0.75 | 0.3   |  |  |
| -5.45 | -3.95 | -1.94 |  |  |
| 1.91  | -3.69 | -5.02 |  |  |
| -2.84 | -2.58 | -1.47 |  |  |
| -3.53 | -5.3  | -3.87 |  |  |
| -4.98 | -5.7  | -3.78 |  |  |
| -7.17 | -3.93 | -1.48 |  |  |
| 2.42  | -1.31 | -2.64 |  |  |
| -3.41 | -2.43 | -0.71 |  |  |
| 1.43  | -0.32 | -1.64 |  |  |
| 1.25  | 2     | 0.87  |  |  |
| 5.58  | 0.7   | -0.63 |  |  |
| 1.09  | -1.1  | -0.08 |  |  |
| 1.05  | -0.84 | 0.24  |  |  |
| 1.03  | 1.59  | 2.69  |  |  |
| -1.31 | -1.11 | 0.43  |  |  |
| -1.44 | -1.37 | 0.3   |  |  |
| 1.56  | -3.37 | -4.7  |  |  |
| -3.56 | -2.47 | -1.32 |  |  |
| -4.05 | -1.88 | -0.54 |  |  |
| 2.2   | -1.01 | -2.34 |  |  |
| 1.81  | -2.2  | -3.25 |  |  |
| -2.75 | -1.92 | -0.66 |  |  |
| 5.05  | 0.59  | -0.74 |  |  |
| -1    | -3.2  | -2.19 |  |  |
| -1.07 | -3.1  | -2    |  |  |
| -2.12 | -5.54 | -3.45 |  |  |
| 2.49  | 0.87  | -0.45 |  |  |
| 2.42  | 0.29  | -1    |  |  |
| 1.99  | -0.58 | -1.58 |  |  |
| -2.1  | -2.18 | -1.13 |  |  |
| -2.23 | -0.19 | 0.95  |  |  |
| -2.34 | -0.39 | 0.83  |  |  |
| -2.41 | -3.4  | -2.14 |  |  |
| -2.5  | -1.58 | -0.27 |  |  |

|       |       |       |  |  |
|-------|-------|-------|--|--|
| -2.53 | -2.59 | -1.26 |  |  |
| 1.74  | 2.19  | 0.86  |  |  |
| 1.43  | 2.26  | 1.21  |  |  |
| 1.4   | -5.29 | -6.31 |  |  |
| 5.47  | 0.27  | -1.06 |  |  |
| 1.03  | -0.35 | 0.73  |  |  |
| -1.04 | -2.89 | -1.72 |  |  |
| -1.13 | -0.84 | 0.46  |  |  |
| -2.11 | -0.12 | 2.09  |  |  |
| 1.87  | 5.34  | 4.01  |  |  |
| 1.55  | 1.97  | 0.91  |  |  |
| -3.9  | -1.2  | 0.34  |  |  |
| 1.38  | -0.51 | -1.84 |  |  |
| 1.15  | -2.34 | -3.41 |  |  |
| -3.74 | -2.43 | -1.39 |  |  |
| -6    | -6.03 | -4.31 |  |  |
| 2.11  | -2.33 | -3.66 |  |  |
| 1.84  | 0.94  | -0.19 |  |  |
| -2.47 | -2.91 | -1.86 |  |  |
| -2.48 | -3.21 | -2.15 |  |  |
| -2.63 | -2.52 | -1.38 |  |  |
| 2.37  | -2.16 | -3.49 |  |  |
| -2.3  | -2.97 | -1.85 |  |  |
| 1.77  | 0.36  | -0.97 |  |  |
| -2.87 | -3.31 | -2.3  |  |  |
| -2.91 | -2.88 | -1.84 |  |  |
| 7.8   | 1.15  | -0.17 |  |  |
| 7.27  | 0.89  | -0.34 |  |  |
| 6.58  | -1.04 | -2.13 |  |  |
| 1.45  | -0.84 | 0.26  |  |  |
| 1.39  | 4.45  | 5.61  |  |  |
| 1.34  | -2.14 | -0.93 |  |  |
| 1.26  | -2.43 | -1.13 |  |  |
| 1.24  | -2.36 | -1.03 |  |  |
| 1.16  | -0.17 | 1.26  |  |  |
| 1.11  | -0.83 | 0.65  |  |  |
| -1.02 | 1.66  | 3.32  |  |  |
| -1.18 | -1.8  | 0.07  |  |  |
| -1.26 | -1.45 | 0.53  |  |  |
| -2.74 | -1.63 | 1.46  |  |  |
| 1.05  | 0.34  | -0.99 |  |  |
| -1.02 | -5.09 | -6.31 |  |  |
| -4.96 | -3.43 | -2.38 |  |  |
| 1.7   | -0.62 | -1.95 |  |  |
| 1.63  | 2.64  | 1.36  |  |  |
| 1.52  | 0.27  | -0.9  |  |  |
| 1.48  | -0.25 | -1.39 |  |  |
| 1.44  | 0.19  | -0.91 |  |  |
| 1.6   | -1.04 | -2.36 |  |  |
| 1.39  | -0.55 | -1.67 |  |  |
| 1.3   | 0.84  | -0.2  |  |  |
| 1.94  | -0.01 | -1.33 |  |  |
| 1.7   | 1.55  | 0.41  |  |  |
| -3.27 | -4.02 | -2.68 |  |  |
| -3.9  | -4.82 | -3.23 |  |  |
| 1.97  | 2.4   | 1.07  |  |  |
| 1.91  | 3.77  | 2.48  |  |  |
| 1.89  | -1.84 | -3.1  |  |  |

|        |       |       |  |  |
|--------|-------|-------|--|--|
| 1.89   | 0.61  | -0.67 |  |  |
| 1.58   | 3.86  | 2.84  |  |  |
| -2.68  | -1.01 | 0.06  |  |  |
| -4.09  | -2.83 | -1.16 |  |  |
| -34.6  | -4.17 | 0.59  |  |  |
| 2.69   | -1.94 | -3.27 |  |  |
| -1.88  | -2.39 | -1.37 |  |  |
| 1.38   | 2.24  | 0.93  |  |  |
| 1.29   | -0.71 | -1.93 |  |  |
| 1.16   | -0.93 | -2.01 |  |  |
| 1.12   | -1.87 | -2.9  |  |  |
| -4.76  | -1.69 | -0.29 |  |  |
| 2.12   | -3.6  | -4.92 |  |  |
| -3.49  | -4.36 | -2.79 |  |  |
| 2.13   | -3.83 | -5.15 |  |  |
| 1.94   | -3.75 | -4.94 |  |  |
| 1.9    | -2.96 | -4.11 |  |  |
| 1.56   | 1.69  | 0.37  |  |  |
| 1.31   | 3.44  | 2.38  |  |  |
| -3.21  | -1    | 0     |  |  |
| 1.42   | 2.77  | 1.45  |  |  |
| 1.31   | -1.34 | -2.53 |  |  |
| 1.28   | 7.17  | 6     |  |  |
| 1.15   | -3.02 | -4.04 |  |  |
| 1.14   | 2.31  | 1.31  |  |  |
| -3.71  | -3.32 | -2.24 |  |  |
| -3.85  | -1.9  | -0.77 |  |  |
| -4.03  | -2.57 | -1.37 |  |  |
| -4.32  | -1.73 | -0.44 |  |  |
| -4.65  | -2.47 | -1.07 |  |  |
| -6.72  | -2.47 | -0.53 |  |  |
| -9.94  | -1.91 | 0.59  |  |  |
| -10.52 | -2.22 | 0.36  |  |  |
| 15.14  | -1.65 | -2.97 |  |  |
| 13.48  | 0.17  | -0.98 |  |  |
| 2.95   | 0.67  | 1.71  |  |  |
| 2.62   | -4.42 | -3.21 |  |  |
| 2.5    | 0.85  | 2.12  |  |  |
| 2.24   | -3.6  | -2.17 |  |  |
| 2.23   | -1.38 | 0.07  |  |  |
| 2.08   | -3.19 | -1.65 |  |  |
| 1.99   | -1.81 | -0.2  |  |  |
| 1.89   | -4.5  | -2.82 |  |  |
| 1.78   | -1.11 | 0.65  |  |  |
| 1.36   | -0.9  | 1.26  |  |  |
| 1.07   | -2.28 | 0.22  |  |  |
| 1.06   | 1.08  | 3.59  |  |  |
| -1.08  | -1.41 | 1.31  |  |  |
| -1.42  | -4.73 | -1.62 |  |  |
| -1.42  | -1.62 | 1.49  |  |  |
| 2.46   | -3.39 | -4.72 |  |  |
| 2      | 2.13  | 1.1   |  |  |
| -3.02  | -2.59 | -1.01 |  |  |
| 1.8    | -1.19 | -2.51 |  |  |
| 1.56   | 2.22  | 1.11  |  |  |
| 1.45   | -2.5  | -3.51 |  |  |
| -3.1   | -3.62 | -2.46 |  |  |
| 2.49   | 1.52  | 0.2   |  |  |

|       |       |       |  |  |
|-------|-------|-------|--|--|
| -2.07 | -0.73 | 0.31  |  |  |
| -2.4  | -2.94 | -1.68 |  |  |
| 6.73  | -3.19 | -4.5  |  |  |
| 5.82  | -1.07 | -2.18 |  |  |
| 1.21  | 2.15  | 3.31  |  |  |
| 1.07  | 1.68  | 3.01  |  |  |
| 1.06  | -5.76 | -4.42 |  |  |
| -1    | -5.81 | -4.37 |  |  |
| -1.02 | -2.49 | -1.03 |  |  |
| -1.18 | -6.79 | -5.12 |  |  |
| -1.64 | 3.43  | 5.58  |  |  |
| 2.87  | -1.6  | -2.92 |  |  |
| 2.49  | -0.21 | -1.32 |  |  |
| -1.75 | -1.84 | -0.84 |  |  |
| 1.8   | -1.56 | -2.87 |  |  |
| -3.31 | -4.64 | -3.37 |  |  |
| 1.8   | 2.94  | 1.62  |  |  |
| 1.68  | 0.57  | -0.65 |  |  |
| -3.04 | -0.36 | 0.78  |  |  |
| 2.12  | -1.98 | -3.3  |  |  |
| 1.81  | -1.53 | -2.62 |  |  |
| 1.44  | -1.64 | -2.96 |  |  |
| 1.17  | 3.62  | 2.6   |  |  |
| 1.16  | -1.32 | -2.33 |  |  |
| -3.82 | -3.46 | -2.31 |  |  |
| 15.75 | 0.41  | -0.91 |  |  |
| 15.35 | -1.37 | -2.65 |  |  |
| 12.72 | -2.33 | -3.33 |  |  |
| 2.58  | -5.46 | -4.16 |  |  |
| 2.37  | -4.06 | -2.64 |  |  |
| 2.22  | -1.19 | 0.32  |  |  |
| 1.77  | -0.74 | 1.1   |  |  |
| 1.74  | -5.21 | -3.35 |  |  |
| 1.67  | -0.84 | 1.08  |  |  |
| 1.43  | -1.53 | 0.62  |  |  |
| 1.41  | -0.09 | 2.08  |  |  |
| 1.09  | -6.37 | -3.82 |  |  |
| -1.12 | -2.36 | 0.46  |  |  |
| -1.34 | -6.15 | -3.06 |  |  |
| -1.39 | -5.51 | -2.37 |  |  |
| -1.91 | -4.26 | -0.67 |  |  |
| -2.62 | -7.09 | -3.03 |  |  |
| 3.46  | 0.22  | -1.1  |  |  |
| -1.46 | -0.1  | 0.91  |  |  |
| -1.67 | -0.47 | 0.74  |  |  |
| -2.11 | -2.77 | -1.22 |  |  |
| 2.33  | 6.15  | 4.83  |  |  |
| 2.24  | 6.06  | 4.8   |  |  |
| -3.51 | -1.9  | -0.18 |  |  |
| 4.22  | -1.43 | -2.74 |  |  |
| 3.8   | 0.84  | -0.33 |  |  |
| 12.78 | -1.79 | -3.1  |  |  |
| 1.56  | -4.37 | -2.64 |  |  |
| 1.43  | 2.12  | 3.97  |  |  |
| -1.8  | -6.21 | -3    |  |  |
| 1.94  | 1.47  | 0.16  |  |  |
| 1.6   | -0.51 | -1.55 |  |  |
| -2.92 | -2.09 | -0.91 |  |  |

|       |       |       |  |  |
|-------|-------|-------|--|--|
| 2.42  | -2.6  | -3.92 |  |  |
| -4.09 | -3.63 | -1.64 |  |  |
| 2.7   | -0.4  | -1.71 |  |  |
| -1.97 | -3.93 | -2.83 |  |  |
| -2.09 | -2.99 | -1.81 |  |  |
| -2.26 | -2.79 | -1.49 |  |  |
| -2.55 | -4.32 | -2.85 |  |  |
| -2.75 | -2.81 | -1.24 |  |  |
| 3.07  | -2.85 | -4.16 |  |  |
| 2.81  | -3.75 | -4.94 |  |  |
| -1.89 | -5.08 | -3.86 |  |  |
| 6.24  | -2.86 | -4.18 |  |  |
| 1.24  | -4.36 | -3.34 |  |  |
| 1.2   | -4.53 | -3.47 |  |  |
| 1.11  | 1.2   | 2.38  |  |  |
| 1.09  | -5.23 | -4.03 |  |  |
| 1.07  | -5.25 | -4.02 |  |  |
| 1.05  | -3.52 | -2.26 |  |  |
| 2.93  | 2.49  | 1.17  |  |  |
| 2.61  | 1.3   | 0.14  |  |  |
| -1.72 | -0.49 | 0.52  |  |  |
| 1.29  | 1.43  | 0.11  |  |  |
| -4.32 | 0.37  | 1.53  |  |  |
| 4.77  | -1.7  | -3.01 |  |  |
| 4.29  | -1.31 | -2.47 |  |  |
| 4.28  | 0.02  | -1.13 |  |  |
| -1.09 | -3.67 | -2.6  |  |  |
| -1.13 | 1.5   | 2.62  |  |  |
| -1.18 | -1.78 | -0.6  |  |  |
| -1.24 | 3.49  | 4.75  |  |  |
| -1.35 | -2.2  | -0.82 |  |  |
| 2.23  | -2.41 | -3.72 |  |  |
| 2.07  | -0.72 | -1.92 |  |  |
| 1.82  | 0.04  | -0.98 |  |  |
| -2.23 | 1.35  | 2.35  |  |  |
| -2.56 | -0.63 | 0.57  |  |  |
| 1.64  | -3.24 | -4.56 |  |  |
| 1.59  | -3.2  | -4.47 |  |  |
| 1.41  | -2.78 | -3.87 |  |  |
| 1.38  | 3.94  | 2.88  |  |  |
| 1.37  | -2.56 | -3.61 |  |  |
| 1.34  | -1.14 | -2.15 |  |  |
| -3.11 | -3.97 | -2.94 |  |  |
| 1.29  | 2.18  | 0.87  |  |  |
| 1.23  | 0.79  | -0.46 |  |  |
| 1.19  | -3.07 | -4.26 |  |  |
| 1.72  | 1.34  | 0.02  |  |  |
| 1.58  | 1.64  | 0.45  |  |  |
| 1.52  | 0.67  | -0.47 |  |  |
| 1.41  | 2.45  | 1.43  |  |  |
| 1.9   | 1.69  | 0.38  |  |  |
| -2.65 | -1.08 | -0.06 |  |  |
| 1.69  | 0.67  | -0.65 |  |  |
| 1.39  | 0.14  | -0.89 |  |  |
| 3.68  | 1.01  | -0.3  |  |  |
| -1.38 | -2.01 | -0.98 |  |  |
| -1.41 | 0.28  | 1.34  |  |  |
| 1.99  | -1.92 | -3.23 |  |  |

|       |       |       |  |  |
|-------|-------|-------|--|--|
| 1.69  | -0.23 | -1.31 |  |  |
| 1.65  | 0     | -1.04 |  |  |
| 1.61  | -3.28 | -4.29 |  |  |
| 1.62  | -1.52 | -2.53 |  |  |
| -2.79 | -1.58 | -0.41 |  |  |
| -3.04 | -0.82 | 0.47  |  |  |
| -3.22 | -3.49 | -2.12 |  |  |
| 6.16  | -1.01 | -2.32 |  |  |
| 1.23  | -1.13 | -0.11 |  |  |
| 1.23  | -0.25 | 0.77  |  |  |
| 1.2   | 0.58  | 1.63  |  |  |
| 1.1   | -2.94 | -1.76 |  |  |
| 1.03  | 1.11  | 2.38  |  |  |
| -1.05 | -1.03 | 0.36  |  |  |
| -1.07 | 4.35  | 5.77  |  |  |
| -1.08 | -4.6  | -3.18 |  |  |
| -1.12 | -3.83 | -2.35 |  |  |
| -1.18 | 0.64  | 2.18  |  |  |
| -1.18 | -0.92 | 0.64  |  |  |
| -1.27 | 0.4   | 2.06  |  |  |
| -1.28 | 0.88  | 2.55  |  |  |
| -1.33 | 1.46  | 3.19  |  |  |
| -1.47 | 1.19  | 3.05  |  |  |
| -1.65 | -0.37 | 1.67  |  |  |
| 1.5   | 1.04  | -0.27 |  |  |
| -3.62 | -2.46 | -1.32 |  |  |
| -6.35 | -3.75 | -1.81 |  |  |
| 3.78  | -3.92 | -5.23 |  |  |
| -1.41 | 0.21  | 1.3   |  |  |
| 2.97  | -2.15 | -3.46 |  |  |
| -1.81 | -4.51 | -3.39 |  |  |
| -1.89 | -2.97 | -1.8  |  |  |
| -1.88 | -3.47 | -2.29 |  |  |
| 2.01  | 0.86  | -0.46 |  |  |
| 1.94  | -1.09 | -2.35 |  |  |
| -2.55 | 0.05  | 1.1   |  |  |
| -2.73 | -1.74 | -0.6  |  |  |
| -4.15 | -1.36 | 0.39  |  |  |
| 2.43  | -0.62 | -1.94 |  |  |
| -2.75 | 3.3   | 4.73  |  |  |
| 1.85  | -1.91 | -3.22 |  |  |
| 1.52  | -1.97 | -3    |  |  |
| -2.78 | -6.36 | -5.31 |  |  |
| -2.96 | -3.83 | -2.69 |  |  |
| 1.39  | -4.49 | -5.8  |  |  |
| 1.25  | 0.11  | -1.04 |  |  |
| 1.25  | -2.25 | -3.4  |  |  |
| 1.14  | -2.61 | -3.63 |  |  |
| 1.13  | -3.54 | -4.54 |  |  |
| 1.16  | -0.98 | -2.29 |  |  |
| 1.06  | -1.06 | -2.23 |  |  |
| 1.05  | -0.75 | -1.91 |  |  |
| 1.04  | 3.71  | 2.57  |  |  |
| 1.02  | 0.73  | -0.39 |  |  |
| 1.01  | -0.49 | -1.59 |  |  |
| -1    | -0.04 | -1.13 |  |  |
| -1    | -1.97 | -3.05 |  |  |
| -1.02 | 0.24  | -0.83 |  |  |



|       |       |       |  |  |
|-------|-------|-------|--|--|
| -1.02 | 2.88  | 1.83  |  |  |
| 1.49  | 0.47  | -0.83 |  |  |
| 1.38  | 0.02  | -1.18 |  |  |
| 1.34  | 0.89  | -0.25 |  |  |
| 1.62  | 0.82  | -0.48 |  |  |
| 1.37  | -1.42 | -2.49 |  |  |
| 1.84  | -4.21 | -5.51 |  |  |
| 1.73  | -0.52 | -1.74 |  |  |
| 1.59  | -4.65 | -5.75 |  |  |
| 1.53  | -4.22 | -5.26 |  |  |
| -2.74 | -3.32 | -2.3  |  |  |
| 1.31  | 0.87  | -0.43 |  |  |
| 1.21  | -3.86 | -5.04 |  |  |
| 1.16  | 0.9   | -0.22 |  |  |
| 1.15  | 1.94  | 0.82  |  |  |
| 5.92  | 0.48  | -0.82 |  |  |
| 5.15  | 2.05  | 0.94  |  |  |
| 5.11  | 0.84  | -0.25 |  |  |
| 4.97  | 0.22  | -0.83 |  |  |
| 1.17  | -1.55 | -0.52 |  |  |
| 1.16  | -1.49 | -0.45 |  |  |
| 1.1   | 0.01  | 1.14  |  |  |
| 1.01  | -0.24 | 1.01  |  |  |
| -1    | -0.44 | 0.83  |  |  |
| -1.09 | -2.44 | -1.05 |  |  |
| -1.11 | 1.41  | 2.83  |  |  |
| -1.12 | -2.05 | -0.62 |  |  |
| -1.13 | -0.85 | 0.59  |  |  |
| -1.13 | -1.74 | -0.3  |  |  |
| -1.17 | 0.44  | 1.93  |  |  |
| -1.19 | 3.01  | 4.52  |  |  |
| -1.52 | -1.13 | 0.74  |  |  |
| -2.12 | -0.97 | 1.37  |  |  |
| 2.97  | -1.61 | -2.92 |  |  |
| 2.56  | -3.17 | -4.27 |  |  |
| -1.68 | -4.11 | -3.09 |  |  |
| -2.28 | -4.28 | -2.83 |  |  |
| -2.82 | -4.9  | -3.14 |  |  |
| 1.47  | -4.43 | -5.74 |  |  |
| 1.41  | -5.79 | -7.04 |  |  |
| 1.33  | 0.01  | -1.16 |  |  |
| 1.28  | -2.8  | -3.9  |  |  |
| -3.44 | -5.6  | -4.57 |  |  |
| -3.48 | -4.72 | -3.67 |  |  |
| -3.64 | -6.54 | -5.43 |  |  |
| -3.71 | -2    | -0.86 |  |  |
| 1.68  | -4.83 | -6.13 |  |  |
| 1.39  | 1.13  | 0.1   |  |  |
| 1.34  | 0.17  | -1.13 |  |  |
| -4.07 | -2.76 | -1.61 |  |  |
| -4.66 | -1.26 | 0.08  |  |  |
| 1.24  | 3.27  | 1.97  |  |  |
| -5.96 | -0.82 | 0.76  |  |  |
| 1.46  | -1.89 | -3.19 |  |  |
| 1.26  | -0.39 | -1.48 |  |  |
| 2.17  | -3.92 | -5.22 |  |  |
| 2.15  | -3.18 | -4.47 |  |  |
| 1.97  | -1.06 | -2.23 |  |  |

|       |       |       |  |  |
|-------|-------|-------|--|--|
| 1.8   | -0.22 | -1.53 |  |  |
| 1.56  | -2.53 | -3.63 |  |  |
| 1.49  | 0.16  | -0.87 |  |  |
| -3.35 | -0.4  | 0.89  |  |  |
| -3.91 | -2.37 | -0.86 |  |  |
| -4.7  | -2.55 | -0.78 |  |  |
| 1.41  | -4.62 | -5.92 |  |  |
| 1.35  | -6.04 | -7.28 |  |  |
| 1.31  | -2.35 | -3.54 |  |  |
| -3.81 | -3.13 | -2    |  |  |
| 2.88  | -2.56 | -3.86 |  |  |
| 2.78  | -3.11 | -4.36 |  |  |
| 2.73  | -2.92 | -4.15 |  |  |
| 2.16  | 2.42  | 1.12  |  |  |
| 2.11  | 2.72  | 1.45  |  |  |
| 2.07  | -0.32 | -1.56 |  |  |
| 1.89  | -0.96 | -2.07 |  |  |
| 1.78  | -0.18 | -1.21 |  |  |
| -2.29 | -1.27 | -0.27 |  |  |
| -2.39 | -1.11 | -0.05 |  |  |
| -2.76 | -2.83 | -1.56 |  |  |
| -3.36 | -2.13 | -0.58 |  |  |
| 1.71  | -1.94 | -3.24 |  |  |
| 1.64  | -1.68 | -2.92 |  |  |
| 1.56  | -0.28 | -1.45 |  |  |
| 1.41  | -2.63 | -3.66 |  |  |
| 2.16  | 2.42  | 1.12  |  |  |
| 2.11  | 2.72  | 1.45  |  |  |
| 2.07  | -0.32 | -1.56 |  |  |
| 1.89  | -0.96 | -2.07 |  |  |
| 1.78  | -0.18 | -1.21 |  |  |
| -2.29 | -1.27 | -0.27 |  |  |
| -2.39 | -1.11 | -0.05 |  |  |
| -2.76 | -2.83 | -1.56 |  |  |
| -3.36 | -2.13 | -0.58 |  |  |
| 1.72  | 0.56  | -0.74 |  |  |
| 1.69  | -2.17 | -3.46 |  |  |
| 1.57  | 1.12  | -0.05 |  |  |
| 1.8   | -2.68 | -3.98 |  |  |
| 1.7   | -2.58 | -3.79 |  |  |
| -2.93 | -3.72 | -2.62 |  |  |
| 2.03  | -1.07 | -2.37 |  |  |
| 1.83  | 2.07  | 0.92  |  |  |
| 2.29  | -2.24 | -3.54 |  |  |
| 2.15  | -0.52 | -1.73 |  |  |
| -4.72 | -3.68 | -1.54 |  |  |
| 1.27  | -2.69 | -3.99 |  |  |
| 1.25  | -2.7  | -3.98 |  |  |
| 1.2   | 0.73  | -0.5  |  |  |
| 1.09  | -1.2  | -2.28 |  |  |
| 6.72  | -1.38 | -2.68 |  |  |
| 1.16  | -0.58 | 0.65  |  |  |
| 1.1   | 3.45  | 4.77  |  |  |
| -1.04 | -1.58 | -0.07 |  |  |
| -1.21 | -1.32 | 0.41  |  |  |
| 1.83  | 3.08  | 1.78  |  |  |
| 1.69  | 0.73  | -0.46 |  |  |
| -3.08 | -1.28 | -0.09 |  |  |

|        |       |       |  |  |
|--------|-------|-------|--|--|
| -3.18  | -1    | 0.24  |  |  |
| -3.69  | -3.48 | -2.02 |  |  |
| 2.7    | -2.61 | -3.91 |  |  |
| -1.84  | -3.78 | -2.77 |  |  |
| 1.69   | 4.25  | 2.94  |  |  |
| 1.48   | -1.03 | -2.13 |  |  |
| 1.41   | 1.23  | 0.2   |  |  |
| 3.88   | 0.1   | -1.2  |  |  |
| -1.77  | 1.1   | 2.58  |  |  |
| 2.54   | -0.63 | -1.92 |  |  |
| -2.92  | -1.06 | 0.54  |  |  |
| 1.31   | 1.26  | -0.03 |  |  |
| 1.06   | 3.08  | 2.08  |  |  |
| 1.9    | -2.95 | -4.24 |  |  |
| 1.73   | 5.54  | 4.38  |  |  |
| 1.62   | 0.74  | -0.33 |  |  |
| 1.08   | 1.32  | 0.03  |  |  |
| 1.03   | -3.4  | -4.63 |  |  |
| 1      | -3.33 | -4.51 |  |  |
| -1.09  | -4.04 | -5.09 |  |  |
| -4.81  | -0.84 | 0.24  |  |  |
| 1.06   | -5.26 | -6.55 |  |  |
| 1.01   | -3.73 | -4.94 |  |  |
| -1.12  | -4.27 | -5.31 |  |  |
| -5.46  | -3.23 | -1.99 |  |  |
| -11.77 | -4.47 | -2.11 |  |  |
| -16.93 | -5.25 | -2.37 |  |  |
| 2.07   | -0.23 | -1.53 |  |  |
| -3.24  | 0.01  | 1.47  |  |  |
| -4.84  | -0.2  | 1.83  |  |  |
| 1.62   | -2.13 | -3.42 |  |  |
| 1.45   | -4.15 | -5.29 |  |  |
| 1.35   | -0.39 | -1.42 |  |  |
| 1.62   | 2.39  | 1.09  |  |  |
| 1.51   | -0.21 | -1.4  |  |  |
| 1.36   | 1.36  | 0.32  |  |  |
| 1.36   | 2.45  | 1.42  |  |  |
| -3.07  | -1.03 | -0.01 |  |  |
| -3.46  | -0.04 | 1.15  |  |  |
| -6.4   | -0.49 | 1.59  |  |  |
| 2.01   | -2.91 | -4.2  |  |  |
| 1.97   | -4.55 | -5.82 |  |  |
| 1.94   | 0.53  | -0.71 |  |  |
| 2.46   | 1.59  | 0.29  |  |  |
| -2.13  | -3    | -1.9  |  |  |
| -2.24  | -1.19 | -0.02 |  |  |
| -2.77  | -3.03 | -1.56 |  |  |
| 1.63   | 6.89  | 5.6   |  |  |
| 1.59   | 0.21  | -1.05 |  |  |
| 1.46   | 2.43  | 1.29  |  |  |
| -5.65  | -0.33 | 1.59  |  |  |
| 2.32   | -2.9  | -4.19 |  |  |
| -2.43  | -1.66 | -0.45 |  |  |
| 1.92   | -0.2  | -1.49 |  |  |
| -2.6   | 1.13  | 2.16  |  |  |
| -3.9   | -1.25 | 0.37  |  |  |
| 4.47   | 0.7   | -0.59 |  |  |
| -1.11  | -1.81 | -0.78 |  |  |

|        |       |       |  |  |
|--------|-------|-------|--|--|
| -1.12  | 0.18  | 1.22  |  |  |
| -1.2   | -0.06 | 1.07  |  |  |
| -1.36  | 1.48  | 2.8   |  |  |
| -1.52  | 0.28  | 1.75  |  |  |
| 8.63   | 0.05  | -1.24 |  |  |
| 1.68   | 1.9   | 2.96  |  |  |
| 1.01   | 0.4   | 2.21  |  |  |
| 1.4    | 2     | 0.71  |  |  |
| 1.35   | 0.39  | -0.85 |  |  |
| -3.73  | -0.11 | 0.98  |  |  |
| -4.12  | -3.3  | -2.06 |  |  |
| -5.91  | -2.09 | -0.34 |  |  |
| -7.44  | -2.63 | -0.55 |  |  |
| -12.27 | -3.63 | -0.82 |  |  |
| 2.34   | 3.92  | 2.63  |  |  |
| 2.27   | 2.08  | 0.83  |  |  |
| 2.14   | 0.09  | -1.07 |  |  |
| 1.65   | -3.12 | -4.41 |  |  |
| -3.81  | -2.97 | -1.61 |  |  |
| 2.29   | -2.57 | -3.86 |  |  |
| 2.29   | -1.06 | -2.36 |  |  |
| 1.93   | -0.19 | -1.24 |  |  |
| 2.29   | -2.57 | -3.86 |  |  |
| 2.29   | -1.06 | -2.36 |  |  |
| 1.93   | -0.19 | -1.24 |  |  |
| 1.11   | 2.18  | 0.89  |  |  |
| 1.01   | 3.24  | 2.09  |  |  |
| 1.01   | -1.49 | -2.65 |  |  |
| -1.02  | 4.13  | 3.02  |  |  |
| -1.05  | 1.04  | -0.03 |  |  |
| 1.58   | -2.26 | -3.55 |  |  |
| 1.45   | -2.87 | -4.03 |  |  |
| 1.72   | 0.26  | -1.03 |  |  |
| 1.5    | 5.42  | 4.33  |  |  |
| 1.44   | -0.23 | -1.27 |  |  |
| -2.97  | -1.58 | -0.52 |  |  |
| -3.01  | -2.58 | -1.5  |  |  |
| -3.14  | -2.07 | -0.93 |  |  |
| 1.75   | -1.62 | -2.91 |  |  |
| 1.74   | 0.87  | -0.41 |  |  |
| 1.82   | -0.74 | -2.03 |  |  |
| 1.56   | -0.63 | -1.7  |  |  |
| -3.17  | -2.62 | -1.38 |  |  |
| 2.02   | -0.56 | -1.85 |  |  |
| -3.47  | -4.98 | -3.46 |  |  |
| 1.85   | 0.57  | -0.71 |  |  |
| 1.54   | 0.54  | -0.49 |  |  |
| -3.2   | -3.16 | -1.89 |  |  |
| -3.19  | -3.36 | -2.09 |  |  |
| -6.08  | -1.9  | 0.3   |  |  |
| 2.38   | -2.14 | -3.43 |  |  |
| 2.2    | 1.97  | 0.8   |  |  |
| -2.2   | -1.48 | -0.38 |  |  |
| -2.67  | -1.98 | -0.6  |  |  |
| 13.16  | 0.58  | -0.71 |  |  |
| 11.95  | 0.02  | -1.12 |  |  |
| 2.29   | -0.13 | 1.11  |  |  |
| 1.95   | -1.08 | 0.39  |  |  |

|        |       |       |  |  |
|--------|-------|-------|--|--|
| 1.93   | -4.39 | -2.9  |  |  |
| 1.62   | -2.62 | -0.89 |  |  |
| 1.17   | -2.03 | 0.17  |  |  |
| 1.16   | -2.93 | -0.71 |  |  |
| -1.01  | -6.64 | -4.2  |  |  |
| 1.6    | -0.56 | -1.85 |  |  |
| -3.08  | -2.3  | -1.28 |  |  |
| -3.94  | -1.16 | 0.21  |  |  |
| -4.04  | -0.85 | 0.55  |  |  |
| -6.47  | -4.38 | -2.29 |  |  |
| -10.31 | -4.09 | -1.33 |  |  |
| 1.72   | 2.78  | 1.49  |  |  |
| 1.49   | 2.77  | 1.7   |  |  |
| -3.93  | -2.72 | -1.25 |  |  |
| 1.31   | 1.62  | 0.33  |  |  |
| -3.81  | -1.61 | -0.58 |  |  |
| -3.99  | -1.68 | -0.59 |  |  |
| 9.68   | -0.74 | -2.02 |  |  |
| 1.8    | -1.94 | -0.8  |  |  |
| 1.77   | -0.33 | 0.84  |  |  |
| 1.67   | -0.15 | 1.1   |  |  |
| 1.42   | 1.55  | 0.26  |  |  |
| 1.26   | -3.26 | -4.38 |  |  |
| 1.24   | 3.74  | 2.66  |  |  |
| 1.16   | -1.33 | -2.33 |  |  |
| -5.11  | -4.39 | -2.82 |  |  |
| 1.1    | 2.2   | 0.91  |  |  |
| -6.39  | 1.28  | 2.8   |  |  |
| -9.98  | 1.3   | 3.47  |  |  |
| -12.82 | 0.89  | 3.42  |  |  |
| -21.24 | 0.11  | 3.37  |  |  |
| 1.67   | 2.93  | 1.64  |  |  |
| -4.69  | -4.28 | -2.59 |  |  |
| 1.06   | 1.27  | -0.01 |  |  |
| -5.97  | -3.58 | -2.19 |  |  |
| 1.46   | -4.05 | -5.33 |  |  |
| 1.28   | -3.18 | -4.26 |  |  |
| 16.09  | 0.28  | -1    |  |  |
| 3.13   | -0.94 | 0.14  |  |  |
| 2.65   | -1.82 | -0.5  |  |  |
| 2.61   | -2.54 | -1.2  |  |  |
| 2.25   | -0.08 | 1.47  |  |  |
| 2.12   | -2.04 | -0.4  |  |  |
| 2.04   | -1.76 | -0.05 |  |  |
| 1.9    | -1.27 | 0.53  |  |  |
| 1.87   | -1.89 | -0.07 |  |  |
| 1.8    | -2.72 | -0.85 |  |  |
| 1.69   | -0.97 | 1     |  |  |
| 1.68   | -2.17 | -0.18 |  |  |
| 1.61   | -0.85 | 1.19  |  |  |
| 1.52   | -0.24 | 1.88  |  |  |
| 1.49   | 0.14  | 2.29  |  |  |
| 1.48   | 0.93  | 3.09  |  |  |
| 1.29   | -3.4  | -1.03 |  |  |
| 1.23   | -2.55 | -0.11 |  |  |
| 1.04   | -0.48 | 2.19  |  |  |
| -1.08  | 0.74  | 3.58  |  |  |
| -1.09  | 6.16  | 9.01  |  |  |

|       |       |       |  |  |
|-------|-------|-------|--|--|
| -1.14 | 0.41  | 3.33  |  |  |
| -1.17 | -3.3  | -0.34 |  |  |
| -1.24 | 2.23  | 5.26  |  |  |
| 3.02  | -2.33 | -3.61 |  |  |
| -1.66 | -1.2  | -0.15 |  |  |
| -1.75 | -0.55 | 0.57  |  |  |
| 10.79 | 0.63  | -0.65 |  |  |
| 10.18 | -0.14 | -1.34 |  |  |
| 10.07 | -0.5  | -1.68 |  |  |
| 2.22  | -1.63 | -0.63 |  |  |
| 2.1   | 0.16  | 1.24  |  |  |
| 1.95  | -3.65 | -2.46 |  |  |
| 1.82  | -2.14 | -0.86 |  |  |
| 1.74  | 0.24  | 1.59  |  |  |
| 1.69  | -3.63 | -2.23 |  |  |
| 1.66  | 1.04  | 2.46  |  |  |
| 1.43  | -4.25 | -2.61 |  |  |
| 1.39  | 1.93  | 3.61  |  |  |
| 1.25  | -3.48 | -1.65 |  |  |
| 1.17  | -1.05 | 0.87  |  |  |
| 1.02  | -4.39 | -2.27 |  |  |
| -1.14 | -4.19 | -1.85 |  |  |
| -1.39 | -4.05 | -1.42 |  |  |
| 1.95  | -2.84 | -4.12 |  |  |
| 1.65  | -1.66 | -2.7  |  |  |
| -2.79 | -1.9  | -0.74 |  |  |
| 3.71  | -0.45 | -1.73 |  |  |
| 3.33  | 0.26  | -0.86 |  |  |
| 3.12  | 0.18  | -0.85 |  |  |
| -1.55 | -1.55 | -0.31 |  |  |
| -1.93 | 0.53  | 2.09  |  |  |
| 3.32  | 1.27  | -0.02 |  |  |
| 3.11  | 1.72  | 0.54  |  |  |
| 2.97  | 1.29  | 0.17  |  |  |
| -1.58 | -0.45 | 0.66  |  |  |
| 1.75  | 2.44  | 1.16  |  |  |
| 1.73  | -0.6  | -1.86 |  |  |
| 1.44  | 1     | 0     |  |  |
| 1.85  | 1.82  | 0.54  |  |  |
| 1.79  | 1.86  | 0.63  |  |  |
| 1.72  | 1.28  | 0.1   |  |  |
| 2.3   | -0.64 | -1.92 |  |  |
| 2.13  | 0.12  | -1.05 |  |  |
| -2.2  | -2.36 | -1.3  |  |  |
| -3.74 | -0.73 | 1.1   |  |  |
| 2.6   | -4.99 | -6.27 |  |  |
| 2.26  | -3.17 | -4.25 |  |  |
| -2.18 | -6.74 | -5.52 |  |  |
| -2.2  | -2.99 | -1.75 |  |  |
| -2.64 | -6.06 | -4.56 |  |  |
| 3.28  | 0.61  | -0.67 |  |  |
| 3     | 0.33  | -0.82 |  |  |
| 2.9   | -0.55 | -1.65 |  |  |
| 2.82  | 1.84  | 0.78  |  |  |
| 2.81  | 0.06  | -1    |  |  |
| 2.84  | -0.59 | -1.87 |  |  |
| 2.47  | -0.76 | -1.84 |  |  |
| 2.34  | -3.31 | -4.32 |  |  |

|       |       |       |  |  |
|-------|-------|-------|--|--|
| -1.74 | -1.91 | -0.89 |  |  |
| -1.76 | -4.79 | -3.75 |  |  |
| -1.76 | -0.04 | 1     |  |  |
| -1.98 | -1.91 | -0.71 |  |  |
| -2.16 | -1.83 | -0.5  |  |  |
| -2.16 | -2.43 | -1.1  |  |  |
| -2.21 | -4.36 | -3    |  |  |
| 1.3   | -3.35 | -4.63 |  |  |
| -8.03 | -4.43 | -2.33 |  |  |
| 1.86  | -4.31 | -5.59 |  |  |
| 1.61  | -5.62 | -6.7  |  |  |
| -4.46 | -7.55 | -5.78 |  |  |
| 1.9   | -2.01 | -3.29 |  |  |
| 1.66  | 1.49  | 0.4   |  |  |
| 1.58  | -1.3  | -2.31 |  |  |
| -2.87 | -2.01 | -0.84 |  |  |
| -3.17 | -3.23 | -1.91 |  |  |
| 1.05  | -4.81 | -6.09 |  |  |
| -5.23 | -4.16 | -2.98 |  |  |
| -5.28 | -7.61 | -6.43 |  |  |
| 2.39  | 1.44  | 0.16  |  |  |
| 2.06  | 1.28  | 0.22  |  |  |
| 2.89  | 1.01  | -0.27 |  |  |
| -1.83 | 3.32  | 4.44  |  |  |
| -2.22 | 1.98  | 3.38  |  |  |
| 1.39  | -2.61 | -3.89 |  |  |
| 1.31  | -0.07 | -1.26 |  |  |
| 1.19  | -2.5  | -3.56 |  |  |
| 1.15  | 1.05  | 0.05  |  |  |
| 1.74  | -2.95 | -4.24 |  |  |
| -2.98 | -4.66 | -3.57 |  |  |
| -4.14 | -5.93 | -4.36 |  |  |
| 2.16  | 0.01  | -1.27 |  |  |
| 1.99  | -0.08 | -1.24 |  |  |
| 2.19  | -2.94 | -4.22 |  |  |
| 1.91  | -5.75 | -6.83 |  |  |
| -2.33 | -3.48 | -2.41 |  |  |
| -2.93 | -2.57 | -1.17 |  |  |
| -3    | -6.24 | -4.81 |  |  |
| 2.16  | 2.65  | 1.37  |  |  |
| 1.89  | -0.73 | -1.82 |  |  |
| 1.78  | 0.04  | -0.96 |  |  |
| -2.29 | -1.04 | -0.01 |  |  |
| -2.39 | -0.88 | 0.21  |  |  |
| -2.76 | -2.6  | -1.31 |  |  |
| -3.36 | -1.9  | -0.32 |  |  |
| 2.16  | 2.43  | 1.15  |  |  |
| 2.11  | 2.73  | 1.49  |  |  |
| 2.07  | -0.31 | -1.53 |  |  |
| 1.89  | -0.95 | -2.04 |  |  |
| 1.78  | -0.17 | -1.18 |  |  |
| -2.29 | -1.26 | -0.23 |  |  |
| -2.39 | -1.1  | -0.01 |  |  |
| -2.76 | -2.82 | -1.52 |  |  |
| -3.36 | -2.12 | -0.54 |  |  |
| 1.71  | -1.95 | -3.23 |  |  |
| 1.64  | -1.69 | -2.91 |  |  |
| 1.56  | -0.29 | -1.44 |  |  |

|       |       |       |  |  |
|-------|-------|-------|--|--|
| 1.41  | -2.64 | -3.65 |  |  |
| 1.2   | -7.41 | -8.68 |  |  |
| 1.15  | -4.8  | -6.01 |  |  |
| -4.33 | -7.75 | -6.64 |  |  |
| -4.55 | -6.41 | -5.24 |  |  |
| -4.64 | -5.22 | -4.02 |  |  |
| 1.67  | -1.41 | -2.69 |  |  |
| 1.62  | -1.66 | -2.89 |  |  |
| -2.93 | -4.12 | -3.1  |  |  |
| -2.98 | -5.29 | -4.24 |  |  |
| -3.32 | -4.15 | -2.95 |  |  |
| 5.67  | -1.39 | -2.66 |  |  |
| 1.13  | -5.01 | -3.96 |  |  |
| 1.13  | -3.68 | -2.62 |  |  |
| 1.07  | -3.72 | -2.58 |  |  |
| 1.03  | -0.96 | 0.23  |  |  |
| -1.02 | -3.68 | -2.42 |  |  |
| -1.3  | -5.31 | -3.7  |  |  |
| 1.87  | -1.37 | -2.64 |  |  |
| 1.59  | 3.11  | 2.07  |  |  |
| -2.92 | -2.6  | -1.42 |  |  |
| -2.96 | 0.35  | 1.55  |  |  |
| -3.92 | -2.73 | -1.13 |  |  |
| 1.19  | 6.03  | 4.76  |  |  |
| 1.14  | 2.83  | 1.6   |  |  |
| 1.07  | 1.58  | 0.45  |  |  |
| 1.01  | 0.68  | -0.36 |  |  |
| 3.16  | -4.87 | -6.14 |  |  |
| 2.99  | -4.76 | -5.96 |  |  |
| 2.95  | -3.57 | -4.75 |  |  |
| 2.94  | -6.19 | -7.37 |  |  |
| 2.87  | -2.1  | -3.24 |  |  |
| 2.79  | -3.48 | -4.58 |  |  |
| 2.74  | -1.86 | -2.94 |  |  |
| 2.66  | -4.56 | -5.59 |  |  |
| 2.64  | -6.01 | -7.03 |  |  |
| 2.61  | -2.67 | -3.68 |  |  |
| 2.61  | -1.62 | -2.62 |  |  |
| -1.61 | -6.81 | -5.74 |  |  |
| 1.52  | -2.51 | -3.78 |  |  |
| 1.52  | -0.73 | -2.01 |  |  |
| 1.45  | -2.36 | -3.57 |  |  |
| 1.35  | -2.42 | -3.52 |  |  |
| 1.34  | -0.3  | -1.39 |  |  |
| 1.32  | -0.7  | -1.77 |  |  |
| 1.28  | -0.39 | -1.41 |  |  |
| -3.8  | -2.98 | -1.73 |  |  |
| -4.46 | -3.11 | -1.63 |  |  |
| 1.23  | 4.07  | 2.8   |  |  |
| 1.05  | -0.06 | -1.1  |  |  |
| 1.05  | -0.68 | -1.72 |  |  |
| 1.25  | -0.96 | -2.24 |  |  |
| 1.22  | -1.03 | -2.29 |  |  |
| 1.22  | -1.72 | -2.97 |  |  |
| 1.2   | -1.04 | -2.26 |  |  |
| 1.05  | 3.89  | 2.86  |  |  |
| 1.03  | 0.28  | -0.72 |  |  |
| -4.64 | -2.83 | -1.57 |  |  |



|       |       |       |  |  |
|-------|-------|-------|--|--|
| -5.4  | -3.77 | -2.29 |  |  |
| 1.23  | -2.03 | -3.3  |  |  |
| 1.07  | -1.34 | -2.42 |  |  |
| -4.54 | -3.87 | -2.66 |  |  |
| 1.55  | -2.15 | -3.42 |  |  |
| 1.32  | 3.72  | 2.67  |  |  |
| -3.18 | -1.95 | -0.93 |  |  |
| -5.42 | -1.58 | 0.22  |  |  |
| 1.49  | -1.22 | -2.49 |  |  |
| 1.39  | -1.31 | -2.48 |  |  |
| 1.26  | -2.94 | -3.97 |  |  |
| -3.25 | -3.85 | -2.85 |  |  |
| -3.44 | -1.05 | 0.04  |  |  |
| -3.47 | -2.02 | -0.92 |  |  |
| -3.63 | -5.13 | -3.97 |  |  |
| -6.63 | -4.84 | -2.81 |  |  |
| 1.55  | -0.64 | -1.92 |  |  |
| 1.47  | -4.78 | -5.98 |  |  |
| 1.28  | -1.06 | -2.06 |  |  |
| 2.16  | 2.43  | 1.15  |  |  |
| 2.11  | 2.73  | 1.49  |  |  |
| 2.07  | -0.31 | -1.53 |  |  |
| 1.89  | -0.95 | -2.04 |  |  |
| 1.78  | -0.18 | -1.17 |  |  |
| -2.29 | -1.26 | -0.23 |  |  |
| -2.39 | -1.11 | -0.01 |  |  |
| -2.76 | -2.82 | -1.52 |  |  |
| -3.36 | -2.12 | -0.54 |  |  |
| 2.53  | -0.61 | -1.88 |  |  |
| -2.23 | -2.32 | -1.1  |  |  |
| -2.56 | -2.08 | -0.66 |  |  |
| 2.88  | 0.95  | -0.32 |  |  |
| -2.2  | -0.87 | 0.52  |  |  |
| -2.21 | -2.78 | -1.37 |  |  |
| 3.31  | -4.81 | -6.09 |  |  |
| -1.87 | -4.73 | -3.38 |  |  |
| 2.75  | -1.33 | -2.6  |  |  |
| -1.8  | -1.61 | -0.58 |  |  |
| 1.88  | -4.46 | -5.74 |  |  |
| 1.81  | -3.28 | -4.51 |  |  |
| 1.69  | 0.23  | -1.05 |  |  |
| -3.54 | 0.43  | 1.73  |  |  |
| 4.15  | -0.62 | -1.89 |  |  |
| 4.06  | 0.02  | -1.23 |  |  |
| -2.99 | -4.86 | -2.5  |  |  |
| 1.61  | -2.27 | -3.54 |  |  |
| 1.49  | -3.36 | -4.51 |  |  |
| 1.37  | 1.83  | 0.8   |  |  |
| 2.12  | -3.15 | -4.42 |  |  |
| -2.35 | -1.48 | -0.43 |  |  |
| -4.51 | -4.11 | -2.13 |  |  |
| 1.97  | 1.24  | -0.03 |  |  |
| 1.96  | 2.19  | 0.93  |  |  |
| 1.76  | -1.34 | -2.45 |  |  |
| 1.69  | 2.88  | 1.84  |  |  |
| -2.56 | -2.48 | -1.41 |  |  |
| -2.76 | -2.45 | -1.27 |  |  |
| -2.8  | -4.35 | -3.16 |  |  |

|       |       |       |  |  |
|-------|-------|-------|--|--|
| 2.38  | -0.8  | -2.07 |  |  |
| 2.36  | -1.15 | -2.4  |  |  |
| 2.27  | -2.14 | -3.34 |  |  |
| 2.14  | -1.24 | -2.36 |  |  |
| -2.18 | -3.48 | -2.37 |  |  |
| -3.12 | -3.11 | -1.48 |  |  |
| -3.77 | -2.17 | -0.27 |  |  |
| 1.99  | -2.42 | -3.68 |  |  |
| 1.9   | -2.47 | -3.67 |  |  |
| -3.32 | -1.3  | 0.16  |  |  |
| 2.24  | 4.24  | 2.97  |  |  |
| 2.13  | 1.06  | -0.14 |  |  |
| 2.06  | 0.1   | -1.06 |  |  |
| -2.48 | -0.39 | 0.81  |  |  |
| -3.05 | 1.64  | 3.14  |  |  |
| 1.72  | 2.84  | 1.58  |  |  |
| 1.69  | 0.98  | -0.27 |  |  |
| 2.8   | -2.08 | -3.34 |  |  |
| 2.39  | 2.89  | 1.85  |  |  |
| -1.75 | -3.82 | -2.79 |  |  |
| -1.78 | -4.11 | -3.06 |  |  |
| -1.84 | -2.73 | -1.64 |  |  |
| -1.85 | -3.23 | -2.12 |  |  |
| -2.55 | -3.81 | -2.24 |  |  |
| 16.78 | -2.81 | -4.08 |  |  |
| 14.08 | -0.12 | -1.14 |  |  |
| 3.29  | -3.07 | -1.99 |  |  |
| 1.64  | -0.26 | 1.83  |  |  |
| 1.63  | -7.56 | -5.46 |  |  |
| 1.35  | -1.81 | 0.56  |  |  |
| 1.18  | -6.69 | -4.13 |  |  |
| -1.02 | -0.09 | 2.74  |  |  |
| -1.06 | -0.69 | 2.19  |  |  |
| -1.07 | 2.43  | 5.32  |  |  |
| 1.48  | 1.9   | 0.63  |  |  |
| 1.29  | 0.93  | -0.14 |  |  |
| 1.24  | 3.23  | 2.21  |  |  |
| 17.18 | -0.82 | -2.09 |  |  |
| 15.68 | -1.58 | -2.72 |  |  |
| 2.63  | 0.61  | 2.05  |  |  |
| 1.89  | -5.63 | -3.71 |  |  |
| 1.51  | -6.66 | -4.42 |  |  |
| 1.51  | -6.55 | -4.31 |  |  |
| 1.44  | -6.11 | -3.8  |  |  |
| 1.36  | -4.05 | -1.66 |  |  |
| 1.34  | -5.62 | -3.21 |  |  |
| 1.32  | -6.26 | -3.83 |  |  |
| 1.29  | -5.18 | -2.71 |  |  |
| 1.28  | -5.59 | -3.12 |  |  |
| 1.21  | -2    | 0.56  |  |  |
| 1.11  | -4.05 | -1.37 |  |  |
| 1.11  | -5.28 | -2.6  |  |  |
| 1.09  | -6.24 | -3.53 |  |  |
| 1.08  | -7.55 | -4.83 |  |  |
| 1.07  | -6.16 | -3.43 |  |  |
| 1.07  | -1.8  | 0.94  |  |  |
| 1.05  | -5.69 | -2.93 |  |  |
| -1.07 | -6.68 | -3.75 |  |  |

|       |       |       |  |  |
|-------|-------|-------|--|--|
| -1.08 | -5.48 | -2.53 |  |  |
| -1.19 | -8.72 | -5.63 |  |  |
| -1.25 | -4.96 | -1.81 |  |  |
| 1.46  | -3.47 | -4.73 |  |  |
| 1.37  | -3.95 | -5.13 |  |  |
| -4.49 | -4.06 | -2.61 |  |  |
| -4.68 | -5.05 | -3.55 |  |  |
| 2.35  | -0.16 | -1.43 |  |  |
| -2.56 | 0.56  | 1.88  |  |  |
| 2.37  | 3     | 1.73  |  |  |
| -2.09 | -3.1  | -2.06 |  |  |
| -2.12 | -2.46 | -1.4  |  |  |
| -2.21 | -1.81 | -0.68 |  |  |
| -2.43 | -1.88 | -0.62 |  |  |
| -2.69 | 1.96  | 3.37  |  |  |
| 2.84  | 4.53  | 3.27  |  |  |
| 2.4   | -0.15 | -1.18 |  |  |
| 2.04  | 3     | 1.73  |  |  |
| -2.64 | -0.7  | 0.45  |  |  |
| 2.29  | -2.54 | -3.81 |  |  |
| 2.29  | -1.03 | -2.3  |  |  |
| 1.93  | -0.16 | -1.19 |  |  |
| 2.29  | -2.54 | -3.81 |  |  |
| 2.29  | -1.03 | -2.3  |  |  |
| 1.93  | -0.16 | -1.19 |  |  |
| 2.29  | -2.54 | -3.81 |  |  |
| 2.29  | -1.03 | -2.3  |  |  |
| 1.93  | -0.16 | -1.19 |  |  |
| 2.29  | -2.54 | -3.81 |  |  |
| 2.29  | -1.03 | -2.3  |  |  |
| 1.93  | -0.16 | -1.19 |  |  |
| 1.49  | -2.05 | -3.33 |  |  |
| 1.41  | -4.16 | -5.35 |  |  |
| 1.23  | -0.4  | -1.4  |  |  |
| 1.79  | -0.15 | -1.41 |  |  |
| 1.76  | -0.67 | -1.91 |  |  |
| -2.71 | 1.1   | 2.11  |  |  |
| -3.18 | -1.24 | 0     |  |  |
| -3.37 | -1.72 | -0.39 |  |  |
| 2.43  | 2.37  | 1.1   |  |  |
| -2.51 | -1.69 | -0.35 |  |  |
| -2.86 | -2.11 | -0.58 |  |  |
| -3.09 | -2.4  | -0.76 |  |  |
| -4.75 | -2.57 | -0.3  |  |  |
| 2.17  | 2     | 0.74  |  |  |
| 2.06  | 0.22  | -0.97 |  |  |
| 7.42  | -1.22 | -2.49 |  |  |
| 6.49  | -2.65 | -3.72 |  |  |
| 1.54  | 0.54  | 1.54  |  |  |
| 1.18  | 0.16  | 1.55  |  |  |
| 1.17  | -3.99 | -2.6  |  |  |
| 1.06  | -2.87 | -1.32 |  |  |
| 1.02  | -4.09 | -2.49 |  |  |
| -1.09 | 4.48  | 6.23  |  |  |
| -1.1  | -4.7  | -2.93 |  |  |
| -1.47 | -2.25 | -0.07 |  |  |
| 1.94  | -2.1  | -3.36 |  |  |
| -2.91 | -2.74 | -1.5  |  |  |

|       |       |       |  |  |
|-------|-------|-------|--|--|
| 6.43  | 1.4   | 0.14  |  |  |
| 5.85  | -2.23 | -3.36 |  |  |
| 5.86  | -2.98 | -4.11 |  |  |
| 5.81  | 1.48  | 0.37  |  |  |
| 5.44  | -2.16 | -3.18 |  |  |
| 1.34  | -2.15 | -1.15 |  |  |
| 1.25  | 1.1   | 2.21  |  |  |
| 1.24  | -3.04 | -1.93 |  |  |
| 1.21  | -1.88 | -0.74 |  |  |
| 1.22  | -1.05 | 0.1   |  |  |
| 1.17  | 2.09  | 3.29  |  |  |
| 1.17  | -3.83 | -2.63 |  |  |
| 1.15  | 0.47  | 1.7   |  |  |
| 1.1   | -1.34 | -0.05 |  |  |
| 1.09  | 0.78  | 2.08  |  |  |
| 1.04  | -2.33 | -0.96 |  |  |
| 1.03  | -1.23 | 0.16  |  |  |
| 1.01  | -1.67 | -0.26 |  |  |
| 1     | -2.72 | -1.3  |  |  |
| -1.01 | -0.29 | 1.15  |  |  |
| -1.08 | -2.69 | -1.16 |  |  |
| -1.16 | -2.37 | -0.73 |  |  |
| -1.2  | -4.81 | -3.13 |  |  |
| 1.33  | -3.08 | -4.34 |  |  |
| 1.28  | 0.29  | -0.91 |  |  |
| 1.22  | -0.89 | -2.03 |  |  |
| 1.18  | 3.53  | 2.45  |  |  |
| -3.84 | -2.46 | -1.37 |  |  |
| 3.64  | 1.65  | 0.38  |  |  |
| -1.49 | -2.31 | -1.14 |  |  |
| -1.57 | -2.08 | -0.83 |  |  |
| 1.18  | 4.14  | 2.87  |  |  |
| 1.07  | 1.91  | 0.79  |  |  |
| 1.02  | -0.47 | -1.51 |  |  |
| 2.8   | 1.98  | 0.71  |  |  |
| 2.68  | 1.57  | 0.37  |  |  |
| -1.83 | 3.67  | 4.76  |  |  |
| 2.63  | 4.27  | 3.01  |  |  |
| -1.83 | 3.95  | 4.96  |  |  |
| -2.22 | 2.61  | 3.89  |  |  |
| 2.03  | -0.31 | -1.57 |  |  |
| 1.9   | -2.64 | -3.8  |  |  |
| 1.78  | -1.43 | -2.5  |  |  |
| 1.68  | -0.4  | -1.66 |  |  |
| 1.54  | 2.18  | 1.05  |  |  |
| 1.46  | 1.77  | 0.72  |  |  |
| 1.47  | 1.06  | -0.2  |  |  |
| 1.46  | -0.96 | -2.21 |  |  |
| 1.4   | 3.22  | 2.02  |  |  |
| 1.4   | -1.6  | -2.79 |  |  |
| 1.32  | 0.37  | -0.73 |  |  |
| 1.25  | 0.11  | -0.91 |  |  |
| 1.24  | 1.03  | 0.02  |  |  |
| 1.59  | 3.53  | 2.27  |  |  |
| 1.44  | 4.71  | 3.6   |  |  |
| 1.34  | 3.2   | 2.19  |  |  |
| -3.04 | 0.11  | 1.13  |  |  |
| -3.06 | -2.12 | -1.09 |  |  |

|       |       |       |  |  |
|-------|-------|-------|--|--|
| -4.69 | -1.2  | 0.45  |  |  |
| 2.52  | -2.23 | -3.49 |  |  |
| 2.19  | -1.18 | -2.23 |  |  |
| -2.19 | -1.81 | -0.6  |  |  |
| 1.41  | -2.19 | -3.44 |  |  |
| 1.34  | 2.92  | 1.74  |  |  |
| 1.28  | 0.59  | -0.52 |  |  |
| 1.23  | -3.13 | -4.18 |  |  |
| -4.71 | -2.92 | -1.44 |  |  |
| 2.72  | 1.89  | 0.64  |  |  |
| -1.81 | -0.98 | 0.06  |  |  |
| -2.14 | 0.68  | 1.97  |  |  |
| -3.26 | -1.24 | 0.65  |  |  |
| 2.46  | -4.42 | -5.68 |  |  |
| 2.15  | 1.96  | 0.89  |  |  |
| -1.98 | -1.02 | 0     |  |  |
| -2.01 | -2.46 | -1.42 |  |  |
| -2.04 | -5.07 | -4.01 |  |  |
| -2.08 | -1.47 | -0.37 |  |  |
| -2.11 | -2.52 | -1.41 |  |  |
| -2.27 | -3.05 | -1.83 |  |  |
| -2.38 | -2.5  | -1.21 |  |  |
| -2.52 | -2.45 | -1.08 |  |  |
| -2.65 | -2.64 | -1.2  |  |  |
| -2.66 | -2.01 | -0.56 |  |  |
| -2.92 | -3.67 | -2.09 |  |  |
| 2.81  | 0.22  | -1.04 |  |  |
| -2.63 | -1.47 | 0.16  |  |  |
| 1.1   | 7.95  | 6.69  |  |  |
| 1.06  | 2.32  | 1.12  |  |  |
| -1.02 | -0.21 | -1.31 |  |  |
| -1.08 | 5.57  | 4.55  |  |  |
| 2.43  | -0.64 | -1.89 |  |  |
| -1.96 | 0.5   | 1.5   |  |  |
| -2.16 | -3.71 | -2.57 |  |  |
| 2.56  | -1.25 | -2.5  |  |  |
| -1.93 | -3.58 | -2.52 |  |  |
| -2.03 | -3.85 | -2.73 |  |  |
| -2.38 | -4.22 | -2.87 |  |  |
| -2.48 | -4.69 | -3.27 |  |  |
| -2.67 | -3.83 | -2.3  |  |  |
| 2.41  | -0.72 | -1.98 |  |  |
| -2.11 | -4.71 | -3.62 |  |  |
| 1.55  | -2.21 | -3.46 |  |  |
| 1.51  | -3.56 | -4.77 |  |  |
| 1.46  | -2    | -3.16 |  |  |
| 1.85  | -2.97 | -4.23 |  |  |
| 1.69  | -0.56 | -1.69 |  |  |
| 1.66  | 1.65  | 0.55  |  |  |
| -2.67 | -4.1  | -3.05 |  |  |
| 1.23  | 1.13  | -0.12 |  |  |
| 1.12  | 0.42  | -0.71 |  |  |
| 1.11  | 5.92  | 4.8   |  |  |
| 1.08  | 3.77  | 2.69  |  |  |
| -3.99 | -2.42 | -1.38 |  |  |
| -4.23 | -1.75 | -0.63 |  |  |
| -4.34 | 0.15  | 1.31  |  |  |
| 1.53  | -1.03 | -2.29 |  |  |

|       |       |       |  |  |
|-------|-------|-------|--|--|
| 1.45  | -0.74 | -1.91 |  |  |
| 1.41  | 1     | -0.14 |  |  |
| 1.41  | -1.02 | -2.16 |  |  |
| 2.29  | -2.79 | -4.04 |  |  |
| 2.06  | 2.47  | 1.37  |  |  |
| 1.93  | -2.21 | -3.46 |  |  |
| -2.85 | -4.29 | -3.09 |  |  |
| 1.07  | 3.58  | 2.33  |  |  |
| 1.04  | -0.28 | -1.49 |  |  |
| 1.02  | 3.2   | 2.02  |  |  |
| 1.03  | -4.21 | -5.46 |  |  |
| 1.01  | -1.15 | -2.38 |  |  |
| -4.86 | -6.38 | -5.32 |  |  |
| -5.67 | -6.18 | -4.89 |  |  |
| -5.86 | -6.24 | -4.91 |  |  |
| -7.35 | -4.28 | -2.62 |  |  |
| -8.42 | -5.1  | -3.24 |  |  |
| 3.01  | 0.18  | -1.08 |  |  |
| 2.56  | -0.62 | -1.64 |  |  |
| 2.59  | -1.18 | -2.43 |  |  |
| 2.24  | -0.34 | -1.38 |  |  |
| 3.18  | 0.95  | -0.31 |  |  |
| 2.93  | -1.26 | -2.4  |  |  |
| 2.93  | -1.5  | -2.63 |  |  |
| -1.52 | -1.55 | -0.53 |  |  |
| -1.52 | -0.17 | 0.85  |  |  |
| -1.67 | -1.96 | -0.81 |  |  |
| -1.91 | -3.09 | -1.74 |  |  |
| 3.16  | 1.18  | -0.08 |  |  |
| -2.08 | -0.34 | 1.12  |  |  |
| -2.15 | 0.44  | 1.95  |  |  |
| -2.25 | -1.28 | 0.3   |  |  |
| -2.46 | -0.07 | 1.64  |  |  |
| -2.84 | 0.05  | 1.96  |  |  |
| 3.49  | -3    | -4.26 |  |  |
| -1.44 | -5.25 | -4.17 |  |  |
| 2.14  | 0.95  | -0.3  |  |  |
| -2.81 | 1.34  | 2.67  |  |  |
| 1.92  | 2.07  | 0.82  |  |  |
| 1.7   | -1.97 | -3.04 |  |  |
| 1.66  | 0.62  | -0.43 |  |  |
| 3.29  | 2.59  | 1.34  |  |  |
| 3.05  | 3.46  | 2.32  |  |  |
| 2.94  | 2.55  | 1.46  |  |  |
| 2.05  | 1.4   | 0.15  |  |  |
| -3.94 | -3.82 | -2.05 |  |  |
| 3.17  | -1.23 | -2.48 |  |  |
| -1.75 | -1.46 | -0.24 |  |  |
| -1.79 | -1.12 | 0.13  |  |  |
| 2.29  | -2.69 | -3.94 |  |  |
| 2.29  | -1.18 | -2.44 |  |  |
| 1.93  | -0.31 | -1.32 |  |  |
| 1.27  | 2.23  | 0.98  |  |  |
| 1.26  | 1.27  | 0.02  |  |  |
| 1.26  | 0.68  | -0.56 |  |  |
| -4.19 | -3.79 | -2.63 |  |  |
| -4.41 | -2.96 | -1.73 |  |  |
| -5.07 | -0.44 | 0.99  |  |  |

|       |       |       |  |  |
|-------|-------|-------|--|--|
| -5.36 | -2.16 | -0.65 |  |  |
| 2.94  | 2.35  | 1.1   |  |  |
| -1.67 | -0.15 | 0.89  |  |  |
| 2.34  | -1.77 | -3.02 |  |  |
| -3.27 | -3.5  | -1.82 |  |  |
| 1.88  | -2.61 | -3.86 |  |  |
| -2.69 | -1.5  | -0.42 |  |  |
| -2.76 | -5.55 | -4.42 |  |  |
| -3.16 | -2.01 | -0.69 |  |  |
| -3.24 | -1.48 | -0.12 |  |  |
| 1.94  | -2.37 | -3.62 |  |  |
| 1.73  | -6.03 | -7.11 |  |  |
| 1.7   | -5.42 | -6.48 |  |  |
| -3.07 | -4.12 | -2.79 |  |  |
| -3.42 | -5.85 | -4.37 |  |  |
| 1.24  | -0.3  | -1.55 |  |  |
| -4.32 | -1.14 | 0.03  |  |  |
| 2.42  | -0.59 | -1.84 |  |  |
| 2.3   | -1.31 | -2.49 |  |  |
| -2.19 | -2.19 | -1.03 |  |  |
| 1.6   | 0.17  | -1.08 |  |  |
| -3.63 | -4.28 | -2.99 |  |  |
| 1.42  | -0.52 | -1.77 |  |  |
| 1.27  | 1.95  | 0.85  |  |  |
| 1.59  | -2.87 | -4.12 |  |  |
| -3.09 | -2.96 | -1.91 |  |  |
| 1.71  | -2.05 | -3.3  |  |  |
| 1.64  | -1.8  | -2.99 |  |  |
| 1.56  | -0.39 | -1.52 |  |  |
| 1.39  | -4.64 | -5.88 |  |  |
| 1.18  | -2.1  | -3.1  |  |  |
| -3.78 | -3.28 | -2.13 |  |  |
| -4.62 | -2.37 | -0.93 |  |  |
| 1.62  | 1.49  | 0.24  |  |  |
| 1.37  | -3.34 | -4.34 |  |  |
| -3.88 | -1.82 | -0.41 |  |  |
| -4.02 | -2.4  | -0.94 |  |  |
| 3.37  | -0.41 | -1.65 |  |  |
| -1.42 | -0.54 | 0.47  |  |  |
| -2.04 | -5.81 | -4.27 |  |  |
| 2.67  | 1.67  | 0.43  |  |  |
| -1.99 | -0.55 | 0.61  |  |  |
| -2.2  | 0.66  | 1.97  |  |  |
| 3.04  | 0.51  | -0.74 |  |  |
| -1.62 | 0.22  | 1.28  |  |  |
| -1.71 | -2.48 | -1.35 |  |  |
| 2.78  | -3.38 | -4.62 |  |  |
| 2.6   | -4.04 | -5.18 |  |  |
| -1.83 | -4.89 | -3.79 |  |  |
| -1.86 | -2.36 | -1.23 |  |  |
| 1.14  | -0.13 | -1.38 |  |  |
| 1.13  | 4.4   | 3.16  |  |  |
| 2.17  | -0.67 | -1.91 |  |  |
| -2.36 | -3.38 | -2.27 |  |  |
| -3.54 | -3.78 | -2.08 |  |  |
| 1.89  | -3.12 | -4.36 |  |  |
| -3.69 | -2.4  | -0.85 |  |  |
| 1.67  | -0.04 | -1.28 |  |  |

|       |       |       |  |  |
|-------|-------|-------|--|--|
| 1.63  | -1.76 | -2.98 |  |  |
| -3.13 | -4.94 | -3.8  |  |  |
| -3.5  | -6.15 | -4.85 |  |  |
| -4.71 | -5.65 | -3.92 |  |  |
| 1.2   | 0.9   | -0.35 |  |  |
| 1.09  | 3.48  | 2.38  |  |  |
| 1.03  | -3.67 | -4.7  |  |  |
| -1.2  | -0.75 | -1.99 |  |  |
| -1.21 | 2.18  | 0.95  |  |  |
| -1.23 | -1.05 | -2.27 |  |  |
| -1.28 | -1.14 | -2.29 |  |  |
| -1.39 | 3.24  | 2.2   |  |  |
| 2.3   | 1.63  | 0.38  |  |  |
| 2.27  | 1.95  | 0.72  |  |  |
| 1.71  | 0.43  | -0.81 |  |  |
| 1.63  | 0.19  | -0.98 |  |  |
| 1.49  | -1.3  | -2.34 |  |  |
| -3.28 | -2.24 | -0.99 |  |  |
| -6.3  | -3.56 | -1.37 |  |  |
| 7.59  | -2.13 | -3.37 |  |  |
| 1.49  | 1.79  | 2.89  |  |  |
| 1.31  | 2.12  | 3.41  |  |  |
| -1.44 | -2.67 | -0.47 |  |  |
| 1.38  | -1.87 | -3.11 |  |  |
| 1.28  | 2.79  | 1.66  |  |  |
| 1.93  | -0.05 | -1.29 |  |  |
| 1.65  | 1.14  | 0.12  |  |  |
| -2.49 | -3.19 | -2.17 |  |  |
| -2.78 | -2.94 | -1.76 |  |  |
| -3.39 | -2.82 | -1.35 |  |  |
| 3.21  | 1.07  | -0.17 |  |  |
| -1.52 | 1.03  | 2.07  |  |  |
| -1.59 | 1.02  | 2.12  |  |  |
| -2.49 | 0.92  | 2.67  |  |  |
| 2.88  | -1.8  | -3.04 |  |  |
| 2.77  | -4.95 | -6.14 |  |  |
| 2.55  | -3.79 | -4.86 |  |  |
| -1.73 | -6.17 | -5.09 |  |  |
| -1.81 | -2.8  | -1.66 |  |  |
| -2.02 | -5.41 | -4.11 |  |  |
| 1.15  | -0.87 | -2.12 |  |  |
| 1.13  | 2.19  | 0.97  |  |  |
| 1     | -2.45 | -3.5  |  |  |
| -1.01 | 1.07  | 0.05  |  |  |
| -1.03 | 3.13  | 2.13  |  |  |
| -1.03 | -1.26 | -2.26 |  |  |
| -4.26 | -2.93 | -1.89 |  |  |
| 3.32  | 1.45  | 0.21  |  |  |
| 2.84  | 0.65  | -0.37 |  |  |
| -1.52 | -0.92 | 0.17  |  |  |
| -1.76 | -1.42 | -0.12 |  |  |
| 1.87  | 3.27  | 2.03  |  |  |
| -2.61 | -3.14 | -2.1  |  |  |
| -2.72 | -1.38 | -0.28 |  |  |
| -3.23 | -2.72 | -1.37 |  |  |
| 1.38  | -0.4  | -1.64 |  |  |
| 1.26  | -0.69 | -1.8  |  |  |
| 1.23  | 1.12  | 0.04  |  |  |



|       |       |       |  |  |
|-------|-------|-------|--|--|
| 1.17  | 0.74  | -0.27 |  |  |
| -8.24 | -1.96 | 0.3   |  |  |
| 2.65  | -1.29 | -2.54 |  |  |
| 2.45  | -1.52 | -2.65 |  |  |
| -2.36 | 0.55  | 1.95  |  |  |
| 2.65  | -1.29 | -2.53 |  |  |
| 2.45  | -1.52 | -2.64 |  |  |
| -2.36 | 0.55  | 1.95  |  |  |
| 3.28  | 4.5   | 3.26  |  |  |
| -1.68 | -1.06 | 0.16  |  |  |
| 1.22  | 5.69  | 4.45  |  |  |
| 1.1   | 0.23  | -0.88 |  |  |
| 1.04  | 0.22  | -0.79 |  |  |
| -3.93 | -1.29 | -0.28 |  |  |
| -6.52 | -3.03 | -1.29 |  |  |
| -6.66 | -1.7  | 0.08  |  |  |
| 1.71  | -1.94 | -3.19 |  |  |
| 1.64  | -1.69 | -2.87 |  |  |
| 1.56  | -0.28 | -1.4  |  |  |
| 1.71  | -1.94 | -3.19 |  |  |
| 1.64  | -1.69 | -2.87 |  |  |
| 1.56  | -0.28 | -1.4  |  |  |
| 1.71  | -1.94 | -3.19 |  |  |
| 1.64  | -1.69 | -2.87 |  |  |
| 1.56  | -0.28 | -1.4  |  |  |
| 1.82  | 0     | -1.25 |  |  |
| 1.53  | -0.18 | -1.17 |  |  |
| 1.81  | -0.88 | -2.12 |  |  |
| 1.73  | -1.87 | -3.05 |  |  |
| -2.63 | -2.81 | -1.81 |  |  |
| 1.23  | 0.79  | -0.45 |  |  |
| 1.19  | -3    | -4.18 |  |  |
| 1.14  | 6.23  | 5.11  |  |  |
| 1.04  | 4.06  | 3.06  |  |  |
| 1.56  | 0.05  | -1.19 |  |  |
| 1.42  | -3.49 | -4.59 |  |  |
| 1.39  | 0.22  | -0.84 |  |  |
| -3.12 | -1.96 | -0.91 |  |  |
| -4.91 | -3.65 | -1.95 |  |  |
| 2.2   | 1.26  | 0.02  |  |  |
| -2.2  | -3.31 | -2.27 |  |  |
| 1.6   | 0.16  | -1.08 |  |  |
| 1.43  | -0.01 | -1.08 |  |  |
| 1.39  | 0.26  | -0.78 |  |  |
| -4.4  | -2.4  | -0.82 |  |  |
| 1.43  | -1.77 | -3.01 |  |  |
| 1.31  | -0.24 | -1.35 |  |  |
| -3.79 | -1.33 | -0.12 |  |  |
| 1.89  | -2.12 | -3.36 |  |  |
| 1.67  | -0.83 | -1.89 |  |  |
| -2.69 | -1.55 | -0.44 |  |  |
| -3.1  | -0.22 | 1.09  |  |  |
| -3.31 | -3.23 | -1.82 |  |  |
| -3.92 | -0.61 | 1.04  |  |  |
| -4.22 | -0.66 | 1.1   |  |  |
| -7.27 | -1.1  | 1.44  |  |  |
| 2.42  | -0.38 | -1.61 |  |  |
| 2.33  | -3.03 | -4.21 |  |  |

|       |       |       |  |  |
|-------|-------|-------|--|--|
| 2.28  | -1.97 | -3.13 |  |  |
| 2.08  | -0.44 | -1.46 |  |  |
| 2.07  | -5.24 | -6.25 |  |  |
| 1.95  | -2.06 | -3.3  |  |  |
| 1.82  | -1.45 | -2.58 |  |  |
| 1.69  | -3.15 | -4.18 |  |  |
| -2.84 | -3.17 | -1.94 |  |  |
| 3.71  | 0.19  | -1.05 |  |  |
| 3.59  | -0.87 | -2.06 |  |  |
| -1.34 | -2.96 | -1.88 |  |  |
| 2.25  | -2.17 | -3.4  |  |  |
| -2.3  | -2.08 | -0.95 |  |  |
| -2.43 | -5.21 | -4    |  |  |
| -2.63 | -2.77 | -1.44 |  |  |
| -3.07 | -2.78 | -1.23 |  |  |
| 1.64  | 1.56  | 0.32  |  |  |
| -4.19 | -0.39 | 1.16  |  |  |
| 8.56  | -1.21 | -2.45 |  |  |
| 7.32  | 0.92  | -0.09 |  |  |
| 1.41  | -3.04 | -1.68 |  |  |
| 1.18  | -2.21 | -0.6  |  |  |
| -1.26 | -2.59 | -0.39 |  |  |
| 1.27  | 0.55  | -0.69 |  |  |
| 1.13  | 0.89  | -0.19 |  |  |
| 1.7   | -4.66 | -5.9  |  |  |
| -2.96 | -4.36 | -3.27 |  |  |
| 1.42  | -1.3  | -2.54 |  |  |
| 1.42  | -1.08 | -2.32 |  |  |
| 2.84  | -2.06 | -3.29 |  |  |
| -1.9  | -3.72 | -2.52 |  |  |
| 1.63  | -1.31 | -2.54 |  |  |
| 1.46  | -2.05 | -3.12 |  |  |
| 1.45  | -2.88 | -3.94 |  |  |
| -2.97 | -1.24 | -0.19 |  |  |
| 2.21  | 2.67  | 1.43  |  |  |
| -2.44 | -0.75 | 0.45  |  |  |
| 1.24  | -3.78 | -5.02 |  |  |
| 1.06  | -2.05 | -3.06 |  |  |
| -4.29 | -4.48 | -3.3  |  |  |
| 1.59  | -3.21 | -4.44 |  |  |
| -3.13 | -1.68 | -0.59 |  |  |
| 1.85  | 1.42  | 0.19  |  |  |
| 1.81  | -1.09 | -2.29 |  |  |
| -2.6  | -4.47 | -3.43 |  |  |
| -3.37 | -3.43 | -2.02 |  |  |
| 1.89  | -1.74 | -2.97 |  |  |
| 1.85  | -4.26 | -5.46 |  |  |
| 1.85  | -3.85 | -5.05 |  |  |
| -2.48 | -2.49 | -1.49 |  |  |
| -2.48 | -5.17 | -4.17 |  |  |
| -3.08 | -3.07 | -1.77 |  |  |
| 1.04  | 0.77  | -0.46 |  |  |
| -5.35 | -1.11 | 0.13  |  |  |
| -5.38 | 0.52  | 1.78  |  |  |
| -5.83 | -0.75 | 0.63  |  |  |
| -6.07 | -0.36 | 1.07  |  |  |
| -7.26 | -0.2  | 1.49  |  |  |
| 9.92  | -0.18 | -1.42 |  |  |

|       |       |       |  |  |
|-------|-------|-------|--|--|
| 2.04  | 0.35  | 1.4   |  |  |
| 1.97  | 0.99  | 2.09  |  |  |
| 1.88  | -0.67 | 0.49  |  |  |
| 1.48  | -3.29 | -1.78 |  |  |
| 1.12  | -1.91 | 0.01  |  |  |
| 1.07  | -3.38 | -1.4  |  |  |
| 1.94  | -2.4  | -3.63 |  |  |
| -2.89 | -3.55 | -2.29 |  |  |
| 2.32  | -1.86 | -3.09 |  |  |
| -2.38 | -1.91 | -0.67 |  |  |
| 2.52  | -3.62 | -4.85 |  |  |
| -1.95 | -4.27 | -3.21 |  |  |
| -1.97 | -6.68 | -5.6  |  |  |
| -2.11 | -5.1  | -3.92 |  |  |
| -2.12 | -5.92 | -4.73 |  |  |
| -3.37 | -5.7  | -3.85 |  |  |
| 2.68  | -0.09 | -1.32 |  |  |
| 2.69  | -0.03 | -1.26 |  |  |
| 1.38  | 2.7   | 1.47  |  |  |
| 1.26  | 0.06  | -1.04 |  |  |
| -3.49 | 1.62  | 2.65  |  |  |
| -3.6  | -0.08 | 1     |  |  |
| -3.84 | -1.37 | -0.2  |  |  |
| 1.82  | 5.35  | 4.12  |  |  |
| 1.68  | -0.81 | -1.93 |  |  |
| 1.61  | 1.69  | 0.63  |  |  |
| 1.6   | 3.1   | 2.05  |  |  |
| 1.59  | 0.38  | -0.66 |  |  |
| 2.42  | 1.2   | -0.03 |  |  |
| 2.26  | 0.48  | -0.65 |  |  |
| 1.78  | -4.44 | -5.67 |  |  |
| -2.9  | -4.51 | -3.38 |  |  |
| 1.85  | 1.52  | 0.29  |  |  |
| 1.59  | 0.19  | -0.83 |  |  |
| 1.99  | -1.75 | -2.98 |  |  |
| 1.92  | -1.28 | -2.46 |  |  |
| 2.24  | 1.85  | 0.62  |  |  |
| 2.04  | -3.05 | -4.15 |  |  |
| 1.7   | -0.51 | -1.74 |  |  |
| 1.47  | -0.47 | -1.5  |  |  |
| -3.11 | -3.95 | -2.78 |  |  |
| 3.19  | -1.21 | -2.45 |  |  |
| -1.47 | -2.42 | -1.42 |  |  |
| 1.25  | 0.31  | -0.92 |  |  |
| 1.12  | -0.33 | -1.41 |  |  |
| 1.87  | 0.32  | -0.91 |  |  |
| 1.64  | -1.86 | -2.89 |  |  |
| 1.15  | 1.75  | 0.53  |  |  |
| 1.14  | -4.75 | -5.96 |  |  |
| 1.11  | -1.35 | -2.52 |  |  |
| 1.05  | 0.43  | -0.67 |  |  |
| 2.13  | 3.34  | 2.11  |  |  |
| 1.97  | 3.27  | 2.15  |  |  |
| -2.28 | -0.83 | 0.22  |  |  |
| -2.34 | -1.18 | -0.09 |  |  |
| -3.08 | -0.17 | 1.32  |  |  |
| -3.75 | -3.4  | -1.63 |  |  |
| -5.03 | -2.76 | -0.57 |  |  |

|       |       |       |  |  |
|-------|-------|-------|--|--|
| 2.49  | -2.44 | -3.67 |  |  |
| 2.39  | -0.04 | -1.22 |  |  |
| 2.39  | -2.44 | -3.6  |  |  |
| 2.13  | -2.9  | -3.91 |  |  |
| 2.12  | -1.87 | -2.87 |  |  |
| 1.66  | -4.38 | -5.61 |  |  |
| 1.51  | -3.75 | -4.85 |  |  |
| 1.48  | -2.1  | -3.17 |  |  |
| -3.43 | -4.97 | -3.69 |  |  |
| 2.04  | -4.36 | -5.59 |  |  |
| 1.83  | -2.94 | -4.01 |  |  |
| -2.37 | -5.4  | -4.36 |  |  |
| -2.63 | -4.97 | -3.77 |  |  |
| -2.71 | -3.01 | -1.78 |  |  |
| -2.87 | -2.91 | -1.59 |  |  |
| -3.01 | -5.67 | -4.28 |  |  |
| -4.13 | -4.44 | -2.59 |  |  |
| 2.65  | -4    | -5.22 |  |  |
| -1.77 | -4.75 | -3.75 |  |  |
| 1.84  | 0.04  | -1.19 |  |  |
| 1.83  | 2.04  | 0.82  |  |  |
| 1.67  | 0.61  | -0.48 |  |  |
| -2.65 | -0.63 | 0.43  |  |  |
| -3.1  | -1.87 | -0.59 |  |  |
| 36.74 | -0.04 | -1.27 |  |  |
| 7.27  | -1.41 | -0.3  |  |  |
| 7.06  | -1.81 | -0.65 |  |  |
| 6.93  | 0.09  | 1.27  |  |  |
| 6.88  | -1.44 | -0.25 |  |  |
| 6.19  | -2.43 | -1.09 |  |  |
| 5.89  | -1.16 | 0.25  |  |  |
| 5.29  | -2.17 | -0.6  |  |  |
| 5.16  | -2    | -0.39 |  |  |
| 4.99  | -2.29 | -0.63 |  |  |
| 4.92  | -1.35 | 0.32  |  |  |
| 4.43  | -1.54 | 0.29  |  |  |
| 3.64  | -2.49 | -0.39 |  |  |
| 3.47  | -3.29 | -1.11 |  |  |
| 3.16  | -1.91 | 0.4   |  |  |
| 3.09  | -3.22 | -0.88 |  |  |
| 2.75  | -3.78 | -1.27 |  |  |
| 2.58  | -1.55 | 1.06  |  |  |
| 2.37  | -3.13 | -0.4  |  |  |
| 2.33  | -3.78 | -1.03 |  |  |
| 2.26  | -3.87 | -1.08 |  |  |
| 1.96  | -3.9  | -0.9  |  |  |
| 1.85  | -3.75 | -0.66 |  |  |
| 1.73  | 0.65  | 3.83  |  |  |
| 1.66  | -4.28 | -1.04 |  |  |
| 1.53  | -4.53 | -1.17 |  |  |
| 1.4   | -3.88 | -0.39 |  |  |
| 1.32  | -0.09 | 3.48  |  |  |
| 1.19  | -0.07 | 3.64  |  |  |
| 1.16  | 4.12  | 7.87  |  |  |
| 1.09  | -2.26 | 1.59  |  |  |
| -1.04 | -3.15 | 0.88  |  |  |
| -1.16 | -5.04 | -0.85 |  |  |
| 2.42  | 0.25  | -0.97 |  |  |

|        |       |       |  |  |
|--------|-------|-------|--|--|
| -2.08  | -0.04 | 1.06  |  |  |
| -2.21  | -1.33 | -0.14 |  |  |
| -2.23  | -1.7  | -0.49 |  |  |
| -3.09  | -3.52 | -1.84 |  |  |
| 1.97   | -0.85 | -2.08 |  |  |
| 1.72   | -1.56 | -2.59 |  |  |
| 1.71   | 0.36  | -0.66 |  |  |
| 1.69   | -1.09 | -2.1  |  |  |
| 1.57   | -2.99 | -4.21 |  |  |
| -3.05  | -4.11 | -3.08 |  |  |
| -3.49  | -3.28 | -2.05 |  |  |
| 1.14   | 2.39  | 1.16  |  |  |
| 1.03   | -5.02 | -6.1  |  |  |
| -4.17  | -3.91 | -2.89 |  |  |
| -4.21  | -3.36 | -2.32 |  |  |
| -4.26  | -3.15 | -2.1  |  |  |
| -4.54  | -2.49 | -1.35 |  |  |
| -5.76  | -4.72 | -3.23 |  |  |
| 1.6    | -2.78 | -4.01 |  |  |
| 1.41   | -3.19 | -4.22 |  |  |
| 1.45   | -0.13 | -1.36 |  |  |
| 1.3    | 3.64  | 2.57  |  |  |
| 1.3    | -0.41 | -1.48 |  |  |
| 1.25   | 2.76  | 1.74  |  |  |
| 1.24   | 2.01  | 1     |  |  |
| -7.21  | -2.32 | -0.16 |  |  |
| 2.31   | -2.13 | -3.35 |  |  |
| -2.21  | -3.37 | -2.25 |  |  |
| 2.05   | -4.5  | -5.73 |  |  |
| 1.89   | 0.32  | -0.8  |  |  |
| 1.86   | -4.27 | -5.36 |  |  |
| -2.58  | -1.46 | -0.29 |  |  |
| 2.14   | -1.09 | -2.31 |  |  |
| -2.2   | -0.46 | 0.55  |  |  |
| -2.45  | -3.91 | -2.75 |  |  |
| -2.52  | -1.84 | -0.64 |  |  |
| 2.85   | 3.7   | 2.47  |  |  |
| 2.7    | 1.7   | 0.55  |  |  |
| 2.67   | 3.13  | 2     |  |  |
| 2.66   | 2.18  | 1.05  |  |  |
| 2.19   | -2.19 | -3.42 |  |  |
| -2.75  | -3.35 | -1.99 |  |  |
| -2.76  | -3.93 | -2.57 |  |  |
| 2.26   | 1.62  | 0.39  |  |  |
| -2.27  | -0.92 | 0.21  |  |  |
| -2.41  | -2.05 | -0.83 |  |  |
| 1.42   | 0.33  | -0.89 |  |  |
| 1.28   | -3.41 | -4.49 |  |  |
| 1.38   | -5.63 | -6.86 |  |  |
| -4.01  | -5.9  | -4.65 |  |  |
| -10.06 | -7.49 | -4.92 |  |  |
| 1.53   | -0.84 | -2.06 |  |  |
| 1.42   | -1.81 | -2.92 |  |  |
| 1.41   | -3.68 | -4.78 |  |  |
| 1.34   | -5.09 | -6.11 |  |  |
| -3.2   | -2.63 | -1.55 |  |  |
| 2.06   | 2.12  | 0.9   |  |  |
| 1.96   | 4.82  | 3.67  |  |  |

|       |       |       |  |  |
|-------|-------|-------|--|--|
| 1.94  | -1.84 | -3.06 |  |  |
| 1.77  | -2.85 | -3.94 |  |  |
| 6.4   | -2.32 | -3.54 |  |  |
| 6     | -1.87 | -3    |  |  |
| 1.37  | -6.08 | -5.08 |  |  |
| 1.32  | -2.81 | -1.75 |  |  |
| 1.32  | -0.39 | 0.67  |  |  |
| 1.28  | -2.92 | -1.81 |  |  |
| 1.17  | -5.62 | -4.39 |  |  |
| 1.12  | -5.44 | -4.15 |  |  |
| 1.11  | -0.02 | 1.28  |  |  |
| -1.04 | -0.94 | 0.57  |  |  |
| -1.05 | -6.24 | -4.7  |  |  |
| -1.19 | -5.36 | -3.65 |  |  |
| 2.51  | -0.13 | -1.35 |  |  |
| 2.38  | -2.3  | -3.44 |  |  |
| 1.57  | 1.41  | 0.19  |  |  |
| 1.45  | -0.32 | -1.42 |  |  |
| 1.4   | 0.96  | -0.09 |  |  |
| 4.68  | -3.11 | -4.33 |  |  |
| 1.01  | -5.04 | -4.04 |  |  |
| -1.04 | -6.05 | -4.99 |  |  |
| -1.04 | -5.38 | -4.31 |  |  |
| -1.1  | -5.94 | -4.79 |  |  |
| -1.15 | -5.03 | -3.83 |  |  |
| -1.16 | -3.26 | -2.05 |  |  |
| -1.22 | 1.13  | 2.43  |  |  |
| -1.31 | -4.37 | -2.97 |  |  |
| -1.38 | -5.36 | -3.88 |  |  |
| -1.42 | -5.35 | -3.84 |  |  |
| -1.5  | -4.73 | -3.14 |  |  |
| -1.77 | -5.9  | -4.06 |  |  |
| 1.62  | -3.41 | -4.63 |  |  |
| 1.55  | -5.32 | -6.48 |  |  |
| 1.46  | -5.2  | -6.27 |  |  |
| -3.14 | -6.42 | -5.29 |  |  |
| -4.92 | -7    | -5.23 |  |  |
| 3.01  | 1.87  | 0.64  |  |  |
| -1.57 | -1.72 | -0.7  |  |  |
| -1.57 | -0.15 | 0.87  |  |  |
| -1.63 | -0.82 | 0.25  |  |  |
| -1.67 | -3.01 | -1.91 |  |  |
| -1.77 | -1.68 | -0.49 |  |  |
| -1.8  | -1.26 | -0.04 |  |  |
| -2.12 | -0.29 | 1.16  |  |  |
| -2.68 | -2.41 | -0.62 |  |  |
| 1.35  | 0.91  | -0.31 |  |  |
| 1.25  | 1.22  | 0.11  |  |  |
| -3.47 | -1.76 | -0.75 |  |  |
| -3.89 | -1.73 | -0.55 |  |  |
| -4.32 | 0.83  | 2.16  |  |  |
| -4.47 | 1.71  | 3.08  |  |  |
| -4.52 | 0.29  | 1.68  |  |  |
| -4.8  | -0.17 | 1.31  |  |  |
| -6.42 | -1.27 | 0.63  |  |  |
| -7.62 | -1.78 | 0.37  |  |  |
| 7.43  | 0.9   | -0.31 |  |  |
| 6.41  | -0.28 | -1.28 |  |  |

|       |       |       |  |  |
|-------|-------|-------|--|--|
| 1.59  | -2.74 | -1.73 |  |  |
| 1.5   | -4.16 | -3.07 |  |  |
| 1.44  | -1.24 | -0.09 |  |  |
| 1.41  | -2.15 | -0.97 |  |  |
| 1.39  | -2.1  | -0.9  |  |  |
| 1.38  | -0.51 | 0.7   |  |  |
| 1.3   | -3.53 | -2.23 |  |  |
| 1.29  | -2.02 | -0.71 |  |  |
| 1.19  | -0.96 | 0.46  |  |  |
| 1.06  | -4.05 | -2.45 |  |  |
| -1.88 | -4.95 | -2.37 |  |  |
| 2.38  | -2.06 | -3.28 |  |  |
| -3.2  | -3.46 | -1.75 |  |  |
| 5.53  | 0.09  | -1.13 |  |  |
| 5.03  | -0.63 | -1.71 |  |  |
| -1.01 | -2.1  | -0.84 |  |  |
| -1.01 | -4.29 | -3.03 |  |  |
| -1.01 | -2.73 | -1.47 |  |  |
| -1.04 | -3.78 | -2.47 |  |  |
| -1.15 | 3.21  | 4.66  |  |  |
| 2.95  | 0.23  | -0.99 |  |  |
| -1.61 | -0.19 | 0.84  |  |  |
| -1.73 | -0.68 | 0.46  |  |  |
| -1.92 | -1.61 | -0.33 |  |  |
| -2.11 | -2.34 | -0.92 |  |  |
| -3.8  | -2.7  | -0.43 |  |  |
| 1.92  | -1.61 | -2.83 |  |  |
| -2.76 | -1.09 | 0.09  |  |  |
| 1.54  | 0.71  | -0.52 |  |  |
| 1.52  | -1.98 | -3.19 |  |  |
| -3.92 | -5.15 | -3.78 |  |  |
| -5.47 | -5.7  | -3.85 |  |  |
| 1.13  | 0.81  | -0.41 |  |  |
| 1.03  | 0.84  | -0.24 |  |  |
| 2.55  | 2.59  | 1.36  |  |  |
| -1.91 | -2.23 | -1.16 |  |  |
| -2.42 | 0.01  | 1.41  |  |  |
| 1.72  | -2.81 | -4.02 |  |  |
| 1.58  | -1.28 | -2.37 |  |  |
| 1.61  | -2.48 | -3.69 |  |  |
| -3.66 | -3.26 | -1.91 |  |  |
| 1.29  | -1.77 | -2.99 |  |  |
| 1.25  | -1.82 | -2.98 |  |  |
| 1.13  | -2.69 | -3.71 |  |  |
| -3.74 | -1.04 | 0.03  |  |  |
| 2.23  | 2.24  | 1.03  |  |  |
| -2.13 | -1.64 | -0.61 |  |  |
| -2.2  | 1.21  | 2.3   |  |  |
| -2.41 | -0.42 | 0.79  |  |  |
| 9.68  | -0.32 | -1.53 |  |  |
| 8.62  | 0.9   | -0.15 |  |  |
| 2.04  | -2.32 | -1.29 |  |  |
| 1.81  | 0.52  | 1.73  |  |  |
| 1.78  | -0.32 | 0.91  |  |  |
| 1.76  | 0.04  | 1.28  |  |  |
| 1.75  | 1.08  | 2.34  |  |  |
| 1.53  | -0.07 | 1.37  |  |  |
| 1.45  | 1.17  | 2.7   |  |  |

|       |       |       |  |  |
|-------|-------|-------|--|--|
| 1.44  | -1.26 | 0.28  |  |  |
| 1.19  | -3.7  | -1.89 |  |  |
| 1.14  | -0.65 | 1.23  |  |  |
| 1.11  | 0.55  | 2.45  |  |  |
| 1.06  | -1.53 | 0.45  |  |  |
| 1.04  | 0.65  | 2.66  |  |  |
| 1.02  | 1.81  | 3.85  |  |  |
| -1.02 | -1.44 | 0.65  |  |  |
| -1.08 | -1.84 | 0.34  |  |  |
| 2.51  | 0.41  | -0.8  |  |  |
| 2.29  | 1.9   | 0.82  |  |  |
| 12.72 | 0.52  | -0.69 |  |  |
| 2.73  | -1.73 | -0.72 |  |  |
| 1.95  | -1.53 | -0.04 |  |  |
| 1.77  | -2.26 | -0.63 |  |  |
| 1.73  | 1.92  | 3.58  |  |  |
| 1.42  | -1.75 | 0.2   |  |  |
| 1.04  | 1.73  | 4.12  |  |  |
| -1.03 | -2.62 | -0.13 |  |  |
| -1.67 | -2.41 | 0.78  |  |  |
| 5.67  | 0.17  | -1.04 |  |  |
| 5.21  | 0.91  | -0.18 |  |  |
| 1.2   | 2.43  | 3.46  |  |  |
| 1.16  | 1.34  | 2.41  |  |  |
| 1.13  | 2.49  | 3.61  |  |  |
| -1.15 | -1.44 | 0.06  |  |  |
| -1.19 | 0.52  | 2.07  |  |  |
| -1.68 | 0.05  | 2.08  |  |  |
| -1.7  | -2.4  | -0.34 |  |  |
| -2.52 | -0.28 | 2.34  |  |  |
| 5.67  | 0.05  | -1.16 |  |  |
| 5.21  | 0.79  | -0.29 |  |  |
| 1.2   | 2.32  | 3.34  |  |  |
| 1.16  | 1.22  | 2.29  |  |  |
| 1.15  | 2.09  | 3.19  |  |  |
| 1.13  | 2.37  | 3.49  |  |  |
| -1.1  | 0.86  | 2.29  |  |  |
| -2.39 | -1.05 | 1.49  |  |  |
| 1.53  | -3.51 | -4.73 |  |  |
| 1.52  | -2.52 | -3.72 |  |  |
| 1.42  | -1.85 | -2.95 |  |  |
| 2.57  | -3.26 | -4.48 |  |  |
| -1.81 | -8    | -7    |  |  |
| -7.56 | -7.71 | -4.65 |  |  |
| 2.59  | 4.1   | 2.89  |  |  |
| -1.82 | -0.65 | 0.38  |  |  |
| -1.96 | -1.88 | -0.75 |  |  |
| -2.02 | -1.92 | -0.75 |  |  |
| -2.5  | -1.88 | -0.39 |  |  |
| -2.97 | -1.42 | 0.31  |  |  |
| 1.41  | -3.17 | -4.39 |  |  |
| -4.52 | -2.81 | -1.35 |  |  |
| -4.69 | -2    | -0.49 |  |  |
| 1.35  | -5.6  | -6.81 |  |  |
| 1.31  | -1.91 | -3.08 |  |  |
| -3.5  | -1.54 | -0.52 |  |  |
| 1.61  | 2.57  | 1.36  |  |  |
| 1.39  | 2.96  | 1.95  |  |  |



|        |       |       |  |  |
|--------|-------|-------|--|--|
| 1.05   | 4.13  | 2.92  |  |  |
| -5.03  | -1.58 | -0.4  |  |  |
| -5.36  | 0.27  | 1.55  |  |  |
| -6.24  | 0.19  | 1.69  |  |  |
| -10.43 | -3.47 | -1.23 |  |  |
| 3.72   | -0.65 | -1.86 |  |  |
| -1.25  | -0.87 | 0.14  |  |  |
| 2.12   | -0.54 | -1.76 |  |  |
| 2      | 1.36  | 0.23  |  |  |
| 1.83   | 2.32  | 1.31  |  |  |
| 2.73   | 0     | -1.21 |  |  |
| 2.63   | 2.13  | 0.98  |  |  |
| 2.39   | 1.9   | 0.88  |  |  |
| -1.7   | -1.25 | -0.24 |  |  |
| -2.55  | -4.4  | -2.8  |  |  |
| 2.37   | 0.1   | -1.11 |  |  |
| 2.21   | 2.55  | 1.44  |  |  |
| -2.08  | 0.35  | 1.44  |  |  |
| -2.12  | 0.63  | 1.75  |  |  |
| -2.83  | -0.69 | 0.85  |  |  |
| -5.54  | -1.42 | 1.09  |  |  |
| 1.23   | -2.73 | -3.94 |  |  |
| 1.19   | 0.38  | -0.78 |  |  |
| 1.17   | -2.28 | -3.41 |  |  |
| 1.12   | -1.84 | -2.91 |  |  |
| 1.1    | -2.91 | -3.96 |  |  |
| 1.07   | -3.46 | -4.46 |  |  |
| 4.77   | 3.76  | 2.55  |  |  |
| 1.03   | -3.89 | -2.89 |  |  |
| 1.02   | -3.6  | -2.59 |  |  |
| -1     | -1.15 | -0.1  |  |  |
| -1.29  | -6.46 | -5.05 |  |  |
| -1.77  | -3.23 | -1.36 |  |  |
| 1.48   | 1.69  | 0.48  |  |  |
| 1.31   | -0.44 | -1.47 |  |  |
| -3.14  | 0.75  | 1.76  |  |  |
| -4.45  | -1.53 | -0.02 |  |  |
| 3.77   | 1.18  | -0.02 |  |  |
| -1.33  | -1.49 | -0.37 |  |  |
| -1.41  | 2.02  | 3.22  |  |  |
| -1.54  | -0.55 | 0.79  |  |  |
| -1.87  | 2.29  | 3.9   |  |  |
| -2.55  | 0.12  | 2.18  |  |  |
| -2.69  | 3.93  | 6.07  |  |  |
| 3.21   | 1.73  | 0.52  |  |  |
| 3.04   | 1.28  | 0.15  |  |  |
| -1.71  | -2.04 | -0.79 |  |  |
| 1.77   | 0.01  | -1.2  |  |  |
| 1.77   | -0.58 | -1.79 |  |  |
| -2.75  | -2.53 | -1.46 |  |  |
| -2.88  | -1.82 | -0.68 |  |  |
| -2.93  | -0.69 | 0.48  |  |  |
| -3.49  | -1.13 | 0.29  |  |  |
| -3.67  | -1.48 | 0.01  |  |  |
| 5.53   | -0.39 | -1.6  |  |  |
| 1.17   | 0.05  | 1.09  |  |  |
| 1.07   | 1.84  | 3     |  |  |
| -1     | 5.11  | 6.38  |  |  |

|       |       |       |  |  |
|-------|-------|-------|--|--|
| -1.07 | 3.88  | 5.24  |  |  |
| -1.53 | -3.05 | -1.18 |  |  |
| -1.68 | 3.3   | 5.31  |  |  |
| 4.02  | -2.67 | -3.88 |  |  |
| -1.56 | -4.76 | -3.32 |  |  |
| -1.75 | -4.94 | -3.34 |  |  |
| 2.73  | 4.15  | 2.94  |  |  |
| -1.7  | 0.23  | 1.24  |  |  |
| -1.71 | -1.93 | -0.92 |  |  |
| -2.11 | -3.24 | -4.45 |  |  |
| -2.27 | -2.08 | -3.18 |  |  |
| 1.71  | 2.48  | 1.27  |  |  |
| 1.57  | -0.36 | -1.44 |  |  |
| -3.1  | -1.63 | -0.42 |  |  |
| 1.02  | 2.15  | 0.94  |  |  |
| -1.02 | 0.19  | -0.96 |  |  |
| -1.03 | 1.8   | 0.65  |  |  |
| -4.93 | -2.28 | -1.17 |  |  |
| -5.38 | -1.01 | 0.22  |  |  |
| -8.54 | -2.68 | -0.78 |  |  |
| 9.85  | -4.8  | -6.01 |  |  |
| 1.95  | -5.82 | -4.69 |  |  |
| 1.82  | 0.72  | 1.95  |  |  |
| -1.05 | 1.2   | 3.36  |  |  |
| -1.35 | -7.9  | -5.38 |  |  |
| 6.09  | 0.26  | -0.94 |  |  |
| 1.18  | -0.38 | 0.78  |  |  |
| 1.18  | 0.91  | 2.08  |  |  |
| 1.1   | -0.61 | 0.65  |  |  |
| 1.05  | 1.71  | 3.04  |  |  |
| -1.04 | 1.01  | 2.47  |  |  |
| -1.05 | 1.85  | 3.32  |  |  |
| -1.65 | -2.3  | -0.18 |  |  |
| 1.61  | -2.19 | -3.4  |  |  |
| 1.47  | -1.7  | -2.77 |  |  |
| 1.68  | -5.46 | -6.66 |  |  |
| 1.64  | -1.72 | -2.89 |  |  |
| -2.84 | -2.21 | -1.16 |  |  |
| -3    | -5.51 | -4.38 |  |  |
| -5.33 | -6.98 | -5.03 |  |  |
| 2.14  | -2.23 | -3.44 |  |  |
| -2.2  | -1.6  | -0.57 |  |  |
| -2.28 | -3.34 | -2.26 |  |  |
| -3.74 | -1.67 | 0.12  |  |  |
| 6.11  | -1.27 | -2.48 |  |  |
| 1.2   | 1.47  | 2.61  |  |  |
| -1.02 | -3.78 | -2.34 |  |  |
| -1.2  | 1.9   | 3.56  |  |  |
| -3.45 | -3.15 | 0.03  |  |  |
| 1.86  | 4.07  | 2.86  |  |  |
| 1.66  | -1.54 | -2.59 |  |  |
| -2.52 | -1.06 | -0.04 |  |  |
| -2.57 | -0.75 | 0.3   |  |  |
| -2.65 | -1.58 | -0.49 |  |  |
| -2.76 | -2.05 | -0.9  |  |  |
| -3.67 | 0.13  | 1.69  |  |  |
| 2.13  | 4.23  | 3.02  |  |  |
| 2.1   | 0.12  | -1.07 |  |  |

|       |       |       |  |  |
|-------|-------|-------|--|--|
| 2.1   | 1.09  | -0.1  |  |  |
| -2.72 | -2.22 | -0.9  |  |  |
| 1.11  | 4.67  | 3.46  |  |  |
| 1.07  | -1.24 | -2.4  |  |  |
| 1.07  | -2.85 | -4    |  |  |
| 1.13  | -4.4  | -5.6  |  |  |
| -5.82 | -6.01 | -4.5  |  |  |
| 2.85  | 0.58  | -0.63 |  |  |
| 2.46  | 1.97  | 0.97  |  |  |
| -2.54 | -2.66 | -1.01 |  |  |
| 1.14  | 2.58  | 1.37  |  |  |
| 1.11  | 0.8   | -0.37 |  |  |
| -1    | 5.94  | 4.93  |  |  |
| -5.78 | -1.86 | -0.34 |  |  |
| 1.95  | -5.97 | -7.17 |  |  |
| -2.45 | -4.61 | -3.55 |  |  |
| 1.29  | 6.5   | 5.3   |  |  |
| -3.93 | 0.02  | 1.16  |  |  |
| -4.94 | -0.53 | 0.93  |  |  |
| 3.44  | -0.17 | -1.37 |  |  |
| -1.45 | 5.02  | 6.14  |  |  |
| 2.02  | -4.73 | -5.93 |  |  |
| 1.82  | -2.39 | -3.44 |  |  |
| 2.99  | -3.28 | -4.49 |  |  |
| 2.75  | -4.05 | -5.13 |  |  |
| -1.54 | 0.08  | 1.08  |  |  |
| -1.55 | -3.98 | -2.97 |  |  |
| -1.56 | -6.47 | -5.45 |  |  |
| -1.59 | -4.47 | -3.42 |  |  |
| -1.6  | -2.58 | -1.53 |  |  |
| -1.61 | -1.99 | -0.93 |  |  |
| -1.82 | -4.91 | -3.67 |  |  |
| 2.47  | -2.23 | -3.43 |  |  |
| 2.24  | -1.15 | -2.2  |  |  |
| -1.91 | -2.14 | -1.11 |  |  |
| -1.98 | -0.88 | 0.21  |  |  |
| -1.99 | -3.36 | -2.27 |  |  |
| -2.26 | -1.67 | -0.39 |  |  |
| -3.72 | -2.32 | -0.32 |  |  |
| 1.88  | 2.73  | 1.53  |  |  |
| 1.64  | 1.28  | 0.28  |  |  |
| -3.14 | -0.37 | 0.98  |  |  |
| 3.25  | -2.48 | -3.68 |  |  |
| 3.11  | -3.44 | -4.57 |  |  |
| -2.74 | -7.43 | -5.47 |  |  |
| 1.52  | -3.11 | -4.31 |  |  |
| 1.5   | -2.21 | -3.39 |  |  |
| 1.49  | -3.83 | -5    |  |  |
| 1.3   | 2.1   | 0.89  |  |  |
| 1.29  | -2.28 | -3.47 |  |  |
| 1.27  | 0.93  | -0.23 |  |  |
| 1.21  | -1.99 | -3.09 |  |  |
| 2.09  | -1.61 | -2.81 |  |  |
| -2.84 | -5.6  | -4.23 |  |  |
| 1.78  | -0.18 | -1.38 |  |  |
| 1.76  | 0.1   | -1.08 |  |  |
| -2.77 | -1.73 | -0.63 |  |  |
| 1.71  | 2.48  | 1.28  |  |  |

|       |       |       |  |  |
|-------|-------|-------|--|--|
| 1.57  | -0.36 | -1.44 |  |  |
| -3.1  | -1.63 | -0.42 |  |  |
| 6.66  | -0.66 | -1.86 |  |  |
| 5.8   | 1     | -0.01 |  |  |
| 1.42  | -1.95 | -0.92 |  |  |
| 1.36  | -3.75 | -2.67 |  |  |
| 1.35  | -3.63 | -2.53 |  |  |
| 1.34  | -2.78 | -1.68 |  |  |
| 1.27  | -4.02 | -2.83 |  |  |
| 1.26  | 1.08  | 2.27  |  |  |
| 1.26  | -3.67 | -2.47 |  |  |
| 1.25  | -4.28 | -3.08 |  |  |
| 1.24  | -4.14 | -2.92 |  |  |
| 1.19  | 1.25  | 2.52  |  |  |
| 1.17  | -0.2  | 1.1   |  |  |
| 1.15  | -2.59 | -1.26 |  |  |
| 1.15  | -2.56 | -1.23 |  |  |
| 1.12  | -3.96 | -2.6  |  |  |
| 1.07  | 3.56  | 5     |  |  |
| 1.05  | -4.4  | -2.94 |  |  |
| 1.04  | -2.63 | -1.16 |  |  |
| 1.03  | -3.29 | -1.81 |  |  |
| 1.01  | 3.53  | 5.05  |  |  |
| -1.04 | 2.75  | 4.34  |  |  |
| -1.07 | -1.54 | 0.09  |  |  |
| -1.08 | 1.29  | 2.93  |  |  |
| -1.15 | -1.01 | 0.72  |  |  |
| -1.16 | -4.47 | -2.73 |  |  |
| -1.25 | -4.27 | -2.41 |  |  |
| -1.34 | -2.5  | -0.55 |  |  |
| -1.35 | -3.2  | -1.24 |  |  |
| -1.35 | -4.62 | -2.65 |  |  |
| -1.36 | -4.89 | -2.91 |  |  |
| -1.51 | -1.72 | 0.41  |  |  |
| -1.61 | -4.93 | -2.71 |  |  |
| -1.69 | -3.28 | -0.99 |  |  |
| 1.33  | -0.37 | -1.57 |  |  |
| -5.9  | -2.75 | -0.98 |  |  |
| 1.64  | -0.88 | -2.08 |  |  |
| 1.52  | 4.29  | 3.19  |  |  |
| 2.21  | 3.53  | 2.33  |  |  |
| 2.1   | -0.46 | -1.58 |  |  |
| -2.08 | -1.06 | -0.05 |  |  |
| -3.1  | -1.51 | 0.07  |  |  |
| 1.3   | -0.13 | -1.33 |  |  |
| 1.29  | -2.37 | -3.56 |  |  |
| 1.19  | 0.9   | -0.16 |  |  |
| 1.35  | -6.03 | -7.24 |  |  |
| 1.31  | -2.34 | -3.5  |  |  |
| 1.18  | -1.66 | -2.67 |  |  |
| 2.07  | -3.62 | -4.82 |  |  |
| 1.82  | -2.8  | -3.81 |  |  |
| -2.71 | -2.26 | -0.97 |  |  |
| 6.57  | -0.95 | -2.15 |  |  |
| 5.96  | -1.88 | -2.94 |  |  |
| 1.34  | -2.04 | -0.95 |  |  |
| 1.68  | 1.49  | 0.29  |  |  |
| 1.64  | 2.02  | 0.84  |  |  |

|       |       |       |  |  |
|-------|-------|-------|--|--|
| 1.59  | 3.13  | 2.01  |  |  |
| 1.59  | -0.64 | -1.76 |  |  |
| 1.57  | 0.01  | -1.09 |  |  |
| 1.57  | 1.58  | 0.47  |  |  |
| -2.88 | -1.24 | -0.17 |  |  |
| -3.57 | -0.58 | 0.8   |  |  |
| 1.64  | -3.1  | -4.3  |  |  |
| 1.44  | -3.65 | -4.66 |  |  |
| 2.07  | 0.17  | -1.03 |  |  |
| -2.3  | -2.37 | -1.32 |  |  |
| 2.07  | 0.17  | -1.03 |  |  |
| -2.3  | -2.37 | -1.32 |  |  |
| 1.5   | -0.98 | -2.18 |  |  |
| 1.32  | -2.05 | -3.07 |  |  |
| 1.31  | -3.2  | -4.21 |  |  |
| 1.5   | -0.98 | -2.18 |  |  |
| 1.32  | -2.05 | -3.07 |  |  |
| 1.31  | -3.2  | -4.21 |  |  |
| 2.35  | 2.86  | 1.67  |  |  |
| 2.1   | 1.31  | 0.28  |  |  |
| 5.11  | -2.17 | -3.36 |  |  |
| -1.1  | -5.24 | -3.95 |  |  |
| 2.26  | 2.63  | 1.44  |  |  |
| 2.23  | 0.76  | -0.42 |  |  |
| 1.98  | 1.04  | 0.03  |  |  |
| -3.05 | -1.49 | 0.09  |  |  |
| -3.05 | -1.27 | 0.32  |  |  |
| 1.03  | -3.35 | -4.55 |  |  |
| 1.02  | -6.09 | -7.28 |  |  |
| -1.02 | -3.41 | -4.54 |  |  |
| -1.07 | -3.75 | -4.81 |  |  |
| -1.08 | -3.6  | -4.65 |  |  |
| 2.18  | -1.82 | -3.02 |  |  |
| -2.26 | -2.66 | -1.55 |  |  |
| -2.48 | -0.44 | 0.8   |  |  |
| 2.34  | 1.34  | 0.14  |  |  |
| 2.15  | -1.71 | -2.78 |  |  |
| -2.12 | -3.77 | -2.66 |  |  |
| -2.12 | -2.21 | -1.1  |  |  |
| -2.17 | -2.1  | -0.96 |  |  |
| -2.9  | -2.42 | -0.86 |  |  |
| 2.26  | -2.62 | -3.82 |  |  |
| 2.1   | -3.16 | -4.25 |  |  |
| -2.55 | 1.69  | 3.02  |  |  |
| -2.89 | -2.15 | -0.64 |  |  |
| 2.11  | -1.61 | -2.81 |  |  |
| 1.94  | 0.49  | -0.59 |  |  |
| 1.92  | -1.13 | -2.2  |  |  |
| 1.84  | -2.03 | -3.04 |  |  |
| -2.38 | -1.15 | -0.02 |  |  |
| -3.03 | -1.18 | 0.3   |  |  |
| -3.66 | -1.44 | 0.31  |  |  |
| 2.12  | 0.06  | -1.13 |  |  |
| 2     | 0.91  | -0.2  |  |  |
| 1.98  | 0.74  | -0.36 |  |  |
| 1.91  | -0.25 | -1.3  |  |  |
| -2.23 | -2.83 | -1.78 |  |  |
| -2.28 | -1.01 | 0.07  |  |  |

|        |       |       |  |  |
|--------|-------|-------|--|--|
| -2.57  | -3.16 | -1.91 |  |  |
| -2.7   | -3.32 | -1.99 |  |  |
| -2.83  | -1.39 | 0     |  |  |
| -3.03  | -0.07 | 1.42  |  |  |
| -5.09  | -2.63 | -0.4  |  |  |
| -5.82  | -1.86 | 0.57  |  |  |
| -6.11  | -3.25 | -0.75 |  |  |
| -6.98  | -2.9  | -0.21 |  |  |
| 1.87   | -6.74 | -7.93 |  |  |
| -2.55  | -8.07 | -7.01 |  |  |
| -2.71  | -4.24 | -3.09 |  |  |
| -3.1   | -6.93 | -5.59 |  |  |
| -3.11  | -6.65 | -5.31 |  |  |
| -3.33  | -6.98 | -5.53 |  |  |
| -4.16  | -6.71 | -4.94 |  |  |
| 2.13   | -2.85 | -4.04 |  |  |
| 2.05   | -0.65 | -1.79 |  |  |
| -2.87  | -3.41 | -1.99 |  |  |
| -3.98  | -3.44 | -1.56 |  |  |
| 1.5    | -0.93 | -2.13 |  |  |
| 1.32   | -2.01 | -3.02 |  |  |
| 1.31   | -3.15 | -4.16 |  |  |
| 3.22   | -3.55 | -4.74 |  |  |
| 2.84   | -3.02 | -4.03 |  |  |
| -1.62  | -5.54 | -4.35 |  |  |
| -1.63  | -3.51 | -2.31 |  |  |
| -1.84  | -5.26 | -3.89 |  |  |
| 1.1    | 0.9   | -0.3  |  |  |
| -4.68  | -1.04 | 0.14  |  |  |
| -4.76  | -3.75 | -2.55 |  |  |
| -5.47  | -3.52 | -2.12 |  |  |
| -7.14  | -1.23 | 0.55  |  |  |
| -9.72  | -0.78 | 1.45  |  |  |
| -20.87 | -1.97 | 1.36  |  |  |
| -23.2  | -2.29 | 1.19  |  |  |
| -56.34 | -3.03 | 1.73  |  |  |
| 3.63   | 4.34  | 3.15  |  |  |
| -1.41  | -2.62 | -1.46 |  |  |
| -1.64  | -2.8  | -1.42 |  |  |
| -1.63  | -0.88 | 0.5   |  |  |
| 2.74   | 2.42  | 1.23  |  |  |
| -1.89  | -3.31 | -2.13 |  |  |
| -2.14  | -1.91 | -0.56 |  |  |
| 1.92   | 0.27  | -0.93 |  |  |
| -2.43  | 1.5   | 2.53  |  |  |
| -2.54  | -2.43 | -1.34 |  |  |
| -2.55  | 0.68  | 1.77  |  |  |
| -2.84  | 1.37  | 2.62  |  |  |
| -2.99  | -0.96 | 0.36  |  |  |
| -3.26  | -3    | -1.55 |  |  |
| -5.63  | -2.48 | -0.24 |  |  |
| 1.76   | -4.48 | -5.67 |  |  |
| 1.65   | -5.22 | -6.32 |  |  |
| 1.54   | -2.46 | -3.46 |  |  |
| -3.11  | -0.8  | 0.46  |  |  |
| 1.67   | -0.8  | -2    |  |  |
| 1.6    | -0.2  | -1.33 |  |  |
| 2.91   | -3.42 | -4.61 |  |  |

|       |       |       |  |  |
|-------|-------|-------|--|--|
| -1.66 | -5.8  | -4.72 |  |  |
| 2.07  | 0.16  | -1.03 |  |  |
| -2.3  | -2.37 | -1.32 |  |  |
| 1.5   | -0.94 | -2.13 |  |  |
| 1.45  | -0.93 | -2.08 |  |  |
| 1.32  | -2.01 | -3.03 |  |  |
| 1.31  | -3.16 | -4.16 |  |  |
| 1.5   | -0.93 | -2.13 |  |  |
| 1.32  | -2.01 | -3.02 |  |  |
| 1.31  | -3.15 | -4.16 |  |  |
| 1.5   | -0.93 | -2.13 |  |  |
| 1.32  | -2.01 | -3.02 |  |  |
| 1.31  | -3.15 | -4.16 |  |  |
| 2.07  | 0.16  | -1.03 |  |  |
| -2.3  | -2.37 | -1.32 |  |  |
| 2.07  | 0.16  | -1.03 |  |  |
| -2.3  | -2.37 | -1.32 |  |  |
| 2.32  | 0.26  | -0.94 |  |  |
| 2.03  | -0.23 | -1.23 |  |  |
| 1.5   | -3.2  | -4.39 |  |  |
| 1.44  | -1.64 | -2.77 |  |  |
| 1.38  | -1.27 | -2.35 |  |  |
| 4.45  | -1.3  | -2.49 |  |  |
| 4.27  | 0.49  | -0.64 |  |  |
| -1.15 | -0.41 | 0.77  |  |  |
| -1.29 | -1.44 | -0.11 |  |  |
| 3.57  | -0.98 | -2.17 |  |  |
| 3.13  | -0.71 | -1.71 |  |  |
| -1.7  | -2.68 | -1.27 |  |  |
| 2     | -4.52 | -5.71 |  |  |
| 1.93  | -4.55 | -5.69 |  |  |
| 1.92  | -2.05 | -3.19 |  |  |
| 3.82  | -3.37 | -4.56 |  |  |
| -1.22 | -4.65 | -3.62 |  |  |
| -1.89 | -2.67 | -1    |  |  |
| 2.48  | 2.12  | 0.93  |  |  |
| 2.23  | -0.06 | -1.1  |  |  |
| 1.88  | 1.92  | 0.73  |  |  |
| -2.57 | -1.47 | -0.38 |  |  |
| -2.57 | -3.16 | -2.07 |  |  |
| -2.93 | -1.12 | 0.16  |  |  |
| -2.95 | -2.28 | -1    |  |  |
| -3.95 | -2.65 | -0.95 |  |  |
| -5.65 | -2.65 | -0.42 |  |  |
| 1.77  | 2.24  | 1.05  |  |  |
| 1.62  | 2.17  | 1.11  |  |  |
| 2.06  | -2.2  | -3.39 |  |  |
| -2.51 | 1.38  | 2.56  |  |  |
| -4.19 | 0.76  | 2.68  |  |  |
| 2.28  | -0.27 | -1.46 |  |  |
| -2.13 | -1.27 | -0.18 |  |  |
| 1.36  | -5.19 | -6.39 |  |  |
| 1.27  | 1.18  | 0.09  |  |  |
| -4.19 | -5.51 | -4.19 |  |  |
| -5.41 | -4.45 | -2.77 |  |  |
| 1.46  | -4.53 | -5.72 |  |  |
| 1.3   | -3.27 | -4.29 |  |  |
| 1.34  | 0.88  | -0.31 |  |  |

|       |       |       |  |  |
|-------|-------|-------|--|--|
| 1.27  | -1.16 | -2.27 |  |  |
| 1.2   | 2.91  | 1.88  |  |  |
| -3.58 | -2.04 | -0.96 |  |  |
| -3.67 | -2.04 | -0.93 |  |  |
| 4.73  | -0.95 | -2.14 |  |  |
| 1.01  | -4.63 | -3.58 |  |  |
| -1.19 | 2.17  | 3.47  |  |  |
| -1.31 | 2.55  | 4     |  |  |
| 1.19  | 0.46  | -0.73 |  |  |
| 1.14  | -4.19 | -5.33 |  |  |
| 1.37  | 0.38  | -0.81 |  |  |
| 1.21  | -2.72 | -3.74 |  |  |
| -3.58 | -4.22 | -3.12 |  |  |
| -3.71 | -3.06 | -1.91 |  |  |
| -5.63 | -3.61 | -1.86 |  |  |
| 2.51  | 2.41  | 1.22  |  |  |
| -2.13 | 2.67  | 3.9   |  |  |
| 1.24  | -3.19 | -4.39 |  |  |
| -4.18 | -2.6  | -1.42 |  |  |
| -4.21 | -1.56 | -0.37 |  |  |
| -4.48 | -2.01 | -0.73 |  |  |
| -5.73 | -2.62 | -0.98 |  |  |
| 1.57  | 2.85  | 1.67  |  |  |
| 1.46  | 0.94  | -0.14 |  |  |
| -3.21 | -2.39 | -1.25 |  |  |
| 1.11  | 6.13  | 4.94  |  |  |
| -4.23 | 0.11  | 1.16  |  |  |
| -4.55 | -1.13 | 0.03  |  |  |
| -5.73 | -1.53 | -0.05 |  |  |
| 3.45  | 1.32  | 0.13  |  |  |
| 3.15  | 0.14  | -0.91 |  |  |
| -1.61 | -1.1  | 0.19  |  |  |
| -1.71 | 2.34  | 3.72  |  |  |
| -2.25 | -0.36 | 1.4   |  |  |
| -3.41 | -1.22 | 1.15  |  |  |
| 5.33  | -0.42 | -1.61 |  |  |
| 1.12  | -4.06 | -3.01 |  |  |
| -1.12 | -3.89 | -2.5  |  |  |
| 1.24  | 3.16  | 1.97  |  |  |
| 1.18  | -1.42 | -2.54 |  |  |
| 2.16  | 2.11  | 0.91  |  |  |
| 1.9   | 1.78  | 0.78  |  |  |
| 6.72  | 1.33  | 0.15  |  |  |
| 6.43  | -1.12 | -2.23 |  |  |
| 1.05  | 0.07  | 1.56  |  |  |
| 1     | 0.66  | 2.23  |  |  |
| -1    | -2.5  | -0.92 |  |  |
| -1.13 | 0.33  | 2.07  |  |  |
| -1.88 | -3.64 | -1.15 |  |  |
| 4.69  | 1.68  | 0.5   |  |  |
| 4.64  | 2.93  | 1.76  |  |  |
| 4.55  | 0.98  | -0.16 |  |  |
| 4.36  | 0.69  | -0.39 |  |  |
| 4.21  | 2.47  | 1.44  |  |  |
| 4.18  | 0.84  | -0.18 |  |  |
| 1.01  | 1.94  | 2.96  |  |  |
| -1.1  | 3.28  | 4.46  |  |  |
| -1.12 | -1.95 | -0.74 |  |  |



|        |       |       |  |  |
|--------|-------|-------|--|--|
| -1.13  | 1.07  | 2.29  |  |  |
| -1.14  | -0.18 | 1.06  |  |  |
| -1.16  | -0.96 | 0.29  |  |  |
| 3      | -1.21 | -2.39 |  |  |
| -1.87  | -2.91 | -1.6  |  |  |
| 2.22   | 0.53  | -0.65 |  |  |
| -2.3   | -2.68 | -1.51 |  |  |
| 1.46   | -2.54 | -3.72 |  |  |
| 1.39   | -4.43 | -5.54 |  |  |
| 1.37   | -4.92 | -6.01 |  |  |
| -3.11  | -1.9  | -0.9  |  |  |
| -4.08  | -5.38 | -3.99 |  |  |
| 2.46   | -2.2  | -3.38 |  |  |
| 2.29   | 4.3   | 3.22  |  |  |
| 2.25   | -0.97 | -2.02 |  |  |
| 2.22   | -2.98 | -4.16 |  |  |
| 2.17   | -6.36 | -7.51 |  |  |
| 4.3    | 1.59  | 0.41  |  |  |
| 4.16   | -0.58 | -1.71 |  |  |
| -1.26  | -2.98 | -1.72 |  |  |
| -1.29  | -0.58 | 0.7   |  |  |
| -1.42  | -4.53 | -3.1  |  |  |
| 3      | 1.85  | 0.67  |  |  |
| 2.7    | 1.54  | 0.52  |  |  |
| 2.15   | 4.56  | 3.37  |  |  |
| 1.91   | -1.53 | -2.55 |  |  |
| 1.35   | 2.3   | 1.12  |  |  |
| -3.54  | -0.72 | 0.35  |  |  |
| -3.75  | -3.57 | -2.41 |  |  |
| 2.67   | 1.44  | 0.26  |  |  |
| -1.93  | -1.22 | -0.04 |  |  |
| -2.5   | -2.09 | -0.53 |  |  |
| -2.6   | -3.59 | -1.98 |  |  |
| -4.34  | -1.99 | 0.36  |  |  |
| 2.02   | -1.03 | -2.22 |  |  |
| 1.85   | -3.74 | -4.8  |  |  |
| 1.35   | 1.84  | 0.66  |  |  |
| 1.34   | -1.48 | -2.65 |  |  |
| 1.64   | -1.55 | -2.73 |  |  |
| -4.23  | -1.82 | -0.21 |  |  |
| 2.19   | 2.5   | 1.32  |  |  |
| -2.35  | -3.08 | -1.9  |  |  |
| 1.85   | 2.6   | 1.41  |  |  |
| -2.66  | -1.94 | -0.83 |  |  |
| 1.41   | -6.24 | -7.42 |  |  |
| 1.39   | -4.95 | -6.1  |  |  |
| 1.56   | -0.5  | -1.68 |  |  |
| 1.38   | -1.99 | -2.99 |  |  |
| -3.17  | -2.48 | -1.36 |  |  |
| 1.5    | -0.94 | -2.13 |  |  |
| 1.32   | -2.02 | -3.02 |  |  |
| 1.82   | -2.81 | -3.99 |  |  |
| 1.73   | -2.26 | -3.37 |  |  |
| 1.6    | -2.73 | -3.73 |  |  |
| 1.34   | 1.47  | 0.29  |  |  |
| 1.3    | 0.9   | -0.24 |  |  |
| -4.18  | -0.73 | 0.57  |  |  |
| -22.42 | -2.86 | 0.87  |  |  |

|       |       |       |  |  |
|-------|-------|-------|--|--|
| 1     | 0.54  | -0.64 |  |  |
| -1.01 | -3.85 | -5.01 |  |  |
| -1.05 | -1.77 | -2.88 |  |  |
| -1.07 | 1.72  | 0.64  |  |  |
| -1.08 | -4.09 | -5.16 |  |  |
| -1.09 | 1     | -0.06 |  |  |
| -4.52 | 0.77  | 1.77  |  |  |
| -5.23 | 0.19  | 1.4   |  |  |
| -5.89 | 1.54  | 2.92  |  |  |
| -5.9  | -1.08 | 0.3   |  |  |
| -7.45 | 0.67  | 2.39  |  |  |
| 2.61  | -1.29 | -2.46 |  |  |
| 2.34  | -2.62 | -3.64 |  |  |
| -2.23 | -2.88 | -1.51 |  |  |
| 3.5   | -2.09 | -3.27 |  |  |
| 3.3   | 1.08  | -0.01 |  |  |
| -1.39 | 1.22  | 2.33  |  |  |
| -1.4  | -2.83 | -1.72 |  |  |
| -1.41 | 0.43  | 1.56  |  |  |
| -1.41 | -2.21 | -1.08 |  |  |
| -1.45 | -0.08 | 1.09  |  |  |
| 1.78  | 0.98  | -0.2  |  |  |
| -2.58 | -1.13 | -0.11 |  |  |
| 2.21  | -1.88 | -3.06 |  |  |
| -2.19 | -3.83 | -2.73 |  |  |
| -2.27 | -3.45 | -2.3  |  |  |
| 1.57  | 3.29  | 2.11  |  |  |
| 1.55  | -0.24 | -1.4  |  |  |
| -2.9  | -1.52 | -0.51 |  |  |
| 1.23  | -1.21 | -2.38 |  |  |
| 1.24  | 5.08  | 3.9   |  |  |
| 1.2   | 2.28  | 1.15  |  |  |
| -4.08 | -0.38 | 0.77  |  |  |
| 3.28  | 0.09  | -1.08 |  |  |
| -1.38 | -1.15 | -0.14 |  |  |
| -1.38 | -1.84 | -0.83 |  |  |
| -1.39 | -1.17 | -0.16 |  |  |
| -1.42 | -0.86 | 0.19  |  |  |
| -1.46 | 0.64  | 1.73  |  |  |
| -1.57 | -0.04 | 1.16  |  |  |
| -1.79 | 0.52  | 1.89  |  |  |
| 1.58  | -2.99 | -4.17 |  |  |
| 1.45  | 0.71  | -0.34 |  |  |
| 2.5   | -1.37 | -2.54 |  |  |
| -1.93 | -4.04 | -2.94 |  |  |
| 2.32  | 1.15  | -0.03 |  |  |
| 2.2   | -2.07 | -3.17 |  |  |
| -2.34 | -3.31 | -2.05 |  |  |
| 1.78  | 4.02  | 2.84  |  |  |
| -3.08 | -4.01 | -2.72 |  |  |
| 1.98  | -3.54 | -4.72 |  |  |
| -2.51 | -5    | -3.87 |  |  |
| 3.98  | -4.28 | -5.46 |  |  |
| -1.4  | -5.01 | -3.71 |  |  |
| -1.61 | -7.08 | -5.57 |  |  |
| -1.97 | -7.17 | -5.37 |  |  |
| 4.75  | -0.95 | -2.12 |  |  |
| 1.02  | 1.46  | 2.5   |  |  |

|       |       |       |  |  |
|-------|-------|-------|--|--|
| -1.09 | 0.94  | 2.12  |  |  |
| -1.53 | -3.5  | -1.82 |  |  |
| 1.18  | 0.96  | -0.22 |  |  |
| 1.05  | 0.98  | -0.03 |  |  |
| 1.23  | -1.6  | -2.78 |  |  |
| 1.22  | 0.75  | -0.42 |  |  |
| 1.21  | 2.72  | 1.56  |  |  |
| 2.99  | 1.4   | 0.22  |  |  |
| -2.57 | -1.53 | 0.23  |  |  |
| 1.27  | -3.25 | -4.43 |  |  |
| 1.26  | 2.61  | 1.44  |  |  |
| -4.2  | -1.35 | -0.12 |  |  |
| 28.7  | 0.5   | -0.68 |  |  |
| 2.3   | 3.68  | 6.14  |  |  |
| 1.74  | 3.68  | 6.55  |  |  |
| 1.19  | -2.02 | 1.39  |  |  |
| 1.16  | -0.77 | -1.95 |  |  |
| 1.11  | -0.64 | -1.75 |  |  |
| 1.06  | 2.59  | 1.55  |  |  |
| 1.61  | 1.81  | 0.63  |  |  |
| 1.5   | -0.34 | -1.41 |  |  |
| -3.1  | -0.87 | 0.28  |  |  |
| -4.19 | -2.27 | -0.69 |  |  |
| 1.72  | 3.04  | 1.86  |  |  |
| -4.28 | -2.44 | -0.73 |  |  |
| 1.75  | -2.07 | -3.25 |  |  |
| 1.71  | -4.97 | -6.12 |  |  |
| 1.59  | -2.08 | -3.12 |  |  |
| -2.65 | -1.03 | 0.01  |  |  |
| 2.43  | 0.28  | -0.9  |  |  |
| -1.91 | -4.65 | -3.61 |  |  |
| -2.36 | -1.91 | -0.56 |  |  |
| -2.48 | -3.17 | -1.75 |  |  |
| 1.58  | -2.99 | -4.17 |  |  |
| 1.45  | 0.71  | -0.34 |  |  |
| 1.58  | -2.99 | -4.17 |  |  |
| 1.45  | 0.71  | -0.34 |  |  |
| 1.56  | -0.5  | -1.67 |  |  |
| -3.17 | -2.48 | -1.35 |  |  |
| 1.56  | -0.5  | -1.67 |  |  |
| -3.17 | -2.48 | -1.35 |  |  |
| 1.56  | -0.5  | -1.67 |  |  |
| -3.17 | -2.48 | -1.35 |  |  |
| 1.58  | -2.99 | -4.17 |  |  |
| 1.45  | 0.71  | -0.34 |  |  |
| -2.86 | -4.12 | -3.12 |  |  |
| 2.62  | 0.65  | -0.52 |  |  |
| -1.76 | -2.28 | -1.24 |  |  |
| 2.04  | 3.11  | 1.94  |  |  |
| -2.33 | -1.69 | -0.62 |  |  |
| 2.59  | -3.32 | -4.49 |  |  |
| 2.44  | -2.52 | -3.6  |  |  |
| -1.83 | -3.75 | -2.68 |  |  |
| -1.87 | -5.44 | -4.33 |  |  |
| -1.89 | -5.71 | -4.59 |  |  |
| -3.08 | -5.14 | -3.31 |  |  |
| 2.59  | -3.32 | -4.49 |  |  |
| 2.44  | -2.52 | -3.6  |  |  |

|       |       |       |  |  |
|-------|-------|-------|--|--|
| -1.83 | -3.75 | -2.68 |  |  |
| -1.87 | -5.44 | -4.33 |  |  |
| -1.89 | -5.71 | -4.59 |  |  |
| -2.47 | -6.94 | -5.43 |  |  |
| 2.5   | -1.04 | -2.21 |  |  |
| 2.26  | 1.11  | 0.08  |  |  |
| -2.05 | -1.58 | -0.39 |  |  |
| 2.58  | 2.34  | 1.17  |  |  |
| -1.96 | -0.87 | 0.3   |  |  |
| 5.87  | -4.18 | -5.35 |  |  |
| 5.39  | 1.31  | 0.26  |  |  |
| 1.29  | -2.32 | -1.3  |  |  |
| 1.26  | -0.95 | 0.1   |  |  |
| 1.23  | -3.38 | -2.29 |  |  |
| 1.21  | -6.05 | -4.94 |  |  |
| 1.15  | -3.81 | -2.63 |  |  |
| 1.15  | -2.84 | -1.66 |  |  |
| 1.14  | -4.44 | -3.24 |  |  |
| -1.16 | -5.88 | -4.28 |  |  |
| 2.16  | 1.51  | 0.35  |  |  |
| 2.03  | 0.21  | -0.87 |  |  |
| 1.61  | -1.36 | -2.54 |  |  |
| -4.11 | -4.88 | -3.33 |  |  |
| 1.85  | 0.96  | -0.21 |  |  |
| 1.8   | -0.82 | -1.96 |  |  |
| -2.55 | 1.23  | 2.29  |  |  |
| -3.92 | -1.67 | 0.01  |  |  |
| 1.21  | -1.15 | -2.32 |  |  |
| 1.17  | -0.61 | -1.74 |  |  |
| 1.16  | 1.54  | 0.43  |  |  |
| 1.12  | -1.57 | -2.63 |  |  |
| 1.09  | 0.48  | -0.54 |  |  |
| -4.55 | -0.36 | 0.93  |  |  |
| 2.09  | -1    | -2.17 |  |  |
| 2.02  | 2.62  | 1.49  |  |  |
| -2.88 | -1.55 | -0.13 |  |  |
| 1.44  | 3.73  | 2.56  |  |  |
| -3.75 | -1.43 | -0.16 |  |  |
| 5.67  | -0.03 | -1.2  |  |  |
| 5.21  | 0.71  | -0.34 |  |  |
| 1.2   | 2.23  | 3.3   |  |  |
| 1.16  | 1.14  | 2.25  |  |  |
| 1.13  | 2.29  | 3.45  |  |  |
| -1.1  | 0.78  | 2.25  |  |  |
| -1.7  | -2.6  | -0.5  |  |  |
| -2.39 | -1.14 | 1.45  |  |  |
| 1.86  | -1.72 | -2.89 |  |  |
| -2.9  | -0.8  | 0.46  |  |  |
| 1.42  | 0.8   | -0.37 |  |  |
| 1.27  | 2.78  | 1.78  |  |  |
| 1.41  | 0.15  | -1.02 |  |  |
| 1.37  | 2.34  | 1.22  |  |  |
| 4.4   | -0.88 | -2.05 |  |  |
| 4.35  | 0.98  | -0.17 |  |  |
| 4.26  | 0.8   | -0.32 |  |  |
| -1.05 | -2.34 | -1.29 |  |  |
| -1.07 | -0.07 | 1     |  |  |
| 2.12  | 1.61  | 0.44  |  |  |

|       |       |       |  |  |
|-------|-------|-------|--|--|
| 2.04  | -0.95 | -2.07 |  |  |
| 1.56  | -0.49 | -1.66 |  |  |
| -3.17 | -2.47 | -1.34 |  |  |
| 1.7   | -0.11 | -1.27 |  |  |
| 1.54  | 1.4   | 0.39  |  |  |
| 2.25  | -1.11 | -2.27 |  |  |
| -2.05 | -4.01 | -2.97 |  |  |
| -2.56 | -2.51 | -1.15 |  |  |
| 3.1   | -4.47 | -5.63 |  |  |
| -1.49 | 0.04  | 1.09  |  |  |
| -1.51 | -1.83 | -0.77 |  |  |
| -1.51 | -2.69 | -1.62 |  |  |
| -1.9  | -5.8  | -4.41 |  |  |
| -2.17 | -5.78 | -4.19 |  |  |
| 12.29 | 1.2   | 0.04  |  |  |
| 11.99 | 1.85  | 0.72  |  |  |
| 11.55 | 0.7   | -0.37 |  |  |
| 1.58  | -4.42 | -2.62 |  |  |
| 1.52  | -5.21 | -3.36 |  |  |
| 1.04  | -2.21 | 0.2   |  |  |
| -1.36 | -4.7  | -1.79 |  |  |
| 2.09  | -6.2  | -7.37 |  |  |
| -2.14 | -8.38 | -7.38 |  |  |
| -2.35 | -9.3  | -8.16 |  |  |
| 5.12  | -0.88 | -2.04 |  |  |
| 1.12  | 0.77  | 1.8   |  |  |
| 1.1   | -2.75 | -1.7  |  |  |
| 1.09  | -2.65 | -1.58 |  |  |
| -1.01 | -0.96 | 0.25  |  |  |
| -1.04 | -3.65 | -2.39 |  |  |
| -1.81 | -6.02 | -3.97 |  |  |
| 2.06  | -3.82 | -4.99 |  |  |
| -2.2  | -3.57 | -2.55 |  |  |
| -4.6  | -4.48 | -2.39 |  |  |
| 2.58  | -0.09 | -1.25 |  |  |
| -1.73 | 1.02  | 2.01  |  |  |
| -1.88 | -3.87 | -2.75 |  |  |
| -2.01 | -2.36 | -1.14 |  |  |
| 13.3  | 0.28  | -0.88 |  |  |
| 2.2   | -1.25 | 0.19  |  |  |
| 2.02  | -0.35 | 1.2   |  |  |
| 1.33  | -4.11 | -1.95 |  |  |
| 2.13  | 1.81  | 0.65  |  |  |
| 2.13  | 3.62  | 2.46  |  |  |
| -2.2  | -2.99 | -1.92 |  |  |
| 1.97  | 0.23  | -0.94 |  |  |
| 1.91  | 0.15  | -0.97 |  |  |
| -2.29 | -2.91 | -1.9  |  |  |
| 1.56  | -1.16 | -2.32 |  |  |
| -5.43 | -3.53 | -1.61 |  |  |
| 2.34  | -1.65 | -2.82 |  |  |
| 2.13  | -1.96 | -2.98 |  |  |
| -2    | -3.64 | -2.58 |  |  |
| 1.55  | 0.29  | -0.87 |  |  |
| 1.51  | 0.18  | -0.95 |  |  |
| 2     | -6.51 | -7.67 |  |  |
| 1.79  | -6.08 | -7.09 |  |  |
| -2.43 | -8.86 | -7.75 |  |  |

|       |       |       |  |  |
|-------|-------|-------|--|--|
| 3.19  | -2.36 | -3.52 |  |  |
| -1.44 | -0.38 | 0.65  |  |  |
| -1.48 | 0.92  | 1.99  |  |  |
| 1.47  | 1.54  | 0.38  |  |  |
| 1.39  | -3.72 | -4.8  |  |  |
| 2.18  | 2.91  | 1.74  |  |  |
| 1.96  | 0.15  | -0.86 |  |  |
| -2.94 | -2.36 | -0.85 |  |  |
| 2.02  | -2.19 | -3.35 |  |  |
| 1.86  | -2.44 | -3.49 |  |  |
| 2.67  | -1.04 | -2.2  |  |  |
| -1.68 | -2.07 | -1.06 |  |  |
| 2.28  | 1.3   | 0.14  |  |  |
| -3.25 | -4.01 | -2.28 |  |  |
| 2.06  | -6.17 | -7.33 |  |  |
| -2.55 | -4.95 | -3.72 |  |  |
| 2.41  | 1.7   | 0.54  |  |  |
| -2.09 | -0.87 | 0.32  |  |  |
| 1.37  | -2.06 | -3.21 |  |  |
| 1.29  | -0.6  | -1.67 |  |  |
| -3.35 | -3.89 | -2.85 |  |  |
| -4.11 | -1.96 | -0.62 |  |  |
| -4.3  | -1.56 | -0.16 |  |  |
| 3.79  | 1.93  | 0.77  |  |  |
| -1.34 | -3.78 | -2.59 |  |  |
| 1.52  | -3.24 | -4.39 |  |  |
| 1.41  | 1.24  | 0.19  |  |  |
| 1.38  | 1.01  | -0.01 |  |  |
| -3.27 | -1.8  | -0.64 |  |  |
| -3.58 | -2.36 | -1.07 |  |  |
| 2.59  | -2.61 | -3.76 |  |  |
| 2.41  | 0.39  | -0.66 |  |  |
| -1.78 | -2.18 | -1.13 |  |  |
| -1.82 | -3.51 | -2.43 |  |  |
| -3.09 | -3.83 | -1.99 |  |  |
| 1.64  | 1.98  | 0.82  |  |  |
| 1.53  | 2.06  | 1     |  |  |
| 1.51  | -0.68 | -1.72 |  |  |
| -2.92 | -1.84 | -0.74 |  |  |
| 2.7   | 2.55  | 1.39  |  |  |
| -2.11 | -0.35 | 1     |  |  |
| -2.27 | -0.43 | 1.02  |  |  |
| -2.27 | -0.43 | 1.02  |  |  |
| 7.8   | 0.62  | -0.54 |  |  |
| 1.74  | -3.9  | -2.89 |  |  |
| 1.44  | -1.88 | -0.6  |  |  |
| 1.28  | -0.03 | 1.43  |  |  |
| 1.18  | 1.18  | 2.75  |  |  |
| 1.16  | -2.86 | -1.26 |  |  |
| 1.5   | 0.57  | -0.58 |  |  |
| -4.67 | 0.09  | 1.73  |  |  |
| 2.66  | 0.03  | -1.13 |  |  |
| 2.59  | -0.28 | -1.41 |  |  |
| 2.42  | -1.78 | -2.94 |  |  |
| -1.87 | -4.41 | -3.39 |  |  |
| -2.07 | -2.36 | -1.19 |  |  |
| -2.91 | -2.65 | -0.99 |  |  |
| 1.72  | 6.92  | 5.76  |  |  |

|       |       |       |  |  |
|-------|-------|-------|--|--|
| 1.55  | 0.94  | -0.05 |  |  |
| 3.97  | 0.03  | -1.13 |  |  |
| -1.17 | -0.89 | 0.17  |  |  |
| -1.77 | -2.27 | -0.62 |  |  |
| -1.78 | -1.66 | 0     |  |  |
| 1.44  | -0.21 | -1.36 |  |  |
| 1.43  | 1     | -0.15 |  |  |
| 1.39  | -0.98 | -2.08 |  |  |
| -3.1  | -1.78 | -0.77 |  |  |
| -4.51 | -3.54 | -1.99 |  |  |
| -6.38 | -2.22 | -0.17 |  |  |
| 1.2   | 1.03  | -0.13 |  |  |
| 1.15  | -0.39 | -1.49 |  |  |
| 2.51  | 3.53  | 2.37  |  |  |
| -2.05 | 0.28  | 1.48  |  |  |
| 1.58  | -3.01 | -4.17 |  |  |
| 1.45  | 0.69  | -0.35 |  |  |
| 1.73  | 2.68  | 1.52  |  |  |
| 1.54  | -0.94 | -1.94 |  |  |
| -3.74 | -2.71 | -1.18 |  |  |
| 3.48  | 2.73  | 1.58  |  |  |
| 3.33  | 3.66  | 2.57  |  |  |
| 3.23  | 4.59  | 3.55  |  |  |
| 7.52  | -3.02 | -4.18 |  |  |
| 1.67  | -4.05 | -3.04 |  |  |
| 1.63  | -5.27 | -4.21 |  |  |
| 1.52  | -6.18 | -5.02 |  |  |
| 1.45  | -2.28 | -1.06 |  |  |
| 1.37  | -1.02 | 0.29  |  |  |
| 1.26  | -2.53 | -1.11 |  |  |
| 1.26  | 0.42  | 1.84  |  |  |
| 1.17  | -5.57 | -4.04 |  |  |
| 1.06  | -5.59 | -3.92 |  |  |
| 1.03  | -3.5  | -1.78 |  |  |
| 1.01  | -7    | -5.26 |  |  |
| -1.07 | -4.22 | -2.37 |  |  |
| -1.12 | -3.28 | -1.36 |  |  |
| -1.15 | -5.83 | -3.87 |  |  |
| -1.16 | -3.83 | -1.86 |  |  |
| -1.21 | -3.04 | -1.01 |  |  |
| 1.82  | -0.33 | -1.49 |  |  |
| 1.66  | -1.98 | -3    |  |  |
| 1.63  | -1.07 | -2.07 |  |  |
| 1.31  | -1.75 | -2.9  |  |  |
| 1.23  | -4.95 | -6.01 |  |  |
| 1.19  | -4.25 | -5.26 |  |  |
| -4.79 | -5.08 | -3.58 |  |  |
| 6.85  | -4.28 | -5.43 |  |  |
| 1.53  | -2.45 | -1.43 |  |  |
| 1.52  | -3.34 | -2.32 |  |  |
| 1.21  | -3.96 | -2.6  |  |  |
| 1.35  | 3.78  | 2.63  |  |  |
| -4.34 | -4.66 | -3.27 |  |  |
| 2.21  | 2.3   | 1.15  |  |  |
| -3.57 | -4.25 | -2.41 |  |  |
| 1.72  | -5.93 | -7.08 |  |  |
| -3.83 | -2.82 | -1.25 |  |  |
| 1.46  | -3.96 | -5.11 |  |  |

|        |       |       |  |  |
|--------|-------|-------|--|--|
| 1.43   | -3.39 | -4.51 |  |  |
| 1.34   | -3.78 | -4.81 |  |  |
| 1.87   | -0.04 | -1.19 |  |  |
| -2.69  | -2.41 | -1.22 |  |  |
| -3.59  | -0.72 | 0.87  |  |  |
| 1.71   | -0.12 | -1.27 |  |  |
| -2.6   | -2.71 | -1.71 |  |  |
| -4.31  | -2.47 | -0.74 |  |  |
| -6.05  | -1.11 | 1.11  |  |  |
| 1.42   | 0.16  | -0.99 |  |  |
| 1.3    | 0.89  | -0.13 |  |  |
| -3.49  | -1.11 | 0.05  |  |  |
| -3.77  | -0.87 | 0.4   |  |  |
| 2.07   | -1.2  | -2.36 |  |  |
| -2.21  | -2.08 | -1.04 |  |  |
| 2.6    | 1.59  | 0.43  |  |  |
| 2.38   | 3.05  | 2.03  |  |  |
| -1.78  | -1.91 | -0.85 |  |  |
| -2.01  | -0.97 | 0.27  |  |  |
| 3.83   | -0.15 | -1.31 |  |  |
| -1.21  | -1.15 | -0.08 |  |  |
| 2.52   | 0.73  | -0.43 |  |  |
| -1.84  | -1.41 | -0.34 |  |  |
| 1.45   | -3.89 | -5.04 |  |  |
| 1.41   | -4.24 | -5.35 |  |  |
| 1.4    | 0.68  | -0.42 |  |  |
| -3.64  | 0.1   | 1.35  |  |  |
| 1.56   | -0.47 | -1.62 |  |  |
| -3.17  | -2.46 | -1.3  |  |  |
| 1.62   | 0.86  | -0.29 |  |  |
| 1.46   | -0.77 | -1.77 |  |  |
| -3.47  | -4.13 | -2.79 |  |  |
| 2.06   | -0.35 | -1.49 |  |  |
| 1.91   | -2.5  | -3.53 |  |  |
| 1.88   | -2.56 | -3.57 |  |  |
| -2.15  | -3.41 | -2.4  |  |  |
| 1.85   | -6.15 | -7.29 |  |  |
| -2.55  | -2.74 | -1.65 |  |  |
| 1.86   | 0.51  | -0.63 |  |  |
| 1.77   | -3.17 | -4.24 |  |  |
| 1.11   | 1.31  | 0.17  |  |  |
| 1.07   | 5.46  | 4.36  |  |  |
| 1.05   | 0.16  | -0.9  |  |  |
| -4.5   | -0.13 | 1.04  |  |  |
| 1.42   | 0.6   | -0.55 |  |  |
| 1.41   | 0.76  | -0.38 |  |  |
| 1.53   | 2.34  | 1.2   |  |  |
| 1.41   | -2.5  | -3.52 |  |  |
| -3.15  | -2.59 | -1.46 |  |  |
| 1.17   | 1.41  | 0.26  |  |  |
| 1.07   | 0.08  | -0.94 |  |  |
| -4.25  | 0.03  | 1.19  |  |  |
| -4.33  | 0.49  | 1.68  |  |  |
| -4.37  | -1.22 | -0.02 |  |  |
| -4.66  | -1.87 | -0.58 |  |  |
| -4.95  | 1.48  | 2.86  |  |  |
| -5.22  | -3.87 | -2.41 |  |  |
| -45.57 | -2.85 | 1.73  |  |  |



|       |       |       |  |  |
|-------|-------|-------|--|--|
| 2.17  | -1.58 | -2.73 |  |  |
| 2.15  | 1.71  | 0.58  |  |  |
| 2.12  | -0.11 | -1.22 |  |  |
| 2     | 1.06  | 0.04  |  |  |
| -2.19 | -1.9  | -0.8  |  |  |
| -4.48 | -2.57 | -0.43 |  |  |
| 2.98  | 0.29  | -0.86 |  |  |
| -1.76 | 1.14  | 2.38  |  |  |
| -1.79 | 0.31  | 1.58  |  |  |
| 1.72  | 0.34  | -0.81 |  |  |
| 1.61  | -2.78 | -3.83 |  |  |
| 1.58  | -3.25 | -4.27 |  |  |
| 5.39  | -1.1  | -2.25 |  |  |
| 1.08  | -4.32 | -3.15 |  |  |
| -1.11 | 5.03  | 6.47  |  |  |
| -1.13 | 5.92  | 7.38  |  |  |
| -1.22 | -1.25 | 0.31  |  |  |
| -1.56 | 3.2   | 5.12  |  |  |
| 17.41 | -1.85 | -2.99 |  |  |
| 2.27  | -4.87 | -3.07 |  |  |
| 1.99  | -1.33 | 0.66  |  |  |
| 1.92  | -1.48 | 0.56  |  |  |
| 1.77  | -4.42 | -2.27 |  |  |
| 1.41  | -1.36 | 1.12  |  |  |
| -1.08 | -6.28 | -3.19 |  |  |
| 8.91  | -3.67 | -4.81 |  |  |
| 1.88  | -5.52 | -4.42 |  |  |
| 1.68  | -5.36 | -4.1  |  |  |
| 1.63  | -4.59 | -3.29 |  |  |
| 1.57  | -4.37 | -3.01 |  |  |
| 1.25  | -5.4  | -3.71 |  |  |
| 1.23  | -1.38 | 0.34  |  |  |
| 1.05  | -5.18 | -3.24 |  |  |
| 1     | -6.18 | -4.17 |  |  |
| -1.18 | -1.21 | 1.04  |  |  |
| -1.53 | -5.73 | -3.11 |  |  |
| 1.18  | -2.11 | -3.25 |  |  |
| 1.14  | -0.38 | -1.47 |  |  |
| 1.11  | -3.15 | -4.2  |  |  |
| 1.11  | 2.04  | 0.98  |  |  |
| -3.95 | -3.1  | -2.02 |  |  |
| 1.56  | -0.32 | -1.46 |  |  |
| -2.93 | -3.14 | -2.09 |  |  |
| 1.54  | 2.7   | 1.56  |  |  |
| -2.97 | -3.14 | -2.09 |  |  |
| -3.36 | -2.61 | -1.39 |  |  |
| -3.37 | -0.8  | 0.44  |  |  |
| -3.45 | -1.1  | 0.17  |  |  |
| -3.64 | -2.1  | -0.76 |  |  |
| -6.08 | -3.88 | -1.79 |  |  |
| -8.2  | -2.9  | -0.39 |  |  |
| 2.06  | -1.94 | -3.08 |  |  |
| -3.21 | -2.1  | -0.52 |  |  |
| -5.46 | -2.04 | 0.3   |  |  |
| -9.77 | -3.34 | -0.15 |  |  |
| 1.87  | -2.1  | -3.24 |  |  |
| -2.39 | -0.31 | 0.7   |  |  |
| 1.41  | -0.76 | -1.9  |  |  |

|       |       |       |  |  |
|-------|-------|-------|--|--|
| 1.32  | -0.52 | -1.58 |  |  |
| -3.16 | 0.65  | 1.66  |  |  |
| -3.75 | -0.76 | 0.49  |  |  |
| 3.39  | -3.35 | -4.49 |  |  |
| -1.32 | -3.78 | -2.76 |  |  |
| -1.33 | -3.34 | -2.31 |  |  |
| -1.33 | -5.16 | -4.12 |  |  |
| -1.38 | -6.36 | -5.27 |  |  |
| -1.39 | -4.51 | -3.41 |  |  |
| -1.48 | -5.44 | -4.25 |  |  |
| -1.5  | -4.12 | -2.92 |  |  |
| -1.55 | -6.51 | -5.26 |  |  |
| -1.73 | -6.59 | -5.18 |  |  |
| -2.98 | -2.15 | 0.04  |  |  |
| 1.75  | -0.23 | -1.37 |  |  |
| 1.71  | 0.57  | -0.53 |  |  |
| -3.31 | -2.14 | -0.75 |  |  |
| 2.08  | 0     | -1.14 |  |  |
| -4.47 | -3.15 | -1.07 |  |  |
| 2.29  | 1.82  | 0.68  |  |  |
| -1.96 | -0.48 | 0.54  |  |  |
| -2.17 | -0.37 | 0.8   |  |  |
| 1.79  | 0.35  | -0.79 |  |  |
| 1.74  | -0.4  | -1.5  |  |  |
| 1.31  | -6.07 | -7.21 |  |  |
| 1.23  | -4.43 | -5.48 |  |  |
| 1.23  | -3.09 | -4.14 |  |  |
| 1.2   | -6.83 | -7.84 |  |  |
| 1.6   | 1.51  | 0.37  |  |  |
| -3.95 | -3.85 | -2.33 |  |  |
| 1.77  | -5.93 | -7.07 |  |  |
| 1.61  | -4.75 | -5.76 |  |  |
| 1.6   | -4.38 | -5.38 |  |  |
| -3.32 | -6.45 | -5.04 |  |  |
| 1.7   | -1.65 | -2.78 |  |  |
| -2.89 | -3.55 | -2.39 |  |  |
| 1.91  | -2.85 | -3.99 |  |  |
| 1.83  | -1.28 | -2.35 |  |  |
| 1.76  | -2    | -3.02 |  |  |
| -2.39 | -5.86 | -4.81 |  |  |
| 2.22  | -4.23 | -5.37 |  |  |
| 2.13  | -2.85 | -3.92 |  |  |
| 1.64  | 1.37  | 0.23  |  |  |
| 1.55  | -0.04 | -1.09 |  |  |
| -2.69 | -1.43 | -0.43 |  |  |
| -3.42 | -1.68 | -0.33 |  |  |
| 5.23  | -3.06 | -4.2  |  |  |
| 1.17  | -1.46 | -0.44 |  |  |
| 1.1   | -1.46 | -0.35 |  |  |
| 1.06  | -3.16 | -1.99 |  |  |
| -1.09 | -3.72 | -2.35 |  |  |
| -1.17 | -2.95 | -1.47 |  |  |
| -1.32 | -0.38 | 1.27  |  |  |
| -1.4  | 0.67  | 2.4   |  |  |
| -1.46 | -3.37 | -1.58 |  |  |
| -1.8  | -5.13 | -3.03 |  |  |
| -2.07 | -6.07 | -3.78 |  |  |
| 1.36  | 1.31  | 0.17  |  |  |

|       |       |       |  |  |
|-------|-------|-------|--|--|
| 1.25  | -5.72 | -6.73 |  |  |
| -3.79 | -4.44 | -3.21 |  |  |
| 1.26  | 0.49  | -0.64 |  |  |
| 1.19  | 7.08  | 6.02  |  |  |
| 1.17  | -2.44 | -3.48 |  |  |
| -3.99 | -3.5  | -2.31 |  |  |
| 2.78  | -1.64 | -2.77 |  |  |
| -1.59 | -4.58 | -3.56 |  |  |
| 1.69  | -0.05 | -1.19 |  |  |
| -3.58 | -3.07 | -1.61 |  |  |
| 9.68  | -1.48 | -2.62 |  |  |
| 1.84  | -0.94 | 0.32  |  |  |
| 1.8   | -2.69 | -1.4  |  |  |
| 1.48  | -1.08 | 0.49  |  |  |
| 2.18  | -0.89 | -2.02 |  |  |
| -2.11 | -4.07 | -3    |  |  |
| 1.39  | -1.87 | -3.01 |  |  |
| 1.3   | -2.19 | -3.23 |  |  |
| 1.28  | 0.75  | -0.28 |  |  |
| 1.27  | -2.68 | -3.69 |  |  |
| 2.02  | 1.97  | 0.83  |  |  |
| -2.23 | -0.63 | 0.4   |  |  |
| -5.16 | -1.84 | 0.4   |  |  |
| 1.98  | 5.38  | 4.24  |  |  |
| -2.5  | 1.96  | 3.12  |  |  |
| -3.2  | -1.99 | -0.47 |  |  |
| 1.64  | 0.25  | -0.89 |  |  |
| -2.85 | -2.41 | -1.32 |  |  |
| -3.04 | -2.01 | -0.83 |  |  |
| 1.73  | 0.74  | -0.4  |  |  |
| 1.59  | -0.9  | -1.91 |  |  |
| -3.65 | -3.08 | -1.56 |  |  |
| 1.73  | 0.74  | -0.4  |  |  |
| 1.59  | -0.9  | -1.91 |  |  |
| -3.65 | -3.08 | -1.56 |  |  |
| 1.73  | 0.74  | -0.4  |  |  |
| 1.59  | -0.9  | -1.91 |  |  |
| -3.65 | -3.08 | -1.56 |  |  |
| 1.73  | 0.74  | -0.4  |  |  |
| 1.59  | -0.9  | -1.91 |  |  |
| -3.65 | -3.08 | -1.56 |  |  |
| 1.73  | 0.74  | -0.4  |  |  |
| 1.59  | -0.9  | -1.91 |  |  |
| -3.65 | -3.08 | -1.56 |  |  |
| 1.06  | 0.5   | -0.64 |  |  |
| -1.03 | 1.09  | 0.08  |  |  |
| 2.17  | 2.57  | 1.44  |  |  |
| 2.12  | 2.96  | 1.86  |  |  |
| 2.08  | 3.81  | 2.74  |  |  |
| -2.17 | -4.15 | -3.05 |  |  |
| -2.9  | -3.31 | -1.78 |  |  |
| 1.43  | 1.04  | -0.09 |  |  |
| 1.34  | 1.69  | 0.65  |  |  |
| -3.08 | -1.04 | -0.02 |  |  |
| 6.88  | -3.21 | -4.34 |  |  |

|       |       |       |  |  |
|-------|-------|-------|--|--|
| 1.43  | -5.98 | -4.84 |  |  |
| 1.27  | -7.51 | -6.2  |  |  |
| -1.28 | -4.38 | -2.36 |  |  |
| 1.12  | 7.47  | 6.34  |  |  |
| 1.06  | -1.33 | -2.39 |  |  |
| 2.06  | 2.3   | 1.17  |  |  |
| -2.31 | 1.63  | 2.75  |  |  |
| -2.87 | -2.05 | -0.62 |  |  |
| -5.04 | -1.38 | 0.87  |  |  |
| -7.96 | -2.26 | 0.64  |  |  |
| 1.68  | -4.5  | -5.64 |  |  |
| 1.6   | -4.37 | -5.44 |  |  |
| 2.02  | 0.38  | -0.75 |  |  |
| 1.95  | -1.29 | -2.37 |  |  |
| -2.18 | -3.86 | -2.85 |  |  |
| 7.63  | -0.88 | -2.01 |  |  |
| 7.52  | -0.33 | -1.44 |  |  |
| 1.54  | -0.85 | 0.33  |  |  |
| 1.47  | -0.88 | 0.36  |  |  |
| 1.46  | -4.49 | -3.24 |  |  |
| 1.4   | -5.1  | -3.79 |  |  |
| 1.35  | -1.92 | -0.56 |  |  |
| 1.35  | -2.76 | -1.39 |  |  |
| 1.32  | -4.85 | -3.45 |  |  |
| 1.32  | -2.73 | -1.33 |  |  |
| 1.3   | -3.71 | -2.29 |  |  |
| 1.26  | -2.24 | -0.77 |  |  |
| 1.19  | -1.96 | -0.41 |  |  |
| 1.17  | -2.28 | -0.7  |  |  |
| 1.16  | -3.81 | -2.22 |  |  |
| 1.14  | 0.11  | 1.72  |  |  |
| 1.11  | -3.67 | -2.02 |  |  |
| 1.09  | -1.79 | -0.11 |  |  |
| 1.08  | -2.33 | -0.64 |  |  |
| 1.06  | -2.42 | -0.7  |  |  |
| 1.04  | -3.11 | -1.36 |  |  |
| -1.01 | -2.6  | -0.79 |  |  |
| -1.03 | -4.67 | -2.82 |  |  |
| -1.04 | -3.25 | -1.4  |  |  |
| -1.05 | -3.94 | -2.07 |  |  |
| -1.15 | -2.4  | -0.39 |  |  |
| -1.46 | -4.71 | -2.36 |  |  |
| 1.93  | -1.86 | -2.99 |  |  |
| 1.8   | -1.98 | -3.02 |  |  |
| -2.9  | -3.15 | -1.8  |  |  |
| -3.5  | -2.72 | -1.1  |  |  |
| 2.14  | 0.49  | -0.64 |  |  |
| -2.13 | -1.14 | -0.09 |  |  |
| -2.6  | -1.42 | -0.08 |  |  |
| -2.98 | -2.29 | -0.74 |  |  |
| 1.58  | -3.89 | -5.02 |  |  |
| -3.3  | -1.08 | 0.17  |  |  |
| 1.67  | -3.96 | -5.09 |  |  |
| 1.57  | -2.18 | -3.23 |  |  |
| 1.47  | -3.77 | -4.9  |  |  |
| 1.44  | -2.41 | -3.51 |  |  |
| 1.36  | -3.91 | -4.93 |  |  |
| 2.38  | 4.93  | 3.8   |  |  |

|       |       |       |  |  |
|-------|-------|-------|--|--|
| 2.26  | 1.44  | 0.39  |  |  |
| -1.88 | -2.51 | -1.48 |  |  |
| -2.18 | 0.39  | 1.64  |  |  |
| 2.26  | -2.49 | -3.62 |  |  |
| 2.17  | -2    | -3.07 |  |  |
| -1.99 | -1.85 | -0.8  |  |  |
| -2.17 | -1.62 | -0.46 |  |  |
| -2.18 | -2.29 | -1.12 |  |  |
| -2.83 | -3.96 | -2.41 |  |  |
| 1.89  | -2.83 | -3.96 |  |  |
| -2.93 | 0.05  | 1.38  |  |  |
| 1.41  | -1.16 | -2.29 |  |  |
| 1.39  | 0.33  | -0.78 |  |  |
| 1.33  | -1.88 | -2.92 |  |  |
| 1.63  | -2.22 | -3.35 |  |  |
| -3.57 | -5.04 | -3.63 |  |  |
| 2.17  | 0.03  | -1.1  |  |  |
| 1.98  | 1.5   | 0.49  |  |  |
| 1.87  | -1.57 | -2.71 |  |  |
| 1.75  | -0.58 | -1.62 |  |  |
| 1.7   | -0.97 | -1.97 |  |  |
| -2.56 | 2.41  | 3.54  |  |  |
| 1.62  | 0.06  | -1.07 |  |  |
| 1.5   | -0.38 | -1.4  |  |  |
| -2.74 | -1.9  | -0.88 |  |  |
| 1.19  | -0.48 | -1.62 |  |  |
| -6.57 | -2.95 | -1.11 |  |  |
| 2.32  | -2.52 | -3.65 |  |  |
| -1.93 | -4.87 | -3.84 |  |  |
| 3.32  | -1.93 | -3.07 |  |  |
| -1.33 | 0.79  | 1.8   |  |  |
| -1.81 | -3.68 | -2.23 |  |  |
| -2.07 | -4.08 | -2.44 |  |  |
| 1.43  | 1.25  | 0.12  |  |  |
| -3.24 | -0.35 | 0.74  |  |  |
| -3.36 | -1.79 | -0.66 |  |  |
| -3.62 | -0.17 | 1.07  |  |  |
| -3.66 | -0.98 | 0.28  |  |  |
| -4.08 | -2.9  | -1.49 |  |  |
| 1.8   | 1.69  | 0.56  |  |  |
| -2.99 | -2.4  | -1.1  |  |  |
| -3.19 | -2.71 | -1.32 |  |  |
| 1.27  | -0.51 | -1.64 |  |  |
| -4.57 | -4.62 | -3.22 |  |  |
| 1.58  | -3.85 | -4.98 |  |  |
| -3.3  | -1.03 | 0.22  |  |  |
| 2.59  | -3.44 | -4.56 |  |  |
| 2.44  | -2.63 | -3.67 |  |  |
| -2.14 | -4.68 | -3.34 |  |  |
| 2.31  | 4.89  | 3.77  |  |  |
| -1.99 | -0.52 | 0.55  |  |  |
| -2.3  | -2.8  | -1.52 |  |  |
| -2.42 | -2.31 | -0.95 |  |  |
| 2.24  | -2.01 | -3.13 |  |  |
| 2.1   | -1    | -2.03 |  |  |
| -2.06 | -3.95 | -2.87 |  |  |
| 1.53  | -5.77 | -6.89 |  |  |
| 1.53  | -2.81 | -3.93 |  |  |

|       |       |       |  |  |
|-------|-------|-------|--|--|
| -5.61 | -7.18 | -5.2  |  |  |
| 1.79  | -5.16 | -6.29 |  |  |
| -2.65 | -4.74 | -3.62 |  |  |
| -2.8  | -3.01 | -1.81 |  |  |
| -3.7  | -5.13 | -3.53 |  |  |
| 3.2   | 0.63  | -0.5  |  |  |
| -1.41 | -0.86 | 0.19  |  |  |
| -1.42 | 1.87  | 2.92  |  |  |
| -1.63 | -1.47 | -0.21 |  |  |
| 1.24  | 1.98  | 0.86  |  |  |
| -5.11 | -4.63 | -3.09 |  |  |
| 2.17  | -6.86 | -7.98 |  |  |
| 2.04  | -8.14 | -9.16 |  |  |
| -2.05 | -2.33 | -1.3  |  |  |
| -2.07 | -3.66 | -2.61 |  |  |
| -2.09 | -5.49 | -4.43 |  |  |
| -2.09 | -3.66 | -2.6  |  |  |
| -2.1  | -6.25 | -5.19 |  |  |
| -2.12 | -3.53 | -2.44 |  |  |
| -2.14 | -3.87 | -2.77 |  |  |
| -2.16 | -4.58 | -3.47 |  |  |
| -2.39 | -4.09 | -2.83 |  |  |
| -2.66 | -5.44 | -4.03 |  |  |
| -2.85 | -5.01 | -3.5  |  |  |
| -3.7  | -6.5  | -4.62 |  |  |
| 42.62 | -0.56 | -1.68 |  |  |
| 9.57  | -3.57 | -2.54 |  |  |
| 6.78  | -1.86 | -0.33 |  |  |
| 6.29  | 0.36  | 2     |  |  |
| 5.43  | -0.92 | 0.93  |  |  |
| 4.63  | 0.99  | 3.07  |  |  |
| 3.51  | -0.09 | 2.39  |  |  |
| 2.03  | 1.81  | 5.08  |  |  |
| 1.98  | -2.74 | 0.57  |  |  |
| 1.6   | -3.78 | -0.17 |  |  |
| 1.59  | -0.69 | 2.93  |  |  |
| 1.34  | -3.93 | -0.07 |  |  |
| 1.32  | -1.95 | 1.93  |  |  |
| 1.27  | -3.53 | 0.42  |  |  |
| 1.23  | -4.45 | -0.46 |  |  |
| 1.22  | -5.43 | -1.42 |  |  |
| -1.3  | -6.48 | -1.81 |  |  |
| 2.27  | -2.22 | -3.34 |  |  |
| -2.41 | -2.81 | -1.48 |  |  |
| 1.72  | -0.01 | -1.14 |  |  |
| 1.59  | 1.18  | 0.17  |  |  |
| 2.05  | 2.46  | 1.33  |  |  |
| 1.97  | 1.15  | 0.08  |  |  |
| 1.91  | 0.37  | -0.65 |  |  |
| -2.29 | -1.48 | -0.37 |  |  |
| -2.33 | -1.51 | -0.38 |  |  |
| 1.33  | -0.12 | -1.24 |  |  |
| 1.3   | 1.82  | 0.73  |  |  |
| -3.29 | 0.02  | 1.02  |  |  |
| -3.48 | -4.37 | -3.28 |  |  |
| -4.41 | -2.59 | -1.16 |  |  |
| -5.32 | -2.19 | -0.48 |  |  |
| 2.06  | -2.02 | -3.15 |  |  |

|       |       |       |  |  |
|-------|-------|-------|--|--|
| -2.36 | -2.79 | -1.63 |  |  |
| -2.79 | -3.54 | -2.14 |  |  |
| 1.44  | 4.12  | 2.99  |  |  |
| -3.3  | -6.34 | -5.22 |  |  |
| -4.76 | -3.8  | -2.15 |  |  |
| 1.6   | -1.79 | -2.91 |  |  |
| 1.53  | 1.22  | 0.17  |  |  |
| -2.86 | -1.03 | 0.05  |  |  |
| -2.91 | -2.39 | -1.3  |  |  |
| -2.94 | -2.07 | -0.96 |  |  |
| -3    | -2.92 | -1.78 |  |  |
| -3.55 | -2.38 | -1    |  |  |
| -4.81 | -2.42 | -0.6  |  |  |
| 2.35  | 4.17  | 3.04  |  |  |
| -2.22 | 2.66  | 3.92  |  |  |
| 2.55  | -0.04 | -1.16 |  |  |
| -2.01 | -3.02 | -1.78 |  |  |
| -2.4  | -3.75 | -2.25 |  |  |
| 1.65  | -0.52 | -1.64 |  |  |
| 1.56  | -3.46 | -4.5  |  |  |
| 1.52  | -2.21 | -3.22 |  |  |
| 1.92  | 0.63  | -0.5  |  |  |
| 1.78  | 1.15  | 0.14  |  |  |
| -2.36 | -1.95 | -0.9  |  |  |
| -2.38 | -3.3  | -2.24 |  |  |
| -2.45 | -1.95 | -0.84 |  |  |
| -2.64 | -0.91 | 0.3   |  |  |
| -2.96 | -2.1  | -0.72 |  |  |
| -3.27 | -0.56 | 0.97  |  |  |
| -4.94 | -2.48 | -0.37 |  |  |
| -9.37 | -3.27 | -0.23 |  |  |
| -1.02 | 2.17  | 1.05  |  |  |
| -1.04 | -2.33 | -3.43 |  |  |
| -4.72 | -0.48 | 0.6   |  |  |
| 84.42 | -0.58 | -1.7  |  |  |
| 84.43 | -0.28 | -1.4  |  |  |
| 19.22 | 0.63  | 1.63  |  |  |
| 14.55 | 0.51  | 1.92  |  |  |
| 10.31 | -3.06 | -1.15 |  |  |
| 9.79  | -4.83 | -2.85 |  |  |
| 9.01  | -0.57 | 1.53  |  |  |
| 2.8   | -3.74 | 0.05  |  |  |
| 2.04  | 1.38  | 0.26  |  |  |
| 1.89  | 2.04  | 1.04  |  |  |
| 1.42  | 1.26  | 0.14  |  |  |
| 1.42  | 1.32  | 0.21  |  |  |
| 1.34  | 1.27  | 0.24  |  |  |
| 1.32  | 2.5   | 1.48  |  |  |
| 1.54  | -2.01 | -3.12 |  |  |
| 1.5   | -0.02 | -1.09 |  |  |
| -2.85 | -3.75 | -2.72 |  |  |
| 1.81  | -1.04 | -2.15 |  |  |
| -2.55 | -3.15 | -2.06 |  |  |
| 1.77  | -1.67 | -2.78 |  |  |
| 1.72  | 1.5   | 0.42  |  |  |
| -2.49 | -3    | -1.98 |  |  |
| -4.04 | -4.47 | -2.74 |  |  |
| 13.17 | 1.19  | 0.07  |  |  |

|       |       |       |  |  |
|-------|-------|-------|--|--|
| 1.88  | -1.75 | -0.06 |  |  |
| 1.11  | -2.85 | -0.4  |  |  |
| 1.1   | -0.92 | 1.54  |  |  |
| 1.07  | -1.26 | 1.24  |  |  |
| 1.03  | -2.19 | 0.36  |  |  |
| -1    | -1.63 | 0.97  |  |  |
| 1.54  | -6.31 | -7.43 |  |  |
| 1.53  | -5.98 | -7.09 |  |  |
| -2.87 | -7.97 | -6.94 |  |  |
| -3.31 | -7.52 | -6.29 |  |  |
| -3.95 | -5.92 | -4.44 |  |  |
| -4.37 | -7.51 | -5.88 |  |  |
| -4.39 | -8.89 | -7.24 |  |  |
| 1.65  | -0.65 | -1.76 |  |  |
| 1.62  | -0.73 | -1.83 |  |  |
| 1.58  | -0.55 | -1.61 |  |  |
| 1.57  | -1.92 | -2.96 |  |  |
| 1.54  | -1.13 | -2.15 |  |  |
| 1.95  | -3.42 | -4.53 |  |  |
| 1.89  | -0.71 | -1.79 |  |  |
| 1.88  | 0.7   | -0.37 |  |  |
| -2.73 | -2.6  | -1.31 |  |  |
| 1.59  | 1.08  | -0.04 |  |  |
| -3.63 | -2.55 | -1.14 |  |  |
| 1.92  | 1.83  | 0.72  |  |  |
| -2.82 | -0.39 | 0.93  |  |  |
| -2.85 | -1.37 | -0.03 |  |  |
| -2.97 | -0.19 | 1.21  |  |  |
| -3.9  | 3.17  | 4.96  |  |  |
| -4.46 | 3.19  | 5.17  |  |  |
| -4.83 | 3.09  | 5.19  |  |  |
| -4.99 | -1.15 | 0.99  |  |  |
| -5.54 | 1.73  | 4.02  |  |  |
| -5.55 | 1.86  | 4.16  |  |  |
| -5.62 | 1.75  | 4.07  |  |  |
| -6.35 | 1.73  | 4.22  |  |  |
| -6.79 | 1.13  | 3.72  |  |  |
| -7.07 | 0.95  | 3.6   |  |  |
| -7.17 | 2.75  | 5.41  |  |  |
| -7.76 | 0.82  | 3.59  |  |  |
| -8.47 | -0.06 | 2.85  |  |  |
| -9.33 | 1.79  | 4.84  |  |  |
| 1.33  | -3.39 | -4.51 |  |  |
| 1.23  | -1.45 | -2.46 |  |  |
| 1.22  | -2.49 | -3.49 |  |  |
| -5.41 | -6.03 | -4.31 |  |  |
| 2.98  | -1.52 | -2.64 |  |  |
| -1.8  | -0.08 | 1.23  |  |  |
| 1.45  | 2.23  | 1.11  |  |  |
| -3.16 | -1.48 | -0.41 |  |  |
| 1.43  | -1.89 | -3.01 |  |  |
| 1.4   | -2.9  | -4    |  |  |
| 1.37  | -2.68 | -3.74 |  |  |
| -3.31 | -2.8  | -1.68 |  |  |
| 2.2   | -1.4  | -2.52 |  |  |
| 2.03  | 1.87  | 0.86  |  |  |
| 2.43  | -1.57 | -2.68 |  |  |
| -1.79 | -3.65 | -2.63 |  |  |



|       |       |       |  |  |
|-------|-------|-------|--|--|
| -1.84 | -3.73 | -2.67 |  |  |
| 1.54  | -3.54 | -4.65 |  |  |
| 1.48  | -1.61 | -2.67 |  |  |
| 1.44  | -4.91 | -5.93 |  |  |
| 1.55  | 0.08  | -1.04 |  |  |
| 1.45  | 0.29  | -0.73 |  |  |
| 1.44  | -1.29 | -2.3  |  |  |
| 4.73  | -2.87 | -3.99 |  |  |
| 4.5   | 0.49  | -0.54 |  |  |
| 4.5   | -1.99 | -3.03 |  |  |
| 3.86  | 0.52  | -0.59 |  |  |
| -1.81 | -3.3  | -1.6  |  |  |
| 2.48  | 0.49  | -0.61 |  |  |
| -2    | -0.7  | 0.51  |  |  |
| -2.09 | 0.91  | 2.18  |  |  |
| -2.21 | 0.54  | 1.89  |  |  |
| -3.46 | 0.25  | 2.24  |  |  |
| -3.84 | -0.85 | 1.29  |  |  |
| -3.87 | 2.1   | 4.25  |  |  |
| 2.53  | -2.91 | -4.02 |  |  |
| -2.33 | -0.84 | 0.62  |  |  |
| 3.24  | -5.68 | -6.79 |  |  |
| 3.15  | -5.32 | -6.38 |  |  |
| 1.54  | -1.73 | -2.84 |  |  |
| -3.1  | -3.29 | -2.15 |  |  |
| 2.26  | -3.57 | -4.68 |  |  |
| -2.09 | -4.53 | -3.4  |  |  |
| -2.17 | -2.7  | -1.52 |  |  |
| -2.26 | -3.62 | -2.38 |  |  |
| -2.38 | -3.88 | -2.57 |  |  |
| -3.8  | -5.33 | -3.34 |  |  |
| 8.2   | -1.2  | -2.31 |  |  |
| 7.77  | -1.88 | -2.91 |  |  |
| 1.74  | -2.51 | -1.38 |  |  |
| 1.36  | -5.54 | -4.06 |  |  |
| 1.13  | -5.04 | -3.28 |  |  |
| 1.07  | -2    | -0.18 |  |  |
| 1.87  | -1.75 | -2.86 |  |  |
| 1.88  | -3.5  | -4.61 |  |  |
| -2.38 | -6.12 | -5.08 |  |  |
| 2.11  | -4.35 | -5.46 |  |  |
| 2.03  | -0.49 | -1.55 |  |  |
| 2.03  | -3.67 | -4.78 |  |  |
| -2.84 | -5.09 | -3.68 |  |  |
| 2.46  | -3.37 | -4.49 |  |  |
| -1.79 | -1.72 | -0.69 |  |  |
| -2.42 | -2.27 | -0.8  |  |  |
| 2.18  | -0.55 | -1.67 |  |  |
| -2.52 | -0.53 | 0.81  |  |  |
| 10.48 | -1.75 | -2.86 |  |  |
| 2.37  | -0.11 | 0.93  |  |  |
| 2.34  | 0.63  | 1.68  |  |  |
| 2.26  | -2.71 | -1.61 |  |  |
| 1.8   | 0.13  | 1.56  |  |  |
| 1.3   | -4.04 | -2.14 |  |  |
| 1.27  | -2.01 | -0.08 |  |  |
| 1.21  | -2.71 | -0.71 |  |  |
| 1.11  | -1.95 | 0.18  |  |  |

|       |       |       |  |  |
|-------|-------|-------|--|--|
| 1.06  | 2.22  | 4.4   |  |  |
| 1.04  | 0.2   | 2.41  |  |  |
| -1.02 | -5.11 | -2.81 |  |  |
| 1.98  | -1.22 | -2.33 |  |  |
| -2.64 | -2.7  | -1.43 |  |  |
| 1.46  | 2.05  | 0.94  |  |  |
| 1.4   | -3.15 | -4.2  |  |  |
| 1.7   | -1.55 | -2.65 |  |  |
| -5.56 | -3.2  | -1.07 |  |  |
| 1.3   | 4.85  | 3.75  |  |  |
| -3.37 | -2.76 | -1.74 |  |  |
| -3.61 | -0.88 | 0.24  |  |  |
| -4.01 | -1.3  | -0.03 |  |  |
| 4.13  | -0.44 | -1.54 |  |  |
| -1.18 | -3.21 | -2.03 |  |  |
| -1.29 | 0.3   | 1.62  |  |  |
| 3.65  | -1.4  | -2.51 |  |  |
| 3.44  | -2.86 | -3.88 |  |  |
| -1.19 | -4.72 | -3.7  |  |  |
| -1.23 | -3.2  | -2.14 |  |  |
| -1.24 | -2.82 | -1.75 |  |  |
| -1.34 | -1.24 | -0.05 |  |  |
| -1.58 | -2.19 | -0.77 |  |  |
| 1.67  | -3.52 | -4.63 |  |  |
| -2.68 | -3.23 | -2.17 |  |  |
| -2.76 | -3.36 | -2.26 |  |  |
| -2.77 | -2.02 | -0.92 |  |  |
| 2.02  | -2.42 | -3.52 |  |  |
| 1.96  | -2.79 | -3.84 |  |  |
| 1.56  | -2.56 | -3.67 |  |  |
| 1.51  | 0.35  | -0.71 |  |  |
| 1.5   | -2.01 | -3.06 |  |  |
| -3.27 | -0.25 | 0.99  |  |  |
| -3.52 | -2.61 | -1.26 |  |  |
| 2.81  | 2.41  | 1.3   |  |  |
| -1.89 | -1.22 | 0.09  |  |  |
| -1.94 | -0.14 | 1.2   |  |  |
| -2.03 | -0.25 | 1.16  |  |  |
| -2.26 | -2.39 | -0.83 |  |  |
| -2.39 | 0.52  | 2.16  |  |  |
| 1.51  | 3.32  | 2.22  |  |  |
| 1.43  | 2.37  | 1.35  |  |  |
| 1.54  | 1.32  | 0.21  |  |  |
| 1.54  | 3.53  | 2.43  |  |  |
| 6.56  | -0.01 | -1.11 |  |  |
| 1.51  | -1    | 0.02  |  |  |
| 1.38  | -3.13 | -1.98 |  |  |
| 1.38  | -2.33 | -1.18 |  |  |
| 1.3   | 4.03  | 5.26  |  |  |
| 1.14  | 4.36  | 5.78  |  |  |
| 1.12  | 4.03  | 5.47  |  |  |
| -4.08 | -1.07 | 2.57  |  |  |
| 1.89  | 2.05  | 0.94  |  |  |
| -2.29 | -1.45 | -0.44 |  |  |
| -2.47 | -2.61 | -1.49 |  |  |
| 4.79  | -0.93 | -2.03 |  |  |
| 4.54  | -0.48 | -1.51 |  |  |
| 1.69  | 0.14  | -0.96 |  |  |

|       |       |       |  |  |
|-------|-------|-------|--|--|
| 1.67  | -2.4  | -3.49 |  |  |
| 1.61  | -3.14 | -4.17 |  |  |
| -3.03 | -2.99 | -1.74 |  |  |
| 2.92  | -2.18 | -3.28 |  |  |
| 2.78  | -1.87 | -2.91 |  |  |
| -1.48 | -4.53 | -3.53 |  |  |
| -1.59 | -2.49 | -1.38 |  |  |
| -1.77 | -5.67 | -4.41 |  |  |
| -1.8  | 0.2   | 1.48  |  |  |
| -1.81 | -0.79 | 0.5   |  |  |
| -2.29 | -3.2  | -1.56 |  |  |
| -1.07 | -2.23 | -3.33 |  |  |
| -1.07 | 2.73  | 1.63  |  |  |
| -4.6  | -1.05 | -0.05 |  |  |
| -4.63 | -1.42 | -0.41 |  |  |
| 1.77  | -0.06 | -1.17 |  |  |
| -2.54 | -4.1  | -3.04 |  |  |
| -2.67 | -3.22 | -2.08 |  |  |
| 1.3   | 1.44  | 0.34  |  |  |
| 1.23  | -2.09 | -3.11 |  |  |
| 1.76  | 0.66  | -0.44 |  |  |
| -2.45 | -0.57 | 0.44  |  |  |
| -3.02 | -0.66 | 0.65  |  |  |
| -3.11 | -1.58 | -0.23 |  |  |
| 1.82  | -0.53 | -1.63 |  |  |
| -7.18 | -3.07 | -0.46 |  |  |
| 2.23  | -3.6  | -4.7  |  |  |
| 2.09  | -1.25 | -2.26 |  |  |
| -2.98 | -0.28 | 1.34  |  |  |
| 1.75  | -0.94 | -2.05 |  |  |
| -4.23 | -1.38 | 0.4   |  |  |
| 1.62  | 1.98  | 0.88  |  |  |
| 1.61  | -1.42 | -2.51 |  |  |
| 1.52  | 0.84  | -0.16 |  |  |
| 2.07  | -0.78 | -1.88 |  |  |
| -2.14 | -0.22 | 0.83  |  |  |
| -2.22 | -1.94 | -0.84 |  |  |
| -4.51 | -1.29 | 0.83  |  |  |
| 1.88  | 1.58  | 0.49  |  |  |
| -2.67 | -2.59 | -1.36 |  |  |
| -2.78 | -1.13 | 0.16  |  |  |
| -2.92 | -2.38 | -1.02 |  |  |
| -4.07 | -2.37 | -0.53 |  |  |
| 2.32  | -0.92 | -2.01 |  |  |
| -1.99 | -2.15 | -1.04 |  |  |
| -2.93 | -2.49 | -0.82 |  |  |
| 1.97  | -0.26 | -1.36 |  |  |
| 1.94  | -1.02 | -2.1  |  |  |
| -5.53 | -7.12 | -4.76 |  |  |
| 2.24  | -1.91 | -3.01 |  |  |
| 2.19  | -1.3  | -2.37 |  |  |
| -1.96 | 0.94  | 1.97  |  |  |
| -1.99 | 0.25  | 1.3   |  |  |
| -2.03 | -0.18 | 0.91  |  |  |
| -2.04 | -3.73 | -2.64 |  |  |
| -2.22 | -3.17 | -1.95 |  |  |
| -2.24 | -2.53 | -1.31 |  |  |
| -2.31 | -1.94 | -0.66 |  |  |

|       |       |       |  |  |
|-------|-------|-------|--|--|
| -2.5  | -3.82 | -2.44 |  |  |
| -2.73 | -4.21 | -2.7  |  |  |
| -2.76 | -3.27 | -1.75 |  |  |
| -2.91 | -2.95 | -1.35 |  |  |
| 1.73  | 0.97  | -0.13 |  |  |
| 1.63  | 1.36  | 0.35  |  |  |
| 1.73  | 0.5   | -0.6  |  |  |
| 1.62  | -1.65 | -2.65 |  |  |
| 3.31  | 1.59  | 0.49  |  |  |
| -1.44 | 0.19  | 1.34  |  |  |
| 2.47  | -0.58 | -1.68 |  |  |
| 2.45  | 0.25  | -0.83 |  |  |
| -2.9  | -2.07 | -0.33 |  |  |
| 1.36  | 1.73  | 0.63  |  |  |
| 1.31  | 3.45  | 2.4   |  |  |
| 1.28  | -2.28 | -3.29 |  |  |
| 1.65  | -3.25 | -4.35 |  |  |
| 1.64  | -0.03 | -1.12 |  |  |
| 1.59  | -1.18 | -2.22 |  |  |
| -2.64 | -0.82 | 0.21  |  |  |
| -2.97 | -4.21 | -3.01 |  |  |
| 1.51  | 0.31  | -0.79 |  |  |
| 1.43  | 0.73  | -0.28 |  |  |
| 1.43  | -1.06 | -2.08 |  |  |
| -5.19 | -3.94 | -2.06 |  |  |
| 5.23  | 1.19  | 0.1   |  |  |
| 1.13  | -0.2  | 0.91  |  |  |
| 1.89  | -0.02 | -1.12 |  |  |
| -3.61 | -3.33 | -1.66 |  |  |
| 2.17  | -2.03 | -3.13 |  |  |
| -1.99 | -4.07 | -3.06 |  |  |
| -2.19 | -3.98 | -2.82 |  |  |
| -2.27 | -1.83 | -0.63 |  |  |
| -2.43 | -3.63 | -2.33 |  |  |
| -2.8  | -1.87 | -0.36 |  |  |
| 2.24  | 3.69  | 2.59  |  |  |
| 2.14  | 2.84  | 1.81  |  |  |
| -1.98 | 0.1   | 1.16  |  |  |
| -1.98 | 0.1   | 1.16  |  |  |
| 1.62  | -0.5  | -1.59 |  |  |
| -2.94 | -3.72 | -2.56 |  |  |
| 1.75  | -2.45 | -3.55 |  |  |
| 1.75  | -2.84 | -3.93 |  |  |
| -3.07 | -3.29 | -1.96 |  |  |
| 1.49  | -2.79 | -3.89 |  |  |
| -3.18 | -3.32 | -2.17 |  |  |
| 1.26  | 0.9   | -0.19 |  |  |
| -4.4  | -2.16 | -0.78 |  |  |
| 2.19  | 3.45  | 2.36  |  |  |
| 2.13  | 1.72  | 0.67  |  |  |
| -2.26 | -1.63 | -0.42 |  |  |
| -2.72 | -1.27 | 0.21  |  |  |
| -3.04 | -1.27 | 0.37  |  |  |
| 4.26  | 1.51  | 0.41  |  |  |
| -1.05 | -0.79 | 0.29  |  |  |
| -1.06 | 0.07  | 1.16  |  |  |
| -1.13 | 0.76  | 1.94  |  |  |
| -1.24 | -2.49 | -1.18 |  |  |

|       |       |       |  |  |
|-------|-------|-------|--|--|
| -1.29 | -4.41 | -3.05 |  |  |
| 1.39  | -4.29 | -5.38 |  |  |
| 1.32  | 2.17  | 1.16  |  |  |
| -3.15 | -3.62 | -2.58 |  |  |
| 2.37  | -2.56 | -3.65 |  |  |
| -2.07 | -4.48 | -3.28 |  |  |
| 2.01  | -1.18 | -2.27 |  |  |
| -2.36 | -4.93 | -3.77 |  |  |
| -2.57 | -1.89 | -0.6  |  |  |
| -5.88 | -4.67 | -2.19 |  |  |
| 2.16  | 2.53  | 1.44  |  |  |
| -1.97 | -3.25 | -2.25 |  |  |
| -2.39 | -2.07 | -0.79 |  |  |
| -2.4  | -1.96 | -0.68 |  |  |
| -2.77 | 0.62  | 2.11  |  |  |
| -3    | -1.36 | 0.24  |  |  |
| -3.01 | 0.08  | 1.69  |  |  |
| 2.01  | -5.05 | -6.14 |  |  |
| 1.99  | -5.87 | -6.95 |  |  |
| -3.17 | -8.01 | -6.43 |  |  |
| 1.79  | -3.24 | -4.33 |  |  |
| 1.69  | -2.68 | -3.69 |  |  |
| -6.13 | -3.87 | -1.51 |  |  |
| 2.39  | 0.5   | -0.59 |  |  |
| -1.78 | -1.14 | -0.15 |  |  |
| 1.57  | 0.24  | -0.85 |  |  |
| -3.14 | -2.59 | -1.38 |  |  |
| -3.47 | -0.74 | 0.62  |  |  |
| -4.88 | -4.04 | -2.2  |  |  |
| 3.57  | -2.42 | -3.52 |  |  |
| -1.35 | -3.66 | -2.48 |  |  |
| 1.83  | -1.84 | -2.93 |  |  |
| -2.74 | -2.21 | -0.98 |  |  |
| -2.76 | -1.24 | 0     |  |  |
| -3.27 | -1.27 | 0.22  |  |  |
| 9.25  | 0.65  | -0.44 |  |  |
| 9.15  | 1.38  | 0.31  |  |  |
| 1.9   | -1.6  | -0.4  |  |  |
| 1.87  | 2.28  | 3.5   |  |  |
| 1.85  | -1.27 | -0.04 |  |  |
| 1.82  | -0.36 | 0.9   |  |  |
| 1.78  | 0.63  | 1.92  |  |  |
| 1.68  | -2.39 | -1.02 |  |  |
| 1.57  | -0.68 | 0.78  |  |  |
| 1.25  | -1.98 | -0.18 |  |  |
| 1.1   | -2.21 | -0.23 |  |  |
| 1.04  | 3.47  | 5.54  |  |  |
| -1    | 5.08  | 7.21  |  |  |
| -1.14 | -0.83 | 1.47  |  |  |
| -1.55 | 1.57  | 4.32  |  |  |
| 1.36  | 1.95  | 0.86  |  |  |
| 1.34  | 1.5   | 0.44  |  |  |
| 1.3   | 0.42  | -0.61 |  |  |
| -3.44 | 0.85  | 1.98  |  |  |
| -7.88 | -0.64 | 1.69  |  |  |
| 1.78  | 0.47  | -0.62 |  |  |
| 1.75  | -0.38 | -1.45 |  |  |
| 1.54  | -1.72 | -2.8  |  |  |

|       |       |       |  |  |
|-------|-------|-------|--|--|
| -3.47 | -3.3  | -1.96 |  |  |
| -3.54 | -5.21 | -3.85 |  |  |
| -4.39 | -4.74 | -3.07 |  |  |
| -6.59 | -6.4  | -4.14 |  |  |
| 1.5   | -0.32 | -1.41 |  |  |
| 1.48  | -1.93 | -2.99 |  |  |
| 1.48  | 0.23  | -0.84 |  |  |
| -3.22 | -3.92 | -2.74 |  |  |
| -3.29 | -1.77 | -0.55 |  |  |
| -4.3  | -3.25 | -1.65 |  |  |
| 2.41  | -0.99 | -2.08 |  |  |
| -1.79 | -5.96 | -4.94 |  |  |
| -1.79 | -5.82 | -4.79 |  |  |
| -1.91 | -4.58 | -3.47 |  |  |
| -1.96 | -6.09 | -4.94 |  |  |
| 1.64  | -1.66 | -2.75 |  |  |
| 1.59  | -2.43 | -3.48 |  |  |
| -3.04 | -2.86 | -1.63 |  |  |
| 2.22  | 1.19  | 0.1   |  |  |
| -2.69 | 0.58  | 2.07  |  |  |
| -3.07 | 1.32  | 3     |  |  |
| -4.45 | -0.3  | 1.91  |  |  |
| -5.23 | -1.44 | 1     |  |  |
| -8.39 | -2.85 | 0.27  |  |  |
| 3.99  | -0.53 | -1.62 |  |  |
| -1.22 | -0.08 | 1.11  |  |  |
| -1.22 | -0.61 | 0.58  |  |  |
| -1.33 | 0.82  | 2.14  |  |  |
| 2.09  | -5.47 | -6.55 |  |  |
| -2.03 | -4.19 | -3.19 |  |  |
| 1.77  | -0.8  | -1.88 |  |  |
| -2.41 | -3.04 | -2.03 |  |  |
| -3.79 | -1.06 | 0.61  |  |  |
| 1.32  | -0.83 | -1.91 |  |  |
| 1.28  | -2.25 | -3.29 |  |  |
| -3.24 | -1.76 | -0.75 |  |  |
| -3.51 | -1.64 | -0.51 |  |  |
| 2.55  | -0.97 | -2.06 |  |  |
| -2.3  | 1.18  | 2.65  |  |  |
| 5.4   | 0     | -1.09 |  |  |
| 1.17  | -2.27 | -1.15 |  |  |
| 1.05  | -4.77 | -3.5  |  |  |
| -1.08 | -2.62 | -1.17 |  |  |
| -1.56 | -3.26 | -1.27 |  |  |
| 10.57 | 0.77  | -0.31 |  |  |
| 2.45  | -3.88 | -2.85 |  |  |
| 2.25  | -1.05 | 0.1   |  |  |
| 1.82  | -3.18 | -1.73 |  |  |
| 1.81  | -1.73 | -0.27 |  |  |
| 1.52  | -4.05 | -2.33 |  |  |
| 1.45  | -1.02 | 0.77  |  |  |
| 1.4   | -2.47 | -0.63 |  |  |
| 1.32  | -4.91 | -2.99 |  |  |
| 1.24  | -4.47 | -2.46 |  |  |
| 1.17  | 1.07  | 3.16  |  |  |
| 1.11  | -5.09 | -2.92 |  |  |
| 1.07  | -0.24 | 1.99  |  |  |
| 1.06  | -4.95 | -2.72 |  |  |

|       |       |       |  |  |
|-------|-------|-------|--|--|
| 1.04  | 2.31  | 4.57  |  |  |
| -1.26 | -4.92 | -2.26 |  |  |
| -1.65 | -3.73 | -0.69 |  |  |
| 1.32  | -1.45 | -2.53 |  |  |
| -8.51 | -4.77 | -2.36 |  |  |
| 1.33  | -6.67 | -7.75 |  |  |
| 1.32  | -7.54 | -8.61 |  |  |
| -3.24 | -4.8  | -3.77 |  |  |
| -3.39 | -4.9  | -3.81 |  |  |
| 1.78  | 0.05  | -1.03 |  |  |
| 1.76  | 0.73  | -0.34 |  |  |
| -3.9  | -0.32 | 1.4   |  |  |
| 1.93  | -0.33 | -1.41 |  |  |
| 1.87  | -1.35 | -2.39 |  |  |
| -2.72 | -2.5  | -1.19 |  |  |
| 2.19  | 1.93  | 0.84  |  |  |
| 2.14  | -0.62 | -1.68 |  |  |
| -2.68 | -0.85 | 0.62  |  |  |
| 4.45  | 1.3   | 0.22  |  |  |
| 4.27  | -0.23 | -1.25 |  |  |
| 1     | -1.42 | -0.35 |  |  |
| -1.02 | 0.83  | 1.93  |  |  |
| -1.06 | -1.96 | -0.8  |  |  |
| 3.32  | -0.22 | -1.3  |  |  |
| 3.2   | -0.25 | -1.28 |  |  |
| -1.58 | 0.71  | 2.02  |  |  |
| -2.12 | -3.72 | -1.98 |  |  |
| 1.43  | -3.52 | -4.6  |  |  |
| -3.26 | -3.45 | -2.32 |  |  |
| -3.64 | -2.5  | -1.21 |  |  |
| -5.06 | -4.58 | -2.81 |  |  |
| 5.4   | 0.07  | -1.01 |  |  |
| -1.2  | -0.01 | 1.61  |  |  |
| 2.1   | -1.27 | -2.36 |  |  |
| -2.56 | -4.45 | -3.11 |  |  |
| 1.88  | -3.44 | -4.52 |  |  |
| -2.96 | -2.61 | -1.22 |  |  |
| 1.11  | -0.62 | -1.71 |  |  |
| -4.26 | -2.26 | -1.11 |  |  |
| -5.77 | -5.16 | -3.56 |  |  |
| 1.92  | -3.34 | -4.43 |  |  |
| -2.48 | -4.58 | -3.41 |  |  |
| -2.52 | -4.01 | -2.82 |  |  |
| 1.56  | -1.07 | -2.16 |  |  |
| -2.89 | -1.61 | -0.52 |  |  |
| 1.24  | -0.36 | -1.45 |  |  |
| 1.17  | -3.16 | -4.16 |  |  |
| 2.2   | 1.39  | 0.32  |  |  |
| -2.24 | -4.14 | -2.91 |  |  |
| 3.26  | 0.1   | -0.98 |  |  |
| -1.44 | -3.36 | -2.21 |  |  |
| 1.82  | 1.36  | 0.29  |  |  |
| 1.81  | 1.11  | 0.04  |  |  |
| -2.41 | -2.07 | -1.01 |  |  |
| -3.34 | -2.46 | -0.93 |  |  |
| 2.27  | 0.86  | -0.22 |  |  |
| 2.22  | -1.25 | -2.3  |  |  |
| -1.86 | 3.05  | 4.05  |  |  |

|       |       |       |  |  |
|-------|-------|-------|--|--|
| -1.9  | -1.6  | -0.57 |  |  |
| -1.92 | -1.06 | -0.01 |  |  |
| -2.04 | -0.22 | 0.91  |  |  |
| 2.56  | -2.89 | -3.97 |  |  |
| -1.68 | -4.22 | -3.19 |  |  |
| -1.88 | -3.59 | -2.4  |  |  |
| -2.82 | -4.61 | -2.84 |  |  |
| 2.12  | -1.46 | -2.53 |  |  |
| 2.1   | 2.65  | 1.58  |  |  |
| 3.43  | -3.7  | -4.78 |  |  |
| -1.24 | -3.04 | -2.02 |  |  |
| -1.32 | -7.79 | -6.69 |  |  |
| -1.35 | -4    | -2.87 |  |  |
| -2.06 | -7.09 | -5.35 |  |  |
| -2.81 | -6.51 | -4.32 |  |  |
| 1.74  | -5.86 | -6.93 |  |  |
| 1.74  | -4.26 | -5.33 |  |  |
| -2.41 | -6.98 | -5.98 |  |  |
| -2.52 | -5.73 | -4.68 |  |  |
| -2.85 | -6.66 | -5.42 |  |  |
| -3.7  | -4.68 | -3.07 |  |  |
| 5.72  | -1.87 | -2.95 |  |  |
| 1.29  | -4.66 | -3.59 |  |  |
| 1.24  | -4.43 | -3.3  |  |  |
| 1.15  | -3.01 | -1.78 |  |  |
| 1.03  | -2.92 | -1.53 |  |  |
| 1.02  | -5.11 | -3.71 |  |  |
| 1     | -0.1  | 1.33  |  |  |
| 2.49  | -2.2  | -3.28 |  |  |
| 2.38  | 0.74  | -0.28 |  |  |
| 3.08  | -2.99 | -4.07 |  |  |
| 2.99  | -4.52 | -5.55 |  |  |
| 1.62  | -1.11 | -2.19 |  |  |
| -2.85 | -1.11 | 0.03  |  |  |
| -3.08 | -1.93 | -0.69 |  |  |
| -3.83 | -1.39 | 0.17  |  |  |
| -3.83 | -1.78 | -0.23 |  |  |
| -4.17 | -2.04 | -0.36 |  |  |
| -4.37 | -1.89 | -0.14 |  |  |
| -4.94 | -1.91 | 0.01  |  |  |
| 2.28  | 4.55  | 3.48  |  |  |
| -2.57 | -1.51 | -0.03 |  |  |
| 2.24  | 2.14  | 1.06  |  |  |
| -2.01 | -0.48 | 0.62  |  |  |
| 1.83  | -1.23 | -2.3  |  |  |
| -3.09 | -1.59 | -0.17 |  |  |
| 1.73  | 0.67  | -0.41 |  |  |
| -3.65 | -3.15 | -1.57 |  |  |
| 5.82  | 0.14  | -0.93 |  |  |
| 5.63  | 3.33  | 2.3   |  |  |
| 1.35  | -2.61 | -1.58 |  |  |
| 1.32  | -1.94 | -0.86 |  |  |
| 1.21  | -1.67 | -0.47 |  |  |
| 1.2   | 0.04  | 1.26  |  |  |
| 1.15  | -1.8  | -0.54 |  |  |
| -1.03 | -1.47 | 0.05  |  |  |
| -1.07 | 3.52  | 5.09  |  |  |
| -1.17 | -2.74 | -1.05 |  |  |



|        |       |       |  |  |
|--------|-------|-------|--|--|
| -1.29  | 0.11  | 1.95  |  |  |
| 2.12   | -1.78 | -2.85 |  |  |
| -2.09  | -1.72 | -0.64 |  |  |
| 3.14   | 3.47  | 2.4   |  |  |
| 3.1    | -2.8  | -3.85 |  |  |
| 3.07   | 1.66  | 0.62  |  |  |
| -1.36  | -2.42 | -1.39 |  |  |
| -1.55  | -4.18 | -2.96 |  |  |
| -1.91  | -4.67 | -3.15 |  |  |
| -2.08  | -3.37 | -1.73 |  |  |
| 9.85   | -2.79 | -3.86 |  |  |
| 2.32   | -2.44 | -1.42 |  |  |
| 1.93   | -1.67 | -0.39 |  |  |
| 1.46   | -1.88 | -0.19 |  |  |
| 1.28   | -3.83 | -1.96 |  |  |
| 1.22   | -3.89 | -1.95 |  |  |
| 1.15   | -4.5  | -2.47 |  |  |
| -1.12  | -5.1  | -2.7  |  |  |
| 1.95   | 0.15  | -0.92 |  |  |
| -2.15  | -1.43 | -0.44 |  |  |
| -2.47  | -2.37 | -1.18 |  |  |
| -2.65  | -0.84 | 0.46  |  |  |
| -3.18  | -2.16 | -0.6  |  |  |
| -3.34  | 0.94  | 2.57  |  |  |
| -3.4   | -1.36 | 0.3   |  |  |
| 2.47   | 1.34  | 0.27  |  |  |
| -1.86  | -3.29 | -2.16 |  |  |
| 2.04   | 1.56  | 0.49  |  |  |
| -2.34  | -2.27 | -1.09 |  |  |
| -2.66  | -2.19 | -0.83 |  |  |
| -2.9   | -2.26 | -0.77 |  |  |
| -4.43  | -2.56 | -0.46 |  |  |
| 2.6    | -1.71 | -2.78 |  |  |
| 2.6    | 2.53  | 1.46  |  |  |
| 2.55   | -3.57 | -4.61 |  |  |
| 1.72   | -5.31 | -6.38 |  |  |
| -2.75  | -4.58 | -3.42 |  |  |
| 1.12   | -0.47 | -1.54 |  |  |
| -3.77  | -0.56 | 0.45  |  |  |
| -5.51  | -0.15 | 1.41  |  |  |
| -15.27 | -3.07 | -0.04 |  |  |
| 1.81   | 0.88  | -0.2  |  |  |
| -3.34  | -4.95 | -3.43 |  |  |
| 1.29   | -2.05 | -3.12 |  |  |
| -3.79  | -4.28 | -3.06 |  |  |
| -4.05  | -2.61 | -1.29 |  |  |
| -4.5   | -1.21 | 0.27  |  |  |
| 1.86   | 1.69  | 0.62  |  |  |
| -2.62  | -1.89 | -0.68 |  |  |
| 1.87   | -0.57 | -1.63 |  |  |
| -2.29  | -1.14 | -0.12 |  |  |
| -4.68  | -0.62 | 1.44  |  |  |
| 1.64   | -1.18 | -2.25 |  |  |
| -2.65  | -0.95 | 0.1   |  |  |
| 6.18   | 1.02  | -0.05 |  |  |
| 1.44   | -3.67 | -2.63 |  |  |
| 1.28   | 0.93  | 2.13  |  |  |
| 1.25   | -4.15 | -2.91 |  |  |

|       |        |       |  |  |
|-------|--------|-------|--|--|
| 1.21  | -0.25  | 1.03  |  |  |
| 1.18  | -5.02  | -3.71 |  |  |
| 1.16  | -5.32  | -3.98 |  |  |
| 1.1   | -2.52  | -1.09 |  |  |
| 1.09  | -3.39  | -1.96 |  |  |
| -1.54 | -2.01  | 0.17  |  |  |
| 1.27  | 1.81   | 0.74  |  |  |
| -4.08 | 2.1    | 3.41  |  |  |
| 1.27  | 1.81   | 0.74  |  |  |
| -4.08 | 2.1    | 3.41  |  |  |
| 1.82  | 1.94   | 0.87  |  |  |
| -2.3  | -2.48  | -1.47 |  |  |
| 1.6   | -0.26  | -1.33 |  |  |
| 1.53  | -3.8   | -4.81 |  |  |
| 1.52  | -3.18  | -4.18 |  |  |
| -2.64 | -2.29  | -1.28 |  |  |
| -2.97 | -2.67  | -1.5  |  |  |
| -3.09 | -2.3   | -1.07 |  |  |
| -3.3  | -3.11  | -1.78 |  |  |
| 2.05  | 0.09   | -0.98 |  |  |
| 1.95  | 1.27   | 0.27  |  |  |
| 2.47  | 0.69   | -0.37 |  |  |
| -1.79 | -1.12  | -0.04 |  |  |
| 2.69  | -6.31  | -7.37 |  |  |
| -1.6  | -5.7   | -4.65 |  |  |
| -1.86 | -3.01  | -1.75 |  |  |
| 2.25  | 2.5    | 1.44  |  |  |
| -2.21 | -0.46  | 0.79  |  |  |
| -2.31 | -1.68  | -0.36 |  |  |
| -2.63 | -0.5   | 0.99  |  |  |
| -3.21 | -1.1   | 0.68  |  |  |
| 2.92  | -4.59  | -5.66 |  |  |
| -1.43 | -6.43  | -5.42 |  |  |
| -1.43 | -3.36  | -2.36 |  |  |
| -1.47 | -2.26  | -1.23 |  |  |
| -1.54 | -3.04  | -1.93 |  |  |
| -1.57 | -2.74  | -1.61 |  |  |
| -1.58 | -3.17  | -2.02 |  |  |
| -1.7  | -2.19  | -0.94 |  |  |
| -1.78 | -2.71  | -1.39 |  |  |
| -1.85 | -3.95  | -2.57 |  |  |
| -2.12 | -4.27  | -2.7  |  |  |
| -2.42 | -4.99  | -3.23 |  |  |
| -2.66 | -4.88  | -2.98 |  |  |
| 1.63  | -3.83  | -4.9  |  |  |
| -3.5  | -5.1   | -3.66 |  |  |
| 2.29  | -0.09  | -1.15 |  |  |
| 2.25  | 0.72   | -0.31 |  |  |
| -1.88 | -1.5   | -0.46 |  |  |
| -1.95 | -1.73  | -0.64 |  |  |
| 1.36  | -1.18  | -2.24 |  |  |
| -4.98 | -6.37  | -4.67 |  |  |
| 1.59  | -2.72  | -3.78 |  |  |
| 1.59  | -5.94  | -7    |  |  |
| -5.67 | -9.22  | -7.11 |  |  |
| 2.18  | -7.69  | -8.75 |  |  |
| -1.96 | -10.17 | -9.14 |  |  |
| -2.68 | -4.82  | -3.33 |  |  |

|       |       |       |  |  |
|-------|-------|-------|--|--|
| 1.35  | 3.31  | 2.25  |  |  |
| 1.32  | -0.16 | -1.18 |  |  |
| 1.81  | 2.26  | 1.2   |  |  |
| 1.74  | 0.22  | -0.79 |  |  |
| 1.59  | 3.11  | 2.04  |  |  |
| -4.2  | -0.94 | 0.74  |  |  |
| -6.16 | 0.07  | 2.3   |  |  |
| 2.6   | -1.29 | -2.35 |  |  |
| -1.84 | -4.29 | -3.09 |  |  |
| 1.08  | 7.29  | 6.23  |  |  |
| 1.07  | 0.1   | -0.96 |  |  |
| -6.22 | -1.99 | -0.3  |  |  |
| 1.67  | 3.53  | 2.47  |  |  |
| -3.37 | -1.59 | -0.16 |  |  |
| 1.76  | -0.84 | -1.91 |  |  |
| -2.42 | -2.16 | -1.14 |  |  |
| -2.62 | -0.03 | 1.11  |  |  |
| -2.82 | -3.07 | -1.82 |  |  |
| -2.86 | -1    | 0.26  |  |  |
| -2.87 | -1.18 | 0.09  |  |  |
| -2.95 | -1.32 | -0.01 |  |  |
| -3.27 | -2.19 | -0.73 |  |  |
| -3.62 | -0.49 | 1.11  |  |  |
| -3.94 | -2.38 | -0.66 |  |  |
| -4.25 | -1.81 | 0.03  |  |  |
| -5.68 | -1.68 | 0.57  |  |  |
| 1.89  | 0.15  | -0.91 |  |  |
| 1.87  | -1.72 | -2.76 |  |  |
| 1.81  | -0.77 | -1.77 |  |  |
| -2.28 | -0.44 | 0.61  |  |  |
| -4.48 | -1.52 | 0.5   |  |  |
| 1.37  | 1.61  | 0.55  |  |  |
| 1.36  | 2.5   | 1.44  |  |  |
| 1.31  | -2.17 | -3.18 |  |  |
| 1.85  | -4.43 | -5.49 |  |  |
| -2.7  | -6.17 | -4.91 |  |  |
| 2.1   | 2.42  | 1.36  |  |  |
| -2.64 | -0.1  | 1.31  |  |  |
| -3.5  | -1.39 | 0.43  |  |  |
| -3.82 | -2.44 | -0.5  |  |  |
| 1.72  | -0.39 | -1.45 |  |  |
| 1.67  | 0.55  | -0.47 |  |  |
| -2.49 | 0.44  | 1.48  |  |  |
| -2.72 | -2.79 | -1.63 |  |  |
| -2.99 | -2.27 | -0.96 |  |  |
| -3.01 | -2.09 | -0.78 |  |  |
| 1.42  | 2.34  | 1.28  |  |  |
| -3.33 | -3.93 | -2.75 |  |  |
| -4.22 | -2.74 | -1.22 |  |  |
| -5.2  | -2.92 | -1.1  |  |  |
| 1.83  | -5.2  | -6.26 |  |  |
| -2.34 | -3.59 | -2.55 |  |  |
| -2.36 | -3.88 | -2.83 |  |  |
| -2.35 | 0.16  | 1.21  |  |  |
| 1.37  | -1.41 | -2.47 |  |  |
| -3.1  | -4    | -2.97 |  |  |
| 1.91  | -2.12 | -3.18 |  |  |
| -2.4  | -2.8  | -1.65 |  |  |

|       |       |       |  |  |
|-------|-------|-------|--|--|
| -4    | -5.32 | -3.44 |  |  |
| 1.31  | 2.66  | 1.61  |  |  |
| 1.28  | -1.53 | -2.54 |  |  |
| 8.37  | 0.87  | -0.19 |  |  |
| 1.75  | -2.39 | -1.19 |  |  |
| 1.54  | 0.98  | 2.36  |  |  |
| 1.46  | -2.18 | -0.71 |  |  |
| 1.37  | -0.6  | 0.95  |  |  |
| 1.36  | -3.26 | -1.7  |  |  |
| 1.36  | 0.48  | 2.05  |  |  |
| 1.26  | -1.48 | 0.19  |  |  |
| 1.23  | -2.23 | -0.51 |  |  |
| 1.21  | -0.12 | 1.62  |  |  |
| 1.19  | 0.36  | 2.12  |  |  |
| 1.14  | 0.67  | 2.49  |  |  |
| 1.14  | 4.4   | 6.23  |  |  |
| 1.03  | -3.69 | -1.72 |  |  |
| 1.01  | 1.39  | 3.39  |  |  |
| -1.01 | -3.16 | -1.14 |  |  |
| -1.01 | -3.4  | -1.38 |  |  |
| -1.03 | -0.25 | 1.81  |  |  |
| -1.13 | 4.07  | 6.25  |  |  |
| -1.21 | -2.18 | 0.1   |  |  |
| -1.23 | -1.17 | 1.14  |  |  |
| -1.23 | -0.02 | 2.29  |  |  |
| -1.29 | -0.74 | 1.64  |  |  |
| 2.29  | -6.41 | -7.46 |  |  |
| -1.84 | -6.18 | -5.17 |  |  |
| -2.49 | -7.1  | -5.64 |  |  |
| 2.75  | -1.25 | -2.3  |  |  |
| 2.74  | -0.13 | -1.18 |  |  |
| -2.96 | -2.95 | -0.98 |  |  |
| 1.94  | 0.47  | -0.58 |  |  |
| 1.9   | -0.33 | -1.36 |  |  |
| -2.25 | -0.49 | 0.58  |  |  |
| -2.77 | -1.56 | -0.19 |  |  |
| 1.36  | -2.21 | -3.26 |  |  |
| 1.33  | -0.16 | -1.19 |  |  |
| -3.12 | -5.11 | -4.08 |  |  |
| 3.17  | -0.63 | -1.69 |  |  |
| 3.08  | -1.41 | -2.43 |  |  |
| -1.36 | -3.23 | -2.18 |  |  |
| -1.38 | -1.6  | -0.53 |  |  |
| -1.86 | -2.48 | -0.98 |  |  |
| 3.08  | -1.35 | -2.4  |  |  |
| -1.58 | -3.07 | -1.84 |  |  |
| -1.75 | -3.22 | -1.84 |  |  |
| -2.11 | -3.37 | -1.72 |  |  |
| -2.39 | -1.52 | 0.31  |  |  |
| 1.4   | 0.91  | -0.14 |  |  |
| -3.92 | -3.18 | -1.77 |  |  |
| -4.93 | -3.24 | -1.51 |  |  |
| -7.1  | -4.05 | -1.78 |  |  |
| 1.95  | 2.33  | 1.27  |  |  |
| -2.17 | -3.43 | -2.41 |  |  |
| 2.02  | 1.6   | 0.54  |  |  |
| 1.98  | -0.56 | -1.59 |  |  |
| -2.79 | 1.85  | 3.29  |  |  |

|       |       |       |  |  |
|-------|-------|-------|--|--|
| 2.05  | -0.43 | -1.49 |  |  |
| -2.17 | -1.05 | 0.05  |  |  |
| -2.17 | -1.17 | -0.07 |  |  |
| -2.84 | 2.08  | 3.57  |  |  |
| 2.03  | 2.45  | 1.4   |  |  |
| -2.31 | -2.92 | -1.75 |  |  |
| 2.68  | 0.13  | -0.92 |  |  |
| -1.57 | -0.86 | 0.17  |  |  |
| -2.26 | -4.87 | -3.31 |  |  |
| 30.33 | -0.43 | -1.48 |  |  |
| 4.61  | -4.58 | -2.91 |  |  |
| 4.25  | -0.14 | 1.64  |  |  |
| 2.52  | -0.54 | 2     |  |  |
| 1.98  | 0.32  | 3.21  |  |  |
| 10.12 | 1.6   | 0.56  |  |  |
| 1.93  | 2.02  | 3.36  |  |  |
| 1.59  | 2.77  | 4.39  |  |  |
| 1.57  | -0.96 | 0.69  |  |  |
| 1.57  | 0.33  | 1.98  |  |  |
| 1.47  | -2.92 | -1.18 |  |  |
| 1.37  | 2.65  | 4.49  |  |  |
| 1.28  | -1.29 | 0.64  |  |  |
| 1.26  | 0.49  | 2.45  |  |  |
| 1.22  | -1.28 | 0.73  |  |  |
| 1.16  | -1.33 | 0.75  |  |  |
| 1.04  | -6.59 | -4.35 |  |  |
| 1.02  | -0.16 | 2.1   |  |  |
| 1     | -3.58 | -1.29 |  |  |
| -1.25 | -3.63 | -1.01 |  |  |
| -1.41 | -5.93 | -3.14 |  |  |
| -1.51 | -6.88 | -3.99 |  |  |
| 1.53  | 0.36  | -0.69 |  |  |
| -3.08 | -2.36 | -1.17 |  |  |
| -3.21 | -4.54 | -3.29 |  |  |
| 1.37  | -4.91 | -5.96 |  |  |
| 1.32  | 0.5   | -0.5  |  |  |
| -3.2  | -2.75 | -1.67 |  |  |
| -3.28 | -4.79 | -3.67 |  |  |
| -3.54 | -4.17 | -2.94 |  |  |
| -3.7  | -4.56 | -3.27 |  |  |
| 3.31  | 0.33  | -0.72 |  |  |
| -1.35 | -2.14 | -1.04 |  |  |
| -1.66 | -1.97 | -0.57 |  |  |
| 3.3   | 0.54  | -0.5  |  |  |
| -1.31 | 6.15  | 7.21  |  |  |
| -1.37 | 0.84  | 1.97  |  |  |
| 2.11  | -1.61 | -2.66 |  |  |
| 2.07  | -1.37 | -2.39 |  |  |
| 2.24  | -2.35 | -3.4  |  |  |
| -2.91 | -6.58 | -4.93 |  |  |
| 2.14  | -2.48 | -3.53 |  |  |
| -2.24 | -2.15 | -0.94 |  |  |
| -2.3  | -0.48 | 0.77  |  |  |
| 1.36  | 0.3   | -0.76 |  |  |
| -3.05 | 1.28  | 2.28  |  |  |
| -3.49 | -0.93 | 0.27  |  |  |
| -3.58 | -0.56 | 0.67  |  |  |
| -6.11 | -2.13 | -0.12 |  |  |

|       |       |       |  |  |
|-------|-------|-------|--|--|
| 4.12  | -1.65 | -2.7  |  |  |
| -1.17 | -4.63 | -3.41 |  |  |
| -1.22 | -5.19 | -3.91 |  |  |
| -1.27 | -5.06 | -3.72 |  |  |
| -1.5  | -5.41 | -3.84 |  |  |
| 2.79  | 1.56  | 0.51  |  |  |
| -1.54 | -2.97 | -1.92 |  |  |
| -1.62 | 1.55  | 2.67  |  |  |
| 1.64  | -1.32 | -2.37 |  |  |
| 1.62  | -0.89 | -1.92 |  |  |
| -6.28 | -4.78 | -2.47 |  |  |
| 1.47  | -1.69 | -2.74 |  |  |
| -3.73 | -2.5  | -1.1  |  |  |
| -3.75 | -0.39 | 1.02  |  |  |
| -4.98 | -1.81 | 0.01  |  |  |
| 1.59  | -1.01 | -2.06 |  |  |
| -2.79 | -3.19 | -2.09 |  |  |
| 1.64  | -0.28 | -1.32 |  |  |
| 1.64  | -1.79 | -2.82 |  |  |
| -2.85 | 0.56  | 1.75  |  |  |
| 1.89  | -1.31 | -2.36 |  |  |
| -2.55 | -2.43 | -1.2  |  |  |
| 3.03  | -1.89 | -2.94 |  |  |
| -2.12 | -7.79 | -6.15 |  |  |
| -2.15 | -4.65 | -2.99 |  |  |
| 1.72  | -0.83 | -1.87 |  |  |
| -2.66 | -4.01 | -2.86 |  |  |
| 1.65  | -0.96 | -2    |  |  |
| -2.52 | -2.53 | -1.52 |  |  |
| 3.04  | 0.78  | -0.26 |  |  |
| -1.78 | -2.02 | -0.63 |  |  |
| 8.25  | -2.79 | -3.83 |  |  |
| 8.19  | 0.94  | -0.09 |  |  |
| 1.91  | -4.92 | -3.85 |  |  |
| 1.63  | -3.68 | -2.38 |  |  |
| 1.55  | -0.21 | 1.16  |  |  |
| 1.55  | 0.5   | 1.87  |  |  |
| 1.47  | -1.64 | -0.19 |  |  |
| 1.3   | -0.51 | 1.11  |  |  |
| 1.3   | -3.7  | -2.08 |  |  |
| 1.25  | -3.05 | -1.37 |  |  |
| 1.09  | -4    | -2.12 |  |  |
| 6.12  | -1.43 | -2.48 |  |  |
| 1.34  | -3.46 | -2.31 |  |  |
| 1.28  | -5.08 | -3.86 |  |  |
| 1.24  | -4.14 | -2.88 |  |  |
| 1.2   | -4.2  | -2.9  |  |  |
| 1.13  | -0.22 | 1.17  |  |  |
| 1.13  | -4.12 | -2.73 |  |  |
| 1.11  | -3.71 | -2.29 |  |  |
| 1.04  | -4.77 | -3.26 |  |  |
| 1.03  | -1.01 | 0.52  |  |  |
| -1.01 | 0.86  | 2.44  |  |  |
| -1.02 | -4.48 | -2.88 |  |  |
| -1.71 | -1.78 | 0.56  |  |  |
| -2.1  | -5.36 | -2.73 |  |  |
| 1.37  | -2.89 | -3.94 |  |  |
| -3.19 | -3.14 | -2.05 |  |  |

|       |       |       |  |  |
|-------|-------|-------|--|--|
| -4.46 | -4    | -2.43 |  |  |
| 1.04  | -5.8  | -6.84 |  |  |
| -4.07 | -2.33 | -1.29 |  |  |
| -5.23 | -3.94 | -2.54 |  |  |
| 1.79  | -3.8  | -4.84 |  |  |
| -2.49 | -4.68 | -3.56 |  |  |
| -3.46 | -3.79 | -2.2  |  |  |
| 1.14  | -1.62 | -2.66 |  |  |
| -5.24 | -2.61 | -1.07 |  |  |
| -5.42 | -1.91 | -0.32 |  |  |
| 2.07  | 1.03  | -0.01 |  |  |
| -2.27 | -2.36 | -1.18 |  |  |
| -3.34 | -1.75 | -0.01 |  |  |
| 1.75  | -0.8  | -1.85 |  |  |
| -2.51 | -1.26 | -0.18 |  |  |
| -2.51 | -1.26 | -0.18 |  |  |
| -2.52 | -3.4  | -2.31 |  |  |
| -2.65 | -1.57 | -0.4  |  |  |
| -2.78 | -2.41 | -1.17 |  |  |
| -2.91 | -3.12 | -1.82 |  |  |
| -2.91 | -3.12 | -1.82 |  |  |
| 1.82  | 0.27  | -0.78 |  |  |
| -2.83 | -0.91 | 0.41  |  |  |
| -3.3  | -1.33 | 0.21  |  |  |
| 1.95  | 2.12  | 1.07  |  |  |
| 1.9   | -1.49 | -2.5  |  |  |
| -2.17 | -3.65 | -2.61 |  |  |
| 1.36  | 2.15  | 1.11  |  |  |
| -3.51 | -0.8  | 0.42  |  |  |
| 2.11  | -1.16 | -2.2  |  |  |
| -2.48 | -4.99 | -3.64 |  |  |
| 1.38  | 2.15  | 1.11  |  |  |
| -3.18 | -3.22 | -2.14 |  |  |
| -4.54 | -2.42 | -0.82 |  |  |
| 2.25  | -4.76 | -5.8  |  |  |
| 2.23  | 0.43  | -0.61 |  |  |
| -1.89 | -2.85 | -1.8  |  |  |
| -2.16 | -5.1  | -3.87 |  |  |
| -2.54 | -3.43 | -1.96 |  |  |
| 1.42  | -0.81 | -1.85 |  |  |
| 1.39  | -0.21 | -1.22 |  |  |
| -3.66 | -2.06 | -0.72 |  |  |
| 7.14  | -0.41 | -1.46 |  |  |
| 1.41  | -1.85 | -0.55 |  |  |
| 1.35  | -1.02 | 0.34  |  |  |
| 1.33  | 1.39  | 2.76  |  |  |
| 1.33  | 2.06  | 3.44  |  |  |
| 1.32  | -1.22 | 0.17  |  |  |
| 1.27  | -2.59 | -1.15 |  |  |
| 1.21  | -1.66 | -0.14 |  |  |
| 1.19  | 1.09  | 2.63  |  |  |
| 1.12  | -0.07 | 1.56  |  |  |
| 1.08  | -3.62 | -1.94 |  |  |
| -1.02 | -1.64 | 0.18  |  |  |
| -1.03 | -2.45 | -0.61 |  |  |
| -1.08 | 5.3   | 7.2   |  |  |
| -1.1  | 5.66  | 7.59  |  |  |
| -1.13 | 2.7   | 4.67  |  |  |

|        |       |       |  |  |
|--------|-------|-------|--|--|
| -1.18  | -3.36 | -1.33 |  |  |
| -1.19  | -1.19 | 0.86  |  |  |
| -1.27  | -0.55 | 1.59  |  |  |
| -2.5   | -2.89 | 0.22  |  |  |
| 1.67   | -1.1  | -2.15 |  |  |
| 1.65   | -0.38 | -1.41 |  |  |
| 1.35   | -0.96 | -2    |  |  |
| 1.33   | 0.05  | -0.97 |  |  |
| -3.15  | 0.86  | 1.9   |  |  |
| -3.26  | -0.88 | 0.22  |  |  |
| -4.12  | -0.85 | 0.58  |  |  |
| -4.26  | -1    | 0.48  |  |  |
| -11.41 | -2.91 | -0.01 |  |  |
| 2.97   | -1.06 | -2.1  |  |  |
| -2.28  | 0.81  | 2.52  |  |  |
| 1.68   | -0.85 | -1.89 |  |  |
| -2.83  | -1.04 | 0.16  |  |  |
| -2.89  | -0.35 | 0.88  |  |  |
| -3.17  | -2.32 | -0.95 |  |  |
| -4.52  | -1.88 | 0     |  |  |
| -4.58  | -1.47 | 0.43  |  |  |
| 1.76   | 0.02  | -1.02 |  |  |
| -2.37  | -2.35 | -1.33 |  |  |
| -2.45  | -1.54 | -0.47 |  |  |
| -3.26  | -3.78 | -2.3  |  |  |
| -4.64  | -2.55 | -0.56 |  |  |
| 1.5    | -2.21 | -3.26 |  |  |
| 1.48   | -2.43 | -3.45 |  |  |
| 1.46   | -1.85 | -2.85 |  |  |
| 1.94   | 0.73  | -0.31 |  |  |
| -2.15  | 0.04  | 1.07  |  |  |
| -2.66  | -3.01 | -1.68 |  |  |
| 2.01   | 2.03  | 0.99  |  |  |
| -2.1   | -0.49 | 0.55  |  |  |
| 5.56   | -0.83 | -1.87 |  |  |
| 1.18   | -2.11 | -0.91 |  |  |
| 1.16   | 1.09  | 2.32  |  |  |
| 2.63   | -1.19 | -2.22 |  |  |
| -1.61  | -5.22 | -4.18 |  |  |
| -1.67  | -5.6  | -4.5  |  |  |
| -2.02  | -4.28 | -2.9  |  |  |
| 2.01   | -4.29 | -5.33 |  |  |
| 1.98   | 0.32  | -0.69 |  |  |
| -2.27  | -4.47 | -3.31 |  |  |
| -2.98  | -5.45 | -3.91 |  |  |
| 2.84   | 0.65  | -0.39 |  |  |
| -1.92  | -0.8  | 0.61  |  |  |
| -2     | 1.09  | 2.56  |  |  |
| 5.14   | 1.35  | 0.32  |  |  |
| 5.1    | 1.28  | 0.26  |  |  |
| 1.24   | -1    | 0.03  |  |  |
| 1.18   | 0.04  | 1.12  |  |  |
| -1.09  | -1.47 | -0.01 |  |  |
| -1.37  | -0.17 | 1.6   |  |  |
| -1.39  | -2.43 | -0.63 |  |  |
| 1.6    | -4.62 | -5.66 |  |  |
| -3.89  | -4.75 | -3.15 |  |  |
| 1.75   | -2.9  | -3.94 |  |  |



|       |       |       |  |  |
|-------|-------|-------|--|--|
| -2.5  | -3.86 | -2.76 |  |  |
| -2.62 | -0.9  | 0.26  |  |  |
| -3.87 | -3.62 | -1.9  |  |  |
| 1.26  | 3.09  | 2.06  |  |  |
| -4.79 | -3.63 | -2.07 |  |  |
| -6.38 | -3.79 | -1.82 |  |  |
| 1.79  | -2.6  | -3.64 |  |  |
| -2.39 | -3    | -1.94 |  |  |
| -2.48 | -3.06 | -1.96 |  |  |
| 3.72  | -1.99 | -3.02 |  |  |
| -1.21 | -3.57 | -2.44 |  |  |
| -1.36 | -5.55 | -4.24 |  |  |
| -1.45 | -6.05 | -4.65 |  |  |
| -2.06 | -3.75 | -1.84 |  |  |
| 5.03  | -3.01 | -4.05 |  |  |
| 1.01  | 0.26  | 1.53  |  |  |
| -1.05 | -2.5  | -1.14 |  |  |
| -1.06 | 0.91  | 2.28  |  |  |
| -1.81 | -6.83 | -4.68 |  |  |
| 1.35  | -0.25 | -1.28 |  |  |
| -5.76 | -6.22 | -4.29 |  |  |
| 2.04  | -2.15 | -3.19 |  |  |
| -2.15 | -0.49 | 0.61  |  |  |
| -2.52 | -3.71 | -2.39 |  |  |
| -2.59 | -3.58 | -2.21 |  |  |
| -3.09 | -2.35 | -0.73 |  |  |
| 1.91  | 1.11  | 0.08  |  |  |
| -2.27 | -0.62 | 0.46  |  |  |
| -2.63 | -1.71 | -0.42 |  |  |
| 4.41  | 0.61  | -0.43 |  |  |
| -1.1  | 0.56  | 1.81  |  |  |
| -1.74 | -2.3  | -0.39 |  |  |
| 1.43  | 0.1   | -0.94 |  |  |
| -4.23 | -2.22 | -0.66 |  |  |
| 1.59  | 1.55  | 0.51  |  |  |
| -2.87 | 0.05  | 1.2   |  |  |
| 1.35  | 1.27  | 0.24  |  |  |
| -3.38 | -1.82 | -0.66 |  |  |
| 2.66  | 1.83  | 0.79  |  |  |
| -1.58 | -1.54 | -0.5  |  |  |
| -1.67 | 0.35  | 1.46  |  |  |
| -1.7  | 0.74  | 1.88  |  |  |
| -1.91 | 0.24  | 1.55  |  |  |
| 1.33  | -1.46 | -2.5  |  |  |
| 1.3   | 1.51  | 0.51  |  |  |
| -3.82 | -1.69 | -0.39 |  |  |
| -3.93 | -2.53 | -1.19 |  |  |
| 1.33  | -3.41 | -4.44 |  |  |
| -3.11 | -3.73 | -2.72 |  |  |
| -3.2  | -5.16 | -4.11 |  |  |
| -3.41 | -2.65 | -1.5  |  |  |
| -4.02 | -5.21 | -3.82 |  |  |
| 1.52  | -0.36 | -1.38 |  |  |
| -2.79 | -0.5  | 0.56  |  |  |
| -2.98 | -0.34 | 0.81  |  |  |
| -3.19 | -1.31 | -0.06 |  |  |
| 2.39  | -0.8  | -1.83 |  |  |
| -2.15 | -1.3  | 0.03  |  |  |

|       |       |       |  |  |
|-------|-------|-------|--|--|
| 1.99  | -0.31 | -1.34 |  |  |
| -2.07 | -5.6  | -4.59 |  |  |
| 1.69  | -2.16 | -3.19 |  |  |
| -2.76 | -4.49 | -3.29 |  |  |
| 1.62  | 2.37  | 1.35  |  |  |
| -2.84 | -2.12 | -0.95 |  |  |
| 3.02  | 1.99  | 0.96  |  |  |
| -3.4  | -2.87 | -0.54 |  |  |
| 2.85  | 1.01  | -0.03 |  |  |
| 2.82  | 1.65  | 0.63  |  |  |
| -1.68 | -3.02 | -1.79 |  |  |
| -2.15 | -2.76 | -1.18 |  |  |
| 1.56  | -1.33 | -2.36 |  |  |
| 1.54  | -1.69 | -2.7  |  |  |
| 1.68  | 0.85  | -0.18 |  |  |
| -4.14 | 0.3   | 2.07  |  |  |
| 2.08  | 1.26  | 0.23  |  |  |
| 2.07  | -1.62 | -2.64 |  |  |
| -2.04 | -0.4  | 0.66  |  |  |
| -2.84 | 0.08  | 1.62  |  |  |
| -3.63 | -1.04 | 0.85  |  |  |
| 1.42  | -1.03 | -2.06 |  |  |
| -5    | -3.51 | -1.71 |  |  |
| 2.25  | -0.51 | -1.54 |  |  |
| -2.13 | -4.87 | -3.64 |  |  |
| -2.41 | -5.49 | -4.08 |  |  |
| -2.58 | -5.06 | -3.55 |  |  |
| 2     | -2.2  | -3.23 |  |  |
| 1.96  | 2.45  | 1.44  |  |  |
| -2.11 | -1.89 | -0.84 |  |  |
| -2.16 | -0.72 | 0.36  |  |  |
| -3.79 | -2.31 | -0.42 |  |  |
| 2.14  | 0.56  | -0.47 |  |  |
| -1.99 | -1.07 | -0.01 |  |  |
| -2.06 | 1.32  | 2.42  |  |  |
| -2.43 | -1.47 | -0.12 |  |  |
| 1.81  | -4.51 | -5.54 |  |  |
| -3.16 | -5.36 | -3.88 |  |  |
| -3.19 | -4.18 | -2.68 |  |  |
| 2.46  | -3.33 | -4.36 |  |  |
| -1.7  | -4.44 | -3.41 |  |  |
| -2.39 | -7.1  | -5.58 |  |  |
| 5.34  | 0.05  | -0.98 |  |  |
| 1.29  | 1.65  | 2.67  |  |  |
| 1.26  | 1.08  | 2.15  |  |  |
| 1.16  | -4.27 | -3.1  |  |  |
| 1.1   | -3.46 | -2.21 |  |  |
| 1.11  | -0.11 | 1.14  |  |  |
| 1.08  | -0.55 | 0.73  |  |  |
| 1.02  | -0.89 | 0.47  |  |  |
| -1.09 | -1.43 | 0.08  |  |  |
| -1.11 | -1.58 | -0.04 |  |  |
| -1.12 | -0.18 | 1.37  |  |  |
| -3.42 | -5.44 | -2.27 |  |  |
| 2.22  | -0.22 | -1.25 |  |  |
| -2.09 | -1.27 | -0.08 |  |  |
| 2.38  | -0.29 | -1.32 |  |  |
| -2.15 | 1     | 2.33  |  |  |

|       |       |       |  |  |
|-------|-------|-------|--|--|
| 1.38  | 1.95  | 0.92  |  |  |
| -3.09 | -3.99 | -2.93 |  |  |
| 2.35  | -0.84 | -1.87 |  |  |
| 2.34  | 3.01  | 1.99  |  |  |
| -1.74 | -1.66 | -0.66 |  |  |
| 3.9   | 0.64  | -0.39 |  |  |
| -1.05 | 7.12  | 8.12  |  |  |
| -1.49 | -1.05 | 0.46  |  |  |
| 2.65  | -3.41 | -4.43 |  |  |
| -1.81 | -5.79 | -4.55 |  |  |
| -3.75 | -6.01 | -3.72 |  |  |
| 1.97  | 1.14  | 0.12  |  |  |
| 1.98  | 2.39  | 1.36  |  |  |
| 1.51  | -3.04 | -4.06 |  |  |
| -3.21 | -5.09 | -3.83 |  |  |
| 4.86  | -3.22 | -4.24 |  |  |
| 1.19  | -5.02 | -4.02 |  |  |
| 1.16  | -4.48 | -3.43 |  |  |
| 1.09  | -3.21 | -2.08 |  |  |
| 1.08  | -6.03 | -4.89 |  |  |
| 1.08  | -1.27 | -0.12 |  |  |
| 1.07  | -5.08 | -3.92 |  |  |
| 1.03  | 2.55  | 3.77  |  |  |
| 1.02  | -6.07 | -4.85 |  |  |
| 1.02  | -5.66 | -4.44 |  |  |
| -1.05 | -4.19 | -2.86 |  |  |
| -1.17 | -3.83 | -2.34 |  |  |
| -1.19 | -5.99 | -4.48 |  |  |
| -1.22 | -6.49 | -4.96 |  |  |
| -1.27 | -4.77 | -3.17 |  |  |
| -1.34 | -5.68 | -4.01 |  |  |
| -1.35 | -6.15 | -4.46 |  |  |
| -1.49 | -4.52 | -2.69 |  |  |
| -1.53 | -5    | -3.12 |  |  |
| -1.58 | -3.55 | -1.63 |  |  |
| -1.64 | -5.97 | -4.01 |  |  |
| -1.74 | -6.18 | -4.12 |  |  |
| -2.27 | -5.3  | -2.86 |  |  |
| 1.76  | -3.42 | -4.44 |  |  |
| -3.08 | -4.48 | -3.06 |  |  |
| 1.3   | -1.8  | -2.82 |  |  |
| -4.19 | -3.86 | -2.44 |  |  |
| 3.01  | 1.03  | 0.01  |  |  |
| -1.36 | -1.48 | -0.48 |  |  |
| -1.5  | 2.13  | 3.29  |  |  |
| -1.54 | 1     | 2.2   |  |  |
| -1.89 | -1.45 | 0.04  |  |  |
| 1.76  | -0.43 | -1.45 |  |  |
| 1.75  | 0.42  | -0.59 |  |  |
| 2.38  | -3.26 | -4.28 |  |  |
| -1.72 | -3.82 | -2.8  |  |  |
| 1.86  | -0.19 | -1.21 |  |  |
| -2.27 | -1.68 | -0.62 |  |  |
| -2.6  | -2.15 | -0.9  |  |  |
| -2.61 | -1.43 | -0.18 |  |  |
| 3.7   | -0.31 | -1.33 |  |  |
| -1.2  | -5.48 | -4.35 |  |  |
| -1.2  | -5.04 | -3.9  |  |  |

|       |       |       |  |  |
|-------|-------|-------|--|--|
| 1.59  | -0.45 | -1.47 |  |  |
| 1.57  | 4.77  | 3.77  |  |  |
| -3.65 | -2.63 | -1.12 |  |  |
| 1.45  | -2.6  | -3.62 |  |  |
| -2.8  | -3.03 | -2.03 |  |  |
| 2.23  | 1.44  | 0.42  |  |  |
| -1.83 | -0.08 | 0.93  |  |  |
| 1.56  | 2.49  | 1.47  |  |  |
| -3.29 | -3.69 | -2.35 |  |  |
| 1.91  | -2.98 | -4    |  |  |
| -2.49 | 0     | 1.23  |  |  |
| -2.74 | -0.75 | 0.62  |  |  |
| -3.6  | -3.18 | -1.42 |  |  |
| -3.7  | -2.62 | -0.82 |  |  |
| -3.88 | -2.81 | -0.94 |  |  |
| 1.83  | 1.54  | 0.52  |  |  |
| -2.7  | -1.91 | -0.63 |  |  |
| 1.94  | 2.56  | 1.54  |  |  |
| 1.94  | 2.56  | 1.54  |  |  |
| -2.39 | -3.29 | -2.1  |  |  |
| -2.45 | -2.19 | -0.96 |  |  |
| -2.46 | -5.46 | -4.22 |  |  |
| -2.85 | -2.15 | -0.7  |  |  |
| -3.01 | -5.57 | -4.05 |  |  |
| 1.91  | -2.28 | -3.3  |  |  |
| -2.15 | -3.4  | -2.38 |  |  |
| -2.15 | -0.7  | 0.32  |  |  |
| -2.18 | -2.33 | -1.3  |  |  |
| -2.98 | -4.21 | -2.72 |  |  |
| -3.33 | -3.49 | -1.84 |  |  |
| 4.56  | -4.61 | -5.64 |  |  |
| -1.04 | -2.1  | -0.88 |  |  |
| 1.31  | -0.71 | -1.72 |  |  |
| -3.13 | -3.13 | -2.11 |  |  |
| -3.22 | -2.72 | -1.66 |  |  |
| -3.82 | -3.41 | -2.1  |  |  |
| -4.18 | -3.27 | -1.84 |  |  |
| -4.31 | -1.94 | -0.46 |  |  |
| -4.48 | -3.37 | -1.83 |  |  |
| -4.56 | -3.24 | -1.68 |  |  |
| -4.77 | -4.8  | -3.18 |  |  |
| 1.84  | -3.92 | -4.94 |  |  |
| -2.26 | -2.9  | -1.87 |  |  |
| 1.86  | -0.72 | -1.75 |  |  |
| -2.53 | -1.46 | -0.25 |  |  |
| 1.59  | -1.43 | -2.45 |  |  |
| 1.58  | -1.15 | -2.16 |  |  |
| -3.06 | -2.82 | -1.55 |  |  |
| -3.59 | -3.83 | -2.33 |  |  |
| 1.01  | -6.32 | -7.34 |  |  |
| -6.86 | -5.55 | -3.77 |  |  |
| 1.86  | -0.19 | -1.21 |  |  |
| -2.27 | -1.68 | -0.62 |  |  |
| -2.6  | -2.15 | -0.9  |  |  |
| -2.61 | -1.43 | -0.18 |  |  |
| 1.73  | -3.26 | -4.27 |  |  |
| -2.57 | 0.33  | 1.47  |  |  |
| -2.72 | -0.25 | 0.97  |  |  |

|       |       |       |  |  |
|-------|-------|-------|--|--|
| 1.76  | -0.44 | -1.46 |  |  |
| 1.74  | -1.29 | -2.29 |  |  |
| -2.39 | -0.39 | 0.67  |  |  |
| 1.32  | -3.57 | -4.58 |  |  |
| 1.32  | -2.8  | -3.81 |  |  |
| 1.31  | -4.24 | -5.24 |  |  |
| 1.93  | 1.16  | 0.14  |  |  |
| -2.18 | -1.29 | -0.24 |  |  |
| -2.9  | -3.02 | -1.55 |  |  |
| 2.14  | -2.9  | -3.92 |  |  |
| -1.9  | -5.57 | -4.56 |  |  |
| -1.93 | -4.23 | -3.2  |  |  |
| -1.93 | 0.33  | 1.36  |  |  |
| -1.93 | -0.13 | 0.9   |  |  |
| -1.98 | -4.65 | -3.58 |  |  |
| -2.04 | -3.13 | -2.02 |  |  |
| -3.39 | -2.79 | -0.94 |  |  |
| 1.59  | 2.37  | 1.35  |  |  |
| -2.62 | -2.86 | -1.81 |  |  |
| -2.69 | -3.27 | -2.18 |  |  |
| 2.1   | -4.79 | -5.8  |  |  |
| -2.04 | -4.3  | -3.21 |  |  |
| -4.08 | -4.35 | -2.27 |  |  |
| 2.75  | -3.31 | -4.32 |  |  |
| -1.65 | -6.32 | -5.14 |  |  |
| 5.92  | -3.1  | -4.12 |  |  |
| 1.45  | -4.71 | -3.69 |  |  |
| 1.41  | -5    | -3.95 |  |  |
| 1.25  | -0.52 | 0.71  |  |  |
| -1.12 | -5.17 | -3.47 |  |  |
| -1.17 | -4.74 | -2.97 |  |  |
| 5.35  | 0.14  | -0.88 |  |  |
| 1.29  | 0.81  | 1.84  |  |  |
| 1.28  | -0.95 | 0.1   |  |  |
| 1.21  | 0.53  | 1.66  |  |  |
| 1.18  | -1.88 | -0.72 |  |  |
| 1.16  | -1.85 | -0.66 |  |  |
| 1.09  | -0.66 | 0.62  |  |  |
| 1.06  | -1.68 | -0.36 |  |  |
| 1.03  | 1.58  | 2.94  |  |  |
| 1.01  | -1    | 0.4   |  |  |
| -1.04 | -1.23 | 0.23  |  |  |
| -1.11 | -2.98 | -1.42 |  |  |
| 3.4   | -0.94 | -1.96 |  |  |
| -1.25 | -2.25 | -1.18 |  |  |
| -1.26 | -2.86 | -1.77 |  |  |
| -1.48 | -3.11 | -1.79 |  |  |
| 1.57  | 0.64  | -0.37 |  |  |
| -3.03 | -0.78 | 0.45  |  |  |
| -3.35 | -1.25 | 0.13  |  |  |
| -4.01 | -3.63 | -1.99 |  |  |
| 2.18  | 3.42  | 2.41  |  |  |
| -2.48 | -1.49 | -0.07 |  |  |
| 2.91  | -0.07 | -1.09 |  |  |
| -1.49 | -3.5  | -2.39 |  |  |
| 2.28  | -1.17 | -2.18 |  |  |
| -1.77 | -0.85 | 0.16  |  |  |
| -1.93 | 0.41  | 1.54  |  |  |

|       |       |       |  |  |
|-------|-------|-------|--|--|
| -2.15 | -3.21 | -1.92 |  |  |
| -2.29 | -3.22 | -1.85 |  |  |
| 1.64  | 5.36  | 4.34  |  |  |
| -2.49 | -2.14 | -1.12 |  |  |
| -2.76 | 0.35  | 1.52  |  |  |
| 1.7   | -2.12 | -3.14 |  |  |
| -3.12 | -3.55 | -2.16 |  |  |
| -4.32 | -3.85 | -1.99 |  |  |
| 1.9   | 2.5   | 1.48  |  |  |
| -2.45 | -0.76 | 0.44  |  |  |
| 4.43  | 0.62  | -0.39 |  |  |
| -1.02 | -6.65 | -5.49 |  |  |
| -1.55 | -4.76 | -3    |  |  |
| 1.81  | 1.62  | 0.6   |  |  |
| -3.15 | -0.33 | 1.17  |  |  |
| 1.19  | -0.18 | -1.19 |  |  |
| -3.64 | -4.03 | -2.93 |  |  |
| 1.55  | -0.12 | -1.13 |  |  |
| -2.92 | -3.17 | -2    |  |  |
| -5.84 | -3.87 | -1.7  |  |  |
| 2.5   | -1.74 | -2.76 |  |  |
| -1.67 | -5.18 | -4.13 |  |  |
| -1.91 | -6.96 | -5.72 |  |  |
| -2.19 | -7.89 | -6.45 |  |  |
| -4.03 | -6.78 | -4.46 |  |  |
| -1.02 | -0.1  | -1.12 |  |  |
| -4.6  | 0.47  | 1.63  |  |  |
| 2.22  | -3.46 | -4.46 |  |  |
| -1.82 | -4.11 | -3.1  |  |  |
| -1.94 | -4.96 | -3.86 |  |  |
| 2.35  | -5.05 | -6.06 |  |  |
| -1.79 | -3.94 | -2.88 |  |  |
| -2.02 | -4.92 | -3.68 |  |  |
| -2.59 | -3.98 | -2.39 |  |  |
| 1.94  | -1.23 | -2.23 |  |  |
| -2.45 | -2.08 | -0.84 |  |  |
| -3.54 | -5.47 | -3.69 |  |  |
| 1.34  | -1.43 | -2.44 |  |  |
| -4.81 | -0.86 | 0.81  |  |  |
| 2.21  | -1.22 | -2.23 |  |  |
| -2.38 | -2.72 | -1.33 |  |  |
| 2.46  | -2.18 | -3.18 |  |  |
| -1.65 | -2.26 | -1.25 |  |  |
| -1.74 | -3.74 | -2.65 |  |  |
| -1.97 | -3.22 | -1.95 |  |  |
| 3.29  | -5.14 | -6.15 |  |  |
| -1.23 | -5.41 | -4.4  |  |  |
| -1.23 | -0.96 | 0.05  |  |  |
| -1.3  | -5.75 | -4.65 |  |  |
| -1.36 | -1.69 | -0.54 |  |  |
| -1.4  | -6.92 | -5.72 |  |  |
| -1.49 | -5.4  | -4.1  |  |  |
| -1.69 | -3.58 | -2.11 |  |  |
| 2.17  | -1.94 | -2.95 |  |  |
| -1.86 | -4.13 | -3.13 |  |  |
| -1.9  | -2.53 | -1.5  |  |  |
| -2.17 | -2.39 | -1.17 |  |  |
| -4.05 | -4.36 | -2.24 |  |  |

|       |       |       |  |  |
|-------|-------|-------|--|--|
| 6.22  | 0.31  | -0.69 |  |  |
| 1.46  | -0.61 | 0.48  |  |  |
| 1.39  | -0.17 | 0.99  |  |  |
| 1.35  | -0.78 | 0.42  |  |  |
| 1.25  | -1.97 | -0.66 |  |  |
| 1.17  | 0.83  | 2.24  |  |  |
| 1.04  | -3.16 | -1.58 |  |  |
| -1.02 | -1.13 | 0.52  |  |  |
| -1.53 | -0.28 | 1.96  |  |  |
| -1.99 | -3.34 | -0.72 |  |  |
| 3.78  | -4.03 | -5.04 |  |  |
| -1.09 | -2.3  | -1.28 |  |  |
| -1.16 | -5.29 | -4.17 |  |  |
| -1.2  | -2.65 | -1.47 |  |  |
| 2.04  | -3.62 | -4.62 |  |  |
| -2.03 | -3.87 | -2.83 |  |  |
| -2.32 | -5.3  | -4.06 |  |  |
| -2.78 | -3.8  | -2.29 |  |  |
| -3.3  | -4.14 | -2.39 |  |  |
| 1.67  | -6.48 | -7.48 |  |  |
| -2.45 | -7.46 | -6.43 |  |  |
| 2.43  | -0.99 | -1.99 |  |  |
| -3.2  | -3.09 | -1.14 |  |  |
| 3.25  | 0.3   | -0.71 |  |  |
| -1.57 | -2.67 | -1.33 |  |  |
| 1.8   | -1.53 | -2.54 |  |  |
| -2.82 | 0.97  | 2.31  |  |  |
| -3.54 | 1.22  | 2.89  |  |  |
| -4.4  | -1.37 | 0.61  |  |  |
| -4.82 | 0.16  | 2.28  |  |  |
| 1.33  | -2.28 | -3.29 |  |  |
| -3.52 | -3.09 | -1.87 |  |  |
| 1.47  | -4.69 | -5.69 |  |  |
| -2.75 | -3.98 | -2.97 |  |  |
| -3    | -1.64 | -0.5  |  |  |
| -3.72 | -5.4  | -3.95 |  |  |
| -4.11 | -3.11 | -1.52 |  |  |
| 2.32  | -0.7  | -1.71 |  |  |
| -1.9  | -2.81 | -1.67 |  |  |
| 1.98  | -0.56 | -1.56 |  |  |
| -4.77 | -2.58 | -0.35 |  |  |
| 2.47  | -0.61 | -1.62 |  |  |
| -1.9  | -2.64 | -1.41 |  |  |
| 1.18  | 1.66  | 0.66  |  |  |
| -3.45 | -2.34 | -1.32 |  |  |
| -4.25 | -2.62 | -1.3  |  |  |
| -4.64 | -2.86 | -1.41 |  |  |
| 2.08  | -5.11 | -6.12 |  |  |
| -1.95 | -2.61 | -1.6  |  |  |
| -2.1  | -5.28 | -4.16 |  |  |
| -2.13 | -6.2  | -5.05 |  |  |
| 2.84  | -2.18 | -3.18 |  |  |
| -1.43 | -3.81 | -2.78 |  |  |
| 3.28  | 0.03  | -0.97 |  |  |
| -1.25 | 0.53  | 1.57  |  |  |
| -1.27 | -2.17 | -1.1  |  |  |
| -1.28 | 0.16  | 1.23  |  |  |
| -1.32 | -4.68 | -3.57 |  |  |

|        |       |       |  |  |
|--------|-------|-------|--|--|
| -1.59  | -3.28 | -1.9  |  |  |
| -1.65  | -0.13 | 1.31  |  |  |
| -1.77  | -1.73 | -0.19 |  |  |
| -2     | -3.35 | -1.63 |  |  |
| -2.51  | -2.21 | -0.18 |  |  |
| 2.9    | -2.53 | -3.53 |  |  |
| -1.42  | -5.35 | -4.31 |  |  |
| -1.62  | -2.84 | -1.61 |  |  |
| 1.82   | 4.33  | 3.32  |  |  |
| -2.26  | 0.12  | 1.16  |  |  |
| -2.6   | -2.12 | -0.87 |  |  |
| -2.71  | 1.06  | 2.37  |  |  |
| -3.66  | -1.81 | -0.07 |  |  |
| -3.72  | -3.07 | -1.31 |  |  |
| 2.97   | 0.19  | -0.81 |  |  |
| -1.39  | 0.39  | 1.44  |  |  |
| -1.4   | -1.56 | -0.5  |  |  |
| 1.65   | 1.62  | 0.61  |  |  |
| -2.52  | -1.09 | -0.03 |  |  |
| -3.06  | -1.08 | 0.25  |  |  |
| 1.3    | -0.64 | -1.64 |  |  |
| -3.21  | -1.03 | 0.03  |  |  |
| 22.73  | 0.88  | -0.12 |  |  |
| 5.3    | -0.62 | 0.48  |  |  |
| 4.08   | -1.49 | -0.01 |  |  |
| 3.83   | -5.19 | -3.62 |  |  |
| 1.64   | -6.5  | -3.71 |  |  |
| 1.56   | -3.85 | -0.98 |  |  |
| 1.18   | -6.52 | -3.26 |  |  |
| -1.16  | -7.35 | -3.63 |  |  |
| 1.74   | 0.95  | -0.06 |  |  |
| -2.49  | 0.57  | 1.68  |  |  |
| -3.48  | -1.97 | -0.38 |  |  |
| 2.42   | -0.81 | -1.81 |  |  |
| 2.42   | -4.28 | -5.28 |  |  |
| -1.8   | -4.66 | -3.54 |  |  |
| -1.82  | -3.8  | -2.67 |  |  |
| -1.89  | -4.12 | -2.93 |  |  |
| 3.2    | -0.13 | -1.13 |  |  |
| -1.48  | -1.1  | 0.14  |  |  |
| -2.12  | 0.71  | 2.47  |  |  |
| 3.37   | -2.05 | -3.05 |  |  |
| -1.41  | -5.55 | -4.3  |  |  |
| 1.51   | 0.87  | -0.13 |  |  |
| -5.08  | -4.18 | -2.24 |  |  |
| 18.42  | -0.28 | -1.28 |  |  |
| 1.32   | -2.05 | 0.75  |  |  |
| 1.68   | -1.32 | -2.32 |  |  |
| -4.07  | -4.58 | -2.81 |  |  |
| 1.69   | 0.41  | -0.59 |  |  |
| -2.84  | -3.55 | -2.29 |  |  |
| -3.29  | -1.96 | -0.49 |  |  |
| 1.5    | 0.96  | -0.04 |  |  |
| -3.22  | -0.79 | 0.49  |  |  |
| -12.53 | -2.04 | 1.19  |  |  |
| 1.69   | -1.5  | -2.5  |  |  |
| -3.81  | -3.53 | -1.84 |  |  |
| 1.85   | 1.73  | 0.73  |  |  |



|       |       |       |  |  |
|-------|-------|-------|--|--|
| -2.73 | -3.28 | -1.94 |  |  |
| 1.01  | -6.53 | -7.53 |  |  |
| -6.86 | -5.76 | -3.96 |  |  |
| 1.01  | -6.53 | -7.53 |  |  |
| -6.86 | -5.76 | -3.96 |  |  |
| -1.21 | -1.35 | -0.35 |  |  |
| -1.21 | -1.93 | -0.92 |  |  |
| -1.26 | -2.58 | -1.51 |  |  |
| -1.26 | -2.41 | -1.34 |  |  |
| -1.29 | -3.74 | -2.64 |  |  |
| -1.31 | -2.86 | -1.74 |  |  |
| -1.38 | -5.51 | -4.31 |  |  |
| -1.39 | -2.31 | -1.1  |  |  |
| -1.5  | -1.56 | -0.24 |  |  |
| -1.57 | -4.99 | -3.61 |  |  |
| -1.61 | -3.69 | -2.26 |  |  |
| -1.69 | -4.64 | -3.15 |  |  |
| -1.2  | 1.77  | 2.77  |  |  |
| -1.21 | -0.33 | 0.67  |  |  |
| -1.3  | -1.46 | -0.35 |  |  |
| -1.3  | -1.79 | -0.68 |  |  |
| -1.32 | 3.95  | 5.08  |  |  |
| -1.51 | 2.55  | 3.88  |  |  |
| -1.57 | -1.73 | -0.34 |  |  |
| -1.58 | 2.62  | 4.01  |  |  |
| -1.77 | 0.78  | 2.33  |  |  |
| -2.21 | 0.05  | 1.93  |  |  |
| -2.74 | -0.2  | 1.99  |  |  |
| -1.03 | 1.06  | 2.06  |  |  |
| -1.03 | -0.4  | 0.61  |  |  |
| -1.08 | 0.31  | 1.38  |  |  |
| -1.09 | -2.68 | -1.6  |  |  |
| -1.17 | 0.1   | 1.29  |  |  |
| -1.3  | 1.43  | 2.77  |  |  |
| -2.8  | 0.42  | 1.42  |  |  |
| -2.82 | -5.37 | -4.36 |  |  |
| -3.35 | 0     | 1.26  |  |  |
| -3.49 | -3.56 | -2.25 |  |  |
| -3.68 | -2.18 | -0.79 |  |  |
| -4.94 | -1.61 | 0.21  |  |  |
| -5.67 | -1.62 | 0.4   |  |  |
| 1.14  | -1.42 | -0.41 |  |  |
| 1.13  | -0.27 | 0.75  |  |  |
| 1.1   | -1.92 | -0.87 |  |  |
| 1.08  | 2.82  | 3.9   |  |  |
| 1.08  | -3.06 | -1.98 |  |  |
| 1.07  | -2.66 | -1.57 |  |  |
| 1.06  | -6.86 | -5.75 |  |  |
| 1.04  | -2.3  | -1.17 |  |  |
| 1.03  | -3.67 | -2.52 |  |  |
| -1.05 | -2.36 | -1.1  |  |  |
| -1.09 | -2.8  | -1.48 |  |  |
| -1.12 | -5.49 | -4.14 |  |  |
| -1.16 | -6.84 | -5.43 |  |  |
| -1.33 | -2.85 | -1.25 |  |  |
| -1.38 | -6.23 | -4.58 |  |  |
| -2.02 | -0.89 | 0.11  |  |  |
| -2.04 | -2.97 | -1.96 |  |  |

|       |       |       |  |  |
|-------|-------|-------|--|--|
| -2.13 | 0.58  | 1.65  |  |  |
| -2.19 | -2.78 | -1.66 |  |  |
| -2.29 | -0.48 | 0.7   |  |  |
| -2.49 | -1.66 | -0.36 |  |  |
| -1.04 | 3.71  | 4.71  |  |  |
| -1.05 | -0.92 | 0.09  |  |  |
| -1.2  | -2.13 | -0.92 |  |  |
| -1    | 6.33  | 7.32  |  |  |
| -1.02 | -3.38 | -2.36 |  |  |
| -1.02 | 5.57  | 6.59  |  |  |
| -1.05 | 3.33  | 4.39  |  |  |
| -1.06 | 5.33  | 6.41  |  |  |
| -1.09 | -4.33 | -3.22 |  |  |
| -1.09 | 4.45  | 5.57  |  |  |
| -1.1  | -0.18 | 0.95  |  |  |
| -1.14 | -3.39 | -2.21 |  |  |
| -1.16 | -1.3  | -0.09 |  |  |
| -1.21 | -4.01 | -2.75 |  |  |
| -1.27 | -3.76 | -2.42 |  |  |
| -1.41 | -2.87 | -1.38 |  |  |
| -1.43 | 0.01  | 1.52  |  |  |
| -1.76 | -3.36 | -1.56 |  |  |
| -1.82 | -3.77 | -1.91 |  |  |
| -1.03 | 2.23  | 3.24  |  |  |
| -1.04 | 1.66  | 2.67  |  |  |
| -1.06 | 1.31  | 2.37  |  |  |
| -1.97 | -0.89 | 0.11  |  |  |
| -1.99 | -1.62 | -0.6  |  |  |
| -2.44 | -4.2  | -2.89 |  |  |
| -3.36 | -2.39 | -0.63 |  |  |
| -9.37 | -2.39 | 0.86  |  |  |
| -2.27 | -2.64 | -1.64 |  |  |
| -2.3  | -1.92 | -0.89 |  |  |
| -2.34 | -0.62 | 0.43  |  |  |
| -2.5  | -1.69 | -0.55 |  |  |
| -2.6  | -1.1  | 0.1   |  |  |
| -3.15 | -4.26 | -2.78 |  |  |
| -4.8  | -4.09 | -2    |  |  |
| -1.11 | -3.62 | -2.61 |  |  |
| -1.13 | 1.01  | 2.03  |  |  |
| -1.14 | 4.25  | 5.28  |  |  |
| -1.21 | -4.66 | -3.54 |  |  |
| -1.35 | -3.24 | -1.96 |  |  |
| -1.44 | 0.33  | 1.7   |  |  |
| -1.68 | -1.8  | -0.21 |  |  |
| -2.01 | -0.14 | 1.71  |  |  |
| -1.14 | -3.25 | -2.26 |  |  |
| -1.16 | -5.15 | -4.13 |  |  |
| -1.17 | -6.26 | -5.23 |  |  |
| -1.35 | -4.34 | -3.1  |  |  |
| -1.57 | -5.61 | -4.15 |  |  |
| -1.85 | -5.08 | -3.38 |  |  |
| -1.4  | -0.19 | 0.81  |  |  |
| -1.43 | -0.28 | 0.75  |  |  |
| -1.97 | 0.23  | 1.23  |  |  |
| -2.01 | 2.75  | 3.77  |  |  |
| 1.01  | -1.15 | -0.15 |  |  |
| -1.01 | -4.42 | -3.4  |  |  |

|       |       |       |  |  |
|-------|-------|-------|--|--|
| -1.19 | -1.77 | -0.51 |  |  |
| -1.92 | -1.26 | -0.26 |  |  |
| -1.97 | -1.59 | -0.55 |  |  |
| -2.48 | -1.64 | -0.28 |  |  |
| -3    | -3.26 | -1.61 |  |  |
| -3.04 | -2.65 | -0.99 |  |  |
| -3.63 | -1.77 | 0.14  |  |  |
| -2.23 | -2.14 | -1.14 |  |  |
| -2.28 | -3.78 | -2.75 |  |  |
| -2.33 | -4.09 | -3.03 |  |  |
| -2.4  | -1.55 | -0.45 |  |  |
| -2.42 | -3.3  | -2.18 |  |  |
| 1.79  | -3.08 | -2.08 |  |  |
| 1.74  | -3.14 | -2.09 |  |  |
| 1.58  | -2.91 | -1.73 |  |  |
| 1.56  | -0.85 | 0.36  |  |  |
| 1.49  | -3.3  | -2.04 |  |  |
| 1.42  | 0.32  | 1.65  |  |  |
| 1.42  | -2.67 | -1.34 |  |  |
| 1.35  | -4.98 | -3.57 |  |  |
| 1.25  | 0.05  | 1.57  |  |  |
| 1.18  | -3.66 | -2.05 |  |  |
| 1.14  | -3.98 | -2.33 |  |  |
| 1.11  | -2.02 | -0.32 |  |  |
| 1.07  | -3.72 | -1.98 |  |  |
| 1.03  | -1.85 | -0.05 |  |  |
| -1.07 | -3.23 | -1.29 |  |  |
| -1.4  | -4.41 | -2.09 |  |  |
| -1.32 | -4.87 | -3.87 |  |  |
| -1.36 | -6.46 | -5.41 |  |  |
| -1.56 | 0.38  | 1.62  |  |  |
| -1.57 | -3.83 | -2.57 |  |  |
| -1.86 | 0.03  | 1.52  |  |  |
| -1.18 | -4.56 | -3.57 |  |  |
| -1.23 | -0.61 | 0.45  |  |  |
| -1.24 | -3.57 | -2.51 |  |  |
| -1.34 | -2.99 | -1.81 |  |  |
| -1.67 | -2.43 | -0.93 |  |  |
| 1.54  | -6.09 | -5.09 |  |  |
| 1.48  | -2.91 | -1.86 |  |  |
| 1.47  | -4.7  | -3.64 |  |  |
| 1.3   | -6.25 | -5.01 |  |  |
| 1.3   | -3.68 | -2.44 |  |  |
| 1.23  | -4.59 | -3.28 |  |  |
| 1.18  | -2.06 | -0.68 |  |  |
| 1.08  | -4.18 | -2.68 |  |  |
| 1.07  | -2.99 | -1.47 |  |  |
| -1.12 | -4.87 | -3.09 |  |  |
| -1.25 | -5.12 | -3.18 |  |  |
| 1.19  | -4.23 | -3.23 |  |  |
| 1.13  | -4.63 | -3.56 |  |  |
| 1.12  | -2.55 | -1.47 |  |  |
| -1.2  | -7.68 | -6.16 |  |  |
| -1.4  | -6.88 | -5.15 |  |  |
| -1.64 | -1.04 | -0.04 |  |  |
| -1.72 | -1.63 | -0.56 |  |  |
| -1.74 | -3.4  | -2.32 |  |  |
| -1.75 | -3.45 | -2.36 |  |  |

|       |       |       |  |  |
|-------|-------|-------|--|--|
| -1.74 | -2.66 | -1.66 |  |  |
| -1.84 | -4.22 | -3.14 |  |  |
| -1.88 | -1.47 | -0.36 |  |  |
| -1.89 | -3.08 | -1.95 |  |  |
| -1.95 | -0.14 | 1.03  |  |  |
| -2.16 | -4.39 | -3.07 |  |  |
| -2.24 | -5.96 | -4.6  |  |  |
| -2.8  | -6.64 | -4.95 |  |  |
| -2.88 | -4.45 | -2.72 |  |  |
| -3.13 | -5.47 | -3.62 |  |  |
| -3.37 | -3.79 | -1.83 |  |  |
| -3.4  | -4.45 | -2.48 |  |  |
| -3.55 | -5.05 | -3.02 |  |  |
| -1.91 | -3.76 | -2.76 |  |  |
| -2.03 | -3.55 | -2.46 |  |  |
| -2.03 | -1.74 | -0.75 |  |  |
| -2.17 | -4.42 | -3.32 |  |  |
| -2.76 | -5.02 | -3.58 |  |  |
| -1.98 | -1.42 | -0.42 |  |  |
| -2.12 | 0.5   | 1.6   |  |  |
| -2.31 | -1.26 | -0.04 |  |  |
| -2.39 | -1.97 | -0.7  |  |  |
| -1.21 | -7.98 | -6.98 |  |  |
| -1.3  | -5.84 | -4.73 |  |  |
| 1.68  | 1.09  | 2.09  |  |  |
| 1.56  | -2.24 | -1.12 |  |  |
| 1.5   | -2.73 | -1.56 |  |  |
| 1.49  | -0.99 | 0.18  |  |  |
| 1.43  | -1.79 | -0.55 |  |  |
| 1.41  | -3.37 | -2.12 |  |  |
| 1.34  | -4    | -2.68 |  |  |
| 1.28  | -2.06 | -0.67 |  |  |
| 1.2   | -0.5  | 0.99  |  |  |
| 1.18  | 0.47  | 1.98  |  |  |
| 1.13  | -0.55 | 1.02  |  |  |
| -1.01 | -2.3  | -0.53 |  |  |
| -1.02 | -1.66 | 0.12  |  |  |
| -1.33 | 4.41  | 6.57  |  |  |
| -1.71 | -3.83 | -1.31 |  |  |
| -1.35 | -0.84 | 0.16  |  |  |
| -1.46 | -3.2  | -2.08 |  |  |
| -1.75 | -2.88 | -1.51 |  |  |
| 1.73  | -0.77 | 0.23  |  |  |
| 1.6   | -5.48 | -4.36 |  |  |
| 1.57  | -4.35 | -3.21 |  |  |
| 1.45  | -1.47 | -0.22 |  |  |
| 1.18  | -5.44 | -3.89 |  |  |
| 1.16  | -5.19 | -3.61 |  |  |
| 1.1   | -2.11 | -0.46 |  |  |
| 1.05  | -4.61 | -2.89 |  |  |
| 1.03  | -2.35 | -0.6  |  |  |
| 1     | -4.1  | -2.31 |  |  |
| -1.08 | -3.08 | -1.18 |  |  |
| -1.1  | -4.4  | -2.48 |  |  |
| -1.11 | -0.47 | 1.47  |  |  |
| -1.3  | -1.6  | 0.57  |  |  |
| -1.28 | -1.21 | -0.21 |  |  |
| -1.38 | 1.47  | 2.58  |  |  |

|        |       |       |  |  |
|--------|-------|-------|--|--|
| -1.62  | -0.67 | 0.68  |  |  |
| -1.66  | 0.19  | 1.57  |  |  |
| -1.7   | -0.7  | 0.71  |  |  |
| -2.43  | 2.93  | 4.86  |  |  |
| -1.41  | 1.92  | 2.92  |  |  |
| -1.54  | -6.16 | -5.03 |  |  |
| -2.14  | -3.83 | -2.83 |  |  |
| -2.34  | -0.65 | 0.48  |  |  |
| -2.85  | -0.06 | 1.36  |  |  |
| -3.25  | -1.84 | -0.23 |  |  |
| -1.24  | -5.6  | -4.59 |  |  |
| -1.4   | -6.27 | -5.1  |  |  |
| -1.44  | -4.04 | -2.82 |  |  |
| -1.01  | -8.79 | -7.78 |  |  |
| -1.13  | -6.96 | -5.8  |  |  |
| -1.38  | -4.83 | -3.39 |  |  |
| -4.66  | -3.08 | -2.08 |  |  |
| -5.26  | -4.19 | -3.01 |  |  |
| -9.65  | -4.36 | -2.3  |  |  |
| -13.37 | -6.28 | -3.76 |  |  |
| -1.95  | -5.58 | -4.58 |  |  |
| -2.22  | -2.2  | -1.02 |  |  |
| -2.59  | -2.87 | -1.87 |  |  |
| -2.94  | -2.79 | -1.61 |  |  |
| -6.21  | -3.61 | -1.35 |  |  |
| 1.37   | -1.73 | -0.73 |  |  |
| 1.21   | -2.89 | -1.7  |  |  |
| 1.1    | -0.16 | 1.15  |  |  |
| 1.1    | -2.61 | -1.29 |  |  |
| 1.05   | -3.01 | -1.63 |  |  |
| -1.05  | -0.03 | 1.51  |  |  |
| -1.14  | 1.24  | 2.88  |  |  |
| -1.34  | -2.93 | -1.05 |  |  |
| -2.27  | -3.97 | -2.97 |  |  |
| -2.59  | -4.42 | -3.23 |  |  |
| -2.76  | -5.47 | -4.19 |  |  |
| -2.83  | -1.83 | -0.52 |  |  |
| -1.12  | -2.36 | -1.36 |  |  |
| -1.3   | -4.14 | -2.92 |  |  |
| 1.09   | 0.56  | 1.56  |  |  |
| -1.09  | 4.58  | 5.82  |  |  |
| -1.38  | -4.44 | -2.85 |  |  |
| -1.43  | -3.1  | -1.47 |  |  |
| -1.6   | -4.71 | -2.91 |  |  |
| -1.13  | -3.9  | -2.9  |  |  |
| -1.33  | -5.81 | -4.58 |  |  |
| -1.38  | -6.78 | -5.49 |  |  |
| -1.41  | -6.3  | -4.97 |  |  |
| 3.48   | -0.32 | 0.68  |  |  |
| 2.88   | -1.11 | 0.16  |  |  |
| 2.81   | 0.09  | 1.4   |  |  |
| 2.19   | -3.26 | -1.59 |  |  |
| 2.15   | -3.61 | -1.91 |  |  |
| 2.07   | -3.3  | -1.55 |  |  |
| 1.93   | -3.22 | -1.37 |  |  |
| 1.84   | -3.27 | -1.36 |  |  |
| 1.54   | -3.19 | -1.01 |  |  |
| 1.42   | -0.08 | 2.22  |  |  |

|        |       |       |  |  |
|--------|-------|-------|--|--|
| 1.41   | -0.22 | 2.08  |  |  |
| 1.11   | -2.19 | 0.46  |  |  |
| 1.05   | -3.98 | -1.25 |  |  |
| 1.04   | -3.56 | -0.81 |  |  |
| -1.05  | 5.79  | 8.66  |  |  |
| 3.34   | 0.17  | 1.17  |  |  |
| 2.75   | -0.96 | 0.32  |  |  |
| 2      | 0.71  | 2.45  |  |  |
| 1.33   | -2.5  | -0.17 |  |  |
| -1.01  | -1.21 | 1.55  |  |  |
| -1.76  | -4.36 | -3.35 |  |  |
| -2.14  | -6.69 | -5.4  |  |  |
| -2.38  | -6.05 | -4.6  |  |  |
| -2.45  | -5.75 | -4.27 |  |  |
| -1.1   | -2.61 | -1.61 |  |  |
| -1.37  | 1.23  | 2.54  |  |  |
| -1.91  | -4.24 | -2.46 |  |  |
| -2.03  | -3.56 | -2.57 |  |  |
| -2.65  | -0.68 | 0.69  |  |  |
| -2.36  | -2.15 | -1.15 |  |  |
| -3.12  | -4.96 | -3.55 |  |  |
| -2.16  | -2.16 | -1.16 |  |  |
| -2.87  | -2.03 | -0.61 |  |  |
| -3.03  | -2.05 | -0.56 |  |  |
| -3.08  | -0.96 | 0.55  |  |  |
| -3.53  | -0.87 | 0.84  |  |  |
| -5.67  | -2.92 | -0.53 |  |  |
| -8.31  | -2.6  | 0.35  |  |  |
| -14.45 | -3.26 | 0.48  |  |  |
| -1.44  | -2.07 | -1.07 |  |  |
| -2.07  | -2.45 | -0.93 |  |  |
| -2.36  | 1.57  | 2.57  |  |  |
| -7.19  | -2.38 | 0.23  |  |  |
| -8.13  | -2.35 | 0.44  |  |  |
| 12.67  | -1.56 | -0.56 |  |  |
| 1.87   | -4.59 | -0.83 |  |  |
| -1.78  | -1.33 | -0.33 |  |  |
| -2.57  | 0.11  | 1.64  |  |  |
| -1.11  | 4.29  | 5.29  |  |  |
| -1.17  | 2.12  | 3.2   |  |  |
| -2.14  | -0.26 | 0.74  |  |  |
| -2.38  | 0.5   | 1.66  |  |  |
| -1.38  | -2.16 | -1.16 |  |  |
| -1.38  | -1.94 | -0.95 |  |  |
| -1.68  | 0.34  | 1.34  |  |  |
| -2.02  | 0.71  | 1.97  |  |  |
| -2.22  | -0.57 | 0.83  |  |  |
| -2.53  | 1.18  | 2.78  |  |  |
| -1.14  | 0.91  | 1.91  |  |  |
| -2.51  | -2.08 | 0.06  |  |  |
| 1.01   | -1.76 | -0.76 |  |  |
| -2.76  | -0.83 | 1.65  |  |  |
| -1.91  | -2.22 | -1.22 |  |  |
| -2.13  | -2.16 | -1    |  |  |
| -2.26  | -1.11 | 0.13  |  |  |
| -3.88  | -1.73 | 0.29  |  |  |
| -2.13  | -1.57 | -0.57 |  |  |
| -2.63  | -3.34 | -2.04 |  |  |

|       |       |       |  |  |
|-------|-------|-------|--|--|
| -1.06 | 5.15  | 6.15  |  |  |
| -1.23 | -1.54 | -0.33 |  |  |
| -1.41 | -2.02 | -0.6  |  |  |
| -1.95 | -2.02 | -0.14 |  |  |
| -2.15 | -3.76 | -2.76 |  |  |
| -3.13 | -2.09 | -0.54 |  |  |
| -2.02 | -1.56 | -0.56 |  |  |
| -3.76 | -2.04 | -0.14 |  |  |
| -2.15 | -3.76 | -2.76 |  |  |
| -3.13 | -2.09 | -0.54 |  |  |
| -2.02 | -1.56 | -0.56 |  |  |
| -3.76 | -2.04 | -0.14 |  |  |
| -1.89 | 0.63  | 1.64  |  |  |
| -4.33 | -0.39 | 1.8   |  |  |
| 1.03  | -0.67 | 0.34  |  |  |
| -1.03 | -4.94 | -3.85 |  |  |
| -1.19 | -5.66 | -4.36 |  |  |
| -1.24 | -4.96 | -3.6  |  |  |
| -1.41 | -5.03 | -4.02 |  |  |
| -1.42 | -6.52 | -5.5  |  |  |
| -1.43 | -2.28 | -1.24 |  |  |
| -1.43 | -5.3  | -4.26 |  |  |
| -1.46 | -3.39 | -2.33 |  |  |
| -1.48 | -6.8  | -5.71 |  |  |
| -1.48 | -3.88 | -2.8  |  |  |
| -1.51 | -5.21 | -4.09 |  |  |
| -1.58 | -6.32 | -5.14 |  |  |
| -1.6  | -3.9  | -2.71 |  |  |
| -1.66 | -5.33 | -4.08 |  |  |
| -1.74 | -5.54 | -4.23 |  |  |
| -1.75 | -4.52 | -3.19 |  |  |
| -1.81 | -9.03 | -7.66 |  |  |
| -1.94 | -6.93 | -5.45 |  |  |
| -1.95 | -2.76 | -1.27 |  |  |
| -2.12 | -6.1  | -4.5  |  |  |
| -2.17 | -5.27 | -3.63 |  |  |
| -2.28 | -6.42 | -4.71 |  |  |
| -2.33 | -8.14 | -6.4  |  |  |
| -2.37 | -6.88 | -5.12 |  |  |
| -2.5  | -6.64 | -4.8  |  |  |
| -2.52 | -6.23 | -4.38 |  |  |
| -2.79 | -3.88 | -1.88 |  |  |
| -3.44 | -7.61 | -5.31 |  |  |
| -4.22 | -6.95 | -4.35 |  |  |
| -2.35 | -0.7  | 0.3   |  |  |
| -2.38 | -0.14 | 0.89  |  |  |
| -2.41 | -2.54 | -1.49 |  |  |
| -2.45 | -0.09 | 0.98  |  |  |
| -2.47 | -1.09 | -0.02 |  |  |
| -2.56 | -1.45 | -0.32 |  |  |
| -2.66 | 0.17  | 1.35  |  |  |
| -2.69 | -1.97 | -0.77 |  |  |
| -2.84 | -2.02 | -0.74 |  |  |
| -4.18 | -1.99 | -0.15 |  |  |
| -4.53 | -3.2  | -1.25 |  |  |
| -4.54 | -2.8  | -0.84 |  |  |
| -4.65 | -2.42 | -0.42 |  |  |
| -2.08 | 0.99  | 2     |  |  |

|       |       |       |  |  |
|-------|-------|-------|--|--|
| -2.16 | -0.82 | 0.25  |  |  |
| -2.48 | -1.79 | -0.54 |  |  |
| -2.47 | 0.69  | 1.94  |  |  |
| -2.98 | -3.1  | -1.57 |  |  |
| -1.16 | -2.38 | -1.37 |  |  |
| -1.16 | -2.14 | -1.13 |  |  |
| -1.25 | -2.34 | -1.23 |  |  |
| -1.27 | -3.06 | -1.92 |  |  |
| -1.48 | -4.6  | -3.24 |  |  |
| -1.51 | -2.23 | -0.84 |  |  |
| 1.1   | -1.04 | -0.03 |  |  |
| 1.08  | 3.6   | 4.64  |  |  |
| 1.05  | 0.53  | 1.6   |  |  |
| 1.03  | -2.12 | -1.02 |  |  |
| 1.01  | 1.89  | 3.02  |  |  |
| -1.03 | 0.1   | 1.29  |  |  |
| -1.05 | -0.37 | 0.85  |  |  |
| -1.08 | -1.39 | -0.13 |  |  |
| -1.1  | 1.51  | 2.79  |  |  |
| -1.11 | -0.38 | 0.92  |  |  |
| -1.2  | 0.08  | 1.49  |  |  |
| -1.59 | -0.73 | 1.08  |  |  |
| -1.09 | -4.73 | -3.72 |  |  |
| -1.1  | -4.05 | -3.04 |  |  |
| -1.12 | -3.81 | -2.77 |  |  |
| -1.26 | -1.63 | -0.41 |  |  |
| -1.51 | -5.57 | -4.1  |  |  |
| -1.52 | -6.27 | -4.78 |  |  |
| -1.55 | -6.64 | -5.12 |  |  |
| -1.6  | -4.53 | -2.98 |  |  |
| -1.71 | -4.03 | -2.38 |  |  |
| -1.71 | -6.21 | -4.55 |  |  |
| -2.08 | -4.72 | -2.78 |  |  |
| -1.32 | 0.53  | 1.54  |  |  |
| -1.36 | 0.94  | 1.98  |  |  |
| -2.19 | -0.98 | 0.75  |  |  |
| 1.12  | -5.17 | -4.16 |  |  |
| 1.1   | -2.76 | -1.73 |  |  |
| 1.02  | -2.92 | -1.78 |  |  |
| -1.16 | -5.75 | -4.37 |  |  |
| -1.86 | 1.23  | 3.3   |  |  |
| -2.07 | -1.64 | -0.63 |  |  |
| -2.12 | -3.18 | -2.13 |  |  |
| -2.13 | -2.49 | -1.43 |  |  |
| -2.14 | -0.26 | 0.8   |  |  |
| -2.14 | -1.59 | -0.54 |  |  |
| -2.14 | -2.2  | -1.14 |  |  |
| -2.17 | -0.3  | 0.78  |  |  |
| -2.31 | -1.27 | -0.11 |  |  |
| -2.36 | 1.68  | 2.88  |  |  |
| -2.73 | -1.69 | -0.28 |  |  |
| -2.75 | -1.67 | -0.25 |  |  |
| -2.78 | -1.28 | 0.15  |  |  |
| -2.94 | 0.5   | 2.02  |  |  |
| -2.98 | -2.2  | -0.66 |  |  |
| -6.3  | -0.56 | 2.06  |  |  |
| 1.15  | 0.38  | 1.39  |  |  |
| -1.03 | 0.48  | 1.72  |  |  |



|        |       |       |  |  |
|--------|-------|-------|--|--|
| -1.04  | -1.23 | 0.03  |  |  |
| -1.1   | -1.71 | -0.37 |  |  |
| 1.23   | -0.86 | 0.15  |  |  |
| 1.2    | 0.15  | 1.19  |  |  |
| 1.2    | -2.67 | -1.63 |  |  |
| 1.17   | -3.97 | -2.89 |  |  |
| 1.15   | -1.27 | -0.17 |  |  |
| 1.14   | -0.98 | 0.13  |  |  |
| 1.12   | -2.86 | -1.73 |  |  |
| 1.09   | -2.82 | -1.65 |  |  |
| 1.07   | -0.03 | 1.17  |  |  |
| 1.05   | 1     | 2.24  |  |  |
| -1.01  | -4.68 | -3.37 |  |  |
| -1.02  | -2.82 | -1.49 |  |  |
| -1.24  | 1.31  | 2.93  |  |  |
| -1.27  | 3.65  | 5.29  |  |  |
| -1.27  | -3.72 | -2.08 |  |  |
| -2.53  | -4.88 | -2.24 |  |  |
| -1.06  | -0.74 | 0.27  |  |  |
| -1.08  | -4.61 | -3.57 |  |  |
| -1.09  | -2.57 | -1.52 |  |  |
| -1.1   | -3.16 | -2.1  |  |  |
| -1.15  | -4    | -2.88 |  |  |
| -1.16  | -5.14 | -4.01 |  |  |
| -1.27  | -5.27 | -4    |  |  |
| -1.6   | -4.52 | -2.93 |  |  |
| -5.9   | -3.35 | -2.34 |  |  |
| -12.08 | -1.56 | 0.48  |  |  |
| -12.48 | -0.21 | 1.87  |  |  |
| -2.04  | -0.16 | 0.85  |  |  |
| -2.23  | -2.66 | -1.52 |  |  |
| -2.49  | 0.25  | 1.54  |  |  |
| -2.56  | -2.8  | -1.79 |  |  |
| -2.56  | -3.99 | -2.99 |  |  |
| -2.69  | -3.55 | -2.47 |  |  |
| -2.9   | -4.4  | -3.21 |  |  |
| -3.84  | -4.75 | -3.16 |  |  |
| -1.67  | -1.49 | -0.48 |  |  |
| -1.73  | -2.23 | -1.18 |  |  |
| -1.82  | -3.8  | -2.67 |  |  |
| -2.07  | -4.01 | -2.69 |  |  |
| -1.3   | 1.35  | 2.36  |  |  |
| -1.53  | -2.65 | -1.4  |  |  |
| -1.66  | -5.32 | -3.96 |  |  |
| -2.84  | -2.03 | -1.02 |  |  |
| -3.36  | -2.21 | -0.96 |  |  |
| -3.56  | -3.79 | -2.45 |  |  |
| -1.52  | 6.36  | 7.37  |  |  |
| -2.16  | -0.66 | 0.86  |  |  |
| 1.08   | 0.86  | 1.86  |  |  |
| -1.2   | -5.46 | -4.09 |  |  |
| -1.94  | -2.45 | -1.44 |  |  |
| -2.07  | -4.81 | -3.71 |  |  |
| -2.17  | -4.4  | -3.24 |  |  |
| -2.63  | -2.81 | -1.37 |  |  |
| -1.37  | -0.37 | 0.64  |  |  |
| -1.42  | -3.86 | -2.8  |  |  |
| -1.43  | -4.33 | -3.26 |  |  |

|       |       |       |  |  |
|-------|-------|-------|--|--|
| -1.53 | -3.91 | -2.75 |  |  |
| -1.53 | -2.75 | -1.58 |  |  |
| -2.11 | -4.13 | -2.5  |  |  |
| -1.28 | 3.68  | 4.69  |  |  |
| -1.35 | -0.39 | 0.69  |  |  |
| -1.48 | -2.3  | -1.29 |  |  |
| -1.49 | -2.61 | -1.59 |  |  |
| -1.51 | -1.94 | -0.89 |  |  |
| -1.53 | -4.5  | -3.43 |  |  |
| -1.55 | -2.76 | -1.68 |  |  |
| -1.55 | -4.5  | -3.42 |  |  |
| -1.58 | -3.15 | -2.04 |  |  |
| -1.58 | -3.86 | -2.76 |  |  |
| -1.61 | -4.31 | -3.18 |  |  |
| -1.67 | -6.44 | -5.25 |  |  |
| -1.75 | -3.52 | -2.26 |  |  |
| -1.82 | -1.18 | 0.13  |  |  |
| -1.89 | -4.36 | -2.99 |  |  |
| -1.96 | -3.95 | -2.53 |  |  |
| -2.13 | -6.39 | -4.85 |  |  |
| -2.2  | -3.47 | -1.88 |  |  |
| -2.36 | -6.01 | -4.32 |  |  |
| -1.72 | -3.72 | -2.71 |  |  |
| -3.27 | -6.57 | -4.65 |  |  |
| -1.71 | 3.51  | 4.52  |  |  |
| -1.97 | 0.17  | 1.38  |  |  |
| -2.5  | -0.94 | 0.61  |  |  |
| -1.38 | -2.93 | -1.93 |  |  |
| -1.42 | -2.7  | -1.65 |  |  |
| -1.12 | -2.01 | -1    |  |  |
| -1.13 | -3.87 | -2.85 |  |  |
| -1.17 | -5.81 | -4.73 |  |  |
| -1.21 | -4.07 | -2.95 |  |  |
| -1.32 | -7.39 | -6.14 |  |  |
| -1.35 | -5.43 | -4.16 |  |  |
| -2.14 | -6.45 | -4.5  |  |  |
| -2.07 | -0.98 | 0.03  |  |  |
| -2.32 | -4.07 | -2.9  |  |  |
| -2.7  | -3.33 | -1.94 |  |  |
| 1.31  | -1.15 | -0.14 |  |  |
| 1.28  | -0.48 | 0.57  |  |  |
| 1.08  | -4.62 | -3.32 |  |  |
| -1.05 | -4.19 | -2.71 |  |  |
| -1.3  | -4.74 | -2.96 |  |  |
| -2.06 | -2.32 | -1.31 |  |  |
| -2.26 | 1.36  | 2.5   |  |  |
| -2.51 | -2.4  | -1.11 |  |  |
| -2.8  | 2.77  | 4.22  |  |  |
| -1.11 | 2.05  | 3.06  |  |  |
| -1.15 | 3.1   | 4.17  |  |  |
| -1.17 | 3.01  | 4.09  |  |  |
| -1.2  | -1.64 | -0.52 |  |  |
| -1.29 | -0.97 | 0.26  |  |  |
| -1.47 | -0.65 | 0.76  |  |  |
| -1.63 | -1.07 | 0.5   |  |  |
| -1.91 | -0.35 | 1.45  |  |  |
| -2.65 | 0.89  | 3.15  |  |  |
| -1.41 | -0.88 | 0.14  |  |  |

|       |       |       |  |  |
|-------|-------|-------|--|--|
| -1.41 | -0.92 | 0.09  |  |  |
| -1.47 | -2.24 | -1.16 |  |  |
| -1.58 | 4.23  | 5.4   |  |  |
| 1.17  | -2.45 | -1.44 |  |  |
| 1.13  | 0.44  | 1.51  |  |  |
| 1.09  | -4.55 | -3.44 |  |  |
| 1.07  | -1.92 | -0.78 |  |  |
| 1.05  | -4.16 | -2.99 |  |  |
| 1.02  | -2.3  | -1.09 |  |  |
| -1.53 | -3.2  | -1.35 |  |  |
| -2.61 | -4.01 | -3    |  |  |
| -2.79 | -3.46 | -2.36 |  |  |
| -3.09 | -2.03 | -0.78 |  |  |
| -1.36 | 0.29  | 1.3   |  |  |
| -1.39 | 5.18  | 6.22  |  |  |
| -1.56 | -1.76 | -0.55 |  |  |
| -1.61 | -0.33 | 0.92  |  |  |
| -2.43 | -3.5  | -1.65 |  |  |
| -1.7  | 0.6   | 1.61  |  |  |
| -1.82 | -0.18 | 0.93  |  |  |
| -1.85 | -0.53 | 0.6   |  |  |
| -2.23 | -0.38 | 1.01  |  |  |
| -2.61 | -1.17 | 0.45  |  |  |
| -1.5  | -1.7  | -0.69 |  |  |
| -1.62 | 0.11  | 1.23  |  |  |
| -1.83 | 1.89  | 3.19  |  |  |
| -1.33 | -1.51 | -0.5  |  |  |
| -1.35 | 0.54  | 1.58  |  |  |
| -1.36 | -1.04 | 0     |  |  |
| -2.38 | 0.38  | 1.39  |  |  |
| -2.59 | -3.49 | -2.36 |  |  |
| -1.2  | -4.42 | -3.41 |  |  |
| -1.45 | -0.27 | 1     |  |  |
| -1.77 | -4.24 | -3.23 |  |  |
| -1.89 | -3.64 | -2.53 |  |  |
| -2    | -4.14 | -2.95 |  |  |
| 1.15  | -1.07 | -0.05 |  |  |
| 1.03  | -4.49 | -3.32 |  |  |
| -1.13 | -3.75 | -2.35 |  |  |
| -1.14 | -4.55 | -3.15 |  |  |
| -1.14 | 1.92  | 3.33  |  |  |
| -1.15 | -0.25 | 1.16  |  |  |
| -3.66 | -5.26 | -4.25 |  |  |
| -4.53 | -5.85 | -4.53 |  |  |
| -4.64 | -5.18 | -3.83 |  |  |
| 3.89  | -0.12 | 0.9   |  |  |
| 3.66  | -1.56 | -0.45 |  |  |
| 3.54  | -0.71 | 0.44  |  |  |
| 3.48  | -2.94 | -1.77 |  |  |
| 3.41  | -1.69 | -0.48 |  |  |
| 3.36  | -3.34 | -2.11 |  |  |
| 2.04  | -3.47 | -1.52 |  |  |
| 2.03  | -1.71 | 0.24  |  |  |
| 1.93  | -2.32 | -0.29 |  |  |
| 1.68  | -2.98 | -0.75 |  |  |
| 1.54  | -3.77 | -1.42 |  |  |
| 1.42  | 0.34  | 2.81  |  |  |
| 1.33  | 0.7   | 3.26  |  |  |

|       |       |       |  |  |
|-------|-------|-------|--|--|
| 1.22  | 1.19  | 3.88  |  |  |
| 1.21  | 0.13  | 2.84  |  |  |
| 1.17  | 0.45  | 3.2   |  |  |
| 1.06  | -3.91 | -1.02 |  |  |
| 1.05  | 3.82  | 6.73  |  |  |
| 1.03  | 0.79  | 3.72  |  |  |
| -1.15 | 1.15  | 4.32  |  |  |
| -1.71 | -3.02 | 0.73  |  |  |
| -1.72 | -5.51 | -4.5  |  |  |
| -2.37 | -6.53 | -5.05 |  |  |
| 1.1   | -0.55 | 0.46  |  |  |
| 1.03  | 1.99  | 3.09  |  |  |
| 1.02  | -0.33 | 0.78  |  |  |
| 1     | 0.74  | 1.87  |  |  |
| -1.1  | 4.03  | 5.31  |  |  |
| -1.12 | -3.33 | -2.03 |  |  |
| -1.93 | -1.08 | 1.02  |  |  |
| 9.22  | -0.31 | 0.71  |  |  |
| 8.1   | -0.59 | 0.61  |  |  |
| 6.83  | -1.24 | 0.21  |  |  |
| 5.45  | -6.19 | -4.42 |  |  |
| 4.35  | -2.06 | 0.04  |  |  |
| 3.63  | -2.59 | -0.23 |  |  |
| 3.54  | -3.91 | -1.51 |  |  |
| 3.49  | -6.34 | -3.92 |  |  |
| 2.72  | -6.43 | -3.65 |  |  |
| 2.57  | -7.02 | -4.16 |  |  |
| 2.37  | -5.47 | -2.5  |  |  |
| 2.31  | -4.66 | -1.65 |  |  |
| 1.62  | -0.71 | 2.82  |  |  |
| 1.49  | -6.91 | -3.27 |  |  |
| 1.13  | -4.21 | -0.16 |  |  |
| 1.11  | 1.9   | 5.97  |  |  |
| 1.09  | -5.4  | -1.31 |  |  |
| 1.02  | -6.11 | -1.91 |  |  |
| -2.14 | -1.12 | -0.11 |  |  |
| -2.18 | 1.05  | 2.09  |  |  |
| -2.34 | -0.49 | 0.65  |  |  |
| -2.36 | -2.23 | -1.08 |  |  |
| -2.37 | 2.19  | 3.35  |  |  |
| -2.69 | -2.56 | -1.22 |  |  |
| -2.7  | 0.18  | 1.52  |  |  |
| -2.91 | -1.13 | 0.32  |  |  |
| -2.94 | 0.4   | 1.87  |  |  |
| -2.94 | -2.18 | -0.7  |  |  |
| -3.12 | -0.06 | 1.5   |  |  |
| -3.14 | -3.54 | -1.98 |  |  |
| -3.32 | -0.68 | 0.97  |  |  |
| -3.32 | -0.68 | 0.97  |  |  |
| -3.46 | 0.56  | 2.27  |  |  |
| -3.47 | -2.69 | -0.98 |  |  |
| -3.89 | 0.68  | 2.55  |  |  |
| -4.03 | 0.61  | 2.53  |  |  |
| -4.43 | -0.26 | 1.81  |  |  |
| -1.28 | 1.18  | 2.2   |  |  |
| -1.36 | 4.33  | 5.44  |  |  |
| -1.43 | 3.1   | 4.28  |  |  |
| -1.44 | 2.75  | 3.94  |  |  |

|       |       |       |  |  |
|-------|-------|-------|--|--|
| -1.47 | -1.09 | 0.12  |  |  |
| -1.99 | 2.23  | 3.88  |  |  |
| -2.76 | 2.03  | 4.16  |  |  |
| -3.41 | 2.86  | 5.3   |  |  |
| 1.85  | -4.2  | -3.18 |  |  |
| 1.19  | 1.78  | 3.44  |  |  |
| 1.1   | 1.76  | 3.52  |  |  |
| 1.06  | -5.84 | -4.03 |  |  |
| 1.04  | 5.26  | 7.1   |  |  |
| -1.11 | -6.34 | -4.29 |  |  |
| -1.22 | -5.23 | -3.04 |  |  |
| -2.09 | -2.9  | -1.88 |  |  |
| -2.1  | -2    | -0.97 |  |  |
| -2.21 | 0.13  | 1.23  |  |  |
| -1.62 | -2.95 | -1.94 |  |  |
| -1.68 | -4.67 | -3.61 |  |  |
| -2.62 | -5.07 | -3.36 |  |  |
| 2.27  | -3.05 | -2.03 |  |  |
| 1.75  | 0.2   | 1.59  |  |  |
| 1.73  | 0.95  | 2.35  |  |  |
| 1.64  | -0.48 | 1     |  |  |
| 1.38  | 1.68  | 3.41  |  |  |
| 1.15  | -0.47 | 1.53  |  |  |
| -1.74 | -4.51 | -1.52 |  |  |
| -2.1  | -1.95 | -0.94 |  |  |
| -2.19 | -4.01 | -2.93 |  |  |
| -3.38 | -3.48 | -1.78 |  |  |
| -1.15 | -4.69 | -3.68 |  |  |
| -1.22 | -1.05 | 0.05  |  |  |
| -1.86 | -1.58 | -0.57 |  |  |
| -1.93 | -2.56 | -1.49 |  |  |
| -1.71 | -0.23 | 0.79  |  |  |
| -1.73 | -3.67 | -2.64 |  |  |
| -1.73 | 1.34  | 2.37  |  |  |
| -1.75 | -2.06 | -1.01 |  |  |
| -1.75 | 0.33  | 1.37  |  |  |
| -1.77 | 0.82  | 1.88  |  |  |
| -2.16 | -0.58 | 0.77  |  |  |
| -2.23 | -1.58 | -0.18 |  |  |
| -2.52 | -1.92 | -0.35 |  |  |
| -3.32 | -1.39 | 0.59  |  |  |
| -2.19 | -3.06 | -2.04 |  |  |
| -3.17 | -2.58 | -1.03 |  |  |
| -1.37 | -5.21 | -4.19 |  |  |
| -4.38 | -1.37 | 1.32  |  |  |
| -1.42 | -1.05 | -0.03 |  |  |
| -1.51 | -1    | 0.11  |  |  |
| -1.62 | -2.26 | -1.05 |  |  |
| -2.03 | 3.07  | 4.61  |  |  |
| -1.8  | -6.98 | -5.97 |  |  |
| -1.99 | -3.78 | -2.62 |  |  |
| 1.47  | 1.98  | 2.99  |  |  |
| 1.4   | -0.53 | 0.55  |  |  |
| -1.06 | -1.63 | 0.02  |  |  |
| -1.11 | -5.41 | -3.68 |  |  |
| -1.18 | -2.75 | -0.94 |  |  |
| -1.25 | -3.41 | -1.52 |  |  |
| -1.38 | -2.56 | -0.52 |  |  |

|       |       |       |  |  |
|-------|-------|-------|--|--|
| -1.47 | 0.76  | 2.89  |  |  |
| -2.24 | -3.16 | -0.42 |  |  |
| -1.25 | -3.26 | -2.24 |  |  |
| -1.28 | -5.57 | -4.52 |  |  |
| -2.01 | -3.25 | -1.55 |  |  |
| 1.34  | 1.62  | 2.64  |  |  |
| 1.32  | 1.65  | 2.69  |  |  |
| 1.06  | -1.61 | -0.26 |  |  |
| 1.05  | -1.5  | -0.13 |  |  |
| 1.02  | 1.33  | 2.74  |  |  |
| 1     | -0.45 | 0.99  |  |  |
| -1.05 | -1.09 | 0.42  |  |  |
| -1.09 | 3.89  | 5.45  |  |  |
| -1.1  | 5.67  | 7.25  |  |  |
| -1.23 | 2.33  | 4.07  |  |  |
| -1.51 | 1.46  | 3.49  |  |  |
| -2.09 | -0.89 | 1.61  |  |  |
| -2.25 | -1.92 | -0.91 |  |  |
| -2.7  | -2.1  | -0.83 |  |  |
| -1.66 | -0.02 | 0.99  |  |  |
| -1.66 | -0.25 | 0.76  |  |  |
| -1.22 | -2.29 | -1.27 |  |  |
| -1.4  | 1.57  | 2.78  |  |  |
| -1.23 | -4.97 | -3.95 |  |  |
| -1.27 | -2.62 | -1.56 |  |  |
| -1.73 | -4.77 | -3.26 |  |  |
| -1.35 | 0.97  | 1.98  |  |  |
| -1.36 | 0.36  | 1.38  |  |  |
| -2.82 | -2.08 | 0     |  |  |
| -2.11 | -4.33 | -3.32 |  |  |
| -2.17 | -4.03 | -2.97 |  |  |
| -3.13 | -4.36 | -2.78 |  |  |
| -1.54 | 1.4   | 2.42  |  |  |
| -1.61 | -0.46 | 0.61  |  |  |
| -1.3  | -4.17 | -3.16 |  |  |
| -1.39 | -5.28 | -4.16 |  |  |
| -1.45 | -4.22 | -3.04 |  |  |
| -1.12 | -2.11 | -1.1  |  |  |
| -1.15 | 2.83  | 3.89  |  |  |
| -1.24 | -1.29 | -0.13 |  |  |
| 1.85  | -2.97 | -1.95 |  |  |
| 1.7   | 0.36  | 1.5   |  |  |
| 1.38  | -0.34 | 1.11  |  |  |
| 1.11  | -0.72 | 1.04  |  |  |
| -1.04 | 2.37  | 4.33  |  |  |
| -1.36 | -5.02 | -2.67 |  |  |
| -1.95 | 2.24  | 3.25  |  |  |
| -2.44 | 1.84  | 3.18  |  |  |
| -2.94 | 0.45  | 2.06  |  |  |
| -3.73 | 2.65  | 4.6   |  |  |
| -1.62 | 1.07  | 2.08  |  |  |
| -1.74 | -2.14 | -1.03 |  |  |
| -1.77 | -3.59 | -2.45 |  |  |
| -1.8  | -0.62 | 0.54  |  |  |
| -1.82 | -0.8  | 0.38  |  |  |
| -2.32 | 0.07  | 1.6   |  |  |
| -3.53 | -2.66 | -0.53 |  |  |
| -4.67 | -3    | -0.46 |  |  |

|       |       |       |  |  |
|-------|-------|-------|--|--|
| 1.48  | -2.9  | -1.89 |  |  |
| 1.47  | -1.37 | -0.36 |  |  |
| 1.38  | -2.51 | -1.4  |  |  |
| 1.37  | -4.1  | -2.98 |  |  |
| 1.34  | -3.88 | -2.73 |  |  |
| 1.26  | 0.8   | 2.04  |  |  |
| 1.24  | 0.37  | 1.63  |  |  |
| 1.2   | -6.28 | -4.97 |  |  |
| 1.06  | 2.34  | 3.82  |  |  |
| 1.05  | -4.28 | -2.78 |  |  |
| -1.01 | -4.82 | -3.23 |  |  |
| -1.08 | -2.51 | -0.83 |  |  |
| 1.33  | 3.36  | 4.37  |  |  |
| 1.31  | -3    | -1.96 |  |  |
| 1.3   | 2.23  | 3.27  |  |  |
| 1.26  | -1.58 | -0.5  |  |  |
| 1.26  | 3.16  | 4.25  |  |  |
| -1.95 | -3.24 | -2.23 |  |  |
| -4.23 | -3.85 | -1.72 |  |  |
| -1.7  | -2.15 | -1.14 |  |  |
| -2.9  | -2.72 | -0.94 |  |  |
| -1.47 | 0.29  | 1.3   |  |  |
| -1.5  | 3.27  | 4.31  |  |  |
| -1.63 | -1.6  | -0.59 |  |  |
| -1.77 | -1.89 | -0.76 |  |  |
| -2.16 | -2.81 | -1.39 |  |  |
| -1.84 | -2.21 | -1.2  |  |  |
| -1.95 | -1.43 | -0.33 |  |  |
| -1.34 | -0.77 | 0.24  |  |  |
| -1.59 | -0.2  | 1.06  |  |  |
| -1.62 | -1.44 | -0.15 |  |  |
| -1.64 | -3.46 | -2.45 |  |  |
| -1.87 | -5.4  | -4.19 |  |  |
| -2.14 | -3.4  | -2    |  |  |
| -2.39 | -4.63 | -3.07 |  |  |
| -2.7  | 1.55  | 2.56  |  |  |
| -3.06 | -0.72 | 0.47  |  |  |
| 1.08  | -2.47 | -1.46 |  |  |
| -1.5  | -2.65 | -0.95 |  |  |
| -1.41 | -6.07 | -5.06 |  |  |
| -1.59 | -4.84 | -3.65 |  |  |
| -1.69 | -5    | -3.72 |  |  |
| -1.81 | -3.82 | -2.44 |  |  |
| -1.84 | -6.06 | -4.66 |  |  |
| -2.02 | -1.57 | -0.55 |  |  |
| -3.76 | -2.05 | -0.13 |  |  |
| -2.02 | -1.57 | -0.55 |  |  |
| -3.76 | -2.05 | -0.13 |  |  |
| -1.72 | 0.39  | 1.4   |  |  |
| -2.02 | 2.32  | 3.56  |  |  |
| -2.26 | -1.17 | 0.24  |  |  |
| -2.4  | 3.68  | 5.18  |  |  |
| -2.44 | 3.26  | 4.78  |  |  |
| -3.36 | 2.52  | 4.49  |  |  |
| -1.81 | -2.43 | -1.41 |  |  |
| -2.42 | -5.09 | -3.65 |  |  |
| 1.07  | -1.73 | -0.71 |  |  |
| 1.06  | -2.32 | -1.29 |  |  |

|       |       |       |  |  |
|-------|-------|-------|--|--|
| 1     | -1.76 | -0.66 |  |  |
| -1.01 | -1.75 | -0.62 |  |  |
| -1.14 | -3.12 | -1.81 |  |  |
| -1.23 | -4.04 | -2.63 |  |  |
| -1.24 | -2.99 | -1.57 |  |  |
| -1.58 | -4.6  | -2.83 |  |  |
| -1.11 | 5.96  | 6.98  |  |  |
| -1.13 | 2.09  | 3.13  |  |  |
| 1.48  | -3.58 | -2.56 |  |  |
| 1.44  | -2.9  | -1.84 |  |  |
| 1.29  | -2.01 | -0.79 |  |  |
| 1.28  | -0.22 | 1.01  |  |  |
| 1.18  | -2.08 | -0.73 |  |  |
| 1.18  | -1.45 | -0.1  |  |  |
| 1.16  | -2.53 | -1.16 |  |  |
| 1.13  | -4.45 | -3.04 |  |  |
| 1.05  | -3.08 | -1.56 |  |  |
| -1.03 | -0.04 | 1.59  |  |  |
| -1.15 | -3.37 | -1.58 |  |  |
| -1.42 | -3.46 | -2.44 |  |  |
| -1.68 | -8.05 | -6.79 |  |  |
| -2.59 | -5.16 | -3.27 |  |  |
| -1.82 | -2.03 | -1.01 |  |  |
| -1.92 | -1.77 | -0.67 |  |  |
| -1.01 | -1.57 | -0.55 |  |  |
| -1.09 | -3.31 | -2.19 |  |  |
| -1.12 | -3.89 | -2.73 |  |  |
| -1.01 | -4.76 | -3.73 |  |  |
| -1.01 | -1.89 | -0.86 |  |  |
| -1.03 | -1.15 | -0.1  |  |  |
| -1.04 | -4.43 | -3.37 |  |  |
| -1.03 | -2.54 | -1.48 |  |  |
| -1.07 | -2.44 | -1.33 |  |  |
| -1.11 | -4.8  | -3.64 |  |  |
| -1.15 | 3.95  | 5.15  |  |  |
| -1.15 | -4.04 | -2.82 |  |  |
| -1.17 | -2.51 | -1.27 |  |  |
| -1.23 | -3.82 | -2.51 |  |  |
| -1.31 | -0.53 | 0.86  |  |  |
| -2.27 | -1.09 | -0.07 |  |  |
| -2.31 | -2.28 | -1.23 |  |  |
| -2.4  | -3.58 | -2.48 |  |  |
| -2.42 | -1.63 | -0.51 |  |  |
| -2.48 | -2.94 | -1.79 |  |  |
| -2.73 | -2.28 | -0.99 |  |  |
| -2.92 | -4.31 | -2.92 |  |  |
| -2.97 | -3.34 | -1.93 |  |  |
| -3.94 | -2.66 | -0.84 |  |  |
| -2.11 | -5.18 | -4.16 |  |  |
| -2.15 | -4.49 | -3.45 |  |  |
| -2.36 | -3.92 | -2.75 |  |  |
| -1.66 | -3.78 | -2.75 |  |  |
| -1.68 | 1.09  | 2.13  |  |  |
| -1.72 | -3.15 | -2.07 |  |  |
| -1.89 | -3.01 | -1.8  |  |  |
| -1.1  | 3.8   | 4.82  |  |  |
| -1.28 | -3.84 | -2.61 |  |  |
| -2.42 | -3.03 | -0.87 |  |  |



|       |       |       |  |  |
|-------|-------|-------|--|--|
| 1.03  | 4.03  | 5.05  |  |  |
| 1     | 0.74  | 1.8   |  |  |
| -1.03 | -1.27 | -0.17 |  |  |
| -1.73 | 0.78  | 1.8   |  |  |
| -1.87 | -1.85 | -0.72 |  |  |
| -1.11 | -1.97 | -0.95 |  |  |
| -1.12 | -4.71 | -3.67 |  |  |
| -1.14 | -3.33 | -2.26 |  |  |
| -1.23 | -2.16 | -0.99 |  |  |
| -1.27 | -2.53 | -1.31 |  |  |
| -1.59 | -6.47 | -4.93 |  |  |
| -1.65 | -3.39 | -2.38 |  |  |
| -2.05 | -5.8  | -4.46 |  |  |
| -1.02 | -0.45 | 0.57  |  |  |
| -1.03 | 0.14  | 1.17  |  |  |
| -1.05 | 1.84  | 2.89  |  |  |
| -1.05 | 0.68  | 1.74  |  |  |
| -1.06 | -0.01 | 1.06  |  |  |
| -1.06 | 0.95  | 2.02  |  |  |
| -1.1  | -1.13 | -0.01 |  |  |
| -1.1  | 4.16  | 5.29  |  |  |
| -1.15 | 2.58  | 3.76  |  |  |
| -1.27 | -1.3  | 0.02  |  |  |
| -1.32 | -3.59 | -2.21 |  |  |
| -1.34 | -4.24 | -2.84 |  |  |
| -1.7  | -2.51 | -0.75 |  |  |
| 1.04  | -3.46 | -2.44 |  |  |
| 1.02  | -2.67 | -1.62 |  |  |
| 1.01  | 1.21  | 2.27  |  |  |
| -1.06 | -4.05 | -2.89 |  |  |
| -1.11 | 2.16  | 3.4   |  |  |
| -1.5  | -1.14 | 0.53  |  |  |
| -1.98 | -2.41 | -0.35 |  |  |
| -2.45 | -5.19 | -4.17 |  |  |
| -3.09 | -4.99 | -3.64 |  |  |
| 1.09  | 1.37  | 2.39  |  |  |
| 1.07  | -2.2  | -1.16 |  |  |
| -1.64 | -3.2  | -2.17 |  |  |
| -2.19 | -5.14 | -3.71 |  |  |
| 1.53  | -2.73 | -1.71 |  |  |
| 1.52  | -0.7  | 0.32  |  |  |
| 1.26  | 0.28  | 1.57  |  |  |
| 1.19  | 0.55  | 1.93  |  |  |
| 1.5   | 1.18  | 2.2   |  |  |
| 1.44  | -3.17 | -2.08 |  |  |
| 1.43  | 0.22  | 1.31  |  |  |
| 1.35  | -0.47 | 0.71  |  |  |
| 1.34  | -3.16 | -1.97 |  |  |
| 1.32  | -2.38 | -1.18 |  |  |
| 1.31  | -1.54 | -0.33 |  |  |
| 1.3   | -5.03 | -3.8  |  |  |
| 1.28  | -0.07 | 1.18  |  |  |
| 1.26  | -3.96 | -2.69 |  |  |
| 1.25  | -1.19 | 0.09  |  |  |
| 1.24  | -5.42 | -4.13 |  |  |
| 1.23  | -1.67 | -0.36 |  |  |
| 1.23  | -2.44 | -1.13 |  |  |
| 1.21  | -1.04 | 0.29  |  |  |

|       |       |       |  |  |
|-------|-------|-------|--|--|
| 1.19  | -0.71 | 0.65  |  |  |
| 1.14  | -5.06 | -3.64 |  |  |
| 1.03  | -3.63 | -2.07 |  |  |
| 1.02  | -5.18 | -3.61 |  |  |
| -1.07 | -1.53 | 0.17  |  |  |
| -1.08 | -2.85 | -1.14 |  |  |
| -1.14 | 0.67  | 2.47  |  |  |
| -1.15 | -2.07 | -0.25 |  |  |
| -1.19 | -4.84 | -2.98 |  |  |
| -1.34 | -3.45 | -1.42 |  |  |
| -1.5  | -2.96 | -0.77 |  |  |
| -1.87 | 1.8   | 2.82  |  |  |
| -2.02 | 2.35  | 3.48  |  |  |
| -2.11 | 0.68  | 1.87  |  |  |
| -2.15 | 0.53  | 1.75  |  |  |
| -2.62 | -1.5  | 0.01  |  |  |
| -2.75 | -1.39 | 0.19  |  |  |
| -2.78 | -1.37 | 0.22  |  |  |
| 1.19  | -1.17 | -0.16 |  |  |
| 1.12  | -0.79 | 0.32  |  |  |
| 1.09  | -5.64 | -4.5  |  |  |
| 1.05  | -0.92 | 0.27  |  |  |
| 1.03  | -0.95 | 0.28  |  |  |
| 1.02  | -4.1  | -2.86 |  |  |
| -1.03 | -4.46 | -3.16 |  |  |
| -1.06 | -5.53 | -4.18 |  |  |
| -1.07 | -1.31 | 0.05  |  |  |
| -1.12 | -5.51 | -4.08 |  |  |
| -1.13 | -5.48 | -4.04 |  |  |
| -1.27 | -2.71 | -1.11 |  |  |
| -1.37 | -0.99 | 0.72  |  |  |
| -1.8  | -5.71 | -3.6  |  |  |
| -1.83 | -6.04 | -3.91 |  |  |
| -1.72 | 0.38  | 1.39  |  |  |
| -1.74 | -1.56 | -0.52 |  |  |
| -1.8  | -2.74 | -1.66 |  |  |
| -1.85 | -0.1  | 1.02  |  |  |
| -2.4  | -0.21 | 1.29  |  |  |
| -2.82 | -0.75 | 0.98  |  |  |
| 1.47  | -0.53 | 0.49  |  |  |
| 1.33  | -2.47 | -1.3  |  |  |
| 1.31  | -2.08 | -0.89 |  |  |
| 1.26  | -3.45 | -2.21 |  |  |
| 1.21  | -2.06 | -0.77 |  |  |
| 1.21  | -3.4  | -2.1  |  |  |
| 1.15  | -2.34 | -0.96 |  |  |
| -2.43 | 1.73  | 2.75  |  |  |
| -2.43 | -2.77 | -1.75 |  |  |
| -2.6  | -0.47 | 0.65  |  |  |
| -2.63 | -0.94 | 0.19  |  |  |
| -3.04 | -0.4  | 0.95  |  |  |
| -3.39 | -3.31 | -1.8  |  |  |
| -3.84 | -4.2  | -2.51 |  |  |
| -1.56 | -2.14 | -1.11 |  |  |
| -3.13 | -2.84 | -0.81 |  |  |
| -1.7  | -1.57 | -0.55 |  |  |
| -2.37 | 1.78  | 3.27  |  |  |
| -1.04 | 0.62  | 1.64  |  |  |

|       |       |       |  |  |
|-------|-------|-------|--|--|
| -1.12 | -2.35 | -1.23 |  |  |
| 1.3   | -4.91 | -3.89 |  |  |
| 1.24  | 0.68  | 1.77  |  |  |
| -1.16 | -3.26 | -1.65 |  |  |
| -1.86 | -0.32 | 0.7   |  |  |
| -2.52 | -0.39 | 1.07  |  |  |
| 1.36  | -1.13 | -0.11 |  |  |
| 1.33  | 0.43  | 1.49  |  |  |
| 1.29  | -1.71 | -0.6  |  |  |
| 1.28  | -0.83 | 0.29  |  |  |
| 1.27  | -1.4  | -0.27 |  |  |
| 1.04  | 1.28  | 2.69  |  |  |
| -1.1  | -2.92 | -1.31 |  |  |
| -1.43 | -4.44 | -2.45 |  |  |
| -2.55 | -3.96 | -2.94 |  |  |
| -2.73 | -0.61 | 0.52  |  |  |
| -3.15 | -3.16 | -1.82 |  |  |
| -1.54 | -2.82 | -1.8  |  |  |
| -2.34 | -1.08 | 0.55  |  |  |
| -1.22 | -0.07 | 0.96  |  |  |
| -1.41 | -0.27 | 0.95  |  |  |
| -1.43 | -0.94 | 0.31  |  |  |
| 1.16  | 3.49  | 4.51  |  |  |
| -1.02 | -3.23 | -1.96 |  |  |
| -1.23 | -2.57 | -1.03 |  |  |
| 1.02  | -3.15 | -2.13 |  |  |
| -1.42 | -6.34 | -4.77 |  |  |
| -1.51 | -3.81 | -2.16 |  |  |
| -1.76 | -4.25 | -3.23 |  |  |
| -1.77 | -4.21 | -3.18 |  |  |
| -1.84 | -1.35 | -0.26 |  |  |
| -2.18 | -2.15 | -0.82 |  |  |
| -2.36 | -2.79 | -1.34 |  |  |
| -1.17 | -2.2  | -1.18 |  |  |
| -1.44 | -1.85 | -0.53 |  |  |
| -1.28 | -0.96 | 0.06  |  |  |
| -1.3  | -2.25 | -1.2  |  |  |
| -1.45 | -1.96 | -0.76 |  |  |
| -1.8  | -1.41 | 0.11  |  |  |
| 1.17  | -1.76 | -0.74 |  |  |
| 1.08  | -4.26 | -3.12 |  |  |
| -1.22 | 4.01  | 5.55  |  |  |
| -2.91 | -4.66 | -3.64 |  |  |
| -3.13 | -4.34 | -3.21 |  |  |
| 1.28  | 1.43  | 2.45  |  |  |
| 1.24  | 0.92  | 1.99  |  |  |
| 1.21  | 0.24  | 1.34  |  |  |
| 1.18  | -1.1  | 0.05  |  |  |
| 1.14  | 0.61  | 1.8   |  |  |
| 1.12  | -0.95 | 0.27  |  |  |
| -1.02 | 1.13  | 2.53  |  |  |
| -1.13 | -3.57 | -2.01 |  |  |
| -1.78 | -2.32 | -1.3  |  |  |
| -1.81 | -2.62 | -1.57 |  |  |
| 1.54  | -2.69 | -1.67 |  |  |
| 1.47  | -2.64 | -1.54 |  |  |
| 1.46  | -2.34 | -1.23 |  |  |
| 1.29  | -7.29 | -6.01 |  |  |

|       |       |       |  |  |
|-------|-------|-------|--|--|
| 1.09  | -3.16 | -1.63 |  |  |
| 1.07  | 1.99  | 3.54  |  |  |
| 1.05  | -3.55 | -1.98 |  |  |
| -1.05 | -3.49 | -1.77 |  |  |
| -1.07 | -1.28 | 0.47  |  |  |
| -2.61 | 0.29  | 1.32  |  |  |
| -4.1  | -3.55 | -1.87 |  |  |
| -5.35 | -3.17 | -1.1  |  |  |
| -2.45 | -0.42 | 0.6   |  |  |
| -2.46 | 1.38  | 2.41  |  |  |
| -3.13 | -0.4  | 0.97  |  |  |
| -4.03 | -1.11 | 0.63  |  |  |
| -1.5  | -1.29 | -0.25 |  |  |
| -1.83 | -0.7  | 0.62  |  |  |
| -2.27 | -1.36 | -0.33 |  |  |
| -2.38 | -1.57 | -0.47 |  |  |
| -4.19 | -3.36 | -1.45 |  |  |
| -1.3  | -0.3  | 0.73  |  |  |
| -1.37 | -0.19 | 0.92  |  |  |
| -1.4  | 1.45  | 2.59  |  |  |
| -1.45 | -0.08 | 1.11  |  |  |
| -2.24 | 1.43  | 3.25  |  |  |
| -1.01 | -0.66 | 0.37  |  |  |
| -1.06 | 0.03  | 1.12  |  |  |
| -1.23 | 5.08  | 6.39  |  |  |
| -1.55 | -4.31 | -3.28 |  |  |
| -1.99 | -4.02 | -2.63 |  |  |
| -2.01 | -4.62 | -3.22 |  |  |
| -2.18 | -2.29 | -1.26 |  |  |
| -2.26 | -3.33 | -2.25 |  |  |
| -2.38 | -2.13 | -0.97 |  |  |
| -1.27 | -3.49 | -2.46 |  |  |
| -1.31 | -2.89 | -1.81 |  |  |
| -1.37 | -0.48 | 0.66  |  |  |
| -1.46 | -0.76 | 0.47  |  |  |
| -1.48 | -3.44 | -2.19 |  |  |
| -2.14 | -1.6  | -0.57 |  |  |
| -2.52 | -4.38 | -3.12 |  |  |
| -2.08 | -1.16 | -0.14 |  |  |
| -2.12 | -3.25 | -2.19 |  |  |
| -2.34 | -1.96 | -0.77 |  |  |
| -2.62 | -0.91 | 0.45  |  |  |
| -3.31 | -3.45 | -1.76 |  |  |
| -3.24 | -6.65 | -5.61 |  |  |
| -3.54 | -5.93 | -4.77 |  |  |
| -3.95 | 0.69  | 1.72  |  |  |
| -4.21 | -0.21 | 0.9   |  |  |
| -4.53 | 0.73  | 1.96  |  |  |
| -8.85 | -3.87 | -1.67 |  |  |
| -1.04 | -5.26 | -4.24 |  |  |
| -1.1  | -3.23 | -2.13 |  |  |
| -1.1  | 2.95  | 4.06  |  |  |
| -1.57 | -2.81 | -1.19 |  |  |
| 1.06  | -2.8  | -1.78 |  |  |
| 1.05  | -3.95 | -2.9  |  |  |
| -1.09 | -0.8  | 0.44  |  |  |
| -1.18 | -3.83 | -2.47 |  |  |
| 1.65  | 0.67  | 1.7   |  |  |

|       |       |       |  |  |
|-------|-------|-------|--|--|
| 1.61  | -0.58 | 0.48  |  |  |
| 1.58  | 4.94  | 6.03  |  |  |
| 1.55  | -1.17 | -0.06 |  |  |
| 1.52  | -1.05 | 0.1   |  |  |
| 1.46  | 2.14  | 3.34  |  |  |
| 1.41  | -1.12 | 0.14  |  |  |
| 1.41  | -0.44 | 0.82  |  |  |
| 1.36  | 0.09  | 1.4   |  |  |
| 1.14  | -3.04 | -1.49 |  |  |
| 1.13  | 1.01  | 2.59  |  |  |
| 1.12  | 0.4   | 1.99  |  |  |
| -1.04 | -0.5  | 1.32  |  |  |
| -1.16 | -3.5  | -1.54 |  |  |
| -1.74 | -1.89 | -0.87 |  |  |
| -1.85 | -1.69 | -0.58 |  |  |
| 1.03  | -0.99 | 0.04  |  |  |
| -1.01 | 0.47  | 1.56  |  |  |
| -1.02 | -0.5  | 0.6   |  |  |
| -1.04 | -2.46 | -1.33 |  |  |
| -1.05 | -1.31 | -0.17 |  |  |
| -1.19 | -1.57 | -0.25 |  |  |
| -1.22 | -0.48 | 0.88  |  |  |
| -1.29 | -3.16 | -1.73 |  |  |
| -1.22 | -4.5  | -3.47 |  |  |
| -1.44 | -3.67 | -2.39 |  |  |
| -2.12 | -2.21 | -1.18 |  |  |
| -2.19 | -0.16 | 0.92  |  |  |
| -2.25 | -1.48 | -0.36 |  |  |
| -2.3  | 0.68  | 1.83  |  |  |
| -2.46 | -0.7  | 0.54  |  |  |
| -2.78 | -0.23 | 1.19  |  |  |
| -3.1  | -1.75 | -0.18 |  |  |
| -4.28 | -0.61 | 1.43  |  |  |
| -1.5  | -2.23 | -1.2  |  |  |
| -1.64 | -1.5  | -0.34 |  |  |
| -1.86 | 1.9   | 3.24  |  |  |
| -1.88 | -0.88 | 0.48  |  |  |
| -1.01 | -2.13 | -1.1  |  |  |
| -1.02 | 5.75  | 6.8   |  |  |
| -1.05 | -2.67 | -1.58 |  |  |
| -1.12 | -2.56 | -1.38 |  |  |
| -1.5  | -2.17 | -0.57 |  |  |
| -2.3  | -1.55 | 0.67  |  |  |
| -1.1  | -2.47 | -1.43 |  |  |
| -1.16 | 1.2   | 2.31  |  |  |
| -1.71 | 0.95  | 1.98  |  |  |
| -1.77 | -0.19 | 0.88  |  |  |
| -1.89 | 0.27  | 1.44  |  |  |
| -2.07 | 0.17  | 1.47  |  |  |
| -2.21 | -0.38 | 1.02  |  |  |
| 1.02  | -1.89 | -0.86 |  |  |
| -1.01 | 0.95  | 2.01  |  |  |
| -1.02 | 1.33  | 2.41  |  |  |
| -1.04 | -2.28 | -1.17 |  |  |
| -1.11 | -3.31 | -2.11 |  |  |
| -1.12 | -3.32 | -2.11 |  |  |
| -2.45 | -1.54 | -0.51 |  |  |
| -4.76 | -2.59 | -0.6  |  |  |

|       |       |       |  |  |
|-------|-------|-------|--|--|
| 1.08  | -0.1  | 0.93  |  |  |
| -1.28 | -3.83 | -2.35 |  |  |
| -1.52 | -2.62 | -0.89 |  |  |
| -1.97 | -1.66 | -0.63 |  |  |
| -2.06 | -1.18 | -0.08 |  |  |
| -2.41 | -2.59 | -1.27 |  |  |
| -2.7  | 1.04  | 2.53  |  |  |
| -2.82 | -2.44 | -0.89 |  |  |
| -3.82 | 0.06  | 2.04  |  |  |
| -5.33 | -2.73 | -0.27 |  |  |
| -2.04 | -2.48 | -1.45 |  |  |
| -2.3  | -0.45 | 0.75  |  |  |
| -2.45 | -3.57 | -2.27 |  |  |
| -1.07 | 7.41  | 8.44  |  |  |
| -1.07 | -0.89 | 0.14  |  |  |
| -1.08 | 2.28  | 3.32  |  |  |
| -1.1  | 5.77  | 6.84  |  |  |
| -1.11 | 4.38  | 5.46  |  |  |
| -1.15 | 1.53  | 2.65  |  |  |
| -1.16 | 1.73  | 2.87  |  |  |
| -1.26 | 5.9   | 7.17  |  |  |
| -1.27 | 2.54  | 3.82  |  |  |
| -1.14 | -4.88 | -3.85 |  |  |
| -1.22 | -1.35 | -0.22 |  |  |
| -1.41 | -3.09 | -1.75 |  |  |
| 1.55  | -3.19 | -2.16 |  |  |
| 1.07  | 0.08  | 1.64  |  |  |
| 1.07  | -0.08 | 1.49  |  |  |
| -2.82 | -1.3  | -0.26 |  |  |
| -2.97 | -2.68 | -1.57 |  |  |
| -3.52 | -2.52 | -1.17 |  |  |
| -2.65 | -2.58 | -1.55 |  |  |
| -2.88 | -3.17 | -2.03 |  |  |
| -1.9  | -5.77 | -4.74 |  |  |
| -2.66 | -3.82 | -2.31 |  |  |
| -3.28 | -3.06 | -1.24 |  |  |
| -2.68 | -1.06 | -0.03 |  |  |
| -2.96 | -2.02 | -0.86 |  |  |
| -3.11 | -2.52 | -1.28 |  |  |
| -3.79 | -4.33 | -2.8  |  |  |
| -1.2  | -2.29 | -1.26 |  |  |
| -1.23 | -4.18 | -3.12 |  |  |
| -1.75 | -4.11 | -2.54 |  |  |
| -2.12 | 0.84  | 1.86  |  |  |
| -2.12 | -3.47 | -2.44 |  |  |
| -2.2  | -1.33 | -0.25 |  |  |
| -2.23 | -1.11 | -0.02 |  |  |
| -2.5  | -2.41 | -1.15 |  |  |
| -2.66 | -2.78 | -1.42 |  |  |
| -2.91 | -1.88 | -0.4  |  |  |
| -1.7  | -4.47 | -3.43 |  |  |
| -1.91 | -6.45 | -5.25 |  |  |
| 1.96  | -2.47 | -1.44 |  |  |
| 1.88  | 0.98  | 2.07  |  |  |
| 1.76  | -0.95 | 0.23  |  |  |
| 1.71  | 0.47  | 1.7   |  |  |
| 1.27  | 2.7   | 4.36  |  |  |
| 1.24  | 3.77  | 5.46  |  |  |

|       |       |       |  |  |
|-------|-------|-------|--|--|
| 1.13  | 1.15  | 2.98  |  |  |
| 1.05  | -0.39 | 1.54  |  |  |
| -1.11 | -1.35 | 0.8   |  |  |
| -1.17 | -0.68 | 1.54  |  |  |
| -1.24 | 5.22  | 7.54  |  |  |
| 1.25  | -6.75 | -5.71 |  |  |
| 1.08  | -2.34 | -1.09 |  |  |
| -1.04 | -1.38 | 0.04  |  |  |
| -1.15 | -2.91 | -1.35 |  |  |
| -1.57 | -1.74 | 0.28  |  |  |
| -1.58 | -2.74 | -0.71 |  |  |
| -1.64 | -1.94 | 0.14  |  |  |
| -1.68 | -2.55 | -0.44 |  |  |
| -1.69 | -2.1  | 0.02  |  |  |
| -2.03 | -2.27 | 0.11  |  |  |
| -2.24 | -2.85 | -0.32 |  |  |
| -2.3  | -3.23 | -0.67 |  |  |
| -1.76 | -3.81 | -2.77 |  |  |
| -2.19 | -4.67 | -3.32 |  |  |
| -3.47 | -4.08 | -2.07 |  |  |
| -1.97 | -3.52 | -2.49 |  |  |
| -2.18 | -4.2  | -3.02 |  |  |
| -4.65 | -4.87 | -2.59 |  |  |
| 1.19  | -0.31 | 0.72  |  |  |
| 1.08  | -1.06 | 0.12  |  |  |
| 1.07  | -0.29 | 0.9   |  |  |
| 1.02  | -7.21 | -5.96 |  |  |
| -1.13 | -8.68 | -7.22 |  |  |
| -1.16 | -0.38 | 1.13  |  |  |
| -1.18 | -2.36 | -0.83 |  |  |
| -1.2  | -3.09 | -1.53 |  |  |
| -1.32 | -7.78 | -6.09 |  |  |
| -1.38 | 0.01  | 1.05  |  |  |
| -1.43 | -3.47 | -2.38 |  |  |
| -1.48 | -3.68 | -2.54 |  |  |
| -1.61 | -1.86 | -0.59 |  |  |
| -1.64 | 4.75  | 5.79  |  |  |
| -1.67 | 2.78  | 3.84  |  |  |
| -1.99 | 1.32  | 2.64  |  |  |
| -1.5  | -0.66 | 0.37  |  |  |
| -1.52 | -0.26 | 0.8   |  |  |
| -1.67 | -1.49 | -0.31 |  |  |
| -1.79 | -3.36 | -2.07 |  |  |
| -2.12 | 0.56  | 2.09  |  |  |
| -2.43 | -2.39 | -0.67 |  |  |
| -2.19 | -2.48 | -1.44 |  |  |
| -3.52 | -2.73 | -1.01 |  |  |
| -1.05 | -3.08 | -2.05 |  |  |
| -1.09 | -1.97 | -0.89 |  |  |
| -1.11 | -0.78 | 0.33  |  |  |
| -1.19 | -0.64 | 0.57  |  |  |
| -2.15 | -2.97 | -1.93 |  |  |
| -4    | -3.4  | -1.46 |  |  |
| -1.1  | 1.66  | 2.7   |  |  |
| -1.16 | 0.93  | 2.04  |  |  |
| -1.22 | -0.09 | 1.09  |  |  |
| -1.86 | 2.09  | 3.13  |  |  |
| -1.87 | -2.64 | -1.6  |  |  |

|       |       |       |  |  |
|-------|-------|-------|--|--|
| -2.38 | -3.71 | -2.67 |  |  |
| -2.38 | -3.85 | -2.81 |  |  |
| -2.46 | -3.8  | -2.71 |  |  |
| -2.45 | -4.02 | -2.93 |  |  |
| -1.23 | -1    | 0.04  |  |  |
| -1.24 | -1.39 | -0.35 |  |  |
| -1.27 | -1.41 | -0.33 |  |  |
| -1.31 | 2.84  | 3.97  |  |  |
| -1.32 | -1.54 | -0.4  |  |  |
| -1.52 | -2.08 | -0.73 |  |  |
| -1.56 | 0.48  | 1.86  |  |  |
| -1.74 | 3.09  | 4.63  |  |  |
| -1.83 | -0.58 | 1.03  |  |  |
| -2.44 | -4.78 | -3.74 |  |  |
| -4.3  | -3.72 | -1.86 |  |  |
| -1.64 | 1.2   | 2.23  |  |  |
| -1.65 | -2.45 | -1.41 |  |  |
| -1.78 | 0.7   | 1.85  |  |  |
| -2.12 | -2.55 | -1.14 |  |  |
| -2.22 | -1.32 | 0.15  |  |  |
| -1.56 | -2.07 | -1.04 |  |  |
| -1.84 | -2.62 | -1.34 |  |  |
| -2.54 | -3.09 | -1.35 |  |  |
| -3.03 | -3.48 | -1.48 |  |  |
| -3.71 | -2.92 | -0.64 |  |  |
| -1.41 | 1.66  | 2.69  |  |  |
| -1.42 | 1.4   | 2.44  |  |  |
| -2    | -3.44 | -2.41 |  |  |
| -2.39 | -7.04 | -5.74 |  |  |
| -2.83 | -6.56 | -5.02 |  |  |
| -2.96 | -4.25 | -2.65 |  |  |
| 1.22  | -0.88 | 0.16  |  |  |
| 1.2   | -2.12 | -1.05 |  |  |
| 1.17  | 0.67  | 1.77  |  |  |
| -1.08 | -3.14 | -1.69 |  |  |
| 1.59  | 0.93  | 1.97  |  |  |
| 1.42  | -0.88 | 0.32  |  |  |
| 1.22  | -5.8  | -4.37 |  |  |
| -2.5  | -2.67 | -1.64 |  |  |
| -2.53 | -3.22 | -2.17 |  |  |
| -3.02 | -3.77 | -2.46 |  |  |
| -1.14 | 0.57  | 1.6   |  |  |
| -1.19 | 1.87  | 2.97  |  |  |
| -1.75 | 0.97  | 2.63  |  |  |
| -1.93 | -1.39 | -0.35 |  |  |
| -2.81 | -4.4  | -2.81 |  |  |
| -2.23 | -1.45 | -0.41 |  |  |
| -3.95 | -2.29 | -0.43 |  |  |
| -2.11 | -2.81 | -1.77 |  |  |
| -3.39 | -2.01 | -0.29 |  |  |
| 1.36  | 1.75  | 2.79  |  |  |
| 1.27  | -1.11 | 0.02  |  |  |
| 1.23  | 0.76  | 1.95  |  |  |
| 1.21  | -1.88 | -0.67 |  |  |
| 1.11  | -1.75 | -0.42 |  |  |
| 1.1   | -0.19 | 1.15  |  |  |
| -1.04 | 0.11  | 1.65  |  |  |
| -1.17 | 0.3   | 2     |  |  |



|       |       |       |  |  |
|-------|-------|-------|--|--|
| -1.23 | -2.7  | -0.92 |  |  |
| -1.43 | -0.86 | 1.14  |  |  |
| -2.48 | -2.37 | -1.34 |  |  |
| -2.52 | -2.55 | -1.49 |  |  |
| -4.23 | -1.56 | 0.25  |  |  |
| -1.32 | -0.15 | 0.88  |  |  |
| -1.42 | 0     | 1.15  |  |  |
| -1.49 | -3.14 | -1.93 |  |  |
| -1.52 | 0.31  | 1.55  |  |  |
| -1.54 | 0.22  | 1.48  |  |  |
| -1.6  | -0.45 | 0.86  |  |  |
| -1.69 | -2.01 | -0.62 |  |  |
| -1.73 | -3.3  | -1.87 |  |  |
| -1.75 | -2.41 | -0.96 |  |  |
| -1.79 | -2.49 | -1.01 |  |  |
| -1.94 | -1.84 | -0.25 |  |  |
| -1.42 | -3.69 | -2.65 |  |  |
| -1.46 | -3.08 | -2    |  |  |
| -1.46 | -4.36 | -3.28 |  |  |
| -1.47 | -1.5  | -0.42 |  |  |
| -1.49 | -1.52 | -0.42 |  |  |
| -2.2  | -2.94 | -1.28 |  |  |
| -2.23 | -2.11 | -0.42 |  |  |
| -2.5  | -3.31 | -1.46 |  |  |
| -2.68 | -4.14 | -2.19 |  |  |
| -1.22 | -5.2  | -4.16 |  |  |
| -1.25 | -5.23 | -4.17 |  |  |
| -1.25 | -6.75 | -5.68 |  |  |
| -1.27 | -2.65 | -1.56 |  |  |
| -1.7  | -4.91 | -3.4  |  |  |
| -3.53 | -1.08 | -0.05 |  |  |
| -4.45 | -3.37 | -2    |  |  |
| -3.53 | -1.08 | -0.05 |  |  |
| -4.45 | -3.37 | -2    |  |  |
| 2.27  | -4.88 | -3.83 |  |  |
| 2.25  | -1.37 | -0.31 |  |  |
| 1.73  | -6.26 | -4.83 |  |  |
| 1.52  | -1.85 | -0.23 |  |  |
| 1.3   | -6    | -4.16 |  |  |
| 1.23  | -2.43 | -0.51 |  |  |
| 1.19  | -5.78 | -3.81 |  |  |
| -1.19 | -2.61 | -0.14 |  |  |
| 2.9   | -3.62 | -2.58 |  |  |
| 2.77  | -2.03 | -0.92 |  |  |
| 1.54  | -7.15 | -5.2  |  |  |
| 1.46  | -1.85 | 0.18  |  |  |
| 1.42  | -2.58 | -0.5  |  |  |
| 1.18  | 0.37  | 2.71  |  |  |
| 1.02  | -3.46 | -0.91 |  |  |
| -1.14 | -7.7  | -4.94 |  |  |
| -3.57 | -0.75 | 0.29  |  |  |
| -4.64 | -0.66 | 0.77  |  |  |
| -8.53 | -2.13 | 0.17  |  |  |
| -2.3  | -2.32 | -1.27 |  |  |
| -2.52 | -0.29 | 0.89  |  |  |
| -3.05 | -3.19 | -1.74 |  |  |
| -4.7  | -2.39 | -0.31 |  |  |
| -5.43 | -2.86 | -0.57 |  |  |

|        |       |       |  |  |
|--------|-------|-------|--|--|
| -1.2   | -3.76 | -2.72 |  |  |
| -1.32  | -4.89 | -3.72 |  |  |
| -1.8   | -4.61 | -2.99 |  |  |
| -1.26  | 0.03  | 1.07  |  |  |
| -1.56  | -1.17 | 0.18  |  |  |
| -1.96  | -2.05 | -0.37 |  |  |
| -2.17  | -0.04 | 1.79  |  |  |
| -1.93  | 2.55  | 3.59  |  |  |
| -2.02  | 1.37  | 2.47  |  |  |
| -2.3   | 0.5   | 1.79  |  |  |
| -2.74  | 0.76  | 2.3   |  |  |
| -2.95  | 0.72  | 2.37  |  |  |
| 1.22   | -6.23 | -5.18 |  |  |
| 1.08   | -5.91 | -4.69 |  |  |
| 1.04   | -5.81 | -4.55 |  |  |
| -1.01  | -5.88 | -4.55 |  |  |
| -1.01  | -5.6  | -4.25 |  |  |
| -1.03  | -5.31 | -3.95 |  |  |
| -1.07  | -5.68 | -4.26 |  |  |
| -1.13  | -5.61 | -4.11 |  |  |
| -1.26  | -5.62 | -3.96 |  |  |
| -1.28  | -3.25 | -1.56 |  |  |
| -1.15  | -2.41 | -1.37 |  |  |
| -1.19  | -1.18 | -0.09 |  |  |
| -1.39  | -2.24 | -0.92 |  |  |
| -1.41  | 0.99  | 2.32  |  |  |
| -1.62  | -2.56 | -1.03 |  |  |
| -1.63  | -2.13 | -0.58 |  |  |
| -1.65  | -2.26 | -0.69 |  |  |
| -1.03  | 0.84  | 1.88  |  |  |
| -1.27  | 5.17  | 6.51  |  |  |
| -1.34  | 3.74  | 5.16  |  |  |
| -2.25  | -2.64 | -1.6  |  |  |
| -2.36  | -5.65 | -4.54 |  |  |
| -1.41  | -4.45 | -3.41 |  |  |
| -1.42  | -3.29 | -2.24 |  |  |
| -1.7   | -2.69 | -1.37 |  |  |
| -1.73  | -4.02 | -2.68 |  |  |
| -2.61  | -5.24 | -3.3  |  |  |
| -2.58  | -1.2  | -0.16 |  |  |
| -2.95  | -1.02 | 0.22  |  |  |
| -1.62  | -5.34 | -4.29 |  |  |
| -1.83  | -6.17 | -4.94 |  |  |
| -1.84  | -3.9  | -2.67 |  |  |
| -1.89  | -3.07 | -1.8  |  |  |
| -2.02  | -6.01 | -4.65 |  |  |
| -3.52  | 1.75  | 2.8   |  |  |
| -3.54  | -2.55 | -1.49 |  |  |
| -3.58  | 1.01  | 2.07  |  |  |
| -3.96  | 0.92  | 2.13  |  |  |
| -3.99  | -4.13 | -2.9  |  |  |
| -4.04  | -1.01 | 0.23  |  |  |
| -5.15  | -2.36 | -0.77 |  |  |
| -5.68  | -1.56 | 0.18  |  |  |
| -11.55 | -3.67 | -0.91 |  |  |
| -2     | -0.91 | 0.13  |  |  |
| -2.28  | -2.28 | -1.06 |  |  |
| -1.24  | 0.91  | 1.95  |  |  |

|       |       |       |  |  |
|-------|-------|-------|--|--|
| -1.25 | -0.05 | 1     |  |  |
| -1.3  | -1.73 | -0.63 |  |  |
| -1.31 | 2.05  | 3.17  |  |  |
| -1.36 | 0.81  | 1.99  |  |  |
| -1.98 | 0.45  | 2.18  |  |  |
| -4.81 | -2.49 | 0.51  |  |  |
| -1.47 | -2.6  | -1.56 |  |  |
| -1.56 | -3.07 | -1.94 |  |  |
| -1.65 | -5.02 | -3.81 |  |  |
| -2.25 | -1.85 | -0.8  |  |  |
| -2.81 | -0.71 | 0.65  |  |  |
| -4.24 | -3.19 | -1.23 |  |  |
| -1.51 | -1.78 | -0.74 |  |  |
| -1.55 | 0.73  | 1.82  |  |  |
| 1.03  | -0.03 | 1.01  |  |  |
| -1.05 | 7.54  | 8.69  |  |  |
| -1.05 | 1.86  | 3.01  |  |  |
| -1.13 | 1.98  | 3.24  |  |  |
| -1.23 | -2.26 | -0.88 |  |  |
| -1.21 | 3.8   | 4.84  |  |  |
| -1.24 | -1.18 | -0.1  |  |  |
| -1.29 | 2.65  | 3.77  |  |  |
| -1.33 | -0.56 | 0.62  |  |  |
| -1.69 | 0.43  | 1.96  |  |  |
| 1.38  | -5.11 | -4.07 |  |  |
| 1.34  | -3.1  | -2.02 |  |  |
| 1.25  | -5.33 | -4.14 |  |  |
| 1.15  | 3.61  | 4.65  |  |  |
| -1.11 | -3.37 | -1.97 |  |  |
| -1.14 | 0.19  | 1.62  |  |  |
| -1.56 | -3.64 | -1.75 |  |  |
| -1.49 | -4.35 | -3.31 |  |  |
| -1.95 | -5.34 | -3.91 |  |  |
| -2.02 | 0.78  | 1.83  |  |  |
| -2.33 | 0.16  | 1.42  |  |  |
| -2.35 | 2.26  | 3.53  |  |  |
| -2.81 | 2.01  | 3.54  |  |  |
| -3.91 | 0.22  | 2.22  |  |  |
| -1.85 | -3.86 | -2.82 |  |  |
| -1.96 | -0.96 | 0.16  |  |  |
| -2.07 | -0.1  | 1.1   |  |  |
| -2.32 | -3.52 | -2.15 |  |  |
| -2.9  | -3.53 | -1.84 |  |  |
| -1.53 | -1.49 | -0.45 |  |  |
| -1.53 | -1.42 | -0.38 |  |  |
| -1.55 | -0.57 | 0.49  |  |  |
| 1.02  | 0.46  | 1.5   |  |  |
| -1.05 | -2.16 | -1.01 |  |  |
| -1.06 | 5.05  | 6.21  |  |  |
| -1.68 | -3.97 | -2.92 |  |  |
| -1.84 | -2.57 | -1.4  |  |  |
| -1.89 | -2.69 | -1.49 |  |  |
| -2.32 | 3.9   | 4.95  |  |  |
| -2.45 | -2.37 | -1.24 |  |  |
| -2.83 | -2.14 | -0.81 |  |  |
| -1    | -1.32 | -0.27 |  |  |
| -1.01 | -0.01 | 1.04  |  |  |
| -1.04 | -2.11 | -1.01 |  |  |

|       |       |       |  |  |
|-------|-------|-------|--|--|
| -1.05 | -1.34 | -0.23 |  |  |
| -1.18 | -2.26 | -0.97 |  |  |
| -1.3  | -3.15 | -1.73 |  |  |
| -1.33 | -4.68 | -3.22 |  |  |
| -1.51 | 4.04  | 5.68  |  |  |
| 1.48  | -5.78 | -4.73 |  |  |
| 1.47  | -7.4  | -6.35 |  |  |
| 1.39  | -4.98 | -3.84 |  |  |
| 1.25  | -3.71 | -2.42 |  |  |
| 1.19  | -7.27 | -5.9  |  |  |
| 1.1   | -6.68 | -5.2  |  |  |
| 1.06  | -4.35 | -2.83 |  |  |
| -1.01 | -5.4  | -3.78 |  |  |
| -1.23 | -8.2  | -6.29 |  |  |
| -1.39 | -7.05 | -4.97 |  |  |
| -1.15 | -5.32 | -4.27 |  |  |
| -1.18 | -3.24 | -2.15 |  |  |
| -1.19 | -5.17 | -4.06 |  |  |
| -1.2  | -1.77 | -0.66 |  |  |
| -1.21 | -4.46 | -3.33 |  |  |
| -1.46 | -3.59 | -2.19 |  |  |
| -1.71 | -5.3  | -3.67 |  |  |
| -1.96 | -4.44 | -2.62 |  |  |
| -2.72 | -5.38 | -3.08 |  |  |
| 1.03  | -3.97 | -2.92 |  |  |
| 1.02  | -4.39 | -3.32 |  |  |
| -1.04 | -5.17 | -4.02 |  |  |
| -1.06 | -4.04 | -2.86 |  |  |
| -1.14 | -2.58 | -1.29 |  |  |
| -1.17 | -4.17 | -2.84 |  |  |
| -1.2  | -5.5  | -4.13 |  |  |
| -1.92 | -4.98 | -2.94 |  |  |
| -2.19 | -3.24 | -2.19 |  |  |
| -2.5  | -1.75 | -0.52 |  |  |
| -1.15 | 0.76  | 1.81  |  |  |
| -1.17 | 2.53  | 3.6   |  |  |
| -1.19 | -2.7  | -1.61 |  |  |
| -1.21 | -1.43 | -0.32 |  |  |
| -2.02 | -1.91 | -0.05 |  |  |
| -3.42 | -0.49 | 0.56  |  |  |
| -3.9  | 2.05  | 3.29  |  |  |
| -2.45 | -5.07 | -4.02 |  |  |
| -3.55 | -4    | -2.41 |  |  |
| -4.53 | -5.43 | -3.49 |  |  |
| -4.8  | -3.72 | -1.7  |  |  |
| -5.08 | -5.33 | -3.23 |  |  |
| -1.05 | -4.11 | -3.06 |  |  |
| -1.28 | 4.79  | 6.13  |  |  |
| 1.21  | 1.31  | 2.36  |  |  |
| -1.12 | -1.08 | 0.41  |  |  |
| -1.53 | -0.48 | 0.57  |  |  |
| -2.41 | 0.66  | 2.37  |  |  |
| -1.19 | -3.4  | -2.34 |  |  |
| -1.31 | -1.44 | -0.25 |  |  |
| -1.46 | -5.26 | -3.91 |  |  |
| -1.61 | -5.07 | -3.58 |  |  |
| -1.51 | -5.91 | -4.86 |  |  |
| -1.52 | -2.6  | -1.55 |  |  |

|       |       |       |  |  |
|-------|-------|-------|--|--|
| -1.73 | -4.02 | -2.77 |  |  |
| -1.81 | -4.04 | -2.73 |  |  |
| -1.87 | -3.11 | -1.75 |  |  |
| -2.1  | -3.44 | -1.92 |  |  |
| 1.34  | -1.85 | -0.8  |  |  |
| 1.2   | 0.15  | 1.37  |  |  |
| 1.04  | -2.57 | -1.16 |  |  |
| 1.03  | -0.66 | 0.77  |  |  |
| 1.02  | 0.63  | 2.08  |  |  |
| -1.03 | -2.15 | -0.63 |  |  |
| -1.08 | -4.31 | -2.73 |  |  |
| -1.15 | 2.13  | 3.8   |  |  |
| -1.15 | -2.64 | -0.96 |  |  |
| -1.17 | -3.4  | -1.69 |  |  |
| -1.23 | -4.1  | -2.33 |  |  |
| -1.34 | -2.26 | -0.36 |  |  |
| -1.38 | -5.43 | -3.49 |  |  |
| -1.44 | -0.91 | 1.08  |  |  |
| -1.44 | -3.64 | -1.64 |  |  |
| -1.51 | -4.5  | -2.43 |  |  |
| -1.99 | -5.44 | -2.97 |  |  |
| 1.04  | -1.57 | -0.52 |  |  |
| -1.14 | 3.87  | 5.17  |  |  |
| -1.16 | -1    | 0.32  |  |  |
| -1.58 | 2.97  | 4.74  |  |  |
| -2.74 | -4.94 | -3.89 |  |  |
| -3.26 | -5.92 | -4.62 |  |  |
| -4.35 | -2.71 | -0.99 |  |  |
| -1.7  | -4.91 | -3.86 |  |  |
| -2.17 | -3.86 | -2.47 |  |  |
| -2.32 | -5.56 | -4.06 |  |  |
| -1.5  | -2.58 | -1.53 |  |  |
| -1.5  | 1.52  | 2.57  |  |  |
| -2.19 | -1.64 | -0.04 |  |  |
| -1.52 | 0.69  | 1.74  |  |  |
| -1.53 | -0.63 | 0.43  |  |  |
| -1.95 | -1.54 | -0.13 |  |  |
| -2.03 | -0.71 | 0.77  |  |  |
| 1.42  | 1.1   | 2.16  |  |  |
| 1.19  | -3.67 | -2.36 |  |  |
| -1.12 | -2.08 | -0.35 |  |  |
| -1.79 | -2.36 | -1.31 |  |  |
| -1.95 | -5    | -3.83 |  |  |
| -2.58 | -2.9  | -1.33 |  |  |
| 1.07  | -0.22 | 0.83  |  |  |
| 1.01  | 1.32  | 2.47  |  |  |
| -1.04 | 0.49  | 1.7   |  |  |
| -1.1  | -1.44 | -0.15 |  |  |
| -1.36 | -4.91 | -3.31 |  |  |
| 1.11  | 2.74  | 3.79  |  |  |
| -1.24 | -2.93 | -1.41 |  |  |
| -1.06 | 0.47  | 1.52  |  |  |
| -1.16 | -4.96 | -3.79 |  |  |
| -1.41 | -4.23 | -2.77 |  |  |
| 2.11  | -1.38 | -0.34 |  |  |
| 1.89  | 0.27  | 1.48  |  |  |
| 1.77  | 0.22  | 1.53  |  |  |
| 1.72  | -1.83 | -0.48 |  |  |

|       |       |       |  |  |
|-------|-------|-------|--|--|
| 1.72  | -1.52 | -0.18 |  |  |
| 1.66  | -0.18 | 1.21  |  |  |
| 1.4   | 0.48  | 2.12  |  |  |
| 1.38  | -0.48 | 1.18  |  |  |
| 1.33  | -0.53 | 1.19  |  |  |
| 1.32  | -0.8  | 0.92  |  |  |
| 1.18  | -3.13 | -1.24 |  |  |
| 1.18  | -2.21 | -0.32 |  |  |
| 1.11  | -3.09 | -1.11 |  |  |
| -1.09 | -0.6  | 1.65  |  |  |
| -1.15 | -2.05 | 0.28  |  |  |
| -1.82 | 4.2   | 7.19  |  |  |
| -2.3  | -3.29 | 0.04  |  |  |
| -1.05 | 0.32  | 1.37  |  |  |
| -1.12 | -5.57 | -4.43 |  |  |
| -1.13 | -5.13 | -3.97 |  |  |
| -1.14 | 1.61  | 2.78  |  |  |
| -1.27 | -4.79 | -3.46 |  |  |
| -1.32 | -4.93 | -3.56 |  |  |
| -1.45 | -6.3  | -4.79 |  |  |
| -1.69 | -4.67 | -2.94 |  |  |
| -1.13 | -2.3  | -1.26 |  |  |
| -1.14 | -3.85 | -2.79 |  |  |
| -1.21 | 0.81  | 1.95  |  |  |
| -1.36 | -1.82 | -0.5  |  |  |
| -1.37 | -3.37 | -2.04 |  |  |
| -1.69 | -2.15 | -0.52 |  |  |
| 1.51  | 0.89  | 1.95  |  |  |
| 1.36  | 0.5   | 1.7   |  |  |
| 1.21  | 0.34  | 1.71  |  |  |
| -2.5  | -1.18 | -0.12 |  |  |
| -2.62 | -2.15 | -1.03 |  |  |
| -1.89 | -4.42 | -3.37 |  |  |
| -1.91 | -3.68 | -2.61 |  |  |
| -2.05 | -5.15 | -3.97 |  |  |
| -2.26 | -5.26 | -3.95 |  |  |
| -1.63 | 1.38  | 2.44  |  |  |
| -1.73 | -1.42 | -0.28 |  |  |
| -1.57 | -2.37 | -1.31 |  |  |
| -1.76 | -4.2  | -2.98 |  |  |
| -2.13 | -1.77 | -0.28 |  |  |
| -2.49 | -5.31 | -3.58 |  |  |
| 1.21  | -6.71 | -5.65 |  |  |
| 1.2   | -3.97 | -2.89 |  |  |
| 1.14  | -5.11 | -3.96 |  |  |
| 1.08  | -4.1  | -2.87 |  |  |
| 1.04  | -0.89 | 0.39  |  |  |
| -1.06 | -6.33 | -4.91 |  |  |
| -1.09 | -6.62 | -5.16 |  |  |
| -1.13 | 0.1   | 1.62  |  |  |
| -1.21 | -5.4  | -3.79 |  |  |
| -1.3  | -6    | -4.29 |  |  |
| -1.3  | -4.9  | -3.18 |  |  |
| -1.31 | -4.24 | -2.51 |  |  |
| -2.07 | -3.18 | -2.12 |  |  |
| -3.24 | -3.55 | -1.84 |  |  |
| 1.19  | -3.27 | -2.22 |  |  |
| 1.2   | -5.28 | -4.23 |  |  |

|       |       |       |  |  |
|-------|-------|-------|--|--|
| 1.19  | -2.83 | -1.78 |  |  |
| 1.13  | -0.85 | 0.28  |  |  |
| 1.01  | -1.41 | -0.11 |  |  |
| -1.06 | -2.7  | -1.31 |  |  |
| -1.22 | -2.35 | -0.74 |  |  |
| -1.49 | -0.76 | 0.29  |  |  |
| -1.54 | 0.24  | 1.35  |  |  |
| -1.64 | -0.95 | 0.25  |  |  |
| -2.49 | -2.27 | -1.22 |  |  |
| -2.51 | -2.73 | -1.66 |  |  |
| -3.22 | -4.24 | -3.19 |  |  |
| -3.23 | -4.24 | -3.18 |  |  |
| -3.43 | -2.49 | -1.35 |  |  |
| -5.23 | -3.04 | -1.28 |  |  |
| 1.4   | 1.48  | 2.54  |  |  |
| 1.4   | -0.01 | 1.05  |  |  |
| 1.34  | -1.75 | -0.63 |  |  |
| 1.25  | -0.65 | 0.56  |  |  |
| 1.24  | -0.17 | 1.06  |  |  |
| 1.05  | 0.18  | 1.65  |  |  |
| -1.03 | 1.58  | 3.16  |  |  |
| -1.04 | -3.91 | -2.31 |  |  |
| -1.11 | 1.36  | 3.05  |  |  |
| -1.18 | -1.52 | 0.26  |  |  |
| -1.73 | -1.19 | 1.14  |  |  |
| -3.05 | -3.91 | -0.76 |  |  |
| -1.19 | -2.54 | -1.48 |  |  |
| -1.21 | -4.39 | -3.31 |  |  |
| -1.23 | -3.74 | -2.63 |  |  |
| -1.23 | -4.87 | -3.76 |  |  |
| -1.54 | -5.19 | -3.76 |  |  |
| 1.18  | -5.12 | -4.06 |  |  |
| 1.15  | -2.53 | -1.44 |  |  |
| 1.05  | -3.56 | -2.35 |  |  |
| 1.05  | -1.22 | -0.01 |  |  |
| -1.05 | -4.09 | -2.72 |  |  |
| -1.18 | -0.42 | 1.1   |  |  |
| -1.28 | -3.56 | -1.92 |  |  |
| -1.33 | 0.41  | 1.47  |  |  |
| -1.92 | -4.71 | -3.12 |  |  |
| -1.48 | -0.55 | 0.51  |  |  |
| -1.6  | -1.71 | -0.54 |  |  |
| -1.95 | -3.07 | -2.02 |  |  |
| -2.03 | 0.47  | 1.58  |  |  |
| -2.28 | -2.6  | -1.32 |  |  |
| -3.11 | -2.13 | -0.4  |  |  |
| -1.18 | -0.04 | 1.01  |  |  |
| -1.21 | -3.45 | -2.35 |  |  |
| -1.23 | -3.09 | -1.97 |  |  |
| -1.25 | -1.85 | -0.7  |  |  |
| -1.3  | -2.66 | -1.46 |  |  |
| -1.32 | -0.08 | 1.14  |  |  |
| -1.43 | -4.78 | -3.44 |  |  |
| -1.44 | -1.23 | 0.12  |  |  |
| -1.54 | -0.12 | 1.33  |  |  |
| -1.59 | -1.29 | 0.2   |  |  |
| -1.66 | -3.64 | -2.08 |  |  |
| -1.81 | -3.17 | -2.11 |  |  |

|       |       |       |  |  |
|-------|-------|-------|--|--|
| -1.82 | -1.48 | -0.42 |  |  |
| -1.85 | -1.96 | -0.88 |  |  |
| 2     | -0.45 | 0.61  |  |  |
| 1.68  | -4.59 | -3.29 |  |  |
| 1.49  | -3.08 | -1.61 |  |  |
| 1.46  | 0.25  | 1.75  |  |  |
| 1.32  | -2.38 | -0.73 |  |  |
| 1.07  | -4.29 | -2.34 |  |  |
| 1.05  | -2.19 | -0.21 |  |  |
| -1.08 | -2.07 | 0.1   |  |  |
| -2.73 | 0.7   | 1.76  |  |  |
| -2.81 | -0.39 | 0.7   |  |  |
| -4.04 | -2.39 | -0.77 |  |  |
| -2.25 | -0.3  | 0.76  |  |  |
| -2.72 | -0.76 | 0.57  |  |  |
| -2.98 | -1.47 | 0     |  |  |
| -4.08 | -1.54 | 0.38  |  |  |
| -4.59 | -2.81 | -0.73 |  |  |
| -5.03 | -1.18 | 1.04  |  |  |
| -2.59 | 1.95  | 3.01  |  |  |
| -2.69 | 0.22  | 1.33  |  |  |
| -2.75 | -0.94 | 0.2   |  |  |
| -2.76 | -1.6  | -0.46 |  |  |
| -3.04 | -4.53 | -3.47 |  |  |
| -4.1  | -3.92 | -2.43 |  |  |
| -1.15 | 0.34  | 1.4   |  |  |
| -1.51 | 2.32  | 3.77  |  |  |
| -2.2  | -2.7  | -1.63 |  |  |
| -2.45 | -0.92 | 0.3   |  |  |
| -2.62 | -2.61 | -1.3  |  |  |
| -1.08 | -2.24 | -1.17 |  |  |
| -1.09 | -3.39 | -2.32 |  |  |
| -1.12 | 0.51  | 1.61  |  |  |
| -1.12 | 0.77  | 1.87  |  |  |
| -1.18 | -0.48 | 0.7   |  |  |
| -1.38 | -0.64 | 0.76  |  |  |
| -1.41 | -1.85 | -0.41 |  |  |
| -2.05 | -3.62 | -1.64 |  |  |
| -1.84 | -3.54 | -2.48 |  |  |
| -2.47 | -2.22 | -0.73 |  |  |
| -1.63 | -4.09 | -3.02 |  |  |
| -1.63 | -2.74 | -1.67 |  |  |
| -1.82 | -4.56 | -3.34 |  |  |
| -2.23 | -3.16 | -1.65 |  |  |
| -1.09 | -0.05 | 1.01  |  |  |
| -1.22 | -3.67 | -2.44 |  |  |
| -1.26 | -1    | 0.28  |  |  |
| -1.45 | -1.49 | -0.02 |  |  |
| -1.04 | 0.79  | 1.86  |  |  |
| -1.11 | -4.05 | -2.9  |  |  |
| -1.95 | -4.21 | -2.24 |  |  |
| -2.02 | 3.73  | 4.79  |  |  |
| -2.07 | -3.46 | -2.36 |  |  |
| -1.86 | -0.81 | 0.26  |  |  |
| -1.92 | -3.09 | -1.98 |  |  |
| -1.56 | 0.31  | 1.37  |  |  |
| -1.64 | 0.41  | 1.54  |  |  |
| -1.86 | -2    | -0.69 |  |  |



|       |       |       |  |  |
|-------|-------|-------|--|--|
| -1.96 | -4.25 | -3.18 |  |  |
| -2.73 | -2.78 | -1.24 |  |  |
| -2.11 | -4.2  | -3.14 |  |  |
| -2.2  | -1.33 | -0.21 |  |  |
| -1.97 | -1.7  | -0.64 |  |  |
| -2.22 | -1.12 | 0.11  |  |  |
| -1.48 | -1.37 | -0.31 |  |  |
| -1.55 | -2.23 | -1.1  |  |  |
| -1.75 | 2.76  | 4.06  |  |  |
| -1.82 | -0.63 | 0.74  |  |  |
| -2    | 0.2   | 1.26  |  |  |
| -2.13 | 0.24  | 1.39  |  |  |
| -2.59 | -1.87 | -0.43 |  |  |
| -2.69 | -2.53 | -1.03 |  |  |
| -1.04 | 6.46  | 7.53  |  |  |
| -1.06 | -3.31 | -2.21 |  |  |
| -1.12 | -1.04 | 0.14  |  |  |
| -1.55 | -3.9  | -2.25 |  |  |
| -2.41 | -6.02 | -4.95 |  |  |
| -2.59 | -6.71 | -5.53 |  |  |
| -1.4  | -2.54 | -1.47 |  |  |
| -1.49 | -2.26 | -1.1  |  |  |
| -1.77 | 0.21  | 1.62  |  |  |
| 1.12  | -2.42 | -1.35 |  |  |
| -1.11 | 2.32  | 3.7   |  |  |
| -1.28 | 0.25  | 1.83  |  |  |
| -3.16 | -1.09 | -0.02 |  |  |
| -3.71 | -0.6  | 0.7   |  |  |
| -1.58 | -0.57 | 0.5   |  |  |
| -1.59 | 1.61  | 2.7   |  |  |
| -1.71 | -5.87 | -4.79 |  |  |
| -1.89 | -4.42 | -3.2  |  |  |
| -2.08 | -2.16 | -0.81 |  |  |
| -1.28 | 0.61  | 1.69  |  |  |
| -1.4  | -3.67 | -2.47 |  |  |
| -1.92 | -2.92 | -1.27 |  |  |
| -3.14 | -2.23 | -1.17 |  |  |
| -3.24 | -8.69 | -7.57 |  |  |
| -3.38 | -7.16 | -5.98 |  |  |
| -3.46 | -8.46 | -7.25 |  |  |
| -3.53 | -8.62 | -7.38 |  |  |
| -3.63 | -6.15 | -4.87 |  |  |
| -4.25 | -2.96 | -1.45 |  |  |
| -1.13 | -5.96 | -4.89 |  |  |
| -1.57 | -4.68 | -3.13 |  |  |
| -1.57 | -3.46 | -2.39 |  |  |
| -1.58 | -4.23 | -3.15 |  |  |
| -1.68 | -5.92 | -4.75 |  |  |
| 1.09  | 0.23  | 1.3   |  |  |
| -1.03 | -0.53 | 0.71  |  |  |
| 2.22  | 1.15  | 2.22  |  |  |
| 2.09  | -3.67 | -2.51 |  |  |
| 1.84  | 0.73  | 2.07  |  |  |
| 1.84  | -5.04 | -3.7  |  |  |
| 1.45  | -4.68 | -2.99 |  |  |
| 1.38  | -3.81 | -2.05 |  |  |
| 1.32  | -0.31 | 1.5   |  |  |
| 1.3   | -2.95 | -1.1  |  |  |

|       |       |       |  |  |
|-------|-------|-------|--|--|
| 1.16  | -5.28 | -3.27 |  |  |
| 1.14  | -2.08 | -0.05 |  |  |
| 1.13  | -5.78 | -3.74 |  |  |
| 1.12  | -4.49 | -2.43 |  |  |
| 1.09  | -4.4  | -2.3  |  |  |
| -1.06 | -5.55 | -3.25 |  |  |
| -1.14 | -5.77 | -3.36 |  |  |
| -1.15 | -4.44 | -2.01 |  |  |
| -1.2  | -6.17 | -3.68 |  |  |
| -1.23 | -5.2  | -2.67 |  |  |
| -1.35 | -5.26 | -2.61 |  |  |
| -2.16 | -4.69 | -1.36 |  |  |
| -2.22 | 0.33  | 3.7   |  |  |
| -2.01 | -5.57 | -4.5  |  |  |
| -2.46 | -5.11 | -3.75 |  |  |
| -2.62 | -5.46 | -4    |  |  |
| -2.72 | -4.7  | -3.63 |  |  |
| -2.88 | -7.22 | -6.07 |  |  |
| -1.95 | -0.77 | 0.3   |  |  |
| -2.01 | -4.02 | -2.91 |  |  |
| -2.05 | -3.2  | -2.05 |  |  |
| -2.11 | -1.63 | -0.45 |  |  |
| -2.36 | -1.77 | -0.43 |  |  |
| -2.83 | -2.99 | -1.38 |  |  |
| -3.12 | -4.99 | -3.24 |  |  |
| -3.55 | -2.42 | -0.48 |  |  |
| -1.31 | -0.27 | 0.8   |  |  |
| -1.4  | -6.24 | -5.06 |  |  |
| -3.13 | -2.04 | -0.97 |  |  |
| -6.25 | -1.98 | 0.08  |  |  |
| -3.23 | -0.31 | 0.77  |  |  |
| -3.24 | -1.44 | -0.37 |  |  |
| -3.31 | -2.34 | -1.24 |  |  |
| -3.46 | -2.42 | -1.26 |  |  |
| -1.26 | -4.21 | -3.14 |  |  |
| -1.76 | -5.33 | -3.78 |  |  |
| -2.14 | -4.92 | -3.85 |  |  |
| -2.28 | -4.04 | -2.87 |  |  |
| -2.46 | -3.13 | -1.86 |  |  |
| -2.44 | 0.9   | 1.97  |  |  |
| -2.48 | 0.24  | 1.34  |  |  |
| -2.82 | -1.24 | 0.04  |  |  |
| -7.64 | -2.54 | 0.18  |  |  |
| -1.69 | -1.35 | -0.27 |  |  |
| -2.55 | -4.51 | -2.84 |  |  |
| -1.32 | 2.53  | 3.6   |  |  |
| -1.33 | 6.14  | 7.21  |  |  |
| -2.31 | -3.59 | -2.51 |  |  |
| -2.57 | -3.74 | -2.51 |  |  |
| -2.82 | -3.16 | -1.79 |  |  |
| -3.53 | -3.38 | -1.69 |  |  |
| -4.33 | -3.98 | -1.99 |  |  |
| -2.28 | -1.54 | -0.46 |  |  |
| -2.4  | -2.72 | -1.57 |  |  |
| 1.02  | 0.17  | 1.25  |  |  |
| -1.24 | 2.56  | 3.98  |  |  |
| -1.88 | 0.44  | 2.46  |  |  |
| -1.81 | -6.94 | -5.87 |  |  |

|        |       |       |  |  |
|--------|-------|-------|--|--|
| -1.9   | -6.74 | -5.6  |  |  |
| -1.08  | -0.4  | 0.68  |  |  |
| -1.11  | -5.07 | -3.96 |  |  |
| -1.16  | -4.84 | -3.65 |  |  |
| -1.21  | 0.06  | 1.3   |  |  |
| -1.25  | -3.92 | -2.63 |  |  |
| -2.43  | -2.89 | -0.64 |  |  |
| -1.08  | -1.41 | -0.33 |  |  |
| -1.15  | -3.73 | -2.58 |  |  |
| -1.14  | -1.95 | -0.79 |  |  |
| -1.43  | -3.75 | -2.27 |  |  |
| -1.57  | -2.95 | -1.87 |  |  |
| -1.72  | 0.25  | 1.46  |  |  |
| -4.99  | -4.38 | -1.64 |  |  |
| -1.38  | 1.52  | 2.6   |  |  |
| -1.43  | 3.17  | 4.31  |  |  |
| -1.65  | 2.83  | 4.16  |  |  |
| -1.48  | -5.72 | -4.64 |  |  |
| -1.57  | -4.21 | -3.05 |  |  |
| -1.91  | -4.12 | -2.67 |  |  |
| -1.87  | -6.93 | -5.86 |  |  |
| -1.94  | -8.2  | -7.07 |  |  |
| -2.02  | -8.39 | -7.2  |  |  |
| 2.06   | 0.87  | 1.94  |  |  |
| 1.68   | -2.71 | -1.35 |  |  |
| 1.62   | -5.55 | -4.13 |  |  |
| 1.2    | -2.27 | -0.42 |  |  |
| -1.1   | -5.26 | -3    |  |  |
| -2.02  | -8.26 | -7.18 |  |  |
| -3.65  | -7.32 | -5.39 |  |  |
| -1.53  | -1.11 | -0.03 |  |  |
| -1.52  | -1.58 | -0.51 |  |  |
| -2.99  | 0.08  | 2.13  |  |  |
| -2.51  | 1.75  | 2.83  |  |  |
| -2.7   | 2.37  | 3.56  |  |  |
| -2.99  | 0.73  | 2.06  |  |  |
| -3.65  | -0.34 | 1.28  |  |  |
| -3.65  | 0.67  | 2.29  |  |  |
| -4.06  | -3.59 | -1.82 |  |  |
| -4.06  | 0.42  | 2.19  |  |  |
| -10.59 | -2.47 | 0.68  |  |  |
| 1.75   | -1.21 | -0.13 |  |  |
| 1.46   | -0.99 | 0.34  |  |  |
| 1.43   | 1.79  | 3.16  |  |  |
| 1.42   | 0.44  | 1.82  |  |  |
| 1.42   | 0.95  | 2.33  |  |  |
| 1.25   | -2.13 | -0.57 |  |  |
| 1.16   | 1.99  | 3.66  |  |  |
| 1.05   | -0.57 | 1.25  |  |  |
| 1.03   | 1.81  | 3.66  |  |  |
| -1.12  | -0.48 | 1.57  |  |  |
| -1.19  | -2.07 | 0.07  |  |  |
| -1.63  | -1.12 | -0.05 |  |  |
| -1.79  | -1.84 | -0.63 |  |  |
| 1.34   | -3.14 | -2.06 |  |  |
| 1.21   | 1.11  | 2.34  |  |  |
| 1.21   | 1.17  | 2.4   |  |  |
| 1.15   | 1.7   | 3     |  |  |

|       |       |       |  |  |
|-------|-------|-------|--|--|
| 1.14  | -3.17 | -1.85 |  |  |
| 1.04  | -0.02 | 1.42  |  |  |
| -1    | 0.31  | 1.81  |  |  |
| -1.08 | -1.46 | 0.15  |  |  |
| -2.61 | -4.42 | -3.34 |  |  |
| -2.65 | -1.32 | -0.22 |  |  |
| -3.27 | -1.89 | -0.48 |  |  |
| -6.99 | -4.42 | -1.92 |  |  |
| -1.8  | 1.27  | 2.34  |  |  |
| -1.82 | -1.82 | -0.72 |  |  |
| -2.35 | -2.07 | -0.99 |  |  |
| -2.64 | -1.7  | -0.46 |  |  |
| -2.71 | -2.03 | -0.75 |  |  |
| -2.9  | -1.6  | -0.51 |  |  |
| -3.36 | -2.66 | -1.37 |  |  |
| -1    | -1.93 | -0.85 |  |  |
| -1.01 | -3.68 | -2.59 |  |  |
| -1.07 | -0.79 | 0.39  |  |  |
| -1.12 | -2.98 | -1.75 |  |  |
| -1.11 | -0.61 | 0.62  |  |  |
| -1.14 | 1.87  | 3.14  |  |  |
| -1.15 | -0.57 | 0.71  |  |  |
| -1.24 | -1.13 | 0.26  |  |  |
| -1.24 | -1.94 | -0.55 |  |  |
| -1.26 | -3.24 | -1.83 |  |  |
| -1.28 | 1.67  | 3.11  |  |  |
| -1.32 | 4.3   | 5.78  |  |  |
| -1.58 | -3.24 | -1.5  |  |  |
| -1.8  | -3.85 | -2.76 |  |  |
| -1.97 | -3.67 | -2.45 |  |  |
| -2.08 | -3.61 | -2.52 |  |  |
| -3.02 | -5.35 | -3.72 |  |  |
| -2.07 | -4.01 | -2.92 |  |  |
| -2.25 | -5.75 | -4.55 |  |  |
| -2.93 | -6.17 | -4.59 |  |  |
| -1.49 | -1.8  | -0.71 |  |  |
| -1.52 | 0.52  | 1.63  |  |  |
| 1.04  | -4.66 | -3.58 |  |  |
| -1.1  | -3.45 | -2.18 |  |  |
| -1.11 | -3.92 | -2.63 |  |  |
| 1     | 0.97  | 2.06  |  |  |
| -1.05 | -3.97 | -2.81 |  |  |
| -1.07 | -1.81 | -0.62 |  |  |
| -1.07 | -4.5  | -3.31 |  |  |
| -1.09 | -5.97 | -4.76 |  |  |
| -1.12 | -3.63 | -2.37 |  |  |
| -1.19 | -0.83 | 0.5   |  |  |
| -1.24 | -3.5  | -2.1  |  |  |
| -1.73 | -5.68 | -3.8  |  |  |
| -2.85 | 0.72  | 1.81  |  |  |
| -3.12 | -1.85 | -0.63 |  |  |
| 1.31  | -1.34 | -0.26 |  |  |
| 1.3   | -2.22 | -1.13 |  |  |
| 1.16  | 2.94  | 4.19  |  |  |
| 1.14  | 1.91  | 3.19  |  |  |
| -2.8  | 0.17  | 1.26  |  |  |
| -4.36 | -0.58 | 1.14  |  |  |
| -5.79 | -2.94 | -0.8  |  |  |

|       |       |       |  |  |
|-------|-------|-------|--|--|
| -1.06 | -2.95 | -1.87 |  |  |
| -1.07 | -2.71 | -1.6  |  |  |
| -1.18 | 0.99  | 2.24  |  |  |
| -1.28 | -2.83 | -1.46 |  |  |
| -2.54 | -1.98 | -0.89 |  |  |
| -2.56 | -0.89 | 0.2   |  |  |
| -2.63 | -0.19 | 0.94  |  |  |
| -2.86 | 0.16  | 1.42  |  |  |
| -1.36 | -1.49 | -0.4  |  |  |
| -3.16 | -1.25 | 1.06  |  |  |
| 1.6   | 0.16  | 1.25  |  |  |
| 1.6   | -2.23 | -1.14 |  |  |
| 1.39  | -3.74 | -2.45 |  |  |
| 1.32  | -3.59 | -2.22 |  |  |
| 1.27  | -0.73 | 0.7   |  |  |
| 1.09  | -1.86 | -0.22 |  |  |
| 1.05  | -2.7  | -1    |  |  |
| 1.03  | -4.51 | -2.78 |  |  |
| 1.02  | -4.93 | -3.19 |  |  |
| -1.06 | -3.47 | -1.61 |  |  |
| -1.11 | 4.02  | 5.94  |  |  |
| -1.42 | -2.07 | -0.97 |  |  |
| -1.56 | -0.59 | 0.64  |  |  |
| 1.02  | -0.74 | 0.35  |  |  |
| -1.17 | -5.7  | -4.36 |  |  |
| -1.68 | -5.87 | -4.01 |  |  |
| -1.77 | -5.8  | -4.71 |  |  |
| -2.16 | -5.89 | -4.52 |  |  |
| 1.28  | -3.38 | -2.28 |  |  |
| 1.28  | -6.76 | -5.67 |  |  |
| 1.25  | -5.26 | -4.13 |  |  |
| 1.16  | -4.14 | -2.9  |  |  |
| 1.07  | -4.36 | -3    |  |  |
| 1.01  | -2.75 | -1.32 |  |  |
| -1.06 | -1.5  | 0.04  |  |  |
| -1.21 | -4.88 | -3.15 |  |  |
| -1.28 | -3.46 | -2.37 |  |  |
| -1.31 | -3.65 | -2.54 |  |  |
| -1.45 | -3.17 | -1.9  |  |  |
| 1.09  | 1.43  | 2.53  |  |  |
| 1.09  | -1.33 | -0.23 |  |  |
| -2.92 | -2.09 | 0.68  |  |  |
| -1.54 | -2.64 | -1.55 |  |  |
| -1.62 | -3.14 | -1.98 |  |  |
| -1.57 | -1.93 | -0.84 |  |  |
| -2.39 | -2.3  | -0.6  |  |  |
| -2.83 | -0.55 | 0.54  |  |  |
| -2.93 | -1.55 | -0.41 |  |  |
| -3.05 | -1.1  | 0.1   |  |  |
| -4.17 | -0.54 | 1.11  |  |  |
| -2.48 | -2.57 | -1.48 |  |  |
| -5.04 | -3.21 | -1.1  |  |  |
| -2.89 | -2.86 | -1.77 |  |  |
| -2.91 | -2.61 | -1.52 |  |  |
| 1.08  | -3.12 | -2.02 |  |  |
| 1.06  | 2.85  | 3.97  |  |  |
| 1.06  | -2.23 | -1.11 |  |  |
| 1.03  | -0.9  | 0.27  |  |  |

|       |       |       |  |  |
|-------|-------|-------|--|--|
| 1.02  | -3.14 | -1.96 |  |  |
| -1.03 | -0.15 | 1.11  |  |  |
| -1.09 | -2.38 | -1.05 |  |  |
| -1.11 | -0.85 | 0.51  |  |  |
| -1.14 | -2.21 | -0.82 |  |  |
| -1.56 | -1.87 | -0.02 |  |  |
| 1.23  | -4.32 | -3.23 |  |  |
| 1.23  | -4.8  | -3.71 |  |  |
| 1.21  | -6.93 | -5.82 |  |  |
| 1.05  | -6.35 | -5.02 |  |  |
| 1.28  | 1.3   | 2.38  |  |  |
| 1.07  | -3.22 | -1.87 |  |  |
| 1.31  | 0.09  | 1.18  |  |  |
| 1.22  | 2.1   | 3.3   |  |  |
| 1.04  | 1.93  | 3.36  |  |  |
| -1.02 | -3.03 | -1.51 |  |  |
| -1.09 | -3.55 | -1.95 |  |  |
| 1.18  | -1.47 | -0.38 |  |  |
| 1.15  | 5.36  | 6.48  |  |  |
| 1.03  | 0.62  | 1.91  |  |  |
| -1.02 | -2.25 | -0.89 |  |  |
| -1.03 | -1.5  | -0.14 |  |  |
| -1.06 | -2.03 | -0.61 |  |  |
| -1.12 | 2.61  | 4.1   |  |  |
| -2.15 | -2.56 | -0.13 |  |  |
| -2.02 | -1.23 | -0.13 |  |  |
| -2.05 | -1.91 | -0.79 |  |  |
| -2.98 | -1.03 | 0.62  |  |  |
| -3.15 | -2.85 | -1.12 |  |  |
| -2.28 | -1.2  | -0.11 |  |  |
| -2.37 | -1.98 | -0.84 |  |  |
| -2.4  | -1.87 | -0.71 |  |  |
| -2.95 | 0.35  | 1.81  |  |  |
| -1.14 | -3.04 | -1.95 |  |  |
| -2.02 | -1.05 | 0.87  |  |  |
| -1.1  | -0.46 | 0.63  |  |  |
| -1.21 | 1.33  | 2.56  |  |  |
| -1.28 | -2.28 | -0.96 |  |  |
| -1.83 | -0.5  | 1.33  |  |  |
| -2.09 | -1.87 | -0.79 |  |  |
| -2.17 | -1.8  | -0.66 |  |  |
| -2.31 | -3.46 | -2.23 |  |  |
| -2.38 | -2.21 | -0.93 |  |  |
| -5.84 | -3.13 | -0.56 |  |  |
| -2.63 | -2.25 | -1.16 |  |  |
| -3.18 | -2.67 | -1.3  |  |  |
| -4.09 | -2.39 | -0.66 |  |  |
| -1.07 | 3.79  | 4.88  |  |  |
| -1.09 | 2.6   | 3.74  |  |  |
| -1.1  | 2.43  | 3.57  |  |  |
| -1.1  | -2.01 | -0.86 |  |  |
| -1.23 | -6.47 | -5.37 |  |  |
| -1.24 | -4.84 | -3.74 |  |  |
| -1.3  | -4.77 | -3.61 |  |  |
| -1.32 | 0.09  | 1.29  |  |  |
| -1.34 | -4.22 | -3    |  |  |
| -1.78 | -5.55 | -3.92 |  |  |
| -1.87 | -6.28 | -4.58 |  |  |

|       |       |       |  |  |
|-------|-------|-------|--|--|
| 1.01  | 6.54  | 7.64  |  |  |
| -1.04 | 0.01  | 1.17  |  |  |
| -1.23 | -1.37 | 0.04  |  |  |
| -1.31 | 2.1   | 3.6   |  |  |
| 1.21  | -4.31 | -3.21 |  |  |
| 1.2   | 1.37  | 2.48  |  |  |
| 1.07  | 3.35  | 4.62  |  |  |
| -1.33 | -5.56 | -3.77 |  |  |
| -1.72 | -3.92 | -1.76 |  |  |
| -1.48 | -0.36 | 0.74  |  |  |
| -1.77 | -1.28 | 0.07  |  |  |
| -5.12 | 0.37  | 3.26  |  |  |
| -1.88 | -2.74 | -1.64 |  |  |
| -2.11 | -2.36 | -1.1  |  |  |
| -2.76 | -6.75 | -5.1  |  |  |
| 1.8   | -1.11 | -0.01 |  |  |
| 1.8   | -3.64 | -2.54 |  |  |
| 1.62  | -3.82 | -2.57 |  |  |
| 1.49  | 0.38  | 1.76  |  |  |
| 1.47  | -1.42 | -0.04 |  |  |
| 1.44  | -5.08 | -3.66 |  |  |
| 1.34  | -2.4  | -0.88 |  |  |
| 1.29  | -4.19 | -2.61 |  |  |
| 1.27  | -1.91 | -0.31 |  |  |
| 1.16  | -2.7  | -0.97 |  |  |
| 1.04  | -2.2  | -0.31 |  |  |
| 1.03  | -1.76 | 0.14  |  |  |
| -1.04 | 2.37  | 4.38  |  |  |
| -1.11 | 4.06  | 6.16  |  |  |
| -1.23 | -6.15 | -3.91 |  |  |
| -1.52 | -5.32 | -2.76 |  |  |
| -1.72 | -5.77 | -3.04 |  |  |
| -1.75 | -0.59 | 0.51  |  |  |
| -2.02 | -1.39 | -0.08 |  |  |
| -2.19 | -2.44 | -1.02 |  |  |
| -4.66 | -3.75 | -1.24 |  |  |
| -1.09 | 3.4   | 4.5   |  |  |
| -1.15 | 3.66  | 4.84  |  |  |
| -1.23 | 3.38  | 4.65  |  |  |
| -1.34 | 0.83  | 2.23  |  |  |
| 1.21  | -4.55 | -3.45 |  |  |
| 1.16  | -3.03 | -1.86 |  |  |
| 1.13  | -4.48 | -3.28 |  |  |
| -1.21 | -4.62 | -2.98 |  |  |
| -1.48 | -7.84 | -5.9  |  |  |
| -1.74 | -3.96 | -1.79 |  |  |
| -1.84 | -1.66 | -0.56 |  |  |
| -3.44 | -2.72 | -0.71 |  |  |
| -1.53 | -2.78 | -1.69 |  |  |
| -1.74 | -2.86 | -1.58 |  |  |
| -1.2  | -8.53 | -7.44 |  |  |
| -2.06 | -8.62 | -6.75 |  |  |
| -2.7  | -2.76 | -1.66 |  |  |
| -3.28 | -5.06 | -3.68 |  |  |
| -2.04 | -3.63 | -2.54 |  |  |
| -2.18 | -3.35 | -2.16 |  |  |
| -2.2  | -2.99 | -1.79 |  |  |
| -2.25 | -0.5  | 0.74  |  |  |

|       |       |       |  |  |
|-------|-------|-------|--|--|
| -2.26 | -4.05 | -2.8  |  |  |
| -2.31 | -2.55 | -1.28 |  |  |
| -2.31 | -0.99 | 0.28  |  |  |
| -2.4  | -2.25 | -0.92 |  |  |
| -3.55 | -0.85 | 0.25  |  |  |
| -4.1  | -0.32 | 0.98  |  |  |
| -4.76 | -3.13 | -1.61 |  |  |
| 1.03  | 0.51  | 1.61  |  |  |
| -1    | 6.76  | 7.91  |  |  |
| -1.42 | -3.1  | -1.45 |  |  |
| 8.59  | -1.15 | -0.06 |  |  |
| 7.7   | -1.14 | 0.11  |  |  |
| 2.95  | -0.37 | 2.27  |  |  |
| -1.61 | -4.85 | -3.75 |  |  |
| -1.87 | -1.4  | -0.08 |  |  |
| -2.46 | -3.89 | -2.17 |  |  |
| -1.89 | 0.46  | 1.55  |  |  |
| -4.33 | -0.57 | 1.72  |  |  |
| -1.89 | 0.46  | 1.55  |  |  |
| -4.33 | -0.57 | 1.72  |  |  |
| -2.57 | 0.32  | 1.42  |  |  |
| -2.69 | 0.21  | 1.38  |  |  |
| -2.33 | -1.24 | -0.13 |  |  |
| -2.99 | -1.48 | -0.02 |  |  |
| -1.46 | -2.18 | -1.07 |  |  |
| -2.13 | 1.53  | 3.18  |  |  |
| 3.21  | -5.51 | -4.4  |  |  |
| 2.91  | -5.75 | -4.5  |  |  |
| 1.93  | -5.59 | -3.75 |  |  |
| 1.89  | -4.01 | -2.14 |  |  |
| 1.44  | -3.83 | -1.57 |  |  |
| 1.4   | -6.57 | -4.26 |  |  |
| -1.99 | -2.39 | -1.28 |  |  |
| -2.2  | -1.91 | -0.66 |  |  |
| 1.23  | -4.01 | -2.91 |  |  |
| 1.14  | -1.92 | -0.7  |  |  |
| 1.06  | -4.96 | -3.64 |  |  |
| 1.06  | -2.01 | -0.69 |  |  |
| 1.04  | -4.77 | -3.43 |  |  |
| -1.01 | 4.33  | 5.75  |  |  |
| -1.12 | -2.42 | -0.85 |  |  |
| -1.52 | -2.99 | -1.89 |  |  |
| -2.1  | -1.82 | -0.25 |  |  |
| 1.27  | -0.02 | 1.08  |  |  |
| 1.03  | 4.94  | 6.34  |  |  |
| -1.11 | 1.69  | 3.29  |  |  |
| -1.41 | 3.31  | 5.25  |  |  |
| -1.63 | -0.52 | 0.58  |  |  |
| -1.76 | 1.17  | 2.39  |  |  |
| -1.86 | -2.23 | -1.13 |  |  |
| -2.73 | -2    | -0.35 |  |  |
| 1.08  | -3.5  | -2.4  |  |  |
| 1.06  | -4.61 | -3.48 |  |  |
| -1.07 | -5.7  | -4.39 |  |  |
| -1.17 | -5.45 | -4.01 |  |  |
| -1.25 | -1.02 | 0.51  |  |  |
| -1.53 | -2.97 | -1.15 |  |  |
| 1.13  | -6.28 | -5.18 |  |  |



|       |       |       |  |  |
|-------|-------|-------|--|--|
| 1.06  | -1.48 | -0.28 |  |  |
| 1.03  | 1.27  | 2.51  |  |  |
| -2.11 | -3.06 | -1.95 |  |  |
| -2.37 | 0.01  | 1.28  |  |  |
| -2.98 | -2.01 | -0.41 |  |  |
| -2.29 | -3.13 | -2.02 |  |  |
| -2.86 | -4.03 | -2.6  |  |  |
| 1.32  | 0.44  | 1.55  |  |  |
| 1.27  | -3    | -1.84 |  |  |
| 1.17  | -3.99 | -2.71 |  |  |
| 1.13  | -2.33 | -1    |  |  |
| -1.13 | 0.59  | 2.28  |  |  |
| -1.16 | 0.05  | 1.76  |  |  |
| -1.05 | -3.91 | -2.81 |  |  |
| -1.08 | -3.33 | -2.19 |  |  |
| -1.78 | 1.21  | 3.07  |  |  |
| -2.1  | -3.09 | -1.98 |  |  |
| -2.28 | -2.61 | -1.38 |  |  |
| -1.79 | 2.32  | 3.43  |  |  |
| -1.9  | -0.95 | 0.24  |  |  |
| -2.23 | 0.28  | 1.71  |  |  |
| -4.85 | -4.44 | -1.9  |  |  |
| 1.03  | -0.81 | 0.3   |  |  |
| 1.02  | -3.44 | -2.33 |  |  |
| -1.02 | -0.32 | 0.86  |  |  |
| -1.04 | -2.28 | -1.08 |  |  |
| -1.05 | -1.13 | 0.08  |  |  |
| -1.19 | -1.39 | 0.01  |  |  |
| -1.29 | -2.98 | -1.47 |  |  |
| 1.03  | -0.81 | 0.3   |  |  |
| 1.02  | -3.44 | -2.33 |  |  |
| -1.02 | -0.32 | 0.86  |  |  |
| -1.04 | -2.28 | -1.08 |  |  |
| -1.05 | -1.13 | 0.08  |  |  |
| -1.19 | -1.39 | 0.01  |  |  |
| -1.29 | -2.98 | -1.47 |  |  |
| 1.03  | -0.81 | 0.3   |  |  |
| 1.02  | -3.44 | -2.33 |  |  |
| -1.02 | -0.32 | 0.86  |  |  |
| -1.04 | -2.28 | -1.08 |  |  |
| -1.05 | -1.13 | 0.08  |  |  |
| -1.19 | -1.39 | 0.01  |  |  |
| -1.29 | -2.98 | -1.47 |  |  |
| 1.03  | -0.81 | 0.3   |  |  |
| 1.02  | -3.44 | -2.33 |  |  |
| -1.02 | -0.32 | 0.86  |  |  |
| -1.04 | -2.28 | -1.08 |  |  |
| -1.05 | -1.13 | 0.08  |  |  |
| -1.19 | -1.39 | 0.01  |  |  |
| -1.29 | -2.98 | -1.47 |  |  |
| 1.03  | -0.98 | 0.12  |  |  |
| 1.02  | -3.61 | -2.5  |  |  |
| -1.02 | -0.49 | 0.69  |  |  |
| -1.04 | -2.45 | -1.25 |  |  |
| -1.05 | -1.3  | -0.09 |  |  |
| -1.19 | -1.56 | -0.16 |  |  |
| -1.29 | -3.14 | -1.64 |  |  |
| 1.03  | -0.98 | 0.12  |  |  |

|        |       |       |  |  |
|--------|-------|-------|--|--|
| 1.02   | -3.61 | -2.5  |  |  |
| -1.02  | -0.49 | 0.69  |  |  |
| -1.04  | -2.45 | -1.25 |  |  |
| -1.05  | -1.3  | -0.09 |  |  |
| -1.19  | -1.56 | -0.16 |  |  |
| -1.29  | -3.14 | -1.64 |  |  |
| -1.59  | -0.66 | 0.46  |  |  |
| -1.9   | -0.85 | 0.52  |  |  |
| -1.7   | -2.27 | -1.16 |  |  |
| -2.8   | -2.13 | -0.3  |  |  |
| 1.19   | -3.05 | -1.94 |  |  |
| -1.07  | -0.63 | 0.83  |  |  |
| -1.16  | -0.6  | 0.98  |  |  |
| -2.48  | -5.75 | -4.64 |  |  |
| -2.96  | -4.17 | -2.8  |  |  |
| -2.96  | -4.29 | -2.91 |  |  |
| -3.6   | -3.35 | -1.7  |  |  |
| -19.28 | -5.16 | -1.08 |  |  |
| -24.52 | -6.39 | -1.97 |  |  |
| -1.11  | -3.78 | -2.68 |  |  |
| -1.32  | -3.2  | -1.84 |  |  |
| -2.32  | -0.76 | 0.34  |  |  |
| -2.57  | -2.45 | -1.19 |  |  |
| -2.57  | -2.91 | -1.65 |  |  |
| -2.64  | -1.45 | -0.15 |  |  |
| -1.63  | -4.65 | -3.54 |  |  |
| -1.68  | -1.83 | -0.68 |  |  |
| -1.81  | -5.8  | -4.54 |  |  |
| -2.09  | -2.73 | -1.62 |  |  |
| -2.15  | -3.15 | -1.99 |  |  |
| -2.27  | -0.29 | 0.94  |  |  |
| -2.77  | -3.45 | -1.93 |  |  |
| 6.5    | 0.26  | 1.37  |  |  |
| 6.07   | 0.57  | 1.78  |  |  |
| 2.12   | -5.37 | -2.65 |  |  |
| 1.73   | -7.44 | -4.42 |  |  |
| -1.62  | -1.03 | 0.08  |  |  |
| -2.09  | -1.74 | -0.26 |  |  |
| -3.71  | -0.97 | 0.14  |  |  |
| -3.84  | 0.83  | 1.99  |  |  |
| -3.95  | -2.28 | -1.08 |  |  |
| -4.64  | -1.2  | 0.24  |  |  |
| -5.16  | -2.55 | -0.96 |  |  |
| -2.41  | 1.11  | 2.21  |  |  |
| -2.43  | 2.02  | 3.14  |  |  |
| -2.43  | -2.47 | -1.35 |  |  |
| -2.6   | -0.18 | 1.04  |  |  |
| -2.63  | -0.65 | 0.59  |  |  |
| -3.04  | -0.11 | 1.34  |  |  |
| -3.84  | -3.9  | -2.12 |  |  |
| 1.01   | -0.83 | 0.28  |  |  |
| -1.02  | -3.88 | -2.73 |  |  |
| -2.17  | -3.13 | -2.02 |  |  |
| -2.64  | -0.12 | 1.28  |  |  |
| -3.01  | -0.77 | 0.82  |  |  |
| 2.42   | -0.2  | 0.91  |  |  |
| 1.84   | -4.69 | -3.18 |  |  |
| 1.71   | -3.7  | -2.08 |  |  |

|       |       |       |  |  |
|-------|-------|-------|--|--|
| -1.11 | -0.25 | 2.29  |  |  |
| -2.17 | 0.29  | 1.4   |  |  |
| -2.36 | -2.15 | -0.92 |  |  |
| -2.37 | -2.35 | -1.11 |  |  |
| -2.08 | 1.29  | 2.41  |  |  |
| -2.27 | -1.44 | -0.21 |  |  |
| -1.78 | -0.05 | 1.06  |  |  |
| -1.98 | 1.48  | 2.74  |  |  |
| -4.36 | 0.96  | 3.36  |  |  |
| 1     | 2.26  | 3.38  |  |  |
| -1.09 | 1.69  | 2.94  |  |  |
| -1.14 | -2.38 | -1.06 |  |  |
| -1.18 | 1.28  | 2.65  |  |  |
| -1.25 | 2.23  | 3.67  |  |  |
| -1.88 | 1.01  | 2.13  |  |  |
| -1.89 | 0.12  | 1.25  |  |  |
| -2.2  | -2    | -0.65 |  |  |
| -2.3  | -3.25 | -1.84 |  |  |
| -2.45 | -3.14 | -1.64 |  |  |
| -2.45 | -2.62 | -1.5  |  |  |
| -3.13 | -0.65 | 0.83  |  |  |
| -3.66 | -3.05 | -1.35 |  |  |
| -1.69 | -4.79 | -3.68 |  |  |
| -1.83 | -8.99 | -7.76 |  |  |
| -1.84 | -2.96 | -1.72 |  |  |
| -1.88 | -3.68 | -2.41 |  |  |
| -3.29 | -3.65 | -1.57 |  |  |
| 1.02  | -3.44 | -2.32 |  |  |
| -1.09 | -2.53 | -1.27 |  |  |
| -1.19 | -0.05 | 1.06  |  |  |
| -1.62 | -1.63 | -0.07 |  |  |
| -2.57 | -3.53 | -2.41 |  |  |
| -3.06 | -5.74 | -4.37 |  |  |
| -3.41 | -3.15 | -2.03 |  |  |
| -3.46 | -3.15 | -2.01 |  |  |
| -1.1  | -0.19 | 0.93  |  |  |
| -1.13 | -1.54 | -0.38 |  |  |
| -1.24 | 3.09  | 4.38  |  |  |
| 2.76  | -2.37 | -1.25 |  |  |
| 2.51  | -0.02 | 1.23  |  |  |
| 2.24  | -4.22 | -2.81 |  |  |
| 2.04  | -4.05 | -2.5  |  |  |
| 1.92  | -2.91 | -1.28 |  |  |
| 1.89  | -3.53 | -1.87 |  |  |
| 1.68  | -1.88 | -0.05 |  |  |
| 1.12  | -2.83 | -0.41 |  |  |
| -1.08 | -0.91 | 1.78  |  |  |
| -1.48 | -1.81 | 1.34  |  |  |
| -1.58 | 0.04  | 1.16  |  |  |
| -2.05 | -0.22 | 1.26  |  |  |
| -2.09 | 1.55  | 3.07  |  |  |
| -1.7  | -0.83 | 0.29  |  |  |
| -1.87 | -3.29 | -2.03 |  |  |
| -1.57 | -4.56 | -3.44 |  |  |
| -1.6  | -3.46 | -2.31 |  |  |
| -1.61 | -4.72 | -3.57 |  |  |
| -1.64 | -2.25 | -1.06 |  |  |
| -1.65 | -1.84 | -0.64 |  |  |

|        |       |       |  |  |
|--------|-------|-------|--|--|
| -1.79  | -2.56 | -1.25 |  |  |
| -1.85  | -3.85 | -2.48 |  |  |
| -3.35  | -2.52 | -1.4  |  |  |
| -3.35  | -2.52 | -1.4  |  |  |
| -3.35  | -2.52 | -1.4  |  |  |
| -3.4   | 0.22  | 1.35  |  |  |
| -3.58  | 0.23  | 1.44  |  |  |
| -3.44  | 0.09  | 1.22  |  |  |
| -3.47  | 0.19  | 1.33  |  |  |
| -3.71  | 0.01  | 1.24  |  |  |
| -3.84  | 0.07  | 1.35  |  |  |
| -10.36 | -2.12 | 0.6   |  |  |
| 1.66   | -1.81 | -0.69 |  |  |
| 1.16   | 2.95  | 4.58  |  |  |
| 1.06   | -0.85 | 0.92  |  |  |
| 1.03   | 0.9   | 2.72  |  |  |
| -1     | -0.57 | 1.29  |  |  |
| -1.57  | -1.29 | -0.16 |  |  |
| -1.94  | -0.42 | 1.01  |  |  |
| 1.16   | -0.14 | 0.98  |  |  |
| 1.14   | -1.9  | -0.74 |  |  |
| 1.08   | 6.8   | 8.03  |  |  |
| 1.06   | -1.52 | -0.27 |  |  |
| 1.04   | 5.88  | 7.17  |  |  |
| -1.16  | 2.75  | 4.3   |  |  |
| -1.17  | 1.38  | 2.94  |  |  |
| -1.26  | 3.97  | 5.63  |  |  |
| -1.4   | 2.45  | 4.27  |  |  |
| -2.12  | -0.56 | 0.56  |  |  |
| -2.65  | -3.05 | -1.6  |  |  |
| -3.41  | -4.02 | -2.2  |  |  |
| 1.6    | -1.17 | -0.05 |  |  |
| 1.58   | -4.17 | -3.03 |  |  |
| 1.35   | 1.81  | 3.18  |  |  |
| 1.33   | -0.84 | 0.54  |  |  |
| 1.32   | -1.4  | -0.01 |  |  |
| 1.32   | -0.48 | 0.92  |  |  |
| 1.3    | 0.17  | 1.59  |  |  |
| 1.27   | -0.38 | 1.07  |  |  |
| 1.21   | -2.14 | -0.61 |  |  |
| 1.19   | 0.09  | 1.63  |  |  |
| 1.19   | -1.15 | 0.4   |  |  |
| 1.13   | -2.77 | -1.15 |  |  |
| 1.09   | -0.12 | 1.55  |  |  |
| 1.06   | -3.85 | -2.14 |  |  |
| -1.11  | -3.41 | -1.46 |  |  |
| -1.13  | -0.1  | 1.87  |  |  |
| -1.13  | -3.92 | -1.95 |  |  |
| -1.14  | -4.42 | -2.42 |  |  |
| -1.16  | -2.48 | -0.47 |  |  |
| -1.16  | -4.87 | -2.85 |  |  |
| -1.49  | -4.55 | -2.18 |  |  |
| -1.55  | -4.73 | -2.3  |  |  |
| -1.61  | -1.93 | 0.56  |  |  |
| -2.74  | -1.88 | -0.76 |  |  |
| -3.75  | -4.82 | -3.24 |  |  |
| -4.05  | -3.49 | -1.8  |  |  |
| 1.49   | 1.26  | 2.38  |  |  |

|       |       |       |  |  |
|-------|-------|-------|--|--|
| 1.39  | -2.53 | -1.3  |  |  |
| 1.1   | -2.9  | -1.33 |  |  |
| -1.01 | 3.17  | 4.89  |  |  |
| -1.04 | 0.02  | 1.77  |  |  |
| -1.05 | 1.9   | 3.67  |  |  |
| -1.14 | 1.05  | 2.94  |  |  |
| -1.32 | -3.04 | -0.93 |  |  |
| -2.05 | -3.3  | -2.17 |  |  |
| -2.08 | -3.96 | -2.82 |  |  |
| -2.13 | -1.58 | -0.4  |  |  |
| -3.1  | -2.66 | -0.94 |  |  |
| 1.07  | -4.16 | -3.04 |  |  |
| 1.07  | -4.93 | -3.8  |  |  |
| 1.01  | -0.3  | 0.9   |  |  |
| -1.01 | 1.31  | 2.55  |  |  |
| -1.02 | -5.77 | -4.52 |  |  |
| -1.04 | -3.93 | -2.65 |  |  |
| -1.06 | -2.89 | -1.58 |  |  |
| -1.09 | -3.21 | -1.86 |  |  |
| -1.31 | -3.16 | -1.55 |  |  |
| -1.51 | -1.96 | -0.14 |  |  |
| -1.81 | -5.09 | -3.01 |  |  |
| -1.53 | -5.21 | -4.09 |  |  |
| -1.57 | -7.03 | -5.87 |  |  |
| -1.96 | -2.32 | -1.19 |  |  |
| -2.4  | -1.94 | -0.52 |  |  |
| -2.44 | -1.53 | -0.08 |  |  |
| -2.61 | -2.19 | -1.06 |  |  |
| -2.63 | -1.9  | -0.76 |  |  |
| -3.37 | -1.01 | 0.49  |  |  |
| -3.66 | -0.84 | 0.78  |  |  |
| -1.24 | 4.28  | 5.41  |  |  |
| -1.53 | -3.67 | -2.24 |  |  |
| -2.09 | -3.26 | -1.38 |  |  |
| -2.49 | -1.38 | -0.25 |  |  |
| -3.51 | -2.77 | -1.14 |  |  |
| -1.21 | 0.73  | 1.87  |  |  |
| -1.33 | -1.02 | 0.25  |  |  |
| -1.41 | 1.43  | 2.78  |  |  |
| -1.43 | -1.39 | -0.01 |  |  |
| -1.67 | -0.03 | 1.57  |  |  |
| -2.7  | -3.09 | -1.95 |  |  |
| -3.06 | -4.26 | -2.94 |  |  |
| 1     | -4.39 | -3.25 |  |  |
| -1.01 | -6.07 | -4.92 |  |  |
| -1.03 | -4.31 | -3.13 |  |  |
| -1.05 | -4.1  | -2.89 |  |  |
| -1.66 | -2.13 | -0.99 |  |  |
| -1.79 | -2.65 | -1.41 |  |  |
| -1.57 | 0.12  | 1.26  |  |  |
| -2.3  | -3.99 | -2.31 |  |  |
| -2.4  | -0.93 | 0.82  |  |  |
| -2.14 | -1.93 | -0.79 |  |  |
| -2.34 | -2.8  | -1.53 |  |  |
| -2.5  | -2.69 | -1.32 |  |  |
| -2.98 | -4.57 | -2.95 |  |  |
| -1.62 | 1.66  | 2.8   |  |  |
| -1.76 | -1.56 | -0.31 |  |  |

|        |       |       |  |  |
|--------|-------|-------|--|--|
| -2.46  | -1.06 | 0.67  |  |  |
| -1.38  | -0.27 | 0.87  |  |  |
| -1.47  | -1.76 | -0.53 |  |  |
| -3.13  | -0.83 | 0.31  |  |  |
| -3.49  | -0.34 | 0.96  |  |  |
| -4.47  | -3.02 | -1.37 |  |  |
| -4.65  | -2.36 | -0.65 |  |  |
| -4.78  | -0.22 | 1.53  |  |  |
| -25.02 | -4.26 | -0.12 |  |  |
| 4.38   | -2.52 | -1.38 |  |  |
| 4.29   | -2.58 | -1.41 |  |  |
| 4.16   | -0.4  | 0.81  |  |  |
| 3.55   | -2.78 | -1.34 |  |  |
| 3.38   | -0.56 | 0.95  |  |  |
| 3.34   | -0.62 | 0.91  |  |  |
| 3.06   | -1.25 | 0.4   |  |  |
| 2.98   | -1.7  | 0     |  |  |
| 2.85   | -3.87 | -2.11 |  |  |
| 2.84   | -1.26 | 0.51  |  |  |
| 2.76   | -1.72 | 0.08  |  |  |
| 2.72   | -2.28 | -0.45 |  |  |
| 2.58   | -0.71 | 1.19  |  |  |
| 2.55   | 0.61  | 2.53  |  |  |
| 2.5    | -0.93 | 1.03  |  |  |
| 2.47   | -4.05 | -2.08 |  |  |
| 2.45   | -0.88 | 1.11  |  |  |
| 2.43   | -2.87 | -0.88 |  |  |
| 2.29   | -1.35 | 0.73  |  |  |
| 2.21   | -0.11 | 2.02  |  |  |
| 2.21   | -2.26 | -0.14 |  |  |
| 2.2    | -1.51 | 0.62  |  |  |
| 2.08   | -2.27 | -0.06 |  |  |
| 2      | -0.87 | 1.4   |  |  |
| 1.99   | -0.49 | 1.79  |  |  |
| 1.99   | -1    | 1.28  |  |  |
| 1.97   | -0.43 | 1.86  |  |  |
| 1.82   | -1.3  | 1.1   |  |  |
| 1.78   | -1.82 | 0.62  |  |  |
| 1.7    | -0.27 | 2.23  |  |  |
| 1.69   | -2.27 | 0.25  |  |  |
| 1.66   | -2.32 | 0.22  |  |  |
| 1.65   | -2.91 | -0.36 |  |  |
| 1.61   | -1.3  | 1.28  |  |  |
| 1.6    | -3.36 | -0.76 |  |  |
| 1.57   | -2.98 | -0.36 |  |  |
| 1.56   | -1.98 | 0.65  |  |  |
| 1.52   | -2.44 | 0.23  |  |  |
| 1.5    | -1.25 | 1.43  |  |  |
| 1.48   | -3.96 | -1.26 |  |  |
| 1.48   | -3.81 | -1.11 |  |  |
| 1.45   | -1.91 | 0.82  |  |  |
| 1.4    | -0.94 | 1.84  |  |  |
| 1.34   | -1.44 | 1.4   |  |  |
| 1.3    | -1.71 | 1.18  |  |  |
| 1.24   | -0.23 | 2.73  |  |  |
| 1.2    | -1.77 | 1.23  |  |  |
| 1.2    | -1.31 | 1.69  |  |  |
| 1.11   | -3.06 | 0.06  |  |  |

|        |       |       |  |  |
|--------|-------|-------|--|--|
| 1.11   | -1.02 | 2.1   |  |  |
| 1.08   | -3.13 | 0.02  |  |  |
| 1.07   | -2.77 | 0.4   |  |  |
| -1.03  | -1.19 | 2.12  |  |  |
| -1.06  | -2.47 | 0.88  |  |  |
| -1.13  | -1.51 | 1.94  |  |  |
| -1.24  | -2.19 | 1.39  |  |  |
| -1.26  | -2.69 | 0.92  |  |  |
| -1.79  | -0.27 | 0.87  |  |  |
| -2.33  | 0.86  | 2.38  |  |  |
| -2.82  | 4.13  | 5.93  |  |  |
| -4.43  | 4.19  | 6.64  |  |  |
| -23.72 | -0.95 | 3.92  |  |  |
| -1.79  | -0.27 | 0.87  |  |  |
| -2.33  | 0.86  | 2.38  |  |  |
| -2.82  | 4.13  | 5.93  |  |  |
| -4.43  | 4.19  | 6.64  |  |  |
| -23.72 | -0.95 | 3.92  |  |  |
| -1.77  | -4.61 | -3.47 |  |  |
| -1.83  | -4.45 | -3.26 |  |  |
| -2.41  | -5.26 | -3.66 |  |  |
| -1.39  | 3.75  | 4.9   |  |  |
| -1.54  | -5.47 | -4.18 |  |  |
| -1.68  | -3.17 | -1.75 |  |  |
| -2.54  | -0.08 | 1.07  |  |  |
| -2.91  | -1.12 | 0.22  |  |  |
| -2.58  | -1.75 | -0.61 |  |  |
| -2.77  | -0.02 | 1.23  |  |  |
| -4.04  | -1.27 | 0.52  |  |  |
| -1.65  | -6.28 | -5.14 |  |  |
| -2.4   | -4.43 | -2.75 |  |  |
| 2.31   | -0.82 | 0.32  |  |  |
| 2.3    | -2.04 | -0.89 |  |  |
| 2      | -2.19 | -0.83 |  |  |
| 1.84   | -1.89 | -0.41 |  |  |
| 1.76   | -2.93 | -1.39 |  |  |
| 1.62   | -2.08 | -0.41 |  |  |
| 1.55   | 1.07  | 2.79  |  |  |
| 1.52   | -2.11 | -0.36 |  |  |
| 1.22   | -2.98 | -0.91 |  |  |
| 1.22   | -1.65 | 0.43  |  |  |
| 1.16   | -0.14 | 2.01  |  |  |
| 1.09   | -2.53 | -0.31 |  |  |
| 1.07   | -0.39 | 1.87  |  |  |
| 1.04   | -1.54 | 0.76  |  |  |
| 1.03   | 3.29  | 5.6   |  |  |
| -1.06  | -2.63 | -0.18 |  |  |
| -1.14  | -1.88 | 0.66  |  |  |
| -1.17  | -3.24 | -0.65 |  |  |
| -2.11  | -1.62 | -0.48 |  |  |
| -2.32  | 0.13  | 1.42  |  |  |
| -1.43  | 1.87  | 3.01  |  |  |
| -1.68  | 2.08  | 3.45  |  |  |
| -2.54  | -0.77 | 0.37  |  |  |
| -3.59  | -4.77 | -3.13 |  |  |
| -2.18  | -5.19 | -4.04 |  |  |
| -2.19  | -3.87 | -2.71 |  |  |
| -2.42  | -3.53 | -2.23 |  |  |

|       |       |       |  |  |
|-------|-------|-------|--|--|
| -2.44 | -4.26 | -2.95 |  |  |
| -2.57 | -2.81 | -1.43 |  |  |
| -1.51 | -2.66 | -1.51 |  |  |
| -1.59 | -0.9  | 0.32  |  |  |
| -1.59 | 1.26  | 2.47  |  |  |
| -1.88 | -0.92 | 0.54  |  |  |
| 7.23  | -2.69 | -1.54 |  |  |
| 5.51  | -5.9  | -4.36 |  |  |
| -1.01 | -9.01 | -4.99 |  |  |
| -1.22 | -7.87 | -3.59 |  |  |
| -2.54 | -0.97 | 0.18  |  |  |
| -2.58 | -1.3  | -0.13 |  |  |
| -2.58 | -2.17 | -1.01 |  |  |
| -3.01 | -1.28 | 0.1   |  |  |
| -3.05 | -2.33 | -0.92 |  |  |
| -2.25 | -2.6  | -1.46 |  |  |
| -2.37 | -2.21 | -0.99 |  |  |
| -2.5  | -2.04 | -0.75 |  |  |
| -3.02 | -4.09 | -2.52 |  |  |
| -1.96 | -6.05 | -4.9  |  |  |
| -2.62 | -5.41 | -3.85 |  |  |
| -1.26 | -2.36 | -1.22 |  |  |
| -1.45 | -0.54 | 0.8   |  |  |
| -1.59 | -1.55 | -0.07 |  |  |
| 1.11  | -0.86 | 0.28  |  |  |
| 1.02  | -1.73 | -0.46 |  |  |
| -1.06 | 4.58  | 5.96  |  |  |
| -1.09 | 2.69  | 4.11  |  |  |
| -1.23 | 2.67  | 4.26  |  |  |
| -1.34 | 0.12  | 1.84  |  |  |
| -1.66 | -3.93 | -2.78 |  |  |
| -1.97 | -2.57 | -1.18 |  |  |
| -2.21 | -2.48 | -0.92 |  |  |
| -6.63 | -2.96 | 0.19  |  |  |
| -2    | -8.17 | -7.03 |  |  |
| -2.93 | -8.3  | -6.6  |  |  |
| -1.66 | -1.42 | -0.28 |  |  |
| -1.73 | 0.18  | 1.38  |  |  |
| -2.37 | -5.23 | -4.09 |  |  |
| -5.39 | -6.34 | -4.01 |  |  |
| 1.52  | 6.23  | 7.38  |  |  |
| 1.16  | 1.21  | 2.74  |  |  |
| 1.25  | -6.37 | -5.22 |  |  |
| 1.07  | -2.91 | -1.55 |  |  |
| -2.48 | -1.79 | -0.64 |  |  |
| -3.36 | -2.59 | -1    |  |  |
| -2.7  | -2.25 | -1.1  |  |  |
| -4.46 | -4.33 | -2.45 |  |  |
| -4.18 | -0.79 | 0.36  |  |  |
| -4.37 | 0.21  | 1.42  |  |  |
| -2.2  | -2.85 | -1.7  |  |  |
| -2.36 | -2.72 | -1.47 |  |  |
| -2.37 | 0.28  | 1.54  |  |  |
| -1.6  | -7.48 | -6.33 |  |  |
| -1.63 | -6.62 | -5.44 |  |  |
| -1.54 | -3.12 | -1.97 |  |  |
| -1.59 | -1.2  | 0     |  |  |
| -2.35 | 0.76  | 2.52  |  |  |



|       |       |       |  |  |
|-------|-------|-------|--|--|
| -1.6  | 0.6   | 1.75  |  |  |
| -2.44 | 3.57  | 5.33  |  |  |
| -2.79 | -1.63 | 0.32  |  |  |
| -2.66 | -2.85 | -1.69 |  |  |
| -2.67 | -0.26 | 0.9   |  |  |
| 1.11  | 0.88  | 2.03  |  |  |
| -1.14 | -4.83 | -3.33 |  |  |
| -1.15 | 6.38  | 7.88  |  |  |
| -1.22 | 0.37  | 1.96  |  |  |
| -2.09 | -1.43 | -0.27 |  |  |
| -2.17 | -1.05 | 0.15  |  |  |
| -2.21 | -3.77 | -2.54 |  |  |
| -2.47 | -7.74 | -6.59 |  |  |
| -5.47 | -8.11 | -5.81 |  |  |
| -7.4  | -7.05 | -4.32 |  |  |
| 36.64 | 0.99  | 2.15  |  |  |
| 5.35  | -5.87 | -1.93 |  |  |
| 1.16  | -2.43 | -1.27 |  |  |
| -1.03 | 5.01  | 6.43  |  |  |
| -1.06 | -0.38 | 1.07  |  |  |
| -2.49 | -6.96 | -5.81 |  |  |
| -2.61 | -3.95 | -2.72 |  |  |
| 1.1   | -2.78 | -1.62 |  |  |
| 1.04  | -2.44 | -1.21 |  |  |
| 1.02  | -0.89 | 0.36  |  |  |
| -1    | -3.64 | -2.35 |  |  |
| -1.01 | -0.66 | 0.65  |  |  |
| -1.08 | 6.26  | 7.66  |  |  |
| -1.11 | -2.6  | -1.16 |  |  |
| -1.37 | -0.83 | 0.92  |  |  |
| -1.48 | -3.05 | -1.19 |  |  |
| -1.66 | -2.87 | -0.85 |  |  |
| -1.58 | -3.53 | -2.37 |  |  |
| -1.67 | -2.77 | -1.52 |  |  |
| -1.73 | -3.14 | -1.85 |  |  |
| -1.91 | -3.52 | -2.08 |  |  |
| -2.2  | 0.78  | 1.94  |  |  |
| -2.34 | -1.54 | -0.29 |  |  |
| -1.82 | -2.82 | -1.66 |  |  |
| -2.32 | -4.3  | -2.79 |  |  |
| -2.31 | -4.04 | -2.88 |  |  |
| -2.57 | -2.32 | -1.01 |  |  |
| -1.19 | -5.19 | -4.03 |  |  |
| -1.66 | -3.92 | -2.28 |  |  |
| -1.74 | -2.42 | -1.25 |  |  |
| -2.04 | -2.9  | -1.51 |  |  |
| -2.76 | -3.89 | -2.06 |  |  |
| -2.41 | -6.44 | -5.28 |  |  |
| -2.79 | -7.26 | -5.89 |  |  |
| -3.61 | -3.02 | -1.27 |  |  |
| -3.8  | -4.1  | -2.28 |  |  |
| -4.7  | -5.9  | -3.77 |  |  |
| -2.52 | -1.94 | -0.78 |  |  |
| -3.63 | -2.96 | -1.27 |  |  |
| 1.25  | -1.69 | -0.52 |  |  |
| -1.04 | -3.66 | -2.11 |  |  |
| -1.11 | 4.01  | 5.65  |  |  |
| 1.64  | -1.63 | -0.47 |  |  |

|       |       |       |  |  |
|-------|-------|-------|--|--|
| 1.49  | 0.43  | 1.73  |  |  |
| -2.71 | -2    | -0.84 |  |  |
| -3.24 | 1.57  | 2.99  |  |  |
| -3.36 | 0.54  | 2.01  |  |  |
| -3.43 | 0.91  | 2.41  |  |  |
| -6.59 | -1.12 | 1.32  |  |  |
| -1.89 | -0.7  | 0.47  |  |  |
| -1.99 | -2.34 | -1.1  |  |  |
| -2.91 | 0.47  | 2.26  |  |  |
| -3.31 | -5.09 | -3.12 |  |  |
| -1.47 | -5.85 | -4.68 |  |  |
| -1.9  | -5.63 | -4.1  |  |  |
| -2.26 | -1.84 | -0.67 |  |  |
| -2.48 | -4.91 | -3.61 |  |  |
| -1.58 | 2.11  | 3.28  |  |  |
| -1.65 | -0.6  | 0.63  |  |  |
| -2.42 | -2.58 | -1.42 |  |  |
| -2.52 | -1.95 | -0.72 |  |  |
| 1.62  | 0.41  | 1.58  |  |  |
| 1.52  | -1.28 | -0.01 |  |  |
| 1.5   | -1.05 | 0.23  |  |  |
| 1.45  | 2.78  | 4.1   |  |  |
| 1.31  | -2.19 | -0.71 |  |  |
| 1.23  | -1.49 | 0.07  |  |  |
| 1.15  | -0.45 | 1.21  |  |  |
| -1.08 | -1.85 | 0.12  |  |  |
| -1.12 | -2.15 | -0.11 |  |  |
| -1.12 | -0.6  | 1.43  |  |  |
| -1.2  | 2.44  | 4.56  |  |  |
| -1.22 | 3.28  | 5.44  |  |  |
| -1.26 | 0.62  | 2.81  |  |  |
| -1.34 | -1.13 | 1.16  |  |  |
| -1.58 | -1.48 | 1.05  |  |  |
| -2.29 | -0.65 | 0.52  |  |  |
| -2.74 | -2.07 | -0.64 |  |  |
| -2.34 | -3.17 | -2    |  |  |
| -3.12 | -3.65 | -2.06 |  |  |
| -3.2  | -2.9  | -1.28 |  |  |
| -3.63 | -1.39 | -0.22 |  |  |
| -4.76 | -1.76 | -0.19 |  |  |
| -1.26 | 0.1   | 1.26  |  |  |
| -1.4  | 0.71  | 2.03  |  |  |
| -1.49 | -1.84 | -0.67 |  |  |
| -1.62 | -2.03 | -0.73 |  |  |
| -2.99 | 3.72  | 5.89  |  |  |
| -2.22 | -1.56 | -0.4  |  |  |
| -2.33 | -2.57 | -1.33 |  |  |
| -2.44 | -2.31 | -1.01 |  |  |
| 1.12  | -1.22 | -0.05 |  |  |
| 1.07  | 1.52  | 2.74  |  |  |
| 1.07  | 0.79  | 2.02  |  |  |
| -2.59 | -2.58 | -1.41 |  |  |
| -2.66 | -1.59 | -0.38 |  |  |
| -4.4  | -2.93 | -1    |  |  |
| -2.29 | -0.65 | 0.52  |  |  |
| -2.74 | -2.07 | -0.64 |  |  |
| -2.29 | -0.65 | 0.52  |  |  |
| -2.74 | -2.07 | -0.64 |  |  |

|       |       |       |  |  |
|-------|-------|-------|--|--|
| -2.29 | -0.65 | 0.52  |  |  |
| -2.74 | -2.07 | -0.64 |  |  |
| -2.29 | -0.65 | 0.52  |  |  |
| -2.74 | -2.07 | -0.64 |  |  |
| -2.29 | -0.65 | 0.52  |  |  |
| -2.74 | -2.07 | -0.64 |  |  |
| -2.29 | -0.65 | 0.52  |  |  |
| -2.74 | -2.07 | -0.64 |  |  |
| -1.42 | 2.22  | 3.4   |  |  |
| -1.55 | -0.42 | 0.88  |  |  |
| -1.73 | -2.52 | -1.05 |  |  |
| -1.66 | -3.6  | -2.42 |  |  |
| -1.7  | -3.07 | -1.87 |  |  |
| -1.81 | -0.36 | 0.94  |  |  |
| -1.86 | -3.93 | -2.59 |  |  |
| -1.91 | -6.14 | -4.97 |  |  |
| -2.14 | -6.15 | -4.81 |  |  |
| -1.9  | -4.06 | -2.88 |  |  |
| -2.01 | -4.39 | -3.13 |  |  |
| -2.04 | -3.98 | -2.7  |  |  |
| -1.98 | -4.96 | -3.79 |  |  |
| -2.33 | -3.29 | -1.88 |  |  |
| -2.2  | -4.42 | -3.25 |  |  |
| -2.29 | -3.07 | -1.84 |  |  |
| -1.46 | -0.74 | 0.43  |  |  |
| -1.7  | 0.99  | 2.39  |  |  |
| -1.66 | -4.29 | -3.11 |  |  |
| -1.8  | -4.88 | -3.59 |  |  |
| -2.81 | -5.41 | -3.48 |  |  |
| -2.35 | -3.32 | -2.14 |  |  |
| -2.61 | -3.01 | -1.69 |  |  |
| -3.12 | 0.15  | 1.34  |  |  |
| -4.47 | 0.23  | 1.94  |  |  |
| -2.76 | -2.61 | -1.43 |  |  |
| -3.16 | -2.04 | -0.66 |  |  |
| -1.45 | -0.88 | 0.3   |  |  |
| -1.5  | 1.94  | 3.16  |  |  |
| -1.81 | 1.02  | 2.52  |  |  |
| -1.66 | -1.17 | 0.01  |  |  |
| -2.59 | -1.2  | 0.63  |  |  |
| -2.23 | 0.82  | 2     |  |  |
| -2.48 | 1.71  | 3.05  |  |  |
| -1.32 | -6.26 | -5.08 |  |  |
| -1.61 | -3.54 | -2.07 |  |  |
| 3.01  | -2    | -0.81 |  |  |
| 2.71  | 0.27  | 1.61  |  |  |
| 2.67  | -1.7  | -0.34 |  |  |
| 1.95  | -2.11 | -0.3  |  |  |
| 1.94  | 0.06  | 1.88  |  |  |
| 1.71  | -4.56 | -2.56 |  |  |
| 1.46  | -0.85 | 1.39  |  |  |
| 1.27  | -3.9  | -1.47 |  |  |
| 1.04  | -3.69 | -0.96 |  |  |
| 1.47  | -1.49 | -0.3  |  |  |
| 1.46  | 2.41  | 3.61  |  |  |
| 1.38  | 1.05  | 2.32  |  |  |
| 1.3   | -0.98 | 0.38  |  |  |
| 1.3   | 0.54  | 1.9   |  |  |

|       |       |       |  |  |
|-------|-------|-------|--|--|
| 1.28  | -3.34 | -1.95 |  |  |
| 1.25  | 0.51  | 1.92  |  |  |
| 1.17  | -0.97 | 0.54  |  |  |
| 1.11  | 1.58  | 3.17  |  |  |
| -1.08 | 1.07  | 2.92  |  |  |
| -1.15 | -3.45 | -1.51 |  |  |
| -1.18 | -2.97 | -0.99 |  |  |
| -1.2  | 2.05  | 4.05  |  |  |
| -1.35 | -3.13 | -0.96 |  |  |
| 1.58  | -1.33 | -0.14 |  |  |
| 1.51  | -3.81 | -2.56 |  |  |
| -1.01 | 0.28  | 2.15  |  |  |
| -1.02 | -3.61 | -1.73 |  |  |
| -2.99 | -2.18 | -1    |  |  |
| -3.3  | -3.09 | -1.76 |  |  |
| -1.32 | -0.57 | 0.62  |  |  |
| -1.36 | 1.25  | 2.48  |  |  |
| -1.84 | -1.24 | -0.05 |  |  |
| -2.6  | -1.94 | -0.25 |  |  |
| -2.68 | -1.23 | 0.5   |  |  |
| -3.27 | -2.99 | -0.97 |  |  |
| 9.63  | -4.71 | -3.52 |  |  |
| 8.88  | 0.52  | 1.82  |  |  |
| 6.98  | -2.59 | -0.93 |  |  |
| 2.74  | -3.65 | -0.65 |  |  |
| 2.46  | -7.29 | -4.13 |  |  |
| 1.77  | -2.56 | 1.08  |  |  |
| -1.06 | -5.43 | -0.89 |  |  |
| -1.58 | -0.96 | 0.23  |  |  |
| -1.6  | -0.34 | 0.86  |  |  |
| -1.91 | -3.72 | -2.54 |  |  |
| -2.24 | -3.72 | -2.31 |  |  |
| -2.29 | -0.66 | 0.52  |  |  |
| -2.96 | -2.2  | -0.64 |  |  |
| -1.68 | -2.92 | -1.72 |  |  |
| -3.91 | -2.52 | -0.11 |  |  |
| 1.17  | -3.17 | -1.98 |  |  |
| 1.11  | -6.13 | -4.86 |  |  |
| 1.06  | -0.99 | 0.34  |  |  |
| -1.29 | -4.97 | -3.18 |  |  |
| -1.58 | -7.24 | -5.16 |  |  |
| -2.19 | -5.08 | -3.88 |  |  |
| -2.54 | -2.93 | -1.52 |  |  |
| -1.94 | -7.35 | -6.15 |  |  |
| -3.43 | -6.35 | -4.33 |  |  |
| 10.06 | -3.44 | -2.24 |  |  |
| 9.45  | -1.77 | -0.48 |  |  |
| 8.92  | -0.62 | 0.75  |  |  |
| 6.53  | 0.03  | 1.86  |  |  |
| 5.71  | -3.07 | -1.06 |  |  |
| 5.14  | 1.81  | 3.98  |  |  |
| 1.37  | -1.93 | 2.15  |  |  |
| 1.24  | -5.27 | -1.05 |  |  |
| 1.19  | -3.67 | 0.6   |  |  |
| 1.13  | -3.99 | 0.36  |  |  |
| -1.04 | -0.68 | 3.9   |  |  |
| -1.07 | -3.51 | 1.12  |  |  |
| -1.19 | -2.52 | 2.26  |  |  |

|       |       |       |  |  |
|-------|-------|-------|--|--|
| -1.64 | -5.91 | -0.66 |  |  |
| -3.78 | -3.07 | -1.87 |  |  |
| -3.82 | -1.28 | -0.07 |  |  |
| -5.78 | -1.82 | 0     |  |  |
| -1.25 | -1.16 | 0.04  |  |  |
| -1.4  | -0.86 | 0.51  |  |  |
| -3.92 | -1.69 | -0.49 |  |  |
| -4.25 | -2.37 | -1.05 |  |  |
| -5.26 | -2.21 | -0.58 |  |  |
| -2.11 | -4.48 | -3.28 |  |  |
| -2.38 | -2.34 | -0.97 |  |  |
| -2.49 | -3.43 | -1.99 |  |  |
| -2.97 | -2.42 | -0.72 |  |  |
| -2.44 | -1.38 | -0.18 |  |  |
| -2.7  | -1.84 | -0.5  |  |  |
| -3.78 | -3.07 | -1.87 |  |  |
| -3.82 | -1.28 | -0.07 |  |  |
| -5.78 | -1.82 | 0     |  |  |
| -1.25 | -1.16 | 0.04  |  |  |
| -1.4  | -0.86 | 0.51  |  |  |
| -3.78 | -3.07 | -1.87 |  |  |
| -3.82 | -1.28 | -0.07 |  |  |
| -5.78 | -1.82 | 0     |  |  |
| -3.78 | -3.07 | -1.87 |  |  |
| -3.82 | -1.28 | -0.07 |  |  |
| -5.78 | -1.82 | 0     |  |  |
| -1.25 | -1.16 | 0.04  |  |  |
| -1.4  | -0.86 | 0.51  |  |  |
| -3.78 | -3.07 | -1.87 |  |  |
| -3.82 | -1.28 | -0.07 |  |  |
| -5.78 | -1.82 | 0     |  |  |
| -1.25 | -1.16 | 0.04  |  |  |
| -1.4  | -0.86 | 0.51  |  |  |
| -3.78 | -3.07 | -1.87 |  |  |
| -3.82 | -1.28 | -0.07 |  |  |
| -5.78 | -1.82 | 0     |  |  |
| -3.78 | -3.07 | -1.87 |  |  |
| -3.82 | -1.28 | -0.07 |  |  |
| -5.78 | -1.82 | 0     |  |  |
| 1.08  | -1.96 | -0.75 |  |  |
| -1.08 | 2.51  | 3.93  |  |  |
| -1.28 | -2.6  | -0.93 |  |  |
| -1.75 | 3.15  | 5.28  |  |  |
| 1.01  | -4.46 | -3.26 |  |  |
| -1.18 | -3.72 | -2.25 |  |  |
| -2.26 | -1.92 | -0.72 |  |  |
| -2.37 | -3.36 | -2.08 |  |  |
| -1.82 | -0.15 | 1.06  |  |  |
| -1.87 | -0.11 | 1.13  |  |  |
| -1.91 | -5.32 | -4.12 |  |  |
| -2.22 | -6.02 | -4.6  |  |  |
| -1.76 | -0.41 | 0.8   |  |  |
| -2.53 | -2.43 | -0.69 |  |  |
| -1.19 | -1.25 | -0.04 |  |  |
| -2.62 | 2.59  | 4.93  |  |  |
| -2.36 | -6.94 | -5.73 |  |  |
| -2.78 | -5.84 | -4.4  |  |  |
| -2.86 | -5.71 | -4.22 |  |  |

|        |       |       |  |  |
|--------|-------|-------|--|--|
| -1.97  | -3    | -1.79 |  |  |
| -2.17  | 2.66  | 4.01  |  |  |
| -2.39  | -4.3  | -2.81 |  |  |
| 2.58   | -1.82 | -0.61 |  |  |
| 1.29   | -3.07 | -0.86 |  |  |
| -1.04  | -2.13 | 0.5   |  |  |
| -1.01  | 3.85  | 5.06  |  |  |
| -1.05  | -1.64 | -0.37 |  |  |
| 3.6    | -1.68 | -0.47 |  |  |
| 3.12   | 1.43  | 2.85  |  |  |
| 2.43   | -0.88 | 0.9   |  |  |
| 2.06   | -3.47 | -1.45 |  |  |
| 1.87   | -2.29 | -0.13 |  |  |
| 1.45   | -0.53 | 2     |  |  |
| 1.25   | -2.54 | 0.2   |  |  |
| 1.19   | 0.47  | 3.28  |  |  |
| -1.93  | -1.84 | -0.63 |  |  |
| -2.02  | 1.24  | 2.52  |  |  |
| -2.14  | -3.16 | -1.8  |  |  |
| -2.38  | -1.8  | -0.29 |  |  |
| -3.37  | -3.99 | -1.97 |  |  |
| -5.07  | -3.03 | -0.42 |  |  |
| -10.97 | -3.73 | -0.01 |  |  |
| -1.85  | -1.9  | -0.69 |  |  |
| -2.64  | -2.73 | -1    |  |  |
| -2.82  | 5.01  | 6.22  |  |  |
| -3.95  | 1.77  | 3.47  |  |  |
| -4.62  | 4.44  | 6.36  |  |  |
| -23.72 | -0.07 | 4.21  |  |  |
| -2.19  | -2.82 | -1.6  |  |  |
| -3.51  | -4.38 | -2.48 |  |  |
| -3.39  | -2.28 | -1.06 |  |  |
| -3.72  | -6.87 | -5.51 |  |  |
| -8.96  | -5.98 | -3.36 |  |  |
| 1.61   | 0.79  | 2.01  |  |  |
| 1.45   | 0     | 1.37  |  |  |
| 1.42   | 1.17  | 2.58  |  |  |
| 1.07   | 1.5   | 3.31  |  |  |
| -1.11  | 5.39  | 7.45  |  |  |
| -2.35  | -1.1  | 0.12  |  |  |
| -3.86  | -3.06 | -1.12 |  |  |
| -1.44  | -2.23 | -1.01 |  |  |
| -1.54  | -2.35 | -1.04 |  |  |
| -1.98  | -2.42 | -0.74 |  |  |
| -1.68  | -2.08 | -0.86 |  |  |
| -1.71  | -2.12 | -0.87 |  |  |
| -1.72  | -3.11 | -1.85 |  |  |
| -2.59  | -3.55 | -1.7  |  |  |
| -1.31  | -6.59 | -5.37 |  |  |
| -1.42  | -6.62 | -5.28 |  |  |
| -1.51  | -4.1  | -2.67 |  |  |
| 1.12   | -3.83 | -2.61 |  |  |
| 1.06   | -3.27 | -1.98 |  |  |
| -1.2   | -0.52 | 1.12  |  |  |
| -1.56  | -8.88 | -6.86 |  |  |
| -2.48  | 0.05  | 1.27  |  |  |
| -3.39  | -2.35 | -0.68 |  |  |
| -3.67  | -4.12 | -2.33 |  |  |

|        |       |       |  |  |
|--------|-------|-------|--|--|
| -1.75  | -3.44 | -2.21 |  |  |
| -1.87  | -1.83 | -0.5  |  |  |
| 1.4    | -3.29 | -2.07 |  |  |
| 1.23   | -4.39 | -2.97 |  |  |
| 1.14   | -3.89 | -2.37 |  |  |
| -1.95  | -0.51 | 0.71  |  |  |
| -3.01  | -1.9  | -0.04 |  |  |
| -2.03  | -2.48 | -1.25 |  |  |
| -2.1   | -2.68 | -1.4  |  |  |
| -2.08  | -4.47 | -3.24 |  |  |
| -2.71  | -5.63 | -4.01 |  |  |
| -3.29  | -5.97 | -4.07 |  |  |
| -1.75  | -3.3  | -2.07 |  |  |
| -2.2   | -2.59 | -1.02 |  |  |
| -2.12  | -0.99 | 0.25  |  |  |
| -2.73  | -0.58 | 1.01  |  |  |
| -1.47  | -2.26 | -1.03 |  |  |
| -2.5   | -3.58 | -1.59 |  |  |
| -3.78  | -0.47 | 0.77  |  |  |
| -5.5   | 0     | 1.77  |  |  |
| -9.98  | 1.98  | 4.61  |  |  |
| -12.82 | 1.57  | 4.56  |  |  |
| -2.05  | -1.13 | 0.1   |  |  |
| -2.29  | -0.21 | 1.19  |  |  |
| -1.89  | -1.28 | -0.04 |  |  |
| -1.98  | -1.18 | 0.11  |  |  |
| -3.04  | -1.6  | 0.32  |  |  |
| -1.85  | 0.3   | 1.53  |  |  |
| -1.89  | 1.67  | 2.93  |  |  |
| -1.9   | -0.99 | 0.28  |  |  |
| -2.11  | -0.03 | 1.38  |  |  |
| -2.25  | -0.58 | 0.93  |  |  |
| -2.52  | -2.05 | -0.81 |  |  |
| -2.81  | -1.91 | -0.51 |  |  |
| -3.09  | -2.43 | -0.91 |  |  |
| -6.38  | -4.28 | -1.7  |  |  |
| -2.19  | -4.75 | -3.51 |  |  |
| -3.26  | -3.99 | -2.18 |  |  |
| -4.95  | -6.19 | -3.78 |  |  |
| -2.93  | -1.52 | -0.28 |  |  |
| -3.07  | -3.37 | -2.07 |  |  |
| -1.53  | -1.71 | -0.47 |  |  |
| -1.65  | -2.68 | -1.34 |  |  |
| -1.73  | 0.47  | 1.71  |  |  |
| -2.44  | 3.42  | 5.16  |  |  |
| -1.71  | -0.17 | 1.08  |  |  |
| -1.91  | 3.11  | 4.51  |  |  |
| 1.02   | -2.32 | -1.07 |  |  |
| -1.35  | -3.16 | -1.45 |  |  |
| -1.7   | 0.16  | 1.4   |  |  |
| -1.98  | 0.28  | 1.74  |  |  |
| 2.38   | -3.47 | -2.23 |  |  |
| 2.12   | -1.75 | -0.34 |  |  |
| 1.71   | -0.45 | 1.27  |  |  |
| 1.6    | -5.57 | -3.75 |  |  |
| -2.77  | -5.37 | -4.13 |  |  |
| -3.01  | -3.38 | -2.01 |  |  |
| -2.32  | -1.71 | -0.46 |  |  |

|        |       |       |  |  |
|--------|-------|-------|--|--|
| -2.39  | -2.88 | -1.6  |  |  |
| -2.06  | -0.2  | 1.05  |  |  |
| -13.12 | -2.09 | 1.83  |  |  |
| -1.78  | 0.01  | 1.26  |  |  |
| -1.97  | -2.33 | -0.93 |  |  |
| 2.1    | -6.41 | -5.17 |  |  |
| 2.1    | -4.25 | -3    |  |  |
| 2.04   | -7.18 | -5.89 |  |  |
| 1.88   | -8.32 | -6.91 |  |  |
| 1.63   | -7.51 | -5.9  |  |  |
| -1.03  | -8.77 | -6.42 |  |  |
| -1.13  | 3.68  | 4.94  |  |  |
| -1.39  | -1.61 | -0.05 |  |  |
| 2.1    | 0.55  | 1.8   |  |  |
| 1.99   | 2.42  | 3.74  |  |  |
| 1.81   | -3.13 | -1.66 |  |  |
| 1.74   | -2.82 | -1.3  |  |  |
| 1.73   | 0.08  | 1.61  |  |  |
| 1.67   | -4.41 | -2.84 |  |  |
| 1.58   | -3.93 | -2.27 |  |  |
| 1.37   | -3.2  | -1.34 |  |  |
| 1.34   | -0.37 | 1.53  |  |  |
| 1.19   | 0.01  | 2.07  |  |  |
| 1.07   | -0.78 | 1.44  |  |  |
| -1.38  | -5.87 | -4.62 |  |  |
| -1.43  | -7.45 | -6.15 |  |  |
| -1.44  | -8.34 | -7.03 |  |  |
| 3.11   | -1.5  | -0.25 |  |  |
| 2.61   | -7.46 | -5.96 |  |  |
| 2.4    | 1.41  | 3.03  |  |  |
| 2.3    | 2.08  | 3.76  |  |  |
| 1.86   | 2.16  | 4.15  |  |  |
| -1.25  | -1.21 | 0.05  |  |  |
| -1.4   | -0.91 | 0.51  |  |  |
| -2.06  | 1.22  | 2.48  |  |  |
| -2.38  | -3.59 | -2.12 |  |  |
| -2.45  | -2.53 | -1.03 |  |  |
| -4.38  | -1.01 | 0.25  |  |  |
| -6.5   | 1.27  | 3.1   |  |  |
| 1.59   | 0.08  | 1.34  |  |  |
| -1     | -3.06 | -1.13 |  |  |
| -1.1   | 2.96  | 5.02  |  |  |
| -2.35  | -3.08 | -1.82 |  |  |
| -2.48  | -2.55 | -1.21 |  |  |
| -4.09  | -2.7  | -0.64 |  |  |
| -1.83  | -5.03 | -3.77 |  |  |
| -2.93  | -7.11 | -5.17 |  |  |
| -2.12  | -2.46 | -1.19 |  |  |
| -2.71  | -4.23 | -2.61 |  |  |
| -2.04  | -2.89 | -1.62 |  |  |
| -2.69  | -1.96 | -0.29 |  |  |
| -2.76  | -2.33 | -0.63 |  |  |
| -3.85  | -1.57 | 0.61  |  |  |
| -5.96  | -0.94 | 1.87  |  |  |
| -1.73  | -3.87 | -2.6  |  |  |
| -2.1   | -3.97 | -2.41 |  |  |
| -1.26  | -0.34 | 0.93  |  |  |
| -1.45  | -0.74 | 0.74  |  |  |



|       |       |       |  |  |
|-------|-------|-------|--|--|
| -1.75 | -0.67 | 1.08  |  |  |
| -3.76 | 2.02  | 3.29  |  |  |
| -8.5  | -0.34 | 2.1   |  |  |
| -2.16 | -3.08 | -1.8  |  |  |
| -2.69 | -2.49 | -0.9  |  |  |
| -2.12 | -0.83 | 0.45  |  |  |
| -3.46 | -1.09 | 0.89  |  |  |
| -2.07 | -4.4  | -3.12 |  |  |
| -2.18 | -6    | -4.64 |  |  |
| 1.66  | -1.97 | -0.69 |  |  |
| 1.35  | 0.08  | 1.65  |  |  |
| -2.22 | -0.79 | 0.49  |  |  |
| -2.41 | -1.98 | -0.58 |  |  |
| -2.43 | -2.51 | -1.1  |  |  |
| 1.07  | -5.66 | -4.37 |  |  |
| -1.01 | -5.66 | -4.26 |  |  |
| -1.03 | -5.15 | -3.73 |  |  |
| -1.03 | -3.12 | -1.7  |  |  |
| -1.05 | -5.15 | -3.69 |  |  |
| -1.08 | -3.35 | -1.87 |  |  |
| -1.72 | -6.31 | -4.15 |  |  |
| -3.12 | 0.91  | 2.19  |  |  |
| -3.6  | 1.11  | 2.6   |  |  |
| -4.84 | -0.23 | 1.68  |  |  |
| 1.1   | -0.48 | 0.81  |  |  |
| -2.39 | -3.88 | -1.2  |  |  |
| 1.5   | -4.11 | -2.81 |  |  |
| 1.03  | 2.53  | 4.37  |  |  |
| 1     | 1.07  | 2.95  |  |  |
| 4.56  | -1.04 | 0.25  |  |  |
| 2.49  | -2.16 | 0.01  |  |  |
| 1.25  | -1.61 | 1.55  |  |  |
| 1.1   | -2.94 | 0.4   |  |  |
| -1.19 | 0.06  | 3.79  |  |  |
| -1.28 | -4    | -2.7  |  |  |
| -1.28 | 0.05  | 1.35  |  |  |
| -1.5  | -1.93 | -0.4  |  |  |
| -1.56 | -0.9  | 0.68  |  |  |
| -1.71 | 0.46  | 2.17  |  |  |
| -1.73 | 0.4   | 2.13  |  |  |
| -1.88 | -0.03 | 1.81  |  |  |
| -2.51 | -2.68 | -1.39 |  |  |
| -2.93 | -2.07 | -0.55 |  |  |
| -2.73 | -4.55 | -3.25 |  |  |
| -3.68 | -3.74 | -2.01 |  |  |
| -2.8  | -3.22 | -1.92 |  |  |
| -3.93 | -4.08 | -2.3  |  |  |
| -2.42 | -2.78 | -1.48 |  |  |
| -2.71 | -3.05 | -1.58 |  |  |
| -4.02 | -1.54 | -0.23 |  |  |
| -5.68 | -2.77 | -0.96 |  |  |
| -2.42 | -2.12 | -0.81 |  |  |
| -3.07 | -3.49 | -1.84 |  |  |
| -3.09 | -1.56 | 0.1   |  |  |
| -2.86 | -4.02 | -2.71 |  |  |
| -4.2  | -4.82 | -2.96 |  |  |
| -3.39 | -2.09 | -0.77 |  |  |
| -3.41 | -2.94 | -1.62 |  |  |

|       |       |       |  |  |
|-------|-------|-------|--|--|
| -3.88 | -4.23 | -2.72 |  |  |
| 2.37  | -0.67 | 0.65  |  |  |
| -1.22 | -2.71 | 0.14  |  |  |
| -1.7  | -2.08 | -0.77 |  |  |
| -1.8  | -3.01 | -1.62 |  |  |
| -1.89 | -1.38 | 0.08  |  |  |
| -2.82 | 4.34  | 5.65  |  |  |
| -3.36 | 1.27  | 2.84  |  |  |
| -4.43 | 4.39  | 6.36  |  |  |
| -1.67 | -3.3  | -1.99 |  |  |
| -1.77 | -2.37 | -0.97 |  |  |
| -2.63 | -2.07 | -0.1  |  |  |
| -3.72 | -1.96 | -0.65 |  |  |
| -3.73 | -3.64 | -2.32 |  |  |
| -1.49 | -4.19 | -2.86 |  |  |
| -1.67 | -5.16 | -3.67 |  |  |
| -1.57 | -1.61 | -0.29 |  |  |
| -1.64 | 0.64  | 2.02  |  |  |
| -3.17 | -0.68 | 0.65  |  |  |
| -3.34 | -2.74 | -1.34 |  |  |
| -3.57 | -0.88 | 0.63  |  |  |
| -2.88 | -2.89 | -1.55 |  |  |
| -3.83 | -1    | 0.75  |  |  |
| -6.79 | -4.31 | -1.73 |  |  |
| -2.01 | -5.11 | -3.77 |  |  |
| -2.94 | -4.69 | -2.8  |  |  |
| -2.1  | 1.1   | 2.45  |  |  |
| -2.14 | -4.23 | -2.85 |  |  |
| -4.38 | -3.3  | -0.89 |  |  |
| -2.89 | -4.28 | -2.93 |  |  |
| -3.24 | -4.92 | -3.4  |  |  |
| -3.39 | -5.21 | -3.62 |  |  |
| -1.51 | -2.04 | -0.69 |  |  |
| -1.9  | -3.27 | -1.59 |  |  |
| 1.33  | -1.37 | -0.01 |  |  |
| 1.04  | 0.94  | 2.65  |  |  |
| -3.1  | -3.86 | -2.5  |  |  |
| -4.64 | -5.69 | -3.75 |  |  |
| 1.44  | -5.85 | -4.48 |  |  |
| 1.2   | -1.52 | 0.11  |  |  |
| -1.68 | -1.33 | 0.05  |  |  |
| -2.7  | -1.12 | 0.95  |  |  |
| -1.04 | -2.2  | -0.82 |  |  |
| -1.26 | -2.81 | -1.16 |  |  |
| -1.29 | -5.59 | -3.91 |  |  |
| -1.45 | -4.36 | -2.51 |  |  |
| -1.2  | 0.14  | 1.52  |  |  |
| -1.28 | 0.17  | 1.64  |  |  |
| -1.56 | -4.55 | -3.16 |  |  |
| -1.6  | -4.75 | -3.32 |  |  |
| -1.69 | -2.55 | -1.05 |  |  |
| -1.69 | -4.19 | -2.69 |  |  |
| -1.9  | -6.53 | -4.85 |  |  |
| -2.05 | -3.89 | -2.1  |  |  |
| -3.39 | -4.06 | -2.67 |  |  |
| -5.13 | -4.42 | -2.43 |  |  |
| -3.09 | -1.69 | -0.29 |  |  |
| -3.24 | -0.34 | 1.12  |  |  |

|       |       |       |  |  |
|-------|-------|-------|--|--|
| -3.67 | -0.38 | 1.26  |  |  |
| -5.47 | -1.56 | 0.65  |  |  |
| 1.32  | -1.28 | 0.12  |  |  |
| 1.3   | -2.25 | -0.83 |  |  |
| -1.05 | 4.06  | 5.93  |  |  |
| -1.15 | -2.31 | -0.31 |  |  |
| -2.41 | -6.15 | -4.75 |  |  |
| -4.68 | -6.95 | -4.58 |  |  |
| -1.25 | -5.09 | -3.68 |  |  |
| -1.26 | -7.12 | -5.69 |  |  |
| -1.36 | -6.44 | -4.9  |  |  |
| -2.21 | -6.36 | -4.96 |  |  |
| -2.59 | -6.13 | -4.5  |  |  |
| 4.06  | -1.15 | 0.27  |  |  |
| 4.01  | -3.17 | -1.74 |  |  |
| 3.25  | -4.1  | -2.37 |  |  |
| 3.16  | -4.37 | -2.6  |  |  |
| 3.09  | -1.96 | -0.15 |  |  |
| 3     | -3.98 | -2.13 |  |  |
| 2.78  | -3.28 | -1.32 |  |  |
| 2.62  | -2.49 | -0.44 |  |  |
| 1.99  | -3.34 | -0.9  |  |  |
| 1.68  | -2.82 | -0.13 |  |  |
| 1.46  | -0.2  | 2.68  |  |  |
| 1.42  | -4.59 | -1.66 |  |  |
| 1.33  | -4.33 | -1.3  |  |  |
| 1.29  | -5.21 | -2.14 |  |  |
| 1.27  | -3.38 | -0.3  |  |  |
| 1.23  | 3.19  | 6.33  |  |  |
| 1.17  | -3.46 | -0.26 |  |  |
| 1.17  | -4.11 | -0.9  |  |  |
| 1.11  | 4.38  | 7.66  |  |  |
| 1.09  | 3.07  | 6.38  |  |  |
| 1.08  | -5.01 | -1.69 |  |  |
| 1.01  | -0.11 | 3.31  |  |  |
| -1    | 2.91  | 6.35  |  |  |
| -1.02 | -5.28 | -1.82 |  |  |
| -1.3  | -4.19 | -0.37 |  |  |
| -3.21 | -2.38 | -0.97 |  |  |
| -3.26 | -2.18 | -0.74 |  |  |
| -2.97 | -6.46 | -5.05 |  |  |
| -3.39 | -5.15 | -3.55 |  |  |
| -2.25 | 1.19  | 2.6   |  |  |
| -2.58 | 1.53  | 3.14  |  |  |
| -2.65 | 1.95  | 3.6   |  |  |
| -2.36 | 1.7   | 3.11  |  |  |
| -2.43 | -3.49 | -2.04 |  |  |
| -2.72 | -0.21 | 1.4   |  |  |
| -2.87 | -1.06 | 0.36  |  |  |
| -5.73 | -4.38 | -1.96 |  |  |
| -1.24 | -3.48 | -2.07 |  |  |
| -1.66 | -0.58 | 1.26  |  |  |
| -2.36 | -3.59 | -2.17 |  |  |
| -4.22 | -2.69 | -0.44 |  |  |
| -2.63 | -2.41 | -0.99 |  |  |
| -3.21 | -3.93 | -2.22 |  |  |
| -5.95 | -3.26 | -0.66 |  |  |
| -1.97 | -0.77 | 0.65  |  |  |

|       |       |       |  |  |
|-------|-------|-------|--|--|
| -2.29 | -0.09 | 1.55  |  |  |
| -4.47 | -2.91 | -0.31 |  |  |
| -2.67 | -2.42 | -1    |  |  |
| -3.14 | -2.96 | -1.3  |  |  |
| -3.55 | -4.51 | -2.68 |  |  |
| -4.21 | -4.63 | -2.55 |  |  |
| 2.08  | -3.13 | -1.69 |  |  |
| 2.06  | 0.07  | 1.52  |  |  |
| 1.74  | -1.08 | 0.61  |  |  |
| 1.05  | -2.01 | 0.4   |  |  |
| 1     | -2.02 | 0.47  |  |  |
| -1.07 | -1.4  | 1.19  |  |  |
| -1.22 | -0.59 | 2.19  |  |  |
| -1.25 | -4.42 | -1.61 |  |  |
| -3.25 | -5.83 | -4.4  |  |  |
| -3.48 | -4.87 | -3.34 |  |  |
| 1.06  | 0.62  | 2.07  |  |  |
| 1.06  | -1.82 | -0.38 |  |  |
| -1.14 | -4.99 | -3.27 |  |  |
| -1.15 | -4.03 | -2.3  |  |  |
| -1.21 | 0.67  | 2.48  |  |  |
| -1.32 | -0.27 | 1.66  |  |  |
| 1.11  | 0.55  | 1.99  |  |  |
| -1.13 | 2.74  | 4.5   |  |  |
| -1.32 | -2.17 | -0.19 |  |  |
| 3.55  | -3.41 | -1.97 |  |  |
| 2.51  | -2.22 | -0.27 |  |  |
| 2.31  | -2.42 | -0.36 |  |  |
| 1.86  | 0.73  | 3.11  |  |  |
| 1.56  | -2.43 | 0.2   |  |  |
| 1.31  | -4.77 | -1.89 |  |  |
| 1.2   | -2.09 | 0.92  |  |  |
| 1.19  | -3.4  | -0.38 |  |  |
| 1.02  | -3.75 | -0.51 |  |  |
| -1.19 | -6.08 | -2.55 |  |  |
| -1.31 | -5.04 | -1.38 |  |  |
| -1.05 | 4.13  | 5.59  |  |  |
| -1.25 | -3.22 | -1.51 |  |  |
| -2.44 | -1.37 | 0.08  |  |  |
| -3.44 | -2.29 | -0.34 |  |  |
| -1.5  | 0.29  | 1.76  |  |  |
| -2.11 | -2.42 | -0.46 |  |  |
| -1.45 | 1.94  | 3.41  |  |  |
| -1.64 | -0.97 | 0.68  |  |  |
| -2.5  | -3.84 | -2.36 |  |  |
| -2.62 | -2.11 | -0.55 |  |  |
| -1.22 | 4.69  | 6.18  |  |  |
| -2.01 | 1.82  | 4.04  |  |  |
| -1.25 | -3.98 | -2.49 |  |  |
| -1.5  | -3.72 | -1.97 |  |  |
| -3.62 | -5.95 | -4.46 |  |  |
| -4.55 | -7.54 | -5.72 |  |  |
| 3.9   | 0.4   | 1.9   |  |  |
| 2.48  | -4.75 | -2.6  |  |  |
| 2.27  | -0.72 | 1.55  |  |  |
| 1.35  | -2.92 | 0.1   |  |  |
| 1.3   | -0.11 | 2.97  |  |  |
| 1.11  | -4.25 | -0.94 |  |  |

|        |       |       |  |  |
|--------|-------|-------|--|--|
| -1.6   | 1.55  | 3.07  |  |  |
| -2.35  | 4.35  | 6.42  |  |  |
| -1.6   | 1.55  | 3.07  |  |  |
| -2.35  | 4.35  | 6.42  |  |  |
| -4.17  | -2.85 | -1.34 |  |  |
| -4.28  | -2.27 | -0.72 |  |  |
| -2.87  | -1.54 | 0     |  |  |
| -3.89  | -3.3  | -1.33 |  |  |
| -5.75  | -5.59 | -3.06 |  |  |
| -10.04 | -7.52 | -4.18 |  |  |
| -3.17  | -1.59 | -0.04 |  |  |
| -3.31  | -1.63 | -0.02 |  |  |
| -2.46  | -6.46 | -4.91 |  |  |
| -2.71  | -3.11 | -1.43 |  |  |
| -2.82  | 4.42  | 5.97  |  |  |
| -3.36  | 1.36  | 3.16  |  |  |
| -4.43  | 4.48  | 6.67  |  |  |
| -3.21  | -3.97 | -2.42 |  |  |
| -4.88  | -6.75 | -4.59 |  |  |
| 1.71   | -1.83 | -0.28 |  |  |
| 1.25   | -5.92 | -3.91 |  |  |
| 1.08   | 0.68  | 2.91  |  |  |
| 1      | -4.24 | -1.92 |  |  |
| -1.11  | 1.81  | 4.29  |  |  |
| -1.21  | -2.26 | 0.34  |  |  |
| -1.22  | -0.87 | 1.75  |  |  |
| -1.23  | -5.78 | -3.15 |  |  |
| -4.84  | -1.22 | 0.33  |  |  |
| -9.5   | -1.85 | 0.68  |  |  |
| -39.93 | -4.25 | 0.35  |  |  |
| -2.75  | -1.73 | -0.17 |  |  |
| -3.37  | -2.29 | -0.44 |  |  |
| -2.35  | 0.13  | 1.69  |  |  |
| -4.02  | -0.58 | 1.75  |  |  |
| -7.27  | -0.75 | 2.44  |  |  |
| -1.63  | -4.87 | -3.3  |  |  |
| -1.79  | -5.7  | -3.99 |  |  |
| -3.52  | -4.92 | -3.33 |  |  |
| -8.7   | -2.94 | -0.04 |  |  |
| -3     | -4.49 | -2.9  |  |  |
| -3.73  | -1.98 | -0.07 |  |  |
| -4.06  | -2.95 | -0.91 |  |  |
| -4.32  | -4    | -1.88 |  |  |
| -4.92  | -3.02 | -0.71 |  |  |
| 1.62   | -3    | -1.38 |  |  |
| 1.24   | -3.5  | -1.48 |  |  |
| 1.05   | -1.47 | 0.77  |  |  |
| -1.24  | -5.02 | -2.38 |  |  |
| -1.31  | -4.23 | -1.52 |  |  |
| 1.88   | -3.31 | -1.69 |  |  |
| 1.57   | 0.31  | 2.19  |  |  |
| -2.44  | 3.64  | 5.28  |  |  |
| -2.65  | 1.44  | 3.2   |  |  |
| -2.79  | -1.56 | 0.27  |  |  |
| 3.43   | -1.76 | -0.12 |  |  |
| 1.53   | -1.93 | 0.88  |  |  |
| 1.49   | -4.94 | -2.1  |  |  |
| 1.28   | -3.64 | -0.57 |  |  |

|        |       |       |  |  |
|--------|-------|-------|--|--|
| 1.2    | 0.14  | 3.3   |  |  |
| 1.42   | -0.16 | 1.49  |  |  |
| 1.12   | 2.27  | 4.27  |  |  |
| -1.03  | -5.24 | -3.03 |  |  |
| 2.08   | -2.38 | -0.7  |  |  |
| 1.98   | -4.56 | -2.82 |  |  |
| 1.93   | -0.1  | 1.68  |  |  |
| 1.83   | -2.9  | -1.05 |  |  |
| 1.63   | -1.1  | 0.92  |  |  |
| 1.62   | 2.32  | 4.36  |  |  |
| 1.29   | -4.26 | -1.9  |  |  |
| 1.09   | -3.61 | -1.01 |  |  |
| 1      | -0.75 | 1.97  |  |  |
| -1.02  | -0.07 | 2.68  |  |  |
| -1.1   | -1.24 | 1.63  |  |  |
| -1.11  | -4.98 | -2.1  |  |  |
| -1.14  | -0.36 | 2.56  |  |  |
| -1.17  | -5.12 | -2.16 |  |  |
| -1.27  | -5.04 | -1.97 |  |  |
| -1.28  | -1.18 | 1.91  |  |  |
| -2.01  | 0.84  | 2.51  |  |  |
| -2.69  | 1.86  | 3.96  |  |  |
| -3.17  | -3.6  | -1.9  |  |  |
| -3.28  | -2.35 | -0.61 |  |  |
| -3.79  | -3.94 | -1.99 |  |  |
| -5.31  | -1.36 | 0.38  |  |  |
| -5.72  | -1.83 | 0.02  |  |  |
| -7.17  | -1.93 | 0.24  |  |  |
| -17.22 | -3.67 | -0.24 |  |  |
| -4.04  | 0.48  | 2.25  |  |  |
| -5.5   | -3.17 | -0.95 |  |  |
| -2.44  | 3.58  | 5.36  |  |  |
| -2.65  | 1.38  | 3.27  |  |  |
| -2.79  | -1.62 | 0.35  |  |  |
| -2.96  | -4.54 | -2.73 |  |  |
| -3.65  | -3.11 | -0.99 |  |  |
| -2.96  | -4.54 | -2.73 |  |  |
| -3.65  | -3.11 | -0.99 |  |  |
| -2.96  | -4.54 | -2.73 |  |  |
| -3.65  | -3.11 | -0.99 |  |  |
| -2.96  | -4.55 | -2.72 |  |  |
| -3.65  | -3.11 | -0.98 |  |  |
| -2.96  | -4.54 | -2.71 |  |  |
| -3.65  | -3.1  | -0.97 |  |  |
| -2.96  | -4.57 | -2.74 |  |  |
| -3.65  | -3.13 | -1    |  |  |
| -2.96  | -4.54 | -2.72 |  |  |
| -3.65  | -3.11 | -0.98 |  |  |
| -2.96  | -4.49 | -2.64 |  |  |
| -3.65  | -3.06 | -0.9  |  |  |
| 1.65   | -1.69 | 0.17  |  |  |
| 1.39   | -1.33 | 0.78  |  |  |
| 1.26   | -2.13 | 0.11  |  |  |
| 1.2    | -3.23 | -0.92 |  |  |
| -1.08  | 2.64  | 5.33  |  |  |
| -1.21  | -0.17 | 2.67  |  |  |
| -1.22  | 1.48  | 4.34  |  |  |
| -1.38  | 0.02  | 3.06  |  |  |

|       |       |       |  |  |
|-------|-------|-------|--|--|
| -1.48 | -1.45 | 1.69  |  |  |
| 2.65  | -1.97 | -0.11 |  |  |
| 2.09  | -5.11 | -2.91 |  |  |
| 1.72  | -3.56 | -1.08 |  |  |
| 1.62  | -5.47 | -2.9  |  |  |
| 1.22  | -6.62 | -3.64 |  |  |
| 1.18  | -4.53 | -1.51 |  |  |
| 1.16  | -4.51 | -1.45 |  |  |
| 1.09  | -4.06 | -0.91 |  |  |
| 1.06  | -5.87 | -2.69 |  |  |
| 1.04  | -3.79 | -0.58 |  |  |
| 1.01  | -3.98 | -0.73 |  |  |
| -1.07 | -4.79 | -1.42 |  |  |
| -1.1  | -4    | -0.59 |  |  |
| -1.12 | -2.16 | 1.28  |  |  |
| -1.31 | -5.81 | -2.16 |  |  |
| 1.57  | -5.37 | -3.47 |  |  |
| 1.5   | -5.02 | -3.05 |  |  |
| 1.16  | -7.15 | -4.8  |  |  |
| 1.11  | -6.84 | -4.42 |  |  |
| 1.09  | 1.33  | 3.76  |  |  |
| 1.08  | -7    | -4.54 |  |  |
| -1.01 | -7    | -4.43 |  |  |
| -1.14 | -5.32 | -2.57 |  |  |
| -1.14 | -8.14 | -5.38 |  |  |
| -1.31 | -8.63 | -5.68 |  |  |
| 1.53  | -5.48 | -3.56 |  |  |
| 1.43  | -4.85 | -2.84 |  |  |
| -1.08 | 1.65  | 4.29  |  |  |
| -1.16 | -0.42 | 2.33  |  |  |
| -1.22 | -1.9  | 0.91  |  |  |
| -4.26 | -1.29 | 0.79  |  |  |
| -6.21 | -2.6  | 0.02  |  |  |
| 1.08  | -1.24 | 0.92  |  |  |
| 1.01  | -4.3  | -2.04 |  |  |
| 2.01  | -2.31 | -0.14 |  |  |
| 1.98  | -0.87 | 1.31  |  |  |

| Gene symble | Gene ID      | Primers (5' to 3')                               |
|-------------|--------------|--------------------------------------------------|
| PDE4B       | NM_002600    | GCAGGAGTGTGATGACGGTG<br>GATCCAGTGGACTCCGACCT     |
| KIAA1244    | NM_020340    | CTGGAGATGGGAAGCCACAAC<br>GCTGAGACTGCGATGCTTT     |
| GSTM1       | NM_000561    | CCAGAGCAACGCCATCTTGT<br>CCCCAGAAACTCTGAGTAGAGC   |
| CSGALNACT1  | NM_001130518 | TTCAAGGAAAGACGCCAAGGT<br>CTGGGCTAGACCACAGGAAG    |
| SYTL2       | NM_032943    | GTGTTGAGCCTGAGCCATCT<br>CATCTTCAGCACTACGCACT     |
| KDM5D       | NM_004653    | TTAAGGCCCGACATGGAACC<br>CCGCTCCACATTGGGAATCT     |
| ANK2        | NM_001127493 | AGTTCTTGTTAAGGAAGGAGCCA<br>TGTACGTCAGCATTGTGGTCA |
| MASP1       | NM_001879    | AGCCATGGTCATCGTCAGCG<br>ATACTCCGTAGCGGTCCTTCT    |
| ADAMTSL3    | NM_207517    | TGTCCTGGACGTTGCATGGG<br>GCAGCACCTTTGTTTGTAGCG    |
| GPR126      | NM_198569    | GTTCCCTACCTGATCCCGCTC<br>CCTCAGGGTGACGAAGGATG    |



GO Term

GO:0006355 regulation of transcription, DNA-dependent  
GO:0006350 transcription  
GO:0007165 signal transduction  
GO:0044419 interspecies interaction between organisms  
GO:0007155 cell adhesion  
GO:0006468 protein amino acid phosphorylation  
GO:0055114 oxidation reduction  
GO:0007275 development  
GO:0002474 antigen processing and presentation of peptide antigen via MHC class I  
GO:0006955 immune response  
GO:0019882 antigen processing and presentation  
GO:0006811 ion transport  
GO:0006974 response to DNA damage stimulus  
GO:0007049 cell cycle  
GO:0019941 modification-dependent protein catabolism  
GO:0016568 chromatin modification  
GO:0030154 cell differentiation  
GO:0007399 nervous system development  
GO:0006508 proteolysis  
GO:0051301 cell division  
GO:0045786 negative regulation of progression through cell cycle  
GO:0005975 carbohydrate metabolism  
GO:0008285 negative regulation of cell proliferation  
GO:0006281 DNA repair  
GO:0006915 apoptosis  
GO:0000122 negative regulation of transcription from RNA polymerase II promoter  
GO:0015031 protein transport  
GO:0006470 protein amino acid dephosphorylation  
GO:0045944 positive regulation of transcription from RNA polymerase II promoter  
GO:0007605 sensory perception of sound  
GO:0007067 mitosis  
GO:0007050 cell cycle arrest  
GO:0008284 positive regulation of cell proliferation  
GO:0006814 sodium ion transport  
GO:0006954 inflammatory response  
GO:0006260 DNA replication  
GO:0007160 cell-matrix adhesion  
GO:0006916 anti-apoptosis  
GO:0006511 ubiquitin-dependent protein catabolism  
GO:0006917 induction of apoptosis  
GO:0007283 spermatogenesis  
GO:0006629 lipid metabolism  
GO:0001501 skeletal development  
GO:0006810 transport  
GO:0008283 cell proliferation  
GO:0006897 endocytosis  
GO:0043123 positive regulation of I-kappaB kinase/NF-kappaB cascade  
GO:0008380 RNA splicing  
GO:0035023 regulation of Rho protein signal transduction  
GO:0007242 intracellular signaling cascade  
GO:0030036 actin cytoskeleton organization and biogenesis

G0:0007267 cell-cell signaling  
G0:0001666 response to hypoxia  
G0:0007517 muscle development  
G0:0045087 innate immune response  
G0:0006357 regulation of transcription from RNA polymerase II promoter  
G0:0007601 visual perception  
G0:0016055 Wnt receptor signaling pathway  
G0:0046777 protein amino acid autophosphorylation  
G0:0006461 protein complex assembly  
G0:0006886 intracellular protein transport  
G0:0007018 microtubule-based movement  
G0:0030308 negative regulation of cell growth  
G0:0007268 synaptic transmission  
G0:0007229 integrin-mediated signaling pathway  
G0:0006816 calcium ion transport  
G0:0007507 heart development  
G0:0007264 small GTPase mediated signal transduction  
G0:0051260 protein homooligomerization  
G0:0030324 lung development  
G0:0006096 glycolysis  
G0:0016567 protein ubiquitination  
G0:0007420 brain development  
G0:0051092 activation of NF-kappaB transcription factor  
G0:0008360 regulation of cell shape  
G0:0006979 response to oxidative stress  
G0:0042493 response to drug  
G0:0007595 lactation  
G0:0006397 mRNA processing  
G0:0006813 potassium ion transport  
G0:0006935 chemotaxis  
G0:0006919 caspase activation  
G0:0016481 negative regulation of transcription  
G0:0006457 protein folding  
G0:0001503 ossification  
G0:0007218 neuropeptide signaling pathway  
G0:0030199 collagen fibril organization  
G0:0048661 positive regulation of smooth muscle cell proliferation  
G0:0006936 muscle contraction  
G0:0007565 pregnancy  
G0:0009887 organ morphogenesis  
G0:0043066 negative regulation of apoptosis  
G0:0007411 axon guidance  
G0:0030521 androgen receptor signaling pathway  
G0:0045454 cell redox homeostasis  
G0:0007156 homophilic cell adhesion  
G0:0006412 protein biosynthesis  
G0:0016575 histone deacetylation  
G0:0001701 embryonic development (sensu Mammalia)  
G0:0042632 cholesterol homeostasis  
G0:0045893 positive regulation of transcription, DNA-dependent  
G0:0006631 fatty acid metabolism  
G0:0008203 cholesterol metabolism

G0:0007417 central nervous system development  
G0:0008277 regulation of G-protein coupled receptor protein signaling pathway  
G0:0006869 lipid transport  
G0:0001525 angiogenesis  
G0:0022900 electron transport chain  
G0:0007169 transmembrane receptor protein tyrosine kinase signaling pathway  
G0:0007584 response to nutrient  
G0:0001570 vasculogenesis  
G0:0000187 activation of MAPK activity  
G0:0048538 thymus development  
G0:0030326 embryonic limb morphogenesis  
G0:0008286 insulin receptor signaling pathway  
G0:0065002 intracellular protein transmembrane transport  
G0:0007243 protein kinase cascade  
G0:0009791 post-embryonic development  
G0:0008202 steroid metabolism  
G0:0008217 blood pressure regulation  
G0:0007257 activation of JNK activity  
G0:0030336 negative regulation of cell migration  
G0:0030183 B cell differentiation  
G0:0007588 excretion  
G0:0051016 barbed-end actin filament capping  
G0:0007010 cytoskeleton organization and biogenesis  
G0:0006464 protein modification  
G0:0018106 peptidyl-histidine phosphorylation  
G0:0050731 positive regulation of peptidyl-tyrosine phosphorylation  
G0:0007186 G-protein coupled receptor protein signaling pathway  
G0:0032313 regulation of Rab GTPase activity  
G0:0006986 response to unfolded protein  
G0:0009615 response to virus  
G0:0006754 ATP biosynthesis  
G0:0050679 positive regulation of epithelial cell proliferation  
G0:0006297 nucleotide-excision repair, DNA gap filling  
G0:0043433 negative regulation of transcription factor activity  
G0:0006006 glucose metabolism  
G0:0009953 dorsal/ventral pattern formation  
G0:0006958 complement activation, classical pathway  
G0:0048146 positive regulation of fibroblast proliferation  
G0:0009749 response to glucose stimulus  
G0:0042384 cilium biogenesis  
G0:0000082 G1/S transition of mitotic cell cycle  
G0:0019433 triacylglycerol catabolism  
G0:0009952 anterior/posterior pattern formation  
G0:0018149 peptide cross-linking  
G0:0006611 protein export from nucleus  
G0:0006633 fatty acid biosynthesis  
G0:0051056 regulation of small GTPase mediated signal transduction  
G0:0006904 vesicle docking during exocytosis  
G0:0051592 response to calcium ion  
G0:0001558 regulation of cell growth  
G0:0006268 DNA unwinding during replication  
G0:0006367 transcription initiation from RNA polymerase II promoter

GO:0051028 mRNA transport  
GO:0010552 positive regulation of specific transcription from RNA polymerase II promoter  
GO:0006099 tricarboxylic acid cycle  
GO:0008033 tRNA processing  
GO:0016192 vesicle-mediated transport  
GO:0006270 DNA replication initiation  
GO:0007173 epidermal growth factor receptor signaling pathway  
GO:0030335 positive regulation of cell migration  
GO:0006821 chloride transport  
GO:0006366 transcription from RNA polymerase II promoter  
GO:0008643 carbohydrate transport  
GO:0006879 iron ion homeostasis  
GO:0007205 protein kinase C activation  
GO:0007569 cell aging  
GO:0001569 patterning of blood vessels  
GO:0007026 negative regulation of microtubule depolymerization  
GO:0043124 negative regulation of I-kappaB kinase/NF-kappaB cascade  
GO:0007596 blood coagulation  
GO:0048704 embryonic skeletal morphogenesis  
GO:0006887 exocytosis  
GO:0001937 negative regulation of endothelial cell proliferation  
GO:0048536 spleen development  
GO:0002504 antigen processing and presentation of peptide or polysaccharide antigen  
GO:0006826 iron ion transport  
GO:0006298 mismatch repair  
GO:0050885 regulation of balance  
GO:0000398 nuclear mRNA splicing, via spliceosome  
GO:0007368 determination of left/right symmetry  
GO:0008016 regulation of heart contraction  
GO:0043065 positive regulation of apoptosis  
GO:0001843 neural tube closure  
GO:0000059 protein import into nucleus, docking  
GO:0048008 platelet-derived growth factor receptor signaling pathway  
GO:0006378 mRNA polyadenylation  
GO:0043524 negative regulation of neuron apoptosis  
GO:0006836 neurotransmitter transport  
GO:0007076 mitotic chromosome condensation  
GO:0006695 cholesterol biosynthesis  
GO:0016042 lipid catabolism  
GO:0051437 positive regulation of ubiquitin ligase activity during mitotic cell cycle  
GO:0006953 acute-phase response  
GO:0001516 prostaglandin biosynthesis  
GO:0050718 positive regulation of interleukin-1 beta secretion  
GO:0045669 positive regulation of osteoblast differentiation  
GO:0032869 cellular response to insulin stimulus  
GO:0040018 positive regulation of body size  
GO:0006417 regulation of protein biosynthesis  
GO:0005977 glycogen metabolism  
GO:0007040 lysosome organization and biogenesis  
GO:0001514 selenocysteine incorporation  
GO:0016188 synaptic vesicle maturation  
GO:0050729 positive regulation of inflammatory response

GO:0000184 mRNA catabolism, nonsense-mediated decay  
GO:0008633 activation of pro-apoptotic gene products  
GO:0006486 protein amino acid glycosylation  
GO:0046928 regulation of neurotransmitter secretion  
GO:0031532 actin cytoskeleton reorganization  
GO:0007568 aging  
GO:0008544 epidermis development  
GO:0007204 elevation of cytosolic calcium ion concentration  
GO:0006898 receptor mediated endocytosis  
GO:0009968 negative regulation of signal transduction  
GO:0042472 inner ear morphogenesis  
GO:0030216 keratinocyte differentiation  
GO:0019885 antigen processing and presentation of endogenous peptide antigen via MHC class II  
GO:0007094 mitotic spindle checkpoint  
GO:0006101 citrate metabolism  
GO:0030198 extracellular matrix organization and biogenesis  
GO:0019221 cytokine and chemokine mediated signaling pathway  
GO:0050821 protein stabilization  
GO:0006635 fatty acid beta-oxidation  
GO:0019722 calcium-mediated signaling  
GO:0006446 regulation of translational initiation  
GO:0031145 anaphase-promoting complex-dependent proteasomal ubiquitin-dependent proteolysis  
GO:0018105 peptidyl-serine phosphorylation  
GO:0015992 proton transport  
GO:0048015 phosphoinositide-mediated signaling  
GO:0007059 chromosome segregation  
GO:0030879 mammary gland development  
GO:0001889 liver development  
GO:0006032 chitin catabolism  
GO:0045995 regulation of embryonic development  
GO:0006265 DNA topological change  
GO:0030325 adrenal gland development  
GO:0045931 positive regulation of progression through mitotic cell cycle  
GO:0006338 chromatin remodeling  
GO:0000209 protein polyubiquitination  
GO:0016254 preassembly of GPI anchor in ER membrane  
GO:0042542 response to hydrogen peroxide  
GO:0009411 response to UV  
GO:0015758 glucose transport  
GO:0006865 amino acid transport  
GO:0009083 branched chain family amino acid catabolism  
GO:0051457 maintenance of protein localization in nucleus  
GO:0042102 positive regulation of T cell proliferation  
GO:0032312 regulation of ARF GTPase activity  
GO:0042552 myelination  
GO:0007190 adenylate cyclase activation  
GO:0019229 regulation of vasoconstriction  
GO:0006081 aldehyde metabolism  
GO:0006541 glutamine metabolism  
GO:0045162 clustering of voltage-gated sodium channels  
GO:0045663 positive regulation of myoblast differentiation  
GO:0002063 chondrocyte development

G0:0060023 soft palate development  
G0:0030263 apoptotic chromosome condensation  
G0:0018242 protein amino acid O-linked glycosylation via serine  
G0:0018243 protein amino acid O-linked glycosylation via threonine  
G0:0048861 leukemia inhibitory factor signaling pathway  
G0:0007412 axon target recognition  
G0:0035024 negative regulation of Rho protein signal transduction  
G0:0043570 maintenance of DNA repeat elements  
G0:0006333 chromatin assembly or disassembly  
G0:0007219 Notch signaling pathway  
G0:0043043 peptide biosynthesis  
G0:0006688 glycosphingolipid biosynthesis  
G0:0006707 cholesterol catabolism  
G0:0006303 double-strand break repair via nonhomologous end joining  
G0:0033209 tumor necrosis factor-mediated signaling pathway  
G0:0051216 cartilage development  
G0:0043627 response to estrogen stimulus  
G0:0030574 collagen catabolism  
G0:0016525 negative regulation of angiogenesis  
G0:0045740 positive regulation of DNA replication  
G0:0006888 ER to Golgi vesicle-mediated transport  
G0:0045736 negative regulation of cyclin-dependent protein kinase activity  
G0:0032355 response to estradiol stimulus  
G0:0045843 negative regulation of striated muscle development  
G0:0007259 JAK-STAT cascade  
G0:0042981 regulation of apoptosis  
G0:0006968 cellular defense response  
G0:0051384 response to glucocorticoid stimulus  
G0:0006310 DNA recombination  
G0:0006406 mRNA export from nucleus  
G0:0035116 embryonic hindlimb morphogenesis  
G0:0030866 cortical actin cytoskeleton organization and biogenesis  
G0:0051289 protein homotetramerization  
G0:0030071 regulation of mitotic metaphase/anaphase transition  
G0:0030032 lamellipodium biogenesis  
G0:0042517 positive regulation of tyrosine phosphorylation of Stat3 protein  
G0:0051436 negative regulation of ubiquitin ligase activity during mitotic cell cycle  
G0:0008152 metabolism  
G0:0030334 regulation of cell migration  
G0:0019835 cytolysis  
G0:0030900 forebrain development  
G0:0006003 fructose 2,6-bisphosphate metabolism  
G0:0010613 positive regulation of cardiac muscle hypertrophy  
G0:0034383 low-density lipoprotein particle clearance  
G0:0006422 aspartyl-tRNA aminoacylation  
G0:0051450 myoblast proliferation  
G0:0006689 ganglioside catabolism  
G0:0051096 positive regulation of helicase activity  
G0:0008654 phospholipid biosynthesis  
G0:0016339 calcium-dependent cell-cell adhesion  
G0:0001764 neuron migration  
G0:0006094 gluconeogenesis

GO:0008015 circulation  
GO:0016197 endosome transport  
GO:0009954 proximal/distal pattern formation  
GO:0010744 positive regulation of foam cell differentiation  
GO:0001502 cartilage condensation  
GO:0007030 Golgi organization and biogenesis  
GO:0010332 response to gamma radiation  
GO:0006368 RNA elongation from RNA polymerase II promoter  
GO:0042326 negative regulation of phosphorylation  
GO:0009408 response to heat  
GO:0030203 glycosaminoglycan metabolism  
GO:0001702 gastrulation (sensu Deuterostomia)  
GO:0007043 intercellular junction assembly  
GO:0007566 embryo implantation  
GO:0006930 substrate-bound cell migration, cell extension  
GO:0051895 negative regulation of focal adhesion formation  
GO:0032092 positive regulation of protein binding  
GO:0001736 establishment of planar polarity  
GO:0045910 negative regulation of DNA recombination  
GO:0051607 defense response to virus  
GO:0015914 phospholipid transport  
GO:0016049 cell growth  
GO:0007416 synaptogenesis  
GO:0006885 regulation of pH  
GO:0000070 mitotic sister chromatid segregation  
GO:0042733 embryonic digit morphogenesis  
GO:0008206 bile acid metabolism  
GO:0001974 blood vessel remodeling  
GO:0006957 complement activation, alternative pathway  
GO:0001755 neural crest cell migration  
GO:0060021 palate development  
GO:0050772 positive regulation of axonogenesis  
GO:0048168 regulation of neuronal synaptic plasticity  
GO:0043029 T cell homeostasis  
GO:0007585 respiratory gaseous exchange  
GO:0008543 fibroblast growth factor receptor signaling pathway  
GO:0030509 BMP signaling pathway  
GO:0030855 epithelial cell differentiation  
GO:0014065 phosphoinositide 3-kinase cascade  
GO:0045727 positive regulation of protein biosynthesis  
GO:0046847 filopodium formation  
GO:0007628 adult walking behavior  
GO:0045768 positive regulation of anti-apoptosis  
GO:0019915 sequestering of lipid  
GO:0015813 glutamate transport  
GO:0006914 autophagy  
GO:0008344 adult locomotory behavior  
GO:0001822 kidney development  
GO:0045773 positive regulation of axon extension  
GO:0006590 thyroid hormone generation  
GO:0034374 low-density lipoprotein particle remodeling  
GO:0007016 cytoskeletal anchoring

GO:0006658 phosphatidylserine metabolism  
GO:0007185 transmembrane receptor protein tyrosine phosphatase signaling pathway  
GO:0034341 response to interferon-gamma  
GO:0006467 protein thiol-disulfide exchange  
GO:0006027 glycosaminoglycan catabolism  
GO:0008340 determination of adult life span  
GO:0045749 negative regulation of S phase of mitotic cell cycle  
GO:0001837 epithelial to mesenchymal transition  
GO:0006309 DNA fragmentation during apoptosis  
GO:0008542 visual learning  
GO:0006516 glycoprotein catabolism  
GO:0006730 one-carbon compound metabolism  
GO:0006334 nucleosome assembly  
GO:0006364 rRNA processing  
GO:0007519 striated muscle development  
GO:0000086 G2/M transition of mitotic cell cycle  
GO:0007157 heterophilic cell adhesion  
GO:0046488 phosphatidylinositol metabolism  
GO:0048041 focal adhesion formation  
GO:0007626 locomotory behavior  
GO:0006694 steroid biosynthesis  
GO:0016255 attachment of GPI anchor to protein  
GO:0006105 succinate metabolism  
GO:0060396 growth hormone receptor signaling pathway  
GO:0031529 ruffle organization and biogenesis  
GO:0032402 melanosome transport  
GO:0009113 purine base biosynthesis  
GO:0006107 oxaloacetate metabolism  
GO:0006777 Mo-molybdopterin cofactor biosynthesis  
GO:0016226 iron-sulfur cluster assembly  
GO:0045444 fat cell differentiation  
GO:0030968 unfolded protein response  
GO:0045190 isotype switching  
GO:0007611 learning and/or memory  
GO:0045766 positive regulation of angiogenesis  
GO:0060048 cardiac muscle contraction  
GO:0045445 myoblast differentiation  
GO:0030178 negative regulation of Wnt receptor signaling pathway  
GO:0000718 nucleotide-excision repair, DNA damage removal  
GO:0030206 chondroitin sulfate biosynthesis  
GO:0030856 regulation of epithelial cell differentiation  
GO:0035303 regulation of dephosphorylation  
GO:0006911 phagocytosis, engulfment  
GO:0010149 senescence (sensu Magnoliophyta)  
GO:0001975 response to amphetamine  
GO:0002675 positive regulation of acute inflammatory response  
GO:0042787 protein ubiquitination during ubiquitin-dependent protein catabolism  
GO:0006895 Golgi to endosome transport  
GO:0021756 striatum development  
GO:0009405 pathogenesis  
GO:0007265 Ras protein signal transduction  
GO:0015986 ATP synthesis coupled proton transport



G0:0008624 induction of apoptosis by extracellular signals  
G0:0006413 translational initiation  
G0:0008630 DNA damage response, signal transduction resulting in induction of apopt  
G0:0032496 response to lipopolysaccharide  
G0:0006471 protein amino acid ADP-ribosylation  
G0:0007254 JNK cascade  
G0:0006469 negative regulation of protein kinase activity  
G0:0045840 positive regulation of mitosis  
G0:0030317 sperm motility  
G0:0006044 N-acetylglucosamine metabolism  
G0:0060041 retina development in camera-type eye  
G0:0045671 negative regulation of osteoclast differentiation  
G0:0030299 cholesterol absorption  
G0:0010595 positive regulation of endothelial cell migration  
G0:0002076 osteoblast development  
G0:0045909 positive regulation of vasodilation  
G0:0006559 L-phenylalanine catabolism  
G0:0045725 positive regulation of glycogen biosynthesis  
G0:0032088 inhibition of NF-kappaB transcription factor  
G0:0000731 DNA synthesis during DNA repair  
G0:0010745 negative regulation of foam cell differentiation  
G0:0042994 cytoplasmic sequestering of transcription factor  
G0:0006171 cAMP biosynthesis  
G0:0006829 zinc ion transport  
G0:0030997 regulation of centriole-centriole cohesion  
G0:0051155 positive regulation of striated muscle cell differentiation  
G0:0006855 multidrug transport  
G0:0032914 positive regulation of transforming growth factor-beta1 production  
G0:0002230 positive regulation of antiviral response by host  
G0:0006410 transcription, RNA-dependent  
G0:0045869 negative regulation of retroviral genome replication  
G0:0060135 maternal process involved in pregnancy  
G0:0045629 negative regulation of T-helper 2 cell differentiation  
G0:0043482 cellular pigment accumulation  
G0:0000066 mitochondrial ornithine transport  
G0:0032764 negative regulation of mast cell cytokine production  
G0:0006868 glutamine transport  
G0:0007079 mitotic chromosome movement towards spindle pole  
G0:0048012 hepatocyte growth factor receptor signaling pathway  
G0:0008065 establishment of blood-nerve barrier  
G0:0006287 base-excision repair, gap-filling  
G0:0002268 follicular dendritic cell differentiation  
G0:0006264 mitochondrial DNA replication  
G0:0002051 osteoblast fate commitment  
G0:0006426 glycyl-tRNA aminoacylation  
G0:0006423 cysteinyl-tRNA aminoacylation  
G0:0045842 positive regulation of mitotic metaphase/anaphase transition  
G0:0006478 peptidyl-tyrosine sulfation  
G0:0006749 glutathione metabolism  
G0:0016358 dendrite development  
G0:0046627 negative regulation of insulin receptor signaling pathway  
G0:0008589 regulation of smoothed signaling pathway

GO:0035176 social behavior  
GO:0016180 snRNA processing  
GO:0030878 thyroid gland development  
GO:0006750 glutathione biosynthesis  
GO:0000050 urea cycle  
GO:0001953 negative regulation of cell-matrix adhesion  
GO:0045885 positive regulation of survival gene product activity  
GO:0001649 osteoblast differentiation  
GO:0000165 MAPKKK cascade  
GO:0006928 cell motility  
GO:0032012 regulation of ARF protein signal transduction  
GO:0006820 anion transport  
GO:0006396 RNA processing  
GO:0000226 microtubule cytoskeleton organization and biogenesis  
GO:0042475 odontogenesis (sensu Vertebrata)  
GO:0060070 Wnt receptor signaling pathway through beta-catenin  
GO:0048488 synaptic vesicle endocytosis  
GO:0030520 estrogen receptor signaling pathway  
GO:0018107 peptidyl-threonine phosphorylation  
GO:0000045 autophagic vacuole formation  
GO:0046716 muscle maintenance  
GO:0007512 adult heart development  
GO:0046677 response to antibiotic  
GO:0048286 alveolus development  
GO:0051591 response to cAMP  
GO:0045086 positive regulation of interleukin-2 biosynthesis  
GO:0008584 male gonad development  
GO:0006289 nucleotide-excision repair  
GO:0000079 regulation of cyclin-dependent protein kinase activity  
GO:0009612 response to mechanical stimulus  
GO:0007051 spindle organization and biogenesis  
GO:0000077 DNA damage checkpoint  
GO:0030890 positive regulation of B cell proliferation  
GO:0007250 activation of NF-kappaB-inducing kinase  
GO:0030433 ER-associated protein catabolism  
GO:0010165 response to X-ray  
GO:0048469 cell maturation  
GO:0045765 regulation of angiogenesis  
GO:0016477 cell migration  
GO:0043410 positive regulation of MAPKKK cascade  
GO:0000060 protein import into nucleus, translocation  
GO:0006805 xenobiotic metabolism  
GO:0009636 response to toxin  
GO:0007422 peripheral nervous system development  
GO:0001890 placenta development  
GO:0045777 positive regulation of blood pressure  
GO:0046718 entry of virus into host cell  
GO:0000186 activation of MAPKK activity  
GO:0033344 cholesterol efflux  
GO:0007263 nitric oxide mediated signal transduction  
GO:0045058 T cell selection  
GO:0007172 signal complex formation

GO:0046326 positive regulation of glucose import  
GO:0007052 mitotic spindle organization and biogenesis  
GO:0007188 G-protein signaling, coupled to cAMP nucleotide second messenger  
GO:0046548 retinal rod cell development  
GO:0015014 heparan sulfate proteoglycan biosynthesis, polysaccharide chain biosynt  
GO:0001958 endochondral ossification  
GO:0043589 skin morphogenesis  
GO:0035307 positive regulation of protein amino acid dephosphorylation  
GO:0042832 defense response to protozoan  
GO:0051549 positive regulation of keratinocyte migration  
GO:0006435 threonyl-tRNA aminoacylation  
GO:0045010 actin nucleation  
GO:0007195 dopamine receptor, adenylate cyclase inhibiting pathway  
GO:0042420 dopamine catabolism  
GO:0001553 luteinization  
GO:0045475 locomotor rhythm  
GO:0006288 base-excision repair, DNA ligation  
GO:0007080 mitotic metaphase plate congression  
GO:0051382 kinetochore assembly  
GO:0032568 general transcription from RNA polymerase II promoter  
GO:0048013 ephrin receptor signaling pathway  
GO:0021938 smoothed signaling pathway in regulation of granule cell precursor cel  
GO:0000212 meiotic spindle organization and biogenesis  
GO:0048645 organ formation  
GO:0032332 positive regulation of chondrocyte differentiation  
GO:0060087 relaxation of vascular smooth muscle  
GO:0034394 protein localization at cell surface  
GO:0040001 establishment of mitotic spindle localization  
GO:0042977 tyrosine phosphorylation of JAK2 protein  
GO:0006549 isoleucine metabolism  
GO:0046449 creatinine metabolism  
GO:0016446 somatic hypermutation of immunoglobulin genes  
GO:0043415 positive regulation of skeletal muscle regeneration  
GO:0007182 common-partner SMAD protein phosphorylation  
GO:0016337 cell-cell adhesion  
GO:0006874 calcium ion homeostasis  
GO:0006584 catecholamine metabolism  
GO:0009116 nucleoside metabolism  
GO:0030514 negative regulation of BMP signaling pathway  
GO:0006306 DNA methylation  
GO:0045446 endothelial cell differentiation  
GO:0030307 positive regulation of cell growth  
GO:0032526 response to retinoic acid  
GO:0016601 Rac protein signal transduction  
GO:0050830 defense response to Gram-positive bacterium  
GO:0007338 fertilization (sensu Metazoa)  
GO:0030301 cholesterol transport  
GO:0030041 actin filament polymerization  
GO:0007612 learning  
GO:0016486 peptide hormone processing  
GO:0030511 positive regulation of transforming growth factor beta receptor signalir  
GO:0031018 endocrine pancreas development

G0:0008299 isoprenoid biosynthesis  
G0:0000084 S phase of mitotic cell cycle  
G0:0043462 regulation of ATPase activity  
G0:0007093 mitotic checkpoint  
G0:0045892 negative regulation of transcription, DNA-dependent  
G0:0000075 cell cycle checkpoint  
G0:0043542 endothelial cell migration  
G0:0007623 circadian rhythm  
G0:0055085 transmembrane transport  
G0:0009653 morphogenesis  
G0:0021983 pituitary gland development  
G0:0046320 regulation of fatty acid oxidation  
G0:0050680 negative regulation of epithelial cell proliferation  
G0:0009755 hormone-mediated signaling  
G0:0015840 urea transport  
G0:0030818 negative regulation of cAMP biosynthesis  
G0:0014824 artery smooth muscle contraction  
G0:0051151 negative regulation of smooth muscle cell differentiation  
G0:0002040 sprouting angiogenesis  
G0:0010748 negative regulation of plasma membrane long-chain fatty acid transport  
G0:0032695 negative regulation of interleukin-12 production  
G0:0031053 primary microRNA processing  
G0:0042149 cellular response to glucose starvation  
G0:0016553 base conversion or substitution editing  
G0:0050847 progesterone receptor signaling pathway  
G0:0007029 endoplasmic reticulum organization and biogenesis  
G0:0045747 positive regulation of Notch signaling pathway  
G0:0051014 actin filament severing  
G0:0032455 nerve growth factor processing  
G0:0048625 myoblast cell fate commitment  
G0:0030889 negative regulation of B cell proliferation  
G0:0030388 fructose 1,6-bisphosphate metabolism  
G0:0009186 deoxyribonucleoside diphosphate metabolism  
G0:0000281 cytokinesis after mitosis  
G0:0050919 negative chemotaxis  
G0:0031953 negative regulation of protein amino acid autophosphorylation  
G0:0047496 vesicle transport along microtubule  
G0:0019530 taurine metabolism  
G0:0045588 positive regulation of gamma-delta T cell differentiation  
G0:0051497 negative regulation of stress fiber formation  
G0:0031573 intra-S DNA damage checkpoint  
G0:0048703 embryonic viscerocranium morphogenesis  
G0:0010310 regulation of hydrogen peroxide metabolic process  
G0:0007130 synaptonemal complex formation  
G0:0015808 L-alanine transport  
G0:0015851 nucleobase transport  
G0:0030073 insulin secretion  
G0:0048009 insulin-like growth factor receptor signaling pathway  
G0:0006004 fucose metabolism  
G0:0021987 cerebral cortex development  
G0:0006302 double-strand break repair  
G0:0045429 positive regulation of nitric oxide biosynthesis

G0:0001947 heart looping  
G0:0006890 retrograde vesicle-mediated transport, Golgi to ER  
G0:0000910 cytokinesis  
G0:0006959 humoral immune response  
G0:0006939 smooth muscle contraction  
G0:0045453 bone resorption  
G0:0019370 leukotriene biosynthesis  
G0:0006120 mitochondrial electron transport, NADH to ubiquinone  
G0:0014047 glutamate secretion  
G0:0001678 cell glucose homeostasis  
G0:0003100 regulation of systemic arterial blood pressure by endothelin  
G0:0009249 protein-lipoylation  
G0:0030194 positive regulation of blood coagulation  
G0:0006572 tyrosine catabolism  
G0:0046685 response to arsenic  
G0:0042159 lipoprotein catabolism  
G0:0034379 very-low-density lipoprotein particle assembly  
G0:0002011 morphogenesis of an epithelial sheet  
G0:0016540 protein autoprocessing  
G0:0000085 G2 phase of mitotic cell cycle  
G0:0007598 blood coagulation, extrinsic pathway  
G0:0015904 tetracycline transport  
G0:0008631 induction of apoptosis by oxidative stress  
G0:0031670 cellular response to nutrient  
G0:0046686 response to cadmium ion  
G0:0021702 cerebellar Purkinje cell differentiation  
G0:0043113 receptor clustering  
G0:0001833 inner cell mass cell proliferation  
G0:0000389 nuclear mRNA 3'-splice site recognition  
G0:0007171 transmembrane receptor protein tyrosine kinase activation (dimerization)  
G0:0031116 positive regulation of microtubule polymerization  
G0:0007520 myoblast fusion  
G0:0048341 paraxial mesoderm formation  
G0:0016574 histone ubiquitination  
G0:0000012 single strand break repair  
G0:0006978 DNA damage response, signal transduction by p53 class mediator resulting  
G0:0048255 mRNA stabilization  
G0:0010225 response to UV-C  
G0:0046473 phosphatidic acid metabolism  
G0:0000303 response to superoxide  
G0:0001895 retinal homeostasis  
G0:0043330 response to exogenous dsRNA  
G0:0045723 positive regulation of fatty acid biosynthesis  
G0:0000255 allantoin metabolism  
G0:0006103 2-oxoglutarate metabolism  
G0:0006573 valine metabolism  
G0:0007044 cell-substrate junction assembly  
G0:0046541 saliva secretion  
G0:0006069 ethanol oxidation  
G0:0007625 grooming behavior  
G0:0007089 traversing start control point of mitotic cell cycle  
G0:0042723 thiamin and derivative metabolism

GO:0042060 wound healing  
GO:0000188 inactivation of MAPK activity  
GO:0017148 negative regulation of protein biosynthesis  
GO:0005978 glycogen biosynthesis  
GO:0008652 amino acid biosynthesis  
GO:0042254 ribosome biogenesis and assembly  
GO:0030101 natural killer cell activation  
GO:0007189 G-protein signaling, adenylate cyclase activating pathway  
GO:0007131 meiotic recombination  
GO:0007179 transforming growth factor beta receptor signaling pathway  
GO:0050905 neuromuscular physiological process  
GO:0014032 neural crest cell development  
GO:0051017 actin filament bundle formation  
GO:0051262 protein tetramerization  
GO:0016338 calcium-independent cell-cell adhesion  
GO:0016050 vesicle organization and biogenesis  
GO:0050773 regulation of dendrite development  
GO:0043536 positive regulation of blood vessel endothelial cell migration  
GO:0007413 axonal fasciculation  
GO:0050732 negative regulation of peptidyl-tyrosine phosphorylation  
GO:0046835 carbohydrate phosphorylation  
GO:0006583 melanin biosynthesis from tyrosine  
GO:0048525 negative regulation of viral life cycle  
GO:0045540 regulation of cholesterol biosynthesis  
GO:0006072 glycerol-3-phosphate metabolism  
GO:0045745 positive regulation of G-protein coupled receptor protein signaling path  
GO:0030838 positive regulation of actin filament polymerization  
GO:0007143 female meiosis  
GO:0042053 regulation of dopamine metabolism  
GO:0006622 protein targeting to lysosome  
GO:0007603 phototransduction, visible light  
GO:0007406 negative regulation of neuroblast proliferation  
GO:0018345 protein palmitoylation  
GO:0009263 deoxyribonucleotide biosynthesis  
GO:0015991 ATP hydrolysis coupled proton transport  
GO:0035019 somatic stem cell maintenance  
GO:0001556 oocyte maturation  
GO:0060017 parathyroid gland development  
GO:0046688 response to copper ion  
GO:0006614 SRP-dependent cotranslational protein targeting to membrane  
GO:0015937 coenzyme A biosynthesis  
GO:0043550 regulation of lipid kinase activity  
GO:0006950 response to stress  
GO:0006612 protein targeting to membrane  
GO:0008637 apoptotic mitochondrial changes  
GO:0001657 ureteric bud development  
GO:0034097 response to cytokine stimulus  
GO:0006284 base-excision repair  
GO:0006909 phagocytosis  
GO:0006940 regulation of smooth muscle contraction  
GO:0007405 neuroblast proliferation  
GO:0051297 centrosome organization and biogenesis

G0:0032870 cellular response to hormone stimulus  
G0:0006493 protein amino acid O-linked glycosylation  
G0:0030048 actin filament-based movement  
G0:0019059 initiation of viral infection  
G0:0007530 sex determination  
G0:0007586 digestion  
G0:0007126 meiosis  
G0:0001568 blood vessel development  
G0:0016485 protein processing  
G0:0015844 monoamine transport  
G0:0009950 dorsal/ventral axis specification  
G0:0030949 positive regulation of vascular endothelial growth factor receptor signaling  
G0:0048260 positive regulation of receptor mediated endocytosis  
G0:0040015 negative regulation of body size  
G0:0007158 neuron adhesion  
G0:0030321 transepithelial chloride transport  
G0:0046629 gamma-delta T cell activation  
G0:0034612 response to tumor necrosis factor  
G0:0003016 respiratory system process  
G0:0030212 hyaluronan metabolism  
G0:0045080 positive regulation of chemokine biosynthesis  
G0:0032981 mitochondrial respiratory chain complex I assembly  
G0:0045732 positive regulation of protein catabolism  
G0:0031623 receptor internalization  
G0:0007141 male meiosis I  
G0:0007128 meiotic prophase I  
G0:0008333 endosome to lysosome transport  
G0:0019432 triacylglycerol biosynthesis  
G0:0032755 positive regulation of interleukin-6 production  
G0:0014068 positive regulation of phosphoinositide 3-kinase cascade  
G0:0007567 parturition  
G0:0001782 B cell homeostasis  
G0:0006111 regulation of gluconeogenesis  
G0:0042921 glucocorticoid receptor signaling pathway  
G0:0033138 positive regulation of peptidyl-serine phosphorylation  
G0:0006546 glycine catabolism  
G0:0060263 regulation of respiratory burst  
G0:0033365 protein localization in organelle  
G0:0000076 DNA replication checkpoint  
G0:0048706 embryonic skeletal development  
G0:0031032 actomyosin structure organization and biogenesis  
G0:0008156 negative regulation of DNA replication  
G0:0042176 regulation of protein catabolism  
G0:0000387 spliceosomal snRNP biogenesis  
G0:0051482 elevation of cytosolic calcium ion concentration during G-protein signaling  
G0:0030850 prostate gland development  
G0:0045987 positive regulation of smooth muscle contraction  
G0:0051205 protein insertion into membrane  
G0:0007183 SMAD protein heteromerization  
G0:0042953 lipoprotein transport  
G0:0050482 arachidonic acid secretion  
G0:0032024 positive regulation of insulin secretion

G0:0032438 melanosome organization  
G0:0045176 apical protein localization  
G0:0018279 protein amino acid N-linked glycosylation via asparagine  
G0:0007638 mechanosensory behavior  
G0:0007062 sister chromatid cohesion  
G0:0001832 blastocyst growth  
G0:0019047 provirus integration  
G0:0033205 cytokinesis during cell cycle  
G0:0006301 postreplication repair  
G0:0010224 response to UV-B  
G0:0042755 eating behavior  
G0:0009790 embryonic development  
G0:0019233 sensory perception of pain  
G0:0032868 response to insulin stimulus  
G0:0010212 response to ionizing radiation  
G0:0007498 mesoderm development  
G0:0050870 positive regulation of T cell activation  
G0:0001707 mesoderm formation  
G0:0030534 adult behavior  
G0:0000245 spliceosome assembly  
G0:0030168 platelet activation  
G0:0042474 middle ear morphogenesis  
G0:0035050 embryonic heart tube development  
G0:0006983 ER overload response  
G0:0048844 artery morphogenesis  
G0:0006491 N-glycan processing  
G0:0006379 mRNA cleavage  
G0:0009435 NAD biosynthesis  
G0:0051044 positive regulation of membrane protein ectodomain proteolysis  
G0:0005513 detection of calcium ion  
G0:0008045 motor axon guidance  
G0:0050853 B cell receptor signaling pathway  
G0:0043691 reverse cholesterol transport  
G0:0000160 two-component signal transduction system (phosphorelay)  
G0:0046513 ceramide biosynthesis  
G0:0002467 germinal center formation  
G0:0042255 ribosome assembly  
G0:0016045 detection of bacterium  
G0:0006600 creatine metabolism  
G0:0048070 regulation of developmental pigmentation  
G0:0006857 oligopeptide transport  
G0:0016571 histone methylation  
G0:0006878 copper ion homeostasis  
G0:0042523 positive regulation of tyrosine phosphorylation of Stat5 protein  
G0:0045941 positive regulation of transcription  
G0:0030097 hemopoiesis  
G0:0001709 cell fate determination  
G0:0030155 regulation of cell adhesion  
G0:0042742 defense response to bacterium  
G0:0048593 eye morphogenesis (sensu Vertebrata)  
G0:0040008 regulation of growth  
G0:0002687 positive regulation of leukocyte migration



G0:0006548 histidine catabolism  
G0:0055007 cardiac muscle cell differentiation  
G0:0045668 negative regulation of osteoblast differentiation  
G0:0001759 induction of an organ  
G0:0006098 pentose-phosphate shunt  
G0:0001662 behavioral fear response  
G0:0043030 regulation of macrophage activation  
G0:0043409 negative regulation of MAPKKK cascade  
G0:0031398 positive regulation of protein ubiquitination  
G0:0050850 positive regulation of calcium-mediated signaling  
G0:0003009 skeletal muscle contraction  
G0:0048011 nerve growth factor receptor signaling pathway  
G0:0016311 dephosphorylation  
G0:0009725 response to hormone stimulus  
G0:0007194 negative regulation of adenylate cyclase activity  
G0:0008219 cell death  
G0:0007409 axonogenesis  
G0:0007015 actin filament organization  
G0:0001938 positive regulation of endothelial cell proliferation  
G0:0042993 positive regulation of transcription factor import into nucleus  
G0:0016079 synaptic vesicle exocytosis  
G0:0030901 midbrain development  
G0:0048048 embryonic eye morphogenesis  
G0:0048813 dendrite morphogenesis  
G0:0042771 DNA damage response, signal transduction by p53 class mediator resulting  
G0:0006183 GTP biosynthesis  
G0:0006228 UTP biosynthesis  
G0:0045742 positive regulation of epidermal growth factor receptor signaling pathwa  
G0:0042177 negative regulation of protein catabolism  
G0:0043154 negative regulation of caspase activity  
G0:0032369 negative regulation of lipid transport  
G0:0006656 phosphatidylcholine biosynthesis  
G0:0042593 glucose homeostasis  
G0:0051258 protein polymerization  
G0:0001659 thermoregulation  
G0:0007202 phospholipase C activation  
G0:0051209 release of sequestered calcium ion into cytosol  
G0:0009143 nucleoside triphosphate catabolism  
G0:0042491 auditory receptor cell differentiation  
G0:0007096 regulation of exit from mitosis  
G0:0006835 dicarboxylic acid transport  
G0:0021696 cerebellar cortex morphogenesis  
G0:0042088 T-helper 1 type immune response  
G0:0006241 CTP biosynthesis  
G0:0002347 response to tumor cell  
G0:0042476 odontogenesis  
G0:0030516 regulation of axon extension  
G0:0001658 ureteric bud branching  
G0:0006607 NLS-bearing substrate import into nucleus  
G0:0050810 regulation of steroid biosynthesis  
G0:0031575 G1/S transition checkpoint  
G0:0042554 superoxide release

GO:0046620 regulation of organ size  
GO:0051881 regulation of mitochondrial membrane potential  
GO:0046330 positive regulation of JNK cascade  
GO:0009409 response to cold  
GO:0001504 neurotransmitter uptake  
GO:0008625 induction of apoptosis via death domain receptors  
GO:0031668 cellular response to extracellular stimulus  
GO:0006487 protein amino acid N-linked glycosylation  
GO:0006825 copper ion transport  
GO:0046888 negative regulation of hormone secretion  
GO:0007339 binding of sperm to zona pellucida  
GO:0006144 purine base metabolism  
GO:0016573 histone acetylation  
GO:0050709 negative regulation of protein secretion  
GO:0007212 dopamine receptor signaling pathway  
GO:0048738 cardiac muscle development  
GO:0006700 C21-steroid hormone biosynthesis  
GO:0000080 G1 phase of mitotic cell cycle  
GO:0001523 retinoid metabolism  
GO:0051668 localization within membrane  
GO:0042157 lipoprotein metabolism  
GO:0007200 G-protein signaling, coupled to IP3 second messenger (phospholipase C ac  
GO:0006164 purine nucleotide biosynthesis  
GO:0030902 hindbrain development  
GO:0045664 regulation of neuron differentiation  
GO:0051259 protein oligomerization  
GO:0009880 embryonic pattern specification  
GO:0043434 response to peptide hormone stimulus  
GO:0045666 positive regulation of neuron differentiation  
GO:0007271 synaptic transmission, cholinergic  
GO:0045055 regulated secretory pathway  
GO:0042744 hydrogen peroxide catabolism  
GO:0021545 cranial nerve development  
GO:0007009 plasma membrane organization and biogenesis  
GO:0008272 sulfate transport  
GO:0006942 regulation of striated muscle contraction  
GO:0031047 RNA-mediated gene silencing  
GO:0008038 neuron recognition  
GO:0016998 cell wall catabolism  
GO:0001711 endodermal cell fate commitment  
GO:0030858 positive regulation of epithelial cell differentiation  
GO:0031547 brain-derived neurotrophic factor receptor signaling pathway  
GO:0035066 positive regulation of histone acetylation  
GO:0015670 carbon dioxide transport  
GO:0042313 protein kinase C deactivation  
GO:0051771 negative regulation of nitric-oxide synthase biosynthesis  
GO:0042489 negative regulation of odontogenesis (sensu Vertebrata)  
GO:0019371 cyclooxygenase pathway  
GO:0006172 ADP biosynthesis  
GO:0006173 dADP biosynthesis  
GO:0015755 fructose transport  
GO:0045602 negative regulation of endothelial cell differentiation

G0:0002581 negative regulation of antigen processing and presentation of peptide or  
G0:0002605 negative regulation of dendritic cell antigen processing and presentatio  
G0:0043652 engulfment of apoptotic cell  
G0:0010751 negative regulation of nitric oxide mediated signal transduction  
G0:0010754 negative regulation of cGMP-mediated signaling  
G0:0010757 negative regulation of plasminogen activation  
G0:0010759 positive regulation of macrophage chemotaxis  
G0:0002539 prostaglandin production during acute inflammatory response  
G0:0043651 linoleic acid metabolism  
G0:0018872 arsonoacetate metabolism  
G0:0007424 tracheal system development (sensu Insecta)  
G0:0007501 mesodermal cell fate specification  
G0:0006196 AMP catabolism  
G0:0019100 male germ-line sex determination  
G0:0002223 stimulatory C-type lectin receptor signaling pathway  
G0:0016344 meiotic chromosome movement towards spindle pole  
G0:0040038 polar body extrusion after meiotic divisions  
G0:0021557 oculomotor nerve development  
G0:0021558 trochlear nerve development  
G0:0034230 enkephalin processing  
G0:0034231 islet amyloid polypeptide processing  
G0:0043128 positive regulation of 1-phosphatidylinositol 4-kinase activity  
G0:0051451 myoblast migration  
G0:0051594 detection of glucose  
G0:0001300 chronological cell aging  
G0:0034241 positive regulation of macrophage fusion  
G0:0001921 positive regulation of receptor recycling  
G0:0034959 endothelin maturation  
G0:0008057 eye pigment granule organization and biogenesis  
G0:0045870 positive regulation of retroviral genome replication  
G0:0018146 keratan sulfate biosynthesis  
G0:0010044 response to aluminum ion  
G0:0045654 positive regulation of megakaryocyte differentiation  
G0:0060324 face development  
G0:0031630 regulation of synaptic vesicle fusion to presynaptic membrane  
G0:0048790 maintenance of presynaptic active zone structure  
G0:0050975 sensory perception of touch  
G0:0051602 response to electrical stimulus  
G0:0014707 branchiomic skeletal muscle development  
G0:0019682 glyceraldehyde-3-phosphate metabolism  
G0:0002686 negative regulation of leukocyte migration  
G0:0043305 negative regulation of mast cell degranulation  
G0:0006231 dTMP biosynthesis  
G0:0009157 deoxyribonucleoside monophosphate biosynthesis  
G0:0016242 negative regulation of macroautophagy  
G0:0006554 lysine catabolism  
G0:0006062 sorbitol catabolism  
G0:0046370 fructose biosynthesis  
G0:0051160 L-xylitol catabolism  
G0:0046947 hydroxylysine biosynthesis  
G0:0021919 BMP signaling pathway in spinal cord dorsal-ventral patterning  
G0:0033504 floor plate development

G0:0032224 positive regulation of synaptic transmission, cholinergic  
G0:0021660 rhombomere 3 formation  
G0:0021666 rhombomere 5 formation  
G0:0048752 semicircular canal morphogenesis  
G0:0060005 vestibular reflex  
G0:0006649 phospholipid transfer to membrane  
G0:0021897 forebrain astrocyte development  
G0:0048677 axon extension involved in regeneration  
G0:0031581 hemidesmosome assembly  
G0:0048386 positive regulation of retinoic acid receptor signaling pathway  
G0:0006683 galactosylceramide catabolism  
G0:0046208 spermine catabolism  
G0:0031441 negative regulation of mRNA 3'-end processing  
G0:0007258 JUN phosphorylation  
G0:0016189 synaptic vesicle to endosome fusion  
G0:0050823 peptide antigen stabilization  
G0:0030393 fructoselysine metabolism  
G0:0002072 optic cup morphogenesis (sensu Mammalia)  
G0:0021768 nucleus accumbens development  
G0:0021999 neural plate anterioposterior pattern formation  
G0:0008049 male courtship behavior  
G0:0045603 positive regulation of endothelial cell differentiation  
G0:0035083 cilium axoneme biogenesis  
G0:0065001 specification of axis polarity  
G0:0001762 beta-alanine transport  
G0:0015734 taurine transport  
G0:0006145 purine base catabolism  
G0:0006214 thymidine catabolism  
G0:0048793 pronephros development  
G0:0032229 negative regulation of synaptic transmission, GABAergic  
G0:0006565 L-serine catabolism  
G0:0007527 adult somatic muscle development  
G0:0051102 DNA ligation during DNA recombination  
G0:0033153 T cell receptor V(D)J recombination  
G0:0034340 response to type I interferon  
G0:0021592 fourth ventricle development  
G0:0021670 lateral ventricle development  
G0:0021678 third ventricle development  
G0:0046293 formaldehyde biosynthesis  
G0:0033169 histone H3-K9 demethylation  
G0:0045381 regulation of interleukin-18 biosynthesis  
G0:0045751 negative regulation of Toll signaling pathway  
G0:0033595 response to genistein  
G0:0033600 negative regulation of mammary gland epithelial cell proliferation  
G0:0006272 leading strand elongation  
G0:0006273 lagging strand elongation  
G0:0002315 marginal zone B cell differentiation  
G0:0001682 tRNA 5'-leader removal  
G0:0016078 tRNA catabolism  
G0:0015744 succinate transport  
G0:0042412 taurine biosynthesis  
G0:0046439 L-cysteine metabolism

G0:0016082 synaptic vesicle priming  
G0:0046833 positive regulation of RNA export from nucleus  
G0:0000747 conjugation with cellular fusion  
G0:0032486 Rap protein signal transduction  
G0:0010159 specification of organ position  
G0:0010826 negative regulation of centrosome duplication  
G0:0031062 positive regulation of histone methylation  
G0:0060032 notochord regression  
G0:0032287 myelin maintenance in the peripheral nervous system  
G0:0032498 detection of muramyl dipeptide  
G0:0032701 negative regulation of interleukin-18 production  
G0:0034136 negative regulation of toll-like receptor 2 signaling pathway  
G0:0051790 short-chain fatty acid biosynthesis  
G0:0051792 medium-chain fatty acid biosynthesis  
G0:0032972 regulation of muscle filament sliding speed  
G0:0001998 angiotensin mediated vasoconstriction during regulation of blood pressure  
G0:0002019 angiotensin mediated regulation of renal output  
G0:0048143 astrocyte activation  
G0:0014873 response to muscle activity involved in regulation of muscle adaptation  
G0:0019265 glycine biosynthesis, by transamination of glyoxylate  
G0:0042866 pyruvate biosynthesis  
G0:0046724 oxalic acid secretion  
G0:0006051 N-acetylmannosamine metabolism  
G0:0019060 intracellular transport of viral proteins in host cell  
G0:0045023 G0 to G1 transition  
G0:0000710 meiotic mismatch repair  
G0:0050902 leukocyte adhesive activation  
G0:0051041 positive regulation of calcium-independent cell-cell adhesion  
G0:0046855 inositol phosphate dephosphorylation  
G0:0046856 phosphoinositide dephosphorylation  
G0:0007614 short-term memory  
G0:0035129 post-embryonic hindlimb morphogenesis  
G0:0032790 ribosome disassembly  
G0:0001887 selenium metabolism  
G0:0051642 centrosome localization  
G0:0032793 positive regulation of CREB transcription factor activity  
G0:0031946 regulation of glucocorticoid biosynthesis  
G0:0009294 DNA mediated transformation  
G0:0006178 guanine salvage  
G0:0045964 positive regulation of dopamine metabolism  
G0:0007035 vacuolar acidification  
G0:0051764 actin crosslink formation  
G0:0032966 negative regulation of collagen biosynthetic process  
G0:0055096 low density lipoprotein mediated signaling  
G0:0050760 negative regulation of thymidylate synthase biosynthesis  
G0:0048006 antigen processing and presentation, endogenous lipid antigen via MHC class I  
G0:0000717 nucleotide-excision repair, DNA duplex unwinding  
G0:0060022 hard palate development  
G0:0019089 transmission of virus  
G0:0010766 negative regulation of sodium ion transport  
G0:0010768 negative regulation of transcription from RNA polymerase II promoter in interphase  
G0:0052171 growth or development during symbiotic interaction

G0:0032468 Golgi calcium ion homeostasis  
G0:0032472 Golgi calcium ion transport  
G0:0045199 maintenance of epithelial cell polarity  
G0:0015789 UDP-N-acetylgalactosamine transport  
G0:0002316 follicular B cell differentiation  
G0:0042276 error-prone postreplication DNA repair  
G0:0019102 male somatic sex determination  
G0:0019244 lactate biosynthesis from pyruvate  
G0:0008655 pyrimidine salvage  
G0:0009972 cytidine deamination  
G0:0046087 cytidine metabolism  
G0:0032119 sequestering of zinc ion  
G0:0048075 positive regulation of eye pigmentation  
G0:0015747 urate transport  
G0:0001835 blastocyst hatching  
G0:0048808 male genitalia morphogenesis  
G0:0021785 branchiomotor neuron axon guidance  
G0:0034263 autophagy in response to ER overload  
G0:0009399 nitrogen fixation  
G0:0015888 thiamin transport  
G0:0030007 potassium ion homeostasis  
G0:0045794 negative regulation of cell volume  
G0:0034465 response to carbon monoxide  
G0:0060082 eye blink reflex  
G0:0060083 smooth muscle contraction involved in micturition  
G0:0018119 peptidyl-cysteine S-nitrosylation  
G0:0046294 formaldehyde catabolism  
G0:0001986 decreased strength of heart contraction during baroreceptor response to  
G0:0001994 norepinephrine-epinephrine vasoconstriction during regulation of blood p  
G0:0051036 regulation of endosome volume  
G0:0015684 ferrous iron transport  
G0:0043380 regulation of memory T cell differentiation  
G0:0048294 negative regulation of isotype switching to IgE isotypes  
G0:0015864 pyrimidine nucleoside transport  
G0:0006535 cysteine biosynthesis from serine  
G0:0019343 cysteine biosynthesis via cystathione  
G0:0033037 polysaccharide localization  
G0:0009236 cobalamin biosynthesis  
G0:0016340 calcium-dependent cell-matrix adhesion  
G0:0018350 protein amino acid esterification  
G0:0044258 intestinal lipid catabolism  
G0:0009441 glycolate metabolism  
G0:0014834 satellite cell maintenance involved in skeletal muscle regeneration  
G0:0014904 myotube cell development  
G0:0045724 positive regulation of flagellum biogenesis  
G0:0050893 sensory processing  
G0:0034454 microtubule anchoring at centrosome  
G0:0042823 pyridoxal phosphate biosynthesis  
G0:0030857 negative regulation of epithelial cell differentiation  
G0:0033484 nitric oxide homeostasis  
G0:0002001 renin secretion into blood stream  
G0:0051788 response to misfolded protein

G0:0010756 positive regulation of plasminogen activation  
G0:0034373 intermediate-density lipoprotein particle remodeling  
G0:0034638 phosphatidylcholine catabolic process  
G0:0050689 negative regulation of antiviral response by host  
G0:0046491 L-methylmalonyl-CoA metabolism  
G0:0046604 positive regulation of mitotic centrosome separation  
G0:0045143 homologous chromosome segregation  
G0:0045875 negative regulation of sister chromatid cohesion  
G0:0031223 auditory behavior  
G0:0035148 lumen formation  
G0:0045719 negative regulation of glycogen biosynthesis  
G0:0006256 UDP catabolism  
G0:0042780 tRNA 3'-processing  
G0:0006867 asparagine transport  
G0:0015817 histidine transport  
G0:0002651 positive regulation of tolerance induction to self antigen  
G0:0030047 actin modification  
G0:0030218 erythrocyte differentiation  
G0:0008037 cell recognition  
G0:0006401 RNA catabolism  
G0:0006839 mitochondrial transport  
G0:0040014 regulation of body size  
G0:0009168 purine ribonucleoside monophosphate biosynthesis  
G0:0021575 hindbrain morphogenesis  
G0:0046854 phosphoinositide phosphorylation  
G0:0007041 lysosomal transport  
G0:0000724 double-strand break repair via homologous recombination  
G0:0043473 pigmentation  
G0:0007631 feeding behavior  
G0:0006091 generation of precursor metabolites and energy  
G0:0048511 rhythmic process  
G0:0030593 neutrophil chemotaxis  
G0:0045651 positive regulation of macrophage differentiation  
G0:0042730 fibrinolysis  
G0:0001933 negative regulation of protein amino acid phosphorylation  
G0:0031175 neurite development  
G0:0006937 regulation of muscle contraction  
G0:0042490 mechanoreceptor differentiation  
G0:0009395 phospholipid catabolism  
G0:0043588 skin development  
G0:0017156 calcium ion-dependent exocytosis  
G0:0006891 intra-Golgi vesicle-mediated transport  
G0:0006626 protein targeting to mitochondrion  
G0:0006944 membrane fusion  
G0:0007162 negative regulation of cell adhesion  
G0:0055010 ventricular cardiac muscle morphogenesis  
G0:0007249 I-kappaB kinase/NF-kappaB cascade  
G0:0045494 photoreceptor maintenance  
G0:0042246 tissue regeneration  
G0:0003014 renal system process  
G0:0016447 somatic recombination of immunoglobulin gene segments  
G0:0000902 cell morphogenesis

G0:0003007 heart morphogenesis  
G0:0051605 proteolysis during protein maturation  
G0:0019439 aromatic compound catabolism  
G0:0046328 regulation of JNK cascade  
G0:0006479 protein amino acid methylation  
G0:0006024 glycosaminoglycan biosynthesis  
G0:0001706 endoderm formation  
G0:0051968 positive regulation of synaptic transmission, glutamatergic  
G0:0045722 positive regulation of gluconeogenesis  
G0:0006679 glucosylceramide biosynthesis  
G0:0018153 isopeptide cross-linking via N6-(L-isoglutamyl)-L-lysine  
G0:0006429 leucyl-tRNA aminoacylation  
G0:0042339 keratan sulfate metabolism  
G0:0045906 negative regulation of vasoconstriction  
G0:0030210 heparin biosynthesis  
G0:0046398 UDP-glucuronate metabolism  
G0:0050653 chondroitin sulfate proteoglycan biosynthesis, polysaccharide chain biosynthesis  
G0:0015798 myo-inositol transport  
G0:0030185 nitric oxide transport  
G0:0031583 G-protein signaling, phospholipase D activating pathway  
G0:0043179 rhythmic excitation  
G0:0060298 positive regulation of sarcomere organization  
G0:0001798 positive regulation of type IIa hypersensitivity  
G0:0006710 androgen catabolism  
G0:0043006 calcium-dependent phospholipase A2 activation  
G0:0032026 response to magnesium ion  
G0:0040037 negative regulation of fibroblast growth factor receptor signaling pathway  
G0:0010670 positive regulation of oxygen and reactive oxygen species metabolic processes  
G0:0010763 positive regulation of fibroblast cell migration  
G0:0034605 cellular response to heat  
G0:0043508 negative regulation of JNK activity  
G0:0019049 evasion of host defenses by virus  
G0:0032057 negative regulation of translation initiation in response to stress  
G0:0006642 triacylglycerol mobilization  
G0:0001957 intramembranous ossification  
G0:0045657 positive regulation of monocyte differentiation  
G0:0045627 positive regulation of T-helper 1 cell differentiation  
G0:0007132 meiotic metaphase I  
G0:0051295 establishment of meiotic spindle localization  
G0:0021555 midbrain-hindbrain boundary morphogenesis  
G0:0045608 negative regulation of auditory receptor cell differentiation  
G0:0060164 regulation of timing of neuron differentiation  
G0:0030070 insulin processing  
G0:0042359 vitamin D metabolism  
G0:0060009 Sertoli cell development  
G0:0000921 septin ring assembly  
G0:0006335 DNA replication-dependent nucleosome assembly  
G0:0006982 response to lipid hydroperoxide  
G0:0032516 positive regulation of phosphoprotein phosphatase activity  
G0:0032510 endosome to lysosome transport via multivesicular body sorting pathway  
G0:0033364 mast cell secretory granule organization  
G0:0010042 response to manganese ion



GO:0002378 immunoglobulin biosynthesis  
GO:0018401 peptidyl-proline hydroxylation to 4-hydroxy-L-proline  
GO:0030578 PML body organization and biogenesis  
GO:0046022 positive regulation of transcription from RNA polymerase II promoter, mi  
GO:0006788 heme oxidation  
GO:0014806 smooth muscle hyperplasia  
GO:0010389 regulation of G2/M transition of mitotic cell cycle  
GO:0033088 negative regulation of immature T cell proliferation in the thymus  
GO:0051586 positive regulation of dopamine uptake  
GO:0032417 positive regulation of sodium:hydrogen antiporter activity  
GO:0045213 neurotransmitter receptor metabolism  
GO:0009051 pentose-phosphate shunt, oxidative branch  
GO:0019322 pentose biosynthesis  
GO:0007538 primary sex determination  
GO:0042986 positive regulation of amyloid precursor protein biosynthesis  
GO:0034435 cholesterol esterification  
GO:0000022 mitotic spindle elongation  
GO:0006421 asparaginyl-tRNA aminoacylation  
GO:0048745 smooth muscle development  
GO:0022617 extracellular matrix disassembly  
GO:0042473 outer ear morphogenesis  
GO:0032288 myelin formation  
GO:0033280 response to vitamin D  
GO:0017183 peptidyl-diphthamide biosynthesis from peptidyl-histidine  
GO:0046826 negative regulation of protein export from nucleus  
GO:0043000 Golgi to plasma membrane CFTR protein transport  
GO:0000089 mitotic metaphase  
GO:0006370 mRNA capping  
GO:0055098 response to low density lipoprotein stimulus  
GO:0060166 olfactory pit development  
GO:0009313 oligosaccharide catabolism  
GO:0042511 positive regulation of tyrosine phosphorylation of Stat1 protein  
GO:0060272 embryonic skeletal joint morphogenesis  
GO:0006210 thymine catabolism  
GO:0006212 uracil catabolism  
GO:0021542 dentate gyrus development  
GO:0006627 mitochondrial protein processing  
GO:0006670 sphingosine metabolism  
GO:0046655 folic acid metabolism  
GO:0007518 myoblast cell fate determination  
GO:0017055 negative regulation of transcriptional preinitiation complex formation  
GO:0009082 branched chain family amino acid biosynthesis  
GO:0033152 immunoglobulin V(D)J recombination  
GO:0001778 plasma membrane repair  
GO:0007097 nuclear migration  
GO:0048843 negative regulation of axon extension involved in axon guidance  
GO:0050711 negative regulation of interleukin-1 secretion  
GO:0001550 ovarian cumulus expansion  
GO:0006499 N-terminal protein myristoylation  
GO:0050434 positive regulation of viral transcription  
GO:0045082 positive regulation of interleukin-10 biosynthesis  
GO:0045415 negative regulation of interleukin-8 biosynthesis

G0:0001823 mesonephros development  
G0:0006552 leucine catabolism  
G0:0006408 snRNA export from nucleus  
G0:0002066 columnar/cuboidal epithelial cell development  
G0:0035090 maintenance of apical/basal cell polarity  
G0:0006597 spermine biosynthesis  
G0:0051781 positive regulation of cell division  
G0:0045332 phospholipid translocation  
G0:0045541 negative regulation of cholesterol biosynthesis  
G0:0060088 auditory receptor cell stereocilium organization  
G0:0002925 positive regulation of humoral immune response mediated by circulating i  
G0:0006965 positive regulation of biosynthesis of antibacterial peptides active ag  
G0:0032740 positive regulation of interleukin-17 production  
G0:0000103 sulfate assimilation  
G0:0001543 ovarian follicle rupture  
G0:0001999 renal response to blood flow during renin-angiotensin regulation of bloc  
G0:0002018 renin-angiotensin regulation of aldosterone production  
G0:0042756 drinking behavior  
G0:0051387 negative regulation of nerve growth factor receptor signaling pathway  
G0:0003078 regulation of natriuresis  
G0:0033864 positive regulation of NAD(P)H oxidase activity  
G0:0009597 detection of virus  
G0:0046543 development of secondary female sexual characteristics  
G0:0046544 development of secondary male sexual characteristics  
G0:0060397 JAK-STAT cascade involved in growth hormone signaling pathway  
G0:0007288 sperm axoneme assembly  
G0:0010512 negative regulation of phosphatidylinositol biosynthetic process  
G0:0001661 conditioned taste aversion  
G0:0006999 nuclear pore organization and biogenesis  
G0:0016080 synaptic vesicle targeting  
G0:0032792 negative regulation of CREB transcription factor activity  
G0:0022027 interkinetic nuclear migration  
G0:0030953 astral microtubule organization and biogenesis  
G0:0030220 platelet formation  
G0:0031296 B cell costimulation  
G0:0006991 response to sterol depletion  
G0:0006168 adenine salvage  
G0:0051300 spindle pole body organization and biogenesis  
G0:0001781 neutrophil apoptosis  
G0:0002384 hepatic immune response  
G0:0070102 interleukin-6-mediated signaling pathway  
G0:0045198 establishment of epithelial cell polarity  
G0:0050862 positive regulation of T cell receptor signaling pathway  
G0:0019695 choline metabolism  
G0:0033615 mitochondrial proton-transporting ATP synthase complex assembly  
G0:0045899 positive regulation of transcriptional preinitiation complex formation  
G0:0002003 angiotensin maturation  
G0:0048550 negative regulation of pinocytosis  
G0:0034644 cellular response to UV  
G0:0007206 metabotropic glutamate receptor, phospholipase C activating pathway  
G0:0051725 protein amino acid de-ADP-ribosylation  
G0:0032237 activation of store-operated calcium channel activity

G0:0043490 malate-aspartate shuttle  
G0:0021990 neural plate formation  
G0:0046952 ketone body catabolism  
G0:0019858 cytosine metabolism  
G0:0007064 mitotic sister chromatid cohesion  
G0:0007403 glial cell fate determination  
G0:0009609 response to symbiotic bacterium  
G0:0048170 positive regulation of long-term neuronal synaptic plasticity  
G0:0006011 UDP-glucose metabolism  
G0:0032344 regulation of aldosterone metabolism  
G0:0006659 phosphatidylserine biosynthesis  
G0:0051409 response to nitrosative stress  
G0:0050955 thermoception  
G0:0034392 negative regulation of smooth muscle cell apoptosis  
G0:0060027 convergent extension involved in gastrulation  
G0:0006542 glutamine biosynthesis  
G0:0006925 inflammatory cell apoptosis  
G0:0045019 negative regulation of nitric oxide biosynthesis  
G0:0045908 negative regulation of vasodilation  
G0:0002542 Factor XII activation  
G0:0007597 blood coagulation, intrinsic pathway  
G0:0019509 methionine salvage  
G0:0046337 phosphatidylethanolamine metabolism  
G0:0030264 nuclear fragmentation  
G0:0046007 negative regulation of activated T cell proliferation  
G0:0006431 methionyl-tRNA aminoacylation  
G0:0042404 thyroid hormone catabolism  
G0:0015993 molecular hydrogen transport  
G0:0048563 post-embryonic organ morphogenesis  
G0:0030505 inorganic diphosphate transport  
G0:0050427 3'-phosphoadenosine 5'-phosphosulfate metabolism  
G0:0007066 female meiosis sister chromatid cohesion  
G0:0009258 10-formyltetrahydrofolate catabolism  
G0:0006529 asparagine biosynthesis  
G0:0030300 regulation of cholesterol absorption  
G0:0032099 negative regulation of appetite  
G0:0002663 positive regulation of B cell tolerance induction  
G0:0002666 positive regulation of T cell tolerance induction  
G0:0051138 positive regulation of NK T cell differentiation  
G0:0001574 ganglioside biosynthesis  
G0:0046967 cytosol to ER transport  
G0:0048227 plasma membrane to endosome transport  
G0:0051899 membrane depolarization  
G0:0048477 oogenesis  
G0:0030330 DNA damage response, signal transduction by p53 class mediator  
G0:0001541 ovarian follicle development  
G0:0006414 translational elongation  
G0:0009306 protein secretion  
G0:0006605 protein targeting  
G0:0015074 DNA integration  
G0:0001756 somitogenesis  
G0:0045089 positive regulation of innate immune response

G0:0021954 central nervous system neuron development  
G0:0045165 cell fate commitment  
G0:0045860 positive regulation of protein kinase activity  
G0:0031016 pancreas development  
G0:0030195 negative regulation of blood coagulation  
G0:0045665 negative regulation of neuron differentiation  
G0:0006071 glycerol metabolism  
G0:0033077 T cell differentiation in the thymus  
G0:0030500 regulation of bone mineralization  
G0:0009072 aromatic amino acid family metabolism  
G0:0045834 positive regulation of lipid metabolism  
G0:0042327 positive regulation of phosphorylation  
G0:0006800 oxygen and reactive oxygen species metabolism  
G0:0006913 nucleocytoplasmic transport  
G0:0001708 cell fate specification  
G0:0006520 amino acid metabolism  
G0:0007207 muscarinic acetylcholine receptor, phospholipase C activating pathway  
G0:0006663 platelet activating factor biosynthesis  
G0:0006701 progesterone biosynthesis  
G0:0019276 UDP-N-acetylgalactosamine metabolism  
G0:0043267 negative regulation of potassium ion transport  
G0:0006702 androgen biosynthesis  
G0:0031659 G1/S-specific positive regulation of cyclin-dependent protein kinase act  
G0:0070141 response to UV-A  
G0:0045879 negative regulation of smoothened signaling pathway  
G0:0015732 prostaglandin transport  
G0:0006167 AMP biosynthesis  
G0:0031000 response to caffeine  
G0:0031642 negative regulation of myelination  
G0:0010107 potassium ion import  
G0:0051496 positive regulation of stress fiber formation  
G0:0042668 auditory receptor cell fate determination  
G0:0046813 virion attachment, binding of host cell surface receptor  
G0:0008054 cyclin catabolism  
G0:0045721 negative regulation of gluconeogenesis  
G0:0051156 glucose 6-phosphate metabolism  
G0:0035308 negative regulation of protein amino acid dephosphorylation  
G0:0032515 negative regulation of phosphoprotein phosphatase activity  
G0:0051088 PMA-inducible membrane protein ectodomain proteolysis  
G0:0033630 positive regulation of cell adhesion mediated by integrin  
G0:0019987 negative regulation of anti-apoptosis  
G0:0030573 bile acid catabolism  
G0:0030540 female genitalia development  
G0:0006271 DNA strand elongation  
G0:0042167 heme catabolism  
G0:0048149 behavioral response to ethanol  
G0:0051927 negative regulation of calcium ion transport via voltage gated calcium c  
G0:0034776 response to histamine  
G0:0060080 regulation of inhibitory postsynaptic membrane potential  
G0:0034653 retinoic acid catabolic process  
G0:0008582 regulation of synaptic growth at neuromuscular junction  
G0:0021569 rhombomere 3 development

G0:0021612 facial nerve structural organization  
G0:0035284 brain segmentation  
G0:0033632 regulation of cell-cell adhesion mediated by integrin  
G0:0006564 L-serine biosynthesis  
G0:0048485 sympathetic nervous system development  
G0:0015760 glucose-6-phosphate transport  
G0:0015015 heparan sulfate proteoglycan biosynthesis, enzymatic modification  
G0:0007095 mitotic G2 checkpoint  
G0:0050872 white fat cell differentiation  
G0:0033993 response to lipid  
G0:0006222 UMP biosynthesis  
G0:0030916 otic vesicle formation  
G0:0034505 tooth mineralization  
G0:0006654 phosphatidic acid biosynthesis  
G0:0002328 pro-B cell differentiation  
G0:0060337 type I interferon-mediated signaling pathway  
G0:0006591 ornithine metabolism  
G0:0048478 replication fork protection  
G0:0042536 negative regulation of tumor necrosis factor-alpha biosynthesis  
G0:0015746 citrate transport  
G0:0006295 nucleotide-excision repair, DNA incision, 3'-to lesion  
G0:0006296 nucleotide-excision repair, DNA incision, 5'-to lesion  
G0:0010834 telomere maintenance via telomere shortening  
G0:0021615 glossopharyngeal nerve morphogenesis  
G0:0046621 negative regulation of organ size  
G0:0007418 ventral midline development  
G0:0001675 acrosome formation  
G0:0002227 innate immune response in mucosa  
G0:0032874 positive regulation of stress-activated MAPK cascade  
G0:0002035 brain renin-angiotensin system  
G0:0046487 glyoxylate metabolism  
G0:0043558 regulation of translation initiation in response to stress  
G0:0042789 mRNA transcription from RNA polymerase II promoter  
G0:0032091 negative regulation of protein binding  
G0:0035092 sperm chromatin condensation  
G0:0002636 positive regulation of germinal center formation  
G0:0006424 glutamyl-tRNA aminoacylation  
G0:0000083 G1/S-specific transcription in mitotic cell cycle  
G0:0046100 hypoxanthine metabolism  
G0:0007100 mitotic centrosome separation  
G0:0002548 monocyte chemotaxis  
G0:0045079 negative regulation of chemokine biosynthesis  
G0:0051024 positive regulation of immunoglobulin secretion  
G0:0032494 response to peptidoglycan  
G0:0045715 negative regulation of low-density lipoprotein receptor biosynthesis  
G0:0032780 negative regulation of ATPase activity  
G0:0009301 snRNA transcription  
G0:0035315 hair cell differentiation  
G0:0006551 leucine metabolism  
G0:0018076 N-terminal peptidyl-lysine acetylation  
G0:0032236 positive regulation of calcium ion transport via store-operated calcium  
G0:0032959 inositol trisphosphate biosynthetic process

G0:0046653 tetrahydrofolate metabolism  
G0:0015810 aspartate transport  
G0:0001561 fatty acid alpha-oxidation  
G0:0019805 quinolinate biosynthesis  
G0:0021988 olfactory lobe development  
G0:0051938 L-glutamate import  
G0:0006837 serotonin transport  
G0:0015871 choline transport  
G0:0045007 depurination  
G0:0006346 methylation-dependent chromatin silencing  
G0:0015816 glycine transport  
G0:0002862 negative regulation of inflammatory response to antigenic stimulus  
G0:0019896 axon transport of mitochondrion  
G0:0006189 'de novo' IMP biosynthesis  
G0:0006623 protein targeting to vacuole  
G0:0032855 positive regulation of Rac GTPase activity  
G0:0002829 negative regulation of T-helper 2 type immune response  
G0:0002903 negative regulation of B cell apoptosis  
G0:0015860 purine nucleoside transport  
G0:0035121 tail morphogenesis  
G0:0030157 pancreatic juice secretion  
G0:0033143 regulation of steroid hormone receptor signaling pathway  
G0:0014911 positive regulation of smooth muscle cell migration  
G0:0051877 pigment granule aggregation in cell center  
G0:0008615 pyridoxine biosynthesis  
G0:0042816 vitamin B6 metabolism  
G0:0033603 positive regulation of dopamine secretion  
G0:0006924 activated T cell apoptosis  
G0:0045060 negative thymic T cell selection  
G0:0014912 negative regulation of smooth muscle cell migration  
G0:0045907 positive regulation of vasoconstriction  
G0:0048554 positive regulation of metalloenzyme activity  
G0:0045604 regulation of epidermal cell differentiation  
G0:0043569 negative regulation of insulin-like growth factor receptor signaling pat  
G0:0031648 protein destabilization  
G0:0019852 L-ascorbic acid metabolism  
G0:0018348 protein amino acid geranylgeranylation  
G0:0030730 sequestering of triacylglycerol  
G0:0032042 mitochondrial DNA metabolism  
G0:0006853 carnitine shuttle  
G0:0032509 endosome transport via multivesicular body sorting pathway  
G0:0045785 positive regulation of cell adhesion  
G0:0010742 foam cell differentiation  
G0:0000723 telomere maintenance  
G0:0048167 regulation of synaptic plasticity  
G0:0043583 ear development  
G0:0030217 T cell differentiation  
G0:0006383 transcription from RNA polymerase III promoter  
G0:0019079 viral genome replication  
G0:0050769 positive regulation of neurogenesis  
G0:0055072 iron ion homeostasis  
G0:0019216 regulation of lipid metabolism

G0:0042594 response to starvation  
G0:0006809 nitric oxide biosynthesis  
G0:0043407 negative regulation of MAPK activity  
G0:0007266 Rho protein signal transduction  
G0:0032331 negative regulation of chondrocyte differentiation  
G0:0035117 embryonic arm morphogenesis  
G0:0050651 dermatan sulfate proteoglycan biosynthesis  
G0:0014826 vein smooth muscle contraction  
G0:0043497 regulation of protein heterodimerization  
G0:0001867 complement activation, lectin pathway  
G0:0043032 positive regulation of macrophage activation  
G0:0032570 response to progesterone stimulus  
G0:0032909 regulation of transforming growth factor-beta2 production  
G0:0050901 leukocyte tethering or rolling  
G0:0009404 toxin metabolism  
G0:0016322 neuron remodeling  
G0:0006926 virus-infected cell apoptosis  
G0:0009134 nucleoside diphosphate catabolism  
G0:0007525 somatic muscle development  
G0:0043114 regulation of vascular permeability  
G0:0031536 positive regulation of exit from mitosis  
G0:0043278 response to morphine  
G0:0045217 intercellular junction maintenance  
G0:0002246 healing during inflammatory response  
G0:0043619 regulation of transcription from RNA polymerase II promoter in response  
G0:0006651 diacylglycerol biosynthesis  
G0:0031119 tRNA pseudouridine synthesis  
G0:0048387 negative regulation of retinoic acid receptor signaling pathway  
G0:0022011 myelination in the peripheral nervous system  
G0:0048715 negative regulation of oligodendrocyte differentiation  
G0:0048853 forebrain morphogenesis  
G0:0006002 fructose 6-phosphate metabolism  
G0:0007386 compartment specification  
G0:0000288 mRNA catabolism, deadenylation-dependent decay  
G0:0055091 phospholipid homeostasis  
G0:0060155 platelet dense granule organization  
G0:0045022 early endosome to late endosome transport  
G0:0006102 isocitrate metabolism  
G0:0045600 positive regulation of fat cell differentiation  
G0:0006269 DNA replication, synthesis of RNA primer  
G0:0006207 'de novo' pyrimidine base biosynthesis  
G0:0021527 spinal cord association neuron differentiation  
G0:0060333 interferon-gamma-mediated signaling pathway  
G0:0007042 lysosomal lumen acidification  
G0:0051045 negative regulation of membrane protein ectodomain proteolysis  
G0:0008588 release of cytoplasmic sequestered NF-kappaB  
G0:0045409 negative regulation of interleukin-6 biosynthesis  
G0:0051310 metaphase plate congression  
G0:0019730 antimicrobial humoral response  
G0:0048251 elastic fiber assembly  
G0:0051974 negative regulation of telomerase activity  
G0:0050665 hydrogen peroxide biosynthesis

G0:0006290 pyrimidine dimer repair  
G0:0032689 negative regulation of interferon-gamma production  
G0:0032735 positive regulation of interleukin-12 production  
G0:0007199 G-protein signaling, coupled to cGMP nucleotide second messenger  
G0:0030432 peristalsis  
G0:0006972 hyperosmotic response  
G0:0045356 positive regulation of interferon-alpha biosynthesis  
G0:0045359 positive regulation of interferon-beta biosynthesis  
G0:0030970 retrograde protein transport, ER to cytosol  
G0:0001779 natural killer cell differentiation  
G0:0045579 positive regulation of B cell differentiation  
G0:0045647 negative regulation of erythrocyte differentiation  
G0:0048541 Peyer's patch development  
G0:0010544 negative regulation of platelet activation  
G0:0051898 negative regulation of protein kinase B signaling cascade  
G0:0032000 positive regulation of fatty acid beta-oxidation  
G0:0018206 peptidyl-methionine modification  
G0:0006166 purine ribonucleoside salvage  
G0:0046689 response to mercury ion  
G0:0032020 ISG15-protein conjugation  
G0:0035025 positive regulation of Rho protein signal transduction  
G0:0008612 hypusine biosynthesis from peptidyl-lysine  
G0:0032376 positive regulation of cholesterol transport  
G0:0007253 cytoplasmic sequestering of NF-kappaB  
G0:0015824 proline transport  
G0:0051702 interaction with symbiont  
G0:0030259 lipid glycosylation  
G0:0006432 phenylalanyl-tRNA aminoacylation  
G0:0035022 positive regulation of Rac protein signal transduction  
G0:0010039 response to iron ion  
G0:0006434 seryl-tRNA aminoacylation  
G0:0060296 regulation of cilium beat frequency involved in ciliary motility  
G0:0017121 phospholipid scrambling  
G0:0006927 transformed cell apoptosis  
G0:0060056 mammary gland involution  
G0:0051919 positive regulation of fibrinolysis  
G0:0034375 high-density lipoprotein particle remodeling  
G0:0045578 negative regulation of B cell differentiation  
G0:0006358 regulation of global transcription from RNA polymerase II promoter  
G0:0008053 mitochondrial fusion  
G0:0035162 embryonic hemopoiesis  
G0:0060044 negative regulation of cardiac muscle cell proliferation  
G0:0045639 positive regulation of myeloid cell differentiation  
G0:0045638 negative regulation of myeloid cell differentiation  
G0:0006641 triacylglycerol metabolism  
G0:0018108 peptidyl-tyrosine phosphorylation  
G0:0042692 muscle cell differentiation  
G0:0007163 establishment and/or maintenance of cell polarity  
G0:0043392 negative regulation of DNA binding  
G0:0007286 spermatid development  
G0:0009062 fatty acid catabolism  
G0:0016202 regulation of striated muscle development



G0:0030282 bone mineralization  
G0:0006952 defense response  
G0:0006261 DNA-dependent DNA replication  
G0:0030146 diuresis  
G0:0015701 bicarbonate transport  
G0:0040036 regulation of fibroblast growth factor receptor signaling pathway  
G0:0002544 chronic inflammatory response  
G0:0051918 negative regulation of fibrinolysis  
G0:0022614 membrane to membrane docking  
G0:0032370 positive regulation of lipid transport  
G0:0045741 positive regulation of epidermal growth factor receptor activity  
G0:0032148 activation of protein kinase B  
G0:0006977 DNA damage response, signal transduction by p53 class mediator resulting  
G0:0042117 monocyte activation  
G0:0006699 bile acid biosynthesis  
G0:0002089 lens morphogenesis (sensu Vertebrata)  
G0:0021520 spinal cord motor neuron cell fate specification  
G0:0009268 response to pH  
G0:0045187 regulation of circadian sleep/wake cycle, sleep  
G0:0000185 activation of MAPKKK activity  
G0:0048103 somatic stem cell division  
G0:0042416 dopamine biosynthesis  
G0:0060134 prepulse inhibition  
G0:0046676 negative regulation of insulin secretion  
G0:0042769 DNA damage response, detection of DNA damage  
G0:0045616 regulation of keratinocyte differentiation  
G0:0030819 positive regulation of cAMP biosynthesis  
G0:0032367 intracellular cholesterol transport  
G0:0009649 entrainment of circadian clock  
G0:0045713 low-density lipoprotein receptor biosynthesis  
G0:0032364 oxygen homeostasis  
G0:0007341 penetration of zona pellucida  
G0:0046521 sphingoid catabolism  
G0:0051103 DNA ligation during DNA repair  
G0:0055015 ventricular cardiac muscle cell development  
G0:0006538 glutamate catabolism  
G0:0045064 T-helper 2 cell differentiation  
G0:0009200 deoxyribonucleoside triphosphate metabolism  
G0:0046329 negative regulation of JNK cascade  
G0:0002262 myeloid cell homeostasis  
G0:0019430 removal of superoxide radicals  
G0:0042535 positive regulation of tumor necrosis factor-alpha biosynthesis  
G0:0045410 positive regulation of interleukin-6 biosynthesis  
G0:0045940 positive regulation of steroid metabolism  
G0:0046622 positive regulation of organ size  
G0:0047497 mitochondrion transport along microtubule  
G0:0048305 immunoglobulin secretion  
G0:0060037 pharyngeal system development  
G0:0032722 positive regulation of chemokine production  
G0:0001954 positive regulation of cell-matrix adhesion  
G0:0006882 zinc ion homeostasis  
G0:0046668 regulation of retinal programmed cell death

G0:0045008 depyrimidination  
G0:0030033 microvillus biogenesis  
G0:0050748 negative regulation of lipoprotein metabolism  
G0:0048261 negative regulation of receptor mediated endocytosis  
G0:0019642 anaerobic glycolysis  
G0:0051006 positive regulation of lipoprotein lipase activity  
G0:0018101 peptidyl-citrulline biosynthesis from peptidyl-arginine  
G0:0040020 regulation of meiosis  
G0:0032801 receptor catabolic process  
G0:0046697 decidualization  
G0:0002726 positive regulation of T cell cytokine production  
G0:0032743 positive regulation of interleukin-2 production  
G0:0034447 very-low-density lipoprotein particle clearance  
G0:0006824 cobalt ion transport  
G0:0002634 regulation of germinal center formation  
G0:0043568 positive regulation of insulin-like growth factor receptor signaling pat  
G0:0035058 sensory cilium biogenesis  
G0:0032465 regulation of cytokinesis  
G0:0051584 regulation of dopamine uptake  
G0:0019067 viral assembly, maturation, egress, and release  
G0:0009437 carnitine metabolism  
G0:0030643 phosphate ion homeostasis  
G0:0045599 negative regulation of fat cell differentiation  
G0:0048268 clathrin cage assembly  
G0:0051005 negative regulation of lipoprotein lipase activity  
G0:0030111 regulation of Wnt receptor signaling pathway  
G0:0009060 aerobic respiration  
G0:0016331 morphogenesis of embryonic epithelium  
G0:0031647 regulation of protein stability  
G0:0048568 embryonic organ development  
G0:0030595 leukocyte chemotaxis  
G0:0042446 hormone biosynthesis  
G0:0046321 positive regulation of fatty acid oxidation  
G0:0050873 brown fat cell differentiation  
G0:0015721 bile acid transport  
G0:0050930 induction of positive chemotaxis  
G0:0043496 regulation of protein homodimerization  
G0:0042640 anagen  
G0:0017144 drug metabolism  
G0:0043353 enucleate erythrocyte differentiation  
G0:0045132 meiotic chromosome segregation  
G0:0043266 regulation of potassium ion transport  
G0:0033631 cell-cell adhesion mediated by integrin  
G0:0048535 lymph node development  
G0:0046885 regulation of hormone biosynthesis  
G0:0043584 nose development  
G0:0060123 regulation of growth hormone secretion  
G0:0048148 behavioral response to cocaine  
G0:0007213 acetylcholine receptor signaling, muscarinic pathway  
G0:0007216 metabotropic glutamate receptor signaling pathway  
G0:0019240 citrulline biosynthesis  
G0:0014829 vascular smooth muscle contraction

G0:0048247 lymphocyte chemotaxis  
G0:0042745 circadian sleep/wake cycle  
G0:0042074 cell migration involved in gastrulation  
G0:0009296 flagellum biogenesis  
G0:0055003 cardiac myofibril assembly  
G0:0051123 transcriptional preinitiation complex formation  
G0:0006621 protein retention in ER  
G0:0033081 regulation of T cell differentiation in the thymus  
G0:0060052 neurofilament cytoskeleton organization  
G0:0002224 toll-like receptor signaling pathway  
G0:0009651 response to salt stress  
G0:0042448 progesterone metabolism  
G0:0045737 positive regulation of cyclin-dependent protein kinase activity  
G0:0015879 carnitine transport  
G0:0046836 glycolipid transport  
G0:0021895 cerebral cortex neuron differentiation  
G0:0002446 neutrophil mediated immunity  
G0:0045948 positive regulation of translational initiation  
G0:0006200 ATP catabolism  
G0:0042791 5S class rRNA transcription  
G0:0042797 tRNA transcription from RNA polymerase III promoter  
G0:0006283 transcription-coupled nucleotide-excision repair  
G0:0033683 nucleotide-excision repair, DNA incision  
G0:0046902 regulation of mitochondrial membrane permeability  
G0:0016579 protein deubiquitination  
G0:0006337 nucleosome disassembly  
G0:0060271 cilium morphogenesis  
G0:0046426 negative regulation of JAK-STAT cascade  
G0:0060079 regulation of excitatory postsynaptic membrane potential  
G0:0045039 protein import into mitochondrial inner membrane  
G0:0043011 myeloid dendritic cell differentiation  
G0:0060389 pathway-restricted SMAD protein phosphorylation  
G0:0006729 tetrahydrobiopterin biosynthesis  
G0:0042110 T cell activation  
G0:0051246 regulation of protein metabolism  
G0:0007005 mitochondrion organization and biogenesis  
G0:0001932 regulation of protein amino acid phosphorylation  
G0:0043193 positive regulation of gene-specific transcription  
G0:0031424 keratinization  
G0:0008629 induction of apoptosis by intracellular signals  
G0:0019228 generation of action potential  
G0:0006012 galactose metabolism  
G0:0030147 natriuresis  
G0:0010460 positive regulation of heart rate  
G0:0048340 paraxial mesoderm morphogenesis  
G0:0008595 determination of anterior/posterior axis, embryo  
G0:0045648 positive regulation of erythrocyte differentiation  
G0:0031640 killing of cells of another organism  
G0:0014037 Schwann cell differentiation  
G0:0021984 adenohypophysis development  
G0:0005980 glycogen catabolism  
G0:0043303 mast cell degranulation

G0:0030224 monocyte differentiation  
G0:0010553 negative regulation of specific transcription from RNA polymerase II promoter  
G0:0050910 detection of mechanical stimulus during sensory perception of sound  
G0:0008593 regulation of Notch signaling pathway  
G0:0010575 positive regulation of vascular endothelial growth factor production  
G0:0002052 positive regulation of neuroblast proliferation  
G0:0009103 lipopolysaccharide biosynthesis  
G0:0032729 positive regulation of interferon-gamma production  
G0:0000380 alternative nuclear mRNA splicing, via spliceosome  
G0:0008634 negative regulation of survival gene product activity  
G0:0022409 positive regulation of cell-cell adhesion  
G0:0008354 germ cell migration  
G0:0048169 regulation of long-term neuronal synaptic plasticity  
G0:0032760 positive regulation of tumor necrosis factor production  
G0:0042104 positive regulation of activated T cell proliferation  
G0:0031295 T cell costimulation  
G0:0055012 ventricular cardiac muscle cell differentiation  
G0:0002690 positive regulation of leukocyte chemotaxis  
G0:0008635 caspase activation via cytochrome c  
G0:0006353 transcription termination  
G0:0000052 citrulline metabolism  
G0:0045980 negative regulation of nucleotide metabolism  
G0:0021952 central nervous system projection neuron axonogenesis  
G0:0051775 response to redox state  
G0:0007635 chemosensory behavior  
G0:0035313 wound healing, spreading of epidermal cells  
G0:0021940 positive regulation of granule cell precursor proliferation  
G0:0045821 positive regulation of glycolysis  
G0:0046461 neutral lipid catabolism  
G0:0042391 regulation of membrane potential  
G0:0001819 positive regulation of cytokine production  
G0:0006359 regulation of transcription from RNA polymerase III promoter  
G0:0048016 inositol phosphate-mediated signaling  
G0:0043537 negative regulation of blood vessel endothelial cell migration  
G0:0007217 tachykinin signaling pathway  
G0:0001573 ganglioside metabolism  
G0:0006661 phosphatidylinositol biosynthesis  
G0:0000038 very-long-chain fatty acid metabolism  
G0:0042447 hormone catabolism  
G0:0032401 establishment of melanosome localization  
G0:0006906 vesicle fusion  
G0:0006043 glucosamine catabolism  
G0:0042573 retinoic acid metabolism  
G0:0019883 antigen processing and presentation of endogenous antigen  
G0:0006282 regulation of DNA repair  
G0:0006596 polyamine biosynthesis  
G0:0021680 cerebellar Purkinje cell layer development  
G0:0032205 negative regulation of telomere maintenance  
G0:0015936 coenzyme A metabolism  
G0:0031663 lipopolysaccharide-mediated signaling pathway  
G0:0048678 response to axon injury  
G0:0046339 diacylglycerol metabolism

G0:0001542 ovulation (sensu Mammalia)  
G0:0014910 regulation of smooth muscle cell migration  
G0:0045197 establishment and/or maintenance of epithelial cell polarity  
G0:0045109 intermediate filament organization  
G0:0050884 regulation of posture  
G0:0050690 regulation of antiviral response by virus  
G0:0010574 regulation of vascular endothelial growth factor production  
G0:0006817 phosphate transport  
G0:0001710 mesodermal cell fate commitment  
G0:0051354 negative regulation of oxidoreductase activity  
G0:0021516 dorsal spinal cord development  
G0:0009650 UV protection  
G0:0006527 arginine catabolism  
G0:0042135 neurotransmitter catabolism  
G0:0014896 muscle hypertrophy  
G0:0032770 positive regulation of monooxygenase activity  
G0:0050771 negative regulation of axonogenesis  
G0:0006465 signal peptide processing  
G0:0046325 negative regulation of glucose import  
G0:0008343 adult feeding behavior  
G0:0002009 morphogenesis of an epithelium  
G0:0030100 regulation of endocytosis  
G0:0050808 synapse organization and biogenesis  
G0:0050727 regulation of inflammatory response  
G0:0030072 peptide hormone secretion  
G0:0043280 positive regulation of caspase activity  
G0:0006744 ubiquinone biosynthesis  
G0:0002418 immune response to tumor cell  
G0:0006266 DNA ligation  
G0:0001578 microtubule bundle formation  
G0:0032781 positive regulation of ATPase activity  
G0:0030174 regulation of DNA replication initiation  
G0:0051085 chaperone cofactor-dependent protein folding  
G0:0014909 smooth muscle cell migration  
G0:0043088 regulation of Cdc42 GTPase activity  
G0:0031290 retinal ganglion cell axon guidance  
G0:0051298 centrosome duplication  
G0:0045123 cellular extravasation  
G0:0050829 defense response to Gram-negative bacterium  
G0:0006013 mannose metabolism  
G0:0043616 keratinocyte proliferation  
G0:0050927 positive regulation of positive chemotaxis  
G0:0006360 transcription from RNA polymerase I promoter  
G0:0008306 associative learning  
G0:0016558 protein import into peroxisome matrix  
G0:0032582 negative regulation of gene-specific transcription  
G0:0048821 erythrocyte development  
G0:0048854 brain morphogenesis  
G0:0001510 RNA methylation  
G0:0048662 negative regulation of smooth muscle cell proliferation  
G0:0048566 embryonic gut development  
G0:0031638 zymogen activation

G0:0009086 methionine biosynthesis  
G0:0002021 response to dietary excess  
G0:0002053 positive regulation of mesenchymal cell proliferation  
G0:0009396 folic acid and derivative biosynthesis  
G0:0006606 protein import into nucleus  
G0:0042445 hormone metabolism  
G0:0001763 morphogenesis of a branching structure  
G0:0007088 regulation of mitosis  
G0:0032259 methylation  
G0:0007599 hemostasis  
G0:0048741 skeletal muscle fiber development  
G0:0034101 erythrocyte homeostasis  
G0:0051271 negative regulation of cell motility  
G0:0006354 RNA elongation  
G0:0007017 microtubule-based process  
G0:0050766 positive regulation of phagocytosis  
G0:0007342 fusion of sperm to egg plasma membrane  
G0:0007622 rhythmic behavior  
G0:0043525 positive regulation of neuron apoptosis  
G0:0045124 regulation of bone resorption  
G0:0033700 phospholipid efflux  
G0:0048205 COPI coating of Golgi vesicle  
G0:0032964 collagen biosynthetic process  
G0:0007090 regulation of S phase of mitotic cell cycle  
G0:0043149 stress fiber formation  
G0:0032350 regulation of hormone metabolism  
G0:0010469 regulation of receptor activity  
G0:0051291 protein heterooligomerization  
G0:0015695 organic cation transport  
G0:0007032 endosome organization and biogenesis  
G0:0050650 chondroitin sulfate proteoglycan biosynthesis  
G0:0015012 heparan sulfate proteoglycan biosynthesis  
G0:0007184 SMAD protein nuclear translocation  
G0:0034599 cellular response to oxidative stress  
G0:0048701 embryonic cranial skeleton morphogenesis  
G0:0014902 myotube differentiation  
G0:0050730 regulation of peptidyl-tyrosine phosphorylation  
G0:0048839 inner ear development  
G0:0008610 lipid biosynthesis  
G0:0006812 cation transport  
G0:0048589 developmental growth  
G0:0006275 regulation of DNA replication  
G0:0031333 negative regulation of protein complex assembly  
G0:0043666 regulation of phosphoprotein phosphatase activity  
G0:0045576 mast cell activation  
G0:0030539 male genitalia development  
G0:0030010 establishment of cell polarity  
G0:0043484 regulation of RNA splicing  
G0:0042375 quinone cofactor metabolism  
G0:0035094 response to nicotine  
G0:0008105 asymmetric protein localization  
G0:0045598 regulation of fat cell differentiation

G0:0042992 negative regulation of transcription factor import into nucleus  
G0:0043488 regulation of mRNA stability  
G0:0015909 long-chain fatty acid transport  
G0:0046889 positive regulation of lipid biosynthesis  
G0:0045078 positive regulation of interferon-gamma biosynthesis  
G0:0042147 retrograde transport, endosome to Golgi  
G0:0014003 oligodendrocyte development  
G0:0051220 cytoplasmic sequestering of protein  
G0:0006110 regulation of glycolysis  
G0:0001829 trophectodermal cell differentiation  
G0:0009611 response to wounding  
G0:0001934 positive regulation of protein amino acid phosphorylation  
G0:0043631 RNA polyadenylation  
G0:0032320 positive regulation of Ras GTPase activity  
G0:0043535 regulation of blood vessel endothelial cell migration  
G0:0045685 regulation of glial cell differentiation  
G0:0007492 endoderm development  
G0:0002026 cardiac inotropy  
G0:0006555 methionine metabolism  
G0:0051145 smooth muscle cell differentiation  
G0:0035136 forelimb morphogenesis  
G0:0050684 regulation of mRNA processing  
G0:0008088 axon cargo transport  
G0:0007140 male meiosis  
G0:0030104 water homeostasis  
G0:0021766 hippocampus development  
G0:0050869 negative regulation of B cell activation  
G0:0042269 regulation of natural killer cell mediated cytotoxicity  
G0:0006941 striated muscle contraction  
G0:0051272 positive regulation of cell motility  
G0:0043087 regulation of GTPase activity  
G0:0042325 regulation of phosphorylation  
G0:0009948 anterior/posterior axis specification  
G0:0050999 regulation of nitric-oxide synthase activity  
G0:0045930 negative regulation of progression through mitotic cell cycle  
G0:0060401 cytosolic calcium ion transport  
G0:0007528 neuromuscular junction development  
G0:0030318 melanocyte differentiation  
G0:0006833 water transport  
G0:0050702 interleukin-1 beta secretion  
G0:0032488 Cdc42 protein signal transduction  
G0:0006525 arginine metabolism  
G0:0006544 glycine metabolism  
G0:0042345 regulation of NF-kappaB import into nucleus  
G0:0006182 cGMP biosynthesis  
G0:0042308 negative regulation of protein import into nucleus  
G0:0006637 acyl-CoA metabolism  
G0:0006625 protein targeting to peroxisome  
G0:0042596 fear response  
G0:0030049 muscle filament sliding  
G0:0031069 hair follicle morphogenesis  
G0:0001825 blastocyst formation

G0:0006020 myo-inositol metabolism  
G0:0046579 positive regulation of Ras protein signal transduction  
G0:0050806 positive regulation of synaptic transmission  
G0:0022904 respiratory electron transport chain  
G0:0035108 limb morphogenesis  
G0:0046068 cGMP metabolism  
G0:0019827 stem cell maintenance  
G0:0015872 dopamine transport  
G0:0001892 embryonic placenta development  
G0:0042307 positive regulation of protein import into nucleus  
G0:0042462 eye photoreceptor cell development  
G0:0033261 regulation of S phase  
G0:0002062 chondrocyte differentiation  
G0:0006970 response to osmotic stress  
G0:0001836 release of cytochrome c from mitochondria  
G0:0009247 glycolipid biosynthesis  
G0:0006665 sphingolipid metabolism  
G0:0048705 skeletal morphogenesis  
G0:0006739 NADP metabolism  
G0:0000272 polysaccharide catabolism  
G0:0042551 neuron maturation  
G0:0002027 cardiac chronotropy  
G0:0030501 positive regulation of bone mineralization  
G0:0000097 sulfur amino acid biosynthesis  
G0:0031365 N-terminal protein amino acid modification  
G0:0006783 heme biosynthesis  
G0:0015711 organic anion transport  
G0:0019724 B cell mediated immunity  
G0:0009566 fertilization  
G0:0007389 pattern specification  
G0:0042035 regulation of cytokine biosynthesis  
G0:0030384 phosphoinositide metabolism  
G0:0045730 respiratory burst  
G0:0007274 neuromuscular synaptic transmission  
G0:0035137 hindlimb morphogenesis  
G0:0015804 neutral amino acid transport  
G0:0007214 gamma-aminobutyric acid signaling pathway  
G0:0042058 regulation of epidermal growth factor receptor signaling pathway  
G0:0007613 memory  
G0:0042130 negative regulation of T cell proliferation  
G0:0006536 glutamate metabolism  
G0:0051353 positive regulation of oxidoreductase activity  
G0:0045793 positive regulation of cell size  
G0:0046887 positive regulation of hormone secretion  
G0:0006693 prostaglandin metabolism  
G0:0009220 pyrimidine ribonucleotide biosynthesis  
G0:0007224 smoothed signaling pathway  
G0:0002367 cytokine production during immune response  
G0:0042116 macrophage activation  
G0:0048010 vascular endothelial growth factor receptor signaling pathway  
G0:0030030 cell projection organization and biogenesis  
G0:0032147 activation of protein kinase activity



GO:0015718 monocarboxylic acid transport  
GO:0042267 natural killer cell mediated cytotoxicity  
GO:0015807 L-amino acid transport  
GO:0006687 glycosphingolipid metabolism  
GO:0007098 centrosome cycle  
GO:0031396 regulation of protein ubiquitination  
GO:0042417 dopamine metabolism  
GO:0046824 positive regulation of nucleocytoplasmic transport  
GO:0042133 neurotransmitter metabolism  
GO:0045104 intermediate filament cytoskeleton organization and biogenesis  
GO:0050715 positive regulation of cytokine secretion  
GO:0045026 plasma membrane fusion  
GO:0032956 regulation of actin cytoskeleton organization  
GO:0030031 cell projection biogenesis  
GO:0045596 negative regulation of cell differentiation  
GO:0050921 positive regulation of chemotaxis  
GO:0007193 G-protein signaling, adenylate cyclase inhibiting pathway  
GO:0045778 positive regulation of ossification  
GO:0007223 frizzled-2 signaling pathway  
GO:0048562 embryonic organ morphogenesis  
GO:0045814 negative regulation of gene expression, epigenetic  
GO:0050672 negative regulation of lymphocyte proliferation  
GO:0032319 regulation of Rho GTPase activity  
GO:0051789 response to protein stimulus  
GO:0008104 protein localization  
GO:0009311 oligosaccharide metabolism  
GO:0006892 post-Golgi vesicle-mediated transport  
GO:0051495 positive regulation of cytoskeleton organization and biogenesis  
GO:0051180 vitamin transport  
GO:0045833 negative regulation of lipid metabolism  
GO:0007632 visual behavior  
GO:0031110 regulation of microtubule polymerization or depolymerization  
GO:0002381 immunoglobulin production during immune response  
GO:0019218 regulation of steroid metabolism  
GO:0006473 protein amino acid acetylation  
GO:0030239 myofibril assembly  
GO:0006776 vitamin A metabolism  
GO:0043393 regulation of protein binding  
GO:0042531 positive regulation of tyrosine phosphorylation of STAT protein  
GO:0001952 regulation of cell-matrix adhesion  
GO:0007215 glutamate signaling pathway  
GO:0006903 vesicle targeting  
GO:0021675 nerve development  
GO:0007031 peroxisome organization and biogenesis  
GO:0006801 superoxide metabolism  
GO:0045926 negative regulation of growth  
GO:0051101 regulation of DNA binding  
GO:0045216 intercellular junction assembly and maintenance  
GO:0030148 sphingolipid biosynthesis  
GO:0045471 response to ethanol  
GO:0032640 tumor necrosis factor production  
GO:0002821 positive regulation of adaptive immune response

G0:0007034 vacuolar transport  
G0:0050868 negative regulation of T cell activation  
G0:0046427 positive regulation of JAK-STAT cascade  
G0:0050871 positive regulation of B cell activation  
G0:0046324 regulation of glucose import  
G0:0006221 pyrimidine nucleotide biosynthesis  
G0:0050796 regulation of insulin secretion  
G0:0070201 regulation of establishment of protein localization  
G0:0016032 viral life cycle  
G0:0048489 synaptic vesicle transport  
G0:0048066 pigmentation during development  
G0:0001841 neural tube formation  
G0:0031960 response to corticosteroid stimulus  
G0:0006518 peptide metabolism  
G0:0030512 negative regulation of transforming growth factor beta receptor signaling  
G0:0030166 proteoglycan biosynthesis  
G0:0006790 sulfur metabolism  
G0:0043507 positive regulation of JNK activity  
G0:0006509 membrane protein ectodomain proteolysis  
G0:0030835 negative regulation of actin filament depolymerization  
G0:0009267 cellular response to starvation  
G0:0042100 B cell proliferation  
G0:0046323 glucose import  
G0:0050714 positive regulation of protein secretion  
G0:0048145 regulation of fibroblast proliferation  
G0:0021953 central nervous system neuron differentiation  
G0:0042310 vasoconstriction  
G0:0048667 neuron morphogenesis during differentiation  
G0:0042113 B cell activation  
G0:0001776 leukocyte homeostasis  
G0:0032635 interleukin-6 production  
G0:0002429 immune response-activating cell surface receptor signaling pathway  
G0:0014070 response to organic cyclic substance  
G0:0043161 proteasomal ubiquitin-dependent protein catabolism  
G0:0007187 G-protein signaling, coupled to cyclic nucleotide second messenger  
G0:0032880 regulation of protein localization  
G0:0006644 phospholipid metabolism  
G0:0030182 neuron differentiation  
G0:0006664 glycolipid metabolism  
G0:0045088 regulation of innate immune response  
G0:0048659 smooth muscle cell proliferation  
G0:0051924 regulation of calcium ion transport  
G0:0043506 regulation of JNK activity  
G0:0019217 regulation of fatty acid metabolism  
G0:0006040 amino sugar metabolism  
G0:0001942 hair follicle development  
G0:0021510 spinal cord development  
G0:0007602 phototransduction  
G0:0030193 regulation of blood coagulation  
G0:0001656 metanephros development  
G0:0042311 vasodilation  
G0:0042633 hair cycle

G0:0007548 sex differentiation  
G0:0046034 ATP metabolism  
G0:0001935 endothelial cell proliferation  
G0:0046209 nitric oxide metabolism  
G0:0022407 regulation of cell-cell adhesion  
G0:0032886 regulation of microtubule-based process  
G0:0050770 regulation of axonogenesis  
G0:0051048 negative regulation of secretion  
G0:0007260 tyrosine phosphorylation of STAT protein  
G0:0046425 regulation of JAK-STAT cascade  
G0:0007270 nerve-nerve synaptic transmission  
G0:0002377 immunoglobulin production  
G0:0006505 GPI anchor metabolism  
G0:0048663 neuron fate commitment  
G0:0030162 regulation of proteolysis  
G0:0002455 humoral immune response mediated by circulating immunoglobulin  
G0:0032963 collagen metabolic process  
G0:0006672 ceramide metabolism  
G0:0006506 GPI anchor biosynthesis  
G0:0007608 sensory perception of smell  
G0:0009583 detection of light stimulus  
G0:0009410 response to xenobiotic stimulus  
G0:0007269 neurotransmitter secretion  
G0:0021915 neural tube development  
G0:0051493 regulation of cytoskeleton organization and biogenesis  
G0:0009166 nucleotide catabolism  
G0:0051091 positive regulation of transcription factor activity  
G0:0042698 menstrual cycle  
G0:0048514 blood vessel morphogenesis  
G0:0046883 regulation of hormone secretion  
G0:0055088 lipid homeostasis  
G0:0008585 female gonad development  
G0:0009117 nucleotide metabolism  
G0:0001894 tissue homeostasis  
G0:0043254 regulation of protein complex assembly  
G0:0016126 sterol biosynthesis  
G0:0050708 regulation of protein secretion  
G0:0006997 nuclear organization and biogenesis  
G0:0007346 regulation of progression through mitotic cell cycle  
G0:0006690 icosanoid metabolism  
G0:0045762 positive regulation of adenylate cyclase activity  
G0:0045619 regulation of lymphocyte differentiation  
G0:0007292 female gamete generation  
G0:0050909 sensory perception of taste  
G0:0032270 positive regulation of cellular protein metabolism  
G0:0044236 organismal metabolism  
G0:0010001 glial cell differentiation  
G0:0048754 branching morphogenesis of a tube  
G0:0050678 regulation of epithelial cell proliferation  
G0:0045333 cellular respiration  
G0:0050673 epithelial cell proliferation  
G0:0043244 regulation of protein complex disassembly

GO:0009187 cyclic nucleotide metabolism  
GO:0043408 regulation of MAPKKK cascade  
GO:0009617 response to bacterium  
GO:0051276 chromosome organization and biogenesis  
GO:0009913 epidermal cell differentiation  
GO:0009266 response to temperature stimulus  
GO:0006325 establishment and/or maintenance of chromatin architecture  
GO:0046903 secretion  
GO:0040029 regulation of gene expression, epigenetic  
GO:0042127 regulation of cell proliferation  
GO:0017015 regulation of transforming growth factor beta receptor signaling pathway  
GO:0006497 protein amino acid lipidation  
GO:0051168 nuclear export  
GO:0051402 neuron apoptosis  
GO:0030278 regulation of ossification  
GO:0007166 cell surface receptor linked signal transduction  
GO:0048592 eye morphogenesis  
GO:0006112 energy reserve metabolism  
GO:0006308 DNA catabolism  
GO:0007369 gastrulation  
GO:0008064 regulation of actin polymerization and/or depolymerization  
GO:0042158 lipoprotein biosynthesis  
GO:0009582 detection of abiotic stimulus  
GO:0042098 T cell proliferation  
GO:0030832 regulation of actin filament length  
GO:0035264 body growth  
GO:0007281 germ cell development  
GO:0006066 alcohol metabolism  
GO:0050776 regulation of immune response  
GO:0051047 positive regulation of secretion  
GO:0032583 regulation of gene-specific transcription  
GO:0001816 cytokine production  
GO:0010038 response to metal ion  
GO:0016064 immunoglobulin mediated immune response  
GO:0043624 cellular protein complex disassembly  
GO:0060173 limb development  
GO:0051444 negative regulation of ubiquitin ligase activity  
GO:0009063 amino acid catabolism  
GO:0019933 cAMP-mediated signaling  
GO:0040007 growth  
GO:0051090 regulation of transcription factor activity  
GO:0048730 epidermis morphogenesis  
GO:0050804 regulation of synaptic transmission  
GO:0045637 regulation of myeloid cell differentiation  
GO:0030323 respiratory tube development  
GO:0048812 neurite morphogenesis  
GO:0018193 peptidyl-amino acid modification  
GO:0052547 regulation of peptidase activity  
GO:0010035 response to inorganic substance  
GO:0002253 activation of immune response  
GO:0008154 actin polymerization and/or depolymerization  
GO:0043010 eye development (sensu Vertebrata)

G0:0008406 gonad development  
G0:0051351 positive regulation of ligase activity  
G0:0007398 ectoderm development  
G0:0031401 positive regulation of protein modification  
G0:0009309 amine biosynthesis  
G0:0005976 polysaccharide metabolism  
G0:0060047 heart contraction  
G0:0046651 lymphocyte proliferation  
G0:0015980 energy derivation by oxidation of organic compounds  
G0:0051480 cytosolic calcium ion homeostasis  
G0:0042089 cytokine biosynthesis  
G0:0042107 cytokine metabolism  
G0:0051223 regulation of protein transport  
G0:0001775 cell activation  
G0:0043406 positive regulation of MAPK activity  
G0:0009165 nucleotide biosynthesis  
G0:0032196 transposition  
G0:0001654 eye development  
G0:0006650 glycerophospholipid metabolism  
G0:0051325 interphase  
G0:0043122 regulation of I-kappaB kinase/NF-kappaB cascade  
G0:0006119 oxidative phosphorylation  
G0:0009142 nucleoside triphosphate biosynthesis  
G0:0031667 response to nutrient levels  
G0:0031589 cell-substrate adhesion  
G0:0051170 nuclear import  
G0:0051249 regulation of lymphocyte activation  
G0:0051098 regulation of binding  
G0:0006643 membrane lipid metabolism  
G0:0010033 response to organic substance  
G0:0032446 protein modification by small protein conjugation  
G0:0009416 response to light stimulus  
G0:0000087 M phase of mitotic cell cycle  
G0:0016051 carbohydrate biosynthesis  
G0:0043405 regulation of MAPK activity  
G0:0019932 second-messenger-mediated signaling  
G0:0051046 regulation of secretion  
G0:0032269 negative regulation of cellular protein metabolism  
G0:0007178 transmembrane receptor protein serine/threonine kinase signaling pathway  
G0:0019953 sexual reproduction  
G0:0030163 protein catabolism  
G0:0040012 regulation of locomotion  
G0:0006875 metal ion homeostasis  
G0:0009314 response to radiation  
G0:0022008 neurogenesis  
G0:0006163 purine nucleotide metabolism  
G0:0006807 nitrogen compound metabolism  
G0:0045597 positive regulation of cell differentiation  
G0:0019318 hexose metabolism  
G0:0033674 positive regulation of kinase activity  
G0:0002684 positive regulation of immune system process  
G0:0051347 positive regulation of transferase activity

G0:0007276 gametogenesis  
G0:0030001 metal ion transport  
G0:0009888 tissue development  
G0:0009607 response to biotic stimulus  
G0:0051726 regulation of cell cycle  
G0:0043009 embryonic development (sensu Vertebrata)  
G0:0009308 amine metabolism  
G0:0016044 membrane organization and biogenesis  
G0:0019752 carboxylic acid metabolism  
G0:0007610 behavior  
G0:0051707 response to other organism  
G0:0000278 mitotic cell cycle  
G0:0048646 anatomical structure formation  
G0:0048666 neuron development  
G0:0045321 leukocyte activation  
G0:0046907 intracellular transport  
G0:0045859 regulation of protein kinase activity  
G0:0048468 cell development  
G0:0002682 regulation of immune system process  
G0:0043069 negative regulation of programmed cell death  
G0:0043068 positive regulation of programmed cell death  
G0:0048870 cell motility  
G0:0045595 regulation of cell differentiation  
G0:0050896 response to stimulus  
G0:0044262 cellular carbohydrate metabolism  
G0:0019226 transmission of nerve impulse  
G0:0006259 DNA metabolism  
G0:0051128 regulation of cell organization and biogenesis  
G0:0016071 mRNA metabolism  
G0:0016310 phosphorylation  
G0:0019725 cell homeostasis  
G0:0048699 generation of neurons  
G0:0043085 positive regulation of enzyme activity  
G0:0051716 cellular response to stimulus  
G0:0042592 homeostasis  
G0:0043687 post-translational protein modification  
G0:0006082 organic acid metabolism  
G0:0006996 organelle organization and biogenesis  
G0:0051603 proteolysis during cellular protein catabolism  
G0:0045184 establishment of protein localization  
G0:0007600 sensory perception  
G0:0009966 regulation of signal transduction  
G0:0050790 regulation of catalytic activity  
G0:0050890 cognition  
G0:0050793 regulation of development  
G0:0006796 phosphate metabolism  
G0:0008150 biological\_process  
G0:0006139 nucleobase, nucleoside, nucleotide and nucleic acid metabolism  
G0:0051649 establishment of cellular localization  
G0:0016043 cell organization and biogenesis  
G0:0019538 protein metabolism  
G0:0045449 regulation of transcription

G0:0002376 immune system process  
G0:0009056 catabolism  
G0:0007154 cell communication  
G0:0006351 transcription, DNA-dependent  
G0:0010468 regulation of gene expression  
G0:0019222 regulation of metabolism  
G0:0044267 cellular protein metabolism  
G0:0009058 biosynthesis  
G0:0016070 RNA metabolism  
G0:0031323 regulation of cellular metabolism  
G0:0009987 cellular process  
G0:0050794 regulation of cellular process  
G0:0044237 cellular metabolism  
G0:0010467 gene expression

| Count | p-Value   | q-Value   | Protein          | Input Symbol                                        |
|-------|-----------|-----------|------------------|-----------------------------------------------------|
| 329   | 4.50E-257 | 8.95E-255 | STAT1;ZNF395;NO  | STAT1;ZNF395;NOTCH3;DDX54;HIPK3;ZNF238;ZNF529       |
| 268   | 1.11E-174 | 1.69E-172 | SMARCC1;ZNF143;S | SMARCC1;ZNF143;ZNF395;NOTCH3;NOTCH3;DDX54;HIP       |
| 291   | 2.97E-159 | 3.84E-157 | CHRM2;PDE4B;CX3  | CHRM2;PDE4B;CCRL1;CCRL1;ADM;ARHGAP19;ANK2;CNT       |
| 112   | 3.49E-138 | 4.09E-136 | HLA-A;HLA-A;HLA  | HLA-A;HLA-A;HLA-A;HLA-A;HLA-A;HLA-A;HLA-A;HLA-A;HLA |
| 146   | 1.19E-133 | 1.28E-131 | THBS4;POSTN;FN1  | THBS4;POSTN;FN1;LOXL2;CCRL1;LPP;ITGB4;IL32;CN       |
| 128   | 2.47E-116 | 2.20E-114 | DCLK1;PRKCH;PAK  | DCLK1;PRKCH;CDKN1A;WNK4;NUAK2;DDR2;KSR1;BCR;T       |
| 122   | 5.27E-115 | 4.54E-113 | EGLN3;CP;UTY;LEI | EGLN3;CP;UTY;LEPREL1;AKR1C1;LOXL2;MOXD1;ALOX1       |
| 197   | 3.39E-108 | 2.83E-106 | CHRD2;NTRK2;DCI  | CHRD2;NTRK2;DCLK1;VEGFA;BST1;HK2;CDKN1A;ST6G        |
| 61    | 3.21E-101 | 2.51E-99  | HLA-A;HLA-A;HLA  | HLA-A;HLA-A;HLA-A;HLA-A;HLA-A;HLA-A;HLA-A;HLA-A;HLA |
| 127   | 1.24E-100 | 9.42E-99  | HLA-A;HLA-A;HLA  | HLA-A;HLA-A;HLA-A;HLA-A;HLA-A;HLA-A;HLA-A;HLA-A;HLA |
| 66    | 2.07E-88  | 1.27E-86  | HLA-A;HLA-A;HLA  | HLA-A;HLA-A;HLA-A;HLA-A;HLA-A;HLA-A;HLA-A;HLA-A;HLA |
| 92    | 3.56E-68  | 1.84E-66  | CP;ITPR1;KCNA5;I | CP;ITPR1;HK2;KCNK2;SLC39A8;WNK4;SLC8A1;CACNB3       |
| 65    | 2.97E-61  | 1.45E-59  | CDKN1A;UBR5;FAN  | CDKN1A;UBR5;FANCI;MICA;RNF8;SHPRH;CHAF1B;TOP2       |
| 92    | 3.27E-61  | 1.57E-59  | CDC20;CROCC;SGO  | CDC20;CROCC;SGOL1;FANCI;STAG2;RNF8;TFDP2;SIK1       |
| 72    | 2.78E-54  | 1.20E-52  | HECW1;FBXL22;ST  | HECW1;FBXL22;STAMBPL1;KLHL13;FBXL5;MDM2;RNF14       |
| 51    | 3.06E-53  | 1.30E-51  | UTY;KDM5D;HDAC9  | UTY;KDM5D;HDAC9;HDAC11;TRRAP;KAT7;HDAC6;MLL5;       |
| 98    | 9.09E-51  | 3.61E-49  | CHRD2;DCLK1;KII  | CHRD2;DCLK1;HK2;ZIC1;SEMA6D;CHRD1;RBM45;SLC         |
| 78    | 2.00E-48  | 7.70E-47  | NTRK2;CHRM2;VEG  | NTRK2;CHRM2;VEGFA;CSGALNACT1;NRG1;HK2;SEMA6D;       |
| 85    | 1.81E-47  | 6.89E-46  | MMP3;CFB;KLK2;M  | MMP3;CFB;HK2;MASP1;APEH;LGMN;LRP8;PLAT;ERAP1;       |
| 49    | 5.62E-46  | 2.05E-44  | CDC20;SGOL1;STA  | CDC20;SGOL1;STAG2;RNF8;KIAA1009;UBE2C;KNTC1;D       |
| 41    | 1.80E-44  | 6.47E-43  | DBC1;MTUS1;ALOX  | DBC1;MTUS1;ALOX15B;EGFR;RASSF4;VWA5A;ARHGAP20       |
| 62    | 3.30E-44  | 1.15E-42  | CHI3L1;PPP1R3E;( | CHI3L1;PPP1R3E;CHI3L2;HYAL1;HYAL1;SLC2A5;PDK1       |
| 48    | 1.37E-42  | 4.71E-41  | ALOX15B;CDKN1A;I | ALOX15B;CDKN1A;PTGS2;MDM2;TNFRSF9;HDAC4;ETS1;       |
| 45    | 4.65E-40  | 1.56E-38  | FANCI;SHPRH;CHAF | FANCI;SHPRH;CHAF1B;TOP2A;PRKDC;RFC4;TYMS;TP53       |
| 71    | 6.37E-40  | 2.11E-38  | CTNNB1;EGLN3;KI  | CTNNB1;EGLN3;DBC1;TNFRSF11B;HIPK3;TNFRSF19;AC       |
| 40    | 8.98E-40  | 2.94E-38  | CTNNB1;SMAD3;ZNI | CTNNB1;SMAD3;ZNF238;ID2;MDM2;HOXC8;SORBS3;HES       |
| 65    | 9.40E-38  | 2.92E-36  | SCAMP1;SELENBP1  | SCAMP1;SELENBP1;ATG4B;EPS15;LYST;KIF20A;RAB3A       |
| 34    | 2.26E-37  | 6.86E-36  | EYA2;PPP3CA;PTPI | EYA2;PPP3CA;PTPRS;PPP2R2A;DUSP10;PTPRF;CDC14A       |
| 41    | 2.22E-36  | 6.53E-35  | PPARGC1A;SMAD3;( | PPARGC1A;SMAD3;SOX9;MAML3;HES1;RORA;AGRN;EGR2       |
| 34    | 2.81E-36  | 8.16E-35  | COL11A2;EYA4;MYO | COL11A2;EYA4;MYO15A;SIX1;ATP6V1B1;CHD7;COL4A3       |
| 40    | 3.12E-36  | 8.95E-35  | CDC20;SGOL1;STA  | CDC20;SGOL1;STAG2;RNF8;KIAA1009;UBE2C;ANLN;TA       |
| 30    | 1.76E-35  | 4.89E-34  | DBC1;CDKN1A;THB  | DBC1;CDKN1A;THBS1;SMAD3;MLL5;CDKN2A;CDKN2A;NB       |
| 41    | 1.66E-32  | 4.34E-31  | TBC1D8;ADM;DDR2  | TBC1D8;ADM;DDR2;TKT;LYN;FGF18;HES1;CD81;NAMPT       |
| 31    | 2.79E-32  | 7.21E-31  | SLC4A8;SLC4A7;SI | SLC4A8;SLC4A7;SLC8A1;SLC9A8;SCN10A;SLC4A4;SLC       |
| 41    | 1.38E-31  | 3.49E-30  | CHST1;C3;EPHX2;( | CHST1;C3;EPHX2;CXCL2;ORM1;MGLL;APOL3;HDAC9;BD       |
| 37    | 6.81E-31  | 1.71E-29  | NFIA;MYST2;CHAF  | NFIA;KAT7;CHAF1B;TOP2A;RFC4;ORC1;TYMS;GINS1;P       |
| 27    | 8.24E-31  | 2.05E-29  | CTNNB1;ITGB4;IT  | CTNNB1;ITGB4;ITGA3;ITGB1BP1;CD44;COL5A3;ITGB8       |
| 33    | 2.99E-30  | 7.35E-29  | PRKCZ;PRDX2;THB  | PRKCZ;PRDX2;THBS1;HIPK3;TNFAIP3;SOCS2;BIRC6;H       |
| 34    | 6.70E-29  | 1.59E-27  | CDC20;USP9Y;UBR  | CDC20;USP9Y;UBR5;UBE2D3;USP48;BTRC;USP25;UBE2       |
| 33    | 1.35E-27  | 2.95E-26  | TGM2;ALOX15B;SM  | TGM2;ALOX15B;SMAD3;TNFRSF19;TNFRSF9;STK17B;CD       |
| 34    | 1.95E-27  | 4.22E-26  | KDM5D;USP9Y;KHD  | KDM5D;USP9Y;KHDRBS3;SLC2A14;APOB;TESK2;BRD2;L       |
| 53    | 2.66E-26  | 5.68E-25  | ALOX15B;HSD17B6  | ALOX15B;HSD17B6;LDLRAP1;LRP8;ALDH3A2;MGLL;APO       |
| 34    | 9.46E-26  | 2.00E-24  | CTNNB1;POSTN;TN  | CTNNB1;POSTN;TNFRSF11B;COL10A1;EIF2AK3;COL1A2       |
| 97    | 2.66E-25  | 5.46E-24  | LAP4A_HUMAN;SLC  | LAP4A;SLC14A1;NPTX1;SLC47A1;ZNF238;SYT9;SDH         |
| 54    | 1.09E-24  | 2.21E-23  | CSGALNACT1;S100  | CSGALNACT1;S100B;TBX20;SERPINF1;UBR5;TGFA;CLK       |
| 30    | 7.25E-24  | 1.41E-22  | AP1S3;HOOK2;LDL  | AP1S3;HOOK2;LDLRAP1;LRP8;RASSF4;DNM3;FNBP1;LDLR     |
| 22    | 9.07E-24  | 1.75E-22  | TGM2;TRAF3IP2;AI | TGM2;TRAF3IP2;APOL3;ECM1;PLK2;HMOX1;REL;UBE2V       |
| 32    | 3.28E-23  | 6.23E-22  | PPARGC1A;TARDBP  | PPARGC1A;TARDBP;PPIL3;SRRM1;PRPF40A;SF1;PPIE;       |
| 21    | 9.81E-23  | 1.81E-21  | RASGRF2;BCR;PRE  | RASGRF2;BCR;PREX2;PLEKHG3;PLEKHG1;FGD6;ITSN2;       |
| 67    | 1.44E-22  | 2.59E-21  | DCLK1;S100A1;PRI | DCLK1;S100A1;PRKCH;PRKCZ;TRAF3IP2;TREM1;ARHGA       |
| 28    | 4.42E-21  | 7.47E-20  | NUAK2;FHOD3;FMN  | NUAK2;FHOD3;FMN2;CAPZB;TESK2;ARHGA                  |



41 1. 59E-20 2. 61E-19 PCSK1;STC1;ADM;IPCSK1;STC1;ADM;EDN1;EFNB1;FGF18;NAMPT;CXCL14;  
18 7. 36E-20 1. 17E-18 VEGFA;EDN1;ITPR;VEGFA;EDN1;ITPR1;THBS1;SMAD3;RYR1;ECE1;HMOX1;  
26 8. 50E-20 1. 35E-18 SIX1;DMD;LAMA2;(SIX1;DMD;LAMA2;CAPN3;MET;UTRN;SOX6;SGCB;FHL1;  
22 2. 94E-19 4. 60E-18 IL1RL1;APOBEC3G;IL1RL1;APOBEC3G;CD55;TLR5;APOBEC3F;APOL1;CD46  
37 1. 12E-18 1. 72E-17 SMARCC1;ZNF143;ISMARCC1;ZNF143;LRRFIP1;RNF14;DBP;BRWD1;FOSL1;  
25 1. 12E-18 1. 72E-17 ABLIM1;RIMS1;EY/ABLIM1;RIMS1;EYA4;SFRP5;EML2;OAT;COL11A1;RP9;  
21 1. 28E-18 1. 96E-17 BTRC;FZD4;LRRFII;BTRC;FZD4;LRRFIP2;CSNK1A1;SFRP5;RSP01;FZD6;PY  
16 1. 61E-18 2. 45E-17 NTRK2;EGFR;PDGFR;NTRK2;EGFR;PDGFRA;EIF2AK3;CAMK2D;TAF1;MAP3K11  
30 1. 88E-18 2. 83E-17 PPARGC1A;RIMS1;PPARGC1A;RIMS1;MDM2;HLA-H;WIPF1;CHAF1B;HFE;KN  
32 1. 96E-18 2. 95E-17 PGAP1;AP1S3;SYT1BST1;AP1S3;SYTL2;SAR1B;ARFIP1;RIMS1;RAMP1;SNU  
19 4. 97E-18 7. 29E-17 KIF2A;KIF27;KIF2HK2;KIF27;KIF26B;TUBA4A;KIF20A;DYNC2H1;KIF23;  
16 5. 07E-18 7. 37E-17 CDKN1A;SMAD3;CDKN1A;SMAD3;CDKN2A;BTG1;TP63;RERG;NDRG3;APBB  
27 5. 92E-18 8. 55E-17 CTNNB1;NPTX1;GR/CTNNB1;NPTX1;GRIA1;KCNMB1;KCNMB4;SP110;ATXN3;  
15 9. 53E-18 1. 36E-16 ITGB4;ITGA3;ITGI;ITGB4;ITGA3;ITGB8;ADAM9;ITGBL1;ITGA2;ITGA1;IT  
20 1. 95E-17 2. 75E-16 ITPR1;CACNB3;CA/ITPR1;CACNB3;CACNA1I;RYR1;CACNA2D1;ASIC1;CAMK  
21 2. 09E-17 2. 94E-16 CTNNB1;ADM;EDN1;CTNNB1;ADM;EDN1;ID2;SOX9;ECE1;NF1;MAP2K5;EGLN  
33 7. 02E-17 9. 49E-16 RIN2;PDK1;RASL1;RASSF4;PDK1;RASL1B;TNK2;RAB3A;HMOX1;LRRK2;AR  
14 1. 03E-16 1. 38E-15 AKR1C1;TGM2;EIF/AKR1C1;TGM2;EIF2AK3;MUC20;SCUBE1;DGKD;LNX1;SC  
15 1. 59E-16 2. 11E-15 CTNNB1;HHIP;PDG/CTNNB1;HHIP;PDGFRA;FGF18;HES1;RAB3A;ZFPM2;FGF  
14 3. 44E-16 4. 40E-15 PFKP;HK2;ENO2;G/PFKP;HK2;ENO2;GK;TPI1;ALDOA;PFKL;ALDOC;GAPDH;  
17 5. 04E-16 6. 38E-15 FBXL5;UBE2D3;MD/ FBXL5;UBE2D3;MDM2;RNF14;RNF8;UBE2C;TRIP12;BAR  
21 2. 20E-15 2. 70E-14 ZIC1;NOTCH4;SHR/ZIC1;NOTCH3;SHROOM2;ROBO2;PGD;NF1;CTTNBP2;MET  
11 2. 60E-15 3. 16E-14 MAP3K13;PYCARD;MAP3K13;PYCARD;UBE2V1;NPM1;IRAK2;NOD2;AGT;TLR  
13 2. 81E-15 3. 40E-14 FN1;VEGFA;ALDOA;FN1;VEGFA;ALDOA;MYH14;FGD6;ARAP3;MYH10;SHROOM  
17 3. 10E-15 3. 73E-14 PTGS2;PRDX2;ANGI;PTGS2;PRDX2;ANGPTL7;GPX3;ADAM9;RRM2B;DDIT3;SE  
15 3. 81E-15 4. 56E-14 ABCC1;S22AI\_HUM/ABCC1;SLC22A18;POLK;CTTNBP2;CENPF;SOD1;DDIT3;  
9 6. 34E-15 7. 51E-14 HK2;APLN;XDH;SL/HK2;APLN;XDH;SLC6A3;OXTR;CTTNBP2;MET;PRLR;STA  
25 6. 72E-15 7. 89E-14 PPARGC1A;TARDBP;PPARGC1A;TARDBP;PPIL3;PAPD4;PRPF40A;PPIE;DHX1  
19 7. 31E-15 8. 55E-14 KCNK2;KCNMB1;KCNK2;KCNMB1;KCNMB4;KCNH1;SLC12A7;SLC12A2;KCN  
19 9. 24E-15 1. 08E-13 CX3CR1;CCRL1;CX/CCRL1;CCRL1;CXCL2;CXCL14;CXCL13;FOSL1;ROBO2;C  
12 1. 68E-14 1. 92E-13 STAT1;SMAD3;TNF/STAT1;SMAD3;TNFSF15;EIF2AK3;CDKN2A;COL4A3;PYC  
26 1. 75E-14 2. 00E-13 NRG1;ID2;LRRFIP;NRG1;ID2;LRRFIP1;HR;RUNX2;NAB1;HMGB2;LRRN1;RF  
19 1. 83E-14 2. 07E-13 ST13;SIL1;PPIL3;ST13;SIL1;PPIL3;NFYC;PPIE;PDIA6;DNAJB2;FKBP5;  
17 2. 07E-14 2. 34E-13 CHRDL2;EGFR;CHRI;CHRDL2;EGFR;CHRDL1;ATP6V1B1;PDLIM7;COL1A1;MEN  
15 2. 11E-14 2. 36E-13 GPR126;CD97;MCHI;GPR126;CD97;MCHR1;SCG5;CELSR2;NXPH4;GPR56;GPR  
10 2. 38E-14 2. 66E-13 COL14A1;COL5A3;(COL14A1;COL5A3;COL11A2;COL1A2;NF1;COL12A1;COL  
9 3. 02E-14 3. 37E-13 TGM2;EDN1;NOTCH/TGM2;EDN1;NOTCH3;AGPAT1;HGF;CDH13;NOTCH4;HBEG  
19 3. 16E-14 3. 51E-13 TBX20;SLC8A1;RYI;TBX20;SLC8A1;RYR1;GJA5;CALD1;DES;GNAO1;OXTR;D  
14 3. 26E-14 3. 60E-13 PSG4;ADM;PSG5;P/PSG4;ADM;PSG5;PSG9;PSG9;OVGP1;PAPPA;OXTR;GNAS  
31 3. 80E-14 4. 14E-13 SMARCC1;HHIP;ABI;SMARCC1;HHIP;ABLIM1;PDGFRA;JAG1;ITGA2;DCN;FHL  
23 4. 03E-14 4. 37E-13 VEGFA;CDKN1A;NU/VEGFA;CDKN1A;NUAK2;BARD1;KRT18;MAPK8;SMO;CD74  
14 4. 86E-14 5. 25E-13 CDH4;EFNB1;SEMA/CDH4;EFNB1;SEMA5A;SEMA6C;SEMA4F;MYH10;SEMA3A;  
11 6. 75E-14 7. 24E-13 CTNNB1;PPARGC1A;CTNNB1;PPARGC1A;RNF14;MED24;RNF4;KDM3A;MED12;  
13 9. 81E-14 1. 04E-12 PRDX2;SELT;TXNRI;PRDX2;SELT;TXNRD1;PDIA6;GBF1;TMX3;DDIT3;TXNDC  
17 9. 85E-14 1. 04E-12 PVRL3;FAT3;CDH4;PVRL3;FAT3;CDH4;CADM3;DSG3;ROBO2;CELSR2;FAT1;  
26 1. 46E-13 1. 51E-12 RPS4Y2;SECISBP2;RPS4Y2;SECISBP2;PABPC4;RRBP1;ABTB1;QRSL1;RPL3  
8 1. 60E-13 1. 65E-12 HDAC9;HDAC11;HD/HDAC9;HDAC11;HDAC6;HDAC2;HDAC1;HDAC3;HDAC8;HO  
15 1. 79E-13 1. 83E-12 EDN1;APOB;HES1;(EDN1;APOB;HES1;CHD7;ZFPM2;NBN;PTPRQ;CCNB2;LIG  
10 2. 31E-13 2. 35E-12 AKR1C1;LDLRAP1;/AKR1C1;LDLRAP1;APOB;MALL;LDLR;NPC1;ACAT1;ABCA  
24 3. 64E-13 3. 66E-12 SMARCC1;TBX20;N/SMARCC1;TBX20;NOTCH3;RNF14;ETS1;TRERF1;RNF4;T  
19 4. 16E-13 4. 16E-12 ALOX15B;ACOX2;S/ALOX15B;ACOX2;SLC27A3;PRKAR2B;ECHDC2;ACADSB;A  
14 4. 17E-13 4. 16E-12 LDLRAP1;APOL2;AI;LDLRAP1;APOL3;APOB;LDLR;APOL1;OSBPL1A;ACAT1;A

23 4. 25E-13 4. 22E-12 DCLK1;NRCAM;NPTX1;DCLK1;NRCAM;NPTX1;S100B;RCAN1;ALDH3A2;RPS6KA6  
11 4. 55E-13 4. 50E-12 RGS4;RGS5;GRK5;RGS4;RGS5;GRK5;RGS3;RAMP1;GRK4;RGS7;RIC8B;RGS  
16 8. 44E-13 8. 23E-12 SLCO2A1;STARD5;SLCO2A1;STARD5;APOL3;APOL3;APOB;GULP1;LDLR;AP  
17 1. 18E-12 1. 14E-11 VEGFA;TGFA;FGF1;VEGFA;TGFA;FGF18;JAG1;FGF1;TNFAIP2;HS6ST1;C1G  
15 1. 46E-12 1. 40E-11 NDUFA10;CYB561;NDUFA10;CYB561;NDUFS7;TXNRD1;ERO1L;MADD;MADD;  
20 1. 57E-12 1. 50E-11 FN1;DDR2;DDR2;FN1;DDR2;TKT;ROS1;COL1A2;BDKRB2;DDR1;NGF;NTRK  
12 1. 97E-12 1. 87E-11 CP;STC1;CFB;PPA1;CP;STC1;CFB;PPARG;BCKDHA;APOM;COL1A1;BRCA2;DD  
9 5. 31E-12 4. 92E-11 NTRK2;VEGFA;ZFP1;NTRK2;VEGFA;ZFP2;ZFP36L1;SMO;EGFL7;FAP;CAV1;  
12 6. 27E-12 5. 78E-11 THBS1;TGFA;CD81;THBS1;TGFA;CD81;DRD4;MET;MAP2K3;MADD;FPR1;SOD  
7 9. 52E-12 8. 60E-11 SIX1;CCNB2;HOXA;SIX1;CCNB2;HOXA3;SOD1;TBX1;JARID2;BCL2L11  
11 1. 12E-11 1. 01E-10 FBN2;GJA5;HOXC1;FBN2;GJA5;HOXC10;DYNC2H1;LEF1;PTCH1;GDF5;PBX2  
10 1. 50E-11 1. 34E-10 BAIAP2;PDPK1;ZFP1;BAIAP2;PDK1;ZFP106;PHIP;SOCS7;GAB1;SORBS1;PIK  
12 1. 78E-11 1. 59E-10 SIL1;RRBP1;XPO7;SIL1;RRBP1;XPO7;NUP160;NUP214;RANBP17;SEC61A2  
25 2. 12E-11 1. 86E-10 ITGB1BP1;WNK4;RITGB1BP1;WNK4;RPS6KA1;RPS6KA6;SIK1;STK17B;TNI  
9 2. 20E-11 1. 93E-10 APOB;RAB3A;STK3;APOB;RAB3A;STK36;SCUBE1;SEPP1;SEMA3C;CHST11;A  
17 2. 75E-11 2. 39E-10 HSD17B6;LDLRAP1;HSD17B6;LDLRAP1;APOB;CYP39A1;LDLR;APOL1;OSBPL  
12 2. 90E-11 2. 51E-10 EDN1;PTGS2;ERAP;EDN1;PTGS2;ERAP1;CORIN;COL1A2;ERAP2;HMOX1;ACT  
8 3. 65E-11 3. 12E-10 MAP3K1;MAP4K1;MAP3K1;MAP4K1;MAP3K6;MAP3K11;DBNL;MDFIC;ZAK;M  
10 4. 01E-11 3. 42E-10 ALOX15B;CHRD;NF;ALOX15B;CHRD;NF1;ARAP3;PTPRU;MIA3;PTEN;EGFL7;  
10 4. 01E-11 3. 42E-10 TPD52;VCAM1;HDAC;TPD52;VCAM1;HDAC9;HDAC4;NHEJ1;TSHR;PIK3R1;MSH  
10 5. 05E-11 4. 28E-10 IFT88;ATP6V1B1;IFT88;ATP6V1B1;HMOX1;CLCNKB;SLC22A18;AQP3;NPH  
8 5. 54E-11 4. 67E-10 CAPZB;GSN;SCIN;CAPZB;GSN;SCIN;ADD2;SVIL;AVIL;SPTBN1;TRIOBP  
16 5. 91E-11 4. 96E-10 ABLIM1;PALLD;DE;ABLIM1;PALLD;DES;MARK1;SGCB;KRT7;ARAP3;SEMA6A  
46 6. 77E-11 5. 66E-10 HECW1;LOXL2;PLA;HECW1;LOXL2;PLAT;UBR5;CDKL3;USP48;TLL7;USP25  
5 1. 18E-10 9. 60E-10 PDK1;PDK2;PDK3;PDK1;PDK2;PDK3;BCKDK;PDK4  
9 1. 28E-10 1. 04E-09 CD81;TNK2;CD4;N;CD81;TNK2;CD4;NOD2;AGT;HGF;GHR;LIF;IGF1  
38 1. 39E-10 1. 12E-09 CX3CR1;CCRL1;C3;CCRL1;CCRL1;C3;CKNK2;GPRC5C;PREX2;FZD4;GPER;B  
10 1. 47E-10 1. 19E-09 TBC1D8;TBC1D15;TBC1D8;TBC1D15;RABGAP1L;SGSM3;TBC1D26;EVI5;TB  
11 1. 50E-10 1. 20E-09 CFB;EIF2AK3;APO;CFB;EIF2AK3;APOM;CREB3L2;DNAJB2;HSPA4L;DERL1;  
13 1. 58E-10 1. 27E-09 STAT1;APOBEC3G;STAT1;APOBEC3G;FOSL1;PRKRA;XPO1;BCL3;TRIM5;IF  
12 1. 67E-10 1. 33E-09 ALDOA;ATP11A;ATP11A;ATP11A;ATP8B3;ATP2B4;ATP10B;ATP11C;ATP1  
8 1. 72E-10 1. 37E-09 EGFR;TGFA;LAMC1;EGFR;TGFA;LAMB2;FGF1;LAMA1;DLX6;LAMB1;IGF1  
7 2. 23E-10 1. 76E-09 RFC4;POLD3;LIG4;RFC4;POLD3;LIG4;PCNA;POLE;RPA3;RFC5  
8 2. 42E-10 1. 89E-09 ID2;HMOX1;EGLN1;ID2;HMOX1;EGLN1;SP100;MEN1;IRAK2;FLNA;PEX14  
13 3. 46E-10 2. 67E-09 HK2;PDK1;SORD;PIHK2;PDK1;SORD;PDK2;SLC37A4;GAPDH;PDK3;AKT2;H6  
9 4. 39E-10 3. 38E-09 EDN1;HHIP;TBX20;EDN1;HHIP;TBX20;IFT172;DYNC2H1;SMO;BMPR1B;GLI  
8 4. 59E-10 3. 51E-09 C3;MASP1;CD55;C3;MASP1;CD55;CD46;C1S;CFI;CLU;C5  
7 5. 68E-10 4. 32E-09 CDKN1A;PDGFRA;SI;CDKN1A;PDGFRA;SPHK1;LIG4;AGT;PDGFA;IGF1  
7 5. 68E-10 4. 32E-09 THBS1;PFKL;EIF2;THBS1;PFKL;EIF2B4;SLC30A8;GLUL;SARM1;TGFB2  
7 5. 68E-10 4. 32E-09 DYNC2LI1;IFT172;DYNC2LI1;IFT172;DYNC2H1;BBS5;PCM1;PCNT;ARL6  
9 6. 86E-10 5. 16E-09 CDKN1A;CDKN2A;CDKN1A;CDKN2A;CAMK2D;CDKN3;POLE;CDCA5;CUL4A;D  
5 7. 02E-10 5. 26E-09 LPL;APOB;CPS1;LPL;APOB;CPS1;PNPLA3;LIPC  
12 7. 50E-10 5. 59E-09 HOXC8;HOXB6;HOXC;HOXC8;HOXB6;HOXC10;LRP5;HOXB5;HOXC9;HOXC6;HOX  
7 8. 67E-10 6. 41E-09 FN1;TGM2;THBS1;FN1;TGM2;THBS1;LOR;TGM5;DSP;F13A1  
7 8. 67E-10 6. 41E-09 XPO7;XPO1;NUP214;XPO7;XPO1;NUP214;STRADB;EIF5A;CCHCR1;XPO5  
11 8. 90E-10 6. 55E-09 PTGS2;PRKAA2;TP;PTGS2;PRKAA2;TPI1;PTGDS;TBXAS1;GBF1;PRKAB1;PR  
17 1. 14E-09 8. 40E-09 RASGRF2;GARNL3;RASGRF2;GARNL3;NF1;RALGDS;RASGEF1A;RAP1GAP2;I  
7 1. 29E-09 9. 33E-09 EXOC6B;STXBP1;V;EXOC6B;STXBP1;VPS33A;EXOC6;EXOC4;STXBP2;VPS45  
8 1. 43E-09 1. 03E-08 THBS1;ADAM9;AQP;THBS1;ADAM9;AQP3;MGP;NEDD4;SLC25A12;HTT;KCNMA  
13 1. 71E-09 1. 23E-08 CRIM1;SOCS2;CAM;CRIM1;SOCS2;CAMK2D;CHAD;MORF4L1;WISP3;KAZALD1  
6 1. 96E-09 1. 40E-08 MCM7;HMGB2;MCM2;MCM7;HMGB2;CCNL1;HMGB1;MCM2;MCM2;TOP1MT;TOP3B  
10 2. 33E-09 1. 64E-08 PPARGC1A;TBPL1;PPARGC1A;TBPL1;MED24;TAF1;TBP;GTF2A2;MED12;ER

11 2. 49E-09 1. 73E-08 XPO7; XPO1; NUP214; XPO7; XPO1; NUP214; RANBP17; NCBP2; THOC1; LRPPRC; N  
7 2. 67E-09 1. 85E-08 CTNNB1; ETS1; PPAI CTNNB1; ETS1; PPARG; GTF2A2; TCF7L2; NR1H3; TCF4; AT  
7 2. 67E-09 1. 85E-08 SDHA; IDH3G; SDHC SDHA; IDH3G; SDHC; NNT; ACO1; ACO2; KIAA0100  
10 2. 70E-09 1. 86E-08 PUS7L; TYW1B; TRM PUS7L; TYW1B; TRMT6; TRMT2B; TYW3; FDXACB1; ELAC1; A  
24 3. 33E-09 2. 30E-08 SYTL2; SAR1B; KIF SYTL2; SAR1B; KIF20A; OSBPL1A; AP3M2; STXBP1; ARAP3  
7 3. 73E-09 2. 55E-08 ORC1L; MCM7; MCM2 ORC1; MCM7; CCNL1; ORC2; POLA1; ORC4; MCM2; MCM2; MCM  
8 3. 84E-09 2. 61E-08 EGFR; SOCS5; EPS1 EGFR; SOCS5; EPS15; GAB1; REPS2; DGKD; AR; HBEGF  
9 4. 69E-09 3. 16E-08 EGFR; PDGFRA; CXCI EGFR; PDGFRA; CXCL16; SPHK1; PDGFA; PIK3R1; CDH13; L  
9 4. 69E-09 3. 16E-08 WNK4; ANO1; APOL1 WNK4; ANO1; APOL1; CLCNKB; SLC12A7; CLIC6; CLCN4; FX  
28 4. 70E-09 3. 16E-08 STAT1; SOX5; TARDI STAT1; SOX5; TARDBP; ETV1; TRIP13; TCERG1; TSC22D1;  
10 4. 75E-09 3. 19E-08 SLC2A9; SLC2A5; SI SLC2A9; SLC2A5; SLC2A12; SLC2A14; SLC2A3; SLC37A3;  
7 5. 14E-09 3. 42E-08 CP; HFE; HFE; TFRC CP; HLA-H; HFE; TFRC; SOD1; ABCB6; MFI2; SLC40A1  
7 5. 14E-09 3. 42E-08 EDN1; DGKI; DGKG; EDN1; DGKI; DGKG; SPHK1; PRKD3; DGKD; DGKH  
7 5. 14E-09 3. 42E-08 ZMIZ1; BRCA2; NPM ZMIZ1; BRCA2; NPM1; SOD1; NOX4; HTT; PRELP  
6 5. 63E-09 3. 71E-08 CTNNB1; EDN1; TBX CTNNB1; EDN1; TBX20; NOTCH3; SEMA5A; NOTCH4; TGFB2  
6 5. 63E-09 3. 71E-08 HDAC6; MAP1B; CLA HDAC6; MAP1B; CLASP2; MAP2; MAPT; MAP4  
5 6. 44E-09 4. 22E-08 IL1RL1; TNFAIP3; IL1RL1; TNFAIP3; NLRP12; C9orf89; CARD8  
11 7. 01E-09 4. 56E-08 TFPI2; SERPINA1; I TFPI2; SERPINA1; PLAT; SERPINE1; PABPC4; ITGA2; SCU  
8 7. 44E-09 4. 83E-08 SIX1; HOXB6; HOXB SIX1; HOXB6; HOXB5; HOXC9; HOXA3; MEN1; HOXB8; CHST1  
11 7. 81E-09 5. 05E-08 MYH10; EXOC7; EXO MYH10; EXOC1; EXOC1; UNC13B; DLG4; RAPGEF4; ANK1; EX  
6 8. 93E-09 5. 76E-08 THBS1; TNFSF15; NI THBS1; TNFSF15; NF1; CTTNBP2; ATP5A1; CAV1  
6 8. 93E-09 5. 76E-08 TLX1; BCL3; NFKB2 TLX1; BCL3; NFKB2; JARID2; FAS; BCL2L11  
8 9. 16E-09 5. 88E-08 HLA-DPB1; HLA-DPI HLA-DPB1; HLA-DPB1; HLA-DPB1; HLA-DPB1; HLA-DPA1;  
7 9. 32E-09 5. 95E-08 HFE; HFE; MFI2; HEI HLA-H; HFE; MFI2; HEPH; SFXN5; SLC25A37; STEAP3; SLC  
7 9. 32E-09 5. 95E-08 POLD3; PMS2; MSH2 POLD3; PMS2; MSH2; ANKRD17; TDG; TP73; MSH3  
7 9. 32E-09 5. 95E-08 NR4A3; NBN; HEXB; NR4A3; NBN; HEXB; MYH10; HEXA; KCNMA1; SLC1A3  
13 9. 48E-09 6. 01E-08 HNRNPF; CSTF2; RB HNRNPF; CSTF2; RBM5; SRRM1; HNRNPH3; FUS; PCBP2; SNW  
7 1. 23E-08 7. 76E-08 RTTN; DYNC2LI1; I RTTN; DYNC2LI1; IFT172; DYNC2H1; RFX3; SMO; ARL6  
9 1. 23E-08 7. 76E-08 CHRM2; S100A1; DE CHRM2; S100A1; DES; GNAO1; THRB; SP4; HSPB7; HBEGF; H  
17 1. 30E-08 8. 17E-08 STK3; TOP2A; SCIN STK3; TOP2A; SCIN; BARD1; ALDH1A3; CSRNP3; ZAK; MEN1  
6 1. 37E-08 8. 54E-08 FZD6; SHROOM3; FZI FZD6; SHROOM3; FZD3; DLC1; BBS4; CELSR1  
6 1. 37E-08 8. 54E-08 XPO7; XPO1; RANBP XPO7; XPO1; RANBP17; NUP98; IPO5; TNPO1  
5 1. 44E-08 8. 91E-08 VEGFA; PDGFRA; PD VEGFA; PDGFRA; PDGFA; PTEN; PDGFRB  
5 1. 44E-08 8. 91E-08 CSTF2; PABPC1; API CSTF2; PABPC1; APLP1; GRSF1; CSTF3  
7 1. 61E-08 9. 93E-08 LIG4; SOD1; AGT; M LIG4; SOD1; AGT; MSH2; BDNF; HTT; ATF2  
10 1. 69E-08 1. 04E-07 RIMS1; SLC6A3; SL RIMS1; SLC6A3; SLC6A6; ICA1; SLC6A8; NET1; NET1; SLC  
6 2. 03E-08 1. 24E-07 POLS; NCAPG; NUSAI POLK; NCAPG; NUSAP1; CDCA5; SMC2; SMC4  
7 2. 08E-08 1. 26E-07 PRKAA2; HMGCS1; C PRKAA2; HMGCS1; CYP51A1; HMGCR; FDFT1; EBP; CYB5R3  
13 2. 52E-08 1. 52E-07 PLA2G4A; PLB1; LPI PLA2G4A; PLB1; LPL; APOB; PLA1A; PNPLA2; PNPLA3; PLA  
9 2. 54E-08 1. 53E-07 CDC20; BTRC; UBE2 CDC20; BTRC; UBE2C; RPN2; PSMB8; CDK1; PSMD1; PSMA4;  
7 2. 66E-08 1. 59E-07 FN1; SERPINA1; OR FN1; SERPINA1; ORM1; APOL3; ITIH4; HGF; SERPINA3; AP  
5 2. 85E-08 1. 70E-07 PTGDS; TBXAS1; PT PTGDS; TBXAS1; GBF1; CD74; PTGS1  
5 2. 85E-08 1. 70E-07 PYCARD; NLRP12; P PYCARD; NLRP12; POP1; NOD2; CARD8  
6 2. 95E-08 1. 74E-07 CTNNB1; IL6ST; BMI CTNNB1; IL6ST; BMPR1B; MEN1; HGF; SMAD1  
6 2. 95E-08 1. 74E-07 PDPK1; LPIN1; PPAI PDK1; LPIN1; PPARG; SORBS1; AKT2; ENPP1  
6 2. 95E-08 1. 74E-07 CHD7; SLC6A3; TSHI CHD7; SLC6A3; TSHR; AGT; STAT5B; GHR  
11 3. 16E-08 1. 86E-07 ZFP36L1; KRT7; API ZFP36L1; KRT7; APLP1; MKNK1; EIF2B4; EIF2A; EIF2A; E  
8 3. 39E-08 1. 99E-07 PPP1R3E; PYGL; SL PPP1R3E; PYGL; SLC37A4; IL6ST; PRKAG2; PHKA2; PPP1C  
6 4. 17E-08 2. 44E-07 GBA; ABCA1; HEXB; GBA; ABCA1; HEXB; ARSB; HEXA; HPS4  
4 5. 66E-08 3. 25E-07 SELT; SEPSECS; SEI SELT; SEPSECS; SLA; TRNAU1AP; DIO2  
4 5. 66E-08 3. 25E-07 RAB3A; ZDHHC15; S RAB3A; ZDHHC15; STXBP1; DLG4  
6 5. 79E-08 3. 27E-07 TGM2; NLRP12; PLA TGM2; NLRP12; PLA2G2A; AGT; STAT5B; CX3CL1

6 5.79E-08 3.27E-07 SMG5;SMG7;EXOSC1;SMG5;SMG7;EXOSC10;DCP1B;EIF4A3;SMG6  
6 5.79E-08 3.27E-07 MAPK8;CASP8;TRAF1;MAPK8;CASP8;TRAF2;DLC1;FAS;BCL2L11  
11 7.00E-08 3.93E-07 ST6GAL2;ST3GAL6;ST6GAL2;ST3GAL6;ST3GAL4;LARGE;ST3GAL1;TSPAN8;  
5 8.80E-08 4.91E-07 NTRK2;NGF;KCNMB2;NTRK2;NGF;KCNMB4;SNCAIP;CAMK2A  
5 8.80E-08 4.91E-07 LPIN1;CDC42BPG;ILPIN1;CDC42BPG;FLNA;CDC42BPA;ATP2C1  
8 8.85E-08 4.93E-07 CP;LOXL2;NOTCH4;CP;LOXL2;NOTCH3;AGPAT1;DDIT3;PTH1R;NOTCH4;IFI  
12 9.77E-08 5.41E-07 UGCG;COL7A1;DCT;UGCG;COL7A1;DCT;ALDH3A2;LAMA3;PLOD1;LAMC2;KRT  
9 1.15E-07 6.31E-07 BDKRB2;CD55;CXCL1;BDKRB2;CD55;CXCL13;MCHR1;CACNA1A;CCL28;EPOR;P  
8 1.19E-07 6.51E-07 HFE;HFE;CXCL16;HLA-H;HFE;CXCL16;STAB1;PDLIM7;DNM1;HIP1R;CLTC  
12 1.21E-07 6.60E-07 RGS4;RGS5;SOCS5;RGS4;RGS5;SOCS5;RGS3;SOCS2;RGS7;SOCS7;SOCS7;R  
7 1.45E-07 7.83E-07 ZIC1;MYO15A;SIX1;ZIC1;MYO15A;SIX1;CHD7;FZD6;FZD3;DLX6  
7 1.45E-07 7.83E-07 JAG1;ADAM9;LOR;JAG1;ADAM9;LOR;TXNIP;SMARCA4;DSP;CASP3  
4 1.68E-07 9.01E-07 ERAP1;ERAP2;TAPEERAP1;ERAP2;TAPBP;TAP2  
4 1.68E-07 9.01E-07 BUB1;CENPF;ATM;BUB1;CENPF;ATM;TTK  
4 1.68E-07 9.01E-07 STAT5B;ACO1;ACO2;STAT5B;ACO1;ACO2;GHR  
8 1.80E-07 9.53E-07 CSGALNACT1;PDGFR;CSGALNACT1;PDGFRA;BCL3;APLP1;MPZL3;AGT;LGALS3  
8 1.80E-07 9.53E-07 LRP8;SOCS5;IL6ST;LRP8;SOCS5;IL6ST;STAT5B;CX3CL1;KLF6;LIFR;IRAK  
6 1.82E-07 9.59E-07 PPARGC1A;MDM4;PIPPARGC1A;MDM4;PRKCD;FLNA;COG3;HPS4  
6 1.82E-07 9.59E-07 ACOX2;HSD17B4;ACOX2;DBP;ACADVL;HADHB;ACADM;CHKB  
7 2.08E-07 1.09E-06 MCTP2;EDN1;RCAN1;MCTP2;EDN1;RCAN1;EIF2AK3;RCAN2;LAT2;SPHK1  
7 2.47E-07 1.28E-06 TRMT6;MTIF3;EIF4;TRMT6;MTIF3;EIF4H;EIF3B;MTIF2;DDX1;NAT1  
8 2.67E-07 1.38E-06 CDC20;UBE2C;PSMD1;CDC20;UBE2C;RPN2;PSMB8;CDK1;PSMD1;PSMA4;PSMD1  
6 2.99E-07 1.54E-06 PRKCZ;HIPK3;PRK1;PRKCZ;HIPK3;PRKDC;MAP4K1;STK4;TGFB2  
8 3.03E-07 1.56E-06 ATP6V1B1;ATP6V0E1;ATP6V1B1;ATP6V0E2;ATP5A1;NNT;ATP6V1H;SLC36A1;  
10 3.26E-07 1.66E-06 UBE2C;PIK3C2B;TOP2A;UBE2C;PIK3C2B;TOP2A;RFC4;TYMS;HMGB2;PCNA;NDC8  
8 3.44E-07 1.74E-06 STAG2;DSN1;TOP2A;STAG2;DSN1;TOP2A;NSL1;SRPK1;TOP3B;STAG3;ESPL1  
6 3.78E-07 1.91E-06 NRG1;NOTCH4;LEF1;NRG1;NOTCH3;LEF1;BRCA2;NOTCH4;IGF1;BCL2L11  
6 3.78E-07 1.91E-06 HES1;LSR;NF1;HGF;HES1;LSR;NF1;HGF;JARID2;ACADM  
4 3.90E-07 1.95E-06 CHI3L1;CHI3L2;CHIT1;CHI3L1;CHI3L2;CHIT1;OVGP1  
4 3.90E-07 1.95E-06 LAMA3;LAMA4;LAMA3;LAMA3;LAMA2;LAMA4;LAMA1  
4 3.90E-07 1.95E-06 TOP2A;TOP1MT;ERCC3;TOP2A;TOP1MT;ERCC3;TOP3B  
4 3.90E-07 1.95E-06 NR5A1;NF1;NR3C1;NF1;NR3C1;MDK  
4 3.90E-07 1.95E-06 SPHK1;BRCA2;STAT5B;SPHK1;BRCA2;STAT5B;ASNS  
7 4.05E-07 2.00E-06 SMARCC1;RERE;PBRM1;SMARCC1;RERE;PBRM1;MEN1;CHD5;KAT2B;CHD1;CHD6  
5 4.69E-07 2.30E-06 HDAC6;DZIP3;HUWE1;HDAC6;DZIP3;HUWE1;UBE2V1;UBE3C  
5 4.69E-07 2.30E-06 PIGN;PIGG;PIGW;PIGN;PIGG;PIGW;PIGL;PIGP  
6 4.72E-07 2.30E-06 ADAM9;HMOX1;COL1A1;ADAM9;HMOX1;COL1A1;SOD1;DDIT3;PPP2CB  
7 5.51E-07 2.67E-06 CDKN1A;MAPK8;ERCC3;CDKN1A;MAPK8;RAD1;MEN1;MSH6;REV1;CASP3  
7 6.39E-07 3.09E-06 EDN1;SLC2A9;SLC2A9;EDN1;SLC2A9;SLC2A5;SLC2A3;SORBS1;SLC2A1;EDNRA  
8 6.94E-07 3.32E-06 SLC38A6;SLC38A9;SLC38A6;SLC38A9;SAT2;SLC7A2;SLC38A4;SLC36A1;S  
4 7.73E-07 3.67E-06 BCKDHB;BCKDHA;BCKDHB;BCKDHA;BCKDK;TMEM91;HIBCH  
4 7.73E-07 3.67E-06 NR5A1;BCL3;BBS4;SF1;BCL3;BBS4;SUPT7L  
6 8.77E-07 4.12E-06 VCAM1;EFNB1;IL6;VCAM1;EFNB1;IL6ST;TNFSF13B;HGF;NCK1  
6 8.77E-07 4.12E-06 ACAP2;SMAP1;AGAP1;ACAP2;SMAP1;AGAP1;ARAP2;ARAP3;ADAP2  
6 8.77E-07 4.12E-06 EGR2;HEXB;EIF2B;EGR2;HEXB;EIF2B4;HEXA;SBF2;SERINC5  
5 9.04E-07 4.21E-06 NTRK2;NTRK1;GNAS;NTRK2;NTRK1;GNAS;CRHR1;EDNRA  
5 9.04E-07 4.21E-06 EDN1;BDKRB2;ECE1;EDN1;BDKRB2;ECE1;KCNMB4;AGT  
5 9.04E-07 4.21E-06 ALDH3A1;ALDH3A2;ALDH3A1;ALDH3A2;ALDH3B1;ALDH7A1;ALDH1A1  
5 9.04E-07 4.21E-06 GGH;CPS1;PPAT;GGH;CPS1;PPAT;CTPS2;ASNS  
3 1.11E-06 4.98E-06 NRCAM;AGRN;SCLT1;NRCAM;AGRN;SCLT1  
3 1.11E-06 4.98E-06 BOC;BTG1;IGFBP3;BOC;BTG1;IGFBP3  
3 1.11E-06 4.98E-06 EIF2AK3;FGF18;EIF2AK3;FGF18;CHST11

3 1. 11E-06 4. 98E-06 COL11A2;TBX1;FO COL11A2;TBX1;TTF2  
3 1. 11E-06 4. 98E-06 ACIN1;TOP2A;DFFI ACIN1;TOP2A;DFFB  
3 1. 11E-06 4. 98E-06 GALNT2;GALNT3;G GALNT2;GALNT3;GALNT1  
3 1. 11E-06 4. 98E-06 GALNT2;GALNT3;G GALNT2;GALNT3;GALNT1  
3 1. 11E-06 4. 98E-06 IL6ST;LIFR;LIF IL6ST;LIFR;LIF  
3 1. 11E-06 4. 98E-06 STXBP1;BDNF;UCHI STXBP1;BDNF;UCHL1  
3 1. 11E-06 4. 98E-06 ARAP3;DLC1;BCL6 ARAP3;DLC1;BCL6  
3 1. 11E-06 4. 98E-06 MSH6;MSH2;MSH3 MSH6;MSH2;MSH3  
10 1. 11E-06 4. 98E-06 SMARCC1;CHD7;CB SMARCC1;CHD7;CBX7;CHD9;NPTXR;CHD3;CHD5;CHD5;H  
7 1. 12E-06 5. 00E-06 NRG1;NOTCH3;NOT(NRG1;NOTCH3;NOTCH3;MAML3;RBPJ;MIB2;APP;NOTCH4  
4 1. 38E-06 6. 09E-06 PCSK1;DMD;MRPS3 PCSK1;DMD;MRPS28;PCSK5  
4 1. 38E-06 6. 09E-06 UGCG;LARGE;ST8S UGCG;LARGE;ST8SIA1;A4GALT  
4 1. 38E-06 6. 09E-06 CYP39A1;TRERF1;(CYP39A1;TRERF1;CYP46A1;FAP  
4 1. 38E-06 6. 09E-06 PRKDC;NHEJ1;LIG PRKDC;NHEJ1;LIG4;POLA1  
4 1. 38E-06 6. 09E-06 KRT18;PYCARD;PYI KRT18;PYCARD;POP1;KRT8  
7 1. 46E-06 6. 38E-06 CHRDL2;EDN1;COL CHRDL2;EDN1;COL11A2;PITX1;COL2A1;HOXA3;CHST11  
6 1. 82E-06 7. 94E-06 RCAN1;HMOX1;CTT RCAN1;HMOX1;CTTNBP2;GSTM3;BRCA2;TGFB2  
5 2. 09E-06 9. 07E-06 MMP3;MMP16;MMP1 MMP3;MMP16;MMP11;MMP7;MMP19  
5 2. 09E-06 9. 07E-06 THBS1;SERPINF1;( THBS1;SERPINF1;COL4A3;STAB1;TIE1  
5 2. 09E-06 9. 07E-06 PDGFRA;GLI1;PDGI PDGFRA;GLI1;PDGFA;AR;IGF1  
6 2. 15E-06 9. 30E-06 SAR1B;NRBP1;SAR SAR1B;NRBP1;SAR1A;HTT;COG3;BET1  
4 2. 28E-06 9. 82E-06 CDKN1A;CDKN2A;M CDKN1A;CDKN2A;MEN1;CASP3  
4 2. 28E-06 9. 82E-06 RNF14;SOCS2;STA RNF14;SOCS2;STAT5B;SLC25A36  
4 2. 28E-06 9. 82E-06 HDAC9;HDAC4;LEF HDAC9;HDAC4;LEF1;LUC7L  
7 2. 39E-06 1. 02E-05 NOTCH4;SOCS2;AGI NOTCH3;SOCS2;AGPAT1;FGFR3;STAT4;GHR;NOTCH4;NM  
21 2. 55E-06 1. 09E-05 PRDX2;SOX9;ACTN PRDX2;SOX9;ACTN1;HTATIP2;BMF;MADD;BTG1;BCL2L1  
7 2. 68E-06 1. 14E-05 CX3CR1;FOSL1;HL CCRL1;FOSL1;HLA-G;LSP1;SLC12A8;NCR1;LGALS3BP  
5 2. 68E-06 1. 14E-05 ADAM9;BCKDHA;AG ADAM9;BCKDHA;AGT;TMEM91;HGF;FAS  
9 3. 05E-06 1. 29E-05 PRKDC;RBPJ;KIN;( PRKDC;RBPJ;KIN;SFPQ;HMGB1;BRCA2;ZSWIM7;NONO;D  
5 3. 40E-06 1. 44E-05 SMG5;SMG7;NUP16( SMG5;SMG7;NUP160;EIF5A;SMG6  
4 3. 56E-06 1. 49E-05 CTNNB1;CHD7;RARI CTNNB1;CHD7;RARB;SMARCA4  
4 3. 56E-06 1. 49E-05 EPB41L1;EPB41;LIEPB41L1;EPB41;DLG4;TLN1  
4 3. 56E-06 1. 49E-05 GPX3;TP63;HPRT1 GPX3;TP63;HPRT1;CDA  
4 3. 56E-06 1. 49E-05 CUL9;ZZEF1;HECTI CUL9;ZZEF1;HECTD3;MYCBP2  
4 3. 56E-06 1. 49E-05 ARFIP2;CDH13;RAC( ARFIP2;CDH13;RAC1;NCK1  
4 3. 56E-06 1. 49E-05 IL6ST;IL6;GHR;L IL6ST;HGF;GHR;LIF  
7 3. 76E-06 1. 57E-05 CDC20;UBE2C;PSMI CDC20;UBE2C;RPN2;PSMB8;PSMD1;PSMA4;PSMD11;CDC  
127 3. 77E-06 1. 57E-05 MMP3;PCSK1;PFKFI MMP3;PCSK1;PFKFB3;GSTM1;PLA2G4A;BST1;HYAL1;HY  
9 3. 78E-06 1. 58E-05 LAMA3;LAMA4;JAG LAMA3;LAMA3;JAG1;SERPINE2;MAP3K1;LAMA2;LAMA4;  
5 4. 26E-06 1. 77E-05 MICA;APOL1;HPRT MICA;APOL1;HPRT1;MICB;C5  
8 4. 36E-06 1. 80E-05 CTNNB1;NOTCH3;D CTNNB1;NOTCH3;DYNC2H1;NR2F1;APLP1;DKK1;SMARCA  
3 4. 39E-06 1. 80E-05 PFKFB3;PFKFB4;PI PFKFB3;PFKFB4;PFKFB2  
3 4. 39E-06 1. 80E-05 EDN1;IL6ST;AGT EDN1;IL6ST;AGT  
3 4. 39E-06 1. 80E-05 APOB;LDLR;HMOX1 APOB;LDLR;HMOX1  
3 4. 39E-06 1. 80E-05 NARS2;DARS;DARS( NARS2;DARS;DARS2  
3 4. 39E-06 1. 80E-05 MET;HGF;IGF1 MET;HGF;IGF1  
3 4. 39E-06 1. 80E-05 HEXB;NEU3;HEXA HEXB;NEU3;HEXA  
3 4. 39E-06 1. 80E-05 MSH6;MSH2;MSH3 MSH6;MSH2;MSH3  
8 5. 15E-06 2. 08E-05 AGPAT5;LPCAT1;HI AGPAT5;LPCAT1;HEXB;AGPAT1;LCLAT1;GPAM;PTDSS2;  
5 5. 28E-06 2. 11E-05 PCDHB9;NLGN1;CDI PCDHB9;NLGN1;CDH13;ATP2C1;CDH2  
6 5. 35E-06 2. 12E-05 NRCAM;CTTNBP2;MI NRCAM;CTTNBP2;MET;NR2F1;MDGA1;MYH10  
5 6. 48E-06 2. 56E-05 GPD2;SLC25A10;TI GPD2;SLC25A10;TPI1;GPI;PC

11 6. 64E-06 2. 61E-05 TBC1D8;ADM;RCAN TBC1D8;ADM;RCAN1;TBX20;EPB41;CHD7;COL4A3;ELN;  
6 7. 03E-06 2. 76E-05 DCLK1;ZFYVE16;AIDCLK1;ZFYVE16;ABCA1;SQSTM1;ZFYVE20;HTT  
4 7. 58E-06 2. 96E-05 CTNNB1;HOXC10;GICTNNB1;HOXC10;GLI1;PBX2  
4 7. 58E-06 2. 96E-05 LPL;APOB;PLA2G2/LPL;APOB;PLA2G2A;AGT  
4 7. 58E-06 2. 96E-05 SOX9;BMPR1B;MGP SOX9;BMPR1B;MGP;BMP1  
4 7. 58E-06 2. 96E-05 SYNE1;NPLOC4;COXSYNE1;NPLOC4;COG1;GORASP2  
4 7. 58E-06 2. 96E-05 LIG4;BRCA2;FANCLIG4;BRCA2;FANCD2;MEN1  
6 9. 10E-06 3. 53E-05 TAF1;TBP;GTF2A2 TAF1;TBP;GTF2A2;ERCC3;POLR2B;POLR2D  
5 9. 51E-06 3. 68E-05 CDKN1A;CDKN2A;DCDKN1A;CDKN2A;DLC1;CDKN2B;ATXN1  
5 9. 51E-06 3. 68E-05 MICA;SOD1;EIF2B2/MICA;SOD1;EIF2B4;HSPB7;MICB  
6 1. 03E-05 3. 98E-05 HYAL1;SUMF1;HEXIHyal1;SUMF1;HEXB;NAT6;ARSB;HEXA;HGSNAT  
4 1. 05E-05 4. 03E-05 CTNNB1;LRP5;ODZ/CTNNB1;LRP5;ODZ4;ZBTB17  
4 1. 05E-05 4. 03E-05 GJA5;TLN1;TLN2;GJA5;TLN1;TLN2;TJP1  
4 1. 05E-05 4. 03E-05 SOD1;PRLR;PCSK5 SOD1;PRLR;PCSK5;TGFB2  
3 1. 09E-05 4. 10E-05 THBS4;MYH10;SDCI THBS4;MYH10;SDCBP  
3 1. 09E-05 4. 10E-05 THBS1;PTEN;ARHG/THBS1;PTEN;ARHGAP6  
3 1. 09E-05 4. 10E-05 EIF2AK3;EPB41;AIEIF2AK3;EPB41;ADD2  
3 1. 09E-05 4. 10E-05 FZD6;FZD3;CELSR FZD6;FZD3;CELSR1  
3 1. 09E-05 4. 10E-05 MSH6;MSH2;MSH3 MSH6;MSH2;MSH3  
5 1. 14E-05 4. 24E-05 ABCC9;MICA;LYST ABCC9;MICA;LYST;BNIP3L;HGF  
5 1. 14E-05 4. 24E-05 ATP11A;ATP10B;AATP11A;ATP10B;ATP11C;ATP10D;ATP10A  
10 1. 25E-05 4. 62E-05 SOCS5;FGFR2;NDR(SOCS5;FGFR2;NDRG4;FHL1;DGKD;FGFR3;MTOR;FGFR1;  
5 1. 36E-05 5. 01E-05 NRCAM;DNM3;PCDH NRCAM;DNM3;PCDHB9;NLGN1;CDH2  
5 1. 36E-05 5. 01E-05 EDN1;SLC9A8;ATP(EDN1;SLC9A8;ATP6V1B1;SLC9A9;SLC9A7  
5 1. 36E-05 5. 01E-05 NDC80;ZWINT;DDX NDC80;ZWINT;DDX11;KIFC1;ESPL1  
4 1. 42E-05 5. 20E-05 CTNNB1;ECE1;LRP(CTNNB1;ECE1;LRP5;CHST11  
4 1. 42E-05 5. 20E-05 AKR1C1;ACOX2;NPC(AKR1C1;ACOX2;NPC1;LEP  
4 1. 42E-05 5. 20E-05 TGM2;HOXA3;AGT;TGM2;HOXA3;AGT;SEMA3C  
4 1. 42E-05 5. 20E-05 CFB;C3;CFH;C5 CFB;C3;FHL1;C5  
4 1. 42E-05 5. 20E-05 EFN1;SMO;SEMA3(EFN1;SMO;SEMA3C;ATF2  
4 1. 42E-05 5. 20E-05 CHD7;BCOR;MEN1;CHD7;BCOR;MEN1;TGFB2  
4 1. 42E-05 5. 20E-05 ROBO2;PLXNB2;TI(ROBO2;PLXNB2;TIAM1;PLXNB1  
4 1. 42E-05 5. 20E-05 EGR2;CAMK2A;EPH EGR2;CAMK2A;EPHB2;DBN1  
4 1. 42E-05 5. 20E-05 CCNB2;STAT5B;CA(CCNB2;STAT5B;CASP3;BCL2L11  
5 1. 60E-05 5. 78E-05 EDN1;ELN;HNMT;CEDN1;ELN;HNMT;CHST11;EDNRA  
5 1. 60E-05 5. 78E-05 FGF18;FGFR2;FGF FGF18;FGFR2;FGF1;FGFR3;FGFR1  
6 1. 65E-05 5. 94E-05 CHRDL1;UBE2D3;ZICHRDL1;UBE2D3;ZFYVE16;BMPR1B;SMAD1;RGMB  
6 1. 65E-05 5. 94E-05 SIX1;PPARG;KRT4 SIX1;PPARG;KRT4;CBFA2T2;DLX6;KRT3  
4 1. 88E-05 6. 68E-05 EDN1;NF1;PIK3R1 EDN1;NF1;PIK3R1;IGF1  
4 1. 88E-05 6. 68E-05 THBS1;SAMD4A;BCI THBS1;SAMD4A;BCL3;HGF  
4 1. 88E-05 6. 68E-05 BAIAP2;BAIAP2L1 BAIAP2;BAIAP2L1;DNM3;FGD6  
4 1. 88E-05 6. 68E-05 CHD7;HEXA;KCNMA CHD7;HEXA;KCNMA1;UCHL1  
4 1. 88E-05 6. 68E-05 HMOX1;IL6ST;IL6 HMOX1;IL6ST;HGF;MAPK8IP2  
4 1. 88E-05 6. 68E-05 HEXB;STAT5B;HEX/HEXB;STAT5B;HEXA;CAV1  
4 1. 88E-05 6. 68E-05 PRAF2;SLC25A22;PRAF2;SLC25A22;SLC25A12;SLC1A3  
5 1. 88E-05 6. 68E-05 ATG4B;ATG16L2;R(ATG4B;ATG16L2;RAB24;ATG4C;ATG12  
5 1. 88E-05 6. 68E-05 DRD4;TSHR;HOXB8 DRD4;TSHR;HOXB8;ATF2;ATXN1  
6 2. 06E-05 7. 28E-05 C1GALT1;RRM2B;AIC1GALT1;RRM2B;ADAMTS1;AGT;PCSK5;BCL2L11  
3 2. 16E-05 7. 52E-05 CDH4;NGF;MAPT CDH4;NGF;MAPT  
3 2. 16E-05 7. 52E-05 TG;FOXO1;DIO2 TG;TTF2;DIO2  
3 2. 16E-05 7. 52E-05 APOB;PLA2G2A;AG APOB;PLA2G2A;AGT  
3 2. 16E-05 7. 52E-05 FLNB;TLN1;TLN2 FLNB;TLN1;TLN2

3 2. 16E-05 7. 52E-05 PLA1A;LIPC;SERI PLA1A;LIPC;SERINC5  
3 2. 16E-05 7. 52E-05 PTPRF;PTPRD;PTPI PTPRF;PTPRD;PTPRU  
3 2. 16E-05 7. 52E-05 CXCL16;SP100;CAI CXCL16;SP100;CALCOCO2  
3 2. 16E-05 7. 52E-05 ERO1L;ERO1LB;TXI ERO1L;ERO1LB;TXNDC2  
3 2. 16E-05 7. 52E-05 GUSB;FUCA1;LYVE GUSB;FUCA1;LYVE1  
3 2. 16E-05 7. 52E-05 MSH6;MSH2;HTT MSH6;MSH2;HTT  
3 2. 16E-05 7. 52E-05 APBB2;APBB1;BCL( APBB2;APBB1;BCL6  
4 2. 44E-05 8. 31E-05 CTNNB1;S100A4;S( CTNNB1;S100A4;SOX9;HGF  
4 2. 44E-05 8. 31E-05 CDKN2A;SOD1;DFFI CDKN2A;SOD1;DFFB;CASP3  
4 2. 44E-05 8. 31E-05 NF1;PDE1B;HTT;A NF1;PDE1B;HTT;ATXN1  
4 2. 44E-05 8. 31E-05 MGEA5;ADAMTS9;FIMGEA5;ADAMTS9;FBX02;MANBA  
7 2. 63E-05 8. 91E-05 CA2;CA12;CA5B;SI CA2;CA12;CA5B;SHMT1;CA9;AHCYL2;ALDH1L1  
7 2. 84E-05 9. 62E-05 SHPRH;HMGB2;MCM SHPRH;HMGB2;CCNL1;CENPA;NPM1;MCM2;HP1BP3;H2AF  
7 3. 07E-05 1. 03E-04 PDCD11;CDKN2A;HIPDCD11;CDKN2A;HEATR1;EXOSC10;UTP14A;EIF4A3;UT  
7 3. 07E-05 1. 03E-04 SIX1;UNC45A;FLNI SIX1;SMAP1;FLNB;SVIL;UNC45A;MYL6B;FXR1;CAV1  
4 3. 11E-05 1. 04E-04 CDKN1A;CDK2;DDX CDKN1A;CDK2;DDX11;CDKN2B  
4 3. 11E-05 1. 04E-04 VCAM1;CDH4;CADM VCAM1;CDH4;CADM3;CDH2  
4 3. 11E-05 1. 04E-04 PIP5K1A;PIP4K2B PIP5K1A;PIP4K2B;PIP5KL1;PIP5K1C  
4 3. 11E-05 1. 04E-04 TESK2;ACTN1;SORI TESK2;ACTN1;SORBS1;DLC1  
11 3. 53E-05 1. 17E-04 MYO15A;CHD7;GNA MYO15A;CHD7;GNAO1;SLC6A3;HEXB;SOD1;SEPP1;HEXA  
7 3. 57E-05 1. 19E-04 STARD5;TRERF1;H( STARD5;TRERF1;HSD11B1;HSD17B7;PRLR;CYP19A1;SC  
3 3. 75E-05 1. 23E-04 PGAP1;PIGU;PGAP BST1;GAB1;PGAP1;PIGS  
3 3. 75E-05 1. 23E-04 SDHA;STAT5B;GHR SDHA;STAT5B;GHR  
3 3. 75E-05 1. 23E-04 SOCS2;PIK3R1;GHI SOCS2;PIK3R1;GHR  
3 3. 75E-05 1. 23E-04 LPIN1;ARFIP2;RA( LPIN1;ARFIP2;RAC1  
3 3. 75E-05 1. 23E-04 BBS5;ARL6;BBS4 BBS5;ARL6;BBS4  
3 3. 75E-05 1. 23E-04 SHMT1;PPAT;GART SHMT1;PPAT;GART  
3 3. 75E-05 1. 23E-04 STAT5B;PC;GHR STAT5B;PC;GHR  
3 3. 75E-05 1. 23E-04 MOCS2;MOCS2;MOC MOCS2;MOCS2;MOCS1  
3 3. 75E-05 1. 23E-04 ISCU;ISCA2;ISCA ISCU;ISCA2;ISCA1  
5 3. 90E-05 1. 26E-04 ERAP1;SOCS7;TCF ERAP1;SOCS7;TCF7L2;TCF4;RUNX1T1;BBS4  
4 3. 91E-05 1. 26E-04 EIF2AK3;ERO1L;DI EIF2AK3;ERO1L;DERL1;DDIT3  
4 3. 91E-05 1. 26E-04 NBN;LIG4;MSH6;M( NBN;LIG4;MSH6;MSH2  
6 4. 56E-05 1. 47E-04 S100B;ADCY8;EGR S100B;ADCY3;EGR2;TMOD2;FZD3;BDNF  
4 4. 85E-05 1. 55E-04 THBS1;ERAP1;BTG THBS1;ERAP1;BTG1;SPHK1  
4 4. 85E-05 1. 55E-04 CAMK2D;MYL3;MAP CAMK2D;MYL3;MAP2K3;TNC  
4 5. 94E-05 1. 88E-04 JAG1;IGF1;CSRP2 JAG1;IGF1;CSRP2;MBNL1  
4 5. 94E-05 1. 88E-04 TLE1;FRZB;MDFI;I TLE1;FRZB;MDFI;DKK1  
4 5. 94E-05 1. 88E-04 ERCC4;XPC;RPA3;I RAD1;XPC;RPA3;ERCC3  
3 5. 95E-05 1. 88E-04 CSGALNACT1;SLC3( CSGALNACT1;SLC35D1;CHST11  
3 5. 95E-05 1. 88E-04 ALOX15B;XDH;STA ALOX15B;XDH;STAT5B  
3 5. 95E-05 1. 88E-04 SMG5;SMG7;SMG6 SMG5;SMG7;SMG6  
3 5. 95E-05 1. 88E-04 GULP1;ELM01;DOCI GULP1;ELM01;DOCK1  
3 5. 95E-05 1. 88E-04 CDKN2A;CDKN2A;PI CDKN2A;CDKN2A;PRKCD  
3 5. 95E-05 1. 88E-04 DRD4;DDIT3;HPRT DRD4;DDIT3;HPRT1  
3 5. 95E-05 1. 88E-04 IL6ST;IL6;OSMR IL6ST;HGF;OSMR  
3 5. 95E-05 1. 88E-04 RNF144B;LNX1;NEI RNF144B;LNX1;NEDD4  
3 5. 95E-05 1. 88E-04 VPS13A;RAB9B;SOI VPS13A;RAB9B;SORT1  
3 5. 95E-05 1. 88E-04 HPRT1;HTT;BBS4 HPRT1;HTT;BBS4  
3 5. 95E-05 1. 88E-04 NEDD4;HTT;CLDN4 NEDD4;HTT;CLDN4  
12 6. 39E-05 1. 99E-04 KSR1;NGF;NTRK1;I KSR1;NGF;NTRK1;MAPKAPK3;NF1;RALGDS;MAPK13;HGF  
5 6. 49E-05 2. 02E-04 ATP6V1B1;ATP6V0I ATP6V1B1;ATP6V0E2;ATP5A1;ATP6V1H;ATP6V0D1

5 6. 49E-05 2. 02E-04 FASTK; CASP8; DAP1; FASTK; CASP8; DAP3; CFLAR; SORT1  
6 6. 51E-05 2. 03E-04 EIF2B4; EIF4E3; EIF2B4; EIF4E3; EIF1AY; DENR; EIF1AX; EIF4E  
4 7. 20E-05 2. 23E-04 HMOX1; CIDEB; MSH6; HMOX1; CIDEB; MSH6; TP73  
4 7. 20E-05 2. 23E-04 CPS1; NOD2; PLCG2; CPS1; NOD2; PLCG2; ADH5  
4 7. 20E-05 2. 23E-04 PARP3; ART4; PARP1; PARP3; DOK1; PARP1; TIPARP  
6 8. 37E-05 2. 58E-04 TNFRSF19; TNIK; TNFRSF19; TNIK; DUSP10; MAP3K13; MAP4K2; MAP2K4  
6 8. 37E-05 2. 58E-04 PDPK1; CDKN2A; PYIPDK1; CDKN2A; POP1; PKIG; PRKAG2; PKIB  
4 8. 64E-05 2. 65E-04 EDN1; TGFA; NUSAP1; EDN1; TGFA; NUSAP1; IGF1  
4 8. 64E-05 2. 65E-04 APOB; SORD; CTTNBP2; APOB; SORD; CTTNBP2; MET  
4 8. 64E-05 2. 65E-04 LARGE; CHST6; GNPI; LARGE; CHST6; GPI; NAGK  
4 8. 64E-05 2. 65E-04 CHD7; MYH10; BMPR1B; CHD7; MYH10; BMPR1B; PRPH  
3 8. 86E-05 2. 68E-04 CTNNA1; TLR3; PIK3R1; CTNNA1; TLR3; PIK3R1  
3 8. 86E-05 2. 68E-04 AKR1C1; LDLR; CELSR3; AKR1C1; LDLR; FAP  
3 8. 86E-05 2. 68E-04 EDN1; AAMP; AGT; EDN1; AAMP; AGT  
3 8. 86E-05 2. 68E-04 SMAD3; MEN1; PTH1R; SMAD3; MEN1; PTH1R  
3 8. 86E-05 2. 68E-04 EPHX2; HMOX1; CPS1; EPHX2; HMOX1; CPS1  
3 8. 86E-05 2. 68E-04 HPD; FAH; PTS; HPD; FAH; PTS  
3 8. 86E-05 2. 68E-04 GSK3; SORBS1; AKT2; GSK3; SORBS1; AKT2  
3 8. 86E-05 2. 68E-04 CDKN2A; PYDC1; NOX1; CDKN2A; POP1; NOD2  
3 8. 86E-05 2. 68E-04 POLD3; POLA1; POLIP; POLD3; POLA1; POLE  
3 8. 86E-05 2. 68E-04 PPARG; ITGB3; NR1H3; PPARG; ITGB3; NR1H3  
3 8. 86E-05 2. 68E-04 MXI1; MDM1; NFKB1; MXI1; MDM1; LST1  
4 1. 03E-04 3. 04E-04 ADM; ADCY3; ADCY8; ADM; ADCY3; ADCY3; ADCY2  
4 1. 03E-04 3. 04E-04 SLC39A8; SLC39A1; SLC39A8; SLC39A10; SLC39A5; SLC30A8  
2 1. 07E-04 3. 04E-04 CTNNA1; CEP250; CTNNA1; CEP250  
2 1. 07E-04 3. 04E-04 NRG1; HOPX; NRG1; HOPX  
2 1. 07E-04 3. 04E-04 SLC47A1; SLC47A2; SLC47A1; SLC47A2  
2 1. 07E-04 3. 04E-04 THBS1; REN1; THBS1; ATP6AP2  
2 1. 07E-04 3. 04E-04 APOBEC3G; APOBEC3; APOBEC3G; APOBEC3F  
2 1. 07E-04 3. 04E-04 APOBEC3G; APOBEC3; APOBEC3G; APOBEC3F  
2 1. 07E-04 3. 04E-04 APOBEC3G; APOBEC3; APOBEC3G; APOBEC3F  
2 1. 07E-04 3. 04E-04 APOL2; MEN1; APOL3; MEN1; APOL2  
2 1. 07E-04 3. 04E-04 SOCS5; BCL6; SOCS5; BCL6  
2 1. 07E-04 3. 04E-04 SHROOM2; SHROOM3; SHROOM2; SHROOM3  
2 1. 07E-04 3. 04E-04 SLC25A15; SLC25A1; ORC1; ORC2  
2 1. 07E-04 3. 04E-04 HMOX1; BCL6; HMOX1; BCL6  
2 1. 07E-04 3. 04E-04 SLC38A1; SLC38A1; SAT1; SLC38A1; NAT1  
2 1. 07E-04 3. 04E-04 CENPE; DLGAP5; CENPE; DLGAP5  
2 1. 07E-04 3. 04E-04 MET; HGF; MET; HGF  
2 1. 07E-04 3. 04E-04 GSTM3; AGT; GSTM3; AGT  
2 1. 07E-04 3. 04E-04 PCNA; POLG; PCNA; MDP1  
2 1. 07E-04 3. 04E-04 BCL3; NFKB2; BCL3; NFKB2  
2 1. 07E-04 3. 04E-04 RRM2B; POLG; RRM2B; MDP1  
2 1. 07E-04 3. 04E-04 MEN1; SMAD1; MEN1; SMAD1  
2 1. 07E-04 3. 04E-04 POLG2; GARS; POLB; SMAD1  
2 1. 07E-04 3. 04E-04 CARS2; CARS; CARS2; CARS  
2 1. 07E-04 3. 04E-04 DLGAP5; ESPL1; DLGAP5; ESPL1  
2 1. 07E-04 3. 04E-04 TPST1; TPST2; TPST1; TPST2  
4 1. 21E-04 3. 32E-04 GPX3; SOD1; GSR; MGST1; GPX3; SOD1; GSR; MGST1  
4 1. 21E-04 3. 32E-04 MAP1B; BDNF; LST1; MAP1B; BDNF; LST1; BBS4  
3 1. 26E-04 3. 38E-04 PRKCZ; PRKCD; ENPP1; PRKCZ; PRKCD; ENPP1  
3 1. 26E-04 3. 38E-04 ZIC1; GLI1; PTCH1; ZIC1; GLI1; PTCH1



3 1. 26E-04 3. 38E-04 NLGN4X;DRD4;HTT NLGN4X;DRD4;HTT  
3 1. 26E-04 3. 38E-04 INTS6;INTS7;INTS10 INTS6;INTS7;INTS10  
3 1. 26E-04 3. 38E-04 SIX1;HOXA3;FOXE SIX1;HOXA3;TTF2  
3 1. 26E-04 3. 38E-04 GGT7;GGTLC2;GGT2 GGT7;GGTLC2;GGT2  
3 1. 26E-04 3. 38E-04 SLC25A15;CPS1;H ORC1;CPS1;HTT  
3 1. 26E-04 3. 38E-04 CDKN2A;PIK3R1;B CDKN2A;PIK3R1;BCL6  
3 1. 26E-04 3. 38E-04 STAT5B;TN13B\_HU STAT5B;TNFSF13B;CDH13  
5 1. 26E-04 3. 38E-04 RUNX2;NF1;SMO;GI RUNX2;NF1;SMO;GLI1;SP7  
9 1. 28E-04 3. 43E-04 FGF13;MAP2K5;LRI FGF13;MAP2K5;LRRK2;MEN1;FGFR3;RAPGEF2;FGFR1;S  
15 1. 30E-04 3. 48E-04 PTGS2;CAPZB;CALI PTGS2;CAPZB;CALD1;CD97;MAPK8;ARFIP2;FPR1;MSH2  
5 1. 40E-04 3. 73E-04 ARFGEF3;PSD3;GBI KIAA1244;PSD3;GBF1;PSD4;ARFGEF1  
7 1. 41E-04 3. 77E-04 SLC4A8;SLC4A7;SI SLC4A8;SLC4A7;SLC4A4;SLC4A2;SLC4A5;SLC  
16 1. 42E-04 3. 78E-04 PDCD11;DDX54;PAI PDCD11;DDX54;PABPC4;RBM5;MRPL44;POP1;RBM6;EXO  
7 1. 58E-04 4. 21E-04 HOOK2;TUBG1;CEP HOOK2;TUBG1;CEP120;MAPT;RNF19A;BBS4;TTL  
4 1. 66E-04 4. 40E-04 CTNNB1;PDGFRA;SI CTNNB1;PDGFRA;SMO;LEF1  
3 1. 71E-04 4. 50E-04 CTNNB1;TCF7L2;P CTNNB1;TCF7L2;PTPRU;TCF4  
3 1. 71E-04 4. 50E-04 SYNJ1;ITSN1;AMPI SYNJ1;ITSN1;AMPH  
3 1. 71E-04 4. 50E-04 DDX54;ESR1;ESR2 DDX54;ESR1;ESR2  
3 1. 71E-04 4. 50E-04 HIPK3;PDPK1;TGFI HIPK3;PDK1;TGFB2  
3 1. 71E-04 4. 50E-04 ATG4B;ATG4C;ATG ATG4B;ATG4C;ATG12  
3 1. 71E-04 4. 50E-04 LARGE;ALDOA;SOD LARGE;ALDOA;SOD1  
3 1. 71E-04 4. 50E-04 CHD7;MYH10;SCUBI CHD7;MYH10;SCUBE1  
3 1. 71E-04 4. 50E-04 MFSD9;S22AI\_HUM MFSD9;SLC22A18;PPP2CB  
3 1. 71E-04 4. 50E-04 TNS3;HS6ST1;HOP TNS3;HS6ST1;HOPX  
3 1. 71E-04 4. 50E-04 BCKDHA;COL1A1;A BCKDHA;COL1A1;AGT;TMEM91  
3 1. 71E-04 4. 50E-04 CD4;STAT5B;GLMN CD4;STAT5B;FAP  
4 1. 92E-04 5. 00E-04 SOX9;NR5A1;MSH2 SOX9;SF1;MSH2;AR  
5 2. 05E-04 5. 32E-04 ATXN3;BRCA2;MMS ATXN3;BRCA2;MMS19;NEIL3;OGG1  
5 2. 05E-04 5. 32E-04 CDKN3;PTEN;BCCII CDKN3;PTEN;BCCIP;CDKN2B;CDC6  
4 2. 21E-04 5. 72E-04 RCAN1;COL1A1;MGI RCAN1;COL1A1;MGP;TGFB2  
4 2. 21E-04 5. 72E-04 UBE2C;NDC80;ZWI UBE2C;NDC80;ZWINT;RANBP1  
4 2. 21E-04 5. 72E-04 NBN;RAD1;MLTK;R NBN;RAD1;ZAK;RAD17  
3 2. 27E-04 5. 85E-04 CDKN1A;TN13B\_HU CDKN1A;TNFSF13B;BCL6  
3 2. 27E-04 5. 85E-04 TNFSF15;TLR3;TR TNFSF15;TLR3;TRAF2  
3 2. 27E-04 5. 85E-04 NPLOC4;DERL1;FB NPLOC4;DERL1;FBXO2  
3 2. 27E-04 5. 85E-04 LIG4;BRCA2;MSH2 LIG4;BRCA2;MSH2  
5 2. 45E-04 6. 29E-04 CTNNB1;HES1;PPAI CTNNB1;HES1;PPARG;PTH1R;KCNMA1  
5 2. 45E-04 6. 29E-04 SERPINE1;HMOX1;I SERPINE1;HMOX1;HTATIP2;NF1;HGF  
11 2. 46E-04 6. 31E-04 FN1;ITGB1BP1;SHI FN1;ITGB1BP1;SHROOM2;TNS3;LAMB2;BTG1;PSG1;PLX  
4 2. 52E-04 6. 46E-04 SORBS3;AGT;IL6;I SORBS3;AGT;HGF;LIF  
4 2. 52E-04 6. 46E-04 BCL3;POLA2;TNPO BCL3;POLA2;TNPO1;BCL6  
4 2. 88E-04 7. 33E-04 AKR1C1;NQO1;EPH AKR1C1;NQO1;EPHX2;FM04  
4 2. 88E-04 7. 33E-04 NQO1;EPHX2;CES1 NQO1;EPHX2;CES2;FAS  
4 2. 88E-04 7. 33E-04 ALDH3A2;NGF;NF1 ALDH3A2;NGF;NF1;SP110  
4 2. 88E-04 7. 33E-04 HS6ST1;PPARG;LEI HS6ST1;PPARG;LEF1;SOD1  
3 2. 92E-04 7. 39E-04 EPHX2;OXTR;ADH5 EPHX2;OXTR;ADH5  
3 2. 92E-04 7. 39E-04 CD81;WWP2;WWP1 CD81;WWP2;WWP1  
3 2. 92E-04 7. 39E-04 ADAM9;MAP3K13;MI ADAM9;MAP3K13;ZAK  
3 2. 92E-04 7. 39E-04 NPC1;SOAT1;ABCA NPC1;ACAT1;ABCA1  
3 2. 92E-04 7. 39E-04 FPR1;GUCY1B3;AG FPR1;GUCY1B3;AGT  
3 2. 92E-04 7. 39E-04 CD74;CD4;CD1D CD74;CD4;CD1D  
3 2. 92E-04 7. 39E-04 PTK2B;NCK1;MAPK PTK2B;NCK1;MAPK8IP2

|    |          |           |                  |                                               |
|----|----------|-----------|------------------|-----------------------------------------------|
| 3  | 2.92E-04 | 7.39E-04  | SORBS1;PIK3R1;AI | SORBS1;PIK3R1;AKT2                            |
| 3  | 2.92E-04 | 7.39E-04  | TTK;SMC3;KIF11   | TTK;SMC3;KIF11                                |
| 5  | 3.16E-04 | 7.58E-04  | CHRM2;GRK5;FPR1  | CHRM2;GRK5;FPR1;CRHR1;ADRA1A                  |
| 2  | 3.19E-04 | 7.58E-04  | NTRK2;BBS4       | NTRK2;BBS4                                    |
| 2  | 3.19E-04 | 7.58E-04  | CSGALNACT1;EXT2  | CSGALNACT1;EXT2                               |
| 2  | 3.19E-04 | 7.58E-04  | FGF18;COL13A1    | FGF18;COL13A1                                 |
| 2  | 3.19E-04 | 7.58E-04  | COL1A2;COL1A1    | COL1A2;COL1A1                                 |
| 2  | 3.19E-04 | 7.58E-04  | PPP2R4;DLC1      | PPP2R4;DLC1                                   |
| 2  | 3.19E-04 | 7.58E-04  | LYST;BCL3        | LYST;BCL3                                     |
| 2  | 3.19E-04 | 7.58E-04  | ADAM9;HBEGF      | ADAM9;HBEGF                                   |
| 2  | 3.19E-04 | 7.58E-04  | TARSL2;TARS      | TARSL2;TARS                                   |
| 2  | 3.19E-04 | 7.58E-04  | SCIN;ARPC4;ARPC4 | SCIN;TTLL3;ARPC4                              |
| 2  | 3.19E-04 | 7.58E-04  | DRD4;FLNA        | DRD4;FLNA                                     |
| 2  | 3.19E-04 | 7.58E-04  | SLC6A3;MAOA      | SLC6A3;MAOA                                   |
| 2  | 3.19E-04 | 7.58E-04  | NR5A1;STAT5B     | SF1;STAT5B                                    |
| 2  | 3.19E-04 | 7.58E-04  | NPAS2;KCNMA1     | NPAS2;KCNMA1                                  |
| 2  | 3.19E-04 | 7.58E-04  | HMGB2;HMGB1      | HMGB2;HMGB1                                   |
| 2  | 3.19E-04 | 7.58E-04  | CENPE;CDCA5      | CENPE;CDCA5                                   |
| 2  | 3.19E-04 | 7.58E-04  | CENPE;CENPF      | CENPE;CENPF                                   |
| 2  | 3.19E-04 | 7.58E-04  | TBP;GTF2A2       | TBP;GTF2A2                                    |
| 2  | 3.19E-04 | 7.58E-04  | EPHA2;TIAM1      | EPHA2;TIAM1                                   |
| 2  | 3.19E-04 | 7.58E-04  | SMO;GLI1         | SMO;GLI1                                      |
| 2  | 3.19E-04 | 7.58E-04  | TUBG1;ESPL1      | TUBG1;ESPL1                                   |
| 2  | 3.19E-04 | 7.58E-04  | TLX1;HOXA3       | TLX1;HOXA3                                    |
| 2  | 3.19E-04 | 7.58E-04  | THRB;GDF5        | THRB;GDF5                                     |
| 2  | 3.19E-04 | 7.58E-04  | SOD1;KCNMA1      | SOD1;KCNMA1                                   |
| 2  | 3.19E-04 | 7.58E-04  | PTPRU;FLNA       | PTPRU;FLNA                                    |
| 2  | 3.19E-04 | 7.58E-04  | NUSAP1;ESPL1     | NUSAP1;ESPL1                                  |
| 2  | 3.19E-04 | 7.58E-04  | PRLR;GHR         | PRLR;GHR                                      |
| 2  | 3.19E-04 | 7.58E-04  | STAT5B;GHR       | STAT5B;GHR                                    |
| 2  | 3.19E-04 | 7.58E-04  | STAT5B;GHR       | STAT5B;GHR                                    |
| 2  | 3.19E-04 | 7.58E-04  | MSH6;MSH2        | MSH6;MSH2                                     |
| 2  | 3.19E-04 | 7.58E-04  | HOPX;TGFB2       | HOPX;TGFB2                                    |
| 2  | 3.19E-04 | 7.58E-04  | SPTBN1;TGFB2     | SPTBN1;TGFB2                                  |
| 11 | 3.29E-04 | 7.64E-04  | CTNNB1;NRCAM;COI | CTNNB1;NRCAM;COL14A1;EGFR;CD44;PKP2;NPHP1;CYF |
| 7  | 3.64E-04 | 8.46E-04  | STC1;EPHX2;DRD4  | STC1;EPHX2;DRD4;HEXB;PTH1R;CAV1;CXCL12        |
| 4  | 3.68E-04 | 8.50E-04  | MOXD1;SULT1A1;SI | MOXD1;SULT1A1;SULT1A2;MAOA                    |
| 4  | 3.68E-04 | 8.50E-04  | PRPSAP1;NME5;HPI | PRPSAP1;NME5;HPRT1;PPAT                       |
| 3  | 3.69E-04 | 8.50E-04  | BMPER;CHRD;FSTL  | BMPER;CHRD;FSTL3                              |
| 3  | 3.69E-04 | 8.50E-04  | DNMT3A;DMAP1;HEM | DNMT3A;DMAP1;HEMK1                            |
| 3  | 3.69E-04 | 8.50E-04  | JAG1;HOXB5;SCUB  | JAG1;HOXB5;SCUBE1                             |
| 3  | 3.69E-04 | 8.50E-04  | CXCL16;SPHK1;NOI | CXCL16;SPHK1;NOL8                             |
| 3  | 3.69E-04 | 8.50E-04  | AQP3;MICB;TIE1   | AQP3;MICB;TIE1                                |
| 3  | 3.69E-04 | 8.50E-04  | DBNL;CDH13;ELMO  | DBNL;CDH13;ELMO1                              |
| 3  | 3.69E-04 | 8.50E-04  | PLA2G2A;NOD2;IL  | PLA2G2A;NOD2;HGF                              |
| 5  | 3.72E-04 | 8.50E-04  | CD46;OVGP1;GNPD  | CD46;OVGP1;GPI;LCN6;DNALI1                    |
| 4  | 4.13E-04 | 9.43E-04  | APOB;LDLR;CAV1;I | APOB;LDLR;CAV1;LIPC                           |
| 4  | 4.13E-04 | 9.43E-04  | GSN;ARPC4;ARHGAI | GSN;TTLL3;ARHGAP6;RAC1;ARPC4                  |
| 4  | 4.13E-04 | 9.43E-04  | PRKAR2B;DLG4;AMI | PRKAR2B;DLG4;AMPH;EPHB2                       |
| 3  | 4.58E-04 | 0.0010395 | PCSK1;SCG5;PCSK  | PCSK1;SCG5;PCSK7                              |
| 3  | 4.58E-04 | 0.0010395 | THBS1;MEN1;CDKN  | THBS1;MEN1;CDKN2B                             |
| 3  | 4.58E-04 | 0.0010395 | EIF2AK3;IL6;CLU  | EIF2AK3;HGF;CLU                               |

3 4. 58E-04 0. 0010395 HMGCS1;HMGCR;FDI HMGCS1;HMGCR;FDFT1  
3 4. 58E-04 0. 0010395 POLA1;DDX11;CDK;POLA1;DDX11;CDK2AP1  
3 4. 58E-04 0. 0010395 TNNC1;TPM2;TNNT;TNC;TPM2;TNNT3  
4 4. 63E-04 0. 0010453 KNTC1;ZWINT;RAD;KNTC1;ZWINT;RAD17;ZWILCH  
10 4. 80E-04 0. 0010831 TBX20;SOX9;TRIM;TBX20;SOX9;TRIM66;RBPJ;BCOR;ZBTB16;TP63;CBFA2  
5 5. 04E-04 0. 0011363 CDKN2A;RAD1;MLT;CDKN2A;RAD1;ZAK;XPC;ERCC3  
4 5. 17E-04 0. 0011628 S100P;PTEN;S100;S100P;PTEN;S100A2;CDH13  
4 5. 17E-04 0. 0011628 NR1D1;TIMELESS;INR1D1;TIMELESS;KCNMA1;ARNTL  
7 5. 27E-04 0. 0011858 SLC2A9;SLC2A5;S;SLC2A9;SLC2A5;SLC2A12;SLC2A14;SLC2A3;SLC2A13;  
24 5. 45E-04 0. 0012232 CSGALNACT1;TPD5;CSGALNACT1;TPD52;FBN2;EYA4;FGF18;CORIN;SFRP5;  
3 5. 60E-04 0. 0012536 HES1;PITX1;GLI1 HES1;PITX1;GLI1  
3 5. 60E-04 0. 0012536 PRKAA2;PRKAG2;C;PRKAA2;PRKAG2;CHKB  
3 5. 60E-04 0. 0012536 KRT4;PLA2G2A;CD;KRT4;PLA2G2A;CDKN2B  
4 5. 74E-04 0. 0012836 ADCY8;PRKAR2B;G;ADCY3;PRKAR2B;GNAS;KDM3A  
2 6. 33E-04 0. 0013395 SLC14A1;SLC14A2 SLC14A1;SLC14A2  
2 6. 33E-04 0. 0013395 EDN1;DRD4 EDN1;DRD4  
2 6. 33E-04 0. 0013395 EDN1;EDNRA EDN1;EDNRA  
2 6. 33E-04 0. 0013395 RCAN1;PRDM6 RCAN1;PRDM6  
2 6. 33E-04 0. 0013395 THBS1;CDH13 THBS1;CDH13  
2 6. 33E-04 0. 0013395 THBS1;AKT2 THBS1;AKT2  
2 6. 33E-04 0. 0013395 THBS1;NOD2 THBS1;NOD2  
2 6. 33E-04 0. 0013395 SMAD3;SMAD1 SMAD3;SMAD1  
2 6. 33E-04 0. 0013395 NUA2;ASNS NUA2;ASNS  
2 6. 33E-04 0. 0013395 APOBEC3G;APOBEC;APOBEC3G;APOBEC3F  
2 6. 33E-04 0. 0013395 UBR5;NEDD4 UBR5;NEDD4  
2 6. 33E-04 0. 0013395 EIF2AK3;HTT EIF2AK3;HTT  
2 6. 33E-04 0. 0013395 JAG1;TP63 JAG1;TP63  
2 6. 33E-04 0. 0013395 GSN;SCIN GSN;SCIN  
2 6. 33E-04 0. 0013395 NGF;PCSK5 NGF;PCSK5  
2 6. 33E-04 0. 0013395 PITX1;TCF7L2;TCI;PITX1;TCF7L2;TCF4  
2 6. 33E-04 0. 0013395 CDKN2A;CASP3 CDKN2A;CASP3  
2 6. 33E-04 0. 0013395 ALDOA;ALDOC ALDOA;ALDOC  
2 6. 33E-04 0. 0013395 RRM2;RRM2B RRM2;RRM2B  
2 6. 33E-04 0. 0013395 MYH10;NUSAP1 MYH10;NUSAP1  
2 6. 33E-04 0. 0013395 SEMA3A;PDGFA SEMA3A;PDGFA  
2 6. 33E-04 0. 0013395 NLRP12;ENPP1 NLRP12;ENPP1  
2 6. 33E-04 0. 0013395 DYNC1I1;HTT DYNC1I1;HTT  
2 6. 33E-04 0. 0013395 STAT5B;GHR STAT5B;GHR  
2 6. 33E-04 0. 0013395 STAT5B;LCK STAT5B;LCK  
2 6. 33E-04 0. 0013395 ARHGAP6;DLC1 ARHGAP6;DLC1  
2 6. 33E-04 0. 0013395 MSH2;XPC MSH2;XPC  
2 6. 33E-04 0. 0013395 TBX1;CHST11 TBX1;CHST11  
2 6. 33E-04 0. 0013395 RAC1;RAC2 RAC1;RAC2  
2 6. 33E-04 0. 0013395 SYCP2;STAG3 SCP2;STAG3  
2 6. 33E-04 0. 0013395 SLC36A1;SLC38A3 SLC36A1;NAT1  
2 6. 33E-04 0. 0013395 SLC23A2;SLC23A1 SLC23A2;SLC23A2  
4 6. 37E-04 0. 0013395 EIF2AK3;CAMK2G;I;EIF2AK3;CAMK2G;HTT;SLC30A8  
3 6. 74E-04 0. 0014136 EIF2AK3;PIK3R1;(EIF2AK3;PIK3R1;GHR  
3 6. 74E-04 0. 0014136 POFUT2;FUCA1;B3;POFUT2;FUCA1;B3GALTL  
3 6. 74E-04 0. 0014136 NF1;CEP120;BBS4 NF1;CEP120;BBS4  
4 7. 76E-04 0. 0016196 POLS;NBN;SOD1;M;POLK;NBN;SOD1;MSH2  
3 8. 03E-04 0. 0016711 EDN1;EGFR;HRH1 EDN1;EGFR;HRH1

3 8. 03E-04 0. 0016711 TBX20;BBS5;BBS4 TBX20;BBS5;BBS4  
3 8. 03E-04 0. 0016711 TAPBP;GBF1;COG3 TAPBP;GBF1;COG3  
4 8. 52E-04 0. 0017679 ANLN;ROCK2;AURKI ANLN;ROCK2;AIM1;ESPL1  
5 9. 30E-04 0. 0019255 BST1;TREM1;GPI; BST1;TREM1;GPI;YTHDF2;HGF  
4 9. 35E-04 0. 0019342 BDKRB2;SMTN;ADR/ BDKRB2;SMTN;ADRA1A;EDNRA  
3 9. 46E-04 0. 001955 CTNNB1;XDH;PTH1I CTNNB1;XDH;PTH1R  
3 9. 46E-04 0. 001955 ALOX15B;LTA4H;R ALOX15B;LTA4H;RNPEP  
4 0. 001022 0. 0020745 NDUFA10;NDUFS7; NDUFA10;NDUFS7;NDUFV3;NDUFB2  
2 0. 0010474 0. 0020745 NTRK2;BDNF NTRK2;BDNF  
2 0. 0010474 0. 0020745 PPARGC1A;GCK PPARGC1A;GK  
2 0. 0010474 0. 0020745 EDN1;ECE1 EDN1;ECE1  
2 0. 0010474 0. 0020745 ST3GAL6;NMT2 ST3GAL6;NMT2  
2 0. 0010474 0. 0020745 THBS1;F12 THBS1;F12  
2 0. 0010474 0. 0020745 HPD;FAH HPD;FAH  
2 0. 0010474 0. 0020745 AS3MT;CPOX AS3MT;CPOX  
2 0. 0010474 0. 0020745 APOB;LDLR APOB;LDLR  
2 0. 0010474 0. 0020745 APOB;SOAT1 APOB;ACAT1  
2 0. 0010474 0. 0020745 JAG1;LAMA1 JAG1;LAMA1  
2 0. 0010474 0. 0020745 PCSK2;F12 PCSK2;F12  
2 0. 0010474 0. 0020745 GTSE1;CENPF GTSE1;CENPF  
2 0. 0010474 0. 0020745 TFPI;F7 TFPI;F7  
2 0. 0010474 0. 0020745 MFSD9;S22AI\_HUM/ MFSD9;SLC22A18  
2 0. 0010474 0. 0020745 TP53I3;CASP3 TP53I3;CASP3  
2 0. 0010474 0. 0020745 HMOX1;CDKN2B HMOX1;CDKN2B  
2 0. 0010474 0. 0020745 NPC1;PRNP NPC1;PRNP  
2 0. 0010474 0. 0020745 RORA;RORA;RORA; RORA;ROR1;ROR2;AGTPBP1  
2 0. 0010474 0. 0020745 AGRN;FLNA AGRN;FLNA  
2 0. 0010474 0. 0020745 GINS1;BRCA2 GINS1;BRCA2  
2 0. 0010474 0. 0020745 SF1;SLU7 SF1;SLU7  
2 0. 0010474 0. 0020745 PILRB;PRLR PILRB;PRLR  
2 0. 0010474 0. 0020745 CTTNBP2;MAPT CTTNBP2;MAPT  
2 0. 0010474 0. 0020745 KCNH1;ADAM12 KCNH1;ADAM12  
2 0. 0010474 0. 0020745 LEF1;HTT LEF1;HTT  
2 0. 0010474 0. 0020745 HUWE1;SUZ12 HUWE1;SUZ12  
2 0. 0010474 0. 0020745 LIG4;TRC2L\_HUMAN LIG4;LOC100133315  
2 0. 0010474 0. 0020745 SP100;BRCA2 SP100;BRCA2  
2 0. 0010474 0. 0020745 PABPC1;GDNF PABPC1;ATF2  
2 0. 0010474 0. 0020745 BRCA2;BCL3 BRCA2;BCL3  
2 0. 0010474 0. 0020745 PLA2G2A;LIPC PLA2G2A;LIPC  
2 0. 0010474 0. 0020745 SOD1;UCP2 SOD1;UCP2  
2 0. 0010474 0. 0020745 SOD1;BBS4 SOD1;BBS4  
2 0. 0010474 0. 0020745 NOD2;TLR3 NOD2;TLR3  
2 0. 0010474 0. 0020745 AGT;NR1H3 AGT;NR1H3  
2 0. 0010474 0. 0020745 STAT5B;GHR STAT5B;GHR  
2 0. 0010474 0. 0020745 STAT5B;GHR STAT5B;GHR  
2 0. 0010474 0. 0020745 STAT5B;GHR STAT5B;GHR  
2 0. 0010474 0. 0020745 TLN1;ITGB3 TLN1;ITGB3  
2 0. 0010474 0. 0020745 TRPC1;KCNMA1 TRPC1;KCNMA1  
2 0. 0010474 0. 0020745 ADH1B;ADH5 ADH1C;ADH5  
2 0. 0010474 0. 0020745 HPRT1;HOXB8 HPRT1;HOXB8  
2 0. 0010474 0. 0020745 CDK2;CDC6 CDK2;CDC6  
2 0. 0010474 0. 0020745 SLC19A2;SLC19A3 SLC19A2;SLC19A3

7 0. 0010658 0. 0020745 NRG1;SMAD3;MAP3K1;NRG1;SMAD3;MAP3K1;NF1;MIA3;PDGFA;TGFB2  
3 0. 0011045 0. 0021361 RGS4;RGS3;CAV1 RGS4;RGS3;CAV1  
3 0. 0011045 0. 0021361 IGF2BP1;EIF2AK3 IGF2BP1;EIF2AK3;EIF4A3  
3 0. 0011045 0. 0021361 GYS1;GBE1;AGL GYS1;GBE1;AGL  
4 0. 0012138 0. 0023362 PHGDH;CBS;ADI1;PGD;CBS;ADI1;ASNS  
6 0. 0012567 0. 0024171 GNL2;RCL1;RNASEH1;GNL2;RCL1;DROSHA;EBNA1BP2;BYSL;SDAD1  
3 0. 0012787 0. 0024556 IL21R;NCR1;ULBP1 IL21R;NCR1;ULBP1  
3 0. 0012787 0. 0024556 GNAS;TSHR;PTH1R GNAS;TSHR;PTH1R  
3 0. 0012787 0. 0024556 ATM;RAD51L1;RAD51B;RAD51C ATM;RAD51B;RAD51C  
6 0. 0013741 0. 002635 COL1A2;ADAM9;MAP3K1;ARRB2;GDF5;LTBP2 COL1A2;ADAM9;MAP3K1;ARRB2;GDF5;LTBP2  
4 0. 0014295 0. 0027392 HOXC10;APP;AGTPBP1;UCHL1 HOXC10;APP;AGTPBP1;UCHL1  
3 0. 0014692 0. 002809 EDN1;NRG1;SOX9 EDN1;NRG1;SOX9  
3 0. 0014692 0. 002809 LCP1;SHROOM2;ADD2 LCP1;SHROOM2;ADD2  
3 0. 0014692 0. 002809 AASS;SHMT1;SBF2 AASS;SHMT1;SBF2  
3 0. 0014692 0. 002809 CLDN1;CLDN4;CLDN12 CLDN1;CLDN4;CLDN12  
4 0. 0015468 0. 0029289 EPS15;ZFYVE16;CAV1;SORT1 EPS15;ZFYVE16;CAV1;SORT1  
2 0. 0015602 0. 0029289 NTRK2;DBN1 NTRK2;DBN1  
2 0. 0015602 0. 0029289 VEGFA;THBS1 VEGFA;THBS1  
2 0. 0015602 0. 0029289 NRCAM;SEMA3A NRCAM;SEMA3A  
2 0. 0015602 0. 0029289 PRKCZ;PRKCD PRKCZ;PRKCD  
2 0. 0015602 0. 0029289 HK2;GCK HK2;GCK  
2 0. 0015602 0. 0029289 DCT;SLC45A2 DCT;SLC45A2  
2 0. 0015602 0. 0029289 APOBEC3G;APOBEC3F APOBEC3G;APOBEC3F  
2 0. 0015602 0. 0029289 APOB;SEC14L2 APOB;SEC14L2  
2 0. 0015602 0. 0029289 GPD2;GK GPD2;GK  
2 0. 0015602 0. 0029289 ECE1;TMOD2 ECE1;TMOD2  
2 0. 0015602 0. 0029289 MAP3K1;NCK1 MAP3K1;NCK1  
2 0. 0015602 0. 0029289 ADCY3;SCP2 ADCY3;SCP2  
2 0. 0015602 0. 0029289 DRD4;SLC6A3 DRD4;SLC6A3  
2 0. 0015602 0. 0029289 ZFYVE16;NEDD4 ZFYVE16;NEDD4  
2 0. 0015602 0. 0029289 ABCA4;PDE6B ABCA4;PDE6B  
2 0. 0015602 0. 0029289 NF1;BDNF NF1;BDNF  
2 0. 0015602 0. 0029289 ZDHHC15;ZDHHC2 ZDHHC15;ZDHHC2  
2 0. 0015602 0. 0029289 RRM2;RRM2B RRM2;RRM2B  
2 0. 0015602 0. 0029289 ATP6V0E2;ATP6V1H ATP6V0E2;ATP6V1H  
2 0. 0015602 0. 0029289 LIG4;PLA2G2A LIG4;PLA2G2A  
2 0. 0015602 0. 0029289 BRCA2;PDE3A BRCA2;PDE3A  
2 0. 0015602 0. 0029289 HOXA3;TBX1 HOXA3;TBX1  
2 0. 0015602 0. 0029289 SOD1;PRNP SOD1;PRNP  
2 0. 0015602 0. 0029289 SRP54;SRP19 SRP54;SRP19  
2 0. 0015602 0. 0029289 PANK1;PPAT PANK1;PPAT  
2 0. 0015602 0. 0029289 RBL1;RBL2 RBL1;RBL2  
27 0. 0016518 0. 0030519 EGFR;AKR1B1;TNIK;EGFR;AKR1B1;TNIK;DUSP10;MAP4K1;NDRG4;MAPKAPK3  
3 0. 0016766 0. 0030901 ATG4B;ATG4C;SDCBP ATG4B;ATG4C;SDCBP  
3 0. 0016766 0. 0030901 MAP3K1;CDKN2A;DAP3 MAP3K1;CDKN2A;DAP3  
3 0. 0016766 0. 0030901 ROBO2;RARB;BDNF ROBO2;RARB;BDNF  
3 0. 0016766 0. 0030901 IL6ST;LIFR;OSMR IL6ST;LIFR;OSMR  
3 0. 0016766 0. 0030901 TDG;NEIL3;OGG1 TDG;NEIL3;OGG1  
4 0. 0018011 0. 0033111 ELMOD3;ELMO2;MEGF10;CDC42SE1 ELMOD3;ELMO2;MEGF10;CDC42SE1  
3 0. 0019014 0. 0034833 CHRM2;CNN1;CAV1 CHRM2;CNN1;CAV1  
3 0. 0019014 0. 0034833 HHIP;ARTN;FZD3 HHIP;ARTN;FZD3  
3 0. 0019014 0. 0034833 CROCC;PCM1;BBS4 CROCC;PCM1;BBS4

3 0. 0019014 0. 0034833 SOCS2;STAT5B;GHI SOCS2;STAT5B;GHR  
3 0. 0019014 0. 0034833 LDLR;GALNT7;GAL1 LDLR;GALNT7;GALNT9  
3 0. 0019014 0. 0034833 MYO6;MYH10;MYO5;MYO6;MYH10;MYO5A  
3 0. 0019014 0. 0034833 LIG4;CD4;BANF1 LIG4;CD4;BANF1  
3 0. 0019014 0. 0034833 PBX1;NR3C1;DMRT/PBX1;NR3C1;DMRTA1  
5 0. 0019519 0. 0035618 PPARGC1A;AKR1C1 PPARGC1A;AKR1C1;CYP39A1;CA11;TFF3  
5 0. 0019519 0. 0035618 STAG2;MEI1;NBN;STAG2;MEI1;NBN;SMC3;STAG3  
8 0. 0019614 0. 0035754 COL1A2;GJA5;CHD7 COL1A2;GJA5;CHD7;COL1A1;TCF7L2;AGT;EGFL7;TCF4  
4 0. 0020829 0. 0037942 IFT172;DYNC2H1;IFT172;DYNC2H1;PTCH1;MAP2  
3 0. 0021442 0. 0038711 SLC6A3;SLC6A2;SLC6A3;NET1;HTT;NAT1  
2 0. 0021693 0. 0038711 CTNNB1;MDFI CTNNB1;MDFI  
2 0. 0021693 0. 0038711 VEGFA;FGF18 VEGFA;FGF18  
2 0. 0021693 0. 0038711 LDLRAP1;HIP1 LDLRAP1;HIP1  
2 0. 0021693 0. 0038711 LGMN;PTCH1 LGMN;PTCH1  
2 0. 0021693 0. 0038711 CTNND2;NINJ2 CTNND2;NINJ2  
2 0. 0021693 0. 0038711 P2RY6;CTTNBP2 P2RY6;CTTNBP2  
2 0. 0021693 0. 0038711 MICA;MICB MICA;MICB  
2 0. 0021693 0. 0038711 ADAM9;CXCL16 ADAM9;CXCL16  
2 0. 0021693 0. 0038711 RAB3A;ADH5 RAB3A;ADH5  
2 0. 0021693 0. 0038711 ITIH5;ITIH4 ITIH5;ITIH4  
2 0. 0021693 0. 0038711 HMOX1;TLR3 HMOX1;TLR3  
2 0. 0021693 0. 0038711 NDUFS7;OXA1L NDUFS7;OXA1L  
2 0. 0021693 0. 0038711 BARD1;NEDD4 BARD1;NEDD4  
2 0. 0021693 0. 0038711 ARRB2;NEDD4 ARRB2;NEDD4  
2 0. 0021693 0. 0038711 BRCA2;RAD51C BRCA2;RAD51C  
2 0. 0021693 0. 0038711 RAD1;SYCP2 RAD1;SCP2  
2 0. 0021693 0. 0038711 HMGXB4;SORT1 HMGXB4;SORT1  
2 0. 0021693 0. 0038711 PNPLA3;GPAM PNPLA3;GPAM  
2 0. 0021693 0. 0038711 NOD2;IL6 NOD2;HGF  
2 0. 0021693 0. 0038711 AGT;NEDD4 AGT;NEDD4  
2 0. 0021693 0. 0038711 CRHR1;MAFF CRHR1;MAFF  
2 0. 0021693 0. 0038711 TN13B\_HUMAN;CAS1 TNFSF13B;CASP3  
2 0. 0021693 0. 0038711 NR3C1;LEP NR3C1;LEP  
2 0. 0021693 0. 0038711 NR3C1;NEDD4 NR3C1;NEDD4  
2 0. 0021693 0. 0038711 IL6;LIF HGF;LIF  
2 0. 0021693 0. 0038711 DMGDH;SARDH DMGDH;SARDH  
2 0. 0021693 0. 0038711 RAC1;RAC2 RAC1;RAC2  
2 0. 0021693 0. 0038711 COG3;BBS4 COG3;BBS4  
2 0. 0021693 0. 0038711 RAD17;CDC6 RAD17;CDC6  
4 0. 0022347 0. 0039213 SKT;COL1A1;HOXC6 KIAA1217;COL1A1;HOXC6;PCSK5  
3 0. 0024053 0. 004215 CNN1;LIMCH1;TRPM7 CNN1;LIMCH1;TRPM7  
3 0. 0024053 0. 004215 GMNN;RAD17;CDC6 GMNN;RAD17;CDC6  
3 0. 0026852 0. 0046944 MDM2;PSMD1;XPO1 MDM2;RPN2;XPO1;PSMD1  
3 0. 0026852 0. 0046944 SNUPN;GEMIN7;NCI SNUPN;GEMIN7;NCBP2  
2 0. 0028726 0. 0049476 TGM2;EDN1 TGM2;EDN1  
2 0. 0028726 0. 0049476 ALOX15B;AR ALOX15B;AR  
2 0. 0028726 0. 0049476 EDN1;SPHK1 EDN1;SPHK1  
2 0. 0028726 0. 0049476 EGFR;OXA1L EGFR;OXA1L  
2 0. 0028726 0. 0049476 SMAD3;SMAD1 SMAD3;SMAD1  
2 0. 0028726 0. 0049476 APOB;PPARG APOB;PPARG  
2 0. 0028726 0. 0049476 BDKRB2;DRD4 BDKRB2;DRD4  
2 0. 0028726 0. 0049476 GCK;TCF7L2;TCF71GK;TCF7L2;TCF4

2 0. 0028726 0. 0049476 LYST;SHROOM2 LYST;SHROOM2  
2 0. 0028726 0. 0049476 SHROOM2;SHROOM3 SHROOM2;SHROOM3  
2 0. 0028726 0. 0049476 RPN2;TUSC3 RPN2;TUSC3  
2 0. 0028726 0. 0049476 EGR2;PMP22 EGR2;SP110  
2 0. 0028726 0. 0049476 POLS;SMC3 POLK;SMC3  
2 0. 0028726 0. 0049476 NBN;SMARCA4 NBN;SMARCA4  
2 0. 0028726 0. 0049476 LIG4;BANF1 LIG4;BANF1  
2 0. 0028726 0. 0049476 BRCA2;BBS4 BRCA2;BBS4  
2 0. 0028726 0. 0049476 UBE2B;MSH2 UBE2B;MSH2  
2 0. 0028726 0. 0049476 MSH2;XPC MSH2;XPC  
2 0. 0028726 0. 0049476 UCHL1;LEP UCHL1;LEP  
11 0. 0029448 0. 0050373 NRG1;NRG2;NOTCH NRG1;NRG2;NOTCH3;TPI1;LSR;ATP5A1;MEN1;PDGFA;E  
3 0. 0029844 0. 0050967 EPHX2;NGF;HOXB8 EPHX2;NGF;HOXB8  
3 0. 0029844 0. 0050967 EGR2;LEP;SORT1 EGR2;LEP;SORT1  
3 0. 0029844 0. 0050967 TOPBP1;NHEJ1;ATM TOPBP1;NHEJ1;ATM  
4 0. 0031086 0. 0052964 MEST;IKZF3;HCK; MEST;IKZF3;HCK;TIE1  
4 0. 0031086 0. 0052964 SIRPG;CD4;LCK;TI SIRPG;CD4;LCK;TRAF2  
3 0. 0033033 0. 0056191 SMAD3;NR4A3;EXT2 SMAD3;NR4A3;EXT2  
4 0. 0035152 0. 0059696 NR4A3;MET;GRM7;NR4A3;MET;GRM7;BBS4  
3 0. 0036423 0. 0060947 SF1;DDX1;SRPK2 SF1;DDX1;SRPK2  
3 0. 0036423 0. 0060947 IL6;CD40;PLSCR1 HGF;CD40;PLSCR1  
2 0. 003668 0. 0060947 EDN1;PRKRA EDN1;PRKRA  
2 0. 003668 0. 0060947 TBX20;GJA5 TBX20;GJA5  
2 0. 003668 0. 0060947 EIF2AK3;DDIT3 EIF2AK3;DDIT3  
2 0. 003668 0. 0060947 APOB;NF1 APOB;NF1  
2 0. 003668 0. 0060947 MGAT4B;MGAT4A MGAT4B;MGAT4A  
2 0. 003668 0. 0060947 CSTF2;CSTF3 CSTF2;CSTF3  
2 0. 003668 0. 0060947 NAMPT;NADSYN1 NAMPT;NADSYN1  
2 0. 003668 0. 0060947 ADAM9;SH3D19 ADAM9;EBP  
2 0. 003668 0. 0060947 KCNMB4;KCNIP1 KCNMB4;KCNIP1  
2 0. 003668 0. 0060947 EGR2;ETV4 EGR2;ETV4  
2 0. 003668 0. 0060947 NTAL\_HUMAN;LCK LAT2;LCK  
2 0. 003668 0. 0060947 ABCA1;APOM ABCA1;APOM  
2 0. 003668 0. 0060947 KCNH1;MMS19 KCNH1;MMS19  
2 0. 003668 0. 0060947 LASS4;LASS5 CERS4;CERS5  
2 0. 003668 0. 0060947 BCL3;NFKB2 BCL3;NFKB2  
2 0. 003668 0. 0060947 NPM1;EIF2A NPM1;EIF2A  
2 0. 003668 0. 0060947 NOD2;CD1D NOD2;CD1D  
2 0. 003668 0. 0060947 STAT5B;GHR STAT5B;GHR  
2 0. 003668 0. 0060947 VPS33A;BCL2L11 VPS33A;BCL2L11  
2 0. 003668 0. 0060947 ABCB9;TAP2 ABCB9;TAP2  
2 0. 003668 0. 0060947 EHMT1;SUZ12 EHMT1;SUZ12  
2 0. 003668 0. 0060947 PRNP;APP PRNP;APP  
2 0. 003668 0. 0060947 GHR;IGF1 GHR;IGF1  
11 0. 0036903 0. 0060947 PPARG;NFATC2;KDM PPARG;NFATC2;KDM3A;BCL3;MEN1;DDIT3;KLF5;ETV4;  
8 0. 0037398 0. 0061724 CTNNB1;NOTCH4;J/ CTNNB1;NOTCH3;JAG1;KIRREL3;MEN1;LCK;NOTCH4;EB  
3 0. 0040018 0. 0065964 CTNNB1;NOTCH4;J/ CTNNB1;NOTCH3;JAG1;NOTCH4  
5 0. 0041179 0. 0067792 LAMA3;LAMA4;LAM/ LAMA3;LAMA3;LAMA2;LAMA4;STAT5B;LAMA1  
5 0. 0042939 0. 0070643 MICA;LYST;STAB1 MICA;LYST;STAB1;BCL3;TLR3  
3 0. 004382 0. 0072049 CTNNB1;NF1;COL8/ CTNNB1;NF1;COL8A1  
8 0. 0045491 0. 0074185 TKT;SOCS5;DMAP1 TKT;SOCS5;DMAP1;SOCS7;SOCS7;EPC1;ING3;NRP2  
2 0. 0045536 0. 0074185 VEGFA;MIA3 VEGFA;MIA3

|    |    |         |    |         |                  |                                               |
|----|----|---------|----|---------|------------------|-----------------------------------------------|
| 2  | 0. | 0045536 | 0. | 0074185 | MOXD1;FRRS1      | MOXD1;FRRS1                                   |
| 2  | 0. | 0045536 | 0. | 0074185 | NRG1;ACADM       | NRG1;ACADM                                    |
| 2  | 0. | 0045536 | 0. | 0074185 | SMAD3;MEN1       | SMAD3;MEN1                                    |
| 2  | 0. | 0045536 | 0. | 0074185 | SIX1;FGF1        | SIX1;FGF1                                     |
| 2  | 0. | 0045536 | 0. | 0074185 | TPI1;H6PD        | TPI1;H6PD                                     |
| 2  | 0. | 0045536 | 0. | 0074185 | DRD4;GRM7        | DRD4;GRM7                                     |
| 2  | 0. | 0045536 | 0. | 0074185 | RORA;CD74;RORA;I | RORA;CD74;ROR1;ROR2                           |
| 2  | 0. | 0045536 | 0. | 0074185 | NF1;CAV1         | NF1;CAV1                                      |
| 2  | 0. | 0045536 | 0. | 0074185 | LRRK2;NHLRC1     | LRRK2;EPM2A                                   |
| 2  | 0. | 0045536 | 0. | 0074185 | CD4;CDH13        | CD4;CDH13                                     |
| 2  | 0. | 0045536 | 0. | 0074185 | TNNT3;HOMER1     | TNNT3;HOMER1                                  |
| 2  | 0. | 0045536 | 0. | 0074185 | SOS1;SORT1       | HGF;SORT1                                     |
| 6  | 0. | 0047764 | 0. | 0077084 | SYNJ1;MTMR1;SYN  | SYNJ1;MTMR1;SYNJ2;MTMR11;CDKN3;SBF2           |
| 6  | 0. | 0047764 | 0. | 0077084 | LYN;MMS19;AGXT;I | LYN;MMS19;AGT;RERG;MGP;FHL2                   |
| 3  | 0. | 0047835 | 0. | 0077103 | DRD4;GRM7;GABBR  | DRD4;GRM7;GABBR1                              |
| 19 | 0. | 0047915 | 0. | 0077161 | DBC1;ITPR1;SYNE  | DBC1;ITPR1;SYNE1;HMOX1;CACNA1A;ADCK3;ATXN3;TB |
| 6  | 0. | 0049326 | 0. | 0079383 | S100B;BAIAP2;RAI | S100B;BAIAP2;RAB3A;APBB1;NTNG2;PIP5K1C        |
| 5  | 0. | 0052547 | 0. | 0084434 | ALDOA;ARHGAP6;PI | ALDOA;ARHGAP6;PLS3;NCK1;DBN1                  |
| 2  | 0. | 0055275 | 0. | 0088133 | VEGFA;CDH13      | VEGFA;CDH13                                   |
| 2  | 0. | 0055275 | 0. | 0088133 | SMAD3;FLNA       | SMAD3;FLNA                                    |
| 2  | 0. | 0055275 | 0. | 0088133 | RIMS1;RAB3A      | RIMS1;RAB3A                                   |
| 2  | 0. | 0055275 | 0. | 0088133 | HES1;SMAD1       | HES1;SMAD1                                    |
| 2  | 0. | 0055275 | 0. | 0088133 | ALDH1A3;RARB     | ALDH1A3;RARB                                  |
| 2  | 0. | 0055275 | 0. | 0088133 | CELSR2;HPRT1     | CELSR2;HPRT1                                  |
| 2  | 0. | 0055275 | 0. | 0088133 | BRCA2;BCL3       | BRCA2;BCL3                                    |
| 2  | 0. | 0055275 | 0. | 0088133 | NME6;NME5        | NME6;NME5                                     |
| 2  | 0. | 0055275 | 0. | 0088133 | NME6;NME5        | NME6;NME5                                     |
| 2  | 0. | 0055275 | 0. | 0088133 | AGT;SOS1         | AGT;HGF                                       |
| 2  | 0. | 0055275 | 0. | 0088133 | MDM4;FLNA        | MDM4;FLNA                                     |
| 2  | 0. | 0055275 | 0. | 0088133 | DNAJB6;NR4A1     | DNAJB6;NR4A1                                  |
| 2  | 0. | 0055275 | 0. | 0088133 | ITGB3;NR1H3      | ITGB3;NR1H3                                   |
| 2  | 0. | 0055275 | 0. | 0088133 | FABP3;CHKB       | FABP3;CHKB                                    |
| 3  | 0. | 0061178 | 0. | 0096888 | PYGL;PPARG;TCF71 | PYGL;PPARG;TCF7L2;TCF4                        |
| 4  | 0. | 0064061 | 0. | 0101391 | TUBG2;TUBA4A;TUI | TUBG2;TUBA4A;TUBG1;TUBD1                      |
| 2  | 0. | 0065876 | 0. | 010366  | PPARGC1A;GPX2    | PPARGC1A;GPX2                                 |
| 2  | 0. | 0065876 | 0. | 010366  | EGFR;EDNRA       | EGFR;EDNRA                                    |
| 2  | 0. | 0065876 | 0. | 010366  | RYR1;LCK         | RYR1;LCK                                      |
| 2  | 0. | 0065876 | 0. | 010366  | ENTPD3;ENPP1     | ENTPD3;ENPP1                                  |
| 2  | 0. | 0065876 | 0. | 010366  | JAG1;KCNMA1      | JAG1;KCNMA1                                   |
| 2  | 0. | 0065876 | 0. | 010366  | ANLN;KNTC1       | ANLN;KNTC1                                    |
| 2  | 0. | 0065876 | 0. | 010366  | SLC25A10;SLC1A3  | SLC25A10;SLC1A3                               |
| 2  | 0. | 0065876 | 0. | 010366  | SMO;GLI1         | SMO;GLI1                                      |
| 2  | 0. | 0065876 | 0. | 010366  | BCL3;IL18BP      | BCL3;IL18BP                                   |
| 2  | 0. | 0065876 | 0. | 010366  | NME6;NME5        | NME6;NME5                                     |
| 2  | 0. | 0065876 | 0. | 010366  | TP63;TP73        | TP63;TP73                                     |
| 3  | 0. | 0076533 | 0. | 0119591 | COL1A2;BCOR;LAMI | COL1A2;BCOR;LAMB1                             |
| 2  | 0. | 0077322 | 0. | 0120242 | NRCAM;TTL        | NRCAM;TTL                                     |
| 2  | 0. | 0077322 | 0. | 0120242 | SIX1;AGT         | SIX1;AGT                                      |
| 2  | 0. | 0077322 | 0. | 0120242 | RERE;IPO5        | RERE;IPO5                                     |
| 2  | 0. | 0077322 | 0. | 0120242 | NR5A1;LEP        | SF1;LEP                                       |
| 2  | 0. | 0077322 | 0. | 0120242 | NBN;CDKN2B       | NBN;CDKN2B                                    |
| 2  | 0. | 0077322 | 0. | 0120242 | SOD1;NOX4        | SOD1;NOX4                                     |



|   |    |         |    |         |                  |                              |
|---|----|---------|----|---------|------------------|------------------------------|
| 2 | 0. | 0077322 | 0. | 0120242 | SOD1;BCL2L11     | SOD1;BCL2L11                 |
| 2 | 0. | 0077322 | 0. | 0120242 | SOD1;HTT         | SOD1;HTT                     |
| 2 | 0. | 0077322 | 0. | 0120242 | NOD2;TLR3        | NOD2;TLR3                    |
| 2 | 0. | 0077322 | 0. | 0120242 | AGT;ACADM        | AGT;ACADM                    |
| 2 | 0. | 0077322 | 0. | 0120242 | SLC6A4;SLC1A3    | HTT;SLC1A3                   |
| 2 | 0. | 0077322 | 0. | 0120242 | FAS;CASP3        | FAS;CASP3                    |
| 3 | 0. | 0082109 | 0. | 0124472 | CDKN1A;FOSL1;CDI | CDKN1A;FOSL1;CDKN2B          |
| 3 | 0. | 0087918 | 0. | 0124472 | MGAT5;MGAT1;LIP  | (MGAT5;MGAT1;LIPC            |
| 2 | 0. | 0089593 | 0. | 0124472 | CP;HEPH          | CP;HEPH                      |
| 2 | 0. | 0089593 | 0. | 0124472 | EDN1;LIF         | EDN1;LIF                     |
| 2 | 0. | 0089593 | 0. | 0124472 | SPAM1;ATP8B3;SP  | /HYAL1;ATP8B3;HYAL3          |
| 2 | 0. | 0089593 | 0. | 0124472 | AMPD3;AMPD2      | AMPD3;AMPD2                  |
| 2 | 0. | 0089593 | 0. | 0124472 | TRRAP;PCAF       | TRRAP;KAT2B                  |
| 2 | 0. | 0089593 | 0. | 0124472 | DRD4;SERGEF      | DRD4;SERGEF                  |
| 2 | 0. | 0089593 | 0. | 0124472 | GNAO1;HTT        | GNAO1;HTT                    |
| 2 | 0. | 0089593 | 0. | 0124472 | ZFPM2;PTEN       | ZFPM2;PTEN                   |
| 2 | 0. | 0089593 | 0. | 0124472 | CYP21A2;PBX1     | CPS1;PBX1                    |
| 2 | 0. | 0089593 | 0. | 0124472 | TAF1;MAP3K11     | TAF1;MAP3K11                 |
| 2 | 0. | 0089593 | 0. | 0124472 | RARRES2;ADH5     | RARRES2;ADH5                 |
| 2 | 0. | 0089593 | 0. | 0124472 | CDH13;RAC1       | CDH13;RAC1                   |
| 4 | 0. | 0092859 | 0. | 0124472 | APOL2;APOL3;APOI | APOL3;APOL3;APOL1;APOM;APOL2 |
| 4 | 0. | 0092859 | 0. | 0124472 | P2RY6;AGT;HRH1;I | P2RY6;AGT;HRH1;PTH1R         |
| 5 | 0. | 009339  | 0. | 0124472 | ADSSL1;MSH2;HPR  | ADSSL1;MSH2;HPRT1;PPAT;GART  |
| 3 | 0. | 0093962 | 0. | 0124472 | CEP290;SMAD1;SM  | CEP290;SMAD1;SMARCA4         |
| 4 | 0. | 0096961 | 0. | 0124472 | SIX1;NGF;CDK5RAI | SIX1;NGF;CDK5RAP2;NLGN1      |
| 4 | 0. | 0096961 | 0. | 0124472 | PFKL;RRM2;MAP3K  | PFKL;RRM2;MAP3K11;NOD2       |
| 3 | 0. | 0100243 | 0. | 0124472 | EFNB1;SIM2;SMAD  | EFNB1;SIM2;SMAD1             |
| 3 | 0. | 0100243 | 0. | 0124472 | CTTNBP2;COL1A1;I | CTTNBP2;COL1A1;EIF2B4        |
| 2 | 0. | 0102672 | 0. | 0124472 | NRCAM;BDNF       | NRCAM;BDNF                   |
| 2 | 0. | 0102672 | 0. | 0124472 | NQO1;CHRNE       | NQO1;CHRNE                   |
| 2 | 0. | 0102672 | 0. | 0124472 | RIMS1;GARS       | RIMS1;SMAD1                  |
| 2 | 0. | 0102672 | 0. | 0124472 | GPX3;PXDN        | GPX3;PXDN                    |
| 2 | 0. | 0102672 | 0. | 0124472 | CHD7;SLC1A3      | CHD7;SLC1A3                  |
| 2 | 0. | 0102672 | 0. | 0124472 | AGRN;A4GALT      | AGRN;A4GALT                  |
| 2 | 0. | 0102672 | 0. | 0124472 | SLC26A1;SLC26A6  | SAT1;SLC26A6                 |
| 2 | 0. | 0102672 | 0. | 0124472 | MYL3;TNNT3       | MYL3;TNNT3                   |
| 2 | 0. | 0102672 | 0. | 0124472 | RNASEN;XPO5      | DROSHA;XPO5                  |
| 2 | 0. | 0102672 | 0. | 0124472 | BDNF;NTM         | BDNF;NTM                     |
| 2 | 0. | 0102672 | 0. | 0124472 | OXR1;NCOA7       | OXR1;NCOA7                   |
| 1 | 0. | 0103422 | 0. | 0124472 | CTNNB1           | CTNNB1                       |
| 1 | 0. | 0103422 | 0. | 0124472 | CTNNB1           | CTNNB1                       |
| 1 | 0. | 0103422 | 0. | 0124472 | NTRK2            | NTRK2                        |
| 1 | 0. | 0103422 | 0. | 0124472 | PPARGC1A         | PPARGC1A                     |
| 1 | 0. | 0103422 | 0. | 0124472 | CA2              | CA2                          |
| 1 | 0. | 0103422 | 0. | 0124472 | EDN1             | EDN1                         |
| 1 | 0. | 0103422 | 0. | 0124472 | EDN1             | EDN1                         |
| 1 | 0. | 0103422 | 0. | 0124472 | TNFRSF11B        | TNFRSF11B                    |
| 1 | 0. | 0103422 | 0. | 0124472 | PTGS2            | PTGS2                        |
| 1 | 0. | 0103422 | 0. | 0124472 | AK5              | AK5                          |
| 1 | 0. | 0103422 | 0. | 0124472 | AK5              | AK5                          |
| 1 | 0. | 0103422 | 0. | 0124472 | SLC2A5           | SLC2A5                       |
| 1 | 0. | 0103422 | 0. | 0124472 | NOTCH4;NOTCH4    | NOTCH3;NOTCH4                |

|                                  |          |
|----------------------------------|----------|
| 1 0. 0103422 0. 0124472 THBS1    | THBS1    |
| 1 0. 0103422 0. 0124472 THBS1    | THBS1    |
| 1 0. 0103422 0. 0124472 THBS1    | THBS1    |
| 1 0. 0103422 0. 0124472 THBS1    | THBS1    |
| 1 0. 0103422 0. 0124472 THBS1    | THBS1    |
| 1 0. 0103422 0. 0124472 THBS1    | THBS1    |
| 1 0. 0103422 0. 0124472 THBS1    | THBS1    |
| 1 0. 0103422 0. 0124472 EPHX2    | EPHX2    |
| 1 0. 0103422 0. 0124472 EPHX2    | EPHX2    |
| 1 0. 0103422 0. 0124472 AS3MT    | AS3MT    |
| 1 0. 0103422 0. 0124472 ANO1     | ANO1     |
| 1 0. 0103422 0. 0124472 EYA2     | EYA2     |
| 1 0. 0103422 0. 0124472 AMPD3    | AMPD3    |
| 1 0. 0103422 0. 0124472 SOX9     | SOX9     |
| 1 0. 0103422 0. 0124472 MICA     | MICA     |
| 1 0. 0103422 0. 0124472 FMN2     | FMN2     |
| 1 0. 0103422 0. 0124472 FMN2     | FMN2     |
| 1 0. 0103422 0. 0124472 HES1     | HES1     |
| 1 0. 0103422 0. 0124472 HES1     | HES1     |
| 1 0. 0103422 0. 0124472 PCSK2    | PCSK2    |
| 1 0. 0103422 0. 0124472 PCSK2    | PCSK2    |
| 1 0. 0103422 0. 0124472 CD81     | CD81     |
| 1 0. 0103422 0. 0124472 SIX1     | SIX1     |
| 1 0. 0103422 0. 0124472 GCK      | GK       |
| 1 0. 0103422 0. 0124472 SERPINE1 | SERPINE1 |
| 1 0. 0103422 0. 0124472 ADAM9    | ADAM9    |
| 1 0. 0103422 0. 0124472 ECE1     | ECE1     |
| 1 0. 0103422 0. 0124472 ECE1     | ECE1     |
| 1 0. 0103422 0. 0124472 SHROOM2  | SHROOM2  |
| 1 0. 0103422 0. 0124472 TOP2A    | TOP2A    |
| 1 0. 0103422 0. 0124472 CHST6    | CHST6    |
| 1 0. 0103422 0. 0124472 XDH      | XDH      |
| 1 0. 0103422 0. 0124472 SCIN     | SCIN     |
| 1 0. 0103422 0. 0124472 CHD7     | CHD7     |
| 1 0. 0103422 0. 0124472 RAB3A    | RAB3A    |
| 1 0. 0103422 0. 0124472 RAB3A    | RAB3A    |
| 1 0. 0103422 0. 0124472 RAB3A    | RAB3A    |
| 1 0. 0103422 0. 0124472 RAB3A    | RAB3A    |
| 1 0. 0103422 0. 0124472 RAB3A    | RAB3A    |
| 1 0. 0103422 0. 0124472 PITX1    | PITX1    |
| 1 0. 0103422 0. 0124472 TPI1     | TPI1     |
| 1 0. 0103422 0. 0124472 HMOX1    | HMOX1    |
| 1 0. 0103422 0. 0124472 HMOX1    | HMOX1    |
| 1 0. 0103422 0. 0124472 TYMS     | TYMS     |
| 1 0. 0103422 0. 0124472 TYMS     | TYMS     |
| 1 0. 0103422 0. 0124472 NPC1     | NPC1     |
| 1 0. 0103422 0. 0124472 AASS     | AASS     |
| 1 0. 0103422 0. 0124472 SORD     | SORD     |
| 1 0. 0103422 0. 0124472 SORD     | SORD     |
| 1 0. 0103422 0. 0124472 SORD     | SORD     |
| 1 0. 0103422 0. 0124472 SORD     | SORD     |
| 1 0. 0103422 0. 0124472 PLOD1    | PLOD1    |
| 1 0. 0103422 0. 0124472 CHR1     | CHR1     |
| 1 0. 0103422 0. 0124472 CHR1     | CHR1     |

|                                   |          |
|-----------------------------------|----------|
| 1 0. 0103422 0. 0124472 LAMA2     | LAMA2    |
| 1 0. 0103422 0. 0124472 EGR2      | EGR2     |
| 1 0. 0103422 0. 0124472 EGR2      | EGR2     |
| 1 0. 0103422 0. 0124472 NR4A3     | NR4A3    |
| 1 0. 0103422 0. 0124472 NR4A3     | NR4A3    |
| 1 0. 0103422 0. 0124472 ABCA4     | ABCA4    |
| 1 0. 0103422 0. 0124472 NF1       | NF1      |
| 1 0. 0103422 0. 0124472 LAMB2     | LAMB2    |
| 1 0. 0103422 0. 0124472 LAMC1     | LAMB2    |
| 1 0. 0103422 0. 0124472 ESR1      | ESR1     |
| 1 0. 0103422 0. 0124472 GALC      | GALC     |
| 1 0. 0103422 0. 0124472 SMOX;SMOX | SMOX;SMO |
| 1 0. 0103422 0. 0124472 BARD1     | BARD1    |
| 1 0. 0103422 0. 0124472 MAPK8     | MAPK8    |
| 1 0. 0103422 0. 0124472 EEA1      | EEA1     |
| 1 0. 0103422 0. 0124472 TAPBP     | TAPBP    |
| 1 0. 0103422 0. 0124472 FN3K      | FN3K     |
| 1 0. 0103422 0. 0124472 ALDH1A3   | ALDH1A3  |
| 1 0. 0103422 0. 0124472 ALDH1A3   | ALDH1A3  |
| 1 0. 0103422 0. 0124472 CELSR2    | CELSR2   |
| 1 0. 0103422 0. 0124472 HEXB      | HEXB     |
| 1 0. 0103422 0. 0124472 BTG1      | BTG1     |
| 1 0. 0103422 0. 0124472 OFD1      | OFD1     |
| 1 0. 0103422 0. 0124472 BCOR      | BCOR     |
| 1 0. 0103422 0. 0124472 SLC6A6    | SLC6A6   |
| 1 0. 0103422 0. 0124472 SLC6A6    | SLC6A6   |
| 1 0. 0103422 0. 0124472 DPYD      | DPYD     |
| 1 0. 0103422 0. 0124472 DPYD      | DPYD     |
| 1 0. 0103422 0. 0124472 CEP290    | CEP290   |
| 1 0. 0103422 0. 0124472 STXBP1    | STXBP1   |
| 1 0. 0103422 0. 0124472 SHMT1     | SHMT1    |
| 1 0. 0103422 0. 0124472 IFRD1     | IFRD1    |
| 1 0. 0103422 0. 0124472 LIG4      | LIG4     |
| 1 0. 0103422 0. 0124472 LIG4      | LIG4     |
| 1 0. 0103422 0. 0124472 SP100     | SP100    |
| 1 0. 0103422 0. 0124472 MYH10     | MYH10    |
| 1 0. 0103422 0. 0124472 MYH10     | MYH10    |
| 1 0. 0103422 0. 0124472 MYH10     | MYH10    |
| 1 0. 0103422 0. 0124472 KDM3A     | KDM3A    |
| 1 0. 0103422 0. 0124472 KDM3A     | KDM3A    |
| 1 0. 0103422 0. 0124472 NLRP12    | NLRP12   |
| 1 0. 0103422 0. 0124472 NLRP12    | NLRP12   |
| 1 0. 0103422 0. 0124472 BRCA2     | BRCA2    |
| 1 0. 0103422 0. 0124472 BRCA2     | BRCA2    |
| 1 0. 0103422 0. 0124472 POLA1     | POLA1    |
| 1 0. 0103422 0. 0124472 POLA1     | POLA1    |
| 1 0. 0103422 0. 0124472 BCL3      | BCL3     |
| 1 0. 0103422 0. 0124472 POP1      | POP1     |
| 1 0. 0103422 0. 0124472 POP1      | POP1     |
| 1 0. 0103422 0. 0124472 SLC13A5   | SLC13A5  |
| 1 0. 0103422 0. 0124472 CD01      | CD01     |
| 1 0. 0103422 0. 0124472 CD01      | CD01     |

|                                 |         |
|---------------------------------|---------|
| 1 0. 0103422 0. 0124472 UNC13B  | UNC13B  |
| 1 0. 0103422 0. 0124472 NCBP2   | NCBP2   |
| 1 0. 0103422 0. 0124472 CD4     | CD4     |
| 1 0. 0103422 0. 0124472 SGSM3   | SGSM3   |
| 1 0. 0103422 0. 0124472 HOXA3   | HOXA3   |
| 1 0. 0103422 0. 0124472 NPM1    | NPM1    |
| 1 0. 0103422 0. 0124472 MEN1    | MEN1    |
| 1 0. 0103422 0. 0124472 GLI1    | GLI1    |
| 1 0. 0103422 0. 0124472 SOD1    | SOD1    |
| 1 0. 0103422 0. 0124472 NOD2    | NOD2    |
| 1 0. 0103422 0. 0124472 NOD2    | NOD2    |
| 1 0. 0103422 0. 0124472 NOD2    | NOD2    |
| 1 0. 0103422 0. 0124472 OXSM    | OXSM    |
| 1 0. 0103422 0. 0124472 OXSM    | OXSM    |
| 1 0. 0103422 0. 0124472 TNNC1   | TNC     |
| 1 0. 0103422 0. 0124472 AGT     | AGT     |
| 1 0. 0103422 0. 0124472 AGT     | AGT     |
| 1 0. 0103422 0. 0124472 AGT     | AGT     |
| 1 0. 0103422 0. 0124472 AGT     | AGT     |
| 1 0. 0103422 0. 0124472 AGT     | AGT     |
| 1 0. 0103422 0. 0124472 AGXT    | AGT     |
| 1 0. 0103422 0. 0124472 AGXT    | AGT     |
| 1 0. 0103422 0. 0124472 AGXT    | AGT     |
| 1 0. 0103422 0. 0124472 AGXT    | AGT     |
| 1 0. 0103422 0. 0124472 NAGK    | NAGK    |
| 1 0. 0103422 0. 0124472 DERL1   | DERL1   |
| 1 0. 0103422 0. 0124472 MDM4    | MDM4    |
| 1 0. 0103422 0. 0124472 MSH6    | MSH6    |
| 1 0. 0103422 0. 0124472 CX3CL1  | CX3CL1  |
| 1 0. 0103422 0. 0124472 CX3CL1  | CX3CL1  |
| 1 0. 0103422 0. 0124472 PTEN    | PTEN    |
| 1 0. 0103422 0. 0124472 PTEN    | PTEN    |
| 1 0. 0103422 0. 0124472 GRM7    | GRM7    |
| 1 0. 0103422 0. 0124472 GDF5    | GDF5    |
| 1 0. 0103422 0. 0124472 MTIF3   | MTIF3   |
| 1 0. 0103422 0. 0124472 SEPP1   | SEPP1   |
| 1 0. 0103422 0. 0124472 NIN     | NIN     |
| 1 0. 0103422 0. 0124472 TSSK4   | TSSK4   |
| 1 0. 0103422 0. 0124472 NR3C1   | NR3C1   |
| 1 0. 0103422 0. 0124472 SMC3    | SMC3    |
| 1 0. 0103422 0. 0124472 HPRT1   | HPRT1   |
| 1 0. 0103422 0. 0124472 HPRT1   | HPRT1   |
| 1 0. 0103422 0. 0124472 ATP6V1H | ATP6V1H |
| 1 0. 0103422 0. 0124472 FLNA    | FLNA    |
| 1 0. 0103422 0. 0124472 IL6     | HGF     |
| 1 0. 0103422 0. 0124472 CDH13   | CDH13   |
| 1 0. 0103422 0. 0124472 APBB1   | APBB1   |
| 1 0. 0103422 0. 0124472 CD1D    | CD1D    |
| 1 0. 0103422 0. 0124472 ERCC3   | ERCC3   |
| 1 0. 0103422 0. 0124472 FOXE1   | TTF2    |
| 1 0. 0103422 0. 0124472 NEDD4   | NEDD4   |
| 1 0. 0103422 0. 0124472 NEDD4   | NEDD4   |
| 1 0. 0103422 0. 0124472 NEDD4   | NEDD4   |
| 1 0. 0103422 0. 0124472 NEDD4   | NEDD4   |

|                                  |          |
|----------------------------------|----------|
| 1 0. 0103422 0. 0124472 ATP2C1   | ATP2C1   |
| 1 0. 0103422 0. 0124472 ATP2C1   | ATP2C1   |
| 1 0. 0103422 0. 0124472 ANK1     | ANK1     |
| 1 0. 0103422 0. 0124472 SLC35D1  | SLC35D1  |
| 1 0. 0103422 0. 0124472 PLCG2    | PLCG2    |
| 1 0. 0103422 0. 0124472 REV1     | REV1     |
| 1 0. 0103422 0. 0124472 AR       | AR       |
| 1 0. 0103422 0. 0124472 HTT      | HTT      |
| 1 0. 0103422 0. 0124472 CDA      | CDA      |
| 1 0. 0103422 0. 0124472 CDA      | CDA      |
| 1 0. 0103422 0. 0124472 CDA      | CDA      |
| 1 0. 0103422 0. 0124472 SLC30A8  | SLC30A8  |
| 1 0. 0103422 0. 0124472 HPS4     | HPS4     |
| 1 0. 0103422 0. 0124472 SLC22A12 | SLC22A12 |
| 1 0. 0103422 0. 0124472 SMARCA4  | SMARCA4  |
| 1 0. 0103422 0. 0124472 SYCP2    | SCP2     |
| 1 0. 0103422 0. 0124472 MYCBP2   | MYCBP2   |
| 1 0. 0103422 0. 0124472 ATG10    | ATG10    |
| 1 0. 0103422 0. 0124472 ISCU     | ISCU     |
| 1 0. 0103422 0. 0124472 SLC19A2  | SLC19A2  |
| 1 0. 0103422 0. 0124472 KCNMA1   | KCNMA1   |
| 1 0. 0103422 0. 0124472 KCNMA1   | KCNMA1   |
| 1 0. 0103422 0. 0124472 KCNMA1   | KCNMA1   |
| 1 0. 0103422 0. 0124472 KCNMA1   | KCNMA1   |
| 1 0. 0103422 0. 0124472 KCNMA1   | KCNMA1   |
| 1 0. 0103422 0. 0124472 ADH5     | ADH5     |
| 1 0. 0103422 0. 0124472 ADH5     | ADH5     |
| 1 0. 0103422 0. 0124472 ADRA1D   | ADRA1A   |
| 1 0. 0103422 0. 0124472 ADRA1D   | ADRA1A   |
| 1 0. 0103422 0. 0124472 ALS2     | ALS2     |
| 1 0. 0103422 0. 0124472 SLC11A2  | SLC11A2  |
| 1 0. 0103422 0. 0124472 BCL6     | BCL6     |
| 1 0. 0103422 0. 0124472 BCL6     | BCL6     |
| 1 0. 0103422 0. 0124472 SLC28A3  | SLC28A3  |
| 1 0. 0103422 0. 0124472 CBS      | CBS      |
| 1 0. 0103422 0. 0124472 CBS      | CBS      |
| 1 0. 0103422 0. 0124472 CHST11   | CHST11   |
| 1 0. 0103422 0. 0124472 MMAB     | MMAB     |
| 1 0. 0103422 0. 0124472 TRPM7    | TRPM7    |
| 1 0. 0103422 0. 0124472 CEL      | FAP      |
| 1 0. 0103422 0. 0124472 CEL      | FAP      |
| 1 0. 0103422 0. 0124472 IGF1     | IGF1     |
| 1 0. 0103422 0. 0124472 IGF1     | IGF1     |
| 1 0. 0103422 0. 0124472 IGF1     | IGF1     |
| 1 0. 0103422 0. 0124472 BBS4     | BBS4     |
| 1 0. 0103422 0. 0124472 BBS4     | BBS4     |
| 1 0. 0103422 0. 0124472 BBS4     | BBS4     |
| 1 0. 0103422 0. 0124472 PDXK     | PDXK     |
| 1 0. 0103422 0. 0124472 CAV1     | CAV1     |
| 1 0. 0103422 0. 0124472 CAV1     | CAV1     |
| 1 0. 0103422 0. 0124472 PCSK5    | PCSK5    |
| 1 0. 0103422 0. 0124472 F12      | F12      |

|                         |                                                  |                       |
|-------------------------|--------------------------------------------------|-----------------------|
| 1 0. 0103422 0. 0124472 | F12                                              | F12                   |
| 1 0. 0103422 0. 0124472 | LIPC                                             | LIPC                  |
| 1 0. 0103422 0. 0124472 | LIPC                                             | LIPC                  |
| 1 0. 0103422 0. 0124472 | MICB                                             | MICB                  |
| 1 0. 0103422 0. 0124472 | MCEE                                             | MCEE                  |
| 1 0. 0103422 0. 0124472 | RANBP1                                           | RANBP1                |
| 1 0. 0103422 0. 0124472 | ESPL1                                            | ESPL1                 |
| 1 0. 0103422 0. 0124472 | ESPL1                                            | ESPL1                 |
| 1 0. 0103422 0. 0124472 | SLC1A3                                           | SLC1A3                |
| 1 0. 0103422 0. 0124472 | BCL2L11                                          | BCL2L11               |
| 1 0. 0103422 0. 0124472 | ENPP1                                            | ENPP1                 |
| 1 0. 0103422 0. 0124472 | ENTPD4                                           | ENTPD4                |
| 1 0. 0103422 0. 0124472 | TRNT1                                            | TRNT1                 |
| 1 0. 0103422 0. 0124472 | SLC38A3                                          | NAT1                  |
| 1 0. 0103422 0. 0124472 | SLC38A3                                          | NAT1                  |
| 1 0. 0103422 0. 0124472 | TGFBR2                                           | TGFBR2                |
| 1 0. 0103422 0. 0124472 | TRIOBP                                           | TRIOBP                |
| 3 0. 0106762 0. 0124472 | LYN;ACIN1;HEPH                                   | LYN;ACIN1;HEPH        |
| 3 0. 0113521 0. 0132173 | CSGALNACT1;CNTN/CSGALNACT1;CNTNAP3;VCAN          |                       |
| 3 0. 0113521 0. 0132173 | RNASET2;PABPC4;IRNASET2;PABPC4;HNRNP             |                       |
| 3 0. 0113521 0. 0132173 | SLC25A10;UCP2;SI SLC25A10;UCP2;SLC25A14          |                       |
| 3 0. 0113521 0. 0132173 | SOD1;GDF5;IGF1                                   | SOD1;GDF5;IGF1        |
| 2 0. 011654 0. 0135321  | AMPD3;AMPD2                                      | AMPD3;AMPD2           |
| 2 0. 011654 0. 0135321  | HES1;DLC1                                        | HES1;DLC1             |
| 2 0. 011654 0. 0135321  | PIK3C2B;PIK3R1                                   | PIK3C2B;PIK3R1        |
| 2 0. 011654 0. 0135321  | NPC1;ARSB                                        | NPC1;ARSB             |
| 2 0. 011654 0. 0135321  | BRCA2;ERCC4                                      | BRCA2;RAD1            |
| 3 0. 0120521 0. 0139599 | LYST;NF1;HPS3                                    | LYST;NF1;HPS3         |
| 3 0. 0127764 0. 0147922 | NTRK2;MCHR1;BDNF                                 | NTRK2;MCHR1;BDNF      |
| 9 0. 0127982 0. 0148108 | MCHR1;GNPDA1;APOM;GBE1;SLC25A27;ACO2;PHKA2;RUNX1 |                       |
| 4 0. 0128979 0. 0149162 | DBP;NPAS2;ARNTL2                                 | DBP;NPAS2;ARNTL2;PER3 |
| 2 0. 013118 0. 0151503  | EDN1;ITGA1                                       | EDN1;ITGA1            |
| 2 0. 013118 0. 0151503  | ID2;LIF                                          | ID2;LIF               |
| 2 0. 013118 0. 0151503  | SERPINE1;PLAU                                    | SERPINE1;PLAU         |
| 2 0. 013118 0. 0151503  | MEN1;IGFBP3                                      | MEN1;IGFBP3           |
| 6 0. 0137541 0. 0158672 | MYH10;PTEN;IL6;IMYH10;PTEN;HGF;LAMB1;NEDD4;ATF2  |                       |
| 3 0. 0142982 0. 0164876 | MYL5;PPP1R12B;TIMM9                              | MYL5;PPP1R12B;TNC     |
| 2 0. 0146573 0. 0168566 | NTRK2;BDNF                                       | NTRK2;BDNF            |
| 2 0. 0146573 0. 0168566 | PLA2G4A;PLCG2                                    | PLA2G4A;PLCG2         |
| 2 0. 0146573 0. 0168566 | COL5A3;COL5A2                                    | COL5A3;COL5A2         |
| 2 0. 0146573 0. 0168566 | RIMS1;SCIN                                       | RIMS1;SCIN            |
| 2 0. 0146573 0. 0168566 | COG1;COG3                                        | COG1;COG3             |
| 2 0. 0146573 0. 0168566 | TIMM9;TRNT1                                      | TIMM9;TRNT1           |
| 3 0. 0150958 0. 0173031 | RIMS1;NPLOC4;RAI1                                | RIMS1;NPLOC4;RABEP1   |
| 3 0. 0150958 0. 0173031 | ADAM22;MIA3;CDH13                                | ADAM22;MIA3;CDH13     |
| 2 0. 0162704 0. 0186205 | MYL3;TNNC1                                       | MYL3;TNC              |
| 5 0. 0174505 0. 0199446 | STAT1;MAP3K1;BCL3;IRAK2;TIRAP                    |                       |
| 2 0. 0179555 0. 0204539 | ABCA4;BBS4                                       | ABCA4;BBS4            |
| 2 0. 0179555 0. 0204539 | NINJ1;NINJ2                                      | NINJ1;NINJ2           |
| 2 0. 0179555 0. 0204539 | RRM2B;FAS                                        | RRM2B;FAS             |
| 2 0. 0179555 0. 0204539 | MSH6;MSH3                                        | MSH6;MSH3             |
| 9 0. 0184263 0. 0208804 | SHROOM2;SSH1;SHROOM3;NOX4;HGF;ECT2;STK4;LST1;    |                       |

|   |    |         |    |         |                  |                  |
|---|----|---------|----|---------|------------------|------------------|
| 3 | 0. | 0185337 | 0. | 0208804 | CHD7;SMO;DLC1    | CHD7;SMO;DLC1    |
| 2 | 0. | 019711  | 0. | 0208804 | PCSK1;F12        | PCSK1;F12        |
| 2 | 0. | 019711  | 0. | 0208804 | EPHX2;PON2       | EPHX2;PON2       |
| 2 | 0. | 019711  | 0. | 0208804 | MAP3K11;MAPK8IP2 | MAP3K11;MAPK8IP2 |
| 2 | 0. | 019711  | 0. | 0208804 | BTG1;HEMK1       | BTG1;HEMK1       |
| 2 | 0. | 019711  | 0. | 0208804 | XYLT2;EXT2       | XYLT2;EXT2       |
| 1 | 0. | 0205774 | 0. | 0208804 | CTNNB1           | CTNNB1           |
| 1 | 0. | 0205774 | 0. | 0208804 | NTRK2            | NTRK2            |
| 1 | 0. | 0205774 | 0. | 0208804 | PPARGC1A         | PPARGC1A         |
| 1 | 0. | 0205774 | 0. | 0208804 | UGCG             | UGCG             |
| 1 | 0. | 0205774 | 0. | 0208804 | TGM2             | TGM2             |
| 1 | 0. | 0205774 | 0. | 0208804 | LARS             | LARS             |
| 1 | 0. | 0205774 | 0. | 0208804 | CHST1            | CHST1            |
| 1 | 0. | 0205774 | 0. | 0208804 | ADM              | ADM              |
| 1 | 0. | 0205774 | 0. | 0208804 | CSGALNACT1       | CSGALNACT1       |
| 1 | 0. | 0205774 | 0. | 0208804 | CSGALNACT1       | CSGALNACT1       |
| 1 | 0. | 0205774 | 0. | 0208804 | CSGALNACT1       | CSGALNACT1       |
| 1 | 0. | 0205774 | 0. | 0208804 | PGAP1;PGAP1      | BST1;PGAP1       |
| 1 | 0. | 0205774 | 0. | 0208804 | EDN1             | EDN1             |
| 1 | 0. | 0205774 | 0. | 0208804 | EDN1             | EDN1             |
| 1 | 0. | 0205774 | 0. | 0208804 | EDN1             | EDN1             |
| 1 | 0. | 0205774 | 0. | 0208804 | EDN1             | EDN1             |
| 1 | 0. | 0205774 | 0. | 0208804 | C3               | C3               |
| 1 | 0. | 0205774 | 0. | 0208804 | HSD17B6          | HSD17B6          |
| 1 | 0. | 0205774 | 0. | 0208804 | EGFR             | EGFR             |
| 1 | 0. | 0205774 | 0. | 0208804 | THBS1            | THBS1            |
| 1 | 0. | 0205774 | 0. | 0208804 | THBS1            | THBS1            |
| 1 | 0. | 0205774 | 0. | 0208804 | THBS1            | THBS1            |
| 1 | 0. | 0205774 | 0. | 0208804 | THBS1            | THBS1            |
| 1 | 0. | 0205774 | 0. | 0208804 | THBS1            | THBS1            |
| 1 | 0. | 0205774 | 0. | 0208804 | THBS1            | THBS1            |
| 1 | 0. | 0205774 | 0. | 0208804 | HIPK3            | HIPK3            |
| 1 | 0. | 0205774 | 0. | 0208804 | SMAD3            | SMAD3            |
| 1 | 0. | 0205774 | 0. | 0208804 | EIF2AK3          | EIF2AK3          |
| 1 | 0. | 0205774 | 0. | 0208804 | APOB             | APOB             |
| 1 | 0. | 0205774 | 0. | 0208804 | FGF18            | FGF18            |
| 1 | 0. | 0205774 | 0. | 0208804 | ACIN1            | ACIN1            |
| 1 | 0. | 0205774 | 0. | 0208804 | SOCS5            | SOCS5            |
| 1 | 0. | 0205774 | 0. | 0208804 | FMN2             | FMN2             |
| 1 | 0. | 0205774 | 0. | 0208804 | FMN2             | FMN2             |
| 1 | 0. | 0205774 | 0. | 0208804 | HES1             | HES1             |
| 1 | 0. | 0205774 | 0. | 0208804 | HES1             | HES1             |
| 1 | 0. | 0205774 | 0. | 0208804 | HES1             | HES1             |
| 1 | 0. | 0205774 | 0. | 0208804 | PCSK2            | PCSK2            |
| 1 | 0. | 0205774 | 0. | 0208804 | GC               | DBP              |
| 1 | 0. | 0205774 | 0. | 0208804 | HSD17B4          | DBP              |
| 1 | 0. | 0205774 | 0. | 0208804 | ANLN             | ANLN             |
| 1 | 0. | 0205774 | 0. | 0208804 | CHAF1B;CHAF1B    | CHAF1B;MPP7      |
| 1 | 0. | 0205774 | 0. | 0208804 | GPX3             | GPX3             |
| 1 | 0. | 0205774 | 0. | 0208804 | PPP2R4           | PPP2R4           |
| 1 | 0. | 0205774 | 0. | 0208804 | LYST             | LYST             |
| 1 | 0. | 0205774 | 0. | 0208804 | LYST             | LYST             |
| 1 | 0. | 0205774 | 0. | 0208804 | ADAM9            | ADAM9            |

|                                 |         |
|---------------------------------|---------|
| 1 0. 0205774 0. 0208804 GALNT2  | GALNT2  |
| 1 0. 0205774 0. 0208804 P4HA2   | P4HA2   |
| 1 0. 0205774 0. 0208804 ETS1    | ETS1    |
| 1 0. 0205774 0. 0208804 FOSL1   | FOSL1   |
| 1 0. 0205774 0. 0208804 HMOX1   | HMOX1   |
| 1 0. 0205774 0. 0208804 HMOX1   | HMOX1   |
| 1 0. 0205774 0. 0208804 CDKN2A  | CDKN2A  |
| 1 0. 0205774 0. 0208804 CDKN2A  | CDKN2A  |
| 1 0. 0205774 0. 0208804 DRD4    | DRD4    |
| 1 0. 0205774 0. 0208804 DRD4    | DRD4    |
| 1 0. 0205774 0. 0208804 AGRN    | AGRN    |
| 1 0. 0205774 0. 0208804 PGD     | PGD     |
| 1 0. 0205774 0. 0208804 PGD     | PGD     |
| 1 0. 0205774 0. 0208804 NR5A1   | SF1     |
| 1 0. 0205774 0. 0208804 SOAT1   | ACAT1   |
| 1 0. 0205774 0. 0208804 SOAT1   | ACAT1   |
| 1 0. 0205774 0. 0208804 KIF23   | KIF23   |
| 1 0. 0205774 0. 0208804 NARS2   | NARS2   |
| 1 0. 0205774 0. 0208804 NF1     | NF1     |
| 1 0. 0205774 0. 0208804 LAMC1   | LAMB2   |
| 1 0. 0205774 0. 0208804 PRKRA   | PRKRA   |
| 1 0. 0205774 0. 0208804 PMP22   | SP110   |
| 1 0. 0205774 0. 0208804 AQP3    | AQP3    |
| 1 0. 0205774 0. 0208804 DPH5    | DPH5    |
| 1 0. 0205774 0. 0208804 BARD1   | BARD1   |
| 1 0. 0205774 0. 0208804 KRT18   | KRT18   |
| 1 0. 0205774 0. 0208804 CENPE   | CENPE   |
| 1 0. 0205774 0. 0208804 RNMT    | MET     |
| 1 0. 0205774 0. 0208804 PPARG   | PPARG   |
| 1 0. 0205774 0. 0208804 ALDH1A3 | ALDH1A3 |
| 1 0. 0205774 0. 0208804 HEXB    | HEXB    |
| 1 0. 0205774 0. 0208804 IL6ST   | IL6ST   |
| 1 0. 0205774 0. 0208804 COL2A1  | COL2A1  |
| 1 0. 0205774 0. 0208804 DPYD    | DPYD    |
| 1 0. 0205774 0. 0208804 DPYD    | DPYD    |
| 1 0. 0205774 0. 0208804 LEF1    | LEF1    |
| 1 0. 0205774 0. 0208804 MIPEP   | MIPEP   |
| 1 0. 0205774 0. 0208804 SPHK1   | SPHK1   |
| 1 0. 0205774 0. 0208804 SHMT1   | SHMT1   |
| 1 0. 0205774 0. 0208804 IFRD1   | IFRD1   |
| 1 0. 0205774 0. 0208804 HMGB1   | HMGB1   |
| 1 0. 0205774 0. 0208804 BCAT2   | BCAM    |
| 1 0. 0205774 0. 0208804 LIG4    | LIG4    |
| 1 0. 0205774 0. 0208804 MYH10   | MYH10   |
| 1 0. 0205774 0. 0208804 MYH10   | MYH10   |
| 1 0. 0205774 0. 0208804 SEMA3A  | SEMA3A  |
| 1 0. 0205774 0. 0208804 NLRP12  | NLRP12  |
| 1 0. 0205774 0. 0208804 BMPR1B  | BMPR1B  |
| 1 0. 0205774 0. 0208804 NMT2    | NMT2    |
| 1 0. 0205774 0. 0208804 MDFIC   | MDFIC   |
| 1 0. 0205774 0. 0208804 BCL3    | BCL3    |
| 1 0. 0205774 0. 0208804 BCL3    | BCL3    |



|                                     |          |
|-------------------------------------|----------|
| 1 0. 0205774 0. 0208804 ZBTB16      | ZBTB16   |
| 1 0. 0205774 0. 0208804 MCCC2       | MCCC2    |
| 1 0. 0205774 0. 0208804 NCBP2       | NCBP2    |
| 1 0. 0205774 0. 0208804 SHROOM3     | SHROOM3  |
| 1 0. 0205774 0. 0208804 LLGL1       | DLG4     |
| 1 0. 0205774 0. 0208804 SMS         | SMS      |
| 1 0. 0205774 0. 0208804 MEN1        | MEN1     |
| 1 0. 0205774 0. 0208804 ATP8B3      | ATP8B3   |
| 1 0. 0205774 0. 0208804 SOD1        | SOD1     |
| 1 0. 0205774 0. 0208804 SOD1        | SOD1     |
| 1 0. 0205774 0. 0208804 NOD2        | NOD2     |
| 1 0. 0205774 0. 0208804 NOD2        | NOD2     |
| 1 0. 0205774 0. 0208804 NOD2        | NOD2     |
| 1 0. 0205774 0. 0208804 PAPSS2      | PAPSS2   |
| 1 0. 0205774 0. 0208804 AGT         | AGT      |
| 1 0. 0205774 0. 0208804 AGT         | AGT      |
| 1 0. 0205774 0. 0208804 AGT         | AGT      |
| 1 0. 0205774 0. 0208804 AGT         | AGT      |
| 1 0. 0205774 0. 0208804 AGT         | AGT      |
| 1 0. 0205774 0. 0208804 AGT         | AGT      |
| 1 0. 0205774 0. 0208804 AGT         | AGT      |
| 1 0. 0205774 0. 0208804 AGT         | AGT      |
| 1 0. 0205774 0. 0208804 TLR3        | TLR3     |
| 1 0. 0205774 0. 0208804 STAT5B      | STAT5B   |
| 1 0. 0205774 0. 0208804 STAT5B      | STAT5B   |
| 1 0. 0205774 0. 0208804 STAT5B      | STAT5B   |
| 1 0. 0205774 0. 0208804 UBE2B       | UBE2B    |
| 1 0. 0205774 0. 0208804 PDGFA       | PDGFA    |
| 1 0. 0205774 0. 0208804 GRM7        | GRM7     |
| 1 0. 0205774 0. 0208804 NUP98       | NUP98    |
| 1 0. 0205774 0. 0208804 NLGN1       | NLGN1    |
| 1 0. 0205774 0. 0208804 DDIT3       | DDIT3    |
| 1 0. 0205774 0. 0208804 CEP120      | CEP120   |
| 1 0. 0205774 0. 0208804 CEP120      | CEP120   |
| 1 0. 0205774 0. 0208804 VPS33A      | VPS33A   |
| 1 0. 0205774 0. 0208804 TN13B_HUMAN | TNFSF13B |
| 1 0. 0205774 0. 0208804 INSIG2      | INSIG2   |
| 1 0. 0205774 0. 0208804 HPRT1       | HPRT1    |
| 1 0. 0205774 0. 0208804 KIF11       | KIF11    |
| 1 0. 0205774 0. 0208804 IL6         | HGF      |
| 1 0. 0205774 0. 0208804 IL6         | HGF      |
| 1 0. 0205774 0. 0208804 IL6         | HGF      |
| 1 0. 0205774 0. 0208804 LAMA1       | LAMA1    |
| 1 0. 0205774 0. 0208804 LCK         | LCK      |
| 1 0. 0205774 0. 0208804 DMGDH       | DMGDH    |
| 1 0. 0205774 0. 0208804 OXA1L       | OXA1L    |
| 1 0. 0205774 0. 0208804 AHR         | AHR      |
| 1 0. 0205774 0. 0208804 RENR_HUMAN  | ATP6AP2  |
| 1 0. 0205774 0. 0208804 NR1H3       | NR1H3    |
| 1 0. 0205774 0. 0208804 NEDD4       | NEDD4    |
| 1 0. 0205774 0. 0208804 HOMER1      | HOMER1   |
| 1 0. 0205774 0. 0208804 ADPRH       | ADPRH    |
| 1 0. 0205774 0. 0208804 PLCG2       | PLCG2    |

|                                                                             |              |
|-----------------------------------------------------------------------------|--------------|
| 1 0. 0205774 0. 0208804 SLC25A12                                            | SLC25A12     |
| 1 0. 0205774 0. 0208804 HTT                                                 | HTT          |
| 1 0. 0205774 0. 0208804 OXCT1                                               | OXCT1        |
| 1 0. 0205774 0. 0208804 CDA                                                 | CDA          |
| 1 0. 0205774 0. 0208804 PDS5B                                               | PDS5B        |
| 1 0. 0205774 0. 0208804 SMARCA4                                             | SMARCA4      |
| 1 0. 0205774 0. 0208804 GPX2                                                | GPX2         |
| 1 0. 0205774 0. 0208804 EPHB2                                               | EPHB2        |
| 1 0. 0205774 0. 0208804 UGP2                                                | UGP2         |
| 1 0. 0205774 0. 0208804 KCNMA1                                              | KCNMA1       |
| 1 0. 0205774 0. 0208804 PTDSS2                                              | PTDSS2       |
| 1 0. 0205774 0. 0208804 ADH5                                                | ADH5         |
| 1 0. 0205774 0. 0208804 TRPV1                                               | TRPV1        |
| 1 0. 0205774 0. 0208804 IGF1                                                | IGF1         |
| 1 0. 0205774 0. 0208804 BBS4                                                | BBS4         |
| 1 0. 0205774 0. 0208804 GLUL                                                | GLUL         |
| 1 0. 0205774 0. 0208804 FAS                                                 | FAS          |
| 1 0. 0205774 0. 0208804 CAV1                                                | CAV1         |
| 1 0. 0205774 0. 0208804 CAV1                                                | CAV1         |
| 1 0. 0205774 0. 0208804 F12                                                 | F12          |
| 1 0. 0205774 0. 0208804 F12                                                 | F12          |
| 1 0. 0205774 0. 0208804 ADI1                                                | ADI1         |
| 1 0. 0205774 0. 0208804 LIPC                                                | LIPC         |
| 1 0. 0205774 0. 0208804 CASP3                                               | CASP3        |
| 1 0. 0205774 0. 0208804 CASP3                                               | CASP3        |
| 1 0. 0205774 0. 0208804 MARS                                                | MARS         |
| 1 0. 0205774 0. 0208804 DIO2                                                | DIO2         |
| 1 0. 0205774 0. 0208804 SLC23A2                                             | SLC23A2      |
| 1 0. 0205774 0. 0208804 BCL2L11                                             | BCL2L11      |
| 1 0. 0205774 0. 0208804 ENPP1                                               | ENPP1        |
| 1 0. 0205774 0. 0208804 ENPP1                                               | ENPP1        |
| 1 0. 0205774 0. 0208804 RAD51C                                              | RAD51C       |
| 1 0. 0205774 0. 0208804 ALDH1L1                                             | ALDH1L1      |
| 1 0. 0205774 0. 0208804 ASNS                                                | ASNS         |
| 1 0. 0205774 0. 0208804 LEP                                                 | LEP          |
| 1 0. 0205774 0. 0208804 LEP                                                 | LEP          |
| 1 0. 0205774 0. 0208804 TGFBR2                                              | TGFBR2       |
| 1 0. 0205774 0. 0208804 TGFBR2                                              | TGFBR2       |
| 1 0. 0205774 0. 0208804 TGFBR2                                              | TGFBR2       |
| 1 0. 0205774 0. 0208804 ST3GAL5                                             | ST3GAL5      |
| 1 0. 0205774 0. 0208804 TAP2                                                | TAP2         |
| 1 0. 0205774 0. 0208804 SORT1                                               | SORT1        |
| 2 0. 0215352 0. 0208804 EDN1;CAV1                                           | EDN1;CAV1    |
| 2 0. 0215352 0. 0208804 FMN2;HEXB                                           | FMN2;HEXB    |
| 2 0. 0215352 0. 0208804 NBN;MYO6                                            | NBN;MYO6     |
| 2 0. 0215352 0. 0208804 SOD1;EIF2B4                                         | SOD1;EIF2B4  |
| 4 0. 0218336 0. 0211459 RPL37A;RPL9P9;GRPL37A;RPL9;GFM1;NOV                 |              |
| 3 0. 0223692 0. 0216566 GNAS;ARL4D;LTBP2;GNAS;ARL6;LTBP2                    |              |
| 6 0. 0224179 0. 0216956 AKAP6;YWHAZ;NLGN1;AKAP6;YWHAZ;NLGN1;ANK3;LTBP2;HPS4 |              |
| 2 0. 0234265 0. 0226335 PPFIBP2;GIN1                                        | PPFIBP2;GIN1 |
| 2 0. 0234265 0. 0226335 LEF1;SFRP1                                          | LEF1;SFRP1   |
| 2 0. 0234265 0. 0226335 NOD2;CD1D                                           | NOD2;CD1D    |

|   |    |         |    |         |                    |                                          |
|---|----|---------|----|---------|--------------------|------------------------------------------|
| 2 | 0. | 0234265 | 0. | 0226335 | HPRT1;LEP          | HPRT1;LEP                                |
| 4 | 0. | 0239784 | 0. | 0231451 | HES1;PPARG;TLX1    | HES1;PPARG;TLX1;CASP3                    |
| 5 | 0. | 0248655 | 0. | 0239924 | CENPE;MAP2K3;CD4   | CENPE;MAP2K3;CD4;PRKAG2;ALS2             |
| 2 | 0. | 0253833 | 0. | 0244418 | CTNNB1;TCF7L2;TCF4 | CTNNB1;TCF7L2;TCF4                       |
| 2 | 0. | 0253833 | 0. | 0244418 | EDN1;PROC          | EDN1;PC                                  |
| 2 | 0. | 0253833 | 0. | 0244418 | NOTCH3;HES1        | NOTCH3;HES1                              |
| 2 | 0. | 0253833 | 0. | 0244418 | GK;MOGAT1          | GK;MGAT1                                 |
| 2 | 0. | 0253833 | 0. | 0244418 | LIG4;STAT5B        | LIG4;STAT5B                              |
| 2 | 0. | 0253833 | 0. | 0244418 | MGP;ENPP1          | MGP;ENPP1                                |
| 2 | 0. | 0274041 | 0. | 0263287 | HPD;FAH            | HPD;FAH                                  |
| 2 | 0. | 0274041 | 0. | 0263287 | APOB;ABCA1         | APOB;ABCA1                               |
| 3 | 0. | 0277238 | 0. | 0266013 | EGFR;THBS1;GLMN    | EGFR;THBS1;FAP                           |
| 3 | 0. | 0277238 | 0. | 0266013 | EPHX2;NOX4;AGT     | EPHX2;NOX4;AGT                           |
| 5 | 0. | 0279359 | 0. | 0267749 | CAMK1;NPM1;NUP98   | CAMK1;NPM1;NUP98;ANP32A;EIF5A            |
| 2 | 0. | 0294873 | 0. | 0278996 | CTNNB1;SOX9        | CTNNB1;SOX9                              |
| 6 | 0. | 0300679 | 0. | 0278996 | SLC25A15;SLC7A8    | ORC1;LAT2;SLC6A6;GLUD1;SLC7A2;SLC7A8;PTS |
| 1 | 0. | 0307068 | 0. | 0278996 | CHRM2              | CHRM2                                    |
| 1 | 0. | 0307068 | 0. | 0278996 | PLA2G4A            | PLA2G4A                                  |
| 1 | 0. | 0307068 | 0. | 0278996 | ADM                | ADM                                      |
| 1 | 0. | 0307068 | 0. | 0278996 | CSGALNACT1         | CSGALNACT1                               |
| 1 | 0. | 0307068 | 0. | 0278996 | KCNA5              | HK2                                      |
| 1 | 0. | 0307068 | 0. | 0278996 | HSD17B6            | HSD17B6                                  |
| 1 | 0. | 0307068 | 0. | 0278996 | EGFR               | EGFR                                     |
| 1 | 0. | 0307068 | 0. | 0278996 | EGFR               | EGFR                                     |
| 1 | 0. | 0307068 | 0. | 0278996 | HHIP               | HHIP                                     |
| 1 | 0. | 0307068 | 0. | 0278996 | SLC02A1            | SLC02A1                                  |
| 1 | 0. | 0307068 | 0. | 0278996 | ADSSL1             | ADSSL1                                   |
| 1 | 0. | 0307068 | 0. | 0278996 | RYR1               | RYR1                                     |
| 1 | 0. | 0307068 | 0. | 0278996 | EIF2AK3            | EIF2AK3                                  |
| 1 | 0. | 0307068 | 0. | 0278996 | ABCC9              | ABCC9                                    |
| 1 | 0. | 0307068 | 0. | 0278996 | SORBS3             | SORBS3                                   |
| 1 | 0. | 0307068 | 0. | 0278996 | HES1               | HES1                                     |
| 1 | 0. | 0307068 | 0. | 0278996 | CD81               | CD81                                     |
| 1 | 0. | 0307068 | 0. | 0278996 | UBE2C              | UBE2C                                    |
| 1 | 0. | 0307068 | 0. | 0278996 | GCK                | GK                                       |
| 1 | 0. | 0307068 | 0. | 0278996 | GCK                | GK                                       |
| 1 | 0. | 0307068 | 0. | 0278996 | PPP2R4             | PPP2R4                                   |
| 1 | 0. | 0307068 | 0. | 0278996 | PPP2R4             | PPP2R4                                   |
| 1 | 0. | 0307068 | 0. | 0278996 | ADAM9              | ADAM9                                    |
| 1 | 0. | 0307068 | 0. | 0278996 | ADAM9              | ADAM9                                    |
| 1 | 0. | 0307068 | 0. | 0278996 | TNFAIP8            | TNFAIP8                                  |
| 1 | 0. | 0307068 | 0. | 0278996 | CYP39A1            | CYP39A1                                  |
| 1 | 0. | 0307068 | 0. | 0278996 | CHD7               | CHD7                                     |
| 1 | 0. | 0307068 | 0. | 0278996 | RFC4               | RFC4                                     |
| 1 | 0. | 0307068 | 0. | 0278996 | HMOX1              | HMOX1                                    |
| 1 | 0. | 0307068 | 0. | 0278996 | DRD4               | DRD4                                     |
| 1 | 0. | 0307068 | 0. | 0278996 | DRD4               | DRD4                                     |
| 1 | 0. | 0307068 | 0. | 0278996 | DRD4               | DRD4                                     |
| 1 | 0. | 0307068 | 0. | 0278996 | DRD4               | DRD4                                     |
| 1 | 0. | 0307068 | 0. | 0278996 | DRD4               | DRD4                                     |
| 1 | 0. | 0307068 | 0. | 0278996 | CYP26A1            | CYP26A1                                  |
| 1 | 0. | 0307068 | 0. | 0278996 | AGRN               | AGRN                                     |
| 1 | 0. | 0307068 | 0. | 0278996 | EGR2               | EGR2                                     |

|                                     |          |
|-------------------------------------|----------|
| 1 0. 0307068 0. 0278996 EGR2        | EGR2     |
| 1 0. 0307068 0. 0278996 EGR2        | EGR2     |
| 1 0. 0307068 0. 0278996 DPP4        | DPP4     |
| 1 0. 0307068 0. 0278996 PHGDH       | PGD      |
| 1 0. 0307068 0. 0278996 NF1         | NF1      |
| 1 0. 0307068 0. 0278996 SLC37A4     | SLC37A4  |
| 1 0. 0307068 0. 0278996 HS6ST1      | HS6ST1   |
| 1 0. 0307068 0. 0278996 NBN         | NBN      |
| 1 0. 0307068 0. 0278996 PPARG       | PPARG    |
| 1 0. 0307068 0. 0278996 PPARG       | PPARG    |
| 1 0. 0307068 0. 0278996 DPYD        | DPYD     |
| 1 0. 0307068 0. 0278996 CEP290      | CEP290   |
| 1 0. 0307068 0. 0278996 COL1A1      | COL1A1   |
| 1 0. 0307068 0. 0278996 AGPAT1      | AGPAT1   |
| 1 0. 0307068 0. 0278996 LIG4        | LIG4     |
| 1 0. 0307068 0. 0278996 SP100       | SP100    |
| 1 0. 0307068 0. 0278996 ADC         | ADC      |
| 1 0. 0307068 0. 0278996 BRCA2       | BRCA2    |
| 1 0. 0307068 0. 0278996 BCL3        | BCL3     |
| 1 0. 0307068 0. 0278996 SLC13A5     | SLC13A5  |
| 1 0. 0307068 0. 0278996 ERCC4       | RAD1     |
| 1 0. 0307068 0. 0278996 ERCC4       | RAD1     |
| 1 0. 0307068 0. 0278996 ERCC4       | RAD1     |
| 1 0. 0307068 0. 0278996 HOXA3       | HOXA3    |
| 1 0. 0307068 0. 0278996 MEN1        | MEN1     |
| 1 0. 0307068 0. 0278996 GLI1        | GLI1     |
| 1 0. 0307068 0. 0278996 CASC5       | CASC5    |
| 1 0. 0307068 0. 0278996 NOD2        | NOD2     |
| 1 0. 0307068 0. 0278996 NOD2        | NOD2     |
| 1 0. 0307068 0. 0278996 AGT         | AGT      |
| 1 0. 0307068 0. 0278996 AGXT        | AGT      |
| 1 0. 0307068 0. 0278996 EIF2S1      | EIF2A    |
| 1 0. 0307068 0. 0278996 DDIT3       | DDIT3    |
| 1 0. 0307068 0. 0278996 PRKCD       | PRKCD    |
| 1 0. 0307068 0. 0278996 TSSK6       | TSSK4    |
| 1 0. 0307068 0. 0278996 TN13B_HUMAN | TNFSF13B |
| 1 0. 0307068 0. 0278996 EARS2       | EARS2    |
| 1 0. 0307068 0. 0278996 E2F6        | E2F6     |
| 1 0. 0307068 0. 0278996 HPRT1       | HPRT1    |
| 1 0. 0307068 0. 0278996 KIF11       | KIF11    |
| 1 0. 0307068 0. 0278996 IL6         | HGF      |
| 1 0. 0307068 0. 0278996 IL6         | HGF      |
| 1 0. 0307068 0. 0278996 IL6         | HGF      |
| 1 0. 0307068 0. 0278996 IL6         | HGF      |
| 1 0. 0307068 0. 0278996 ITGB3       | ITGB3    |
| 1 0. 0307068 0. 0278996 OXA1L       | OXA1L    |
| 1 0. 0307068 0. 0278996 SNAPC2      | SNAPC2   |
| 1 0. 0307068 0. 0278996 ERCC3       | ERCC3    |
| 1 0. 0307068 0. 0278996 DAO         | DAO      |
| 1 0. 0307068 0. 0278996 PCAF        | KAT2B    |
| 1 0. 0307068 0. 0278996 HOMER1      | HOMER1   |
| 1 0. 0307068 0. 0278996 PLCG2       | PLCG2    |

|                         |                  |                      |
|-------------------------|------------------|----------------------|
| 1 0. 0307068 0. 0278996 | PIPOX            | PIPOX                |
| 1 0. 0307068 0. 0278996 | SLC25A12         | SLC25A12             |
| 1 0. 0307068 0. 0278996 | HACL1            | HACL1                |
| 1 0. 0307068 0. 0278996 | HTT              | HTT                  |
| 1 0. 0307068 0. 0278996 | HTT              | HTT                  |
| 1 0. 0307068 0. 0278996 | HTT              | HTT                  |
| 1 0. 0307068 0. 0278996 | SLC6A4           | HTT                  |
| 1 0. 0307068 0. 0278996 | SLC44A1          | SLC44A1              |
| 1 0. 0307068 0. 0278996 | OGG1             | OGG1                 |
| 1 0. 0307068 0. 0278996 | SMARCA4          | SMARCA4              |
| 1 0. 0307068 0. 0278996 | SLC36A1          | SLC36A1              |
| 1 0. 0307068 0. 0278996 | GPX2             | GPX2                 |
| 1 0. 0307068 0. 0278996 | UHL1             | UHL1                 |
| 1 0. 0307068 0. 0278996 | GART             | GART                 |
| 1 0. 0307068 0. 0278996 | ATG4C            | ATG4C                |
| 1 0. 0307068 0. 0278996 | ALS2             | ALS2                 |
| 1 0. 0307068 0. 0278996 | BCL6             | BCL6                 |
| 1 0. 0307068 0. 0278996 | BCL6             | BCL6                 |
| 1 0. 0307068 0. 0278996 | SLC28A3          | SLC28A3              |
| 1 0. 0307068 0. 0278996 | CHST11           | CHST11               |
| 1 0. 0307068 0. 0278996 | CEL              | FAP                  |
| 1 0. 0307068 0. 0278996 | IGF1             | IGF1                 |
| 1 0. 0307068 0. 0278996 | IGF1             | IGF1                 |
| 1 0. 0307068 0. 0278996 | BBS4             | BBS4                 |
| 1 0. 0307068 0. 0278996 | PDXK             | PDXK                 |
| 1 0. 0307068 0. 0278996 | PDXK             | PDXK                 |
| 1 0. 0307068 0. 0278996 | GDNF             | ATF2                 |
| 1 0. 0307068 0. 0278996 | FAS              | FAS                  |
| 1 0. 0307068 0. 0278996 | FAS              | FAS                  |
| 1 0. 0307068 0. 0278996 | IGFBP3           | IGFBP3               |
| 1 0. 0307068 0. 0278996 | CAV1             | CAV1                 |
| 1 0. 0307068 0. 0278996 | CAV1             | CAV1                 |
| 1 0. 0307068 0. 0278996 | MAFF             | MAFF                 |
| 1 0. 0307068 0. 0278996 | ATXN1            | ATXN1                |
| 1 0. 0307068 0. 0278996 | CCDC88C          | CCDC88C              |
| 1 0. 0307068 0. 0278996 | SLC23A2          | SLC23A2              |
| 1 0. 0307068 0. 0278996 | PGGT1B           | PGGT1B               |
| 1 0. 0307068 0. 0278996 | ENPP1            | ENPP1                |
| 1 0. 0307068 0. 0278996 | LONP1            | PIM1                 |
| 1 0. 0307068 0. 0278996 | CPT1B            | CHKB                 |
| 1 0. 0307068 0. 0278996 | SORT1            | SORT1                |
| 2 0. 0316315 0. 0278996 | TGM2;CHRD        | TGM2;CHRD            |
| 2 0. 0316315 0. 0278996 | SOAT1;ABCA1      | ACAT1;ABCA1          |
| 2 0. 0316315 0. 0278996 | NBN;SMG6         | NBN;SMG6             |
| 2 0. 0316315 0. 0278996 | BDNF;HTT         | BDNF;HTT             |
| 3 0. 0324536 0. 0286004 | ECE1;SHROOM2;BCI | ECE1;SHROOM2;BCL2L11 |
| 3 0. 0336976 0. 0296865 | CHD7;NHEJ1;LCK   | CHD7;NHEJ1;LCK       |
| 2 0. 0338351 0. 0297873 | TROVE2;SNAPC2    | TROVE2;SNAPC2        |
| 2 0. 0338351 0. 0297873 | NFIA;EIF5A       | NFIA;EIF5A           |
| 2 0. 0360967 0. 0317405 | SERPINF1;LIG4    | SERPINF1;LIG4        |
| 2 0. 0360967 0. 0317405 | HMOX1;HTT        | HMOX1;HTT            |
| 3 0. 0375758 0. 033013  | THRB;SERPINA3;BI | THRB;SERPINA3;BBS4   |

|   |    |         |    |         |                                     |                               |
|---|----|---------|----|---------|-------------------------------------|-------------------------------|
| 2 | 0. | 0384149 | 0. | 0337158 | PPARGC1A;ACADM                      | PPARGC1A;ACADM                |
| 2 | 0. | 0384149 | 0. | 0337158 | NQO1;RORA;RORA;INQO1;RORA;ROR1;ROR2 |                               |
| 2 | 0. | 0384149 | 0. | 0337158 | NF1;SPRY4                           | NF1;SPRY4                     |
| 4 | 0. | 0384867 | 0. | 0337445 | ARHGAP29;COL1A2                     | ARHGAP29;COL1A2;ARHGAP6;CDH13 |
| 1 | 0. | 0407315 | 0. | 0340517 | CTNNB1                              | CTNNB1                        |
| 1 | 0. | 0407315 | 0. | 0340517 | CTNNB1                              | CTNNB1                        |
| 1 | 0. | 0407315 | 0. | 0340517 | CSGALNACT1                          | CSGALNACT1                    |
| 1 | 0. | 0407315 | 0. | 0340517 | EDN1                                | EDN1                          |
| 1 | 0. | 0407315 | 0. | 0340517 | NRG1                                | NRG1                          |
| 1 | 0. | 0407315 | 0. | 0340517 | MASP1                               | MASP1                         |
| 1 | 0. | 0407315 | 0. | 0340517 | THBS1                               | THBS1                         |
| 1 | 0. | 0407315 | 0. | 0340517 | THBS1                               | THBS1                         |
| 1 | 0. | 0407315 | 0. | 0340517 | SMAD3                               | SMAD3                         |
| 1 | 0. | 0407315 | 0. | 0340517 | VCAM1                               | VCAM1                         |
| 1 | 0. | 0407315 | 0. | 0340517 | AS3MT                               | AS3MT                         |
| 1 | 0. | 0407315 | 0. | 0340517 | NTN4                                | NTN4                          |
| 1 | 0. | 0407315 | 0. | 0340517 | EIF2AK3                             | EIF2AK3                       |
| 1 | 0. | 0407315 | 0. | 0340517 | ENTPD3                              | ENTPD3                        |
| 1 | 0. | 0407315 | 0. | 0340517 | NEB                                 | NEB                           |
| 1 | 0. | 0407315 | 0. | 0340517 | BDKRB2                              | BDKRB2                        |
| 1 | 0. | 0407315 | 0. | 0340517 | UBE2C                               | UBE2C                         |
| 1 | 0. | 0407315 | 0. | 0340517 | PPP2R2A                             | PPP2R2A                       |
| 1 | 0. | 0407315 | 0. | 0340517 | SHROOM2                             | SHROOM2                       |
| 1 | 0. | 0407315 | 0. | 0340517 | HMOX1                               | HMOX1                         |
| 1 | 0. | 0407315 | 0. | 0340517 | HMOX1                               | HMOX1                         |
| 1 | 0. | 0407315 | 0. | 0340517 | MOGAT1                              | MOGAT1                        |
| 1 | 0. | 0407315 | 0. | 0340517 | PUS7L                               | PUS7L                         |
| 1 | 0. | 0407315 | 0. | 0340517 | CYP26A1                             | CYP26A1                       |
| 1 | 0. | 0407315 | 0. | 0340517 | NF1                                 | NF1                           |
| 1 | 0. | 0407315 | 0. | 0340517 | NF1                                 | NF1                           |
| 1 | 0. | 0407315 | 0. | 0340517 | NF1                                 | NF1                           |
| 1 | 0. | 0407315 | 0. | 0340517 | PFKL                                | PFKL                          |
| 1 | 0. | 0407315 | 0. | 0340517 | TRIM14                              | TRIM14                        |
| 1 | 0. | 0407315 | 0. | 0340517 | ZFP36L1                             | ZFP36L1                       |
| 1 | 0. | 0407315 | 0. | 0340517 | ABCA1                               | ABCA1                         |
| 1 | 0. | 0407315 | 0. | 0340517 | ABCA1                               | ABCA1                         |
| 1 | 0. | 0407315 | 0. | 0340517 | EEA1                                | EEA1                          |
| 1 | 0. | 0407315 | 0. | 0340517 | IDH3G                               | IDH3G                         |
| 1 | 0. | 0407315 | 0. | 0340517 | PPARG                               | PPARG                         |
| 1 | 0. | 0407315 | 0. | 0340517 | CCDC111                             | CCDC111                       |
| 1 | 0. | 0407315 | 0. | 0340517 | DPYD                                | DPYD                          |
| 1 | 0. | 0407315 | 0. | 0340517 | MDGA1                               | MDGA1                         |
| 1 | 0. | 0407315 | 0. | 0340517 | SP100                               | SP100                         |
| 1 | 0. | 0407315 | 0. | 0340517 | CLN5                                | NCL                           |
| 1 | 0. | 0407315 | 0. | 0340517 | PTPN3                               | PTPN3                         |
| 1 | 0. | 0407315 | 0. | 0340517 | NLRP12                              | NLRP12                        |
| 1 | 0. | 0407315 | 0. | 0340517 | NLRP12                              | NLRP12                        |
| 1 | 0. | 0407315 | 0. | 0340517 | CENPF                               | CENPF                         |
| 1 | 0. | 0407315 | 0. | 0340517 | BCL3                                | BCL3                          |
| 1 | 0. | 0407315 | 0. | 0340517 | TNXB                                | TNXB                          |
| 1 | 0. | 0407315 | 0. | 0340517 | MEN1                                | MEN1                          |
| 1 | 0. | 0407315 | 0. | 0340517 | SOD1                                | SOD1                          |

|                                         |                 |
|-----------------------------------------|-----------------|
| 1 0. 0407315 0. 0340517 POLB            | POLB            |
| 1 0. 0407315 0. 0340517 NOD2            | NOD2            |
| 1 0. 0407315 0. 0340517 NOD2            | NOD2            |
| 1 0. 0407315 0. 0340517 AGT             | AGT             |
| 1 0. 0407315 0. 0340517 AGT             | AGT             |
| 1 0. 0407315 0. 0340517 TLR3            | TLR3            |
| 1 0. 0407315 0. 0340517 TLR3            | TLR3            |
| 1 0. 0407315 0. 0340517 TLR3            | TLR3            |
| 1 0. 0407315 0. 0340517 DERL1           | DERL1           |
| 1 0. 0407315 0. 0340517 STAT5B          | STAT5B          |
| 1 0. 0407315 0. 0340517 STAT5B          | STAT5B          |
| 1 0. 0407315 0. 0340517 STAT5B          | STAT5B          |
| 1 0. 0407315 0. 0340517 STAT5B          | STAT5B          |
| 1 0. 0407315 0. 0340517 PDGFA           | PDGFA           |
| 1 0. 0407315 0. 0340517 PTEN            | PTEN            |
| 1 0. 0407315 0. 0340517 AKT2            | AKT2            |
| 1 0. 0407315 0. 0340517 METAP2          | MAP2            |
| 1 0. 0407315 0. 0340517 HPRT1           | HPRT1           |
| 1 0. 0407315 0. 0340517 CPOX            | CPOX            |
| 1 0. 0407315 0. 0340517 UBA7            | UBA7            |
| 1 0. 0407315 0. 0340517 RAC1            | RAC1            |
| 1 0. 0407315 0. 0340517 EIF5A           | EIF5A           |
| 1 0. 0407315 0. 0340517 NR1H3           | NR1H3           |
| 1 0. 0407315 0. 0340517 G3BP2           | G3BP2           |
| 1 0. 0407315 0. 0340517 SLC36A1         | SLC36A1         |
| 1 0. 0407315 0. 0340517 GPX2            | GPX2            |
| 1 0. 0407315 0. 0340517 ALG13           | ALG13           |
| 1 0. 0407315 0. 0340517 FDXACB1         | FDXACB1         |
| 1 0. 0407315 0. 0340517 ALS2            | ALS2            |
| 1 0. 0407315 0. 0340517 SLC11A2         | SLC11A2         |
| 1 0. 0407315 0. 0340517 TPR             | TPR             |
| 1 0. 0407315 0. 0340517 BBS4            | BBS4            |
| 1 0. 0407315 0. 0340517 PLSCR1          | PLSCR1          |
| 1 0. 0407315 0. 0340517 FAS             | FAS             |
| 1 0. 0407315 0. 0340517 CAV1            | CAV1            |
| 1 0. 0407315 0. 0340517 F12             | F12             |
| 1 0. 0407315 0. 0340517 LIPC            | LIPC            |
| 1 0. 0407315 0. 0340517 HMGB3           | HMGB3           |
| 1 0. 0407315 0. 0340517 CNOT2           | CNOT2           |
| 1 0. 0407315 0. 0340517 MFN1            | MFN1            |
| 1 0. 0407315 0. 0340517 TGFBR2          | TGFBR2          |
| 1 0. 0407315 0. 0340517 TGFBR2          | TGFBR2          |
| 2 0. 0407882 0. 0340517 JAG1;LEP        | JAG1;LEP        |
| 2 0. 0407882 0. 0340517 ZBTB16;HMGB3    | ZBTB16;HMGB3    |
| 2 0. 0407882 0. 0340517 CEL;CAV1        | FAP;CAV1        |
| 3 0. 0445212 0. 0371142 PDGFRA;LCK;ABL2 | PDGFRA;LCK;ABL2 |
| 3 0. 0445212 0. 0371142 SYNE1;IFRD1;GLM | SYNE1;IFRD1;FAP |
| 2 0. 0456947 0. 0380495 SFRP5;CLASP2    | SFRP5;CLASP2    |
| 2 0. 0456947 0. 0380495 SMO;MDFI        | SMO;MDFI        |
| 2 0. 0456947 0. 0380495 NME5;BBS4       | NME5;BBS4       |
| 2 0. 0456947 0. 0380495 CEL;FAAH        | FAP;FAAH        |
| 2 0. 0482253 0. 0401114 SMAD3;CENPF     | SMAD3;CENPF     |

|    |    |         |    |         |                 |                                               |
|----|----|---------|----|---------|-----------------|-----------------------------------------------|
| 2  | 0. | 0482253 | 0. | 0401114 | EIF2AK3;PTH1R   | EIF2AK3;PTH1R                                 |
| 11 | 0. | 0501209 | 0. | 0406098 | PSG4;IL32;HLA-B | PSG4;IL32;HLA-B;NTN4;PSG9;CD81;SP140;APOM;CX3 |
| 3  | 0. | 0505027 | 0. | 0406098 | POLB;POLG2;CDK2 | POLB;POLB;CDK2AP1                             |
| 1  | 0. | 0506525 | 0. | 0406098 | EDN1            | EDN1                                          |
| 1  | 0. | 0506525 | 0. | 0406098 | SLC4A7          | SLC4A7                                        |
| 1  | 0. | 0506525 | 0. | 0406098 | HHIP            | HHIP                                          |
| 1  | 0. | 0506525 | 0. | 0406098 | THBS1           | THBS1                                         |
| 1  | 0. | 0506525 | 0. | 0406098 | THBS1           | THBS1                                         |
| 1  | 0. | 0506525 | 0. | 0406098 | VCAM1           | VCAM1                                         |
| 1  | 0. | 0506525 | 0. | 0406098 | LPL             | LPL                                           |
| 1  | 0. | 0506525 | 0. | 0406098 | TGFA            | TGFA                                          |
| 1  | 0. | 0506525 | 0. | 0406098 | PDPK1           | PDK1                                          |
| 1  | 0. | 0506525 | 0. | 0406098 | GTSE1           | GTSE1                                         |
| 1  | 0. | 0506525 | 0. | 0406098 | ADAM9           | ADAM9                                         |
| 1  | 0. | 0506525 | 0. | 0406098 | CYP39A1         | CYP39A1                                       |
| 1  | 0. | 0506525 | 0. | 0406098 | SHROOM2         | SHROOM2                                       |
| 1  | 0. | 0506525 | 0. | 0406098 | HOXC10          | HOXC10                                        |
| 1  | 0. | 0506525 | 0. | 0406098 | ACCN2           | ASIC1                                         |
| 1  | 0. | 0506525 | 0. | 0406098 | PTGDS           | PTGDS                                         |
| 1  | 0. | 0506525 | 0. | 0406098 | MAP4K1          | MAP4K1                                        |
| 1  | 0. | 0506525 | 0. | 0406098 | CDKN2A          | CDKN2A                                        |
| 1  | 0. | 0506525 | 0. | 0406098 | SLC6A3          | SLC6A3                                        |
| 1  | 0. | 0506525 | 0. | 0406098 | SLC6A3          | SLC6A3                                        |
| 1  | 0. | 0506525 | 0. | 0406098 | PFKL            | PFKL                                          |
| 1  | 0. | 0506525 | 0. | 0406098 | MRPS35          | MRPS28                                        |
| 1  | 0. | 0506525 | 0. | 0406098 | AQP3            | AQP3                                          |
| 1  | 0. | 0506525 | 0. | 0406098 | ABCA1           | ABCA1                                         |
| 1  | 0. | 0506525 | 0. | 0406098 | ABCA1           | ABCA1                                         |
| 1  | 0. | 0506525 | 0. | 0406098 | ARNTL2          | ARNTL2                                        |
| 1  | 0. | 0506525 | 0. | 0406098 | PPARG           | PPARG                                         |
| 1  | 0. | 0506525 | 0. | 0406098 | EGLN1           | EGLN1                                         |
| 1  | 0. | 0506525 | 0. | 0406098 | HEXB            | HEXB                                          |
| 1  | 0. | 0506525 | 0. | 0406098 | SPHK1           | SPHK1                                         |
| 1  | 0. | 0506525 | 0. | 0406098 | LIG4            | LIG4                                          |
| 1  | 0. | 0506525 | 0. | 0406098 | MYH10           | MYH10                                         |
| 1  | 0. | 0506525 | 0. | 0406098 | GLUD1           | GLUD1                                         |
| 1  | 0. | 0506525 | 0. | 0406098 | BCL3            | BCL3                                          |
| 1  | 0. | 0506525 | 0. | 0406098 | RRM2B           | RRM2B                                         |
| 1  | 0. | 0506525 | 0. | 0406098 | MEN1            | MEN1                                          |
| 1  | 0. | 0506525 | 0. | 0406098 | SOD1            | SOD1                                          |
| 1  | 0. | 0506525 | 0. | 0406098 | SOD1            | SOD1                                          |
| 1  | 0. | 0506525 | 0. | 0406098 | TLR1            | TLR1                                          |
| 1  | 0. | 0506525 | 0. | 0406098 | TLR1            | TLR1                                          |
| 1  | 0. | 0506525 | 0. | 0406098 | AGT             | AGT                                           |
| 1  | 0. | 0506525 | 0. | 0406098 | AGT             | AGT                                           |
| 1  | 0. | 0506525 | 0. | 0406098 | LRPPRC          | LRPPRC                                        |
| 1  | 0. | 0506525 | 0. | 0406098 | TN13B_HUMAN     | TNFSF13B                                      |
| 1  | 0. | 0506525 | 0. | 0406098 | TBX1            | TBX1                                          |
| 1  | 0. | 0506525 | 0. | 0406098 | IL6             | HGF                                           |
| 1  | 0. | 0506525 | 0. | 0406098 | CDH13           | CDH13                                         |
| 1  | 0. | 0506525 | 0. | 0406098 | LCK             | LCK                                           |
| 1  | 0. | 0506525 | 0. | 0406098 | BDNF            | BDNF                                          |



|                                        |                |
|----------------------------------------|----------------|
| 1 0. 0506525 0. 0406098 TDG            | TDG            |
| 1 0. 0506525 0. 0406098 KLF5           | KLF5           |
| 1 0. 0506525 0. 0406098 ITGB3          | ITGB3          |
| 1 0. 0506525 0. 0406098 RAC1           | RAC1           |
| 1 0. 0506525 0. 0406098 LDHA           | LDHA           |
| 1 0. 0506525 0. 0406098 NR1H3          | NR1H3          |
| 1 0. 0506525 0. 0406098 PADI4          | PADI4          |
| 1 0. 0506525 0. 0406098 PDE3A          | PDE3A          |
| 1 0. 0506525 0. 0406098 NEDD4          | NEDD4          |
| 1 0. 0506525 0. 0406098 EPOR           | EPOR           |
| 1 0. 0506525 0. 0406098 TRAF2          | TRAF2          |
| 1 0. 0506525 0. 0406098 TRAF2          | TRAF2          |
| 1 0. 0506525 0. 0406098 VLDLR          | FLJ35024       |
| 1 0. 0506525 0. 0406098 SLC11A2        | SLC11A2        |
| 1 0. 0506525 0. 0406098 BCL6           | BCL6           |
| 1 0. 0506525 0. 0406098 IGF1           | IGF1           |
| 1 0. 0506525 0. 0406098 BBS4           | BBS4           |
| 1 0. 0506525 0. 0406098 BBS4           | BBS4           |
| 1 0. 0506525 0. 0406098 GDNF           | ATF2           |
| 1 0. 0506525 0. 0406098 PCSK5          | PCSK5          |
| 1 0. 0506525 0. 0406098 ACADM          | ACADM          |
| 1 0. 0506525 0. 0406098 ENPP1          | ENPP1          |
| 1 0. 0506525 0. 0406098 ENPP1          | ENPP1          |
| 1 0. 0506525 0. 0406098 HIP1           | HIP1           |
| 1 0. 0506525 0. 0406098 SORT1          | SORT1          |
| 2 0. 0508055 0. 0406098 LEF1;MDFIC     | LEF1;MDFIC     |
| 2 0. 0508055 0. 0406098 OXA1L;SLC25A14 | OXA1L;SLC25A14 |
| 2 0. 0534342 0. 042678 CTNNB1;GRSF1    | CTNNB1;GRSF1   |
| 2 0. 0534342 0. 042678 CDKN2A;PTEN     | CDKN2A;PTEN    |
| 2 0. 0534342 0. 042678 ZFPM2;DDIT3     | ZFPM2;DDIT3    |
| 2 0. 05611 0. 0447875 LYST;CX3CL1      | LYST;CX3CL1    |
| 2 0. 0588318 0. 046931 TG;DIO2         | TG;DIO2        |
| 1 0. 0604709 0. 0471245 PPARGC1A       | PPARGC1A       |
| 1 0. 0604709 0. 0471245 PPARGC1A       | PPARGC1A       |
| 1 0. 0604709 0. 0471245 AKR1C1         | AKR1C1         |
| 1 0. 0604709 0. 0471245 VEGFA          | VEGFA          |
| 1 0. 0604709 0. 0471245 NRG1           | NRG1           |
| 1 0. 0604709 0. 0471245 PTGS2          | PTGS2          |
| 1 0. 0604709 0. 0471245 EPHX2          | EPHX2          |
| 1 0. 0604709 0. 0471245 ID2            | ID2            |
| 1 0. 0604709 0. 0471245 SGOL1          | SGOL1          |
| 1 0. 0604709 0. 0471245 GCK            | GK             |
| 1 0. 0604709 0. 0471245 ADAM9          | ADAM9          |
| 1 0. 0604709 0. 0471245 CXCL13         | CXCL13         |
| 1 0. 0604709 0. 0471245 TRERF1         | TRERF1         |
| 1 0. 0604709 0. 0471245 CHD7           | CHD7           |
| 1 0. 0604709 0. 0471245 CHD7           | CHD7           |
| 1 0. 0604709 0. 0471245 DRD4           | DRD4           |
| 1 0. 0604709 0. 0471245 AGRN           | AGRN           |
| 1 0. 0604709 0. 0471245 HOMER2         | HOMER2         |
| 1 0. 0604709 0. 0471245 CPS1           | CPS1           |
| 1 0. 0604709 0. 0471245 ACTA2          | ACTA2          |

|                       |                  |                                               |
|-----------------------|------------------|-----------------------------------------------|
| 1 0.0604709 0.0471245 | CXCL16           | CXCL16                                        |
| 1 0.0604709 0.0471245 | NPAS2            | NPAS2                                         |
| 1 0.0604709 0.0471245 | LRP5             | LRP5                                          |
| 1 0.0604709 0.0471245 | BBS5             | BBS5                                          |
| 1 0.0604709 0.0471245 | MYH10            | MYH10                                         |
| 1 0.0604709 0.0471245 | GTF2A2           | GTF2A2                                        |
| 1 0.0604709 0.0471245 | KDEL3            | KDEL3                                         |
| 1 0.0604709 0.0471245 | SOD1             | SOD1                                          |
| 1 0.0604709 0.0471245 | SOD1             | SOD1                                          |
| 1 0.0604709 0.0471245 | NOD2             | NOD2                                          |
| 1 0.0604709 0.0471245 | AGT              | AGT                                           |
| 1 0.0604709 0.0471245 | STAT5B           | STAT5B                                        |
| 1 0.0604709 0.0471245 | CCND3            | CCND3                                         |
| 1 0.0604709 0.0471245 | SLC22A5          | SLC22A5                                       |
| 1 0.0604709 0.0471245 | PLEKHA8          | PLEKHA8                                       |
| 1 0.0604709 0.0471245 | HPRT1            | HPRT1                                         |
| 1 0.0604709 0.0471245 | IL6              | HGF                                           |
| 1 0.0604709 0.0471245 | EIF5A            | EIF5A                                         |
| 1 0.0604709 0.0471245 | OLA1             | OLA1                                          |
| 1 0.0604709 0.0471245 | GTF3C1           | GTF3C1                                        |
| 1 0.0604709 0.0471245 | GTF3C1           | GTF3C1                                        |
| 1 0.0604709 0.0471245 | ERCC3            | ERCC3                                         |
| 1 0.0604709 0.0471245 | ERCC3            | ERCC3                                         |
| 1 0.0604709 0.0471245 | HTT              | HTT                                           |
| 1 0.0604709 0.0471245 | UCL1             | UCL1                                          |
| 1 0.0604709 0.0471245 | SUPT16H          | SUPT16H                                       |
| 1 0.0604709 0.0471245 | BBS4             | BBS4                                          |
| 1 0.0604709 0.0471245 | CAV1             | CAV1                                          |
| 1 0.0604709 0.0471245 | ATXN1            | ATXN1                                         |
| 1 0.0604709 0.0471245 | TIMM9            | TIMM9                                         |
| 1 0.0604709 0.0471245 | TGFBR2           | TGFBR2                                        |
| 1 0.0604709 0.0471245 | TGFBR2           | TGFBR2                                        |
| 1 0.0604709 0.0471245 | PTS              | PTS                                           |
| 4 0.0632855 0.0490743 | SMAD3;DPP4;PRLR  | SMAD3;DPP4;PRLR;NCK1                          |
| 8 0.0641742 0.0497485 | UBE2D3;UBE2C;BII | UBE2D3;UBE2C;BIRC6;UBE2V1;UBE2B;UBE2Q2;UBE2F; |
| 3 0.0652914 0.0505842 | PPARGC1A;RAB3A;I | PPARGC1A;RAB3A;HTT                            |
| 3 0.0670444 0.051919  | PRKAR2B;RAPGEF4  | PRKAR2B;RAPGEF4;CCDC88C                       |
| 2 0.0672602 0.0520548 | MAPRE3;MAPRE3;I  | EBF3;MAPRE3;IGF1                              |
| 2 0.0672602 0.0520548 | LOR;PPL          | LOR;PPL                                       |
| 2 0.0701533 0.053583  | CDKN1A;CUL4A     | CDKN1A;CUL4A                                  |
| 2 0.0701533 0.053583  | KCNMB4;KCNMA1    | KCNMB4;KCNMA1                                 |
| 1 0.0701879 0.053583  | CHST1            | CHST1                                         |
| 1 0.0701879 0.053583  | EDN1             | EDN1                                          |
| 1 0.0701879 0.053583  | EDN1             | EDN1                                          |
| 1 0.0701879 0.053583  | SMAD3            | SMAD3                                         |
| 1 0.0701879 0.053583  | HOXB6            | HOXB6                                         |
| 1 0.0701879 0.053583  | ETS1             | ETS1                                          |
| 1 0.0701879 0.053583  | APOL1            | APOL1                                         |
| 1 0.0701879 0.053583  | EGR2             | EGR2                                          |
| 1 0.0701879 0.053583  | SLC6A3           | SLC6A3                                        |
| 1 0.0701879 0.053583  | CPS1             | CPS1                                          |
| 1 0.0701879 0.053583  | NTAL_HUMAN       | LAT2                                          |

|   |           |           |                 |                  |
|---|-----------|-----------|-----------------|------------------|
| 1 | 0.0701879 | 0.053583  | PPARG           | PPARG            |
| 1 | 0.0701879 | 0.053583  | PPARG           | PPARG            |
| 1 | 0.0701879 | 0.053583  | COL11A1         | COL11A1          |
| 1 | 0.0701879 | 0.053583  | IL6ST           | IL6ST            |
| 1 | 0.0701879 | 0.053583  | IL6ST           | IL6ST            |
| 1 | 0.0701879 | 0.053583  | SMO             | SMO              |
| 1 | 0.0701879 | 0.053583  | CMAS            | CMAS             |
| 1 | 0.0701879 | 0.053583  | BCL3            | BCL3             |
| 1 | 0.0701879 | 0.053583  | SLU7            | SLU7             |
| 1 | 0.0701879 | 0.053583  | BNIP3L          | BNIP3L           |
| 1 | 0.0701879 | 0.053583  | SIRPG           | SIRPG            |
| 1 | 0.0701879 | 0.053583  | HMGCR           | HMGCR            |
| 1 | 0.0701879 | 0.053583  | DLG4            | DLG4             |
| 1 | 0.0701879 | 0.053583  | NOD2            | NOD2             |
| 1 | 0.0701879 | 0.053583  | STAT5B          | STAT5B           |
| 1 | 0.0701879 | 0.053583  | TN13B_HUMAN     | TNFSF13B         |
| 1 | 0.0701879 | 0.053583  | RARB            | RARB             |
| 1 | 0.0701879 | 0.053583  | IL6             | HGF              |
| 1 | 0.0701879 | 0.053583  | APAF1           | APAF1            |
| 1 | 0.0701879 | 0.053583  | TTF2            | TTF2             |
| 1 | 0.0701879 | 0.053583  | HTT             | HTT              |
| 1 | 0.0701879 | 0.053583  | CDA             | CDA              |
| 1 | 0.0701879 | 0.053583  | MYCBP2          | MYCBP2           |
| 1 | 0.0701879 | 0.053583  | ADH5            | ADH5             |
| 1 | 0.0701879 | 0.053583  | TRPV1           | TRPV1            |
| 1 | 0.0701879 | 0.053583  | HBEGF           | HBEGF            |
| 1 | 0.0701879 | 0.053583  | IGF1            | IGF1             |
| 1 | 0.0701879 | 0.053583  | IGF1            | IGF1             |
| 1 | 0.0701879 | 0.053583  | LIPC            | LIPC             |
| 3 | 0.0724307 | 0.0549452 | KCNA5;CHRNE;KCN | HK2;CHRNE;KCNMA1 |
| 2 | 0.0760584 | 0.0576802 | SOD1;AGT        | SOD1;AGT         |
| 1 | 0.0798044 | 0.0594429 | ZNF143          | ZNF143           |
| 1 | 0.0798044 | 0.0594429 | EDN1            | EDN1             |
| 1 | 0.0798044 | 0.0594429 | THBS1           | THBS1            |
| 1 | 0.0798044 | 0.0594429 | GRK5            | GRK5             |
| 1 | 0.0798044 | 0.0594429 | ITGB8           | ITGB8            |
| 1 | 0.0798044 | 0.0594429 | CD81            | CD81             |
| 1 | 0.0798044 | 0.0594429 | HSD17B4         | DBP              |
| 1 | 0.0798044 | 0.0594429 | ECE1            | ECE1             |
| 1 | 0.0798044 | 0.0594429 | SHROOM2         | SHROOM2          |
| 1 | 0.0798044 | 0.0594429 | EEA1            | EEA1             |
| 1 | 0.0798044 | 0.0594429 | GNPDA1          | GPI              |
| 1 | 0.0798044 | 0.0594429 | ALDH1A3         | ALDH1A3          |
| 1 | 0.0798044 | 0.0594429 | CD74            | CD74             |
| 1 | 0.0798044 | 0.0594429 | UBE2V1          | UBE2V1           |
| 1 | 0.0798044 | 0.0594429 | ADC             | ADC              |
| 1 | 0.0798044 | 0.0594429 | MYH10           | MYH10            |
| 1 | 0.0798044 | 0.0594429 | ERCC4           | RAD1             |
| 1 | 0.0798044 | 0.0594429 | HMGCR           | HMGCR            |
| 1 | 0.0798044 | 0.0594429 | IRAK2           | IRAK2            |
| 1 | 0.0798044 | 0.0594429 | SOD1            | SOD1             |
| 1 | 0.0798044 | 0.0594429 | DGKD            | DGKD             |

|                                        |                  |
|----------------------------------------|------------------|
| 1 0.0798044 0.0594429 ADAMTS1          | ADAMTS1          |
| 1 0.0798044 0.0594429 PDGFA            | PDGFA            |
| 1 0.0798044 0.0594429 MARK2            | MARK2            |
| 1 0.0798044 0.0594429 DNAJB6           | DNAJB6           |
| 1 0.0798044 0.0594429 HEXA             | HEXA             |
| 1 0.0798044 0.0594429 ATP6V1H          | ATP6V1H          |
| 1 0.0798044 0.0594429 IL6              | HGF              |
| 1 0.0798044 0.0594429 SLC20A2          | SLC20A2          |
| 1 0.0798044 0.0594429 SMAD1            | SMAD1            |
| 1 0.0798044 0.0594429 OXA1L            | OXA1L            |
| 1 0.0798044 0.0594429 HOXB8            | HOXB8            |
| 1 0.0798044 0.0594429 ERCC3            | ERCC3            |
| 1 0.0798044 0.0594429 FAH              | FAH              |
| 1 0.0798044 0.0594429 MAOA             | MAOA             |
| 1 0.0798044 0.0594429 IGF1             | IGF1             |
| 1 0.0798044 0.0594429 GDNF             | ATF2             |
| 1 0.0798044 0.0594429 RUFY3            | RUFY3            |
| 1 0.0798044 0.0594429 PCSK5            | PCSK5            |
| 1 0.0798044 0.0594429 ENPP1            | ENPP1            |
| 1 0.0798044 0.0594429 LEP              | LEP              |
| 3 0.0799016 0.0594429 CA2;TIMELESS;CA9 | CA2;TIMELESS;CA9 |
| 2 0.0821142 0.0610714 ZFYVE16;CDH13    | ZFYVE16;CDH13    |
| 2 0.0851958 0.0633178 CTNNB1;NLGN4X    | CTNNB1;NLGN4X    |
| 2 0.0851958 0.0633178 PTGS2;BCL6       | PTGS2;BCL6       |
| 2 0.088312 0.0655771 EDN1;IL6          | EDN1;HGF         |
| 2 0.088312 0.0655771 MEN1;CARD8        | MEN1;CARD8       |
| 1 0.0893214 0.0658504 COQ7             | CLK1             |
| 1 0.0893214 0.0658504 MICA             | MICA             |
| 1 0.0893214 0.0658504 TOP2A            | TOP2A            |
| 1 0.0893214 0.0658504 MAP1B            | MAP1B            |
| 1 0.0893214 0.0658504 MYL3             | MYL3             |
| 1 0.0893214 0.0658504 NBN              | NBN              |
| 1 0.0893214 0.0658504 ERO1L            | ERO1L            |
| 1 0.0893214 0.0658504 AAMP             | AAMP             |
| 1 0.0893214 0.0658504 FGD6             | FGD6             |
| 1 0.0893214 0.0658504 BMPR1B           | BMPR1B           |
| 1 0.0893214 0.0658504 BRCA2            | BRCA2            |
| 1 0.0893214 0.0658504 ITGA1            | ITGA1            |
| 1 0.0893214 0.0658504 IL6              | HGF              |
| 1 0.0893214 0.0658504 MAN2A2           | MAN2A2           |
| 1 0.0893214 0.0658504 CDH13            | CDH13            |
| 1 0.0893214 0.0658504 CDH13            | CDH13            |
| 1 0.0893214 0.0658504 TAF1A            | TAF1A            |
| 1 0.0893214 0.0658504 HTT              | HTT              |
| 1 0.0893214 0.0658504 PEX14            | PEX14            |
| 1 0.0893214 0.0658504 PEX14            | PEX14            |
| 1 0.0893214 0.0658504 BCL6             | BCL6             |
| 1 0.0893214 0.0658504 BBS4             | BBS4             |
| 1 0.0893214 0.0658504 METTL3           | METTL3           |
| 1 0.0893214 0.0658504 IGFBP3           | IGFBP3           |
| 1 0.0893214 0.0658504 PCSK5            | PCSK5            |
| 1 0.0893214 0.0658504 F12              | F12              |

|   |           |           |                                                              |                                                              |
|---|-----------|-----------|--------------------------------------------------------------|--------------------------------------------------------------|
| 1 | 0.0893214 | 0.0658504 | ADI1                                                         | ADI1                                                         |
| 1 | 0.0893214 | 0.0658504 | LEP                                                          | LEP                                                          |
| 1 | 0.0893214 | 0.0658504 | TGFBR2                                                       | TGFBR2                                                       |
| 1 | 0.0893214 | 0.0658504 | MTHFSD                                                       | MTHFSD                                                       |
| 3 | 0.0896871 | 0.0658504 | SNUPN;HTT;TPR                                                | SNUPN;HTT;TPR                                                |
| 3 | 0.0896871 | 0.0658504 | AGT;HTT;LEP                                                  | AGT;HTT;LEP                                                  |
| 2 | 0.0914615 | 0.0670865 | NOTCH4;COL13A1;NOTCH3;COL13A1;NOTCH4                         | NOTCH4;COL13A1;NOTCH3;COL13A1;NOTCH4                         |
| 2 | 0.0914615 | 0.0670865 | MPHOSPH1;CDC16                                               | MPP1;CDC16                                                   |
| 2 | 0.0914615 | 0.0670865 | HEMK1;METTL4                                                 | HEMK1;METTL4                                                 |
| 3 | 0.0937349 | 0.0687052 | GPI;FLI1;HPS4                                                | GPI;FLI1;HPS4                                                |
| 2 | 0.0946434 | 0.0693416 | RCAN1;HOMER1                                                 | RCAN1;HOMER1                                                 |
| 2 | 0.0946434 | 0.0693416 | HOXB6;HMOX1                                                  | HOXB6;HMOX1                                                  |
| 2 | 0.0978567 | 0.0716349 | ACTN1;SP100                                                  | ACTN1;SP100                                                  |
| 2 | 0.0978567 | 0.0716349 | TCEA3;TCEA2                                                  | TCEA3;TCEA2                                                  |
| 5 | 0.0986026 | 0.0718539 | TUBG2;GTSE1;MAP3K11;KIFAP3;DLC1                              | TUBG2;GTSE1;MAP3K11;KIFAP3;DLC1                              |
| 1 | 0.09874   | 0.0718539 | C3                                                           | C3                                                           |
| 1 | 0.09874   | 0.0718539 | SPAM1;SPAM1                                                  | HYAL1;HYAL3                                                  |
| 1 | 0.09874   | 0.0718539 | EGR2                                                         | EGR2                                                         |
| 1 | 0.09874   | 0.0718539 | NF1                                                          | NF1                                                          |
| 1 | 0.09874   | 0.0718539 | NF1                                                          | NF1                                                          |
| 1 | 0.09874   | 0.0718539 | ABCA1                                                        | ABCA1                                                        |
| 1 | 0.09874   | 0.0718539 | GBF1                                                         | GBF1                                                         |
| 1 | 0.09874   | 0.0718539 | COL1A1                                                       | COL1A1                                                       |
| 1 | 0.09874   | 0.0718539 | BRCA2                                                        | BRCA2                                                        |
| 1 | 0.09874   | 0.0718539 | SORBS1                                                       | SORBS1                                                       |
| 1 | 0.09874   | 0.0718539 | TCF7L2;TCF7L2                                                | TCF7L2;TCF4                                                  |
| 1 | 0.09874   | 0.0718539 | PRKCD                                                        | PRKCD                                                        |
| 1 | 0.09874   | 0.0718539 | SCUBE3                                                       | SCUBE3                                                       |
| 1 | 0.09874   | 0.0718539 | SLC22A14                                                     | SLC22A14                                                     |
| 1 | 0.09874   | 0.0718539 | ALS2                                                         | ALS2                                                         |
| 1 | 0.09874   | 0.0718539 | IGF1                                                         | IGF1                                                         |
| 1 | 0.09874   | 0.0718539 | LIPC                                                         | LIPC                                                         |
| 1 | 0.09874   | 0.0718539 | SPTBN1                                                       | SPTBN1                                                       |
| 1 | 0.09874   | 0.0718539 | LONP1                                                        | PIM1                                                         |
| 1 | 0.09874   | 0.0718539 | TGFBR2                                                       | TGFBR2                                                       |
| 1 | 0.09874   | 0.0718539 | SORT1                                                        | SORT1                                                        |
| 2 | 0.1043734 | 0.0755172 | EGFR;PDGFRB                                                  | EGFR;PDGFRB                                                  |
| 2 | 0.1043734 | 0.0755172 | JAG1;BDNF                                                    | JAG1;BDNF                                                    |
| 6 | 0.104936  | 0.0758818 | ACSS2;MOGAT1;LA;ACSS2;MGAT1;CERS4;PC;CERS5;A4GALT            | ACSS2;MGAT1;CERS4;PC;CERS5;A4GALT                            |
| 9 | 0.1071917 | 0.0774912 | SLC9A8;SLC41A3;SLC9A8;SLC41A3;ATP2B4;SLC9A9;SFXN5;ATP10D;ATP | SLC9A8;SLC41A3;SLC9A8;SLC41A3;ATP2B4;SLC9A9;SFXN5;ATP10D;ATP |
| 2 | 0.1076749 | 0.0777391 | SMO;CHST11                                                   | SMO;CHST11                                                   |
| 2 | 0.1076749 | 0.0777391 | PCNA;CDK2                                                    | PCNA;CDK2                                                    |
| 1 | 0.1080613 | 0.0777391 | PRKCZ                                                        | PRKCZ                                                        |
| 1 | 0.1080613 | 0.0777391 | RCAN1                                                        | RCAN1                                                        |
| 1 | 0.1080613 | 0.0777391 | NDRG1                                                        | NDRG1                                                        |
| 1 | 0.1080613 | 0.0777391 | PDGFRA                                                       | PDGFRA                                                       |
| 1 | 0.1080613 | 0.0777391 | BRSK2                                                        | BRSK2                                                        |
| 1 | 0.1080613 | 0.0777391 | HNRNPF                                                       | HNRNPF                                                       |
| 1 | 0.1080613 | 0.0777391 | CRYZL1                                                       | CRYZL1                                                       |
| 1 | 0.1080613 | 0.0777391 | HMOX1                                                        | HMOX1                                                        |
| 1 | 0.1080613 | 0.0777391 | DYNC2H1                                                      | DYNC2H1                                                      |
| 1 | 0.1080613 | 0.0777391 | LPIN1                                                        | LPIN1                                                        |

|                                                                                |                       |
|--------------------------------------------------------------------------------|-----------------------|
| 1 0. 1080613 0. 0777391 NF1                                                    | NF1                   |
| 1 0. 1080613 0. 0777391 ZFP36L1                                                | ZFP36L1               |
| 1 0. 1080613 0. 0777391 PPARG                                                  | PPARG                 |
| 1 0. 1080613 0. 0777391 SORBS1                                                 | SORBS1                |
| 1 0. 1080613 0. 0777391 TLR3                                                   | TLR3                  |
| 1 0. 1080613 0. 0777391 VTI1A                                                  | VTI1A                 |
| 1 0. 1080613 0. 0777391 EIF2B4                                                 | EIF2B4                |
| 1 0. 1080613 0. 0777391 FLNA                                                   | FLNA                  |
| 1 0. 1080613 0. 0777391 PRKAG2                                                 | PRKAG2                |
| 1 0. 1080613 0. 0777391 HOPX                                                   | HOPX                  |
| 8 0. 1099976 0. 078792 FN1;CX3CR1;ADM;FN1;CCRL1;ADM;TNC;MDK;CASP3;SLC1A3;LYVE1 |                       |
| 2 0. 111004 0. 0794908 CCND3;PRKAG2                                            | CCND3;PRKAG2          |
| 1 0. 1172862 0. 0836071 PAPD4                                                  | PAPD4                 |
| 1 0. 1172862 0. 0836071 NF1                                                    | NF1                   |
| 1 0. 1172862 0. 0836071 NF1                                                    | NF1                   |
| 1 0. 1172862 0. 0836071 NF1                                                    | NF1                   |
| 1 0. 1172862 0. 0836071 LAMC1                                                  | LAMB2                 |
| 1 0. 1172862 0. 0836071 MYL3                                                   | MYL3                  |
| 1 0. 1172862 0. 0836071 SMS                                                    | SMS                   |
| 1 0. 1172862 0. 0836071 AGT                                                    | AGT                   |
| 1 0. 1172862 0. 0836071 GDF5                                                   | GDF5                  |
| 1 0. 1172862 0. 0836071 SRPK1                                                  | SRPK1                 |
| 1 0. 1172862 0. 0836071 HTT                                                    | HTT                   |
| 1 0. 1172862 0. 0836071 SYCP2                                                  | SCP2                  |
| 1 0. 1172862 0. 0836071 IGF1                                                   | IGF1                  |
| 1 0. 1172862 0. 0836071 BBS4                                                   | BBS4                  |
| 1 0. 1172862 0. 0836071 FAS                                                    | FAS                   |
| 1 0. 1172862 0. 0836071 NCR1                                                   | NCR1                  |
| 2 0. 1211471 0. 0859678 ALDOA;MYH7B;MYH14;MYH7B                                | ALDOA;MYH14;MYH7B     |
| 2 0. 1245771 0. 0883169 ETS1;BCL6                                              | ETS1;BCL6             |
| 3 0. 1263209 0. 0892041 ALS2CR12;ARHGAP6;GDI1                                  | ALS2CR12;ARHGAP6;GDI1 |
| 3 0. 1263209 0. 0892041 MCM7;BARD1;MCM7                                        | MCM7;BARD1;MCM2;RAD17 |
| 1 0. 1264157 0. 0892041 CTNNB1                                                 | CTNNB1                |
| 1 0. 1264157 0. 0892041 EGFR                                                   | EGFR                  |
| 1 0. 1264157 0. 0892041 SMAD3                                                  | SMAD3                 |
| 1 0. 1264157 0. 0892041 SLC8A1                                                 | SLC8A1                |
| 1 0. 1264157 0. 0892041 AGRN                                                   | AGRN                  |
| 1 0. 1264157 0. 0892041 MITF                                                   | MITF                  |
| 1 0. 1264157 0. 0892041 AQP3                                                   | AQP3                  |
| 1 0. 1264157 0. 0892041 ABCA1                                                  | ABCA1                 |
| 1 0. 1264157 0. 0892041 ABCA1                                                  | ABCA1                 |
| 1 0. 1264157 0. 0892041 ART4                                                   | DOK1                  |
| 1 0. 1264157 0. 0892041 SHMT1                                                  | SHMT1                 |
| 1 0. 1264157 0. 0892041 BCL3                                                   | BCL3                  |
| 1 0. 1264157 0. 0892041 GUCY1B3                                                | GUCY1B3               |
| 1 0. 1264157 0. 0892041 PKIG                                                   | PKIG                  |
| 1 0. 1264157 0. 0892041 OXSM                                                   | OXSM                  |
| 1 0. 1264157 0. 0892041 AGXT                                                   | AGT                   |
| 1 0. 1264157 0. 0892041 BDNF                                                   | BDNF                  |
| 1 0. 1264157 0. 0892041 MYL6B                                                  | MYL6B                 |
| 1 0. 1264157 0. 0892041 FOXE1                                                  | TTF2                  |
| 1 0. 1264157 0. 0892041 TJP1                                                   | TJP1                  |

|   |    |         |    |         |                  |                                     |
|---|----|---------|----|---------|------------------|-------------------------------------|
| 1 | 0. | 1264157 | 0. | 0892041 | HISPPD1          | PIIP5K2                             |
| 1 | 0. | 1264157 | 0. | 0892041 | IGF1             | IGF1                                |
| 1 | 0. | 1264157 | 0. | 0892041 | SLC1A3           | SLC1A3                              |
| 2 | 0. | 1315056 | 0. | 0924296 | PPARGC1A;SDHA    | PPARGC1A;SDHA                       |
| 2 | 0. | 1350023 | 0. | 0948615 | BMPR1B;PCSK5     | BMPR1B;PCSK5                        |
| 1 | 0. | 1354508 | 0. | 0950086 | RORA;RORA;RORA   | RORA;ROR1;ROR2                      |
| 1 | 0. | 1354508 | 0. | 0950086 | RIF1             | RIF1                                |
| 1 | 0. | 1354508 | 0. | 0950086 | SLC6A3           | SLC6A3                              |
| 1 | 0. | 1354508 | 0. | 0950086 | EGLN1            | EGLN1                               |
| 1 | 0. | 1354508 | 0. | 0950086 | SMO              | SMO                                 |
| 1 | 0. | 1354508 | 0. | 0950086 | CEP290           | CEP290                              |
| 1 | 0. | 1354508 | 0. | 0950086 | TIMELESS         | TIMELESS                            |
| 1 | 0. | 1354508 | 0. | 0950086 | PTH1R            | PTH1R                               |
| 1 | 0. | 1354508 | 0. | 0950086 | KCNMA1           | KCNMA1                              |
| 1 | 0. | 1354508 | 0. | 0950086 | CASP3            | CASP3                               |
| 1 | 0. | 1354508 | 0. | 0950086 | GBGT1            | GBGT1                               |
| 2 | 0. | 1385197 | 0. | 0969638 | GBA;FA2H         | GBA;FAAH                            |
| 2 | 0. | 1420568 | 0. | 0994128 | HOXC8;PRKRA      | HOXC8;PRKRA                         |
| 1 | 0. | 1443924 | 0. | 100897  | GCK              | GK                                  |
| 1 | 0. | 1443924 | 0. | 100897  | CHIT1            | CHIT1                               |
| 1 | 0. | 1443924 | 0. | 100897  | CLN5             | NCL                                 |
| 1 | 0. | 1443924 | 0. | 100897  | SEMA3A           | SEMA3A                              |
| 1 | 0. | 1443924 | 0. | 100897  | BMPR1B           | BMPR1B                              |
| 1 | 0. | 1443924 | 0. | 100897  | CD01             | CD01                                |
| 1 | 0. | 1443924 | 0. | 100897  | METAP2           | MAP2                                |
| 1 | 0. | 1443924 | 0. | 100897  | CPOX             | CPOX                                |
| 1 | 0. | 1443924 | 0. | 100897  | SLC01B1          | LST1                                |
| 2 | 0. | 1456129 | 0. | 1015986 | MSH2;FAS         | MSH2;FAS                            |
| 2 | 0. | 1491872 | 0. | 1040504 | APOB;SYCP2       | APOB;SCP2                           |
| 4 | 0. | 1525422 | 0. | 1063472 | ZIC1;SIX1;SMO;SI | ZIC1;SIX1;SMO;SHROOM3               |
| 2 | 0. | 152779  | 0. | 1064692 | IGF2BP1;MAP2K3   | IGF2BP1;MAP2K3                      |
| 2 | 0. | 152779  | 0. | 1064692 | CD81;PITPNM3     | CD81;PITPNM3                        |
| 1 | 0. | 1532417 | 0. | 1065473 | CD55             | CD55                                |
| 1 | 0. | 1532417 | 0. | 1065473 | RAB3A            | RAB3A                               |
| 1 | 0. | 1532417 | 0. | 1065473 | PITX1            | PITX1                               |
| 1 | 0. | 1532417 | 0. | 1065473 | SLC7A8;SLC7A8    | LAT2;SLC7A8                         |
| 1 | 0. | 1532417 | 0. | 1065473 | GABBR1           | GABBR1                              |
| 1 | 0. | 1532417 | 0. | 1065473 | CDH13            | CDH13                               |
| 1 | 0. | 1532417 | 0. | 1065473 | VLDLR            | FLJ35024                            |
| 1 | 0. | 1532417 | 0. | 1065473 | GLMN             | FAP                                 |
| 1 | 0. | 1532417 | 0. | 1065473 | SLC1A3           | SLC1A3                              |
| 1 | 0. | 1532417 | 0. | 1065473 | ABL2             | ABL2                                |
| 1 | 0. | 1619994 | 0. | 1122136 | EDN1             | EDN1                                |
| 1 | 0. | 1619994 | 0. | 1122136 | EDN1             | EDN1                                |
| 1 | 0. | 1619994 | 0. | 1122136 | AKR1C3           | AKR1C3                              |
| 1 | 0. | 1619994 | 0. | 1122136 | AK5              | AK5                                 |
| 1 | 0. | 1619994 | 0. | 1122136 | IFT172           | IFT172                              |
| 1 | 0. | 1619994 | 0. | 1122136 | NOD2             | NOD2                                |
| 1 | 0. | 1619994 | 0. | 1122136 | TLR1             | TLR1                                |
| 1 | 0. | 1619994 | 0. | 1122136 | FLT4             | FLT4                                |
| 5 | 0. | 1665337 | 0. | 1151383 | CROCC;DYNC2LI1;I | CROCC;DYNC2LI1;DYNC2H1;CEP290;DNAI1 |
| 2 | 0. | 1673062 | 0. | 115626  | STRADB;TGFB2     | STRADB;TGFB2                        |

|    |    |         |    |         |                 |                                               |
|----|----|---------|----|---------|-----------------|-----------------------------------------------|
| 1  | 0. | 1706666 | 0. | 1175478 | SLC16A4         | SLC16A4                                       |
| 1  | 0. | 1706666 | 0. | 1175478 | LYST            | LYST                                          |
| 1  | 0. | 1706666 | 0. | 1175478 | SLC7A8;SLC7A8   | LAT2;SLC7A8                                   |
| 1  | 0. | 1706666 | 0. | 1175478 | HEXB            | HEXB                                          |
| 1  | 0. | 1706666 | 0. | 1175478 | NPM1            | NPM1                                          |
| 1  | 0. | 1706666 | 0. | 1175478 | FBXO2           | FBXO2                                         |
| 1  | 0. | 1706666 | 0. | 1175478 | SNCAIP          | SNCAIP                                        |
| 1  | 0. | 1706666 | 0. | 1175478 | NEDD4           | NEDD4                                         |
| 1  | 0. | 1706666 | 0. | 1175478 | AGTPBP1         | AGTPBP1                                       |
| 1  | 0. | 1706666 | 0. | 1175478 | KRT3            | KRT3                                          |
| 1  | 0. | 1706666 | 0. | 1175478 | GLMN            | FAP                                           |
| 1  | 0. | 1706666 | 0. | 1175478 | TIE1            | TIE1                                          |
| 2  | 0. | 1709745 | 0. | 1175478 | PDGFA;DLC1      | PDGFA;DLC1                                    |
| 2  | 0. | 174656  | 0. | 120031  | TSGA10;RAC2     | TSGA10;RAC2                                   |
| 3  | 0. | 1748986 | 0. | 1201498 | JAG1;BCL6;HOPX  | JAG1;BCL6;HOPX                                |
| 1  | 0. | 1792442 | 0. | 1229552 | THBS1           | THBS1                                         |
| 1  | 0. | 1792442 | 0. | 1229552 | MCHR1           | MCHR1                                         |
| 1  | 0. | 1792442 | 0. | 1229552 | THRB            | THRB                                          |
| 1  | 0. | 1792442 | 0. | 1229552 | WNT9B           | WNT9B                                         |
| 1  | 0. | 1792442 | 0. | 1229552 | FOXE1           | TTF2                                          |
| 1  | 0. | 1792442 | 0. | 1229552 | EPC1            | EPC1                                          |
| 1  | 0. | 1792442 | 0. | 1229552 | LST1            | LST1                                          |
| 1  | 0. | 1792442 | 0. | 1229552 | BCL6            | BCL6                                          |
| 2  | 0. | 1820559 | 0. | 1247018 | NR3C1;FAS       | NR3C1;FAS                                     |
| 12 | 0. | 1855541 | 0. | 1270642 | WNK4;CROCC;CD81 | WNK4;CROCC;CD81;CEP250;SQSTM1;NBEA;NPM1;VPS13 |
| 1  | 0. | 187733  | 0. | 1282334 | ST6GAL2         | ST6GAL2                                       |
| 1  | 0. | 187733  | 0. | 1282334 | SCAMP1          | SCAMP1                                        |
| 1  | 0. | 187733  | 0. | 1282334 | SORBS3          | SORBS3                                        |
| 1  | 0. | 187733  | 0. | 1282334 | GC              | DBP                                           |
| 1  | 0. | 187733  | 0. | 1282334 | PPARG           | PPARG                                         |
| 1  | 0. | 187733  | 0. | 1282334 | NPHP1           | NPHP1                                         |
| 1  | 0. | 187733  | 0. | 1282334 | CLASP2          | CLASP2                                        |
| 1  | 0. | 187733  | 0. | 1282334 | NOD2            | NOD2                                          |
| 1  | 0. | 187733  | 0. | 1282334 | STAT5B          | STAT5B                                        |
| 1  | 0. | 187733  | 0. | 1282334 | ING5            | ING5                                          |
| 1  | 0. | 187733  | 0. | 1282334 | TMOD1           | TMOD1                                         |
| 1  | 0. | 187733  | 0. | 1282334 | ALDH1A2         | ALDH1A2                                       |
| 1  | 0. | 1961341 | 0. | 1333722 | LDLRAP1         | LDLRAP1                                       |
| 1  | 0. | 1961341 | 0. | 1333722 | LYN             | LYN                                           |
| 1  | 0. | 1961341 | 0. | 1333722 | NF1             | NF1                                           |
| 1  | 0. | 1961341 | 0. | 1333722 | GRIA3           | GRIA3                                         |
| 1  | 0. | 1961341 | 0. | 1333722 | MAP4K2          | MAP4K2                                        |
| 1  | 0. | 1961341 | 0. | 1333722 | BDNF            | BDNF                                          |
| 1  | 0. | 1961341 | 0. | 1333722 | PEX14           | PEX14                                         |
| 1  | 0. | 1961341 | 0. | 1333722 | SOD3            | SOD3                                          |
| 2  | 0. | 1969858 | 0. | 1336874 | ALOX15B;ING5    | ALOX15B;ING5                                  |
| 2  | 0. | 1969858 | 0. | 1336874 | BCL3;RUNX1T1    | BCL3;RUNX1T1                                  |
| 1  | 0. | 2044484 | 0. | 1386063 | NLGN4X          | NLGN4X                                        |
| 1  | 0. | 2044484 | 0. | 1386063 | LASS4           | CERS4                                         |
| 1  | 0. | 2044484 | 0. | 1386063 | SOD1            | SOD1                                          |
| 1  | 0. | 2044484 | 0. | 1386063 | TLR3            | TLR3                                          |
| 1  | 0. | 2126766 | 0. | 1438638 | IL6ST           | IL6ST                                         |



|                                          |                              |
|------------------------------------------|------------------------------|
| 1 0. 2126766 0. 1438638 DSCR3            | DSCR3                        |
| 1 0. 2126766 0. 1438638 PAG1             | PAG1                         |
| 1 0. 2126766 0. 1438638 IL6              | HGF                          |
| 1 0. 2126766 0. 1438638 IL6              | HGF                          |
| 1 0. 2126766 0. 1438638 PRKAG2           | PRKAG2                       |
| 1 0. 2126766 0. 1438638 CTPS2            | CTPS2                        |
| 1 0. 2126766 0. 1438638 LEP              | LEP                          |
| 2 0. 2158422 0. 1458142 PDPK1;PIK3R1     | PDK1;PIK3R1                  |
| 2 0. 2158422 0. 1458142 UACA;CALCOCO2    | UACA;CALCOCO2                |
| 1 0. 2208198 0. 1489431 CTNNB1           | CTNNB1                       |
| 1 0. 2208198 0. 1489431 DCT              | DCT                          |
| 1 0. 2208198 0. 1489431 IFT172           | IFT172                       |
| 1 0. 2208198 0. 1489431 COL1A1           | COL1A1                       |
| 1 0. 2208198 0. 1489431 DNPEP            | DNPEP                        |
| 1 0. 2208198 0. 1489431 CHST11           | CHST11                       |
| 1 0. 2208198 0. 1489431 IGF1             | IGF1                         |
| 2 0. 2272325 0. 1530088 CHST6;MOCS2      | CHST6;MOCS2                  |
| 1 0. 2288788 0. 1539768 EDN1             | EDN1                         |
| 1 0. 2288788 0. 1539768 ERAP1            | ERAP1                        |
| 1 0. 2288788 0. 1539768 SHROOM2          | SHROOM2                      |
| 1 0. 2288788 0. 1539768 SREBF1           | SREBF1                       |
| 1 0. 2288788 0. 1539768 CD40             | CD40                         |
| 1 0. 2288788 0. 1539768 SORT1            | SORT1                        |
| 1 0. 2368545 0. 1590524 ADAM9            | ADAM9                        |
| 1 0. 2368545 0. 1590524 NBN              | NBN                          |
| 1 0. 2368545 0. 1590524 SMO              | SMO                          |
| 1 0. 2368545 0. 1590524 EDNRA            | EDNRA                        |
| 3 0. 2385705 0. 1600591 HES1;MYCBP2;SLC  | HES1;MYCBP2;SLC1A3           |
| 2 0. 2424796 0. 1626184 BANK1;NTAL_HUMAN | BANK1;LAT2                   |
| 1 0. 2447477 0. 1639692 MEN1             | MEN1                         |
| 1 0. 2447477 0. 1639692 TLR3             | TLR3                         |
| 1 0. 2447477 0. 1639692 MICB             | MICB                         |
| 1 0. 2447477 0. 1639692 TGFBR2           | TGFBR2                       |
| 2 0. 2462989 0. 164816 PCNP;PPP2CB       | PCNP;PPP2CB                  |
| 2 0. 2462989 0. 164816 TSHR;PTH1R        | TSHR;PTH1R                   |
| 2 0. 2462989 0. 164816 CEP120;MYCBP2     | CEP120;MYCBP2                |
| 3 0. 2468045 0. 1650689 LPL;PLA2G2A;PLCL | LPL;PLA2G2A;PLCD1            |
| 5 0. 2498782 0. 1670814 BRSK2;HOXC8;STM  | BRSK2;HOXC8;STMN2;EPHA2;TLX1 |
| 1 0. 2525592 0. 1686994 ST3GAL6          | ST3GAL6                      |
| 1 0. 2525592 0. 1686994 ERAP1            | ERAP1                        |
| 1 0. 2525592 0. 1686994 AGT              | AGT                          |
| 1 0. 2525592 0. 1686994 RCVRN            | RCVRN                        |
| 1 0. 2525592 0. 1686994 CBS              | CBS                          |
| 1 0. 2525592 0. 1686994 CAV1             | CAV1                         |
| 1 0. 2602901 0. 1735043 ST3GAL6          | ST3GAL6                      |
| 1 0. 2602901 0. 1735043 SOX9             | SOX9                         |
| 1 0. 2602901 0. 1735043 NF1              | NF1                          |
| 1 0. 2602901 0. 1735043 RCVRN            | RCVRN                        |
| 1 0. 2602901 0. 1735043 CAV1             | CAV1                         |
| 1 0. 2679409 0. 1782133 NF1              | NF1                          |
| 1 0. 2679409 0. 1782133 CTTNBP2          | CTTNBP2                      |
| 1 0. 2679409 0. 1782133 MPZL3            | MPZL3                        |

|   |    |         |    |         |                                    |                                    |
|---|----|---------|----|---------|------------------------------------|------------------------------------|
| 2 | 0. | 2692418 | 0. | 1789173 | AR;DMRTA1                          | AR;DMRTA1                          |
| 2 | 0. | 2730662 | 0. | 181412  | AK5;ATP6V1B1                       | AK5;ATP6V1B1                       |
| 1 | 0. | 2755127 | 0. | 1828258 | HMOX1                              | HMOX1                              |
| 1 | 0. | 2755127 | 0. | 1828258 | CPS1                               | CPS1                               |
| 1 | 0. | 2755127 | 0. | 1828258 | CELSR2                             | CELSR2                             |
| 1 | 0. | 2755127 | 0. | 1828258 | CEP120                             | CEP120                             |
| 1 | 0. | 2755127 | 0. | 1828258 | EPHB2                              | EPHB2                              |
| 1 | 0. | 2830061 | 0. | 1874371 | NRG1                               | NRG1                               |
| 1 | 0. | 2830061 | 0. | 1874371 | STAT1                              | STAT1                              |
| 1 | 0. | 2830061 | 0. | 1874371 | PIGU                               | GAB1                               |
| 1 | 0. | 2830061 | 0. | 1874371 | TMOD2                              | TMOD2                              |
| 1 | 0. | 2830061 | 0. | 1874371 | FAS                                | FAS                                |
| 1 | 0. | 2904221 | 0. | 1918814 | PGAP1;PGAP1                        | BST1;PGAP1                         |
| 1 | 0. | 2904221 | 0. | 1918814 | NOTCH3                             | NOTCH3                             |
| 1 | 0. | 2904221 | 0. | 1918814 | SERPINE2                           | SERPINE2                           |
| 1 | 0. | 2904221 | 0. | 1918814 | BCL3                               | BCL3                               |
| 1 | 0. | 2904221 | 0. | 1918814 | TNXB                               | TNXB                               |
| 1 | 0. | 2904221 | 0. | 1918814 | NSMAF                              | NSMAF                              |
| 1 | 0. | 2904221 | 0. | 1918814 | ALG9                               | ALG9                               |
| 6 | 0. | 2963657 | 0. | 1955832 | ADCY3;SLC6A3;GNAS;GRM7;BBS4;OR11A1 | ADCY3;SLC6A3;GNAS;GRM7;BBS4;OR11A1 |
| 1 | 0. | 2977614 | 0. | 196429  | PDE6B                              | PDE6B                              |
| 1 | 0. | 2977614 | 0. | 196429  | AHR                                | AHR                                |
| 1 | 0. | 3050248 | 0. | 2011435 | SYN2                               | SYN2                               |
| 1 | 0. | 3122131 | 0. | 2058312 | HES1                               | HES1                               |
| 2 | 0. | 3187816 | 0. | 2101079 | MYCBP2;NEXN                        | MYCBP2;NEXN                        |
| 1 | 0. | 3193271 | 0. | 2103065 | NT5E                               | NT5E                               |
| 1 | 0. | 3193271 | 0. | 2103065 | GTF2A2                             | GTF2A2                             |
| 1 | 0. | 3193271 | 0. | 2103065 | BMPR1B                             | BMPR1B                             |
| 3 | 0. | 3250564 | 0. | 2139161 | EDN1;ITGA7;CDH2                    | EDN1;ITGA7;CDH2                    |
| 1 | 0. | 3263675 | 0. | 2146149 | SCG5                               | SCG5                               |
| 1 | 0. | 3263675 | 0. | 2146149 | PPARG                              | PPARG                              |
| 1 | 0. | 3263675 | 0. | 2146149 | BRCA2                              | BRCA2                              |
| 4 | 0. | 3269786 | 0. | 2148526 | AMPD3;NME6;NT5C2;REXO2             | AMPD3;NME6;NT5C2;REXO2             |
| 1 | 0. | 3333351 | 0. | 2188346 | BARD1                              | BARD1                              |
| 1 | 0. | 3333351 | 0. | 2188346 | MDN1                               | MDN1                               |
| 1 | 0. | 3333351 | 0. | 2188346 | PRKAG2                             | PRKAG2                             |
| 1 | 0. | 3402307 | 0. | 223163  | ARFIP1                             | ARFIP1                             |
| 1 | 0. | 3402307 | 0. | 223163  | SYNE1                              | SYNE1                              |
| 2 | 0. | 3414008 | 0. | 2238168 | SIK1;HDAC3                         | SIK1;HDAC3                         |
| 1 | 0. | 347055  | 0. | 2273793 | PLA2G4A                            | PLA2G4A                            |
| 1 | 0. | 347055  | 0. | 2273793 | NF1                                | NF1                                |
| 1 | 0. | 347055  | 0. | 2273793 | FAS                                | FAS                                |
| 1 | 0. | 3538087 | 0. | 2315692 | DYNLL1                             | DLC1                               |
| 1 | 0. | 3538087 | 0. | 2315692 | SCNN1A                             | SCNN1A                             |
| 2 | 0. | 3600662 | 0. | 2355752 | AGT;NR1H3                          | AGT;NR1H3                          |
| 1 | 0. | 3604925 | 0. | 2357347 | GHR                                | GHR                                |
| 1 | 0. | 3604925 | 0. | 2357347 | IGF1                               | IGF1                               |
| 1 | 0. | 3604925 | 0. | 2357347 | IGF1                               | IGF1                               |
| 1 | 0. | 3671073 | 0. | 2398478 | SMAD3                              | SMAD3                              |
| 1 | 0. | 3801323 | 0. | 2480752 | PPARGC1A                           | PPARGC1A                           |
| 1 | 0. | 3865439 | 0. | 2520366 | COL8A1                             | COL8A1                             |
| 1 | 0. | 3865439 | 0. | 2520366 | IRAK3                              | IRAK3                              |

|    |    |         |    |         |                    |                                               |
|----|----|---------|----|---------|--------------------|-----------------------------------------------|
| 1  | 0. | 3928893 | 0. | 2560124 | PDE5A              | PDE5A                                         |
| 1  | 0. | 3928893 | 0. | 2560124 | RENH_HUMAN         | ATP6AP2                                       |
| 2  | 0. | 3931399 | 0. | 2560465 | ERAP1;CHIT1        | ERAP1;CHIT1                                   |
| 5  | 0. | 3980335 | 0. | 2591682 | LIG4;BRCA2;SMC2    | LIG4;BRCA2;SMC2;SMCHD1;SMC4                   |
| 1  | 0. | 3991691 | 0. | 2598094 | GLI1               | GLI1                                          |
| 1  | 0. | 4053839 | 0. | 2636552 | ERO1L              | ERO1L                                         |
| 4  | 0. | 4083333 | 0. | 2654732 | HMGB2;SOX6;HMGB1   | HMGB2;SOX6;HMGB1;HMGN2                        |
| 4  | 0. | 41064   | 0. | 2669057 | CA2;TPD52;RIMS1    | CA2;TPD52;RIMS1;CA9                           |
| 1  | 0. | 4115344 | 0. | 2673861 | GLMN               | FAP                                           |
| 7  | 0. | 4118225 | 0. | 2674724 | CTNNB1;SOX9;JAG1   | CTNNB1;SOX9;JAG1;DBP;SERPINE1;TIMELESS;CHST11 |
| 1  | 0. | 4176214 | 0. | 2710682 | SMAD3              | SMAD3                                         |
| 1  | 0. | 4176214 | 0. | 2710682 | ATG10              | ATG10                                         |
| 1  | 0. | 4176214 | 0. | 2710682 | ATXN1              | ATXN1                                         |
| 1  | 0. | 4176214 | 0. | 2710682 | CASP3              | CASP3                                         |
| 1  | 0. | 4236454 | 0. | 2748056 | EGR2               | EGR2                                          |
| 20 | 0. | 4269082 | 0. | 2768526 | STC1;EGFR;IL17RA   | STC1;EGFR;IL17RA;TNFRSF14;COL4A3;MET;MADD;DOK |
| 1  | 0. | 4296071 | 0. | 2784979 | COL5A2             | COL5A2                                        |
| 1  | 0. | 4296071 | 0. | 2784979 | LEP                | LEP                                           |
| 1  | 0. | 4355071 | 0. | 2821457 | DNASE1             | DNASE1                                        |
| 1  | 0. | 4355071 | 0. | 2821457 | HTT                | HTT                                           |
| 1  | 0. | 4355071 | 0. | 2821457 | CXCL12             | CXCL12                                        |
| 1  | 0. | 4413462 | 0. | 2857136 | APOB               | APOB                                          |
| 1  | 0. | 4413462 | 0. | 2857136 | TIMELESS           | TIMELESS                                      |
| 1  | 0. | 4413462 | 0. | 2857136 | RIPK2_HUMAN        | RIPK2                                         |
| 1  | 0. | 4471248 | 0. | 2892732 | NEB                | NEB                                           |
| 1  | 0. | 4471248 | 0. | 2892732 | BRCA2              | BRCA2                                         |
| 1  | 0. | 4528437 | 0. | 2928265 | MSH2               | MSH2                                          |
| 4  | 0. | 4540316 | 0. | 2934844 | ALDH1A3;ALDH3B1    | ALDH1A3;ALDH3B1;ADH1C;CHDH                    |
| 2  | 0. | 4635954 | 0. | 2995914 | SMAD3;TN13B_HUMAN  | SMAD3;TNFSF13B                                |
| 1  | 0. | 4641047 | 0. | 2997706 | SCIN               | SCIN                                          |
| 1  | 0. | 4641047 | 0. | 2997706 | CELSR2             | CELSR2                                        |
| 2  | 0. | 4703762 | 0. | 3036695 | NFATC2;CD4         | NFATC2;CD4                                    |
| 1  | 0. | 4805633 | 0. | 309975  | NDRG1              | NDRG1                                         |
| 1  | 0. | 4805633 | 0. | 309975  | CD74               | CD74                                          |
| 1  | 0. | 4859364 | 0. | 3131671 | NRG1               | NRG1                                          |
| 1  | 0. | 4859364 | 0. | 3131671 | CHD7               | CHD7                                          |
| 1  | 0. | 4859364 | 0. | 3131671 | CDKN2A             | CDKN2A                                        |
| 1  | 0. | 4859364 | 0. | 3131671 | ENOSF1             | ENOSF1                                        |
| 1  | 0. | 4859364 | 0. | 3131671 | RAPGEF2            | RAPGEF2                                       |
| 4  | 0. | 4875217 | 0. | 3139538 | ST6GAL2;CCNB2;GDF5 | ST6GAL2;CCNB2;GDF5;SEPP1                      |
| 1  | 0. | 491254  | 0. | 3161996 | STK36              | STK36                                         |
| 1  | 0. | 491254  | 0. | 3161996 | SMARCA4            | SMARCA4                                       |
| 1  | 0. | 491254  | 0. | 3161996 | PXK                | PXK                                           |
| 1  | 0. | 4965166 | 0. | 3193482 | FAS                | FAS                                           |
| 1  | 0. | 4965166 | 0. | 3193482 | PCSK5              | PCSK5                                         |
| 2  | 0. | 496974  | 0. | 3194833 | CLU;ALS2           | CLU;ALS2                                      |
| 2  | 0. | 5002382 | 0. | 3215017 | ASPH;ASPHD1        | ASPH;ASPHD1                                   |
| 1  | 0. | 5017247 | 0. | 3223769 | CAV1               | CAV1                                          |
| 1  | 0. | 506879  | 0. | 3254863 | COL1A1             | COL1A1                                        |
| 1  | 0. | 506879  | 0. | 3254863 | NOD2               | NOD2                                          |
| 1  | 0. | 51198   | 0. | 328476  | WIPF1              | WIPF1                                         |
| 1  | 0. | 51198   | 0. | 328476  | MAP3K1             | MAP3K1                                        |

|   |           |           |                  |                              |
|---|-----------|-----------|------------------|------------------------------|
| 1 | 0.51198   | 0.328476  | HMGCR            | HMGCR                        |
| 1 | 0.5170282 | 0.331509  | NHEJ1            | NHEJ1                        |
| 2 | 0.5227009 | 0.3350214 | CTNNB1;ZBTB17    | CTNNB1;ZBTB17                |
| 1 | 0.5269686 | 0.3376311 | ATG10            | ATG10                        |
| 1 | 0.5269686 | 0.3376311 | SULT1A2          | SULT1A2                      |
| 1 | 0.5367045 | 0.3436558 | CHST1            | CHST1                        |
| 1 | 0.5367045 | 0.3436558 | SOD1             | SOD1                         |
| 1 | 0.541497  | 0.3465527 | HPRT1            | HPRT1                        |
| 2 | 0.5444734 | 0.3483713 | CRAT;ACADVL      | CRAT;ACADVL                  |
| 1 | 0.5509339 | 0.352156  | RYR1             | RYR1                         |
| 1 | 0.5509339 | 0.352156  | PCSK5            | PCSK5                        |
| 1 | 0.5555793 | 0.3549496 | TNFSF15          | TNFSF15                      |
| 1 | 0.5601767 | 0.3577099 | GAPVD1           | GAPVD1                       |
| 3 | 0.570882  | 0.3643658 | PDGFRA;PDGFA;SLI | PDGFRA;PDGFA;ARSB            |
| 1 | 0.5780955 | 0.3686965 | EGFR             | EGFR                         |
| 2 | 0.6055379 | 0.3859128 | TYMS;PRPSAP1     | TYMS;PRPSAP1                 |
| 1 | 0.6236979 | 0.3970454 | PEG10            | PEG10                        |
| 1 | 0.6236979 | 0.3970454 | PAX6             | PAX6                         |
| 1 | 0.6314434 | 0.4017287 | PIP5K1A          | PIP5K1A                      |
| 1 | 0.6390296 | 0.4064549 | KRT7             | KRT7                         |
| 1 | 0.6464596 | 0.4106246 | SQSTM1           | SQSTM1                       |
| 1 | 0.6464596 | 0.4106246 | MSH2             | MSH2                         |
| 1 | 0.6501171 | 0.4126434 | NME6             | NME6                         |
| 1 | 0.6501171 | 0.4126434 | SOD1             | SOD1                         |
| 1 | 0.6573189 | 0.4170609 | SORBS3           | SORBS3                       |
| 1 | 0.6608641 | 0.4191558 | HTATIP2          | HTATIP2                      |
| 1 | 0.6608641 | 0.4191558 | LCK              | LCK                          |
| 1 | 0.6643726 | 0.4212259 | SMAD3            | SMAD3                        |
| 2 | 0.6674682 | 0.4230847 | APOM;B4GALT4     | APOM;B4GALT4                 |
| 1 | 0.6678448 | 0.4232196 | DGKD             | DGKD                         |
| 1 | 0.6712811 | 0.4252407 | ATG10            | ATG10                        |
| 1 | 0.6712811 | 0.4252407 | SLC1A3           | SLC1A3                       |
| 2 | 0.690852  | 0.4373703 | MPHOSPH6;DLGAP5  | MPP6;DLGAP5                  |
| 1 | 0.6975225 | 0.4414851 | CHST11           | CHST11                       |
| 1 | 0.7006519 | 0.4433571 | TRIB2            | TRIB2                        |
| 2 | 0.7085676 | 0.4482562 | GCK;DGKD         | GK;DGKD                      |
| 1 | 0.7098471 | 0.4489557 | MYO6             | MYO6                         |
| 1 | 0.712849  | 0.4507439 | PPARG            | PPARG                        |
| 1 | 0.7187599 | 0.4542591 | BMPR1B           | BMPR1B                       |
| 3 | 0.721854  | 0.4561029 | HEXB;SEPP1;HEXA  | HEXB;SEPP1;HEXA              |
| 5 | 0.7313405 | 0.461871  | CLN5;FBXO2;FRAP  | NCL;FBXO2;MTOR;PRSS16;FBXO27 |
| 1 | 0.7465393 | 0.4711241 | TSHR             | TSHR                         |
| 1 | 0.751757  | 0.474301  | MT4              | MT4                          |
| 1 | 0.7568672 | 0.4774086 | MLTK             | ZAK                          |
| 3 | 0.7654534 | 0.4827066 | CLN5;CEP120;HTT  | NCL;CEP120;HTT               |
| 1 | 0.7691875 | 0.4848838 | AMPD2            | AMPD2                        |
| 3 | 0.7699363 | 0.4851782 | NADSYN1;GLUL;NIT | NADSYN1;GLUL;NIT2            |
| 1 | 0.7808836 | 0.4919567 | CLU              | CLU                          |
| 1 | 0.8025282 | 0.5053463 | GALM             | GALM                         |
| 1 | 0.8085948 | 0.5089182 | DRD4             | DRD4                         |
| 1 | 0.8105753 | 0.5100404 | AQP3             | AQP3                         |
| 1 | 0.8201747 | 0.515955  | SERINC5          | SERINC5                      |

2 0.8229948 0.517603 SMAD1;ZNF148 SMAD1;SLC12A8  
3 0.8488246 0.5337181 SLC39A8;SLC39A1(SLC39A8;SLC39A10;SLC39A5  
2 0.8514543 0.5351111 NR5A1;LAMA1 SF1;LAMA1  
2 0.8538231 0.5364693 TMEM91;TUSC5 TMEM91;TUSC5  
2 0.8705166 0.546692 MADD;COPS5 MADD;COPS5  
1 0.8763417 0.5502165 BRCA2 BRCA2  
2 0.8766886 0.5503005 SULT1A1;ABP1 SULT1A1;DAO  
2 0.8835453 0.5543351 SAR1B;GBF1 SAR1B;GBF1  
3 0.8958124 0.5617586 PDXDC1;CSAD;MCFI PDXDC1;CSAD;MCFD2  
2 0.8987524 0.5634654 ZIC1;MAOA ZIC1;MAOA  
1 0.9122732 0.5718034 KRT8 KRT8  
2 0.9156879 0.5737662 PLK2;CEP250 PLK2;CEP250  
1 0.915849 0.5737662 DLX6 DLX6  
1 0.9167199 0.5740333 HTT HTT  
1 0.9272549 0.5802082 EDN1 EDN1  
4 0.9310947 0.5824697 GNAS;RANBP3L;BB(GNAS;RANBP3L;BBS4;RANBP1  
1 0.9330646 0.5835607 SOD1 SOD1  
3 0.9403994 0.5880057 DCT;SMO;LEF1 DCT;SMO;LEF1  
1 0.9444964 0.5904246 ORM1 ORM1  
1 0.9473101 0.5920402 PLCG2 PLCG2  
1 0.9510114 0.5942096 LRRK2 LRRK2  
1 0.9576524 0.5982143 ETS1 ETS1  
1 0.9633933 0.601655 SIK1 SIK1  
23 0.9642146 0.6020223 RIMS1;ADCY3;HMO1 RIMS1;ADCY3;HMOX1;RSP01;ABCA4;TUB;RP9;RPGR;AR  
1 0.9645185 0.6020665 LDHA LDHA  
1 0.9659651 0.6028238 SOD1 SOD1  
2 0.9679997 0.6038018 NT5E;ADRA1D NT5E;ADRA1A  
1 0.9699606 0.6047894 STK38L STK38L  
1 0.9729296 0.6064375 PCBP2 PCBP2  
4 0.9747945 0.6074534 PIP5K1A;BCKDK;FI PIP5K1A;BCKDK;MTOR;UGP2  
1 0.9768422 0.6085826 SLC22A12 SLC22A12  
1 0.9773192 0.6087329 MAPT MAPT  
1 0.9799821 0.6102444 SOD1 SOD1  
1 0.9850428 0.6131001 EIF2B4 EIF2B4  
2 0.9884941 0.6149519 TRERF1;SMAD1 TRERF1;SMAD1  
5 0.99165 0.6155129 BIRC6;UBE2V1;UBI BIRC6;UBE2V1;UBE2B;UBE2Q2;UBE2F  
1 0.99509 0.6155129 ACADM ACADM  
3 0.996082 0.6155129 KIF3A;DTNBP1;HP(KIF3A;DTNBP1;HPS3  
1 0.9970828 0.6155129 LONP1 PIM1  
2 0.9970842 0.6155129 ZDHHC15;FLNA ZDHHC15;FLNA  
2 0.9984805 0.6155129 SCN10A;ARRB2 SCN10A;ARRB2  
1 0.9989378 0.6155129 SPRY4 SPRY4  
1 0.9990429 0.6155129 AR AR  
2 0.9990932 0.6155129 CHD7;NF1 CHD7;NF1  
2 0.999598 0.6155129 NOTCH3;NOTCH4;N NOTCH3;NOTCH3;NOTCH4  
2 0.9996644 0.6155129 INPP5D;ENPP1 INPP5D;ENPP1  
111 0.999751 0.6155129 LPP;APM2;LOXL3;I LPP;C10orf116;LOXL3;KRTAP1-5;ARFIP1;GRIPAP1;L  
19 0.9998918 0.6155129 AK5;NDUFA10;TYM(AK5;NDUFA10;TYMS;TK1;PRPSAP1;DPYSL2;POLA1;EXO  
1 0.9999003 0.6155129 ZWINT ZWINT  
6 0.9999809 0.6155129 FHOD3;FMNL3;FMN(FHOD3;FHOD3;FMN2;DAAM2;DAAM1;FMNL1  
11 0.9999853 0.6155129 EGLN3;LEPREL1;P EGLN3;LEPREL1;P4HA1;CLK1;P4HTM;P4HA2;PLOD1;EG  
8 0.9999891 0.6155129 SSBP2;PPIE;BTG1 SSBP2;PPIE;BTG1;C11orf9;APBB2;L3MBTL3;APBB1;N

|    |           |           |                                                        |                                                        |
|----|-----------|-----------|--------------------------------------------------------|--------------------------------------------------------|
| 1  | 0.999994  | 0.6155129 | ADSSL1                                                 | ADSSL1                                                 |
| 1  | 0.9999944 | 0.6155129 | CES2                                                   | CES2                                                   |
| 15 | 0.9999993 | 0.6155129 | ITGB4;NRG1;SLC8A1;GJA5;JAG1;PPFIBP2;PIK3C2B;H          | ITGB4;NRG1;SLC8A1;GJA5;JAG1;PPFIBP2;PIK3C2B;H          |
| 2  | 1         | 0.6155129 | POLR3A;PTGER3                                          | POLR3A;PTGER3                                          |
| 3  | 1         | 0.6155129 | PLCG2;PPP2CB;SOX1;PLCG2;PPP2CB;SORT1                   | PLCG2;PPP2CB;SOX1;PLCG2;PPP2CB;SORT1                   |
| 3  | 1         | 0.6155129 | NTRK2;BDNF;LEP                                         | NTRK2;BDNF;LEP                                         |
| 2  | 1         | 0.6155129 | L2HGDH;HEXB                                            | L2HGDH;HEXB                                            |
| 6  | 1         | 0.6155129 | GTDC1;SPTLC3;COX6B;GTDC1;SPTLC3;PPAT;GART;GPT2;ALDH1L1 | GTDC1;SPTLC3;COX6B;GTDC1;SPTLC3;PPAT;GART;GPT2;ALDH1L1 |
| 1  | 1         | 0.6155129 | EIF4G2                                                 | NAT1                                                   |
| 1  | 1         | 0.6155129 | HEXB                                                   | HEXB                                                   |
| 4  | 1         | 0.6155129 | MOXD1;GNAO1;MET;MOXD1;GNAO1;MAP2;SUPT16H               | MOXD1;GNAO1;MET;MOXD1;GNAO1;MAP2;SUPT16H               |
| 2  | 1         | 0.6155129 | WNK4;WNK1                                              | WNK4;WNK1                                              |
| 2  | 1         | 0.6155129 | EIF2B4;POLR2D                                          | EIF2B4;POLR2D                                          |
| 1  | 1         | 0.6155129 | FAS                                                    | FAS                                                    |



CD97;CXCL13;FGF13;SEMA5A;MLLT4;SF1;STAB1;SEMA4F;FAT1;WISP3;SEMA3B;GPR56;SIRPG;PGF;WNT9F  
PLOD1;DPP4;ITPR2;NF1;EGLN1;KCNMA1;SOD3;ATP1B1;CAV1;PIM1  
SGCA;POP1;SPEG;MEF2D;SMTN;SGCD;SGCE;POU6F1;TAGLN2;HBEGF;ITGA7;IGF1;TAGLN;CSRP2;MBNL1;CFI  
;C1S;PPARG;POP1;DHX58;IL1RAP;TLR1;TLR3;TMEM173;CFI;TIRAP;IFIH1;IL1R1;CLU;SARM1;F12  
NFATC3;NFYC;HTATIP2;TCEB1;RNF4;HMGB2;ELP3;HMGB1;UBN1;SREBF1;SP4;HOXC6;TCF7L2;CHD3;SP7;  
RPGR;COL2A1;BBS5;COL1A1;PDE6B;NCL;EFEMP1;RCVRN;PRPH;SEMA4A;PITPNM3;COL18A1;CC2D2A;DTNBI  
G01;LRP5;CELSR2;SFRP1;TLE6;CPZ;FZD3;FZD3;TLE3;HBP1;BRD7;CCDC88C;TCF7;RSP03  
;LRRK2;CTTNBP2;MET;MAP3K13;LCK;STK4;CAMK2A;TRPM7;PDGFRB  
ITC1;LAMB2;DARS;LPXN;FANCC;TAPBP;CD74;PTK2B;SH3BGR;REPS2;DLG4;DLG4;IL1RAP;MPP6;MDM4;MPP7  
IPN;MYRIP;MYO6;SCG5;RPGR;AP3M2;XPO1;CD74;PCNA;NPM1;VPS41;AP1G2;VTI1A;AP1G1;PGAP1;IPO5;S  
DYNC1I2;DNHD1;CENPE;KIF3A;MPP1;TUBD1;KIF21A;KIF11;KIF18B;KIF17;KIF13A;KIFC1  
;ESR2;APBB1;TP73;CDA;ENO1;BCL6;TP53TG5;ENPP1  
CTTNBP2;PCDHB9;CACNA1B;UNC13B;DLG4;GRM7;KCNQ3;HRH1;NET1;NET1;SYN2;AMPH;KCNQ5;SCN1B;HOMI  
GA10;ADAMTS1;ITGB3;ITGAE;ITGA9;DOCK1;ITGA7;ITGB5  
;2D;ITPR2;CACNA1A;CACNA1D;TPCN1;CACNA2D3;CACNA1B;CACNA1G;ATP2B4;TRPC1;CAMK2A;TRPV1;TRPM  
;1;BCOR;TBX1;EPOR;POU6F1;SEMA3C;PCSK5;FBN1;CASP3;ACADM;HOPX;ADAP2;TGFB2  
;FIP2;RALGPS2;RND3;RHOBTB2;RAB24;DNAJC27;RAD1;RERG;TIAM1;RAB9B;RAP2C;RAC1;GDI1;RHOBTB1;I  
;UBE3;PRNP;PEX14;FAS;CAV1;CCDC88C;PIM1  
;1;CTTNBP2;HSD11B1;CRISPLD2;GLI1;SIM2;MGP;TGFB2  
;GPI;PKM;OGDH;ENO1;ENO3  
;D1;HERC2P3;SOCS7;PCNP;RNF41;FBXO10;MIB2;WWP1;FBXO25;WDSUB1  
;AGPAT1;MDGA1;NCL;MYH10;BRCA2;GPR56;CDK5RAP2;SEPP1;EPOR;HTT;POU6F1;NOTCH4;ABR;TGFB2  
;3;HGF;CAMK2A;RIPK2  
;3;LST1;DLC1;ITGA7;ATP10A;CDC42SE1  
;PP1;TXNIP;PRNP;OXR1;ERCC3;CLU;PXDN;GPX2;PTGS1;MICB  
;CPOX;LCK;BDNF;ABCA3;PDE3A;SLC22A12;SEMA3C;SLC1A3  
;T5B  
;5;KIN;SFPQ;PABPC1;SLU7;HNRPLL;THOC1;KIAA1429;HRH1;SNRNP35;CPSF4;NONO;TTF2;AQR;EIF4A3;AI  
;T2;KCNQ3;KCNQ5;KCNIP1;KCTD9;KCNMA1;SLC12A8;ATP1B1;KCNJ15;SLC9A7;KCNS3;KCNJ5;KCNJ6  
;XCL16;FPR1;CCL28;CX3CL1;IL16;PLAU;LSP1;CCBP2;CCBP2;CMTM3;C5;RAC2;CXCL12  
;ARD;NLRP12;BCL2L13;LCK;DLC1;HIP1  
;X3;TLE1;PCM1;DMAP1;THRB;CENPF;BCL3;MEN1;PTPRU;EED;PRDM6;TIMELESS;NKRF;SNW1;WWP1;BCLAF1  
;HSPA4L;PPIG;PPIL4;NKTR;DNAJB6;DNAJC18;CCT8;TTC9;PDIA5;PPIL6;DNAJC10  
;1;KAZALD1;MGP;FAM83H;EXT2;IBSP;DSP;BMP1;ENPP1;CDH11;SORT1  
;133;EMR2;LPHN2;GPR64;PKD1L2;SLC26A6;CELSR1;SORT1  
;11A1;COL2A1;COL1A1;COL5A2  
;F;IGF1;TGFB2  
;YSF;UTRN;MYOT;SLC6A8;SGCA;ASPH;FLI1;FXD1;SSPN;CHRNE;P2RX6  
;;CRHR1;STAT5B;PSG1;PSG1;PSG1;PSG1;BYSL;PSG7;PSG7;PSG2  
;1;TLE1;THRB;ELN;SEMA6A;COL9A1;APLP1;BHLHE41;FLI1;PTCH1;TLE3;ETV4;ETV5;COMP;HTT;COL18A1  
;BCL3;BNIP3L;FAIM;STAT5B;PTEN;PIK3R1;HGF;PC;PPP2CB;BCL6;CHST11;CASP3;PIM1;ASNS;SORT1  
;SEMA3B;SEMA6A;TNR;BDNF;NRXN3;EPHB2;NRP2  
;NCOA3;FHL2;AR;PMEPA1  
;16;PDIA5;TXNDC2;DNAJC10;GLRX;GSR  
;PCDH9;PCDHB9;CDH13;PCDH7;SLC26A6;CLSTN3;CDH2;CELSR1;CDH11  
;9L;MRPS25;MRPL52;POLB;MRPS36;GFM2;PET112;ABCF1;PSTK;EIF3E;SEPSECS;MRPL2;MRPL2;COPS5;EII  
;PX  
;4;MYH10;MSH2;AR;MAFF;MBNL1;BCL2L11  
;1;CAV1;LIPC  
;P53BP1;ETS2;MAP2K3;BCKDHA;SP100;DYRK1B;MMS19;TP63;NCOA3;SEC14L2;TMEM91;TP73;AHR;NIF3L1  
;CSM5;CRAT;ACADVL;ACSF2;AASDH;ACSL5;STAT5B;CRYL1;HADHB;GHR;LIPC;ACADM;CHKB  
;BCA1;SREBF1;INSIG2;MBTPS2;APOL2;FLJ35024;LIPC;LEP



; ADAM22; RCAN2; CHD7; NPAS2; MOG; ADAM23; NHEJ1; TLX1; LIG4; ZBTB16; PTEN; WWP1; JARID2; CELSR1; PAX6  
; RGS12; RGS16  
POL1; OSBPL1A; APOM; COL4A3BP; LRP10; PLTP; SCP2; OSBPL10; APOL2; FLJ35024  
; ALT1; AAMP; NCL; PGF; ARHGAP24; PTEN; KLF5; EGFL7; ANPEP; MMP19  
MADD; SDHC; NDUFV3; ERO1LB; FRRS1; ETFDH; NDUFB2; GLRX; FAAH  
; DOK1; GLUD1; GFRA2; CD4; EPHA4; ROR1; ROR2; RGS2; DOK5; EPHB6; EPHB2; SEMA3C  
; IT3; MGP; MTOR; TMEM91; TGFBR2  
TGFBR2  
; HGF; GHR; C5  
  
; DLX6; DKK1; MBNL1  
; R1; AKT2; GRB10  
; NUP98; NUP85; PEX14; TPR; TIMM9  
; K; MARK1; STK3; MAP4K1; HMOX1; MAP4K2; ZAK; MAPK13; MKNK1; MAP4K4; MARK2; WNK1; SRPK1; STK4; WNK3; PRR1  
; CADM; BCL2L11  
; L1A; ACAT1; ABCA1; SREBF1; CYP46A1; SULT1A1; INSIG2; MBTPS2; OSBPL10; SULT1A2; FLJ35024  
; A2; PPARG; SOD1; AGT; LRP4; PTGS1  
IDFI  
DLC1; TIE1  
; I2; KLF6; BCL6  
IP1; UNC13B; AGT; SCNN1A  
  
; KRT4; SVIL; AVIL; KRT86; ANK1; SGCD; ABLIM3; KRT8  
; HERC3; C12orf51; HECW2; RPN2; PRKDC; TTLL3; PLOD1; TRIP12; QPCT; ERO1L; BAG6; HUWE1; HERC1; HECTD3  
  
; DKRB2; GNAZ; FZD6; OXTR; NPFFR1; ABCA1; GNAL; FPR1; SMO; GNAS; GNAS; CRHR1; GRM7; FZD3; FZD3; APLP2; GRI  
; C1D1; TBC1D12; TBC1D19; TBC1D16  
DNAJB6; HSPB7; CREB3L3; HERPUD1  
; IH1; IFI27; BANF1; PLSCR1; MX1; CXCL12  
; OD; ATP2C1; ATP13A3; PRKAG2; ATP1B1; ATP10A  
  
; PD; PGM2; PGM2L1; PDK4; LEP  
; I1; PTCH1  
  
; BF4; CAMK2A  
  
; A3; GRSF1; HOXB8; HTT; PCSK5  
  
; KAG2; FAS; PTGS1; FAAH  
; QGAP3; RAPGEF5; SYNGAP1; RAPGEF2; HGF; RAPGEF4; DAB2IP; KNDC1; RASGEF1B; GAPVD1; SIPA1L3  
;  
; I1  
; ; AGT; NET1; IGFBP2; CD320; IGFBP3; NOV  
;  
; CC3; POLR2B; POLR2D

UUP98;G3BP2;NUP85;TPR  
F2

UDAT1;RPP25;TRNT1  
;KDELR3;VPS41;CPNE3;AP1G2;VTI1A;VPS33A;ERGIC3;STX17;SAR1A;NCALD;MCFD2;CLTCL1;AP4S1;TRAI  
I5

UAMB1;PDGFRB  
UYD1;SLC12A2  
PIR;PCM1;MAF;HSF2BP;NFATC1;PARP1;NR3C1;TMF1;KLF5;TRIM24;SNAPC2;AHR;COPS5;TAF1A;KDM5A;SI  
SLC37A4;SLC37A1;SLC2A1;SLC35D1

;

UBE1;PLAU;ITGB3;PROS1;F13A1  
.1  
UOC2;CADPS2;ARFGEF1;STXBP5

HLA-DRB3;HLA-DRB3;HLA-DRB3  
U40A1

U1;CSTF3;HNRNPD;POLR2B;POLR2D;DHX38

UOPX  
. ;SOD1;AGT;DDIT3;RARB;STK4;KCNMA1;BCL6;IGFBP3;RIPK2

U6A13;SLC6A9;SLC6A1;NAT1

U2G2A;PLCD4;PLCD1;PLCG2;FAP;LIPC  
PSMD11;CDC16  
UOL2

EIF4E3;NCK1;GCN1L1;EIF4E  
UB;EPM2A

ST6GALNAC2;COG3;ST8SIA1;ST3GAL5;ST6GALNAC5

27;MDP1

5;TGM5;PC;ATP2C1;DSP

TH1R;EDNRA

L1;TGFBR2

GS2;RGS12;RGS16;IGFBP3

;NFKB2

3

.1;CDC16

UCP2;ATP6VOD1

30;ZWINT;IGF1

LC6A9;NAT1

IDAC8;CHD1;CHD6

1

11

3;CASP1;NOD2;MST4;TRAF1;GDF5;CASP8;IFIH1;APAF1;TRAF2;CFLAR;SARM1;CARD8;HIP1

10CLRE1C

16

7AL1;EPHX2;DCT;ACSS2;AS3MT;PHOSPHO2;ARSJ;EYA2;TKT;SLC27A3;EYA4;CHIT1;AGPAT5;ACSS1;PFKFB-  
LAMA1;ITGB3;NEXN

14;DLC1

SERINC5

GUCY1B3;CYB5R3;CXCL12

AR;CSRP2

7Z  
P23

1;PDE1B;HTT;NOVA1  
P2

7;LCK;G3BP2;IGF1;SDCBP



SMAD1;DOK5  
;TLN1;LSP1;RAC1;DNALI1;ELM01;IGF1;LYVE1

MA9;SLC4A3  
SC10;DDX17;DROSHA;NUFIP1;HNRNPD;ZFC3H1;ADAT1;ATXN1;TRNT1

NB1;NCK1;TTF2;CDH2;PSG2



FIP2;COL13A1;PTPRU;JAM2

T2;DNAJB6;ARID5B

SLC2A1

PITX1;FGF1;KRT18;IER3;HOXB5;FAT1;SIX4;SFRP1;WHSC1;EZH1;RAC1;LRP4;CLTCL1;LST1;DLC1;MCAM



;PRKRA;SGK1;MAPK8;SQSTM1;PTK2B;MAP4K2;ZAK;NPM1;MAPK13;ERRFI1;MKNK1;MAP4K4;AVIL;STK39;AI

†;TGFBR2

EPOR;HTT;NOTCH4;MDF1

ETV5;RGMB;KDM5A  
EP;ZNF160

BP; APLP1; ATM; ZAK; POLB; PTGER3; PLEKHG4; CLU; APP; ATXN1; HIP1; NAT1













.T1;ENPP1

BCL6





















CL1;PSG1;TFF3;TIAL1;PSG7;MX1





IGF1





'2C1;SLC30A8;SLC9A7





SA; TNS4; ERCC3; BCL6; CAV1







1; SEMA6A; BSG; PRLR; IL12RB1; LAMA1; LCK; IL1R1; CLEC2D; PIP4K2B; OSMR; CDA; TRPV1



RB2;BBS5;PDE6B;GRM7;RCVRN;PRPH;SEMA4A;PITPNM3;CC2D2A;DTNBP1;BBS4;AIM1;SCNN1A;OR11A1;RSI

.PL;DONSON;CALU;STAG2;TBL2;SORBS2;CMAHP;AUTS2;PART1;LRRFIP2;BAIAP2L1;MUC4;PIK3C2B;TM4SF;  
SC10;OAS1;POLE;TK2;TK2;METTL4;OAS3;DDX11;AK2;METTL3;SLC23A2;SLC23A2;REXO2

LN1;LEPRE1;PLOD3;OGFOD2  
RK

IS1BP3;SNX16;PPFIA4;ZCCHC2;SNX21;SNX25;SH3PXD2A;PXK



B;TSHR;AGT;PDGFA;MME;EFNA5;GDF5;ESR2;DAP3;DLGAP5;AR;AR;ADRA1A;ADRA1A;GRB10;SH3KBP1;PCSK

HKB;FKTN

TCEA3;TBX1;TCEA2;IKZF3;SNW1;SRCAP;FHL2;PKNOX2;ELF2;TCF4;CHD1;SMARCA2;GABPB1;BRD7;TCF7;T  
P1;RGS16;AIM1;PAX6

7;TRAF1;KIFAP3;OXA1L;KCNQ5;CD40;FAH;TRAF2;FANCA;FAS;TAP2  
TX17;SAR1A;KLHL2;COG3;CLTCL1;AP4S1;TOM1L2;STXBP2;VPS45;TAP2

ER1;NOVA1;KCNIP1;KCNMA1;SDCBP;SLC6A1;NAT1

7;CAV1

RABL2A;ARL6;ARL6;RIN2;ABR;DOCK1;RAB15;RAB36;BRAF;RAB8B;RHEB;RAP1B;RAC2

DARB1;RBM39;SRPK2;PRPF18

;ATXN1;PBXIP1

;SCP2;EPHB2;LY6H;BRAF;IGF1;CSRP2;PAX6;TGFB2

F4H;CARS;FDXACB1;TPR;SLA;TRNAU1AP;MRPS5

;TTF2;FHL2;ILF2;NOTCH4;TCF4

6;PTS

KAG2;ADRA1A;SRPK2;STK38L

;WWP2;KIAA0317;TGM5;FBX02;HECTD2;PLOD3;GABBR1;AKT2;ZFAND4;UBA7;UBL4A;MANBA;PADI4;WWP1;N

PR1;PTGER3;RAPGEF4;CCBP2;CCBP2;AR;ADRA1A;ADRA1A;GPR135;C5;OR11A1;PTGER2;CXCL12;LPAR4;ED



PPC10;STXBP2;BET1;VPS45

KIL;SUPT16H;MAFF;NMI;BATF3;MAX



4;TPI1;WBSCR22;C1QTNF3;PIGN;ALDOA;MMP28;SAT1;GLB1L2;ACAT1;GBA;ACAD10;LPCAT1;GALC;ECHDC2













;SLC40A1;LYVE1



HR;PDIA5;AR;AHSA2;UCL1;MAFF;C5







































































P03

1;SMA5;TARSL2;BRWD1;SH3TC1;PLEKHA4;MT4;GNL2;RIF1;NR4A3;LAMB2;NPFFR1;MRPS28;ORAOV1;EBF3;



DIS1;HR;TARDBP;CHAF1B;ZFX;ZMIZ1;ZNF658B;HOXB6;NFXL1;ETV1;MEIS2;ZNF83;MED24;MED24;LIMD1;IDBP;CHAF1B;ZMIZ1;ZNF658B;HDAC4;ETV1;ZNF83;MED24;MED24;ETS1;BRWD1;TRERF1;RERE;CBX7;AKNA;C...;INPP5F;TKT;ROS1;RPS6KA6;BTRC;LYN;ARHGAP20;FGF18;TRRAP;GRIA1;HDGF;GPER;BAIAP2L1;PRKAA2...A-B;HLA-B;HLA-B;HLA-B;HLA-B;HLA-B;HLA-B;HLA-B;HLA-B;HLA-B;HLA-C;HLA-C;HLA-C;HLA-C;HLA-C...OR1;SSX2IP;ISLR;MUC4;COL22A1;CD97;CADM3;CPXM2;ITGBL1;DSG3;ITGA2;SEMA5A;LGALS4;MLLT4;PDZ1...GRK4;MAPKAPK3;MAP2K5;PRKRA;STK36;MLKL;SGK1;EPHA2;BUB1;WEE1;NEK3;ADRBK2;PRKX;FASTK;BMPR...SORD;CYP2R1;HTATIP2;CYP26A1;PLOD1;PGD;PGD;CPS1;PTGR2;PYROXD1;SUMF1;CBR4;RRM2;TBXAS1;SM...2;MEIS1;PLXNA2;TMEFF1;HDAC4;HOXB6;ENC1;SHROOM2;SMAP1;LIMD1;TRERF1;SFRP5;HOXC10;SEMA4B;I...A-B;HLA-B;HLA-B;HLA-B;HLA-B;HLA-B;HLA-B;HLA-B;HLA-B;HLA-C;HLA-C;HLA-C;HLA-C;HLA-C;HLA-C...A-B;HLA-B;HLA-B;HLA-B;HLA-B;HLA-B;HLA-B;HLA-B;HLA-B;HLA-B;HLA-B;HLA-B;HLA-B;HLA-B;HLA-B...A-B;HLA-B;HLA-B;HLA-B;HLA-B;HLA-B;HLA-B;HLA-B;HLA-B;HLA-C;HLA-C;HLA-C;HLA-C;HLA-C;HLA-C...;NALCN;ATP6V0E2;KCNH1;ATP5A1;SLC12A7;ANO8;GRIA3;CLIC6;MCOLN3;CLCN4;CACNA2D3;SLC22A23;SI...2B;MPP7;DDIT3;MSH2;PARP1;CUL4A;RAD51B;SMC3;XPC;C11orf30;MCM2;TIMELESS;TDG;NONO;NEIL3;MD...APG;CLASP2;MAPRE3;FANCD2;NDC80;SGSM3;ZAK;MAPRE2;PCNP;NUSAP1;MAPK13;CDK1;CDCA5;SPC25;CDC...3TB16;WWP2;RNF144B;KIAA0317;CAND2;CCL28;UFSP2;RNF41;HECTD2;GABBR1;TRIM5;LRSAM1;FBXO10;UI...EZH1;EZH1;PHF1;KDM5C;KDM5A;CHD5;SRCAP;PADI4;EZH2;PHF2;EPC1;HDAC8;PRDM7;ING3;RBL1;RNF40...M7;FHL1;SQSTM1;DPYSL2;HUWE1;NPNT;MDGA1;UBE2V1;COL13A1;SEMA3A;CAMK1;SEMA6A;TUBD1;SPATA2...IA4F;LRRN1;NR2F1;INSC;DPYSL2;AGPAT1;MDGA1;SEMA3A;DPYSL4;GFRA2;CAMK1;SEMA6A;APLP1;SCRG1;C...ARD;ADAMTS16;ADAMTS6;POP1;CASP1;LTA4H;CTSL1;ADAM33;PCSK7;KLK4;ADAMTS1;DNPEP;TLL2;MMP7;I...TIMELESS;SMC4;CDK2;KIFC1;EVI5;PDS5B;SCP2;NEK1;LMLN;PPP1CB;CDC6;CDC16;ZWILCH

ZBTB7C;RBL1;RBL2;CDK2AP1

ANT7;B3GALT;NEU3;HEXA;NPL;H6PD;MAN2A2;MANBA;AR;PGM2;B4GALT6;PGM2L1;PHKA2;ST8SIA1;GALNT...

PTH1R;COL18A1;JARID2;E2F7;PDS5B;ADRA1A;DLC1;DLC1;BCL6;CDC6

ISP1;FAH;REV1;DCLRE1C;BCCIP;RAD17;FANCA;SUPT16H;RFC5;RAD51C

6;APLP1;ZBTB16;RNF144B;KIAA1967;SHF;TP63;TMEM173;MDM4;INPP5D;FASTKD1;TNS4;TP73;PDE1B;AI...

RBL1;HOPX

COG1;LRSAM1;TNPO3;RAB9B;ZFYVE20;RAB3IP;MAMDC4;GDI1;KIF17;NUP85;EXOC2;KIF13A;MCFD2;PEX1...

CRTC1;IGF1;ATXN1;ARNTL

N;CDC6;AIM1;ZWILCH

IF1;PDGFRB;RAC2

2;SCNN1A;NAT1

IPK2;VPS45;PXK

1;SULT1A1;CPNE3;PTEN;INSIG2;LRP10;PNPLA7;LRP4;HADHB;CLU;PLTP;PDE3A;MBTPS2;HACL1;APOL2;S...

QP3;ABCA1;STAU2;ERO1L;SCG5;LCN6;MADD;MADD;MADD;SDHC;HERC1;SLC25A42;ORC2;SLC25A22;CRAT;S...D3;MCM2;STIL;EIF5A;DLGAP5;MKI67;AR;AR;EVI5;TCF4;MDK;TAL1;UCHL1;PDXK;CSR2;TNFSF9;CDC16

1;PRKD3;SHANK2;ROCK2;NOD2;NFATC1;PLCD4;AKAP13;PAG1;PRKCD;CDC42BPG;PLCD1;NET1;DNMBP;DGKI

5;EFNA1;TNFSF9

IAL1

VEDD4;ADPRH;UBA6;PHKA2;HERPUD1;RIMKLB;RNF19A;UBE3C;TTL;ABL2

DNRA







;DPH5;ACSM5;ARSK;MMP16;PNPLA2;ALDOC;HMGCS1;GUSB;MGEA5;MMP24;FUCA1;HEXB;GSTM3;ELP3;TMEM6

























































































TMEM50B;C9orf114;MAPKAP1;NRM;OFD1;FSD1L;RNF6;DSCR3;PPP1R7;FAM53B;COL13A1;SOCS7;MYH10;MI



HOXC10;CHD7;RUNX2;RERE;PITX1;CBX7;AKNA;CDKN2A;ZBTB46;ZNF596;ZNF792;ITGB3BP;ZNF33B;RORA;CDKN2A;NFYC;ZBTB46;ZNF596;TCEB1;ZNF792;ITGB3BP;ZNF33B;RORA;ZNF554;RNF4;ZFPM2;NR4A3;ZNF6;PPP2R2C;ANGPTL7;TLR5;HLA-DRB3;NAMPT;PLXNA2;ODZ2;CXCL14;GNAZ;PDE1C;PPP2R2A;SRGAP3;SRGAPC;HLA-C;HLA-C;HLA-C;HLA-C;HLA-C;HLA-C;HLA-C;VCAM1;APOBEC3G;MAGI3;MDM2;BTRC;LYN;CD81;LMBD2;ITGB3BP;COL4A3;PTPRF;COL12A1;LAMB2;LAMB2;MSLN;STAB1;LPXN;NINJ1;COL11A1;ADAM23;RND3;P1B;PTK2B;MAP4K2;MELK;CAMK1;RIOK2;PRKD3;DYRK1B;SPEG;IRAK2;ROCK2;EPA4;MST4;MAPK13;CDK1;MOX;ACADSB;L2HGDH;GAPDH;IDH3G;EGLN1;ALDH1A3;HSD11B1;CYP51A1;BCKDHA;SMO;DPYD;FMO4;RFESD;KRERE;PITX1;NDRG2;ROBO2;SEMA5A;OLFM1;NTRK1;PLXND1;HTATIP2;ODF2;ODF2;FZD6;NDRG4;DYNC2H1;RC;HLA-C;HLA-C;HLA-C;HLA-C;HLA-C;HLA-C;HLA-H;HLA-H;HFE;HLA-F;HLA-G;MR1;HLA-B;HLA-B;HLA-C;HLA-C;HLA-C;HLA-C;HLA-C;HLA-C;HLA-C;HLA-C;HLA-C;HLA-C;HLA-C;HLA-C;HLA-C;THC;HLA-C;HLA-C;HLA-C;HLA-C;HLA-C;HLA-C;MICA;HLA-H;HLA-H;HFE;HLA-F;PSMB8;HLA-G;MR1;CD1D;MLC6A8;SLC38A9;SLC13A5;CACNA1B;CACNA1G;SCN4B;FXYP1;SLC12A2;KCNT2;SLC38A1;KCNQ3;TRPC1;SLC1;USP1;ERCC3;FAH;REV1;DCLRE1C;BCCIP;OGG1;RAD17;MSH3;FANCA;SUPT16H;BCL6;CASP3;RAD51C;A8;SMC2;MPP7;CCND3;ZWINT;DDIT3;TXNIP;SMC3;E2F6;KIF11;STRADB;MCM2;MCM2;TIMELESS;PLK3;RGSBA7;KLHL3;DET1;FBXO32;MIB2;WWP1;NEDD4;WSB1;FBXO25;UBA6;MYCBP2;ATG10;SH3RF2;ATG4C;UBE2Q2;RBL2;GPM6B;PGF;ZAK;GAS7;SPEG;SFRP1;KAZALD1;BHLHE41;SIM2;NAV1;ARHGAP24;TLL2;LGALS3;EFNA5;TS;GPM6B;DLG4;GAS7;CYP46A1;SIM2;NAV1;CCL28;RAPGEF5;TMOD2;AVIL;EFNA5;NINJ2;FZD3;GLDN;APAF1;FBXO2;MME;MME;CTSH;CASP8;GABBR1;TLL1;MAP2;PLAU;CFI;CPZ;HGF;ADAM28;PRSS23;PRSS16;F7;LRP4

3;AMY2A;ALG13;EBP;PPP1CB;NAGA;EPM2A;PDK4;GALM;HYAL3;HYAL3;GBGT1;ST3GAL5

HR;CD40;CLU;DAP3;DFFB;FXR1;ELM01;CTNBL1;CKAP2;APP;APIP;SCP2;RABEP1;ADRA1A;DOCK1;STEAP3;4;EXOC4;ATG10;RABEP1;CADPS2;SNX25;SDAD1;RAB15;ATG4C;RAB36;TPR;CHMP2B;RAB8B;XPO5;STXB5;

SULT1A2;FLJ35024;SERINC5;ACADM;CHKB;LEP;APOD

SORBS1;NCBP2;THOC1;ABCB6;TMED4;TCOF1;OSCP1;LRPPRC;SLC25A27;NDUFV3;SEC14L2;SLC35B3;SYT3;PIM1;PRG4;EDNRA

H;PLXNB1;APBB2;HMHA1;ANP32A;LCK;ECT2;CDC42BPA;DFFB;ARHGEF7;WSB1;PLCG2;DEPDC5;CHN1;SDCBP











68;AGPAT1;BCAM;GLB1L;C7orf10;ACSF2;AASDH;PNPLA3;PIGG;ACSL5;ENOSF1;PCCA;ATP2B4;NAT6;NAT6

























































































RPL44;NAAA;STRN;DOCK9;ERLIN2;TNXB;SPSB2;APOBEC3B;INPP5B;MAPRE3;FANCD2;RCL1;AKAP13;MOV10



ZNF554; MITF; EGR2; NR4A3; ZNF615; FRY; MYBL1; CHD9; TAF1; SF1; FOXM1; NAB1; ZNF75D; HIVEP2; ZNF655; I  
;15; FRY; CHD9; TP53BP1; TAF1; SF1; SF1; FOXM1; ZNF75D; HIVEP2; ZNF655; MED15; TCERG1; ZNF484; SP110; I  
'3; APLN; STK3; STK3; FGF13; LIMD1; SFRP5; ASIC1; DRD4; RRB1; ODZ3; ODZ3; ARHGAP26; MLLT4; PLXND1; GN  
3RD1; LDLR; CD46; HTATIP2; UBR4; SP110; KRT18; TBP; KIN; XPO1; CENPA; KRT7; UBN1; MDFIC; BNIP3L; CD4; W  
PKP1; LAMC2; PARVB; FAT1; EDIL3; NPNT; BCAM; CD72; PCDH9; COL8A1; NEO1; COL9A1; TNXB; ALCAM; GPR56; API  
10K; PTPRA; PIK3R4; COL4A3BP; MKNK1; FGFR3; MAP4K4; PIK3R1; ROR1; PRKCD; CDC42BPG; PTPRE; TWF1; CDK8  
DM3A; OGDH; GLUD1; ALDH3B1; JMJD1C; DHRS12; ACADVL; HSD17B7; LEPRE1; CDO1; RRM2B; HMGCR; SOD1; NNT; C  
NF111; FLNB; MITF; CHR1; SEMA6C; KIAA1598; SEMA5B; PLXNB2; FGF1; TNFAIP2; HHAT; SPRY4; CENPE; EBF3; C

IBS1; CXCL2; TNFSF15; ERAP1; HLA-DPA1; IFI44L; HLA-H; HLA-H; TNFRSF14; CHIT1; HLA-DRB3; HLA-DRB3; HI  
ICB; ULBP1

22A5; WNK1; ATP6V1H; ANO6; ABCC4; SAT2; MFI2; SLC20A2; HEPH; SLC39A5; KCNQ5; SCN1B; SLC38A4; PKD1L2

2; SMC4; MAP3K8; CDK2; AHR; MDC1; KAT2B; DLGAP5; CKAP2; BCCIP; MKI67; DDX11; DBF4; E2F7; RAD17; KIFC1  
; UBE2F; RNF19A; RFWD2; ATG12; UBE3C; KLHL9; RNF40; CDC16; ZNRF2; FBXO41; FBXO27

SK4; TSSK4; MARK2; TLL1; MGP; PBX1; UNC45A; NDRG3; GLDN; SRPK1; FXR1; SEMA4A; TXNDC2; NTNG2; FRZB; MDI  
DLX6; DOK5; CHD5; SEMA4A; NOTCH4; NTNG2; MDK; EPHB2; LY6H; FLJ35024; DBN1; IGF1; ATF2; RUFY3; CHD6; MI  
L; CPXM1; PC; QPCTL; MBTPS2; AGTPBP1; SUFU; LMLN; ATG4C; ADAMTS12; CFLAR; FAP; PEG10; BMP1; ADAM12; CA

; XAF1; PEG10; SH3KBP1; KRT8; UNC5B; PID1; ESPL1; TNFSF9; PDCD6IP; TIAL1

BET1; PDCD6IP; TIMM9; SNX27

ERO1LB; ABCA3; FRRS1; ETFDH; SLC7A2; FABP3; G3BP2; SLC16A9; SLC25A12; AR; PITPNM3; SLC44A1; MYO5A; C

; TP53TG5; PRKCE; RGNEF









);AGL;AGT;LCLAT1;THNSL2;MMP7;KCNT2;ECHDC3;ACO1;AMACR;MME;MOCS1;HDHD3;NEU3;ARSB;HEXA;NPL

























































































); ZMYM2; LYPLAL1; FAM3C; TM6SF1; TMEM106A; NUB1; TRIM2; MKRN1; WNK1; KDM4C; LRP10; ABCC4; EHMT2; FIL.





MED15;TCERG1;ESR1;ZNF484;ZFY;SP110;MCM7;NPAS2;ZNF501;NPTXR;PRDM8;ATXN3;HIF3A;ARNTL2;ZNF  
MCM7;ZNF501;NPTXR;PRDM8;ATXN3;ZNF354C;ZNF568;ZNF498;TBP;TSC22D1;ZNF273;MET;ZNF595;SOX6;  
A01;ITGB3BP;RORA;FLNB;ZFYVE16;MCHR1;AGRN;PDK2;MAP3K6;ITPR2;GRK4;SF1;NF1;ROPN1L;TXNRD1;E  
WP2;NPM1;CLDN1;AP1G2;DERL1;PIK3R1;NUP98;TRIM5;IPO5;ATP6V1H;ANKRD17;IFIH1;LCK;SLC20A2;IT  
LP1;ITGA1;PCDHB9;SIRPG;CD4;CLDN1;NLGN4Y;CNTNAP1;VCAN;MPZL3;ITGA10;TNC;THBS3;CX3CL1;NLGN  
;TSSK4;TSSK4;TTK;MARK2;CLK3;AKT2;CAMK2G;WNK1;MARK3;PKN2;STRADB;FGFR1;STK39;ROR2;PLK3;NR  
CYP46A1;ASPH;NOX4;CYP2C8;PLOD3;ADH1C;ADH1C;TMEM91;SQRDL;ACAD9;KDM4C;CPOX;H6PD;DMGDH;HEP  
SEMA4F;EPHA2;MET;SOX6;LRP5;C1GALT1;CELSR2;PKP1;AAMP;AFF3;INSC;PDLIM7;FHL1;HOXB5;PHF3;DF  
LA-DRB3;HFE;CXCL14;HLA-F;CD97;ERAP2;CTSC;CXCL13;APLN;ETS1;ODZ3;PSMB8;PRKRA;LAT2;TAPBP;S  
;CHRNE;SLC25A37;P2RX6;KCNIP1;SLC22A12;LST1;KCNMA1;TRPV1;SLC11A2;STEAP3;SLC12A8;TRPM7;AT  
;EVI5;PDS5B;SCP2;NEK1;LMLN;STAG3;STEAP3;PPP1CB;CDC6;AIM1;CDC16;ZWILCH;G0S2  
  
FI;EXT2;MDK;CCHCR1;TAL1;MICALCL;DBN1;PEG10;SRPK2;RUFY3;BMP1;CSRP2;PBXIP1;RGNEF;NRP2;HIP  
BNL1;NRP2;FKTN  
SP3;ESPL1;ANPEP;CTSK;MMP19

SLC26A6;MFSD1;SLC35F2;SLC36A1;NDUFB2;SLC19A2;GLRX;SLC7A8;SLC25A36;ABCA13;SLC28A3;UCP2;F









;GSTA4;PNPLA7;SAT2;UBA7;MAN2A2;TDG;PRNP;CRYL1;ACO2;GSTM2;DIP2A;HADHB;MANBA;CECR5;PPAT;C

























































































IP1L;HIP1R;LRP4;KDM5C;PLEKHA5;TTC39A;CARKD;WSB1;C2CD2L;TMEM106B;POMZP3;KNDC1;LRRTM1;HNR





ZNF354C; ZNF568; ZNF498; EBF3; L3MBTL1; TBP; TSC22D1; KCNH1; ZNF273; MET; ZNF595; SOX6; SAFB2; ZNF718; SAFB2; ZNF718; RFX5; NR2F1; CCNL1; CCNL1; MORF4L1; ZSCAN29; PRDM15; AFF3; PARP14; ELP3; NR4A2; VGLL3; SR1; MAP2K5; IL15RA; PLXNB2; FGF1; LPXN; NPAS2; NPPFR1; APBB1IP; HIF3A; PDE5A; NBN; ARNTL2; MAPK8; AITGB3; CPSF4; CD1D; HCK; TNPO1; EIF4H; KAT2B; SRCAP; WWP1; CRT1; CFLAR; BANF1; KRT8; MICB; FBLN1; EIF4A1; SIRPA; ARSB; NINJ2; CD99; TNR; PPF1BP1; FBLN5; ITGB3; RAC1; PRPH; SSPN; DCBLD1; CPXM1; RGMB; MEGF10; BP1; MAP3K8; CDK2; CDC42BPA; MAST4; HCK; SRPK1; AKT3; MAP2K4; FLT4; WNK3; NRK; CASK; EPHB6; EPHB2; NEIPH; OXA1L; LDHA; CHDH; CYP19A1; KDM5C; DAO; DAO; KDM5A; PDIA5; PIPOX; PXDN; FDFT1; AR; OGFOD2; GPX2; ALIPYSL2; PRTG; EDIL3; PLXNA4; TLE1; ADAMTS9; NPNT; MMP11; IFRD1; MDGA1; TLX1; SIX4; COL13A1; SEMA3A; HO1; QSTM1; CD74; ZEB1; MAP4K2; DBNL; CD4; HLA-G; OAS1; CRHR1; CCL28; COL4A3BP; CX3CL1; PAG1; IL16; GBP3; ITP1B1; KCNJ15; KCNS3; SLC23A2; SLC23A2; SCNN1A; KCNJ5; ATP6V0D1; SLC40A1; NAT1; KCNJ6

ANPEP; MMP19; DMRTA1; ZSCAN2; PAX6; SORT1

AAH; NMI; SLC25A14; DOC2B; SLC1A3; SLC19A3; SLC25A16; CHKB; SPIRE2; LYVE1; TAP2; SORT1; APOD









DES2;KAT2B;KIAA1456;PC;WBCR27;GPAM;ATP2C1;FAH;MICAL3;HMGCL;ATP13A3;OXCT1;OGG1;AHCYL2;F

























































































NPDP;IFI27;EXOG;SLC35F2;C14orf2;MACF1;MACF1;ETNK2;TMEM126B;FAM63B;MICALCL;LTBP1;PIGP;FAI



RFX5;RFX3;NR2F1;CCNL1;CCNL1;MORF4L1;ZSCAN29;PRDM15;AFF3;PARP14;HOXB5;NR4A2;VGLL4;DMTF1;4;PHF3;LEF1;SFPQ;ZNF566;ZNF343;ZEB1;ZNF621;ZNF776;ZNF692;ZBTB25;GTF2A2;NR1D1;PER3;HDAC2;RAP2;PTPN22;EPHA2;MYO10;PPARG;MAP2K3;LRP5;ARRB2;PPP1R12B;NR2F1;IL6ST;GNAL;PKP1;FPR1;ADRE;PDCD6IP;ANPEP

0;SVEP1;TLN2;COMP;NRXN3;NRXN3;ITGAE;LAMB1;FERMT1;NCAM1;APP;CASK;PCDH7;COL18A1;BYSL;ITGAK1;CAMK2B;IKBKE;BRAF;NUAK1;PTK7;SRPK2;CDKL1;IRAK3;AIM1;PRKCE;RIPK2;STK32C;TIE1;STK38L;FDH7A1;ADH5;MAOA;SOD3;GSR;STEAP3;ALDH1A1;FAS;PTGS1;ADI1;ASPHD1;DIO2;ACADM;SARDH;CYB5R3;AXC9;SEMA3B;CAMK1;SEMA6A;EBF1;TUBD1;SPATA20;HOXC6;GPM6B;HOXA3;PGF;GAS7;SFRP1;GLI1;VCAN;D

NUDCD1;INPP5D;CIITA;MR1;GBP1;CD40;OAS3;DCLRE1C;PXDN;CCBP2;CCBP2;LST1;SEMA3C;LIF;IKBKE;F











AHD2A;SCP2;PFKFB2;MICAL2;AMY2A;UGP2;KCNMA1;METTL7A;EBP;CBS;HIBCH;NAGA;HYAL3;HYAL3;ENPP1

























































































M114A2;C18orf1;DENR;NIT2;LRBA;AIM1;KIAA0247;BRD1;MT1F;C11orf58;FMNL1;MFN1;TIMP4



;SFPQ;TLE1;CREB3L2;PCMI;ZNF566;ZNF343;DMAP1;MTA3;NFATC2;TLX1;REL;ZNF621;MAF;THRB;SIX4;UI  
2;ZNF705G;CSRNP3;SP4;MDFIC;JMJD1C;PBRM1;ZBTB16;MPP2;ZNF419;MMS19;ZNF133;MED12;TCF7L2;GL  
RBK2;NR4A2;DPYSL2;MPP1;NPHP1;PLXNA4;TLE1;CD74;ANGPTL1;HMGB1;PYCARD;GNAS;GNAS;BCAM;RASSF

A9;PSTPIP1;IBSP;LMLN;CLSTN3;ITGA7;CDH2;PTK7;MCAM;ADAM12;LGALS3BP;HYAL3;NTM;THBS2;OMD;IT  
PIM1;PXK;CDK2AP1

ALDH1A2;ALDH1L1

OGKD;WNT9B;NME5;KAZALD1;FLI1;SIM2;TP63;NAV1;CCL28;ARHGAP24;TLL2;MOV10;TGIF1;EFNA5;TSSK4

AS;CEACAM8;MICB;TNFSF9;TCF7;ULBP1;SAMHD1;PF4V1;CXCL12;TAP2











l;MMP19;NAT1;ASNS;NAT10;ARSD





























































































BE2V1;ZNF776;ZNF692;ZBTB25;CERS4;KDM3A;GTF2A2;BRCA2;NR1D1;PER3;HOXC9;HDAC2;EBF1;ZNF705G  
I1;ZNF557;PHTF2;BBX;IRF5;MED22;TCEAL7;MEF2D;FLI1;FLI1;ZNF641;CAND2;WHSC1;MPP7;ZNF480;HC  
5;PDE6B;FASTK;PPP1R1C;PPP3CB;ARAP3;WISP3;PTK2B;PER3;CAMK1;DLG3;TNXB;ALCAM;CASP1;INPP5B;

GB5;DPT;NRP2;NRP2;NRXN2;NRXN2;ABL2;MFAP4;CXCL12;LYVE1

;TSSK4;MARK2;TLL1;MGP;TCTN1;UNC45A;FZD3;FZD3;PLXNB1;ROR2;TIMELESS;GLDN;LAMA1;STIL;ZMYM3









































































































;CSRNP3;JMJD1C;BCL3;PBRM1;MPP2;HOXA3;MTA1;ZNF419;ZNF133;MED12;GLI1;ZNF557;PHTF2;BBX;IRI  
JAC1;LRPPRC;ZMYM2;ZNF425;ZNF782;PHF21A;SUV420H1;HDAC3;ZNF862;ROR1;ZNF512;SP7;CDK8;NR1D2  
;IQGAP3;ATM;MPP2;PGF;NPM1;MTA1;DLG4;THOC1;MAPRE2;IRAK2;SFRP1;CNTNAP1;PDE4A;EPHA4;PDK3;I

3;ZBTB17;HOXB8;DIP2A;DLX6;KDM5A;FXR1;EGFL7;PLXNB3;SEMA4A;DDX1;CCBP2;TXNDC2;JARID2;SUFU;l









































































































F5;MED22;TCEAL7;MEF2D;BHLHE41;HMBOX1;FLI1;FLI1;NFATC1;SIM2;TSC22D3;ZNF641;CAND2;WHSC1;M  
;ZFP92;RARB;NFIB;TXNIP;KLF6;SEC14L2;ZNF451;C11orf30;E2F6;FOXJ2;KDM4C;ZNF684;ZNF585B;MCM  
L1RAP;TLR1;TNC;TSHR;SIM2;TLR3;YWHAZ;PTCH1;RIN3;FAM13B;MOK;ARHGAP24;STAT5B;TRAF1;SAV1;AF

EVI5;SLC26A6;NTNG2;FRZB;DKK1;MDK;APOL2;CCHCR1;TAL1;SHISA3;LIF;SKIL;ADRA1A;ZFR;MICALCL;F









































































































MPP7;EED;NCOR2;ZNF480;HDAC1;LRPPRC;ZMYM2;ZNF425;ZNF782;PHF21A;SUV420H1;DDIT3;HDAC3;ZNF8  
M2;MCM2;CCNC;HMG20A;TMF1;ROR2;ANP32A;SUZ12;ESR2;ZNF496;SMAD1;IKZF3;EZH1;EZH1;BAZ2B;NONO  
RHGAP6;PIK3R1;NCOA3;GRM7;ODZ4;ROR1;SYNGAP1;TNFSF13B;GABBR1;KIFAP3;HRH1;RARB;BCKDK;MTOR;

HIC1;DBN1;DSP;RUFY3;BMP1;UNC5B;MBNL3;NOV;CSRP2;CELSR1;PBXIP1;HMGB3;HOPX;NRP2;ANPEP;PIM1









































































































62;TGIF1;ROR1;ZNF512;PRDM6;CDK8;NR1D2;YEATS2;ZFP92;TLE6;RARB;NFIB;TXNIP;PBX1;NR3C1;KLF6  
;ZNF571;ZNF678;ZKSCAN3;TRIM24;ZBTB17;BAZ1A;SNAPC2;TAF1A;ZNF224;ERCC3;PHF1;KDM5C;CHD5;KAF  
NR3C1;PLAU;INPP5D;SMC3;IGFBP2;FLT3LG;TNR;DLG2;RCVRN;RAPH1;PKN2;HGF;TIRAP;TLE3;ROR2;ROR2

;MMP19;ZSCAN2;PAX6;SORT1;OLFML3









































































































3;HMG2;ZNF451;C11orf30;CIITA;E2F6;FOXJ2;KDM4C;ZNF684;ZNF585B;MCM2;MCM2;CCNC;HMG20A;TLE  
AT2B;ZNF618;NR1H3;SRCAP;PADI4;ZNF84;TTF2;TTF2;MCM5;FHL2;ZFP64;ZFP64;PRDM10;ZKSCAN2;ILF2  
2;LSP1;STAT4;ANK3;ESR2;INPP4B;SMAD1;MAP3K8;APBB1;ARHGAP28;GPR1;PDE1B;PTGER3;AHR;GDI1;RG







































































































3; TMF1; ROR2; TIMELESS; ANP32A; STAT4; SUZ12; ESR2; ZNF496; MXI1; KLF5; EZH1; EZH1; ETV4; BAZ2B; PBX2  
; ZNF433; GLIS3; ZSCAN23; C14orf43; ZBTB38; FRYL; ZNF700; EZH2; ZSCAN18; ZNF672; FOXP1; HNRNPD; JARID  
MB; NFKB2; PRKAB1; CD40; AKT3; NR4A1; STK4; WWP1; MAP2K4; PDE3A; ANK1; RIN2; EPOR; PLXNB3; CHRNE; CCBF









































































































| GO Term                                         | Count | p-Value     | q-Value      |
|-------------------------------------------------|-------|-------------|--------------|
| GO:0016020 membrane                             | 761   | 0           | 0            |
| GO:0016021 integral to membrane                 | 696   | 0           | 0            |
| GO:0005634 nucleus                              | 992   | 0           | 0            |
| GO:0005737 cytoplasm                            | 982   | 0           | 0            |
| GO:0005886 plasma membrane                      | 484   | 0           | 0            |
| GO:0005576 extracellular region                 | 362   | 3.22837E-17 | 7.580807E-17 |
| GO:0005829 cytosol                              | 212   | 4.78E-211   | 8.23E-209    |
| GO:0005739 mitochondrion                        | 203   | 4.25E-189   | 6.86E-187    |
| GO:0005887 integral to plasma membrane          | 199   | 4.25E-172   | 6.10E-170    |
| GO:0005783 endoplasmic reticulum                | 173   | 1.22E-159   | 1.66E-157    |
| GO:0005794 Golgi apparatus                      | 153   | 5.67E-138   | 6.36E-136    |
| GO:0005730 nucleolus                            | 121   | 2.98E-122   | 2.85E-120    |
| GO:0042612 MHC class I protein complex          | 65    | 1.69E-106   | 1.36E-104    |
| GO:0005615 extracellular space                  | 103   | 3.76E-93    | 2.62E-91     |
| GO:0005622 intracellular                        | 377   | 1.76E-91    | 1.16E-89     |
| GO:0005856 cytoskeleton                         | 133   | 7.43E-88    | 4.46E-86     |
| GO:0005789 endoplasmic reticulum membrane       | 94    | 3.14E-82    | 1.77E-80     |
| GO:0005578 extracellular matrix (sensu Metazoa) | 75    | 1.30E-78    | 6.99E-77     |
| GO:0005624 membrane fraction                    | 88    | 5.56E-69    | 2.93E-67     |
| GO:0030054 cell junction                        | 76    | 2.17E-64    | 1.08E-62     |
| GO:0005654 nucleoplasm                          | 82    | 1.13E-57    | 5.23E-56     |
| GO:0005625 soluble fraction                     | 52    | 3.27E-55    | 1.48E-53     |
| GO:0000139 Golgi membrane                       | 63    | 8.52E-55    | 3.73E-53     |
| GO:0005874 microtubule                          | 51    | 1.49E-50    | 5.81E-49     |
| GO:0005813 centrosome                           | 46    | 2.68E-47    | 1.00E-45     |
| GO:0045202 synapse                              | 45    | 2.63E-39    | 8.50E-38     |
| GO:0009986 cell surface                         | 41    | 1.78E-37    | 5.47E-36     |
| GO:0005759 mitochondrial matrix                 | 39    | 5.90E-36    | 1.68E-34     |
| GO:0048471 perinuclear region                   | 26    | 1.72E-28    | 3.96E-27     |
| GO:0005768 endosome                             | 35    | 1.86E-28    | 4.26E-27     |
| GO:0005792 microsome                            | 29    | 9.90E-26    | 2.08E-24     |
| GO:0005764 lysosome                             | 29    | 1.38E-25    | 2.85E-24     |
| GO:0005743 mitochondrial inner membrane         | 33    | 1.62E-24    | 3.24E-23     |
| GO:0005925 focal adhesion                       | 20    | 3.38E-24    | 6.66E-23     |
| GO:0031410 cytoplasmic vesicle                  | 41    | 4.62E-23    | 8.71E-22     |
| GO:0045211 postsynaptic membrane                | 23    | 3.10E-22    | 5.56E-21     |
| GO:0031225 anchored to membrane                 | 23    | 1.43E-21    | 2.46E-20     |
| GO:0005777 peroxisome                           | 21    | 1.79E-21    | 3.04E-20     |
| GO:0005788 endoplasmic reticulum lumen          | 18    | 3.24E-20    | 5.30E-19     |
| GO:0005875 microtubule associated complex       | 21    | 3.28E-20    | 5.33E-19     |
| GO:0015629 actin cytoskeleton                   | 25    | 4.62E-18    | 6.82E-17     |
| GO:0005765 lysosomal membrane                   | 16    | 5.07E-18    | 7.37E-17     |
| GO:0030173 integral to Golgi membrane           | 14    | 9.24E-18    | 1.33E-16     |
| GO:0009897 external side of plasma membrane     | 17    | 1.82E-17    | 2.59E-16     |
| GO:0008305 integrin complex                     | 12    | 3.84E-17    | 5.30E-16     |
| GO:0001726 ruffle                               | 14    | 3.88E-17    | 5.31E-16     |
| GO:0016607 nuclear speck                        | 17    | 6.39E-17    | 8.69E-16     |
| GO:0016363 nuclear matrix                       | 14    | 7.51E-17    | 1.01E-15     |
| GO:0016323 basolateral plasma membrane          | 20    | 1.64E-16    | 2.17E-15     |
| GO:0042995 cell projection                      | 31    | 1.74E-16    | 2.27E-15     |
| GO:0016459 myosin                               | 15    | 2.05E-16    | 2.66E-15     |

|            |                                       |    |          |          |
|------------|---------------------------------------|----|----------|----------|
| G0:0031965 | nuclear membrane                      | 18 | 2.33E-16 | 3.02E-15 |
| G0:0005741 | mitochondrial outer membrane          | 16 | 2.39E-16 | 3.08E-15 |
| G0:0016324 | apical plasma membrane                | 17 | 4.22E-16 | 5.38E-15 |
| G0:0005694 | chromosome                            | 28 | 7.18E-16 | 9.00E-15 |
| G0:0005581 | collagen                              | 12 | 9.84E-16 | 1.23E-14 |
| G0:0045121 | lipid raft                            | 15 | 1.33E-15 | 1.65E-14 |
| G0:0030424 | axon                                  | 13 | 6.61E-15 | 7.80E-14 |
| G0:0031093 | platelet alpha granule lumen          | 11 | 3.28E-14 | 3.60E-13 |
| G0:0000785 | chromatin                             | 18 | 3.42E-14 | 3.74E-13 |
| G0:0005681 | spliceosome complex                   | 17 | 7.68E-14 | 8.20E-13 |
| G0:0000118 | histone deacetylase complex           | 10 | 9.93E-14 | 1.04E-12 |
| G0:0005905 | coated pit                            | 11 | 2.50E-13 | 2.53E-12 |
| G0:0000777 | condensed chromosome kinetochore      | 11 | 2.50E-13 | 2.53E-12 |
| G0:0042470 | melanosome                            | 14 | 5.78E-13 | 5.69E-12 |
| G0:0005604 | basement membrane                     | 12 | 1.05E-12 | 1.02E-11 |
| G0:0005819 | spindle                               | 14 | 1.96E-12 | 1.87E-11 |
| G0:0005923 | tight junction                        | 12 | 3.57E-12 | 3.36E-11 |
| G0:0005840 | ribosome                              | 18 | 4.65E-12 | 4.35E-11 |
| G0:0030426 | growth cone                           | 9  | 5.31E-12 | 4.92E-11 |
| G0:0005606 | laminin-1                             | 6  | 8.45E-12 | 7.77E-11 |
| G0:0009925 | basal plasma membrane                 | 8  | 8.87E-12 | 8.11E-11 |
| G0:0005643 | nuclear pore                          | 12 | 1.07E-11 | 9.64E-11 |
| G0:0030027 | lamellipodium                         | 10 | 2.49E-11 | 2.17E-10 |
| G0:0008076 | voltage-gated potassium channel compl | 12 | 7.23E-11 | 6.02E-10 |
| G0:0005635 | nuclear envelope                      | 17 | 9.72E-11 | 7.99E-10 |
| G0:0000145 | exocyst                               | 5  | 1.18E-10 | 9.60E-10 |
| G0:0000151 | ubiquitin ligase complex              | 11 | 3.81E-10 | 2.93E-09 |
| G0:0005938 | cell cortex                           | 11 | 4.41E-10 | 3.38E-09 |
| G0:0005929 | cilium                                | 12 | 7.50E-10 | 5.59E-09 |
| G0:0043025 | cell soma                             | 10 | 1.26E-09 | 9.19E-09 |
| G0:0005891 | voltage-gated calcium channel complex | 7  | 1.87E-09 | 1.34E-08 |
| G0:0010008 | endosome membrane                     | 13 | 2.25E-09 | 1.59E-08 |
| G0:0042613 | MHC class II protein complex          | 8  | 3.84E-09 | 2.61E-08 |
| G0:0005769 | early endosome                        | 10 | 4.14E-09 | 2.81E-08 |
| G0:0000242 | pericentriolar material               | 5  | 6.44E-09 | 4.22E-08 |
| G0:0000159 | protein phosphatase type 2A complex   | 6  | 1.37E-08 | 8.54E-08 |
| G0:0030659 | cytoplasmic vesicle membrane          | 12 | 1.63E-08 | 1.01E-07 |
| G0:0042383 | sarcolemma                            | 7  | 2.08E-08 | 1.26E-07 |
| G0:0042645 | mitochondrial nucleoid                | 7  | 2.08E-08 | 1.26E-07 |
| G0:0005793 | ER-Golgi intermediate compartment     | 8  | 2.39E-08 | 1.44E-07 |
| G0:0005814 | centriole                             | 5  | 5.18E-08 | 3.01E-07 |
| G0:0001527 | microfibril                           | 4  | 5.66E-08 | 3.25E-07 |
| G0:0008021 | synaptic vesicle                      | 8  | 6.52E-08 | 3.67E-07 |
| G0:0019898 | extrinsic to membrane                 | 9  | 9.11E-08 | 5.06E-07 |
| G0:0005667 | transcription factor complex          | 12 | 1.12E-07 | 6.19E-07 |
| G0:0005605 | basal lamina                          | 5  | 1.42E-07 | 7.71E-07 |
| G0:0016012 | sarcoglycan complex                   | 4  | 1.68E-07 | 9.01E-07 |
| G0:0030018 | Z disc                                | 6  | 2.35E-07 | 1.22E-06 |
| G0:0031902 | late endosome membrane                | 7  | 2.47E-07 | 1.28E-06 |
| G0:0031901 | early endosome membrane               | 6  | 2.99E-07 | 1.54E-06 |
| G0:0005802 | Golgi trans face                      | 6  | 3.78E-07 | 1.91E-06 |
| G0:0034451 | centriolar satellite                  | 4  | 3.90E-07 | 1.95E-06 |



|            |                                       |   |          |          |
|------------|---------------------------------------|---|----------|----------|
| G0:0046658 | anchored to plasma membrane           | 5 | 6.58E-07 | 3.17E-06 |
| G0:0005640 | nuclear outer membrane                | 5 | 6.58E-07 | 3.17E-06 |
| G0:0000307 | cyclin-dependent protein kinase holoe | 4 | 7.73E-07 | 3.67E-06 |
| G0:0005881 | cytoplasmic microtubule               | 4 | 7.73E-07 | 3.67E-06 |
| G0:0043034 | costamere                             | 4 | 7.73E-07 | 3.67E-06 |
| G0:0005876 | spindle microtubule                   | 5 | 1.22E-06 | 5.40E-06 |
| G0:0030425 | dendrite                              | 7 | 1.87E-06 | 8.16E-06 |
| G0:0005901 | caveola                               | 5 | 2.09E-06 | 9.07E-06 |
| G0:0005637 | nuclear inner membrane                | 5 | 2.68E-06 | 1.14E-05 |
| G0:0000015 | phosphopyruvate hydratase complex     | 3 | 4.39E-06 | 1.80E-05 |
| G0:0005947 | alpha-ketoglutarate dehydrogenase com | 3 | 4.39E-06 | 1.80E-05 |
| G0:0009341 | beta-galactosidase complex            | 3 | 4.39E-06 | 1.80E-05 |
| G0:0045095 | keratin filament                      | 8 | 4.74E-06 | 1.91E-05 |
| G0:0000922 | spindle pole                          | 5 | 5.28E-06 | 2.11E-05 |
| G0:0030496 | midbody                               | 4 | 5.29E-06 | 2.11E-05 |
| G0:0008023 | transcription elongation factor compl | 4 | 5.29E-06 | 2.11E-05 |
| G0:0019717 | synaptosome                           | 6 | 1.03E-05 | 3.98E-05 |
| G0:0005665 | DNA-directed RNA polymerase II, core  | 4 | 1.05E-05 | 4.03E-05 |
| G0:0016514 | SWI/SNF complex                       | 4 | 1.05E-05 | 4.03E-05 |
| G0:0043197 | dendritic spine                       | 4 | 1.05E-05 | 4.03E-05 |
| G0:0005680 | anaphase-promoting complex            | 4 | 1.05E-05 | 4.03E-05 |
| G0:0046581 | intercellular canaliculus             | 3 | 1.09E-05 | 4.10E-05 |
| G0:0016529 | sarcoplasmic reticulum                | 5 | 1.36E-05 | 5.01E-05 |
| G0:0014069 | postsynaptic density                  | 4 | 1.42E-05 | 5.20E-05 |
| G0:0034361 | very-low-density lipoprotein particle | 4 | 1.42E-05 | 5.20E-05 |
| G0:0005639 | integral to nuclear inner membrane    | 3 | 2.16E-05 | 7.52E-05 |
| G0:0005663 | DNA replication factor C complex      | 3 | 2.16E-05 | 7.52E-05 |
| G0:0008385 | IkappaB kinase complex                | 3 | 2.16E-05 | 7.52E-05 |
| G0:0000796 | condensin complex                     | 3 | 2.16E-05 | 7.52E-05 |
| G0:0030286 | dynein complex                        | 5 | 2.20E-05 | 7.53E-05 |
| G0:0001669 | acrosome                              | 5 | 2.96E-05 | 9.98E-05 |
| G0:0005763 | mitochondrial small ribosomal subunit | 4 | 3.11E-05 | 1.04E-04 |
| G0:0000775 | chromosome, pericentric region        | 7 | 4.14E-05 | 1.33E-04 |
| G0:0033162 | melanosome membrane                   | 3 | 5.95E-05 | 1.88E-04 |
| G0:0030176 | integral to endoplasmic reticulum mem | 5 | 7.30E-05 | 2.26E-04 |
| G0:0005778 | peroxisomal membrane                  | 5 | 8.19E-05 | 2.53E-04 |
| G0:0032580 | Golgi cisterna membrane               | 3 | 8.86E-05 | 2.68E-04 |
| G0:0043204 | perikaryon                            | 3 | 8.86E-05 | 2.68E-04 |
| G0:0016281 | eukaryotic translation initiation fac | 3 | 8.86E-05 | 2.68E-04 |
| G0:0000119 | mediator complex                      | 4 | 1.03E-04 | 3.04E-04 |
| G0:0016605 | PML body                              | 4 | 1.03E-04 | 3.04E-04 |
| G0:0016235 | aggresome                             | 2 | 1.07E-04 | 3.04E-04 |
| G0:0005592 | collagen type XI                      | 2 | 1.07E-04 | 3.04E-04 |
| G0:0005584 | collagen type I                       | 2 | 1.07E-04 | 3.04E-04 |
| G0:0043259 | laminin-10                            | 2 | 1.07E-04 | 3.04E-04 |
| G0:0005642 | annulate lamellae                     | 2 | 1.07E-04 | 3.04E-04 |
| G0:0033257 | Bcl3/NF-kappaB2 complex               | 2 | 1.07E-04 | 3.04E-04 |
| G0:0032301 | MutSalpha complex                     | 2 | 1.07E-04 | 3.04E-04 |
| G0:0019008 | molybdopterin synthase complex        | 2 | 1.07E-04 | 3.04E-04 |
| G0:0032302 | MutSbeta complex                      | 2 | 1.07E-04 | 3.04E-04 |
| G0:0035098 | ESC/E(Z) complex                      | 2 | 1.07E-04 | 3.04E-04 |
| G0:0030133 | transport vesicle                     | 5 | 1.70E-04 | 4.50E-04 |

|            |                                       |   |           |           |
|------------|---------------------------------------|---|-----------|-----------|
| G0:0032039 | integrator complex                    | 3 | 1.71E-04  | 4.50E-04  |
| G0:0031941 | filamentous actin                     | 3 | 1.71E-04  | 4.50E-04  |
| G0:0034362 | low-density lipoprotein particle      | 3 | 2.27E-04  | 5.85E-04  |
| G0:0005657 | replication fork                      | 4 | 2.88E-04  | 7.33E-04  |
| G0:0030130 | clathrin coat of trans-Golgi network  | 3 | 2.92E-04  | 7.39E-04  |
| G0:0031461 | cullin-RING ubiquitin ligase complex  | 3 | 2.92E-04  | 7.39E-04  |
| G0:0005844 | polysome                              | 3 | 2.92E-04  | 7.39E-04  |
| G0:0048786 | presynaptic active zone               | 2 | 3.19E-04  | 7.58E-04  |
| G0:0005945 | 6-phosphofructokinase complex         | 2 | 3.19E-04  | 7.58E-04  |
| G0:0030895 | apolipoprotein B mRNA editing enzyme  | 2 | 3.19E-04  | 7.58E-04  |
| G0:0000780 | condensed nuclear chromosome, pericen | 2 | 3.19E-04  | 7.58E-04  |
| G0:0005588 | collagen type V                       | 2 | 3.19E-04  | 7.58E-04  |
| G0:0032281 | alpha-amino-3-hydroxy-5-methyl-4-isox | 2 | 3.19E-04  | 7.58E-04  |
| G0:0000300 | peripheral to membrane of membrane fr | 2 | 3.19E-04  | 7.58E-04  |
| G0:0001940 | male pronucleus                       | 2 | 3.19E-04  | 7.58E-04  |
| G0:0042405 | nuclear inclusion body                | 2 | 3.19E-04  | 7.58E-04  |
| G0:0000940 | outer kinetochore of condensed chromo | 2 | 3.19E-04  | 7.58E-04  |
| G0:0005816 | spindle pole body                     | 2 | 3.19E-04  | 7.58E-04  |
| G0:0005896 | interleukin-6 receptor complex        | 2 | 3.19E-04  | 7.58E-04  |
| G0:0005900 | oncostatin-M receptor complex         | 2 | 3.19E-04  | 7.58E-04  |
| G0:0005594 | collagen type IX                      | 2 | 3.19E-04  | 7.58E-04  |
| G0:0031616 | spindle pole centrosome               | 2 | 3.19E-04  | 7.58E-04  |
| G0:0000794 | condensed nuclear chromosome          | 4 | 3.68E-04  | 8.50E-04  |
| G0:0005801 | Golgi cis face                        | 3 | 4.58E-04  | 0.0010395 |
| G0:0005955 | calcineurin complex                   | 2 | 6.33E-04  | 0.0013395 |
| G0:0014731 | spectrin-associated cytoskeleton      | 2 | 6.33E-04  | 0.0013395 |
| G0:0005828 | kinetochore microtubule               | 2 | 6.33E-04  | 0.0013395 |
| G0:0000444 | MIS12/MIND type complex               | 2 | 6.33E-04  | 0.0013395 |
| G0:0005954 | calcium- and calmodulin-dependent pro | 2 | 6.33E-04  | 0.0013395 |
| G0:0001939 | female pronucleus                     | 2 | 6.33E-04  | 0.0013395 |
| G0:0005652 | nuclear lamina                        | 2 | 6.33E-04  | 0.0013395 |
| G0:0005672 | transcription factor TFIIA complex    | 2 | 6.33E-04  | 0.0013395 |
| G0:0005850 | eukaryotic translation initiation fac | 2 | 6.33E-04  | 0.0013395 |
| G0:0000800 | lateral element                       | 2 | 6.33E-04  | 0.0013395 |
| G0:0016942 | insulin-like growth factor binding pr | 2 | 6.33E-04  | 0.0013395 |
| G0:0030530 | heterogeneous nuclear ribonucleoprote | 3 | 6.74E-04  | 0.0014136 |
| G0:0016010 | dystrophin-associated glycoprotein co | 3 | 6.74E-04  | 0.0014136 |
| G0:0001725 | stress fiber                          | 3 | 6.74E-04  | 0.0014136 |
| G0:0019861 | flagellum                             | 4 | 7.04E-04  | 0.0014708 |
| G0:0005747 | respiratory chain complex I (sensu Eu | 4 | 0.001022  | 0.0020745 |
| G0:0043195 | terminal button                       | 2 | 0.0010474 | 0.0020745 |
| G0:0030122 | AP-2 adaptor complex                  | 2 | 0.0010474 | 0.0020745 |
| G0:0030121 | AP-1 adaptor complex                  | 2 | 0.0010474 | 0.0020745 |
| G0:0005958 | DNA-dependent protein kinase complex  | 2 | 0.0010474 | 0.0020745 |
| G0:0042825 | TAP complex                           | 2 | 0.0010474 | 0.0020745 |
| G0:0032154 | cleavage furrow                       | 2 | 0.0010474 | 0.0020745 |
| G0:0042765 | GPI-anchor transamidase complex       | 2 | 0.0010474 | 0.0020745 |
| G0:0005669 | transcription factor TFIID complex    | 3 | 0.0011045 | 0.0021361 |
| G0:0034364 | high-density lipoprotein particle     | 3 | 0.0011045 | 0.0021361 |
| G0:0005911 | intercellular junction                | 7 | 0.0011074 | 0.0021361 |
| G0:0030864 | cortical actin cytoskeleton           | 3 | 0.0014692 | 0.002809  |
| G0:0019907 | cyclin-dependent protein kinase activ | 2 | 0.0015602 | 0.0029289 |

|            |                                       |   |           |           |
|------------|---------------------------------------|---|-----------|-----------|
| G0:0016461 | unconventional myosin                 | 2 | 0.0015602 | 0.0029289 |
| G0:0033179 | proton-transporting V-type ATPase, VO | 2 | 0.0015602 | 0.0029289 |
| G0:0005658 | alpha DNA polymerase:primase complex  | 2 | 0.0015602 | 0.0029289 |
| G0:0008278 | cohesin complex                       | 2 | 0.0015602 | 0.0029289 |
| G0:0005868 | cytoplasmic dynein complex            | 2 | 0.0015602 | 0.0029289 |
| G0:0005851 | eukaryotic translation initiation fac | 2 | 0.0015602 | 0.0029289 |
| G0:0030141 | secretory granule                     | 6 | 0.0016338 | 0.0030209 |
| G0:0031513 | nonmotile primary cilium              | 3 | 0.0016766 | 0.0030901 |
| G0:0005859 | muscle myosin                         | 3 | 0.0021442 | 0.0038711 |
| G0:0005577 | fibrinogen complex                    | 2 | 0.0021693 | 0.0038711 |
| G0:0030669 | clathrin-coated endocytic vesicle mem | 2 | 0.0021693 | 0.0038711 |
| G0:0008290 | F-actin capping protein complex       | 2 | 0.0021693 | 0.0038711 |
| G0:0016471 | hydrogen-translocating V-type ATPase  | 2 | 0.0021693 | 0.0038711 |
| G0:0034464 | BBSome                                | 2 | 0.0021693 | 0.0038711 |
| G0:0032420 | stereocilium                          | 2 | 0.0021693 | 0.0038711 |
| G0:0005675 | transcription factor TFIID complex    | 2 | 0.0021693 | 0.0038711 |
| G0:0005786 | signal recognition particle (sensu Eu | 2 | 0.0021693 | 0.0038711 |
| G0:0000781 | chromosome, telomeric region          | 3 | 0.0024053 | 0.004215  |
| G0:0005884 | actin filament                        | 3 | 0.0026852 | 0.0046944 |
| G0:0005834 | heterotrimeric G-protein complex      | 3 | 0.0026852 | 0.0046944 |
| G0:0005890 | sodium:potassium-exchanging ATPase co | 2 | 0.0028726 | 0.0049476 |
| G0:0008250 | oligosaccharyl transferase complex    | 2 | 0.0028726 | 0.0049476 |
| G0:0005861 | troponin complex                      | 2 | 0.0028726 | 0.0049476 |
| G0:0030136 | clathrin-coated vesicle               | 5 | 0.0028904 | 0.0049476 |
| G0:0030131 | clathrin adaptor complex              | 3 | 0.0029844 | 0.0050967 |
| G0:0031227 | intrinsic to endoplasmic reticulum me | 4 | 0.0031086 | 0.0052964 |
| G0:0005795 | Golgi stack                           | 3 | 0.0036423 | 0.0060947 |
| G0:0008091 | spectrin                              | 2 | 0.003668  | 0.0060947 |
| G0:0005796 | Golgi lumen                           | 2 | 0.003668  | 0.0060947 |
| G0:0030057 | desmosome                             | 2 | 0.003668  | 0.0060947 |
| G0:0030672 | synaptic vesicle membrane             | 2 | 0.003668  | 0.0060947 |
| G0:0043190 | ATP-binding cassette (ABC) transporte | 2 | 0.003668  | 0.0060947 |
| G0:0017119 | Golgi transport complex               | 2 | 0.003668  | 0.0060947 |
| G0:0030867 | rough endoplasmic reticulum membrane  | 2 | 0.0045536 | 0.0074185 |
| G0:0005952 | cAMP-dependent protein kinase complex | 2 | 0.0045536 | 0.0074185 |
| G0:0000930 | gamma-tubulin complex                 | 2 | 0.0045536 | 0.0074185 |
| G0:0005932 | basal body                            | 2 | 0.0045536 | 0.0074185 |
| G0:0008180 | signalosome complex                   | 2 | 0.0045536 | 0.0074185 |
| G0:0000786 | nucleosome                            | 4 | 0.0046863 | 0.0075701 |
| G0:0031674 | I band                                | 3 | 0.0047835 | 0.0077103 |
| G0:0008287 | protein serine/threonine phosphatase  | 3 | 0.0052064 | 0.0083736 |
| G0:0000228 | nuclear chromosome                    | 5 | 0.0052547 | 0.0084434 |
| G0:0016328 | lateral plasma membrane               | 2 | 0.0055275 | 0.0088133 |
| G0:0031526 | brush border membrane                 | 2 | 0.0055275 | 0.0088133 |
| G0:0042627 | chylomicron                           | 2 | 0.0065876 | 0.010366  |
| G0:0001518 | voltage-gated sodium channel complex  | 2 | 0.0065876 | 0.010366  |
| G0:0005942 | phosphoinositide 3-kinase complex     | 2 | 0.0065876 | 0.010366  |
| G0:0005811 | lipid particle                        | 2 | 0.0065876 | 0.010366  |
| G0:0045177 | apical part of cell                   | 5 | 0.0081627 | 0.0124472 |
| G0:0009434 | flagellum (sensu Eukaryota)           | 2 | 0.0089593 | 0.0124472 |
| G0:0043005 | neuron projection                     | 5 | 0.0096503 | 0.0124472 |
| G0:0030175 | filopodium                            | 2 | 0.0102672 | 0.0124472 |

|            |                                       |   |           |           |
|------------|---------------------------------------|---|-----------|-----------|
| G0:0005596 | collagen type XIV                     | 1 | 0.0103422 | 0.0124472 |
| G0:0031095 | platelet dense tubular network membra | 1 | 0.0103422 | 0.0124472 |
| G0:0005590 | collagen type VII                     | 1 | 0.0103422 | 0.0124472 |
| G0:0005749 | respiratory chain complex II (sensu E | 1 | 0.0103422 | 0.0124472 |
| G0:0034359 | mature chylomicron                    | 1 | 0.0103422 | 0.0124472 |
| G0:0034360 | chylomicron remnant                   | 1 | 0.0103422 | 0.0124472 |
| G0:0000125 | PCAF complex                          | 1 | 0.0103422 | 0.0124472 |
| G0:0031302 | intrinsic to endosome membrane        | 1 | 0.0103422 | 0.0124472 |
| G0:0009330 | DNA topoisomerase complex (ATP-hydrol | 1 | 0.0103422 | 0.0124472 |
| G0:0019035 | viral integration complex             | 1 | 0.0103422 | 0.0124472 |
| G0:0002079 | inner acrosomal membrane              | 1 | 0.0103422 | 0.0124472 |
| G0:0031380 | nuclear RNA-directed RNA polymerase c | 1 | 0.0103422 | 0.0124472 |
| G0:0070062 | extracellular vesicular exosome       | 1 | 0.0103422 | 0.0124472 |
| G0:0043625 | delta DNA polymerase complex          | 1 | 0.0103422 | 0.0124472 |
| G0:0005595 | collagen type XII                     | 1 | 0.0103422 | 0.0124472 |
| G0:0042555 | MCM complex                           | 1 | 0.0103422 | 0.0124472 |
| G0:0005969 | serine-pyruvate aminotransferase, typ | 1 | 0.0103422 | 0.0124472 |
| G0:0005585 | collagen type II                      | 1 | 0.0103422 | 0.0124472 |
| G0:0032588 | trans-Golgi network membrane          | 1 | 0.0103422 | 0.0124472 |
| G0:0005600 | collagen type XIII                    | 1 | 0.0103422 | 0.0124472 |
| G0:0005591 | collagen type VIII                    | 1 | 0.0103422 | 0.0124472 |
| G0:0033593 | BRCA2-MAGE-D1 complex                 | 1 | 0.0103422 | 0.0124472 |
| G0:0043626 | PCNA complex                          | 1 | 0.0103422 | 0.0124472 |
| G0:0032996 | Bcl3-Bcl10 complex                    | 1 | 0.0103422 | 0.0124472 |
| G0:0033270 | paranode region of axon               | 1 | 0.0103422 | 0.0124472 |
| G0:0032839 | dendrite cytoplasm                    | 1 | 0.0103422 | 0.0124472 |
| G0:0000262 | mitochondrial chromosome              | 1 | 0.0103422 | 0.0124472 |
| G0:0043033 | isoamylase complex                    | 1 | 0.0103422 | 0.0124472 |
| G0:0005943 | 1-phosphatidylinositol-4-phosphate ki | 1 | 0.0103422 | 0.0124472 |
| G0:0048787 | active zone presynaptic plasma membra | 1 | 0.0103422 | 0.0124472 |
| G0:0016939 | kinesin II complex                    | 1 | 0.0103422 | 0.0124472 |
| G0:0048222 | glycoprotein network                  | 1 | 0.0103422 | 0.0124472 |
| G0:0000221 | hydrogen-transporting ATPase VI domai | 1 | 0.0103422 | 0.0124472 |
| G0:0005608 | laminin-3                             | 1 | 0.0103422 | 0.0124472 |
| G0:0005607 | laminin-2                             | 1 | 0.0103422 | 0.0124472 |
| G0:0043257 | laminin-8                             | 1 | 0.0103422 | 0.0124472 |
| G0:0070195 | growth hormone receptor complex       | 1 | 0.0103422 | 0.0124472 |
| G0:0005726 | perichromatin fibrils                 | 1 | 0.0103422 | 0.0124472 |
| G0:0031315 | extrinsic to mitochondrial outer memb | 1 | 0.0103422 | 0.0124472 |
| G0:0005895 | interleukin-5 receptor complex        | 1 | 0.0103422 | 0.0124472 |
| G0:0045160 | myosin I                              | 1 | 0.0103422 | 0.0124472 |
| G0:0005760 | gamma DNA polymerase complex          | 1 | 0.0103422 | 0.0124472 |
| G0:0005953 | CAAX-protein geranylgeranyltransferas | 1 | 0.0103422 | 0.0124472 |
| G0:0019897 | extrinsic to plasma membrane          | 3 | 0.0106762 | 0.0124472 |
| G0:0042734 | presynaptic membrane                  | 2 | 0.011654  | 0.0135321 |
| G0:0005871 | kinesin complex                       | 2 | 0.011654  | 0.0135321 |
| G0:0005882 | intermediate filament                 | 6 | 0.0118729 | 0.0137585 |
| G0:0000793 | condensed chromosome                  | 4 | 0.0128979 | 0.0149162 |
| G0:0055037 | recycling endosome                    | 2 | 0.0146573 | 0.0168566 |
| G0:0005913 | cell-cell adherens junction           | 2 | 0.0162704 | 0.0186205 |
| G0:0000784 | nuclear chromosome, telomeric region  | 2 | 0.0162704 | 0.0186205 |
| G0:0005798 | Golgi-associated vesicle              | 3 | 0.0176371 | 0.0201444 |

|            |                                       |   |           |           |
|------------|---------------------------------------|---|-----------|-----------|
| G0:0005839 | proteasome core complex (sensu Eukary | 2 | 0.0179555 | 0.0204539 |
| G0:0001533 | cornified envelope                    | 2 | 0.0179555 | 0.0204539 |
| G0:0005902 | microvillus                           | 2 | 0.019711  | 0.0208804 |
| G0:0031528 | microvillus membrane                  | 1 | 0.0205774 | 0.0208804 |
| G0:0060076 | excitatory synapse                    | 1 | 0.0205774 | 0.0208804 |
| G0:0030892 | mitotic cohesin complex               | 1 | 0.0205774 | 0.0208804 |
| G0:0014802 | terminal cisterna                     | 1 | 0.0205774 | 0.0208804 |
| G0:0031904 | endosome lumen                        | 1 | 0.0205774 | 0.0208804 |
| G0:0000791 | euchromatin                           | 1 | 0.0205774 | 0.0208804 |
| G0:0005589 | collagen type VI                      | 1 | 0.0205774 | 0.0208804 |
| G0:0045098 | type III intermediate filament        | 1 | 0.0205774 | 0.0208804 |
| G0:0033093 | Weibel-Palade body                    | 1 | 0.0205774 | 0.0208804 |
| G0:0005638 | lamin filament                        | 1 | 0.0205774 | 0.0208804 |
| G0:0032473 | external side of mitochondrial outer  | 1 | 0.0205774 | 0.0208804 |
| G0:0031436 | BRCA1-BARD1 complex                   | 1 | 0.0205774 | 0.0208804 |
| G0:0031305 | integral to mitochondrial inner membr | 1 | 0.0205774 | 0.0208804 |
| G0:0005827 | polar microtubule                     | 1 | 0.0205774 | 0.0208804 |
| G0:0045273 | respiratory chain complex II          | 1 | 0.0205774 | 0.0208804 |
| G0:0032807 | DNA ligase IV complex                 | 1 | 0.0205774 | 0.0208804 |
| G0:0005915 | zonula adherens                       | 1 | 0.0205774 | 0.0208804 |
| G0:0000172 | ribonuclease MRP complex              | 1 | 0.0205774 | 0.0208804 |
| G0:0008074 | guanylate cyclase complex, soluble    | 1 | 0.0205774 | 0.0208804 |
| G0:0005845 | mRNA cap complex                      | 1 | 0.0205774 | 0.0208804 |
| G0:0031234 | extrinsic to internal side of plasma  | 1 | 0.0205774 | 0.0208804 |
| G0:0031089 | platelet dense granule lumen          | 1 | 0.0205774 | 0.0208804 |
| G0:0031088 | platelet dense granule membrane       | 1 | 0.0205774 | 0.0208804 |
| G0:0005797 | Golgi medial cisterna                 | 1 | 0.0205774 | 0.0208804 |
| G0:0042599 | lamellar body                         | 1 | 0.0205774 | 0.0208804 |
| G0:0000120 | RNA polymerase I transcription factor | 1 | 0.0205774 | 0.0208804 |
| G0:0045298 | tubulin                               | 1 | 0.0205774 | 0.0208804 |
| G0:0031588 | AMP-activated protein kinase complex  | 1 | 0.0205774 | 0.0208804 |
| G0:0060170 | cilium membrane                       | 1 | 0.0205774 | 0.0208804 |
| G0:0042587 | glycogen granule                      | 1 | 0.0205774 | 0.0208804 |
| G0:0000792 | heterochromatin                       | 2 | 0.0215352 | 0.0208804 |
| G0:0030117 | membrane coat                         | 3 | 0.0233904 | 0.022624  |
| G0:0005770 | late endosome                         | 3 | 0.0233904 | 0.022624  |
| G0:0000790 | nuclear chromatin                     | 2 | 0.0253833 | 0.0244418 |
| G0:0034704 | calcium channel complex               | 2 | 0.0274041 | 0.0263287 |
| G0:0005746 | mitochondrial electron transport chai | 3 | 0.0277238 | 0.0266013 |
| G0:0034747 | Axin-APC-beta-catenin-GSK3B complex   | 1 | 0.0307068 | 0.0278996 |
| G0:0001891 | phagocytic cup                        | 1 | 0.0307068 | 0.0278996 |
| G0:0008282 | ATP-sensitive potassium channel compl | 1 | 0.0307068 | 0.0278996 |
| G0:0009331 | glycerol-3-phosphate dehydrogenase co | 1 | 0.0307068 | 0.0278996 |
| G0:0005826 | contractile ring                      | 1 | 0.0307068 | 0.0278996 |
| G0:0001520 | outer dense fiber                     | 1 | 0.0307068 | 0.0278996 |
| G0:0034430 | monolayer-surrounded lipid storage bo | 1 | 0.0307068 | 0.0278996 |
| G0:0016600 | flotillin complex                     | 1 | 0.0307068 | 0.0278996 |
| G0:0030904 | retromer complex                      | 1 | 0.0307068 | 0.0278996 |
| G0:0000176 | nuclear exosome (RNase complex)       | 1 | 0.0307068 | 0.0278996 |
| G0:0005964 | phosphorylase kinase complex          | 1 | 0.0307068 | 0.0278996 |
| G0:0042641 | actomyosin                            | 1 | 0.0307068 | 0.0278996 |
| G0:0042272 | nuclear RNA export factor complex     | 1 | 0.0307068 | 0.0278996 |

|            |                                       |   |           |           |
|------------|---------------------------------------|---|-----------|-----------|
| G0:0070022 | transforming growth factor beta recep | 1 | 0.0307068 | 0.0278996 |
| G0:0005758 | mitochondrial intermembrane space     | 2 | 0.0360967 | 0.0317405 |
| G0:0016342 | catenin complex                       | 1 | 0.0407315 | 0.0340517 |
| G0:0030877 | beta-catenin destruction complex      | 1 | 0.0407315 | 0.0340517 |
| G0:0034363 | intermediate-density lipoprotein part | 1 | 0.0407315 | 0.0340517 |
| G0:0031143 | pseudopodium                          | 1 | 0.0407315 | 0.0340517 |
| G0:0016602 | CCAAT-binding factor complex          | 1 | 0.0407315 | 0.0340517 |
| G0:0030870 | Mre11 complex                         | 1 | 0.0407315 | 0.0340517 |
| G0:0005664 | nuclear origin of replication recogni | 1 | 0.0407315 | 0.0340517 |
| G0:0031371 | ubiquitin conjugating enzyme complex  | 1 | 0.0407315 | 0.0340517 |
| G0:0000109 | nucleotide-excision repair complex    | 1 | 0.0407315 | 0.0340517 |
| G0:0005862 | muscle thin filament tropomyosin      | 1 | 0.0407315 | 0.0340517 |
| G0:0031514 | motile secondary cilium               | 1 | 0.0407315 | 0.0340517 |
| G0:0030863 | cortical cytoskeleton                 | 2 | 0.0432153 | 0.0360429 |
| G0:0005916 | fascia adherens                       | 1 | 0.0506525 | 0.0406098 |
| G0:0035253 | ciliary rootlet                       | 1 | 0.0506525 | 0.0406098 |
| G0:0014701 | junctional sarcoplasmic reticulum mem | 1 | 0.0506525 | 0.0406098 |
| G0:0033018 | sarcoplasmic reticulum lumen          | 1 | 0.0506525 | 0.0406098 |
| G0:0005782 | peroxisomal matrix                    | 1 | 0.0506525 | 0.0406098 |
| G0:0031233 | intrinsic to external side of plasma  | 1 | 0.0506525 | 0.0406098 |
| G0:0010369 | chromocenter                          | 1 | 0.0506525 | 0.0406098 |
| G0:0045335 | phagocytic vesicle                    | 1 | 0.0506525 | 0.0406098 |
| G0:0000808 | origin recognition complex            | 1 | 0.0506525 | 0.0406098 |
| G0:0005775 | vacuolar lumen                        | 1 | 0.0506525 | 0.0406098 |
| G0:0042827 | platelet dense granule                | 1 | 0.0506525 | 0.0406098 |
| G0:0005697 | telomerase holoenzyme complex         | 1 | 0.0506525 | 0.0406098 |
| G0:0022625 | cytosolic large ribosomal subunit     | 2 | 0.0588318 | 0.046931  |
| G0:0035267 | TIP60 histone acetyltransferase compl | 1 | 0.0604709 | 0.0471245 |
| G0:0005678 | chromatin assembly complex            | 1 | 0.0604709 | 0.0471245 |
| G0:0005587 | collagen type IV                      | 1 | 0.0604709 | 0.0471245 |
| G0:0031672 | A band                                | 1 | 0.0604709 | 0.0471245 |
| G0:0032391 | photoreceptor connecting cilium       | 1 | 0.0604709 | 0.0471245 |
| G0:0005655 | nucleolar ribonuclease P complex      | 1 | 0.0604709 | 0.0471245 |
| G0:0032040 | small subunit processome              | 1 | 0.0604709 | 0.0471245 |
| G0:0005662 | DNA replication factor A complex      | 1 | 0.0604709 | 0.0471245 |
| G0:0001739 | sex chromatin                         | 1 | 0.0604709 | 0.0471245 |
| G0:0005869 | dynactin complex                      | 1 | 0.0604709 | 0.0471245 |
| G0:0000127 | transcription factor TFIIC complex    | 1 | 0.0604709 | 0.0471245 |
| G0:0042719 | mitochondrial intermembrane space pro | 1 | 0.0604709 | 0.0471245 |
| G0:0005912 | adherens junction                     | 3 | 0.0670444 | 0.051919  |
| G0:0005885 | Arp2/3 protein complex                | 1 | 0.0701879 | 0.053583  |
| G0:0042824 | MHC class I peptide loading complex   | 1 | 0.0701879 | 0.053583  |
| G0:0045261 | proton-transporting ATP synthase comp | 1 | 0.0701879 | 0.053583  |
| G0:0031519 | PcG protein complex                   | 1 | 0.0701879 | 0.053583  |
| G0:0005666 | DNA-directed RNA polymerase III compl | 1 | 0.0701879 | 0.053583  |
| G0:0016581 | NuRD complex                          | 1 | 0.0701879 | 0.053583  |
| G0:0016234 | inclusion body                        | 1 | 0.0701879 | 0.053583  |
| G0:0043209 | myelin sheath                         | 1 | 0.0701879 | 0.053583  |
| G0:0005579 | membrane attack complex               | 1 | 0.0701879 | 0.053583  |
| G0:0005838 | proteasome regulatory particle (sensu | 1 | 0.0798044 | 0.0594429 |
| G0:0030315 | T-tubule                              | 1 | 0.0798044 | 0.0594429 |
| G0:0035097 | histone methyltransferase complex     | 1 | 0.0798044 | 0.0594429 |

|            |                                       |    |           |           |
|------------|---------------------------------------|----|-----------|-----------|
| G0:0043205 | fibril                                | 1  | 0.0798044 | 0.0594429 |
| G0:0005761 | mitochondrial ribosome                | 2  | 0.0851958 | 0.0633178 |
| G0:0033180 | proton-transporting V-type ATPase, V1 | 1  | 0.0893214 | 0.0658504 |
| G0:0005852 | eukaryotic translation initiation fac | 1  | 0.0893214 | 0.0658504 |
| G0:0000502 | proteasome complex (sensu Eukaryota)  | 2  | 0.0914615 | 0.0670865 |
| G0:0005790 | smooth endoplasmic reticulum          | 1  | 0.09874   | 0.0718539 |
| G0:0001673 | male germ cell nucleus                | 1  | 0.09874   | 0.0718539 |
| G0:0045334 | clathrin-coated endocytic vesicle     | 1  | 0.09874   | 0.0718539 |
| G0:0031201 | SNARE complex                         | 1  | 0.09874   | 0.0718539 |
| G0:0031092 | platelet alpha granule membrane       | 1  | 0.09874   | 0.0718539 |
| G0:0032592 | integral to mitochondrial membrane    | 1  | 0.09874   | 0.0718539 |
| G0:0030132 | clathrin coat of coated pit           | 1  | 0.09874   | 0.0718539 |
| G0:0005689 | minor (U12-dependent) spliceosome com | 1  | 0.1080613 | 0.0777391 |
| G0:0031594 | neuromuscular junction                | 1  | 0.1080613 | 0.0777391 |
| G0:0005583 | fibrillar collagen                    | 1  | 0.1080613 | 0.0777391 |
| G0:0005744 | mitochondrial inner membrane preseque | 1  | 0.1080613 | 0.0777391 |
| G0:0001750 | photoreceptor outer segment           | 1  | 0.1172862 | 0.0836071 |
| G0:0009898 | internal side of plasma membrane      | 1  | 0.1172862 | 0.0836071 |
| G0:0042101 | T cell receptor complex               | 1  | 0.1172862 | 0.0836071 |
| G0:0000299 | integral to membrane of membrane frac | 1  | 0.1172862 | 0.0836071 |
| G0:0005858 | axonemal dynein complex               | 1  | 0.1172862 | 0.0836071 |
| G0:0000795 | synaptonemal complex                  | 1  | 0.1172862 | 0.0836071 |
| G0:0005833 | hemoglobin complex                    | 1  | 0.1172862 | 0.0836071 |
| G0:0012505 | endomembrane system                   | 17 | 0.1235505 | 0.0876252 |
| G0:0031231 | intrinsic to peroxisomal membrane     | 1  | 0.1264157 | 0.0892041 |
| G0:0005892 | nicotinic acetylcholine-gated recepto | 1  | 0.1264157 | 0.0892041 |
| G0:0033116 | ER-Golgi intermediate compartment mem | 1  | 0.1443924 | 0.100897  |
| G0:0005791 | rough endoplasmic reticulum           | 1  | 0.1532417 | 0.1065473 |
| G0:0005762 | mitochondrial large ribosomal subunit | 1  | 0.1532417 | 0.1065473 |
| G0:0005924 | cell-substrate adherens junction      | 2  | 0.1600121 | 0.1110156 |
| G0:0005863 | striated muscle thick filament        | 1  | 0.1619994 | 0.1122136 |
| G0:0005753 | proton-transporting ATP synthase comp | 1  | 0.187733  | 0.1282334 |
| G0:0030667 | secretory granule membrane            | 1  | 0.187733  | 0.1282334 |
| G0:0017053 | transcriptional repressor complex     | 1  | 0.187733  | 0.1282334 |
| G0:0005922 | connexon complex                      | 1  | 0.1961341 | 0.1333722 |
| G0:0005930 | axoneme                               | 1  | 0.1961341 | 0.1333722 |
| G0:0043296 | apical junction complex               | 2  | 0.1969858 | 0.1336874 |
| G0:0016327 | apicolateral plasma membrane          | 2  | 0.2082778 | 0.1410729 |
| G0:0031252 | leading edge                          | 2  | 0.2082778 | 0.1410729 |
| G0:0030532 | small nuclear ribonucleoprotein compl | 1  | 0.2208198 | 0.1489431 |
| G0:0016591 | DNA-directed RNA polymerase II, holoe | 2  | 0.2234306 | 0.150488  |
| G0:0005903 | brush border                          | 1  | 0.2368545 | 0.1590524 |
| G0:0005921 | gap junction                          | 1  | 0.2447477 | 0.1639692 |
| G0:0043234 | protein complex                       | 23 | 0.2577476 | 0.1719871 |
| G0:0016585 | chromatin remodeling complex          | 1  | 0.2602901 | 0.1735043 |
| G0:0043235 | receptor complex                      | 2  | 0.2654169 | 0.1767165 |
| G0:0030139 | endocytic vesicle                     | 1  | 0.2755127 | 0.1828258 |
| G0:0016528 | sarcoplasm                            | 1  | 0.2830061 | 0.1874371 |
| G0:0016023 | cytoplasmic membrane-bound vesicle    | 6  | 0.2839861 | 0.1878935 |
| G0:0031966 | mitochondrial membrane                | 5  | 0.3635063 | 0.2375852 |
| G0:0016604 | nuclear body                          | 2  | 0.3785311 | 0.2470927 |
| G0:0005740 | mitochondrial envelope                | 5  | 0.4000607 | 0.2602914 |

|            |                                       |     |           |             |
|------------|---------------------------------------|-----|-----------|-------------|
| G0:0015935 | small ribosomal subunit               | 1   | 0.4528437 | 0.2928265   |
| G0:0005626 | insoluble fraction                    | 7   | 0.5040288 | 0.3237768   |
| G0:0030017 | sarcomere                             | 1   | 0.5367045 | 0.3436558   |
| G0:0015630 | microtubule cytoskeleton              | 5   | 0.5468422 | 0.3498003   |
| G0:0022626 | cytosolic ribosome                    | 1   | 0.5509339 | 0.352156    |
| G0:0005774 | vacuolar membrane                     | 1   | 0.5601767 | 0.3577099   |
| G0:0030016 | myofibril                             | 1   | 0.5736854 | 0.3660194   |
| G0:0043292 | contractile fiber                     | 1   | 0.5994713 | 0.3821408   |
| G0:0005815 | microtubule organizing center         | 2   | 0.6401151 | 0.4070451   |
| G0:0031012 | extracellular matrix                  | 3   | 0.6418848 | 0.40807     |
| G0:0030529 | ribonucleoprotein complex             | 4   | 0.6483737 | 0.4116886   |
| G0:0012506 | vesicle membrane                      | 1   | 0.7691875 | 0.4848838   |
| G0:0042598 | vesicular fraction                    | 1   | 0.8508789 | 0.5348796   |
| G0:0005773 | vacuole                               | 1   | 0.8826091 | 0.5538822   |
| G0:0031982 | vesicle                               | 3   | 0.9161592 | 0.5738213   |
| G0:0044431 | Golgi apparatus part                  | 1   | 0.989168  | 0.615223    |
| G0:0042175 | nuclear envelope-endoplasmic reticulu | 1   | 0.997113  | 0.6155129   |
| G0:0000267 | cell fraction                         | 1   | 0.9998136 | 0.6155129   |
| G0:0005575 | cellular_component                    | 125 | 0.9999346 | 0.6155129   |
| G0:0031981 | nuclear lumen                         | 1   | 0.9999948 | 0.6155129   |
| G0:0044428 | nuclear part                          | 1   | 0.9999999 | 0.6155129   |
| G0:0043231 | intracellular membrane-bound organell | 7   |           | 1 0.6155129 |
| G0:0031224 | intrinsic to membrane                 | 4   |           | 1 0.6155129 |





UNC84A;PTGDS;AKAP6;IL SUN1;PTGDS;AKAP6;IL15RA;MYO6;CERS4;SHISA5;NUP98;MKRN1;PNPLA7;NUI  
HK2;MFF;GK;GK3P;MAOB;HK2;MFF;GK;GK;MAOB;AKAP1;ACSL5;ABC6;TMEM173;GPAM;MAOA;MGST1;BCI  
SLC4A7;PLB1;SLC14A2;MSLC4A7;PLB1;SLC14A2;MAL2;INADL;MUC20;SHROOM2;ATP6V1B1;SLC22A18;A  
TELO2;FANCI;TOP2A;ITG CLK2;FANCI;TOP2A;ITGB3BP;RIF1;NBN;CENPA;SP100;CENPF;FANCD2;CDCA8  
COL14A1;COL10A1;COL5A COL14A1;COL10A1;COL5A3;COL24A1;COL11A2;COL1A2;COL4A3;COL11A1;COI  
MALL;LYN;EFNB1;CD55;A MALL;LYN;EFNB1;CD55;ADCY3;LAT2;LRRK2;ABCA1;CTTNBP2;SORBS1;SGCA;I  
NTRK2;SLC38A1;NF1;DPY NTRK2;SAT1;NF1;DPYSL2;MYH10;SEMA6A;SLC38A1;HTT;LRRTM1;MAPT;MYCBI  
THBS4;FN1;VEGFA;SERPI THBS4;FN1;VEGFA;SERPINA1;THBS1;THBS3;HGF;APP;IGF1;IGF1;THBS2  
SMARCC1;CHD7;CBX7;CHD SMARCC1;CHD7;CBX7;CHD9;MCM7;NPTXR;CCNL1;MAF;POLA1;CENPF;MEN1;CHI  
HNRNPF;PPIL3;SRRM1;SF HNRNPF;PPIL3;SRRM1;SF1;PPIE;GEMIN7;PABPC1;SLU7;HRH1;SNRNP35;SNW  
HDAC9;HDAC11;HDAC6;HD HDAC9;HDAC11;HDAC6;HDAC4;RERE;HDAC2;HDAC1;PHF21A;HDAC3;HDAC8  
AP1S3;EPS15;DAB2;LDLR AP1S3;EPS15;DAB2;LDLR;MYO6;LRP10;HIP1R;APP;FLJ35024;AP4S1;SORT1  
KNTC1;TP53BP1;BUB1;CE KNTC1;TP53BP1;BUB1;CENPA;CLASP2;NDC80;SPC25;ZWINT;NUP85;CENPN;ZV  
SERPINF1;CALU;GGH;TFR SERPINF1;CALU;GGH;TFR;MYRIP;PDIA6;BSG;YWHAZ;SLC2A1;RAC1;HPS4;FA  
COL7A1;LAMA3;NTN4;SMO COL7A1;LAMA3;NTN4;SMOC1;LAMC2;COL8A1;APLP1;ADAMTS1;SMC3;LAMA1;LA  
CDC20;KIAA1009;KIF23;CDC20;KIAA1009;KIF23;MAP2K5;CENPE;MYH10;CLASP2;TTK;SNCG;NUP85;K  
WNK4;MAGI3;INADL;SHRO WNK4;MAGI3;INADL;SHROOM2;SYNPO;CLDN1;MPP7;JAM2;TJP1;CLDN4;CLDN12  
RPS4Y2;RPL37A;RRBP1;R RPS4Y2;RPL37A;RRBP1;RPL9;SF1;MRPS28;MRPS28;MRPL44;RPL39L;MRPS25  
NTRK2;STMN2;MYH10;APB NTRK2;STMN2;MYH10;APBB2;APBB1;LRRTM1;MYO5A;MAPT;RUFY3  
LAMA3;LAMA4;LAMA2;LAM LAMA3;LAMA3;LAMA2;LAMA4;LAMB2;LAMA1;LAMB1  
LDLRAP1;NOTCH4;MUC20; LDLRAP1;NOTCH3;MUC20;CTTNBP2;MET;AGPAT1;OSCP1;NOTCH4;NMI  
XPO7;SNUPN;NUP160;XPO XPO7;SNUPN;NUP160;XPO1;NUP214;RANBP17;NUP98;IPO5;EIF5A;TNPO1;NUI  
CTNNB1;ITGB1BP1;FGD6;CTNNB1;ITGB1BP1;FGD6;ARAP3;DBNL;APBB2;APBB1;ALS2;FAP;CDH2  
KCNA5;KCNK2;KCNMB1;KC HK2;KCNK2;KCNMB1;KCNMB4;KCNH1;KCNQ3;KCNQ5;KCTD9;KCNMA1;KCN3;KCN  
SYNE1;GNAZ;SP140;NPC1 SYNE1;GNAZ;SP140;NPC1;HTATIP2;LBR;DNASE1;NRM;POLA1;SREBF1;CENPF  
EXOC6B;EXOC7;EXOC1;EX EXOC6B;EXOC1;EXOC1;EXOC6;EXOC4  
FBXL5;FBXL4;BARD1;FBX FBXL5;FBXL4;BARD1;FBXO21;WWP2;RNF144B;FBXO10;WWP1;NEDD4;FBXO25;V  
COL10A1;RYR1;SHROOM2;COL10A1;RYR1;SHROOM2;SCIN;MYO6;ARFIP2;NCL;MYH10;CLASP2;DBNL;NEDI  
DYNC2LI1;IFT172;TTL7 DYNC2LI1;IFT172;TTL7;ODF2;DYNC2H1;SPAG4;CEP250;SMO;CEP290;BBS5  
NTRK2;SHROOM2;DPYSL2;NTRK2;SHROOM2;DPYSL2;MYH10;SOD1;SNCAIP;HGF;MAPK8IP2;UCHL1;SLC1A3  
CACNB3;CACNA1I;CACNA2 CACNB3;CACNA1I;CACNA2D1;CACNA1A;CACNA1D;CACNA1B;CACNA1G  
APOB;LDLR;VPS53;PRAF2 APOB;LDLR;VPS53;PRAF2;VPS52;TLR3;AP1G2;CD1D;WDR44;STEAP3;ZNRF2;V  
HLA-DPB1;HLA-DPB1;HLA HLA-DPB1;HLA-DPB1;HLA-DPB1;HLA-DPB1;HLA-DPA1;HLA-DRB3;HLA-DRB3;I  
LDLRAP1;GRIPAP1;CD4;R LDLRAP1;GRIPAP1;CD4;RIN3;KIFC1;RABEP1;ALS2;SLC11A2;SNX27;SORT1  
TUBG2;TUBG1;PCM1;LCK;TUBG2;TUBG1;PCM1;LCK;BBS4  
PPP2R2C;PPP2R4;PPP2R2 PPP2R2C;PPP2R4;PPP2R2A;PPP2R3A;PPP2R3B;PPP2CB  
AP1S3;GPRC5C;IL15RA;D AP1S3;GPRC5C;IL15RA;DYSF;CTTNBP2;AP1G2;WHAMM;ARHGAP21;CLTCL1;CAI  
DMD;DES;LAMA2;GNAS;SG DMD;DES;LAMA2;GNAS;SGCA;DTNBP1;KRT8  
CPS1;ACADVL;LRPPRC;TO CPS1;ACADVL;LRPPRC;TOP1MT;HADHB;MDP1;PIM1  
FN1;NUCB2;PDIA6;RAB24 FN1;NUCB2;PDIA6;RAB24;RGMB;WHAMM;MCFD2;ANPEP  
CROCC;TOP2A;CEP250;TU CROCC;TOP2A;CEP250;TUBD1;BBS4  
MFAP5;MFAP2;FBN1;MFAP MFAP5;MFAP2;FBN1;MFAP4  
SYT9;RAB3A;LRRK2;DMXL SYT9;RAB3A;LRRK2;DMXL2;SYT3;AMPH;DOC2B;SLC40A1  
BST1;EPB41L1;EPB41;EP BST1;EPB41L1;EPB41;EPB41L5;EPB41L4B;PTPN3;GFRA2;PRNP;PTPN4  
CTNNB1;SMAD3;TFDP2;SI CTNNB1;SMAD3;TFDP2;SIX1;NPAS2;LEF1;E2F6;SMAD1;PBX2;E2F7;ARNTL;RI  
LAMA4;AGRN;LAMA2;LAMA LAMA3;AGRN;LAMA2;LAMA4;LAMB2;LAMB2  
SGCB;SGCA;SGCD;SGCE SGCB;SGCA;SGCD;SGCE  
CTNNB1;SORBS2;NEB;DES CTNNB1;SORBS2;NEB;DES;HOMER1;KRT8  
ABCA5;NPC1;SLC9A9;VPS ABCA5;NPC1;SLC9A9;VPS37A;VPS33A;STARD3NL;SLC11A2  
HLA-A;HSD17B6;EPS15;Z HLA-A;HSD17B6;EPS15;ZFYVE16;EEA1;ZFYVE20  
LRRK2;TGOLN2;NBEA;ATP LRRK2;TGOLN2;NBEA;ATP2C1;SOD3;SLC9A7  
KRT18;PCM1;EXOC7;BBS4 KRT18;PCM1;EXOC1;BBS4

CP;MDGA1;EFNA5;RGMB;N CP;MDGA1;EFNA5;RGMB;NTNG2  
SYNE1;SYNE2;NUCB2;LRP SYNE1;SYNE2;NUCB2;LRPPRC;NAV3  
CDKN1A;PCNA;CCND3;CDK CDKN1A;PCNA;CCND3;CDK2  
TUBG2;GTSE1;TUBG1;CLA TUBG2;GTSE1;TUBG1;CLASP2  
DMD;SVIL;TRPC1;HOMER1 DMD;SVIL;TRPC1;HOMER1  
TUBG2;POLB;CDC2;KIF11 TUBG2;POLB;CDK1;KIF11;CDC16  
NTRK2;NF1;ADCY2;DPYSL NTRK2;NF1;ADCY2;DPYSL2;PLK3;ALS2;DBN1  
LRP8;CDH13;DLC1;CAV1; LRP8;CDH13;DLC1;CAV1;TGFB2  
TOR1AIP1;LBR;NRM;LRPP TOR1AIP1;LBR;NRM;LRPPRC;LEMD2  
ENO2;ENO1;ENO3 ENO2;ENO1;ENO3  
BCKDHB;BCKDHA;BCKDK;B BCKDHB;BCKDHA;BCKDK;TMEM91  
GLB1L2;GLB1L;GLB1 GLB1L2;GLB1L;EBP  
KRTAP1-5;KRT18;KRT5;K KRTAP1-5;KRT18;KRT5;KRT7;KRT4;KRT86;KRT3;KRT8  
KNTC1;TPX2;CENPF;SMC3 KNTC1;TPX2;CENPF;SMC3;KIF11  
MAPRE3;MYH10;MAPRE3;C EBF3;MYH10;MAPRE3;CDK1;AIM1  
ELP3;TCEA2;TTF2;NUFIP ELP3;TCEA2;TTF2;NUFIP1  
MAGI2;SAMD4A;CYFIP2;I MAGI2;SAMD4A;CYFIP2;ITSN1;DLG4;SH3KBP1  
PPARGC1A;POLR2B;POLR2 PPARGC1A;POLR2B;POLR2D;SLC12A8  
SMARCC1;SMARCA4;SMARC SMARCC1;SMARCA4;SMARCA2;NCR1  
DNM3;SYNPO;MYH10;FBXO DNM3;SYNPO;MYH10;FBXO2  
CUL9;ZZEF1;HECTD3;MYC CUL9;ZZEF1;HECTD3;MYCBP2  
DPP4;ABCC2;TJP1 DPP4;ABCC2;TJP1  
S100A1;AKAP6;MRVI1;SA S100A1;AKAP6;MRVI1;SAR1A;ANK1  
NTRK2;DNM3;DLG4;SOS1 NTRK2;DNM3;DLG4;HGF  
LPL;APOB;LSR;VLDLR LPL;APOB;LSR;FLJ35024  
UNC84A;LBR;LEMD2 SUN1;LBR;LEMD2  
RFC4;PCNA;RFC5 RFC4;PCNA;RFC5  
MAP3K13;PYCARD;PYDC1 MAP3K13;PYCARD;POP1  
NCAPG;SMC2;SMC4 NCAPG;SMC2;SMC4  
DYNC2LI1;DYNC2H1;DYNC DYNC2LI1;DYNC2H1;DYNC1I2;DNHD1;DNAI1  
SPAG9;HEXB;ATP8B3;CAS SPAG9;HEXB;ATP8B3;CASC5;CLK3  
MRPS28;MRPS35;MRPS25; MRPS28;MRPS28;MRPS25;MRPS36  
SGOL1;ITGB3BP;CENPA;N SGOL1;ITGB3BP;CENPA;NDC80;CDCA8;CENPN;AIM1  
SYTL2;DCT;SLC45A2 SYTL2;DCT;AIM1  
RRBP1;ASPH;DERL1;SLC3 RRBP1;ASPH;DERL1;SLC35D1;ASPHD1  
MPV17L;HMGCR;ACSL5;PX MPV17L;HMGCR;ACSL5;PXMP2;PEX14  
CSGALNACT1;CHSY3;B4GA CSGALNACT1;CHSY3;B4GALNT4  
TTLL7;SYNPO;KLHL24 TTLL7;SYNPO;KLHL24  
EIF4H;EIF4E;EIF4G2 EIF4H;EIF4E;NAT1  
MED22;MED24\_HUMAN;MED MED24;MED24;MED12;MED22;CDK8  
TOPBP1;LRCH4;SP100;ZB TOPBP1;LRRN1;SP100;ZBTB16  
RNF32;CLU RNF32;CLU  
COL11A2;COL11A1 COL11A2;COL11A1  
COL1A2;COL1A1 COL1A2;COL1A1  
LAMC1;LAMB1 LAMB2;LAMB1  
XP01;EIF5A XP01;EIF5A  
BCL3;NFKB2 BCL3;NFKB2  
MSH6;MSH2 MSH6;MSH2  
MOCS2;MOCS1 MOCS2;MOCS1  
MSH2;MSH3 MSH2;MSH3  
SUZ12;EZH2;EZH2 SUZ12;EZH1;EZH2  
GALNTL2;CRLD2\_HUMAN;T GALNT13;CRISPLD2;TGOLN2;AP1G2;GALNT7;SSPN

|                       |                                            |
|-----------------------|--------------------------------------------|
| INTS6;INTS7;INTS10    | INTS6;INTS7;INTS10                         |
| SHROOM2;MYO6;MYO1C    | SHROOM2;MYO6;NMI                           |
| APOB;LDLR;LSR         | APOB;LDLR;LSR                              |
| TP53BP1;NBN;HDAC2;BCL | TP53BP1;NBN;HDAC2;BCL6                     |
| AP1S3;NCALD;CLTCL1    | AP1S3;NCALD;CLTCL1                         |
| CUL9;CUL4B;CUL4A      | CUL9;CUL4B;CUL4A                           |
| EIF2S1;FXR1;EPM2A     | EIF2A;FXR1;EPM2A                           |
| NTRK2;NUFIP1          | NTRK2;NUFIP1                               |
| PFKP;PFKL             | PFKP;PFKL                                  |
| APOBEC3G;APOBEC3F     | APOBEC3G;APOBEC3F                          |
| SGOL1;BUB1            | SGOL1;BUB1                                 |
| COL5A3;COL5A2         | COL5A3;COL5A2                              |
| GRIA1;DLG4            | GRIA1;DLG4                                 |
| RECK;BCL2L11          | RECK;BCL2L11                               |
| RIF1;TBP              | RIF1;TBP                                   |
| NBN;ATXN1             | NBN;ATXN1                                  |
| CENPE;CENPF           | CENPE;CENPF                                |
| BUB1;TUBG1            | BUB1;TUBG1                                 |
| IL6ST;IL6             | IL6ST;HGF                                  |
| IL6ST;OSMR            | IL6ST;OSMR                                 |
| COL9A1;COL9A3         | COL9A1;COL9A3                              |
| NPM1;DLGAP5           | NPM1;DLGAP5                                |
| TOPBP1;TUBG1;LRPPRC;R | TOPBP1;TUBG1;LRPPRC;RGS12                  |
| LIMK2;GOLGA2;COG3     | LIMK2;GOLGA2;COG3                          |
| PPP3CA;PPP3CB         | PPP3CA;PPP3CB                              |
| EPB41;ANK1            | EPB41;ANK1                                 |
| KNTC1;CLASP2          | KNTC1;CLASP2                               |
| DSN1;NSL1             | DSN1;NSL1                                  |
| CAMK2D;CAMK2G         | CAMK2D;CAMK2G                              |
| RIF1;TBP              | RIF1;TBP                                   |
| LMNB2;PCNA            | LAMB2;PCNA                                 |
| TBP;GTF2A2            | TBP;GTF2A2                                 |
| EIF2S1;EIF2A          | EIF2A;EIF2A                                |
| SMC3;SYCP2            | SMC3;SCP2                                  |
| IGF1;IGFBP3           | IGF1;IGFBP3                                |
| HNRNPF;HNRNPH3;HNRNPD | HNRNPF;HNRNPH3;HNRNPD                      |
| DMD;SGCA;SSPN         | DMD;SGCA;SSPN                              |
| MYH10;SORBS1;MYO1C    | MYH10;SORBS1;NMI                           |
| CTTNBP2;MET;SPAG4;CAB | CTTNBP2;MET;SPAG4;CABYR                    |
| NDUFA10;NDUFS7;NDUFV3 | NDUFA10;NDUFS7;NDUFV3;NDUFB2               |
| NTRK2;KCNMA1          | NTRK2;KCNMA1                               |
| EGFR;LDLRAP1          | EGFR;LDLRAP1                               |
| LDLRAP1;AP1G2         | LDLRAP1;AP1G2                              |
| PRKDC;LIG4            | PRKDC;LIG4                                 |
| PSMB8;TAP2            | PSMB8;TAP2                                 |
| MYH10;MEN1            | MYH10;MEN1                                 |
| PIGU;PIGS             | GAB1;PIGS                                  |
| TBPL1;TAF1;TBP        | TBPL1;TAF1;TBP                             |
| APOL1;APOM;LIPC       | APOL1;APOM;LIPC                            |
| CADM3_HUMAN;MLLT4;PDZ | CADM3;MLLT4;PDZD2;PTPRU;TLN1;CDC42BPA;TLN2 |
| SHROOM2;LLGL1;SCNN1A  | SHROOM2;DLG4;SCNN1A                        |
| HOXC10;KDM5A          | HOXC10;KDM5A                               |

|                       |                                     |
|-----------------------|-------------------------------------|
| MYO6;MYL6B            | MYO6;MYL6B                          |
| ATP6VOE2;ATP6VOD1     | ATP6VOE2;ATP6VOD1                   |
| POLA1;POLA2           | POLA1;POLA2                         |
| CDCA5;SMC3            | CDCA5;SMC3                          |
| DYNC1I1;DYNLL1        | DYNC1I1;DLC1                        |
| EIF2B4;EIF2S1         | EIF2B4;EIF2A                        |
| GKN1;SCG5;BRCA2;GARS; | CA11;SCG5;BRCA2;SMAD1;SLC30A8;PCSK5 |
| MCHR1;PCM1;BBS4       | MCHR1;PCM1;BBS4                     |
| MYL5;MYL3;MYL6B       | MYL5;MYL3;MYL6B                     |
| FN1;THBS1             | FN1;THBS1                           |
| APOB;LDLR             | APOB;LDLR                           |
| CAPZB;ADD2            | CAPZB;ADD2                          |
| ATP6V1B1;ATP6VOD1     | ATP6V1B1;ATP6VOD1                   |
| BBS5;BBS4             | BBS5;BBS4                           |
| DOCK4;MYO1C           | DOCK4;NMI                           |
| MMS19;ERCC3           | MMS19;ERCC3                         |
| SRP54;SRP19           | SRP54;SRP19                         |
| TELO2;RIF1;SMG6       | CLK2;RIF1;SMG6                      |
| LCP1;PALLD;ARHGAP6    | LPL;PALLD;ARHGAP6                   |
| RGS7;GNAS;GNAS        | RGS7;GNAS;GNAS                      |
| ROS1;ATP1B1           | ROS1;ATP1B1                         |
| RPN2;TUSC3            | RPN2;TUSC3                          |
| TNNC1;TNNT3           | TNC;TNNT3                           |
| MALL;AP1G1;HIP1R;HIP1 | MALL;AP1G1;HIP1R;HIP1;SORT1         |
| AP1S3;AP3M2;AP1G1     | AP1S3;AP3M2;AP1G1                   |
| PGAP1;FM04;PGAP1;ALG9 | BST1;FM04;PGAP1;ALG9;EXT2           |
| OCRL;GALNT2;A4GALT    | INPP5F;GALNT2;A4GALT                |
| EPB41;SPTBN1          | EPB41;SPTBN1                        |
| NGF;PCSK5             | NGF;PCSK5                           |
| PKP1;PKP2             | PKP1;PKP2                           |
| ICA1;SYN2             | ICA1;SYN2                           |
| ABCB6;ABCB9           | ABCB6;ABCB9                         |
| COG1;COG3             | COG1;COG3                           |
| PLOD1;PLOD3           | PLOD1;PLOD3                         |
| PRKAR2B;RAPGEF4       | PRKAR2B;RAPGEF4                     |
| CEP290;TUBG1          | CEP290;TUBG1                        |
| BBS5;BBS4             | BBS5;BBS4                           |
| NOD2;COPS5            | NOD2;COPS5                          |
| SHPRH;CENPA;HP1BP3;H2 | SHPRH;CENPA;HP1BP3;H2AFZ            |
| RYR1;ALDOA;MYL3       | RYR1;ALDOA;MYL3                     |
| PPP4R4;PPM1K;PDP1     | PPP4R4;PPM1K;PDP1                   |
| ZNF238;HMGB2;PBRM1;SM | ZNF238;HMGB2;PBRM1;SMC2;HDAC8       |
| CTNNB1;MYO1C          | CTNNB1;NMI                          |
| PTH1R;SLC22A12        | PTH1R;SLC22A12                      |
| LPL;LSR               | LPL;LSR                             |
| SCN10A;SCN4B          | SCN10A;SCN4B                        |
| PIK3C2B;FRAP1         | PIK3C2B;MTOR                        |
| PNPLA2;CAV1           | PNPLA2;CAV1                         |
| CTNNB1;LGMN;VCAM1;FZD | CTNNB1;LGMN;VCAM1;FZD6;FZD3         |
| TXNDC2;TSGA10         | TXNDC2;TSGA10                       |
| NRCAM;INPP5K;CDH13;MY | NRCAM;INPP5K;CDH13;MYO5A;TSGA10     |
| VCAM1;RUFY3           | VCAM1;RUFY3                         |

|                           |                                    |
|---------------------------|------------------------------------|
| COL14A1                   | COL14A1                            |
| ITPR1                     | ITPR1                              |
| COL7A1                    | COL7A1                             |
| SDHA                      | SDHA                               |
| APOB                      | APOB                               |
| APOB                      | APOB                               |
| TRRAP                     | TRRAP                              |
| ECE1                      | ECE1                               |
| TOP2A                     | TOP2A                              |
| TOP2A                     | TOP2A                              |
| CD46                      | CD46                               |
| PAPD4                     | PAPD4                              |
| ALDOA                     | ALDOA                              |
| POLD3                     | POLD3                              |
| COL12A1                   | COL12A1                            |
| MCM7 ;MCM7                | MCM7 ;MCM2                         |
| EEA1                      | EEA1                               |
| COL2A1                    | COL2A1                             |
| GNAS                      | GNAS                               |
| COL13A1                   | COL13A1                            |
| COL8A1                    | COL8A1                             |
| BRCA2                     | BRCA2                              |
| PCNA                      | PCNA                               |
| BCL3                      | BCL3                               |
| CNTNAP1                   | CNTNAP1                            |
| SOD1                      | SOD1                               |
| POLG2                     | POLB                               |
| AGL                       | AGL                                |
| PIK3R1                    | PIK3R1                             |
| GRM7                      | GRM7                               |
| KIFAP3                    | KIFAP3                             |
| SCUBE3                    | SCUBE3                             |
| ATP6V1H                   | ATP6V1H                            |
| LAMA1                     | LAMA1                              |
| LAMB1                     | LAMB1                              |
| LAMB1                     | LAMB1                              |
| GHR                       | GHR                                |
| NUFIP1                    | NUFIP1                             |
| SARM1                     | SARM1                              |
| SDCBP                     | SDCBP                              |
| MYO1C                     | NMI                                |
| POLG                      | MDP1                               |
| PGGT1B                    | PGGT1B                             |
| SYTL2 ;EEA1 ; SCUBE1      | SYTL2 ;EEA1 ; SCUBE1               |
| RIMS1 ;SNCAIP             | RIMS1 ;SNCAIP                      |
| KIF23 ;KIF11              | KIF23 ;KIF11                       |
| LMNA ;LMNB2 ;PKP1 ;PRPH ; | LMNA ;LAMB2 ;PKP1 ;PRPH ;PC ;HACL1 |
| HMGB2 ;HMGB1 ;LIG4 ;TOP3  | HMGB2 ;HMGB1 ;LIG4 ;TOP3B          |
| SLC9A9 ;RABEP1            | SLC9A9 ;RABEP1                     |
| SHROOM2 ;TJP1             | SHROOM2 ;TJP1                      |
| NBN ;ERCC4                | NBN ;RAD1                          |
| OCRL ;AP1G2 ;VPS45        | INPP5F ;AP1G2 ;VPS45               |

|                   |                   |
|-------------------|-------------------|
| PSMB8;PSMA4       | PSMB8;PSMA4       |
| LOR;DSP           | LOR;DSP           |
| VCAM1;LIPC        | VCAM1;LIPC        |
| CTNNB1            | CTNNB1            |
| NTRK2             | NTRK2             |
| SGOL1             | SGOL1             |
| RYR1              | RYR1              |
| APOB              | APOB              |
| DNMT3A            | DNMT3A            |
| COL6A1            | COL6A1            |
| DES               | DES               |
| ECE1              | ECE1              |
| NARF              | NARF              |
| LRRK2             | LRRK2             |
| BARD1             | BARD1             |
| L2HGDH            | L2HGDH            |
| TUBG1             | TUBG1             |
| SDHC              | SDHC              |
| LIG4              | LIG4              |
| SORBS1            | SORBS1            |
| POP1              | POP1              |
| GUCY1B3           | GUCY1B3           |
| NCBP2             | NCBP2             |
| DLG4              | DLG4              |
| PDGFA             | PDGFA             |
| ABCC4             | ABCC4             |
| GORASP2           | GORASP2           |
| ABCA3             | ABCA3             |
| TAF1A             | TAF1A             |
| MAPT              | MAPT              |
| PRKAG2            | PRKAG2            |
| BBS4              | BBS4              |
| FASN              | FASN              |
| HDAC2;SMARCA4     | HDAC2;SMARCA4     |
| AP1S3;AP1G2;AP4S1 | AP1S3;AP1G2;AP4S1 |
| LGMN;SQSTM1;RAB24 | LGMN;SQSTM1;RAB24 |
| MSH6;TIMELESS     | MSH6;TIMELESS     |
| PPP2R4;AKAP6      | PPP2R4;AKAP6      |
| NNT;OXA1L;COX7A2L | NNT;OXA1L;COX7A2L |
| CTNNB1            | CTNNB1            |
| LCP1              | LPL               |
| ABCC9             | ABCC9             |
| GPD2              | GPD2              |
| ANLN              | ANLN              |
| ODF1              | ODF2              |
| PNPLA2            | PNPLA2            |
| NRM               | NRM               |
| DSCR3             | DSCR3             |
| EXOSC10           | EXOSC10           |
| PHKA2             | PHKA2             |
| DBN1              | DBN1              |
| ATXN1             | ATXN1             |

|                    |                    |
|--------------------|--------------------|
| TGFBR2             | TGFBR2             |
| CPOX;AK2           | CPOX;AK2           |
| CTNNB1             | CTNNB1             |
| CTNNB1             | CTNNB1             |
| APOB               | APOB               |
| ACTN1              | ACTN1              |
| NFYC               | NFYC               |
| NBN                | NBN                |
| MCM2;MCM2          | CCNL1;MCM2         |
| UBE2V1             | UBE2V1             |
| ERCC4              | RAD1               |
| TPM2               | TPM2               |
| BBS4               | BBS4               |
| EPB41;DLG4         | EPB41;DLG4         |
| CTNNB1             | CTNNB1             |
| CROCC              | CROCC              |
| RYR1               | RYR1               |
| CALU               | CALU               |
| HSD17B4            | DBP                |
| ADAM9              | ADAM9              |
| TRIM66             | TRIM66             |
| ABCA1              | ABCA1              |
| ORC2L              | ORC2               |
| CLN5               | NCL                |
| HPS4               | HPS4               |
| SMG6               | SMG6               |
| RPL39L;RPL10       | RPL39L;NOV         |
| TRRAP              | TRRAP              |
| CHAF1B;CHAF1B      | CHAF1B;MPP7        |
| COL4A3             | COL4A3             |
| MYL3               | MYL3               |
| CEP290             | CEP290             |
| POP1               | POP1               |
| UTP14A             | UTP14A             |
| RPA3               | RPA3               |
| SUZ12              | SUZ12              |
| ACTR1B             | ACTR1B             |
| GTF3C1             | GTF3C1             |
| TIMM9              | TIMM9              |
| SHROOM3;CDH2;SDCBP | SHROOM3;CDH2;SDCBP |
| ARPC4;ARPC4        | TLL3;ARPC4         |
| TAPBP              | TAPBP              |
| ATP5A1             | ATP5A1             |
| BCOR               | BCOR               |
| POLR3A             | POLR3A             |
| MTA1               | MTA1               |
| HTT                | HTT                |
| SERINC5            | SERINC5            |
| C5                 | C5                 |
| PSMD1;PSMD1        | RPN2;PSMD1         |
| CAMK2D             | CAMK2D             |
| MEN1               | MEN1               |



|                       |                                                                  |
|-----------------------|------------------------------------------------------------------|
| SLC1A3                | SLC1A3                                                           |
| MRPL37;DAP3           | MRPL2;DAP3                                                       |
| ATP6V1B1              | ATP6V1B1                                                         |
| COPS5                 | COPS5                                                            |
| PSMD1;PSMD1;PSMD11    | RPN2;PSMD1;PSMD11                                                |
| RYR1                  | RYR1                                                             |
| TOPBP1                | TOPBP1                                                           |
| MYO6                  | MYO6                                                             |
| VTI1A                 | VTI1A                                                            |
| ITGB3                 | ITGB3                                                            |
| OXA1L                 | OXA1L                                                            |
| CLTCL1                | CLTCL1                                                           |
| DHX15                 | DHX15                                                            |
| MYH10                 | MYH10                                                            |
| TNXB                  | TNXB                                                             |
| TIMM9                 | TIMM9                                                            |
| MYRIP                 | MYRIP                                                            |
| LOR                   | LOR                                                              |
| CD4                   | CD4                                                              |
| ATP8B3                | ATP8B3                                                           |
| DNALI1                | DNALI1                                                           |
| STAG3                 | STAG3                                                            |
| CYB5R3                | CYB5R3                                                           |
| LAP4A_HUMAN;SYTL2;SLC | LAPTM4A;SYTL2;SLC2A12;PIP5K1A;MAL2;ATP6V1B1;NBEA;DOCK9;DOCK4;ITC |
| SLC22A5               | SLC22A5                                                          |
| CHRNE                 | CHRNE                                                            |
| ERGI3_HUMAN           | ERGIC3                                                           |
| PTGDS                 | PTGDS                                                            |
| MRPL52                | MRPL52                                                           |
| SORBS1;NEXN           | SORBS1;NEXN                                                      |
| MYH7B;MYH7B           | MYH14;MYH7B                                                      |
| ATP5A1                | ATP5A1                                                           |
| ICA1                  | ICA1                                                             |
| ZBTB16                | ZBTB16                                                           |
| GJA5                  | GJA5                                                             |
| DNALI1                | DNALI1                                                           |
| CTNNB1;SHROOM3        | CTNNB1;SHROOM3                                                   |
| FZD6;NEDD4            | FZD6;NEDD4                                                       |
| CDC42BPG;CDC42BPA     | CDC42BPG;CDC42BPA                                                |
| SLU7                  | SLU7                                                             |
| MYO6;ELP3             | MYO6;ELP3                                                        |
| MYO1C                 | NMI                                                              |
| PANX2                 | PANX2                                                            |
| CFB;S100A1;PTGS2;TUBG | CFB;S100A1;PTGS2;TUBG2;TUBA4A;SSX2IP;EPB41;STRA6;TRIP12;UCHL5;AI |
| ESR1                  | ESR1                                                             |
| SMAD3;BMPR1B          | SMAD3;BMPR1B                                                     |
| EGFR                  | EGFR                                                             |
| DTNBP1                | DTNBP1                                                           |
| MALL;TFRC;DGKD;BDNF;H | MALL;TFRC;DGKD;BDNF;HTT;SORT1                                    |
| LETM2;S27A3_HUMAN;OGD | LETM2;SLC27A3;OGDH;BCL2L13;PNPLA7                                |
| HR;GEMIN7             | HR;GEMIN7                                                        |
| MAOB;BNIP3L;ABCB6;HAD | MAOB;BNIP3L;ABCB6;HADHB;ADAP2                                    |

|                       |                                                                  |
|-----------------------|------------------------------------------------------------------|
| DAP3                  | DAP3                                                             |
| PDE4B;PDE4D;MDM2;DES  | PDE4B;PDE4D;MDM2;DES;LOR;PDE3A;CCDC88C                           |
| TRPC1                 | TRPC1                                                            |
| LYST;MARK1;CCNB2;PKNO | LYST;MARK1;CCNB2;PKNOX2;MYCBP2                                   |
| NUFIP1                | NUFIP1                                                           |
| SBF2                  | SBF2                                                             |
| TMOD1                 | TMOD1                                                            |
| DES                   | DES                                                              |
| KRT18;EXOC7           | KRT18;EXOC1                                                      |
| THBS1;CD44;SOD1       | THBS1;CD44;SOD1                                                  |
| TROVE2;HEATR1;HNRPLL  | TROVE2;HEATR1;HNRPLL;PCBP2                                       |
| NCK1                  | NCK1                                                             |
| ALS2                  | ALS2                                                             |
| DNPEP                 | DNPEP                                                            |
| ECE1;GNAS;NOD2        | ECE1;GNAS;NOD2                                                   |
| AP1G1                 | AP1G1                                                            |
| NPLOC4                | NPLOC4                                                           |
| PDE7A                 | PDE7A                                                            |
| PFKFB3;LPP;KDM5D;TRAF | PFKFB3;LPP;KDM5D;TRAF3IP2;C10orf116;KRTAP1-5;NTN4;PIP5K1A;GRIPAI |
| NARF                  | NARF                                                             |
| GLIS3                 | GLIS3                                                            |
| MMP3;S100A1;LGMN;SEMA | MMP3;S100A1;LGMN;SEMA5A;TLN1;USP40;ATG12                         |
| APOL1;GNAS;TIRAP;SARM | APOL1;GNAS;TIRAP;SARM1                                           |

LA-A;HLA-A;HLA-A;HLA-A;HLA-A;HLA-A;HLA-A;HLA-A;HLA-A;HLA-A;HLA-A;HLA-A;HLA-A;GLT8D1;LOX  
LA-A;HLA-A;HLA-A;HLA-A;HLA-A;HLA-A;HLA-A;HLA-A;HLA-A;HLA-A;GLT8D1;SLC4A8;KIAA1244;MCTP2;CA12;CHST1;  
ROVE2;ARHGAP19;LPP;KDM5D;NRG1;SERPINA1;ZIC1;LMNA;CDKN1A;INCA1;PTGS2;STAT1;S100B;RCAN1;E  
244;CA12;NNMT;GSTM1;PLA2G4A;S100A1;ADM;TROVE2;ALOX15B;TPD52;EDN1;LPP;PFKP;ANK2;RGS5;PRK  
1;BST1;HLA-DPB1;LPP;CNTNAP3;PRKCZ;NRG1;HK2;NFASC;SLC4A7;ENO2;LMNA;RASGRF2;TREM1;EGFR;HL  
ADAMTSL1;ADM;CHI3L1;EDN1;TFPI2;IL32;COL14A1;CNTNAP3;NRG1;C3;MASP1;COL7A1;TNFRSF11B;SERP  
H3A1;CDKN1A;PDCD11;ITGB1BP1;AK5;LDLRAP1;SMAD3;EPHX2;DCT;CACNB3;ACSS2;AS3MT;APOBEC3G;STA  
BEC3G;GPRC5C;SERPINF1;P4HA1;MFF;LETM2;NDUFA10;PDK1;CLK1;SLC27A3;RPS6KA6;GPD2;TBL2;HES1;  
CRL1;NRCAM;HLA-B;HLA-B;HLA-B;HHIP;HLA-C;HLA-C;HLA-C;HLA-C;HLA-C;NOTCH3;SLC02A1;SLC8A1;D  
S2;EGFR;ERP27;HPD;ALDH3A2;SAR1B;ERAP1;P4HA1;EIF2AK3;APOB;SEZ6L2;SGPP2;GRIA1;GPER;P4HTM;  
CR17;ST6GAL2;ST3GAL6;HPD;ST3GAL4;SAR1B;CD44;PIP5K1A;SLC9A8;CDKL3;SYNE1;CALU;LYN;MGAT4B;  
SOX9;MDM2;LRCH2;RPS6KA6;FGF18;ACIN1;FCGR2A;INTS6;SIX1;CSTF2;PYGL;MUC4;ZFX;PPP2R4;FRMD7;  
-A;HLA-A;HLA-A;HLA-A;HLA-A;HLA-A;HLA-A;HLA-A;HLA-B;HLA-B;HLA-B;HLA-B;HLA-B;HLA-B;HLA-B;  
;LGALS8;EGFR;CHI3L2;HYAL1;NOTCH3;CXCL2;VCAM1;ORM1;TNFSF15;SERPINF1;LPL;TGFA;AKR1B1;MICA  
9;KDM5D;HSD17B6;ZIC1;RASGRF2;EGFR;PDCD11;AKR1C3;ARHGAP29;TRIM16;ZNF365;ZNF395;SMAD3;ZNF  
;STAG2;MYO15A;SORBS3;SYNE2;EPB41L1;AFAP1;INTS6;CALD1;PALLD;DMD;DES;TNS1;DNM3;FRMD7;ACTN  
3;SEZ6L2;SGPP2;GRIA1;GPER;P4HTM;ERAP2;CYP39A1;RRBP1;MGAT1;PIGN;CYP2R1;CYP26A1;ITPR2;CPS  
INA1;ADAMTSL3;FBN2;SPON1;ECM1;VIT;COL6A1;PAPLN;FBLN7;PODN;MFAP5;MUC4;COL22A1;CILP2;MMP2  
ROS1;GRIA1;ABCC1;SLC16A4;STMN2;ECE1;ATP6V1B1;NT5E;CD68;ADCY3;HMOX1;BIRC6;MGAT1;SORD;ITG  
RBS3;SSX2IP;INADL;TNS1;DSG3;EPB41L5;ARHGAP26;ANKS1B;HOMER2;TNS3;SHC4;APBB1IP;DMXL2;ZNR  
KIF20A;SP140;TOP2A;PRKDC;RFC4;ORC1;CDKN2A;POLD3;TCEB1;TP53BP1;TAF1;KIF23;MCM7;ATXN3;NBN  
SK2;STMN2;PYGL;GK;CD55;GPX3;PPP2R4;LIMK2;CXCL13;STAC;MED24;SORD;PFKL;DARS;CTTNBP2;HMGCS  
E;ABCA5;GALNT12;MGAT5;CHST6;MGAT1;IL15RA;LPCAT1;GALNTL1;ENTPD6;TAPBP;TMC01;RND3;GALNT13  
MAP1B;ODF2;DYNC2H1;EML2;KIF23;DYNC1I2;MAP3K11;CENPE;EBF3;STAU2;KIF3A;MPP1;RASSF5;RASSF5  
NDRG2;SFI1;ODF2;MCPH1;PRKAR2B;MAP3K11;CDC14A;PARP3;OFD1;CEP290;MPP1;BRCA2;CLASP2;CEP72;  
;SHC4;DMXL2;ZNR1;UTRN;GRIA3;SYNPO;ICA1;CYFIP2;UNC13B;ITSN1;CRIPT;DLG4;SHANK2;NLGN1;GAB  
N;FGFR2;DMD;ADAM9;ROBO2;AGRN;DPP4;MMP16;PTPRQ;AAMP;CEP290;BCAM;PPF1A4;DLG3;MPP2;TRAK2;N  
5;ATP5A1;IDH3G;MADD;MADD;BCKDHA;MIPEP;OGDH;GLUD1;MCCC2;KIAA1967;SOD1;PCCA;PDK3;AGT;BCKD  
NC1I1;AP1G1;LRPPRC;DNAJB6;ANP32A;NRBP1;CALCOCO2;CLU;LAMB1;NEDD4;GALNT3;GALNT1;EPM2A;CAV  
TFRC;NTRK1;NPC1;VPS53;ZNR1;PRAF2;FPR1;VPS52;TLR3;AP1G2;VPS37A;VPS33A;OCIAD1;STARD3NL;S  
1;ACAT1;TAPBP;ER01L;CYP51A1;FMO4;OAS1;ACSL5;CYP46A1;CYP2C8;H6PD;PNPLA7;OAS3;CERS5;EBP;P  
;TSPAN8;NAAA;CTSL1;NAT6;CTSH;ARSB;HEXA;EPDR1;MANBA;HPS4;EBP;NAGA;HYAL3;TIAL1;VPS45;CTSK  
RAT;ACADVL;TK2;SLC25A27;NDUFV3;SQRLD;SFXN5;CHDH;ETFDH;HADHB;PC;SLC25A12;HMGCL;SLC25A37;  
NC;TP63;TLN1;TNS4;MDC1;TLN2;FHL2;MYO5A;USP40;DLC1  
BP1;IFT74;IL15RA;DYSF;DMXL2;ZNR1;MAPKAP1;ARRB2;ICA1;SREBF1;ATM;SOD1;TLR1;ADAMTS1;AP1G2  
YNPO;DLG4;SHANK2;GRM7;NLGN1;GABBR1;DLG2;SSPN;DAP3;HOMER1;CHRNE;KCNMA1;CLSTN3  
;CDH13;MFI2;PRNP;LYPD6B;NCAM1;LY6H;HYAL3;CEACAM8;EFNA1;NTM;CD109;ULBP1  
ERHL2;AGT;AMACR;SLC22A5;DAO;DAO;PIPOX;HACL1;PXMP2;PEX14;SCP2  
;H6PD;CES2;CES2;PDIA5;SUMF2;DNAJC10;TAP2  
A;MAP2;CLIP2;KIF18B;KIF17;KIF13A;KIF1C1;MAPT;ATG4C;MAP4;EML1  
;MYOT;SMTN;SVIL;AVIL;TWF1;FLNA;LSP1;AMPH;TLN2;PKNOX2;KLHL2;CASK;STK38L;TRIOBP  
SLC36A1;HGSNAT;SLC11A2;ZNR2;SORT1  
AC2;PCSK7;ST8SIA1;ENTPD4;ST3GAL5;A4GALT;ST6GALNAC5  
;ATP6AP2;ITGAE;KCNMA1;GSR;FAS;TGFB2  
TGA7;ITGB5  
;MYO5A;ALS2;TRPM7  
OC1;PPIG;SRP54;RBM39;METTL3;PRPF18;RFWD2  
L28;SMC3;NUFIP1;ATXN1  
A5;TRPC1;STK39;SLC2A1;SLC39A5;MEGF10;ANK1;PTH1R;TJP1;LST1;SLC7A8;ATP1B1;ENPP1  
NA1A;APBB1IP;SPRY4;SH3RF1;SYNPO;MPP1;GNAS;THEM4;SSH1;ITSN1;CRIPT;KLHL24;ARHGAP24;RAPH1;  
FILIP1L;MYO1G;MYO5A;MYH7B;CGNL1

P85;TAGLN2;CERS5;EPC1;TSGA10;TPR;PRICKLE1;SORT1  
L2L11;CYB5R3;CHKB;MFN1  
ABCC2;CTTNBP2;SHROOM3;SLC4A5;STK39;SLC22A12;KCNMA1;SCNN1A  
8;SUV420H1;PRDM6;SMC3;TOP1MT;SMCHD1;SMC4;HP1BP3;HNRNPD;CENPN;SUPT16H;PRDM7;H2AFZ;BANF1;  
L2A1;COL1A1;COL5A2;COL18A1  
PAG1;TRPC1;LCK;PRNP  
P2;UCHL1;DTNBP1;SLC6A1

D3;UBE2B;HMG2;MCM2;MCM2;CHD5;CHD5;NEDD4;CHD1;CHD6  
1;TTF2;AQR;EIF4A3;DHX38;RHEB;PRPF18

WILCH  
AS;SDCBP;PDCD6IP  
AMB1;FBN1  
IFC1;FAM82A1;CDC6;AIM1  
2;CGNL1  
;MRPL52;MRPS36;MRPL2;MRPL2;GCN1L1;DAP3;NOV;MRPS5

P85;TPR

NJ5;KCNJ6  
;BNIP3L;PARP1;PTGER3;LEMD2;ANKLE2;RAC2

WDSUB1  
D4  
;DNAI1;CABYR  
3

VPS45;SORT1  
HLA-DRB3

DPS2;SH3KBP1;STXBP5

BL1















SN1;NRBP1;HIP1R;PITPNM3;SLC11A2;FAAH;BCL2L11;HIP1

POM;CEP250;PRPSAP1;TUBD1;MEN1;SOD1;CDCA8;TRPC1;MGP;OXA1L;PEX14;ALS2;UBE3C

P1;RASSF4;DONSON;TBL2;MTMR1;AUTS2;PART1;FMN2;LRRFIP2;BAIAP2L1;INADL;TNIK;SMA5;S100A13;R

IL2; VEGFA; SLC4A8; KIAA1244; MCTP2; CHST1; TBC1D8; MOXD1; CSGALNACT1; BST1; AP1S3; HLA-DPB1; HLA-DI  
PLA2G4A; MOXD1; CSGALNACT1; BST1; HLA-DPB1; HLA-DPB1; HLA-DPB1; HLA-DPB1; ITGB4; CNTNAP3; ITPR1; I  
GFR; PDCD11; TBX20; IGF2BP1; S100A4; NDRG1; YY1AP1; ZNF395; NOTCH3; NOTCH3; DDX54; HIPK3; SMAD3; ZNI  
CZ; HK2; HK2; GSTT1; ALDH3A1; ZIC1; ENO2; LDB3; LMNA; CDKN1A; PDE4D; RASGRF2; PTGS2; LGALS8; STAT1; S  
A-B; PVRL3; SEMA6D; HHIP; GPR126; NRG2; IL1RL1; HYAL1; CRIM1; NDRG1; LSAMP; SLC47A1; HLA-C; SLC2A5; I  
INA1; TREM1; ADAMTSL3; EGFR; HHIP; LOXL3; NRG2; AGR2; IL1RL1; HYAL1; CRIM1; PSG5; HLA-C; THBS1; LRP8  
RD5; ARFIP1; ERAP1; LPL; MDM2; PDK1; AKR1B1; TKT; BTRC; ACIN1; RPL37A; UBE2C; ATG4B; GK; GK; PRKAA2; CI  
DBP; GK; GK; GK; PPF1BP2; MAOB; LIMK2; BCKDHB; AKAP1; AGPAT5; SLC25A10; ACSS1; FAM110B; ORC1; C1QTNF  
DR2; CDH4; TNFSF15; GPRC5C; CD44; RYR1; NLGN4X; PDGFRA; PTPRS; P2RY6; TKT; HLA-DPA1; EFN1; MICA; HLA  
PIK3C2B; NUCB2; GNAZ; ERAP2; CYP39A1; P4HA2; SIL1; RPN2; HMOX1; OLFM1; RRB1; MGAT1; NPC1; PIGN; POFI  
GPER; GOLGA1; LARGE; KIF20A; ST3GAL1; NUCB2; CXCL14; GALNT2; ABCA5; GLCCI1; ECE1; GALNT12; MGAT5; CI  
ACTN1; GLCCI1; MEIS2; TOP2A; HMOX1; CDKN2A; LSR; RBPJ; PDK2; RPL9; MYBL1; TNS3; PTGR2; TAF1; KIAA090  
HLA-B; HLA  
; FGF18; COL1A2; HDGF; PCSK2; DBP; CHIT1; GPX3; NUCB2; CXCL14; ADAM9; CXCL13; SFRP5; APOL1; HMOX1; SOI  
238; KSR1; BCR; ZNF529; GARNL3; ZNF514; PSD3; SAR1B; RPS4Y2; CLK2; UBR5; MDM2; INPP5F; NF1A; ARHGAP20  
1; FRMD4A; ENC1; SHROOM2; DCTN4; ELMOD3; FNBP1; SCIN; TTLL3; EPB41L5; ARHGAP26; UACA; PLEKHH2; UBR4  
1; ACAT1; SLC37A4; IL15RA; LPCAT1; HHAT; SPTLC3; TAPBP; ER01L; HSD11B1; CYP51A1; TMC01; CREB3L2; UBI  
8; CTHRC1; AGRN; COL12A1; FGF1; DCN; MMP16; ADAMTS17; MMP24; CHAD; ADAMTS9; NPNT; MMP11; ADAMTS16; EI  
B3BP; ZFP106; SAT1; ABCA4; ABCC2; LRRK2; ABCA1; CTTNBP2; EEA1; SEMA4F; MET; ER01L; UTRN; CCNB2; MPP1  
1; UTRN; GRIA3; PKP1; SYNPO; ICA1; PARVB; NPHP1; CYFIP2; SORBS1; UNC13B; ITSN1; CRIPT; SHROOM3; DLG4  
1; MYO6; TBP; MET; GEMIN7; CCNL1; WEE1; XPO1; MPP1; ORC2; ZNF638; GTF2A2; BRCA2; POLA1; PCNA; ORC4; RAD  
1; SPHK1; WISP3; MAP4K2; MEN1; PKIG; PDE4A; MED22; AGT; NAGK; TNFSF13B; FLT3LG; HPRT1; FBLN5; SMAD1; (C  
); GALNT13; ICA1; GBF1; GBF1; IL17RD; ST6GALNAC2; MAP4K2; SREBF1; BSG; AP1G2; GALNT7; GALNT7; ZDHHC3  
1; NICN1; TUBD1; MAPRE3; SHROOM3; MAPRE2; NUSAP1; NAV1; DYNC1I1; KIF21A; LRRC49; NIN; MAP2; DNMI; CLII  
MED12; FLI1; CDK5RAP2; CEP192; CEP120; NIN; CASP8; PNPLA7; ACTR1B; PCNT; TACC2; CEP70; SNCG; SDCCAG  
B1; DNMBP; DLG2; APBB2; SYT3; SYN2; APBB1; AMPH; SSPN; TLN2; DAP3; HOMER1; CHRNE; EGFLAM; CAMK2A; CAI  
OD2; PRLR; STRC; PDGFA; CX3CL1; SCUBE3; DLG2; LRP4; GHR; APP; AR; GPM6A; LRRTM1; NOTCH4; HBEGF; SLC1A  
K; NR3C1; EARS2; TMEM91; DMGDH; ACO2; CARS2; PC; PPM1K; HMGCL; OXCT1; PDP1; DARS2; PDK4; ACADM; SARDH  
1; SORT1  
SYT3; CD1D; ZFYVE20; WDR44; MIB2; GAPVD1; STEAP3; SLA; ZNRF2; VPS45  
PTGS1; FAAH; MGST1; CHKB; SORT1  
; USP5; ARSD  
EXOG; NDUFB2; SLC25A36; PDK4; UCP2; MDP1; SLC25A14; MGST1; CYB5R3; SLC25A16

; RIN3; EPN2; AP1G1; SYT3; PRSS16; HIP1R; AMPH; WHAMM; SLC30A8; ARHGAP21; CLTCL1; CADPS2; SH3KBP1; S'

CA9; NRBP1; FERMT1; PIP5KL1; MAPT; PSTPIP1; SH3PXD2A; SLC1A3; ARPC4

SMG6;AIM1;HMGB3;RNF40

















RCAN2;AGPAT5;TARSL2;MAP3K1;TP53I3;PFKFB4;SH3TC1;WBSCR22;BIRC6;ARHGAP26;PLEKHA4;ALS2CR12

PB1;HLA-DPB1;SYTL2;ITGB4;ITPR1;NRG1;HK2;HSD17B6;KCNK2;SLC2A9;WBSCR17;ITGA3;PDE4D;PTGS2;NRG1;NRG1;HK2;KCNK2;SLC2A9;WBSCR17;NFASC;ITGA3;SLC4A7;TREM1;EGFR;ST6GAL2;HLA-B;HLA-B;HLF238;SMG5;SUN1;ID2;TOR1AIP1;ZNF529;KHDRBS3;ACSS2;DCUN1D4;APOBEC3G;TRIB2;ZNF514;SGOL1;MA100B;RCAN1;EGFR;PRDX2;SEMA6D;HHIP;ABLIM1;AKR1C3;ITGB1BP1;AGR2;AK5;SYNJ1;IL1RL1;IGF2BP1;PLB1;NOTCH3;NOTCH3;SMAD3;SLC8A1;LRP8;CDH4;TNFSF15;ANO1;MAGI3;CNTN3;PSD3;GPRC5C;CD44;SLC;CXCL2;FBN2;CHRDL1;ST3GAL4;ORM1;TNFSF15;PLAT;LAMA3;LAMA3;COL10A1;SPON1;NTN4;SERPINF1;ERHAF1B;PIK3C2B;CSNK1A1;NAMPT;EPS15;NUCB2;RGS3;GSN;AGPAT5;XDH;MAP1B;MAP3K1;RPN2;DSG3;ORC13;AASS;PDK2;NDUFS7;CPS1;CA5B;ACAT1;NARS2;GFM1;OAT;PRKAR2B;ADCK3;ECHDC2;MRPS28;MRPS28;ACA-H;HLA-H;TNFRSF9;CORIN;IL17RA;TNFRSF14;JAG1;GPER;ABCC1;CD81;BDKRB2;DDR1;SLC16A4;LAPTM5UT2;PDZD2;CYP2R1;CYP26A1;PLOD1;ITPR2;CPS1;ACAT1;SUMF1;LAMB2;LAMB2;SLC37A4;IL15RA;LPCAT1HST6;PTGDS;LSR;MGAT1;BEND5;MED15;VPS53;IL15RA;MSLN;PRKAR2B;LPCAT1;NBN;GALNTL1;ENTPD6;MY7;ESR1;NBN;HMGB2;RGS7;IDH3G;ELP3;LEF1;MPP1;HUWE1;HMGB1;NCL;POLA1;DLG3;CASP1;ZBTB16;GPM6A-B;HLA-B;HLA-B;HLA-B;HLA-B;HLA-B;HLA-C;HLA-C;HLA-C;HLA-C;HLA-C;HLA-C;HLA-C;HLA-C;HLA-C;HLA-C;HRD;CHRD;CXCL16;FGF1;TNFAIP2;COL25A1;GPI;FHL1;ANGPTL1;AGPAT1;SCUBE1;SCRG1;PLA2G2A;RNPEP;0;ZNF610;EWSR1;PREX2;ZNF765;HERC3;ZNF248;KAT7;C12orf51;RPL37A;ZBTB20;ZNF362;HECW2;RASL1;EPB41L4B;ADD2;APBB1IP;ALDOC;ELMO2;MYO10;UTRN;SGCB;SPAG4;UBXN11;PDLIM7;PARVB;DPYSL2;FGDE2V1;CERS4;TMX3;GAB1;SREBF1;SHISA5;LCTL;ERLIN2;HSD17B7;CD4;PIGG;HMGCR;KDELR3;ACSL5;CYP4LN;ADAMTS6;MFAP2;COL9A1;TNXB;LEPRE1;VCAN;WNT9B;TNC;KAZALD1;EFEMP1;FBLN2;MMP7;LGALS3;COL;MAP3K13;SPHK1;GNAS;GBAS;APLP1;MPP2;PDE4A;AKAP13;SLC12A2;SLC38A1;SLC4A2;NET1;DLG2;FGFR1;CLDN1;SHANK2;NOX4;ARHGAP24;MPP7;NLGN1;GABBR1;DNMBP;JAM2;DLG2;SYT3;SYN2;AMPH;TNS4;SSPN;1;ATM;NCBP2;NPM1;POLE;POLA2;POLB;PPIG;CDK1;MPP7;NUP98;XPC;MCM2;MCM2;RPA3;GMNN;TDG;SMAD1CALCOCO2;PC;PDE3A;NSMAF;HTT;SCP2;ACP1;SOD3;PTPN12;FAS;FBLN1;ANPEP;ASNS;GBP3;COG1;SLC35B3;GLG1;MAN2A2;GORASP2;GCC2;ATP2C1;XYLT2;ARHGAP21;EXT2;ST8SIA1;LST1;CLSP2;KIF18B;KIF17;CKAP2;KIF13A;KIFC1;MAPT;CEP170;DLC1;DNAI1;FAM82A1;MAP4;SARM1;EML1;PBXIP8;KIFC1;MYO5A;EVI5;ALS2;RNF19A;RANBP1;ESPL1;CDC16DPS2;SH3KBP1;CDH2;STXBP5;ZNRF23;ENPP1;SORT1

TXBP5;ENTPD4;HIP1



















;AMPD2;PHIP;TRIP12;PDE5A;DPH5;ORA0V1;EBF3;RGS7;RALGDS;FN3K;C9orf114;MAPKAP1;OFD1;CUL4B;























FHL1;FSD1L;PHF3;RNF6;FAM53B;ADC;SOCS7;MRPL44;NAAA;STRN;DLG3;DOCK9;TNXB;NME6;SPSB2;APOBI

HLA-B;HLA-B;HLA-B;HLA-B;HLA-B;HLA-B;HLA-B;HLA-B;HLA-B;HLA-B;HLA-B;HLA-B;HLA-B;ST3GAL6;C  
B;HLA-B;HLA-B;HLA-B;HLA-B;HLA-B;HLA-B;HLA-B;ST3GAL6;PVRL3;SEMA6D;CDON;GPR126;NRG2;IL1RL  
ND2;CDKL3;UPRT;SOX9;RPS6KA1;MDM2;DONSON;DNMT3A;RNF14;SYNE1;CLK1;CLK1;USP48;MAML3;HDAC9;  
SMG5;SUN1;ID2;RBMS3;KSR1;TRIM16L;SLC2A12;KHDRBS3;ACSS2;AS3MT;APOBEC3G;TRIB2;ANO1;STAP2;  
LC47A2;MALL;HLA-DPA1;LRCH2;LYN;MICA;PON2;HDAC11;HLA-H;HLA-H;ENTPD3;CORIN;FCGR2A;COL1A2;  
L6A1;PSG9;PSG9;RNASET2;PON2;FGF18;PAPLN;COL1A2;FBLN7;JAG1;SERPINE2;PODN;GLIPR1L2;DBP;GG  
1;PSMB8;PFKL;ZFP36L1;RRM2;TRIP12;CTTNBP2;MAPK8;EEA1;FANCC;RALGDS;PPARG;HMGCS1;EGLN1;UCH  
;GBF1;DPYSL2;MIPEP;SDHC;STXBP1;SLC25A42;BCAM;ORC2;SLC25A22;ADC;GBAS;OGDH;CRAT;GLUD1;MRP  
4;CD46;NTRK1;ODZ3;NPC1;FZD6;EVI2B;MCHR1;CLCNKB;SLC6A3;SYNGR3;ABCA4;PTPRF;ABCC2;PILRB;ST  
1;CYP51A1;TMC01;PDIA6;CREB3L2;AGPAT1;FMO4;UBE2V1;NCL;RAB24;CERS4;CRAT;TMX3;GAB1;SREBF1;  
RD;FGD6;HERC1;MGAT4A;NCL;RAB24;ST6GALNAC2;TGOLN2;MAP4K2;CLASP2;SREBF1;NMT2;HMGXB4;UNC13  
1;PARP1;NFIB;PBX1;NR3C1;NOL8;CFI;HMG20A;STAT4;ETV4;OXR1;ZMYM3;COPS5;NKRF;STX17;USP28;SN

FBP2;FLT3LG;HGF;CDH13;CPXM1;CLU;GHR;EGFL7;AR;AR;ATRN;NOTCH4;AMY2A;SEMA3C;LIF;HBEGF;SOD3  
TRIM59;NFYC;BIRC6;ARHGAP26;PLXND1;TRIM66;GNA01;ZBTB46;ZNF596;ZNF792;ZNF33B;ZNF554;GNL2;  
RAP2;TP63;NAV1;CCL28;ARHGAP24;TMOD2;LRPPRC;LRRC49;CASP8;TLN1;ITIH4;MAP2;DNM1;DNMBP;RAPH  
;INSIG2;ABCB9;PIGW;ERO1LB;ERGIC3;PIGL;ERLIN1;PIP4K2B;SLC35D1;FDFT1;RHBDF2;LMF2;XYLT2;LR  
P;LGALS3BP;FBLN1;OMD;DPT;MFAP4;MMP19;ECM2;TIMP4  
R1;RAPGEF4;LMOD1;HPS4;SLC4A3;MTMR7;GALNT3;LST1;FLJ35024;SLC6A9;DLC1;TPST1;FAAH;NOV;SLC2  
;SH3KBP1;DSP;SDCBP;CLDN4;STXBP5;CLDN12;ZNRF2;CGNL1  
;PRKAG2;POLR2D;SMARCA2;SUPT16H;TPR;CDC6;METTL3;RFC5;CTDP1;ATXN1;CASP3;CDC16

T6GALNAC5



















EC3B;MAPRE3;FANCD2;NME5;RIN3;AKAP13;PIK3R4;COL4A3BP;MOV10;MAP4K4;ZMYM2;LYPLAL1;TMEM106A





















\;NUB1;RARB;S100A2;NET1;CAMK2G;MKRN1;KDM4C;LRP10;ABCC4;RAB9B;PRSS16;ANK3;EHMT2;CD320;LRI

HLA-C; SLC39A8; SUN1; SLC02A1; FAT3; DDR2; VCAM1; TOR1AIP1; KSR1; ST3GAL4; DCT; SLC2A12; SYT9; SDHA; OTCH3; SUN1; FAT3; VCAM1; TOR1AIP1; ST3GAL4; DCT; SLC2A12; SYT9; ILDR2; ALDH3A2; TNFRSF19; MFSD6; ANA; SORBS2; AUTS2; TRRAP; TFDP2; ZNF765; SIK1; SORBS3; SYNE2; HDGF; ZNF248; TBPL1; KAT7; SECISBP2; TNFL3; LPL; RBM45; CTNND2; CDKL3; GRK5; UPRT; DYNC2LI1; RPS6KA1; MDM2; EIF2AK3; SLC2A14; MAL2; RASSF4; DSLC4A4; HLA-DRB3; HLA-DRB3; PIK3C2B; HFE; MUC20; EPS15; NUCB2; RGS3; SLC2A3; SERPINE1; ADAM9; CD97; RPINE1; ADAM9; CD97; GALNT2; CPXM2; GSN; NGF; CXCL13; APLN; TFPI; KIRREL3; ISM2; CILP2; SFRP5; ITGBL1214; SHMT1; PYCARD; AGPAT1; NFATC2; GBE1; PABPC1; GAB1; SORBS1; NBEA; CLIP4; POP1; INPP5B; CD01; SH3B6; NNT; PCCA; POLB; PDK3; OXSM; CXorf23; AGT; MRPS36; YWHAZ; TMEM173; ECHDC3; LRPPRC; TK2; SLC25A27; B; APOM; SLC6A6; FAT1; MPP1; BCAM; CD72; GBAS; BMPR1B; NEO1; SLC6A8; DLG3; GPR56; MPP2; CLDN1; CNTNAP1; PHTF2; CYP46A1; TMED4; ASPH; NOX4; PLCD4; TLR3; PTGFRN; TMEM173; DERL1; LCLAT1; COL4A3BP; SEC61A2; CLG1; TMF1; MAN2A2; GORASP2; LCK; ERGIC3; PRNP; WDR44; CALCOCO2; GOLGA2; CHSY3; SAR1A; GCC2; ATP2C1; WST1; KIAA1210; UCHL1; SDAD1; GART; ATG4C; ITGA7; CBS; SLC12A8; SH3KBP1; ALDH1A1; ANKS6; MBNL3; USP13

1; FKTN; LEP; CXCL12; CRLF1; APOD

5; NF1; GFM1; PRKRA; PLXNB2; ZNF484; TRIM14; ZFY; TOPBP1; ZNF608; ZNF501; LRRK2; TRIP12; PRDM8; NBN; ZGCD; PTPN13; SGCE; LMOD1; TAGLN2; MAPT; ARHGAP21; RBM39; PPL; MICAL2; PSTPIP1; LST1; MACF1; MACF1; CEH; BET1; CYB5R3; TAP2; SORT1



















P4;OXR1;GGTLC2;PPAT;KDM5C;PLEKHA5;TRIM38;TTC39A;CARND;WSB1;RIN2;C2CD2L;TMEM106B;DDX1;PC



;CACNB3;ILDR2;ALDH3A2;TNFRSF19;MFSD6;SAR1B;ANO2;CACNA1I;ERAP1;CLK2;NLGN4X;PDGFRA;SLC9A8  
NO1;ANO2;CACNA1I;ERAP1;SLC14A2;SLC9A8;BOC;MFF;LETM2;CCDC136;EIF2AK3;SLC2A14;MAL2;TGFA;AI  
AIP3;HDAC6;HES1;STK17B;CHD1L;INTS6;KIAA1009;ZBTB20;ZNF362;SHPRH;SIX1;FAM178A;SSX2IP;IRI  
DNMT3A;RNF14;PDK1;SYNE1;AKR1B1;KIAA1217;USP48;RNF32;LRCH2;HDAC9;RPS6KA6;BTRC;LYN;RIPK4;I  
;CADM3;GNAZ;TMEFF1;FRMD7;TFPI;SHROOM2;KIRREL3;SMAP1;FNBP1;VEPH1;NT5E;RAB3A;DSG3;ITGA2;AI  
L;ITIH5;PTGDS;APOL1;CA11;CA11;TFRC;RSP01;ODZ3;C1QTNF3;PDZD2;MMP28;UACA;CTHRC1;COL4A3;AGI  
3GR;RIC8B;NCBP2;MEN1;SOD1;NOD2;HSF2BP;AGL;CDK1;CPNE3;RERG;PIK3R4;MPP7;AP1G1;PTEN;PIK3R1  
;GFM2;AMACR;ZNF782;NDUFV3;PET112;MTIF3;HDHD3;CASP8;BCKDK;NET1;EARS2;TXNDC16;PNKD;TMEM91  
L;PTPRU;EPA4;ATP2B4;IL1RAP;TLR1;TSHR;TLR3;CRHR1;PTCH1;FXYD1;SLC12A2;PTPRA;FGFR3;GRM7;NI  
YYP2C8;B3GALT;ACO1;PGAP1;PLOD3;PIGS;INSIG2;KIFAP3;MGP;ABCB9;INPP5K;MR1;PIGW;H6PD;PNPLA  
VHAMM;APP;HTT;COG3;COL18A1;XYLT2;B4GALT6;MCFD2;SLC30A8;ARHGAP21;EXT2;OSBPL10;ST8SIA1;TCI  
3;CASP3;PMFBP1;SPTBN1;DDX10;USP5;ZSCAN2;RIBC2

ZNF354C;BARD1;CAPN3;ZNF568;ZNF498;ARAP2;EEA1;FAM49A;NPLOC4;ZNF273;RALGDS;STAU2;ZNF595;R  
P170;ACTG2;DLC1;DNAI1;CABYR;ZFC3H1;NEXN;SH3KBP1;BBS4;ADD3;PLEKHH3;SDCBP;TMOD1;FAAH;CDC



















MZP3;KNDC1;XYLT2;EXOG;TSGA10;SLC35F2;C14orf2;ETNK2;ALDH7A1;TMEM126B;FAM63B;FAM114A2;ST

;MFF;LETM2;PTPRS;CCDC136;EIF2AK3;ABCC9;TKT;TMEM185A;SLC27A3;ROS1;RNF185;BTN2A2;SCAMP1;LBCC9;SEZ6L2;SYNE1;TMEM185A;SLC47A2;SLC27A3;ROS1;RNF185;BTN2A2;MALL;SCAMP1;SGPP2;NETO2;AF2;HNRNPF;CSTF2;PYGL;DBP;TESK2;GK;KLKP1;FBXL4;PRKAA2;ANLN;BRD2;MEIS1;PPFIBP2;EPB41;HR;TMICA;IFI44L;EYA4;EWSR1;TBL2;ACIN1;HLA-H;SELENBP1;FCGR2A;SORBS2;CMAHP;AUTS2;HERC3;TNFRSF RMCX5;ASIC1;CD68;LDLR;DNAJC15;STRA6;ADCY3;ADCY3;RAMP1;TFRC;DRD4;LSR;CD46;NTRK1;LGALS4;FRN;RIF1;CHRD;LAMA2;OLFM2;DPP4;CPS1;GLB1L2;LAMA4;PLA1A;NHLRC3;COL12A1;LUZP2;C6orf57;LAME ;AC01;TK2;EIF2A;ARHGEF1;PRKCD;CASP8;AKT2;MTOR;NR3C1;INPP5D;INPP5K;HPRT1;ATP6V1H;EIF3E;H ;SQRD;MR1;SLC35B3;ACAD9;CPOX;ERICH1;TOP1MT;PNPLA7;MRPL2;MRPL2;ESR2;KIAA1683;DMGDH;OXA1 LGN1;ROR1;MME;SLC4A5;NEU3;IL12RB1;TRPC1;GABBR1;NINJ2;HRH1;CD99;NET1;NET1;LIFR;JAM2;FZD3 7;ANP32A;ERO1LB;GPANK1;ERGIC3;PIGL;CD320;PRNP;CYP19A1;NCK1;STX17;ERLIN1;CES2;CES2;PDIA5 P11L1;CLCC1;GALNT3;LST1;AP4S1;CLSTN3;RAB36;SLC12A8;CHST11;GLUL;GALNT9;GALNT1;TRAPPC10;S

ALGPS2;UCHL5;ZNF718;CIDEB;RND3;TBC1D15;RASGEF1A;ZSCAN29;PRDM15;GBF1;KIN;MPP1;ANKZF1;PLE 42SE1;PBXIP1;FRMD6;RAI14;HIP1;ABL2;SPTBN1;KY;ARPC4;FRMD1;SPIRE2



















XBP2;DENR;RAB8B;NIT2;LRBA;NOV;AIM1;GGT2;KIAA0247;C11orf58;FMNL1;GOS2

LOXL4; SGPP2; RIPK4; EFN1; NETO2; ADAM22; TNFRSF9; SELENBP1; IL17RA; FZD4; FER1L4; TMEM56; TNFRSF10A; ADAM22; CHRFB1; ENTPD3; FCGR2A; FZD4; GRIA1; FER1L4; TMEM56; GJA5; SYNE2; MGAT4B; ITGB8; C12orf51; ARDBP; CHAF1B; PIK3C2B; PALLD; ZFX; PPP2R4; LIMK2; MLL5; DMD; ZMIZ1; KNTC1; ZMAT4; NUCB2; RGS3; NAV2; MYO15A; SIK1; SORBS3; SYNE2; HDGF; TBPL1; EPB41L1; TNFAIP3; HDAC6; HES1; KANK1; WIPF1; AFAP1; NEPLXND1; DYNC2H1; EVI2B; ANKS1B; SH2B2; BMF; MCHR1; DPP4; ITPR2; HOMER2; SLC6A3; SAT1; TNS3; SLC22A18; LAMB2; IL15RA; MSLN; PAPP; CXCL16; FGF1; C1S; NBN; DCN; ARSK; ENTPD6; MMP16; ADAMTS17; C14orf93; IGF; PANK1; LCK; CCT8; SMAD1; MAP3K8; RAC1; PSMD1; CDK2; RAB3IP; NADSYN1; LDHA; EIF5A; APAF1; NFKB2; EIL; SFXN5; GLYATL2; ACO2; CARS2; OXR1; CHDH; ETFDH; C21orf33; HADHB; CECR5; PC; DAP3; GPAM; MTIF2; WSB3; DLG2; RAPGEF2; SLC6A13; PLXNB1; FGFR1; GPR64; ROR2; MF12; SLC20A2; CD1D; LRP4; IL1R1; SSPN; GPR1; PIP5; PIP4K2B; SLC35D1; SUMF2; FDFT1; ALG9; RHBDF2; LMF2; XYLT2; LRRTM1; CREB3L3; MCFD2; DNAJC10; EXT2; SLC9A7; MCAM; FAS; CAV1; PCSK5; PTGS1; TPST1; B4GALNT4; MBNL3; SERINC5; GSGT1; BET1; TPST2; ENTPD4; H

KHG1; MYO9A; RABGAP1L; PLXNA4; HUWE1; FGD6; BBS5; CD74; ZNF566; ZNF343; HERC1; PYCARD; RHOBTB2; TAF





















4; SYNE2; MGAT4B; ITGB8; C12orf51; TMEM200A; TSPAN1; ABCC1; PCSK2; CD81; P4HTM; SCN10A; KCNMB1; DDR1; TMEM200A; TSPAN1; SCN10A; KCNMB1; RNF180; CNNM2; GLIPR1L2; FGFR2; TLR5; HLA-DRB3; HLA-DRB3; MAOB; DSN1; ZNF658B; FRMD7; HDAC4; GLCCI1; HOXB6; WRB; NFXL1; SP140; ETV1; STK3; TFPI; ENC1; MEIS2; TOP2A; B; ATG4B; CAPZB; SIX1; HECW2; STMN2; PYGL; DBP; GK; GK; GK; KLKP1; ST13; FBXL4; ANLN; BRD2; PPFIBP2; PPF; PIK3AP1; ADD2; CACNA1A; LAMB2; ESR1; MSLN; CXCL16; SHC4; STAB1; OXTR; DYSF; LAT2; LAT2; NPFFR1; LRRK; SCG5; DNASE1; MMP24; COL11A1; ADAM23; ADAM23; LCN6; NXPH4; CHAD; IL6ST; APOM; COL2A1; LAMC2; FHL1; LYIF4H; EIF3B; C21orf59; DFFB; GPAM; NEDD4; ELM01; ARHGEF7; FAH; AR; CDA; GAPVD1; TRAF2; NCALD; C9orf89; SETD3; PPM1K; SLC25A12; HMGCL; SLC25A37; OXCT1; AK2; OGG1; COX7A2L; STARD7; PHF16; EXOG; PPL; SCP2; TGER3; SLC7A2; CD40; PC; CLEC2D; NRXN3; GHR; HOMER1; FLT4; SLC22A14; EPOR; APP; CCBP2; CCBP2; PTH1R; F; CERS5; HERPUD1; SLC36A1; CLCC1; SHISA3; ALG13; ANTXR2; EBP; CLSTN3; TMC6; EPM2A; EPM2A; CAV1; SDCBP; IP1; VPS45; FKTN; ST3GAL5; A4GALT; ST6GALNAC5; RIBC2; KCNJ6; SORT1

15; ZEB1; ZNF638; LIG4; ZNF621; ZNF776; ZNF692; ARAP3; ZBTB25; MRPL44; ITSN2; DBNL; PPFIA4; ZNF705G;























L;RNF180;CNNM2;STMN2;GLIPR1L2;GOLGA1;GK;GK;LAPTM5;TLR5;MUC4;HLA-DRB3;MAOB;FAM159A;PLXNA;  
;FAM159A;PLXNA2;ODZ2;LARGE;ST3GAL1;SLC2A3;HLA-F;ADAM9;CADM3;AKAP1;GALNT2;CACNA2D1;TMEFF  
;ZNF83;PNMA2;DCTN4;SMAP1;FGF13;MED24;MED24;ETS1;BRWD1;RSBN1;RBM5;TRERF1;DUSP10;HOXC10;C  
P4R4;EPB41;CHAF1B;COL22A1;PIK3C2B;PALLD;CSNK1A1;HFE;LIMK2;DZIP3;NAMPT;DMD;GTSE1;EPS15;Z  
C2;NPTXR;AQP3;APBB1IP;SLC41A3;ZNF185;SPRY4;CTTNBP2;MYO6;MMP16;MOG;ARFIP2;PNPLA2;SEMA4F;  
{NX1;EDIL3;IL17RE;ADAMTS9;NPNT;MMP11;ANGPTL1;PYCARD;COL1A1;GNAS;MGAT4A;ADAMTS16;GLB1L;F  
);PSMA4;PSMD11;MAPT;PIIP5K2;MTMR7;PRKAG2;PFKFB2;ISCU;SERPINB8;UGP2;GLRX;UCHL1;GART;ATG4  
2;NDUFB2;ISCU;C14orf2;ALDH7A1;MLLT6;ADH5;PDP1;GART;MAOA;SLC25A36;GSR;MMAB;XAF1;GLUL;HIB  
HTT;PCDH7;SGCE;P2RX6;ATRN;NOTCH4;SLC4A3;LST1;SLC7A8;ADRA1A;ADRA1A;TRPV1;SLC6A9;HBEGF;SL  
;PTGS1;SERINC5;FAAH;NOV;BET1;MGST1;CYB5R3;ULBP1;TMT2;TPST2;TAP2;CCDC3;SORT1

;SP4;JMJD1C;RAP1GAP2;RPL39L;TNXB;CASP1;INPP5B;HECTD3;IQGAP3;DZIP1L;ZBTB16;RBM6;ITSN1;WW





















2; TM4SF1; ODZ2; LARGE; ST3GAL1; HLA-F; AKAP1; CYB561; GALNT2; CACNA2D1; ABCA5; ERAP2; CYP39A1; WRB; 1; ABCA5; ERAP2; WRB; NFXL1; LMBRD1; SLC37A3; ECE1; AGPAT5; CLMN; SLC39A10; GALNT12; KIRREL3; MGAT5; HD7; PRKDC; RFC4; FOXL1; ORC1; RUNX2; ARMCX5; RERE; PITX1; NDRG2; CBX7; PTGDS; DNAJC15; SKIV2L; WBSCF; MIZ1; KNTC1; LYST; DES; NUCB2; TNS1; RGS3; SLC2A3; ADAM9; TNFAIP8; MARK1; GULP1; AKAP1; GNAZ; DNMT3; GSG; TMEM50B; ATP5A1; C14orf93; UTRN; RALGPS2; MMP24; ADAM23; ADAM23; PTPRQ; MAPKAP1; CELSR2; CD200; SGC; NDC1; CRISPLD2; WISP3; ELN; SEMA3A; COL8A1; SCUBE1; FAM132B; ADAMTS6; MFAP2; SEMA3B; COL9A1; TMEM25; C; ALS2; DLC1; GSR; CBS; BANF1; PTPN12; SH3KBP1; ALDH1A1; PDXK; ATF2; CDC6; C21orf7; FAS; FAS; EPM2A; F; CH; DARS2; NIT2; PDK4; UCP2; CTAGE5; CASP3; ISCA2; MCEE; MDP1; SLC25A14; ACADM; SARDH; ISCA1; MGST1; F; C11A2; EBP; KCNJ15; PTK7; NCR1; CAV1; CLDN4; CEACAM8; MICB; EFNA1; SLC23A2; SLC23A2; SLC25A14; CELSF

P2; SGSM3; EXOSC10; ZNF419; ZNF133; GLI1; ZNF557; KIAA0317; ROCK2; POLB; NOD2; ZNF641; TBC1D26; CANT





















;NFXL1;LMBRD1;SLC37A3;ECE1;AGPAT5;CLMN;SLC39A10;DAB2;GALNT12;ATP6V1B1;MGAT5;CHST6;GGT7;  
;CHST6;GGT7;SLC38A6;TMEM26;SLC25A10;TSPAN11;RPN2;DSG3;MFSD9;SEMA4B;ORC1;TRIM59;ITGA2;RN  
R22;AKNA;NFATC3;HMOX1;CDKN2A;CDKN2A;NFYC;TET1;LSR;CAMK2D;TRIP13;PAPD4;TACC1;PDZD2;TRIM6  
5N;DSN1;FRMD7;ACTN1;HDAC4;GLCCI1;PABPC4;SP140;CLMN;FRMD4A;STK3;STK3;TFPI;ENC1;SHROOM2;M  
CB;GRIA3;MADD;ARRB2;IL6ST;AAMP;FPR1;CLIC6;SYNPO;PKP2;ADRBK2;PARVB;DOK1;IL17RD;FAT1;LYNX  
5;RSPRY1;TNXB;LEPRE1;SCRG1;CTSL1;PLA2G2A;PGF;RNPEP;CRTAC1;SFRP1;VCAN;WNT9B;IL1RAP;PRLR;  
RHEB;NT5C2;UBE3C;CASP3;NOV;EIF1AX;PBXIP1;EIF4E;BCL2L11;RIPK2;CDC16;MX1;NAT1;ASNS;TGFB2  
FRMD6;BCL2L11;CYB5R3;RAI14;TIMM9;TRNT1;TRNT1;PIM1;NAT1;MRPS5;SLC25A16;CHKB;MFN1;REXO2;P  
R1;TIE1;SLC40A1;ANPEP;SLC6A1;NAT1;NAT1;PTGER2;ST3GAL5;LPAR4;EDNRA;LYVE1

02;FAM13B;AKAP13;MDM4;ARHGAP24;RAPGEF5;REERG;ZNF706;ARHGAP6;ZNF480;PIK3R1;PSD4;ZNF425;FU





















SLC38A6;KCNMB4;TMEM26;SLC25A10;TSPAN11;RPN2;MFSD9;SEMA4B;ORC1;TRIM59;RHCE;RNF145;GREB1;F145;CD68;GREB1;ROB02;TMEM180;DNAJC15;STRA6;ADCY3;SPAG9;SEMA5A;ACBD5;ADAM15;LSR;RRBP1;S6;ALDOA;HTATIP2;ZMYM1;ODF2;POLD3;ZBTB46;ZNF596;AKAP6;TCEB1;ZNF792;ITGB3BP;XP07;RNF111;UEIS2;TOP2A;DCTN4;SMAP1;STAC;FGF13;TARSL2;MED24;BRWD1;FNBP1;SOCS2;DUSP10;SCIN;FAM110B;RA1;BBS5;COL1A1;GNAS;GNAS;GNAS;MDGA1;BCAM;MEGF11;LIG4;COL13A1;SOCS7;MYOT;ARAP3;PCDH9;MYH1TNC;KAZALD1;STRC;NAT6;KLK4;ADAMTS1;AGT;EFEMP1;THBS3;FBLN2;CCL28;TLL2;NOTUM;PDGFA;MMP7;C;TAP2;PRICKLE1  
TS

S;TIAM1;ZNF782;ZNF862;ARHGEF1;ZNF512;PRDM6;HECTD2;TWF1;PARP1;SYNGAP1;SP7;ZFP92;ZNF704;N























;ROBO2;PTGDS;TMEM180;SEMA5A;ACBD5;OLFM1;ADAM15;RRBP1;SLC35F5;MGAT1;M  
SLC35F5;MGAT1;MGAT1;ODZ3;PIGN;SLCO3A1;PLXND1;TMEM176A;PLEKHH2;FLNB;D  
JACA;SRRM1;S100P;RBPJ;ZNF33B;RORA;ZNF554;GNL2;INTS7;ANKS1B;PRPF40A;F  
AB3A;STK11IP;ARMCX5;NDRG2;PTGDS;DNAJC15;NFATC3;SPAG9;TTLL3;CDKN2A;LS  
10;PTPN3;TGOLN2;BMPR1B;PTK2B;SCUBE1;GAB1;MAP4K2;NEO1;THEM4;SORBS1;GF  
CX3CL1;C1QTNF1;LGI3;IL16;FAM3C;COL9A3;MME;GDF5;SEPP1;IL18BP;ARSB;TNF

NFIB;TRIM2;NR3C1;NET1;KLF6;SEC14L2;VPS13A;DNMBP;ZNF451;TRIM5;TRIM9;R





















| GO Term                                                        | Count | p-Value   | q-Value   |
|----------------------------------------------------------------|-------|-----------|-----------|
| GO:0005515 protein binding                                     | 1143  | 0         | 0         |
| GO:0046872 metal ion binding                                   | 513   | 0         | 0         |
| GO:0000166 nucleotide binding                                  | 442   | 0         | 0         |
| GO:0005524 ATP binding                                         | 370   | 0         | 0         |
| GO:0008270 zinc ion binding                                    | 485   | 0         | 0         |
| GO:0016740 transferase activity                                | 305   | 2.20E-275 | 4.73E-273 |
| GO:0005509 calcium ion binding                                 | 217   | 3.17E-221 | 5.86E-219 |
| GO:0003700 transcription factor activity                       | 167   | 4.35E-148 | 5.35E-146 |
| GO:0003677 DNA binding                                         | 218   | 5.50E-133 | 5.68E-131 |
| GO:0000287 magnesium ion binding                               | 114   | 2.40E-122 | 2.38E-120 |
| GO:0016787 hydrolase activity                                  | 203   | 5.50E-121 | 5.07E-119 |
| GO:0016491 oxidoreductase activity                             | 113   | 1.73E-98  | 1.28E-96  |
| GO:0008233 peptidase activity                                  | 104   | 1.40E-93  | 1.00E-91  |
| GO:0004674 protein serine/threonine kinase activity            | 93    | 1.97E-92  | 1.34E-90  |
| GO:0003779 actin binding                                       | 84    | 3.62E-91  | 2.34E-89  |
| GO:0003723 RNA binding                                         | 109   | 1.76E-90  | 1.11E-88  |
| GO:0042803 protein homodimerization activity                   | 76    | 2.62E-87  | 1.54E-85  |
| GO:0004872 receptor activity                                   | 147   | 9.66E-85  | 5.55E-83  |
| GO:0016874 ligase activity                                     | 80    | 9.95E-79  | 5.47E-77  |
| GO:0005506 iron ion binding                                    | 56    | 1.58E-65  | 8.00E-64  |
| GO:0043565 sequence-specific DNA binding                       | 75    | 2.29E-59  | 1.08E-57  |
| GO:0005525 GTP binding                                         | 62    | 6.03E-55  | 2.69E-53  |
| GO:0009055 electron carrier activity                           | 51    | 6.73E-53  | 2.80E-51  |
| GO:0042802 identical protein binding                           | 67    | 1.17E-51  | 4.79E-50  |
| GO:0005516 calmodulin binding                                  | 43    | 4.65E-51  | 1.88E-49  |
| GO:0008201 heparin binding                                     | 35    | 1.48E-46  | 5.48E-45  |
| GO:0005096 GTPase activator activity                           | 46    | 2.81E-44  | 9.93E-43  |
| GO:0046982 protein heterodimerization activity                 | 38    | 5.28E-41  | 1.79E-39  |
| GO:0005201 extracellular matrix structural constituent         | 30    | 3.20E-38  | 1.02E-36  |
| GO:0004222 metalloendopeptidase activity                       | 32    | 5.54E-38  | 1.74E-36  |
| GO:0017124 SH3 domain binding                                  | 30    | 4.04E-37  | 1.21E-35  |
| GO:0005085 guanyl-nucleotide exchange factor activity          | 35    | 7.54E-37  | 2.24E-35  |
| GO:0008415 acyltransferase activity                            | 37    | 6.16E-36  | 1.73E-34  |
| GO:0004386 helicase activity                                   | 33    | 5.16E-35  | 1.42E-33  |
| GO:0008083 growth factor activity                              | 36    | 1.21E-34  | 3.29E-33  |
| GO:0016757 transferase activity, transferring glycosyl groups  | 40    | 6.94E-34  | 1.87E-32  |
| GO:0003682 chromatin binding                                   | 30    | 9.11E-34  | 2.43E-32  |
| GO:0031402 sodium ion binding                                  | 30    | 7.21E-33  | 1.90E-31  |
| GO:0003713 transcription coactivator activity                  | 34    | 4.38E-32  | 1.12E-30  |
| GO:0008022 protein C-terminus binding                          | 27    | 6.79E-30  | 1.65E-28  |
| GO:0030145 manganese ion binding                               | 30    | 2.35E-29  | 5.68E-28  |
| GO:0019992 diacylglycerol binding                              | 23    | 4.59E-29  | 1.10E-27  |
| GO:0004842 ubiquitin-protein ligase activity                   | 28    | 9.09E-29  | 2.13E-27  |
| GO:0003924 GTPase activity                                     | 32    | 1.24E-28  | 2.88E-27  |
| GO:0008168 methyltransferase activity                          | 30    | 3.26E-28  | 7.40E-27  |
| GO:0015293 symporter activity                                  | 29    | 4.60E-28  | 1.03E-26  |
| GO:0016702 oxidoreductase activity, acting on single donors w: | 22    | 6.90E-28  | 1.54E-26  |
| GO:0032393 MHC class I receptor activity                       | 17    | 1.30E-27  | 2.88E-26  |
| GO:0003714 transcription corepressor activity                  | 26    | 2.08E-26  | 4.47E-25  |
| GO:0003777 microtubule motor activity                          | 22    | 1.16E-25  | 2.41E-24  |
| GO:0008134 transcription factor binding                        | 40    | 4.65E-25  | 9.45E-24  |

|            |                                                        |    |          |          |
|------------|--------------------------------------------------------|----|----------|----------|
| G0:0016853 | isomerase activity                                     | 25 | 1.92E-24 | 3.82E-23 |
| G0:0005215 | transporter activity                                   | 61 | 4.19E-24 | 8.19E-23 |
| G0:0051015 | actin filament binding                                 | 17 | 2.04E-23 | 3.91E-22 |
| G0:0005200 | structural constituent of cytoskeleton                 | 20 | 4.73E-23 | 8.86E-22 |
| G0:0016563 | transcriptional activator activity                     | 33 | 6.49E-23 | 1.21E-21 |
| G0:0005198 | structural molecule activity                           | 44 | 9.92E-23 | 1.82E-21 |
| G0:0005244 | voltage-gated ion channel activity                     | 27 | 1.10E-22 | 2.01E-21 |
| G0:0004252 | serine-type endopeptidase activity                     | 25 | 3.30E-22 | 5.88E-21 |
| G0:0005507 | copper ion binding                                     | 19 | 3.74E-22 | 6.59E-21 |
| G0:0050660 | FAD binding                                            | 19 | 3.74E-22 | 6.59E-21 |
| G0:0016829 | lyase activity                                         | 24 | 1.00E-21 | 1.75E-20 |
| G0:0005089 | Rho guanyl-nucleotide exchange factor activity         | 19 | 1.26E-21 | 2.19E-20 |
| G0:0004221 | ubiquitin thiolesterase activity                       | 19 | 1.69E-21 | 2.89E-20 |
| G0:0003684 | damaged DNA binding                                    | 16 | 5.25E-21 | 8.81E-20 |
| G0:0003702 | RNA polymerase II transcription factor activity        | 27 | 5.47E-21 | 9.11E-20 |
| G0:0030955 | potassium ion binding                                  | 22 | 1.44E-20 | 2.38E-19 |
| G0:0003743 | translation initiation factor activity                 | 17 | 4.33E-20 | 7.00E-19 |
| G0:0047485 | protein N-terminus binding                             | 16 | 5.85E-20 | 9.39E-19 |
| G0:0005529 | sugar binding                                          | 24 | 1.68E-19 | 2.64E-18 |
| G0:0004725 | protein tyrosine phosphatase activity                  | 19 | 1.08E-18 | 1.68E-17 |
| G0:0008017 | microtubule binding                                    | 15 | 3.61E-18 | 5.40E-17 |
| G0:0004867 | serine-type endopeptidase inhibitor activity           | 18 | 4.05E-18 | 6.02E-17 |
| G0:0016564 | transcriptional repressor activity                     | 25 | 2.12E-17 | 2.96E-16 |
| G0:0004197 | cysteine-type endopeptidase activity                   | 16 | 2.43E-17 | 3.37E-16 |
| G0:0005070 | SH3/SH2 adaptor activity                               | 14 | 3.88E-17 | 5.31E-16 |
| G0:0019901 | protein kinase binding                                 | 17 | 1.40E-16 | 1.86E-15 |
| G0:0008026 | ATP-dependent helicase activity                        | 17 | 1.69E-16 | 2.22E-15 |
| G0:0004722 | protein serine/threonine phosphatase activity          | 13 | 5.84E-16 | 7.35E-15 |
| G0:0004653 | polypeptide N-acetylgalactosaminyltransferase activity | 10 | 1.17E-15 | 1.46E-14 |
| G0:0005518 | collagen binding                                       | 11 | 1.60E-15 | 1.96E-14 |
| G0:0031418 | L-ascorbic acid binding                                | 10 | 2.32E-15 | 2.83E-14 |
| G0:0016887 | ATPase activity                                        | 25 | 5.80E-15 | 6.90E-14 |
| G0:0008565 | protein transporter activity                           | 15 | 1.01E-14 | 1.17E-13 |
| G0:0020037 | heme binding                                           | 17 | 1.18E-14 | 1.37E-13 |
| G0:0003774 | motor activity                                         | 18 | 1.65E-14 | 1.90E-13 |
| G0:0003697 | single-stranded DNA binding                            | 12 | 5.50E-14 | 5.91E-13 |
| G0:0003707 | steroid hormone receptor activity                      | 12 | 9.52E-14 | 1.01E-12 |
| G0:0004713 | protein-tyrosine kinase activity                       | 18 | 1.19E-13 | 1.25E-12 |
| G0:0008234 | cysteine-type peptidase activity                       | 17 | 1.42E-13 | 1.48E-12 |
| G0:0005178 | integrin binding                                       | 12 | 1.61E-13 | 1.65E-12 |
| G0:0004930 | G-protein coupled receptor activity                    | 38 | 2.14E-13 | 2.18E-12 |
| G0:0018024 | histone-lysine N-methyltransferase activity            | 10 | 7.25E-13 | 7.10E-12 |
| G0:0003887 | DNA-directed DNA polymerase activity                   | 10 | 7.25E-13 | 7.10E-12 |
| G0:0003725 | double-stranded RNA binding                            | 10 | 1.03E-12 | 1.00E-11 |
| G0:0000049 | tRNA binding                                           | 8  | 2.91E-12 | 2.75E-11 |
| G0:0005125 | cytokine activity                                      | 18 | 4.27E-12 | 4.01E-11 |
| G0:0005351 | sugar porter activity                                  | 10 | 5.02E-12 | 4.68E-11 |
| G0:0004407 | histone deacetylase activity                           | 8  | 8.87E-12 | 8.11E-11 |
| G0:0016881 | acid-amino acid ligase activity                        | 17 | 8.97E-12 | 8.15E-11 |
| G0:0030170 | pyridoxal phosphate binding                            | 11 | 9.07E-12 | 8.22E-11 |
| G0:0008307 | structural constituent of muscle                       | 10 | 1.94E-11 | 1.72E-10 |
| G0:0005452 | inorganic anion exchanger activity                     | 7  | 2.04E-11 | 1.81E-10 |

|            |                                                     |    |          |          |
|------------|-----------------------------------------------------|----|----------|----------|
| G0:0015297 | antiporter activity                                 | 11 | 2.08E-11 | 1.83E-10 |
| G0:0031404 | chloride ion binding                                | 12 | 2.90E-11 | 2.51E-10 |
| G0:0031072 | heat shock protein binding                          | 11 | 3.07E-11 | 2.64E-10 |
| G0:0016798 | hydrolase activity, acting on glycosyl bonds        | 14 | 3.35E-11 | 2.88E-10 |
| G0:0051539 | 4 iron, 4 sulfur cluster binding                    | 8  | 5.54E-11 | 4.67E-10 |
| G0:0005545 | phosphatidylinositol binding                        | 7  | 7.53E-11 | 6.24E-10 |
| G0:0004012 | phospholipid-translocating ATPase activity          | 7  | 7.53E-11 | 6.24E-10 |
| G0:0016779 | nucleotidyltransferase activity                     | 14 | 8.13E-11 | 6.71E-10 |
| G0:0005216 | ion channel activity                                | 22 | 1.11E-10 | 9.06E-10 |
| G0:0030674 | protein binding, bridging                           | 12 | 1.11E-10 | 9.06E-10 |
| G0:0005097 | Rab GTPase activator activity                       | 10 | 1.80E-10 | 1.42E-09 |
| G0:0035091 | phosphoinositide binding                            | 12 | 1.91E-10 | 1.51E-09 |
| G0:0005001 | transmembrane receptor protein tyrosine phosphatase | 7  | 2.23E-10 | 1.76E-09 |
| G0:0005161 | platelet-derived growth factor receptor binding     | 6  | 2.47E-10 | 1.92E-09 |
| G0:0004385 | guanylate kinase activity                           | 6  | 2.47E-10 | 1.92E-09 |
| G0:0004871 | signal transducer activity                          | 57 | 2.78E-10 | 2.16E-09 |
| G0:0008430 | selenium binding                                    | 8  | 6.21E-10 | 4.69E-09 |
| G0:0030020 | extracellular matrix structural constituent confere | 5  | 7.02E-10 | 5.26E-09 |
| G0:0050661 | NADP binding                                        | 8  | 8.29E-10 | 6.15E-09 |
| G0:0016820 | hydrolase activity, acting on acid anhydrides, cata | 12 | 1.18E-09 | 8.64E-09 |
| G0:0008009 | chemokine activity                                  | 9  | 1.28E-09 | 9.32E-09 |
| G0:0043130 | ubiquitin binding                                   | 7  | 1.29E-09 | 9.33E-09 |
| G0:0005158 | insulin receptor binding                            | 7  | 1.87E-09 | 1.34E-08 |
| G0:0008093 | cytoskeletal adaptor activity                       | 6  | 1.96E-09 | 1.40E-08 |
| G0:0000155 | two-component sensor activity                       | 6  | 1.96E-09 | 1.40E-08 |
| G0:0008289 | lipid binding                                       | 21 | 2.13E-09 | 1.51E-08 |
| G0:0005179 | hormone activity                                    | 12 | 2.25E-09 | 1.59E-08 |
| G0:0005044 | scavenger receptor activity                         | 8  | 2.38E-09 | 1.67E-08 |
| G0:0004115 | 3',5'-cyclic-AMP phosphodiesterase activity         | 5  | 2.44E-09 | 1.70E-08 |
| G0:0043531 | ADP binding                                         | 6  | 3.41E-09 | 2.34E-08 |
| G0:0008656 | caspase activator activity                          | 6  | 3.41E-09 | 2.34E-08 |
| G0:0004519 | endonuclease activity                               | 11 | 5.02E-09 | 3.36E-08 |
| G0:0050681 | androgen receptor binding                           | 7  | 5.14E-09 | 3.42E-08 |
| G0:0004715 | non-membrane spanning protein tyrosine kinase activ | 8  | 6.01E-09 | 3.95E-08 |
| G0:0016706 | oxidoreductase activity, acting on paired donors, v | 7  | 6.97E-09 | 4.54E-08 |
| G0:0004402 | histone acetyltransferase activity                  | 7  | 9.32E-09 | 5.95E-08 |
| G0:0004740 | [pyruvate dehydrogenase (lipoamide)] kinase activit | 4  | 1.14E-08 | 7.23E-08 |
| G0:0005086 | ARF guanyl-nucleotide exchange factor activity      | 6  | 1.37E-08 | 8.54E-08 |
| G0:0004177 | aminopeptidase activity                             | 7  | 1.61E-08 | 9.93E-08 |
| G0:0003690 | double-stranded DNA binding                         | 9  | 1.66E-08 | 1.02E-07 |
| G0:0004714 | transmembrane receptor protein tyrosine kinase acti | 9  | 2.21E-08 | 1.34E-07 |
| G0:0051082 | unfolded protein binding                            | 11 | 2.62E-08 | 1.57E-07 |
| G0:0004004 | ATP-dependent RNA helicase activity                 | 6  | 2.95E-08 | 1.74E-07 |
| G0:0008060 | ARF GTPase activator activity                       | 7  | 4.25E-08 | 2.48E-07 |
| G0:0004926 | non-G-protein coupled 7TM receptor activity         | 5  | 5.18E-08 | 3.01E-07 |
| G0:0008301 | DNA bending activity                                | 5  | 5.18E-08 | 3.01E-07 |
| G0:0005041 | low-density lipoprotein receptor activity           | 5  | 5.18E-08 | 3.01E-07 |
| G0:0003755 | peptidyl-prolyl cis-trans isomerase activity        | 7  | 5.30E-08 | 3.06E-07 |
| G0:0030971 | receptor tyrosine kinase binding                    | 4  | 5.66E-08 | 3.25E-07 |
| G0:0004439 | phosphoinositide 5-phosphatase activity             | 4  | 5.66E-08 | 3.25E-07 |
| G0:0004028 | 3-chloroallyl aldehyde dehydrogenase activity       | 4  | 5.66E-08 | 3.25E-07 |
| G0:0008237 | metallopeptidase activity                           | 13 | 5.76E-08 | 3.27E-07 |

|            |                                                        |    |          |          |
|------------|--------------------------------------------------------|----|----------|----------|
| G0:0017137 | Rab GTPase binding                                     | 6  | 5.79E-08 | 3.27E-07 |
| G0:0004364 | glutathione transferase activity                       | 6  | 7.89E-08 | 4.42E-07 |
| G0:0046332 | SMAD binding                                           | 7  | 9.87E-08 | 5.46E-07 |
| G0:0004437 | inositol or phosphatidylinositol phosphatase activity  | 6  | 1.06E-07 | 5.84E-07 |
| G0:0042626 | ATPase activity, coupled to transmembrane movement     | 10 | 1.24E-07 | 6.78E-07 |
| G0:0005523 | tropomyosin binding                                    | 5  | 1.42E-07 | 7.71E-07 |
| G0:0042288 | MHC class I protein binding                            | 5  | 1.42E-07 | 7.71E-07 |
| G0:0016301 | kinase activity                                        | 26 | 1.66E-07 | 8.94E-07 |
| G0:0004030 | aldehyde dehydrogenase [NAD(P)+] activity              | 4  | 1.68E-07 | 9.01E-07 |
| G0:0004415 | hyaluronoglucosaminidase activity                      | 4  | 1.68E-07 | 9.01E-07 |
| G0:0005521 | lamin binding                                          | 4  | 1.68E-07 | 9.01E-07 |
| G0:0004497 | monooxygenase activity                                 | 9  | 1.79E-07 | 9.49E-07 |
| G0:0003950 | NAD+ ADP-ribosyltransferase activity                   | 6  | 1.82E-07 | 9.59E-07 |
| G0:0005102 | receptor binding                                       | 27 | 1.85E-07 | 9.67E-07 |
| G0:0008138 | protein tyrosine/serine/threonine phosphatase activity | 7  | 2.08E-07 | 1.09E-06 |
| G0:0030165 | PDZ domain binding                                     | 6  | 2.99E-07 | 1.54E-06 |
| G0:0004697 | protein kinase C activity                              | 5  | 3.25E-07 | 1.66E-06 |
| G0:0004806 | triacylglycerol lipase activity                        | 5  | 3.25E-07 | 1.66E-06 |
| G0:0003995 | acyl-CoA dehydrogenase activity                        | 5  | 3.25E-07 | 1.66E-06 |
| G0:0004143 | diacylglycerol kinase activity                         | 5  | 3.25E-07 | 1.66E-06 |
| G0:0004568 | chitinase activity                                     | 4  | 3.90E-07 | 1.95E-06 |
| G0:0004445 | inositol-polyphosphate 5-phosphatase activity          | 4  | 3.90E-07 | 1.95E-06 |
| G0:0016308 | 1-phosphatidylinositol-4-phosphate 5-kinase activity   | 4  | 3.90E-07 | 1.95E-06 |
| G0:0046875 | ephrin receptor binding                                | 4  | 3.90E-07 | 1.95E-06 |
| G0:0016455 | RNA polymerase II transcription mediator activity      | 5  | 4.69E-07 | 2.30E-06 |
| G0:0004089 | carbonate dehydratase activity                         | 5  | 4.69E-07 | 2.30E-06 |
| G0:0001948 | glycoprotein binding                                   | 5  | 4.69E-07 | 2.30E-06 |
| G0:0008603 | cAMP-dependent protein kinase regulator activity       | 5  | 4.69E-07 | 2.30E-06 |
| G0:0004693 | cyclin-dependent protein kinase activity               | 6  | 4.72E-07 | 2.30E-06 |
| G0:0005057 | receptor signaling protein activity                    | 11 | 5.70E-07 | 2.76E-06 |
| G0:0015662 | ATPase activity, coupled to transmembrane movement     | 7  | 6.39E-07 | 3.09E-06 |
| G0:0008601 | protein phosphatase type 2A regulator activity         | 5  | 6.58E-07 | 3.17E-06 |
| G0:0004029 | aldehyde dehydrogenase (NAD) activity                  | 4  | 7.73E-07 | 3.67E-06 |
| G0:0005021 | vascular endothelial growth factor receptor activity   | 4  | 7.73E-07 | 3.67E-06 |
| G0:0030675 | Rac GTPase activator activity                          | 4  | 7.73E-07 | 3.67E-06 |
| G0:0042813 | Wnt receptor activity                                  | 4  | 7.73E-07 | 3.67E-06 |
| G0:0048306 | calcium-dependent protein binding                      | 5  | 9.04E-07 | 4.21E-06 |
| G0:0004709 | MAP kinase kinase kinase activity                      | 5  | 9.04E-07 | 4.21E-06 |
| G0:0004683 | calmodulin regulated protein kinase activity           | 5  | 9.04E-07 | 4.21E-06 |
| G0:0003735 | structural constituent of ribosome                     | 11 | 1.08E-06 | 4.98E-06 |
| G0:0030229 | very-low-density lipoprotein receptor activity         | 3  | 1.11E-06 | 4.98E-06 |
| G0:0017112 | Rab guanyl-nucleotide exchange factor activity         | 3  | 1.11E-06 | 4.98E-06 |
| G0:0004924 | oncostatin-M receptor activity                         | 3  | 1.11E-06 | 4.98E-06 |
| G0:0000400 | four-way junction DNA binding                          | 3  | 1.11E-06 | 4.98E-06 |
| G0:0032137 | guanine/thymine mispair binding                        | 3  | 1.11E-06 | 4.98E-06 |
| G0:0032142 | single guanine insertion binding                       | 3  | 1.11E-06 | 4.98E-06 |
| G0:0032357 | oxidized purine DNA binding                            | 3  | 1.11E-06 | 4.98E-06 |
| G0:0003746 | translation elongation factor activity                 | 5  | 1.22E-06 | 5.40E-06 |
| G0:0042169 | SH2 domain binding                                     | 5  | 1.22E-06 | 5.40E-06 |
| G0:0003840 | gamma-glutamyltransferase activity                     | 4  | 1.38E-06 | 6.09E-06 |
| G0:0030742 | GTP-dependent protein binding                          | 4  | 1.38E-06 | 6.09E-06 |
| G0:0016566 | specific transcriptional repressor activity            | 5  | 1.61E-06 | 7.02E-06 |

|            |                                                     |    |          |          |
|------------|-----------------------------------------------------|----|----------|----------|
| G0:0004861 | cyclin-dependent protein kinase inhibitor activity  | 4  | 2.28E-06 | 9.82E-06 |
| G0:0042301 | phosphate binding                                   | 5  | 3.40E-06 | 1.44E-05 |
| G0:0031625 | ubiquitin protein ligase binding                    | 5  | 3.40E-06 | 1.44E-05 |
| G0:0003873 | 6-phosphofructo-2-kinase activity                   | 3  | 4.39E-06 | 1.80E-05 |
| G0:0004634 | phosphopyruvate hydratase activity                  | 3  | 4.39E-06 | 1.80E-05 |
| G0:0004301 | epoxide hydrolase activity                          | 3  | 4.39E-06 | 1.80E-05 |
| G0:0030507 | spectrin binding                                    | 3  | 4.39E-06 | 1.80E-05 |
| G0:0004815 | aspartate-tRNA ligase activity                      | 3  | 4.39E-06 | 1.80E-05 |
| G0:0004563 | beta-N-acetylhexosaminidase activity                | 3  | 4.39E-06 | 1.80E-05 |
| G0:0004862 | cAMP-dependent protein kinase inhibitor activity    | 3  | 4.39E-06 | 1.80E-05 |
| G0:0004435 | phosphoinositide phospholipase C activity           | 5  | 5.28E-06 | 2.11E-05 |
| G0:0004622 | lysophospholipase activity                          | 4  | 5.29E-06 | 2.11E-05 |
| G0:0005355 | glucose transporter activity                        | 4  | 5.29E-06 | 2.11E-05 |
| G0:0004065 | arylsulfatase activity                              | 4  | 5.29E-06 | 2.11E-05 |
| G0:0042826 | histone deacetylase binding                         | 4  | 5.29E-06 | 2.11E-05 |
| G0:0001540 | beta-amyloid binding                                | 4  | 5.29E-06 | 2.11E-05 |
| G0:0046870 | cadmium ion binding                                 | 4  | 5.29E-06 | 2.11E-05 |
| G0:0005100 | Rho GTPase activator activity                       | 5  | 6.48E-06 | 2.56E-05 |
| G0:0005159 | insulin-like growth factor receptor binding         | 4  | 7.58E-06 | 2.96E-05 |
| G0:0017048 | Rho GTPase binding                                  | 5  | 7.88E-06 | 3.06E-05 |
| G0:0046966 | thyroid hormone receptor binding                    | 5  | 7.88E-06 | 3.06E-05 |
| G0:0030295 | protein kinase activator activity                   | 4  | 1.05E-05 | 4.03E-05 |
| G0:0004720 | protein-lysine 6-oxidase activity                   | 3  | 1.09E-05 | 4.10E-05 |
| G0:0051721 | protein phosphatase 2A binding                      | 3  | 1.09E-05 | 4.10E-05 |
| G0:0048407 | platelet-derived growth factor binding              | 3  | 1.09E-05 | 4.10E-05 |
| G0:0005007 | fibroblast growth factor receptor activity          | 3  | 1.09E-05 | 4.10E-05 |
| G0:0008131 | amine oxidase activity                              | 3  | 1.09E-05 | 4.10E-05 |
| G0:0004565 | beta-galactosidase activity                         | 3  | 1.09E-05 | 4.10E-05 |
| G0:0005547 | phosphatidylinositol-3,4,5-triphosphate binding     | 3  | 1.09E-05 | 4.10E-05 |
| G0:0000036 | acyl carrier activity                               | 3  | 1.09E-05 | 4.10E-05 |
| G0:0004062 | aryl sulfotransferase activity                      | 3  | 1.09E-05 | 4.10E-05 |
| G0:0050897 | cobalt ion binding                                  | 4  | 1.42E-05 | 5.20E-05 |
| G0:0017046 | peptide hormone binding                             | 4  | 1.42E-05 | 5.20E-05 |
| G0:0015035 | protein disulfide oxidoreductase activity           | 4  | 1.42E-05 | 5.20E-05 |
| G0:0002020 | protease binding                                    | 4  | 1.88E-05 | 6.68E-05 |
| G0:0017022 | myosin binding                                      | 4  | 1.88E-05 | 6.68E-05 |
| G0:0042043 | neurexin binding                                    | 3  | 2.16E-05 | 7.52E-05 |
| G0:0004126 | cytidine deaminase activity                         | 3  | 2.16E-05 | 7.52E-05 |
| G0:0008046 | axon guidance receptor activity                     | 3  | 2.16E-05 | 7.52E-05 |
| G0:0004887 | thyroid hormone receptor activity                   | 3  | 2.16E-05 | 7.52E-05 |
| G0:0016018 | cyclosporin A binding                               | 3  | 2.16E-05 | 7.52E-05 |
| G0:0003688 | DNA replication origin binding                      | 3  | 2.16E-05 | 7.52E-05 |
| G0:0032405 | MutLalpha complex binding                           | 3  | 2.16E-05 | 7.52E-05 |
| G0:0050700 | CARD domain binding                                 | 3  | 2.16E-05 | 7.52E-05 |
| G0:0051287 | NAD binding                                         | 5  | 2.20E-05 | 7.53E-05 |
| G0:0019899 | enzyme binding                                      | 14 | 2.20E-05 | 7.53E-05 |
| G0:0042605 | peptide antigen binding                             | 4  | 2.44E-05 | 8.31E-05 |
| G0:0004860 | protein kinase inhibitor activity                   | 5  | 2.56E-05 | 8.67E-05 |
| G0:0003704 | specific RNA polymerase II transcription factor act | 5  | 2.96E-05 | 9.98E-05 |
| G0:0030159 | receptor signaling complex scaffold activity        | 4  | 3.11E-05 | 1.04E-04 |
| G0:0004843 | ubiquitin-specific protease activity                | 4  | 3.11E-05 | 1.04E-04 |
| G0:0005540 | hyaluronic acid binding                             | 4  | 3.11E-05 | 1.04E-04 |

|            |                                                            |    |          |          |
|------------|------------------------------------------------------------|----|----------|----------|
| G0:0019904 | protein domain specific binding                            | 11 | 3.67E-05 | 1.22E-04 |
| G0:0004331 | fructose-2,6-bisphosphate 2-phosphatase activity           | 3  | 3.75E-05 | 1.23E-04 |
| G0:0004128 | cytochrome-b5 reductase activity                           | 3  | 3.75E-05 | 1.23E-04 |
| G0:0043236 | laminin binding                                            | 3  | 3.75E-05 | 1.23E-04 |
| G0:0015270 | dihydropyridine-sensitive calcium channel activity         | 3  | 3.75E-05 | 1.23E-04 |
| G0:0004703 | G-protein coupled receptor kinase activity                 | 3  | 3.75E-05 | 1.23E-04 |
| G0:0017166 | vinculin binding                                           | 3  | 3.75E-05 | 1.23E-04 |
| G0:0000339 | RNA cap binding                                            | 3  | 3.75E-05 | 1.23E-04 |
| G0:0051879 | Hsp90 protein binding                                      | 3  | 3.75E-05 | 1.23E-04 |
| G0:0004726 | non-membrane spanning protein tyrosine phosphatase         | 3  | 3.75E-05 | 1.23E-04 |
| G0:0005328 | neurotransmitter:sodium symporter activity                 | 4  | 3.91E-05 | 1.26E-04 |
| G0:0046983 | protein dimerization activity                              | 15 | 4.33E-05 | 1.39E-04 |
| G0:0030983 | mismatched DNA binding                                     | 4  | 4.85E-05 | 1.55E-04 |
| G0:0030276 | clathrin binding                                           | 3  | 5.95E-05 | 1.88E-04 |
| G0:0050998 | nitric-oxide synthase binding                              | 3  | 5.95E-05 | 1.88E-04 |
| G0:0008143 | poly(A) binding                                            | 3  | 5.95E-05 | 1.88E-04 |
| G0:0015280 | amiloride-sensitive sodium channel activity                | 3  | 5.95E-05 | 1.88E-04 |
| G0:0004553 | hydrolase activity, hydrolyzing O-glycosyl compound        | 7  | 7.18E-05 | 2.23E-04 |
| G0:0015459 | potassium channel regulator activity                       | 4  | 7.20E-05 | 2.23E-04 |
| G0:0004003 | ATP-dependent DNA helicase activity                        | 4  | 8.64E-05 | 2.65E-04 |
| G0:0003810 | protein-glutamine gamma-glutamyltransferase activity       | 3  | 8.86E-05 | 2.68E-04 |
| G0:0030331 | estrogen receptor binding                                  | 3  | 8.86E-05 | 2.68E-04 |
| G0:0019894 | kinesin binding                                            | 3  | 8.86E-05 | 2.68E-04 |
| G0:0015385 | sodium:hydrogen antiporter activity                        | 3  | 8.86E-05 | 2.68E-04 |
| G0:0005112 | Notch binding                                              | 3  | 8.86E-05 | 2.68E-04 |
| G0:0003841 | 1-acylglycerol-3-phosphate O-acyltransferase activity      | 3  | 8.86E-05 | 2.68E-04 |
| G0:0003756 | protein disulfide isomerase activity                       | 3  | 8.86E-05 | 2.68E-04 |
| G0:0043621 | protein self-association                                   | 3  | 8.86E-05 | 2.68E-04 |
| G0:0005254 | chloride channel activity                                  | 6  | 9.08E-05 | 2.70E-04 |
| G0:0051059 | NF-kappaB binding                                          | 4  | 1.03E-04 | 3.04E-04 |
| G0:0008509 | anion transporter activity                                 | 8  | 1.05E-04 | 3.04E-04 |
| G0:0015204 | urea transporter activity                                  | 2  | 1.07E-04 | 3.04E-04 |
| G0:0008510 | sodium:bicarbonate symporter activity                      | 2  | 1.07E-04 | 3.04E-04 |
| G0:0004666 | prostaglandin-endoperoxide synthase activity               | 2  | 1.07E-04 | 3.04E-04 |
| G0:0015460 | transport accessory protein activity                       | 2  | 1.07E-04 | 3.04E-04 |
| G0:0034187 | apolipoprotein E binding                                   | 2  | 1.07E-04 | 3.04E-04 |
| G0:0030881 | beta-2-microglobulin binding                               | 2  | 1.07E-04 | 3.04E-04 |
| G0:0046703 | natural killer cell lectin-like receptor binding           | 2  | 1.07E-04 | 3.04E-04 |
| G0:0008160 | protein tyrosine phosphatase activator activity            | 2  | 1.07E-04 | 3.04E-04 |
| G0:0003863 | 3-methyl-2-oxobutanoate dehydrogenase (2-methylpropanoate) | 2  | 1.07E-04 | 3.04E-04 |
| G0:0008269 | JAK pathway signal transduction adaptor activity           | 2  | 1.07E-04 | 3.04E-04 |
| G0:0000064 | L-ornithine transporter activity                           | 2  | 1.07E-04 | 3.04E-04 |
| G0:0030160 | GKAP/Homer scaffold activity                               | 2  | 1.07E-04 | 3.04E-04 |
| G0:0004145 | diamine N-acetyltransferase activity                       | 2  | 1.07E-04 | 3.04E-04 |
| G0:0015186 | L-glutamine transporter activity                           | 2  | 1.07E-04 | 3.04E-04 |
| G0:0030284 | estrogen receptor activity                                 | 2  | 1.07E-04 | 3.04E-04 |
| G0:0004797 | thymidine kinase activity                                  | 2  | 1.07E-04 | 3.04E-04 |
| G0:0004923 | leukemia inhibitory factor receptor activity               | 2  | 1.07E-04 | 3.04E-04 |
| G0:0030957 | Tat protein binding                                        | 2  | 1.07E-04 | 3.04E-04 |
| G0:0004820 | glycine-tRNA ligase activity                               | 2  | 1.07E-04 | 3.04E-04 |
| G0:0004315 | 3-oxoacyl-[acyl-carrier protein] synthase activity         | 2  | 1.07E-04 | 3.04E-04 |
| G0:0017034 | Rap guanyl-nucleotide exchange factor activity             | 2  | 1.07E-04 | 3.04E-04 |



|            |                                                      |    |          |          |
|------------|------------------------------------------------------|----|----------|----------|
| G0:0000701 | purine-specific mismatch base pair DNA N-glycosylase | 2  | 1.07E-04 | 3.04E-04 |
| G0:0032143 | single thymine insertion binding                     | 2  | 1.07E-04 | 3.04E-04 |
| G0:0003994 | aconitate hydratase activity                         | 2  | 1.07E-04 | 3.04E-04 |
| G0:0032181 | dinucleotide repeat insertion binding                | 2  | 1.07E-04 | 3.04E-04 |
| G0:0043024 | ribosomal small subunit binding                      | 2  | 1.07E-04 | 3.04E-04 |
| G0:0032794 | GTPase activating protein binding                    | 2  | 1.07E-04 | 3.04E-04 |
| G0:0015375 | glycine:sodium symporter activity                    | 2  | 1.07E-04 | 3.04E-04 |
| G0:0017154 | semaphorin receptor activity                         | 2  | 1.07E-04 | 3.04E-04 |
| G0:0030215 | semaphorin receptor binding                          | 2  | 1.07E-04 | 3.04E-04 |
| G0:0016316 | phosphatidylinositol-3,4-bisphosphate 4-phosphatase  | 2  | 1.07E-04 | 3.04E-04 |
| G0:0034597 | phosphatidylinositol-4,5-bisphosphate 4-phosphatase  | 2  | 1.07E-04 | 3.04E-04 |
| G0:0004817 | cysteine-tRNA ligase activity                        | 2  | 1.07E-04 | 3.04E-04 |
| G0:0070064 | proline-rich region binding                          | 2  | 1.07E-04 | 3.04E-04 |
| G0:0008476 | protein-tyrosine sulfotransferase activity           | 2  | 1.07E-04 | 3.04E-04 |
| G0:0005083 | small GTPase regulator activity                      | 11 | 1.12E-04 | 3.08E-04 |
| G0:0004181 | metallocarboxypeptidase activity                     | 4  | 1.21E-04 | 3.32E-04 |
| G0:0005262 | calcium channel activity                             | 6  | 1.24E-04 | 3.38E-04 |
| G0:0004303 | estradiol 17-beta-dehydrogenase activity             | 3  | 1.26E-04 | 3.38E-04 |
| G0:0008191 | metalloendopeptidase inhibitor activity              | 3  | 1.26E-04 | 3.38E-04 |
| G0:0005095 | GTPase inhibitor activity                            | 3  | 1.26E-04 | 3.38E-04 |
| G0:0048365 | Rac GTPase binding                                   | 3  | 1.26E-04 | 3.38E-04 |
| G0:0016884 | carbon-nitrogen ligase activity, with glutamine as   | 3  | 1.26E-04 | 3.38E-04 |
| G0:0001882 | nucleoside binding                                   | 3  | 1.26E-04 | 3.38E-04 |
| G0:0005544 | calcium-dependent phospholipid binding               | 4  | 1.42E-04 | 3.79E-04 |
| G0:0005520 | insulin-like growth factor binding                   | 4  | 1.42E-04 | 3.79E-04 |
| G0:0017111 | nucleoside-triphosphatase activity                   | 19 | 1.52E-04 | 4.04E-04 |
| G0:0003724 | RNA helicase activity                                | 4  | 1.66E-04 | 4.40E-04 |
| G0:0005080 | protein kinase C binding                             | 3  | 1.71E-04 | 4.50E-04 |
| G0:0003993 | acid phosphatase activity                            | 3  | 1.71E-04 | 4.50E-04 |
| G0:0030374 | ligand-dependent nuclear receptor transcription coa  | 4  | 1.92E-04 | 5.00E-04 |
| G0:0005543 | phospholipid binding                                 | 8  | 2.23E-04 | 5.78E-04 |
| G0:0005251 | delayed rectifier potassium channel activity         | 3  | 2.27E-04 | 5.85E-04 |
| G0:0004708 | MAP kinase kinase activity                           | 3  | 2.27E-04 | 5.85E-04 |
| G0:0015085 | calcium ion transporter activity                     | 3  | 2.92E-04 | 7.39E-04 |
| G0:0000062 | acyl-CoA binding                                     | 3  | 2.92E-04 | 7.39E-04 |
| G0:0005542 | folic acid binding                                   | 3  | 2.92E-04 | 7.39E-04 |
| G0:0005319 | lipid transporter activity                           | 5  | 3.16E-04 | 7.58E-04 |
| G0:0019797 | procollagen-proline 3-dioxygenase activity           | 2  | 3.19E-04 | 7.58E-04 |
| G0:0001968 | fibronectin binding                                  | 2  | 3.19E-04 | 7.58E-04 |
| G0:0003872 | 6-phosphofructokinase activity                       | 2  | 3.19E-04 | 7.58E-04 |
| G0:0005220 | inositol 1,4,5-triphosphate-sensitive calcium-relea  | 2  | 3.19E-04 | 7.58E-04 |
| G0:0030332 | cyclin binding                                       | 2  | 3.19E-04 | 7.58E-04 |
| G0:0050785 | advanced glycation end-product receptor activity     | 2  | 3.19E-04 | 7.58E-04 |
| G0:0003836 | beta-galactoside alpha-2,3-sialyltransferase activi  | 2  | 3.19E-04 | 7.58E-04 |
| G0:0000104 | succinate dehydrogenase activity                     | 2  | 3.19E-04 | 7.58E-04 |
| G0:0003987 | acetate-CoA ligase activity                          | 2  | 3.19E-04 | 7.58E-04 |
| G0:0047372 | acylglycerol lipase activity                         | 2  | 3.19E-04 | 7.58E-04 |
| G0:0008332 | low voltage-gated calcium channel activity           | 2  | 3.19E-04 | 7.58E-04 |
| G0:0003876 | AMP deaminase activity                               | 2  | 3.19E-04 | 7.58E-04 |
| G0:0008454 | alpha-1,3-mannosylglycoprotein 4-beta-N-acetylglucc  | 2  | 3.19E-04 | 7.58E-04 |
| G0:0031702 | type 1 angiotensin receptor binding                  | 2  | 3.19E-04 | 7.58E-04 |
| G0:0000293 | ferric-chelate reductase activity                    | 2  | 3.19E-04 | 7.58E-04 |

|            |                                                                       |   |          |           |
|------------|-----------------------------------------------------------------------|---|----------|-----------|
| G0:0004117 | calmodulin-dependent cyclic-nucleotide phosphodiesterase activity     | 2 | 3.19E-04 | 7.58E-04  |
| G0:0030346 | protein phosphatase 2B binding                                        | 2 | 3.19E-04 | 7.58E-04  |
| G0:0004829 | threonine-tRNA ligase activity                                        | 2 | 3.19E-04 | 7.58E-04  |
| G0:0008294 | calcium- and calmodulin-responsive adenylate cyclase activity         | 2 | 3.19E-04 | 7.58E-04  |
| G0:0004332 | fructose-bisphosphate aldolase activity                               | 2 | 3.19E-04 | 7.58E-04  |
| G0:0008475 | procollagen-lysine 5-dioxygenase activity                             | 2 | 3.19E-04 | 7.58E-04  |
| G0:0015433 | peptide antigen-transporting ATPase activity                          | 2 | 3.19E-04 | 7.58E-04  |
| G0:0042289 | MHC class II protein binding                                          | 2 | 3.19E-04 | 7.58E-04  |
| G0:0042978 | ornithine decarboxylase activator activity                            | 2 | 3.19E-04 | 7.58E-04  |
| G0:0043325 | phosphatidylinositol-3,4-bisphosphate binding                         | 2 | 3.19E-04 | 7.58E-04  |
| G0:0004525 | ribonuclease III activity                                             | 2 | 3.19E-04 | 7.58E-04  |
| G0:0004784 | superoxide dismutase activity                                         | 2 | 3.19E-04 | 7.58E-04  |
| G0:0004422 | hypoxanthine phosphoribosyltransferase activity                       | 2 | 3.19E-04 | 7.58E-04  |
| G0:0004103 | choline kinase activity                                               | 2 | 3.19E-04 | 7.58E-04  |
| G0:0004305 | ethanolamine kinase activity                                          | 2 | 3.19E-04 | 7.58E-04  |
| G0:0004937 | alpha1-adrenergic receptor activity                                   | 2 | 3.19E-04 | 7.58E-04  |
| G0:0001758 | retinal dehydrogenase activity                                        | 2 | 3.19E-04 | 7.58E-04  |
| G0:0008144 | drug binding                                                          | 4 | 3.26E-04 | 7.58E-04  |
| G0:0019206 | nucleoside kinase activity                                            | 3 | 3.69E-04 | 8.50E-04  |
| G0:0032395 | MHC class II receptor activity                                        | 3 | 3.69E-04 | 8.50E-04  |
| G0:0004835 | tubulin-tyrosine ligase activity                                      | 3 | 3.69E-04 | 8.50E-04  |
| G0:0050699 | WW domain binding                                                     | 3 | 3.69E-04 | 8.50E-04  |
| G0:0042162 | telomeric DNA binding                                                 | 3 | 3.69E-04 | 8.50E-04  |
| G0:0005496 | steroid binding                                                       | 5 | 4.02E-04 | 9.19E-04  |
| G0:0015238 | drug transporter activity                                             | 3 | 4.58E-04 | 0.0010395 |
| G0:0005248 | voltage-gated sodium channel activity                                 | 3 | 4.58E-04 | 0.0010395 |
| G0:0015269 | calcium-activated potassium channel activity                          | 3 | 4.58E-04 | 0.0010395 |
| G0:0005247 | voltage-gated chloride channel activity                               | 3 | 5.60E-04 | 0.0012536 |
| G0:0015485 | cholesterol binding                                                   | 3 | 5.60E-04 | 0.0012536 |
| G0:0047115 | trans-1,2-dihydrobenzene-1,2-diol dehydrogenase activity              | 2 | 6.33E-04 | 0.0013395 |
| G0:0048154 | S100 beta binding                                                     | 2 | 6.33E-04 | 0.0013395 |
| G0:0047238 | glucuronosyl-N-acetylgalactosaminyl-proteoglycan 4-epimerase activity | 2 | 6.33E-04 | 0.0013395 |
| G0:0008095 | inositol-1,4,5-triphosphate receptor activity                         | 2 | 6.33E-04 | 0.0013395 |
| G0:0050327 | testosterone 17-beta-dehydrogenase activity                           | 2 | 6.33E-04 | 0.0013395 |
| G0:0005062 | hematopoietin/interferon-class (D200-domain) cytokine activity        | 2 | 6.33E-04 | 0.0013395 |
| G0:0005138 | interleukin-6 receptor binding                                        | 2 | 6.33E-04 | 0.0013395 |
| G0:0004656 | procollagen-proline 4-dioxygenase activity                            | 2 | 6.33E-04 | 0.0013395 |
| G0:0042801 | polo kinase kinase activity                                           | 2 | 6.33E-04 | 0.0013395 |
| G0:0002060 | purine binding                                                        | 2 | 6.33E-04 | 0.0013395 |
| G0:0005536 | glucose binding                                                       | 2 | 6.33E-04 | 0.0013395 |
| G0:0004370 | glycerol kinase activity                                              | 2 | 6.33E-04 | 0.0013395 |
| G0:0003918 | DNA topoisomerase (ATP-hydrolyzing) activity                          | 2 | 6.33E-04 | 0.0013395 |
| G0:0004748 | ribonucleoside-diphosphate reductase activity                         | 2 | 6.33E-04 | 0.0013395 |
| G0:0004897 | ciliary neurotrophic factor receptor activity                         | 2 | 6.33E-04 | 0.0013395 |
| G0:0003896 | DNA primase activity                                                  | 2 | 6.33E-04 | 0.0013395 |
| G0:0008607 | phosphorylase kinase regulator activity                               | 2 | 6.33E-04 | 0.0013395 |
| G0:0017025 | TATA-binding protein binding                                          | 2 | 6.33E-04 | 0.0013395 |
| G0:0004597 | peptide-aspartate beta-dioxygenase activity                           | 2 | 6.33E-04 | 0.0013395 |
| G0:0019237 | centromeric DNA binding                                               | 2 | 6.33E-04 | 0.0013395 |
| G0:0005332 | gamma-aminobutyric acid:sodium symporter activity                     | 2 | 6.33E-04 | 0.0013395 |
| G0:0003917 | DNA topoisomerase type I activity                                     | 2 | 6.33E-04 | 0.0013395 |
| G0:0005497 | androgen binding                                                      | 2 | 6.33E-04 | 0.0013395 |

|            |                                                     |   |           |           |
|------------|-----------------------------------------------------|---|-----------|-----------|
| G0:0005087 | Ran guanyl-nucleotide exchange factor activity      | 2 | 6.33E-04  | 0.0013395 |
| G0:0015180 | L-alanine transporter activity                      | 2 | 6.33E-04  | 0.0013395 |
| G0:0008518 | reduced folate carrier activity                     | 2 | 6.33E-04  | 0.0013395 |
| G0:0016151 | nickel ion binding                                  | 2 | 6.33E-04  | 0.0013395 |
| G0:0015467 | G-protein activated inward rectifier potassium char | 2 | 6.33E-04  | 0.0013395 |
| G0:0005003 | ephrin receptor activity                            | 3 | 6.74E-04  | 0.0014136 |
| G0:0016208 | AMP binding                                         | 3 | 8.03E-04  | 0.0016711 |
| G0:0051537 | 2 iron, 2 sulfur cluster binding                    | 3 | 8.03E-04  | 0.0016711 |
| G0:0042393 | histone binding                                     | 3 | 8.03E-04  | 0.0016711 |
| G0:0019905 | syntaxin binding                                    | 3 | 8.03E-04  | 0.0016711 |
| G0:0003899 | DNA-directed RNA polymerase activity                | 4 | 8.52E-04  | 0.0017679 |
| G0:0008013 | beta-catenin binding                                | 3 | 9.46E-04  | 0.001955  |
| G0:0032052 | bile acid binding                                   | 2 | 0.0010474 | 0.0020745 |
| G0:0004500 | dopamine beta-monooxygenase activity                | 2 | 0.0010474 | 0.0020745 |
| G0:0030618 | transforming growth factor beta receptor, pathway-s | 2 | 0.0010474 | 0.0020745 |
| G0:0015081 | sodium ion transporter activity                     | 2 | 0.0010474 | 0.0020745 |
| G0:0030676 | Rac guanyl-nucleotide exchange factor activity      | 2 | 0.0010474 | 0.0020745 |
| G0:0005522 | profilin binding                                    | 2 | 0.0010474 | 0.0020745 |
| G0:0005498 | sterol carrier activity                             | 2 | 0.0010474 | 0.0020745 |
| G0:0008266 | poly(U) binding                                     | 2 | 0.0010474 | 0.0020745 |
| G0:0046027 | phospholipid:diacylglycerol acyltransferase activit | 2 | 0.0010474 | 0.0020745 |
| G0:0015520 | tetracycline:hydrogen antiporter activity           | 2 | 0.0010474 | 0.0020745 |
| G0:0003689 | DNA clamp loader activity                           | 2 | 0.0010474 | 0.0020745 |
| G0:0004791 | thioredoxin-disulfide reductase activity            | 2 | 0.0010474 | 0.0020745 |
| G0:0050291 | sphingosine N-acyltransferase activity              | 2 | 0.0010474 | 0.0020745 |
| G0:0030976 | thiamin pyrophosphate binding                       | 2 | 0.0010474 | 0.0020745 |
| G0:0003923 | GPI-anchor transamidase activity                    | 2 | 0.0010474 | 0.0020745 |
| G0:0004704 | NF-kappaB-inducing kinase activity                  | 2 | 0.0010474 | 0.0020745 |
| G0:0009374 | biotin binding                                      | 2 | 0.0010474 | 0.0020745 |
| G0:0031013 | troponin I binding                                  | 2 | 0.0010474 | 0.0020745 |
| G0:0008353 | RNA polymerase subunit kinase activity              | 2 | 0.0010474 | 0.0020745 |
| G0:0001671 | ATPase stimulator activity                          | 2 | 0.0010474 | 0.0020745 |
| G0:0031994 | insulin-like growth factor I binding                | 2 | 0.0010474 | 0.0020745 |
| G0:0004957 | prostaglandin E receptor activity                   | 2 | 0.0010474 | 0.0020745 |
| G0:0019900 | kinase binding                                      | 6 | 0.0010952 | 0.0021302 |
| G0:0008373 | sialyltransferase activity                          | 3 | 0.0011045 | 0.0021361 |
| G0:0005164 | tumor necrosis factor receptor binding              | 3 | 0.0011045 | 0.0021361 |
| G0:0015299 | solute:hydrogen antiporter activity                 | 3 | 0.0011045 | 0.0021361 |
| G0:0046961 | hydrogen-transporting ATPase activity, rotational r | 3 | 0.0011045 | 0.0021361 |
| G0:0051087 | chaperone binding                                   | 3 | 0.0011045 | 0.0021361 |
| G0:0008137 | NADH dehydrogenase (ubiquinone) activity            | 4 | 0.001115  | 0.0021485 |
| G0:0008094 | DNA-dependent ATPase activity                       | 4 | 0.001115  | 0.0021485 |
| G0:0051536 | iron-sulfur cluster binding                         | 4 | 0.0015468 | 0.0029289 |
| G0:0030235 | nitric-oxide synthase regulator activity            | 2 | 0.0015602 | 0.0029289 |
| G0:0017110 | nucleoside-diphosphatase activity                   | 2 | 0.0015602 | 0.0029289 |
| G0:0005154 | epidermal growth factor receptor binding            | 2 | 0.0015602 | 0.0029289 |
| G0:0003857 | 3-hydroxyacyl-CoA dehydrogenase activity            | 2 | 0.0015602 | 0.0029289 |
| G0:0045502 | dynein binding                                      | 2 | 0.0015602 | 0.0029289 |
| G0:0030274 | LIM domain binding                                  | 2 | 0.0015602 | 0.0029289 |
| G0:0004047 | aminomethyltransferase activity                     | 2 | 0.0015602 | 0.0029289 |
| G0:0015205 | nucleobase transporter activity                     | 2 | 0.0015602 | 0.0029289 |
| G0:0008408 | 3'-5' exonuclease activity                          | 3 | 0.0019014 | 0.0034833 |

|            |                                                     |   |           |           |
|------------|-----------------------------------------------------|---|-----------|-----------|
| G0:0019903 | protein phosphatase binding                         | 3 | 0.0021442 | 0.0038711 |
| G0:0004623 | phospholipase A2 activity                           | 3 | 0.0021442 | 0.0038711 |
| G0:0005245 | voltage-gated calcium channel activity              | 3 | 0.0021442 | 0.0038711 |
| G0:0051117 | ATPase binding                                      | 2 | 0.0021693 | 0.0038711 |
| G0:0043560 | insulin receptor substrate binding                  | 2 | 0.0021693 | 0.0038711 |
| G0:0004908 | interleukin-1 receptor activity                     | 2 | 0.0021693 | 0.0038711 |
| G0:0030151 | molybdenum ion binding                              | 2 | 0.0021693 | 0.0038711 |
| G0:0005546 | phosphatidylinositol-4,5-bisphosphate binding       | 2 | 0.0021693 | 0.0038711 |
| G0:0003785 | actin monomer binding                               | 2 | 0.0021693 | 0.0038711 |
| G0:0047555 | 3',5'-cyclic-GMP phosphodiesterase activity         | 2 | 0.0021693 | 0.0038711 |
| G0:0016671 | oxidoreductase activity, acting on sulfur group of  | 2 | 0.0021693 | 0.0038711 |
| G0:0005123 | death receptor binding                              | 2 | 0.0021693 | 0.0038711 |
| G0:0004691 | cAMP-dependent protein kinase activity              | 2 | 0.0021693 | 0.0038711 |
| G0:0008312 | 7S RNA binding                                      | 2 | 0.0021693 | 0.0038711 |
| G0:0019838 | growth factor binding                               | 5 | 0.0027582 | 0.0048138 |
| G0:0004017 | adenylate kinase activity                           | 2 | 0.0028726 | 0.0049476 |
| G0:0005031 | tumor necrosis factor receptor activity             | 2 | 0.0028726 | 0.0049476 |
| G0:0004551 | nucleotide diphosphatase activity                   | 2 | 0.0028726 | 0.0049476 |
| G0:0004579 | dolichyl-diphosphooligosaccharide-protein glycotran | 2 | 0.0028726 | 0.0049476 |
| G0:0008253 | 5'-nucleotidase activity                            | 2 | 0.0028726 | 0.0049476 |
| G0:0005528 | FK506 binding                                       | 2 | 0.0028726 | 0.0049476 |
| G0:0016831 | carboxy-lyase activity                              | 3 | 0.0033033 | 0.0056191 |
| G0:0008080 | N-acetyltransferase activity                        | 4 | 0.0033076 | 0.0056208 |
| G0:0016814 | hydrolase activity, acting on carbon-nitrogen (but  | 3 | 0.0036423 | 0.0060947 |
| G0:0004602 | glutathione peroxidase activity                     | 2 | 0.003668  | 0.0060947 |
| G0:0008158 | hedgehog receptor activity                          | 2 | 0.003668  | 0.0060947 |
| G0:0008195 | phosphatidate phosphatase activity                  | 2 | 0.003668  | 0.0060947 |
| G0:0005066 | transmembrane receptor protein tyrosine kinase sig  | 2 | 0.003668  | 0.0060947 |
| G0:0030280 | structural constituent of epidermis                 | 2 | 0.003668  | 0.0060947 |
| G0:0005388 | calcium-transporting ATPase activity                | 2 | 0.003668  | 0.0060947 |
| G0:0015198 | oligopeptide transporter activity                   | 2 | 0.003668  | 0.0060947 |
| G0:0004022 | alcohol dehydrogenase activity                      | 2 | 0.003668  | 0.0060947 |
| G0:0004935 | adrenoceptor activity                               | 2 | 0.003668  | 0.0060947 |
| G0:0004601 | peroxidase activity                                 | 3 | 0.0040018 | 0.0065964 |
| G0:0008378 | galactosyltransferase activity                      | 3 | 0.0040018 | 0.0065964 |
| G0:0050840 | extracellular matrix binding                        | 2 | 0.0045536 | 0.0074185 |
| G0:0003709 | RNA polymerase III transcription factor activity    | 2 | 0.0045536 | 0.0074185 |
| G0:0050431 | transforming growth factor beta binding             | 2 | 0.0045536 | 0.0074185 |
| G0:0017127 | cholesterol transporter activity                    | 2 | 0.0045536 | 0.0074185 |
| G0:0008239 | dipeptidyl-peptidase activity                       | 2 | 0.0045536 | 0.0074185 |
| G0:0008271 | sulfate porter activity                             | 2 | 0.0045536 | 0.0074185 |
| G0:0004526 | ribonuclease P activity                             | 2 | 0.0045536 | 0.0074185 |
| G0:0008536 | Ran GTPase binding                                  | 2 | 0.0045536 | 0.0074185 |
| G0:0003712 | transcription cofactor activity                     | 9 | 0.005482  | 0.0088005 |
| G0:0050750 | low-density lipoprotein receptor binding            | 2 | 0.0055275 | 0.0088133 |
| G0:0016303 | phosphatidylinositol 3-kinase activity              | 2 | 0.0055275 | 0.0088133 |
| G0:0005313 | L-glutamate transporter activity                    | 2 | 0.0055275 | 0.0088133 |
| G0:0004550 | nucleoside diphosphate kinase activity              | 2 | 0.0055275 | 0.0088133 |
| G0:0048487 | beta-tubulin binding                                | 2 | 0.0055275 | 0.0088133 |
| G0:0015248 | sterol transporter activity                         | 2 | 0.0065876 | 0.010366  |
| G0:0016409 | palmitoyltransferase activity                       | 2 | 0.0065876 | 0.010366  |
| G0:0048019 | receptor antagonist activity                        | 2 | 0.0065876 | 0.010366  |

|                                                                |                       |
|----------------------------------------------------------------|-----------------------|
| G0:0008235 metalloexopeptidase activity                        | 3 0.0071187 0.0111339 |
| G0:0016251 general RNA polymerase II transcription factor acti | 3 0.0071187 0.0111339 |
| G0:0045296 cadherin binding                                    | 2 0.0077322 0.0120242 |
| G0:0005537 mannose binding                                     | 2 0.0077322 0.0120242 |
| G0:0005246 calcium channel regulator activity                  | 2 0.0077322 0.0120242 |
| G0:0043499 eukaryotic cell surface binding                     | 2 0.0089593 0.0124472 |
| G0:0046933 hydrogen-transporting ATP synthase activity, rotati | 2 0.0089593 0.0124472 |
| G0:0030552 cAMP binding                                        | 2 0.0089593 0.0124472 |
| G0:0004707 MAP kinase activity                                 | 2 0.0089593 0.0124472 |
| G0:0004033 aldo-keto reductase activity                        | 2 0.0102672 0.0124472 |
| G0:0000146 microfilament motor activity                        | 2 0.0102672 0.0124472 |
| G0:0048403 brain-derived neurotrophic factor binding           | 1 0.0103422 0.0124472 |
| G0:0008120 ceramide glucosyltransferase activity               | 1 0.0103422 0.0124472 |
| G0:0043183 vascular endothelial growth factor receptor 1 bindi | 1 0.0103422 0.0124472 |
| G0:0043184 vascular endothelial growth factor receptor 2 bindi | 1 0.0103422 0.0124472 |
| G0:0045130 keratan sulfotransferase activity                   | 1 0.0103422 0.0124472 |
| G0:0008112 nicotinamide N-methyltransferase activity           | 1 0.0103422 0.0124472 |
| G0:0008955 peptidoglycan glycosyltransferase activity          | 1 0.0103422 0.0124472 |
| G0:0031707 endothelin A receptor binding                       | 1 0.0103422 0.0124472 |
| G0:0004710 MAP/ERK kinase kinase activity                      | 1 0.0103422 0.0124472 |
| G0:0047017 prostaglandin-F synthase activity                   | 1 0.0103422 0.0124472 |
| G0:0002114 interleukin-33 receptor activity                    | 1 0.0103422 0.0124472 |
| G0:0003955 NAD(P)H dehydrogenase (quinone) activity            | 1 0.0103422 0.0124472 |
| G0:0048603 fibroblast growth factor 2 binding                  | 1 0.0103422 0.0124472 |
| G0:0070051 fibrinogen binding                                  | 1 0.0103422 0.0124472 |
| G0:0070052 collagen V binding                                  | 1 0.0103422 0.0124472 |
| G0:0003869 4-nitrophenylphosphatase activity                   | 1 0.0103422 0.0124472 |
| G0:0015132 prostaglandin transporter activity                  | 1 0.0103422 0.0124472 |
| G0:0030791 arsenite methyltransferase activity                 | 1 0.0103422 0.0124472 |
| G0:0030792 methylarsonite methyltransferase activity           | 1 0.0103422 0.0124472 |
| G0:0005151 interleukin-1, Type II receptor binding             | 1 0.0103422 0.0124472 |
| G0:0005018 platelet-derived growth factor alpha-receptor activ | 1 0.0103422 0.0124472 |
| G0:0004845 uracil phosphoribosyltransferase activity           | 1 0.0103422 0.0124472 |
| G0:0033791 3alpha,7alpha,12alpha-trihydroxy-5beta-cholestanoyl | 1 0.0103422 0.0124472 |
| G0:0004676 3-phosphoinositide-dependent protein kinase activit | 1 0.0103422 0.0124472 |
| G0:0033897 ribonuclease T2 activity                            | 1 0.0103422 0.0124472 |
| G0:0030338 CMP-N-acetylneuramate monooxygenase activity        | 1 0.0103422 0.0124472 |
| G0:0030368 interleukin-17 receptor activity                    | 1 0.0103422 0.0124472 |
| G0:0033989 3alpha,7alpha,12alpha-trihydroxy-5beta-cholest-24-e | 1 0.0103422 0.0124472 |
| G0:0004340 glucokinase activity                                | 1 0.0103422 0.0124472 |
| G0:0034722 gamma-glutamyl-peptidase activity                   | 1 0.0103422 0.0124472 |
| G0:0047280 nicotinamide phosphoribosyltransferase activity     | 1 0.0103422 0.0124472 |
| G0:0008387 steroid 7-alpha-hydroxylase activity                | 1 0.0103422 0.0124472 |
| G0:0033782 24-hydroxycholesterol 7alpha-hydroxylase activity   | 1 0.0103422 0.0124472 |
| G0:0017130 poly(rC) binding                                    | 1 0.0103422 0.0124472 |
| G0:0005163 nerve growth factor receptor binding                | 1 0.0103422 0.0124472 |
| G0:0004855 xanthine oxidase activity                           | 1 0.0103422 0.0124472 |
| G0:0008545 JUN kinase kinase activity                          | 1 0.0103422 0.0124472 |
| G0:0008267 poly-glutamine tract binding                        | 1 0.0103422 0.0124472 |
| G0:0008349 MAP kinase kinase kinase activity                   | 1 0.0103422 0.0124472 |
| G0:0055105 ubiquitin-protein ligase inhibitor activity         | 1 0.0103422 0.0124472 |
| G0:0001593 dopamine D4 receptor activity                       | 1 0.0103422 0.0124472 |

|            |                                                      |   |           |           |
|------------|------------------------------------------------------|---|-----------|-----------|
| G0:0004799 | thymidylate synthase activity                        | 1 | 0.0103422 | 0.0124472 |
| G0:0008111 | alpha-methylacyl-CoA racemase activity               | 1 | 0.0103422 | 0.0124472 |
| G0:0047130 | saccharopine dehydrogenase (NADP+, L-lysine-forming  | 1 | 0.0103422 | 0.0124472 |
| G0:0003939 | L-idoitol 2-dehydrogenase activity                   | 1 | 0.0103422 | 0.0124472 |
| G0:0030273 | melanin-concentrating hormone receptor activity      | 1 | 0.0103422 | 0.0124472 |
| G0:0004617 | phosphoglycerate dehydrogenase activity              | 1 | 0.0103422 | 0.0124472 |
| G0:0005330 | dopamine:sodium symporter activity                   | 1 | 0.0103422 | 0.0124472 |
| G0:0004087 | carbamoyl-phosphate synthase (ammonia) activity      | 1 | 0.0103422 | 0.0124472 |
| G0:0004509 | steroid 21-monooxygenase activity                    | 1 | 0.0103422 | 0.0124472 |
| G0:0043221 | SMC protein binding                                  | 1 | 0.0103422 | 0.0124472 |
| G0:0004587 | ornithine-oxo-acid transaminase activity             | 1 | 0.0103422 | 0.0124472 |
| G0:0015152 | glucose-6-phosphate transporter activity             | 1 | 0.0103422 | 0.0124472 |
| G0:0004336 | galactosylceramidase activity                        | 1 | 0.0103422 | 0.0124472 |
| G0:0004990 | oxytocin receptor activity                           | 1 | 0.0103422 | 0.0124472 |
| G0:0004796 | thromboxane-A synthase activity                      | 1 | 0.0103422 | 0.0124472 |
| G0:0034188 | apolipoprotein A-I receptor activity                 | 1 | 0.0103422 | 0.0124472 |
| G0:0004164 | diphthine synthase activity                          | 1 | 0.0103422 | 0.0124472 |
| G0:0047545 | 2-hydroxyglutarate dehydrogenase activity            | 1 | 0.0103422 | 0.0124472 |
| G0:0016603 | glutaminy-peptide cyclotransferase activity          | 1 | 0.0103422 | 0.0124472 |
| G0:0060001 | minus-end directed microfilament motor activity      | 1 | 0.0103422 | 0.0124472 |
| G0:0005008 | hepatocyte growth factor receptor activity           | 1 | 0.0103422 | 0.0124472 |
| G0:0004482 | mRNA (guanine-N7-)-methyltransferase activity        | 1 | 0.0103422 | 0.0124472 |
| G0:0030387 | fructosamine-3-kinase activity                       | 1 | 0.0103422 | 0.0124472 |
| G0:0033613 | transcription activator binding                      | 1 | 0.0103422 | 0.0124472 |
| G0:0004347 | glucose-6-phosphate isomerase activity               | 1 | 0.0103422 | 0.0124472 |
| G0:0004530 | deoxyribonuclease I activity                         | 1 | 0.0103422 | 0.0124472 |
| G0:0001532 | interleukin-21 receptor activity                     | 1 | 0.0103422 | 0.0124472 |
| G0:0016263 | glycoprotein-N-acetylgalactosamine 3-beta-galactosyl | 1 | 0.0103422 | 0.0124472 |
| G0:0008398 | sterol 14-demethylase activity                       | 1 | 0.0103422 | 0.0124472 |
| G0:0003826 | alpha-ketoacid dehydrogenase activity                | 1 | 0.0103422 | 0.0124472 |
| G0:0016536 | cyclin-dependent protein kinase 5 activator regulat  | 1 | 0.0103422 | 0.0124472 |
| G0:0004921 | interleukin-11 receptor activity                     | 1 | 0.0103422 | 0.0124472 |
| G0:0001761 | beta-alanine transporter activity                    | 1 | 0.0103422 | 0.0124472 |
| G0:0005369 | taurine:sodium symporter activity                    | 1 | 0.0103422 | 0.0124472 |
| G0:0004159 | dihydrouracil dehydrogenase (NAD+) activity          | 1 | 0.0103422 | 0.0124472 |
| G0:0017113 | dihydropyrimidine dehydrogenase (NADP+) activity     | 1 | 0.0103422 | 0.0124472 |
| G0:0051011 | microtubule minus-end binding                        | 1 | 0.0103422 | 0.0124472 |
| G0:0017050 | D-erythro-sphingosine kinase activity                | 1 | 0.0103422 | 0.0124472 |
| G0:0031852 | mu-type opioid receptor binding                      | 1 | 0.0103422 | 0.0124472 |
| G0:0003844 | 1,4-alpha-glucan branching enzyme activity           | 1 | 0.0103422 | 0.0124472 |
| G0:0033867 | Fas-activated serine/threonine kinase activity       | 1 | 0.0103422 | 0.0124472 |
| G0:0008792 | arginine decarboxylase activity                      | 1 | 0.0103422 | 0.0124472 |
| G0:0034602 | oxoglutarate dehydrogenase (NAD+) activity           | 1 | 0.0103422 | 0.0124472 |
| G0:0045499 | chemorepellant activity                              | 1 | 0.0103422 | 0.0124472 |
| G0:0004092 | carnitine O-acetyltransferase activity               | 1 | 0.0103422 | 0.0124472 |
| G0:0004782 | sulfinioalanine decarboxylase activity               | 1 | 0.0103422 | 0.0124472 |
| G0:0032810 | sterol response element binding                      | 1 | 0.0103422 | 0.0124472 |
| G0:0030337 | DNA polymerase processivity factor activity          | 1 | 0.0103422 | 0.0124472 |
| G0:0005309 | creatine:sodium symporter activity                   | 1 | 0.0103422 | 0.0124472 |
| G0:0000386 | second spliceosomal transesterification activity     | 1 | 0.0103422 | 0.0124472 |
| G0:0030628 | pre-mRNA 3'-splice site binding                      | 1 | 0.0103422 | 0.0124472 |
| G0:0000171 | ribonuclease MRP activity                            | 1 | 0.0103422 | 0.0124472 |

|                                                                              |                       |
|------------------------------------------------------------------------------|-----------------------|
| G0:0015141 succinate transporter activity                                    | 1 0.0103422 0.0124472 |
| G0:0050576 3-keto-steroid reductase activity                                 | 1 0.0103422 0.0124472 |
| G0:0017172 cysteine dioxygenase activity                                     | 1 0.0103422 0.0124472 |
| G0:0051264 mono-olein transacylation activity                                | 1 0.0103422 0.0124472 |
| G0:0051265 diolein transacylation activity                                   | 1 0.0103422 0.0124472 |
| G0:0004463 leukotriene-A4 hydrolase activity                                 | 1 0.0103422 0.0124472 |
| G0:0051267 CP2 mannose-ethanolamine phosphotransferase activity              | 1 0.0103422 0.0124472 |
| G0:0004420 hydroxymethylglutaryl-CoA reductase (NADPH) activity              | 1 0.0103422 0.0124472 |
| G0:0016768 spermine synthase activity                                        | 1 0.0103422 0.0124472 |
| G0:0003957 NAD(P)+ transhydrogenase (B-specific) activity                    | 1 0.0103422 0.0124472 |
| G0:0008750 NAD(P)+ transhydrogenase (AB-specific) activity                   | 1 0.0103422 0.0124472 |
| G0:0033781 cholesterol 24-hydroxylase activity                               | 1 0.0103422 0.0124472 |
| G0:0032500 muramyl dipeptide binding                                         | 1 0.0103422 0.0124472 |
| G0:0004925 prolactin receptor activity                                       | 1 0.0103422 0.0124472 |
| G0:0004134 4-alpha-glucanotransferase activity                               | 1 0.0103422 0.0124472 |
| G0:0004135 amylo-alpha-1,6-glucosidase activity                              | 1 0.0103422 0.0124472 |
| G0:0031703 type 2 angiotensin receptor binding                               | 1 0.0103422 0.0124472 |
| G0:0004760 serine-pyruvate transaminase activity                             | 1 0.0103422 0.0124472 |
| G0:0045127 N-acetylglucosamine kinase activity                               | 1 0.0103422 0.0124472 |
| G0:0046539 histamine N-methyltransferase activity                            | 1 0.0103422 0.0124472 |
| G0:0009021 tRNA (uracil-5-)-methyltransferase activity                       | 1 0.0103422 0.0124472 |
| G0:0051717 inositol-1,3,4,5-tetrakisphosphate 3-phosphatase activity         | 1 0.0103422 0.0124472 |
| G0:0051800 phosphatidylinositol-3,4-bisphosphate 3-phosphatase activity      | 1 0.0103422 0.0124472 |
| G0:0018112 proline racemase activity                                         | 1 0.0103422 0.0124472 |
| G0:0004699 calcium-independent protein kinase C activity                     | 1 0.0103422 0.0124472 |
| G0:0042007 interleukin-18 binding                                            | 1 0.0103422 0.0124472 |
| G0:0030899 calcium-dependent ATPase activity                                 | 1 0.0103422 0.0124472 |
| G0:0047323 [3-methyl-2-oxobutanoate dehydrogenase (lipoamide)] activity      | 1 0.0103422 0.0124472 |
| G0:0004883 glucocorticoid receptor activity                                  | 1 0.0103422 0.0124472 |
| G0:0005334 norepinephrine:sodium symporter activity                          | 1 0.0103422 0.0124472 |
| G0:0016524 latrotoxin receptor activity                                      | 1 0.0103422 0.0124472 |
| G0:0008747 N-acetylneuraminatase lyase activity                              | 1 0.0103422 0.0124472 |
| G0:0034988 Fc-gamma receptor I complex binding                               | 1 0.0103422 0.0124472 |
| G0:0034989 GTP-Ral binding                                                   | 1 0.0103422 0.0124472 |
| G0:0047936 glucose 1-dehydrogenase activity                                  | 1 0.0103422 0.0124472 |
| G0:0019782 ISG15 activating enzyme activity                                  | 1 0.0103422 0.0124472 |
| G0:0016786 selenotransferase activity                                        | 1 0.0103422 0.0124472 |
| G0:0055100 adiponectin binding                                               | 1 0.0103422 0.0124472 |
| G0:0042610 CD8 receptor binding                                              | 1 0.0103422 0.0124472 |
| G0:0008263 pyrimidine-specific mismatch base pair DNA N-glycosylase activity | 1 0.0103422 0.0124472 |
| G0:0047865 dimethylglycine dehydrogenase activity                            | 1 0.0103422 0.0124472 |
| G0:0000225 N-acetylglucosaminylphosphatidylinositol deacetylase activity     | 1 0.0103422 0.0124472 |
| G0:0030884 exogenous lipid antigen binding                                   | 1 0.0103422 0.0124472 |
| G0:0035173 histone kinase activity                                           | 1 0.0103422 0.0124472 |
| G0:0003952 NAD+ synthase (glutamine-hydrolyzing) activity                    | 1 0.0103422 0.0124472 |
| G0:0008812 choline dehydrogenase activity                                    | 1 0.0103422 0.0124472 |
| G0:0004567 beta-mannosidase activity                                         | 1 0.0103422 0.0124472 |
| G0:0008924 malate dehydrogenase (acceptor) activity                          | 1 0.0103422 0.0124472 |
| G0:0004044 amidophosphoribosyltransferase activity                           | 1 0.0103422 0.0124472 |
| G0:0004140 dephospho-CoA kinase activity                                     | 1 0.0103422 0.0124472 |
| G0:0004595 pantetheine-phosphate adenylyltransferase activity                | 1 0.0103422 0.0124472 |
| G0:0004736 pyruvate carboxylase activity                                     | 1 0.0103422 0.0124472 |

|            |                                                                                  |   |           |           |
|------------|----------------------------------------------------------------------------------|---|-----------|-----------|
| G0:0003717 | RNA polymerase II transcription termination factor                               | 1 | 0.0103422 | 0.0124472 |
| G0:0019871 | sodium channel inhibitor activity                                                | 1 | 0.0103422 | 0.0124472 |
| G0:0004334 | fumarylacetoacetase activity                                                     | 1 | 0.0103422 | 0.0124472 |
| G0:0005463 | UDP-N-acetylgalactosamine transporter activity                                   | 1 | 0.0103422 | 0.0124472 |
| G0:0008115 | sarcosine oxidase activity                                                       | 1 | 0.0103422 | 0.0124472 |
| G0:0050031 | L-pipecolate oxidase activity                                                    | 1 | 0.0103422 | 0.0124472 |
| G0:0017125 | deoxycytidyl transferase activity                                                | 1 | 0.0103422 | 0.0124472 |
| G0:0004900 | erythropoietin receptor activity                                                 | 1 | 0.0103422 | 0.0124472 |
| G0:0004310 | farnesyl-diphosphate farnesyltransferase activity                                | 1 | 0.0103422 | 0.0124472 |
| G0:0050809 | diazepam binding                                                                 | 1 | 0.0103422 | 0.0124472 |
| G0:0005335 | serotonin:sodium symporter activity                                              | 1 | 0.0103422 | 0.0124472 |
| G0:0015222 | serotonin transporter activity                                                   | 1 | 0.0103422 | 0.0124472 |
| G0:0008534 | oxidized purine base lesion DNA N-glycosylase activity                           | 1 | 0.0103422 | 0.0124472 |
| G0:0015143 | urate transporter activity                                                       | 1 | 0.0103422 | 0.0124472 |
| G0:0047933 | glucose-1,6-bisphosphate synthase activity                                       | 1 | 0.0103422 | 0.0124472 |
| G0:0033814 | propanoyl-CoA C-acyltransferase activity                                         | 1 | 0.0103422 | 0.0124472 |
| G0:0015234 | thiamin transporter activity                                                     | 1 | 0.0103422 | 0.0124472 |
| G0:0015019 | heparan-alpha-glucosaminide N-acetyltransferase activity                         | 1 | 0.0103422 | 0.0124472 |
| G0:0003983 | UTP:glucose-1-phosphate uridylyltransferase activity                             | 1 | 0.0103422 | 0.0124472 |
| G0:0004043 | L-aminoadipate-semialdehyde dehydrogenase activity                               | 1 | 0.0103422 | 0.0124472 |
| G0:0004577 | N-acetylglucosaminyl diphosphodolichol N-acetylglucosaminyl transferase activity | 1 | 0.0103422 | 0.0124472 |
| G0:0060072 | large conductance calcium-activated potassium channel activity                   | 1 | 0.0103422 | 0.0124472 |
| G0:0003882 | CDP-diacylglycerol-serine O-phosphatidyltransferase activity                     | 1 | 0.0103422 | 0.0124472 |
| G0:0018467 | formaldehyde dehydrogenase activity                                              | 1 | 0.0103422 | 0.0124472 |
| G0:0051903 | S-(hydroxymethyl)glutathione dehydrogenase activity                              | 1 | 0.0103422 | 0.0124472 |
| G0:0004637 | phosphoribosylamine-glycine ligase activity                                      | 1 | 0.0103422 | 0.0124472 |
| G0:0004641 | phosphoribosylformylglycinamide cyclo-ligase activity                            | 1 | 0.0103422 | 0.0124472 |
| G0:0004644 | phosphoribosylglycinamide formyltransferase activity                             | 1 | 0.0103422 | 0.0124472 |
| G0:0043539 | protein serine/threonine kinase activator activity                               | 1 | 0.0103422 | 0.0124472 |
| G0:0005384 | manganese ion transporter activity                                               | 1 | 0.0103422 | 0.0124472 |
| G0:0015086 | cadmium ion transporter activity                                                 | 1 | 0.0103422 | 0.0124472 |
| G0:0015093 | ferrous iron transporter activity                                                | 1 | 0.0103422 | 0.0124472 |
| G0:0015094 | lead ion transporter activity                                                    | 1 | 0.0103422 | 0.0124472 |
| G0:0015099 | nickel ion transporter activity                                                  | 1 | 0.0103422 | 0.0124472 |
| G0:0004362 | glutathione-disulfide reductase activity                                         | 1 | 0.0103422 | 0.0124472 |
| G0:0015389 | pyrimidine- and adenine-specific:sodium symporter activity                       | 1 | 0.0103422 | 0.0124472 |
| G0:0015390 | purine-specific nucleoside:sodium symporter activity                             | 1 | 0.0103422 | 0.0124472 |
| G0:0008251 | tRNA specific adenosine deaminase activity                                       | 1 | 0.0103422 | 0.0124472 |
| G0:0004122 | cystathionine beta-synthase activity                                             | 1 | 0.0103422 | 0.0124472 |
| G0:0008817 | cob(I)yrinic acid a,c-diamide adenosyltransferase activity                       | 1 | 0.0103422 | 0.0124472 |
| G0:0005171 | hepatocyte growth factor receptor binding                                        | 1 | 0.0103422 | 0.0124472 |
| G0:0008478 | pyridoxal kinase activity                                                        | 1 | 0.0103422 | 0.0124472 |
| G0:0003860 | 3-hydroxyisobutyryl-CoA hydrolase activity                                       | 1 | 0.0103422 | 0.0124472 |
| G0:0015386 | potassium:hydrogen antiporter activity                                           | 1 | 0.0103422 | 0.0124472 |
| G0:0030347 | syntaxin-2 binding                                                               | 1 | 0.0103422 | 0.0124472 |
| G0:0030348 | syntaxin-3 binding                                                               | 1 | 0.0103422 | 0.0124472 |
| G0:0008456 | alpha-N-acetylgalactosaminidase activity                                         | 1 | 0.0103422 | 0.0124472 |
| G0:0004313 | [acyl-carrier protein] S-acetyltransferase activity                              | 1 | 0.0103422 | 0.0124472 |
| G0:0004316 | 3-oxoacyl-[acyl-carrier protein] reductase activity                              | 1 | 0.0103422 | 0.0124472 |
| G0:0004317 | 3-hydroxypalmitoyl-[acyl-carrier protein] dehydratase activity                   | 1 | 0.0103422 | 0.0124472 |
| G0:0004319 | enoyl-[acyl-carrier protein] reductase (NADPH, B-specific)                       | 1 | 0.0103422 | 0.0124472 |
| G0:0051787 | misfolded protein binding                                                        | 1 | 0.0103422 | 0.0124472 |



|            |                                                     |    |           |           |
|------------|-----------------------------------------------------|----|-----------|-----------|
| G0:0045545 | syndecan binding                                    | 1  | 0.0103422 | 0.0124472 |
| G0:0004034 | aldose 1-epimerase activity                         | 1  | 0.0103422 | 0.0124472 |
| G0:0043395 | heparan sulfate proteoglycan binding                | 1  | 0.0103422 | 0.0124472 |
| G0:0032089 | NACHT domain binding                                | 1  | 0.0103422 | 0.0124472 |
| G0:0034046 | poly(rG) binding                                    | 1  | 0.0103422 | 0.0124472 |
| G0:0017064 | fatty acid amide hydrolase activity                 | 1  | 0.0103422 | 0.0124472 |
| G0:0004493 | methylmalonyl-CoA epimerase activity                | 1  | 0.0103422 | 0.0124472 |
| G0:0005314 | high-affinity glutamate transporter activity        | 1  | 0.0103422 | 0.0124472 |
| G0:0008480 | sarcosine dehydrogenase activity                    | 1  | 0.0103422 | 0.0124472 |
| G0:0045134 | uridine-diphosphatase activity                      | 1  | 0.0103422 | 0.0124472 |
| G0:0008821 | crossover junction endodeoxyribonuclease activity   | 1  | 0.0103422 | 0.0124472 |
| G0:0004810 | tRNA adenylyltransferase activity                   | 1  | 0.0103422 | 0.0124472 |
| G0:0004808 | tRNA (5-methylaminomethyl-2-thiouridylate)-methyltr | 1  | 0.0103422 | 0.0124472 |
| G0:0004632 | phosphopantothenate--cysteine ligase activity       | 1  | 0.0103422 | 0.0124472 |
| G0:0005290 | L-histidine transporter activity                    | 1  | 0.0103422 | 0.0124472 |
| G0:0015182 | L-asparagine transporter activity                   | 1  | 0.0103422 | 0.0124472 |
| G0:0031435 | mitogen-activated protein kinase kinase kinase bind | 1  | 0.0103422 | 0.0124472 |
| G0:0004513 | neolactotetraosylceramide alpha-2,3-sialyltransfera | 1  | 0.0103422 | 0.0124472 |
| G0:0047291 | lactosylceramide alpha-2,3-sialyltransferase activi | 1  | 0.0103422 | 0.0124472 |
| G0:0050512 | lactosylceramide 4-alpha-galactosyltransferase acti | 1  | 0.0103422 | 0.0124472 |
| G0:0001599 | endothelin-A receptor activity                      | 1  | 0.0103422 | 0.0124472 |
| G0:0003874 | 6-pyruvoyltetrahydropterin synthase activity        | 1  | 0.0103422 | 0.0124472 |
| G0:0004409 | homoaconitate hydratase activity                    | 1  | 0.0103422 | 0.0124472 |
| G0:0030379 | neurotensin receptor activity, non-G-protein couple | 1  | 0.0103422 | 0.0124472 |
| G0:0010465 | nerve growth factor receptor activity               | 1  | 0.0103422 | 0.0124472 |
| G0:0016493 | C-C chemokine receptor activity                     | 2  | 0.011654  | 0.0135321 |
| G0:0042809 | vitamin D receptor binding                          | 2  | 0.0146573 | 0.0168566 |
| G0:0016780 | phosphotransferase activity, for other substituted  | 2  | 0.0146573 | 0.0168566 |
| G0:0015175 | neutral amino acid transporter activity             | 2  | 0.0146573 | 0.0168566 |
| G0:0005242 | inward rectifier potassium channel activity         | 2  | 0.0146573 | 0.0168566 |
| G0:0004888 | transmembrane receptor activity                     | 22 | 0.0149582 | 0.0171568 |
| G0:0030169 | low-density lipoprotein binding                     | 2  | 0.0162704 | 0.0186205 |
| G0:0005234 | glutamate-gated ion channel activity                | 2  | 0.0162704 | 0.0186205 |
| G0:0004896 | hematopoietin/interferon-class (D200-domain) cytoki | 3  | 0.0176371 | 0.0201444 |
| G0:0005501 | retinoid binding                                    | 2  | 0.0179555 | 0.0204539 |
| G0:0004298 | threonine endopeptidase activity                    | 2  | 0.0179555 | 0.0204539 |
| G0:0005484 | SNAP receptor activity                              | 2  | 0.0179555 | 0.0204539 |
| G0:0003711 | transcriptional elongation regulator activity       | 2  | 0.0179555 | 0.0204539 |
| G0:0047006 | 20-alpha-hydroxysteroid dehydrogenase activity      | 1  | 0.0205774 | 0.0208804 |
| G0:0047042 | 3-alpha-hydroxysteroid dehydrogenase (B-specific) a | 1  | 0.0205774 | 0.0208804 |
| G0:0004823 | leucine-tRNA ligase activity                        | 1  | 0.0205774 | 0.0208804 |
| G0:0048155 | S100 alpha binding                                  | 1  | 0.0205774 | 0.0208804 |
| G0:0047237 | glucuronylgalactosylproteoglycan 4-beta-N-acetylga  | 1  | 0.0205774 | 0.0208804 |
| G0:0003953 | NAD+ nucleosidase activity                          | 1  | 0.0205774 | 0.0208804 |
| G0:0050473 | arachidonate 15-lipoxygenase activity               | 1  | 0.0205774 | 0.0208804 |
| G0:0019870 | potassium channel inhibitor activity                | 1  | 0.0205774 | 0.0208804 |
| G0:0008106 | alcohol dehydrogenase (NADP+) activity              | 1  | 0.0205774 | 0.0208804 |
| G0:0048156 | tau protein binding                                 | 1  | 0.0205774 | 0.0208804 |
| G0:0005006 | epidermal growth factor receptor activity           | 1  | 0.0205774 | 0.0208804 |
| G0:0008379 | thioredoxin peroxidase activity                     | 1  | 0.0205774 | 0.0208804 |
| G0:0003835 | beta-galactoside alpha-2,6-sialyltransferase activi | 1  | 0.0205774 | 0.0208804 |
| G0:0047026 | 3-alpha-hydroxysteroid dehydrogenase (A-specific) a | 1  | 0.0205774 | 0.0208804 |

|            |                                                     |   |           |           |
|------------|-----------------------------------------------------|---|-----------|-----------|
| G0:0005353 | fructose transporter activity                       | 1 | 0.0205774 | 0.0208804 |
| G0:0003868 | 4-hydroxyphenylpyruvate dioxygenase activity        | 1 | 0.0205774 | 0.0208804 |
| G0:0004167 | dopachrome isomerase activity                       | 1 | 0.0205774 | 0.0208804 |
| G0:0008177 | succinate dehydrogenase (ubiquinone) activity       | 1 | 0.0205774 | 0.0208804 |
| G0:0033883 | pyridoxal phosphatase activity                      | 1 | 0.0205774 | 0.0208804 |
| G0:0005229 | intracellular calcium activated chloride channel ac | 1 | 0.0205774 | 0.0208804 |
| G0:0042624 | ATPase activity, uncoupled                          | 1 | 0.0205774 | 0.0208804 |
| G0:0004019 | adenylosuccinate synthase activity                  | 1 | 0.0205774 | 0.0208804 |
| G0:0045029 | UDP-activated nucleotide receptor activity          | 1 | 0.0205774 | 0.0208804 |
| G0:0017163 | negative regulator of basal transcription activity  | 1 | 0.0205774 | 0.0208804 |
| G0:0008281 | sulfonylurea receptor activity                      | 1 | 0.0205774 | 0.0208804 |
| G0:0004368 | glycerol-3-phosphate dehydrogenase activity         | 1 | 0.0205774 | 0.0208804 |
| G0:0004063 | aryldialkylphosphatase activity                     | 1 | 0.0205774 | 0.0208804 |
| G0:0042903 | tubulin deacetylase activity                        | 1 | 0.0205774 | 0.0208804 |
| G0:0004947 | bradykinin receptor activity                        | 1 | 0.0205774 | 0.0208804 |
| G0:0030275 | LRR domain binding                                  | 1 | 0.0205774 | 0.0208804 |
| G0:0008061 | chitin binding                                      | 1 | 0.0205774 | 0.0208804 |
| G0:0051371 | muscle alpha-actinin binding                        | 1 | 0.0205774 | 0.0208804 |
| G0:0031593 | polyubiquitin binding                               | 1 | 0.0205774 | 0.0208804 |
| G0:0008396 | oxysterol 7-alpha-hydroxylase activity              | 1 | 0.0205774 | 0.0208804 |
| G0:0030144 | alpha-1,6-mannosyl-glycoprotein 6-beta-N-acetylgluc | 1 | 0.0205774 | 0.0208804 |
| G0:0004854 | xanthine dehydrogenase activity                     | 1 | 0.0205774 | 0.0208804 |
| G0:0004677 | DNA-dependent protein kinase activity               | 1 | 0.0205774 | 0.0208804 |
| G0:0004807 | triose-phosphate isomerase activity                 | 1 | 0.0205774 | 0.0208804 |
| G0:0004667 | prostaglandin-D synthase activity                   | 1 | 0.0205774 | 0.0208804 |
| G0:0004392 | heme oxygenase (decyclizing) activity               | 1 | 0.0205774 | 0.0208804 |
| G0:0004998 | transferrin receptor activity                       | 1 | 0.0205774 | 0.0208804 |
| G0:0003827 | alpha-1,3-mannosylglycoprotein 2-beta-N-acetylgluc  | 1 | 0.0205774 | 0.0208804 |
| G0:0046922 | peptide-O-fucosyltransferase activity               | 1 | 0.0205774 | 0.0208804 |
| G0:0047131 | saccharopine dehydrogenase (NAD+, L-glutamate-formi | 1 | 0.0205774 | 0.0208804 |
| G0:0047749 | cholestanetriol 26-monooxygenase activity           | 1 | 0.0205774 | 0.0208804 |
| G0:0000150 | recombinase activity                                | 1 | 0.0205774 | 0.0208804 |
| G0:0047522 | 15-oxoprostaglandin 13-oxidase activity             | 1 | 0.0205774 | 0.0208804 |
| G0:0008970 | phospholipase A1 activity                           | 1 | 0.0205774 | 0.0208804 |
| G0:0034736 | cholesterol O-acyltransferase activity              | 1 | 0.0205774 | 0.0208804 |
| G0:0034737 | ergosterol O-acyltransferase activity               | 1 | 0.0205774 | 0.0208804 |
| G0:0034738 | lanosterol O-acyltransferase activity               | 1 | 0.0205774 | 0.0208804 |
| G0:0004816 | asparagine-tRNA ligase activity                     | 1 | 0.0205774 | 0.0208804 |
| G0:0004348 | glucosylceramidase activity                         | 1 | 0.0205774 | 0.0208804 |
| G0:0070095 | fructose-6-phosphate binding                        | 1 | 0.0205774 | 0.0208804 |
| G0:0032038 | myosin II heavy chain binding                       | 1 | 0.0205774 | 0.0208804 |
| G0:0050613 | delta14-sterol reductase activity                   | 1 | 0.0205774 | 0.0208804 |
| G0:0046592 | polyamine oxidase activity                          | 1 | 0.0205774 | 0.0208804 |
| G0:0015254 | glycerol channel activity                           | 1 | 0.0205774 | 0.0208804 |
| G0:0030349 | syntaxin-13 binding                                 | 1 | 0.0205774 | 0.0208804 |
| G0:0004365 | glyceraldehyde-3-phosphate dehydrogenase (phosphory | 1 | 0.0205774 | 0.0208804 |
| G0:0050544 | arachidonic acid binding                            | 1 | 0.0205774 | 0.0208804 |
| G0:0004421 | hydroxymethylglutaryl-CoA synthase activity         | 1 | 0.0205774 | 0.0208804 |
| G0:0004342 | glucosamine-6-phosphate deaminase activity          | 1 | 0.0205774 | 0.0208804 |
| G0:0003845 | 11-beta-hydroxysteroid dehydrogenase activity       | 1 | 0.0205774 | 0.0208804 |
| G0:0004560 | alpha-L-fucosidase activity                         | 1 | 0.0205774 | 0.0208804 |
| G0:0004174 | electron-transferring-flavoprotein dehydrogenase ac | 1 | 0.0205774 | 0.0208804 |

|            |                                                                 |   |           |           |
|------------|-----------------------------------------------------------------|---|-----------|-----------|
| G0:0004915 | interleukin-6 receptor activity                                 | 1 | 0.0205774 | 0.0208804 |
| G0:0045509 | interleukin-27 receptor activity                                | 1 | 0.0205774 | 0.0208804 |
| G0:0047696 | beta-adrenergic receptor kinase activity                        | 1 | 0.0205774 | 0.0208804 |
| G0:0004158 | dihydroorotate oxidase activity                                 | 1 | 0.0205774 | 0.0208804 |
| G0:0004373 | glycogen (starch) synthase activity                             | 1 | 0.0205774 | 0.0208804 |
| G0:0004743 | pyruvate kinase activity                                        | 1 | 0.0205774 | 0.0208804 |
| G0:0008481 | sphinganine kinase activity                                     | 1 | 0.0205774 | 0.0208804 |
| G0:0008327 | methyl-CpG binding                                              | 1 | 0.0205774 | 0.0208804 |
| G0:0032090 | Pyrin domain binding                                            | 1 | 0.0205774 | 0.0208804 |
| G0:0004084 | branched-chain-amino-acid transaminase activity                 | 1 | 0.0205774 | 0.0208804 |
| G0:0008599 | protein phosphatase type 1 regulator activity                   | 1 | 0.0205774 | 0.0208804 |
| G0:0004352 | glutamate dehydrogenase activity                                | 1 | 0.0205774 | 0.0208804 |
| G0:0004353 | glutamate dehydrogenase [NAD(P)+] activity                      | 1 | 0.0205774 | 0.0208804 |
| G0:0008781 | N-acylneuraminate cytidyltransferase activity                   | 1 | 0.0205774 | 0.0208804 |
| G0:0016167 | glial cell line-derived neurotrophic factor receptor activity   | 1 | 0.0205774 | 0.0208804 |
| G0:0004379 | glycylpeptide N-tetradecanoyltransferase activity               | 1 | 0.0205774 | 0.0208804 |
| G0:0004466 | long-chain-acyl-CoA dehydrogenase activity                      | 1 | 0.0205774 | 0.0208804 |
| G0:0004485 | methylcrotonoyl-CoA carboxylase activity                        | 1 | 0.0205774 | 0.0208804 |
| G0:0001965 | G-protein alpha-subunit binding                                 | 1 | 0.0205774 | 0.0208804 |
| G0:0003963 | RNA-3'-phosphate cyclase activity                               | 1 | 0.0205774 | 0.0208804 |
| G0:0004766 | spermidine synthase activity                                    | 1 | 0.0205774 | 0.0208804 |
| G0:0000403 | Y-form DNA binding                                              | 1 | 0.0205774 | 0.0208804 |
| G0:0004658 | propionyl-CoA carboxylase activity                              | 1 | 0.0205774 | 0.0208804 |
| G0:0004020 | adenylylsulfate kinase activity                                 | 1 | 0.0205774 | 0.0208804 |
| G0:0004781 | sulfate adenylyltransferase (ATP) activity                      | 1 | 0.0205774 | 0.0208804 |
| G0:0019826 | oxygen sensor activity                                          | 1 | 0.0205774 | 0.0208804 |
| G0:0004996 | thyroid-stimulating hormone receptor activity                   | 1 | 0.0205774 | 0.0208804 |
| G0:0010698 | acetyltransferase activator activity                            | 1 | 0.0205774 | 0.0208804 |
| G0:0009384 | N-acylmannosamine kinase activity                               | 1 | 0.0205774 | 0.0208804 |
| G0:0015056 | corticotrophin-releasing factor receptor activity               | 1 | 0.0205774 | 0.0208804 |
| G0:0008511 | sodium:potassium:chloride symporter activity                    | 1 | 0.0205774 | 0.0208804 |
| G0:0004438 | phosphatidylinositol-3-phosphatase activity                     | 1 | 0.0205774 | 0.0208804 |
| G0:0016314 | phosphatidylinositol-3,4,5-trisphosphate 3-phosphatase activity | 1 | 0.0205774 | 0.0208804 |
| G0:0031386 | protein tag                                                     | 1 | 0.0205774 | 0.0208804 |
| G0:0003943 | N-acetylgalactosamine-4-sulfatase activity                      | 1 | 0.0205774 | 0.0208804 |
| G0:0008147 | structural constituent of bone                                  | 1 | 0.0205774 | 0.0208804 |
| G0:0008431 | vitamin E binding                                               | 1 | 0.0205774 | 0.0208804 |
| G0:0004818 | glutamate-tRNA ligase activity                                  | 1 | 0.0205774 | 0.0208804 |
| G0:0016312 | inositol bisphosphate phosphatase activity                      | 1 | 0.0205774 | 0.0208804 |
| G0:0031995 | insulin-like growth factor II binding                           | 1 | 0.0205774 | 0.0208804 |
| G0:0004723 | calcium-dependent protein serine/threonine phosphatase activity | 1 | 0.0205774 | 0.0208804 |
| G0:0004109 | coproporphyrinogen oxidase activity                             | 1 | 0.0205774 | 0.0208804 |
| G0:0004345 | glucose-6-phosphate 1-dehydrogenase activity                    | 1 | 0.0205774 | 0.0208804 |
| G0:0017057 | 6-phosphogluconolactonase activity                              | 1 | 0.0205774 | 0.0208804 |
| G0:0016404 | 15-hydroxyprostaglandin dehydrogenase (NAD+) activity           | 1 | 0.0205774 | 0.0208804 |
| G0:0004572 | mannosyl-oligosaccharide 1,3-1,6-alpha-mannosidase activity     | 1 | 0.0205774 | 0.0208804 |
| G0:0042609 | CD4 receptor binding                                            | 1 | 0.0205774 | 0.0208804 |
| G0:0004909 | interleukin-1, Type I, activating receptor activity             | 1 | 0.0205774 | 0.0208804 |
| G0:0005093 | Rab GDP-dissociation inhibitor activity                         | 1 | 0.0205774 | 0.0208804 |
| G0:0003884 | D-amino-acid oxidase activity                                   | 1 | 0.0205774 | 0.0208804 |
| G0:0004516 | nicotinate phosphoribosyltransferase activity                   | 1 | 0.0205774 | 0.0208804 |
| G0:0004537 | caspase-activated deoxyribonuclease activity                    | 1 | 0.0205774 | 0.0208804 |

|            |                                                                                         |   |           |           |
|------------|-----------------------------------------------------------------------------------------|---|-----------|-----------|
| G0:0004119 | cGMP-inhibited cyclic-nucleotide phosphodiesterase                                      | 1 | 0.0205774 | 0.0208804 |
| G0:0031698 | beta-2 adrenergic receptor binding                                                      | 1 | 0.0205774 | 0.0208804 |
| G0:0050815 | phosphoserine binding                                                                   | 1 | 0.0205774 | 0.0208804 |
| G0:0050816 | phosphothreonine binding                                                                | 1 | 0.0205774 | 0.0208804 |
| G0:0070063 | RNA polymerase binding                                                                  | 1 | 0.0205774 | 0.0208804 |
| G0:0003875 | ADP-ribosylarginine hydrolase activity                                                  | 1 | 0.0205774 | 0.0208804 |
| G0:0033130 | acetylcholine receptor binding                                                          | 1 | 0.0205774 | 0.0208804 |
| G0:0004419 | hydroxymethylglutaryl-CoA lyase activity                                                | 1 | 0.0205774 | 0.0208804 |
| G0:0004991 | parathyroid hormone receptor activity                                                   | 1 | 0.0205774 | 0.0208804 |
| G0:0004882 | androgen receptor activity                                                              | 1 | 0.0205774 | 0.0208804 |
| G0:0008260 | 3-oxoacid CoA-transferase activity                                                      | 1 | 0.0205774 | 0.0208804 |
| G0:0030158 | protein xylosyltransferase activity                                                     | 1 | 0.0205774 | 0.0208804 |
| G0:0035254 | glutamate receptor binding                                                              | 1 | 0.0205774 | 0.0208804 |
| G0:0000827 | inositol 1,3,4,5,6-pentakisphosphate kinase activity                                    | 1 | 0.0205774 | 0.0208804 |
| G0:0000832 | inositol hexakisphosphate 5-kinase activity                                             | 1 | 0.0205774 | 0.0208804 |
| G0:0033857 | diphosphoinositol-pentakisphosphate kinase activity                                     | 1 | 0.0205774 | 0.0208804 |
| G0:0042328 | heparan sulfate N-acetylglucosaminyltransferase activity                                | 1 | 0.0205774 | 0.0208804 |
| G0:0050509 | N-acetylglucosaminyl-proteoglycan 4-beta-glucuronosyltransferase activity               | 1 | 0.0205774 | 0.0208804 |
| G0:0005146 | leukemia inhibitory factor receptor binding                                             | 1 | 0.0205774 | 0.0208804 |
| G0:0004741 | [pyruvate dehydrogenase (lipoamide)] phosphatase activity                               | 1 | 0.0205774 | 0.0208804 |
| G0:0000247 | C-8 sterol isomerase activity                                                           | 1 | 0.0205774 | 0.0208804 |
| G0:0047750 | cholestenol delta-isomerase activity                                                    | 1 | 0.0205774 | 0.0208804 |
| G0:0004771 | sterol esterase activity                                                                | 1 | 0.0205774 | 0.0208804 |
| G0:0034452 | dynactin binding                                                                        | 1 | 0.0205774 | 0.0208804 |
| G0:0004356 | glutamate-ammonia ligase activity                                                       | 1 | 0.0205774 | 0.0208804 |
| G0:0004314 | [acyl-carrier protein] S-malonyltransferase activity                                    | 1 | 0.0205774 | 0.0208804 |
| G0:0004320 | oleoyl-[acyl-carrier protein] hydrolase activity                                        | 1 | 0.0205774 | 0.0208804 |
| G0:0016422 | mRNA (2'-O-methyladenosine-N6-)-methyltransferase activity                              | 1 | 0.0205774 | 0.0208804 |
| G0:0005137 | interleukin-5 receptor binding                                                          | 1 | 0.0205774 | 0.0208804 |
| G0:0003883 | CTP synthase activity                                                                   | 1 | 0.0205774 | 0.0208804 |
| G0:0033842 | N-acetyl-beta-glucosaminyl-glycoprotein 4-beta-N-acetylglucosaminyltransferase activity | 1 | 0.0205774 | 0.0208804 |
| G0:0005019 | platelet-derived growth factor beta-receptor activity                                   | 1 | 0.0205774 | 0.0208804 |
| G0:0004825 | methionine-tRNA ligase activity                                                         | 1 | 0.0205774 | 0.0208804 |
| G0:0004040 | amidase activity                                                                        | 1 | 0.0205774 | 0.0208804 |
| G0:0008523 | sodium-dependent multivitamin transporter activity                                      | 1 | 0.0205774 | 0.0208804 |
| G0:0004021 | alanine transaminase activity                                                           | 1 | 0.0205774 | 0.0208804 |
| G0:0004662 | CAAX-protein geranylgeranyltransferase activity                                         | 1 | 0.0205774 | 0.0208804 |
| G0:0070182 | DNA polymerase binding                                                                  | 1 | 0.0205774 | 0.0208804 |
| G0:0004066 | asparagine synthase (glutamine-hydrolyzing) activity                                    | 1 | 0.0205774 | 0.0208804 |
| G0:0030272 | 5-formyltetrahydrofolate cyclo-ligase activity                                          | 1 | 0.0205774 | 0.0208804 |
| G0:0046980 | tapasin binding                                                                         | 1 | 0.0205774 | 0.0208804 |
| G0:0008047 | enzyme activator activity                                                               | 8 | 0.0250343 | 0.0241462 |
| G0:0043498 | cell surface binding                                                                    | 2 | 0.0253833 | 0.0244418 |
| G0:0050839 | cell adhesion molecule binding                                                          | 2 | 0.0274041 | 0.0263287 |
| G0:0016810 | hydrolase activity, acting on carbon-nitrogen (but not ester) bonds                     | 4 | 0.0278273 | 0.0266807 |
| G0:0004864 | protein phosphatase inhibitor activity                                                  | 2 | 0.0294873 | 0.0278996 |
| G0:0045294 | alpha-catenin binding                                                                   | 1 | 0.0307068 | 0.0278996 |
| G0:0005030 | neurotrophin receptor activity                                                          | 1 | 0.0307068 | 0.0278996 |
| G0:0004322 | ferroxidase activity                                                                    | 1 | 0.0307068 | 0.0278996 |
| G0:0034450 | ubiquitin-ubiquitin ligase activity                                                     | 1 | 0.0307068 | 0.0278996 |
| G0:0031708 | endothelin B receptor binding                                                           | 1 | 0.0307068 | 0.0278996 |
| G0:0030297 | transmembrane receptor protein tyrosine kinase activity                                 | 1 | 0.0307068 | 0.0278996 |

|            |                                                     |   |           |           |
|------------|-----------------------------------------------------|---|-----------|-----------|
| G0:0047045 | testosterone 17-beta-dehydrogenase (NADP+) activity | 1 | 0.0307068 | 0.0278996 |
| G0:0005010 | insulin-like growth factor receptor activity        | 1 | 0.0307068 | 0.0278996 |
| G0:0043394 | proteoglycan binding                                | 1 | 0.0307068 | 0.0278996 |
| G0:0004465 | lipoprotein lipase activity                         | 1 | 0.0307068 | 0.0278996 |
| G0:0004802 | transketolase activity                              | 1 | 0.0307068 | 0.0278996 |
| G0:0004064 | arylesterase activity                               | 1 | 0.0307068 | 0.0278996 |
| G0:0008184 | glycogen phosphorylase activity                     | 1 | 0.0307068 | 0.0278996 |
| G0:0005176 | ErbB-2 class receptor binding                       | 1 | 0.0307068 | 0.0278996 |
| G0:0035005 | phosphatidylinositol-4-phosphate 3-kinase activity  | 1 | 0.0307068 | 0.0278996 |
| G0:0043295 | glutathione binding                                 | 1 | 0.0307068 | 0.0278996 |
| G0:0005148 | prolactin receptor binding                          | 1 | 0.0307068 | 0.0278996 |
| G0:0003960 | NADPH:quinone reductase activity                    | 1 | 0.0307068 | 0.0278996 |
| G0:0005049 | nuclear export signal receptor activity             | 1 | 0.0307068 | 0.0278996 |
| G0:0008401 | retinoic acid 4-hydroxylase activity                | 1 | 0.0307068 | 0.0278996 |
| G0:0030548 | acetylcholine receptor regulator activity           | 1 | 0.0307068 | 0.0278996 |
| G0:0004616 | phosphogluconate dehydrogenase (decarboxylating) ac | 1 | 0.0307068 | 0.0278996 |
| G0:0003985 | acetyl-CoA C-acetyltransferase activity             | 1 | 0.0307068 | 0.0278996 |
| G0:0004706 | JUN kinase kinase kinase activity                   | 1 | 0.0307068 | 0.0278996 |
| G0:0043515 | kinetochore binding                                 | 1 | 0.0307068 | 0.0278996 |
| G0:0004705 | JUN kinase activity                                 | 1 | 0.0307068 | 0.0278996 |
| G0:0004758 | serine C-palmitoyltransferase activity              | 1 | 0.0307068 | 0.0278996 |
| G0:0046978 | TAP1 binding                                        | 1 | 0.0307068 | 0.0278996 |
| G0:0046979 | TAP2 binding                                        | 1 | 0.0307068 | 0.0278996 |
| G0:0004449 | isocitrate dehydrogenase (NAD+) activity            | 1 | 0.0307068 | 0.0278996 |
| G0:0004566 | beta-glucuronidase activity                         | 1 | 0.0307068 | 0.0278996 |
| G0:0019215 | intermediate filament binding                       | 1 | 0.0307068 | 0.0278996 |
| G0:0050220 | prostaglandin-E synthase activity                   | 1 | 0.0307068 | 0.0278996 |
| G0:0032266 | phosphatidylinositol 3-phosphate binding            | 1 | 0.0307068 | 0.0278996 |
| G0:0003910 | DNA ligase (ATP) activity                           | 1 | 0.0307068 | 0.0278996 |
| G0:0004591 | oxoglutarate dehydrogenase (succinyl-transferring)  | 1 | 0.0307068 | 0.0278996 |
| G0:0030023 | extracellular matrix constituent conferring elastic | 1 | 0.0307068 | 0.0278996 |
| G0:0008107 | galactoside 2-alpha-L-fucosyltransferase activity   | 1 | 0.0307068 | 0.0278996 |
| G0:0051010 | microtubule plus-end binding                        | 1 | 0.0307068 | 0.0278996 |
| G0:0015137 | citrate transporter activity                        | 1 | 0.0307068 | 0.0278996 |
| G0:0031014 | troponin T binding                                  | 1 | 0.0307068 | 0.0278996 |
| G0:0008339 | MP kinase activity                                  | 1 | 0.0307068 | 0.0278996 |
| G0:0042808 | neuronal Cdc2-like kinase binding                   | 1 | 0.0307068 | 0.0278996 |
| G0:0008453 | alanine-glyoxylate transaminase activity            | 1 | 0.0307068 | 0.0278996 |
| G0:0032139 | dinucleotide insertion or deletion binding          | 1 | 0.0307068 | 0.0278996 |
| G0:0043125 | ErbB-3 class receptor binding                       | 1 | 0.0307068 | 0.0278996 |
| G0:0043559 | insulin binding                                     | 1 | 0.0307068 | 0.0278996 |
| G0:0046582 | Rap GTPase activator activity                       | 1 | 0.0307068 | 0.0278996 |
| G0:0005315 | inorganic phosphate transporter activity            | 1 | 0.0307068 | 0.0278996 |
| G0:0047961 | glycine N-acyltransferase activity                  | 1 | 0.0307068 | 0.0278996 |
| G0:0032183 | SUMO binding                                        | 1 | 0.0307068 | 0.0278996 |
| G0:0003701 | RNA polymerase I transcription factor activity      | 1 | 0.0307068 | 0.0278996 |
| G0:0043138 | 3' to 5' DNA helicase activity                      | 1 | 0.0307068 | 0.0278996 |
| G0:0048038 | quinone binding                                     | 1 | 0.0307068 | 0.0278996 |
| G0:0004366 | glycerol-3-phosphate 0-acyltransferase activity     | 1 | 0.0307068 | 0.0278996 |
| G0:0005078 | MAP-kinase scaffold activity                        | 1 | 0.0307068 | 0.0278996 |
| G0:0016309 | 1-phosphatidylinositol-5-phosphate 4-kinase activit | 1 | 0.0307068 | 0.0278996 |
| G0:0015183 | L-aspartate transporter activity                    | 1 | 0.0307068 | 0.0278996 |

|            |                                                     |   |           |           |
|------------|-----------------------------------------------------|---|-----------|-----------|
| G0:0004614 | phosphoglucomutase activity                         | 1 | 0.0307068 | 0.0278996 |
| G0:0017160 | Ral GTPase binding                                  | 1 | 0.0307068 | 0.0278996 |
| G0:0015220 | choline transporter activity                        | 1 | 0.0307068 | 0.0278996 |
| G0:0004013 | adenosylhomocysteinase activity                     | 1 | 0.0307068 | 0.0278996 |
| G0:0017147 | Wnt-protein binding                                 | 1 | 0.0307068 | 0.0278996 |
| G0:0050508 | glucuronosyl-N-acetylglucosaminyl-proteoglycan 4-a  | 1 | 0.0307068 | 0.0278996 |
| G0:0032549 | ribonucleoside binding                              | 1 | 0.0307068 | 0.0278996 |
| G0:0005280 | hydrogen:amino acid symporter activity              | 1 | 0.0307068 | 0.0278996 |
| G0:0015193 | L-proline transporter activity                      | 1 | 0.0307068 | 0.0278996 |
| G0:0004556 | alpha-amylase activity                              | 1 | 0.0307068 | 0.0278996 |
| G0:0015038 | glutathione disulfide oxidoreductase activity       | 1 | 0.0307068 | 0.0278996 |
| G0:0008242 | omega peptidase activity                            | 1 | 0.0307068 | 0.0278996 |
| G0:0051019 | mitogen-activated protein kinase binding            | 1 | 0.0307068 | 0.0278996 |
| G0:0008140 | cAMP response element binding protein binding       | 1 | 0.0307068 | 0.0278996 |
| G0:0008384 | IkappaB kinase activity                             | 1 | 0.0307068 | 0.0278996 |
| G0:0004769 | steroid delta-isomerase activity                    | 1 | 0.0307068 | 0.0278996 |
| G0:0047756 | chondroitin 4-sulfotransferase activity             | 1 | 0.0307068 | 0.0278996 |
| G0:0031177 | phosphopantetheine binding                          | 1 | 0.0307068 | 0.0278996 |
| G0:0004992 | platelet activating factor receptor activity        | 1 | 0.0307068 | 0.0278996 |
| G0:0004800 | thyroxine 5'-deiodinase activity                    | 1 | 0.0307068 | 0.0278996 |
| G0:0017162 | aryl hydrocarbon receptor binding                   | 1 | 0.0307068 | 0.0278996 |
| G0:0043533 | inositol 1,3,4,5 tetrakisphosphate binding          | 1 | 0.0307068 | 0.0278996 |
| G0:0051880 | G-quadruplex DNA binding                            | 1 | 0.0307068 | 0.0278996 |
| G0:0004060 | arylamine N-acetyltransferase activity              | 1 | 0.0307068 | 0.0278996 |
| G0:0016155 | formyltetrahydrofolate dehydrogenase activity       | 1 | 0.0307068 | 0.0278996 |
| G0:0005026 | transforming growth factor beta receptor activity,  | 1 | 0.0307068 | 0.0278996 |
| G0:0045159 | myosin II binding                                   | 1 | 0.0307068 | 0.0278996 |
| G0:0003705 | RNA polymerase II transcription factor activity, er | 2 | 0.0338351 | 0.0297873 |
| G0:0005548 | phospholipid transporter activity                   | 2 | 0.0360967 | 0.0317405 |
| G0:0045028 | purinergic nucleotide receptor activity, G-protein  | 2 | 0.0384149 | 0.0337158 |
| G0:0019902 | phosphatase binding                                 | 2 | 0.0384149 | 0.0337158 |
| G0:0016758 | transferase activity, transferring hexosyl groups   | 5 | 0.0385434 | 0.0337827 |
| G0:0015271 | outward rectifier potassium channel activity        | 1 | 0.0407315 | 0.0340517 |
| G0:0048027 | mRNA 5'-UTR binding                                 | 1 | 0.0407315 | 0.0340517 |
| G0:0001784 | phosphotyrosine binding                             | 1 | 0.0407315 | 0.0340517 |
| G0:0005432 | calcium:sodium antiporter activity                  | 1 | 0.0407315 | 0.0340517 |
| G0:0004694 | eukaryotic translation initiation factor 2alpha kir | 1 | 0.0407315 | 0.0340517 |
| G0:0003997 | acyl-CoA oxidase activity                           | 1 | 0.0407315 | 0.0340517 |
| G0:0003886 | DNA (cytosine-5-)-methyltransferase activity        | 1 | 0.0407315 | 0.0340517 |
| G0:0004032 | aldehyde reductase activity                         | 1 | 0.0407315 | 0.0340517 |
| G0:0004406 | H3/H4 histone acetyltransferase activity            | 1 | 0.0407315 | 0.0340517 |
| G0:0005499 | vitamin D binding                                   | 1 | 0.0407315 | 0.0340517 |
| G0:0003846 | 2-acylglycerol 0-acyltransferase activity           | 1 | 0.0407315 | 0.0340517 |
| G0:0004144 | diacylglycerol 0-acyltransferase activity           | 1 | 0.0407315 | 0.0340517 |
| G0:0070061 | fructose binding                                    | 1 | 0.0407315 | 0.0340517 |
| G0:0001972 | retinoic acid binding                               | 1 | 0.0407315 | 0.0340517 |
| G0:0047184 | 1-acylglycerophosphocholine 0-acyltransferase activ | 1 | 0.0407315 | 0.0340517 |
| G0:0015379 | potassium:chloride symporter activity               | 1 | 0.0407315 | 0.0340517 |
| G0:0003945 | N-acetyllactosamine synthase activity               | 1 | 0.0407315 | 0.0340517 |
| G0:0004157 | dihydropyrimidinase activity                        | 1 | 0.0407315 | 0.0340517 |
| G0:0032138 | single base insertion or deletion binding           | 1 | 0.0407315 | 0.0340517 |
| G0:0008853 | exodeoxyribonuclease III activity                   | 1 | 0.0407315 | 0.0340517 |

|            |                                                                   |   |           |           |
|------------|-------------------------------------------------------------------|---|-----------|-----------|
| G0:0046923 | ER retention sequence binding                                     | 1 | 0.0407315 | 0.0340517 |
| G0:0035259 | glucocorticoid receptor binding                                   | 1 | 0.0407315 | 0.0340517 |
| G0:0035014 | phosphoinositide 3-kinase regulator activity                      | 1 | 0.0407315 | 0.0340517 |
| G0:0004308 | exo-alpha-sialidase activity                                      | 1 | 0.0407315 | 0.0340517 |
| G0:0015226 | carnitine transporter activity                                    | 1 | 0.0407315 | 0.0340517 |
| G0:0004965 | GABA-B receptor activity                                          | 1 | 0.0407315 | 0.0340517 |
| G0:0030172 | troponin C binding                                                | 1 | 0.0407315 | 0.0340517 |
| G0:0004594 | pantothenate kinase activity                                      | 1 | 0.0407315 | 0.0340517 |
| G0:0017070 | U6 snRNA binding                                                  | 1 | 0.0407315 | 0.0340517 |
| G0:0003988 | acetyl-CoA C-acyltransferase activity                             | 1 | 0.0407315 | 0.0340517 |
| G0:0050510 | N-acetylgalactosaminyl-proteoglycan 3-beta-glucuronidase activity | 1 | 0.0407315 | 0.0340517 |
| G0:0004689 | phosphorylase kinase activity                                     | 1 | 0.0407315 | 0.0340517 |
| G0:0003828 | alpha-N-acetylneuraminase alpha-2,8-sialyltransferase activity    | 1 | 0.0407315 | 0.0340517 |
| G0:0015347 | sodium-independent organic anion transporter activity             | 1 | 0.0407315 | 0.0340517 |
| G0:0015087 | cobalt ion transporter activity                                   | 1 | 0.0407315 | 0.0340517 |
| G0:0004828 | serine-tRNA ligase activity                                       | 1 | 0.0407315 | 0.0340517 |
| G0:0043014 | alpha-tubulin binding                                             | 1 | 0.0407315 | 0.0340517 |
| G0:0017128 | phospholipid scramblase activity                                  | 1 | 0.0407315 | 0.0340517 |
| G0:0016595 | glutamate binding                                                 | 1 | 0.0407315 | 0.0340517 |
| G0:0004528 | phosphodiesterase I activity                                      | 1 | 0.0407315 | 0.0340517 |
| G0:0047429 | nucleoside-triphosphate diphosphatase activity                    | 1 | 0.0407315 | 0.0340517 |
| G0:0008553 | hydrogen-exporting ATPase activity, phosphorylative               | 1 | 0.0407315 | 0.0340517 |
| G0:0005381 | iron ion transporter activity                                     | 1 | 0.0407315 | 0.0340517 |
| G0:0004095 | carnitine O-palmitoyltransferase activity                         | 1 | 0.0407315 | 0.0340517 |
| G0:0031267 | small GTPase binding                                              | 3 | 0.0430845 | 0.0359455 |
| G0:0019825 | oxygen binding                                                    | 2 | 0.0456947 | 0.0380495 |
| G0:0004981 | muscarinic acetylcholine receptor activity                        | 1 | 0.0506525 | 0.0406098 |
| G0:0005219 | ryanodine-sensitive calcium-release channel activity              | 1 | 0.0506525 | 0.0406098 |
| G0:0008035 | high-density lipoprotein binding                                  | 1 | 0.0506525 | 0.0406098 |
| G0:0030197 | extracellular matrix constituent, lubricant activity              | 1 | 0.0506525 | 0.0406098 |
| G0:0001517 | N-acetylglucosamine 6-O-sulfotransferase activity                 | 1 | 0.0506525 | 0.0406098 |
| G0:0005131 | growth hormone receptor binding                                   | 1 | 0.0506525 | 0.0406098 |
| G0:0004652 | polynucleotide adenylyltransferase activity                       | 1 | 0.0506525 | 0.0406098 |
| G0:0001515 | opioid peptide activity                                           | 1 | 0.0506525 | 0.0406098 |
| G0:0005000 | vasopressin receptor activity                                     | 1 | 0.0506525 | 0.0406098 |
| G0:0004046 | aminoacylase activity                                             | 1 | 0.0506525 | 0.0406098 |
| G0:0004185 | serine carboxypeptidase activity                                  | 1 | 0.0506525 | 0.0406098 |
| G0:0004749 | ribose phosphate diphosphokinase activity                         | 1 | 0.0506525 | 0.0406098 |
| G0:0003956 | NAD(P)+-protein-arginine ADP-ribosyltransferase activity          | 1 | 0.0506525 | 0.0406098 |
| G0:0032407 | MutSalpha complex binding                                         | 1 | 0.0506525 | 0.0406098 |
| G0:0034235 | GPI anchor binding                                                | 1 | 0.0506525 | 0.0406098 |
| G0:0016174 | NAD(P)H oxidase activity                                          | 1 | 0.0506525 | 0.0406098 |
| G0:0019863 | IgE binding                                                       | 1 | 0.0506525 | 0.0406098 |
| G0:0017056 | structural constituent of nuclear pore                            | 1 | 0.0506525 | 0.0406098 |
| G0:0008967 | phosphoglycolate phosphatase activity                             | 1 | 0.0506525 | 0.0406098 |
| G0:0017089 | glycolipid transporter activity                                   | 1 | 0.0506525 | 0.0406098 |
| G0:0008504 | monoamine transporter activity                                    | 1 | 0.0506525 | 0.0406098 |
| G0:0004024 | alcohol dehydrogenase activity, zinc-dependent                    | 1 | 0.0506525 | 0.0406098 |
| G0:0008048 | calcium sensitive guanylate cyclase activator activity            | 1 | 0.0506525 | 0.0406098 |
| G0:0004459 | L-lactate dehydrogenase activity                                  | 1 | 0.0506525 | 0.0406098 |
| G0:0004668 | protein-arginine deiminase activity                               | 1 | 0.0506525 | 0.0406098 |
| G0:0008526 | phosphatidylinositol transporter activity                         | 1 | 0.0506525 | 0.0406098 |

|            |                                                              |   |           |           |
|------------|--------------------------------------------------------------|---|-----------|-----------|
| G0:0015187 | glycine transporter activity                                 | 1 | 0.0506525 | 0.0406098 |
| G0:0008517 | folic acid transporter activity                              | 1 | 0.0506525 | 0.0406098 |
| G0:0005005 | transmembrane-ephrin receptor activity                       | 1 | 0.0506525 | 0.0406098 |
| G0:0050733 | RS domain binding                                            | 1 | 0.0506525 | 0.0406098 |
| G0:0004826 | phenylalanine-tRNA ligase activity                           | 1 | 0.0506525 | 0.0406098 |
| G0:0001537 | N-acetylgalactosamine 4-O-sulfotransferase activity          | 1 | 0.0506525 | 0.0406098 |
| G0:0017176 | phosphatidylinositol N-acetylglucosaminyltransferase         | 1 | 0.0506525 | 0.0406098 |
| G0:0031403 | lithium ion binding                                          | 1 | 0.0506525 | 0.0406098 |
| G0:0017049 | GTP-Rho binding                                              | 1 | 0.0506525 | 0.0406098 |
| G0:0048406 | nerve growth factor binding                                  | 1 | 0.0506525 | 0.0406098 |
| G0:0008375 | acetylglucosaminyltransferase activity                       | 2 | 0.0588318 | 0.046931  |
| G0:0030506 | ankyrin binding                                              | 1 | 0.0604709 | 0.0471245 |
| G0:0016165 | lipoxygenase activity                                        | 1 | 0.0604709 | 0.0471245 |
| G0:0004396 | hexokinase activity                                          | 1 | 0.0604709 | 0.0471245 |
| G0:0004035 | alkaline phosphatase activity                                | 1 | 0.0604709 | 0.0471245 |
| G0:0001786 | phosphatidylserine binding                                   | 1 | 0.0604709 | 0.0471245 |
| G0:0016565 | general transcriptional repressor activity                   | 1 | 0.0604709 | 0.0471245 |
| G0:0046965 | retinoid X receptor binding                                  | 1 | 0.0604709 | 0.0471245 |
| G0:0016944 | RNA polymerase II transcription elongation factor $\epsilon$ | 1 | 0.0604709 | 0.0471245 |
| G0:0004499 | dimethylaniline monooxygenase (N-oxide-forming) act          | 1 | 0.0604709 | 0.0471245 |
| G0:0030898 | actin-dependent ATPase activity                              | 1 | 0.0604709 | 0.0471245 |
| G0:0005025 | transforming growth factor beta receptor activity,           | 1 | 0.0604709 | 0.0471245 |
| G0:0008494 | translation activator activity                               | 1 | 0.0604709 | 0.0471245 |
| G0:0017080 | sodium channel regulator activity                            | 1 | 0.0604709 | 0.0471245 |
| G0:0015279 | store-operated calcium channel activity                      | 1 | 0.0604709 | 0.0471245 |
| G0:0004969 | histamine receptor activity                                  | 1 | 0.0604709 | 0.0471245 |
| G0:0004559 | alpha-mannosidase activity                                   | 1 | 0.0604709 | 0.0471245 |
| G0:0043548 | phosphoinositide 3-kinase binding                            | 1 | 0.0604709 | 0.0471245 |
| G0:0004300 | enoyl-CoA hydratase activity                                 | 1 | 0.0604709 | 0.0471245 |
| G0:0005152 | interleukin-1 receptor antagonist activity                   | 1 | 0.0604709 | 0.0471245 |
| G0:0008159 | positive transcription elongation factor activity            | 1 | 0.0604709 | 0.0471245 |
| G0:0005375 | copper ion transporter activity                              | 1 | 0.0604709 | 0.0471245 |
| G0:0031490 | chromatin DNA binding                                        | 1 | 0.0604709 | 0.0471245 |
| G0:0005092 | GDP-dissociation inhibitor activity                          | 1 | 0.0604709 | 0.0471245 |
| G0:0050656 | 3'-phosphoadenosine 5'-phosphosulfate binding                | 1 | 0.0604709 | 0.0471245 |
| G0:0016742 | hydroxymethyl-, formyl- and related transferase act          | 1 | 0.0604709 | 0.0471245 |
| G0:0019787 | small conjugating protein ligase activity                    | 4 | 0.0607528 | 0.0471245 |
| G0:0008188 | neuropeptide receptor activity                               | 2 | 0.064408  | 0.0499148 |
| G0:0015277 | kainate selective glutamate receptor activity                | 1 | 0.0701879 | 0.053583  |
| G0:0030371 | translation repressor activity                               | 1 | 0.0701879 | 0.053583  |
| G0:0004630 | phospholipase D activity                                     | 1 | 0.0701879 | 0.053583  |
| G0:0047760 | butyrate-CoA ligase activity                                 | 1 | 0.0701879 | 0.053583  |
| G0:0047498 | calcium-dependent phospholipase A2 activity                  | 1 | 0.0701879 | 0.053583  |
| G0:0051861 | glycolipid binding                                           | 1 | 0.0701879 | 0.053583  |
| G0:0042577 | lipid phosphatase activity                                   | 1 | 0.0701879 | 0.053583  |
| G0:0005436 | sodium:phosphate symporter activity                          | 1 | 0.0701879 | 0.053583  |
| G0:0015174 | basic amino acid transporter activity                        | 1 | 0.0701879 | 0.053583  |
| G0:0008139 | nuclear localization sequence binding                        | 1 | 0.0701879 | 0.053583  |
| G0:0016494 | C-X-C chemokine receptor activity                            | 1 | 0.0701879 | 0.053583  |
| G0:0004931 | ATP-gated cation channel activity                            | 1 | 0.0701879 | 0.053583  |
| G0:0050811 | GABA receptor binding                                        | 1 | 0.0701879 | 0.053583  |
| G0:0034713 | type I transforming growth factor beta receptor bir          | 1 | 0.0701879 | 0.053583  |



|            |                                                       |   |           |           |
|------------|-------------------------------------------------------|---|-----------|-----------|
| G0:0005099 | Ras GTPase activator activity                         | 3 | 0.0706143 | 0.053583  |
| G0:0005249 | voltage-gated potassium channel activity              | 3 | 0.0780035 | 0.0591379 |
| G0:0016209 | antioxidant activity                                  | 2 | 0.079068  | 0.0594429 |
| G0:0001848 | complement binding                                    | 1 | 0.0798044 | 0.0594429 |
| G0:0015278 | calcium-release channel activity                      | 1 | 0.0798044 | 0.0594429 |
| G0:0003730 | mRNA 3'-UTR binding                                   | 1 | 0.0798044 | 0.0594429 |
| G0:0031419 | cobalamin binding                                     | 1 | 0.0798044 | 0.0594429 |
| G0:0043121 | neurotrophin binding                                  | 1 | 0.0798044 | 0.0594429 |
| G0:0005283 | sodium:amino acid symporter activity                  | 1 | 0.0798044 | 0.0594429 |
| G0:0031543 | peptidyl-proline dioxygenase activity                 | 1 | 0.0798044 | 0.0594429 |
| G0:0003706 | ligand-regulated transcription factor activity        | 1 | 0.0798044 | 0.0594429 |
| G0:0004982 | N-formyl peptide receptor activity                    | 1 | 0.0798044 | 0.0594429 |
| G0:0005487 | nucleocytoplasmic transporter activity                | 1 | 0.0798044 | 0.0594429 |
| G0:0004372 | glycine hydroxymethyltransferase activity             | 1 | 0.0798044 | 0.0594429 |
| G0:0043015 | gamma-tubulin binding                                 | 1 | 0.0798044 | 0.0594429 |
| G0:0019003 | GDP binding                                           | 1 | 0.0798044 | 0.0594429 |
| G0:0003906 | DNA-(apurinic or apyrimidinic site) lyase activity    | 1 | 0.0798044 | 0.0594429 |
| G0:0004000 | adenosine deaminase activity                          | 1 | 0.0798044 | 0.0594429 |
| G0:0008641 | small protein activating enzyme activity              | 1 | 0.0798044 | 0.0594429 |
| G0:0017153 | sodium:dicarboxylate symporter activity               | 1 | 0.0798044 | 0.0594429 |
| G0:0004176 | ATP-dependent peptidase activity                      | 1 | 0.0798044 | 0.0594429 |
| G0:0003729 | mRNA binding                                          | 2 | 0.0851958 | 0.0633178 |
| G0:0043027 | caspase inhibitor activity                            | 1 | 0.0893214 | 0.0658504 |
| G0:0004955 | prostaglandin receptor activity                       | 1 | 0.0893214 | 0.0658504 |
| G0:0004383 | guanylate cyclase activity                            | 1 | 0.0893214 | 0.0658504 |
| G0:0008199 | ferric iron binding                                   | 1 | 0.0893214 | 0.0658504 |
| G0:0015101 | organic cation transporter activity                   | 1 | 0.0893214 | 0.0658504 |
| G0:0008135 | translation factor activity, nucleic acid binding     | 3 | 0.0896871 | 0.0658504 |
| G0:0019955 | cytokine binding                                      | 3 | 0.0957865 | 0.0701493 |
| G0:0004745 | retinol dehydrogenase activity                        | 1 | 0.09874   | 0.0718539 |
| G0:0019864 | IgG binding                                           | 1 | 0.09874   | 0.0718539 |
| G0:0008907 | integrase activity                                    | 1 | 0.09874   | 0.0718539 |
| G0:0017017 | MAP kinase phosphatase activity                       | 1 | 0.09874   | 0.0718539 |
| G0:0015250 | water channel activity                                | 1 | 0.09874   | 0.0718539 |
| G0:0030553 | cGMP binding                                          | 1 | 0.09874   | 0.0718539 |
| G0:0004467 | long-chain-fatty-acid-CoA ligase activity             | 1 | 0.09874   | 0.0718539 |
| G0:0005385 | zinc ion transporter activity                         | 1 | 0.09874   | 0.0718539 |
| G0:0005391 | sodium:potassium-exchanging ATPase activity           | 1 | 0.09874   | 0.0718539 |
| G0:0048185 | activin binding                                       | 1 | 0.09874   | 0.0718539 |
| G0:0004527 | exonuclease activity                                  | 2 | 0.1043734 | 0.0755172 |
| G0:0051183 | vitamin transporter activity                          | 1 | 0.1080613 | 0.0777391 |
| G0:0051018 | protein kinase A binding                              | 1 | 0.1080613 | 0.0777391 |
| G0:0008514 | organic anion transporter activity                    | 1 | 0.1080613 | 0.0777391 |
| G0:0004016 | adenylate cyclase activity                            | 1 | 0.1080613 | 0.0777391 |
| G0:0015450 | protein translocase activity                          | 1 | 0.1080613 | 0.0777391 |
| G0:0005072 | transforming growth factor beta receptor, cytoplasmic | 1 | 0.1080613 | 0.0777391 |
| G0:0004716 | receptor signaling protein tyrosine kinase activity   | 1 | 0.1172862 | 0.0836071 |
| G0:0005310 | dicarboxylic acid transporter activity                | 1 | 0.1172862 | 0.0836071 |
| G0:0009982 | pseudouridine synthase activity                       | 1 | 0.1172862 | 0.0836071 |
| G0:0008367 | bacterial binding                                     | 1 | 0.1172862 | 0.0836071 |
| G0:0010181 | FMN binding                                           | 1 | 0.1172862 | 0.0836071 |
| G0:0008395 | steroid hydroxylase activity                          | 1 | 0.1172862 | 0.0836071 |

|            |                                                         |    |           |           |
|------------|---------------------------------------------------------|----|-----------|-----------|
| G0:0051219 | phosphoprotein binding                                  | 1  | 0.1172862 | 0.0836071 |
| G0:0019104 | DNA N-glycosylase activity                              | 1  | 0.1172862 | 0.0836071 |
| G0:0031406 | carboxylic acid binding                                 | 1  | 0.1172862 | 0.0836071 |
| G0:0003676 | nucleic acid binding                                    | 41 | 0.1221911 | 0.0866848 |
| G0:0004879 | ligand-dependent nuclear receptor activity              | 2  | 0.1245771 | 0.0883169 |
| G0:0043022 | ribosome binding                                        | 1  | 0.1264157 | 0.0892041 |
| G0:0003708 | retinoic acid receptor activity                         | 1  | 0.1264157 | 0.0892041 |
| G0:0016868 | intramolecular transferase activity, phosphotransferase | 1  | 0.1264157 | 0.0892041 |
| G0:0004659 | prenyltransferase activity                              | 1  | 0.1354508 | 0.0950086 |
| G0:0004857 | enzyme inhibitor activity                               | 5  | 0.1359024 | 0.0951574 |
| G0:0017016 | Ras GTPase binding                                      | 2  | 0.1491872 | 0.1040504 |
| G0:0004198 | calpain activity                                        | 1  | 0.1532417 | 0.1065473 |
| G0:0004889 | nicotinic acetylcholine-activated cation-selective      | 1  | 0.1532417 | 0.1065473 |
| G0:0005024 | transforming growth factor beta receptor activity       | 1  | 0.1532417 | 0.1065473 |
| G0:0005160 | transforming growth factor beta receptor binding        | 1  | 0.1619994 | 0.1122136 |
| G0:0005212 | structural constituent of eye lens                      | 1  | 0.1619994 | 0.1122136 |
| G0:0015631 | tubulin binding                                         | 2  | 0.1636519 | 0.1131761 |
| G0:0016407 | acetyltransferase activity                              | 2  | 0.1673062 | 0.115626  |
| G0:0004970 | ionotropic glutamate receptor activity                  | 1  | 0.1706666 | 0.1175478 |
| G0:0016878 | acid-thiol ligase activity                              | 1  | 0.1706666 | 0.1175478 |
| G0:0004520 | endodeoxyribonuclease activity                          | 1  | 0.1706666 | 0.1175478 |
| G0:0015026 | coreceptor activity                                     | 1  | 0.1706666 | 0.1175478 |
| G0:0016597 | amino acid binding                                      | 1  | 0.1706666 | 0.1175478 |
| G0:0015464 | acetylcholine receptor activity                         | 1  | 0.1706666 | 0.1175478 |
| G0:0005230 | extracellular ligand-gated ion channel activity         | 2  | 0.174656  | 0.120031  |
| G0:0016799 | hydrolase activity, hydrolyzing N-glycosyl compound     | 1  | 0.1792442 | 0.1229552 |
| G0:0016504 | protease activator activity                             | 1  | 0.1792442 | 0.1229552 |
| G0:0019843 | rRNA binding                                            | 1  | 0.187733  | 0.1282334 |
| G0:0008186 | RNA-dependent ATPase activity                           | 1  | 0.187733  | 0.1282334 |
| G0:0032947 | protein complex scaffold                                | 1  | 0.187733  | 0.1282334 |
| G0:0004866 | endopeptidase inhibitor activity                        | 3  | 0.1903704 | 0.129709  |
| G0:0030246 | carbohydrate binding                                    | 5  | 0.1942237 | 0.1322995 |
| G0:0008028 | monocarboxylic acid transporter activity                | 1  | 0.1961341 | 0.1333722 |
| G0:0043021 | ribonucleoprotein binding                               | 1  | 0.1961341 | 0.1333722 |
| G0:0003727 | single-stranded RNA binding                             | 1  | 0.2044484 | 0.1386063 |
| G0:0004950 | chemokine receptor activity                             | 1  | 0.2208198 | 0.1489431 |
| G0:0031202 | RNA splicing factor activity, transesterification r     | 1  | 0.2208198 | 0.1489431 |
| G0:0004721 | phosphoprotein phosphatase activity                     | 3  | 0.2331076 | 0.1566789 |
| G0:0004869 | cysteine protease inhibitor activity                    | 1  | 0.2368545 | 0.1590524 |
| G0:0004091 | carboxylesterase activity                               | 2  | 0.2424796 | 0.1626184 |
| G0:0004129 | cytochrome-c oxidase activity                           | 1  | 0.2447477 | 0.1639692 |
| G0:0005504 | fatty acid binding                                      | 1  | 0.2525592 | 0.1686994 |
| G0:0008034 | lipoprotein binding                                     | 1  | 0.2602901 | 0.1735043 |
| G0:0015078 | hydrogen ion transporter activity                       | 2  | 0.2654169 | 0.1767165 |
| G0:0015020 | glucuronosyltransferase activity                        | 1  | 0.2679409 | 0.1782133 |
| G0:0016769 | transferase activity, transferring nitrogenous group    | 1  | 0.2679409 | 0.1782133 |
| G0:0008066 | glutamate receptor activity                             | 1  | 0.2679409 | 0.1782133 |
| G0:0004536 | deoxyribonuclease activity                              | 1  | 0.2755127 | 0.1828258 |
| G0:0015300 | solute:solute antiporter activity                       | 1  | 0.2755127 | 0.1828258 |
| G0:0005272 | sodium channel activity                                 | 1  | 0.2830061 | 0.1874371 |
| G0:0042277 | peptide binding                                         | 3  | 0.2857137 | 0.1889881 |
| G0:0004190 | aspartic-type endopeptidase activity                    | 1  | 0.2904221 | 0.1918814 |

|            |                                                     |     |           |           |
|------------|-----------------------------------------------------|-----|-----------|-----------|
| G0:0015179 | L-amino acid transporter activity                   | 1   | 0.3193271 | 0.2103065 |
| G0:0001614 | purinergic nucleotide receptor activity             | 1   | 0.3193271 | 0.2103065 |
| G0:0008374 | O-acyltransferase activity                          | 1   | 0.3263675 | 0.2146149 |
| G0:0042054 | histone methyltransferase activity                  | 1   | 0.3263675 | 0.2146149 |
| G0:0019001 | guanyl nucleotide binding                           | 5   | 0.3330854 | 0.2188096 |
| G0:0003678 | DNA helicase activity                               | 1   | 0.3333351 | 0.2188346 |
| G0:0004428 | inositol or phosphatidylinositol kinase activity    | 1   | 0.3402307 | 0.223163  |
| G0:0016830 | carbon-carbon lyase activity                        | 1   | 0.347055  | 0.2273793 |
| G0:0045182 | translation regulator activity                      | 2   | 0.3526224 | 0.2308805 |
| G0:0003954 | NADH dehydrogenase activity                         | 1   | 0.3671073 | 0.2398478 |
| G0:0008276 | protein methyltransferase activity                  | 1   | 0.3736536 | 0.2440322 |
| G0:0005267 | potassium channel activity                          | 2   | 0.3748555 | 0.2447553 |
| G0:0048037 | cofactor binding                                    | 3   | 0.383926  | 0.2504877 |
| G0:0004672 | protein kinase activity                             | 7   | 0.3850883 | 0.2511826 |
| G0:0008146 | sulfotransferase activity                           | 1   | 0.3928893 | 0.2560124 |
| G0:0016655 | oxidoreductase activity, acting on NADH or NADPH, c | 1   | 0.3991691 | 0.2598094 |
| G0:0019208 | phosphatase regulator activity                      | 1   | 0.4053839 | 0.2636552 |
| G0:0008170 | N-methyltransferase activity                        | 1   | 0.4115344 | 0.2673861 |
| G0:0004702 | receptor signaling protein serine/threonine kinase  | 1   | 0.4641047 | 0.2997706 |
| G0:0016791 | phosphoric monoester hydrolase activity             | 3   | 0.4708749 | 0.3039155 |
| G0:0004518 | nuclease activity                                   | 2   | 0.48045   | 0.309975  |
| G0:0035257 | nuclear hormone receptor binding                    | 1   | 0.4965166 | 0.3193482 |
| G0:0008092 | cytoskeletal protein binding                        | 5   | 0.5072083 | 0.3255763 |
| G0:0004540 | ribonuclease activity                               | 1   | 0.5170282 | 0.331509  |
| G0:0008236 | serine-type peptidase activity                      | 2   | 0.5475265 | 0.3501513 |
| G0:0004620 | phospholipase activity                              | 1   | 0.5601767 | 0.3577099 |
| G0:0051020 | GTPase binding                                      | 1   | 0.5736854 | 0.3660194 |
| G0:0030528 | transcription regulator activity                    | 14  | 0.5927712 | 0.377963  |
| G0:0046873 | metal ion transporter activity                      | 3   | 0.6162647 | 0.3926521 |
| G0:0016298 | lipase activity                                     | 1   | 0.6197644 | 0.3947846 |
| G0:0016818 | hydrolase activity, acting on acid anhydrides, in p | 7   | 0.6200228 | 0.3948518 |
| G0:0016790 | thiolester hydrolase activity                       | 1   | 0.6275908 | 0.399376  |
| G0:0030594 | neurotransmitter receptor activity                  | 1   | 0.6427639 | 0.4084781 |
| G0:0016616 | oxidoreductase activity, acting on the CH-OH group  | 1   | 0.6427639 | 0.4084781 |
| G0:0005539 | glycosaminoglycan binding                           | 1   | 0.6746819 | 0.4272379 |
| G0:0016773 | phosphotransferase activity, alcohol group as accep | 6   | 0.7166955 | 0.4530652 |
| G0:0022891 | substrate-specific transmembrane transporter activi | 7   | 0.7264113 | 0.4588702 |
| G0:0032403 | protein complex binding                             | 1   | 0.7330106 | 0.4628126 |
| G0:0019842 | vitamin binding                                     | 1   | 0.7357729 | 0.4644431 |
| G0:0050662 | coenzyme binding                                    | 1   | 0.7962695 | 0.5015274 |
| G0:0008324 | cation transporter activity                         | 4   | 0.8060114 | 0.5074159 |
| G0:0016746 | transferase activity, transferring acyl groups      | 1   | 0.8683778 | 0.5454815 |
| G0:0015291 | porter activity                                     | 1   | 0.891983  | 0.559493  |
| G0:0016788 | hydrolase activity, acting on ester bonds           | 4   | 0.9206739 | 0.5763695 |
| G0:0042623 | ATPase activity, coupled                            | 1   | 0.9225692 | 0.5774161 |
| G0:0042578 | phosphoric ester hydrolase activity                 | 1   | 0.9676907 | 0.6037548 |
| G0:0005488 | binding                                             | 108 | 0.9700513 | 0.6047894 |
| G0:0015267 | channel or pore class transporter activity          | 1   | 0.983744  | 0.6124393 |
| G0:0004984 | olfactory receptor activity                         | 1   | 0.9875983 | 0.6145426 |
| G0:0030234 | enzyme regulator activity                           | 3   | 0.9901778 | 0.6155129 |
| G0:0015075 | ion transporter activity                            | 1   | 0.9994547 | 0.6155129 |
| G0:0043169 | cation binding                                      | 17  | 0.999969  | 0.6155129 |

|            |                           |     |           |           |
|------------|---------------------------|-----|-----------|-----------|
| G0:0003674 | molecular_function        | 102 | 0.9999998 | 0.6155129 |
| G0:0003824 | catalytic_activity        | 20  | 0.9999999 | 0.6155129 |
| G0:0017076 | purine_nucleotide_binding | 1   | 1         | 0.6155129 |

| Protein                                                                                                                                                                                                                                                                                                                                                                                                                                                                                                                                                                                                                                                                                                                                                                                                                                                                                                                                                                                                                                                                                                                                                                                                                                                                                                                                                                                                                                                                                                                                                                                                                                                                                                                                                                                                                                                                                                                                                                                                                                                                                                                                                                                                                                                                                                                                                                                                                                                                                                                                                                                                                                                                                                                                                                                                                                                                                                                                                                                                                                                                                                                                                                                                                                                                                                                                                                                                                                                                                                                                                                                                                                                                                                                                                                                                                                                                                                                                                                                                                                                                                                                                                                                                                                                                                                                                                                                                                                                                                                                                                                                                                                                                                                                                                                                                              | Input Symbol |
|----------------------------------------------------------------------------------------------------------------------------------------------------------------------------------------------------------------------------------------------------------------------------------------------------------------------------------------------------------------------------------------------------------------------------------------------------------------------------------------------------------------------------------------------------------------------------------------------------------------------------------------------------------------------------------------------------------------------------------------------------------------------------------------------------------------------------------------------------------------------------------------------------------------------------------------------------------------------------------------------------------------------------------------------------------------------------------------------------------------------------------------------------------------------------------------------------------------------------------------------------------------------------------------------------------------------------------------------------------------------------------------------------------------------------------------------------------------------------------------------------------------------------------------------------------------------------------------------------------------------------------------------------------------------------------------------------------------------------------------------------------------------------------------------------------------------------------------------------------------------------------------------------------------------------------------------------------------------------------------------------------------------------------------------------------------------------------------------------------------------------------------------------------------------------------------------------------------------------------------------------------------------------------------------------------------------------------------------------------------------------------------------------------------------------------------------------------------------------------------------------------------------------------------------------------------------------------------------------------------------------------------------------------------------------------------------------------------------------------------------------------------------------------------------------------------------------------------------------------------------------------------------------------------------------------------------------------------------------------------------------------------------------------------------------------------------------------------------------------------------------------------------------------------------------------------------------------------------------------------------------------------------------------------------------------------------------------------------------------------------------------------------------------------------------------------------------------------------------------------------------------------------------------------------------------------------------------------------------------------------------------------------------------------------------------------------------------------------------------------------------------------------------------------------------------------------------------------------------------------------------------------------------------------------------------------------------------------------------------------------------------------------------------------------------------------------------------------------------------------------------------------------------------------------------------------------------------------------------------------------------------------------------------------------------------------------------------------------------------------------------------------------------------------------------------------------------------------------------------------------------------------------------------------------------------------------------------------------------------------------------------------------------------------------------------------------------------------------------------------------------------------------------------------------------------------------|--------------|
| LRRC37B;EGLN3;NTRK LRRC37B;EGLN3;NTRK2;THBS4;HECW1;MEST;DBC1;DBC1;POSTN;HLA-A;HLA-A;HLA-A;EGLN3;CP;UTY;CA2;L EGLN3;CP;UTY;CA2;LEPREL1;LOXL2;CA12;MOXD1;ZNF143;CSGALNACT1;ALOX15B;LPP NTRK2;PPARGC1A;DCL NTRK2;PPARGC1A;DCLK1;PFKFB3;LARS;PFKP;PRKCH;PRKCZ;HK2;HK2;CDKN1A;EGFR;A NTRK2;DCLK1;PFKFB3 NTRK2;DCLK1;PFKFB3;LARS;PFKP;PRKCH;PRKCZ;HK2;HK2;CDKN1A;EGFR;AK5;DDX54; MMP3;CA2;CA12;ADAM MMP3;CA2;CA12;ADAMTSL1;ZNF143;S100A1;LPP;KDM5D;PRKCH;PRKCZ;ZIC1;LDB3;CD NTRK2;DCLK1;PFKFB3 NTRK2;DCLK1;PFKFB3;TGM2;CHST1;NNMT;GSTM1;CSGALNACT1;PFKP;PRKCH;PRKCZ;HK THBS4;MMP3;PCSK1;T THBS4;MMP3;PCSK1;TGM2;MCTP2;PLA2G4A;S100A1;NPTX1;TPD52;ITPR1;MASP1;WBSC CTNNB1;ZIC1;STAT1;CTNNB1;ZIC1;STAT1;RCAN1;TBX20;SMAD3;ZNF238;ATAD2;SOX5;NFIA;HOXC8;TFDP2; PPARGC1A;SMARCC1;Z PPARGC1A;SMARCC1;ZNF143;KDM5D;ZNF395;ZNF529;ZNF514;LRRFIP1;TOX;DNMT3A;Z PFKP;ENO2;PAK3;EPH PFKP;ENO2;CDKN1A;EPHX2;NUAK2;PHOSPHO2;SAR1B;ADSSL1;EYA2;RPS6KA1;BRSK2;R PDE4B;PFKFB3;PLA2G PDE4B;PFKFB3;PLA2G4A;BST1;PDE4D;SYNJ1;CHI3L2;APEH;DDX54;EPHX2;PHOSPHO2; EGLN3;CP;UTY;LEPRE EGLN3;CP;UTY;LEPREL1;AKR1C1;LOXL2;ALOX15B;KDM5D;HSD17B6;ALDH3A1;PTGS2;P MMP3;PCSK1;CFB;C9c MMP3;PCSK1;CFB;ADAMTSL1;HK2;MASP1;SERPINA1;ADAMTSL3;USP9Y;LGMM;STAMBPL1 DCLK1;PAK3;HIPK3;WDCLK1;CDKN1A;HIPK3;WNK4;NUAK2;LGMM;KSR1;BCR;CLK2;RPS6KA1;BRSK2;CLK1;RPS ABLIM1;FHOD3;FMNL3 ABLIM1;FHOD3;FHOD3;MYO1B;SYNE1;MYO15A;CNN1;SYNE2;EPB41L1;HDAC6;FMN2;WIP PPARGC1A;TROVE2;PE PPARGC1A;TROVE2;PDCD11;SYNJ1;IGF2BP1;DDX54;RBMS3;KHDRBS3;APOBEC3G;UBR5; VEGFA;S100A1;TPD52 VEGFA;S100A1;TPD52;S100B;PVRL3;SMAD3;EPHX2;APOBEC3G;NLGN4X;PDGFRA;PYGL; CHRM2;CX3CR1;CCRL1 CHRM2;CCRL1;CCRL1;ITGB4;TNFRSF11B;ITGA3;TREM1;SEMA6D;NOTCH3;DDR2;TNFRSF HECW1;LARS;ACSS2;AHECW1;LARS;ACSS2;ADSSL1;UBR5;UBE2D3;MDM2;RNF14;SLC27A3;BTRC;TTLL7;RNF8; EGLN3;UTY;LEPREL1;EGLN3;UTY;LEPREL1;ALOX15B;KDM5D;HPD;P4HA1;PPP3CA;CLK1;HLA-H;P4HTM;HFE;C SOX9;HOXC8;SIX1;DE SOX9;HOXC8;SIX1;DBP;MEIS1;HOXB6;ETV1;MEIS2;ETS1;HOXC10;FOSL1;RERE;PITX1 TGM2;SAR1B;ADSSL1;TGM2;SAR1B;ADSSL1;TUBG2;TUBA4A;RASL11B;GNAZ;DNM3;RAB3A;GNAO1;GNL2;TPX2; LOXL2;HSD17B6;NQO1 LOXL2;HSD17B6;NQO1;SDHA;ACOX2;AKR1B1;CMAHP;MAOB;CYP39A1;P4HA2;XDH;AASS; PFKFB3;EGFR;S100A4 PFKFB3;EGFR;S100A4;THBS1;LPL;MDM2;EIF2AK3;PON2;COL1A2;FNBP1;MAP3K1;ITGA RGS4;SLC8A1;PPP3CARGS4;SLC8A1;PPP3CA;MYO1B;EWSR1;MYO15A;CNN1;CALD1;PDE1C;ADCY3;CAMK2D;SPA THBS4;POSTN;FN1;VE THBS4;POSTN;FN1;VEGFA;THBS1;COL5A3;LPL;APOB;FBLN7;HDGF;SERPINE2;FGFR2;R RGS4;TBC1D8;ARHGAF RGS4;TBC1D8;ARHGAP19;RGS5;ARHGAP29;BCR;GARNL3;RASSF4;ARHGAP20;RGS3;SRGA TPD52;EGFR;NOTCH4;TPD52;EGFR;NOTCH3;PDGFRA;APOB;BDKRB2;PPP2R4;LIMK2;TOP2A;ADD2;BARD1;PPAR FN1;CHI3L1;TFPI2;CFN1;CHI3L1;TFPI2;COL14A1;FBN2;LAMA3;COL5A3;COL24A1;COL1A2;MFAP5;COL4A3; MMP3;ADAM22;PAPLN;MMP3;ADAM22;PAPLN;ADAM9;ECE1;ADAM15;MMP28;ADAM32;MMP16;ADAMTS17;MMP24;A PAK3;KHDRBS3;BAIAP CDKN1A;KHDRBS3;BAIAP2;SH3BP2;BAIAP2L1;EPS15;ADAM9;ADAM15;DRD4;ZFP106;EL RASGRF2;BCR;PREX2;RASGRF2;BCR;PREX2;RALGDS;RALGPS2;RPGR;MADD;RASGEF1A;PLEKHG1;FGD6;DOCK9; TGM2;MBOAT1;MYST2;TGM2;MBOAT1;KAT7;AGPAT5;GGT7;MGAT1;SAT1;ACAT1;LPCAT1;HHAT;QPCT;SPTLC3;M DDX54;CHD1L;SHPRH;DDX54;CHD1L;SHPRH;DHX40;DDX60L;NAV2;DDX43;CHD7;SKIV2L;CHD9;DHX57;DDX60; VEGFA;NRG1;NRG1;NF VEGFA;NRG1;NRG1;NRG2;TGFA;FGF18;HDGF;JAG1;NGF;FGF13;CA11;FGF1;NBN;GPI;W UGCG;GL8D1_HUMAN;W UGCG;GLT8D1;WBSCR17;UPRT;PYGL;GTDC1;NAMPT;LARGE;GALNT2;GALNT12;MGAT5;MG CTNNB1;SMARCC1;CHA CTNNB1;SMARCC1;CHAF1B;TOP2A;CHD7;CBX7;CHD9;NPTXR;MORF4L1;LEF1;CENPA;POL SLC4A8;SLC4A7;SLC8 SLC4A8;SLC4A7;SLC8A1;SLC9A8;SCN10A;SLC4A4;SLC38A6;ASIC1;SAT1;NALCN;SLC6 CTNNB1;SMARCC1;RNF CTNNB1;SMARCC1;RNF14;MAML3;TBPL1;ZFX;NFYC;HTATIP2;RNF4;SF1;TCERG1;NR2F1 CTNNB1;SMARCC1;ITG CTNNB1;SMARCC1;ITGB1BP1;LDLRAP1;BAIAP2;DAB2;TOP2A;MLLT4;ITGB3BP;TOPBP1; WBSCR17;TESK2;GALN WBSCR17;TESK2;GALNT2;GALNT12;GALNTL1;IDH3G;B4GALT4;GALNT13;GALNT13;MIPE PRKCH;PRKCZ;ARHGAF PRKCH;PRKCZ;ARHGAP29;KSR1;STAC;DGKG;MYO9A;RASSF5;UNC13B;PRKD3;ROCK2;DGK UBR5;FBXL5;UBE2D3;UBR5;FBXL5;UBE2D3;MDM2;UBE2C;DZIP3;BIRC6;UBR4;TRIP12;BARD1;BCOR;HUWE1;H TUBG2;TUBA4A;GNAZ;TUBG2;TUBA4A;GNAZ;DNM3;RAB3A;GNAO1;GNL2;GFM1;RND3;GNAL;ATL2;TUBG1;GNAS; NNMT;AS3MT;NSUN6;L NNMT;AS3MT;NSUN6;DNMT3A;MLL5;WBSCR22;TYMS;DPH5;MET;THUMP2;HNMT;TRMT2B; SLC4A7;SLC16A4;SLC SLC4A7;SLC16A4;SLC4A4;SLC6A3;SAT1;SLC22A18;SLC12A7;SLC6A6;SLC25A22;SLC6 EGLN3;UTY;LEPREL1;EGLN3;UTY;LEPREL1;KDM5D;PTGS2;P4HA1;P4HTM;P4HA2;PLOD1;EGLN1;KDM3A;JMJD1 HLA-A;HLA-A;HLA-A;HLA-A;HLA-A;HLA-A;HLA-A;HLA-A;HLA-B;HLA-B;HLA-B;HLA-B;HLA-C;HLA-C;HLA-C;HLA-C DDX54;HR;MEIS2;ZFF DDX54;HR;MEIS2;ZFFM2;SF1;BCOR;PCM1;ZEB1;SP100;THRB;NR1D1;HOXC6;NCOR2;DD KIF2A;KIF27;KIF26E HK2;KIF27;KIF26B;KIF20A;DYNC2H1;KIF23;DYNC1I2;DNHD1;CENPE;KIF3A;MPP1;DY CTNNB1;PPARGC1A;PE CTNNB1;PPARGC1A;PDCD11;SMAD3;HDAC9;NFIA;HDAC11;SORBS3;GPX3;HDAC4;ETS1;T |              |

DCT;HSD17B4;TPI1;FDCT;DBP;TPI1;PTGDS;PPIL3;C1QTNF3;TBXAS1;PPIE;GPI;PDIA6;GBF1;FKBP5;TMX3;SLC4A8;SLC2A9;SLC4SLC4A8;SLC2A9;SLC4A7;SLC2A5;SLC02A1;SLC2A12;SYT9;SLC2A14;ABCC9;ABCC1;SLC4A8;EGFR;LCP1;SHROOM2;EGFR;LPL;SHROOM2;SCIN;TTLL3;ADD2;MYO6;MYH10;DBNL;TNC;SVIL;LRPPRC;FLNA;FSORBS2;SORBS3;EPB4SORBS2;SORBS3;EPB41;DMD;DES;AGRN;EPB41L4B;LOR;KRT5;TUBG1;TLN1;PC;TLN2;ATBX20;SMAD3;SOX9;MTBX20;SMAD3;SOX9;MED24;FOSL1;RUNX2;MITF;NR4A3;MYBL1;TP53BP1;PPARG;LEF1;THBS4;LMNA;THBS1;CTHBS4;LMNA;THBS1;CROCC;LAMA3;JAG1;EPB41L1;TUBG2;TUBA4A;COL22A1;MAP1B;ODKCN5;KCNK2;CACNB3HK2;KCNK2;CACNB3;CACNA1I;SCN10A;CACNA2D1;CLCNKB;CACNA1A;CACNA1D;TPCN1;NPCSK1;CFB;KLK2;MASPCSK1;CFB;HK2;MASP1;APEH;PLAT;CORIN;PCSK2;SERPINE1;DPP4;EML2;C1S;PCSK7;CP;LOXL2;MOXD1;LOXCP;LOXL2;MOXD1;LOXL3;DCT;LOXL4;MT4;APLP1;SOD1;HEPH;PRNP;MT1M;DA0;APP;SLSDHA;ACOX2;XDH;TXN SDHA;ACOX2;XDH;TXNRD1;ACAD10;ACADSB;ERO1L;MADD;DPYD;FMO4;ACADVL;NOX4;ACCA2;CA12;ENO2;PDXCA2;CA12;ENO2;PDXDC1;DBP;ALDOA;CA5B;ECHDC2;ALDOC;ADC;CSAD;POLB;THNSL2;ARASGRF2;BCR;PLEKHGRASGRF2;BCR;PLEKHG3;PLEKHG1;FGD6;ITSN2;ITSN1;AKAP13;TIAM1;ARHGEF1;NET1;USP9Y;STAMBPL1;USF USP9Y;STAMBPL1;USP48;USP25;USP34;USP54;USP24;USP43;UCHL5;USP45;USP49;USTP53BP1;POLK;NBN;ETP53BP1;POLK;NBN;RAD1;RAD1;POLB;MSH6;MSH2;LOC100133315;XPC;TDG;NEIL3;ERTBPL1;IRF2;DBP;MEITBPL1;IRF2;DBP;MEIS1;HOXC10;RUNX2;NFYC;HTATIP2;ZFPM2;SF1;TCERG1;MAF;SREKCN5;KCNK2;ACAT1;HK2;KCNK2;ACAT1;KCNH1;SLC12A7;BCKDHA;PKM;SLC12A2;KCNT2;KCNQ3;TMEM91;KCNTRMT6;EIF2B4;EIF2S TRMT6;EIF2B4;EIF2A;EIF2A;MTIF3;EIF4E3;EIF3E;EIF1AY;EIF5A;COPS5;EIF4H;EISMARCC1;DCTN4;ESR1 SMARCC1;DCTN4;ESR1;NBN;RAD1;ATM;MEN1;ZWINT;NCOA3;PARP1;EIF5A;ERCC3;PEX1CHI3L1;WBSCR17;LGACHI3L1;WBSCR17;LGALS8;CLK1;GALNT2;GALNT12;LGALS4;SORD;GALNTL1;GALNT13;GEYA2;EYA4;MTMR1;DUEYA2;EYA4;MTMR1;DUSP10;CDC14A;PTPN22;PTPRQ;CDKN3;PTPN3;SSH3;SSH1;PTEN;MHOOK2;TARDBP;MAPREHK2;TARDBP;EBF3;MAPRE3;MAPRE2;GLI1;POLB;CDK5RAP2;DYNC1I1;LRPPRC;PRNP;HTTFPI2;COL7A1;SERPITFP12;COL7A1;SERPINA1;CRIM1;SERPINF1;PAPLN;RECK;SERPINE2;SERPINE1;TFPI;ID2;LRRFIP1;HOXC8;ID2;LRRFIP1;HOXC8;HES1;HDAC4;TRIM66;NAB1;PPARG;LRRN1;RFX3;DMAP1;SIM2;TFLGMN;CTSC;PYCARD;FLGMN;CTSC;PYCARD;POP1;CASP1;CTSL1;CTSH;CASP8;USP1;UCHL1;ATG4C;CFLAR;USPSH3BP2;SOCS2;SH2B2SH3BP2;SOCS2;SH2B2;GAB1;SORBS1;ITSN2;SH3BGR;SH3BGR;CNTNAP1;PAG1;ARHGAP6CDKN2A;RNF138;PTPRCDKN2A;NARF;PTPRQ;CEP250;SQSTM1;MAP3K13;NBEA;CD4;DLG4;TCF7L2;NOD2;CCND3CHD1L;DHX40;DDX60LCHD1L;DHX40;DDX60L;DHX57;DHX15;DDX60;DHX58;DDX50;DDX27;DDX17;DDX55;CHD5PPP3CA;PPP2R2A;CDKPPP3CA;PPP2R2A;CDKN3;PPP3CB;PTEN;PPP2R3B;LCK;MTMR3;PPM1K;PDP1;PPP2CB;PWBSCR17;GALNT2;GALWBSCR17;GALNT2;GALNT12;GALNTL1;GALNT13;GALNT13;GALNT7;GALNT7;GALNT3;GALFN1;COL14A1;SMAD3;FN1;COL14A1;SMAD3;CD44;COL5A3;ADAM9;ITGA2;ITGA1;ITGA10;PDGFA;DSPEGLN3;LEPREL1;P4HA EGLN3;LEPREL1;P4HA1;P4HTM;P4HA2;PLOD1;EGLN1;LEPRE1;PLOD3;OGFOD2ABCC9;ACIN1;ABCC1;ABCC9;ACIN1;ABCC1;PPP2R4;ABCA5;DYNC2H1;ABCA4;ABCC2;ABCA1;ATP5A1;MDN1;MPAP1S3;RAMP1;XPO7;ZAP1S3;RAMP1;XPO7;ZFYVE16;SNUPN;XPO1;RANBP17;AP1G2;VTI1A;AP1G1;IPO5;TNPCPTGS2;CYB5D1;CYP39PTGS2;CYB5D1;CYP39A1;HMOX1;CYP2R1;CYP26A1;CPS1;TBXAS1;CYP51A1;GUCY1B3;CDYNC2LI1;MYO1B;MYC DYNC2LI1;MYO1B;MYO15A;DNM3;MYH14;MYH14;MYL5;MYL3;MYO6;MYO10;MYO9A;MYO5BSSBP2;MCM7;HMGB2;FSSBP2;MCM7;HMGB2;PMS2;BRCA2;RAD1;POLB;LRPPRC;MSH2;XPC;MCM2;RPA3;MSHRORA;NR4A3;NR5A1;FRORA;NR4A3;SF1;PPARG;NR2F1;NR4A2;THRB;NR1D1;ROR1;NR1D2;RARB;ROR2;NR1H3;KSR1;CLK2;TESK2;MAKSR1;CLK2;TESK2;MAP2K5;MAP3K11;MLKL;CTTNBP2;MAP2K3;MAP3K13;ZAK;DYRK1B;FUSP9Y;USP48;USP25;USP9Y;USP48;USP25;TNFAIP3;ATG4B;USP34;USP24;USP43;UCHL5;USP45;UFSP2;USPTHBS1;VCAM1;ADAM22 THBS1;VCAM1;ADAM22;ADAM9;ACTN1;COL4A3;ADAM23;EDIL3;TNXB;FBLN5;ITGB3;ECMCHRM2;CX3CR1;CCRL1CHRM2;CCRL1;CCRL1;GPR126;GPCR5C;P2RY6;FZD4;GPER;BDKRB2;CD97;DRD4;FZD6;CMLL5;MEN1;WHSC1;SUMLL5;MEN1;WHSC1;SUV420H1;PRDM6;EHMT1;EHMT2;EZH1;EZH1;EZH2;PRDM7POLD3;POLS;POLK;PCPOLD3;POLK;POLK;POLA1;POLE;POLA2;POLB;POLB;REV1;MDP1LRRFIP1;PRKRA;STAU LRRFIP1;PRKRA;STAU2;MRPL44;TLR3;DROSHA;NKRF;ILF2;ADARB1;MBNL1EIF2A;SEPSECS;CARSEIF2A;SEPSECS;CARSEIF2A;SLA;XPO5;MARS;TRNT1;TRNT1VEGFA;IL32;TNFRSF1 VEGFA;IL32;TNFRSF11B;TNFRSF15;NAMPT;GPI;IL16;FAM3C;GDF5;ARSB;TNFRSF13B;FLSLC2A9;SLC2A5;SLC2SLC2A9;SLC2A5;SLC2A12;SLC2A14;SLC2A3;SLC37A3;SLC37A4;SLC37A1;SLC2A1;SLCHDAC9;HDAC11;HDAC6 HDAC9;HDAC11;HDAC6;HDAC4;HDAC2;HDAC1;HDAC3;HDAC8HECW1;UBR5;RNF8;HEHECW1;UBR5;RNF8;HERC3;C12orf51;HECW2;TRIP12;HUWE1;HERC1;HECTD3;WWP2;KIA PDXDC1;PYGL;OAT;SFPDXDC1;PYGL;OAT;SPTLC3;SHMT1;CSAD;AGT;THNSL2;CBS;PDXK;GPT2SORBS2;NEB;DMD;MYL SORBS2;NEB;DMD;MYL5;MYL3;MYOT;ASPH;SMTN;TPM2;MYL6BSLC4A8;SLC4A7;SLC4SLC4A8;SLC4A7;SLC4A4;SLC4A2;SLC4A5;SLC4A5;SLC4A9;SLC4A3

SLC4A8;SLC47A1;SLC SLC4A8;SLC47A1;SLC8A1;SLC9A8;SLC47A2;SLC9A9;SLC4A2;SLC4A9;SLC4A3;SLC9A7  
ANO1;ANO2;NLGN4X;C ANO1;ANO2;NLGN4X;CTSC;CLCNKB;ANO8;CLIC6;CLCN4;FXD1;ANO6;AMY2A;SLC12A8  
DNAJC12;DNAJC15;BC DNAJC12;DNAJC15;BCOR;DNAJB2;DNAJC27;DNAJB6;DNAJC18;DNAJC13;DNAJC6;DNAJC  
HYAL1;SPAM1;GLB1L2HYAL1;HYAL1;GLB1L2;GBA;GALC;MGEA5;FUCA1;GLB1L;NAT6;AGL;NEU3;OGG1;AMY2A;  
NDUFS7;ETFDH;DPYD;NDUFS7;MADD;DPYD;TYW1B;ACO1;MOCS1;ACO2;ETFDH;PPAT  
EPB41;SCIN;PLEKHA4EPB41;SCIN;PLEKHA4;ZFYVE16;EEA1;PIK3R1;PLEKHA5  
ABCA4;ATP11A;ATP8E ABCA4;ATP11A;ATP8B3;ATP10B;ATP11C;ATP10D;ATP10A  
POLD3;POLS;POLK;PC POLD3;POLK;POLK;POLR3A;POLA1;OAS1;POLE;POLB;POLB;PAPSS2;OAS3;POLR2B;UGF  
ITPR1;ANO1;ANO2;RY ITPR1;ANO1;ANO2;RYR1;GRIA1;KCNMB1;KCNMB4;ASIC1;ITPR2;ANO8;GRIA3;MCOLN3;  
COL14A1;LDLRAP1;CC COL14A1;LDLRAP1;COL11A2;COL1A2;ST13;TTLL3;LOR;COL11A1;BCL3;MMS19;DSP;AD  
TBC1D8;TBC1D15;RAE TBC1D8;TBC1D15;RABGAP1L;SGSM3;TBC1D26;EVI5;TBC1D1;TBC1D12;TBC1D19;TBC1D  
PIK3C2B;HS1BP3;SNX PIK3C2B;HS1BP3;SNX16;ZCCHC2;SNX21;HIP1R;SBF2;SNX25;SH3PXD2A;HIP1;PKX;SN  
PTPRS;PTPRF;PTPRD;PTPRS;PTPRF;PTPRD;PTPRQ;PTPRU;PTPRA;PTPRE  
VEGFA;PDGFRA;PDGFA VEGFA;PDGFRA;PDGFA;PTEN;IL1R1;PDGFRB  
MPP1;DLG3;MPP3;MPF MPP1;DLG3;DLG3;MPP2;DLG2;DLG2;CASK  
CTNNB1;RGS4;RGS5;S CTNNB1;RGS4;RGS5;STAT1;APOL3;GRK5;ECM1;TGFA;PLK2;RGS3;GULP1;HMOX1;GNAO1  
SELT;SELENBP1;GPX3 SELT;SELENBP1;GPX3;TXNRD1;SEPP1;SEPSECS;GPX2;SLA;DI02  
COL11A2;COL12A1;CC COL11A2;COL12A1;COL2A1;COL9A1;COL9A3  
CRYZL1;PGD;TXNRD1;CRYZL1;PGD;TXNRD1;DPYD;FMO4;HMGCR;NNT;GSR  
ATP6V1B1;ATP11A;AI ATP6V1B1;ATP11A;ATP5A1;ATP8B3;ATP2B4;ATP10B;ATP11C;ATP6V1H;ATP10D;ATP2C  
CXCL2;CXCL14;CXCL1 CXCL2;CXCL14;CXCL13;CXCL16;CCL28;CX3CL1;C5;PF4V1;CXCL12  
SMAD3;TOP2A;SQSTM1 SMAD3;TOP2A;SQSTM1;CIITA;GHR;NEDD4;UCHL1  
PHIP;DOK1;SORBS1;F PHIP;DOK1;SORBS1;PIK3R1;DOK5;IGF1;ENPP1  
BAIAP2;SORBS2;BAIABAIAP2;SORBS2;BAIAP2L1;NCK1;ANK1;SDCBP  
PDK1;PDK2;KCNH1;PC PDK1;PDK2;KCNH1;PDK3;BCKDK;PDK4  
PTGS2;STARD5;APOL2 PTGS2;STARD5;APOL3;APOL3;FBNP1;APOL1;ACBD5;PLEKHA4;SF1;EPN2;PTEN;PLTP;F  
STC1;ADM;EDN1;TG;A STC1;ADM;EDN1;TG;APLN;RIF1;AGT;LRSAM1;GH2;IGF1;IGF1;LEP  
LOXL2;LOXL3;LOXL4;LOXL2;LOXL3;LOXL4;CORIN;CXCL16;STAB1;CFI;LRP4;LGALS3BP  
PDE4B;PDE4D;PDE7A;PDE4B;PDE4D;PDE7A;PDE4A;PDE3A  
MYO6;MYH10;MSH6;MS MYO6;MYH10;MSH6;MSH2;PRKAG2;PIM1  
PYCARD;NLRP12;BCL2 PYCARD;NLRP12;BCL2L13;CASP1;APAF1;CARD8  
RNASET2;DNASE1;PMS RNASET2;DNASE1;PMS2;MRPL44;DROSHA;DCLRE1C;ZNRANB3;OGG1;EXO1;ELAC1;SMG6  
CTNNB1;PPARGC1A;RN CTNNB1;PPARGC1A;RNF14;RNF4;KDM3A;NCOA3;FHL2  
CLK1;LYN;TNK2;WEE1 CLK1;LYN;TNK2;WEE1;PTK2B;LCK;HCK;ABL2  
EGLN3;LEPREL1;P4HA EGLN3;LEPREL1;P4HA1;P4HTM;P4HA2;LEPRE1;OGFOD2  
TAF1;MGEA5;ELP3;BF TAF1;MGEA5;ELP3;BRCA2;NCOA3;KAT2B;SRCAP  
PDK1;PDK2;PDK3;PDK PDK1;PDK2;PDK3;PDK4  
ARFGEF3;PSD3;GBF1;KIAA1244;PSD3;GBF1;HERC1;PSD4;ARFGEF1  
ERAP1;ERAP2;DPP4;F ERAP1;ERAP2;DPP4;RNPEP;DNPEP;MAP2;ANPEP  
CTNNB1;EGFR;SMAD3;CTNNB1;EGFR;SMAD3;SF1;HMGB2;KIN;ZNF638;THRB;MEN1  
NTRK2;DDR2;DDR2;RC NTRK2;DDR2;TKT;ROS1;DDR1;NTRK1;ROR1;ROR2;PTK7;TIE1  
CHAF1B;SIL1;TAPBP;CHAF1B;SIL1;TAPBP;SCG5;MDN1;DNAJB2;NPM1;MPP7;DNAJC18;ERO1LB;CCT8;DNAJC1  
DDX54;DDX43;SKIV2L DDX54;DDX43;SKIV2L;HRH1;EIF4A3;DHX38  
ACAP2;SMAP1;AGAP11 ACAP2;SMAP1;AGAP11;ARAP2;ARAP3;ARFGEF1;ADAP2  
FZD4;FZD6;SMO;FZD3 FZD4;FZD6;SMO;FZD3;FZD3  
TRERF1;HMGB2;LEF1;TRERF1;HMGB2;LEF1;HMGB1;HMGB3  
LDLR;CXCL16;STAB1;LDLR;CXCL16;STAB1;LRP10;FLJ35024  
PPIL3;PPIE;FKBP5;F PPIL3;PPIE;FKBP5;PPIG;PPIL4;NKTR;PPIL6  
NRG1;SHC4;SQSTM1;F NRG1;SHC4;SQSTM1;PITPNM3  
SYNJ1;OCRL;SYNJ2;I SYNJ1;INPP5F;SYNJ2;INPP5B  
ALDH3A2;ALDH1A3;AL ALDH3A2;ALDH1A3;ALDH3B1;ALDH1A2  
ADAMTSL1;ADAMTSL3;ADAMTSL1;ADAMTSL3;STAMBPL1;ERAP2;CPS1;PAPPA;LTA4H;DNPEP;CPZ;COPS5;CPXM1

SYTL2;RIMS1;MYRIP;SYTL2;RIMS1;MYRIP;DMXL2;SGSM3;ALS2  
GSTM1;GSTT1;GSTM3;GSTM1;GSTT1;GSTM3;GSTA4;GSTM2;MGST1  
CTNNB1;SMAD3;COL1A2CTNNB1;SMAD3;COL1A2;BMPR1B;MEN1;SMAD1;TGFB2  
SYNJ1;OCRL;SYNJ2;ISYNJ1;INPP5F;SYNJ2;INPP5B;INPP5D;MTMR7  
ABCC9;ABCC1;ABCA4;ABCC9;ABCC1;ABCA4;ABCC2;ABCB6;ABCF1;ABCB9;ABCC4;ABCA3;TAP2  
CALD1;TMOD2;TNNT3;CALD1;TMOD2;TNNT3;LMOD1;TMOD1  
PSMB8;TAPBP;ATP5A1PSMB8;TAPBP;ATP5A1;DERL1;TAP2  
PFKFB3;PFKP;HK2;BCPFKFB3;PFKP;HK2;BCR;PIP5K1A;GK;PFKFB4;TAF1;PFKL;ADCK3;TK1;RIOK2;NME6;NA  
ALDH3A1;ALDH3A2;ALALDH3A1;ALDH3A2;ALDH1A3;ALDH3B1  
HYAL1;SPAM1;MGEA5;HYAL1;HYAL1;MGEA5;NAT6;HYAL3;HYAL3  
SYNE1;NARF;LBR;BNISYNE1;NARF;LBR;BNIP3L  
MOXD1;CYP39A1;CYP2MOXD1;CYP39A1;CYP2R1;TBXAS1;CYP51A1;FMO4;CYP2C8;MICAL3;MICAL2  
PARP3;PARP14;PARP1PARP3;PARP14;PARP1;PARP8;PARP16;TIPARP  
CNTNAP3;C3;DDX54;LCNTNAP3;C3;DDX54;LAMA3;LAMA3;APOL3;LPL;ANGPTL7;PPP2R4;AKAP6;LAMA2;LAMA4  
CDC14A;CDKN3;SSH3;CDC14A;CDKN3;SSH3;SSH1;PTEN;DUSP15;EPM2A  
DOCK4;PTEN;GRM7;LNDOCK4;PTEN;GRM7;LNX1;SLC22A12;CCDC88C  
PRKCH;PRKCZ;PRKD3;PRKCH;PRKCZ;PRKD3;PKN2;PRKCE  
LPL;PNPLA2;PNPLA3;LPL;PNPLA2;PNPLA3;FAP;LIPC  
ACOX2;ACAD10;ACADSACOX2;ACAD10;ACADSB;ACAD9;ACADM  
DGKI;DGKG;SPHK1;DGDGKI;DGKG;SPHK1;DGKD;DGKH  
CHI3L1;CHI3L2;CHITCHI3L1;CHI3L2;CHIT1;OVGP1  
SYNJ1;INPP5B;INPP5SYNJ1;INPP5B;INPP5D;INPP5K  
PIP5K1A;PIP4K2B;PIPIP5K1A;PIP4K2B;PIP5KL1;PIP5K1C  
EFNB1;TIAM1;EFNA5;EFNB1;TIAM1;EFNA5;EFNA1  
PPARGC1A;MED24\_HUMPPARGC1A;MED24;TRERF1;MED12;CNOT2  
CA2;CA12;CA11;CA5ECA2;CA12;CA11;CA5B;CA9  
TGFA;CD4;FBXO2;FLNTGFA;CD4;FBXO2;FLNA;LCK  
ROPN1L;PRKAR2B;RAFROPN1L;PRKAR2B;RAPGEF4;PRKAG2;CABYR  
CDKL3;CDC2;RAGE;CECDKL3;CDK1;MOK;CDK8;CDK2;CDKL1  
DCLK1;IL1RL1;GNAZ;DCLK1;IL1RL1;GNAZ;NGF;TIAM1;SMAD1;PIP4K2B;NSMAF;RGS12;BRAF;NCR1  
ATP11A;ATP8B3;ATP1ATP11A;ATP8B3;ATP10B;ATP11C;ATP10D;ATP13A3;ATP10A  
PPP2R2C;PPP2R4;PPFPPP2R2C;PPP2R4;PPP2R2A;PPP2R3A;PPP2R3B  
ALDH3A1;ALDH3A2;ALALDH3A1;ALDH3A2;ALDH7A1;ALDH1A1  
PDGFRA;FLT4;PDGFREPDGFRA;FLT4;PDGFRB;NRP2  
PREX2;ARAP3;DOCK4;PREX2;ARAP3;DOCK4;DLC1  
FZD4;FZD6;FZD3;FZEFZD4;FZD6;FZD3;FZD3  
S100B;S100P;TNNC1;S100B;S100P;TNC;TNNT3;MGP  
MAP3K1;MAP3K6;MAP3MAP3K1;MAP3K6;MAP3K13;ZAK;MAP3K8  
CAMK2D;CAMK1;CAMK2CAMK2D;CAMK1;CAMK2G;CAMK2A;CAMK2B  
RPS4Y2;RPL37A;RPL9RPS4Y2;RPL37A;RPL9;RPL39L;MRPS25;MRPL52;MRPS36;MRPL2;MRPL2;NOV;MRPS5  
LRP8;LDLR;VLDLR LRP8;LDLR;FLJ35024  
RIN2;MADD;RIN2;ALS RASSF4;MADD;RIN2;ALS2  
IL6ST;LIFR;OSMR IL6ST;LIFR;OSMR  
MEN1;MSH6;MSH2 MEN1;MSH6;MSH2  
MSH6;MSH2;MSH3 MSH6;MSH2;MSH3  
MSH6;MSH2;MSH3 MSH6;MSH2;MSH3  
MSH6;MSH2;MSH3 MSH6;MSH2;MSH3  
GFM1;ABTB1;GFM2;TCGFM1;ABTB1;GFM2;TCEA3;TCEA2  
NTAL\_HUMAN;SQSTM1;LAT2;SQSTM1;PAG1;LCK;DLC1  
GGT7;GGTLC2;GGT2;GGGT7;GGTLC2;GGT2;GGTLC3  
ARFIP2;EEA1;RAPGEF ARFIP2;EEA1;RAPGEF5;RAC1  
HDAC9;HDAC6;ZBTB16HDAC9;HDAC6;ZBTB16;TCF7L2;NKRF;TCF4



CDKN1A;CDKN2A;CDKN CDKN1A;CDKN2A;CDKN2B;CASP3  
CTNNB1;ADSSL1;ADAM CTNNB1;ADSSL1;ADAM9;GHR;TAP2  
SMAD3;CUL9;CUL4B;C SMAD3;CUL9;CUL4B;CUL4A;SMAD1  
PFKFB3;PFKFB4;PFKF PFKFB3;PFKFB4;PFKFB2  
ENO2;ENO1;ENO3 ENO2;ENO1;ENO3  
EPHX2;LTA4H;RNPEP EPHX2;LTA4H;RNPEP  
EPB41;ADD2;ANK1 EPB41;ADD2;ANK1  
NARS2;DARS;DARS2 NARS2;DARS;DARS2  
MGEA5;HEXB;HEXA MGEA5;HEXB;HEXA  
PKIG;PRKAG2;PKIB PKIG;PRKAG2;PKIB  
BDKRB2;PLCD4;PLCD1 BDKRB2;PLCD4;PLCD1;PLCG2;EDNRA  
PLA2G4A;PLB1;MGLL;PLA2G4A;PLB1;MGLL;LYPLAL1  
SLC2A5;SLC2A14;SLC SLC2A5;SLC2A14;SLC2A3;SLC2A1  
ARSJ;ARSK;ARSB;ARS ARSJ;ARSK;ARSB;ARSD  
HDAC6;TOP2A;BCOR;F HDAC6;TOP2A;BCOR;KAT2B  
COL25A1;APBB2;APBE COL25A1;APBB2;APBB1;MAPK8IP2  
MT1M;SLC11A2;MT1G;MT1M;SLC11A2;MT1G;MT1F  
ARHGAP29;ARHGAP26;ARHGAP29;ARHGAP26;ERRFI1;ARHGAP6;HGF  
SOCS2;PIK3R1;IGF1;SOCS2;PIK3R1;IGF1;IGF1  
FMNL3;DAAM2;DAAM1;FHOD3;DAAM2;DAAM1;ECT2;FMNL1  
MED24\_HUMAN;TRIP12MED24;TRIP12;JMJD1C;MED12;NCOA3  
FGF13;MADD;MAPK8IF FGF13;MADD;MAPK8IP2;PRKAG2  
LOXL2;LOXL3;LOXL4 LOXL2;LOXL3;LOXL4  
SMG5;SMG7;PPP2R4 SMG5;SMG7;PPP2R4  
PDGFRA;PDGFA;PDGFR PDGFRA;PDGFA;PDGFRB  
FGFR2;FGFR3;FGFR1 FGFR2;FGFR3;FGFR1  
MAOB;ABP1;MAOA MAOB;DAO;MAOA  
GLB1L2;GLB1L;GLB1 GLB1L2;GLB1L;EBP  
ARAP2;ARAP3;ADAP2 ARAP2;ARAP3;ADAP2  
AASDH;FASN;ALDH1L1 AASDH;FAS;ALDH1L1  
SULT1C3;SULT1A1;SU SULT1C3;SULT1A1;SULT1A2  
LMBRD1;MIPEP;METAF LMBRD1;MIPEP;MAP2;SLC11A2  
ECE1;OXTR;PRLR;GHR ECE1;OXTR;PRLR;GHR  
TXNRD1;STAB1;PTGES TXNRD1;STAB1;GBF1;GLRX  
SERPINA1;BDKRB2;SE SERPINA1;BDKRB2;SERPINE1;MDP1  
CALD1;MYRIP;ARFGEF CALD1;MYRIP;ARFGEF1;TRPM7  
SYTL2;NLGN4X;NLGN1 SYTL2;NLGN4X;NLGN1  
APOBEC3G;APOBEC3F;APOBEC3G;APOBEC3F;CDA  
ROBO2;SEMA5A;EPHB2 ROBO2;SEMA5A;EPHB2  
NR4A3;THRB;NR1H3 NR4A3;THRB;NR1H3  
PPIE;PPIG;NKTR PPIE;PPIG;NKTR  
MCM2;ORC2L;ORC4L;MCCNL1;ORC2;ORC4;MCM2  
PCNA;MSH6;MSH2 PCNA;MSH6;MSH2  
NOD2;C9orf89;RIPK2 NOD2;C9orf89;RIPK2  
SORD;PHGDH;GAPDH;N SORD;PGD;GAPDH;NNT;PARP1  
MDM2;ACIN1;HMOX1;HMDM2;ACIN1;HMOX1;HDAC2;NOD2;HDAC1;PRKCD;RAC1;CD40;DFFB;ANK1;MAPT;RFC5;S  
MSLN;SLC7A8;TAPBP;MSLN;LAT2;TAPBP;SLC7A8;TAP2  
CDKN1A;TRIB2;PKIG;CDKN1A;TRIB2;PKIG;WNK1;PKIB  
ZNF143;SOX9;MEIS2;ZNF143;SOX9;MEIS2;GLIS3;SLC12A8  
LDLRAP1;MMS19;NCK1 LDLRAP1;MMS19;NCK1;G3BP2  
USP9Y;USP25;USP1;U USP9Y;USP25;USP1;USP13  
CD44;STAB1;VCAN;LYCD44;STAB1;VCAN;LYVE1

TGM2;SHROOM2;SHC4;TGM2;SHROOM2;SHC4;SP100;MED12;YWHAZ;NCK1;NEDD4;TJP1;DLC1;CHMP2B  
PFKFB3;PFKFB4;PFKF PFKFB3;PFKFB4;PFKFB2  
NQO1;CYB561;CYB5R3NQO1;CYB561;CYB5R3  
THBS1;ADAM9;AGRN THBS1;ADAM9;AGRN  
CACNB3;CACNA2D1;CACACNB3;CACNA2D1;CACNA1D  
GRK5;GRK4;ADRBK2 GRK5;GRK4;ADRBK2  
SORBS3;ACTN1;TLN1 SORBS3;ACTN1;TLN1  
SNUPN;NCBP2;EIF4E SNUPN;NCBP2;EIF4E  
NPAS2;AHR;ARNTL NPAS2;AHR;ARNTL  
PTPN4;ACP1;PTPN12 PTPN4;ACP1;PTPN12  
SLC6A5;SLC6A13;SLC NET1;SLC6A13;SLC6A9;SLC6A1  
SPEF2;DBP;STK3;FOS SPEF2;DBP;STK3;FOSL1;ZMYM1;CPS1;CREB3L2;DDIT3;ZNF862;ZNF618;AR;CREB3L3;  
PMS2;ANKRD17;TDG;M PMS2;ANKRD17;TDG;MSH3  
LDLRAP1;NCALD;HIP1 LDLRAP1;NCALD;HIP1  
DMD;CTTNBP2;CAV1 DMD;CTTNBP2;CAV1  
PABPC4;PABPC1;EIF4PABPC4;PABPC1;EIF4A3  
SHROOM2;ACCN2;SCNN SHROOM2;ASIC1;SCNN1A  
SMA5;HEXB;GBE1;LCT SMA5;HEXB;GBE1;LCTL;HEXA;MANBA;NAGA  
ABCC9;KCNMB1;DRD4;ABCC9;KCNMB1;DRD4;KCNS3  
CHD3;ERCC3;DDX11;C CHD3;ERCC3;DDX11;CHD1  
TGM2;TGM5;F13A1 TGM2;TGM5;F13A1  
DDX54;MMS19;RERG DDX54;MMS19;RERG  
CROCC;KIFAP3;MAPK8 CROCC;KIFAP3;MAPK8IP2  
SLC9A8;SLC9A9;SLC9 SLC9A8;SLC9A9;SLC9A7  
JAG1;NCOR2;SNW1 JAG1;NCOR2;SNW1  
AGPAT5;AGPAT1;LCLA AGPAT5;AGPAT1;LCLAT1  
PDIA6;TMX3;PDIA5 PDIA6;TMX3;PDIA5  
CPOX;ATXN1;CCDC88C CPOX;ATXN1;CCDC88C  
ANO2;APOL1;ANO8;FX ANO2;APOL1;ANO8;FX YD1;ANO6;ABCC4  
CFB;CDKN2A;APOM;NF CFB;CDKN2A;APOM;NPM1  
SLC4A8;SLC4A7;SLC4 SLC4A8;SLC4A7;SLC4A4;ABCA1;SLC4A2;SLC4A5;SLC4A5;SLC4A9;SLC4A3  
SLC14A1;SLC14A2 SLC14A1;SLC14A2  
SLC4A7;SLC4A4;SLC4 SLC4A7;SLC4A4;SLC4A5  
PTGS2;PTGS1 PTGS2;PTGS1  
LDLRAP1;SMAD3 LDLRAP1;SMAD3  
LRP8;MAPT LRP8;MAPT  
MICA;CD1D MICA;CD1D  
MICA;MICB MICA;MICB  
PPP2R4;IGFBP3 PPP2R4;IGFBP3  
BCKDHB;BCKDHA;BCKE BCKDHB;BCKDHA;TMEM91  
SOCS2;SH2B2 SOCS2;SH2B2  
SLC25A15;SLC25A2 ORC1;ORC2  
HOMER2;SHANK2 HOMER2;SHANK2  
SAT1;SAT2 SAT1;SAT2  
SLC38A1;SLC38A1;SL SAT1;SLC38A1;NAT1  
ESR1;ESR2 ESR1;ESR2  
TK1;TK1;TK2 TK1;TK2;TK2  
IL6ST;LIFR IL6ST;LIFR  
MDFIC;NPM1 MDFIC;NPM1  
POLG2;GARS POLB;SMAD1  
OXSM;FASN OXSM;FAS  
RAPGEF5;RAPGEF2 RAPGEF5;RAPGEF2

|                    |                                                                         |
|--------------------|-------------------------------------------------------------------------|
| MSH6;MSH3          | MSH6;MSH3                                                               |
| MSH6;MSH2          | MSH6;MSH2                                                               |
| ACO1;ACO2          | ACO1;ACO2                                                               |
| MSH2;MSH3          | MSH2;MSH3                                                               |
| MTIF3;MTIF2        | MTIF3;MTIF2                                                             |
| PLCD1;GAPVD1       | PLCD1;GAPVD1                                                            |
| SLC6A5;SLC6A9      | NET1;SLC6A9                                                             |
| PLXNB1;PLXNA1      | PLXNB1;NOV                                                              |
| PLXNB1;SEMA3C      | PLXNB1;SEMA3C                                                           |
| INPP4B;INPP4A      | INPP4B;INPP4A                                                           |
| INPP4B;INPP4A      | INPP4B;INPP4A                                                           |
| CARS2;CARS         | CARS2;CARS                                                              |
| GHR;NEDD4          | GHR;NEDD4                                                               |
| TPST1;TPST2        | TPST1;TPST2                                                             |
| GARNL3;RIN2;TNIK;M | GARNL3;RASSF4;TNIK;MAP4K1;EBF3;RALGDS;MAP4K2;MAPRE3;MAP4K4;CDC42BPG;CDC |
| CPXM2;CPZ;CPXM1;AG | CPXM2;CPZ;CPXM1;AGTPBP1                                                 |
| ITPR1;ITPR2;TPCN1; | ITPR1;ITPR2;TPCN1;CACNA2D3;TRPV1;TRPM7                                  |
| HSD17B6;HSD17B4;HS | HSD17B6;DBP;HSD17B7                                                     |
| RECK;COL4A3;TIMP4  | RECK;COL4A3;TIMP4                                                       |
| TNK2;IP05;CDC42SE1 | TNK2;IP05;CDC42SE1                                                      |
| ARFIP2;DOCK4;FLNA  | ARFIP2;DOCK4;FLNA                                                       |
| QRSL1;PET112L;FAAH | QRSL1;PET112;FAAH                                                       |
| POLA1;CDA;SLC28A3  | POLA1;CDA;SLC28A3                                                       |
| MCTP2;CPNE3;SYT3;E | MCTP2;CPNE3;SYT3;DOC2B                                                  |
| CRIM1;WISP3;KAZALD | CRIM1;WISP3;KAZALD1;NOV                                                 |
| ATAD2;ENTPD3;RFC4; | ATAD2;ENTPD3;RFC4;ORC1;TRIP13;MCM7;ORC4;SRP54;NAV1;RAD51B;GPN1;MCM2;NAV |
| DHX15;DDX17;DDX1;E | DHX15;DDX17;DDX1;DDX10                                                  |
| GRK5;ADAM9;TOP2A   | GRK5;ADAM9;TOP2A                                                        |
| ACPL2;HISPPD1;ACP1 | ACPL2;PIP5K2;ACP1                                                       |
| PPARGC1A;MED24_HUM | PPARGC1A;MED24;TRERF1;MED12                                             |
| GRK5;APOB;OSBPL1A; | GRK5;APOB;OSBPL1A;ABCA1;PLA2G2A;TIAM1;SEC14L2;FAAH                      |
| KCNA5;KCNH1;KCNS3  | HK2;KCNH1;KCNS3                                                         |
| TGFA;MAPKAPK3;MAP2 | TGFA;MAPKAPK3;MAP2K3                                                    |
| ITPR1;SLC8A1;ITPR2 | ITPR1;SLC8A1;ITPR2                                                      |
| ACBD5;SOAT1;ACBD6  | ACBD5;ACAT1;ACBD6                                                       |
| DMGDH;SLC19A2;SLC1 | DMGDH;SLC19A2;SLC19A3                                                   |
| SLCO2A1;APOL3;APOE | SLCO2A1;APOL3;APOB;APOM;APOD                                            |
| LEPREL1;LEPRE1     | LEPREL1;LEPRE1                                                          |
| VEGFA;THBS1        | VEGFA;THBS1                                                             |
| PFKP;PFKL          | PFKP;PFKL                                                               |
| ITPR1;ITPR2        | ITPR1;ITPR2                                                             |
| CDKN1A;MDFIC       | CDKN1A;MDFIC                                                            |
| NOTCH4;AGPAT1;NOTC | NOTCH3;AGPAT1;NOTCH4                                                    |
| ST3GAL4;ST3GAL1    | ST3GAL4;ST3GAL1                                                         |
| SDHA;SDHC          | SDHA;SDHC                                                               |
| ACSS2;ACSS1        | ACSS2;ACSS1                                                             |
| MGLL;CEL           | MGLL;FAP                                                                |
| CACNA1I;CACNA1G    | CACNA1I;CACNA1G                                                         |
| AMPD3;AMPD2        | AMPD3;AMPD2                                                             |
| MGAT4B;MGAT4A      | MGAT4B;MGAT4A                                                           |
| BDKRB2;AGT         | BDKRB2;AGT                                                              |
| CYB561;FRRS1       | CYB561;FRRS1                                                            |

|                                              |                            |
|----------------------------------------------|----------------------------|
| PDE1C;PDE1B                                  | PDE1C;PDE1B                |
| RCAN2;SOD1                                   | RCAN2;SOD1                 |
| TARSL2;TARS                                  | TARSL2;TARS                |
| ADCY3;ADCY8                                  | ADCY3;ADCY3                |
| ALDOA;ALDOC                                  | ALDOA;ALDOC                |
| PLOD1;PLOD3                                  | PLOD1;PLOD3                |
| TAPBP;TAP2                                   | TAPBP;TAP2                 |
| CD74;CD4                                     | CD74;CD4                   |
| ADC;PRLR                                     | ADC;PRLR                   |
| ARAP3;ADAP2                                  | ARAP3;ADAP2                |
| MRPL44;RNASEN                                | MRPL44;DROSHA              |
| SOD1;SOD3                                    | SOD1;SOD3                  |
| MSH2;HPRT1                                   | MSH2;HPRT1                 |
| ETNK2;CHKB                                   | ETNK2;CHKB                 |
| ETNK2;CHKB                                   | ETNK2;CHKB                 |
| ADRA1D;ADRA1A                                | ADRA1A;ADRA1A              |
| ALDH1A1;ALDH1A2                              | ALDH1A1;ALDH1A2            |
| PYGL;TOP2A;DRD4;PF                           | PYGL;TOP2A;DRD4;PPARG      |
| AK5;TK1;TK1;AK2                              | AK5;TK1;TK2;AK2            |
| HLA-DPA1;HLA-DRB1;HLA-DPA1;HLA-DRB3;HLA-DRB3 |                            |
| TTLL7;TTLL3;TTL                              | TTLL7;TTLL3;TTL            |
| MPHOSPH1;PMEPA1;SCMPP1;PMEPA1;SCNN1A         |                            |
| NCL;HNRNPD;SMG6                              | NCL;HNRNPD;SMG6            |
| CYP21A2;ESR1;NR3C1                           | CPS1;ESR1;NR3C1;PAQR5;ESR2 |
| SLC47A1;SLC47A2;EE                           | SLC47A1;SLC47A2;EBP        |
| SCN10A;SCN4B;SCN1E                           | SCN10A;SCN4B;SCN1B         |
| KCNMB1;KCNMB4;KCNI                           | KCNMB1;KCNMB4;KCNT2        |
| CLCNKB;CLIC6;CLCN4                           | CLCNKB;CLIC6;CLCN4         |
| SOAT1;ABCA1;CAV1                             | ACAT1;ABCA1;CAV1           |
| AKR1C1;AKR1C3                                | AKR1C1;AKR1C3              |
| S100A1;S100B                                 | S100A1;S100B               |
| CSGALNACT1;CHSY3                             | CSGALNACT1;CHSY3           |
| ITPR1;ITPR2                                  | ITPR1;ITPR2                |
| HSD17B6;AKR1C3                               | HSD17B6;AKR1C3             |
| STAT1;SP110                                  | STAT1;SP110                |
| ERAP1;IL6                                    | ERAP1;HGF                  |
| P4HA1;P4HA2                                  | P4HA1;P4HA2                |
| PLK2;PLK3                                    | PLK2;PLK3                  |
| PYGL;HPRT1                                   | PYGL;HPRT1                 |
| PYGL;GCK                                     | PYGL;GK                    |
| GK;GK3P                                      | GK;GK                      |
| TOP2A;TOP1MT                                 | TOP2A;TOP1MT               |
| RRM2;RRM2B                                   | RRM2;RRM2B                 |
| IL6ST;LIFR                                   | IL6ST;LIFR                 |
| CCDC111;POLA1                                | CCDC111;POLA1              |
| ELP3;PRKAG2                                  | ELP3;PRKAG2                |
| GTF2A2;CAND2                                 | GTF2A2;CAND2               |
| ASPH;ASPHD1                                  | ASPH;ASPHD1                |
| MSH2;MSH3                                    | MSH2;MSH3                  |
| SLC6A13;SLC6A1                               | SLC6A13;SLC6A1             |
| TOP1MT;TOP3B                                 | TOP1MT;TOP3B               |
| AR;ALDH1A1                                   | AR;ALDH1A1                 |

|                                                        |                               |
|--------------------------------------------------------|-------------------------------|
| SERGEF;ALS2                                            | SERGEF;ALS2                   |
| SLC36A1;SLC38A3                                        | SLC36A1;NAT1                  |
| SLC19A2;SLC19A3                                        | SLC19A2;SLC19A3               |
| SLC11A2;ADI1                                           | SLC11A2;ADI1                  |
| KCNJ5;KCNJ6                                            | KCNJ5;KCNJ6                   |
| EPHA2;EPHA4;EPHB6                                      | EPHA2;EPHA4;EPHB6             |
| ACSS2;PYGL;ACSS1                                       | ACSS2;PYGL;ACSS1              |
| CMAH;XDH;RFESD                                         | CMAHP;XDH;RFESD               |
| CHAF1B;NPM1;CHAF1E                                     | CHAF1B;NPM1;MPP7;BRD7         |
| CACNA1A;CTTNBP2;SY                                     | CACNA1A;CTTNBP2;SYT3          |
| POLR3A;POLR2B;POLR                                     | POLR3A;POLR2B;POLR2D;CTDP1    |
| SHROOM2;TCF7L2;PTF                                     | SHROOM2;TCF7L2;PTPRU;TCF4     |
| AKR1C1;PYGL                                            | AKR1C1;PYGL                   |
| MOXD1;FRRS1                                            | MOXD1;FRRS1                   |
| SMAD3;SMAD1                                            | SMAD3;SMAD1                   |
| SLC8A1;TRAPPC10                                        | SLC8A1;TRAPPC10               |
| PREX2;ALS2                                             | PREX2;ALS2                    |
| WIPF1;DBN1                                             | WIPF1;DBN1                    |
| HSD17B4;SCP2                                           | DBP;SCP2                      |
| PABPC4;ATXN1                                           | PABPC4;ATXN1                  |
| AGPAT5;AGPAT1                                          | AGPAT5;AGPAT1                 |
| MFSD9;S22AI_HUMAN                                      | MFSD9;SLC22A18                |
| RFC4;RFC5                                              | RFC4;RFC5                     |
| TXNRD1;TXNDC2                                          | TXNRD1;TXNDC2                 |
| LASS4;LASS5                                            | CERS4;CERS5                   |
| OGDH;HACL1                                             | OGDH;HACL1                    |
| PIGU;PIGS                                              | GAB1;PIGS                     |
| IRAK2;IKBKE                                            | IRAK2;IKBKE                   |
| PCCA;PC                                                | PCCA;PC                       |
| TNNC1;TNNT3                                            | TNC;TNNT3                     |
| CDC2;CDK8                                              | CDK1;CDK8                     |
| DNAJB6;AHSA2                                           | DNAJB6;AHSA2                  |
| IGFBP2;IGFBP3                                          | IGFBP2;IGFBP3                 |
| PTGER3;PTGER2                                          | PTGER3;PTGER2                 |
| CTNNB1;PFKL;BARD1;CTNNB1;PFKL;BARD1;CTTNBP2;BTG1;SP100 |                               |
| ST3GAL6;ST6GALNAC2                                     | ST3GAL6;ST6GALNAC2;ST6GALNAC5 |
| TNFSF15;TN13B_HUMA                                     | TNFSF15;TNFSF13B;TNFSF9       |
| SLC9A8;SLC9A9;SLC9                                     | SLC9A8;SLC9A9;SLC9A7          |
| ATP6V1B1;ATP5A1;AI                                     | ATP6V1B1;ATP5A1;ATP6V1H       |
| SOD1;DNAJB6;AHSA2                                      | SOD1;DNAJB6;AHSA2             |
| NDUFA10;NDUFS7;NDU                                     | NDUFA10;NDUFS7;NDUFV3;NDUFB2  |
| TOP2A;RAD51L1;TTF2                                     | TOP2A;RAD51B;TTF2;RAD51C      |
| ELP3;ISCU;ISCA2;IS                                     | ELP3;ISCU;ISCA2;ISCA1         |
| EGFR;ESR1                                              | EGFR;ESR1                     |
| ENTPD3;ENTPD6                                          | ENTPD3;ENTPD6                 |
| SOCS5;HBEGF                                            | SOCS5;HBEGF                   |
| HSD17B4;HADHB                                          | DBP;HADHB                     |
| CENPF;SMC3                                             | CENPF;SMC3                    |
| TLN1;RIPK2_HUMAN                                       | TLN1;RIPK2                    |
| DMGDH;SARDH                                            | DMGDH;SARDH                   |
| SLC23A2;SLC23A1                                        | SLC23A2;SLC23A2               |
| RAD1;EXOSC10;REX02                                     | RAD1;EXOSC10;REX02            |

CTNNB1;EGFR;PIK3R1 CTNNB1;EGFR;PIK3R1  
 PLA2G4A;PLB1;PNPLA PLA2G4A;PLB1;PNPLA3  
 CACNA1A;CACNA1B;GRM7 CACNA1A;CACNA1B;GRM7  
 S100A1;LCK S100A1;LCK  
 PRKCZ;PIK3R1 PRKCZ;PIK3R1  
 IL1RL1;IL1RAP IL1RL1;IL1RAP  
 XDH;MOCS1 XDH;MOCS1  
 SCIN;ADAP2 SCIN;ADAP2  
 MYL3;PKNOX2 MYL3;PKNOX2  
 PDE5A;PDE6B PDE5A;PDE6B  
 ERO1L;ERO1LB ERO1L;ERO1LB  
 MADD;LRDD MADD;PIDD  
 PRKX;AKAP13 PRKX;AKAP13  
 SRP54;SRP19 SRP54;SRP19  
 LIFR;OSMR;LTBP2;LTBP1 LIFR;OSMR;LTBP2;LTBP2;LTBP2;LTBP1  
 AK5;AK2 AK5;AK2  
 TNFRSF19;TNFRSF14 TNFRSF19;TNFRSF14  
 CILP2;ENPP1 CILP2;ENPP1  
 RPN2;TUSC3 RPN2;TUSC3  
 NT5E;NT5C2 NT5E;NT5C2  
 FKBP5;NFATC1 FKBP5;NFATC1  
 PDXDC1;BCKDHB;BCKD PDXDC1;BCKDHB;BCKDHA;TMEM91  
 ELP3;NAT6;PCAF;NAT1 ELP3;NAT6;KAT2B;NAT10  
 APOBEC3B;APOBEC3C;APOBEC3B;APOBEC3C;APOBEC3C;APOBEC3D  
 GPX3;GPX2 GPX3;GPX2  
 NPC1;PTCH1 NPC1;PTCH1  
 LPIN1;LPPR3 LPIN1;LPPR3  
 PIK3AP1;DOK5 PIK3AP1;DOK5  
 LOR;PKP1 LOR;PKP1  
 ATP2B4;ATP2C1 ATP2B4;ATP2C1  
 ABCB9;TAP2 ABCB9;TAP2  
 ADH1B;ADH5 ADH1C;ADH5  
 ADRA1D;ADRA1A ADRA1A;ADRA1A  
 PTGS2;PXDN;PTGS1 PTGS2;PXDN;PTGS1  
 B4GALT4;B4GALT6;A4B4GALT4;B4GALT6;A4GALT  
 VEGFA;COL11A1 VEGFA;COL11A1  
 ZNF143;GTF3C1 ZNF143;GTF3C1  
 THBS1;TGFB2 THBS1;TGFB2  
 APOB;ABCA1 APOB;ABCA1  
 DPP4;FAP DPP4;FAP  
 SLC26A1;SLC26A6 SAT1;SLC26A6  
 POP1;RPP25 POP1;RPP25  
 IPO5;RANBP1 IPO5;RANBP1  
 NRG1;TRRAP;TFDP2;MED24;TRIP13;PIR;BTG1;TMF1;NMI  
 APOB;DKK1 APOB;DKK1  
 PIK3C2B;ATM PIK3C2B;ATM  
 SLC25A22;SLC25A12 SLC25A22;SLC25A12  
 NME6;NME5 NME6;NME5  
 LRPPRC;BBS4 LRPPRC;BBS4  
 HSD17B4;NPC1 DBP;NPC1  
 ZDHHC15;ZDHHC2 ZDHHC15;ZDHHC2  
 IL18BP;ESR2 IL18BP;ESR2

|                    |                  |
|--------------------|------------------|
| ERAP1;RNPEP;METAP2 | ERAP1;RNPEP;MAP2 |
| TBP;GTF2A2;TAF1A   | TBP;GTF2A2;TAF1A |
| CTNNB1;CDH13       | CTNNB1;CDH13     |
| COLEC11;BSG        | CLK1;BSG         |
| GRM7;HTT           | GRM7;HTT         |
| THBS1;ATP5A1       | THBS1;ATP5A1     |
| ATP6V1B1;ATP5A1    | ATP6V1B1;ATP5A1  |
| PRKAR2B;RAPGEF4    | PRKAR2B;RAPGEF4  |
| MAPK8;MAPK13       | MAPK8;MAPK13     |
| AKR1C1;AKR1C3      | AKR1C1;AKR1C3    |
| MYH10;MYO5A        | MYH10;MYO5A      |
| NTRK2              | NTRK2            |
| UGCG               | UGCG             |
| VEGFA              | VEGFA            |
| VEGFA              | VEGFA            |
| CHST1              | CHST1            |
| NNMT               | NNMT             |
| CSGALNACT1         | CSGALNACT1       |
| EDN1               | EDN1             |
| EGFR               | EGFR             |
| AKR1C3             | AKR1C3           |
| IL1RL1             | IL1RL1           |
| NQO1               | NQO1             |
| THBS1              | THBS1            |
| THBS1              | THBS1            |
| THBS1              | THBS1            |
| EPHX2              | EPHX2            |
| SLCO2A1            | SLCO2A1          |
| AS3MT              | AS3MT            |
| AS3MT              | AS3MT            |
| ERAP1              | ERAP1            |
| PDGFRA             | PDGFRA           |
| UPRT               | UPRT             |
| ACOX2              | ACOX2            |
| PDPK1              | PDK1             |
| RNASET2            | RNASET2          |
| CMAH               | CMAHP            |
| IL17RA             | IL17RA           |
| HSD17B4            | DBP              |
| GCK                | GK               |
| GGH                | GGH              |
| NAMPT              | NAMPT            |
| CYP39A1            | CYP39A1          |
| CYP39A1            | CYP39A1          |
| PABPC4             | PABPC4           |
| NGF                | NGF              |
| XDH                | XDH              |
| MAP3K1             | MAP3K1           |
| RERE               | RERE             |
| MAP4K1             | MAP4K1           |
| CDKN2A             | CDKN2A           |
| DRD4               | DRD4             |

|               |               |
|---------------|---------------|
| TYMS          | TYMS          |
| AMACR;AMACR   | C1QTNF3;AMACR |
| AASS          | AASS          |
| SORD          | SORD          |
| MCHR1         | MCHR1         |
| PHGDH         | PGD           |
| SLC6A3        | SLC6A3        |
| CPS1          | CPS1          |
| CYP21A2       | CPS1          |
| POLS          | POLK          |
| OAT           | OAT           |
| SLC37A4       | SLC37A4       |
| GALC          | GALC          |
| OXTR          | OXTR          |
| TBXAS1        | TBXAS1        |
| ABCA1         | ABCA1         |
| DPH5          | DPH5          |
| L2HGDH        | L2HGDH        |
| QPCT          | QPCT          |
| MYO6          | MYO6          |
| MET           | MET           |
| RNMT          | MET           |
| FN3K          | FN3K          |
| PPARG         | PPARG         |
| GPI           | GPI           |
| DNASE1        | DNASE1        |
| IL21R         | IL21R         |
| C1GALT1       | C1GALT1       |
| CYP51A1       | CYP51A1       |
| BCKDHA;BCKDHA | BCKDHA;TMEM91 |
| BCKDHA;BCKDHA | BCKDHA;TMEM91 |
| IL6ST         | IL6ST         |
| SLC6A6        | SLC6A6        |
| SLC6A6        | SLC6A6        |
| DPYD          | DPYD          |
| DPYD          | DPYD          |
| CEP290        | CEP290        |
| SPHK1         | SPHK1         |
| GNAS          | GNAS          |
| GBE1          | GBE1          |
| FASTK         | FASTK         |
| ADC           | ADC           |
| OGDH          | OGDH          |
| SEMA3A        | SEMA3A        |
| CRAT          | CRAT          |
| CSAD          | CSAD          |
| SREBF1        | SREBF1        |
| PCNA          | PCNA          |
| SLC6A8        | SLC6A8        |
| SLU7          | SLU7          |
| SLU7          | SLU7          |
| POP1          | POP1          |



|                 |             |
|-----------------|-------------|
| SLC13A5         | SLC13A5     |
| HSD17B7         | HSD17B7     |
| CD01            | CD01        |
| PNPLA3          | PNPLA3      |
| PNPLA3          | PNPLA3      |
| LTA4H           | LTA4H       |
| PIGG            | PIGG        |
| HMGCR           | HMGCR       |
| SMS             | SMS         |
| NNT             | NNT         |
| NNT             | NNT         |
| CYP46A1         | CYP46A1     |
| NOD2            | NOD2        |
| PRLR            | PRLR        |
| AGL             | AGL         |
| AGL             | AGL         |
| AGT             | AGT         |
| AGXT            | AGT         |
| NAGK            | NAGK        |
| HNMT            | HNMT        |
| TRMT2B          | TRMT2B      |
| PTEN            | PTEN        |
| PTEN            | PTEN        |
| C14orf149       | C14orf149   |
| PRKCD           | PRKCD       |
| IL18BP          | IL18BP      |
| TNNT3           | TNNT3       |
| BCKDK           | BCKDK       |
| NR3C1           | NR3C1       |
| SLC6A2;SLC6A2   | NET1;NAT1   |
| LPHN2           | LPHN2       |
| NPL             | NPL         |
| FLNA            | FLNA        |
| FLNA            | FLNA        |
| H6PD            | H6PD        |
| UBA7            | UBA7        |
| SEPSECS;SEPSECS | SEPSECS;SLA |
| CDH13           | CDH13       |
| LCK             | LCK         |
| TDG             | TDG         |
| DMGDH           | DMGDH       |
| PIGL            | PIGL        |
| CD1D            | CD1D        |
| CDK2            | CDK2        |
| NADSYN1         | NADSYN1     |
| CHDH            | CHDH        |
| MANBA           | MANBA       |
| KIAA0100        | KIAA0100    |
| PPAT            | PPAT        |
| COASY           | PPAT        |
| COASY           | PPAT        |
| PC              | PC          |

|          |          |
|----------|----------|
| TTF2     | TTF2     |
| NEDD4    | NEDD4    |
| FAH      | FAH      |
| SLC35D1  | SLC35D1  |
| PIPOX    | PIPOX    |
| PIPOX    | PIPOX    |
| REV1     | REV1     |
| EPOR     | EPOR     |
| FDFT1    | FDFT1    |
| HTT      | HTT      |
| SLC6A4   | HTT      |
| SLC6A4   | HTT      |
| OGG1     | OGG1     |
| SLC22A12 | SLC22A12 |
| PGM2L1   | PGM2L1   |
| SCP2     | SCP2     |
| SLC19A2  | SLC19A2  |
| HGSNAT   | HGSNAT   |
| UGP2     | UGP2     |
| ALDH7A1  | ALDH7A1  |
| ALG13    | ALG13    |
| KCNMA1   | KCNMA1   |
| PTDSS2   | PTDSS2   |
| ADH5     | ADH5     |
| ADH5     | ADH5     |
| GART     | GART     |
| GART     | GART     |
| GART     | GART     |
| ALS2     | ALS2     |
| SLC11A2  | SLC11A2  |
| SLC11A2  | SLC11A2  |
| SLC11A2  | SLC11A2  |
| SLC11A2  | SLC11A2  |
| SLC11A2  | SLC11A2  |
| GSR      | GSR      |
| SLC28A3  | SLC28A3  |
| SLC28A3  | SLC28A3  |
| ADAT1    | ADAT1    |
| CBS      | CBS      |
| MMAB     | MMAB     |
| GLMN     | FAP      |
| PDXK     | PDXK     |
| HIBCH    | HIBCH    |
| SLC9A7   | SLC9A7   |
| STXBP2   | STXBP2   |
| STXBP2   | STXBP2   |
| NAGA     | NAGA     |
| FASN     | FAS      |
| FASN     | FAS      |
| FASN     | FAS      |
| FASN     | FAS      |
| F12      | F12      |

|                    |                                                                         |
|--------------------|-------------------------------------------------------------------------|
| SDCBP              | SDCBP                                                                   |
| GALM               | GALM                                                                    |
| LIPC               | LIPC                                                                    |
| CARD8              | CARD8                                                                   |
| ATXN1              | ATXN1                                                                   |
| FAAH               | FAAH                                                                    |
| MCEE               | MCEE                                                                    |
| SLC1A3             | SLC1A3                                                                  |
| SARDH              | SARDH                                                                   |
| ENTPD4             | ENTPD4                                                                  |
| RAD51C             | RAD51C                                                                  |
| TRNT1              | TRNT1                                                                   |
| TRMU               | TRNT1                                                                   |
| PPCS               | PPCS                                                                    |
| SLC38A3            | NAT1                                                                    |
| SLC38A3            | NAT1                                                                    |
| TGFBR2             | TGFBR2                                                                  |
| ST3GAL5            | ST3GAL5                                                                 |
| ST3GAL5            | ST3GAL5                                                                 |
| A4GALT             | A4GALT                                                                  |
| EDNRA              | EDNRA                                                                   |
| PTS                | PTS                                                                     |
| TAP2               | TAP2                                                                    |
| SORT1              | SORT1                                                                   |
| SORT1              | SORT1                                                                   |
| CCRL1;CCBP2;CCRL1  | CCRL1;CCBP2;CCBP2                                                       |
| MED24_HUMAN;MED12  | MED24;MED12                                                             |
| PIGN;PIGG          | PIGN;PIGG                                                               |
| SLC38A1;SLC7A8;SLC | SAT1;LAT2;SLC38A1;SLC7A8                                                |
| KCNQ5;KCNJ15       | KCNQ5;KCNJ15                                                            |
| EGFR;LRP8;TNFRSF14 | EGFR;LRP8;TNFRSF14;INTS6;TLR5;LDLR;BCAM;CD72;CD4;IL1RAP;TLR1;TLR3;TIRAP |
| THBS1;CDH13        | THBS1;CDH13                                                             |
| GRIA1;GRIA3        | GRIA1;GRIA3                                                             |
| IL15RA;IL12RB1;GHR | IL15RA;IL12RB1;GHR                                                      |
| PTGDS;APOD         | PTGDS;APOD                                                              |
| PSMB8;PSMA4        | PSMB8;PSMA4                                                             |
| VTI1A;STX17        | VTI1A;STX17                                                             |
| TCEA3;TCEA2        | TCEA3;TCEA2                                                             |
| AKR1C1             | AKR1C1                                                                  |
| AKR1C1             | AKR1C1                                                                  |
| LARS               | LARS                                                                    |
| S100A1             | S100A1                                                                  |
| CSGALNACT1         | CSGALNACT1                                                              |
| BST1               | BST1                                                                    |
| ALOX15B            | ALOX15B                                                                 |
| KCNA5              | HK2                                                                     |
| ALDH3A1            | ALDH3A1                                                                 |
| S100B              | S100B                                                                   |
| EGFR               | EGFR                                                                    |
| PRDX2              | PRDX2                                                                   |
| ST6GAL2            | ST6GAL2                                                                 |
| AKR1C3             | AKR1C3                                                                  |

|             |            |
|-------------|------------|
| SLC2A5      | SLC2A5     |
| HPD         | HPD        |
| DCT         | DCT        |
| SDHA        | SDHA       |
| PHOSPHO2    | PHOSPHO2   |
| ANO1        | ANO1       |
| ATAD2       | ATAD2      |
| ADSSL1      | ADSSL1     |
| P2RY6       | P2RY6      |
| MDM2        | MDM2       |
| ABCC9       | ABCC9      |
| GPD2        | GPD2       |
| PON2        | PON2       |
| HDAC6       | HDAC6      |
| BDKRB2      | BDKRB2     |
| LRRFIP2     | LRRFIP2    |
| CHIT1       | CHIT1      |
| PALLD       | PALLD      |
| DZIP3       | DZIP3      |
| CYP39A1     | CYP39A1    |
| MGAT5       | MGAT5      |
| XDH         | XDH        |
| PRKDC       | PRKDC      |
| TPI1        | TPI1       |
| PTGDS       | PTGDS      |
| HMOX1       | HMOX1      |
| TFRC        | TFRC       |
| MGAT1       | MGAT1      |
| POFUT2      | POFUT2     |
| AASS        | AASS       |
| CYP2R1      | CYP2R1     |
| RBPJ        | RBPJ       |
| PTGR2       | PTGR2      |
| PLA1A       | PLA1A      |
| SOAT1       | ACAT1      |
| SOAT1       | ACAT1      |
| SOAT1       | ACAT1      |
| NARS2       | NARS2      |
| GBA         | GBA        |
| PFKL        | PFKL       |
| MYL3        | MYL3       |
| LBR         | LBR        |
| SMOX;SMOX   | SMOX;SMO   |
| AQP3        | AQP3       |
| ABCA1       | ABCA1      |
| GAPDH       | GAPDH      |
| PPARG       | PPARG      |
| HMGCS1      | HMGCS1     |
| GNPDA1      | GPI        |
| HSD11B1     | HSD11B1    |
| FUCA1       | FUCA1      |
| ETFDH;ETFDH | MADD;ETFDH |

|         |         |
|---------|---------|
| IL6ST   | IL6ST   |
| IL6ST   | IL6ST   |
| ADRBK2  | ADRBK2  |
| DPYD    | DPYD    |
| GYS1    | GYS1    |
| PKM2    | PKM     |
| SPHK1   | SPHK1   |
| MBD1    | PCM1    |
| PYCARD  | PYCARD  |
| BCAT2   | BCAM    |
| PPP1R7  | PPP1R7  |
| GLUD1   | GLUD1   |
| GLUD1   | GLUD1   |
| CMAS    | CMAS    |
| GFRA2   | GFRA2   |
| NMT2    | NMT2    |
| ACADVL  | ACADVL  |
| MCCC2   | MCCC2   |
| RIC8B   | RIC8B   |
| RCL1    | RCL1    |
| SMS     | SMS     |
| MEN1    | MEN1    |
| PCCA    | PCCA    |
| PAPSS2  | PAPSS2  |
| PAPSS2  | PAPSS2  |
| NOX4    | NOX4    |
| TSHR    | TSHR    |
| AGT     | AGT     |
| NAGK    | NAGK    |
| CRHR1   | CRHR1   |
| SLC12A2 | SLC12A2 |
| PTEN    | PTEN    |
| PTEN    | PTEN    |
| RNF41   | RNF41   |
| ARSB    | ARSB    |
| MGP     | MGP     |
| SEC14L2 | SEC14L2 |
| EARS2   | EARS2   |
| INPP5K  | INPP5K  |
| IGFBP2  | IGFBP2  |
| CAMK2G  | CAMK2G  |
| CPOX    | CPOX    |
| H6PD    | H6PD    |
| H6PD    | H6PD    |
| ABCC4   | ABCC4   |
| MAN2A2  | MAN2A2  |
| LCK     | LCK     |
| IL1R1   | IL1R1   |
| GDI1    | GDI1    |
| DAO     | DAO     |
| DFFB    | DFFB    |
| DFFB    | DFFB    |

|                                                                     |                            |
|---------------------------------------------------------------------|----------------------------|
| PDE3A                                                               | PDE3A                      |
| NEDD4                                                               | NEDD4                      |
| NEDD4                                                               | NEDD4                      |
| NEDD4                                                               | NEDD4                      |
| NEDD4                                                               | NEDD4                      |
| ADPRH                                                               | ADPRH                      |
| APP                                                                 | APP                        |
| HMGCL                                                               | HMGCL                      |
| PTH1R                                                               | PTH1R                      |
| AR                                                                  | AR                         |
| OXCT1                                                               | OXCT1                      |
| XYLT2                                                               | XYLT2                      |
| CAMK2A                                                              | CAMK2A                     |
| HISPPD1                                                             | PPIP5K2                    |
| HISPPD1                                                             | PPIP5K2                    |
| HISPPD1                                                             | PPIP5K2                    |
| EXT2                                                                | EXT2                       |
| EXT2                                                                | EXT2                       |
| LIF                                                                 | LIF                        |
| PDP1                                                                | PDP1                       |
| EBP                                                                 | EBP                        |
| EBP                                                                 | EBP                        |
| CEL                                                                 | FAP                        |
| BBS4                                                                | BBS4                       |
| GLUL                                                                | GLUL                       |
| FASN                                                                | FAS                        |
| FASN                                                                | FAS                        |
| METTL3                                                              | METTL3                     |
| SDCBP                                                               | SDCBP                      |
| CTPS2                                                               | CTPS2                      |
| B4GALNT4                                                            | B4GALNT4                   |
| PDGFRB                                                              | PDGFRB                     |
| MARS                                                                | MARS                       |
| FAAH                                                                | FAAH                       |
| SLC23A2                                                             | SLC23A2                    |
| GPT2                                                                | GPT2                       |
| PGGT1B                                                              | PGGT1B                     |
| LONP1                                                               | PIM1                       |
| ASNS                                                                | ASNS                       |
| MTHFSD                                                              | MTHFSD                     |
| TAP2                                                                | TAP2                       |
| PRKRA;MMP16;MMP24;PRKRA;MMP16;MMP24;PPP1R12B;DBNL;PRKCD;DBF4;CTAGE5 |                            |
| VEGFA;PDGFA                                                         | VEGFA;PDGFA                |
| PVRL3;VCAM1                                                         | PVRL3;VCAM1                |
| DPYSL2;DPYSL4;NADS                                                  | DPYSL2;DPYSL4;NADSYN1;NIT2 |
| PPP1R1C;PHACTR2                                                     | PPP1R1C;PHACTR2            |
| CTNNB1                                                              | CTNNB1                     |
| NTRK2                                                               | NTRK2                      |
| CP                                                                  | CP                         |
| SLC14A1                                                             | SLC14A1                    |
| EDN1                                                                | EDN1                       |
| NRG1                                                                | NRG1                       |

|          |          |
|----------|----------|
| AKR1C3   | AKR1C3   |
| CRIM1    | CRIM1    |
| THBS1    | THBS1    |
| LPL      | LPL      |
| TKT      | TKT      |
| PON2     | PON2     |
| PYGL     | PYGL     |
| MUC4     | MUC4     |
| PIK3C2B  | PIK3C2B  |
| GPX3     | GPX3     |
| SOCS2    | SOCS2    |
| CRYZL1   | CRYZL1   |
| XPO7     | XPO7     |
| CYP26A1  | CYP26A1  |
| AGRN     | AGRN     |
| PGD      | PGD      |
| ACAT1    | ACAT1    |
| MAP3K11  | MAP3K11  |
| CENPE    | CENPE    |
| MAPK8    | MAPK8    |
| SPTLC3   | SPTLC3   |
| TAPBP    | TAPBP    |
| TAPBP    | TAPBP    |
| IDH3G    | IDH3G    |
| GUSB     | GUSB     |
| PKP1     | PKP1     |
| PTGES2   | GBF1     |
| BBS5     | BBS5     |
| LIG4     | LIG4     |
| OGDH     | OGDH     |
| ELN      | ELN      |
| CLASP2   | CLASP2   |
| CLASP2   | CLASP2   |
| SLC13A5  | SLC13A5  |
| TNNC1    | TNC      |
| MAPK13   | MAPK13   |
| CDK5RAP2 | CDK5RAP2 |
| AGXT     | AGT      |
| MSH6     | MSH6     |
| PIK3R1   | PIK3R1   |
| PIK3R1   | PIK3R1   |
| RAPGEF2  | RAPGEF2  |
| SLC20A2  | SLC20A2  |
| GLYATL2  | GLYATL2  |
| TRIM24   | TRIM24   |
| TAF1A    | TAF1A    |
| ERCC3    | ERCC3    |
| ABP1     | DAO      |
| GPAM     | GPAM     |
| MAPK8IP2 | MAPK8IP2 |
| PIP4K2B  | PIP4K2B  |
| SLC25A12 | SLC25A12 |

|                    |                                 |
|--------------------|---------------------------------|
| PGM2               | PGM2                            |
| EXOC2              | EXOC2                           |
| SLC44A1            | SLC44A1                         |
| AHCYL2             | AHCYL2                          |
| FRZB               | FRZB                            |
| EXT2               | EXT2                            |
| POLR2B             | POLR2B                          |
| SLC36A1            | SLC36A1                         |
| SLC36A1            | SLC36A1                         |
| AMY2A              | AMY2A                           |
| GLRX               | GLRX                            |
| UCHL1              | UCHL1                           |
| MICALCL            | MICALCL                         |
| CRTC1              | CRTC1                           |
| IKBKE              | IKBKE                           |
| EBP                | EBP                             |
| CHST11             | CHST11                          |
| FASN               | FAS                             |
| PDGFRB             | PDGFRB                          |
| DIO2               | DIO2                            |
| ARNTL              | ARNTL                           |
| ADAP2              | ADAP2                           |
| LONP1              | PIM1                            |
| NAT1               | NAT1                            |
| ALDH1L1            | ALDH1L1                         |
| TGFBR2             | TGFBR2                          |
| TRIOBP             | TRIOBP                          |
| RFX3;LEF1          | RFX3;LEF1                       |
| ABCA4;ABCA1        | ABCA4;ABCA1                     |
| P2RY6;LPAR4        | P2RY6;LPAR4                     |
| MAGI2;SBF2         | MAGI2;SBF2                      |
| MGAT4B;MGAT4A;CHSY | MGAT4B;MGAT4A;CHSY3;ALG13;GBGT1 |
| KCNK2              | KCNK2                           |
| IGF2BP1            | IGF2BP1                         |
| LDLRAP1            | LDLRAP1                         |
| SLC8A1             | SLC8A1                          |
| EIF2AK3            | EIF2AK3                         |
| ACOX2              | ACOX2                           |
| DNMT3A             | DNMT3A                          |
| AKR1B1;AKR1B1      | AKR1B1;AR                       |
| MYST2              | KAT7                            |
| GC                 | DBP                             |
| MOGAT1             | MGAT1                           |
| MOGAT1             | MGAT1                           |
| ALDOA              | ALDOA                           |
| CYP26A1            | CYP26A1                         |
| LPCAT1             | LPCAT1                          |
| SLC12A7            | SLC12A7                         |
| B4GALT4            | B4GALT4                         |
| DPYSL2             | DPYSL2                          |
| PMS2               | PMS2                            |
| RAD1               | RAD1                            |



|                 |                 |
|-----------------|-----------------|
| KDEL3           | KDEL3           |
| STAT5B          | STAT5B          |
| PIK3R1          | PIK3R1          |
| NEU3            | NEU3            |
| SLC22A5         | SLC22A5         |
| GABBR1          | GABBR1          |
| TNNT3           | TNNT3           |
| PANK1           | PANK1           |
| EIF5A           | EIF5A           |
| HADHB           | HADHB           |
| CHSY3           | CHSY3           |
| PHKA2           | PHKA2           |
| ST8SIA1         | ST8SIA1         |
| SLC01B1         | LST1            |
| SLC11A2         | SLC11A2         |
| TPR             | TPR             |
| BBS4            | BBS4            |
| PLSCR1          | PLSCR1          |
| SLC1A3          | SLC1A3          |
| ENPP1           | ENPP1           |
| ENPP1           | ENPP1           |
| ATP6VOD1        | ATP6VOD1        |
| SLC40A1         | SLC40A1         |
| CPT1B           | CHKB            |
| ABCA1;FGD6;FLNA | ABCA1;FGD6;FLNA |
| CYP26A1;CYP19A1 | CYP26A1;CYP19A1 |
| CHRM2           | CHRM2           |
| RYR1            | RYR1            |
| APOL2;APOL2     | APOL3;APOL2     |
| MUC4            | MUC4            |
| CHST6           | CHST6           |
| SOCS2           | SOCS2           |
| PAPD4           | PAPD4           |
| ZFP106          | ZFP106          |
| OXTR            | OXTR            |
| DARS            | DARS            |
| PRCP            | PRCP            |
| PRPSAP1         | PRPSAP1         |
| ART4            | DOK1            |
| PMS2            | PMS2            |
| PIGU            | GAB1            |
| NOX4            | NOX4            |
| LGALS3          | LGALS3          |
| NUP98           | NUP98           |
| HDHD3           | HDHD3           |
| PLEKHA8         | PLEKHA8         |
| SLC6A2;SLC6A2   | NET1;NAT1       |
| ADH1C           | ADH1C           |
| RCVRN           | RCVRN           |
| LDHA            | LDHA            |
| PADI4           | PADI4           |
| PITPNM3         | PITPNM3         |

|                    |                          |
|--------------------|--------------------------|
| SLC36A1            | SLC36A1                  |
| SLC19A2            | SLC19A2                  |
| EPHB2              | EPHB2                    |
| LUC7L              | LUC7L                    |
| FDXACB1            | FDXACB1                  |
| CHST11             | CHST11                   |
| PIGP               | PIGP                     |
| PDXK               | PDXK                     |
| TRIOBP             | TRIOBP                   |
| SORT1              | SORT1                    |
| LARGE;XYLT2        | LARGE;XYLT2              |
| NRCAM              | NRCAM                    |
| ALOX15B            | ALOX15B                  |
| HK2                | HK2                      |
| CILP2              | CILP2                    |
| SCIN               | SCIN                     |
| HMGB2              | HMGB2                    |
| PPARG              | PPARG                    |
| ELP3               | ELP3                     |
| FM04               | FM04                     |
| MYH10              | MYH10                    |
| BMPR1B             | BMPR1B                   |
| PABPC1             | PABPC1                   |
| SCLT1              | SCLT1                    |
| TRPC1              | TRPC1                    |
| HRH1               | HRH1                     |
| MAN2A2             | MAN2A2                   |
| LCK                | LCK                      |
| HADHB              | HADHB                    |
| PXDN               | PXDN                     |
| SUPT16H            | SUPT16H                  |
| SLC11A2            | SLC11A2                  |
| BCL6               | BCL6                     |
| RANBP1             | RANBP1                   |
| ENPP1              | ENPP1                    |
| ALDH1L1            | ALDH1L1                  |
| RNF14;UBE2V1;UBL4A | RNF14;UBE2V1;UBL4A;UBE2F |
| MCHR1;NPFFR1       | MCHR1;NPFFR1             |
| GRIA1              | GRIA1                    |
| SAMD4A             | SAMD4A                   |
| HMOX1              | HMOX1                    |
| ACSM5              | ACSM5                    |
| PLA2G2A            | PLA2G2A                  |
| PLEKHA8            | PLEKHA8                  |
| INPP5K             | INPP5K                   |
| SLC20A2            | SLC20A2                  |
| SLC7A2             | SLC7A2                   |
| TNP01              | TNP01                    |
| CCBP2              | CCBP2                    |
| P2RX6              | P2RX6                    |
| TRAK2              | TRAK2                    |
| TGFBR2             | TGFBR2                   |

|                      |                       |
|----------------------|-----------------------|
| NF1; IQGAP3; ALDH1A1 | NF1; IQGAP3; ALDH1A1  |
| KCNQ3; KCTD9; KCNMA1 | KCNQ3; KCTD9; KCNMA1  |
| SOD1; SOD3           | SOD1; SOD3            |
| CFB                  | CFB                   |
| RYR1                 | RYR1                  |
| SECISBP2             | SECISBP2              |
| LMBRD1               | LMBRD1                |
| NTRK1                | NTRK1                 |
| SLC38A1; SLC38A1     | SAT1; SLC38A1         |
| EGLN1                | EGLN1                 |
| NR2F1                | NR2F1                 |
| FPR1                 | FPR1                  |
| NUP160               | NUP160                |
| SHMT1                | SHMT1                 |
| BRCA2                | BRCA2                 |
| RERG                 | RERG                  |
| NEIL3                | NEIL3                 |
| ADARB1               | ADARB1                |
| UBA6                 | UBA6                  |
| SLC1A3               | SLC1A3                |
| LONP1                | PIM1                  |
| ZFP36L1; GRSF1       | ZFP36L1; GRSF1        |
| TNFAIP8              | TNFAIP8               |
| PPARG                | PPARG                 |
| GUCY1B3              | GUCY1B3               |
| MFI2                 | MFI2                  |
| SLC22A14             | SLC22A14              |
| PET112L; ABCF1; GCN1 | PET112; ABCF1; GCN1L1 |
| CHRD; CD74; CRLF1    | CHRD; CD74; CRLF1     |
| HSD17B6              | HSD17B6               |
| FCGR2A               | FCGR2A                |
| PPFIBP2              | PPFIBP2               |
| DUSP10               | DUSP10                |
| AQP3                 | AQP3                  |
| PDE5A                | PDE5A                 |
| ACSL5                | ACSL5                 |
| SLC30A8              | SLC30A8               |
| ATP1B1               | ATP1B1                |
| FSTL3                | FSTL3                 |
| DCLRE1C; POLG        | DCLRE1C; MDP1         |
| GC                   | DBP                   |
| AKAP6                | AKAP6                 |
| ABCC2                | ABCC2                 |
| ADCY2                | ADCY2                 |
| SEC61A2              | SEC61A2               |
| SKIL                 | SKIL                  |
| LYN                  | LYN                   |
| SLC25A10             | SLC25A10              |
| PUS7L                | PUS7L                 |
| STAB1                | STAB1                 |
| TYW1B                | TYW1B                 |
| CYP46A1              | CYP46A1               |

|                    |                                                                         |
|--------------------|-------------------------------------------------------------------------|
| FRAP1              | MTOR                                                                    |
| TDG                | TDG                                                                     |
| PC                 | PC                                                                      |
| ACIN1;DHX40;ZBTB46 | ACIN1;DHX40;ZBTB46;NARS2;DARS;DHX57;DHX15;RP9;SLU7;C3orf33;ZCCHC2;DDX27 |
| PTGER3;AHR         | PTGER3;AHR                                                              |
| EIF2A              | EIF2A                                                                   |
| RARB               | RARB                                                                    |
| PGM2L1             | PGM2L1                                                                  |
| PGGT1B             | PGGT1B                                                                  |
| CRIM1;SCG5;PRPSAP1 | CRIM1;SCG5;PRPSAP1;TXNIP;TIMP4                                          |
| MAPKAP1;RIN3       | MAPKAP1;RIN3                                                            |
| CAPN3              | CAPN3                                                                   |
| CHRNE              | CHRNE                                                                   |
| LTBP1              | LTBP1                                                                   |
| SMAD3              | SMAD3                                                                   |
| CRYGS              | CRYGS                                                                   |
| ALDOA;NCALD        | ALDOA;NCALD                                                             |
| ACAT1;NAT1         | ACAT1;NAT1                                                              |
| GRIA3              | GRIA3                                                                   |
| AASDH              | AASDH                                                                   |
| ERCC4              | RAD1                                                                    |
| CD4                | CD4                                                                     |
| AGXT               | AGT                                                                     |
| CHRNE              | CHRNE                                                                   |
| CHRFAM7A;CHRNE     | CHRFAM7A;CHRNE                                                          |
| NEIL3              | NEIL3                                                                   |
| CAV1               | CAV1                                                                    |
| RPS4Y2             | RPS4Y2                                                                  |
| DDX17              | DDX17                                                                   |
| ISCU               | ISCU                                                                    |
| C3;PROS1;C5        | C3;PROS1;C5                                                             |
| FBXO2;MAN2A2;ALG13 | FBXO2;MAN2A2;ALG13;EPM2A;GALM                                           |
| SLC16A4            | SLC16A4                                                                 |
| SRP54              | SRP54                                                                   |
| LONP1              | PIM1                                                                    |
| CX3CR1             | CCRL1                                                                   |
| SRRM1              | SRRM1                                                                   |
| DLGAP5;CTDSP2;CTDF | DLGAP5;SCP2;CTDP1                                                       |
| BIRC6              | BIRC6                                                                   |
| CES1;CES2          | CES2;CES2                                                               |
| COX7A2L            | COX7A2L                                                                 |
| ADH5               | ADH5                                                                    |
| MAPT               | MAPT                                                                    |
| ATP6V0E2;SLC36A1   | ATP6V0E2;SLC36A1                                                        |
| CSGALNACT1         | CSGALNACT1                                                              |
| SPTLC3             | SPTLC3                                                                  |
| GRM7               | GRM7                                                                    |
| DNASE1             | DNASE1                                                                  |
| SLC25A16           | SLC25A16                                                                |
| NALCN              | NALCN                                                                   |
| PSMB8;PCSK5;ANPEP  | PSMB8;PCSK5;ANPEP                                                       |
| PEG10              | PEG10                                                                   |

|                    |                                                                         |
|--------------------|-------------------------------------------------------------------------|
| SLC7A8;SLC7A8      | LAT2;SLC7A8                                                             |
| P2RX6              | P2RX6                                                                   |
| PIGW               | PIGW                                                                    |
| SUZ12              | SUZ12                                                                   |
| GNAZ;GNA01;GNAL;GN | GNAZ;GNA01;GNAL;GNAS;GNAS                                               |
| MCM7;MCM7          | MCM7;MCM2                                                               |
| PIK3C2B            | PIK3C2B                                                                 |
| HACL1              | HACL1                                                                   |
| IGF2BP1;MRPL37     | IGF2BP1;MRPL2                                                           |
| NDUFS7             | NDUFS7                                                                  |
| HEMK1              | HEMK1                                                                   |
| KCNIP1;KCNJ15      | KCNIP1;KCNJ15                                                           |
| PHGDH;AASDH;FASN   | PGD;AASDH;FAS                                                           |
| TRIB2;IRAK2;COL4A3 | TRIB2;IRAK2;COL4A3BP;STRADB;NRBP1;FASTKD1;PXK                           |
| HS6ST1             | HS6ST1                                                                  |
| NDUFS7             | NDUFS7                                                                  |
| SBF2               | SBF2                                                                    |
| HEMK1              | HEMK1                                                                   |
| STK39              | STK39                                                                   |
| MTMR1;MTMR11;SBF2  | MTMR1;MTMR11;SBF2                                                       |
| PGAP1;PGAP1;DFFB   | BST1;PGAP1;DFFB                                                         |
| TACC2              | TACC2                                                                   |
| EPB41L5;EPB41L4B;A | EPB41L5;EPB41L4B;ALDOC;PTPN3;PTPN4                                      |
| RNASET2            | RNASET2                                                                 |
| PRCP;PRSS16        | PRCP;PRSS16                                                             |
| LPL                | LPL                                                                     |
| DOCK9              | DOCK9                                                                   |
| ZFX;BRWD1;SSBP2;ZF | ZFX;BRWD1;SSBP2;ZFY;HIF3A;EBF3;EBF1;MEN1;NCOA3;SP7;MXI1;TAL1;RFX2;CNOT2 |
| SLC39A8;SLC39A10;S | SLC39A8;SLC39A10;SLC39A5                                                |
| PLB1               | PLB1                                                                    |
| DDX54;SKIV2L;CHD3; | DDX54;SKIV2L;CHD3;CHD5;DDX11;SMARCA4;SMARCA2                            |
| UFSP2              | UFSP2                                                                   |
| CHRFAM7A           | CHRFAM7A                                                                |
| IDH3G              | IDH3G                                                                   |
| TGFBR2             | TGFBR2                                                                  |
| NDUFA10;TRRAP;PIK3 | NDUFA10;TRRAP;PIK3C2B;TK2;MTOR;PSTK                                     |
| SLC2A9;SLC2A5;SLC2 | SLC2A9;SLC2A5;SLC2A12;SLC2A14;SLC2A3;SLC2A13;SLC2A1                     |
| BCKDHA;BCKDHA      | BCKDHA;TMEM91                                                           |
| PYGL               | PYGL                                                                    |
| NQO1               | NQO1                                                                    |
| SLC41A3;SFXN5;CHRN | SLC41A3;SFXN5;CHRNE;SLC30A8                                             |
| PIGW               | PIGW                                                                    |
| SLC25A10           | SLC25A10                                                                |
| NT5E;C3orf33;FASN; | NT5E;C3orf33;FAS;FAAH                                                   |
| CCT8               | CCT8                                                                    |
| PGAP1;PGAP1        | BST1;PGAP1                                                              |
| UTY;BST1;HSD17B6;S | UTY;BST1;HSD17B6;SH3TC2;RTTN;FBN2;FHOD3;P4HA1;CLK1;EPB41L1;ST13;FRMD7;F |
| P2RX6              | P2RX6                                                                   |
| OR11A1             | OR11A1                                                                  |
| PSMD1;PPP1R7;ATP6V | RPN2;PPP1R7;ATP6V1H;PSMD1                                               |
| SLC22A5            | SLC22A5                                                                 |
| CHI3L1;CHI3L2;CHIT | CHI3L1;CHI3L2;CHIT1;GLB1L2;GBA;OVGP1;GALC;GUSB;HEXB;GBE1;GLB1L;LCTL;AGL |

KIAA1967;LPP;KDM5E DBC1;LPP;KDM5D;C10orf116;KRTAP1-5;ARFIP1;GRIPAP1;DONSON;KIAA1217;COL6A1  
MEST;CHI3L1;HHIP;CMEST;CHI3L1;HHIP;OVGP1;LCTL;SPATA20;RCL1;KCNT2;ECHDC3;MOCS1;HGF;SYN2;DI  
FAM114A2 FAM114A2

HLA-A; HLA-A; DCLK1; CCRL1; BMPER; NRCAM; AP1S3; TROVE2; CDC20; LPP; ITGB4; PFKP; KDM5D; ANK2; ITPR1; KDM5D; PRKCH; PRKCZ; ZIC1; LDB3; CDKN1A; PDE4D; PTGS2; RNF38; ABLIM1; LOXL3; ARHGAP29; TRIM16; ZNF4K5; IGF2BP1; DDX54; HIPK3; WNK4; NUA2; DDR2; RBMS3; KIF27; TRIB2; MAGI3; ATAD2; SAR1B; ADSSL1; CLK2; HIPK3; WNK4; NUA2; DDR2; KIF27; KSR1; TRIB2; MAGI3; ATAD2; CLK2; PDGFRA; CDKL3; GRK5; NDUFA10; KIF20KN1A; ADAMTSL3; S100B; RNF38; ABLIM1; ARHGAP29; TRIM16; ZNF365; SLC39A8; ZNF395; ZNF238; STAMBPL1; GSTT1; CDKN1A; EGFR; AK5; MBOAT1; HIPK3; WNK4; NUA2; DDR2; BCR; AS3MT; PIP5K1A; CLK2; PDGFRA; CDKL17; ITGA3; RASGRF2; STAT1; S100B; S100A4; NOTCH3; NOTCH3; THBS1; FAT3; SLC8A1; LRP8; FBN2; CDH4; SYK; KAT7; SIX1; IRF2; DBP; MEIS1; HR; TARDBP; HOXB6; NFXL1; SP140; ETV1; MEIS2; ZNF83; ETS1; TRERF1; HOXC10; ZNF610; ZNF765; HDGF; ZNF248; TBPL1; TNFAIP3; HES1; CHD1L; ZBTB20; ZNF362; SHPRH; PPF1BP2; ZFX; ZMAT4; SPS6KA6; EYA4; ENTPD3; SIK1; TESK2; PRKAA2; TNK2; MARK1; STK3; MAP3K1; ITGA2; ADCY3; ADCY3; S100P; MAI1; APOBEC3G; MGLL; ATAD2; PDE7A; ARSJ; EYA2; PPP3CA; LPL; AMPD3; PTPRS; INPP5F; INPP5F; HDAC9; SGPP2; ROR1; PRDX2; LOXL3; AKR1C3; NQO1; HPD; DCT; ALDH3A2; P4HA1; CLK1; AKR1B1; LOXL4; GPD2; CMAHP; P4HTM; DBP; MAI1; PLAT; ERAP1; USP48; PAPLN; CORIN; USP25; TNFAIP3; PCSK2; ATG4B; ADAM9; ERAP2; CTSC; ECE1; USP34; ADAM10; SPS6KA6; RIPK4; PLK2; SIK1; STK17B; TESK2; PRKAA2; BRD2; CSNK1A1; TNIK; LIMK2; MARK1; STK3; STK3; MAP3K1; ROR1; AFAP1; NEB; CAPZB; DBP; BAIAP2L1; ANLN; EPB41; CALD1; PALLD; DMD; TNS1; GSN; ACTN1; CLMN; ENC1; MAI1; RBM45; NSUN6; RNASET2; EWSR1; SECISBP2; DDX60L; HNRNPF; CSTF2; TARDBP; DZIP3; AKAP1; DDX43; APOBEC3; PPP2R4; CADM3; ECE1; TOP2A; TRIM66; PLOD1; DPP4; ADD2; MAP3K11; LRRK2; BARD1; MYO6; EEA1; HEXB; IL6ST; RYR1; GPRC5C; CD44; RYR1; PDGFRA; PTPRS; P2RY6; ABCC9; TKT; ROS1; RIPK4; NETO2; TNFRSF9; FCGR2A; IL17R; HEC3; C12orf51; UBE2C; SHPRH; HECW2; DZIP3; TARSL2; ACS1; BIRC6; RNF111; NARF; UBR4; CPS1; NARS2; IL17C; CYB561; P4HA2; XDH; PLOD1; NDUFS7; RRM2; EGLN1; PIR; MADD; ELP3; DPYD; MIPEP; SDHC; RFESD; PPP3CB; KDM5B; NFYC; RORA; NR4A3; SF1; FOXM1; ETS2; ESR1; PPARG; NR2F1; HOXB5; NR4A2; LEF1; CREB3L2; MTA3; NFATC2; ZNF143; GFM1; HHAT; LRRK2; ACSM5; ARFIP2; SCG5; RND3; GNAL; ATL2; TUBG1; RRGD; GNAS; GNAS; RHOBTB2; RANBP17; CYP2R1; CYP26A1; PGD; CPS1; TXNRD1; ACAD10; TBXAS1; SMOX; ACADSB; ERO1L; CYP51A1; MADD; MADD; MADD; SLC12; ROBO2; TRIP13; ALDOA; PFKL; COL2A1; CD74; NHEJ1; COL1A1; GNAS; SCUBE1; DBNL; POP1; APLP1; EXOSC10; C12orf17; UBR4; MYH14; ADD2; MYO6; EEA1; KCN1; SPHK1; PPP3CB; MYH10; STRN; CAMK1; IQGAP3; RAD1; ATP2B4; IL17A; RSP01; ODZ3; FGF1; COL25A1; AAMP; LAMC2; COL13A1; TNXB; APLP1; PGF; ADAMTS1; FGFR1; DAO; PCOLCE2; APP; APLP3; SRGAP3; ARHGAP26; LRRK2; TBC1D15; MYO9A; RABGAP1L; RAP1GAP2; RIN3; TBC1D26; FAM13B; ARHGAP24; IL17C; HEXB; TLX1; GTF2A2; SCUBE1; POLA1; CENPF; BNIP3L; NPM1; POLA2; DGKD; SIM2; SMC2; PDGFA; HEXA; SMC3; LAMA4; LAMB2; COL11A1; CHAD; COL1A1; COL13A1; CD4; WNT9B; FBLN2; MGP; COL5A2; LAMA1; COMP; LAMB1; MADAM23; ADAM23; MIPEP; ADAMTS9; MMP11; ADAMTS16; ADAMTS6; ADAM33; ADAMTS1; TLL2; MMP7; MME; MME; TLL2; MO2; SOCS7; DOCK4; SH3BGR; SH3BGR; CNTNAP1; SHANK2; ARHGAP6; SIRPA; SYNGAP1; INPP5D; HGF; ELMO1; DNAAF1; DOCK4; RIC8B; ITS1; AKAP13; EIF2B4; TIAM1; ARHGEF1; NET1; DNMBP; RAPGEF2; ECT2; ARHGEF19; RAB3IP; IL17E; IGEA5; ELP3; TMEM68; AGPAT1; CRAT; NMT2; PNPLA3; TGM5; OXSM; NAT6; LCLAT1; NCOA3; ZDHHC3; SAT2; ZDHHC3; DHX58; DDX50; DDX27; CHD3; MOV10; HRH1; HRH1; DDX55; IFIH1; ERCC3; CHD5; CHD5; SRCAP; TTF2; EIF4A3; ZNF171; VISP3; PGF; AGT; PDGFA; GDF5; HGF; BDNF; KGFLP1; CD320; AR; DKK1; MDK; RABEP1; LIF; HBEGF; IGF1; IGF1; APLP1; POFUT2; GALNT1; C1GALT1; PARP3; B4GALT4; GALNT13; GALNT13; PARP14; DOK1; GYS1; GBE1; AGL; GALNT1A1; CENPF; PBRM1; MEN1; GLI1; POLE; CDCA5; CHD3; MSH6; MPP7; MKRN1; SUZ12; EZH1; PBX2; SVEP1; CHD5; CHD5; CHD5A8; SLC38A9; SLC13A5; SCN4B; POLB; SLC12A2; SLC9A9; SLC38A1; SLC4A5; SLC4A5; SLC22A5; SAT2; SLC20A1; SLC20A1; ZEB1; SP100; GTF2A2; SP4; NPM1; DYRK1B; MMS19; NCOA3; CIITA; ESR2; TRIM24; COPS5; NFKB2; SNW1; KAT21; CEP250; LIG4; NCL; PABPC1; CENPF; RAD1; CACNA1B; DLG4; MSH2; PRKCD; CEP120; LCK; HSPB7; ERCC3; DLC1; IL17D; BMPR1B; GALNT7; GALNT7; PC; PPM1K; B4GALT6; GALNT3; PPP2CB; GART; SLC11A2; RIMKLB; PPP1CB; GALNT3; AKAP13; PRKCD; CDC42BPB; RAPGEF2; DGKH; HMHA1; CDC42BPA; CHN1; BRAF; PRKCE; RGNEF; HEC2P3; FBXO21; WWP2; RNF144B; UBE2B; FBXO2; LNX1; FBXO10; MIB2; WWP1; NEDD4; FBXO25; UBE2Q2; EPM2A; TUBD1; RAD1; RERG; GFM2; GBP3; GBP3; DNM1; RAC1; GBP1; RABL2A; SAR1A; MTF2; ARL6; GTPBP2; RAB8B; RHEI1; WHSC1; SUV420H1; PRDM6; EHMT1; EHMT2; EZH1; EZH1; KIAA1456; METTL4; WBSR27; TYW3; EZH2; METTL7A; GATA3; GATA3; SLC13A5; SLC12A2; SLC38A1; SLC4A5; SLC22A5; NET1; NET1; SLC6A13; SAT2; SLC20A2; SLC16A9; SLC38A1; SLC38A1; LEPRE1; ASPH; PLOD3; KDM4C; KDM5C; KDM5A; OGFOD2; PTGS1; ADI1; ASPHD1; HLA-C; HLA-H; HLA-F; HLA-G; MR1; ULBP1; IL17F; TGIF1; CBFA2T2; E2F6; MXI1; HTT; SUFU; PEX14; ENO1; SKIL; ZNF85; PBXIP1; BATF3; IL17G; NC111; KIF21A; SMC3; KIF11; KIF18B; DNALI1; KIF17; KIF13A; KIFC1; DLC1; BBS4; TRERF1; ZFPM2; STK36; NBN; TBP; BCOR; TLE1; HMGB1; GTF2A2; HDAC2; CENPF; BCL3; TCF7L2; YWHAZ; HDAC1; HIF1A

ENOSF1;PPIG;C14orf149;AMACR;PPIL4;NKTR;PDIA5;PPIL6;PGM2;PGM2L1;EBP;GALM;MCEE  
.C4A4;KIF20A;SLC2A3;ORC1;PTGDS;SLC03A1;SAT1;ABCA4;SLC22A18;ABCC2;SLC37A4;SLC2A13;AQP3;SI  
PKNOX2;MYO5A;MACF1;NEXN;ARPC4  
ANK1;MAPT;PPL;ADD3;DSP;HIP1;SPTBN1  
CEP290;NFATC2;UBE2V1;BRCA2;HOXC9;GLI1;NFATC1;TP63;CAND2;RARB;KLF6;SEC14L2;SMAD1;ETV4;E  
DF2;ODF2;LAMA2;COL12A1;LAMB2;LAMB2;KRT18;SPAG4;NPHP1;KRT7;COL9A1;KRT4;TUBD1;DLG4;CLDN1;I  
JALCN;KCNH1;CLIC6;CLCN4;CACNA2D3;CACNA1B;CACNA1G;SCN4B;KCNQ3;KCNQ5;SCN1B;KCNIP1;KCNMA1;I  
KLK4;PLAU;CFI;HGF;PRSS23;F7;LRP4;PC;ENO1;FAP;PCSK5;F12;PIM1  
.C11A2;SOD3;STEAP3;MT1G;MT1F  
AD9;ERO1LB;DMGDH;CHDH;GSR;STEAP3;ACADM  
ACO1;NPL;CA9;ACO2;HMGCL;OGG1;ENO1;CBS;FAS;ENO3;PTS  
DNMBP;HGF;ECT2;ARHGEF19;PLEKHG4;ARHGEF7;ABR;RGNEF  
SP36;USP37;USP28;USP1;UCHL1;USP40;USP13;USP5  
RCC3;REV1;OGG1;MSH3  
EBF1;SP4;TCF7L2;CIITA;TCEA3;TBX1;TMF1;TCEA2;SMAD1;KLF5;TTF2;ILF2;TCF4;ATF2;TCF7;TIAL1  
KQ5;KCNIP1;KCNMA1;SLC12A8;ATP1B1;KCNJ15;PDXK;SLC9A7;KCNS3;TTL;KCNJ5;KCNJ6  
F3B;MTIF2;DENR;EIF1AX;EIF4E;NAT1  
.4;SMARCA4;GLRX;SDCBP  
GALNT13;CD72;VCAN;BSG;GALNT7;GALNT7;LGALS3;LPHN2;CLEC2D;PKD1L2;ATRN;GALNT3;GALNT9;GALNT  
TMR4;MTMR3;DUSP15;DNAJC6;PTPN13;MTMR7;EPM2A  
T;MAPT;MACF1;ATG4C;BCL2L11  
ITIH5;SERPINB1;AGT;ITIH4;APLP2;APP;SERPINB8;CD109  
P63;EED;DNAJB6;TTF2;JARID2;E2F7;BCLAF1;EPC1;ARID5B;RUNX1T1;BCL6;ATXN1;HOPX  
P13;CASP3;CTSK;USP5  
;CHN1;GRB10;SLA  
;LCK;GHR;MAPK8IP2;TCF4;PRKAG2;CDKN2B  
;CHD5;TTF2;DDX1;DHX36;CHD6;DDX10  
P1CB;EPM2A  
.NT9;GALNT1

P1;ATP8B3;ABCB6;MSH6;MSH2;ABCF1;ABCF3;ABCB9;ATP6V1H;ABCC4;ABCA3;ERCC3;ABCA13;TAP2  
D1;COG3;AP4S1;XP05  
YP46A1;NOX4;CYP2C8;CYP19A1;PXDN;PTGS1;FAAH  
;DNM1;MYL6B;MYO1G;DNAI1;NMI;MYH7B;CGNL1

NR4A1

P1K3R4;TWF1;TTK;CLK3;MAP2K4;EPHB6;NEK1  
P49;USP36;USP37;USP28;USP40;ESPL1

f2

XXTR;NPFFR1;CELSR2;FPR1;SMO;GPR56;GPR133;EMR2;GRM7;GABBR1;HRH1;LPHN2;FZD3;FZD3;GPR64;GPI

.T3LG;HGF;AR;LIF;CMTM3;BMP1;TNFSF9

.35D1

.A0317;RNF41;HECTD2;WWP1;NEDD4;UBE3C



7;NAT1

10;DNAJC24  
EBP;HYAL3;HYAL3

2;MDP1  
FXD1;KCNT2;TRPC1;ANO6;PKD1L2;CHRNE;P2RX6;TRPV1;TRPM7;SCNN1A  
AP2;ARPC4  
16  
X27

1;ITGB3BP;GRK4;NPAS2;HIF3A;ARNTL2;CAPN3;RGS7;GNAL;PKP1;ADRBK2;GNAS;GNAS;GNAS;TSPAN8;PTK

1;ATP13A3;ATP10A

ABP3;PITPNM3;SCP2;APOL2;CADPS2;PTGS1;LIPC;LPAR4;TAP2;APOD

.0

1;AGTPBP1;ANPEP

AKT; TK2; TK2; BCKDK; MTOR; PSTK; PIP4K2B; PIP5KL1; PPIP5K2; LRGUK; PFKFB2; NEK10; PIP5K1C; TRPM7

IL6ST; ANGPTL1; CD72; ALCAM; CNTNAP1; TNC; LIFR; TNFR; GLG1; LAMA1; TRIM24; NCK1; AR; APOL2; EPHB2; C

30RT1

ATF2;CELSR1;BATF3

42BPA;RIN2;NRK

73;RNF213;RAD17;NVL;CDC6;RFC5;RAD51C;PIM1

















9; IL1R1; CD40; CLEC2D; P2RX6; EBP; FAS; SARM1; CLDN4; LYVE1



















7; ZNF480; ZNF862; PRDM6; RMI1; MKRN1; KDM4C; ZNF585B; PHF20L1; GPANK1; CCDC75; PHF1; ZNF720; METTL4

2

TRMD4A;SLC25A10;SIL1;ITGBL1;ORC1;ARMCX5;CRYZL1;TP53I3;PTGDS;SH3TC1;EPB41L5;AASS;SORD;PLI

;HEXA;MANBA;EBP;NAGA

1; TBL2; AUTS2; PART1; FMN2; BAIAP2L1; PPFIBP2; GTSE1; TM4SF1; SMA5; TARSL2; NDRG2; CA11; UACA; ALS2C1  
P2A; PHKA2; PSTPIP1; POLR2D; KCNMA1; RIMKLB; FAM111A; SAMHD1



;HK2;HK2;COL7A1;NFASC;TNFRSF11B;SERPINA1;ITGA3;ZIC1;SLC4A7;LDB3;LMNA;RASGRF2;PTGS2;STAT395;HPD;ZNF238;CYB5D1;STAMBPL1;KSR1;DCT;ZNF529;APOBEC3G;ZNF514;ERAP1;UBR5;P4HA1;RIMS1;M;PDGFRA;RBM45;CDKL3;GRK5;KIF26B;RPS6KA1;EIF2AK3;MYO1B;BRSK2;LACE1;ABCC9;PDK1;CLK1;TKT;S6B;RPS6KA1;EIF2AK3;MYO1B;BRSK2;LACE1;ABCC9;PDK1;PDK1;CLK1;TKT;ROS1;RPS6KA6;LYN;RIPK4;PL;KSR1;DCT;ZNF529;APOBEC3G;ZNF514;ERAP1;UBR5;PPP3CA;RIMS1;MDM2;DNMT3A;RNF14;RNF185;RNF32L3;GRK5;RPS6KA1;EIF2AK3;NSUN6;BRSK2;DNMT3A;PDK1;PDK1;CLK1;TKT;TKT;ROS1;RPS6KA6;LYN;RIPKT9;CACNB3;COL10A1;ANO1;ANO2;CACNA1I;RYR1;ARSJ;PPP3CA;LPL;CLK1;TKT;CALU;EFCAB6;CCBE1;GPD10;FOSL1;RUNX2;RERE;PITX1;NFATC3;NFYC;RBPJ;ZNF33B;RORA;RNF4;EGR2;NR4A3;SF1;FOXM1;ZNF75D4;NUCB2;ZNF658B;HDAC4;RBM5;CHD7;PRKDC;ORC1;AKNA;CDKN2A;TET1;ZNF596;ZNF792;SRRM1;ZNF554;P3K6;POLK;MAP2K5;PFKL;ATP11A;STK36;PDE5A;ACSM5;ENTPD6;ADCY2;IDH3G;C1GALT1;WEE1;NEK3;PRFNASET2;EYA4;PON2;HDAC11;ENTPD3;MTMR1;HDAC6;CHD1L;SHPRH;DHX40;DDX60L;GGH;NAV2;DDX43;PDE1OB;GPX3;BCKDHB;P4HA2;XDH;CRYZL1;TP53I3;HMOX1;AASS;SORD;HTATIP2;PLOD1;PGD;PGD;PTGR2;PYRCAM15;USP24;MMP28;DPP4;CPS1;PSMB8;PAPPA;USP43;C1S;QPCT;MMP16;CAPN3;PRCP;ADAMTS17;MMP24;A1;ULK4;MAP4K1;MAP3K6;TAF1;MAPKAPK3;MAP2K5;MAP3K11;LRRK2;STK36;SGK1;MAPK8;MAP2K3;BUB1;WEPIB;ALDOA;FLNB;HOMER2;MYH14;MYH14;MYRIP;MYO10;UTRN;DNASE1;DAAM2;SYNPO;PARVB;MYO9A;MYOT;3F;PABPC4;RBM5;SKIV2L;LARP4;PUS7L;SRRM1;RPL9;SF1;PABPC1L;SYNJ2;MRPS28;BARD1;PPIE;MET;MET;DPYD;MAP3K13;SHMT1;PYCARD;SP100;THRB;GTF2A2;CENPF;BNIP3L;ZBTB16;CD4;NPM1;SOD1;DGKD;PRA;GRIA1;ITGB8;GPER;BDKRB2;DDR1;FGFR2;PLXNA2;MED24;ITGBL1;SEMA4B;ITGA2;STRA6;RAMP1;SEMA5DARS;TRIP12;ACSM5;SH3RF1;ZNRF1;HUWE1;HERC1;LIG4;QRSL1;ACSF2;AASDH;HECTD3;MCCC2;WWP2;RNF3A;JMJD1C;LEPRE1;CD01;TYW1B;RRM2B;ASPH;ACO1;MOCS1;PLOD3;KDM4C;FRRS1;HEPH;SFXN5;ACO2;ETFZEB1;TLX1;MAF;THRB;SIX4;CERS4;NR1D1;HOXC9;HOXC6;MPP2;HOXA3;MTA1;POLB;MEF2D;HMBOX1;FLI1;RAB24;GLUD1;DNAJC27;DOCK9;TUBD1;RAD1;SRP54;RERG;GFM2;MOCS1;NIN;GBP3;GBP3;DNM1;GPN1;RAESMO;DPYD;GBF1;SDHC;RFESD;ACADVL;TYW1B;NNT;CYP46A1;ASPH;NOX4;CYP2C8;ACAD9;ERO1LB;DMGDH;E;CEP72;ZAK;IRAK2;CLDN1;POLB;MST4;CMYA5;TP63;FGFR3;EED;SAV1;HDAC1;MOCS2;PARP1;CASP8;SMADMYO5B;MAP2;CAMK2G;RGS2;PDE1B;PCNT;MYO1G;CASK;MYO5A;CAMK2A;PHKA2;CAMK2B;TRPV1;RGS16;ADD3;MDK;HBEGF;SOD3;FAP;LIPC;THBS2;RSPO3;PF4V1ARHGAP6;ARHGEF1;SYNGAP1;HMHA1;RGS2;ARHGAP28;GDI1;RIN2;DAB2IP;GAPVD1;ABR;ARHGAP21;RGS12;TIMELESS;SMC4;CD1D;NR4A1;P2RX6;NOTCH4;TCF4;EXT2;SCP2;SDCBP;TGFB2;TAP2TN3;COL18A1;PRELP;DSP;FBN1;FBLN11;ADAM28;MBTPS2;LMLN;ADAMTS12;FAP;BMP1;ADAM12;MMP19AJC6;MAPT;DOCK1;PTPN12;SH3KBP1;PLSCR1;ADAM12PLEKHG4;ARHGEF7;RAPGEF4;KNDC1;RASGEF1B;GAPVD1;ABR;SERGEF;DOCK1;ALS2;RGNEF14;GLYATL2;HADHB;ZDHHC11;GPAM;QPCTL;HGSNAT;GGT2;NAT10;CHKB;F13A1RANB3;SMARCA4;CHD1;SMARCA2;DHX36;DHX38;CHD6TF2;BMP1;NOV;LEP;CXCL12NT7;GALNT7;B3GALTL;PARP1;HPRT1;PPAT;ALG9;XYLT2;B4GALT6;GALNT3;PARP8;PIGP;GALNT9;GALNT1;D5;SMARCA4;CHD1;CDC6;CHD62;SCN1B;SLC38A4;ATP1B1;PDXK;SLC9A7;SLC23A2;SLC23A2;SCNN1A;NAT1B;NR1H3;SRCAP;FHL2;SMARCA4;SMARCA2;ATF2;MAXATXN1;NMI9;GALNT1;SMG6;GBGT1;NUDT18;ABL2;PIM1;TGFB2;REX02

;UBE3C;WDSUB1B;MX1;MFN1;RAC2ART;PRDM7;METTL3;FTSJD2;NSUN7;ALDH1L1A4;HTT;SLC36A1;SLC6A9;SLC12A8;SLC23A2;SLC23A2;SLC1A3;SLC6A1;NAT1;NAT1

DAC3;FLNA;APBB2;APBB1;AHR;DIP2A;NIF3L1;ERCC3;STK4;TCF4;MDFI;SMARCA4;HDAC8;RNF19A;BRD7

LC12A7;LCN6;NUP214;ORC2;SLC25A22;SLC22A23;SLC13A5;TCOF1;CPNE3;SLC12A2;AP1G1;SLC25A27;NU

TV5;KDM5A;NR4A1;HNRNPD;ELF2;EPC1;FUBP3

ROCK2;THBS3;KRT86;MAP2;KLHL3;PRPH;MAPK8IP2;CLTCL1;KRT3;MAP4;CAV1;KRT8;CLDN4;ISCA2;THBS2  
KCNJ15;KCNS3;KCNJ5;KCNJ6

1;AIM1

R1;PTGER3;CCBP2;CCBP2;SLC26A6;ADRA1A;ADRA1A;GPR135;CELSR1;PTGER2;LPAR4;EDNRA

2B;PER3;SHISA5;WNT9B;SIM2;PLCD4;AKAP13;STAT5B;NCOA3;PLCD1;RAPGEF2;FLNA;LSP1;STAT4;RGS2;

5;MFAP4











































;DBF4;PHF2;EXOG;GPATCH1;GPATCH4;PRDM7;DHX36;DHX38;ZNF385B;DARS2;R3HCC1;MBNL3;TIPARP;ZBT



EKHH2;RIF1;NR4A3;PTGR2;EPB41L4B;TTC33;CBR4;ACBD6;MEI1;TRIP12;TTC37;ELM02;HSD11B1;LCN6;W

R12;LPIN1;MRPS28;ORA0V1;TMEM50B;C9orf114;NXPH4;NRM;OFD1;CUL4B;ICA1;FHL1;FSD1L;PHF3;DSCR

1; RCAN1; RNF38; B9D1; HLA-B; HHIP; CDON; ABLIM1; TBX20; IL1RL1; IGF2BP1; HYAL1; NDRG1; LSAMP; ZNF36;  
DM2; DNMT3A; RNF14; RNF185; RNF32; LOXL4; RNF8; ZNF610; EWSR1; ZNF765; ZNF248; KAT7; MGAT4B; TNFAIP;  
SLC27A3; ROS1; RPS6KA6; LYN; RIPK4; EWSR1; PLK2; ACIN1; MYO15A; SIK1; HDGF; STK17B; ABCC1; CHD1L; TUB  
K2; MYO15A; SIK1; STK17B; ABCC1; CHD1L; UBE2C; SHPRH; DHX40; DDR1; DDX60L; PYGL; TESK2; GK; GK; GK; PRI  
2; RNF8; ZNF610; ADAM22; EWSR1; PAPLN; ZNF765; ZNF248; KAT7; TNFAIP3; HDAC6; RPL37A; ZBTB20; RNF157;  
4; PLK2; SIK1; KAT7; STK17B; DDR1; TESK2; GK; GK; GK; PRKAA2; FGFR2; TNK2; PIK3C2B; CSNK1A1; TNIK; LIM  
2; ENTPD3; FBLN7; JAG1; P4HTM; SMOC1; DMD; EPS15; NUCB2; CD97; CADM3; GALNT2; S100A13; CACNA2D1; GSN  
); ETS2; ESR1; ZFP36L1; NPAS2; ARNTL2; HMGB2; ZNF498; L3MBTL1; TSC22D1; PPARG; SOX6; RFX5; NR2F1; ZSC  
; MITF; ZFPM2; ZNF615; SSBP2; MYBL1; CHD9; TAF1; HIVEP2; ZNF655; POLK; ZNF484; ZFY; SP110; MCM7; LBR; T  
SAP1; MIPEP; MAP3K13; PKM; SPHK1; POLR3A; LIG4; BMPR1B; NME6; ITGA1; RAD1; ZAK; ACSL5; ENOSF1; ATP8B  
C; DNMT3; HDAC4; APOBEC3F; ATP6V1B1; DUSP10; CHD7; PFKFB4; SKIV2L; MPPED2; CHD9; AMPD2; PLA1A; PTPRF  
XD1; TXNRD1; SUMF1; ALKBH6; CBR4; RRM2; SMOX; L2HGDH; GAPDH; IDH3G; ERO1L; EGLN1; ALDH1A3; HSD11B1; I  
ADAM23; UCHL5; USP45; MIPEP; ADAMTS9; MMP11; ADAMTS16; ADAMTS6; CASP1; LTA4H; CTSL1; ADAM33; RNPEP; I  
E1; NEK3; PRKX; MAP3K13; MAP4K2; MELK; RIOK2; ATM; EXOSC10; ZAK; DYRK1B; SPEG; ROCK2; MST4; MAPK13; CI  
; SORBS1; PHACTR2; SSH1; SHROOM3; SMTN; FLI1; TPM2; CCL28; TMOD2; MYO5B; AVIL; TWF1; TLN1; TNNT3; DAAM  
ET; RBM33; SAFB2; RBM12B; KIN; XPO1; SFPQ; TAF15; ZNF638; DDX60; HNRNPH3; NCL; PABPC1; APOBEC3B; DHX5  
RLR; TNC; AGT; MSH6; PDGFA; MSH2; PRDM6; HPRT1; TBX1; FLNA; CDH13; NRBP1; CALCOCO2; SBF2; NR4A1; STK4;  
5A; TFRC; DRD4; LSR; RRBP1; CD46; NTRK1; PLXND1; MCHR1; PTPRF; SEMA6C; SEMA5B; PILRB; IL15RA; PLXNB2;  
144B; ACSL5; PCCA; UBE2B; RNF41; PET112; HECTD2; LNX1; EARS2; TRIM5; LRSAM1; UBA7; SMAD1; NADSYN1; C  
FDH; PPAT; KDM5C; KDM5A; APP; SLC25A37; ISCU; OGFOD2; PPP2CB; SLC11A2; CBS; STEAP3; PPP1CB; ISCA2; IS  
DDIT3; TGIF1; ROR1; NR1D2; RARB; PBX1; NR3C1; FOXJ2; TBX1; ROR2; ESR2; ETV4; PBX2; ETV5; HOXB8; DLX6;  
39B; RAP2C; RAC1; OLA1; RHOBTB1; GBP1; RABL2A; SAR1A; MTIF2; ARL6; ARL6; RAB15; GTPBP2; RAB36; RAB8B; I  
ETFDH; CYP19A1; AR; COX7A2L; GPX2; GLRX; ADH5; MAOA; GSR; STEAP3; ACADM; CYB5R3; ALDH1A2  
1); APLP2; ITGB3; PRNP; NONO; CDK2; CDC42BPA; RGMB; GCC2; FHL2; APP; HACL1; APIP; SUFU; E2F7; PSMA4; MAI  
); NMI; SPTBN1

; RABEP1; TBC1D1; DOCK1; CHN1; DLC1; RGS16; ARHGAP9; TBC1D12; TBC1D19; RANBP1; SIPA1L3; TBC1D16

; PARP16; TIPARP; A4GALT

JP98; SLC4A2; SLC4A5; SLC4A5; SLC22A5; SEC14L2; ABCB9; SYT3; SLC2A1; ABCA3; SLC4A9; FABP3; SLC25A12

2; ISCA1; CLDN12; NRP2

ECT2;MIB2;TRIM38;ATP2C1;PLCG2;TRAF2;SUFU;DKK1;CLTCL1;SNX25;RGS16;PRKCE;ARNTL;RIPK2;CXCI















































B7C;FTSJD2;ENPP1;REX02

WDFY3; INSC; DPYD; C7orf63; IFRD1; SLC25A42; ORC2; RANBP17; HEATR7B1; NBEAL2; BHLHB9; DHRS12; ARMC2

3;GNAS;MDGA1;FAM53B;MRPL44;NAAA;ERLIN2;TNXB;SPSB2;LEPRE1;FANCD2;GPM6B;KIAA1967;POLA2;M

5; YY1AP1; PDXDC1; NOTCH3; NOTCH3; WNK4; ANKRD44; ZNF238; SMG5; SUN1; SLC02A1; FAT3; ID2; PLEKHA7; LR3; HDAC6; RPL37A; ZBTB20; RNF157; ZNF362; SHPRH; RNF180; HR; ZFX; LIMK2; DZIP3; MLL5; ACAP2; ZMIZ1; ZMG2; TUBA4A; SHPRH; DHX40; DDR1; DDX60L; HNRNPF; CSTF2; PYGL; TESK2; GK; GK; GK; PRKAA2; FGFR2; RASL11E; KAA2; FGFR2; TNK2; CSNK1A1; TNIK; PPP2R4; LIMK2; HSPA12A; IQCA1; KIF20A; NAV2; MARK1; DDX43; ABCA5; S; ZNF362; SHPRH; RNF180; HR; ZFX; LIMK2; DZIP3; MLL5; ACAP2; DMD; ZMIZ1; ZMAT4; ADAM9; CPXM2; ZNF658B; EK2; MLL5; MARK1; AGPAT5; STK3; STK3; CHST6; GGT7; MAP3K1; RPN2; PRKDC; PFKFB4; ULK4; WBSR22; MAP4K1; ; ACTN1; GALNT12; SCIN; DSG3; ITGA2; ASIC1; LDLR; MMP28; S100P; ITPR2; MYL5; CACNA1A; SUMF1; MYL3; CACAN29; HOXB5; NR4A2; DMTF1; CREB3L2; PCM1; MTA3; NFATC2; ZEB1; TLX1; REL; MAF; THRB; SIX4; ZBTB25; CERSOPBP1; ZNF501; PRDM8; HIF3A; ZNF354C; ZNF568; EBF3; TBP; ZNF273; ZNF595; SAFB2; ZNF718; PRR12; CCNL13; POLB; MST4; ATP2B4; ITGA10; MSH6; PTEN; MSH2; CDC42BPG; TSSK4; TSSK4; MARK2; ATP10B; ATP11C; PSTK; ; PPAPDC1A; ACAD10; SYNJ2; ATP11A; CDC14A; DHX57; ATXN3; PDE5A; ARSK; ENTPD6; PNPLA2; ATP6VOE2; PTPN MADD; SMO; DPYD; RFESD; KDM3A; OGDH; GLUD1; ALDH3B1; JMJD1C; DHRS12; HSD17B7; LEPRE1; CDO1; TYW1B; RRPCSK7; MPND; KLK4; ADAMTS1; DNPEP; TLL2; MMP7; UFSP2; MME; MME; CTSH; CASP8; TLL1; USP49; MAP2; PLAU; CPNE3; PIK3R4; MKNK1; MAP4K4; CDC42BPG; TSSK4; TSSK4; TTK; MARK2; CLK3; BCKDK; AKT2; MTOR; WNK1; MARK31; LSP1; KLHL3; HIP1R; PLS3; TNS4; MIB2; TLN2; MYO1G; WHAMM; KLHL2; NCALD; ABLIM3; LIMCH1; DBN1; TRPM78; HNRPLL; RBM6; EXOSC10; OAS1; NPM1; THOC1; DDX50; RBM43; DDX17; CPEB3; LRPPRC; ACO1; FUS; EIF2A; PPIGHR; OXCT1; CDA; CARS; MSH3; HPS4; EXT2; MYCBP2; RUNX1T1; ADH5; ALS2; FAP; PDXK; ATF2; SLC9A7; TARS; CASTAB1; OXTR; LBR; NPFFR1; NPTXR; SEMA4F; PTPRD; EPHA2; MET; LRP5; IL21R; PTPRQ; PTPRQ; LMBR1; GRIA3; IARS2; MIB2; PC; WWP1; NEDD4; CARS; UBA6; MYCBP2; UCHL1; SH3RF2; GART; UBE2Q2; UBE2F; RNF19A; GLUL; DARCA1; SLC40A1  
TGIF2; NR1H3; NR4A1; TTF2; PKNOX2; AR; FOXP1; POU6F1; CREB3L3; ELF2; CERS5; BCL6; ATF2; MAFF; HOPX; BARRHEB; RAP1B; MX1; MFN1; RAC2

PT; PDS5B; SMARCA4; ACP1; DTNBP1; FAS; IRAK3; ATXN1; CLDN4; CLDN12

;KLHL2;HTT;SLC4A3;SLC26A6;LST1;SLC11A2;AP4S1;SLC25A36;SLC23A2;SLC23A2;DOC2B;TAP2;TAP2;A

L12

















































;HSD17B7;RIC8B;RNPEP;VCAN;TTC4;NNT;TTC12;ASPH;HSF2BP;C2orf63;SLC25A27;WDFY4;ADH1C;ADH1C

OV10;MOCS2;TM6SF1;TMEM106A;NUB1;PSG1;RARRES2;MKRN1;WNK1;KDM4C;NDRG3;COL5A2;ANK3;L3MBTL3

RP8;KSR1;CDH4;SYT9;SDHA;KHDRBS3;CACNB3;ORM1;ACSS2;CROCC;TNFRSF19;APOBEC3G;TRIB2;KLHL13;MAT4;ADAM9;CYB561;ZNF658B;ERAP2;CYP39A1;APOBEC3F;NFXL1;P4HA2;ECE1;SP140;ZNF83;SMAP1;STAB3;TNK2;TARDBP;CSNK1A1;TNIK;LIMK2;HSPA12A;IQCA1;KIF20A;NAV2;MARK1;GNAZ;DDX43;DNM3;ABCA5;ISTK3;STK3;TOP2A;TARSL2;MAP3K1;CHD7;PRKDC;RFC4;ORC1;RUNX2;PFKFB4;ULK4;SKIV2L;MAP4K1;NTRKERAP2;APOBEC3F;NFXL1;ECE1;SP140;SLC39A10;ZNF83;SMAP1;STAC;LIMD1;RBM5;TRERF1;ZCWPW2;MAP3I;TYMS;NTRK1;CAMK2D;MGAT1;PIGN;PAPD4;POLD3;PDK2;MAP3K6;GRK4;SAT1;TAF1;ACAT1;ACAT1;MAPKAP1;DNA1D;LPCAT1;C1S;NPTXR;GALNTL1;TPCN1;ARSK;ENTPD6;MMP16;CAPN3;ZZEF1;AN08;UTRN;DNASE1;MMP14;UBN1;NR1D1;HOXC9;SREBF1;HDAC2;CSRNP3;BCL3;HOXC6;MPP2;HOXA3;C11orf9;MTA1;GAS7;ZNF133;L1;PRDM15;AFF3;ELP3;KIN;SFPQ;HUWE1;SPHK1;SP140L;ZNF566;ZNF343;DMAP1;NHEJ1;TAF15;CENPA;POLR;HPRT1;MAP3K8;CDC42BPA;MAST4;ATP10D;PPAT;SRPK1;ITGAE;STK4;ARL6;ATP2C1;FAH;ADPRH;PPM1K;RII22;PTPRD;DHX15;GPI;DNASE1;PTPRQ;PTPRQ;CDKN3;PDE6B;DDX60;PPP3CB;PMS2;PTPN3;SSH3;MRPL44;IRM2B;HMGCR;SOD1;NNT;ASPH;NOX4;PLOD3;ADH1C;ADH1C;SQRDL;KDM4C;CPOX;H6PD;ERO1LB;DMGDH;FRRS1;CFI;CPZ;ADAM28;PRSS23;PRSS16;F7;LRP4;COPS5;USP36;CPXM1;USP37;USP28;USP1;PC;QPCTL;MBTPS23;PLK3;MAP3K8;CDC42BPA;MAST4;SRPK1;AKT3;STK4;MAP2K4;WNK3;NRK;CASK;NEK10;NEK1;BRAF;NUAK17;ADD3;TMOD1;TAGLN;NMI;SCNN1A;MYPN;HIP1;SPTBN1;MYH7B;STK38L;FMNL1;PXX;SPIRE2;TRIOBP1L4;EIF4E3;RAVER2;HRH1;HRH1;SNRNP35;NOL8;SCAF4;PCBP2;ANKRD17;DDX55;EIF1AY;IFIH1;CPSF4;NARD8;FAAH;ENPP1;PTS1L6ST;FPR1;IL17RD;PLXNA4;IL17RE;SEMA3A;BMPR1B;GFRA2;SEMA3B;SEMA6A;ITGA1;GUCY1B3;UNC13B;IRS2;TARS;RFWD2;CTPS2;UBE3C;MARS;TTL;RNF40;ZNRF2;PPCS;ASNS

ATF3;PIM1;PAX6

APOD



















































);H6PD;CRYL1;TTC9;TMC06;DNAJC13;DAO;CLEC2D;THADA;TTC17;TTC39A;CTNBL1;ARMC8;LTBP2;PKD1L:

3;CD320;FILIP1L;OXA1L;OXR1;KDM5C;CARKD;WSB1;C2CD2L;TMEM106B;POMZP3;KNDC1;LRRTM1;NTNG2;I



SPON1;SGOL1;MAGI3;CNTN3;GPCR5C;STAP2;CACNA1I;LRRFIP1;NTN4;NTN4;FHOD3;SMG7;ERAP1;SLC14A2  
C;LIMD1;RBM5;TRERF1;XDH;ZCWPW2;NT5E;TRIM59;RERE;RNF145;HMOX1;ADAM15;TET1;SORD;RNF220;TF  
PABPC4;STK3;STK3;TOP2A;TARSL2;RBM5;MAP3K1;NT5E;CHD7;RAB3A;RFC4;ORC1;PFKFB4;ULK4;SKIV2L;  
1;CAMK2D;TRIP13;DYNC2H1;PDK2;TPX2;MAP3K6;CUL9;GRK4;CPS1;CHD9;ABCA4;TAF1;MYH14;MYH14;HSF  
K1;NT5E;TRIM59;CRYZL1;RERE;TP53I3;RNF145;ADAM15;TET1;SORD;RNF220;TRIM66;MMP28;ZMYM1;ZBT  
K3;POLK;POLK;OAT;MAP2K5;PFKL;ADCK3;LPCAT1;ZDHHC15;HHAT;MAP3K11;HS6ST1;LRRK2;STK36;DPH5;  
24;EFHA2;CELSR2;PPP2R3A;DGKG;GALNT13;GALNT13;FAT1;MIPEP;EDIL3;KIAA0494;NPNT;MMP11;SUSD1  
TCF7L2;IRF5;MEF2D;BHLHE41;HMBOX1;FLI1;NFATC1;SIM2;TP63;TSC22D3;STAT5B;HDAC1;DDIT3;TGIF1  
LR3A;ZNF638;LIG4;SP100;ZNF621;HEMK1;NCL;ZNF776;ZNF692;PMS2;POLA1;PCNA;EBF1;ZNF705G;ORC4  
EV1;DCLRE1C;ATP13A3;FDFT1;HACL1;PGM2;B4GALT6;FAHD2A;POLR2B;NEK10;NEK1;KCNMA1;ENO1;PDP1;  
NAAA;HDAC2;POP1;SSH1;APOBEC3B;INPP5B;DHX58;RAD1;RAD1;PNPLA3;EXOSC10;PLA2G2A;DDX50;ATP8E  
1;HEPH;CRYL1;LDHA;ETFDH;KDM5C;DAO;DAO;KDM5A;PDIA5;PIPOX;PXDND;FDFT1;AR;SCP2;OGFOD2;GPX2;  
;AGTPBP1;PSMA4;LMLN;UCHL1;ATG4C;USP40;ADAMTS12;FAP;PCSK5;F12;BMP1;USP13;ADAM12;CASP3;ES  
;TRPM7;SRPK2;IRAK3;AIM1;RIPK2;STK32C;STK38L;PIM1

ONO;EIF5A;EIF4H;EIF3B;CSTF3;FXR1;G3BP2;OAS3;AQR;EIF4A3;DDX1;DDX11;NOVA1;NUFIP1;HNRNPD;F

KDEL3;MED12;CNTNAP1;PTPRU;EPHA4;ITGA10;PRLR;TSHR;PTCH1;DERL1;ANTXR1;FGFR3;GRM7;ROR1;GA





















































2;SUMF2;SLC25A37;AGTPBP1;ATRN;AHCYL2;ARFGEF1;PACRGL;ADH5;STAG3;SLC25A36;SERAC1;ZFC3H1;L

FI27;TSGA10;SLC35F2;HERPUD1;C14orf2;LST1;TMEM126B;FAM63B;DLC1;PMEPA1;PIGP;SH3KBP1;C18orf

2;CLK2;UBR5;FANCI;BOC;CTNND2;SH3BP2;GRK5;FBXL5;UBE2D3;IFT172;SOX9;PTPRS;CCDC136;RIMS1;RIM66;CYP2R1;ZMYM1;ZBTB46;ZNF596;UNKL;ZNF792;RNF111;ZNF33B;RORA;MT4;ZNF554;CYP26A1;ZFYV;MAP4K1;NTRK1;CAMK2D;TRIP13;GNAO1;DYNC2H1;GNL2;MAP3K6;CUL9;GRK4;CPS1;CHD9;ABCA4;TAF1;MYPA14;KIF23;MAPKAPK3;NARS2;ACTA2;ABCC2;PSMB8;MAP2K5;PFKL;ADCK3;MCM7;DARS;ATP11A;MAP3K11;ITGB4;ZNF596;UNKL;ZNF792;RNF111;ZNF33B;RORA;MT4;ZNF554;ZFYVE16;RNF4;EGR2;NARF;ZFPM2;NR4A1;SGK1;QPCT;MAPK8;EPHA2;DGKI;MET;MET;FN3K;HMGCS1;MAP2K3;BUB1;MGEA5;GSTM3;TK1;WEE1;NEK3;DGL;CACNA2D3;PPP3CB;PCDH9;EFCAB2;SCUBE1;ITSN2;SGCA;ITGA1;PCDHB9;CACNA1B;ITSN1;PLA2G2A;REPL;ROR1;NR1D2;CBFA2T2;RARB;NFIB;PBX1;NR3C1;E2F6;FOXJ2;TBX1;HMG20A;ROR2;STAT4;ESR2;ZNF4964;SP4;PBRM1;HJURP;ZBTB16;ZBED5;HMGXB4;RBM6;ATM;THOC1;ZNF419;MEN1;GLI1;POLE;ZNF557;POLA2;FDXACB1;NUAK1;PDXK;SRPK2;NT5C2;IRAK3;ATP10A;AIM1;MDP1;TTL;NUDT18;STK32C;ENTPD4;ABL2;TRIP33;PDE4A;PTPRU;ATP2B4;SERHL2;PLCD4;DDX27;CHD3;DDX17;NOTUM;PTPRA;MOV10;PTEN;HDAC1;LYPLAL;ALDH7A1;ADH5;MAOA;SOD3;GSR;STEAP3;ALDH1A1;FAS;PTGS1;ASPHD1;FAAH;SARDH;CYB5R3;ALDH1A2;AIISPL1;KY;ANPEP;CTSK;PIM1;MMP19;USP5

RBM39;ZFR;ADAT1;FUBP3;RPP25;METTL3;TRNAU1AP;ATXN1;EIF1AX;RGNEF;TIAL1;DDX10;MRPS5;MTHFS

ABBR1;HRH1;LIFR;TNPO3;LRP10;LRP10;PAQR5;FGFR1;ROR2;SLC20A2;ITGB3;CD1D;LRP4;GPR1;ATP6AP2





















































.TBP1;STEAP3;TTC13;FAM82A1;F12;HEATR3;UCP2;TTC31;SLC25A14;FRMD6;TMTC2;CDC16;SLC25A16;FRI

orf1;DENR;NIT2;CSRP2;AIM1;TP53TG5;KIAA0247;MFAP4;BRD1;C11orf58;PSG2;FMNL1;NAT10;GOS2

PS6KA1;MAL2;RASSF4;RASSF4;DNMT3A;RNF14;PDK1;AKR1B1;TKT;RNF185;MALL;RNF32;LRCH2;BTRC;LYN  
E16;PLOD1;RNF4;EGR2;NARF;ZFPM2;NR4A3;ZNF615;CUL9;ZFP106;NDUFS7;UBR4;CPS1;CPS1;SF1;SF1;Z  
H14;MYH14;HSPA14;KIF23;MAPKAPK3;NARS2;ACTA2;PABPC1L;GFM1;ABCC2;PSMB8;MAP2K5;PFKL;PRKAR2  
LRRK2;STK36;DHX57;ABCA1;MLKL;ACSM5;SGK1;MYO6;CENPE;MAPK8;EPHA2;ATP5A1;DHX15;MET;MYO10;C  
3;ZNF615;CUL9;ZFP106;UBR4;CPS1;PTGR2;SF1;SF1;ZNF75D;CA5B;HIVEP2;ZNF655;POLK;ADAM32;AGAF  
GKG;ELP3;ADRBK2;PRKX;MAP3K13;PKM;SPHK1;SHMT1;AGPAT1;BCAM;POLR3A;FASTK;HEMK1;CRAT;BMPR1E  
S2;CRTAC1;CACNA1G;VCAN;SCUBE2;TGM5;ATP2B4;ITGA10;ASPH;TNC;PLCD4;EFEMP1;THBS3;FBLN2;GALN  
;SMAD1;KLF5;IKZF3;ETV4;PBX2;ETV5;ZKSCAN3;TP73;ZBTB17;SNAPC2;AHR;HOXB8;DLX6;NFKB2;TGIF2;  
;PHTF2;POLB;BBX;NUSAP1;ZNF641;CHD3;WHSC1;NCOR2;LRPPRC;ZNF425;FUS;ZNF782;PHF21A;HDAC3;Z  
NT1;STK38L;TGFB2;ENO3  
1;HDAC3;PTPRE;HDHD3;ARSB;HRH1;HRH1;PLCD1;ATP10B;DCP1B;INPP5D;DNM1;PNKD;ATP11C;INPP5K;MF  
LDH1L1

;NRXN3;ITGAE;GHR;FLT4;OSMR;PLXNB3;SEMA4A;CCBP2;CCBP2;AR;ATRN;ITGA9;EPHB6;EPHB2;SEMA3C;A





















































MD1;TMTC1;LYVE1



ND; STAG2; COL6A1; EFN1; RNF8; ADAM22; HOXC8; PLK2; FCGR2A; SORBS2; PREX2; TRRAP; FZD4; GRIA1; FBLN7; ZNF75D; CA5B; ACAT1; HIVEP2; ZNF655; ADD2; AGAP11; APLF; ESR1; MYRIP; PAPP; ZNF484; TRIM14; ZFY; SP12B; ADCK3; MCM7; DARS; ATP11A; HHAT; MAP3K11; LRRK2; STK36; DHX57; PDE5A; ABCA1; ACSM5; SGK1; MYO6; CE1BWD6; IDH3G; MAP2K3; KIF3A; BUB1; NLRC5; MDN1; TK1; CCNL1; WEE1; NEK3; ADRBK2; PRKX; MPP1; MAP3K13; M2P11; APLF; ESR1; MYRIP; PAPP; ZNF484; TRIM14; ZFY; SP110; ZFP36L1; ZDHHC15; LPXN; ZNF608; ZNF501; DH3; PTK2B; THUMP2; MAP4K2; POLA1; CMAS; MELK; CAMK1; NMT2; RIOK2; C7orf10; NME6; ATM; PNPLA3; PRKD3; OMT7; GALNT7; TLL2; STAT5B; MMP7; SVIL; EMR2; AVIL; MME; HPCAL1; ARSB; TRPC1; TLL1; MGP; S100A2; PLCD1; PHF1; KDM5A; NR1H3; NR4A1; TTF2; ZKSCAN2; GLIS3; ZSCAN23; ZBTB38; NRK; PKNOX2; ZSCAN18; AR; FOXP1; PNF512; TNRC18; PARP1; SP7; ZFP92; DNAJB6; KLF6; RAD51B; HMG2; ZNF451; CIITA; TCEA3; ZNF684; PCBP2; M2R1; ACPL2; H6PD; PNPLA7; DDX55; APOBEC3C; APOBEC3C; IFIH1; DROSHA; INPP4B; PIGL; MTMR4; MTMR3; OLA1; ;

ADRA1A; ADRA1A; FLJ35024; HBEGF; ANTXR2; ITGA7; PTK7; NCR1; GPR135; UNC5B; PDGFRB; NOV; IL20RB; ITGB



























































MAGI2; TNFRSF14; SOCS5; SIK1; TBPL1; KAT7; JAG1; ITGB8; TNFAIP3; RPL37A; STK17B; RECK; PCSK2; CD81; N  
10; ZFP36L1; ZDHHC15; TBXAS1; LPXN; ZNF608; ZNF501; DHX57; PRDM8; ZNF185; ZNF354C; BARD1; QPCT; ZNF5  
NPE; MAPK8; PPIE; EPHA2; ATP5A1; DHX15; MET; MET; MYO10; CBWD6; IDH3G; MAP2K3; KIF3A; SAFB2; BUB1; NLF  
YO9A; SPHK1; FASTK; LIG4; DDX60; NUBPL; PMS2; MYH10; NLRP12; BMPR1B; PTK2B; GLUD1; MAP4K2; MELK; CAMK  
X57; PRDM8; PDE5A; ZNF185; ZNF354C; BARD1; QPCT; MMP16; ZNF568; ZNF498; EBF3; L3MBTL1; ARAP2; EEA1; S  
AS1; ZAK; PIGG; DYRK1B; SMS; SPEG; POLE; ROCK2; POLB; POLB; DGKD; EPHA4; ZDHHC2; MST4; TGM5; PDK3; SULT  
SCUBE3; RAPGEF2; ANO6; RCVRN; LRP10; STAT4; EPDR1; FBLN5; CDH13; SYT3; PPP2R3B; F7; C17orf57; PLS3; L  
OU6F1; E2F7; CREB3L3; PHF2; ELF2; TCF4; TCF4; CERS5; SMARCA4; RUNX1T1; ZNF70; ENO1; GABPB1; BCL6; HIC  
CM2; MCM2; HGF; TMF1; IFIH1; TCEA2; MXI1; APLP2; EZH1; EZH1; BAZ2B; GIN1; NONO; ZNF571; ZNF678; TRIM24  
  
PDE1B; ATP10D; CECR5; ERCC3; CES2; CES2; CHD5; CHD5; SRCAP; PADI4; PTPN4; DFFB; TTF2; PDE3A; ATP2C1; F

5; ANTXR1; TIE1; NRP2; OR11A1; ANPEP; PTGER2; TGFBR2; LPAR4; EDNRA; CRLF1; SORT1

























































NEB; INTS6; ZBTB20; ATG4B; IFT88; RNF157; CAPZB; SCN10A; PODN; TUBA4A; SHPRH; SIX1; DDR1; RNF180; HEC568; ZNF498; EBF3; L3MBTL1; ARAP2; EEA1; SH3RF1; ADAMTS17; DGKI; PYG01; NPLOC4; ZNF273; ZNRF1; PPARG; RC5; MDN1; RND3; TK1; CCNL1; WEE1; GNAL; RBM12B; NEK3; ADRBK2; PRKX; MPP1; SFPQ; ATL2; MAP3K13; MYO9A; KIF11; RIOK2; ORC4; ACSF2; AASDH; NME6; DHX58; HSPA4L; CACNA1B; PRKD3; OAS1; ZAK; DYRK1B; SPEG; IRAK2; DDIT3; SH3RF1; ADAMTS17; DGKI; PYG01; NPLOC4; ZNF273; ZNRF1; ZZEF1; PPARG; DTX3L; RNF122; EGLN1; ZNF595; UTIF1C3; OXSM; SULT1A1; NAT6; MAPK13; CDK1; AGT; NAGK; HNMT; MOK; LCLAT1; TRMT2B; PIK3R4; WHSC1; MKNK1; FHL2; LRP4; SVEP1; MYL6B; DAO; PC; COMP; PADI4; NRXN3; ITGAE; ATP2C1; FAH; LTBP2; LTBP2; PLCG2; SLC25A12; EGFR; ZNF37A; PHTF1; ATF2; ZNF397; ZNF85; MAFF; ARNTL; HOPX; BATF3; DMRTA1; ZSCAN2; PAX6; MAX1; ZMYM3; GTF3C1; NKRF; TAF1A; ZNF224; KDM5C; CHD5; CHD5; ZNF618; SRCAP; ZNF84; DFFB; TTF2; MCM5; ZFP64; FAH; ADPRH; DUSP15; EIF4A3; PPM1K; PLCG2; ADARB1; DCLRE1C; DDX1; DDX11; DNAJC6; ATP13A3; INPP4A; ZRA1

























































W2;SSX2IP;LRRFIP2;HNRNPF;CAB39L;CSTF2;STMN2;DBP;DBP;GK;PRKAA2;FGFR2;INADL;PPP4R4;TNK2;F  
.;DTX3L;RNF122;EGLN1;ZNF595;PIR;ADAM23;ZNF718;CYP51A1;RP9;MADD;BCKDHA;RNF212;NR2F1;CCNL1  
TUBG1;SPHK1;RRAGD;GNAS;GNAS;RHOBTB2;LIG4;DDX60;HNRNPH3;NUBPL;NCL;RAB24;MYH10;NLRP12;BMF  
X50;ATP8B3;ABCB6;PCCA;ROCK2;POLB;NOD2;EPA4;MST4;ATP2B4;PDK3;NME5;PAPSS2;MAPK13;CDK1;NA  
RN;MMP24;ADAM23;ADAM23;ZNF718;RP9;RNF212;NR2F1;CCNL1;WDFY3;ZSCAN29;PRDM15;DGKG;PDLIM7;Z  
GFR3;MAP4K4;TK2;TK2;NCOA3;SUV420H1;ZDHHC3;ROR1;PRKCD;PRDM6;CDC42BPG;CDK8;TSSK4;TSSK4;T1  
FL7;PXDN;SUMF2;PITPNM3;PCDH7;SGCE;B4GALT6;NCALD;NOTCH4;MCFD2;SLC26A6;KCNIP1;FAHD2A;ITGA  
4;ZFP64;PRDM10;ILF2;ZNF433;C14orf43;ZNF700;HP1BP3;EZH2;DDX11;ZNF672;ZRANB3;NUFIP1;HNRNF  
NB3;PTPN13;CDA;AHCYL2;EXOG;MTMR7;FAHD2A;SMARCA4;SCP2;PFKFB2;ACP1;HDAC8;CHD1;PDP1;PPP2CE

























































HR; ISLR; TARDBP; TLR5; MUC4; PIK3C2B; PALLD; CSNK1A1; TNIK; LIMK2; DZIP3; MLL5; DMD; EPS15; ZMIZ1; KN  
1; WDFY3; ZSCAN29; PRDM15; B4GALT4; ELP3; DPYD; PDLIM7; ZFAND1; FHL1; NR4A2; SQSTM1; KIN; PHF3; RNF6;  
PR1B; PTK2B; PABPC1; GLUD1; MAP4K2; DNAJC27; POLA1; MELK; CAMK1; RIOK2; ORC4; ACSF2; AASDH; TUBD1; NM  
AGK; DDX27; MOK; CHD3; DDX17; SMC2; KIF21A; MSH6; PIK3R4; MYO5B; MOV10; MKNK1; FGFR3; KCNT2; MAP4K4; T  
ZFAND1; FHL1; NR4A2; SQSTM1; KIN; PHF3; RNF6; USP45; MIPEP; ANKZF1; MYO9A; FGD6; SP140L; ADAMTS9; ANK  
TK; MARK2; CLK3; AKT2; EHMT1; PSTK; CAMK2G; GSTA4; WNK1; DGKH; MARK3; PKN2; FGFR1; SAT2; STK39; ROR2; P  
A9; GALNT3; AMY2A; CADPS2; MACF1; MACF1; EFHD1; KCNMA1; PDP1; FLJ35024; TRPV1; CABYR; CLSTN3; ITGA7;  
  
PD; JARID2; MBD5; BCLAF1; PDS5B; POLR2B; SCP2; SERPINA3; ARID5B; ZNF431; TAL1; HBP1; CHD1; SMARCA2; Z  
3; SMARCA2; ELAC1; SERHL; DHX36; ADAT1; PPP1CB; DHX38; FAP; PTPN12; RPP25; HIBCH; SMG6; EPM2A; NT5C2;



























































TC1;BCKDHB;LYST;DES;TNS1;RGS3;SERPINE1;CD97;CADM3;TNFAIP8;GULP1;C10orf11;AKAP1;HEATR2;I  
USP45;ANKZF1;MYO9A;FGD6;SDHC;SP140L;ADAMTS9;ANKMY1;PCM1;ZNF566;ZNF343;HERC2P3;MTA3;TAF1  
E6;DHX58;HNRPLL;HSPA4L;RAD1;CACNA1B;NCBP2;PRKD3;ZAK;DYRK1B;SPEG;DDX50;POLE;ATP8B3;ABCB6  
K2;TK2;ROR1;MSH2;PRKCD;CDC42BPG;CDK8;TSSK4;TSSK4;TTK;ABCF1;SLC22A5;MARK2;CLK3;HRH1;HRH1  
MY1;PCM1;ZNF566;ZNF343;MMP11;MTA3;TAF15;RASSF5;ZEB1;POLR3A;ZNF638;ZNF621;ADAMTS16;THRB;  
LK3;SEPSECS;ZDHHC14;PANK1;EHMT2;LCK;MAP3K8;EZH1;EZH1;GLYATL2;CDK2;CDC42BPA;MAST4;HCK;GS  
LTBP1;TRPM7;PLSCR1;GALNT9;GALNT1;CDH2;DSP;BMP1;FBN1;PROS1;EML1;FBLN1;DOC2B;THBS2;CELSR1  
NF254;RFX2;ZFR;BTBD11;H2AFZ;ZNF471;SLC12A8;FUBP3;BANF1;PEG10;ZNF577;SMG6;CHD6;ZNF643;FI  
CTDP1;CHD6;LIPC;ATP10A;APOBEC3D;LPPR3;NUDT18;ENPP1;ENTPD4;DDX10;MFN1;REXO2;ARSD

























































DNM3;GSN;DSN1;ACTN1;PPP2R2A;PABPC4;NFXL1;P4HA2;SP140;ENC1;SASH1;KIRREL3;PNMA2;KIAA0528;  
15;RASSF5;ZEB1;ZNF638;MGAT4A;ZNF621;ADAMTS16;THRB;RFESD;ZNF776;ZNF692;ARAP3;ZBTB25;KDM3  
3;PCCA;ROCK2;POLB;NOD2;EPHA4;MST4;ATP2B4;SRP54;PAPSS2;MAPK13;CDK1;NOX4;NAGK;NAV1;DDX27;  
1;ABCF3;CBWD1;BCKDK;AKT2;KIAA0232;RAD51B;ATP10B;ABCB9;EARS2;ATP11C;SMC3;PSTK;CAMK2G;CII  
;PPP3CB;ZNF776;ZNF692;ARAP3;ZBTB25;KDM3A;NR1D1;POLA1;ADAMTS6;PHF7;EBF1;COL9A1;ZNF705G;S  
STM2;HADHB;PPAT;SRPK1;AKT3;KAT2B;KIAA1456;STK4;CHSY3;MAP2K4;METTL4;ZDHHC11;GPAM;FLT4;PI  
1;NRP2;VSNL1;ENTPD4;NRXN2;CDH11;MFAP4;ANKRD5;MMP19;F13A1;ARSD

LYWCH1;MDP1;ZNF814;SALL4;ZNF674;TCF7;PRDM5;RAD51C;RBL2;THAP5;CDK2AP1;ZNF160

























































SMAP1;FGF13;KCNMB4;MED24;LIMD1;BRWD1;RSBN1;SFRP5;SOCS2;MAF  
A;NR1D1;POLA1;ADAMTS6;PHF7;EBF1;COL9A1;ZNF705G;SP4;JMJD1C;  
MOK;CHD3;DDX17;SMC2;RERG;KIF21A;MSH6;PIK3R4;CPEB3;MYO5B;MC  
TA;WNK1;MARK3;MORC2;KIF11;PKN2;STRADB;MCM2;MCM2;ANKRD17;SM  
P4;JMJD1C;RSPRY1;SLU7;APLP1;APOBEC3B;DZIP1L;ZBTB16;ZBED5;F  
P4K2B;OAS3;WNK3;QPCTL;REV1;TYW3;EZH2;NRK;FDFT1;CASK;OXCT1;

























































| Pathway                                    | Count | p-Value  | q-Value  |
|--------------------------------------------|-------|----------|----------|
| Focal adhesion                             | 74    | 2.82E-43 | 2.27E-41 |
| MAPK signaling pathway                     | 75    | 2.46E-34 | 7.93E-33 |
| ECM-receptor interaction                   | 39    | 2.04E-28 | 3.29E-27 |
| Axon guidance                              | 45    | 5.69E-26 | 7.04E-25 |
| Regulation of actin cytoskeleton           | 52    | 2.44E-21 | 1.09E-20 |
| Calcium signaling pathway                  | 45    | 4.03E-19 | 1.32E-18 |
| p53 signaling pathway                      | 27    | 9.45E-18 | 2.53E-17 |
| Purine metabolism                          | 39    | 1.53E-17 | 3.92E-17 |
| Insulin signaling pathway                  | 37    | 2.12E-17 | 5.28E-17 |
| Glycolysis / Gluconeogenesis               | 25    | 1.61E-16 | 3.23E-16 |
| Wnt signaling pathway                      | 37    | 6.51E-16 | 1.20E-15 |
| Cell adhesion molecules (CAMs)             | 34    | 2.53E-15 | 4.32E-15 |
| Colorectal cancer                          | 27    | 3.05E-15 | 5.07E-15 |
| Cell cycle                                 | 31    | 1.93E-14 | 3.02E-14 |
| Cytokine-cytokine receptor interaction     | 47    | 2.60E-14 | 3.91E-14 |
| ErbB signaling pathway                     | 26    | 6.98E-14 | 9.60E-14 |
| Prostate cancer                            | 26    | 9.44E-14 | 1.28E-13 |
| Ubiquitin mediated proteolysis             | 32    | 3.06E-13 | 3.89E-13 |
| Glioma                                     | 22    | 3.32E-13 | 4.18E-13 |
| Phosphatidylinositol signaling system      | 23    | 1.42E-12 | 1.64E-12 |
| Valine, leucine and isoleucine degradation | 18    | 2.66E-12 | 2.97E-12 |
| Tight junction                             | 30    | 5.36E-12 | 5.83E-12 |
| Small cell lung cancer                     | 23    | 2.42E-11 | 2.44E-11 |
| Glycerolipid metabolism                    | 17    | 4.75E-11 | 4.63E-11 |
| Complement and coagulation cascades        | 20    | 9.70E-11 | 9.08E-11 |
| Melanoma                                   | 20    | 1.72E-10 | 1.54E-10 |
| Melanogenesis                              | 24    | 2.57E-10 | 2.25E-10 |
| Apoptosis                                  | 22    | 3.45E-10 | 2.97E-10 |
| GnRH signaling pathway                     | 24    | 4.80E-10 | 4.09E-10 |
| Pyrimidine metabolism                      | 22    | 8.55E-10 | 7.09E-10 |
| Glycine, serine and threonine metabolism   | 15    | 1.18E-09 | 9.72E-10 |
| Renal cell carcinoma                       | 19    | 1.28E-09 | 1.04E-09 |
| Adherens junction                          | 20    | 1.37E-09 | 1.11E-09 |
| Jak-STAT signaling pathway                 | 28    | 3.46E-09 | 2.72E-09 |
| Tyrosine metabolism                        | 15    | 4.84E-09 | 3.73E-09 |
| Inositol phosphate metabolism              | 16    | 6.78E-09 | 5.15E-09 |
| TGF-beta signaling pathway                 | 20    | 8.39E-09 | 6.31E-09 |
| Fructose and mannose metabolism            | 13    | 9.31E-09 | 6.97E-09 |
| Glutathione metabolism                     | 15    | 1.26E-08 | 9.29E-09 |
| O-Glycan biosynthesis                      | 12    | 1.39E-08 | 1.02E-08 |
| Lysine degradation                         | 15    | 1.70E-08 | 1.24E-08 |
| Natural killer cell mediated cytotoxicity  | 25    | 2.21E-08 | 1.60E-08 |
| mTOR signaling pathway                     | 15    | 2.28E-08 | 1.63E-08 |
| VEGF signaling pathway                     | 18    | 2.81E-08 | 1.97E-08 |
| Urea cycle and metabolism of amino groups  | 11    | 4.68E-08 | 3.21E-08 |
| Basal cell carcinoma                       | 15    | 5.24E-08 | 3.58E-08 |
| Fc epsilon RI signaling pathway            | 18    | 5.34E-08 | 3.63E-08 |
| Aminoacyl-tRNA biosynthesis                | 13    | 5.61E-08 | 3.80E-08 |
| Long-term depression                       | 17    | 5.70E-08 | 3.84E-08 |
| Aminosugars metabolism                     | 11    | 7.20E-08 | 4.76E-08 |
| Arachidonic acid metabolism                | 15    | 8.84E-08 | 5.74E-08 |

|                                               |    |          |          |
|-----------------------------------------------|----|----------|----------|
| Pancreatic cancer                             | 17 | 8.85E-08 | 5.74E-08 |
| DNA polymerase                                | 12 | 9.73E-08 | 6.28E-08 |
| B cell receptor signaling pathway             | 17 | 1.35E-07 | 8.46E-08 |
| Histidine metabolism                          | 11 | 1.60E-07 | 9.96E-08 |
| Type II diabetes mellitus                     | 13 | 1.93E-07 | 1.18E-07 |
| Epithelial cell signaling in Helicobacter py  | 16 | 2.77E-07 | 1.67E-07 |
| Propanoate metabolism                         | 11 | 4.72E-07 | 2.73E-07 |
| Amyotrophic lateral sclerosis (ALS)           | 14 | 4.72E-07 | 2.73E-07 |
| Phenylalanine metabolism                      | 9  | 5.31E-07 | 3.07E-07 |
| Toll-like receptor signaling pathway          | 19 | 6.68E-07 | 3.79E-07 |
| Long-term potentiation                        | 16 | 7.54E-07 | 4.25E-07 |
| Mismatch repair                               | 9  | 8.34E-07 | 4.65E-07 |
| ABC transporters - General                    | 12 | 1.13E-06 | 6.18E-07 |
| Starch and sucrose metabolism                 | 13 | 1.21E-06 | 6.53E-07 |
| Glycerophospholipid metabolism                | 15 | 1.29E-06 | 6.94E-07 |
| Fatty acid metabolism                         | 12 | 1.47E-06 | 7.89E-07 |
| Antigen processing and presentation           | 17 | 1.77E-06 | 9.38E-07 |
| Glycosaminoglycan degradation                 | 8  | 1.79E-06 | 9.41E-07 |
| Non-small cell lung cancer                    | 13 | 1.92E-06 | 1.00E-06 |
| Glycosphingolipid biosynthesis - globoseries  | 7  | 1.96E-06 | 1.01E-06 |
| Drug metabolism - cytochrome P450             | 15 | 2.28E-06 | 1.17E-06 |
| Notch signaling pathway                       | 12 | 2.43E-06 | 1.25E-06 |
| Leukocyte transendothelial migration          | 20 | 2.44E-06 | 1.25E-06 |
| Pentose phosphate pathway                     | 9  | 2.78E-06 | 1.41E-06 |
| Alzheimer's disease                           | 25 | 2.89E-06 | 1.46E-06 |
| Gap junction                                  | 17 | 3.34E-06 | 1.67E-06 |
| Glycosphingolipid biosynthesis - ganglioseri  | 7  | 3.51E-06 | 1.75E-06 |
| Chronic myeloid leukemia                      | 15 | 3.91E-06 | 1.93E-06 |
| Cholera - Infection                           | 13 | 5.55E-06 | 2.72E-06 |
| Acute myeloid leukemia                        | 13 | 5.55E-06 | 2.72E-06 |
| Hematopoietic cell lineage                    | 16 | 5.92E-06 | 2.86E-06 |
| Base excision repair                          | 10 | 7.40E-06 | 3.56E-06 |
| Endometrial cancer                            | 12 | 7.62E-06 | 3.65E-06 |
| Bile acid biosynthesis                        | 9  | 7.78E-06 | 3.71E-06 |
| Alanine and aspartate metabolism              | 9  | 7.78E-06 | 3.71E-06 |
| Nucleotide excision repair                    | 11 | 7.96E-06 | 3.78E-06 |
| Metabolism of xenobiotics by cytochrome P450  | 14 | 8.14E-06 | 3.86E-06 |
| Autoimmune thyroid disease                    | 12 | 9.40E-06 | 4.39E-06 |
| Allograft rejection                           | 10 | 1.26E-05 | 5.75E-06 |
| Butanoate metabolism                          | 10 | 1.26E-05 | 5.75E-06 |
| Nitrogen metabolism                           | 8  | 1.39E-05 | 6.30E-06 |
| Nicotinate and nicotinamide metabolism        | 8  | 1.39E-05 | 6.30E-06 |
| Neuroactive ligand-receptor interaction       | 30 | 1.49E-05 | 6.66E-06 |
| Glycosylphosphatidylinositol (GPI)-anchor bio | 8  | 1.95E-05 | 8.57E-06 |
| N-Glycan degradation                          | 6  | 1.97E-05 | 8.59E-06 |
| 1- and 2-Methylnaphthalene degradation        | 6  | 1.97E-05 | 8.59E-06 |
| Pyruvate metabolism                           | 10 | 2.60E-05 | 1.11E-05 |
| Galactose metabolism                          | 8  | 2.69E-05 | 1.14E-05 |
| Graft-versus-host disease                     | 10 | 3.25E-05 | 1.36E-05 |
| Biosynthesis of steroids                      | 8  | 4.90E-05 | 1.99E-05 |
| Type I diabetes mellitus                      | 10 | 5.01E-05 | 2.03E-05 |
| Pantothenate and CoA biosynthesis             | 6  | 5.27E-05 | 2.12E-05 |



|                                              |    |           |           |
|----------------------------------------------|----|-----------|-----------|
| Thyroid cancer                               | 8  | 6.47E-05  | 2.56E-05  |
| beta-Alanine metabolism                      | 7  | 9.38E-05  | 3.59E-05  |
| T cell receptor signaling pathway            | 16 | 1.06E-04  | 4.03E-05  |
| Adipocytokine signaling pathway              | 12 | 1.10E-04  | 4.20E-05  |
| Glutamate metabolism                         | 7  | 1.27E-04  | 4.74E-05  |
| PPAR signaling pathway                       | 12 | 1.71E-04  | 6.31E-05  |
| Limonene and pinene degradation              | 6  | 1.72E-04  | 6.33E-05  |
| Drug metabolism - other enzymes              | 10 | 1.87E-04  | 6.87E-05  |
| Bladder cancer                               | 9  | 1.92E-04  | 7.00E-05  |
| Selenoamino acid metabolism                  | 7  | 2.21E-04  | 7.97E-05  |
| Tryptophan metabolism                        | 9  | 2.32E-04  | 8.37E-05  |
| 3-Chloroacrylic acid degradation             | 5  | 2.87E-04  | 1.03E-04  |
| Circadian rhythm                             | 5  | 2.87E-04  | 1.03E-04  |
| Homologous recombination                     | 7  | 3.64E-04  | 1.29E-04  |
| Hedgehog signaling pathway                   | 10 | 4.82E-04  | 1.67E-04  |
| Sphingolipid metabolism                      | 8  | 5.94E-04  | 2.05E-04  |
| Atrazine degradation                         | 4  | 6.43E-04  | 2.19E-04  |
| Synthesis and degradation of ketone bodies   | 4  | 6.43E-04  | 2.19E-04  |
| Reductive carboxylate cycle (CO2 fixation)   | 4  | 0.0010292 | 3.43E-04  |
| Folate biosynthesis                          | 7  | 0.0010537 | 3.48E-04  |
| Citrate cycle (TCA cycle)                    | 7  | 0.0010537 | 3.48E-04  |
| Parkinson's disease                          | 16 | 0.0013075 | 4.22E-04  |
| Primary immunodeficiency                     | 7  | 0.0015198 | 4.88E-04  |
| Pathogenic Escherichia coli infection - EHEC | 9  | 0.0015282 | 4.90E-04  |
| Pathogenic Escherichia coli infection - EPEC | 9  | 0.0015282 | 4.90E-04  |
| Cysteine metabolism                          | 4  | 0.0031055 | 9.59E-04  |
| Sulfur metabolism                            | 4  | 0.0031055 | 9.59E-04  |
| Non-homologous end-joining                   | 4  | 0.0041767 | 0.0012546 |
| N-Glycan biosynthesis                        | 7  | 0.0051431 | 0.0015334 |
| Keratan sulfate biosynthesis                 | 4  | 0.0054719 | 0.001618  |
| Benzoate degradation via CoA ligation        | 4  | 0.0054719 | 0.001618  |
| One carbon pool by folate                    | 4  | 0.0070101 | 0.0020409 |
| Arginine and proline metabolism              | 6  | 0.0083417 | 0.0024043 |
| Taurine and hypotaurine metabolism           | 3  | 0.0115163 | 0.0032302 |
| Geraniol degradation                         | 2  | 0.0140338 | 0.0038656 |
| Porphyrin and chlorophyll metabolism         | 6  | 0.0155906 | 0.00424   |
| Protein export                               | 3  | 0.0195904 | 0.0052611 |
| Chondroitin sulfate biosynthesis             | 4  | 0.0222055 | 0.0059239 |
| Oxidative phosphorylation                    | 13 | 0.0224485 | 0.0059739 |
| Lysine biosynthesis                          | 2  | 0.0226168 | 0.0059939 |
| Androgen and estrogen metabolism             | 6  | 0.023875  | 0.0063014 |
| Methionine metabolism                        | 4  | 0.0258419 | 0.0067816 |
| Regulation of autophagy                      | 5  | 0.0290524 | 0.0075932 |
| Fatty acid biosynthesis                      | 2  | 0.0328092 | 0.008418  |
| Riboflavin metabolism                        | 3  | 0.0362425 | 0.0092181 |
| Glycosphingolipid biosynthesis - lactoseries | 4  | 0.038785  | 0.0098337 |
| Caffeine metabolism                          | 2  | 0.0444284 | 0.011133  |
| Methane metabolism                           | 2  | 0.0444284 | 0.011133  |
| D-Arginine and D-ornithine metabolism        | 1  | 0.0500371 | 0.0123843 |
| Renin-angiotensin system                     | 3  | 0.0503127 | 0.0123953 |
| Taste transduction                           | 6  | 0.0520502 | 0.0127745 |
| Cyanoamino acid metabolism                   | 2  | 0.0573064 | 0.0139793 |

|                                             |    |           |           |
|---------------------------------------------|----|-----------|-----------|
| Asthma                                      | 4  | 0.0608445 | 0.0147087 |
| Alkaloid biosynthesis II                    | 2  | 0.0712883 | 0.0171049 |
| Fatty acid elongation in mitochondria       | 2  | 0.0862313 | 0.0204767 |
| Ether lipid metabolism                      | 4  | 0.0958772 | 0.0225346 |
| Valine, leucine and isoleucine biosynthesis | 2  | 0.1020043 | 0.0236638 |
| Aminophosphonate metabolism                 | 2  | 0.1020043 | 0.0236638 |
| C21-Steroid hormone metabolism              | 2  | 0.1020043 | 0.0236638 |
| Retinol metabolism                          | 6  | 0.1060055 | 0.0244161 |
| Systemic lupus erythematosus                | 11 | 0.1078328 | 0.0248015 |
| Basal transcription factors                 | 4  | 0.112037  | 0.0257317 |
| Pentose and glucuronate interconversions    | 3  | 0.1272649 | 0.0290222 |
| Ascorbate and aldarate metabolism           | 3  | 0.1388058 | 0.0314314 |
| Tetrachloroethene degradation               | 1  | 0.1427284 | 0.0321164 |
| Styrene degradation                         | 1  | 0.1427284 | 0.0321164 |
| Heparan sulfate biosynthesis                | 3  | 0.1628696 | 0.0361683 |
| Glyoxylate and dicarboxylate metabolism     | 2  | 0.171135  | 0.0378732 |
| RNA polymerase                              | 3  | 0.175337  | 0.0386702 |
| D-Glutamine and D-glutamate metabolism      | 1  | 0.1856266 | 0.0406888 |
| Linoleic acid metabolism                    | 3  | 0.1880584 | 0.0409708 |
| Proteasome                                  | 4  | 0.2182704 | 0.0472332 |
| Ubiquinone biosynthesis                     | 1  | 0.2263791 | 0.0478706 |
| Bisphenol A degradation                     | 1  | 0.2263791 | 0.0478706 |
| Peptidoglycan biosynthesis                  | 1  | 0.2263791 | 0.0478706 |
| Vitamin B6 metabolism                       | 1  | 0.2263791 | 0.0478706 |
| alpha-Linolenic acid metabolism             | 2  | 0.2267163 | 0.0478706 |
| gamma-Hexachlorocyclohexane degradation     | 2  | 0.2267163 | 0.0478706 |
| Terpenoid biosynthesis                      | 1  | 0.2650931 | 0.0550354 |
| Nucleotide sugars metabolism                | 1  | 0.2650931 | 0.0550354 |
| SNARE interactions in vesicular transport   | 3  | 0.2958887 | 0.0607629 |
| Thiamine metabolism                         | 1  | 0.3018705 | 0.0615984 |
| Caprolactam degradation                     | 1  | 0.3018705 | 0.0615984 |
| Maturity onset diabetes of the young        | 2  | 0.3395288 | 0.0685874 |
| Ribosome                                    | 2  | 0.9662192 | 0.1901727 |
| Olfactory transduction                      | 11 | 0.9865909 | 0.1939452 |

| Gene                                                                                                                                                                                                   | Input Symbol |
|--------------------------------------------------------------------------------------------------------------------------------------------------------------------------------------------------------|--------------|
| CTNNB1; THBS4; FN1; VEGFA; ITGB4; ITGA3; CDKN1A; EGFR; THBS1; LAMA3; NTRK2; PLA2G4A; RASGRF2; EGFR; NTRK2; PLA2G4A; RASGRF2; EGFR; CACNB3; CACNA1I; PDGFRA; PPP3CA; I                                  |              |
| THBS4; FN1; ITGB4; ITGA3; THBS1; THBS4; FN1; ITGB4; ITGA3; THBS1; LAMA3; LAMA3; CD44; COL5A3; COL1A1; PAK3; SEMA6D; ABLIM1; NTN4; PPF; CDKN1A; SEMA6D; ABLIM1; NTN4; PPP3CA; EFN1; LIMK2; PLXNA2; RGS3 |              |
| CHRM2; FN1; ITGB4; ITGA3; PAK3; CHRM2; FN1; ITGB4; ITGA3; CDKN1A; EGFR; BAIAP2; PIP5K1A; PDGFRA; I                                                                                                     |              |
| CHRM2; BST1; ITPR1; EGFR; SLC8A1; CHRM2; BST1; ITPR1; EGFR; SLC8A1; CACNA1I; RYR1; PDGFRA; PPP3CA; I                                                                                                   |              |
| CDKN1A; THBS1; MDM2; GTSE1; SEF; CDKN1A; THBS1; MDM2; GTSE1; SERPINE1; TP53I3; CDKN2A; RRM2; CCNB2; PDE4B; PDE4D; AK5; PDE7A; ADSSI; PDE4B; PDE4D; AK5; PDE7A; ADSSL1; AMPD3; ENTPD3; PDE1C; XDH; NT5E |              |
| PPARGC1A; PFKP; PRKCZ; PDPK1; PPF; PPARGC1A; PFKP; PRKCZ; PDK1; PYGL; PRKAA2; SOCS2; SH2B2; PTPRF; PI                                                                                                  |              |
| PFKP; HK2; ALDH3A1; ENO2; ACSS2; PFKP; HK2; ALDH3A1; ENO2; ACSS2; ALDH3A2; GK; ACSS1; TPI1; ALDOA; I                                                                                                   |              |
| CTNNB1; SMAD3; PPP3CA; BTRC; FZ; CTNNB1; SMAD3; PPP3CA; BTRC; FZD4; CSNK1A1; SFRP5; FOSL1; NFATC3                                                                                                      |              |
| HLA-A; NRCAM; HLA-DPB1; NFASC; HLA-A; NRCAM; HLA-DPB1; NFASC; HLA-B; PVRL3; HLA-C; VCAM1; CDH4; I                                                                                                      |              |
| CTNNB1; EGFR; SMAD3; PDGFRA; FZ; CTNNB1; EGFR; SMAD3; PDGFRA; FZD4; FZD6; MAPK8; RALGDS; MET; LEF1                                                                                                     |              |
| CDC20; CDKN1A; SMAD3; MDM2; PRK; CDC20; CDKN1A; SMAD3; MDM2; PRKDC; ORC1; CDKN2A; MCM7; CDC14A; BUI                                                                                                    |              |
| VEGFA; CX3CR1; TNFRSF11B; EGFR; VEGFA; CCRL1; TNFRSF11B; EGFR; CXCL2; TNFSF15; TNFRSF19; PDGFRA                                                                                                        |              |
| NRG1; CDKN1A; PAK3; EGFR; NRG2; NRG1; CDKN1A; CDKN1A; EGFR; NRG2; TGFA; CAMK2D; SHC4; MAPK8; GAB1                                                                                                      |              |
| CTNNB1; CDKN1A; EGFR; PDGFRA; M; CTNNB1; CDKN1A; EGFR; PDGFRA; MDM2; TGFA; PDK1; FGFR2; LEF1; CREB;                                                                                                    |              |
| CDC20; KLHL13; UBR5; UBE2D3; M; CDC20; KLHL13; UBR5; UBE2D3; MDM2; BTRC; HERC3; UBE2C; MAP3K1; BII                                                                                                     |              |
| CDKN1A; EGFR; PDGFRA; MDM2; TG; CDKN1A; EGFR; PDGFRA; MDM2; TGFA; CDKN2A; CAMK2D; SHC4; PDGFA; PTI                                                                                                     |              |
| ITPR1; SYNJ1; PIP5K1A; OCRL; PI; ITPR1; SYNJ1; PIP5K1A; INPP5F; PIK3C2B; ITPR2; SYNJ2; DGKI; DGKG                                                                                                      |              |
| ALDH3A1; ALDH3A2; HSD17B4; BC; ALDH3A1; ALDH3A2; DBP; BCKDHB; ACAT1; ACADSB; HMGCS1; BCKDHA; BC;                                                                                                       |              |
| CTNNB1; PRKCH; PRKCZ; MAGI3; M; CTNNB1; PRKCH; PRKCZ; MAGI3; MAGI2; EPB41L1; INADL; EPB41; PPP2R2;                                                                                                     |              |
| FN1; ITGA3; PTGS2; LAMA3; LAMA; FN1; ITGA3; PTGS2; LAMA3; LAMA3; ITGA2; LAMA2; LAMA4; LAMB2; LAMB2;                                                                                                    |              |
| ALDH3A1; ALDH3A2; MGLL; LPL; A; ALDH3A1; ALDH3A2; MGLL; LPL; AKR1B1; GK; DGKI; DGKG; AGPAT1; PNPLA                                                                                                     |              |
| CFB; C3; MASP1; SERPINA1; PLAT; CFB; C3; MASP1; SERPINA1; PLAT; BDKRB2; CD55; SERPINE1; TFPI; CD46                                                                                                     |              |
| CDKN1A; EGFR; PDGFRA; MDM2; FGF; CDKN1A; EGFR; PDGFRA; MDM2; FGF18; FGF13; CDKN2A; MITF; FGF1; MET                                                                                                     |              |
| CTNNB1; EDN1; DCT; FZD4; ADCY3; CTNNB1; EDN1; DCT; FZD4; ADCY3; ADCY3; CAMK2D; GNAO1; FZD6; MITF; I                                                                                                    |              |
| PPP3CA; NGF; NTRK1; PRKAR2B; P; PPP3CA; NGF; NTRK1; PRKAR2B; PRKX; PPP3CB; ATM; IRAK2; IL1RAP; PII                                                                                                     |              |
| PLA2G4A; ITPR1; EGFR; MAP3K1; A; PLA2G4A; ITPR1; EGFR; MAP3K1; ADCY3; ADCY3; CAMK2D; ITPR2; CACNA                                                                                                      |              |
| UPRT; ENTPD3; NT5E; TYMS; POLD; UPRT; ENTPD3; NT5E; TYMS; POLD3; TXNRD1; RRM2; ENTPD6; TK1; DPYD; I                                                                                                    |              |
| MAOB; TARSL2; PHGDH; SHMT1; AG; MAOB; TARSL2; PGD; SHMT1; AGT; SMAD1; DMGDH; CHDH; DAO; PIPOX; MAO                                                                                                     |              |
| EGLN3; VEGFA; PAK3; TGFA; ETS1; EGLN3; VEGFA; CDKN1A; TGFA; ETS1; TCEB1; MET; EGLN1; GAB1; PGF; PII                                                                                                    |              |
| CTNNB1; EGFR; PVRL3; SMAD3; BA; CTNNB1; EGFR; PVRL3; SMAD3; BAIAP2; SSX2IP; ACTN1; MLLT4; PTPRF; M                                                                                                     |              |
| STAT1; SOCS5; SOCS2; IL15RA; SF; STAT1; SOCS5; SOCS2; IL15RA; SPRY4; IL21R; IL6ST; SOCS7; SOCS7; PI                                                                                                    |              |
| ALDH3A1; HPD; DCT; MAOB; WBSCR; ALDH3A1; HPD; DCT; MAOB; WBSCR22; ALDH1A3; HEMK1; ALDH3B1; PNPLA;                                                                                                      |              |
| SYNJ1; PIP5K1A; OCRL; PIK3C2B; SYNJ1; PIP5K1A; INPP5F; PIK3C2B; TPI1; SYNJ2; INPP5B; PLCD4; PTEI                                                                                                       |              |
| THBS4; THBS1; SMAD3; ID2; ZFYVE; THBS4; THBS1; SMAD3; ID2; ZFYVE16; CHR1; DCN; BMP1B; ROCK2; THBS;                                                                                                     |              |
| PFKFB3; PFKP; HK2; AKR1B1; MTM; PFKFB3; PFKP; HK2; AKR1B1; MTMR1; GK; PFKFB4; TPI1; SORD; ALDOA; PI                                                                                                    |              |
| GSTM1; GSTT1; GPX3; GGT7; PGD; F; GSTM1; GSTT1; GPX3; GGT7; PGD; RRM2; GSTM3; RRM2B; SMS; GSTA4; GSTI                                                                                                  |              |
| WBSCR17; ST3GAL1; GALNT2; GAL; WBSCR17; ST3GAL1; GALNT2; GALNT12; GALNTL1; C1GALT1; GALNT13; G                                                                                                         |              |
| ALDH3A1; ALDH3A2; HSD17B4; AAS; ALDH3A1; ALDH3A2; DBP; AASS; PLOD1; ACAT1; OGDH; AASDH; WHSC1; SU                                                                                                      |              |
| HLA-A; HLA-B; HLA-C; PPP3CA; S; HLA-A; HLA-B; HLA-C; PPP3CA; SH3BP2; MICA; NFATC3; SHC4; NFATC2; I                                                                                                     |              |
| VEGFA; RPS6KA1; PDPK1; RPS6KA; VEGFA; RPS6KA1; PDK1; RPS6KA6; CAB39L; PRKAA2; PGF; PIK3R1; AKT2                                                                                                        |              |
| VEGFA; PLA2G4A; PTGS2; PPP3CA; VEGFA; PLA2G4A; PTGS2; PPP3CA; NFATC3; MAPKAPK3; SPHK1; NFATC2; I                                                                                                       |              |
| ALDH3A1; ALDH3A2; MAOB; SAT1; C; ALDH3A1; ALDH3A2; MAOB; SAT1; CPS1; ADC; SMS; SAT2; DAO; ALDH7A1; M                                                                                                   |              |
| CTNNB1; HHIP; FZD4; FZD6; STK3; CTNNB1; HHIP; FZD4; FZD6; STK36; SMO; LEF1; TCF7L2; GLI1; WNT9B; P                                                                                                     |              |
| PLA2G4A; PDK1; LYN; MAPK8; MAP; PLA2G4A; PDK1; LYN; MAPK8; MAP2K3; PLA2G2A; MAPK13; PIK3R1; PRKCI                                                                                                      |              |
| LARS; TARSL2; NARS2; DARS; EARS; LARS; TARSL2; NARS2; DARS; EARS2; PSTK; SEPSECS; SMAD1; CARS2; CAI                                                                                                    |              |
| PLA2G4A; ITPR1; RYR1; LYN; GRI; PLA2G4A; ITPR1; RYR1; LYN; GRIA1; GNAZ; GNAO1; ITPR2; CACNA1A; GR                                                                                                      |              |
| HK2; MTMR1; GCK; CHIT1; GNPDA1; HK2; MTMR1; GK; CHIT1; GPI; HEXB; CMAS; NAGK; HEXA; NPL; CYB5R3                                                                                                        |              |
| PLA2G4A; ALOX15B; PTGS2; AKR1; PLA2G4A; ALOX15B; PTGS2; AKR1C3; EPHX2; GPX3; GGT7; PTGDS; TBXAS;                                                                                                       |              |

VEGFA; STAT1; EGFR; SMAD3; TGFA; VEGFA; STAT1; EGFR; SMAD3; TGFA; CDKN2A; MAPK8; RALGDS; BRCA2; PGRFC4; POLD3; MCM7; MCM2; POLA1; RFC4; POLD3; MCM7; CCNL1; POLA1; PCNA; POLE; POLA2; RNASEH2B; MCM2PPP3CA; LYN; CD81; NFATC3; PIK3AP1; NFATC2; CD72; PPP3CB; NFATC1; ALDH3A1; ALDH3A2; MAOB; WBSR2; ALDH3A1; ALDH3A2; MAOB; WBSR22; ALDH1A3; HEMK1; ALDH3B1; HNMT; IPRKCZ; SOCS2; CACNA1A; CACNA1I; PRKCZ; SOCS2; CACNA1A; CACNA1D; MAPK8; PKM; SOCS7; CACNA1B; CACNA1E; EGFR; LYN; ATP6V1B1; MAPK8; ATF; EGFR; LYN; ATP6V1B1; MAPK8; ATP6V0E2; MET; MAPK13; JAM2; ATP6V1H; ALDH3A1; ACSS2; ALDH3A2; ACSS1; ALDH3A1; ACSS2; ALDH3A2; ACSS1; ACAT1; PCCA; LDHA; ALDH7A1; HIBC1; PPP3CA; GRIA1; MAP2K3; PPP3CB; PPP3CA; GRIA1; MAP2K3; PPP3CB; CASP1; SOD1; MAPK13; DERL1; RAC1; IALDH3A1; HPD; MAOB; ALDH1A3; AI; ALDH3A1; HPD; MAOB; ALDH1A3; ALDH3B1; PNPLA3; NAT6; LCLAT1; MAOA; STAT1; TLR5; MAPK8; MAP2K3; IRF; STAT1; TLR5; MAPK8; MAP2K3; IRF5; TLR1; MAPK13; TLR3; PIK3R1; CASP1; ITPR1; PPP3CA; RPS6KA1; RPS6KA1; ITPR1; PPP3CA; RPS6KA1; RPS6KA6; GRIA1; ADCY3; CAMK2D; ITPR2; PRIRFC4; POLD3; PMS2; PCNA; MSH6; M; RFC4; POLD3; PMS2; PCNA; MSH6; MSH2; RPA3; MSH3; RFC5; ABCC9; ABCC1; ABCA5; ABCA4; ABC; ABCC9; ABCC1; ABCA5; ABCA4; ABCC2; ABCA1; ABCB6; ABCB9; ABCC4; ABC; HK2; PYGL; GCK; GPI; GUSB; GYS1; HK2; PYGL; GK; GPI; GUSB; GYS1; GBE1; AGL; PGM2; PGM2L1; AMY2A; UGP2; PLA2G4A; GPD2; DGKI; DGKG; AGP; PLA2G4A; GPD2; DGKI; DGKG; AGPAT1; PNPLA3; PLA2G2A; DGKD; NAT6; LALDH3A1; ALDH3A2; HSD17B4; AC; ALDH3A1; ALDH3A2; DBP; ACAT1; ACADSB; ACADVL; ACSL5; ADH1C; HADH1; HLA-A; HLA-DPB1; HLA-B; HLA-C; HLA-A; HLA-DPB1; HLA-B; HLA-C; LGMN; HLA-DPA1; HLA-DRB3; HLA-F; IHYAL1; SPAM1; GUSB; HEXB; HYAL1; HYAL1; HYAL1; GUSB; HEXB; NAT6; ARSB; HEXA; HGSNAT; EBP; HYAL3; EGFR; TGFA; PDPK1; CDKN2A; RASS; EGFR; TGFA; PDK1; CDKN2A; RASSF5; PIK3R1; RARB; AKT2; HGF; AKT3; ST3GAL1; HEXB; HEXA; ST8SIA1; ST3GAL1; HEXB; HEXA; ST8SIA1; NAGA; GBGT1; A4GALT; GSTM1; GSTT1; ALDH3A1; MAOB; AI; GSTM1; GSTT1; ALDH3A1; MAOB; ALDH1A3; GSTM3; FM04; ALDH3B1; CYP2CNOTCH3; NOTCH4; MAML3; JAG1; HE; NOTCH3; NOTCH3; MAML3; JAG1; HES1; RBPJ; DTX3L; HDAC2; NCOR2; HDACCTNNB1; VCAM1; ACTN1; MLLT4; MY; CTNNB1; VCAM1; ACTN1; MLLT4; MYL5; RASSF5; PTK2B; CLDN1; ROCK2; M; PFKP; TKT; ALDOA; PGD; PFKL; ALI; PFKP; TKT; ALDOA; PGD; PFKL; ALDOC; GPI; H6PD; PGM2; NDUFA4L2; ITPR1; SDHA; PPP3CA; NDUFA4L2; ITPR1; SDHA; PPP3CA; LPL; NDUFA10; EIF2AK3; ITPR2; NDUITPR1; EGFR; PDGFRA; TUBA4A; AI; ITPR1; EGFR; PDGFRA; TUBA4A; ADCY3; ADCY3; ITPR2; MAP2K5; ADCY2; I; ST3GAL1; HEXB; HEXA; ST8SIA1; ST3GAL1; HEXB; HEXA; ST8SIA1; EBP; ST3GAL5; ST6GALNAC5; CDKN1A; SMAD3; BCR; MDM2; CDKN2; CDKN1A; SMAD3; BCR; MDM2; CDKN2A; SHC4; HDAC2; STAT5B; HDAC1; PIK; ATP6V1B1; ADCY3; ATP6V0E2; ER; ATP6V1B1; ADCY3; ATP6V0E2; ERO1L; PRKX; GNAS; KDELR3; SLC12A2; SILEF1; ZBTB16; TCF7L2; STAT5B; I; LEF1; ZBTB16; TCF7L2; STAT5B; PIK3R1; AKT2; MTOR; HGF; AKT3; TCF4; ITGA3; CD44; CD55; HLA-DRB3; I; ITGA3; CD44; CD55; HLA-DRB3; ITGA2; TFRC; ITGA1; CD4; MME; FLT3LG; POLD3; PARP3; HMGB1; PCNA; POLI; POLD3; PARP3; HMGB1; PCNA; POLE; POLB; PARP1; TDG; NEIL3; OGG1; CTNNB1; EGFR; PDPK1; LEF1; TCF7; CTNNB1; EGFR; PDK1; LEF1; TCF7L2; PTEN; PIK3R1; AKT2; HGF; AKT3; T; ALDH3A1; ALDH3A2; SOAT1; ADH1C; ALDH3A1; ALDH3A2; ACAT1; ADH1C; ACAD9; HADHB; ALDH7A1; ADH5; FAP; ADSSL1; NARS2; DARS; CRAT; AGX1; ADSSL1; NARS2; DARS; CRAT; AGT; PC; DARS2; GPT2; ASNS; RFC4; POLD3; CUL4B; PCNA; ERCC4; RFC4; POLD3; CUL4B; PCNA; RAD1; POLE; CUL4A; XPC; RPA3; ERCC3; RFC; AKR1C1; GSTM1; GSTT1; ALDH3A1; AKR1C1; GSTM1; GSTT1; ALDH3A1; AKR1C3; ALDH1A3; GSTM3; ALDH3B1; (HLA-A; HLA-DPB1; HLA-B; HLA-C; HLA-A; HLA-DPB1; HLA-B; HLA-C; TG; HLA-DPA1; HLA-DRB3; HLA-F; HLAHLA-A; HLA-DPB1; HLA-B; HLA-C; HLA-A; HLA-DPB1; HLA-B; HLA-C; HLA-DPA1; HLA-DRB3; HLA-F; HLA-G; ALDH3A1; ALDH3A2; HSD17B4; AC; ALDH3A1; ALDH3A2; DBP; ACAT1; ACSM5; L2HGDH; HMGCS1; HMGCL; OXCT; CA2; CA12; CPS1; CA5B; GLUD1; CA; CA2; CA12; CPS1; CA5B; GLUD1; CA9; GLUL; ASNS; NNMT; BST1; NAMPT; NT5E; NNT; N; NNMT; BST1; NAMPT; NT5E; NNT; NADSYN1; NT5C2; ENPP1; CHRM2; P2RY6; GRIA1; BDKRB2; DF; CHRM2; P2RY6; GRIA1; BDKRB2; DRD4; MCHR1; OXTR; NPFFR1; GRIA3; FPI; PGAP1; PIGN; PIGU; PIGG; PGAP1; BST1; PIGN; GAB1; PIGG; PGAP1; PIGS; PIGW; PIGL; PIGP; GBA; FUCA1; HEXB; HEXA; MANBA; C; GBA; FUCA1; HEXB; HEXA; MANBA; EBP; PNPLA3; NAT6; LCLAT1; ADH1C; AC; PNPLA3; NAT6; LCLAT1; ADH1C; ACAD9; ADH5; ALDH3A1; ACSS2; ALDH3A2; AKR1E; ALDH3A1; ACSS2; ALDH3A2; AKR1B1; ACSS1; ACAT1; PKM; LDHA; PC; AR; I; PFKP; HK2; AKR1B1; GCK; PFKL; A; PFKP; HK2; AKR1B1; GK; PFKL; AR; PGM2; UGP2; EBP; HLA-A; HLA-DPB1; HLA-B; HLA-C; HLA-A; HLA-DPB1; HLA-B; HLA-C; HLA-DPA1; HLA-DRB3; HLA-F; HLA-G; NQO1; SOAT1; CYP51A1; HSD17B7; NQO1; ACAT1; CYP51A1; HSD17B7; HMGCR; FDFT1; EBP; FAP; HLA-A; HLA-DPB1; HLA-B; HLA-C; HLA-A; HLA-DPB1; HLA-B; HLA-C; HLA-DPA1; HLA-DRB3; HLA-F; ICA1; I; DPYD; BCAT2; PANK1; COASY; ENP; DPYD; BCAM; PANK1; PPAT; ENPP1; PPCS

CTNNB1;NTRK1;PPARG;LEF1;TCF CTNNB1;NTRK1;PPARG;LEF1;TCF7L2;TCF4;BRAF;TPR;TCF7  
 ALDH3A1;ALDH3A2;DPYD;SMS;AI ALDH3A1;ALDH3A2;DPYD;SMS;ALDH7A1;HIBCH;ACADM  
 PAK3;PPP3CA;PDK1;NFATC3;NFATCDKN1A;PPP3CA;PDK1;NFATC3;NFATC2;PPP3CB;CD4;MAPK13;NFATC  
 PPARGC1A;PRKAA2;MAPK8;ACSL5;PPARGC1A;PRKAA2;MAPK8;ACSL5;AKT2;MTOR;SLC2A1;PRKAB1;AKT3  
 CPS1;GLUD1;EARS2;NADSYN1;PF CPS1;GLUD1;EARS2;NADSYN1;PPAT;GLUL;GPT2  
 LPL;ACOX2;PDPK1;GK;PPARG;SC LPL;ACOX2;PDK1;GK;PPARG;SORBS1;ACSL5;NR1H3;PLTP;FABP3;SCI  
 ALDH3A1;ALDH3A2;PNPLA3;NAT6;ALDH3A1;ALDH3A2;PNPLA3;NAT6;LCLAT1;ALDH7A1  
 XDH;GUSB;TK1;DPYD;TK1;TK2;FXDH;GUSB;TK1;DPYD;TK2;TK2;HPRT1;CES2;CES2;CDA;NAT1  
 VEGFA;CDKN1A;EGFR;THBS1;MDM VEGFA;CDKN1A;EGFR;THBS1;MDM2;CDKN2A;PGF;FGFR3;BRAF  
 GGT7;WBSCR22;HEMK1;PAPSS2;FGGT7;WBSCR22;HEMK1;PAPSS2;AHCYL2;CBS;MARS  
 ALDH3A1;ALDH3A2;HSD17B4;MAC ALDH3A1;ALDH3A2;DBP;MAOB;ACAT1;OGDH;DAO;ALDH7A1;MAOA  
 ALDH3A1;ALDH3A2;ADH1C;ALDH7 ALDH3A1;ALDH3A2;ADH1C;ALDH7A1;ADH5  
 NPAS2;NR1D1;PER3;BHLHE41;AF NPAS2;NR1D1;PER3;BHLHE41;ARNTL  
 POLD3;NBN;BRCA2;RAD51L1;RPA POLD3;NBN;BRCA2;RAD51B;RPA3;TOP3B;RAD51C  
 HHIP;BTRC;CSNK1A1;STK36;SMC HHIP;BTRC;CSNK1A1;STK36;SMO;PRKX;GLI1;WNT9B;PTCH1;SUFU  
 UGCG;SGPP2;GBA;GALC;SPHK1;F UGCG;SGPP2;GBA;GALC;SPHK1;B4GALT6;EBP;ARSD  
 APOBEC3G;APOBEC3F;APOBEC3B;APOBEC3G;APOBEC3F;APOBEC3B;APOBEC3C  
 ACAT1;HMGCS1;HMGCL;OXCT1 ACAT1;HMGCS1;HMGCL;OXCT1  
 ACSS2;ACSS1;ACO1;ACO2 ACSS2;ACSS1;ACO1;ACO2  
 DDX54;GGH;DHX58;DDX50;DDX55;DDX54;GGH;DHX58;DDX50;DDX55;IFIH1;PTS  
 SDHA;IDH3G;SDHC;OGDH;ACO1;F SDHA;IDH3G;SDHC;OGDH;ACO1;ACO2;PC  
 NDUFA4L2;SDHA;NDUFA10;NDUFS NDUFA4L2;SDHA;NDUFA10;NDUFS7;SLC6A3;LRRK2;ATP5A1;SDHC;SN  
 RFX5;CD4;CIITA;LCK;CD40;DCI RFX5;CD4;CIITA;LCK;CD40;DCLRE1C;TAP2  
 CTNNB1;TUBA4A;TLR5;KRT18;NC CTNNB1;TUBA4A;TLR5;KRT18;NCL;CLDN1;ROCK2;YWHAZ;NCK1  
 CTNNB1;TUBA4A;TLR5;KRT18;NC CTNNB1;TUBA4A;TLR5;KRT18;NCL;CLDN1;ROCK2;YWHAZ;NCK1  
 CD01;CARS2;LDHA;CARS CD01;CARS2;LDHA;CARS  
 PAPSS2;SULT1A1;SULT1A2;CHS1 PAPSS2;SULT1A1;SULT1A2;CHST11  
 PRKDC;NHEJ1;LIG4;DCLRE1C PRKDC;NHEJ1;LIG4;DCLRE1C  
 MGAT4B;MGAT5;RPN2;MGAT1;MGAT4B;MGAT5;RPN2;MGAT1;MGAT4A;ALG9;ALG13  
 CHST1;ST3GAL1;CHST6;B4GALT4 CHST1;ST3GAL1;CHST6;B4GALT4  
 ACAT1;PNPLA3;NAT6;LCLAT1 ACAT1;PNPLA3;NAT6;LCLAT1  
 TYMS;SHMT1;GART;ALDH1L1 TYMS;SHMT1;GART;ALDH1L1  
 P4HA1;P4HA2;CPS1;OAT;GLUD1;P4HA1;P4HA2;CPS1;OAT;GLUD1;DAO  
 GGT7;CSAD;CD01 GGT7;CSAD;CD01  
 HSD17B4;ACAD9 DBP;ACAD9  
 CP;HMOX1;GUSB;EARS2;CPOX;MM CP;HMOX1;GUSB;EARS2;CPOX;MMAB  
 SRP54;OXA1L;SRP19 SRP54;OXA1L;SRP19  
 CSGALNACT1;CHSY3;XYLT2;CHS1 CSGALNACT1;CHSY3;XYLT2;CHST11  
 NDUFA4L2;SDHA;NDUFA10;ATP6V NDUFA4L2;SDHA;NDUFA10;ATP6V1B1;NDUFS7;ATP6VOE2;ATP5A1;SDI  
 AASS;AASDH AASS;AASDH  
 WBSCR22;HSD11B1;HEMK1;HSD17 WBSCR22;HSD11B1;HEMK1;HSD17B7;CYP19A1;ARSD  
 DNMT3A;AHCYL2;CBS;MARS DNMT3A;AHCYL2;CBS;MARS  
 ATG4B;PRKAA2;PIK3R4;ATG4C;F ATG4B;PRKAA2;PIK3R4;ATG4C;ATG12  
 OXSM;FASN OXSM;FAS  
 MTMR1;ACP1;ENPP1 MTMR1;ACP1;ENPP1  
 ST3GAL6;ST3GAL4;B4GALT4;ST8 ST3GAL6;ST3GAL4;B4GALT4;ST8SIA1  
 XDH;NAT1 XDH;NAT1  
 SHMT1;ADH5 SHMT1;ADH5  
 DAO DAO  
 AGT;MME;ANPEP AGT;MME;ANPEP  
 ADCY8;CACNA1A;PRKX;GNAS;CAC ADCY3;CACNA1A;PRKX;GNAS;CACNA1B;SCNN1A  
 GGT7;SHMT1 GGT7;SHMT1

|                                                                  |                                                                    |
|------------------------------------------------------------------|--------------------------------------------------------------------|
| HLA-DPB1 ;HLA-DPA1 ;HLA-DRB3 ;HLA-DPB1 ;HLA-DPA1 ;HLA-DRB3 ;CD40 |                                                                    |
| PLA1A ;CES1                                                      | PLA1A ;CES2                                                        |
| HSD17B4 ;HADHB                                                   | DBP ;HADHB                                                         |
| PLA2G4A ;AGPAT1 ;PLA2G2A ;LCLAT1                                 | PLA2G4A ;AGPAT1 ;PLA2G2A ;LCLAT1                                   |
| LARS ;BCAT2                                                      | LARS ;BCAM                                                         |
| WBSCR22 ;HEMK1                                                   | WBSCR22 ;HEMK1                                                     |
| CYP21A2 ;HSD11B1                                                 | CPS1 ;HSD11B1                                                      |
| CYP26A1 ;CYP2C8 ;ADH1C ;ADH5 ;                                   | CYP26A1 ;CYP2C8 ;ADH1C ;ADH5 ;ALDH1A1 ;ALDH1A2                     |
| TROVE2 ;HLA-DPB1 ;C3 ;HLA-DPA1                                   | TROVE2 ;HLA-DPB1 ;C3 ;HLA-DPA1 ;FCGR2A ;HLA-DRB3 ;ACTN1 ;C1S ;CD40 |
| TBPL1 ;TAF1 ;TBP ;GTF2A2                                         | TBPL1 ;TAF1 ;TBP ;GTF2A2                                           |
| AKR1B1 ;GUSB ;AKR1B1 ;UGP2                                       | AKR1B1 ;GUSB ;AR ;UGP2                                             |
| ALDH3A1 ;ALDH3A2 ;ALDH7A1                                        | ALDH3A1 ;ALDH3A2 ;ALDH7A1                                          |
| EPHX2                                                            | EPHX2                                                              |
| FAH                                                              | FAH                                                                |
| HS6ST1 ;XYLT2 ;EXT2                                              | HS6ST1 ;XYLT2 ;EXT2                                                |
| ACO1 ;ACO2                                                       | ACO1 ;ACO2                                                         |
| POLR3A ;POLR2B ;POLR2D                                           | POLR3A ;POLR2B ;POLR2D                                             |
| GLUD1                                                            | GLUD1                                                              |
| PLA2G4A ;PLA2G2A ;CYP2C8                                         | PLA2G4A ;PLA2G2A ;CYP2C8                                           |
| PSMD1 ;PSMB8 ;PSMD1 ;PSMA4 ;PSM                                  | RPN2 ;PSMB8 ;PSMD1 ;PSMA4 ;PSMD11                                  |
| COQ7                                                             | CLK1                                                               |
| PON2                                                             | PON2                                                               |
| GLUL                                                             | GLUL                                                               |
| PDXK                                                             | PDXK                                                               |
| PLA2G4A ;PLA2G2A                                                 | PLA2G4A ;PLA2G2A                                                   |
| PON2 ;ACP1                                                       | PON2 ;ACP1                                                         |
| FDFT1                                                            | FDFT1                                                              |
| UGP2                                                             | UGP2                                                               |
| VTI1A ;STX17 ;BET1                                               | VTI1A ;STX17 ;BET1                                                 |
| MTMR1                                                            | MTMR1                                                              |
| HSD17B4                                                          | DBP                                                                |
| HES1 ;PAX6                                                       | HES1 ;PAX6                                                         |
| RPL37A ;RPL9                                                     | RPL37A ;RPL9                                                       |
| PDE1C ;ADCY3 ;CAMK2D ;ARRB2 ;GN                                  | PDE1C ;ADCY3 ;CAMK2D ;ARRB2 ;GNAL ;ADRBK2 ;PRKX ;CAMK2G ;CAMK2A ;C |

A3;LAMA3;COL5A3;PDGFRA;PDK1;COL11A2;COL6A1;COL1A2;ITGB8;ACTN1;ITGA2;FLNB;LAMA2;LAMA4;MYRPS6KA1;RPS6KA6;FGF18;FGFR2;CACNA2D1;NGF;STK3;FGF13;DUSP10;MAP3K1;MAP4K1;NTRK1;FLNB;MAP1A2;COL6A1;COL1A2;ITGB8;ITGA2;AGRN;LAMA2;LAMA4;LAMB2;LAMB2;COL11A1;CHAD;COL2A1;LAMC2;CO;SRGAP3;SRGAP3;SEMA4B;ROBO2;NFATC3;SEMA5A;SEMA6C;SEMA5B;PLXNB2;SEMA4F;EPHA2;MET;DPYSL2;FGF18;ITGB8;BDKRB2;FGFR2;LIMK2;GSN;ACTN1;FGF13;SCIN;ITGA2;MYH14;MYL5;FGF1;CYFIP2;MYH10;BDKRB2;PDE1C;ADCY3;ADCY3;CAMK2D;ITPR2;CACNA1A;CACNA1D;OXTR;ADCY2;GNAL;PRKX;SPHK1;GNAS;P2;SHISA5;RRM2B;ATM;CDK1;MDM4;CCND3;PTEN;CASP8;CDK2;TP73;APAF1;STEAP3;IGF1;FAS;IGFBP3;RF;ADCY3;ADCY3;POLD3;AMPD2;RRM2;PDE5A;ENTPD6;ADCY2;PKM;POLR3A;POLA1;NME6;GUCY1B3;RRM2B;P0FKL;PRKAR2B;SHC4;MAPK8;GYS1;PRKX;PKM;SOCS7;SORBS1;SREBF1;EXOC1;MKNK1;PIK3R1;AKT2;MTOR;IPFKL;ALDOC;GAPDH;GPI;ALDH1A3;PKM;ALDH3B1;ADH1C;LDHA;PGM2;ALDH7A1;ENO1;ADH5;GALM;ENO3;CAMK2D;FZD6;MAPK8;LRP5;DAAM2;LEF1;PRKX;NFATC2;PPP3CB;SFRP1;TCF7L2;ROCK2;WNT9B;NFATC1;MNLGN4X;HLA-DPA1;ITGB8;HLA-DRB3;HLA-F;CADM3;PTPRF;NEO1;ALCAM;CD4;HLA-G;CLDN1;CNTNAP1;VCA;TCF7L2;MSH6;PIK3R1;MSH2;AKT2;FZD3;FZD3;HGF;RAC1;AKT3;MSH3;TCF4;BRAF;PDGFRB;CASP3;TCF7;B1;CCNL1;WEE1;CCNB2;ORC2;PCNA;HDAC2;ORC4;ATM;CDK1;YWHAZ;CCND3;HDAC1;MCM2;MCM2;CDK2;MCM5;TNFRSF9;IL17RA;TNFRSF14;CXCL14;CXCL13;IL15RA;CXCL16;MET;IL21R;IL6ST;BMPR1B;IL1RAP;PRLR;STAT5B;PIK3R1;AKT2;MTOR;CAMK2G;HGF;NCK1;AKT3;MAP2K4;PLCG2;AR;CAMK2A;CAMK2B;HBEGF;BRAF;3L2;TCF7L2;PDGFA;PTEN;PIK3R1;AKT2;MTOR;HGF;FGFR1;CDK2;AKT3;AR;CREB3L3;TCF4;BRAF;IGF1;PDRC6;TCEB1;TRIP12;CUL4B;HUWE1;HERC1;RHOBTB2;WWP2;UBE2B;FBXO2;CUL4A;UBA7;DET1;WWP1;NEDD4;EN;PIK3R1;AKT2;MTOR;CAMK2G;HGF;AKT3;PLCG2;CAMK2A;CAMK2B;BRAF;IGF1;PDGFRB;INPP5B;DGKD;PLCD4;PTEN;PIK3R1;PLCD1;INPP5D;INPP5K;DGKH;INPP4B;PIP4K2B;PLCG2;INPP4A;PIPAM;MCCC2;PCCA;HADHB;HMGCL;OXCT1;ALDH7A1;HIBCH;MCEE;ACADM2C;ACTN1;PPP2R2A;MLLT4;MYH14;MYH14;MYL5;MYH10;ZAK;DLG4;CLDN1;PTEN;PRKCD;AKT2;JAM2;AKT3;2;LAMC2;TRAF1;PTEN;PIK3R1;RARB;AKT2;LAMA1;CDK2;APAF1;AKT3;LAMB1;TRAF2;CDKN2B;MAXA3;DGKD;LCLAT1;DGKH;GPAM;AR;ALDH7A1;FAP;LIPC6;C1S;FHL1;PLAU;CFI;F7;PC;F12;PROS1;C5;F13A1;PDGFA;PTEN;PIK3R1;AKT2;HGF;FGFR1;AKT3;BRAF;IGF1;PDGFRBADCY2;LEF1;PRKX;CREB3L2;GNAS;TCF7L2;WNT9B;CAMK2G;FZD3;FZD3;CREB3L3;CAMK2A;TCF4;CAMK2B;TK3R1;CASP8;AKT2;IL1R1;APAF1;AKT3;DFFB;TRAF2;EXOG;CFLAR;FAS;IRAK3;CASP31D;MAPK8;ADCY2;MAP2K3;PRKX;GNAS;PTK2B;PLA2G2A;MAPK13;PRKCD;CAMK2G;HGF;MAP2K4;CAMK2A;CAMPOLR3A;POLA1;NME6;RRM2B;POLE;POLA2;TK2;TK2;CDA;POLR2B;POLR2D;NT5C2;CTPS2A;CBS;TARS;SARDH;CHKBK3R1;AKT2;HGF;HGF;SLC2A1;RAC1;AKT3;BRAF;RAP1BMET;LEF1;SORBS1;TCF7L2;FGFR1;RAC1;TJP1;TCF4;ACP1;TCF7;TGFB2;RAC2RLR;STAT5B;CCND3;PIK3R1;IL12RB1;AKT2;LIFR;HGF;HGF;STAT4;AKT3;GHR;OSMR;EPOR;LIF;GH2;IL203;NAT6;LCLAT1;ADH1C;FAH;ADH5;MAOAN;PLCD1;INPP5K;INPP4B;PIP4K2B;PLCG2;INPP4A;PIP5K1C3;GDF5;SMAD1;COMP;PPP2CB;LTBP1;CDKN2B;THBS2;RBL1;RBL2;TGFB2FKL;ALDOC;AR;PFKFB2M2;GPX2;GSR;MGST1;ANPEPALNT13;GALNT7;GALNT7;GALNT3;GALNT9;GALNT1V420H1;PLOD3;EHMT1;EHMT2;PIPOX;ALDH7A1PPP3CB;PTK2B;HLA-G;NFATC1;PIK3R1;HGF;LCK;RAC1;PLCG2;BRAF;FAS;NCR1;CASP3;MICB;ULBP1;RAC2;MTOR;AKT3;BRAF;IGF1;RHEB;EIF4EPPP3CB;PLA2G2A;MAPK13;NFATC1;PIK3R1;AKT2;RAC1;AKT3;PLCG2;RAC2MAOA TCH1;FZD3;FZD3;SUFU;TCF4;TCF7D;AKT2;INPP5D;HGF;RAC1;AKT3;MAP2K4;PLCG2;PRKCE;RAC2RS;SLA;DARS2;TARS;MARSIA3;GNAS;GUCY1B3;PLA2G2A;CRHR1;PPP2CB;BRAF;IGF11;GBF1;LTA4H;PLA2G2A;CYP2C8;GPX2;PTGS1

F;PIK3R1;AKT2;RAC1;AKT3;BRAF;TGFBR2;RAC2  
2;MCM2;RPA3;MCM5;RFC5  
;PIK3R1;AKT2;INPP5D;HGF;RAC1;AKT3;PLCG2;RAC2  
DAO;ALDH7A1;MAOA  
A1G;PIK3R1;PRKCD;MTOR;PRKCE  
;RAC1;MAP2K4;PLCG2;TJP1;HBEGF;CASP3;ATP6VOD1  
H;MCEE;ACADM  
PRPH;PRPH;APAF1;ALS2;CASP3

P8;AKT2;HGF;TIRAP;MAP3K8;RAC1;CD40;AKT3;MAP2K4;IKBKE  
KX;PPP3CB;CAMK2G;CAMK2A;CAMK2B;PPP1CB;BRAF;RAP1B

CA3;ABCA13;TAP2  
2;ENPP1  
CLAT1;DGKH;GPAM;ETNK2;PTDSS2;CHKB  
B;ALDH7A1;ADH5;ACADM  
NFYC;TAPBP;RFX5;CD74;CD4;HLA-G;CTSL1;CIITA;TAP2

TK4;PLCG2;BRAF

C8;ADH1C;GSTA4;GSTM2;ADH5;MAOA;MGST1  
C1;SNW1;KAT2B;NOTCH4  
APK13;PIK3R1;CD99;JAM2;RAC1;RAPGEF4;PLCG2;CLDN4;RAP1B;RAC2;CXCL12

FS7;CACNA1D;GAPDH;ATP5A1;SDHC;PPP3CB;NDUFV3;MME;CASP8;APBB1;APAF1;APP;COX7A2L;MAPT;NDUF  
PRKX;GNAS;GUCY1B3;CDK1;PDGFA;HGF;TJP1;PDGFRB

3R1;AKT2;HGF;AKT3;BRAF;TGFBR2  
EC61A2;ATP6V1H;PLCG2;TJP1;ATP6VOD1  
;RUNX1T1;BRAF;TCF7;PIM1  
;HGF;ITGB3;CD1D;IL1R1;EPOR;ANPEP

CF4;BRAF;TCF7

5  
CYP2C8;ADH1C;GSTA4;GSTM2;ADH5;MGST1  
A-G;TSHR;CD40;FAS  
;CD40;FAS  
1;ALDH7A1

R1;THRB;PRLR;TSHR;CRHR1;GRM7;GABBR1;HRH1;NR3C1;PTGER3;GHR;PTH1R;P2RX6;ADRA1A;ADRA1A;GH2

ALDH7A1

;HGF;FAS

HLA-G;FAS



1;PIK3R1;AKT2;HGF;LCK;MAP3K8;NCK1;AKT3  
;TRAF2;PRKAG2;LEP

P2;ACADM

CAIP;NDUFV3;UBA7;APAF1;COX7A2L;NDUFB2;UCHL1;CASP3

HC;NDUFV3;ATP6V1H;COX7A2L;NDUFB2;ATP6V0D1

40;H2AFZ;C5

CAMK2B;OR11A1

IL5; LAMB2; LAMB2; SHC4; MAPK8; MET; COL11A1; CHAD; COL2A1; LAMC2; PARVB; COL1A1; TNXB; ITGA1; PGF; RO  
3K6; MAPKAPK3; NF1; CACNA1A; MAP2K5; CACNA1D; FGF1; MAP3K11; MAPK8; MAP2K3; PTPRQ; ARRB2; PRKX; MAP  
L1A1; TNXB; ITGA1; ITGA10; TNC; THBS3; TNR; COL5A2; LAMA1; ITGB3; COMP; LAMB1; ITGA9; IBSP; ITGA7; TH  
NFATC2; PPP3CB; SEMA3A; SEMA3B; SEMA6A; ROCK2; EPHA4; NFATC1; EFNA5; PLXNB1; RAC1; NCK1; PLXNB3; SE  
SSH3; SSH1; ITGA1; IQGAP3; ROCK2; ITGA10; PDGFA; FGFR3; PIK3R1; TIAM1; ARHGEF1; HGF; FGFR1; ITGB3; R  
PP3CB; PTK2B; CACNA1B; CACNA1G; ATP2B4; TNC; PLCD4; TRPC1; HRH1; PLCD1; CAMK2G; PDE1B; PTGER3; PLCG  
FWD2; CASP3; PIDD  
LE; POLA2; PDE4A; PAPSS2; HPRT1; PDE1B; PPAT; PDE3A; AK2; POLR2B; POLR2D; GART; NT5C2; ENPP1; ENTPD4  
INPP5D; INPP5K; HGF; PRKAB1; AKT3; PDE3A; PRKAG2; PHKA2; PPP1CB; BRAF; FAS; RHEB; EIF4E

MP7; CCND3; DAAM1; CAMK2G; FZD3; FZD3; RAC1; CAMK2A; TCF4; DKK1; CAMK2B; PPP2CB; TCF7; RAC2; PRICKLE  
N; NLGN1; CD99; JAM2; GLG1; CD40; NRXN3; NCAM1; ITGA9; CDH2; CLDN4; NRXN2  
TGFB2; RAC2  
5; DBF4; CDKN2B; CDC6; ESPL1; RBL1; CDC16; RBL2  
; CCL28; PDGFA; CX3CL1; GDF5; IL12RB1; TNFSF13B; LIFR; FLT3LG; HGF; HGF; IL1R1; CD40; GHR; FLT4; OSMR  
ABL2  
GFRB; TCF7  
UBA6; UBE2Q2; UBE2F; EPM2A; RFWD2; UBE3C; KLHL9; CDC16

5K1C

CASK; TJP1; EXOC4; PPP2CB; CLDN4; PRKCE; MYH7B

CF7

IK2B; HBEGF

ORB; PIM1; LEP

2

β2; FAS; CASP3

; TRPV1; PTGER2; LEP; LPAR4; EDNRA





CK2; ITGA10; TNC; THBS3; PDGFA; CCND3; PTEN; PIK3R1; TLN1; AKT2; TNR; FLNA; HGF; HGF; COL5A2; LAMA1; IT3K13; NFATC2; CACNA2D3; PPP3CB; MAP4K2; CACNA1B; PLA2G2A; ZAK; CACNA1G; MAPK13; PDGFA; MKNK1; FGFR3BS2; ITGB5  
MA4A; EPHB6; ABLIM3; EPHB2; SEMA3C; UNC5B; NOV; EFNA1; RAC2; CXCL12  
AC1; ITGAE; ARHGEF7; PIP4K2B; ITGA9; DOCK1; ITGA7; PIP5K1C; PPP1CB; BRAF; PDGFRB; ITGB5; ARPC4; RAC22; P2RX6; CAMK2A; PHKA2; CAMK2B; ADRA1A; ADRA1A; PDGFRB; EDNRA

1

; EPOR; LIF; GH2; FAS; PDGFRB; IL20RB; TNFSF9; LEP; TGFB2; PF4V1; CXCL12









ITGB3;RAC1;AKT3;TLN2;COMP;LAMB1;FLT4;ITGA9;IBSP;DOCK1;ITGA7;PIP5K1C;PPP1CB;BRAF;IGF1;CAV  
3;MAP4K4;DDIT3;AKT2;RAPGEF2;FLNA;HGF;FGFR1;BDNF;MAP3K8;RAC1;IL1R1;NFKB2;AKT3;NR4A1;STK4

2







1;PDGFRB;RAP1B;THBS2;ITGB5;RAC2

;MAP2K4;MAPK8IP2;TRAF2;MAPT;BRAF;ATF2;FAS;PDGFRB;CASP3;RAP1B;TGFB2;RAC2;MAX
